# Supplementary material for: A Novel Molecular Classification Method for Glioblastoma Based on Tumor Cell Differentiation Trajectories
Source: Hindawi journal article supplement (doi:10.1155/2023/2826815), 2023-02-22
Supplement: f3 [file 2826815.f3.pdf]

|          | p_val    | avg_logFC | pct.1 | pct.2 | p_val_adj | cluster  | gene     |
|----------|----------|-----------|-------|-------|-----------|----------|----------|
| MALAT1   | 4.38E-68 | 0.964054  | 0.963 | 0.996 | 6.54E-64  | Undiff-G | MALAT1   |
| SEC61G   | 1.46E-62 | 1.571338  | 0.941 | 0.797 | 2.19E-58  | Undiff-G | SEC61G   |
| CHI3L1   | 5.47E-62 | 1.86183   | 0.89  | 0.52  | 8.17E-58  | Undiff-G | CHI3L1   |
| MT2A     | 8.38E-62 | 1.579659  | 0.934 | 0.782 | 1.25E-57  | Undiff-G | MT2A     |
| FTL      | 9.75E-62 | 1.145351  | 0.956 | 0.994 | 1.46E-57  | Undiff-G | FTL      |
| TMSB4X   | 1.78E-61 | 1.046026  | 0.971 | 0.997 | 2.66E-57  | Undiff-G | TMSB4X   |
| ACTB     | 4.78E-60 | 1.035659  | 0.971 | 0.993 | 7.15E-56  | Undiff-G | ACTB     |
| GAPDH    | 1.42E-55 | 1.198554  | 0.934 | 0.985 | 2.12E-51  | Undiff-G | GAPDH    |
| CLU      | 2.22E-53 | 1.412215  | 0.904 | 0.781 | 3.32E-49  | Undiff-G | CLU      |
| B2M      | 8.66E-49 | 1.002675  | 0.919 | 0.971 | 1.29E-44  | Undiff-G | B2M      |
| TMSB10   | 2.53E-46 | 1.140405  | 0.897 | 0.966 | 3.77E-42  | Undiff-G | TMSB10   |
| CCNI     | 2.10E-44 | -1.61265  | 0.022 | 0.714 | 3.14E-40  | Undiff-G | CCNI     |
| ITM2B    | 2.72E-44 | -1.07166  | 0.074 | 0.808 | 4.06E-40  | Undiff-G | ITM2B    |
| YBX1     | 2.34E-42 | -1.11148  | 0.066 | 0.771 | 3.49E-38  | Undiff-G | YBX1     |
| EEF1A1   | 5.67E-42 | 1.134212  | 0.868 | 0.825 | 8.47E-38  | Undiff-G | EEF1A1   |
| MT1X     | 3.25E-41 | 1.79932   | 0.794 | 0.575 | 4.86E-37  | Undiff-G | MT1X     |
| RAC1     | 5.41E-41 | -1.05258  | 0.059 | 0.751 | 8.09E-37  | Undiff-G | RAC1     |
| RTN4     | 3.60E-40 | -1.41526  | 0.044 | 0.708 | 5.38E-36  | Undiff-G | RTN4     |
| C19orf43 | 6.83E-40 | -1.34805  | 0.029 | 0.68  | 1.02E-35  | Undiff-G | C19orf43 |
| CLTA     | 3.33E-39 | -1.49863  | 0     | 0.635 | 4.98E-35  | Undiff-G | CLTA     |
| HMGNI    | 4.42E-37 | -1.18581  | 0.037 | 0.672 | 6.61E-33  | Undiff-G | HMGNI    |
| PFN1     | 7.47E-37 | -0.71159  | 0.118 | 0.817 | 1.12E-32  | Undiff-G | PFN1     |
| HNRNPAO  | 7.56E-36 | -1.2231   | 0.029 | 0.649 | 1.13E-31  | Undiff-G | HNRNPAO  |
| U2AF1    | 8.25E-36 | -1.30541  | 0.022 | 0.638 | 1.23E-31  | Undiff-G | U2AF1    |
| JUNB     | 2.95E-35 | -1.03809  | 0.074 | 0.731 | 4.41E-31  | Undiff-G | JUNB     |
| BTG1     | 5.30E-35 | -1.14297  | 0.066 | 0.696 | 7.93E-31  | Undiff-G | BTG1     |
| SNX3     | 1.36E-34 | -0.63161  | 0.074 | 0.724 | 2.03E-30  | Undiff-G | SNX3     |
| MTDH     | 4.51E-34 | -1.29312  | 0.022 | 0.617 | 6.74E-30  | Undiff-G | MTDH     |
| JTB      | 7.73E-34 | -1.272    | 0.022 | 0.616 | 1.15E-29  | Undiff-G | JTB      |
| SLPI     | 1.59E-33 | 1.891948  | 0.463 | 0.146 | 2.38E-29  | Undiff-G | SLPI     |
| YWHAQ    | 1.62E-33 | -0.83352  | 0.044 | 0.651 | 2.42E-29  | Undiff-G | YWHAQ    |
| COX5A    | 2.04E-33 | -1.18729  | 0.022 | 0.605 | 3.05E-29  | Undiff-G | COX5A    |
| ACTG1    | 3.18E-33 | 0.985502  | 0.846 | 0.95  | 4.75E-29  | Undiff-G | ACTG1    |
| MZT2B    | 3.98E-33 | -1.30089  | 0.015 | 0.6   | 5.94E-29  | Undiff-G | MZT2B    |
| ATP5D    | 4.00E-33 | -1.26139  | 0.029 | 0.621 | 5.97E-29  | Undiff-G | ATP5D    |
| YWHAB    | 4.21E-33 | -0.71795  | 0.081 | 0.71  | 6.29E-29  | Undiff-G | YWHAB    |
| CHI3L2   | 6.18E-33 | 1.894952  | 0.5   | 0.177 | 9.23E-29  | Undiff-G | CHI3L2   |
| NDFIP1   | 2.48E-32 | -1.18967  | 0.029 | 0.608 | 3.70E-28  | Undiff-G | NDFIP1   |
| ATP6VOB  | 3.10E-32 | -0.40856  | 0.132 | 0.806 | 4.63E-28  | Undiff-G | ATP6VOB  |
| GLTSCR2  | 5.89E-32 | -1.33797  | 0.007 | 0.57  | 8.80E-28  | Undiff-G | GLTSCR2  |
| EIF3F    | 6.36E-32 | -0.89849  | 0.029 | 0.612 | 9.50E-28  | Undiff-G | EIF3F    |
| MARCKS   | 9.46E-32 | -1.39723  | 0.037 | 0.604 | 1.41E-27  | Undiff-G | MARCKS   |
| HN1      | 1.00E-31 | -0.65701  | 0.066 | 0.682 | 1.50E-27  | Undiff-G | HN1      |
| IER2     | 1.44E-31 | -1.23506  | 0.037 | 0.622 | 2.16E-27  | Undiff-G | IER2     |
| UBE2D2   | 1.65E-31 | -0.89032  | 0.022 | 0.595 | 2.46E-27  | Undiff-G | UBE2D2   |
| APOE     | 3.06E-31 | -0.94488  | 0.088 | 0.693 | 4.57E-27  | Undiff-G | APOE     |
| SERP1    | 3.55E-31 | -1.20539  | 0.037 | 0.61  | 5.30E-27  | Undiff-G | SERP1    |
| NDUFA3   | 7.45E-31 | -0.68208  | 0.066 | 0.655 | 1.11E-26  | Undiff-G | NDUFA3   |
| LGALS3   | 1.04E-30 | 1.739438  | 0.699 | 0.478 | 1.56E-26  | Undiff-G | LGALS3   |
| MAP1LC3B | 1.18E-30 | -1.0051   | 0.015 | 0.572 | 1.77E-26  | Undiff-G | MAP1LC3B |

|          |          |          |       |       |          |          |          |
|----------|----------|----------|-------|-------|----------|----------|----------|
| C1QBP    | 1.79E-30 | -1.20821 | 0.015 | 0.561 | 2.68E-26 | Undiff-G | C1QBP    |
| ASAH1    | 2.16E-30 | -0.61971 | 0.066 | 0.658 | 3.23E-26 | Undiff-G | ASAH1    |
| H2AFY    | 3.66E-30 | -0.8835  | 0.044 | 0.614 | 5.47E-26 | Undiff-G | H2AFY    |
| FIS1     | 7.00E-30 | -0.59951 | 0.059 | 0.645 | 1.05E-25 | Undiff-G | FIS1     |
| MIF      | 9.39E-30 | -0.80724 | 0.081 | 0.677 | 1.40E-25 | Undiff-G | MIF      |
| UQCR11   | 9.69E-30 | 1.61225  | 0.39  | 0.112 | 1.45E-25 | Undiff-G | UQCR11   |
| YWHAH    | 1.16E-29 | -1.22609 | 0.022 | 0.571 | 1.73E-25 | Undiff-G | YWHAH    |
| ARL6IP4  | 1.41E-29 | -0.97335 | 0.059 | 0.631 | 2.10E-25 | Undiff-G | ARL6IP4  |
| PABPC1   | 6.20E-29 | -0.39326 | 0.125 | 0.752 | 9.26E-25 | Undiff-G | PABPC1   |
| SCAND1   | 6.48E-29 | -1.1351  | 0.037 | 0.577 | 9.68E-25 | Undiff-G | SCAND1   |
| UQCRFS1  | 7.27E-29 | -0.90412 | 0.015 | 0.551 | 1.09E-24 | Undiff-G | UQCRFS1  |
| KDELR2   | 1.07E-28 | -0.88235 | 0.029 | 0.575 | 1.60E-24 | Undiff-G | KDELR2   |
| CYC1     | 1.17E-28 | -1.0107  | 0.015 | 0.546 | 1.75E-24 | Undiff-G | CYC1     |
| C4orf48  | 1.41E-28 | -1.32118 | 0.007 | 0.532 | 2.11E-24 | Undiff-G | C4orf48  |
| SEPW1    | 2.18E-28 | -0.58992 | 0.096 | 0.679 | 3.26E-24 | Undiff-G | SEPW1    |
| SRSF2    | 2.80E-28 | -0.90552 | 0.051 | 0.612 | 4.19E-24 | Undiff-G | SRSF2    |
| VAPA     | 4.02E-28 | -0.64291 | 0.074 | 0.64  | 6.01E-24 | Undiff-G | VAPA     |
| SRSF9    | 4.31E-28 | -0.94002 | 0.029 | 0.568 | 6.44E-24 | Undiff-G | SRSF9    |
| RANBP1   | 4.35E-28 | -0.92159 | 0.044 | 0.584 | 6.49E-24 | Undiff-G | RANBP1   |
| ATP1B3   | 4.72E-28 | -1.07282 | 0.022 | 0.551 | 7.05E-24 | Undiff-G | ATP1B3   |
| CST3     | 5.30E-28 | -0.50083 | 0.154 | 0.794 | 7.92E-24 | Undiff-G | CST3     |
| ZNF428   | 5.81E-28 | -1.23888 | 0.022 | 0.551 | 8.68E-24 | Undiff-G | ZNF428   |
| AP2S1    | 6.43E-28 | -0.44398 | 0.088 | 0.667 | 9.61E-24 | Undiff-G | AP2S1    |
| STMN1    | 9.00E-28 | -0.81352 | 0.074 | 0.637 | 1.34E-23 | Undiff-G | STMN1    |
| PRELID1  | 1.88E-27 | -1.07763 | 0.037 | 0.566 | 2.81E-23 | Undiff-G | PRELID1  |
| UQCRB    | 2.38E-27 | -0.37434 | 0.096 | 0.685 | 3.56E-23 | Undiff-G | UQCRB    |
| KIF5B    | 7.74E-27 | -1.15248 | 0.015 | 0.517 | 1.16E-22 | Undiff-G | KIF5B    |
| HNRNPM   | 8.34E-27 | -0.98411 | 0.029 | 0.549 | 1.25E-22 | Undiff-G | HNRNPM   |
| EIF4G2   | 1.04E-26 | -0.35335 | 0.088 | 0.666 | 1.56E-22 | Undiff-G | EIF4G2   |
| RHOB     | 1.13E-26 | -0.76651 | 0.066 | 0.615 | 1.69E-22 | Undiff-G | RHOB     |
| LAMP1    | 1.31E-26 | -1.18827 | 0.022 | 0.527 | 1.96E-22 | Undiff-G | LAMP1    |
| ARF5     | 1.50E-26 | -0.92397 | 0.022 | 0.535 | 2.24E-22 | Undiff-G | ARF5     |
| LTF      | 1.99E-26 | 1.794555 | 0.426 | 0.148 | 2.97E-22 | Undiff-G | LTF      |
| DUSP1    | 2.67E-26 | -1.03827 | 0.051 | 0.581 | 3.99E-22 | Undiff-G | DUSP1    |
| PCBP2    | 3.45E-26 | -0.45538 | 0.096 | 0.669 | 5.16E-22 | Undiff-G | PCBP2    |
| GNB2     | 3.67E-26 | -0.79922 | 0.051 | 0.575 | 5.49E-22 | Undiff-G | GNB2     |
| AKR1B1   | 7.37E-26 | -0.36768 | 0.081 | 0.631 | 1.10E-21 | Undiff-G | AKR1B1   |
| CAPZA2   | 8.16E-26 | -0.29829 | 0.096 | 0.661 | 1.22E-21 | Undiff-G | CAPZA2   |
| ARL5A    | 8.59E-26 | -1.08686 | 0.022 | 0.523 | 1.28E-21 | Undiff-G | ARL5A    |
| FSCN1    | 9.90E-26 | -0.99281 | 0.015 | 0.51  | 1.48E-21 | Undiff-G | FSCN1    |
| GTF3A    | 1.29E-25 | -0.98054 | 0.015 | 0.51  | 1.92E-21 | Undiff-G | GTF3A    |
| RNASSET2 | 1.94E-25 | -1.45935 | 0.007 | 0.488 | 2.90E-21 | Undiff-G | RNASSET2 |
| MATR3    | 1.96E-25 | -1.13142 | 0.007 | 0.492 | 2.92E-21 | Undiff-G | MATR3    |
| PDIA3    | 1.97E-25 | -0.57373 | 0.059 | 0.589 | 2.94E-21 | Undiff-G | PDIA3    |
| PYURF    | 2.26E-25 | -0.82294 | 0.037 | 0.547 | 3.37E-21 | Undiff-G | PYURF    |
| CALM1    | 3.11E-25 | -0.42898 | 0.162 | 0.779 | 4.64E-21 | Undiff-G | CALM1    |
| COTL1    | 3.30E-25 | -0.98412 | 0.022 | 0.515 | 4.93E-21 | Undiff-G | COTL1    |
| ISCU     | 3.34E-25 | -0.62877 | 0.051 | 0.572 | 5.00E-21 | Undiff-G | ISCU     |
| RHEB     | 4.84E-25 | -0.32222 | 0.088 | 0.644 | 7.23E-21 | Undiff-G | RHEB     |
| EIF1     | 5.47E-25 | 1.009729 | 0.794 | 0.976 | 8.18E-21 | Undiff-G | EIF1     |
| MARCKSL1 | 7.06E-25 | -1.23708 | 0.051 | 0.55  | 1.05E-20 | Undiff-G | MARCKSL1 |

|            |          |          |       |       |          |          |            |
|------------|----------|----------|-------|-------|----------|----------|------------|
| CALM3      | 7.43E-25 | -0.60858 | 0.074 | 0.599 | 1.11E-20 | Undiff-G | CALM3      |
| UBXN1      | 7.87E-25 | -0.40843 | 0.088 | 0.627 | 1.18E-20 | Undiff-G | UBXN1      |
| PCBP1      | 8.59E-25 | -0.46815 | 0.066 | 0.594 | 1.28E-20 | Undiff-G | PCBP1      |
| AURKAIP1   | 9.95E-25 | -0.51949 | 0.081 | 0.612 | 1.49E-20 | Undiff-G | AURKAIP1   |
| GADD45GIP1 | 1.22E-24 | -0.71476 | 0.059 | 0.569 | 1.82E-20 | Undiff-G | GADD45GIP1 |
| ARPC4      | 2.51E-24 | -0.72092 | 0.029 | 0.519 | 3.75E-20 | Undiff-G | ARPC4      |
| PNRC1      | 2.63E-24 | -0.75231 | 0.044 | 0.546 | 3.93E-20 | Undiff-G | PNRC1      |
| UBE2N      | 2.71E-24 | -0.68294 | 0.037 | 0.527 | 4.05E-20 | Undiff-G | UBE2N      |
| PGLS       | 2.77E-24 | -0.91938 | 0.029 | 0.516 | 4.14E-20 | Undiff-G | PGLS       |
| BLOC1S1    | 3.31E-24 | -0.18881 | 0.103 | 0.654 | 4.95E-20 | Undiff-G | BLOC1S1    |
| ARPC5      | 4.42E-24 | -0.21949 | 0.118 | 0.679 | 6.60E-20 | Undiff-G | ARPC5      |
| MTCH1      | 4.65E-24 | -0.70713 | 0.044 | 0.54  | 6.96E-20 | Undiff-G | MTCH1      |
| RALY       | 4.82E-24 | -1.13799 | 0     | 0.461 | 7.20E-20 | Undiff-G | RALY       |
| AP1S2      | 5.18E-24 | -1.10314 | 0.029 | 0.506 | 7.74E-20 | Undiff-G | AP1S2      |
| RTFDC1     | 5.57E-24 | -0.50239 | 0.044 | 0.544 | 8.33E-20 | Undiff-G | RTFDC1     |
| RAB31      | 7.76E-24 | -1.17132 | 0.007 | 0.465 | 1.16E-19 | Undiff-G | RAB31      |
| FAM49B     | 1.07E-23 | -1.00356 | 0.029 | 0.512 | 1.60E-19 | Undiff-G | FAM49B     |
| C7orf50    | 1.09E-23 | -0.59912 | 0.029 | 0.513 | 1.62E-19 | Undiff-G | C7orf50    |
| P4HB       | 1.24E-23 | -0.54834 | 0.066 | 0.578 | 1.85E-19 | Undiff-G | P4HB       |
| TPM3       | 1.40E-23 | -0.54612 | 0.059 | 0.564 | 2.09E-19 | Undiff-G | TPM3       |
| SUB1       | 2.14E-23 | -0.20952 | 0.169 | 0.763 | 3.19E-19 | Undiff-G | SUB1       |
| HNRNPU     | 2.23E-23 | -0.69382 | 0.044 | 0.536 | 3.33E-19 | Undiff-G | HNRNPU     |
| USMG5      | 2.27E-23 | -0.23591 | 0.096 | 0.626 | 3.39E-19 | Undiff-G | USMG5      |
| KRT10      | 2.29E-23 | -0.78472 | 0.066 | 0.564 | 3.42E-19 | Undiff-G | KRT10      |
| COX16      | 2.61E-23 | -0.92214 | 0.029 | 0.506 | 3.90E-19 | Undiff-G | COX16      |
| SNF8       | 2.94E-23 | -0.86159 | 0.007 | 0.465 | 4.40E-19 | Undiff-G | SNF8       |
| PPP4C      | 3.04E-23 | -0.57071 | 0.051 | 0.549 | 4.55E-19 | Undiff-G | PPP4C      |
| HMGN3      | 3.36E-23 | -0.41057 | 0.088 | 0.615 | 5.02E-19 | Undiff-G | HMGN3      |
| NDUFB10    | 3.41E-23 | -0.43101 | 0.11  | 0.646 | 5.10E-19 | Undiff-G | NDUFB10    |
| PARP1      | 3.63E-23 | -0.95312 | 0.015 | 0.477 | 5.42E-19 | Undiff-G | PARP1      |
| PPP1R15A   | 4.00E-23 | -1.18967 | 0.015 | 0.472 | 5.98E-19 | Undiff-G | PPP1R15A   |
| CTSD       | 4.09E-23 | -0.34779 | 0.103 | 0.645 | 6.11E-19 | Undiff-G | CTSD       |
| TMEM160    | 5.63E-23 | -1.01016 | 0.015 | 0.471 | 8.42E-19 | Undiff-G | TMEM160    |
| TIMM13     | 5.66E-23 | -0.35364 | 0.081 | 0.597 | 8.45E-19 | Undiff-G | TIMM13     |
| H2AFV      | 5.87E-23 | -0.51311 | 0.044 | 0.528 | 8.77E-19 | Undiff-G | H2AFV      |
| BRI3       | 6.59E-23 | -0.99465 | 0.015 | 0.473 | 9.85E-19 | Undiff-G | BRI3       |
| NME1       | 6.87E-23 | -0.36565 | 0.066 | 0.574 | 1.03E-18 | Undiff-G | NME1       |
| METTL9     | 6.98E-23 | -0.80173 | 0.015 | 0.474 | 1.04E-18 | Undiff-G | METTL9     |
| DEK        | 7.89E-23 | -1.06733 | 0.015 | 0.469 | 1.18E-18 | Undiff-G | DEK        |
| GNAS       | 8.08E-23 | -0.43196 | 0.118 | 0.653 | 1.21E-18 | Undiff-G | GNAS       |
| TTC3       | 8.15E-23 | -1.00972 | 0.044 | 0.522 | 1.22E-18 | Undiff-G | TTC3       |
| CSNK1A1    | 8.43E-23 | -0.57698 | 0.066 | 0.564 | 1.26E-18 | Undiff-G | CSNK1A1    |
| GRB2       | 1.02E-22 | -0.67399 | 0.022 | 0.486 | 1.53E-18 | Undiff-G | GRB2       |
| ZFP36L2    | 1.07E-22 | -0.77031 | 0.044 | 0.521 | 1.59E-18 | Undiff-G | ZFP36L2    |
| GUK1       | 1.09E-22 | -0.17214 | 0.14  | 0.71  | 1.63E-18 | Undiff-G | GUK1       |
| NDUFA11    | 1.34E-22 | -0.20448 | 0.162 | 0.748 | 2.00E-18 | Undiff-G | NDUFA11    |
| PTMS       | 1.42E-22 | -0.90506 | 0.074 | 0.559 | 2.12E-18 | Undiff-G | PTMS       |
| APLP2      | 1.46E-22 | -0.47205 | 0.088 | 0.599 | 2.18E-18 | Undiff-G | APLP2      |
| TIMP1      | 1.46E-22 | 1.467713 | 0.699 | 0.62  | 2.19E-18 | Undiff-G | TIMP1      |
| NOP10      | 1.50E-22 | -0.33571 | 0.088 | 0.612 | 2.24E-18 | Undiff-G | NOP10      |
| KHDRBS1    | 1.55E-22 | -0.98834 | 0.029 | 0.491 | 2.31E-18 | Undiff-G | KHDRBS1    |

|          |          |          |       |       |          |          |          |
|----------|----------|----------|-------|-------|----------|----------|----------|
| FUS      | 1.68E-22 | -0.22804 | 0.11  | 0.649 | 2.51E-18 | Undiff-G | FUS      |
| NFKBIA   | 1.74E-22 | -0.75591 | 0.037 | 0.505 | 2.60E-18 | Undiff-G | NFKBIA   |
| C9orf16  | 1.78E-22 | -0.27404 | 0.081 | 0.588 | 2.66E-18 | Undiff-G | C9orf16  |
| CKB      | 1.89E-22 | -0.8866  | 0.088 | 0.588 | 2.83E-18 | Undiff-G | CKB      |
| KTN1     | 1.90E-22 | -0.81555 | 0.051 | 0.533 | 2.84E-18 | Undiff-G | KTN1     |
| DYNC1I2  | 2.01E-22 | -0.902   | 0.022 | 0.474 | 3.01E-18 | Undiff-G | DYNC1I2  |
| RBPJ     | 2.21E-22 | -0.8189  | 0.022 | 0.474 | 3.30E-18 | Undiff-G | RBPJ     |
| SET      | 2.21E-22 | -0.5842  | 0.074 | 0.566 | 3.31E-18 | Undiff-G | SET      |
| LAMTOR2  | 2.39E-22 | -0.42152 | 0.088 | 0.593 | 3.58E-18 | Undiff-G | LAMTOR2  |
| AUP1     | 2.46E-22 | -0.4517  | 0.051 | 0.528 | 3.68E-18 | Undiff-G | AUP1     |
| RTN3     | 2.75E-22 | -0.16032 | 0.118 | 0.661 | 4.11E-18 | Undiff-G | RTN3     |
| NENF     | 2.83E-22 | -0.79239 | 0.037 | 0.499 | 4.23E-18 | Undiff-G | NENF     |
| PUF60    | 3.44E-22 | -0.43335 | 0.059 | 0.547 | 5.15E-18 | Undiff-G | PUF60    |
| C20orf24 | 3.77E-22 | -0.81109 | 0.022 | 0.472 | 5.63E-18 | Undiff-G | C20orf24 |
| RWDD1    | 3.87E-22 | -0.41128 | 0.051 | 0.533 | 5.78E-18 | Undiff-G | RWDD1    |
| UFC1     | 4.48E-22 | -0.33947 | 0.074 | 0.567 | 6.69E-18 | Undiff-G | UFC1     |
| TERF2IP  | 4.75E-22 | -0.78439 | 0.051 | 0.523 | 7.10E-18 | Undiff-G | TERF2IP  |
| RBX1     | 5.60E-22 | -0.11953 | 0.125 | 0.672 | 8.38E-18 | Undiff-G | RBX1     |
| ANP32B   | 6.79E-22 | -1.04197 | 0.015 | 0.455 | 1.01E-17 | Undiff-G | ANP32B   |
| TALDO1   | 6.84E-22 | -0.17593 | 0.096 | 0.603 | 1.02E-17 | Undiff-G | TALDO1   |
| ACTR2    | 7.07E-22 | -1.03844 | 0.022 | 0.464 | 1.06E-17 | Undiff-G | ACTR2    |
| STUB1    | 7.33E-22 | -0.89521 | 0.022 | 0.466 | 1.09E-17 | Undiff-G | STUB1    |
| STRAP    | 8.29E-22 | -0.1935  | 0.066 | 0.559 | 1.24E-17 | Undiff-G | STRAP    |
| POLR2E   | 9.10E-22 | -0.44896 | 0.059 | 0.541 | 1.36E-17 | Undiff-G | POLR2E   |
| SQSTM1   | 9.38E-22 | -0.69316 | 0.059 | 0.529 | 1.40E-17 | Undiff-G | SQSTM1   |
| LAPTM5   | 1.08E-21 | -1.558   | 0.007 | 0.441 | 1.61E-17 | Undiff-G | LAPTM5   |
| DUT      | 1.17E-21 | -1.03579 | 0.022 | 0.46  | 1.75E-17 | Undiff-G | DUT      |
| EIF3D    | 1.19E-21 | -0.83499 | 0.029 | 0.482 | 1.77E-17 | Undiff-G | EIF3D    |
| FEZ2     | 1.33E-21 | -0.93186 | 0.015 | 0.454 | 1.98E-17 | Undiff-G | FEZ2     |
| BCAP31   | 1.59E-21 | -0.19915 | 0.103 | 0.624 | 2.37E-17 | Undiff-G | BCAP31   |
| NUTF2    | 1.59E-21 | -0.65181 | 0.015 | 0.454 | 2.37E-17 | Undiff-G | NUTF2    |
| NUCKS1   | 1.75E-21 | -0.34338 | 0.118 | 0.642 | 2.62E-17 | Undiff-G | NUCKS1   |
| SFPQ     | 1.78E-21 | -0.61605 | 0.066 | 0.548 | 2.67E-17 | Undiff-G | SFPQ     |
| BAX      | 1.81E-21 | -0.3102  | 0.081 | 0.571 | 2.71E-17 | Undiff-G | BAX      |
| ATP6VOD1 | 2.46E-21 | -0.30258 | 0.051 | 0.516 | 3.68E-17 | Undiff-G | ATP6VOD1 |
| HSPA1A   | 2.46E-21 | -1.05774 | 0.044 | 0.497 | 3.68E-17 | Undiff-G | HSPA1A   |
| PSMA2    | 2.57E-21 | 1.590678 | 0.243 | 0.059 | 3.84E-17 | Undiff-G | PSMA2    |
| CD63     | 2.76E-21 | 1.037496 | 0.757 | 0.926 | 4.12E-17 | Undiff-G | CD63     |
| C6orf62  | 2.88E-21 | -0.7813  | 0.022 | 0.457 | 4.30E-17 | Undiff-G | C6orf62  |
| OAZ2     | 3.10E-21 | -0.57258 | 0.051 | 0.511 | 4.64E-17 | Undiff-G | OAZ2     |
| ZFAND5   | 3.27E-21 | -0.94339 | 0.029 | 0.468 | 4.89E-17 | Undiff-G | ZFAND5   |
| PDAP1    | 3.53E-21 | -0.23266 | 0.066 | 0.541 | 5.28E-17 | Undiff-G | PDAP1    |
| ALKBH7   | 3.62E-21 | -0.57697 | 0.029 | 0.477 | 5.41E-17 | Undiff-G | ALKBH7   |
| ZNF706   | 3.74E-21 | -0.2226  | 0.088 | 0.58  | 5.59E-17 | Undiff-G | ZNF706   |
| UBE2L3   | 3.90E-21 | -0.24619 | 0.066 | 0.541 | 5.82E-17 | Undiff-G | UBE2L3   |
| KDELR1   | 3.91E-21 | -0.50384 | 0.044 | 0.498 | 5.85E-17 | Undiff-G | KDELR1   |
| PSMA5    | 4.76E-21 | -0.71375 | 0.015 | 0.448 | 7.12E-17 | Undiff-G | PSMA5    |
| NDUFB6   | 4.79E-21 | -0.51605 | 0.044 | 0.502 | 7.16E-17 | Undiff-G | NDUFB6   |
| RAB2A    | 5.06E-21 | -0.19579 | 0.096 | 0.597 | 7.56E-17 | Undiff-G | RAB2A    |
| GNAI2    | 5.48E-21 | -0.52056 | 0.037 | 0.488 | 8.19E-17 | Undiff-G | GNAI2    |
| UBXN4    | 5.61E-21 | -0.20881 | 0.074 | 0.55  | 8.39E-17 | Undiff-G | UBXN4    |

|          |          |          |       |       |          |          |          |
|----------|----------|----------|-------|-------|----------|----------|----------|
| NCL      | 6.50E-21 | -0.15449 | 0.074 | 0.56  | 9.71E-17 | Undiff-G | NCL      |
| OCIAD1   | 6.56E-21 | -0.18256 | 0.118 | 0.642 | 9.80E-17 | Undiff-G | OCIAD1   |
| SRRM2    | 6.98E-21 | -0.61561 | 0.066 | 0.538 | 1.04E-16 | Undiff-G | SRRM2    |
| HNRNPF   | 7.25E-21 | -0.38061 | 0.051 | 0.514 | 1.08E-16 | Undiff-G | HNRNPF   |
| EI24     | 7.53E-21 | -0.79472 | 0.015 | 0.438 | 1.13E-16 | Undiff-G | EI24     |
| CSDE1    | 7.98E-21 | -0.11268 | 0.103 | 0.607 | 1.19E-16 | Undiff-G | CSDE1    |
| CXCL16   | 8.04E-21 | -0.76343 | 0.022 | 0.458 | 1.20E-16 | Undiff-G | CXCL16   |
| GRN      | 8.15E-21 | -0.43663 | 0.088 | 0.576 | 1.22E-16 | Undiff-G | GRN      |
| NUDC     | 9.40E-21 | -0.19521 | 0.088 | 0.585 | 1.40E-16 | Undiff-G | NUDC     |
| OS9      | 9.87E-21 | -0.34627 | 0.066 | 0.541 | 1.47E-16 | Undiff-G | OS9      |
| IFNGR1   | 1.02E-20 | -0.98606 | 0.015 | 0.442 | 1.53E-16 | Undiff-G | IFNGR1   |
| NINJ1    | 1.03E-20 | -0.7428  | 0.022 | 0.457 | 1.54E-16 | Undiff-G | NINJ1    |
| CCT6A    | 1.07E-20 | -0.22576 | 0.088 | 0.58  | 1.59E-16 | Undiff-G | CCT6A    |
| ZC3H15   | 1.17E-20 | -0.20533 | 0.051 | 0.509 | 1.75E-16 | Undiff-G | ZC3H15   |
| FTH1     | 1.21E-20 | -0.36292 | 0.279 | 0.94  | 1.81E-16 | Undiff-G | FTH1     |
| CHMP4B   | 1.27E-20 | -0.96156 | 0.029 | 0.459 | 1.89E-16 | Undiff-G | CHMP4B   |
| TCF25    | 1.27E-20 | -0.68255 | 0.081 | 0.557 | 1.90E-16 | Undiff-G | TCF25    |
| EMC10    | 1.35E-20 | -0.75414 | 0.022 | 0.455 | 2.02E-16 | Undiff-G | EMC10    |
| ENY2     | 1.40E-20 | -0.15606 | 0.103 | 0.61  | 2.09E-16 | Undiff-G | ENY2     |
| ATP5C1   | 1.48E-20 | -0.21793 | 0.096 | 0.592 | 2.22E-16 | Undiff-G | ATP5C1   |
| PTP4A1   | 1.50E-20 | -0.99473 | 0     | 0.412 | 2.25E-16 | Undiff-G | PTP4A1   |
| TMEM219  | 1.53E-20 | -0.11535 | 0.081 | 0.566 | 2.28E-16 | Undiff-G | TMEM219  |
| SF3B2    | 1.58E-20 | -0.39916 | 0.066 | 0.53  | 2.37E-16 | Undiff-G | SF3B2    |
| PDCD6    | 1.63E-20 | -0.28066 | 0.066 | 0.54  | 2.44E-16 | Undiff-G | PDCD6    |
| TMEM165  | 1.74E-20 | -0.91398 | 0.029 | 0.461 | 2.60E-16 | Undiff-G | TMEM165  |
| HEXB     | 1.91E-20 | -1.06785 | 0     | 0.41  | 2.86E-16 | Undiff-G | HEXB     |
| VCP      | 2.17E-20 | -0.92277 | 0.015 | 0.437 | 3.24E-16 | Undiff-G | VCP      |
| TCF4     | 2.25E-20 | -0.7341  | 0.066 | 0.528 | 3.36E-16 | Undiff-G | TCF4     |
| UBE2E3   | 2.49E-20 | -0.63475 | 0.029 | 0.465 | 3.72E-16 | Undiff-G | UBE2E3   |
| ETFB     | 2.66E-20 | -0.46181 | 0.051 | 0.505 | 3.97E-16 | Undiff-G | ETFB     |
| SSNA1    | 2.66E-20 | -0.61499 | 0.022 | 0.451 | 3.98E-16 | Undiff-G | SSNA1    |
| PPP2R1A  | 2.87E-20 | -0.26143 | 0.059 | 0.52  | 4.28E-16 | Undiff-G | PPP2R1A  |
| EIF3G    | 3.22E-20 | -0.10855 | 0.118 | 0.626 | 4.81E-16 | Undiff-G | EIF3G    |
| EIF5     | 3.50E-20 | -0.11104 | 0.132 | 0.656 | 5.23E-16 | Undiff-G | EIF5     |
| NCOR1    | 3.61E-20 | -0.62746 | 0.037 | 0.469 | 5.39E-16 | Undiff-G | NCOR1    |
| PRPF40A  | 3.97E-20 | -0.77722 | 0.029 | 0.455 | 5.93E-16 | Undiff-G | PRPF40A  |
| APH1A    | 4.03E-20 | -0.47143 | 0.044 | 0.49  | 6.02E-16 | Undiff-G | APH1A    |
| NONO     | 4.05E-20 | -0.71073 | 0.029 | 0.46  | 6.05E-16 | Undiff-G | NONO     |
| TRA2B    | 4.18E-20 | -0.22426 | 0.074 | 0.545 | 6.25E-16 | Undiff-G | TRA2B    |
| HLA-E    | 4.79E-20 | -0.3527  | 0.11  | 0.602 | 7.15E-16 | Undiff-G | HLA-E    |
| PPP2CA   | 4.93E-20 | -0.65039 | 0.044 | 0.485 | 7.37E-16 | Undiff-G | PPP2CA   |
| PGRMC1   | 5.02E-20 | -0.85609 | 0.029 | 0.452 | 7.51E-16 | Undiff-G | PGRMC1   |
| ATP6AP1  | 5.18E-20 | -0.51954 | 0.051 | 0.498 | 7.74E-16 | Undiff-G | ATP6AP1  |
| RAB10    | 5.50E-20 | -0.28175 | 0.051 | 0.501 | 8.21E-16 | Undiff-G | RAB10    |
| C19orf60 | 5.52E-20 | -0.63294 | 0.059 | 0.507 | 8.24E-16 | Undiff-G | C19orf60 |
| NFE2L2   | 5.57E-20 | -0.5569  | 0.037 | 0.473 | 8.33E-16 | Undiff-G | NFE2L2   |
| FEZ1     | 6.46E-20 | -0.94109 | 0.022 | 0.434 | 9.65E-16 | Undiff-G | FEZ1     |
| PTOV1    | 6.49E-20 | -0.92365 | 0.022 | 0.443 | 9.70E-16 | Undiff-G | PTOV1    |
| PPM1G    | 7.25E-20 | -0.92884 | 0.015 | 0.423 | 1.08E-15 | Undiff-G | PPM1G    |
| DPY30    | 7.46E-20 | -0.42543 | 0.051 | 0.501 | 1.12E-15 | Undiff-G | DPY30    |
| DCXR     | 8.10E-20 | -0.57826 | 0.029 | 0.458 | 1.21E-15 | Undiff-G | DCXR     |

|         |          |          |       |       |          |          |         |
|---------|----------|----------|-------|-------|----------|----------|---------|
| LDHA    | 8.30E-20 | 1.238561 | 0.706 | 0.767 | 1.24E-15 | Undiff-G | LDHA    |
| PPP1CC  | 8.45E-20 | -0.79599 | 0.029 | 0.45  | 1.26E-15 | Undiff-G | PPP1CC  |
| ILF2    | 9.46E-20 | -0.26528 | 0.096 | 0.58  | 1.41E-15 | Undiff-G | ILF2    |
| ENSA    | 9.69E-20 | -0.33223 | 0.059 | 0.506 | 1.45E-15 | Undiff-G | ENSA    |
| PTMA    | 9.89E-20 | 0.874744 | 0.772 | 0.969 | 1.48E-15 | Undiff-G | PTMA    |
| PNISR   | 1.06E-19 | -0.27976 | 0.118 | 0.617 | 1.58E-15 | Undiff-G | PNISR   |
| PSMD2   | 1.08E-19 | -0.45766 | 0.037 | 0.466 | 1.62E-15 | Undiff-G | PSMD2   |
| CLK1    | 1.09E-19 | -0.60447 | 0.015 | 0.427 | 1.63E-15 | Undiff-G | CLK1    |
| DHRS7   | 1.17E-19 | -0.2407  | 0.088 | 0.562 | 1.76E-15 | Undiff-G | DHRS7   |
| RAB11B  | 1.19E-19 | -0.47179 | 0.059 | 0.509 | 1.78E-15 | Undiff-G | RAB11B  |
| BEX4    | 1.31E-19 | -0.52078 | 0.044 | 0.482 | 1.96E-15 | Undiff-G | BEX4    |
| ASNA1   | 1.32E-19 | -0.31673 | 0.066 | 0.525 | 1.97E-15 | Undiff-G | ASNA1   |
| CBX3    | 1.37E-19 | -0.34676 | 0.088 | 0.559 | 2.05E-15 | Undiff-G | CBX3    |
| RNF130  | 1.43E-19 | -0.59799 | 0.037 | 0.468 | 2.14E-15 | Undiff-G | RNF130  |
| CAV1    | 1.47E-19 | 1.872622 | 0.346 | 0.124 | 2.20E-15 | Undiff-G | CAV1    |
| DNAJB11 | 1.49E-19 | -0.68826 | 0.022 | 0.438 | 2.22E-15 | Undiff-G | DNAJB11 |
| CYBA    | 1.59E-19 | -1.39133 | 0.007 | 0.409 | 2.37E-15 | Undiff-G | CYBA    |
| STAT3   | 1.64E-19 | -0.58886 | 0.037 | 0.463 | 2.45E-15 | Undiff-G | STAT3   |
| NDUFS2  | 1.66E-19 | -0.20964 | 0.088 | 0.556 | 2.49E-15 | Undiff-G | NDUFS2  |
| PSMC3   | 1.88E-19 | -0.25836 | 0.074 | 0.536 | 2.81E-15 | Undiff-G | PSMC3   |
| RAP1A   | 1.89E-19 | -0.17166 | 0.066 | 0.521 | 2.82E-15 | Undiff-G | RAP1A   |
| APMAP   | 2.10E-19 | -0.17529 | 0.066 | 0.523 | 3.14E-15 | Undiff-G | APMAP   |
| HP1BP3  | 2.13E-19 | -0.81846 | 0.029 | 0.447 | 3.18E-15 | Undiff-G | HP1BP3  |
| OLA1    | 2.15E-19 | -0.24192 | 0.051 | 0.493 | 3.22E-15 | Undiff-G | OLA1    |
| COMT    | 2.19E-19 | -0.24431 | 0.088 | 0.553 | 3.27E-15 | Undiff-G | COMT    |
| SRGN    | 2.21E-19 | -0.69385 | 0.059 | 0.504 | 3.30E-15 | Undiff-G | SRGN    |
| CCDC88A | 2.29E-19 | -0.91319 | 0.015 | 0.421 | 3.43E-15 | Undiff-G | CCDC88A |
| UXT     | 2.39E-19 | -0.12115 | 0.081 | 0.543 | 3.57E-15 | Undiff-G | UXT     |
| GTF3C6  | 2.45E-19 | -0.28636 | 0.066 | 0.519 | 3.66E-15 | Undiff-G | GTF3C6  |
| DPYSL2  | 2.59E-19 | -0.8752  | 0.022 | 0.428 | 3.87E-15 | Undiff-G | DPYSL2  |
| HLA-A   | 2.59E-19 | 1.002054 | 0.743 | 0.898 | 3.88E-15 | Undiff-G | HLA-A   |
| HNRNPD  | 2.60E-19 | -0.92575 | 0.015 | 0.419 | 3.88E-15 | Undiff-G | HNRNPD  |
| PAIP2   | 2.81E-19 | 0.124316 | 0.132 | 0.636 | 4.20E-15 | Undiff-G | PAIP2   |
| AIF1    | 2.97E-19 | -1.35672 | 0.015 | 0.415 | 4.43E-15 | Undiff-G | AIF1    |
| RCN2    | 3.34E-19 | -0.6944  | 0.044 | 0.472 | 4.99E-15 | Undiff-G | RCN2    |
| LMO4    | 3.55E-19 | -0.37249 | 0.051 | 0.483 | 5.30E-15 | Undiff-G | LMO4    |
| ARRB2   | 3.78E-19 | -0.90934 | 0.007 | 0.405 | 5.65E-15 | Undiff-G | ARRB2   |
| ARPP19  | 3.95E-19 | -0.85547 | 0.022 | 0.43  | 5.90E-15 | Undiff-G | ARPP19  |
| HTRA1   | 3.99E-19 | -0.68209 | 0.044 | 0.465 | 5.96E-15 | Undiff-G | HTRA1   |
| PRPF38B | 4.00E-19 | -0.93041 | 0.029 | 0.44  | 5.97E-15 | Undiff-G | PRPF38B |
| CLTB    | 4.23E-19 | -0.66829 | 0.029 | 0.446 | 6.32E-15 | Undiff-G | CLTB    |
| RBMX    | 4.33E-19 | -0.30575 | 0.103 | 0.572 | 6.47E-15 | Undiff-G | RBMX    |
| EMC6    | 5.00E-19 | -0.61395 | 0.029 | 0.438 | 7.47E-15 | Undiff-G | EMC6    |
| CD81    | 5.09E-19 | -0.86774 | 0.029 | 0.443 | 7.61E-15 | Undiff-G | CD81    |
| RER1    | 5.14E-19 | -0.27356 | 0.059 | 0.502 | 7.68E-15 | Undiff-G | RER1    |
| GRINA   | 5.16E-19 | -0.6213  | 0.029 | 0.441 | 7.71E-15 | Undiff-G | GRINA   |
| CKLF    | 5.40E-19 | -0.19602 | 0.074 | 0.525 | 8.08E-15 | Undiff-G | CKLF    |
| SNRNP70 | 5.76E-19 | -0.6159  | 0.051 | 0.48  | 8.60E-15 | Undiff-G | SNRNP70 |
| NDUFV1  | 5.87E-19 | -0.55326 | 0.051 | 0.484 | 8.78E-15 | Undiff-G | NDUFV1  |
| TSPAN3  | 6.51E-19 | -0.59756 | 0.044 | 0.464 | 9.72E-15 | Undiff-G | TSPAN3  |
| TMEM123 | 6.55E-19 | -0.71623 | 0.007 | 0.401 | 9.79E-15 | Undiff-G | TMEM123 |

|          |          |          |       |       |          |          |          |
|----------|----------|----------|-------|-------|----------|----------|----------|
| LSM7     | 6.67E-19 | -0.10798 | 0.132 | 0.636 | 9.97E-15 | Undiff-G | LSM7     |
| CD14     | 6.70E-19 | -1.37115 | 0.015 | 0.413 | 1.00E-14 | Undiff-G | CD14     |
| SNX2     | 6.95E-19 | -0.7313  | 0.015 | 0.415 | 1.04E-14 | Undiff-G | SNX2     |
| TUBB2A   | 7.13E-19 | -0.54981 | 0.051 | 0.483 | 1.07E-14 | Undiff-G | TUBB2A   |
| CHMP1B   | 7.59E-19 | -0.57972 | 0.029 | 0.443 | 1.13E-14 | Undiff-G | CHMP1B   |
| XRCC5    | 7.85E-19 | -0.2281  | 0.096 | 0.566 | 1.17E-14 | Undiff-G | XRCC5    |
| HNRNP3   | 8.35E-19 | -0.38965 | 0.037 | 0.45  | 1.25E-14 | Undiff-G | HNRNP3   |
| APP      | 8.54E-19 | -0.57884 | 0.081 | 0.53  | 1.28E-14 | Undiff-G | APP      |
| RDX      | 9.00E-19 | -0.53598 | 0.059 | 0.495 | 1.34E-14 | Undiff-G | RDX      |
| DDAH2    | 9.42E-19 | -0.40916 | 0.059 | 0.494 | 1.41E-14 | Undiff-G | DDAH2    |
| BRD2     | 9.97E-19 | -0.58087 | 0.044 | 0.458 | 1.49E-14 | Undiff-G | BRD2     |
| EIF4A3   | 1.02E-18 | -0.50482 | 0.037 | 0.455 | 1.52E-14 | Undiff-G | EIF4A3   |
| CCT3     | 1.03E-18 | -0.1108  | 0.103 | 0.583 | 1.55E-14 | Undiff-G | CCT3     |
| RGS1     | 1.09E-18 | -0.91529 | 0.037 | 0.452 | 1.63E-14 | Undiff-G | RGS1     |
| DPP7     | 1.12E-18 | -0.6717  | 0.051 | 0.472 | 1.67E-14 | Undiff-G | DPP7     |
| CREM     | 1.15E-18 | -0.92707 | 0.015 | 0.411 | 1.72E-14 | Undiff-G | CREM     |
| QKI      | 1.18E-18 | -0.5302  | 0.051 | 0.476 | 1.76E-14 | Undiff-G | QKI      |
| SELK     | 1.19E-18 | 0.186636 | 0.162 | 0.707 | 1.77E-14 | Undiff-G | SELK     |
| H3F3B    | 1.29E-18 | 0.822538 | 0.75  | 0.973 | 1.93E-14 | Undiff-G | H3F3B    |
| CCDC85B  | 1.31E-18 | -0.80238 | 0.022 | 0.418 | 1.96E-14 | Undiff-G | CCDC85B  |
| TIMM8B   | 1.38E-18 | -0.18319 | 0.088 | 0.549 | 2.06E-14 | Undiff-G | TIMM8B   |
| ATG3     | 1.43E-18 | -0.96405 | 0     | 0.381 | 2.14E-14 | Undiff-G | ATG3     |
| CMPK1    | 1.53E-18 | -0.71907 | 0.022 | 0.421 | 2.28E-14 | Undiff-G | CMPK1    |
| VPS29    | 1.53E-18 | -0.11795 | 0.096 | 0.559 | 2.29E-14 | Undiff-G | VPS29    |
| NUCB1    | 1.59E-18 | -0.49732 | 0.037 | 0.45  | 2.38E-14 | Undiff-G | NUCB1    |
| PRRC2C   | 1.67E-18 | -0.54616 | 0.059 | 0.487 | 2.50E-14 | Undiff-G | PRRC2C   |
| C9orf142 | 1.69E-18 | -0.93002 | 0     | 0.38  | 2.52E-14 | Undiff-G | C9orf142 |
| MTPN     | 1.70E-18 | -0.53059 | 0.029 | 0.437 | 2.54E-14 | Undiff-G | MTPN     |
| PPA1     | 1.81E-18 | -0.12758 | 0.081 | 0.534 | 2.70E-14 | Undiff-G | PPA1     |
| CEBPD    | 1.83E-18 | -0.81247 | 0.044 | 0.464 | 2.74E-14 | Undiff-G | CEBPD    |
| XRN2     | 1.95E-18 | -0.46305 | 0.044 | 0.462 | 2.92E-14 | Undiff-G | XRN2     |
| POLR2F   | 1.98E-18 | -0.25451 | 0.088 | 0.547 | 2.95E-14 | Undiff-G | POLR2F   |
| NDUFB11  | 1.98E-18 | 0.104083 | 0.184 | 0.741 | 2.96E-14 | Undiff-G | NDUFB11  |
| TOP1     | 1.99E-18 | -0.63698 | 0.007 | 0.393 | 2.98E-14 | Undiff-G | TOP1     |
| TKT      | 2.17E-18 | -0.11257 | 0.074 | 0.514 | 3.24E-14 | Undiff-G | TKT      |
| VAMP2    | 2.27E-18 | -0.13046 | 0.132 | 0.628 | 3.39E-14 | Undiff-G | VAMP2    |
| DDX5     | 2.29E-18 | -0.12037 | 0.221 | 0.824 | 3.42E-14 | Undiff-G | DDX5     |
| NAA10    | 2.29E-18 | -0.62059 | 0.029 | 0.43  | 3.43E-14 | Undiff-G | NAA10    |
| SCARB2   | 2.62E-18 | -0.92698 | 0.007 | 0.386 | 3.92E-14 | Undiff-G | SCARB2   |
| MAF1     | 2.67E-18 | -0.62218 | 0.029 | 0.433 | 3.98E-14 | Undiff-G | MAF1     |
| GBAS     | 2.67E-18 | -0.7858  | 0.015 | 0.404 | 4.00E-14 | Undiff-G | GBAS     |
| WBP2     | 2.68E-18 | -0.63948 | 0.044 | 0.457 | 4.00E-14 | Undiff-G | WBP2     |
| ODC1     | 2.81E-18 | -0.97576 | 0.015 | 0.398 | 4.20E-14 | Undiff-G | ODC1     |
| MZT2A    | 2.83E-18 | -0.66992 | 0.022 | 0.418 | 4.23E-14 | Undiff-G | MZT2A    |
| SMARCB1  | 2.85E-18 | -0.75826 | 0.022 | 0.419 | 4.26E-14 | Undiff-G | SMARCB1  |
| WASF2    | 2.93E-18 | -0.63152 | 0.037 | 0.443 | 4.38E-14 | Undiff-G | WASF2    |
| PCSK1N   | 2.99E-18 | -1.05338 | 0.029 | 0.425 | 4.47E-14 | Undiff-G | PCSK1N   |
| ATF4     | 3.13E-18 | -0.36912 | 0.081 | 0.522 | 4.68E-14 | Undiff-G | ATF4     |
| FNTA     | 3.14E-18 | -0.87478 | 0.007 | 0.39  | 4.69E-14 | Undiff-G | FNTA     |
| TCEAL8   | 3.16E-18 | -0.4792  | 0.037 | 0.446 | 4.72E-14 | Undiff-G | TCEAL8   |
| NUDT3    | 3.26E-18 | -0.66001 | 0.015 | 0.404 | 4.87E-14 | Undiff-G | NUDT3    |

|          |          |          |       |       |          |          |          |
|----------|----------|----------|-------|-------|----------|----------|----------|
| XBP1     | 3.40E-18 | -1.03876 | 0     | 0.375 | 5.08E-14 | Undiff-G | XBP1     |
| IDH2     | 3.47E-18 | -0.7345  | 0.029 | 0.431 | 5.19E-14 | Undiff-G | IDH2     |
| H1FX     | 3.58E-18 | -0.94071 | 0.007 | 0.389 | 5.36E-14 | Undiff-G | H1FX     |
| SRPK2    | 3.61E-18 | -0.85599 | 0.022 | 0.415 | 5.39E-14 | Undiff-G | SRPK2    |
| WTAP     | 3.90E-18 | -0.63409 | 0.029 | 0.425 | 5.84E-14 | Undiff-G | WTAP     |
| TOMM22   | 3.95E-18 | -0.19286 | 0.051 | 0.474 | 5.90E-14 | Undiff-G | TOMM22   |
| COPE     | 4.00E-18 | 0.109372 | 0.199 | 0.777 | 5.97E-14 | Undiff-G | COPE     |
| KPNB1    | 4.27E-18 | -0.59174 | 0.044 | 0.452 | 6.38E-14 | Undiff-G | KPNB1    |
| PSMD3    | 4.35E-18 | -0.85356 | 0.022 | 0.409 | 6.50E-14 | Undiff-G | PSMD3    |
| SAA1     | 4.69E-18 | 1.628611 | 0.331 | 0.116 | 7.01E-14 | Undiff-G | SAA1     |
| RBM17    | 4.81E-18 | -0.89856 | 0     | 0.373 | 7.19E-14 | Undiff-G | RBM17    |
| HNRNPAB  | 4.82E-18 | -0.61693 | 0.015 | 0.402 | 7.20E-14 | Undiff-G | HNRNPAB  |
| SUMO3    | 5.04E-18 | -0.39459 | 0.037 | 0.444 | 7.53E-14 | Undiff-G | SUMO3    |
| CACYBP   | 5.26E-18 | -0.13236 | 0.074 | 0.511 | 7.86E-14 | Undiff-G | CACYBP   |
| ATP6VOE2 | 5.78E-18 | -0.49386 | 0.044 | 0.457 | 8.64E-14 | Undiff-G | ATP6VOE2 |
| ABHD12   | 6.02E-18 | -0.76206 | 0.007 | 0.386 | 9.00E-14 | Undiff-G | ABHD12   |
| SFT2D1   | 6.03E-18 | -0.15852 | 0.074 | 0.506 | 9.01E-14 | Undiff-G | SFT2D1   |
| BRK1     | 6.15E-18 | 0.10117  | 0.206 | 0.787 | 9.20E-14 | Undiff-G | BRK1     |
| EIF3M    | 6.25E-18 | -0.17392 | 0.088 | 0.531 | 9.34E-14 | Undiff-G | EIF3M    |
| FAM3C    | 6.33E-18 | -0.51121 | 0.037 | 0.441 | 9.46E-14 | Undiff-G | FAM3C    |
| TMEM70   | 6.37E-18 | -0.65437 | 0.015 | 0.4   | 9.51E-14 | Undiff-G | TMEM70   |
| PRKAR1A  | 6.76E-18 | -0.23676 | 0.059 | 0.477 | 1.01E-13 | Undiff-G | PRKAR1A  |
| CTNNA1   | 6.88E-18 | -0.45217 | 0.029 | 0.426 | 1.03E-13 | Undiff-G | CTNNA1   |
| GNB1     | 7.22E-18 | -0.72491 | 0.029 | 0.42  | 1.08E-13 | Undiff-G | GNB1     |
| MAPRE1   | 7.52E-18 | -0.16497 | 0.059 | 0.482 | 1.12E-13 | Undiff-G | MAPRE1   |
| ADI1     | 7.59E-18 | -0.70543 | 0.022 | 0.411 | 1.13E-13 | Undiff-G | ADI1     |
| CLNS1A   | 7.70E-18 | -0.20185 | 0.066 | 0.497 | 1.15E-13 | Undiff-G | CLNS1A   |
| PRMT1    | 8.39E-18 | -0.20153 | 0.103 | 0.559 | 1.25E-13 | Undiff-G | PRMT1    |
| FLOT1    | 8.86E-18 | -0.22289 | 0.074 | 0.508 | 1.32E-13 | Undiff-G | FLOT1    |
| HSPD1    | 8.96E-18 | 0.124026 | 0.132 | 0.62  | 1.34E-13 | Undiff-G | HSPD1    |
| LYPLA1   | 9.24E-18 | -0.45101 | 0.022 | 0.411 | 1.38E-13 | Undiff-G | LYPLA1   |
| HADHA    | 1.02E-17 | -0.45169 | 0.044 | 0.446 | 1.52E-13 | Undiff-G | HADHA    |
| IFNGR2   | 1.07E-17 | -0.8934  | 0.015 | 0.394 | 1.59E-13 | Undiff-G | IFNGR2   |
| GDI1     | 1.09E-17 | -0.22666 | 0.066 | 0.491 | 1.62E-13 | Undiff-G | GDI1     |
| HDAC2    | 1.13E-17 | -0.33365 | 0.044 | 0.452 | 1.69E-13 | Undiff-G | HDAC2    |
| SIRT2    | 1.19E-17 | -0.74095 | 0.029 | 0.421 | 1.78E-13 | Undiff-G | SIRT2    |
| MPC1     | 1.27E-17 | -0.24609 | 0.066 | 0.493 | 1.90E-13 | Undiff-G | MPC1     |
| LMNA     | 1.30E-17 | -0.77157 | 0.029 | 0.42  | 1.94E-13 | Undiff-G | LMNA     |
| SPAG7    | 1.46E-17 | -0.15341 | 0.066 | 0.483 | 2.18E-13 | Undiff-G | SPAG7    |
| FXYD6    | 1.48E-17 | -0.67694 | 0.059 | 0.465 | 2.20E-13 | Undiff-G | FXYD6    |
| TMEM9B   | 1.53E-17 | -0.10332 | 0.096 | 0.541 | 2.29E-13 | Undiff-G | TMEM9B   |
| LEPROTL1 | 1.56E-17 | -0.71727 | 0.015 | 0.392 | 2.33E-13 | Undiff-G | LEPROTL1 |
| DCTN6    | 1.57E-17 | -0.40228 | 0.044 | 0.448 | 2.34E-13 | Undiff-G | DCTN6    |
| MIDN     | 1.66E-17 | -0.65997 | 0.029 | 0.419 | 2.49E-13 | Undiff-G | MIDN     |
| ATP6V1F  | 1.69E-17 | 0.132222 | 0.221 | 0.808 | 2.52E-13 | Undiff-G | ATP6V1F  |
| C17orf89 | 1.72E-17 | -0.78094 | 0.037 | 0.426 | 2.58E-13 | Undiff-G | C17orf89 |
| IMP3     | 1.81E-17 | -0.9008  | 0     | 0.364 | 2.70E-13 | Undiff-G | IMP3     |
| MTCH2    | 1.85E-17 | -0.39755 | 0.037 | 0.433 | 2.77E-13 | Undiff-G | MTCH2    |
| C16orf13 | 1.91E-17 | -0.57368 | 0.059 | 0.465 | 2.85E-13 | Undiff-G | C16orf13 |
| CHCHD10  | 1.91E-17 | -0.86468 | 0.015 | 0.385 | 2.85E-13 | Undiff-G | CHCHD10  |
| SGK1     | 1.99E-17 | -0.81434 | 0.044 | 0.441 | 2.98E-13 | Undiff-G | SGK1     |



|           |          |          |       |       |          |          |           |
|-----------|----------|----------|-------|-------|----------|----------|-----------|
| SNX6      | 2.01E-17 | -0.29668 | 0.037 | 0.434 | 3.00E-13 | Undiff-G | SNX6      |
| FCER1G    | 2.06E-17 | -0.6909  | 0.044 | 0.446 | 3.08E-13 | Undiff-G | FCER1G    |
| ARPC1B    | 2.14E-17 | -0.45248 | 0.096 | 0.536 | 3.20E-13 | Undiff-G | ARPC1B    |
| MAGOH     | 2.35E-17 | -0.45573 | 0.029 | 0.418 | 3.52E-13 | Undiff-G | MAGOH     |
| PSIP1     | 2.39E-17 | -0.88328 | 0.015 | 0.388 | 3.57E-13 | Undiff-G | PSIP1     |
| ARGLU1    | 2.42E-17 | -0.48497 | 0.059 | 0.473 | 3.61E-13 | Undiff-G | ARGLU1    |
| TUBB4B    | 2.42E-17 | -0.13149 | 0.074 | 0.497 | 3.62E-13 | Undiff-G | TUBB4B    |
| PAIP1     | 2.43E-17 | -0.82304 | 0.022 | 0.4   | 3.63E-13 | Undiff-G | PAIP1     |
| EMC4      | 2.84E-17 | -0.17764 | 0.066 | 0.487 | 4.24E-13 | Undiff-G | EMC4      |
| WIPI2     | 2.90E-17 | -0.47173 | 0.022 | 0.402 | 4.33E-13 | Undiff-G | WIPI2     |
| PTP4A2    | 2.94E-17 | -0.51739 | 0.051 | 0.458 | 4.39E-13 | Undiff-G | PTP4A2    |
| DDX46     | 3.18E-17 | -0.43435 | 0.051 | 0.451 | 4.75E-13 | Undiff-G | DDX46     |
| NSA2      | 3.18E-17 | -0.27515 | 0.022 | 0.403 | 4.75E-13 | Undiff-G | NSA2      |
| CCNL1     | 3.23E-17 | -0.14704 | 0.088 | 0.53  | 4.83E-13 | Undiff-G | CCNL1     |
| TXN2      | 3.32E-17 | -0.67476 | 0.044 | 0.438 | 4.96E-13 | Undiff-G | TXN2      |
| AES       | 3.35E-17 | -0.57457 | 0.029 | 0.415 | 5.00E-13 | Undiff-G | AES       |
| CMTM6     | 3.60E-17 | -0.33135 | 0.037 | 0.43  | 5.38E-13 | Undiff-G | CMTM6     |
| DDX17     | 3.66E-17 | -0.47454 | 0.037 | 0.428 | 5.47E-13 | Undiff-G | DDX17     |
| ACADVL    | 3.79E-17 | -0.44152 | 0.051 | 0.455 | 5.66E-13 | Undiff-G | ACADVL    |
| AKIRIN2   | 3.84E-17 | -0.68798 | 0.015 | 0.385 | 5.73E-13 | Undiff-G | AKIRIN2   |
| HIST1H4C  | 4.05E-17 | -0.48901 | 0.037 | 0.429 | 6.05E-13 | Undiff-G | HIST1H4C  |
| PTTG1IP   | 4.07E-17 | -0.5241  | 0.059 | 0.461 | 6.08E-13 | Undiff-G | PTTG1IP   |
| YTHDF2    | 4.10E-17 | -0.48307 | 0.044 | 0.435 | 6.13E-13 | Undiff-G | YTHDF2    |
| UGP2      | 4.17E-17 | -0.11902 | 0.059 | 0.465 | 6.23E-13 | Undiff-G | UGP2      |
| YPEL5     | 4.43E-17 | -0.21123 | 0.051 | 0.457 | 6.62E-13 | Undiff-G | YPEL5     |
| RNF13     | 4.54E-17 | -0.15205 | 0.066 | 0.485 | 6.79E-13 | Undiff-G | RNF13     |
| MKRN1     | 4.84E-17 | -0.52067 | 0.029 | 0.412 | 7.23E-13 | Undiff-G | MKRN1     |
| RHOG      | 4.85E-17 | -0.54882 | 0.029 | 0.414 | 7.24E-13 | Undiff-G | RHOG      |
| BAG1      | 5.11E-17 | -0.88055 | 0     | 0.356 | 7.64E-13 | Undiff-G | BAG1      |
| PSMC2     | 5.19E-17 | -0.1167  | 0.059 | 0.463 | 7.76E-13 | Undiff-G | PSMC2     |
| POLR2G    | 5.22E-17 | 0.118973 | 0.11  | 0.572 | 7.79E-13 | Undiff-G | POLR2G    |
| GABARAPL2 | 5.48E-17 | 0.145768 | 0.199 | 0.749 | 8.19E-13 | Undiff-G | GABARAPL2 |
| RNF145    | 5.97E-17 | -0.82837 | 0.015 | 0.382 | 8.93E-13 | Undiff-G | RNF145    |
| C8orf59   | 6.44E-17 | -0.42627 | 0.022 | 0.398 | 9.62E-13 | Undiff-G | C8orf59   |
| GRHPR     | 6.48E-17 | -0.60979 | 0.022 | 0.397 | 9.68E-13 | Undiff-G | GRHPR     |
| STOML2    | 6.91E-17 | -0.27829 | 0.037 | 0.425 | 1.03E-12 | Undiff-G | STOML2    |
| CCDC107   | 7.08E-17 | -0.79286 | 0.022 | 0.395 | 1.06E-12 | Undiff-G | CCDC107   |
| POLR1D    | 7.20E-17 | -0.18587 | 0.037 | 0.42  | 1.08E-12 | Undiff-G | POLR1D    |
| MYL6B     | 7.27E-17 | -0.18338 | 0.051 | 0.447 | 1.09E-12 | Undiff-G | MYL6B     |
| TPM4      | 7.31E-17 | -0.33834 | 0.081 | 0.502 | 1.09E-12 | Undiff-G | TPM4      |
| CEBPB     | 7.43E-17 | -0.82178 | 0.051 | 0.439 | 1.11E-12 | Undiff-G | CEBPB     |
| LAGE3     | 7.61E-17 | -0.68439 | 0.029 | 0.403 | 1.14E-12 | Undiff-G | LAGE3     |
| LIMS1     | 7.68E-17 | -0.40408 | 0.051 | 0.444 | 1.15E-12 | Undiff-G | LIMS1     |
| PFKL      | 7.70E-17 | -0.82265 | 0.007 | 0.367 | 1.15E-12 | Undiff-G | PFKL      |
| EIF3J     | 7.73E-17 | -0.50091 | 0.015 | 0.382 | 1.16E-12 | Undiff-G | EIF3J     |
| DTD1      | 7.97E-17 | -0.58286 | 0.022 | 0.396 | 1.19E-12 | Undiff-G | DTD1      |
| SMARCA5   | 8.54E-17 | -0.83361 | 0     | 0.353 | 1.28E-12 | Undiff-G | SMARCA5   |
| ATOX1     | 8.59E-17 | 0.131272 | 0.132 | 0.61  | 1.28E-12 | Undiff-G | ATOX1     |
| GDI2      | 9.12E-17 | -0.16217 | 0.074 | 0.493 | 1.36E-12 | Undiff-G | GDI2      |
| CISD2     | 9.54E-17 | -0.54856 | 0.029 | 0.408 | 1.43E-12 | Undiff-G | CISD2     |
| CNPY3     | 9.76E-17 | -0.52384 | 0.037 | 0.417 | 1.46E-12 | Undiff-G | CNPY3     |

|          |          |          |       |       |          |          |          |
|----------|----------|----------|-------|-------|----------|----------|----------|
| BIN1     | 1.09E-16 | -0.84618 | 0.007 | 0.365 | 1.63E-12 | Undiff-G | BIN1     |
| C1QB     | 1.14E-16 | -0.43289 | 0.125 | 0.575 | 1.70E-12 | Undiff-G | C1QB     |
| BASP1    | 1.16E-16 | -0.87382 | 0.015 | 0.377 | 1.73E-12 | Undiff-G | BASP1    |
| WDR45B   | 1.20E-16 | -0.33607 | 0.029 | 0.407 | 1.79E-12 | Undiff-G | WDR45B   |
| CSTB     | 1.20E-16 | 0.149391 | 0.176 | 0.696 | 1.79E-12 | Undiff-G | CSTB     |
| EIF3H    | 1.24E-16 | 0.246003 | 0.162 | 0.675 | 1.85E-12 | Undiff-G | EIF3H    |
| AKIRIN1  | 1.25E-16 | -0.82898 | 0.015 | 0.372 | 1.87E-12 | Undiff-G | AKIRIN1  |
| COMMD7   | 1.30E-16 | -0.76308 | 0.029 | 0.404 | 1.94E-12 | Undiff-G | COMMD7   |
| COR01A   | 1.31E-16 | -1.03416 | 0.015 | 0.377 | 1.95E-12 | Undiff-G | COR01A   |
| PSMD13   | 1.32E-16 | -0.6725  | 0.037 | 0.418 | 1.97E-12 | Undiff-G | PSMD13   |
| NME4     | 1.36E-16 | -0.78972 | 0.022 | 0.386 | 2.03E-12 | Undiff-G | NME4     |
| HMGA1    | 1.36E-16 | -0.88992 | 0     | 0.349 | 2.03E-12 | Undiff-G | HMGA1    |
| SRSF11   | 1.42E-16 | -0.20082 | 0.103 | 0.544 | 2.12E-12 | Undiff-G | SRSF11   |
| RAB6A    | 1.51E-16 | -0.652   | 0.029 | 0.398 | 2.26E-12 | Undiff-G | RAB6A    |
| DNAJC7   | 1.55E-16 | -0.47058 | 0.066 | 0.469 | 2.32E-12 | Undiff-G | DNAJC7   |
| PLEKHB2  | 1.60E-16 | -0.37539 | 0.029 | 0.403 | 2.38E-12 | Undiff-G | PLEKHB2  |
| HMGB2    | 1.61E-16 | -0.1238  | 0.081 | 0.499 | 2.41E-12 | Undiff-G | HMGB2    |
| EIF5A    | 1.62E-16 | -0.10148 | 0.096 | 0.532 | 2.42E-12 | Undiff-G | EIF5A    |
| MFSD1    | 1.62E-16 | -1.05634 | 0     | 0.348 | 2.42E-12 | Undiff-G | MFSD1    |
| UBA2     | 1.65E-16 | -0.63266 | 0.007 | 0.362 | 2.47E-12 | Undiff-G | UBA2     |
| TYROBP   | 1.66E-16 | -0.78587 | 0.066 | 0.464 | 2.48E-12 | Undiff-G | TYROBP   |
| MGAT1    | 1.69E-16 | -0.91791 | 0.007 | 0.362 | 2.52E-12 | Undiff-G | MGAT1    |
| CD164    | 1.70E-16 | -0.11765 | 0.081 | 0.495 | 2.54E-12 | Undiff-G | CD164    |
| CHMP4A   | 1.76E-16 | -0.25086 | 0.066 | 0.473 | 2.64E-12 | Undiff-G | CHMP4A   |
| STAU1    | 1.82E-16 | -0.79087 | 0.015 | 0.37  | 2.72E-12 | Undiff-G | STAU1    |
| SPG21    | 2.06E-16 | -0.49424 | 0.022 | 0.389 | 3.07E-12 | Undiff-G | SPG21    |
| PAK2     | 2.07E-16 | -0.81685 | 0.007 | 0.356 | 3.10E-12 | Undiff-G | PAK2     |
| ARID4B   | 2.11E-16 | -0.39915 | 0.037 | 0.41  | 3.16E-12 | Undiff-G | ARID4B   |
| SRA1     | 2.12E-16 | -0.45471 | 0.029 | 0.403 | 3.17E-12 | Undiff-G | SRA1     |
| PSMF1    | 2.13E-16 | -0.26056 | 0.029 | 0.403 | 3.18E-12 | Undiff-G | PSMF1    |
| ATP5B    | 2.15E-16 | 0.204932 | 0.221 | 0.782 | 3.21E-12 | Undiff-G | ATP5B    |
| BCAS2    | 2.22E-16 | -0.22812 | 0.066 | 0.467 | 3.31E-12 | Undiff-G | BCAS2    |
| SSR2     | 2.46E-16 | 0.244985 | 0.191 | 0.72  | 3.67E-12 | Undiff-G | SSR2     |
| LAMTOR1  | 2.47E-16 | 0.179725 | 0.169 | 0.66  | 3.69E-12 | Undiff-G | LAMTOR1  |
| IDH3B    | 2.47E-16 | -0.36116 | 0.044 | 0.428 | 3.69E-12 | Undiff-G | IDH3B    |
| NDUFA12  | 2.50E-16 | 0.116192 | 0.118 | 0.563 | 3.74E-12 | Undiff-G | NDUFA12  |
| SOX4     | 2.55E-16 | -0.84089 | 0.066 | 0.45  | 3.82E-12 | Undiff-G | SOX4     |
| RTF1     | 2.56E-16 | -0.5181  | 0.051 | 0.435 | 3.83E-12 | Undiff-G | RTF1     |
| SNRPC    | 2.58E-16 | 0.174166 | 0.088 | 0.517 | 3.85E-12 | Undiff-G | SNRPC    |
| ATRX     | 2.64E-16 | -0.5295  | 0.059 | 0.449 | 3.94E-12 | Undiff-G | ATRX     |
| VPS28    | 2.71E-16 | 0.267035 | 0.154 | 0.642 | 4.05E-12 | Undiff-G | VPS28    |
| MKKS     | 2.80E-16 | -0.4105  | 0.037 | 0.408 | 4.18E-12 | Undiff-G | MKKS     |
| SUCLG1   | 3.31E-16 | -0.36949 | 0.051 | 0.441 | 4.95E-12 | Undiff-G | SUCLG1   |
| NDUFB3   | 3.52E-16 | 0.118924 | 0.11  | 0.559 | 5.26E-12 | Undiff-G | NDUFB3   |
| ADIPOR1  | 3.71E-16 | -0.5935  | 0.022 | 0.384 | 5.54E-12 | Undiff-G | ADIPOR1  |
| CCDC109B | 3.76E-16 | -0.90365 | 0.007 | 0.353 | 5.61E-12 | Undiff-G | CCDC109B |
| SURF1    | 3.80E-16 | -0.77264 | 0.007 | 0.356 | 5.67E-12 | Undiff-G | SURF1    |
| CNDP2    | 3.81E-16 | -0.27051 | 0.051 | 0.435 | 5.69E-12 | Undiff-G | CNDP2    |
| ATP6V1B2 | 3.88E-16 | -0.31015 | 0.037 | 0.413 | 5.80E-12 | Undiff-G | ATP6V1B2 |
| SDF4     | 3.98E-16 | -0.68563 | 0.037 | 0.408 | 5.95E-12 | Undiff-G | SDF4     |
| ZYX      | 4.03E-16 | -0.52962 | 0.037 | 0.406 | 6.03E-12 | Undiff-G | ZYX      |

|          |          |          |       |       |          |          |          |
|----------|----------|----------|-------|-------|----------|----------|----------|
| PFN2     | 4.06E-16 | -0.2603  | 0.051 | 0.439 | 6.06E-12 | Undiff-G | PFN2     |
| ARL4C    | 4.20E-16 | -0.51508 | 0.022 | 0.382 | 6.28E-12 | Undiff-G | ARL4C    |
| RNF187   | 4.48E-16 | -0.74843 | 0.022 | 0.382 | 6.69E-12 | Undiff-G | RNF187   |
| SEC11A   | 4.52E-16 | 0.114875 | 0.132 | 0.596 | 6.76E-12 | Undiff-G | SEC11A   |
| SMARCE1  | 4.67E-16 | -0.67687 | 0.022 | 0.383 | 6.98E-12 | Undiff-G | SMARCE1  |
| BBX      | 4.78E-16 | -0.33187 | 0.037 | 0.411 | 7.14E-12 | Undiff-G | BBX      |
| MLEC     | 4.88E-16 | -0.53948 | 0.037 | 0.405 | 7.30E-12 | Undiff-G | MLEC     |
| EIF4B    | 5.09E-16 | -0.43621 | 0.022 | 0.382 | 7.60E-12 | Undiff-G | EIF4B    |
| EIF3K    | 5.26E-16 | 0.238331 | 0.213 | 0.765 | 7.86E-12 | Undiff-G | EIF3K    |
| SLC25A11 | 5.58E-16 | -0.42093 | 0.044 | 0.424 | 8.34E-12 | Undiff-G | SLC25A11 |
| CCT7     | 6.11E-16 | -0.18776 | 0.103 | 0.535 | 9.14E-12 | Undiff-G | CCT7     |
| DNPH1    | 6.24E-16 | -0.50701 | 0.022 | 0.381 | 9.33E-12 | Undiff-G | DNPH1    |
| GCSH     | 6.43E-16 | -0.86329 | 0.007 | 0.351 | 9.61E-12 | Undiff-G | GCSH     |
| COPRS    | 6.58E-16 | -0.82932 | 0     | 0.338 | 9.84E-12 | Undiff-G | COPRS    |
| BTG3     | 6.68E-16 | -0.58833 | 0.022 | 0.375 | 9.98E-12 | Undiff-G | BTG3     |
| STARD3NL | 6.69E-16 | -0.41785 | 0.037 | 0.402 | 1.00E-11 | Undiff-G | STARD3NL |
| SNRPE    | 6.84E-16 | 0.128981 | 0.132 | 0.585 | 1.02E-11 | Undiff-G | SNRPE    |
| ATP6V1E1 | 6.87E-16 | -0.18219 | 0.051 | 0.437 | 1.03E-11 | Undiff-G | ATP6V1E1 |
| ATP5G1   | 7.02E-16 | 0.211549 | 0.147 | 0.623 | 1.05E-11 | Undiff-G | ATP5G1   |
| RBM42    | 7.55E-16 | -0.55271 | 0.029 | 0.39  | 1.13E-11 | Undiff-G | RBM42    |
| HIGD2A   | 7.58E-16 | 0.181779 | 0.147 | 0.624 | 1.13E-11 | Undiff-G | HIGD2A   |
| SF3B5    | 7.93E-16 | 0.232594 | 0.154 | 0.635 | 1.18E-11 | Undiff-G | SF3B5    |
| NDUFA1   | 9.74E-16 | 0.221599 | 0.199 | 0.73  | 1.46E-11 | Undiff-G | NDUFA1   |
| PEPD     | 9.96E-16 | -0.25684 | 0.051 | 0.433 | 1.49E-11 | Undiff-G | PEPD     |
| ALDH2    | 1.03E-15 | -0.72917 | 0.022 | 0.375 | 1.53E-11 | Undiff-G | ALDH2    |
| TAF9     | 1.03E-15 | 0.135232 | 0.088 | 0.505 | 1.54E-11 | Undiff-G | TAF9     |
| PSMC6    | 1.04E-15 | -0.38978 | 0.029 | 0.391 | 1.55E-11 | Undiff-G | PSMC6    |
| LMAN2    | 1.09E-15 | 0.114166 | 0.125 | 0.579 | 1.62E-11 | Undiff-G | LMAN2    |
| NAPA     | 1.10E-15 | -0.48297 | 0.037 | 0.398 | 1.65E-11 | Undiff-G | NAPA     |
| FHL1     | 1.13E-15 | -0.85759 | 0.015 | 0.361 | 1.68E-11 | Undiff-G | FHL1     |
| CCL3     | 1.16E-15 | -0.75441 | 0.051 | 0.426 | 1.73E-11 | Undiff-G | CCL3     |
| IFI27L2  | 1.20E-15 | -0.11925 | 0.074 | 0.476 | 1.80E-11 | Undiff-G | IFI27L2  |
| WBSCR22  | 1.23E-15 | 0.124145 | 0.088 | 0.498 | 1.84E-11 | Undiff-G | WBSCR22  |
| TNFRSF1A | 1.26E-15 | -0.50356 | 0.022 | 0.376 | 1.88E-11 | Undiff-G | TNFRSF1A |
| CD68     | 1.27E-15 | -0.47048 | 0.059 | 0.446 | 1.90E-11 | Undiff-G | CD68     |
| TMEM126A | 1.28E-15 | -0.8783  | 0     | 0.333 | 1.92E-11 | Undiff-G | TMEM126A |
| MAP1LC3A | 1.32E-15 | -0.77501 | 0.022 | 0.369 | 1.98E-11 | Undiff-G | MAP1LC3A |
| TMEM179B | 1.37E-15 | -0.20868 | 0.044 | 0.418 | 2.05E-11 | Undiff-G | TMEM179B |
| BCLAF1   | 1.39E-15 | -0.32035 | 0.029 | 0.389 | 2.08E-11 | Undiff-G | BCLAF1   |
| NOL7     | 1.42E-15 | -0.14981 | 0.059 | 0.443 | 2.13E-11 | Undiff-G | NOL7     |
| SELT     | 1.43E-15 | 0.122762 | 0.176 | 0.665 | 2.14E-11 | Undiff-G | SELT     |
| RGS10    | 1.45E-15 | -1.07926 | 0.007 | 0.346 | 2.16E-11 | Undiff-G | RGS10    |
| AHSA1    | 1.47E-15 | -0.25311 | 0.037 | 0.403 | 2.19E-11 | Undiff-G | AHSA1    |
| COX7B    | 1.48E-15 | 0.151584 | 0.169 | 0.648 | 2.22E-11 | Undiff-G | COX7B    |
| TRAPPC2L | 1.50E-15 | -0.22652 | 0.051 | 0.424 | 2.24E-11 | Undiff-G | TRAPPC2L |
| DBNL     | 1.52E-15 | -0.29306 | 0.051 | 0.43  | 2.27E-11 | Undiff-G | DBNL     |
| C19orf24 | 1.52E-15 | -0.48216 | 0.022 | 0.369 | 2.27E-11 | Undiff-G | C19orf24 |
| DHX36    | 1.60E-15 | -0.32157 | 0.051 | 0.43  | 2.39E-11 | Undiff-G | DHX36    |
| PSMG2    | 1.63E-15 | -0.14511 | 0.044 | 0.416 | 2.43E-11 | Undiff-G | PSMG2    |
| TSEN34   | 1.67E-15 | -0.6695  | 0.022 | 0.372 | 2.49E-11 | Undiff-G | TSEN34   |
| CCT5     | 1.70E-15 | 0.118478 | 0.081 | 0.487 | 2.54E-11 | Undiff-G | CCT5     |

|          |           |           |        |        |           |          |          |
|----------|-----------|-----------|--------|--------|-----------|----------|----------|
| BTF3L4   | 1. 81E-15 | 0. 170267 | 0. 096 | 0. 517 | 2. 71E-11 | Undiff-G | BTF3L4   |
| PHLDA1   | 1. 88E-15 | -0. 71369 | 0. 037 | 0. 4   | 2. 81E-11 | Undiff-G | PHLDA1   |
| GPAA1    | 1. 94E-15 | -0. 49302 | 0. 037 | 0. 397 | 2. 90E-11 | Undiff-G | GPAA1    |
| PCMT1    | 1. 97E-15 | 0. 168989 | 0. 11  | 0. 546 | 2. 95E-11 | Undiff-G | PCMT1    |
| GATM     | 2. 02E-15 | -0. 83102 | 0. 015 | 0. 356 | 3. 01E-11 | Undiff-G | GATM     |
| ARL6IP1  | 2. 11E-15 | 0. 157431 | 0. 213 | 0. 748 | 3. 15E-11 | Undiff-G | ARL6IP1  |
| APLP1    | 2. 14E-15 | -0. 83446 | 0. 015 | 0. 355 | 3. 21E-11 | Undiff-G | APLP1    |
| ATP5F1   | 2. 15E-15 | 0. 208051 | 0. 162 | 0. 649 | 3. 22E-11 | Undiff-G | ATP5F1   |
| YBX3     | 2. 22E-15 | -0. 56637 | 0. 044 | 0. 409 | 3. 32E-11 | Undiff-G | YBX3     |
| ANAPC5   | 2. 24E-15 | -0. 20026 | 0. 037 | 0. 4   | 3. 34E-11 | Undiff-G | ANAPC5   |
| N4BP2L2  | 2. 36E-15 | -0. 27821 | 0. 103 | 0. 521 | 3. 53E-11 | Undiff-G | N4BP2L2  |
| CYB5R3   | 2. 37E-15 | -0. 73909 | 0. 022 | 0. 365 | 3. 54E-11 | Undiff-G | CYB5R3   |
| TSC22D1  | 2. 44E-15 | -0. 20176 | 0. 103 | 0. 517 | 3. 65E-11 | Undiff-G | TSC22D1  |
| ITGB2    | 2. 46E-15 | -1. 27152 | 0      | 0. 328 | 3. 68E-11 | Undiff-G | ITGB2    |
| C6orf48  | 2. 52E-15 | 0. 246023 | 0. 169 | 0. 652 | 3. 76E-11 | Undiff-G | C6orf48  |
| RAD23B   | 2. 52E-15 | -0. 38457 | 0. 029 | 0. 384 | 3. 76E-11 | Undiff-G | RAD23B   |
| SOX2     | 2. 58E-15 | -0. 7843  | 0. 059 | 0. 434 | 3. 86E-11 | Undiff-G | SOX2     |
| LITAF    | 2. 65E-15 | -0. 2353  | 0. 074 | 0. 463 | 3. 96E-11 | Undiff-G | LITAF    |
| PSMD11   | 2. 92E-15 | -0. 16999 | 0. 044 | 0. 412 | 4. 36E-11 | Undiff-G | PSMD11   |
| FAM50A   | 2. 96E-15 | -0. 57254 | 0. 029 | 0. 377 | 4. 43E-11 | Undiff-G | FAM50A   |
| PDHB     | 2. 98E-15 | -0. 51719 | 0. 022 | 0. 367 | 4. 46E-11 | Undiff-G | PDHB     |
| GRSF1    | 3. 02E-15 | -0. 76889 | 0      | 0. 326 | 4. 51E-11 | Undiff-G | GRSF1    |
| APOC1    | 3. 04E-15 | -0. 41666 | 0. 103 | 0. 521 | 4. 54E-11 | Undiff-G | APOC1    |
| TAOK3    | 3. 09E-15 | -0. 56503 | 0. 037 | 0. 39  | 4. 61E-11 | Undiff-G | TAOK3    |
| TUBB2B   | 3. 11E-15 | -0. 46272 | 0. 132 | 0. 56  | 4. 64E-11 | Undiff-G | TUBB2B   |
| ARHGDIB  | 3. 24E-15 | -0. 87621 | 0. 029 | 0. 376 | 4. 85E-11 | Undiff-G | ARHGDIB  |
| NEDD8    | 3. 33E-15 | 0. 187903 | 0. 213 | 0. 751 | 4. 98E-11 | Undiff-G | NEDD8    |
| MAP7D1   | 3. 35E-15 | -0. 66162 | 0. 015 | 0. 35  | 5. 00E-11 | Undiff-G | MAP7D1   |
| ARL2BP   | 3. 42E-15 | -0. 13979 | 0. 044 | 0. 409 | 5. 11E-11 | Undiff-G | ARL2BP   |
| GTF2I    | 3. 44E-15 | -0. 38516 | 0. 059 | 0. 431 | 5. 13E-11 | Undiff-G | GTF2I    |
| UBE2I    | 3. 53E-15 | 0. 260799 | 0. 132 | 0. 582 | 5. 28E-11 | Undiff-G | UBE2I    |
| JMJD1C   | 3. 64E-15 | -0. 80728 | 0. 007 | 0. 338 | 5. 43E-11 | Undiff-G | JMJD1C   |
| TMEM59   | 3. 65E-15 | 0. 31542  | 0. 228 | 0. 792 | 5. 46E-11 | Undiff-G | TMEM59   |
| SNRPD3   | 3. 72E-15 | -0. 45129 | 0. 051 | 0. 418 | 5. 56E-11 | Undiff-G | SNRPD3   |
| C21orf33 | 3. 73E-15 | -0. 42378 | 0. 022 | 0. 367 | 5. 57E-11 | Undiff-G | C21orf33 |
| MAGED2   | 3. 88E-15 | 0. 121247 | 0. 103 | 0. 513 | 5. 80E-11 | Undiff-G | MAGED2   |
| ERCC1    | 3. 90E-15 | -0. 13465 | 0. 081 | 0. 477 | 5. 83E-11 | Undiff-G | ERCC1    |
| HIGD1A   | 3. 98E-15 | -0. 13744 | 0. 059 | 0. 431 | 5. 94E-11 | Undiff-G | HIGD1A   |
| NAP1L4   | 4. 01E-15 | -0. 42871 | 0. 044 | 0. 408 | 6. 00E-11 | Undiff-G | NAP1L4   |
| NSFL1C   | 4. 07E-15 | -0. 30586 | 0. 044 | 0. 406 | 6. 08E-11 | Undiff-G | NSFL1C   |
| RBM25    | 4. 16E-15 | -0. 35509 | 0. 066 | 0. 445 | 6. 22E-11 | Undiff-G | RBM25    |
| RHOBTB3  | 4. 19E-15 | -0. 58706 | 0. 051 | 0. 413 | 6. 26E-11 | Undiff-G | RHOBTB3  |
| ATP5A1   | 4. 27E-15 | 0. 225084 | 0. 184 | 0. 68  | 6. 38E-11 | Undiff-G | ATP5A1   |
| IDH3G    | 4. 54E-15 | -0. 25617 | 0. 044 | 0. 407 | 6. 79E-11 | Undiff-G | IDH3G    |
| POLDIP2  | 4. 56E-15 | -0. 72202 | 0. 015 | 0. 351 | 6. 82E-11 | Undiff-G | POLDIP2  |
| ERI3     | 4. 64E-15 | -0. 76769 | 0. 029 | 0. 373 | 6. 93E-11 | Undiff-G | ERI3     |
| ALOX5AP  | 4. 78E-15 | -0. 78016 | 0. 044 | 0. 403 | 7. 15E-11 | Undiff-G | ALOX5AP  |
| WHSC1L1  | 4. 79E-15 | -0. 68898 | 0. 029 | 0. 377 | 7. 15E-11 | Undiff-G | WHSC1L1  |
| RNF181   | 4. 80E-15 | 0. 200021 | 0. 125 | 0. 56  | 7. 18E-11 | Undiff-G | RNF181   |
| 15-Sep   | 4. 89E-15 | 0. 1561   | 0. 176 | 0. 662 | 7. 31E-11 | Undiff-G | 15-Sep   |
| PIH1D1   | 4. 91E-15 | -0. 15181 | 0. 037 | 0. 394 | 7. 33E-11 | Undiff-G | PIH1D1   |

|          |          |          |       |       |          |          |          |
|----------|----------|----------|-------|-------|----------|----------|----------|
| CCNH     | 4.98E-15 | -0.4214  | 0.051 | 0.416 | 7.44E-11 | Undiff-G | CCNH     |
| HSPH1    | 5.03E-15 | -0.59899 | 0.022 | 0.365 | 7.51E-11 | Undiff-G | HSPH1    |
| NDUFV3   | 5.16E-15 | -0.29503 | 0.051 | 0.414 | 7.71E-11 | Undiff-G | NDUFV3   |
| PEA15    | 5.31E-15 | -0.22781 | 0.066 | 0.448 | 7.93E-11 | Undiff-G | PEA15    |
| ENOPH1   | 5.32E-15 | -0.23553 | 0.037 | 0.393 | 7.95E-11 | Undiff-G | ENOPH1   |
| RALA     | 5.35E-15 | -0.38024 | 0.022 | 0.364 | 8.00E-11 | Undiff-G | RALA     |
| KLC1     | 5.40E-15 | -0.58294 | 0.022 | 0.363 | 8.07E-11 | Undiff-G | KLC1     |
| HNRNPUL1 | 5.42E-15 | -0.49117 | 0.037 | 0.388 | 8.10E-11 | Undiff-G | HNRNPUL1 |
| NDUFB4   | 5.44E-15 | 0.168714 | 0.191 | 0.686 | 8.13E-11 | Undiff-G | NDUFB4   |
| GLOD4    | 5.47E-15 | -0.1373  | 0.037 | 0.393 | 8.18E-11 | Undiff-G | GLOD4    |
| CANX     | 5.53E-15 | 0.177119 | 0.132 | 0.579 | 8.27E-11 | Undiff-G | CANX     |
| FUNDC2   | 5.66E-15 | -0.21214 | 0.044 | 0.407 | 8.46E-11 | Undiff-G | FUNDC2   |
| SRSF4    | 5.71E-15 | -0.43707 | 0.022 | 0.364 | 8.53E-11 | Undiff-G | SRSF4    |
| YIPF3    | 5.72E-15 | -0.16169 | 0.088 | 0.488 | 8.55E-11 | Undiff-G | YIPF3    |
| LAPTM4B  | 5.87E-15 | -0.81124 | 0.007 | 0.335 | 8.77E-11 | Undiff-G | LAPTM4B  |
| THRAP3   | 5.96E-15 | -0.17642 | 0.066 | 0.442 | 8.90E-11 | Undiff-G | THRAP3   |
| PABPC4   | 6.02E-15 | -0.82711 | 0.007 | 0.332 | 8.99E-11 | Undiff-G | PABPC4   |
| LSM14A   | 6.20E-15 | -0.4533  | 0.037 | 0.385 | 9.26E-11 | Undiff-G | LSM14A   |
| SEC63    | 6.25E-15 | -0.11254 | 0.037 | 0.392 | 9.34E-11 | Undiff-G | SEC63    |
| NFIB     | 6.27E-15 | -0.78049 | 0.037 | 0.382 | 9.37E-11 | Undiff-G | NFIB     |
| ATP5H    | 6.34E-15 | 0.313699 | 0.169 | 0.655 | 9.48E-11 | Undiff-G | ATP5H    |
| UBL3     | 6.59E-15 | -0.60441 | 0.022 | 0.358 | 9.84E-11 | Undiff-G | UBL3     |
| UBE2V2   | 6.73E-15 | 0.199357 | 0.096 | 0.499 | 1.01E-10 | Undiff-G | UBE2V2   |
| TGOLN2   | 6.94E-15 | -0.45633 | 0.029 | 0.377 | 1.04E-10 | Undiff-G | TGOLN2   |
| UBE2A    | 8.17E-15 | -0.24122 | 0.059 | 0.426 | 1.22E-10 | Undiff-G | UBE2A    |
| CTSS     | 8.67E-15 | -0.97724 | 0.022 | 0.358 | 1.30E-10 | Undiff-G | CTSS     |
| MAFB     | 8.68E-15 | -1.06232 | 0     | 0.318 | 1.30E-10 | Undiff-G | MAFB     |
| NDUFA10  | 8.75E-15 | -0.10604 | 0.066 | 0.443 | 1.31E-10 | Undiff-G | NDUFA10  |
| PSME1    | 8.87E-15 | 0.157109 | 0.14  | 0.588 | 1.33E-10 | Undiff-G | PSME1    |
| PRMT2    | 9.05E-15 | -0.144   | 0.074 | 0.453 | 1.35E-10 | Undiff-G | PRMT2    |
| CD47     | 9.07E-15 | -0.41387 | 0.037 | 0.388 | 1.36E-10 | Undiff-G | CD47     |
| VSIG4    | 9.10E-15 | -1.10043 | 0.029 | 0.369 | 1.36E-10 | Undiff-G | VSIG4    |
| EZR      | 9.16E-15 | -0.70421 | 0.015 | 0.346 | 1.37E-10 | Undiff-G | EZR      |
| NASP     | 9.17E-15 | -0.39975 | 0.051 | 0.413 | 1.37E-10 | Undiff-G | NASP     |
| LRRFIP1  | 9.34E-15 | -0.65455 | 0.022 | 0.357 | 1.40E-10 | Undiff-G | LRRFIP1  |
| MS4A6A   | 9.44E-15 | -1.06726 | 0.015 | 0.345 | 1.41E-10 | Undiff-G | MS4A6A   |
| CTDNEP1  | 9.70E-15 | -0.79412 | 0     | 0.317 | 1.45E-10 | Undiff-G | CTDNEP1  |
| ORMDL1   | 9.75E-15 | 0.107668 | 0.088 | 0.487 | 1.46E-10 | Undiff-G | ORMDL1   |
| RBBP6    | 1.00E-14 | -0.78407 | 0     | 0.317 | 1.50E-10 | Undiff-G | RBBP6    |
| SEPHS2   | 1.03E-14 | -0.75729 | 0     | 0.317 | 1.53E-10 | Undiff-G | SEPHS2   |
| BLOC1S2  | 1.04E-14 | -0.3742  | 0.029 | 0.372 | 1.55E-10 | Undiff-G | BLOC1S2  |
| FCGR3A   | 1.04E-14 | -0.98857 | 0.015 | 0.345 | 1.56E-10 | Undiff-G | FCGR3A   |
| TMED2    | 1.07E-14 | 0.207365 | 0.154 | 0.617 | 1.61E-10 | Undiff-G | TMED2    |
| RCN1     | 1.09E-14 | -0.49729 | 0.022 | 0.358 | 1.63E-10 | Undiff-G | RCN1     |
| KPNA2    | 1.12E-14 | -0.61103 | 0.022 | 0.359 | 1.68E-10 | Undiff-G | KPNA2    |
| YY1      | 1.18E-14 | -0.62687 | 0.015 | 0.344 | 1.76E-10 | Undiff-G | YY1      |
| ATP1A1   | 1.20E-14 | -0.26121 | 0.088 | 0.478 | 1.79E-10 | Undiff-G | ATP1A1   |
| SEC11C   | 1.21E-14 | 0.159024 | 0.096 | 0.502 | 1.80E-10 | Undiff-G | SEC11C   |
| FIBP     | 1.23E-14 | 0.117216 | 0.088 | 0.487 | 1.83E-10 | Undiff-G | FIBP     |
| NDUFS3   | 1.24E-14 | 0.156388 | 0.096 | 0.494 | 1.86E-10 | Undiff-G | NDUFS3   |
| KLF6     | 1.25E-14 | -0.18318 | 0.118 | 0.536 | 1.87E-10 | Undiff-G | KLF6     |

|          |           |           |        |        |           |          |          |
|----------|-----------|-----------|--------|--------|-----------|----------|----------|
| FAM96B   | 1. 27E-14 | 0. 214885 | 0. 184 | 0. 663 | 1. 90E-10 | Undiff-G | FAM96B   |
| SCAMP2   | 1. 28E-14 | -0. 7141  | 0. 037 | 0. 378 | 1. 91E-10 | Undiff-G | SCAMP2   |
| RHOA     | 1. 31E-14 | 0. 208697 | 0. 228 | 0. 761 | 1. 95E-10 | Undiff-G | RHOA     |
| TIMM10   | 1. 33E-14 | -0. 2607  | 0. 022 | 0. 358 | 1. 98E-10 | Undiff-G | TIMM10   |
| CLTC     | 1. 34E-14 | -0. 57434 | 0. 022 | 0. 353 | 2. 00E-10 | Undiff-G | CLTC     |
| CBX1     | 1. 39E-14 | -0. 3201  | 0. 029 | 0. 371 | 2. 08E-10 | Undiff-G | CBX1     |
| UQCR10   | 1. 41E-14 | 0. 128469 | 0. 221 | 0. 748 | 2. 11E-10 | Undiff-G | UQCR10   |
| PFDN2    | 1. 47E-14 | 0. 199341 | 0. 154 | 0. 616 | 2. 19E-10 | Undiff-G | PFDN2    |
| PSMB8    | 1. 49E-14 | -0. 14155 | 0. 059 | 0. 419 | 2. 22E-10 | Undiff-G | PSMB8    |
| RBCK1    | 1. 51E-14 | -0. 5566  | 0. 015 | 0. 341 | 2. 25E-10 | Undiff-G | RBCK1    |
| SRM      | 1. 54E-14 | -0. 59999 | 0. 029 | 0. 369 | 2. 30E-10 | Undiff-G | SRM      |
| EID1     | 1. 58E-14 | 0. 156695 | 0. 206 | 0. 713 | 2. 36E-10 | Undiff-G | EID1     |
| RNF167   | 1. 61E-14 | -0. 25951 | 0. 051 | 0. 412 | 2. 40E-10 | Undiff-G | RNF167   |
| ZCCHC17  | 1. 62E-14 | -0. 59882 | 0. 022 | 0. 355 | 2. 42E-10 | Undiff-G | ZCCHC17  |
| GNAI3    | 1. 63E-14 | -0. 18476 | 0. 044 | 0. 397 | 2. 43E-10 | Undiff-G | GNAI3    |
| PIN1     | 1. 64E-14 | 0. 150507 | 0. 118 | 0. 542 | 2. 45E-10 | Undiff-G | PIN1     |
| ATP6AP2  | 1. 66E-14 | 0. 200293 | 0. 176 | 0. 662 | 2. 48E-10 | Undiff-G | ATP6AP2  |
| DPM2     | 1. 66E-14 | -0. 74991 | 0. 022 | 0. 35  | 2. 48E-10 | Undiff-G | DPM2     |
| SURF4    | 1. 77E-14 | -0. 49352 | 0. 022 | 0. 354 | 2. 65E-10 | Undiff-G | SURF4    |
| SNRPF    | 1. 77E-14 | 0. 118362 | 0. 125 | 0. 552 | 2. 65E-10 | Undiff-G | SNRPF    |
| HSBP1    | 1. 97E-14 | 0. 165345 | 0. 206 | 0. 721 | 2. 94E-10 | Undiff-G | HSBP1    |
| AP2M1    | 2. 00E-14 | 0. 144632 | 0. 213 | 0. 718 | 2. 99E-10 | Undiff-G | AP2M1    |
| CHD4     | 2. 02E-14 | -0. 54325 | 0. 007 | 0. 326 | 3. 02E-10 | Undiff-G | CHD4     |
| BCL7B    | 2. 02E-14 | -0. 7034  | 0. 007 | 0. 326 | 3. 02E-10 | Undiff-G | BCL7B    |
| PSAP     | 2. 05E-14 | 0. 128631 | 0. 265 | 0. 825 | 3. 06E-10 | Undiff-G | PSAP     |
| CXADR    | 2. 18E-14 | -0. 88201 | 0      | 0. 311 | 3. 25E-10 | Undiff-G | CXADR    |
| SNRPB2   | 2. 23E-14 | 0. 304008 | 0. 132 | 0. 569 | 3. 34E-10 | Undiff-G | SNRPB2   |
| SNRNP25  | 2. 25E-14 | -0. 35777 | 0. 022 | 0. 353 | 3. 37E-10 | Undiff-G | SNRNP25  |
| NFIX     | 2. 27E-14 | -0. 81299 | 0. 015 | 0. 336 | 3. 39E-10 | Undiff-G | NFIX     |
| FKBP4    | 2. 33E-14 | -0. 70008 | 0. 007 | 0. 325 | 3. 49E-10 | Undiff-G | FKBP4    |
| RAD23A   | 2. 40E-14 | 0. 18234  | 0. 14  | 0. 572 | 3. 58E-10 | Undiff-G | RAD23A   |
| EIF1B    | 2. 40E-14 | 0. 122698 | 0. 147 | 0. 593 | 3. 58E-10 | Undiff-G | EIF1B    |
| TPR      | 2. 46E-14 | -0. 19594 | 0. 051 | 0. 409 | 3. 67E-10 | Undiff-G | TPR      |
| ROMO1    | 2. 47E-14 | 0. 157667 | 0. 147 | 0. 6   | 3. 69E-10 | Undiff-G | ROMO1    |
| UBE2J2   | 2. 48E-14 | -0. 51965 | 0. 015 | 0. 338 | 3. 70E-10 | Undiff-G | UBE2J2   |
| JOSD2    | 2. 48E-14 | -0. 59819 | 0. 015 | 0. 339 | 3. 71E-10 | Undiff-G | JOSD2    |
| CAPG     | 2. 49E-14 | -0. 53604 | 0. 059 | 0. 419 | 3. 71E-10 | Undiff-G | CAPG     |
| FAU      | 2. 51E-14 | 0. 951005 | 0. 713 | 0. 961 | 3. 75E-10 | Undiff-G | FAU      |
| GSPT1    | 2. 59E-14 | -0. 56148 | 0. 022 | 0. 352 | 3. 88E-10 | Undiff-G | GSPT1    |
| FAM192A  | 2. 67E-14 | -0. 438   | 0. 029 | 0. 361 | 4. 00E-10 | Undiff-G | FAM192A  |
| MGP      | 2. 69E-14 | 1. 54327  | 0. 279 | 0. 102 | 4. 02E-10 | Undiff-G | MGP      |
| DTYMK    | 2. 74E-14 | -0. 64702 | 0. 015 | 0. 333 | 4. 10E-10 | Undiff-G | DTYMK    |
| SNHG7    | 2. 92E-14 | -0. 68781 | 0. 022 | 0. 35  | 4. 37E-10 | Undiff-G | SNHG7    |
| SRP19    | 2. 99E-14 | -0. 12779 | 0. 051 | 0. 408 | 4. 48E-10 | Undiff-G | SRP19    |
| NANS     | 3. 01E-14 | -0. 4977  | 0. 029 | 0. 364 | 4. 49E-10 | Undiff-G | NANS     |
| PAFAH1B3 | 3. 04E-14 | -0. 40421 | 0. 066 | 0. 428 | 4. 54E-10 | Undiff-G | PAFAH1B3 |
| HINT2    | 3. 07E-14 | -0. 62077 | 0. 022 | 0. 35  | 4. 59E-10 | Undiff-G | HINT2    |
| JUND     | 3. 14E-14 | -0. 41785 | 0. 051 | 0. 403 | 4. 69E-10 | Undiff-G | JUND     |
| C6orf1   | 3. 19E-14 | -0. 53319 | 0. 029 | 0. 364 | 4. 77E-10 | Undiff-G | C6orf1   |
| METTL23  | 3. 19E-14 | -0. 67788 | 0. 007 | 0. 322 | 4. 77E-10 | Undiff-G | METTL23  |
| PRKRA    | 3. 22E-14 | -0. 44671 | 0. 029 | 0. 365 | 4. 81E-10 | Undiff-G | PRKRA    |

|           |          |          |       |       |          |          |                |
|-----------|----------|----------|-------|-------|----------|----------|----------------|
| YIPF4     | 3.36E-14 | -0.27064 | 0.037 | 0.378 | 5.02E-10 | Undiff-G | YIPF4          |
| PHB2      | 3.38E-14 | 0.104528 | 0.074 | 0.447 | 5.05E-10 | Undiff-G | PHB2           |
| HNRNPC    | 3.45E-14 | 0.26077  | 0.199 | 0.699 | 5.16E-10 | Undiff-G | HNRNPC         |
| CSNK1D    | 3.53E-14 | -0.47063 | 0.029 | 0.363 | 5.27E-10 | Undiff-G | CSNK1D         |
| CHD9      | 3.55E-14 | -0.11743 | 0.088 | 0.472 | 5.31E-10 | Undiff-G | CHD9           |
| FGFR10P2  | 3.63E-14 | -0.68903 | 0.007 | 0.321 | 5.43E-10 | Undiff-G | FGFR10P2       |
| AFF4      | 3.70E-14 | -0.65642 | 0.022 | 0.344 | 5.52E-10 | Undiff-G | AFF4           |
| CLPTM1    | 3.71E-14 | -0.40634 | 0.022 | 0.349 | 5.54E-10 | Undiff-G | CLPTM1         |
| EIF1AX    | 3.88E-14 | 0.350317 | 0.132 | 0.565 | 5.80E-10 | Undiff-G | EIF1AX         |
| EVL       | 3.91E-14 | -0.72159 | 0.029 | 0.356 | 5.85E-10 | Undiff-G | EVL            |
| ILF3      | 4.01E-14 | -0.20466 | 0.059 | 0.416 | 6.00E-10 | Undiff-G | ILF3           |
| PLSCR1    | 4.06E-14 | -0.46027 | 0.029 | 0.363 | 6.07E-10 | Undiff-G | PLSCR1         |
| NXT1      | 4.07E-14 | -0.66326 | 0.007 | 0.32  | 6.08E-10 | Undiff-G | NXT1           |
| CSNK2A1   | 4.21E-14 | -0.67566 | 0.007 | 0.32  | 6.30E-10 | Undiff-G | CSNK2A1        |
| CTNNB1    | 4.23E-14 | -0.66883 | 0.029 | 0.359 | 6.32E-10 | Undiff-G | CTNNB1         |
| PRAF2     | 4.24E-14 | -0.75785 | 0     | 0.306 | 6.34E-10 | Undiff-G | PRAF2          |
| CRK       | 4.25E-14 | -0.62484 | 0.007 | 0.32  | 6.36E-10 | Undiff-G | CRK            |
| GPBP1     | 4.36E-14 | -0.19527 | 0.081 | 0.453 | 6.52E-10 | Undiff-G | GPBP1          |
| TIMP2     | 4.41E-14 | -0.75924 | 0.015 | 0.329 | 6.60E-10 | Undiff-G | TIMP2          |
| LGALS1    | 4.46E-14 | 1.21913  | 0.654 | 0.704 | 6.66E-10 | Undiff-G | LGALS1         |
| DYNC1H1   | 4.51E-14 | -0.75465 | 0.022 | 0.342 | 6.73E-10 | Undiff-G | DYNC1H1        |
| PQBP1     | 4.51E-14 | -0.37988 | 0.022 | 0.348 | 6.75E-10 | Undiff-G | PQBP1          |
| HAGH      | 4.55E-14 | -0.50684 | 0.029 | 0.357 | 6.80E-10 | Undiff-G | HAGH           |
| EIF4EBP1  | 4.62E-14 | -0.15404 | 0.066 | 0.431 | 6.90E-10 | Undiff-G | EIF4EBP1       |
| DYNLT1    | 4.65E-14 | 0.217254 | 0.169 | 0.634 | 6.95E-10 | Undiff-G | DYNLT1         |
| DLD       | 4.75E-14 | -0.42235 | 0.022 | 0.348 | 7.10E-10 | Undiff-G | DLD            |
| NFIC      | 4.82E-14 | -0.27458 | 0.074 | 0.438 | 7.20E-10 | Undiff-G | NFIC           |
| COA1      | 4.87E-14 | -0.30744 | 0.051 | 0.401 | 7.28E-10 | Undiff-G | COA1           |
| TREM2     | 4.91E-14 | -1.02518 | 0.029 | 0.354 | 7.34E-10 | Undiff-G | TREM2          |
| VAMP8     | 5.16E-14 | -0.75108 | 0.022 | 0.347 | 7.70E-10 | Undiff-G | VAMP8          |
| PAPOLA    | 5.23E-14 | 0.212377 | 0.096 | 0.489 | 7.82E-10 | Undiff-G | PAPOLA         |
| TCEA2     | 5.37E-14 | -0.56426 | 0.037 | 0.372 | 8.02E-10 | Undiff-G | TCEA2          |
| TAPBP     | 5.56E-14 | -0.3674  | 0.022 | 0.346 | 8.32E-10 | Undiff-G | TAPBP          |
| TMEM50A   | 5.59E-14 | 0.272666 | 0.154 | 0.597 | 8.35E-10 | Undiff-G | TMEM50A        |
| TCEB1     | 5.59E-14 | 0.299157 | 0.169 | 0.628 | 8.35E-10 | Undiff-G | TCEB1          |
| CYTH2     | 5.63E-14 | -0.54172 | 0.022 | 0.345 | 8.42E-10 | Undiff-G | CYTH2          |
| CXXC5     | 5.77E-14 | -0.59856 | 0.044 | 0.384 | 8.63E-10 | Undiff-G | CXXC5          |
| ACSL3     | 5.82E-14 | -0.63732 | 0.022 | 0.345 | 8.70E-10 | Undiff-G | ACSL3          |
| CMTM3     | 5.87E-14 | -0.64589 | 0.015 | 0.327 | 8.78E-10 | Undiff-G | CMTM3          |
| C7orf55-L | 5.93E-14 | -0.70813 | 0.022 | 0.342 | 8.87E-10 | Undiff-G | C7orf55-LUC7L2 |
| RAB4A     | 5.93E-14 | -0.48309 | 0.022 | 0.345 | 8.87E-10 | Undiff-G | RAB4A          |
| SF3B1     | 6.04E-14 | -0.25271 | 0.074 | 0.441 | 9.03E-10 | Undiff-G | SF3B1          |
| SLC25A4   | 6.06E-14 | -0.12254 | 0.066 | 0.431 | 9.06E-10 | Undiff-G | SLC25A4        |
| ARPC5L    | 6.20E-14 | -0.33679 | 0.037 | 0.373 | 9.26E-10 | Undiff-G | ARPC5L         |
| PHF14     | 6.20E-14 | -0.40638 | 0.066 | 0.427 | 9.26E-10 | Undiff-G | PHF14          |
| SSRP1     | 6.24E-14 | -0.55602 | 0.029 | 0.358 | 9.32E-10 | Undiff-G | SSRP1          |
| TSPAN13   | 6.41E-14 | -0.92531 | 0     | 0.302 | 9.58E-10 | Undiff-G | TSPAN13        |
| PRCP      | 6.47E-14 | -0.28978 | 0.029 | 0.359 | 9.66E-10 | Undiff-G | PRCP           |
| PTBP1     | 6.48E-14 | -0.63933 | 0.015 | 0.327 | 9.68E-10 | Undiff-G | PTBP1          |
| ESD       | 6.79E-14 | 0.234759 | 0.103 | 0.494 | 1.01E-09 | Undiff-G | ESD            |
| FGD5-AS1  | 6.94E-14 | -0.5631  | 0.007 | 0.316 | 1.04E-09 | Undiff-G | FGD5-AS1       |

|          |          |          |       |       |          |          |          |
|----------|----------|----------|-------|-------|----------|----------|----------|
| SSBP1    | 7.08E-14 | 0.445862 | 0.176 | 0.644 | 1.06E-09 | Undiff-G | SSBP1    |
| SPAG9    | 7.09E-14 | -0.60843 | 0.029 | 0.357 | 1.06E-09 | Undiff-G | SPAG9    |
| SCD5     | 7.10E-14 | -0.46609 | 0.051 | 0.398 | 1.06E-09 | Undiff-G | SCD5     |
| SPCS3    | 7.14E-14 | -0.76161 | 0.015 | 0.329 | 1.07E-09 | Undiff-G | SPCS3    |
| TYMP     | 7.15E-14 | -1.06134 | 0.007 | 0.31  | 1.07E-09 | Undiff-G | TYMP     |
| USP16    | 7.16E-14 | -0.49217 | 0.037 | 0.367 | 1.07E-09 | Undiff-G | USP16    |
| TWF2     | 7.17E-14 | -0.32055 | 0.022 | 0.344 | 1.07E-09 | Undiff-G | TWF2     |
| USF2     | 7.24E-14 | -0.47309 | 0.015 | 0.329 | 1.08E-09 | Undiff-G | USF2     |
| OSBPL8   | 7.25E-14 | -0.72484 | 0.007 | 0.315 | 1.08E-09 | Undiff-G | OSBPL8   |
| HLA-DPB1 | 7.26E-14 | -0.27566 | 0.103 | 0.499 | 1.09E-09 | Undiff-G | HLA-DPB1 |
| SMAP1    | 7.54E-14 | -0.73248 | 0     | 0.301 | 1.13E-09 | Undiff-G | SMAP1    |
| ECH1     | 7.54E-14 | 0.187089 | 0.14  | 0.563 | 1.13E-09 | Undiff-G | ECH1     |
| SERPINB6 | 7.59E-14 | 0.15434  | 0.096 | 0.482 | 1.13E-09 | Undiff-G | SERPINB6 |
| SERINC3  | 7.78E-14 | -0.37906 | 0.037 | 0.369 | 1.16E-09 | Undiff-G | SERINC3  |
| MYEOV2   | 7.90E-14 | 0.18061  | 0.191 | 0.679 | 1.18E-09 | Undiff-G | MYEOV2   |
| YWHAE    | 7.96E-14 | 0.214054 | 0.235 | 0.758 | 1.19E-09 | Undiff-G | YWHAE    |
| VPS4A    | 7.98E-14 | -0.72026 | 0.007 | 0.311 | 1.19E-09 | Undiff-G | VPS4A    |
| NLRP1    | 8.13E-14 | -0.48133 | 0.022 | 0.342 | 1.21E-09 | Undiff-G | NLRP1    |
| M6PR     | 8.18E-14 | -0.12045 | 0.044 | 0.386 | 1.22E-09 | Undiff-G | M6PR     |
| CREG1    | 8.21E-14 | -0.89567 | 0     | 0.3   | 1.23E-09 | Undiff-G | CREG1    |
| PET100   | 8.34E-14 | 0.130318 | 0.118 | 0.529 | 1.25E-09 | Undiff-G | PET100   |
| TPGS2    | 8.48E-14 | -0.56702 | 0.022 | 0.342 | 1.27E-09 | Undiff-G | TPGS2    |
| GPM6A    | 8.55E-14 | -0.22473 | 0.118 | 0.509 | 1.28E-09 | Undiff-G | GPM6A    |
| HMG20B   | 8.58E-14 | -0.68559 | 0.022 | 0.34  | 1.28E-09 | Undiff-G | HMG20B   |
| UBC      | 8.67E-14 | 0.891802 | 0.713 | 0.953 | 1.30E-09 | Undiff-G | UBC      |
| ARMC10   | 8.67E-14 | -0.68577 | 0     | 0.3   | 1.30E-09 | Undiff-G | ARMC10   |
| SLC39A3  | 8.68E-14 | -0.62691 | 0.022 | 0.342 | 1.30E-09 | Undiff-G | SLC39A3  |
| IFI6     | 8.86E-14 | -0.3678  | 0.059 | 0.41  | 1.32E-09 | Undiff-G | IFI6     |
| DDX18    | 9.12E-14 | 0.114426 | 0.11  | 0.506 | 1.36E-09 | Undiff-G | DDX18    |
| PRPF6    | 9.14E-14 | -0.3146  | 0.029 | 0.357 | 1.37E-09 | Undiff-G | PRPF6    |
| CKS2     | 9.18E-14 | -0.44573 | 0.037 | 0.37  | 1.37E-09 | Undiff-G | CKS2     |
| TPGS1    | 9.25E-14 | -0.68857 | 0.007 | 0.313 | 1.38E-09 | Undiff-G | TPGS1    |
| NPDC1    | 9.32E-14 | -0.74848 | 0.015 | 0.327 | 1.39E-09 | Undiff-G | NPDC1    |
| GYPC     | 9.62E-14 | -0.93913 | 0.007 | 0.313 | 1.44E-09 | Undiff-G | GYPC     |
| KLHDC3   | 9.82E-14 | -0.25942 | 0.037 | 0.366 | 1.47E-09 | Undiff-G | KLHDC3   |
| ACAA1    | 9.88E-14 | -0.59574 | 0.029 | 0.353 | 1.48E-09 | Undiff-G | ACAA1    |
| PTPMT1   | 9.93E-14 | -0.34866 | 0.029 | 0.356 | 1.48E-09 | Undiff-G | PTPMT1   |
| SMIM19   | 1.00E-13 | -0.48356 | 0.015 | 0.327 | 1.50E-09 | Undiff-G | SMIM19   |
| SOCS3    | 1.02E-13 | -0.72372 | 0.029 | 0.352 | 1.52E-09 | Undiff-G | SOCS3    |
| ATF6B    | 1.03E-13 | -0.51488 | 0.051 | 0.391 | 1.54E-09 | Undiff-G | ATF6B    |
| SNRNP27  | 1.03E-13 | -0.33591 | 0.029 | 0.356 | 1.54E-09 | Undiff-G | SNRNP27  |
| RBM39    | 1.04E-13 | 0.226617 | 0.184 | 0.66  | 1.56E-09 | Undiff-G | RBM39    |
| CORO1B   | 1.06E-13 | -0.40543 | 0.037 | 0.365 | 1.58E-09 | Undiff-G | CORO1B   |
| CAPZA1   | 1.06E-13 | -0.22102 | 0.051 | 0.396 | 1.59E-09 | Undiff-G | CAPZA1   |
| CFDP1    | 1.07E-13 | -0.12172 | 0.066 | 0.42  | 1.61E-09 | Undiff-G | CFDP1    |
| CELF2    | 1.09E-13 | -0.3516  | 0.051 | 0.387 | 1.63E-09 | Undiff-G | CELF2    |
| STMN4    | 1.10E-13 | -1.13275 | 0.007 | 0.309 | 1.65E-09 | Undiff-G | STMN4    |
| NME3     | 1.13E-13 | -0.27224 | 0.066 | 0.421 | 1.69E-09 | Undiff-G | NME3     |
| PITHD1   | 1.14E-13 | -0.48522 | 0.029 | 0.35  | 1.70E-09 | Undiff-G | PITHD1   |
| TMEM256  | 1.14E-13 | -0.10711 | 0.074 | 0.434 | 1.71E-09 | Undiff-G | TMEM256  |
| RDH11    | 1.16E-13 | -0.12792 | 0.051 | 0.392 | 1.73E-09 | Undiff-G | RDH11    |



|           |          |          |       |       |          |          |           |
|-----------|----------|----------|-------|-------|----------|----------|-----------|
| PAPSS1    | 1.16E-13 | -0.75276 | 0     | 0.298 | 1.73E-09 | Undiff-G | PAPSS1    |
| APEX1     | 1.16E-13 | 0.261685 | 0.125 | 0.542 | 1.74E-09 | Undiff-G | APEX1     |
| NUDT1     | 1.16E-13 | -0.40718 | 0.029 | 0.354 | 1.74E-09 | Undiff-G | NUDT1     |
| PMF1      | 1.17E-13 | -0.79635 | 0.015 | 0.324 | 1.74E-09 | Undiff-G | PMF1      |
| ITFG1     | 1.17E-13 | -0.43573 | 0.029 | 0.352 | 1.75E-09 | Undiff-G | ITFG1     |
| PFDN4     | 1.17E-13 | -0.50549 | 0.037 | 0.363 | 1.75E-09 | Undiff-G | PFDN4     |
| SDF2L1    | 1.22E-13 | -0.5808  | 0.037 | 0.364 | 1.82E-09 | Undiff-G | SDF2L1    |
| RNF11     | 1.25E-13 | -0.66524 | 0.007 | 0.311 | 1.88E-09 | Undiff-G | RNF11     |
| C14orf166 | 1.26E-13 | 0.316878 | 0.154 | 0.59  | 1.89E-09 | Undiff-G | C14orf166 |
| HNRNPH2   | 1.28E-13 | -0.11388 | 0.059 | 0.404 | 1.91E-09 | Undiff-G | HNRNPH2   |
| SSB       | 1.32E-13 | 0.231751 | 0.154 | 0.597 | 1.97E-09 | Undiff-G | SSB       |
| C11orf31  | 1.32E-13 | 0.301167 | 0.191 | 0.673 | 1.98E-09 | Undiff-G | C11orf31  |
| TUSC2     | 1.34E-13 | -0.55447 | 0.022 | 0.339 | 2.00E-09 | Undiff-G | TUSC2     |
| NSMCE1    | 1.38E-13 | -0.12493 | 0.059 | 0.408 | 2.07E-09 | Undiff-G | NSMCE1    |
| GOLGA4    | 1.40E-13 | -0.45981 | 0.029 | 0.35  | 2.09E-09 | Undiff-G | GOLGA4    |
| MRFAP1    | 1.41E-13 | 0.27132  | 0.191 | 0.676 | 2.10E-09 | Undiff-G | MRFAP1    |
| TMEM30A   | 1.41E-13 | -0.64443 | 0.022 | 0.338 | 2.11E-09 | Undiff-G | TMEM30A   |
| ARF6      | 1.42E-13 | -0.55584 | 0.029 | 0.347 | 2.12E-09 | Undiff-G | ARF6      |
| STMN3     | 1.44E-13 | -0.63234 | 0.007 | 0.31  | 2.15E-09 | Undiff-G | STMN3     |
| AAMP      | 1.45E-13 | -0.19465 | 0.074 | 0.431 | 2.17E-09 | Undiff-G | AAMP      |
| LY86      | 1.50E-13 | -1.23079 | 0     | 0.296 | 2.24E-09 | Undiff-G | LY86      |
| CBX5      | 1.51E-13 | -0.44018 | 0.029 | 0.348 | 2.25E-09 | Undiff-G | CBX5      |
| TMEM183A  | 1.53E-13 | -0.67947 | 0     | 0.295 | 2.29E-09 | Undiff-G | TMEM183A  |
| CAPRIN1   | 1.58E-13 | -0.50512 | 0.015 | 0.324 | 2.35E-09 | Undiff-G | CAPRIN1   |
| YWHAG     | 1.58E-13 | -0.18299 | 0.051 | 0.394 | 2.36E-09 | Undiff-G | YWHAG     |
| PHF20     | 1.59E-13 | -0.4945  | 0.015 | 0.324 | 2.38E-09 | Undiff-G | PHF20     |
| STK25     | 1.63E-13 | -0.6986  | 0.007 | 0.306 | 2.44E-09 | Undiff-G | STK25     |
| U2SURP    | 1.74E-13 | -0.496   | 0.044 | 0.373 | 2.59E-09 | Undiff-G | U2SURP    |
| MYL12A    | 1.78E-13 | 0.163866 | 0.132 | 0.548 | 2.66E-09 | Undiff-G | MYL12A    |
| ANKRD12   | 1.78E-13 | -0.3046  | 0.074 | 0.43  | 2.67E-09 | Undiff-G | ANKRD12   |
| TMEM261   | 1.79E-13 | -0.25849 | 0.037 | 0.364 | 2.68E-09 | Undiff-G | TMEM261   |
| MSN       | 1.81E-13 | -0.22997 | 0.044 | 0.379 | 2.70E-09 | Undiff-G | MSN       |
| VTI1B     | 1.81E-13 | -0.40391 | 0.029 | 0.35  | 2.70E-09 | Undiff-G | VTI1B     |
| MTFR1L    | 1.84E-13 | -0.72159 | 0     | 0.294 | 2.74E-09 | Undiff-G | MTFR1L    |
| HCLS1     | 1.85E-13 | -1.16703 | 0     | 0.294 | 2.77E-09 | Undiff-G | HCLS1     |
| C20orf27  | 1.86E-13 | -0.36657 | 0.037 | 0.364 | 2.78E-09 | Undiff-G | C20orf27  |
| CWC15     | 1.87E-13 | 0.271136 | 0.103 | 0.492 | 2.80E-09 | Undiff-G | CWC15     |
| AKR7A2    | 1.89E-13 | -0.53367 | 0.015 | 0.318 | 2.82E-09 | Undiff-G | AKR7A2    |
| TOMM40    | 1.90E-13 | -0.68038 | 0.022 | 0.331 | 2.84E-09 | Undiff-G | TOMM40    |
| CDC42SE1  | 1.91E-13 | -0.77956 | 0.007 | 0.307 | 2.86E-09 | Undiff-G | CDC42SE1  |
| TXNL4A    | 1.92E-13 | -0.15652 | 0.066 | 0.414 | 2.87E-09 | Undiff-G | TXNL4A    |
| VBP1      | 1.93E-13 | 0.247106 | 0.103 | 0.491 | 2.89E-09 | Undiff-G | VBP1      |
| EIF4E2    | 1.98E-13 | -0.40209 | 0.022 | 0.336 | 2.97E-09 | Undiff-G | EIF4E2    |
| EBPL      | 2.04E-13 | -0.69743 | 0.007 | 0.306 | 3.05E-09 | Undiff-G | EBPL      |
| MS4A7     | 2.08E-13 | -0.86702 | 0.022 | 0.336 | 3.11E-09 | Undiff-G | MS4A7     |
| CCDC50    | 2.10E-13 | -0.73004 | 0.007 | 0.303 | 3.13E-09 | Undiff-G | CCDC50    |
| MPG       | 2.12E-13 | -0.36976 | 0.029 | 0.349 | 3.17E-09 | Undiff-G | MPG       |
| COMMD3    | 2.13E-13 | -0.41935 | 0.037 | 0.358 | 3.18E-09 | Undiff-G | COMMD3    |
| TCEAL4    | 2.18E-13 | 0.244815 | 0.147 | 0.576 | 3.26E-09 | Undiff-G | TCEAL4    |
| ELAVL1    | 2.20E-13 | -0.42676 | 0.029 | 0.348 | 3.28E-09 | Undiff-G | ELAVL1    |
| C1QA      | 2.24E-13 | -0.322   | 0.14  | 0.542 | 3.34E-09 | Undiff-G | C1QA      |

|           |           |           |        |        |           |          |           |
|-----------|-----------|-----------|--------|--------|-----------|----------|-----------|
| ARMCX3    | 2. 27E-13 | 0. 125059 | 0. 074 | 0. 434 | 3. 40E-09 | Undiff-G | ARMCX3    |
| TTC1      | 2. 28E-13 | -0. 11654 | 0. 044 | 0. 377 | 3. 40E-09 | Undiff-G | TTC1      |
| SRP72     | 2. 30E-13 | -0. 10052 | 0. 088 | 0. 463 | 3. 43E-09 | Undiff-G | SRP72     |
| IDH1      | 2. 35E-13 | -0. 39134 | 0. 051 | 0. 384 | 3. 52E-09 | Undiff-G | IDH1      |
| SHARPIN   | 2. 36E-13 | -0. 7071  | 0. 007 | 0. 305 | 3. 53E-09 | Undiff-G | SHARPIN   |
| DNASE2    | 2. 41E-13 | -0. 46131 | 0. 051 | 0. 387 | 3. 60E-09 | Undiff-G | DNASE2    |
| FKBP2     | 2. 45E-13 | 0. 299289 | 0. 154 | 0. 595 | 3. 66E-09 | Undiff-G | FKBP2     |
| NHP2      | 2. 49E-13 | 0. 300994 | 0. 154 | 0. 585 | 3. 73E-09 | Undiff-G | NHP2      |
| MMP24-AS1 | 2. 51E-13 | -0. 65114 | 0. 015 | 0. 315 | 3. 75E-09 | Undiff-G | MMP24-AS1 |
| CCL4      | 2. 59E-13 | -1. 01195 | 0. 022 | 0. 328 | 3. 87E-09 | Undiff-G | CCL4      |
| ATP2B1    | 2. 64E-13 | -0. 36009 | 0. 037 | 0. 358 | 3. 94E-09 | Undiff-G | ATP2B1    |
| SCP2      | 2. 69E-13 | 0. 226488 | 0. 154 | 0. 589 | 4. 02E-09 | Undiff-G | SCP2      |
| SYNCRIP   | 2. 72E-13 | -0. 19775 | 0. 051 | 0. 387 | 4. 07E-09 | Undiff-G | SYNCRIP   |
| SARS      | 2. 74E-13 | 0. 136066 | 0. 081 | 0. 447 | 4. 10E-09 | Undiff-G | SARS      |
| ATP50     | 2. 82E-13 | 0. 354987 | 0. 243 | 0. 756 | 4. 22E-09 | Undiff-G | ATP50     |
| PSMC4     | 2. 92E-13 | 0. 122347 | 0. 11  | 0. 499 | 4. 36E-09 | Undiff-G | PSMC4     |
| CD53      | 2. 94E-13 | -0. 97879 | 0. 015 | 0. 319 | 4. 39E-09 | Undiff-G | CD53      |
| PTPRA     | 3. 01E-13 | -0. 67009 | 0. 037 | 0. 358 | 4. 50E-09 | Undiff-G | PTPRA     |
| RSL1D1    | 3. 07E-13 | 0. 136421 | 0. 11  | 0. 501 | 4. 58E-09 | Undiff-G | RSL1D1    |
| TTC19     | 3. 14E-13 | -0. 29945 | 0. 037 | 0. 36  | 4. 69E-09 | Undiff-G | TTC19     |
| DNAJC8    | 3. 16E-13 | 0. 29912  | 0. 14  | 0. 556 | 4. 72E-09 | Undiff-G | DNAJC8    |
| RAD21     | 3. 19E-13 | -0. 40152 | 0. 044 | 0. 37  | 4. 77E-09 | Undiff-G | RAD21     |
| EPB41L2   | 3. 24E-13 | -0. 83633 | 0. 015 | 0. 314 | 4. 85E-09 | Undiff-G | EPB41L2   |
| SDHC      | 3. 25E-13 | 0. 300841 | 0. 14  | 0. 562 | 4. 85E-09 | Undiff-G | SDHC      |
| PSMB2     | 3. 25E-13 | 0. 294069 | 0. 147 | 0. 579 | 4. 85E-09 | Undiff-G | PSMB2     |
| DDRGK1    | 3. 26E-13 | -0. 18616 | 0. 074 | 0. 422 | 4. 87E-09 | Undiff-G | DDRGK1    |
| RAB5A     | 3. 40E-13 | 0. 102243 | 0. 088 | 0. 452 | 5. 08E-09 | Undiff-G | RAB5A     |
| SYNGR2    | 3. 42E-13 | -0. 66893 | 0. 022 | 0. 332 | 5. 12E-09 | Undiff-G | SYNGR2    |
| PCM1      | 3. 43E-13 | -0. 65057 | 0. 022 | 0. 327 | 5. 12E-09 | Undiff-G | PCM1      |
| ALKBH5    | 3. 44E-13 | -0. 64013 | 0. 022 | 0. 327 | 5. 14E-09 | Undiff-G | ALKBH5    |
| RNH1      | 3. 52E-13 | 0. 243793 | 0. 132 | 0. 542 | 5. 26E-09 | Undiff-G | RNH1      |
| FDPS      | 3. 71E-13 | -0. 16346 | 0. 074 | 0. 42  | 5. 54E-09 | Undiff-G | FDPS      |
| SLBP      | 3. 72E-13 | -0. 68851 | 0. 015 | 0. 314 | 5. 55E-09 | Undiff-G | SLBP      |
| CITED2    | 3. 81E-13 | -0. 59114 | 0. 037 | 0. 356 | 5. 70E-09 | Undiff-G | CITED2    |
| FPR1      | 3. 85E-13 | -1. 23109 | 0      | 0. 288 | 5. 76E-09 | Undiff-G | FPR1      |
| PHB       | 3. 88E-13 | 0. 317246 | 0. 14  | 0. 559 | 5. 80E-09 | Undiff-G | PHB       |
| TSC22D4   | 3. 90E-13 | -0. 31851 | 0. 103 | 0. 474 | 5. 83E-09 | Undiff-G | TSC22D4   |
| FXR1      | 3. 92E-13 | -0. 40692 | 0. 022 | 0. 33  | 5. 86E-09 | Undiff-G | FXR1      |
| MAGEF1    | 3. 95E-13 | -0. 29463 | 0. 044 | 0. 367 | 5. 91E-09 | Undiff-G | MAGEF1    |
| SRSF7     | 4. 05E-13 | 0. 257709 | 0. 162 | 0. 595 | 6. 05E-09 | Undiff-G | SRSF7     |
| IRS2      | 4. 05E-13 | -0. 34074 | 0. 037 | 0. 352 | 6. 06E-09 | Undiff-G | IRS2      |
| SLC22A17  | 4. 19E-13 | -0. 74583 | 0      | 0. 287 | 6. 26E-09 | Undiff-G | SLC22A17  |
| TSN       | 4. 36E-13 | -0. 1231  | 0. 051 | 0. 381 | 6. 52E-09 | Undiff-G | TSN       |
| HSP90B1   | 4. 63E-13 | 0. 290917 | 0. 199 | 0. 663 | 6. 91E-09 | Undiff-G | HSP90B1   |
| IFITM2    | 4. 70E-13 | -1. 08715 | 0      | 0. 286 | 7. 03E-09 | Undiff-G | IFITM2    |
| HLA-B     | 4. 84E-13 | 1. 001428 | 0. 684 | 0. 854 | 7. 23E-09 | Undiff-G | HLA-B     |
| DCAF7     | 4. 85E-13 | -0. 51017 | 0. 022 | 0. 324 | 7. 25E-09 | Undiff-G | DCAF7     |
| NUBP2     | 4. 87E-13 | -0. 13571 | 0. 051 | 0. 385 | 7. 27E-09 | Undiff-G | NUBP2     |
| USP11     | 4. 91E-13 | -0. 3748  | 0. 037 | 0. 356 | 7. 33E-09 | Undiff-G | USP11     |
| VKORC1    | 5. 10E-13 | 0. 298952 | 0. 11  | 0. 501 | 7. 63E-09 | Undiff-G | VKORC1    |
| LGMN      | 5. 11E-13 | -0. 41305 | 0. 037 | 0. 354 | 7. 64E-09 | Undiff-G | LGMN      |

|           |          |          |       |       |          |          |           |
|-----------|----------|----------|-------|-------|----------|----------|-----------|
| TM9SF2    | 5.19E-13 | -0.23133 | 0.029 | 0.343 | 7.76E-09 | Undiff-G | TM9SF2    |
| GLRX5     | 5.31E-13 | -0.50988 | 0.007 | 0.3   | 7.94E-09 | Undiff-G | GLRX5     |
| BPTF      | 5.33E-13 | -0.49971 | 0.015 | 0.314 | 7.96E-09 | Undiff-G | BPTF      |
| APPL1     | 5.53E-13 | -0.69164 | 0.007 | 0.299 | 8.26E-09 | Undiff-G | APPL1     |
| UQCRH     | 5.57E-13 | 0.277688 | 0.25  | 0.787 | 8.32E-09 | Undiff-G | UQCRH     |
| GPS1      | 5.64E-13 | -0.36903 | 0.022 | 0.328 | 8.44E-09 | Undiff-G | GPS1      |
| NELFCD    | 5.76E-13 | -0.54549 | 0.029 | 0.34  | 8.61E-09 | Undiff-G | NELFCD    |
| CTSH      | 5.82E-13 | -0.87119 | 0.007 | 0.299 | 8.69E-09 | Undiff-G | CTSH      |
| ZNF580    | 5.85E-13 | -0.71146 | 0.007 | 0.295 | 8.75E-09 | Undiff-G | ZNF580    |
| ATP6V1G1  | 5.92E-13 | 0.302401 | 0.243 | 0.76  | 8.84E-09 | Undiff-G | ATP6V1G1  |
| DGCR6L    | 5.92E-13 | -0.59874 | 0.029 | 0.339 | 8.85E-09 | Undiff-G | DGCR6L    |
| G6PC3     | 5.93E-13 | -0.33204 | 0.037 | 0.351 | 8.86E-09 | Undiff-G | G6PC3     |
| PRPF31    | 5.95E-13 | -0.21745 | 0.059 | 0.396 | 8.90E-09 | Undiff-G | PRPF31    |
| TMEM134   | 5.99E-13 | -0.40323 | 0.015 | 0.313 | 8.95E-09 | Undiff-G | TMEM134   |
| AK1       | 6.02E-13 | -0.45739 | 0.029 | 0.339 | 9.00E-09 | Undiff-G | AK1       |
| CYB5B     | 6.04E-13 | -0.29692 | 0.029 | 0.341 | 9.02E-09 | Undiff-G | CYB5B     |
| HRAS      | 6.13E-13 | -0.66135 | 0.007 | 0.297 | 9.16E-09 | Undiff-G | HRAS      |
| MEST      | 6.20E-13 | -0.40929 | 0.059 | 0.39  | 9.27E-09 | Undiff-G | MEST      |
| SAR1B     | 6.35E-13 | -0.37578 | 0.022 | 0.326 | 9.48E-09 | Undiff-G | SAR1B     |
| CAMTA1    | 6.52E-13 | 0.281027 | 0.088 | 0.453 | 9.74E-09 | Undiff-G | CAMTA1    |
| TMED3     | 6.62E-13 | -0.53429 | 0.015 | 0.311 | 9.90E-09 | Undiff-G | TMED3     |
| SLC52A2   | 6.65E-13 | -0.67166 | 0     | 0.283 | 9.93E-09 | Undiff-G | SLC52A2   |
| STK17A    | 6.73E-13 | -0.74154 | 0.007 | 0.297 | 1.01E-08 | Undiff-G | STK17A    |
| PDCD2     | 6.83E-13 | -0.45819 | 0.007 | 0.298 | 1.02E-08 | Undiff-G | PDCD2     |
| LINC00657 | 6.86E-13 | -0.32724 | 0.029 | 0.335 | 1.02E-08 | Undiff-G | LINC00657 |
| SNRPD2    | 7.00E-13 | 0.364122 | 0.235 | 0.754 | 1.05E-08 | Undiff-G | SNRPD2    |
| IFRD1     | 7.10E-13 | 0.187077 | 0.11  | 0.492 | 1.06E-08 | Undiff-G | IFRD1     |
| NR1H2     | 7.15E-13 | -0.72891 | 0.015 | 0.307 | 1.07E-08 | Undiff-G | NR1H2     |
| SPNS1     | 7.16E-13 | -0.67504 | 0.007 | 0.294 | 1.07E-08 | Undiff-G | SPNS1     |
| NDUFC2    | 7.22E-13 | 0.356016 | 0.235 | 0.759 | 1.08E-08 | Undiff-G | NDUFC2    |
| CUEDC2    | 7.23E-13 | -0.21287 | 0.066 | 0.404 | 1.08E-08 | Undiff-G | CUEDC2    |
| DDX39A    | 7.28E-13 | -0.12421 | 0.059 | 0.396 | 1.09E-08 | Undiff-G | DDX39A    |
| ITM2C     | 7.29E-13 | -0.10158 | 0.074 | 0.421 | 1.09E-08 | Undiff-G | ITM2C     |
| IGFBP2    | 7.48E-13 | -0.60728 | 0.051 | 0.378 | 1.12E-08 | Undiff-G | IGFBP2    |
| NT5C3B    | 7.64E-13 | -0.27662 | 0.029 | 0.335 | 1.14E-08 | Undiff-G | NT5C3B    |
| POLR2J    | 7.74E-13 | 0.295653 | 0.191 | 0.649 | 1.16E-08 | Undiff-G | POLR2J    |
| MINOS1    | 7.79E-13 | 0.295433 | 0.184 | 0.645 | 1.16E-08 | Undiff-G | MINOS1    |
| ARF1      | 7.85E-13 | 0.379545 | 0.213 | 0.7   | 1.17E-08 | Undiff-G | ARF1      |
| CCDC12    | 7.90E-13 | -0.16063 | 0.081 | 0.434 | 1.18E-08 | Undiff-G | CCDC12    |
| WNK1      | 7.93E-13 | -0.72342 | 0     | 0.282 | 1.19E-08 | Undiff-G | WNK1      |
| MPST      | 8.13E-13 | -0.64451 | 0.015 | 0.31  | 1.21E-08 | Undiff-G | MPST      |
| BAG6      | 8.32E-13 | -0.30802 | 0.029 | 0.335 | 1.24E-08 | Undiff-G | BAG6      |
| AZIN1     | 8.39E-13 | -0.53283 | 0.029 | 0.333 | 1.25E-08 | Undiff-G | AZIN1     |
| RHBDD2    | 8.44E-13 | 0.21922  | 0.096 | 0.463 | 1.26E-08 | Undiff-G | RHBDD2    |
| CPVL      | 8.46E-13 | -0.44513 | 0.037 | 0.352 | 1.26E-08 | Undiff-G | CPVL      |
| RNF7      | 8.49E-13 | 0.11692  | 0.132 | 0.537 | 1.27E-08 | Undiff-G | RNF7      |
| SUGT1     | 8.49E-13 | -0.21571 | 0.037 | 0.348 | 1.27E-08 | Undiff-G | SUGT1     |
| VIMP      | 8.56E-13 | 0.244066 | 0.096 | 0.46  | 1.28E-08 | Undiff-G | VIMP      |
| MCL1      | 8.68E-13 | 0.254964 | 0.169 | 0.603 | 1.30E-08 | Undiff-G | MCL1      |
| RAB7A     | 8.72E-13 | 0.301002 | 0.199 | 0.664 | 1.30E-08 | Undiff-G | RAB7A     |
| ERLEC1    | 9.02E-13 | -0.17095 | 0.044 | 0.365 | 1.35E-08 | Undiff-G | ERLEC1    |

|          |          |          |       |       |          |          |          |
|----------|----------|----------|-------|-------|----------|----------|----------|
| SLC16A3  | 9.16E-13 | -0.57964 | 0.022 | 0.324 | 1.37E-08 | Undiff-G | SLC16A3  |
| UFD1L    | 9.25E-13 | -0.31848 | 0.029 | 0.334 | 1.38E-08 | Undiff-G | UFD1L    |
| HSPA9    | 9.39E-13 | 0.239733 | 0.11  | 0.492 | 1.40E-08 | Undiff-G | HSPA9    |
| GAA      | 9.53E-13 | -0.54575 | 0.022 | 0.323 | 1.42E-08 | Undiff-G | GAA      |
| SPATS2L  | 9.55E-13 | -0.58829 | 0.029 | 0.335 | 1.43E-08 | Undiff-G | SPATS2L  |
| DNAJA2   | 9.66E-13 | -0.34027 | 0.029 | 0.333 | 1.44E-08 | Undiff-G | DNAJA2   |
| ZC3H13   | 9.67E-13 | -0.12133 | 0.029 | 0.337 | 1.45E-08 | Undiff-G | ZC3H13   |
| OSTF1    | 9.67E-13 | -0.78296 | 0.007 | 0.295 | 1.45E-08 | Undiff-G | OSTF1    |
| PDIA4    | 9.72E-13 | 0.187915 | 0.096 | 0.466 | 1.45E-08 | Undiff-G | PDIA4    |
| SYT11    | 9.72E-13 | -0.1676  | 0.059 | 0.388 | 1.45E-08 | Undiff-G | SYT11    |
| FDX1     | 9.80E-13 | -0.36436 | 0.015 | 0.309 | 1.46E-08 | Undiff-G | FDX1     |
| BID      | 1.01E-12 | -0.19749 | 0.044 | 0.36  | 1.51E-08 | Undiff-G | BID      |
| CD37     | 1.01E-12 | -0.95965 | 0.015 | 0.304 | 1.51E-08 | Undiff-G | CD37     |
| S100A6   | 1.04E-12 | 1.275746 | 0.625 | 0.644 | 1.55E-08 | Undiff-G | S100A6   |
| RTCB     | 1.05E-12 | -0.10108 | 0.029 | 0.337 | 1.58E-08 | Undiff-G | RTCB     |
| MPHOSPH6 | 1.05E-12 | -0.61121 | 0.007 | 0.294 | 1.58E-08 | Undiff-G | MPHOSPH6 |
| ADH5     | 1.05E-12 | 0.112282 | 0.059 | 0.393 | 1.58E-08 | Undiff-G | ADH5     |
| IGBP1    | 1.06E-12 | -0.30105 | 0.037 | 0.349 | 1.59E-08 | Undiff-G | IGBP1    |
| TM2D1    | 1.08E-12 | -0.1223  | 0.059 | 0.39  | 1.62E-08 | Undiff-G | TM2D1    |
| GNAQ     | 1.09E-12 | -0.70004 | 0.007 | 0.29  | 1.62E-08 | Undiff-G | GNAQ     |
| C4orf27  | 1.10E-12 | -0.33285 | 0.022 | 0.322 | 1.64E-08 | Undiff-G | C4orf27  |
| TSR3     | 1.11E-12 | -0.65075 | 0     | 0.279 | 1.65E-08 | Undiff-G | TSR3     |
| CD163    | 1.13E-12 | -1.15384 | 0     | 0.279 | 1.69E-08 | Undiff-G | CD163    |
| IIFT20   | 1.14E-12 | -0.39179 | 0.037 | 0.348 | 1.71E-08 | Undiff-G | IIFT20   |
| ETF1     | 1.15E-12 | -0.31357 | 0.037 | 0.349 | 1.72E-08 | Undiff-G | ETF1     |
| RGS19    | 1.17E-12 | -0.83951 | 0     | 0.279 | 1.74E-08 | Undiff-G | RGS19    |
| QDPR     | 1.17E-12 | -0.17843 | 0.044 | 0.364 | 1.75E-08 | Undiff-G | QDPR     |
| POMP     | 1.19E-12 | 0.288517 | 0.235 | 0.741 | 1.78E-08 | Undiff-G | POMP     |
| MVB12A   | 1.20E-12 | -0.69403 | 0.015 | 0.305 | 1.80E-08 | Undiff-G | MVB12A   |
| ADAM9    | 1.22E-12 | -0.36489 | 0.029 | 0.333 | 1.82E-08 | Undiff-G | ADAM9    |
| GOLIM4   | 1.23E-12 | -0.57379 | 0.029 | 0.33  | 1.83E-08 | Undiff-G | GOLIM4   |
| RNASE6   | 1.23E-12 | -1.14846 | 0     | 0.278 | 1.83E-08 | Undiff-G | RNASE6   |
| TOMM20   | 1.24E-12 | 0.305258 | 0.125 | 0.521 | 1.85E-08 | Undiff-G | TOMM20   |
| POLR2I   | 1.24E-12 | 0.239852 | 0.147 | 0.557 | 1.85E-08 | Undiff-G | POLR2I   |
| ISG15    | 1.25E-12 | -0.46539 | 0.044 | 0.36  | 1.87E-08 | Undiff-G | ISG15    |
| SMIM12   | 1.27E-12 | -0.59539 | 0.015 | 0.306 | 1.89E-08 | Undiff-G | SMIM12   |
| PSMD12   | 1.27E-12 | -0.21951 | 0.037 | 0.346 | 1.89E-08 | Undiff-G | PSMD12   |
| DNTTIP1  | 1.28E-12 | -0.38892 | 0.029 | 0.333 | 1.91E-08 | Undiff-G | DNTTIP1  |
| GAMT     | 1.28E-12 | -0.46816 | 0.015 | 0.303 | 1.92E-08 | Undiff-G | GAMT     |
| PDHA1    | 1.31E-12 | -0.43563 | 0.015 | 0.306 | 1.96E-08 | Undiff-G | PDHA1    |
| REL      | 1.32E-12 | -0.76668 | 0.015 | 0.301 | 1.97E-08 | Undiff-G | REL      |
| ATF3     | 1.33E-12 | -0.8308  | 0.015 | 0.305 | 1.99E-08 | Undiff-G | ATF3     |
| CDH2     | 1.34E-12 | -0.72235 | 0.007 | 0.287 | 2.00E-08 | Undiff-G | CDH2     |
| YTHDC1   | 1.34E-12 | -0.56799 | 0.015 | 0.305 | 2.00E-08 | Undiff-G | YTHDC1   |
| C10orf54 | 1.34E-12 | -1.05681 | 0.007 | 0.291 | 2.01E-08 | Undiff-G | C10orf54 |
| TRAPPC4  | 1.36E-12 | 0.287608 | 0.088 | 0.449 | 2.04E-08 | Undiff-G | TRAPPC4  |
| ZNF331   | 1.36E-12 | -0.62152 | 0.022 | 0.319 | 2.04E-08 | Undiff-G | ZNF331   |
| PPM1B    | 1.38E-12 | -0.65766 | 0.015 | 0.304 | 2.06E-08 | Undiff-G | PPM1B    |
| PPP1R10  | 1.38E-12 | -0.7369  | 0.007 | 0.291 | 2.06E-08 | Undiff-G | PPP1R10  |
| SGTA     | 1.41E-12 | -0.49436 | 0.022 | 0.319 | 2.11E-08 | Undiff-G | SGTA     |
| DBN1     | 1.43E-12 | -0.69357 | 0.022 | 0.315 | 2.14E-08 | Undiff-G | DBN1     |

|          |          |          |       |       |          |          |          |
|----------|----------|----------|-------|-------|----------|----------|----------|
| FKBP3    | 1.44E-12 | 0.131798 | 0.11  | 0.481 | 2.16E-08 | Undiff-G | FKBP3    |
| PPP1R14B | 1.45E-12 | -0.27224 | 0.037 | 0.348 | 2.17E-08 | Undiff-G | PPP1R14B |
| TACC1    | 1.48E-12 | -0.61079 | 0.022 | 0.316 | 2.21E-08 | Undiff-G | TACC1    |
| HCST     | 1.50E-12 | -1.15316 | 0.007 | 0.288 | 2.24E-08 | Undiff-G | HCST     |
| IRF2BP2  | 1.52E-12 | -0.44558 | 0.022 | 0.319 | 2.27E-08 | Undiff-G | IRF2BP2  |
| EBNA1BP2 | 1.52E-12 | -0.13832 | 0.044 | 0.357 | 2.27E-08 | Undiff-G | EBNA1BP2 |
| RBBP7    | 1.57E-12 | 0.112863 | 0.081 | 0.428 | 2.34E-08 | Undiff-G | RBBP7    |
| NR4A1    | 1.62E-12 | -1.00224 | 0     | 0.276 | 2.42E-08 | Undiff-G | NR4A1    |
| PAFAH1B2 | 1.63E-12 | -0.63452 | 0.029 | 0.329 | 2.44E-08 | Undiff-G | PAFAH1B2 |
| CD2BP2   | 1.64E-12 | -0.35267 | 0.029 | 0.332 | 2.45E-08 | Undiff-G | CD2BP2   |
| AMZ2     | 1.68E-12 | -0.12657 | 0.059 | 0.384 | 2.51E-08 | Undiff-G | AMZ2     |
| SNRPG    | 1.70E-12 | 0.352002 | 0.191 | 0.645 | 2.54E-08 | Undiff-G | SNRPG    |
| WDR18    | 1.73E-12 | -0.64935 | 0.007 | 0.289 | 2.58E-08 | Undiff-G | WDR18    |
| SCAF11   | 1.74E-12 | 0.104522 | 0.066 | 0.4   | 2.60E-08 | Undiff-G | SCAF11   |
| NAA50    | 1.80E-12 | -0.69276 | 0     | 0.275 | 2.69E-08 | Undiff-G | NAA50    |
| ATP6V1D  | 1.81E-12 | -0.11371 | 0.051 | 0.374 | 2.70E-08 | Undiff-G | ATP6V1D  |
| UBE2R2   | 1.81E-12 | -0.34337 | 0.007 | 0.289 | 2.71E-08 | Undiff-G | UBE2R2   |
| EMC8     | 1.82E-12 | -0.64362 | 0     | 0.275 | 2.71E-08 | Undiff-G | EMC8     |
| SMC3     | 1.85E-12 | -0.69311 | 0.007 | 0.289 | 2.76E-08 | Undiff-G | SMC3     |
| YIF1A    | 1.87E-12 | 0.203818 | 0.081 | 0.428 | 2.80E-08 | Undiff-G | YIF1A    |
| EIF4A2   | 1.88E-12 | 0.179411 | 0.228 | 0.725 | 2.80E-08 | Undiff-G | EIF4A2   |
| ROCK1    | 1.90E-12 | -0.6696  | 0.022 | 0.312 | 2.84E-08 | Undiff-G | ROCK1    |
| GTF2B    | 1.92E-12 | -0.38661 | 0.015 | 0.303 | 2.86E-08 | Undiff-G | GTF2B    |
| CTSC     | 1.96E-12 | -0.31931 | 0.059 | 0.388 | 2.93E-08 | Undiff-G | CTSC     |
| CDIPT    | 1.97E-12 | -0.52294 | 0.007 | 0.289 | 2.94E-08 | Undiff-G | CDIPT    |
| G3BP1    | 1.97E-12 | -0.34917 | 0.022 | 0.317 | 2.95E-08 | Undiff-G | G3BP1    |
| COPA     | 2.04E-12 | -0.51615 | 0.022 | 0.316 | 3.05E-08 | Undiff-G | COPA     |
| SLC44A1  | 2.09E-12 | -0.38022 | 0.022 | 0.317 | 3.12E-08 | Undiff-G | SLC44A1  |
| SCNM1    | 2.10E-12 | -0.354   | 0.037 | 0.343 | 3.14E-08 | Undiff-G | SCNM1    |
| PHF5A    | 2.11E-12 | -0.16863 | 0.029 | 0.331 | 3.16E-08 | Undiff-G | PHF5A    |
| PFDN6    | 2.11E-12 | -0.22952 | 0.044 | 0.356 | 3.16E-08 | Undiff-G | PFDN6    |
| TPP1     | 2.12E-12 | -0.46871 | 0.029 | 0.326 | 3.17E-08 | Undiff-G | TPP1     |
| LST1     | 2.15E-12 | -0.7933  | 0.022 | 0.316 | 3.21E-08 | Undiff-G | LST1     |
| NAE1     | 2.19E-12 | -0.15956 | 0.037 | 0.344 | 3.27E-08 | Undiff-G | NAE1     |
| PSMG3    | 2.20E-12 | -0.26313 | 0.029 | 0.33  | 3.28E-08 | Undiff-G | PSMG3    |
| NFIA     | 2.27E-12 | -0.37208 | 0.059 | 0.383 | 3.39E-08 | Undiff-G | NFIA     |
| HLA-DQB1 | 2.30E-12 | -0.80355 | 0.029 | 0.329 | 3.44E-08 | Undiff-G | HLA-DQB1 |
| 9-Sep    | 2.33E-12 | -0.21624 | 0.037 | 0.344 | 3.48E-08 | Undiff-G | 9-Sep    |
| BAZ2B    | 2.34E-12 | -0.62994 | 0.029 | 0.324 | 3.50E-08 | Undiff-G | BAZ2B    |
| FXVD5    | 2.36E-12 | -0.50631 | 0.037 | 0.344 | 3.53E-08 | Undiff-G | FXVD5    |
| ABCF1    | 2.38E-12 | -0.60779 | 0.007 | 0.287 | 3.56E-08 | Undiff-G | ABCF1    |
| PMVK     | 2.40E-12 | 0.110066 | 0.088 | 0.441 | 3.58E-08 | Undiff-G | PMVK     |
| TMEM176B | 2.40E-12 | -0.66385 | 0.044 | 0.356 | 3.59E-08 | Undiff-G | TMEM176B |
| PNMA1    | 2.42E-12 | -0.64145 | 0.007 | 0.287 | 3.61E-08 | Undiff-G | PNMA1    |
| TMEM14B  | 2.54E-12 | 0.290342 | 0.132 | 0.53  | 3.80E-08 | Undiff-G | TMEM14B  |
| TSSC4    | 2.58E-12 | -0.11473 | 0.022 | 0.315 | 3.85E-08 | Undiff-G | TSSC4    |
| NDUFA6   | 2.61E-12 | 0.308124 | 0.162 | 0.576 | 3.90E-08 | Undiff-G | NDUFA6   |
| ARL2     | 2.64E-12 | 0.136344 | 0.088 | 0.442 | 3.95E-08 | Undiff-G | ARL2     |
| LIPA     | 2.65E-12 | -0.39064 | 0.037 | 0.338 | 3.96E-08 | Undiff-G | LIPA     |
| TNRC6B   | 2.65E-12 | -0.39687 | 0.044 | 0.356 | 3.97E-08 | Undiff-G | TNRC6B   |
| CRELD2   | 2.67E-12 | -0.62287 | 0.007 | 0.286 | 3.99E-08 | Undiff-G | CRELD2   |

|           |          |          |       |       |          |          |           |
|-----------|----------|----------|-------|-------|----------|----------|-----------|
| CUTA      | 2.68E-12 | 0.359403 | 0.206 | 0.687 | 4.00E-08 | Undiff-G | CUTA      |
| EPN1      | 2.81E-12 | -0.23252 | 0.037 | 0.338 | 4.19E-08 | Undiff-G | EPN1      |
| PPP2CB    | 2.86E-12 | -0.43161 | 0.015 | 0.3   | 4.27E-08 | Undiff-G | PPP2CB    |
| BAZ1A     | 2.89E-12 | -0.41543 | 0.029 | 0.323 | 4.32E-08 | Undiff-G | BAZ1A     |
| ACTN4     | 2.92E-12 | -0.48228 | 0.037 | 0.336 | 4.36E-08 | Undiff-G | ACTN4     |
| ITGAV     | 2.93E-12 | -0.68944 | 0.007 | 0.282 | 4.38E-08 | Undiff-G | ITGAV     |
| IDI1      | 2.99E-12 | -0.40408 | 0.029 | 0.327 | 4.47E-08 | Undiff-G | IDI1      |
| BNIP3L    | 3.01E-12 | 0.390817 | 0.169 | 0.604 | 4.50E-08 | Undiff-G | BNIP3L    |
| BRMS1     | 3.02E-12 | -0.2635  | 0.022 | 0.314 | 4.51E-08 | Undiff-G | BRMS1     |
| PRPSAP1   | 3.09E-12 | -0.52423 | 0.022 | 0.309 | 4.62E-08 | Undiff-G | PRPSAP1   |
| DST       | 3.14E-12 | -0.52624 | 0.059 | 0.38  | 4.69E-08 | Undiff-G | DST       |
| C1D       | 3.29E-12 | -0.4336  | 0.022 | 0.313 | 4.92E-08 | Undiff-G | C1D       |
| PSMB7     | 3.35E-12 | 0.332914 | 0.191 | 0.645 | 5.01E-08 | Undiff-G | PSMB7     |
| PRKAG1    | 3.38E-12 | -0.66473 | 0.015 | 0.297 | 5.06E-08 | Undiff-G | PRKAG1    |
| FLYWCH2   | 3.41E-12 | -0.23336 | 0.022 | 0.313 | 5.10E-08 | Undiff-G | FLYWCH2   |
| TXNDC12   | 3.45E-12 | 0.169995 | 0.088 | 0.436 | 5.15E-08 | Undiff-G | TXNDC12   |
| BUB3      | 3.54E-12 | -0.6029  | 0.022 | 0.311 | 5.29E-08 | Undiff-G | BUB3      |
| MANF      | 3.55E-12 | 0.243476 | 0.096 | 0.455 | 5.31E-08 | Undiff-G | MANF      |
| PSMD6     | 3.56E-12 | -0.25321 | 0.044 | 0.354 | 5.32E-08 | Undiff-G | PSMD6     |
| DENR      | 3.63E-12 | -0.54832 | 0.029 | 0.324 | 5.42E-08 | Undiff-G | DENR      |
| KIF1B     | 3.64E-12 | -0.64248 | 0.015 | 0.297 | 5.44E-08 | Undiff-G | KIF1B     |
| AHCY      | 3.74E-12 | -0.4565  | 0.015 | 0.297 | 5.59E-08 | Undiff-G | AHCY      |
| TGIF1     | 3.81E-12 | -0.24061 | 0.051 | 0.361 | 5.70E-08 | Undiff-G | TGIF1     |
| CCDC47    | 3.82E-12 | 0.183964 | 0.074 | 0.408 | 5.70E-08 | Undiff-G | CCDC47    |
| NCBP2-AS2 | 3.85E-12 | -0.64665 | 0.007 | 0.28  | 5.76E-08 | Undiff-G | NCBP2-AS2 |
| MYL12B    | 3.91E-12 | 0.380759 | 0.235 | 0.733 | 5.85E-08 | Undiff-G | MYL12B    |
| ATAT1     | 3.92E-12 | -0.72167 | 0.015 | 0.292 | 5.85E-08 | Undiff-G | ATAT1     |
| SMARCA4   | 3.93E-12 | -0.3173  | 0.051 | 0.365 | 5.88E-08 | Undiff-G | SMARCA4   |
| GARS      | 3.93E-12 | -0.6337  | 0.015 | 0.296 | 5.88E-08 | Undiff-G | GARS      |
| SAFB2     | 4.04E-12 | -0.37263 | 0.037 | 0.335 | 6.04E-08 | Undiff-G | SAFB2     |
| DPM1      | 4.25E-12 | 0.164174 | 0.059 | 0.382 | 6.35E-08 | Undiff-G | DPM1      |
| NT5C      | 4.34E-12 | -0.46619 | 0.029 | 0.323 | 6.48E-08 | Undiff-G | NT5C      |
| METAP2    | 4.37E-12 | 0.336281 | 0.11  | 0.474 | 6.52E-08 | Undiff-G | METAP2    |
| ZCRB1     | 4.37E-12 | 0.398919 | 0.118 | 0.495 | 6.53E-08 | Undiff-G | ZCRB1     |
| PPP1R18   | 4.38E-12 | -0.62754 | 0.015 | 0.296 | 6.55E-08 | Undiff-G | PPP1R18   |
| HNRNPK    | 4.50E-12 | 0.269867 | 0.265 | 0.795 | 6.72E-08 | Undiff-G | HNRNPK    |
| C1QC      | 4.51E-12 | -0.2559  | 0.132 | 0.506 | 6.74E-08 | Undiff-G | C1QC      |
| MEAF6     | 4.61E-12 | 0.222722 | 0.11  | 0.481 | 6.89E-08 | Undiff-G | MEAF6     |
| FCGR2A    | 4.67E-12 | -0.9607  | 0.015 | 0.292 | 6.98E-08 | Undiff-G | FCGR2A    |
| CORO1C    | 4.71E-12 | -0.19817 | 0.059 | 0.377 | 7.04E-08 | Undiff-G | CORO1C    |
| ACTR1A    | 4.73E-12 | -0.4277  | 0.007 | 0.281 | 7.07E-08 | Undiff-G | ACTR1A    |
| HNRNPH1   | 4.75E-12 | -0.10059 | 0.103 | 0.461 | 7.09E-08 | Undiff-G | HNRNPH1   |
| FYTTD1    | 4.79E-12 | -0.4494  | 0.015 | 0.292 | 7.15E-08 | Undiff-G | FYTTD1    |
| HLA-DMB   | 4.80E-12 | -0.6124  | 0.029 | 0.324 | 7.17E-08 | Undiff-G | HLA-DMB   |
| KLHDC2    | 4.84E-12 | -0.4769  | 0.022 | 0.305 | 7.23E-08 | Undiff-G | KLHDC2    |
| NDUFS6    | 4.99E-12 | 0.334954 | 0.191 | 0.633 | 7.45E-08 | Undiff-G | NDUFS6    |
| EIF3A     | 4.99E-12 | -0.4621  | 0.037 | 0.336 | 7.46E-08 | Undiff-G | EIF3A     |
| SPCS1     | 5.01E-12 | 0.418368 | 0.235 | 0.742 | 7.48E-08 | Undiff-G | SPCS1     |
| MYCBP2    | 5.29E-12 | -0.44783 | 0.022 | 0.308 | 7.91E-08 | Undiff-G | MYCBP2    |
| HLA-DMA   | 5.44E-12 | -0.39987 | 0.081 | 0.412 | 8.14E-08 | Undiff-G | HLA-DMA   |
| NSL1      | 5.45E-12 | -0.18995 | 0.044 | 0.35  | 8.15E-08 | Undiff-G | NSL1      |

|          |          |          |       |       |          |          |          |
|----------|----------|----------|-------|-------|----------|----------|----------|
| RNF126   | 5.48E-12 | -0.56788 | 0.015 | 0.294 | 8.20E-08 | Undiff-G | RNF126   |
| LAMP2    | 5.50E-12 | 0.11926  | 0.11  | 0.475 | 8.22E-08 | Undiff-G | LAMP2    |
| DDR1     | 5.57E-12 | -0.50821 | 0.037 | 0.335 | 8.33E-08 | Undiff-G | DDR1     |
| HADHB    | 5.59E-12 | 0.244269 | 0.103 | 0.465 | 8.35E-08 | Undiff-G | HADHB    |
| SLC11A1  | 5.61E-12 | -0.57036 | 0.022 | 0.309 | 8.38E-08 | Undiff-G | SLC11A1  |
| RSBN1L   | 5.70E-12 | -0.21018 | 0.051 | 0.358 | 8.51E-08 | Undiff-G | RSBN1L   |
| TSPAN5   | 5.74E-12 | -0.6795  | 0     | 0.265 | 8.58E-08 | Undiff-G | TSPAN5   |
| CHPT1    | 5.85E-12 | -0.59441 | 0.022 | 0.306 | 8.75E-08 | Undiff-G | CHPT1    |
| RAB18    | 5.88E-12 | 0.159215 | 0.074 | 0.402 | 8.79E-08 | Undiff-G | RAB18    |
| PNPLA8   | 5.94E-12 | 0.153671 | 0.044 | 0.351 | 8.88E-08 | Undiff-G | PNPLA8   |
| FAM173A  | 5.95E-12 | -0.60369 | 0.015 | 0.29  | 8.90E-08 | Undiff-G | FAM173A  |
| ZFAS1    | 6.00E-12 | 0.336542 | 0.221 | 0.703 | 8.97E-08 | Undiff-G | ZFAS1    |
| MAP2     | 6.04E-12 | -0.50016 | 0.044 | 0.341 | 9.02E-08 | Undiff-G | MAP2     |
| ZEB2     | 6.08E-12 | -0.54723 | 0.022 | 0.307 | 9.08E-08 | Undiff-G | ZEB2     |
| C19orf70 | 6.08E-12 | 0.255502 | 0.169 | 0.583 | 9.09E-08 | Undiff-G | C19orf70 |
| SH3GLB1  | 6.09E-12 | 0.111932 | 0.088 | 0.434 | 9.10E-08 | Undiff-G | SH3GLB1  |
| RRAGA    | 6.25E-12 | 0.337407 | 0.066 | 0.393 | 9.35E-08 | Undiff-G | RRAGA    |
| ZBTB20   | 6.26E-12 | -0.38174 | 0.066 | 0.389 | 9.36E-08 | Undiff-G | ZBTB20   |
| DNAJC19  | 6.26E-12 | 0.206327 | 0.066 | 0.393 | 9.36E-08 | Undiff-G | DNAJC19  |
| MAGED1   | 6.36E-12 | -0.21153 | 0.044 | 0.348 | 9.51E-08 | Undiff-G | MAGED1   |
| SKIL     | 6.37E-12 | -0.54797 | 0.015 | 0.289 | 9.53E-08 | Undiff-G | SKIL     |
| UBE2S    | 6.40E-12 | -0.33794 | 0.044 | 0.348 | 9.57E-08 | Undiff-G | UBE2S    |
| BCAP29   | 6.41E-12 | -0.39213 | 0.029 | 0.32  | 9.58E-08 | Undiff-G | BCAP29   |
| SCRG1    | 6.41E-12 | -0.33101 | 0.044 | 0.349 | 9.59E-08 | Undiff-G | SCRG1    |
| BEX1     | 6.53E-12 | -0.46363 | 0.051 | 0.354 | 9.76E-08 | Undiff-G | BEX1     |
| ZNF22    | 6.60E-12 | -0.53022 | 0.007 | 0.279 | 9.86E-08 | Undiff-G | ZNF22    |
| ITGB1BP1 | 6.60E-12 | 0.12524  | 0.066 | 0.39  | 9.86E-08 | Undiff-G | ITGB1BP1 |
| DYNC1LI2 | 6.65E-12 | -0.31099 | 0.044 | 0.348 | 9.94E-08 | Undiff-G | DYNC1LI2 |
| CYB5A    | 6.68E-12 | -0.11863 | 0.044 | 0.345 | 9.99E-08 | Undiff-G | CYB5A    |
| MAGEH1   | 6.88E-12 | -0.19051 | 0.029 | 0.321 | 1.03E-07 | Undiff-G | MAGEH1   |
| CCDC112  | 6.95E-12 | -0.65195 | 0     | 0.264 | 1.04E-07 | Undiff-G | CCDC112  |
| CCND2    | 7.00E-12 | -0.49316 | 0.037 | 0.33  | 1.05E-07 | Undiff-G | CCND2    |
| UBE3A    | 7.03E-12 | -0.6154  | 0.015 | 0.29  | 1.05E-07 | Undiff-G | UBE3A    |
| AKAP9    | 7.07E-12 | 0.100564 | 0.103 | 0.454 | 1.06E-07 | Undiff-G | AKAP9    |
| CHURC1   | 7.28E-12 | 0.21224  | 0.074 | 0.404 | 1.09E-07 | Undiff-G | CHURC1   |
| REPIN1   | 7.30E-12 | -0.59902 | 0.007 | 0.277 | 1.09E-07 | Undiff-G | REPIN1   |
| INTS10   | 7.31E-12 | -0.48319 | 0.022 | 0.305 | 1.09E-07 | Undiff-G | INTS10   |
| YIPF6    | 7.42E-12 | -0.18981 | 0.029 | 0.316 | 1.11E-07 | Undiff-G | YIPF6    |
| PAFAH1B1 | 7.47E-12 | -0.20122 | 0.059 | 0.371 | 1.12E-07 | Undiff-G | PAFAH1B1 |
| TUFM     | 7.58E-12 | 0.305611 | 0.191 | 0.638 | 1.13E-07 | Undiff-G | TUFM     |
| TCF12    | 7.73E-12 | -0.68177 | 0.015 | 0.287 | 1.16E-07 | Undiff-G | TCF12    |
| ACADM    | 7.78E-12 | -0.1934  | 0.037 | 0.334 | 1.16E-07 | Undiff-G | ACADM    |
| 6-Mar    | 7.96E-12 | -0.12116 | 0.051 | 0.36  | 1.19E-07 | Undiff-G | 6-Mar    |
| IMMT     | 8.07E-12 | -0.19165 | 0.022 | 0.305 | 1.21E-07 | Undiff-G | IMMT     |
| RABAC1   | 8.15E-12 | 0.362418 | 0.206 | 0.67  | 1.22E-07 | Undiff-G | RABAC1   |
| EIF2AK2  | 8.25E-12 | -0.17902 | 0.022 | 0.305 | 1.23E-07 | Undiff-G | EIF2AK2  |
| H2AFJ    | 8.33E-12 | -0.80446 | 0     | 0.262 | 1.24E-07 | Undiff-G | H2AFJ    |
| PTPRE    | 8.33E-12 | -0.77753 | 0.007 | 0.273 | 1.25E-07 | Undiff-G | PTPRE    |
| BAZ1B    | 8.44E-12 | -0.5339  | 0.022 | 0.301 | 1.26E-07 | Undiff-G | BAZ1B    |
| NUDCD2   | 8.44E-12 | 0.22544  | 0.074 | 0.404 | 1.26E-07 | Undiff-G | NUDCD2   |
| PRDX4    | 8.47E-12 | 0.466061 | 0.147 | 0.551 | 1.27E-07 | Undiff-G | PRDX4    |

|          |          |          |       |       |          |          |          |
|----------|----------|----------|-------|-------|----------|----------|----------|
| CDKN1B   | 8.50E-12 | -0.70042 | 0     | 0.262 | 1.27E-07 | Undiff-G | CDKN1B   |
| PSMA1    | 8.56E-12 | 0.298623 | 0.184 | 0.616 | 1.28E-07 | Undiff-G | PSMA1    |
| COMMD6   | 8.62E-12 | 0.313929 | 0.257 | 0.782 | 1.29E-07 | Undiff-G | COMMD6   |
| AP1B1    | 8.67E-12 | -0.79469 | 0     | 0.262 | 1.30E-07 | Undiff-G | AP1B1    |
| SUCLA2   | 8.75E-12 | -0.41638 | 0.015 | 0.29  | 1.31E-07 | Undiff-G | SUCLA2   |
| TECR     | 8.81E-12 | 0.263148 | 0.147 | 0.547 | 1.32E-07 | Undiff-G | TECR     |
| PABPN1   | 8.94E-12 | -0.22934 | 0.051 | 0.359 | 1.34E-07 | Undiff-G | PABPN1   |
| DNMT1    | 8.96E-12 | -0.5785  | 0.015 | 0.289 | 1.34E-07 | Undiff-G | DNMT1    |
| LRRC59   | 8.99E-12 | 0.174533 | 0.051 | 0.361 | 1.34E-07 | Undiff-G | LRRC59   |
| GMFG     | 9.24E-12 | -0.82299 | 0.022 | 0.301 | 1.38E-07 | Undiff-G | GMFG     |
| ANXA7    | 9.31E-12 | -0.1516  | 0.044 | 0.342 | 1.39E-07 | Undiff-G | ANXA7    |
| NCAM1    | 9.32E-12 | -0.55394 | 0.044 | 0.339 | 1.39E-07 | Undiff-G | NCAM1    |
| TMEM258  | 9.35E-12 | 0.294735 | 0.235 | 0.734 | 1.40E-07 | Undiff-G | TMEM258  |
| MOB1A    | 9.38E-12 | -0.13267 | 0.044 | 0.344 | 1.40E-07 | Undiff-G | MOB1A    |
| DPM3     | 9.44E-12 | -0.13416 | 0.051 | 0.356 | 1.41E-07 | Undiff-G | DPM3     |
| SLC39A6  | 9.56E-12 | -0.1612  | 0.037 | 0.332 | 1.43E-07 | Undiff-G | SLC39A6  |
| FASTK    | 9.65E-12 | -0.1764  | 0.044 | 0.341 | 1.44E-07 | Undiff-G | FASTK    |
| ARHGDI A | 9.69E-12 | 0.159479 | 0.162 | 0.569 | 1.45E-07 | Undiff-G | ARHGDI A |
| DNAJB2   | 9.69E-12 | -0.23703 | 0.029 | 0.317 | 1.45E-07 | Undiff-G | DNAJB2   |
| ACTL6A   | 9.78E-12 | -0.67104 | 0     | 0.261 | 1.46E-07 | Undiff-G | ACTL6A   |
| TCEAL3   | 1.00E-11 | -0.1339  | 0.044 | 0.345 | 1.50E-07 | Undiff-G | TCEAL3   |
| MLX      | 1.02E-11 | -0.32277 | 0.022 | 0.302 | 1.52E-07 | Undiff-G | MLX      |
| RSRC2    | 1.04E-11 | 0.221648 | 0.118 | 0.479 | 1.55E-07 | Undiff-G | RSRC2    |
| STX4     | 1.07E-11 | -0.22451 | 0.029 | 0.317 | 1.60E-07 | Undiff-G | STX4     |
| HOOK3    | 1.07E-11 | -0.6077  | 0.015 | 0.287 | 1.60E-07 | Undiff-G | HOOK3    |
| C5orf24  | 1.07E-11 | -0.37818 | 0.022 | 0.299 | 1.60E-07 | Undiff-G | C5orf24  |
| CAMLG    | 1.08E-11 | 0.245762 | 0.125 | 0.498 | 1.61E-07 | Undiff-G | CAMLG    |
| SLTM     | 1.08E-11 | -0.28913 | 0.051 | 0.353 | 1.61E-07 | Undiff-G | SLTM     |
| JKAMP    | 1.10E-11 | -0.31292 | 0.022 | 0.303 | 1.65E-07 | Undiff-G | JKAMP    |
| GCA      | 1.11E-11 | -0.5415  | 0.022 | 0.302 | 1.66E-07 | Undiff-G | GCA      |
| CDC123   | 1.11E-11 | -0.16487 | 0.044 | 0.34  | 1.66E-07 | Undiff-G | CDC123   |
| MEF2C    | 1.12E-11 | -0.79429 | 0.015 | 0.286 | 1.67E-07 | Undiff-G | MEF2C    |
| GDE1     | 1.15E-11 | -0.26042 | 0.022 | 0.302 | 1.72E-07 | Undiff-G | GDE1     |
| NDUFS8   | 1.16E-11 | 0.375992 | 0.184 | 0.614 | 1.74E-07 | Undiff-G | NDUFS8   |
| GLO1     | 1.17E-11 | 0.112784 | 0.081 | 0.414 | 1.75E-07 | Undiff-G | GLO1     |
| PPP6C    | 1.17E-11 | -0.68337 | 0     | 0.259 | 1.75E-07 | Undiff-G | PPP6C    |
| C1orf162 | 1.18E-11 | -0.69908 | 0.037 | 0.325 | 1.76E-07 | Undiff-G | C1orf162 |
| FAM134A  | 1.19E-11 | -0.47281 | 0.022 | 0.301 | 1.78E-07 | Undiff-G | FAM134A  |
| PYCARD   | 1.19E-11 | -0.68999 | 0.015 | 0.288 | 1.78E-07 | Undiff-G | PYCARD   |
| CTSF     | 1.21E-11 | -0.64392 | 0.007 | 0.273 | 1.81E-07 | Undiff-G | CTSF     |
| UBE2J1   | 1.23E-11 | -0.58446 | 0.015 | 0.284 | 1.84E-07 | Undiff-G | UBE2J1   |
| SSBP4    | 1.23E-11 | -0.56262 | 0.007 | 0.273 | 1.85E-07 | Undiff-G | SSBP4    |
| ECHDC1   | 1.25E-11 | -0.15961 | 0.037 | 0.33  | 1.87E-07 | Undiff-G | ECHDC1   |
| TRAF4    | 1.27E-11 | -0.65817 | 0.007 | 0.272 | 1.89E-07 | Undiff-G | TRAF4    |
| CRLS1    | 1.28E-11 | -0.57969 | 0.015 | 0.286 | 1.91E-07 | Undiff-G | CRLS1    |
| PODXL2   | 1.28E-11 | -0.55922 | 0.029 | 0.311 | 1.92E-07 | Undiff-G | PODXL2   |
| PHF20L1  | 1.29E-11 | -0.49973 | 0.029 | 0.311 | 1.93E-07 | Undiff-G | PHF20L1  |
| NUDT22   | 1.30E-11 | -0.5569  | 0.007 | 0.273 | 1.94E-07 | Undiff-G | NUDT22   |
| PSMB5    | 1.32E-11 | 0.314511 | 0.176 | 0.6   | 1.97E-07 | Undiff-G | PSMB5    |
| LILRB4   | 1.32E-11 | -1.08149 | 0     | 0.258 | 1.97E-07 | Undiff-G | LILRB4   |
| ELAVL3   | 1.33E-11 | -0.49257 | 0.029 | 0.314 | 1.99E-07 | Undiff-G | ELAVL3   |



|           |          |          |       |       |          |          |           |
|-----------|----------|----------|-------|-------|----------|----------|-----------|
| CNOT7     | 1.34E-11 | 0.114141 | 0.059 | 0.372 | 2.00E-07 | Undiff-G | CNOT7     |
| POLR2H    | 1.34E-11 | -0.16407 | 0.037 | 0.326 | 2.01E-07 | Undiff-G | POLR2H    |
| KIDINS220 | 1.34E-11 | -0.6418  | 0.007 | 0.272 | 2.01E-07 | Undiff-G | KIDINS220 |
| MLF2      | 1.37E-11 | 0.326798 | 0.184 | 0.614 | 2.05E-07 | Undiff-G | MLF2      |
| NOVA1     | 1.38E-11 | -0.24458 | 0.118 | 0.483 | 2.06E-07 | Undiff-G | NOVA1     |
| PPIE      | 1.42E-11 | -0.37546 | 0.015 | 0.286 | 2.12E-07 | Undiff-G | PPIE      |
| MAP2K1    | 1.43E-11 | -0.63513 | 0.007 | 0.272 | 2.13E-07 | Undiff-G | MAP2K1    |
| CYFIP1    | 1.43E-11 | -0.50647 | 0.015 | 0.286 | 2.13E-07 | Undiff-G | CYFIP1    |
| LRP1      | 1.46E-11 | -0.33174 | 0.051 | 0.354 | 2.17E-07 | Undiff-G | LRP1      |
| C9orf78   | 1.46E-11 | 0.171648 | 0.103 | 0.448 | 2.18E-07 | Undiff-G | C9orf78   |
| CD59      | 1.46E-11 | 0.31708  | 0.154 | 0.558 | 2.18E-07 | Undiff-G | CD59      |
| ATRAID    | 1.46E-11 | 0.419997 | 0.184 | 0.616 | 2.19E-07 | Undiff-G | ATRAID    |
| EXOC7     | 1.49E-11 | -0.22342 | 0.051 | 0.355 | 2.22E-07 | Undiff-G | EXOC7     |
| FAM195A   | 1.49E-11 | -0.64646 | 0     | 0.257 | 2.22E-07 | Undiff-G | FAM195A   |
| RPN1      | 1.49E-11 | 0.257508 | 0.081 | 0.414 | 2.22E-07 | Undiff-G | RPN1      |
| GIPC1     | 1.52E-11 | -0.61887 | 0.007 | 0.271 | 2.27E-07 | Undiff-G | GIPC1     |
| ATP2A2    | 1.54E-11 | -0.55195 | 0.015 | 0.282 | 2.30E-07 | Undiff-G | ATP2A2    |
| POP5      | 1.55E-11 | -0.36909 | 0.022 | 0.299 | 2.32E-07 | Undiff-G | POP5      |
| TRAPPC3   | 1.55E-11 | 0.197326 | 0.096 | 0.441 | 2.32E-07 | Undiff-G | TRAPPC3   |
| TBCB      | 1.56E-11 | 0.291486 | 0.213 | 0.663 | 2.32E-07 | Undiff-G | TBCB      |
| PICALM    | 1.57E-11 | -0.43336 | 0.015 | 0.284 | 2.34E-07 | Undiff-G | PICALM    |
| TERF1     | 1.57E-11 | -0.2748  | 0.037 | 0.327 | 2.35E-07 | Undiff-G | TERF1     |
| SPECC1    | 1.58E-11 | -0.55837 | 0.022 | 0.299 | 2.36E-07 | Undiff-G | SPECC1    |
| PON2      | 1.58E-11 | 0.100423 | 0.103 | 0.454 | 2.36E-07 | Undiff-G | PON2      |
| PIN4      | 1.58E-11 | 0.305157 | 0.088 | 0.422 | 2.37E-07 | Undiff-G | PIN4      |
| CSF1R     | 1.60E-11 | -0.92598 | 0.007 | 0.271 | 2.39E-07 | Undiff-G | CSF1R     |
| SMS       | 1.60E-11 | 0.317849 | 0.169 | 0.577 | 2.40E-07 | Undiff-G | SMS       |
| CHMP2A    | 1.60E-11 | 0.294876 | 0.206 | 0.66  | 2.40E-07 | Undiff-G | CHMP2A    |
| KIF5C     | 1.61E-11 | -0.62966 | 0.007 | 0.271 | 2.40E-07 | Undiff-G | KIF5C     |
| CCDC90B   | 1.61E-11 | 0.266347 | 0.081 | 0.413 | 2.41E-07 | Undiff-G | CCDC90B   |
| COPS6     | 1.62E-11 | 0.22768  | 0.184 | 0.609 | 2.43E-07 | Undiff-G | COPS6     |
| PPP1R12A  | 1.63E-11 | -0.28698 | 0.059 | 0.363 | 2.44E-07 | Undiff-G | PPP1R12A  |
| PTGES2    | 1.64E-11 | -0.59229 | 0.007 | 0.27  | 2.45E-07 | Undiff-G | PTGES2    |
| SLC35C2   | 1.66E-11 | -0.64476 | 0     | 0.256 | 2.48E-07 | Undiff-G | SLC35C2   |
| AP3D1     | 1.69E-11 | -0.4155  | 0.029 | 0.312 | 2.52E-07 | Undiff-G | AP3D1     |
| DHX9      | 1.69E-11 | -0.50452 | 0.015 | 0.281 | 2.53E-07 | Undiff-G | DHX9      |
| ATP5L     | 1.69E-11 | 0.282845 | 0.301 | 0.866 | 2.53E-07 | Undiff-G | ATP5L     |
| FBXO7     | 1.72E-11 | -0.12532 | 0.029 | 0.313 | 2.57E-07 | Undiff-G | FBXO7     |
| BAALC     | 1.72E-11 | -0.35155 | 0.051 | 0.349 | 2.57E-07 | Undiff-G | BAALC     |
| CDC5L     | 1.75E-11 | -0.4229  | 0.015 | 0.284 | 2.62E-07 | Undiff-G | CDC5L     |
| UBE2D1    | 1.79E-11 | -0.5899  | 0.007 | 0.27  | 2.68E-07 | Undiff-G | UBE2D1    |
| TAF12     | 1.82E-11 | -0.31242 | 0.029 | 0.312 | 2.72E-07 | Undiff-G | TAF12     |
| CMAS      | 1.83E-11 | -0.58453 | 0.007 | 0.27  | 2.74E-07 | Undiff-G | CMAS      |
| BUD31     | 1.85E-11 | 0.471352 | 0.191 | 0.633 | 2.77E-07 | Undiff-G | BUD31     |
| NDUFB9    | 1.89E-11 | 0.358828 | 0.221 | 0.694 | 2.83E-07 | Undiff-G | NDUFB9    |
| MORF4L1   | 1.90E-11 | 0.37094  | 0.25  | 0.75  | 2.84E-07 | Undiff-G | MORF4L1   |
| HDLBP     | 1.91E-11 | -0.13733 | 0.044 | 0.339 | 2.86E-07 | Undiff-G | HDLBP     |
| WBP4      | 1.92E-11 | -0.23594 | 0.029 | 0.308 | 2.87E-07 | Undiff-G | WBP4      |
| MIF4GD    | 1.92E-11 | -0.71947 | 0     | 0.255 | 2.88E-07 | Undiff-G | MIF4GD    |
| THYN1     | 1.93E-11 | 0.153871 | 0.081 | 0.41  | 2.88E-07 | Undiff-G | THYN1     |
| SERPINE2  | 1.93E-11 | -0.61263 | 0.022 | 0.296 | 2.89E-07 | Undiff-G | SERPINE2  |

|          |          |          |       |       |          |          |          |
|----------|----------|----------|-------|-------|----------|----------|----------|
| LYRM2    | 1.94E-11 | -0.43699 | 0.022 | 0.297 | 2.90E-07 | Undiff-G | LYRM2    |
| SAMSN1   | 1.94E-11 | -1.04193 | 0     | 0.255 | 2.90E-07 | Undiff-G | SAMSN1   |
| GHITM    | 1.98E-11 | 0.378828 | 0.14  | 0.528 | 2.95E-07 | Undiff-G | GHITM    |
| PHIP     | 1.98E-11 | -0.41842 | 0.044 | 0.335 | 2.96E-07 | Undiff-G | PHIP     |
| ASPH     | 1.99E-11 | -0.53202 | 0.015 | 0.28  | 2.97E-07 | Undiff-G | ASPH     |
| RAF1     | 2.00E-11 | -0.58917 | 0.015 | 0.28  | 2.98E-07 | Undiff-G | RAF1     |
| VGLL4    | 2.01E-11 | -0.37284 | 0.037 | 0.321 | 3.00E-07 | Undiff-G | VGLL4    |
| 11-Sep   | 2.05E-11 | -0.5224  | 0.029 | 0.306 | 3.07E-07 | Undiff-G | 11-Sep   |
| PAICS    | 2.07E-11 | -0.23742 | 0.029 | 0.311 | 3.09E-07 | Undiff-G | PAICS    |
| FMNL2    | 2.07E-11 | -0.63242 | 0.007 | 0.268 | 3.09E-07 | Undiff-G | FMNL2    |
| PLEKH01  | 2.08E-11 | -0.65923 | 0.015 | 0.278 | 3.11E-07 | Undiff-G | PLEKH01  |
| YEATS4   | 2.08E-11 | -0.74769 | 0     | 0.254 | 3.11E-07 | Undiff-G | YEATS4   |
| ANKRD10  | 2.10E-11 | -0.37424 | 0.029 | 0.309 | 3.14E-07 | Undiff-G | ANKRD10  |
| EBP      | 2.10E-11 | -0.68758 | 0     | 0.254 | 3.14E-07 | Undiff-G | EBP      |
| TMEM170A | 2.12E-11 | -0.66195 | 0     | 0.254 | 3.17E-07 | Undiff-G | TMEM170A |
| FAM32A   | 2.17E-11 | 0.102134 | 0.11  | 0.456 | 3.24E-07 | Undiff-G | FAM32A   |
| CRMP1    | 2.19E-11 | -0.64759 | 0.007 | 0.268 | 3.27E-07 | Undiff-G | CRMP1    |
| DAZAP2   | 2.21E-11 | 0.256759 | 0.154 | 0.541 | 3.31E-07 | Undiff-G | DAZAP2   |
| NIPA2    | 2.24E-11 | -0.59817 | 0.007 | 0.267 | 3.35E-07 | Undiff-G | NIPA2    |
| PIK3R1   | 2.24E-11 | -0.32421 | 0.029 | 0.31  | 3.35E-07 | Undiff-G | PIK3R1   |
| HSD17B12 | 2.28E-11 | 0.114084 | 0.088 | 0.417 | 3.40E-07 | Undiff-G | HSD17B12 |
| CSNK1E   | 2.30E-11 | -0.44217 | 0.029 | 0.309 | 3.44E-07 | Undiff-G | CSNK1E   |
| IFNAR1   | 2.30E-11 | -0.25242 | 0.022 | 0.293 | 3.44E-07 | Undiff-G | IFNAR1   |
| MAPKAP1  | 2.32E-11 | -0.61889 | 0     | 0.253 | 3.47E-07 | Undiff-G | MAPKAP1  |
| PGD      | 2.36E-11 | -0.23562 | 0.022 | 0.296 | 3.53E-07 | Undiff-G | PGD      |
| FARSA    | 2.46E-11 | -0.17002 | 0.037 | 0.323 | 3.67E-07 | Undiff-G | FARSA    |
| NDUFB1   | 2.47E-11 | 0.214149 | 0.176 | 0.598 | 3.70E-07 | Undiff-G | NDUFB1   |
| TAF1D    | 2.49E-11 | -0.28832 | 0.051 | 0.346 | 3.72E-07 | Undiff-G | TAF1D    |
| RBM8A    | 2.49E-11 | 0.319427 | 0.191 | 0.618 | 3.72E-07 | Undiff-G | RBM8A    |
| MPHOSPH8 | 2.50E-11 | 0.138564 | 0.081 | 0.403 | 3.73E-07 | Undiff-G | MPHOSPH8 |
| RNF114   | 2.53E-11 | 0.242003 | 0.088 | 0.419 | 3.79E-07 | Undiff-G | RNF114   |
| NAA20    | 2.55E-11 | 0.314439 | 0.132 | 0.501 | 3.82E-07 | Undiff-G | NAA20    |
| PTPRZ1   | 2.61E-11 | -0.31102 | 0.074 | 0.388 | 3.90E-07 | Undiff-G | PTPRZ1   |
| EEF1B2   | 2.61E-11 | 0.410374 | 0.265 | 0.782 | 3.91E-07 | Undiff-G | EEF1B2   |
| C7orf55  | 2.64E-11 | 0.200838 | 0.096 | 0.427 | 3.94E-07 | Undiff-G | C7orf55  |
| C1orf35  | 2.65E-11 | -0.58468 | 0.007 | 0.266 | 3.96E-07 | Undiff-G | C1orf35  |
| KIF21A   | 2.66E-11 | -0.62666 | 0.029 | 0.305 | 3.98E-07 | Undiff-G | KIF21A   |
| HSPB11   | 2.66E-11 | -0.23637 | 0.044 | 0.332 | 3.98E-07 | Undiff-G | HSPB11   |
| CADM4    | 2.69E-11 | -0.50856 | 0.007 | 0.266 | 4.02E-07 | Undiff-G | CADM4    |
| VPS51    | 2.70E-11 | -0.58131 | 0.007 | 0.266 | 4.03E-07 | Undiff-G | VPS51    |
| PEF1     | 2.71E-11 | -0.2949  | 0.037 | 0.323 | 4.05E-07 | Undiff-G | PEF1     |
| MTIF3    | 2.73E-11 | -0.12388 | 0.051 | 0.349 | 4.08E-07 | Undiff-G | MTIF3    |
| RHOT1    | 2.74E-11 | -0.59406 | 0     | 0.252 | 4.10E-07 | Undiff-G | RHOT1    |
| AIMP1    | 2.78E-11 | 0.147664 | 0.066 | 0.374 | 4.15E-07 | Undiff-G | AIMP1    |
| TDG      | 2.81E-11 | -0.64532 | 0.015 | 0.276 | 4.21E-07 | Undiff-G | TDG      |
| ATF6     | 2.83E-11 | -0.65729 | 0     | 0.251 | 4.22E-07 | Undiff-G | ATF6     |
| LARP7    | 2.84E-11 | -0.13717 | 0.059 | 0.363 | 4.25E-07 | Undiff-G | LARP7    |
| MPLKIP   | 2.89E-11 | 0.240316 | 0.103 | 0.449 | 4.31E-07 | Undiff-G | MPLKIP   |
| GPR183   | 2.91E-11 | -0.77602 | 0.022 | 0.293 | 4.34E-07 | Undiff-G | GPR183   |
| VPS4B    | 2.91E-11 | -0.65664 | 0     | 0.251 | 4.35E-07 | Undiff-G | VPS4B    |
| CLCN3    | 2.94E-11 | -0.60641 | 0     | 0.251 | 4.39E-07 | Undiff-G | CLCN3    |

|          |          |          |       |       |          |          |          |
|----------|----------|----------|-------|-------|----------|----------|----------|
| STARD7   | 2.97E-11 | -0.52218 | 0.037 | 0.32  | 4.43E-07 | Undiff-G | STARD7   |
| VOPPI    | 3.01E-11 | -0.32289 | 0.022 | 0.294 | 4.49E-07 | Undiff-G | VOPPI    |
| OGFR     | 3.02E-11 | -0.46382 | 0.022 | 0.29  | 4.51E-07 | Undiff-G | OGFR     |
| RFC1     | 3.03E-11 | -0.26314 | 0.015 | 0.28  | 4.53E-07 | Undiff-G | RFC1     |
| SAFB     | 3.03E-11 | -0.48241 | 0.022 | 0.292 | 4.53E-07 | Undiff-G | SAFB     |
| SOX11    | 3.05E-11 | -0.80473 | 0.015 | 0.275 | 4.56E-07 | Undiff-G | SOX11    |
| VPS72    | 3.26E-11 | -0.30596 | 0.015 | 0.279 | 4.87E-07 | Undiff-G | VPS72    |
| TLN1     | 3.29E-11 | -0.66349 | 0.022 | 0.288 | 4.92E-07 | Undiff-G | TLN1     |
| ADORA3   | 3.35E-11 | -0.99037 | 0.007 | 0.264 | 5.01E-07 | Undiff-G | ADORA3   |
| RNF149   | 3.53E-11 | -0.68567 | 0.015 | 0.274 | 5.28E-07 | Undiff-G | RNF149   |
| RRAGC    | 3.54E-11 | -0.63491 | 0     | 0.249 | 5.29E-07 | Undiff-G | RRAGC    |
| CAMK2N1  | 3.68E-11 | -0.26001 | 0.037 | 0.32  | 5.50E-07 | Undiff-G | CAMK2N1  |
| RALBP1   | 3.70E-11 | -0.23509 | 0.029 | 0.306 | 5.52E-07 | Undiff-G | RALBP1   |
| GRAMD1A  | 3.71E-11 | -0.40151 | 0.015 | 0.278 | 5.55E-07 | Undiff-G | GRAMD1A  |
| CPSF6    | 3.81E-11 | -0.24782 | 0.044 | 0.333 | 5.69E-07 | Undiff-G | CPSF6    |
| ANP32A   | 3.81E-11 | 0.33458  | 0.096 | 0.432 | 5.70E-07 | Undiff-G | ANP32A   |
| BOD1     | 3.83E-11 | -0.20759 | 0.029 | 0.306 | 5.72E-07 | Undiff-G | BOD1     |
| SCOC     | 3.83E-11 | 0.21355  | 0.088 | 0.418 | 5.73E-07 | Undiff-G | SCOC     |
| SEC13    | 3.84E-11 | 0.201688 | 0.066 | 0.372 | 5.73E-07 | Undiff-G | SEC13    |
| HTATSF1  | 3.89E-11 | -0.30304 | 0.015 | 0.277 | 5.81E-07 | Undiff-G | HTATSF1  |
| TMEM59L  | 3.89E-11 | -0.64204 | 0.007 | 0.261 | 5.82E-07 | Undiff-G | TMEM59L  |
| C22orf39 | 3.93E-11 | -0.59592 | 0.007 | 0.262 | 5.87E-07 | Undiff-G | C22orf39 |
| SEC61B   | 3.98E-11 | 0.386898 | 0.25  | 0.742 | 5.95E-07 | Undiff-G | SEC61B   |
| GNB2L1   | 3.98E-11 | 0.846719 | 0.691 | 0.945 | 5.95E-07 | Undiff-G | GNB2L1   |
| CNIH1    | 4.07E-11 | 0.216425 | 0.066 | 0.376 | 6.08E-07 | Undiff-G | CNIH1    |
| MAP3K13  | 4.26E-11 | 0.189804 | 0.081 | 0.397 | 6.37E-07 | Undiff-G | MAP3K13  |
| MOSPD3   | 4.32E-11 | -0.31636 | 0.022 | 0.29  | 6.46E-07 | Undiff-G | MOSPD3   |
| DRAM2    | 4.36E-11 | -0.34167 | 0.051 | 0.339 | 6.52E-07 | Undiff-G | DRAM2    |
| TP53I13  | 4.44E-11 | -0.59773 | 0     | 0.248 | 6.63E-07 | Undiff-G | TP53I13  |
| TGFB1    | 4.52E-11 | -0.71336 | 0     | 0.247 | 6.76E-07 | Undiff-G | TGFB1    |
| FCGR1A   | 4.63E-11 | -0.94156 | 0.007 | 0.262 | 6.91E-07 | Undiff-G | FCGR1A   |
| GTF2A2   | 4.67E-11 | 0.464283 | 0.132 | 0.503 | 6.97E-07 | Undiff-G | GTF2A2   |
| FAM200B  | 4.68E-11 | 0.199927 | 0.066 | 0.37  | 6.99E-07 | Undiff-G | FAM200B  |
| CNP      | 4.71E-11 | -0.27878 | 0.074 | 0.38  | 7.03E-07 | Undiff-G | CNP      |
| 7-Sep    | 4.71E-11 | 0.222718 | 0.235 | 0.708 | 7.03E-07 | Undiff-G | 7-Sep    |
| GANAB    | 4.75E-11 | -0.38666 | 0.015 | 0.276 | 7.09E-07 | Undiff-G | GANAB    |
| AKIP1    | 4.77E-11 | -0.15676 | 0.022 | 0.29  | 7.12E-07 | Undiff-G | AKIP1    |
| H2AFZ    | 4.78E-11 | 0.361414 | 0.25  | 0.745 | 7.15E-07 | Undiff-G | H2AFZ    |
| EGLN2    | 4.80E-11 | -0.42005 | 0.022 | 0.286 | 7.17E-07 | Undiff-G | EGLN2    |
| CLPP     | 4.84E-11 | 0.190599 | 0.081 | 0.402 | 7.24E-07 | Undiff-G | CLPP     |
| UCP2     | 4.85E-11 | -0.68808 | 0.015 | 0.275 | 7.25E-07 | Undiff-G | UCP2     |
| VDAC1    | 4.85E-11 | 0.451087 | 0.199 | 0.636 | 7.25E-07 | Undiff-G | VDAC1    |
| CTSL     | 4.92E-11 | 0.20312  | 0.147 | 0.528 | 7.35E-07 | Undiff-G | CTSL     |
| GNG7     | 4.96E-11 | -0.33773 | 0.029 | 0.302 | 7.41E-07 | Undiff-G | GNG7     |
| TMED7    | 5.06E-11 | -0.57585 | 0.015 | 0.274 | 7.56E-07 | Undiff-G | TMED7    |
| AKAP13   | 5.06E-11 | -0.25671 | 0.044 | 0.329 | 7.56E-07 | Undiff-G | AKAP13   |
| BRD4     | 5.09E-11 | -0.15957 | 0.044 | 0.33  | 7.60E-07 | Undiff-G | BRD4     |
| TBCA     | 5.10E-11 | 0.375999 | 0.243 | 0.716 | 7.62E-07 | Undiff-G | TBCA     |
| CTSZ     | 5.11E-11 | -0.88962 | 0.007 | 0.259 | 7.63E-07 | Undiff-G | CTSZ     |
| MUM1     | 5.18E-11 | -0.22186 | 0.066 | 0.367 | 7.74E-07 | Undiff-G | MUM1     |
| KEAP1    | 5.21E-11 | -0.42261 | 0.015 | 0.275 | 7.79E-07 | Undiff-G | KEAP1    |

|           |           |           |        |        |           |          |           |
|-----------|-----------|-----------|--------|--------|-----------|----------|-----------|
| PVRL2     | 5. 29E-11 | -0. 63225 | 0      | 0. 246 | 7. 90E-07 | Undiff-G | PVRL2     |
| DDX56     | 5. 29E-11 | -0. 63713 | 0. 007 | 0. 26  | 7. 90E-07 | Undiff-G | DDX56     |
| TMEM33    | 5. 30E-11 | -0. 26453 | 0. 022 | 0. 289 | 7. 93E-07 | Undiff-G | TMEM33    |
| WDR13     | 5. 33E-11 | -0. 37492 | 0. 022 | 0. 289 | 7. 96E-07 | Undiff-G | WDR13     |
| KRAS      | 5. 40E-11 | -0. 60162 | 0. 007 | 0. 257 | 8. 06E-07 | Undiff-G | KRAS      |
| CCZ1      | 5. 45E-11 | -0. 13647 | 0. 059 | 0. 354 | 8. 15E-07 | Undiff-G | CCZ1      |
| NMT1      | 5. 49E-11 | -0. 57521 | 0. 015 | 0. 271 | 8. 20E-07 | Undiff-G | NMT1      |
| ADSL      | 5. 55E-11 | -0. 42873 | 0. 007 | 0. 26  | 8. 30E-07 | Undiff-G | ADSL      |
| UBAC2     | 5. 67E-11 | -0. 29947 | 0. 015 | 0. 274 | 8. 47E-07 | Undiff-G | UBAC2     |
| DEF8      | 5. 72E-11 | -0. 46459 | 0. 015 | 0. 273 | 8. 55E-07 | Undiff-G | DEF8      |
| TMEM259   | 5. 85E-11 | -0. 4557  | 0. 051 | 0. 339 | 8. 74E-07 | Undiff-G | TMEM259   |
| TMEM248   | 5. 88E-11 | -0. 23607 | 0. 029 | 0. 298 | 8. 79E-07 | Undiff-G | TMEM248   |
| CNPY2     | 5. 90E-11 | 0. 327281 | 0. 169 | 0. 573 | 8. 81E-07 | Undiff-G | CNPY2     |
| FOXN3     | 6. 00E-11 | -0. 71632 | 0. 007 | 0. 258 | 8. 97E-07 | Undiff-G | FOXN3     |
| DNAJC2    | 6. 01E-11 | -0. 37312 | 0. 029 | 0. 301 | 8. 98E-07 | Undiff-G | DNAJC2    |
| PLAUR     | 6. 06E-11 | -0. 19754 | 0. 066 | 0. 37  | 9. 05E-07 | Undiff-G | PLAUR     |
| GABARAPL1 | 6. 06E-11 | -0. 31263 | 0. 029 | 0. 301 | 9. 06E-07 | Undiff-G | GABARAPL1 |
| BIRC2     | 6. 13E-11 | -0. 40004 | 0. 022 | 0. 284 | 9. 17E-07 | Undiff-G | BIRC2     |
| TMEM208   | 6. 20E-11 | 0. 33062  | 0. 118 | 0. 471 | 9. 26E-07 | Undiff-G | TMEM208   |
| TPD52L2   | 6. 22E-11 | -0. 32627 | 0. 044 | 0. 327 | 9. 30E-07 | Undiff-G | TPD52L2   |
| TSTA3     | 6. 32E-11 | -0. 47759 | 0. 015 | 0. 272 | 9. 44E-07 | Undiff-G | TSTA3     |
| GRPEL1    | 6. 37E-11 | -0. 39292 | 0. 015 | 0. 273 | 9. 52E-07 | Undiff-G | GRPEL1    |
| EIF4E     | 6. 40E-11 | 0. 372532 | 0. 132 | 0. 493 | 9. 57E-07 | Undiff-G | EIF4E     |
| 7-Mar     | 6. 44E-11 | -0. 60264 | 0. 007 | 0. 258 | 9. 62E-07 | Undiff-G | 7-Mar     |
| TMUB1     | 6. 54E-11 | -0. 57189 | 0. 015 | 0. 269 | 9. 77E-07 | Undiff-G | TMUB1     |
| DNER      | 6. 67E-11 | -0. 61358 | 0. 022 | 0. 283 | 9. 97E-07 | Undiff-G | DNER      |
| TBXAS1    | 6. 68E-11 | -0. 99    | 0      | 0. 244 | 9. 98E-07 | Undiff-G | TBXAS1    |
| RTCA      | 6. 72E-11 | -0. 37615 | 0. 015 | 0. 273 | 1. 00E-06 | Undiff-G | RTCA      |
| RRBP1     | 6. 74E-11 | -0. 4251  | 0. 029 | 0. 3   | 1. 01E-06 | Undiff-G | RRBP1     |
| PSMD14    | 6. 87E-11 | 0. 375997 | 0. 118 | 0. 471 | 1. 03E-06 | Undiff-G | PSMD14    |
| RNF139    | 6. 87E-11 | -0. 50939 | 0. 007 | 0. 258 | 1. 03E-06 | Undiff-G | RNF139    |
| CELF1     | 6. 91E-11 | -0. 26106 | 0. 037 | 0. 311 | 1. 03E-06 | Undiff-G | CELF1     |
| PRDX3     | 6. 95E-11 | 0. 187355 | 0. 118 | 0. 471 | 1. 04E-06 | Undiff-G | PRDX3     |
| NDUFS1    | 7. 00E-11 | -0. 48373 | 0. 007 | 0. 258 | 1. 05E-06 | Undiff-G | NDUFS1    |
| NTMT1     | 7. 04E-11 | -0. 11848 | 0. 044 | 0. 328 | 1. 05E-06 | Undiff-G | NTMT1     |
| UROS      | 7. 09E-11 | -0. 59916 | 0. 007 | 0. 255 | 1. 06E-06 | Undiff-G | UROS      |
| RMDN3     | 7. 15E-11 | -0. 59941 | 0      | 0. 243 | 1. 07E-06 | Undiff-G | RMDN3     |
| CHID1     | 7. 17E-11 | 0. 288929 | 0. 103 | 0. 441 | 1. 07E-06 | Undiff-G | CHID1     |
| DDOST     | 7. 18E-11 | 0. 289655 | 0. 118 | 0. 469 | 1. 07E-06 | Undiff-G | DDOST     |
| BRD7      | 7. 50E-11 | -0. 56513 | 0. 007 | 0. 257 | 1. 12E-06 | Undiff-G | BRD7      |
| ISCA1     | 7. 60E-11 | -0. 16179 | 0. 029 | 0. 3   | 1. 14E-06 | Undiff-G | ISCA1     |
| IL6ST     | 7. 61E-11 | -0. 595   | 0. 007 | 0. 257 | 1. 14E-06 | Undiff-G | IL6ST     |
| PDCD10    | 7. 62E-11 | -0. 14681 | 0. 022 | 0. 286 | 1. 14E-06 | Undiff-G | PDCD10    |
| GOLGB1    | 7. 65E-11 | -0. 65043 | 0      | 0. 243 | 1. 14E-06 | Undiff-G | GOLGB1    |
| ZFR       | 7. 71E-11 | -0. 23977 | 0. 037 | 0. 309 | 1. 15E-06 | Undiff-G | ZFR       |
| PEX2      | 7. 75E-11 | -0. 38893 | 0. 015 | 0. 271 | 1. 16E-06 | Undiff-G | PEX2      |
| FAM133B   | 7. 82E-11 | 0. 28055  | 0. 125 | 0. 475 | 1. 17E-06 | Undiff-G | FAM133B   |
| SEC14L1   | 7. 83E-11 | -0. 42518 | 0. 029 | 0. 295 | 1. 17E-06 | Undiff-G | SEC14L1   |
| EIF4A1    | 7. 93E-11 | 0. 23672  | 0. 309 | 0. 868 | 1. 18E-06 | Undiff-G | EIF4A1    |
| DPYSL3    | 7. 93E-11 | -0. 41668 | 0. 044 | 0. 325 | 1. 18E-06 | Undiff-G | DPYSL3    |
| GLTP      | 8. 00E-11 | -0. 16854 | 0. 015 | 0. 271 | 1. 20E-06 | Undiff-G | GLTP      |

|          |           |           |        |        |           |          |          |
|----------|-----------|-----------|--------|--------|-----------|----------|----------|
| TM7SF3   | 8. 01E-11 | -0. 59563 | 0. 007 | 0. 254 | 1. 20E-06 | Undiff-G | TM7SF3   |
| PSMD1    | 8. 14E-11 | -0. 23064 | 0. 044 | 0. 326 | 1. 22E-06 | Undiff-G | PSMD1    |
| GORASP2  | 8. 20E-11 | -0. 13324 | 0. 029 | 0. 296 | 1. 23E-06 | Undiff-G | GORASP2  |
| ACIN1    | 8. 24E-11 | -0. 31863 | 0. 015 | 0. 268 | 1. 23E-06 | Undiff-G | ACIN1    |
| QTRT1    | 8. 34E-11 | -0. 23486 | 0. 051 | 0. 334 | 1. 25E-06 | Undiff-G | QTRT1    |
| MED30    | 8. 34E-11 | -0. 48164 | 0. 007 | 0. 256 | 1. 25E-06 | Undiff-G | MED30    |
| SCG3     | 8. 52E-11 | -0. 73552 | 0. 015 | 0. 269 | 1. 27E-06 | Undiff-G | SCG3     |
| ALG5     | 8. 52E-11 | 0. 190844 | 0. 066 | 0. 369 | 1. 27E-06 | Undiff-G | ALG5     |
| NIPBL    | 8. 59E-11 | -0. 59004 | 0      | 0. 242 | 1. 28E-06 | Undiff-G | NIPBL    |
| SPI1     | 8. 59E-11 | -0. 92295 | 0      | 0. 242 | 1. 28E-06 | Undiff-G | SPI1     |
| DHX29    | 8. 63E-11 | 0. 181621 | 0. 037 | 0. 313 | 1. 29E-06 | Undiff-G | DHX29    |
| SPOP     | 8. 77E-11 | -0. 16836 | 0. 037 | 0. 312 | 1. 31E-06 | Undiff-G | SPOP     |
| YKT6     | 8. 84E-11 | -0. 58951 | 0      | 0. 241 | 1. 32E-06 | Undiff-G | YKT6     |
| RNASEH2B | 8. 84E-11 | -0. 63243 | 0      | 0. 241 | 1. 32E-06 | Undiff-G | RNASEH2B |
| PLGRKT   | 8. 89E-11 | -0. 44321 | 0. 015 | 0. 27  | 1. 33E-06 | Undiff-G | PLGRKT   |
| PJA2     | 8. 91E-11 | -0. 25091 | 0. 051 | 0. 338 | 1. 33E-06 | Undiff-G | PJA2     |
| ELP5     | 8. 95E-11 | -0. 30405 | 0. 015 | 0. 27  | 1. 34E-06 | Undiff-G | ELP5     |
| RABEP1   | 9. 05E-11 | -0. 51695 | 0. 007 | 0. 256 | 1. 35E-06 | Undiff-G | RABEP1   |
| RNF10    | 9. 05E-11 | -0. 1459  | 0. 051 | 0. 336 | 1. 35E-06 | Undiff-G | RNF10    |
| TMEM203  | 9. 13E-11 | -0. 53989 | 0. 007 | 0. 255 | 1. 36E-06 | Undiff-G | TMEM203  |
| GPR34    | 9. 17E-11 | -0. 8097  | 0. 015 | 0. 27  | 1. 37E-06 | Undiff-G | GPR34    |
| DCK      | 9. 30E-11 | -0. 59529 | 0. 015 | 0. 269 | 1. 39E-06 | Undiff-G | DCK      |
| WAC      | 9. 35E-11 | -0. 43561 | 0. 015 | 0. 267 | 1. 40E-06 | Undiff-G | WAC      |
| KLHL7    | 9. 46E-11 | -0. 47987 | 0. 022 | 0. 282 | 1. 41E-06 | Undiff-G | KLHL7    |
| CD83     | 9. 47E-11 | -0. 43831 | 0. 029 | 0. 298 | 1. 42E-06 | Undiff-G | CD83     |
| GPSM3    | 9. 51E-11 | -0. 96508 | 0. 015 | 0. 265 | 1. 42E-06 | Undiff-G | GPSM3    |
| DKC1     | 9. 52E-11 | -0. 5788  | 0. 015 | 0. 268 | 1. 42E-06 | Undiff-G | DKC1     |
| EPRS     | 9. 66E-11 | -0. 36645 | 0. 029 | 0. 297 | 1. 44E-06 | Undiff-G | EPRS     |
| RB1CC1   | 9. 81E-11 | -0. 51868 | 0. 022 | 0. 28  | 1. 47E-06 | Undiff-G | RB1CC1   |
| VAMP3    | 9. 85E-11 | -0. 21604 | 0. 059 | 0. 352 | 1. 47E-06 | Undiff-G | VAMP3    |
| HES6     | 9. 85E-11 | -0. 69166 | 0. 029 | 0. 289 | 1. 47E-06 | Undiff-G | HES6     |
| ABRACL   | 9. 88E-11 | -0. 18665 | 0. 037 | 0. 307 | 1. 48E-06 | Undiff-G | ABRACL   |
| SLC38A2  | 9. 94E-11 | -0. 46112 | 0. 022 | 0. 282 | 1. 49E-06 | Undiff-G | SLC38A2  |
| TWF1     | 9. 96E-11 | -0. 47542 | 0. 015 | 0. 266 | 1. 49E-06 | Undiff-G | TWF1     |
| DDX1     | 1. 00E-10 | 0. 11598  | 0. 066 | 0. 363 | 1. 49E-06 | Undiff-G | DDX1     |
| ACBD6    | 1. 01E-10 | -0. 26611 | 0. 022 | 0. 28  | 1. 51E-06 | Undiff-G | ACBD6    |
| AP2A2    | 1. 02E-10 | -0. 57858 | 0. 007 | 0. 254 | 1. 52E-06 | Undiff-G | AP2A2    |
| ITPA     | 1. 03E-10 | 0. 137991 | 0. 088 | 0. 408 | 1. 54E-06 | Undiff-G | ITPA     |
| TRAM1    | 1. 04E-10 | 0. 360642 | 0. 103 | 0. 437 | 1. 56E-06 | Undiff-G | TRAM1    |
| PWP1     | 1. 04E-10 | -0. 4057  | 0. 037 | 0. 306 | 1. 56E-06 | Undiff-G | PWP1     |
| TOLLIP   | 1. 05E-10 | -0. 40893 | 0. 015 | 0. 269 | 1. 56E-06 | Undiff-G | TOLLIP   |
| RASSF4   | 1. 06E-10 | -0. 21877 | 0. 051 | 0. 332 | 1. 58E-06 | Undiff-G | RASSF4   |
| PRPF38A  | 1. 06E-10 | -0. 3409  | 0. 029 | 0. 293 | 1. 59E-06 | Undiff-G | PRPF38A  |
| MAP4     | 1. 07E-10 | -0. 13514 | 0. 051 | 0. 338 | 1. 59E-06 | Undiff-G | MAP4     |
| SHKBP1   | 1. 07E-10 | -0. 62687 | 0      | 0. 24  | 1. 60E-06 | Undiff-G | SHKBP1   |
| TMEM50B  | 1. 10E-10 | -0. 26594 | 0. 037 | 0. 306 | 1. 64E-06 | Undiff-G | TMEM50B  |
| CDKN1A   | 1. 12E-10 | -0. 37865 | 0. 037 | 0. 31  | 1. 67E-06 | Undiff-G | CDKN1A   |
| CAST     | 1. 12E-10 | -0. 23064 | 0. 044 | 0. 321 | 1. 68E-06 | Undiff-G | CAST     |
| CRTAP    | 1. 12E-10 | -0. 65233 | 0      | 0. 239 | 1. 68E-06 | Undiff-G | CRTAP    |
| TRPC4AP  | 1. 15E-10 | -0. 52839 | 0. 007 | 0. 253 | 1. 72E-06 | Undiff-G | TRPC4AP  |
| RAB20    | 1. 16E-10 | -0. 86218 | 0      | 0. 239 | 1. 73E-06 | Undiff-G | RAB20    |

|         |           |           |        |        |           |          |         |
|---------|-----------|-----------|--------|--------|-----------|----------|---------|
| SMAP2   | 1. 17E-10 | -0. 74984 | 0      | 0. 239 | 1. 75E-06 | Undiff-G | SMAP2   |
| IMP4    | 1. 18E-10 | 0. 223016 | 0. 066 | 0. 362 | 1. 77E-06 | Undiff-G | IMP4    |
| GPATCH8 | 1. 18E-10 | -0. 47744 | 0. 037 | 0. 307 | 1. 77E-06 | Undiff-G | GPATCH8 |
| HDAC3   | 1. 19E-10 | -0. 47167 | 0. 015 | 0. 266 | 1. 78E-06 | Undiff-G | HDAC3   |
| PPP2R3C | 1. 19E-10 | -0. 28162 | 0. 037 | 0. 309 | 1. 78E-06 | Undiff-G | PPP2R3C |
| HMGB3   | 1. 20E-10 | -0. 26653 | 0. 022 | 0. 282 | 1. 79E-06 | Undiff-G | HMGB3   |
| OLR1    | 1. 21E-10 | -0. 89634 | 0. 007 | 0. 253 | 1. 80E-06 | Undiff-G | OLR1    |
| SZRD1   | 1. 21E-10 | -0. 2148  | 0. 015 | 0. 267 | 1. 81E-06 | Undiff-G | SZRD1   |
| EPC1    | 1. 22E-10 | -0. 33615 | 0. 029 | 0. 294 | 1. 82E-06 | Undiff-G | EPC1    |
| NBPF1   | 1. 23E-10 | -0. 56065 | 0      | 0. 238 | 1. 83E-06 | Undiff-G | NBPF1   |
| DAD1    | 1. 24E-10 | 0. 402909 | 0. 243 | 0. 726 | 1. 85E-06 | Undiff-G | DAD1    |
| RABGGTB | 1. 25E-10 | -0. 34615 | 0. 029 | 0. 294 | 1. 87E-06 | Undiff-G | RABGGTB |
| COMMD2  | 1. 25E-10 | -0. 23021 | 0. 029 | 0. 292 | 1. 87E-06 | Undiff-G | COMMD2  |
| FDFT1   | 1. 28E-10 | -0. 12166 | 0. 037 | 0. 309 | 1. 91E-06 | Undiff-G | FDFT1   |
| TRIM28  | 1. 28E-10 | -0. 53832 | 0. 007 | 0. 252 | 1. 91E-06 | Undiff-G | TRIM28  |
| ABHD17A | 1. 29E-10 | -0. 57465 | 0      | 0. 238 | 1. 92E-06 | Undiff-G | ABHD17A |
| MBD4    | 1. 31E-10 | -0. 51277 | 0. 015 | 0. 266 | 1. 96E-06 | Undiff-G | MBD4    |
| SPSB3   | 1. 31E-10 | -0. 37401 | 0. 037 | 0. 307 | 1. 96E-06 | Undiff-G | SPSB3   |
| CRYAB   | 1. 35E-10 | 1. 352686 | 0. 551 | 0. 499 | 2. 01E-06 | Undiff-G | CRYAB   |
| USP22   | 1. 37E-10 | -0. 21061 | 0. 044 | 0. 322 | 2. 04E-06 | Undiff-G | USP22   |
| SHISA4  | 1. 37E-10 | -0. 62852 | 0. 007 | 0. 249 | 2. 05E-06 | Undiff-G | SHISA4  |
| IL13RA1 | 1. 38E-10 | -0. 56695 | 0. 007 | 0. 252 | 2. 06E-06 | Undiff-G | IL13RA1 |
| EXOSC8  | 1. 41E-10 | -0. 38602 | 0. 029 | 0. 292 | 2. 11E-06 | Undiff-G | EXOSC8  |
| LIMD2   | 1. 41E-10 | -0. 57812 | 0. 007 | 0. 252 | 2. 11E-06 | Undiff-G | LIMD2   |
| EIF2AK1 | 1. 42E-10 | -0. 19732 | 0. 051 | 0. 335 | 2. 12E-06 | Undiff-G | EIF2AK1 |
| MICU2   | 1. 42E-10 | -0. 59695 | 0      | 0. 237 | 2. 12E-06 | Undiff-G | MICU2   |
| CYCS    | 1. 44E-10 | 0. 408949 | 0. 25  | 0. 739 | 2. 16E-06 | Undiff-G | CYCS    |
| COPS7A  | 1. 44E-10 | -0. 25684 | 0. 022 | 0. 279 | 2. 16E-06 | Undiff-G | COPS7A  |
| PLD3    | 1. 45E-10 | 0. 326206 | 0. 154 | 0. 533 | 2. 16E-06 | Undiff-G | PLD3    |
| MCUR1   | 1. 45E-10 | -0. 53325 | 0. 015 | 0. 265 | 2. 17E-06 | Undiff-G | MCUR1   |
| STK4    | 1. 46E-10 | -0. 53084 | 0. 029 | 0. 29  | 2. 18E-06 | Undiff-G | STK4    |
| RSRC1   | 1. 46E-10 | -0. 17908 | 0. 037 | 0. 308 | 2. 19E-06 | Undiff-G | RSRC1   |
| DAP     | 1. 47E-10 | -0. 33028 | 0. 022 | 0. 279 | 2. 20E-06 | Undiff-G | DAP     |
| TMX4    | 1. 47E-10 | -0. 56822 | 0. 007 | 0. 248 | 2. 20E-06 | Undiff-G | TMX4    |
| NKTR    | 1. 51E-10 | -0. 3778  | 0. 066 | 0. 36  | 2. 25E-06 | Undiff-G | NKTR    |
| KARS    | 1. 56E-10 | 0. 196846 | 0. 074 | 0. 377 | 2. 33E-06 | Undiff-G | KARS    |
| LSM12   | 1. 57E-10 | -0. 43093 | 0. 015 | 0. 262 | 2. 34E-06 | Undiff-G | LSM12   |
| ADPRHL2 | 1. 58E-10 | -0. 52911 | 0. 015 | 0. 264 | 2. 36E-06 | Undiff-G | ADPRHL2 |
| ACP1    | 1. 58E-10 | 0. 361652 | 0. 14  | 0. 503 | 2. 37E-06 | Undiff-G | ACP1    |
| MCFD2   | 1. 63E-10 | -0. 37191 | 0. 029 | 0. 289 | 2. 43E-06 | Undiff-G | MCFD2   |
| TMC01   | 1. 64E-10 | 0. 429268 | 0. 176 | 0. 58  | 2. 45E-06 | Undiff-G | TMC01   |
| ERGIC1  | 1. 68E-10 | -0. 33013 | 0. 029 | 0. 292 | 2. 50E-06 | Undiff-G | ERGIC1  |
| FBXW5   | 1. 68E-10 | -0. 37856 | 0. 029 | 0. 291 | 2. 52E-06 | Undiff-G | FBXW5   |
| RABL6   | 1. 71E-10 | -0. 53148 | 0. 007 | 0. 25  | 2. 56E-06 | Undiff-G | RABL6   |
| 2-Mar   | 1. 73E-10 | -0. 60578 | 0      | 0. 235 | 2. 59E-06 | Undiff-G | 2-Mar   |
| A1BG    | 1. 74E-10 | -0. 17789 | 0. 037 | 0. 302 | 2. 60E-06 | Undiff-G | A1BG    |
| BRD3    | 1. 75E-10 | -0. 36625 | 0. 022 | 0. 277 | 2. 61E-06 | Undiff-G | BRD3    |
| TTYH3   | 1. 75E-10 | -0. 43454 | 0. 007 | 0. 25  | 2. 61E-06 | Undiff-G | TTYH3   |
| UBXN6   | 1. 82E-10 | -0. 30178 | 0. 037 | 0. 302 | 2. 72E-06 | Undiff-G | UBXN6   |
| ERICH1  | 1. 82E-10 | -0. 6133  | 0. 022 | 0. 275 | 2. 72E-06 | Undiff-G | ERICH1  |
| UBALD2  | 1. 91E-10 | -0. 45646 | 0. 015 | 0. 262 | 2. 85E-06 | Undiff-G | UBALD2  |

|          |          |          |       |       |          |          |          |
|----------|----------|----------|-------|-------|----------|----------|----------|
| DDX49    | 1.91E-10 | -0.4142  | 0.022 | 0.277 | 2.85E-06 | Undiff-G | DDX49    |
| TRABD    | 1.92E-10 | -0.59983 | 0.015 | 0.262 | 2.86E-06 | Undiff-G | TRABD    |
| USP8     | 1.93E-10 | -0.43003 | 0.015 | 0.262 | 2.89E-06 | Undiff-G | USP8     |
| DAZAP1   | 1.94E-10 | -0.58914 | 0     | 0.234 | 2.90E-06 | Undiff-G | DAZAP1   |
| CLEC11A  | 1.94E-10 | -0.59024 | 0     | 0.234 | 2.90E-06 | Undiff-G | CLEC11A  |
| NTPCR    | 1.96E-10 | -0.17103 | 0.022 | 0.276 | 2.93E-06 | Undiff-G | NTPCR    |
| C19orf25 | 1.98E-10 | -0.3794  | 0.037 | 0.302 | 2.96E-06 | Undiff-G | C19orf25 |
| TPT1     | 1.98E-10 | 0.835507 | 0.691 | 0.956 | 2.96E-06 | Undiff-G | TPT1     |
| BCKDK    | 1.99E-10 | -0.10334 | 0.044 | 0.317 | 2.97E-06 | Undiff-G | BCKDK    |
| SDHAF2   | 2.00E-10 | -0.22366 | 0.022 | 0.274 | 2.99E-06 | Undiff-G | SDHAF2   |
| CHMP1A   | 2.08E-10 | -0.16482 | 0.022 | 0.276 | 3.11E-06 | Undiff-G | CHMP1A   |
| PSMC1    | 2.09E-10 | 0.331745 | 0.081 | 0.388 | 3.13E-06 | Undiff-G | PSMC1    |
| SAE1     | 2.12E-10 | -0.30544 | 0.022 | 0.276 | 3.17E-06 | Undiff-G | SAE1     |
| TMEM87A  | 2.14E-10 | -0.14316 | 0.022 | 0.276 | 3.21E-06 | Undiff-G | TMEM87A  |
| SNX27    | 2.20E-10 | -0.55661 | 0.007 | 0.247 | 3.29E-06 | Undiff-G | SNX27    |
| ZNF106   | 2.22E-10 | -0.56333 | 0.015 | 0.26  | 3.32E-06 | Undiff-G | ZNF106   |
| ARL8A    | 2.22E-10 | -0.28653 | 0.022 | 0.275 | 3.32E-06 | Undiff-G | ARL8A    |
| TRAPPC6A | 2.24E-10 | -0.46928 | 0.015 | 0.262 | 3.35E-06 | Undiff-G | TRAPPC6A |
| ARID1A   | 2.25E-10 | -0.58542 | 0.007 | 0.245 | 3.36E-06 | Undiff-G | ARID1A   |
| ZFAND3   | 2.30E-10 | -0.2257  | 0.022 | 0.276 | 3.44E-06 | Undiff-G | ZFAND3   |
| VDAC3    | 2.34E-10 | 0.388902 | 0.125 | 0.468 | 3.50E-06 | Undiff-G | VDAC3    |
| NOC2L    | 2.35E-10 | -0.28592 | 0.044 | 0.316 | 3.51E-06 | Undiff-G | NOC2L    |
| TRAP1    | 2.37E-10 | -0.49156 | 0.015 | 0.261 | 3.54E-06 | Undiff-G | TRAP1    |
| SIRPA    | 2.37E-10 | -0.63997 | 0.007 | 0.246 | 3.54E-06 | Undiff-G | SIRPA    |
| USP1     | 2.40E-10 | -0.24326 | 0.015 | 0.261 | 3.59E-06 | Undiff-G | USP1     |
| MSRB2    | 2.41E-10 | -0.52545 | 0.015 | 0.258 | 3.60E-06 | Undiff-G | MSRB2    |
| CLSTN1   | 2.42E-10 | -0.38446 | 0.029 | 0.285 | 3.62E-06 | Undiff-G | CLSTN1   |
| POLR2L   | 2.45E-10 | 0.397482 | 0.228 | 0.693 | 3.67E-06 | Undiff-G | POLR2L   |
| CPNE1    | 2.46E-10 | -0.21542 | 0.059 | 0.342 | 3.68E-06 | Undiff-G | CPNE1    |
| GPR137B  | 2.49E-10 | -0.59801 | 0     | 0.232 | 3.71E-06 | Undiff-G | GPR137B  |
| UBE2G1   | 2.53E-10 | -0.40597 | 0.015 | 0.261 | 3.78E-06 | Undiff-G | UBE2G1   |
| SEC62    | 2.55E-10 | 0.428267 | 0.235 | 0.696 | 3.81E-06 | Undiff-G | SEC62    |
| LRPAP1   | 2.57E-10 | 0.298262 | 0.169 | 0.551 | 3.84E-06 | Undiff-G | LRPAP1   |
| RNASEH1  | 2.63E-10 | -0.58028 | 0     | 0.232 | 3.93E-06 | Undiff-G | RNASEH1  |
| CHCHD3   | 2.67E-10 | 0.247583 | 0.074 | 0.372 | 3.99E-06 | Undiff-G | CHCHD3   |
| DHPS     | 2.68E-10 | 0.355231 | 0.118 | 0.451 | 4.00E-06 | Undiff-G | DHPS     |
| PIGT     | 2.68E-10 | 0.247442 | 0.088 | 0.401 | 4.01E-06 | Undiff-G | PIGT     |
| FUCA2    | 2.70E-10 | -0.58078 | 0.007 | 0.246 | 4.03E-06 | Undiff-G | FUCA2    |
| FAM204A  | 2.76E-10 | -0.41503 | 0.015 | 0.26  | 4.12E-06 | Undiff-G | FAM204A  |
| TAX1BP3  | 2.76E-10 | 0.245299 | 0.081 | 0.385 | 4.13E-06 | Undiff-G | TAX1BP3  |
| KPNA3    | 2.82E-10 | -0.31224 | 0.015 | 0.258 | 4.21E-06 | Undiff-G | KPNA3    |
| FOSB     | 2.84E-10 | -0.15947 | 0.088 | 0.395 | 4.24E-06 | Undiff-G | FOSB     |
| PLEKHJ1  | 2.87E-10 | 0.120809 | 0.074 | 0.37  | 4.28E-06 | Undiff-G | PLEKHJ1  |
| TFPT     | 2.88E-10 | -0.1819  | 0.044 | 0.311 | 4.31E-06 | Undiff-G | TFPT     |
| ZDHHC4   | 2.95E-10 | 0.343758 | 0.066 | 0.358 | 4.41E-06 | Undiff-G | ZDHHC4   |
| CGGBP1   | 3.04E-10 | -0.1985  | 0.022 | 0.272 | 4.55E-06 | Undiff-G | CGGBP1   |
| ROGDI    | 3.18E-10 | -0.60399 | 0     | 0.23  | 4.75E-06 | Undiff-G | ROGDI    |
| PARL     | 3.19E-10 | 0.16777  | 0.059 | 0.341 | 4.77E-06 | Undiff-G | PARL     |
| ANAPC13  | 3.21E-10 | 0.212464 | 0.066 | 0.357 | 4.80E-06 | Undiff-G | ANAPC13  |
| PIGX     | 3.21E-10 | -0.3969  | 0.015 | 0.256 | 4.80E-06 | Undiff-G | PIGX     |
| MZT1     | 3.23E-10 | -0.49461 | 0.015 | 0.258 | 4.82E-06 | Undiff-G | MZT1     |

|            |          |          |       |       |          |          |            |
|------------|----------|----------|-------|-------|----------|----------|------------|
| IER3       | 3.23E-10 | -0.8241  | 0.007 | 0.244 | 4.83E-06 | Undiff-G | IER3       |
| B3GAT3     | 3.30E-10 | 0.214099 | 0.081 | 0.382 | 4.93E-06 | Undiff-G | B3GAT3     |
| SYF2       | 3.33E-10 | 0.376934 | 0.154 | 0.522 | 4.98E-06 | Undiff-G | SYF2       |
| RB1        | 3.44E-10 | -0.39774 | 0.044 | 0.308 | 5.14E-06 | Undiff-G | RB1        |
| SMARCC1    | 3.44E-10 | -0.5029  | 0.015 | 0.257 | 5.14E-06 | Undiff-G | SMARCC1    |
| CUX1       | 3.45E-10 | -0.54161 | 0.007 | 0.243 | 5.16E-06 | Undiff-G | CUX1       |
| GTF2F1     | 3.46E-10 | -0.16591 | 0.029 | 0.286 | 5.17E-06 | Undiff-G | GTF2F1     |
| EIF3I      | 3.52E-10 | 0.413064 | 0.191 | 0.607 | 5.26E-06 | Undiff-G | EIF3I      |
| C3AR1      | 3.56E-10 | -0.97026 | 0.007 | 0.241 | 5.33E-06 | Undiff-G | C3AR1      |
| RBM27      | 3.66E-10 | -0.53135 | 0     | 0.229 | 5.47E-06 | Undiff-G | RBM27      |
| RUFY3      | 3.77E-10 | -0.35544 | 0.044 | 0.308 | 5.63E-06 | Undiff-G | RUFY3      |
| SREK1IP1   | 3.86E-10 | 0.177392 | 0.059 | 0.341 | 5.77E-06 | Undiff-G | SREK1IP1   |
| ANP32E     | 4.01E-10 | -0.18293 | 0.022 | 0.27  | 6.00E-06 | Undiff-G | ANP32E     |
| SECISBP2   | 4.01E-10 | -0.30988 | 0.015 | 0.256 | 6.00E-06 | Undiff-G | SECISBP2   |
| SMARCC2    | 4.02E-10 | -0.57397 | 0.022 | 0.266 | 6.00E-06 | Undiff-G | SMARCC2    |
| CISD3      | 4.04E-10 | -0.33509 | 0.015 | 0.256 | 6.04E-06 | Undiff-G | CISD3      |
| NR4A2      | 4.06E-10 | -0.80435 | 0.015 | 0.254 | 6.06E-06 | Undiff-G | NR4A2      |
| CHD7       | 4.14E-10 | -0.53527 | 0.037 | 0.292 | 6.18E-06 | Undiff-G | CHD7       |
| UTP18      | 4.19E-10 | -0.46496 | 0.022 | 0.267 | 6.26E-06 | Undiff-G | UTP18      |
| METRN      | 4.20E-10 | -0.35194 | 0.037 | 0.297 | 6.27E-06 | Undiff-G | METRN      |
| GPN3       | 4.22E-10 | -0.32057 | 0.015 | 0.256 | 6.30E-06 | Undiff-G | GPN3       |
| ARF3       | 4.33E-10 | 0.282926 | 0.081 | 0.381 | 6.47E-06 | Undiff-G | ARF3       |
| MAZ        | 4.33E-10 | -0.44529 | 0.015 | 0.253 | 6.48E-06 | Undiff-G | MAZ        |
| PARK7      | 4.37E-10 | 0.392728 | 0.272 | 0.771 | 6.54E-06 | Undiff-G | PARK7      |
| CHD1       | 4.38E-10 | -0.3868  | 0.037 | 0.296 | 6.54E-06 | Undiff-G | CHD1       |
| ANAPC11    | 4.39E-10 | 0.259283 | 0.257 | 0.732 | 6.56E-06 | Undiff-G | ANAPC11    |
| KIAA1033   | 4.40E-10 | -0.52725 | 0.007 | 0.241 | 6.58E-06 | Undiff-G | KIAA1033   |
| NQO2       | 4.44E-10 | -0.30009 | 0.015 | 0.256 | 6.63E-06 | Undiff-G | NQO2       |
| RAB32      | 4.45E-10 | -0.535   | 0.007 | 0.241 | 6.64E-06 | Undiff-G | RAB32      |
| BSDC1      | 4.50E-10 | -0.2124  | 0.037 | 0.293 | 6.72E-06 | Undiff-G | BSDC1      |
| LARP1      | 4.58E-10 | -0.3712  | 0.015 | 0.255 | 6.85E-06 | Undiff-G | LARP1      |
| EGFR       | 4.61E-10 | -0.4417  | 0.044 | 0.303 | 6.89E-06 | Undiff-G | EGFR       |
| C12orf76   | 4.63E-10 | -0.18158 | 0.022 | 0.269 | 6.92E-06 | Undiff-G | C12orf76   |
| BNIP2      | 4.68E-10 | -0.57408 | 0.022 | 0.267 | 7.00E-06 | Undiff-G | BNIP2      |
| PROSC      | 4.70E-10 | -0.42969 | 0.015 | 0.255 | 7.02E-06 | Undiff-G | PROSC      |
| MOCS2      | 4.70E-10 | -0.3993  | 0.022 | 0.266 | 7.03E-06 | Undiff-G | MOCS2      |
| EXOSC4     | 4.72E-10 | -0.46042 | 0.015 | 0.254 | 7.05E-06 | Undiff-G | EXOSC4     |
| LPAR6      | 4.81E-10 | -0.74483 | 0.007 | 0.24  | 7.19E-06 | Undiff-G | LPAR6      |
| HSP90AB1   | 4.95E-10 | 0.191296 | 0.294 | 0.827 | 7.39E-06 | Undiff-G | HSP90AB1   |
| YAF2       | 4.97E-10 | -0.10771 | 0.066 | 0.35  | 7.42E-06 | Undiff-G | YAF2       |
| SLC30A9    | 5.02E-10 | -0.17816 | 0.015 | 0.254 | 7.51E-06 | Undiff-G | SLC30A9    |
| ZNF638     | 5.02E-10 | -0.44741 | 0.015 | 0.254 | 7.51E-06 | Undiff-G | ZNF638     |
| ZNF292     | 5.04E-10 | -0.53303 | 0.022 | 0.267 | 7.53E-06 | Undiff-G | ZNF292     |
| PXMP2      | 5.04E-10 | -0.5243  | 0     | 0.226 | 7.53E-06 | Undiff-G | PXMP2      |
| COX6C      | 5.04E-10 | 0.198312 | 0.301 | 0.837 | 7.54E-06 | Undiff-G | COX6C      |
| FYB        | 5.14E-10 | -0.91303 | 0     | 0.225 | 7.68E-06 | Undiff-G | FYB        |
| DR1        | 5.17E-10 | -0.55943 | 0.007 | 0.237 | 7.73E-06 | Undiff-G | DR1        |
| KATNBL1    | 5.24E-10 | -0.42092 | 0.015 | 0.254 | 7.83E-06 | Undiff-G | KATNBL1    |
| IMPDH2     | 5.24E-10 | 0.24319  | 0.103 | 0.42  | 7.83E-06 | Undiff-G | IMPDH2     |
| AC010642.1 | 5.28E-10 | -0.55574 | 0     | 0.225 | 7.90E-06 | Undiff-G | AC010642.1 |
| TMEM128    | 5.32E-10 | -0.25877 | 0.037 | 0.294 | 7.94E-06 | Undiff-G | TMEM128    |



|           |          |          |       |       |          |          |                 |
|-----------|----------|----------|-------|-------|----------|----------|-----------------|
| FNBP1     | 5.33E-10 | -0.56236 | 0.022 | 0.266 | 7.97E-06 | Undiff-G | FNBP1           |
| ZNF32     | 5.33E-10 | -0.55831 | 0     | 0.225 | 7.97E-06 | Undiff-G | ZNF32           |
| C14orf2   | 5.33E-10 | 0.383718 | 0.221 | 0.659 | 7.97E-06 | Undiff-G | C14orf2         |
| KAT5      | 5.34E-10 | -0.3557  | 0.015 | 0.254 | 7.98E-06 | Undiff-G | KAT5            |
| AAK1      | 5.42E-10 | -0.53013 | 0.029 | 0.28  | 8.09E-06 | Undiff-G | AAK1            |
| RANBP3    | 5.43E-10 | -0.54316 | 0     | 0.225 | 8.12E-06 | Undiff-G | RANBP3          |
| DMAP1     | 5.46E-10 | -0.16805 | 0.015 | 0.254 | 8.16E-06 | Undiff-G | DMAP1           |
| TMED5     | 5.49E-10 | 0.171149 | 0.044 | 0.309 | 8.20E-06 | Undiff-G | TMED5           |
| ASPSCR1   | 5.49E-10 | -0.52478 | 0.007 | 0.239 | 8.20E-06 | Undiff-G | ASPSCR1         |
| ANXA5     | 5.49E-10 | 0.255186 | 0.265 | 0.732 | 8.21E-06 | Undiff-G | ANXA5           |
| SMPD1     | 5.60E-10 | -0.33668 | 0.007 | 0.239 | 8.37E-06 | Undiff-G | SMPD1           |
| CD276     | 5.64E-10 | -0.56091 | 0     | 0.225 | 8.43E-06 | Undiff-G | CD276           |
| PGM1      | 5.66E-10 | -0.20927 | 0.015 | 0.253 | 8.46E-06 | Undiff-G | PGM1            |
| TRIB2     | 5.68E-10 | -0.59582 | 0.022 | 0.266 | 8.49E-06 | Undiff-G | TRIB2           |
| MLST8     | 5.76E-10 | -0.3433  | 0.007 | 0.239 | 8.61E-06 | Undiff-G | MLST8           |
| KCTD12    | 5.82E-10 | -0.46705 | 0.007 | 0.239 | 8.69E-06 | Undiff-G | KCTD12          |
| ANKRD11   | 5.83E-10 | -0.17493 | 0.051 | 0.319 | 8.71E-06 | Undiff-G | ANKRD11         |
| COPB2     | 5.89E-10 | -0.11437 | 0.044 | 0.309 | 8.80E-06 | Undiff-G | COPB2           |
| MARK3     | 5.93E-10 | -0.47247 | 0.037 | 0.29  | 8.86E-06 | Undiff-G | MARK3           |
| PNN       | 5.93E-10 | 0.118367 | 0.096 | 0.405 | 8.86E-06 | Undiff-G | PNN             |
| TNP01     | 5.96E-10 | -0.21516 | 0.029 | 0.281 | 8.90E-06 | Undiff-G | TNP01           |
| IL1B      | 5.97E-10 | -0.94322 | 0     | 0.224 | 8.92E-06 | Undiff-G | IL1B            |
| SH3GL1    | 6.00E-10 | -0.31176 | 0.015 | 0.253 | 8.97E-06 | Undiff-G | SH3GL1          |
| ERV3-1    | 6.05E-10 | -0.62194 | 0.022 | 0.263 | 9.04E-06 | Undiff-G | ERV3-1          |
| WDR1      | 6.05E-10 | 0.21308  | 0.103 | 0.418 | 9.05E-06 | Undiff-G | WDR1            |
| DARS      | 6.15E-10 | 0.243814 | 0.096 | 0.406 | 9.19E-06 | Undiff-G | DARS            |
| ORAI2     | 6.17E-10 | -0.35201 | 0.029 | 0.279 | 9.22E-06 | Undiff-G | ORAI2           |
| NRP2      | 6.19E-10 | -0.60785 | 0     | 0.224 | 9.26E-06 | Undiff-G | NRP2            |
| AP3S1     | 6.21E-10 | 0.353478 | 0.11  | 0.43  | 9.28E-06 | Undiff-G | AP3S1           |
| RBMX2     | 6.22E-10 | -0.51666 | 0.007 | 0.238 | 9.29E-06 | Undiff-G | RBMX2           |
| LINC00493 | 6.22E-10 | 0.401347 | 0.162 | 0.534 | 9.30E-06 | Undiff-G | LINC00493       |
| CHD2      | 6.24E-10 | -0.20952 | 0.037 | 0.295 | 9.33E-06 | Undiff-G | CHD2            |
| URI1      | 6.31E-10 | -0.53879 | 0     | 0.224 | 9.43E-06 | Undiff-G | URI1            |
| FN3KRP    | 6.31E-10 | -0.59318 | 0     | 0.224 | 9.43E-06 | Undiff-G | FN3KRP          |
| AHCYL1    | 6.37E-10 | -0.10922 | 0.059 | 0.331 | 9.52E-06 | Undiff-G | AHCYL1          |
| KIF2A     | 6.39E-10 | -0.29277 | 0.007 | 0.238 | 9.55E-06 | Undiff-G | KIF2A           |
| CWC27     | 6.39E-10 | -0.11182 | 0.022 | 0.266 | 9.55E-06 | Undiff-G | CWC27           |
| SNX4      | 6.40E-10 | -0.20151 | 0.015 | 0.252 | 9.57E-06 | Undiff-G | SNX4            |
| DNTTIP2   | 6.47E-10 | -0.16128 | 0.037 | 0.29  | 9.67E-06 | Undiff-G | DNTTIP2         |
| ESF1      | 6.53E-10 | -0.14561 | 0.066 | 0.349 | 9.75E-06 | Undiff-G | ESF1            |
| MGAT4A    | 6.61E-10 | -0.79756 | 0     | 0.223 | 9.88E-06 | Undiff-G | MGAT4A          |
| ZFPL1     | 6.62E-10 | -0.40095 | 0.007 | 0.238 | 9.89E-06 | Undiff-G | ZFPL1           |
| UBQLN2    | 6.68E-10 | -0.56386 | 0     | 0.223 | 9.98E-06 | Undiff-G | UBQLN2          |
| KIF3A     | 6.68E-10 | -0.59427 | 0.007 | 0.237 | 9.99E-06 | Undiff-G | KIF3A           |
| CCDC53    | 6.70E-10 | 0.140648 | 0.059 | 0.332 | 1.00E-05 | Undiff-G | CCDC53          |
| RP11-1094 | 6.73E-10 | -0.55692 | 0.007 | 0.237 | 1.01E-05 | Undiff-G | RP11-1094M14.11 |
| CPM       | 6.76E-10 | -0.76959 | 0.007 | 0.237 | 1.01E-05 | Undiff-G | CPM             |
| PLA2G16   | 6.85E-10 | 0.174855 | 0.103 | 0.408 | 1.02E-05 | Undiff-G | PLA2G16         |
| GSTA4     | 6.93E-10 | -0.16523 | 0.037 | 0.293 | 1.04E-05 | Undiff-G | GSTA4           |
| RP11-345J | 6.94E-10 | -0.32867 | 0.007 | 0.237 | 1.04E-05 | Undiff-G | RP11-345J4.5    |
| ATP1B1    | 7.00E-10 | -0.5735  | 0.007 | 0.237 | 1.05E-05 | Undiff-G | ATP1B1          |

|          |          |          |       |       |          |          |          |
|----------|----------|----------|-------|-------|----------|----------|----------|
| CEBPG    | 7.10E-10 | -0.28032 | 0.015 | 0.251 | 1.06E-05 | Undiff-G | CEBPG    |
| FUCA1    | 7.13E-10 | -0.66965 | 0     | 0.222 | 1.06E-05 | Undiff-G | FUCA1    |
| NCOA4    | 7.16E-10 | -0.15098 | 0.022 | 0.265 | 1.07E-05 | Undiff-G | NCOA4    |
| CPNE3    | 7.22E-10 | 0.106275 | 0.059 | 0.334 | 1.08E-05 | Undiff-G | CPNE3    |
| TM9SF3   | 7.26E-10 | -0.55959 | 0     | 0.222 | 1.08E-05 | Undiff-G | TM9SF3   |
| TAOK1    | 7.27E-10 | -0.3413  | 0.022 | 0.262 | 1.09E-05 | Undiff-G | TAOK1    |
| FOXO3    | 7.30E-10 | -0.37161 | 0.029 | 0.275 | 1.09E-05 | Undiff-G | FOXO3    |
| MRFAP1L1 | 7.40E-10 | -0.5915  | 0     | 0.222 | 1.11E-05 | Undiff-G | MRFAP1L1 |
| RSPRY1   | 7.49E-10 | -0.29833 | 0.015 | 0.251 | 1.12E-05 | Undiff-G | RSPRY1   |
| CEP170   | 7.52E-10 | -0.35487 | 0.022 | 0.264 | 1.12E-05 | Undiff-G | CEP170   |
| KXD1     | 7.54E-10 | 0.341139 | 0.125 | 0.452 | 1.13E-05 | Undiff-G | KXD1     |
| EEA1     | 7.55E-10 | -0.50039 | 0.015 | 0.248 | 1.13E-05 | Undiff-G | EEA1     |
| G3BP2    | 7.55E-10 | -0.19507 | 0.029 | 0.279 | 1.13E-05 | Undiff-G | G3BP2    |
| HEY1     | 7.56E-10 | -0.60632 | 0.015 | 0.25  | 1.13E-05 | Undiff-G | HEY1     |
| REEP3    | 7.64E-10 | -0.3846  | 0.015 | 0.247 | 1.14E-05 | Undiff-G | REEP3    |
| SSR4     | 7.85E-10 | 0.433719 | 0.272 | 0.768 | 1.17E-05 | Undiff-G | SSR4     |
| KNOP1    | 7.86E-10 | -0.35376 | 0.022 | 0.262 | 1.17E-05 | Undiff-G | KNOP1    |
| CTSA     | 7.86E-10 | 0.291926 | 0.096 | 0.403 | 1.17E-05 | Undiff-G | CTSA     |
| ACYP2    | 8.00E-10 | -0.21978 | 0.051 | 0.315 | 1.20E-05 | Undiff-G | ACYP2    |
| ANAPC15  | 8.03E-10 | -0.21628 | 0.022 | 0.264 | 1.20E-05 | Undiff-G | ANAPC15  |
| MID1IP1  | 8.08E-10 | -0.27781 | 0.022 | 0.264 | 1.21E-05 | Undiff-G | MID1IP1  |
| CYB5R1   | 8.16E-10 | -0.43326 | 0.022 | 0.261 | 1.22E-05 | Undiff-G | CYB5R1   |
| USP14    | 8.26E-10 | -0.51481 | 0.022 | 0.26  | 1.23E-05 | Undiff-G | USP14    |
| CDC42SE2 | 8.27E-10 | -0.61077 | 0     | 0.221 | 1.24E-05 | Undiff-G | CDC42SE2 |
| CHCHD5   | 8.43E-10 | 0.168238 | 0.081 | 0.376 | 1.26E-05 | Undiff-G | CHCHD5   |
| TRIM44   | 8.51E-10 | -0.336   | 0.037 | 0.29  | 1.27E-05 | Undiff-G | TRIM44   |
| GNB4     | 8.53E-10 | -0.38456 | 0.007 | 0.235 | 1.27E-05 | Undiff-G | GNB4     |
| CCDC106  | 8.66E-10 | -0.52594 | 0.007 | 0.235 | 1.29E-05 | Undiff-G | CCDC106  |
| COX6A1   | 8.73E-10 | 0.321639 | 0.309 | 0.851 | 1.31E-05 | Undiff-G | COX6A1   |
| UBAC1    | 8.83E-10 | -0.55005 | 0     | 0.22  | 1.32E-05 | Undiff-G | UBAC1    |
| MAPT     | 8.88E-10 | -0.39027 | 0.037 | 0.288 | 1.33E-05 | Undiff-G | MAPT     |
| RASSF2   | 8.89E-10 | -0.52305 | 0.022 | 0.261 | 1.33E-05 | Undiff-G | RASSF2   |
| YPEL3    | 8.90E-10 | -0.60717 | 0.015 | 0.247 | 1.33E-05 | Undiff-G | YPEL3    |
| DCTPP1   | 8.91E-10 | 0.167923 | 0.059 | 0.333 | 1.33E-05 | Undiff-G | DCTPP1   |
| THEMIS2  | 8.91E-10 | -0.70832 | 0.015 | 0.244 | 1.33E-05 | Undiff-G | THEMIS2  |
| ZDHHC12  | 8.91E-10 | -0.24052 | 0.022 | 0.263 | 1.33E-05 | Undiff-G | ZDHHC12  |
| C11orf73 | 8.92E-10 | 0.291686 | 0.11  | 0.424 | 1.33E-05 | Undiff-G | C11orf73 |
| PTPN1    | 8.93E-10 | -0.55449 | 0.007 | 0.234 | 1.34E-05 | Undiff-G | PTPN1    |
| OARD1    | 9.10E-10 | -0.26777 | 0.007 | 0.235 | 1.36E-05 | Undiff-G | OARD1    |
| CIR1     | 9.32E-10 | 0.13017  | 0.059 | 0.332 | 1.39E-05 | Undiff-G | CIR1     |
| ABL2     | 9.44E-10 | -0.61396 | 0.029 | 0.271 | 1.41E-05 | Undiff-G | ABL2     |
| CCDC66   | 9.52E-10 | -0.52917 | 0.007 | 0.232 | 1.42E-05 | Undiff-G | CCDC66   |
| HAVCR2   | 9.53E-10 | -0.70582 | 0.007 | 0.234 | 1.42E-05 | Undiff-G | HAVCR2   |
| PCNA     | 9.55E-10 | 0.151822 | 0.051 | 0.318 | 1.43E-05 | Undiff-G | PCNA     |
| PLEKHA3  | 9.65E-10 | -0.47078 | 0.007 | 0.234 | 1.44E-05 | Undiff-G | PLEKHA3  |
| GOLM1    | 9.71E-10 | 0.227705 | 0.051 | 0.319 | 1.45E-05 | Undiff-G | GOLM1    |
| PPA2     | 9.82E-10 | 0.250475 | 0.051 | 0.319 | 1.47E-05 | Undiff-G | PPA2     |
| MTX1     | 9.91E-10 | -0.13586 | 0.015 | 0.248 | 1.48E-05 | Undiff-G | MTX1     |
| DNAJC4   | 9.95E-10 | -0.61804 | 0.007 | 0.231 | 1.49E-05 | Undiff-G | DNAJC4   |
| DRG1     | 1.00E-09 | -0.20632 | 0.015 | 0.248 | 1.50E-05 | Undiff-G | DRG1     |
| XP01     | 1.00E-09 | -0.4743  | 0.022 | 0.261 | 1.50E-05 | Undiff-G | XP01     |

|          |           |           |        |        |           |          |          |
|----------|-----------|-----------|--------|--------|-----------|----------|----------|
| EEF1E1   | 1. 01E-09 | 0. 154462 | 0. 051 | 0. 318 | 1. 51E-05 | Undiff-G | EEF1E1   |
| MMD      | 1. 02E-09 | -0. 44412 | 0. 015 | 0. 247 | 1. 52E-05 | Undiff-G | MMD      |
| TSPAN31  | 1. 02E-09 | -0. 26446 | 0. 044 | 0. 298 | 1. 52E-05 | Undiff-G | TSPAN31  |
| SEC23B   | 1. 02E-09 | -0. 10957 | 0. 029 | 0. 273 | 1. 52E-05 | Undiff-G | SEC23B   |
| NREP     | 1. 03E-09 | -0. 26765 | 0. 029 | 0. 276 | 1. 54E-05 | Undiff-G | NREP     |
| TMEM251  | 1. 03E-09 | -0. 35022 | 0. 015 | 0. 245 | 1. 54E-05 | Undiff-G | TMEM251  |
| CD151    | 1. 03E-09 | 0. 325882 | 0. 14  | 0. 486 | 1. 54E-05 | Undiff-G | CD151    |
| SPINT2   | 1. 03E-09 | -0. 79429 | 0      | 0. 219 | 1. 54E-05 | Undiff-G | SPINT2   |
| R3HCC1   | 1. 04E-09 | -0. 19255 | 0. 037 | 0. 289 | 1. 55E-05 | Undiff-G | R3HCC1   |
| OSTM1    | 1. 04E-09 | -0. 55227 | 0. 007 | 0. 231 | 1. 55E-05 | Undiff-G | OSTM1    |
| CENPV    | 1. 04E-09 | -0. 53482 | 0. 022 | 0. 258 | 1. 55E-05 | Undiff-G | CENPV    |
| SSR3     | 1. 04E-09 | 0. 440048 | 0. 162 | 0. 531 | 1. 56E-05 | Undiff-G | SSR3     |
| CDK2AP2  | 1. 05E-09 | 0. 131906 | 0. 059 | 0. 332 | 1. 57E-05 | Undiff-G | CDK2AP2  |
| HECTD1   | 1. 06E-09 | -0. 54841 | 0. 007 | 0. 231 | 1. 58E-05 | Undiff-G | HECTD1   |
| RILPL2   | 1. 08E-09 | -0. 47739 | 0. 022 | 0. 261 | 1. 62E-05 | Undiff-G | RILPL2   |
| UBE2M    | 1. 09E-09 | -0. 49513 | 0. 007 | 0. 233 | 1. 62E-05 | Undiff-G | UBE2M    |
| ANXA11   | 1. 10E-09 | -0. 70156 | 0      | 0. 218 | 1. 65E-05 | Undiff-G | ANXA11   |
| ARFIP2   | 1. 11E-09 | -0. 49815 | 0. 015 | 0. 246 | 1. 65E-05 | Undiff-G | ARFIP2   |
| ASAP1    | 1. 11E-09 | -0. 53689 | 0. 007 | 0. 23  | 1. 66E-05 | Undiff-G | ASAP1    |
| DECR1    | 1. 12E-09 | 0. 293673 | 0. 103 | 0. 416 | 1. 67E-05 | Undiff-G | DECR1    |
| MS4A4A   | 1. 12E-09 | -0. 422   | 0. 037 | 0. 289 | 1. 68E-05 | Undiff-G | MS4A4A   |
| FAM210B  | 1. 13E-09 | -0. 47483 | 0. 029 | 0. 273 | 1. 69E-05 | Undiff-G | FAM210B  |
| GUSB     | 1. 14E-09 | -0. 25562 | 0. 029 | 0. 275 | 1. 70E-05 | Undiff-G | GUSB     |
| ABCF2    | 1. 14E-09 | -0. 55153 | 0      | 0. 218 | 1. 71E-05 | Undiff-G | ABCF2    |
| ARF4     | 1. 15E-09 | 0. 530912 | 0. 206 | 0. 627 | 1. 72E-05 | Undiff-G | ARF4     |
| LARS     | 1. 15E-09 | 0. 145556 | 0. 066 | 0. 345 | 1. 72E-05 | Undiff-G | LARS     |
| PKN1     | 1. 17E-09 | -0. 49503 | 0. 015 | 0. 246 | 1. 74E-05 | Undiff-G | PKN1     |
| POLE4    | 1. 17E-09 | -0. 19565 | 0. 037 | 0. 288 | 1. 76E-05 | Undiff-G | POLE4    |
| MEF2A    | 1. 18E-09 | -0. 68811 | 0      | 0. 218 | 1. 76E-05 | Undiff-G | MEF2A    |
| TMED9    | 1. 18E-09 | 0. 474372 | 0. 243 | 0. 694 | 1. 76E-05 | Undiff-G | TMED9    |
| SCAMP4   | 1. 18E-09 | -0. 43944 | 0. 029 | 0. 271 | 1. 76E-05 | Undiff-G | SCAMP4   |
| ARID5B   | 1. 19E-09 | 0. 182218 | 0. 074 | 0. 359 | 1. 78E-05 | Undiff-G | ARID5B   |
| CHIC2    | 1. 21E-09 | -0. 31122 | 0. 015 | 0. 246 | 1. 81E-05 | Undiff-G | CHIC2    |
| MCOLN1   | 1. 21E-09 | -0. 49667 | 0. 015 | 0. 246 | 1. 81E-05 | Undiff-G | MCOLN1   |
| DDX27    | 1. 22E-09 | -0. 21123 | 0. 037 | 0. 285 | 1. 82E-05 | Undiff-G | DDX27    |
| KCNQ2    | 1. 22E-09 | -0. 58701 | 0      | 0. 217 | 1. 82E-05 | Undiff-G | KCNQ2    |
| DDIT4    | 1. 25E-09 | 0. 180803 | 0. 103 | 0. 412 | 1. 86E-05 | Undiff-G | DDIT4    |
| CTNNBIP1 | 1. 27E-09 | -0. 50784 | 0      | 0. 217 | 1. 89E-05 | Undiff-G | CTNNBIP1 |
| BLOC1S4  | 1. 29E-09 | -0. 10032 | 0. 015 | 0. 246 | 1. 92E-05 | Undiff-G | BLOC1S4  |
| CCDC25   | 1. 29E-09 | -0. 2134  | 0. 044 | 0. 3   | 1. 92E-05 | Undiff-G | CCDC25   |
| CCSER2   | 1. 29E-09 | -0. 55169 | 0. 007 | 0. 231 | 1. 93E-05 | Undiff-G | CCSER2   |
| EIF2S2   | 1. 30E-09 | 0. 495413 | 0. 199 | 0. 592 | 1. 94E-05 | Undiff-G | EIF2S2   |
| SIAH1    | 1. 31E-09 | -0. 33242 | 0. 007 | 0. 231 | 1. 95E-05 | Undiff-G | SIAH1    |
| SNX10    | 1. 31E-09 | -0. 55673 | 0. 007 | 0. 231 | 1. 96E-05 | Undiff-G | SNX10    |
| SCYL1    | 1. 32E-09 | -0. 53602 | 0. 007 | 0. 229 | 1. 97E-05 | Undiff-G | SCYL1    |
| MAPK1    | 1. 32E-09 | -0. 394   | 0. 015 | 0. 245 | 1. 97E-05 | Undiff-G | MAPK1    |
| COQ9     | 1. 33E-09 | -0. 49408 | 0. 015 | 0. 245 | 1. 98E-05 | Undiff-G | COQ9     |
| RFC2     | 1. 35E-09 | -0. 40237 | 0. 015 | 0. 245 | 2. 01E-05 | Undiff-G | RFC2     |
| UQCRC1   | 1. 36E-09 | 0. 391092 | 0. 147 | 0. 492 | 2. 03E-05 | Undiff-G | UQCRC1   |
| RPA1     | 1. 37E-09 | -0. 35149 | 0. 015 | 0. 242 | 2. 04E-05 | Undiff-G | RPA1     |
| EAPP     | 1. 37E-09 | 0. 296059 | 0. 074 | 0. 358 | 2. 05E-05 | Undiff-G | EAPP     |

|           |          |          |       |       |          |          |              |
|-----------|----------|----------|-------|-------|----------|----------|--------------|
| CHCHD1    | 1.37E-09 | -0.13075 | 0.029 | 0.273 | 2.05E-05 | Undiff-G | CHCHD1       |
| ADAM17    | 1.38E-09 | -0.34965 | 0.022 | 0.258 | 2.06E-05 | Undiff-G | ADAM17       |
| DCTD      | 1.38E-09 | -0.41483 | 0.022 | 0.258 | 2.07E-05 | Undiff-G | DCTD         |
| LAMTOR5   | 1.40E-09 | 0.419259 | 0.243 | 0.697 | 2.09E-05 | Undiff-G | LAMTOR5      |
| AP1S1     | 1.40E-09 | 0.399523 | 0.132 | 0.471 | 2.10E-05 | Undiff-G | AP1S1        |
| CCM2      | 1.42E-09 | -0.10302 | 0.037 | 0.287 | 2.12E-05 | Undiff-G | CCM2         |
| IFT52     | 1.43E-09 | -0.10649 | 0.022 | 0.259 | 2.14E-05 | Undiff-G | IFT52        |
| CLN8      | 1.44E-09 | -0.38093 | 0.029 | 0.272 | 2.15E-05 | Undiff-G | CLN8         |
| JAK1      | 1.44E-09 | -0.3084  | 0.022 | 0.255 | 2.15E-05 | Undiff-G | JAK1         |
| SH3KBP1   | 1.44E-09 | -0.49455 | 0.015 | 0.244 | 2.15E-05 | Undiff-G | SH3KBP1      |
| BZW2      | 1.45E-09 | -0.17865 | 0.029 | 0.273 | 2.16E-05 | Undiff-G | BZW2         |
| CD58      | 1.46E-09 | -0.65675 | 0.007 | 0.23  | 2.18E-05 | Undiff-G | CD58         |
| PDLIM7    | 1.48E-09 | -0.52351 | 0.015 | 0.241 | 2.21E-05 | Undiff-G | PDLIM7       |
| STX7      | 1.48E-09 | -0.22254 | 0.029 | 0.27  | 2.21E-05 | Undiff-G | STX7         |
| ATPAF2    | 1.48E-09 | -0.54911 | 0     | 0.216 | 2.21E-05 | Undiff-G | ATPAF2       |
| PRKRIP1   | 1.49E-09 | -0.40299 | 0.015 | 0.244 | 2.23E-05 | Undiff-G | PRKRIP1      |
| PKIB      | 1.50E-09 | -0.19468 | 0.037 | 0.287 | 2.24E-05 | Undiff-G | PKIB         |
| DAPK3     | 1.50E-09 | -0.49747 | 0.015 | 0.241 | 2.24E-05 | Undiff-G | DAPK3        |
| VPS37B    | 1.50E-09 | -0.47452 | 0.022 | 0.257 | 2.25E-05 | Undiff-G | VPS37B       |
| RNF146    | 1.51E-09 | -0.24094 | 0.022 | 0.258 | 2.26E-05 | Undiff-G | RNF146       |
| POP7      | 1.52E-09 | 0.399106 | 0.096 | 0.398 | 2.27E-05 | Undiff-G | POP7         |
| ACSL1     | 1.52E-09 | -0.62721 | 0.007 | 0.23  | 2.28E-05 | Undiff-G | ACSL1        |
| COQ4      | 1.54E-09 | -0.11723 | 0.029 | 0.27  | 2.30E-05 | Undiff-G | COQ4         |
| NDUFV2    | 1.54E-09 | 0.560227 | 0.199 | 0.596 | 2.31E-05 | Undiff-G | NDUFV2       |
| SBN01     | 1.54E-09 | -0.1722  | 0.029 | 0.268 | 2.31E-05 | Undiff-G | SBN01        |
| GLIPR2    | 1.56E-09 | -0.29766 | 0.029 | 0.271 | 2.33E-05 | Undiff-G | GLIPR2       |
| TSPAN14   | 1.59E-09 | -0.63556 | 0     | 0.215 | 2.38E-05 | Undiff-G | TSPAN14      |
| CTDSP2    | 1.62E-09 | -0.43866 | 0.037 | 0.279 | 2.41E-05 | Undiff-G | CTDSP2       |
| LIMA1     | 1.62E-09 | -0.17605 | 0.059 | 0.321 | 2.41E-05 | Undiff-G | LIMA1        |
| PSMB1     | 1.62E-09 | 0.471069 | 0.257 | 0.73  | 2.42E-05 | Undiff-G | PSMB1        |
| GTF2H5    | 1.65E-09 | 0.308181 | 0.103 | 0.408 | 2.46E-05 | Undiff-G | GTF2H5       |
| JMJD6     | 1.65E-09 | -0.11403 | 0.037 | 0.285 | 2.47E-05 | Undiff-G | JMJD6        |
| HSF1      | 1.66E-09 | -0.31372 | 0.037 | 0.281 | 2.49E-05 | Undiff-G | HSF1         |
| GALNT11   | 1.67E-09 | -0.38112 | 0.007 | 0.229 | 2.50E-05 | Undiff-G | GALNT11      |
| SAP30     | 1.69E-09 | -0.4689  | 0.015 | 0.243 | 2.52E-05 | Undiff-G | SAP30        |
| CDK5      | 1.69E-09 | -0.28494 | 0.015 | 0.241 | 2.52E-05 | Undiff-G | CDK5         |
| NUDT16L1  | 1.69E-09 | -0.24705 | 0.037 | 0.284 | 2.52E-05 | Undiff-G | NUDT16L1     |
| RAB1A     | 1.69E-09 | 0.641456 | 0.206 | 0.625 | 2.52E-05 | Undiff-G | RAB1A        |
| SLC25A3   | 1.72E-09 | 0.346001 | 0.265 | 0.752 | 2.57E-05 | Undiff-G | SLC25A3      |
| CTD-2336C | 1.73E-09 | -0.56917 | 0.007 | 0.226 | 2.59E-05 | Undiff-G | CTD-233602.1 |
| GTPBP6    | 1.73E-09 | -0.51537 | 0     | 0.214 | 2.59E-05 | Undiff-G | GTPBP6       |
| ATP5EP2   | 1.75E-09 | 0.214435 | 0.125 | 0.451 | 2.61E-05 | Undiff-G | ATP5EP2      |
| GLG1      | 1.75E-09 | -0.44669 | 0.029 | 0.269 | 2.62E-05 | Undiff-G | GLG1         |
| C5orf15   | 1.76E-09 | 0.148737 | 0.059 | 0.327 | 2.63E-05 | Undiff-G | C5orf15      |
| UBE2E2    | 1.77E-09 | -0.25804 | 0.015 | 0.243 | 2.65E-05 | Undiff-G | UBE2E2       |
| GSS       | 1.79E-09 | -0.19448 | 0.015 | 0.243 | 2.67E-05 | Undiff-G | GSS          |
| SNN       | 1.79E-09 | -0.53668 | 0.007 | 0.228 | 2.67E-05 | Undiff-G | SNN          |
| ATPAF1    | 1.79E-09 | -0.39871 | 0.015 | 0.243 | 2.68E-05 | Undiff-G | ATPAF1       |
| PRPSAP2   | 1.80E-09 | -0.20797 | 0.029 | 0.269 | 2.68E-05 | Undiff-G | PRPSAP2      |
| AKT1S1    | 1.80E-09 | -0.29539 | 0.015 | 0.243 | 2.69E-05 | Undiff-G | AKT1S1       |
| MTF2      | 1.80E-09 | -0.28067 | 0.022 | 0.256 | 2.69E-05 | Undiff-G | MTF2         |

|         |           |           |        |        |           |          |         |
|---------|-----------|-----------|--------|--------|-----------|----------|---------|
| TPST1   | 1. 82E-09 | -0. 45826 | 0. 015 | 0. 242 | 2. 72E-05 | Undiff-G | TPST1   |
| VASP    | 1. 84E-09 | -0. 2773  | 0. 015 | 0. 242 | 2. 75E-05 | Undiff-G | VASP    |
| HSPE1   | 1. 85E-09 | 0. 407077 | 0. 257 | 0. 735 | 2. 76E-05 | Undiff-G | HSPE1   |
| INO80E  | 1. 85E-09 | -0. 39939 | 0. 007 | 0. 228 | 2. 77E-05 | Undiff-G | INO80E  |
| RBM5    | 1. 89E-09 | -0. 14274 | 0. 037 | 0. 281 | 2. 83E-05 | Undiff-G | RBM5    |
| RAE1    | 1. 92E-09 | 0. 111484 | 0. 029 | 0. 27  | 2. 87E-05 | Undiff-G | RAE1    |
| TXNDC17 | 1. 93E-09 | 0. 397723 | 0. 169 | 0. 529 | 2. 88E-05 | Undiff-G | TXNDC17 |
| PRPF19  | 1. 94E-09 | -0. 18928 | 0. 022 | 0. 256 | 2. 90E-05 | Undiff-G | PRPF19  |
| ZC2HC1A | 1. 95E-09 | -0. 61573 | 0      | 0. 213 | 2. 92E-05 | Undiff-G | ZC2HC1A |
| MAP2K2  | 1. 96E-09 | -0. 46128 | 0. 051 | 0. 305 | 2. 92E-05 | Undiff-G | MAP2K2  |
| EIF4H   | 1. 97E-09 | 0. 487215 | 0. 176 | 0. 545 | 2. 94E-05 | Undiff-G | EIF4H   |
| TRMT10C | 1. 99E-09 | -0. 41927 | 0. 022 | 0. 252 | 2. 97E-05 | Undiff-G | TRMT10C |
| ETNK1   | 1. 99E-09 | -0. 5625  | 0. 007 | 0. 226 | 2. 97E-05 | Undiff-G | ETNK1   |
| KHSRP   | 1. 99E-09 | -0. 46714 | 0. 015 | 0. 241 | 2. 98E-05 | Undiff-G | KHSRP   |
| SPTLC2  | 2. 02E-09 | -0. 72121 | 0      | 0. 213 | 3. 02E-05 | Undiff-G | SPTLC2  |
| CECR5   | 2. 03E-09 | -0. 17331 | 0. 022 | 0. 254 | 3. 03E-05 | Undiff-G | CECR5   |
| RAB22A  | 2. 04E-09 | -0. 3902  | 0. 015 | 0. 241 | 3. 04E-05 | Undiff-G | RAB22A  |
| RGCC    | 2. 05E-09 | -0. 70696 | 0. 022 | 0. 253 | 3. 06E-05 | Undiff-G | RGCC    |
| KMT2A   | 2. 05E-09 | -0. 43185 | 0. 015 | 0. 239 | 3. 06E-05 | Undiff-G | KMT2A   |
| ING4    | 2. 08E-09 | -0. 22699 | 0. 029 | 0. 269 | 3. 10E-05 | Undiff-G | ING4    |
| TIMM44  | 2. 08E-09 | -0. 49631 | 0. 029 | 0. 265 | 3. 11E-05 | Undiff-G | TIMM44  |
| IQGAP1  | 2. 09E-09 | -0. 17141 | 0. 022 | 0. 255 | 3. 13E-05 | Undiff-G | IQGAP1  |
| TM2D3   | 2. 10E-09 | 0. 104107 | 0. 066 | 0. 334 | 3. 13E-05 | Undiff-G | TM2D3   |
| TRIM27  | 2. 14E-09 | -0. 52849 | 0      | 0. 212 | 3. 20E-05 | Undiff-G | TRIM27  |
| PCNP    | 2. 14E-09 | 0. 420156 | 0. 176 | 0. 541 | 3. 20E-05 | Undiff-G | PCNP    |
| EBAG9   | 2. 14E-09 | -0. 15667 | 0. 022 | 0. 255 | 3. 21E-05 | Undiff-G | EBAG9   |
| TBRG4   | 2. 17E-09 | -0. 36764 | 0. 015 | 0. 24  | 3. 24E-05 | Undiff-G | TBRG4   |
| RFK     | 2. 19E-09 | -0. 45073 | 0. 015 | 0. 24  | 3. 28E-05 | Undiff-G | RFK     |
| LASP1   | 2. 20E-09 | -0. 57738 | 0      | 0. 212 | 3. 28E-05 | Undiff-G | LASP1   |
| RGS16   | 2. 22E-09 | -0. 40678 | 0. 037 | 0. 278 | 3. 31E-05 | Undiff-G | RGS16   |
| B4GALT7 | 2. 22E-09 | -0. 52355 | 0      | 0. 212 | 3. 31E-05 | Undiff-G | B4GALT7 |
| SLC35F6 | 2. 22E-09 | -0. 5563  | 0      | 0. 212 | 3. 31E-05 | Undiff-G | SLC35F6 |
| HYAL2   | 2. 26E-09 | -0. 49366 | 0. 007 | 0. 225 | 3. 37E-05 | Undiff-G | HYAL2   |
| LAIR1   | 2. 26E-09 | -0. 87536 | 0. 015 | 0. 233 | 3. 38E-05 | Undiff-G | LAIR1   |
| TPRKB   | 2. 29E-09 | 0. 319603 | 0. 081 | 0. 367 | 3. 43E-05 | Undiff-G | TPRKB   |
| PUM1    | 2. 31E-09 | -0. 24174 | 0. 015 | 0. 24  | 3. 45E-05 | Undiff-G | PUM1    |
| TXNRD1  | 2. 32E-09 | -0. 34196 | 0. 015 | 0. 24  | 3. 46E-05 | Undiff-G | TXNRD1  |
| BEST1   | 2. 32E-09 | -0. 44181 | 0. 037 | 0. 278 | 3. 47E-05 | Undiff-G | BEST1   |
| EPN2    | 2. 33E-09 | -0. 50027 | 0. 015 | 0. 24  | 3. 49E-05 | Undiff-G | EPN2    |
| ILVBL   | 2. 36E-09 | -0. 27    | 0. 022 | 0. 254 | 3. 52E-05 | Undiff-G | ILVBL   |
| PLRG1   | 2. 37E-09 | -0. 22765 | 0. 015 | 0. 24  | 3. 54E-05 | Undiff-G | PLRG1   |
| ADPGK   | 2. 38E-09 | -0. 29842 | 0. 029 | 0. 264 | 3. 55E-05 | Undiff-G | ADPGK   |
| SUPT5H  | 2. 38E-09 | -0. 37481 | 0. 022 | 0. 252 | 3. 56E-05 | Undiff-G | SUPT5H  |
| DERA    | 2. 38E-09 | -0. 34618 | 0. 022 | 0. 254 | 3. 56E-05 | Undiff-G | DERA    |
| TOR1A   | 2. 40E-09 | -0. 25508 | 0. 029 | 0. 264 | 3. 58E-05 | Undiff-G | TOR1A   |
| CAND1   | 2. 43E-09 | -0. 53335 | 0. 015 | 0. 238 | 3. 63E-05 | Undiff-G | CAND1   |
| FAM136A | 2. 43E-09 | -0. 20717 | 0. 029 | 0. 265 | 3. 63E-05 | Undiff-G | FAM136A |
| MANBAL  | 2. 44E-09 | 0. 200699 | 0. 066 | 0. 338 | 3. 65E-05 | Undiff-G | MANBAL  |
| C1orf52 | 2. 45E-09 | 0. 128777 | 0. 051 | 0. 31  | 3. 66E-05 | Undiff-G | C1orf52 |
| LY96    | 2. 46E-09 | -0. 47107 | 0. 007 | 0. 225 | 3. 67E-05 | Undiff-G | LY96    |
| KDM6B   | 2. 46E-09 | -0. 62702 | 0. 007 | 0. 225 | 3. 68E-05 | Undiff-G | KDM6B   |

|           |          |          |       |       |          |          |           |
|-----------|----------|----------|-------|-------|----------|----------|-----------|
| GGA1      | 2.46E-09 | -0.41157 | 0.044 | 0.292 | 3.68E-05 | Undiff-G | GGA1      |
| HLA-DQA1  | 2.46E-09 | -0.26299 | 0.051 | 0.309 | 3.68E-05 | Undiff-G | HLA-DQA1  |
| BTG2      | 2.47E-09 | 0.293489 | 0.14  | 0.471 | 3.69E-05 | Undiff-G | BTG2      |
| SLC35A4   | 2.52E-09 | -0.52159 | 0     | 0.211 | 3.77E-05 | Undiff-G | SLC35A4   |
| CCND1     | 2.53E-09 | -0.66622 | 0.007 | 0.221 | 3.78E-05 | Undiff-G | CCND1     |
| ATP6VOA1  | 2.54E-09 | -0.51851 | 0.044 | 0.288 | 3.80E-05 | Undiff-G | ATP6VOA1  |
| FAM174A   | 2.55E-09 | -0.41566 | 0.007 | 0.225 | 3.81E-05 | Undiff-G | FAM174A   |
| PLA2G12A  | 2.57E-09 | -0.47708 | 0.015 | 0.236 | 3.83E-05 | Undiff-G | PLA2G12A  |
| HIST1H2BK | 2.57E-09 | -0.63363 | 0     | 0.21  | 3.84E-05 | Undiff-G | HIST1H2BK |
| CUL5      | 2.62E-09 | -0.31244 | 0.007 | 0.225 | 3.92E-05 | Undiff-G | CUL5      |
| CPSF3L    | 2.63E-09 | -0.23831 | 0.037 | 0.277 | 3.92E-05 | Undiff-G | CPSF3L    |
| TMEM14C   | 2.63E-09 | 0.501407 | 0.199 | 0.595 | 3.93E-05 | Undiff-G | TMEM14C   |
| TATDN1    | 2.65E-09 | -0.2009  | 0.015 | 0.239 | 3.96E-05 | Undiff-G | TATDN1    |
| VMP1      | 2.70E-09 | 0.248001 | 0.14  | 0.476 | 4.03E-05 | Undiff-G | VMP1      |
| AFG3L2    | 2.74E-09 | -0.49116 | 0     | 0.21  | 4.09E-05 | Undiff-G | AFG3L2    |
| P4HTM     | 2.75E-09 | -0.47979 | 0.029 | 0.264 | 4.11E-05 | Undiff-G | P4HTM     |
| ARMC1     | 2.77E-09 | -0.19412 | 0.029 | 0.267 | 4.14E-05 | Undiff-G | ARMC1     |
| PMP2      | 2.77E-09 | -0.40856 | 0.081 | 0.353 | 4.15E-05 | Undiff-G | PMP2      |
| NES       | 2.79E-09 | -0.2961  | 0.037 | 0.279 | 4.18E-05 | Undiff-G | NES       |
| TNFRSF12A | 2.81E-09 | -0.24412 | 0.044 | 0.29  | 4.20E-05 | Undiff-G | TNFRSF12A |
| SUPT20H   | 2.81E-09 | -0.5074  | 0     | 0.21  | 4.20E-05 | Undiff-G | SUPT20H   |
| CTDSP1    | 2.82E-09 | -0.48448 | 0.007 | 0.224 | 4.21E-05 | Undiff-G | CTDSP1    |
| RAB1B     | 2.84E-09 | -0.27204 | 0.015 | 0.238 | 4.25E-05 | Undiff-G | RAB1B     |
| PPIF      | 2.87E-09 | -0.59486 | 0.007 | 0.223 | 4.29E-05 | Undiff-G | PPIF      |
| MTHFD2    | 2.91E-09 | -0.45993 | 0.044 | 0.291 | 4.35E-05 | Undiff-G | MTHFD2    |
| KMT2C     | 2.93E-09 | -0.32359 | 0.029 | 0.264 | 4.38E-05 | Undiff-G | KMT2C     |
| CHP1      | 2.94E-09 | -0.39452 | 0.015 | 0.237 | 4.39E-05 | Undiff-G | CHP1      |
| RAB4B     | 2.95E-09 | -0.24055 | 0.029 | 0.265 | 4.41E-05 | Undiff-G | RAB4B     |
| CHCHD6    | 2.95E-09 | -0.22514 | 0.015 | 0.238 | 4.41E-05 | Undiff-G | CHCHD6    |
| CDK16     | 2.96E-09 | -0.29295 | 0.015 | 0.238 | 4.43E-05 | Undiff-G | CDK16     |
| DHR SX    | 2.96E-09 | -0.45708 | 0.015 | 0.235 | 4.43E-05 | Undiff-G | DHR SX    |
| PPP1R11   | 2.97E-09 | 0.328838 | 0.081 | 0.363 | 4.44E-05 | Undiff-G | PPP1R11   |
| ORC4      | 2.98E-09 | -0.40698 | 0.015 | 0.237 | 4.45E-05 | Undiff-G | ORC4      |
| ZMAT5     | 2.98E-09 | -0.20144 | 0.015 | 0.238 | 4.45E-05 | Undiff-G | ZMAT5     |
| CLN5      | 2.98E-09 | -0.33872 | 0.007 | 0.224 | 4.45E-05 | Undiff-G | CLN5      |
| CDC34     | 2.98E-09 | -0.24466 | 0.015 | 0.237 | 4.46E-05 | Undiff-G | CDC34     |
| HIPK2     | 3.02E-09 | -0.5393  | 0.007 | 0.223 | 4.51E-05 | Undiff-G | HIPK2     |
| SRSF6     | 3.02E-09 | 0.240329 | 0.081 | 0.362 | 4.51E-05 | Undiff-G | SRSF6     |
| NFYC      | 3.02E-09 | -0.47918 | 0.007 | 0.223 | 4.52E-05 | Undiff-G | NFYC      |
| PMPCA     | 3.02E-09 | -0.45358 | 0.022 | 0.249 | 4.52E-05 | Undiff-G | PMPCA     |
| FKBP5     | 3.06E-09 | -0.29536 | 0.059 | 0.32  | 4.57E-05 | Undiff-G | FKBP5     |
| SQLE      | 3.06E-09 | -0.29399 | 0.022 | 0.251 | 4.57E-05 | Undiff-G | SQLE      |
| HDGF      | 3.06E-09 | -0.14798 | 0.037 | 0.276 | 4.58E-05 | Undiff-G | HDGF      |
| TBL1XR1   | 3.08E-09 | -0.44114 | 0.022 | 0.251 | 4.60E-05 | Undiff-G | TBL1XR1   |
| TMEM98    | 3.09E-09 | -0.18917 | 0.015 | 0.238 | 4.62E-05 | Undiff-G | TMEM98    |
| RGS12     | 3.17E-09 | -0.49885 | 0.037 | 0.273 | 4.74E-05 | Undiff-G | RGS12     |
| CDS2      | 3.22E-09 | -0.34799 | 0.022 | 0.251 | 4.81E-05 | Undiff-G | CDS2      |
| CAPN1     | 3.22E-09 | -0.30886 | 0.029 | 0.261 | 4.81E-05 | Undiff-G | CAPN1     |
| AGGF1     | 3.22E-09 | -0.4942  | 0.007 | 0.222 | 4.81E-05 | Undiff-G | AGGF1     |
| ARL8B     | 3.22E-09 | -0.54396 | 0     | 0.208 | 4.82E-05 | Undiff-G | ARL8B     |
| POLR2B    | 3.22E-09 | -0.2224  | 0.029 | 0.265 | 4.82E-05 | Undiff-G | POLR2B    |

|           |           |           |        |        |           |          |                |
|-----------|-----------|-----------|--------|--------|-----------|----------|----------------|
| MSRB1     | 3. 27E-09 | -0. 45569 | 0. 007 | 0. 223 | 4. 89E-05 | Undiff-G | MSRB1          |
| COA6      | 3. 30E-09 | 0. 122145 | 0. 037 | 0. 279 | 4. 94E-05 | Undiff-G | COA6           |
| NABP2     | 3. 31E-09 | -0. 1799  | 0. 037 | 0. 279 | 4. 94E-05 | Undiff-G | NABP2          |
| GALNT1    | 3. 31E-09 | -0. 49984 | 0      | 0. 208 | 4. 95E-05 | Undiff-G | GALNT1         |
| CACUL1    | 3. 31E-09 | -0. 56307 | 0      | 0. 208 | 4. 95E-05 | Undiff-G | CACUL1         |
| GOPC      | 3. 31E-09 | -0. 48667 | 0. 029 | 0. 26  | 4. 95E-05 | Undiff-G | GOPC           |
| ASF1A     | 3. 35E-09 | -0. 28949 | 0. 015 | 0. 237 | 5. 00E-05 | Undiff-G | ASF1A          |
| WIF1      | 3. 40E-09 | 0. 33469  | 0. 015 | 0. 001 | 5. 08E-05 | Undiff-G | WIF1           |
| RP11-286N | 3. 40E-09 | 0. 326086 | 0. 015 | 0. 001 | 5. 08E-05 | Undiff-G | RP11-286N22. 8 |
| PDXK      | 3. 41E-09 | -0. 15043 | 0. 044 | 0. 287 | 5. 09E-05 | Undiff-G | PDXK           |
| HSPA4     | 3. 41E-09 | 0. 13989  | 0. 037 | 0. 279 | 5. 10E-05 | Undiff-G | HSPA4          |
| MED28     | 3. 42E-09 | 0. 104994 | 0. 074 | 0. 342 | 5. 12E-05 | Undiff-G | MED28          |
| TM7SF2    | 3. 43E-09 | -0. 54611 | 0. 015 | 0. 233 | 5. 12E-05 | Undiff-G | TM7SF2         |
| CBFB      | 3. 44E-09 | -0. 3453  | 0. 015 | 0. 236 | 5. 14E-05 | Undiff-G | CBFB           |
| H2AFX     | 3. 49E-09 | -0. 54315 | 0. 007 | 0. 222 | 5. 21E-05 | Undiff-G | H2AFX          |
| MYL6      | 3. 50E-09 | 0. 860697 | 0. 676 | 0. 945 | 5. 23E-05 | Undiff-G | MYL6           |
| PDLIM5    | 3. 50E-09 | -0. 4813  | 0. 007 | 0. 222 | 5. 24E-05 | Undiff-G | PDLIM5         |
| SIVA1     | 3. 51E-09 | 0. 403994 | 0. 147 | 0. 489 | 5. 24E-05 | Undiff-G | SIVA1          |
| SRGAP2    | 3. 53E-09 | -0. 5524  | 0. 015 | 0. 235 | 5. 27E-05 | Undiff-G | SRGAP2         |
| MOB4      | 3. 54E-09 | 0. 343679 | 0. 088 | 0. 375 | 5. 30E-05 | Undiff-G | MOB4           |
| LBR       | 3. 59E-09 | -0. 53548 | 0. 015 | 0. 235 | 5. 36E-05 | Undiff-G | LBR            |
| NUDT16    | 3. 60E-09 | -0. 51764 | 0. 007 | 0. 222 | 5. 37E-05 | Undiff-G | NUDT16         |
| ZCCHC10   | 3. 63E-09 | -0. 26233 | 0. 015 | 0. 236 | 5. 42E-05 | Undiff-G | ZCCHC10        |
| FAM207A   | 3. 66E-09 | -0. 51116 | 0      | 0. 207 | 5. 47E-05 | Undiff-G | FAM207A        |
| TMEM109   | 3. 66E-09 | -0. 65953 | 0      | 0. 207 | 5. 47E-05 | Undiff-G | TMEM109        |
| NRBF2     | 3. 66E-09 | -0. 12802 | 0. 037 | 0. 274 | 5. 47E-05 | Undiff-G | NRBF2          |
| PCSK7     | 3. 69E-09 | -0. 51126 | 0. 044 | 0. 285 | 5. 51E-05 | Undiff-G | PCSK7          |
| GAS6      | 3. 69E-09 | -0. 6616  | 0      | 0. 207 | 5. 52E-05 | Undiff-G | GAS6           |
| BICD1     | 3. 76E-09 | -0. 47955 | 0      | 0. 207 | 5. 62E-05 | Undiff-G | BICD1          |
| SENP6     | 3. 76E-09 | -0. 50045 | 0. 007 | 0. 221 | 5. 62E-05 | Undiff-G | SENP6          |
| HEBP2     | 3. 79E-09 | -0. 43542 | 0. 007 | 0. 221 | 5. 66E-05 | Undiff-G | HEBP2          |
| DCX       | 3. 79E-09 | -0. 68736 | 0      | 0. 207 | 5. 67E-05 | Undiff-G | DCX            |
| PPIL4     | 3. 82E-09 | -0. 17665 | 0. 022 | 0. 249 | 5. 71E-05 | Undiff-G | PPIL4          |
| PRPF4B    | 3. 90E-09 | -0. 2056  | 0. 037 | 0. 276 | 5. 83E-05 | Undiff-G | PRPF4B         |
| TMEM55B   | 3. 92E-09 | -0. 51027 | 0. 007 | 0. 221 | 5. 86E-05 | Undiff-G | TMEM55B        |
| SLC25A33  | 3. 95E-09 | -0. 4663  | 0. 007 | 0. 221 | 5. 91E-05 | Undiff-G | SLC25A33       |
| DHX30     | 3. 96E-09 | -0. 25203 | 0. 029 | 0. 26  | 5. 92E-05 | Undiff-G | DHX30          |
| DCTN1     | 3. 96E-09 | -0. 55276 | 0. 007 | 0. 218 | 5. 92E-05 | Undiff-G | DCTN1          |
| SAMHD1    | 4. 00E-09 | -0. 6859  | 0. 007 | 0. 217 | 5. 98E-05 | Undiff-G | SAMHD1         |
| BZW1      | 4. 00E-09 | 0. 496043 | 0. 176 | 0. 542 | 5. 98E-05 | Undiff-G | BZW1           |
| FAM89B    | 4. 06E-09 | -0. 26165 | 0. 022 | 0. 249 | 6. 07E-05 | Undiff-G | FAM89B         |
| HCFC1R1   | 4. 13E-09 | -0. 23561 | 0. 044 | 0. 285 | 6. 18E-05 | Undiff-G | HCFC1R1        |
| NHLRC3    | 4. 16E-09 | -0. 11717 | 0. 037 | 0. 273 | 6. 22E-05 | Undiff-G | NHLRC3         |
| AASDHPPT  | 4. 19E-09 | 0. 331411 | 0. 044 | 0. 291 | 6. 27E-05 | Undiff-G | AASDHPPT       |
| NUDT21    | 4. 24E-09 | 0. 11109  | 0. 029 | 0. 263 | 6. 34E-05 | Undiff-G | NUDT21         |
| SMC1A     | 4. 28E-09 | -0. 52148 | 0. 007 | 0. 22  | 6. 39E-05 | Undiff-G | SMC1A          |
| ACP2      | 4. 30E-09 | -0. 44986 | 0. 022 | 0. 246 | 6. 43E-05 | Undiff-G | ACP2           |
| SMARCD3   | 4. 32E-09 | -0. 38496 | 0. 015 | 0. 234 | 6. 46E-05 | Undiff-G | SMARCD3        |
| SEZ6L2    | 4. 34E-09 | -0. 14727 | 0. 037 | 0. 276 | 6. 48E-05 | Undiff-G | SEZ6L2         |
| PTPRC     | 4. 35E-09 | -0. 82808 | 0      | 0. 205 | 6. 49E-05 | Undiff-G | PTPRC          |
| SF3A2     | 4. 36E-09 | -0. 22461 | 0. 029 | 0. 262 | 6. 52E-05 | Undiff-G | SF3A2          |

|         |          |          |       |       |          |          |         |
|---------|----------|----------|-------|-------|----------|----------|---------|
| TMEM107 | 4.37E-09 | -0.51957 | 0.007 | 0.22  | 6.54E-05 | Undiff-G | TMEM107 |
| VPS26B  | 4.39E-09 | -0.44976 | 0.015 | 0.234 | 6.56E-05 | Undiff-G | VPS26B  |
| MOAP1   | 4.39E-09 | -0.4874  | 0.007 | 0.22  | 6.57E-05 | Undiff-G | MOAP1   |
| U2AF2   | 4.41E-09 | -0.17638 | 0.029 | 0.26  | 6.59E-05 | Undiff-G | U2AF2   |
| KIFAP3  | 4.46E-09 | -0.54197 | 0     | 0.205 | 6.67E-05 | Undiff-G | KIFAP3  |
| LAT2    | 4.46E-09 | -0.83432 | 0     | 0.205 | 6.67E-05 | Undiff-G | LAT2    |
| EVI2B   | 4.50E-09 | -0.86641 | 0     | 0.205 | 6.73E-05 | Undiff-G | EVI2B   |
| FAM213A | 4.52E-09 | 0.268574 | 0.096 | 0.386 | 6.76E-05 | Undiff-G | FAM213A |
| RARS    | 4.55E-09 | -0.23427 | 0.022 | 0.247 | 6.80E-05 | Undiff-G | RARS    |
| DHX15   | 4.61E-09 | -0.43288 | 0.022 | 0.247 | 6.89E-05 | Undiff-G | DHX15   |
| PLK3    | 4.62E-09 | -0.53879 | 0.022 | 0.243 | 6.90E-05 | Undiff-G | PLK3    |
| CSF2RA  | 4.67E-09 | -0.88882 | 0     | 0.205 | 6.98E-05 | Undiff-G | CSF2RA  |
| NPM3    | 4.73E-09 | -0.39654 | 0.007 | 0.219 | 7.06E-05 | Undiff-G | NPM3    |
| DNAJC15 | 4.73E-09 | 0.284273 | 0.103 | 0.393 | 7.07E-05 | Undiff-G | DNAJC15 |
| TMEM206 | 4.78E-09 | -0.19308 | 0.015 | 0.233 | 7.14E-05 | Undiff-G | TMEM206 |
| RBFOX2  | 4.81E-09 | -0.54726 | 0.007 | 0.218 | 7.19E-05 | Undiff-G | RBFOX2  |
| DERL1   | 4.86E-09 | 0.183566 | 0.059 | 0.316 | 7.27E-05 | Undiff-G | DERL1   |
| CCDC137 | 4.89E-09 | -0.47619 | 0     | 0.204 | 7.30E-05 | Undiff-G | CCDC137 |
| MECP2   | 4.89E-09 | -0.54553 | 0     | 0.204 | 7.30E-05 | Undiff-G | MECP2   |
| SLA     | 4.93E-09 | -0.83458 | 0     | 0.204 | 7.37E-05 | Undiff-G | SLA     |
| BOLA3   | 4.98E-09 | 0.111157 | 0.074 | 0.339 | 7.44E-05 | Undiff-G | BOLA3   |
| BRWD1   | 5.00E-09 | -0.43161 | 0.022 | 0.244 | 7.47E-05 | Undiff-G | BRWD1   |
| MSRA    | 5.04E-09 | -0.32634 | 0.029 | 0.259 | 7.54E-05 | Undiff-G | MSRA    |
| SF3A3   | 5.06E-09 | 0.118424 | 0.044 | 0.288 | 7.56E-05 | Undiff-G | SF3A3   |
| VAT1    | 5.07E-09 | -0.54067 | 0     | 0.204 | 7.57E-05 | Undiff-G | VAT1    |
| SOX9    | 5.10E-09 | -0.35036 | 0.037 | 0.274 | 7.62E-05 | Undiff-G | SOX9    |
| BECN1   | 5.12E-09 | -0.33067 | 0.015 | 0.232 | 7.65E-05 | Undiff-G | BECN1   |
| MMP2    | 5.13E-09 | -0.55409 | 0.015 | 0.229 | 7.66E-05 | Undiff-G | MMP2    |
| SRP68   | 5.14E-09 | -0.43658 | 0.015 | 0.232 | 7.69E-05 | Undiff-G | SRP68   |
| ARL1    | 5.21E-09 | 0.188974 | 0.059 | 0.316 | 7.79E-05 | Undiff-G | ARL1    |
| PSMB10  | 5.22E-09 | -0.43519 | 0.029 | 0.258 | 7.79E-05 | Undiff-G | PSMB10  |
| IL10RB  | 5.22E-09 | -0.31809 | 0.022 | 0.246 | 7.80E-05 | Undiff-G | IL10RB  |
| PCMTD2  | 5.32E-09 | -0.2973  | 0.015 | 0.23  | 7.95E-05 | Undiff-G | PCMTD2  |
| HDHD2   | 5.32E-09 | -0.16344 | 0.029 | 0.26  | 7.95E-05 | Undiff-G | HDHD2   |
| ELF1    | 5.33E-09 | -0.19016 | 0.022 | 0.246 | 7.96E-05 | Undiff-G | ELF1    |
| TCEAL1  | 5.34E-09 | -0.2751  | 0.029 | 0.258 | 7.98E-05 | Undiff-G | TCEAL1  |
| ACAT1   | 5.34E-09 | 0.332443 | 0.088 | 0.369 | 7.98E-05 | Undiff-G | ACAT1   |
| PMEPA1  | 5.40E-09 | -0.5817  | 0     | 0.203 | 8.06E-05 | Undiff-G | PMEPA1  |
| PRKACB  | 5.46E-09 | -0.49383 | 0.007 | 0.218 | 8.17E-05 | Undiff-G | PRKACB  |
| EIF2S3  | 5.48E-09 | -0.10296 | 0.051 | 0.297 | 8.19E-05 | Undiff-G | EIF2S3  |
| PCBP4   | 5.49E-09 | -0.37003 | 0.029 | 0.258 | 8.20E-05 | Undiff-G | PCBP4   |
| EFTUD2  | 5.52E-09 | -0.49022 | 0.007 | 0.217 | 8.24E-05 | Undiff-G | EFTUD2  |
| PPIL3   | 5.53E-09 | -0.52988 | 0.007 | 0.215 | 8.27E-05 | Undiff-G | PPIL3   |
| SYS1    | 5.53E-09 | -0.3516  | 0.022 | 0.243 | 8.27E-05 | Undiff-G | SYS1    |
| SAR1A   | 5.54E-09 | 0.113785 | 0.051 | 0.301 | 8.28E-05 | Undiff-G | SAR1A   |
| ASRGL1  | 5.54E-09 | -0.53936 | 0     | 0.203 | 8.28E-05 | Undiff-G | ASRGL1  |
| VPS36   | 5.54E-09 | -0.56013 | 0     | 0.203 | 8.28E-05 | Undiff-G | VPS36   |
| USO1    | 5.56E-09 | -0.32559 | 0.007 | 0.218 | 8.31E-05 | Undiff-G | USO1    |
| SORT1   | 5.58E-09 | -0.33751 | 0.015 | 0.232 | 8.34E-05 | Undiff-G | SORT1   |
| UNC93B1 | 5.59E-09 | -0.62536 | 0     | 0.203 | 8.36E-05 | Undiff-G | UNC93B1 |
| CTNND1  | 5.62E-09 | -0.49352 | 0.007 | 0.217 | 8.40E-05 | Undiff-G | CTNND1  |



|          |          |          |       |       |          |          |          |
|----------|----------|----------|-------|-------|----------|----------|----------|
| QARS     | 5.71E-09 | -0.28119 | 0.044 | 0.285 | 8.54E-05 | Undiff-G | QARS     |
| TTYH1    | 5.76E-09 | -0.43413 | 0.037 | 0.271 | 8.61E-05 | Undiff-G | TTYH1    |
| SMIM20   | 5.81E-09 | 0.191134 | 0.074 | 0.343 | 8.68E-05 | Undiff-G | SMIM20   |
| KIAA1715 | 5.81E-09 | -0.20938 | 0.029 | 0.258 | 8.69E-05 | Undiff-G | KIAA1715 |
| CSTF3    | 5.82E-09 | -0.12919 | 0.037 | 0.27  | 8.70E-05 | Undiff-G | CSTF3    |
| DDX41    | 5.85E-09 | -0.24276 | 0.022 | 0.245 | 8.74E-05 | Undiff-G | DDX41    |
| APOO     | 5.86E-09 | -0.16583 | 0.015 | 0.231 | 8.76E-05 | Undiff-G | APOO     |
| PPHLN1   | 5.88E-09 | 0.43297  | 0.088 | 0.37  | 8.79E-05 | Undiff-G | PPHLN1   |
| SMARCD1  | 5.89E-09 | -0.46332 | 0.007 | 0.217 | 8.80E-05 | Undiff-G | SMARCD1  |
| CAMK1    | 5.91E-09 | -0.45501 | 0.015 | 0.228 | 8.83E-05 | Undiff-G | CAMK1    |
| SNRPA1   | 5.92E-09 | 0.153667 | 0.051 | 0.298 | 8.85E-05 | Undiff-G | SNRPA1   |
| CTNNBL1  | 5.98E-09 | 0.170438 | 0.051 | 0.299 | 8.94E-05 | Undiff-G | CTNNBL1  |
| RND3     | 5.98E-09 | -0.35388 | 0.022 | 0.245 | 8.94E-05 | Undiff-G | RND3     |
| CHTOP    | 6.01E-09 | 0.355262 | 0.088 | 0.37  | 8.99E-05 | Undiff-G | CHTOP    |
| DNPEP    | 6.04E-09 | -0.35587 | 0.022 | 0.244 | 9.03E-05 | Undiff-G | DNPEP    |
| GART     | 6.06E-09 | -0.53223 | 0     | 0.202 | 9.06E-05 | Undiff-G | GART     |
| MRPS23   | 6.09E-09 | 0.379341 | 0.088 | 0.37  | 9.11E-05 | Undiff-G | MRPS23   |
| BFAR     | 6.13E-09 | -0.25979 | 0.015 | 0.231 | 9.16E-05 | Undiff-G | BFAR     |
| DNM2     | 6.14E-09 | -0.22294 | 0.022 | 0.245 | 9.18E-05 | Undiff-G | DNM2     |
| RNF141   | 6.19E-09 | -0.34058 | 0.007 | 0.217 | 9.26E-05 | Undiff-G | RNF141   |
| ALDH9A1  | 6.22E-09 | 0.271191 | 0.074 | 0.342 | 9.29E-05 | Undiff-G | ALDH9A1  |
| DEAF1    | 6.22E-09 | -0.4952  | 0.007 | 0.214 | 9.29E-05 | Undiff-G | DEAF1    |
| PGRMC2   | 6.23E-09 | -0.37014 | 0.015 | 0.228 | 9.31E-05 | Undiff-G | PGRMC2   |
| ECI2     | 6.23E-09 | 0.124768 | 0.066 | 0.326 | 9.32E-05 | Undiff-G | ECI2     |
| SORL1    | 6.26E-09 | -0.49922 | 0.015 | 0.23  | 9.35E-05 | Undiff-G | SORL1    |
| MYO6     | 6.39E-09 | -0.53048 | 0.015 | 0.227 | 9.55E-05 | Undiff-G | MYO6     |
| PPIH     | 6.41E-09 | -0.44563 | 0.015 | 0.23  | 9.57E-05 | Undiff-G | PPIH     |
| E2F4     | 6.41E-09 | -0.47043 | 0.007 | 0.216 | 9.58E-05 | Undiff-G | E2F4     |
| TPM1     | 6.54E-09 | -0.31489 | 0.029 | 0.255 | 9.78E-05 | Undiff-G | TPM1     |
| CD86     | 6.58E-09 | -0.78278 | 0.007 | 0.216 | 9.84E-05 | Undiff-G | CD86     |
| HIBADH   | 6.59E-09 | -0.16397 | 0.015 | 0.23  | 9.85E-05 | Undiff-G | HIBADH   |
| DAAM1    | 6.63E-09 | -0.34473 | 0.022 | 0.243 | 9.91E-05 | Undiff-G | DAAM1    |
| S100A9   | 6.64E-09 | -0.9593  | 0.015 | 0.226 | 9.92E-05 | Undiff-G | S100A9   |
| ERAL1    | 6.64E-09 | -0.227   | 0.022 | 0.243 | 9.92E-05 | Undiff-G | ERAL1    |
| INSIG1   | 6.66E-09 | -0.55394 | 0.015 | 0.229 | 9.96E-05 | Undiff-G | INSIG1   |
| AGPAT1   | 6.67E-09 | -0.25022 | 0.015 | 0.229 | 9.97E-05 | Undiff-G | AGPAT1   |
| CREB1    | 6.69E-09 | -0.25699 | 0.022 | 0.244 | 0.0001   | Undiff-G | CREB1    |
| HOMER3   | 6.74E-09 | -0.21278 | 0.022 | 0.244 | 0.000101 | Undiff-G | HOMER3   |
| CCPG1    | 6.80E-09 | -0.51237 | 0.007 | 0.215 | 0.000102 | Undiff-G | CCPG1    |
| ECI1     | 6.84E-09 | -0.21105 | 0.007 | 0.216 | 0.000102 | Undiff-G | ECI1     |
| PDCL3    | 6.88E-09 | 0.125899 | 0.051 | 0.296 | 0.000103 | Undiff-G | PDCL3    |
| S100A4   | 6.93E-09 | -0.30591 | 0.051 | 0.298 | 0.000104 | Undiff-G | S100A4   |
| ZNF146   | 6.96E-09 | -0.26586 | 0.015 | 0.23  | 0.000104 | Undiff-G | ZNF146   |
| KLHDC8A  | 6.96E-09 | -0.50556 | 0.029 | 0.253 | 0.000104 | Undiff-G | KLHDC8A  |
| ACOT7    | 7.00E-09 | -0.44327 | 0.015 | 0.229 | 0.000105 | Undiff-G | ACOT7    |
| SRSF3    | 7.06E-09 | 0.444135 | 0.272 | 0.734 | 0.000105 | Undiff-G | SRSF3    |
| TMEM242  | 7.09E-09 | -0.16867 | 0.022 | 0.243 | 0.000106 | Undiff-G | TMEM242  |
| PSME3    | 7.15E-09 | -0.45131 | 0.015 | 0.229 | 0.000107 | Undiff-G | PSME3    |
| RAD51C   | 7.18E-09 | -0.13932 | 0.037 | 0.269 | 0.000107 | Undiff-G | RAD51C   |
| HSD17B4  | 7.18E-09 | -0.15939 | 0.022 | 0.244 | 0.000107 | Undiff-G | HSD17B4  |
| MSI2     | 7.20E-09 | -0.13192 | 0.066 | 0.324 | 0.000108 | Undiff-G | MSI2     |

|          |           |           |        |        |           |          |          |
|----------|-----------|-----------|--------|--------|-----------|----------|----------|
| RPS6KB2  | 7. 20E-09 | -0. 36976 | 0. 015 | 0. 229 | 0. 000108 | Undiff-G | RPS6KB2  |
| PPP1CB   | 7. 20E-09 | 0. 300902 | 0. 162 | 0. 51  | 0. 000108 | Undiff-G | PPP1CB   |
| UBTF     | 7. 30E-09 | -0. 34661 | 0. 015 | 0. 229 | 0. 000109 | Undiff-G | UBTF     |
| FABP7    | 7. 31E-09 | -0. 17456 | 0. 103 | 0. 387 | 0. 000109 | Undiff-G | FABP7    |
| SP3      | 7. 35E-09 | -0. 52214 | 0. 007 | 0. 212 | 0. 00011  | Undiff-G | SP3      |
| THUMPD1  | 7. 37E-09 | -0. 52002 | 0. 007 | 0. 214 | 0. 00011  | Undiff-G | THUMPD1  |
| CBX6     | 7. 40E-09 | -0. 1617  | 0. 022 | 0. 243 | 0. 000111 | Undiff-G | CBX6     |
| SLC2A3   | 7. 40E-09 | -0. 23652 | 0. 029 | 0. 257 | 0. 000111 | Undiff-G | SLC2A3   |
| SNHG9    | 7. 43E-09 | -0. 11501 | 0. 059 | 0. 307 | 0. 000111 | Undiff-G | SNHG9    |
| AK3      | 7. 45E-09 | -0. 30451 | 0. 022 | 0. 24  | 0. 000111 | Undiff-G | AK3      |
| EEF1D    | 7. 54E-09 | 0. 266208 | 0. 331 | 0. 851 | 0. 000113 | Undiff-G | EEF1D    |
| C5AR1    | 7. 56E-09 | -0. 52166 | 0. 022 | 0. 24  | 0. 000113 | Undiff-G | C5AR1    |
| PNPLA2   | 7. 58E-09 | -0. 43472 | 0. 007 | 0. 215 | 0. 000113 | Undiff-G | PNPLA2   |
| CHORDC1  | 7. 58E-09 | -0. 4686  | 0. 007 | 0. 215 | 0. 000113 | Undiff-G | CHORDC1  |
| NF1      | 7. 65E-09 | -0. 4977  | 0. 015 | 0. 226 | 0. 000114 | Undiff-G | NF1      |
| COX14    | 7. 83E-09 | 0. 420043 | 0. 14  | 0. 464 | 0. 000117 | Undiff-G | COX14    |
| LGALS9   | 7. 93E-09 | -0. 40841 | 0. 022 | 0. 243 | 0. 000118 | Undiff-G | LGALS9   |
| SPPL3    | 7. 93E-09 | -0. 50775 | 0      | 0. 2   | 0. 000119 | Undiff-G | SPPL3    |
| RANBP2   | 7. 97E-09 | -0. 55893 | 0. 007 | 0. 211 | 0. 000119 | Undiff-G | RANBP2   |
| UFL1     | 8. 05E-09 | -0. 51247 | 0. 007 | 0. 214 | 0. 00012  | Undiff-G | UFL1     |
| EIF4G1   | 8. 06E-09 | -0. 23843 | 0. 044 | 0. 28  | 0. 00012  | Undiff-G | EIF4G1   |
| VAPB     | 8. 15E-09 | -0. 46519 | 0      | 0. 199 | 0. 000122 | Undiff-G | VAPB     |
| ARHGEF2  | 8. 21E-09 | -0. 26753 | 0. 051 | 0. 292 | 0. 000123 | Undiff-G | ARHGEF2  |
| QSOX1    | 8. 33E-09 | -0. 4516  | 0. 022 | 0. 239 | 0. 000125 | Undiff-G | QSOX1    |
| MGST2    | 8. 34E-09 | -0. 20558 | 0. 029 | 0. 256 | 0. 000125 | Undiff-G | MGST2    |
| ARIH2    | 8. 34E-09 | -0. 29104 | 0. 029 | 0. 253 | 0. 000125 | Undiff-G | ARIH2    |
| HTRA2    | 8. 40E-09 | -0. 36581 | 0. 015 | 0. 227 | 0. 000126 | Undiff-G | HTRA2    |
| THRA     | 8. 43E-09 | -0. 45593 | 0. 022 | 0. 241 | 0. 000126 | Undiff-G | THRA     |
| CASP3    | 8. 45E-09 | -0. 51794 | 0      | 0. 199 | 0. 000126 | Undiff-G | CASP3    |
| OFD1     | 8. 51E-09 | -0. 34274 | 0. 044 | 0. 277 | 0. 000127 | Undiff-G | OFD1     |
| PYGB     | 8. 58E-09 | -0. 47323 | 0. 007 | 0. 213 | 0. 000128 | Undiff-G | PYGB     |
| NDN      | 8. 60E-09 | -0. 49886 | 0      | 0. 199 | 0. 000129 | Undiff-G | NDN      |
| FNBP4    | 8. 66E-09 | -0. 40477 | 0. 029 | 0. 254 | 0. 000129 | Undiff-G | FNBP4    |
| ATP5I    | 8. 67E-09 | 0. 314516 | 0. 279 | 0. 757 | 0. 00013  | Undiff-G | ATP5I    |
| TRIM13   | 8. 68E-09 | -0. 52938 | 0. 029 | 0. 252 | 0. 00013  | Undiff-G | TRIM13   |
| SIAH2    | 8. 70E-09 | -0. 50401 | 0. 007 | 0. 213 | 0. 00013  | Undiff-G | SIAH2    |
| CSE1L    | 8. 80E-09 | -0. 42009 | 0. 015 | 0. 225 | 0. 000131 | Undiff-G | CSE1L    |
| TMEM223  | 9. 01E-09 | -0. 20023 | 0. 015 | 0. 227 | 0. 000135 | Undiff-G | TMEM223  |
| TIMM17A  | 9. 01E-09 | 0. 393374 | 0. 096 | 0. 379 | 0. 000135 | Undiff-G | TIMM17A  |
| SIGIRR   | 9. 15E-09 | -0. 56786 | 0      | 0. 198 | 0. 000137 | Undiff-G | SIGIRR   |
| OXR1     | 9. 17E-09 | -0. 11503 | 0. 029 | 0. 254 | 0. 000137 | Undiff-G | OXR1     |
| AKAP8L   | 9. 18E-09 | -0. 41759 | 0. 029 | 0. 252 | 0. 000137 | Undiff-G | AKAP8L   |
| NT5C3A   | 9. 20E-09 | 0. 291022 | 0. 051 | 0. 297 | 0. 000137 | Undiff-G | NT5C3A   |
| COQ5     | 9. 24E-09 | -0. 54702 | 0      | 0. 198 | 0. 000138 | Undiff-G | COQ5     |
| FAM120A  | 9. 32E-09 | -0. 41352 | 0. 007 | 0. 213 | 0. 000139 | Undiff-G | FAM120A  |
| TSPYL1   | 9. 45E-09 | -0. 19328 | 0. 022 | 0. 24  | 0. 000141 | Undiff-G | TSPYL1   |
| EXOC1    | 9. 46E-09 | -0. 28254 | 0. 029 | 0. 252 | 0. 000141 | Undiff-G | EXOC1    |
| MAGOHB   | 9. 49E-09 | -0. 27666 | 0. 022 | 0. 24  | 0. 000142 | Undiff-G | MAGOHB   |
| WDR46    | 9. 59E-09 | -0. 3722  | 0. 022 | 0. 238 | 0. 000143 | Undiff-G | WDR46    |
| HPCAL1   | 9. 59E-09 | -0. 43434 | 0. 007 | 0. 212 | 0. 000143 | Undiff-G | HPCAL1   |
| IVNS1ABP | 9. 65E-09 | -0. 18782 | 0. 022 | 0. 24  | 0. 000144 | Undiff-G | IVNS1ABP |

|           |          |          |       |       |          |          |            |
|-----------|----------|----------|-------|-------|----------|----------|------------|
| PELI1     | 9.76E-09 | -0.62054 | 0.007 | 0.211 | 0.000146 | Undiff-G | PELI1      |
| MTMR14    | 9.80E-09 | -0.46216 | 0.015 | 0.224 | 0.000147 | Undiff-G | MTMR14     |
| RAB9A     | 9.81E-09 | 0.249956 | 0.059 | 0.307 | 0.000147 | Undiff-G | RAB9A      |
| GPN1      | 9.81E-09 | -0.25563 | 0.015 | 0.226 | 0.000147 | Undiff-G | GPN1       |
| RNPEP     | 9.83E-09 | -0.36773 | 0.015 | 0.226 | 0.000147 | Undiff-G | RNPEP      |
| FBXL15    | 9.92E-09 | -0.54262 | 0     | 0.198 | 0.000148 | Undiff-G | FBXL15     |
| LRP10     | 1.00E-08 | -0.2463  | 0.029 | 0.254 | 0.00015  | Undiff-G | LRP10      |
| MPZL1     | 1.00E-08 | -0.19223 | 0.029 | 0.251 | 0.00015  | Undiff-G | MPZL1      |
| THAP7     | 1.01E-08 | -0.44524 | 0.007 | 0.212 | 0.00015  | Undiff-G | THAP7      |
| METTL5    | 1.01E-08 | 0.264354 | 0.088 | 0.363 | 0.000151 | Undiff-G | METTL5     |
| RNF34     | 1.02E-08 | -0.49095 | 0     | 0.197 | 0.000152 | Undiff-G | RNF34      |
| NUFIP2    | 1.03E-08 | -0.44941 | 0.022 | 0.239 | 0.000153 | Undiff-G | NUFIP2     |
| SON       | 1.03E-08 | 0.43982  | 0.265 | 0.716 | 0.000154 | Undiff-G | SON        |
| WSB2      | 1.03E-08 | -0.13393 | 0.015 | 0.226 | 0.000154 | Undiff-G | WSB2       |
| PDE4B     | 1.04E-08 | -0.15922 | 0.044 | 0.279 | 0.000155 | Undiff-G | PDE4B      |
| WDR77     | 1.04E-08 | -0.24344 | 0.007 | 0.212 | 0.000156 | Undiff-G | WDR77      |
| AIG1      | 1.05E-08 | 0.285488 | 0.074 | 0.337 | 0.000156 | Undiff-G | AIG1       |
| TOP2B     | 1.06E-08 | -0.19132 | 0.022 | 0.24  | 0.000158 | Undiff-G | TOP2B      |
| KDM5A     | 1.06E-08 | -0.45269 | 0.029 | 0.25  | 0.000158 | Undiff-G | KDM5A      |
| UTP6      | 1.07E-08 | -0.36995 | 0.007 | 0.211 | 0.000159 | Undiff-G | UTP6       |
| ARFGAP2   | 1.08E-08 | -0.10305 | 0.051 | 0.295 | 0.000161 | Undiff-G | ARFGAP2    |
| GGPS1     | 1.08E-08 | 0.154123 | 0.066 | 0.32  | 0.000162 | Undiff-G | GGPS1      |
| ENAH      | 1.10E-08 | -0.14136 | 0.037 | 0.267 | 0.000164 | Undiff-G | ENAH       |
| TMEM218   | 1.12E-08 | -0.31087 | 0.015 | 0.224 | 0.000167 | Undiff-G | TMEM218    |
| KLF4      | 1.13E-08 | -0.75196 | 0.007 | 0.208 | 0.00017  | Undiff-G | KLF4       |
| ANKIB1    | 1.14E-08 | -0.39315 | 0.007 | 0.211 | 0.000171 | Undiff-G | ANKIB1     |
| CCAR1     | 1.15E-08 | -0.24789 | 0.029 | 0.252 | 0.000172 | Undiff-G | CCAR1      |
| XPA       | 1.15E-08 | -0.44784 | 0.015 | 0.224 | 0.000172 | Undiff-G | XPA        |
| UTP11L    | 1.17E-08 | 0.156263 | 0.051 | 0.294 | 0.000174 | Undiff-G | UTP11L     |
| GNL3      | 1.17E-08 | 0.324374 | 0.081 | 0.349 | 0.000175 | Undiff-G | GNL3       |
| BHLHE41   | 1.17E-08 | -0.58066 | 0.007 | 0.21  | 0.000175 | Undiff-G | BHLHE41    |
| CAT       | 1.17E-08 | 0.131697 | 0.059 | 0.308 | 0.000175 | Undiff-G | CAT        |
| TMPO      | 1.17E-08 | -0.5392  | 0     | 0.196 | 0.000175 | Undiff-G | TMPO       |
| ETS2      | 1.18E-08 | -0.69628 | 0.007 | 0.209 | 0.000176 | Undiff-G | ETS2       |
| SLC02B1   | 1.18E-08 | -0.68005 | 0.015 | 0.223 | 0.000177 | Undiff-G | SLC02B1    |
| ABHD14A   | 1.19E-08 | -0.23116 | 0.015 | 0.224 | 0.000178 | Undiff-G | ABHD14A    |
| KCTD5     | 1.21E-08 | -0.22492 | 0.007 | 0.21  | 0.000181 | Undiff-G | KCTD5      |
| ACAT2     | 1.21E-08 | 0.121984 | 0.044 | 0.28  | 0.000181 | Undiff-G | ACAT2      |
| SLC43A2   | 1.21E-08 | -0.36175 | 0.029 | 0.248 | 0.000181 | Undiff-G | SLC43A2    |
| EIF3B     | 1.22E-08 | -0.32177 | 0.029 | 0.249 | 0.000182 | Undiff-G | EIF3B      |
| DFFA      | 1.23E-08 | -0.26884 | 0.015 | 0.222 | 0.000183 | Undiff-G | DFFA       |
| GPANK1    | 1.23E-08 | -0.49926 | 0     | 0.195 | 0.000183 | Undiff-G | GPANK1     |
| C7orf49   | 1.23E-08 | -0.24203 | 0.007 | 0.21  | 0.000184 | Undiff-G | C7orf49    |
| SPRY2     | 1.24E-08 | -0.53521 | 0.015 | 0.22  | 0.000185 | Undiff-G | SPRY2      |
| KANSL1-AS | 1.24E-08 | -0.52707 | 0     | 0.195 | 0.000185 | Undiff-G | KANSL1-AS1 |
| ZMYND8    | 1.24E-08 | -0.32344 | 0.007 | 0.21  | 0.000186 | Undiff-G | ZMYND8     |
| ARL3      | 1.24E-08 | 0.288898 | 0.081 | 0.349 | 0.000186 | Undiff-G | ARL3       |
| MNAT1     | 1.26E-08 | -0.50693 | 0     | 0.195 | 0.000188 | Undiff-G | MNAT1      |
| C12orf75  | 1.26E-08 | -0.57509 | 0     | 0.195 | 0.000188 | Undiff-G | C12orf75   |
| LYSMD2    | 1.28E-08 | -0.49438 | 0     | 0.195 | 0.000192 | Undiff-G | LYSMD2     |
| CHPF      | 1.31E-08 | -0.39193 | 0.037 | 0.261 | 0.000196 | Undiff-G | CHPF       |

|           |           |           |        |        |           |          |           |
|-----------|-----------|-----------|--------|--------|-----------|----------|-----------|
| HERPUD1   | 1. 31E-08 | 0. 374298 | 0. 235 | 0. 647 | 0. 000196 | Undiff-G | HERPUD1   |
| DEXI      | 1. 33E-08 | -0. 44408 | 0. 007 | 0. 209 | 0. 000199 | Undiff-G | DEXI      |
| ETFA      | 1. 35E-08 | 0. 395673 | 0. 096 | 0. 375 | 0. 000202 | Undiff-G | ETFA      |
| PEX10     | 1. 35E-08 | -0. 45591 | 0      | 0. 195 | 0. 000202 | Undiff-G | PEX10     |
| PLS3      | 1. 36E-08 | -0. 26518 | 0. 015 | 0. 223 | 0. 000203 | Undiff-G | PLS3      |
| ZNF326    | 1. 37E-08 | -0. 34347 | 0. 029 | 0. 25  | 0. 000205 | Undiff-G | ZNF326    |
| LINC01003 | 1. 38E-08 | -0. 47282 | 0      | 0. 194 | 0. 000206 | Undiff-G | LINC01003 |
| NEK6      | 1. 40E-08 | 0. 117652 | 0. 051 | 0. 292 | 0. 000209 | Undiff-G | NEK6      |
| PLIN3     | 1. 40E-08 | 0. 353862 | 0. 088 | 0. 361 | 0. 000209 | Undiff-G | PLIN3     |
| NUDT14    | 1. 40E-08 | -0. 61055 | 0      | 0. 194 | 0. 00021  | Undiff-G | NUDT14    |
| ING2      | 1. 41E-08 | -0. 38363 | 0. 007 | 0. 209 | 0. 00021  | Undiff-G | ING2      |
| DNM1L     | 1. 41E-08 | -0. 25794 | 0. 022 | 0. 234 | 0. 000211 | Undiff-G | DNM1L     |
| MAN1A2    | 1. 42E-08 | -0. 45835 | 0. 007 | 0. 206 | 0. 000213 | Undiff-G | MAN1A2    |
| CCS       | 1. 42E-08 | -0. 13278 | 0. 037 | 0. 262 | 0. 000213 | Undiff-G | CCS       |
| LYZ       | 1. 43E-08 | -0. 65013 | 0. 007 | 0. 208 | 0. 000214 | Undiff-G | LYZ       |
| ZMYM2     | 1. 44E-08 | -0. 52162 | 0. 007 | 0. 207 | 0. 000215 | Undiff-G | ZMYM2     |
| HNRNPA1   | 1. 44E-08 | 0. 276205 | 0. 346 | 0. 883 | 0. 000216 | Undiff-G | HNRNPA1   |
| MFSD10    | 1. 45E-08 | 0. 112432 | 0. 059 | 0. 304 | 0. 000216 | Undiff-G | MFSD10    |
| CHD6      | 1. 45E-08 | -0. 42762 | 0. 029 | 0. 247 | 0. 000216 | Undiff-G | CHD6      |
| CD300A    | 1. 45E-08 | -0. 80173 | 0      | 0. 194 | 0. 000217 | Undiff-G | CD300A    |
| TRIM24    | 1. 47E-08 | -0. 45313 | 0      | 0. 194 | 0. 000219 | Undiff-G | TRIM24    |
| PFKFB3    | 1. 50E-08 | -0. 33907 | 0. 029 | 0. 246 | 0. 000224 | Undiff-G | PFKFB3    |
| SLAIN1    | 1. 50E-08 | -0. 59452 | 0. 007 | 0. 205 | 0. 000224 | Undiff-G | SLAIN1    |
| RSBN1     | 1. 51E-08 | -0. 20845 | 0. 015 | 0. 219 | 0. 000226 | Undiff-G | RSBN1     |
| BANF1     | 1. 51E-08 | 0. 478993 | 0. 243 | 0. 666 | 0. 000226 | Undiff-G | BANF1     |
| SNRNP40   | 1. 53E-08 | 0. 210047 | 0. 074 | 0. 332 | 0. 000229 | Undiff-G | SNRNP40   |
| PPP2R5E   | 1. 55E-08 | -0. 25431 | 0. 029 | 0. 25  | 0. 000231 | Undiff-G | PPP2R5E   |
| PGAM1     | 1. 57E-08 | 0. 530694 | 0. 162 | 0. 505 | 0. 000235 | Undiff-G | PGAM1     |
| UBE2H     | 1. 58E-08 | -0. 16275 | 0. 037 | 0. 262 | 0. 000237 | Undiff-G | UBE2H     |
| IFI30     | 1. 60E-08 | -0. 51999 | 0. 015 | 0. 222 | 0. 000239 | Undiff-G | IFI30     |
| SPTAN1    | 1. 60E-08 | -0. 22574 | 0. 037 | 0. 263 | 0. 000239 | Undiff-G | SPTAN1    |
| TIMM50    | 1. 62E-08 | 0. 165059 | 0. 066 | 0. 313 | 0. 000242 | Undiff-G | TIMM50    |
| FCGBP     | 1. 62E-08 | -0. 70883 | 0. 022 | 0. 232 | 0. 000243 | Undiff-G | FCGBP     |
| 1-Mar     | 1. 63E-08 | -0. 65762 | 0      | 0. 193 | 0. 000244 | Undiff-G | 1-Mar     |
| LONP1     | 1. 64E-08 | -0. 42635 | 0. 007 | 0. 207 | 0. 000245 | Undiff-G | LONP1     |
| AZI2      | 1. 66E-08 | 0. 135685 | 0. 059 | 0. 304 | 0. 000248 | Undiff-G | AZI2      |
| SLC30A5   | 1. 66E-08 | -0. 21573 | 0. 007 | 0. 207 | 0. 000249 | Undiff-G | SLC30A5   |
| TMF1      | 1. 69E-08 | -0. 21583 | 0. 015 | 0. 221 | 0. 000253 | Undiff-G | TMF1      |
| RPA3      | 1. 69E-08 | 0. 340259 | 0. 081 | 0. 346 | 0. 000253 | Undiff-G | RPA3      |
| FLAD1     | 1. 69E-08 | -0. 35477 | 0. 022 | 0. 234 | 0. 000253 | Undiff-G | FLAD1     |
| PTCD3     | 1. 71E-08 | -0. 42545 | 0. 022 | 0. 232 | 0. 000256 | Undiff-G | PTCD3     |
| MAP1A     | 1. 73E-08 | -0. 15819 | 0. 022 | 0. 232 | 0. 000258 | Undiff-G | MAP1A     |
| PREX1     | 1. 73E-08 | -0. 45665 | 0. 015 | 0. 22  | 0. 000258 | Undiff-G | PREX1     |
| GSK3A     | 1. 73E-08 | -0. 4594  | 0      | 0. 192 | 0. 000259 | Undiff-G | GSK3A     |
| GADD45G   | 1. 74E-08 | -0. 56867 | 0. 037 | 0. 258 | 0. 00026  | Undiff-G | GADD45G   |
| RAP1B     | 1. 74E-08 | 0. 349713 | 0. 132 | 0. 438 | 0. 00026  | Undiff-G | RAP1B     |
| HNMT      | 1. 74E-08 | -0. 33667 | 0. 015 | 0. 221 | 0. 000261 | Undiff-G | HNMT      |
| SOCS6     | 1. 75E-08 | -0. 51461 | 0. 022 | 0. 232 | 0. 000261 | Undiff-G | SOCS6     |
| PRPF8     | 1. 75E-08 | -0. 14249 | 0. 037 | 0. 259 | 0. 000261 | Undiff-G | PRPF8     |
| DDX42     | 1. 75E-08 | -0. 20755 | 0. 015 | 0. 221 | 0. 000262 | Undiff-G | DDX42     |
| SURF2     | 1. 75E-08 | -0. 15306 | 0. 022 | 0. 234 | 0. 000262 | Undiff-G | SURF2     |

|           |          |          |       |       |          |          |             |
|-----------|----------|----------|-------|-------|----------|----------|-------------|
| LUC7L     | 1.75E-08 | -0.28574 | 0.029 | 0.248 | 0.000262 | Undiff-G | LUC7L       |
| ZNF593    | 1.76E-08 | 0.286302 | 0.059 | 0.304 | 0.000264 | Undiff-G | ZNF593      |
| C6orf226  | 1.76E-08 | -0.50329 | 0     | 0.192 | 0.000264 | Undiff-G | C6orf226    |
| VCAN      | 1.78E-08 | -0.19075 | 0.029 | 0.249 | 0.000265 | Undiff-G | VCAN        |
| ARPC1A    | 1.78E-08 | 0.507641 | 0.191 | 0.562 | 0.000266 | Undiff-G | ARPC1A      |
| ZSCAN18   | 1.78E-08 | -0.43392 | 0.022 | 0.234 | 0.000266 | Undiff-G | ZSCAN18     |
| ANKRD17   | 1.78E-08 | -0.40789 | 0.015 | 0.219 | 0.000267 | Undiff-G | ANKRD17     |
| RPF1      | 1.82E-08 | -0.12693 | 0.029 | 0.248 | 0.000272 | Undiff-G | RPF1        |
| SPCS2     | 1.82E-08 | 0.481952 | 0.272 | 0.735 | 0.000272 | Undiff-G | SPCS2       |
| GALNT2    | 1.82E-08 | -0.36909 | 0.029 | 0.246 | 0.000272 | Undiff-G | GALNT2      |
| CHST12    | 1.82E-08 | -0.11403 | 0.029 | 0.248 | 0.000272 | Undiff-G | CHST12      |
| RELA      | 1.83E-08 | -0.29261 | 0.007 | 0.206 | 0.000274 | Undiff-G | RELA        |
| RAB21     | 1.83E-08 | -0.25965 | 0.007 | 0.206 | 0.000274 | Undiff-G | RAB21       |
| CDKN2C    | 1.84E-08 | -0.10943 | 0.051 | 0.285 | 0.000275 | Undiff-G | CDKN2C      |
| ABHD2     | 1.84E-08 | -0.14259 | 0.022 | 0.232 | 0.000275 | Undiff-G | ABHD2       |
| HEBP1     | 1.84E-08 | -0.54929 | 0     | 0.191 | 0.000276 | Undiff-G | HEBP1       |
| IFT27     | 1.86E-08 | -0.2248  | 0.037 | 0.259 | 0.000278 | Undiff-G | IFT27       |
| EFCAB14   | 1.86E-08 | -0.46932 | 0.007 | 0.205 | 0.000278 | Undiff-G | EFCAB14     |
| FAF2      | 1.86E-08 | -0.47856 | 0     | 0.191 | 0.000278 | Undiff-G | FAF2        |
| NDUFB7    | 1.87E-08 | 0.413    | 0.272 | 0.725 | 0.000279 | Undiff-G | NDUFB7      |
| UNC119    | 1.87E-08 | -0.28091 | 0.015 | 0.219 | 0.000279 | Undiff-G | UNC119      |
| EXOSC7    | 1.87E-08 | -0.17568 | 0.022 | 0.231 | 0.00028  | Undiff-G | EXOSC7      |
| RAB28     | 1.87E-08 | -0.39231 | 0.015 | 0.22  | 0.00028  | Undiff-G | RAB28       |
| APOC2     | 1.88E-08 | -1.00614 | 0     | 0.191 | 0.00028  | Undiff-G | APOC2       |
| ERGIC3    | 1.89E-08 | 0.467988 | 0.206 | 0.58  | 0.000283 | Undiff-G | ERGIC3      |
| CERS2     | 1.90E-08 | -0.22127 | 0.022 | 0.234 | 0.000283 | Undiff-G | CERS2       |
| TNFSF13B  | 1.90E-08 | -0.49111 | 0.007 | 0.206 | 0.000284 | Undiff-G | TNFSF13B    |
| BCAT1     | 1.91E-08 | -0.29789 | 0.022 | 0.234 | 0.000285 | Undiff-G | BCAT1       |
| FNDC3A    | 1.91E-08 | -0.48508 | 0.015 | 0.217 | 0.000286 | Undiff-G | FNDC3A      |
| ID4       | 1.92E-08 | -0.61351 | 0.015 | 0.218 | 0.000288 | Undiff-G | ID4         |
| BDP1      | 1.92E-08 | -0.24286 | 0.029 | 0.247 | 0.000288 | Undiff-G | BDP1        |
| PDE6D     | 1.93E-08 | -0.49563 | 0     | 0.191 | 0.000288 | Undiff-G | PDE6D       |
| ZSCAN16-A | 1.93E-08 | -0.36207 | 0.037 | 0.26  | 0.000289 | Undiff-G | ZSCAN16-AS1 |
| SPATS2    | 1.94E-08 | -0.22136 | 0.037 | 0.261 | 0.00029  | Undiff-G | SPATS2      |
| ZMPSTE24  | 1.94E-08 | -0.35522 | 0.015 | 0.22  | 0.00029  | Undiff-G | ZMPSTE24    |
| SWI5      | 1.95E-08 | -0.11253 | 0.029 | 0.248 | 0.000291 | Undiff-G | SWI5        |
| IER5      | 1.95E-08 | -0.55095 | 0.007 | 0.205 | 0.000292 | Undiff-G | IER5        |
| IAH1      | 1.96E-08 | 0.453746 | 0.125 | 0.424 | 0.000293 | Undiff-G | IAH1        |
| ATP5SL    | 1.97E-08 | -0.27543 | 0.022 | 0.233 | 0.000294 | Undiff-G | ATP5SL      |
| THY1      | 1.98E-08 | -0.33925 | 0.037 | 0.258 | 0.000296 | Undiff-G | THY1        |
| NCOR2     | 1.98E-08 | -0.21324 | 0.022 | 0.233 | 0.000297 | Undiff-G | NCOR2       |
| UBA1      | 1.99E-08 | 0.305099 | 0.081 | 0.345 | 0.000297 | Undiff-G | UBA1        |
| ZC3H14    | 2.00E-08 | -0.2582  | 0.007 | 0.205 | 0.000299 | Undiff-G | ZC3H14      |
| LRRC47    | 2.02E-08 | -0.43683 | 0.015 | 0.219 | 0.000302 | Undiff-G | LRRC47      |
| COX19     | 2.03E-08 | -0.22457 | 0.022 | 0.233 | 0.000303 | Undiff-G | COX19       |
| MXD4      | 2.03E-08 | -0.49134 | 0     | 0.191 | 0.000304 | Undiff-G | MXD4        |
| PRADC1    | 2.05E-08 | -0.406   | 0.015 | 0.219 | 0.000306 | Undiff-G | PRADC1      |
| CNOT2     | 2.06E-08 | 0.127847 | 0.059 | 0.301 | 0.000308 | Undiff-G | CNOT2       |
| SRRT      | 2.09E-08 | -0.18574 | 0.015 | 0.219 | 0.000312 | Undiff-G | SRRT        |
| PYCR2     | 2.10E-08 | -0.23048 | 0.029 | 0.244 | 0.000314 | Undiff-G | PYCR2       |
| LTA4H     | 2.10E-08 | -0.3964  | 0.022 | 0.232 | 0.000314 | Undiff-G | LTA4H       |

|           |          |          |       |       |          |          |           |
|-----------|----------|----------|-------|-------|----------|----------|-----------|
| ZMAT3     | 2.13E-08 | -0.44095 | 0.007 | 0.204 | 0.000319 | Undiff-G | ZMAT3     |
| CUL3      | 2.13E-08 | -0.47571 | 0.007 | 0.202 | 0.000319 | Undiff-G | CUL3      |
| LMBRD1    | 2.14E-08 | -0.27254 | 0.015 | 0.219 | 0.000319 | Undiff-G | LMBRD1    |
| POU3F2    | 2.14E-08 | -0.50578 | 0.015 | 0.218 | 0.000321 | Undiff-G | POU3F2    |
| HNRNPA2B1 | 2.15E-08 | 0.293204 | 0.324 | 0.851 | 0.000321 | Undiff-G | HNRNPA2B1 |
| CAMK2D    | 2.16E-08 | -0.14405 | 0.029 | 0.246 | 0.000322 | Undiff-G | CAMK2D    |
| ZDHHC24   | 2.16E-08 | -0.46824 | 0     | 0.19  | 0.000323 | Undiff-G | ZDHHC24   |
| LRRFIP2   | 2.18E-08 | -0.46104 | 0     | 0.19  | 0.000326 | Undiff-G | LRRFIP2   |
| PRRC2A    | 2.18E-08 | -0.18465 | 0.029 | 0.245 | 0.000326 | Undiff-G | PRRC2A    |
| IGFBP7    | 2.19E-08 | -0.32367 | 0.044 | 0.271 | 0.000327 | Undiff-G | IGFBP7    |
| IGSF8     | 2.21E-08 | -0.51502 | 0.015 | 0.215 | 0.00033  | Undiff-G | IGSF8     |
| SLC12A9   | 2.21E-08 | -0.49969 | 0.007 | 0.204 | 0.00033  | Undiff-G | SLC12A9   |
| REEP2     | 2.23E-08 | -0.18694 | 0.007 | 0.204 | 0.000333 | Undiff-G | REEP2     |
| SV2A      | 2.24E-08 | -0.33779 | 0.007 | 0.204 | 0.000335 | Undiff-G | SV2A      |
| SMCHD1    | 2.26E-08 | -0.46239 | 0     | 0.19  | 0.000337 | Undiff-G | SMCHD1    |
| THOP1     | 2.26E-08 | -0.42486 | 0.007 | 0.204 | 0.000338 | Undiff-G | THOP1     |
| MBOAT7    | 2.27E-08 | -0.27269 | 0.029 | 0.245 | 0.000339 | Undiff-G | MBOAT7    |
| USP9X     | 2.28E-08 | -0.3314  | 0.007 | 0.204 | 0.000341 | Undiff-G | USP9X     |
| CIB1      | 2.29E-08 | 0.418625 | 0.162 | 0.496 | 0.000342 | Undiff-G | CIB1      |
| TMEM189   | 2.30E-08 | -0.45062 | 0     | 0.189 | 0.000343 | Undiff-G | TMEM189   |
| COX8A     | 2.30E-08 | 0.453149 | 0.287 | 0.776 | 0.000344 | Undiff-G | COX8A     |
| CARHSP1   | 2.31E-08 | 0.414529 | 0.125 | 0.426 | 0.000345 | Undiff-G | CARHSP1   |
| GLA       | 2.31E-08 | -0.4463  | 0.015 | 0.218 | 0.000346 | Undiff-G | GLA       |
| USB1      | 2.32E-08 | -0.23181 | 0.022 | 0.232 | 0.000347 | Undiff-G | USB1      |
| KHDRBS3   | 2.34E-08 | -0.22878 | 0.015 | 0.217 | 0.00035  | Undiff-G | KHDRBS3   |
| RPP14     | 2.36E-08 | -0.47052 | 0     | 0.189 | 0.000352 | Undiff-G | RPP14     |
| TMEM9     | 2.37E-08 | 0.253452 | 0.096 | 0.37  | 0.000354 | Undiff-G | TMEM9     |
| LYRM7     | 2.38E-08 | -0.40012 | 0.007 | 0.203 | 0.000356 | Undiff-G | LYRM7     |
| USP10     | 2.39E-08 | -0.10688 | 0.029 | 0.245 | 0.000357 | Undiff-G | USP10     |
| NAA15     | 2.41E-08 | -0.27528 | 0.015 | 0.218 | 0.00036  | Undiff-G | NAA15     |
| PSME2     | 2.41E-08 | 0.429339 | 0.191 | 0.562 | 0.000361 | Undiff-G | PSME2     |
| BLVRA     | 2.42E-08 | 0.35209  | 0.081 | 0.343 | 0.000361 | Undiff-G | BLVRA     |
| DSEL      | 2.42E-08 | -0.52789 | 0.022 | 0.227 | 0.000361 | Undiff-G | DSEL      |
| SREK1     | 2.44E-08 | 0.127659 | 0.074 | 0.325 | 0.000365 | Undiff-G | SREK1     |
| TXN       | 2.44E-08 | 0.462714 | 0.243 | 0.671 | 0.000365 | Undiff-G | TXN       |
| MGAT2     | 2.44E-08 | -0.45981 | 0     | 0.189 | 0.000365 | Undiff-G | MGAT2     |
| FUBP3     | 2.46E-08 | -0.37782 | 0.029 | 0.242 | 0.000368 | Undiff-G | FUBP3     |
| EDEM2     | 2.46E-08 | -0.16005 | 0.029 | 0.243 | 0.000368 | Undiff-G | EDEM2     |
| GMPR2     | 2.51E-08 | -0.15883 | 0.015 | 0.217 | 0.000375 | Undiff-G | GMPR2     |
| CISD1     | 2.52E-08 | 0.252607 | 0.081 | 0.34  | 0.000376 | Undiff-G | CISD1     |
| SMC4      | 2.53E-08 | -0.50499 | 0.015 | 0.214 | 0.000379 | Undiff-G | SMC4      |
| ZNF644    | 2.54E-08 | -0.18991 | 0.037 | 0.255 | 0.000379 | Undiff-G | ZNF644    |
| HNRNPA1L2 | 2.54E-08 | -0.35702 | 0.007 | 0.203 | 0.000379 | Undiff-G | HNRNPA1L2 |
| NPL       | 2.56E-08 | -0.52607 | 0.007 | 0.203 | 0.000382 | Undiff-G | NPL       |
| FOSL2     | 2.57E-08 | -0.55873 | 0     | 0.188 | 0.000385 | Undiff-G | FOSL2     |
| CLINT1    | 2.58E-08 | -0.42242 | 0.007 | 0.203 | 0.000385 | Undiff-G | CLINT1    |
| TMA16     | 2.58E-08 | -0.33104 | 0.007 | 0.203 | 0.000386 | Undiff-G | TMA16     |
| C19orf48  | 2.63E-08 | -0.39485 | 0.022 | 0.23  | 0.000393 | Undiff-G | C19orf48  |
| KLF3      | 2.63E-08 | -0.30087 | 0.015 | 0.217 | 0.000393 | Undiff-G | KLF3      |
| C17orf58  | 2.64E-08 | -0.44066 | 0     | 0.188 | 0.000395 | Undiff-G | C17orf58  |
| MAP3K2    | 2.65E-08 | -0.43906 | 0.007 | 0.202 | 0.000396 | Undiff-G | MAP3K2    |

|           |          |          |       |       |          |          |              |
|-----------|----------|----------|-------|-------|----------|----------|--------------|
| NTAN1     | 2.66E-08 | -0.47229 | 0.007 | 0.202 | 0.000398 | Undiff-G | NTAN1        |
| SRPRB     | 2.68E-08 | 0.111736 | 0.037 | 0.258 | 0.0004   | Undiff-G | SRPRB        |
| ASCL1     | 2.69E-08 | -0.61715 | 0     | 0.188 | 0.000402 | Undiff-G | ASCL1        |
| DRG2      | 2.72E-08 | -0.28772 | 0.007 | 0.202 | 0.000407 | Undiff-G | DRG2         |
| REST      | 2.74E-08 | -0.4521  | 0.007 | 0.2   | 0.000409 | Undiff-G | REST         |
| MCM7      | 2.76E-08 | -0.19945 | 0.037 | 0.257 | 0.000412 | Undiff-G | MCM7         |
| CYSTM1    | 2.77E-08 | 0.319093 | 0.074 | 0.327 | 0.000413 | Undiff-G | CYSTM1       |
| SEMA6A    | 2.79E-08 | -0.4526  | 0.007 | 0.202 | 0.000417 | Undiff-G | SEMA6A       |
| IFNAR2    | 2.80E-08 | -0.44253 | 0.007 | 0.202 | 0.000418 | Undiff-G | IFNAR2       |
| MTSS1     | 2.83E-08 | -0.55603 | 0.015 | 0.215 | 0.000422 | Undiff-G | MTSS1        |
| CBWD1     | 2.85E-08 | -0.33572 | 0.015 | 0.216 | 0.000426 | Undiff-G | CBWD1        |
| FIP1L1    | 2.87E-08 | 0.257519 | 0.059 | 0.299 | 0.000429 | Undiff-G | FIP1L1       |
| ENC1      | 2.89E-08 | -0.3903  | 0.022 | 0.227 | 0.000432 | Undiff-G | ENC1         |
| ZC3H11A   | 2.89E-08 | -0.32719 | 0.007 | 0.202 | 0.000432 | Undiff-G | ZC3H11A      |
| ZNF281    | 2.91E-08 | -0.49166 | 0     | 0.187 | 0.000435 | Undiff-G | ZNF281       |
| ACER3     | 2.91E-08 | -0.55924 | 0     | 0.187 | 0.000435 | Undiff-G | ACER3        |
| ATP6V1A   | 2.93E-08 | -0.45566 | 0.007 | 0.201 | 0.000438 | Undiff-G | ATP6V1A      |
| ZBTB80S   | 2.94E-08 | 0.199003 | 0.059 | 0.297 | 0.000439 | Undiff-G | ZBTB80S      |
| RP11-553L | 2.97E-08 | -0.41288 | 0.022 | 0.229 | 0.000444 | Undiff-G | RP11-553L6.5 |
| ENTPD6    | 2.97E-08 | -0.45627 | 0.007 | 0.201 | 0.000445 | Undiff-G | ENTPD6       |
| COMMD8    | 3.00E-08 | -0.21951 | 0.022 | 0.227 | 0.000448 | Undiff-G | COMMD8       |
| NAGA      | 3.01E-08 | -0.64291 | 0     | 0.187 | 0.00045  | Undiff-G | NAGA         |
| ABCA1     | 3.03E-08 | -0.421   | 0.029 | 0.241 | 0.000453 | Undiff-G | ABCA1        |
| CHST11    | 3.05E-08 | -0.46568 | 0.015 | 0.215 | 0.000456 | Undiff-G | CHST11       |
| UBQLN1    | 3.08E-08 | 0.168816 | 0.051 | 0.284 | 0.00046  | Undiff-G | UBQLN1       |
| ABI1      | 3.10E-08 | -0.14913 | 0.029 | 0.243 | 0.000463 | Undiff-G | ABI1         |
| WDR82     | 3.11E-08 | -0.16884 | 0.037 | 0.257 | 0.000464 | Undiff-G | WDR82        |
| MBNL1     | 3.12E-08 | -0.43131 | 0.022 | 0.226 | 0.000467 | Undiff-G | MBNL1        |
| TMEM176A  | 3.12E-08 | -0.26779 | 0.022 | 0.229 | 0.000467 | Undiff-G | TMEM176A     |
| IRF2      | 3.13E-08 | -0.52613 | 0.007 | 0.2   | 0.000467 | Undiff-G | IRF2         |
| HINT3     | 3.13E-08 | -0.33126 | 0.007 | 0.201 | 0.000468 | Undiff-G | HINT3        |
| BCAN      | 3.15E-08 | -0.36692 | 0.051 | 0.278 | 0.000471 | Undiff-G | BCAN         |
| MESDC2    | 3.20E-08 | 0.533074 | 0.118 | 0.407 | 0.000478 | Undiff-G | MESDC2       |
| OLFML3    | 3.20E-08 | -0.38339 | 0.022 | 0.229 | 0.000478 | Undiff-G | OLFML3       |
| ISCA2     | 3.21E-08 | 0.251062 | 0.051 | 0.284 | 0.00048  | Undiff-G | ISCA2        |
| EPM2AIP1  | 3.24E-08 | -0.31686 | 0.007 | 0.2   | 0.000485 | Undiff-G | EPM2AIP1     |
| SMIM14    | 3.24E-08 | 0.356979 | 0.081 | 0.333 | 0.000485 | Undiff-G | SMIM14       |
| GOSR1     | 3.25E-08 | 0.134304 | 0.044 | 0.27  | 0.000486 | Undiff-G | GOSR1        |
| OXLD1     | 3.26E-08 | -0.21397 | 0.037 | 0.255 | 0.000487 | Undiff-G | OXLD1        |
| HRSP12    | 3.29E-08 | -0.39656 | 0.007 | 0.2   | 0.000492 | Undiff-G | HRSP12       |
| MED10     | 3.32E-08 | 0.471827 | 0.162 | 0.487 | 0.000496 | Undiff-G | MED10        |
| GPCPD1    | 3.33E-08 | -0.34737 | 0.007 | 0.2   | 0.000497 | Undiff-G | GPCPD1       |
| WASL      | 3.35E-08 | -0.4453  | 0     | 0.186 | 0.0005   | Undiff-G | WASL         |
| SMIM4     | 3.36E-08 | 0.105784 | 0.044 | 0.27  | 0.000502 | Undiff-G | SMIM4        |
| MAP3K8    | 3.38E-08 | -0.74879 | 0     | 0.186 | 0.000504 | Undiff-G | MAP3K8       |
| TIAL1     | 3.38E-08 | -0.22163 | 0.022 | 0.228 | 0.000505 | Undiff-G | TIAL1        |
| IPO7      | 3.42E-08 | -0.32103 | 0.015 | 0.214 | 0.000511 | Undiff-G | IPO7         |
| LYRM1     | 3.43E-08 | -0.51441 | 0     | 0.185 | 0.000513 | Undiff-G | LYRM1        |
| HDAC1     | 3.44E-08 | -0.1629  | 0.022 | 0.228 | 0.000514 | Undiff-G | HDAC1        |
| CETN2     | 3.45E-08 | 0.353927 | 0.074 | 0.325 | 0.000515 | Undiff-G | CETN2        |
| PKN2      | 3.48E-08 | -0.33833 | 0.015 | 0.213 | 0.00052  | Undiff-G | PKN2         |

|              |          |          |       |       |          |          |              |
|--------------|----------|----------|-------|-------|----------|----------|--------------|
| TMX1         | 3.49E-08 | 0.344891 | 0.118 | 0.406 | 0.000521 | Undiff-G | TMX1         |
| SAP30BP      | 3.49E-08 | 0.32764  | 0.096 | 0.365 | 0.000521 | Undiff-G | SAP30BP      |
| C1orf54      | 3.49E-08 | -0.36871 | 0.022 | 0.228 | 0.000522 | Undiff-G | C1orf54      |
| TAF10        | 3.50E-08 | -0.11595 | 0.022 | 0.228 | 0.000523 | Undiff-G | TAF10        |
| RNMT         | 3.52E-08 | 0.276923 | 0.066 | 0.306 | 0.000526 | Undiff-G | RNMT         |
| GSK3B        | 3.53E-08 | -0.39537 | 0.007 | 0.2   | 0.000527 | Undiff-G | GSK3B        |
| INIP         | 3.60E-08 | -0.27197 | 0.007 | 0.199 | 0.000538 | Undiff-G | INIP         |
| RBP1         | 3.60E-08 | 0.439277 | 0.147 | 0.463 | 0.000538 | Undiff-G | RBP1         |
| PSPC1        | 3.61E-08 | -0.3783  | 0.015 | 0.213 | 0.000539 | Undiff-G | PSPC1        |
| EVI2A        | 3.61E-08 | -0.57115 | 0.022 | 0.225 | 0.000539 | Undiff-G | EVI2A        |
| HMBS         | 3.62E-08 | -0.45092 | 0.007 | 0.199 | 0.000541 | Undiff-G | HMBS         |
| SNAPC5       | 3.62E-08 | -0.13305 | 0.015 | 0.214 | 0.000541 | Undiff-G | SNAPC5       |
| ZNF677       | 3.63E-08 | -0.29187 | 0.007 | 0.199 | 0.000542 | Undiff-G | ZNF677       |
| ARHGEF1      | 3.65E-08 | -0.50939 | 0.007 | 0.199 | 0.000545 | Undiff-G | ARHGEF1      |
| EFHD2        | 3.65E-08 | -0.46393 | 0.015 | 0.213 | 0.000546 | Undiff-G | EFHD2        |
| FLNA         | 3.68E-08 | -0.34352 | 0.037 | 0.253 | 0.00055  | Undiff-G | FLNA         |
| ISOC2        | 3.70E-08 | 0.386178 | 0.088 | 0.352 | 0.000552 | Undiff-G | ISOC2        |
| PHAX         | 3.73E-08 | 0.226888 | 0.066 | 0.308 | 0.000558 | Undiff-G | PHAX         |
| ABHD3        | 3.75E-08 | -0.51344 | 0     | 0.185 | 0.00056  | Undiff-G | ABHD3        |
| PPM1K        | 3.75E-08 | -0.30796 | 0.022 | 0.227 | 0.00056  | Undiff-G | PPM1K        |
| TFRC         | 3.77E-08 | -0.58067 | 0.015 | 0.211 | 0.000563 | Undiff-G | TFRC         |
| LZIC         | 3.78E-08 | -0.48651 | 0     | 0.184 | 0.000565 | Undiff-G | LZIC         |
| RNASEH2A     | 3.81E-08 | -0.18031 | 0.015 | 0.213 | 0.000569 | Undiff-G | RNASEH2A     |
| PI4KB        | 3.84E-08 | -0.43408 | 0.015 | 0.212 | 0.000574 | Undiff-G | PI4KB        |
| HBB          | 3.84E-08 | 0.44019  | 0.118 | 0.402 | 0.000574 | Undiff-G | HBB          |
| PTPN18       | 3.88E-08 | -0.24158 | 0.015 | 0.213 | 0.00058  | Undiff-G | PTPN18       |
| TMEM141      | 3.88E-08 | 0.118909 | 0.037 | 0.255 | 0.000581 | Undiff-G | TMEM141      |
| NUP214       | 3.89E-08 | -0.63482 | 0.007 | 0.197 | 0.000582 | Undiff-G | NUP214       |
| C2orf69      | 3.94E-08 | -0.4618  | 0.007 | 0.196 | 0.000589 | Undiff-G | C2orf69      |
| COPS2        | 3.94E-08 | -0.41324 | 0.015 | 0.212 | 0.000589 | Undiff-G | COPS2        |
| NNAT         | 3.95E-08 | -0.91355 | 0.007 | 0.198 | 0.00059  | Undiff-G | NNAT         |
| PLXDC2       | 3.95E-08 | -0.52738 | 0.015 | 0.211 | 0.000591 | Undiff-G | PLXDC2       |
| PANK2        | 3.96E-08 | -0.4315  | 0.015 | 0.21  | 0.000592 | Undiff-G | PANK2        |
| RBMS1        | 3.96E-08 | -0.18543 | 0.037 | 0.252 | 0.000592 | Undiff-G | RBMS1        |
| SPATC1L      | 3.96E-08 | -0.42101 | 0.007 | 0.197 | 0.000592 | Undiff-G | SPATC1L      |
| SCAMP3       | 3.97E-08 | 0.214534 | 0.059 | 0.293 | 0.000593 | Undiff-G | SCAMP3       |
| CDC16        | 3.97E-08 | -0.39777 | 0.007 | 0.198 | 0.000593 | Undiff-G | CDC16        |
| CSRP1        | 3.97E-08 | -0.21338 | 0.029 | 0.241 | 0.000594 | Undiff-G | CSRP1        |
| OGFOD3       | 3.98E-08 | -0.33034 | 0.022 | 0.224 | 0.000595 | Undiff-G | OGFOD3       |
| EPB41L4A-AS1 | 3.99E-08 | 0.176379 | 0.059 | 0.296 | 0.000596 | Undiff-G | EPB41L4A-AS1 |
| ALCAM        | 4.01E-08 | -0.51278 | 0.007 | 0.198 | 0.0006   | Undiff-G | ALCAM        |
| ARHGAP21     | 4.03E-08 | -0.37389 | 0.037 | 0.253 | 0.000602 | Undiff-G | ARHGAP21     |
| PITPNA       | 4.05E-08 | -0.42333 | 0     | 0.184 | 0.000606 | Undiff-G | PITPNA       |
| ACTR1B       | 4.06E-08 | -0.42246 | 0.015 | 0.212 | 0.000607 | Undiff-G | ACTR1B       |
| STOM         | 4.07E-08 | -0.14885 | 0.037 | 0.254 | 0.000608 | Undiff-G | STOM         |
| ERBB2IP      | 4.07E-08 | -0.27462 | 0.022 | 0.224 | 0.000608 | Undiff-G | ERBB2IP      |
| VEZF1        | 4.10E-08 | -0.12402 | 0.029 | 0.24  | 0.000612 | Undiff-G | VEZF1        |
| HELZ         | 4.11E-08 | -0.42166 | 0.007 | 0.198 | 0.000614 | Undiff-G | HELZ         |
| ATP2C1       | 4.11E-08 | -0.24499 | 0.022 | 0.226 | 0.000614 | Undiff-G | ATP2C1       |
| LPCAT1       | 4.12E-08 | -0.48765 | 0     | 0.184 | 0.000616 | Undiff-G | LPCAT1       |
| ITSN2        | 4.12E-08 | -0.50079 | 0     | 0.184 | 0.000616 | Undiff-G | ITSN2        |



|          |           |           |        |        |           |          |          |
|----------|-----------|-----------|--------|--------|-----------|----------|----------|
| SNRNP35  | 4. 14E-08 | -0. 34024 | 0. 007 | 0. 198 | 0. 000618 | Undiff-G | SNRNP35  |
| 8-Sep    | 4. 14E-08 | -0. 47887 | 0. 007 | 0. 198 | 0. 000619 | Undiff-G | 8-Sep    |
| RING1    | 4. 15E-08 | -0. 16947 | 0. 044 | 0. 264 | 0. 00062  | Undiff-G | RING1    |
| SDCCAG8  | 4. 17E-08 | 0. 216503 | 0. 081 | 0. 332 | 0. 000624 | Undiff-G | SDCCAG8  |
| LTBP3    | 4. 18E-08 | -0. 30281 | 0. 015 | 0. 212 | 0. 000624 | Undiff-G | LTBP3    |
| CNOT8    | 4. 20E-08 | -0. 4762  | 0      | 0. 183 | 0. 000627 | Undiff-G | CNOT8    |
| CCNG2    | 4. 20E-08 | -0. 53983 | 0      | 0. 183 | 0. 000627 | Undiff-G | CCNG2    |
| MIA3     | 4. 20E-08 | -0. 25455 | 0. 015 | 0. 212 | 0. 000628 | Undiff-G | MIA3     |
| AAED1    | 4. 23E-08 | -0. 49176 | 0      | 0. 183 | 0. 000632 | Undiff-G | AAED1    |
| SAT2     | 4. 25E-08 | 0. 4457   | 0. 213 | 0. 59  | 0. 000635 | Undiff-G | SAT2     |
| LY6E     | 4. 25E-08 | 0. 277004 | 0. 103 | 0. 379 | 0. 000636 | Undiff-G | LY6E     |
| SUZ12    | 4. 27E-08 | -0. 42744 | 0. 007 | 0. 197 | 0. 000639 | Undiff-G | SUZ12    |
| DCAF8    | 4. 36E-08 | -0. 2432  | 0. 015 | 0. 21  | 0. 000651 | Undiff-G | DCAF8    |
| TOMM5    | 4. 39E-08 | -0. 39905 | 0. 015 | 0. 211 | 0. 000656 | Undiff-G | TOMM5    |
| ZHX1     | 4. 45E-08 | -0. 37127 | 0. 015 | 0. 211 | 0. 000665 | Undiff-G | ZHX1     |
| TCOF1    | 4. 45E-08 | -0. 49273 | 0. 007 | 0. 197 | 0. 000665 | Undiff-G | TCOF1    |
| TMED4    | 4. 46E-08 | 0. 488729 | 0. 14  | 0. 441 | 0. 000667 | Undiff-G | TMED4    |
| RNF14    | 4. 47E-08 | -0. 42911 | 0. 007 | 0. 197 | 0. 000668 | Undiff-G | RNF14    |
| SIRT6    | 4. 51E-08 | -0. 25843 | 0. 007 | 0. 197 | 0. 000674 | Undiff-G | SIRT6    |
| LYPLA2   | 4. 52E-08 | -0. 18584 | 0. 022 | 0. 223 | 0. 000675 | Undiff-G | LYPLA2   |
| AXL      | 4. 54E-08 | -0. 76296 | 0      | 0. 183 | 0. 000678 | Undiff-G | AXL      |
| HMGXB4   | 4. 60E-08 | -0. 34676 | 0. 022 | 0. 225 | 0. 000688 | Undiff-G | HMGXB4   |
| IL18     | 4. 62E-08 | -0. 79257 | 0. 007 | 0. 195 | 0. 00069  | Undiff-G | IL18     |
| CTBP1    | 4. 65E-08 | -0. 28918 | 0. 022 | 0. 225 | 0. 000696 | Undiff-G | CTBP1    |
| GNA13    | 4. 70E-08 | -0. 56676 | 0      | 0. 182 | 0. 000702 | Undiff-G | GNA13    |
| GFER     | 4. 70E-08 | -0. 30411 | 0. 015 | 0. 211 | 0. 000702 | Undiff-G | GFER     |
| ARHGAP5  | 4. 72E-08 | -0. 45248 | 0. 007 | 0. 196 | 0. 000705 | Undiff-G | ARHGAP5  |
| PRRC2B   | 4. 72E-08 | -0. 14464 | 0. 029 | 0. 239 | 0. 000705 | Undiff-G | PRRC2B   |
| GLUD1    | 4. 72E-08 | -0. 18627 | 0. 037 | 0. 25  | 0. 000705 | Undiff-G | GLUD1    |
| SLC25A1  | 4. 75E-08 | -0. 31947 | 0. 007 | 0. 197 | 0. 00071  | Undiff-G | SLC25A1  |
| RBM4     | 4. 77E-08 | -0. 41495 | 0. 022 | 0. 222 | 0. 000713 | Undiff-G | RBM4     |
| FBX011   | 4. 79E-08 | -0. 44133 | 0. 015 | 0. 208 | 0. 000716 | Undiff-G | FBX011   |
| CDC25B   | 4. 82E-08 | -0. 4701  | 0. 007 | 0. 196 | 0. 000721 | Undiff-G | CDC25B   |
| PSD3     | 4. 83E-08 | -0. 254   | 0. 007 | 0. 196 | 0. 000722 | Undiff-G | PSD3     |
| GPR137   | 4. 85E-08 | -0. 19904 | 0. 015 | 0. 211 | 0. 000725 | Undiff-G | GPR137   |
| NUDT9    | 4. 85E-08 | -0. 1452  | 0. 022 | 0. 225 | 0. 000725 | Undiff-G | NUDT9    |
| WDR33    | 4. 87E-08 | 0. 298995 | 0. 066 | 0. 303 | 0. 000727 | Undiff-G | WDR33    |
| WBP11    | 4. 88E-08 | 0. 275711 | 0. 059 | 0. 294 | 0. 000729 | Undiff-G | WBP11    |
| TSEN15   | 4. 89E-08 | -0. 39559 | 0. 029 | 0. 235 | 0. 00073  | Undiff-G | TSEN15   |
| ZKSCAN1  | 4. 98E-08 | 0. 207264 | 0. 074 | 0. 319 | 0. 000744 | Undiff-G | ZKSCAN1  |
| NR3C1    | 4. 99E-08 | -0. 29117 | 0. 037 | 0. 251 | 0. 000746 | Undiff-G | NR3C1    |
| PTPN12   | 4. 99E-08 | -0. 18786 | 0. 022 | 0. 224 | 0. 000746 | Undiff-G | PTPN12   |
| CALCOCO2 | 5. 03E-08 | -0. 51419 | 0. 007 | 0. 196 | 0. 000752 | Undiff-G | CALCOCO2 |
| ACTR10   | 5. 06E-08 | 0. 455352 | 0. 096 | 0. 363 | 0. 000756 | Undiff-G | ACTR10   |
| PIGF     | 5. 07E-08 | 0. 227871 | 0. 059 | 0. 29  | 0. 000758 | Undiff-G | PIGF     |
| ARC      | 5. 08E-08 | -0. 52183 | 0. 015 | 0. 21  | 0. 000759 | Undiff-G | ARC      |
| CIZ1     | 5. 12E-08 | -0. 43978 | 0      | 0. 181 | 0. 000765 | Undiff-G | CIZ1     |
| AGPAT2   | 5. 12E-08 | -0. 49426 | 0      | 0. 181 | 0. 000765 | Undiff-G | AGPAT2   |
| PGP      | 5. 15E-08 | -0. 25904 | 0. 022 | 0. 221 | 0. 000769 | Undiff-G | PGP      |
| MMP14    | 5. 17E-08 | -0. 15964 | 0. 022 | 0. 224 | 0. 000773 | Undiff-G | MMP14    |
| GLRX3    | 5. 18E-08 | 0. 315243 | 0. 066 | 0. 307 | 0. 000773 | Undiff-G | GLRX3    |

|           |          |          |       |       |          |          |            |
|-----------|----------|----------|-------|-------|----------|----------|------------|
| MYEF2     | 5.24E-08 | -0.40268 | 0.007 | 0.195 | 0.000782 | Undiff-G | MYEF2      |
| TFDP1     | 5.27E-08 | -0.44857 | 0.007 | 0.194 | 0.000788 | Undiff-G | TFDP1      |
| BRD9      | 5.27E-08 | -0.32734 | 0.007 | 0.196 | 0.000788 | Undiff-G | BRD9       |
| ST3GAL5   | 5.32E-08 | -0.54999 | 0.007 | 0.193 | 0.000794 | Undiff-G | ST3GAL5    |
| NGDN      | 5.36E-08 | 0.220867 | 0.044 | 0.266 | 0.000801 | Undiff-G | NGDN       |
| MAPRE3    | 5.39E-08 | -0.46573 | 0     | 0.181 | 0.000806 | Undiff-G | MAPRE3     |
| POLR3K    | 5.46E-08 | -0.16046 | 0.022 | 0.223 | 0.000816 | Undiff-G | POLR3K     |
| CDKN2AIPN | 5.47E-08 | 0.125102 | 0.037 | 0.251 | 0.000817 | Undiff-G | CDKN2AIPNL |
| DENND5A   | 5.49E-08 | -0.48348 | 0     | 0.181 | 0.00082  | Undiff-G | DENND5A    |
| GNPTG     | 5.49E-08 | -0.30449 | 0.044 | 0.26  | 0.00082  | Undiff-G | GNPTG      |
| APBA2     | 5.50E-08 | -0.42334 | 0.015 | 0.209 | 0.000822 | Undiff-G | APBA2      |
| PHF23     | 5.52E-08 | -0.19973 | 0.015 | 0.209 | 0.000824 | Undiff-G | PHF23      |
| GSTM4     | 5.54E-08 | -0.41904 | 0.015 | 0.207 | 0.000827 | Undiff-G | GSTM4      |
| SNAP23    | 5.55E-08 | -0.24485 | 0.037 | 0.247 | 0.00083  | Undiff-G | SNAP23     |
| NOB1      | 5.56E-08 | -0.47609 | 0.007 | 0.195 | 0.00083  | Undiff-G | NOB1       |
| ZNF131    | 5.56E-08 | -0.29134 | 0.029 | 0.234 | 0.000831 | Undiff-G | ZNF131     |
| PINK1     | 5.63E-08 | -0.25112 | 0.015 | 0.209 | 0.000841 | Undiff-G | PINK1      |
| TMSB15A   | 5.63E-08 | -0.57365 | 0     | 0.18  | 0.000842 | Undiff-G | TMSB15A    |
| ACO09501. | 5.63E-08 | 1.468214 | 0.287 | 0.155 | 0.000842 | Undiff-G | ACO09501.4 |
| HSD11B1L  | 5.65E-08 | -0.27835 | 0.015 | 0.207 | 0.000844 | Undiff-G | HSD11B1L   |
| LARP6     | 5.69E-08 | -0.38664 | 0.007 | 0.195 | 0.00085  | Undiff-G | LARP6      |
| CPEB4     | 5.70E-08 | -0.33515 | 0.037 | 0.249 | 0.000852 | Undiff-G | CPEB4      |
| SLC31A2   | 5.71E-08 | -0.66856 | 0.007 | 0.195 | 0.000854 | Undiff-G | SLC31A2    |
| TEN1      | 5.73E-08 | -0.42782 | 0     | 0.18  | 0.000856 | Undiff-G | TEN1       |
| PMPCB     | 5.75E-08 | 0.359439 | 0.088 | 0.346 | 0.000859 | Undiff-G | PMPCB      |
| MED11     | 5.79E-08 | -0.418   | 0.022 | 0.22  | 0.000865 | Undiff-G | MED11      |
| LRRC58    | 5.80E-08 | -0.29176 | 0.015 | 0.209 | 0.000867 | Undiff-G | LRRC58     |
| EPHX1     | 5.82E-08 | -0.27633 | 0.029 | 0.234 | 0.000869 | Undiff-G | EPHX1      |
| PDZD11    | 5.82E-08 | 0.473994 | 0.096 | 0.362 | 0.00087  | Undiff-G | PDZD11     |
| MEX3A     | 5.83E-08 | -0.49266 | 0     | 0.18  | 0.000871 | Undiff-G | MEX3A      |
| TRMT1     | 5.84E-08 | -0.26972 | 0.044 | 0.26  | 0.000873 | Undiff-G | TRMT1      |
| MTHFD2L   | 5.85E-08 | -0.27092 | 0.015 | 0.208 | 0.000875 | Undiff-G | MTHFD2L    |
| DTNBP1    | 5.89E-08 | -0.24319 | 0.015 | 0.209 | 0.00088  | Undiff-G | DTNBP1     |
| SPRY1     | 5.90E-08 | -0.30286 | 0.029 | 0.235 | 0.000881 | Undiff-G | SPRY1      |
| TMEM101   | 5.90E-08 | -0.22993 | 0.015 | 0.209 | 0.000882 | Undiff-G | TMEM101    |
| SMIM7     | 5.93E-08 | 0.518174 | 0.176 | 0.509 | 0.000886 | Undiff-G | SMIM7      |
| TINF2     | 5.98E-08 | 0.226228 | 0.037 | 0.251 | 0.000893 | Undiff-G | TINF2      |
| EIF1AY    | 5.98E-08 | -0.44419 | 0     | 0.18  | 0.000894 | Undiff-G | EIF1AY     |
| PJA1      | 6.00E-08 | -0.34583 | 0.007 | 0.194 | 0.000896 | Undiff-G | PJA1       |
| DERL2     | 6.03E-08 | 0.293376 | 0.096 | 0.355 | 0.000901 | Undiff-G | DERL2      |
| PLOD3     | 6.06E-08 | -0.21104 | 0.022 | 0.22  | 0.000906 | Undiff-G | PLOD3      |
| RHBDF2    | 6.09E-08 | -0.70529 | 0     | 0.18  | 0.00091  | Undiff-G | RHBDF2     |
| HGSNAT    | 6.11E-08 | -0.26807 | 0.015 | 0.208 | 0.000913 | Undiff-G | HGSNAT     |
| ATP5G2    | 6.12E-08 | 0.38582  | 0.346 | 0.875 | 0.000914 | Undiff-G | ATP5G2     |
| CYBB      | 6.15E-08 | -0.6131  | 0.007 | 0.194 | 0.000919 | Undiff-G | CYBB       |
| NFKBIL1   | 6.15E-08 | -0.32964 | 0.015 | 0.206 | 0.00092  | Undiff-G | NFKBIL1    |
| TEX264    | 6.16E-08 | 0.359373 | 0.118 | 0.399 | 0.000921 | Undiff-G | TEX264     |
| KLF7      | 6.18E-08 | -0.46012 | 0.015 | 0.208 | 0.000923 | Undiff-G | KLF7       |
| ABI3      | 6.21E-08 | -0.74706 | 0.007 | 0.192 | 0.000928 | Undiff-G | ABI3       |
| MAPK8IP1  | 6.24E-08 | -0.48212 | 0.007 | 0.193 | 0.000932 | Undiff-G | MAPK8IP1   |
| PES1      | 6.32E-08 | -0.33241 | 0.007 | 0.194 | 0.000944 | Undiff-G | PES1       |

|           |          |          |       |       |          |          |           |
|-----------|----------|----------|-------|-------|----------|----------|-----------|
| MTRF1L    | 6.32E-08 | -0.40735 | 0.007 | 0.192 | 0.000945 | Undiff-G | MTRF1L    |
| SOX8      | 6.35E-08 | -0.56198 | 0     | 0.179 | 0.00095  | Undiff-G | SOX8      |
| SUN2      | 6.36E-08 | -0.46908 | 0.022 | 0.221 | 0.000951 | Undiff-G | SUN2      |
| APIP      | 6.44E-08 | -0.12415 | 0.029 | 0.235 | 0.000962 | Undiff-G | APIP      |
| TTF1      | 6.46E-08 | -0.45469 | 0.015 | 0.205 | 0.000965 | Undiff-G | TTF1      |
| WIPF1     | 6.46E-08 | -0.18732 | 0.022 | 0.222 | 0.000966 | Undiff-G | WIPF1     |
| LINC00667 | 6.47E-08 | -0.14389 | 0.037 | 0.246 | 0.000967 | Undiff-G | LINC00667 |
| 5-Mar     | 6.49E-08 | -0.22976 | 0.007 | 0.194 | 0.00097  | Undiff-G | 5-Mar     |
| MFSD12    | 6.49E-08 | -0.39004 | 0.007 | 0.193 | 0.000971 | Undiff-G | MFSD12    |
| TMEM60    | 6.52E-08 | 0.131241 | 0.037 | 0.25  | 0.000974 | Undiff-G | TMEM60    |
| GOLGA2    | 6.52E-08 | -0.39957 | 0.015 | 0.207 | 0.000975 | Undiff-G | GOLGA2    |
| TAGLN3    | 6.61E-08 | -0.64649 | 0.007 | 0.19  | 0.000988 | Undiff-G | TAGLN3    |
| ALG13     | 6.64E-08 | -0.14075 | 0.022 | 0.222 | 0.000992 | Undiff-G | ALG13     |
| PLOD1     | 6.66E-08 | -0.44334 | 0.007 | 0.193 | 0.000996 | Undiff-G | PLOD1     |
| P2RX4     | 6.69E-08 | -0.578   | 0     | 0.179 | 0.001    | Undiff-G | P2RX4     |
| SLC35B4   | 6.69E-08 | -0.39793 | 0.007 | 0.193 | 0.001    | Undiff-G | SLC35B4   |
| USP15     | 6.70E-08 | -0.3537  | 0.037 | 0.245 | 0.001001 | Undiff-G | USP15     |
| GPRC5B    | 6.71E-08 | -0.23897 | 0.022 | 0.221 | 0.001003 | Undiff-G | GPRC5B    |
| KCMF1     | 6.74E-08 | -0.3609  | 0.007 | 0.193 | 0.001008 | Undiff-G | KCMF1     |
| PTPRS     | 6.80E-08 | -0.27011 | 0.044 | 0.26  | 0.001016 | Undiff-G | PTPRS     |
| ZC3HAV1   | 6.81E-08 | -0.4923  | 0     | 0.179 | 0.001017 | Undiff-G | ZC3HAV1   |
| ASNSD1    | 6.83E-08 | 0.262434 | 0.051 | 0.274 | 0.001021 | Undiff-G | ASNSD1    |
| CLIP2     | 6.87E-08 | -0.47625 | 0     | 0.178 | 0.001026 | Undiff-G | CLIP2     |
| POMGNT1   | 6.98E-08 | -0.25065 | 0.044 | 0.261 | 0.001043 | Undiff-G | POMGNT1   |
| CD302     | 6.99E-08 | -0.43243 | 0.015 | 0.207 | 0.001045 | Undiff-G | CD302     |
| MTMR9     | 7.04E-08 | -0.46687 | 0.007 | 0.191 | 0.001052 | Undiff-G | MTMR9     |
| C1orf56   | 7.10E-08 | -0.5443  | 0.015 | 0.204 | 0.001061 | Undiff-G | C1orf56   |
| ETV5      | 7.10E-08 | -0.21224 | 0.044 | 0.261 | 0.001061 | Undiff-G | ETV5      |
| KAT8      | 7.11E-08 | -0.50508 | 0     | 0.178 | 0.001062 | Undiff-G | KAT8      |
| STT3B     | 7.11E-08 | -0.36915 | 0.015 | 0.206 | 0.001062 | Undiff-G | STT3B     |
| SIL1      | 7.12E-08 | -0.35791 | 0.044 | 0.257 | 0.001064 | Undiff-G | SIL1      |
| MYO9B     | 7.13E-08 | -0.14045 | 0.051 | 0.272 | 0.001065 | Undiff-G | MYO9B     |
| HNRNPDL   | 7.13E-08 | 0.435659 | 0.309 | 0.803 | 0.001066 | Undiff-G | HNRNPDL   |
| C10orf10  | 7.14E-08 | 1.593219 | 0.206 | 0.089 | 0.001067 | Undiff-G | C10orf10  |
| UHMK1     | 7.16E-08 | -0.42844 | 0.015 | 0.205 | 0.00107  | Undiff-G | UHMK1     |
| NFKBIB    | 7.17E-08 | -0.47158 | 0     | 0.178 | 0.001071 | Undiff-G | NFKBIB    |
| ALDH3A2   | 7.18E-08 | -0.11961 | 0.029 | 0.234 | 0.001073 | Undiff-G | ALDH3A2   |
| PIM3      | 7.19E-08 | -0.36814 | 0.007 | 0.193 | 0.001075 | Undiff-G | PIM3      |
| HGS       | 7.28E-08 | -0.18285 | 0.022 | 0.218 | 0.001088 | Undiff-G | HGS       |
| DCAF11    | 7.32E-08 | -0.21109 | 0.007 | 0.192 | 0.001094 | Undiff-G | DCAF11    |
| IMMP1L    | 7.35E-08 | -0.15205 | 0.029 | 0.234 | 0.001099 | Undiff-G | IMMP1L    |
| SLC25A6   | 7.37E-08 | 0.324365 | 0.338 | 0.864 | 0.001101 | Undiff-G | SLC25A6   |
| ILKAP     | 7.47E-08 | -0.28629 | 0.029 | 0.231 | 0.001116 | Undiff-G | ILKAP     |
| FOS       | 7.54E-08 | 0.970099 | 0.632 | 0.843 | 0.001127 | Undiff-G | FOS       |
| PTTG1     | 7.58E-08 | -0.13622 | 0.029 | 0.233 | 0.001133 | Undiff-G | PTTG1     |
| STMN2     | 7.61E-08 | -0.9701  | 0.007 | 0.189 | 0.001137 | Undiff-G | STMN2     |
| RNF40     | 7.61E-08 | -0.4231  | 0     | 0.177 | 0.001138 | Undiff-G | RNF40     |
| APBB1     | 7.64E-08 | -0.24534 | 0.007 | 0.192 | 0.001142 | Undiff-G | APBB1     |
| MT1E      | 7.73E-08 | 1.512381 | 0.456 | 0.379 | 0.001156 | Undiff-G | MT1E      |
| BLMH      | 7.75E-08 | -0.43439 | 0     | 0.177 | 0.001157 | Undiff-G | BLMH      |
| TNFAIP1   | 7.81E-08 | -0.40346 | 0     | 0.177 | 0.001167 | Undiff-G | TNFAIP1   |

|           |          |          |       |       |          |          |           |
|-----------|----------|----------|-------|-------|----------|----------|-----------|
| ETV1      | 8.02E-08 | -0.19475 | 0.037 | 0.247 | 0.001199 | Undiff-G | ETV1      |
| IP6K2     | 8.03E-08 | 0.545829 | 0.14  | 0.438 | 0.0012   | Undiff-G | IP6K2     |
| HBEGF     | 8.10E-08 | -0.53071 | 0.022 | 0.218 | 0.00121  | Undiff-G | HBEGF     |
| NBR1      | 8.11E-08 | -0.22485 | 0.007 | 0.191 | 0.001212 | Undiff-G | NBR1      |
| DPP3      | 8.14E-08 | -0.45975 | 0.007 | 0.191 | 0.001216 | Undiff-G | DPP3      |
| FAM53C    | 8.16E-08 | -0.19906 | 0.037 | 0.244 | 0.001219 | Undiff-G | FAM53C    |
| DBI       | 8.17E-08 | 0.992944 | 0.632 | 0.846 | 0.001221 | Undiff-G | DBI       |
| RBM10     | 8.18E-08 | -0.40906 | 0.015 | 0.204 | 0.001222 | Undiff-G | RBM10     |
| MAP2K3    | 8.18E-08 | -0.35167 | 0.007 | 0.191 | 0.001222 | Undiff-G | MAP2K3    |
| HERPUD2   | 8.22E-08 | -0.46557 | 0     | 0.177 | 0.001229 | Undiff-G | HERPUD2   |
| SPAG16    | 8.23E-08 | 0.357313 | 0.066 | 0.299 | 0.00123  | Undiff-G | SPAG16    |
| TLK1      | 8.24E-08 | -0.25091 | 0.029 | 0.23  | 0.001231 | Undiff-G | TLK1      |
| PBX1      | 8.28E-08 | -0.38616 | 0.022 | 0.216 | 0.001238 | Undiff-G | PBX1      |
| FAM60A    | 8.37E-08 | -0.46701 | 0     | 0.176 | 0.00125  | Undiff-G | FAM60A    |
| WAS       | 8.37E-08 | -0.70026 | 0     | 0.176 | 0.00125  | Undiff-G | WAS       |
| NCKAP1    | 8.50E-08 | -0.40077 | 0.007 | 0.19  | 0.00127  | Undiff-G | NCKAP1    |
| PCCB      | 8.51E-08 | -0.49982 | 0     | 0.176 | 0.001272 | Undiff-G | PCCB      |
| FRYL      | 8.58E-08 | -0.44788 | 0.007 | 0.19  | 0.001283 | Undiff-G | FRYL      |
| EHMT2     | 8.60E-08 | -0.43326 | 0.015 | 0.202 | 0.001285 | Undiff-G | EHMT2     |
| SLC4A7    | 8.69E-08 | -0.37112 | 0.022 | 0.216 | 0.001299 | Undiff-G | SLC4A7    |
| TNFRSF1B  | 8.70E-08 | -0.62982 | 0.007 | 0.19  | 0.0013   | Undiff-G | TNFRSF1B  |
| ACLY      | 8.75E-08 | -0.22808 | 0.022 | 0.219 | 0.001307 | Undiff-G | ACLY      |
| ABCD4     | 8.78E-08 | -0.20303 | 0.044 | 0.259 | 0.001312 | Undiff-G | ABCD4     |
| SLC44A2   | 8.79E-08 | -0.21631 | 0.015 | 0.205 | 0.001314 | Undiff-G | SLC44A2   |
| SECISBP2L | 8.88E-08 | -0.47169 | 0     | 0.176 | 0.001328 | Undiff-G | SECISBP2L |
| GTF2E2    | 9.00E-08 | -0.40354 | 0.007 | 0.19  | 0.001345 | Undiff-G | GTF2E2    |
| RNFT1     | 9.03E-08 | -0.22041 | 0.015 | 0.204 | 0.001349 | Undiff-G | RNFT1     |
| FERMT2    | 9.03E-08 | -0.17205 | 0.015 | 0.204 | 0.001349 | Undiff-G | FERMT2    |
| DUSP23    | 9.03E-08 | -0.63015 | 0.007 | 0.19  | 0.00135  | Undiff-G | DUSP23    |
| C19orf52  | 9.04E-08 | -0.41121 | 0     | 0.176 | 0.001351 | Undiff-G | C19orf52  |
| PRR7      | 9.13E-08 | -0.34826 | 0.007 | 0.19  | 0.001365 | Undiff-G | PRR7      |
| STK16     | 9.14E-08 | -0.27553 | 0.007 | 0.19  | 0.001366 | Undiff-G | STK16     |
| CXXC1     | 9.19E-08 | -0.46157 | 0     | 0.176 | 0.001374 | Undiff-G | CXXC1     |
| RIT1      | 9.20E-08 | -0.1235  | 0.022 | 0.216 | 0.001375 | Undiff-G | RIT1      |
| SPRED1    | 9.22E-08 | -0.40343 | 0.015 | 0.203 | 0.001377 | Undiff-G | SPRED1    |
| IPO5      | 9.26E-08 | -0.13991 | 0.022 | 0.218 | 0.001384 | Undiff-G | IPO5      |
| ZNF524    | 9.30E-08 | -0.32161 | 0.007 | 0.19  | 0.00139  | Undiff-G | ZNF524    |
| PTDSS1    | 9.31E-08 | -0.32314 | 0.015 | 0.204 | 0.001391 | Undiff-G | PTDSS1    |
| POLR3H    | 9.32E-08 | -0.29317 | 0.022 | 0.217 | 0.001393 | Undiff-G | POLR3H    |
| PAK1IP1   | 9.38E-08 | -0.18842 | 0.022 | 0.218 | 0.001402 | Undiff-G | PAK1IP1   |
| ITGB8     | 9.46E-08 | -0.22625 | 0.037 | 0.242 | 0.001414 | Undiff-G | ITGB8     |
| GNPAT     | 9.61E-08 | -0.15289 | 0.037 | 0.242 | 0.001436 | Undiff-G | GNPAT     |
| KCTD20    | 9.62E-08 | -0.31733 | 0.007 | 0.19  | 0.001438 | Undiff-G | KCTD20    |
| CNBP      | 9.64E-08 | 0.492309 | 0.294 | 0.754 | 0.00144  | Undiff-G | CNBP      |
| GON4L     | 9.66E-08 | -0.38186 | 0.022 | 0.217 | 0.001444 | Undiff-G | GON4L     |
| MFAP1     | 9.68E-08 | -0.45237 | 0     | 0.175 | 0.001446 | Undiff-G | MFAP1     |
| UBXN2A    | 9.71E-08 | -0.21978 | 0.007 | 0.19  | 0.001451 | Undiff-G | UBXN2A    |
| AMFR      | 9.76E-08 | -0.43883 | 0     | 0.175 | 0.001459 | Undiff-G | AMFR      |
| SMUG1     | 9.80E-08 | -0.2308  | 0.022 | 0.215 | 0.001464 | Undiff-G | SMUG1     |
| CMIP      | 9.85E-08 | -0.49032 | 0     | 0.175 | 0.001471 | Undiff-G | CMIP      |
| NGLY1     | 9.94E-08 | -0.20807 | 0.022 | 0.217 | 0.001486 | Undiff-G | NGLY1     |

|           |          |          |       |       |          |          |           |
|-----------|----------|----------|-------|-------|----------|----------|-----------|
| STX5      | 9.98E-08 | 0.118438 | 0.051 | 0.271 | 0.001491 | Undiff-G | STX5      |
| PTRH1     | 1.00E-07 | -0.39928 | 0.007 | 0.189 | 0.001497 | Undiff-G | PTRH1     |
| SDSL      | 1.00E-07 | -0.32349 | 0.007 | 0.189 | 0.001501 | Undiff-G | SDSL      |
| COIL      | 1.01E-07 | -0.43782 | 0.007 | 0.187 | 0.00151  | Undiff-G | COIL      |
| IWS1      | 1.01E-07 | -0.17674 | 0.022 | 0.215 | 0.001512 | Undiff-G | IWS1      |
| CERS4     | 1.02E-07 | -0.30812 | 0.015 | 0.201 | 0.001519 | Undiff-G | CERS4     |
| SPP1      | 1.02E-07 | 1.022616 | 0.64  | 0.856 | 0.001522 | Undiff-G | SPP1      |
| TMEM237   | 1.02E-07 | -0.42147 | 0.007 | 0.189 | 0.001523 | Undiff-G | TMEM237   |
| TUBGCP2   | 1.03E-07 | -0.28697 | 0.022 | 0.215 | 0.001541 | Undiff-G | TUBGCP2   |
| SH3BP5    | 1.03E-07 | -0.33328 | 0.015 | 0.203 | 0.001543 | Undiff-G | SH3BP5    |
| FAM92A1   | 1.03E-07 | -0.11745 | 0.015 | 0.203 | 0.001544 | Undiff-G | FAM92A1   |
| C7orf73   | 1.04E-07 | 0.553465 | 0.199 | 0.559 | 0.001547 | Undiff-G | C7orf73   |
| ARHGAP18  | 1.04E-07 | -0.67867 | 0     | 0.174 | 0.001549 | Undiff-G | ARHGAP18  |
| LMBR1L    | 1.05E-07 | -0.50662 | 0.007 | 0.186 | 0.001562 | Undiff-G | LMBR1L    |
| SIGMAR1   | 1.05E-07 | -0.40399 | 0     | 0.174 | 0.001575 | Undiff-G | SIGMAR1   |
| GPNMB     | 1.06E-07 | -0.55032 | 0.015 | 0.203 | 0.001587 | Undiff-G | GPNMB     |
| R3HDM4    | 1.07E-07 | -0.34159 | 0.015 | 0.203 | 0.001598 | Undiff-G | R3HDM4    |
| DEDD2     | 1.07E-07 | -0.48687 | 0     | 0.174 | 0.001603 | Undiff-G | DEDD2     |
| SPPL2A    | 1.07E-07 | -0.48627 | 0.007 | 0.186 | 0.001603 | Undiff-G | SPPL2A    |
| BCHE      | 1.08E-07 | -0.31756 | 0.007 | 0.188 | 0.001607 | Undiff-G | BCHE      |
| MPP1      | 1.08E-07 | -0.32458 | 0.015 | 0.203 | 0.001607 | Undiff-G | MPP1      |
| PSMB9     | 1.08E-07 | 0.378794 | 0.125 | 0.408 | 0.001616 | Undiff-G | PSMB9     |
| OSTC      | 1.08E-07 | 0.451576 | 0.176 | 0.507 | 0.001618 | Undiff-G | OSTC      |
| VEZT      | 1.10E-07 | -0.38842 | 0.029 | 0.229 | 0.001638 | Undiff-G | VEZT      |
| POLR2C    | 1.11E-07 | 0.404154 | 0.096 | 0.353 | 0.001652 | Undiff-G | POLR2C    |
| SPG7      | 1.11E-07 | -0.1118  | 0.037 | 0.243 | 0.001655 | Undiff-G | SPG7      |
| MGST1     | 1.11E-07 | 1.348858 | 0.272 | 0.143 | 0.001655 | Undiff-G | MGST1     |
| RAB5B     | 1.11E-07 | -0.20438 | 0.022 | 0.216 | 0.001657 | Undiff-G | RAB5B     |
| SEC31A    | 1.12E-07 | -0.15094 | 0.029 | 0.23  | 0.001673 | Undiff-G | SEC31A    |
| GTF3C5    | 1.12E-07 | -0.30508 | 0.007 | 0.188 | 0.001677 | Undiff-G | GTF3C5    |
| LINC00665 | 1.12E-07 | -0.24105 | 0.007 | 0.188 | 0.001678 | Undiff-G | LINC00665 |
| STX6      | 1.12E-07 | -0.46683 | 0.015 | 0.199 | 0.001679 | Undiff-G | STX6      |
| TAF7      | 1.14E-07 | 0.522511 | 0.206 | 0.557 | 0.001703 | Undiff-G | TAF7      |
| NIPSNAP3A | 1.14E-07 | -0.27111 | 0.015 | 0.202 | 0.001705 | Undiff-G | NIPSNAP3A |
| PHYHIPL   | 1.14E-07 | -0.5852  | 0.007 | 0.187 | 0.001706 | Undiff-G | PHYHIPL   |
| CCDC14    | 1.15E-07 | -0.21196 | 0.029 | 0.229 | 0.001714 | Undiff-G | CCDC14    |
| PHPT1     | 1.15E-07 | 0.496838 | 0.25  | 0.656 | 0.00172  | Undiff-G | PHPT1     |
| FAM120AOS | 1.16E-07 | -0.36    | 0.007 | 0.188 | 0.001731 | Undiff-G | FAM120AOS |
| MAP1S     | 1.17E-07 | -0.43071 | 0     | 0.173 | 0.001745 | Undiff-G | MAP1S     |
| TNFSF12   | 1.17E-07 | -0.3525  | 0.007 | 0.188 | 0.00175  | Undiff-G | TNFSF12   |
| PGAP1     | 1.18E-07 | -0.44302 | 0.007 | 0.185 | 0.001757 | Undiff-G | PGAP1     |
| DNAJC1    | 1.18E-07 | -0.41561 | 0.007 | 0.187 | 0.001766 | Undiff-G | DNAJC1    |
| WIPI1     | 1.19E-07 | -0.33778 | 0.007 | 0.187 | 0.00178  | Undiff-G | WIPI1     |
| IFI44     | 1.20E-07 | -0.54869 | 0.007 | 0.186 | 0.001794 | Undiff-G | IFI44     |
| DDX54     | 1.20E-07 | -0.21765 | 0.015 | 0.201 | 0.001797 | Undiff-G | DDX54     |
| PSMD9     | 1.21E-07 | 0.181895 | 0.059 | 0.283 | 0.001804 | Undiff-G | PSMD9     |
| RABEPK    | 1.21E-07 | -0.16508 | 0.015 | 0.201 | 0.001815 | Undiff-G | RABEPK    |
| CYHR1     | 1.22E-07 | 0.105269 | 0.059 | 0.281 | 0.001824 | Undiff-G | CYHR1     |
| RNF166    | 1.23E-07 | -0.42826 | 0.007 | 0.187 | 0.001841 | Undiff-G | RNF166    |
| PRKCSH    | 1.24E-07 | 0.463523 | 0.14  | 0.434 | 0.001857 | Undiff-G | PRKCSH    |
| ECSIT     | 1.25E-07 | 0.296845 | 0.051 | 0.27  | 0.001861 | Undiff-G | ECSIT     |

|           |           |           |        |        |           |          |               |
|-----------|-----------|-----------|--------|--------|-----------|----------|---------------|
| SLC2A5    | 1. 25E-07 | -0. 81267 | 0      | 0. 172 | 0. 001868 | Undiff-G | SLC2A5        |
| SERPINB1  | 1. 25E-07 | -0. 12822 | 0. 051 | 0. 269 | 0. 00187  | Undiff-G | SERPINB1      |
| PDRG1     | 1. 25E-07 | 0. 393265 | 0. 051 | 0. 271 | 0. 001871 | Undiff-G | PDRG1         |
| MAPKAPK5- | 1. 25E-07 | -0. 24634 | 0. 029 | 0. 226 | 0. 001872 | Undiff-G | MAPKAPK5-AS1  |
| DNAJC5    | 1. 25E-07 | -0. 30738 | 0. 022 | 0. 214 | 0. 001873 | Undiff-G | DNAJC5        |
| PQLC3     | 1. 26E-07 | -0. 4591  | 0. 007 | 0. 186 | 0. 001888 | Undiff-G | PQLC3         |
| SNX14     | 1. 26E-07 | -0. 20108 | 0. 022 | 0. 213 | 0. 00189  | Undiff-G | SNX14         |
| HMOX2     | 1. 28E-07 | 0. 301049 | 0. 066 | 0. 297 | 0. 001917 | Undiff-G | HMOX2         |
| AIMP2     | 1. 29E-07 | 0. 205673 | 0. 037 | 0. 243 | 0. 001935 | Undiff-G | AIMP2         |
| CASC4     | 1. 30E-07 | -0. 26408 | 0. 029 | 0. 226 | 0. 001938 | Undiff-G | CASC4         |
| RP11-792A | 1. 30E-07 | -0. 19268 | 0. 022 | 0. 212 | 0. 001941 | Undiff-G | RP11-792A8. 4 |
| GOLPH3    | 1. 31E-07 | -0. 30909 | 0. 007 | 0. 186 | 0. 001956 | Undiff-G | GOLPH3        |
| SART1     | 1. 33E-07 | -0. 37586 | 0. 015 | 0. 2   | 0. 00198  | Undiff-G | SART1         |
| SERPINF1  | 1. 33E-07 | -0. 59639 | 0. 029 | 0. 227 | 0. 001982 | Undiff-G | SERPINF1      |
| ATN1      | 1. 33E-07 | -0. 41425 | 0. 007 | 0. 185 | 0. 001985 | Undiff-G | ATN1          |
| SRGAP1    | 1. 33E-07 | -0. 13626 | 0. 029 | 0. 227 | 0. 001989 | Undiff-G | SRGAP1        |
| THOC3     | 1. 34E-07 | -0. 42024 | 0      | 0. 172 | 0. 002    | Undiff-G | THOC3         |
| PAK1      | 1. 34E-07 | -0. 57559 | 0      | 0. 172 | 0. 002    | Undiff-G | PAK1          |
| CAB39     | 1. 35E-07 | -0. 44443 | 0. 007 | 0. 186 | 0. 002014 | Undiff-G | CAB39         |
| RERE      | 1. 36E-07 | -0. 38358 | 0. 022 | 0. 213 | 0. 002026 | Undiff-G | RERE          |
| SNAP29    | 1. 36E-07 | -0. 14688 | 0. 029 | 0. 227 | 0. 002029 | Undiff-G | SNAP29        |
| ADAP2     | 1. 36E-07 | -0. 58653 | 0. 007 | 0. 186 | 0. 002038 | Undiff-G | ADAP2         |
| CES2      | 1. 38E-07 | -0. 32104 | 0. 007 | 0. 186 | 0. 002056 | Undiff-G | CES2          |
| ZNF800    | 1. 38E-07 | -0. 42501 | 0. 007 | 0. 184 | 0. 002057 | Undiff-G | ZNF800        |
| TRAPPC12  | 1. 38E-07 | -0. 37931 | 0. 015 | 0. 2   | 0. 002058 | Undiff-G | TRAPPC12      |
| ZNRD1     | 1. 38E-07 | -0. 33346 | 0. 022 | 0. 213 | 0. 002059 | Undiff-G | ZNRD1         |
| ALKBH4    | 1. 38E-07 | -0. 22421 | 0. 015 | 0. 2   | 0. 002059 | Undiff-G | ALKBH4        |
| PDK4      | 1. 40E-07 | -0. 74382 | 0      | 0. 171 | 0. 002087 | Undiff-G | PDK4          |
| TRIM69    | 1. 40E-07 | -0. 3614  | 0. 015 | 0. 2   | 0. 002097 | Undiff-G | TRIM69        |
| SP110     | 1. 40E-07 | -0. 25482 | 0. 015 | 0. 2   | 0. 002098 | Undiff-G | SP110         |
| PTPRN2    | 1. 41E-07 | -0. 21829 | 0. 022 | 0. 214 | 0. 002108 | Undiff-G | PTPRN2        |
| MYO1F     | 1. 41E-07 | -0. 45    | 0. 007 | 0. 186 | 0. 002112 | Undiff-G | MYO1F         |
| SOAT1     | 1. 41E-07 | -0. 2813  | 0. 015 | 0. 2   | 0. 002113 | Undiff-G | SOAT1         |
| ATP6VOE1  | 1. 41E-07 | 0. 489322 | 0. 294 | 0. 766 | 0. 002114 | Undiff-G | ATP6VOE1      |
| TTC37     | 1. 42E-07 | -0. 30047 | 0. 007 | 0. 186 | 0. 002129 | Undiff-G | TTC37         |
| HSP90AA1  | 1. 43E-07 | 0. 213479 | 0. 36  | 0. 894 | 0. 002135 | Undiff-G | HSP90AA1      |
| MMAB      | 1. 43E-07 | -0. 24052 | 0. 015 | 0. 199 | 0. 00214  | Undiff-G | MMAB          |
| B3GALNT1  | 1. 44E-07 | -0. 24419 | 0. 007 | 0. 186 | 0. 002146 | Undiff-G | B3GALNT1      |
| PHC2      | 1. 45E-07 | 0. 237906 | 0. 059 | 0. 279 | 0. 002173 | Undiff-G | PHC2          |
| CKAP2     | 1. 47E-07 | -0. 47401 | 0      | 0. 171 | 0. 002196 | Undiff-G | CKAP2         |
| SWAP70    | 1. 47E-07 | -0. 1816  | 0. 029 | 0. 224 | 0. 002197 | Undiff-G | SWAP70        |
| SCO2      | 1. 47E-07 | -0. 17202 | 0. 022 | 0. 213 | 0. 002198 | Undiff-G | SCO2          |
| MAPKAPK5  | 1. 47E-07 | -0. 31023 | 0. 007 | 0. 185 | 0. 002202 | Undiff-G | MAPKAPK5      |
| TOB2      | 1. 48E-07 | -0. 22346 | 0. 015 | 0. 199 | 0. 002216 | Undiff-G | TOB2          |
| F2R       | 1. 49E-07 | -0. 41196 | 0      | 0. 171 | 0. 002234 | Undiff-G | F2R           |
| MLXIP     | 1. 50E-07 | -0. 25881 | 0. 007 | 0. 185 | 0. 002241 | Undiff-G | MLXIP         |
| LRIF1     | 1. 50E-07 | -0. 15443 | 0. 015 | 0. 199 | 0. 002242 | Undiff-G | LRIF1         |
| RAC3      | 1. 51E-07 | -0. 38545 | 0. 007 | 0. 185 | 0. 002264 | Undiff-G | RAC3          |
| ERH       | 1. 53E-07 | 0. 529926 | 0. 272 | 0. 719 | 0. 002281 | Undiff-G | ERH           |
| USP34     | 1. 53E-07 | -0. 38169 | 0. 022 | 0. 212 | 0. 002289 | Undiff-G | USP34         |
| RNF213    | 1. 55E-07 | -0. 20946 | 0. 051 | 0. 264 | 0. 002315 | Undiff-G | RNF213        |

|          |          |          |       |       |          |          |          |
|----------|----------|----------|-------|-------|----------|----------|----------|
| DNAJC10  | 1.55E-07 | -0.13935 | 0.015 | 0.199 | 0.002321 | Undiff-G | DNAJC10  |
| TIA1     | 1.56E-07 | -0.13672 | 0.044 | 0.25  | 0.002333 | Undiff-G | TIA1     |
| UPF3B    | 1.57E-07 | 0.107856 | 0.044 | 0.253 | 0.00234  | Undiff-G | UPF3B    |
| TRIM2    | 1.57E-07 | -0.25502 | 0.029 | 0.226 | 0.002347 | Undiff-G | TRIM2    |
| LTC4S    | 1.59E-07 | -0.69419 | 0     | 0.17  | 0.00237  | Undiff-G | LTC4S    |
| ACAA2    | 1.59E-07 | -0.19934 | 0.022 | 0.212 | 0.002381 | Undiff-G | ACAA2    |
| FAM172A  | 1.59E-07 | -0.23953 | 0.015 | 0.198 | 0.002382 | Undiff-G | FAM172A  |
| TFAM     | 1.60E-07 | -0.44467 | 0.007 | 0.183 | 0.002385 | Undiff-G | TFAM     |
| SNHG8    | 1.60E-07 | 0.496544 | 0.162 | 0.472 | 0.002391 | Undiff-G | SNHG8    |
| JAGN1    | 1.60E-07 | 0.4026   | 0.081 | 0.323 | 0.002397 | Undiff-G | JAGN1    |
| BCL2L1   | 1.62E-07 | 0.113924 | 0.051 | 0.266 | 0.002416 | Undiff-G | BCL2L1   |
| B4GALT5  | 1.62E-07 | -0.22657 | 0.015 | 0.199 | 0.00242  | Undiff-G | B4GALT5  |
| PPIL1    | 1.63E-07 | -0.24461 | 0.015 | 0.196 | 0.002437 | Undiff-G | PPIL1    |
| TMEM54   | 1.63E-07 | -0.39142 | 0.015 | 0.198 | 0.002443 | Undiff-G | TMEM54   |
| UPF3A    | 1.64E-07 | 0.161103 | 0.096 | 0.348 | 0.002446 | Undiff-G | UPF3A    |
| MRAS     | 1.64E-07 | -0.4092  | 0     | 0.17  | 0.002452 | Undiff-G | MRAS     |
| FNIP2    | 1.65E-07 | -0.31165 | 0.015 | 0.198 | 0.002467 | Undiff-G | FNIP2    |
| PEBP1    | 1.65E-07 | 0.403642 | 0.324 | 0.809 | 0.00247  | Undiff-G | PEBP1    |
| LRPPRC   | 1.65E-07 | -0.43521 | 0     | 0.17  | 0.002473 | Undiff-G | LRPPRC   |
| SYMPK    | 1.66E-07 | -0.3247  | 0.029 | 0.225 | 0.002474 | Undiff-G | SYMPK    |
| CPSF4    | 1.66E-07 | -0.29048 | 0.015 | 0.198 | 0.002478 | Undiff-G | CPSF4    |
| NEU1     | 1.67E-07 | 0.329126 | 0.066 | 0.295 | 0.002493 | Undiff-G | NEU1     |
| PREB     | 1.67E-07 | -0.14728 | 0.022 | 0.212 | 0.0025   | Undiff-G | PREB     |
| TGFBI    | 1.68E-07 | -0.57842 | 0.022 | 0.207 | 0.002505 | Undiff-G | TGFBI    |
| ZNF511   | 1.68E-07 | -0.36571 | 0.015 | 0.198 | 0.002511 | Undiff-G | ZNF511   |
| MSR1     | 1.70E-07 | -0.73003 | 0.007 | 0.182 | 0.002542 | Undiff-G | MSR1     |
| AP1M1    | 1.71E-07 | -0.24249 | 0.029 | 0.225 | 0.002555 | Undiff-G | AP1M1    |
| RPUSD3   | 1.72E-07 | -0.12822 | 0.015 | 0.198 | 0.002568 | Undiff-G | RPUSD3   |
| TRIM47   | 1.72E-07 | -0.4525  | 0.007 | 0.182 | 0.00257  | Undiff-G | TRIM47   |
| RNF8     | 1.74E-07 | -0.41354 | 0     | 0.169 | 0.002602 | Undiff-G | RNF8     |
| CCDC34   | 1.74E-07 | -0.46822 | 0     | 0.169 | 0.002602 | Undiff-G | CCDC34   |
| DDIT3    | 1.74E-07 | 0.536125 | 0.14  | 0.431 | 0.002607 | Undiff-G | DDIT3    |
| PPME1    | 1.77E-07 | -0.33515 | 0.007 | 0.183 | 0.00265  | Undiff-G | PPME1    |
| CHMP6    | 1.77E-07 | -0.23649 | 0.015 | 0.197 | 0.00265  | Undiff-G | CHMP6    |
| WDR34    | 1.78E-07 | -0.36    | 0.022 | 0.209 | 0.00266  | Undiff-G | WDR34    |
| FAM20C   | 1.78E-07 | 0.133579 | 0.029 | 0.226 | 0.002661 | Undiff-G | FAM20C   |
| TUBA1C   | 1.78E-07 | 0.276054 | 0.118 | 0.383 | 0.002664 | Undiff-G | TUBA1C   |
| GRIPAP1  | 1.79E-07 | -0.44078 | 0.015 | 0.195 | 0.002675 | Undiff-G | GRIPAP1  |
| RABIF    | 1.79E-07 | -0.2304  | 0.007 | 0.183 | 0.002677 | Undiff-G | RABIF    |
| EIF2AK4  | 1.80E-07 | -0.34636 | 0.007 | 0.183 | 0.002692 | Undiff-G | EIF2AK4  |
| ZFHX3    | 1.80E-07 | -0.11397 | 0.015 | 0.197 | 0.002695 | Undiff-G | ZFHX3    |
| GGCT     | 1.81E-07 | 0.485453 | 0.118 | 0.39  | 0.002698 | Undiff-G | GGCT     |
| KPNA6    | 1.81E-07 | 0.10056  | 0.037 | 0.237 | 0.0027   | Undiff-G | KPNA6    |
| CDK6     | 1.82E-07 | -0.46078 | 0.022 | 0.208 | 0.002727 | Undiff-G | CDK6     |
| STX16    | 1.84E-07 | -0.29963 | 0.022 | 0.211 | 0.002756 | Undiff-G | STX16    |
| DUSP4    | 1.84E-07 | -0.51368 | 0.007 | 0.181 | 0.002756 | Undiff-G | DUSP4    |
| C16orf45 | 1.85E-07 | 0.316095 | 0.081 | 0.321 | 0.002765 | Undiff-G | C16orf45 |
| NDUFAF6  | 1.86E-07 | -0.37823 | 0.007 | 0.183 | 0.002785 | Undiff-G | NDUFAF6  |
| BROX     | 1.87E-07 | -0.12538 | 0.037 | 0.237 | 0.002801 | Undiff-G | BROX     |
| ACOX1    | 1.88E-07 | -0.40892 | 0     | 0.168 | 0.002808 | Undiff-G | ACOX1    |
| ICT1     | 1.88E-07 | 0.201176 | 0.037 | 0.239 | 0.002811 | Undiff-G | ICT1     |

|           |          |          |       |       |          |          |           |
|-----------|----------|----------|-------|-------|----------|----------|-----------|
| SRFBP1    | 1.88E-07 | -0.313   | 0.007 | 0.183 | 0.002813 | Undiff-G | SRFBP1    |
| FBXW11    | 1.88E-07 | -0.12476 | 0.007 | 0.183 | 0.002817 | Undiff-G | FBXW11    |
| ATAD1     | 1.89E-07 | -0.46139 | 0     | 0.168 | 0.002832 | Undiff-G | ATAD1     |
| FERMT3    | 1.89E-07 | -0.66594 | 0     | 0.168 | 0.002832 | Undiff-G | FERMT3    |
| LINC00659 | 1.90E-07 | 0.278875 | 0.007 | 0     | 0.002838 | Undiff-G | LINC00659 |
| NBL1      | 1.90E-07 | -0.47699 | 0.007 | 0.18  | 0.002842 | Undiff-G | NBL1      |
| UBA6      | 1.92E-07 | -0.22174 | 0.015 | 0.197 | 0.002863 | Undiff-G | UBA6      |
| DESI2     | 1.94E-07 | -0.30078 | 0.015 | 0.196 | 0.002899 | Undiff-G | DESI2     |
| LACTB     | 1.94E-07 | -0.49391 | 0     | 0.168 | 0.002904 | Undiff-G | LACTB     |
| LSP1      | 1.96E-07 | -0.75877 | 0     | 0.168 | 0.002929 | Undiff-G | LSP1      |
| PURA      | 1.96E-07 | -0.15552 | 0.022 | 0.21  | 0.002933 | Undiff-G | PURA      |
| 6-Sep     | 1.98E-07 | -0.51524 | 0     | 0.168 | 0.002954 | Undiff-G | 6-Sep     |
| MGRN1     | 1.98E-07 | -0.14809 | 0.022 | 0.21  | 0.00296  | Undiff-G | MGRN1     |
| RAB35     | 1.99E-07 | -0.42751 | 0     | 0.168 | 0.002979 | Undiff-G | RAB35     |
| DCAF6     | 1.99E-07 | -0.44302 | 0     | 0.168 | 0.002979 | Undiff-G | DCAF6     |
| SEC23A    | 2.01E-07 | -0.42266 | 0.015 | 0.195 | 0.003006 | Undiff-G | SEC23A    |
| POLK      | 2.02E-07 | -0.40631 | 0.007 | 0.182 | 0.003017 | Undiff-G | POLK      |
| SMC5      | 2.03E-07 | -0.39688 | 0.007 | 0.182 | 0.003034 | Undiff-G | SMC5      |
| DOHH      | 2.04E-07 | -0.33123 | 0.015 | 0.196 | 0.003047 | Undiff-G | DOHH      |
| NRP1      | 2.04E-07 | -0.45428 | 0     | 0.167 | 0.003055 | Undiff-G | NRP1      |
| ATF5      | 2.05E-07 | -0.41358 | 0.015 | 0.196 | 0.003066 | Undiff-G | ATF5      |
| WDR6      | 2.06E-07 | -0.25638 | 0.037 | 0.234 | 0.003072 | Undiff-G | WDR6      |
| SLC36A4   | 2.08E-07 | -0.39151 | 0.015 | 0.195 | 0.003103 | Undiff-G | SLC36A4   |
| COQ2      | 2.11E-07 | -0.40144 | 0.007 | 0.182 | 0.003154 | Undiff-G | COQ2      |
| TMUB2     | 2.13E-07 | -0.1994  | 0.051 | 0.262 | 0.003182 | Undiff-G | TMUB2     |
| FBXO9     | 2.15E-07 | -0.3736  | 0.022 | 0.208 | 0.003207 | Undiff-G | FBXO9     |
| TBCC      | 2.15E-07 | 0.140768 | 0.029 | 0.224 | 0.003214 | Undiff-G | TBCC      |
| MDM2      | 2.15E-07 | -0.29951 | 0.022 | 0.208 | 0.003218 | Undiff-G | MDM2      |
| RP9       | 2.16E-07 | -0.41159 | 0.007 | 0.181 | 0.003224 | Undiff-G | RP9       |
| ENG       | 2.17E-07 | -0.62066 | 0     | 0.167 | 0.003241 | Undiff-G | ENG       |
| SLC1A3    | 2.18E-07 | 0.259011 | 0.169 | 0.48  | 0.003254 | Undiff-G | SLC1A3    |
| TNIP2     | 2.19E-07 | -0.40387 | 0     | 0.167 | 0.003269 | Undiff-G | TNIP2     |
| DUSP14    | 2.19E-07 | -0.29455 | 0.007 | 0.181 | 0.003272 | Undiff-G | DUSP14    |
| PSEN1     | 2.19E-07 | -0.27325 | 0.007 | 0.181 | 0.003278 | Undiff-G | PSEN1     |
| MORN2     | 2.20E-07 | 0.272326 | 0.051 | 0.264 | 0.003281 | Undiff-G | MORN2     |
| MGEA5     | 2.20E-07 | -0.35839 | 0.037 | 0.235 | 0.003288 | Undiff-G | MGEA5     |
| PPP3CA    | 2.21E-07 | -0.14356 | 0.044 | 0.249 | 0.003305 | Undiff-G | PPP3CA    |
| GNG2      | 2.21E-07 | -0.26823 | 0.007 | 0.181 | 0.003306 | Undiff-G | GNG2      |
| TOPORS    | 2.21E-07 | -0.45146 | 0.007 | 0.181 | 0.003309 | Undiff-G | TOPORS    |
| COG4      | 2.22E-07 | -0.41527 | 0.015 | 0.193 | 0.003314 | Undiff-G | COG4      |
| ZNF358    | 2.22E-07 | -0.38184 | 0     | 0.167 | 0.003324 | Undiff-G | ZNF358    |
| B4GALT3   | 2.24E-07 | -0.2063  | 0.029 | 0.22  | 0.003341 | Undiff-G | B4GALT3   |
| RBM22     | 2.24E-07 | 0.416783 | 0.074 | 0.305 | 0.003345 | Undiff-G | RBM22     |
| KLF10     | 2.25E-07 | -0.11745 | 0.037 | 0.235 | 0.003365 | Undiff-G | KLF10     |
| SUPT16H   | 2.25E-07 | 0.275033 | 0.044 | 0.251 | 0.003367 | Undiff-G | SUPT16H   |
| SLC3A2    | 2.25E-07 | 0.51401  | 0.221 | 0.592 | 0.003369 | Undiff-G | SLC3A2    |
| SRP54     | 2.27E-07 | 0.107668 | 0.059 | 0.275 | 0.003388 | Undiff-G | SRP54     |
| KLHL24    | 2.27E-07 | -0.31925 | 0.007 | 0.181 | 0.003389 | Undiff-G | KLHL24    |
| CNRIP1    | 2.27E-07 | -0.29494 | 0.022 | 0.206 | 0.003396 | Undiff-G | CNRIP1    |
| NSD1      | 2.28E-07 | -0.10743 | 0.037 | 0.235 | 0.003411 | Undiff-G | NSD1      |
| ZBED5     | 2.28E-07 | -0.32452 | 0.007 | 0.181 | 0.003414 | Undiff-G | ZBED5     |



|           |          |          |       |       |          |          |              |
|-----------|----------|----------|-------|-------|----------|----------|--------------|
| MVD       | 2.31E-07 | -0.40947 | 0.007 | 0.18  | 0.003453 | Undiff-G | MVD          |
| CMTM7     | 2.32E-07 | -0.58179 | 0     | 0.166 | 0.003467 | Undiff-G | CMTM7        |
| TP53RK    | 2.33E-07 | -0.34733 | 0.015 | 0.193 | 0.003477 | Undiff-G | TP53RK       |
| AHI1      | 2.34E-07 | -0.27114 | 0.022 | 0.207 | 0.0035   | Undiff-G | AHI1         |
| TRMT112   | 2.36E-07 | 0.449074 | 0.279 | 0.712 | 0.003522 | Undiff-G | TRMT112      |
| ELAVL4    | 2.37E-07 | -0.57985 | 0.007 | 0.18  | 0.003536 | Undiff-G | ELAVL4       |
| ELL2      | 2.37E-07 | -0.22221 | 0.015 | 0.195 | 0.00354  | Undiff-G | ELL2         |
| GALK1     | 2.37E-07 | -0.2818  | 0.022 | 0.206 | 0.003548 | Undiff-G | GALK1        |
| RP11-345F | 2.38E-07 | -0.39179 | 0     | 0.166 | 0.003556 | Undiff-G | RP11-345P4.9 |
| PARVB     | 2.38E-07 | -0.48279 | 0     | 0.166 | 0.003556 | Undiff-G | PARVB        |
| REX04     | 2.38E-07 | -0.38307 | 0.015 | 0.192 | 0.003556 | Undiff-G | REX04        |
| IGFBP5    | 2.39E-07 | 1.548914 | 0.375 | 0.267 | 0.003565 | Undiff-G | IGFBP5       |
| FAM181B   | 2.43E-07 | -0.4853  | 0.022 | 0.205 | 0.003625 | Undiff-G | FAM181B      |
| CEP63     | 2.43E-07 | -0.26268 | 0.007 | 0.18  | 0.003626 | Undiff-G | CEP63        |
| ACAP2     | 2.43E-07 | -0.41765 | 0.007 | 0.18  | 0.003636 | Undiff-G | ACAP2        |
| NDFIP2    | 2.45E-07 | -0.10264 | 0.015 | 0.194 | 0.003657 | Undiff-G | NDFIP2       |
| GPBP1L1   | 2.46E-07 | -0.1828  | 0.022 | 0.208 | 0.00368  | Undiff-G | GPBP1L1      |
| IFT57     | 2.47E-07 | 0.248609 | 0.044 | 0.25  | 0.003688 | Undiff-G | IFT57        |
| DYNLL2    | 2.48E-07 | -0.2174  | 0.022 | 0.208 | 0.003706 | Undiff-G | DYNLL2       |
| BBIP1     | 2.49E-07 | -0.3901  | 0.007 | 0.18  | 0.003714 | Undiff-G | BBIP1        |
| CSRNP1    | 2.49E-07 | -0.52252 | 0.015 | 0.193 | 0.003726 | Undiff-G | CSRNP1       |
| CENPT     | 2.50E-07 | -0.38823 | 0.015 | 0.192 | 0.003742 | Undiff-G | CENPT        |
| FGL2      | 2.51E-07 | -0.70381 | 0.007 | 0.179 | 0.003747 | Undiff-G | FGL2         |
| OLFM2     | 2.52E-07 | -0.27696 | 0.015 | 0.193 | 0.00376  | Undiff-G | OLFM2        |
| RBM14     | 2.53E-07 | -0.27159 | 0.015 | 0.194 | 0.003777 | Undiff-G | RBM14        |
| UBE2Q2    | 2.54E-07 | -0.33435 | 0.022 | 0.207 | 0.003794 | Undiff-G | UBE2Q2       |
| NCK1      | 2.54E-07 | 0.162939 | 0.044 | 0.246 | 0.003803 | Undiff-G | NCK1         |
| PSMD8     | 2.56E-07 | 0.569599 | 0.265 | 0.678 | 0.003822 | Undiff-G | PSMD8        |
| LDLRAD3   | 2.58E-07 | -0.41189 | 0.007 | 0.178 | 0.003854 | Undiff-G | LDLRAD3      |
| TMEM167B  | 2.58E-07 | -0.21988 | 0.022 | 0.207 | 0.003858 | Undiff-G | TMEM167B     |
| CLK3      | 2.59E-07 | -0.46263 | 0     | 0.165 | 0.003868 | Undiff-G | CLK3         |
| PLAU      | 2.59E-07 | -0.53507 | 0     | 0.165 | 0.003868 | Undiff-G | PLAU         |
| FCGR1B    | 2.59E-07 | -0.78437 | 0     | 0.165 | 0.003868 | Undiff-G | FCGR1B       |
| TAF15     | 2.61E-07 | 0.170593 | 0.059 | 0.276 | 0.003899 | Undiff-G | TAF15        |
| TBRG1     | 2.61E-07 | 0.100717 | 0.044 | 0.247 | 0.003906 | Undiff-G | TBRG1        |
| NDRG3     | 2.62E-07 | -0.20951 | 0.007 | 0.179 | 0.003911 | Undiff-G | NDRG3        |
| HNRNPLL   | 2.67E-07 | -0.40012 | 0.015 | 0.193 | 0.003993 | Undiff-G | HNRNPLL      |
| CDC27     | 2.68E-07 | -0.40486 | 0     | 0.165 | 0.004    | Undiff-G | CDC27        |
| MAP3K7    | 2.68E-07 | -0.21497 | 0.022 | 0.207 | 0.004011 | Undiff-G | MAP3K7       |
| LPP       | 2.70E-07 | -0.3338  | 0.029 | 0.219 | 0.004032 | Undiff-G | LPP          |
| RUNX1     | 2.73E-07 | -0.27531 | 0.015 | 0.192 | 0.004075 | Undiff-G | RUNX1        |
| ACAP3     | 2.73E-07 | -0.11122 | 0.029 | 0.218 | 0.004082 | Undiff-G | ACAP3        |
| TRAF7     | 2.75E-07 | -0.21174 | 0.015 | 0.191 | 0.004104 | Undiff-G | TRAF7        |
| ANKRD40   | 2.75E-07 | -0.43235 | 0.007 | 0.177 | 0.004106 | Undiff-G | ANKRD40      |
| SDHAF1    | 2.76E-07 | -0.38561 | 0.007 | 0.178 | 0.004119 | Undiff-G | SDHAF1       |
| C19orf66  | 2.76E-07 | -0.11143 | 0.051 | 0.258 | 0.004119 | Undiff-G | C19orf66     |
| FAM105A   | 2.77E-07 | -0.65984 | 0     | 0.164 | 0.004137 | Undiff-G | FAM105A      |
| ANAPC10   | 2.77E-07 | -0.31584 | 0.007 | 0.179 | 0.004139 | Undiff-G | ANAPC10      |
| MYH9      | 2.79E-07 | -0.47088 | 0.015 | 0.19  | 0.004166 | Undiff-G | MYH9         |
| SRD5A3    | 2.79E-07 | -0.4377  | 0     | 0.164 | 0.004172 | Undiff-G | SRD5A3       |
| FAM127B   | 2.80E-07 | 0.330606 | 0.074 | 0.303 | 0.004178 | Undiff-G | FAM127B      |

|           |          |          |       |       |          |          |               |
|-----------|----------|----------|-------|-------|----------|----------|---------------|
| CHN1      | 2.81E-07 | -0.10117 | 0.029 | 0.218 | 0.004193 | Undiff-G | CHN1          |
| CLDND1    | 2.82E-07 | 0.353054 | 0.125 | 0.397 | 0.00421  | Undiff-G | CLDND1        |
| UBE2Z     | 2.82E-07 | -0.40455 | 0.007 | 0.178 | 0.004211 | Undiff-G | UBE2Z         |
| PPP5C     | 2.82E-07 | -0.40855 | 0.007 | 0.178 | 0.004217 | Undiff-G | PPP5C         |
| CNOT3     | 2.84E-07 | -0.36936 | 0     | 0.164 | 0.004242 | Undiff-G | CNOT3         |
| NPRL3     | 2.84E-07 | -0.34288 | 0.015 | 0.192 | 0.004246 | Undiff-G | NPRL3         |
| ENTPD1    | 2.86E-07 | -0.68199 | 0     | 0.164 | 0.004278 | Undiff-G | ENTPD1        |
| PTPN6     | 2.91E-07 | -0.65621 | 0     | 0.164 | 0.00435  | Undiff-G | PTPN6         |
| ASH2L     | 2.92E-07 | -0.2489  | 0.007 | 0.178 | 0.004359 | Undiff-G | ASH2L         |
| ILF3-AS1  | 2.93E-07 | 0.14431  | 0.081 | 0.312 | 0.004378 | Undiff-G | ILF3-AS1      |
| ILK       | 2.93E-07 | 0.447633 | 0.11  | 0.368 | 0.004385 | Undiff-G | ILK           |
| TGFBR1    | 2.94E-07 | -0.51206 | 0     | 0.164 | 0.004387 | Undiff-G | TGFBR1        |
| DOCK4     | 2.94E-07 | -0.54401 | 0     | 0.164 | 0.004387 | Undiff-G | DOCK4         |
| SIGLEC10  | 2.94E-07 | -0.67341 | 0     | 0.164 | 0.004387 | Undiff-G | SIGLEC10      |
| C1orf61   | 2.96E-07 | 0.253169 | 0.206 | 0.539 | 0.004424 | Undiff-G | C1orf61       |
| CYB5R4    | 2.97E-07 | -0.28898 | 0.007 | 0.178 | 0.004434 | Undiff-G | CYB5R4        |
| ACOT13    | 3.03E-07 | 0.124727 | 0.029 | 0.22  | 0.004526 | Undiff-G | ACOT13        |
| BAZ2A     | 3.04E-07 | -0.37119 | 0.015 | 0.192 | 0.004536 | Undiff-G | BAZ2A         |
| STAB1     | 3.04E-07 | -0.72065 | 0     | 0.163 | 0.004537 | Undiff-G | STAB1         |
| MIER1     | 3.04E-07 | -0.42461 | 0.007 | 0.176 | 0.00455  | Undiff-G | MIER1         |
| THAP11    | 3.04E-07 | -0.1431  | 0.007 | 0.178 | 0.00455  | Undiff-G | THAP11        |
| CEP57     | 3.06E-07 | -0.26838 | 0.037 | 0.232 | 0.004571 | Undiff-G | CEP57         |
| EIF2B4    | 3.06E-07 | -0.25099 | 0.015 | 0.19  | 0.00458  | Undiff-G | EIF2B4        |
| RPIA      | 3.07E-07 | -0.24822 | 0.015 | 0.19  | 0.004582 | Undiff-G | RPIA          |
| FBXL3     | 3.07E-07 | -0.19683 | 0.007 | 0.178 | 0.004589 | Undiff-G | FBXL3         |
| ATP13A1   | 3.09E-07 | -0.39388 | 0     | 0.163 | 0.004613 | Undiff-G | ATP13A1       |
| ATP5J2    | 3.09E-07 | 0.369779 | 0.324 | 0.813 | 0.004624 | Undiff-G | ATP5J2        |
| POLR2J3   | 3.11E-07 | 0.280427 | 0.096 | 0.342 | 0.004641 | Undiff-G | POLR2J3       |
| MTHFS     | 3.11E-07 | -0.28708 | 0.015 | 0.191 | 0.004646 | Undiff-G | MTHFS         |
| ZNF688    | 3.11E-07 | -0.35468 | 0.007 | 0.178 | 0.004647 | Undiff-G | ZNF688        |
| SF3B3     | 3.11E-07 | -0.19618 | 0.015 | 0.192 | 0.004655 | Undiff-G | SF3B3         |
| C14orf119 | 3.12E-07 | 0.511181 | 0.081 | 0.316 | 0.004664 | Undiff-G | C14orf119     |
| UBE2D4    | 3.16E-07 | -0.28587 | 0.015 | 0.192 | 0.00472  | Undiff-G | UBE2D4        |
| PLEK      | 3.16E-07 | -0.69711 | 0.007 | 0.177 | 0.004725 | Undiff-G | PLEK          |
| GCAT      | 3.17E-07 | -0.35588 | 0     | 0.163 | 0.004731 | Undiff-G | GCAT          |
| PDPK1     | 3.17E-07 | -0.39668 | 0.015 | 0.189 | 0.004738 | Undiff-G | PDPK1         |
| MAGT1     | 3.19E-07 | -0.27488 | 0.022 | 0.205 | 0.004772 | Undiff-G | MAGT1         |
| IRF2BPL   | 3.20E-07 | 0.135742 | 0.044 | 0.244 | 0.004779 | Undiff-G | IRF2BPL       |
| TYMS      | 3.22E-07 | -0.46182 | 0     | 0.163 | 0.004811 | Undiff-G | TYMS          |
| IRF7      | 3.25E-07 | -0.4682  | 0     | 0.163 | 0.004851 | Undiff-G | IRF7          |
| RP11-620J | 3.27E-07 | 0.174217 | 0.059 | 0.272 | 0.004891 | Undiff-G | RP11-620J15.3 |
| YRDC      | 3.27E-07 | -0.39745 | 0     | 0.163 | 0.004892 | Undiff-G | YRDC          |
| HAMP      | 3.27E-07 | -0.84567 | 0     | 0.163 | 0.004892 | Undiff-G | HAMP          |
| XIST      | 3.30E-07 | -0.21448 | 0.059 | 0.268 | 0.004938 | Undiff-G | XIST          |
| SCCPDH    | 3.31E-07 | 0.488855 | 0.118 | 0.38  | 0.00494  | Undiff-G | SCCPDH        |
| SMAD2     | 3.31E-07 | -0.12176 | 0.015 | 0.191 | 0.004947 | Undiff-G | SMAD2         |
| ZNF581    | 3.32E-07 | -0.46171 | 0.007 | 0.175 | 0.004969 | Undiff-G | ZNF581        |
| GATAD2B   | 3.33E-07 | -0.42335 | 0     | 0.162 | 0.004974 | Undiff-G | GATAD2B       |
| TBL2      | 3.33E-07 | -0.22884 | 0.015 | 0.191 | 0.004977 | Undiff-G | TBL2          |
| CLEC7A    | 3.33E-07 | -0.57931 | 0.007 | 0.177 | 0.004977 | Undiff-G | CLEC7A        |
| SLC25A37  | 3.35E-07 | 0.123006 | 0.081 | 0.313 | 0.005004 | Undiff-G | SLC25A37      |

|           |          |          |       |       |          |          |            |
|-----------|----------|----------|-------|-------|----------|----------|------------|
| PHYKPL    | 3.36E-07 | -0.37034 | 0.022 | 0.204 | 0.005016 | Undiff-G | PHYKPL     |
| KIF9      | 3.37E-07 | -0.4192  | 0.007 | 0.176 | 0.005041 | Undiff-G | KIF9       |
| CANT1     | 3.39E-07 | -0.16084 | 0.007 | 0.177 | 0.005072 | Undiff-G | CANT1      |
| LYN       | 3.40E-07 | -0.57006 | 0.007 | 0.176 | 0.005081 | Undiff-G | LYN        |
| EGLN1     | 3.41E-07 | -0.30951 | 0.015 | 0.189 | 0.005096 | Undiff-G | EGLN1      |
| EIF4G3    | 3.41E-07 | -0.40525 | 0.007 | 0.176 | 0.005096 | Undiff-G | EIF4G3     |
| FRMD4A    | 3.42E-07 | -0.55973 | 0.015 | 0.19  | 0.005105 | Undiff-G | FRMD4A     |
| ISY1      | 3.43E-07 | -0.45363 | 0.007 | 0.176 | 0.00512  | Undiff-G | ISY1       |
| CREBL2    | 3.43E-07 | -0.36879 | 0.015 | 0.191 | 0.005123 | Undiff-G | CREBL2     |
| SELM      | 3.47E-07 | -0.30802 | 0.015 | 0.19  | 0.005186 | Undiff-G | SELM       |
| PGM3      | 3.47E-07 | -0.38201 | 0.007 | 0.176 | 0.005187 | Undiff-G | PGM3       |
| FNDC3B    | 3.49E-07 | -0.41223 | 0.007 | 0.176 | 0.005214 | Undiff-G | FNDC3B     |
| PKIG      | 3.50E-07 | 0.367706 | 0.081 | 0.313 | 0.005235 | Undiff-G | PKIG       |
| SLC7A7    | 3.52E-07 | -0.64161 | 0.007 | 0.176 | 0.005255 | Undiff-G | SLC7A7     |
| NMB       | 3.52E-07 | -0.347   | 0.022 | 0.204 | 0.005265 | Undiff-G | NMB        |
| ZNF655    | 3.53E-07 | -0.12774 | 0.044 | 0.242 | 0.005278 | Undiff-G | ZNF655     |
| ACBD3     | 3.54E-07 | -0.1929  | 0.007 | 0.176 | 0.005289 | Undiff-G | ACBD3      |
| LTV1      | 3.57E-07 | -0.42192 | 0.015 | 0.188 | 0.00534  | Undiff-G | LTV1       |
| CCDC130   | 3.60E-07 | -0.30459 | 0.037 | 0.23  | 0.005383 | Undiff-G | CCDC130    |
| RAP1GDS1  | 3.65E-07 | -0.42475 | 0.007 | 0.176 | 0.005452 | Undiff-G | RAP1GDS1   |
| GRIA2     | 3.65E-07 | -0.39524 | 0.029 | 0.214 | 0.005455 | Undiff-G | GRIA2      |
| SF3A1     | 3.69E-07 | -0.29896 | 0.007 | 0.176 | 0.00551  | Undiff-G | SF3A1      |
| BPHL      | 3.69E-07 | -0.15696 | 0.007 | 0.176 | 0.005514 | Undiff-G | BPHL       |
| ZDHHC3    | 3.72E-07 | -0.21078 | 0.022 | 0.202 | 0.005557 | Undiff-G | ZDHHC3     |
| TM9SF4    | 3.73E-07 | -0.24446 | 0.015 | 0.19  | 0.005579 | Undiff-G | TM9SF4     |
| NDUFC1    | 3.77E-07 | 0.592702 | 0.206 | 0.556 | 0.00563  | Undiff-G | NDUFC1     |
| SULF2     | 3.77E-07 | -0.39359 | 0     | 0.161 | 0.005639 | Undiff-G | SULF2      |
| CBY1      | 3.77E-07 | -0.41618 | 0     | 0.161 | 0.005639 | Undiff-G | CBY1       |
| CIAO1     | 3.77E-07 | 0.135459 | 0.044 | 0.245 | 0.005641 | Undiff-G | CIAO1      |
| MTHFD1    | 3.80E-07 | -0.22599 | 0.015 | 0.189 | 0.005684 | Undiff-G | MTHFD1     |
| THAP4     | 3.84E-07 | -0.39644 | 0     | 0.161 | 0.005734 | Undiff-G | THAP4      |
| TTL7      | 3.84E-07 | -0.32868 | 0.044 | 0.239 | 0.005738 | Undiff-G | TTL7       |
| C15orf61  | 3.85E-07 | -0.22933 | 0.007 | 0.175 | 0.00575  | Undiff-G | C15orf61   |
| STAU2     | 3.87E-07 | -0.26899 | 0.007 | 0.175 | 0.00579  | Undiff-G | STAU2      |
| FJX1      | 3.87E-07 | -0.2828  | 0.022 | 0.204 | 0.00579  | Undiff-G | FJX1       |
| SCD       | 3.93E-07 | -0.15181 | 0.029 | 0.214 | 0.005867 | Undiff-G | SCD        |
| DAG1      | 3.94E-07 | -0.26203 | 0.007 | 0.175 | 0.005894 | Undiff-G | DAG1       |
| FLII      | 3.97E-07 | -0.25671 | 0.015 | 0.189 | 0.005932 | Undiff-G | FLII       |
| RHOC      | 4.00E-07 | 0.510615 | 0.199 | 0.537 | 0.00598  | Undiff-G | RHOC       |
| NUDCD3    | 4.01E-07 | -0.41375 | 0.022 | 0.2   | 0.005985 | Undiff-G | NUDCD3     |
| EDNRB     | 4.02E-07 | -0.37767 | 0.015 | 0.189 | 0.006013 | Undiff-G | EDNRB      |
| MSMO1     | 4.04E-07 | -0.13347 | 0.022 | 0.203 | 0.006036 | Undiff-G | MSMO1      |
| UQCRQ     | 4.06E-07 | 0.411738 | 0.324 | 0.805 | 0.006069 | Undiff-G | UQCRQ      |
| PAXIP1-AS | 4.07E-07 | -0.40913 | 0     | 0.16  | 0.006079 | Undiff-G | PAXIP1-AS1 |
| ZNF414    | 4.11E-07 | -0.32026 | 0.015 | 0.187 | 0.006141 | Undiff-G | ZNF414     |
| NXF1      | 4.15E-07 | -0.40057 | 0.022 | 0.2   | 0.006196 | Undiff-G | NXF1       |
| IRF8      | 4.17E-07 | -0.65787 | 0     | 0.16  | 0.006232 | Undiff-G | IRF8       |
| UCK1      | 4.17E-07 | -0.22163 | 0.015 | 0.187 | 0.006237 | Undiff-G | UCK1       |
| DNAAF2    | 4.18E-07 | -0.23576 | 0.007 | 0.175 | 0.006248 | Undiff-G | DNAAF2     |
| TM6SF1    | 4.21E-07 | -0.72292 | 0     | 0.16  | 0.006285 | Undiff-G | TM6SF1     |
| GAK       | 4.24E-07 | -0.43173 | 0     | 0.16  | 0.006337 | Undiff-G | GAK        |

|          |          |          |       |       |          |          |          |
|----------|----------|----------|-------|-------|----------|----------|----------|
| SYPL1    | 4.28E-07 | 0.511028 | 0.132 | 0.409 | 0.0064   | Undiff-G | SYPL1    |
| UGCG     | 4.31E-07 | -0.44988 | 0     | 0.16  | 0.006444 | Undiff-G | UGCG     |
| VARS     | 4.35E-07 | -0.39922 | 0     | 0.16  | 0.006498 | Undiff-G | VARS     |
| GPX1     | 4.42E-07 | 0.368478 | 0.324 | 0.819 | 0.006607 | Undiff-G | GPX1     |
| CASP1    | 4.44E-07 | -0.12129 | 0.037 | 0.228 | 0.006631 | Undiff-G | CASP1    |
| XIAP     | 4.44E-07 | -0.10035 | 0.029 | 0.215 | 0.006639 | Undiff-G | XIAP     |
| GMPS     | 4.46E-07 | -0.31481 | 0.015 | 0.186 | 0.006658 | Undiff-G | GMPS     |
| CHMP2B   | 4.46E-07 | 0.442245 | 0.081 | 0.31  | 0.006661 | Undiff-G | CHMP2B   |
| CLASP2   | 4.48E-07 | -0.43044 | 0.022 | 0.199 | 0.006697 | Undiff-G | CLASP2   |
| NLN      | 4.51E-07 | -0.36047 | 0.015 | 0.187 | 0.006738 | Undiff-G | NLN      |
| PEX16    | 4.51E-07 | 0.222674 | 0.037 | 0.23  | 0.006744 | Undiff-G | PEX16    |
| REEP5    | 4.53E-07 | 0.601849 | 0.228 | 0.589 | 0.006763 | Undiff-G | REEP5    |
| GNS      | 4.55E-07 | -0.17815 | 0.022 | 0.201 | 0.006794 | Undiff-G | GNS      |
| IMPDH1   | 4.57E-07 | -0.40341 | 0     | 0.159 | 0.00683  | Undiff-G | IMPDH1   |
| PRRX1    | 4.58E-07 | -0.43056 | 0.007 | 0.173 | 0.006841 | Undiff-G | PRRX1    |
| TMEM97   | 4.58E-07 | -0.21321 | 0.007 | 0.174 | 0.006847 | Undiff-G | TMEM97   |
| BCAR1    | 4.58E-07 | -0.18066 | 0.007 | 0.174 | 0.006849 | Undiff-G | BCAR1    |
| DKK3     | 4.60E-07 | -0.26582 | 0.022 | 0.202 | 0.006879 | Undiff-G | DKK3     |
| TNRC6C   | 4.62E-07 | -0.3048  | 0.007 | 0.174 | 0.006897 | Undiff-G | TNRC6C   |
| ANAPC7   | 4.62E-07 | -0.25581 | 0.007 | 0.174 | 0.006901 | Undiff-G | ANAPC7   |
| HSPA13   | 4.63E-07 | -0.10716 | 0.022 | 0.202 | 0.006913 | Undiff-G | HSPA13   |
| ALAS1    | 4.64E-07 | -0.34478 | 0.007 | 0.173 | 0.006933 | Undiff-G | ALAS1    |
| S100A8   | 4.67E-07 | -0.60373 | 0.015 | 0.187 | 0.006986 | Undiff-G | S100A8   |
| FNBP1L   | 4.69E-07 | -0.40175 | 0.015 | 0.187 | 0.007005 | Undiff-G | FNBP1L   |
| PDHX     | 4.73E-07 | -0.27109 | 0.007 | 0.173 | 0.007074 | Undiff-G | PDHX     |
| NOP16    | 4.74E-07 | -0.10407 | 0.022 | 0.201 | 0.007077 | Undiff-G | NOP16    |
| GAL3ST4  | 4.81E-07 | -0.46133 | 0.007 | 0.173 | 0.007192 | Undiff-G | GAL3ST4  |
| OXA1L    | 4.82E-07 | 0.169929 | 0.081 | 0.304 | 0.007207 | Undiff-G | OXA1L    |
| TRIB1    | 4.84E-07 | -0.56242 | 0     | 0.159 | 0.00724  | Undiff-G | TRIB1    |
| C8orf82  | 4.87E-07 | -0.34252 | 0.007 | 0.173 | 0.007285 | Undiff-G | C8orf82  |
| ABHD11   | 4.89E-07 | -0.47453 | 0.007 | 0.171 | 0.007311 | Undiff-G | ABHD11   |
| RBM15B   | 4.90E-07 | -0.2344  | 0.007 | 0.173 | 0.00732  | Undiff-G | RBM15B   |
| MKNK2    | 4.91E-07 | -0.33935 | 0.015 | 0.186 | 0.007334 | Undiff-G | MKNK2    |
| SLC38A10 | 4.93E-07 | -0.27043 | 0.022 | 0.201 | 0.007361 | Undiff-G | SLC38A10 |
| RFC4     | 4.93E-07 | -0.4383  | 0     | 0.158 | 0.007361 | Undiff-G | RFC4     |
| RPAP2    | 4.93E-07 | -0.37637 | 0.015 | 0.186 | 0.007372 | Undiff-G | RPAP2    |
| SMAD5    | 4.93E-07 | -0.39719 | 0.007 | 0.172 | 0.007372 | Undiff-G | SMAD5    |
| TOR3A    | 4.94E-07 | -0.24726 | 0.029 | 0.212 | 0.007379 | Undiff-G | TOR3A    |
| AP3B1    | 4.96E-07 | -0.40008 | 0.007 | 0.172 | 0.007407 | Undiff-G | AP3B1    |
| HOMER1   | 4.97E-07 | -0.37815 | 0     | 0.158 | 0.007422 | Undiff-G | HOMER1   |
| TSC22D2  | 4.97E-07 | -0.45268 | 0     | 0.158 | 0.007422 | Undiff-G | TSC22D2  |
| COPS8    | 4.99E-07 | 0.735599 | 0.169 | 0.473 | 0.007459 | Undiff-G | COPS8    |
| SOCS2    | 5.01E-07 | -0.41857 | 0     | 0.158 | 0.007484 | Undiff-G | SOCS2    |
| JAM2     | 5.02E-07 | 0.144928 | 0.051 | 0.255 | 0.007507 | Undiff-G | JAM2     |
| C11orf49 | 5.03E-07 | 0.15293  | 0.044 | 0.239 | 0.007521 | Undiff-G | C11orf49 |
| PPP2R4   | 5.05E-07 | -0.17897 | 0.044 | 0.239 | 0.007541 | Undiff-G | PPP2R4   |
| PTGS1    | 5.05E-07 | -0.56109 | 0     | 0.158 | 0.007547 | Undiff-G | PTGS1    |
| GGH      | 5.06E-07 | 0.181153 | 0.059 | 0.265 | 0.007557 | Undiff-G | GGH      |
| TBC1D20  | 5.06E-07 | -0.36711 | 0.015 | 0.185 | 0.007567 | Undiff-G | TBC1D20  |
| UBA5     | 5.07E-07 | -0.28125 | 0.015 | 0.186 | 0.00758  | Undiff-G | UBA5     |
| CKAP5    | 5.09E-07 | -0.39167 | 0     | 0.158 | 0.00761  | Undiff-G | CKAP5    |

|           |          |          |       |       |          |          |              |
|-----------|----------|----------|-------|-------|----------|----------|--------------|
| BIRC6     | 5.15E-07 | -0.30944 | 0.015 | 0.186 | 0.007692 | Undiff-G | BIRC6        |
| KIAA0319L | 5.16E-07 | -0.28033 | 0.015 | 0.186 | 0.007707 | Undiff-G | KIAA0319L    |
| SETD3     | 5.18E-07 | -0.41537 | 0     | 0.158 | 0.007737 | Undiff-G | SETD3        |
| CTBS      | 5.18E-07 | -0.46249 | 0     | 0.158 | 0.007737 | Undiff-G | CTBS         |
| CFD       | 5.18E-07 | -0.67813 | 0     | 0.158 | 0.007737 | Undiff-G | CFD          |
| REV3L     | 5.21E-07 | -0.35777 | 0.029 | 0.211 | 0.007789 | Undiff-G | REV3L        |
| BRAT1     | 5.22E-07 | -0.3894  | 0.015 | 0.186 | 0.007807 | Undiff-G | BRAT1        |
| NDUFA7    | 5.23E-07 | 1.117351 | 0.125 | 0.042 | 0.007821 | Undiff-G | NDUFA7       |
| NOL8      | 5.26E-07 | -0.15969 | 0.015 | 0.186 | 0.007862 | Undiff-G | NOL8         |
| PPFIBP1   | 5.26E-07 | -0.39405 | 0     | 0.158 | 0.007867 | Undiff-G | PPFIBP1      |
| C12orf57  | 5.27E-07 | 0.572804 | 0.199 | 0.54  | 0.00788  | Undiff-G | C12orf57     |
| MAP2K7    | 5.28E-07 | -0.34897 | 0.022 | 0.198 | 0.007888 | Undiff-G | MAP2K7       |
| RRP1B     | 5.31E-07 | -0.37258 | 0     | 0.158 | 0.007932 | Undiff-G | RRP1B        |
| PALLD     | 5.33E-07 | -0.27496 | 0.022 | 0.2   | 0.007968 | Undiff-G | PALLD        |
| NEDD9     | 5.35E-07 | -0.34568 | 0.037 | 0.223 | 0.007991 | Undiff-G | NEDD9        |
| MAGI1     | 5.35E-07 | -0.35857 | 0.022 | 0.199 | 0.007995 | Undiff-G | MAGI1        |
| PIGS      | 5.35E-07 | -0.21547 | 0.015 | 0.185 | 0.007999 | Undiff-G | PIGS         |
| NOP58     | 5.36E-07 | 0.264158 | 0.074 | 0.295 | 0.008005 | Undiff-G | NOP58        |
| FH        | 5.38E-07 | 0.186511 | 0.037 | 0.228 | 0.008034 | Undiff-G | FH           |
| CKAP4     | 5.46E-07 | -0.2716  | 0.029 | 0.211 | 0.008159 | Undiff-G | CKAP4        |
| CLIP3     | 5.48E-07 | -0.17966 | 0.022 | 0.199 | 0.008197 | Undiff-G | CLIP3        |
| SAC3D1    | 5.55E-07 | -0.22393 | 0.007 | 0.172 | 0.00829  | Undiff-G | SAC3D1       |
| UBE2L6    | 5.55E-07 | 0.526609 | 0.169 | 0.477 | 0.008295 | Undiff-G | UBE2L6       |
| ACD       | 5.55E-07 | -0.4367  | 0.007 | 0.17  | 0.008298 | Undiff-G | ACD          |
| PAG1      | 5.61E-07 | -0.46671 | 0.007 | 0.171 | 0.008379 | Undiff-G | PAG1         |
| BAIAP2    | 5.68E-07 | -0.1387  | 0.022 | 0.199 | 0.008484 | Undiff-G | BAIAP2       |
| SPTSSA    | 5.71E-07 | 0.532682 | 0.147 | 0.431 | 0.008527 | Undiff-G | SPTSSA       |
| SVIP      | 5.73E-07 | -0.51545 | 0.007 | 0.171 | 0.008557 | Undiff-G | SVIP         |
| PEX19     | 5.75E-07 | -0.35936 | 0.007 | 0.171 | 0.008589 | Undiff-G | PEX19        |
| CCDC91    | 5.81E-07 | -0.13754 | 0.022 | 0.199 | 0.008683 | Undiff-G | CCDC91       |
| TRPT1     | 5.92E-07 | 0.176038 | 0.037 | 0.225 | 0.00885  | Undiff-G | TRPT1        |
| RP11-161M | 5.95E-07 | -0.51489 | 0.007 | 0.168 | 0.008886 | Undiff-G | RP11-161M6.2 |
| PURB      | 5.95E-07 | -0.37936 | 0.007 | 0.171 | 0.008888 | Undiff-G | PURB         |
| FSD1      | 6.01E-07 | -0.37114 | 0     | 0.156 | 0.008982 | Undiff-G | FSD1         |
| ABCD3     | 6.03E-07 | -0.36296 | 0.022 | 0.197 | 0.009015 | Undiff-G | ABCD3        |
| TRIM33    | 6.04E-07 | -0.3291  | 0.015 | 0.185 | 0.009027 | Undiff-G | TRIM33       |
| TDP2      | 6.14E-07 | -0.22378 | 0.015 | 0.185 | 0.009173 | Undiff-G | TDP2         |
| PUM2      | 6.16E-07 | -0.37508 | 0     | 0.156 | 0.009208 | Undiff-G | PUM2         |
| TRA2A     | 6.16E-07 | 0.304986 | 0.103 | 0.346 | 0.009213 | Undiff-G | TRA2A        |
| DPYSL4    | 6.21E-07 | -0.37429 | 0     | 0.156 | 0.009285 | Undiff-G | DPYSL4       |
| MED24     | 6.23E-07 | -0.36922 | 0.007 | 0.17  | 0.009316 | Undiff-G | MED24        |
| OGFRL1    | 6.24E-07 | -0.23192 | 0.015 | 0.183 | 0.009332 | Undiff-G | OGFRL1       |
| MAP3K11   | 6.25E-07 | -0.20011 | 0.015 | 0.184 | 0.009343 | Undiff-G | MAP3K11      |
| FAM58A    | 6.26E-07 | -0.37961 | 0     | 0.156 | 0.009362 | Undiff-G | FAM58A       |
| DOK1      | 6.26E-07 | -0.46377 | 0     | 0.156 | 0.009362 | Undiff-G | DOK1         |
| DGKZ      | 6.30E-07 | -0.33715 | 0.022 | 0.198 | 0.009421 | Undiff-G | DGKZ         |
| IFRD2     | 6.40E-07 | -0.22804 | 0.029 | 0.211 | 0.009557 | Undiff-G | IFRD2        |
| TPST2     | 6.41E-07 | -0.45285 | 0.007 | 0.169 | 0.009586 | Undiff-G | TPST2        |
| APPBP2    | 6.42E-07 | -0.18106 | 0.029 | 0.211 | 0.009596 | Undiff-G | APPBP2       |
| SLC31A1   | 6.45E-07 | -0.44494 | 0.007 | 0.17  | 0.009637 | Undiff-G | SLC31A1      |
| TRIM36    | 6.45E-07 | -0.35755 | 0.015 | 0.184 | 0.00964  | Undiff-G | TRIM36       |

|           |          |          |       |       |          |          |            |
|-----------|----------|----------|-------|-------|----------|----------|------------|
| EGR2      | 6.48E-07 | -0.48452 | 0.022 | 0.194 | 0.009684 | Undiff-G | EGR2       |
| NMI       | 6.50E-07 | -0.16562 | 0.015 | 0.184 | 0.009713 | Undiff-G | NMI        |
| HK1       | 6.59E-07 | -0.25423 | 0.022 | 0.197 | 0.009852 | Undiff-G | HK1        |
| IGSF6     | 6.64E-07 | -0.69681 | 0     | 0.155 | 0.00992  | Undiff-G | IGSF6      |
| REV1      | 6.64E-07 | -0.38962 | 0.007 | 0.169 | 0.009928 | Undiff-G | REV1       |
| STXBP3    | 6.68E-07 | -0.21418 | 0.022 | 0.196 | 0.009984 | Undiff-G | STXBP3     |
| RBFA      | 6.68E-07 | -0.38134 | 0.007 | 0.169 | 0.009986 | Undiff-G | RBFA       |
| ST6GALNAC | 6.69E-07 | -0.40569 | 0     | 0.155 | 0.010002 | Undiff-G | ST6GALNAC6 |
| EZH2      | 6.69E-07 | -0.42658 | 0     | 0.155 | 0.010002 | Undiff-G | EZH2       |
| PLD4      | 6.69E-07 | -0.69849 | 0     | 0.155 | 0.010002 | Undiff-G | PLD4       |
| HOTAIRM1  | 6.69E-07 | -0.2191  | 0.015 | 0.184 | 0.010003 | Undiff-G | HOTAIRM1   |
| TRADD     | 6.70E-07 | -0.36373 | 0.007 | 0.17  | 0.010007 | Undiff-G | TRADD      |
| AKAP7     | 6.71E-07 | -0.33542 | 0.022 | 0.197 | 0.010035 | Undiff-G | AKAP7      |
| XPOT      | 6.78E-07 | -0.36599 | 0.007 | 0.169 | 0.010137 | Undiff-G | XPOT       |
| CD69      | 6.80E-07 | -0.78034 | 0     | 0.155 | 0.010169 | Undiff-G | CD69       |
| ALDH6A1   | 6.82E-07 | -0.15664 | 0.029 | 0.209 | 0.010189 | Undiff-G | ALDH6A1    |
| MBOAT2    | 6.85E-07 | -0.26963 | 0.015 | 0.184 | 0.010241 | Undiff-G | MBOAT2     |
| TRIM9     | 6.87E-07 | -0.11333 | 0.044 | 0.235 | 0.010264 | Undiff-G | TRIM9      |
| SBDS      | 6.87E-07 | 0.569279 | 0.235 | 0.614 | 0.010272 | Undiff-G | SBDS       |
| UBALD1    | 6.91E-07 | -0.36087 | 0.007 | 0.169 | 0.010326 | Undiff-G | UBALD1     |
| YIPF1     | 6.92E-07 | -0.15172 | 0.015 | 0.182 | 0.010334 | Undiff-G | YIPF1      |
| IBTK      | 6.98E-07 | -0.26904 | 0.007 | 0.169 | 0.010437 | Undiff-G | IBTK       |
| NIPSNAP1  | 6.99E-07 | -0.19485 | 0.007 | 0.169 | 0.010448 | Undiff-G | NIPSNAP1   |
| SNX1      | 7.02E-07 | 0.125063 | 0.037 | 0.224 | 0.010487 | Undiff-G | SNX1       |
| CSNK1G3   | 7.03E-07 | -0.35857 | 0     | 0.155 | 0.01051  | Undiff-G | CSNK1G3    |
| C21orf2   | 7.10E-07 | -0.18506 | 0.022 | 0.197 | 0.010612 | Undiff-G | C21orf2    |
| HCK       | 7.11E-07 | -0.42646 | 0.007 | 0.169 | 0.010622 | Undiff-G | HCK        |
| BTBD10    | 7.16E-07 | -0.12711 | 0.015 | 0.183 | 0.010704 | Undiff-G | BTBD10     |
| TRIP12    | 7.18E-07 | -0.38445 | 0.007 | 0.167 | 0.010729 | Undiff-G | TRIP12     |
| GGT7      | 7.19E-07 | -0.37659 | 0.007 | 0.167 | 0.01075  | Undiff-G | GGT7       |
| SDC2      | 7.20E-07 | -0.30302 | 0.022 | 0.194 | 0.010759 | Undiff-G | SDC2       |
| ELAC2     | 7.21E-07 | -0.36913 | 0     | 0.154 | 0.010774 | Undiff-G | ELAC2      |
| CSF3R     | 7.21E-07 | -0.68018 | 0     | 0.154 | 0.010774 | Undiff-G | CSF3R      |
| COLGALT1  | 7.28E-07 | -0.23246 | 0.022 | 0.194 | 0.010875 | Undiff-G | COLGALT1   |
| ATP1B2    | 7.30E-07 | -0.25539 | 0.044 | 0.235 | 0.010915 | Undiff-G | ATP1B2     |
| SUN1      | 7.32E-07 | -0.17381 | 0.029 | 0.21  | 0.010937 | Undiff-G | SUN1       |
| DRAXIN    | 7.33E-07 | -0.40557 | 0     | 0.154 | 0.010953 | Undiff-G | DRAXIN     |
| COQ10B    | 7.33E-07 | 0.340217 | 0.059 | 0.265 | 0.01096  | Undiff-G | COQ10B     |
| TTC17     | 7.37E-07 | -0.17075 | 0.037 | 0.221 | 0.01101  | Undiff-G | TTC17      |
| HIVEP3    | 7.39E-07 | -0.36631 | 0     | 0.154 | 0.011044 | Undiff-G | HIVEP3     |
| FAM26F    | 7.47E-07 | -0.49896 | 0.007 | 0.169 | 0.011158 | Undiff-G | FAM26F     |
| DUSP12    | 7.48E-07 | 0.286146 | 0.044 | 0.238 | 0.011176 | Undiff-G | DUSP12     |
| TJP1      | 7.54E-07 | -0.19052 | 0.015 | 0.182 | 0.011263 | Undiff-G | TJP1       |
| HLA-DPA1  | 7.56E-07 | 0.17142  | 0.213 | 0.537 | 0.011295 | Undiff-G | HLA-DPA1   |
| UBN1      | 7.58E-07 | -0.34907 | 0.007 | 0.168 | 0.011329 | Undiff-G | UBN1       |
| PXDC1     | 7.64E-07 | -0.3719  | 0     | 0.154 | 0.011414 | Undiff-G | PXDC1      |
| CCDC174   | 7.66E-07 | -0.2402  | 0.022 | 0.195 | 0.011447 | Undiff-G | CCDC174    |
| CYP27A1   | 7.68E-07 | -0.43405 | 0.007 | 0.166 | 0.011478 | Undiff-G | CYP27A1    |
| KPNA4     | 7.73E-07 | -0.27084 | 0.015 | 0.182 | 0.011556 | Undiff-G | KPNA4      |
| GAS2L1    | 7.76E-07 | -0.35124 | 0     | 0.154 | 0.011604 | Undiff-G | GAS2L1     |
| MBD1      | 7.89E-07 | -0.37432 | 0     | 0.153 | 0.011797 | Undiff-G | MBD1       |

|          |          |          |       |       |          |          |          |
|----------|----------|----------|-------|-------|----------|----------|----------|
| VAMP7    | 7.92E-07 | -0.3704  | 0.007 | 0.168 | 0.011832 | Undiff-G | VAMP7    |
| OLIG2    | 7.95E-07 | -0.50957 | 0.015 | 0.18  | 0.011886 | Undiff-G | OLIG2    |
| TEX261   | 7.98E-07 | -0.12353 | 0.007 | 0.168 | 0.011923 | Undiff-G | TEX261   |
| CCNDBP1  | 7.98E-07 | -0.41435 | 0.029 | 0.207 | 0.011931 | Undiff-G | CCNDBP1  |
| ZEB1     | 8.01E-07 | -0.33081 | 0.022 | 0.195 | 0.011969 | Undiff-G | ZEB1     |
| BCS1L    | 8.04E-07 | -0.12729 | 0.007 | 0.168 | 0.012021 | Undiff-G | BCS1L    |
| RIOK3    | 8.05E-07 | -0.16029 | 0.022 | 0.195 | 0.012036 | Undiff-G | RIOK3    |
| PAPD4    | 8.14E-07 | -0.22671 | 0.015 | 0.181 | 0.012168 | Undiff-G | PAPD4    |
| TCEAL7   | 8.15E-07 | 0.415753 | 0.081 | 0.305 | 0.012174 | Undiff-G | TCEAL7   |
| FADS1    | 8.21E-07 | -0.22754 | 0.037 | 0.22  | 0.012267 | Undiff-G | FADS1    |
| USP3     | 8.24E-07 | -0.25603 | 0.007 | 0.168 | 0.012314 | Undiff-G | USP3     |
| POLE3    | 8.27E-07 | 0.175285 | 0.051 | 0.249 | 0.012355 | Undiff-G | POLE3    |
| FAM134B  | 8.28E-07 | -0.3757  | 0.007 | 0.167 | 0.012373 | Undiff-G | FAM134B  |
| ADK      | 8.30E-07 | -0.33437 | 0.007 | 0.167 | 0.012401 | Undiff-G | ADK      |
| RRP7A    | 8.34E-07 | 0.436957 | 0.074 | 0.29  | 0.012467 | Undiff-G | RRP7A    |
| EML4     | 8.36E-07 | -0.30277 | 0.022 | 0.193 | 0.012486 | Undiff-G | EML4     |
| SCRN1    | 8.41E-07 | -0.2475  | 0.015 | 0.181 | 0.012567 | Undiff-G | SCRN1    |
| FAM45A   | 8.44E-07 | -0.10696 | 0.022 | 0.193 | 0.012608 | Undiff-G | FAM45A   |
| TNPO2    | 8.44E-07 | -0.23785 | 0.015 | 0.181 | 0.012617 | Undiff-G | TNPO2    |
| CEBPZ    | 8.45E-07 | 0.375252 | 0.066 | 0.274 | 0.012623 | Undiff-G | CEBPZ    |
| RGL2     | 8.46E-07 | -0.1821  | 0.029 | 0.206 | 0.012636 | Undiff-G | RGL2     |
| UCHL3    | 8.63E-07 | 0.199021 | 0.051 | 0.25  | 0.012896 | Undiff-G | UCHL3    |
| NR4A3    | 8.64E-07 | -0.64469 | 0     | 0.153 | 0.012915 | Undiff-G | NR4A3    |
| SCIN     | 8.64E-07 | -0.74357 | 0     | 0.153 | 0.012915 | Undiff-G | SCIN     |
| HPRT1    | 8.78E-07 | 0.133951 | 0.044 | 0.233 | 0.013115 | Undiff-G | HPRT1    |
| CRNKL1   | 8.79E-07 | -0.35849 | 0     | 0.152 | 0.013129 | Undiff-G | CRNKL1   |
| PNKP     | 8.79E-07 | -0.38887 | 0.015 | 0.18  | 0.013134 | Undiff-G | PNKP     |
| C18orf21 | 8.80E-07 | -0.19909 | 0.007 | 0.167 | 0.013146 | Undiff-G | C18orf21 |
| RIMKLB   | 8.86E-07 | -0.39821 | 0     | 0.152 | 0.013237 | Undiff-G | RIMKLB   |
| PSMB3    | 8.86E-07 | 0.59865  | 0.287 | 0.708 | 0.013241 | Undiff-G | PSMB3    |
| FAM104B  | 8.95E-07 | -0.13018 | 0.022 | 0.193 | 0.013381 | Undiff-G | FAM104B  |
| MNDA     | 8.97E-07 | -0.56103 | 0.015 | 0.179 | 0.013399 | Undiff-G | MNDA     |
| C20orf96 | 9.00E-07 | -0.36484 | 0     | 0.152 | 0.013457 | Undiff-G | C20orf96 |
| ATP13A3  | 9.00E-07 | -0.39419 | 0     | 0.152 | 0.013457 | Undiff-G | ATP13A3  |
| ADIPOR2  | 9.00E-07 | -0.43544 | 0     | 0.152 | 0.013457 | Undiff-G | ADIPOR2  |
| ZBTB1    | 9.04E-07 | -0.36317 | 0.007 | 0.166 | 0.013515 | Undiff-G | ZBTB1    |
| PTK2     | 9.05E-07 | -0.25138 | 0.015 | 0.18  | 0.013519 | Undiff-G | PTK2     |
| ZNF3     | 9.06E-07 | -0.23361 | 0.029 | 0.207 | 0.013538 | Undiff-G | ZNF3     |
| RFWD2    | 9.18E-07 | -0.22614 | 0.007 | 0.166 | 0.013711 | Undiff-G | RFWD2    |
| CHMP7    | 9.18E-07 | -0.15587 | 0.015 | 0.179 | 0.013721 | Undiff-G | CHMP7    |
| SLC9A3R1 | 9.23E-07 | -0.39905 | 0     | 0.152 | 0.013793 | Undiff-G | SLC9A3R1 |
| DAB2     | 9.23E-07 | -0.6382  | 0     | 0.152 | 0.013793 | Undiff-G | DAB2     |
| PROX1    | 9.27E-07 | -0.40338 | 0.007 | 0.166 | 0.013849 | Undiff-G | PROX1    |
| C2orf76  | 9.46E-07 | -0.34886 | 0.007 | 0.166 | 0.01414  | Undiff-G | C2orf76  |
| SERPINA1 | 9.47E-07 | 0.105129 | 0.081 | 0.302 | 0.014156 | Undiff-G | SERPINA1 |
| NRSN2    | 9.47E-07 | -0.16434 | 0.007 | 0.166 | 0.014157 | Undiff-G | NRSN2    |
| PRKACA   | 9.54E-07 | -0.38515 | 0     | 0.151 | 0.014253 | Undiff-G | PRKACA   |
| FAIM2    | 9.57E-07 | -0.26074 | 0.022 | 0.193 | 0.014305 | Undiff-G | FAIM2    |
| SSBP2    | 9.58E-07 | 0.181973 | 0.066 | 0.272 | 0.01432  | Undiff-G | SSBP2    |
| HBS1L    | 9.71E-07 | -0.27441 | 0.022 | 0.193 | 0.014511 | Undiff-G | HBS1L    |
| CPNE2    | 9.76E-07 | -0.3748  | 0.015 | 0.179 | 0.014579 | Undiff-G | CPNE2    |

|           |          |          |       |       |          |          |               |
|-----------|----------|----------|-------|-------|----------|----------|---------------|
| TRIM37    | 9.78E-07 | -0.3351  | 0     | 0.151 | 0.014609 | Undiff-G | TRIM37        |
| LMNB1     | 9.78E-07 | -0.43113 | 0     | 0.151 | 0.014609 | Undiff-G | LMNB1         |
| PAQR4     | 9.79E-07 | -0.27711 | 0.007 | 0.166 | 0.014636 | Undiff-G | PAQR4         |
| NAA38     | 9.82E-07 | 0.533308 | 0.176 | 0.475 | 0.014675 | Undiff-G | NAA38         |
| ICAM1     | 9.86E-07 | -0.44414 | 0.007 | 0.166 | 0.014735 | Undiff-G | ICAM1         |
| TRNAU1AP  | 9.89E-07 | -0.18893 | 0.029 | 0.204 | 0.014786 | Undiff-G | TRNAU1AP      |
| TCEB3     | 9.93E-07 | -0.31654 | 0.015 | 0.178 | 0.01484  | Undiff-G | TCEB3         |
| CTD-2090I | 9.98E-07 | 1.26912  | 0.14  | 0.052 | 0.01492  | Undiff-G | CTD-2090I13.1 |
| FOLR2     | 1.00E-06 | -0.49991 | 0.015 | 0.18  | 0.014943 | Undiff-G | FOLR2         |
| NRXN1     | 1.01E-06 | -0.5446  | 0.007 | 0.165 | 0.015037 | Undiff-G | NRXN1         |
| TMEM181   | 1.02E-06 | -0.2866  | 0.007 | 0.165 | 0.015227 | Undiff-G | TMEM181       |
| CTCF      | 1.02E-06 | -0.24202 | 0.007 | 0.165 | 0.015254 | Undiff-G | CTCF          |
| FAM228B   | 1.02E-06 | -0.13983 | 0.037 | 0.217 | 0.015281 | Undiff-G | FAM228B       |
| ARFIP1    | 1.02E-06 | -0.38329 | 0.007 | 0.164 | 0.015284 | Undiff-G | ARFIP1        |
| TCERG1    | 1.03E-06 | -0.21409 | 0.029 | 0.206 | 0.015334 | Undiff-G | TCERG1        |
| TLE4      | 1.03E-06 | -0.33397 | 0.007 | 0.165 | 0.015349 | Undiff-G | TLE4          |
| VHL       | 1.03E-06 | -0.37119 | 0.007 | 0.165 | 0.015364 | Undiff-G | VHL           |
| DCAF10    | 1.03E-06 | -0.13867 | 0.015 | 0.179 | 0.015382 | Undiff-G | DCAF10        |
| TANC2     | 1.03E-06 | -0.35264 | 0.022 | 0.191 | 0.015404 | Undiff-G | TANC2         |
| FAM103A1  | 1.03E-06 | 0.237818 | 0.051 | 0.245 | 0.01544  | Undiff-G | FAM103A1      |
| ASXL1     | 1.03E-06 | -0.3312  | 0.015 | 0.179 | 0.015445 | Undiff-G | ASXL1         |
| GNG5      | 1.03E-06 | 0.468925 | 0.257 | 0.649 | 0.015449 | Undiff-G | GNG5          |
| NELFB     | 1.04E-06 | -0.33521 | 0     | 0.151 | 0.015472 | Undiff-G | NELFB         |
| SNAP47    | 1.04E-06 | -0.1012  | 0.029 | 0.204 | 0.015492 | Undiff-G | SNAP47        |
| RP11-395G | 1.04E-06 | -0.16206 | 0.015 | 0.179 | 0.015532 | Undiff-G | RP11-395G23.3 |
| ZNF821    | 1.04E-06 | -0.35625 | 0.007 | 0.165 | 0.015571 | Undiff-G | ZNF821        |
| RND2      | 1.05E-06 | -0.19381 | 0.007 | 0.165 | 0.015627 | Undiff-G | RND2          |
| SDAD1     | 1.05E-06 | 0.183517 | 0.037 | 0.221 | 0.015637 | Undiff-G | SDAD1         |
| IQGAP2    | 1.05E-06 | -0.39017 | 0     | 0.15  | 0.015728 | Undiff-G | IQGAP2        |
| ATXN1     | 1.05E-06 | -0.35818 | 0.007 | 0.165 | 0.015755 | Undiff-G | ATXN1         |
| GPSM2     | 1.06E-06 | -0.36637 | 0.015 | 0.179 | 0.015806 | Undiff-G | GPSM2         |
| LINC00116 | 1.06E-06 | 0.355094 | 0.118 | 0.367 | 0.015812 | Undiff-G | LINC00116     |
| CNPPD1    | 1.06E-06 | 0.163465 | 0.029 | 0.207 | 0.015863 | Undiff-G | CNPPD1        |
| SNX9      | 1.06E-06 | -0.40529 | 0.022 | 0.191 | 0.015902 | Undiff-G | SNX9          |
| NDUFAF2   | 1.07E-06 | 0.497143 | 0.066 | 0.275 | 0.015944 | Undiff-G | NDUFAF2       |
| PHACTR4   | 1.07E-06 | -0.16553 | 0.029 | 0.204 | 0.015978 | Undiff-G | PHACTR4       |
| HNRNPUL2  | 1.07E-06 | -0.34016 | 0.007 | 0.165 | 0.01598  | Undiff-G | HNRNPUL2      |
| RNF20     | 1.07E-06 | -0.38656 | 0     | 0.15  | 0.015988 | Undiff-G | RNF20         |
| CDC73     | 1.08E-06 | -0.10742 | 0.022 | 0.191 | 0.016119 | Undiff-G | CDC73         |
| MLC1      | 1.08E-06 | -0.38674 | 0     | 0.15  | 0.01612  | Undiff-G | MLC1          |
| ARHGAP24  | 1.08E-06 | -0.6611  | 0     | 0.15  | 0.01612  | Undiff-G | ARHGAP24      |
| GLIPR1    | 1.08E-06 | 0.269087 | 0.103 | 0.337 | 0.016147 | Undiff-G | GLIPR1        |
| TNFRSF21  | 1.08E-06 | -0.22404 | 0.007 | 0.165 | 0.016151 | Undiff-G | TNFRSF21      |
| RCAN1     | 1.08E-06 | 0.178032 | 0.066 | 0.27  | 0.016152 | Undiff-G | RCAN1         |
| FIBIN     | 1.08E-06 | -0.14366 | 0.044 | 0.229 | 0.016162 | Undiff-G | FIBIN         |
| GSKIP     | 1.09E-06 | -0.39198 | 0     | 0.15  | 0.016252 | Undiff-G | GSKIP         |
| SYNC      | 1.09E-06 | -0.36657 | 0.015 | 0.178 | 0.01633  | Undiff-G | SYNC          |
| MEIS2     | 1.10E-06 | -0.16935 | 0.029 | 0.205 | 0.016369 | Undiff-G | MEIS2         |
| SFSWAP    | 1.10E-06 | -0.21821 | 0.015 | 0.178 | 0.016506 | Undiff-G | SFSWAP        |
| NUDT2     | 1.11E-06 | -0.38217 | 0.015 | 0.177 | 0.01652  | Undiff-G | NUDT2         |
| PTPN11    | 1.11E-06 | -0.35952 | 0     | 0.15  | 0.016521 | Undiff-G | PTPN11        |



|          |           |           |        |        |           |          |          |
|----------|-----------|-----------|--------|--------|-----------|----------|----------|
| DNAJB12  | 1. 12E-06 | -0. 47367 | 0      | 0. 15  | 0. 016793 | Undiff-G | DNAJB12  |
| CYBRD1   | 1. 12E-06 | -0. 3756  | 0. 015 | 0. 178 | 0. 0168   | Undiff-G | CYBRD1   |
| PRR4     | 1. 13E-06 | -0. 12499 | 0. 037 | 0. 218 | 0. 016889 | Undiff-G | PRR4     |
| VPS16    | 1. 13E-06 | -0. 30039 | 0. 015 | 0. 177 | 0. 016891 | Undiff-G | VPS16    |
| ZNF75A   | 1. 13E-06 | -0. 20759 | 0. 037 | 0. 216 | 0. 016941 | Undiff-G | ZNF75A   |
| TBC1D7   | 1. 14E-06 | -0. 22656 | 0. 007 | 0. 164 | 0. 016964 | Undiff-G | TBC1D7   |
| ZNF195   | 1. 14E-06 | -0. 18351 | 0. 007 | 0. 164 | 0. 017103 | Undiff-G | ZNF195   |
| RGMA     | 1. 15E-06 | -0. 3821  | 0. 029 | 0. 202 | 0. 017141 | Undiff-G | RGMA     |
| GMNN     | 1. 15E-06 | -0. 16521 | 0. 015 | 0. 178 | 0. 017142 | Undiff-G | GMNN     |
| ECHDC2   | 1. 15E-06 | -0. 33343 | 0. 022 | 0. 19  | 0. 01721  | Undiff-G | ECHDC2   |
| NCK2     | 1. 15E-06 | -0. 40018 | 0      | 0. 15  | 0. 017211 | Undiff-G | NCK2     |
| TMEM243  | 1. 15E-06 | -0. 3115  | 0. 029 | 0. 204 | 0. 017243 | Undiff-G | TMEM243  |
| ETV6     | 1. 17E-06 | -0. 41988 | 0      | 0. 149 | 0. 017495 | Undiff-G | ETV6     |
| DNAJC9   | 1. 17E-06 | -0. 26614 | 0. 007 | 0. 164 | 0. 017521 | Undiff-G | DNAJC9   |
| BRD8     | 1. 17E-06 | -0. 16077 | 0. 007 | 0. 164 | 0. 017531 | Undiff-G | BRD8     |
| SSH2     | 1. 18E-06 | -0. 11579 | 0. 015 | 0. 178 | 0. 0176   | Undiff-G | SSH2     |
| KDM5B    | 1. 18E-06 | -0. 29719 | 0. 007 | 0. 164 | 0. 017654 | Undiff-G | KDM5B    |
| LUZP1    | 1. 18E-06 | -0. 10842 | 0. 022 | 0. 19  | 0. 017691 | Undiff-G | LUZP1    |
| LPCAT2   | 1. 20E-06 | -0. 57139 | 0      | 0. 149 | 0. 017929 | Undiff-G | LPCAT2   |
| MLLT4    | 1. 20E-06 | -0. 32297 | 0. 007 | 0. 164 | 0. 017941 | Undiff-G | MLLT4    |
| TPRA1    | 1. 21E-06 | -0. 21093 | 0. 007 | 0. 163 | 0. 018103 | Undiff-G | TPRA1    |
| TSR1     | 1. 21E-06 | -0. 21163 | 0. 022 | 0. 191 | 0. 018132 | Undiff-G | TSR1     |
| TUG1     | 1. 22E-06 | -0. 28525 | 0. 015 | 0. 177 | 0. 018221 | Undiff-G | TUG1     |
| ENDOG    | 1. 22E-06 | -0. 33814 | 0      | 0. 149 | 0. 018225 | Undiff-G | ENDOG    |
| CSK      | 1. 22E-06 | -0. 46141 | 0      | 0. 149 | 0. 018225 | Undiff-G | CSK      |
| TRIP11   | 1. 22E-06 | -0. 18794 | 0. 022 | 0. 191 | 0. 018252 | Undiff-G | TRIP11   |
| TOR2A    | 1. 23E-06 | -0. 40928 | 0      | 0. 149 | 0. 018375 | Undiff-G | TOR2A    |
| NETO2    | 1. 23E-06 | -0. 33883 | 0. 007 | 0. 163 | 0. 018383 | Undiff-G | NETO2    |
| SIKE1    | 1. 23E-06 | -0. 37337 | 0. 022 | 0. 19  | 0. 018425 | Undiff-G | SIKE1    |
| DUSP3    | 1. 26E-06 | -0. 11268 | 0. 015 | 0. 177 | 0. 018761 | Undiff-G | DUSP3    |
| PLEC     | 1. 26E-06 | -0. 15324 | 0. 022 | 0. 188 | 0. 018807 | Undiff-G | PLEC     |
| ZDHHC7   | 1. 26E-06 | -0. 37971 | 0      | 0. 149 | 0. 018831 | Undiff-G | ZDHHC7   |
| AKT1     | 1. 27E-06 | -0. 39288 | 0      | 0. 148 | 0. 018985 | Undiff-G | AKT1     |
| ZC3H6    | 1. 27E-06 | -0. 40665 | 0      | 0. 148 | 0. 018985 | Undiff-G | ZC3H6    |
| TMEM57   | 1. 27E-06 | -0. 36435 | 0. 015 | 0. 176 | 0. 01901  | Undiff-G | TMEM57   |
| FAM110B  | 1. 27E-06 | -0. 36268 | 0. 022 | 0. 188 | 0. 019035 | Undiff-G | FAM110B  |
| FUZ      | 1. 28E-06 | -0. 31922 | 0. 007 | 0. 163 | 0. 019106 | Undiff-G | FUZ      |
| LMF2     | 1. 28E-06 | -0. 17269 | 0. 029 | 0. 203 | 0. 019125 | Undiff-G | LMF2     |
| PIK3IP1  | 1. 28E-06 | -0. 57851 | 0. 007 | 0. 163 | 0. 019137 | Undiff-G | PIK3IP1  |
| HTATIP2  | 1. 28E-06 | -0. 47086 | 0      | 0. 148 | 0. 019141 | Undiff-G | HTATIP2  |
| CS       | 1. 29E-06 | -0. 29788 | 0. 007 | 0. 163 | 0. 019274 | Undiff-G | CS       |
| TARBP2   | 1. 30E-06 | -0. 3659  | 0      | 0. 148 | 0. 019456 | Undiff-G | TARBP2   |
| FAM118B  | 1. 30E-06 | -0. 38831 | 0      | 0. 148 | 0. 019456 | Undiff-G | FAM118B  |
| SERPINB9 | 1. 30E-06 | -0. 61489 | 0      | 0. 148 | 0. 019456 | Undiff-G | SERPINB9 |
| CDC42EP4 | 1. 32E-06 | -0. 23107 | 0. 029 | 0. 203 | 0. 019712 | Undiff-G | CDC42EP4 |
| ARL16    | 1. 32E-06 | 0. 474334 | 0. 096 | 0. 322 | 0. 019734 | Undiff-G | ARL16    |
| ZMYND11  | 1. 32E-06 | -0. 34332 | 0      | 0. 148 | 0. 019776 | Undiff-G | ZMYND11  |
| CYTH1    | 1. 33E-06 | -0. 48663 | 0. 007 | 0. 16  | 0. 019901 | Undiff-G | CYTH1    |
| LHFPL2   | 1. 34E-06 | -0. 39744 | 0. 007 | 0. 162 | 0. 019953 | Undiff-G | LHFPL2   |
| GGCX     | 1. 35E-06 | -0. 13476 | 0. 015 | 0. 176 | 0. 020169 | Undiff-G | GGCX     |
| APC      | 1. 35E-06 | -0. 10531 | 0. 037 | 0. 215 | 0. 020223 | Undiff-G | APC      |

|           |           |           |        |        |           |          |            |
|-----------|-----------|-----------|--------|--------|-----------|----------|------------|
| VPS13C    | 1. 36E-06 | -0. 30138 | 0. 015 | 0. 176 | 0. 020255 | Undiff-G | VPS13C     |
| SUDS3     | 1. 36E-06 | -0. 24895 | 0. 022 | 0. 19  | 0. 0203   | Undiff-G | SUDS3      |
| AAAS      | 1. 36E-06 | -0. 36944 | 0. 022 | 0. 188 | 0. 020302 | Undiff-G | AAAS       |
| MTMR2     | 1. 37E-06 | -0. 34682 | 0      | 0. 148 | 0. 020432 | Undiff-G | MTMR2      |
| ZNF92     | 1. 37E-06 | -0. 42607 | 0      | 0. 148 | 0. 020432 | Undiff-G | ZNF92      |
| NECAP2    | 1. 37E-06 | 0. 345302 | 0. 081 | 0. 294 | 0. 020481 | Undiff-G | NECAP2     |
| IFT81     | 1. 38E-06 | -0. 35358 | 0. 007 | 0. 161 | 0. 020569 | Undiff-G | IFT81      |
| SCFD1     | 1. 38E-06 | 0. 241421 | 0. 059 | 0. 255 | 0. 020624 | Undiff-G | SCFD1      |
| CRAT      | 1. 38E-06 | -0. 23969 | 0. 007 | 0. 162 | 0. 020627 | Undiff-G | CRAT       |
| IVD       | 1. 38E-06 | -0. 19872 | 0. 029 | 0. 201 | 0. 020641 | Undiff-G | IVD        |
| GPR155    | 1. 39E-06 | -0. 32777 | 0. 022 | 0. 189 | 0. 020719 | Undiff-G | GPR155     |
| NCF4      | 1. 39E-06 | -0. 66255 | 0      | 0. 148 | 0. 020769 | Undiff-G | NCF4       |
| CDKN2D    | 1. 41E-06 | -0. 40588 | 0. 007 | 0. 161 | 0. 02102  | Undiff-G | CDKN2D     |
| ALYREF    | 1. 41E-06 | -0. 32637 | 0      | 0. 147 | 0. 02111  | Undiff-G | ALYREF     |
| CHKA      | 1. 41E-06 | -0. 1384  | 0. 022 | 0. 189 | 0. 021136 | Undiff-G | CHKA       |
| SLC27A1   | 1. 41E-06 | -0. 28022 | 0. 007 | 0. 162 | 0. 021137 | Undiff-G | SLC27A1    |
| DCP1A     | 1. 42E-06 | 0. 108068 | 0. 044 | 0. 229 | 0. 021186 | Undiff-G | DCP1A      |
| SAMM50    | 1. 42E-06 | 0. 192668 | 0. 037 | 0. 217 | 0. 021238 | Undiff-G | SAMM50     |
| PCYT2     | 1. 43E-06 | -0. 22502 | 0. 007 | 0. 162 | 0. 021315 | Undiff-G | PCYT2      |
| EXOSC3    | 1. 43E-06 | -0. 22467 | 0. 007 | 0. 162 | 0. 021319 | Undiff-G | EXOSC3     |
| ZNF138    | 1. 44E-06 | -0. 39172 | 0      | 0. 147 | 0. 021457 | Undiff-G | ZNF138     |
| SORBS3    | 1. 44E-06 | -0. 28053 | 0. 015 | 0. 174 | 0. 021528 | Undiff-G | SORBS3     |
| NFE2L1    | 1. 44E-06 | -0. 27725 | 0. 022 | 0. 189 | 0. 021552 | Undiff-G | NFE2L1     |
| CUL4A     | 1. 45E-06 | -0. 36616 | 0      | 0. 147 | 0. 021633 | Undiff-G | CUL4A      |
| ABAT      | 1. 45E-06 | -0. 37696 | 0. 007 | 0. 161 | 0. 021695 | Undiff-G | ABAT       |
| RRP36     | 1. 46E-06 | -0. 32232 | 0      | 0. 147 | 0. 02181  | Undiff-G | RRP36      |
| OSM       | 1. 46E-06 | -0. 72863 | 0      | 0. 147 | 0. 02181  | Undiff-G | OSM        |
| TIPRL     | 1. 46E-06 | 0. 406952 | 0. 066 | 0. 268 | 0. 021873 | Undiff-G | TIPRL      |
| SNX7      | 1. 46E-06 | -0. 18311 | 0. 015 | 0. 175 | 0. 021874 | Undiff-G | SNX7       |
| FLOT2     | 1. 46E-06 | -0. 22243 | 0. 022 | 0. 188 | 0. 021874 | Undiff-G | FLOT2      |
| TP53I3    | 1. 47E-06 | -0. 40533 | 0      | 0. 147 | 0. 021988 | Undiff-G | TP53I3     |
| BOD1L1    | 1. 47E-06 | -0. 36443 | 0. 007 | 0. 161 | 0. 022015 | Undiff-G | BOD1L1     |
| CTXN1     | 1. 47E-06 | -0. 31824 | 0. 007 | 0. 161 | 0. 022028 | Undiff-G | CTXN1      |
| PHGDH     | 1. 48E-06 | -0. 29138 | 0. 029 | 0. 202 | 0. 022052 | Undiff-G | PHGDH      |
| HES4      | 1. 48E-06 | -0. 34194 | 0. 022 | 0. 189 | 0. 02208  | Undiff-G | HES4       |
| TWISTNB   | 1. 48E-06 | 0. 481589 | 0. 066 | 0. 271 | 0. 022143 | Undiff-G | TWISTNB    |
| ZNF667-AS | 1. 49E-06 | 0. 546336 | 0. 132 | 0. 391 | 0. 022264 | Undiff-G | ZNF667-AS1 |
| POLR2M    | 1. 51E-06 | -0. 33178 | 0. 007 | 0. 161 | 0. 022557 | Undiff-G | POLR2M     |
| TBC1D14   | 1. 52E-06 | -0. 27433 | 0. 015 | 0. 173 | 0. 022663 | Undiff-G | TBC1D14    |
| STX18     | 1. 52E-06 | -0. 27826 | 0. 007 | 0. 161 | 0. 022717 | Undiff-G | STX18      |
| DTNA      | 1. 52E-06 | 0. 240436 | 0. 059 | 0. 255 | 0. 022728 | Undiff-G | DTNA       |
| PRR14     | 1. 52E-06 | -0. 13008 | 0. 029 | 0. 202 | 0. 022732 | Undiff-G | PRR14      |
| ABHD8     | 1. 53E-06 | -0. 34716 | 0      | 0. 147 | 0. 022902 | Undiff-G | ABHD8      |
| KIAA0930  | 1. 53E-06 | -0. 4696  | 0      | 0. 147 | 0. 022902 | Undiff-G | KIAA0930   |
| RNASE2    | 1. 54E-06 | -0. 71084 | 0. 007 | 0. 159 | 0. 022985 | Undiff-G | RNASE2     |
| PKM       | 1. 54E-06 | 1. 042024 | 0. 596 | 0. 772 | 0. 023007 | Undiff-G | PKM        |
| TEAD1     | 1. 55E-06 | -0. 31113 | 0      | 0. 146 | 0. 023089 | Undiff-G | TEAD1      |
| MTMR6     | 1. 56E-06 | -0. 40768 | 0      | 0. 146 | 0. 023278 | Undiff-G | MTMR6      |
| SEC22C    | 1. 56E-06 | 0. 345318 | 0. 044 | 0. 23  | 0. 023294 | Undiff-G | SEC22C     |
| FHL3      | 1. 56E-06 | -0. 15669 | 0. 007 | 0. 161 | 0. 02332  | Undiff-G | FHL3       |
| TMEM132A  | 1. 57E-06 | -0. 32468 | 0      | 0. 146 | 0. 023468 | Undiff-G | TMEM132A   |

|           |          |          |       |       |          |          |            |
|-----------|----------|----------|-------|-------|----------|----------|------------|
| FAM162A   | 1.57E-06 | 0.487574 | 0.14  | 0.404 | 0.023524 | Undiff-G | FAM162A    |
| MAFG      | 1.58E-06 | -0.13937 | 0.022 | 0.186 | 0.023612 | Undiff-G | MAFG       |
| HBD       | 1.58E-06 | 0.540291 | 0.015 | 0.001 | 0.023639 | Undiff-G | HBD        |
| MCMBP     | 1.58E-06 | -0.38971 | 0     | 0.146 | 0.02366  | Undiff-G | MCMBP      |
| C11orf1   | 1.58E-06 | -0.45953 | 0     | 0.146 | 0.02366  | Undiff-G | C11orf1    |
| ACO08268. | 1.61E-06 | 0.209071 | 0.015 | 0.001 | 0.024006 | Undiff-G | ACO08268.1 |
| WDR83     | 1.61E-06 | -0.35223 | 0.015 | 0.173 | 0.02402  | Undiff-G | WDR83      |
| COR07     | 1.61E-06 | -0.45097 | 0.007 | 0.16  | 0.024074 | Undiff-G | COR07      |
| TRIO      | 1.61E-06 | -0.34956 | 0.015 | 0.174 | 0.024082 | Undiff-G | TRIO       |
| HUWE1     | 1.62E-06 | -0.25189 | 0.015 | 0.174 | 0.024158 | Undiff-G | HUWE1      |
| NDUFS5    | 1.62E-06 | 0.453151 | 0.331 | 0.816 | 0.024215 | Undiff-G | NDUFS5     |
| POM121    | 1.63E-06 | -0.37977 | 0.007 | 0.159 | 0.024329 | Undiff-G | POM121     |
| STXBP2    | 1.64E-06 | -0.3244  | 0.015 | 0.174 | 0.024491 | Undiff-G | STXBP2     |
| TMEM129   | 1.64E-06 | -0.28586 | 0.015 | 0.174 | 0.024514 | Undiff-G | TMEM129    |
| VWA1      | 1.65E-06 | -0.36659 | 0     | 0.146 | 0.024642 | Undiff-G | VWA1       |
| COL4A3BP  | 1.65E-06 | -0.38485 | 0     | 0.146 | 0.024642 | Undiff-G | COL4A3BP   |
| TARS      | 1.66E-06 | 0.2143   | 0.044 | 0.229 | 0.024761 | Undiff-G | TARS       |
| COA5      | 1.66E-06 | 0.206245 | 0.088 | 0.308 | 0.024771 | Undiff-G | COA5       |
| BST2      | 1.66E-06 | 0.222356 | 0.191 | 0.489 | 0.024861 | Undiff-G | BST2       |
| METTL2A   | 1.66E-06 | -0.10983 | 0.007 | 0.16  | 0.024881 | Undiff-G | METTL2A    |
| CFLAR     | 1.68E-06 | 0.465245 | 0.096 | 0.321 | 0.025127 | Undiff-G | CFLAR      |
| PITPNB    | 1.68E-06 | -0.32784 | 0.015 | 0.173 | 0.025156 | Undiff-G | PITPNB     |
| KLHL5     | 1.68E-06 | -0.39323 | 0.015 | 0.172 | 0.025168 | Undiff-G | KLHL5      |
| DLX5      | 1.69E-06 | -0.73669 | 0     | 0.145 | 0.02525  | Undiff-G | DLX5       |
| CCDC28A   | 1.69E-06 | -0.29131 | 0.007 | 0.16  | 0.025269 | Undiff-G | CCDC28A    |
| BCL2A1    | 1.69E-06 | -0.61746 | 0.007 | 0.159 | 0.025321 | Undiff-G | BCL2A1     |
| APBB1IP   | 1.69E-06 | -0.59428 | 0.007 | 0.158 | 0.025327 | Undiff-G | APBB1IP    |
| ZFYVE21   | 1.70E-06 | 0.340874 | 0.066 | 0.268 | 0.025436 | Undiff-G | ZFYVE21    |
| IRAK1     | 1.71E-06 | -0.27221 | 0.007 | 0.16  | 0.02549  | Undiff-G | IRAK1      |
| FAM122A   | 1.72E-06 | -0.38491 | 0     | 0.145 | 0.025664 | Undiff-G | FAM122A    |
| UGDH      | 1.72E-06 | -0.17172 | 0.007 | 0.16  | 0.025697 | Undiff-G | UGDH       |
| SAMD8     | 1.73E-06 | -0.37642 | 0     | 0.145 | 0.025873 | Undiff-G | SAMD8      |
| DPP8      | 1.74E-06 | -0.35348 | 0.007 | 0.159 | 0.025946 | Undiff-G | DPP8       |
| EXT2      | 1.74E-06 | -0.25899 | 0.015 | 0.173 | 0.026054 | Undiff-G | EXT2       |
| HSCB      | 1.75E-06 | -0.25931 | 0.015 | 0.174 | 0.026078 | Undiff-G | HSCB       |
| PDS5A     | 1.75E-06 | -0.17462 | 0.007 | 0.16  | 0.026123 | Undiff-G | PDS5A      |
| CALU      | 1.76E-06 | 0.715868 | 0.14  | 0.406 | 0.02625  | Undiff-G | CALU       |
| NUMB      | 1.76E-06 | -0.35733 | 0.015 | 0.172 | 0.02625  | Undiff-G | NUMB       |
| GM2A      | 1.76E-06 | -0.49267 | 0     | 0.145 | 0.026297 | Undiff-G | GM2A       |
| FAH       | 1.77E-06 | -0.4092  | 0.007 | 0.159 | 0.026434 | Undiff-G | FAH        |
| BRX1      | 1.77E-06 | 0.467185 | 0.059 | 0.256 | 0.026514 | Undiff-G | BRX1       |
| PRKAB1    | 1.78E-06 | -0.39663 | 0.007 | 0.159 | 0.026534 | Undiff-G | PRKAB1     |
| EVI5      | 1.79E-06 | -0.25302 | 0.022 | 0.186 | 0.026704 | Undiff-G | EVI5       |
| TLE1      | 1.79E-06 | -0.34592 | 0.015 | 0.171 | 0.026739 | Undiff-G | TLE1       |
| JOSD1     | 1.79E-06 | -0.22931 | 0.007 | 0.159 | 0.026761 | Undiff-G | JOSD1      |
| USP39     | 1.79E-06 | -0.2079  | 0.022 | 0.187 | 0.026765 | Undiff-G | USP39      |
| NOA1      | 1.80E-06 | -0.37675 | 0     | 0.145 | 0.026946 | Undiff-G | NOA1       |
| C7orf26   | 1.80E-06 | -0.29168 | 0.007 | 0.159 | 0.026963 | Undiff-G | C7orf26    |
| PPP1R35   | 1.81E-06 | -0.32458 | 0.007 | 0.159 | 0.027082 | Undiff-G | PPP1R35    |
| SPATA6    | 1.81E-06 | -0.37844 | 0.007 | 0.158 | 0.027093 | Undiff-G | SPATA6     |
| RNF26     | 1.82E-06 | -0.25847 | 0.007 | 0.159 | 0.027161 | Undiff-G | RNF26      |

|           |           |           |        |        |           |          |           |
|-----------|-----------|-----------|--------|--------|-----------|----------|-----------|
| DCBLD2    | 1. 82E-06 | -0. 35155 | 0      | 0. 145 | 0. 027165 | Undiff-G | DCBLD2    |
| BRE       | 1. 82E-06 | 0. 295131 | 0. 044 | 0. 228 | 0. 027175 | Undiff-G | BRE       |
| CBS       | 1. 83E-06 | -0. 3084  | 0. 007 | 0. 159 | 0. 027273 | Undiff-G | CBS       |
| KIAA2026  | 1. 83E-06 | -0. 40278 | 0      | 0. 145 | 0. 027387 | Undiff-G | KIAA2026  |
| CDK11A    | 1. 84E-06 | -0. 12407 | 0. 029 | 0. 198 | 0. 027531 | Undiff-G | CDK11A    |
| MUT       | 1. 85E-06 | -0. 18762 | 0. 007 | 0. 159 | 0. 027644 | Undiff-G | MUT       |
| MAFF      | 1. 87E-06 | -0. 19606 | 0. 015 | 0. 173 | 0. 027925 | Undiff-G | MAFF      |
| SEMA6D    | 1. 87E-06 | -0. 38861 | 0. 007 | 0. 159 | 0. 027944 | Undiff-G | SEMA6D    |
| PLXNB2    | 1. 90E-06 | -0. 20895 | 0. 007 | 0. 159 | 0. 028324 | Undiff-G | PLXNB2    |
| SCAP      | 1. 90E-06 | -0. 21165 | 0. 007 | 0. 159 | 0. 028324 | Undiff-G | SCAP      |
| ZC3H18    | 1. 90E-06 | -0. 34402 | 0. 007 | 0. 158 | 0. 028457 | Undiff-G | ZC3H18    |
| OCEL1     | 1. 90E-06 | -0. 39624 | 0. 007 | 0. 158 | 0. 028459 | Undiff-G | OCEL1     |
| MAD1L1    | 1. 91E-06 | -0. 38975 | 0. 007 | 0. 158 | 0. 028566 | Undiff-G | MAD1L1    |
| UBAP1     | 1. 91E-06 | -0. 10053 | 0. 022 | 0. 186 | 0. 028592 | Undiff-G | UBAP1     |
| SLC25A17  | 1. 92E-06 | -0. 27993 | 0. 007 | 0. 159 | 0. 028741 | Undiff-G | SLC25A17  |
| C11orf24  | 1. 92E-06 | -0. 38854 | 0      | 0. 144 | 0. 028753 | Undiff-G | C11orf24  |
| HPS4      | 1. 93E-06 | -0. 37028 | 0. 022 | 0. 185 | 0. 028825 | Undiff-G | HPS4      |
| ZNF83     | 1. 93E-06 | -0. 1224  | 0. 029 | 0. 199 | 0. 028876 | Undiff-G | ZNF83     |
| NIT1      | 1. 94E-06 | -0. 18125 | 0. 015 | 0. 172 | 0. 028917 | Undiff-G | NIT1      |
| SMC6      | 1. 94E-06 | -0. 10412 | 0. 007 | 0. 158 | 0. 029032 | Undiff-G | SMC6      |
| RPP30     | 1. 95E-06 | -0. 27732 | 0. 015 | 0. 17  | 0. 029199 | Undiff-G | RPP30     |
| ARHGEF6   | 1. 96E-06 | -0. 3672  | 0      | 0. 144 | 0. 029223 | Undiff-G | ARHGEF6   |
| MPRIP     | 1. 96E-06 | -0. 22514 | 0. 007 | 0. 158 | 0. 029257 | Undiff-G | MPRIP     |
| SPTBN1    | 1. 96E-06 | 0. 171946 | 0. 074 | 0. 277 | 0. 029288 | Undiff-G | SPTBN1    |
| FBX03     | 1. 97E-06 | -0. 31555 | 0. 015 | 0. 172 | 0. 029439 | Undiff-G | FBX03     |
| COMMD10   | 1. 97E-06 | 0. 271418 | 0. 044 | 0. 227 | 0. 029446 | Undiff-G | COMMD10   |
| GPATCH2L  | 2. 00E-06 | -0. 12745 | 0. 044 | 0. 225 | 0. 029833 | Undiff-G | GPATCH2L  |
| RAB3GAP2  | 2. 00E-06 | -0. 20555 | 0. 015 | 0. 172 | 0. 029912 | Undiff-G | RAB3GAP2  |
| ZNF711    | 2. 00E-06 | -0. 39277 | 0      | 0. 144 | 0. 029942 | Undiff-G | ZNF711    |
| MKNK1     | 2. 02E-06 | -0. 28702 | 0. 015 | 0. 172 | 0. 030114 | Undiff-G | MKNK1     |
| BCCIP     | 2. 04E-06 | -0. 20968 | 0. 022 | 0. 185 | 0. 030423 | Undiff-G | BCCIP     |
| NOC4L     | 2. 04E-06 | -0. 10229 | 0. 007 | 0. 158 | 0. 030477 | Undiff-G | NOC4L     |
| PSMG4     | 2. 04E-06 | 0. 10394  | 0. 029 | 0. 2   | 0. 030481 | Undiff-G | PSMG4     |
| LENG8     | 2. 05E-06 | -0. 11117 | 0. 044 | 0. 225 | 0. 030638 | Undiff-G | LENG8     |
| PHF11     | 2. 05E-06 | -0. 42378 | 0      | 0. 143 | 0. 030678 | Undiff-G | PHF11     |
| KIN       | 2. 07E-06 | -0. 38479 | 0      | 0. 143 | 0. 030928 | Undiff-G | KIN       |
| TMSB15B   | 2. 08E-06 | -0. 35298 | 0. 022 | 0. 183 | 0. 031049 | Undiff-G | TMSB15B   |
| TCEB2     | 2. 08E-06 | 0. 423059 | 0. 346 | 0. 829 | 0. 031141 | Undiff-G | TCEB2     |
| TBC1D5    | 2. 09E-06 | -0. 38692 | 0      | 0. 143 | 0. 031179 | Undiff-G | TBC1D5    |
| AP5M1     | 2. 10E-06 | -0. 36355 | 0. 007 | 0. 157 | 0. 031432 | Undiff-G | AP5M1     |
| PTS       | 2. 11E-06 | 0. 474729 | 0. 103 | 0. 329 | 0. 031516 | Undiff-G | PTS       |
| B3GNT5    | 2. 12E-06 | -0. 45862 | 0      | 0. 143 | 0. 031688 | Undiff-G | B3GNT5    |
| ADAM28    | 2. 14E-06 | -0. 6424  | 0      | 0. 143 | 0. 031946 | Undiff-G | ADAM28    |
| OLIG1     | 2. 14E-06 | -0. 57472 | 0. 022 | 0. 182 | 0. 031983 | Undiff-G | OLIG1     |
| COX5B     | 2. 15E-06 | 0. 407001 | 0. 353 | 0. 854 | 0. 032119 | Undiff-G | COX5B     |
| SETD5     | 2. 20E-06 | 0. 124912 | 0. 081 | 0. 291 | 0. 032805 | Undiff-G | SETD5     |
| AP2A1     | 2. 21E-06 | 0. 148871 | 0. 051 | 0. 238 | 0. 032977 | Undiff-G | AP2A1     |
| LINC00662 | 2. 21E-06 | -0. 1289  | 0. 022 | 0. 185 | 0. 032988 | Undiff-G | LINC00662 |
| ALKBH2    | 2. 21E-06 | -0. 25517 | 0. 029 | 0. 197 | 0. 033027 | Undiff-G | ALKBH2    |
| ACBD5     | 2. 22E-06 | -0. 3523  | 0. 015 | 0. 169 | 0. 033127 | Undiff-G | ACBD5     |
| FAM217B   | 2. 22E-06 | -0. 34462 | 0. 007 | 0. 157 | 0. 033214 | Undiff-G | FAM217B   |

|           |          |          |       |       |          |          |           |
|-----------|----------|----------|-------|-------|----------|----------|-----------|
| NR2F6     | 2.23E-06 | -0.31218 | 0     | 0.143 | 0.033265 | Undiff-G | NR2F6     |
| VAC14     | 2.23E-06 | -0.3372  | 0     | 0.143 | 0.033265 | Undiff-G | VAC14     |
| C6orf47   | 2.23E-06 | -0.34661 | 0     | 0.143 | 0.033265 | Undiff-G | C6orf47   |
| CDK9      | 2.23E-06 | -0.35646 | 0     | 0.143 | 0.033265 | Undiff-G | CDK9      |
| CTTNBP2NL | 2.23E-06 | -0.40708 | 0.007 | 0.155 | 0.033295 | Undiff-G | CTTNBP2NL |
| FTSJ2     | 2.23E-06 | 0.16106  | 0.051 | 0.239 | 0.033356 | Undiff-G | FTSJ2     |
| CD4       | 2.25E-06 | -0.55003 | 0.007 | 0.157 | 0.033577 | Undiff-G | CD4       |
| GRIA3     | 2.25E-06 | -0.33917 | 0.015 | 0.17  | 0.033671 | Undiff-G | GRIA3     |
| SOGA1     | 2.25E-06 | -0.30003 | 0.007 | 0.157 | 0.033673 | Undiff-G | SOGA1     |
| TMEM205   | 2.25E-06 | 0.578314 | 0.191 | 0.499 | 0.033697 | Undiff-G | TMEM205   |
| FZR1      | 2.26E-06 | -0.29121 | 0.007 | 0.157 | 0.0337   | Undiff-G | FZR1      |
| FUOM      | 2.26E-06 | -0.54554 | 0     | 0.142 | 0.033807 | Undiff-G | FUOM      |
| GPC1      | 2.26E-06 | 0.108885 | 0.051 | 0.239 | 0.033842 | Undiff-G | GPC1      |
| POMGNT2   | 2.28E-06 | -0.33433 | 0     | 0.142 | 0.034081 | Undiff-G | POMGNT2   |
| CLCN7     | 2.29E-06 | -0.33846 | 0.007 | 0.156 | 0.034226 | Undiff-G | CLCN7     |
| DCLK2     | 2.30E-06 | -0.15839 | 0.029 | 0.198 | 0.034302 | Undiff-G | DCLK2     |
| PDS5B     | 2.30E-06 | -0.2611  | 0.015 | 0.169 | 0.034405 | Undiff-G | PDS5B     |
| COASY     | 2.30E-06 | -0.28488 | 0.029 | 0.196 | 0.034409 | Undiff-G | COASY     |
| EHBP1     | 2.32E-06 | -0.33621 | 0.015 | 0.169 | 0.034632 | Undiff-G | EHBP1     |
| ARL4D     | 2.33E-06 | -0.34211 | 0.015 | 0.171 | 0.034748 | Undiff-G | ARL4D     |
| RAB8B     | 2.34E-06 | -0.23624 | 0.007 | 0.156 | 0.034952 | Undiff-G | RAB8B     |
| RIPK2     | 2.35E-06 | -0.23407 | 0.015 | 0.17  | 0.035127 | Undiff-G | RIPK2     |
| ZNF672    | 2.36E-06 | -0.34995 | 0     | 0.142 | 0.035201 | Undiff-G | ZNF672    |
| SLC25A19  | 2.36E-06 | -0.29919 | 0.015 | 0.17  | 0.035271 | Undiff-G | SLC25A19  |
| HADH      | 2.36E-06 | 0.175532 | 0.037 | 0.209 | 0.035272 | Undiff-G | HADH      |
| SCG5      | 2.36E-06 | 0.369906 | 0.103 | 0.331 | 0.035293 | Undiff-G | SCG5      |
| TMEM115   | 2.36E-06 | 0.108491 | 0.037 | 0.21  | 0.035328 | Undiff-G | TMEM115   |
| MAP4K5    | 2.37E-06 | -0.30956 | 0.007 | 0.156 | 0.035422 | Undiff-G | MAP4K5    |
| VPS45     | 2.37E-06 | -0.12406 | 0.015 | 0.17  | 0.03544  | Undiff-G | VPS45     |
| ATP13A2   | 2.37E-06 | -0.33958 | 0     | 0.142 | 0.035487 | Undiff-G | ATP13A2   |
| PHKG2     | 2.38E-06 | -0.18788 | 0.007 | 0.156 | 0.035527 | Undiff-G | PHKG2     |
| UBL4A     | 2.41E-06 | 0.114135 | 0.022 | 0.184 | 0.035945 | Undiff-G | UBL4A     |
| ACOT9     | 2.41E-06 | -0.24563 | 0.022 | 0.184 | 0.036005 | Undiff-G | ACOT9     |
| PXK       | 2.41E-06 | -0.42078 | 0     | 0.142 | 0.036065 | Undiff-G | PXK       |
| MAPK10    | 2.44E-06 | -0.14092 | 0.029 | 0.197 | 0.036427 | Undiff-G | MAPK10    |
| F8A1      | 2.45E-06 | -0.33319 | 0     | 0.142 | 0.036652 | Undiff-G | F8A1      |
| C2orf68   | 2.45E-06 | -0.39449 | 0     | 0.142 | 0.036652 | Undiff-G | C2orf68   |
| NOTCH2NL  | 2.47E-06 | -0.32871 | 0.015 | 0.168 | 0.036845 | Undiff-G | NOTCH2NL  |
| PPM1A     | 2.47E-06 | -0.12087 | 0.022 | 0.184 | 0.036925 | Undiff-G | PPM1A     |
| MIAT      | 2.47E-06 | -0.43472 | 0.015 | 0.169 | 0.036935 | Undiff-G | MIAT      |
| POU3F3    | 2.47E-06 | -0.24993 | 0.007 | 0.156 | 0.036982 | Undiff-G | POU3F3    |
| BAP1      | 2.49E-06 | -0.34847 | 0     | 0.141 | 0.037248 | Undiff-G | BAP1      |
| ADCK2     | 2.49E-06 | -0.39178 | 0     | 0.141 | 0.037248 | Undiff-G | ADCK2     |
| GPC2      | 2.51E-06 | -0.3748  | 0.015 | 0.17  | 0.03751  | Undiff-G | GPC2      |
| RPRD1A    | 2.52E-06 | -0.16798 | 0.037 | 0.209 | 0.037637 | Undiff-G | RPRD1A    |
| ANKRD13D  | 2.52E-06 | -0.32999 | 0.015 | 0.169 | 0.037648 | Undiff-G | ANKRD13D  |
| SLC50A1   | 2.52E-06 | -0.26206 | 0.015 | 0.169 | 0.037684 | Undiff-G | SLC50A1   |
| CIAPIN1   | 2.52E-06 | 0.374759 | 0.066 | 0.262 | 0.037719 | Undiff-G | CIAPIN1   |
| CRCP      | 2.53E-06 | -0.10735 | 0.022 | 0.183 | 0.037763 | Undiff-G | CRCP      |
| BMP7      | 2.53E-06 | -0.36698 | 0.015 | 0.168 | 0.037831 | Undiff-G | BMP7      |
| LIX1L     | 2.55E-06 | -0.32843 | 0     | 0.141 | 0.038161 | Undiff-G | LIX1L     |

|           |          |          |       |       |          |          |           |
|-----------|----------|----------|-------|-------|----------|----------|-----------|
| SCAF1     | 2.57E-06 | -0.32462 | 0.007 | 0.155 | 0.038363 | Undiff-G | SCAF1     |
| LINC01094 | 2.57E-06 | -0.41275 | 0.007 | 0.155 | 0.038457 | Undiff-G | LINC01094 |
| BMI1      | 2.57E-06 | -0.32882 | 0     | 0.141 | 0.03847  | Undiff-G | BMI1      |
| BTBD7     | 2.60E-06 | -0.37391 | 0     | 0.141 | 0.038782 | Undiff-G | BTBD7     |
| DNAJC30   | 2.60E-06 | -0.25018 | 0.007 | 0.155 | 0.038814 | Undiff-G | DNAJC30   |
| SH3YL1    | 2.62E-06 | 0.11948  | 0.022 | 0.183 | 0.039212 | Undiff-G | SH3YL1    |
| FBXW2     | 2.63E-06 | -0.11774 | 0.029 | 0.194 | 0.039357 | Undiff-G | FBXW2     |
| ZBED1     | 2.64E-06 | -0.35326 | 0     | 0.141 | 0.039412 | Undiff-G | ZBED1     |
| MITD1     | 2.67E-06 | 0.189557 | 0.051 | 0.236 | 0.039858 | Undiff-G | MITD1     |
| FOXG1     | 2.68E-06 | -0.30997 | 0.007 | 0.155 | 0.040038 | Undiff-G | FOXG1     |
| RAP2B     | 2.68E-06 | -0.21062 | 0.015 | 0.167 | 0.040049 | Undiff-G | RAP2B     |
| LBH       | 2.68E-06 | -0.21931 | 0.007 | 0.155 | 0.040101 | Undiff-G | LBH       |
| AGA       | 2.70E-06 | -0.31155 | 0.007 | 0.155 | 0.040329 | Undiff-G | AGA       |
| C1GALT1C1 | 2.70E-06 | -0.23359 | 0.007 | 0.155 | 0.040369 | Undiff-G | C1GALT1C1 |
| CEP164    | 2.71E-06 | -0.33124 | 0.007 | 0.155 | 0.040526 | Undiff-G | CEP164    |
| ANKRD39   | 2.71E-06 | -0.13887 | 0.015 | 0.169 | 0.040542 | Undiff-G | ANKRD39   |
| SLAIN2    | 2.72E-06 | -0.33754 | 0     | 0.14  | 0.040704 | Undiff-G | SLAIN2    |
| SLC40A1   | 2.72E-06 | -0.44378 | 0     | 0.14  | 0.040704 | Undiff-G | SLC40A1   |
| YIPF5     | 2.74E-06 | 0.465626 | 0.066 | 0.264 | 0.040961 | Undiff-G | YIPF5     |
| ZFAND2B   | 2.74E-06 | -0.20842 | 0.037 | 0.208 | 0.040964 | Undiff-G | ZFAND2B   |
| PNPLA6    | 2.74E-06 | -0.35578 | 0.015 | 0.168 | 0.040977 | Undiff-G | PNPLA6    |
| ZNF37A    | 2.75E-06 | -0.34421 | 0     | 0.14  | 0.041033 | Undiff-G | ZNF37A    |
| SMYD3     | 2.77E-06 | -0.41185 | 0     | 0.14  | 0.041365 | Undiff-G | SMYD3     |
| C1orf50   | 2.77E-06 | -0.19341 | 0.022 | 0.182 | 0.041384 | Undiff-G | C1orf50   |
| CD01      | 2.77E-06 | 0.209277 | 0.051 | 0.237 | 0.04142  | Undiff-G | CD01      |
| ATAD3A    | 2.78E-06 | -0.33013 | 0.007 | 0.153 | 0.041567 | Undiff-G | ATAD3A    |
| DCAKD     | 2.79E-06 | -0.33109 | 0     | 0.14  | 0.041699 | Undiff-G | DCAKD     |
| ALOX5     | 2.79E-06 | -0.5804  | 0     | 0.14  | 0.041699 | Undiff-G | ALOX5     |
| NDUFAF4   | 2.80E-06 | 0.309596 | 0.044 | 0.223 | 0.041866 | Undiff-G | NDUFAF4   |
| APTX      | 2.81E-06 | -0.38608 | 0     | 0.14  | 0.042037 | Undiff-G | APTX      |
| SLC7A5    | 2.81E-06 | -0.51463 | 0     | 0.14  | 0.042037 | Undiff-G | SLC7A5    |
| SETX      | 2.82E-06 | -0.34324 | 0.015 | 0.168 | 0.042193 | Undiff-G | SETX      |
| STT3A     | 2.83E-06 | -0.15561 | 0.015 | 0.168 | 0.042226 | Undiff-G | STT3A     |
| PLA2G15   | 2.84E-06 | -0.45899 | 0     | 0.14  | 0.042377 | Undiff-G | PLA2G15   |
| IL10RA    | 2.84E-06 | -0.57663 | 0     | 0.14  | 0.042377 | Undiff-G | IL10RA    |
| VRK3      | 2.85E-06 | 0.144024 | 0.044 | 0.22  | 0.04261  | Undiff-G | VRK3      |
| NNT-AS1   | 2.85E-06 | 0.273661 | 0.044 | 0.223 | 0.042627 | Undiff-G | NNT-AS1   |
| B3GALT6   | 2.86E-06 | -0.32427 | 0     | 0.14  | 0.042719 | Undiff-G | B3GALT6   |
| AFTPH     | 2.88E-06 | -0.18009 | 0.007 | 0.154 | 0.043104 | Undiff-G | AFTPH     |
| RALGDS    | 2.91E-06 | -0.41622 | 0.007 | 0.154 | 0.043413 | Undiff-G | RALGDS    |
| HN1L      | 2.93E-06 | -0.21623 | 0.007 | 0.154 | 0.043794 | Undiff-G | HN1L      |
| PTDSS2    | 2.94E-06 | -0.31024 | 0.007 | 0.154 | 0.043986 | Undiff-G | PTDSS2    |
| WDR54     | 2.95E-06 | 0.287483 | 0.051 | 0.236 | 0.044013 | Undiff-G | WDR54     |
| RAB3A     | 2.95E-06 | -0.32342 | 0.015 | 0.166 | 0.044089 | Undiff-G | RAB3A     |
| NOLC1     | 2.97E-06 | -0.37705 | 0.007 | 0.153 | 0.044386 | Undiff-G | NOLC1     |
| RUSC1     | 2.98E-06 | -0.34023 | 0     | 0.139 | 0.044473 | Undiff-G | RUSC1     |
| LIMK1     | 2.98E-06 | -0.3842  | 0     | 0.139 | 0.044473 | Undiff-G | LIMK1     |
| TIMM23    | 2.99E-06 | -0.30359 | 0.007 | 0.154 | 0.044685 | Undiff-G | TIMM23    |
| LRCH3     | 3.00E-06 | -0.35847 | 0     | 0.139 | 0.044833 | Undiff-G | LRCH3     |
| UTP3      | 3.00E-06 | -0.39062 | 0     | 0.139 | 0.044833 | Undiff-G | UTP3      |
| GPKOW     | 3.02E-06 | -0.37706 | 0     | 0.139 | 0.045195 | Undiff-G | GPKOW     |

|          |          |          |       |       |          |          |          |
|----------|----------|----------|-------|-------|----------|----------|----------|
| DSE      | 3.02E-06 | -0.51678 | 0     | 0.139 | 0.045195 | Undiff-G | DSE      |
| SLC29A1  | 3.05E-06 | -0.5371  | 0     | 0.139 | 0.04556  | Undiff-G | SLC29A1  |
| SPATA13  | 3.05E-06 | -0.2036  | 0.015 | 0.167 | 0.045627 | Undiff-G | SPATA13  |
| CALD1    | 3.07E-06 | 0.355902 | 0.154 | 0.423 | 0.045811 | Undiff-G | CALD1    |
| C6orf120 | 3.07E-06 | -0.30689 | 0     | 0.139 | 0.045927 | Undiff-G | C6orf120 |
| CHD1L    | 3.07E-06 | -0.38984 | 0     | 0.139 | 0.045927 | Undiff-G | CHD1L    |
| SKI      | 3.09E-06 | -0.39588 | 0.007 | 0.153 | 0.046225 | Undiff-G | SKI      |
| ZNF43    | 3.10E-06 | -0.3404  | 0     | 0.139 | 0.046298 | Undiff-G | ZNF43    |
| MARS     | 3.10E-06 | 0.103416 | 0.037 | 0.208 | 0.046387 | Undiff-G | MARS     |
| CLPTM1L  | 3.12E-06 | -0.31692 | 0.007 | 0.153 | 0.046567 | Undiff-G | CLPTM1L  |
| ARAF     | 3.12E-06 | -0.23209 | 0.022 | 0.179 | 0.04664  | Undiff-G | ARAF     |
| USP46    | 3.12E-06 | -0.36979 | 0     | 0.139 | 0.046672 | Undiff-G | USP46    |
| GDAP1    | 3.13E-06 | -0.15489 | 0.007 | 0.153 | 0.046719 | Undiff-G | GDAP1    |
| ERRFI1   | 3.13E-06 | -0.34509 | 0.007 | 0.153 | 0.046752 | Undiff-G | ERRFI1   |
| SLC16A1  | 3.13E-06 | 0.223535 | 0.051 | 0.236 | 0.046803 | Undiff-G | SLC16A1  |
| FBX025   | 3.15E-06 | -0.34493 | 0.007 | 0.153 | 0.047045 | Undiff-G | FBX025   |
| TEX30    | 3.16E-06 | -0.27356 | 0.015 | 0.167 | 0.047263 | Undiff-G | TEX30    |
| RBM18    | 3.17E-06 | 0.259017 | 0.037 | 0.208 | 0.047364 | Undiff-G | RBM18    |
| C12orf45 | 3.17E-06 | -0.19231 | 0.022 | 0.18  | 0.047382 | Undiff-G | C12orf45 |
| NUS1     | 3.18E-06 | -0.10326 | 0.007 | 0.153 | 0.047476 | Undiff-G | NUS1     |
| KANSL1   | 3.19E-06 | -0.17407 | 0.015 | 0.167 | 0.047642 | Undiff-G | KANSL1   |
| SLC18B1  | 3.22E-06 | -0.1533  | 0.022 | 0.181 | 0.048169 | Undiff-G | SLC18B1  |
| MED27    | 3.23E-06 | -0.35624 | 0.007 | 0.153 | 0.048295 | Undiff-G | MED27    |
| AAMDC    | 3.26E-06 | 0.109282 | 0.037 | 0.208 | 0.048699 | Undiff-G | AAMDC    |
| FKBP1A   | 3.27E-06 | 0.525452 | 0.294 | 0.704 | 0.048902 | Undiff-G | FKBP1A   |
| PILRA    | 3.28E-06 | -0.45596 | 0.015 | 0.167 | 0.048949 | Undiff-G | PILRA    |
| CDK10    | 3.30E-06 | -0.39481 | 0.015 | 0.165 | 0.04925  | Undiff-G | CDK10    |
| ROB01    | 3.30E-06 | -0.27907 | 0.022 | 0.18  | 0.049258 | Undiff-G | ROB01    |
| IP6K1    | 3.31E-06 | -0.12059 | 0.007 | 0.153 | 0.049409 | Undiff-G | IP6K1    |
| ZNF385A  | 3.33E-06 | -0.45012 | 0     | 0.138 | 0.04977  | Undiff-G | ZNF385A  |
| NF2      | 3.33E-06 | -0.21176 | 0.007 | 0.153 | 0.049797 | Undiff-G | NF2      |
| RANBP9   | 3.33E-06 | -0.13733 | 0.007 | 0.153 | 0.049817 | Undiff-G | RANBP9   |
| NAMPT    | 3.35E-06 | 1.423389 | 0.456 | 0.437 | 0.050086 | Undiff-G | NAMPT    |
| PTAR1    | 3.36E-06 | -0.32036 | 0     | 0.138 | 0.050171 | Undiff-G | PTAR1    |
| AAR2     | 3.36E-06 | -0.34714 | 0     | 0.138 | 0.050171 | Undiff-G | AAR2     |
| KIAA2013 | 3.36E-06 | -0.3333  | 0.007 | 0.152 | 0.050178 | Undiff-G | KIAA2013 |
| ALG8     | 3.38E-06 | -0.12808 | 0.022 | 0.18  | 0.050492 | Undiff-G | ALG8     |
| GIMAP4   | 3.39E-06 | -0.63956 | 0.007 | 0.151 | 0.050726 | Undiff-G | GIMAP4   |
| RFFL     | 3.40E-06 | -0.27681 | 0.015 | 0.166 | 0.050825 | Undiff-G | RFFL     |
| RHBDD3   | 3.41E-06 | -0.33878 | 0.007 | 0.151 | 0.050982 | Undiff-G | RHBDD3   |
| C1GALT1  | 3.41E-06 | -0.37762 | 0.015 | 0.164 | 0.051017 | Undiff-G | C1GALT1  |
| FAM168B  | 3.41E-06 | -0.35262 | 0.015 | 0.165 | 0.051019 | Undiff-G | FAM168B  |
| PAM      | 3.43E-06 | -0.18159 | 0.015 | 0.166 | 0.051308 | Undiff-G | PAM      |
| GLRX2    | 3.44E-06 | -0.21072 | 0.015 | 0.165 | 0.051335 | Undiff-G | GLRX2    |
| KRIT1    | 3.45E-06 | -0.17825 | 0.044 | 0.219 | 0.051484 | Undiff-G | KRIT1    |
| OSBPL1A  | 3.45E-06 | -0.10061 | 0.029 | 0.193 | 0.051496 | Undiff-G | OSBPL1A  |
| DCP2     | 3.50E-06 | -0.14766 | 0.007 | 0.152 | 0.052261 | Undiff-G | DCP2     |
| C9orf72  | 3.52E-06 | -0.32996 | 0.007 | 0.152 | 0.052608 | Undiff-G | C9orf72  |
| BEX2     | 3.52E-06 | 0.238229 | 0.066 | 0.259 | 0.052625 | Undiff-G | BEX2     |
| TBK1     | 3.57E-06 | -0.3735  | 0.007 | 0.151 | 0.053365 | Undiff-G | TBK1     |
| DYNC2LI1 | 3.57E-06 | -0.10429 | 0.015 | 0.166 | 0.053385 | Undiff-G | DYNC2LI1 |

|          |          |          |       |       |          |          |          |
|----------|----------|----------|-------|-------|----------|----------|----------|
| FPGS     | 3.59E-06 | -0.34036 | 0.007 | 0.151 | 0.053587 | Undiff-G | FPGS     |
| PDGFRA   | 3.60E-06 | -0.43085 | 0.007 | 0.15  | 0.053756 | Undiff-G | PDGFRA   |
| HEXIM1   | 3.60E-06 | 0.249056 | 0.044 | 0.22  | 0.053828 | Undiff-G | HEXIM1   |
| NT5DC2   | 3.61E-06 | -0.19662 | 0.015 | 0.166 | 0.053963 | Undiff-G | NT5DC2   |
| BMPR2    | 3.63E-06 | -0.19779 | 0.022 | 0.179 | 0.05424  | Undiff-G | BMPR2    |
| PSMA7    | 3.64E-06 | 0.470486 | 0.331 | 0.807 | 0.054335 | Undiff-G | PSMA7    |
| SESN3    | 3.64E-06 | -0.26886 | 0.007 | 0.152 | 0.054342 | Undiff-G | SESN3    |
| NCOA6    | 3.67E-06 | -0.29811 | 0     | 0.137 | 0.0548   | Undiff-G | NCOA6    |
| RBM38    | 3.70E-06 | -0.32888 | 0     | 0.137 | 0.055241 | Undiff-G | RBM38    |
| PGS1     | 3.70E-06 | -0.35822 | 0     | 0.137 | 0.055241 | Undiff-G | PGS1     |
| MTHFD1L  | 3.70E-06 | -0.38427 | 0     | 0.137 | 0.055241 | Undiff-G | MTHFD1L  |
| RAMP2    | 3.70E-06 | -0.38667 | 0     | 0.137 | 0.055241 | Undiff-G | RAMP2    |
| SNUPN    | 3.70E-06 | -0.20067 | 0.015 | 0.164 | 0.055352 | Undiff-G | SNUPN    |
| IMPACT   | 3.74E-06 | -0.13148 | 0.015 | 0.164 | 0.055833 | Undiff-G | IMPACT   |
| ALG2     | 3.75E-06 | -0.13821 | 0.015 | 0.165 | 0.056041 | Undiff-G | ALG2     |
| MCM5     | 3.75E-06 | -0.35186 | 0.007 | 0.151 | 0.056044 | Undiff-G | MCM5     |
| RNF19A   | 3.76E-06 | 0.104153 | 0.037 | 0.204 | 0.056195 | Undiff-G | RNF19A   |
| ASNS     | 3.76E-06 | -0.2163  | 0.022 | 0.179 | 0.056259 | Undiff-G | ASNS     |
| BCL7A    | 3.77E-06 | -0.35623 | 0.007 | 0.151 | 0.056381 | Undiff-G | BCL7A    |
| ZFP91    | 3.79E-06 | -0.32789 | 0     | 0.137 | 0.056585 | Undiff-G | ZFP91    |
| POU2F2   | 3.79E-06 | -0.50652 | 0     | 0.137 | 0.056585 | Undiff-G | POU2F2   |
| NISCH    | 3.80E-06 | -0.29605 | 0.022 | 0.178 | 0.056735 | Undiff-G | NISCH    |
| GRK6     | 3.82E-06 | -0.33549 | 0     | 0.137 | 0.05704  | Undiff-G | GRK6     |
| SRI      | 3.83E-06 | 0.446475 | 0.309 | 0.734 | 0.057251 | Undiff-G | SRI      |
| SH2B1    | 3.83E-06 | -0.34396 | 0.007 | 0.151 | 0.057284 | Undiff-G | SH2B1    |
| FILIP1L  | 3.88E-06 | -0.39887 | 0.007 | 0.151 | 0.058014 | Undiff-G | FILIP1L  |
| IGSF21   | 3.90E-06 | -0.43197 | 0.015 | 0.165 | 0.058238 | Undiff-G | IGSF21   |
| DESI1    | 3.90E-06 | -0.13566 | 0.022 | 0.177 | 0.058351 | Undiff-G | DESI1    |
| QRICH1   | 3.92E-06 | -0.30286 | 0.007 | 0.151 | 0.058544 | Undiff-G | QRICH1   |
| ANKH     | 3.92E-06 | -0.45025 | 0.007 | 0.15  | 0.058638 | Undiff-G | ANKH     |
| LPIN2    | 3.93E-06 | -0.2871  | 0.007 | 0.151 | 0.058741 | Undiff-G | LPIN2    |
| CGRRF1   | 3.94E-06 | -0.10859 | 0.015 | 0.165 | 0.058818 | Undiff-G | CGRRF1   |
| KCTD17   | 3.94E-06 | -0.33624 | 0     | 0.136 | 0.058897 | Undiff-G | KCTD17   |
| PADI2    | 3.94E-06 | -0.56328 | 0     | 0.136 | 0.058897 | Undiff-G | PADI2    |
| TNFAIP3  | 3.98E-06 | -0.38492 | 0.015 | 0.165 | 0.059489 | Undiff-G | TNFAIP3  |
| KLHL23   | 3.99E-06 | -0.235   | 0.015 | 0.163 | 0.059653 | Undiff-G | KLHL23   |
| VPS41    | 4.00E-06 | -0.13654 | 0.037 | 0.203 | 0.059793 | Undiff-G | VPS41    |
| ARSA     | 4.00E-06 | -0.44097 | 0     | 0.136 | 0.059847 | Undiff-G | ARSA     |
| ZNF664   | 4.01E-06 | -0.18813 | 0.007 | 0.151 | 0.059877 | Undiff-G | ZNF664   |
| DYRK4    | 4.09E-06 | 0.180244 | 0.044 | 0.219 | 0.061092 | Undiff-G | DYRK4    |
| ARHGAP12 | 4.14E-06 | -0.15424 | 0.029 | 0.191 | 0.061903 | Undiff-G | ARHGAP12 |
| DPYSL5   | 4.15E-06 | -0.19155 | 0.015 | 0.164 | 0.062079 | Undiff-G | DPYSL5   |
| TNKS     | 4.16E-06 | -0.3037  | 0.007 | 0.15  | 0.062229 | Undiff-G | TNKS     |
| NFATC2IP | 4.17E-06 | -0.26537 | 0.015 | 0.164 | 0.06237  | Undiff-G | NFATC2IP |
| FTO      | 4.20E-06 | -0.35072 | 0     | 0.136 | 0.06279  | Undiff-G | FTO      |
| RPUSD1   | 4.24E-06 | -0.31607 | 0     | 0.136 | 0.063294 | Undiff-G | RPUSD1   |
| BTBD1    | 4.24E-06 | -0.12199 | 0.007 | 0.15  | 0.06332  | Undiff-G | BTBD1    |
| TXNIP    | 4.24E-06 | 0.450976 | 0.169 | 0.449 | 0.06334  | Undiff-G | TXNIP    |
| NFKBIZ   | 4.25E-06 | -0.20588 | 0.022 | 0.177 | 0.06352  | Undiff-G | NFKBIZ   |
| PQLC1    | 4.27E-06 | -0.34022 | 0     | 0.136 | 0.063802 | Undiff-G | PQLC1    |
| NSUN2    | 4.27E-06 | -0.34614 | 0     | 0.136 | 0.063802 | Undiff-G | NSUN2    |



|           |           |           |        |        |           |          |            |
|-----------|-----------|-----------|--------|--------|-----------|----------|------------|
| LEMD2     | 4. 28E-06 | -0. 30592 | 0. 007 | 0. 15  | 0. 06402  | Undiff-G | LEMD2      |
| SYNE2     | 4. 33E-06 | -0. 15255 | 0. 022 | 0. 176 | 0. 064715 | Undiff-G | SYNE2      |
| UXS1      | 4. 37E-06 | 0. 258769 | 0. 037 | 0. 205 | 0. 065316 | Undiff-G | UXS1       |
| SLC35E1   | 4. 40E-06 | -0. 15342 | 0. 015 | 0. 164 | 0. 065761 | Undiff-G | SLC35E1    |
| NAAA      | 4. 41E-06 | -0. 41202 | 0      | 0. 135 | 0. 065874 | Undiff-G | NAAA       |
| ALKBH3    | 4. 41E-06 | -0. 39259 | 0. 007 | 0. 149 | 0. 065915 | Undiff-G | ALKBH3     |
| GIGYF2    | 4. 43E-06 | -0. 16151 | 0. 022 | 0. 177 | 0. 066127 | Undiff-G | GIGYF2     |
| ATG4D     | 4. 43E-06 | -0. 30309 | 0. 015 | 0. 162 | 0. 0662   | Undiff-G | ATG4D      |
| TSPAN17   | 4. 43E-06 | -0. 29448 | 0. 007 | 0. 149 | 0. 06624  | Undiff-G | TSPAN17    |
| ODF2L     | 4. 43E-06 | -0. 32141 | 0. 022 | 0. 177 | 0. 066262 | Undiff-G | ODF2L      |
| NUPL2     | 4. 44E-06 | 0. 336672 | 0. 074 | 0. 271 | 0. 066394 | Undiff-G | NUPL2      |
| SLC25A23  | 4. 44E-06 | -0. 29204 | 0      | 0. 135 | 0. 066403 | Undiff-G | SLC25A23   |
| COL9A3    | 4. 45E-06 | -0. 3289  | 0. 029 | 0. 188 | 0. 066487 | Undiff-G | COL9A3     |
| MRGBP     | 4. 46E-06 | -0. 30763 | 0. 007 | 0. 148 | 0. 066659 | Undiff-G | MRGBP      |
| WARS      | 4. 48E-06 | -0. 14408 | 0. 037 | 0. 203 | 0. 066882 | Undiff-G | WARS       |
| TMEM245   | 4. 48E-06 | -0. 34137 | 0      | 0. 135 | 0. 066935 | Undiff-G | TMEM245    |
| GPR65     | 4. 51E-06 | -0. 57468 | 0      | 0. 135 | 0. 067472 | Undiff-G | GPR65      |
| ABT1      | 4. 52E-06 | 0. 321976 | 0. 044 | 0. 218 | 0. 067592 | Undiff-G | ABT1       |
| APC2      | 4. 53E-06 | -0. 32636 | 0. 007 | 0. 149 | 0. 067673 | Undiff-G | APC2       |
| PARVG     | 4. 57E-06 | -0. 37821 | 0. 015 | 0. 163 | 0. 068257 | Undiff-G | PARVG      |
| IL1RAP    | 4. 58E-06 | -0. 30166 | 0. 015 | 0. 161 | 0. 068427 | Undiff-G | IL1RAP     |
| NDUF AF1  | 4. 62E-06 | -0. 12884 | 0. 022 | 0. 177 | 0. 069051 | Undiff-G | NDUF AF1   |
| NOL11     | 4. 62E-06 | 0. 148325 | 0. 029 | 0. 191 | 0. 069104 | Undiff-G | NOL11      |
| COX11     | 4. 63E-06 | 0. 509353 | 0. 103 | 0. 321 | 0. 069249 | Undiff-G | COX11      |
| LRRC4B    | 4. 66E-06 | -0. 29845 | 0      | 0. 135 | 0. 069662 | Undiff-G | LRRC4B     |
| KLHL8     | 4. 66E-06 | -0. 35493 | 0      | 0. 135 | 0. 069662 | Undiff-G | KLHL8      |
| FBL       | 4. 69E-06 | 0. 702477 | 0. 132 | 0. 38  | 0. 070065 | Undiff-G | FBL        |
| DICER1    | 4. 73E-06 | -0. 13306 | 0. 022 | 0. 176 | 0. 070671 | Undiff-G | DICER1     |
| TOPORS-AS | 4. 74E-06 | -0. 1946  | 0. 007 | 0. 149 | 0. 070787 | Undiff-G | TOPORS-AS1 |
| HLA-F     | 4. 74E-06 | -0. 53033 | 0. 007 | 0. 148 | 0. 070877 | Undiff-G | HLA-F      |
| MTUS1     | 4. 77E-06 | -0. 27721 | 0. 007 | 0. 149 | 0. 071311 | Undiff-G | MTUS1      |
| ACTN1     | 4. 77E-06 | 0. 36037  | 0. 066 | 0. 257 | 0. 071328 | Undiff-G | ACTN1      |
| ARFGAP3   | 4. 79E-06 | 0. 393099 | 0. 051 | 0. 231 | 0. 071574 | Undiff-G | ARFGAP3    |
| CABIN1    | 4. 81E-06 | -0. 34287 | 0      | 0. 134 | 0. 071921 | Undiff-G | CABIN1     |
| NCOA1     | 4. 82E-06 | -0. 19523 | 0. 015 | 0. 163 | 0. 07202  | Undiff-G | NCOA1      |
| RCC2      | 4. 85E-06 | -0. 21631 | 0. 022 | 0. 176 | 0. 072413 | Undiff-G | RCC2       |
| MIS18BP1  | 4. 88E-06 | -0. 43506 | 0. 007 | 0. 148 | 0. 072865 | Undiff-G | MIS18BP1   |
| GFM1      | 4. 89E-06 | -0. 16471 | 0. 029 | 0. 188 | 0. 07304  | Undiff-G | GFM1       |
| PPP3CC    | 4. 89E-06 | -0. 36517 | 0      | 0. 134 | 0. 073077 | Undiff-G | PPP3CC     |
| COQ7      | 4. 89E-06 | -0. 1496  | 0. 029 | 0. 189 | 0. 073138 | Undiff-G | COQ7       |
| PRKD3     | 4. 92E-06 | -0. 34686 | 0. 007 | 0. 148 | 0. 073554 | Undiff-G | PRKD3      |
| RASSF1    | 4. 94E-06 | -0. 33197 | 0. 015 | 0. 16  | 0. 073857 | Undiff-G | RASSF1     |
| BARD1     | 4. 94E-06 | -0. 33084 | 0. 007 | 0. 148 | 0. 073883 | Undiff-G | BARD1      |
| SSFA2     | 4. 96E-06 | -0. 15742 | 0. 029 | 0. 188 | 0. 074169 | Undiff-G | SSFA2      |
| AGTRAP    | 4. 97E-06 | 0. 529094 | 0. 081 | 0. 284 | 0. 074201 | Undiff-G | AGTRAP     |
| SLC48A1   | 4. 97E-06 | -0. 42146 | 0      | 0. 134 | 0. 074252 | Undiff-G | SLC48A1    |
| HIST2H2BE | 4. 97E-06 | -0. 18611 | 0. 007 | 0. 148 | 0. 074252 | Undiff-G | HIST2H2BE  |
| CTNNAL1   | 4. 97E-06 | -0. 21106 | 0. 007 | 0. 148 | 0. 074252 | Undiff-G | CTNNAL1    |
| TAC01     | 4. 98E-06 | -0. 13196 | 0. 022 | 0. 176 | 0. 074413 | Undiff-G | TAC01      |
| NOTCH2    | 4. 98E-06 | -0. 31316 | 0. 007 | 0. 148 | 0. 074464 | Undiff-G | NOTCH2     |
| PDIA6     | 5. 00E-06 | 0. 694222 | 0. 265 | 0. 652 | 0. 074724 | Undiff-G | PDIA6      |

|           |          |          |       |       |          |          |           |
|-----------|----------|----------|-------|-------|----------|----------|-----------|
| ZNF267    | 5.01E-06 | -0.43002 | 0     | 0.134 | 0.074846 | Undiff-G | ZNF267    |
| SNAPC1    | 5.01E-06 | 0.163046 | 0.029 | 0.19  | 0.07489  | Undiff-G | SNAPC1    |
| HS2ST1    | 5.02E-06 | 0.102088 | 0.022 | 0.176 | 0.075006 | Undiff-G | HS2ST1    |
| PDCD5     | 5.03E-06 | 0.711314 | 0.221 | 0.543 | 0.075177 | Undiff-G | PDCD5     |
| RNF2      | 5.05E-06 | -0.19134 | 0.007 | 0.148 | 0.075414 | Undiff-G | RNF2      |
| RHOT2     | 5.05E-06 | 0.116583 | 0.066 | 0.253 | 0.075528 | Undiff-G | RHOT2     |
| Clorf131  | 5.07E-06 | -0.10668 | 0.037 | 0.202 | 0.075825 | Undiff-G | Clorf131  |
| DNAJB14   | 5.08E-06 | 0.137631 | 0.037 | 0.202 | 0.075965 | Undiff-G | DNAJB14   |
| FAIM      | 5.09E-06 | -0.14275 | 0.007 | 0.148 | 0.076017 | Undiff-G | FAIM      |
| SSSCA1    | 5.09E-06 | 0.100236 | 0.029 | 0.189 | 0.0761   | Undiff-G | SSSCA1    |
| LDLRAD4   | 5.15E-06 | -0.48366 | 0.007 | 0.147 | 0.076917 | Undiff-G | LDLRAD4   |
| KDM4B     | 5.17E-06 | -0.33553 | 0     | 0.133 | 0.077271 | Undiff-G | KDM4B     |
| WRAP73    | 5.17E-06 | -0.13933 | 0.007 | 0.148 | 0.077282 | Undiff-G | WRAP73    |
| CASP4     | 5.18E-06 | 0.230722 | 0.051 | 0.23  | 0.077337 | Undiff-G | CASP4     |
| ARHGAP35  | 5.19E-06 | -0.25434 | 0.007 | 0.148 | 0.077608 | Undiff-G | ARHGAP35  |
| EHMT1     | 5.19E-06 | -0.30721 | 0.007 | 0.148 | 0.077629 | Undiff-G | EHMT1     |
| NTHL1     | 5.25E-06 | 0.173928 | 0.029 | 0.189 | 0.07843  | Undiff-G | NTHL1     |
| MIR4458HG | 5.25E-06 | -0.21287 | 0.015 | 0.162 | 0.078497 | Undiff-G | MIR4458HG |
| SQRDL     | 5.28E-06 | -0.19722 | 0.015 | 0.162 | 0.078859 | Undiff-G | SQRDL     |
| MED16     | 5.28E-06 | -0.19187 | 0.015 | 0.161 | 0.078948 | Undiff-G | MED16     |
| TRIM4     | 5.31E-06 | -0.31442 | 0.007 | 0.148 | 0.079315 | Undiff-G | TRIM4     |
| NDRG4     | 5.34E-06 | -0.11222 | 0.015 | 0.162 | 0.079859 | Undiff-G | NDRG4     |
| TMEM222   | 5.35E-06 | 0.499059 | 0.081 | 0.282 | 0.07998  | Undiff-G | TMEM222   |
| KLF2      | 5.38E-06 | -0.55918 | 0     | 0.133 | 0.08041  | Undiff-G | KLF2      |
| MRS2      | 5.39E-06 | -0.11002 | 0.015 | 0.162 | 0.080555 | Undiff-G | MRS2      |
| ARMCX1    | 5.40E-06 | 0.102098 | 0.044 | 0.215 | 0.080654 | Undiff-G | ARMCX1    |
| ARHGAP1   | 5.40E-06 | -0.22385 | 0.015 | 0.161 | 0.080719 | Undiff-G | ARHGAP1   |
| MSL1      | 5.41E-06 | -0.32326 | 0.015 | 0.16  | 0.080816 | Undiff-G | MSL1      |
| DYNC1LI1  | 5.44E-06 | 0.403163 | 0.074 | 0.269 | 0.081252 | Undiff-G | DYNC1LI1  |
| Clorf21   | 5.45E-06 | 0.273969 | 0.037 | 0.202 | 0.081479 | Undiff-G | Clorf21   |
| ABCG1     | 5.47E-06 | -0.47059 | 0     | 0.133 | 0.0817   | Undiff-G | ABCG1     |
| CDK5RAP1  | 5.51E-06 | -0.31485 | 0.015 | 0.16  | 0.082268 | Undiff-G | CDK5RAP1  |
| SC5D      | 5.51E-06 | -0.15457 | 0.022 | 0.175 | 0.082315 | Undiff-G | SC5D      |
| FRA10AC1  | 5.52E-06 | -0.28319 | 0.015 | 0.161 | 0.082507 | Undiff-G | FRA10AC1  |
| OSBPL9    | 5.53E-06 | -0.12096 | 0.029 | 0.188 | 0.082676 | Undiff-G | OSBPL9    |
| VMO1      | 5.55E-06 | -0.39402 | 0.015 | 0.161 | 0.083002 | Undiff-G | VMO1      |
| HLA-DQA2  | 5.59E-06 | -0.62314 | 0.022 | 0.174 | 0.083481 | Undiff-G | HLA-DQA2  |
| DCPS      | 5.60E-06 | -0.22781 | 0.022 | 0.173 | 0.083616 | Undiff-G | DCPS      |
| SRGAP3    | 5.62E-06 | -0.34395 | 0.007 | 0.147 | 0.083946 | Undiff-G | SRGAP3    |
| PAXBP1    | 5.62E-06 | -0.10008 | 0.015 | 0.161 | 0.084005 | Undiff-G | PAXBP1    |
| ZFP90     | 5.64E-06 | -0.33482 | 0     | 0.133 | 0.084342 | Undiff-G | ZFP90     |
| RPS6KA1   | 5.64E-06 | -0.49599 | 0     | 0.133 | 0.084342 | Undiff-G | RPS6KA1   |
| SPEN      | 5.68E-06 | -0.27514 | 0.015 | 0.161 | 0.084942 | Undiff-G | SPEN      |
| BMS1      | 5.78E-06 | -0.20704 | 0.007 | 0.147 | 0.086309 | Undiff-G | BMS1      |
| HSDL1     | 5.78E-06 | -0.36934 | 0     | 0.132 | 0.086379 | Undiff-G | HSDL1     |
| WSCD1     | 5.83E-06 | -0.33632 | 0     | 0.132 | 0.087068 | Undiff-G | WSCD1     |
| AIFM1     | 5.83E-06 | -0.12681 | 0.007 | 0.147 | 0.087082 | Undiff-G | AIFM1     |
| TMX3      | 5.84E-06 | -0.2896  | 0.015 | 0.159 | 0.087241 | Undiff-G | TMX3      |
| WBSCR16   | 5.87E-06 | -0.14526 | 0.007 | 0.147 | 0.087759 | Undiff-G | WBSCR16   |
| RTKN      | 5.89E-06 | -0.35529 | 0.022 | 0.173 | 0.088015 | Undiff-G | RTKN      |
| FAHD2A    | 5.90E-06 | -0.12962 | 0.022 | 0.174 | 0.088145 | Undiff-G | FAHD2A    |

|          |          |          |       |       |          |          |          |
|----------|----------|----------|-------|-------|----------|----------|----------|
| OPA1     | 5.92E-06 | -0.33168 | 0     | 0.132 | 0.088464 | Undiff-G | OPA1     |
| CCDC94   | 5.95E-06 | -0.31419 | 0.015 | 0.16  | 0.088849 | Undiff-G | CCDC94   |
| FUBP1    | 5.95E-06 | 0.250547 | 0.051 | 0.226 | 0.088938 | Undiff-G | FUBP1    |
| CHRAC1   | 5.96E-06 | -0.38433 | 0.007 | 0.146 | 0.089132 | Undiff-G | CHRAC1   |
| ANKRD36  | 5.98E-06 | -0.22185 | 0.029 | 0.187 | 0.089373 | Undiff-G | ANKRD36  |
| XPC      | 5.99E-06 | -0.22804 | 0.015 | 0.16  | 0.089554 | Undiff-G | XPC      |
| GOSR2    | 6.00E-06 | 0.130785 | 0.029 | 0.187 | 0.089668 | Undiff-G | GOSR2    |
| NSUN5    | 6.01E-06 | 0.174322 | 0.051 | 0.225 | 0.089839 | Undiff-G | NSUN5    |
| ZFYVE16  | 6.02E-06 | -0.32053 | 0.022 | 0.173 | 0.089918 | Undiff-G | ZFYVE16  |
| FCGR2B   | 6.08E-06 | -0.63826 | 0.007 | 0.146 | 0.090876 | Undiff-G | FCGR2B   |
| DUS3L    | 6.11E-06 | -0.33619 | 0.007 | 0.145 | 0.091273 | Undiff-G | DUS3L    |
| KAT6A    | 6.12E-06 | -0.22793 | 0.015 | 0.16  | 0.091531 | Undiff-G | KAT6A    |
| AGPAT3   | 6.16E-06 | -0.33621 | 0     | 0.132 | 0.092049 | Undiff-G | AGPAT3   |
| PIM1     | 6.16E-06 | -0.44869 | 0     | 0.132 | 0.092049 | Undiff-G | PIM1     |
| TNIK     | 6.16E-06 | -0.30362 | 0.007 | 0.146 | 0.092087 | Undiff-G | TNIK     |
| CWF19L2  | 6.17E-06 | -0.2692  | 0.022 | 0.173 | 0.092131 | Undiff-G | CWF19L2  |
| DDX19A   | 6.17E-06 | -0.1138  | 0.015 | 0.16  | 0.092262 | Undiff-G | DDX19A   |
| CCDC43   | 6.18E-06 | 0.12261  | 0.037 | 0.201 | 0.09231  | Undiff-G | CCDC43   |
| KIF3B    | 6.21E-06 | -0.28398 | 0     | 0.132 | 0.092783 | Undiff-G | KIF3B    |
| SNCA     | 6.25E-06 | -0.5735  | 0.007 | 0.146 | 0.093342 | Undiff-G | SNCA     |
| CNIH2    | 6.26E-06 | -0.30453 | 0     | 0.131 | 0.093522 | Undiff-G | CNIH2    |
| CNTFR    | 6.26E-06 | -0.34282 | 0     | 0.131 | 0.093522 | Undiff-G | CNTFR    |
| LETM1    | 6.33E-06 | -0.1932  | 0.029 | 0.187 | 0.094601 | Undiff-G | LETM1    |
| HMGCS1   | 6.33E-06 | -0.2216  | 0.029 | 0.185 | 0.094608 | Undiff-G | HMGCS1   |
| RAB40B   | 6.36E-06 | -0.3835  | 0     | 0.131 | 0.095019 | Undiff-G | RAB40B   |
| PHF1     | 6.39E-06 | -0.32672 | 0.022 | 0.171 | 0.09545  | Undiff-G | PHF1     |
| TPD52    | 6.39E-06 | 0.304093 | 0.059 | 0.238 | 0.095548 | Undiff-G | TPD52    |
| SETD2    | 6.40E-06 | -0.32273 | 0.007 | 0.145 | 0.095654 | Undiff-G | SETD2    |
| DSTN     | 6.44E-06 | 0.558181 | 0.257 | 0.622 | 0.09629  | Undiff-G | DSTN     |
| RNMTL1   | 6.46E-06 | -0.32143 | 0     | 0.131 | 0.096539 | Undiff-G | RNMTL1   |
| CLN6     | 6.46E-06 | -0.37019 | 0     | 0.131 | 0.096539 | Undiff-G | CLN6     |
| VASH1    | 6.46E-06 | -0.43831 | 0     | 0.131 | 0.096539 | Undiff-G | VASH1    |
| KCNQ10T1 | 6.47E-06 | 0.344083 | 0.081 | 0.28  | 0.096639 | Undiff-G | KCNQ10T1 |
| CTNND2   | 6.47E-06 | -0.28949 | 0.015 | 0.159 | 0.096664 | Undiff-G | CTNND2   |
| HDAC5    | 6.50E-06 | -0.28625 | 0.022 | 0.171 | 0.097087 | Undiff-G | HDAC5    |
| CCDC58   | 6.51E-06 | -0.10802 | 0.007 | 0.145 | 0.097269 | Undiff-G | CCDC58   |
| NAPG     | 6.52E-06 | -0.17546 | 0.015 | 0.16  | 0.097398 | Undiff-G | NAPG     |
| SKIV2L2  | 6.56E-06 | -0.22135 | 0.015 | 0.158 | 0.098053 | Undiff-G | SKIV2L2  |
| TMEM161A | 6.59E-06 | -0.14174 | 0.022 | 0.173 | 0.09849  | Undiff-G | TMEM161A |
| PTEN     | 6.62E-06 | -0.37139 | 0     | 0.131 | 0.098865 | Undiff-G | PTEN     |
| NEIL2    | 6.67E-06 | 0.309747 | 0.037 | 0.2   | 0.099622 | Undiff-G | NEIL2    |
| DLL3     | 6.67E-06 | -0.39729 | 0.007 | 0.145 | 0.099648 | Undiff-G | DLL3     |
| GALE     | 6.67E-06 | -0.3352  | 0.015 | 0.157 | 0.09975  | Undiff-G | GALE     |
| SMARCA1  | 6.68E-06 | -0.16601 | 0.022 | 0.173 | 0.099851 | Undiff-G | SMARCA1  |
| GOLT1B   | 6.71E-06 | 0.352032 | 0.059 | 0.24  | 0.100328 | Undiff-G | GOLT1B   |
| ENDOD1   | 6.71E-06 | -0.20878 | 0.007 | 0.145 | 0.100341 | Undiff-G | ENDOD1   |
| POP4     | 6.72E-06 | 0.513083 | 0.074 | 0.267 | 0.100356 | Undiff-G | POP4     |
| CD84     | 6.72E-06 | -0.55079 | 0     | 0.131 | 0.100445 | Undiff-G | CD84     |
| PAK3     | 6.73E-06 | -0.41816 | 0.007 | 0.145 | 0.100526 | Undiff-G | PAK3     |
| PARP9    | 6.76E-06 | -0.132   | 0.022 | 0.172 | 0.101017 | Undiff-G | PARP9    |
| S100A11  | 6.80E-06 | 1.058217 | 0.551 | 0.658 | 0.101557 | Undiff-G | S100A11  |

|           |           |           |        |        |           |          |           |
|-----------|-----------|-----------|--------|--------|-----------|----------|-----------|
| ZCCHC7    | 6. 87E-06 | -0. 32524 | 0. 007 | 0. 145 | 0. 102663 | Undiff-G | ZCCHC7    |
| TBC1D17   | 6. 91E-06 | -0. 34856 | 0. 015 | 0. 157 | 0. 103221 | Undiff-G | TBC1D17   |
| PHF6      | 6. 91E-06 | -0. 3108  | 0. 022 | 0. 172 | 0. 103316 | Undiff-G | PHF6      |
| MED8      | 6. 91E-06 | 0. 330229 | 0. 051 | 0. 226 | 0. 103334 | Undiff-G | MED8      |
| HPS3      | 6. 92E-06 | -0. 36543 | 0. 007 | 0. 144 | 0. 103436 | Undiff-G | HPS3      |
| B4GALNT1  | 6. 93E-06 | -0. 38831 | 0. 007 | 0. 145 | 0. 10361  | Undiff-G | B4GALNT1  |
| NUMA1     | 6. 95E-06 | -0. 16303 | 0. 022 | 0. 172 | 0. 103803 | Undiff-G | NUMA1     |
| RALB      | 6. 95E-06 | -0. 25665 | 0. 015 | 0. 159 | 0. 103844 | Undiff-G | RALB      |
| TRIP6     | 6. 96E-06 | 0. 17454  | 0. 066 | 0. 251 | 0. 103993 | Undiff-G | TRIP6     |
| THSD7A    | 6. 96E-06 | -0. 47423 | 0. 007 | 0. 144 | 0. 103997 | Undiff-G | THSD7A    |
| NUP62     | 6. 96E-06 | 0. 471106 | 0. 059 | 0. 239 | 0. 104082 | Undiff-G | NUP62     |
| LINC00094 | 6. 99E-06 | -0. 29299 | 0      | 0. 13  | 0. 104507 | Undiff-G | LINC00094 |
| CSNK1G2   | 7. 10E-06 | -0. 27864 | 0. 007 | 0. 144 | 0. 10611  | Undiff-G | CSNK1G2   |
| CHAMP1    | 7. 16E-06 | -0. 29332 | 0      | 0. 13  | 0. 10702  | Undiff-G | CHAMP1    |
| TSTD1     | 7. 20E-06 | 0. 153979 | 0. 037 | 0. 199 | 0. 107557 | Undiff-G | TSTD1     |
| FBX044    | 7. 20E-06 | -0. 36518 | 0. 007 | 0. 143 | 0. 1076   | Undiff-G | FBX044    |
| WDR12     | 7. 25E-06 | -0. 26836 | 0. 007 | 0. 144 | 0. 10839  | Undiff-G | WDR12     |
| SSBP3     | 7. 28E-06 | -0. 33714 | 0      | 0. 13  | 0. 108729 | Undiff-G | SSBP3     |
| ARHGEF40  | 7. 28E-06 | -0. 37899 | 0      | 0. 13  | 0. 108729 | Undiff-G | ARHGEF40  |
| IREB2     | 7. 29E-06 | -0. 11025 | 0. 015 | 0. 157 | 0. 108931 | Undiff-G | IREB2     |
| REEP4     | 7. 31E-06 | -0. 36616 | 0. 022 | 0. 169 | 0. 109299 | Undiff-G | REEP4     |
| MED15     | 7. 32E-06 | -0. 24698 | 0. 007 | 0. 144 | 0. 109443 | Undiff-G | MED15     |
| C3orf17   | 7. 32E-06 | -0. 19027 | 0. 007 | 0. 144 | 0. 109465 | Undiff-G | C3orf17   |
| ZNF394    | 7. 33E-06 | -0. 39292 | 0. 007 | 0. 144 | 0. 109475 | Undiff-G | ZNF394    |
| MAD2L1    | 7. 33E-06 | -0. 43307 | 0      | 0. 13  | 0. 109594 | Undiff-G | MAD2L1    |
| GNPTAB    | 7. 35E-06 | -0. 33886 | 0. 015 | 0. 158 | 0. 109794 | Undiff-G | GNPTAB    |
| C19orf12  | 7. 38E-06 | -0. 17964 | 0. 007 | 0. 144 | 0. 11029  | Undiff-G | C19orf12  |
| LRRC40    | 7. 44E-06 | -0. 25959 | 0. 007 | 0. 144 | 0. 111122 | Undiff-G | LRRC40    |
| ADCK3     | 7. 45E-06 | -0. 35444 | 0      | 0. 13  | 0. 111343 | Undiff-G | ADCK3     |
| RRS1      | 7. 50E-06 | -0. 21172 | 0. 007 | 0. 144 | 0. 112113 | Undiff-G | RRS1      |
| TULP4     | 7. 57E-06 | -0. 21267 | 0. 007 | 0. 144 | 0. 113069 | Undiff-G | TULP4     |
| RRP1      | 7. 58E-06 | 0. 225174 | 0. 044 | 0. 212 | 0. 113229 | Undiff-G | RRP1      |
| SACS      | 7. 65E-06 | -0. 28447 | 0. 015 | 0. 156 | 0. 114352 | Undiff-G | SACS      |
| CDC26     | 7. 66E-06 | 0. 470214 | 0. 074 | 0. 264 | 0. 114545 | Undiff-G | CDC26     |
| RCBTB2    | 7. 68E-06 | -0. 37623 | 0. 007 | 0. 144 | 0. 114763 | Undiff-G | RCBTB2    |
| DNAL4     | 7. 69E-06 | -0. 31806 | 0      | 0. 129 | 0. 114923 | Undiff-G | DNAL4     |
| NUP88     | 7. 69E-06 | -0. 33015 | 0      | 0. 129 | 0. 114923 | Undiff-G | NUP88     |
| SEPN1     | 7. 78E-06 | 0. 225006 | 0. 044 | 0. 211 | 0. 116316 | Undiff-G | SEPN1     |
| RNF180    | 7. 86E-06 | -0. 2396  | 0. 022 | 0. 169 | 0. 117453 | Undiff-G | RNF180    |
| ORAI3     | 7. 87E-06 | -0. 36661 | 0. 007 | 0. 143 | 0. 117659 | Undiff-G | ORAI3     |
| C16orf72  | 7. 87E-06 | -0. 33934 | 0      | 0. 129 | 0. 117683 | Undiff-G | C16orf72  |
| PSMD5-AS1 | 7. 88E-06 | -0. 27836 | 0. 029 | 0. 184 | 0. 117723 | Undiff-G | PSMD5-AS1 |
| APH1B     | 7. 94E-06 | -0. 42723 | 0      | 0. 129 | 0. 118617 | Undiff-G | APH1B     |
| IST1      | 7. 97E-06 | 0. 298717 | 0. 074 | 0. 262 | 0. 119167 | Undiff-G | IST1      |
| EXTL2     | 7. 98E-06 | -0. 28553 | 0. 022 | 0. 169 | 0. 119253 | Undiff-G | EXTL2     |
| REPS1     | 8. 00E-06 | -0. 29833 | 0      | 0. 129 | 0. 119559 | Undiff-G | REPS1     |
| SDC3      | 8. 04E-06 | 0. 184091 | 0. 037 | 0. 198 | 0. 120084 | Undiff-G | SDC3      |
| PRDX1     | 8. 06E-06 | 0. 442511 | 0. 346 | 0. 814 | 0. 120481 | Undiff-G | PRDX1     |
| TCF7      | 8. 10E-06 | -0. 38128 | 0. 007 | 0. 141 | 0. 121028 | Undiff-G | TCF7      |
| NPTXR     | 8. 13E-06 | -0. 29535 | 0      | 0. 129 | 0. 121464 | Undiff-G | NPTXR     |
| HCFC1     | 8. 15E-06 | -0. 27868 | 0. 007 | 0. 143 | 0. 12176  | Undiff-G | HCFC1     |

|           |          |          |       |       |          |          |               |
|-----------|----------|----------|-------|-------|----------|----------|---------------|
| FAM129A   | 8.15E-06 | -0.36966 | 0.007 | 0.141 | 0.121865 | Undiff-G | FAM129A       |
| TMEM55A   | 8.26E-06 | 0.306119 | 0.059 | 0.235 | 0.123371 | Undiff-G | TMEM55A       |
| UBE2T     | 8.26E-06 | -0.42019 | 0     | 0.128 | 0.123399 | Undiff-G | UBE2T         |
| NFKBID    | 8.26E-06 | -0.52877 | 0.007 | 0.142 | 0.123402 | Undiff-G | NFKBID        |
| SOX6      | 8.30E-06 | -0.29499 | 0.007 | 0.143 | 0.124084 | Undiff-G | SOX6          |
| RP11-452F | 8.32E-06 | -0.46705 | 0     | 0.128 | 0.124378 | Undiff-G | RP11-452F19.3 |
| SMYD2     | 8.33E-06 | -0.32248 | 0.007 | 0.142 | 0.124545 | Undiff-G | SMYD2         |
| SMIM3     | 8.35E-06 | 1.140906 | 0.103 | 0.035 | 0.124743 | Undiff-G | SMIM3         |
| PMM1      | 8.35E-06 | 0.401968 | 0.059 | 0.235 | 0.124845 | Undiff-G | PMM1          |
| RHN01     | 8.37E-06 | 0.124197 | 0.037 | 0.197 | 0.125083 | Undiff-G | RHN01         |
| DCUN1D1   | 8.39E-06 | -0.24074 | 0.015 | 0.157 | 0.125346 | Undiff-G | DCUN1D1       |
| EPDR1     | 8.46E-06 | -0.30146 | 0     | 0.128 | 0.126358 | Undiff-G | EPDR1         |
| MFNG      | 8.46E-06 | -0.51314 | 0     | 0.128 | 0.126358 | Undiff-G | MFNG          |
| CCDC22    | 8.52E-06 | -0.34844 | 0     | 0.128 | 0.12736  | Undiff-G | CCDC22        |
| DVL3      | 8.53E-06 | -0.28529 | 0.015 | 0.155 | 0.127493 | Undiff-G | DVL3          |
| WHSC1     | 8.58E-06 | -0.30318 | 0.015 | 0.155 | 0.128227 | Undiff-G | WHSC1         |
| SPIN1     | 8.61E-06 | -0.11982 | 0.022 | 0.168 | 0.128702 | Undiff-G | SPIN1         |
| MICAL1    | 8.65E-06 | -0.23195 | 0.007 | 0.142 | 0.129276 | Undiff-G | MICAL1        |
| EIF4EBP2  | 8.65E-06 | -0.23501 | 0.007 | 0.142 | 0.129302 | Undiff-G | EIF4EBP2      |
| C16orf91  | 8.69E-06 | 0.282106 | 0.037 | 0.197 | 0.129816 | Undiff-G | C16orf91      |
| FOPNL     | 8.69E-06 | 0.191551 | 0.037 | 0.195 | 0.129906 | Undiff-G | FOPNL         |
| MYH10     | 8.69E-06 | -0.21899 | 0.015 | 0.155 | 0.129918 | Undiff-G | MYH10         |
| STK19     | 8.73E-06 | -0.31447 | 0     | 0.128 | 0.130413 | Undiff-G | STK19         |
| CERS6     | 8.73E-06 | -0.32562 | 0     | 0.128 | 0.130413 | Undiff-G | CERS6         |
| TMEM173   | 8.73E-06 | -0.5528  | 0     | 0.128 | 0.130413 | Undiff-G | TMEM173       |
| LINC00936 | 8.80E-06 | -0.39293 | 0.007 | 0.142 | 0.131439 | Undiff-G | LINC00936     |
| PDP1      | 8.80E-06 | -0.34567 | 0     | 0.128 | 0.131446 | Undiff-G | PDP1          |
| PPP2R5B   | 8.83E-06 | -0.27139 | 0.022 | 0.168 | 0.131988 | Undiff-G | PPP2R5B       |
| SHPRH     | 8.87E-06 | -0.33013 | 0     | 0.128 | 0.132488 | Undiff-G | SHPRH         |
| CENPH     | 8.87E-06 | -0.34232 | 0     | 0.128 | 0.132488 | Undiff-G | CENPH         |
| DPH7      | 8.90E-06 | -0.27426 | 0.022 | 0.169 | 0.133004 | Undiff-G | DPH7          |
| HMOX1     | 8.95E-06 | 0.129851 | 0.096 | 0.297 | 0.133783 | Undiff-G | HMOX1         |
| SRR       | 8.99E-06 | -0.29427 | 0.015 | 0.155 | 0.134382 | Undiff-G | SRR           |
| DPF1      | 8.99E-06 | -0.21858 | 0.007 | 0.142 | 0.134392 | Undiff-G | DPF1          |
| DOCK10    | 9.08E-06 | -0.39901 | 0     | 0.127 | 0.135661 | Undiff-G | DOCK10        |
| SHD       | 9.08E-06 | -0.45222 | 0     | 0.127 | 0.135661 | Undiff-G | SHD           |
| TATDN3    | 9.15E-06 | -0.19065 | 0.015 | 0.155 | 0.136756 | Undiff-G | TATDN3        |
| NAB1      | 9.22E-06 | -0.31487 | 0     | 0.127 | 0.137818 | Undiff-G | NAB1          |
| NCOA3     | 9.22E-06 | -0.32903 | 0     | 0.127 | 0.137818 | Undiff-G | NCOA3         |
| RNF115    | 9.34E-06 | 0.182531 | 0.066 | 0.245 | 0.139642 | Undiff-G | RNF115        |
| MLLT10    | 9.37E-06 | -0.33899 | 0     | 0.127 | 0.140009 | Undiff-G | MLLT10        |
| CDK19     | 9.37E-06 | -0.36362 | 0     | 0.127 | 0.140009 | Undiff-G | CDK19         |
| TUBB      | 9.37E-06 | 0.461019 | 0.331 | 0.776 | 0.140013 | Undiff-G | TUBB          |
| IFI35     | 9.39E-06 | 0.216652 | 0.059 | 0.233 | 0.140376 | Undiff-G | IFI35         |
| SLC25A46  | 9.49E-06 | -0.31247 | 0.015 | 0.155 | 0.141763 | Undiff-G | SLC25A46      |
| NELFA     | 9.51E-06 | -0.21307 | 0.007 | 0.141 | 0.142088 | Undiff-G | NELFA         |
| TPPP3     | 9.52E-06 | -0.3053  | 0.015 | 0.155 | 0.142315 | Undiff-G | TPPP3         |
| SLC25A25  | 9.57E-06 | -0.19254 | 0.022 | 0.167 | 0.143022 | Undiff-G | SLC25A25      |
| GPATCH11  | 9.64E-06 | -0.34061 | 0.007 | 0.14  | 0.143994 | Undiff-G | GPATCH11      |
| SLC2A8    | 9.67E-06 | -0.32537 | 0.007 | 0.141 | 0.144556 | Undiff-G | SLC2A8        |
| NDEL1     | 9.73E-06 | -0.15251 | 0.015 | 0.155 | 0.145376 | Undiff-G | NDEL1         |

|           |          |          |       |       |          |          |            |
|-----------|----------|----------|-------|-------|----------|----------|------------|
| ATXN7L3B  | 9.74E-06 | 0.177683 | 0.029 | 0.183 | 0.145495 | Undiff-G | ATXN7L3B   |
| IFI16     | 9.78E-06 | 0.538435 | 0.147 | 0.396 | 0.146086 | Undiff-G | IFI16      |
| NADK      | 9.81E-06 | -0.14854 | 0.022 | 0.169 | 0.146564 | Undiff-G | NADK       |
| ELOVL1    | 9.86E-06 | 0.22512  | 0.059 | 0.233 | 0.14733  | Undiff-G | ELOVL1     |
| TMEM158   | 9.88E-06 | -0.22209 | 0.007 | 0.141 | 0.147672 | Undiff-G | TMEM158    |
| ASIC4     | 9.89E-06 | -0.41141 | 0.007 | 0.141 | 0.147759 | Undiff-G | ASIC4      |
| SEZ6      | 9.93E-06 | -0.38041 | 0.007 | 0.14  | 0.148367 | Undiff-G | SEZ6       |
| NMRK1     | 9.94E-06 | -0.33635 | 0.007 | 0.141 | 0.148576 | Undiff-G | NMRK1      |
| SIPA1     | 9.97E-06 | -0.28866 | 0.007 | 0.141 | 0.149012 | Undiff-G | SIPA1      |
| ORAI1     | 9.98E-06 | -0.28954 | 0     | 0.126 | 0.149118 | Undiff-G | ORAI1      |
| SHOC2     | 1.00E-05 | -0.33775 | 0.015 | 0.153 | 0.149385 | Undiff-G | SHOC2      |
| CLASP1    | 1.00E-05 | -0.33025 | 0.007 | 0.139 | 0.149675 | Undiff-G | CLASP1     |
| PHKB      | 1.00E-05 | -0.26166 | 0.037 | 0.194 | 0.149818 | Undiff-G | PHKB       |
| NSMCE4A   | 1.00E-05 | -0.14456 | 0.015 | 0.154 | 0.14992  | Undiff-G | NSMCE4A    |
| NKAIN3    | 1.01E-05 | -0.32162 | 0     | 0.126 | 0.151485 | Undiff-G | NKAIN3     |
| GALM      | 1.01E-05 | -0.43313 | 0     | 0.126 | 0.151485 | Undiff-G | GALM       |
| FAM98C    | 1.01E-05 | -0.3528  | 0.007 | 0.139 | 0.151627 | Undiff-G | FAM98C     |
| BHLHE40   | 1.01E-05 | 0.236514 | 0.037 | 0.195 | 0.151634 | Undiff-G | BHLHE40    |
| UBE4A     | 1.02E-05 | -0.24075 | 0.015 | 0.154 | 0.151734 | Undiff-G | UBE4A      |
| MARK2     | 1.02E-05 | -0.31614 | 0     | 0.126 | 0.152682 | Undiff-G | MARK2      |
| PAN3      | 1.02E-05 | -0.3671  | 0     | 0.126 | 0.152682 | Undiff-G | PAN3       |
| MEG3      | 1.03E-05 | -0.11703 | 0.103 | 0.307 | 0.153717 | Undiff-G | MEG3       |
| CCND3     | 1.03E-05 | 0.504508 | 0.074 | 0.262 | 0.15388  | Undiff-G | CCND3      |
| PNMA2     | 1.03E-05 | -0.25114 | 0.007 | 0.14  | 0.154651 | Undiff-G | PNMA2      |
| RABGAP1   | 1.04E-05 | -0.32963 | 0     | 0.126 | 0.155105 | Undiff-G | RABGAP1    |
| LANCL2    | 1.04E-05 | -0.29841 | 0.015 | 0.154 | 0.156071 | Undiff-G | LANCL2     |
| ZMIZ1     | 1.05E-05 | -0.15358 | 0.007 | 0.14  | 0.156206 | Undiff-G | ZMIZ1      |
| TMEM19    | 1.05E-05 | -0.21894 | 0.015 | 0.154 | 0.15658  | Undiff-G | TMEM19     |
| GNL2      | 1.05E-05 | 0.271037 | 0.044 | 0.208 | 0.156859 | Undiff-G | GNL2       |
| IRF1      | 1.05E-05 | 0.12993  | 0.044 | 0.208 | 0.156963 | Undiff-G | IRF1       |
| ZNF576    | 1.05E-05 | -0.35626 | 0.007 | 0.139 | 0.157418 | Undiff-G | ZNF576     |
| THAP5     | 1.06E-05 | -0.12776 | 0.029 | 0.181 | 0.158206 | Undiff-G | THAP5      |
| PRPF18    | 1.06E-05 | -0.3562  | 0.007 | 0.139 | 0.158377 | Undiff-G | PRPF18     |
| FKBP15    | 1.06E-05 | -0.37281 | 0.007 | 0.14  | 0.158613 | Undiff-G | FKBP15     |
| ABHD13    | 1.06E-05 | -0.28877 | 0.007 | 0.14  | 0.159088 | Undiff-G | ABHD13     |
| AL592183. | 1.07E-05 | -0.34617 | 0.022 | 0.167 | 0.159672 | Undiff-G | AL592183.1 |
| ANXA2R    | 1.07E-05 | -0.25037 | 0.015 | 0.154 | 0.160114 | Undiff-G | ANXA2R     |
| KCTD13    | 1.08E-05 | -0.29787 | 0.007 | 0.14  | 0.160913 | Undiff-G | KCTD13     |
| FMNL1     | 1.08E-05 | -0.49655 | 0     | 0.125 | 0.161327 | Undiff-G | FMNL1      |
| CDK12     | 1.08E-05 | -0.19118 | 0.022 | 0.167 | 0.161618 | Undiff-G | CDK12      |
| BTBD3     | 1.08E-05 | -0.30087 | 0.007 | 0.139 | 0.162087 | Undiff-G | BTBD3      |
| GK        | 1.09E-05 | -0.16974 | 0.007 | 0.14  | 0.162461 | Undiff-G | GK         |
| MT1G      | 1.09E-05 | 1.459658 | 0.228 | 0.127 | 0.162568 | Undiff-G | MT1G       |
| C15orf57  | 1.09E-05 | -0.38397 | 0     | 0.125 | 0.162601 | Undiff-G | C15orf57   |
| NABP1     | 1.09E-05 | -0.50767 | 0     | 0.125 | 0.162601 | Undiff-G | NABP1      |
| IPO9      | 1.09E-05 | 0.172682 | 0.059 | 0.233 | 0.163074 | Undiff-G | IPO9       |
| LIMCH1    | 1.09E-05 | -0.15375 | 0.015 | 0.154 | 0.163455 | Undiff-G | LIMCH1     |
| PWP2      | 1.10E-05 | -0.3655  | 0     | 0.125 | 0.163884 | Undiff-G | PWP2       |
| AASDH     | 1.10E-05 | -0.27821 | 0.022 | 0.165 | 0.164086 | Undiff-G | AASDH      |
| ERF       | 1.10E-05 | -0.24657 | 0.029 | 0.179 | 0.164251 | Undiff-G | ERF        |
| FAR1      | 1.10E-05 | -0.36688 | 0.007 | 0.139 | 0.164939 | Undiff-G | FAR1       |

|           |           |           |        |        |           |          |             |
|-----------|-----------|-----------|--------|--------|-----------|----------|-------------|
| PTGER4    | 1. 11E-05 | -0. 52779 | 0      | 0. 125 | 0. 165178 | Undiff-G | PTGER4      |
| STK40     | 1. 11E-05 | -0. 30061 | 0      | 0. 125 | 0. 166481 | Undiff-G | STK40       |
| MESDC1    | 1. 11E-05 | -0. 33004 | 0      | 0. 125 | 0. 166481 | Undiff-G | MESDC1      |
| SENP5     | 1. 12E-05 | -0. 27511 | 0. 007 | 0. 139 | 0. 167974 | Undiff-G | SENP5       |
| LRCH4     | 1. 14E-05 | -0. 19367 | 0. 037 | 0. 19  | 0. 17103  | Undiff-G | LRCH4       |
| CCZ1B     | 1. 15E-05 | -0. 27823 | 0. 015 | 0. 153 | 0. 171451 | Undiff-G | CCZ1B       |
| LYST      | 1. 15E-05 | -0. 12995 | 0. 015 | 0. 152 | 0. 171566 | Undiff-G | LYST        |
| NCF1      | 1. 15E-05 | -0. 49853 | 0      | 0. 125 | 0. 171797 | Undiff-G | NCF1        |
| MGMT      | 1. 16E-05 | -0. 14766 | 0. 015 | 0. 153 | 0. 172861 | Undiff-G | MGMT        |
| STRN4     | 1. 16E-05 | -0. 29853 | 0      | 0. 125 | 0. 173152 | Undiff-G | STRN4       |
| ZNF704    | 1. 16E-05 | -0. 33246 | 0      | 0. 125 | 0. 173152 | Undiff-G | ZNF704      |
| MT3       | 1. 16E-05 | 1. 232347 | 0. 485 | 0. 49  | 0. 1739   | Undiff-G | MT3         |
| MED25     | 1. 17E-05 | -0. 31299 | 0      | 0. 125 | 0. 174517 | Undiff-G | MED25       |
| PPP6R2    | 1. 17E-05 | -0. 31336 | 0. 015 | 0. 151 | 0. 175338 | Undiff-G | PPP6R2      |
| PITPNC1   | 1. 18E-05 | -0. 28664 | 0      | 0. 125 | 0. 175893 | Undiff-G | PITPNC1     |
| AOAH      | 1. 19E-05 | -0. 55993 | 0      | 0. 124 | 0. 17728  | Undiff-G | AOAH        |
| AKAP11    | 1. 19E-05 | -0. 25757 | 0. 015 | 0. 151 | 0. 17757  | Undiff-G | AKAP11      |
| ALG14     | 1. 19E-05 | -0. 15242 | 0. 015 | 0. 153 | 0. 177668 | Undiff-G | ALG14       |
| GLCCI1    | 1. 19E-05 | -0. 3382  | 0. 015 | 0. 153 | 0. 178421 | Undiff-G | GLCCI1      |
| PRKAG2    | 1. 19E-05 | -0. 22947 | 0. 007 | 0. 139 | 0. 178492 | Undiff-G | PRKAG2      |
| NCLN      | 1. 20E-05 | -0. 1448  | 0. 022 | 0. 166 | 0. 178901 | Undiff-G | NCLN        |
| CADM1     | 1. 20E-05 | 0. 609517 | 0. 11  | 0. 327 | 0. 179864 | Undiff-G | CADM1       |
| EVA1B     | 1. 21E-05 | -0. 25668 | 0      | 0. 124 | 0. 180085 | Undiff-G | EVA1B       |
| METTL13   | 1. 21E-05 | -0. 31281 | 0      | 0. 124 | 0. 180085 | Undiff-G | METTL13     |
| CLEC2B    | 1. 21E-05 | 0. 10262  | 0. 044 | 0. 207 | 0. 180273 | Undiff-G | CLEC2B      |
| ATM       | 1. 21E-05 | -0. 20053 | 0. 037 | 0. 191 | 0. 180781 | Undiff-G | ATM         |
| MBD3      | 1. 21E-05 | -0. 2645  | 0. 022 | 0. 165 | 0. 181066 | Undiff-G | MBD3        |
| NSF       | 1. 21E-05 | -0. 16228 | 0. 007 | 0. 139 | 0. 181276 | Undiff-G | NSF         |
| CARD16    | 1. 21E-05 | 0. 179899 | 0. 059 | 0. 231 | 0. 181328 | Undiff-G | CARD16      |
| NRIP1     | 1. 21E-05 | -0. 29488 | 0      | 0. 124 | 0. 181504 | Undiff-G | NRIP1       |
| ITGA7     | 1. 22E-05 | -0. 27859 | 0. 007 | 0. 138 | 0. 181683 | Undiff-G | ITGA7       |
| SMAD1     | 1. 22E-05 | -0. 15863 | 0. 029 | 0. 179 | 0. 18214  | Undiff-G | SMAD1       |
| RPS6KA3   | 1. 22E-05 | -0. 23694 | 0. 007 | 0. 139 | 0. 182594 | Undiff-G | RPS6KA3     |
| LINC00685 | 1. 22E-05 | -0. 29814 | 0. 015 | 0. 151 | 0. 182813 | Undiff-G | LINC00685   |
| GUCD1     | 1. 22E-05 | -0. 31476 | 0      | 0. 124 | 0. 182934 | Undiff-G | GUCD1       |
| TBC1D1    | 1. 22E-05 | -0. 34374 | 0      | 0. 124 | 0. 182934 | Undiff-G | TBC1D1      |
| AC004540. | 1. 22E-05 | -0. 43918 | 0      | 0. 124 | 0. 182934 | Undiff-G | AC004540. 4 |
| SUMF1     | 1. 23E-05 | -0. 28346 | 0. 007 | 0. 138 | 0. 18317  | Undiff-G | SUMF1       |
| RMND5B    | 1. 23E-05 | -0. 25705 | 0. 022 | 0. 166 | 0. 183824 | Undiff-G | RMND5B      |
| AC093673. | 1. 23E-05 | 0. 239964 | 0. 029 | 0. 18  | 0. 183882 | Undiff-G | AC093673. 5 |
| CTTNBP2   | 1. 23E-05 | -0. 39445 | 0. 007 | 0. 138 | 0. 184302 | Undiff-G | CTTNBP2     |
| MOB3A     | 1. 24E-05 | -0. 22718 | 0. 022 | 0. 164 | 0. 184602 | Undiff-G | MOB3A       |
| PDK2      | 1. 24E-05 | -0. 10129 | 0. 022 | 0. 166 | 0. 185526 | Undiff-G | PDK2        |
| ZNF544    | 1. 24E-05 | -0. 33266 | 0      | 0. 124 | 0. 185827 | Undiff-G | ZNF544      |
| CNOT10    | 1. 24E-05 | -0. 3561  | 0      | 0. 124 | 0. 185827 | Undiff-G | CNOT10      |
| DSCR3     | 1. 25E-05 | 0. 204738 | 0. 022 | 0. 166 | 0. 187174 | Undiff-G | DSCR3       |
| ASMTL     | 1. 25E-05 | 0. 2192   | 0. 022 | 0. 166 | 0. 187242 | Undiff-G | ASMTL       |
| OST4      | 1. 25E-05 | 0. 501482 | 0. 331 | 0. 785 | 0. 187412 | Undiff-G | OST4        |
| ENHO      | 1. 26E-05 | -0. 26791 | 0. 015 | 0. 152 | 0. 188068 | Undiff-G | ENHO        |
| UROD      | 1. 26E-05 | 0. 566122 | 0. 132 | 0. 362 | 0. 188609 | Undiff-G | UROD        |
| OLFM1     | 1. 27E-05 | -0. 21149 | 0. 015 | 0. 152 | 0. 189406 | Undiff-G | OLFM1       |

|           |           |           |        |        |           |          |               |
|-----------|-----------|-----------|--------|--------|-----------|----------|---------------|
| FADS2     | 1. 27E-05 | -0. 29736 | 0. 007 | 0. 138 | 0. 189931 | Undiff-G | FADS2         |
| MACROD1   | 1. 27E-05 | -0. 28502 | 0      | 0. 124 | 0. 190251 | Undiff-G | MACROD1       |
| AGPS      | 1. 27E-05 | -0. 31949 | 0      | 0. 124 | 0. 190251 | Undiff-G | AGPS          |
| ZNF639    | 1. 28E-05 | -0. 28328 | 0. 007 | 0. 138 | 0. 191651 | Undiff-G | ZNF639        |
| FAM107B   | 1. 28E-05 | -0. 44201 | 0      | 0. 124 | 0. 191749 | Undiff-G | FAM107B       |
| UCHL5     | 1. 28E-05 | -0. 12643 | 0. 015 | 0. 15  | 0. 191872 | Undiff-G | UCHL5         |
| DVL2      | 1. 29E-05 | -0. 25098 | 0. 029 | 0. 178 | 0. 192402 | Undiff-G | DVL2          |
| ZFAND2A   | 1. 30E-05 | 0. 481448 | 0. 088 | 0. 285 | 0. 194308 | Undiff-G | ZFAND2A       |
| MIB2      | 1. 30E-05 | -0. 10076 | 0. 015 | 0. 151 | 0. 194661 | Undiff-G | MIB2          |
| NAT9      | 1. 30E-05 | -0. 11535 | 0. 044 | 0. 205 | 0. 194692 | Undiff-G | NAT9          |
| FADD      | 1. 30E-05 | -0. 27302 | 0. 007 | 0. 138 | 0. 195015 | Undiff-G | FADD          |
| ZC3H7A    | 1. 31E-05 | -0. 31246 | 0. 015 | 0. 151 | 0. 195142 | Undiff-G | ZC3H7A        |
| GAR1      | 1. 31E-05 | 0. 191312 | 0. 037 | 0. 192 | 0. 195221 | Undiff-G | GAR1          |
| ANKRD36C  | 1. 31E-05 | -0. 33874 | 0. 022 | 0. 164 | 0. 195342 | Undiff-G | ANKRD36C      |
| CHST2     | 1. 31E-05 | -0. 28131 | 0. 007 | 0. 137 | 0. 195976 | Undiff-G | CHST2         |
| FEN1      | 1. 31E-05 | -0. 11251 | 0. 007 | 0. 138 | 0. 196036 | Undiff-G | FEN1          |
| RP11-71N1 | 1. 31E-05 | -0. 33389 | 0. 007 | 0. 137 | 0. 196205 | Undiff-G | RP11-71N10. 1 |
| CNOT11    | 1. 31E-05 | -0. 29243 | 0      | 0. 123 | 0. 196312 | Undiff-G | CNOT11        |
| MIOS      | 1. 31E-05 | -0. 34385 | 0      | 0. 123 | 0. 196312 | Undiff-G | MIOS          |
| DCTN5     | 1. 31E-05 | -0. 34688 | 0      | 0. 123 | 0. 196312 | Undiff-G | DCTN5         |
| TOMM34    | 1. 32E-05 | -0. 25859 | 0. 007 | 0. 138 | 0. 196615 | Undiff-G | TOMM34        |
| NCSTN     | 1. 32E-05 | 0. 304041 | 0. 074 | 0. 256 | 0. 197138 | Undiff-G | NCSTN         |
| ZYG11B    | 1. 33E-05 | -0. 19301 | 0. 015 | 0. 15  | 0. 198872 | Undiff-G | ZYG11B        |
| ELP2      | 1. 33E-05 | 0. 148017 | 0. 044 | 0. 205 | 0. 199168 | Undiff-G | ELP2          |
| SMAD4     | 1. 33E-05 | -0. 27795 | 0      | 0. 123 | 0. 199413 | Undiff-G | SMAD4         |
| C16orf62  | 1. 35E-05 | -0. 2252  | 0. 015 | 0. 15  | 0. 201069 | Undiff-G | C16orf62      |
| ARRDC1    | 1. 35E-05 | -0. 38626 | 0. 007 | 0. 136 | 0. 201075 | Undiff-G | ARRDC1        |
| CRKL      | 1. 36E-05 | -0. 3068  | 0      | 0. 123 | 0. 202562 | Undiff-G | CRKL          |
| RPS6KA4   | 1. 36E-05 | -0. 34465 | 0      | 0. 123 | 0. 202562 | Undiff-G | RPS6KA4       |
| RIOK2     | 1. 36E-05 | -0. 36204 | 0      | 0. 123 | 0. 202562 | Undiff-G | RIOK2         |
| LLPH      | 1. 36E-05 | 0. 485116 | 0. 081 | 0. 27  | 0. 202649 | Undiff-G | LLPH          |
| CCNG1     | 1. 36E-05 | 0. 440231 | 0. 081 | 0. 272 | 0. 203691 | Undiff-G | CCNG1         |
| EHD1      | 1. 37E-05 | -0. 31945 | 0      | 0. 123 | 0. 204154 | Undiff-G | EHD1          |
| KIAA0141  | 1. 37E-05 | -0. 3635  | 0      | 0. 123 | 0. 204154 | Undiff-G | KIAA0141      |
| ING1      | 1. 37E-05 | -0. 13704 | 0. 007 | 0. 137 | 0. 205412 | Undiff-G | ING1          |
| TAZ       | 1. 38E-05 | -0. 36489 | 0. 007 | 0. 136 | 0. 205484 | Undiff-G | TAZ           |
| KANSL2    | 1. 38E-05 | -0. 17183 | 0. 015 | 0. 151 | 0. 206417 | Undiff-G | KANSL2        |
| SNAPC3    | 1. 38E-05 | -0. 2152  | 0. 007 | 0. 137 | 0. 206863 | Undiff-G | SNAPC3        |
| BTN3A2    | 1. 39E-05 | -0. 44348 | 0. 015 | 0. 148 | 0. 208251 | Undiff-G | BTN3A2        |
| SLC30A7   | 1. 40E-05 | -0. 13674 | 0. 022 | 0. 163 | 0. 209773 | Undiff-G | SLC30A7       |
| EXOSC9    | 1. 40E-05 | -0. 11342 | 0. 015 | 0. 151 | 0. 209845 | Undiff-G | EXOSC9        |
| UTP23     | 1. 40E-05 | -0. 19276 | 0. 015 | 0. 151 | 0. 209909 | Undiff-G | UTP23         |
| LRRCC1    | 1. 40E-05 | -0. 22563 | 0. 007 | 0. 137 | 0. 209916 | Undiff-G | LRRCC1        |
| SEZ6L     | 1. 41E-05 | -0. 37282 | 0. 007 | 0. 137 | 0. 210137 | Undiff-G | SEZ6L         |
| KLC2      | 1. 41E-05 | -0. 28509 | 0      | 0. 123 | 0. 210649 | Undiff-G | KLC2          |
| WDYHV1    | 1. 41E-05 | -0. 3517  | 0      | 0. 123 | 0. 210649 | Undiff-G | WDYHV1        |
| ZCCHC6    | 1. 42E-05 | -0. 36434 | 0. 007 | 0. 137 | 0. 211983 | Undiff-G | ZCCHC6        |
| PUSL1     | 1. 42E-05 | -0. 28323 | 0      | 0. 122 | 0. 212305 | Undiff-G | PUSL1         |
| TRIM22    | 1. 42E-05 | -0. 44435 | 0. 007 | 0. 136 | 0. 212906 | Undiff-G | TRIM22        |
| NUP160    | 1. 44E-05 | -0. 30264 | 0. 022 | 0. 164 | 0. 214685 | Undiff-G | NUP160        |
| FBX018    | 1. 44E-05 | -0. 29491 | 0. 007 | 0. 136 | 0. 215415 | Undiff-G | FBX018        |



|           |          |          |       |       |          |          |               |
|-----------|----------|----------|-------|-------|----------|----------|---------------|
| DOCK8     | 1.44E-05 | -0.50724 | 0     | 0.122 | 0.215654 | Undiff-G | DOCK8         |
| PACS2     | 1.45E-05 | -0.36096 | 0.007 | 0.136 | 0.216382 | Undiff-G | PACS2         |
| MUS81     | 1.45E-05 | -0.26736 | 0.029 | 0.176 | 0.216461 | Undiff-G | MUS81         |
| NAV1      | 1.45E-05 | -0.21986 | 0.022 | 0.164 | 0.216925 | Undiff-G | NAV1          |
| SCYL2     | 1.45E-05 | -0.26923 | 0.007 | 0.137 | 0.21722  | Undiff-G | SCYL2         |
| ARMCX6    | 1.47E-05 | 0.423975 | 0.066 | 0.244 | 0.220265 | Undiff-G | ARMCX6        |
| ATP6V1G2  | 1.48E-05 | -0.1308  | 0.015 | 0.151 | 0.220444 | Undiff-G | ATP6V1G2      |
| NSG1      | 1.48E-05 | -0.16313 | 0.029 | 0.177 | 0.220588 | Undiff-G | NSG1          |
| RASGEF1B  | 1.48E-05 | -0.51807 | 0     | 0.122 | 0.220774 | Undiff-G | RASGEF1B      |
| GATAD1    | 1.48E-05 | -0.14258 | 0.044 | 0.203 | 0.221204 | Undiff-G | GATAD1        |
| TBC1D9B   | 1.49E-05 | -0.32448 | 0.022 | 0.162 | 0.222064 | Undiff-G | TBC1D9B       |
| HERC2     | 1.50E-05 | -0.21647 | 0.037 | 0.19  | 0.224084 | Undiff-G | HERC2         |
| GCFC2     | 1.50E-05 | -0.31618 | 0     | 0.122 | 0.224255 | Undiff-G | GCFC2         |
| TIMM10B   | 1.50E-05 | 0.149349 | 0.029 | 0.177 | 0.224551 | Undiff-G | TIMM10B       |
| PARN      | 1.51E-05 | -0.3394  | 0     | 0.122 | 0.226015 | Undiff-G | PARN          |
| FAHD1     | 1.52E-05 | 0.200053 | 0.029 | 0.177 | 0.226902 | Undiff-G | FAHD1         |
| C3        | 1.52E-05 | 0.272902 | 0.154 | 0.404 | 0.227095 | Undiff-G | C3            |
| FTSJ3     | 1.52E-05 | -0.11395 | 0.015 | 0.15  | 0.227186 | Undiff-G | FTSJ3         |
| TSPAN12   | 1.52E-05 | -0.32889 | 0     | 0.122 | 0.227789 | Undiff-G | TSPAN12       |
| B4GALT1   | 1.52E-05 | -0.48928 | 0     | 0.122 | 0.227789 | Undiff-G | B4GALT1       |
| PDCD4     | 1.53E-05 | -0.21722 | 0.015 | 0.15  | 0.227967 | Undiff-G | PDCD4         |
| WDR26     | 1.53E-05 | -0.29461 | 0.022 | 0.162 | 0.228133 | Undiff-G | WDR26         |
| GPM6B     | 1.53E-05 | 1.01384  | 0.537 | 0.62  | 0.228863 | Undiff-G | GPM6B         |
| ATP5S     | 1.54E-05 | 0.108555 | 0.029 | 0.177 | 0.230033 | Undiff-G | ATP5S         |
| RNF168    | 1.54E-05 | -0.11877 | 0.015 | 0.15  | 0.230369 | Undiff-G | RNF168        |
| RP11-294J | 1.54E-05 | -0.32196 | 0.007 | 0.136 | 0.230809 | Undiff-G | RP11-294J22.6 |
| DMTF1     | 1.55E-05 | -0.28678 | 0.015 | 0.15  | 0.231081 | Undiff-G | DMTF1         |
| TTC9B     | 1.55E-05 | -0.46611 | 0     | 0.122 | 0.231377 | Undiff-G | TTC9B         |
| IKBKG     | 1.56E-05 | -0.30668 | 0.007 | 0.135 | 0.232463 | Undiff-G | IKBKG         |
| ZNF322    | 1.56E-05 | -0.29048 | 0.007 | 0.135 | 0.232472 | Undiff-G | ZNF322        |
| C11orf96  | 1.56E-05 | -0.38159 | 0.007 | 0.136 | 0.232799 | Undiff-G | C11orf96      |
| DPP6      | 1.56E-05 | -0.24631 | 0.022 | 0.163 | 0.233161 | Undiff-G | DPP6          |
| RAB30-AS1 | 1.56E-05 | -0.17215 | 0.015 | 0.15  | 0.233224 | Undiff-G | RAB30-AS1     |
| GEMIN6    | 1.56E-05 | 0.110427 | 0.022 | 0.164 | 0.233397 | Undiff-G | GEMIN6        |
| FGD4      | 1.57E-05 | -0.45834 | 0.015 | 0.148 | 0.235046 | Undiff-G | FGD4          |
| RSAD1     | 1.57E-05 | -0.2314  | 0.015 | 0.15  | 0.235304 | Undiff-G | RSAD1         |
| SMARCA2   | 1.58E-05 | -0.18811 | 0.007 | 0.136 | 0.236263 | Undiff-G | SMARCA2       |
| SNRPN     | 1.58E-05 | 1.472872 | 0.191 | 0.097 | 0.236657 | Undiff-G | SNRPN         |
| ZBTB44    | 1.59E-05 | -0.32036 | 0     | 0.121 | 0.236865 | Undiff-G | ZBTB44        |
| TOM1L2    | 1.59E-05 | -0.32353 | 0     | 0.121 | 0.236865 | Undiff-G | TOM1L2        |
| CD33      | 1.59E-05 | -0.5506  | 0     | 0.121 | 0.236865 | Undiff-G | CD33          |
| LENG1     | 1.59E-05 | 0.307017 | 0.044 | 0.203 | 0.237378 | Undiff-G | LENG1         |
| NUP107    | 1.59E-05 | -0.19153 | 0.059 | 0.225 | 0.237625 | Undiff-G | NUP107        |
| MICU1     | 1.59E-05 | -0.34786 | 0.007 | 0.135 | 0.238215 | Undiff-G | MICU1         |
| NFKBIE    | 1.60E-05 | -0.32269 | 0.007 | 0.135 | 0.238401 | Undiff-G | NFKBIE        |
| ARHGEF9   | 1.60E-05 | -0.34142 | 0     | 0.121 | 0.238722 | Undiff-G | ARHGEF9       |
| RP11-552D | 1.60E-05 | -0.6415  | 0     | 0.121 | 0.238722 | Undiff-G | RP11-552D4.1  |
| CBR4      | 1.60E-05 | 0.144809 | 0.037 | 0.19  | 0.239508 | Undiff-G | CBR4          |
| LINC01116 | 1.60E-05 | -0.34192 | 0.007 | 0.134 | 0.239528 | Undiff-G | LINC01116     |
| CCAR2     | 1.61E-05 | -0.19935 | 0.015 | 0.148 | 0.240811 | Undiff-G | CCAR2         |
| ZNF444    | 1.61E-05 | -0.18028 | 0.022 | 0.162 | 0.240967 | Undiff-G | ZNF444        |

|           |           |           |        |        |           |          |               |
|-----------|-----------|-----------|--------|--------|-----------|----------|---------------|
| RNF220    | 1. 61E-05 | -0. 2108  | 0. 015 | 0. 149 | 0. 24115  | Undiff-G | RNF220        |
| REX02     | 1. 62E-05 | 0. 45809  | 0. 11  | 0. 321 | 0. 242198 | Undiff-G | REX02         |
| LHFPL3    | 1. 64E-05 | -0. 35893 | 0      | 0. 121 | 0. 244381 | Undiff-G | LHFPL3        |
| HLTF      | 1. 64E-05 | 0. 164207 | 0. 029 | 0. 175 | 0. 244869 | Undiff-G | HLTF          |
| CALCOCO1  | 1. 64E-05 | -0. 22127 | 0. 015 | 0. 149 | 0. 24574  | Undiff-G | CALCOCO1      |
| THOC1     | 1. 65E-05 | -0. 18628 | 0. 015 | 0. 148 | 0. 246314 | Undiff-G | THOC1         |
| PACSIN2   | 1. 66E-05 | -0. 10471 | 0. 029 | 0. 176 | 0. 248423 | Undiff-G | PACSIN2       |
| RASD1     | 1. 66E-05 | -0. 46798 | 0. 007 | 0. 135 | 0. 248591 | Undiff-G | RASD1         |
| RHOQ      | 1. 66E-05 | 0. 119793 | 0. 022 | 0. 163 | 0. 24877  | Undiff-G | RHOQ          |
| PQLC2     | 1. 67E-05 | -0. 28567 | 0      | 0. 121 | 0. 250171 | Undiff-G | PQLC2         |
| MED13L    | 1. 67E-05 | -0. 34747 | 0      | 0. 121 | 0. 250171 | Undiff-G | MED13L        |
| CDKN2AIP  | 1. 68E-05 | -0. 16832 | 0. 015 | 0. 149 | 0. 251067 | Undiff-G | CDKN2AIP      |
| KAT2A     | 1. 68E-05 | -0. 28827 | 0. 022 | 0. 162 | 0. 251125 | Undiff-G | KAT2A         |
| ZNF771    | 1. 69E-05 | -0. 25791 | 0. 015 | 0. 148 | 0. 251906 | Undiff-G | ZNF771        |
| WDR5      | 1. 69E-05 | -0. 29821 | 0      | 0. 121 | 0. 252131 | Undiff-G | WDR5          |
| IL17RA    | 1. 69E-05 | -0. 39651 | 0      | 0. 121 | 0. 252131 | Undiff-G | IL17RA        |
| WWTR1     | 1. 70E-05 | -0. 15197 | 0. 022 | 0. 162 | 0. 253693 | Undiff-G | WWTR1         |
| GPR108    | 1. 70E-05 | 0. 275571 | 0. 081 | 0. 268 | 0. 253737 | Undiff-G | GPR108        |
| RP11-390F | 1. 70E-05 | -0. 31137 | 0. 007 | 0. 134 | 0. 254419 | Undiff-G | RP11-390P2. 4 |
| MTG2      | 1. 70E-05 | -0. 20921 | 0. 015 | 0. 149 | 0. 254675 | Undiff-G | MTG2          |
| NFATC3    | 1. 71E-05 | -0. 25578 | 0. 015 | 0. 147 | 0. 255566 | Undiff-G | NFATC3        |
| RMDN1     | 1. 71E-05 | 0. 299171 | 0. 037 | 0. 19  | 0. 255793 | Undiff-G | RMDN1         |
| EFEMP1    | 1. 71E-05 | 1. 353128 | 0. 316 | 0. 22  | 0. 255826 | Undiff-G | EFEMP1        |
| C2orf80   | 1. 71E-05 | -0. 35127 | 0      | 0. 12  | 0. 256096 | Undiff-G | C2orf80       |
| ST8SIA4   | 1. 71E-05 | -0. 43201 | 0      | 0. 12  | 0. 256096 | Undiff-G | ST8SIA4       |
| RAC2      | 1. 71E-05 | -0. 53784 | 0      | 0. 12  | 0. 256096 | Undiff-G | RAC2          |
| DCAF5     | 1. 72E-05 | -0. 30581 | 0. 007 | 0. 135 | 0. 257558 | Undiff-G | DCAF5         |
| TOM1      | 1. 73E-05 | -0. 19144 | 0. 022 | 0. 162 | 0. 259137 | Undiff-G | TOM1          |
| TMEM51    | 1. 74E-05 | -0. 36194 | 0      | 0. 12  | 0. 260123 | Undiff-G | TMEM51        |
| TMEM42    | 1. 74E-05 | 0. 116355 | 0. 022 | 0. 162 | 0. 26021  | Undiff-G | TMEM42        |
| C1R       | 1. 75E-05 | 1. 39382  | 0. 309 | 0. 214 | 0. 261316 | Undiff-G | C1R           |
| GMCL1     | 1. 75E-05 | -0. 30762 | 0. 022 | 0. 16  | 0. 262146 | Undiff-G | GMCL1         |
| PDDC1     | 1. 76E-05 | -0. 22207 | 0. 015 | 0. 147 | 0. 26326  | Undiff-G | PDDC1         |
| MPI       | 1. 76E-05 | -0. 31247 | 0. 007 | 0. 134 | 0. 263434 | Undiff-G | MPI           |
| MCCC1     | 1. 77E-05 | -0. 23068 | 0. 015 | 0. 148 | 0. 263879 | Undiff-G | MCCC1         |
| KBTBD6    | 1. 77E-05 | -0. 33465 | 0. 007 | 0. 133 | 0. 264291 | Undiff-G | KBTBD6        |
| FAM118A   | 1. 77E-05 | -0. 37593 | 0. 007 | 0. 134 | 0. 265081 | Undiff-G | FAM118A       |
| IFFO1     | 1. 78E-05 | -0. 35173 | 0      | 0. 12  | 0. 266279 | Undiff-G | IFFO1         |
| POLD2     | 1. 80E-05 | 0. 654288 | 0. 169 | 0. 424 | 0. 268567 | Undiff-G | POLD2         |
| HSPA1B    | 1. 80E-05 | 0. 388906 | 0. 162 | 0. 413 | 0. 268635 | Undiff-G | HSPA1B        |
| KLHL42    | 1. 81E-05 | -0. 21713 | 0. 022 | 0. 16  | 0. 269932 | Undiff-G | KLHL42        |
| FRMD4B    | 1. 81E-05 | -0. 2133  | 0. 022 | 0. 161 | 0. 27045  | Undiff-G | FRMD4B        |
| MED1      | 1. 81E-05 | -0. 2944  | 0      | 0. 12  | 0. 270463 | Undiff-G | MED1          |
| NDUFB2    | 1. 82E-05 | 0. 514024 | 0. 338 | 0. 814 | 0. 271504 | Undiff-G | NDUFB2        |
| PLEKHB1   | 1. 82E-05 | 0. 144351 | 0. 051 | 0. 215 | 0. 272279 | Undiff-G | PLEKHB1       |
| FAM214B   | 1. 82E-05 | -0. 32308 | 0      | 0. 12  | 0. 272579 | Undiff-G | FAM214B       |
| CNTRL     | 1. 82E-05 | -0. 35593 | 0      | 0. 12  | 0. 272579 | Undiff-G | CNTRL         |
| IKBIP     | 1. 83E-05 | 0. 330642 | 0. 059 | 0. 228 | 0. 273091 | Undiff-G | IKBIP         |
| TXNRD2    | 1. 84E-05 | -0. 28953 | 0      | 0. 12  | 0. 274711 | Undiff-G | TXNRD2        |
| ZNF559    | 1. 85E-05 | -0. 30814 | 0. 015 | 0. 146 | 0. 276218 | Undiff-G | ZNF559        |
| BACE1     | 1. 88E-05 | -0. 33074 | 0      | 0. 119 | 0. 281207 | Undiff-G | BACE1         |

|            |           |           |        |        |           |          |                |
|------------|-----------|-----------|--------|--------|-----------|----------|----------------|
| TMEM131    | 1. 88E-05 | -0. 23811 | 0. 015 | 0. 148 | 0. 281283 | Undiff-G | TMEM131        |
| PBX3       | 1. 90E-05 | -0. 30736 | 0      | 0. 119 | 0. 283405 | Undiff-G | PBX3           |
| TUBB4A     | 1. 90E-05 | -0. 54582 | 0      | 0. 119 | 0. 283405 | Undiff-G | TUBB4A         |
| PEX11B     | 1. 91E-05 | -0. 17911 | 0. 007 | 0. 134 | 0. 284732 | Undiff-G | PEX11B         |
| CD55       | 1. 91E-05 | -0. 5128  | 0      | 0. 119 | 0. 285621 | Undiff-G | CD55           |
| UBR4       | 1. 91E-05 | -0. 31762 | 0. 015 | 0. 147 | 0. 28589  | Undiff-G | UBR4           |
| DPF2       | 1. 92E-05 | 0. 191819 | 0. 059 | 0. 226 | 0. 286277 | Undiff-G | DPF2           |
| PNPT1      | 1. 93E-05 | -0. 10238 | 0. 044 | 0. 198 | 0. 288916 | Undiff-G | PNPT1          |
| SRP14      | 1. 94E-05 | 0. 455224 | 0. 375 | 0. 872 | 0. 289176 | Undiff-G | SRP14          |
| RAB11B-AS1 | 1. 94E-05 | -0. 16072 | 0. 007 | 0. 133 | 0. 289359 | Undiff-G | RAB11B-AS1     |
| CTC-524C5  | 1. 94E-05 | -0. 28325 | 0      | 0. 119 | 0. 290103 | Undiff-G | CTC-524C5. 2   |
| GEMIN7     | 1. 95E-05 | 0. 105152 | 0. 022 | 0. 161 | 0. 291842 | Undiff-G | GEMIN7         |
| SLC6A8     | 1. 96E-05 | -0. 34686 | 0      | 0. 119 | 0. 29237  | Undiff-G | SLC6A8         |
| GBA        | 1. 96E-05 | -0. 37618 | 0. 007 | 0. 132 | 0. 292437 | Undiff-G | GBA            |
| NPRL2      | 1. 97E-05 | -0. 21226 | 0. 022 | 0. 159 | 0. 294394 | Undiff-G | NPRL2          |
| RP11-849I  | 1. 98E-05 | -0. 298   | 0. 007 | 0. 133 | 0. 295835 | Undiff-G | RP11-849I19. 1 |
| COPG2      | 1. 99E-05 | -0. 30003 | 0      | 0. 119 | 0. 296956 | Undiff-G | COPG2          |
| SAYSD1     | 1. 99E-05 | -0. 33067 | 0      | 0. 119 | 0. 296956 | Undiff-G | SAYSD1         |
| MGLL       | 2. 01E-05 | -0. 31402 | 0. 015 | 0. 147 | 0. 300112 | Undiff-G | MGLL           |
| NARFL      | 2. 01E-05 | -0. 27928 | 0. 015 | 0. 147 | 0. 301032 | Undiff-G | NARFL          |
| SBF2       | 2. 02E-05 | -0. 22824 | 0. 037 | 0. 184 | 0. 302122 | Undiff-G | SBF2           |
| ITPR2      | 2. 03E-05 | -0. 22576 | 0. 007 | 0. 133 | 0. 303218 | Undiff-G | ITPR2          |
| MAPK6      | 2. 03E-05 | 0. 134417 | 0. 029 | 0. 174 | 0. 303323 | Undiff-G | MAPK6          |
| NPAS3      | 2. 03E-05 | -0. 26898 | 0. 022 | 0. 16  | 0. 303793 | Undiff-G | NPAS3          |
| CEP290     | 2. 03E-05 | -0. 11104 | 0. 022 | 0. 159 | 0. 303824 | Undiff-G | CEP290         |
| TMEM214    | 2. 03E-05 | -0. 29908 | 0      | 0. 118 | 0. 303968 | Undiff-G | TMEM214        |
| MAML1      | 2. 03E-05 | -0. 39098 | 0      | 0. 118 | 0. 303968 | Undiff-G | MAML1          |
| FBXO17     | 2. 04E-05 | -0. 29499 | 0. 015 | 0. 145 | 0. 304769 | Undiff-G | FBXO17         |
| TRAPPC2P1  | 2. 04E-05 | 0. 145106 | 0. 059 | 0. 226 | 0. 305439 | Undiff-G | TRAPPC2P1      |
| FOXN2      | 2. 06E-05 | -0. 35826 | 0. 007 | 0. 132 | 0. 307953 | Undiff-G | FOXN2          |
| ARHGEF7    | 2. 06E-05 | -0. 30745 | 0. 022 | 0. 16  | 0. 30845  | Undiff-G | ARHGEF7        |
| TGFBR2     | 2. 07E-05 | -0. 40273 | 0      | 0. 118 | 0. 308733 | Undiff-G | TGFBR2         |
| KLHDC10    | 2. 07E-05 | -0. 28939 | 0. 007 | 0. 132 | 0. 309752 | Undiff-G | KLHDC10        |
| LMNB2      | 2. 08E-05 | -0. 27367 | 0      | 0. 118 | 0. 311142 | Undiff-G | LMNB2          |
| N4BP2      | 2. 08E-05 | -0. 2946  | 0      | 0. 118 | 0. 311142 | Undiff-G | N4BP2          |
| INSM1      | 2. 08E-05 | -0. 33397 | 0      | 0. 118 | 0. 311142 | Undiff-G | INSM1          |
| LANCL1     | 2. 08E-05 | -0. 3651  | 0      | 0. 118 | 0. 311142 | Undiff-G | LANCL1         |
| SLC35E2B   | 2. 08E-05 | -0. 23235 | 0. 015 | 0. 146 | 0. 311411 | Undiff-G | SLC35E2B       |
| PTGR1      | 2. 09E-05 | 0. 242445 | 0. 037 | 0. 187 | 0. 31244  | Undiff-G | PTGR1          |
| XPNPEP1    | 2. 14E-05 | -0. 333   | 0. 015 | 0. 144 | 0. 320087 | Undiff-G | XPNPEP1        |
| DCTN4      | 2. 15E-05 | 0. 215735 | 0. 037 | 0. 187 | 0. 320786 | Undiff-G | DCTN4          |
| SREBF1     | 2. 15E-05 | -0. 35868 | 0      | 0. 118 | 0. 320968 | Undiff-G | SREBF1         |
| RP1-39G22  | 2. 16E-05 | -0. 17657 | 0. 007 | 0. 132 | 0. 322631 | Undiff-G | RP1-39G22. 7   |
| PPP1R8     | 2. 17E-05 | 0. 450352 | 0. 059 | 0. 225 | 0. 324219 | Undiff-G | PPP1R8         |
| PLP1       | 2. 18E-05 | -0. 26725 | 0. 029 | 0. 173 | 0. 325519 | Undiff-G | PLP1           |
| GAS1       | 2. 18E-05 | -0. 29123 | 0. 015 | 0. 146 | 0. 326001 | Undiff-G | GAS1           |
| PCIF1      | 2. 19E-05 | -0. 31903 | 0. 015 | 0. 144 | 0. 327517 | Undiff-G | PCIF1          |
| SERPINH1   | 2. 19E-05 | 0. 370554 | 0. 051 | 0. 211 | 0. 327658 | Undiff-G | SERPINH1       |
| MYD88      | 2. 20E-05 | -0. 3245  | 0. 007 | 0. 132 | 0. 328362 | Undiff-G | MYD88          |
| HKR1       | 2. 20E-05 | -0. 31377 | 0      | 0. 118 | 0. 328537 | Undiff-G | HKR1           |
| SPG11      | 2. 20E-05 | -0. 32974 | 0      | 0. 118 | 0. 328537 | Undiff-G | SPG11          |

|           |           |           |        |        |           |          |             |
|-----------|-----------|-----------|--------|--------|-----------|----------|-------------|
| SRRD      | 2. 22E-05 | -0. 25344 | 0      | 0. 118 | 0. 331099 | Undiff-G | SRRD        |
| AP006222. | 2. 23E-05 | 0. 29988  | 0. 051 | 0. 213 | 0. 333323 | Undiff-G | AP006222. 2 |
| TRAFD1    | 2. 25E-05 | -0. 30843 | 0. 007 | 0. 131 | 0. 336279 | Undiff-G | TRAFD1      |
| ZNRF1     | 2. 25E-05 | -0. 25776 | 0      | 0. 117 | 0. 336281 | Undiff-G | ZNRF1       |
| BCL10     | 2. 26E-05 | -0. 14065 | 0. 007 | 0. 132 | 0. 338118 | Undiff-G | BCL10       |
| GNG4      | 2. 27E-05 | -0. 30867 | 0      | 0. 117 | 0. 338902 | Undiff-G | GNG4        |
| ZNF738    | 2. 28E-05 | -0. 10731 | 0. 015 | 0. 145 | 0. 340145 | Undiff-G | ZNF738      |
| CEP89     | 2. 28E-05 | -0. 16222 | 0. 007 | 0. 132 | 0. 340417 | Undiff-G | CEP89       |
| MSH2      | 2. 29E-05 | -0. 30325 | 0      | 0. 117 | 0. 341543 | Undiff-G | MSH2        |
| GLS       | 2. 29E-05 | -0. 34015 | 0. 007 | 0. 13  | 0. 342126 | Undiff-G | GLS         |
| NUP93     | 2. 29E-05 | -0. 26257 | 0. 037 | 0. 183 | 0. 34244  | Undiff-G | NUP93       |
| ZSWIM6    | 2. 29E-05 | -0. 31608 | 0. 007 | 0. 13  | 0. 342525 | Undiff-G | ZSWIM6      |
| ZNF770    | 2. 29E-05 | -0. 26291 | 0. 007 | 0. 131 | 0. 342861 | Undiff-G | ZNF770      |
| RNPEPL1   | 2. 30E-05 | -0. 14264 | 0. 007 | 0. 132 | 0. 343396 | Undiff-G | RNPEPL1     |
| PAK4      | 2. 30E-05 | -0. 28382 | 0      | 0. 117 | 0. 344204 | Undiff-G | PAK4        |
| CD99L2    | 2. 31E-05 | -0. 28223 | 0. 007 | 0. 131 | 0. 344927 | Undiff-G | CD99L2      |
| 9-Mar     | 2. 31E-05 | -0. 37676 | 0. 022 | 0. 156 | 0. 344988 | Undiff-G | 9-Mar       |
| YDJC      | 2. 32E-05 | -0. 2292  | 0. 015 | 0. 145 | 0. 346447 | Undiff-G | YDJC        |
| 4-Sep     | 2. 32E-05 | -0. 42551 | 0. 007 | 0. 131 | 0. 346798 | Undiff-G | 4-Sep       |
| SNX12     | 2. 34E-05 | -0. 29198 | 0. 007 | 0. 131 | 0. 349496 | Undiff-G | SNX12       |
| ARHGAP4   | 2. 34E-05 | -0. 46327 | 0      | 0. 117 | 0. 349588 | Undiff-G | ARHGAP4     |
| PPAT      | 2. 35E-05 | -0. 20834 | 0. 015 | 0. 145 | 0. 3514   | Undiff-G | PPAT        |
| SAMD4B    | 2. 36E-05 | 0. 2805   | 0. 059 | 0. 225 | 0. 352376 | Undiff-G | SAMD4B      |
| SYNJ2BP   | 2. 36E-05 | -0. 17373 | 0. 015 | 0. 145 | 0. 353321 | Undiff-G | SYNJ2BP     |
| TCF3      | 2. 38E-05 | -0. 26143 | 0. 007 | 0. 131 | 0. 355143 | Undiff-G | TCF3        |
| POGK      | 2. 38E-05 | -0. 27884 | 0. 007 | 0. 131 | 0. 355905 | Undiff-G | POGK        |
| LHX2      | 2. 39E-05 | -0. 22532 | 0. 007 | 0. 131 | 0. 356673 | Undiff-G | LHX2        |
| TTYH2     | 2. 39E-05 | -0. 35603 | 0      | 0. 117 | 0. 35782  | Undiff-G | TTYH2       |
| PSPH      | 2. 41E-05 | 0. 111403 | 0. 022 | 0. 159 | 0. 36069  | Undiff-G | PSPH        |
| LGALS3BP  | 2. 42E-05 | 0. 51194  | 0. 184 | 0. 452 | 0. 3615   | Undiff-G | LGALS3BP    |
| ERCC4     | 2. 42E-05 | -0. 29976 | 0. 007 | 0. 131 | 0. 361596 | Undiff-G | ERCC4       |
| ATG13     | 2. 42E-05 | -0. 17606 | 0. 007 | 0. 131 | 0. 362376 | Undiff-G | ATG13       |
| CBX4      | 2. 43E-05 | -0. 31187 | 0      | 0. 117 | 0. 363413 | Undiff-G | CBX4        |
| ADAM10    | 2. 43E-05 | 0. 336262 | 0. 037 | 0. 186 | 0. 363467 | Undiff-G | ADAM10      |
| EFR3A     | 2. 44E-05 | -0. 25185 | 0. 015 | 0. 144 | 0. 363984 | Undiff-G | EFR3A       |
| RRAGD     | 2. 44E-05 | -0. 14632 | 0. 007 | 0. 131 | 0. 365261 | Undiff-G | RRAGD       |
| COPB1     | 2. 46E-05 | 0. 512541 | 0. 096 | 0. 288 | 0. 367891 | Undiff-G | COPB1       |
| PHF19     | 2. 47E-05 | -0. 32267 | 0. 007 | 0. 131 | 0. 368373 | Undiff-G | PHF19       |
| TMEM198   | 2. 47E-05 | -0. 26552 | 0      | 0. 116 | 0. 369092 | Undiff-G | TMEM198     |
| SLC37A3   | 2. 48E-05 | -0. 10657 | 0. 007 | 0. 131 | 0. 370955 | Undiff-G | SLC37A3     |
| STAG1     | 2. 49E-05 | -0. 32016 | 0. 007 | 0. 129 | 0. 371939 | Undiff-G | STAG1       |
| POSTN     | 2. 51E-05 | -0. 3655  | 0. 007 | 0. 131 | 0. 374629 | Undiff-G | POSTN       |
| CDYL      | 2. 51E-05 | -0. 25933 | 0      | 0. 116 | 0. 374858 | Undiff-G | CDYL        |
| ANXA4     | 2. 53E-05 | 0. 254427 | 0. 044 | 0. 196 | 0. 378149 | Undiff-G | ANXA4       |
| DPP9      | 2. 56E-05 | -0. 28648 | 0. 007 | 0. 13  | 0. 382588 | Undiff-G | DPP9        |
| MCAT      | 2. 60E-05 | -0. 16191 | 0. 007 | 0. 13  | 0. 388641 | Undiff-G | MCAT        |
| EML3      | 2. 63E-05 | -0. 2857  | 0      | 0. 116 | 0. 392693 | Undiff-G | EML3        |
| STX11     | 2. 63E-05 | -0. 49966 | 0      | 0. 116 | 0. 392693 | Undiff-G | STX11       |
| C12orf73  | 2. 63E-05 | -0. 11211 | 0. 022 | 0. 156 | 0. 392915 | Undiff-G | C12orf73    |
| PITPNA-AS | 2. 64E-05 | 0. 335802 | 0. 044 | 0. 197 | 0. 394987 | Undiff-G | PITPNA-AS1  |
| AMER2     | 2. 65E-05 | -0. 46236 | 0      | 0. 116 | 0. 395745 | Undiff-G | AMER2       |

|           |          |          |       |       |          |          |             |
|-----------|----------|----------|-------|-------|----------|----------|-------------|
| MCM3      | 2.65E-05 | -0.24903 | 0.015 | 0.144 | 0.396472 | Undiff-G | MCM3        |
| CSTA      | 2.68E-05 | -0.38114 | 0.007 | 0.13  | 0.399909 | Undiff-G | CSTA        |
| HPS5      | 2.69E-05 | -0.3288  | 0     | 0.115 | 0.401921 | Undiff-G | HPS5        |
| ELMO2     | 2.70E-05 | -0.2624  | 0.007 | 0.13  | 0.402922 | Undiff-G | ELMO2       |
| ZNF579    | 2.71E-05 | -0.24856 | 0     | 0.115 | 0.405044 | Undiff-G | ZNF579      |
| WDR73     | 2.71E-05 | -0.30226 | 0.015 | 0.143 | 0.40532  | Undiff-G | WDR73       |
| SLC11A2   | 2.74E-05 | 0.117439 | 0.029 | 0.17  | 0.410134 | Undiff-G | SLC11A2     |
| ZNF263    | 2.76E-05 | -0.29612 | 0.007 | 0.129 | 0.411877 | Undiff-G | ZNF263      |
| RNF44     | 2.82E-05 | -0.32338 | 0     | 0.115 | 0.42102  | Undiff-G | RNF44       |
| PLEKHF2   | 2.83E-05 | -0.14728 | 0.007 | 0.129 | 0.423093 | Undiff-G | PLEKHF2     |
| FBXW7     | 2.85E-05 | -0.27843 | 0.007 | 0.129 | 0.426268 | Undiff-G | FBXW7       |
| GPR89A    | 2.85E-05 | -0.2912  | 0.007 | 0.129 | 0.426364 | Undiff-G | GPR89A      |
| SP100     | 2.86E-05 | 0.475523 | 0.096 | 0.289 | 0.427702 | Undiff-G | SP100       |
| ARID1B    | 2.87E-05 | -0.28952 | 0.007 | 0.129 | 0.428987 | Undiff-G | ARID1B      |
| FAM222B   | 2.88E-05 | -0.24869 | 0     | 0.115 | 0.430901 | Undiff-G | FAM222B     |
| HEXDC     | 2.88E-05 | -0.28671 | 0     | 0.115 | 0.430901 | Undiff-G | HEXDC       |
| STARD4-AS | 2.89E-05 | -0.29851 | 0.007 | 0.128 | 0.431581 | Undiff-G | STARD4-AS1  |
| PRKAR1B   | 2.89E-05 | -0.25971 | 0.007 | 0.129 | 0.432163 | Undiff-G | PRKAR1B     |
| TMEM99    | 2.89E-05 | -0.21174 | 0.007 | 0.129 | 0.432413 | Undiff-G | TMEM99      |
| FBR5      | 2.91E-05 | -0.29827 | 0     | 0.115 | 0.434245 | Undiff-G | FBR5        |
| R3HDM2    | 2.91E-05 | -0.23985 | 0.029 | 0.169 | 0.435371 | Undiff-G | R3HDM2      |
| CCDC93    | 2.93E-05 | -0.27789 | 0.007 | 0.129 | 0.437773 | Undiff-G | CCDC93      |
| PCDHB16   | 2.96E-05 | -0.16246 | 0.015 | 0.141 | 0.442338 | Undiff-G | PCDHB16     |
| TREX1     | 2.97E-05 | -0.31031 | 0     | 0.114 | 0.444432 | Undiff-G | TREX1       |
| TNK2      | 2.98E-05 | -0.27589 | 0.007 | 0.129 | 0.445011 | Undiff-G | TNK2        |
| MSH6      | 2.99E-05 | -0.29663 | 0.007 | 0.128 | 0.447513 | Undiff-G | MSH6        |
| USP53     | 2.99E-05 | -0.21278 | 0.015 | 0.143 | 0.447539 | Undiff-G | USP53       |
| ZNF883    | 3.00E-05 | -0.26161 | 0.015 | 0.142 | 0.447719 | Undiff-G | ZNF883      |
| SEPHS1    | 3.00E-05 | -0.28435 | 0     | 0.114 | 0.447879 | Undiff-G | SEPHS1      |
| MFSD5     | 3.00E-05 | -0.28723 | 0     | 0.114 | 0.447879 | Undiff-G | MFSD5       |
| PPIP5K2   | 3.00E-05 | -0.25959 | 0.007 | 0.129 | 0.448022 | Undiff-G | PPIP5K2     |
| SMURF2    | 3.01E-05 | -0.30212 | 0.007 | 0.127 | 0.449093 | Undiff-G | SMURF2      |
| WDR43     | 3.03E-05 | 0.387603 | 0.044 | 0.196 | 0.453017 | Undiff-G | WDR43       |
| PTK2B     | 3.05E-05 | -0.32499 | 0.007 | 0.128 | 0.455061 | Undiff-G | PTK2B       |
| HCG18     | 3.07E-05 | -0.28501 | 0     | 0.114 | 0.45838  | Undiff-G | HCG18       |
| BRI3BP    | 3.07E-05 | -0.29762 | 0     | 0.114 | 0.45838  | Undiff-G | BRI3BP      |
| APBB2     | 3.07E-05 | -0.30672 | 0     | 0.114 | 0.45838  | Undiff-G | APBB2       |
| FAM208A   | 3.12E-05 | -0.26812 | 0.015 | 0.141 | 0.465629 | Undiff-G | FAM208A     |
| RUFY1     | 3.13E-05 | -0.16698 | 0.022 | 0.154 | 0.468268 | Undiff-G | RUFY1       |
| BIN2      | 3.14E-05 | -0.48282 | 0     | 0.114 | 0.469122 | Undiff-G | BIN2        |
| PLEKHA4   | 3.14E-05 | -0.20398 | 0.007 | 0.128 | 0.469581 | Undiff-G | PLEKHA4     |
| SERGEF    | 3.14E-05 | 0.264491 | 0.029 | 0.169 | 0.46991  | Undiff-G | SERGEF      |
| RP11-14N7 | 3.16E-05 | 0.172266 | 0.051 | 0.206 | 0.472498 | Undiff-G | RP11-14N7.2 |
| HEPACAM   | 3.16E-05 | -0.20285 | 0.037 | 0.179 | 0.47263  | Undiff-G | HEPACAM     |
| ORMDL3    | 3.17E-05 | -0.22578 | 0.007 | 0.128 | 0.474125 | Undiff-G | ORMDL3      |
| GIT2      | 3.19E-05 | -0.24538 | 0.022 | 0.155 | 0.476113 | Undiff-G | GIT2        |
| ZMYM4     | 3.19E-05 | -0.26009 | 0.007 | 0.127 | 0.476331 | Undiff-G | ZMYM4       |
| FAM131A   | 3.20E-05 | -0.27888 | 0.007 | 0.128 | 0.477759 | Undiff-G | FAM131A     |
| NUDT11    | 3.21E-05 | -0.31809 | 0.007 | 0.128 | 0.479607 | Undiff-G | NUDT11      |
| ATP9A     | 3.21E-05 | -0.28405 | 0     | 0.113 | 0.480112 | Undiff-G | ATP9A       |
| STYXL1    | 3.22E-05 | -0.24645 | 0.007 | 0.128 | 0.48176  | Undiff-G | STYXL1      |

|           |          |          |       |       |          |          |            |
|-----------|----------|----------|-------|-------|----------|----------|------------|
| TMEM68    | 3.24E-05 | 0.187534 | 0.029 | 0.169 | 0.48356  | Undiff-G | TMEM68     |
| CTSO      | 3.24E-05 | -0.30101 | 0     | 0.113 | 0.483831 | Undiff-G | CTSO       |
| CYTH4     | 3.24E-05 | -0.48393 | 0     | 0.113 | 0.483831 | Undiff-G | CYTH4      |
| TGFB1I1   | 3.24E-05 | -0.22025 | 0.007 | 0.128 | 0.483987 | Undiff-G | TGFB1I1    |
| PTAFR     | 3.25E-05 | -0.50124 | 0.007 | 0.127 | 0.484982 | Undiff-G | PTAFR      |
| ABHD17B   | 3.25E-05 | -0.34525 | 0.007 | 0.126 | 0.485244 | Undiff-G | ABHD17B    |
| TCIRG1    | 3.26E-05 | -0.42954 | 0.007 | 0.127 | 0.486932 | Undiff-G | TCIRG1     |
| UBTD1     | 3.26E-05 | -0.27165 | 0     | 0.113 | 0.487579 | Undiff-G | UBTD1      |
| LRP6      | 3.26E-05 | -0.28301 | 0     | 0.113 | 0.487579 | Undiff-G | LRP6       |
| IFITM10   | 3.27E-05 | -0.40486 | 0.007 | 0.127 | 0.488008 | Undiff-G | IFITM10    |
| EPS8      | 3.27E-05 | -0.27767 | 0.007 | 0.128 | 0.488951 | Undiff-G | EPS8       |
| DOLK      | 3.28E-05 | -0.10197 | 0.007 | 0.128 | 0.489706 | Undiff-G | DOLK       |
| XXYLT1    | 3.28E-05 | -0.1383  | 0.007 | 0.128 | 0.489706 | Undiff-G | XXYLT1     |
| LMO2      | 3.28E-05 | -0.21509 | 0.029 | 0.166 | 0.490597 | Undiff-G | LMO2       |
| SH3BP1    | 3.29E-05 | -0.36272 | 0     | 0.113 | 0.491355 | Undiff-G | SH3BP1     |
| DIAPH1    | 3.33E-05 | -0.21593 | 0.015 | 0.14  | 0.497052 | Undiff-G | DIAPH1     |
| SRPX      | 3.33E-05 | -0.11123 | 0.037 | 0.178 | 0.497097 | Undiff-G | SRPX       |
| DLAT      | 3.33E-05 | -0.12053 | 0.007 | 0.127 | 0.497108 | Undiff-G | DLAT       |
| POGLUT1   | 3.36E-05 | -0.28683 | 0     | 0.113 | 0.502856 | Undiff-G | POGLUT1    |
| PRKX      | 3.36E-05 | -0.33081 | 0     | 0.113 | 0.502856 | Undiff-G | PRKX       |
| PIP4K2A   | 3.38E-05 | -0.40219 | 0.015 | 0.138 | 0.504409 | Undiff-G | PIP4K2A    |
| INPP1     | 3.38E-05 | -0.2939  | 0.022 | 0.153 | 0.505256 | Undiff-G | INPP1      |
| DLG1      | 3.38E-05 | -0.16489 | 0.029 | 0.167 | 0.505579 | Undiff-G | DLG1       |
| SLC35F1   | 3.40E-05 | -0.10303 | 0.007 | 0.127 | 0.508811 | Undiff-G | SLC35F1    |
| CEP68     | 3.41E-05 | -0.14502 | 0.022 | 0.153 | 0.50947  | Undiff-G | CEP68      |
| DNAJB4    | 3.42E-05 | -0.3336  | 0.007 | 0.127 | 0.510558 | Undiff-G | DNAJB4     |
| ACSS3     | 3.42E-05 | -0.24212 | 0     | 0.113 | 0.510671 | Undiff-G | ACSS3      |
| ST3GAL6   | 3.42E-05 | -0.44031 | 0     | 0.113 | 0.510671 | Undiff-G | ST3GAL6    |
| HMGXB3    | 3.43E-05 | -0.26046 | 0.007 | 0.127 | 0.512221 | Undiff-G | HMGXB3     |
| KIAA0232  | 3.45E-05 | -0.17603 | 0.022 | 0.153 | 0.516224 | Undiff-G | KIAA0232   |
| TXLNA     | 3.46E-05 | -0.20354 | 0.015 | 0.141 | 0.517759 | Undiff-G | TXLNA      |
| USP36     | 3.46E-05 | -0.33014 | 0.015 | 0.14  | 0.517778 | Undiff-G | USP36      |
| MTIF2     | 3.46E-05 | 0.10473  | 0.015 | 0.141 | 0.517787 | Undiff-G | MTIF2      |
| C5orf56   | 3.47E-05 | -0.32979 | 0     | 0.113 | 0.518604 | Undiff-G | C5orf56    |
| FAM126B   | 3.47E-05 | -0.26188 | 0.015 | 0.141 | 0.519097 | Undiff-G | FAM126B    |
| CXorf40B  | 3.48E-05 | 0.166046 | 0.022 | 0.155 | 0.520693 | Undiff-G | CXorf40B   |
| GGA2      | 3.49E-05 | -0.32535 | 0.015 | 0.14  | 0.522053 | Undiff-G | GGA2       |
| GLI4      | 3.50E-05 | -0.28204 | 0     | 0.112 | 0.522616 | Undiff-G | GLI4       |
| CAMK1D    | 3.50E-05 | -0.34345 | 0     | 0.112 | 0.522616 | Undiff-G | CAMK1D     |
| TMC6      | 3.50E-05 | -0.44595 | 0     | 0.112 | 0.522616 | Undiff-G | TMC6       |
| HYOU1     | 3.50E-05 | -0.22732 | 0.015 | 0.141 | 0.523074 | Undiff-G | HYOU1      |
| PRKAG2-AS | 3.52E-05 | -0.45762 | 0.007 | 0.126 | 0.525765 | Undiff-G | PRKAG2-AS1 |
| TULP3     | 3.52E-05 | -0.23651 | 0.007 | 0.127 | 0.526006 | Undiff-G | TULP3      |
| KIAA0196  | 3.52E-05 | -0.29565 | 0     | 0.112 | 0.526659 | Undiff-G | KIAA0196   |
| ATG7      | 3.52E-05 | -0.34987 | 0     | 0.112 | 0.526659 | Undiff-G | ATG7       |
| TLR2      | 3.52E-05 | -0.50063 | 0     | 0.112 | 0.526659 | Undiff-G | TLR2       |
| DHX40     | 3.53E-05 | -0.18184 | 0.015 | 0.141 | 0.528013 | Undiff-G | DHX40      |
| DHCR7     | 3.54E-05 | 0.354785 | 0.037 | 0.179 | 0.528794 | Undiff-G | DHCR7      |
| RGS2      | 3.55E-05 | 0.46579  | 0.184 | 0.448 | 0.53089  | Undiff-G | RGS2       |
| XPR1      | 3.56E-05 | -0.21836 | 0.007 | 0.127 | 0.531701 | Undiff-G | XPR1       |
| CUTC      | 3.56E-05 | -0.25716 | 0.007 | 0.127 | 0.531701 | Undiff-G | CUTC       |

|           |          |          |       |       |          |          |               |
|-----------|----------|----------|-------|-------|----------|----------|---------------|
| SRPK1     | 3.57E-05 | 0.14719  | 0.029 | 0.168 | 0.533604 | Undiff-G | SRPK1         |
| EPS15     | 3.57E-05 | -0.33777 | 0.022 | 0.152 | 0.534084 | Undiff-G | EPS15         |
| CHL1      | 3.59E-05 | 0.147934 | 0.022 | 0.154 | 0.535917 | Undiff-G | CHL1          |
| TMEM41A   | 3.59E-05 | -0.2008  | 0.007 | 0.127 | 0.536421 | Undiff-G | TMEM41A       |
| C17orf49  | 3.60E-05 | -0.25373 | 0.015 | 0.139 | 0.53821  | Undiff-G | C17orf49      |
| FAM171B   | 3.61E-05 | -0.2917  | 0     | 0.112 | 0.538972 | Undiff-G | FAM171B       |
| UGGT1     | 3.61E-05 | -0.30701 | 0     | 0.112 | 0.538972 | Undiff-G | UGGT1         |
| SHMT2     | 3.61E-05 | 0.410547 | 0.066 | 0.233 | 0.539707 | Undiff-G | SHMT2         |
| COLGALT2  | 3.61E-05 | -0.1065  | 0.015 | 0.14  | 0.540179 | Undiff-G | COLGALT2      |
| SART3     | 3.62E-05 | -0.10667 | 0.007 | 0.127 | 0.541183 | Undiff-G | SART3         |
| STAT2     | 3.64E-05 | -0.13854 | 0.015 | 0.14  | 0.543552 | Undiff-G | STAT2         |
| NOL3      | 3.66E-05 | 0.109432 | 0.029 | 0.167 | 0.546874 | Undiff-G | NOL3          |
| RALGAPA2  | 3.66E-05 | -0.25936 | 0     | 0.112 | 0.547338 | Undiff-G | RALGAPA2      |
| CEP57L1   | 3.66E-05 | -0.29537 | 0     | 0.112 | 0.547338 | Undiff-G | CEP57L1       |
| AMPD2     | 3.66E-05 | -0.13577 | 0.022 | 0.153 | 0.547622 | Undiff-G | AMPD2         |
| STRIP1    | 3.67E-05 | -0.29976 | 0.007 | 0.126 | 0.548018 | Undiff-G | STRIP1        |
| TPT1-AS1  | 3.67E-05 | -0.12177 | 0.015 | 0.14  | 0.548758 | Undiff-G | TPT1-AS1      |
| SLC35B3   | 3.68E-05 | -0.10763 | 0.007 | 0.126 | 0.549561 | Undiff-G | SLC35B3       |
| LPIN1     | 3.68E-05 | -0.3264  | 0.015 | 0.138 | 0.549564 | Undiff-G | LPIN1         |
| WDR48     | 3.68E-05 | -0.24916 | 0.015 | 0.14  | 0.550078 | Undiff-G | WDR48         |
| NOTCH1    | 3.69E-05 | -0.27339 | 0     | 0.112 | 0.551568 | Undiff-G | NOTCH1        |
| RNF135    | 3.69E-05 | -0.35885 | 0     | 0.112 | 0.551568 | Undiff-G | RNF135        |
| ANK2      | 3.70E-05 | -0.19373 | 0.029 | 0.165 | 0.552485 | Undiff-G | ANK2          |
| PPAN      | 3.74E-05 | -0.16728 | 0.029 | 0.166 | 0.559318 | Undiff-G | PPAN          |
| BIVM      | 3.75E-05 | -0.26753 | 0     | 0.112 | 0.560126 | Undiff-G | BIVM          |
| PRPS2     | 3.75E-05 | -0.26235 | 0.007 | 0.126 | 0.560314 | Undiff-G | PRPS2         |
| NLGN1     | 3.76E-05 | -0.25682 | 0.015 | 0.139 | 0.56212  | Undiff-G | NLGN1         |
| LRRC41    | 3.76E-05 | 0.312865 | 0.074 | 0.243 | 0.562426 | Undiff-G | LRRC41        |
| ENOSF1    | 3.77E-05 | -0.27086 | 0.007 | 0.126 | 0.563188 | Undiff-G | ENOSF1        |
| PI3       | 3.77E-05 | 1.445171 | 0.125 | 0.052 | 0.563392 | Undiff-G | PI3           |
| RALGAPB   | 3.78E-05 | -0.24023 | 0     | 0.112 | 0.564453 | Undiff-G | RALGAPB       |
| GTPBP8    | 3.78E-05 | -0.31588 | 0     | 0.112 | 0.564453 | Undiff-G | GTPBP8        |
| CCP110    | 3.78E-05 | -0.33809 | 0.007 | 0.125 | 0.565615 | Undiff-G | CCP110        |
| ST6GAL1   | 3.81E-05 | -0.44118 | 0     | 0.112 | 0.568814 | Undiff-G | ST6GAL1       |
| TMEM175   | 3.81E-05 | -0.24418 | 0.022 | 0.153 | 0.569118 | Undiff-G | TMEM175       |
| SH3BP2    | 3.82E-05 | -0.27719 | 0.015 | 0.14  | 0.570354 | Undiff-G | SH3BP2        |
| DCAF15    | 3.84E-05 | -0.26418 | 0     | 0.111 | 0.573208 | Undiff-G | DCAF15        |
| MTA1      | 3.85E-05 | -0.17443 | 0.044 | 0.192 | 0.575515 | Undiff-G | MTA1          |
| FASTKD5   | 3.87E-05 | -0.28627 | 0     | 0.111 | 0.577635 | Undiff-G | FASTKD5       |
| RP11-390E | 3.88E-05 | -0.20134 | 0.007 | 0.126 | 0.579118 | Undiff-G | RP11-390E23.6 |
| MERTK     | 3.88E-05 | -0.32017 | 0.007 | 0.126 | 0.57923  | Undiff-G | MERTK         |
| FUT8      | 3.88E-05 | -0.20113 | 0.007 | 0.126 | 0.579676 | Undiff-G | FUT8          |
| DDAH1     | 3.88E-05 | -0.16137 | 0.007 | 0.126 | 0.579787 | Undiff-G | DDAH1         |
| KLHL12    | 3.88E-05 | -0.10691 | 0.007 | 0.126 | 0.579899 | Undiff-G | KLHL12        |
| TCAIM     | 3.90E-05 | -0.16895 | 0.015 | 0.138 | 0.582138 | Undiff-G | TCAIM         |
| RPP21     | 3.90E-05 | -0.26747 | 0.007 | 0.126 | 0.582232 | Undiff-G | RPP21         |
| MGST3     | 3.90E-05 | 0.697724 | 0.294 | 0.698 | 0.583516 | Undiff-G | MGST3         |
| ZFC3H1    | 3.91E-05 | -0.28284 | 0.007 | 0.125 | 0.584989 | Undiff-G | ZFC3H1        |
| CD200     | 3.93E-05 | -0.33025 | 0     | 0.111 | 0.58659  | Undiff-G | CD200         |
| LAPTM4A   | 3.93E-05 | 0.545913 | 0.331 | 0.778 | 0.587602 | Undiff-G | LAPTM4A       |
| PXN       | 3.93E-05 | -0.2146  | 0.007 | 0.126 | 0.587959 | Undiff-G | PXN           |

|          |          |          |       |       |          |          |          |
|----------|----------|----------|-------|-------|----------|----------|----------|
| HIRIP3   | 3.95E-05 | 0.186084 | 0.029 | 0.167 | 0.590667 | Undiff-G | HIRIP3   |
| GNB5     | 3.96E-05 | -0.26856 | 0     | 0.111 | 0.591118 | Undiff-G | GNB5     |
| TMEM43   | 3.96E-05 | 0.332105 | 0.044 | 0.193 | 0.59149  | Undiff-G | TMEM43   |
| FAM91A1  | 3.97E-05 | -0.19422 | 0.007 | 0.125 | 0.592601 | Undiff-G | FAM91A1  |
| RAB3GAP1 | 3.97E-05 | -0.19776 | 0.015 | 0.139 | 0.593257 | Undiff-G | RAB3GAP1 |
| PDE12    | 3.99E-05 | -0.29725 | 0     | 0.111 | 0.595681 | Undiff-G | PDE12    |
| ZNF12    | 3.99E-05 | -0.24543 | 0.007 | 0.125 | 0.595998 | Undiff-G | ZNF12    |
| UTRN     | 4.02E-05 | -0.30029 | 0     | 0.111 | 0.600279 | Undiff-G | UTRN     |
| KLRC2    | 4.02E-05 | -0.40053 | 0     | 0.111 | 0.600279 | Undiff-G | KLRC2    |
| JADE1    | 4.02E-05 | -0.2559  | 0.007 | 0.125 | 0.600834 | Undiff-G | JADE1    |
| WEE1     | 4.03E-05 | -0.24093 | 0.022 | 0.151 | 0.602492 | Undiff-G | WEE1     |
| ZNF451   | 4.04E-05 | -0.11097 | 0.029 | 0.164 | 0.604088 | Undiff-G | ZNF451   |
| OPA3     | 4.05E-05 | -0.28891 | 0     | 0.111 | 0.604911 | Undiff-G | OPA3     |
| CYB561A3 | 4.06E-05 | -0.25282 | 0.022 | 0.152 | 0.606268 | Undiff-G | CYB561A3 |
| USP42    | 4.07E-05 | -0.29835 | 0.007 | 0.124 | 0.607751 | Undiff-G | USP42    |
| TLK2     | 4.09E-05 | -0.25098 | 0.007 | 0.125 | 0.611941 | Undiff-G | TLK2     |
| NFAT5    | 4.10E-05 | -0.26168 | 0.015 | 0.138 | 0.612155 | Undiff-G | NFAT5    |
| AMDHD2   | 4.11E-05 | -0.30799 | 0.007 | 0.124 | 0.613672 | Undiff-G | AMDHD2   |
| RFTN1    | 4.11E-05 | -0.26403 | 0     | 0.111 | 0.614282 | Undiff-G | RFTN1    |
| MOSPD2   | 4.11E-05 | -0.31681 | 0     | 0.111 | 0.614282 | Undiff-G | MOSPD2   |
| HDDC3    | 4.11E-05 | -0.13187 | 0.022 | 0.151 | 0.614725 | Undiff-G | HDDC3    |
| ZNF830   | 4.13E-05 | 0.382289 | 0.044 | 0.193 | 0.61676  | Undiff-G | ZNF830   |
| SALL1    | 4.14E-05 | -0.18887 | 0.015 | 0.139 | 0.618448 | Undiff-G | SALL1    |
| CREB3L2  | 4.14E-05 | -0.29853 | 0.007 | 0.125 | 0.618828 | Undiff-G | CREB3L2  |
| ZZZ3     | 4.14E-05 | -0.2812  | 0     | 0.111 | 0.61902  | Undiff-G | ZZZ3     |
| C6orf136 | 4.14E-05 | -0.29448 | 0     | 0.111 | 0.61902  | Undiff-G | C6orf136 |
| ZNF512   | 4.17E-05 | -0.25917 | 0.007 | 0.125 | 0.623229 | Undiff-G | ZNF512   |
| ARFGEF1  | 4.18E-05 | -0.19446 | 0.007 | 0.125 | 0.625149 | Undiff-G | ARFGEF1  |
| JAKMIP2  | 4.19E-05 | 0.125691 | 0.022 | 0.152 | 0.625815 | Undiff-G | JAKMIP2  |
| PRDX2    | 4.19E-05 | 0.432061 | 0.316 | 0.706 | 0.626863 | Undiff-G | PRDX2    |
| XRCC1    | 4.20E-05 | -0.2527  | 0.007 | 0.125 | 0.627057 | Undiff-G | XRCC1    |
| METTL16  | 4.21E-05 | -0.26979 | 0     | 0.11  | 0.628606 | Undiff-G | METTL16  |
| OXSRI    | 4.21E-05 | -0.29347 | 0     | 0.11  | 0.628606 | Undiff-G | OXSRI    |
| PIP4K2C  | 4.21E-05 | -0.34251 | 0     | 0.11  | 0.628606 | Undiff-G | PIP4K2C  |
| CLPX     | 4.21E-05 | -0.15507 | 0.022 | 0.151 | 0.629735 | Undiff-G | CLPX     |
| CTTN     | 4.23E-05 | 0.462827 | 0.066 | 0.231 | 0.632497 | Undiff-G | CTTN     |
| RUFY2    | 4.26E-05 | -0.22451 | 0.022 | 0.151 | 0.636354 | Undiff-G | RUFY2    |
| BEND5    | 4.26E-05 | -0.12392 | 0.015 | 0.138 | 0.636986 | Undiff-G | BEND5    |
| CHST7    | 4.27E-05 | -0.23897 | 0     | 0.11  | 0.638337 | Undiff-G | CHST7    |
| COL6A1   | 4.27E-05 | 0.175136 | 0.066 | 0.231 | 0.638584 | Undiff-G | COL6A1   |
| KCNF1    | 4.28E-05 | -0.25829 | 0.007 | 0.125 | 0.639683 | Undiff-G | KCNF1    |
| TAF3     | 4.30E-05 | -0.30951 | 0.007 | 0.123 | 0.643122 | Undiff-G | TAF3     |
| PRKRIR   | 4.30E-05 | -0.24835 | 0     | 0.11  | 0.643258 | Undiff-G | PRKRIR   |
| PPP3CB   | 4.30E-05 | -0.29962 | 0     | 0.11  | 0.643258 | Undiff-G | PPP3CB   |
| PELP1    | 4.31E-05 | 0.131889 | 0.022 | 0.152 | 0.643553 | Undiff-G | PELP1    |
| LACTB2   | 4.33E-05 | 0.141422 | 0.022 | 0.152 | 0.647002 | Undiff-G | LACTB2   |
| ZNF721   | 4.34E-05 | -0.26551 | 0.022 | 0.15  | 0.648863 | Undiff-G | ZNF721   |
| PLK2     | 4.34E-05 | -0.10589 | 0.015 | 0.138 | 0.649176 | Undiff-G | PLK2     |
| CCNY     | 4.37E-05 | -0.29873 | 0     | 0.11  | 0.653212 | Undiff-G | CCNY     |
| SLC27A3  | 4.39E-05 | -0.3075  | 0.007 | 0.124 | 0.656192 | Undiff-G | SLC27A3  |
| SH2B3    | 4.40E-05 | -0.39906 | 0     | 0.11  | 0.658246 | Undiff-G | SH2B3    |



|           |          |          |       |       |          |          |           |
|-----------|----------|----------|-------|-------|----------|----------|-----------|
| PRPS1     | 4.41E-05 | 0.344619 | 0.044 | 0.191 | 0.658898 | Undiff-G | PRPS1     |
| PLOD2     | 4.42E-05 | -0.1708  | 0.029 | 0.163 | 0.660887 | Undiff-G | PLOD2     |
| CLASRP    | 4.43E-05 | -0.17512 | 0.022 | 0.15  | 0.66257  | Undiff-G | CLASRP    |
| SH2B2     | 4.44E-05 | -0.2648  | 0     | 0.11  | 0.663318 | Undiff-G | SH2B2     |
| TPP2      | 4.45E-05 | -0.11727 | 0.007 | 0.124 | 0.66567  | Undiff-G | TPP2      |
| CNOT6L    | 4.47E-05 | -0.30807 | 0     | 0.11  | 0.668428 | Undiff-G | CNOT6L    |
| HMHA1     | 4.47E-05 | -0.45688 | 0     | 0.11  | 0.668428 | Undiff-G | HMHA1     |
| TBL3      | 4.49E-05 | -0.28916 | 0.007 | 0.124 | 0.6711   | Undiff-G | TBL3      |
| MSI1      | 4.50E-05 | -0.26633 | 0.015 | 0.137 | 0.672866 | Undiff-G | MSI1      |
| LINC00847 | 4.51E-05 | -0.30792 | 0     | 0.11  | 0.673577 | Undiff-G | LINC00847 |
| TBC1D22A  | 4.52E-05 | -0.13991 | 0.007 | 0.124 | 0.676067 | Undiff-G | TBC1D22A  |
| YTHDF3    | 4.53E-05 | -0.26451 | 0.015 | 0.138 | 0.676538 | Undiff-G | YTHDF3    |
| DLX2      | 4.54E-05 | -0.46095 | 0     | 0.11  | 0.678765 | Undiff-G | DLX2      |
| C20orf194 | 4.59E-05 | -0.30154 | 0.015 | 0.136 | 0.68563  | Undiff-G | C20orf194 |
| MFN2      | 4.61E-05 | -0.28739 | 0     | 0.109 | 0.689259 | Undiff-G | MFN2      |
| FADS3     | 4.62E-05 | -0.17703 | 0.022 | 0.15  | 0.691025 | Undiff-G | FADS3     |
| NXPH1     | 4.64E-05 | -0.28837 | 0.015 | 0.137 | 0.693359 | Undiff-G | NXPH1     |
| STXBP1    | 4.65E-05 | -0.29239 | 0.007 | 0.122 | 0.694321 | Undiff-G | STXBP1    |
| SMG1      | 4.65E-05 | -0.15566 | 0.029 | 0.164 | 0.694589 | Undiff-G | SMG1      |
| FAM126A   | 4.66E-05 | 0.131925 | 0.015 | 0.138 | 0.696769 | Undiff-G | FAM126A   |
| ZNF528    | 4.68E-05 | -0.2575  | 0     | 0.109 | 0.699913 | Undiff-G | ZNF528    |
| ZNF439    | 4.71E-05 | -0.25148 | 0.022 | 0.149 | 0.704008 | Undiff-G | ZNF439    |
| USE1      | 4.75E-05 | 0.537267 | 0.125 | 0.332 | 0.709647 | Undiff-G | USE1      |
| ALDOA     | 4.78E-05 | 0.931123 | 0.596 | 0.848 | 0.71369  | Undiff-G | ALDOA     |
| BCL2L13   | 4.78E-05 | 0.125067 | 0.022 | 0.151 | 0.714198 | Undiff-G | BCL2L13   |
| SLC35F2   | 4.79E-05 | -0.24665 | 0     | 0.109 | 0.716197 | Undiff-G | SLC35F2   |
| ANKFY1    | 4.80E-05 | -0.21643 | 0.015 | 0.137 | 0.716742 | Undiff-G | ANKFY1    |
| AKAP1     | 4.80E-05 | -0.26014 | 0.007 | 0.123 | 0.716877 | Undiff-G | AKAP1     |
| WBP5      | 4.81E-05 | 0.732208 | 0.213 | 0.506 | 0.719274 | Undiff-G | WBP5      |
| KAT6B     | 4.82E-05 | -0.27321 | 0.007 | 0.123 | 0.720743 | Undiff-G | KAT6B     |
| STX2      | 4.83E-05 | -0.25562 | 0     | 0.109 | 0.721708 | Undiff-G | STX2      |
| FAM199X   | 4.83E-05 | -0.25872 | 0     | 0.109 | 0.721708 | Undiff-G | FAM199X   |
| GOLGA5    | 4.84E-05 | 0.135128 | 0.022 | 0.149 | 0.722928 | Undiff-G | GOLGA5    |
| NCKAP1L   | 4.84E-05 | -0.31136 | 0.007 | 0.123 | 0.723264 | Undiff-G | NCKAP1L   |
| POU2F1    | 4.85E-05 | -0.18907 | 0.029 | 0.162 | 0.725453 | Undiff-G | POU2F1    |
| ARFGAP1   | 4.86E-05 | -0.22517 | 0.022 | 0.149 | 0.725615 | Undiff-G | ARFGAP1   |
| CASP6     | 4.86E-05 | 0.147359 | 0.029 | 0.164 | 0.72576  | Undiff-G | CASP6     |
| SUGP1     | 4.87E-05 | -0.23057 | 0.015 | 0.137 | 0.727195 | Undiff-G | SUGP1     |
| FAM216A   | 4.88E-05 | -0.11012 | 0.007 | 0.123 | 0.729652 | Undiff-G | FAM216A   |
| RASSF5    | 4.90E-05 | -0.42191 | 0.007 | 0.121 | 0.731636 | Undiff-G | RASSF5    |
| PCGF2     | 4.92E-05 | 0.290273 | 0.029 | 0.164 | 0.735149 | Undiff-G | PCGF2     |
| PPP1R37   | 4.96E-05 | -0.24851 | 0.015 | 0.136 | 0.741323 | Undiff-G | PPP1R37   |
| CERK      | 4.98E-05 | -0.2876  | 0     | 0.108 | 0.74417  | Undiff-G | CERK      |
| ANAPC4    | 4.98E-05 | -0.29885 | 0     | 0.108 | 0.74417  | Undiff-G | ANAPC4    |
| IPO13     | 4.98E-05 | -0.30518 | 0     | 0.108 | 0.74417  | Undiff-G | IPO13     |
| TBC1D12   | 4.98E-05 | -0.33121 | 0     | 0.108 | 0.74417  | Undiff-G | TBC1D12   |
| CCDC57    | 4.98E-05 | -0.36422 | 0     | 0.108 | 0.74417  | Undiff-G | CCDC57    |
| ADSS      | 5.00E-05 | 0.180141 | 0.044 | 0.188 | 0.74651  | Undiff-G | ADSS      |
| NAA16     | 5.00E-05 | -0.27977 | 0.007 | 0.123 | 0.747021 | Undiff-G | NAA16     |
| USP7      | 5.02E-05 | -0.17322 | 0.015 | 0.137 | 0.75055  | Undiff-G | USP7      |
| SELPLG    | 5.05E-05 | -0.43868 | 0.007 | 0.123 | 0.755303 | Undiff-G | SELPLG    |

|          |          |          |       |       |          |          |          |
|----------|----------|----------|-------|-------|----------|----------|----------|
| RAN      | 5.06E-05 | 0.62373  | 0.331 | 0.762 | 0.75633  | Undiff-G | RAN      |
| HBA2     | 5.07E-05 | 0.338016 | 0.051 | 0.199 | 0.758336 | Undiff-G | HBA2     |
| SMARCAD1 | 5.10E-05 | -0.2557  | 0     | 0.108 | 0.761466 | Undiff-G | SMARCAD1 |
| GPR82    | 5.12E-05 | -0.2672  | 0.015 | 0.136 | 0.764732 | Undiff-G | GPR82    |
| CHRN1    | 5.15E-05 | 0.202598 | 0.022 | 0.15  | 0.76987  | Undiff-G | CHRN1    |
| TTC9C    | 5.18E-05 | 0.354006 | 0.037 | 0.177 | 0.774184 | Undiff-G | TTC9C    |
| MAF      | 5.20E-05 | -0.20284 | 0.015 | 0.136 | 0.777427 | Undiff-G | MAF      |
| TMEM138  | 5.23E-05 | 0.127967 | 0.037 | 0.174 | 0.781319 | Undiff-G | TMEM138  |
| LYAR     | 5.23E-05 | 0.268452 | 0.037 | 0.176 | 0.781765 | Undiff-G | LYAR     |
| WDR11    | 5.25E-05 | -0.3358  | 0     | 0.108 | 0.785144 | Undiff-G | WDR11    |
| PHTF1    | 5.26E-05 | -0.25685 | 0.007 | 0.122 | 0.7864   | Undiff-G | PHTF1    |
| SLC37A4  | 5.27E-05 | -0.17365 | 0.007 | 0.122 | 0.787254 | Undiff-G | SLC37A4  |
| PAAF1    | 5.28E-05 | 0.128659 | 0.051 | 0.201 | 0.789448 | Undiff-G | PAAF1    |
| MFSD3    | 5.28E-05 | -0.26899 | 0.007 | 0.121 | 0.78972  | Undiff-G | MFSD3    |
| ATP1A3   | 5.30E-05 | -0.38568 | 0.007 | 0.122 | 0.792423 | Undiff-G | ATP1A3   |
| MANBA    | 5.33E-05 | -0.36865 | 0.007 | 0.122 | 0.796692 | Undiff-G | MANBA    |
| SH3RF1   | 5.33E-05 | -0.25208 | 0     | 0.108 | 0.797253 | Undiff-G | SH3RF1   |
| SPHK1    | 5.33E-05 | -0.29625 | 0     | 0.108 | 0.797253 | Undiff-G | SPHK1    |
| BTN2A1   | 5.36E-05 | -0.30064 | 0.007 | 0.121 | 0.800964 | Undiff-G | BTN2A1   |
| PILRB    | 5.36E-05 | -0.18821 | 0.029 | 0.163 | 0.8016   | Undiff-G | PILRB    |
| RGS3     | 5.38E-05 | -0.26838 | 0     | 0.108 | 0.803376 | Undiff-G | RGS3     |
| BRCC3    | 5.38E-05 | -0.28116 | 0     | 0.108 | 0.803376 | Undiff-G | BRCC3    |
| NAP1L5   | 5.38E-05 | -0.24043 | 0.015 | 0.136 | 0.804495 | Undiff-G | NAP1L5   |
| AGAP1    | 5.40E-05 | -0.29529 | 0.007 | 0.121 | 0.80638  | Undiff-G | AGAP1    |
| BPNT1    | 5.42E-05 | -0.29659 | 0     | 0.108 | 0.809546 | Undiff-G | BPNT1    |
| ISYNA1   | 5.43E-05 | -0.15657 | 0.015 | 0.135 | 0.810951 | Undiff-G | ISYNA1   |
| ID1      | 5.43E-05 | -0.23195 | 0.007 | 0.122 | 0.811805 | Undiff-G | ID1      |
| ESYT1    | 5.44E-05 | -0.31336 | 0.007 | 0.122 | 0.813178 | Undiff-G | ESYT1    |
| SERTAD2  | 5.45E-05 | -0.25276 | 0.007 | 0.122 | 0.814579 | Undiff-G | SERTAD2  |
| NFS1     | 5.46E-05 | -0.14262 | 0.015 | 0.135 | 0.815771 | Undiff-G | NFS1     |
| VPS53    | 5.48E-05 | -0.14418 | 0.029 | 0.161 | 0.819272 | Undiff-G | VPS53    |
| NME7     | 5.50E-05 | 0.310156 | 0.029 | 0.163 | 0.821329 | Undiff-G | NME7     |
| SOBP     | 5.50E-05 | -0.19537 | 0.015 | 0.136 | 0.82241  | Undiff-G | SOBP     |
| NBN      | 5.52E-05 | 0.144574 | 0.022 | 0.149 | 0.825139 | Undiff-G | NBN      |
| LRRN1    | 5.54E-05 | -0.30764 | 0     | 0.107 | 0.828335 | Undiff-G | LRRN1    |
| MAN2C1   | 5.55E-05 | -0.3363  | 0.015 | 0.135 | 0.829243 | Undiff-G | MAN2C1   |
| IRF2BP1  | 5.59E-05 | -0.23236 | 0     | 0.107 | 0.834692 | Undiff-G | IRF2BP1  |
| MAPKAPK2 | 5.59E-05 | -0.15134 | 0.015 | 0.134 | 0.835105 | Undiff-G | MAPKAPK2 |
| SLC7A6OS | 5.61E-05 | -0.21024 | 0.015 | 0.135 | 0.838927 | Undiff-G | SLC7A6OS |
| TECPR1   | 5.61E-05 | -0.24714 | 0.007 | 0.122 | 0.839001 | Undiff-G | TECPR1   |
| ZCCHC3   | 5.63E-05 | -0.23444 | 0     | 0.107 | 0.841098 | Undiff-G | ZCCHC3   |
| SYK      | 5.63E-05 | -0.43637 | 0     | 0.107 | 0.841098 | Undiff-G | SYK      |
| BAG5     | 5.63E-05 | 0.218799 | 0.044 | 0.186 | 0.8415   | Undiff-G | BAG5     |
| CTPS1    | 5.67E-05 | -0.28408 | 0     | 0.107 | 0.847552 | Undiff-G | CTPS1    |
| SNX29    | 5.67E-05 | -0.34404 | 0     | 0.107 | 0.847552 | Undiff-G | SNX29    |
| AKAP12   | 5.68E-05 | 0.155792 | 0.044 | 0.189 | 0.848593 | Undiff-G | AKAP12   |
| FAM134C  | 5.70E-05 | -0.28804 | 0.007 | 0.121 | 0.851932 | Undiff-G | FAM134C  |
| PEMT     | 5.74E-05 | 0.472447 | 0.059 | 0.214 | 0.857495 | Undiff-G | PEMT     |
| SEH1L    | 5.77E-05 | -0.16456 | 0.007 | 0.121 | 0.86236  | Undiff-G | SEH1L    |
| GIT1     | 5.80E-05 | -0.25172 | 0     | 0.107 | 0.867208 | Undiff-G | GIT1     |
| TMEM121  | 5.80E-05 | -0.25868 | 0     | 0.107 | 0.867208 | Undiff-G | TMEM121  |

|          |          |          |       |       |          |          |          |
|----------|----------|----------|-------|-------|----------|----------|----------|
| ICMT     | 5.81E-05 | -0.13589 | 0.015 | 0.134 | 0.86793  | Undiff-G | ICMT     |
| KATNB1   | 5.82E-05 | -0.23188 | 0.007 | 0.121 | 0.870044 | Undiff-G | KATNB1   |
| DIMT1    | 5.83E-05 | 0.133436 | 0.044 | 0.188 | 0.871205 | Undiff-G | DIMT1    |
| ZDHC16   | 5.85E-05 | -0.25622 | 0     | 0.107 | 0.87386  | Undiff-G | ZDHC16   |
| UBTD2    | 5.85E-05 | -0.26142 | 0     | 0.107 | 0.87386  | Undiff-G | UBTD2    |
| RCHY1    | 5.85E-05 | 0.502511 | 0.051 | 0.202 | 0.87426  | Undiff-G | RCHY1    |
| INPPL1   | 5.86E-05 | -0.12829 | 0.007 | 0.121 | 0.875936 | Undiff-G | INPPL1   |
| ALDH16A1 | 5.87E-05 | -0.29141 | 0.007 | 0.121 | 0.87745  | Undiff-G | ALDH16A1 |
| ASCC3    | 5.88E-05 | -0.2329  | 0.015 | 0.135 | 0.878837 | Undiff-G | ASCC3    |
| MCCC2    | 5.88E-05 | -0.16291 | 0.015 | 0.135 | 0.879319 | Undiff-G | MCCC2    |
| NDE1     | 5.89E-05 | -0.28226 | 0     | 0.107 | 0.880561 | Undiff-G | NDE1     |
| STK17B   | 5.90E-05 | -0.2576  | 0.015 | 0.134 | 0.881826 | Undiff-G | STK17B   |
| DUS1L    | 5.90E-05 | -0.23628 | 0.015 | 0.134 | 0.881994 | Undiff-G | DUS1L    |
| CA2      | 5.92E-05 | 0.41065  | 0.066 | 0.227 | 0.885229 | Undiff-G | CA2      |
| OTUD6B   | 5.98E-05 | -0.2429  | 0.007 | 0.121 | 0.893227 | Undiff-G | OTUD6B   |
| CIC      | 5.98E-05 | -0.26091 | 0.007 | 0.121 | 0.893355 | Undiff-G | CIC      |
| SLC26A11 | 5.98E-05 | -0.24967 | 0     | 0.106 | 0.894115 | Undiff-G | SLC26A11 |
| NBAS     | 5.98E-05 | -0.27418 | 0     | 0.106 | 0.894115 | Undiff-G | NBAS     |
| GNAI1    | 5.98E-05 | -0.33626 | 0     | 0.106 | 0.894115 | Undiff-G | GNAI1    |
| LHPP     | 5.98E-05 | -0.49502 | 0     | 0.106 | 0.894115 | Undiff-G | LHPP     |
| ODF2     | 6.01E-05 | -0.17285 | 0.015 | 0.133 | 0.898322 | Undiff-G | ODF2     |
| CENPB    | 6.03E-05 | -0.2676  | 0     | 0.106 | 0.900969 | Undiff-G | CENPB    |
| EPB41L3  | 6.03E-05 | -0.43804 | 0     | 0.106 | 0.900969 | Undiff-G | EPB41L3  |
| NBPF10   | 6.07E-05 | -0.1509  | 0.022 | 0.147 | 0.906397 | Undiff-G | NBPF10   |
| KTI12    | 6.08E-05 | -0.26709 | 0     | 0.106 | 0.907875 | Undiff-G | KTI12    |
| DNAJC24  | 6.08E-05 | -0.28403 | 0     | 0.106 | 0.907875 | Undiff-G | DNAJC24  |
| TBCD     | 6.10E-05 | -0.23389 | 0.022 | 0.147 | 0.911831 | Undiff-G | TBCD     |
| SNX8     | 6.10E-05 | -0.18267 | 0.022 | 0.148 | 0.912197 | Undiff-G | SNX8     |
| TMEM119  | 6.12E-05 | -0.50964 | 0     | 0.106 | 0.914832 | Undiff-G | TMEM119  |
| NECAP1   | 6.15E-05 | 0.229206 | 0.051 | 0.2   | 0.918945 | Undiff-G | NECAP1   |
| ANAPC2   | 6.17E-05 | -0.17159 | 0.015 | 0.133 | 0.921635 | Undiff-G | ANAPC2   |
| HDAC7    | 6.17E-05 | -0.27773 | 0     | 0.106 | 0.921843 | Undiff-G | HDAC7    |
| EEFSEC   | 6.17E-05 | -0.28458 | 0     | 0.106 | 0.921843 | Undiff-G | EEFSEC   |
| HUS1     | 6.17E-05 | -0.35116 | 0.007 | 0.119 | 0.922113 | Undiff-G | HUS1     |
| QSER1    | 6.23E-05 | -0.24156 | 0.007 | 0.119 | 0.930869 | Undiff-G | QSER1    |
| CDC42BPB | 6.33E-05 | -0.2323  | 0.007 | 0.12  | 0.945717 | Undiff-G | CDC42BPB |
| SPATA33  | 6.34E-05 | -0.13533 | 0.022 | 0.147 | 0.947942 | Undiff-G | SPATA33  |
| KIF22    | 6.36E-05 | 0.30642  | 0.051 | 0.198 | 0.95016  | Undiff-G | KIF22    |
| BIRC5    | 6.36E-05 | -0.44339 | 0     | 0.106 | 0.950415 | Undiff-G | BIRC5    |
| GSDMD    | 6.37E-05 | 0.190474 | 0.044 | 0.186 | 0.951373 | Undiff-G | GSDMD    |
| RGMB     | 6.38E-05 | -0.25845 | 0.015 | 0.133 | 0.953647 | Undiff-G | RGMB     |
| PHACTR1  | 6.39E-05 | -0.50577 | 0.007 | 0.119 | 0.954788 | Undiff-G | PHACTR1  |
| ABR      | 6.40E-05 | -0.11384 | 0.022 | 0.147 | 0.956519 | Undiff-G | ABR      |
| SPATA20  | 6.40E-05 | -0.1926  | 0.015 | 0.132 | 0.956812 | Undiff-G | SPATA20  |
| ELMOD2   | 6.41E-05 | -0.2977  | 0     | 0.106 | 0.957693 | Undiff-G | ELMOD2   |
| NUSAP1   | 6.41E-05 | -0.44131 | 0     | 0.106 | 0.957693 | Undiff-G | NUSAP1   |
| C5orf28  | 6.42E-05 | -0.19693 | 0.007 | 0.12  | 0.959341 | Undiff-G | C5orf28  |
| PRKAA1   | 6.44E-05 | -0.21905 | 0.022 | 0.147 | 0.962096 | Undiff-G | PRKAA1   |
| SCG2     | 6.45E-05 | 0.250833 | 0.088 | 0.264 | 0.963161 | Undiff-G | SCG2     |
| ITSN1    | 6.45E-05 | 0.105121 | 0.022 | 0.147 | 0.963971 | Undiff-G | ITSN1    |
| SEN2     | 6.46E-05 | 0.125656 | 0.015 | 0.134 | 0.965099 | Undiff-G | SEN2     |

|           |          |          |       |       |          |          |               |
|-----------|----------|----------|-------|-------|----------|----------|---------------|
| IQCE      | 6.46E-05 | -0.24417 | 0.007 | 0.12  | 0.965509 | Undiff-G | IQCE          |
| GALNS     | 6.47E-05 | -0.23038 | 0.015 | 0.133 | 0.966369 | Undiff-G | GALNS         |
| RP11-262H | 6.48E-05 | -0.25646 | 0.007 | 0.12  | 0.968977 | Undiff-G | RP11-262H14.4 |
| THAP9-AS1 | 6.49E-05 | 0.338014 | 0.066 | 0.223 | 0.969476 | Undiff-G | THAP9-AS1     |
| ZNF652    | 6.49E-05 | -0.24766 | 0.022 | 0.146 | 0.970427 | Undiff-G | ZNF652        |
| ZNF44     | 6.51E-05 | -0.2833  | 0     | 0.105 | 0.972414 | Undiff-G | ZNF44         |
| FAM179B   | 6.53E-05 | -0.24277 | 0.007 | 0.12  | 0.975114 | Undiff-G | FAM179B       |
| PSMA3     | 6.54E-05 | 0.799517 | 0.184 | 0.444 | 0.978074 | Undiff-G | PSMA3         |
| PARP14    | 6.55E-05 | -0.2836  | 0.029 | 0.158 | 0.97845  | Undiff-G | PARP14        |
| GTF3C2    | 6.56E-05 | -0.28783 | 0     | 0.105 | 0.979858 | Undiff-G | GTF3C2        |
| SPTY2D1   | 6.56E-05 | -0.22364 | 0.007 | 0.12  | 0.980163 | Undiff-G | SPTY2D1       |
| DDX50     | 6.56E-05 | 0.256968 | 0.029 | 0.161 | 0.980687 | Undiff-G | DDX50         |
| DZIP3     | 6.57E-05 | -0.24994 | 0.015 | 0.132 | 0.98176  | Undiff-G | DZIP3         |
| CAPRIN2   | 6.61E-05 | -0.23254 | 0     | 0.105 | 0.987358 | Undiff-G | CAPRIN2       |
| CEBPA     | 6.61E-05 | -0.41353 | 0     | 0.105 | 0.987358 | Undiff-G | CEBPA         |
| MGAT4B    | 6.66E-05 | -0.22379 | 0     | 0.105 | 0.994914 | Undiff-G | MGAT4B        |
| ARL9      | 6.66E-05 | -0.24533 | 0     | 0.105 | 0.994914 | Undiff-G | ARL9          |
| SLC25A38  | 6.69E-05 | 0.153065 | 0.022 | 0.147 | 1        | Undiff-G | SLC25A38      |
| SH3GLB2   | 6.70E-05 | -0.21664 | 0.007 | 0.12  | 1        | Undiff-G | SH3GLB2       |
| WDR47     | 6.71E-05 | -0.27669 | 0     | 0.105 | 1        | Undiff-G | WDR47         |
| SEMA5A    | 6.71E-05 | -0.28988 | 0     | 0.105 | 1        | Undiff-G | SEMA5A        |
| IKBKB     | 6.76E-05 | -0.2694  | 0.007 | 0.119 | 1        | Undiff-G | IKBKB         |
| H2AFY2    | 6.76E-05 | -0.23264 | 0     | 0.105 | 1        | Undiff-G | H2AFY2        |
| ESRRA     | 6.76E-05 | -0.26663 | 0     | 0.105 | 1        | Undiff-G | ESRRA         |
| CTR9      | 6.78E-05 | 0.290803 | 0.037 | 0.174 | 1        | Undiff-G | CTR9          |
| RRM1      | 6.79E-05 | 0.375746 | 0.044 | 0.187 | 1        | Undiff-G | RRM1          |
| DNAJB9    | 6.79E-05 | 0.845206 | 0.154 | 0.388 | 1        | Undiff-G | DNAJB9        |
| CDK2AP1   | 6.81E-05 | -0.24232 | 0     | 0.105 | 1        | Undiff-G | CDK2AP1       |
| APOBEC3G  | 6.81E-05 | -0.2805  | 0.007 | 0.119 | 1        | Undiff-G | APOBEC3G      |
| SLC8A1    | 6.83E-05 | -0.18495 | 0.022 | 0.146 | 1        | Undiff-G | SLC8A1        |
| ING3      | 6.84E-05 | 0.381081 | 0.044 | 0.186 | 1        | Undiff-G | ING3          |
| SHMT1     | 6.88E-05 | -0.15028 | 0.007 | 0.119 | 1        | Undiff-G | SHMT1         |
| LEO1      | 6.91E-05 | -0.10996 | 0.022 | 0.145 | 1        | Undiff-G | LEO1          |
| SATB1     | 6.91E-05 | -0.25574 | 0.015 | 0.131 | 1        | Undiff-G | SATB1         |
| UBFD1     | 6.92E-05 | -0.25177 | 0     | 0.105 | 1        | Undiff-G | UBFD1         |
| LPAR5     | 6.92E-05 | -0.44385 | 0     | 0.105 | 1        | Undiff-G | LPAR5         |
| ACADS     | 6.92E-05 | -0.21321 | 0.007 | 0.119 | 1        | Undiff-G | ACADS         |
| KIAA0101  | 6.98E-05 | -0.39571 | 0.007 | 0.119 | 1        | Undiff-G | KIAA0101      |
| C11orf74  | 7.01E-05 | 0.431172 | 0.037 | 0.173 | 1        | Undiff-G | C11orf74      |
| AK2       | 7.02E-05 | 0.728475 | 0.162 | 0.393 | 1        | Undiff-G | AK2           |
| TMEM209   | 7.03E-05 | -0.14674 | 0.007 | 0.119 | 1        | Undiff-G | TMEM209       |
| CENPW     | 7.04E-05 | -0.29224 | 0.007 | 0.119 | 1        | Undiff-G | CENPW         |
| FUNDC1    | 7.06E-05 | 0.486139 | 0.081 | 0.248 | 1        | Undiff-G | FUNDC1        |
| GZF1      | 7.08E-05 | -0.27803 | 0     | 0.105 | 1        | Undiff-G | GZF1          |
| POLRMT    | 7.10E-05 | -0.22088 | 0.015 | 0.132 | 1        | Undiff-G | POLRMT        |
| EIF2B5    | 7.11E-05 | 0.188801 | 0.044 | 0.185 | 1        | Undiff-G | EIF2B5        |
| RRP9      | 7.17E-05 | 0.156646 | 0.029 | 0.158 | 1        | Undiff-G | RRP9          |
| SPATA2L   | 7.18E-05 | -0.26148 | 0     | 0.104 | 1        | Undiff-G | SPATA2L       |
| RALGAPA1  | 7.26E-05 | -0.28669 | 0.015 | 0.131 | 1        | Undiff-G | RALGAPA1      |
| 10-Sep    | 7.31E-05 | -0.15302 | 0.007 | 0.119 | 1        | Undiff-G | 10-Sep        |
| KIAA0907  | 7.33E-05 | 0.26136  | 0.051 | 0.196 | 1        | Undiff-G | KIAA0907      |

|          |          |          |       |       |            |          |
|----------|----------|----------|-------|-------|------------|----------|
| IL17RC   | 7.34E-05 | -0.23782 | 0.007 | 0.118 | 1 Undiff-G | IL17RC   |
| PIP4K2B  | 7.35E-05 | -0.25037 | 0     | 0.104 | 1 Undiff-G | PIP4K2B  |
| CBL      | 7.35E-05 | -0.26411 | 0     | 0.104 | 1 Undiff-G | CBL      |
| RILP     | 7.35E-05 | -0.297   | 0     | 0.104 | 1 Undiff-G | RILP     |
| ANO6     | 7.41E-05 | -0.2653  | 0     | 0.104 | 1 Undiff-G | ANO6     |
| CARKD    | 7.41E-05 | -0.21134 | 0.015 | 0.131 | 1 Undiff-G | CARKD    |
| E2F6     | 7.45E-05 | -0.13907 | 0.022 | 0.146 | 1 Undiff-G | E2F6     |
| PPIL2    | 7.46E-05 | -0.21857 | 0.007 | 0.118 | 1 Undiff-G | PPIL2    |
| FBP1     | 7.46E-05 | -0.40194 | 0.007 | 0.118 | 1 Undiff-G | FBP1     |
| SRCAP    | 7.46E-05 | -0.27737 | 0     | 0.104 | 1 Undiff-G | SRCAP    |
| MORC3    | 7.46E-05 | -0.28101 | 0     | 0.104 | 1 Undiff-G | MORC3    |
| PCED1A   | 7.48E-05 | -0.21093 | 0.015 | 0.132 | 1 Undiff-G | PCED1A   |
| ATG10    | 7.48E-05 | -0.11719 | 0.022 | 0.144 | 1 Undiff-G | ATG10    |
| PRR3     | 7.52E-05 | -0.27297 | 0     | 0.104 | 1 Undiff-G | PRR3     |
| KCNMB1   | 7.52E-05 | -0.48705 | 0     | 0.104 | 1 Undiff-G | KCNMB1   |
| SERPING1 | 7.53E-05 | 1.22101  | 0.316 | 0.233 | 1 Undiff-G | SERPING1 |
| NUP50    | 7.56E-05 | -0.22189 | 0.007 | 0.118 | 1 Undiff-G | NUP50    |
| UBXN7    | 7.57E-05 | -0.26403 | 0.007 | 0.118 | 1 Undiff-G | UBXN7    |
| SH3PXD2B | 7.59E-05 | -0.11861 | 0.007 | 0.118 | 1 Undiff-G | SH3PXD2B |
| SNHG15   | 7.60E-05 | 0.404723 | 0.066 | 0.224 | 1 Undiff-G | SNHG15   |
| S100A10  | 7.62E-05 | 1.192475 | 0.485 | 0.545 | 1 Undiff-G | S100A10  |
| QPRT     | 7.63E-05 | -0.39187 | 0.007 | 0.116 | 1 Undiff-G | QPRT     |
| ZNF268   | 7.65E-05 | -0.15512 | 0.007 | 0.118 | 1 Undiff-G | ZNF268   |
| UBQLN4   | 7.69E-05 | -0.25588 | 0     | 0.104 | 1 Undiff-G | UBQLN4   |
| CDKN2A   | 7.69E-05 | -0.44631 | 0     | 0.104 | 1 Undiff-G | CDKN2A   |
| NSMF     | 7.70E-05 | -0.23378 | 0.007 | 0.118 | 1 Undiff-G | NSMF     |
| ATG9A    | 7.71E-05 | -0.24948 | 0.007 | 0.118 | 1 Undiff-G | ATG9A    |
| ENO2     | 7.72E-05 | 0.609941 | 0.103 | 0.286 | 1 Undiff-G | ENO2     |
| RBM47    | 7.72E-05 | -0.30737 | 0.007 | 0.118 | 1 Undiff-G | RBM47    |
| TMEM255A | 7.75E-05 | -0.25166 | 0     | 0.103 | 1 Undiff-G | TMEM255A |
| TMOD3    | 7.78E-05 | 0.111193 | 0.022 | 0.145 | 1 Undiff-G | TMOD3    |
| RCE1     | 7.78E-05 | -0.26744 | 0.015 | 0.13  | 1 Undiff-G | RCE1     |
| METTL21A | 7.81E-05 | 0.266253 | 0.044 | 0.185 | 1 Undiff-G | METTL21A |
| RNASE1   | 7.85E-05 | -0.20415 | 0.037 | 0.171 | 1 Undiff-G | RNASE1   |
| LGR4     | 7.87E-05 | -0.20635 | 0     | 0.103 | 1 Undiff-G | LGR4     |
| DENND6B  | 7.87E-05 | -0.34956 | 0     | 0.103 | 1 Undiff-G | DENND6B  |
| PLEKH02  | 7.87E-05 | -0.36057 | 0     | 0.103 | 1 Undiff-G | PLEKH02  |
| TFE3     | 7.88E-05 | -0.12119 | 0.007 | 0.118 | 1 Undiff-G | TFE3     |
| FHIT     | 7.93E-05 | -0.27357 | 0.007 | 0.118 | 1 Undiff-G | FHIT     |
| CEPT1    | 7.94E-05 | -0.11939 | 0.029 | 0.157 | 1 Undiff-G | CEPT1    |
| CDK17    | 7.94E-05 | -0.21729 | 0.007 | 0.118 | 1 Undiff-G | CDK17    |
| NT5C2    | 7.94E-05 | -0.31776 | 0.015 | 0.131 | 1 Undiff-G | NT5C2    |
| NSMAF    | 7.96E-05 | -0.2521  | 0.007 | 0.118 | 1 Undiff-G | NSMAF    |
| GPN2     | 7.97E-05 | -0.29788 | 0.007 | 0.116 | 1 Undiff-G | GPN2     |
| SMNDC1   | 7.98E-05 | -0.28093 | 0.007 | 0.117 | 1 Undiff-G | SMNDC1   |
| MDM4     | 7.99E-05 | 0.225826 | 0.081 | 0.248 | 1 Undiff-G | MDM4     |
| HDAC8    | 7.99E-05 | -0.2907  | 0     | 0.103 | 1 Undiff-G | HDAC8    |
| GTF2IRD2 | 8.00E-05 | -0.26974 | 0.007 | 0.117 | 1 Undiff-G | GTF2IRD2 |
| DPH2     | 8.00E-05 | -0.2492  | 0.007 | 0.117 | 1 Undiff-G | DPH2     |
| PRRC1    | 8.01E-05 | -0.13179 | 0.007 | 0.118 | 1 Undiff-G | PRRC1    |
| ZSCAN21  | 8.05E-05 | -0.27514 | 0     | 0.103 | 1 Undiff-G | ZSCAN21  |

|          |          |          |       |       |            |          |
|----------|----------|----------|-------|-------|------------|----------|
| NAP1L3   | 8.05E-05 | -0.31032 | 0     | 0.103 | 1 Undiff-G | NAP1L3   |
| NOM1     | 8.06E-05 | -0.25555 | 0.007 | 0.117 | 1 Undiff-G | NOM1     |
| RBL2     | 8.07E-05 | -0.25521 | 0.015 | 0.131 | 1 Undiff-G | RBL2     |
| NCAPH2   | 8.08E-05 | -0.17038 | 0.015 | 0.131 | 1 Undiff-G | NCAPH2   |
| PALD1    | 8.11E-05 | -0.42635 | 0     | 0.103 | 1 Undiff-G | PALD1    |
| TRIM16   | 8.15E-05 | -0.21788 | 0.015 | 0.131 | 1 Undiff-G | TRIM16   |
| DLX6-AS1 | 8.16E-05 | -0.45606 | 0.015 | 0.131 | 1 Undiff-G | DLX6-AS1 |
| SEC16A   | 8.17E-05 | -0.25634 | 0.007 | 0.117 | 1 Undiff-G | SEC16A   |
| KBTBD2   | 8.17E-05 | -0.28463 | 0.007 | 0.116 | 1 Undiff-G | KBTBD2   |
| ZSWIM2   | 8.18E-05 | 0.302351 | 0.007 | 0     | 1 Undiff-G | ZSWIM2   |
| ELSPBP1  | 8.18E-05 | 0.258194 | 0.007 | 0     | 1 Undiff-G | ELSPBP1  |
| CRTC3    | 8.20E-05 | -0.26648 | 0.007 | 0.117 | 1 Undiff-G | CRTC3    |
| SEC14L2  | 8.23E-05 | -0.26525 | 0.007 | 0.116 | 1 Undiff-G | SEC14L2  |
| SAV1     | 8.24E-05 | -0.26926 | 0     | 0.103 | 1 Undiff-G | SAV1     |
| RTN1     | 8.29E-05 | -0.11968 | 0.022 | 0.145 | 1 Undiff-G | RTN1     |
| SERP2    | 8.30E-05 | -0.29849 | 0     | 0.103 | 1 Undiff-G | SERP2    |
| HIBCH    | 8.36E-05 | 0.406965 | 0.081 | 0.246 | 1 Undiff-G | HIBCH    |
| PML      | 8.36E-05 | -0.27564 | 0     | 0.103 | 1 Undiff-G | PML      |
| NCF2     | 8.36E-05 | -0.42844 | 0     | 0.103 | 1 Undiff-G | NCF2     |
| SPHK2    | 8.38E-05 | -0.26596 | 0.015 | 0.129 | 1 Undiff-G | SPHK2    |
| DOLPP1   | 8.43E-05 | -0.27751 | 0     | 0.103 | 1 Undiff-G | DOLPP1   |
| DNAJC11  | 8.43E-05 | -0.30475 | 0     | 0.103 | 1 Undiff-G | DNAJC11  |
| BAK1     | 8.43E-05 | -0.17592 | 0.007 | 0.117 | 1 Undiff-G | BAK1     |
| CCDC126  | 8.48E-05 | -0.26007 | 0.007 | 0.117 | 1 Undiff-G | CCDC126  |
| NAB2     | 8.48E-05 | -0.13027 | 0.022 | 0.143 | 1 Undiff-G | NAB2     |
| HOXA7    | 8.49E-05 | -0.35866 | 0     | 0.102 | 1 Undiff-G | HOXA7    |
| C1orf216 | 8.50E-05 | -0.24731 | 0.015 | 0.129 | 1 Undiff-G | C1orf216 |
| DHX38    | 8.52E-05 | -0.25321 | 0.007 | 0.117 | 1 Undiff-G | DHX38    |
| ABCB8    | 8.54E-05 | -0.21503 | 0.022 | 0.143 | 1 Undiff-G | ABCB8    |
| CX3CR1   | 8.56E-05 | -0.49289 | 0     | 0.102 | 1 Undiff-G | CX3CR1   |
| RRP15    | 8.60E-05 | 0.424358 | 0.066 | 0.222 | 1 Undiff-G | RRP15    |
| PLEKHA2  | 8.61E-05 | -0.29776 | 0.007 | 0.115 | 1 Undiff-G | PLEKHA2  |
| JMY      | 8.62E-05 | -0.24716 | 0     | 0.102 | 1 Undiff-G | JMY      |
| CENPF    | 8.62E-05 | -0.4139  | 0     | 0.102 | 1 Undiff-G | CENPF    |
| ACAD9    | 8.65E-05 | -0.23842 | 0.007 | 0.117 | 1 Undiff-G | ACAD9    |
| CDC42EP1 | 8.67E-05 | -0.27341 | 0.015 | 0.129 | 1 Undiff-G | CDC42EP1 |
| YLPM1    | 8.67E-05 | -0.26122 | 0.007 | 0.116 | 1 Undiff-G | YLPM1    |
| TMEM184C | 8.69E-05 | -0.25217 | 0     | 0.102 | 1 Undiff-G | TMEM184C |
| MYLIP    | 8.74E-05 | -0.20702 | 0.015 | 0.13  | 1 Undiff-G | MYLIP    |
| NOM01    | 8.75E-05 | -0.25548 | 0     | 0.102 | 1 Undiff-G | NOM01    |
| NKAIN4   | 8.75E-05 | -0.42027 | 0     | 0.102 | 1 Undiff-G | NKAIN4   |
| KRBOX4   | 8.76E-05 | -0.19745 | 0.007 | 0.117 | 1 Undiff-G | KRBOX4   |
| MBD6     | 8.77E-05 | -0.36092 | 0.022 | 0.14  | 1 Undiff-G | MBD6     |
| ATMIN    | 8.77E-05 | -0.10343 | 0.007 | 0.117 | 1 Undiff-G | ATMIN    |
| RIN3     | 8.78E-05 | -0.36117 | 0.007 | 0.116 | 1 Undiff-G | RIN3     |
| SNAP25   | 8.78E-05 | -0.15149 | 0.022 | 0.144 | 1 Undiff-G | SNAP25   |
| KIAA1586 | 8.79E-05 | -0.26626 | 0.007 | 0.116 | 1 Undiff-G | KIAA1586 |
| INPP4A   | 8.82E-05 | -0.28753 | 0     | 0.102 | 1 Undiff-G | INPP4A   |
| ZNF33A   | 8.82E-05 | -0.31622 | 0     | 0.102 | 1 Undiff-G | ZNF33A   |
| C10orf11 | 8.82E-05 | -0.38229 | 0     | 0.102 | 1 Undiff-G | C10orf11 |
| TNFRSF14 | 8.83E-05 | -0.19417 | 0.007 | 0.116 | 1 Undiff-G | TNFRSF14 |

|           |          |          |       |       |                         |
|-----------|----------|----------|-------|-------|-------------------------|
| IFT43     | 8.92E-05 | 0.69303  | 0.088 | 0.259 | 1 Undiff-G IFT43        |
| NUDCD1    | 8.96E-05 | -0.26985 | 0     | 0.102 | 1 Undiff-G NUDCD1       |
| AAGAB     | 8.96E-05 | -0.14179 | 0.007 | 0.116 | 1 Undiff-G AAGAB        |
| NUFIP1    | 8.97E-05 | -0.12347 | 0.007 | 0.116 | 1 Undiff-G NUFIP1       |
| MAP1B     | 8.99E-05 | 0.418545 | 0.243 | 0.537 | 1 Undiff-G MAP1B        |
| RYBP      | 9.03E-05 | -0.21946 | 0.007 | 0.116 | 1 Undiff-G RYBP         |
| RP11-25K1 | 9.16E-05 | -0.24667 | 0     | 0.102 | 1 Undiff-G RP11-25K19.1 |
| DENND3    | 9.16E-05 | -0.42497 | 0     | 0.102 | 1 Undiff-G DENND3       |
| LCP2      | 9.17E-05 | -0.32772 | 0.007 | 0.116 | 1 Undiff-G LCP2         |
| RIN2      | 9.21E-05 | -0.3861  | 0.015 | 0.127 | 1 Undiff-G RIN2         |
| SLC38A1   | 9.22E-05 | -0.27054 | 0.022 | 0.143 | 1 Undiff-G SLC38A1      |
| PRKCZ     | 9.23E-05 | -0.26693 | 0     | 0.102 | 1 Undiff-G PRKCZ        |
| PCMTD1    | 9.28E-05 | -0.12178 | 0.029 | 0.154 | 1 Undiff-G PCMTD1       |
| CUEDC1    | 9.28E-05 | -0.2229  | 0.007 | 0.116 | 1 Undiff-G CUEDC1       |
| FAM189B   | 9.30E-05 | -0.25187 | 0     | 0.101 | 1 Undiff-G FAM189B      |
| C3orf70   | 9.30E-05 | -0.26653 | 0     | 0.101 | 1 Undiff-G C3orf70      |
| MTFMT     | 9.30E-05 | -0.27239 | 0     | 0.101 | 1 Undiff-G MTFMT        |
| C1QL1     | 9.33E-05 | -0.25111 | 0.007 | 0.116 | 1 Undiff-G C1QL1        |
| BCL6      | 9.36E-05 | -0.23731 | 0.015 | 0.129 | 1 Undiff-G BCL6         |
| SIK1      | 9.37E-05 | -0.40305 | 0     | 0.101 | 1 Undiff-G SIK1         |
| NOL10     | 9.38E-05 | 0.220273 | 0.029 | 0.156 | 1 Undiff-G NOL10        |
| VWA9      | 9.41E-05 | 0.137981 | 0.015 | 0.13  | 1 Undiff-G VWA9         |
| ABHD14B   | 9.41E-05 | 0.274146 | 0.044 | 0.181 | 1 Undiff-G ABHD14B      |
| PCGF3     | 9.43E-05 | -0.21765 | 0.007 | 0.116 | 1 Undiff-G PCGF3        |
| DBT       | 9.44E-05 | -0.27584 | 0     | 0.101 | 1 Undiff-G DBT          |
| HMBOX1    | 9.47E-05 | 0.111862 | 0.051 | 0.194 | 1 Undiff-G HMBOX1       |
| FDXR      | 9.50E-05 | -0.27358 | 0.007 | 0.115 | 1 Undiff-G FDXR         |
| FGFBP3    | 9.52E-05 | -0.23745 | 0     | 0.101 | 1 Undiff-G FGFBP3       |
| SLMAP     | 9.55E-05 | -0.19819 | 0.015 | 0.128 | 1 Undiff-G SLMAP        |
| PRDM1     | 9.59E-05 | -0.41669 | 0     | 0.101 | 1 Undiff-G PRDM1        |
| RBM4B     | 9.62E-05 | 0.396887 | 0.051 | 0.193 | 1 Undiff-G RBM4B        |
| LPGAT1    | 9.64E-05 | -0.12127 | 0.015 | 0.129 | 1 Undiff-G LPGAT1       |
| SYT1      | 9.66E-05 | -0.40829 | 0     | 0.101 | 1 Undiff-G SYT1         |
| PIK3C2A   | 9.67E-05 | -0.11513 | 0.022 | 0.141 | 1 Undiff-G PIK3C2A      |
| CTB-3102C | 9.67E-05 | -0.23242 | 0.007 | 0.115 | 1 Undiff-G CTB-31020.2  |
| FOXK1     | 9.67E-05 | -0.27116 | 0.015 | 0.128 | 1 Undiff-G FOXK1        |
| TBC1D10B  | 9.74E-05 | -0.25411 | 0     | 0.101 | 1 Undiff-G TBC1D10B     |
| EFNB2     | 9.88E-05 | -0.20159 | 0     | 0.101 | 1 Undiff-G EFNB2        |
| CMTM5     | 9.88E-05 | -0.50644 | 0     | 0.101 | 1 Undiff-G CMTM5        |
| F3        | 9.92E-05 | -0.12868 | 0.051 | 0.193 | 1 Undiff-G F3           |
| ANKRD26   | 9.94E-05 | -0.24189 | 0.007 | 0.115 | 1 Undiff-G ANKRD26      |
| JAZF1     | 9.95E-05 | -0.24528 | 0.007 | 0.115 | 1 Undiff-G JAZF1        |
| COG5      | 9.96E-05 | -0.26986 | 0     | 0.101 | 1 Undiff-G COG5         |
| DNAJC14   | 9.96E-05 | -0.27891 | 0     | 0.101 | 1 Undiff-G DNAJC14      |
| CDKN1C    | 9.97E-05 | -0.14749 | 0.007 | 0.115 | 1 Undiff-G CDKN1C       |
| SLC35F5   | 9.97E-05 | -0.10226 | 0.022 | 0.141 | 1 Undiff-G SLC35F5      |
| CEP78     | 0.0001   | -0.22546 | 0.007 | 0.115 | 1 Undiff-G CEP78        |
| ZDHHC9    | 0.0001   | 0.390102 | 0.037 | 0.169 | 1 Undiff-G ZDHHC9       |
| GINS2     | 0.0001   | -0.30341 | 0     | 0.101 | 1 Undiff-G GINS2        |
| GADD45A   | 0.000101 | 0.447245 | 0.103 | 0.281 | 1 Undiff-G GADD45A      |
| CASC15    | 0.000101 | -0.3069  | 0     | 0.1   | 1 Undiff-G CASC15       |

|          |          |          |       |       |            |          |
|----------|----------|----------|-------|-------|------------|----------|
| PCDH9    | 0.000101 | 0.25199  | 0.088 | 0.257 | 1 Undiff-G | PCDH9    |
| EFHC1    | 0.000101 | 0.267571 | 0.059 | 0.207 | 1 Undiff-G | EFHC1    |
| HDAC6    | 0.000101 | -0.2192  | 0.007 | 0.115 | 1 Undiff-G | HDAC6    |
| C18orf8  | 0.000102 | -0.19586 | 0.007 | 0.115 | 1 Undiff-G | C18orf8  |
| FBX028   | 0.000102 | -0.2598  | 0     | 0.1   | 1 Undiff-G | FBX028   |
| DDX59    | 0.000102 | -0.26537 | 0     | 0.1   | 1 Undiff-G | DDX59    |
| STAM     | 0.000102 | -0.27415 | 0     | 0.1   | 1 Undiff-G | STAM     |
| TCN2     | 0.000102 | -0.35482 | 0     | 0.1   | 1 Undiff-G | TCN2     |
| PEX26    | 0.000102 | -0.26723 | 0.007 | 0.114 | 1 Undiff-G | PEX26    |
| OTUD4    | 0.000103 | -0.21384 | 0     | 0.1   | 1 Undiff-G | OTUD4    |
| FAM168A  | 0.000103 | -0.10654 | 0.015 | 0.128 | 1 Undiff-G | FAM168A  |
| CYFIP2   | 0.000103 | -0.1532  | 0.007 | 0.115 | 1 Undiff-G | CYFIP2   |
| SNX24    | 0.000103 | -0.18564 | 0.015 | 0.127 | 1 Undiff-G | SNX24    |
| ERI1     | 0.000103 | -0.27938 | 0.007 | 0.114 | 1 Undiff-G | ERI1     |
| TMCC1    | 0.000103 | -0.20501 | 0.007 | 0.115 | 1 Undiff-G | TMCC1    |
| ALG1     | 0.000103 | -0.25112 | 0.007 | 0.115 | 1 Undiff-G | ALG1     |
| POM121C  | 0.000104 | -0.13945 | 0.022 | 0.142 | 1 Undiff-G | POM121C  |
| BCL2L12  | 0.000104 | 0.112884 | 0.015 | 0.128 | 1 Undiff-G | BCL2L12  |
| CEP85L   | 0.000104 | -0.24828 | 0.007 | 0.114 | 1 Undiff-G | CEP85L   |
| POLR3D   | 0.000104 | -0.25632 | 0.015 | 0.127 | 1 Undiff-G | POLR3D   |
| KLHL13   | 0.000104 | -0.23039 | 0     | 0.1   | 1 Undiff-G | KLHL13   |
| PGGT1B   | 0.000104 | -0.29148 | 0     | 0.1   | 1 Undiff-G | PGGT1B   |
| TRMT6    | 0.000104 | 0.400731 | 0.044 | 0.18  | 1 Undiff-G | TRMT6    |
| ADO      | 0.000105 | -0.1269  | 0.015 | 0.127 | 1 Undiff-G | ADO      |
| KIAA0355 | 0.000105 | -0.13888 | 0.029 | 0.153 | 1 Undiff-G | KIAA0355 |
| LRRC37B  | 0.000105 | -0.24041 | 0.007 | 0.114 | 1 Undiff-G | LRRC37B  |
| SPRED2   | 0.000105 | -0.17913 | 0.007 | 0.114 | 1 Undiff-G | SPRED2   |
| MAPK8    | 0.000105 | -0.25705 | 0     | 0.1   | 1 Undiff-G | MAPK8    |
| PYGL     | 0.000105 | 0.242597 | 0.051 | 0.194 | 1 Undiff-G | PYGL     |
| CWC22    | 0.000105 | 0.106221 | 0.015 | 0.128 | 1 Undiff-G | CWC22    |
| SLC1A5   | 0.000106 | -0.31745 | 0.022 | 0.139 | 1 Undiff-G | SLC1A5   |
| PWWP2A   | 0.000106 | -0.21643 | 0.015 | 0.128 | 1 Undiff-G | PWWP2A   |
| CSRNP3   | 0.000106 | -0.31866 | 0     | 0.1   | 1 Undiff-G | CSRNP3   |
| ID3      | 0.000106 | 0.382645 | 0.096 | 0.266 | 1 Undiff-G | ID3      |
| ZDHHC21  | 0.000107 | -0.25182 | 0     | 0.1   | 1 Undiff-G | ZDHHC21  |
| RNF170   | 0.000107 | 0.141275 | 0.037 | 0.166 | 1 Undiff-G | RNF170   |
| CENPQ    | 0.000107 | -0.25462 | 0     | 0.1   | 1 Undiff-G | CENPQ    |
| SLC25A24 | 0.000107 | -0.26836 | 0     | 0.1   | 1 Undiff-G | SLC25A24 |
| MILR1    | 0.000107 | -0.47717 | 0     | 0.1   | 1 Undiff-G | MILR1    |
| NUP54    | 0.000108 | 0.437222 | 0.044 | 0.179 | 1 Undiff-G | NUP54    |
| GPX3     | 0.000108 | -0.15867 | 0.029 | 0.154 | 1 Undiff-G | GPX3     |
| SLC33A1  | 0.000108 | -0.1237  | 0.015 | 0.128 | 1 Undiff-G | SLC33A1  |
| STRBP    | 0.000108 | -0.18332 | 0.015 | 0.128 | 1 Undiff-G | STRBP    |
| WWOX     | 0.000108 | -0.28713 | 0     | 0.1   | 1 Undiff-G | WWOX     |
| ASXL2    | 0.000109 | -0.27179 | 0     | 0.1   | 1 Undiff-G | ASXL2    |
| RBMXL1   | 0.000111 | 0.307872 | 0.029 | 0.155 | 1 Undiff-G | RBMXL1   |
| FXN      | 0.000111 | -0.26228 | 0.007 | 0.114 | 1 Undiff-G | FXN      |
| NEDD4L   | 0.000111 | -0.25273 | 0.007 | 0.114 | 1 Undiff-G | NEDD4L   |
| PLXND1   | 0.000112 | -0.35228 | 0     | 0.099 | 1 Undiff-G | PLXND1   |
| POLR2D   | 0.000112 | 0.149783 | 0.022 | 0.14  | 1 Undiff-G | POLR2D   |
| OTUD1    | 0.000112 | -0.40069 | 0     | 0.099 | 1 Undiff-G | OTUD1    |



|           |          |          |       |       |                         |
|-----------|----------|----------|-------|-------|-------------------------|
| POLR1E    | 0.000113 | -0.25105 | 0.007 | 0.113 | 1 Undiff-G POLR1E       |
| SLC2A4RG  | 0.000113 | -0.21586 | 0.015 | 0.127 | 1 Undiff-G SLC2A4RG     |
| KIF1A     | 0.000113 | -0.19565 | 0.015 | 0.127 | 1 Undiff-G KIF1A        |
| TCHP      | 0.000114 | -0.24934 | 0.007 | 0.113 | 1 Undiff-G TCHP         |
| TOMM70A   | 0.000114 | -0.18805 | 0.015 | 0.126 | 1 Undiff-G TOMM70A      |
| NECAB3    | 0.000115 | -0.20403 | 0     | 0.099 | 1 Undiff-G NECAB3       |
| LONRF1    | 0.000115 | -0.21781 | 0     | 0.099 | 1 Undiff-G LONRF1       |
| ATG4C     | 0.000115 | -0.1107  | 0.022 | 0.14  | 1 Undiff-G ATG4C        |
| PSEN2     | 0.000115 | -0.24833 | 0.007 | 0.113 | 1 Undiff-G PSEN2        |
| INO80C    | 0.000116 | 0.309396 | 0.037 | 0.167 | 1 Undiff-G INO80C       |
| SFRP1     | 0.000116 | -0.22584 | 0     | 0.099 | 1 Undiff-G SFRP1        |
| KLF13     | 0.000116 | -0.24595 | 0.015 | 0.127 | 1 Undiff-G KLF13        |
| SPAST     | 0.000116 | -0.22804 | 0.007 | 0.113 | 1 Undiff-G SPAST        |
| DGCR2     | 0.000116 | 0.11609  | 0.029 | 0.154 | 1 Undiff-G DGCR2        |
| MAP2K4    | 0.000117 | -0.22572 | 0     | 0.099 | 1 Undiff-G MAP2K4       |
| IER5L     | 0.000117 | -0.24407 | 0     | 0.099 | 1 Undiff-G IER5L        |
| QRSL1     | 0.000117 | -0.11552 | 0.015 | 0.127 | 1 Undiff-G QRSL1        |
| FRS2      | 0.000118 | -0.31128 | 0.007 | 0.113 | 1 Undiff-G FRS2         |
| ELOVL2    | 0.000118 | -0.22566 | 0     | 0.099 | 1 Undiff-G ELOVL2       |
| ARNT2     | 0.000118 | -0.2352  | 0.007 | 0.112 | 1 Undiff-G ARNT2        |
| RP4-665J2 | 0.000118 | -0.16354 | 0.015 | 0.127 | 1 Undiff-G RP4-665J23.1 |
| ZNF708    | 0.000119 | -0.25785 | 0     | 0.099 | 1 Undiff-G ZNF708       |
| CEP70     | 0.000119 | -0.26681 | 0     | 0.099 | 1 Undiff-G CEP70        |
| ZNF703    | 0.000119 | -0.2866  | 0     | 0.099 | 1 Undiff-G ZNF703       |
| SLC8B1    | 0.000119 | -0.30795 | 0     | 0.099 | 1 Undiff-G SLC8B1       |
| NUP35     | 0.000119 | -0.10386 | 0.007 | 0.113 | 1 Undiff-G NUP35        |
| MAN2A1    | 0.000119 | -0.3368  | 0.007 | 0.112 | 1 Undiff-G MAN2A1       |
| PHF12     | 0.000119 | -0.25524 | 0.007 | 0.112 | 1 Undiff-G PHF12        |
| PEX14     | 0.000119 | -0.2518  | 0     | 0.099 | 1 Undiff-G PEX14        |
| NOL9      | 0.000119 | -0.26115 | 0     | 0.099 | 1 Undiff-G NOL9         |
| LAS1L     | 0.00012  | -0.1826  | 0.022 | 0.139 | 1 Undiff-G LAS1L        |
| SYNGR1    | 0.00012  | -0.30787 | 0.007 | 0.113 | 1 Undiff-G SYNGR1       |
| VPS8      | 0.00012  | -0.21924 | 0.007 | 0.113 | 1 Undiff-G VPS8         |
| LAMA5     | 0.00012  | -0.20844 | 0.007 | 0.113 | 1 Undiff-G LAMA5        |
| CNEP1R1   | 0.000121 | -0.29399 | 0.007 | 0.112 | 1 Undiff-G CNEP1R1      |
| ZNF302    | 0.000121 | 0.488872 | 0.125 | 0.317 | 1 Undiff-G ZNF302       |
| MAP3K1    | 0.000121 | -0.25156 | 0     | 0.098 | 1 Undiff-G MAP3K1       |
| HLA-DQB2  | 0.000122 | -0.63212 | 0     | 0.098 | 1 Undiff-G HLA-DQB2     |
| SRSF10    | 0.000122 | 0.459249 | 0.081 | 0.242 | 1 Undiff-G SRSF10       |
| ATP11A    | 0.000123 | -0.26131 | 0     | 0.098 | 1 Undiff-G ATP11A       |
| KATNA1    | 0.000124 | 0.104826 | 0.022 | 0.14  | 1 Undiff-G KATNA1       |
| TRIM11    | 0.000124 | -0.2613  | 0     | 0.098 | 1 Undiff-G TRIM11       |
| PDGFA     | 0.000124 | -0.30823 | 0     | 0.098 | 1 Undiff-G PDGFA        |
| ASB3      | 0.000124 | 0.568942 | 0.029 | 0.005 | 1 Undiff-G ASB3         |
| TMEM168   | 0.000125 | -0.26479 | 0.007 | 0.112 | 1 Undiff-G TMEM168      |
| EPSTI1    | 0.000125 | -0.26035 | 0.015 | 0.126 | 1 Undiff-G EPSTI1       |
| ACO1      | 0.000125 | -0.2629  | 0     | 0.098 | 1 Undiff-G ACO1         |
| ARHGAP15  | 0.000125 | -0.4367  | 0     | 0.098 | 1 Undiff-G ARHGAP15     |
| FOXJ3     | 0.000125 | -0.14205 | 0.007 | 0.112 | 1 Undiff-G FOXJ3        |
| FAM221A   | 0.000125 | 0.426644 | 0.044 | 0.179 | 1 Undiff-G FAM221A      |
| ZNF160    | 0.000126 | -0.23328 | 0.007 | 0.112 | 1 Undiff-G ZNF160       |

|           |          |          |       |       |                      |
|-----------|----------|----------|-------|-------|----------------------|
| ARSJ      | 0.000126 | -0.21839 | 0.015 | 0.126 | 1 Undiff-G ARSJ      |
| MAPK7     | 0.000126 | 0.14397  | 0.015 | 0.126 | 1 Undiff-G MAPK7     |
| DCLK1     | 0.000126 | 0.10766  | 0.029 | 0.153 | 1 Undiff-G DCLK1     |
| NPM1      | 0.000127 | 0.478299 | 0.382 | 0.874 | 1 Undiff-G NPM1      |
| GLDN      | 0.000127 | -0.41538 | 0     | 0.098 | 1 Undiff-G GLDN      |
| FTSJ1     | 0.000127 | -0.193   | 0.022 | 0.138 | 1 Undiff-G FTSJ1     |
| NCALD     | 0.000128 | -0.19447 | 0.015 | 0.126 | 1 Undiff-G NCALD     |
| PREP      | 0.000128 | -0.26415 | 0     | 0.098 | 1 Undiff-G PREP      |
| EID2      | 0.000128 | -0.19649 | 0.007 | 0.112 | 1 Undiff-G EID2      |
| SLC35A3   | 0.000128 | -0.26931 | 0.015 | 0.124 | 1 Undiff-G SLC35A3   |
| ZNF385D   | 0.000128 | -0.24527 | 0.007 | 0.112 | 1 Undiff-G ZNF385D   |
| CPT2      | 0.000129 | -0.21858 | 0.007 | 0.112 | 1 Undiff-G CPT2      |
| PIGQ      | 0.000129 | -0.23226 | 0.007 | 0.112 | 1 Undiff-G PIGQ      |
| PRMT5     | 0.00013  | 0.139785 | 0.029 | 0.152 | 1 Undiff-G PRMT5     |
| PACS1     | 0.00013  | -0.25493 | 0     | 0.098 | 1 Undiff-G PACS1     |
| TFB1M     | 0.00013  | -0.26797 | 0     | 0.098 | 1 Undiff-G TFB1M     |
| ZNF48     | 0.000131 | -0.224   | 0     | 0.098 | 1 Undiff-G ZNF48     |
| CPXM1     | 0.000131 | -0.19392 | 0.015 | 0.125 | 1 Undiff-G CPXM1     |
| RC3H2     | 0.000132 | -0.24199 | 0     | 0.097 | 1 Undiff-G RC3H2     |
| IGF2R     | 0.000132 | -0.24548 | 0     | 0.097 | 1 Undiff-G IGF2R     |
| ATL3      | 0.000132 | 0.151681 | 0.022 | 0.139 | 1 Undiff-G ATL3      |
| ASUN      | 0.000133 | -0.23277 | 0.007 | 0.112 | 1 Undiff-G ASUN      |
| MAP6      | 0.000133 | -0.21808 | 0     | 0.097 | 1 Undiff-G MAP6      |
| DUSP2     | 0.000133 | -0.43522 | 0.007 | 0.112 | 1 Undiff-G DUSP2     |
| CDC42EP3  | 0.000134 | -0.1979  | 0.015 | 0.125 | 1 Undiff-G CDC42EP3  |
| ARIH1     | 0.000134 | -0.28255 | 0     | 0.097 | 1 Undiff-G ARIH1     |
| ZRSR2     | 0.000134 | -0.25672 | 0.015 | 0.125 | 1 Undiff-G ZRSR2     |
| LNPEP     | 0.000134 | -0.22434 | 0.015 | 0.125 | 1 Undiff-G LNPEP     |
| SFXN5     | 0.000135 | 0.22749  | 0.051 | 0.19  | 1 Undiff-G SFXN5     |
| WDR20     | 0.000135 | 0.194209 | 0.022 | 0.139 | 1 Undiff-G WDR20     |
| ZNF280D   | 0.000135 | -0.18715 | 0.015 | 0.125 | 1 Undiff-G ZNF280D   |
| FAM219B   | 0.000136 | -0.17014 | 0.029 | 0.151 | 1 Undiff-G FAM219B   |
| SPRYD7    | 0.000136 | 0.335557 | 0.044 | 0.178 | 1 Undiff-G SPRYD7    |
| RABGAP1L  | 0.000136 | -0.33887 | 0.007 | 0.111 | 1 Undiff-G RABGAP1L  |
| CHFR      | 0.000136 | -0.24702 | 0.015 | 0.124 | 1 Undiff-G CHFR      |
| PPOX      | 0.000136 | -0.27588 | 0.007 | 0.11  | 1 Undiff-G PPOX      |
| TMOD2     | 0.000136 | -0.1902  | 0.007 | 0.111 | 1 Undiff-G TMOD2     |
| LAMP5     | 0.000137 | -0.25718 | 0.007 | 0.11  | 1 Undiff-G LAMP5     |
| PNMAL1    | 0.000137 | -0.23995 | 0     | 0.097 | 1 Undiff-G PNMAL1    |
| LPXN      | 0.000137 | -0.34957 | 0.007 | 0.111 | 1 Undiff-G LPXN      |
| KPNA1     | 0.000137 | 0.231643 | 0.037 | 0.165 | 1 Undiff-G KPNA1     |
| GTF2IRD2E | 0.000137 | -0.23201 | 0.022 | 0.138 | 1 Undiff-G GTF2IRD2B |
| NAF1      | 0.000138 | -0.31907 | 0.007 | 0.111 | 1 Undiff-G NAF1      |
| SMG7      | 0.000138 | -0.24206 | 0     | 0.097 | 1 Undiff-G SMG7      |
| SCAMP5    | 0.000138 | -0.24322 | 0     | 0.097 | 1 Undiff-G SCAMP5    |
| TARSL2    | 0.000138 | -0.23049 | 0.007 | 0.111 | 1 Undiff-G TARSL2    |
| TNKS2     | 0.000138 | -0.25013 | 0.007 | 0.111 | 1 Undiff-G TNKS2     |
| NPHP3     | 0.000139 | -0.26435 | 0.007 | 0.11  | 1 Undiff-G NPHP3     |
| EFNB1     | 0.000139 | -0.26475 | 0     | 0.097 | 1 Undiff-G EFNB1     |
| TYRO3     | 0.000139 | -0.25838 | 0.007 | 0.11  | 1 Undiff-G TYRO3     |
| DIS3      | 0.00014  | 0.214756 | 0.029 | 0.152 | 1 Undiff-G DIS3      |

|           |          |          |       |       |                       |
|-----------|----------|----------|-------|-------|-----------------------|
| PARVA     | 0.00014  | -0.20913 | 0     | 0.097 | 1 Undiff-G PARVA      |
| DENND5B   | 0.00014  | -0.24388 | 0     | 0.097 | 1 Undiff-G DENND5B    |
| DTNB      | 0.00014  | -0.26121 | 0     | 0.097 | 1 Undiff-G DTNB       |
| ZBTB43    | 0.00014  | 0.13105  | 0.029 | 0.151 | 1 Undiff-G ZBTB43     |
| RBM12     | 0.000141 | -0.19727 | 0.015 | 0.124 | 1 Undiff-G RBM12      |
| RELB      | 0.000141 | -0.23932 | 0     | 0.097 | 1 Undiff-G RELB       |
| MCF2L     | 0.000141 | -0.30194 | 0     | 0.097 | 1 Undiff-G MCF2L      |
| MBNL2     | 0.000141 | -0.32173 | 0     | 0.097 | 1 Undiff-G MBNL2      |
| C9orf9    | 0.000142 | -0.11502 | 0.007 | 0.111 | 1 Undiff-G C9orf9     |
| LRRC4C    | 0.000143 | -0.3029  | 0     | 0.097 | 1 Undiff-G LRRC4C     |
| KIF5A     | 0.000144 | -0.27599 | 0.015 | 0.123 | 1 Undiff-G KIF5A      |
| COG1      | 0.000145 | -0.16666 | 0.007 | 0.111 | 1 Undiff-G COG1       |
| FAM98B    | 0.000145 | -0.23655 | 0     | 0.096 | 1 Undiff-G FAM98B     |
| RFXAP     | 0.000145 | -0.24626 | 0     | 0.096 | 1 Undiff-G RFXAP      |
| SUSD3     | 0.000145 | -0.44    | 0     | 0.096 | 1 Undiff-G SUSD3      |
| DDX39B    | 0.000146 | -0.21696 | 0.007 | 0.111 | 1 Undiff-G DDX39B     |
| CIRBP     | 0.000146 | 0.391506 | 0.382 | 0.871 | 1 Undiff-G CIRBP      |
| ASAP2     | 0.000146 | -0.19699 | 0     | 0.096 | 1 Undiff-G ASAP2      |
| TTC28     | 0.000146 | -0.23502 | 0     | 0.096 | 1 Undiff-G TTC28      |
| SEMA4C    | 0.000146 | -0.26536 | 0     | 0.096 | 1 Undiff-G SEMA4C     |
| RMND5A    | 0.000147 | -0.2123  | 0.015 | 0.124 | 1 Undiff-G RMND5A     |
| PPM1D     | 0.000147 | -0.25724 | 0     | 0.096 | 1 Undiff-G PPM1D      |
| KDM3B     | 0.000148 | -0.27228 | 0.007 | 0.11  | 1 Undiff-G KDM3B      |
| WBP1L     | 0.000148 | -0.25508 | 0.007 | 0.11  | 1 Undiff-G WBP1L      |
| TSC2      | 0.000148 | -0.23078 | 0.022 | 0.137 | 1 Undiff-G TSC2       |
| DHX8      | 0.000149 | -0.10627 | 0.007 | 0.11  | 1 Undiff-G DHX8       |
| TSPAN6    | 0.000149 | 0.109787 | 0.029 | 0.151 | 1 Undiff-G TSPAN6     |
| AC004158. | 0.000149 | -0.25616 | 0.015 | 0.124 | 1 Undiff-G AC004158.3 |
| NUP85     | 0.000149 | 0.109116 | 0.015 | 0.124 | 1 Undiff-G NUP85      |
| EPC2      | 0.00015  | -0.24252 | 0     | 0.096 | 1 Undiff-G EPC2       |
| DIXDC1    | 0.00015  | -0.25805 | 0     | 0.096 | 1 Undiff-G DIXDC1     |
| GNA12     | 0.00015  | 0.259415 | 0.022 | 0.138 | 1 Undiff-G GNA12      |
| GNA15     | 0.000151 | -0.23946 | 0.007 | 0.11  | 1 Undiff-G GNA15      |
| KLHL9     | 0.000151 | -0.18403 | 0.007 | 0.11  | 1 Undiff-G KLHL9      |
| TP53INP2  | 0.000151 | -0.25808 | 0     | 0.096 | 1 Undiff-G TP53INP2   |
| C17orf75  | 0.000151 | -0.27529 | 0     | 0.096 | 1 Undiff-G C17orf75   |
| HIP1R     | 0.000151 | -0.27728 | 0.007 | 0.11  | 1 Undiff-G HIP1R      |
| RENBP     | 0.000151 | -0.15035 | 0.022 | 0.137 | 1 Undiff-G RENBP      |
| ITCH      | 0.000152 | -0.25205 | 0.007 | 0.11  | 1 Undiff-G ITCH       |
| MAP2K5    | 0.000152 | -0.24167 | 0     | 0.096 | 1 Undiff-G MAP2K5     |
| CA12      | 0.000152 | 0.122282 | 0.022 | 0.137 | 1 Undiff-G CA12       |
| HNRNPL    | 0.000153 | 0.396281 | 0.096 | 0.266 | 1 Undiff-G HNRNPL     |
| PARD6A    | 0.000153 | -0.22484 | 0     | 0.096 | 1 Undiff-G PARD6A     |
| AP3M1     | 0.000153 | -0.26637 | 0     | 0.096 | 1 Undiff-G AP3M1      |
| ZNF350    | 0.000153 | -0.29227 | 0     | 0.096 | 1 Undiff-G ZNF350     |
| TNFAIP8L2 | 0.000153 | -0.41087 | 0     | 0.096 | 1 Undiff-G TNFAIP8L2  |
| UIMC1     | 0.000154 | -0.12394 | 0.007 | 0.11  | 1 Undiff-G UIMC1      |
| ZNF768    | 0.000154 | -0.22308 | 0     | 0.096 | 1 Undiff-G ZNF768     |
| RNF38     | 0.000154 | -0.24647 | 0     | 0.096 | 1 Undiff-G RNF38      |
| MCC       | 0.000154 | -0.21318 | 0.015 | 0.123 | 1 Undiff-G MCC        |
| HMGCR     | 0.000155 | -0.2134  | 0.007 | 0.11  | 1 Undiff-G HMGCR      |

|           |          |          |       |       |                       |
|-----------|----------|----------|-------|-------|-----------------------|
| ZNF775    | 0.000155 | -0.22812 | 0     | 0.096 | 1 Undiff-G ZNF775     |
| ST3GAL4   | 0.000156 | -0.12438 | 0.015 | 0.124 | 1 Undiff-G ST3GAL4    |
| WDR59     | 0.000156 | -0.2752  | 0.007 | 0.109 | 1 Undiff-G WDR59      |
| NVL       | 0.000157 | -0.25174 | 0.007 | 0.11  | 1 Undiff-G NVL        |
| TANC1     | 0.000157 | -0.21867 | 0.007 | 0.109 | 1 Undiff-G TANC1      |
| PLBD1     | 0.000158 | -0.35977 | 0     | 0.095 | 1 Undiff-G PLBD1      |
| ARHGAP30  | 0.000158 | -0.39294 | 0     | 0.095 | 1 Undiff-G ARHGAP30   |
| CSPG5     | 0.000158 | -0.31825 | 0.007 | 0.109 | 1 Undiff-G CSPG5      |
| AKAP8     | 0.000159 | -0.17398 | 0.022 | 0.137 | 1 Undiff-G AKAP8      |
| SLC1A2    | 0.000159 | -0.16815 | 0.022 | 0.137 | 1 Undiff-G SLC1A2     |
| THBD      | 0.000159 | -0.42774 | 0     | 0.095 | 1 Undiff-G THBD       |
| RBBP9     | 0.00016  | -0.1986  | 0     | 0.095 | 1 Undiff-G RBBP9      |
| CBWD5     | 0.000161 | -0.15725 | 0.015 | 0.123 | 1 Undiff-G CBWD5      |
| ZNF506    | 0.000161 | -0.14351 | 0.015 | 0.122 | 1 Undiff-G ZNF506     |
| ROBO2     | 0.000161 | -0.22394 | 0.007 | 0.109 | 1 Undiff-G ROBO2      |
| ZNF362    | 0.000161 | -0.23592 | 0     | 0.095 | 1 Undiff-G ZNF362     |
| SLC23A2   | 0.000162 | -0.25378 | 0.007 | 0.108 | 1 Undiff-G SLC23A2    |
| SLC25A44  | 0.000163 | -0.25957 | 0     | 0.095 | 1 Undiff-G SLC25A44   |
| STK32C    | 0.000163 | -0.26516 | 0     | 0.095 | 1 Undiff-G STK32C     |
| ODF3B     | 0.000163 | -0.34135 | 0     | 0.095 | 1 Undiff-G ODF3B      |
| CPD       | 0.000163 | 0.269363 | 0.037 | 0.161 | 1 Undiff-G CPD        |
| LRIG1     | 0.000163 | -0.21414 | 0.007 | 0.109 | 1 Undiff-G LRIG1      |
| LRRC8D    | 0.000164 | -0.24994 | 0     | 0.095 | 1 Undiff-G LRRC8D     |
| RASA3     | 0.000164 | -0.26948 | 0     | 0.095 | 1 Undiff-G RASA3      |
| ALAD      | 0.000165 | -0.27179 | 0.007 | 0.109 | 1 Undiff-G ALAD       |
| MLLT3     | 0.000165 | -0.25559 | 0     | 0.095 | 1 Undiff-G MLLT3      |
| KIAA1549  | 0.000165 | -0.25633 | 0     | 0.095 | 1 Undiff-G KIAA1549   |
| PLAA      | 0.000165 | -0.26208 | 0     | 0.095 | 1 Undiff-G PLAA       |
| ZMAT1     | 0.000165 | -0.28359 | 0     | 0.095 | 1 Undiff-G ZMAT1      |
| AVPI1     | 0.000165 | -0.37486 | 0     | 0.095 | 1 Undiff-G AVPI1      |
| MIER2     | 0.000165 | -0.21392 | 0.007 | 0.109 | 1 Undiff-G MIER2      |
| PIP5K1C   | 0.000165 | -0.20203 | 0.007 | 0.109 | 1 Undiff-G PIP5K1C    |
| DDX6      | 0.000166 | 0.449345 | 0.059 | 0.199 | 1 Undiff-G DDX6       |
| FAM161A   | 0.000167 | -0.17892 | 0.007 | 0.109 | 1 Undiff-G FAM161A    |
| IFIT3     | 0.000167 | -0.20589 | 0.007 | 0.109 | 1 Undiff-G IFIT3      |
| BAG3      | 0.000167 | -0.23054 | 0.007 | 0.109 | 1 Undiff-G BAG3       |
| BACH1     | 0.000167 | -0.27969 | 0.007 | 0.109 | 1 Undiff-G BACH1      |
| POGZ      | 0.000167 | 0.306905 | 0.066 | 0.212 | 1 Undiff-G POGZ       |
| RECQL     | 0.000168 | 0.110046 | 0.044 | 0.174 | 1 Undiff-G RECQL      |
| ARAP1     | 0.000169 | -0.1763  | 0.007 | 0.109 | 1 Undiff-G ARAP1      |
| RHOU      | 0.000169 | -0.14104 | 0.022 | 0.136 | 1 Undiff-G RHOU       |
| CEP104    | 0.00017  | -0.17092 | 0.015 | 0.123 | 1 Undiff-G CEP104     |
| EXOSC10   | 0.00017  | -0.11825 | 0.029 | 0.148 | 1 Undiff-G EXOSC10    |
| ENTPD4    | 0.00017  | -0.25292 | 0     | 0.095 | 1 Undiff-G ENTPD4     |
| CSGALNACT | 0.00017  | -0.26909 | 0     | 0.095 | 1 Undiff-G CSGALNACT2 |
| UBE3B     | 0.000171 | -0.20299 | 0.007 | 0.109 | 1 Undiff-G UBE3B      |
| DNAJA3    | 0.000171 | 0.167515 | 0.044 | 0.175 | 1 Undiff-G DNAJA3     |
| PGPEP1    | 0.000171 | -0.13919 | 0.022 | 0.135 | 1 Undiff-G PGPEP1     |
| NRBP2     | 0.000172 | -0.20315 | 0.015 | 0.122 | 1 Undiff-G NRBP2      |
| DUSP15    | 0.000173 | -0.19682 | 0     | 0.094 | 1 Undiff-G DUSP15     |
| PKIA      | 0.000173 | -0.31237 | 0     | 0.094 | 1 Undiff-G PKIA       |

|           |          |          |       |       |            |               |
|-----------|----------|----------|-------|-------|------------|---------------|
| METTL8    | 0.000173 | -0.2639  | 0.015 | 0.121 | 1 Undiff-G | METTL8        |
| CDKAL1    | 0.000174 | -0.26557 | 0     | 0.094 | 1 Undiff-G | CDKAL1        |
| C9orf69   | 0.000175 | -0.21512 | 0     | 0.094 | 1 Undiff-G | C9orf69       |
| DAGLB     | 0.000175 | -0.31372 | 0.015 | 0.122 | 1 Undiff-G | DAGLB         |
| SYP       | 0.000176 | -0.2496  | 0.022 | 0.135 | 1 Undiff-G | SYP           |
| HACL1     | 0.000176 | -0.19749 | 0.007 | 0.108 | 1 Undiff-G | HACL1         |
| MGME1     | 0.000176 | 0.237566 | 0.029 | 0.149 | 1 Undiff-G | MGME1         |
| CDK5R1    | 0.000177 | -0.27508 | 0     | 0.094 | 1 Undiff-G | CDK5R1        |
| RP11-472N | 0.000177 | -0.26905 | 0.007 | 0.108 | 1 Undiff-G | RP11-472N13.3 |
| GPALPP1   | 0.000177 | -0.233   | 0.015 | 0.122 | 1 Undiff-G | GPALPP1       |
| YAE1D1    | 0.000178 | 0.214778 | 0.037 | 0.161 | 1 Undiff-G | YAE1D1        |
| HDAC10    | 0.000179 | -0.15837 | 0.007 | 0.108 | 1 Undiff-G | HDAC10        |
| SORBS1    | 0.000179 | -0.20615 | 0     | 0.094 | 1 Undiff-G | SORBS1        |
| ANKZF1    | 0.000179 | -0.18116 | 0.022 | 0.135 | 1 Undiff-G | ANKZF1        |
| DSTYK     | 0.00018  | -0.19219 | 0.015 | 0.122 | 1 Undiff-G | DSTYK         |
| ADA       | 0.000181 | -0.22699 | 0     | 0.094 | 1 Undiff-G | ADA           |
| SNHG12    | 0.000181 | -0.10724 | 0.022 | 0.135 | 1 Undiff-G | SNHG12        |
| METTL1    | 0.000181 | 0.337815 | 0.029 | 0.149 | 1 Undiff-G | METTL1        |
| LRP12     | 0.000182 | -0.233   | 0     | 0.094 | 1 Undiff-G | LRP12         |
| SIGLEC9   | 0.000182 | -0.4055  | 0     | 0.094 | 1 Undiff-G | SIGLEC9       |
| TOPBP1    | 0.000183 | -0.22888 | 0     | 0.094 | 1 Undiff-G | TOPBP1        |
| ZWINT     | 0.000183 | -0.30987 | 0     | 0.094 | 1 Undiff-G | ZWINT         |
| ATCAY     | 0.000184 | -0.21949 | 0.015 | 0.122 | 1 Undiff-G | ATCAY         |
| PEX3      | 0.000184 | -0.14411 | 0.007 | 0.108 | 1 Undiff-G | PEX3          |
| KPNA5     | 0.000185 | -0.25311 | 0     | 0.094 | 1 Undiff-G | KPNA5         |
| 1-Sep     | 0.000185 | -0.23366 | 0.007 | 0.108 | 1 Undiff-G | 1-Sep         |
| HTT       | 0.000185 | -0.10961 | 0.015 | 0.122 | 1 Undiff-G | HTT           |
| CELSR2    | 0.000186 | -0.2315  | 0     | 0.094 | 1 Undiff-G | CELSR2        |
| ASB16-AS1 | 0.000186 | -0.23478 | 0     | 0.094 | 1 Undiff-G | ASB16-AS1     |
| MINPP1    | 0.000187 | -0.15887 | 0.007 | 0.108 | 1 Undiff-G | MINPP1        |
| METTL14   | 0.000188 | -0.24587 | 0     | 0.093 | 1 Undiff-G | METTL14       |
| WIPF3     | 0.000188 | -0.27869 | 0     | 0.093 | 1 Undiff-G | WIPF3         |
| ADRBK1    | 0.000188 | -0.30803 | 0     | 0.093 | 1 Undiff-G | ADRBK1        |
| MXI1      | 0.000188 | -0.23559 | 0.022 | 0.134 | 1 Undiff-G | MXI1          |
| LARP1B    | 0.000188 | -0.19657 | 0.015 | 0.121 | 1 Undiff-G | LARP1B        |
| MNT       | 0.000189 | -0.24829 | 0     | 0.093 | 1 Undiff-G | MNT           |
| ELMSAN1   | 0.000189 | -0.16505 | 0.022 | 0.135 | 1 Undiff-G | ELMSAN1       |
| MT1A      | 0.000189 | 0.973258 | 0.081 | 0.029 | 1 Undiff-G | MT1A          |
| PTRF      | 0.000189 | 0.426995 | 0.051 | 0.187 | 1 Undiff-G | PTRF          |
| DIP2B     | 0.00019  | -0.21593 | 0.015 | 0.12  | 1 Undiff-G | DIP2B         |
| MAK16     | 0.00019  | -0.22053 | 0     | 0.093 | 1 Undiff-G | MAK16         |
| TRIM14    | 0.00019  | -0.25445 | 0     | 0.093 | 1 Undiff-G | TRIM14        |
| STOX2     | 0.00019  | -0.25832 | 0     | 0.093 | 1 Undiff-G | STOX2         |
| FAM57B    | 0.00019  | -0.2898  | 0     | 0.093 | 1 Undiff-G | FAM57B        |
| TP53TG1   | 0.000191 | 0.269227 | 0.059 | 0.199 | 1 Undiff-G | TP53TG1       |
| SLC12A5   | 0.000192 | -0.34181 | 0     | 0.093 | 1 Undiff-G | SLC12A5       |
| HSD17B14  | 0.000193 | -0.37504 | 0     | 0.093 | 1 Undiff-G | HSD17B14      |
| DDHD2     | 0.000194 | -0.24749 | 0.007 | 0.107 | 1 Undiff-G | DDHD2         |
| CRTC1     | 0.000195 | -0.23457 | 0     | 0.093 | 1 Undiff-G | CRTC1         |
| RCSD1     | 0.000195 | -0.28002 | 0.015 | 0.121 | 1 Undiff-G | RCSD1         |
| IL10      | 0.000196 | -0.27502 | 0.007 | 0.107 | 1 Undiff-G | IL10          |

|          |          |          |       |       |                     |
|----------|----------|----------|-------|-------|---------------------|
| ZNF609   | 0.000196 | -0.23068 | 0     | 0.093 | 1 Undiff-G ZNF609   |
| ELP4     | 0.000196 | -0.2856  | 0     | 0.093 | 1 Undiff-G ELP4     |
| YTHDC2   | 0.000196 | -0.21792 | 0.015 | 0.12  | 1 Undiff-G YTHDC2   |
| COQ6     | 0.000197 | -0.25583 | 0.007 | 0.107 | 1 Undiff-G COQ6     |
| RAB33A   | 0.000197 | -0.17881 | 0.007 | 0.107 | 1 Undiff-G RAB33A   |
| SSPN     | 0.000197 | -0.28086 | 0.007 | 0.107 | 1 Undiff-G SSPN     |
| TMEM178A | 0.000197 | -0.24241 | 0.015 | 0.12  | 1 Undiff-G TMEM178A |
| SMCR5    | 0.000198 | -0.23673 | 0     | 0.093 | 1 Undiff-G SMCR5    |
| SORD     | 0.000198 | -0.25274 | 0     | 0.093 | 1 Undiff-G SORD     |
| SLC17A5  | 0.000199 | -0.2624  | 0.007 | 0.107 | 1 Undiff-G SLC17A5  |
| SMIM8    | 0.000199 | -0.25292 | 0.007 | 0.107 | 1 Undiff-G SMIM8    |
| PTN      | 0.000199 | 0.909912 | 0.515 | 0.617 | 1 Undiff-G PTN      |
| TMEM35   | 0.000199 | -0.2874  | 0     | 0.093 | 1 Undiff-G TMEM35   |
| LILRB1   | 0.000199 | -0.39291 | 0     | 0.093 | 1 Undiff-G LILRB1   |
| CSPP1    | 0.0002   | -0.18515 | 0.007 | 0.107 | 1 Undiff-G CSPP1    |
| BEND6    | 0.000201 | -0.18091 | 0.015 | 0.12  | 1 Undiff-G BEND6    |
| OAS1     | 0.000201 | -0.22809 | 0.022 | 0.134 | 1 Undiff-G OAS1     |
| A2M      | 0.000202 | 0.501045 | 0.206 | 0.467 | 1 Undiff-G A2M      |
| AUTS2    | 0.000202 | -0.20569 | 0.015 | 0.12  | 1 Undiff-G AUTS2    |
| RASA1    | 0.000202 | -0.2066  | 0.007 | 0.107 | 1 Undiff-G RASA1    |
| ARHGAP26 | 0.000202 | -0.33426 | 0     | 0.093 | 1 Undiff-G ARHGAP26 |
| TUBGCP3  | 0.000203 | -0.26467 | 0.007 | 0.106 | 1 Undiff-G TUBGCP3  |
| AP3M2    | 0.000204 | -0.23258 | 0     | 0.092 | 1 Undiff-G AP3M2    |
| MLLT6    | 0.000204 | -0.15891 | 0.022 | 0.133 | 1 Undiff-G MLLT6    |
| PHTF2    | 0.000205 | -0.27502 | 0     | 0.092 | 1 Undiff-G PHTF2    |
| TYW1     | 0.000205 | -0.18155 | 0.015 | 0.12  | 1 Undiff-G TYW1     |
| GOS2     | 0.000206 | 0.186386 | 0.051 | 0.186 | 1 Undiff-G GOS2     |
| SMCO4    | 0.000207 | 0.100045 | 0.022 | 0.134 | 1 Undiff-G SMC04    |
| UPF1     | 0.000207 | -0.23532 | 0     | 0.092 | 1 Undiff-G UPF1     |
| KCNE4    | 0.000207 | -0.23068 | 0.007 | 0.106 | 1 Undiff-G KCNE4    |
| NLGN4X   | 0.000208 | -0.20202 | 0.007 | 0.107 | 1 Undiff-G NLGN4X   |
| DEF6     | 0.000208 | -0.36381 | 0     | 0.092 | 1 Undiff-G DEF6     |
| INSR     | 0.00021  | -0.12772 | 0.029 | 0.146 | 1 Undiff-G INSR     |
| KIAA0430 | 0.00021  | -0.24526 | 0     | 0.092 | 1 Undiff-G KIAA0430 |
| ZNF117   | 0.00021  | -0.24182 | 0.007 | 0.106 | 1 Undiff-G ZNF117   |
| MED22    | 0.000211 | -0.18757 | 0.007 | 0.106 | 1 Undiff-G MED22    |
| SCRIB    | 0.000211 | -0.2187  | 0     | 0.092 | 1 Undiff-G SCRIB    |
| KBTBD3   | 0.000212 | -0.22001 | 0.007 | 0.106 | 1 Undiff-G KBTBD3   |
| ZDHHC17  | 0.000213 | -0.11403 | 0.007 | 0.106 | 1 Undiff-G ZDHHC17  |
| HAGHL    | 0.000213 | -0.21871 | 0.007 | 0.106 | 1 Undiff-G HAGHL    |
| FAM219A  | 0.000213 | -0.22844 | 0     | 0.092 | 1 Undiff-G FAM219A  |
| PEX5     | 0.000213 | -0.26288 | 0     | 0.092 | 1 Undiff-G PEX5     |
| ITGAX    | 0.000213 | -0.4195  | 0     | 0.092 | 1 Undiff-G ITGAX    |
| MAGI2    | 0.000213 | -0.24799 | 0.007 | 0.106 | 1 Undiff-G MAGI2    |
| FASTKD2  | 0.000214 | -0.26602 | 0.007 | 0.105 | 1 Undiff-G FASTKD2  |
| MPND     | 0.000215 | -0.18838 | 0     | 0.092 | 1 Undiff-G MPND     |
| ZFX      | 0.000215 | -0.19742 | 0.015 | 0.12  | 1 Undiff-G ZFX      |
| TP53BP2  | 0.000216 | -0.25229 | 0.007 | 0.105 | 1 Undiff-G TP53BP2  |
| PRRT2    | 0.000216 | -0.22334 | 0     | 0.092 | 1 Undiff-G PRRT2    |
| CNKSR3   | 0.000217 | -0.21354 | 0.015 | 0.119 | 1 Undiff-G CNKSR3   |
| CENPU    | 0.000217 | -0.12161 | 0.007 | 0.106 | 1 Undiff-G CENPU    |

|           |          |          |       |       |                      |
|-----------|----------|----------|-------|-------|----------------------|
| FAM188A   | 0.000218 | -0.23708 | 0     | 0.092 | 1 Undiff-G FAM188A   |
| SAA2      | 0.000218 | 1.047951 | 0.118 | 0.051 | 1 Undiff-G SAA2      |
| TICAM1    | 0.000219 | -0.24574 | 0     | 0.092 | 1 Undiff-G TICAM1    |
| FBX034    | 0.000219 | -0.24784 | 0     | 0.092 | 1 Undiff-G FBX034    |
| GNAO1     | 0.000219 | -0.3286  | 0     | 0.092 | 1 Undiff-G GNAO1     |
| EGR3      | 0.00022  | -0.37695 | 0.007 | 0.105 | 1 Undiff-G EGR3      |
| FAM84A    | 0.00022  | -0.1315  | 0.029 | 0.146 | 1 Undiff-G FAM84A    |
| ANTXR1    | 0.000221 | -0.23046 | 0     | 0.092 | 1 Undiff-G ANTXR1    |
| UBAP2     | 0.000221 | -0.2506  | 0     | 0.092 | 1 Undiff-G UBAP2     |
| DYM       | 0.000221 | -0.25957 | 0     | 0.092 | 1 Undiff-G DYM       |
| CCNB1     | 0.000221 | -0.35646 | 0     | 0.092 | 1 Undiff-G CCNB1     |
| RLF       | 0.000221 | -0.21289 | 0.007 | 0.106 | 1 Undiff-G RLF       |
| C17orf10C | 0.000223 | -0.19913 | 0     | 0.091 | 1 Undiff-G C17orf100 |
| RFX5      | 0.000224 | -0.26109 | 0.007 | 0.105 | 1 Undiff-G RFX5      |
| C8orf76   | 0.000225 | 0.188769 | 0.037 | 0.159 | 1 Undiff-G C8orf76   |
| DYNC1I1   | 0.000225 | -0.34778 | 0.007 | 0.105 | 1 Undiff-G DYNC1I1   |
| EMC1      | 0.000226 | 0.160039 | 0.022 | 0.133 | 1 Undiff-G EMC1      |
| PDCD2L    | 0.000226 | -0.10023 | 0.007 | 0.106 | 1 Undiff-G PDCD2L    |
| ANKS3     | 0.000226 | -0.11301 | 0.044 | 0.17  | 1 Undiff-G ANKS3     |
| KLHDC8B   | 0.000228 | -0.25686 | 0.007 | 0.104 | 1 Undiff-G KLHDC8B   |
| TOP3A     | 0.000228 | -0.22764 | 0     | 0.091 | 1 Undiff-G TOP3A     |
| SLC39A4   | 0.000228 | -0.35065 | 0     | 0.091 | 1 Undiff-G SLC39A4   |
| PPP1R15B  | 0.00023  | -0.16735 | 0.015 | 0.119 | 1 Undiff-G PPP1R15B  |
| COG2      | 0.000231 | -0.11229 | 0.015 | 0.119 | 1 Undiff-G COG2      |
| VWA5A     | 0.000231 | -0.28124 | 0     | 0.091 | 1 Undiff-G VWA5A     |
| METTL17   | 0.000232 | -0.16423 | 0.015 | 0.119 | 1 Undiff-G METTL17   |
| GSTZ1     | 0.000232 | 0.446763 | 0.037 | 0.159 | 1 Undiff-G GSTZ1     |
| OSER1-AS1 | 0.000233 | 0.216595 | 0.022 | 0.133 | 1 Undiff-G OSER1-AS1 |
| MINK1     | 0.000233 | -0.21737 | 0.007 | 0.105 | 1 Undiff-G MINK1     |
| PALM      | 0.000234 | -0.19141 | 0.007 | 0.105 | 1 Undiff-G PALM      |
| LRRC42    | 0.000234 | 0.144516 | 0.029 | 0.146 | 1 Undiff-G LRRC42    |
| CRISPLD1  | 0.000235 | -0.24557 | 0     | 0.091 | 1 Undiff-G CRISPLD1  |
| CYTIP     | 0.000235 | -0.42128 | 0.007 | 0.105 | 1 Undiff-G CYTIP     |
| UBE20     | 0.000235 | -0.20434 | 0.015 | 0.118 | 1 Undiff-G UBE20     |
| B3GAT1    | 0.000237 | -0.28883 | 0     | 0.091 | 1 Undiff-G B3GAT1    |
| SLC26A2   | 0.000237 | -0.22579 | 0.007 | 0.105 | 1 Undiff-G SLC26A2   |
| ATXN3     | 0.000237 | 0.110533 | 0.037 | 0.158 | 1 Undiff-G ATXN3     |
| NSMCE2    | 0.000237 | 0.279818 | 0.037 | 0.158 | 1 Undiff-G NSMCE2    |
| ZNF649    | 0.000238 | -0.21079 | 0     | 0.091 | 1 Undiff-G ZNF649    |
| PPP2R2D   | 0.000238 | -0.22168 | 0     | 0.091 | 1 Undiff-G PPP2R2D   |
| AGO1      | 0.000238 | -0.23255 | 0     | 0.091 | 1 Undiff-G AGO1      |
| GKAP1     | 0.000238 | -0.23587 | 0     | 0.091 | 1 Undiff-G GKAP1     |
| IFI44L    | 0.000239 | -0.29421 | 0.029 | 0.143 | 1 Undiff-G IFI44L    |
| FRMD8     | 0.000239 | -0.24108 | 0.015 | 0.117 | 1 Undiff-G FRMD8     |
| NFKB1     | 0.00024  | -0.12093 | 0.007 | 0.105 | 1 Undiff-G NFKB1     |
| PIGH      | 0.00024  | 0.480614 | 0.066 | 0.21  | 1 Undiff-G PIGH      |
| GALNT7    | 0.00024  | -0.23278 | 0     | 0.091 | 1 Undiff-G GALNT7    |
| CCNT2     | 0.000241 | -0.25542 | 0.007 | 0.104 | 1 Undiff-G CCNT2     |
| PPFIA3    | 0.000242 | -0.19898 | 0     | 0.09  | 1 Undiff-G PPFIA3    |
| CAAP1     | 0.000242 | -0.22125 | 0     | 0.09  | 1 Undiff-G CAAP1     |
| MYC       | 0.000242 | 0.237217 | 0.044 | 0.171 | 1 Undiff-G MYC       |

|          |          |          |       |       |                     |
|----------|----------|----------|-------|-------|---------------------|
| C4orf3   | 0.000243 | 0.776099 | 0.294 | 0.65  | 1 Undiff-G C4orf3   |
| SACM1L   | 0.000243 | -0.22502 | 0.022 | 0.13  | 1 Undiff-G SACM1L   |
| MPHOSPH9 | 0.000244 | -0.19462 | 0.015 | 0.118 | 1 Undiff-G MPHOSPH9 |
| FASN     | 0.000244 | -0.18984 | 0.015 | 0.118 | 1 Undiff-G FASN     |
| EID2B    | 0.000244 | -0.23244 | 0     | 0.09  | 1 Undiff-G EID2B    |
| PID1     | 0.000245 | -0.21446 | 0.015 | 0.118 | 1 Undiff-G PID1     |
| ZNF503   | 0.000245 | -0.11338 | 0.007 | 0.105 | 1 Undiff-G ZNF503   |
| PRR14L   | 0.000246 | -0.21855 | 0     | 0.09  | 1 Undiff-G PRR14L   |
| HIPK3    | 0.000246 | -0.24989 | 0     | 0.09  | 1 Undiff-G HIPK3    |
| NUP37    | 0.000246 | 0.271155 | 0.022 | 0.132 | 1 Undiff-G NUP37    |
| RNF185   | 0.000247 | -0.10329 | 0.007 | 0.105 | 1 Undiff-G RNF185   |
| GMDS     | 0.000247 | -0.22095 | 0     | 0.09  | 1 Undiff-G GMDS     |
| UVRAG    | 0.000247 | -0.25528 | 0     | 0.09  | 1 Undiff-G UVRAG    |
| ESYT2    | 0.000247 | -0.26474 | 0     | 0.09  | 1 Undiff-G ESYT2    |
| HPGDS    | 0.000251 | -0.44058 | 0     | 0.09  | 1 Undiff-G HPGDS    |
| L3MBTL2  | 0.000251 | -0.25739 | 0.007 | 0.103 | 1 Undiff-G L3MBTL2  |
| CSTF1    | 0.000252 | 0.134721 | 0.022 | 0.132 | 1 Undiff-G CSTF1    |
| SLC30A1  | 0.000253 | -0.22216 | 0     | 0.09  | 1 Undiff-G SLC30A1  |
| HAUS6    | 0.000253 | -0.23575 | 0     | 0.09  | 1 Undiff-G HAUS6    |
| PPP2R2B  | 0.000253 | 0.466478 | 0.074 | 0.221 | 1 Undiff-G PPP2R2B  |
| DIS3L    | 0.000253 | -0.20671 | 0.007 | 0.104 | 1 Undiff-G DIS3L    |
| RRM2B    | 0.000254 | -0.21355 | 0.007 | 0.104 | 1 Undiff-G RRM2B    |
| NR1D2    | 0.000257 | -0.23143 | 0     | 0.09  | 1 Undiff-G NR1D2    |
| CCRL2    | 0.000257 | -0.40893 | 0     | 0.09  | 1 Undiff-G CCRL2    |
| AP5Z1    | 0.000257 | -0.10868 | 0.022 | 0.13  | 1 Undiff-G AP5Z1    |
| EXOG     | 0.000257 | 0.232344 | 0.037 | 0.157 | 1 Undiff-G EXOG     |
| EP400    | 0.000258 | -0.14083 | 0.015 | 0.118 | 1 Undiff-G EP400    |
| AGPAT4   | 0.00026  | -0.23916 | 0.007 | 0.104 | 1 Undiff-G AGPAT4   |
| BRF1     | 0.000261 | -0.17655 | 0.007 | 0.104 | 1 Undiff-G BRF1     |
| SYVN1    | 0.000262 | 0.161902 | 0.007 | 0.104 | 1 Undiff-G SYVN1    |
| GPR162   | 0.000262 | -0.23947 | 0.007 | 0.103 | 1 Undiff-G GPR162   |
| SOX5     | 0.000263 | -0.23514 | 0     | 0.09  | 1 Undiff-G SOX5     |
| RPS6KB1  | 0.000263 | 0.143706 | 0.022 | 0.13  | 1 Undiff-G RPS6KB1  |
| NACC2    | 0.000263 | -0.20036 | 0.007 | 0.104 | 1 Undiff-G NACC2    |
| CLOCK    | 0.000264 | -0.21002 | 0.022 | 0.129 | 1 Undiff-G CLOCK    |
| N4BP1    | 0.000265 | -0.22158 | 0     | 0.089 | 1 Undiff-G N4BP1    |
| RAD17    | 0.000265 | 0.226182 | 0.022 | 0.131 | 1 Undiff-G RAD17    |
| TMEM132B | 0.000266 | -0.21729 | 0.007 | 0.103 | 1 Undiff-G TMEM132B |
| XRRA1    | 0.000266 | -0.16634 | 0.022 | 0.13  | 1 Undiff-G XRRA1    |
| PTPRF    | 0.000266 | -0.17971 | 0.015 | 0.116 | 1 Undiff-G PTPRF    |
| MAPK8IP3 | 0.000267 | -0.23853 | 0     | 0.089 | 1 Undiff-G MAPK8IP3 |
| CCDC92   | 0.000267 | -0.23584 | 0.007 | 0.103 | 1 Undiff-G CCDC92   |
| ING5     | 0.000267 | -0.1706  | 0.015 | 0.117 | 1 Undiff-G ING5     |
| LAMC1    | 0.000268 | -0.16805 | 0.007 | 0.104 | 1 Undiff-G LAMC1    |
| XPO6     | 0.000268 | -0.21288 | 0.015 | 0.116 | 1 Undiff-G XPO6     |
| ZDHHC6   | 0.000269 | 0.267719 | 0.044 | 0.169 | 1 Undiff-G ZDHHC6   |
| RANGAP1  | 0.000269 | -0.20249 | 0.007 | 0.104 | 1 Undiff-G RANGAP1  |
| LRRTM2   | 0.000269 | -0.17759 | 0.007 | 0.104 | 1 Undiff-G LRRTM2   |
| DHRS11   | 0.00027  | -0.12238 | 0.007 | 0.104 | 1 Undiff-G DHRS11   |
| DZIP1    | 0.00027  | -0.16935 | 0.007 | 0.103 | 1 Undiff-G DZIP1    |
| ARL13B   | 0.00027  | 0.406622 | 0.029 | 0.144 | 1 Undiff-G ARL13B   |



|           |          |          |       |       |                          |
|-----------|----------|----------|-------|-------|--------------------------|
| RNF103    | 0.000272 | -0.17842 | 0.007 | 0.103 | 1 Undiff-G RNF103        |
| SCFD2     | 0.000273 | -0.24511 | 0     | 0.089 | 1 Undiff-G SCFD2         |
| PCDHB10   | 0.000273 | -0.26083 | 0.007 | 0.103 | 1 Undiff-G PCDHB10       |
| PEG10     | 0.000274 | -0.15007 | 0.007 | 0.103 | 1 Undiff-G PEG10         |
| KIF3C     | 0.000274 | -0.11593 | 0.007 | 0.103 | 1 Undiff-G KIF3C         |
| RP11-284F | 0.000274 | 0.581511 | 0.037 | 0.008 | 1 Undiff-G RP11-284F21.8 |
| EPB41L1   | 0.000275 | -0.20893 | 0     | 0.089 | 1 Undiff-G EPB41L1       |
| GNPNAT1   | 0.000278 | -0.23207 | 0.007 | 0.102 | 1 Undiff-G GNPNAT1       |
| ZNF226    | 0.000278 | 0.227658 | 0.066 | 0.205 | 1 Undiff-G ZNF226        |
| LDOC1     | 0.000279 | -0.33693 | 0     | 0.089 | 1 Undiff-G LDOC1         |
| HS3ST1    | 0.000279 | -0.37238 | 0     | 0.089 | 1 Undiff-G HS3ST1        |
| TSEN54    | 0.000279 | -0.22025 | 0.015 | 0.116 | 1 Undiff-G TSEN54        |
| BIN3      | 0.000279 | 0.302002 | 0.037 | 0.156 | 1 Undiff-G BIN3          |
| DMWD      | 0.00028  | -0.15277 | 0.029 | 0.143 | 1 Undiff-G DMWD          |
| SCRN3     | 0.000281 | -0.23554 | 0.007 | 0.102 | 1 Undiff-G SCRN3         |
| SGTB      | 0.000281 | -0.21662 | 0     | 0.089 | 1 Undiff-G SGTB          |
| C9orf114  | 0.000282 | 0.230438 | 0.029 | 0.143 | 1 Undiff-G C9orf114      |
| RP11-108M | 0.000282 | -0.15472 | 0.007 | 0.103 | 1 Undiff-G RP11-108M9.4  |
| POFUT2    | 0.000283 | -0.22954 | 0     | 0.089 | 1 Undiff-G POFUT2        |
| FIGN      | 0.000285 | -0.201   | 0     | 0.089 | 1 Undiff-G FIGN          |
| RFC3      | 0.000285 | -0.2402  | 0     | 0.089 | 1 Undiff-G RFC3          |
| BSG       | 0.000287 | 0.561913 | 0.338 | 0.746 | 1 Undiff-G BSG           |
| TRIM25    | 0.000287 | -0.21543 | 0     | 0.089 | 1 Undiff-G TRIM25        |
| UEVLD     | 0.000287 | -0.22407 | 0     | 0.089 | 1 Undiff-G UEVLD         |
| MDFI      | 0.000287 | -0.24506 | 0     | 0.089 | 1 Undiff-G MDFI          |
| NLRP3     | 0.000287 | -0.39602 | 0     | 0.089 | 1 Undiff-G NLRP3         |
| MBIP      | 0.000288 | 0.428515 | 0.051 | 0.181 | 1 Undiff-G MBIP          |
| NCOA7     | 0.000288 | -0.22733 | 0.015 | 0.116 | 1 Undiff-G NCOA7         |
| SESN1     | 0.000288 | -0.17415 | 0.007 | 0.103 | 1 Undiff-G SESN1         |
| ARL5B     | 0.000289 | -0.23368 | 0     | 0.088 | 1 Undiff-G ARL5B         |
| PHLDB1    | 0.000292 | 0.158995 | 0.029 | 0.143 | 1 Undiff-G PHLDB1        |
| HSPA14    | 0.000292 | 0.116509 | 0.029 | 0.143 | 1 Undiff-G HSPA14        |
| STK39     | 0.000292 | -0.15192 | 0.007 | 0.103 | 1 Undiff-G STK39         |
| DLX1      | 0.000292 | -0.29229 | 0.015 | 0.116 | 1 Undiff-G DLX1          |
| SFXN4     | 0.000293 | -0.15591 | 0.015 | 0.115 | 1 Undiff-G SFXN4         |
| NINJ2     | 0.000294 | -0.43047 | 0     | 0.088 | 1 Undiff-G NINJ2         |
| FAM98A    | 0.000294 | 0.139724 | 0.029 | 0.143 | 1 Undiff-G FAM98A        |
| KIF20B    | 0.000296 | -0.30915 | 0     | 0.088 | 1 Undiff-G KIF20B        |
| ASB1      | 0.000296 | -0.25972 | 0.007 | 0.101 | 1 Undiff-G ASB1          |
| TOX       | 0.000298 | -0.23823 | 0     | 0.088 | 1 Undiff-G TOX           |
| KIAA1551  | 0.000298 | -0.2767  | 0     | 0.088 | 1 Undiff-G KIAA1551      |
| SLC16A10  | 0.000298 | -0.43071 | 0     | 0.088 | 1 Undiff-G SLC16A10      |
| C6orf203  | 0.000299 | 0.325645 | 0.044 | 0.167 | 1 Undiff-G C6orf203      |
| CAPN7     | 0.000299 | -0.14208 | 0.015 | 0.115 | 1 Undiff-G CAPN7         |
| MXRA7     | 0.0003   | 0.293166 | 0.044 | 0.168 | 1 Undiff-G MXRA7         |
| ZNF217    | 0.0003   | -0.20584 | 0     | 0.088 | 1 Undiff-G ZNF217        |
| FAM210A   | 0.000301 | 0.229199 | 0.029 | 0.143 | 1 Undiff-G FAM210A       |
| LSM14B    | 0.000302 | -0.20573 | 0.007 | 0.102 | 1 Undiff-G LSM14B        |
| MIR181A1H | 0.000302 | -0.31168 | 0.015 | 0.114 | 1 Undiff-G MIR181A1HG    |
| NDST1     | 0.000303 | -0.21439 | 0     | 0.088 | 1 Undiff-G NDST1         |
| ZNF574    | 0.000303 | -0.22555 | 0     | 0.088 | 1 Undiff-G ZNF574        |

|           |          |          |       |       |                        |
|-----------|----------|----------|-------|-------|------------------------|
| NCKAP5L   | 0.000304 | -0.23444 | 0.015 | 0.115 | 1 Undiff-G NCKAP5L     |
| MEIS1     | 0.000305 | -0.20776 | 0     | 0.088 | 1 Undiff-G MEIS1       |
| FBXL17    | 0.000305 | -0.22429 | 0     | 0.088 | 1 Undiff-G FBXL17      |
| CDH4      | 0.000307 | -0.20549 | 0     | 0.088 | 1 Undiff-G CDH4        |
| SYBU      | 0.000307 | -0.22393 | 0     | 0.088 | 1 Undiff-G SYBU        |
| KBTBD7    | 0.000307 | -0.25145 | 0     | 0.088 | 1 Undiff-G KBTBD7      |
| GRAMD3    | 0.000307 | -0.14627 | 0.029 | 0.141 | 1 Undiff-G GRAMD3      |
| ZNF827    | 0.000307 | -0.1734  | 0.015 | 0.116 | 1 Undiff-G ZNF827      |
| FEM1B     | 0.000308 | -0.22948 | 0.015 | 0.115 | 1 Undiff-G FEM1B       |
| ICAM3     | 0.00031  | -0.15881 | 0.007 | 0.102 | 1 Undiff-G ICAM3       |
| NIN       | 0.000311 | -0.16987 | 0.022 | 0.129 | 1 Undiff-G NIN         |
| LLGL1     | 0.000311 | -0.23045 | 0.007 | 0.101 | 1 Undiff-G LLGL1       |
| ANGEL2    | 0.000311 | -0.24327 | 0.015 | 0.114 | 1 Undiff-G ANGEL2      |
| LIMK2     | 0.000312 | -0.22921 | 0     | 0.088 | 1 Undiff-G LIMK2       |
| MEPCE     | 0.000312 | 0.120772 | 0.022 | 0.129 | 1 Undiff-G MEPCE       |
| THOC5     | 0.000314 | -0.249   | 0     | 0.087 | 1 Undiff-G THOC5       |
| AEN       | 0.000314 | -0.27033 | 0     | 0.087 | 1 Undiff-G AEN         |
| GAD1      | 0.000314 | -0.15105 | 0.015 | 0.114 | 1 Undiff-G GAD1        |
| SNX18     | 0.000314 | -0.22836 | 0.015 | 0.114 | 1 Undiff-G SNX18       |
| RC3H1     | 0.000315 | -0.15    | 0.007 | 0.102 | 1 Undiff-G RC3H1       |
| CPSF1     | 0.000316 | -0.24959 | 0     | 0.087 | 1 Undiff-G CPSF1       |
| RP11-51J9 | 0.000316 | 0.212498 | 0.029 | 0.142 | 1 Undiff-G RP11-51J9.5 |
| TAGAP     | 0.000317 | -0.30624 | 0.007 | 0.102 | 1 Undiff-G TAGAP       |
| GDAP1L1   | 0.000317 | -0.27486 | 0.007 | 0.102 | 1 Undiff-G GDAP1L1     |
| HDAC9     | 0.000318 | -0.14406 | 0.022 | 0.127 | 1 Undiff-G HDAC9       |
| NIT2      | 0.000319 | 0.598662 | 0.081 | 0.23  | 1 Undiff-G NIT2        |
| STK24     | 0.000319 | -0.19178 | 0.007 | 0.102 | 1 Undiff-G STK24       |
| PRMT7     | 0.000319 | -0.2367  | 0.007 | 0.101 | 1 Undiff-G PRMT7       |
| SLC25A22  | 0.000319 | -0.20121 | 0.015 | 0.114 | 1 Undiff-G SLC25A22    |
| EDEM3     | 0.00032  | -0.21157 | 0.015 | 0.114 | 1 Undiff-G EDEM3       |
| PPP3R1    | 0.00032  | -0.21341 | 0.015 | 0.114 | 1 Undiff-G PPP3R1      |
| ZNF462    | 0.000321 | 0.128013 | 0.051 | 0.178 | 1 Undiff-G ZNF462      |
| UQCC1     | 0.000322 | 0.183288 | 0.044 | 0.167 | 1 Undiff-G UQCC1       |
| FLYWCH1   | 0.000322 | -0.12701 | 0.007 | 0.102 | 1 Undiff-G FLYWCH1     |
| EIF3J-AS1 | 0.000322 | -0.10407 | 0.022 | 0.128 | 1 Undiff-G EIF3J-AS1   |
| HELZ2     | 0.000323 | -0.22694 | 0.007 | 0.101 | 1 Undiff-G HELZ2       |
| NUDT19    | 0.000323 | -0.18475 | 0.007 | 0.101 | 1 Undiff-G NUDT19      |
| POMZP3    | 0.000323 | -0.21737 | 0     | 0.087 | 1 Undiff-G POMZP3      |
| JMJD8     | 0.000323 | -0.27444 | 0     | 0.087 | 1 Undiff-G JMJD8       |
| ARRDC2    | 0.000323 | -0.33567 | 0     | 0.087 | 1 Undiff-G ARRDC2      |
| GPR75-ASE | 0.000326 | -0.22869 | 0     | 0.087 | 1 Undiff-G GPR75-ASB3  |
| PRC1      | 0.000326 | -0.2938  | 0     | 0.087 | 1 Undiff-G PRC1        |
| DIP2A     | 0.000327 | -0.11923 | 0.015 | 0.115 | 1 Undiff-G DIP2A       |
| ANKRD54   | 0.000328 | 0.106025 | 0.029 | 0.141 | 1 Undiff-G ANKRD54     |
| ELL       | 0.000328 | -0.26575 | 0.007 | 0.101 | 1 Undiff-G ELL         |
| ZCCHC8    | 0.000328 | -0.24378 | 0     | 0.087 | 1 Undiff-G ZCCHC8      |
| ARHGAP9   | 0.000328 | -0.34834 | 0     | 0.087 | 1 Undiff-G ARHGAP9     |
| ST3GAL2   | 0.000328 | -0.21625 | 0.007 | 0.1   | 1 Undiff-G ST3GAL2     |
| SMIM13    | 0.000331 | -0.20798 | 0     | 0.087 | 1 Undiff-G SMIM13      |
| FNTB      | 0.000331 | -0.26251 | 0     | 0.087 | 1 Undiff-G FNTB        |
| FKBP9     | 0.000331 | 0.33993  | 0.051 | 0.178 | 1 Undiff-G FKBP9       |

|           |          |          |       |       |                      |
|-----------|----------|----------|-------|-------|----------------------|
| ELM01     | 0.000331 | 0.171265 | 0.059 | 0.191 | 1 Undiff-G ELM01     |
| TEFM      | 0.000333 | -0.22187 | 0.015 | 0.114 | 1 Undiff-G TEFM      |
| RDH10     | 0.000333 | -0.2684  | 0     | 0.087 | 1 Undiff-G RDH10     |
| IL6R      | 0.000333 | -0.34741 | 0     | 0.087 | 1 Undiff-G IL6R      |
| BTK       | 0.000333 | -0.35928 | 0     | 0.087 | 1 Undiff-G BTK       |
| ASCC1     | 0.000334 | -0.20863 | 0.015 | 0.115 | 1 Undiff-G ASCC1     |
| FAM160A2  | 0.000334 | -0.16303 | 0.015 | 0.115 | 1 Undiff-G FAM160A2  |
| ARV1      | 0.000337 | 0.48809  | 0.051 | 0.18  | 1 Undiff-G ARV1      |
| DSN1      | 0.000337 | -0.23154 | 0.007 | 0.101 | 1 Undiff-G DSN1      |
| FAXC      | 0.000338 | -0.23999 | 0     | 0.087 | 1 Undiff-G FAXC      |
| MVB12B    | 0.000338 | -0.21726 | 0.007 | 0.101 | 1 Undiff-G MVB12B    |
| DCUN1D4   | 0.00034  | -0.21771 | 0.007 | 0.101 | 1 Undiff-G DCUN1D4   |
| GNB1L     | 0.000341 | -0.21819 | 0     | 0.087 | 1 Undiff-G GNB1L     |
| SNCAIP    | 0.000343 | -0.21088 | 0     | 0.086 | 1 Undiff-G SNCAIP    |
| ZZEF1     | 0.000343 | -0.21689 | 0     | 0.086 | 1 Undiff-G ZZEF1     |
| ARAP2     | 0.000343 | -0.25469 | 0     | 0.086 | 1 Undiff-G ARAP2     |
| INF2      | 0.000343 | -0.26842 | 0     | 0.086 | 1 Undiff-G INF2      |
| METTL12   | 0.000344 | 0.164351 | 0.044 | 0.166 | 1 Undiff-G METTL12   |
| KDM4A     | 0.000344 | -0.20464 | 0.015 | 0.114 | 1 Undiff-G KDM4A     |
| LRRC27    | 0.000346 | -0.21452 | 0     | 0.086 | 1 Undiff-G LRRC27    |
| TAF1B     | 0.000346 | -0.24376 | 0     | 0.086 | 1 Undiff-G TAF1B     |
| TANGO2    | 0.000346 | -0.27579 | 0     | 0.086 | 1 Undiff-G TANGO2    |
| AGK       | 0.000347 | -0.1373  | 0.007 | 0.101 | 1 Undiff-G AGK       |
| FGF14     | 0.000348 | -0.21285 | 0     | 0.086 | 1 Undiff-G FGF14     |
| HOXC9     | 0.000348 | -0.29849 | 0     | 0.086 | 1 Undiff-G HOXC9     |
| FBLN1     | 0.000348 | -0.32852 | 0     | 0.086 | 1 Undiff-G FBLN1     |
| RABEP2    | 0.000348 | -0.20844 | 0.007 | 0.1   | 1 Undiff-G RABEP2    |
| CLEC5A    | 0.000349 | -0.3368  | 0.007 | 0.101 | 1 Undiff-G CLEC5A    |
| TMBIM4    | 0.00035  | 1.022442 | 0.125 | 0.058 | 1 Undiff-G TMBIM4    |
| SLC20A2   | 0.00035  | -0.23907 | 0.015 | 0.114 | 1 Undiff-G SLC20A2   |
| PPP2R5A   | 0.000351 | -0.18595 | 0.015 | 0.114 | 1 Undiff-G PPP2R5A   |
| CUL4B     | 0.000351 | -0.21914 | 0     | 0.086 | 1 Undiff-G CUL4B     |
| ALDH18A1  | 0.000351 | -0.22364 | 0     | 0.086 | 1 Undiff-G ALDH18A1  |
| DIRAS1    | 0.000352 | -0.13627 | 0.015 | 0.114 | 1 Undiff-G DIRAS1    |
| VCL       | 0.000352 | -0.20679 | 0.007 | 0.1   | 1 Undiff-G VCL       |
| MYO5A     | 0.000353 | -0.17808 | 0.015 | 0.113 | 1 Undiff-G MYO5A     |
| SNTA1     | 0.000354 | -0.17472 | 0     | 0.086 | 1 Undiff-G SNTA1     |
| PLXNA1    | 0.000354 | -0.20647 | 0     | 0.086 | 1 Undiff-G PLXNA1    |
| KLHL2     | 0.000354 | -0.23018 | 0     | 0.086 | 1 Undiff-G KLHL2     |
| ZUFSP     | 0.000354 | -0.23676 | 0     | 0.086 | 1 Undiff-G ZUFSP     |
| INPP5D    | 0.000356 | -0.39114 | 0     | 0.086 | 1 Undiff-G INPP5D    |
| BCAT2     | 0.00036  | -0.10888 | 0.029 | 0.14  | 1 Undiff-G BCAT2     |
| C14orf159 | 0.000361 | -0.22201 | 0.022 | 0.127 | 1 Undiff-G C14orf159 |
| ZNF85     | 0.000362 | -0.228   | 0     | 0.086 | 1 Undiff-G ZNF85     |
| ZMIZ2     | 0.000364 | -0.18936 | 0.007 | 0.1   | 1 Undiff-G ZMIZ2     |
| SRBD1     | 0.000364 | -0.24382 | 0     | 0.086 | 1 Undiff-G SRBD1     |
| SNRK      | 0.000364 | -0.2483  | 0     | 0.086 | 1 Undiff-G SNRK      |
| PPP4R1    | 0.000366 | -0.18422 | 0.015 | 0.113 | 1 Undiff-G PPP4R1    |
| SPRTN     | 0.000367 | 0.285654 | 0.022 | 0.127 | 1 Undiff-G SPRTN     |
| HK2       | 0.000367 | -0.27783 | 0     | 0.086 | 1 Undiff-G HK2       |
| WDTC1     | 0.000368 | -0.23209 | 0.007 | 0.1   | 1 Undiff-G WDTC1     |

|           |          |          |       |       |                      |
|-----------|----------|----------|-------|-------|----------------------|
| PITX1     | 0.00037  | -0.15933 | 0     | 0.086 | 1 Undiff-G PITX1     |
| DNAJC25   | 0.00037  | -0.2224  | 0     | 0.086 | 1 Undiff-G DNAJC25   |
| DIP2C     | 0.00037  | -0.24282 | 0     | 0.086 | 1 Undiff-G DIP2C     |
| CYTL1     | 0.00037  | -0.35766 | 0.015 | 0.111 | 1 Undiff-G CYTL1     |
| ZNF227    | 0.000373 | -0.16652 | 0.007 | 0.1   | 1 Undiff-G ZNF227    |
| KCTD10    | 0.000373 | -0.23337 | 0     | 0.085 | 1 Undiff-G KCTD10    |
| P2RY13    | 0.000373 | -0.45584 | 0     | 0.085 | 1 Undiff-G P2RY13    |
| XPNPEP3   | 0.000373 | -0.26377 | 0.007 | 0.099 | 1 Undiff-G XPNPEP3   |
| PSMD5     | 0.000373 | -0.21241 | 0.015 | 0.113 | 1 Undiff-G PSMD5     |
| ATF7IP    | 0.000374 | -0.17942 | 0.015 | 0.113 | 1 Undiff-G ATF7IP    |
| STX17     | 0.000374 | -0.12025 | 0.015 | 0.113 | 1 Undiff-G STX17     |
| HSD17B8   | 0.000375 | -0.27148 | 0.007 | 0.099 | 1 Undiff-G HSD17B8   |
| ZNF430    | 0.000375 | 0.385903 | 0.059 | 0.191 | 1 Undiff-G ZNF430    |
| ITGA3     | 0.000375 | -0.15795 | 0.007 | 0.1   | 1 Undiff-G ITGA3     |
| PLEKHA1   | 0.000376 | -0.14111 | 0.007 | 0.1   | 1 Undiff-G PLEKHA1   |
| ARHGFEF26 | 0.000378 | -0.15166 | 0.022 | 0.126 | 1 Undiff-G ARHGFEF26 |
| TRIM8     | 0.000378 | -0.21236 | 0.007 | 0.1   | 1 Undiff-G TRIM8     |
| NTM       | 0.000379 | -0.2983  | 0.015 | 0.113 | 1 Undiff-G NTM       |
| CHN2      | 0.00038  | -0.32027 | 0.007 | 0.099 | 1 Undiff-G CHN2      |
| TRIM41    | 0.00038  | -0.22919 | 0.007 | 0.099 | 1 Undiff-G TRIM41    |
| HOXB2     | 0.000381 | -0.29748 | 0     | 0.085 | 1 Undiff-G HOXB2     |
| TK2       | 0.000382 | -0.132   | 0.022 | 0.125 | 1 Undiff-G TK2       |
| ENTPD8    | 0.000382 | 0.259258 | 0.007 | 0     | 1 Undiff-G ENTPD8    |
| MAP1LC3B2 | 0.000384 | -0.32298 | 0     | 0.085 | 1 Undiff-G MAP1LC3B2 |
| KYNU      | 0.000384 | -0.37778 | 0     | 0.085 | 1 Undiff-G KYNU      |
| RPS6KA2   | 0.000384 | -0.23014 | 0.015 | 0.113 | 1 Undiff-G RPS6KA2   |
| NRM       | 0.000387 | -0.23099 | 0     | 0.085 | 1 Undiff-G NRM       |
| CITED1    | 0.000387 | 0.370709 | 0.037 | 0.152 | 1 Undiff-G CITED1    |
| KCNIP1    | 0.000388 | -0.15167 | 0.007 | 0.099 | 1 Undiff-G KCNIP1    |
| PEX7      | 0.000389 | -0.19553 | 0     | 0.085 | 1 Undiff-G PEX7      |
| RBM19     | 0.000389 | -0.21116 | 0     | 0.085 | 1 Undiff-G RBM19     |
| SLC22A18  | 0.000392 | -0.19369 | 0.022 | 0.125 | 1 Undiff-G SLC22A18  |
| LILRA2    | 0.000392 | -0.4059  | 0     | 0.085 | 1 Undiff-G LILRA2    |
| SLC9A3R2  | 0.000395 | 0.148248 | 0.015 | 0.113 | 1 Undiff-G SLC9A3R2  |
| S100B     | 0.000395 | 0.492476 | 0.25  | 0.531 | 1 Undiff-G S100B     |
| PATZ1     | 0.000395 | -0.21824 | 0     | 0.085 | 1 Undiff-G PATZ1     |
| INO80D    | 0.000395 | -0.23512 | 0     | 0.085 | 1 Undiff-G INO80D    |
| CDK2      | 0.000395 | -0.23552 | 0     | 0.085 | 1 Undiff-G CDK2      |
| IRAK4     | 0.000396 | -0.24723 | 0.007 | 0.099 | 1 Undiff-G IRAK4     |
| LSS       | 0.000396 | -0.13022 | 0.007 | 0.099 | 1 Undiff-G LSS       |
| L3HYPDH   | 0.000396 | -0.13875 | 0.022 | 0.126 | 1 Undiff-G L3HYPDH   |
| HEMK1     | 0.000396 | -0.18259 | 0.015 | 0.112 | 1 Undiff-G HEMK1     |
| B4GALT4   | 0.000399 | 0.270442 | 0.029 | 0.139 | 1 Undiff-G B4GALT4   |
| UBE4B     | 0.000399 | -0.26982 | 0.007 | 0.098 | 1 Undiff-G UBE4B     |
| WDR25     | 0.000399 | -0.10496 | 0.007 | 0.099 | 1 Undiff-G WDR25     |
| NMT2      | 0.0004   | -0.18668 | 0.007 | 0.099 | 1 Undiff-G NMT2      |
| EPHB2     | 0.000401 | -0.23377 | 0     | 0.085 | 1 Undiff-G EPHB2     |
| UNC5B     | 0.000401 | -0.31624 | 0     | 0.085 | 1 Undiff-G UNC5B     |
| CLK4      | 0.000401 | 0.121554 | 0.044 | 0.164 | 1 Undiff-G CLK4      |
| KCNMB4    | 0.000403 | -0.14199 | 0.022 | 0.124 | 1 Undiff-G KCNMB4    |
| INTS6     | 0.000403 | 0.173838 | 0.029 | 0.139 | 1 Undiff-G INTS6     |

|           |          |          |       |       |                          |
|-----------|----------|----------|-------|-------|--------------------------|
| DHRS13    | 0.000404 | -0.16841 | 0.007 | 0.099 | 1 Undiff-G DHRS13        |
| AGBL5     | 0.000404 | -0.17905 | 0     | 0.085 | 1 Undiff-G AGBL5         |
| ZNF561    | 0.000407 | -0.20906 | 0.015 | 0.112 | 1 Undiff-G ZNF561        |
| ARHGAP17  | 0.000407 | -0.21923 | 0     | 0.084 | 1 Undiff-G ARHGAP17      |
| KIF1C     | 0.00041  | -0.22073 | 0     | 0.084 | 1 Undiff-G KIF1C         |
| PHRF1     | 0.00041  | -0.22094 | 0     | 0.084 | 1 Undiff-G PHRF1         |
| ACSL4     | 0.00041  | -0.24844 | 0     | 0.084 | 1 Undiff-G ACSL4         |
| PMAIP1    | 0.00041  | -0.44277 | 0     | 0.084 | 1 Undiff-G PMAIP1        |
| PTBP3     | 0.000412 | -0.18501 | 0.015 | 0.112 | 1 Undiff-G PTBP3         |
| AHSA2     | 0.000413 | -0.19244 | 0.022 | 0.125 | 1 Undiff-G AHSA2         |
| BTBD2     | 0.000413 | -0.1907  | 0.007 | 0.099 | 1 Undiff-G BTBD2         |
| KLC4      | 0.000413 | -0.21925 | 0     | 0.084 | 1 Undiff-G KLC4          |
| GCLC      | 0.000416 | -0.25295 | 0.007 | 0.098 | 1 Undiff-G GCLC          |
| ZNF253    | 0.000416 | -0.21981 | 0     | 0.084 | 1 Undiff-G ZNF253        |
| UBA6-AS1  | 0.000416 | -0.23692 | 0     | 0.084 | 1 Undiff-G UBA6-AS1      |
| AP1G1     | 0.000417 | 0.212292 | 0.022 | 0.126 | 1 Undiff-G AP1G1         |
| BRMS1L    | 0.000417 | -0.1329  | 0.007 | 0.099 | 1 Undiff-G BRMS1L        |
| FN3K      | 0.000419 | -0.23299 | 0     | 0.084 | 1 Undiff-G FN3K          |
| NFIL3     | 0.000419 | -0.30967 | 0     | 0.084 | 1 Undiff-G NFIL3         |
| FKBP10    | 0.000422 | 0.191244 | 0.074 | 0.214 | 1 Undiff-G FKBP10        |
| GPR161    | 0.000423 | -0.20758 | 0     | 0.084 | 1 Undiff-G GPR161        |
| HAUS8     | 0.000423 | -0.24988 | 0     | 0.084 | 1 Undiff-G HAUS8         |
| INTS3     | 0.000423 | -0.2078  | 0.015 | 0.111 | 1 Undiff-G INTS3         |
| RBBP8     | 0.000426 | -0.19668 | 0     | 0.084 | 1 Undiff-G RBBP8         |
| NXT2      | 0.000426 | -0.2038  | 0     | 0.084 | 1 Undiff-G NXT2          |
| PHF10     | 0.000426 | -0.21069 | 0     | 0.084 | 1 Undiff-G PHF10         |
| CCDC159   | 0.000428 | 0.24902  | 0.037 | 0.15  | 1 Undiff-G CCDC159       |
| CCDC71    | 0.000428 | -0.16705 | 0.007 | 0.098 | 1 Undiff-G CCDC71        |
| SOS2      | 0.000429 | -0.20943 | 0     | 0.084 | 1 Undiff-G SOS2          |
| DYRK1A    | 0.000429 | -0.20994 | 0     | 0.084 | 1 Undiff-G DYRK1A        |
| ORAOV1    | 0.000429 | -0.22083 | 0     | 0.084 | 1 Undiff-G ORAOV1        |
| RP11-660L | 0.000429 | 0.137966 | 0.022 | 0.125 | 1 Undiff-G RP11-660L16.2 |
| EAF1      | 0.00043  | 0.103407 | 0.022 | 0.125 | 1 Undiff-G EAF1          |
| ZNF668    | 0.000432 | -0.20141 | 0     | 0.084 | 1 Undiff-G ZNF668        |
| PHACTR2   | 0.000432 | -0.20394 | 0     | 0.084 | 1 Undiff-G PHACTR2       |
| METRNL    | 0.000432 | -0.32614 | 0     | 0.084 | 1 Undiff-G METRNL        |
| SCIMP     | 0.000432 | -0.36234 | 0     | 0.084 | 1 Undiff-G SCIMP         |
| RP11-242D | 0.000433 | 0.467059 | 0.029 | 0.006 | 1 Undiff-G RP11-242D8.1  |
| MECR      | 0.000434 | 0.268375 | 0.044 | 0.162 | 1 Undiff-G MECR          |
| NCBP1     | 0.000435 | -0.21277 | 0     | 0.084 | 1 Undiff-G NCBP1         |
| ZNF266    | 0.000435 | -0.22019 | 0     | 0.084 | 1 Undiff-G ZNF266        |
| ARNTL     | 0.000436 | -0.22763 | 0.007 | 0.097 | 1 Undiff-G ARNTL         |
| FOXRED2   | 0.000439 | -0.196   | 0     | 0.084 | 1 Undiff-G FOXRED2       |
| RGS17     | 0.00044  | 0.287534 | 0.044 | 0.164 | 1 Undiff-G RGS17         |
| SLC10A4   | 0.000441 | -0.17435 | 0.007 | 0.098 | 1 Undiff-G SLC10A4       |
| DGCR8     | 0.000442 | -0.20674 | 0     | 0.084 | 1 Undiff-G DGCR8         |
| FAM193A   | 0.000442 | -0.21686 | 0     | 0.084 | 1 Undiff-G FAM193A       |
| CNOT1     | 0.000444 | 0.27487  | 0.037 | 0.151 | 1 Undiff-G CNOT1         |
| TRAK1     | 0.000444 | -0.21348 | 0.007 | 0.098 | 1 Undiff-G TRAK1         |
| BICD2     | 0.000445 | -0.231   | 0     | 0.083 | 1 Undiff-G BICD2         |
| RXRA      | 0.000445 | -0.26996 | 0.007 | 0.097 | 1 Undiff-G RXRA          |

|           |          |          |       |       |                          |
|-----------|----------|----------|-------|-------|--------------------------|
| MCM4      | 0.000446 | -0.23658 | 0.007 | 0.097 | 1 Undiff-G MCM4          |
| TRAPPC2   | 0.000447 | -0.23282 | 0.007 | 0.097 | 1 Undiff-G TRAPPC2       |
| TUBGCP4   | 0.000447 | -0.15552 | 0.022 | 0.124 | 1 Undiff-G TUBGCP4       |
| SIN3B     | 0.000448 | -0.22391 | 0.007 | 0.097 | 1 Undiff-G SIN3B         |
| FAHD2B    | 0.000448 | -0.22457 | 0     | 0.083 | 1 Undiff-G FAHD2B        |
| SLC10A3   | 0.000448 | -0.23616 | 0     | 0.083 | 1 Undiff-G SLC10A3       |
| RP11-834C | 0.000449 | -0.24486 | 0.007 | 0.098 | 1 Undiff-G RP11-834C11.4 |
| CDCA7     | 0.00045  | -0.13601 | 0.022 | 0.124 | 1 Undiff-G CDCA7         |
| METTL10   | 0.000451 | -0.14673 | 0.015 | 0.11  | 1 Undiff-G METTL10       |
| MAPK14    | 0.000451 | -0.19964 | 0.015 | 0.111 | 1 Undiff-G MAPK14        |
| TERF2     | 0.000452 | -0.20953 | 0     | 0.083 | 1 Undiff-G TERF2         |
| MAP6D1    | 0.000452 | -0.23784 | 0     | 0.083 | 1 Undiff-G MAP6D1        |
| SSX2IP    | 0.000454 | -0.16642 | 0.007 | 0.097 | 1 Undiff-G SSX2IP        |
| UBE3C     | 0.000456 | 0.106066 | 0.015 | 0.111 | 1 Undiff-G UBE3C         |
| POLG      | 0.000457 | -0.22364 | 0.007 | 0.097 | 1 Undiff-G POLG          |
| C9orf85   | 0.000458 | -0.16644 | 0.007 | 0.097 | 1 Undiff-G C9orf85       |
| GOLGA1    | 0.000458 | -0.2102  | 0     | 0.083 | 1 Undiff-G GOLGA1        |
| NCOA5     | 0.000458 | -0.21323 | 0     | 0.083 | 1 Undiff-G NCOA5         |
| LMBR1     | 0.000459 | -0.11059 | 0.015 | 0.111 | 1 Undiff-G LMBR1         |
| TMED10    | 0.00046  | 0.656313 | 0.287 | 0.617 | 1 Undiff-G TMED10        |
| BBS7      | 0.00046  | -0.17737 | 0.007 | 0.097 | 1 Undiff-G BBS7          |
| MRC2      | 0.00046  | 0.250118 | 0.051 | 0.175 | 1 Undiff-G MRC2          |
| ERLIN2    | 0.000461 | 0.161339 | 0.022 | 0.124 | 1 Undiff-G ERLIN2        |
| RIN1      | 0.000462 | -0.17561 | 0     | 0.083 | 1 Undiff-G RIN1          |
| IFIT2     | 0.000462 | -0.3342  | 0     | 0.083 | 1 Undiff-G IFIT2         |
| MUTYH     | 0.000462 | -0.15437 | 0.007 | 0.097 | 1 Undiff-G MUTYH         |
| HVCN1     | 0.000463 | -0.12525 | 0.007 | 0.097 | 1 Undiff-G HVCN1         |
| POLM      | 0.000464 | -0.19775 | 0.007 | 0.097 | 1 Undiff-G POLM          |
| BBS2      | 0.000465 | 0.245077 | 0.051 | 0.174 | 1 Undiff-G BBS2          |
| UTP14C    | 0.000465 | -0.18511 | 0     | 0.083 | 1 Undiff-G UTP14C        |
| PIANP     | 0.000465 | -0.18545 | 0     | 0.083 | 1 Undiff-G PIANP         |
| GMPR      | 0.000465 | -0.21793 | 0     | 0.083 | 1 Undiff-G GMPR          |
| BEX5      | 0.000466 | -0.22584 | 0.007 | 0.097 | 1 Undiff-G BEX5          |
| EBI3      | 0.000466 | -0.2466  | 0.007 | 0.097 | 1 Undiff-G EBI3          |
| FAM111A   | 0.000466 | -0.22401 | 0.015 | 0.11  | 1 Undiff-G FAM111A       |
| GPATCH2   | 0.000468 | 0.472692 | 0.044 | 0.163 | 1 Undiff-G GPATCH2       |
| PPARD     | 0.000468 | -0.22518 | 0.015 | 0.109 | 1 Undiff-G PPARD         |
| RNF6      | 0.000468 | 0.107036 | 0.029 | 0.137 | 1 Undiff-G RNF6          |
| ARHGAP33  | 0.000469 | -0.22002 | 0     | 0.083 | 1 Undiff-G ARHGAP33      |
| LEAP2     | 0.000469 | -0.26817 | 0     | 0.083 | 1 Undiff-G LEAP2         |
| CCR1      | 0.000469 | -0.35537 | 0     | 0.083 | 1 Undiff-G CCR1          |
| RP11-539L | 0.000472 | -0.14855 | 0.007 | 0.097 | 1 Undiff-G RP11-539L10.3 |
| MCM3AP    | 0.000475 | -0.23186 | 0.015 | 0.109 | 1 Undiff-G MCM3AP        |
| MYBBP1A   | 0.000476 | -0.19584 | 0     | 0.083 | 1 Undiff-G MYBBP1A       |
| UBA7      | 0.000476 | -0.32912 | 0     | 0.083 | 1 Undiff-G UBA7          |
| VPS11     | 0.000479 | -0.16121 | 0.007 | 0.097 | 1 Undiff-G VPS11         |
| RP11-400F | 0.000479 | -0.18218 | 0     | 0.083 | 1 Undiff-G RP11-400F19.6 |
| CD2AP     | 0.000479 | -0.21378 | 0     | 0.083 | 1 Undiff-G CD2AP         |
| ZNF669    | 0.00048  | -0.17093 | 0.007 | 0.097 | 1 Undiff-G ZNF669        |
| FOXK2     | 0.000483 | -0.21026 | 0     | 0.082 | 1 Undiff-G FOXK2         |
| LPCAT3    | 0.000484 | 0.291012 | 0.037 | 0.15  | 1 Undiff-G LPCAT3        |

|           |          |          |       |       |                          |
|-----------|----------|----------|-------|-------|--------------------------|
| MYL5      | 0.000485 | -0.1843  | 0.007 | 0.097 | 1 Undiff-G MYL5          |
| SCRN2     | 0.000485 | 0.389025 | 0.051 | 0.174 | 1 Undiff-G SCRN2         |
| GALNT10   | 0.000486 | -0.26906 | 0.007 | 0.096 | 1 Undiff-G GALNT10       |
| ACSS2     | 0.000486 | -0.19629 | 0     | 0.082 | 1 Undiff-G ACSS2         |
| AC093323. | 0.000487 | -0.12797 | 0.007 | 0.097 | 1 Undiff-G AC093323.3    |
| ZNF692    | 0.000488 | -0.15264 | 0.015 | 0.11  | 1 Undiff-G ZNF692        |
| PSENEEN   | 0.000489 | 0.772531 | 0.228 | 0.495 | 1 Undiff-G PSENEEN       |
| DONSON    | 0.00049  | -0.18501 | 0     | 0.082 | 1 Undiff-G DONSON        |
| KATNAL1   | 0.00049  | -0.19414 | 0     | 0.082 | 1 Undiff-G KATNAL1       |
| RP11-421L | 0.00049  | -0.23777 | 0     | 0.082 | 1 Undiff-G RP11-421L21.3 |
| ZNF606    | 0.000494 | -0.21018 | 0     | 0.082 | 1 Undiff-G ZNF606        |
| LYL1      | 0.000494 | -0.34383 | 0     | 0.082 | 1 Undiff-G LYL1          |
| TAPBP1    | 0.000494 | 0.115537 | 0.022 | 0.123 | 1 Undiff-G TAPBP1        |
| SDCCAG3   | 0.000496 | -0.15506 | 0.007 | 0.096 | 1 Undiff-G SDCCAG3       |
| GPATCH3   | 0.000497 | -0.23221 | 0     | 0.082 | 1 Undiff-G GPATCH3       |
| NAIP      | 0.000498 | -0.1857  | 0.015 | 0.11  | 1 Undiff-G NAIP          |
| SERPINA3  | 0.000499 | 0.608856 | 0.029 | 0.006 | 1 Undiff-G SERPINA3      |
| ENTHD2    | 0.000501 | -0.2214  | 0     | 0.082 | 1 Undiff-G ENTHD2        |
| RAB2B     | 0.000501 | -0.23415 | 0     | 0.082 | 1 Undiff-G RAB2B         |
| BCAM      | 0.000502 | 0.141564 | 0.015 | 0.11  | 1 Undiff-G BCAM          |
| AGAP2-AS1 | 0.000502 | -0.12565 | 0.007 | 0.096 | 1 Undiff-G AGAP2-AS1     |
| DHX32     | 0.000505 | -0.19364 | 0     | 0.082 | 1 Undiff-G DHX32         |
| FCHSD2    | 0.000505 | -0.27017 | 0     | 0.082 | 1 Undiff-G FCHSD2        |
| GAP43     | 0.000505 | 1.106998 | 0.441 | 0.467 | 1 Undiff-G GAP43         |
| LTBR      | 0.000507 | -0.28273 | 0.007 | 0.096 | 1 Undiff-G LTBR          |
| SLC4A4    | 0.000507 | -0.16278 | 0.015 | 0.11  | 1 Undiff-G SLC4A4        |
| TESK1     | 0.000508 | -0.19984 | 0     | 0.082 | 1 Undiff-G TESK1         |
| DIRC2     | 0.000508 | -0.20543 | 0     | 0.082 | 1 Undiff-G DIRC2         |
| TAF1C     | 0.000508 | -0.21963 | 0     | 0.082 | 1 Undiff-G TAF1C         |
| OTUD5     | 0.00051  | 0.122607 | 0.029 | 0.136 | 1 Undiff-G OTUD5         |
| PI4KA     | 0.000511 | -0.21979 | 0.007 | 0.096 | 1 Undiff-G PI4KA         |
| REEP1     | 0.000512 | -0.22918 | 0     | 0.082 | 1 Undiff-G REEP1         |
| ZNF250    | 0.000512 | -0.24614 | 0     | 0.082 | 1 Undiff-G ZNF250        |
| ACO09506. | 0.000512 | -0.25539 | 0     | 0.082 | 1 Undiff-G ACO09506.1    |
| D2HGDH    | 0.000515 | -0.1031  | 0.015 | 0.11  | 1 Undiff-G D2HGDH        |
| SNTB2     | 0.000516 | -0.13904 | 0.007 | 0.096 | 1 Undiff-G SNTB2         |
| CDK8      | 0.000516 | -0.20988 | 0     | 0.082 | 1 Undiff-G CDK8          |
| FAM175B   | 0.000516 | -0.23774 | 0     | 0.082 | 1 Undiff-G FAM175B       |
| NQO1      | 0.000516 | 0.20946  | 0.015 | 0.11  | 1 Undiff-G NQO1          |
| TBCK      | 0.00052  | -0.20564 | 0     | 0.082 | 1 Undiff-G TBCK          |
| GABPB1    | 0.000523 | -0.18527 | 0.015 | 0.108 | 1 Undiff-G GABPB1        |
| TMEM185A  | 0.000524 | -0.1898  | 0     | 0.082 | 1 Undiff-G TMEM185A      |
| TNFAIP8L1 | 0.000524 | -0.23751 | 0     | 0.082 | 1 Undiff-G TNFAIP8L1     |
| THAP3     | 0.000527 | 0.390565 | 0.029 | 0.136 | 1 Undiff-G THAP3         |
| AHCTF1    | 0.000528 | -0.19914 | 0     | 0.081 | 1 Undiff-G AHCTF1        |
| EMILIN2   | 0.000528 | -0.2446  | 0     | 0.081 | 1 Undiff-G EMILIN2       |
| ADSSL1    | 0.000528 | -0.25204 | 0     | 0.081 | 1 Undiff-G ADSSL1        |
| GTF2A1    | 0.000528 | -0.18041 | 0.015 | 0.109 | 1 Undiff-G GTF2A1        |
| H6PD      | 0.000531 | -0.14516 | 0.007 | 0.096 | 1 Undiff-G H6PD          |
| ACO91729. | 0.000531 | -0.19744 | 0     | 0.081 | 1 Undiff-G ACO91729.9    |
| SEMA4D    | 0.000531 | -0.34301 | 0     | 0.081 | 1 Undiff-G SEMA4D        |

|           |          |          |       |       |                          |
|-----------|----------|----------|-------|-------|--------------------------|
| STK11     | 0.000534 | -0.17052 | 0.007 | 0.095 | 1 Undiff-G STK11         |
| PRKD2     | 0.000535 | -0.20936 | 0     | 0.081 | 1 Undiff-G PRKD2         |
| JMJD4     | 0.000535 | -0.21586 | 0     | 0.081 | 1 Undiff-G JMJD4         |
| VPS39     | 0.000539 | -0.21848 | 0     | 0.081 | 1 Undiff-G VPS39         |
| PRKCD     | 0.000539 | -0.30271 | 0     | 0.081 | 1 Undiff-G PRKCD         |
| OBSL1     | 0.000541 | 0.145109 | 0.037 | 0.147 | 1 Undiff-G OBSL1         |
| ANKS1B    | 0.000543 | -0.27711 | 0.015 | 0.109 | 1 Undiff-G ANKS1B        |
| MYO9A     | 0.000543 | -0.20738 | 0     | 0.081 | 1 Undiff-G MYO9A         |
| RP11-140K | 0.000543 | -0.23903 | 0     | 0.081 | 1 Undiff-G RP11-140K17.3 |
| LCOR      | 0.000543 | -0.25893 | 0     | 0.081 | 1 Undiff-G LCOR          |
| SCML1     | 0.000544 | -0.29995 | 0.007 | 0.095 | 1 Undiff-G SCML1         |
| CETN3     | 0.000548 | 0.253059 | 0.037 | 0.148 | 1 Undiff-G CETN3         |
| MEX3C     | 0.000548 | -0.16668 | 0.007 | 0.095 | 1 Undiff-G MEX3C         |
| FAM57A    | 0.000549 | -0.14987 | 0.007 | 0.095 | 1 Undiff-G FAM57A        |
| ILDR2     | 0.000551 | -0.15824 | 0     | 0.081 | 1 Undiff-G ILDR2         |
| BANP      | 0.000551 | -0.22015 | 0     | 0.081 | 1 Undiff-G BANP          |
| DNAJB5    | 0.000551 | -0.23604 | 0     | 0.081 | 1 Undiff-G DNAJB5        |
| AP001055. | 0.000551 | -0.36832 | 0     | 0.081 | 1 Undiff-G AP001055.6    |
| NOC3L     | 0.000552 | -0.12207 | 0.007 | 0.095 | 1 Undiff-G NOC3L         |
| DBF4      | 0.000554 | 0.149613 | 0.022 | 0.122 | 1 Undiff-G DBF4          |
| MGARP     | 0.000556 | -0.16585 | 0     | 0.081 | 1 Undiff-G MGARP         |
| ZNF232    | 0.000556 | -0.20284 | 0     | 0.081 | 1 Undiff-G ZNF232        |
| SH3TC1    | 0.000556 | -0.35848 | 0     | 0.081 | 1 Undiff-G SH3TC1        |
| ERCC2     | 0.000558 | -0.17324 | 0.007 | 0.095 | 1 Undiff-G ERCC2         |
| TRAF3IP2- | 0.00056  | -0.21809 | 0     | 0.081 | 1 Undiff-G TRAF3IP2-AS1  |
| ACAP1     | 0.00056  | -0.27447 | 0     | 0.081 | 1 Undiff-G ACAP1         |
| DDX23     | 0.000562 | 0.342646 | 0.044 | 0.16  | 1 Undiff-G DDX23         |
| C5orf42   | 0.000563 | -0.13641 | 0.007 | 0.095 | 1 Undiff-G C5orf42       |
| SCARB1    | 0.000564 | 0.156762 | 0.015 | 0.109 | 1 Undiff-G SCARB1        |
| VAX2      | 0.000564 | -0.19939 | 0     | 0.081 | 1 Undiff-G VAX2          |
| ZC3H3     | 0.000564 | -0.20666 | 0     | 0.081 | 1 Undiff-G ZC3H3         |
| GGA3      | 0.000564 | -0.216   | 0     | 0.081 | 1 Undiff-G GGA3          |
| PIGG      | 0.000565 | -0.20743 | 0.007 | 0.095 | 1 Undiff-G PIGG          |
| MOB3B     | 0.000566 | -0.22855 | 0.007 | 0.095 | 1 Undiff-G MOB3B         |
| TCF7L2    | 0.000568 | -0.19393 | 0.007 | 0.095 | 1 Undiff-G TCF7L2        |
| ELOVL4    | 0.000568 | -0.20584 | 0     | 0.081 | 1 Undiff-G ELOVL4        |
| NTRK2     | 0.000571 | -0.12825 | 0.022 | 0.122 | 1 Undiff-G NTRK2         |
| CBLL1     | 0.000571 | 0.107685 | 0.015 | 0.108 | 1 Undiff-G CBLL1         |
| TLN2      | 0.000572 | -0.22318 | 0.007 | 0.095 | 1 Undiff-G TLN2          |
| LZTS2     | 0.000572 | -0.20521 | 0     | 0.08  | 1 Undiff-G LZTS2         |
| ADAM19    | 0.000576 | -0.19807 | 0     | 0.08  | 1 Undiff-G ADAM19        |
| ZNF789    | 0.000576 | -0.22208 | 0     | 0.08  | 1 Undiff-G ZNF789        |
| AC004540. | 0.000576 | -0.25652 | 0     | 0.08  | 1 Undiff-G AC004540.5    |
| ELAVL2    | 0.000576 | -0.27898 | 0     | 0.08  | 1 Undiff-G ELAVL2        |
| NME1-NME2 | 0.000577 | -0.14149 | 0.007 | 0.095 | 1 Undiff-G NME1-NME2     |
| LINC00844 | 0.000577 | -0.33273 | 0.015 | 0.107 | 1 Undiff-G LINC00844     |
| ZNF354A   | 0.00058  | 0.274855 | 0.022 | 0.122 | 1 Undiff-G ZNF354A       |
| RAB40C    | 0.000581 | -0.19028 | 0     | 0.08  | 1 Undiff-G RAB40C        |
| ZNF133    | 0.000581 | -0.19644 | 0     | 0.08  | 1 Undiff-G ZNF133        |
| DUS4L     | 0.000581 | -0.20639 | 0     | 0.08  | 1 Undiff-G DUS4L         |
| KPTN      | 0.000581 | -0.22509 | 0     | 0.08  | 1 Undiff-G KPTN          |



|          |          |          |       |       |                     |
|----------|----------|----------|-------|-------|---------------------|
| FES      | 0.000581 | -0.32809 | 0     | 0.08  | 1 Undiff-G FES      |
| NUP133   | 0.000585 | -0.13061 | 0.007 | 0.095 | 1 Undiff-G NUP133   |
| ORC3     | 0.000587 | -0.11415 | 0.015 | 0.107 | 1 Undiff-G ORC3     |
| ACACA    | 0.000588 | -0.13962 | 0.007 | 0.094 | 1 Undiff-G ACACA    |
| DTX3L    | 0.000589 | -0.21976 | 0     | 0.08  | 1 Undiff-G DTX3L    |
| GABPA    | 0.000589 | -0.22439 | 0     | 0.08  | 1 Undiff-G GABPA    |
| KNSTRN   | 0.000589 | -0.25976 | 0     | 0.08  | 1 Undiff-G KNSTRN   |
| PCNX     | 0.000592 | -0.16415 | 0.007 | 0.094 | 1 Undiff-G PCNX     |
| NOS1AP   | 0.000594 | -0.19403 | 0     | 0.08  | 1 Undiff-G NOS1AP   |
| EIF5AL1  | 0.000596 | 0.136121 | 0.022 | 0.121 | 1 Undiff-G EIF5AL1  |
| RARRES3  | 0.000596 | 0.385985 | 0.096 | 0.245 | 1 Undiff-G RARRES3  |
| GSAP     | 0.000598 | -0.27886 | 0     | 0.08  | 1 Undiff-G GSAP     |
| LIN7C    | 0.0006   | 0.191355 | 0.022 | 0.121 | 1 Undiff-G LIN7C    |
| TMEM69   | 0.000601 | 0.332639 | 0.051 | 0.17  | 1 Undiff-G TMEM69   |
| PIAS1    | 0.000602 | 0.528982 | 0.044 | 0.16  | 1 Undiff-G PIAS1    |
| CBLN4    | 0.000603 | -0.23539 | 0     | 0.08  | 1 Undiff-G CBLN4    |
| ZNF420   | 0.000606 | 0.166038 | 0.015 | 0.108 | 1 Undiff-G ZNF420   |
| TASP1    | 0.000607 | -0.21945 | 0.007 | 0.093 | 1 Undiff-G TASP1    |
| GABBR1   | 0.000607 | -0.21311 | 0     | 0.08  | 1 Undiff-G GABBR1   |
| SGPP1    | 0.000607 | -0.24409 | 0     | 0.08  | 1 Undiff-G SGPP1    |
| RIC8B    | 0.000608 | -0.20841 | 0.007 | 0.094 | 1 Undiff-G RIC8B    |
| WNK3     | 0.00061  | 0.212024 | 0.022 | 0.121 | 1 Undiff-G WNK3     |
| PTPN13   | 0.000611 | -0.12207 | 0.007 | 0.094 | 1 Undiff-G PTPN13   |
| ELOVL6   | 0.000611 | -0.18149 | 0.007 | 0.094 | 1 Undiff-G ELOVL6   |
| PNPO     | 0.000611 | -0.25483 | 0     | 0.08  | 1 Undiff-G PNPO     |
| PAGR1    | 0.000614 | 0.780534 | 0.037 | 0.009 | 1 Undiff-G PAGR1    |
| CELF4    | 0.000614 | -0.32019 | 0.007 | 0.094 | 1 Undiff-G CELF4    |
| CREBZF   | 0.000616 | -0.12558 | 0.029 | 0.132 | 1 Undiff-G CREBZF   |
| XKR8     | 0.000621 | -0.22654 | 0     | 0.08  | 1 Undiff-G XKR8     |
| DFNA5    | 0.000621 | 0.412687 | 0.066 | 0.197 | 1 Undiff-G DFNA5    |
| PRMT6    | 0.000622 | -0.21989 | 0.007 | 0.093 | 1 Undiff-G PRMT6    |
| PAX6     | 0.000625 | -0.17896 | 0     | 0.079 | 1 Undiff-G PAX6     |
| PPTC7    | 0.000625 | -0.20196 | 0     | 0.079 | 1 Undiff-G PPTC7    |
| MEOX2    | 0.000625 | -0.22164 | 0     | 0.079 | 1 Undiff-G MEOX2    |
| CBR3     | 0.000627 | -0.16408 | 0.015 | 0.106 | 1 Undiff-G CBR3     |
| EAF2     | 0.00063  | -0.17121 | 0.007 | 0.094 | 1 Undiff-G EAF2     |
| TMEM177  | 0.00063  | -0.20469 | 0     | 0.079 | 1 Undiff-G TMEM177  |
| TUSC1    | 0.00063  | -0.22941 | 0     | 0.079 | 1 Undiff-G TUSC1    |
| FANCL    | 0.00063  | 0.111339 | 0.037 | 0.144 | 1 Undiff-G FANCL    |
| TRAPPC10 | 0.000631 | -0.21148 | 0.007 | 0.093 | 1 Undiff-G TRAPPC10 |
| C5orf45  | 0.000631 | 0.167358 | 0.051 | 0.169 | 1 Undiff-G C5orf45  |
| ALKBH6   | 0.000638 | -0.16526 | 0.015 | 0.106 | 1 Undiff-G ALKBH6   |
| BAG2     | 0.000639 | -0.21047 | 0     | 0.079 | 1 Undiff-G BAG2     |
| BLOC1S5  | 0.000639 | -0.22561 | 0     | 0.079 | 1 Undiff-G BLOC1S5  |
| PTPRO    | 0.000639 | -0.27331 | 0     | 0.079 | 1 Undiff-G PTPRO    |
| CROT     | 0.00064  | 0.200209 | 0.029 | 0.133 | 1 Undiff-G CROT     |
| DCAF16   | 0.000641 | 0.30995  | 0.022 | 0.12  | 1 Undiff-G DCAF16   |
| MAST3    | 0.000644 | -0.23576 | 0     | 0.079 | 1 Undiff-G MAST3    |
| CD48     | 0.000644 | -0.38033 | 0     | 0.079 | 1 Undiff-G CD48     |
| KLHL28   | 0.000647 | 0.147577 | 0.022 | 0.12  | 1 Undiff-G KLHL28   |
| ERCC3    | 0.000648 | 0.196268 | 0.037 | 0.146 | 1 Undiff-G ERCC3    |

|           |          |          |       |       |                      |
|-----------|----------|----------|-------|-------|----------------------|
| RRAS2     | 0.000649 | -0.16536 | 0     | 0.079 | 1 Undiff-G RRAS2     |
| ETV4      | 0.000649 | -0.18859 | 0     | 0.079 | 1 Undiff-G ETV4      |
| SASH3     | 0.000649 | -0.3331  | 0     | 0.079 | 1 Undiff-G SASH3     |
| ZNF577    | 0.000652 | -0.16123 | 0.007 | 0.093 | 1 Undiff-G ZNF577    |
| LRRC25    | 0.000653 | -0.18507 | 0.007 | 0.093 | 1 Undiff-G LRRC25    |
| SAP30L    | 0.000657 | -0.11508 | 0.007 | 0.093 | 1 Undiff-G SAP30L    |
| CHST14    | 0.000658 | -0.17162 | 0     | 0.079 | 1 Undiff-G CHST14    |
| CHSY1     | 0.000659 | -0.22509 | 0.007 | 0.092 | 1 Undiff-G CHSY1     |
| FXYD7     | 0.000663 | -0.34023 | 0     | 0.079 | 1 Undiff-G FXYD7     |
| ALG12     | 0.000665 | -0.16265 | 0.007 | 0.093 | 1 Undiff-G ALG12     |
| NPEPL1    | 0.000668 | -0.13714 | 0.015 | 0.106 | 1 Undiff-G NPEPL1    |
| IFT74     | 0.000668 | -0.21948 | 0     | 0.079 | 1 Undiff-G IFT74     |
| ZSWIM8    | 0.000668 | -0.23301 | 0     | 0.079 | 1 Undiff-G ZSWIM8    |
| NLGN2     | 0.000669 | -0.17788 | 0.007 | 0.093 | 1 Undiff-G NLGN2     |
| EYA2      | 0.000673 | -0.18287 | 0     | 0.079 | 1 Undiff-G EYA2      |
| ALDOC     | 0.000676 | 0.129833 | 0.044 | 0.157 | 1 Undiff-G ALDOC     |
| PMS1      | 0.000676 | -0.17905 | 0.022 | 0.118 | 1 Undiff-G PMS1      |
| LOXL1     | 0.000678 | -0.15409 | 0     | 0.079 | 1 Undiff-G LOXL1     |
| PHACTR3   | 0.000678 | -0.27455 | 0     | 0.079 | 1 Undiff-G PHACTR3   |
| TMEFF2    | 0.000678 | -0.28478 | 0     | 0.079 | 1 Undiff-G TMEFF2    |
| ZNF224    | 0.00068  | -0.22983 | 0.015 | 0.105 | 1 Undiff-G ZNF224    |
| SMYD4     | 0.000681 | -0.20137 | 0.022 | 0.118 | 1 Undiff-G SMYD4     |
| CIB2      | 0.000683 | -0.15062 | 0     | 0.078 | 1 Undiff-G CIB2      |
| F12       | 0.000683 | -0.17262 | 0     | 0.078 | 1 Undiff-G F12       |
| TST       | 0.000683 | -0.21897 | 0     | 0.078 | 1 Undiff-G TST       |
| SIGLEC8   | 0.000683 | -0.36512 | 0     | 0.078 | 1 Undiff-G SIGLEC8   |
| FIG4      | 0.000689 | -0.13641 | 0.015 | 0.106 | 1 Undiff-G FIG4      |
| PAPOLG    | 0.00069  | -0.26704 | 0.007 | 0.092 | 1 Undiff-G PAPOLG    |
| CAHM      | 0.000698 | -0.20177 | 0.007 | 0.092 | 1 Undiff-G CAHM      |
| CNPY1     | 0.000698 | -0.22613 | 0     | 0.078 | 1 Undiff-G CNPY1     |
| RP2       | 0.000698 | -0.25383 | 0     | 0.078 | 1 Undiff-G RP2       |
| DDX55     | 0.000702 | -0.18084 | 0.022 | 0.119 | 1 Undiff-G DDX55     |
| DOCK2     | 0.000703 | -0.337   | 0     | 0.078 | 1 Undiff-G DOCK2     |
| SESN2     | 0.000705 | -0.25133 | 0.015 | 0.105 | 1 Undiff-G SESN2     |
| LINC00632 | 0.000707 | -0.2314  | 0.007 | 0.092 | 1 Undiff-G LINC00632 |
| PYG02     | 0.000708 | -0.19363 | 0     | 0.078 | 1 Undiff-G PYG02     |
| HOXA10    | 0.000708 | -0.26396 | 0     | 0.078 | 1 Undiff-G HOXA10    |
| EHD4      | 0.000711 | -0.21082 | 0.007 | 0.092 | 1 Undiff-G EHD4      |
| SETD6     | 0.000712 | -0.21132 | 0.007 | 0.091 | 1 Undiff-G SETD6     |
| GABARAP   | 0.000717 | 0.695817 | 0.213 | 0.464 | 1 Undiff-G GABARAP   |
| FAM69C    | 0.000719 | -0.16555 | 0     | 0.078 | 1 Undiff-G FAM69C    |
| MKL2      | 0.000719 | -0.19566 | 0     | 0.078 | 1 Undiff-G MKL2      |
| ZNF25     | 0.000719 | -0.20159 | 0     | 0.078 | 1 Undiff-G ZNF25     |
| TACC3     | 0.000719 | -0.25933 | 0     | 0.078 | 1 Undiff-G TACC3     |
| Clorf198  | 0.000721 | 0.11289  | 0.015 | 0.106 | 1 Undiff-G Clorf198  |
| TAF1      | 0.000724 | -0.20495 | 0.007 | 0.092 | 1 Undiff-G TAF1      |
| MANEA     | 0.000724 | -0.18335 | 0     | 0.078 | 1 Undiff-G MANEA     |
| ITGA6     | 0.000724 | -0.22606 | 0     | 0.078 | 1 Undiff-G ITGA6     |
| RIOK1     | 0.000724 | 0.425612 | 0.044 | 0.157 | 1 Undiff-G RIOK1     |
| ICOSLG    | 0.000729 | -0.26482 | 0.007 | 0.092 | 1 Undiff-G ICOSLG    |
| OSGEP     | 0.000729 | 0.315205 | 0.074 | 0.204 | 1 Undiff-G OSGEP     |

|           |          |          |       |       |                           |
|-----------|----------|----------|-------|-------|---------------------------|
| RNF169    | 0.00073  | -0.18265 | 0     | 0.078 | 1 Undiff-G RNF169         |
| ADNP2     | 0.00073  | -0.186   | 0     | 0.078 | 1 Undiff-G ADNP2          |
| SH3BP4    | 0.00073  | -0.20119 | 0     | 0.078 | 1 Undiff-G SH3BP4         |
| STAT5B    | 0.00073  | -0.20835 | 0     | 0.078 | 1 Undiff-G STAT5B         |
| CELF5     | 0.00073  | -0.27192 | 0.007 | 0.092 | 1 Undiff-G CELF5          |
| H1FO      | 0.000731 | 0.437418 | 0.11  | 0.265 | 1 Undiff-G H1FO           |
| ARL14EP   | 0.000737 | 0.499709 | 0.059 | 0.182 | 1 Undiff-G ARL14EP        |
| HSF2      | 0.000737 | 0.10566  | 0.022 | 0.119 | 1 Undiff-G HSF2           |
| GRIA4     | 0.000737 | -0.12296 | 0.029 | 0.13  | 1 Undiff-G GRIA4          |
| ABTB1     | 0.000739 | -0.23003 | 0.015 | 0.105 | 1 Undiff-G ABTB1          |
| CEP19     | 0.00074  | -0.21743 | 0     | 0.077 | 1 Undiff-G CEP19          |
| WDR55     | 0.000743 | 0.136313 | 0.022 | 0.118 | 1 Undiff-G WDR55          |
| KCNAB2    | 0.000746 | -0.29025 | 0     | 0.077 | 1 Undiff-G KCNAB2         |
| ZNF562    | 0.000748 | 0.119414 | 0.037 | 0.142 | 1 Undiff-G ZNF562         |
| POFUT1    | 0.000749 | 0.106408 | 0.022 | 0.118 | 1 Undiff-G POFUT1         |
| FAM171A1  | 0.000751 | -0.19003 | 0     | 0.077 | 1 Undiff-G FAM171A1       |
| CBLB      | 0.000751 | -0.23063 | 0     | 0.077 | 1 Undiff-G CBLB           |
| TEX10     | 0.000757 | -0.22069 | 0     | 0.077 | 1 Undiff-G TEX10          |
| ETV3      | 0.000757 | -0.26428 | 0     | 0.077 | 1 Undiff-G ETV3           |
| PARP6     | 0.000761 | -0.18453 | 0.015 | 0.104 | 1 Undiff-G PARP6          |
| RP11-395A | 0.000763 | -0.16654 | 0     | 0.077 | 1 Undiff-G RP11-395A13.2  |
| PANX1     | 0.000763 | -0.23245 | 0     | 0.077 | 1 Undiff-G PANX1          |
| ATP2B4    | 0.000763 | 0.150505 | 0.015 | 0.105 | 1 Undiff-G ATP2B4         |
| UBR7      | 0.000765 | 0.186042 | 0.022 | 0.118 | 1 Undiff-G UBR7           |
| GTF2H3    | 0.000766 | 0.19185  | 0.037 | 0.143 | 1 Undiff-G GTF2H3         |
| TRIM65    | 0.000768 | -0.18244 | 0     | 0.077 | 1 Undiff-G TRIM65         |
| CXorf21   | 0.000768 | -0.36257 | 0     | 0.077 | 1 Undiff-G CXorf21        |
| C9orf116  | 0.000774 | -0.1702  | 0     | 0.077 | 1 Undiff-G C9orf116       |
| CDPF1     | 0.000774 | -0.2278  | 0     | 0.077 | 1 Undiff-G CDPF1          |
| RIT2      | 0.000774 | -0.3273  | 0     | 0.077 | 1 Undiff-G RIT2           |
| RBM48     | 0.000774 | -0.21834 | 0.007 | 0.091 | 1 Undiff-G RBM48          |
| NRXN2     | 0.000778 | -0.17642 | 0.022 | 0.118 | 1 Undiff-G NRXN2          |
| SIRT3     | 0.000779 | -0.1448  | 0.015 | 0.104 | 1 Undiff-G SIRT3          |
| BOK       | 0.00078  | -0.21597 | 0     | 0.077 | 1 Undiff-G BOK            |
| NUMBL     | 0.000781 | -0.18872 | 0.007 | 0.09  | 1 Undiff-G NUMBL          |
| PTPN4     | 0.000783 | -0.21468 | 0.015 | 0.103 | 1 Undiff-G PTPN4          |
| RYK       | 0.000784 | -0.11169 | 0.007 | 0.091 | 1 Undiff-G RYK            |
| C12orf4   | 0.000785 | -0.23868 | 0.007 | 0.09  | 1 Undiff-G C12orf4        |
| RP11-398K | 0.000785 | -0.2031  | 0     | 0.077 | 1 Undiff-G RP11-398K22.12 |
| RASA2     | 0.000785 | -0.22904 | 0     | 0.077 | 1 Undiff-G RASA2          |
| C12orf29  | 0.000786 | 0.391357 | 0.044 | 0.155 | 1 Undiff-G C12orf29       |
| BRF2      | 0.000788 | -0.20723 | 0.007 | 0.091 | 1 Undiff-G BRF2           |
| SAMD1     | 0.000789 | -0.13714 | 0.015 | 0.104 | 1 Undiff-G SAMD1          |
| CCHCR1    | 0.000791 | -0.18177 | 0     | 0.077 | 1 Undiff-G CCHCR1         |
| TSTD2     | 0.000791 | -0.20592 | 0     | 0.077 | 1 Undiff-G TSTD2          |
| TEAD2     | 0.000794 | -0.13254 | 0.007 | 0.091 | 1 Undiff-G TEAD2          |
| METTL22   | 0.000794 | -0.27311 | 0.007 | 0.09  | 1 Undiff-G METTL22        |
| RBM7      | 0.000796 | 0.774481 | 0.096 | 0.244 | 1 Undiff-G RBM7           |
| SLC35C1   | 0.000797 | -0.19018 | 0     | 0.077 | 1 Undiff-G SLC35C1        |
| PMP22     | 0.000798 | 0.615723 | 0.206 | 0.43  | 1 Undiff-G PMP22          |
| ZBTB8A    | 0.000798 | -0.11674 | 0.015 | 0.104 | 1 Undiff-G ZBTB8A         |

|          |          |          |       |       |                     |
|----------|----------|----------|-------|-------|---------------------|
| UBE2C    | 0.000802 | 0.136397 | 0.022 | 0.118 | 1 Undiff-G UBE2C    |
| GUF1     | 0.000803 | -0.19627 | 0.007 | 0.09  | 1 Undiff-G GUF1     |
| ABHD10   | 0.000803 | -0.20247 | 0     | 0.077 | 1 Undiff-G ABHD10   |
| MAN2A2   | 0.000803 | -0.23281 | 0     | 0.077 | 1 Undiff-G MAN2A2   |
| ITGAM    | 0.000803 | -0.33097 | 0     | 0.077 | 1 Undiff-G ITGAM    |
| ZBTB4    | 0.000805 | 0.416012 | 0.022 | 0.118 | 1 Undiff-G ZBTB4    |
| LRRC45   | 0.000806 | -0.18319 | 0.007 | 0.09  | 1 Undiff-G LRRC45   |
| VCPIP1   | 0.000807 | -0.12083 | 0.007 | 0.091 | 1 Undiff-G VCPIP1   |
| TEX2     | 0.000809 | -0.17154 | 0     | 0.076 | 1 Undiff-G TEX2     |
| THG1L    | 0.000809 | -0.22837 | 0     | 0.076 | 1 Undiff-G THG1L    |
| ATP5E    | 0.000811 | 0.337668 | 0.419 | 0.92  | 1 Undiff-G ATP5E    |
| CBFA2T2  | 0.000811 | -0.13184 | 0.029 | 0.13  | 1 Undiff-G CBFA2T2  |
| ADAM15   | 0.000814 | -0.19444 | 0.022 | 0.117 | 1 Undiff-G ADAM15   |
| CHPF2    | 0.000815 | 0.250662 | 0.044 | 0.154 | 1 Undiff-G CHPF2    |
| ZNF276   | 0.000816 | -0.18046 | 0.007 | 0.091 | 1 Undiff-G ZNF276   |
| CHAF1A   | 0.000816 | -0.20669 | 0.007 | 0.09  | 1 Undiff-G CHAF1A   |
| ATXN80S  | 0.000816 | 0.948176 | 0.147 | 0.079 | 1 Undiff-G ATXN80S  |
| C1orf27  | 0.000817 | 0.60135  | 0.059 | 0.181 | 1 Undiff-G C1orf27  |
| RAB30    | 0.000821 | -0.18895 | 0     | 0.076 | 1 Undiff-G RAB30    |
| TMEM8A   | 0.000821 | -0.19488 | 0     | 0.076 | 1 Undiff-G TMEM8A   |
| C5orf30  | 0.000821 | -0.21904 | 0     | 0.076 | 1 Undiff-G C5orf30  |
| PLXNB1   | 0.000821 | -0.2243  | 0     | 0.076 | 1 Undiff-G PLXNB1   |
| LSG1     | 0.000827 | 0.202366 | 0.029 | 0.129 | 1 Undiff-G LSG1     |
| GEMIN8   | 0.000833 | -0.24136 | 0     | 0.076 | 1 Undiff-G GEMIN8   |
| PRDX5    | 0.000836 | 0.646095 | 0.338 | 0.747 | 1 Undiff-G PRDX5    |
| C2       | 0.000836 | -0.2176  | 0.022 | 0.116 | 1 Undiff-G C2       |
| ATG2A    | 0.000839 | -0.24745 | 0     | 0.076 | 1 Undiff-G ATG2A    |
| STX3     | 0.000839 | -0.24966 | 0     | 0.076 | 1 Undiff-G STX3     |
| RDH5     | 0.000841 | -0.17507 | 0.015 | 0.103 | 1 Undiff-G RDH5     |
| MYO1C    | 0.000841 | -0.12223 | 0.015 | 0.103 | 1 Undiff-G MYO1C    |
| PLP2     | 0.000844 | 0.789666 | 0.154 | 0.346 | 1 Undiff-G PLP2     |
| UBASH3B  | 0.000845 | -0.19328 | 0     | 0.076 | 1 Undiff-G UBASH3B  |
| IL1RN    | 0.000845 | -0.35893 | 0     | 0.076 | 1 Undiff-G IL1RN    |
| GPR107   | 0.000851 | 0.217149 | 0.015 | 0.104 | 1 Undiff-G GPR107   |
| MFI2-AS1 | 0.000851 | -0.17401 | 0     | 0.076 | 1 Undiff-G MFI2-AS1 |
| INO80    | 0.000851 | -0.18766 | 0     | 0.076 | 1 Undiff-G INO80    |
| ARMCX5   | 0.000851 | -0.22025 | 0     | 0.076 | 1 Undiff-G ARMCX5   |
| CAMKMT   | 0.000851 | -0.23782 | 0     | 0.076 | 1 Undiff-G CAMKMT   |
| ITPRIP   | 0.000851 | -0.2564  | 0     | 0.076 | 1 Undiff-G ITPRIP   |
| EMB      | 0.000851 | -0.32972 | 0     | 0.076 | 1 Undiff-G EMB      |
| LMAN1    | 0.000855 | 0.80668  | 0.147 | 0.331 | 1 Undiff-G LMAN1    |
| COL9A2   | 0.000861 | -0.23257 | 0.007 | 0.09  | 1 Undiff-G COL9A2   |
| PPM1M    | 0.000864 | -0.24484 | 0     | 0.076 | 1 Undiff-G PPM1M    |
| PIK3CA   | 0.000867 | -0.15051 | 0.007 | 0.09  | 1 Undiff-G PIK3CA   |
| FAM160B2 | 0.00087  | -0.20053 | 0     | 0.076 | 1 Undiff-G FAM160B2 |
| ECD      | 0.00087  | -0.23719 | 0     | 0.076 | 1 Undiff-G ECD      |
| TNFAIP2  | 0.00087  | -0.2944  | 0     | 0.076 | 1 Undiff-G TNFAIP2  |
| CYP20A1  | 0.000872 | 0.184695 | 0.051 | 0.166 | 1 Undiff-G CYP20A1  |
| SLC25A32 | 0.000874 | -0.22537 | 0.015 | 0.102 | 1 Undiff-G SLC25A32 |
| LMO1     | 0.000877 | -0.27091 | 0     | 0.075 | 1 Undiff-G LMO1     |
| TTC7A    | 0.000877 | -0.27493 | 0     | 0.075 | 1 Undiff-G TTC7A    |

|           |          |          |       |       |                          |
|-----------|----------|----------|-------|-------|--------------------------|
| ZNF595    | 0.000883 | -0.22153 | 0     | 0.075 | 1 Undiff-G ZNF595        |
| PARP12    | 0.000883 | -0.22454 | 0     | 0.075 | 1 Undiff-G PARP12        |
| SPATA7    | 0.000883 | -0.24721 | 0     | 0.075 | 1 Undiff-G SPATA7        |
| TMEM100   | 0.000887 | -0.21008 | 0.007 | 0.09  | 1 Undiff-G TMEM100       |
| FAM213B   | 0.000888 | -0.10322 | 0.007 | 0.09  | 1 Undiff-G FAM213B       |
| SEC24A    | 0.000896 | -0.18677 | 0     | 0.075 | 1 Undiff-G SEC24A        |
| ARHGAP22  | 0.000896 | -0.3067  | 0     | 0.075 | 1 Undiff-G ARHGAP22      |
| PMS2      | 0.000901 | 0.155072 | 0.029 | 0.129 | 1 Undiff-G PMS2          |
| RP11-332H | 0.000901 | 0.144081 | 0.029 | 0.128 | 1 Undiff-G RP11-332H14.2 |
| DCBLD1    | 0.000907 | -0.18113 | 0.007 | 0.089 | 1 Undiff-G DCBLD1        |
| ZNF566    | 0.000907 | 0.235099 | 0.022 | 0.116 | 1 Undiff-G ZNF566        |
| ENOX2     | 0.000909 | -0.21511 | 0     | 0.075 | 1 Undiff-G ENOX2         |
| FCH02     | 0.000909 | -0.23053 | 0     | 0.075 | 1 Undiff-G FCH02         |
| TET2      | 0.000911 | -0.2222  | 0.007 | 0.089 | 1 Undiff-G TET2          |
| EXOC4     | 0.000912 | 0.372335 | 0.051 | 0.165 | 1 Undiff-G EXOC4         |
| RFX3      | 0.000916 | -0.18423 | 0     | 0.075 | 1 Undiff-G RFX3          |
| STYX      | 0.000916 | -0.19258 | 0     | 0.075 | 1 Undiff-G STYX          |
| SIGLEC7   | 0.000916 | -0.32219 | 0     | 0.075 | 1 Undiff-G SIGLEC7       |
| RFTN2     | 0.000917 | 0.161396 | 0.029 | 0.129 | 1 Undiff-G RFTN2         |
| SETBP1    | 0.000923 | -0.18852 | 0     | 0.075 | 1 Undiff-G SETBP1        |
| KIF13B    | 0.000923 | -0.21843 | 0     | 0.075 | 1 Undiff-G KIF13B        |
| AHDC1     | 0.000929 | -0.1547  | 0.015 | 0.102 | 1 Undiff-G AHDC1         |
| PROSER1   | 0.00093  | -0.18872 | 0     | 0.075 | 1 Undiff-G PROSER1       |
| GMIP      | 0.00093  | -0.25567 | 0     | 0.075 | 1 Undiff-G GMIP          |
| DGAT1     | 0.000935 | -0.17474 | 0.007 | 0.089 | 1 Undiff-G DGAT1         |
| TSHZ1     | 0.000937 | -0.20549 | 0     | 0.075 | 1 Undiff-G TSHZ1         |
| CENPM     | 0.000937 | -0.23425 | 0     | 0.075 | 1 Undiff-G CENPM         |
| PTPRN     | 0.000937 | -0.26683 | 0     | 0.075 | 1 Undiff-G PTPRN         |
| RPS6KL1   | 0.000943 | -0.19345 | 0.015 | 0.101 | 1 Undiff-G RPS6KL1       |
| EFNB3     | 0.000943 | -0.17467 | 0     | 0.075 | 1 Undiff-G EFNB3         |
| VAV1      | 0.000943 | -0.30676 | 0     | 0.075 | 1 Undiff-G VAV1          |
| TMEM136   | 0.000945 | -0.14062 | 0.007 | 0.089 | 1 Undiff-G TMEM136       |
| MDP1      | 0.000945 | 0.12868  | 0.022 | 0.116 | 1 Undiff-G MDP1          |
| RP11-192H | 0.00095  | -0.15676 | 0.022 | 0.115 | 1 Undiff-G RP11-192H23.6 |
| ZNF513    | 0.00095  | -0.18747 | 0     | 0.075 | 1 Undiff-G ZNF513        |
| ST5       | 0.000954 | 0.11805  | 0.044 | 0.152 | 1 Undiff-G ST5           |
| BCKDHB    | 0.000954 | -0.14174 | 0.007 | 0.089 | 1 Undiff-G BCKDHB        |
| GPR84     | 0.000957 | -0.3353  | 0     | 0.074 | 1 Undiff-G GPR84         |
| CACNA2D4  | 0.000957 | -0.34028 | 0     | 0.074 | 1 Undiff-G CACNA2D4      |
| UCK2      | 0.000961 | -0.19912 | 0.007 | 0.088 | 1 Undiff-G UCK2          |
| PDLIM1    | 0.000964 | -0.19484 | 0     | 0.074 | 1 Undiff-G PDLIM1        |
| FAM110A   | 0.000964 | -0.22554 | 0     | 0.074 | 1 Undiff-G FAM110A       |
| IRAK3     | 0.000964 | -0.31655 | 0     | 0.074 | 1 Undiff-G IRAK3         |
| MGA       | 0.000965 | -0.1398  | 0.015 | 0.102 | 1 Undiff-G MGA           |
| DUSP26    | 0.000966 | -0.26521 | 0.007 | 0.089 | 1 Undiff-G DUSP26        |
| TOP1MT    | 0.000972 | -0.18292 | 0     | 0.074 | 1 Undiff-G TOP1MT        |
| FAM129B   | 0.000972 | -0.2006  | 0     | 0.074 | 1 Undiff-G FAM129B       |
| CNTROB    | 0.000972 | -0.20487 | 0     | 0.074 | 1 Undiff-G CNTROB        |
| GNG3      | 0.000972 | -0.30882 | 0     | 0.074 | 1 Undiff-G GNG3          |
| RICTOR    | 0.000973 | 0.1893   | 0.066 | 0.187 | 1 Undiff-G RICTOR        |
| ZBTB25    | 0.000975 | -0.14079 | 0.007 | 0.089 | 1 Undiff-G ZBTB25        |

|           |          |          |       |       |                         |
|-----------|----------|----------|-------|-------|-------------------------|
| KIAA0100  | 0.000977 | -0.16941 | 0.007 | 0.088 | 1 Undiff-G KIAA0100     |
| DNAJC17   | 0.000977 | -0.22609 | 0.007 | 0.088 | 1 Undiff-G DNAJC17      |
| CNR1      | 0.000979 | -0.16602 | 0     | 0.074 | 1 Undiff-G CNR1         |
| ITPRIPL2  | 0.000979 | -0.19444 | 0     | 0.074 | 1 Undiff-G ITPRIPL2     |
| ZNF689    | 0.000979 | -0.20275 | 0     | 0.074 | 1 Undiff-G ZNF689       |
| DRAM1     | 0.000979 | -0.22167 | 0     | 0.074 | 1 Undiff-G DRAM1        |
| TNS3      | 0.000979 | -0.27707 | 0     | 0.074 | 1 Undiff-G TNS3         |
| PBK       | 0.000979 | -0.31175 | 0     | 0.074 | 1 Undiff-G PBK          |
| RASSF8    | 0.00098  | -0.1554  | 0.007 | 0.088 | 1 Undiff-G RASSF8       |
| TOP2A     | 0.000981 | -0.35106 | 0.007 | 0.087 | 1 Undiff-G TOP2A        |
| PUS3      | 0.000982 | 0.19986  | 0.022 | 0.115 | 1 Undiff-G PUS3         |
| ZNF76     | 0.000982 | 0.158089 | 0.015 | 0.102 | 1 Undiff-G ZNF76        |
| LRFN4     | 0.000986 | -0.14903 | 0     | 0.074 | 1 Undiff-G LRFN4        |
| ZFHX4     | 0.000986 | 0.108508 | 0.044 | 0.153 | 1 Undiff-G ZFHX4        |
| WDFY3     | 0.000987 | -0.16852 | 0.007 | 0.088 | 1 Undiff-G WDFY3        |
| EYA3      | 0.000987 | -0.22052 | 0.007 | 0.087 | 1 Undiff-G EYA3         |
| NAA30     | 0.000991 | -0.20783 | 0.007 | 0.087 | 1 Undiff-G NAA30        |
| CAPN10    | 0.000992 | -0.21283 | 0.007 | 0.087 | 1 Undiff-G CAPN10       |
| DUSP28    | 0.000996 | -0.1983  | 0.007 | 0.088 | 1 Undiff-G DUSP28       |
| CHGB      | 0.000998 | -0.11692 | 0.007 | 0.088 | 1 Undiff-G CHGB         |
| TRIM16L   | 0.001    | -0.17472 | 0     | 0.074 | 1 Undiff-G TRIM16L      |
| CNOT6     | 0.001    | -0.17998 | 0     | 0.074 | 1 Undiff-G CNOT6        |
| DROSHA    | 0.001    | -0.18877 | 0     | 0.074 | 1 Undiff-G DROSHA       |
| SLC39A11  | 0.001    | -0.20935 | 0     | 0.074 | 1 Undiff-G SLC39A11     |
| GIMAP1    | 0.001    | -0.31567 | 0     | 0.074 | 1 Undiff-G GIMAP1       |
| CADPS     | 0.001001 | 1.020162 | 0.096 | 0.042 | 1 Undiff-G CADPS        |
| CACFD1    | 0.001006 | -0.16615 | 0.007 | 0.088 | 1 Undiff-G CACFD1       |
| AIF1L     | 0.001007 | -0.10631 | 0.022 | 0.114 | 1 Undiff-G AIF1L        |
| EPHA3     | 0.001008 | -0.13376 | 0     | 0.074 | 1 Undiff-G EPHA3        |
| MPP6      | 0.001008 | -0.17237 | 0     | 0.074 | 1 Undiff-G MPP6         |
| ZC3H4     | 0.001008 | -0.18959 | 0.007 | 0.088 | 1 Undiff-G ZC3H4        |
| WDR830S   | 0.001008 | 0.686002 | 0.353 | 0.748 | 1 Undiff-G WDR830S      |
| TP53      | 0.001014 | 0.240463 | 0.022 | 0.115 | 1 Undiff-G TP53         |
| DDX20     | 0.001015 | -0.19723 | 0     | 0.074 | 1 Undiff-G DDX20        |
| CSRNP2    | 0.001016 | -0.20326 | 0.007 | 0.087 | 1 Undiff-G CSRNP2       |
| RP11-138A | 0.001018 | -0.25141 | 0.029 | 0.126 | 1 Undiff-G RP11-138A9.1 |
| ABCA5     | 0.001021 | -0.18123 | 0.007 | 0.088 | 1 Undiff-G ABCA5        |
| SRSF12    | 0.001023 | -0.18106 | 0     | 0.074 | 1 Undiff-G SRSF12       |
| USP19     | 0.001023 | -0.18937 | 0     | 0.074 | 1 Undiff-G USP19        |
| ASB6      | 0.001023 | -0.19366 | 0     | 0.074 | 1 Undiff-G ASB6         |
| RFNG      | 0.001028 | -0.19458 | 0.015 | 0.1   | 1 Undiff-G RFNG         |
| FTX       | 0.001028 | -0.20659 | 0.015 | 0.101 | 1 Undiff-G FTX          |
| FAM84B    | 0.001029 | -0.18604 | 0.007 | 0.088 | 1 Undiff-G FAM84B       |
| TP53I11   | 0.00103  | -0.25346 | 0     | 0.074 | 1 Undiff-G TP53I11      |
| ST14      | 0.00103  | -0.29844 | 0     | 0.074 | 1 Undiff-G ST14         |
| DBP       | 0.001033 | -0.22588 | 0.007 | 0.088 | 1 Undiff-G DBP          |
| ZNF584    | 0.001037 | -0.16773 | 0.007 | 0.087 | 1 Undiff-G ZNF584       |
| VANGL2    | 0.001038 | -0.18739 | 0     | 0.074 | 1 Undiff-G VANGL2       |
| HAUS2     | 0.00104  | 0.194249 | 0.015 | 0.101 | 1 Undiff-G HAUS2        |
| ACSS1     | 0.00104  | -0.18235 | 0.015 | 0.101 | 1 Undiff-G ACSS1        |
| PHF21A    | 0.001044 | -0.13107 | 0.022 | 0.113 | 1 Undiff-G PHF21A       |

|           |          |          |       |       |                          |
|-----------|----------|----------|-------|-------|--------------------------|
| CRLF3     | 0.001045 | 0.189673 | 0.022 | 0.114 | 1 Undiff-G CRLF3         |
| VPS52     | 0.001045 | -0.16656 | 0.007 | 0.088 | 1 Undiff-G VPS52         |
| MARK4     | 0.001045 | -0.17403 | 0     | 0.073 | 1 Undiff-G MARK4         |
| ZNF335    | 0.001045 | -0.20232 | 0     | 0.073 | 1 Undiff-G ZNF335        |
| BTN3A1    | 0.001045 | -0.23399 | 0     | 0.073 | 1 Undiff-G BTN3A1        |
| TMEM91    | 0.001045 | -0.26122 | 0     | 0.073 | 1 Undiff-G TMEM91        |
| MON1A     | 0.001046 | -0.18887 | 0.007 | 0.087 | 1 Undiff-G MON1A         |
| BOC       | 0.001048 | -0.14767 | 0.007 | 0.088 | 1 Undiff-G BOC           |
| PCTP      | 0.001053 | -0.24596 | 0     | 0.073 | 1 Undiff-G PCTP          |
| OSCAR     | 0.001053 | -0.28682 | 0     | 0.073 | 1 Undiff-G OSCAR         |
| ST7L      | 0.001055 | 0.139464 | 0.022 | 0.114 | 1 Undiff-G ST7L          |
| LDOC1L    | 0.001057 | -0.10179 | 0.007 | 0.088 | 1 Undiff-G LDOC1L        |
| USP38     | 0.001057 | -0.12708 | 0.007 | 0.088 | 1 Undiff-G USP38         |
| BOLA1     | 0.001058 | 0.432836 | 0.044 | 0.152 | 1 Undiff-G BOLA1         |
| BRINP2    | 0.001061 | -0.17965 | 0     | 0.073 | 1 Undiff-G BRINP2        |
| FUT11     | 0.001061 | -0.19847 | 0     | 0.073 | 1 Undiff-G FUT11         |
| ZBTB11    | 0.001061 | -0.20039 | 0     | 0.073 | 1 Undiff-G ZBTB11        |
| DNASE1L1  | 0.001061 | -0.27304 | 0     | 0.073 | 1 Undiff-G DNASE1L1      |
| LRRC8B    | 0.001061 | -0.1555  | 0.007 | 0.087 | 1 Undiff-G LRRC8B        |
| ERCC6L2   | 0.001065 | -0.19028 | 0.007 | 0.087 | 1 Undiff-G ERCC6L2       |
| CASP7     | 0.001065 | -0.19065 | 0.007 | 0.087 | 1 Undiff-G CASP7         |
| RGN       | 0.001069 | -0.24425 | 0     | 0.073 | 1 Undiff-G RGN           |
| CDCA7L    | 0.001069 | 0.155729 | 0.044 | 0.15  | 1 Undiff-G CDCA7L        |
| GBE1      | 0.001071 | 0.425617 | 0.066 | 0.187 | 1 Undiff-G GBE1          |
| SKIV2L    | 0.001072 | -0.12491 | 0.007 | 0.087 | 1 Undiff-G SKIV2L        |
| UBXN2B    | 0.001074 | 0.512712 | 0.044 | 0.152 | 1 Undiff-G UBXN2B        |
| EMID1     | 0.001076 | -0.16985 | 0     | 0.073 | 1 Undiff-G EMID1         |
| CMTR1     | 0.001076 | -0.18404 | 0     | 0.073 | 1 Undiff-G CMTR1         |
| STK38     | 0.001076 | -0.19507 | 0     | 0.073 | 1 Undiff-G STK38         |
| KLHDC4    | 0.001076 | -0.21931 | 0     | 0.073 | 1 Undiff-G KLHDC4        |
| RBM41     | 0.001078 | -0.20527 | 0.007 | 0.087 | 1 Undiff-G RBM41         |
| ST3GAL3   | 0.001081 | 0.118935 | 0.007 | 0.087 | 1 Undiff-G ST3GAL3       |
| GBA2      | 0.001083 | -0.20906 | 0.007 | 0.086 | 1 Undiff-G GBA2          |
| PEX11G    | 0.001084 | -0.18146 | 0     | 0.073 | 1 Undiff-G PEX11G        |
| CCL4L2    | 0.001085 | -0.35894 | 0.007 | 0.087 | 1 Undiff-G CCL4L2        |
| FAM212B   | 0.001088 | -0.18461 | 0.015 | 0.1   | 1 Undiff-G FAM212B       |
| ZNF7      | 0.001089 | 0.134245 | 0.051 | 0.162 | 1 Undiff-G ZNF7          |
| PRDM4     | 0.00109  | -0.19051 | 0.007 | 0.086 | 1 Undiff-G PRDM4         |
| RGL1      | 0.00109  | -0.20592 | 0.007 | 0.087 | 1 Undiff-G RGL1          |
| WDR91     | 0.001091 | -0.24336 | 0.007 | 0.087 | 1 Undiff-G WDR91         |
| SRRM3     | 0.001092 | -0.26216 | 0     | 0.073 | 1 Undiff-G SRRM3         |
| BBOX1     | 0.001098 | 0.120971 | 0.037 | 0.138 | 1 Undiff-G BBOX1         |
| USP13     | 0.0011   | -0.16723 | 0     | 0.073 | 1 Undiff-G USP13         |
| FASTKD3   | 0.0011   | -0.18811 | 0     | 0.073 | 1 Undiff-G FASTKD3       |
| ZBTB2     | 0.0011   | -0.20295 | 0     | 0.073 | 1 Undiff-G ZBTB2         |
| OPN3      | 0.0011   | -0.2061  | 0     | 0.073 | 1 Undiff-G OPN3          |
| SCN3B     | 0.0011   | -0.26551 | 0     | 0.073 | 1 Undiff-G SCN3B         |
| PI4K2B    | 0.001101 | -0.16668 | 0.007 | 0.087 | 1 Undiff-G PI4K2B        |
| PTRH2     | 0.001107 | 0.329843 | 0.037 | 0.139 | 1 Undiff-G PTRH2         |
| RP11-379H | 0.001108 | -0.17484 | 0     | 0.073 | 1 Undiff-G RP11-379H18.1 |
| FAM135A   | 0.001113 | -0.11087 | 0.007 | 0.087 | 1 Undiff-G FAM135A       |

|           |          |          |       |       |                          |
|-----------|----------|----------|-------|-------|--------------------------|
| KAT2B     | 0.001117 | -0.2088  | 0     | 0.073 | 1 Undiff-G KAT2B         |
| SCN3A     | 0.001117 | -0.22696 | 0     | 0.073 | 1 Undiff-G SCN3A         |
| SCARA3    | 0.001122 | 0.137002 | 0.037 | 0.139 | 1 Undiff-G SCARA3        |
| RCBTB1    | 0.001125 | -0.20845 | 0     | 0.073 | 1 Undiff-G RCBTB1        |
| COL6A2    | 0.001125 | 0.296471 | 0.051 | 0.164 | 1 Undiff-G COL6A2        |
| CNPY4     | 0.001127 | 0.178118 | 0.022 | 0.113 | 1 Undiff-G CNPY4         |
| E2F3      | 0.001128 | -0.16844 | 0.007 | 0.087 | 1 Undiff-G E2F3          |
| PLD2      | 0.00113  | -0.21323 | 0.007 | 0.087 | 1 Undiff-G PLD2          |
| TAMM41    | 0.001133 | -0.22312 | 0     | 0.072 | 1 Undiff-G TAMM41        |
| FURIN     | 0.001133 | -0.23819 | 0     | 0.072 | 1 Undiff-G FURIN         |
| POMT1     | 0.001137 | 0.167839 | 0.037 | 0.138 | 1 Undiff-G POMT1         |
| ASPHD1    | 0.001141 | 0.226537 | 0.037 | 0.139 | 1 Undiff-G ASPHD1        |
| SYCE1L    | 0.001141 | -0.15794 | 0     | 0.072 | 1 Undiff-G SYCE1L        |
| SBK1      | 0.001141 | -0.22078 | 0     | 0.072 | 1 Undiff-G SBK1          |
| RREB1     | 0.001141 | -0.2423  | 0     | 0.072 | 1 Undiff-G RREB1         |
| LINC00869 | 0.001146 | 0.803815 | 0.051 | 0.016 | 1 Undiff-G LINC00869     |
| MEGF8     | 0.001146 | 0.144203 | 0.007 | 0.087 | 1 Undiff-G MEGF8         |
| KAZN      | 0.00115  | -0.19097 | 0     | 0.072 | 1 Undiff-G KAZN          |
| DUS2      | 0.00115  | -0.20254 | 0     | 0.072 | 1 Undiff-G DUS2          |
| DPCD      | 0.00115  | 0.423141 | 0.051 | 0.162 | 1 Undiff-G DPCD          |
| C2orf47   | 0.001152 | 0.102379 | 0.029 | 0.125 | 1 Undiff-G C2orf47       |
| U2AF1L4   | 0.001155 | 0.32368  | 0.074 | 0.198 | 1 Undiff-G U2AF1L4       |
| LY6H      | 0.001156 | -0.29169 | 0.007 | 0.086 | 1 Undiff-G LY6H          |
| LYRM9     | 0.001159 | 0.333191 | 0.059 | 0.174 | 1 Undiff-G LYRM9         |
| RP11-378E | 0.001162 | 0.167846 | 0.007 | 0.001 | 1 Undiff-G RP11-378E13.4 |
| SMAGP     | 0.001167 | -0.14267 | 0.007 | 0.086 | 1 Undiff-G SMAGP         |
| LMCD1     | 0.001171 | -0.10635 | 0.007 | 0.086 | 1 Undiff-G LMCD1         |
| RETSAT    | 0.001171 | -0.2135  | 0.007 | 0.085 | 1 Undiff-G RETSAT        |
| TBC1D24   | 0.001175 | -0.16816 | 0     | 0.072 | 1 Undiff-G TBC1D24       |
| NUP153    | 0.001175 | -0.21055 | 0     | 0.072 | 1 Undiff-G NUP153        |
| POLR3F    | 0.001175 | 0.121438 | 0.037 | 0.138 | 1 Undiff-G POLR3F        |
| FAM13B    | 0.001176 | -0.16349 | 0.007 | 0.086 | 1 Undiff-G FAM13B        |
| HNRNPU-AS | 0.001183 | -0.20537 | 0.015 | 0.099 | 1 Undiff-G HNRNPU-AS1    |
| RP11-798M | 0.001186 | 0.244041 | 0.044 | 0.15  | 1 Undiff-G RP11-798M19.6 |
| ICK       | 0.001187 | -0.17671 | 0.007 | 0.086 | 1 Undiff-G ICK           |
| MAU2      | 0.001195 | -0.13272 | 0.029 | 0.124 | 1 Undiff-G MAU2          |
| PM20D2    | 0.001196 | -0.17601 | 0.007 | 0.085 | 1 Undiff-G PM20D2        |
| CTDP1     | 0.001201 | -0.18883 | 0     | 0.072 | 1 Undiff-G CTDP1         |
| CECR1     | 0.001201 | -0.31029 | 0     | 0.072 | 1 Undiff-G CECR1         |
| KLF12     | 0.001207 | -0.18161 | 0.007 | 0.086 | 1 Undiff-G KLF12         |
| PGBD1     | 0.00121  | -0.16455 | 0     | 0.072 | 1 Undiff-G PGBD1         |
| NUAK1     | 0.00121  | -0.21304 | 0     | 0.072 | 1 Undiff-G NUAK1         |
| PPWD1     | 0.001211 | 0.195468 | 0.022 | 0.113 | 1 Undiff-G PPWD1         |
| DCHS1     | 0.001217 | -0.17203 | 0.007 | 0.085 | 1 Undiff-G DCHS1         |
| NUDT8     | 0.001219 | -0.1529  | 0     | 0.072 | 1 Undiff-G NUDT8         |
| DTD2      | 0.001219 | -0.19133 | 0     | 0.072 | 1 Undiff-G DTD2          |
| IL4R      | 0.001219 | -0.28976 | 0     | 0.072 | 1 Undiff-G IL4R          |
| MRI1      | 0.001222 | -0.12053 | 0.022 | 0.111 | 1 Undiff-G MRI1          |
| AGO2      | 0.001228 | -0.19082 | 0     | 0.072 | 1 Undiff-G AGO2          |
| WWP2      | 0.001228 | -0.20903 | 0     | 0.072 | 1 Undiff-G WWP2          |
| CD93      | 0.001228 | -0.31132 | 0     | 0.072 | 1 Undiff-G CD93          |



|           |          |          |       |       |                         |
|-----------|----------|----------|-------|-------|-------------------------|
| PHLPP1    | 0.001228 | -0.19391 | 0.007 | 0.086 | 1 Undiff-G PHLPP1       |
| ITFG2     | 0.001229 | -0.19174 | 0.022 | 0.111 | 1 Undiff-G ITFG2        |
| DUSP22    | 0.001236 | 0.231376 | 0.022 | 0.112 | 1 Undiff-G DUSP22       |
| ZNF598    | 0.001237 | -0.16419 | 0     | 0.071 | 1 Undiff-G ZNF598       |
| ALDH1B1   | 0.001237 | -0.17616 | 0     | 0.071 | 1 Undiff-G ALDH1B1      |
| HECA      | 0.001237 | -0.20968 | 0     | 0.071 | 1 Undiff-G HECA         |
| EHBP1L1   | 0.001237 | -0.21005 | 0     | 0.071 | 1 Undiff-G EHBP1L1      |
| RRAGB     | 0.001238 | 0.140978 | 0.022 | 0.112 | 1 Undiff-G RRAGB        |
| SLC2A6    | 0.001246 | -0.16499 | 0     | 0.071 | 1 Undiff-G SLC2A6       |
| RASSF7    | 0.001246 | -0.20223 | 0     | 0.071 | 1 Undiff-G RASSF7       |
| CENPBD1   | 0.001255 | -0.19973 | 0     | 0.071 | 1 Undiff-G CENPBD1      |
| SCN1B     | 0.001255 | -0.24526 | 0     | 0.071 | 1 Undiff-G SCN1B        |
| TK1       | 0.001255 | -0.26156 | 0     | 0.071 | 1 Undiff-G TK1          |
| MTAP      | 0.001255 | -0.26253 | 0     | 0.071 | 1 Undiff-G MTAP         |
| JDP2      | 0.001255 | -0.30361 | 0     | 0.071 | 1 Undiff-G JDP2         |
| DMD       | 0.001256 | -0.17698 | 0.007 | 0.085 | 1 Undiff-G DMD          |
| AEBP2     | 0.001257 | -0.15599 | 0.007 | 0.085 | 1 Undiff-G AEBP2        |
| ZNF71     | 0.001263 | -0.16461 | 0.007 | 0.085 | 1 Undiff-G ZNF71        |
| PSMC3IP   | 0.001264 | -0.19743 | 0     | 0.071 | 1 Undiff-G PSMC3IP      |
| GCC1      | 0.001264 | -0.19989 | 0     | 0.071 | 1 Undiff-G GCC1         |
| CC2D2A    | 0.001264 | -0.2197  | 0     | 0.071 | 1 Undiff-G CC2D2A       |
| VCPKMT    | 0.001264 | -0.22199 | 0     | 0.071 | 1 Undiff-G VCPKMT       |
| CTD-3184A | 0.001267 | -0.16496 | 0.015 | 0.098 | 1 Undiff-G CTD-3184A7.4 |
| SLC27A5   | 0.00127  | 0.156673 | 0.037 | 0.137 | 1 Undiff-G SLC27A5      |
| SOS1      | 0.001275 | -0.18454 | 0.007 | 0.085 | 1 Undiff-G SOS1         |
| CASP9     | 0.001278 | -0.2316  | 0.007 | 0.085 | 1 Undiff-G CASP9        |
| IER3IP1   | 0.001279 | 0.847918 | 0.088 | 0.038 | 1 Undiff-G IER3IP1      |
| FAM208B   | 0.001279 | -0.14369 | 0.007 | 0.085 | 1 Undiff-G FAM208B      |
| ZNF846    | 0.001283 | -0.28394 | 0     | 0.071 | 1 Undiff-G ZNF846       |
| NKX2-2    | 0.001286 | 0.113651 | 0.044 | 0.149 | 1 Undiff-G NKX2-2       |
| GPR37L1   | 0.00129  | -0.2565  | 0.007 | 0.085 | 1 Undiff-G GPR37L1      |
| PAQR8     | 0.001291 | -0.27988 | 0.015 | 0.097 | 1 Undiff-G PAQR8        |
| MDGA1     | 0.001292 | -0.12904 | 0     | 0.071 | 1 Undiff-G MDGA1        |
| INO80B    | 0.001292 | -0.17217 | 0     | 0.071 | 1 Undiff-G INO80B       |
| BLVRB     | 0.001297 | 0.794173 | 0.176 | 0.377 | 1 Undiff-G BLVRB        |
| ZNF174    | 0.001302 | -0.16404 | 0     | 0.071 | 1 Undiff-G ZNF174       |
| RP3-428L1 | 0.001302 | -0.17447 | 0     | 0.071 | 1 Undiff-G RP3-428L16.2 |
| CACNG7    | 0.001303 | -0.14011 | 0.007 | 0.085 | 1 Undiff-G CACNG7       |
| C17orf80  | 0.001311 | -0.12796 | 0.007 | 0.085 | 1 Undiff-G C17orf80     |
| PODXL     | 0.001311 | -0.1654  | 0     | 0.071 | 1 Undiff-G PODXL        |
| IPO8      | 0.001311 | -0.16849 | 0     | 0.071 | 1 Undiff-G IPO8         |
| DHRS3     | 0.001312 | 0.363776 | 0.059 | 0.172 | 1 Undiff-G DHRS3        |
| CAMSAP1   | 0.001312 | -0.15256 | 0.007 | 0.085 | 1 Undiff-G CAMSAP1      |
| NR2C1     | 0.001316 | -0.18086 | 0.015 | 0.098 | 1 Undiff-G NR2C1        |
| ADM       | 0.001319 | 1.455816 | 0.25  | 0.184 | 1 Undiff-G ADM          |
| ZNF121    | 0.001321 | 0.122399 | 0.022 | 0.112 | 1 Undiff-G ZNF121       |
| COX15     | 0.001321 | -0.21042 | 0     | 0.071 | 1 Undiff-G COX15        |
| RUNDC3A   | 0.001325 | -0.11014 | 0.015 | 0.098 | 1 Undiff-G RUNDC3A      |
| SCAF8     | 0.001331 | -0.18704 | 0     | 0.071 | 1 Undiff-G SCAF8        |
| SLC19A1   | 0.00134  | -0.18278 | 0     | 0.07  | 1 Undiff-G SLC19A1      |
| PLEKHH3   | 0.001343 | -0.15127 | 0.007 | 0.085 | 1 Undiff-G PLEKHH3      |

|           |          |          |       |       |                      |
|-----------|----------|----------|-------|-------|----------------------|
| LSAMP     | 0.001348 | 0.164731 | 0.059 | 0.173 | 1 Undiff-G LSAMP     |
| MAPK12    | 0.00135  | -0.1378  | 0     | 0.07  | 1 Undiff-G MAPK12    |
| REXO1     | 0.00135  | -0.16021 | 0     | 0.07  | 1 Undiff-G REXO1     |
| PACRGL    | 0.00135  | -0.20195 | 0     | 0.07  | 1 Undiff-G PACRGL    |
| THEM6     | 0.00135  | -0.18949 | 0.007 | 0.084 | 1 Undiff-G THEM6     |
| FGR       | 0.001351 | -0.31162 | 0.007 | 0.084 | 1 Undiff-G FGR       |
| ATG14     | 0.00136  | -0.18449 | 0     | 0.07  | 1 Undiff-G ATG14     |
| ARMC9     | 0.00136  | -0.18714 | 0     | 0.07  | 1 Undiff-G ARMC9     |
| YPEL2     | 0.00136  | -0.24768 | 0     | 0.07  | 1 Undiff-G YPEL2     |
| GPRC5C    | 0.00136  | -0.25827 | 0     | 0.07  | 1 Undiff-G GPRC5C    |
| SRD5A1    | 0.001362 | 0.273288 | 0.022 | 0.111 | 1 Undiff-G SRD5A1    |
| BAMBI     | 0.00137  | -0.1803  | 0     | 0.07  | 1 Undiff-G BAMBI     |
| RAB11FIP2 | 0.00137  | -0.18425 | 0     | 0.07  | 1 Undiff-G RAB11FIP2 |
| PIEZO1    | 0.00137  | -0.2075  | 0     | 0.07  | 1 Undiff-G PIEZO1    |
| ABCA2     | 0.001376 | -0.3048  | 0.015 | 0.097 | 1 Undiff-G ABCA2     |
| KIAA0586  | 0.00138  | -0.17829 | 0     | 0.07  | 1 Undiff-G KIAA0586  |
| CLUH      | 0.00138  | -0.18138 | 0     | 0.07  | 1 Undiff-G CLUH      |
| NUDT6     | 0.00138  | -0.20176 | 0     | 0.07  | 1 Undiff-G NUDT6     |
| PSTK      | 0.00138  | -0.20927 | 0     | 0.07  | 1 Undiff-G PSTK      |
| NFX1      | 0.00138  | -0.18767 | 0.015 | 0.098 | 1 Undiff-G NFX1      |
| MTRR      | 0.001385 | -0.16405 | 0.007 | 0.084 | 1 Undiff-G MTRR      |
| ZNF300    | 0.00139  | -0.19413 | 0     | 0.07  | 1 Undiff-G ZNF300    |
| PCK2      | 0.00139  | -0.22646 | 0     | 0.07  | 1 Undiff-G PCK2      |
| TMEM186   | 0.001393 | 0.121944 | 0.015 | 0.098 | 1 Undiff-G TMEM186   |
| USP6NL    | 0.001394 | -0.2142  | 0.007 | 0.084 | 1 Undiff-G USP6NL    |
| PACSIN3   | 0.0014   | -0.14977 | 0     | 0.07  | 1 Undiff-G PACSIN3   |
| NCKIPSD   | 0.0014   | -0.17709 | 0     | 0.07  | 1 Undiff-G NCKIPSD   |
| ACVR1     | 0.0014   | -0.17856 | 0     | 0.07  | 1 Undiff-G ACVR1     |
| KMT2B     | 0.0014   | -0.19001 | 0     | 0.07  | 1 Undiff-G KMT2B     |
| C7orf43   | 0.0014   | -0.19013 | 0     | 0.07  | 1 Undiff-G C7orf43   |
| SFMBT1    | 0.0014   | -0.20479 | 0     | 0.07  | 1 Undiff-G SFMBT1    |
| TMEM220   | 0.0014   | -0.21632 | 0     | 0.07  | 1 Undiff-G TMEM220   |
| C15orf48  | 0.0014   | -0.35112 | 0     | 0.07  | 1 Undiff-G C15orf48  |
| IQCB1     | 0.001403 | 0.167298 | 0.029 | 0.123 | 1 Undiff-G IQCB1     |
| ZNF493    | 0.00142  | 0.236607 | 0.051 | 0.159 | 1 Undiff-G ZNF493    |
| CCNT1     | 0.00142  | -0.137   | 0.007 | 0.084 | 1 Undiff-G CCNT1     |
| RPS6KC1   | 0.001421 | -0.17771 | 0     | 0.07  | 1 Undiff-G RPS6KC1   |
| ZNF569    | 0.001421 | -0.19011 | 0     | 0.07  | 1 Undiff-G ZNF569    |
| EML2      | 0.001421 | -0.21663 | 0.007 | 0.084 | 1 Undiff-G EML2      |
| MRRF      | 0.001429 | -0.23932 | 0.015 | 0.096 | 1 Undiff-G MRRF      |
| VIPR2     | 0.001439 | -0.27612 | 0.007 | 0.083 | 1 Undiff-G VIPR2     |
| NUP43     | 0.001442 | -0.12387 | 0.007 | 0.084 | 1 Undiff-G NUP43     |
| PPCDC     | 0.001442 | -0.19834 | 0     | 0.07  | 1 Undiff-G PPCDC     |
| OSBPL2    | 0.00145  | 0.279654 | 0.037 | 0.135 | 1 Undiff-G OSBPL2    |
| MTOR      | 0.001452 | -0.17696 | 0     | 0.07  | 1 Undiff-G MTOR      |
| DENND4B   | 0.001452 | -0.19859 | 0     | 0.07  | 1 Undiff-G DENND4B   |
| RAPGEF2   | 0.001452 | -0.2043  | 0     | 0.07  | 1 Undiff-G RAPGEF2   |
| CARD9     | 0.001452 | -0.26677 | 0     | 0.07  | 1 Undiff-G CARD9     |
| ZFP82     | 0.001453 | 0.168041 | 0.022 | 0.11  | 1 Undiff-G ZFP82     |
| CAPN5     | 0.001463 | -0.15945 | 0     | 0.069 | 1 Undiff-G CAPN5     |
| ZNF500    | 0.001463 | -0.19072 | 0     | 0.069 | 1 Undiff-G ZNF500    |

|           |          |          |       |       |                           |
|-----------|----------|----------|-------|-------|---------------------------|
| PRKAR2B   | 0.001463 | -0.21139 | 0     | 0.069 | 1 Undiff-G PRKAR2B        |
| PPP1R3E   | 0.001463 | -0.23941 | 0     | 0.069 | 1 Undiff-G PPP1R3E        |
| MTFR1     | 0.001465 | 0.139006 | 0.015 | 0.097 | 1 Undiff-G MTFR1          |
| TIMM21    | 0.001474 | 0.516311 | 0.044 | 0.148 | 1 Undiff-G TIMM21         |
| MOB1B     | 0.001474 | -0.1906  | 0     | 0.069 | 1 Undiff-G MOB1B          |
| TRMT5     | 0.001474 | -0.20883 | 0     | 0.069 | 1 Undiff-G TRMT5          |
| PFDN5     | 0.00148  | 0.493682 | 0.404 | 0.889 | 1 Undiff-G PFDN5          |
| C16orf52  | 0.001481 | -0.11789 | 0.015 | 0.097 | 1 Undiff-G C16orf52       |
| LRRC24    | 0.001485 | -0.17416 | 0     | 0.069 | 1 Undiff-G LRRC24         |
| TET1      | 0.001498 | -0.13172 | 0.007 | 0.083 | 1 Undiff-G TET1           |
| GORASP1   | 0.001506 | -0.11272 | 0.007 | 0.083 | 1 Undiff-G GORASP1        |
| GAS2L3    | 0.001506 | -0.17151 | 0     | 0.069 | 1 Undiff-G GAS2L3         |
| PDSS2     | 0.001513 | -0.17215 | 0.007 | 0.083 | 1 Undiff-G PDSS2          |
| TRAPPC8   | 0.001517 | -0.17531 | 0     | 0.069 | 1 Undiff-G TRAPPC8        |
| TMEM254   | 0.001517 | -0.21776 | 0     | 0.069 | 1 Undiff-G TMEM254        |
| PDE7A     | 0.001527 | -0.15454 | 0.007 | 0.083 | 1 Undiff-G PDE7A          |
| ARFGEF2   | 0.001528 | -0.15624 | 0     | 0.069 | 1 Undiff-G ARFGEF2        |
| RP11-977G | 0.001528 | -0.17309 | 0     | 0.069 | 1 Undiff-G RP11-977G19.11 |
| GYS1      | 0.001528 | -0.17886 | 0     | 0.069 | 1 Undiff-G GYS1           |
| MPP5      | 0.00153  | 0.137757 | 0.015 | 0.097 | 1 Undiff-G MPP5           |
| DMXL2     | 0.001535 | -0.22293 | 0.007 | 0.082 | 1 Undiff-G DMXL2          |
| SCLT1     | 0.00154  | -0.19634 | 0     | 0.069 | 1 Undiff-G SCLT1          |
| SFR1      | 0.00154  | -0.27135 | 0     | 0.069 | 1 Undiff-G SFR1           |
| OLFML2B   | 0.00154  | -0.32388 | 0     | 0.069 | 1 Undiff-G OLFML2B        |
| RP11-111M | 0.00154  | 0.254888 | 0.015 | 0.097 | 1 Undiff-G RP11-111M22.3  |
| ARRDC4    | 0.001551 | -0.18328 | 0     | 0.069 | 1 Undiff-G ARRDC4         |
| PLLP      | 0.001551 | -0.34986 | 0     | 0.069 | 1 Undiff-G PLLP           |
| MAPK9     | 0.001559 | -0.13886 | 0.007 | 0.083 | 1 Undiff-G MAPK9          |
| DBNDD1    | 0.001562 | -0.16034 | 0     | 0.069 | 1 Undiff-G DBNDD1         |
| DHODH     | 0.001572 | -0.13442 | 0.007 | 0.083 | 1 Undiff-G DHODH          |
| ACO07405. | 0.001574 | -0.15648 | 0     | 0.069 | 1 Undiff-G ACO07405.6     |
| PARP8     | 0.001574 | -0.22309 | 0     | 0.069 | 1 Undiff-G PARP8          |
| CD300C    | 0.001574 | -0.30413 | 0     | 0.069 | 1 Undiff-G CD300C         |
| FREM2     | 0.001585 | -0.12489 | 0     | 0.069 | 1 Undiff-G FREM2          |
| BMPR1A    | 0.001585 | -0.1717  | 0     | 0.069 | 1 Undiff-G BMPR1A         |
| TLR1      | 0.001585 | -0.29428 | 0     | 0.069 | 1 Undiff-G TLR1           |
| PRIM1     | 0.001592 | -0.19632 | 0.007 | 0.082 | 1 Undiff-G PRIM1          |
| UHRF1BP1L | 0.001597 | -0.19808 | 0     | 0.068 | 1 Undiff-G UHRF1BP1L      |
| DOPEY2    | 0.001597 | -0.22298 | 0     | 0.068 | 1 Undiff-G DOPEY2         |
| CPPED1    | 0.001597 | -0.27083 | 0     | 0.068 | 1 Undiff-G CPPED1         |
| TBP       | 0.001599 | 0.104774 | 0.007 | 0.083 | 1 Undiff-G TBP            |
| DHRS4     | 0.001618 | -0.19055 | 0.007 | 0.082 | 1 Undiff-G DHRS4          |
| CHST8     | 0.00162  | -0.15517 | 0     | 0.068 | 1 Undiff-G CHST8          |
| RNF165    | 0.00162  | -0.18457 | 0     | 0.068 | 1 Undiff-G RNF165         |
| RAD54L2   | 0.001624 | 0.105465 | 0.022 | 0.108 | 1 Undiff-G RAD54L2        |
| GFOD1     | 0.001632 | -0.19302 | 0     | 0.068 | 1 Undiff-G GFOD1          |
| 3-Sep     | 0.001632 | -0.2079  | 0     | 0.068 | 1 Undiff-G 3-Sep          |
| HEPN1     | 0.001632 | 0.421128 | 0.081 | 0.206 | 1 Undiff-G HEPN1          |
| IDNK      | 0.00164  | 0.111081 | 0.015 | 0.096 | 1 Undiff-G IDNK           |
| IGF2BP3   | 0.001649 | 0.303744 | 0.022 | 0.109 | 1 Undiff-G IGF2BP3        |
| RP11-277F | 0.001656 | -0.22359 | 0     | 0.068 | 1 Undiff-G RP11-277F12.20 |

|          |          |          |       |       |                     |
|----------|----------|----------|-------|-------|---------------------|
| SGK3     | 0.001656 | -0.22854 | 0     | 0.068 | 1 Undiff-G SGK3     |
| NCAM2    | 0.001656 | -0.23913 | 0     | 0.068 | 1 Undiff-G NCAM2    |
| TOX3     | 0.001656 | -0.25062 | 0     | 0.068 | 1 Undiff-G TOX3     |
| ZNHIT6   | 0.001659 | -0.17238 | 0.015 | 0.095 | 1 Undiff-G ZNHIT6   |
| HEXIM2   | 0.00166  | -0.19106 | 0.007 | 0.082 | 1 Undiff-G HEXIM2   |
| BBC3     | 0.001664 | -0.18902 | 0.007 | 0.082 | 1 Undiff-G BBC3     |
| MTSS1L   | 0.001666 | -0.17492 | 0.015 | 0.095 | 1 Undiff-G MTSS1L   |
| RNF111   | 0.001668 | -0.15518 | 0.007 | 0.082 | 1 Undiff-G RNF111   |
| OAF      | 0.001668 | -0.13336 | 0     | 0.068 | 1 Undiff-G OAF      |
| ZNF746   | 0.001668 | -0.18581 | 0     | 0.068 | 1 Undiff-G ZNF746   |
| C5orf63  | 0.001668 | -0.20527 | 0     | 0.068 | 1 Undiff-G C5orf63  |
| INADL    | 0.001668 | -0.22021 | 0     | 0.068 | 1 Undiff-G INADL    |
| BLNK     | 0.001668 | -0.34075 | 0     | 0.068 | 1 Undiff-G BLNK     |
| TTC39C   | 0.00167  | -0.18878 | 0.007 | 0.081 | 1 Undiff-G TTC39C   |
| SPOCK1   | 0.001676 | -0.26653 | 0.007 | 0.082 | 1 Undiff-G SPOCK1   |
| UBB      | 0.001677 | 0.363246 | 0.426 | 0.916 | 1 Undiff-G UBB      |
| TLCD1    | 0.001679 | -0.14103 | 0.007 | 0.082 | 1 Undiff-G TLCD1    |
| RAI1     | 0.00168  | -0.16141 | 0     | 0.068 | 1 Undiff-G RAI1     |
| C16orf70 | 0.001693 | -0.19388 | 0     | 0.068 | 1 Undiff-G C16orf70 |
| CD40     | 0.001693 | -0.2792  | 0     | 0.068 | 1 Undiff-G CD40     |
| MYPOP    | 0.001701 | -0.17015 | 0.007 | 0.081 | 1 Undiff-G MYPOP    |
| YPEL1    | 0.001702 | -0.16087 | 0.015 | 0.094 | 1 Undiff-G YPEL1    |
| BYSL     | 0.001707 | 0.341152 | 0.022 | 0.108 | 1 Undiff-G BYSL     |
| CNN3     | 0.001708 | 0.604189 | 0.228 | 0.471 | 1 Undiff-G CNN3     |
| IGF2BP2  | 0.001708 | -0.16989 | 0.007 | 0.081 | 1 Undiff-G IGF2BP2  |
| GDPD1    | 0.001717 | -0.16588 | 0     | 0.068 | 1 Undiff-G GDPD1    |
| SIK3     | 0.001718 | -0.14101 | 0.022 | 0.107 | 1 Undiff-G SIK3     |
| PAPD5    | 0.001729 | -0.21446 | 0.007 | 0.081 | 1 Undiff-G PAPD5    |
| ANO10    | 0.00173  | -0.17929 | 0     | 0.067 | 1 Undiff-G ANO10    |
| STIM1    | 0.00173  | -0.1801  | 0     | 0.067 | 1 Undiff-G STIM1    |
| GPS2     | 0.001732 | 0.325276 | 0.044 | 0.146 | 1 Undiff-G GPS2     |
| BNIP1    | 0.001741 | 0.332808 | 0.029 | 0.121 | 1 Undiff-G BNIP1    |
| CBX2     | 0.001743 | -0.16052 | 0     | 0.067 | 1 Undiff-G CBX2     |
| ZFP1     | 0.001743 | -0.16636 | 0     | 0.067 | 1 Undiff-G ZFP1     |
| SBF1     | 0.001743 | -0.19126 | 0     | 0.067 | 1 Undiff-G SBF1     |
| PPM1F    | 0.001743 | -0.20127 | 0     | 0.067 | 1 Undiff-G PPM1F    |
| MDK      | 0.001748 | 0.584506 | 0.243 | 0.494 | 1 Undiff-G MDK      |
| HEATR5A  | 0.001751 | -0.14194 | 0.007 | 0.082 | 1 Undiff-G HEATR5A  |
| GTF3C4   | 0.001755 | -0.15014 | 0     | 0.067 | 1 Undiff-G GTF3C4   |
| TMEM87B  | 0.001755 | -0.18494 | 0     | 0.067 | 1 Undiff-G TMEM87B  |
| RPRM     | 0.001755 | -0.27051 | 0     | 0.067 | 1 Undiff-G RPRM     |
| MYCBP    | 0.001763 | -0.13921 | 0.015 | 0.094 | 1 Undiff-G MYCBP    |
| DDB2     | 0.001763 | 0.131794 | 0.015 | 0.095 | 1 Undiff-G DDB2     |
| LRRC28   | 0.001763 | 0.147076 | 0.015 | 0.095 | 1 Undiff-G LRRC28   |
| NOVA2    | 0.001765 | -0.16062 | 0.007 | 0.081 | 1 Undiff-G NOVA2    |
| RNF123   | 0.001768 | -0.18822 | 0     | 0.067 | 1 Undiff-G RNF123   |
| FBXO38   | 0.001768 | -0.19721 | 0     | 0.067 | 1 Undiff-G FBXO38   |
| NOP2     | 0.00177  | 0.151993 | 0.022 | 0.107 | 1 Undiff-G NOP2     |
| AMOTL1   | 0.001781 | -0.14754 | 0     | 0.067 | 1 Undiff-G AMOTL1   |
| DYRK1B   | 0.001781 | -0.16406 | 0     | 0.067 | 1 Undiff-G DYRK1B   |
| MTA2     | 0.001781 | -0.17405 | 0     | 0.067 | 1 Undiff-G MTA2     |

|           |          |          |       |       |                          |
|-----------|----------|----------|-------|-------|--------------------------|
| USP37     | 0.001781 | -0.18825 | 0     | 0.067 | 1 Undiff-G USP37         |
| RP11-386I | 0.001781 | -0.30119 | 0     | 0.067 | 1 Undiff-G RP11-386I14.4 |
| B3GNT2    | 0.001794 | -0.18314 | 0     | 0.067 | 1 Undiff-G B3GNT2        |
| ZNF197    | 0.001794 | -0.18633 | 0     | 0.067 | 1 Undiff-G ZNF197        |
| KCNH2     | 0.001794 | -0.211   | 0     | 0.067 | 1 Undiff-G KCNH2         |
| EZH1      | 0.001805 | -0.20689 | 0.007 | 0.081 | 1 Undiff-G EZH1          |
| THBS1     | 0.001806 | -0.23973 | 0.007 | 0.081 | 1 Undiff-G THBS1         |
| APAF1     | 0.001807 | -0.2001  | 0     | 0.067 | 1 Undiff-G APAF1         |
| PLXNC1    | 0.001807 | -0.23351 | 0     | 0.067 | 1 Undiff-G PLXNC1        |
| APEX2     | 0.001812 | 0.11814  | 0.015 | 0.095 | 1 Undiff-G APEX2         |
| ZNF532    | 0.001819 | -0.16091 | 0.015 | 0.094 | 1 Undiff-G ZNF532        |
| LINC00526 | 0.001826 | -0.18693 | 0.007 | 0.08  | 1 Undiff-G LINC00526     |
| LIMD1     | 0.001827 | -0.16491 | 0.007 | 0.08  | 1 Undiff-G LIMD1         |
| IRF9      | 0.001829 | -0.22906 | 0.015 | 0.094 | 1 Undiff-G IRF9          |
| MYSM1     | 0.001831 | -0.13207 | 0.007 | 0.081 | 1 Undiff-G MYSM1         |
| TRMT1L    | 0.001834 | -0.18714 | 0     | 0.067 | 1 Undiff-G TRMT1L        |
| TMEM108   | 0.001835 | 0.114099 | 0.007 | 0.081 | 1 Undiff-G TMEM108       |
| MYADM     | 0.001839 | 0.656251 | 0.074 | 0.194 | 1 Undiff-G MYADM         |
| OMG       | 0.001843 | -0.31721 | 0.007 | 0.08  | 1 Undiff-G OMG           |
| TPI1      | 0.001846 | 0.900702 | 0.574 | 0.869 | 1 Undiff-G TPI1          |
| CDADC1    | 0.001852 | 0.201679 | 0.022 | 0.107 | 1 Undiff-G CDADC1        |
| PLCB1     | 0.001854 | -0.14205 | 0.007 | 0.081 | 1 Undiff-G PLCB1         |
| MAP4K3    | 0.001859 | -0.14234 | 0.007 | 0.081 | 1 Undiff-G MAP4K3        |
| KLF9      | 0.001859 | 0.116449 | 0.037 | 0.132 | 1 Undiff-G KLF9          |
| CELF3     | 0.001861 | -0.23031 | 0     | 0.067 | 1 Undiff-G CELF3         |
| NGRN      | 0.001864 | -0.15488 | 0.007 | 0.081 | 1 Undiff-G NGRN          |
| RP11-69E1 | 0.001874 | -0.20563 | 0     | 0.067 | 1 Undiff-G RP11-69E11.4  |
| DDX28     | 0.001877 | -0.16597 | 0.007 | 0.081 | 1 Undiff-G DDX28         |
| PCDHB2    | 0.001879 | -0.16251 | 0.007 | 0.08  | 1 Undiff-G PCDHB2        |
| RLIM      | 0.00188  | 0.298856 | 0.022 | 0.107 | 1 Undiff-G RLIM          |
| EML1      | 0.001884 | -0.11411 | 0.007 | 0.081 | 1 Undiff-G EML1          |
| GOLPH3L   | 0.001887 | -0.20317 | 0.007 | 0.08  | 1 Undiff-G GOLPH3L       |
| RRNAD1    | 0.00189  | 0.171373 | 0.022 | 0.107 | 1 Undiff-G RRNAD1        |
| GHDC      | 0.001893 | -0.10309 | 0.015 | 0.094 | 1 Undiff-G GHDC          |
| ZKSCAN5   | 0.001902 | -0.17013 | 0     | 0.066 | 1 Undiff-G ZKSCAN5       |
| ZNF189    | 0.001902 | -0.19257 | 0     | 0.066 | 1 Undiff-G ZNF189        |
| NUP155    | 0.001916 | -0.18314 | 0     | 0.066 | 1 Undiff-G NUP155        |
| ACSF2     | 0.001916 | -0.2026  | 0     | 0.066 | 1 Undiff-G ACSF2         |
| OSBPL11   | 0.00192  | 0.181958 | 0.015 | 0.094 | 1 Undiff-G OSBPL11       |
| MIS18A    | 0.001921 | 0.34284  | 0.022 | 0.107 | 1 Undiff-G MIS18A        |
| CDK7      | 0.001933 | 0.128344 | 0.015 | 0.094 | 1 Undiff-G CDK7          |
| PISD      | 0.001935 | 0.104199 | 0.022 | 0.106 | 1 Undiff-G PISD          |
| CRADD     | 0.001939 | 0.162388 | 0.022 | 0.106 | 1 Undiff-G CRADD         |
| VTI1A     | 0.001944 | -0.23173 | 0     | 0.066 | 1 Undiff-G VTI1A         |
| WDR92     | 0.001947 | -0.17536 | 0.007 | 0.08  | 1 Undiff-G WDR92         |
| E2F5      | 0.001958 | -0.1202  | 0     | 0.066 | 1 Undiff-G E2F5          |
| C14orf80  | 0.001958 | -0.17068 | 0     | 0.066 | 1 Undiff-G C14orf80      |
| MED9      | 0.001959 | -0.10709 | 0.015 | 0.094 | 1 Undiff-G MED9          |
| MIB1      | 0.00197  | -0.14779 | 0.015 | 0.093 | 1 Undiff-G MIB1          |
| COX10     | 0.001972 | -0.1611  | 0     | 0.066 | 1 Undiff-G COX10         |
| FKBPL     | 0.001972 | -0.18478 | 0     | 0.066 | 1 Undiff-G FKBPL         |

|           |          |          |       |       |                      |
|-----------|----------|----------|-------|-------|----------------------|
| MBD2      | 0.001972 | -0.18553 | 0     | 0.066 | 1 Undiff-G MBD2      |
| DIAPH2    | 0.001972 | -0.23303 | 0     | 0.066 | 1 Undiff-G DIAPH2    |
| STRN3     | 0.001973 | 0.303265 | 0.037 | 0.131 | 1 Undiff-G STRN3     |
| AUH       | 0.001985 | -0.11002 | 0.007 | 0.08  | 1 Undiff-G AUH       |
| DMPK      | 0.001986 | -0.14332 | 0     | 0.066 | 1 Undiff-G DMPK      |
| KCTD18    | 0.001986 | -0.1866  | 0     | 0.066 | 1 Undiff-G KCTD18    |
| PUS1      | 0.001991 | -0.17043 | 0.007 | 0.08  | 1 Undiff-G PUS1      |
| STAC3     | 0.001999 | -0.23221 | 0.007 | 0.08  | 1 Undiff-G STAC3     |
| DPY19L1   | 0.002    | -0.14836 | 0.022 | 0.105 | 1 Undiff-G DPY19L1   |
| PLCE1     | 0.002001 | -0.16453 | 0     | 0.066 | 1 Undiff-G PLCE1     |
| SP140L    | 0.002007 | -0.27968 | 0.007 | 0.079 | 1 Undiff-G SP140L    |
| TIAM2     | 0.002009 | -0.16583 | 0.007 | 0.08  | 1 Undiff-G TIAM2     |
| SLC35G2   | 0.002014 | 0.174269 | 0.029 | 0.118 | 1 Undiff-G SLC35G2   |
| SPDL1     | 0.002016 | -0.1615  | 0     | 0.066 | 1 Undiff-G SPDL1     |
| IL4I1     | 0.002016 | -0.27641 | 0     | 0.066 | 1 Undiff-G IL4I1     |
| MT1F      | 0.00202  | 0.648439 | 0.14  | 0.307 | 1 Undiff-G MT1F      |
| RNF121    | 0.002031 | 0.405117 | 0.022 | 0.106 | 1 Undiff-G RNF121    |
| FBX032    | 0.002034 | 0.253483 | 0.051 | 0.155 | 1 Undiff-G FBX032    |
| PDGFD     | 0.002038 | -0.12726 | 0.007 | 0.08  | 1 Undiff-G PDGFD     |
| DOT1L     | 0.002044 | -0.14694 | 0.007 | 0.08  | 1 Undiff-G DOT1L     |
| SOCS5     | 0.002045 | -0.16451 | 0     | 0.065 | 1 Undiff-G SOCS5     |
| GXYLT1    | 0.002045 | -0.18004 | 0     | 0.065 | 1 Undiff-G GXYLT1    |
| METTL21B  | 0.002045 | -0.18439 | 0     | 0.065 | 1 Undiff-G METTL21B  |
| PEG3      | 0.002045 | -0.19302 | 0     | 0.065 | 1 Undiff-G PEG3      |
| RPRD2     | 0.002053 | 0.189337 | 0.037 | 0.131 | 1 Undiff-G RPRD2     |
| TMED8     | 0.00206  | -0.16107 | 0     | 0.065 | 1 Undiff-G TMED8     |
| NLE1      | 0.00206  | -0.16107 | 0     | 0.065 | 1 Undiff-G NLE1      |
| RAB6B     | 0.00206  | -0.16349 | 0     | 0.065 | 1 Undiff-G RAB6B     |
| GAN       | 0.00207  | 0.183008 | 0.044 | 0.143 | 1 Undiff-G GAN       |
| KIAA0895L | 0.00207  | -0.17072 | 0.015 | 0.092 | 1 Undiff-G KIAA0895L |
| BATF3     | 0.002074 | 0.114215 | 0.015 | 0.093 | 1 Undiff-G BATF3     |
| CCDC136   | 0.002075 | -0.15204 | 0.015 | 0.092 | 1 Undiff-G CCDC136   |
| SELO      | 0.002075 | -0.16618 | 0     | 0.065 | 1 Undiff-G SELO      |
| PIK3AP1   | 0.002075 | -0.2513  | 0     | 0.065 | 1 Undiff-G PIK3AP1   |
| IKZF1     | 0.002075 | -0.28354 | 0     | 0.065 | 1 Undiff-G IKZF1     |
| CTHRC1    | 0.00209  | -0.13498 | 0     | 0.065 | 1 Undiff-G CTHRC1    |
| TAF8      | 0.002103 | -0.15673 | 0.015 | 0.092 | 1 Undiff-G TAF8      |
| DBX2      | 0.002105 | -0.1388  | 0     | 0.065 | 1 Undiff-G DBX2      |
| SOX21-AS1 | 0.002105 | -0.1395  | 0     | 0.065 | 1 Undiff-G SOX21-AS1 |
| CACTIN    | 0.002105 | -0.13978 | 0     | 0.065 | 1 Undiff-G CACTIN    |
| KHDC1     | 0.002105 | -0.19227 | 0     | 0.065 | 1 Undiff-G KHDC1     |
| HDAC11    | 0.002105 | -0.22044 | 0     | 0.065 | 1 Undiff-G HDAC11    |
| TMEM2     | 0.002105 | -0.22722 | 0     | 0.065 | 1 Undiff-G TMEM2     |
| DBR1      | 0.002111 | -0.18616 | 0.007 | 0.079 | 1 Undiff-G DBR1      |
| ZNF436    | 0.002113 | -0.14152 | 0.007 | 0.079 | 1 Undiff-G ZNF436    |
| FKBP11    | 0.002115 | 0.274957 | 0.029 | 0.117 | 1 Undiff-G FKBP11    |
| KCTD1     | 0.002121 | -0.15282 | 0     | 0.065 | 1 Undiff-G KCTD1     |
| TTLL3     | 0.002121 | -0.17005 | 0     | 0.065 | 1 Undiff-G TTLL3     |
| ORC2      | 0.002121 | -0.18244 | 0     | 0.065 | 1 Undiff-G ORC2      |
| SYTL3     | 0.002121 | -0.31885 | 0     | 0.065 | 1 Undiff-G SYTL3     |
| HILPDA    | 0.002123 | 1.554594 | 0.279 | 0.226 | 1 Undiff-G HILPDA    |

|           |          |          |       |       |                         |
|-----------|----------|----------|-------|-------|-------------------------|
| DENND1B   | 0.002124 | -0.156   | 0.015 | 0.092 | 1 Undiff-G DENND1B      |
| C3orf62   | 0.002129 | -0.13607 | 0.007 | 0.079 | 1 Undiff-G C3orf62      |
| CNST      | 0.002136 | -0.18198 | 0     | 0.065 | 1 Undiff-G CNST         |
| FAM175A   | 0.002136 | -0.20893 | 0     | 0.065 | 1 Undiff-G FAM175A      |
| ZMYM3     | 0.002138 | -0.13939 | 0.007 | 0.079 | 1 Undiff-G ZMYM3        |
| PTPN7     | 0.002148 | -0.20673 | 0.007 | 0.079 | 1 Undiff-G PTPN7        |
| C14orf132 | 0.002151 | -0.1972  | 0.015 | 0.092 | 1 Undiff-G C14orf132    |
| KANSL3    | 0.002152 | -0.18219 | 0     | 0.065 | 1 Undiff-G KANSL3       |
| LRRC57    | 0.002152 | -0.18692 | 0     | 0.065 | 1 Undiff-G LRRC57       |
| RP5-827C2 | 0.002152 | -0.19782 | 0     | 0.065 | 1 Undiff-G RP5-827C21.4 |
| ZNF720    | 0.002158 | 0.487317 | 0.037 | 0.13  | 1 Undiff-G ZNF720       |
| EMP1      | 0.002158 | 0.491911 | 0.066 | 0.18  | 1 Undiff-G EMP1         |
| TMEM64    | 0.002168 | -0.15831 | 0     | 0.065 | 1 Undiff-G TMEM64       |
| BDNF-AS   | 0.002168 | -0.16474 | 0     | 0.065 | 1 Undiff-G BDNF-AS      |
| AFF1      | 0.002168 | -0.18221 | 0     | 0.065 | 1 Undiff-G AFF1         |
| NIM1K     | 0.002168 | -0.19031 | 0     | 0.065 | 1 Undiff-G NIM1K        |
| LRRC61    | 0.002168 | -0.22118 | 0     | 0.065 | 1 Undiff-G LRRC61       |
| SLC9A9    | 0.002168 | -0.22381 | 0.007 | 0.079 | 1 Undiff-G SLC9A9       |
| CXXC4     | 0.002168 | -0.18266 | 0.007 | 0.079 | 1 Undiff-G CXXC4        |
| CAMTA2    | 0.002172 | -0.13716 | 0.007 | 0.079 | 1 Undiff-G CAMTA2       |
| LIPT1     | 0.002173 | -0.14113 | 0.007 | 0.079 | 1 Undiff-G LIPT1        |
| CHST3     | 0.002183 | -0.12803 | 0     | 0.065 | 1 Undiff-G CHST3        |
| MFSD6     | 0.002183 | -0.17796 | 0     | 0.065 | 1 Undiff-G MFSD6        |
| ZNF384    | 0.002183 | -0.18268 | 0     | 0.065 | 1 Undiff-G ZNF384       |
| NEK3      | 0.002183 | -0.18874 | 0     | 0.065 | 1 Undiff-G NEK3         |
| MAP3K3    | 0.002183 | -0.20054 | 0     | 0.065 | 1 Undiff-G MAP3K3       |
| MX2       | 0.002183 | -0.28918 | 0     | 0.065 | 1 Undiff-G MX2          |
| FLVCR1    | 0.002189 | -0.14026 | 0.007 | 0.079 | 1 Undiff-G FLVCR1       |
| BCL3      | 0.002198 | -0.18914 | 0.007 | 0.078 | 1 Undiff-G BCL3         |
| SLC35E4   | 0.002199 | -0.1356  | 0     | 0.065 | 1 Undiff-G SLC35E4      |
| ENKD1     | 0.002199 | -0.1453  | 0     | 0.065 | 1 Undiff-G ENKD1        |
| PHC1      | 0.002214 | -0.15073 | 0.007 | 0.079 | 1 Undiff-G PHC1         |
| ERAP1     | 0.002215 | -0.18293 | 0     | 0.065 | 1 Undiff-G ERAP1        |
| HELQ      | 0.002215 | -0.19648 | 0     | 0.065 | 1 Undiff-G HELQ         |
| ORC6      | 0.00222  | -0.10836 | 0.015 | 0.092 | 1 Undiff-G ORC6         |
| GJC1      | 0.002231 | -0.1274  | 0     | 0.064 | 1 Undiff-G GJC1         |
| SMN1      | 0.002231 | -0.18088 | 0     | 0.064 | 1 Undiff-G SMN1         |
| PLEKHA5   | 0.002231 | -0.18582 | 0     | 0.064 | 1 Undiff-G PLEKHA5      |
| TMEM144   | 0.002232 | -0.37874 | 0.007 | 0.078 | 1 Undiff-G TMEM144      |
| ALG6      | 0.002236 | 0.197741 | 0.022 | 0.104 | 1 Undiff-G ALG6         |
| MAP3K4    | 0.002238 | -0.14076 | 0.015 | 0.091 | 1 Undiff-G MAP3K4       |
| ZNF558    | 0.00224  | -0.1701  | 0.007 | 0.078 | 1 Undiff-G ZNF558       |
| GSE1      | 0.002245 | -0.14596 | 0.015 | 0.092 | 1 Undiff-G GSE1         |
| RHOH      | 0.00225  | -0.34247 | 0.007 | 0.078 | 1 Undiff-G RHOH         |
| METTL15   | 0.00226  | 0.188585 | 0.037 | 0.129 | 1 Undiff-G METTL15      |
| ARID2     | 0.002261 | -0.12626 | 0.022 | 0.104 | 1 Undiff-G ARID2        |
| TIPIN     | 0.002262 | 0.173703 | 0.044 | 0.142 | 1 Undiff-G TIPIN        |
| ATXN7L3   | 0.002264 | -0.15793 | 0     | 0.064 | 1 Undiff-G ATXN7L3      |
| TFEB      | 0.00227  | -0.17894 | 0.007 | 0.078 | 1 Undiff-G TFEB         |
| UBR1      | 0.002277 | -0.1548  | 0.007 | 0.078 | 1 Undiff-G UBR1         |
| B3GALNT2  | 0.002292 | -0.1219  | 0.015 | 0.092 | 1 Undiff-G B3GALNT2     |

|           |          |          |       |       |                       |
|-----------|----------|----------|-------|-------|-----------------------|
| SHOX2     | 0.002297 | -0.13308 | 0     | 0.064 | 1 Undiff-G SHOX2      |
| ULK2      | 0.002297 | -0.15862 | 0     | 0.064 | 1 Undiff-G ULK2       |
| STRN      | 0.002297 | -0.16658 | 0     | 0.064 | 1 Undiff-G STRN       |
| DUOX1     | 0.002297 | -0.19459 | 0     | 0.064 | 1 Undiff-G DUOX1      |
| MMS22L    | 0.002297 | -0.19837 | 0     | 0.064 | 1 Undiff-G MMS22L     |
| SLAMF8    | 0.002297 | -0.26983 | 0     | 0.064 | 1 Undiff-G SLAMF8     |
| MLYCD     | 0.002298 | -0.16195 | 0.007 | 0.078 | 1 Undiff-G MLYCD      |
| AURKA     | 0.002301 | -0.18365 | 0.007 | 0.078 | 1 Undiff-G AURKA      |
| REC8      | 0.002309 | -0.20626 | 0.007 | 0.078 | 1 Undiff-G REC8       |
| TLE2      | 0.002309 | -0.16284 | 0.015 | 0.091 | 1 Undiff-G TLE2       |
| TTL12     | 0.002314 | -0.15339 | 0     | 0.064 | 1 Undiff-G TTL12      |
| SGSH      | 0.002314 | -0.16104 | 0     | 0.064 | 1 Undiff-G SGSH       |
| ZMYM6     | 0.002314 | -0.18637 | 0     | 0.064 | 1 Undiff-G ZMYM6      |
| CCNB2     | 0.002314 | -0.24737 | 0     | 0.064 | 1 Undiff-G CCNB2      |
| HIST2H2AA | 0.002314 | -0.25748 | 0     | 0.064 | 1 Undiff-G HIST2H2AA3 |
| ADCY7     | 0.002314 | -0.26805 | 0     | 0.064 | 1 Undiff-G ADCY7      |
| GLMN      | 0.002316 | -0.14093 | 0.015 | 0.091 | 1 Undiff-G GLMN       |
| ARMC8     | 0.002319 | 0.629186 | 0.081 | 0.202 | 1 Undiff-G ARMC8      |
| CXorf56   | 0.002322 | -0.16158 | 0.007 | 0.078 | 1 Undiff-G CXorf56    |
| IL1RL1    | 0.002324 | 0.306524 | 0.015 | 0.002 | 1 Undiff-G IL1RL1     |
| SFMBT2    | 0.002324 | -0.22131 | 0.007 | 0.078 | 1 Undiff-G SFMBT2     |
| PIBF1     | 0.002325 | -0.16557 | 0.015 | 0.091 | 1 Undiff-G PIBF1      |
| MMP15     | 0.002331 | -0.13718 | 0     | 0.064 | 1 Undiff-G MMP15      |
| CRIM1     | 0.002331 | -0.14615 | 0     | 0.064 | 1 Undiff-G CRIM1      |
| C22orf29  | 0.002331 | -0.16012 | 0     | 0.064 | 1 Undiff-G C22orf29   |
| ZRANB1    | 0.002331 | -0.18266 | 0     | 0.064 | 1 Undiff-G ZRANB1     |
| NEU4      | 0.002331 | -0.27074 | 0     | 0.064 | 1 Undiff-G NEU4       |
| PAQR3     | 0.00234  | -0.16515 | 0.007 | 0.077 | 1 Undiff-G PAQR3      |
| PIK3CB    | 0.002348 | -0.17298 | 0     | 0.064 | 1 Undiff-G PIK3CB     |
| FMNL3     | 0.002361 | -0.20193 | 0.007 | 0.078 | 1 Undiff-G FMNL3      |
| RBM28     | 0.002363 | 0.11487  | 0.059 | 0.164 | 1 Undiff-G RBM28      |
| NCAPG2    | 0.002365 | -0.17335 | 0     | 0.064 | 1 Undiff-G NCAPG2     |
| SETD7     | 0.002381 | 0.121067 | 0.022 | 0.104 | 1 Undiff-G SETD7      |
| HEATR6    | 0.002382 | -0.16414 | 0     | 0.064 | 1 Undiff-G HEATR6     |
| ADAM22    | 0.002382 | -0.18547 | 0     | 0.064 | 1 Undiff-G ADAM22     |
| CTU1      | 0.002408 | -0.12625 | 0.007 | 0.078 | 1 Undiff-G CTU1       |
| DACT3     | 0.00241  | -0.11794 | 0.007 | 0.078 | 1 Undiff-G DACT3      |
| GIMAP2    | 0.00241  | -0.17267 | 0.007 | 0.078 | 1 Undiff-G GIMAP2     |
| CASD1     | 0.002411 | -0.16556 | 0.007 | 0.078 | 1 Undiff-G CASD1      |
| NXPH4     | 0.002417 | -0.21135 | 0     | 0.064 | 1 Undiff-G NXPH4      |
| TMEM37    | 0.002417 | -0.28581 | 0     | 0.064 | 1 Undiff-G TMEM37     |
| THUMP2    | 0.00242  | -0.12389 | 0.015 | 0.091 | 1 Undiff-G THUMP2     |
| CCDC18    | 0.002429 | -0.1884  | 0.007 | 0.077 | 1 Undiff-G CCDC18     |
| USP12     | 0.002435 | -0.16939 | 0     | 0.063 | 1 Undiff-G USP12      |
| RAB39B    | 0.002442 | 0.225926 | 0.015 | 0.091 | 1 Undiff-G RAB39B     |
| ADCK4     | 0.002447 | 0.208942 | 0.037 | 0.128 | 1 Undiff-G ADCK4      |
| UNC119B   | 0.002452 | -0.14434 | 0     | 0.063 | 1 Undiff-G UNC119B    |
| PITRM1    | 0.002452 | -0.1761  | 0     | 0.063 | 1 Undiff-G PITRM1     |
| MEX3B     | 0.002452 | -0.18922 | 0     | 0.063 | 1 Undiff-G MEX3B      |
| HRK       | 0.002452 | -0.20007 | 0     | 0.063 | 1 Undiff-G HRK        |
| AHR       | 0.002452 | -0.23699 | 0     | 0.063 | 1 Undiff-G AHR        |



|           |          |          |       |       |                       |
|-----------|----------|----------|-------|-------|-----------------------|
| MKI67     | 0.002452 | -0.24425 | 0     | 0.063 | 1 Undiff-G MKI67      |
| RRM2      | 0.002452 | -0.25999 | 0     | 0.063 | 1 Undiff-G RRM2       |
| FAM131B   | 0.002453 | -0.18378 | 0.007 | 0.077 | 1 Undiff-G FAM131B    |
| HHLA3     | 0.002455 | 0.219719 | 0.044 | 0.141 | 1 Undiff-G HHLA3      |
| ZFP64     | 0.002462 | -0.12627 | 0.007 | 0.077 | 1 Undiff-G ZFP64      |
| CALR      | 0.002464 | 0.662866 | 0.331 | 0.696 | 1 Undiff-G CALR       |
| ZNF582-AS | 0.002469 | -0.22005 | 0.007 | 0.077 | 1 Undiff-G ZNF582-AS1 |
| FAM76A    | 0.002469 | -0.12077 | 0.015 | 0.09  | 1 Undiff-G FAM76A     |
| FBX045    | 0.00247  | -0.14547 | 0     | 0.063 | 1 Undiff-G FBX045     |
| SLC25A40  | 0.00247  | -0.19876 | 0     | 0.063 | 1 Undiff-G SLC25A40   |
| NANOS3    | 0.002488 | -0.14104 | 0     | 0.063 | 1 Undiff-G NANOS3     |
| MFHAS1    | 0.002488 | -0.1564  | 0     | 0.063 | 1 Undiff-G MFHAS1     |
| LGALSL    | 0.002488 | -0.16115 | 0     | 0.063 | 1 Undiff-G LGALSL     |
| ACTL6B    | 0.002492 | -0.22522 | 0.007 | 0.077 | 1 Undiff-G ACTL6B     |
| FARS2     | 0.002494 | 0.337507 | 0.029 | 0.116 | 1 Undiff-G FARS2      |
| SARM1     | 0.002506 | -0.15288 | 0     | 0.063 | 1 Undiff-G SARM1      |
| NICN1     | 0.002506 | -0.18675 | 0     | 0.063 | 1 Undiff-G NICN1      |
| DTX2      | 0.002506 | -0.19829 | 0     | 0.063 | 1 Undiff-G DTX2       |
| LMBRD2    | 0.002513 | -0.15958 | 0.007 | 0.077 | 1 Undiff-G LMBRD2     |
| PDE4A     | 0.002514 | -0.18858 | 0.015 | 0.09  | 1 Undiff-G PDE4A      |
| NLK       | 0.002522 | -0.13778 | 0.007 | 0.077 | 1 Undiff-G NLK        |
| ITGA2     | 0.002525 | -0.14531 | 0     | 0.063 | 1 Undiff-G ITGA2      |
| TECPR2    | 0.002525 | -0.18036 | 0     | 0.063 | 1 Undiff-G TECPR2     |
| PTPN23    | 0.002529 | -0.11991 | 0.007 | 0.077 | 1 Undiff-G PTPN23     |
| THEM4     | 0.00253  | -0.13375 | 0.007 | 0.077 | 1 Undiff-G THEM4      |
| ANKHD1    | 0.002532 | -0.14646 | 0.007 | 0.077 | 1 Undiff-G ANKHD1     |
| HIST1H1C  | 0.002533 | 0.654665 | 0.074 | 0.19  | 1 Undiff-G HIST1H1C   |
| AGL       | 0.002536 | -0.16224 | 0.015 | 0.09  | 1 Undiff-G AGL        |
| PANK3     | 0.002537 | 0.161301 | 0.029 | 0.115 | 1 Undiff-G PANK3      |
| RGAG4     | 0.002543 | -0.1288  | 0     | 0.063 | 1 Undiff-G RGAG4      |
| SYNDIG1   | 0.002548 | -0.19563 | 0.015 | 0.09  | 1 Undiff-G SYNDIG1    |
| AKAP6     | 0.002557 | -0.12271 | 0.022 | 0.103 | 1 Undiff-G AKAP6      |
| GAB1      | 0.002558 | 0.10132  | 0.022 | 0.102 | 1 Undiff-G GAB1       |
| ABCA3     | 0.002559 | -0.13042 | 0.007 | 0.077 | 1 Undiff-G ABCA3      |
| MIEF2     | 0.002561 | -0.15524 | 0     | 0.063 | 1 Undiff-G MIEF2      |
| RAB24     | 0.002561 | -0.16087 | 0     | 0.063 | 1 Undiff-G RAB24      |
| ZDHHC5    | 0.002561 | -0.17792 | 0     | 0.063 | 1 Undiff-G ZDHHC5     |
| PRMT3     | 0.002569 | -0.1142  | 0.015 | 0.09  | 1 Undiff-G PRMT3      |
| MEX3D     | 0.00258  | -0.14178 | 0     | 0.063 | 1 Undiff-G MEX3D      |
| TTI2      | 0.00258  | -0.19053 | 0     | 0.063 | 1 Undiff-G TTI2       |
| CLSPN     | 0.00258  | -0.20068 | 0     | 0.063 | 1 Undiff-G CLSPN      |
| NUF2      | 0.00258  | -0.22381 | 0     | 0.063 | 1 Undiff-G NUF2       |
| KBTBD4    | 0.002582 | 0.158044 | 0.015 | 0.09  | 1 Undiff-G KBTBD4     |
| FASTKD1   | 0.002598 | -0.19805 | 0.007 | 0.076 | 1 Undiff-G FASTKD1    |
| EXOC6B    | 0.002599 | -0.1711  | 0     | 0.063 | 1 Undiff-G EXOC6B     |
| NOTCH4    | 0.002599 | -0.18457 | 0     | 0.063 | 1 Undiff-G NOTCH4     |
| TOMM40L   | 0.002599 | -0.18947 | 0     | 0.063 | 1 Undiff-G TOMM40L    |
| TMEM163   | 0.002599 | -0.20893 | 0     | 0.063 | 1 Undiff-G TMEM163    |
| SARS2     | 0.002608 | -0.18642 | 0.007 | 0.076 | 1 Undiff-G SARS2      |
| AVIL      | 0.002609 | -0.15704 | 0.015 | 0.09  | 1 Undiff-G AVIL       |
| NACAD     | 0.002613 | -0.13492 | 0.015 | 0.09  | 1 Undiff-G NACAD      |

|           |          |          |       |       |                          |
|-----------|----------|----------|-------|-------|--------------------------|
| USP30     | 0.002618 | -0.16111 | 0     | 0.063 | 1 Undiff-G USP30         |
| DNAJA4    | 0.002618 | -0.2511  | 0     | 0.063 | 1 Undiff-G DNAJA4        |
| CHCHD4    | 0.002633 | 0.226962 | 0.029 | 0.115 | 1 Undiff-G CHCHD4        |
| CEP97     | 0.002656 | -0.14753 | 0.007 | 0.077 | 1 Undiff-G CEP97         |
| PIGW      | 0.002656 | -0.14986 | 0     | 0.062 | 1 Undiff-G PIGW          |
| SNX30     | 0.002656 | -0.20506 | 0     | 0.062 | 1 Undiff-G SNX30         |
| PSMA6     | 0.002674 | 0.552338 | 0.096 | 0.225 | 1 Undiff-G PSMA6         |
| CLYBL     | 0.002675 | -0.21217 | 0     | 0.062 | 1 Undiff-G CLYBL         |
| ZNF408    | 0.002682 | -0.16507 | 0.007 | 0.076 | 1 Undiff-G ZNF408        |
| RP11-264E | 0.002696 | 0.340558 | 0.007 | 0.001 | 1 Undiff-G RP11-264B17.4 |
| C4orf46   | 0.002702 | -0.12542 | 0.007 | 0.076 | 1 Undiff-G C4orf46       |
| TRAPPC13  | 0.002712 | 0.135598 | 0.029 | 0.114 | 1 Undiff-G TRAPPC13      |
| VPS33B    | 0.002714 | -0.15896 | 0     | 0.062 | 1 Undiff-G VPS33B        |
| PEX6      | 0.002714 | -0.17273 | 0     | 0.062 | 1 Undiff-G PEX6          |
| RP11-138A | 0.002714 | -0.29105 | 0.022 | 0.1   | 1 Undiff-G RP11-138A9.2  |
| XPO5      | 0.002718 | -0.16311 | 0.007 | 0.076 | 1 Undiff-G XPO5          |
| TVP23B    | 0.002735 | 0.32955  | 0.022 | 0.103 | 1 Undiff-G TVP23B        |
| CLP1      | 0.002737 | -0.20818 | 0.007 | 0.075 | 1 Undiff-G CLP1          |
| NUP205    | 0.002754 | -0.16185 | 0     | 0.062 | 1 Undiff-G NUP205        |
| TGFBRAP1  | 0.002754 | -0.1661  | 0     | 0.062 | 1 Undiff-G TGFBRAP1      |
| TMEM120B  | 0.002754 | -0.17222 | 0     | 0.062 | 1 Undiff-G TMEM120B      |
| ZW10      | 0.002754 | -0.17408 | 0     | 0.062 | 1 Undiff-G ZW10          |
| DNMT3A    | 0.002765 | -0.10534 | 0.022 | 0.101 | 1 Undiff-G DNMT3A        |
| TMEM104   | 0.002774 | -0.15849 | 0     | 0.062 | 1 Undiff-G TMEM104       |
| AP006621. | 0.002774 | -0.15922 | 0     | 0.062 | 1 Undiff-G AP006621.5    |
| ZBED3     | 0.002777 | -0.1294  | 0.015 | 0.089 | 1 Undiff-G ZBED3         |
| GS1-124K5 | 0.002786 | 0.212764 | 0.029 | 0.115 | 1 Undiff-G GS1-124K5.4   |
| MICAL3    | 0.002792 | -0.15238 | 0.007 | 0.076 | 1 Undiff-G MICAL3        |
| TSEN2     | 0.002792 | -0.12234 | 0.015 | 0.089 | 1 Undiff-G TSEN2         |
| PVRL1     | 0.002794 | -0.18905 | 0     | 0.062 | 1 Undiff-G PVRL1         |
| HOXB7     | 0.002794 | -0.2501  | 0     | 0.062 | 1 Undiff-G HOXB7         |
| CAMK2B    | 0.002797 | 0.165235 | 0.029 | 0.115 | 1 Undiff-G CAMK2B        |
| PUS7      | 0.002815 | -0.15197 | 0     | 0.062 | 1 Undiff-G PUS7          |
| PLCB2     | 0.002815 | -0.2654  | 0     | 0.062 | 1 Undiff-G PLCB2         |
| AC074289. | 0.002815 | -0.29393 | 0     | 0.062 | 1 Undiff-G AC074289.1    |
| ZNF844    | 0.002816 | -0.16357 | 0.007 | 0.076 | 1 Undiff-G ZNF844        |
| HSBP1L1   | 0.002819 | -0.22171 | 0.007 | 0.075 | 1 Undiff-G HSBP1L1       |
| GFM2      | 0.002832 | 0.147502 | 0.015 | 0.089 | 1 Undiff-G GFM2          |
| GTPBP3    | 0.002832 | 0.166692 | 0.029 | 0.113 | 1 Undiff-G GTPBP3        |
| SLC46A1   | 0.002835 | -0.16717 | 0     | 0.062 | 1 Undiff-G SLC46A1       |
| SIRT1     | 0.002835 | -0.17593 | 0     | 0.062 | 1 Undiff-G SIRT1         |
| SMIM18    | 0.002835 | -0.2122  | 0     | 0.062 | 1 Undiff-G SMIM18        |
| CLDN12    | 0.002843 | 0.321705 | 0.044 | 0.139 | 1 Undiff-G CLDN12        |
| PPP2R5D   | 0.002845 | -0.16501 | 0.007 | 0.075 | 1 Undiff-G PPP2R5D       |
| NFKB2     | 0.002856 | -0.21579 | 0     | 0.062 | 1 Undiff-G NFKB2         |
| FAM198B   | 0.002856 | -0.25767 | 0     | 0.062 | 1 Undiff-G FAM198B       |
| PICK1     | 0.002858 | -0.15104 | 0.015 | 0.089 | 1 Undiff-G PICK1         |
| GORAB     | 0.002861 | -0.10117 | 0.007 | 0.076 | 1 Undiff-G GORAB         |
| FAM220A   | 0.002864 | -0.10475 | 0.007 | 0.076 | 1 Undiff-G FAM220A       |
| DNM3      | 0.002869 | -0.10552 | 0.015 | 0.089 | 1 Undiff-G DNM3          |
| SLC2A13   | 0.002874 | -0.14905 | 0.015 | 0.088 | 1 Undiff-G SLC2A13       |

|           |          |          |       |       |                       |
|-----------|----------|----------|-------|-------|-----------------------|
| MYO1G     | 0.002877 | -0.24572 | 0     | 0.061 | 1 Undiff-G MYO1G      |
| APBA3     | 0.002884 | -0.12755 | 0.015 | 0.089 | 1 Undiff-G APBA3      |
| MTRNR2L1C | 0.002885 | 0.948312 | 0.132 | 0.073 | 1 Undiff-G MTRNR2L10  |
| PTGR2     | 0.002891 | -0.17057 | 0.007 | 0.075 | 1 Undiff-G PTGR2      |
| MORC4     | 0.002897 | -0.13043 | 0     | 0.061 | 1 Undiff-G MORC4      |
| ZDHHC15   | 0.002897 | -0.14154 | 0     | 0.061 | 1 Undiff-G ZDHHC15    |
| ZBTB33    | 0.002897 | -0.15612 | 0     | 0.061 | 1 Undiff-G ZBTB33     |
| GRAMD4    | 0.002897 | -0.18974 | 0     | 0.061 | 1 Undiff-G GRAMD4     |
| SCAPER    | 0.002898 | -0.10494 | 0.029 | 0.114 | 1 Undiff-G SCAPER     |
| TNRC18    | 0.002901 | -0.16732 | 0.007 | 0.075 | 1 Undiff-G TNRC18     |
| SLC35D2   | 0.002911 | 0.322562 | 0.022 | 0.102 | 1 Undiff-G SLC35D2    |
| MNS1      | 0.002915 | -0.14235 | 0.007 | 0.075 | 1 Undiff-G MNS1       |
| PPP1R14C  | 0.002919 | -0.13489 | 0     | 0.061 | 1 Undiff-G PPP1R14C   |
| NCS1      | 0.002919 | -0.14721 | 0     | 0.061 | 1 Undiff-G NCS1       |
| CACNB3    | 0.002919 | -0.15045 | 0     | 0.061 | 1 Undiff-G CACNB3     |
| B3GNTL1   | 0.002919 | -0.16967 | 0     | 0.061 | 1 Undiff-G B3GNTL1    |
| CAMK2G    | 0.00292  | -0.11621 | 0.022 | 0.101 | 1 Undiff-G CAMK2G     |
| CSGALNACT | 0.00292  | -0.20485 | 0.007 | 0.075 | 1 Undiff-G CSGALNACT1 |
| PIGO      | 0.002922 | -0.19112 | 0.007 | 0.075 | 1 Undiff-G PIGO       |
| KLHL22    | 0.002931 | -0.1096  | 0.015 | 0.089 | 1 Undiff-G KLHL22     |
| CDCA4     | 0.002931 | 0.109672 | 0.015 | 0.089 | 1 Undiff-G CDCA4      |
| CXorf40A  | 0.002934 | 0.158705 | 0.015 | 0.089 | 1 Undiff-G CXorf40A   |
| TCTA      | 0.002937 | 0.315591 | 0.059 | 0.162 | 1 Undiff-G TCTA       |
| CFI       | 0.00294  | -0.20168 | 0     | 0.061 | 1 Undiff-G CFI        |
| SGMS1     | 0.002961 | -0.17081 | 0     | 0.061 | 1 Undiff-G SGMS1      |
| LRRK2     | 0.002961 | -0.22186 | 0     | 0.061 | 1 Undiff-G LRRK2      |
| CCDC80    | 0.002971 | 0.372468 | 0.029 | 0.114 | 1 Undiff-G CCDC80     |
| EFCAB11   | 0.002983 | -0.16367 | 0     | 0.061 | 1 Undiff-G EFCAB11    |
| PDK3      | 0.002983 | -0.17909 | 0     | 0.061 | 1 Undiff-G PDK3       |
| HOXA5     | 0.002983 | -0.21112 | 0     | 0.061 | 1 Undiff-G HOXA5      |
| BEST3     | 0.002991 | -0.10704 | 0.015 | 0.088 | 1 Undiff-G BEST3      |
| NIP7      | 0.002992 | 0.495929 | 0.066 | 0.173 | 1 Undiff-G NIP7       |
| TAB1      | 0.003005 | -0.14011 | 0.007 | 0.075 | 1 Undiff-G TAB1       |
| TAGLN2    | 0.003013 | 0.59715  | 0.257 | 0.517 | 1 Undiff-G TAGLN2     |
| ZNF512B   | 0.003015 | -0.13044 | 0.007 | 0.075 | 1 Undiff-G ZNF512B    |
| INTS1     | 0.003024 | -0.14343 | 0.015 | 0.088 | 1 Undiff-G INTS1      |
| NCOA2     | 0.003026 | -0.16024 | 0     | 0.061 | 1 Undiff-G NCOA2      |
| SENP7     | 0.003039 | -0.14187 | 0.015 | 0.087 | 1 Undiff-G SENP7      |
| LZTS1     | 0.003048 | -0.14081 | 0     | 0.061 | 1 Undiff-G LZTS1      |
| SH3BP5L   | 0.003048 | -0.15148 | 0     | 0.061 | 1 Undiff-G SH3BP5L    |
| ANKS1A    | 0.003048 | -0.1649  | 0     | 0.061 | 1 Undiff-G ANKS1A     |
| ASF1B     | 0.003048 | -0.18967 | 0     | 0.061 | 1 Undiff-G ASF1B      |
| ANKRD28   | 0.003053 | 0.298626 | 0.029 | 0.114 | 1 Undiff-G ANKRD28    |
| SLC2A1    | 0.003056 | 0.448561 | 0.044 | 0.138 | 1 Undiff-G SLC2A1     |
| NXPE3     | 0.003059 | 0.160651 | 0.015 | 0.088 | 1 Undiff-G NXPE3      |
| CXorf23   | 0.00307  | -0.14671 | 0     | 0.061 | 1 Undiff-G CXorf23    |
| VPS37D    | 0.00307  | -0.15873 | 0     | 0.061 | 1 Undiff-G VPS37D     |
| GAPT      | 0.00307  | -0.2777  | 0     | 0.061 | 1 Undiff-G GAPT       |
| LRRC17    | 0.003072 | -0.13125 | 0.007 | 0.075 | 1 Undiff-G LRRC17     |
| MALT1     | 0.003075 | -0.12007 | 0.007 | 0.075 | 1 Undiff-G MALT1      |
| DDX3Y     | 0.003081 | -0.13726 | 0.015 | 0.087 | 1 Undiff-G DDX3Y      |

|           |          |          |       |       |                         |
|-----------|----------|----------|-------|-------|-------------------------|
| PBXIP1    | 0.003089 | 0.247261 | 0.044 | 0.136 | 1 Undiff-G PBXIP1       |
| CALHM2    | 0.003093 | -0.21302 | 0     | 0.061 | 1 Undiff-G CALHM2       |
| RDH13     | 0.003094 | -0.12829 | 0.007 | 0.075 | 1 Undiff-G RDH13        |
| SMG9      | 0.003095 | 0.414862 | 0.037 | 0.126 | 1 Undiff-G SMG9         |
| TRIB3     | 0.003099 | -0.12609 | 0.007 | 0.075 | 1 Undiff-G TRIB3        |
| VIPAS39   | 0.003115 | -0.16518 | 0.007 | 0.075 | 1 Undiff-G VIPAS39      |
| TM4SF1    | 0.003115 | 0.334042 | 0.029 | 0.113 | 1 Undiff-G TM4SF1       |
| MADD      | 0.003115 | -0.18031 | 0     | 0.06  | 1 Undiff-G MADD         |
| IMPA2     | 0.003115 | -0.18921 | 0     | 0.06  | 1 Undiff-G IMPA2        |
| MSANTD3   | 0.003126 | 0.297078 | 0.015 | 0.088 | 1 Undiff-G MSANTD3      |
| CTB-113I2 | 0.003138 | -0.13315 | 0     | 0.06  | 1 Undiff-G CTB-113I20.2 |
| FAM193B   | 0.003138 | -0.15875 | 0     | 0.06  | 1 Undiff-G FAM193B      |
| NRSN1     | 0.003138 | -0.17023 | 0     | 0.06  | 1 Undiff-G NRSN1        |
| RMI1      | 0.003138 | -0.17799 | 0     | 0.06  | 1 Undiff-G RMI1         |
| ZNF124    | 0.003138 | -0.22183 | 0     | 0.06  | 1 Undiff-G ZNF124       |
| TTBK2     | 0.003138 | -0.1206  | 0.007 | 0.075 | 1 Undiff-G TTBK2        |
| COX7C     | 0.003148 | 0.5246   | 0.404 | 0.891 | 1 Undiff-G COX7C        |
| HERC5     | 0.00315  | -0.18911 | 0.007 | 0.074 | 1 Undiff-G HERC5        |
| MPDZ      | 0.003159 | -0.14234 | 0.015 | 0.087 | 1 Undiff-G MPDZ         |
| SMOX      | 0.00316  | 0.767361 | 0.11  | 0.249 | 1 Undiff-G SMOX         |
| TF        | 0.003174 | -0.42415 | 0.007 | 0.074 | 1 Undiff-G TF           |
| MAVS      | 0.003178 | -0.12337 | 0.007 | 0.074 | 1 Undiff-G MAVS         |
| FAM122B   | 0.003181 | 0.15348  | 0.022 | 0.1   | 1 Undiff-G FAM122B      |
| MORC2     | 0.003184 | -0.14526 | 0     | 0.06  | 1 Undiff-G MORC2        |
| YTHDF3-AS | 0.003184 | -0.15125 | 0     | 0.06  | 1 Undiff-G YTHDF3-AS1   |
| FAM69A    | 0.003184 | -0.15959 | 0     | 0.06  | 1 Undiff-G FAM69A       |
| ATAD2B    | 0.003184 | -0.1633  | 0     | 0.06  | 1 Undiff-G ATAD2B       |
| UTP15     | 0.003184 | -0.16439 | 0     | 0.06  | 1 Undiff-G UTP15        |
| SLC9A6    | 0.003184 | -0.16862 | 0     | 0.06  | 1 Undiff-G SLC9A6       |
| TDP1      | 0.003184 | -0.1694  | 0     | 0.06  | 1 Undiff-G TDP1         |
| TRIQQ     | 0.003184 | -0.21537 | 0     | 0.06  | 1 Undiff-G TRIQQ        |
| FAM20A    | 0.003184 | -0.23844 | 0     | 0.06  | 1 Undiff-G FAM20A       |
| C19orf53  | 0.003205 | 0.640252 | 0.338 | 0.687 | 1 Undiff-G C19orf53     |
| MPP2      | 0.003207 | -0.15354 | 0     | 0.06  | 1 Undiff-G MPP2         |
| TBC1D10A  | 0.003211 | -0.10497 | 0.007 | 0.074 | 1 Undiff-G TBC1D10A     |
| SLC38A6   | 0.003226 | 0.302617 | 0.022 | 0.1   | 1 Undiff-G SLC38A6      |
| SLC27A4   | 0.00323  | -0.1513  | 0     | 0.06  | 1 Undiff-G SLC27A4      |
| ZNF333    | 0.003237 | -0.14104 | 0.015 | 0.087 | 1 Undiff-G ZNF333       |
| TMA7      | 0.003245 | 0.486267 | 0.397 | 0.856 | 1 Undiff-G TMA7         |
| LINC00909 | 0.003253 | 0.379743 | 0.029 | 0.113 | 1 Undiff-G LINC00909    |
| PARD3     | 0.003254 | -0.11195 | 0     | 0.06  | 1 Undiff-G PARD3        |
| GLRB      | 0.003254 | -0.14058 | 0     | 0.06  | 1 Undiff-G GLRB         |
| RBM12B    | 0.003261 | -0.13534 | 0.007 | 0.074 | 1 Undiff-G RBM12B       |
| FLCN      | 0.00327  | 0.248849 | 0.044 | 0.137 | 1 Undiff-G FLCN         |
| GAL3ST3   | 0.003277 | -0.13751 | 0     | 0.06  | 1 Undiff-G GAL3ST3      |
| ZNF530    | 0.003277 | -0.15108 | 0     | 0.06  | 1 Undiff-G ZNF530       |
| ZCWPW1    | 0.003301 | -0.19078 | 0     | 0.06  | 1 Undiff-G ZCWPW1       |
| ARNT      | 0.003322 | -0.13351 | 0.007 | 0.074 | 1 Undiff-G ARNT         |
| RCAN3     | 0.003325 | -0.17344 | 0     | 0.06  | 1 Undiff-G RCAN3        |
| LRRC8C    | 0.003325 | -0.1953  | 0     | 0.06  | 1 Undiff-G LRRC8C       |
| LRR1      | 0.003326 | 0.137742 | 0.015 | 0.087 | 1 Undiff-G LRR1         |

|         |          |          |       |       |                    |
|---------|----------|----------|-------|-------|--------------------|
| ASGR1   | 0.003337 | -0.20378 | 0.007 | 0.074 | 1 Undiff-G ASGR1   |
| UBP1    | 0.003338 | -0.16547 | 0.007 | 0.073 | 1 Undiff-G UBP1    |
| MED26   | 0.003341 | -0.14097 | 0.007 | 0.074 | 1 Undiff-G MED26   |
| GRB10   | 0.003356 | -0.15599 | 0.007 | 0.074 | 1 Undiff-G GRB10   |
| ZNF274  | 0.003357 | 0.203297 | 0.029 | 0.112 | 1 Undiff-G ZNF274  |
| 1-Mar   | 0.003373 | -0.13315 | 0     | 0.06  | 1 Undiff-G 1-Mar   |
| CCNYL1  | 0.003373 | -0.14537 | 0     | 0.06  | 1 Undiff-G CCNYL1  |
| KDM1B   | 0.003373 | -0.15094 | 0     | 0.06  | 1 Undiff-G KDM1B   |
| ZNF286A | 0.003373 | -0.16099 | 0     | 0.06  | 1 Undiff-G ZNF286A |
| PHF2    | 0.003373 | -0.16537 | 0     | 0.06  | 1 Undiff-G PHF2    |
| ZNF529  | 0.003373 | -0.17381 | 0     | 0.06  | 1 Undiff-G ZNF529  |
| KIFC1   | 0.003373 | -0.19705 | 0     | 0.06  | 1 Undiff-G KIFC1   |
| ZMYND19 | 0.003398 | -0.12443 | 0     | 0.059 | 1 Undiff-G ZMYND19 |
| SPSB4   | 0.003398 | -0.12707 | 0     | 0.059 | 1 Undiff-G SPSB4   |
| KCTD7   | 0.003398 | -0.17221 | 0     | 0.059 | 1 Undiff-G KCTD7   |
| IRF5    | 0.003398 | -0.255   | 0     | 0.059 | 1 Undiff-G IRF5    |
| GPSM1   | 0.003403 | -0.10017 | 0.007 | 0.074 | 1 Undiff-G GPSM1   |
| NEO1    | 0.003405 | -0.15805 | 0.007 | 0.073 | 1 Undiff-G NEO1    |
| ASPHD2  | 0.003423 | -0.11154 | 0     | 0.059 | 1 Undiff-G ASPHD2  |
| MCHR1   | 0.003423 | -0.12215 | 0     | 0.059 | 1 Undiff-G MCHR1   |
| ZNF496  | 0.003423 | -0.14374 | 0     | 0.059 | 1 Undiff-G ZNF496  |
| LRP4    | 0.003423 | -0.17153 | 0     | 0.059 | 1 Undiff-G LRP4    |
| MYT1L   | 0.003423 | -0.22913 | 0     | 0.059 | 1 Undiff-G MYT1L   |
| TRPV2   | 0.003423 | -0.24262 | 0     | 0.059 | 1 Undiff-G TRPV2   |
| SDS     | 0.003423 | -0.33333 | 0     | 0.059 | 1 Undiff-G SDS     |
| PTPRD   | 0.00343  | -0.21137 | 0.007 | 0.073 | 1 Undiff-G PTPRD   |
| KIF13A  | 0.003448 | -0.14552 | 0     | 0.059 | 1 Undiff-G KIF13A  |
| CCDC117 | 0.003448 | -0.15262 | 0     | 0.059 | 1 Undiff-G CCDC117 |
| BRPF1   | 0.003448 | -0.15456 | 0     | 0.059 | 1 Undiff-G BRPF1   |
| WARS2   | 0.003448 | -0.16855 | 0     | 0.059 | 1 Undiff-G WARS2   |
| PDLIM4  | 0.003449 | -0.18745 | 0.007 | 0.073 | 1 Undiff-G PDLIM4  |
| PAQR6   | 0.003452 | -0.21005 | 0.007 | 0.073 | 1 Undiff-G PAQR6   |
| TUBG2   | 0.003458 | 0.13999  | 0.029 | 0.111 | 1 Undiff-G TUBG2   |
| SLC1A4  | 0.003469 | -0.14019 | 0.007 | 0.073 | 1 Undiff-G SLC1A4  |
| SH3BGR  | 0.003472 | 0.291833 | 0.037 | 0.124 | 1 Undiff-G SH3BGR  |
| ATR     | 0.003473 | -0.15466 | 0     | 0.059 | 1 Undiff-G ATR     |
| SWSAP1  | 0.003473 | -0.19559 | 0     | 0.059 | 1 Undiff-G SWSAP1  |
| ZNHIT2  | 0.003491 | -0.1402  | 0.015 | 0.086 | 1 Undiff-G ZNHIT2  |
| ZNF318  | 0.003498 | -0.14606 | 0     | 0.059 | 1 Undiff-G ZNF318  |
| ZNF687  | 0.003498 | -0.16428 | 0     | 0.059 | 1 Undiff-G ZNF687  |
| LYSMD3  | 0.003498 | -0.18655 | 0     | 0.059 | 1 Undiff-G LYSMD3  |
| WNT5A   | 0.003498 | -0.21416 | 0     | 0.059 | 1 Undiff-G WNT5A   |
| ZBTB48  | 0.003498 | 0.243802 | 0.015 | 0.087 | 1 Undiff-G ZBTB48  |
| CBX8    | 0.00352  | -0.16088 | 0.007 | 0.073 | 1 Undiff-G CBX8    |
| CLSTN3  | 0.003523 | -0.16195 | 0     | 0.059 | 1 Undiff-G CLSTN3  |
| ERBB4   | 0.003523 | -0.19854 | 0     | 0.059 | 1 Undiff-G ERBB4   |
| SLC39A8 | 0.003523 | -0.21126 | 0     | 0.059 | 1 Undiff-G SLC39A8 |
| GPRIN3  | 0.003523 | -0.24059 | 0     | 0.059 | 1 Undiff-G GPRIN3  |
| GMPPA   | 0.003527 | 0.584308 | 0.059 | 0.161 | 1 Undiff-G GMPPA   |
| AP5S1   | 0.003535 | -0.1016  | 0.022 | 0.099 | 1 Undiff-G AP5S1   |
| AEBP1   | 0.003548 | 0.180295 | 0.037 | 0.122 | 1 Undiff-G AEBP1   |

|           |          |          |       |       |                          |
|-----------|----------|----------|-------|-------|--------------------------|
| FAM69B    | 0.003549 | -0.11312 | 0     | 0.059 | 1 Undiff-G FAM69B        |
| PLAGL2    | 0.003549 | -0.1414  | 0     | 0.059 | 1 Undiff-G PLAGL2        |
| ZBTB45    | 0.003549 | -0.14221 | 0     | 0.059 | 1 Undiff-G ZBTB45        |
| ADCY3     | 0.003549 | -0.18028 | 0     | 0.059 | 1 Undiff-G ADCY3         |
| HPSE      | 0.003549 | -0.26429 | 0     | 0.059 | 1 Undiff-G HPSE          |
| DNAJC13   | 0.003568 | -0.15561 | 0.007 | 0.073 | 1 Undiff-G DNAJC13       |
| SPATA5L1  | 0.003575 | -0.13872 | 0     | 0.059 | 1 Undiff-G SPATA5L1      |
| GRPEL2    | 0.003575 | -0.16732 | 0     | 0.059 | 1 Undiff-G GRPEL2        |
| PDE4D     | 0.003584 | 0.145727 | 0.022 | 0.099 | 1 Undiff-G PDE4D         |
| MTHFSD    | 0.003601 | -0.15637 | 0     | 0.059 | 1 Undiff-G MTHFSD        |
| PDIK1L    | 0.003601 | -0.15724 | 0     | 0.059 | 1 Undiff-G PDIK1L        |
| RP11-698N | 0.003601 | -0.16525 | 0     | 0.059 | 1 Undiff-G RP11-698N11.2 |
| GLRX      | 0.003604 | 0.761651 | 0.191 | 0.391 | 1 Undiff-G GLRX          |
| HOXA2     | 0.003605 | -0.153   | 0.007 | 0.073 | 1 Undiff-G HOXA2         |
| OMA1      | 0.003616 | -0.17003 | 0.007 | 0.073 | 1 Undiff-G OMA1          |
| WRN       | 0.003627 | -0.14774 | 0     | 0.059 | 1 Undiff-G WRN           |
| TMEM169   | 0.003627 | -0.15179 | 0     | 0.059 | 1 Undiff-G TMEM169       |
| ZBTB24    | 0.003627 | -0.16892 | 0     | 0.059 | 1 Undiff-G ZBTB24        |
| TARS2     | 0.003635 | 0.423817 | 0.029 | 0.112 | 1 Undiff-G TARS2         |
| COX6B1    | 0.00364  | 0.57487  | 0.397 | 0.851 | 1 Undiff-G COX6B1        |
| RFWD3     | 0.003653 | -0.15417 | 0     | 0.059 | 1 Undiff-G RFWD3         |
| KCND3     | 0.00368  | -0.13863 | 0     | 0.059 | 1 Undiff-G KCND3         |
| ZNF35     | 0.00368  | -0.14739 | 0     | 0.059 | 1 Undiff-G ZNF35         |
| CTNNA2    | 0.00368  | -0.20224 | 0     | 0.059 | 1 Undiff-G CTNNA2        |
| CAPS      | 0.003691 | -0.18679 | 0.007 | 0.072 | 1 Undiff-G CAPS          |
| HEG1      | 0.003691 | -0.11318 | 0.007 | 0.073 | 1 Undiff-G HEG1          |
| SYNM      | 0.003693 | -0.13004 | 0.007 | 0.072 | 1 Undiff-G SYNM          |
| TIPARP    | 0.003696 | 0.539349 | 0.066 | 0.17  | 1 Undiff-G TIPARP        |
| STK10     | 0.003713 | -0.17919 | 0.007 | 0.072 | 1 Undiff-G STK10         |
| EEPDI     | 0.00372  | -0.18948 | 0.007 | 0.072 | 1 Undiff-G EEPDI         |
| WDFY2     | 0.003728 | -0.18428 | 0.015 | 0.085 | 1 Undiff-G WDFY2         |
| ZNF74     | 0.003733 | -0.14035 | 0     | 0.058 | 1 Undiff-G ZNF74         |
| PPARA     | 0.003733 | -0.15809 | 0     | 0.058 | 1 Undiff-G PPARA         |
| CCL26     | 0.003743 | 0.487735 | 0.015 | 0.002 | 1 Undiff-G CCL26         |
| EVA1C     | 0.003748 | -0.13796 | 0.007 | 0.072 | 1 Undiff-G EVA1C         |
| PIGU      | 0.003749 | 0.569481 | 0.066 | 0.172 | 1 Undiff-G PIGU          |
| CHM       | 0.003752 | 0.142292 | 0.015 | 0.086 | 1 Undiff-G CHM           |
| FLRT3     | 0.00376  | -0.14652 | 0     | 0.058 | 1 Undiff-G FLRT3         |
| MFAP3     | 0.003788 | -0.1391  | 0     | 0.058 | 1 Undiff-G MFAP3         |
| ZNF398    | 0.003788 | -0.15575 | 0     | 0.058 | 1 Undiff-G ZNF398        |
| FAXDC2    | 0.003788 | -0.18572 | 0     | 0.058 | 1 Undiff-G FAXDC2        |
| ABHD15    | 0.003788 | -0.20378 | 0     | 0.058 | 1 Undiff-G ABHD15        |
| SLC46A3   | 0.003788 | -0.22135 | 0     | 0.058 | 1 Undiff-G SLC46A3       |
| HHEX      | 0.003788 | -0.266   | 0     | 0.058 | 1 Undiff-G HHEX          |
| ZNF786    | 0.00379  | -0.13609 | 0.007 | 0.072 | 1 Undiff-G ZNF786        |
| ZNF236    | 0.003807 | -0.13654 | 0.007 | 0.072 | 1 Undiff-G ZNF236        |
| POLG2     | 0.003808 | -0.14747 | 0.015 | 0.085 | 1 Undiff-G POLG2         |
| FRMD5     | 0.003815 | -0.11434 | 0     | 0.058 | 1 Undiff-G FRMD5         |
| SHB       | 0.003815 | -0.13386 | 0     | 0.058 | 1 Undiff-G SHB           |
| KLF16     | 0.003815 | -0.14942 | 0     | 0.058 | 1 Undiff-G KLF16         |
| CTD-2017D | 0.003815 | -0.15508 | 0     | 0.058 | 1 Undiff-G CTD-2017D11.1 |

|         |          |          |       |       |            |         |
|---------|----------|----------|-------|-------|------------|---------|
| MANSC1  | 0.003815 | -0.1617  | 0     | 0.058 | 1 Undiff-G | MANSC1  |
| IPO11   | 0.003815 | -0.17379 | 0     | 0.058 | 1 Undiff-G | IPO11   |
| TOM1L1  | 0.003843 | -0.11331 | 0     | 0.058 | 1 Undiff-G | TOM1L1  |
| TCF20   | 0.003843 | -0.16373 | 0     | 0.058 | 1 Undiff-G | TCF20   |
| TPRG1L  | 0.003843 | -0.16692 | 0     | 0.058 | 1 Undiff-G | TPRG1L  |
| BTN2A2  | 0.003863 | -0.16677 | 0.007 | 0.072 | 1 Undiff-G | BTN2A2  |
| PPP1R9A | 0.003865 | -0.17281 | 0.007 | 0.072 | 1 Undiff-G | PPP1R9A |
| USPL1   | 0.003874 | -0.1603  | 0.007 | 0.072 | 1 Undiff-G | USPL1   |
| VPS13D  | 0.003875 | -0.17516 | 0.007 | 0.072 | 1 Undiff-G | VPS13D  |
| ETFDH   | 0.003877 | 0.322672 | 0.037 | 0.123 | 1 Undiff-G | ETFDH   |
| DUSP18  | 0.003884 | -0.12765 | 0.015 | 0.085 | 1 Undiff-G | DUSP18  |
| CPEB2   | 0.003886 | -0.16401 | 0.007 | 0.072 | 1 Undiff-G | CPEB2   |
| CACNA1A | 0.003886 | -0.16263 | 0.022 | 0.096 | 1 Undiff-G | CACNA1A |
| EYA4    | 0.003899 | -0.10283 | 0     | 0.058 | 1 Undiff-G | EYA4    |
| RAD18   | 0.003899 | -0.14875 | 0     | 0.058 | 1 Undiff-G | RAD18   |
| PLBD2   | 0.003899 | -0.17746 | 0     | 0.058 | 1 Undiff-G | PLBD2   |
| CBX7    | 0.003917 | -0.20054 | 0.007 | 0.072 | 1 Undiff-G | CBX7    |
| F11R    | 0.003927 | -0.23217 | 0     | 0.058 | 1 Undiff-G | F11R    |
| RASAL3  | 0.003927 | -0.24286 | 0     | 0.058 | 1 Undiff-G | RASAL3  |
| AQR     | 0.003938 | -0.16736 | 0.007 | 0.072 | 1 Undiff-G | AQR     |
| OPHN1   | 0.00395  | -0.13855 | 0.007 | 0.072 | 1 Undiff-G | OPHN1   |
| ZP3     | 0.003954 | -0.10281 | 0.007 | 0.072 | 1 Undiff-G | ZP3     |
| PDSS1   | 0.003956 | -0.13539 | 0     | 0.058 | 1 Undiff-G | PDSS1   |
| SIK2    | 0.003956 | -0.16074 | 0     | 0.058 | 1 Undiff-G | SIK2    |
| LDLRAP1 | 0.003956 | -0.1734  | 0     | 0.058 | 1 Undiff-G | LDLRAP1 |
| HAUS3   | 0.003958 | -0.14928 | 0.015 | 0.085 | 1 Undiff-G | HAUS3   |
| RTN2    | 0.003965 | -0.16995 | 0.015 | 0.085 | 1 Undiff-G | RTN2    |
| ZNF273  | 0.003966 | 0.104865 | 0.015 | 0.085 | 1 Undiff-G | ZNF273  |
| AMH     | 0.003984 | -0.13374 | 0     | 0.058 | 1 Undiff-G | AMH     |
| ASB13   | 0.003984 | -0.13693 | 0     | 0.058 | 1 Undiff-G | ASB13   |
| SIX1    | 0.003984 | -0.15371 | 0     | 0.058 | 1 Undiff-G | SIX1    |
| POLD1   | 0.003984 | -0.16131 | 0     | 0.058 | 1 Undiff-G | POLD1   |
| PDZRN3  | 0.003984 | -0.16557 | 0     | 0.058 | 1 Undiff-G | PDZRN3  |
| GHRL    | 0.003984 | -0.20808 | 0     | 0.058 | 1 Undiff-G | GHRL    |
| ZNF8    | 0.003986 | 0.454055 | 0.022 | 0.005 | 1 Undiff-G | ZNF8    |
| PARP4   | 0.003991 | -0.15476 | 0.015 | 0.085 | 1 Undiff-G | PARP4   |
| PCDHB7  | 0.003994 | -0.16673 | 0.007 | 0.072 | 1 Undiff-G | PCDHB7  |
| POLR1C  | 0.004003 | 0.334998 | 0.037 | 0.122 | 1 Undiff-G | POLR1C  |
| TARBP1  | 0.004008 | -0.13936 | 0.007 | 0.072 | 1 Undiff-G | TARBP1  |
| DLX6    | 0.004013 | -0.2217  | 0     | 0.057 | 1 Undiff-G | DLX6    |
| COX18   | 0.004018 | -0.15459 | 0.007 | 0.071 | 1 Undiff-G | COX18   |
| ALS2    | 0.004042 | -0.1363  | 0     | 0.057 | 1 Undiff-G | ALS2    |
| CHUK    | 0.004042 | -0.15649 | 0     | 0.057 | 1 Undiff-G | CHUK    |
| VEGFA   | 0.004062 | 0.606214 | 0.096 | 0.217 | 1 Undiff-G | VEGFA   |
| SCAI    | 0.004063 | -0.12092 | 0.015 | 0.084 | 1 Undiff-G | SCAI    |
| RCCD1   | 0.004072 | -0.15415 | 0     | 0.057 | 1 Undiff-G | RCCD1   |
| FAM184B | 0.004078 | 0.264277 | 0.029 | 0.109 | 1 Undiff-G | FAM184B |
| IFIT5   | 0.004092 | -0.15515 | 0.015 | 0.084 | 1 Undiff-G | IFIT5   |
| VPS54   | 0.004101 | -0.14732 | 0     | 0.057 | 1 Undiff-G | VPS54   |
| POC1A   | 0.004101 | -0.15413 | 0     | 0.057 | 1 Undiff-G | POC1A   |
| CMPK2   | 0.004101 | -0.19937 | 0     | 0.057 | 1 Undiff-G | CMPK2   |

|           |          |          |       |       |                        |
|-----------|----------|----------|-------|-------|------------------------|
| IKBKE     | 0.004101 | -0.21704 | 0     | 0.057 | 1 Undiff-G IKBKE       |
| ZNF514    | 0.004107 | 0.191109 | 0.015 | 0.085 | 1 Undiff-G ZNF514      |
| IFT80     | 0.00411  | -0.13019 | 0.007 | 0.071 | 1 Undiff-G IFT80       |
| GDF15     | 0.004116 | -0.288   | 0.007 | 0.071 | 1 Undiff-G GDF15       |
| CPOX      | 0.004119 | -0.14378 | 0.007 | 0.071 | 1 Undiff-G CPOX        |
| LAYN      | 0.004131 | -0.12442 | 0     | 0.057 | 1 Undiff-G LAYN        |
| RBM45     | 0.004146 | -0.19928 | 0.007 | 0.07  | 1 Undiff-G RBM45       |
| SMAD9     | 0.004187 | -0.12617 | 0.007 | 0.071 | 1 Undiff-G SMAD9       |
| MBTD1     | 0.004191 | -0.14488 | 0     | 0.057 | 1 Undiff-G MBTD1       |
| TMEM178B  | 0.004191 | -0.14642 | 0     | 0.057 | 1 Undiff-G TMEM178B    |
| ZNF275    | 0.004191 | -0.14918 | 0     | 0.057 | 1 Undiff-G ZNF275      |
| CDK1      | 0.004214 | 0.310196 | 0.022 | 0.097 | 1 Undiff-G CDK1        |
| CCNA2     | 0.004221 | -0.19089 | 0     | 0.057 | 1 Undiff-G CCNA2       |
| FPR3      | 0.004221 | -0.23026 | 0     | 0.057 | 1 Undiff-G FPR3        |
| HLA-DRB1  | 0.004234 | 0.419659 | 0.272 | 0.536 | 1 Undiff-G HLA-DRB1    |
| CAMKK2    | 0.004239 | -0.12661 | 0.007 | 0.071 | 1 Undiff-G CAMKK2      |
| PITPNM1   | 0.004252 | -0.1361  | 0     | 0.057 | 1 Undiff-G PITPNM1     |
| FHOD1     | 0.004252 | -0.19999 | 0     | 0.057 | 1 Undiff-G FHOD1       |
| NADSYN1   | 0.004253 | 0.346912 | 0.037 | 0.121 | 1 Undiff-G NADSYN1     |
| TBC1D13   | 0.004258 | -0.17107 | 0.007 | 0.07  | 1 Undiff-G TBC1D13     |
| LRRC1     | 0.004279 | -0.15763 | 0.007 | 0.071 | 1 Undiff-G LRRC1       |
| TRNT1     | 0.00428  | 0.278704 | 0.044 | 0.133 | 1 Undiff-G TRNT1       |
| SAPCD2    | 0.004283 | -0.15777 | 0     | 0.057 | 1 Undiff-G SAPCD2      |
| C10orf76  | 0.004283 | -0.1889  | 0     | 0.057 | 1 Undiff-G C10orf76    |
| AK4       | 0.004308 | 0.468184 | 0.074 | 0.181 | 1 Undiff-G AK4         |
| HSD17B1   | 0.004314 | -0.11423 | 0     | 0.057 | 1 Undiff-G HSD17B1     |
| MTM1      | 0.004314 | -0.15311 | 0     | 0.057 | 1 Undiff-G MTM1        |
| TMEM156   | 0.004314 | -0.27591 | 0     | 0.057 | 1 Undiff-G TMEM156     |
| B3GAT2    | 0.004326 | -0.14794 | 0.015 | 0.084 | 1 Undiff-G B3GAT2      |
| ALDH5A1   | 0.004345 | -0.12499 | 0     | 0.057 | 1 Undiff-G ALDH5A1     |
| HECTD3    | 0.004345 | -0.14323 | 0     | 0.057 | 1 Undiff-G HECTD3      |
| VPS13B    | 0.004345 | -0.15335 | 0     | 0.057 | 1 Undiff-G VPS13B      |
| HOXA3     | 0.004345 | -0.18676 | 0     | 0.057 | 1 Undiff-G HOXA3       |
| TFEC      | 0.004345 | -0.23978 | 0     | 0.057 | 1 Undiff-G TFEC        |
| PIKFYVE   | 0.004351 | -0.11172 | 0.015 | 0.083 | 1 Undiff-G PIKFYVE     |
| KDM5C     | 0.004354 | 0.304393 | 0.029 | 0.109 | 1 Undiff-G KDM5C       |
| DYRK2     | 0.004377 | -0.13909 | 0     | 0.056 | 1 Undiff-G DYRK2       |
| RP6-91H8. | 0.004377 | -0.29536 | 0     | 0.056 | 1 Undiff-G RP6-91H8. 3 |
| MED14     | 0.004406 | -0.16251 | 0.007 | 0.07  | 1 Undiff-G MED14       |
| SBN02     | 0.004409 | -0.13938 | 0     | 0.056 | 1 Undiff-G SBN02       |
| AGAP2     | 0.004409 | -0.17933 | 0     | 0.056 | 1 Undiff-G AGAP2       |
| UPP1      | 0.004423 | 0.886597 | 0.118 | 0.256 | 1 Undiff-G UPP1        |
| POC1B     | 0.004424 | 0.100802 | 0.015 | 0.084 | 1 Undiff-G POC1B       |
| ARMC5     | 0.004426 | -0.13204 | 0.007 | 0.07  | 1 Undiff-G ARMC5       |
| EARS2     | 0.004441 | -0.13659 | 0     | 0.056 | 1 Undiff-G EARS2       |
| FAM214A   | 0.004441 | -0.15609 | 0     | 0.056 | 1 Undiff-G FAM214A     |
| ANTXR2    | 0.004441 | -0.16135 | 0     | 0.056 | 1 Undiff-G ANTXR2      |
| TLR7      | 0.004441 | -0.27707 | 0     | 0.056 | 1 Undiff-G TLR7        |
| FKRP      | 0.004473 | -0.12723 | 0     | 0.056 | 1 Undiff-G FKRP        |
| SLC30A6   | 0.004473 | -0.14898 | 0     | 0.056 | 1 Undiff-G SLC30A6     |
| AKT3      | 0.004473 | -0.16438 | 0     | 0.056 | 1 Undiff-G AKT3        |



|           |          |          |       |       |                           |
|-----------|----------|----------|-------|-------|---------------------------|
| TXNDC16   | 0.004473 | -0.167   | 0     | 0.056 | 1 Undiff-G TXNDC16        |
| PEAK1     | 0.004485 | -0.15373 | 0.007 | 0.07  | 1 Undiff-G PEAK1          |
| B9D2      | 0.004502 | 0.187471 | 0.015 | 0.084 | 1 Undiff-G B9D2           |
| SYNJ1     | 0.004505 | -0.13526 | 0     | 0.056 | 1 Undiff-G SYNJ1          |
| SETMAR    | 0.004505 | -0.16476 | 0     | 0.056 | 1 Undiff-G SETMAR         |
| C3orf33   | 0.004505 | -0.16532 | 0     | 0.056 | 1 Undiff-G C3orf33        |
| SPN       | 0.004505 | -0.2431  | 0     | 0.056 | 1 Undiff-G SPN            |
| RP5-1085F | 0.004515 | -0.10674 | 0.022 | 0.095 | 1 Undiff-G RP5-1085F17.3  |
| ZNF324    | 0.004518 | -0.1391  | 0.015 | 0.083 | 1 Undiff-G ZNF324         |
| CXorf38   | 0.004518 | -0.15519 | 0.007 | 0.07  | 1 Undiff-G CXorf38        |
| TMEM145   | 0.004526 | -0.12329 | 0.007 | 0.07  | 1 Undiff-G TMEM145        |
| TMEM187   | 0.004527 | 0.146029 | 0.015 | 0.083 | 1 Undiff-G TMEM187        |
| TXNL4B    | 0.004528 | 0.163477 | 0.022 | 0.096 | 1 Undiff-G TXNL4B         |
| TTC13     | 0.00453  | -0.11126 | 0.007 | 0.07  | 1 Undiff-G TTC13          |
| PGAM5     | 0.004538 | -0.12757 | 0     | 0.056 | 1 Undiff-G PGAM5          |
| KIAA1211L | 0.004538 | -0.13542 | 0     | 0.056 | 1 Undiff-G KIAA1211L      |
| MTG1      | 0.004538 | -0.1494  | 0     | 0.056 | 1 Undiff-G MTG1           |
| LPCAT4    | 0.004542 | -0.11729 | 0.007 | 0.07  | 1 Undiff-G LPCAT4         |
| SERTAD1   | 0.004546 | 0.803751 | 0.154 | 0.318 | 1 Undiff-G SERTAD1        |
| RP11-386G | 0.004556 | 0.349835 | 0.051 | 0.145 | 1 Undiff-G RP11-386G11.10 |
| NR2E1     | 0.004571 | -0.11308 | 0     | 0.056 | 1 Undiff-G NR2E1          |
| C17orf96  | 0.004571 | -0.12359 | 0     | 0.056 | 1 Undiff-G C17orf96       |
| MED18     | 0.004571 | -0.1464  | 0     | 0.056 | 1 Undiff-G MED18          |
| TTY15     | 0.004571 | -0.15587 | 0     | 0.056 | 1 Undiff-G TTY15          |
| DDX60L    | 0.004571 | -0.18684 | 0     | 0.056 | 1 Undiff-G DDX60L         |
| ARL17B    | 0.004604 | -0.14397 | 0     | 0.056 | 1 Undiff-G ARL17B         |
| DCLRE1B   | 0.004604 | -0.14901 | 0     | 0.056 | 1 Undiff-G DCLRE1B        |
| SUSD1     | 0.004604 | -0.17095 | 0     | 0.056 | 1 Undiff-G SUSD1          |
| USF1      | 0.004604 | -0.20726 | 0     | 0.056 | 1 Undiff-G USF1           |
| DOCK5     | 0.004604 | -0.26335 | 0     | 0.056 | 1 Undiff-G DOCK5          |
| ITM2A     | 0.004604 | -0.27156 | 0     | 0.056 | 1 Undiff-G ITM2A          |
| MICU3     | 0.004605 | -0.12015 | 0.015 | 0.083 | 1 Undiff-G MICU3          |
| BDH1      | 0.004614 | -0.16057 | 0.007 | 0.07  | 1 Undiff-G BDH1           |
| SLC15A3   | 0.004621 | -0.23367 | 0.007 | 0.07  | 1 Undiff-G SLC15A3        |
| RASGRP1   | 0.004622 | -0.1281  | 0.007 | 0.07  | 1 Undiff-G RASGRP1        |
| RP11-182L | 0.004623 | -0.13746 | 0.007 | 0.07  | 1 Undiff-G RP11-182L21.6  |
| RAI14     | 0.004626 | -0.11361 | 0.007 | 0.07  | 1 Undiff-G RAI14          |
| SPSB2     | 0.00463  | -0.17906 | 0.007 | 0.069 | 1 Undiff-G SPSB2          |
| STK32A    | 0.004637 | -0.11638 | 0     | 0.056 | 1 Undiff-G STK32A         |
| GEMIN4    | 0.004637 | -0.12976 | 0     | 0.056 | 1 Undiff-G GEMIN4         |
| TMEM255B  | 0.004637 | -0.28323 | 0     | 0.056 | 1 Undiff-G TMEM255B       |
| NPAT      | 0.004656 | -0.1615  | 0.015 | 0.082 | 1 Undiff-G NPAT           |
| FAM64A    | 0.004665 | -0.10548 | 0.007 | 0.07  | 1 Undiff-G FAM64A         |
| ARVCF     | 0.004671 | -0.1258  | 0     | 0.056 | 1 Undiff-G ARVCF          |
| KCTD9     | 0.004671 | -0.15517 | 0     | 0.056 | 1 Undiff-G KCTD9          |
| CENPE     | 0.004671 | -0.20795 | 0     | 0.056 | 1 Undiff-G CENPE          |
| CCER2     | 0.004671 | -0.21139 | 0     | 0.056 | 1 Undiff-G CCER2          |
| ARHGAP27  | 0.004671 | -0.2314  | 0     | 0.056 | 1 Undiff-G ARHGAP27       |
| VGFB      | 0.004675 | -0.18135 | 0.007 | 0.07  | 1 Undiff-G VGFB           |
| MKL1      | 0.004681 | -0.12616 | 0.007 | 0.07  | 1 Undiff-G MKL1           |
| PTPN14    | 0.004701 | -0.15666 | 0.007 | 0.069 | 1 Undiff-G PTPN14         |

|           |          |          |       |       |                          |
|-----------|----------|----------|-------|-------|--------------------------|
| IGHMBP2   | 0.004705 | -0.14077 | 0     | 0.056 | 1 Undiff-G IGHMBP2       |
| CA8       | 0.004705 | -0.2261  | 0     | 0.056 | 1 Undiff-G CA8           |
| PROCR     | 0.00473  | -0.10431 | 0.007 | 0.07  | 1 Undiff-G PROCR         |
| CREBRF    | 0.004739 | 0.520088 | 0.044 | 0.132 | 1 Undiff-G CREBRF        |
| TMEM17    | 0.004739 | -0.1371  | 0     | 0.055 | 1 Undiff-G TMEM17        |
| RPTOR     | 0.004739 | -0.13934 | 0     | 0.055 | 1 Undiff-G RPTOR         |
| ZNF747    | 0.004739 | -0.14371 | 0     | 0.055 | 1 Undiff-G ZNF747        |
| RP11-556E | 0.004739 | -0.26918 | 0     | 0.055 | 1 Undiff-G RP11-556E13.1 |
| ELMOD1    | 0.004743 | 0.101236 | 0.015 | 0.083 | 1 Undiff-G ELMOD1        |
| SETDB1    | 0.004743 | -0.13152 | 0.007 | 0.07  | 1 Undiff-G SETDB1        |
| MGAT5     | 0.004766 | -0.1959  | 0.007 | 0.069 | 1 Undiff-G MGAT5         |
| MFAP3L    | 0.004773 | -0.13303 | 0     | 0.055 | 1 Undiff-G MFAP3L        |
| TNR       | 0.004773 | -0.23332 | 0     | 0.055 | 1 Undiff-G TNR           |
| IL13RA2   | 0.004773 | -0.25919 | 0     | 0.055 | 1 Undiff-G IL13RA2       |
| SNX19     | 0.004777 | 0.193849 | 0.022 | 0.095 | 1 Undiff-G SNX19         |
| MIS12     | 0.004777 | 0.379204 | 0.051 | 0.143 | 1 Undiff-G MIS12         |
| RANBP6    | 0.004799 | -0.15125 | 0.007 | 0.069 | 1 Undiff-G RANBP6        |
| COPZ2     | 0.004808 | -0.14109 | 0     | 0.055 | 1 Undiff-G COPZ2         |
| RNFT2     | 0.004829 | -0.12095 | 0.007 | 0.069 | 1 Undiff-G RNFT2         |
| ZNF667    | 0.004836 | -0.13726 | 0.015 | 0.082 | 1 Undiff-G ZNF667        |
| CLCN4     | 0.004843 | -0.16107 | 0     | 0.055 | 1 Undiff-G CLCN4         |
| ERN1      | 0.004843 | -0.165   | 0     | 0.055 | 1 Undiff-G ERN1          |
| SS18      | 0.004856 | 0.135606 | 0.015 | 0.083 | 1 Undiff-G SS18          |
| RWDD2B    | 0.004863 | -0.13609 | 0.007 | 0.069 | 1 Undiff-G RWDD2B        |
| ZFYVE19   | 0.004869 | 0.48269  | 0.029 | 0.108 | 1 Undiff-G ZFYVE19       |
| VRK2      | 0.004878 | -0.21504 | 0     | 0.055 | 1 Undiff-G VRK2          |
| BRAF      | 0.004891 | -0.15813 | 0.007 | 0.069 | 1 Undiff-G BRAF          |
| GINS1     | 0.004913 | -0.12782 | 0     | 0.055 | 1 Undiff-G GINS1         |
| CCDC157   | 0.004913 | -0.13659 | 0     | 0.055 | 1 Undiff-G CCDC157       |
| WDR76     | 0.004913 | -0.15085 | 0     | 0.055 | 1 Undiff-G WDR76         |
| CYP4V2    | 0.004913 | -0.17402 | 0     | 0.055 | 1 Undiff-G CYP4V2        |
| GALT      | 0.004926 | -0.13078 | 0.015 | 0.082 | 1 Undiff-G GALT          |
| Clorf174  | 0.004935 | 0.565546 | 0.059 | 0.155 | 1 Undiff-G Clorf174      |
| IL16      | 0.004936 | -0.14602 | 0.007 | 0.069 | 1 Undiff-G IL16          |
| SYNGAP1   | 0.004949 | -0.14082 | 0     | 0.055 | 1 Undiff-G SYNGAP1       |
| DNAJC12   | 0.004956 | 0.103927 | 0.015 | 0.082 | 1 Undiff-G DNAJC12       |
| WWP1      | 0.004968 | -0.15081 | 0.007 | 0.068 | 1 Undiff-G WWP1          |
| BACE2     | 0.004985 | -0.16053 | 0     | 0.055 | 1 Undiff-G BACE2         |
| PELO      | 0.004989 | 0.326638 | 0.029 | 0.107 | 1 Undiff-G PELO          |
| RPP40     | 0.005    | 0.31892  | 0.037 | 0.119 | 1 Undiff-G RPP40         |
| THAP6     | 0.005    | 0.107746 | 0.015 | 0.082 | 1 Undiff-G THAP6         |
| SPIN2B    | 0.005005 | 0.293748 | 0.029 | 0.107 | 1 Undiff-G SPIN2B        |
| MRE11A    | 0.005021 | -0.17392 | 0     | 0.055 | 1 Undiff-G MRE11A        |
| FAM120B   | 0.005029 | 0.139536 | 0.015 | 0.082 | 1 Undiff-G FAM120B       |
| RWDD2A    | 0.005032 | -0.10156 | 0.007 | 0.069 | 1 Undiff-G RWDD2A        |
| SNX16     | 0.005057 | -0.16861 | 0     | 0.055 | 1 Undiff-G SNX16         |
| IQSEC2    | 0.005057 | -0.18474 | 0     | 0.055 | 1 Undiff-G IQSEC2        |
| RP11-11N9 | 0.005057 | -0.22292 | 0     | 0.055 | 1 Undiff-G RP11-11N9.4   |
| APOBEC3A  | 0.005077 | 0.477002 | 0.022 | 0.005 | 1 Undiff-G APOBEC3A      |
| PPP2R3B   | 0.005079 | -0.13493 | 0.007 | 0.068 | 1 Undiff-G PPP2R3B       |
| APOL6     | 0.005086 | -0.14359 | 0.022 | 0.094 | 1 Undiff-G APOL6         |

|           |          |          |       |       |                          |
|-----------|----------|----------|-------|-------|--------------------------|
| PKP4      | 0.005094 | -0.1457  | 0     | 0.055 | 1 Undiff-G PKP4          |
| DOCK11    | 0.005094 | -0.21068 | 0     | 0.055 | 1 Undiff-G DOCK11        |
| RASL11B   | 0.005094 | -0.23672 | 0     | 0.055 | 1 Undiff-G RASL11B       |
| ATL2      | 0.005099 | -0.1647  | 0.007 | 0.069 | 1 Undiff-G ATL2          |
| RP11-488C | 0.005115 | -0.17316 | 0.007 | 0.068 | 1 Undiff-G RP11-488C13.5 |
| KCNJ16    | 0.005131 | -0.12808 | 0     | 0.055 | 1 Undiff-G KCNJ16        |
| C17orf51  | 0.005138 | -0.12567 | 0.007 | 0.069 | 1 Undiff-G C17orf51      |
| COQ3      | 0.005143 | -0.14539 | 0.007 | 0.069 | 1 Undiff-G COQ3          |
| PCDH10    | 0.005147 | -0.12265 | 0.007 | 0.069 | 1 Undiff-G PCDH10        |
| PCCA      | 0.005158 | 0.100411 | 0.015 | 0.082 | 1 Undiff-G PCCA          |
| RP5-940J5 | 0.005165 | 0.140977 | 0.066 | 0.163 | 1 Undiff-G RP5-940J5.9   |
| RALGPS1   | 0.005168 | -0.15719 | 0     | 0.054 | 1 Undiff-G RALGPS1       |
| GANC      | 0.005168 | -0.15902 | 0     | 0.054 | 1 Undiff-G GANC          |
| HEATR5B   | 0.005168 | -0.18544 | 0     | 0.054 | 1 Undiff-G HEATR5B       |
| BBS10     | 0.005205 | -0.1374  | 0     | 0.054 | 1 Undiff-G BBS10         |
| ASTE1     | 0.005205 | -0.15903 | 0     | 0.054 | 1 Undiff-G ASTE1         |
| GOLGA6L1C | 0.00522  | 0.278986 | 0.007 | 0.001 | 1 Undiff-G GOLGA6L10     |
| CNN2      | 0.005226 | -0.22262 | 0.007 | 0.067 | 1 Undiff-G CNN2          |
| PVR       | 0.005232 | -0.11045 | 0.007 | 0.068 | 1 Undiff-G PVR           |
| HLA-DRA   | 0.005235 | 0.823333 | 0.5   | 0.635 | 1 Undiff-G HLA-DRA       |
| DPY19L4   | 0.005237 | 0.271825 | 0.022 | 0.094 | 1 Undiff-G DPY19L4       |
| NANP      | 0.005243 | -0.13662 | 0     | 0.054 | 1 Undiff-G NANP          |
| TBC1D9    | 0.005243 | -0.17732 | 0     | 0.054 | 1 Undiff-G TBC1D9        |
| HS1BP3    | 0.00525  | 0.149243 | 0.022 | 0.093 | 1 Undiff-G HS1BP3        |
| CEP135    | 0.005254 | -0.14925 | 0.015 | 0.081 | 1 Undiff-G CEP135        |
| TMEM170B  | 0.005281 | -0.13479 | 0     | 0.054 | 1 Undiff-G TMEM170B      |
| SPOPL     | 0.005281 | -0.15551 | 0     | 0.054 | 1 Undiff-G SPOPL         |
| STX1A     | 0.005295 | -0.178   | 0.007 | 0.068 | 1 Undiff-G STX1A         |
| SOWAHC    | 0.005319 | -0.1076  | 0.007 | 0.068 | 1 Undiff-G SOWAHC        |
| SLC25A51  | 0.005319 | -0.15599 | 0     | 0.054 | 1 Undiff-G SLC25A51      |
| ACO09948. | 0.005319 | -0.18202 | 0     | 0.054 | 1 Undiff-G ACO09948.5    |
| COBL      | 0.005332 | -0.10881 | 0.007 | 0.068 | 1 Undiff-G COBL          |
| EXOSC2    | 0.005333 | 0.123757 | 0.022 | 0.094 | 1 Undiff-G EXOSC2        |
| YEATS2    | 0.005357 | -0.11746 | 0.007 | 0.068 | 1 Undiff-G YEATS2        |
| GBF1      | 0.005358 | -0.15025 | 0     | 0.054 | 1 Undiff-G GBF1          |
| SLC37A1   | 0.005358 | -0.17064 | 0     | 0.054 | 1 Undiff-G SLC37A1       |
| LILRB2    | 0.005358 | -0.25242 | 0     | 0.054 | 1 Undiff-G LILRB2        |
| IL7R      | 0.005358 | -0.2776  | 0     | 0.054 | 1 Undiff-G IL7R          |
| ZNF583    | 0.005362 | 0.293266 | 0.029 | 0.106 | 1 Undiff-G ZNF583        |
| SPA17     | 0.005395 | 0.179821 | 0.015 | 0.081 | 1 Undiff-G SPA17         |
| INTS2     | 0.005397 | -0.12562 | 0     | 0.054 | 1 Undiff-G INTS2         |
| TJP2      | 0.005397 | -0.17026 | 0     | 0.054 | 1 Undiff-G TJP2          |
| PIM2      | 0.005397 | -0.18166 | 0     | 0.054 | 1 Undiff-G PIM2          |
| ATOH8     | 0.005397 | -0.19691 | 0     | 0.054 | 1 Undiff-G ATOH8         |
| SHC1      | 0.005401 | 0.401623 | 0.044 | 0.13  | 1 Undiff-G SHC1          |
| MAN2B1    | 0.005425 | -0.16101 | 0.007 | 0.068 | 1 Undiff-G MAN2B1        |
| AFMID     | 0.00543  | 0.240658 | 0.029 | 0.106 | 1 Undiff-G AFMID         |
| TNFRSF19  | 0.005437 | 0.231735 | 0.029 | 0.106 | 1 Undiff-G TNFRSF19      |
| CYB561    | 0.00544  | -0.14374 | 0.015 | 0.08  | 1 Undiff-G CYB561        |
| FAM109A   | 0.005475 | -0.13952 | 0     | 0.054 | 1 Undiff-G FAM109A       |
| PRAM1     | 0.005475 | -0.24455 | 0     | 0.054 | 1 Undiff-G PRAM1         |

|           |          |          |       |       |                      |
|-----------|----------|----------|-------|-------|----------------------|
| LCLAT1    | 0.005515 | -0.12094 | 0     | 0.054 | 1 Undiff-G LCLAT1    |
| KLHL25    | 0.005515 | -0.12329 | 0     | 0.054 | 1 Undiff-G KLHL25    |
| SHCBP1    | 0.005515 | -0.15955 | 0     | 0.054 | 1 Undiff-G SHCBP1    |
| ABLIM1    | 0.005555 | -0.13956 | 0     | 0.054 | 1 Undiff-G ABLIM1    |
| ZNF222    | 0.005555 | -0.15036 | 0     | 0.054 | 1 Undiff-G ZNF222    |
| SERPINI1  | 0.005555 | -0.19443 | 0     | 0.054 | 1 Undiff-G SERPINI1  |
| UACA      | 0.005571 | -0.14858 | 0.007 | 0.067 | 1 Undiff-G UACA      |
| SERINC5   | 0.00559  | -0.14354 | 0.007 | 0.067 | 1 Undiff-G SERINC5   |
| NAT6      | 0.005595 | -0.14037 | 0     | 0.054 | 1 Undiff-G NAT6      |
| UHRF2     | 0.005616 | -0.13531 | 0.007 | 0.067 | 1 Undiff-G UHRF2     |
| ZNF429    | 0.005619 | 0.454997 | 0.044 | 0.13  | 1 Undiff-G ZNF429    |
| ACOX3     | 0.005628 | 0.139175 | 0.022 | 0.093 | 1 Undiff-G ACOX3     |
| STK11IP   | 0.005636 | -0.15122 | 0     | 0.053 | 1 Undiff-G STK11IP   |
| ADRBK2    | 0.005636 | -0.19387 | 0     | 0.053 | 1 Undiff-G ADRBK2    |
| ARIH2OS   | 0.005649 | -0.14482 | 0.007 | 0.067 | 1 Undiff-G ARIH2OS   |
| IZUM04    | 0.005675 | -0.14582 | 0.007 | 0.067 | 1 Undiff-G IZUM04    |
| COL18A1   | 0.005677 | -0.14358 | 0     | 0.053 | 1 Undiff-G COL18A1   |
| SOCS1     | 0.005677 | -0.22129 | 0     | 0.053 | 1 Undiff-G SOCS1     |
| LINC0091C | 0.005677 | -0.14643 | 0.015 | 0.08  | 1 Undiff-G LINC00910 |
| SEC14L4   | 0.005677 | 0.501809 | 0.015 | 0.002 | 1 Undiff-G SEC14L4   |
| TGFB2     | 0.005687 | -0.10232 | 0.007 | 0.067 | 1 Undiff-G TGFB2     |
| EIF2AK3   | 0.005718 | -0.15289 | 0     | 0.053 | 1 Undiff-G EIF2AK3   |
| SLC7A6    | 0.005725 | -0.16538 | 0.007 | 0.067 | 1 Undiff-G SLC7A6    |
| PAOX      | 0.005759 | -0.1421  | 0     | 0.053 | 1 Undiff-G PAOX      |
| COG8      | 0.005765 | 0.122291 | 0.022 | 0.093 | 1 Undiff-G COG8      |
| ACOX2     | 0.005801 | -0.11927 | 0     | 0.053 | 1 Undiff-G ACOX2     |
| CYP2U1    | 0.005801 | -0.12998 | 0     | 0.053 | 1 Undiff-G CYP2U1    |
| CYTH3     | 0.005801 | -0.15901 | 0     | 0.053 | 1 Undiff-G CYTH3     |
| PEX12     | 0.005843 | -0.13412 | 0     | 0.053 | 1 Undiff-G PEX12     |
| RGS18     | 0.005843 | -0.23979 | 0     | 0.053 | 1 Undiff-G RGS18     |
| PCYOX1L   | 0.005876 | -0.14967 | 0.007 | 0.066 | 1 Undiff-G PCYOX1L   |
| MDN1      | 0.005885 | -0.14162 | 0     | 0.053 | 1 Undiff-G MDN1      |
| ZNF345    | 0.005885 | -0.15749 | 0     | 0.053 | 1 Undiff-G ZNF345    |
| PIGV      | 0.005885 | -0.17582 | 0     | 0.053 | 1 Undiff-G PIGV      |
| NFATC1    | 0.005885 | -0.19062 | 0     | 0.053 | 1 Undiff-G NFATC1    |
| GNGT2     | 0.005885 | -0.23369 | 0     | 0.053 | 1 Undiff-G GNGT2     |
| TSLP      | 0.005901 | 0.871243 | 0.051 | 0.019 | 1 Undiff-G TSLP      |
| FAT1      | 0.005906 | 0.111814 | 0.007 | 0.067 | 1 Undiff-G FAT1      |
| SLC12A4   | 0.005927 | -0.12717 | 0.007 | 0.067 | 1 Undiff-G SLC12A4   |
| HID1      | 0.005928 | -0.14339 | 0     | 0.053 | 1 Undiff-G HID1      |
| ZC4H2     | 0.005928 | -0.16651 | 0     | 0.053 | 1 Undiff-G ZC4H2     |
| TRAF3IP3  | 0.005928 | -0.26122 | 0     | 0.053 | 1 Undiff-G TRAF3IP3  |
| RAD51AP1  | 0.005948 | 0.144678 | 0.007 | 0.067 | 1 Undiff-G RAD51AP1  |
| MED7      | 0.005957 | 0.143372 | 0.037 | 0.116 | 1 Undiff-G MED7      |
| TEAD4     | 0.005971 | -0.10132 | 0     | 0.053 | 1 Undiff-G TEAD4     |
| SPECC1L   | 0.005971 | -0.13787 | 0     | 0.053 | 1 Undiff-G SPECC1L   |
| TYSND1    | 0.005971 | -0.14171 | 0     | 0.053 | 1 Undiff-G TYSND1    |
| CENPL     | 0.005971 | -0.15264 | 0     | 0.053 | 1 Undiff-G CENPL     |
| TRIM39    | 0.005971 | -0.15588 | 0     | 0.053 | 1 Undiff-G TRIM39    |
| LONRF2    | 0.005992 | 0.189619 | 0.022 | 0.093 | 1 Undiff-G LONRF2    |
| ANKRD16   | 0.006014 | -0.10798 | 0     | 0.053 | 1 Undiff-G ANKRD16   |

|           |          |          |       |       |                         |
|-----------|----------|----------|-------|-------|-------------------------|
| DNAJC6    | 0.006014 | -0.1563  | 0     | 0.053 | 1 Undiff-G DNAJC6       |
| RNF19B    | 0.006014 | -0.17819 | 0     | 0.053 | 1 Undiff-G RNF19B       |
| STAT6     | 0.006014 | -0.23698 | 0     | 0.053 | 1 Undiff-G STAT6        |
| FANCF     | 0.006042 | 0.265076 | 0.022 | 0.093 | 1 Undiff-G FANCF        |
| PRKAA2    | 0.006058 | -0.12136 | 0     | 0.053 | 1 Undiff-G PRKAA2       |
| POLA2     | 0.006058 | -0.14875 | 0     | 0.053 | 1 Undiff-G POLA2        |
| BTBD17    | 0.006058 | -0.18471 | 0     | 0.053 | 1 Undiff-G BTBD17       |
| FLI1      | 0.006058 | -0.23742 | 0     | 0.053 | 1 Undiff-G FLI1         |
| TMEM185B  | 0.006101 | -0.16167 | 0     | 0.052 | 1 Undiff-G TMEM185B     |
| CLCN6     | 0.006116 | -0.15684 | 0.007 | 0.066 | 1 Undiff-G CLCN6        |
| SEC23IP   | 0.006124 | -0.10653 | 0.015 | 0.079 | 1 Undiff-G SEC23IP      |
| XRN1      | 0.006143 | 0.128985 | 0.022 | 0.092 | 1 Undiff-G XRN1         |
| DOCK1     | 0.006146 | -0.12912 | 0     | 0.052 | 1 Undiff-G DOCK1        |
| STAT5A    | 0.006146 | -0.18572 | 0     | 0.052 | 1 Undiff-G STAT5A       |
| FABP5     | 0.006162 | 1.141423 | 0.382 | 0.392 | 1 Undiff-G FABP5        |
| LRRTM3    | 0.00619  | -0.10389 | 0     | 0.052 | 1 Undiff-G LRRTM3       |
| AADAT     | 0.00619  | -0.11967 | 0     | 0.052 | 1 Undiff-G AADAT        |
| MORC2-AS1 | 0.00619  | -0.14271 | 0     | 0.052 | 1 Undiff-G MORC2-AS1    |
| ZBTB18    | 0.00619  | -0.15368 | 0     | 0.052 | 1 Undiff-G ZBTB18       |
| KCNJ10    | 0.00619  | -0.19236 | 0     | 0.052 | 1 Undiff-G KCNJ10       |
| TBC1D2B   | 0.00619  | -0.19966 | 0     | 0.052 | 1 Undiff-G TBC1D2B      |
| TRPM2     | 0.00619  | -0.22555 | 0     | 0.052 | 1 Undiff-G TRPM2        |
| MAFG-AS1  | 0.006193 | -0.10251 | 0.007 | 0.066 | 1 Undiff-G MAFG-AS1     |
| AKAP10    | 0.006198 | 0.208191 | 0.022 | 0.092 | 1 Undiff-G AKAP10       |
| RECK      | 0.006201 | -0.13958 | 0.007 | 0.066 | 1 Undiff-G RECK         |
| IGFBP6    | 0.006202 | -0.10074 | 0.007 | 0.066 | 1 Undiff-G IGFBP6       |
| OSCP1     | 0.006208 | 0.189112 | 0.007 | 0.066 | 1 Undiff-G OSCP1        |
| CMTR2     | 0.00621  | 0.256177 | 0.051 | 0.14  | 1 Undiff-G CMTR2        |
| CEP44     | 0.006226 | -0.13893 | 0.007 | 0.066 | 1 Undiff-G CEP44        |
| Clorf159  | 0.006235 | -0.12828 | 0     | 0.052 | 1 Undiff-G Clorf159     |
| SNIP1     | 0.006235 | -0.13956 | 0     | 0.052 | 1 Undiff-G SNIP1        |
| ZSCAN5A   | 0.006235 | -0.17151 | 0     | 0.052 | 1 Undiff-G ZSCAN5A      |
| RASGRP2   | 0.006235 | -0.19607 | 0     | 0.052 | 1 Undiff-G RASGRP2      |
| SMO       | 0.00628  | -0.10693 | 0     | 0.052 | 1 Undiff-G SMO          |
| PLCXD1    | 0.00628  | -0.13914 | 0     | 0.052 | 1 Undiff-G PLCXD1       |
| ZIK1      | 0.00628  | -0.15447 | 0     | 0.052 | 1 Undiff-G ZIK1         |
| ACTA2     | 0.00628  | -0.1939  | 0     | 0.052 | 1 Undiff-G ACTA2        |
| GRASP     | 0.00628  | -0.24698 | 0     | 0.052 | 1 Undiff-G GRASP        |
| ADAMTS6   | 0.00629  | -0.10538 | 0.007 | 0.066 | 1 Undiff-G ADAMTS6      |
| ZBED6     | 0.006316 | -0.10383 | 0.015 | 0.079 | 1 Undiff-G ZBED6        |
| RP11-796E | 0.006336 | -0.21488 | 0.007 | 0.066 | 1 Undiff-G RP11-796E. 4 |
| DOK3      | 0.006337 | -0.13595 | 0.007 | 0.066 | 1 Undiff-G DOK3         |
| USP31     | 0.006371 | -0.1399  | 0     | 0.052 | 1 Undiff-G USP31        |
| ARHGEF25  | 0.00638  | -0.12433 | 0.007 | 0.066 | 1 Undiff-G ARHGEF25     |
| NOL4      | 0.006385 | -0.14116 | 0.007 | 0.066 | 1 Undiff-G NOL4         |
| RFX1      | 0.006392 | 0.152107 | 0.022 | 0.091 | 1 Undiff-G RFX1         |
| GSTP1     | 0.006394 | 0.541825 | 0.404 | 0.827 | 1 Undiff-G GSTP1        |
| VAV3      | 0.006401 | -0.12273 | 0.007 | 0.066 | 1 Undiff-G VAV3         |
| EXOC2     | 0.006442 | -0.13747 | 0.007 | 0.066 | 1 Undiff-G EXOC2        |
| HES1      | 0.006462 | 0.527664 | 0.088 | 0.198 | 1 Undiff-G HES1         |
| ALDH4A1   | 0.006464 | -0.1196  | 0     | 0.052 | 1 Undiff-G ALDH4A1      |

|           |          |          |       |       |                         |
|-----------|----------|----------|-------|-------|-------------------------|
| PDE6B     | 0.006464 | -0.16961 | 0     | 0.052 | 1 Undiff-G PDE6B        |
| AP1G2     | 0.006464 | -0.21032 | 0     | 0.052 | 1 Undiff-G AP1G2        |
| PI4K2A    | 0.006476 | -0.16053 | 0.007 | 0.066 | 1 Undiff-G PI4K2A       |
| PTX3      | 0.006484 | 0.156955 | 0.037 | 0.116 | 1 Undiff-G PTX3         |
| HAUS5     | 0.006495 | -0.1564  | 0.007 | 0.065 | 1 Undiff-G HAUS5        |
| ACBD4     | 0.006511 | -0.13343 | 0     | 0.052 | 1 Undiff-G ACBD4        |
| FAM53B    | 0.006511 | -0.19248 | 0     | 0.052 | 1 Undiff-G FAM53B       |
| PLA2G7    | 0.006511 | -0.21375 | 0     | 0.052 | 1 Undiff-G PLA2G7       |
| LIAS      | 0.006511 | 0.25337  | 0.029 | 0.104 | 1 Undiff-G LIAS         |
| GPRASP2   | 0.00653  | -0.12922 | 0.007 | 0.066 | 1 Undiff-G GPRASP2      |
| LRP5      | 0.006558 | -0.11314 | 0     | 0.052 | 1 Undiff-G LRP5         |
| FAM184A   | 0.006558 | -0.11872 | 0     | 0.052 | 1 Undiff-G FAM184A      |
| EFNA2     | 0.006558 | -0.12085 | 0     | 0.052 | 1 Undiff-G EFNA2        |
| FLNB      | 0.006558 | -0.13499 | 0     | 0.052 | 1 Undiff-G FLNB         |
| ST3GAL1   | 0.006562 | 0.160172 | 0.029 | 0.103 | 1 Undiff-G ST3GAL1      |
| TSPYL4    | 0.006579 | 0.330545 | 0.029 | 0.104 | 1 Undiff-G TSPYL4       |
| EMP3      | 0.006599 | 0.816643 | 0.228 | 0.451 | 1 Undiff-G EMP3         |
| RAB27A    | 0.006605 | 0.180853 | 0.015 | 0.079 | 1 Undiff-G RAB27A       |
| INPP5E    | 0.006605 | -0.12315 | 0     | 0.052 | 1 Undiff-G INPP5E       |
| MTRF1     | 0.006605 | -0.13577 | 0     | 0.052 | 1 Undiff-G MTRF1        |
| CA14      | 0.006605 | -0.19577 | 0     | 0.052 | 1 Undiff-G CA14         |
| FAM206A   | 0.00661  | -0.14451 | 0.007 | 0.065 | 1 Undiff-G FAM206A      |
| ANKRD22   | 0.006617 | -0.16508 | 0.007 | 0.066 | 1 Undiff-G ANKRD22      |
| MSL2      | 0.006659 | -0.14477 | 0.007 | 0.065 | 1 Undiff-G MSL2         |
| AREG      | 0.006661 | -0.14288 | 0.007 | 0.065 | 1 Undiff-G AREG         |
| PDE8A     | 0.006681 | -0.1436  | 0.022 | 0.09  | 1 Undiff-G PDE8A        |
| ARAP3     | 0.006689 | -0.11629 | 0.007 | 0.065 | 1 Undiff-G ARAP3        |
| PHF13     | 0.006689 | -0.12659 | 0.007 | 0.065 | 1 Undiff-G PHF13        |
| SIN3A     | 0.006705 | 0.219888 | 0.022 | 0.09  | 1 Undiff-G SIN3A        |
| NKX2-5    | 0.006739 | -0.18115 | 0.007 | 0.065 | 1 Undiff-G NKX2-5       |
| FAM173B   | 0.00674  | -0.15073 | 0.007 | 0.065 | 1 Undiff-G FAM173B      |
| MORN4     | 0.00675  | -0.12645 | 0     | 0.051 | 1 Undiff-G MORN4        |
| PSMG3-AS1 | 0.00675  | -0.13967 | 0     | 0.051 | 1 Undiff-G PSMG3-AS1    |
| ZDHHC2    | 0.006793 | -0.18873 | 0.007 | 0.064 | 1 Undiff-G ZDHHC2       |
| TMTC2     | 0.006799 | -0.1699  | 0     | 0.051 | 1 Undiff-G TMTC2        |
| TTF2      | 0.006832 | -0.11253 | 0.007 | 0.065 | 1 Undiff-G TTF2         |
| RP11-347F | 0.006832 | -0.25803 | 0.007 | 0.065 | 1 Undiff-G RP11-347P5.1 |
| FSD1L     | 0.006848 | -0.14026 | 0     | 0.051 | 1 Undiff-G FSD1L        |
| AGTPBP1   | 0.006848 | -0.16488 | 0     | 0.051 | 1 Undiff-G AGTPBP1      |
| SORBS2    | 0.006848 | -0.17897 | 0     | 0.051 | 1 Undiff-G SORBS2       |
| GIMAP5    | 0.006848 | -0.23042 | 0     | 0.051 | 1 Undiff-G GIMAP5       |
| ZXDC      | 0.006893 | -0.12006 | 0.007 | 0.065 | 1 Undiff-G ZXDC         |
| LTBP1     | 0.006898 | -0.11044 | 0     | 0.051 | 1 Undiff-G LTBP1        |
| TLDC1     | 0.006898 | -0.15146 | 0     | 0.051 | 1 Undiff-G TLDC1        |
| PHLDA2    | 0.006898 | -0.15834 | 0     | 0.051 | 1 Undiff-G PHLDA2       |
| ATE1      | 0.006898 | -0.16605 | 0     | 0.051 | 1 Undiff-G ATE1         |
| FGF9      | 0.006898 | -0.18461 | 0     | 0.051 | 1 Undiff-G FGF9         |
| PLEKHG2   | 0.006936 | -0.11926 | 0.007 | 0.065 | 1 Undiff-G PLEKHG2      |
| CDR2L     | 0.006943 | -0.13414 | 0.007 | 0.064 | 1 Undiff-G CDR2L        |
| ZNF248    | 0.006948 | -0.13286 | 0     | 0.051 | 1 Undiff-G ZNF248       |
| ZNF615    | 0.006948 | -0.13508 | 0     | 0.051 | 1 Undiff-G ZNF615       |

|           |          |          |       |       |                          |
|-----------|----------|----------|-------|-------|--------------------------|
| KLHL6     | 0.006948 | -0.25143 | 0     | 0.051 | 1 Undiff-G KLHL6         |
| SLC45A1   | 0.006998 | -0.12387 | 0     | 0.051 | 1 Undiff-G SLC45A1       |
| TMEM38A   | 0.006998 | -0.14889 | 0     | 0.051 | 1 Undiff-G TMEM38A       |
| SYT6      | 0.006998 | -0.16791 | 0     | 0.051 | 1 Undiff-G SYT6          |
| EXOC6     | 0.007012 | -0.18242 | 0.007 | 0.064 | 1 Undiff-G EXOC6         |
| PDLIM3    | 0.007027 | 0.297495 | 0.037 | 0.115 | 1 Undiff-G PDLIM3        |
| SLC2A10   | 0.00703  | -0.10063 | 0.007 | 0.065 | 1 Undiff-G SLC2A10       |
| VAV2      | 0.007049 | -0.12045 | 0     | 0.051 | 1 Undiff-G VAV2          |
| RP11-545E | 0.007049 | -0.1408  | 0     | 0.051 | 1 Undiff-G RP11-545E17.3 |
| CTSK      | 0.007049 | -0.16641 | 0     | 0.051 | 1 Undiff-G CTSK          |
| CDC23     | 0.007054 | 0.36653  | 0.044 | 0.126 | 1 Undiff-G CDC23         |
| CLDN15    | 0.007077 | -0.17556 | 0.007 | 0.064 | 1 Undiff-G CLDN15        |
| NKIRAS1   | 0.007085 | 0.201164 | 0.029 | 0.103 | 1 Undiff-G NKIRAS1       |
| TPCN1     | 0.00709  | 0.120615 | 0.022 | 0.09  | 1 Undiff-G TPCN1         |
| SEPP1     | 0.007099 | 0.485535 | 0.169 | 0.33  | 1 Undiff-G SEPP1         |
| POC5      | 0.0071   | -0.15321 | 0     | 0.051 | 1 Undiff-G POC5          |
| ARPP21    | 0.0071   | -0.16224 | 0     | 0.051 | 1 Undiff-G ARPP21        |
| ACP6      | 0.007139 | -0.14593 | 0.007 | 0.064 | 1 Undiff-G ACP6          |
| COX4I1    | 0.007142 | 0.506154 | 0.426 | 0.916 | 1 Undiff-G COX4I1        |
| SAP130    | 0.007151 | -0.12393 | 0     | 0.051 | 1 Undiff-G SAP130        |
| PYCR1     | 0.007151 | -0.13235 | 0     | 0.051 | 1 Undiff-G PYCR1         |
| HIRA      | 0.007203 | -0.12854 | 0     | 0.05  | 1 Undiff-G HIRA          |
| PIK3R2    | 0.007203 | -0.14169 | 0     | 0.05  | 1 Undiff-G PIK3R2        |
| ATP11C    | 0.007203 | -0.14403 | 0     | 0.05  | 1 Undiff-G ATP11C        |
| GBGT1     | 0.007203 | -0.19531 | 0     | 0.05  | 1 Undiff-G GBGT1         |
| STEAP3    | 0.007204 | 0.681449 | 0.066 | 0.163 | 1 Undiff-G STEAP3        |
| RAB13     | 0.007217 | 0.950898 | 0.191 | 0.374 | 1 Undiff-G RAB13         |
| GTF2E1    | 0.007255 | -0.14329 | 0     | 0.05  | 1 Undiff-G GTF2E1        |
| SEC22A    | 0.007255 | 0.426944 | 0.029 | 0.103 | 1 Undiff-G SEC22A        |
| ZNF445    | 0.007279 | -0.13411 | 0.007 | 0.064 | 1 Undiff-G ZNF445        |
| UBIAD1    | 0.007283 | 0.337452 | 0.029 | 0.102 | 1 Undiff-G UBIAD1        |
| ENTPD5    | 0.007307 | -0.12299 | 0     | 0.05  | 1 Undiff-G ENTPD5        |
| NAT8L     | 0.007307 | -0.12447 | 0     | 0.05  | 1 Undiff-G NAT8L         |
| HELLS     | 0.007308 | -0.15274 | 0.007 | 0.064 | 1 Undiff-G HELLS         |
| BMP1      | 0.007358 | -0.11032 | 0.007 | 0.064 | 1 Undiff-G BMP1          |
| URB1      | 0.00736  | -0.12406 | 0     | 0.05  | 1 Undiff-G URB1          |
| ZCCHC14   | 0.00736  | -0.14468 | 0     | 0.05  | 1 Undiff-G ZCCHC14       |
| FERMT1    | 0.00736  | -0.18977 | 0     | 0.05  | 1 Undiff-G FERMT1        |
| DLEU7     | 0.00736  | -0.23213 | 0     | 0.05  | 1 Undiff-G DLEU7         |
| CARF      | 0.007382 | -0.10525 | 0.015 | 0.077 | 1 Undiff-G CARF          |
| GPX4      | 0.007404 | 0.574116 | 0.404 | 0.847 | 1 Undiff-G GPX4          |
| ZNF213    | 0.007414 | -0.11507 | 0     | 0.05  | 1 Undiff-G ZNF213        |
| ECT2      | 0.007414 | -0.14235 | 0     | 0.05  | 1 Undiff-G ECT2          |
| GIN1      | 0.007414 | -0.14723 | 0     | 0.05  | 1 Undiff-G GIN1          |
| ZNF184    | 0.007414 | -0.15716 | 0     | 0.05  | 1 Undiff-G ZNF184        |
| ANKRD13B  | 0.007467 | -0.12468 | 0     | 0.05  | 1 Undiff-G ANKRD13B      |
| KIAA1524  | 0.007467 | -0.13681 | 0     | 0.05  | 1 Undiff-G KIAA1524      |
| SULT1A1   | 0.007467 | -0.22342 | 0     | 0.05  | 1 Undiff-G SULT1A1       |
| UGT8      | 0.007467 | -0.25028 | 0     | 0.05  | 1 Undiff-G UGT8          |
| LRRN3     | 0.007488 | 0.141757 | 0.037 | 0.114 | 1 Undiff-G LRRN3         |
| HOXD11    | 0.007502 | 0.158806 | 0.015 | 0.077 | 1 Undiff-G HOXD11        |

|          |          |          |       |       |                     |
|----------|----------|----------|-------|-------|---------------------|
| TRMT12   | 0.007521 | -0.13813 | 0     | 0.05  | 1 Undiff-G TRMT12   |
| CMKLR1   | 0.007521 | -0.21371 | 0     | 0.05  | 1 Undiff-G CMKLR1   |
| GCHFR    | 0.007538 | 0.149386 | 0.015 | 0.077 | 1 Undiff-G GCHFR    |
| ZSCAN16  | 0.007542 | -0.15589 | 0.007 | 0.064 | 1 Undiff-G ZSCAN16  |
| FITM2    | 0.007576 | -0.11687 | 0     | 0.05  | 1 Undiff-G FITM2    |
| RBL1     | 0.007576 | -0.12307 | 0     | 0.05  | 1 Undiff-G RBL1     |
| SLC9A8   | 0.007576 | -0.14741 | 0     | 0.05  | 1 Undiff-G SLC9A8   |
| SLC38A9  | 0.007599 | -0.15706 | 0.007 | 0.064 | 1 Undiff-G SLC38A9  |
| HLA-DRB5 | 0.007612 | 0.431769 | 0.213 | 0.402 | 1 Undiff-G HLA-DRB5 |
| SLC6A6   | 0.007613 | -0.15043 | 0.007 | 0.064 | 1 Undiff-G SLC6A6   |
| BCR      | 0.007616 | -0.14616 | 0.007 | 0.064 | 1 Undiff-G BCR      |
| RAB23    | 0.007631 | -0.10845 | 0     | 0.05  | 1 Undiff-G RAB23    |
| FIZ1     | 0.007631 | -0.11753 | 0     | 0.05  | 1 Undiff-G FIZ1     |
| RAB42    | 0.007631 | -0.15987 | 0     | 0.05  | 1 Undiff-G RAB42    |
| SEMA4A   | 0.007631 | -0.18597 | 0     | 0.05  | 1 Undiff-G SEMA4A   |
| ZC3H12A  | 0.007639 | 0.143594 | 0.015 | 0.077 | 1 Undiff-G ZC3H12A  |
| HEATR1   | 0.007657 | -0.14573 | 0.007 | 0.063 | 1 Undiff-G HEATR1   |
| NCAPD2   | 0.007678 | -0.11246 | 0.007 | 0.064 | 1 Undiff-G NCAPD2   |
| PLEKHA8  | 0.007686 | 0.106159 | 0.007 | 0.064 | 1 Undiff-G PLEKHA8  |
| JRKL     | 0.007691 | 0.157206 | 0.015 | 0.077 | 1 Undiff-G JRKL     |
| HSPA5    | 0.007705 | 0.898998 | 0.331 | 0.661 | 1 Undiff-G HSPA5    |
| STOML1   | 0.007706 | 0.331108 | 0.029 | 0.102 | 1 Undiff-G STOML1   |
| TRAF3    | 0.007714 | -0.11762 | 0.007 | 0.064 | 1 Undiff-G TRAF3    |
| ATAD5    | 0.007724 | -0.13084 | 0.015 | 0.076 | 1 Undiff-G ATAD5    |
| DIRAS2   | 0.007727 | -0.12506 | 0.007 | 0.064 | 1 Undiff-G DIRAS2   |
| XPO4     | 0.007733 | -0.1263  | 0.007 | 0.064 | 1 Undiff-G XPO4     |
| ADAM23   | 0.007742 | -0.10877 | 0     | 0.05  | 1 Undiff-G ADAM23   |
| RHPN1    | 0.007742 | -0.11294 | 0     | 0.05  | 1 Undiff-G RHPN1    |
| ANKRD50  | 0.007742 | -0.12471 | 0     | 0.05  | 1 Undiff-G ANKRD50  |
| ARSB     | 0.007742 | -0.13082 | 0     | 0.05  | 1 Undiff-G ARSB     |
| CENPA    | 0.007742 | -0.17386 | 0     | 0.05  | 1 Undiff-G CENPA    |
| BCL2     | 0.007742 | -0.19556 | 0     | 0.05  | 1 Undiff-G BCL2     |
| PNPLA4   | 0.007752 | -0.23758 | 0.007 | 0.063 | 1 Undiff-G PNPLA4   |
| YJEFN3   | 0.007773 | -0.10241 | 0.007 | 0.064 | 1 Undiff-G YJEFN3   |
| MXD3     | 0.007797 | -0.15701 | 0.007 | 0.063 | 1 Undiff-G MXD3     |
| CCDC138  | 0.007798 | -0.14857 | 0     | 0.05  | 1 Undiff-G CCDC138  |
| FBXO30   | 0.007807 | -0.11104 | 0.007 | 0.064 | 1 Undiff-G FBXO30   |
| DNALI1   | 0.00781  | 0.454031 | 0.037 | 0.114 | 1 Undiff-G DNALI1   |
| MED23    | 0.007827 | -0.15588 | 0.007 | 0.063 | 1 Undiff-G MED23    |
| ELMOD3   | 0.007831 | 0.337965 | 0.051 | 0.136 | 1 Undiff-G ELMOD3   |
| C16orf46 | 0.007854 | -0.11286 | 0     | 0.049 | 1 Undiff-G C16orf46 |
| ITPKC    | 0.007854 | -0.1193  | 0     | 0.049 | 1 Undiff-G ITPKC    |
| EPB41L5  | 0.007854 | -0.13336 | 0     | 0.049 | 1 Undiff-G EPB41L5  |
| SPC24    | 0.007854 | -0.15191 | 0     | 0.049 | 1 Undiff-G SPC24    |
| MIPEP    | 0.007859 | -0.12572 | 0.007 | 0.063 | 1 Undiff-G MIPEP    |
| ATAD2    | 0.007911 | -0.10854 | 0.015 | 0.076 | 1 Undiff-G ATAD2    |
| ZMYM1    | 0.007911 | -0.11571 | 0     | 0.049 | 1 Undiff-G ZMYM1    |
| PRR12    | 0.007911 | -0.11945 | 0     | 0.049 | 1 Undiff-G PRR12    |
| LPAR1    | 0.007911 | -0.15894 | 0     | 0.049 | 1 Undiff-G LPAR1    |
| WDSUB1   | 0.007913 | 0.177732 | 0.015 | 0.077 | 1 Undiff-G WDSUB1   |
| FAM73B   | 0.007918 | -0.16071 | 0.007 | 0.063 | 1 Undiff-G FAM73B   |



|           |          |          |       |       |                          |
|-----------|----------|----------|-------|-------|--------------------------|
| IGDCC3    | 0.007924 | -0.11146 | 0.007 | 0.063 | 1 Undiff-G IGDCC3        |
| UTP20     | 0.00794  | -0.11397 | 0.007 | 0.063 | 1 Undiff-G UTP20         |
| LHFP      | 0.007965 | 0.750832 | 0.11  | 0.233 | 1 Undiff-G LHFP          |
| TAF4      | 0.007968 | -0.11441 | 0     | 0.049 | 1 Undiff-G TAF4          |
| RNF182    | 0.007968 | -0.12697 | 0     | 0.049 | 1 Undiff-G RNF182        |
| AURKB     | 0.007968 | -0.18863 | 0     | 0.049 | 1 Undiff-G AURKB         |
| FAM212A   | 0.007968 | -0.23648 | 0     | 0.049 | 1 Undiff-G FAM212A       |
| SH3D19    | 0.007999 | -0.10544 | 0.007 | 0.063 | 1 Undiff-G SH3D19        |
| IL11RA    | 0.008008 | -0.12025 | 0.007 | 0.063 | 1 Undiff-G IL11RA        |
| PARP3     | 0.008026 | -0.13666 | 0     | 0.049 | 1 Undiff-G PARP3         |
| PLXNA2    | 0.008026 | -0.1466  | 0     | 0.049 | 1 Undiff-G PLXNA2        |
| STARD13   | 0.008026 | -0.15402 | 0     | 0.049 | 1 Undiff-G STARD13       |
| APOLD1    | 0.008026 | -0.15745 | 0     | 0.049 | 1 Undiff-G APOLD1        |
| COL5A2    | 0.008045 | -0.10305 | 0.007 | 0.063 | 1 Undiff-G COL5A2        |
| SMURF1    | 0.008084 | -0.13588 | 0     | 0.049 | 1 Undiff-G SMURF1        |
| IDUA      | 0.008084 | -0.1365  | 0     | 0.049 | 1 Undiff-G IDUA          |
| CENPP     | 0.008084 | -0.15111 | 0     | 0.049 | 1 Undiff-G CENPP         |
| FAM114A1  | 0.008106 | 0.22328  | 0.037 | 0.113 | 1 Undiff-G FAM114A1      |
| ZFP14     | 0.008141 | 0.231352 | 0.037 | 0.112 | 1 Undiff-G ZFP14         |
| UNC13D    | 0.008142 | -0.17896 | 0     | 0.049 | 1 Undiff-G UNC13D        |
| FABP3     | 0.008142 | -0.23665 | 0     | 0.049 | 1 Undiff-G FABP3         |
| PYROXD1   | 0.008144 | -0.16208 | 0.007 | 0.063 | 1 Undiff-G PYROXD1       |
| ATG16L2   | 0.008195 | -0.15083 | 0.022 | 0.088 | 1 Undiff-G ATG16L2       |
| CCDC74A   | 0.008201 | -0.13004 | 0     | 0.049 | 1 Undiff-G CCDC74A       |
| CRY2      | 0.008201 | -0.14995 | 0     | 0.049 | 1 Undiff-G CRY2          |
| STK32B    | 0.008259 | -0.12877 | 0.007 | 0.062 | 1 Undiff-G STK32B        |
| EPG5      | 0.008261 | -0.12838 | 0     | 0.049 | 1 Undiff-G EPG5          |
| ZWILCH    | 0.008308 | 0.192371 | 0.015 | 0.076 | 1 Undiff-G ZWILCH        |
| VLDLR     | 0.008321 | -0.11158 | 0     | 0.049 | 1 Undiff-G VLDLR         |
| HRASLS    | 0.008321 | -0.11647 | 0     | 0.049 | 1 Undiff-G HRASLS        |
| RP11-159D | 0.008321 | -0.11668 | 0     | 0.049 | 1 Undiff-G RP11-159D12.2 |
| BCL2L11   | 0.008321 | -0.17648 | 0     | 0.049 | 1 Undiff-G BCL2L11       |
| CHEK2     | 0.008321 | -0.19203 | 0     | 0.049 | 1 Undiff-G CHEK2         |
| CH25H     | 0.008338 | 0.378406 | 0.059 | 0.148 | 1 Undiff-G CH25H         |
| LIG3      | 0.008354 | -0.12364 | 0.007 | 0.062 | 1 Undiff-G LIG3          |
| LEMD3     | 0.00838  | -0.11265 | 0.007 | 0.063 | 1 Undiff-G LEMD3         |
| DGKG      | 0.008381 | -0.13303 | 0     | 0.049 | 1 Undiff-G DGKG          |
| GPD1      | 0.008381 | -0.21684 | 0     | 0.049 | 1 Undiff-G GPD1          |
| RNGTT     | 0.008402 | 0.137681 | 0.015 | 0.076 | 1 Undiff-G RNGTT         |
| CNKSR2    | 0.008418 | -0.11486 | 0.007 | 0.062 | 1 Undiff-G CNKSR2        |
| WDR44     | 0.008441 | -0.13131 | 0     | 0.049 | 1 Undiff-G WDR44         |
| ANKRD9    | 0.008447 | 0.154243 | 0.022 | 0.088 | 1 Undiff-G ANKRD9        |
| SDC1      | 0.008503 | -0.10529 | 0     | 0.049 | 1 Undiff-G SDC1          |
| TMEM246   | 0.008503 | -0.16174 | 0     | 0.049 | 1 Undiff-G TMEM246       |
| TBC1D4    | 0.008503 | -0.19076 | 0     | 0.049 | 1 Undiff-G TBC1D4        |
| PGAM2     | 0.008503 | -0.22647 | 0     | 0.049 | 1 Undiff-G PGAM2         |
| TRO       | 0.008525 | -0.11143 | 0.007 | 0.062 | 1 Undiff-G TRO           |
| CLEC4A    | 0.008549 | -0.24134 | 0.007 | 0.062 | 1 Undiff-G CLEC4A        |
| ZNF550    | 0.008564 | -0.14899 | 0     | 0.048 | 1 Undiff-G ZNF550        |
| RP11-480C | 0.008564 | -0.27515 | 0     | 0.048 | 1 Undiff-G RP11-480C22.1 |
| PLIN2     | 0.00858  | 0.680034 | 0.176 | 0.344 | 1 Undiff-G PLIN2         |

|            |          |          |       |       |                       |
|------------|----------|----------|-------|-------|-----------------------|
| N4BP2L1    | 0.008595 | 0.309123 | 0.066 | 0.158 | 1 Undiff-G N4BP2L1    |
| ADCYAP1R1  | 0.008626 | -0.13079 | 0     | 0.048 | 1 Undiff-G ADCYAP1R1  |
| C19orf38   | 0.008626 | -0.23292 | 0     | 0.048 | 1 Undiff-G C19orf38   |
| SPC25      | 0.008632 | -0.1709  | 0.007 | 0.062 | 1 Undiff-G SPC25      |
| ORC5       | 0.008672 | 0.144221 | 0.029 | 0.1   | 1 Undiff-G ORC5       |
| TRAM2      | 0.008689 | -0.10667 | 0     | 0.048 | 1 Undiff-G TRAM2      |
| INPP5F     | 0.008689 | -0.12809 | 0     | 0.048 | 1 Undiff-G INPP5F     |
| TTC26      | 0.008689 | -0.14851 | 0     | 0.048 | 1 Undiff-G TTC26      |
| DENND4C    | 0.00871  | 0.222976 | 0.022 | 0.088 | 1 Undiff-G DENND4C    |
| HAUS4      | 0.008737 | -0.22658 | 0.007 | 0.062 | 1 Undiff-G HAUS4      |
| ZNF853     | 0.008751 | -0.10379 | 0     | 0.048 | 1 Undiff-G ZNF853     |
| LRP11      | 0.008751 | -0.10758 | 0     | 0.048 | 1 Undiff-G LRP11      |
| WWC3       | 0.008751 | -0.12303 | 0     | 0.048 | 1 Undiff-G WWC3       |
| ZNF614     | 0.008751 | -0.12377 | 0     | 0.048 | 1 Undiff-G ZNF614     |
| ANKRD6     | 0.008751 | -0.12885 | 0     | 0.048 | 1 Undiff-G ANKRD6     |
| PPIL6      | 0.008751 | -0.13767 | 0     | 0.048 | 1 Undiff-G PPIL6      |
| IGLON5     | 0.008751 | -0.16764 | 0     | 0.048 | 1 Undiff-G IGLON5     |
| ACP5       | 0.008751 | -0.21544 | 0     | 0.048 | 1 Undiff-G ACP5       |
| HSPA6      | 0.008809 | 0.208953 | 0.029 | 0.1   | 1 Undiff-G HSPA6      |
| MED12L     | 0.008811 | -0.11123 | 0.007 | 0.062 | 1 Undiff-G MED12L     |
| CTPS2      | 0.008815 | -0.12793 | 0     | 0.048 | 1 Undiff-G CTPS2      |
| PLCD1      | 0.008815 | -0.15186 | 0     | 0.048 | 1 Undiff-G PLCD1      |
| LRRC16A    | 0.008859 | -0.10525 | 0.015 | 0.075 | 1 Undiff-G LRRC16A    |
| SLC16A9    | 0.008879 | -0.10694 | 0     | 0.048 | 1 Undiff-G SLC16A9    |
| IKZF4      | 0.008879 | -0.11088 | 0     | 0.048 | 1 Undiff-G IKZF4      |
| ZNF618     | 0.008879 | -0.16181 | 0     | 0.048 | 1 Undiff-G ZNF618     |
| GPATCH1    | 0.008896 | 0.143388 | 0.015 | 0.075 | 1 Undiff-G GPATCH1    |
| AC005477.1 | 0.008899 | 0.16933  | 0.007 | 0.001 | 1 Undiff-G AC005477.1 |
| PTGS2      | 0.00892  | -0.13757 | 0.007 | 0.062 | 1 Undiff-G PTGS2      |
| C9orf40    | 0.008943 | -0.10111 | 0     | 0.048 | 1 Undiff-G C9orf40    |
| TRMT2B     | 0.008943 | -0.13404 | 0     | 0.048 | 1 Undiff-G TRMT2B     |
| FAM19A5    | 0.008943 | -0.14018 | 0     | 0.048 | 1 Undiff-G FAM19A5    |
| USP54      | 0.008943 | -0.1727  | 0     | 0.048 | 1 Undiff-G USP54      |
| CASP8      | 0.008943 | -0.19009 | 0     | 0.048 | 1 Undiff-G CASP8      |
| CLECL1     | 0.008943 | -0.19481 | 0     | 0.048 | 1 Undiff-G CLECL1     |
| SLC15A4    | 0.008948 | -0.11572 | 0.015 | 0.075 | 1 Undiff-G SLC15A4    |
| CRTC2      | 0.008967 | 0.116222 | 0.015 | 0.075 | 1 Undiff-G CRTC2      |
| ARHGEF10L  | 0.008979 | -0.13595 | 0.007 | 0.062 | 1 Undiff-G ARHGEF10L  |
| PPM1L      | 0.009008 | -0.11981 | 0     | 0.048 | 1 Undiff-G PPM1L      |
| SHQ1       | 0.009008 | -0.12395 | 0     | 0.048 | 1 Undiff-G SHQ1       |
| IFIH1      | 0.009008 | -0.13299 | 0     | 0.048 | 1 Undiff-G IFIH1      |
| PIK3R5     | 0.009008 | -0.20082 | 0     | 0.048 | 1 Undiff-G PIK3R5     |
| NRDE2      | 0.009017 | 0.126331 | 0.029 | 0.099 | 1 Undiff-G NRDE2      |
| METTL4     | 0.009018 | 0.140508 | 0.015 | 0.075 | 1 Undiff-G METTL4     |
| ZNF611     | 0.009044 | -0.12083 | 0.007 | 0.062 | 1 Undiff-G ZNF611     |
| MFSD2A     | 0.009056 | 0.218601 | 0.029 | 0.099 | 1 Undiff-G MFSD2A     |
| ALKBH8     | 0.009073 | -0.10273 | 0     | 0.048 | 1 Undiff-G ALKBH8     |
| ZNF454     | 0.009073 | -0.11892 | 0     | 0.048 | 1 Undiff-G ZNF454     |
| EP400NL    | 0.009073 | -0.12822 | 0     | 0.048 | 1 Undiff-G EP400NL    |
| CCDC149    | 0.009073 | -0.1332  | 0     | 0.048 | 1 Undiff-G CCDC149    |
| WDR19      | 0.009073 | -0.13746 | 0     | 0.048 | 1 Undiff-G WDR19      |

|           |          |          |       |       |                           |
|-----------|----------|----------|-------|-------|---------------------------|
| NFRKB     | 0.00908  | 0.315075 | 0.029 | 0.1   | 1 Undiff-G NFRKB          |
| TMEM25    | 0.009093 | 0.416934 | 0.044 | 0.123 | 1 Undiff-G TMEM25         |
| TMEM234   | 0.009121 | 0.32685  | 0.022 | 0.087 | 1 Undiff-G TMEM234        |
| MDC1      | 0.00913  | -0.11587 | 0.007 | 0.061 | 1 Undiff-G MDC1           |
| PDZD4     | 0.009138 | -0.13204 | 0     | 0.048 | 1 Undiff-G PDZD4          |
| WDR53     | 0.009138 | -0.13578 | 0     | 0.048 | 1 Undiff-G WDR53          |
| TMEM52B   | 0.009138 | -0.23    | 0     | 0.048 | 1 Undiff-G TMEM52B        |
| PLEKHM1   | 0.009149 | 0.128186 | 0.015 | 0.075 | 1 Undiff-G PLEKHM1        |
| PPP5D1    | 0.009205 | -0.1423  | 0     | 0.048 | 1 Undiff-G PPP5D1         |
| POMC      | 0.009205 | -0.21341 | 0     | 0.048 | 1 Undiff-G POMC           |
| CCL20     | 0.009206 | -0.21836 | 0.007 | 0.062 | 1 Undiff-G CCL20          |
| ZNF599    | 0.009211 | 0.127791 | 0.015 | 0.075 | 1 Undiff-G ZNF599         |
| AP001372. | 0.009271 | -0.12168 | 0     | 0.047 | 1 Undiff-G AP001372. 2    |
| GPD1L     | 0.009271 | -0.12499 | 0     | 0.047 | 1 Undiff-G GPD1L          |
| SUOX      | 0.009271 | -0.1367  | 0     | 0.047 | 1 Undiff-G SUOX           |
| ZNF713    | 0.009271 | -0.13851 | 0     | 0.047 | 1 Undiff-G ZNF713         |
| ZNF736    | 0.009271 | -0.1396  | 0     | 0.047 | 1 Undiff-G ZNF736         |
| ZGLP1     | 0.009271 | -0.16195 | 0     | 0.047 | 1 Undiff-G ZGLP1          |
| UAP1L1    | 0.009272 | -0.10263 | 0.007 | 0.061 | 1 Undiff-G UAP1L1         |
| GABPB2    | 0.009277 | -0.10091 | 0.007 | 0.061 | 1 Undiff-G GABPB2         |
| COMTD1    | 0.009306 | -0.16999 | 0.007 | 0.061 | 1 Undiff-G COMTD1         |
| DENND6A   | 0.009317 | -0.15571 | 0.007 | 0.061 | 1 Undiff-G DENND6A        |
| HSPA4L    | 0.009318 | -0.15906 | 0.015 | 0.074 | 1 Undiff-G HSPA4L         |
| PRR5      | 0.009338 | -0.18061 | 0     | 0.047 | 1 Undiff-G PRR5           |
| QPCT      | 0.009338 | -0.19353 | 0     | 0.047 | 1 Undiff-G QPCT           |
| CAB39L    | 0.009341 | 0.16417  | 0.015 | 0.074 | 1 Undiff-G CAB39L         |
| TRIM56    | 0.009344 | 0.218101 | 0.015 | 0.074 | 1 Undiff-G TRIM56         |
| GNAZ      | 0.009377 | -0.13425 | 0.007 | 0.061 | 1 Undiff-G GNAZ           |
| IQCG      | 0.009381 | 0.444029 | 0.044 | 0.123 | 1 Undiff-G IQCG           |
| PARG      | 0.009406 | -0.11442 | 0     | 0.047 | 1 Undiff-G PARG           |
| CUL9      | 0.009406 | -0.12231 | 0     | 0.047 | 1 Undiff-G CUL9           |
| TRMT10A   | 0.009406 | -0.13429 | 0     | 0.047 | 1 Undiff-G TRMT10A        |
| ASPM      | 0.009406 | -0.17196 | 0     | 0.047 | 1 Undiff-G ASPM           |
| FGD2      | 0.00943  | -0.16554 | 0.007 | 0.061 | 1 Undiff-G FGD2           |
| RP11-127E | 0.009474 | -0.11805 | 0     | 0.047 | 1 Undiff-G RP11-127B20. 2 |
| HDAC4     | 0.009474 | -0.14773 | 0     | 0.047 | 1 Undiff-G HDAC4          |
| POLR3C    | 0.009477 | 0.119295 | 0.022 | 0.087 | 1 Undiff-G POLR3C         |
| PPP2R3A   | 0.009521 | -0.11125 | 0.007 | 0.061 | 1 Undiff-G PPP2R3A        |
| USP24     | 0.009526 | -0.12552 | 0.015 | 0.074 | 1 Undiff-G USP24          |
| GSR       | 0.009612 | -0.11513 | 0     | 0.047 | 1 Undiff-G GSR            |
| FIGNL1    | 0.009612 | -0.1437  | 0     | 0.047 | 1 Undiff-G FIGNL1         |
| ADCK1     | 0.009612 | -0.14719 | 0     | 0.047 | 1 Undiff-G ADCK1          |
| WDR81     | 0.009612 | -0.14843 | 0     | 0.047 | 1 Undiff-G WDR81          |
| SMARCD2   | 0.009627 | 0.165103 | 0.022 | 0.086 | 1 Undiff-G SMARCD2        |
| FOSL1     | 0.009681 | -0.11505 | 0     | 0.047 | 1 Undiff-G FOSL1          |
| ABCD1     | 0.009681 | -0.14544 | 0     | 0.047 | 1 Undiff-G ABCD1          |
| PAK7      | 0.009681 | -0.15637 | 0     | 0.047 | 1 Undiff-G PAK7           |
| TMEM86A   | 0.009681 | -0.18564 | 0     | 0.047 | 1 Undiff-G TMEM86A        |
| CEP112    | 0.009751 | -0.10019 | 0     | 0.047 | 1 Undiff-G CEP112         |
| TROAP     | 0.009751 | -0.14512 | 0     | 0.047 | 1 Undiff-G TROAP          |
| ATAD3B    | 0.009764 | -0.12336 | 0.007 | 0.061 | 1 Undiff-G ATAD3B         |

|           |          |          |       |       |       |          |                |
|-----------|----------|----------|-------|-------|-------|----------|----------------|
| DSCC1     | 0.009818 | -0.13292 | 0.007 | 0.06  | 1     | Undiff-G | DSCC1          |
| EPHB3     | 0.009822 | -0.11567 | 0     | 0.047 | 1     | Undiff-G | EPHB3          |
| FANCI     | 0.009822 | -0.1271  | 0     | 0.047 | 1     | Undiff-G | FANCI          |
| TCP11L1   | 0.009822 | -0.13991 | 0     | 0.047 | 1     | Undiff-G | TCP11L1        |
| RP11-1275 | 0.009825 | -0.12035 | 0.007 | 0.061 | 1     | Undiff-G | RP11-1275H24.1 |
| TMCC3     | 0.009854 | -0.11608 | 0.015 | 0.074 | 1     | Undiff-G | TMCC3          |
| ANK3      | 0.009884 | -0.16743 | 0.007 | 0.061 | 1     | Undiff-G | ANK3           |
| FHL2      | 0.009893 | -0.1412  | 0     | 0.047 | 1     | Undiff-G | FHL2           |
| PPP1R12B  | 0.009945 | -0.15464 | 0.007 | 0.06  | 1     | Undiff-G | PPP1R12B       |
| DOK4      | 0.009965 | -0.11957 | 0     | 0.047 | 1     | Undiff-G | DOK4           |
| TES       | 0.009965 | -0.2258  | 0     | 0.047 | 1     | Undiff-G | TES            |
| SAA1.1    | 0        | 1.945196 | 0.433 | 0.058 | 0     | AC-G     | SAA1           |
| LTF.1     | 0        | 1.726356 | 0.496 | 0.084 | 0     | AC-G     | LTF            |
| SLPI.1    | 0        | 1.723881 | 0.488 | 0.084 | 0     | AC-G     | SLPI           |
| MGST1.1   | 0        | 1.716853 | 0.577 | 0.06  | 0     | AC-G     | MGST1          |
| CHI3L2.1  | 0        | 1.710796 | 0.592 | 0.1   | 0     | AC-G     | CHI3L2         |
| MGP.1     | 0        | 1.675959 | 0.423 | 0.041 | 0     | AC-G     | MGP            |
| C8orf4    | 0        | 1.552945 | 0.614 | 0.153 | 0     | AC-G     | C8orf4         |
| SAA2.1    | 0        | 1.534099 | 0.23  | 0.017 | 0     | AC-G     | SAA2           |
| EFEMP1.1  | 0        | 1.521288 | 0.577 | 0.152 | 0     | AC-G     | EFEMP1         |
| C1R.1     | 0        | 1.494219 | 0.582 | 0.144 | 0     | AC-G     | C1R            |
| CHI3L1.1  | 0        | 1.471343 | 0.845 | 0.462 | 0     | AC-G     | CHI3L1         |
| CAV1.1    | 0        | 1.447132 | 0.489 | 0.056 | 0     | AC-G     | CAV1           |
| C1S       | 0        | 1.392277 | 0.483 | 0.099 | 0     | AC-G     | C1S            |
| SERPING1. | 0        | 1.344355 | 0.548 | 0.173 | 0     | AC-G     | SERPING1       |
| RARRES2   | 0        | 1.285152 | 0.461 | 0.089 | 0     | AC-G     | RARRES2        |
| CRYAB.1   | 0        | 1.216062 | 0.831 | 0.435 | 0     | AC-G     | CRYAB          |
| MT1X.1    | 0        | 1.166703 | 0.844 | 0.525 | 0     | AC-G     | MT1X           |
| LGALS3.1  | 0        | 1.123973 | 0.786 | 0.421 | 0     | AC-G     | LGALS3         |
| TIMP1.1   | 0        | 1.068728 | 0.858 | 0.574 | 0     | AC-G     | TIMP1          |
| CLU.1     | 0        | 1.05073  | 0.969 | 0.746 | 0     | AC-G     | CLU            |
| SEC61G.1  | 0        | 0.944665 | 0.959 | 0.768 | 0     | AC-G     | SEC61G         |
| MT2A.1    | 0        | 0.923151 | 0.948 | 0.752 | 0     | AC-G     | MT2A           |
| GAPDH.1   | 0        | 0.550311 | 0.986 | 0.985 | 0     | AC-G     | GAPDH          |
| FTL.1     | 0        | 0.510835 | 0.99  | 0.995 | 0     | AC-G     | FTL            |
| CYR61     | #####    | 1.101631 | 0.433 | 0.116 | ##### | AC-G     | CYR61          |
| ACTG1.1   | #####    | 0.556899 | 0.975 | 0.943 | ##### | AC-G     | ACTG1          |
| S100A6.1  | #####    | 0.939019 | 0.84  | 0.605 | ##### | AC-G     | S100A6         |
| BGN       | #####    | 0.726882 | 0.246 | 0.029 | ##### | AC-G     | BGN            |
| CADM3     | #####    | 0.861249 | 0.316 | 0.058 | ##### | AC-G     | CADM3          |
| SOD2      | #####    | 1.039437 | 0.754 | 0.493 | ##### | AC-G     | SOD2           |
| ACTB.1    | #####    | 0.487173 | 0.992 | 0.992 | ##### | AC-G     | ACTB           |
| MT1E.1    | #####    | 0.974895 | 0.645 | 0.328 | ##### | AC-G     | MT1E           |
| NNMT      | #####    | 1.190439 | 0.392 | 0.112 | ##### | AC-G     | NNMT           |
| IL13RA2.1 | #####    | 0.713363 | 0.212 | 0.024 | ##### | AC-G     | IL13RA2        |
| SPOCD1    | #####    | 1.096368 | 0.474 | 0.167 | ##### | AC-G     | SPOCD1         |
| CA9       | #####    | 0.542641 | 0.175 | 0.014 | ##### | AC-G     | CA9            |
| OCIAD2    | #####    | 1.179359 | 0.645 | 0.337 | ##### | AC-G     | OCIAD2         |
| PRSS23    | #####    | 0.761303 | 0.257 | 0.043 | ##### | AC-G     | PRSS23         |
| CD44      | #####    | 0.972719 | 0.64  | 0.332 | ##### | AC-G     | CD44           |
| NTRK2.1   | #####    | 0.815746 | 0.333 | 0.079 | ##### | AC-G     | NTRK2          |

|           |       |          |       |       |       |      |          |
|-----------|-------|----------|-------|-------|-------|------|----------|
| S100A16   | ##### | 0.94998  | 0.586 | 0.252 | ##### | AC-G | S100A16  |
| NAMPT.1   | ##### | 0.964939 | 0.683 | 0.389 | ##### | AC-G | NAMPT    |
| MALAT1.1  | ##### | 0.403988 | 0.996 | 0.995 | ##### | AC-G | MALAT1   |
| S100A10.1 | ##### | 0.838241 | 0.741 | 0.506 | ##### | AC-G | S100A10  |
| PIFO      | ##### | 0.65452  | 0.193 | 0.021 | ##### | AC-G | PIFO     |
| ANXA1     | ##### | 0.859717 | 0.692 | 0.355 | ##### | AC-G | ANXA1    |
| SYTL2     | ##### | 0.678955 | 0.249 | 0.042 | ##### | AC-G | SYTL2    |
| C10orf10. | ##### | 0.966883 | 0.275 | 0.055 | ##### | AC-G | C10orf10 |
| MARCKS.1  | ##### | -0.78132 | 0.3   | 0.655 | ##### | AC-G | MARCKS   |
| YWHAH.1   | ##### | -0.79965 | 0.245 | 0.627 | ##### | AC-G | YWHAH    |
| PKM.1     | ##### | 0.639652 | 0.871 | 0.751 | ##### | AC-G | PKM      |
| GAP43.1   | ##### | 0.964588 | 0.713 | 0.418 | ##### | AC-G | GAP43    |
| HSPB8     | ##### | 0.543558 | 0.165 | 0.015 | ##### | AC-G | HSPB8    |
| SPARC     | ##### | 0.981813 | 0.615 | 0.339 | ##### | AC-G | SPARC    |
| CSRP2     | ##### | 1.134832 | 0.549 | 0.253 | ##### | AC-G | CSRP2    |
| CP        | ##### | 0.512115 | 0.132 | 0.008 | ##### | AC-G | CP       |
| TAGLN     | ##### | 1.098981 | 0.228 | 0.04  | ##### | AC-G | TAGLN    |
| LDHA.1    | ##### | 0.636357 | 0.854 | 0.749 | ##### | AC-G | LDHA     |
| VSTM2A    | ##### | 0.84492  | 0.296 | 0.068 | ##### | AC-G | VSTM2A   |
| ALDOA.1   | ##### | 0.482173 | 0.877 | 0.839 | ##### | AC-G | ALDOA    |
| SPARCL1   | ##### | 1.019565 | 0.573 | 0.301 | ##### | AC-G | SPARCL1  |
| MT1M      | ##### | 0.976046 | 0.475 | 0.199 | ##### | AC-G | MT1M     |
| IGFBP5.1  | ##### | 1.001125 | 0.505 | 0.222 | ##### | AC-G | IGFBP5   |
| RGS10.1   | ##### | -1.23466 | 0.05  | 0.399 | ##### | AC-G | RGS10    |
| SLC39A14  | ##### | 0.645622 | 0.268 | 0.061 | ##### | AC-G | SLC39A14 |
| CD63.1    | ##### | 0.535882 | 0.941 | 0.921 | ##### | AC-G | CD63     |
| GPM6B.1   | ##### | 0.720697 | 0.823 | 0.579 | ##### | AC-G | GPM6B    |
| AIF1.1    | ##### | -1.25518 | 0.138 | 0.464 | ##### | AC-G | AIF1     |
| FCER1G.1  | ##### | -1.2033  | 0.172 | 0.494 | ##### | AC-G | FCER1G   |
| VAMP8.1   | ##### | -1.23532 | 0.062 | 0.398 | ##### | AC-G | VAMP8    |
| MT3.1     | ##### | 0.79104  | 0.722 | 0.445 | ##### | AC-G | MT3      |
| EIF1.1    | ##### | 0.382308 | 0.948 | 0.979 | ##### | AC-G | EIF1     |
| ARHGDI1.1 | ##### | -1.21071 | 0.096 | 0.426 | ##### | AC-G | ARHGDI1  |
| CNN3.1    | ##### | 0.715193 | 0.682 | 0.426 | ##### | AC-G | CNN3     |
| PRDX6     | ##### | 0.783152 | 0.78  | 0.594 | ##### | AC-G | PRDX6    |
| SKP1      | ##### | 0.491052 | 0.899 | 0.858 | ##### | AC-G | SKP1     |
| GALNT15   | ##### | 0.581411 | 0.153 | 0.017 | ##### | AC-G | GALNT15  |
| CORO1A.1  | ##### | -1.05439 | 0.097 | 0.427 | ##### | AC-G | CORO1A   |
| CXCL14    | ##### | 0.850501 | 0.333 | 0.104 | ##### | AC-G | CXCL14   |
| MS4A6A.1  | ##### | -1.23717 | 0.075 | 0.393 | ##### | AC-G | MS4A6A   |
| TYROBP.1  | ##### | -1.08917 | 0.207 | 0.509 | ##### | AC-G | TYROBP   |
| TMSB10.1  | ##### | 0.469053 | 0.972 | 0.963 | ##### | AC-G | TMSB10   |
| CD53.1    | ##### | -1.16859 | 0.052 | 0.366 | ##### | AC-G | CD53     |
| AEBP1.1   | ##### | 0.762544 | 0.296 | 0.087 | ##### | AC-G | AEBP1    |
| DIRAS3    | ##### | 0.941369 | 0.301 | 0.089 | ##### | AC-G | DIRAS3   |
| C1orf162. | ##### | -1.19794 | 0.062 | 0.373 | ##### | AC-G | C1orf162 |
| LY86.1    | ##### | -1.15318 | 0.033 | 0.343 | ##### | AC-G | LY86     |
| ITGB2.1   | ##### | -1.08238 | 0.064 | 0.375 | ##### | AC-G | ITGB2    |
| FCGR3A.1  | ##### | -1.19122 | 0.083 | 0.392 | ##### | AC-G | FCGR3A   |
| TREM2.1   | ##### | -1.19314 | 0.092 | 0.401 | ##### | AC-G | TREM2    |
| AZGP1     | ##### | 0.570794 | 0.187 | 0.031 | ##### | AC-G | AZGP1    |

|           |       |          |       |       |       |      |         |
|-----------|-------|----------|-------|-------|-------|------|---------|
| HP        | ##### | 0.913928 | 0.11  | 0.007 | ##### | AC-G | HP      |
| RAMP1     | ##### | 0.962029 | 0.621 | 0.371 | ##### | AC-G | RAMP1   |
| GMFG.1    | ##### | -1.17711 | 0.045 | 0.347 | ##### | AC-G | GMFG    |
| GJA1      | ##### | 0.606367 | 0.229 | 0.05  | ##### | AC-G | GJA1    |
| RNASET2.1 | ##### | -0.95819 | 0.236 | 0.531 | ##### | AC-G | RNASET2 |
| MS4A7.1   | ##### | -1.14194 | 0.075 | 0.382 | ##### | AC-G | MS4A7   |
| ALOX5AP.1 | ##### | -1.1422  | 0.154 | 0.447 | ##### | AC-G | ALOX5AP |
| CD37.1    | ##### | -1.11526 | 0.047 | 0.35  | ##### | AC-G | CD37    |
| LAPTM5.1  | ##### | -1.04665 | 0.197 | 0.482 | ##### | AC-G | LAPTM5  |
| RNASE6.1  | ##### | -1.15888 | 0.029 | 0.323 | ##### | AC-G | RNASE6  |
| HILPDA.1  | ##### | 0.93552  | 0.424 | 0.189 | ##### | AC-G | HILPDA  |
| COTL1.1   | ##### | -0.72616 | 0.246 | 0.561 | ##### | AC-G | COTL1   |
| SH3BGR.1  | ##### | 0.771097 | 0.295 | 0.09  | ##### | AC-G | SH3BGR  |
| C4orf48.1 | ##### | -0.66133 | 0.252 | 0.579 | ##### | AC-G | C4orf48 |
| CYBA.1    | ##### | -1.06347 | 0.165 | 0.451 | ##### | AC-G | CYBA    |
| FAM49B.1  | ##### | -0.68739 | 0.237 | 0.558 | ##### | AC-G | FAM49B  |
| B2M.1     | ##### | 0.409369 | 0.968 | 0.971 | ##### | AC-G | B2M     |
| UBC.1     | ##### | 0.369425 | 0.924 | 0.956 | ##### | AC-G | UBC     |
| VSIG4.1   | ##### | -1.09769 | 0.121 | 0.413 | ##### | AC-G | VSIG4   |
| HN1.1     | ##### | -0.51826 | 0.44  | 0.721 | ##### | AC-G | HN1     |
| PTN.1     | ##### | 0.729352 | 0.809 | 0.579 | ##### | AC-G | PTN     |
| PYCARD.1  | ##### | -0.97001 | 0.039 | 0.332 | ##### | AC-G | PYCARD  |
| LST1.1    | ##### | -1.13119 | 0.069 | 0.36  | ##### | AC-G | LST1    |
| HCST.1    | ##### | -1.12053 | 0.043 | 0.331 | ##### | AC-G | HCST    |
| FCGR1A.1  | ##### | -1.14876 | 0.024 | 0.304 | ##### | AC-G | FCGR1A  |
| MS4A4A.1  | ##### | -1.1319  | 0.046 | 0.333 | ##### | AC-G | MS4A4A  |
| EVL.1     | ##### | -0.83383 | 0.095 | 0.402 | ##### | AC-G | EVL     |
| LILRB4.1  | ##### | -1.11554 | 0.021 | 0.301 | ##### | AC-G | LILRB4  |
| GPR34.1   | ##### | -1.1388  | 0.031 | 0.313 | ##### | AC-G | GPR34   |
| TYMP.1    | ##### | -0.97794 | 0.065 | 0.354 | ##### | AC-G | TYMP    |
| FSCN1.1   | ##### | -0.67324 | 0.246 | 0.554 | ##### | AC-G | FSCN1   |
| BASP1.1   | ##### | -0.80575 | 0.121 | 0.421 | ##### | AC-G | BASP1   |
| VCAM1     | ##### | 0.761168 | 0.206 | 0.046 | ##### | AC-G | VCAM1   |
| ARRB2.1   | ##### | -0.81599 | 0.147 | 0.449 | ##### | AC-G | ARRB2   |
| FCGR2A.1  | ##### | -1.0232  | 0.052 | 0.335 | ##### | AC-G | FCGR2A  |
| CREM.1    | ##### | -0.89102 | 0.154 | 0.456 | ##### | AC-G | CREM    |
| TPI1.1    | ##### | 0.44321  | 0.878 | 0.863 | ##### | AC-G | TPI1    |
| RASD1.1   | ##### | 0.648681 | 0.307 | 0.1   | ##### | AC-G | RASD1   |
| PLA2G2A   | ##### | 1.107307 | 0.136 | 0.018 | ##### | AC-G | PLA2G2A |
| CSF1R.1   | ##### | -1.00211 | 0.036 | 0.313 | ##### | AC-G | CSF1R   |
| RGS1.1    | ##### | -1.02191 | 0.228 | 0.489 | ##### | AC-G | RGS1    |
| GPSM3.1   | ##### | -1.0224  | 0.034 | 0.306 | ##### | AC-G | GPSM3   |
| DDIT4L    | ##### | 0.30789  | 0.08  | 0.003 | ##### | AC-G | DDIT4L  |
| CD9       | ##### | 0.630664 | 0.737 | 0.532 | ##### | AC-G | CD9     |
| NUPR1     | ##### | 0.708715 | 0.533 | 0.283 | ##### | AC-G | NUPR1   |
| ADORA3.1  | ##### | -1.03468 | 0.034 | 0.305 | ##### | AC-G | ADORA3  |
| HCLS1.1   | ##### | -1.02582 | 0.061 | 0.335 | ##### | AC-G | HCLS1   |
| CALD1.1   | ##### | 0.728964 | 0.586 | 0.387 | ##### | AC-G | CALD1   |
| GRB2.1    | ##### | -0.62157 | 0.226 | 0.53  | ##### | AC-G | GRB2    |
| ANGPTL4   | ##### | 0.715632 | 0.254 | 0.071 | ##### | AC-G | ANGPTL4 |
| FOLR1     | ##### | 0.588419 | 0.128 | 0.016 | ##### | AC-G | FOLR1   |

|           |       |          |       |       |       |      |            |
|-----------|-------|----------|-------|-------|-------|------|------------|
| CA3       | ##### | 0.760821 | 0.141 | 0.02  | ##### | AC-G | CA3        |
| SLC11A1.1 | ##### | -0.96543 | 0.073 | 0.35  | ##### | AC-G | SLC11A1    |
| SGCE      | ##### | 0.72794  | 0.323 | 0.112 | ##### | AC-G | SGCE       |
| TEX26     | ##### | 0.265279 | 0.091 | 0.006 | ##### | AC-G | TEX26      |
| PDLIM4.1  | ##### | 0.634304 | 0.203 | 0.047 | ##### | AC-G | PDLIM4     |
| TMEM205.1 | ##### | 0.70497  | 0.657 | 0.464 | ##### | AC-G | TMEM205    |
| SAMSN1.1  | ##### | -1.03895 | 0.033 | 0.294 | ##### | AC-G | SAMSN1     |
| SLN       | ##### | 1.252576 | 0.332 | 0.128 | ##### | AC-G | SLN        |
| AC009501. | ##### | 0.855997 | 0.335 | 0.122 | ##### | AC-G | AC009501.4 |
| UCP2.1    | ##### | -0.94763 | 0.051 | 0.315 | ##### | AC-G | UCP2       |
| C10orf54. | ##### | -1.04022 | 0.068 | 0.331 | ##### | AC-G | C10orf54   |
| SPI1.1    | ##### | -0.93509 | 0.025 | 0.28  | ##### | AC-G | SPI1       |
| HLA-DMB.1 | ##### | -1.06313 | 0.1   | 0.363 | ##### | AC-G | HLA-DMB    |
| TBXAS1.1  | ##### | -0.98655 | 0.029 | 0.282 | ##### | AC-G | TBXAS1     |
| APLN      | ##### | 0.372938 | 0.119 | 0.015 | ##### | AC-G | APLN       |
| SRGN.1    | ##### | -0.86915 | 0.312 | 0.535 | ##### | AC-G | SRGN       |
| FPR1.1    | ##### | -1.02467 | 0.066 | 0.327 | ##### | AC-G | FPR1       |
| RGS19.1   | ##### | -0.75888 | 0.055 | 0.318 | ##### | AC-G | RGS19      |
| HAVCR2.1  | ##### | -0.98773 | 0.024 | 0.272 | ##### | AC-G | HAVCR2     |
| IL32      | ##### | 0.538792 | 0.245 | 0.072 | ##### | AC-G | IL32       |
| FYB.1     | ##### | -0.93831 | 0.019 | 0.263 | ##### | AC-G | FYB        |
| VIM       | ##### | 0.447559 | 0.761 | 0.645 | ##### | AC-G | VIM        |
| LGALS1.1  | ##### | 0.53412  | 0.801 | 0.685 | ##### | AC-G | LGALS1     |
| ANXA2     | ##### | 0.685847 | 0.696 | 0.478 | ##### | AC-G | ANXA2      |
| FXYD5.1   | ##### | -0.86797 | 0.118 | 0.384 | ##### | AC-G | FXYD5      |
| GNAI2.1   | ##### | -0.59143 | 0.248 | 0.528 | ##### | AC-G | GNAI2      |
| CTSS.1    | ##### | -0.8576  | 0.136 | 0.396 | ##### | AC-G | CTSS       |
| C3AR1.1   | ##### | -0.96411 | 0.033 | 0.278 | ##### | AC-G | C3AR1      |
| REXO2.1   | ##### | 0.769224 | 0.497 | 0.284 | ##### | AC-G | REXO2      |
| ENO1      | ##### | 0.45586  | 0.853 | 0.783 | ##### | AC-G | ENO1       |
| TMEM45A   | ##### | 0.722675 | 0.343 | 0.144 | ##### | AC-G | TMEM45A    |
| STMN1.1   | ##### | -0.58519 | 0.426 | 0.671 | ##### | AC-G | STMN1      |
| CLCF1     | ##### | 0.43479  | 0.136 | 0.023 | ##### | AC-G | CLCF1      |
| CFI.1     | ##### | 0.491995 | 0.173 | 0.039 | ##### | AC-G | CFI        |
| BIN1.1    | ##### | -0.77482 | 0.143 | 0.403 | ##### | AC-G | BIN1       |
| C1QC.1    | ##### | -0.7934  | 0.313 | 0.538 | ##### | AC-G | C1QC       |
| NDUFA4    | ##### | 0.422602 | 0.906 | 0.893 | ##### | AC-G | NDUFA4     |
| RAC1.1    | ##### | -0.4489  | 0.484 | 0.793 | ##### | AC-G | RAC1       |
| OLR1.1    | ##### | -0.96761 | 0.049 | 0.289 | ##### | AC-G | OLR1       |
| CCL3.1    | ##### | -0.89088 | 0.219 | 0.462 | ##### | AC-G | CCL3       |
| TSLP.1    | ##### | 0.389547 | 0.086 | 0.007 | ##### | AC-G | TSLP       |
| MAOB      | ##### | 0.709538 | 0.234 | 0.072 | ##### | AC-G | MAOB       |
| GBP1      | ##### | 0.646678 | 0.318 | 0.122 | ##### | AC-G | GBP1       |
| PI3.1     | ##### | 0.943431 | 0.156 | 0.032 | ##### | AC-G | PI3        |
| TMEM160.1 | ##### | -0.56184 | 0.243 | 0.509 | ##### | AC-G | TMEM160    |
| LIMD2.1   | ##### | -0.6503  | 0.043 | 0.289 | ##### | AC-G | LIMD2      |
| ARPC1B.1  | ##### | -0.59855 | 0.312 | 0.573 | ##### | AC-G | ARPC1B     |
| PTPRC.1   | ##### | -0.86713 | 0.013 | 0.24  | ##### | AC-G | PTPRC      |
| CCL4.1    | ##### | -1.00084 | 0.118 | 0.365 | ##### | AC-G | CCL4       |
| CD86.1    | ##### | -0.92724 | 0.021 | 0.251 | ##### | AC-G | CD86       |
| GFAP      | ##### | 0.941105 | 0.519 | 0.317 | ##### | AC-G | GFAP       |

|            |          |          |       |       |          |      |          |
|------------|----------|----------|-------|-------|----------|------|----------|
| MT1A. 1    | #####    | 0.402218 | 0.109 | 0.014 | #####    | AC-G | MT1A     |
| SYNGR2. 1  | #####    | -0.7445  | 0.112 | 0.37  | #####    | AC-G | SYNGR2   |
| BTG1. 1    | #####    | -0.4681  | 0.429 | 0.739 | #####    | AC-G | BTG1     |
| MYL6. 1    | #####    | 0.428313 | 0.921 | 0.946 | #####    | AC-G | MYL6     |
| SLC02B1. 1 | #####    | -0.91221 | 0.028 | 0.258 | #####    | AC-G | SLC02B1  |
| YBX1. 1    | #####    | -0.38873 | 0.539 | 0.807 | #####    | AC-G | YBX1     |
| TAGLN2. 1  | #####    | 0.602884 | 0.671 | 0.484 | #####    | AC-G | TAGLN2   |
| PDLIM3. 1  | #####    | 0.579005 | 0.258 | 0.086 | #####    | AC-G | PDLIM3   |
| HIST1H4C.  | #####    | -0.64494 | 0.203 | 0.468 | #####    | AC-G | HIST1H4C |
| CFB        | #####    | 0.368088 | 0.09  | 0.009 | #####    | AC-G | CFB      |
| SGK1. 1    | #####    | -0.77477 | 0.225 | 0.478 | #####    | AC-G | SGK1     |
| MYC. 1     | #####    | 0.672498 | 0.333 | 0.138 | #####    | AC-G | MYC      |
| TMBIM6     | #####    | 0.389514 | 0.837 | 0.838 | #####    | AC-G | TMBIM6   |
| EVI2B. 1   | #####    | -0.86506 | 0.017 | 0.239 | #####    | AC-G | EVI2B    |
| APOC2. 1   | #####    | -1.08364 | 0.008 | 0.224 | #####    | AC-G | APOC2    |
| NRN1       | #####    | 0.770318 | 0.416 | 0.222 | #####    | AC-G | NRN1     |
| CSF2RA. 1  | #####    | -0.91817 | 0.018 | 0.238 | #####    | AC-G | CSF2RA   |
| CD163. 1   | #####    | -0.92959 | 0.081 | 0.314 | #####    | AC-G | CD163    |
| ADM. 1     | #####    | 0.711377 | 0.348 | 0.153 | #####    | AC-G | ADM      |
| SOD1       | #####    | 0.465836 | 0.8   | 0.748 | #####    | AC-G | SOD1     |
| GRN. 1     | #####    | -0.52263 | 0.365 | 0.61  | #####    | AC-G | GRN      |
| IGFBP6. 1  | #####    | 0.568825 | 0.176 | 0.044 | #####    | AC-G | IGFBP6   |
| DTNA. 1    | #####    | 0.786517 | 0.415 | 0.221 | #####    | AC-G | DTNA     |
| THEMIS2. 1 | #####    | -0.79063 | 0.049 | 0.279 | #####    | AC-G | THEMIS2  |
| LAIR1. 1   | #####    | -0.87222 | 0.041 | 0.268 | #####    | AC-G | LAIR1    |
| MEF2C. 1   | #####    | -0.74272 | 0.083 | 0.322 | #####    | AC-G | MEF2C    |
| CXCL16. 1  | #####    | -0.59076 | 0.235 | 0.496 | #####    | AC-G | CXCL16   |
| FBX032. 1  | #####    | 0.667881 | 0.305 | 0.124 | #####    | AC-G | FBX032   |
| CD14. 1    | #####    | -0.90431 | 0.227 | 0.444 | #####    | AC-G | CD14     |
| NGFRAP1    | #####    | 0.558683 | 0.78  | 0.618 | #####    | AC-G | NGFRAP1  |
| C1QA. 1    | #####    | -0.75649 | 0.371 | 0.569 | #####    | AC-G | C1QA     |
| RB1. 1     | #####    | -0.69521 | 0.099 | 0.345 | 1.16E-99 | AC-G | RB1      |
| GPR183. 1  | #####    | -0.9914  | 0.099 | 0.327 | 1.73E-99 | AC-G | GPR183   |
| S100A4. 1  | #####    | -0.90083 | 0.1   | 0.334 | 1.92E-99 | AC-G | S100A4   |
| SLA. 1     | #####    | -0.83357 | 0.021 | 0.237 | 2.76E-99 | AC-G | SLA      |
| CPVL. 1    | #####    | -0.70737 | 0.136 | 0.39  | 3.08E-99 | AC-G | CPVL     |
| ASS1       | #####    | 0.420208 | 0.102 | 0.014 | 4.48E-99 | AC-G | ASS1     |
| CYSTM1. 1  | #####    | 0.680436 | 0.489 | 0.292 | 7.59E-99 | AC-G | CYSTM1   |
| CELF2. 1   | #####    | -0.59855 | 0.165 | 0.426 | 1.72E-98 | AC-G | CELF2    |
| MARCKSL1.  | #####    | -0.66222 | 0.382 | 0.576 | 2.01E-98 | AC-G | MARCKSL1 |
| ABI3. 1    | #####    | -0.82159 | 0.014 | 0.224 | 2.04E-98 | AC-G | ABI3     |
| IFI30. 1   | #####    | -0.85473 | 0.034 | 0.255 | 4.66E-98 | AC-G | IFI30    |
| CD300A. 1  | #####    | -0.82203 | 0.015 | 0.226 | 1.55E-97 | AC-G | CD300A   |
| FRZB       | #####    | 0.516391 | 0.137 | 0.027 | 1.79E-97 | AC-G | FRZB     |
| ATP5D. 1   | #####    | -0.46112 | 0.397 | 0.656 | 9.20E-97 | AC-G | ATP5D    |
| CD99       | #####    | 0.583443 | 0.746 | 0.616 | 6.11E-96 | AC-G | CD99     |
| PRKCG      | #####    | 0.425309 | 0.082 | 0.008 | 1.01E-95 | AC-G | PRKCG    |
| FAU. 1     | #####    | 0.307341 | 0.912 | 0.967 | 1.23E-95 | AC-G | FAU      |
| TCF4. 1    | 1.28E-99 | -0.53688 | 0.331 | 0.56  | 1.91E-95 | AC-G | TCF4     |
| LAT2. 1    | 1.66E-99 | -0.8287  | 0.026 | 0.237 | 2.49E-95 | AC-G | LAT2     |
| TMSB4X. 1  | 2.71E-99 | 0.402561 | 0.992 | 0.998 | 4.05E-95 | AC-G | TMSB4X   |



|            |          |          |       |       |          |      |          |
|------------|----------|----------|-------|-------|----------|------|----------|
| LOX        | 9.44E-99 | 0.492185 | 0.135 | 0.027 | 1.41E-94 | AC-G | LOX      |
| WBP5.1     | 1.32E-98 | 0.575425 | 0.648 | 0.474 | 1.97E-94 | AC-G | WBP5     |
| JMJD1C.1   | 3.06E-98 | -0.53943 | 0.123 | 0.375 | 4.57E-94 | AC-G | JMJD1C   |
| SPINT2.1   | 4.26E-98 | -0.74925 | 0.037 | 0.251 | 6.37E-94 | AC-G | SPINT2   |
| CYBB.1     | 1.49E-97 | -0.8008  | 0.019 | 0.226 | 2.22E-93 | AC-G | CYBB     |
| HLA-DQB1.1 | 1.63E-97 | -0.85111 | 0.136 | 0.362 | 2.44E-93 | AC-G | HLA-DQB1 |
| CETN2.1    | 2.25E-97 | 0.724605 | 0.474 | 0.292 | 3.36E-93 | AC-G | CETN2    |
| MMP2.1     | 4.58E-97 | -0.55972 | 0.041 | 0.263 | 6.85E-93 | AC-G | MMP2     |
| LGALS9.1   | 5.91E-97 | -0.82342 | 0.056 | 0.276 | 8.83E-93 | AC-G | LGALS9   |
| H1FX.1     | 1.53E-96 | -0.55178 | 0.173 | 0.426 | 2.29E-92 | AC-G | H1FX     |
| EPB41L2.1  | 6.05E-96 | -0.63928 | 0.115 | 0.349 | 9.04E-92 | AC-G | EPB41L2  |
| CHCHD10.1  | 8.83E-96 | -0.55528 | 0.175 | 0.421 | 1.32E-91 | AC-G | CHCHD10  |
| SERPINA1.1 | 1.22E-95 | -0.83237 | 0.111 | 0.336 | 1.82E-91 | AC-G | SERPINA1 |
| LPAR6.1    | 1.32E-95 | -0.73279 | 0.055 | 0.273 | 1.98E-91 | AC-G | LPAR6    |
| IL18.1     | 4.64E-95 | -0.85813 | 0.024 | 0.226 | 6.93E-91 | AC-G | IL18     |
| NINJ1.1    | 4.82E-95 | -0.63618 | 0.246 | 0.492 | 7.20E-91 | AC-G | NINJ1    |
| EVI2A.1    | 4.87E-95 | -0.8469  | 0.044 | 0.258 | 7.28E-91 | AC-G | EVI2A    |
| TCF12.1    | 6.06E-95 | -0.52049 | 0.088 | 0.322 | 9.06E-91 | AC-G | TCF12    |
| S100A13    | 1.05E-94 | 0.781105 | 0.452 | 0.265 | 1.57E-90 | AC-G | S100A13  |
| CLEC7A.1   | 1.39E-94 | -0.7694  | 0.011 | 0.207 | 2.08E-90 | AC-G | CLEC7A   |
| CPM.1      | 2.46E-93 | -0.83371 | 0.059 | 0.269 | 3.67E-89 | AC-G | CPM      |
| KCTD12.1   | 6.70E-93 | -0.64869 | 0.056 | 0.271 | 1.00E-88 | AC-G | KCTD12   |
| TNFAIP6    | 1.36E-92 | 0.728926 | 0.236 | 0.085 | 2.03E-88 | AC-G | TNFAIP6  |
| REL.1      | 1.66E-92 | -0.69964 | 0.111 | 0.335 | 2.47E-88 | AC-G | REL      |
| H2AFY.1    | 2.50E-92 | -0.4275  | 0.401 | 0.647 | 3.74E-88 | AC-G | H2AFY    |
| FCGR1B.1   | 3.05E-92 | -0.86595 | 0.006 | 0.194 | 4.56E-88 | AC-G | FCGR1B   |
| EMP3.1     | 3.29E-92 | 0.550253 | 0.606 | 0.418 | 4.92E-88 | AC-G | EMP3     |
| MGAT4A.1   | 3.51E-92 | -0.74122 | 0.047 | 0.254 | 5.25E-88 | AC-G | MGAT4A   |
| MNDA.1     | 2.03E-91 | -0.75929 | 0.015 | 0.208 | 3.04E-87 | AC-G | MNDA     |
| ADAP2.1    | 3.47E-91 | -0.74365 | 0.02  | 0.216 | 5.19E-87 | AC-G | ADAP2    |
| SERPINF1.1 | 4.59E-91 | -0.705   | 0.048 | 0.259 | 6.86E-87 | AC-G | SERPINF1 |
| OSTF1.1    | 4.81E-91 | -0.65573 | 0.104 | 0.328 | 7.18E-87 | AC-G | OSTF1    |
| RHOG.1     | 6.47E-91 | -0.62736 | 0.207 | 0.449 | 9.66E-87 | AC-G | RHOG     |
| DCX.1      | 9.23E-91 | -0.63967 | 0.034 | 0.238 | 1.38E-86 | AC-G | DCX      |
| CENPV.1    | 1.08E-90 | -0.56706 | 0.074 | 0.29  | 1.62E-86 | AC-G | CENPV    |
| LTC4S.1    | 1.83E-90 | -0.74419 | 0.01  | 0.199 | 2.74E-86 | AC-G | LTC4S    |
| MT1G.1     | 1.97E-90 | 0.556425 | 0.266 | 0.101 | 2.94E-86 | AC-G | MT1G     |
| TNC        | 2.36E-90 | 0.788992 | 0.345 | 0.173 | 3.52E-86 | AC-G | TNC      |
| CNPY3.1    | 4.41E-90 | -0.60921 | 0.213 | 0.451 | 6.59E-86 | AC-G | CNPY3    |
| RASSF2.1   | 5.67E-90 | -0.51559 | 0.073 | 0.295 | 8.47E-86 | AC-G | RASSF2   |
| PRSS35     | 6.01E-90 | 0.171524 | 0.059 | 0.003 | 8.99E-86 | AC-G | PRSS35   |
| MMP7       | 6.77E-90 | 0.608901 | 0.1   | 0.015 | 1.01E-85 | AC-G | MMP7     |
| WAS.1      | 1.38E-89 | -0.71582 | 0.015 | 0.205 | 2.06E-85 | AC-G | WAS      |
| TNFRSF1B.1 | 2.43E-89 | -0.71883 | 0.026 | 0.22  | 3.63E-85 | AC-G | TNFRSF1B |
| TGFB1.1    | 2.67E-89 | -0.58386 | 0.064 | 0.28  | 3.98E-85 | AC-G | TGFB1    |
| H2AFJ.1    | 4.86E-89 | -0.67822 | 0.079 | 0.294 | 7.26E-85 | AC-G | H2AFJ    |
| SAA4       | 7.51E-89 | 0.384912 | 0.05  | 0.002 | 1.12E-84 | AC-G | SAA4     |
| AP1B1.1    | 8.50E-89 | -0.63894 | 0.078 | 0.294 | 1.27E-84 | AC-G | AP1B1    |
| PRDX5.1    | 9.76E-89 | 0.45425  | 0.781 | 0.735 | 1.46E-84 | AC-G | PRDX5    |
| HNRNPD.1   | 2.66E-88 | -0.48655 | 0.215 | 0.453 | 3.98E-84 | AC-G | HNRNPD   |
| RSPH1      | 2.95E-88 | 0.289539 | 0.091 | 0.013 | 4.42E-84 | AC-G | RSPH1    |

|            |           |           |        |        |           |      |         |
|------------|-----------|-----------|--------|--------|-----------|------|---------|
| EMP1. 1    | 3. 72E-88 | 0. 583892 | 0. 324 | 0. 15  | 5. 55E-84 | AC-G | EMP1    |
| LIPA. 1    | 3. 79E-88 | -0. 63825 | 0. 145 | 0. 371 | 5. 66E-84 | AC-G | LIPA    |
| VAMP5      | 7. 49E-88 | 0. 736479 | 0. 546 | 0. 367 | 1. 12E-83 | AC-G | VAMP5   |
| CTSZ. 1    | 2. 35E-87 | -0. 78785 | 0. 085 | 0. 289 | 3. 51E-83 | AC-G | CTSZ    |
| EFHD2. 1   | 7. 04E-87 | -0. 58231 | 0. 042 | 0. 243 | 1. 05E-82 | AC-G | EFHD2   |
| AGT        | 8. 73E-87 | 0. 816913 | 0. 366 | 0. 191 | 1. 31E-82 | AC-G | AGT     |
| SRI. 1     | 9. 65E-87 | 0. 448671 | 0. 791 | 0. 717 | 1. 44E-82 | AC-G | SRI     |
| ABHD12. 1  | 1. 06E-86 | -0. 5169  | 0. 188 | 0. 419 | 1. 58E-82 | AC-G | ABHD12  |
| NR4A2. 1   | 1. 13E-86 | -0. 82548 | 0. 083 | 0. 284 | 1. 69E-82 | AC-G | NR4A2   |
| COL8A1     | 1. 35E-86 | 0. 326496 | 0. 08  | 0. 009 | 2. 02E-82 | AC-G | COL8A1  |
| CD83. 1    | 1. 39E-86 | -0. 76044 | 0. 12  | 0. 329 | 2. 07E-82 | AC-G | CD83    |
| TPT1. 1    | 5. 26E-86 | 0. 348273 | 0. 924 | 0. 959 | 7. 87E-82 | AC-G | TPT1    |
| GLUL       | 5. 94E-86 | 0. 498459 | 0. 812 | 0. 781 | 8. 88E-82 | AC-G | GLUL    |
| TIMP4      | 2. 59E-85 | 0. 696973 | 0. 218 | 0. 078 | 3. 87E-81 | AC-G | TIMP4   |
| GNG7. 1    | 3. 65E-85 | -0. 57526 | 0. 11  | 0. 336 | 5. 45E-81 | AC-G | GNG7    |
| SMAP2. 1   | 5. 54E-85 | -0. 62739 | 0. 065 | 0. 269 | 8. 28E-81 | AC-G | SMAP2   |
| PTPN6. 1   | 5. 66E-85 | -0. 67874 | 0. 011 | 0. 191 | 8. 46E-81 | AC-G | PTPN6   |
| SBDS. 1    | 8. 72E-85 | 0. 450872 | 0. 698 | 0. 593 | 1. 30E-80 | AC-G | SBDS    |
| HSPA1A. 1  | 9. 43E-85 | -0. 60084 | 0. 296 | 0. 53  | 1. 41E-80 | AC-G | HSPA1A  |
| IGSF6. 1   | 1. 75E-84 | -0. 75258 | 0. 006 | 0. 182 | 2. 61E-80 | AC-G | IGSF6   |
| LAPTM4A. 1 | 6. 11E-84 | 0. 406304 | 0. 801 | 0. 767 | 9. 14E-80 | AC-G | LAPTM4A |
| PLXDC2. 1  | 1. 07E-83 | -0. 70433 | 0. 045 | 0. 241 | 1. 60E-79 | AC-G | PLXDC2  |
| CCDC88A. 1 | 1. 39E-83 | -0. 44019 | 0. 215 | 0. 455 | 2. 08E-79 | AC-G | CCDC88A |
| EGLN3      | 1. 65E-83 | 0. 419653 | 0. 16  | 0. 044 | 2. 46E-79 | AC-G | EGLN3   |
| TM6SF1. 1  | 1. 87E-83 | -0. 7694  | 0. 01  | 0. 187 | 2. 79E-79 | AC-G | TM6SF1  |
| MYO1F. 1   | 5. 53E-83 | -0. 70842 | 0. 028 | 0. 214 | 8. 27E-79 | AC-G | MYO1F   |
| RNASE2. 1  | 9. 79E-83 | -0. 79796 | 0. 011 | 0. 186 | 1. 46E-78 | AC-G | RNASE2  |
| FAM105A. 1 | 2. 62E-82 | -0. 69271 | 0. 015 | 0. 191 | 3. 92E-78 | AC-G | FAM105A |
| FRMD4A. 1  | 2. 84E-82 | -0. 60721 | 0. 031 | 0. 218 | 4. 24E-78 | AC-G | FRMD4A  |
| DBI. 1     | 3. 59E-82 | 0. 486531 | 0. 862 | 0. 84  | 5. 37E-78 | AC-G | DBI     |
| LYZ. 1     | 5. 20E-82 | -0. 8032  | 0. 049 | 0. 237 | 7. 77E-78 | AC-G | LYZ     |
| ENPP5      | 9. 09E-82 | 0. 285237 | 0. 071 | 0. 008 | 1. 36E-77 | AC-G | ENPP5   |
| IRF8. 1    | 1. 08E-81 | -0. 69709 | 0. 013 | 0. 187 | 1. 61E-77 | AC-G | IRF8    |
| APOD       | 1. 19E-81 | 0. 473862 | 0. 313 | 0. 131 | 1. 77E-77 | AC-G | APOD    |
| YWHAB. 1   | 1. 28E-81 | -0. 30047 | 0. 526 | 0. 737 | 1. 91E-77 | AC-G | YWHAB   |
| APBB1IP. 1 | 1. 99E-81 | -0. 67144 | 0. 011 | 0. 185 | 2. 98E-77 | AC-G | APBB1IP |
| PCSK1      | 2. 14E-81 | 0. 419043 | 0. 105 | 0. 02  | 3. 19E-77 | AC-G | PCSK1   |
| SLC7A7. 1  | 2. 17E-81 | -0. 69285 | 0. 023 | 0. 204 | 3. 24E-77 | AC-G | SLC7A7  |
| FGL2. 1    | 2. 33E-81 | -0. 73643 | 0. 026 | 0. 206 | 3. 49E-77 | AC-G | FGL2    |
| RALY. 1    | 2. 46E-81 | -0. 45425 | 0. 265 | 0. 493 | 3. 68E-77 | AC-G | RALY    |
| SPTLC2. 1  | 2. 47E-81 | -0. 6447  | 0. 05  | 0. 242 | 3. 68E-77 | AC-G | SPTLC2  |
| SLC2A5. 1  | 5. 70E-81 | -0. 80037 | 0. 021 | 0. 199 | 8. 52E-77 | AC-G | SLC2A5  |
| PGK1       | 6. 17E-81 | 0. 420127 | 0. 772 | 0. 75  | 9. 23E-77 | AC-G | PGK1    |
| QKI. 1     | 7. 95E-81 | -0. 47767 | 0. 285 | 0. 507 | 1. 19E-76 | AC-G | QKI     |
| MSR1. 1    | 1. 04E-80 | -0. 7147  | 0. 028 | 0. 21  | 1. 56E-76 | AC-G | MSR1    |
| NDRG1      | 1. 28E-80 | 0. 568068 | 0. 312 | 0. 144 | 1. 92E-76 | AC-G | NDRG1   |
| C1QB. 1    | 1. 41E-80 | -0. 60003 | 0. 444 | 0. 594 | 2. 10E-76 | AC-G | C1QB    |
| RGCC. 1    | 1. 43E-80 | -0. 71909 | 0. 084 | 0. 282 | 2. 14E-76 | AC-G | RGCC    |
| TRAF4. 1   | 1. 75E-80 | -0. 5028  | 0. 096 | 0. 303 | 2. 61E-76 | AC-G | TRAF4   |
| PLEK. 1    | 2. 93E-80 | -0. 73538 | 0. 026 | 0. 204 | 4. 37E-76 | AC-G | PLEK    |
| UBL5       | 3. 71E-80 | 0. 392625 | 0. 846 | 0. 828 | 5. 54E-76 | AC-G | UBL5    |

|            |          |          |       |       |          |      |              |
|------------|----------|----------|-------|-------|----------|------|--------------|
| GEM        | 7.43E-80 | 0.507316 | 0.212 | 0.074 | 1.11E-75 | AC-G | GEM          |
| IFITM3     | 7.86E-80 | 0.711375 | 0.61  | 0.482 | 1.17E-75 | AC-G | IFITM3       |
| PREX1.1    | 8.42E-80 | -0.54405 | 0.055 | 0.25  | 1.26E-75 | AC-G | PREX1        |
| TOMM7      | 1.31E-79 | 0.410198 | 0.842 | 0.854 | 1.96E-75 | AC-G | TOMM7        |
| C5AR1.1    | 1.56E-79 | -0.82141 | 0.077 | 0.269 | 2.33E-75 | AC-G | C5AR1        |
| FOLR2.1    | 1.71E-79 | -0.86581 | 0.028 | 0.207 | 2.56E-75 | AC-G | FOLR2        |
| FAM26F.1   | 2.03E-79 | -0.67611 | 0.021 | 0.195 | 3.03E-75 | AC-G | FAM26F       |
| TAF7.1     | 3.00E-79 | 0.475787 | 0.656 | 0.533 | 4.49E-75 | AC-G | TAF7         |
| NUDT3.1    | 3.19E-79 | -0.46336 | 0.208 | 0.437 | 4.76E-75 | AC-G | NUDT3        |
| EIF3L      | 5.81E-79 | -0.33868 | 0.402 | 0.646 | 8.68E-75 | AC-G | EIF3L        |
| EPAS1      | 6.18E-79 | 0.490374 | 0.218 | 0.083 | 9.24E-75 | AC-G | EPAS1        |
| PTGS1.1    | 1.02E-78 | -0.57168 | 0.014 | 0.184 | 1.52E-74 | AC-G | PTGS1        |
| CYFIP1.1   | 1.54E-78 | -0.50207 | 0.106 | 0.318 | 2.31E-74 | AC-G | CYFIP1       |
| GADD45A.1  | 2.51E-78 | 0.611284 | 0.421 | 0.251 | 3.76E-74 | AC-G | GADD45A      |
| TSPAN14.1  | 3.50E-78 | -0.51182 | 0.052 | 0.244 | 5.24E-74 | AC-G | TSPAN14      |
| SHFM1      | 4.38E-78 | 0.432108 | 0.773 | 0.713 | 6.55E-74 | AC-G | SHFM1        |
| FAM181B.1  | 6.61E-78 | -0.52323 | 0.048 | 0.234 | 9.87E-74 | AC-G | FAM181B      |
| RP11-437L  | 8.45E-78 | 0.332877 | 0.056 | 0.004 | 1.26E-73 | AC-G | RP11-437L7.1 |
| SIGLEC10.1 | 1.30E-77 | -0.68203 | 0.019 | 0.19  | 1.94E-73 | AC-G | SIGLEC10     |
| CD81.1     | 1.54E-77 | -0.49931 | 0.248 | 0.476 | 2.31E-73 | AC-G | CD81         |
| SH3KBP1.1  | 1.82E-77 | -0.56371 | 0.078 | 0.273 | 2.72E-73 | AC-G | SH3KBP1      |
| GIMAP4.1   | 2.46E-77 | -0.68413 | 0.01  | 0.177 | 3.68E-73 | AC-G | GIMAP4       |
| RARRES3.1  | 3.18E-77 | 0.734498 | 0.389 | 0.215 | 4.75E-73 | AC-G | RARRES3      |
| SRGAP2.1   | 4.04E-77 | -0.57552 | 0.071 | 0.264 | 6.04E-73 | AC-G | SRGAP2       |
| STXBP2.1   | 5.89E-77 | -0.65857 | 0.027 | 0.201 | 8.80E-73 | AC-G | STXBP2       |
| BACE2.1    | 6.29E-77 | 0.291192 | 0.141 | 0.037 | 9.39E-73 | AC-G | BACE2        |
| MAP3K8.1   | 7.47E-77 | -0.71116 | 0.036 | 0.212 | 1.12E-72 | AC-G | MAP3K8       |
| SKIL.1     | 1.12E-76 | -0.55386 | 0.117 | 0.319 | 1.68E-72 | AC-G | SKIL         |
| VEGFA.1    | 1.13E-76 | 0.621106 | 0.347 | 0.19  | 1.69E-72 | AC-G | VEGFA        |
| SLC31A2.1  | 1.37E-76 | -0.7073  | 0.042 | 0.222 | 2.05E-72 | AC-G | SLC31A2      |
| HLA-E.1    | 2.13E-76 | -0.48027 | 0.434 | 0.628 | 3.18E-72 | AC-G | HLA-E        |
| SRM.1      | 2.52E-76 | -0.4723  | 0.18  | 0.401 | 3.77E-72 | AC-G | SRM          |
| CMTM7.1    | 2.84E-76 | -0.57388 | 0.021 | 0.192 | 4.25E-72 | AC-G | CMTM7        |
| RNF130.1   | 2.90E-76 | -0.50757 | 0.275 | 0.499 | 4.34E-72 | AC-G | RNF130       |
| CHD7.1     | 3.14E-76 | -0.47916 | 0.114 | 0.323 | 4.69E-72 | AC-G | CHD7         |
| HCK.1      | 3.52E-76 | -0.67936 | 0.024 | 0.195 | 5.26E-72 | AC-G | HCK          |
| CD4.1      | 5.93E-76 | -0.65651 | 0.016 | 0.182 | 8.86E-72 | AC-G | CD4          |
| AC015936.7 | 5.51E-76 | 0.320569 | 0.074 | 0.009 | 1.12E-71 | AC-G | AC015936.3   |
| OLFML3.1   | 9.12E-76 | -0.73248 | 0.068 | 0.257 | 1.36E-71 | AC-G | OLFML3       |
| ATP1B3.1   | 9.37E-76 | -0.42181 | 0.353 | 0.582 | 1.40E-71 | AC-G | ATP1B3       |
| HLA-DMA.1  | 1.02E-75 | -0.63183 | 0.246 | 0.44  | 1.52E-71 | AC-G | HLA-DMA      |
| UBE2E3.1   | 1.65E-75 | -0.39604 | 0.269 | 0.497 | 2.46E-71 | AC-G | UBE2E3       |
| SAMHD1.1   | 1.85E-75 | -0.59512 | 0.06  | 0.245 | 2.76E-71 | AC-G | SAMHD1       |
| ZEB2.1     | 1.99E-75 | -0.51982 | 0.13  | 0.337 | 2.98E-71 | AC-G | ZEB2         |
| FMNL2.1    | 2.23E-75 | -0.47292 | 0.097 | 0.298 | 3.33E-71 | AC-G | FMNL2        |
| MTSS1.1    | 7.24E-75 | -0.57994 | 0.059 | 0.243 | 1.08E-70 | AC-G | MTSS1        |
| AES.1      | 8.54E-75 | -0.44723 | 0.226 | 0.446 | 1.28E-70 | AC-G | AES          |
| SOX4.1     | 8.71E-75 | -0.6834  | 0.292 | 0.475 | 1.30E-70 | AC-G | SOX4         |
| SET.1      | 1.34E-74 | -0.33818 | 0.367 | 0.598 | 2.00E-70 | AC-G | SET          |
| FERMT3.1   | 1.35E-74 | -0.6738  | 0.026 | 0.194 | 2.02E-70 | AC-G | FERMT3       |
| PARVG.1    | 1.37E-74 | -0.69162 | 0.022 | 0.189 | 2.04E-70 | AC-G | PARVG        |

|           |          |          |       |       |          |      |              |
|-----------|----------|----------|-------|-------|----------|------|--------------|
| IFNGR2.1  | 1.59E-74 | -0.47976 | 0.206 | 0.425 | 2.38E-70 | AC-G | IFNGR2       |
| UBE2S.1   | 1.79E-74 | -0.51626 | 0.166 | 0.379 | 2.68E-70 | AC-G | UBE2S        |
| C11orf70  | 1.80E-74 | 0.235849 | 0.073 | 0.009 | 2.69E-70 | AC-G | C11orf70     |
| CSF3R.1   | 1.92E-74 | -0.68139 | 0.016 | 0.179 | 2.87E-70 | AC-G | CSF3R        |
| ANP32A.1  | 2.88E-74 | -0.34059 | 0.232 | 0.466 | 4.30E-70 | AC-G | ANP32A       |
| SERPINE1  | 3.15E-74 | 0.56049  | 0.212 | 0.078 | 4.71E-70 | AC-G | SERPINE1     |
| DDX17.1   | 4.23E-74 | -0.45881 | 0.24  | 0.46  | 6.32E-70 | AC-G | DDX17        |
| KHDRBS1.1 | 4.26E-74 | -0.42239 | 0.295 | 0.523 | 6.36E-70 | AC-G | KHDRBS1      |
| RP11-161M | 4.59E-74 | -0.52715 | 0.025 | 0.194 | 6.86E-70 | AC-G | RP11-161M6.2 |
| SLC16A1.1 | 6.16E-74 | 0.570505 | 0.365 | 0.208 | 9.21E-70 | AC-G | SLC16A1      |
| GLTSCR2.1 | 6.86E-74 | -0.38936 | 0.353 | 0.605 | 1.03E-69 | AC-G | GLTSCR2      |
| MAP1B.1   | 8.30E-74 | 0.506063 | 0.672 | 0.507 | 1.24E-69 | AC-G | MAP1B        |
| EIF1AY.1  | 1.10E-73 | -0.39538 | 0.031 | 0.206 | 1.64E-69 | AC-G | EIF1AY       |
| AP1S2.1   | 1.21E-73 | -0.41016 | 0.322 | 0.535 | 1.81E-69 | AC-G | AP1S2        |
| RDH10.1   | 1.33E-73 | 0.457072 | 0.187 | 0.066 | 1.99E-69 | AC-G | RDH10        |
| ARHGAP29  | 2.48E-73 | 0.242176 | 0.095 | 0.018 | 3.70E-69 | AC-G | ARHGAP29     |
| LPCAT2.1  | 2.89E-73 | -0.60122 | 0.014 | 0.173 | 4.31E-69 | AC-G | LPCAT2       |
| MYCBP2.1  | 3.28E-73 | -0.49958 | 0.134 | 0.338 | 4.90E-69 | AC-G | MYCBP2       |
| ZNF331.1  | 3.29E-73 | -0.72484 | 0.155 | 0.347 | 4.92E-69 | AC-G | ZNF331       |
| IDH2.1    | 4.45E-73 | -0.44322 | 0.24  | 0.463 | 6.65E-69 | AC-G | IDH2         |
| IER3.1    | 5.05E-73 | -0.74885 | 0.088 | 0.271 | 7.55E-69 | AC-G | IER3         |
| ACTR2.1   | 6.83E-73 | -0.42752 | 0.274 | 0.495 | 1.02E-68 | AC-G | ACTR2        |
| CLIC4     | 8.11E-73 | 0.550066 | 0.472 | 0.305 | 1.21E-68 | AC-G | CLIC4        |
| LRRC2     | 1.05E-72 | 0.21858  | 0.069 | 0.009 | 1.57E-68 | AC-G | LRRC2        |
| CREG1.1   | 1.18E-72 | -0.60282 | 0.135 | 0.328 | 1.77E-68 | AC-G | CREG1        |
| FOXN3.1   | 2.04E-72 | -0.51336 | 0.091 | 0.287 | 3.05E-68 | AC-G | FOXN3        |
| OLIG1.1   | 2.04E-72 | -0.66626 | 0.036 | 0.208 | 3.05E-68 | AC-G | OLIG1        |
| S100A9.1  | 2.30E-72 | -0.80822 | 0.074 | 0.253 | 3.44E-68 | AC-G | S100A9       |
| HLA-A.1   | 3.08E-72 | 0.362848 | 0.889 | 0.897 | 4.60E-68 | AC-G | HLA-A        |
| SERPINB9  | 3.92E-72 | -0.64051 | 0.014 | 0.172 | 5.85E-68 | AC-G | SERPINB9     |
| MFSD1.1   | 5.58E-72 | -0.55758 | 0.173 | 0.377 | 8.33E-68 | AC-G | MFSD1        |
| UQCRB.1   | 5.70E-72 | -0.29844 | 0.46  | 0.721 | 8.52E-68 | AC-G | UQCRB        |
| SFPQ.1    | 5.94E-72 | -0.39168 | 0.358 | 0.578 | 8.88E-68 | AC-G | SFPQ         |
| S100A8.1  | 6.85E-72 | -0.80942 | 0.043 | 0.213 | 1.02E-67 | AC-G | S100A8       |
| GBE1.1    | 9.07E-72 | 0.554073 | 0.316 | 0.16  | 1.36E-67 | AC-G | GBE1         |
| LAMTOR5.1 | 9.83E-72 | 0.40835  | 0.74  | 0.682 | 1.47E-67 | AC-G | LAMTOR5      |
| IL13RA1.1 | 1.15E-71 | -0.61016 | 0.094 | 0.279 | 1.72E-67 | AC-G | IL13RA1      |
| GSTP1.1   | 1.26E-71 | 0.396784 | 0.821 | 0.822 | 1.88E-67 | AC-G | GSTP1        |
| PLOD2.1   | 1.48E-71 | 0.566879 | 0.281 | 0.139 | 2.21E-67 | AC-G | PLOD2        |
| BDH2      | 1.61E-71 | 0.526159 | 0.262 | 0.118 | 2.40E-67 | AC-G | BDH2         |
| RNF145.1  | 1.75E-71 | -0.42359 | 0.197 | 0.412 | 2.62E-67 | AC-G | RNF145       |
| ARL5A.1   | 1.90E-71 | -0.39723 | 0.33  | 0.554 | 2.84E-67 | AC-G | ARL5A        |
| AKAP12.1  | 2.01E-71 | 0.635283 | 0.31  | 0.163 | 3.00E-67 | AC-G | AKAP12       |
| VASN      | 2.70E-71 | 0.214715 | 0.076 | 0.011 | 4.04E-67 | AC-G | VASN         |
| DYNLL1    | 2.84E-71 | 0.335546 | 0.848 | 0.834 | 4.24E-67 | AC-G | DYNLL1       |
| PLD4.1    | 3.03E-71 | -0.70044 | 0.02  | 0.179 | 4.53E-67 | AC-G | PLD4         |
| ACSL1.1   | 4.32E-71 | -0.65256 | 0.077 | 0.257 | 6.46E-67 | AC-G | ACSL1        |
| HAMP.1    | 4.98E-71 | -0.84045 | 0.026 | 0.187 | 7.44E-67 | AC-G | HAMP         |
| BID.1     | 5.44E-71 | -0.40603 | 0.169 | 0.393 | 8.13E-67 | AC-G | BID          |
| KLHDC8A.1 | 7.05E-71 | -0.46388 | 0.091 | 0.281 | 1.05E-66 | AC-G | KLHDC8A      |
| SRSF9.1   | 8.32E-71 | -0.38614 | 0.382 | 0.596 | 1.24E-66 | AC-G | SRSF9        |

|            |           |           |        |        |           |      |            |
|------------|-----------|-----------|--------|--------|-----------|------|------------|
| FAS        | 1. 62E-70 | 0. 450774 | 0. 159 | 0. 049 | 2. 43E-66 | AC-G | FAS        |
| IL10RA. 1  | 1. 78E-70 | -0. 61681 | 0. 01  | 0. 163 | 2. 66E-66 | AC-G | IL10RA     |
| ARHGAP18.  | 1. 86E-70 | -0. 59144 | 0. 033 | 0. 199 | 2. 78E-66 | AC-G | ARHGAP18   |
| LIMS1. 1   | 2. 00E-70 | -0. 43363 | 0. 264 | 0. 474 | 2. 99E-66 | AC-G | LIMS1      |
| GAA. 1     | 2. 06E-70 | -0. 48606 | 0. 15  | 0. 353 | 3. 07E-66 | AC-G | GAA        |
| WIPF1. 1   | 2. 25E-70 | -0. 53134 | 0. 067 | 0. 249 | 3. 37E-66 | AC-G | WIPF1      |
| FTH1. 1    | 2. 28E-70 | 0. 187843 | 0. 833 | 0. 952 | 3. 41E-66 | AC-G | FTH1       |
| ZNF667-AS  | 2. 47E-70 | 0. 541526 | 0. 515 | 0. 363 | 3. 69E-66 | AC-G | ZNF667-AS1 |
| SEPP1. 1   | 2. 96E-70 | 0. 575829 | 0. 495 | 0. 296 | 4. 42E-66 | AC-G | SEPP1      |
| APOC1. 1   | 3. 07E-70 | -0. 50925 | 0. 372 | 0. 544 | 4. 59E-66 | AC-G | APOC1      |
| MARCH1. 1  | 4. 14E-70 | -0. 5444  | 0. 046 | 0. 219 | 6. 18E-66 | AC-G | 1-Mar      |
| PTPRE. 1   | 4. 19E-70 | -0. 56148 | 0. 108 | 0. 301 | 6. 26E-66 | AC-G | PTPRE      |
| SOX8. 1    | 5. 27E-70 | -0. 49987 | 0. 036 | 0. 205 | 7. 88E-66 | AC-G | SOX8       |
| CD69. 1    | 6. 33E-70 | -0. 79145 | 0. 021 | 0. 179 | 9. 46E-66 | AC-G | CD69       |
| HTRA1. 1   | 8. 62E-70 | -0. 44065 | 0. 27  | 0. 497 | 1. 29E-65 | AC-G | HTRA1      |
| PLP2. 1    | 9. 42E-70 | 0. 580242 | 0. 475 | 0. 318 | 1. 41E-65 | AC-G | PLP2       |
| SCIN. 1    | 1. 22E-69 | -0. 73573 | 0. 02  | 0. 176 | 1. 83E-65 | AC-G | SCIN       |
| SLAIN1. 1  | 1. 63E-69 | -0. 52056 | 0. 055 | 0. 232 | 2. 44E-65 | AC-G | SLAIN1     |
| TSHZ2      | 3. 91E-69 | 0. 338617 | 0. 129 | 0. 034 | 5. 84E-65 | AC-G | TSHZ2      |
| CEP170. 1  | 4. 35E-69 | -0. 44956 | 0. 1   | 0. 293 | 6. 50E-65 | AC-G | CEP170     |
| NCF4. 1    | 4. 48E-69 | -0. 65182 | 0. 016 | 0. 171 | 6. 70E-65 | AC-G | NCF4       |
| DHRS7. 1   | 4. 67E-69 | -0. 36586 | 0. 363 | 0. 594 | 6. 98E-65 | AC-G | DHRS7      |
| FUOM. 1    | 4. 89E-69 | -0. 56691 | 0. 013 | 0. 166 | 7. 31E-65 | AC-G | FUOM       |
| SLC16A3. 1 | 8. 38E-69 | -0. 61423 | 0. 162 | 0. 351 | 1. 25E-64 | AC-G | SLC16A3    |
| USF2. 1    | 1. 17E-68 | -0. 45002 | 0. 154 | 0. 359 | 1. 75E-64 | AC-G | USF2       |
| GPR65. 1   | 1. 50E-68 | -0. 6097  | 0. 009 | 0. 158 | 2. 24E-64 | AC-G | GPR65      |
| GNAQ. 1    | 1. 69E-68 | -0. 41098 | 0. 122 | 0. 319 | 2. 53E-64 | AC-G | GNAQ       |
| ZFAND5. 1  | 1. 71E-68 | -0. 39166 | 0. 271 | 0. 5   | 2. 55E-64 | AC-G | ZFAND5     |
| FAM89B. 1  | 2. 02E-68 | -0. 40865 | 0. 09  | 0. 277 | 3. 03E-64 | AC-G | FAM89B     |
| SPOCK2     | 2. 13E-68 | 0. 54157  | 0. 253 | 0. 117 | 3. 18E-64 | AC-G | SPOCK2     |
| GNB1. 1    | 3. 01E-68 | -0. 41054 | 0. 236 | 0. 45  | 4. 50E-64 | AC-G | GNB1       |
| MEX3A. 1   | 3. 41E-68 | -0. 42213 | 0. 038 | 0. 205 | 5. 10E-64 | AC-G | MEX3A      |
| AQP4       | 7. 82E-68 | 0. 66832  | 0. 288 | 0. 142 | 1. 17E-63 | AC-G | AQP4       |
| NREP. 1    | 9. 55E-68 | -0. 43595 | 0. 109 | 0. 304 | 1. 43E-63 | AC-G | NREP       |
| CA12. 1    | 9. 73E-68 | 0. 553412 | 0. 246 | 0. 115 | 1. 45E-63 | AC-G | CA12       |
| BCL2A1. 1  | 1. 27E-67 | -0. 67429 | 0. 027 | 0. 182 | 1. 89E-63 | AC-G | BCL2A1     |
| ETV5. 1    | 1. 52E-67 | -0. 43153 | 0. 099 | 0. 29  | 2. 26E-63 | AC-G | ETV5       |
| C6orf141   | 1. 63E-67 | 0. 374131 | 0. 091 | 0. 018 | 2. 44E-63 | AC-G | C6orf141   |
| CTSC. 1    | 6. 64E-67 | -0. 50243 | 0. 219 | 0. 416 | 9. 93E-63 | AC-G | CTSC       |
| TXN. 1     | 1. 43E-66 | 0. 457218 | 0. 717 | 0. 656 | 2. 14E-62 | AC-G | TXN        |
| PTMS. 1    | 1. 90E-66 | -0. 3792  | 0. 402 | 0. 582 | 2. 84E-62 | AC-G | PTMS       |
| CSTA. 1    | 1. 93E-66 | -0. 54391 | 0. 008 | 0. 152 | 2. 88E-62 | AC-G | CSTA       |
| HMG1. 1    | 4. 97E-66 | -0. 35132 | 0. 478 | 0. 701 | 7. 43E-62 | AC-G | HMG1       |
| IGSF21. 1  | 6. 80E-66 | -0. 54707 | 0. 03  | 0. 189 | 1. 02E-61 | AC-G | IGSF21     |
| REEP3. 1   | 6. 81E-66 | -0. 40707 | 0. 091 | 0. 275 | 1. 02E-61 | AC-G | REEP3      |
| PCBP1. 1   | 9. 46E-66 | -0. 33047 | 0. 403 | 0. 624 | 1. 41E-61 | AC-G | PCBP1      |
| CD302. 1   | 1. 07E-65 | -0. 59179 | 0. 063 | 0. 232 | 1. 59E-61 | AC-G | CD302      |
| MTDH. 1    | 1. 16E-65 | -0. 34982 | 0. 423 | 0. 646 | 1. 74E-61 | AC-G | MTDH       |
| MPST. 1    | 1. 19E-65 | -0. 40598 | 0. 138 | 0. 339 | 1. 79E-61 | AC-G | MPST       |
| HIF1A      | 1. 72E-65 | -0. 3621  | 0. 313 | 0. 533 | 2. 57E-61 | AC-G | HIF1A      |
| ITM2C. 1   | 1. 92E-65 | 0. 633867 | 0. 51  | 0. 399 | 2. 87E-61 | AC-G | ITM2C      |

|               |           |           |        |        |           |      |               |
|---------------|-----------|-----------|--------|--------|-----------|------|---------------|
| PODXL2. 1     | 1. 93E-65 | -0. 48656 | 0. 148 | 0. 339 | 2. 89E-61 | AC-G | PODXL2        |
| DSTN. 1       | 2. 23E-65 | 0. 425968 | 0. 705 | 0. 601 | 3. 33E-61 | AC-G | DSTN          |
| FRMD4B. 1     | 2. 77E-65 | -0. 57478 | 0. 029 | 0. 185 | 4. 14E-61 | AC-G | FRMD4B        |
| KIF5B. 1      | 3. 34E-65 | -0. 377   | 0. 338 | 0. 545 | 4. 99E-61 | AC-G | KIF5B         |
| SRSF2. 1      | 4. 42E-65 | -0. 35142 | 0. 425 | 0. 64  | 6. 60E-61 | AC-G | SRSF2         |
| RILPL2. 1     | 8. 05E-65 | -0. 58384 | 0. 109 | 0. 288 | 1. 20E-60 | AC-G | RILPL2        |
| AKAP13. 1     | 1. 09E-64 | -0. 44789 | 0. 155 | 0. 358 | 1. 62E-60 | AC-G | AKAP13        |
| GPRC5A        | 1. 56E-64 | 0. 180277 | 0. 048 | 0. 004 | 2. 33E-60 | AC-G | GPRC5A        |
| ADAM28. 1     | 1. 65E-64 | -0. 63249 | 0. 018 | 0. 165 | 2. 46E-60 | AC-G | ADAM28        |
| GBP2          | 2. 71E-64 | 0. 581439 | 0. 341 | 0. 182 | 4. 06E-60 | AC-G | GBP2          |
| TRMT112. 1    | 3. 08E-64 | 0. 402046 | 0. 748 | 0. 699 | 4. 60E-60 | AC-G | TRMT112       |
| CADPS. 1      | 3. 65E-64 | 0. 365733 | 0. 114 | 0. 029 | 5. 46E-60 | AC-G | CADPS         |
| ARHGAP21. 1   | 4. 17E-64 | -0. 44657 | 0. 096 | 0. 28  | 6. 23E-60 | AC-G | ARHGAP21      |
| TRABD. 1      | 5. 19E-64 | -0. 45649 | 0. 105 | 0. 289 | 7. 75E-60 | AC-G | TRABD         |
| ABCC3         | 5. 40E-64 | 0. 503471 | 0. 2   | 0. 08  | 8. 08E-60 | AC-G | ABCC3         |
| PILRA. 1      | 7. 12E-64 | -0. 66863 | 0. 036 | 0. 19  | 1. 06E-59 | AC-G | PILRA         |
| GPC2. 1       | 9. 65E-64 | -0. 51024 | 0. 037 | 0. 193 | 1. 44E-59 | AC-G | GPC2          |
| HINT1         | 1. 72E-63 | 0. 36961  | 0. 84  | 0. 825 | 2. 57E-59 | AC-G | HINT1         |
| VM01. 1       | 2. 83E-63 | -0. 67645 | 0. 033 | 0. 184 | 4. 23E-59 | AC-G | VM01          |
| HSPA5. 1      | 3. 10E-63 | 0. 425902 | 0. 694 | 0. 65  | 4. 63E-59 | AC-G | HSPA5         |
| CCNI. 1       | 3. 40E-63 | -0. 2976  | 0. 541 | 0. 738 | 5. 08E-59 | AC-G | CCNI          |
| COR01B. 1     | 4. 66E-63 | -0. 37723 | 0. 192 | 0. 394 | 6. 96E-59 | AC-G | COR01B        |
| FCGR2B. 1     | 5. 31E-63 | -0. 70216 | 0. 022 | 0. 168 | 7. 93E-59 | AC-G | FCGR2B        |
| MLIP          | 8. 60E-63 | 0. 150826 | 0. 05  | 0. 005 | 1. 29E-58 | AC-G | MLIP          |
| BRI3. 1       | 9. 69E-63 | -0. 3598  | 0. 297 | 0. 501 | 1. 45E-58 | AC-G | BRI3          |
| ALOX5. 1      | 1. 02E-62 | -0. 55494 | 0. 018 | 0. 162 | 1. 53E-58 | AC-G | ALOX5         |
| RHOC. 1       | 1. 09E-62 | 0. 472788 | 0. 631 | 0. 514 | 1. 63E-58 | AC-G | RHOC          |
| HNRNPAB. 1    | 1. 12E-62 | -0. 37538 | 0. 225 | 0. 431 | 1. 67E-58 | AC-G | HNRNPAB       |
| RHBDF2. 1     | 1. 19E-62 | -0. 60807 | 0. 047 | 0. 203 | 1. 77E-58 | AC-G | RHBDF2        |
| TAGLN3. 1     | 1. 32E-62 | -0. 58581 | 0. 055 | 0. 214 | 1. 97E-58 | AC-G | TAGLN3        |
| FAM173A. 1    | 1. 45E-62 | -0. 3954  | 0. 127 | 0. 318 | 2. 16E-58 | AC-G | FAM173A       |
| KLC1. 1       | 1. 56E-62 | -0. 41425 | 0. 19  | 0. 393 | 2. 33E-58 | AC-G | KLC1          |
| MFNG. 1       | 1. 67E-62 | -0. 53598 | 0. 01  | 0. 149 | 2. 50E-58 | AC-G | MFNG          |
| PLEKH01. 1    | 1. 69E-62 | -0. 42393 | 0. 117 | 0. 306 | 2. 52E-58 | AC-G | PLEKH01       |
| NPL. 1        | 2. 23E-62 | -0. 61939 | 0. 064 | 0. 227 | 3. 33E-58 | AC-G | NPL           |
| HLA-B. 1      | 2. 37E-62 | 0. 354579 | 0. 867 | 0. 849 | 3. 55E-58 | AC-G | HLA-B         |
| GYPC. 1       | 2. 40E-62 | -0. 61189 | 0. 158 | 0. 339 | 3. 58E-58 | AC-G | GYPC          |
| STAB1. 1      | 2. 77E-62 | -0. 6451  | 0. 034 | 0. 186 | 4. 14E-58 | AC-G | STAB1         |
| SLC43A2. 1    | 3. 14E-62 | -0. 49029 | 0. 097 | 0. 274 | 4. 69E-58 | AC-G | SLC43A2       |
| CDC42         | 4. 07E-62 | -0. 20554 | 0. 428 | 0. 658 | 6. 09E-58 | AC-G | CDC42         |
| SORL1. 1      | 5. 74E-62 | -0. 54222 | 0. 083 | 0. 255 | 8. 58E-58 | AC-G | SORL1         |
| BSG. 1        | 5. 76E-62 | 0. 382401 | 0. 776 | 0. 735 | 8. 61E-58 | AC-G | BSG           |
| RP11-552D4. 1 | 6. 26E-62 | -0. 69777 | 0. 007 | 0. 142 | 9. 35E-58 | AC-G | RP11-552D4. 1 |
| DNAH11        | 7. 67E-62 | 0. 185942 | 0. 064 | 0. 009 | 1. 15E-57 | AC-G | DNAH11        |
| PRDX2. 1      | 1. 16E-61 | 0. 450701 | 0. 774 | 0. 687 | 1. 73E-57 | AC-G | PRDX2         |
| KIF5C. 1      | 1. 33E-61 | -0. 45136 | 0. 117 | 0. 297 | 1. 99E-57 | AC-G | KIF5C         |
| AP2S1. 1      | 1. 43E-61 | -0. 29841 | 0. 487 | 0. 694 | 2. 14E-57 | AC-G | AP2S1         |
| SYPL1. 1      | 1. 63E-61 | 0. 488045 | 0. 529 | 0. 382 | 2. 43E-57 | AC-G | SYPL1         |
| HES6. 1       | 2. 13E-61 | -0. 58077 | 0. 135 | 0. 315 | 3. 19E-57 | AC-G | HES6          |
| MCL1. 1       | 2. 22E-61 | -0. 36075 | 0. 422 | 0. 633 | 3. 31E-57 | AC-G | MCL1          |
| ARL6IP4. 1    | 2. 41E-61 | -0. 33263 | 0. 449 | 0. 658 | 3. 60E-57 | AC-G | ARL6IP4       |

|           |          |          |       |       |          |      |          |
|-----------|----------|----------|-------|-------|----------|------|----------|
| RGS12.1   | 2.93E-61 | -0.41757 | 0.115 | 0.301 | 4.37E-57 | AC-G | RGS12    |
| KTN1.1    | 3.10E-61 | -0.34608 | 0.361 | 0.559 | 4.64E-57 | AC-G | KTN1     |
| PABPC4.1  | 3.45E-61 | -0.44126 | 0.168 | 0.36  | 5.15E-57 | AC-G | PABPC4   |
| C12orf75. | 3.65E-61 | -0.49784 | 0.059 | 0.219 | 5.45E-57 | AC-G | C12orf75 |
| TSP0      | 3.89E-61 | -0.31264 | 0.422 | 0.628 | 5.82E-57 | AC-G | TSP0     |
| HMGB3.1   | 3.91E-61 | -0.46927 | 0.126 | 0.308 | 5.85E-57 | AC-G | HMGB3    |
| SMARCB1.1 | 4.52E-61 | -0.39027 | 0.244 | 0.447 | 6.75E-57 | AC-G | SMARCB1  |
| DDX5.1    | 5.39E-61 | -0.18437 | 0.656 | 0.848 | 8.05E-57 | AC-G | DDX5     |
| SOCS6.1   | 6.17E-61 | -0.4189  | 0.084 | 0.258 | 9.22E-57 | AC-G | SOCS6    |
| LCP1      | 7.37E-61 | -0.56487 | 0.022 | 0.165 | 1.10E-56 | AC-G | LCP1     |
| RPS6KA1.1 | 7.50E-61 | -0.50787 | 0.015 | 0.154 | 1.12E-56 | AC-G | RPS6KA1  |
| NCKAP1L.1 | 7.68E-61 | -0.5633  | 0.009 | 0.144 | 1.15E-56 | AC-G | NCKAP1L  |
| SMARCA4.1 | 8.21E-61 | -0.36873 | 0.197 | 0.393 | 1.23E-56 | AC-G | SMARCA4  |
| RCSD1.1   | 8.33E-61 | -0.55713 | 0.008 | 0.142 | 1.24E-56 | AC-G | RCSD1    |
| SEZ6L.1   | 9.11E-61 | -0.39686 | 0.017 | 0.158 | 1.36E-56 | AC-G | SEZ6L    |
| SRPX2     | 9.15E-61 | 0.49067  | 0.135 | 0.043 | 1.37E-56 | AC-G | SRPX2    |
| GADD45B   | 1.03E-60 | 0.527761 | 0.618 | 0.466 | 1.53E-56 | AC-G | GADD45B  |
| CD84.1    | 1.09E-60 | -0.56276 | 0.014 | 0.152 | 1.63E-56 | AC-G | CD84     |
| PRTN3     | 1.12E-60 | 0.129883 | 0.032 | 0.001 | 1.67E-56 | AC-G | PRTN3    |
| COL5A1    | 1.24E-60 | 0.149877 | 0.053 | 0.006 | 1.85E-56 | AC-G | COL5A1   |
| RAB20.1   | 1.35E-60 | -0.58985 | 0.094 | 0.264 | 2.02E-56 | AC-G | RAB20    |
| FOS.1     | 1.68E-60 | 0.395717 | 0.841 | 0.841 | 2.52E-56 | AC-G | FOS      |
| PMEPA1.1  | 2.02E-60 | -0.41424 | 0.065 | 0.228 | 3.02E-56 | AC-G | PMEPA1   |
| BAZ1A.1   | 2.24E-60 | -0.38503 | 0.158 | 0.351 | 3.35E-56 | AC-G | BAZ1A    |
| HSPB2     | 2.97E-60 | 0.225857 | 0.061 | 0.008 | 4.43E-56 | AC-G | HSPB2    |
| CSNK1E.1  | 3.43E-60 | -0.3789  | 0.146 | 0.337 | 5.12E-56 | AC-G | CSNK1E   |
| CTDNEP1.1 | 4.01E-60 | -0.39594 | 0.16  | 0.343 | 5.99E-56 | AC-G | CTDNEP1  |
| FABP5.1   | 4.12E-60 | 1.015851 | 0.513 | 0.369 | 6.16E-56 | AC-G | FABP5    |
| HSPB1     | 4.60E-60 | 0.431299 | 0.685 | 0.648 | 6.88E-56 | AC-G | HSPB1    |
| ARF6.1    | 4.74E-60 | -0.39624 | 0.18  | 0.375 | 7.09E-56 | AC-G | ARF6     |
| MBP       | 8.42E-60 | -0.77523 | 0.1   | 0.265 | 1.26E-55 | AC-G | MBP      |
| SNCA.1    | 9.58E-60 | -0.58954 | 0.024 | 0.167 | 1.43E-55 | AC-G | SNCA     |
| PPP1R18.1 | 1.12E-59 | -0.4594  | 0.14  | 0.323 | 1.67E-55 | AC-G | PPP1R18  |
| PRDX1.1   | 2.62E-59 | 0.309728 | 0.795 | 0.811 | 3.91E-55 | AC-G | PRDX1    |
| AOAH.1    | 2.62E-59 | -0.5755  | 0.011 | 0.145 | 3.91E-55 | AC-G | AOAH     |
| CD33.1    | 3.36E-59 | -0.56908 | 0.009 | 0.141 | 5.01E-55 | AC-G | CD33     |
| RABL6.1   | 3.39E-59 | -0.38772 | 0.102 | 0.275 | 5.07E-55 | AC-G | RABL6    |
| CKLF.1    | 3.79E-59 | -0.3524  | 0.341 | 0.554 | 5.66E-55 | AC-G | CKLF     |
| DBN1.1    | 4.58E-59 | -0.42334 | 0.157 | 0.341 | 6.85E-55 | AC-G | DBN1     |
| APLNR     | 4.69E-59 | 0.202494 | 0.042 | 0.003 | 7.01E-55 | AC-G | APLNR    |
| STMN2.1   | 4.88E-59 | -0.81927 | 0.059 | 0.211 | 7.29E-55 | AC-G | STMN2    |
| NKD2      | 5.21E-59 | 0.103975 | 0.042 | 0.003 | 7.79E-55 | AC-G | NKD2     |
| DBNL.1    | 7.35E-59 | -0.34993 | 0.253 | 0.459 | 1.10E-54 | AC-G | DBNL     |
| AKR1B1.1  | 8.43E-59 | -0.24823 | 0.44  | 0.661 | 1.26E-54 | AC-G | AKR1B1   |
| LIX1      | 9.59E-59 | 0.29886  | 0.068 | 0.011 | 1.43E-54 | AC-G | LIX1     |
| SMOX.1    | 1.11E-58 | 0.539748 | 0.367 | 0.223 | 1.67E-54 | AC-G | SMOX     |
| SEPT6.1   | 1.14E-58 | -0.45552 | 0.041 | 0.19  | 1.70E-54 | AC-G | 6-Sep    |
| PTAFR.1   | 1.28E-58 | -0.56675 | 0.014 | 0.147 | 1.91E-54 | AC-G | PTAFR    |
| MPP1.1    | 1.78E-58 | -0.51087 | 0.069 | 0.226 | 2.66E-54 | AC-G | MPP1     |
| NACA      | 1.81E-58 | 0.241101 | 0.877 | 0.934 | 2.71E-54 | AC-G | NACA     |
| MAP2.1    | 1.84E-58 | -0.41116 | 0.181 | 0.368 | 2.76E-54 | AC-G | MAP2     |

|             |           |           |        |        |           |      |          |
|-------------|-----------|-----------|--------|--------|-----------|------|----------|
| PGD. 1      | 1. 87E-58 | -0. 38293 | 0. 136 | 0. 323 | 2. 79E-54 | AC-G | PGD      |
| NCF1. 1     | 2. 32E-58 | -0. 52034 | 0. 013 | 0. 145 | 3. 46E-54 | AC-G | NCF1     |
| VPS37B. 1   | 2. 40E-58 | -0. 41695 | 0. 108 | 0. 283 | 3. 59E-54 | AC-G | VPS37B   |
| CAPZA1. 1   | 3. 57E-58 | -0. 40083 | 0. 23  | 0. 424 | 5. 33E-54 | AC-G | CAPZA1   |
| OSR1        | 6. 72E-58 | 0. 41077  | 0. 051 | 0. 006 | 1. 00E-53 | AC-G | OSR1     |
| SPCS2. 1    | 6. 98E-58 | 0. 357957 | 0. 756 | 0. 725 | 1. 04E-53 | AC-G | SPCS2    |
| ATP6AP1. 1  | 7. 04E-58 | -0. 3781  | 0. 323 | 0. 526 | 1. 05E-53 | AC-G | ATP6AP1  |
| BLVRB. 1    | 8. 15E-58 | 0. 538591 | 0. 498 | 0. 35  | 1. 22E-53 | AC-G | BLVRB    |
| BUD31. 1    | 8. 43E-58 | 0. 416153 | 0. 695 | 0. 615 | 1. 26E-53 | AC-G | BUD31    |
| KISS1R      | 8. 85E-58 | 0. 124092 | 0. 041 | 0. 003 | 1. 32E-53 | AC-G | KISS1R   |
| FMNL1. 1    | 8. 94E-58 | -0. 5015  | 0. 014 | 0. 145 | 1. 34E-53 | AC-G | FMNL1    |
| ROB01. 1    | 1. 08E-57 | -0. 36881 | 0. 051 | 0. 203 | 1. 62E-53 | AC-G | ROB01    |
| ENTPD1. 1   | 1. 30E-57 | -0. 59003 | 0. 041 | 0. 186 | 1. 94E-53 | AC-G | ENTPD1   |
| MAP7D1. 1   | 1. 81E-57 | -0. 38753 | 0. 189 | 0. 376 | 2. 71E-53 | AC-G | MAP7D1   |
| POSTN. 1    | 1. 88E-57 | -0. 437   | 0. 017 | 0. 151 | 2. 81E-53 | AC-G | POSTN    |
| LYSMD2. 1   | 1. 94E-57 | -0. 37048 | 0. 061 | 0. 218 | 2. 89E-53 | AC-G | LYSMD2   |
| H3F3B. 1    | 2. 06E-57 | 0. 239207 | 0. 935 | 0. 978 | 3. 07E-53 | AC-G | H3F3B    |
| CHCHD2      | 2. 45E-57 | 0. 293915 | 0. 869 | 0. 882 | 3. 66E-53 | AC-G | CHCHD2   |
| GNB2L1. 1   | 3. 54E-57 | 0. 251057 | 0. 888 | 0. 953 | 5. 29E-53 | AC-G | GNB2L1   |
| IER2. 1     | 3. 68E-57 | -0. 32269 | 0. 426 | 0. 652 | 5. 51E-53 | AC-G | IER2     |
| DOCK8. 1    | 4. 28E-57 | -0. 52633 | 0. 013 | 0. 142 | 6. 40E-53 | AC-G | DOCK8    |
| TPST1. 1    | 4. 47E-57 | 0. 500925 | 0. 351 | 0. 218 | 6. 68E-53 | AC-G | TPST1    |
| AKIRIN2. 1  | 7. 92E-57 | -0. 37887 | 0. 216 | 0. 413 | 1. 18E-52 | AC-G | AKIRIN2  |
| SRRM2. 1    | 8. 22E-57 | -0. 34152 | 0. 362 | 0. 565 | 1. 23E-52 | AC-G | SRRM2    |
| C1orf194    | 8. 80E-57 | 0. 1801   | 0. 054 | 0. 007 | 1. 31E-52 | AC-G | C1orf194 |
| PDPN        | 1. 06E-56 | 0. 65787  | 0. 543 | 0. 431 | 1. 58E-52 | AC-G | PDPN     |
| DMKN        | 1. 13E-56 | 0. 250048 | 0. 043 | 0. 004 | 1. 69E-52 | AC-G | DMKN     |
| HMGA1. 1    | 1. 34E-56 | -0. 36531 | 0. 185 | 0. 376 | 2. 00E-52 | AC-G | HMGA1    |
| NR4A3. 1    | 1. 37E-56 | -0. 5941  | 0. 034 | 0. 174 | 2. 05E-52 | AC-G | NR4A3    |
| ECM2        | 1. 89E-56 | 0. 235189 | 0. 062 | 0. 009 | 2. 83E-52 | AC-G | ECM2     |
| TMEM173. 1  | 2. 27E-56 | -0. 568   | 0. 017 | 0. 148 | 3. 39E-52 | AC-G | TMEM173  |
| SPTSSA. 1   | 2. 30E-56 | 0. 51486  | 0. 53  | 0. 408 | 3. 44E-52 | AC-G | SPTSSA   |
| RBMS1. 1    | 2. 42E-56 | -0. 32819 | 0. 104 | 0. 278 | 3. 61E-52 | AC-G | RBMS1    |
| LAMP1. 1    | 2. 51E-56 | -0. 34851 | 0. 341 | 0. 556 | 3. 75E-52 | AC-G | LAMP1    |
| GNB4. 1     | 2. 53E-56 | -0. 41531 | 0. 096 | 0. 259 | 3. 79E-52 | AC-G | GNB4     |
| PALMD       | 2. 91E-56 | 0. 180861 | 0. 057 | 0. 008 | 4. 34E-52 | AC-G | PALMD    |
| IFT57. 1    | 3. 37E-56 | 0. 538707 | 0. 363 | 0. 225 | 5. 04E-52 | AC-G | IFT57    |
| CTSH. 1     | 3. 61E-56 | -0. 54033 | 0. 153 | 0. 323 | 5. 39E-52 | AC-G | CTSH     |
| ENG. 1      | 4. 06E-56 | -0. 54288 | 0. 045 | 0. 188 | 6. 06E-52 | AC-G | ENG      |
| PELI1. 1    | 4. 71E-56 | -0. 47877 | 0. 077 | 0. 235 | 7. 04E-52 | AC-G | PELI1    |
| CHST11. 1   | 5. 33E-56 | -0. 42794 | 0. 079 | 0. 239 | 7. 97E-52 | AC-G | CHST11   |
| LHFPL2. 1   | 6. 09E-56 | -0. 45581 | 0. 04  | 0. 184 | 9. 10E-52 | AC-G | LHFPL2   |
| ASCL1. 1    | 7. 60E-56 | -0. 43399 | 0. 057 | 0. 211 | 1. 14E-51 | AC-G | ASCL1    |
| CD68. 1     | 8. 39E-56 | -0. 57029 | 0. 317 | 0. 466 | 1. 25E-51 | AC-G | CD68     |
| FGD4. 1     | 8. 40E-56 | -0. 4676  | 0. 03  | 0. 169 | 1. 26E-51 | AC-G | FGD4     |
| APBA2. 1    | 8. 92E-56 | -0. 33856 | 0. 073 | 0. 233 | 1. 33E-51 | AC-G | APBA2    |
| BAZ2B. 1    | 9. 39E-56 | -0. 36075 | 0. 166 | 0. 35  | 1. 40E-51 | AC-G | BAZ2B    |
| PLA2G5      | 1. 16E-55 | 0. 662522 | 0. 204 | 0. 09  | 1. 73E-51 | AC-G | PLA2G5   |
| SIPA1. 1    | 1. 36E-55 | -0. 43889 | 0. 027 | 0. 161 | 2. 03E-51 | AC-G | SIPA1    |
| LRRFIP1. 1  | 1. 71E-55 | -0. 41121 | 0. 194 | 0. 384 | 2. 55E-51 | AC-G | LRRFIP1  |
| MIS18BP1. 1 | 1. 76E-55 | -0. 44076 | 0. 031 | 0. 169 | 2. 63E-51 | AC-G | MIS18BP1 |



|             |           |           |        |        |           |      |          |
|-------------|-----------|-----------|--------|--------|-----------|------|----------|
| CFD. 1      | 1. 83E-55 | -0. 5954  | 0. 039 | 0. 179 | 2. 74E-51 | AC-G | CFD      |
| OSM. 1      | 2. 33E-55 | -0. 67616 | 0. 032 | 0. 167 | 3. 48E-51 | AC-G | OSM      |
| PABPC1. 1   | 2. 38E-55 | -0. 28922 | 0. 573 | 0. 778 | 3. 56E-51 | AC-G | PABPC1   |
| IFITM2. 1   | 2. 50E-55 | -0. 66236 | 0. 147 | 0. 309 | 3. 74E-51 | AC-G | IFITM2   |
| SPRED1. 1   | 2. 56E-55 | -0. 36113 | 0. 069 | 0. 227 | 3. 83E-51 | AC-G | SPRED1   |
| LDLRAD4. 1  | 2. 79E-55 | -0. 46185 | 0. 031 | 0. 168 | 4. 17E-51 | AC-G | LDLRAD4  |
| NETO2. 1    | 3. 76E-55 | -0. 32258 | 0. 041 | 0. 185 | 5. 62E-51 | AC-G | NETO2    |
| PDZK1IP1    | 3. 91E-55 | 0. 198268 | 0. 053 | 0. 007 | 5. 85E-51 | AC-G | PDZK1IP1 |
| BIN2. 1     | 5. 10E-55 | -0. 51701 | 0. 009 | 0. 132 | 7. 62E-51 | AC-G | BIN2     |
| PKIG. 1     | 5. 14E-55 | 0. 582048 | 0. 426 | 0. 288 | 7. 67E-51 | AC-G | PKIG     |
| NAGA. 1     | 9. 18E-55 | -0. 50362 | 0. 06  | 0. 209 | 1. 37E-50 | AC-G | NAGA     |
| APMAP. 1    | 1. 03E-54 | -0. 34413 | 0. 35  | 0. 551 | 1. 55E-50 | AC-G | APMAP    |
| DLL3. 1     | 1. 39E-54 | -0. 55793 | 0. 031 | 0. 166 | 2. 07E-50 | AC-G | DLL3     |
| CCND1. 1    | 1. 51E-54 | -0. 43779 | 0. 083 | 0. 245 | 2. 26E-50 | AC-G | CCND1    |
| GRINA. 1    | 1. 55E-54 | -0. 38643 | 0. 275 | 0. 468 | 2. 31E-50 | AC-G | GRINA    |
| PRDX4. 1    | 1. 75E-54 | 0. 499301 | 0. 621 | 0. 532 | 2. 62E-50 | AC-G | PRDX4    |
| PARVB. 1    | 1. 79E-54 | -0. 41917 | 0. 044 | 0. 187 | 2. 68E-50 | AC-G | PARVB    |
| PSMA2. 1    | 1. 96E-54 | 0. 572117 | 0. 14  | 0. 046 | 2. 93E-50 | AC-G | PSMA2    |
| CSK. 1      | 2. 29E-54 | -0. 4176  | 0. 032 | 0. 17  | 3. 42E-50 | AC-G | CSK      |
| PTGER4. 1   | 2. 34E-54 | -0. 54332 | 0. 018 | 0. 144 | 3. 50E-50 | AC-G | PTGER4   |
| TMSB15A. 1  | 2. 67E-54 | -0. 46127 | 0. 056 | 0. 202 | 3. 99E-50 | AC-G | TMSB15A  |
| HNRNPU. 1   | 2. 75E-54 | -0. 30368 | 0. 36  | 0. 563 | 4. 11E-50 | AC-G | HNRNPU   |
| ALDH1L1     | 3. 71E-54 | 0. 346195 | 0. 143 | 0. 048 | 5. 55E-50 | AC-G | ALDH1L1  |
| FAM50A. 1   | 3. 80E-54 | -0. 36539 | 0. 216 | 0. 403 | 5. 68E-50 | AC-G | FAM50A   |
| UNC93B1. 1  | 3. 95E-54 | -0. 49677 | 0. 075 | 0. 225 | 5. 90E-50 | AC-G | UNC93B1  |
| C4orf47     | 4. 09E-54 | 0. 243303 | 0. 086 | 0. 02  | 6. 12E-50 | AC-G | C4orf47  |
| LGMN. 1     | 5. 57E-54 | -0. 48878 | 0. 201 | 0. 38  | 8. 32E-50 | AC-G | LGMN     |
| SNRPD2. 1   | 5. 74E-54 | 0. 354832 | 0. 763 | 0. 745 | 8. 58E-50 | AC-G | SNRPD2   |
| NCK2. 1     | 5. 75E-54 | -0. 33273 | 0. 033 | 0. 17  | 8. 59E-50 | AC-G | NCK2     |
| ROGDI. 1    | 5. 83E-54 | -0. 40964 | 0. 092 | 0. 253 | 8. 71E-50 | AC-G | ROGDI    |
| AXL. 1      | 6. 62E-54 | -0. 57073 | 0. 06  | 0. 204 | 9. 89E-50 | AC-G | AXL      |
| NCOR2. 1    | 6. 86E-54 | -0. 36373 | 0. 094 | 0. 257 | 1. 03E-49 | AC-G | NCOR2    |
| HNRNPA3     | 8. 10E-54 | -0. 22542 | 0. 386 | 0. 587 | 1. 21E-49 | AC-G | HNRNPA3  |
| TAF10. 1    | 8. 44E-54 | -0. 34297 | 0. 091 | 0. 252 | 1. 26E-49 | AC-G | TAF10    |
| PDE4B. 1    | 1. 45E-53 | -0. 4097  | 0. 129 | 0. 305 | 2. 17E-49 | AC-G | PDE4B    |
| CLTA. 1     | 2. 05E-53 | -0. 31936 | 0. 454 | 0. 662 | 3. 06E-49 | AC-G | CLTA     |
| CHMP2A. 1   | 2. 12E-53 | 0. 431198 | 0. 7   | 0. 646 | 3. 17E-49 | AC-G | CHMP2A   |
| C9orf142. 1 | 2. 13E-53 | -0. 38837 | 0. 219 | 0. 406 | 3. 18E-49 | AC-G | C9orf142 |
| EVA1A       | 2. 29E-53 | 0. 15606  | 0. 055 | 0. 008 | 3. 42E-49 | AC-G | EVA1A    |
| SOX11. 1    | 2. 35E-53 | -0. 49738 | 0. 134 | 0. 299 | 3. 51E-49 | AC-G | SOX11    |
| TSC22D3     | 2. 44E-53 | -0. 36702 | 0. 297 | 0. 487 | 3. 65E-49 | AC-G | TSC22D3  |
| CYTH4. 1    | 3. 24E-53 | -0. 46539 | 0. 01  | 0. 132 | 4. 84E-49 | AC-G | CYTH4    |
| TBL1XR1. 1  | 3. 68E-53 | -0. 34727 | 0. 109 | 0. 275 | 5. 50E-49 | AC-G | TBL1XR1  |
| CCDC85B. 1  | 3. 87E-53 | -0. 35221 | 0. 256 | 0. 444 | 5. 78E-49 | AC-G | CCDC85B  |
| GGA1. 1     | 4. 30E-53 | -0. 36956 | 0. 143 | 0. 318 | 6. 43E-49 | AC-G | GGA1     |
| PON2. 1     | 5. 77E-53 | 0. 512247 | 0. 539 | 0. 433 | 8. 62E-49 | AC-G | PON2     |
| CYTH1. 1    | 5. 79E-53 | -0. 43368 | 0. 042 | 0. 181 | 8. 66E-49 | AC-G | CYTH1    |
| FJX1. 1     | 6. 42E-53 | -0. 37703 | 0. 074 | 0. 226 | 9. 59E-49 | AC-G | FJX1     |
| C9orf16. 1  | 7. 37E-53 | -0. 24991 | 0. 409 | 0. 616 | 1. 10E-48 | AC-G | C9orf16  |
| SPAG4       | 8. 42E-53 | 0. 348524 | 0. 115 | 0. 034 | 1. 26E-48 | AC-G | SPAG4    |
| TGFBR1. 1   | 8. 71E-53 | -0. 45002 | 0. 046 | 0. 184 | 1. 30E-48 | AC-G | TGFBR1   |

|            |           |           |        |        |           |      |         |
|------------|-----------|-----------|--------|--------|-----------|------|---------|
| BET1       | 1. 04E-52 | 0. 528959 | 0. 335 | 0. 199 | 1. 56E-48 | AC-G | BET1    |
| SHD. 1     | 1. 28E-52 | -0. 4356  | 0. 02  | 0. 146 | 1. 91E-48 | AC-G | SHD     |
| PTGES      | 1. 34E-52 | 0. 243064 | 0. 064 | 0. 011 | 2. 00E-48 | AC-G | PTGES   |
| RTN4. 1    | 1. 39E-52 | -0. 29682 | 0. 518 | 0. 735 | 2. 07E-48 | AC-G | RTN4    |
| FAM107A    | 1. 46E-52 | 0. 321761 | 0. 114 | 0. 034 | 2. 18E-48 | AC-G | FAM107A |
| TTYH3. 1   | 1. 48E-52 | -0. 33385 | 0. 106 | 0. 274 | 2. 20E-48 | AC-G | TTYH3   |
| CALM3. 1   | 1. 75E-52 | -0. 28415 | 0. 429 | 0. 624 | 2. 62E-48 | AC-G | CALM3   |
| LYN. 1     | 2. 05E-52 | -0. 45113 | 0. 056 | 0. 197 | 3. 07E-48 | AC-G | LYN     |
| PICALM. 1  | 2. 21E-52 | -0. 42021 | 0. 142 | 0. 308 | 3. 30E-48 | AC-G | PICALM  |
| SDC4       | 2. 92E-52 | 0. 45883  | 0. 184 | 0. 079 | 4. 36E-48 | AC-G | SDC4    |
| HMHA1. 1   | 3. 21E-52 | -0. 48853 | 0. 01  | 0. 128 | 4. 80E-48 | AC-G | HMHA1   |
| OGFRL1. 1  | 3. 77E-52 | -0. 49179 | 0. 062 | 0. 205 | 5. 64E-48 | AC-G | OGFRL1  |
| SSH2. 1    | 3. 89E-52 | -0. 41232 | 0. 055 | 0. 2   | 5. 82E-48 | AC-G | SSH2    |
| COL9A3. 1  | 4. 31E-52 | -0. 43597 | 0. 063 | 0. 21  | 6. 44E-48 | AC-G | COL9A3  |
| KCNF1. 1   | 4. 78E-52 | -0. 32072 | 0. 019 | 0. 144 | 7. 15E-48 | AC-G | KCNF1   |
| RBPJ. 1    | 5. 15E-52 | -0. 34174 | 0. 308 | 0. 5   | 7. 69E-48 | AC-G | RBPJ    |
| COQ2. 1    | 5. 50E-52 | -0. 39973 | 0. 059 | 0. 203 | 8. 21E-48 | AC-G | COQ2    |
| ABRACL. 1  | 5. 74E-52 | -0. 33702 | 0. 157 | 0. 333 | 8. 58E-48 | AC-G | ABRACL  |
| NFKBID. 1  | 5. 83E-52 | -0. 50915 | 0. 031 | 0. 162 | 8. 71E-48 | AC-G | NFKBID  |
| TSR3. 1    | 5. 90E-52 | -0. 34261 | 0. 135 | 0. 303 | 8. 82E-48 | AC-G | TSR3    |
| TGFBR2. 1  | 7. 41E-52 | -0. 3941  | 0. 015 | 0. 137 | 1. 11E-47 | AC-G | TGFBR2  |
| ELAVL4. 1  | 9. 01E-52 | -0. 57314 | 0. 061 | 0. 201 | 1. 35E-47 | AC-G | ELAVL4  |
| COL6A1. 1  | 9. 29E-52 | 0. 494812 | 0. 342 | 0. 206 | 1. 39E-47 | AC-G | COL6A1  |
| SYK. 1     | 9. 78E-52 | -0. 45405 | 0. 008 | 0. 125 | 1. 46E-47 | AC-G | SYK     |
| DEK. 1     | 1. 01E-51 | -0. 35417 | 0. 311 | 0. 494 | 1. 51E-47 | AC-G | DEK     |
| BPTF. 1    | 1. 01E-51 | -0. 35044 | 0. 166 | 0. 339 | 1. 51E-47 | AC-G | BPTF    |
| NCF2. 1    | 1. 06E-51 | -0. 43449 | 0. 006 | 0. 12  | 1. 59E-47 | AC-G | NCF2    |
| SLC44A3    | 1. 07E-51 | 0. 335582 | 0. 084 | 0. 02  | 1. 61E-47 | AC-G | SLC44A3 |
| LYPLA1. 1  | 1. 09E-51 | -0. 34433 | 0. 251 | 0. 437 | 1. 63E-47 | AC-G | LYPLA1  |
| LPAR5. 1   | 1. 13E-51 | -0. 47768 | 0. 007 | 0. 122 | 1. 68E-47 | AC-G | LPAR5   |
| ARPC2      | 1. 18E-51 | -0. 23367 | 0. 613 | 0. 805 | 1. 77E-47 | AC-G | ARPC2   |
| CORO7. 1   | 1. 19E-51 | -0. 40334 | 0. 043 | 0. 18  | 1. 78E-47 | AC-G | CORO7   |
| OLIG2. 1   | 1. 30E-51 | -0. 48456 | 0. 059 | 0. 202 | 1. 95E-47 | AC-G | OLIG2   |
| ARL1. 1    | 1. 49E-51 | 0. 490279 | 0. 425 | 0. 292 | 2. 22E-47 | AC-G | ARL1    |
| GALNT1. 1  | 1. 50E-51 | -0. 32828 | 0. 077 | 0. 231 | 2. 24E-47 | AC-G | GALNT1  |
| ABHD17A. 1 | 1. 63E-51 | -0. 34196 | 0. 101 | 0. 261 | 2. 43E-47 | AC-G | ABHD17A |
| PPP1R10. 1 | 2. 33E-51 | -0. 36383 | 0. 142 | 0. 316 | 3. 48E-47 | AC-G | PPP1R10 |
| COMMD7. 1  | 2. 42E-51 | -0. 35492 | 0. 247 | 0. 429 | 3. 62E-47 | AC-G | COMMD7  |
| CXCR4      | 2. 65E-51 | -0. 50078 | 0. 244 | 0. 417 | 3. 96E-47 | AC-G | CXCR4   |
| DCK. 1     | 3. 63E-51 | -0. 42137 | 0. 128 | 0. 293 | 5. 42E-47 | AC-G | DCK     |
| RBM17. 1   | 4. 67E-51 | -0. 35803 | 0. 216 | 0. 398 | 6. 97E-47 | AC-G | RBM17   |
| TIMP2. 1   | 5. 64E-51 | -0. 3483  | 0. 169 | 0. 356 | 8. 42E-47 | AC-G | TIMP2   |
| FBP1. 1    | 5. 76E-51 | -0. 48762 | 0. 017 | 0. 136 | 8. 60E-47 | AC-G | FBP1    |
| GNA13. 1   | 7. 27E-51 | -0. 4343  | 0. 061 | 0. 203 | 1. 09E-46 | AC-G | GNA13   |
| CPNE2. 1   | 7. 45E-51 | -0. 3242  | 0. 057 | 0. 201 | 1. 11E-46 | AC-G | CPNE2   |
| CD55. 1    | 8. 60E-51 | -0. 49645 | 0. 017 | 0. 137 | 1. 29E-46 | AC-G | CD55    |
| VASH1. 1   | 9. 06E-51 | -0. 39049 | 0. 025 | 0. 15  | 1. 35E-46 | AC-G | VASH1   |
| CCDC112. 1 | 9. 12E-51 | -0. 35525 | 0. 122 | 0. 288 | 1. 36E-46 | AC-G | CCDC112 |
| SRPX. 1    | 1. 07E-50 | 0. 407599 | 0. 287 | 0. 155 | 1. 59E-46 | AC-G | SRPX    |
| SCAMP2. 1  | 1. 16E-50 | -0. 36283 | 0. 221 | 0. 404 | 1. 74E-46 | AC-G | SCAMP2  |
| GNB2. 1    | 1. 17E-50 | -0. 28834 | 0. 398 | 0. 603 | 1. 75E-46 | AC-G | GNB2    |

|             |           |           |        |        |           |      |                |
|-------------|-----------|-----------|--------|--------|-----------|------|----------------|
| LSP1. 1     | 1. 23E-50 | -0. 63729 | 0. 053 | 0. 188 | 1. 84E-46 | AC-G | LSP1           |
| MARCH2. 1   | 1. 34E-50 | -0. 33024 | 0. 099 | 0. 259 | 2. 00E-46 | AC-G | 2-Mar          |
| CCDC3       | 1. 59E-50 | 0. 117817 | 0. 042 | 0. 004 | 2. 37E-46 | AC-G | CCDC3          |
| MED10. 1    | 1. 65E-50 | 0. 452021 | 0. 572 | 0. 466 | 2. 47E-46 | AC-G | MED10          |
| VMA21       | 1. 87E-50 | -0. 38369 | 0. 192 | 0. 369 | 2. 79E-46 | AC-G | VMA21          |
| TMEM165. 1  | 1. 97E-50 | -0. 35493 | 0. 3   | 0. 487 | 2. 94E-46 | AC-G | TMEM165        |
| UBALD2. 1   | 2. 23E-50 | -0. 35829 | 0. 12  | 0. 287 | 3. 33E-46 | AC-G | UBALD2         |
| HNRNPM. 1   | 2. 27E-50 | -0. 33041 | 0. 377 | 0. 576 | 3. 39E-46 | AC-G | HNRNPM         |
| UBXN1. 1    | 2. 89E-50 | -0. 2832  | 0. 447 | 0. 654 | 4. 32E-46 | AC-G | UBXN1          |
| SERPINB1. 1 | 3. 39E-50 | -0. 50495 | 0. 134 | 0. 292 | 5. 07E-46 | AC-G | SERPINB1       |
| PARP1. 1    | 3. 68E-50 | -0. 35908 | 0. 313 | 0. 503 | 5. 50E-46 | AC-G | PARP1          |
| RCN2. 1     | 4. 06E-50 | -0. 34829 | 0. 322 | 0. 495 | 6. 07E-46 | AC-G | RCN2           |
| SKA2        | 4. 68E-50 | -0. 30239 | 0. 166 | 0. 334 | 7. 00E-46 | AC-G | SKA2           |
| GLRX5. 1    | 4. 76E-50 | -0. 35574 | 0. 153 | 0. 324 | 7. 11E-46 | AC-G | GLRX5          |
| FN1         | 5. 65E-50 | 0. 49715  | 0. 258 | 0. 134 | 8. 45E-46 | AC-G | FN1            |
| HBEGF. 1    | 6. 12E-50 | -0. 57716 | 0. 094 | 0. 239 | 9. 14E-46 | AC-G | HBEGF          |
| ARL9. 1     | 6. 45E-50 | -0. 25112 | 0. 009 | 0. 123 | 9. 65E-46 | AC-G | ARL9           |
| CNP. 1      | 6. 91E-50 | -0. 50531 | 0. 229 | 0. 406 | 1. 03E-45 | AC-G | CNP            |
| KDM6B. 1    | 8. 57E-50 | -0. 46444 | 0. 098 | 0. 247 | 1. 28E-45 | AC-G | KDM6B          |
| TMEM38B     | 9. 09E-50 | 0. 506637 | 0. 269 | 0. 146 | 1. 36E-45 | AC-G | TMEM38B        |
| MAP2K2. 1   | 9. 87E-50 | -0. 36548 | 0. 158 | 0. 33  | 1. 47E-45 | AC-G | MAP2K2         |
| PAK3. 1     | 1. 05E-49 | -0. 38873 | 0. 035 | 0. 164 | 1. 57E-45 | AC-G | PAK3           |
| ARF4. 1     | 1. 21E-49 | 0. 369252 | 0. 671 | 0. 612 | 1. 81E-45 | AC-G | ARF4           |
| TRIP6. 1    | 1. 69E-49 | 0. 528387 | 0. 358 | 0. 228 | 2. 53E-45 | AC-G | TRIP6          |
| CMTM6. 1    | 2. 04E-49 | -0. 36391 | 0. 273 | 0. 455 | 3. 04E-45 | AC-G | CMTM6          |
| Clorf54. 1  | 2. 12E-49 | -0. 47465 | 0. 099 | 0. 25  | 3. 17E-45 | AC-G | Clorf54        |
| KIF1B. 1    | 2. 91E-49 | -0. 31031 | 0. 15  | 0. 322 | 4. 35E-45 | AC-G | KIF1B          |
| MIDN. 1     | 3. 08E-49 | -0. 34332 | 0. 26  | 0. 444 | 4. 60E-45 | AC-G | MIDN           |
| DPYSL5. 1   | 3. 53E-49 | -0. 33801 | 0. 049 | 0. 185 | 5. 28E-45 | AC-G | DPYSL5         |
| MCM5. 1     | 3. 58E-49 | -0. 38384 | 0. 04  | 0. 171 | 5. 35E-45 | AC-G | MCM5           |
| PGLS. 1     | 5. 48E-49 | -0. 29935 | 0. 348 | 0. 542 | 8. 19E-45 | AC-G | PGLS           |
| KCNMA1      | 6. 03E-49 | -0. 40734 | 0. 035 | 0. 164 | 9. 02E-45 | AC-G | KCNMA1         |
| PHACTR1. 1  | 6. 56E-49 | -0. 54384 | 0. 019 | 0. 137 | 9. 81E-45 | AC-G | PHACTR1        |
| RASSF5. 1   | 8. 20E-49 | -0. 43037 | 0. 02  | 0. 139 | 1. 23E-44 | AC-G | RASSF5         |
| ST6GAL1. 1  | 9. 12E-49 | -0. 45509 | 0. 015 | 0. 129 | 1. 36E-44 | AC-G | ST6GAL1        |
| MYL9        | 9. 46E-49 | 0. 333207 | 0. 089 | 0. 023 | 1. 41E-44 | AC-G | MYL9           |
| ODC1. 1     | 1. 00E-48 | -0. 37294 | 0. 253 | 0. 421 | 1. 50E-44 | AC-G | ODC1           |
| TAGAP. 1    | 1. 08E-48 | -0. 49374 | 0. 008 | 0. 119 | 1. 61E-44 | AC-G | TAGAP          |
| TPGS1. 1    | 1. 24E-48 | -0. 34223 | 0. 168 | 0. 337 | 1. 85E-44 | AC-G | TPGS1          |
| ID3. 1      | 1. 41E-48 | 0. 838019 | 0. 366 | 0. 245 | 2. 11E-44 | AC-G | ID3            |
| RP11-472N   | 1. 81E-48 | -0. 33004 | 0. 012 | 0. 126 | 2. 70E-44 | AC-G | RP11-472N13. 3 |
| STX11. 1    | 1. 91E-48 | -0. 50433 | 0. 018 | 0. 133 | 2. 86E-44 | AC-G | STX11          |
| DGKZ. 1     | 2. 00E-48 | -0. 34303 | 0. 074 | 0. 219 | 2. 99E-44 | AC-G | DGKZ           |
| GAL3ST4. 1  | 2. 07E-48 | -0. 51127 | 0. 058 | 0. 193 | 3. 09E-44 | AC-G | GAL3ST4        |
| SCN1A       | 2. 14E-48 | 0. 137969 | 0. 066 | 0. 013 | 3. 21E-44 | AC-G | SCN1A          |
| REEP4. 1    | 2. 41E-48 | -0. 40985 | 0. 054 | 0. 189 | 3. 61E-44 | AC-G | REEP4          |
| ANXA11. 1   | 2. 85E-48 | -0. 47226 | 0. 095 | 0. 239 | 4. 26E-44 | AC-G | ANXA11         |
| CX3CR1. 1   | 3. 45E-48 | -0. 51992 | 0. 009 | 0. 119 | 5. 16E-44 | AC-G | CX3CR1         |
| CKB. 1      | 3. 60E-48 | -0. 32003 | 0. 455 | 0. 607 | 5. 38E-44 | AC-G | CKB            |
| UQCR11. 1   | 3. 72E-48 | 0. 672715 | 0. 212 | 0. 096 | 5. 55E-44 | AC-G | UQCR11         |
| NFIX. 1     | 3. 73E-48 | -0. 38147 | 0. 193 | 0. 36  | 5. 57E-44 | AC-G | NFIX           |

|             |          |          |       |       |          |      |           |
|-------------|----------|----------|-------|-------|----------|------|-----------|
| TGOLN2.1    | 3.92E-48 | -0.34685 | 0.221 | 0.402 | 5.87E-44 | AC-G | TGOLN2    |
| PAK2.1      | 4.16E-48 | -0.35284 | 0.208 | 0.38  | 6.22E-44 | AC-G | PAK2      |
| FCGBP.1     | 4.85E-48 | -0.7108  | 0.113 | 0.252 | 7.25E-44 | AC-G | FCGBP     |
| RBX1.1      | 5.39E-48 | -0.21896 | 0.502 | 0.697 | 8.05E-44 | AC-G | RBX1      |
| LCP2.1      | 5.96E-48 | -0.47535 | 0.018 | 0.134 | 8.91E-44 | AC-G | LCP2      |
| PPP1R14B.1  | 6.25E-48 | -0.33892 | 0.202 | 0.372 | 9.35E-44 | AC-G | PPP1R14B  |
| RCAN1.1     | 6.98E-48 | 0.778126 | 0.366 | 0.249 | 1.04E-43 | AC-G | RCAN1     |
| SLC2A1.1    | 7.65E-48 | 0.468863 | 0.231 | 0.119 | 1.14E-43 | AC-G | SLC2A1    |
| WDR830S.1   | 9.10E-48 | 0.393345 | 0.773 | 0.738 | 1.36E-43 | AC-G | WDR830S   |
| ARHGAP4.1   | 9.50E-48 | -0.4502  | 0.019 | 0.134 | 1.42E-43 | AC-G | ARHGAP4   |
| GNA15.1     | 1.01E-47 | -0.44766 | 0.015 | 0.128 | 1.51E-43 | AC-G | GNA15     |
| SUSD3.1     | 1.24E-47 | -0.47474 | 0.006 | 0.113 | 1.86E-43 | AC-G | SUSD3     |
| INSM1.1     | 1.42E-47 | -0.31335 | 0.019 | 0.136 | 2.13E-43 | AC-G | INSM1     |
| MT1F.1      | 1.76E-47 | 0.50215  | 0.408 | 0.285 | 2.63E-43 | AC-G | MT1F      |
| HIVEP3.1    | 1.91E-47 | -0.28609 | 0.043 | 0.174 | 2.85E-43 | AC-G | HIVEP3    |
| DOCK10.1    | 1.95E-47 | -0.36338 | 0.026 | 0.145 | 2.92E-43 | AC-G | DOCK10    |
| CCL2        | 2.23E-47 | 0.877182 | 0.328 | 0.206 | 3.34E-43 | AC-G | CCL2      |
| PTRF.1      | 2.29E-47 | 0.4353   | 0.285 | 0.166 | 3.42E-43 | AC-G | PTRF      |
| FBLN5       | 2.30E-47 | 0.470254 | 0.098 | 0.028 | 3.43E-43 | AC-G | FBLN5     |
| TNFAIP8L2.1 | 2.37E-47 | -0.4459  | 0.006 | 0.112 | 3.55E-43 | AC-G | TNFAIP8L2 |
| PRUNE2      | 2.42E-47 | 0.392251 | 0.212 | 0.098 | 3.61E-43 | AC-G | PRUNE2    |
| MAF1.1      | 2.72E-47 | -0.32312 | 0.275 | 0.458 | 4.06E-43 | AC-G | MAF1      |
| TNRC6B.1    | 3.26E-47 | -0.31242 | 0.199 | 0.382 | 4.87E-43 | AC-G | TNRC6B    |
| NUDT14.1    | 3.31E-47 | -0.39025 | 0.073 | 0.215 | 4.95E-43 | AC-G | NUDT14    |
| C17orf89.1  | 3.77E-47 | -0.33078 | 0.275 | 0.45  | 5.63E-43 | AC-G | C17orf89  |
| LZTFL1      | 3.78E-47 | 0.324659 | 0.152 | 0.06  | 5.65E-43 | AC-G | LZTFL1    |
| STEAP1      | 4.19E-47 | 0.284087 | 0.074 | 0.017 | 6.26E-43 | AC-G | STEAP1    |
| MYO9B.1     | 4.21E-47 | -0.348   | 0.133 | 0.296 | 6.29E-43 | AC-G | MYO9B     |
| MYBPH       | 4.24E-47 | 0.193981 | 0.062 | 0.012 | 6.34E-43 | AC-G | MYBPH     |
| MICAL1.1    | 4.58E-47 | -0.39097 | 0.037 | 0.161 | 6.85E-43 | AC-G | MICAL1    |
| PIK3IP1.1   | 5.85E-47 | -0.49883 | 0.051 | 0.182 | 8.75E-43 | AC-G | PIK3IP1   |
| SEZ6.1      | 5.86E-47 | -0.34718 | 0.034 | 0.159 | 8.76E-43 | AC-G | SEZ6      |
| CLTB.1      | 7.53E-47 | -0.32193 | 0.289 | 0.47  | 1.12E-42 | AC-G | CLTB      |
| LILRB1.1    | 7.80E-47 | -0.43917 | 0.005 | 0.108 | 1.17E-42 | AC-G | LILRB1    |
| CLEC5A.1    | 8.33E-47 | -0.51705 | 0.01  | 0.117 | 1.24E-42 | AC-G | CLEC5A    |
| GGT5        | 8.89E-47 | 0.139533 | 0.056 | 0.01  | 1.33E-42 | AC-G | GGT5      |
| MFSD12.1    | 9.02E-47 | -0.3102  | 0.072 | 0.215 | 1.35E-42 | AC-G | MFSD12    |
| FXVD6.1     | 9.94E-47 | -0.39144 | 0.331 | 0.486 | 1.48E-42 | AC-G | FXVD6     |
| STK4.1      | 1.00E-46 | -0.39174 | 0.149 | 0.313 | 1.49E-42 | AC-G | STK4      |
| CNDP2.1     | 1.02E-46 | -0.29141 | 0.282 | 0.46  | 1.52E-42 | AC-G | CNDP2     |
| CDK6.1      | 1.05E-46 | -0.33146 | 0.083 | 0.229 | 1.57E-42 | AC-G | CDK6      |
| TRIB3.1     | 1.06E-46 | 0.444697 | 0.148 | 0.06  | 1.58E-42 | AC-G | TRIB3     |
| ARHGAP30.1  | 1.13E-46 | -0.42772 | 0.007 | 0.111 | 1.69E-42 | AC-G | ARHGAP30  |
| CLN8.1      | 1.41E-46 | -0.41743 | 0.139 | 0.294 | 2.11E-42 | AC-G | CLN8      |
| SERPINA3.1  | 1.48E-46 | 0.222357 | 0.03  | 0.002 | 2.21E-42 | AC-G | SERPINA3  |
| CKMT2       | 1.48E-46 | 0.132098 | 0.032 | 0.002 | 2.21E-42 | AC-G | CKMT2     |
| SYNPO       | 1.81E-46 | 0.194544 | 0.066 | 0.014 | 2.71E-42 | AC-G | SYNPO     |
| PDK4.1      | 2.21E-46 | -0.60348 | 0.062 | 0.19  | 3.30E-42 | AC-G | PDK4      |
| PLAUR.1     | 2.35E-46 | -0.58017 | 0.251 | 0.389 | 3.51E-42 | AC-G | PLAUR     |
| IFNGR1.1    | 2.40E-46 | -0.44492 | 0.31  | 0.462 | 3.59E-42 | AC-G | IFNGR1    |
| DYNLRB2     | 2.50E-46 | 0.172669 | 0.046 | 0.006 | 3.74E-42 | AC-G | DYNLRB2   |

|              |           |           |        |        |           |      |              |
|--------------|-----------|-----------|--------|--------|-----------|------|--------------|
| TPM3. 1      | 2. 59E-46 | -0. 28813 | 0. 41  | 0. 587 | 3. 87E-42 | AC-G | TPM3         |
| IL1B. 1      | 2. 80E-46 | -0. 63612 | 0. 107 | 0. 244 | 4. 19E-42 | AC-G | IL1B         |
| TRIM36. 1    | 3. 08E-46 | -0. 30893 | 0. 066 | 0. 205 | 4. 60E-42 | AC-G | TRIM36       |
| ENC1. 1      | 3. 34E-46 | -0. 36417 | 0. 1   | 0. 248 | 4. 99E-42 | AC-G | ENC1         |
| CDC42SE1. 3. | 3. 37E-46 | -0. 36606 | 0. 166 | 0. 331 | 5. 04E-42 | AC-G | CDC42SE1     |
| RP11-108M    | 3. 49E-46 | -0. 4185  | 0. 012 | 0. 119 | 5. 22E-42 | AC-G | RP11-108M. 4 |
| GLA. 1       | 4. 44E-46 | -0. 42228 | 0. 095 | 0. 239 | 6. 64E-42 | AC-G | GLA          |
| TMC6. 1      | 4. 78E-46 | -0. 4323  | 0. 018 | 0. 129 | 7. 14E-42 | AC-G | TMC6         |
| DUSP2. 1     | 4. 80E-46 | -0. 51867 | 0. 018 | 0. 128 | 7. 17E-42 | AC-G | DUSP2        |
| PALD1. 1     | 5. 03E-46 | -0. 4424  | 0. 012 | 0. 119 | 7. 52E-42 | AC-G | PALD1        |
| SIGLEC9. 1   | 5. 22E-46 | -0. 42043 | 0. 006 | 0. 11  | 7. 79E-42 | AC-G | SIGLEC9      |
| TMEM119. 1   | 5. 55E-46 | -0. 51708 | 0. 014 | 0. 123 | 8. 29E-42 | AC-G | TMEM119      |
| ALCAM. 1     | 7. 29E-46 | -0. 35406 | 0. 078 | 0. 219 | 1. 09E-41 | AC-G | ALCAM        |
| UBE2L3. 1    | 8. 28E-46 | -0. 23209 | 0. 38  | 0. 565 | 1. 24E-41 | AC-G | UBE2L3       |
| EPB41L3. 1   | 8. 44E-46 | -0. 43853 | 0. 014 | 0. 123 | 1. 26E-41 | AC-G | EPB41L3      |
| ELF1. 1      | 8. 90E-46 | -0. 49294 | 0. 121 | 0. 268 | 1. 33E-41 | AC-G | ELF1         |
| EFNA1        | 1. 15E-45 | 0. 463052 | 0. 22  | 0. 111 | 1. 72E-41 | AC-G | EFNA1        |
| DEF6. 1      | 1. 20E-45 | -0. 39135 | 0. 006 | 0. 108 | 1. 80E-41 | AC-G | DEF6         |
| HNRNPUL1. 1. | 1. 39E-45 | -0. 34435 | 0. 234 | 0. 413 | 2. 08E-41 | AC-G | HNRNPUL1     |
| NAV1. 1      | 1. 63E-45 | -0. 30095 | 0. 053 | 0. 184 | 2. 44E-41 | AC-G | NAV1         |
| CTNNBIP1. 1. | 1. 91E-45 | -0. 30555 | 0. 094 | 0. 238 | 2. 85E-41 | AC-G | CTNNBIP1     |
| CKS2. 1      | 2. 24E-45 | -0. 3968  | 0. 228 | 0. 393 | 3. 35E-41 | AC-G | CKS2         |
| ROCK1. 1     | 2. 29E-45 | -0. 3527  | 0. 173 | 0. 335 | 3. 42E-41 | AC-G | ROCK1        |
| NDUFA7. 1    | 2. 32E-45 | 0. 455048 | 0. 103 | 0. 031 | 3. 46E-41 | AC-G | NDUFA7       |
| HSD17B11     | 2. 33E-45 | -0. 4107  | 0. 238 | 0. 404 | 3. 49E-41 | AC-G | HSD17B11     |
| PPM1G. 1     | 2. 62E-45 | -0. 31138 | 0. 276 | 0. 446 | 3. 92E-41 | AC-G | PPM1G        |
| RFFL. 1      | 2. 83E-45 | -0. 29798 | 0. 056 | 0. 186 | 4. 23E-41 | AC-G | RFFL         |
| CHD9. 1      | 3. 28E-45 | -0. 27935 | 0. 313 | 0. 497 | 4. 90E-41 | AC-G | CHD9         |
| TACC1. 1     | 3. 39E-45 | -0. 34788 | 0. 178 | 0. 339 | 5. 07E-41 | AC-G | TACC1        |
| DOCK4. 1     | 3. 62E-45 | -0. 42561 | 0. 055 | 0. 183 | 5. 41E-41 | AC-G | DOCK4        |
| HPGDS. 1     | 3. 64E-45 | -0. 48731 | 0. 005 | 0. 105 | 5. 43E-41 | AC-G | HPGDS        |
| SPP1. 1      | 6. 75E-45 | 0. 356932 | 0. 856 | 0. 853 | 1. 01E-40 | AC-G | SPP1         |
| SCN9A        | 7. 69E-45 | 0. 248111 | 0. 089 | 0. 025 | 1. 15E-40 | AC-G | SCN9A        |
| FAM180A      | 9. 13E-45 | 0. 118609 | 0. 03  | 0. 002 | 1. 36E-40 | AC-G | FAM180A      |
| USP22. 1     | 9. 42E-45 | -0. 28775 | 0. 179 | 0. 347 | 1. 41E-40 | AC-G | USP22        |
| BTK. 1       | 1. 02E-44 | -0. 40056 | 0. 004 | 0. 102 | 1. 53E-40 | AC-G | BTK          |
| ACTA2. 1     | 1. 03E-44 | 0. 337416 | 0. 115 | 0. 039 | 1. 53E-40 | AC-G | ACTA2        |
| CTGF         | 1. 03E-44 | 0. 296981 | 0. 078 | 0. 02  | 1. 54E-40 | AC-G | CTGF         |
| ATRX. 1      | 1. 06E-44 | -0. 30731 | 0. 294 | 0. 473 | 1. 59E-40 | AC-G | ATRX         |
| SORT1. 1     | 1. 09E-44 | -0. 35118 | 0. 105 | 0. 254 | 1. 63E-40 | AC-G | SORT1        |
| NR4A1. 1     | 1. 10E-44 | -0. 53177 | 0. 154 | 0. 296 | 1. 65E-40 | AC-G | NR4A1        |
| SEMA6D. 1    | 1. 12E-44 | -0. 25739 | 0. 05  | 0. 178 | 1. 68E-40 | AC-G | SEMA6D       |
| FAM210B. 1   | 1. 15E-44 | -0. 35251 | 0. 143 | 0. 295 | 1. 72E-40 | AC-G | FAM210B      |
| TNFSF12. 1   | 1. 17E-44 | -0. 37963 | 0. 072 | 0. 208 | 1. 75E-40 | AC-G | TNFSF12      |
| SAP30. 1     | 1. 23E-44 | -0. 33521 | 0. 115 | 0. 264 | 1. 83E-40 | AC-G | SAP30        |
| DPP7. 1      | 1. 25E-44 | -0. 34589 | 0. 316 | 0. 496 | 1. 87E-40 | AC-G | DPP7         |
| RNPEPL1. 1   | 1. 29E-44 | -0. 31256 | 0. 031 | 0. 149 | 1. 93E-40 | AC-G | RNPEPL1      |
| SLC25A19. 1. | 1. 30E-44 | -0. 44636 | 0. 06  | 0. 19  | 1. 94E-40 | AC-G | SLC25A19     |
| FAM181A      | 1. 32E-44 | 0. 476524 | 0. 135 | 0. 052 | 1. 97E-40 | AC-G | FAM181A      |
| NINJ2. 1     | 1. 68E-44 | -0. 47468 | 0. 005 | 0. 103 | 2. 50E-40 | AC-G | NINJ2        |
| JOSD1. 1     | 1. 70E-44 | -0. 35134 | 0. 051 | 0. 178 | 2. 54E-40 | AC-G | JOSD1        |

|            |          |          |       |       |          |      |          |
|------------|----------|----------|-------|-------|----------|------|----------|
| P2RY13.1   | 1.90E-44 | -0.50614 | 0.003 | 0.1   | 2.83E-40 | AC-G | P2RY13   |
| ACAP3.1    | 2.20E-44 | -0.33664 | 0.096 | 0.239 | 3.29E-40 | AC-G | ACAP3    |
| CXADR.1    | 2.49E-44 | -0.3332  | 0.172 | 0.334 | 3.72E-40 | AC-G | CXADR    |
| ETV1.1     | 2.63E-44 | -0.33613 | 0.12  | 0.269 | 3.94E-40 | AC-G | ETV1     |
| RANBP1.1   | 3.28E-44 | -0.28232 | 0.418 | 0.609 | 4.90E-40 | AC-G | RANBP1   |
| NUDT1.1    | 3.38E-44 | -0.33085 | 0.21  | 0.378 | 5.05E-40 | AC-G | NUDT1    |
| HMGB2.1    | 4.02E-44 | -0.37199 | 0.36  | 0.521 | 6.01E-40 | AC-G | HMGB2    |
| MAGI1.1    | 4.24E-44 | -0.32275 | 0.079 | 0.22  | 6.34E-40 | AC-G | MAGI1    |
| HMOX1.1    | 4.26E-44 | -0.49719 | 0.174 | 0.318 | 6.37E-40 | AC-G | HMOX1    |
| IL33       | 4.49E-44 | 0.295014 | 0.104 | 0.033 | 6.71E-40 | AC-G | IL33     |
| GRAMD1A.1  | 4.63E-44 | -0.3413  | 0.145 | 0.3   | 6.92E-40 | AC-G | GRAMD1A  |
| NT5DC2.1   | 4.65E-44 | -0.24551 | 0.054 | 0.186 | 6.94E-40 | AC-G | NT5DC2   |
| LRRC25.1   | 4.99E-44 | -0.43115 | 0.008 | 0.109 | 7.46E-40 | AC-G | LRRC25   |
| PDGFRA.1   | 5.07E-44 | -0.3541  | 0.045 | 0.168 | 7.57E-40 | AC-G | PDGFRA   |
| TAOK3.1    | 5.28E-44 | -0.29885 | 0.239 | 0.415 | 7.89E-40 | AC-G | TAOK3    |
| RAC2.1     | 5.50E-44 | -0.48159 | 0.026 | 0.137 | 8.22E-40 | AC-G | RAC2     |
| CXCL2      | 6.44E-44 | 0.48653  | 0.167 | 0.071 | 9.63E-40 | AC-G | CXCL2    |
| ARL8A.1    | 6.74E-44 | -0.29573 | 0.14  | 0.298 | 1.01E-39 | AC-G | ARL8A    |
| ETS2.1     | 7.39E-44 | -0.51609 | 0.096 | 0.229 | 1.10E-39 | AC-G | ETS2     |
| NOP10.1    | 7.74E-44 | -0.24862 | 0.454 | 0.636 | 1.16E-39 | AC-G | NOP10    |
| CYB5R4.1   | 8.83E-44 | -0.35998 | 0.066 | 0.198 | 1.32E-39 | AC-G | CYB5R4   |
| POU2F2.1   | 9.28E-44 | -0.44013 | 0.037 | 0.154 | 1.39E-39 | AC-G | POU2F2   |
| ENHO.1     | 9.73E-44 | -0.25325 | 0.045 | 0.171 | 1.45E-39 | AC-G | ENHO     |
| NUP214.1   | 9.90E-44 | -0.49098 | 0.083 | 0.217 | 1.48E-39 | AC-G | NUP214   |
| CALU.1     | 9.97E-44 | 0.44729  | 0.488 | 0.387 | 1.49E-39 | AC-G | CALU     |
| ELAVL3.1   | 1.02E-43 | -0.39148 | 0.18  | 0.336 | 1.52E-39 | AC-G | ELAVL3   |
| PTPN18.1   | 1.11E-43 | -0.37968 | 0.094 | 0.233 | 1.66E-39 | AC-G | PTPN18   |
| CYTIP.1    | 1.70E-43 | -0.51974 | 0.016 | 0.121 | 2.54E-39 | AC-G | CYTIP    |
| SH3BP5.1   | 1.78E-43 | -0.32506 | 0.084 | 0.224 | 2.67E-39 | AC-G | SH3BP5   |
| DENND3.1   | 2.75E-43 | -0.43456 | 0.014 | 0.117 | 4.11E-39 | AC-G | DENND3   |
| PCSK1N.1   | 2.86E-43 | -0.37742 | 0.282 | 0.447 | 4.27E-39 | AC-G | PCSK1N   |
| EIF3F.1    | 3.30E-43 | -0.27686 | 0.448 | 0.636 | 4.93E-39 | AC-G | EIF3F    |
| ENOSF1.1   | 3.40E-43 | -0.24216 | 0.029 | 0.143 | 5.09E-39 | AC-G | ENOSF1   |
| ROM1       | 3.56E-43 | 0.514775 | 0.196 | 0.097 | 5.32E-39 | AC-G | ROM1     |
| MORN5      | 3.59E-43 | 0.123511 | 0.043 | 0.006 | 5.36E-39 | AC-G | MORN5    |
| RNF213.1   | 3.88E-43 | -0.33509 | 0.133 | 0.286 | 5.79E-39 | AC-G | RNF213   |
| PRKCA      | 3.88E-43 | -0.2881  | 0.083 | 0.221 | 5.80E-39 | AC-G | PRKCA    |
| C12orf57.1 | 4.01E-43 | 0.447662 | 0.617 | 0.521 | 5.99E-39 | AC-G | C12orf57 |
| EMC10.1    | 4.12E-43 | -0.28887 | 0.298 | 0.48  | 6.16E-39 | AC-G | EMC10    |
| LYL1.1     | 5.02E-43 | -0.38289 | 0.003 | 0.097 | 7.50E-39 | AC-G | LYL1     |
| CEBPB.1    | 5.62E-43 | -0.28975 | 0.275 | 0.466 | 8.39E-39 | AC-G | CEBPB    |
| C22orf39.1 | 5.74E-43 | -0.31798 | 0.133 | 0.284 | 8.58E-39 | AC-G | C22orf39 |
| DLX6-AS1.1 | 6.06E-43 | -0.67605 | 0.036 | 0.148 | 9.06E-39 | AC-G | DLX6-AS1 |
| TANC2.1    | 6.74E-43 | -0.26847 | 0.075 | 0.211 | 1.01E-38 | AC-G | TANC2    |
| RERE.1     | 7.53E-43 | -0.27314 | 0.091 | 0.234 | 1.13E-38 | AC-G | RERE     |
| MKNK1.1    | 8.50E-43 | -0.44498 | 0.064 | 0.191 | 1.27E-38 | AC-G | MKNK1    |
| ABL2.1     | 9.02E-43 | -0.38005 | 0.141 | 0.293 | 1.35E-38 | AC-G | ABL2     |
| RBFOX2.1   | 1.15E-42 | -0.33293 | 0.098 | 0.239 | 1.72E-38 | AC-G | RBFOX2   |
| POLD2.1    | 1.57E-42 | 0.48657  | 0.509 | 0.404 | 2.35E-38 | AC-G | POLD2    |
| ADPGK.1    | 1.68E-42 | -0.37132 | 0.136 | 0.286 | 2.51E-38 | AC-G | ADPGK    |
| TCIRG1.1   | 1.75E-42 | -0.43337 | 0.032 | 0.144 | 2.62E-38 | AC-G | TCIRG1   |

|           |          |          |       |       |          |      |          |
|-----------|----------|----------|-------|-------|----------|------|----------|
| PGP.1     | 1.95E-42 | -0.31106 | 0.1   | 0.242 | 2.92E-38 | AC-G | PGP      |
| PPP1R3C   | 2.23E-42 | 0.226831 | 0.072 | 0.018 | 3.33E-38 | AC-G | PPP1R3C  |
| RAMP3     | 2.28E-42 | 0.246995 | 0.072 | 0.017 | 3.40E-38 | AC-G | RAMP3    |
| CCRL2.1   | 2.47E-42 | -0.43414 | 0.008 | 0.105 | 3.69E-38 | AC-G | CCRL2    |
| TMEM51.1  | 2.76E-42 | -0.34122 | 0.027 | 0.137 | 4.13E-38 | AC-G | TMEM51   |
| CLN6.1    | 2.77E-42 | -0.31481 | 0.034 | 0.148 | 4.14E-38 | AC-G | CLN6     |
| ARHGAP15. | 3.00E-42 | -0.4524  | 0.013 | 0.113 | 4.48E-38 | AC-G | ARHGAP15 |
| CNIH2.1   | 3.31E-42 | -0.2434  | 0.034 | 0.148 | 4.94E-38 | AC-G | CNIH2    |
| CTSK.1    | 4.38E-42 | 0.297827 | 0.111 | 0.038 | 6.55E-38 | AC-G | CTSK     |
| NDUFA5    | 4.40E-42 | 0.364521 | 0.649 | 0.563 | 6.58E-38 | AC-G | NDUFA5   |
| SLC10A4.1 | 4.41E-42 | -0.20457 | 0.013 | 0.113 | 6.58E-38 | AC-G | SLC10A4  |
| DLX5.1    | 4.41E-42 | -0.59576 | 0.046 | 0.163 | 6.60E-38 | AC-G | DLX5     |
| STMN4.1   | 4.79E-42 | -0.54913 | 0.186 | 0.329 | 7.16E-38 | AC-G | STMN4    |
| ARL4C.1   | 6.04E-42 | -0.32208 | 0.237 | 0.406 | 9.03E-38 | AC-G | ARL4C    |
| MERTK.1   | 6.69E-42 | -0.45903 | 0.032 | 0.142 | 1.00E-37 | AC-G | MERTK    |
| CFL1      | 7.88E-42 | 0.249257 | 0.908 | 0.958 | 1.18E-37 | AC-G | CFL1     |
| SEC14L1.1 | 9.03E-42 | -0.26605 | 0.159 | 0.317 | 1.35E-37 | AC-G | SEC14L1  |
| POU3F2.1  | 9.46E-42 | -0.33014 | 0.102 | 0.238 | 1.41E-37 | AC-G | POU3F2   |
| DAD1.1    | 1.07E-41 | 0.328061 | 0.746 | 0.716 | 1.60E-37 | AC-G | DAD1     |
| PTOV1.1   | 1.15E-41 | -0.29489 | 0.304 | 0.465 | 1.72E-37 | AC-G | PTOV1    |
| C19orf60. | 1.17E-41 | -0.26732 | 0.346 | 0.533 | 1.75E-37 | AC-G | C19orf60 |
| SIGIRR.1  | 1.54E-41 | -0.3491  | 0.085 | 0.218 | 2.30E-37 | AC-G | SIGIRR   |
| GTF3A.1   | 1.55E-41 | -0.2743  | 0.35  | 0.535 | 2.31E-37 | AC-G | GTF3A    |
| RIN3.1    | 1.56E-41 | -0.39856 | 0.026 | 0.133 | 2.33E-37 | AC-G | RIN3     |
| CCNH.1    | 1.60E-41 | -0.34374 | 0.272 | 0.439 | 2.39E-37 | AC-G | CCNH     |
| SIRPA.1   | 1.65E-41 | -0.38334 | 0.125 | 0.266 | 2.47E-37 | AC-G | SIRPA    |
| DDAH2.1   | 1.99E-41 | -0.21335 | 0.336 | 0.519 | 2.97E-37 | AC-G | DDAH2    |
| TTC9B.1   | 2.20E-41 | -0.41517 | 0.029 | 0.138 | 3.28E-37 | AC-G | TTC9B    |
| SH3BGRL   | 2.41E-41 | -0.16617 | 0.476 | 0.682 | 3.60E-37 | AC-G | SH3BGRL  |
| NT5C.1    | 2.45E-41 | -0.3217  | 0.187 | 0.346 | 3.66E-37 | AC-G | NT5C     |
| H2AFY2.1  | 2.74E-41 | -0.21452 | 0.018 | 0.121 | 4.10E-37 | AC-G | H2AFY2   |
| LEPROTL1. | 2.86E-41 | -0.27841 | 0.247 | 0.415 | 4.27E-37 | AC-G | LEPROTL1 |
| PAQR4.1   | 3.17E-41 | -0.32344 | 0.06  | 0.184 | 4.74E-37 | AC-G | PAQR4    |
| MFSD2A.1  | 3.35E-41 | 0.388897 | 0.177 | 0.083 | 5.01E-37 | AC-G | MFSD2A   |
| PNRC1.1   | 3.49E-41 | -0.25821 | 0.372 | 0.573 | 5.22E-37 | AC-G | PNRC1    |
| NLRP3.1   | 3.62E-41 | -0.42412 | 0.008 | 0.103 | 5.42E-37 | AC-G | NLRP3    |
| EVA1B.1   | 3.89E-41 | -0.22402 | 0.031 | 0.141 | 5.82E-37 | AC-G | EVA1B    |
| ZFHX3.1   | 4.42E-41 | -0.34024 | 0.083 | 0.217 | 6.60E-37 | AC-G | ZFHX3    |
| ACTR1A.1  | 4.60E-41 | -0.28578 | 0.15  | 0.303 | 6.88E-37 | AC-G | ACTR1A   |
| SH2B3.1   | 4.68E-41 | -0.39409 | 0.022 | 0.125 | 6.99E-37 | AC-G | SH2B3    |
| CD151.1   | 4.96E-41 | 0.509715 | 0.566 | 0.466 | 7.41E-37 | AC-G | CD151    |
| GNAS.1    | 5.28E-41 | -0.23309 | 0.518 | 0.672 | 7.90E-37 | AC-G | GNAS     |
| SLC25A11. | 5.41E-41 | -0.24093 | 0.274 | 0.448 | 8.09E-37 | AC-G | SLC25A11 |
| PACRG     | 6.43E-41 | 0.323607 | 0.088 | 0.027 | 9.61E-37 | AC-G | PACRG    |
| KLF13.1   | 6.44E-41 | -0.31031 | 0.033 | 0.143 | 9.62E-37 | AC-G | KLF13    |
| NAIP.1    | 6.48E-41 | -0.35865 | 0.021 | 0.125 | 9.68E-37 | AC-G | NAIP     |
| RASGEF1B. | 7.63E-41 | -0.47043 | 0.031 | 0.138 | 1.14E-36 | AC-G | RASGEF1B |
| PEBP1.1   | 8.34E-41 | 0.273492 | 0.801 | 0.804 | 1.25E-36 | AC-G | PEBP1    |
| MXRA8     | 8.82E-41 | 0.243373 | 0.086 | 0.025 | 1.32E-36 | AC-G | MXRA8    |
| POLR2I.1  | 9.21E-41 | 0.404108 | 0.624 | 0.539 | 1.38E-36 | AC-G | POLR2I   |
| PTP4A1.1  | 1.13E-40 | -0.28847 | 0.261 | 0.435 | 1.69E-36 | AC-G | PTP4A1   |

|             |           |           |        |        |           |      |             |
|-------------|-----------|-----------|--------|--------|-----------|------|-------------|
| H2AFV. 1    | 1. 27E-40 | -0. 26111 | 0. 381 | 0. 55  | 1. 89E-36 | AC-G | H2AFV       |
| PLBD1. 1    | 1. 35E-40 | -0. 36945 | 0. 013 | 0. 11  | 2. 02E-36 | AC-G | PLBD1       |
| RCN1. 1     | 1. 57E-40 | 0. 372787 | 0. 434 | 0. 338 | 2. 34E-36 | AC-G | RCN1        |
| EPC1. 1     | 1. 73E-40 | -0. 3238  | 0. 163 | 0. 316 | 2. 58E-36 | AC-G | EPC1        |
| DUSP1. 1    | 1. 73E-40 | -0. 29938 | 0. 417 | 0. 605 | 2. 58E-36 | AC-G | DUSP1       |
| TMEM206. 1  | 1. 83E-40 | -0. 31339 | 0. 113 | 0. 254 | 2. 74E-36 | AC-G | TMEM206     |
| FRMD3       | 1. 91E-40 | 0. 304836 | 0. 118 | 0. 043 | 2. 86E-36 | AC-G | FRMD3       |
| EMP2        | 1. 97E-40 | 0. 443419 | 0. 19  | 0. 092 | 2. 95E-36 | AC-G | EMP2        |
| CAPZB       | 2. 13E-40 | -0. 1805  | 0. 551 | 0. 731 | 3. 19E-36 | AC-G | CAPZB       |
| TUBA4A      | 2. 32E-40 | 0. 19246  | 0. 117 | 0. 042 | 3. 47E-36 | AC-G | TUBA4A      |
| CD48. 1     | 2. 43E-40 | -0. 42585 | 0. 004 | 0. 093 | 3. 63E-36 | AC-G | CD48        |
| B3GNT5. 1   | 2. 43E-40 | -0. 37764 | 0. 045 | 0. 16  | 3. 64E-36 | AC-G | B3GNT5      |
| ASAH1. 1    | 2. 62E-40 | -0. 2324  | 0. 498 | 0. 681 | 3. 92E-36 | AC-G | ASAH1       |
| HEXA        | 2. 73E-40 | -0. 25175 | 0. 249 | 0. 417 | 4. 07E-36 | AC-G | HEXA        |
| MSRB2. 1    | 3. 11E-40 | -0. 33766 | 0. 134 | 0. 278 | 4. 65E-36 | AC-G | MSRB2       |
| CDO1. 1     | 3. 13E-40 | 0. 516966 | 0. 334 | 0. 215 | 4. 68E-36 | AC-G | CDO1        |
| CHD1. 1     | 3. 32E-40 | -0. 33422 | 0. 168 | 0. 317 | 4. 96E-36 | AC-G | CHD1        |
| TXN2. 1     | 3. 43E-40 | -0. 25975 | 0. 289 | 0. 462 | 5. 13E-36 | AC-G | TXN2        |
| ZNHIT1      | 3. 45E-40 | 0. 344992 | 0. 691 | 0. 644 | 5. 16E-36 | AC-G | ZNHIT1      |
| IL10. 1     | 3. 68E-40 | -0. 51816 | 0. 021 | 0. 123 | 5. 50E-36 | AC-G | IL10        |
| IGFBP7-AS   | 4. 01E-40 | 0. 251025 | 0. 076 | 0. 02  | 5. 99E-36 | AC-G | IGFBP7-AS1  |
| ARHGAP9. 1  | 4. 39E-40 | -0. 36491 | 0. 008 | 0. 101 | 6. 56E-36 | AC-G | ARHGAP9     |
| C1RL        | 4. 77E-40 | 0. 303995 | 0. 12  | 0. 044 | 7. 13E-36 | AC-G | C1RL        |
| RAB31. 1    | 4. 86E-40 | -0. 26026 | 0. 309 | 0. 489 | 7. 26E-36 | AC-G | RAB31       |
| MAPK1. 1    | 4. 86E-40 | -0. 299   | 0. 122 | 0. 266 | 7. 26E-36 | AC-G | MAPK1       |
| NCOA4. 1    | 5. 45E-40 | -0. 33094 | 0. 139 | 0. 287 | 8. 15E-36 | AC-G | NCOA4       |
| FKBP10. 1   | 5. 83E-40 | 0. 472365 | 0. 304 | 0. 194 | 8. 72E-36 | AC-G | FKBP10      |
| SSBP4. 1    | 6. 72E-40 | -0. 29249 | 0. 146 | 0. 294 | 1. 00E-35 | AC-G | SSBP4       |
| ABI1. 1     | 6. 80E-40 | -0. 3228  | 0. 12  | 0. 264 | 1. 02E-35 | AC-G | ABI1        |
| AC114803. 1 | 7. 04E-40 | 0. 162657 | 0. 037 | 0. 004 | 1. 05E-35 | AC-G | AC114803. 3 |
| RTCB. 1     | 7. 34E-40 | -0. 31391 | 0. 199 | 0. 36  | 1. 10E-35 | AC-G | RTCB        |
| TUBB6       | 7. 56E-40 | 0. 55935  | 0. 274 | 0. 166 | 1. 13E-35 | AC-G | TUBB6       |
| ARID4A      | 7. 66E-40 | -0. 30736 | 0. 15  | 0. 299 | 1. 15E-35 | AC-G | ARID4A      |
| PADI2. 1    | 8. 44E-40 | -0. 47013 | 0. 042 | 0. 153 | 1. 26E-35 | AC-G | PADI2       |
| TUBB4A. 1   | 8. 83E-40 | -0. 49279 | 0. 03  | 0. 135 | 1. 32E-35 | AC-G | TUBB4A      |
| CCL4L2. 1   | 8. 95E-40 | -0. 61393 | 0. 009 | 0. 101 | 1. 34E-35 | AC-G | CCL4L2      |
| SLC8A1. 1   | 1. 03E-39 | -0. 33196 | 0. 048 | 0. 164 | 1. 54E-35 | AC-G | SLC8A1      |
| CXorf21. 1  | 1. 18E-39 | -0. 40661 | 0. 003 | 0. 09  | 1. 76E-35 | AC-G | CXorf21     |
| FGR. 1      | 1. 25E-39 | -0. 38157 | 0. 007 | 0. 098 | 1. 86E-35 | AC-G | FGR         |
| F13A1       | 1. 27E-39 | 0. 625391 | 0. 254 | 0. 14  | 1. 91E-35 | AC-G | F13A1       |
| ABCG1. 1    | 1. 29E-39 | -0. 39867 | 0. 04  | 0. 149 | 1. 93E-35 | AC-G | ABCG1       |
| DSE. 1      | 1. 40E-39 | -0. 42947 | 0. 045 | 0. 156 | 2. 09E-35 | AC-G | DSE         |
| TMEM132B. 1 | 1. 40E-39 | -0. 2126  | 0. 018 | 0. 118 | 2. 09E-35 | AC-G | TMEM132B    |
| PABPN1. 1   | 1. 46E-39 | -0. 20952 | 0. 213 | 0. 383 | 2. 18E-35 | AC-G | PABPN1      |
| MACF1       | 1. 51E-39 | -0. 27766 | 0. 192 | 0. 347 | 2. 26E-35 | AC-G | MACF1       |
| SCAND1. 1   | 1. 56E-39 | -0. 26781 | 0. 436 | 0. 597 | 2. 33E-35 | AC-G | SCAND1      |
| TMPO. 1     | 1. 65E-39 | -0. 3404  | 0. 086 | 0. 215 | 2. 46E-35 | AC-G | TMPO        |
| LITAF. 1    | 1. 66E-39 | -0. 36517 | 0. 336 | 0. 483 | 2. 47E-35 | AC-G | LITAF       |
| MBNL1. 1    | 1. 79E-39 | -0. 34696 | 0. 11  | 0. 246 | 2. 67E-35 | AC-G | MBNL1       |
| FNIP2. 1    | 1. 79E-39 | -0. 3927  | 0. 087 | 0. 217 | 2. 68E-35 | AC-G | FNIP2       |
| PCBP4. 1    | 1. 84E-39 | -0. 31704 | 0. 136 | 0. 279 | 2. 75E-35 | AC-G | PCBP4       |



|            |          |          |       |       |          |      |          |
|------------|----------|----------|-------|-------|----------|------|----------|
| WHSC1L1.1  | 2.02E-39 | -0.32383 | 0.241 | 0.398 | 3.02E-35 | AC-G | WHSC1L1  |
| RNF166.1   | 2.08E-39 | -0.39785 | 0.082 | 0.205 | 3.11E-35 | AC-G | RNF166   |
| MGAT1.1    | 2.19E-39 | -0.4051  | 0.234 | 0.382 | 3.28E-35 | AC-G | MGAT1    |
| CAPG.1     | 2.25E-39 | -0.38653 | 0.304 | 0.436 | 3.36E-35 | AC-G | CAPG     |
| CLDN10     | 2.61E-39 | 0.596202 | 0.115 | 0.043 | 3.90E-35 | AC-G | CLDN10   |
| RBM25.1    | 2.70E-39 | -0.2628  | 0.296 | 0.468 | 4.04E-35 | AC-G | RBM25    |
| SLC25A39   | 2.75E-39 | -0.30379 | 0.268 | 0.432 | 4.12E-35 | AC-G | SLC25A39 |
| MEF2A.1    | 2.82E-39 | -0.38568 | 0.104 | 0.237 | 4.21E-35 | AC-G | MEF2A    |
| SSR3.1     | 2.83E-39 | 0.458432 | 0.587 | 0.514 | 4.24E-35 | AC-G | SSR3     |
| ST14.1     | 2.89E-39 | -0.34023 | 0.002 | 0.087 | 4.32E-35 | AC-G | ST14     |
| VAV1.1     | 3.00E-39 | -0.34542 | 0.002 | 0.088 | 4.49E-35 | AC-G | VAV1     |
| PDCD5.1    | 3.22E-39 | 0.437573 | 0.601 | 0.527 | 4.81E-35 | AC-G | PDCD5    |
| SMDT1      | 3.43E-39 | -0.16277 | 0.404 | 0.589 | 5.13E-35 | AC-G | SMDT1    |
| GTF2I.1    | 3.93E-39 | -0.30606 | 0.292 | 0.453 | 5.87E-35 | AC-G | GTF2I    |
| BMP2K      | 4.51E-39 | -0.33609 | 0.029 | 0.134 | 6.74E-35 | AC-G | BMP2K    |
| CUX1.1     | 5.33E-39 | -0.26018 | 0.12  | 0.264 | 7.97E-35 | AC-G | CUX1     |
| MUM1.1     | 5.39E-39 | -0.23445 | 0.227 | 0.39  | 8.06E-35 | AC-G | MUM1     |
| TFDP1.1    | 6.11E-39 | -0.28286 | 0.084 | 0.212 | 9.14E-35 | AC-G | TFDP1    |
| UBE2R2.1   | 6.36E-39 | -0.32024 | 0.164 | 0.31  | 9.50E-35 | AC-G | UBE2R2   |
| PTGDS      | 6.42E-39 | 0.469603 | 0.271 | 0.15  | 9.60E-35 | AC-G | PTGDS    |
| LGR4.1     | 6.67E-39 | -0.18207 | 0.019 | 0.118 | 9.97E-35 | AC-G | LGR4     |
| SMCO4.1    | 7.09E-39 | -0.403   | 0.041 | 0.15  | 1.06E-34 | AC-G | SMCO4    |
| IQCA1      | 7.12E-39 | 0.140142 | 0.045 | 0.007 | 1.06E-34 | AC-G | IQCA1    |
| PTPN1.1    | 7.20E-39 | -0.3025  | 0.115 | 0.255 | 1.08E-34 | AC-G | PTPN1    |
| TLR2.1     | 7.94E-39 | -0.44409 | 0.026 | 0.128 | 1.19E-34 | AC-G | TLR2     |
| FEZ2.1     | 8.39E-39 | -0.29061 | 0.302 | 0.477 | 1.25E-34 | AC-G | FEZ2     |
| GRK6.1     | 8.93E-39 | -0.26522 | 0.042 | 0.153 | 1.33E-34 | AC-G | GRK6     |
| ANP32B.1   | 9.25E-39 | -0.29469 | 0.313 | 0.476 | 1.38E-34 | AC-G | ANP32B   |
| MZT2B.1    | 1.04E-38 | -0.25231 | 0.455 | 0.62  | 1.55E-34 | AC-G | MZT2B    |
| DNM2.1     | 1.11E-38 | -0.2885  | 0.123 | 0.266 | 1.67E-34 | AC-G | DNM2     |
| FAM114A1.1 | 1.33E-38 | 0.329435 | 0.194 | 0.096 | 1.98E-34 | AC-G | FAM114A1 |
| MXD4.1     | 1.49E-38 | -0.30447 | 0.082 | 0.209 | 2.23E-34 | AC-G | MXD4     |
| IL17RA.1   | 1.76E-38 | -0.35199 | 0.032 | 0.136 | 2.63E-34 | AC-G | IL17RA   |
| IL1R1      | 1.82E-38 | 0.177493 | 0.052 | 0.01  | 2.72E-34 | AC-G | IL1R1    |
| WSCD1.1    | 1.83E-38 | -0.24394 | 0.038 | 0.149 | 2.73E-34 | AC-G | WSCD1    |
| CLASP2.1   | 1.87E-38 | -0.35863 | 0.09  | 0.218 | 2.80E-34 | AC-G | CLASP2   |
| DOCK2.1    | 1.91E-38 | -0.35871 | 0.005 | 0.091 | 2.85E-34 | AC-G | DOCK2    |
| SCARB2.1   | 2.10E-38 | -0.31068 | 0.246 | 0.408 | 3.14E-34 | AC-G | SCARB2   |
| PFKFB3.1   | 2.10E-38 | -0.40029 | 0.13  | 0.266 | 3.14E-34 | AC-G | PFKFB3   |
| SAP18      | 2.49E-38 | 0.285949 | 0.764 | 0.767 | 3.72E-34 | AC-G | SAP18    |
| FAM183A    | 2.91E-38 | 0.126006 | 0.028 | 0.002 | 4.34E-34 | AC-G | FAM183A  |
| GPCPD1.1   | 3.28E-38 | -0.27986 | 0.09  | 0.219 | 4.90E-34 | AC-G | GPCPD1   |
| CORO1C.1   | 3.36E-38 | -0.2217  | 0.238 | 0.399 | 5.03E-34 | AC-G | CORO1C   |
| CDKN1C.1   | 3.36E-38 | -0.35592 | 0.028 | 0.13  | 5.03E-34 | AC-G | CDKN1C   |
| STX6.1     | 3.45E-38 | -0.32431 | 0.09  | 0.218 | 5.15E-34 | AC-G | STX6     |
| ACTN1.1    | 3.66E-38 | 0.464172 | 0.346 | 0.237 | 5.47E-34 | AC-G | ACTN1    |
| PPP2R5C    | 3.77E-38 | -0.25886 | 0.134 | 0.281 | 5.63E-34 | AC-G | PPP2R5C  |
| TLN1.1     | 4.02E-38 | -0.3429  | 0.164 | 0.308 | 6.01E-34 | AC-G | TLN1     |
| ITGAM.1    | 4.24E-38 | -0.35691 | 0.004 | 0.09  | 6.34E-34 | AC-G | ITGAM    |
| C19orf53.  | 4.29E-38 | 0.389193 | 0.722 | 0.676 | 6.42E-34 | AC-G | C19orf53 |
| NCOR1.1    | 4.57E-38 | -0.29649 | 0.335 | 0.489 | 6.84E-34 | AC-G | NCOR1    |

|           |          |          |       |       |          |      |           |
|-----------|----------|----------|-------|-------|----------|------|-----------|
| RPS6KL1.1 | 4.95E-38 | -0.26886 | 0.019 | 0.116 | 7.39E-34 | AC-G | RPS6KL1   |
| PIK3R1.1  | 5.34E-38 | -0.36189 | 0.187 | 0.331 | 7.98E-34 | AC-G | PIK3R1    |
| SEP15.1   | 6.92E-38 | 0.333687 | 0.694 | 0.649 | 1.03E-33 | AC-G | 15-Sep    |
| UROS.1    | 7.19E-38 | -0.2995  | 0.133 | 0.275 | 1.07E-33 | AC-G | UROS      |
| LILRA2.1  | 7.36E-38 | -0.40327 | 0.009 | 0.098 | 1.10E-33 | AC-G | LILRA2    |
| SNF8.1    | 7.43E-38 | -0.25543 | 0.319 | 0.487 | 1.11E-33 | AC-G | SNF8      |
| GPS1.1    | 7.46E-38 | -0.24194 | 0.194 | 0.349 | 1.11E-33 | AC-G | GPS1      |
| TSPAN5.1  | 7.73E-38 | -0.33911 | 0.149 | 0.284 | 1.16E-33 | AC-G | TSPAN5    |
| NAA10.1   | 7.95E-38 | -0.25415 | 0.286 | 0.453 | 1.19E-33 | AC-G | NAA10     |
| SUN2.1    | 8.10E-38 | -0.3827  | 0.109 | 0.24  | 1.21E-33 | AC-G | SUN2      |
| MARCH9.1  | 8.44E-38 | -0.32191 | 0.056 | 0.173 | 1.26E-33 | AC-G | 9-Mar     |
| LHX2.1    | 8.45E-38 | -0.24937 | 0.04  | 0.147 | 1.26E-33 | AC-G | LHX2      |
| LMNB1.1   | 9.20E-38 | -0.32639 | 0.055 | 0.168 | 1.37E-33 | AC-G | LMNB1     |
| ECI1.1    | 1.04E-37 | -0.27908 | 0.102 | 0.235 | 1.55E-33 | AC-G | ECI1      |
| DNMT1.1   | 1.09E-37 | -0.26561 | 0.161 | 0.31  | 1.62E-33 | AC-G | DNMT1     |
| C17orf62  | 1.23E-37 | -0.1895  | 0.235 | 0.394 | 1.84E-33 | AC-G | C17orf62  |
| NXPH1.1   | 1.26E-37 | -0.28558 | 0.044 | 0.154 | 1.89E-33 | AC-G | NXPH1     |
| BRD7.1    | 1.35E-37 | -0.29082 | 0.136 | 0.277 | 2.01E-33 | AC-G | BRD7      |
| PLEC.1    | 1.58E-37 | -0.3096  | 0.082 | 0.207 | 2.37E-33 | AC-G | PLEC      |
| DLX1.1    | 1.63E-37 | -0.37118 | 0.03  | 0.131 | 2.43E-33 | AC-G | DLX1      |
| SELPLG.1  | 1.75E-37 | -0.4566  | 0.034 | 0.138 | 2.62E-33 | AC-G | SELPLG    |
| HLA-DQB2. | 1.84E-37 | -0.61531 | 0.019 | 0.112 | 2.75E-33 | AC-G | HLA-DQB2  |
| OTUD1.1   | 1.86E-37 | -0.39322 | 0.019 | 0.113 | 2.78E-33 | AC-G | OTUD1     |
| CHN2.1    | 1.87E-37 | -0.31724 | 0.018 | 0.113 | 2.80E-33 | AC-G | CHN2      |
| OGFR.1    | 2.02E-37 | -0.2622  | 0.161 | 0.311 | 3.02E-33 | AC-G | OGFR      |
| PRDM1.1   | 2.07E-37 | -0.40137 | 0.02  | 0.115 | 3.10E-33 | AC-G | PRDM1     |
| ZNF704.1  | 2.12E-37 | -0.25094 | 0.035 | 0.14  | 3.17E-33 | AC-G | ZNF704    |
| AGPAT2.1  | 2.16E-37 | -0.31752 | 0.076 | 0.199 | 3.22E-33 | AC-G | AGPAT2    |
| SHARPIN.1 | 2.20E-37 | -0.29354 | 0.177 | 0.326 | 3.29E-33 | AC-G | SHARPIN   |
| MIR4458HG | 2.26E-37 | 0.351488 | 0.258 | 0.141 | 3.37E-33 | AC-G | MIR4458HG |
| ATXN10    | 2.36E-37 | -0.23234 | 0.281 | 0.448 | 3.53E-33 | AC-G | ATXN10    |
| SEPT7.1   | 2.80E-37 | 0.290673 | 0.724 | 0.699 | 4.18E-33 | AC-G | 7-Sep     |
| NPTXR.1   | 3.66E-37 | -0.203   | 0.037 | 0.145 | 5.46E-33 | AC-G | NPTXR     |
| CDCA7.1   | 3.67E-37 | -0.27027 | 0.035 | 0.14  | 5.49E-33 | AC-G | CDCA7     |
| USP53.1   | 3.92E-37 | -0.48306 | 0.051 | 0.159 | 5.86E-33 | AC-G | USP53     |
| BRD3.1    | 3.99E-37 | -0.30431 | 0.156 | 0.298 | 5.96E-33 | AC-G | BRD3      |
| SH3TC1.1  | 4.05E-37 | -0.37776 | 0.008 | 0.094 | 6.05E-33 | AC-G | SH3TC1    |
| TOP2B.1   | 4.63E-37 | -0.25901 | 0.121 | 0.26  | 6.91E-33 | AC-G | TOP2B     |
| EPN1.1    | 5.02E-37 | -0.2896  | 0.208 | 0.359 | 7.50E-33 | AC-G | EPN1      |
| EBPL.1    | 5.11E-37 | -0.31401 | 0.179 | 0.326 | 7.64E-33 | AC-G | EBPL      |
| ITGB1     | 5.27E-37 | -0.25365 | 0.259 | 0.41  | 7.87E-33 | AC-G | ITGB1     |
| ORAI1.1   | 5.41E-37 | -0.23958 | 0.037 | 0.142 | 8.09E-33 | AC-G | ORAI1     |
| TMC01.1   | 5.87E-37 | 0.379825 | 0.629 | 0.565 | 8.78E-33 | AC-G | TMC01     |
| KIAA0930. | 5.93E-37 | -0.33746 | 0.052 | 0.163 | 8.86E-33 | AC-G | KIAA0930  |
| VASP.1    | 6.04E-37 | -0.35073 | 0.129 | 0.261 | 9.03E-33 | AC-G | VASP      |
| S100A11.1 | 6.21E-37 | 0.440494 | 0.691 | 0.651 | 9.28E-33 | AC-G | S100A11   |
| TMSB15B.1 | 6.27E-37 | -0.30892 | 0.08  | 0.201 | 9.37E-33 | AC-G | TMSB15B   |
| DGCR6L.1  | 6.69E-37 | -0.24294 | 0.203 | 0.361 | 9.99E-33 | AC-G | DGCR6L    |
| HSPB6     | 7.08E-37 | 0.249005 | 0.122 | 0.048 | 1.06E-32 | AC-G | HSPB6     |
| MAP3K7CL  | 7.30E-37 | 0.27109  | 0.095 | 0.032 | 1.09E-32 | AC-G | MAP3K7CL  |
| OSBPL8.1  | 7.79E-37 | -0.25347 | 0.183 | 0.336 | 1.16E-32 | AC-G | OSBPL8    |

|           |          |          |       |       |          |      |               |
|-----------|----------|----------|-------|-------|----------|------|---------------|
| OGFOD3.1  | 8.32E-37 | -0.25113 | 0.109 | 0.243 | 1.24E-32 | AC-G | OGFOD3        |
| EIF3A.1   | 8.60E-37 | -0.28863 | 0.206 | 0.357 | 1.28E-32 | AC-G | EIF3A         |
| SPCS3.1   | 8.77E-37 | -0.27489 | 0.199 | 0.35  | 1.31E-32 | AC-G | SPCS3         |
| RP11-195F | 8.98E-37 | 0.329059 | 0.164 | 0.076 | 1.34E-32 | AC-G | RP11-195F19.5 |
| NASP.1    | 1.01E-36 | -0.29296 | 0.276 | 0.435 | 1.51E-32 | AC-G | NASP          |
| MUC12     | 1.06E-36 | 0.322612 | 0.095 | 0.032 | 1.59E-32 | AC-G | MUC12         |
| LY96.1    | 1.08E-36 | -0.40434 | 0.118 | 0.243 | 1.61E-32 | AC-G | LY96          |
| GDF15.1   | 1.13E-36 | 0.440148 | 0.135 | 0.057 | 1.68E-32 | AC-G | GDF15         |
| CPNE4     | 1.19E-36 | -0.15132 | 0.016 | 0.108 | 1.77E-32 | AC-G | CPNE4         |
| ZNF511.1  | 1.24E-36 | -0.27649 | 0.09  | 0.216 | 1.85E-32 | AC-G | ZNF511        |
| TRIB2.1   | 1.33E-36 | -0.27078 | 0.146 | 0.285 | 1.99E-32 | AC-G | TRIB2         |
| HOOK3.1   | 1.37E-36 | -0.27878 | 0.161 | 0.307 | 2.04E-32 | AC-G | HOOK3         |
| PHIP.1    | 1.98E-36 | -0.27804 | 0.203 | 0.357 | 2.96E-32 | AC-G | PHIP          |
| CPXM1.1   | 2.01E-36 | -0.19845 | 0.036 | 0.141 | 3.00E-32 | AC-G | CPXM1         |
| HGSNAT.1  | 2.09E-36 | -0.30164 | 0.1   | 0.227 | 3.13E-32 | AC-G | HGSNAT        |
| GFPT2     | 2.13E-36 | 0.269409 | 0.11  | 0.041 | 3.18E-32 | AC-G | GFPT2         |
| TBC1D22A  | 2.24E-36 | -0.3057  | 0.037 | 0.139 | 3.35E-32 | AC-G | TBC1D22A      |
| TMED9.1   | 2.27E-36 | 0.308562 | 0.7   | 0.687 | 3.39E-32 | AC-G | TMED9         |
| CCDC181   | 2.29E-36 | 0.309465 | 0.148 | 0.066 | 3.43E-32 | AC-G | CCDC181       |
| SRGAP3.1  | 2.34E-36 | -0.30486 | 0.053 | 0.163 | 3.50E-32 | AC-G | SRGAP3        |
| PHLDA1.1  | 2.35E-36 | -0.28902 | 0.27  | 0.42  | 3.51E-32 | AC-G | PHLDA1        |
| DNAJC5.1  | 2.69E-36 | -0.28949 | 0.103 | 0.233 | 4.02E-32 | AC-G | DNAJC5        |
| AP001055  | 2.69E-36 | -0.39104 | 0.009 | 0.094 | 4.03E-32 | AC-G | AP001055.6    |
| SHKBP1.1  | 2.82E-36 | -0.28617 | 0.123 | 0.259 | 4.21E-32 | AC-G | SHKBP1        |
| COPS8.1   | 2.90E-36 | 0.406253 | 0.541 | 0.456 | 4.33E-32 | AC-G | COPS8         |
| OAZ1      | 3.10E-36 | 0.182449 | 0.876 | 0.936 | 4.63E-32 | AC-G | OAZ1          |
| RAC3.1    | 3.35E-36 | -0.24579 | 0.081 | 0.203 | 5.01E-32 | AC-G | RAC3          |
| ME2       | 3.91E-36 | -0.32006 | 0.116 | 0.245 | 5.84E-32 | AC-G | ME2           |
| EBI3.1    | 3.95E-36 | -0.39861 | 0.019 | 0.111 | 5.90E-32 | AC-G | EBI3          |
| BIRC5.1   | 4.19E-36 | -0.39614 | 0.025 | 0.12  | 6.26E-32 | AC-G | BIRC5         |
| ASIC4.1   | 4.20E-36 | -0.42215 | 0.05  | 0.157 | 6.27E-32 | AC-G | ASIC4         |
| NIN.1     | 4.25E-36 | -0.25642 | 0.04  | 0.145 | 6.35E-32 | AC-G | NIN           |
| NDUFS5.1  | 4.45E-36 | 0.245592 | 0.789 | 0.815 | 6.65E-32 | AC-G | NDUFS5        |
| TOMM22.1  | 4.51E-36 | -0.20725 | 0.331 | 0.496 | 6.75E-32 | AC-G | TOMM22        |
| PROX1.1   | 4.65E-36 | -0.26748 | 0.066 | 0.183 | 6.95E-32 | AC-G | PROX1         |
| MCF2L.1   | 4.90E-36 | -0.29151 | 0.019 | 0.111 | 7.32E-32 | AC-G | MCF2L         |
| GSN       | 5.02E-36 | -0.30921 | 0.391 | 0.533 | 7.50E-32 | AC-G | GSN           |
| SASH3.1   | 5.23E-36 | -0.34934 | 0.008 | 0.092 | 7.82E-32 | AC-G | SASH3         |
| BAX.1     | 5.37E-36 | -0.22623 | 0.416 | 0.595 | 8.02E-32 | AC-G | BAX           |
| TFDP2     | 6.59E-36 | -0.3064  | 0.106 | 0.233 | 9.85E-32 | AC-G | TFDP2         |
| MIAT.1    | 6.68E-36 | -0.31258 | 0.069 | 0.187 | 9.98E-32 | AC-G | MIAT          |
| SSBP2.1   | 7.37E-36 | 0.541847 | 0.358 | 0.253 | 1.10E-31 | AC-G | SSBP2         |
| ANXA5.1   | 7.56E-36 | 0.287479 | 0.753 | 0.721 | 1.13E-31 | AC-G | ANXA5         |
| SIGLEC8.1 | 7.72E-36 | -0.39048 | 0.008 | 0.091 | 1.15E-31 | AC-G | SIGLEC8       |
| SPAG9.1   | 7.86E-36 | -0.28394 | 0.228 | 0.377 | 1.17E-31 | AC-G | SPAG9         |
| MGST2.1   | 7.97E-36 | -0.29159 | 0.139 | 0.276 | 1.19E-31 | AC-G | MGST2         |
| NFIB.1    | 8.04E-36 | -0.39509 | 0.263 | 0.4   | 1.20E-31 | AC-G | NFIB          |
| FGFBP2    | 8.48E-36 | 0.14459  | 0.036 | 0.005 | 1.27E-31 | AC-G | FGFBP2        |
| ATP6V1B2  | 9.15E-36 | -0.2914  | 0.279 | 0.434 | 1.37E-31 | AC-G | ATP6V1B2      |
| GLCCI1.1  | 9.22E-36 | -0.32603 | 0.058 | 0.169 | 1.38E-31 | AC-G | GLCCI1        |
| PSD3.1    | 9.97E-36 | -0.22462 | 0.089 | 0.215 | 1.49E-31 | AC-G | PSD3          |

|            |          |          |       |       |          |      |              |
|------------|----------|----------|-------|-------|----------|------|--------------|
| PMAIP1.1   | 1.03E-35 | -0.44136 | 0.011 | 0.097 | 1.54E-31 | AC-G | PMAIP1       |
| YWHAZ      | 1.05E-35 | -0.18945 | 0.397 | 0.562 | 1.57E-31 | AC-G | YWHAZ        |
| MOB1A.1    | 1.06E-35 | -0.29211 | 0.216 | 0.364 | 1.59E-31 | AC-G | MOB1A        |
| KYNU.1     | 1.06E-35 | -0.38357 | 0.012 | 0.098 | 1.59E-31 | AC-G | KYNU         |
| HNRNPA0.1  | 1.14E-35 | -0.22667 | 0.491 | 0.671 | 1.70E-31 | AC-G | HNRNPA0      |
| PHACTR2.1  | 1.17E-35 | -0.20897 | 0.011 | 0.097 | 1.75E-31 | AC-G | PHACTR2      |
| PKN1.1     | 1.24E-35 | -0.26738 | 0.129 | 0.265 | 1.85E-31 | AC-G | PKN1         |
| COLGALT1.1 | 1.26E-35 | -0.32509 | 0.09  | 0.212 | 1.88E-31 | AC-G | COLGALT1     |
| WAC.1      | 1.28E-35 | -0.27418 | 0.147 | 0.286 | 1.91E-31 | AC-G | WAC          |
| PAFAH1B3.1 | 1.32E-35 | -0.26559 | 0.294 | 0.449 | 1.98E-31 | AC-G | PAFAH1B3     |
| ARHGAP12.1 | 1.39E-35 | -0.28493 | 0.087 | 0.209 | 2.07E-31 | AC-G | ARHGAP12     |
| DTD1.1     | 1.40E-35 | -0.27285 | 0.263 | 0.416 | 2.10E-31 | AC-G | DTD1         |
| SURF1.1    | 1.61E-35 | -0.26641 | 0.223 | 0.377 | 2.41E-31 | AC-G | SURF1        |
| KLHL35     | 1.66E-35 | -0.35549 | 0.018 | 0.109 | 2.48E-31 | AC-G | KLHL35       |
| ATP2B1.1   | 1.78E-35 | -0.28096 | 0.229 | 0.378 | 2.66E-31 | AC-G | ATP2B1       |
| CDKN2A.1   | 1.79E-35 | -0.35353 | 0.023 | 0.118 | 2.68E-31 | AC-G | CDKN2A       |
| KDM1A      | 2.01E-35 | -0.24311 | 0.097 | 0.224 | 3.00E-31 | AC-G | KDM1A        |
| SCIMP.1    | 2.10E-35 | -0.37115 | 0.011 | 0.097 | 3.14E-31 | AC-G | SCIMP        |
| IMMP2L     | 2.30E-35 | 0.393891 | 0.228 | 0.128 | 3.44E-31 | AC-G | IMMP2L       |
| RHOB.1     | 2.51E-35 | -0.23765 | 0.438 | 0.642 | 3.75E-31 | AC-G | RHOB         |
| PAG1.1     | 2.55E-35 | -0.3388  | 0.073 | 0.188 | 3.80E-31 | AC-G | PAG1         |
| CAMK1D.1   | 2.63E-35 | -0.27921 | 0.03  | 0.127 | 3.94E-31 | AC-G | CAMK1D       |
| HNRNPA1L2  | 2.67E-35 | -0.30248 | 0.097 | 0.221 | 3.99E-31 | AC-G | HNRNPA1L2    |
| KDM2B      | 2.75E-35 | -0.25888 | 0.046 | 0.152 | 4.10E-31 | AC-G | KDM2B        |
| KIAA0101.2 | 2.77E-35 | -0.37126 | 0.034 | 0.134 | 4.13E-31 | AC-G | KIAA0101     |
| MESDC1.1   | 2.77E-35 | -0.26401 | 0.039 | 0.14  | 4.14E-31 | AC-G | MESDC1       |
| SLC39A8.1  | 2.78E-35 | 0.206806 | 0.119 | 0.047 | 4.15E-31 | AC-G | SLC39A8      |
| RANBP2.1   | 2.98E-35 | -0.31358 | 0.104 | 0.229 | 4.46E-31 | AC-G | RANBP2       |
| THBD.1     | 2.99E-35 | -0.39615 | 0.019 | 0.109 | 4.47E-31 | AC-G | THBD         |
| GRIA2.1    | 3.17E-35 | -0.29013 | 0.106 | 0.232 | 4.74E-31 | AC-G | GRIA2        |
| HPCAL1.1   | 3.25E-35 | -0.32414 | 0.106 | 0.23  | 4.86E-31 | AC-G | HPCAL1       |
| AK4.1      | 3.49E-35 | 0.426776 | 0.262 | 0.163 | 5.21E-31 | AC-G | AK4          |
| DDX3Y.1    | 3.97E-35 | -0.22413 | 0.014 | 0.101 | 5.94E-31 | AC-G | DDX3Y        |
| COMT.1     | 4.06E-35 | -0.17838 | 0.409 | 0.574 | 6.06E-31 | AC-G | COMT         |
| GDI2.1     | 4.20E-35 | -0.26559 | 0.352 | 0.515 | 6.28E-31 | AC-G | GDI2         |
| RP11-92G1  | 4.31E-35 | 0.175045 | 0.041 | 0.007 | 6.44E-31 | AC-G | RP11-92G12.3 |
| LINC01003  | 4.40E-35 | -0.27236 | 0.09  | 0.212 | 6.58E-31 | AC-G | LINC01003    |
| IKZF1.1    | 4.40E-35 | -0.32399 | 0.001 | 0.077 | 6.58E-31 | AC-G | IKZF1        |
| DRAXIN.1   | 4.73E-35 | -0.22218 | 0.057 | 0.171 | 7.07E-31 | AC-G | DRAXIN       |
| DAB2.1     | 4.96E-35 | -0.49054 | 0.062 | 0.167 | 7.41E-31 | AC-G | DAB2         |
| RNF149.1   | 5.25E-35 | -0.47302 | 0.17  | 0.29  | 7.85E-31 | AC-G | RNF149       |
| NBPF1.1    | 6.10E-35 | -0.25995 | 0.125 | 0.257 | 9.11E-31 | AC-G | NBPF1        |
| BLNK.1     | 6.35E-35 | -0.38025 | 0.003 | 0.08  | 9.48E-31 | AC-G | BLNK         |
| SH3BP1.1   | 6.78E-35 | -0.32263 | 0.031 | 0.128 | 1.01E-30 | AC-G | SH3BP1       |
| CACNA2D4.6 | 6.78E-35 | -0.36059 | 0.006 | 0.087 | 1.01E-30 | AC-G | CACNA2D4     |
| COMMD3.1   | 8.04E-35 | -0.24459 | 0.224 | 0.38  | 1.20E-30 | AC-G | COMMD3       |
| ATP6VOD1.8 | 8.26E-35 | -0.20215 | 0.364 | 0.539 | 1.23E-30 | AC-G | ATP6VOD1     |
| MDK.1      | 8.45E-35 | 0.560776 | 0.583 | 0.473 | 1.26E-30 | AC-G | MDK          |
| TFPI       | 8.74E-35 | 0.181783 | 0.111 | 0.042 | 1.31E-30 | AC-G | TFPI         |
| CTXN1.1    | 9.12E-35 | -0.22373 | 0.065 | 0.178 | 1.36E-30 | AC-G | CTXN1        |
| OSMR       | 9.23E-35 | 0.332233 | 0.151 | 0.072 | 1.38E-30 | AC-G | OSMR         |

|            |          |          |       |       |          |      |           |
|------------|----------|----------|-------|-------|----------|------|-----------|
| SIGLEC7.1  | 1.08E-34 | -0.33908 | 0.007 | 0.087 | 1.61E-30 | AC-G | SIGLEC7   |
| NAGK       | 1.13E-34 | -0.27027 | 0.252 | 0.406 | 1.68E-30 | AC-G | NAGK      |
| CDK2AP1.1  | 1.13E-34 | -0.20407 | 0.025 | 0.119 | 1.69E-30 | AC-G | CDK2AP1   |
| STUB1.1    | 1.14E-34 | -0.25575 | 0.325 | 0.487 | 1.70E-30 | AC-G | STUB1     |
| GJB2       | 1.19E-34 | 0.37504  | 0.103 | 0.039 | 1.78E-30 | AC-G | GJB2      |
| NPAS3.1    | 1.20E-34 | -0.22801 | 0.065 | 0.177 | 1.80E-30 | AC-G | NPAS3     |
| IFI16.1    | 1.26E-34 | 0.430877 | 0.489 | 0.375 | 1.88E-30 | AC-G | IFI16     |
| EIF3D.1    | 1.38E-34 | -0.25714 | 0.339 | 0.503 | 2.06E-30 | AC-G | EIF3D     |
| CASC4.1    | 1.38E-34 | -0.2489  | 0.115 | 0.245 | 2.06E-30 | AC-G | CASC4     |
| PTPRU      | 1.39E-34 | 0.163508 | 0.04  | 0.007 | 2.07E-30 | AC-G | PTPRU     |
| RAB34      | 1.41E-34 | -0.2108  | 0.158 | 0.307 | 2.11E-30 | AC-G | RAB34     |
| GLDN.1     | 1.42E-34 | -0.31351 | 0.021 | 0.112 | 2.12E-30 | AC-G | GLDN      |
| ATP1A3.1   | 1.50E-34 | -0.35881 | 0.038 | 0.137 | 2.25E-30 | AC-G | ATP1A3    |
| AKAP7.1    | 1.60E-34 | -0.22459 | 0.091 | 0.215 | 2.39E-30 | AC-G | AKAP7     |
| GOLIM4.1   | 1.77E-34 | -0.24628 | 0.201 | 0.351 | 2.64E-30 | AC-G | GOLIM4    |
| IRAK3.1    | 1.81E-34 | -0.33848 | 0.007 | 0.087 | 2.70E-30 | AC-G | IRAK3     |
| ARID1A.1   | 1.86E-34 | -0.26545 | 0.131 | 0.263 | 2.78E-30 | AC-G | ARID1A    |
| SLC12A9.1  | 1.94E-34 | -0.33379 | 0.1   | 0.221 | 2.90E-30 | AC-G | SLC12A9   |
| SOGA1.1    | 2.01E-34 | -0.24177 | 0.061 | 0.173 | 3.00E-30 | AC-G | SOGA1     |
| TIMP3      | 2.02E-34 | 0.355824 | 0.203 | 0.11  | 3.02E-30 | AC-G | TIMP3     |
| MAFB.1     | 2.12E-34 | -0.3635  | 0.203 | 0.336 | 3.16E-30 | AC-G | MAFB      |
| CERK.1     | 2.21E-34 | -0.25211 | 0.028 | 0.123 | 3.31E-30 | AC-G | CERK      |
| CCNG2.1    | 2.51E-34 | -0.3177  | 0.084 | 0.2   | 3.76E-30 | AC-G | CCNG2     |
| CAMP       | 2.54E-34 | 0.204019 | 0.021 | 0.001 | 3.79E-30 | AC-G | CAMP      |
| FRYL.1     | 2.69E-34 | -0.26289 | 0.087 | 0.207 | 4.02E-30 | AC-G | FRYL      |
| GIMAP1.1   | 2.78E-34 | -0.33933 | 0.007 | 0.086 | 4.15E-30 | AC-G | GIMAP1    |
| LACTB.1    | 3.00E-34 | -0.30595 | 0.072 | 0.184 | 4.49E-30 | AC-G | LACTB     |
| CD74       | 3.14E-34 | 0.335501 | 0.805 | 0.741 | 4.70E-30 | AC-G | CD74      |
| HOMER1.1   | 3.27E-34 | -0.21859 | 0.064 | 0.175 | 4.88E-30 | AC-G | HOMER1    |
| COLGALT2.3 | 3.31E-34 | -0.20645 | 0.049 | 0.156 | 4.95E-30 | AC-G | COLGALT2  |
| MMP24-AS1  | 3.45E-34 | -0.28572 | 0.195 | 0.334 | 5.16E-30 | AC-G | MMP24-AS1 |
| CMTM3.1    | 3.61E-34 | -0.27875 | 0.202 | 0.347 | 5.40E-30 | AC-G | CMTM3     |
| NAAA.1     | 3.70E-34 | -0.3335  | 0.048 | 0.15  | 5.52E-30 | AC-G | NAAA      |
| SLC39A3.1  | 3.84E-34 | -0.27575 | 0.218 | 0.361 | 5.74E-30 | AC-G | SLC39A3   |
| SMARCC1.1  | 3.88E-34 | -0.26183 | 0.143 | 0.276 | 5.80E-30 | AC-G | SMARCC1   |
| APLP1.1    | 3.92E-34 | -0.42574 | 0.237 | 0.374 | 5.86E-30 | AC-G | APLP1     |
| STAC3.1    | 4.01E-34 | -0.30407 | 0.01  | 0.092 | 5.99E-30 | AC-G | STAC3     |
| PPIC       | 4.52E-34 | 0.583641 | 0.266 | 0.167 | 6.75E-30 | AC-G | PPIC      |
| DYNC1I1.1  | 4.81E-34 | -0.36382 | 0.028 | 0.119 | 7.19E-30 | AC-G | DYNC1I1   |
| PTPRS.1    | 4.94E-34 | -0.22528 | 0.144 | 0.28  | 7.38E-30 | AC-G | PTPRS     |
| HAGH.1     | 4.98E-34 | -0.25228 | 0.225 | 0.378 | 7.44E-30 | AC-G | HAGH      |
| IMPDH2.1   | 5.25E-34 | 0.406835 | 0.492 | 0.402 | 7.85E-30 | AC-G | IMPDH2    |
| LINC01088  | 5.27E-34 | 0.176746 | 0.031 | 0.004 | 7.88E-30 | AC-G | LINC01088 |
| FAM49A     | 5.44E-34 | -0.31435 | 0.075 | 0.189 | 8.13E-30 | AC-G | FAM49A    |
| SACS.1     | 6.11E-34 | -0.21633 | 0.062 | 0.173 | 9.14E-30 | AC-G | SACS      |
| DUT.1      | 6.39E-34 | -0.25711 | 0.325 | 0.48  | 9.55E-30 | AC-G | DUT       |
| CHD4.1     | 6.77E-34 | -0.22367 | 0.199 | 0.346 | 1.01E-29 | AC-G | CHD4      |
| SLC35B2    | 7.26E-34 | -0.26352 | 0.183 | 0.323 | 1.08E-29 | AC-G | SLC35B2   |
| GRHPR.1    | 8.19E-34 | -0.28068 | 0.265 | 0.417 | 1.22E-29 | AC-G | GRHPR     |
| DYNC1H1.1  | 8.69E-34 | -0.24966 | 0.212 | 0.362 | 1.30E-29 | AC-G | DYNC1H1   |
| MAP3K1.1   | 9.26E-34 | -0.21676 | 0.022 | 0.112 | 1.38E-29 | AC-G | MAP3K1    |

|             |           |           |        |        |           |      |               |
|-------------|-----------|-----------|--------|--------|-----------|------|---------------|
| GSTM5       | 1. 01E-33 | 0. 168535 | 0. 036 | 0. 005 | 1. 51E-29 | AC-G | GSTM5         |
| AFF4. 1     | 1. 04E-33 | -0. 29815 | 0. 219 | 0. 364 | 1. 56E-29 | AC-G | AFF4          |
| EMB. 1      | 1. 05E-33 | -0. 33892 | 0. 008 | 0. 088 | 1. 57E-29 | AC-G | EMB           |
| MAML2       | 1. 08E-33 | -0. 21171 | 0. 095 | 0. 218 | 1. 62E-29 | AC-G | MAML2         |
| CD300C. 1   | 1. 12E-33 | -0. 31377 | 0. 004 | 0. 08  | 1. 68E-29 | AC-G | CD300C        |
| RTF1. 1     | 1. 13E-33 | -0. 24107 | 0. 297 | 0. 456 | 1. 69E-29 | AC-G | RTF1          |
| YPEL3. 1    | 1. 18E-33 | -0. 3077  | 0. 135 | 0. 266 | 1. 76E-29 | AC-G | YPEL3         |
| DUS1L. 1    | 1. 20E-33 | -0. 18867 | 0. 046 | 0. 149 | 1. 80E-29 | AC-G | DUS1L         |
| ITGAX. 1    | 1. 21E-33 | -0. 38664 | 0. 018 | 0. 105 | 1. 80E-29 | AC-G | ITGAX         |
| PDCD2. 1    | 1. 30E-33 | -0. 28343 | 0. 178 | 0. 317 | 1. 94E-29 | AC-G | PDCD2         |
| F8A1. 1     | 1. 31E-33 | -0. 24589 | 0. 052 | 0. 157 | 1. 95E-29 | AC-G | F8A1          |
| CBX1. 1     | 1. 32E-33 | -0. 24677 | 0. 243 | 0. 391 | 1. 97E-29 | AC-G | CBX1          |
| KIF2A. 1    | 1. 35E-33 | -0. 25601 | 0. 127 | 0. 256 | 2. 02E-29 | AC-G | KIF2A         |
| RP11-479J   | 1. 47E-33 | 0. 236472 | 0. 048 | 0. 01  | 2. 19E-29 | AC-G | RP11-479J7. 2 |
| IL6         | 1. 48E-33 | 0. 294665 | 0. 089 | 0. 031 | 2. 21E-29 | AC-G | IL6           |
| TSPAN15     | 1. 52E-33 | -0. 34567 | 0. 01  | 0. 091 | 2. 27E-29 | AC-G | TSPAN15       |
| EML4. 1     | 1. 58E-33 | -0. 25992 | 0. 09  | 0. 21  | 2. 36E-29 | AC-G | EML4          |
| ARHGDI A. 1 | 1. 63E-33 | -0. 20435 | 0. 43  | 0. 591 | 2. 43E-29 | AC-G | ARHGDI A      |
| MIF4GD. 1   | 1. 66E-33 | -0. 27596 | 0. 139 | 0. 274 | 2. 48E-29 | AC-G | MIF4GD        |
| LOXL2       | 1. 78E-33 | 0. 219801 | 0. 076 | 0. 024 | 2. 66E-29 | AC-G | LOXL2         |
| GALC        | 1. 82E-33 | -0. 2095  | 0. 025 | 0. 117 | 2. 72E-29 | AC-G | GALC          |
| KLHL5. 1    | 2. 17E-33 | -0. 27957 | 0. 075 | 0. 188 | 3. 24E-29 | AC-G | KLHL5         |
| PPP1CA      | 2. 52E-33 | -0. 16486 | 0. 433 | 0. 598 | 3. 76E-29 | AC-G | PPP1CA        |
| KIF21A. 1   | 2. 59E-33 | -0. 3309  | 0. 191 | 0. 324 | 3. 87E-29 | AC-G | KIF21A        |
| ACER3. 1    | 2. 62E-33 | -0. 29656 | 0. 089 | 0. 204 | 3. 92E-29 | AC-G | ACER3         |
| TUBGCP2. 1  | 2. 86E-33 | -0. 25252 | 0. 108 | 0. 233 | 4. 28E-29 | AC-G | TUBGCP2       |
| ROBO2. 1    | 2. 99E-33 | -0. 1926  | 0. 029 | 0. 123 | 4. 47E-29 | AC-G | ROBO2         |
| GNPTAB. 1   | 3. 24E-33 | -0. 29132 | 0. 065 | 0. 174 | 4. 84E-29 | AC-G | GNPTAB        |
| RNASEH2B. 3 | 2. 8E-33  | -0. 3149  | 0. 132 | 0. 259 | 4. 90E-29 | AC-G | RNASEH2B      |
| TAOK1. 1    | 3. 71E-33 | -0. 26471 | 0. 148 | 0. 281 | 5. 55E-29 | AC-G | TAOK1         |
| CARD8       | 4. 42E-33 | -0. 31558 | 0. 06  | 0. 166 | 6. 61E-29 | AC-G | CARD8         |
| NEBL        | 5. 36E-33 | 0. 106822 | 0. 052 | 0. 012 | 8. 01E-29 | AC-G | NEBL          |
| UCHL1       | 5. 55E-33 | 0. 404831 | 0. 534 | 0. 417 | 8. 30E-29 | AC-G | UCHL1         |
| GPR82. 1    | 5. 58E-33 | -0. 31393 | 0. 05  | 0. 151 | 8. 34E-29 | AC-G | GPR82         |
| AKR1A1      | 5. 66E-33 | -0. 25657 | 0. 363 | 0. 524 | 8. 46E-29 | AC-G | AKR1A1        |
| BBOX1. 1    | 5. 67E-33 | 0. 675089 | 0. 211 | 0. 123 | 8. 47E-29 | AC-G | BBOX1         |
| SLC25A1. 1  | 5. 69E-33 | -0. 25461 | 0. 094 | 0. 214 | 8. 50E-29 | AC-G | SLC25A1       |
| RCC2. 1     | 5. 83E-33 | -0. 28216 | 0. 079 | 0. 193 | 8. 71E-29 | AC-G | RCC2          |
| APOL2       | 6. 13E-33 | 0. 557217 | 0. 171 | 0. 085 | 9. 16E-29 | AC-G | APOL2         |
| ZSWIM6. 1   | 6. 16E-33 | -0. 24901 | 0. 045 | 0. 145 | 9. 21E-29 | AC-G | ZSWIM6        |
| BMPR2. 1    | 6. 42E-33 | -0. 24143 | 0. 081 | 0. 196 | 9. 59E-29 | AC-G | BMPR2         |
| ACIN1. 1    | 6. 48E-33 | -0. 2315  | 0. 15  | 0. 287 | 9. 68E-29 | AC-G | ACIN1         |
| HMG N3. 1   | 7. 71E-33 | -0. 16165 | 0. 462 | 0. 638 | 1. 15E-28 | AC-G | HMG N3        |
| HRH1        | 7. 81E-33 | 0. 398207 | 0. 164 | 0. 083 | 1. 17E-28 | AC-G | HRH1          |
| CNBP. 1     | 7. 94E-33 | 0. 279044 | 0. 751 | 0. 748 | 1. 19E-28 | AC-G | CNBP          |
| WIPF3. 1    | 8. 46E-33 | -0. 26272 | 0. 02  | 0. 106 | 1. 26E-28 | AC-G | WIPF3         |
| JKAMP. 1    | 8. 51E-33 | -0. 21317 | 0. 18  | 0. 323 | 1. 27E-28 | AC-G | JKAMP         |
| P2RX4. 1    | 8. 56E-33 | -0. 34252 | 0. 083 | 0. 195 | 1. 28E-28 | AC-G | P2RX4         |
| KCNMB1. 1   | 8. 76E-33 | -0. 37004 | 0. 027 | 0. 117 | 1. 31E-28 | AC-G | KCNMB1        |
| PMP2. 1     | 9. 53E-33 | 0. 579568 | 0. 434 | 0. 334 | 1. 42E-28 | AC-G | PMP2          |
| RP11-390F   | 1. 01E-32 | -0. 20748 | 0. 047 | 0. 15  | 1. 50E-28 | AC-G | RP11-390P2. 4 |

|            |           |           |        |        |           |      |          |
|------------|-----------|-----------|--------|--------|-----------|------|----------|
| ZWINT. 1   | 1. 06E-32 | -0. 29721 | 0. 021 | 0. 107 | 1. 58E-28 | AC-G | ZWINT    |
| SATB1. 1   | 1. 23E-32 | -0. 28969 | 0. 047 | 0. 146 | 1. 85E-28 | AC-G | SATB1    |
| OAS1. 1    | 1. 26E-32 | -0. 42507 | 0. 05  | 0. 148 | 1. 88E-28 | AC-G | OAS1     |
| CMYA5      | 1. 33E-32 | 0. 148647 | 0. 072 | 0. 021 | 1. 99E-28 | AC-G | CMYA5    |
| CCR1. 1    | 1. 38E-32 | -0. 3573  | 0. 014 | 0. 095 | 2. 06E-28 | AC-G | CCR1     |
| SERP1. 1   | 1. 38E-32 | -0. 22287 | 0. 451 | 0. 633 | 2. 06E-28 | AC-G | SERP1    |
| SMIM3. 1   | 1. 38E-32 | 0. 420099 | 0. 082 | 0. 027 | 2. 07E-28 | AC-G | SMIM3    |
| ATAT1. 1   | 1. 43E-32 | -0. 27046 | 0. 179 | 0. 31  | 2. 13E-28 | AC-G | ATAT1    |
| ITPK1      | 1. 43E-32 | -0. 25307 | 0. 053 | 0. 155 | 2. 14E-28 | AC-G | ITPK1    |
| ARHGEF6. 1 | 1. 63E-32 | -0. 20949 | 0. 054 | 0. 159 | 2. 43E-28 | AC-G | ARHGEF6  |
| GAPT. 1    | 1. 74E-32 | -0. 31742 | 0. 001 | 0. 071 | 2. 60E-28 | AC-G | GAPT     |
| BTBD3. 1   | 1. 80E-32 | -0. 17395 | 0. 051 | 0. 154 | 2. 68E-28 | AC-G | BTBD3    |
| TUBA1A     | 1. 89E-32 | 0. 340913 | 0. 859 | 0. 798 | 2. 82E-28 | AC-G | TUBA1A   |
| CLTC. 1    | 1. 92E-32 | -0. 26099 | 0. 229 | 0. 372 | 2. 87E-28 | AC-G | CLTC     |
| PLEKH02. 1 | 2. 03E-32 | -0. 32108 | 0. 028 | 0. 117 | 3. 03E-28 | AC-G | PLEKH02  |
| MORF4L2    | 2. 17E-32 | 0. 258315 | 0. 655 | 0. 619 | 3. 25E-28 | AC-G | MORF4L2  |
| USMG5. 1   | 2. 39E-32 | -0. 16635 | 0. 476 | 0. 648 | 3. 57E-28 | AC-G | USMG5    |
| CAPRIN1. 1 | 2. 41E-32 | -0. 25952 | 0. 203 | 0. 343 | 3. 60E-28 | AC-G | CAPRIN1  |
| STX7. 1    | 2. 70E-32 | -0. 31092 | 0. 159 | 0. 289 | 4. 04E-28 | AC-G | STX7     |
| TWF2. 1    | 2. 74E-32 | -0. 24489 | 0. 222 | 0. 364 | 4. 09E-28 | AC-G | TWF2     |
| CCND2. 1   | 2. 75E-32 | -0. 32367 | 0. 213 | 0. 349 | 4. 11E-28 | AC-G | CCND2    |
| VPS51. 1   | 3. 00E-32 | -0. 26595 | 0. 153 | 0. 285 | 4. 48E-28 | AC-G | VPS51    |
| CYTL1. 1   | 3. 38E-32 | -0. 4528  | 0. 034 | 0. 125 | 5. 05E-28 | AC-G | CYTL1    |
| SETD5. 1   | 3. 44E-32 | -0. 25481 | 0. 172 | 0. 311 | 5. 13E-28 | AC-G | SETD5    |
| NIPBL. 1   | 3. 58E-32 | -0. 26366 | 0. 131 | 0. 26  | 5. 36E-28 | AC-G | NIPBL    |
| TMEM259. 1 | 3. 66E-32 | -0. 22944 | 0. 208 | 0. 36  | 5. 48E-28 | AC-G | TMEM259  |
| HP1BP3. 1  | 3. 77E-32 | -0. 2319  | 0. 316 | 0. 466 | 5. 63E-28 | AC-G | HP1BP3   |
| RNASE1. 1  | 4. 11E-32 | -0. 64296 | 0. 082 | 0. 186 | 6. 14E-28 | AC-G | RNASE1   |
| DDIT4. 1   | 4. 12E-32 | -0. 33713 | 0. 286 | 0. 433 | 6. 15E-28 | AC-G | DDIT4    |
| PAPPA2     | 4. 21E-32 | 0. 115995 | 0. 03  | 0. 004 | 6. 29E-28 | AC-G | PAPPA2   |
| ANKRD11. 1 | 5. 55E-32 | -0. 25241 | 0. 195 | 0. 34  | 8. 29E-28 | AC-G | ANKRD11  |
| SPECC1. 1  | 6. 05E-32 | -0. 19643 | 0. 182 | 0. 318 | 9. 03E-28 | AC-G | SPECC1   |
| UBE3A. 1   | 6. 14E-32 | -0. 2392  | 0. 172 | 0. 309 | 9. 18E-28 | AC-G | UBE3A    |
| PIK3AP1. 1 | 6. 39E-32 | -0. 27574 | 0. 004 | 0. 076 | 9. 54E-28 | AC-G | PIK3AP1  |
| NDUFA13    | 6. 85E-32 | 0. 365367 | 0. 769 | 0. 773 | 1. 02E-27 | AC-G | NDUFA13  |
| UNC119. 1  | 6. 88E-32 | -0. 24985 | 0. 114 | 0. 237 | 1. 03E-27 | AC-G | UNC119   |
| SELENBP1   | 6. 94E-32 | 0. 160217 | 0. 053 | 0. 013 | 1. 04E-27 | AC-G | SELENBP1 |
| GNG11      | 7. 09E-32 | 0. 254966 | 0. 084 | 0. 028 | 1. 06E-27 | AC-G | GNG11    |
| C1QTNF1    | 7. 17E-32 | 0. 187864 | 0. 073 | 0. 022 | 1. 07E-27 | AC-G | C1QTNF1  |
| SLC12A5. 1 | 7. 84E-32 | -0. 33349 | 0. 022 | 0. 106 | 1. 17E-27 | AC-G | SLC12A5  |
| KLF4. 1    | 8. 15E-32 | -0. 45901 | 0. 115 | 0. 224 | 1. 22E-27 | AC-G | KLF4     |
| MMP16      | 8. 54E-32 | -0. 20021 | 0. 028 | 0. 118 | 1. 28E-27 | AC-G | MMP16    |
| SNAP29. 1  | 8. 88E-32 | -0. 25713 | 0. 12  | 0. 245 | 1. 33E-27 | AC-G | SNAP29   |
| GMIP. 1    | 9. 05E-32 | -0. 2636  | 0. 01  | 0. 086 | 1. 35E-27 | AC-G | GMIP     |
| ZNF821. 1  | 9. 50E-32 | -0. 24209 | 0. 072 | 0. 181 | 1. 42E-27 | AC-G | ZNF821   |
| NRROS      | 9. 58E-32 | -0. 32887 | 0. 006 | 0. 08  | 1. 43E-27 | AC-G | NRROS    |
| CDK1. 1    | 9. 63E-32 | -0. 34951 | 0. 025 | 0. 11  | 1. 44E-27 | AC-G | CDK1     |
| SKAP2      | 1. 00E-31 | -0. 35509 | 0. 168 | 0. 29  | 1. 50E-27 | AC-G | SKAP2    |
| ACSL3. 1   | 1. 01E-31 | -0. 28332 | 0. 225 | 0. 364 | 1. 50E-27 | AC-G | ACSL3    |
| AIF1L. 1   | 1. 18E-31 | -0. 33754 | 0. 036 | 0. 128 | 1. 76E-27 | AC-G | AIF1L    |
| HDAC2. 1   | 1. 28E-31 | -0. 27207 | 0. 325 | 0. 472 | 1. 91E-27 | AC-G | HDAC2    |

|             |           |           |        |        |           |      |             |
|-------------|-----------|-----------|--------|--------|-----------|------|-------------|
| PTPRA. 1    | 1. 36E-31 | -0. 27965 | 0. 243 | 0. 376 | 2. 03E-27 | AC-G | PTPRA       |
| COX4I1. 1   | 1. 41E-31 | 0. 238062 | 0. 861 | 0. 92  | 2. 10E-27 | AC-G | COX4I1      |
| IER3IP1. 1  | 1. 42E-31 | 0. 345134 | 0. 086 | 0. 029 | 2. 12E-27 | AC-G | IER3IP1     |
| MAML1. 1    | 1. 43E-31 | -0. 30051 | 0. 039 | 0. 132 | 2. 13E-27 | AC-G | MAML1       |
| AREG. 1     | 1. 54E-31 | -0. 46148 | 0. 005 | 0. 077 | 2. 30E-27 | AC-G | AREG        |
| ATP6VOB. 1  | 1. 58E-31 | -0. 16677 | 0. 659 | 0. 825 | 2. 35E-27 | AC-G | ATP6VOB     |
| ST3GAL6. 1  | 1. 63E-31 | -0. 35766 | 0. 036 | 0. 126 | 2. 43E-27 | AC-G | ST3GAL6     |
| IL4R. 1     | 1. 65E-31 | -0. 30892 | 0. 008 | 0. 083 | 2. 47E-27 | AC-G | IL4R        |
| HLA-DPB1. 1 | 1. 68E-31 | -0. 34985 | 0. 413 | 0. 51  | 2. 51E-27 | AC-G | HLA-DPB1    |
| RAB13. 1    | 1. 71E-31 | 0. 537095 | 0. 449 | 0. 357 | 2. 56E-27 | AC-G | RAB13       |
| AC004540. 1 | 1. 74E-31 | -0. 28105 | 0. 043 | 0. 138 | 2. 61E-27 | AC-G | AC004540. 4 |
| CELF5. 1    | 1. 87E-31 | -0. 29081 | 0. 021 | 0. 104 | 2. 79E-27 | AC-G | CELF5       |
| EIF4A3. 1   | 1. 87E-31 | -0. 26348 | 0. 32  | 0. 475 | 2. 80E-27 | AC-G | EIF4A3      |
| ZNF414. 1   | 1. 89E-31 | -0. 21572 | 0. 089 | 0. 204 | 2. 82E-27 | AC-G | ZNF414      |
| FGFBP3. 1   | 1. 89E-31 | -0. 19959 | 0. 027 | 0. 114 | 2. 82E-27 | AC-G | FGFBP3      |
| THSD7A. 1   | 1. 90E-31 | -0. 39432 | 0. 06  | 0. 159 | 2. 84E-27 | AC-G | THSD7A      |
| LRRTM2. 1   | 1. 97E-31 | -0. 18287 | 0. 028 | 0. 117 | 2. 94E-27 | AC-G | LRRTM2      |
| MYO5A. 1    | 2. 01E-31 | -0. 2034  | 0. 034 | 0. 127 | 3. 00E-27 | AC-G | MYO5A       |
| MSRB3       | 2. 11E-31 | 0. 14463  | 0. 046 | 0. 01  | 3. 16E-27 | AC-G | MSRB3       |
| FBX07. 1    | 2. 23E-31 | -0. 2672  | 0. 193 | 0. 332 | 3. 33E-27 | AC-G | FBX07       |
| FAM107B. 1  | 2. 24E-31 | -0. 38159 | 0. 044 | 0. 137 | 3. 35E-27 | AC-G | FAM107B     |
| PLAC8       | 2. 28E-31 | -0. 36277 | 0. 007 | 0. 08  | 3. 41E-27 | AC-G | PLAC8       |
| CLSTN1. 1   | 2. 29E-31 | -0. 14945 | 0. 165 | 0. 305 | 3. 43E-27 | AC-G | CLSTN1      |
| CDC34. 1    | 2. 45E-31 | -0. 23348 | 0. 127 | 0. 256 | 3. 66E-27 | AC-G | CDC34       |
| C1orf61. 1  | 2. 49E-31 | 0. 341317 | 0. 606 | 0. 521 | 3. 73E-27 | AC-G | C1orf61     |
| TPPP3. 1    | 2. 50E-31 | 0. 334187 | 0. 233 | 0. 138 | 3. 73E-27 | AC-G | TPPP3       |
| EWSR1       | 2. 56E-31 | -0. 18491 | 0. 332 | 0. 49  | 3. 82E-27 | AC-G | EWSR1       |
| TMEM59. 1   | 2. 61E-31 | 0. 258305 | 0. 764 | 0. 79  | 3. 90E-27 | AC-G | TMEM59      |
| RAPGEF1     | 2. 78E-31 | -0. 27939 | 0. 039 | 0. 132 | 4. 16E-27 | AC-G | RAPGEF1     |
| FNBP1L. 1   | 2. 81E-31 | -0. 27387 | 0. 091 | 0. 203 | 4. 20E-27 | AC-G | FNBP1L      |
| CACUL1. 1   | 2. 97E-31 | -0. 30688 | 0. 109 | 0. 225 | 4. 43E-27 | AC-G | CACUL1      |
| PDGFRL      | 3. 00E-31 | 0. 134011 | 0. 038 | 0. 007 | 4. 48E-27 | AC-G | PDGFRL      |
| GDPD2       | 3. 09E-31 | 0. 223992 | 0. 075 | 0. 025 | 4. 61E-27 | AC-G | GDPD2       |
| SPCS1. 1    | 3. 19E-31 | 0. 293445 | 0. 728 | 0. 738 | 4. 77E-27 | AC-G | SPCS1       |
| DEF8. 1     | 3. 20E-31 | -0. 23557 | 0. 157 | 0. 292 | 4. 79E-27 | AC-G | DEF8        |
| PQLC1. 1    | 3. 23E-31 | -0. 23214 | 0. 051 | 0. 15  | 4. 83E-27 | AC-G | PQLC1       |
| UBE2C. 1    | 3. 27E-31 | -0. 40395 | 0. 039 | 0. 132 | 4. 88E-27 | AC-G | UBE2C       |
| LDHB        | 3. 32E-31 | 0. 267729 | 0. 768 | 0. 781 | 4. 96E-27 | AC-G | LDHB        |
| ENO2. 1     | 3. 32E-31 | 0. 403525 | 0. 366 | 0. 268 | 4. 97E-27 | AC-G | ENO2        |
| PRKX. 1     | 3. 36E-31 | -0. 28154 | 0. 036 | 0. 126 | 5. 02E-27 | AC-G | PRKX        |
| GDE1. 1     | 3. 37E-31 | -0. 26232 | 0. 185 | 0. 321 | 5. 04E-27 | AC-G | GDE1        |
| RABEP1. 1   | 3. 44E-31 | -0. 2589  | 0. 146 | 0. 274 | 5. 13E-27 | AC-G | RABEP1      |
| MPND. 1     | 3. 70E-31 | -0. 16619 | 0. 021 | 0. 104 | 5. 53E-27 | AC-G | MPND        |
| RRP36. 1    | 3. 86E-31 | -0. 18792 | 0. 059 | 0. 162 | 5. 76E-27 | AC-G | RRP36       |
| APC2. 1     | 3. 94E-31 | -0. 21249 | 0. 06  | 0. 165 | 5. 89E-27 | AC-G | APC2        |
| PNMA1. 1    | 4. 14E-31 | -0. 24548 | 0. 173 | 0. 305 | 6. 19E-27 | AC-G | PNMA1       |
| TBC1D12. 1  | 4. 33E-31 | -0. 2837  | 0. 033 | 0. 122 | 6. 48E-27 | AC-G | TBC1D12     |
| VTI1B. 1    | 4. 52E-31 | -0. 21479 | 0. 226 | 0. 37  | 6. 76E-27 | AC-G | VTI1B       |
| ADCK2. 1    | 4. 57E-31 | -0. 26224 | 0. 056 | 0. 156 | 6. 84E-27 | AC-G | ADCK2       |
| KLF2. 1     | 4. 68E-31 | -0. 43681 | 0. 052 | 0. 147 | 7. 00E-27 | AC-G | KLF2        |
| NBL1. 1     | 4. 71E-31 | -0. 29872 | 0. 086 | 0. 196 | 7. 04E-27 | AC-G | NBL1        |



|           |          |          |       |       |          |      |               |
|-----------|----------|----------|-------|-------|----------|------|---------------|
| CENPU.1   | 4.77E-31 | -0.30067 | 0.031 | 0.119 | 7.12E-27 | AC-G | CENPU         |
| ZBTB7A    | 4.83E-31 | -0.24354 | 0.084 | 0.197 | 7.22E-27 | AC-G | ZBTB7A        |
| NIM1K.1   | 5.55E-31 | 0.270649 | 0.122 | 0.053 | 8.29E-27 | AC-G | NIM1K         |
| PTPN7.1   | 6.10E-31 | -0.34846 | 0.014 | 0.091 | 9.11E-27 | AC-G | PTPN7         |
| MAOA      | 6.68E-31 | 0.234133 | 0.073 | 0.023 | 9.98E-27 | AC-G | MAOA          |
| FPR3.1    | 6.69E-31 | -0.26492 | 0.001 | 0.067 | 1.00E-26 | AC-G | FPR3          |
| SLC47A2   | 7.08E-31 | 0.239279 | 0.063 | 0.018 | 1.06E-26 | AC-G | SLC47A2       |
| C6orf62.1 | 7.24E-31 | -0.21888 | 0.316 | 0.478 | 1.08E-26 | AC-G | C6orf62       |
| TNFRSF12A | 7.25E-31 | 0.371309 | 0.379 | 0.269 | 1.08E-26 | AC-G | TNFRSF12A     |
| EPHA3.1   | 7.53E-31 | -0.12312 | 0.01  | 0.085 | 1.13E-26 | AC-G | EPHA3         |
| IQGAP2.1  | 7.68E-31 | -0.22507 | 0.062 | 0.166 | 1.15E-26 | AC-G | IQGAP2        |
| ACAA1.1   | 7.92E-31 | -0.26427 | 0.229 | 0.372 | 1.18E-26 | AC-G | ACAA1         |
| MTA1.1    | 8.42E-31 | -0.2305  | 0.094 | 0.209 | 1.26E-26 | AC-G | MTA1          |
| KLHDC3.1  | 8.60E-31 | -0.19007 | 0.241 | 0.386 | 1.29E-26 | AC-G | KLHDC3        |
| ARID4B.1  | 9.02E-31 | -0.23656 | 0.281 | 0.43  | 1.35E-26 | AC-G | ARID4B        |
| DNAJB9.1  | 9.10E-31 | 0.412114 | 0.467 | 0.369 | 1.36E-26 | AC-G | DNAJB9        |
| PPP2R5E.1 | 9.14E-31 | -0.22773 | 0.14  | 0.268 | 1.37E-26 | AC-G | PPP2R5E       |
| FARP1     | 9.72E-31 | -0.2328  | 0.089 | 0.204 | 1.45E-26 | AC-G | FARP1         |
| NUSAP1.1  | 1.02E-30 | -0.39542 | 0.032 | 0.119 | 1.53E-26 | AC-G | NUSAP1        |
| SOX12     | 1.03E-30 | -0.15103 | 0.038 | 0.131 | 1.54E-26 | AC-G | SOX12         |
| PGAM2.1   | 1.03E-30 | 0.392463 | 0.098 | 0.038 | 1.54E-26 | AC-G | PGAM2         |
| IL16.1    | 1.08E-30 | -0.33851 | 0.008 | 0.08  | 1.61E-26 | AC-G | IL16          |
| RHOH.1    | 1.14E-30 | -0.38342 | 0.013 | 0.089 | 1.71E-26 | AC-G | RHOH          |
| PRPF38B.1 | 1.17E-30 | -0.26132 | 0.307 | 0.46  | 1.74E-26 | AC-G | PRPF38B       |
| PPIF.1    | 1.20E-30 | -0.30963 | 0.124 | 0.24  | 1.80E-26 | AC-G | PPIF          |
| ELOVL2.1  | 1.22E-30 | -0.14567 | 0.025 | 0.112 | 1.82E-26 | AC-G | ELOVL2        |
| SNAP23.1  | 1.22E-30 | -0.27969 | 0.141 | 0.264 | 1.83E-26 | AC-G | SNAP23        |
| ANKRD22.1 | 1.28E-30 | -0.33242 | 0.006 | 0.076 | 1.92E-26 | AC-G | ANKRD22       |
| RTN2.1    | 1.29E-30 | -0.26239 | 0.017 | 0.097 | 1.92E-26 | AC-G | RTN2          |
| RP11-499E | 1.40E-30 | 0.197171 | 0.073 | 0.023 | 2.10E-26 | AC-G | RP11-499E18.1 |
| WSB2.1    | 1.43E-30 | -0.23547 | 0.122 | 0.243 | 2.14E-26 | AC-G | WSB2          |
| RP5-940J5 | 1.61E-30 | 0.351332 | 0.247 | 0.145 | 2.41E-26 | AC-G | RP5-940J5.9   |
| SEMA4D.1  | 1.69E-30 | -0.3433  | 0.016 | 0.093 | 2.52E-26 | AC-G | SEMA4D        |
| STARD4-AS | 1.71E-30 | -0.21975 | 0.046 | 0.143 | 2.55E-26 | AC-G | STARD4-AS1    |
| TALDO1.1  | 1.78E-30 | -0.18806 | 0.459 | 0.624 | 2.67E-26 | AC-G | TALDO1        |
| CKAP2.1   | 1.86E-30 | -0.28475 | 0.079 | 0.186 | 2.79E-26 | AC-G | CKAP2         |
| SWAP70.1  | 1.94E-30 | -0.29644 | 0.123 | 0.241 | 2.91E-26 | AC-G | SWAP70        |
| HTATIP2.1 | 2.00E-30 | -0.33832 | 0.063 | 0.163 | 2.99E-26 | AC-G | HTATIP2       |
| DAZAP1.1  | 2.01E-30 | -0.24361 | 0.129 | 0.252 | 3.01E-26 | AC-G | DAZAP1        |
| CD93.1    | 2.28E-30 | -0.31633 | 0.009 | 0.083 | 3.41E-26 | AC-G | CD93          |
| RAP1A.1   | 2.29E-30 | -0.24822 | 0.397 | 0.539 | 3.42E-26 | AC-G | RAP1A         |
| CRELD2.1  | 2.32E-30 | -0.24268 | 0.171 | 0.305 | 3.46E-26 | AC-G | CRELD2        |
| COX6A1.1  | 2.32E-30 | 0.245507 | 0.827 | 0.848 | 3.46E-26 | AC-G | COX6A1        |
| CD59.1    | 2.37E-30 | 0.422079 | 0.585 | 0.547 | 3.54E-26 | AC-G | CD59          |
| PPP6R2.1  | 2.39E-30 | -0.24138 | 0.064 | 0.166 | 3.57E-26 | AC-G | PPP6R2        |
| FNBP1.1   | 2.73E-30 | -0.31176 | 0.157 | 0.284 | 4.08E-26 | AC-G | FNBP1         |
| ZNF580.1  | 2.81E-30 | -0.26204 | 0.182 | 0.312 | 4.20E-26 | AC-G | ZNF580        |
| GK.1      | 3.03E-30 | -0.31763 | 0.057 | 0.154 | 4.53E-26 | AC-G | GK            |
| PPIL6.1   | 3.31E-30 | 0.201568 | 0.098 | 0.038 | 4.94E-26 | AC-G | PPIL6         |
| VWA1.1    | 3.58E-30 | -0.24847 | 0.06  | 0.16  | 5.35E-26 | AC-G | VWA1          |
| SCO2.1    | 3.63E-30 | -0.2234  | 0.112 | 0.231 | 5.42E-26 | AC-G | SCO2          |

|             |           |           |        |        |           |      |          |
|-------------|-----------|-----------|--------|--------|-----------|------|----------|
| DHRSX. 1    | 3. 90E-30 | -0. 22453 | 0. 128 | 0. 253 | 5. 82E-26 | AC-G | DHRSX    |
| LDLRAD3. 1  | 4. 27E-30 | -0. 11935 | 0. 082 | 0. 194 | 6. 39E-26 | AC-G | LDLRAD3  |
| MAD2L2      | 4. 54E-30 | -0. 15783 | 0. 268 | 0. 417 | 6. 78E-26 | AC-G | MAD2L2   |
| ZNF106. 1   | 4. 81E-30 | -0. 2442  | 0. 15  | 0. 278 | 7. 19E-26 | AC-G | ZNF106   |
| CENPW. 1    | 4. 94E-30 | -0. 24727 | 0. 041 | 0. 133 | 7. 38E-26 | AC-G | CENPW    |
| ZNF280D. 1  | 4. 99E-30 | -0. 24553 | 0. 045 | 0. 139 | 7. 46E-26 | AC-G | ZNF280D  |
| PNOC        | 5. 00E-30 | 0. 101006 | 0. 028 | 0. 004 | 7. 47E-26 | AC-G | PNOC     |
| PTPRN. 1    | 5. 65E-30 | 0. 22921  | 0. 136 | 0. 062 | 8. 45E-26 | AC-G | PTPRN    |
| MYH9. 1     | 5. 90E-30 | -0. 25598 | 0. 094 | 0. 206 | 8. 82E-26 | AC-G | MYH9     |
| PAK1. 1     | 6. 01E-30 | -0. 37412 | 0. 083 | 0. 187 | 8. 98E-26 | AC-G | PAK1     |
| HHEX. 1     | 6. 05E-30 | -0. 29304 | 0. 002 | 0. 068 | 9. 04E-26 | AC-G | HHEX     |
| TNFSF13B. 1 | 6. 20E-30 | -0. 44277 | 0. 115 | 0. 221 | 9. 26E-26 | AC-G | TNFSF13B |
| ELAVL1. 1   | 6. 23E-30 | -0. 25413 | 0. 227 | 0. 367 | 9. 31E-26 | AC-G | ELAVL1   |
| CTTNBP2. 1  | 7. 06E-30 | -0. 3098  | 0. 056 | 0. 152 | 1. 05E-25 | AC-G | CTTNBP2  |
| ABHD2. 1    | 8. 36E-30 | -0. 17777 | 0. 123 | 0. 25  | 1. 25E-25 | AC-G | ABHD2    |
| WNK1. 1     | 8. 48E-30 | -0. 20715 | 0. 168 | 0. 3   | 1. 27E-25 | AC-G | WNK1     |
| MYO1G. 1    | 8. 48E-30 | -0. 27056 | 0. 004 | 0. 072 | 1. 27E-25 | AC-G | MYO1G    |
| UBAC1. 1    | 9. 16E-30 | -0. 23205 | 0. 12  | 0. 237 | 1. 37E-25 | AC-G | UBAC1    |
| BNIP2. 1    | 9. 79E-30 | -0. 28692 | 0. 159 | 0. 284 | 1. 46E-25 | AC-G | BNIP2    |
| CARD9. 1    | 1. 01E-29 | -0. 27027 | 0. 009 | 0. 08  | 1. 51E-25 | AC-G | CARD9    |
| CMIP. 1     | 1. 06E-29 | -0. 30486 | 0. 085 | 0. 19  | 1. 58E-25 | AC-G | CMIP     |
| FES. 1      | 1. 10E-29 | -0. 30035 | 0. 016 | 0. 092 | 1. 64E-25 | AC-G | FES      |
| CECR5. 1    | 1. 11E-29 | -0. 18392 | 0. 145 | 0. 272 | 1. 65E-25 | AC-G | CECR5    |
| ASAP1. 1    | 1. 11E-29 | -0. 20669 | 0. 126 | 0. 247 | 1. 66E-25 | AC-G | ASAP1    |
| TSPAN7      | 1. 13E-29 | 0. 434311 | 0. 395 | 0. 294 | 1. 69E-25 | AC-G | TSPAN7   |
| RNPEP. 1    | 1. 14E-29 | -0. 27971 | 0. 125 | 0. 243 | 1. 71E-25 | AC-G | RNPEP    |
| EIF4G3. 1   | 1. 14E-29 | -0. 23058 | 0. 084 | 0. 192 | 1. 71E-25 | AC-G | EIF4G3   |
| RALGAPA2. 1 | 1. 18E-29 | -0. 18359 | 0. 036 | 0. 125 | 1. 77E-25 | AC-G | RALGAPA2 |
| TMEM181. 1  | 1. 22E-29 | -0. 18936 | 0. 075 | 0. 181 | 1. 82E-25 | AC-G | TMEM181  |
| EMILIN2. 1  | 1. 26E-29 | -0. 2109  | 0. 016 | 0. 093 | 1. 88E-25 | AC-G | EMILIN2  |
| ANKRD9. 1   | 1. 29E-29 | -0. 18664 | 0. 02  | 0. 101 | 1. 92E-25 | AC-G | ANKRD9   |
| NSD1. 1     | 1. 33E-29 | -0. 24464 | 0. 131 | 0. 252 | 1. 98E-25 | AC-G | NSD1     |
| ITGAV. 1    | 1. 36E-29 | -0. 23779 | 0. 172 | 0. 299 | 2. 04E-25 | AC-G | ITGAV    |
| EEF1B2. 1   | 1. 77E-29 | -0. 10345 | 0. 642 | 0. 803 | 2. 65E-25 | AC-G | EEF1B2   |
| NENF. 1     | 1. 78E-29 | -0. 21576 | 0. 358 | 0. 52  | 2. 67E-25 | AC-G | NENF     |
| TOP2A. 1    | 1. 81E-29 | -0. 35456 | 0. 02  | 0. 099 | 2. 71E-25 | AC-G | TOP2A    |
| KLF3. 1     | 1. 83E-29 | -0. 26913 | 0. 118 | 0. 233 | 2. 74E-25 | AC-G | KLF3     |
| HIPK2. 1    | 1. 92E-29 | -0. 25626 | 0. 122 | 0. 24  | 2. 87E-25 | AC-G | HIPK2    |
| LRCH4. 1    | 2. 25E-29 | -0. 31756 | 0. 098 | 0. 206 | 3. 36E-25 | AC-G | LRCH4    |
| PURA. 1     | 2. 30E-29 | -0. 25973 | 0. 112 | 0. 227 | 3. 44E-25 | AC-G | PURA     |
| PBRM1       | 2. 41E-29 | -0. 23941 | 0. 137 | 0. 26  | 3. 60E-25 | AC-G | PBRM1    |
| GPR84. 1    | 2. 63E-29 | -0. 33849 | 0. 013 | 0. 085 | 3. 93E-25 | AC-G | GPR84    |
| SDF4. 1     | 2. 98E-29 | -0. 26624 | 0. 288 | 0. 426 | 4. 45E-25 | AC-G | SDF4     |
| LMBR1L. 1   | 3. 12E-29 | -0. 27027 | 0. 094 | 0. 202 | 4. 66E-25 | AC-G | LMBR1L   |
| DPYSL4. 1   | 3. 22E-29 | -0. 21919 | 0. 069 | 0. 171 | 4. 82E-25 | AC-G | DPYSL4   |
| FAM69C. 1   | 3. 59E-29 | -0. 1442  | 0. 014 | 0. 089 | 5. 37E-25 | AC-G | FAM69C   |
| RNFT1. 1    | 3. 87E-29 | -0. 20678 | 0. 107 | 0. 221 | 5. 79E-25 | AC-G | RNFT1    |
| TFEC. 1     | 3. 94E-29 | -0. 27069 | 0. 002 | 0. 066 | 5. 88E-25 | AC-G | TFEC     |
| EPN2. 1     | 4. 07E-29 | -0. 24862 | 0. 138 | 0. 256 | 6. 08E-25 | AC-G | EPN2     |
| SPSB4. 1    | 4. 15E-29 | -0. 13528 | 0. 004 | 0. 07  | 6. 20E-25 | AC-G | SPSB4    |
| STK25. 1    | 4. 17E-29 | -0. 22619 | 0. 192 | 0. 324 | 6. 23E-25 | AC-G | STK25    |

|            |           |           |        |        |           |      |                |
|------------|-----------|-----------|--------|--------|-----------|------|----------------|
| CLEC4E     | 4. 26E-29 | -0. 36953 | 0. 003 | 0. 068 | 6. 37E-25 | AC-G | CLEC4E         |
| FAM64A. 1  | 4. 36E-29 | -0. 27203 | 0. 01  | 0. 081 | 6. 52E-25 | AC-G | FAM64A         |
| PRKCD. 1   | 4. 40E-29 | -0. 30382 | 0. 017 | 0. 093 | 6. 58E-25 | AC-G | PRKCD          |
| UBL3. 1    | 4. 61E-29 | -0. 23648 | 0. 239 | 0. 376 | 6. 89E-25 | AC-G | UBL3           |
| CXXC5. 1   | 4. 64E-29 | -0. 25174 | 0. 268 | 0. 402 | 6. 93E-25 | AC-G | CXXC5          |
| ZNF609. 1  | 4. 67E-29 | -0. 1966  | 0. 024 | 0. 105 | 6. 98E-25 | AC-G | ZNF609         |
| TMED10. 1  | 4. 68E-29 | 0. 386348 | 0. 655 | 0. 605 | 6. 99E-25 | AC-G | TMED10         |
| ICA1       | 4. 77E-29 | -0. 2836  | 0. 04  | 0. 128 | 7. 12E-25 | AC-G | ICA1           |
| NOV        | 5. 16E-29 | 0. 129066 | 0. 043 | 0. 009 | 7. 71E-25 | AC-G | NOV            |
| SPG21. 1   | 5. 42E-29 | -0. 22977 | 0. 266 | 0. 408 | 8. 09E-25 | AC-G | SPG21          |
| ATP5C1. 1  | 5. 48E-29 | -0. 11688 | 0. 458 | 0. 612 | 8. 20E-25 | AC-G | ATP5C1         |
| ALYREF. 1  | 5. 50E-29 | -0. 1656  | 0. 062 | 0. 162 | 8. 22E-25 | AC-G | ALYREF         |
| PIP4K2A. 1 | 5. 81E-29 | -0. 32901 | 0. 057 | 0. 153 | 8. 69E-25 | AC-G | PIP4K2A        |
| WDR82. 1   | 5. 91E-29 | -0. 25117 | 0. 151 | 0. 274 | 8. 83E-25 | AC-G | WDR82          |
| MIR181A1H  | 5. 96E-29 | -0. 24863 | 0. 039 | 0. 127 | 8. 91E-25 | AC-G | MIR181A1HG     |
| RP11-326C  | 6. 19E-29 | 0. 150976 | 0. 038 | 0. 007 | 9. 25E-25 | AC-G | RP11-326C3. 12 |
| ZNF295-AS  | 6. 33E-29 | 0. 109124 | 0. 025 | 0. 003 | 9. 46E-25 | AC-G | ZNF295-AS1     |
| PLEKHB2. 1 | 6. 36E-29 | -0. 2073  | 0. 279 | 0. 423 | 9. 51E-25 | AC-G | PLEKHB2        |
| ARHGAP35.  | 6. 49E-29 | -0. 18835 | 0. 063 | 0. 163 | 9. 70E-25 | AC-G | ARHGAP35       |
| BCL7C      | 6. 54E-29 | -0. 21518 | 0. 15  | 0. 275 | 9. 77E-25 | AC-G | BCL7C          |
| CLEC2B. 1  | 6. 79E-29 | -0. 22148 | 0. 108 | 0. 224 | 1. 02E-24 | AC-G | CLEC2B         |
| KATNBL1. 1 | 7. 06E-29 | -0. 21616 | 0. 147 | 0. 271 | 1. 06E-24 | AC-G | KATNBL1        |
| TRIM24. 1  | 7. 20E-29 | -0. 2196  | 0. 099 | 0. 21  | 1. 08E-24 | AC-G | TRIM24         |
| GSK3B. 1   | 7. 26E-29 | -0. 22915 | 0. 103 | 0. 216 | 1. 08E-24 | AC-G | GSK3B          |
| CTSD. 1    | 7. 48E-29 | -0. 17522 | 0. 511 | 0. 664 | 1. 12E-24 | AC-G | CTSD           |
| PDCD7      | 7. 52E-29 | -0. 22315 | 0. 123 | 0. 24  | 1. 12E-24 | AC-G | PDCD7          |
| CFH        | 8. 27E-29 | 0. 117556 | 0. 042 | 0. 009 | 1. 24E-24 | AC-G | CFH            |
| FREM2. 1   | 8. 30E-29 | -0. 11832 | 0. 009 | 0. 079 | 1. 24E-24 | AC-G | FREM2          |
| DHRS11. 1  | 9. 19E-29 | -0. 12058 | 0. 031 | 0. 116 | 1. 37E-24 | AC-G | DHRS11         |
| BTF3       | 9. 36E-29 | 0. 21247  | 0. 854 | 0. 906 | 1. 40E-24 | AC-G | BTF3           |
| RHOQ. 1    | 9. 40E-29 | -0. 23034 | 0. 075 | 0. 178 | 1. 40E-24 | AC-G | RHOQ           |
| CAB39. 1   | 1. 02E-28 | -0. 26877 | 0. 094 | 0. 201 | 1. 52E-24 | AC-G | CAB39          |
| LPXN. 1    | 1. 04E-28 | -0. 35699 | 0. 038 | 0. 124 | 1. 55E-24 | AC-G | LPXN           |
| TMEM131. 1 | 1. 06E-28 | -0. 1569  | 0. 063 | 0. 162 | 1. 58E-24 | AC-G | TMEM131        |
| METRNL. 1  | 1. 08E-28 | -0. 3192  | 0. 019 | 0. 095 | 1. 62E-24 | AC-G | METRNL         |
| PRRC2B. 1  | 1. 14E-28 | -0. 21995 | 0. 135 | 0. 256 | 1. 71E-24 | AC-G | PRRC2B         |
| ZNF428. 1  | 1. 16E-28 | -0. 23854 | 0. 449 | 0. 563 | 1. 73E-24 | AC-G | ZNF428         |
| SPPL2A. 1  | 1. 30E-28 | -0. 28175 | 0. 096 | 0. 201 | 1. 94E-24 | AC-G | SPPL2A         |
| HAP1       | 1. 32E-28 | 0. 272747 | 0. 124 | 0. 057 | 1. 97E-24 | AC-G | HAP1           |
| TACC3. 1   | 1. 34E-28 | -0. 23189 | 0. 015 | 0. 089 | 2. 00E-24 | AC-G | TACC3          |
| GLS. 1     | 1. 44E-28 | -0. 21406 | 0. 051 | 0. 144 | 2. 16E-24 | AC-G | GLS            |
| RP11-556E  | 1. 56E-28 | -0. 30152 | 0. 002 | 0. 065 | 2. 34E-24 | AC-G | RP11-556E13. 1 |
| TMEM38A. 1 | 1. 57E-28 | 0. 180574 | 0. 1   | 0. 041 | 2. 35E-24 | AC-G | TMEM38A        |
| MAST3. 1   | 1. 63E-28 | -0. 19653 | 0. 016 | 0. 09  | 2. 44E-24 | AC-G | MAST3          |
| TMBIM4. 1  | 1. 77E-28 | 0. 395033 | 0. 115 | 0. 048 | 2. 64E-24 | AC-G | TMBIM4         |
| MAPKAPK3   | 1. 91E-28 | -0. 29459 | 0. 085 | 0. 187 | 2. 85E-24 | AC-G | MAPKAPK3       |
| XXYLT1. 1  | 2. 00E-28 | -0. 19598 | 0. 049 | 0. 141 | 2. 99E-24 | AC-G | XXYLT1         |
| WIPI2. 1   | 2. 03E-28 | -0. 23774 | 0. 276 | 0. 421 | 3. 04E-24 | AC-G | WIPI2          |
| TGFBI. 1   | 2. 06E-28 | -0. 46978 | 0. 122 | 0. 222 | 3. 07E-24 | AC-G | TGFBI          |
| NDUFB2. 1  | 2. 13E-28 | 0. 293394 | 0. 786 | 0. 813 | 3. 18E-24 | AC-G | NDUFB2         |
| FAM110B. 1 | 2. 21E-28 | -0. 21177 | 0. 095 | 0. 204 | 3. 30E-24 | AC-G | FAM110B        |

|             |           |           |        |        |           |      |          |
|-------------|-----------|-----------|--------|--------|-----------|------|----------|
| LCA5L       | 2. 28E-28 | 0. 120262 | 0. 045 | 0. 011 | 3. 41E-24 | AC-G | LCA5L    |
| FKBP5. 1    | 2. 31E-28 | -0. 35776 | 0. 218 | 0. 336 | 3. 46E-24 | AC-G | FKBP5    |
| SRGAP1. 1   | 2. 33E-28 | -0. 23524 | 0. 128 | 0. 244 | 3. 48E-24 | AC-G | SRGAP1   |
| IDH1. 1     | 2. 35E-28 | -0. 20496 | 0. 26  | 0. 404 | 3. 51E-24 | AC-G | IDH1     |
| SNHG18      | 2. 35E-28 | 0. 144863 | 0. 056 | 0. 016 | 3. 52E-24 | AC-G | SNHG18   |
| SPPL3. 1    | 2. 41E-28 | -0. 22822 | 0. 102 | 0. 216 | 3. 60E-24 | AC-G | SPPL3    |
| FAM162A. 1  | 2. 49E-28 | 0. 447786 | 0. 473 | 0. 387 | 3. 73E-24 | AC-G | FAM162A  |
| CLEC11A. 1  | 2. 50E-28 | -0. 27794 | 0. 136 | 0. 25  | 3. 74E-24 | AC-G | CLEC11A  |
| ARRDC1. 1   | 2. 52E-28 | -0. 2922  | 0. 056 | 0. 149 | 3. 77E-24 | AC-G | ARRDC1   |
| EHBP1L1. 1  | 2. 65E-28 | -0. 2055  | 0. 011 | 0. 082 | 3. 96E-24 | AC-G | EHBP1L1  |
| COPE. 1     | 2. 66E-28 | 0. 250163 | 0. 759 | 0. 773 | 3. 97E-24 | AC-G | COPE     |
| GIMAP7      | 2. 74E-28 | -0. 31391 | 0. 002 | 0. 065 | 4. 10E-24 | AC-G | GIMAP7   |
| ZMIZ1. 1    | 2. 83E-28 | -0. 25007 | 0. 059 | 0. 154 | 4. 23E-24 | AC-G | ZMIZ1    |
| CCDC50. 1   | 2. 90E-28 | -0. 24588 | 0. 192 | 0. 321 | 4. 33E-24 | AC-G | CCDC50   |
| RASAL3. 1   | 2. 97E-28 | -0. 26705 | 0. 004 | 0. 067 | 4. 45E-24 | AC-G | RASAL3   |
| DENND6B. 1  | 3. 09E-28 | -0. 26052 | 0. 032 | 0. 116 | 4. 61E-24 | AC-G | DENND6B  |
| WSB1        | 3. 09E-28 | -0. 15247 | 0. 505 | 0. 68  | 4. 62E-24 | AC-G | WSB1     |
| PRRC2A. 1   | 3. 19E-28 | -0. 20684 | 0. 141 | 0. 263 | 4. 76E-24 | AC-G | PRRC2A   |
| DLX2. 1     | 3. 35E-28 | -0. 37545 | 0. 038 | 0. 122 | 5. 01E-24 | AC-G | DLX2     |
| CHP1. 1     | 3. 50E-28 | -0. 23556 | 0. 134 | 0. 254 | 5. 23E-24 | AC-G | CHP1     |
| CTDSP1. 1   | 3. 51E-28 | -0. 29109 | 0. 125 | 0. 24  | 5. 25E-24 | AC-G | CTDSP1   |
| NLGN3       | 3. 77E-28 | -0. 19464 | 0. 04  | 0. 128 | 5. 64E-24 | AC-G | NLGN3    |
| SNN. 1      | 3. 93E-28 | -0. 26181 | 0. 13  | 0. 244 | 5. 87E-24 | AC-G | SNN      |
| ETV6. 1     | 4. 02E-28 | -0. 21911 | 0. 066 | 0. 164 | 6. 01E-24 | AC-G | ETV6     |
| PLK3. 1     | 4. 23E-28 | -0. 33765 | 0. 148 | 0. 259 | 6. 32E-24 | AC-G | PLK3     |
| CTDSP2. 1   | 4. 39E-28 | -0. 1976  | 0. 169 | 0. 298 | 6. 56E-24 | AC-G | CTDSP2   |
| SRP9        | 4. 49E-28 | 0. 245435 | 0. 708 | 0. 676 | 6. 71E-24 | AC-G | SRP9     |
| ARSA. 1     | 4. 54E-28 | -0. 24301 | 0. 056 | 0. 15  | 6. 78E-24 | AC-G | ARSA     |
| ADAM10. 1   | 4. 54E-28 | -0. 22605 | 0. 093 | 0. 202 | 6. 79E-24 | AC-G | ADAM10   |
| FHL1. 1     | 5. 04E-28 | 0. 345899 | 0. 436 | 0. 341 | 7. 53E-24 | AC-G | FHL1     |
| FUCA1. 1    | 5. 16E-28 | -0. 3018  | 0. 128 | 0. 238 | 7. 72E-24 | AC-G | FUCA1    |
| NPM1. 1     | 5. 18E-28 | 0. 232424 | 0. 821 | 0. 878 | 7. 73E-24 | AC-G | NPM1     |
| CYC1. 1     | 5. 93E-28 | -0. 21968 | 0. 406 | 0. 565 | 8. 86E-24 | AC-G | CYC1     |
| UBTF. 1     | 6. 25E-28 | -0. 20016 | 0. 126 | 0. 246 | 9. 34E-24 | AC-G | UBTF     |
| SLC16A10. 1 | 6. 37E-28 | -0. 38672 | 0. 023 | 0. 1   | 9. 51E-24 | AC-G | SLC16A10 |
| RAB8B. 1    | 6. 47E-28 | -0. 17385 | 0. 069 | 0. 171 | 9. 67E-24 | AC-G | RAB8B    |
| MKI67. 1    | 6. 69E-28 | -0. 26213 | 0. 007 | 0. 073 | 9. 99E-24 | AC-G | MKI67    |
| CDH4. 1     | 6. 75E-28 | -0. 16149 | 0. 022 | 0. 099 | 1. 01E-23 | AC-G | CDH4     |
| MAP4K4      | 7. 02E-28 | -0. 23309 | 0. 146 | 0. 268 | 1. 05E-23 | AC-G | MAP4K4   |
| PSMD8. 1    | 7. 24E-28 | 0. 349694 | 0. 689 | 0. 67  | 1. 08E-23 | AC-G | PSMD8    |
| CORO2B      | 7. 53E-28 | -0. 15297 | 0. 031 | 0. 114 | 1. 13E-23 | AC-G | CORO2B   |
| GSTO1       | 8. 34E-28 | -0. 26207 | 0. 341 | 0. 478 | 1. 25E-23 | AC-G | GSTO1    |
| PANK2. 1    | 9. 53E-28 | -0. 19458 | 0. 114 | 0. 227 | 1. 42E-23 | AC-G | PANK2    |
| CLPTMIL. 1  | 9. 61E-28 | -0. 19275 | 0. 068 | 0. 168 | 1. 44E-23 | AC-G | CLPTMIL  |
| DESI1. 1    | 9. 76E-28 | -0. 21633 | 0. 086 | 0. 193 | 1. 46E-23 | AC-G | DESI1    |
| GAS2L3. 1   | 1. 01E-27 | -0. 15514 | 0. 01  | 0. 08  | 1. 51E-23 | AC-G | GAS2L3   |
| RGS18. 1    | 1. 03E-27 | -0. 27239 | 0. 002 | 0. 062 | 1. 55E-23 | AC-G | RGS18    |
| SUPT6H      | 1. 04E-27 | -0. 21392 | 0. 084 | 0. 189 | 1. 55E-23 | AC-G | SUPT6H   |
| TTYH2. 1    | 1. 05E-27 | -0. 24051 | 0. 042 | 0. 13  | 1. 57E-23 | AC-G | TTYH2    |
| RNF157      | 1. 07E-27 | -0. 15657 | 0. 054 | 0. 149 | 1. 59E-23 | AC-G | RNF157   |
| HSPA8       | 1. 09E-27 | 0. 230403 | 0. 834 | 0. 872 | 1. 63E-23 | AC-G | HSPA8    |

|           |          |          |       |       |          |      |            |
|-----------|----------|----------|-------|-------|----------|------|------------|
| SSNA1.1   | 1.12E-27 | -0.2052  | 0.322 | 0.47  | 1.67E-23 | AC-G | SSNA1      |
| TRPV2.1   | 1.13E-27 | -0.26588 | 0.005 | 0.069 | 1.69E-23 | AC-G | TRPV2      |
| PKIB.1    | 1.17E-27 | -0.12942 | 0.17  | 0.306 | 1.74E-23 | AC-G | PKIB       |
| MAP2K3.1  | 1.21E-27 | -0.28063 | 0.1   | 0.206 | 1.81E-23 | AC-G | MAP2K3     |
| TP53I13.1 | 1.23E-27 | -0.25136 | 0.147 | 0.264 | 1.84E-23 | AC-G | TP53I13    |
| GCA.1     | 1.25E-27 | -0.38002 | 0.201 | 0.318 | 1.87E-23 | AC-G | GCA        |
| VPS26B.1  | 1.34E-27 | -0.20664 | 0.134 | 0.25  | 2.00E-23 | AC-G | VPS26B     |
| PTX3.1    | 1.35E-27 | 0.512073 | 0.178 | 0.103 | 2.02E-23 | AC-G | PTX3       |
| COX5A.1   | 1.36E-27 | -0.19677 | 0.467 | 0.624 | 2.04E-23 | AC-G | COX5A      |
| KCNAB2.1  | 1.52E-27 | -0.27481 | 0.016 | 0.088 | 2.27E-23 | AC-G | KCNAB2     |
| IER5.1    | 1.67E-27 | -0.27025 | 0.111 | 0.22  | 2.50E-23 | AC-G | IER5       |
| TLR1.1    | 1.80E-27 | -0.30375 | 0.011 | 0.079 | 2.70E-23 | AC-G | TLR1       |
| ELAVL2.1  | 1.81E-27 | -0.23344 | 0.018 | 0.091 | 2.71E-23 | AC-G | ELAVL2     |
| SUMO3.1   | 1.90E-27 | -0.19763 | 0.319 | 0.463 | 2.84E-23 | AC-G | SUMO3      |
| FAM212B.1 | 1.97E-27 | -0.21168 | 0.031 | 0.112 | 2.95E-23 | AC-G | FAM212B    |
| CCDC28B   | 2.18E-27 | -0.14662 | 0.12  | 0.238 | 3.25E-23 | AC-G | CCDC28B    |
| DYNLL2.1  | 2.22E-27 | -0.22888 | 0.113 | 0.224 | 3.32E-23 | AC-G | DYNLL2     |
| IGFBP3    | 2.33E-27 | 0.529364 | 0.269 | 0.18  | 3.48E-23 | AC-G | IGFBP3     |
| ADNP      | 2.35E-27 | -0.18756 | 0.1   | 0.211 | 3.51E-23 | AC-G | ADNP       |
| RPS6KA4.1 | 2.43E-27 | -0.25865 | 0.048 | 0.136 | 3.63E-23 | AC-G | RPS6KA4    |
| RBM26     | 2.55E-27 | -0.2029  | 0.117 | 0.231 | 3.81E-23 | AC-G | RBM26      |
| VCP.1     | 2.57E-27 | -0.23224 | 0.305 | 0.457 | 3.84E-23 | AC-G | VCP        |
| KRAS.1    | 2.62E-27 | -0.25728 | 0.155 | 0.274 | 3.92E-23 | AC-G | KRAS       |
| POU3F3.1  | 2.66E-27 | -0.18874 | 0.071 | 0.17  | 3.97E-23 | AC-G | POU3F3     |
| ZMAT5.1   | 2.67E-27 | -0.15274 | 0.134 | 0.255 | 3.99E-23 | AC-G | ZMAT5      |
| FAM57B.1  | 2.72E-27 | -0.2267  | 0.027 | 0.105 | 4.07E-23 | AC-G | FAM57B     |
| EZH2.1    | 2.82E-27 | -0.23044 | 0.072 | 0.169 | 4.22E-23 | AC-G | EZH2       |
| PRKACA.1  | 2.96E-27 | -0.18951 | 0.067 | 0.166 | 4.42E-23 | AC-G | PRKACA     |
| SLC29A1.1 | 2.97E-27 | -0.35662 | 0.061 | 0.152 | 4.44E-23 | AC-G | SLC29A1    |
| LINC00936 | 3.11E-27 | -0.29771 | 0.062 | 0.156 | 4.65E-23 | AC-G | LINC00936  |
| SLC4A7.1  | 3.20E-27 | -0.26913 | 0.121 | 0.232 | 4.78E-23 | AC-G | SLC4A7     |
| LASP1.1   | 3.44E-27 | -0.2078  | 0.117 | 0.227 | 5.14E-23 | AC-G | LASP1      |
| FAM217B.1 | 3.65E-27 | -0.22171 | 0.072 | 0.171 | 5.46E-23 | AC-G | FAM217B    |
| CFL2      | 3.80E-27 | 0.373462 | 0.406 | 0.312 | 5.68E-23 | AC-G | CFL2       |
| CYCS.1    | 3.84E-27 | 0.275084 | 0.738 | 0.733 | 5.74E-23 | AC-G | CYCS       |
| HDAC10.1  | 3.85E-27 | -0.2318  | 0.038 | 0.121 | 5.75E-23 | AC-G | HDAC10     |
| ZNF582-AS | 4.02E-27 | 0.29539  | 0.135 | 0.065 | 6.01E-23 | AC-G | ZNF582-AS1 |
| CALM1.1   | 4.09E-27 | -0.10552 | 0.656 | 0.794 | 6.11E-23 | AC-G | CALM1      |
| NUDT2.1   | 4.14E-27 | -0.23064 | 0.087 | 0.192 | 6.18E-23 | AC-G | NUDT2      |
| KMT2C.1   | 4.21E-27 | -0.23137 | 0.159 | 0.281 | 6.28E-23 | AC-G | KMT2C      |
| EXOC7.1   | 4.31E-27 | -0.18408 | 0.241 | 0.374 | 6.45E-23 | AC-G | EXOC7      |
| MLX.1     | 4.31E-27 | -0.24824 | 0.192 | 0.319 | 6.45E-23 | AC-G | MLX        |
| CUEDC1.1  | 4.33E-27 | -0.13321 | 0.042 | 0.129 | 6.47E-23 | AC-G | CUEDC1     |
| EPSTI1.1  | 4.35E-27 | -0.38001 | 0.052 | 0.139 | 6.50E-23 | AC-G | EPSTI1     |
| CRMP1.1   | 4.52E-27 | -0.32581 | 0.172 | 0.283 | 6.75E-23 | AC-G | CRMP1      |
| ALDOC.1   | 4.55E-27 | 0.300089 | 0.236 | 0.14  | 6.80E-23 | AC-G | ALDOC      |
| FMNL3.1   | 4.85E-27 | -0.26698 | 0.017 | 0.089 | 7.25E-23 | AC-G | FMNL3      |
| FAM168A.1 | 5.24E-27 | -0.18951 | 0.051 | 0.142 | 7.84E-23 | AC-G | FAM168A    |
| GATM.1    | 5.28E-27 | -0.24459 | 0.242 | 0.374 | 7.89E-23 | AC-G | GATM       |
| INPP5D.1  | 5.41E-27 | -0.32696 | 0.022 | 0.097 | 8.08E-23 | AC-G | INPP5D     |
| ARHGEF1.1 | 5.43E-27 | -0.278   | 0.107 | 0.214 | 8.12E-23 | AC-G | ARHGEF1    |

|            |           |           |        |        |           |      |               |
|------------|-----------|-----------|--------|--------|-----------|------|---------------|
| CYTH2. 1   | 5. 73E-27 | -0. 22636 | 0. 231 | 0. 363 | 8. 56E-23 | AC-G | CYTH2         |
| SERTAD1. 1 | 5. 85E-27 | 0. 405556 | 0. 399 | 0. 3   | 8. 74E-23 | AC-G | SERTAD1       |
| CENPM. 1   | 6. 18E-27 | -0. 22044 | 0. 015 | 0. 085 | 9. 24E-23 | AC-G | CENPM         |
| PCMTD2. 1  | 6. 32E-27 | -0. 22158 | 0. 132 | 0. 246 | 9. 45E-23 | AC-G | PCMTD2        |
| SGOL1      | 6. 37E-27 | -0. 22215 | 0. 005 | 0. 068 | 9. 52E-23 | AC-G | SGOL1         |
| MPPED2     | 6. 49E-27 | -0. 20197 | 0. 026 | 0. 102 | 9. 70E-23 | AC-G | MPPED2        |
| KCNQ2. 1   | 6. 55E-27 | -0. 13533 | 0. 121 | 0. 233 | 9. 79E-23 | AC-G | KCNQ2         |
| WDR26. 1   | 6. 67E-27 | -0. 21715 | 0. 077 | 0. 176 | 9. 97E-23 | AC-G | WDR26         |
| NOL12      | 6. 86E-27 | -0. 16243 | 0. 123 | 0. 239 | 1. 03E-22 | AC-G | NOL12         |
| VPS13C. 1  | 6. 89E-27 | -0. 19592 | 0. 087 | 0. 191 | 1. 03E-22 | AC-G | VPS13C        |
| CHD3       | 6. 94E-27 | -0. 25491 | 0. 044 | 0. 129 | 1. 04E-22 | AC-G | CHD3          |
| SLC7A11    | 8. 18E-27 | 0. 121722 | 0. 058 | 0. 017 | 1. 22E-22 | AC-G | SLC7A11       |
| KIAA2013.  | 8. 22E-27 | -0. 1869  | 0. 068 | 0. 167 | 1. 23E-22 | AC-G | KIAA2013      |
| ADCY7. 1   | 8. 43E-27 | -0. 2769  | 0. 009 | 0. 074 | 1. 26E-22 | AC-G | ADCY7         |
| PHLDB1. 1  | 8. 61E-27 | -0. 22394 | 0. 062 | 0. 157 | 1. 29E-22 | AC-G | PHLDB1        |
| PTP4A2. 1  | 8. 86E-27 | -0. 20979 | 0. 335 | 0. 476 | 1. 32E-22 | AC-G | PTP4A2        |
| RAB32. 1   | 9. 28E-27 | -0. 27237 | 0. 143 | 0. 257 | 1. 39E-22 | AC-G | RAB32         |
| TTC3. 1    | 9. 34E-27 | -0. 23622 | 0. 405 | 0. 538 | 1. 40E-22 | AC-G | TTC3          |
| TCOF1. 1   | 9. 77E-27 | -0. 30854 | 0. 108 | 0. 212 | 1. 46E-22 | AC-G | TCOF1         |
| EIF4G2. 1  | 9. 83E-27 | -0. 15038 | 0. 552 | 0. 68  | 1. 47E-22 | AC-G | EIF4G2        |
| IL10RB. 1  | 1. 02E-26 | -0. 24943 | 0. 147 | 0. 262 | 1. 52E-22 | AC-G | IL10RB        |
| CDV3       | 1. 05E-26 | -0. 27035 | 0. 175 | 0. 295 | 1. 56E-22 | AC-G | CDV3          |
| TYMS. 1    | 1. 05E-26 | -0. 27444 | 0. 079 | 0. 177 | 1. 57E-22 | AC-G | TYMS          |
| CD40. 1    | 1. 06E-26 | -0. 29116 | 0. 011 | 0. 078 | 1. 59E-22 | AC-G | CD40          |
| SUZ12. 1   | 1. 08E-26 | -0. 21153 | 0. 104 | 0. 212 | 1. 61E-22 | AC-G | SUZ12         |
| ENAH. 1    | 1. 12E-26 | -0. 21988 | 0. 164 | 0. 284 | 1. 67E-22 | AC-G | ENAH          |
| GBP3       | 1. 19E-26 | 0. 247426 | 0. 145 | 0. 071 | 1. 78E-22 | AC-G | GBP3          |
| RP11-71N1  | 1. 23E-26 | -0. 14996 | 0. 056 | 0. 151 | 1. 84E-22 | AC-G | RP11-71N10. 1 |
| C1QBP. 1   | 1. 24E-26 | -0. 20119 | 0. 425 | 0. 58  | 1. 85E-22 | AC-G | C1QBP         |
| DOK1. 1    | 1. 29E-26 | -0. 26508 | 0. 075 | 0. 17  | 1. 93E-22 | AC-G | DOK1          |
| SFRP4      | 1. 32E-26 | 0. 363438 | 0. 107 | 0. 047 | 1. 97E-22 | AC-G | SFRP4         |
| FOXN2. 1   | 1. 34E-26 | -0. 21098 | 0. 055 | 0. 146 | 2. 01E-22 | AC-G | FOXN2         |
| M6PR. 1    | 1. 37E-26 | -0. 27486 | 0. 276 | 0. 403 | 2. 05E-22 | AC-G | M6PR          |
| B4GALT1. 1 | 1. 39E-26 | -0. 34855 | 0. 049 | 0. 134 | 2. 08E-22 | AC-G | B4GALT1       |
| DOK5       | 1. 53E-26 | 0. 433721 | 0. 253 | 0. 169 | 2. 29E-22 | AC-G | DOK5          |
| POLR2J. 1  | 1. 55E-26 | 0. 344522 | 0. 664 | 0. 64  | 2. 32E-22 | AC-G | POLR2J        |
| GFER. 1    | 1. 58E-26 | -0. 23037 | 0. 117 | 0. 227 | 2. 36E-22 | AC-G | GFER          |
| LAPTM4B. 1 | 1. 68E-26 | -0. 27555 | 0. 229 | 0. 351 | 2. 51E-22 | AC-G | LAPTM4B       |
| GAS1. 1    | 1. 78E-26 | -0. 22818 | 0. 065 | 0. 16  | 2. 65E-22 | AC-G | GAS1          |
| TMCC3. 1   | 1. 79E-26 | -0. 24395 | 0. 015 | 0. 084 | 2. 67E-22 | AC-G | TMCC3         |
| XRCC5. 1   | 1. 79E-26 | -0. 13578 | 0. 435 | 0. 585 | 2. 68E-22 | AC-G | XRCC5         |
| SEMA6A. 1  | 1. 79E-26 | -0. 1947  | 0. 109 | 0. 217 | 2. 68E-22 | AC-G | SEMA6A        |
| NISCH. 1   | 1. 80E-26 | -0. 25972 | 0. 09  | 0. 193 | 2. 69E-22 | AC-G | NISCH         |
| ITSN2. 1   | 1. 86E-26 | -0. 28332 | 0. 097 | 0. 198 | 2. 79E-22 | AC-G | ITSN2         |
| IDI1. 1    | 1. 88E-26 | -0. 25749 | 0. 22  | 0. 344 | 2. 81E-22 | AC-G | IDI1          |
| TK1. 1     | 1. 92E-26 | -0. 25377 | 0. 014 | 0. 082 | 2. 87E-22 | AC-G | TK1           |
| DEAF1. 1   | 1. 93E-26 | -0. 18938 | 0. 118 | 0. 23  | 2. 89E-22 | AC-G | DEAF1         |
| JUND. 1    | 2. 13E-26 | -0. 25938 | 0. 286 | 0. 421 | 3. 19E-22 | AC-G | JUND          |
| CENPF. 1   | 2. 14E-26 | -0. 32456 | 0. 034 | 0. 114 | 3. 20E-22 | AC-G | CENPF         |
| GTPBP6. 1  | 2. 15E-26 | -0. 20413 | 0. 119 | 0. 23  | 3. 21E-22 | AC-G | GTPBP6        |
| RBM15B. 1  | 2. 18E-26 | -0. 2116  | 0. 087 | 0. 187 | 3. 26E-22 | AC-G | RBM15B        |

|            |           |           |        |        |           |      |          |
|------------|-----------|-----------|--------|--------|-----------|------|----------|
| PRDM2      | 2. 22E-26 | -0. 20478 | 0. 068 | 0. 164 | 3. 31E-22 | AC-G | PRDM2    |
| CCDC170    | 2. 26E-26 | 0. 115334 | 0. 092 | 0. 036 | 3. 37E-22 | AC-G | CCDC170  |
| UBE2Q2. 1  | 2. 44E-26 | -0. 17745 | 0. 112 | 0. 223 | 3. 65E-22 | AC-G | UBE2Q2   |
| ATF6B. 1   | 2. 46E-26 | -0. 2158  | 0. 272 | 0. 409 | 3. 68E-22 | AC-G | ATF6B    |
| ARHGEF40.  | 2. 58E-26 | -0. 21396 | 0. 053 | 0. 143 | 3. 86E-22 | AC-G | ARHGEF40 |
| PRRC2C. 1  | 2. 73E-26 | -0. 17108 | 0. 361 | 0. 506 | 4. 09E-22 | AC-G | PRRC2C   |
| ATXN80S. 1 | 2. 84E-26 | 0. 320112 | 0. 142 | 0. 067 | 4. 25E-22 | AC-G | ATXN80S  |
| YPEL1. 1   | 3. 01E-26 | -0. 15817 | 0. 029 | 0. 106 | 4. 50E-22 | AC-G | YPEL1    |
| UBE2T. 1   | 3. 02E-26 | -0. 27459 | 0. 054 | 0. 141 | 4. 51E-22 | AC-G | UBE2T    |
| CITED2. 1  | 3. 04E-26 | -0. 24808 | 0. 242 | 0. 374 | 4. 54E-22 | AC-G | CITED2   |
| ZNF32. 1   | 3. 09E-26 | -0. 20674 | 0. 127 | 0. 241 | 4. 62E-22 | AC-G | ZNF32    |
| BCL7A. 1   | 3. 09E-26 | -0. 21538 | 0. 069 | 0. 165 | 4. 62E-22 | AC-G | BCL7A    |
| PTGES2. 1  | 3. 14E-26 | -0. 2363  | 0. 168 | 0. 286 | 4. 70E-22 | AC-G | PTGES2   |
| CLIP2. 1   | 3. 18E-26 | -0. 22104 | 0. 091 | 0. 193 | 4. 75E-22 | AC-G | CLIP2    |
| LIMK1. 1   | 3. 20E-26 | -0. 23862 | 0. 062 | 0. 153 | 4. 78E-22 | AC-G | LIMK1    |
| RBM6       | 3. 43E-26 | -0. 22572 | 0. 206 | 0. 334 | 5. 13E-22 | AC-G | RBM6     |
| OLFML2B. 1 | 3. 50E-26 | -0. 32363 | 0. 013 | 0. 079 | 5. 23E-22 | AC-G | OLFML2B  |
| METRN. 1   | 3. 69E-26 | -0. 30169 | 0. 203 | 0. 312 | 5. 51E-22 | AC-G | METRN    |
| RASSF4. 1  | 3. 72E-26 | -0. 27307 | 0. 224 | 0. 35  | 5. 56E-22 | AC-G | RASSF4   |
| CNTFR. 1   | 3. 87E-26 | -0. 20846 | 0. 056 | 0. 144 | 5. 78E-22 | AC-G | CNTFR    |
| TRIM56. 1  | 4. 02E-26 | 0. 241704 | 0. 13  | 0. 063 | 6. 01E-22 | AC-G | TRIM56   |
| TRAF3IP3.  | 4. 64E-26 | -0. 2896  | 0. 003 | 0. 062 | 6. 93E-22 | AC-G | TRAF3IP3 |
| SH3GLB2. 1 | 4. 75E-26 | -0. 18378 | 0. 047 | 0. 132 | 7. 10E-22 | AC-G | SH3GLB2  |
| NRIP1. 1   | 4. 84E-26 | -0. 16317 | 0. 05  | 0. 137 | 7. 23E-22 | AC-G | NRIP1    |
| ERICH1. 1  | 4. 87E-26 | -0. 23902 | 0. 174 | 0. 292 | 7. 28E-22 | AC-G | ERICH1   |
| GNGT2. 1   | 4. 98E-26 | -0. 25496 | 0. 003 | 0. 062 | 7. 44E-22 | AC-G | GNGT2    |
| BTG2. 1    | 5. 19E-26 | -0. 14729 | 0. 335 | 0. 493 | 7. 75E-22 | AC-G | BTG2     |
| HLA-DRA. 1 | 5. 24E-26 | 0. 369931 | 0. 702 | 0. 62  | 7. 84E-22 | AC-G | HLA-DRA  |
| AUTS2. 1   | 5. 50E-26 | -0. 18797 | 0. 047 | 0. 132 | 8. 21E-22 | AC-G | AUTS2    |
| CSF1       | 5. 54E-26 | 0. 264163 | 0. 154 | 0. 083 | 8. 28E-22 | AC-G | CSF1     |
| B3GALT6. 1 | 5. 57E-26 | -0. 17308 | 0. 061 | 0. 153 | 8. 32E-22 | AC-G | B3GALT6  |
| TMEM121. 1 | 5. 85E-26 | -0. 18561 | 0. 038 | 0. 119 | 8. 75E-22 | AC-G | TMEM121  |
| GPR155. 1  | 5. 87E-26 | -0. 28622 | 0. 101 | 0. 203 | 8. 78E-22 | AC-G | GPR155   |
| DNAJC7. 1  | 6. 07E-26 | -0. 13292 | 0. 339 | 0. 489 | 9. 07E-22 | AC-G | DNAJC7   |
| HEBP2. 1   | 6. 14E-26 | -0. 1913  | 0. 127 | 0. 237 | 9. 18E-22 | AC-G | HEBP2    |
| ZNF358. 1  | 6. 27E-26 | -0. 17949 | 0. 081 | 0. 181 | 9. 36E-22 | AC-G | ZNF358   |
| PDIA6. 1   | 6. 42E-26 | 0. 293289 | 0. 659 | 0. 646 | 9. 59E-22 | AC-G | PDIA6    |
| SLAMF8. 1  | 6. 53E-26 | -0. 27583 | 0. 01  | 0. 074 | 9. 76E-22 | AC-G | SLAMF8   |
| EZR. 1     | 6. 56E-26 | -0. 22852 | 0. 237 | 0. 363 | 9. 80E-22 | AC-G | EZR      |
| ZDHHC24. 1 | 6. 58E-26 | -0. 2302  | 0. 102 | 0. 204 | 9. 83E-22 | AC-G | ZDHHC24  |
| DIAPH1. 1  | 6. 67E-26 | -0. 19301 | 0. 062 | 0. 154 | 9. 97E-22 | AC-G | DIAPH1   |
| RRM2. 1    | 6. 77E-26 | -0. 26586 | 0. 009 | 0. 073 | 1. 01E-21 | AC-G | RRM2     |
| ANAPC15. 1 | 6. 84E-26 | -0. 11347 | 0. 156 | 0. 282 | 1. 02E-21 | AC-G | ANAPC15  |
| ANKRD17. 1 | 7. 45E-26 | -0. 21479 | 0. 124 | 0. 235 | 1. 11E-21 | AC-G | ANKRD17  |
| ZDHHC12. 1 | 7. 85E-26 | -0. 21714 | 0. 159 | 0. 28  | 1. 17E-21 | AC-G | ZDHHC12  |
| FDX1. 1    | 8. 08E-26 | -0. 20811 | 0. 2   | 0. 326 | 1. 21E-21 | AC-G | FDX1     |
| HYAL2. 1   | 8. 17E-26 | -0. 18118 | 0. 128 | 0. 241 | 1. 22E-21 | AC-G | HYAL2    |
| CEP350     | 8. 17E-26 | -0. 2261  | 0. 104 | 0. 21  | 1. 22E-21 | AC-G | CEP350   |
| PFN2. 1    | 8. 18E-26 | 0. 389477 | 0. 509 | 0. 419 | 1. 22E-21 | AC-G | PFN2     |
| NUFIP2. 1  | 8. 37E-26 | -0. 19323 | 0. 139 | 0. 255 | 1. 25E-21 | AC-G | NUFIP2   |
| ABHD14A. 1 | 8. 58E-26 | -0. 20823 | 0. 129 | 0. 24  | 1. 28E-21 | AC-G | ABHD14A  |

|              |           |           |        |        |           |      |                |
|--------------|-----------|-----------|--------|--------|-----------|------|----------------|
| IQCG. 1      | 8. 90E-26 | 0. 371566 | 0. 188 | 0. 109 | 1. 33E-21 | AC-G | IQCG           |
| TRPM2. 1     | 9. 17E-26 | -0. 24848 | 0. 003 | 0. 061 | 1. 37E-21 | AC-G | TRPM2          |
| RAB3A. 1     | 9. 37E-26 | -0. 26162 | 0. 082 | 0. 18  | 1. 40E-21 | AC-G | RAB3A          |
| ANKRD13D. 9. | 84E-26    | -0. 22293 | 0. 084 | 0. 184 | 1. 47E-21 | AC-G | ANKRD13D       |
| RBM47. 1     | 9. 90E-26 | -0. 28567 | 0. 047 | 0. 13  | 1. 48E-21 | AC-G | RBM47          |
| KIDINS22C 1. | 01E-25    | -0. 23106 | 0. 168 | 0. 288 | 1. 51E-21 | AC-G | KIDINS220      |
| NEK11        | 1. 05E-25 | 0. 206002 | 0. 093 | 0. 038 | 1. 57E-21 | AC-G | NEK11          |
| PRKACB. 1    | 1. 05E-25 | -0. 22825 | 0. 123 | 0. 233 | 1. 57E-21 | AC-G | PRKACB         |
| LTBR. 1      | 1. 10E-25 | -0. 31873 | 0. 031 | 0. 108 | 1. 65E-21 | AC-G | LTBR           |
| OSCAR. 1     | 1. 11E-25 | -0. 28058 | 0. 016 | 0. 083 | 1. 66E-21 | AC-G | OSCAR          |
| NDUFA4L2 1.  | 16E-25    | 0. 209109 | 0. 083 | 0. 032 | 1. 73E-21 | AC-G | NDUFA4L2       |
| FST          | 1. 19E-25 | 0. 140704 | 0. 038 | 0. 008 | 1. 78E-21 | AC-G | FST            |
| RP11-806H 1. | 23E-25    | 0. 162144 | 0. 051 | 0. 014 | 1. 84E-21 | AC-G | RP11-806H10. 4 |
| PBK. 1       | 1. 30E-25 | -0. 30651 | 0. 017 | 0. 084 | 1. 94E-21 | AC-G | PBK            |
| TOP1. 1      | 1. 30E-25 | -0. 21066 | 0. 277 | 0. 411 | 1. 95E-21 | AC-G | TOP1           |
| PLEKHA2. 1   | 1. 34E-25 | -0. 22678 | 0. 045 | 0. 128 | 2. 00E-21 | AC-G | PLEKHA2        |
| TEAD2. 1     | 1. 43E-25 | -0. 13848 | 0. 027 | 0. 102 | 2. 14E-21 | AC-G | TEAD2          |
| PPT1         | 1. 51E-25 | -0. 20952 | 0. 433 | 0. 58  | 2. 25E-21 | AC-G | PPT1           |
| PRR7. 1      | 1. 54E-25 | -0. 19768 | 0. 102 | 0. 205 | 2. 31E-21 | AC-G | PRR7           |
| PAIP1. 1     | 1. 61E-25 | -0. 23624 | 0. 285 | 0. 417 | 2. 41E-21 | AC-G | PAIP1          |
| ARAP1. 1     | 1. 65E-25 | -0. 24974 | 0. 04  | 0. 121 | 2. 46E-21 | AC-G | ARAP1          |
| ZEB1. 1      | 1. 67E-25 | -0. 22891 | 0. 105 | 0. 21  | 2. 50E-21 | AC-G | ZEB1           |
| CBX3. 1      | 1. 69E-25 | -0. 18479 | 0. 448 | 0. 574 | 2. 53E-21 | AC-G | CBX3           |
| NNAT. 1      | 1. 79E-25 | -0. 64975 | 0. 123 | 0. 21  | 2. 67E-21 | AC-G | NNAT           |
| PSMB2. 1     | 1. 82E-25 | 0. 401888 | 0. 609 | 0. 567 | 2. 73E-21 | AC-G | PSMB2          |
| ARHGAP22. 1. | 87E-25    | -0. 30611 | 0. 018 | 0. 085 | 2. 80E-21 | AC-G | ARHGAP22       |
| RAP2B. 1     | 1. 88E-25 | -0. 25663 | 0. 086 | 0. 18  | 2. 81E-21 | AC-G | RAP2B          |
| MBD6. 1      | 1. 94E-25 | -0. 25465 | 0. 063 | 0. 154 | 2. 89E-21 | AC-G | MBD6           |
| EGR3. 1      | 1. 97E-25 | -0. 33109 | 0. 039 | 0. 117 | 2. 94E-21 | AC-G | EGR3           |
| FLI1. 1      | 2. 10E-25 | -0. 26148 | 0. 004 | 0. 061 | 3. 13E-21 | AC-G | FLI1           |
| RELT         | 2. 10E-25 | -0. 21985 | 0. 024 | 0. 096 | 3. 14E-21 | AC-G | RELT           |
| CLECL1. 1    | 2. 16E-25 | -0. 21551 | 0. 001 | 0. 056 | 3. 23E-21 | AC-G | CLECL1         |
| PLAU. 1      | 2. 25E-25 | -0. 25963 | 0. 082 | 0. 179 | 3. 36E-21 | AC-G | PLAU           |
| ILDR2. 1     | 2. 47E-25 | -0. 11528 | 0. 02  | 0. 092 | 3. 69E-21 | AC-G | ILDR2          |
| MYLIP. 1     | 2. 58E-25 | -0. 36699 | 0. 059 | 0. 143 | 3. 85E-21 | AC-G | MYLIP          |
| UBE2D1. 1    | 2. 59E-25 | -0. 2245  | 0. 169 | 0. 286 | 3. 87E-21 | AC-G | UBE2D1         |
| CEBPA. 1     | 2. 67E-25 | -0. 31257 | 0. 039 | 0. 117 | 3. 99E-21 | AC-G | CEBPA          |
| SLC15A3. 1   | 2. 73E-25 | -0. 23998 | 0. 014 | 0. 079 | 4. 08E-21 | AC-G | SLC15A3        |
| ATP6VOE1. 3. | 16E-25    | 0. 256566 | 0. 746 | 0. 763 | 4. 72E-21 | AC-G | ATP6VOE1       |
| PIPOX        | 3. 17E-25 | -0. 15625 | 0. 057 | 0. 147 | 4. 73E-21 | AC-G | PIPOX          |
| CALM2        | 3. 17E-25 | 0. 203891 | 0. 888 | 0. 941 | 4. 74E-21 | AC-G | CALM2          |
| PITPNA. 1    | 3. 23E-25 | -0. 1812  | 0. 096 | 0. 198 | 4. 82E-21 | AC-G | PITPNA         |
| SYNGR1. 1    | 3. 24E-25 | -0. 2463  | 0. 043 | 0. 125 | 4. 85E-21 | AC-G | SYNGR1         |
| DOK2         | 3. 44E-25 | -0. 25119 | 0. 006 | 0. 065 | 5. 14E-21 | AC-G | DOK2           |
| NPDC1. 1     | 3. 54E-25 | -0. 26146 | 0. 225 | 0. 342 | 5. 29E-21 | AC-G | NPDC1          |
| SALL1. 1     | 3. 59E-25 | -0. 18736 | 0. 062 | 0. 152 | 5. 36E-21 | AC-G | SALL1          |
| ADRBK1. 1    | 3. 63E-25 | -0. 25023 | 0. 03  | 0. 105 | 5. 42E-21 | AC-G | ADRBK1         |
| CHIT1        | 3. 68E-25 | 0. 300837 | 0. 039 | 0. 009 | 5. 50E-21 | AC-G | CHIT1          |
| KLHL23. 1    | 3. 87E-25 | -0. 24733 | 0. 082 | 0. 176 | 5. 78E-21 | AC-G | KLHL23         |
| YY1. 1       | 4. 06E-25 | -0. 17403 | 0. 23  | 0. 361 | 6. 07E-21 | AC-G | YY1            |
| ADO. 1       | 4. 09E-25 | -0. 17541 | 0. 053 | 0. 14  | 6. 12E-21 | AC-G | ADO            |



|           |          |          |       |       |          |      |               |
|-----------|----------|----------|-------|-------|----------|------|---------------|
| TVP23A    | 4.56E-25 | 0.173808 | 0.074 | 0.027 | 6.82E-21 | AC-G | TVP23A        |
| ILF3.1    | 4.77E-25 | -0.18384 | 0.3   | 0.433 | 7.13E-21 | AC-G | ILF3          |
| POLDIP2.1 | 4.92E-25 | -0.22168 | 0.243 | 0.367 | 7.36E-21 | AC-G | POLDIP2       |
| SNRNP70.1 | 4.93E-25 | -0.19554 | 0.346 | 0.5   | 7.36E-21 | AC-G | SNRNP70       |
| SIK3.1    | 4.97E-25 | -0.175   | 0.039 | 0.119 | 7.43E-21 | AC-G | SIK3          |
| AK2.1     | 5.07E-25 | 0.397315 | 0.457 | 0.378 | 7.58E-21 | AC-G | AK2           |
| UBE2F     | 5.13E-25 | -0.23252 | 0.223 | 0.35  | 7.67E-21 | AC-G | UBE2F         |
| TRA2B.1   | 5.87E-25 | -0.14658 | 0.414 | 0.564 | 8.77E-21 | AC-G | TRA2B         |
| PERP      | 5.92E-25 | 0.156864 | 0.076 | 0.028 | 8.84E-21 | AC-G | PERP          |
| MAP3K2.1  | 5.94E-25 | -0.24801 | 0.114 | 0.217 | 8.87E-21 | AC-G | MAP3K2        |
| RNF11.1   | 6.13E-25 | -0.19179 | 0.202 | 0.328 | 9.17E-21 | AC-G | RNF11         |
| GABARAPL1 | 6.16E-25 | -0.25701 | 0.2   | 0.317 | 9.21E-21 | AC-G | GABARAPL1     |
| SNX6.1    | 6.42E-25 | -0.17312 | 0.309 | 0.453 | 9.60E-21 | AC-G | SNX6          |
| ASXL1.1   | 6.69E-25 | -0.18034 | 0.092 | 0.193 | 1.00E-20 | AC-G | ASXL1         |
| TWSG1     | 6.95E-25 | 0.406417 | 0.231 | 0.149 | 1.04E-20 | AC-G | TWSG1         |
| CXXC4.1   | 7.13E-25 | -0.17429 | 0.02  | 0.089 | 1.07E-20 | AC-G | CXXC4         |
| CLEC4A.1  | 7.25E-25 | -0.29128 | 0.01  | 0.071 | 1.08E-20 | AC-G | CLEC4A        |
| CCDC57.1  | 7.93E-25 | -0.27321 | 0.041 | 0.12  | 1.18E-20 | AC-G | CCDC57        |
| LRRC4B.1  | 7.98E-25 | -0.15958 | 0.059 | 0.147 | 1.19E-20 | AC-G | LRRC4B        |
| GINS2.1   | 7.98E-25 | -0.24444 | 0.036 | 0.112 | 1.19E-20 | AC-G | GINS2         |
| G3BP2.1   | 8.17E-25 | -0.24044 | 0.176 | 0.295 | 1.22E-20 | AC-G | G3BP2         |
| SMARCD1.1 | 8.19E-25 | -0.1517  | 0.123 | 0.232 | 1.22E-20 | AC-G | SMARCD1       |
| FCGRT     | 8.36E-25 | -0.25069 | 0.452 | 0.569 | 1.25E-20 | AC-G | FCGRT         |
| VEZF1.1   | 8.51E-25 | -0.21554 | 0.144 | 0.256 | 1.27E-20 | AC-G | VEZF1         |
| PAFAH1B1  | 9.15E-25 | -0.20523 | 0.258 | 0.389 | 1.37E-20 | AC-G | PAFAH1B1      |
| NOTCH1.1  | 9.33E-25 | -0.17042 | 0.042 | 0.124 | 1.39E-20 | AC-G | NOTCH1        |
| SNX8.1    | 9.49E-25 | -0.18223 | 0.069 | 0.162 | 1.42E-20 | AC-G | SNX8          |
| COL1A2    | 9.59E-25 | 0.119724 | 0.043 | 0.011 | 1.43E-20 | AC-G | COL1A2        |
| RP11-480C | 9.66E-25 | -0.31314 | 0.002 | 0.057 | 1.44E-20 | AC-G | RP11-480C22.1 |
| IFT27.1   | 1.05E-24 | -0.16383 | 0.157 | 0.276 | 1.57E-20 | AC-G | IFT27         |
| MCOLN1.1  | 1.05E-24 | -0.22603 | 0.149 | 0.261 | 1.57E-20 | AC-G | MCOLN1        |
| KMT2A.1   | 1.08E-24 | -0.18785 | 0.142 | 0.254 | 1.62E-20 | AC-G | KMT2A         |
| ITM2B.1   | 1.09E-24 | -0.17126 | 0.613 | 0.835 | 1.63E-20 | AC-G | ITM2B         |
| AAK1.1    | 1.16E-24 | -0.27146 | 0.181 | 0.295 | 1.74E-20 | AC-G | AAK1          |
| TMEM9.1   | 1.18E-24 | 0.399393 | 0.428 | 0.355 | 1.77E-20 | AC-G | TMEM9         |
| GSPT1.1   | 1.25E-24 | -0.20583 | 0.241 | 0.369 | 1.87E-20 | AC-G | GSPT1         |
| DHFR      | 1.28E-24 | -0.19873 | 0.073 | 0.166 | 1.91E-20 | AC-G | DHFR          |
| GRASP.1   | 1.30E-24 | -0.26304 | 0.004 | 0.061 | 1.94E-20 | AC-G | GRASP         |
| ADSL.1    | 1.32E-24 | -0.15762 | 0.158 | 0.276 | 1.98E-20 | AC-G | ADSL          |
| ATP2A2.1  | 1.33E-24 | -0.19184 | 0.177 | 0.299 | 1.98E-20 | AC-G | ATP2A2        |
| ANKRD44   | 1.34E-24 | -0.28049 | 0.033 | 0.108 | 2.00E-20 | AC-G | ANKRD44       |
| DOK3.1    | 1.39E-24 | -0.2294  | 0.013 | 0.076 | 2.07E-20 | AC-G | DOK3          |
| MAN2A1.1  | 1.40E-24 | -0.27611 | 0.044 | 0.123 | 2.09E-20 | AC-G | MAN2A1        |
| AC004158. | 1.42E-24 | -0.10816 | 0.051 | 0.136 | 2.12E-20 | AC-G | AC004158.3    |
| NF1.1     | 1.46E-24 | -0.19177 | 0.132 | 0.241 | 2.18E-20 | AC-G | NF1           |
| MED13     | 1.49E-24 | -0.16156 | 0.08  | 0.177 | 2.22E-20 | AC-G | MED13         |
| ZMYND11.1 | 1.50E-24 | -0.15462 | 0.069 | 0.161 | 2.24E-20 | AC-G | ZMYND11       |
| CISD3.1   | 1.50E-24 | -0.18399 | 0.156 | 0.273 | 2.25E-20 | AC-G | CISD3         |
| FGD2.1    | 1.52E-24 | -0.23859 | 0.009 | 0.071 | 2.28E-20 | AC-G | FGD2          |
| ACOT7.1   | 1.56E-24 | -0.17455 | 0.134 | 0.245 | 2.33E-20 | AC-G | ACOT7         |
| PRAM1.1   | 1.59E-24 | -0.2599  | 0.005 | 0.062 | 2.38E-20 | AC-G | PRAM1         |

|            |           |           |        |        |           |      |               |
|------------|-----------|-----------|--------|--------|-----------|------|---------------|
| DST. 1     | 1. 60E-24 | -0. 23604 | 0. 275 | 0. 396 | 2. 40E-20 | AC-G | DST           |
| SGSM3      | 1. 63E-24 | -0. 18999 | 0. 104 | 0. 207 | 2. 44E-20 | AC-G | SGSM3         |
| PRKDC      | 1. 76E-24 | -0. 20928 | 0. 191 | 0. 312 | 2. 63E-20 | AC-G | PRKDC         |
| PLA2G7. 1  | 1. 84E-24 | -0. 23383 | 0. 004 | 0. 06  | 2. 74E-20 | AC-G | PLA2G7        |
| GPX1. 1    | 1. 84E-24 | -0. 10076 | 0. 69  | 0. 838 | 2. 74E-20 | AC-G | GPX1          |
| ARHGEF2. 1 | 1. 85E-24 | -0. 21815 | 0. 185 | 0. 309 | 2. 77E-20 | AC-G | ARHGEF2       |
| ATP5J2. 1  | 1. 86E-24 | 0. 2643   | 0. 781 | 0. 813 | 2. 79E-20 | AC-G | ATP5J2        |
| UAP1       | 1. 88E-24 | 0. 429665 | 0. 254 | 0. 171 | 2. 81E-20 | AC-G | UAP1          |
| RP3-525N1  | 1. 92E-24 | -0. 20162 | 0. 072 | 0. 165 | 2. 86E-20 | AC-G | RP3-525N10. 2 |
| OXR1. 1    | 1. 95E-24 | -0. 1838  | 0. 157 | 0. 27  | 2. 91E-20 | AC-G | OXR1          |
| PHC2. 1    | 2. 14E-24 | -0. 1963  | 0. 176 | 0. 296 | 3. 19E-20 | AC-G | PHC2          |
| TBCD. 1    | 2. 19E-24 | -0. 19103 | 0. 069 | 0. 16  | 3. 28E-20 | AC-G | TBCD          |
| MTHFD1L. 1 | 2. 49E-24 | -0. 21698 | 0. 063 | 0. 15  | 3. 72E-20 | AC-G | MTHFD1L       |
| IGF1       | 2. 52E-24 | -0. 282   | 0. 01  | 0. 071 | 3. 77E-20 | AC-G | IGF1          |
| RHOT1. 1   | 2. 53E-24 | -0. 20359 | 0. 155 | 0. 267 | 3. 79E-20 | AC-G | RHOT1         |
| MTF2. 1    | 2. 61E-24 | -0. 2145  | 0. 157 | 0. 273 | 3. 90E-20 | AC-G | MTF2          |
| LPIN2. 1   | 2. 61E-24 | -0. 18599 | 0. 073 | 0. 164 | 3. 91E-20 | AC-G | LPIN2         |
| FAM120A. 1 | 2. 69E-24 | -0. 18842 | 0. 122 | 0. 227 | 4. 02E-20 | AC-G | FAM120A       |
| TRPM3      | 2. 77E-24 | -0. 12188 | 0. 015 | 0. 08  | 4. 14E-20 | AC-G | TRPM3         |
| PPM1M. 1   | 2. 78E-24 | -0. 2105  | 0. 019 | 0. 086 | 4. 15E-20 | AC-G | PPM1M         |
| ZNF362. 1  | 2. 89E-24 | -0. 14937 | 0. 031 | 0. 106 | 4. 32E-20 | AC-G | ZNF362        |
| TIA1. 1    | 2. 90E-24 | -0. 19537 | 0. 152 | 0. 267 | 4. 33E-20 | AC-G | TIA1          |
| TPP1. 1    | 3. 05E-24 | -0. 21803 | 0. 218 | 0. 343 | 4. 56E-20 | AC-G | TPP1          |
| QARS. 1    | 3. 06E-24 | -0. 16967 | 0. 183 | 0. 301 | 4. 58E-20 | AC-G | QARS          |
| EEF1A1. 1  | 3. 08E-24 | 0. 330487 | 0. 803 | 0. 83  | 4. 61E-20 | AC-G | EEF1A1        |
| PQLC3. 1   | 3. 20E-24 | -0. 22509 | 0. 1   | 0. 201 | 4. 79E-20 | AC-G | PQLC3         |
| FBXO11. 1  | 3. 22E-24 | -0. 22692 | 0. 12  | 0. 223 | 4. 81E-20 | AC-G | FBXO11        |
| SF3B1. 1   | 3. 79E-24 | -0. 21416 | 0. 322 | 0. 458 | 5. 67E-20 | AC-G | SF3B1         |
| SLC35D2. 1 | 3. 79E-24 | -0. 1599  | 0. 037 | 0. 113 | 5. 67E-20 | AC-G | SLC35D2       |
| MX2. 1     | 3. 85E-24 | -0. 29884 | 0. 013 | 0. 074 | 5. 76E-20 | AC-G | MX2           |
| CCSAP      | 3. 90E-24 | -0. 20622 | 0. 036 | 0. 112 | 5. 82E-20 | AC-G | CCSAP         |
| B4GALNT1.  | 4. 04E-24 | -0. 29061 | 0. 07  | 0. 157 | 6. 04E-20 | AC-G | B4GALNT1      |
| SESN3. 1   | 4. 09E-24 | -0. 16102 | 0. 073 | 0. 165 | 6. 10E-20 | AC-G | SESN3         |
| DAGLB. 1   | 4. 16E-24 | -0. 30547 | 0. 053 | 0. 134 | 6. 22E-20 | AC-G | DAGLB         |
| NUDT16. 1  | 4. 25E-24 | -0. 22927 | 0. 13  | 0. 237 | 6. 35E-20 | AC-G | NUDT16        |
| TMEM203. 1 | 4. 25E-24 | -0. 20782 | 0. 159 | 0. 27  | 6. 35E-20 | AC-G | TMEM203       |
| EXTL3      | 4. 32E-24 | -0. 1275  | 0. 058 | 0. 146 | 6. 46E-20 | AC-G | EXTL3         |
| MTMR11     | 4. 33E-24 | 0. 307363 | 0. 122 | 0. 061 | 6. 48E-20 | AC-G | MTMR11        |
| FBXL15. 1  | 4. 41E-24 | -0. 26043 | 0. 112 | 0. 211 | 6. 59E-20 | AC-G | FBXL15        |
| PPM1A. 1   | 4. 55E-24 | -0. 22845 | 0. 1   | 0. 198 | 6. 80E-20 | AC-G | PPM1A         |
| SNX9. 1    | 4. 59E-24 | -0. 26402 | 0. 107 | 0. 205 | 6. 86E-20 | AC-G | SNX9          |
| RASGRP3    | 4. 79E-24 | -0. 29046 | 0. 015 | 0. 079 | 7. 15E-20 | AC-G | RASGRP3       |
| UGDH. 1    | 4. 98E-24 | 0. 353293 | 0. 227 | 0. 145 | 7. 45E-20 | AC-G | UGDH          |
| TMEM19. 1  | 5. 32E-24 | -0. 23067 | 0. 076 | 0. 167 | 7. 95E-20 | AC-G | TMEM19        |
| CDC123. 1  | 5. 45E-24 | -0. 17029 | 0. 232 | 0. 357 | 8. 15E-20 | AC-G | CDC123        |
| LRMP       | 5. 56E-24 | -0. 22795 | 0. 001 | 0. 053 | 8. 31E-20 | AC-G | LRMP          |
| AGAP2. 1   | 5. 61E-24 | -0. 18277 | 0. 007 | 0. 065 | 8. 39E-20 | AC-G | AGAP2         |
| TMEM178A.  | 5. 75E-24 | -0. 18032 | 0. 05  | 0. 132 | 8. 59E-20 | AC-G | TMEM178A      |
| PSMB10. 1  | 5. 76E-24 | -0. 25321 | 0. 166 | 0. 272 | 8. 61E-20 | AC-G | PSMB10        |
| CCL3L3     | 5. 83E-24 | -0. 64071 | 0. 006 | 0. 063 | 8. 71E-20 | AC-G | CCL3L3        |
| MVB12B. 1  | 6. 10E-24 | -0. 19606 | 0. 037 | 0. 112 | 9. 11E-20 | AC-G | MVB12B        |

|           |          |          |       |       |          |      |               |
|-----------|----------|----------|-------|-------|----------|------|---------------|
| GAD1.1    | 6.18E-24 | -0.12643 | 0.044 | 0.127 | 9.24E-20 | AC-G | GAD1          |
| C15orf48. | 6.40E-24 | -0.34444 | 0.016 | 0.079 | 9.57E-20 | AC-G | C15orf48      |
| RP11-263K | 6.41E-24 | 0.281636 | 0.114 | 0.056 | 9.58E-20 | AC-G | RP11-263K19.4 |
| GNPTG.1   | 6.42E-24 | -0.22938 | 0.163 | 0.276 | 9.59E-20 | AC-G | GNPTG         |
| CDC42SE2. | 6.48E-24 | -0.231   | 0.131 | 0.235 | 9.69E-20 | AC-G | CDC42SE2      |
| IFI44.1   | 6.52E-24 | -0.26174 | 0.103 | 0.2   | 9.74E-20 | AC-G | IFI44         |
| HNRNPL.1  | 6.55E-24 | -0.2044  | 0.166 | 0.283 | 9.79E-20 | AC-G | HNRNPL        |
| TOX.1     | 6.98E-24 | -0.15429 | 0.027 | 0.099 | 1.04E-19 | AC-G | TOX           |
| NRBF2.1   | 7.12E-24 | -0.16235 | 0.173 | 0.291 | 1.06E-19 | AC-G | NRBF2         |
| TLR7.1    | 7.16E-24 | -0.27845 | 0.007 | 0.065 | 1.07E-19 | AC-G | TLR7          |
| NAB1.1    | 7.26E-24 | -0.17015 | 0.055 | 0.139 | 1.09E-19 | AC-G | NAB1          |
| MAPK8IP1. | 7.27E-24 | -0.22154 | 0.107 | 0.208 | 1.09E-19 | AC-G | MAPK8IP1      |
| SPC25.1   | 7.59E-24 | -0.18634 | 0.011 | 0.071 | 1.13E-19 | AC-G | SPC25         |
| C3orf70.1 | 7.64E-24 | -0.18223 | 0.037 | 0.113 | 1.14E-19 | AC-G | C3orf70       |
| GRIA4.1   | 8.15E-24 | -0.20656 | 0.058 | 0.143 | 1.22E-19 | AC-G | GRIA4         |
| DHX36.1   | 8.21E-24 | -0.19729 | 0.315 | 0.447 | 1.23E-19 | AC-G | DHX36         |
| F2R.1     | 8.31E-24 | -0.16505 | 0.088 | 0.184 | 1.24E-19 | AC-G | F2R           |
| GAK.1     | 8.31E-24 | -0.22085 | 0.08  | 0.173 | 1.24E-19 | AC-G | GAK           |
| CTCF.1    | 8.37E-24 | -0.19666 | 0.085 | 0.179 | 1.25E-19 | AC-G | CTCF          |
| CADM4.1   | 8.49E-24 | -0.21204 | 0.167 | 0.282 | 1.27E-19 | AC-G | CADM4         |
| ARID1B.1  | 8.99E-24 | -0.19492 | 0.056 | 0.141 | 1.34E-19 | AC-G | ARID1B        |
| LRRN1.1   | 9.32E-24 | -0.19888 | 0.042 | 0.119 | 1.39E-19 | AC-G | LRRN1         |
| TMEM219.1 | 9.56E-24 | -0.14185 | 0.436 | 0.584 | 1.43E-19 | AC-G | TMEM219       |
| FLNC      | 9.57E-24 | 0.141915 | 0.059 | 0.019 | 1.43E-19 | AC-G | FLNC          |
| EPHB2.1   | 9.73E-24 | -0.19601 | 0.026 | 0.095 | 1.45E-19 | AC-G | EPHB2         |
| CCNA2.1   | 9.88E-24 | -0.19126 | 0.008 | 0.066 | 1.48E-19 | AC-G | CCNA2         |
| CRLF3.1   | 9.98E-24 | -0.19924 | 0.046 | 0.126 | 1.49E-19 | AC-G | CRLF3         |
| TRIM13.1  | 1.04E-23 | -0.27106 | 0.158 | 0.267 | 1.56E-19 | AC-G | TRIM13        |
| DDR2      | 1.05E-23 | 0.23874  | 0.103 | 0.048 | 1.56E-19 | AC-G | DDR2          |
| SMIM18.1  | 1.05E-23 | -0.21342 | 0.011 | 0.071 | 1.57E-19 | AC-G | SMIM18        |
| ZNF524.1  | 1.05E-23 | -0.17563 | 0.103 | 0.204 | 1.57E-19 | AC-G | ZNF524        |
| DLL1      | 1.08E-23 | -0.23638 | 0.017 | 0.082 | 1.61E-19 | AC-G | DLL1          |
| DCHS1.1   | 1.13E-23 | -0.13721 | 0.026 | 0.096 | 1.68E-19 | AC-G | DCHS1         |
| TMEM156.1 | 1.14E-23 | -0.28288 | 0.008 | 0.065 | 1.70E-19 | AC-G | TMEM156       |
| CDK5R1.1  | 1.15E-23 | -0.19182 | 0.032 | 0.105 | 1.72E-19 | AC-G | CDK5R1        |
| BIRC3     | 1.16E-23 | 0.290876 | 0.115 | 0.054 | 1.74E-19 | AC-G | BIRC3         |
| PACS2.1   | 1.19E-23 | -0.26195 | 0.063 | 0.149 | 1.78E-19 | AC-G | PACS2         |
| PLXNC1.1  | 1.20E-23 | -0.20173 | 0.014 | 0.076 | 1.80E-19 | AC-G | PLXNC1        |
| ZNF33A.1  | 1.21E-23 | -0.21497 | 0.038 | 0.113 | 1.81E-19 | AC-G | ZNF33A        |
| SCPEP1    | 1.28E-23 | -0.28269 | 0.257 | 0.364 | 1.91E-19 | AC-G | SCPEP1        |
| GNG2.1    | 1.34E-23 | -0.21513 | 0.098 | 0.195 | 2.00E-19 | AC-G | GNG2          |
| ZMYND8.1  | 1.36E-23 | -0.20174 | 0.12  | 0.225 | 2.03E-19 | AC-G | ZMYND8        |
| TBC1D14.1 | 1.37E-23 | -0.24854 | 0.093 | 0.186 | 2.05E-19 | AC-G | TBC1D14       |
| MAP3K11.1 | 1.37E-23 | -0.22296 | 0.102 | 0.198 | 2.05E-19 | AC-G | MAP3K11       |
| SNRPN.1   | 1.40E-23 | 0.453166 | 0.158 | 0.087 | 2.09E-19 | AC-G | SNRPN         |
| TGFB2.1   | 1.42E-23 | 0.228318 | 0.117 | 0.057 | 2.13E-19 | AC-G | TGFB2         |
| PTEN.1    | 1.48E-23 | -0.23921 | 0.06  | 0.143 | 2.21E-19 | AC-G | PTEN          |
| EIF4B.1   | 1.50E-23 | -0.2028  | 0.27  | 0.399 | 2.24E-19 | AC-G | EIF4B         |
| SPATC1L.1 | 1.57E-23 | -0.20927 | 0.112 | 0.21  | 2.34E-19 | AC-G | SPATC1L       |
| CSNK1A1.1 | 1.62E-23 | -0.18387 | 0.428 | 0.583 | 2.42E-19 | AC-G | CSNK1A1       |
| RTN1.1    | 1.67E-23 | -0.29906 | 0.069 | 0.157 | 2.49E-19 | AC-G | RTN1          |

|           |    |         |          |       |       |          |      |           |
|-----------|----|---------|----------|-------|-------|----------|------|-----------|
| TBC1D1.1  | 1. | 6.8E-23 | -0.22673 | 0.054 | 0.136 | 2.51E-19 | AC-G | TBC1D1    |
| G6PD      | 1. | 7.5E-23 | -0.17074 | 0.138 | 0.246 | 2.62E-19 | AC-G | G6PD      |
| TBC1D7.1  | 1. | 8.3E-23 | -0.18281 | 0.084 | 0.178 | 2.74E-19 | AC-G | TBC1D7    |
| C8orf82.1 | 1. | 9.6E-23 | -0.18536 | 0.091 | 0.187 | 2.94E-19 | AC-G | C8orf82   |
| SCN1B.1   | 2. | 1.1E-23 | -0.22882 | 0.017 | 0.081 | 3.15E-19 | AC-G | SCN1B     |
| LINC01114 | 2. | 4.1E-23 | 0.165648 | 0.07  | 0.026 | 3.60E-19 | AC-G | LINC01114 |
| TMCC1.1   | 2. | 4.5E-23 | -0.159   | 0.047 | 0.126 | 3.66E-19 | AC-G | TMCC1     |
| C16orf89  | 2. | 5.7E-23 | 0.183486 | 0.046 | 0.013 | 3.84E-19 | AC-G | C16orf89  |
| SPN.1     | 2. | 6.8E-23 | -0.24214 | 0.008 | 0.065 | 4.00E-19 | AC-G | SPN       |
| SMIM7.1   | 2. | 6.9E-23 | 0.316676 | 0.556 | 0.495 | 4.01E-19 | AC-G | SMIM7     |
| CCDC167   | 2. | 7.0E-23 | -0.13044 | 0.271 | 0.404 | 4.04E-19 | AC-G | CCDC167   |
| TMC8      | 2. | 7.2E-23 | -0.21339 | 0.001 | 0.051 | 4.06E-19 | AC-G | TMC8      |
| SMURF2.1  | 2. | 7.4E-23 | -0.18827 | 0.056 | 0.139 | 4.10E-19 | AC-G | SMURF2    |
| NUDT5     | 2. | 7.4E-23 | -0.19585 | 0.206 | 0.325 | 4.10E-19 | AC-G | NUDT5     |
| CHMP3     | 2. | 7.8E-23 | -0.13834 | 0.268 | 0.4   | 4.16E-19 | AC-G | CHMP3     |
| TNFRSF21. | 2. | 8.4E-23 | -0.21214 | 0.085 | 0.178 | 4.25E-19 | AC-G | TNFRSF21  |
| DNAH9     | 3. | 0.2E-23 | 0.124005 | 0.062 | 0.021 | 4.52E-19 | AC-G | DNAH9     |
| IMPAD1    | 3. | 0.9E-23 | -0.16158 | 0.102 | 0.203 | 4.62E-19 | AC-G | IMPAD1    |
| DHX9.1    | 3. | 1.1E-23 | -0.17194 | 0.18  | 0.297 | 4.64E-19 | AC-G | DHX9      |
| SFMBT2.1  | 3. | 1.4E-23 | -0.32446 | 0.022 | 0.088 | 4.70E-19 | AC-G | SFMBT2    |
| NFIA.1    | 3. | 1.8E-23 | -0.17647 | 0.276 | 0.399 | 4.76E-19 | AC-G | NFIA      |
| C1orf167  | 3. | 2.3E-23 | 0.12336  | 0.026 | 0.004 | 4.82E-19 | AC-G | C1orf167  |
| ALDH16A1. | 3. | 3.7E-23 | -0.2183  | 0.052 | 0.133 | 5.03E-19 | AC-G | ALDH16A1  |
| R3HDM1    | 3. | 4.2E-23 | -0.1476  | 0.057 | 0.141 | 5.11E-19 | AC-G | R3HDM1    |
| CDC20     | 3. | 4.6E-23 | -0.25557 | 0.016 | 0.078 | 5.17E-19 | AC-G | CDC20     |
| BOK.1     | 3. | 4.7E-23 | -0.18032 | 0.021 | 0.087 | 5.19E-19 | AC-G | BOK       |
| NUF2.1    | 3. | 5.2E-23 | -0.20994 | 0.012 | 0.072 | 5.26E-19 | AC-G | NUF2      |
| SLTM.1    | 3. | 5.4E-23 | -0.17237 | 0.239 | 0.371 | 5.29E-19 | AC-G | SLTM      |
| DIP2B.1   | 3. | 6.5E-23 | -0.17612 | 0.051 | 0.132 | 5.45E-19 | AC-G | DIP2B     |
| TGIF2     | 3. | 7.2E-23 | -0.15195 | 0.026 | 0.095 | 5.56E-19 | AC-G | TGIF2     |
| CCNB2.1   | 3. | 7.5E-23 | -0.24062 | 0.013 | 0.073 | 5.61E-19 | AC-G | CCNB2     |
| HEXDC.1   | 3. | 7.9E-23 | -0.17771 | 0.047 | 0.126 | 5.67E-19 | AC-G | HEXDC     |
| MOB3B.1   | 3. | 8.6E-23 | -0.21958 | 0.034 | 0.106 | 5.77E-19 | AC-G | MOB3B     |
| TRAK1.1   | 3. | 8.8E-23 | -0.16683 | 0.035 | 0.108 | 5.81E-19 | AC-G | TRAK1     |
| CSNK1G2.1 | 3. | 8.9E-23 | -0.16868 | 0.069 | 0.157 | 5.82E-19 | AC-G | CSNK1G2   |
| LDOC1.1   | 3. | 9.2E-23 | 0.294091 | 0.147 | 0.076 | 5.85E-19 | AC-G | LDOC1     |
| USP3.1    | 3. | 9.4E-23 | -0.18147 | 0.086 | 0.181 | 5.89E-19 | AC-G | USP3      |
| UBASH3B.1 | 4. | 2.0E-23 | -0.13756 | 0.02  | 0.086 | 6.28E-19 | AC-G | UBASH3B   |
| DYNLT3    | 4. | 2.0E-23 | 0.328802 | 0.365 | 0.281 | 6.28E-19 | AC-G | DYNLT3    |
| MYEF2.1   | 4. | 3.3E-23 | -0.20088 | 0.111 | 0.209 | 6.47E-19 | AC-G | MYEF2     |
| MFAP4     | 4. | 4.5E-23 | 0.308929 | 0.1   | 0.045 | 6.65E-19 | AC-G | MFAP4     |
| NDRG3.1   | 4. | 4.9E-23 | -0.15463 | 0.097 | 0.193 | 6.71E-19 | AC-G | NDRG3     |
| NCOA6.1   | 4. | 6.2E-23 | -0.15334 | 0.063 | 0.15  | 6.91E-19 | AC-G | NCOA6     |
| MPEG1     | 4. | 6.4E-23 | -0.20231 | 0.001 | 0.05  | 6.94E-19 | AC-G | MPEG1     |
| GGA2.1    | 4. | 7.1E-23 | -0.28643 | 0.069 | 0.153 | 7.04E-19 | AC-G | GGA2      |
| PIK3R3    | 4. | 8.0E-23 | -0.10959 | 0.06  | 0.146 | 7.17E-19 | AC-G | PIK3R3    |
| DTNB.1    | 4. | 8.4E-23 | -0.20414 | 0.035 | 0.107 | 7.23E-19 | AC-G | DTNB      |
| TAF11     | 5. | 0.5E-23 | -0.17375 | 0.178 | 0.295 | 7.54E-19 | AC-G | TAF11     |
| PFDN4.1   | 5. | 0.8E-23 | -0.17452 | 0.254 | 0.38  | 7.59E-19 | AC-G | PFDN4     |
| SRRD.1    | 5. | 3.0E-23 | -0.14423 | 0.049 | 0.129 | 7.92E-19 | AC-G | SRRD      |
| MOB3A.1   | 5. | 3.9E-23 | -0.21135 | 0.086 | 0.178 | 8.06E-19 | AC-G | MOB3A     |

|           |          |          |       |       |          |      |            |
|-----------|----------|----------|-------|-------|----------|------|------------|
| PPIB      | 5.53E-23 | 0.295183 | 0.709 | 0.727 | 8.26E-19 | AC-G | PPIB       |
| TMEM35.1  | 5.58E-23 | -0.21449 | 0.032 | 0.103 | 8.34E-19 | AC-G | TMEM35     |
| KLRC2.1   | 5.75E-23 | -0.30759 | 0.047 | 0.122 | 8.60E-19 | AC-G | KLRC2      |
| EHMT2.1   | 6.51E-23 | -0.19894 | 0.116 | 0.217 | 9.73E-19 | AC-G | EHMT2      |
| INSIG1.1  | 6.56E-23 | -0.21705 | 0.137 | 0.244 | 9.81E-19 | AC-G | INSIG1     |
| INF2.1    | 6.61E-23 | -0.2262  | 0.028 | 0.097 | 9.88E-19 | AC-G | INF2       |
| CLK1.1    | 6.63E-23 | -0.22286 | 0.324 | 0.442 | 9.90E-19 | AC-G | CLK1       |
| SNX20     | 6.78E-23 | -0.20603 | 0.002 | 0.053 | 1.01E-18 | AC-G | SNX20      |
| TECR.1    | 7.11E-23 | 0.3131   | 0.579 | 0.535 | 1.06E-18 | AC-G | TECR       |
| CD300LF   | 7.15E-23 | -0.2126  | 0.003 | 0.054 | 1.07E-18 | AC-G | CD300LF    |
| PGAP1.1   | 7.18E-23 | -0.16913 | 0.101 | 0.199 | 1.07E-18 | AC-G | PGAP1      |
| AURKA.1   | 7.33E-23 | -0.22288 | 0.022 | 0.088 | 1.09E-18 | AC-G | AURKA      |
| ADA.1     | 7.33E-23 | -0.16197 | 0.033 | 0.104 | 1.10E-18 | AC-G | ADA        |
| ZMYM4.1   | 7.49E-23 | -0.15151 | 0.056 | 0.139 | 1.12E-18 | AC-G | ZMYM4      |
| ADIPOR1.1 | 7.72E-23 | -0.22487 | 0.272 | 0.401 | 1.15E-18 | AC-G | ADIPOR1    |
| ALDH2.1   | 7.76E-23 | -0.26442 | 0.275 | 0.389 | 1.16E-18 | AC-G | ALDH2      |
| ZNF395    | 7.84E-23 | 0.212991 | 0.113 | 0.055 | 1.17E-18 | AC-G | ZNF395     |
| GIT2.1    | 7.99E-23 | -0.21141 | 0.078 | 0.168 | 1.19E-18 | AC-G | GIT2       |
| FYN       | 8.58E-23 | -0.20494 | 0.233 | 0.344 | 1.28E-18 | AC-G | FYN        |
| ZNF579.1  | 8.85E-23 | -0.12864 | 0.048 | 0.127 | 1.32E-18 | AC-G | ZNF579     |
| LMO2.1    | 9.98E-23 | -0.19625 | 0.089 | 0.179 | 1.49E-18 | AC-G | LMO2       |
| RAB33A.1  | 1.00E-22 | -0.27824 | 0.043 | 0.118 | 1.49E-18 | AC-G | RAB33A     |
| GRSF1.1   | 1.02E-22 | -0.18293 | 0.224 | 0.342 | 1.52E-18 | AC-G | GRSF1      |
| DLEU7.1   | 1.07E-22 | -0.252   | 0.005 | 0.058 | 1.60E-18 | AC-G | DLEU7      |
| FAM110A.1 | 1.09E-22 | -0.20265 | 0.02  | 0.084 | 1.63E-18 | AC-G | FAM110A    |
| PLL.1     | 1.14E-22 | -0.33318 | 0.017 | 0.078 | 1.70E-18 | AC-G | PLL        |
| RP1-17K7. | 1.15E-22 | 0.273368 | 0.102 | 0.045 | 1.72E-18 | AC-G | RP1-17K7.2 |
| SAMM50.1  | 1.16E-22 | -0.14981 | 0.126 | 0.233 | 1.73E-18 | AC-G | SAMM50     |
| PLCB2.1   | 1.18E-22 | -0.25035 | 0.012 | 0.071 | 1.76E-18 | AC-G | PLCB2      |
| KANSL1.1  | 1.19E-22 | -0.19516 | 0.088 | 0.181 | 1.78E-18 | AC-G | KANSL1     |
| AMER2.1   | 1.21E-22 | -0.33564 | 0.05  | 0.127 | 1.80E-18 | AC-G | AMER2      |
| KIAA1211L | 1.21E-22 | -0.12704 | 0.008 | 0.065 | 1.81E-18 | AC-G | KIAA1211L  |
| DRAM2.1   | 1.24E-22 | -0.32637 | 0.248 | 0.353 | 1.85E-18 | AC-G | DRAM2      |
| SDF2L1.1  | 1.28E-22 | -0.19886 | 0.25  | 0.381 | 1.91E-18 | AC-G | SDF2L1     |
| CELF3.1   | 1.29E-22 | -0.20132 | 0.015 | 0.076 | 1.92E-18 | AC-G | CELF3      |
| IDH3G.1   | 1.30E-22 | -0.11357 | 0.288 | 0.425 | 1.94E-18 | AC-G | IDH3G      |
| PCIF1.1   | 1.30E-22 | -0.10836 | 0.069 | 0.157 | 1.94E-18 | AC-G | PCIF1      |
| USP6NL.1  | 1.31E-22 | -0.13936 | 0.026 | 0.094 | 1.95E-18 | AC-G | USP6NL     |
| ATP6VOA1. | 1.34E-22 | -0.19347 | 0.189 | 0.304 | 2.00E-18 | AC-G | ATP6VOA1   |
| NCAM1.1   | 1.39E-22 | -0.21868 | 0.239 | 0.354 | 2.07E-18 | AC-G | NCAM1      |
| ATPAF2.1  | 1.42E-22 | -0.17031 | 0.126 | 0.23  | 2.12E-18 | AC-G | ATPAF2     |
| ATP8B4    | 1.44E-22 | -0.21085 | 0.002 | 0.051 | 2.15E-18 | AC-G | ATP8B4     |
| YDJC.1    | 1.50E-22 | -0.19052 | 0.071 | 0.158 | 2.25E-18 | AC-G | YDJC       |
| SYNDIG1.1 | 1.66E-22 | -0.22869 | 0.031 | 0.101 | 2.48E-18 | AC-G | SYNDIG1    |
| FAM3C.1   | 1.67E-22 | 0.302392 | 0.483 | 0.428 | 2.49E-18 | AC-G | FAM3C      |
| NUBP1     | 1.67E-22 | -0.18909 | 0.131 | 0.235 | 2.50E-18 | AC-G | NUBP1      |
| PRKD3.1   | 1.68E-22 | -0.18262 | 0.073 | 0.161 | 2.52E-18 | AC-G | PRKD3      |
| SCG3.1    | 1.70E-22 | -0.23609 | 0.177 | 0.284 | 2.54E-18 | AC-G | SCG3       |
| EXOC5     | 1.70E-22 | -0.17246 | 0.099 | 0.195 | 2.55E-18 | AC-G | EXOC5      |
| ZMYM2.1   | 1.73E-22 | -0.23656 | 0.121 | 0.221 | 2.58E-18 | AC-G | ZMYM2      |
| IKBK.1    | 1.75E-22 | -0.18201 | 0.064 | 0.147 | 2.62E-18 | AC-G | IKBK       |

|            |           |           |        |        |           |      |             |
|------------|-----------|-----------|--------|--------|-----------|------|-------------|
| DNASE2. 1  | 1. 83E-22 | -0. 19914 | 0. 284 | 0. 403 | 2. 73E-18 | AC-G | DNASE2      |
| LRRC45. 1  | 1. 83E-22 | -0. 15561 | 0. 031 | 0. 1   | 2. 73E-18 | AC-G | LRRC45      |
| CTBP2      | 1. 86E-22 | -0. 20393 | 0. 072 | 0. 158 | 2. 78E-18 | AC-G | CTBP2       |
| ACTL6B. 1  | 1. 96E-22 | -0. 23278 | 0. 022 | 0. 087 | 2. 93E-18 | AC-G | ACTL6B      |
| KLHL6. 1   | 2. 01E-22 | -0. 24532 | 0. 006 | 0. 059 | 3. 01E-18 | AC-G | KLHL6       |
| EBP. 1     | 2. 02E-22 | -0. 10308 | 0. 156 | 0. 27  | 3. 01E-18 | AC-G | EBP         |
| BLOC1S6    | 2. 03E-22 | -0. 23545 | 0. 169 | 0. 278 | 3. 03E-18 | AC-G | BLOC1S6     |
| MGST3. 1   | 2. 04E-22 | 0. 271752 | 0. 684 | 0. 695 | 3. 05E-18 | AC-G | MGST3       |
| B3GAT1. 1  | 2. 11E-22 | -0. 21896 | 0. 032 | 0. 101 | 3. 16E-18 | AC-G | B3GAT1      |
| NLGN1. 1   | 2. 14E-22 | -0. 16088 | 0. 066 | 0. 152 | 3. 19E-18 | AC-G | NLGN1       |
| ATP13A2. 1 | 2. 17E-22 | -0. 18877 | 0. 069 | 0. 154 | 3. 24E-18 | AC-G | ATP13A2     |
| MILR1. 1   | 2. 20E-22 | -0. 29352 | 0. 038 | 0. 11  | 3. 28E-18 | AC-G | MILR1       |
| QSER1. 1   | 2. 41E-22 | -0. 13287 | 0. 052 | 0. 131 | 3. 60E-18 | AC-G | QSER1       |
| CHMP4B. 1  | 2. 41E-22 | -0. 18257 | 0. 348 | 0. 475 | 3. 60E-18 | AC-G | CHMP4B      |
| RAB22A. 1  | 2. 44E-22 | -0. 17932 | 0. 149 | 0. 256 | 3. 64E-18 | AC-G | RAB22A      |
| KIAA1549.  | 2. 45E-22 | -0. 18181 | 0. 034 | 0. 105 | 3. 67E-18 | AC-G | KIAA1549    |
| DYRK3      | 2. 46E-22 | 0. 118009 | 0. 053 | 0. 017 | 3. 68E-18 | AC-G | DYRK3       |
| LGALS3BP.  | 2. 56E-22 | 0. 39514  | 0. 509 | 0. 438 | 3. 83E-18 | AC-G | LGALS3BP    |
| CAHM. 1    | 2. 63E-22 | -0. 17574 | 0. 032 | 0. 103 | 3. 93E-18 | AC-G | CAHM        |
| ERH. 1     | 2. 71E-22 | 0. 306223 | 0. 726 | 0. 711 | 4. 05E-18 | AC-G | ERH         |
| KIAA0040   | 2. 78E-22 | 0. 14708  | 0. 088 | 0. 037 | 4. 16E-18 | AC-G | KIAA0040    |
| IRAK1. 1   | 2. 79E-22 | -0. 23725 | 0. 084 | 0. 173 | 4. 17E-18 | AC-G | IRAK1       |
| C14orf80.  | 2. 81E-22 | -0. 14738 | 0. 015 | 0. 075 | 4. 20E-18 | AC-G | C14orf80    |
| FBXW5. 1   | 2. 87E-22 | -0. 24813 | 0. 196 | 0. 306 | 4. 30E-18 | AC-G | FBXW5       |
| KLHL13. 1  | 3. 08E-22 | -0. 14004 | 0. 038 | 0. 111 | 4. 60E-18 | AC-G | KLHL13      |
| CENPK      | 3. 20E-22 | -0. 20342 | 0. 039 | 0. 111 | 4. 78E-18 | AC-G | CENPK       |
| USP15. 1   | 3. 24E-22 | -0. 2637  | 0. 156 | 0. 26  | 4. 83E-18 | AC-G | USP15       |
| ADAM19. 1  | 3. 25E-22 | -0. 15755 | 0. 025 | 0. 09  | 4. 85E-18 | AC-G | ADAM19      |
| VDAC1. 1   | 3. 31E-22 | 0. 284865 | 0. 652 | 0. 627 | 4. 95E-18 | AC-G | VDAC1       |
| NIPSNAP1.  | 3. 34E-22 | -0. 16531 | 0. 091 | 0. 182 | 4. 98E-18 | AC-G | NIPSNAP1    |
| HELZ. 1    | 3. 36E-22 | -0. 18651 | 0. 113 | 0. 212 | 5. 01E-18 | AC-G | HELZ        |
| POLR2B. 1  | 3. 47E-22 | -0. 1921  | 0. 17  | 0. 28  | 5. 19E-18 | AC-G | POLR2B      |
| DNAJB12. 1 | 3. 48E-22 | -0. 23007 | 0. 076 | 0. 162 | 5. 20E-18 | AC-G | DNAJB12     |
| HOMER3. 1  | 3. 59E-22 | -0. 19137 | 0. 153 | 0. 259 | 5. 36E-18 | AC-G | HOMER3      |
| RP6-91H8.  | 3. 68E-22 | -0. 29047 | 0. 009 | 0. 065 | 5. 50E-18 | AC-G | RP6-91H8. 3 |
| LILRB2. 1  | 3. 69E-22 | -0. 22346 | 0. 008 | 0. 062 | 5. 52E-18 | AC-G | LILRB2      |
| LHFPL3. 1  | 3. 71E-22 | -0. 21225 | 0. 053 | 0. 132 | 5. 55E-18 | AC-G | LHFPL3      |
| SFRP1. 1   | 3. 75E-22 | -0. 10332 | 0. 036 | 0. 11  | 5. 60E-18 | AC-G | SFRP1       |
| DGAT1. 1   | 3. 75E-22 | -0. 16467 | 0. 03  | 0. 099 | 5. 60E-18 | AC-G | DGAT1       |
| CTSA. 1    | 3. 76E-22 | -0. 17038 | 0. 295 | 0. 419 | 5. 61E-18 | AC-G | CTSA        |
| TES. 1     | 3. 83E-22 | -0. 24403 | 0. 004 | 0. 054 | 5. 72E-18 | AC-G | TES         |
| TTY15. 1   | 4. 01E-22 | -0. 14003 | 0. 009 | 0. 064 | 5. 99E-18 | AC-G | TTY15       |
| HNRNPUL2.  | 4. 28E-22 | -0. 18137 | 0. 087 | 0. 178 | 6. 40E-18 | AC-G | HNRNPUL2    |
| TCEB2. 1   | 4. 34E-22 | 0. 232904 | 0. 795 | 0. 829 | 6. 48E-18 | AC-G | TCEB2       |
| IL1RN. 1   | 4. 43E-22 | -0. 29908 | 0. 022 | 0. 085 | 6. 62E-18 | AC-G | IL1RN       |
| HIP1R. 1   | 4. 48E-22 | -0. 21161 | 0. 046 | 0. 121 | 6. 69E-18 | AC-G | HIP1R       |
| STAT1      | 4. 50E-22 | -0. 2104  | 0. 143 | 0. 246 | 6. 72E-18 | AC-G | STAT1       |
| TEN1. 1    | 4. 54E-22 | -0. 15154 | 0. 098 | 0. 194 | 6. 78E-18 | AC-G | TEN1        |
| CTBP1. 1   | 4. 66E-22 | -0. 19406 | 0. 136 | 0. 239 | 6. 97E-18 | AC-G | CTBP1       |
| CERS6. 1   | 4. 75E-22 | -0. 16295 | 0. 059 | 0. 14  | 7. 10E-18 | AC-G | CERS6       |
| KIF9. 1    | 4. 99E-22 | 0. 399035 | 0. 239 | 0. 162 | 7. 45E-18 | AC-G | KIF9        |

|           |          |          |       |       |          |      |           |
|-----------|----------|----------|-------|-------|----------|------|-----------|
| STIM2     | 5.01E-22 | -0.14001 | 0.086 | 0.177 | 7.49E-18 | AC-G | STIM2     |
| PLP1.1    | 5.02E-22 | -0.55693 | 0.097 | 0.185 | 7.50E-18 | AC-G | PLP1      |
| WHSC1.1   | 5.08E-22 | -0.18639 | 0.08  | 0.167 | 7.60E-18 | AC-G | WHSC1     |
| TBC1D9B.1 | 5.25E-22 | -0.18209 | 0.084 | 0.175 | 7.84E-18 | AC-G | TBC1D9B   |
| HOXA2.1   | 5.26E-22 | -0.21784 | 0.02  | 0.082 | 7.86E-18 | AC-G | HOXA2     |
| RILP.1    | 5.69E-22 | -0.21127 | 0.042 | 0.115 | 8.50E-18 | AC-G | RILP      |
| GGCT.1    | 5.77E-22 | 0.464763 | 0.44  | 0.376 | 8.62E-18 | AC-G | GGCT      |
| NF2.1     | 5.83E-22 | -0.14955 | 0.077 | 0.165 | 8.71E-18 | AC-G | NF2       |
| ARF3.1    | 6.08E-22 | -0.1497  | 0.268 | 0.399 | 9.08E-18 | AC-G | ARF3      |
| CMKLR1.1  | 6.10E-22 | -0.21924 | 0.006 | 0.058 | 9.12E-18 | AC-G | CMKLR1    |
| RTKN.1    | 6.16E-22 | -0.1363  | 0.093 | 0.186 | 9.21E-18 | AC-G | RTKN      |
| AP2A2.1   | 6.41E-22 | -0.27209 | 0.167 | 0.268 | 9.58E-18 | AC-G | AP2A2     |
| SECISBP2L | 6.48E-22 | -0.22367 | 0.096 | 0.189 | 9.68E-18 | AC-G | SECISBP2L |
| PHKB.1    | 6.56E-22 | -0.20539 | 0.112 | 0.208 | 9.80E-18 | AC-G | PHKB      |
| WBP1L.1   | 6.58E-22 | -0.25419 | 0.047 | 0.121 | 9.84E-18 | AC-G | WBP1L     |
| IGDCC3.1  | 6.60E-22 | -0.11362 | 0.014 | 0.072 | 9.86E-18 | AC-G | IGDCC3    |
| ACLY.1    | 6.71E-22 | -0.1406  | 0.129 | 0.233 | 1.00E-17 | AC-G | ACLY      |
| CDC42BPB. | 6.86E-22 | -0.15608 | 0.053 | 0.132 | 1.03E-17 | AC-G | CDC42BPB  |
| ZNF292.1  | 6.91E-22 | -0.20565 | 0.173 | 0.281 | 1.03E-17 | AC-G | ZNF292    |
| FOXM1     | 7.23E-22 | -0.15259 | 0.007 | 0.061 | 1.08E-17 | AC-G | FOXM1     |
| TIMELESS  | 7.36E-22 | -0.12472 | 0.014 | 0.072 | 1.10E-17 | AC-G | TIMELESS  |
| SNX27.1   | 7.38E-22 | -0.21701 | 0.156 | 0.262 | 1.10E-17 | AC-G | SNX27     |
| CRTAP.1   | 7.50E-22 | -0.22503 | 0.15  | 0.253 | 1.12E-17 | AC-G | CRTAP     |
| GIMAP6    | 7.53E-22 | -0.2213  | 0.002 | 0.051 | 1.12E-17 | AC-G | GIMAP6    |
| IGFBP7.1  | 7.96E-22 | 0.318174 | 0.345 | 0.254 | 1.19E-17 | AC-G | IGFBP7    |
| TNKS2.1   | 8.06E-22 | -0.20259 | 0.047 | 0.122 | 1.20E-17 | AC-G | TNKS2     |
| MAF.1     | 8.31E-22 | -0.27974 | 0.068 | 0.148 | 1.24E-17 | AC-G | MAF       |
| RAD51AP1. | 8.66E-22 | -0.18355 | 0.016 | 0.076 | 1.29E-17 | AC-G | RAD51AP1  |
| SIGLEC14  | 8.69E-22 | -0.22342 | 0.003 | 0.053 | 1.30E-17 | AC-G | SIGLEC14  |
| LRRC8D.1  | 8.71E-22 | -0.17112 | 0.035 | 0.105 | 1.30E-17 | AC-G | LRRC8D    |
| ZFAND3.1  | 8.73E-22 | -0.1938  | 0.181 | 0.29  | 1.30E-17 | AC-G | ZFAND3    |
| NOL3.1    | 8.88E-22 | 0.343039 | 0.23  | 0.153 | 1.33E-17 | AC-G | NOL3      |
| KCTD20.1  | 9.03E-22 | -0.19325 | 0.108 | 0.203 | 1.35E-17 | AC-G | KCTD20    |
| SIAH1.1   | 9.91E-22 | -0.19673 | 0.142 | 0.246 | 1.48E-17 | AC-G | SIAH1     |
| HLA-C     | 1.01E-21 | 0.234173 | 0.809 | 0.802 | 1.52E-17 | AC-G | HLA-C     |
| HMGXB4.1  | 1.04E-21 | -0.19446 | 0.135 | 0.239 | 1.56E-17 | AC-G | HMGXB4    |
| HECTD1.1  | 1.06E-21 | -0.18425 | 0.14  | 0.245 | 1.58E-17 | AC-G | HECTD1    |
| JDP2.1    | 1.09E-21 | -0.24491 | 0.019 | 0.08  | 1.63E-17 | AC-G | JDP2      |
| MAPRE1.1  | 1.12E-21 | -0.1423  | 0.362 | 0.5   | 1.68E-17 | AC-G | MAPRE1    |
| LIX1L.1   | 1.15E-21 | -0.16353 | 0.069 | 0.153 | 1.72E-17 | AC-G | LIX1L     |
| SFT2D1.1  | 1.17E-21 | -0.17493 | 0.391 | 0.523 | 1.74E-17 | AC-G | SFT2D1    |
| GATAD2B.1 | 1.18E-21 | -0.19317 | 0.086 | 0.175 | 1.76E-17 | AC-G | GATAD2B   |
| PTPRO.1   | 1.25E-21 | -0.23177 | 0.025 | 0.089 | 1.87E-17 | AC-G | PTPRO     |
| PCOLCE2   | 1.27E-21 | 0.26885  | 0.134 | 0.072 | 1.90E-17 | AC-G | PCOLCE2   |
| SPTSSB    | 1.34E-21 | 0.317794 | 0.073 | 0.03  | 2.01E-17 | AC-G | SPTSSB    |
| SPRY2.1   | 1.37E-21 | -0.17694 | 0.134 | 0.234 | 2.05E-17 | AC-G | SPRY2     |
| SPSB1     | 1.44E-21 | 0.248829 | 0.118 | 0.059 | 2.15E-17 | AC-G | SPSB1     |
| UROD.1    | 1.45E-21 | 0.386827 | 0.425 | 0.346 | 2.17E-17 | AC-G | UROD      |
| KHSRP.1   | 1.47E-21 | -0.15333 | 0.147 | 0.256 | 2.20E-17 | AC-G | KHSRP     |
| CDIPT-AS1 | 1.53E-21 | 0.130492 | 0.027 | 0.005 | 2.28E-17 | AC-G | CDIPT-AS1 |
| ACBD5.1   | 1.58E-21 | -0.16731 | 0.091 | 0.182 | 2.36E-17 | AC-G | ACBD5     |

|            |           |           |        |        |           |      |             |
|------------|-----------|-----------|--------|--------|-----------|------|-------------|
| NRP1. 1    | 1. 64E-21 | -0. 18025 | 0. 089 | 0. 18  | 2. 44E-17 | AC-G | NRP1        |
| SQSTM1. 1  | 1. 76E-21 | 0. 245001 | 0. 555 | 0. 517 | 2. 63E-17 | AC-G | SQSTM1      |
| VWA5A. 1   | 1. 78E-21 | 0. 259837 | 0. 145 | 0. 079 | 2. 66E-17 | AC-G | VWA5A       |
| SOCS2. 1   | 1. 85E-21 | -0. 16352 | 0. 082 | 0. 171 | 2. 76E-17 | AC-G | SOCS2       |
| PSPC1. 1   | 2. 06E-21 | -0. 20346 | 0. 129 | 0. 227 | 3. 09E-17 | AC-G | PSPC1       |
| BCAN. 1    | 2. 08E-21 | -0. 30257 | 0. 187 | 0. 293 | 3. 12E-17 | AC-G | BCAN        |
| ZBTB1. 1   | 2. 12E-21 | -0. 22478 | 0. 091 | 0. 179 | 3. 16E-17 | AC-G | ZBTB1       |
| NCL. 1     | 2. 13E-21 | -0. 15935 | 0. 434 | 0. 578 | 3. 19E-17 | AC-G | NCL         |
| ANLN       | 2. 22E-21 | -0. 24493 | 0. 015 | 0. 072 | 3. 31E-17 | AC-G | ANLN        |
| MMP15. 1   | 2. 24E-21 | -0. 10972 | 0. 015 | 0. 073 | 3. 34E-17 | AC-G | MMP15       |
| NSA2. 1    | 2. 25E-21 | -0. 13596 | 0. 293 | 0. 419 | 3. 36E-17 | AC-G | NSA2        |
| IL10RB-AS  | 2. 29E-21 | -0. 21896 | 0. 004 | 0. 053 | 3. 42E-17 | AC-G | IL10RB-AS1  |
| KCTD17. 1  | 2. 30E-21 | -0. 15978 | 0. 066 | 0. 148 | 3. 44E-17 | AC-G | KCTD17      |
| AC074289.  | 2. 33E-21 | -0. 24591 | 0. 014 | 0. 07  | 3. 48E-17 | AC-G | AC074289. 1 |
| ABAT. 1    | 2. 35E-21 | -0. 19335 | 0. 086 | 0. 174 | 3. 51E-17 | AC-G | ABAT        |
| CCDC109B.  | 2. 36E-21 | -0. 2123  | 0. 253 | 0. 367 | 3. 52E-17 | AC-G | CCDC109B    |
| LINC00869  | 2. 39E-21 | 0. 194859 | 0. 042 | 0. 012 | 3. 58E-17 | AC-G | LINC00869   |
| SKI. 1     | 2. 43E-21 | -0. 1974  | 0. 079 | 0. 165 | 3. 63E-17 | AC-G | SKI         |
| KIF3C. 1   | 2. 54E-21 | -0. 14257 | 0. 042 | 0. 114 | 3. 80E-17 | AC-G | KIF3C       |
| PAPOLG. 1  | 2. 55E-21 | -0. 21693 | 0. 034 | 0. 103 | 3. 81E-17 | AC-G | PAPOLG      |
| NKG7       | 2. 55E-21 | -0. 28914 | 0. 007 | 0. 058 | 3. 81E-17 | AC-G | NKG7        |
| MIR497HG   | 2. 60E-21 | 0. 281213 | 0. 115 | 0. 058 | 3. 89E-17 | AC-G | MIR497HG    |
| MEX3B. 1   | 2. 61E-21 | -0. 16527 | 0. 015 | 0. 072 | 3. 90E-17 | AC-G | MEX3B       |
| HSPA9. 1   | 2. 69E-21 | 0. 346889 | 0. 517 | 0. 482 | 4. 01E-17 | AC-G | HSPA9       |
| TBCC. 1    | 2. 70E-21 | -0. 2372  | 0. 138 | 0. 238 | 4. 03E-17 | AC-G | TBCC        |
| TMEM127    | 2. 78E-21 | -0. 20004 | 0. 078 | 0. 163 | 4. 15E-17 | AC-G | TMEM127     |
| EGOT       | 2. 89E-21 | 0. 110947 | 0. 022 | 0. 003 | 4. 32E-17 | AC-G | EGOT        |
| WASF2. 1   | 2. 92E-21 | -0. 22454 | 0. 333 | 0. 459 | 4. 36E-17 | AC-G | WASF2       |
| KCNQ1      | 3. 01E-21 | -0. 1937  | 0. 001 | 0. 046 | 4. 50E-17 | AC-G | KCNQ1       |
| CREBBP     | 3. 05E-21 | -0. 19266 | 0. 079 | 0. 165 | 4. 56E-17 | AC-G | CREBBP      |
| BCKDK. 1   | 3. 07E-21 | -0. 16355 | 0. 216 | 0. 333 | 4. 58E-17 | AC-G | BCKDK       |
| R3HDM2. 1  | 3. 09E-21 | -0. 12592 | 0. 092 | 0. 182 | 4. 62E-17 | AC-G | R3HDM2      |
| MAP6D1. 1  | 3. 17E-21 | -0. 20392 | 0. 028 | 0. 093 | 4. 74E-17 | AC-G | MAP6D1      |
| CHPT1. 1   | 3. 26E-21 | -0. 21476 | 0. 213 | 0. 32  | 4. 88E-17 | AC-G | CHPT1       |
| POMC. 1    | 3. 30E-21 | -0. 22671 | 0. 005 | 0. 055 | 4. 93E-17 | AC-G | POMC        |
| C20orf27.  | 3. 41E-21 | -0. 14978 | 0. 262 | 0. 379 | 5. 10E-17 | AC-G | C20orf27    |
| LINC01094  | 3. 49E-21 | -0. 24561 | 0. 084 | 0. 167 | 5. 21E-17 | AC-G | LINC01094   |
| POGZ. 1    | 3. 60E-21 | -0. 18881 | 0. 128 | 0. 227 | 5. 38E-17 | AC-G | POGZ        |
| SIK1. 1    | 3. 64E-21 | -0. 30962 | 0. 042 | 0. 111 | 5. 45E-17 | AC-G | SIK1        |
| ST8SIA4. 1 | 3. 83E-21 | -0. 24102 | 0. 055 | 0. 131 | 5. 73E-17 | AC-G | ST8SIA4     |
| SREBF2     | 3. 84E-21 | -0. 11242 | 0. 054 | 0. 133 | 5. 74E-17 | AC-G | SREBF2      |
| EGLN2. 1   | 3. 88E-21 | -0. 18549 | 0. 191 | 0. 301 | 5. 80E-17 | AC-G | EGLN2       |
| GSS. 1     | 4. 19E-21 | -0. 12577 | 0. 151 | 0. 257 | 6. 27E-17 | AC-G | GSS         |
| HPS4. 1    | 4. 32E-21 | -0. 15419 | 0. 102 | 0. 198 | 6. 46E-17 | AC-G | HPS4        |
| TM9SF3. 1  | 4. 39E-21 | -0. 22698 | 0. 137 | 0. 236 | 6. 57E-17 | AC-G | TM9SF3      |
| IRF2BPL. 1 | 4. 40E-21 | -0. 19928 | 0. 154 | 0. 259 | 6. 58E-17 | AC-G | IRF2BPL     |
| ABCD4. 1   | 4. 44E-21 | -0. 15247 | 0. 164 | 0. 274 | 6. 64E-17 | AC-G | ABCD4       |
| OS9. 1     | 4. 45E-21 | -0. 17082 | 0. 425 | 0. 557 | 6. 65E-17 | AC-G | OS9         |
| HLA-DQA1.  | 4. 48E-21 | -0. 1767  | 0. 213 | 0. 324 | 6. 69E-17 | AC-G | HLA-DQA1    |
| THAP11. 1  | 4. 49E-21 | -0. 18086 | 0. 099 | 0. 191 | 6. 71E-17 | AC-G | THAP11      |
| EFCAB14. 1 | 4. 70E-21 | -0. 21971 | 0. 123 | 0. 219 | 7. 02E-17 | AC-G | EFCAB14     |



|            |          |          |       |       |          |      |          |
|------------|----------|----------|-------|-------|----------|------|----------|
| RPS6KA3.1  | 4.86E-21 | -0.1688  | 0.068 | 0.15  | 7.27E-17 | AC-G | RPS6KA3  |
| PACSIN2.1  | 4.92E-21 | -0.18196 | 0.097 | 0.189 | 7.35E-17 | AC-G | PACSIN2  |
| CECR1.1    | 5.26E-21 | -0.25087 | 0.02  | 0.081 | 7.87E-17 | AC-G | CECR1    |
| PDGFB      | 5.58E-21 | -0.24225 | 0.005 | 0.054 | 8.33E-17 | AC-G | PDGFB    |
| PCBP2.1    | 5.67E-21 | -0.145   | 0.545 | 0.686 | 8.47E-17 | AC-G | PCBP2    |
| TRAF7.1    | 5.80E-21 | -0.15225 | 0.111 | 0.205 | 8.66E-17 | AC-G | TRAF7    |
| RPAIN      | 5.83E-21 | -0.158   | 0.379 | 0.506 | 8.72E-17 | AC-G | RPAIN    |
| FPGS.1     | 5.89E-21 | -0.18111 | 0.079 | 0.164 | 8.81E-17 | AC-G | FPGS     |
| UBE2Q1     | 5.96E-21 | -0.11922 | 0.086 | 0.176 | 8.91E-17 | AC-G | UBE2Q1   |
| HUWE1.1    | 5.97E-21 | -0.18882 | 0.096 | 0.187 | 8.92E-17 | AC-G | HUWE1    |
| ALG12.1    | 6.28E-21 | -0.11811 | 0.034 | 0.103 | 9.38E-17 | AC-G | ALG12    |
| BMI1.1     | 6.32E-21 | -0.12645 | 0.07  | 0.153 | 9.45E-17 | AC-G | BMI1     |
| FSD1.1     | 6.39E-21 | -0.15255 | 0.082 | 0.169 | 9.55E-17 | AC-G | FSD1     |
| TUBA1C.1   | 6.54E-21 | 0.390504 | 0.443 | 0.367 | 9.77E-17 | AC-G | TUBA1C   |
| DCTN1.1    | 6.74E-21 | -0.20389 | 0.133 | 0.232 | 1.01E-16 | AC-G | DCTN1    |
| FAM222B.1  | 7.01E-21 | -0.10609 | 0.05  | 0.126 | 1.05E-16 | AC-G | FAM222B  |
| TBX15      | 7.24E-21 | 0.103102 | 0.052 | 0.017 | 1.08E-16 | AC-G | TBX15    |
| IQGAP1.1   | 7.46E-21 | -0.21703 | 0.165 | 0.27  | 1.11E-16 | AC-G | IQGAP1   |
| ZNF618.1   | 7.49E-21 | -0.15938 | 0.006 | 0.056 | 1.12E-16 | AC-G | ZNF618   |
| NCOA3.1    | 7.56E-21 | -0.2048  | 0.061 | 0.138 | 1.13E-16 | AC-G | NCOA3    |
| BCLAF1.1   | 7.71E-21 | -0.15476 | 0.281 | 0.405 | 1.15E-16 | AC-G | BCLAF1   |
| FHL3.1     | 7.93E-21 | -0.18864 | 0.086 | 0.173 | 1.18E-16 | AC-G | FHL3     |
| CBL.1      | 8.13E-21 | -0.1488  | 0.043 | 0.115 | 1.21E-16 | AC-G | CBL      |
| TERF2IP.1  | 8.17E-21 | -0.21061 | 0.406 | 0.539 | 1.22E-16 | AC-G | TERF2IP  |
| FAM171A1.1 | 8.22E-21 | -0.15499 | 0.025 | 0.087 | 1.23E-16 | AC-G | FAM171A1 |
| PCM1.1     | 8.28E-21 | -0.19097 | 0.226 | 0.343 | 1.24E-16 | AC-G | PCM1     |
| DYNC2LI1.1 | 8.84E-21 | 0.361207 | 0.228 | 0.152 | 1.32E-16 | AC-G | DYNC2LI1 |
| CD52       | 8.86E-21 | -0.39194 | 0.009 | 0.06  | 1.32E-16 | AC-G | CD52     |
| FASN.1     | 8.99E-21 | -0.14496 | 0.053 | 0.129 | 1.34E-16 | AC-G | FASN     |
| DDX46.1    | 9.20E-21 | -0.142   | 0.334 | 0.468 | 1.38E-16 | AC-G | DDX46    |
| STT3B.1    | 9.25E-21 | -0.1722  | 0.123 | 0.22  | 1.38E-16 | AC-G | STT3B    |
| SMARCC2.1  | 9.26E-21 | -0.1608  | 0.172 | 0.281 | 1.38E-16 | AC-G | SMARCC2  |
| RCAN2      | 9.34E-21 | 0.1854   | 0.084 | 0.036 | 1.40E-16 | AC-G | RCAN2    |
| NCAN       | 9.41E-21 | -0.21242 | 0.027 | 0.09  | 1.41E-16 | AC-G | NCAN     |
| EIF3I.1    | 9.79E-21 | 0.28856  | 0.627 | 0.597 | 1.46E-16 | AC-G | EIF3I    |
| DMWD.1     | 9.81E-21 | -0.13475 | 0.072 | 0.155 | 1.47E-16 | AC-G | DMWD     |
| PPP1R9B    | 9.92E-21 | -0.14278 | 0.041 | 0.112 | 1.48E-16 | AC-G | PPP1R9B  |
| AURKB.1    | 1.02E-20 | -0.19777 | 0.007 | 0.057 | 1.52E-16 | AC-G | AURKB    |
| MXD3.1     | 1.06E-20 | -0.1892  | 0.016 | 0.072 | 1.59E-16 | AC-G | MXD3     |
| CUL3.1     | 1.08E-20 | -0.17561 | 0.119 | 0.216 | 1.61E-16 | AC-G | CUL3     |
| DCLK2.1    | 1.08E-20 | -0.15198 | 0.117 | 0.212 | 1.62E-16 | AC-G | DCLK2    |
| MAPK10.1   | 1.08E-20 | -0.13946 | 0.115 | 0.21  | 1.62E-16 | AC-G | MAPK10   |
| PPP2CB.1   | 1.10E-20 | -0.15444 | 0.205 | 0.314 | 1.64E-16 | AC-G | PPP2CB   |
| B3GNT2.1   | 1.11E-20 | -0.15793 | 0.018 | 0.076 | 1.65E-16 | AC-G | B3GNT2   |
| RCAN3.1    | 1.15E-20 | -0.15594 | 0.013 | 0.068 | 1.71E-16 | AC-G | RCAN3    |
| C7orf73.1  | 1.17E-20 | 0.388375 | 0.581 | 0.549 | 1.74E-16 | AC-G | C7orf73  |
| BRD2.1     | 1.26E-20 | -0.14109 | 0.332 | 0.477 | 1.88E-16 | AC-G | BRD2     |
| SHCBP1.1   | 1.29E-20 | -0.15289 | 0.009 | 0.062 | 1.92E-16 | AC-G | SHCBP1   |
| APC.1      | 1.31E-20 | -0.17611 | 0.13  | 0.229 | 1.95E-16 | AC-G | APC      |
| NRXN1.1    | 1.31E-20 | -0.32414 | 0.096 | 0.176 | 1.96E-16 | AC-G | NRXN1    |
| SERPINE2.1 | 1.32E-20 | 0.350693 | 0.354 | 0.281 | 1.98E-16 | AC-G | SERPINE2 |

|             |           |           |        |        |           |      |            |
|-------------|-----------|-----------|--------|--------|-----------|------|------------|
| MYBPC1      | 1. 35E-20 | 0. 261234 | 0. 084 | 0. 036 | 2. 02E-16 | AC-G | MYBPC1     |
| SOX15       | 1. 46E-20 | 0. 239897 | 0. 119 | 0. 061 | 2. 19E-16 | AC-G | SOX15      |
| RUNX1. 1    | 1. 47E-20 | -0. 21076 | 0. 113 | 0. 205 | 2. 20E-16 | AC-G | RUNX1      |
| HSD11B1     | 1. 48E-20 | 0. 231865 | 0. 054 | 0. 018 | 2. 21E-16 | AC-G | HSD11B1    |
| TEX29       | 1. 49E-20 | 0. 126125 | 0. 024 | 0. 004 | 2. 23E-16 | AC-G | TEX29      |
| UBE2J2. 1   | 1. 54E-20 | -0. 19076 | 0. 236 | 0. 353 | 2. 30E-16 | AC-G | UBE2J2     |
| KPNB1. 1    | 1. 55E-20 | -0. 13315 | 0. 338 | 0. 469 | 2. 31E-16 | AC-G | KPNB1      |
| LHPP. 1     | 1. 56E-20 | -0. 37155 | 0. 046 | 0. 117 | 2. 33E-16 | AC-G | LHPP       |
| SF1         | 1. 61E-20 | -0. 15577 | 0. 388 | 0. 53  | 2. 40E-16 | AC-G | SF1        |
| TUG1. 1     | 1. 65E-20 | -0. 16801 | 0. 099 | 0. 19  | 2. 47E-16 | AC-G | TUG1       |
| TNF         | 1. 66E-20 | -0. 24531 | 0. 004 | 0. 051 | 2. 47E-16 | AC-G | TNF        |
| ECHS1       | 1. 71E-20 | -0. 14011 | 0. 325 | 0. 456 | 2. 56E-16 | AC-G | ECHS1      |
| SBK1. 1     | 1. 72E-20 | -0. 16151 | 0. 021 | 0. 081 | 2. 56E-16 | AC-G | SBK1       |
| CHKA. 1     | 1. 73E-20 | -0. 2516  | 0. 112 | 0. 202 | 2. 59E-16 | AC-G | CHKA       |
| MTMR4       | 1. 73E-20 | -0. 14537 | 0. 087 | 0. 175 | 2. 59E-16 | AC-G | MTMR4      |
| NECAB3. 1   | 1. 75E-20 | -0. 12337 | 0. 04  | 0. 109 | 2. 61E-16 | AC-G | NECAB3     |
| SSH1        | 1. 75E-20 | -0. 20314 | 0. 03  | 0. 094 | 2. 62E-16 | AC-G | SSH1       |
| CRLS1. 1    | 1. 78E-20 | -0. 20933 | 0. 195 | 0. 301 | 2. 66E-16 | AC-G | CRLS1      |
| GBGT1. 1    | 1. 86E-20 | -0. 20061 | 0. 008 | 0. 058 | 2. 78E-16 | AC-G | GBGT1      |
| TMEM86A. 1  | 1. 87E-20 | -0. 17959 | 0. 006 | 0. 054 | 2. 79E-16 | AC-G | TMEM86A    |
| SYNCRIP. 1  | 1. 90E-20 | -0. 16287 | 0. 277 | 0. 404 | 2. 85E-16 | AC-G | SYNCRIP    |
| RAB11B-AS   | 1. 91E-20 | -0. 14687 | 0. 065 | 0. 145 | 2. 86E-16 | AC-G | RAB11B-AS1 |
| CACNA1A. 1  | 1. 93E-20 | -0. 16893 | 0. 038 | 0. 107 | 2. 88E-16 | AC-G | CACNA1A    |
| RASGRP1. 1  | 1. 98E-20 | -0. 10158 | 0. 019 | 0. 078 | 2. 96E-16 | AC-G | RASGRP1    |
| NONO. 1     | 2. 01E-20 | -0. 1668  | 0. 347 | 0. 476 | 3. 00E-16 | AC-G | NONO       |
| RNF220. 1   | 2. 03E-20 | -0. 17318 | 0. 078 | 0. 162 | 3. 03E-16 | AC-G | RNF220     |
| IFI44L. 1   | 2. 09E-20 | -0. 37658 | 0. 076 | 0. 154 | 3. 13E-16 | AC-G | IFI44L     |
| TRIM8. 1    | 2. 20E-20 | -0. 19143 | 0. 041 | 0. 11  | 3. 30E-16 | AC-G | TRIM8      |
| GALM. 1     | 2. 21E-20 | -0. 27798 | 0. 062 | 0. 137 | 3. 30E-16 | AC-G | GALM       |
| PPM1B. 1    | 2. 22E-20 | -0. 21515 | 0. 209 | 0. 318 | 3. 31E-16 | AC-G | PPM1B      |
| CELF4. 1    | 2. 33E-20 | -0. 27868 | 0. 038 | 0. 103 | 3. 49E-16 | AC-G | CELF4      |
| POU2F1. 1   | 2. 36E-20 | -0. 18359 | 0. 089 | 0. 175 | 3. 53E-16 | AC-G | POU2F1     |
| ASAP2. 1    | 2. 45E-20 | -0. 10456 | 0. 038 | 0. 106 | 3. 66E-16 | AC-G | ASAP2      |
| ARNT2. 1    | 2. 47E-20 | -0. 10376 | 0. 049 | 0. 123 | 3. 70E-16 | AC-G | ARNT2      |
| HPSE. 1     | 2. 48E-20 | -0. 24589 | 0. 013 | 0. 067 | 3. 71E-16 | AC-G | HPSE       |
| THSD1       | 2. 52E-20 | -0. 10978 | 0. 037 | 0. 105 | 3. 77E-16 | AC-G | THSD1      |
| AP3B1. 1    | 2. 55E-20 | -0. 14476 | 0. 096 | 0. 185 | 3. 81E-16 | AC-G | AP3B1      |
| DYNC1I2. 1  | 2. 59E-20 | -0. 14582 | 0. 362 | 0. 49  | 3. 87E-16 | AC-G | DYNC1I2    |
| PDE4A. 1    | 2. 73E-20 | -0. 17555 | 0. 034 | 0. 1   | 4. 07E-16 | AC-G | PDE4A      |
| UBE20. 1    | 2. 77E-20 | -0. 13734 | 0. 053 | 0. 129 | 4. 15E-16 | AC-G | UBE20      |
| RFX4        | 2. 88E-20 | 0. 397985 | 0. 209 | 0. 139 | 4. 30E-16 | AC-G | RFX4       |
| PRR11       | 2. 89E-20 | -0. 14658 | 0. 017 | 0. 073 | 4. 32E-16 | AC-G | PRR11      |
| MAN1A1      | 2. 93E-20 | -0. 20341 | 0. 007 | 0. 056 | 4. 37E-16 | AC-G | MAN1A1     |
| ZNF655. 1   | 2. 96E-20 | -0. 16483 | 0. 154 | 0. 256 | 4. 42E-16 | AC-G | ZNF655     |
| RHOU. 1     | 2. 98E-20 | -0. 2707  | 0. 07  | 0. 147 | 4. 45E-16 | AC-G | RHOU       |
| NAP1L4. 1   | 3. 01E-20 | -0. 14898 | 0. 303 | 0. 423 | 4. 50E-16 | AC-G | NAP1L4     |
| HNRNPH3. 1  | 3. 03E-20 | -0. 15377 | 0. 336 | 0. 467 | 4. 53E-16 | AC-G | HNRNPH3    |
| FAM60A. 1   | 3. 05E-20 | -0. 17709 | 0. 1   | 0. 189 | 4. 55E-16 | AC-G | FAM60A     |
| CDCA3       | 3. 10E-20 | -0. 16828 | 0. 009 | 0. 061 | 4. 64E-16 | AC-G | CDCA3      |
| RBP7        | 3. 12E-20 | -0. 243   | 0. 005 | 0. 053 | 4. 67E-16 | AC-G | RBP7       |
| IVNS1ABP. 3 | 1.6E-20   | -0. 21363 | 0. 155 | 0. 254 | 4. 72E-16 | AC-G | IVNS1ABP   |

|           |          |          |       |       |          |      |              |
|-----------|----------|----------|-------|-------|----------|------|--------------|
| TMEM52B.1 | 3.20E-20 | -0.22236 | 0.006 | 0.055 | 4.78E-16 | AC-G | TMEM52B      |
| UGT8.1    | 3.24E-20 | -0.25413 | 0.008 | 0.058 | 4.85E-16 | AC-G | UGT8         |
| SYNRG     | 3.48E-20 | -0.1266  | 0.11  | 0.204 | 5.20E-16 | AC-G | SYNRG        |
| ZFYVE16.1 | 3.49E-20 | -0.22031 | 0.099 | 0.186 | 5.22E-16 | AC-G | ZFYVE16      |
| VIPR2.1   | 3.60E-20 | -0.25007 | 0.03  | 0.093 | 5.38E-16 | AC-G | VIPR2        |
| NKAIN3.1  | 3.60E-20 | -0.13381 | 0.06  | 0.137 | 5.38E-16 | AC-G | NKAIN3       |
| RSF1      | 3.64E-20 | -0.15918 | 0.312 | 0.438 | 5.44E-16 | AC-G | RSF1         |
| PHF14.1   | 3.78E-20 | -0.20515 | 0.322 | 0.442 | 5.66E-16 | AC-G | PHF14        |
| PLA2G15.1 | 3.80E-20 | -0.26871 | 0.073 | 0.151 | 5.68E-16 | AC-G | PLA2G15      |
| TBC1D16   | 3.85E-20 | -0.19779 | 0.068 | 0.147 | 5.76E-16 | AC-G | TBC1D16      |
| ACP5.1    | 3.92E-20 | -0.22532 | 0.007 | 0.056 | 5.85E-16 | AC-G | ACP5         |
| TET2.1    | 4.12E-20 | -0.20145 | 0.034 | 0.099 | 6.16E-16 | AC-G | TET2         |
| TMEM184B  | 4.17E-20 | -0.19214 | 0.072 | 0.151 | 6.23E-16 | AC-G | TMEM184B     |
| RENBP.1   | 4.25E-20 | -0.29139 | 0.071 | 0.148 | 6.35E-16 | AC-G | RENBP        |
| TFPT.1    | 4.28E-20 | -0.12761 | 0.212 | 0.327 | 6.40E-16 | AC-G | TFPT         |
| PCDH19    | 4.31E-20 | -0.10393 | 0.014 | 0.069 | 6.45E-16 | AC-G | PCDH19       |
| ZNF148    | 4.32E-20 | -0.14106 | 0.16  | 0.266 | 6.46E-16 | AC-G | ZNF148       |
| FUCA2.1   | 4.33E-20 | -0.18385 | 0.157 | 0.26  | 6.48E-16 | AC-G | FUCA2        |
| TM7SF3.1  | 4.34E-20 | -0.22999 | 0.168 | 0.267 | 6.49E-16 | AC-G | TM7SF3       |
| RBM4.1    | 4.35E-20 | -0.15854 | 0.137 | 0.236 | 6.50E-16 | AC-G | RBM4         |
| HRAS.1    | 4.38E-20 | -0.17495 | 0.204 | 0.311 | 6.54E-16 | AC-G | HRAS         |
| TMEM189.1 | 4.39E-20 | -0.19038 | 0.111 | 0.202 | 6.56E-16 | AC-G | TMEM189      |
| SPG11.1   | 4.39E-20 | -0.18871 | 0.055 | 0.128 | 6.56E-16 | AC-G | SPG11        |
| SMARCA5.1 | 4.55E-20 | -0.19957 | 0.251 | 0.367 | 6.81E-16 | AC-G | SMARCA5      |
| TRIP12.1  | 4.59E-20 | -0.10641 | 0.092 | 0.18  | 6.86E-16 | AC-G | TRIP12       |
| EHD2      | 5.10E-20 | 0.234453 | 0.13  | 0.072 | 7.62E-16 | AC-G | EHD2         |
| NFKBIE.1  | 5.22E-20 | -0.23146 | 0.07  | 0.146 | 7.79E-16 | AC-G | NFKBIE       |
| DNMT3A.1  | 5.32E-20 | -0.14911 | 0.042 | 0.112 | 7.95E-16 | AC-G | DNMT3A       |
| SLC38A10. | 5.37E-20 | -0.20484 | 0.121 | 0.214 | 8.02E-16 | AC-G | SLC38A10     |
| SAE1.1    | 5.72E-20 | -0.20806 | 0.184 | 0.29  | 8.55E-16 | AC-G | SAE1         |
| RNF144B   | 5.75E-20 | -0.31473 | 0.042 | 0.109 | 8.60E-16 | AC-G | RNF144B      |
| RP11-553L | 5.84E-20 | -0.15381 | 0.141 | 0.243 | 8.72E-16 | AC-G | RP11-553L6.5 |
| CSNK1D.1  | 5.93E-20 | -0.17556 | 0.259 | 0.379 | 8.87E-16 | AC-G | CSNK1D       |
| MAT2A     | 5.99E-20 | -0.16284 | 0.283 | 0.404 | 8.95E-16 | AC-G | MAT2A        |
| VARS.1    | 6.05E-20 | -0.17381 | 0.087 | 0.172 | 9.04E-16 | AC-G | VARS         |
| RNF139.1  | 6.10E-20 | -0.20244 | 0.172 | 0.271 | 9.12E-16 | AC-G | RNF139       |
| FOXO3.1   | 6.17E-20 | -0.21521 | 0.187 | 0.289 | 9.22E-16 | AC-G | FOXO3        |
| TTC7A.1   | 6.46E-20 | -0.22818 | 0.025 | 0.084 | 9.66E-16 | AC-G | TTC7A        |
| KMT2E     | 6.58E-20 | -0.15894 | 0.432 | 0.558 | 9.83E-16 | AC-G | KMT2E        |
| ASCL2     | 6.59E-20 | -0.17457 | 0.001 | 0.044 | 9.85E-16 | AC-G | ASCL2        |
| PARL.1    | 6.65E-20 | -0.17406 | 0.243 | 0.356 | 9.94E-16 | AC-G | PARL         |
| IVD.1     | 6.67E-20 | -0.19282 | 0.121 | 0.214 | 9.97E-16 | AC-G | IVD          |
| LSM14B.1  | 6.99E-20 | -0.13304 | 0.042 | 0.112 | 1.04E-15 | AC-G | LSM14B       |
| DUSP4.1   | 7.01E-20 | -0.1902  | 0.103 | 0.194 | 1.05E-15 | AC-G | DUSP4        |
| PPM1F.1   | 7.16E-20 | -0.15162 | 0.019 | 0.076 | 1.07E-15 | AC-G | PPM1F        |
| SFT2D2    | 7.24E-20 | -0.22323 | 0.079 | 0.161 | 1.08E-15 | AC-G | SFT2D2       |
| PPP1R35.1 | 7.35E-20 | -0.19583 | 0.088 | 0.171 | 1.10E-15 | AC-G | PPP1R35      |
| SAP30L.1  | 7.37E-20 | -0.13075 | 0.037 | 0.103 | 1.10E-15 | AC-G | SAP30L       |
| CISD1.1   | 7.54E-20 | 0.466844 | 0.393 | 0.326 | 1.13E-15 | AC-G | CISD1        |
| PIK3R5.1  | 7.81E-20 | -0.19926 | 0.007 | 0.055 | 1.17E-15 | AC-G | PIK3R5       |
| C20orf24. | 7.84E-20 | -0.16247 | 0.364 | 0.487 | 1.17E-15 | AC-G | C20orf24     |

|           |          |          |       |       |          |      |                |
|-----------|----------|----------|-------|-------|----------|------|----------------|
| CSRNP3.1  | 7.96E-20 | -0.20937 | 0.043 | 0.11  | 1.19E-15 | AC-G | CSRNP3         |
| SOD3      | 7.97E-20 | 0.146862 | 0.076 | 0.032 | 1.19E-15 | AC-G | SOD3           |
| PIM3.1    | 8.28E-20 | -0.21085 | 0.116 | 0.205 | 1.24E-15 | AC-G | PIM3           |
| ZCCHC3.1  | 8.31E-20 | -0.13538 | 0.046 | 0.117 | 1.24E-15 | AC-G | ZCCHC3         |
| OPA1.1    | 8.43E-20 | -0.15932 | 0.065 | 0.143 | 1.26E-15 | AC-G | OPA1           |
| CS.1      | 8.70E-20 | -0.16528 | 0.089 | 0.175 | 1.30E-15 | AC-G | CS             |
| WDR18.1   | 9.00E-20 | -0.18232 | 0.196 | 0.303 | 1.34E-15 | AC-G | WDR18          |
| FAM96B.1  | 9.22E-20 | 0.251026 | 0.667 | 0.656 | 1.38E-15 | AC-G | FAM96B         |
| CDYL.1    | 9.29E-20 | -0.14263 | 0.053 | 0.127 | 1.39E-15 | AC-G | CDYL           |
| HCFC1.1   | 9.34E-20 | -0.14392 | 0.074 | 0.155 | 1.40E-15 | AC-G | HCFC1          |
| SLC39A10  | 9.37E-20 | -0.16458 | 0.086 | 0.171 | 1.40E-15 | AC-G | SLC39A10       |
| ZIC1      | 9.40E-20 | -0.11687 | 0.052 | 0.126 | 1.40E-15 | AC-G | ZIC1           |
| SLC14A1   | 9.51E-20 | 0.134678 | 0.027 | 0.005 | 1.42E-15 | AC-G | SLC14A1        |
| TFEB.1    | 9.81E-20 | -0.20751 | 0.027 | 0.087 | 1.47E-15 | AC-G | TFEB           |
| ATP6VOE2. | 9.83E-20 | -0.14849 | 0.357 | 0.471 | 1.47E-15 | AC-G | ATP6VOE2       |
| ETF1A.1   | 1.02E-19 | -0.15798 | 0.272 | 0.392 | 1.52E-15 | AC-G | ETF1A          |
| CMPK1.1   | 1.04E-19 | -0.17224 | 0.308 | 0.437 | 1.56E-15 | AC-G | CMPK1          |
| TDG.1     | 1.05E-19 | -0.12374 | 0.18  | 0.291 | 1.57E-15 | AC-G | TDG            |
| XPO1.1    | 1.12E-19 | -0.16089 | 0.17  | 0.276 | 1.67E-15 | AC-G | XPO1           |
| KIFC1.1   | 1.13E-19 | -0.15276 | 0.014 | 0.068 | 1.68E-15 | AC-G | KIFC1          |
| APOBR     | 1.15E-19 | -0.18383 | 0.002 | 0.045 | 1.72E-15 | AC-G | APOBR          |
| RAD21.1   | 1.20E-19 | -0.16409 | 0.27  | 0.385 | 1.79E-15 | AC-G | RAD21          |
| ZMYND15   | 1.21E-19 | -0.16093 | 0.013 | 0.065 | 1.80E-15 | AC-G | ZMYND15        |
| SPAST.1   | 1.21E-19 | -0.17077 | 0.052 | 0.123 | 1.81E-15 | AC-G | SPAST          |
| TRIM33.1  | 1.22E-19 | -0.17182 | 0.107 | 0.198 | 1.82E-15 | AC-G | TRIM33         |
| FAM96A    | 1.24E-19 | -0.13041 | 0.257 | 0.376 | 1.85E-15 | AC-G | FAM96A         |
| ID4.1     | 1.26E-19 | -0.21126 | 0.138 | 0.23  | 1.89E-15 | AC-G | ID4            |
| RCOR1     | 1.26E-19 | -0.14146 | 0.022 | 0.081 | 1.89E-15 | AC-G | RCOR1          |
| GPATCH2L. | 1.29E-19 | -0.15158 | 0.139 | 0.239 | 1.92E-15 | AC-G | GPATCH2L       |
| F3.1      | 1.29E-19 | 0.314011 | 0.254 | 0.179 | 1.93E-15 | AC-G | F3             |
| PRC1.1    | 1.30E-19 | -0.20713 | 0.033 | 0.096 | 1.94E-15 | AC-G | PRC1           |
| RP11-277F | 1.36E-19 | -0.15485 | 0.02  | 0.076 | 2.04E-15 | AC-G | RP11-277P12.20 |
| NTAN1.1   | 1.39E-19 | -0.15778 | 0.123 | 0.215 | 2.08E-15 | AC-G | NTAN1          |
| ODF3B.1   | 1.42E-19 | -0.24164 | 0.039 | 0.105 | 2.12E-15 | AC-G | ODF3B          |
| BLOC1S4.1 | 1.43E-19 | -0.18557 | 0.161 | 0.259 | 2.13E-15 | AC-G | BLOC1S4        |
| LRRC8C.1  | 1.44E-19 | -0.18341 | 0.015 | 0.068 | 2.15E-15 | AC-G | LRRC8C         |
| ZNF711.1  | 1.44E-19 | -0.21    | 0.076 | 0.155 | 2.16E-15 | AC-G | ZNF711         |
| MAFG.1    | 1.45E-19 | -0.17399 | 0.109 | 0.199 | 2.17E-15 | AC-G | MAFG           |
| ICMT.1    | 1.50E-19 | -0.17785 | 0.068 | 0.145 | 2.24E-15 | AC-G | ICMT           |
| PPP2R3B.1 | 1.53E-19 | -0.11978 | 0.02  | 0.077 | 2.29E-15 | AC-G | PPP2R3B        |
| PRPSAP1.1 | 1.53E-19 | -0.17656 | 0.216 | 0.324 | 2.29E-15 | AC-G | PRPSAP1        |
| EMID1.1   | 1.53E-19 | -0.10626 | 0.023 | 0.082 | 2.29E-15 | AC-G | EMID1          |
| LINC00882 | 1.55E-19 | 0.213784 | 0.062 | 0.024 | 2.32E-15 | AC-G | LINC00882      |
| RUNX3     | 1.57E-19 | -0.19806 | 0.002 | 0.045 | 2.34E-15 | AC-G | RUNX3          |
| PPP3CB.1  | 1.57E-19 | -0.16981 | 0.05  | 0.12  | 2.35E-15 | AC-G | PPP3CB         |
| ARFGEF1.1 | 1.58E-19 | -0.15515 | 0.061 | 0.136 | 2.37E-15 | AC-G | ARFGEF1        |
| ALKBH7.1  | 1.59E-19 | -0.15281 | 0.367 | 0.492 | 2.38E-15 | AC-G | ALKBH7         |
| PLCG2     | 1.59E-19 | -0.21006 | 0.007 | 0.056 | 2.38E-15 | AC-G | PLCG2          |
| RAF1.1    | 1.65E-19 | -0.16645 | 0.188 | 0.294 | 2.47E-15 | AC-G | RAF1           |
| NUDC.1    | 1.67E-19 | 0.265743 | 0.597 | 0.576 | 2.50E-15 | AC-G | NUDC           |
| CEP68.1   | 1.69E-19 | -0.15458 | 0.083 | 0.165 | 2.53E-15 | AC-G | CEP68          |

|            |          |          |       |       |          |      |            |
|------------|----------|----------|-------|-------|----------|------|------------|
| NSMCE4A.1  | 1.71E-19 | -0.2076  | 0.085 | 0.166 | 2.55E-15 | AC-G | NSMCE4A    |
| GPC4       | 1.71E-19 | 0.155315 | 0.092 | 0.044 | 2.55E-15 | AC-G | GPC4       |
| NCAPH2.1   | 1.72E-19 | -0.16806 | 0.066 | 0.142 | 2.57E-15 | AC-G | NCAPH2     |
| UBE2M.1    | 1.74E-19 | -0.11002 | 0.145 | 0.247 | 2.60E-15 | AC-G | UBE2M      |
| CALR.1     | 1.75E-19 | 0.263578 | 0.683 | 0.694 | 2.62E-15 | AC-G | CALR       |
| PTGES3     | 1.76E-19 | 0.21118  | 0.707 | 0.721 | 2.63E-15 | AC-G | PTGES3     |
| CA14.1     | 1.76E-19 | -0.18553 | 0.009 | 0.059 | 2.63E-15 | AC-G | CA14       |
| TRIM38     | 1.84E-19 | -0.23083 | 0.042 | 0.109 | 2.74E-15 | AC-G | TRIM38     |
| NEMF       | 1.90E-19 | -0.17478 | 0.23  | 0.346 | 2.85E-15 | AC-G | NEMF       |
| HERC2.1    | 1.93E-19 | -0.17192 | 0.111 | 0.203 | 2.89E-15 | AC-G | HERC2      |
| BATF       | 2.05E-19 | -0.18543 | 0.002 | 0.045 | 3.07E-15 | AC-G | BATF       |
| REST.1     | 2.06E-19 | -0.18529 | 0.122 | 0.213 | 3.08E-15 | AC-G | REST       |
| CCAR1.1    | 2.08E-19 | -0.19018 | 0.166 | 0.266 | 3.11E-15 | AC-G | CCAR1      |
| SMC4.1     | 2.09E-19 | -0.27209 | 0.136 | 0.226 | 3.13E-15 | AC-G | SMC4       |
| PHPT1.1    | 2.11E-19 | 0.258439 | 0.643 | 0.653 | 3.16E-15 | AC-G | PHPT1      |
| MANBA.1    | 2.16E-19 | -0.28871 | 0.061 | 0.132 | 3.23E-15 | AC-G | MANBA      |
| TROAP.1    | 2.22E-19 | -0.14752 | 0.007 | 0.054 | 3.32E-15 | AC-G | TROAP      |
| PSTPIP2    | 2.29E-19 | -0.14622 | 0.006 | 0.052 | 3.42E-15 | AC-G | PSTPIP2    |
| AC109826.1 | 2.34E-19 | -0.20202 | 0.002 | 0.044 | 3.49E-15 | AC-G | AC109826.1 |
| SRSF6.1    | 2.36E-19 | -0.16555 | 0.26  | 0.378 | 3.52E-15 | AC-G | SRSF6      |
| UFD1L.1    | 2.36E-19 | -0.17217 | 0.235 | 0.349 | 3.53E-15 | AC-G | UFD1L      |
| JAG1       | 2.37E-19 | -0.1219  | 0.086 | 0.173 | 3.54E-15 | AC-G | JAG1       |
| GAMT.1     | 2.38E-19 | -0.18291 | 0.21  | 0.317 | 3.56E-15 | AC-G | GAMT       |
| ST3GAL4.1  | 2.45E-19 | -0.16478 | 0.06  | 0.134 | 3.67E-15 | AC-G | ST3GAL4    |
| PLSCR4     | 2.54E-19 | 0.219222 | 0.085 | 0.039 | 3.80E-15 | AC-G | PLSCR4     |
| CAMSAP1.1  | 2.54E-19 | -0.17502 | 0.032 | 0.094 | 3.80E-15 | AC-G | CAMSAP1    |
| SP3.1      | 2.55E-19 | -0.18915 | 0.132 | 0.225 | 3.81E-15 | AC-G | SP3        |
| CDK19.1    | 2.60E-19 | -0.1964  | 0.063 | 0.138 | 3.88E-15 | AC-G | CDK19      |
| HAS2       | 2.60E-19 | 0.279612 | 0.092 | 0.045 | 3.89E-15 | AC-G | HAS2       |
| ATF7IP2    | 2.63E-19 | -0.21864 | 0.004 | 0.049 | 3.94E-15 | AC-G | ATF7IP2    |
| RAB4B.1    | 2.68E-19 | -0.16559 | 0.176 | 0.279 | 4.01E-15 | AC-G | RAB4B      |
| C21orf58   | 2.71E-19 | -0.13112 | 0.011 | 0.061 | 4.05E-15 | AC-G | C21orf58   |
| SYT17      | 2.72E-19 | -0.13926 | 0.088 | 0.173 | 4.07E-15 | AC-G | SYT17      |
| POLR2F.1   | 2.82E-19 | -0.14156 | 0.438 | 0.562 | 4.22E-15 | AC-G | POLR2F     |
| CXCL3      | 2.92E-19 | 0.316261 | 0.121 | 0.063 | 4.36E-15 | AC-G | CXCL3      |
| ZKSCAN1.1  | 3.01E-19 | -0.15852 | 0.224 | 0.335 | 4.49E-15 | AC-G | ZKSCAN1    |
| RCBTB2.1   | 3.02E-19 | -0.23271 | 0.077 | 0.155 | 4.52E-15 | AC-G | RCBTB2     |
| SGK223     | 3.12E-19 | -0.13014 | 0.024 | 0.082 | 4.66E-15 | AC-G | SGK223     |
| KIAA0141.1 | 3.12E-19 | -0.21099 | 0.06  | 0.133 | 4.67E-15 | AC-G | KIAA0141   |
| PRKRIR.1   | 3.16E-19 | -0.11141 | 0.05  | 0.12  | 4.73E-15 | AC-G | PRKRIR     |
| KIF2C      | 3.33E-19 | -0.14631 | 0.005 | 0.051 | 4.98E-15 | AC-G | KIF2C      |
| NIPA2.1    | 3.34E-19 | -0.16106 | 0.176 | 0.282 | 4.99E-15 | AC-G | NIPA2      |
| IL4I1.1    | 3.38E-19 | -0.25507 | 0.019 | 0.074 | 5.05E-15 | AC-G | IL4I1      |
| CTNND1.1   | 3.54E-19 | -0.18621 | 0.136 | 0.23  | 5.29E-15 | AC-G | CTNND1     |
| ZDHHC9.1   | 3.56E-19 | 0.324278 | 0.228 | 0.156 | 5.32E-15 | AC-G | ZDHHC9     |
| CRYBB1     | 3.60E-19 | -0.21952 | 0.004 | 0.049 | 5.38E-15 | AC-G | CRYBB1     |
| C1orf56.1  | 3.61E-19 | -0.2066  | 0.126 | 0.217 | 5.40E-15 | AC-G | C1orf56    |
| PDE8A.1    | 3.68E-19 | -0.16783 | 0.036 | 0.1   | 5.50E-15 | AC-G | PDE8A      |
| ENPP2      | 3.69E-19 | -0.30692 | 0.006 | 0.052 | 5.51E-15 | AC-G | ENPP2      |
| MKRN1.1    | 3.72E-19 | -0.18368 | 0.309 | 0.427 | 5.56E-15 | AC-G | MKRN1      |
| POLR2A     | 3.76E-19 | -0.17578 | 0.131 | 0.227 | 5.62E-15 | AC-G | POLR2A     |

|           |          |          |       |       |          |      |               |
|-----------|----------|----------|-------|-------|----------|------|---------------|
| STC2      | 3.76E-19 | 0.143595 | 0.079 | 0.034 | 5.62E-15 | AC-G | STC2          |
| DCP2.1    | 3.80E-19 | -0.19992 | 0.083 | 0.164 | 5.68E-15 | AC-G | DCP2          |
| PSMB1.1   | 3.83E-19 | 0.273308 | 0.713 | 0.727 | 5.72E-15 | AC-G | PSMB1         |
| CRABP2    | 3.87E-19 | 0.172721 | 0.055 | 0.02  | 5.78E-15 | AC-G | CRABP2        |
| SHROOM2   | 4.08E-19 | -0.11454 | 0.015 | 0.067 | 6.09E-15 | AC-G | SHROOM2       |
| NDUFC1.1  | 4.10E-19 | 0.316546 | 0.591 | 0.545 | 6.13E-15 | AC-G | NDUFC1        |
| TNK2.1    | 4.13E-19 | -0.19711 | 0.065 | 0.139 | 6.18E-15 | AC-G | TNK2          |
| AGPAT3.1  | 4.18E-19 | -0.15612 | 0.066 | 0.143 | 6.25E-15 | AC-G | AGPAT3        |
| NUP62.1   | 4.27E-19 | -0.16629 | 0.155 | 0.253 | 6.38E-15 | AC-G | NUP62         |
| EIF4EBP2. | 4.55E-19 | -0.20268 | 0.076 | 0.153 | 6.80E-15 | AC-G | EIF4EBP2      |
| TPX2      | 4.57E-19 | -0.23553 | 0.032 | 0.092 | 6.83E-15 | AC-G | TPX2          |
| CD180     | 4.67E-19 | -0.1676  | 0.002 | 0.043 | 6.97E-15 | AC-G | CD180         |
| PCNP.1    | 4.74E-19 | 0.276138 | 0.566 | 0.531 | 7.09E-15 | AC-G | PCNP          |
| FGD3      | 4.80E-19 | -0.18383 | 0.003 | 0.046 | 7.17E-15 | AC-G | FGD3          |
| SDCBP2    | 4.80E-19 | 0.168053 | 0.082 | 0.037 | 7.17E-15 | AC-G | SDCBP2        |
| COL6A2.1  | 4.82E-19 | 0.393752 | 0.22  | 0.151 | 7.20E-15 | AC-G | COL6A2        |
| CREB1.1   | 4.82E-19 | -0.17805 | 0.16  | 0.257 | 7.21E-15 | AC-G | CREB1         |
| TCF25.1   | 4.87E-19 | -0.12743 | 0.439 | 0.573 | 7.28E-15 | AC-G | TCF25         |
| TSPAN13.1 | 4.92E-19 | -0.2547  | 0.222 | 0.314 | 7.35E-15 | AC-G | TSPAN13       |
| ARHGEF7.1 | 5.10E-19 | -0.21448 | 0.09  | 0.171 | 7.62E-15 | AC-G | ARHGEF7       |
| PVRL2.1   | 5.23E-19 | -0.18954 | 0.161 | 0.259 | 7.82E-15 | AC-G | PVRL2         |
| PRKCB     | 5.26E-19 | -0.17442 | 0.005 | 0.049 | 7.85E-15 | AC-G | PRKCB         |
| PSEN1.1   | 5.26E-19 | -0.19052 | 0.106 | 0.193 | 7.86E-15 | AC-G | PSEN1         |
| FBLN1.1   | 5.27E-19 | -0.19888 | 0.033 | 0.095 | 7.88E-15 | AC-G | FBLN1         |
| STOX2.1   | 5.32E-19 | -0.16453 | 0.038 | 0.103 | 7.96E-15 | AC-G | STOX2         |
| ENKUR     | 5.47E-19 | 0.357045 | 0.117 | 0.063 | 8.17E-15 | AC-G | ENKUR         |
| CPSF6.1   | 5.51E-19 | -0.12885 | 0.236 | 0.348 | 8.24E-15 | AC-G | CPSF6         |
| PTPN9     | 5.57E-19 | -0.12655 | 0.062 | 0.137 | 8.32E-15 | AC-G | PTPN9         |
| CNOT6L.1  | 5.64E-19 | -0.17474 | 0.05  | 0.12  | 8.44E-15 | AC-G | CNOT6L        |
| STEAP3.1  | 5.73E-19 | 0.416588 | 0.22  | 0.15  | 8.56E-15 | AC-G | STEAP3        |
| RP11-76E1 | 6.17E-19 | -0.23756 | 0.002 | 0.043 | 9.22E-15 | AC-G | RP11-76E17.3  |
| CREB3L2.1 | 6.40E-19 | -0.18476 | 0.062 | 0.136 | 9.57E-15 | AC-G | CREB3L2       |
| CTB-61M7. | 6.60E-19 | -0.22208 | 0.003 | 0.045 | 9.86E-15 | AC-G | CTB-61M7.2    |
| ACAT2.1   | 6.69E-19 | -0.18718 | 0.19  | 0.295 | 9.99E-15 | AC-G | ACAT2         |
| PNN.1     | 6.83E-19 | -0.14611 | 0.301 | 0.421 | 1.02E-14 | AC-G | PNN           |
| COX6C.1   | 6.84E-19 | 0.253247 | 0.795 | 0.838 | 1.02E-14 | AC-G | COX6C         |
| LINC01102 | 6.85E-19 | -0.15336 | 0.023 | 0.08  | 1.02E-14 | AC-G | LINC01102     |
| RAP1GDS1. | 6.96E-19 | -0.15694 | 0.102 | 0.188 | 1.04E-14 | AC-G | RAP1GDS1      |
| ATCAY.1   | 7.22E-19 | -0.21038 | 0.061 | 0.132 | 1.08E-14 | AC-G | ATCAY         |
| RP11-262H | 7.54E-19 | -0.13871 | 0.057 | 0.13  | 1.13E-14 | AC-G | RP11-262H14.4 |
| PTMA.1    | 7.61E-19 | 0.16034  | 0.911 | 0.978 | 1.14E-14 | AC-G | PTMA          |
| RRBP1.1   | 7.62E-19 | -0.22217 | 0.211 | 0.314 | 1.14E-14 | AC-G | RRBP1         |
| ADAMTS9-A | 7.70E-19 | 0.136525 | 0.042 | 0.013 | 1.15E-14 | AC-G | ADAMTS9-AS2   |
| ELOVL1.1  | 7.84E-19 | -0.1581  | 0.149 | 0.247 | 1.17E-14 | AC-G | ELOVL1        |
| CCM2.1    | 8.30E-19 | -0.1587  | 0.193 | 0.301 | 1.24E-14 | AC-G | CCM2          |
| ZFP36L2.1 | 8.50E-19 | -0.19624 | 0.391 | 0.54  | 1.27E-14 | AC-G | ZFP36L2       |
| SNRPD3.1  | 8.57E-19 | -0.11748 | 0.311 | 0.434 | 1.28E-14 | AC-G | SNRPD3        |
| MBOAT7.1  | 8.67E-19 | -0.17843 | 0.16  | 0.259 | 1.30E-14 | AC-G | MBOAT7        |
| EFEMP2    | 8.78E-19 | 0.422564 | 0.27  | 0.203 | 1.31E-14 | AC-G | EFEMP2        |
| RBM38.1   | 8.80E-19 | -0.12841 | 0.07  | 0.148 | 1.32E-14 | AC-G | RBM38         |
| PHACTR4.1 | 8.83E-19 | -0.16783 | 0.124 | 0.217 | 1.32E-14 | AC-G | PHACTR4       |

|            |          |          |       |       |          |      |              |
|------------|----------|----------|-------|-------|----------|------|--------------|
| MTUS1.1    | 8.87E-19 | -0.22422 | 0.082 | 0.16  | 1.33E-14 | AC-G | MTUS1        |
| COX6B1.1   | 8.95E-19 | 0.213088 | 0.805 | 0.854 | 1.34E-14 | AC-G | COX6B1       |
| ADAMDEC1   | 8.98E-19 | -0.18556 | 0.002 | 0.044 | 1.34E-14 | AC-G | ADAMDEC1     |
| GTSE1      | 9.00E-19 | -0.17097 | 0.015 | 0.066 | 1.34E-14 | AC-G | GTSE1        |
| FXYD7.1    | 9.01E-19 | -0.25911 | 0.029 | 0.087 | 1.35E-14 | AC-G | FXYD7        |
| TXNL1      | 9.07E-19 | 0.348021 | 0.509 | 0.464 | 1.36E-14 | AC-G | TXNL1        |
| ARGLU1.1   | 9.09E-19 | -0.18301 | 0.361 | 0.489 | 1.36E-14 | AC-G | ARGLU1       |
| NLRP1.1    | 9.21E-19 | -0.14603 | 0.248 | 0.356 | 1.38E-14 | AC-G | NLRP1        |
| CENPE.1    | 9.23E-19 | -0.20129 | 0.013 | 0.063 | 1.38E-14 | AC-G | CENPE        |
| BBS2.1     | 9.38E-19 | 0.350202 | 0.234 | 0.16  | 1.40E-14 | AC-G | BBS2         |
| BAG1.1     | 9.64E-19 | -0.21478 | 0.26  | 0.37  | 1.44E-14 | AC-G | BAG1         |
| ANK2.1     | 9.89E-19 | -0.12416 | 0.092 | 0.178 | 1.48E-14 | AC-G | ANK2         |
| PLEKHG2.1  | 1.00E-18 | -0.16575 | 0.019 | 0.073 | 1.50E-14 | AC-G | PLEKHG2      |
| GM2A.1     | 1.02E-18 | -0.27245 | 0.08  | 0.156 | 1.53E-14 | AC-G | GM2A         |
| IL7R.1     | 1.03E-18 | -0.26246 | 0.012 | 0.061 | 1.54E-14 | AC-G | IL7R         |
| ARHGAP26.1 | 1.04E-18 | -0.24498 | 0.039 | 0.102 | 1.56E-14 | AC-G | ARHGAP26     |
| TOR2A.1    | 1.06E-18 | -0.18638 | 0.082 | 0.16  | 1.58E-14 | AC-G | TOR2A        |
| ARPC4.1    | 1.06E-18 | -0.10841 | 0.402 | 0.535 | 1.58E-14 | AC-G | ARPC4        |
| POMGNT1.1  | 1.09E-18 | -0.13679 | 0.173 | 0.275 | 1.62E-14 | AC-G | POMGNT1      |
| INA        | 1.09E-18 | -0.15975 | 0.005 | 0.049 | 1.64E-14 | AC-G | INA          |
| APOE.1     | 1.10E-18 | -0.10701 | 0.528 | 0.716 | 1.64E-14 | AC-G | APOE         |
| SYT11.1    | 1.11E-18 | -0.17399 | 0.297 | 0.401 | 1.66E-14 | AC-G | SYT11        |
| YIF1A.1    | 1.12E-18 | 0.346902 | 0.47  | 0.415 | 1.67E-14 | AC-G | YIF1A        |
| TP53I11.1  | 1.14E-18 | -0.16873 | 0.025 | 0.082 | 1.70E-14 | AC-G | TP53I11      |
| AGTRAP.1   | 1.16E-18 | 0.494652 | 0.34  | 0.27  | 1.74E-14 | AC-G | AGTRAP       |
| RP11-25K1  | 1.18E-18 | -0.14301 | 0.044 | 0.111 | 1.76E-14 | AC-G | RP11-25K19.1 |
| RMDN3.1    | 1.18E-18 | -0.16168 | 0.158 | 0.256 | 1.77E-14 | AC-G | RMDN3        |
| NUP50.1    | 1.22E-18 | -0.15628 | 0.057 | 0.129 | 1.82E-14 | AC-G | NUP50        |
| ASGR1.1    | 1.23E-18 | -0.13208 | 0.025 | 0.082 | 1.84E-14 | AC-G | ASGR1        |
| SNRPB      | 1.26E-18 | -0.12433 | 0.481 | 0.596 | 1.88E-14 | AC-G | SNRPB        |
| PPP2CA.1   | 1.36E-18 | -0.1497  | 0.368 | 0.501 | 2.03E-14 | AC-G | PPP2CA       |
| RUFY3.1    | 1.36E-18 | -0.19878 | 0.217 | 0.323 | 2.03E-14 | AC-G | RUFY3        |
| PDE6D.1    | 1.37E-18 | -0.15047 | 0.114 | 0.203 | 2.05E-14 | AC-G | PDE6D        |
| SDCCAG8.1  | 1.39E-18 | -0.18203 | 0.239 | 0.347 | 2.07E-14 | AC-G | SDCCAG8      |
| TRIOBP     | 1.40E-18 | -0.129   | 0.036 | 0.099 | 2.09E-14 | AC-G | TRIOBP       |
| COX5B.1    | 1.41E-18 | 0.194636 | 0.812 | 0.855 | 2.10E-14 | AC-G | COX5B        |
| DR1.1      | 1.42E-18 | -0.18015 | 0.154 | 0.25  | 2.12E-14 | AC-G | DR1          |
| UBE2H.1    | 1.43E-18 | -0.17981 | 0.175 | 0.275 | 2.13E-14 | AC-G | UBE2H        |
| ATP8A1     | 1.43E-18 | -0.17248 | 0.006 | 0.05  | 2.13E-14 | AC-G | ATP8A1       |
| RNFT2.1    | 1.43E-18 | -0.12182 | 0.022 | 0.078 | 2.14E-14 | AC-G | RNFT2        |
| ST18       | 1.44E-18 | -0.18279 | 0.004 | 0.046 | 2.15E-14 | AC-G | ST18         |
| CDS2.1     | 1.46E-18 | -0.14468 | 0.163 | 0.264 | 2.18E-14 | AC-G | CDS2         |
| ATRN       | 1.46E-18 | -0.12828 | 0.062 | 0.136 | 2.19E-14 | AC-G | ATRN         |
| STK17B.1   | 1.52E-18 | -0.34043 | 0.073 | 0.144 | 2.26E-14 | AC-G | STK17B       |
| RP3-428L1  | 1.53E-18 | -0.12498 | 0.023 | 0.079 | 2.28E-14 | AC-G | RP3-428L16.2 |
| MYT1L.1    | 1.55E-18 | -0.19785 | 0.016 | 0.067 | 2.32E-14 | AC-G | MYT1L        |
| HJURP      | 1.55E-18 | -0.14769 | 0.004 | 0.046 | 2.32E-14 | AC-G | HJURP        |
| TXNL4A.1   | 1.55E-18 | -0.12054 | 0.315 | 0.429 | 2.32E-14 | AC-G | TXNL4A       |
| JTB.1      | 1.57E-18 | -0.16214 | 0.491 | 0.632 | 2.34E-14 | AC-G | JTB          |
| MYBL2      | 1.60E-18 | -0.11295 | 0.007 | 0.052 | 2.40E-14 | AC-G | MYBL2        |
| DVL3.1     | 1.60E-18 | -0.12102 | 0.085 | 0.167 | 2.40E-14 | AC-G | DVL3         |

|             |           |           |        |        |           |      |               |
|-------------|-----------|-----------|--------|--------|-----------|------|---------------|
| SNX5        | 1. 61E-18 | -0. 16557 | 0. 305 | 0. 412 | 2. 40E-14 | AC-G | SNX5          |
| SAC3D1. 1   | 1. 61E-18 | -0. 15416 | 0. 099 | 0. 183 | 2. 41E-14 | AC-G | SAC3D1        |
| ASRGL1. 1   | 1. 62E-18 | -0. 22286 | 0. 129 | 0. 215 | 2. 43E-14 | AC-G | ASRGL1        |
| RBM5. 1     | 1. 63E-18 | -0. 1577  | 0. 19  | 0. 296 | 2. 44E-14 | AC-G | RBM5          |
| GIMAP5. 1   | 1. 67E-18 | -0. 22618 | 0. 01  | 0. 058 | 2. 49E-14 | AC-G | GIMAP5        |
| PES1. 1     | 1. 68E-18 | -0. 15795 | 0. 117 | 0. 206 | 2. 51E-14 | AC-G | PES1          |
| SDC2. 1     | 1. 72E-18 | 0. 267319 | 0. 257 | 0. 18  | 2. 57E-14 | AC-G | SDC2          |
| SMARCAD1. 1 | 1. 74E-18 | -0. 15289 | 0. 05  | 0. 118 | 2. 61E-14 | AC-G | SMARCAD1      |
| PHF20L1. 1  | 1. 75E-18 | -0. 17968 | 0. 216 | 0. 326 | 2. 62E-14 | AC-G | PHF20L1       |
| CSAD        | 1. 75E-18 | -0. 13602 | 0. 097 | 0. 182 | 2. 62E-14 | AC-G | CSAD          |
| ATP9A. 1    | 1. 79E-18 | -0. 13124 | 0. 053 | 0. 124 | 2. 67E-14 | AC-G | ATP9A         |
| MARK3. 1    | 1. 93E-18 | -0. 15767 | 0. 194 | 0. 305 | 2. 88E-14 | AC-G | MARK3         |
| PSMB3. 1    | 1. 93E-18 | 0. 320557 | 0. 701 | 0. 704 | 2. 89E-14 | AC-G | PSMB3         |
| TK2. 1      | 1. 98E-18 | -0. 18652 | 0. 063 | 0. 136 | 2. 96E-14 | AC-G | TK2           |
| SETX. 1     | 1. 98E-18 | -0. 20731 | 0. 098 | 0. 179 | 2. 97E-14 | AC-G | SETX          |
| TP53INP2. 1 | 1. 99E-18 | -0. 15478 | 0. 041 | 0. 105 | 2. 98E-14 | AC-G | TP53INP2      |
| BCAT1. 1    | 2. 03E-18 | -0. 15992 | 0. 149 | 0. 247 | 3. 04E-14 | AC-G | BCAT1         |
| PSENN. 1    | 2. 07E-18 | 0. 383592 | 0. 525 | 0. 486 | 3. 10E-14 | AC-G | PSENN         |
| RIN2. 1     | 2. 12E-18 | -0. 29019 | 0. 067 | 0. 137 | 3. 16E-14 | AC-G | RIN2          |
| FAM53B. 1   | 2. 13E-18 | -0. 19157 | 0. 011 | 0. 059 | 3. 19E-14 | AC-G | FAM53B        |
| APPL1. 1    | 2. 23E-18 | -0. 19055 | 0. 207 | 0. 312 | 3. 34E-14 | AC-G | APPL1         |
| GAB1. 1     | 2. 28E-18 | -0. 15961 | 0. 046 | 0. 112 | 3. 40E-14 | AC-G | GAB1          |
| YWHAG. 1    | 2. 28E-18 | -0. 13335 | 0. 29  | 0. 41  | 3. 41E-14 | AC-G | YWHAG         |
| GPC6        | 2. 31E-18 | 0. 238015 | 0. 076 | 0. 034 | 3. 45E-14 | AC-G | GPC6          |
| MAG         | 2. 33E-18 | -0. 37916 | 0. 003 | 0. 044 | 3. 49E-14 | AC-G | MAG           |
| NDC80       | 2. 34E-18 | -0. 16161 | 0. 009 | 0. 055 | 3. 50E-14 | AC-G | NDC80         |
| MITF        | 2. 38E-18 | -0. 24784 | 0. 041 | 0. 104 | 3. 56E-14 | AC-G | MITF          |
| ARFGAP2. 1  | 2. 40E-18 | -0. 16652 | 0. 205 | 0. 309 | 3. 58E-14 | AC-G | ARFGAP2       |
| RDH11. 1    | 2. 44E-18 | -0. 14712 | 0. 288 | 0. 407 | 3. 64E-14 | AC-G | RDH11         |
| ISG15. 1    | 2. 47E-18 | -0. 21854 | 0. 264 | 0. 375 | 3. 69E-14 | AC-G | ISG15         |
| EIF3E       | 2. 48E-18 | -0. 12376 | 0. 523 | 0. 671 | 3. 71E-14 | AC-G | EIF3E         |
| UBXN2B. 1   | 2. 56E-18 | -0. 15916 | 0. 084 | 0. 164 | 3. 82E-14 | AC-G | UBXN2B        |
| ATRAID. 1   | 2. 60E-18 | 0. 326382 | 0. 621 | 0. 609 | 3. 89E-14 | AC-G | ATRAID        |
| IFNAR2. 1   | 2. 64E-18 | -0. 17428 | 0. 124 | 0. 214 | 3. 95E-14 | AC-G | IFNAR2        |
| TAL1        | 2. 65E-18 | -0. 19718 | 0. 001 | 0. 041 | 3. 97E-14 | AC-G | TAL1          |
| ARL11       | 2. 70E-18 | -0. 1896  | 0. 004 | 0. 046 | 4. 03E-14 | AC-G | ARL11         |
| MAP3K3. 1   | 2. 71E-18 | -0. 16956 | 0. 019 | 0. 073 | 4. 04E-14 | AC-G | MAP3K3        |
| CAPNS1      | 2. 75E-18 | -0. 12178 | 0. 242 | 0. 358 | 4. 11E-14 | AC-G | CAPNS1        |
| SSB. 1      | 2. 85E-18 | 0. 278801 | 0. 611 | 0. 588 | 4. 26E-14 | AC-G | SSB           |
| MLF2. 1     | 2. 89E-18 | 0. 244289 | 0. 639 | 0. 603 | 4. 32E-14 | AC-G | MLF2          |
| NME3. 1     | 2. 96E-18 | -0. 13226 | 0. 315 | 0. 437 | 4. 43E-14 | AC-G | NME3          |
| RP11-126K   | 2. 98E-18 | -0. 12658 | 0. 038 | 0. 102 | 4. 45E-14 | AC-G | RP11-126K1. 6 |
| ETNK1. 1    | 3. 00E-18 | -0. 18647 | 0. 146 | 0. 238 | 4. 48E-14 | AC-G | ETNK1         |
| ATM. 1      | 3. 03E-18 | -0. 24048 | 0. 118 | 0. 203 | 4. 53E-14 | AC-G | ATM           |
| ACAP2. 1    | 3. 08E-18 | -0. 17252 | 0. 107 | 0. 192 | 4. 61E-14 | AC-G | ACAP2         |
| YTHDC1. 1   | 3. 10E-18 | -0. 17791 | 0. 212 | 0. 32  | 4. 63E-14 | AC-G | YTHDC1        |
| CBX6. 1     | 3. 13E-18 | -0. 13867 | 0. 157 | 0. 256 | 4. 67E-14 | AC-G | CBX6          |
| TAB2        | 3. 17E-18 | -0. 18328 | 0. 065 | 0. 138 | 4. 73E-14 | AC-G | TAB2          |
| MAPK4       | 3. 22E-18 | 0. 144041 | 0. 048 | 0. 017 | 4. 82E-14 | AC-G | MAPK4         |
| TCEA2. 1    | 3. 32E-18 | -0. 19751 | 0. 287 | 0. 384 | 4. 96E-14 | AC-G | TCEA2         |
| TOM1. 1     | 3. 37E-18 | -0. 2159  | 0. 094 | 0. 173 | 5. 03E-14 | AC-G | TOM1          |



|           |          |          |       |       |          |      |          |
|-----------|----------|----------|-------|-------|----------|------|----------|
| ARHGAP24. | 3.46E-18 | -0.35113 | 0.087 | 0.16  | 5.17E-14 | AC-G | ARHGAP24 |
| ZNF513.1  | 3.51E-18 | -0.10508 | 0.026 | 0.083 | 5.24E-14 | AC-G | ZNF513   |
| ZNF827.1  | 3.54E-18 | -0.12628 | 0.056 | 0.126 | 5.28E-14 | AC-G | ZNF827   |
| MINK1.1   | 3.57E-18 | -0.16877 | 0.048 | 0.115 | 5.33E-14 | AC-G | MINK1    |
| SRA1.1    | 3.64E-18 | -0.12772 | 0.301 | 0.417 | 5.44E-14 | AC-G | SRA1     |
| ASPSCR1.1 | 3.66E-18 | -0.15147 | 0.154 | 0.252 | 5.48E-14 | AC-G | ASPSCR1  |
| ARRB1     | 3.83E-18 | -0.19144 | 0.005 | 0.048 | 5.72E-14 | AC-G | ARRB1    |
| BRD9.1    | 3.94E-18 | -0.18753 | 0.121 | 0.208 | 5.89E-14 | AC-G | BRD9     |
| C16orf72. | 3.97E-18 | -0.12295 | 0.065 | 0.14  | 5.93E-14 | AC-G | C16orf72 |
| ADAM17.1  | 4.05E-18 | -0.21267 | 0.175 | 0.271 | 6.06E-14 | AC-G | ADAM17   |
| ICOSLG.1  | 4.09E-18 | -0.28052 | 0.04  | 0.101 | 6.11E-14 | AC-G | ICOSLG   |
| ID2       | 4.09E-18 | -0.14647 | 0.539 | 0.676 | 6.12E-14 | AC-G | ID2      |
| NCKAP5L.1 | 4.21E-18 | -0.20663 | 0.056 | 0.126 | 6.29E-14 | AC-G | NCKAP5L  |
| GDI1.1    | 4.22E-18 | -0.14854 | 0.388 | 0.505 | 6.31E-14 | AC-G | GDI1     |
| PMP22.1   | 4.28E-18 | 0.250346 | 0.509 | 0.412 | 6.40E-14 | AC-G | PMP22    |
| SLC22A17. | 4.32E-18 | -0.15166 | 0.196 | 0.301 | 6.46E-14 | AC-G | SLC22A17 |
| EDARADD   | 4.38E-18 | 0.147241 | 0.057 | 0.022 | 6.54E-14 | AC-G | EDARADD  |
| CKAP2L    | 4.42E-18 | -0.15264 | 0.008 | 0.053 | 6.61E-14 | AC-G | CKAP2L   |
| METTL9.1  | 4.45E-18 | -0.17488 | 0.361 | 0.489 | 6.65E-14 | AC-G | METTL9   |
| KDM5B.1   | 4.59E-18 | -0.13343 | 0.093 | 0.175 | 6.86E-14 | AC-G | KDM5B    |
| PRKCH     | 4.66E-18 | -0.20544 | 0.007 | 0.051 | 6.96E-14 | AC-G | PRKCH    |
| ZWILCH.1  | 4.69E-18 | -0.13348 | 0.027 | 0.085 | 7.01E-14 | AC-G | ZWILCH   |
| PSIP1.1   | 4.70E-18 | -0.19804 | 0.284 | 0.403 | 7.03E-14 | AC-G | PSIP1    |
| PAK7.1    | 4.72E-18 | -0.14912 | 0.008 | 0.054 | 7.06E-14 | AC-G | PAK7     |
| CHCHD1.1  | 4.86E-18 | -0.11221 | 0.184 | 0.287 | 7.27E-14 | AC-G | CHCHD1   |
| RABAC1.1  | 4.86E-18 | 0.270015 | 0.659 | 0.665 | 7.27E-14 | AC-G | RABAC1   |
| GPRIN3.1  | 4.87E-18 | -0.2225  | 0.016 | 0.067 | 7.28E-14 | AC-G | GPRIN3   |
| PAFAH1B2. | 5.02E-18 | -0.18155 | 0.234 | 0.344 | 7.51E-14 | AC-G | PAFAH1B2 |
| TMTC4     | 5.08E-18 | -0.18426 | 0.044 | 0.109 | 7.59E-14 | AC-G | TMTC4    |
| MFSD3.1   | 5.18E-18 | -0.13219 | 0.061 | 0.131 | 7.75E-14 | AC-G | MFSD3    |
| KIF20B.1  | 5.20E-18 | -0.20473 | 0.036 | 0.097 | 7.77E-14 | AC-G | KIF20B   |
| PLXND1.1  | 5.24E-18 | -0.22871 | 0.045 | 0.108 | 7.83E-14 | AC-G | PLXND1   |
| DDX52     | 5.31E-18 | -0.13315 | 0.161 | 0.26  | 7.94E-14 | AC-G | DDX52    |
| ACP2.1    | 5.41E-18 | -0.14071 | 0.162 | 0.259 | 8.08E-14 | AC-G | ACP2     |
| RABGAP1L. | 5.43E-18 | -0.22278 | 0.054 | 0.121 | 8.11E-14 | AC-G | RABGAP1L |
| CLEC9A    | 5.44E-18 | -0.24459 | 0.001 | 0.039 | 8.13E-14 | AC-G | CLEC9A   |
| STRN4.1   | 5.44E-18 | -0.12826 | 0.063 | 0.135 | 8.13E-14 | AC-G | STRN4    |
| MDH2      | 5.45E-18 | 0.281249 | 0.657 | 0.661 | 8.15E-14 | AC-G | MDH2     |
| IGF2BP3.1 | 5.48E-18 | -0.10727 | 0.051 | 0.119 | 8.19E-14 | AC-G | IGF2BP3  |
| CDKN2D.1  | 5.56E-18 | -0.19324 | 0.094 | 0.172 | 8.31E-14 | AC-G | CDKN2D   |
| FAM78A    | 5.57E-18 | -0.18017 | 0.002 | 0.042 | 8.32E-14 | AC-G | FAM78A   |
| DCAF7.1   | 5.94E-18 | -0.14702 | 0.23  | 0.338 | 8.87E-14 | AC-G | DCAF7    |
| CBR4.1    | 6.08E-18 | -0.20098 | 0.116 | 0.202 | 9.08E-14 | AC-G | CBR4     |
| NCAPD2.1  | 6.13E-18 | -0.10581 | 0.019 | 0.072 | 9.16E-14 | AC-G | NCAPD2   |
| ZFP36     | 6.22E-18 | 0.32584  | 0.631 | 0.562 | 9.30E-14 | AC-G | ZFP36    |
| SGPP1.1   | 6.26E-18 | -0.1961  | 0.031 | 0.088 | 9.36E-14 | AC-G | SGPP1    |
| AGFG1     | 6.49E-18 | -0.14422 | 0.07  | 0.143 | 9.69E-14 | AC-G | AGFG1    |
| NRM.1     | 6.93E-18 | -0.16167 | 0.034 | 0.094 | 1.04E-13 | AC-G | NRM      |
| RNF111.1  | 7.07E-18 | -0.14038 | 0.032 | 0.091 | 1.06E-13 | AC-G | RNF111   |
| NES.1     | 7.11E-18 | -0.22256 | 0.206 | 0.289 | 1.06E-13 | AC-G | NES      |
| SGSM2     | 7.12E-18 | -0.11698 | 0.047 | 0.114 | 1.06E-13 | AC-G | SGSM2    |

|           |          |          |       |       |          |      |          |
|-----------|----------|----------|-------|-------|----------|------|----------|
| CPE       | 7.18E-18 | 0.354404 | 0.435 | 0.381 | 1.07E-13 | AC-G | CPE      |
| TSC22D2.1 | 7.18E-18 | -0.23559 | 0.092 | 0.169 | 1.07E-13 | AC-G | TSC22D2  |
| NAGPA     | 7.19E-18 | -0.18901 | 0.053 | 0.12  | 1.07E-13 | AC-G | NAGPA    |
| MTRNR2L1  | 7.22E-18 | -0.24969 | 0.126 | 0.205 | 1.08E-13 | AC-G | MTRNR2L1 |
| SPATA13.1 | 7.25E-18 | -0.22227 | 0.098 | 0.178 | 1.08E-13 | AC-G | SPATA13  |
| STAT6.1   | 7.33E-18 | -0.18667 | 0.012 | 0.06  | 1.10E-13 | AC-G | STAT6    |
| DOCK5.1   | 7.35E-18 | -0.23009 | 0.014 | 0.063 | 1.10E-13 | AC-G | DOCK5    |
| CDK5.1    | 7.57E-18 | -0.10135 | 0.156 | 0.254 | 1.13E-13 | AC-G | CDK5     |
| PRR14L.1  | 8.03E-18 | -0.12525 | 0.038 | 0.099 | 1.20E-13 | AC-G | PRR14L   |
| PCF11     | 8.27E-18 | -0.11976 | 0.129 | 0.218 | 1.24E-13 | AC-G | PCF11    |
| CCDC107.1 | 8.28E-18 | -0.17884 | 0.295 | 0.409 | 1.24E-13 | AC-G | CCDC107  |
| AGFG2     | 8.43E-18 | 0.137746 | 0.075 | 0.033 | 1.26E-13 | AC-G | AGFG2    |
| ASPM.1    | 8.47E-18 | -0.16925 | 0.009 | 0.054 | 1.27E-13 | AC-G | ASPM     |
| ARHGAP27. | 8.65E-18 | -0.18715 | 0.014 | 0.063 | 1.29E-13 | AC-G | ARHGAP27 |
| SOS2.1    | 8.71E-18 | -0.12787 | 0.033 | 0.093 | 1.30E-13 | AC-G | SOS2     |
| CDKN3     | 8.81E-18 | -0.2235  | 0.04  | 0.102 | 1.32E-13 | AC-G | CDKN3    |
| TRAPPC12. | 9.17E-18 | -0.18682 | 0.125 | 0.212 | 1.37E-13 | AC-G | TRAPPC12 |
| TTL       | 9.42E-18 | -0.15639 | 0.059 | 0.129 | 1.41E-13 | AC-G | TTL      |
| C16orf87  | 9.44E-18 | -0.19357 | 0.13  | 0.219 | 1.41E-13 | AC-G | C16orf87 |
| SEPT3.1   | 9.46E-18 | -0.1616  | 0.022 | 0.076 | 1.41E-13 | AC-G | 3-Sep    |
| DIRC2.1   | 9.52E-18 | -0.1441  | 0.032 | 0.09  | 1.42E-13 | AC-G | DIRC2    |
| KDM5D     | 1.00E-17 | -0.10548 | 0.008 | 0.052 | 1.49E-13 | AC-G | KDM5D    |
| MATR3.1   | 1.04E-17 | -0.16258 | 0.379 | 0.507 | 1.55E-13 | AC-G | MATR3    |
| NLK.1     | 1.06E-17 | -0.11422 | 0.028 | 0.086 | 1.58E-13 | AC-G | NLK      |
| MPDU1     | 1.07E-17 | -0.15325 | 0.226 | 0.335 | 1.60E-13 | AC-G | MPDU1    |
| AP1S1.1   | 1.09E-17 | 0.359896 | 0.501 | 0.461 | 1.63E-13 | AC-G | AP1S1    |
| ITGB4     | 1.09E-17 | 0.175228 | 0.064 | 0.027 | 1.64E-13 | AC-G | ITGB4    |
| GPAA1.1   | 1.10E-17 | -0.12592 | 0.288 | 0.414 | 1.65E-13 | AC-G | GPAA1    |
| CRB2      | 1.12E-17 | 0.349601 | 0.079 | 0.037 | 1.68E-13 | AC-G | CRB2     |
| RINT1     | 1.13E-17 | 0.186857 | 0.147 | 0.085 | 1.69E-13 | AC-G | RINT1    |
| MTMR14.1  | 1.14E-17 | -0.19157 | 0.145 | 0.236 | 1.70E-13 | AC-G | MTMR14   |
| PBX3.1    | 1.14E-17 | -0.15436 | 0.06  | 0.129 | 1.71E-13 | AC-G | PBX3     |
| PHYHD1    | 1.15E-17 | 0.13691  | 0.053 | 0.02  | 1.72E-13 | AC-G | PHYHD1   |
| E2F1      | 1.16E-17 | -0.12562 | 0.014 | 0.063 | 1.73E-13 | AC-G | E2F1     |
| ZNF652.1  | 1.17E-17 | -0.18428 | 0.081 | 0.156 | 1.75E-13 | AC-G | ZNF652   |
| TPST2.1   | 1.19E-17 | -0.17288 | 0.098 | 0.181 | 1.77E-13 | AC-G | TPST2    |
| FAM58A.1  | 1.19E-17 | -0.16582 | 0.089 | 0.167 | 1.78E-13 | AC-G | FAM58A   |
| USP13.1   | 1.19E-17 | -0.11989 | 0.026 | 0.081 | 1.78E-13 | AC-G | USP13    |
| TTC19.1   | 1.21E-17 | -0.17071 | 0.261 | 0.374 | 1.81E-13 | AC-G | TTC19    |
| PRELID1.1 | 1.23E-17 | -0.15457 | 0.433 | 0.584 | 1.84E-13 | AC-G | PRELID1  |
| STRBP.1   | 1.23E-17 | -0.16504 | 0.067 | 0.138 | 1.84E-13 | AC-G | STRBP    |
| ANKIB1.1  | 1.25E-17 | -0.17639 | 0.134 | 0.223 | 1.87E-13 | AC-G | ANKIB1   |
| PDS5B.1   | 1.26E-17 | -0.1468  | 0.098 | 0.181 | 1.88E-13 | AC-G | PDS5B    |
| SPRED2.1  | 1.26E-17 | -0.10736 | 0.055 | 0.125 | 1.89E-13 | AC-G | SPRED2   |
| ZNRF1.1   | 1.27E-17 | -0.11771 | 0.058 | 0.127 | 1.89E-13 | AC-G | ZNRF1    |
| SEPT8.1   | 1.28E-17 | -0.21181 | 0.122 | 0.21  | 1.91E-13 | AC-G | 8-Sep    |
| NELFB.1   | 1.30E-17 | -0.12316 | 0.083 | 0.162 | 1.94E-13 | AC-G | NELFB    |
| CTNNAL1.1 | 1.40E-17 | 0.265418 | 0.203 | 0.136 | 2.09E-13 | AC-G | CTNNAL1  |
| HTT.1     | 1.40E-17 | -0.13148 | 0.061 | 0.132 | 2.10E-13 | AC-G | HTT      |
| IKBKB.1   | 1.41E-17 | -0.14528 | 0.06  | 0.129 | 2.10E-13 | AC-G | IKBKB    |
| LIPE-AS1  | 1.42E-17 | -0.13519 | 0.057 | 0.127 | 2.12E-13 | AC-G | LIPE-AS1 |

|            |           |           |        |        |           |      |                |
|------------|-----------|-----------|--------|--------|-----------|------|----------------|
| CELSR2. 1  | 1. 44E-17 | -0. 12741 | 0. 04  | 0. 103 | 2. 16E-13 | AC-G | CELSR2         |
| OSGIN1     | 1. 45E-17 | 0. 120472 | 0. 057 | 0. 022 | 2. 17E-13 | AC-G | OSGIN1         |
| PTBP3. 1   | 1. 48E-17 | -0. 18995 | 0. 055 | 0. 122 | 2. 21E-13 | AC-G | PTBP3          |
| MPHOSPH9.  | 1. 49E-17 | -0. 1196  | 0. 059 | 0. 129 | 2. 23E-13 | AC-G | MPHOSPH9       |
| BRI3BP. 1  | 1. 51E-17 | -0. 15312 | 0. 056 | 0. 124 | 2. 26E-13 | AC-G | BRI3BP         |
| OSGEP. 1   | 1. 51E-17 | -0. 11678 | 0. 127 | 0. 217 | 2. 26E-13 | AC-G | OSGEP          |
| PLXNA4     | 1. 53E-17 | -0. 14825 | 0. 029 | 0. 086 | 2. 29E-13 | AC-G | PLXNA4         |
| RP11-745C  | 1. 55E-17 | 0. 155202 | 0. 028 | 0. 007 | 2. 31E-13 | AC-G | RP11-745C15. 2 |
| MGEA5. 1   | 1. 55E-17 | -0. 19786 | 0. 155 | 0. 247 | 2. 32E-13 | AC-G | MGEA5          |
| JARID2     | 1. 59E-17 | -0. 18892 | 0. 064 | 0. 134 | 2. 38E-13 | AC-G | JARID2         |
| FBXO18. 1  | 1. 66E-17 | -0. 14329 | 0. 073 | 0. 147 | 2. 48E-13 | AC-G | FBXO18         |
| SGPL1      | 1. 67E-17 | -0. 16641 | 0. 071 | 0. 142 | 2. 49E-13 | AC-G | SGPL1          |
| SOX6. 1    | 1. 69E-17 | -0. 20586 | 0. 079 | 0. 153 | 2. 52E-13 | AC-G | SOX6           |
| SOBP. 1    | 1. 70E-17 | -0. 13445 | 0. 072 | 0. 146 | 2. 54E-13 | AC-G | SOBP           |
| SPC24. 1   | 1. 70E-17 | -0. 13846 | 0. 01  | 0. 056 | 2. 54E-13 | AC-G | SPC24          |
| SRD5A3. 1  | 1. 73E-17 | -0. 16163 | 0. 095 | 0. 175 | 2. 58E-13 | AC-G | SRD5A3         |
| RRP7A. 1   | 1. 81E-17 | -0. 15357 | 0. 203 | 0. 304 | 2. 71E-13 | AC-G | RRP7A          |
| UQCRFS1. 1 | 1. 83E-17 | -0. 16774 | 0. 437 | 0. 565 | 2. 74E-13 | AC-G | UQCRFS1        |
| PRPF8. 1   | 1. 83E-17 | -0. 15641 | 0. 172 | 0. 273 | 2. 74E-13 | AC-G | PRPF8          |
| PLXNB2. 1  | 1. 89E-17 | -0. 1589  | 0. 09  | 0. 17  | 2. 83E-13 | AC-G | PLXNB2         |
| CSDE1. 1   | 1. 90E-17 | -0. 13687 | 0. 493 | 0. 622 | 2. 85E-13 | AC-G | CSDE1          |
| ZBTB4. 1   | 1. 91E-17 | -0. 14974 | 0. 059 | 0. 128 | 2. 85E-13 | AC-G | ZBTB4          |
| ATP11A. 1  | 1. 92E-17 | -0. 10799 | 0. 044 | 0. 107 | 2. 87E-13 | AC-G | ATP11A         |
| SNX29. 1   | 1. 93E-17 | -0. 22365 | 0. 052 | 0. 116 | 2. 89E-13 | AC-G | SNX29          |
| SMARCD2. 1 | 1. 96E-17 | -0. 12009 | 0. 036 | 0. 095 | 2. 93E-13 | AC-G | SMARCD2        |
| OTOA       | 2. 14E-17 | -0. 15801 | 0. 001 | 0. 038 | 3. 19E-13 | AC-G | OTOA           |
| NADK. 1    | 2. 14E-17 | -0. 11668 | 0. 099 | 0. 18  | 3. 20E-13 | AC-G | NADK           |
| COX7C. 1   | 2. 16E-17 | 0. 198545 | 0. 834 | 0. 896 | 3. 22E-13 | AC-G | COX7C          |
| SSR4. 1    | 2. 23E-17 | 0. 268173 | 0. 724 | 0. 77  | 3. 33E-13 | AC-G | SSR4           |
| MSN. 1     | 2. 25E-17 | -0. 1731  | 0. 285 | 0. 393 | 3. 36E-13 | AC-G | MSN            |
| GCAT. 1    | 2. 27E-17 | -0. 12464 | 0. 094 | 0. 174 | 3. 40E-13 | AC-G | GCAT           |
| C1QTNF4    | 2. 34E-17 | -0. 16407 | 0. 016 | 0. 064 | 3. 49E-13 | AC-G | C1QTNF4        |
| BTBD1. 1   | 2. 34E-17 | -0. 13242 | 0. 083 | 0. 161 | 3. 49E-13 | AC-G | BTBD1          |
| SPAG16. 1  | 2. 38E-17 | 0. 323273 | 0. 351 | 0. 285 | 3. 56E-13 | AC-G | SPAG16         |
| FOXG1. 1   | 2. 45E-17 | -0. 10133 | 0. 086 | 0. 166 | 3. 66E-13 | AC-G | FOXG1          |
| ERICH2     | 2. 45E-17 | 0. 160681 | 0. 063 | 0. 026 | 3. 67E-13 | AC-G | ERICH2         |
| MLXIP. 1   | 2. 46E-17 | -0. 20593 | 0. 114 | 0. 196 | 3. 68E-13 | AC-G | MLXIP          |
| SOAT1. 1   | 2. 48E-17 | -0. 25649 | 0. 13  | 0. 211 | 3. 71E-13 | AC-G | SOAT1          |
| USP34. 1   | 2. 49E-17 | -0. 14357 | 0. 135 | 0. 224 | 3. 72E-13 | AC-G | USP34          |
| DCLRE1C    | 2. 50E-17 | -0. 15208 | 0. 069 | 0. 142 | 3. 74E-13 | AC-G | DCLRE1C        |
| RNF165. 1  | 2. 54E-17 | -0. 12706 | 0. 023 | 0. 076 | 3. 79E-13 | AC-G | RNF165         |
| ADAM8      | 2. 56E-17 | -0. 19517 | 0. 007 | 0. 05  | 3. 82E-13 | AC-G | ADAM8          |
| ITFG1. 1   | 2. 56E-17 | -0. 12836 | 0. 255 | 0. 366 | 3. 83E-13 | AC-G | ITFG1          |
| RASL11B. 1 | 2. 57E-17 | -0. 20851 | 0. 014 | 0. 062 | 3. 84E-13 | AC-G | RASL11B        |
| CST7       | 2. 57E-17 | -0. 22885 | 0. 003 | 0. 042 | 3. 84E-13 | AC-G | CST7           |
| CENPN      | 2. 67E-17 | -0. 18789 | 0. 038 | 0. 097 | 3. 99E-13 | AC-G | CENPN          |
| SEMA4A. 1  | 2. 67E-17 | -0. 16796 | 0. 011 | 0. 057 | 4. 00E-13 | AC-G | SEMA4A         |
| E2F3. 1    | 2. 70E-17 | -0. 16104 | 0. 037 | 0. 095 | 4. 04E-13 | AC-G | E2F3           |
| ASIC1      | 2. 73E-17 | -0. 13327 | 0. 013 | 0. 06  | 4. 07E-13 | AC-G | ASIC1          |
| ANKH. 1    | 2. 81E-17 | -0. 26181 | 0. 089 | 0. 16  | 4. 20E-13 | AC-G | ANKH           |
| DLGAP5     | 2. 81E-17 | -0. 12317 | 0. 003 | 0. 042 | 4. 21E-13 | AC-G | DLGAP5         |

|            |           |           |        |        |           |      |          |
|------------|-----------|-----------|--------|--------|-----------|------|----------|
| LBR. 1     | 2. 82E-17 | -0. 2251  | 0. 158 | 0. 247 | 4. 22E-13 | AC-G | LBR      |
| YME1L1     | 2. 95E-17 | -0. 19087 | 0. 179 | 0. 276 | 4. 42E-13 | AC-G | YME1L1   |
| LGALS8     | 3. 01E-17 | -0. 19371 | 0. 087 | 0. 164 | 4. 50E-13 | AC-G | LGALS8   |
| FILIP1L. 1 | 3. 06E-17 | -0. 24185 | 0. 088 | 0. 161 | 4. 58E-13 | AC-G | FILIP1L  |
| KCTD5. 1   | 3. 07E-17 | -0. 18219 | 0. 134 | 0. 222 | 4. 58E-13 | AC-G | KCTD5    |
| TMOD2. 1   | 3. 11E-17 | -0. 11638 | 0. 054 | 0. 121 | 4. 65E-13 | AC-G | TMOD2    |
| TM7SF2. 1  | 3. 24E-17 | -0. 15278 | 0. 152 | 0. 246 | 4. 84E-13 | AC-G | TM7SF2   |
| CUEDC2. 1  | 3. 29E-17 | -0. 11418 | 0. 301 | 0. 42  | 4. 92E-13 | AC-G | CUEDC2   |
| COMMD9     | 3. 36E-17 | -0. 15208 | 0. 222 | 0. 327 | 5. 03E-13 | AC-G | COMMD9   |
| GADD45G. 1 | 3. 37E-17 | -0. 24894 | 0. 18  | 0. 27  | 5. 03E-13 | AC-G | GADD45G  |
| KLF7. 1    | 3. 43E-17 | -0. 2209  | 0. 136 | 0. 219 | 5. 13E-13 | AC-G | KLF7     |
| MSL1. 1    | 3. 46E-17 | -0. 15644 | 0. 092 | 0. 171 | 5. 17E-13 | AC-G | MSL1     |
| IL12RB1    | 3. 61E-17 | -0. 17392 | 0. 001 | 0. 037 | 5. 40E-13 | AC-G | IL12RB1  |
| DSEL. 1    | 3. 64E-17 | -0. 19155 | 0. 152 | 0. 239 | 5. 44E-13 | AC-G | DSEL     |
| ITPR2. 1   | 3. 66E-17 | -0. 22981 | 0. 073 | 0. 143 | 5. 47E-13 | AC-G | ITPR2    |
| LDOC1L. 1  | 3. 67E-17 | -0. 10102 | 0. 037 | 0. 096 | 5. 48E-13 | AC-G | LDOC1L   |
| KCTD13. 1  | 3. 80E-17 | -0. 1796  | 0. 077 | 0. 15  | 5. 67E-13 | AC-G | KCTD13   |
| TGM2       | 3. 80E-17 | 0. 167015 | 0. 071 | 0. 031 | 5. 67E-13 | AC-G | TGM2     |
| CLASP1. 1  | 3. 85E-17 | -0. 10109 | 0. 075 | 0. 15  | 5. 75E-13 | AC-G | CLASP1   |
| TRMT1. 1   | 3. 87E-17 | -0. 20384 | 0. 176 | 0. 273 | 5. 78E-13 | AC-G | TRMT1    |
| ATG3. 1    | 3. 88E-17 | -0. 15341 | 0. 282 | 0. 395 | 5. 80E-13 | AC-G | ATG3     |
| CARS       | 3. 94E-17 | 0. 31146  | 0. 277 | 0. 208 | 5. 89E-13 | AC-G | CARS     |
| ZDHHC22    | 3. 98E-17 | -0. 11207 | 0. 007 | 0. 05  | 5. 94E-13 | AC-G | ZDHHC22  |
| N4BP2. 1   | 4. 01E-17 | -0. 14704 | 0. 06  | 0. 128 | 5. 99E-13 | AC-G | N4BP2    |
| KAT7       | 4. 02E-17 | -0. 15019 | 0. 084 | 0. 16  | 6. 01E-13 | AC-G | KAT7     |
| IGF2R. 1   | 4. 08E-17 | -0. 1393  | 0. 044 | 0. 107 | 6. 10E-13 | AC-G | IGF2R    |
| ARPC1A. 1  | 4. 10E-17 | 0. 299889 | 0. 592 | 0. 551 | 6. 13E-13 | AC-G | ARPC1A   |
| PATZ1. 1   | 4. 13E-17 | -0. 12463 | 0. 035 | 0. 093 | 6. 18E-13 | AC-G | PATZ1    |
| SPATA6. 1  | 4. 55E-17 | -0. 13961 | 0. 091 | 0. 168 | 6. 80E-13 | AC-G | SPATA6   |
| HDAC9. 1   | 4. 60E-17 | -0. 16988 | 0. 067 | 0. 137 | 6. 87E-13 | AC-G | HDAC9    |
| SPIN1. 1   | 4. 60E-17 | -0. 14996 | 0. 099 | 0. 18  | 6. 88E-13 | AC-G | SPIN1    |
| MOBP       | 4. 61E-17 | -0. 3468  | 0. 003 | 0. 042 | 6. 89E-13 | AC-G | MOBP     |
| ZBED3. 1   | 4. 62E-17 | -0. 1157  | 0. 038 | 0. 098 | 6. 90E-13 | AC-G | ZBED3    |
| HLA-F. 1   | 4. 66E-17 | -0. 31389 | 0. 088 | 0. 157 | 6. 97E-13 | AC-G | HLA-F    |
| PIP5K1C. 1 | 4. 67E-17 | -0. 12029 | 0. 053 | 0. 119 | 6. 98E-13 | AC-G | PIP5K1C  |
| STK39. 1   | 4. 69E-17 | -0. 1083  | 0. 048 | 0. 112 | 7. 01E-13 | AC-G | STK39    |
| RNF168. 1  | 4. 72E-17 | -0. 18066 | 0. 086 | 0. 16  | 7. 06E-13 | AC-G | RNF168   |
| MORN2. 1   | 4. 74E-17 | 0. 387348 | 0. 315 | 0. 252 | 7. 08E-13 | AC-G | MORN2    |
| CTNNB1. 1  | 4. 81E-17 | -0. 12609 | 0. 262 | 0. 373 | 7. 18E-13 | AC-G | CTNNB1   |
| SDS. 1     | 4. 81E-17 | -0. 2982  | 0. 018 | 0. 067 | 7. 20E-13 | AC-G | SDS      |
| BMP7. 1    | 4. 96E-17 | -0. 16204 | 0. 099 | 0. 179 | 7. 42E-13 | AC-G | BMP7     |
| KDM3B. 1   | 5. 16E-17 | -0. 15604 | 0. 054 | 0. 12  | 7. 70E-13 | AC-G | KDM3B    |
| SLC27A4. 1 | 5. 16E-17 | -0. 11763 | 0. 018 | 0. 067 | 7. 71E-13 | AC-G | SLC27A4  |
| BCL7B. 1   | 5. 18E-17 | -0. 1604  | 0. 237 | 0. 339 | 7. 74E-13 | AC-G | BCL7B    |
| SYTL3. 1   | 5. 28E-17 | -0. 26392 | 0. 022 | 0. 073 | 7. 88E-13 | AC-G | SYTL3    |
| FGF9. 1    | 5. 36E-17 | -0. 15505 | 0. 012 | 0. 058 | 8. 01E-13 | AC-G | FGF9     |
| FGD5-AS1.  | 5. 37E-17 | -0. 17236 | 0. 224 | 0. 33  | 8. 03E-13 | AC-G | FGD5-AS1 |
| C19orf38.  | 5. 38E-17 | -0. 20804 | 0. 01  | 0. 055 | 8. 04E-13 | AC-G | C19orf38 |
| SYT6. 1    | 5. 39E-17 | -0. 15001 | 0. 012 | 0. 058 | 8. 05E-13 | AC-G | SYT6     |
| SF3A1. 1   | 5. 50E-17 | -0. 15542 | 0. 106 | 0. 187 | 8. 22E-13 | AC-G | SF3A1    |
| ACAT1. 1   | 5. 54E-17 | 0. 300301 | 0. 424 | 0. 355 | 8. 28E-13 | AC-G | ACAT1    |

|           |          |          |       |       |          |      |                 |
|-----------|----------|----------|-------|-------|----------|------|-----------------|
| CTH       | 5.57E-17 | 0.205405 | 0.094 | 0.048 | 8.33E-13 | AC-G | CTH             |
| ZC3H13.1  | 5.65E-17 | -0.13425 | 0.242 | 0.352 | 8.45E-13 | AC-G | ZC3H13          |
| MLEC.1    | 5.74E-17 | -0.14237 | 0.305 | 0.419 | 8.58E-13 | AC-G | MLEC            |
| RNF126.1  | 5.78E-17 | -0.13611 | 0.203 | 0.308 | 8.63E-13 | AC-G | RNF126          |
| RP11-395E | 5.81E-17 | 0.193137 | 0.052 | 0.02  | 8.68E-13 | AC-G | RP11-395B7.4    |
| PPP1R15A. | 5.84E-17 | -0.15505 | 0.364 | 0.487 | 8.72E-13 | AC-G | PPP1R15A        |
| EFTUD2.1  | 5.86E-17 | -0.10248 | 0.139 | 0.23  | 8.76E-13 | AC-G | EFTUD2          |
| DENND1C   | 5.89E-17 | -0.17663 | 0.002 | 0.04  | 8.80E-13 | AC-G | DENND1C         |
| SYP.1     | 5.90E-17 | -0.18309 | 0.074 | 0.146 | 8.82E-13 | AC-G | SYP             |
| HIST2H2AC | 6.06E-17 | -0.1122  | 0.017 | 0.066 | 9.05E-13 | AC-G | HIST2H2AC       |
| AHCYL1.1  | 6.09E-17 | 0.45289  | 0.377 | 0.318 | 9.10E-13 | AC-G | AHCYL1          |
| SAT2.1    | 6.18E-17 | 0.297773 | 0.615 | 0.58  | 9.24E-13 | AC-G | SAT2            |
| RP11-386I | 6.23E-17 | -0.27027 | 0.024 | 0.075 | 9.31E-13 | AC-G | RP11-386I14.4   |
| AGPS.1    | 6.33E-17 | -0.17283 | 0.065 | 0.133 | 9.46E-13 | AC-G | AGPS            |
| TOMM40.1  | 6.43E-17 | -0.16854 | 0.235 | 0.346 | 9.61E-13 | AC-G | TOMM40          |
| IGLON5.1  | 6.47E-17 | -0.1556  | 0.01  | 0.055 | 9.67E-13 | AC-G | IGLON5          |
| LRRC37B.1 | 6.69E-17 | -0.1365  | 0.056 | 0.123 | 9.99E-13 | AC-G | LRRC37B         |
| ERCC1.1   | 6.72E-17 | -0.14334 | 0.37  | 0.492 | 1.00E-12 | AC-G | ERCC1           |
| RBMX.1    | 6.86E-17 | -0.10932 | 0.462 | 0.587 | 1.03E-12 | AC-G | RBMX            |
| STK32C.1  | 7.02E-17 | -0.17282 | 0.043 | 0.104 | 1.05E-12 | AC-G | STK32C          |
| DLX6.1    | 7.04E-17 | -0.19346 | 0.017 | 0.065 | 1.05E-12 | AC-G | DLX6            |
| ACSF3     | 7.44E-17 | -0.14893 | 0.057 | 0.124 | 1.11E-12 | AC-G | ACSF3           |
| SETD3.1   | 7.77E-17 | -0.16495 | 0.091 | 0.169 | 1.16E-12 | AC-G | SETD3           |
| RP11-1094 | 7.93E-17 | -0.10482 | 0.154 | 0.25  | 1.18E-12 | AC-G | RP11-1094M14.11 |
| HENMT1    | 8.13E-17 | -0.17308 | 0.002 | 0.038 | 1.21E-12 | AC-G | HENMT1          |
| CCDC106.1 | 8.19E-17 | -0.14101 | 0.157 | 0.247 | 1.22E-12 | AC-G | CCDC106         |
| HLA-DOA   | 8.26E-17 | -0.27374 | 0.044 | 0.104 | 1.23E-12 | AC-G | HLA-DOA         |
| RYBP.1    | 8.31E-17 | -0.17809 | 0.06  | 0.126 | 1.24E-12 | AC-G | RYBP            |
| CAPS.1    | 8.46E-17 | 0.20243  | 0.114 | 0.063 | 1.26E-12 | AC-G | CAPS            |
| C21orf2.1 | 8.48E-17 | -0.15526 | 0.123 | 0.208 | 1.27E-12 | AC-G | C21orf2         |
| YTHDF3.1  | 8.60E-17 | -0.12832 | 0.076 | 0.148 | 1.29E-12 | AC-G | YTHDF3          |
| TCTEX1D1  | 9.31E-17 | 0.111378 | 0.038 | 0.012 | 1.39E-12 | AC-G | TCTEX1D1        |
| RAB21.1   | 9.36E-17 | -0.13485 | 0.13  | 0.218 | 1.40E-12 | AC-G | RAB21           |
| ARHGAP25  | 9.41E-17 | -0.20247 | 0.023 | 0.074 | 1.41E-12 | AC-G | ARHGAP25        |
| ZBTB18.1  | 9.45E-17 | -0.121   | 0.013 | 0.059 | 1.41E-12 | AC-G | ZBTB18          |
| GPNMB.1   | 9.68E-17 | -0.25443 | 0.132 | 0.214 | 1.45E-12 | AC-G | GPNMB           |
| PHF19.1   | 9.74E-17 | -0.13501 | 0.069 | 0.141 | 1.46E-12 | AC-G | PHF19           |
| NCAPG     | 9.85E-17 | -0.11631 | 0.007 | 0.048 | 1.47E-12 | AC-G | NCAPG           |
| TLN2.1    | 9.97E-17 | -0.18253 | 0.043 | 0.104 | 1.49E-12 | AC-G | TLN2            |
| AKT1.1    | 1.04E-16 | -0.13522 | 0.083 | 0.159 | 1.56E-12 | AC-G | AKT1            |
| UBE2D2.1  | 1.07E-16 | -0.12627 | 0.473 | 0.61  | 1.60E-12 | AC-G | UBE2D2          |
| MAPK8.1   | 1.08E-16 | -0.13593 | 0.046 | 0.109 | 1.62E-12 | AC-G | MAPK8           |
| KAT6A.1   | 1.10E-16 | -0.18955 | 0.095 | 0.171 | 1.64E-12 | AC-G | KAT6A           |
| SEMA6B    | 1.10E-16 | -0.16189 | 0.011 | 0.056 | 1.65E-12 | AC-G | SEMA6B          |
| SSBP1.1   | 1.12E-16 | 0.30615  | 0.636 | 0.639 | 1.68E-12 | AC-G | SSBP1           |
| JAK1.1    | 1.13E-16 | -0.1817  | 0.175 | 0.268 | 1.68E-12 | AC-G | JAK1            |
| MAD1L1.1  | 1.13E-16 | -0.17475 | 0.093 | 0.169 | 1.69E-12 | AC-G | MAD1L1          |
| ZNF649.1  | 1.14E-16 | -0.13377 | 0.04  | 0.099 | 1.70E-12 | AC-G | ZNF649          |
| EPHX2     | 1.16E-16 | 0.201971 | 0.072 | 0.032 | 1.73E-12 | AC-G | EPHX2           |
| LSM4      | 1.19E-16 | -0.11403 | 0.467 | 0.578 | 1.78E-12 | AC-G | LSM4            |
| ANKRD39.1 | 1.19E-16 | -0.13883 | 0.101 | 0.18  | 1.78E-12 | AC-G | ANKRD39         |

|            |          |          |       |       |          |      |           |
|------------|----------|----------|-------|-------|----------|------|-----------|
| BCL11A     | 1.19E-16 | -0.10297 | 0.011 | 0.056 | 1.78E-12 | AC-G | BCL11A    |
| AAED1.1    | 1.22E-16 | -0.19443 | 0.116 | 0.194 | 1.83E-12 | AC-G | AAED1     |
| ARL5B.1    | 1.27E-16 | -0.15953 | 0.039 | 0.097 | 1.90E-12 | AC-G | ARL5B     |
| REV1.1     | 1.31E-16 | -0.1443  | 0.101 | 0.18  | 1.95E-12 | AC-G | REV1      |
| CBX4.1     | 1.34E-16 | -0.1579  | 0.06  | 0.126 | 2.00E-12 | AC-G | CBX4      |
| LMF2.1     | 1.35E-16 | -0.13297 | 0.13  | 0.215 | 2.01E-12 | AC-G | LMF2      |
| ATF6.1     | 1.39E-16 | -0.22082 | 0.172 | 0.263 | 2.08E-12 | AC-G | ATF6      |
| PRKAG2.1   | 1.41E-16 | -0.23795 | 0.079 | 0.149 | 2.11E-12 | AC-G | PRKAG2    |
| CBLN4.1    | 1.42E-16 | -0.10725 | 0.031 | 0.088 | 2.12E-12 | AC-G | CBLN4     |
| IFITM10.1  | 1.43E-16 | -0.25438 | 0.071 | 0.136 | 2.14E-12 | AC-G | IFITM10   |
| CDCA5      | 1.47E-16 | -0.12019 | 0.009 | 0.052 | 2.20E-12 | AC-G | CDCA5     |
| MVD.1      | 1.49E-16 | -0.14329 | 0.11  | 0.192 | 2.22E-12 | AC-G | MVD       |
| KLK6       | 1.50E-16 | -0.29956 | 0.001 | 0.037 | 2.24E-12 | AC-G | KLK6      |
| PUM1.1     | 1.52E-16 | -0.14894 | 0.16  | 0.252 | 2.26E-12 | AC-G | PUM1      |
| FABP6      | 1.56E-16 | -0.15444 | 0.005 | 0.045 | 2.33E-12 | AC-G | FABP6     |
| C20orf194  | 1.57E-16 | -0.15416 | 0.075 | 0.146 | 2.35E-12 | AC-G | C20orf194 |
| PHACTR3.1  | 1.57E-16 | -0.1694  | 0.031 | 0.087 | 2.35E-12 | AC-G | PHACTR3   |
| MEIS1.1    | 1.57E-16 | -0.11249 | 0.038 | 0.096 | 2.35E-12 | AC-G | MEIS1     |
| MMD.1      | 1.59E-16 | -0.1175  | 0.167 | 0.26  | 2.37E-12 | AC-G | MMD       |
| UNC13D.1   | 1.67E-16 | -0.16311 | 0.011 | 0.056 | 2.50E-12 | AC-G | UNC13D    |
| GCHFR.1    | 1.68E-16 | -0.25704 | 0.031 | 0.085 | 2.51E-12 | AC-G | GCHFR     |
| FAM192A.1  | 1.72E-16 | -0.11548 | 0.264 | 0.376 | 2.57E-12 | AC-G | FAM192A   |
| SLC35G2.1  | 1.73E-16 | 0.342144 | 0.167 | 0.107 | 2.59E-12 | AC-G | SLC35G2   |
| MAPT.1     | 1.74E-16 | -0.1589  | 0.206 | 0.3   | 2.60E-12 | AC-G | MAPT      |
| RHOBTB3.1  | 1.86E-16 | -0.16312 | 0.321 | 0.425 | 2.78E-12 | AC-G | RHOBTB3   |
| ZC3HAV1.1  | 1.89E-16 | -0.21422 | 0.111 | 0.189 | 2.82E-12 | AC-G | ZC3HAV1   |
| CHADL      | 1.89E-16 | -0.19193 | 0.007 | 0.048 | 2.82E-12 | AC-G | CHADL     |
| TULP4.1    | 1.92E-16 | -0.15888 | 0.081 | 0.154 | 2.88E-12 | AC-G | TULP4     |
| ZNF536     | 1.93E-16 | -0.14517 | 0.008 | 0.049 | 2.88E-12 | AC-G | ZNF536    |
| TBC1D10B.1 | 1.94E-16 | -0.13843 | 0.048 | 0.11  | 2.90E-12 | AC-G | TBC1D10B  |
| SMCR5.1    | 1.94E-16 | -0.11199 | 0.041 | 0.102 | 2.90E-12 | AC-G | SMCR5     |
| NCAPH      | 1.96E-16 | -0.11158 | 0.004 | 0.042 | 2.94E-12 | AC-G | NCAPH     |
| BHLHE41.1  | 2.04E-16 | -0.28547 | 0.141 | 0.221 | 3.05E-12 | AC-G | BHLHE41   |
| SUPT20H.1  | 2.05E-16 | -0.1256  | 0.134 | 0.221 | 3.06E-12 | AC-G | SUPT20H   |
| LRRC4      | 2.09E-16 | -0.13785 | 0.009 | 0.052 | 3.12E-12 | AC-G | LRRC4     |
| ADRB2      | 2.10E-16 | -0.22243 | 0.01  | 0.053 | 3.14E-12 | AC-G | ADRB2     |
| FHOD1.1    | 2.12E-16 | -0.16864 | 0.017 | 0.064 | 3.16E-12 | AC-G | FHOD1     |
| CPPED1.1   | 2.17E-16 | -0.2139  | 0.025 | 0.076 | 3.24E-12 | AC-G | CPPED1    |
| IL2RG      | 2.18E-16 | -0.25914 | 0.008 | 0.05  | 3.25E-12 | AC-G | IL2RG     |
| LMNB2.1    | 2.18E-16 | -0.13605 | 0.061 | 0.128 | 3.26E-12 | AC-G | LMNB2     |
| ENDOG.1    | 2.25E-16 | -0.12771 | 0.085 | 0.159 | 3.36E-12 | AC-G | ENDOG     |
| FUT8.1     | 2.26E-16 | -0.11719 | 0.066 | 0.136 | 3.37E-12 | AC-G | FUT8      |
| DCAF11.1   | 2.27E-16 | -0.10392 | 0.119 | 0.204 | 3.39E-12 | AC-G | DCAF11    |
| PARP14.1   | 2.27E-16 | -0.20896 | 0.094 | 0.168 | 3.40E-12 | AC-G | PARP14    |
| LMO1.1     | 2.32E-16 | -0.19719 | 0.03  | 0.083 | 3.47E-12 | AC-G | LMO1      |
| SLC25A24.1 | 2.33E-16 | -0.16594 | 0.048 | 0.108 | 3.48E-12 | AC-G | SLC25A24  |
| ABR.1      | 2.35E-16 | -0.16084 | 0.084 | 0.157 | 3.51E-12 | AC-G | ABR       |
| GNG5.1     | 2.44E-16 | 0.272994 | 0.677 | 0.638 | 3.65E-12 | AC-G | GNG5      |
| TMEM109.1  | 2.47E-16 | -0.22137 | 0.139 | 0.217 | 3.69E-12 | AC-G | TMEM109   |
| XRN2.1     | 2.51E-16 | -0.13146 | 0.361 | 0.476 | 3.74E-12 | AC-G | XRN2      |
| HEPN1.1    | 2.53E-16 | 0.395823 | 0.262 | 0.193 | 3.79E-12 | AC-G | HEPN1     |

|           |          |          |       |       |          |      |              |
|-----------|----------|----------|-------|-------|----------|------|--------------|
| LARP4B    | 2.58E-16 | -0.1359  | 0.041 | 0.099 | 3.85E-12 | AC-G | LARP4B       |
| GTPBP1    | 2.66E-16 | -0.15929 | 0.049 | 0.111 | 3.97E-12 | AC-G | GTPBP1       |
| ASCC2     | 2.76E-16 | -0.18502 | 0.134 | 0.219 | 4.13E-12 | AC-G | ASCC2        |
| BMS1.1    | 2.77E-16 | -0.13028 | 0.083 | 0.157 | 4.14E-12 | AC-G | BMS1         |
| SSBP3.1   | 2.78E-16 | -0.13547 | 0.07  | 0.14  | 4.16E-12 | AC-G | SSBP3        |
| SIGMAR1.1 | 2.85E-16 | -0.15432 | 0.106 | 0.185 | 4.27E-12 | AC-G | SIGMAR1      |
| LAMP5.1   | 2.86E-16 | -0.12799 | 0.055 | 0.12  | 4.27E-12 | AC-G | LAMP5        |
| CHMP1B.1  | 2.89E-16 | -0.1978  | 0.35  | 0.455 | 4.32E-12 | AC-G | CHMP1B       |
| GRAMD3.1  | 2.90E-16 | 0.291721 | 0.193 | 0.13  | 4.34E-12 | AC-G | GRAMD3       |
| ZNF281.1  | 2.91E-16 | -0.20648 | 0.12  | 0.198 | 4.35E-12 | AC-G | ZNF281       |
| DARS.1    | 3.05E-16 | 0.286024 | 0.448 | 0.393 | 4.55E-12 | AC-G | DARS         |
| ENTPD6.1  | 3.17E-16 | -0.11414 | 0.127 | 0.212 | 4.74E-12 | AC-G | ENTPD6       |
| MARK2.1   | 3.26E-16 | -0.15547 | 0.068 | 0.136 | 4.87E-12 | AC-G | MARK2        |
| GSK3A.1   | 3.28E-16 | -0.12248 | 0.119 | 0.204 | 4.90E-12 | AC-G | GSK3A        |
| OIP5      | 3.28E-16 | -0.1071  | 0.007 | 0.048 | 4.91E-12 | AC-G | OIP5         |
| SUSD1.1   | 3.36E-16 | -0.12953 | 0.016 | 0.063 | 5.01E-12 | AC-G | SUSD1        |
| FAM212A.1 | 3.41E-16 | -0.20859 | 0.012 | 0.056 | 5.09E-12 | AC-G | FAM212A      |
| PNKP.1    | 3.45E-16 | -0.13997 | 0.109 | 0.191 | 5.16E-12 | AC-G | PNKP         |
| TRPC4AP.1 | 3.50E-16 | -0.15916 | 0.173 | 0.266 | 5.23E-12 | AC-G | TRPC4AP      |
| ARHGAP33. | 3.53E-16 | -0.12296 | 0.034 | 0.091 | 5.27E-12 | AC-G | ARHGAP33     |
| SQRDL.1   | 3.54E-16 | -0.264   | 0.101 | 0.172 | 5.29E-12 | AC-G | SQRDL        |
| TMED1     | 3.60E-16 | 0.415003 | 0.344 | 0.281 | 5.38E-12 | AC-G | TMED1        |
| PPP2R2D.1 | 3.63E-16 | -0.1175  | 0.04  | 0.099 | 5.42E-12 | AC-G | PPP2R2D      |
| TBC1D10C  | 3.74E-16 | -0.17367 | 0.001 | 0.036 | 5.59E-12 | AC-G | TBC1D10C     |
| CSPG5.1   | 3.77E-16 | -0.21293 | 0.056 | 0.118 | 5.64E-12 | AC-G | CSPG5        |
| ATP6V1G2. | 4.00E-16 | -0.14353 | 0.087 | 0.161 | 5.97E-12 | AC-G | ATP6V1G2     |
| MGRN1.1   | 4.03E-16 | -0.1572  | 0.137 | 0.222 | 6.02E-12 | AC-G | MGRN1        |
| TRIM27.1  | 4.04E-16 | -0.14867 | 0.137 | 0.224 | 6.04E-12 | AC-G | TRIM27       |
| CD58.1    | 4.14E-16 | -0.21182 | 0.155 | 0.241 | 6.18E-12 | AC-G | CD58         |
| PI4KA.1   | 4.14E-16 | -0.16133 | 0.045 | 0.105 | 6.18E-12 | AC-G | PI4KA        |
| CHKB      | 4.15E-16 | -0.13575 | 0.017 | 0.064 | 6.21E-12 | AC-G | CHKB         |
| EGR2.1    | 4.16E-16 | -0.23302 | 0.125 | 0.205 | 6.22E-12 | AC-G | EGR2         |
| RP3-47704 | 4.25E-16 | -0.16762 | 0     | 0.034 | 6.35E-12 | AC-G | RP3-47704.14 |
| PCYOX1L.1 | 4.34E-16 | -0.12632 | 0.024 | 0.074 | 6.48E-12 | AC-G | PCYOX1L      |
| CA4       | 4.36E-16 | 0.180845 | 0.018 | 0.003 | 6.51E-12 | AC-G | CA4          |
| CLEC18B   | 4.36E-16 | 0.139343 | 0.033 | 0.01  | 6.52E-12 | AC-G | CLEC18B      |
| HAS2-AS1  | 4.38E-16 | 0.112485 | 0.037 | 0.012 | 6.54E-12 | AC-G | HAS2-AS1     |
| RREB1.1   | 4.50E-16 | -0.15649 | 0.028 | 0.08  | 6.72E-12 | AC-G | RREB1        |
| PDE7A.1   | 4.54E-16 | -0.16198 | 0.036 | 0.091 | 6.78E-12 | AC-G | PDE7A        |
| RASSF3    | 4.56E-16 | -0.15592 | 0.008 | 0.048 | 6.82E-12 | AC-G | RASSF3       |
| BTBD7.1   | 4.57E-16 | -0.12998 | 0.078 | 0.151 | 6.83E-12 | AC-G | BTBD7        |
| NUP210    | 4.64E-16 | -0.12281 | 0.021 | 0.071 | 6.94E-12 | AC-G | NUP210       |
| B4GALT7.1 | 4.75E-16 | -0.11628 | 0.137 | 0.223 | 7.09E-12 | AC-G | B4GALT7      |
| ANGPT2    | 4.83E-16 | 0.264284 | 0.079 | 0.039 | 7.22E-12 | AC-G | ANGPT2       |
| RBM12.1   | 5.01E-16 | -0.13765 | 0.066 | 0.134 | 7.48E-12 | AC-G | RBM12        |
| EID2.1    | 5.01E-16 | -0.11755 | 0.057 | 0.121 | 7.49E-12 | AC-G | EID2         |
| NIPAL3    | 5.02E-16 | -0.16087 | 0.034 | 0.09  | 7.50E-12 | AC-G | NIPAL3       |
| CHD6.1    | 5.07E-16 | -0.13046 | 0.168 | 0.26  | 7.57E-12 | AC-G | CHD6         |
| FAM159A   | 5.12E-16 | -0.17643 | 0.01  | 0.052 | 7.65E-12 | AC-G | FAM159A      |
| GOLPH3.1  | 5.13E-16 | -0.1523  | 0.117 | 0.198 | 7.67E-12 | AC-G | GOLPH3       |
| PITPNC1.1 | 5.16E-16 | -0.10776 | 0.066 | 0.134 | 7.71E-12 | AC-G | PITPNC1      |

|            |           |           |        |        |           |      |              |
|------------|-----------|-----------|--------|--------|-----------|------|--------------|
| XIST. 1    | 5. 21E-16 | 0. 135856 | 0. 357 | 0. 248 | 7. 79E-12 | AC-G | XIST         |
| FAXC. 1    | 5. 25E-16 | -0. 15009 | 0. 038 | 0. 095 | 7. 84E-12 | AC-G | FAXC         |
| FSTL1      | 5. 30E-16 | 0. 287462 | 0. 16  | 0. 105 | 7. 92E-12 | AC-G | FSTL1        |
| OSBPL1A. 1 | 5. 44E-16 | -0. 18935 | 0. 124 | 0. 204 | 8. 13E-12 | AC-G | OSBPL1A      |
| PKMYT1     | 5. 53E-16 | -0. 11333 | 0. 008 | 0. 049 | 8. 27E-12 | AC-G | PKMYT1       |
| ABHD15. 1  | 5. 61E-16 | -0. 18566 | 0. 018 | 0. 065 | 8. 38E-12 | AC-G | ABHD15       |
| P2RY11     | 5. 75E-16 | -0. 21275 | 0. 04  | 0. 096 | 8. 59E-12 | AC-G | P2RY11       |
| NFASC      | 5. 93E-16 | 0. 219499 | 0. 152 | 0. 093 | 8. 86E-12 | AC-G | NFASC        |
| PDXK. 1    | 5. 93E-16 | -0. 12456 | 0. 206 | 0. 3   | 8. 87E-12 | AC-G | PDXK         |
| NCLN. 1    | 6. 03E-16 | -0. 14665 | 0. 1   | 0. 177 | 9. 02E-12 | AC-G | NCLN         |
| ZNF462. 1  | 6. 67E-16 | -0. 10872 | 0. 112 | 0. 189 | 9. 96E-12 | AC-G | ZNF462       |
| CTTNBP2NL  | 6. 72E-16 | -0. 15059 | 0. 092 | 0. 165 | 1. 00E-11 | AC-G | CTTNBP2NL    |
| MPHOSPH6.  | 6. 74E-16 | -0. 15396 | 0. 21  | 0. 306 | 1. 01E-11 | AC-G | MPHOSPH6     |
| STK24. 1   | 6. 93E-16 | -0. 13895 | 0. 049 | 0. 111 | 1. 04E-11 | AC-G | STK24        |
| MEIS3      | 6. 99E-16 | -0. 10066 | 0. 072 | 0. 141 | 1. 04E-11 | AC-G | MEIS3        |
| GDAP1. 1   | 7. 04E-16 | -0. 16565 | 0. 091 | 0. 164 | 1. 05E-11 | AC-G | GDAP1        |
| ST6GAL2    | 7. 45E-16 | -0. 12144 | 0. 005 | 0. 043 | 1. 11E-11 | AC-G | ST6GAL2      |
| MEST. 1    | 7. 49E-16 | -0. 19393 | 0. 31  | 0. 401 | 1. 12E-11 | AC-G | MEST         |
| KRT7       | 7. 70E-16 | 0. 306498 | 0. 07  | 0. 033 | 1. 15E-11 | AC-G | KRT7         |
| PXDC1. 1   | 8. 08E-16 | -0. 14813 | 0. 09  | 0. 164 | 1. 21E-11 | AC-G | PXDC1        |
| IBTK. 1    | 8. 27E-16 | -0. 14491 | 0. 103 | 0. 18  | 1. 24E-11 | AC-G | IBTK         |
| CHAF1A. 1  | 8. 28E-16 | -0. 12471 | 0. 04  | 0. 098 | 1. 24E-11 | AC-G | CHAF1A       |
| LAMA2      | 8. 31E-16 | 0. 174849 | 0. 046 | 0. 017 | 1. 24E-11 | AC-G | LAMA2        |
| SLC17A9    | 8. 31E-16 | -0. 13974 | 0. 001 | 0. 035 | 1. 24E-11 | AC-G | SLC17A9      |
| MAN2B1. 1  | 8. 32E-16 | -0. 15696 | 0. 025 | 0. 075 | 1. 24E-11 | AC-G | MAN2B1       |
| UBXN6. 1   | 8. 42E-16 | -0. 14663 | 0. 216 | 0. 315 | 1. 26E-11 | AC-G | UBXN6        |
| PLB1       | 8. 44E-16 | -0. 14877 | 0. 008 | 0. 049 | 1. 26E-11 | AC-G | PLB1         |
| DNAAF2. 1  | 8. 63E-16 | -0. 1207  | 0. 106 | 0. 186 | 1. 29E-11 | AC-G | DNAAF2       |
| CREBL2. 1  | 8. 95E-16 | -0. 19684 | 0. 123 | 0. 202 | 1. 34E-11 | AC-G | CREBL2       |
| SLAIN2. 1  | 8. 99E-16 | -0. 12253 | 0. 079 | 0. 15  | 1. 34E-11 | AC-G | SLAIN2       |
| INSIG2     | 9. 08E-16 | 0. 297857 | 0. 261 | 0. 191 | 1. 36E-11 | AC-G | INSIG2       |
| OSR2       | 9. 24E-16 | 0. 186014 | 0. 043 | 0. 015 | 1. 38E-11 | AC-G | OSR2         |
| SNX30. 1   | 9. 30E-16 | -0. 16512 | 0. 021 | 0. 07  | 1. 39E-11 | AC-G | SNX30        |
| GDAP1L1. 1 | 9. 34E-16 | -0. 16594 | 0. 05  | 0. 111 | 1. 40E-11 | AC-G | GDAP1L1      |
| FAM195A. 1 | 9. 54E-16 | -0. 17348 | 0. 179 | 0. 269 | 1. 43E-11 | AC-G | FAM195A      |
| JAZF1. 1   | 9. 71E-16 | -0. 16899 | 0. 061 | 0. 124 | 1. 45E-11 | AC-G | JAZF1        |
| ATG16L2. 1 | 9. 98E-16 | -0. 23086 | 0. 041 | 0. 096 | 1. 49E-11 | AC-G | ATG16L2      |
| WARS. 1    | 1. 00E-15 | 0. 303    | 0. 255 | 0. 191 | 1. 50E-11 | AC-G | WARS         |
| PNPLA6. 1  | 1. 00E-15 | -0. 1612  | 0. 102 | 0. 179 | 1. 50E-11 | AC-G | PNPLA6       |
| CEP78. 1   | 1. 01E-15 | -0. 13169 | 0. 06  | 0. 124 | 1. 51E-11 | AC-G | CEP78        |
| RP3-460G2  | 1. 01E-15 | 0. 364959 | 0. 098 | 0. 052 | 1. 51E-11 | AC-G | RP3-460G2. 2 |
| MTMR10     | 1. 03E-15 | -0. 18334 | 0. 025 | 0. 074 | 1. 54E-11 | AC-G | MTMR10       |
| TAZ. 1     | 1. 03E-15 | -0. 18786 | 0. 077 | 0. 145 | 1. 54E-11 | AC-G | TAZ          |
| FDFT1. 1   | 1. 04E-15 | -0. 12863 | 0. 223 | 0. 322 | 1. 56E-11 | AC-G | FDFT1        |
| SIAH2. 1   | 1. 05E-15 | -0. 18469 | 0. 141 | 0. 224 | 1. 57E-11 | AC-G | SIAH2        |
| NRP2. 1    | 1. 06E-15 | -0. 11747 | 0. 147 | 0. 236 | 1. 58E-11 | AC-G | NRP2         |
| AP3D1. 1   | 1. 06E-15 | -0. 16337 | 0. 223 | 0. 325 | 1. 58E-11 | AC-G | AP3D1        |
| MDM4. 1    | 1. 06E-15 | -0. 18956 | 0. 171 | 0. 261 | 1. 59E-11 | AC-G | MDM4         |
| MRFAP1. 1  | 1. 07E-15 | 0. 225383 | 0. 681 | 0. 669 | 1. 60E-11 | AC-G | MRFAP1       |
| DNM3. 1    | 1. 07E-15 | -0. 16215 | 0. 041 | 0. 097 | 1. 61E-11 | AC-G | DNM3         |
| DPP8. 1    | 1. 11E-15 | -0. 14196 | 0. 095 | 0. 17  | 1. 66E-11 | AC-G | DPP8         |



|           |          |          |       |       |          |      |           |
|-----------|----------|----------|-------|-------|----------|------|-----------|
| C9orf69.1 | 1.11E-15 | -0.11976 | 0.044 | 0.103 | 1.66E-11 | AC-G | C9orf69   |
| FANCI.1   | 1.12E-15 | -0.11174 | 0.011 | 0.053 | 1.68E-11 | AC-G | FANCI     |
| ZNF90     | 1.13E-15 | 0.32233  | 0.44  | 0.368 | 1.69E-11 | AC-G | ZNF90     |
| CNDP1     | 1.15E-15 | -0.29043 | 0.004 | 0.04  | 1.72E-11 | AC-G | CNDP1     |
| RNASE3    | 1.17E-15 | -0.20575 | 0.003 | 0.039 | 1.74E-11 | AC-G | RNASE3    |
| FSTL3     | 1.17E-15 | 0.154868 | 0.08  | 0.039 | 1.75E-11 | AC-G | FSTL3     |
| FCH01     | 1.21E-15 | -0.15858 | 0.007 | 0.045 | 1.80E-11 | AC-G | FCH01     |
| AKR7A2.1  | 1.22E-15 | -0.17013 | 0.229 | 0.331 | 1.82E-11 | AC-G | AKR7A2    |
| SLC04A1   | 1.30E-15 | 0.132334 | 0.066 | 0.029 | 1.94E-11 | AC-G | SLC04A1   |
| FER       | 1.30E-15 | -0.12648 | 0.044 | 0.103 | 1.95E-11 | AC-G | FER       |
| C19orf43. | 1.31E-15 | -0.10462 | 0.566 | 0.693 | 1.96E-11 | AC-G | C19orf43  |
| MIIP      | 1.32E-15 | -0.16174 | 0.126 | 0.211 | 1.97E-11 | AC-G | MIIP      |
| C19orf24. | 1.32E-15 | -0.1299  | 0.278 | 0.382 | 1.98E-11 | AC-G | C19orf24  |
| MTHFR     | 1.33E-15 | -0.16742 | 0.033 | 0.087 | 1.99E-11 | AC-G | MTHFR     |
| ARHGAP11A | 1.38E-15 | -0.10737 | 0.006 | 0.045 | 2.06E-11 | AC-G | ARHGAP11A |
| CCSER2.1  | 1.38E-15 | -0.13685 | 0.155 | 0.243 | 2.06E-11 | AC-G | CCSER2    |
| EIF2AK2.1 | 1.39E-15 | -0.1538  | 0.221 | 0.318 | 2.07E-11 | AC-G | EIF2AK2   |
| CCDC74A.1 | 1.40E-15 | 0.142646 | 0.084 | 0.042 | 2.09E-11 | AC-G | CCDC74A   |
| SPATS2L.1 | 1.43E-15 | -0.16605 | 0.253 | 0.347 | 2.13E-11 | AC-G | SPATS2L   |
| NNT       | 1.43E-15 | -0.15581 | 0.078 | 0.148 | 2.14E-11 | AC-G | NNT       |
| MCUR1.1   | 1.49E-15 | -0.15658 | 0.185 | 0.277 | 2.23E-11 | AC-G | MCUR1     |
| ABCA2.1   | 1.50E-15 | -0.28511 | 0.047 | 0.105 | 2.25E-11 | AC-G | ABCA2     |
| ABHD6     | 1.56E-15 | -0.13254 | 0.051 | 0.112 | 2.33E-11 | AC-G | ABHD6     |
| GRAMD4.1  | 1.57E-15 | -0.15481 | 0.021 | 0.068 | 2.34E-11 | AC-G | GRAMD4    |
| LYVE1     | 1.59E-15 | -0.31657 | 0.006 | 0.044 | 2.37E-11 | AC-G | LYVE1     |
| PGM3.1    | 1.60E-15 | 0.2564   | 0.226 | 0.164 | 2.38E-11 | AC-G | PGM3      |
| TMOD1     | 1.60E-15 | 0.20872  | 0.214 | 0.146 | 2.39E-11 | AC-G | TMOD1     |
| SCAF11.1  | 1.61E-15 | -0.13896 | 0.303 | 0.415 | 2.41E-11 | AC-G | SCAF11    |
| DUSP10    | 1.62E-15 | -0.18554 | 0.114 | 0.192 | 2.42E-11 | AC-G | DUSP10    |
| HMMR      | 1.66E-15 | -0.12589 | 0.007 | 0.046 | 2.48E-11 | AC-G | HMMR      |
| QSOX1.1   | 1.68E-15 | -0.17604 | 0.163 | 0.25  | 2.51E-11 | AC-G | QSOX1     |
| MYRF      | 1.69E-15 | -0.20706 | 0.002 | 0.036 | 2.53E-11 | AC-G | MYRF      |
| GPD1.1    | 1.72E-15 | -0.16998 | 0.013 | 0.055 | 2.57E-11 | AC-G | GPD1      |
| FAM98B.1  | 1.73E-15 | -0.1114  | 0.045 | 0.105 | 2.58E-11 | AC-G | FAM98B    |
| SOX9.1    | 1.77E-15 | -0.2377  | 0.207 | 0.284 | 2.65E-11 | AC-G | SOX9      |
| GBA2.1    | 1.84E-15 | -0.1289  | 0.039 | 0.095 | 2.74E-11 | AC-G | GBA2      |
| PFKL.1    | 1.84E-15 | -0.16399 | 0.277 | 0.38  | 2.75E-11 | AC-G | PFKL      |
| KIAA0232. | 1.85E-15 | -0.15338 | 0.091 | 0.163 | 2.76E-11 | AC-G | KIAA0232  |
| CDC45     | 1.85E-15 | -0.10489 | 0.005 | 0.041 | 2.76E-11 | AC-G | CDC45     |
| GANAB.1   | 1.87E-15 | -0.14084 | 0.192 | 0.288 | 2.80E-11 | AC-G | GANAB     |
| SAPCD2.1  | 1.90E-15 | -0.12704 | 0.018 | 0.064 | 2.83E-11 | AC-G | SAPCD2    |
| SPNS1.1   | 1.92E-15 | -0.14373 | 0.209 | 0.306 | 2.86E-11 | AC-G | SPNS1     |
| FLOT1.1   | 1.92E-15 | -0.10799 | 0.398 | 0.523 | 2.87E-11 | AC-G | FLOT1     |
| ZFHX4.1   | 1.99E-15 | -0.11665 | 0.09  | 0.164 | 2.97E-11 | AC-G | ZFHX4     |
| RALGDS.1  | 2.02E-15 | -0.23514 | 0.095 | 0.163 | 3.02E-11 | AC-G | RALGDS    |
| SEPHS1.1  | 2.10E-15 | -0.10606 | 0.059 | 0.123 | 3.13E-11 | AC-G | SEPHS1    |
| PDPK1.1   | 2.10E-15 | -0.15818 | 0.121 | 0.2   | 3.14E-11 | AC-G | PDPK1     |
| FAM72A    | 2.10E-15 | -0.15956 | 0.008 | 0.048 | 3.14E-11 | AC-G | FAM72A    |
| RHPN2     | 2.13E-15 | 0.192582 | 0.069 | 0.032 | 3.19E-11 | AC-G | RHPN2     |
| PVRL1.1   | 2.16E-15 | -0.1004  | 0.021 | 0.069 | 3.22E-11 | AC-G | PVRL1     |
| DOPEY2.1  | 2.33E-15 | -0.14769 | 0.026 | 0.076 | 3.49E-11 | AC-G | DOPEY2    |

|            |          |          |       |       |          |      |               |
|------------|----------|----------|-------|-------|----------|------|---------------|
| PKIA.1     | 2.38E-15 | -0.19864 | 0.046 | 0.102 | 3.55E-11 | AC-G | PKIA          |
| APAF1.1    | 2.38E-15 | -0.14954 | 0.025 | 0.074 | 3.56E-11 | AC-G | APAF1         |
| PRKCDBP    | 2.39E-15 | 0.129958 | 0.061 | 0.027 | 3.58E-11 | AC-G | PRKCDBP       |
| DPEP2      | 2.41E-15 | -0.16227 | 0.004 | 0.039 | 3.61E-11 | AC-G | DPEP2         |
| NUCB1.1    | 2.42E-15 | -0.13971 | 0.349 | 0.464 | 3.62E-11 | AC-G | NUCB1         |
| DMXL2.1    | 2.44E-15 | -0.16043 | 0.036 | 0.09  | 3.64E-11 | AC-G | DMXL2         |
| TNPO1.1    | 2.46E-15 | -0.13554 | 0.198 | 0.293 | 3.67E-11 | AC-G | TNPO1         |
| SYNE2.1    | 2.47E-15 | -0.11603 | 0.109 | 0.186 | 3.69E-11 | AC-G | SYNE2         |
| SLC3A2.1   | 2.52E-15 | 0.294535 | 0.583 | 0.588 | 3.76E-11 | AC-G | SLC3A2        |
| CNOT6.1    | 2.52E-15 | -0.11435 | 0.03  | 0.082 | 3.77E-11 | AC-G | CNOT6         |
| ABHD3.1    | 2.55E-15 | -0.1827  | 0.118 | 0.195 | 3.81E-11 | AC-G | ABHD3         |
| HSCB.1     | 2.59E-15 | -0.10939 | 0.107 | 0.184 | 3.87E-11 | AC-G | HSCB          |
| RP11-488C  | 2.60E-15 | -0.13323 | 0.026 | 0.075 | 3.88E-11 | AC-G | RP11-488C13.5 |
| FLOT2.1    | 2.71E-15 | -0.12092 | 0.117 | 0.199 | 4.05E-11 | AC-G | FLOT2         |
| RASA1.1    | 2.74E-15 | -0.12504 | 0.054 | 0.116 | 4.10E-11 | AC-G | RASA1         |
| TRAPPC2P1  | 2.75E-15 | 0.334438 | 0.28  | 0.213 | 4.11E-11 | AC-G | TRAPPC2P1     |
| SMCHD1.1   | 2.75E-15 | -0.16838 | 0.121 | 0.2   | 4.11E-11 | AC-G | SMCHD1        |
| KCNN3      | 2.75E-15 | 0.135668 | 0.06  | 0.026 | 4.11E-11 | AC-G | KCNN3         |
| ARHGEF9.1  | 2.78E-15 | -0.12886 | 0.065 | 0.13  | 4.15E-11 | AC-G | ARHGEF9       |
| NEU4.1     | 2.79E-15 | -0.22257 | 0.024 | 0.071 | 4.17E-11 | AC-G | NEU4          |
| ZMYND12    | 2.88E-15 | 0.120223 | 0.027 | 0.007 | 4.30E-11 | AC-G | ZMYND12       |
| PCNX.1     | 3.00E-15 | -0.1436  | 0.045 | 0.103 | 4.48E-11 | AC-G | PCNX          |
| PHF12.1    | 3.07E-15 | -0.11948 | 0.058 | 0.121 | 4.59E-11 | AC-G | PHF12         |
| TCF3.1     | 3.13E-15 | -0.11104 | 0.073 | 0.14  | 4.68E-11 | AC-G | TCF3          |
| RGL1.1     | 3.17E-15 | -0.13242 | 0.039 | 0.095 | 4.74E-11 | AC-G | RGL1          |
| NEDD4L.1   | 3.24E-15 | -0.11101 | 0.06  | 0.123 | 4.84E-11 | AC-G | NEDD4L        |
| MLLT4.1    | 3.27E-15 | -0.17435 | 0.101 | 0.174 | 4.88E-11 | AC-G | MLLT4         |
| BUB1       | 3.34E-15 | -0.12043 | 0.008 | 0.046 | 4.99E-11 | AC-G | BUB1          |
| C4orf3.1   | 3.57E-15 | 0.278617 | 0.647 | 0.646 | 5.33E-11 | AC-G | C4orf3        |
| MND1       | 3.62E-15 | -0.11854 | 0.01  | 0.051 | 5.41E-11 | AC-G | MND1          |
| ZNF738.1   | 3.63E-15 | -0.10889 | 0.084 | 0.156 | 5.42E-11 | AC-G | ZNF738        |
| IMPDH1.1   | 3.67E-15 | -0.14318 | 0.096 | 0.169 | 5.48E-11 | AC-G | IMPDH1        |
| DNASE1L1.1 | 3.68E-15 | -0.1763  | 0.03  | 0.081 | 5.49E-11 | AC-G | DNASE1L1      |
| CADM2      | 3.68E-15 | -0.21467 | 0.125 | 0.201 | 5.50E-11 | AC-G | CADM2         |
| GNG4.1     | 3.69E-15 | -0.13109 | 0.062 | 0.126 | 5.51E-11 | AC-G | GNG4          |
| BTBD17.1   | 3.69E-15 | -0.15972 | 0.016 | 0.059 | 5.52E-11 | AC-G | BTBD17        |
| GLIPR1L2   | 3.79E-15 | 0.136475 | 0.069 | 0.032 | 5.67E-11 | AC-G | GLIPR1L2      |
| ACSL4.1    | 3.82E-15 | -0.178   | 0.039 | 0.092 | 5.71E-11 | AC-G | ACSL4         |
| CCNDBP1.1  | 3.85E-15 | -0.20201 | 0.137 | 0.218 | 5.76E-11 | AC-G | CCNDBP1       |
| WDR78      | 3.86E-15 | 0.122908 | 0.042 | 0.015 | 5.76E-11 | AC-G | WDR78         |
| ZC3H18.1   | 3.92E-15 | -0.11718 | 0.096 | 0.169 | 5.86E-11 | AC-G | ZC3H18        |
| ITGA4      | 3.96E-15 | -0.15582 | 0.009 | 0.049 | 5.91E-11 | AC-G | ITGA4         |
| PRR4.1     | 3.97E-15 | -0.12773 | 0.146 | 0.23  | 5.93E-11 | AC-G | PRR4          |
| USP9X.1    | 4.05E-15 | -0.14699 | 0.133 | 0.215 | 6.05E-11 | AC-G | USP9X         |
| MOG        | 4.06E-15 | -0.25614 | 0.003 | 0.037 | 6.07E-11 | AC-G | MOG           |
| CKAP5.1    | 4.18E-15 | -0.11283 | 0.095 | 0.168 | 6.25E-11 | AC-G | CKAP5         |
| PEAK1.1    | 4.24E-15 | -0.11372 | 0.027 | 0.077 | 6.34E-11 | AC-G | PEAK1         |
| FAM127B.1  | 4.44E-15 | 0.314073 | 0.354 | 0.29  | 6.64E-11 | AC-G | FAM127B       |
| MARCH6.1   | 4.47E-15 | -0.10157 | 0.271 | 0.374 | 6.68E-11 | AC-G | 6-Mar         |
| HMG20B.1   | 4.51E-15 | -0.16418 | 0.254 | 0.352 | 6.75E-11 | AC-G | HMG20B        |
| PPP1R14A   | 4.69E-15 | -0.34891 | 0.057 | 0.117 | 7.00E-11 | AC-G | PPP1R14A      |

|            |          |          |       |       |          |      |            |
|------------|----------|----------|-------|-------|----------|------|------------|
| LETM1.1    | 4.77E-15 | -0.12333 | 0.12  | 0.198 | 7.12E-11 | AC-G | LETM1      |
| TLE3       | 4.80E-15 | -0.23191 | 0.083 | 0.148 | 7.18E-11 | AC-G | TLE3       |
| KCNQ3      | 4.82E-15 | -0.17189 | 0.009 | 0.048 | 7.21E-11 | AC-G | KCNQ3      |
| BANF1.1    | 4.83E-15 | 0.250662 | 0.677 | 0.659 | 7.22E-11 | AC-G | BANF1      |
| LZTS2.1    | 4.85E-15 | -0.13015 | 0.035 | 0.088 | 7.25E-11 | AC-G | LZTS2      |
| PAM.1      | 4.86E-15 | 0.293967 | 0.214 | 0.155 | 7.26E-11 | AC-G | PAM        |
| VRK1       | 4.86E-15 | -0.13662 | 0.051 | 0.111 | 7.26E-11 | AC-G | VRK1       |
| SSPN.1     | 4.88E-15 | 0.217182 | 0.154 | 0.096 | 7.29E-11 | AC-G | SSPN       |
| MYT1       | 5.09E-15 | -0.13123 | 0.007 | 0.045 | 7.61E-11 | AC-G | MYT1       |
| DCUN1D1.1  | 5.10E-15 | -0.13976 | 0.096 | 0.167 | 7.62E-11 | AC-G | DCUN1D1    |
| SRSF4.1    | 5.12E-15 | -0.12535 | 0.27  | 0.377 | 7.66E-11 | AC-G | SRSF4      |
| EGFR.1     | 5.20E-15 | -0.23236 | 0.23  | 0.314 | 7.77E-11 | AC-G | EGFR       |
| TBC1D2B.1  | 5.24E-15 | -0.16721 | 0.016 | 0.059 | 7.83E-11 | AC-G | TBC1D2B    |
| TLR5       | 5.28E-15 | -0.20609 | 0.011 | 0.052 | 7.90E-11 | AC-G | TLR5       |
| KIF23      | 5.46E-15 | -0.11379 | 0.008 | 0.046 | 8.15E-11 | AC-G | KIF23      |
| RMI2       | 5.59E-15 | -0.11211 | 0.007 | 0.045 | 8.35E-11 | AC-G | RMI2       |
| NCOA1.1    | 5.70E-15 | -0.11035 | 0.099 | 0.173 | 8.52E-11 | AC-G | NCOA1      |
| SYT1.1     | 5.81E-15 | -0.24623 | 0.053 | 0.109 | 8.68E-11 | AC-G | SYT1       |
| RPUSD1.1   | 5.81E-15 | -0.1489  | 0.078 | 0.145 | 8.69E-11 | AC-G | RPUSD1     |
| MAPK9.1    | 5.94E-15 | -0.12653 | 0.037 | 0.091 | 8.87E-11 | AC-G | MAPK9      |
| TTL7.1     | 6.02E-15 | -0.22925 | 0.167 | 0.251 | 8.99E-11 | AC-G | TTL7       |
| BEST3.1    | 6.03E-15 | -0.19752 | 0.041 | 0.096 | 9.02E-11 | AC-G | BEST3      |
| TTYH1.1    | 6.09E-15 | -0.24871 | 0.196 | 0.282 | 9.10E-11 | AC-G | TTYH1      |
| CSNK1G3.1  | 6.11E-15 | -0.13539 | 0.092 | 0.165 | 9.12E-11 | AC-G | CSNK1G3    |
| FAM20C.1   | 6.12E-15 | 0.333509 | 0.274 | 0.213 | 9.15E-11 | AC-G | FAM20C     |
| MED1.1     | 6.16E-15 | -0.12216 | 0.065 | 0.129 | 9.21E-11 | AC-G | MED1       |
| ALDH9A1.1  | 6.20E-15 | 0.278155 | 0.386 | 0.329 | 9.27E-11 | AC-G | ALDH9A1    |
| TRMT11     | 6.21E-15 | 0.233268 | 0.165 | 0.107 | 9.28E-11 | AC-G | TRMT11     |
| PRPF4B.1   | 6.22E-15 | -0.1064  | 0.195 | 0.289 | 9.29E-11 | AC-G | PRPF4B     |
| FCHSD2.1   | 6.30E-15 | -0.18802 | 0.037 | 0.09  | 9.41E-11 | AC-G | FCHSD2     |
| UBE2L6.1   | 6.32E-15 | 0.410907 | 0.497 | 0.469 | 9.44E-11 | AC-G | UBE2L6     |
| APOBEC3C   | 6.33E-15 | -0.14226 | 0.074 | 0.139 | 9.46E-11 | AC-G | APOBEC3C   |
| FKBP2.1    | 6.37E-15 | 0.303229 | 0.599 | 0.588 | 9.51E-11 | AC-G | FKBP2      |
| C21orf62   | 6.52E-15 | 0.34246  | 0.209 | 0.148 | 9.74E-11 | AC-G | C21orf62   |
| AC015987.1 | 6.74E-15 | 0.102291 | 0.023 | 0.005 | 1.01E-10 | AC-G | AC015987.1 |
| GAS6.1     | 6.89E-15 | -0.28865 | 0.146 | 0.216 | 1.03E-10 | AC-G | GAS6       |
| CMPK2.1    | 6.89E-15 | -0.17865 | 0.019 | 0.064 | 1.03E-10 | AC-G | CMPK2      |
| POLG.1     | 7.09E-15 | -0.1528  | 0.048 | 0.106 | 1.06E-10 | AC-G | POLG       |
| AGRN       | 7.20E-15 | -0.11605 | 0.046 | 0.104 | 1.08E-10 | AC-G | AGRN       |
| IRF5.1     | 7.25E-15 | -0.21843 | 0.021 | 0.066 | 1.08E-10 | AC-G | IRF5       |
| BRF1.1     | 7.25E-15 | -0.12621 | 0.053 | 0.113 | 1.08E-10 | AC-G | BRF1       |
| GPR132     | 7.44E-15 | -0.1596  | 0.003 | 0.036 | 1.11E-10 | AC-G | GPR132     |
| YIPF2      | 7.62E-15 | 0.348289 | 0.167 | 0.109 | 1.14E-10 | AC-G | YIPF2      |
| STARD7.1   | 7.65E-15 | -0.17922 | 0.236 | 0.332 | 1.14E-10 | AC-G | STARD7     |
| IRGQ       | 7.81E-15 | -0.12595 | 0.041 | 0.096 | 1.17E-10 | AC-G | IRGQ       |
| HPRT1.1    | 7.98E-15 | -0.22008 | 0.163 | 0.244 | 1.19E-10 | AC-G | HPRT1      |
| CSRNP1.1   | 8.07E-15 | -0.28701 | 0.133 | 0.202 | 1.21E-10 | AC-G | CSRNP1     |
| RANGAP1.1  | 8.07E-15 | -0.13984 | 0.053 | 0.112 | 1.21E-10 | AC-G | RANGAP1    |
| VEZT.1     | 8.16E-15 | -0.12532 | 0.155 | 0.241 | 1.22E-10 | AC-G | VEZT       |
| UBE2G1.1   | 8.25E-15 | -0.12644 | 0.181 | 0.273 | 1.23E-10 | AC-G | UBE2G1     |
| CCER2.1    | 8.32E-15 | -0.18033 | 0.018 | 0.062 | 1.24E-10 | AC-G | CCER2      |

|           |          |          |       |       |          |      |               |
|-----------|----------|----------|-------|-------|----------|------|---------------|
| MTMR9.1   | 8.39E-15 | -0.13566 | 0.124 | 0.202 | 1.25E-10 | AC-G | MTMR9         |
| ZNF131.1  | 8.69E-15 | -0.15148 | 0.161 | 0.246 | 1.30E-10 | AC-G | ZNF131        |
| PTDSS2.1  | 8.92E-15 | -0.13339 | 0.092 | 0.164 | 1.33E-10 | AC-G | PTDSS2        |
| HEXB.1    | 9.16E-15 | -0.18936 | 0.319 | 0.422 | 1.37E-10 | AC-G | HEXB          |
| ASF1A.1   | 9.35E-15 | -0.13197 | 0.162 | 0.248 | 1.40E-10 | AC-G | ASF1A         |
| CDT1      | 9.36E-15 | -0.13071 | 0.022 | 0.068 | 1.40E-10 | AC-G | CDT1          |
| MELK      | 9.61E-15 | -0.10537 | 0.012 | 0.053 | 1.44E-10 | AC-G | MELK          |
| CUL2      | 9.65E-15 | -0.15988 | 0.068 | 0.132 | 1.44E-10 | AC-G | CUL2          |
| PSMA1.1   | 9.76E-15 | 0.28921  | 0.627 | 0.608 | 1.46E-10 | AC-G | PSMA1         |
| SMPDL3A   | 9.79E-15 | -0.2097  | 0.072 | 0.135 | 1.46E-10 | AC-G | SMPDL3A       |
| FCHO2.1   | 9.88E-15 | -0.16261 | 0.032 | 0.082 | 1.48E-10 | AC-G | FCHO2         |
| RP11-452F | 1.01E-14 | -0.20251 | 0.073 | 0.137 | 1.51E-10 | AC-G | RP11-452F19.3 |
| EIF4A2.1  | 1.02E-14 | 0.191918 | 0.704 | 0.722 | 1.52E-10 | AC-G | EIF4A2        |
| RP5-1177M | 1.02E-14 | -0.17204 | 0.011 | 0.051 | 1.53E-10 | AC-G | RP5-1177M21.1 |
| SP110.1   | 1.04E-14 | -0.23917 | 0.135 | 0.21  | 1.55E-10 | AC-G | SP110         |
| BEX2.1    | 1.05E-14 | 0.224001 | 0.329 | 0.243 | 1.57E-10 | AC-G | BEX2          |
| PDE9A     | 1.05E-14 | -0.12209 | 0.029 | 0.079 | 1.57E-10 | AC-G | PDE9A         |
| ESCO2     | 1.07E-14 | -0.10042 | 0.005 | 0.04  | 1.61E-10 | AC-G | ESCO2         |
| NDUFAF2.1 | 1.09E-14 | 0.294769 | 0.324 | 0.262 | 1.62E-10 | AC-G | NDUFAF2       |
| PDE3B     | 1.11E-14 | -0.14151 | 0.008 | 0.045 | 1.65E-10 | AC-G | PDE3B         |
| CYB561A3. | 1.11E-14 | -0.18263 | 0.093 | 0.162 | 1.66E-10 | AC-G | CYB561A3      |
| FAM134A.1 | 1.12E-14 | -0.16747 | 0.22  | 0.313 | 1.68E-10 | AC-G | FAM134A       |
| CRIP1     | 1.14E-14 | -0.21369 | 0.008 | 0.045 | 1.70E-10 | AC-G | CRIP1         |
| MB21D2    | 1.20E-14 | -0.15624 | 0.017 | 0.061 | 1.79E-10 | AC-G | MB21D2        |
| ZNF467    | 1.20E-14 | -0.13636 | 0.005 | 0.039 | 1.79E-10 | AC-G | ZNF467        |
| PAOX.1    | 1.22E-14 | -0.12419 | 0.017 | 0.06  | 1.82E-10 | AC-G | PAOX          |
| ANKS1B.1  | 1.22E-14 | -0.22752 | 0.059 | 0.117 | 1.82E-10 | AC-G | ANKS1B        |
| DICER1.1  | 1.23E-14 | -0.18048 | 0.112 | 0.187 | 1.84E-10 | AC-G | DICER1        |
| PPP2R1A.1 | 1.24E-14 | -0.12099 | 0.418 | 0.534 | 1.86E-10 | AC-G | PPP2R1A       |
| DOCK11.1  | 1.25E-14 | -0.18001 | 0.018 | 0.061 | 1.87E-10 | AC-G | DOCK11        |
| ABCD1.1   | 1.26E-14 | -0.13293 | 0.013 | 0.053 | 1.88E-10 | AC-G | ABCD1         |
| GPR161.1  | 1.27E-14 | -0.13475 | 0.039 | 0.092 | 1.90E-10 | AC-G | GPR161        |
| PFN1.1    | 1.28E-14 | -0.131   | 0.662 | 0.837 | 1.91E-10 | AC-G | PFN1          |
| ATMIN.1   | 1.28E-14 | -0.11616 | 0.063 | 0.125 | 1.92E-10 | AC-G | ATMIN         |
| ZNF326.1  | 1.29E-14 | -0.10878 | 0.172 | 0.262 | 1.93E-10 | AC-G | ZNF326        |
| BRWD1.1   | 1.30E-14 | -0.17679 | 0.172 | 0.255 | 1.94E-10 | AC-G | BRWD1         |
| COL9A2.1  | 1.31E-14 | -0.15718 | 0.043 | 0.098 | 1.96E-10 | AC-G | COL9A2        |
| GTF2E2.1  | 1.31E-14 | -0.13212 | 0.122 | 0.201 | 1.96E-10 | AC-G | GTF2E2        |
| ADD1      | 1.34E-14 | -0.16413 | 0.228 | 0.323 | 2.00E-10 | AC-G | ADD1          |
| PRKAG2-AS | 1.35E-14 | -0.27803 | 0.073 | 0.135 | 2.02E-10 | AC-G | PRKAG2-AS1    |
| GCLC.1    | 1.36E-14 | -0.1551  | 0.05  | 0.106 | 2.03E-10 | AC-G | GCLC          |
| NUAK1.1   | 1.36E-14 | -0.16128 | 0.03  | 0.079 | 2.03E-10 | AC-G | NUAK1         |
| UBE2J1.1  | 1.36E-14 | -0.15658 | 0.205 | 0.295 | 2.04E-10 | AC-G | UBE2J1        |
| ANK3.1    | 1.44E-14 | -0.1565  | 0.022 | 0.067 | 2.15E-10 | AC-G | ANK3          |
| EDIL3     | 1.46E-14 | -0.22942 | 0.004 | 0.037 | 2.17E-10 | AC-G | EDIL3         |
| WDFY3.1   | 1.46E-14 | -0.12607 | 0.042 | 0.096 | 2.18E-10 | AC-G | WDFY3         |
| EFS       | 1.47E-14 | -0.10557 | 0.055 | 0.116 | 2.19E-10 | AC-G | EFS           |
| MASTL     | 1.49E-14 | -0.10237 | 0.007 | 0.043 | 2.23E-10 | AC-G | MASTL         |
| SLC8B1.1  | 1.53E-14 | -0.17159 | 0.05  | 0.107 | 2.28E-10 | AC-G | SLC8B1        |
| SMC1A.1   | 1.54E-14 | -0.18763 | 0.15  | 0.23  | 2.31E-10 | AC-G | SMC1A         |
| RPP38     | 1.55E-14 | -0.11247 | 0.077 | 0.143 | 2.31E-10 | AC-G | RPP38         |

|             |           |           |        |        |           |      |              |
|-------------|-----------|-----------|--------|--------|-----------|------|--------------|
| RAN. 1      | 1. 58E-14 | 0. 199542 | 0. 74  | 0. 76  | 2. 36E-10 | AC-G | RAN          |
| UBA7. 1     | 1. 59E-14 | -0. 25197 | 0. 039 | 0. 09  | 2. 38E-10 | AC-G | UBA7         |
| IPO5. 1     | 1. 61E-14 | -0. 1114  | 0. 146 | 0. 229 | 2. 41E-10 | AC-G | IPO5         |
| HECA. 1     | 1. 62E-14 | -0. 15695 | 0. 03  | 0. 079 | 2. 43E-10 | AC-G | HECA         |
| AKAP11. 1   | 1. 63E-14 | -0. 13741 | 0. 091 | 0. 161 | 2. 43E-10 | AC-G | AKAP11       |
| DUSP26. 1   | 1. 67E-14 | -0. 20396 | 0. 042 | 0. 096 | 2. 49E-10 | AC-G | DUSP26       |
| ITPRIPL2. 1 | 1. 72E-14 | -0. 14806 | 0. 032 | 0. 081 | 2. 57E-10 | AC-G | ITPRIPL2     |
| RP3-522D1   | 1. 73E-14 | -0. 14525 | 0. 007 | 0. 043 | 2. 59E-10 | AC-G | RP3-522D1. 1 |
| HHLA3. 1    | 1. 75E-14 | 0. 328422 | 0. 189 | 0. 13  | 2. 61E-10 | AC-G | HHLA3        |
| BRINP2. 1   | 1. 80E-14 | -0. 10749 | 0. 031 | 0. 081 | 2. 69E-10 | AC-G | BRINP2       |
| TECPR1. 1   | 1. 81E-14 | -0. 13152 | 0. 067 | 0. 13  | 2. 71E-10 | AC-G | TECPR1       |
| ZNF302. 1   | 1. 82E-14 | 0. 339576 | 0. 369 | 0. 304 | 2. 72E-10 | AC-G | ZNF302       |
| AKNA        | 1. 82E-14 | -0. 24055 | 0. 031 | 0. 08  | 2. 72E-10 | AC-G | AKNA         |
| NKD1        | 1. 84E-14 | -0. 11394 | 0. 005 | 0. 04  | 2. 75E-10 | AC-G | NKD1         |
| POLDIP3     | 1. 85E-14 | -0. 11296 | 0. 12  | 0. 199 | 2. 77E-10 | AC-G | POLDIP3      |
| SPINT1      | 1. 88E-14 | -0. 14034 | 0. 005 | 0. 039 | 2. 80E-10 | AC-G | SPINT1       |
| CDPF1. 1    | 1. 89E-14 | -0. 10192 | 0. 033 | 0. 084 | 2. 82E-10 | AC-G | CDPF1        |
| KAT6B. 1    | 1. 90E-14 | -0. 12928 | 0. 068 | 0. 132 | 2. 83E-10 | AC-G | KAT6B        |
| ZNF267. 1   | 1. 92E-14 | -0. 18831 | 0. 078 | 0. 143 | 2. 87E-10 | AC-G | ZNF267       |
| FKBP15. 1   | 1. 94E-14 | -0. 1737  | 0. 083 | 0. 149 | 2. 89E-10 | AC-G | FKBP15       |
| DSC2        | 1. 94E-14 | -0. 12552 | 0. 004 | 0. 038 | 2. 90E-10 | AC-G | DSC2         |
| CDCA8       | 1. 95E-14 | -0. 13666 | 0. 008 | 0. 045 | 2. 91E-10 | AC-G | CDCA8        |
| UBN1. 1     | 1. 98E-14 | -0. 14388 | 0. 106 | 0. 178 | 2. 96E-10 | AC-G | UBN1         |
| EIF2AK4. 1  | 2. 02E-14 | -0. 14032 | 0. 118 | 0. 193 | 3. 02E-10 | AC-G | EIF2AK4      |
| CA10        | 2. 03E-14 | -0. 11037 | 0. 004 | 0. 037 | 3. 03E-10 | AC-G | CA10         |
| GPX4. 1     | 2. 04E-14 | 0. 235019 | 0. 803 | 0. 85  | 3. 05E-10 | AC-G | GPX4         |
| CENPA. 1    | 2. 06E-14 | -0. 15171 | 0. 015 | 0. 056 | 3. 07E-10 | AC-G | CENPA        |
| IRF7. 1     | 2. 16E-14 | -0. 18667 | 0. 102 | 0. 172 | 3. 23E-10 | AC-G | IRF7         |
| TAPBP. 1    | 2. 24E-14 | -0. 14683 | 0. 258 | 0. 359 | 3. 34E-10 | AC-G | TAPBP        |
| DNAJA4. 1   | 2. 24E-14 | -0. 16399 | 0. 024 | 0. 069 | 3. 35E-10 | AC-G | DNAJA4       |
| RIC3        | 2. 30E-14 | 0. 319712 | 0. 288 | 0. 22  | 3. 43E-10 | AC-G | RIC3         |
| EHD4. 1     | 2. 32E-14 | -0. 19146 | 0. 046 | 0. 1   | 3. 47E-10 | AC-G | EHD4         |
| XKR4        | 2. 33E-14 | -0. 12288 | 0. 02  | 0. 064 | 3. 48E-10 | AC-G | XKR4         |
| FAR2        | 2. 33E-14 | -0. 14004 | 0. 019 | 0. 062 | 3. 48E-10 | AC-G | FAR2         |
| ARHGAP11B   | 2. 34E-14 | -0. 10469 | 0. 008 | 0. 044 | 3. 49E-10 | AC-G | ARHGAP11B    |
| TBC1D4. 1   | 2. 40E-14 | -0. 16695 | 0. 014 | 0. 055 | 3. 58E-10 | AC-G | TBC1D4       |
| RQCD1       | 2. 40E-14 | -0. 11639 | 0. 122 | 0. 2   | 3. 59E-10 | AC-G | RQCD1        |
| YLPM1. 1    | 2. 43E-14 | -0. 11003 | 0. 063 | 0. 125 | 3. 63E-10 | AC-G | YLPM1        |
| VEGFB       | 2. 49E-14 | -0. 15352 | 0. 087 | 0. 156 | 3. 72E-10 | AC-G | VEGFB        |
| TOX3. 1     | 2. 53E-14 | -0. 18617 | 0. 028 | 0. 075 | 3. 78E-10 | AC-G | TOX3         |
| CAMK2N1. 1  | 2. 64E-14 | -0. 21093 | 0. 248 | 0. 33  | 3. 95E-10 | AC-G | CAMK2N1      |
| A2M. 1      | 2. 64E-14 | 0. 458795 | 0. 479 | 0. 461 | 3. 95E-10 | AC-G | A2M          |
| MLLT6. 1    | 2. 68E-14 | -0. 12691 | 0. 076 | 0. 142 | 4. 00E-10 | AC-G | MLLT6        |
| ZNF672. 1   | 2. 70E-14 | -0. 14888 | 0. 084 | 0. 151 | 4. 03E-10 | AC-G | ZNF672       |
| PAQR8. 1    | 2. 87E-14 | -0. 21522 | 0. 05  | 0. 105 | 4. 29E-10 | AC-G | PAQR8        |
| TSPAN17. 1  | 2. 88E-14 | -0. 13533 | 0. 09  | 0. 159 | 4. 31E-10 | AC-G | TSPAN17      |
| TYRO3. 1    | 2. 89E-14 | -0. 10192 | 0. 058 | 0. 119 | 4. 32E-10 | AC-G | TYRO3        |
| ATXN2       | 2. 94E-14 | -0. 12675 | 0. 152 | 0. 235 | 4. 39E-10 | AC-G | ATXN2        |
| EP300       | 3. 13E-14 | -0. 12598 | 0. 034 | 0. 084 | 4. 68E-10 | AC-G | EP300        |
| HSPE1. 1    | 3. 14E-14 | 0. 210445 | 0. 714 | 0. 732 | 4. 69E-10 | AC-G | HSPE1        |
| PDIA3. 1    | 3. 17E-14 | -0. 13722 | 0. 463 | 0. 606 | 4. 73E-10 | AC-G | PDIA3        |

|            |           |           |        |        |           |      |                |
|------------|-----------|-----------|--------|--------|-----------|------|----------------|
| FAM219B. 1 | 3. 26E-14 | -0. 13591 | 0. 091 | 0. 161 | 4. 87E-10 | AC-G | FAM219B        |
| CCDC88C    | 3. 27E-14 | -0. 10478 | 0. 01  | 0. 049 | 4. 89E-10 | AC-G | CCDC88C        |
| AC009506.  | 3. 28E-14 | -0. 10518 | 0. 037 | 0. 089 | 4. 91E-10 | AC-G | AC009506. 1    |
| REEP1. 1   | 3. 29E-14 | -0. 1584  | 0. 038 | 0. 089 | 4. 91E-10 | AC-G | REEP1          |
| ATP6V1A. 1 | 3. 35E-14 | -0. 13584 | 0. 134 | 0. 211 | 5. 01E-10 | AC-G | ATP6V1A        |
| ANKS1A. 1  | 3. 41E-14 | -0. 12989 | 0. 022 | 0. 067 | 5. 10E-10 | AC-G | ANKS1A         |
| CCNE2      | 3. 43E-14 | -0. 16788 | 0. 021 | 0. 066 | 5. 13E-10 | AC-G | CCNE2          |
| CNOT11. 1  | 3. 46E-14 | -0. 13299 | 0. 069 | 0. 132 | 5. 18E-10 | AC-G | CNOT11         |
| TNKS. 1    | 3. 47E-14 | -0. 1182  | 0. 09  | 0. 16  | 5. 18E-10 | AC-G | TNKS           |
| GALNT6     | 3. 48E-14 | -0. 13681 | 0. 003 | 0. 035 | 5. 20E-10 | AC-G | GALNT6         |
| NR1D1      | 3. 50E-14 | 0. 187033 | 0. 082 | 0. 043 | 5. 24E-10 | AC-G | NR1D1          |
| NDE1. 1    | 3. 54E-14 | -0. 15002 | 0. 056 | 0. 115 | 5. 29E-10 | AC-G | NDE1           |
| RANBP3. 1  | 3. 55E-14 | -0. 13617 | 0. 152 | 0. 236 | 5. 31E-10 | AC-G | RANBP3         |
| SLC32A1    | 3. 59E-14 | -0. 14791 | 0. 007 | 0. 043 | 5. 37E-10 | AC-G | SLC32A1        |
| SESTD1     | 3. 60E-14 | -0. 15265 | 0. 101 | 0. 17  | 5. 39E-10 | AC-G | SESTD1         |
| EFR3A. 1   | 3. 62E-14 | -0. 15944 | 0. 086 | 0. 153 | 5. 41E-10 | AC-G | EFR3A          |
| NARS       | 3. 76E-14 | 0. 289258 | 0. 467 | 0. 432 | 5. 62E-10 | AC-G | NARS           |
| TPMT       | 3. 81E-14 | -0. 19672 | 0. 13  | 0. 204 | 5. 70E-10 | AC-G | TPMT           |
| NUCB2      | 3. 83E-14 | 0. 327552 | 0. 39  | 0. 338 | 5. 72E-10 | AC-G | NUCB2          |
| U2AF1. 1   | 3. 84E-14 | -0. 12356 | 0. 517 | 0. 653 | 5. 73E-10 | AC-G | U2AF1          |
| CCNY. 1    | 3. 85E-14 | -0. 15296 | 0. 059 | 0. 118 | 5. 76E-10 | AC-G | CCNY           |
| IFNAR1. 1  | 3. 98E-14 | -0. 10119 | 0. 211 | 0. 305 | 5. 95E-10 | AC-G | IFNAR1         |
| NDST1. 1   | 3. 99E-14 | -0. 11605 | 0. 042 | 0. 096 | 5. 96E-10 | AC-G | NDST1          |
| KCNMB4. 1  | 4. 07E-14 | -0. 15703 | 0. 07  | 0. 134 | 6. 09E-10 | AC-G | KCNMB4         |
| CNTN2      | 4. 10E-14 | -0. 27583 | 0. 01  | 0. 047 | 6. 12E-10 | AC-G | CNTN2          |
| AC006946.  | 4. 13E-14 | 0. 1032   | 0. 017 | 0. 003 | 6. 18E-10 | AC-G | AC006946. 16   |
| SNX24. 1   | 4. 15E-14 | -0. 1278  | 0. 072 | 0. 137 | 6. 20E-10 | AC-G | SNX24          |
| RASSF7. 1  | 4. 18E-14 | -0. 1205  | 0. 03  | 0. 078 | 6. 25E-10 | AC-G | RASSF7         |
| DID01      | 4. 18E-14 | -0. 10724 | 0. 089 | 0. 16  | 6. 25E-10 | AC-G | DID01          |
| MTMR6. 1   | 4. 21E-14 | -0. 1353  | 0. 088 | 0. 156 | 6. 29E-10 | AC-G | MTMR6          |
| EAF2. 1    | 4. 23E-14 | -0. 23337 | 0. 048 | 0. 101 | 6. 32E-10 | AC-G | EAF2           |
| SPRY1. 1   | 4. 23E-14 | -0. 17981 | 0. 164 | 0. 246 | 6. 32E-10 | AC-G | SPRY1          |
| EMILIN3    | 4. 24E-14 | -0. 10172 | 0. 004 | 0. 037 | 6. 33E-10 | AC-G | EMILIN3        |
| IL2RA      | 4. 31E-14 | -0. 25111 | 0. 004 | 0. 037 | 6. 44E-10 | AC-G | IL2RA          |
| ZNF480     | 4. 32E-14 | -0. 16929 | 0. 057 | 0. 115 | 6. 46E-10 | AC-G | ZNF480         |
| GLG1. 1    | 4. 52E-14 | -0. 12944 | 0. 19  | 0. 281 | 6. 76E-10 | AC-G | GLG1           |
| TXNRD2. 1  | 4. 56E-14 | -0. 11378 | 0. 066 | 0. 128 | 6. 81E-10 | AC-G | TXNRD2         |
| ECHDC3     | 4. 57E-14 | -0. 14678 | 0. 005 | 0. 038 | 6. 82E-10 | AC-G | ECHDC3         |
| NUTM2A-AS  | 4. 59E-14 | -0. 17005 | 0. 075 | 0. 138 | 6. 86E-10 | AC-G | NUTM2A-AS1     |
| PLK1       | 4. 62E-14 | -0. 16648 | 0. 019 | 0. 062 | 6. 90E-10 | AC-G | PLK1           |
| NRBP2. 1   | 4. 63E-14 | -0. 10603 | 0. 068 | 0. 131 | 6. 91E-10 | AC-G | NRBP2          |
| NKX6-2     | 4. 63E-14 | -0. 20182 | 0      | 0. 029 | 6. 92E-10 | AC-G | NKX6-2         |
| AC147651.  | 4. 71E-14 | -0. 16143 | 0. 007 | 0. 042 | 7. 03E-10 | AC-G | AC147651. 4    |
| RP11-489C  | 4. 71E-14 | -0. 17246 | 0. 002 | 0. 033 | 7. 04E-10 | AC-G | RP11-489018. 1 |
| SAR1A. 1   | 4. 73E-14 | -0. 11754 | 0. 222 | 0. 313 | 7. 07E-10 | AC-G | SAR1A          |
| C10orf11.  | 4. 77E-14 | -0. 2325  | 0. 055 | 0. 11  | 7. 13E-10 | AC-G | C10orf11       |
| ZADH2      | 4. 81E-14 | -0. 13177 | 0. 055 | 0. 113 | 7. 18E-10 | AC-G | ZADH2          |
| CD7        | 4. 82E-14 | -0. 2699  | 0. 011 | 0. 05  | 7. 20E-10 | AC-G | CD7            |
| P2RX7      | 4. 90E-14 | -0. 18177 | 0. 04  | 0. 091 | 7. 32E-10 | AC-G | P2RX7          |
| HPS1       | 4. 91E-14 | -0. 23723 | 0. 062 | 0. 12  | 7. 34E-10 | AC-G | HPS1           |
| EIF3J. 1   | 4. 95E-14 | -0. 11887 | 0. 29  | 0. 395 | 7. 40E-10 | AC-G | EIF3J          |

|           |          |          |       |       |          |      |               |
|-----------|----------|----------|-------|-------|----------|------|---------------|
| NCKAP5    | 5.08E-14 | -0.13654 | 0.026 | 0.073 | 7.59E-10 | AC-G | NCKAP5        |
| APLP2.1   | 5.10E-14 | -0.12615 | 0.489 | 0.613 | 7.62E-10 | AC-G | APLP2         |
| SIRT7     | 5.17E-14 | -0.13387 | 0.139 | 0.219 | 7.72E-10 | AC-G | SIRT7         |
| OSTC.1    | 5.23E-14 | 0.320713 | 0.53  | 0.498 | 7.82E-10 | AC-G | OSTC          |
| EHMT1.1   | 5.26E-14 | -0.14185 | 0.09  | 0.157 | 7.85E-10 | AC-G | EHMT1         |
| CNTNAP3B  | 5.30E-14 | 0.157729 | 0.062 | 0.029 | 7.92E-10 | AC-G | CNTNAP3B      |
| ADRBK2.1  | 5.42E-14 | -0.15054 | 0.018 | 0.06  | 8.10E-10 | AC-G | ADRBK2        |
| RNF44.1   | 5.45E-14 | -0.14828 | 0.064 | 0.123 | 8.14E-10 | AC-G | RNF44         |
| C14orf37  | 5.52E-14 | -0.15854 | 0.062 | 0.121 | 8.24E-10 | AC-G | C14orf37      |
| SCAMP4.1  | 5.60E-14 | -0.10628 | 0.195 | 0.283 | 8.36E-10 | AC-G | SCAMP4        |
| PDP1.1    | 5.66E-14 | -0.11301 | 0.073 | 0.137 | 8.46E-10 | AC-G | PDP1          |
| AP005530. | 5.66E-14 | -0.16215 | 0.003 | 0.034 | 8.46E-10 | AC-G | AP005530.2    |
| ZCCHC11   | 5.76E-14 | -0.11308 | 0.167 | 0.253 | 8.61E-10 | AC-G | ZCCHC11       |
| GLI4.1    | 5.95E-14 | -0.15702 | 0.062 | 0.121 | 8.89E-10 | AC-G | GLI4          |
| CPEB2.1   | 6.00E-14 | -0.10745 | 0.03  | 0.079 | 8.96E-10 | AC-G | CPEB2         |
| HSD11B1L. | 6.10E-14 | -0.13929 | 0.14  | 0.217 | 9.11E-10 | AC-G | HSD11B1L      |
| HSBP1.1   | 6.14E-14 | 0.221924 | 0.699 | 0.718 | 9.17E-10 | AC-G | HSBP1         |
| PIK3C2A.1 | 6.22E-14 | -0.13154 | 0.084 | 0.151 | 9.29E-10 | AC-G | PIK3C2A       |
| NR1H2.1   | 6.34E-14 | -0.16383 | 0.226 | 0.318 | 9.47E-10 | AC-G | NR1H2         |
| NEK2      | 6.55E-14 | -0.11196 | 0.005 | 0.039 | 9.78E-10 | AC-G | NEK2          |
| C5orf28.1 | 6.61E-14 | 0.213353 | 0.166 | 0.11  | 9.88E-10 | AC-G | C5orf28       |
| PDIA4.1   | 6.64E-14 | 0.321741 | 0.483 | 0.457 | 9.92E-10 | AC-G | PDIA4         |
| MEGF9     | 6.71E-14 | -0.13835 | 0.047 | 0.101 | 1.00E-09 | AC-G | MEGF9         |
| ARSB.1    | 6.76E-14 | -0.10505 | 0.015 | 0.056 | 1.01E-09 | AC-G | ARSB          |
| INPPL1.1  | 6.83E-14 | -0.12011 | 0.068 | 0.13  | 1.02E-09 | AC-G | INPPL1        |
| ZBED1.1   | 6.84E-14 | -0.15346 | 0.085 | 0.15  | 1.02E-09 | AC-G | ZBED1         |
| MGMT.1    | 6.84E-14 | -0.24453 | 0.098 | 0.162 | 1.02E-09 | AC-G | MGMT          |
| AKAP17A   | 6.90E-14 | -0.17209 | 0.109 | 0.179 | 1.03E-09 | AC-G | AKAP17A       |
| PCED1B    | 6.99E-14 | -0.15042 | 0.007 | 0.042 | 1.05E-09 | AC-G | PCED1B        |
| PI4K2A.1  | 7.00E-14 | -0.17089 | 0.027 | 0.072 | 1.05E-09 | AC-G | PI4K2A        |
| ATF5.1    | 7.10E-14 | -0.21649 | 0.132 | 0.206 | 1.06E-09 | AC-G | ATF5          |
| PEX26.1   | 7.12E-14 | -0.10639 | 0.062 | 0.123 | 1.06E-09 | AC-G | PEX26         |
| CARD11    | 7.16E-14 | -0.12347 | 0.002 | 0.033 | 1.07E-09 | AC-G | CARD11        |
| SLC40A1.1 | 7.23E-14 | -0.16797 | 0.085 | 0.149 | 1.08E-09 | AC-G | SLC40A1       |
| ADAR      | 7.26E-14 | -0.14833 | 0.228 | 0.323 | 1.08E-09 | AC-G | ADAR          |
| DDX39B.1  | 7.28E-14 | -0.12307 | 0.06  | 0.119 | 1.09E-09 | AC-G | DDX39B        |
| TFRC.1    | 7.30E-14 | -0.22957 | 0.147 | 0.221 | 1.09E-09 | AC-G | TFRC          |
| RP11-742E | 7.37E-14 | -0.16311 | 0.004 | 0.036 | 1.10E-09 | AC-G | RP11-742B18.1 |
| SCAF1.1   | 7.51E-14 | -0.12262 | 0.095 | 0.165 | 1.12E-09 | AC-G | SCAF1         |
| ADAP1     | 7.53E-14 | -0.16014 | 0.01  | 0.047 | 1.12E-09 | AC-G | ADAP1         |
| SDCCAG3.1 | 7.74E-14 | -0.12996 | 0.049 | 0.104 | 1.16E-09 | AC-G | SDCCAG3       |
| ZNF775.1  | 7.89E-14 | -0.1117  | 0.049 | 0.103 | 1.18E-09 | AC-G | ZNF775        |
| DENND5B.1 | 7.95E-14 | -0.10397 | 0.049 | 0.105 | 1.19E-09 | AC-G | DENND5B       |
| MAPK8IP3  | 8.17E-14 | -0.11651 | 0.043 | 0.097 | 1.22E-09 | AC-G | MAPK8IP3      |
| RP11-212F | 8.30E-14 | -0.11854 | 0.045 | 0.1   | 1.24E-09 | AC-G | RP11-212P7.2  |
| GAS2L1.1  | 8.33E-14 | -0.11255 | 0.093 | 0.163 | 1.24E-09 | AC-G | GAS2L1        |
| CAMTA1.1  | 8.44E-14 | -0.11328 | 0.364 | 0.466 | 1.26E-09 | AC-G | CAMTA1        |
| LINC00665 | 8.66E-14 | 0.279664 | 0.236 | 0.176 | 1.29E-09 | AC-G | LINC00665     |
| NFATC2    | 8.71E-14 | -0.17809 | 0.014 | 0.053 | 1.30E-09 | AC-G | NFATC2        |
| FURIN.1   | 8.86E-14 | -0.15102 | 0.031 | 0.079 | 1.32E-09 | AC-G | FURIN         |
| ZNF439.1  | 9.16E-14 | -0.1067  | 0.09  | 0.159 | 1.37E-09 | AC-G | ZNF439        |

|           |          |          |       |       |          |      |               |
|-----------|----------|----------|-------|-------|----------|------|---------------|
| RHBDD2.1  | 9.26E-14 | 0.280465 | 0.481 | 0.455 | 1.38E-09 | AC-G | RHBDD2        |
| PPARG     | 9.33E-14 | -0.12615 | 0.001 | 0.029 | 1.39E-09 | AC-G | PPARG         |
| HNRNPLL.1 | 9.34E-14 | -0.17084 | 0.129 | 0.203 | 1.40E-09 | AC-G | HNRNPLL       |
| DAPP1     | 9.47E-14 | -0.14481 | 0.002 | 0.033 | 1.41E-09 | AC-G | DAPP1         |
| CNTRL.1   | 9.47E-14 | -0.19691 | 0.068 | 0.128 | 1.41E-09 | AC-G | CNTRL         |
| MOAP1.1   | 9.64E-14 | -0.13007 | 0.149 | 0.231 | 1.44E-09 | AC-G | MOAP1         |
| YEATS4.1  | 9.73E-14 | -0.19643 | 0.183 | 0.265 | 1.45E-09 | AC-G | YEATS4        |
| MASP1     | 9.91E-14 | 0.174914 | 0.07  | 0.034 | 1.48E-09 | AC-G | MASP1         |
| UBE2W     | 9.99E-14 | -0.11138 | 0.146 | 0.226 | 1.49E-09 | AC-G | UBE2W         |
| NFAM1     | 1.01E-13 | -0.14809 | 0.006 | 0.039 | 1.51E-09 | AC-G | NFAM1         |
| DLG1.1    | 1.03E-13 | -0.14027 | 0.106 | 0.177 | 1.53E-09 | AC-G | DLG1          |
| TMEM33.1  | 1.06E-13 | -0.12264 | 0.21  | 0.3   | 1.58E-09 | AC-G | TMEM33        |
| GJB1      | 1.06E-13 | -0.19912 | 0.001 | 0.029 | 1.58E-09 | AC-G | GJB1          |
| TUBB2A.1  | 1.07E-13 | -0.17329 | 0.416 | 0.49  | 1.59E-09 | AC-G | TUBB2A        |
| HECTD4    | 1.09E-13 | -0.11309 | 0.045 | 0.099 | 1.62E-09 | AC-G | HECTD4        |
| CCR5      | 1.10E-13 | -0.12267 | 0.001 | 0.03  | 1.65E-09 | AC-G | CCR5          |
| DCTN4.1   | 1.13E-13 | -0.14829 | 0.122 | 0.198 | 1.68E-09 | AC-G | DCTN4         |
| TM4SF1.1  | 1.17E-13 | 0.37492  | 0.155 | 0.104 | 1.74E-09 | AC-G | TM4SF1        |
| FADS3.1   | 1.17E-13 | 0.199153 | 0.197 | 0.14  | 1.75E-09 | AC-G | FADS3         |
| CLSPN.1   | 1.19E-13 | -0.13875 | 0.025 | 0.069 | 1.77E-09 | AC-G | CLSPN         |
| DENR.1    | 1.22E-13 | -0.1123  | 0.24  | 0.336 | 1.82E-09 | AC-G | DENR          |
| ENTPD4.1  | 1.23E-13 | -0.1187  | 0.048 | 0.102 | 1.84E-09 | AC-G | ENTPD4        |
| TBCA.1    | 1.25E-13 | 0.240653 | 0.727 | 0.707 | 1.87E-09 | AC-G | TBCA          |
| CTD-2090I | 1.25E-13 | 0.185847 | 0.089 | 0.046 | 1.87E-09 | AC-G | CTD-2090I13.1 |
| IFFO1.1   | 1.26E-13 | -0.12831 | 0.068 | 0.128 | 1.88E-09 | AC-G | IFFO1         |
| RP11-676J | 1.27E-13 | -0.10488 | 0.004 | 0.036 | 1.89E-09 | AC-G | RP11-676J15.1 |
| PIF1      | 1.27E-13 | -0.11963 | 0.017 | 0.057 | 1.90E-09 | AC-G | PIF1          |
| HSP90AA1. | 1.27E-13 | 0.123957 | 0.829 | 0.9   | 1.90E-09 | AC-G | HSP90AA1      |
| PHF6.1    | 1.29E-13 | -0.1563  | 0.111 | 0.181 | 1.93E-09 | AC-G | PHF6          |
| LCORL     | 1.31E-13 | -0.11424 | 0.051 | 0.107 | 1.96E-09 | AC-G | LCORL         |
| AMDHD2.1  | 1.37E-13 | -0.16661 | 0.072 | 0.133 | 2.05E-09 | AC-G | AMDHD2        |
| ABHD8.1   | 1.39E-13 | -0.13796 | 0.089 | 0.156 | 2.08E-09 | AC-G | ABHD8         |
| STAT5A.1  | 1.40E-13 | -0.15828 | 0.018 | 0.058 | 2.09E-09 | AC-G | STAT5A        |
| KIF3B.1   | 1.43E-13 | -0.1046  | 0.076 | 0.14  | 2.14E-09 | AC-G | KIF3B         |
| CTTN.1    | 1.43E-13 | 0.300364 | 0.279 | 0.22  | 2.14E-09 | AC-G | CTTN          |
| ERF.1     | 1.44E-13 | -0.12114 | 0.114 | 0.189 | 2.15E-09 | AC-G | ERF           |
| PTPRD.1   | 1.48E-13 | -0.17977 | 0.033 | 0.08  | 2.21E-09 | AC-G | PTPRD         |
| TRIM14.1  | 1.49E-13 | -0.13898 | 0.048 | 0.101 | 2.23E-09 | AC-G | TRIM14        |
| RAP2A     | 1.51E-13 | -0.12411 | 0.078 | 0.142 | 2.26E-09 | AC-G | RAP2A         |
| PCSK7.1   | 1.52E-13 | -0.15523 | 0.206 | 0.296 | 2.27E-09 | AC-G | PCSK7         |
| SRCIN1    | 1.53E-13 | -0.14591 | 0.004 | 0.036 | 2.29E-09 | AC-G | SRCIN1        |
| GTDC1     | 1.54E-13 | -0.12985 | 0.053 | 0.108 | 2.30E-09 | AC-G | GTDC1         |
| C19orf25. | 1.54E-13 | -0.13716 | 0.221 | 0.314 | 2.30E-09 | AC-G | C19orf25      |
| LTB       | 1.55E-13 | -0.20176 | 0.005 | 0.038 | 2.31E-09 | AC-G | LTB           |
| DNALI1.1  | 1.55E-13 | 0.318365 | 0.155 | 0.105 | 2.32E-09 | AC-G | DNALI1        |
| HAPLN2    | 1.56E-13 | -0.17514 | 0.005 | 0.038 | 2.33E-09 | AC-G | HAPLN2        |
| CDC27.1   | 1.63E-13 | -0.12517 | 0.104 | 0.174 | 2.44E-09 | AC-G | CDC27         |
| LNPEP.1   | 1.66E-13 | -0.16405 | 0.073 | 0.134 | 2.49E-09 | AC-G | LNPEP         |
| KLF5      | 1.68E-13 | 0.112985 | 0.051 | 0.022 | 2.51E-09 | AC-G | KLF5          |
| KPNA3.1   | 1.71E-13 | -0.16876 | 0.186 | 0.269 | 2.56E-09 | AC-G | KPNA3         |
| MLF1      | 1.73E-13 | 0.281839 | 0.29  | 0.232 | 2.59E-09 | AC-G | MLF1          |



|           |          |          |       |       |          |      |               |
|-----------|----------|----------|-------|-------|----------|------|---------------|
| ALOX15B   | 1.74E-13 | -0.15368 | 0.002 | 0.031 | 2.61E-09 | AC-G | ALOX15B       |
| PCMT1.1   | 1.77E-13 | 0.241929 | 0.545 | 0.54  | 2.64E-09 | AC-G | PCMT1         |
| STAU2.1   | 1.77E-13 | -0.11172 | 0.113 | 0.185 | 2.64E-09 | AC-G | STAU2         |
| SEPT11.1  | 1.78E-13 | -0.13435 | 0.229 | 0.317 | 2.65E-09 | AC-G | 11-Sep        |
| LILRB3    | 1.79E-13 | -0.16829 | 0.01  | 0.046 | 2.67E-09 | AC-G | LILRB3        |
| TNS3.1    | 1.79E-13 | -0.20642 | 0.034 | 0.081 | 2.68E-09 | AC-G | TNS3          |
| MCM2      | 1.80E-13 | -0.12454 | 0.027 | 0.073 | 2.69E-09 | AC-G | MCM2          |
| RAB4A.1   | 1.84E-13 | -0.13725 | 0.262 | 0.356 | 2.76E-09 | AC-G | RAB4A         |
| ZNF639.1  | 1.89E-13 | -0.10882 | 0.082 | 0.147 | 2.83E-09 | AC-G | ZNF639        |
| NAA30.1   | 1.92E-13 | -0.11478 | 0.043 | 0.095 | 2.87E-09 | AC-G | NAA30         |
| SUGP2     | 1.95E-13 | -0.11087 | 0.173 | 0.26  | 2.91E-09 | AC-G | SUGP2         |
| ABI2      | 1.96E-13 | -0.12603 | 0.283 | 0.377 | 2.93E-09 | AC-G | ABI2          |
| LMO4.1    | 1.97E-13 | -0.11028 | 0.396 | 0.494 | 2.94E-09 | AC-G | LMO4          |
| NUP107.1  | 2.02E-13 | -0.19208 | 0.159 | 0.236 | 3.02E-09 | AC-G | NUP107        |
| D2HGDH.1  | 2.03E-13 | -0.10858 | 0.06  | 0.118 | 3.03E-09 | AC-G | D2HGDH        |
| TMEM63A   | 2.04E-13 | -0.15858 | 0.031 | 0.078 | 3.05E-09 | AC-G | TMEM63A       |
| PLEKHA1.1 | 2.09E-13 | -0.16342 | 0.053 | 0.108 | 3.12E-09 | AC-G | PLEKHA1       |
| USP46.1   | 2.11E-13 | -0.12874 | 0.084 | 0.148 | 3.15E-09 | AC-G | USP46         |
| COPS6.1   | 2.14E-13 | 0.265474 | 0.608 | 0.603 | 3.20E-09 | AC-G | COPS6         |
| EIF4EBP3  | 2.14E-13 | 0.103964 | 0.023 | 0.006 | 3.20E-09 | AC-G | EIF4EBP3      |
| SUSD4     | 2.17E-13 | 0.148428 | 0.071 | 0.035 | 3.24E-09 | AC-G | SUSD4         |
| RASGRP2.1 | 2.18E-13 | -0.15855 | 0.018 | 0.058 | 3.26E-09 | AC-G | RASGRP2       |
| CASP1.1   | 2.19E-13 | -0.17725 | 0.164 | 0.238 | 3.27E-09 | AC-G | CASP1         |
| DHTKD1    | 2.27E-13 | -0.14133 | 0.074 | 0.135 | 3.39E-09 | AC-G | DHTKD1        |
| GPSM1.1   | 2.32E-13 | -0.11806 | 0.033 | 0.081 | 3.47E-09 | AC-G | GPSM1         |
| RP11-403I | 2.35E-13 | -0.19639 | 0.006 | 0.039 | 3.51E-09 | AC-G | RP11-403I13.5 |
| MAP2K1.1  | 2.35E-13 | -0.11648 | 0.195 | 0.283 | 3.51E-09 | AC-G | MAP2K1        |
| NDUFB4.1  | 2.41E-13 | 0.244797 | 0.673 | 0.681 | 3.59E-09 | AC-G | NDUFB4        |
| ZNF195.1  | 2.41E-13 | -0.14801 | 0.105 | 0.173 | 3.60E-09 | AC-G | ZNF195        |
| GNS.1     | 2.42E-13 | -0.13792 | 0.135 | 0.212 | 3.61E-09 | AC-G | GNS           |
| IKBKE.1   | 2.51E-13 | -0.15848 | 0.021 | 0.063 | 3.74E-09 | AC-G | IKBKE         |
| NDUFB7.1  | 2.53E-13 | 0.248367 | 0.724 | 0.719 | 3.78E-09 | AC-G | NDUFB7        |
| NKIRAS2   | 2.53E-13 | -0.11821 | 0.191 | 0.277 | 3.79E-09 | AC-G | NKIRAS2       |
| SESN2.1   | 2.53E-13 | 0.17421  | 0.149 | 0.095 | 3.79E-09 | AC-G | SESN2         |
| STAG2     | 2.61E-13 | -0.17077 | 0.174 | 0.256 | 3.90E-09 | AC-G | STAG2         |
| EGR1      | 2.66E-13 | -0.12772 | 0.414 | 0.512 | 3.98E-09 | AC-G | EGR1          |
| AP000439. | 2.68E-13 | -0.16803 | 0.002 | 0.032 | 4.01E-09 | AC-G | AP000439.1    |
| CEACAM4   | 2.70E-13 | -0.11924 | 0.001 | 0.028 | 4.04E-09 | AC-G | CEACAM4       |
| RP11-212I | 2.71E-13 | -0.13587 | 0     | 0.027 | 4.05E-09 | AC-G | RP11-212I21.4 |
| CAMSAP2   | 2.81E-13 | -0.10313 | 0.093 | 0.16  | 4.19E-09 | AC-G | CAMSAP2       |
| FFAR4     | 2.82E-13 | -0.14499 | 0.004 | 0.035 | 4.22E-09 | AC-G | FFAR4         |
| XPO6.1    | 2.88E-13 | -0.10678 | 0.065 | 0.125 | 4.30E-09 | AC-G | XPO6          |
| KLHL2.1   | 2.92E-13 | -0.10198 | 0.042 | 0.093 | 4.36E-09 | AC-G | KLHL2         |
| GOT2      | 2.94E-13 | -0.10295 | 0.133 | 0.209 | 4.39E-09 | AC-G | GOT2          |
| KBTBD2.1  | 2.96E-13 | -0.11503 | 0.066 | 0.124 | 4.42E-09 | AC-G | KBTBD2        |
| KCNK6     | 3.02E-13 | -0.1611  | 0.01  | 0.045 | 4.52E-09 | AC-G | KCNK6         |
| ICK.1     | 3.14E-13 | -0.12203 | 0.042 | 0.093 | 4.69E-09 | AC-G | ICK           |
| SPG7.1    | 3.14E-13 | -0.17692 | 0.173 | 0.254 | 4.69E-09 | AC-G | SPG7          |
| ARHGAP23  | 3.15E-13 | -0.10852 | 0.018 | 0.059 | 4.70E-09 | AC-G | ARHGAP23      |
| KLF12.1   | 3.18E-13 | -0.10219 | 0.042 | 0.093 | 4.75E-09 | AC-G | KLF12         |
| CNOT1.1   | 3.30E-13 | -0.15564 | 0.094 | 0.16  | 4.93E-09 | AC-G | CNOT1         |

|            |           |           |        |        |           |      |                |
|------------|-----------|-----------|--------|--------|-----------|------|----------------|
| TOR1A. 1   | 3. 30E-13 | -0. 10681 | 0. 191 | 0. 275 | 4. 93E-09 | AC-G | TOR1A          |
| ULK3       | 3. 34E-13 | -0. 1469  | 0. 092 | 0. 156 | 5. 00E-09 | AC-G | ULK3           |
| SARS2. 1   | 3. 40E-13 | -0. 10056 | 0. 034 | 0. 083 | 5. 08E-09 | AC-G | SARS2          |
| SRRM3. 1   | 3. 46E-13 | -0. 16815 | 0. 033 | 0. 08  | 5. 17E-09 | AC-G | SRRM3          |
| TAC01. 1   | 3. 47E-13 | -0. 11056 | 0. 114 | 0. 186 | 5. 19E-09 | AC-G | TAC01          |
| GRIPAP1. 1 | 3. 49E-13 | -0. 12416 | 0. 13  | 0. 205 | 5. 21E-09 | AC-G | GRIPAP1        |
| ICAM2      | 3. 54E-13 | -0. 17769 | 0. 007 | 0. 04  | 5. 28E-09 | AC-G | ICAM2          |
| GAB3       | 3. 72E-13 | -0. 13886 | 0. 006 | 0. 038 | 5. 55E-09 | AC-G | GAB3           |
| EMX2       | 3. 72E-13 | 0. 150282 | 0. 053 | 0. 024 | 5. 56E-09 | AC-G | EMX2           |
| RP11-536K  | 3. 80E-13 | -0. 20062 | 0. 008 | 0. 043 | 5. 67E-09 | AC-G | RP11-536K7. 3  |
| NFKB1. 1   | 3. 83E-13 | -0. 21782 | 0. 059 | 0. 113 | 5. 72E-09 | AC-G | NFKB1          |
| TTC26. 1   | 3. 83E-13 | 0. 165749 | 0. 079 | 0. 042 | 5. 72E-09 | AC-G | TTC26          |
| SCLT1. 1   | 3. 91E-13 | -0. 12947 | 0. 03  | 0. 076 | 5. 85E-09 | AC-G | SCLT1          |
| RFTN2. 1   | 3. 98E-13 | -0. 15489 | 0. 077 | 0. 137 | 5. 95E-09 | AC-G | RFTN2          |
| VCPIP1. 1  | 3. 99E-13 | -0. 11795 | 0. 046 | 0. 098 | 5. 97E-09 | AC-G | VCPIP1         |
| ILKAP. 1   | 4. 06E-13 | -0. 14646 | 0. 162 | 0. 242 | 6. 07E-09 | AC-G | ILKAP          |
| KDM2A      | 4. 17E-13 | -0. 12254 | 0. 075 | 0. 137 | 6. 23E-09 | AC-G | KDM2A          |
| SSR1       | 4. 29E-13 | -0. 12274 | 0. 374 | 0. 487 | 6. 41E-09 | AC-G | SSR1           |
| TLR4       | 4. 31E-13 | -0. 14202 | 0. 011 | 0. 047 | 6. 44E-09 | AC-G | TLR4           |
| KCNE3      | 4. 33E-13 | -0. 11796 | 0. 002 | 0. 031 | 6. 47E-09 | AC-G | KCNE3          |
| FBRSL1     | 4. 37E-13 | -0. 10986 | 0. 02  | 0. 062 | 6. 52E-09 | AC-G | FBRSL1         |
| UBR4. 1    | 4. 42E-13 | -0. 10775 | 0. 089 | 0. 156 | 6. 61E-09 | AC-G | UBR4           |
| ZNF628     | 4. 48E-13 | -0. 10315 | 0. 018 | 0. 058 | 6. 69E-09 | AC-G | ZNF628         |
| NUMB. 1    | 4. 50E-13 | -0. 17246 | 0. 113 | 0. 182 | 6. 72E-09 | AC-G | NUMB           |
| ATP6VOA2   | 4. 51E-13 | -0. 10272 | 0. 051 | 0. 104 | 6. 74E-09 | AC-G | ATP6VOA2       |
| KATNB1. 1  | 4. 53E-13 | -0. 11693 | 0. 07  | 0. 129 | 6. 77E-09 | AC-G | KATNB1         |
| MEF2D      | 4. 53E-13 | -0. 16712 | 0. 034 | 0. 081 | 6. 77E-09 | AC-G | MEF2D          |
| RAB3IP     | 4. 62E-13 | -0. 22835 | 0. 183 | 0. 259 | 6. 91E-09 | AC-G | RAB3IP         |
| ASF1B. 1   | 4. 87E-13 | -0. 12448 | 0. 024 | 0. 067 | 7. 28E-09 | AC-G | ASF1B          |
| TLE2. 1    | 4. 91E-13 | -0. 12206 | 0. 047 | 0. 099 | 7. 34E-09 | AC-G | TLE2           |
| TMEM116    | 5. 01E-13 | 0. 197376 | 0. 099 | 0. 056 | 7. 48E-09 | AC-G | TMEM116        |
| SPAG5      | 5. 04E-13 | -0. 10732 | 0. 013 | 0. 05  | 7. 53E-09 | AC-G | SPAG5          |
| SURF2. 1   | 5. 06E-13 | -0. 10334 | 0. 164 | 0. 245 | 7. 56E-09 | AC-G | SURF2          |
| SCYL2. 1   | 5. 09E-13 | -0. 11904 | 0. 082 | 0. 145 | 7. 61E-09 | AC-G | SCYL2          |
| SLC38A7    | 5. 09E-13 | -0. 13211 | 0. 061 | 0. 117 | 7. 61E-09 | AC-G | SLC38A7        |
| PTDSS1. 1  | 5. 13E-13 | -0. 13594 | 0. 139 | 0. 214 | 7. 66E-09 | AC-G | PTDSS1         |
| RC3H1. 1   | 5. 16E-13 | -0. 13125 | 0. 054 | 0. 11  | 7. 71E-09 | AC-G | RC3H1          |
| PDZRN4     | 5. 17E-13 | -0. 14127 | 0. 009 | 0. 044 | 7. 73E-09 | AC-G | PDZRN4         |
| SLC18B1. 1 | 5. 18E-13 | -0. 12258 | 0. 119 | 0. 19  | 7. 74E-09 | AC-G | SLC18B1        |
| FANCA      | 5. 30E-13 | -0. 10772 | 0. 023 | 0. 065 | 7. 92E-09 | AC-G | FANCA          |
| TRAPPC11   | 5. 33E-13 | -0. 10491 | 0. 042 | 0. 093 | 7. 96E-09 | AC-G | TRAPPC11       |
| RP11-514C  | 5. 37E-13 | -0. 1239  | 0. 003 | 0. 032 | 8. 03E-09 | AC-G | RP11-514012. 4 |
| ISCU. 1    | 5. 38E-13 | -0. 10389 | 0. 469 | 0. 585 | 8. 04E-09 | AC-G | ISCU           |
| DIP2C. 1   | 5. 44E-13 | -0. 13693 | 0. 042 | 0. 093 | 8. 13E-09 | AC-G | DIP2C          |
| CD72       | 5. 47E-13 | -0. 17998 | 0. 018 | 0. 057 | 8. 17E-09 | AC-G | CD72           |
| C19orf48.  | 5. 52E-13 | -0. 11248 | 0. 161 | 0. 24  | 8. 25E-09 | AC-G | C19orf48       |
| RFWD2. 1   | 5. 56E-13 | -0. 14754 | 0. 108 | 0. 176 | 8. 30E-09 | AC-G | RFWD2          |
| SIRT2. 1   | 5. 73E-13 | -0. 14279 | 0. 332 | 0. 432 | 8. 56E-09 | AC-G | SIRT2          |
| DCAF13     | 5. 76E-13 | 0. 270722 | 0. 365 | 0. 308 | 8. 60E-09 | AC-G | DCAF13         |
| XBP1. 1    | 5. 91E-13 | -0. 14414 | 0. 29  | 0. 387 | 8. 83E-09 | AC-G | XBP1           |
| PACS1. 1   | 5. 94E-13 | -0. 11025 | 0. 051 | 0. 105 | 8. 88E-09 | AC-G | PACS1          |

|           |          |          |       |       |          |      |               |
|-----------|----------|----------|-------|-------|----------|------|---------------|
| ATF7IP.1  | 5.96E-13 | -0.15201 | 0.065 | 0.121 | 8.90E-09 | AC-G | ATF7IP        |
| NADSYN1.1 | 6.04E-13 | -0.10093 | 0.07  | 0.13  | 9.02E-09 | AC-G | NADSYN1       |
| PTCRA     | 6.04E-13 | -0.12941 | 0.001 | 0.028 | 9.03E-09 | AC-G | PTCRA         |
| VAX2.1    | 6.09E-13 | -0.12443 | 0.039 | 0.088 | 9.10E-09 | AC-G | VAX2          |
| LILRA4    | 6.15E-13 | -0.14523 | 0.001 | 0.028 | 9.20E-09 | AC-G | LILRA4        |
| TNFAIP3.1 | 6.32E-13 | -0.3042  | 0.112 | 0.173 | 9.44E-09 | AC-G | TNFAIP3       |
| BNIP3     | 6.41E-13 | 0.332704 | 0.263 | 0.205 | 9.57E-09 | AC-G | BNIP3         |
| GMFB      | 6.44E-13 | -0.12059 | 0.144 | 0.221 | 9.63E-09 | AC-G | GMFB          |
| RUNDC3A.1 | 6.54E-13 | -0.1577  | 0.053 | 0.106 | 9.77E-09 | AC-G | RUNDC3A       |
| USP7.1    | 6.54E-13 | -0.10995 | 0.083 | 0.145 | 9.78E-09 | AC-G | USP7          |
| INPP4A.1  | 6.64E-13 | -0.12395 | 0.055 | 0.11  | 9.93E-09 | AC-G | INPP4A        |
| PIK3CD    | 6.76E-13 | -0.13268 | 0.005 | 0.036 | 1.01E-08 | AC-G | PIK3CD        |
| SUPT16H.1 | 6.78E-13 | -0.12099 | 0.178 | 0.262 | 1.01E-08 | AC-G | SUPT16H       |
| TMEM125   | 6.89E-13 | -0.1676  | 0     | 0.026 | 1.03E-08 | AC-G | TMEM125       |
| ZNF37A.1  | 7.02E-13 | -0.11587 | 0.086 | 0.149 | 1.05E-08 | AC-G | ZNF37A        |
| MICU1.1   | 7.04E-13 | -0.11873 | 0.082 | 0.144 | 1.05E-08 | AC-G | MICU1         |
| VPS18     | 7.16E-13 | -0.10752 | 0.038 | 0.087 | 1.07E-08 | AC-G | VPS18         |
| AGAP3     | 7.18E-13 | -0.15531 | 0.055 | 0.108 | 1.07E-08 | AC-G | AGAP3         |
| TSPAN6.1  | 7.32E-13 | 0.335935 | 0.194 | 0.141 | 1.09E-08 | AC-G | TSPAN6        |
| TMEM134.1 | 7.49E-13 | -0.10859 | 0.235 | 0.324 | 1.12E-08 | AC-G | TMEM134       |
| TUBB3     | 7.51E-13 | 0.110389 | 0.008 | 0.001 | 1.12E-08 | AC-G | TUBB3         |
| SP9       | 7.64E-13 | -0.1329  | 0.011 | 0.046 | 1.14E-08 | AC-G | SP9           |
| SNAI1     | 7.75E-13 | -0.19052 | 0.014 | 0.051 | 1.16E-08 | AC-G | SNAI1         |
| AKIRIN1.1 | 7.75E-13 | -0.11329 | 0.282 | 0.385 | 1.16E-08 | AC-G | AKIRIN1       |
| FICD      | 7.91E-13 | 0.178324 | 0.116 | 0.071 | 1.18E-08 | AC-G | FICD          |
| BROX.1    | 8.00E-13 | -0.14829 | 0.167 | 0.248 | 1.20E-08 | AC-G | BROX          |
| IRF2BP2.1 | 8.11E-13 | -0.13882 | 0.238 | 0.331 | 1.21E-08 | AC-G | IRF2BP2       |
| DAP.1     | 8.25E-13 | -0.10648 | 0.203 | 0.291 | 1.23E-08 | AC-G | DAP           |
| TMOD3.1   | 8.46E-13 | -0.11263 | 0.089 | 0.155 | 1.26E-08 | AC-G | TMOD3         |
| MICU3.1   | 8.53E-13 | -0.16339 | 0.042 | 0.09  | 1.27E-08 | AC-G | MICU3         |
| MGAT5.1   | 8.59E-13 | -0.14202 | 0.03  | 0.075 | 1.28E-08 | AC-G | MGAT5         |
| RP11-445F | 8.70E-13 | -0.12246 | 0.004 | 0.033 | 1.30E-08 | AC-G | RP11-445F12.1 |
| DERL2.1   | 8.74E-13 | 0.314722 | 0.396 | 0.343 | 1.31E-08 | AC-G | DERL2         |
| PSTPIP1   | 8.74E-13 | -0.16151 | 0.011 | 0.047 | 1.31E-08 | AC-G | PSTPIP1       |
| PLEKHF2.1 | 8.82E-13 | -0.14895 | 0.078 | 0.138 | 1.32E-08 | AC-G | PLEKHF2       |
| RAB42.1   | 8.88E-13 | -0.14614 | 0.017 | 0.055 | 1.33E-08 | AC-G | RAB42         |
| CASD1.1   | 8.94E-13 | -0.12745 | 0.037 | 0.085 | 1.34E-08 | AC-G | CASD1         |
| WDR91.1   | 9.07E-13 | -0.17608 | 0.044 | 0.094 | 1.36E-08 | AC-G | WDR91         |
| UQCRQ.1   | 9.10E-13 | 0.209811 | 0.768 | 0.805 | 1.36E-08 | AC-G | UQCRQ         |
| TRIM44.1  | 9.14E-13 | -0.12727 | 0.212 | 0.301 | 1.37E-08 | AC-G | TRIM44        |
| OTUD5.1   | 9.30E-13 | -0.1283  | 0.082 | 0.145 | 1.39E-08 | AC-G | OTUD5         |
| BCL3.1    | 9.36E-13 | -0.12134 | 0.037 | 0.085 | 1.40E-08 | AC-G | BCL3          |
| SLC25A33. | 9.37E-13 | -0.11257 | 0.151 | 0.231 | 1.40E-08 | AC-G | SLC25A33      |
| SLC46A1.1 | 9.47E-13 | -0.10857 | 0.025 | 0.068 | 1.41E-08 | AC-G | SLC46A1       |
| OPN3.1    | 9.55E-13 | -0.1267  | 0.033 | 0.079 | 1.43E-08 | AC-G | OPN3          |
| SBF1.1    | 9.58E-13 | -0.11633 | 0.029 | 0.074 | 1.43E-08 | AC-G | SBF1          |
| MLXIPL    | 9.78E-13 | -0.17874 | 0.01  | 0.045 | 1.46E-08 | AC-G | MLXIPL        |
| TESK1.1   | 9.82E-13 | -0.10859 | 0.04  | 0.089 | 1.47E-08 | AC-G | TESK1         |
| LPGAT1.1  | 9.90E-13 | -0.12972 | 0.078 | 0.138 | 1.48E-08 | AC-G | LPGAT1        |
| PHF11.1   | 9.92E-13 | -0.1549  | 0.089 | 0.152 | 1.48E-08 | AC-G | PHF11         |
| TRIM22.1  | 9.95E-13 | -0.23079 | 0.085 | 0.144 | 1.49E-08 | AC-G | TRIM22        |

|            |           |           |        |        |           |      |               |
|------------|-----------|-----------|--------|--------|-----------|------|---------------|
| MAML3      | 1. 01E-12 | -0. 13495 | 0. 008 | 0. 041 | 1. 51E-08 | AC-G | MAML3         |
| SCAF4      | 1. 04E-12 | -0. 1269  | 0. 087 | 0. 151 | 1. 56E-08 | AC-G | SCAF4         |
| CTA-384D8  | 1. 09E-12 | -0. 11761 | 0. 001 | 0. 028 | 1. 63E-08 | AC-G | CTA-384D8. 34 |
| VPS36. 1   | 1. 10E-12 | -0. 11455 | 0. 138 | 0. 213 | 1. 65E-08 | AC-G | VPS36         |
| PIGS. 1    | 1. 11E-12 | -0. 10436 | 0. 122 | 0. 194 | 1. 65E-08 | AC-G | PIGS          |
| GALNT10. 1 | 1. 12E-12 | -0. 12329 | 0. 051 | 0. 103 | 1. 67E-08 | AC-G | GALNT10       |
| H2AFX. 1   | 1. 12E-12 | -0. 21699 | 0. 162 | 0. 231 | 1. 67E-08 | AC-G | H2AFX         |
| TSPAN33    | 1. 14E-12 | -0. 14623 | 0. 013 | 0. 048 | 1. 70E-08 | AC-G | TSPAN33       |
| CARNS1     | 1. 14E-12 | -0. 21884 | 0. 004 | 0. 033 | 1. 70E-08 | AC-G | CARNS1        |
| NPPA       | 1. 14E-12 | -0. 14889 | 0. 004 | 0. 033 | 1. 71E-08 | AC-G | NPPA          |
| MAZ. 1     | 1. 17E-12 | -0. 11793 | 0. 181 | 0. 264 | 1. 74E-08 | AC-G | MAZ           |
| CD2AP. 1   | 1. 18E-12 | -0. 11447 | 0. 041 | 0. 09  | 1. 76E-08 | AC-G | CD2AP         |
| DUSP14. 1  | 1. 18E-12 | 0. 348352 | 0. 224 | 0. 17  | 1. 77E-08 | AC-G | DUSP14        |
| NHSL2      | 1. 20E-12 | 0. 124485 | 0. 086 | 0. 045 | 1. 79E-08 | AC-G | NHSL2         |
| PICK1. 1   | 1. 25E-12 | -0. 17129 | 0. 046 | 0. 096 | 1. 87E-08 | AC-G | PICK1         |
| LTB4R      | 1. 25E-12 | -0. 1178  | 0. 007 | 0. 039 | 1. 87E-08 | AC-G | LTB4R         |
| RP11-353N  | 1. 28E-12 | -0. 1241  | 0      | 0. 026 | 1. 92E-08 | AC-G | RP11-353N4. 5 |
| APOBEC3G.  | 1. 31E-12 | -0. 18498 | 0. 071 | 0. 127 | 1. 96E-08 | AC-G | APOBEC3G      |
| MAN1A2. 1  | 1. 32E-12 | -0. 11191 | 0. 141 | 0. 216 | 1. 97E-08 | AC-G | MAN1A2        |
| SART1. 1   | 1. 34E-12 | -0. 13519 | 0. 137 | 0. 21  | 2. 00E-08 | AC-G | SART1         |
| ZNF550. 1  | 1. 34E-12 | 0. 158058 | 0. 079 | 0. 042 | 2. 01E-08 | AC-G | ZNF550        |
| PIAS1. 1   | 1. 35E-12 | -0. 17186 | 0. 104 | 0. 169 | 2. 02E-08 | AC-G | PIAS1         |
| LHFP. 1    | 1. 38E-12 | 0. 391133 | 0. 281 | 0. 222 | 2. 07E-08 | AC-G | LHFP          |
| MFS7       | 1. 42E-12 | -0. 11237 | 0. 006 | 0. 037 | 2. 12E-08 | AC-G | MFS7          |
| RALGAP1.   | 1. 47E-12 | -0. 16018 | 0. 08  | 0. 14  | 2. 19E-08 | AC-G | RALGAP1       |
| LINC01152  | 1. 48E-12 | 0. 202753 | 0. 042 | 0. 017 | 2. 21E-08 | AC-G | LINC01152     |
| LRCH3. 1   | 1. 50E-12 | -0. 10863 | 0. 085 | 0. 148 | 2. 24E-08 | AC-G | LRCH3         |
| CAP1       | 1. 51E-12 | -0. 12371 | 0. 497 | 0. 611 | 2. 26E-08 | AC-G | CAP1          |
| TMEM151A   | 1. 52E-12 | -0. 14035 | 0. 013 | 0. 048 | 2. 27E-08 | AC-G | TMEM151A      |
| FBXW2. 1   | 1. 53E-12 | -0. 12844 | 0. 13  | 0. 205 | 2. 29E-08 | AC-G | FBXW2         |
| MED24. 1   | 1. 57E-12 | -0. 11699 | 0. 111 | 0. 179 | 2. 35E-08 | AC-G | MED24         |
| PHGDH. 1   | 1. 58E-12 | 0. 233835 | 0. 25  | 0. 19  | 2. 36E-08 | AC-G | PHGDH         |
| TRAPPC10.  | 1. 61E-12 | -0. 136   | 0. 05  | 0. 101 | 2. 40E-08 | AC-G | TRAPPC10      |
| AATK       | 1. 65E-12 | -0. 19325 | 0. 007 | 0. 038 | 2. 46E-08 | AC-G | AATK          |
| SELO. 1    | 1. 65E-12 | -0. 11457 | 0. 028 | 0. 072 | 2. 47E-08 | AC-G | SELO          |
| WDFY4      | 1. 67E-12 | -0. 13057 | 0. 003 | 0. 031 | 2. 50E-08 | AC-G | WDFY4         |
| TMEM144. 1 | 1. 69E-12 | -0. 32919 | 0. 039 | 0. 085 | 2. 53E-08 | AC-G | TMEM144       |
| DNAJC13. 1 | 1. 71E-12 | -0. 13317 | 0. 034 | 0. 08  | 2. 56E-08 | AC-G | DNAJC13       |
| PNPLA2. 1  | 1. 72E-12 | -0. 14511 | 0. 149 | 0. 224 | 2. 56E-08 | AC-G | PNPLA2        |
| ZYX. 1     | 1. 77E-12 | -0. 13928 | 0. 325 | 0. 417 | 2. 64E-08 | AC-G | ZYX           |
| SULF2. 1   | 1. 78E-12 | -0. 14023 | 0. 105 | 0. 17  | 2. 66E-08 | AC-G | SULF2         |
| R3HDM4. 1  | 1. 79E-12 | -0. 11114 | 0. 138 | 0. 212 | 2. 68E-08 | AC-G | R3HDM4        |
| ZYG11B. 1  | 1. 79E-12 | -0. 12475 | 0. 095 | 0. 159 | 2. 68E-08 | AC-G | ZYG11B        |
| AP2B1      | 1. 82E-12 | -0. 10467 | 0. 264 | 0. 355 | 2. 71E-08 | AC-G | AP2B1         |
| TCTN1      | 1. 90E-12 | 0. 363869 | 0. 255 | 0. 203 | 2. 84E-08 | AC-G | TCTN1         |
| SYAP1      | 1. 92E-12 | -0. 14713 | 0. 308 | 0. 402 | 2. 87E-08 | AC-G | SYAP1         |
| PLVAP      | 1. 93E-12 | -0. 15068 | 0. 005 | 0. 035 | 2. 89E-08 | AC-G | PLVAP         |
| TMEM87B. 1 | 1. 95E-12 | -0. 12403 | 0. 03  | 0. 074 | 2. 91E-08 | AC-G | TMEM87B       |
| MAPK13     | 1. 97E-12 | -0. 11922 | 0. 005 | 0. 036 | 2. 94E-08 | AC-G | MAPK13        |
| FLII. 1    | 1. 98E-12 | -0. 12799 | 0. 128 | 0. 198 | 2. 95E-08 | AC-G | FLII          |
| AGO1. 1    | 2. 02E-12 | -0. 12844 | 0. 048 | 0. 098 | 3. 01E-08 | AC-G | AGO1          |

|            |          |          |       |       |          |      |               |
|------------|----------|----------|-------|-------|----------|------|---------------|
| RNF13.1    | 2.03E-12 | -0.1446  | 0.4   | 0.496 | 3.03E-08 | AC-G | RNF13         |
| RP11-597E  | 2.03E-12 | -0.15048 | 0.001 | 0.027 | 3.03E-08 | AC-G | RP11-597D13.8 |
| RNF5       | 2.03E-12 | -0.11712 | 0.308 | 0.406 | 3.04E-08 | AC-G | RNF5          |
| CC2D1A     | 2.04E-12 | -0.12852 | 0.126 | 0.198 | 3.05E-08 | AC-G | CC2D1A        |
| CEP135.1   | 2.05E-12 | -0.12688 | 0.04  | 0.088 | 3.07E-08 | AC-G | CEP135        |
| FAR1.1     | 2.08E-12 | -0.11926 | 0.085 | 0.147 | 3.10E-08 | AC-G | FAR1          |
| TMEM50B.1  | 2.08E-12 | 0.291449 | 0.347 | 0.294 | 3.11E-08 | AC-G | TMEM50B       |
| XIAP.1     | 2.09E-12 | -0.13434 | 0.149 | 0.226 | 3.12E-08 | AC-G | XIAP          |
| TMEM57.1   | 2.12E-12 | -0.15895 | 0.118 | 0.186 | 3.17E-08 | AC-G | TMEM57        |
| TNRC6C.1   | 2.14E-12 | -0.10867 | 0.114 | 0.183 | 3.20E-08 | AC-G | TNRC6C        |
| MAST4      | 2.14E-12 | 0.169816 | 0.084 | 0.046 | 3.20E-08 | AC-G | MAST4         |
| RUFY1.1    | 2.16E-12 | -0.10368 | 0.098 | 0.163 | 3.23E-08 | AC-G | RUFY1         |
| SLC05A1    | 2.17E-12 | -0.12251 | 0.012 | 0.047 | 3.24E-08 | AC-G | SLC05A1       |
| CHPF.1     | 2.19E-12 | 0.278112 | 0.299 | 0.251 | 3.27E-08 | AC-G | CHPF          |
| FAM122A.1  | 2.24E-12 | -0.14224 | 0.091 | 0.154 | 3.35E-08 | AC-G | FAM122A       |
| CROT.1     | 2.26E-12 | 0.311604 | 0.176 | 0.124 | 3.37E-08 | AC-G | CROT          |
| FAM222A    | 2.31E-12 | -0.11069 | 0.005 | 0.034 | 3.45E-08 | AC-G | FAM222A       |
| MOGS       | 2.31E-12 | -0.12048 | 0.074 | 0.133 | 3.46E-08 | AC-G | MOGS          |
| TIAM1      | 2.32E-12 | -0.12719 | 0.039 | 0.087 | 3.47E-08 | AC-G | TIAM1         |
| SESN1.1    | 2.32E-12 | -0.22265 | 0.059 | 0.11  | 3.47E-08 | AC-G | SESN1         |
| FAM20A.1   | 2.34E-12 | -0.20278 | 0.026 | 0.066 | 3.49E-08 | AC-G | FAM20A        |
| CCDC6      | 2.36E-12 | -0.10991 | 0.063 | 0.12  | 3.53E-08 | AC-G | CCDC6         |
| KCNQ10T1.1 | 2.40E-12 | -0.19477 | 0.213 | 0.291 | 3.59E-08 | AC-G | KCNQ10T1      |
| DTNBP1.1   | 2.47E-12 | -0.13988 | 0.144 | 0.219 | 3.68E-08 | AC-G | DTNBP1        |
| PTBP1.1    | 2.54E-12 | -0.10432 | 0.243 | 0.339 | 3.80E-08 | AC-G | PTBP1         |
| NCEH1      | 2.55E-12 | -0.12736 | 0.031 | 0.075 | 3.81E-08 | AC-G | NCEH1         |
| TNRC18.1   | 2.61E-12 | -0.12803 | 0.036 | 0.082 | 3.89E-08 | AC-G | TNRC18        |
| COPA.1     | 2.62E-12 | -0.11653 | 0.237 | 0.328 | 3.92E-08 | AC-G | COPA          |
| ISG20L2    | 2.62E-12 | -0.14036 | 0.161 | 0.237 | 3.92E-08 | AC-G | ISG20L2       |
| PWP2.1     | 2.65E-12 | -0.19496 | 0.076 | 0.133 | 3.96E-08 | AC-G | PWP2          |
| ACOT9.1    | 2.67E-12 | -0.12153 | 0.124 | 0.193 | 3.99E-08 | AC-G | ACOT9         |
| RP11-347F  | 2.69E-12 | -0.26845 | 0.029 | 0.071 | 4.01E-08 | AC-G | RP11-347P5.1  |
| BAK1.1     | 2.73E-12 | -0.13557 | 0.069 | 0.125 | 4.07E-08 | AC-G | BAK1          |
| IL27RA     | 2.78E-12 | -0.11703 | 0.022 | 0.062 | 4.16E-08 | AC-G | IL27RA        |
| DUSP8      | 2.86E-12 | -0.12353 | 0.019 | 0.057 | 4.28E-08 | AC-G | DUSP8         |
| MPZL1.1    | 2.94E-12 | -0.15816 | 0.184 | 0.261 | 4.40E-08 | AC-G | MPZL1         |
| ASNS.1     | 2.97E-12 | 0.237841 | 0.226 | 0.167 | 4.43E-08 | AC-G | ASNS          |
| GOPC.1     | 2.98E-12 | -0.11274 | 0.188 | 0.271 | 4.45E-08 | AC-G | GOPC          |
| SMAP1.1    | 3.00E-12 | -0.12431 | 0.225 | 0.312 | 4.48E-08 | AC-G | SMAP1         |
| CPOX.1     | 3.01E-12 | -0.10485 | 0.033 | 0.078 | 4.50E-08 | AC-G | CPOX          |
| CHCHD7     | 3.01E-12 | -0.13567 | 0.22  | 0.299 | 4.50E-08 | AC-G | CHCHD7        |
| REEP5.1    | 3.03E-12 | 0.223447 | 0.596 | 0.582 | 4.53E-08 | AC-G | REEP5         |
| PAPD5.1    | 3.19E-12 | -0.11204 | 0.04  | 0.088 | 4.77E-08 | AC-G | PAPD5         |
| PTPN4.1    | 3.19E-12 | -0.1193  | 0.057 | 0.111 | 4.77E-08 | AC-G | PTPN4         |
| RIF1       | 3.25E-12 | -0.11688 | 0.158 | 0.232 | 4.86E-08 | AC-G | RIF1          |
| PPP1R16A   | 3.26E-12 | 0.244072 | 0.214 | 0.16  | 4.88E-08 | AC-G | PPP1R16A      |
| MPG.1      | 3.28E-12 | -0.10371 | 0.265 | 0.361 | 4.90E-08 | AC-G | MPG           |
| DLD.1      | 3.35E-12 | 0.319384 | 0.386 | 0.336 | 5.00E-08 | AC-G | DLD           |
| PIEZO1.1   | 3.39E-12 | -0.10733 | 0.032 | 0.077 | 5.06E-08 | AC-G | PIEZO1        |
| ZDHHC3.1   | 3.45E-12 | -0.11666 | 0.139 | 0.211 | 5.15E-08 | AC-G | ZDHHC3        |
| KDM4B.1    | 3.48E-12 | -0.12374 | 0.082 | 0.142 | 5.20E-08 | AC-G | KDM4B         |

|           |          |          |       |       |          |      |               |
|-----------|----------|----------|-------|-------|----------|------|---------------|
| ANTXR1.1  | 3.60E-12 | -0.12124 | 0.049 | 0.099 | 5.38E-08 | AC-G | ANTXR1        |
| SCARF1    | 3.62E-12 | -0.10969 | 0.003 | 0.031 | 5.41E-08 | AC-G | SCARF1        |
| RAPGEF5   | 3.62E-12 | -0.19449 | 0.013 | 0.048 | 5.41E-08 | AC-G | RAPGEF5       |
| PLAGL1    | 3.64E-12 | -0.13341 | 0.012 | 0.046 | 5.44E-08 | AC-G | PLAGL1        |
| KB-1507C5 | 3.67E-12 | -0.12346 | 0.002 | 0.028 | 5.49E-08 | AC-G | KB-1507C5.4   |
| KAT2B.1   | 3.70E-12 | -0.10015 | 0.034 | 0.079 | 5.54E-08 | AC-G | KAT2B         |
| HRCT1     | 3.75E-12 | 0.175415 | 0.052 | 0.024 | 5.61E-08 | AC-G | HRCT1         |
| EPS15.1   | 3.78E-12 | -0.18704 | 0.099 | 0.16  | 5.65E-08 | AC-G | EPS15         |
| RASA3.1   | 3.81E-12 | -0.15341 | 0.052 | 0.102 | 5.70E-08 | AC-G | RASA3         |
| TNFRSF11A | 3.90E-12 | -0.11121 | 0.002 | 0.029 | 5.82E-08 | AC-G | TNFRSF11A     |
| ERBB4.1   | 3.90E-12 | -0.12793 | 0.025 | 0.065 | 5.83E-08 | AC-G | ERBB4         |
| FAM149A   | 4.02E-12 | -0.13448 | 0.007 | 0.037 | 6.01E-08 | AC-G | FAM149A       |
| ADIPOR2.1 | 4.04E-12 | -0.19995 | 0.099 | 0.16  | 6.04E-08 | AC-G | ADIPOR2       |
| CSTB.1    | 4.04E-12 | 0.197876 | 0.672 | 0.693 | 6.04E-08 | AC-G | CSTB          |
| GUCD1.1   | 4.04E-12 | -0.11403 | 0.074 | 0.132 | 6.04E-08 | AC-G | GUCD1         |
| NME7.1    | 4.05E-12 | 0.277084 | 0.206 | 0.152 | 6.05E-08 | AC-G | NME7          |
| KPNA4.1   | 4.08E-12 | -0.11298 | 0.122 | 0.191 | 6.10E-08 | AC-G | KPNA4         |
| CELF1.1   | 4.11E-12 | -0.11023 | 0.233 | 0.322 | 6.14E-08 | AC-G | CELF1         |
| NDRG4.1   | 4.14E-12 | -0.11951 | 0.106 | 0.171 | 6.18E-08 | AC-G | NDRG4         |
| FAM84B.1  | 4.24E-12 | -0.13303 | 0.046 | 0.095 | 6.34E-08 | AC-G | FAM84B        |
| WTAP.1    | 4.30E-12 | 0.300874 | 0.428 | 0.419 | 6.42E-08 | AC-G | WTAP          |
| TMEM100.1 | 4.35E-12 | 0.225349 | 0.13  | 0.081 | 6.50E-08 | AC-G | TMEM100       |
| MDM2.1    | 4.43E-12 | -0.17039 | 0.147 | 0.218 | 6.62E-08 | AC-G | MDM2          |
| EIF4E.1   | 4.49E-12 | -0.10753 | 0.403 | 0.505 | 6.71E-08 | AC-G | EIF4E         |
| TMEM208.1 | 4.61E-12 | 0.269184 | 0.491 | 0.462 | 6.89E-08 | AC-G | TMEM208       |
| TMA7.1    | 4.74E-12 | 0.186992 | 0.815 | 0.858 | 7.08E-08 | AC-G | TMA7          |
| SIGLEC1   | 4.81E-12 | -0.14184 | 0.005 | 0.034 | 7.19E-08 | AC-G | SIGLEC1       |
| TOR4A     | 4.81E-12 | -0.10429 | 0.003 | 0.03  | 7.19E-08 | AC-G | TOR4A         |
| SUMF2     | 4.83E-12 | -0.11881 | 0.265 | 0.358 | 7.21E-08 | AC-G | SUMF2         |
| GALNT7.1  | 4.83E-12 | -0.10947 | 0.048 | 0.098 | 7.22E-08 | AC-G | GALNT7        |
| ATP9B     | 4.87E-12 | -0.11689 | 0.039 | 0.086 | 7.28E-08 | AC-G | ATP9B         |
| PHLPP1.1  | 4.94E-12 | -0.1125  | 0.044 | 0.093 | 7.39E-08 | AC-G | PHLPP1        |
| PNO1      | 5.00E-12 | 0.236068 | 0.251 | 0.193 | 7.47E-08 | AC-G | PNO1          |
| DCAF5.1   | 5.08E-12 | -0.11729 | 0.083 | 0.143 | 7.59E-08 | AC-G | DCAF5         |
| GLUD1.1   | 5.27E-12 | -0.18594 | 0.187 | 0.26  | 7.88E-08 | AC-G | GLUD1         |
| ELMO1.1   | 5.43E-12 | -0.20573 | 0.136 | 0.2   | 8.12E-08 | AC-G | ELMO1         |
| CERS4.1   | 5.69E-12 | -0.11859 | 0.139 | 0.211 | 8.50E-08 | AC-G | CERS4         |
| RCOR2     | 5.73E-12 | -0.10442 | 0.016 | 0.052 | 8.56E-08 | AC-G | RCOR2         |
| MIER1.1   | 5.79E-12 | -0.15309 | 0.118 | 0.185 | 8.65E-08 | AC-G | MIER1         |
| PWWP2B    | 5.81E-12 | -0.10955 | 0.008 | 0.039 | 8.69E-08 | AC-G | PWWP2B        |
| HSPA4L.1  | 5.95E-12 | 0.157448 | 0.109 | 0.066 | 8.89E-08 | AC-G | HSPA4L        |
| ASIP      | 6.01E-12 | 0.112005 | 0.043 | 0.018 | 8.98E-08 | AC-G | ASIP          |
| DNM1L.1   | 6.05E-12 | -0.1146  | 0.169 | 0.244 | 9.04E-08 | AC-G | DNM1L         |
| DISC1     | 6.18E-12 | -0.11242 | 0.016 | 0.052 | 9.23E-08 | AC-G | DISC1         |
| TRAF5     | 6.27E-12 | -0.11078 | 0.023 | 0.063 | 9.37E-08 | AC-G | TRAF5         |
| RP11-557H | 6.45E-12 | -0.15258 | 0.004 | 0.031 | 9.64E-08 | AC-G | RP11-557H15.4 |
| RP11-367J | 6.50E-12 | 0.107108 | 0.027 | 0.009 | 9.71E-08 | AC-G | RP11-367J11.3 |
| SAMD8.1   | 6.57E-12 | -0.10381 | 0.091 | 0.154 | 9.82E-08 | AC-G | SAMD8         |
| C7orf43.1 | 6.66E-12 | -0.10778 | 0.033 | 0.076 | 9.95E-08 | AC-G | C7orf43       |
| FBXO34.1  | 6.70E-12 | -0.1305  | 0.049 | 0.099 | 1.00E-07 | AC-G | FBXO34        |
| HINT2.1   | 6.81E-12 | -0.10528 | 0.27  | 0.361 | 1.02E-07 | AC-G | HINT2         |

|            |          |          |       |       |          |      |          |
|------------|----------|----------|-------|-------|----------|------|----------|
| PARP8.1    | 6.91E-12 | -0.14791 | 0.032 | 0.075 | 1.03E-07 | AC-G | PARP8    |
| ZC3H4.1    | 6.94E-12 | -0.11042 | 0.046 | 0.095 | 1.04E-07 | AC-G | ZC3H4    |
| KIF21B     | 6.98E-12 | -0.11238 | 0.004 | 0.032 | 1.04E-07 | AC-G | KIF21B   |
| BAZ1B.1    | 7.01E-12 | -0.11103 | 0.225 | 0.312 | 1.05E-07 | AC-G | BAZ1B    |
| TPK1       | 7.18E-12 | -0.12975 | 0.016 | 0.051 | 1.07E-07 | AC-G | TPK1     |
| CLCN7.1    | 7.32E-12 | -0.11663 | 0.101 | 0.165 | 1.09E-07 | AC-G | CLCN7    |
| TGDS       | 7.54E-12 | 0.145553 | 0.111 | 0.067 | 1.13E-07 | AC-G | TGDS     |
| IPO7.1     | 7.56E-12 | -0.10115 | 0.148 | 0.224 | 1.13E-07 | AC-G | IPO7     |
| DACT3.1    | 7.62E-12 | -0.12051 | 0.039 | 0.084 | 1.14E-07 | AC-G | DACT3    |
| STK17A.1   | 8.20E-12 | -0.12237 | 0.222 | 0.307 | 1.23E-07 | AC-G | STK17A   |
| MIOS.1     | 8.21E-12 | -0.15042 | 0.076 | 0.131 | 1.23E-07 | AC-G | MIOS     |
| LRRK2.1    | 8.22E-12 | -0.14333 | 0.027 | 0.067 | 1.23E-07 | AC-G | LRRK2    |
| GRID2      | 8.27E-12 | -0.11728 | 0.016 | 0.052 | 1.24E-07 | AC-G | GRID2    |
| HNMT.1     | 8.35E-12 | -0.14622 | 0.163 | 0.229 | 1.25E-07 | AC-G | HNMT     |
| SLC7A6.1   | 8.41E-12 | -0.1375  | 0.031 | 0.073 | 1.26E-07 | AC-G | SLC7A6   |
| FBXO9.1    | 8.53E-12 | -0.1235  | 0.145 | 0.218 | 1.27E-07 | AC-G | FBXO9    |
| THRAP3.1   | 8.55E-12 | -0.10192 | 0.348 | 0.455 | 1.28E-07 | AC-G | THRAP3   |
| ANG        | 8.63E-12 | 0.148073 | 0.124 | 0.076 | 1.29E-07 | AC-G | ANG      |
| REC8.1     | 8.66E-12 | -0.14589 | 0.039 | 0.085 | 1.29E-07 | AC-G | REC8     |
| PIK3CG     | 8.69E-12 | -0.1065  | 0.001 | 0.026 | 1.30E-07 | AC-G | PIK3CG   |
| YIPF4.1    | 8.69E-12 | -0.13575 | 0.295 | 0.39  | 1.30E-07 | AC-G | YIPF4    |
| TMEM220.1  | 8.76E-12 | -0.13212 | 0.033 | 0.076 | 1.31E-07 | AC-G | TMEM220  |
| PHRF1.1    | 8.80E-12 | -0.10102 | 0.043 | 0.091 | 1.31E-07 | AC-G | PHRF1    |
| WWP2.1     | 8.89E-12 | -0.10557 | 0.034 | 0.078 | 1.33E-07 | AC-G | WWP2     |
| AQR.1      | 8.92E-12 | -0.10852 | 0.034 | 0.078 | 1.33E-07 | AC-G | AQR      |
| SMIM10     | 8.94E-12 | 0.194451 | 0.077 | 0.042 | 1.34E-07 | AC-G | SMIM10   |
| ARRDC2.1   | 8.95E-12 | -0.22417 | 0.047 | 0.094 | 1.34E-07 | AC-G | ARRDC2   |
| SNRPA      | 8.96E-12 | -0.11868 | 0.184 | 0.266 | 1.34E-07 | AC-G | SNRPA    |
| CHFR.1     | 9.00E-12 | -0.13237 | 0.075 | 0.132 | 1.34E-07 | AC-G | CHFR     |
| SNX2.1     | 9.05E-12 | -0.10698 | 0.332 | 0.425 | 1.35E-07 | AC-G | SNX2     |
| TMEM106A   | 9.05E-12 | -0.16486 | 0.029 | 0.07  | 1.35E-07 | AC-G | TMEM106A |
| ITGA6.1    | 9.06E-12 | -0.13616 | 0.039 | 0.084 | 1.35E-07 | AC-G | ITGA6    |
| ZNFX1      | 9.15E-12 | -0.13604 | 0.089 | 0.151 | 1.37E-07 | AC-G | ZNFX1    |
| IFNLR1     | 9.34E-12 | -0.12523 | 0.002 | 0.028 | 1.40E-07 | AC-G | IFNLR1   |
| CASK       | 9.57E-12 | -0.10792 | 0.075 | 0.133 | 1.43E-07 | AC-G | CASK     |
| MAP4K5.1   | 9.69E-12 | -0.13    | 0.101 | 0.165 | 1.45E-07 | AC-G | MAP4K5   |
| CYFIP2.1   | 9.80E-12 | -0.12395 | 0.068 | 0.122 | 1.46E-07 | AC-G | CYFIP2   |
| PRIM1.1    | 9.93E-12 | -0.11766 | 0.042 | 0.089 | 1.48E-07 | AC-G | PRIM1    |
| PLEKHA3.1  | 9.99E-12 | -0.13464 | 0.168 | 0.244 | 1.49E-07 | AC-G | PLEKHA3  |
| CDH2.1     | 1.01E-11 | -0.11339 | 0.22  | 0.297 | 1.51E-07 | AC-G | CDH2     |
| KCNJ10.1   | 1.02E-11 | -0.15775 | 0.02  | 0.058 | 1.53E-07 | AC-G | KCNJ10   |
| DUOX1.1    | 1.03E-11 | -0.12087 | 0.029 | 0.07  | 1.54E-07 | AC-G | DUOX1    |
| LANCL1.1   | 1.04E-11 | -0.12361 | 0.071 | 0.126 | 1.56E-07 | AC-G | LANCL1   |
| ZDHHC7.1   | 1.05E-11 | -0.15906 | 0.097 | 0.157 | 1.56E-07 | AC-G | ZDHHC7   |
| XAF1       | 1.05E-11 | -0.2239  | 0.065 | 0.117 | 1.57E-07 | AC-G | XAF1     |
| TMEM141.1  | 1.08E-11 | -0.10544 | 0.185 | 0.265 | 1.62E-07 | AC-G | TMEM141  |
| SEL1L      | 1.12E-11 | -0.12785 | 0.117 | 0.184 | 1.68E-07 | AC-G | SEL1L    |
| SRPK1.1    | 1.14E-11 | -0.12769 | 0.111 | 0.177 | 1.70E-07 | AC-G | SRPK1    |
| ADCY3.1    | 1.14E-11 | -0.12676 | 0.025 | 0.065 | 1.71E-07 | AC-G | ADCY3    |
| EPOR       | 1.15E-11 | -0.11916 | 0.033 | 0.076 | 1.72E-07 | AC-G | EPOR     |
| CDC42EP1.1 | 1.16E-11 | -0.12735 | 0.079 | 0.137 | 1.73E-07 | AC-G | CDC42EP1 |

|           |          |          |       |       |          |      |              |
|-----------|----------|----------|-------|-------|----------|------|--------------|
| ZNF100    | 1.16E-11 | -0.11203 | 0.031 | 0.074 | 1.73E-07 | AC-G | ZNF100       |
| ITGB2-AS1 | 1.16E-11 | -0.13603 | 0.005 | 0.033 | 1.74E-07 | AC-G | ITGB2-AS1    |
| TMEM2.1   | 1.17E-11 | -0.14914 | 0.03  | 0.071 | 1.74E-07 | AC-G | TMEM2        |
| UBXN11    | 1.20E-11 | 0.217711 | 0.181 | 0.127 | 1.80E-07 | AC-G | UBXN11       |
| PPIL2.1   | 1.22E-11 | -0.10663 | 0.071 | 0.126 | 1.82E-07 | AC-G | PPIL2        |
| MAL       | 1.22E-11 | -0.24426 | 0.012 | 0.045 | 1.83E-07 | AC-G | MAL          |
| ST3GAL1.1 | 1.22E-11 | -0.15903 | 0.06  | 0.111 | 1.83E-07 | AC-G | ST3GAL1      |
| TP53TG1.1 | 1.24E-11 | 0.361007 | 0.242 | 0.188 | 1.85E-07 | AC-G | TP53TG1      |
| CLEC12A   | 1.25E-11 | -0.1095  | 0     | 0.024 | 1.87E-07 | AC-G | CLEC12A      |
| SEC61B.1  | 1.29E-11 | 0.177466 | 0.708 | 0.742 | 1.93E-07 | AC-G | SEC61B       |
| KHDRBS3.1 | 1.31E-11 | -0.10475 | 0.155 | 0.227 | 1.96E-07 | AC-G | KHDRBS3      |
| SETD2.1   | 1.31E-11 | -0.10349 | 0.092 | 0.154 | 1.96E-07 | AC-G | SETD2        |
| RP11-796E | 1.33E-11 | -0.20675 | 0.031 | 0.072 | 1.98E-07 | AC-G | RP11-796E2.4 |
| CHMP7.1   | 1.36E-11 | -0.108   | 0.121 | 0.188 | 2.03E-07 | AC-G | CHMP7        |
| POLR2C.1  | 1.39E-11 | 0.272934 | 0.385 | 0.343 | 2.08E-07 | AC-G | POLR2C       |
| INTS10.1  | 1.39E-11 | -0.1273  | 0.233 | 0.315 | 2.08E-07 | AC-G | INTS10       |
| CASP9.1   | 1.40E-11 | -0.11824 | 0.044 | 0.092 | 2.09E-07 | AC-G | CASP9        |
| ZNF226.1  | 1.40E-11 | 0.363454 | 0.246 | 0.195 | 2.09E-07 | AC-G | ZNF226       |
| DIS3L.1   | 1.40E-11 | -0.11985 | 0.06  | 0.112 | 2.09E-07 | AC-G | DIS3L        |
| COG4.1    | 1.41E-11 | -0.13153 | 0.133 | 0.202 | 2.11E-07 | AC-G | COG4         |
| AMPD3     | 1.45E-11 | -0.16411 | 0.021 | 0.058 | 2.17E-07 | AC-G | AMPD3        |
| KIAA0196. | 1.45E-11 | -0.10907 | 0.066 | 0.12  | 2.17E-07 | AC-G | KIAA0196     |
| CSF2RB    | 1.50E-11 | -0.10524 | 0.003 | 0.029 | 2.25E-07 | AC-G | CSF2RB       |
| MYO10     | 1.57E-11 | -0.1047  | 0.136 | 0.205 | 2.34E-07 | AC-G | MYO10        |
| TAF3.1    | 1.57E-11 | -0.13164 | 0.075 | 0.131 | 2.35E-07 | AC-G | TAF3         |
| TLE4.1    | 1.58E-11 | -0.12723 | 0.109 | 0.174 | 2.37E-07 | AC-G | TLE4         |
| DHX33     | 1.59E-11 | -0.10519 | 0.074 | 0.13  | 2.37E-07 | AC-G | DHX33        |
| ECE1      | 1.63E-11 | 0.201724 | 0.115 | 0.073 | 2.43E-07 | AC-G | ECE1         |
| MOB1B.1   | 1.64E-11 | -0.10943 | 0.033 | 0.076 | 2.45E-07 | AC-G | MOB1B        |
| AVPI1.1   | 1.64E-11 | -0.26576 | 0.054 | 0.101 | 2.46E-07 | AC-G | AVPI1        |
| CCNK      | 1.66E-11 | -0.10424 | 0.076 | 0.133 | 2.48E-07 | AC-G | CCNK         |
| EIF1B.1   | 1.67E-11 | 0.275107 | 0.597 | 0.586 | 2.50E-07 | AC-G | EIF1B        |
| PDCD4.1   | 1.68E-11 | -0.21229 | 0.1   | 0.158 | 2.51E-07 | AC-G | PDCD4        |
| CCDC80.1  | 1.70E-11 | 0.228941 | 0.154 | 0.105 | 2.54E-07 | AC-G | CCDC80       |
| NEUROD1   | 1.71E-11 | -0.10551 | 0.011 | 0.043 | 2.55E-07 | AC-G | NEUROD1      |
| RRP1B.1   | 1.71E-11 | -0.10264 | 0.103 | 0.166 | 2.55E-07 | AC-G | RRP1B        |
| PLSCR1.1  | 1.73E-11 | -0.13174 | 0.293 | 0.372 | 2.58E-07 | AC-G | PLSCR1       |
| SPOCK3    | 1.76E-11 | -0.20438 | 0.008 | 0.038 | 2.63E-07 | AC-G | SPOCK3       |
| ICAM3.1   | 1.77E-11 | -0.13944 | 0.058 | 0.109 | 2.65E-07 | AC-G | ICAM3        |
| RBM7.1    | 1.80E-11 | 0.230329 | 0.289 | 0.234 | 2.69E-07 | AC-G | RBM7         |
| BCL11B    | 1.81E-11 | -0.11557 | 0.008 | 0.038 | 2.71E-07 | AC-G | BCL11B       |
| SMG1.1    | 1.83E-11 | -0.11543 | 0.108 | 0.173 | 2.73E-07 | AC-G | SMG1         |
| WRB       | 1.86E-11 | 0.300136 | 0.451 | 0.414 | 2.78E-07 | AC-G | WRB          |
| PLEKHH1   | 1.93E-11 | -0.13645 | 0.007 | 0.037 | 2.89E-07 | AC-G | PLEKHH1      |
| STK10.1   | 1.97E-11 | -0.17537 | 0.036 | 0.079 | 2.94E-07 | AC-G | STK10        |
| TMEM70.1  | 2.00E-11 | -0.16726 | 0.322 | 0.409 | 2.99E-07 | AC-G | TMEM70       |
| CHD2.1    | 2.01E-11 | -0.10604 | 0.219 | 0.306 | 3.00E-07 | AC-G | CHD2         |
| HIST1H2AC | 2.02E-11 | 0.345698 | 0.212 | 0.158 | 3.02E-07 | AC-G | HIST1H2AC    |
| SIDT1     | 2.07E-11 | -0.14345 | 0.002 | 0.027 | 3.09E-07 | AC-G | SIDT1        |
| HSD17B10  | 2.10E-11 | 0.329324 | 0.514 | 0.492 | 3.14E-07 | AC-G | HSD17B10     |
| CACNA2D3  | 2.11E-11 | -0.114   | 0.007 | 0.036 | 3.16E-07 | AC-G | CACNA2D3     |



|            |           |           |        |        |           |      |           |
|------------|-----------|-----------|--------|--------|-----------|------|-----------|
| SLC39A11.  | 2. 14E-11 | -0. 11557 | 0. 037 | 0. 08  | 3. 20E-07 | AC-G | SLC39A11  |
| HRSP12. 1  | 2. 16E-11 | 0. 291308 | 0. 243 | 0. 189 | 3. 23E-07 | AC-G | HRSP12    |
| ARFRP1     | 2. 18E-11 | -0. 10892 | 0. 182 | 0. 26  | 3. 25E-07 | AC-G | ARFRP1    |
| PLEKHG3    | 2. 18E-11 | -0. 10834 | 0. 005 | 0. 033 | 3. 25E-07 | AC-G | PLEKHG3   |
| ERMN       | 2. 21E-11 | -0. 35927 | 0. 011 | 0. 043 | 3. 30E-07 | AC-G | ERMN      |
| PTBP2      | 2. 24E-11 | -0. 13094 | 0. 063 | 0. 114 | 3. 35E-07 | AC-G | PTBP2     |
| CALB1      | 2. 24E-11 | 0. 218424 | 0. 03  | 0. 011 | 3. 35E-07 | AC-G | CALB1     |
| CNPY1. 1   | 2. 28E-11 | -0. 11233 | 0. 04  | 0. 085 | 3. 41E-07 | AC-G | CNPY1     |
| L3MBTL2. 1 | 2. 29E-11 | -0. 11984 | 0. 06  | 0. 111 | 3. 42E-07 | AC-G | L3MBTL2   |
| OAS2       | 2. 35E-11 | -0. 15065 | 0. 013 | 0. 045 | 3. 50E-07 | AC-G | OAS2      |
| GNAO1. 1   | 2. 35E-11 | -0. 17496 | 0. 051 | 0. 098 | 3. 51E-07 | AC-G | GNAO1     |
| CCDC18. 1  | 2. 42E-11 | -0. 15302 | 0. 04  | 0. 084 | 3. 62E-07 | AC-G | CCDC18    |
| BEND7      | 2. 43E-11 | -0. 15886 | 0. 026 | 0. 064 | 3. 63E-07 | AC-G | BEND7     |
| LIMA1. 1   | 2. 48E-11 | -0. 13519 | 0. 253 | 0. 33  | 3. 71E-07 | AC-G | LIMA1     |
| TTC37. 1   | 2. 51E-11 | -0. 11227 | 0. 128 | 0. 194 | 3. 75E-07 | AC-G | TTC37     |
| ELF2       | 2. 51E-11 | -0. 16364 | 0. 126 | 0. 192 | 3. 75E-07 | AC-G | ELF2      |
| RIPK3      | 2. 58E-11 | -0. 10079 | 0      | 0. 023 | 3. 86E-07 | AC-G | RIPK3     |
| ALDH1A1    | 2. 58E-11 | -0. 13917 | 0. 006 | 0. 034 | 3. 86E-07 | AC-G | ALDH1A1   |
| SNX14. 1   | 2. 62E-11 | -0. 13109 | 0. 152 | 0. 222 | 3. 92E-07 | AC-G | SNX14     |
| RGP1       | 2. 64E-11 | -0. 12503 | 0. 051 | 0. 098 | 3. 95E-07 | AC-G | RGP1      |
| HYI        | 2. 66E-11 | -0. 11772 | 0. 089 | 0. 149 | 3. 97E-07 | AC-G | HYI       |
| KXD1. 1    | 2. 76E-11 | 0. 300155 | 0. 479 | 0. 443 | 4. 12E-07 | AC-G | KXD1      |
| LRRC34     | 2. 76E-11 | 0. 10902  | 0. 068 | 0. 036 | 4. 13E-07 | AC-G | LRRC34    |
| ARID2. 1   | 2. 77E-11 | -0. 12472 | 0. 06  | 0. 111 | 4. 14E-07 | AC-G | ARID2     |
| MALT1. 1   | 2. 77E-11 | -0. 11311 | 0. 038 | 0. 081 | 4. 14E-07 | AC-G | MALT1     |
| PRKAR2B. 1 | 2. 85E-11 | -0. 13949 | 0. 034 | 0. 075 | 4. 27E-07 | AC-G | PRKAR2B   |
| SCG5. 1    | 2. 88E-11 | 0. 382998 | 0. 369 | 0. 32  | 4. 30E-07 | AC-G | SCG5      |
| NFATC3. 1  | 2. 92E-11 | -0. 14581 | 0. 096 | 0. 156 | 4. 36E-07 | AC-G | NFATC3    |
| PNPLA8. 1  | 2. 97E-11 | 0. 282633 | 0. 383 | 0. 34  | 4. 43E-07 | AC-G | PNPLA8    |
| SPEN. 1    | 3. 01E-11 | -0. 1031  | 0. 106 | 0. 169 | 4. 50E-07 | AC-G | SPEN      |
| PLEK2      | 3. 05E-11 | -0. 10834 | 0. 003 | 0. 028 | 4. 56E-07 | AC-G | PLEK2     |
| DCAF6. 1   | 3. 06E-11 | -0. 14814 | 0. 114 | 0. 176 | 4. 57E-07 | AC-G | DCAF6     |
| GSTM4. 1   | 3. 09E-11 | -0. 10904 | 0. 145 | 0. 216 | 4. 61E-07 | AC-G | GSTM4     |
| NFYC. 1    | 3. 10E-11 | -0. 10218 | 0. 159 | 0. 233 | 4. 64E-07 | AC-G | NFYC      |
| DUSP28. 1  | 3. 11E-11 | -0. 1072  | 0. 048 | 0. 095 | 4. 65E-07 | AC-G | DUSP28    |
| GLIS3      | 3. 12E-11 | 0. 170793 | 0. 112 | 0. 071 | 4. 67E-07 | AC-G | GLIS3     |
| PPP1CC. 1  | 3. 14E-11 | -0. 10952 | 0. 361 | 0. 461 | 4. 69E-07 | AC-G | PPP1CC    |
| SOX10      | 3. 17E-11 | -0. 15478 | 0. 006 | 0. 033 | 4. 73E-07 | AC-G | SOX10     |
| ZC3H11A. 1 | 3. 26E-11 | -0. 10855 | 0. 141 | 0. 211 | 4. 87E-07 | AC-G | ZC3H11A   |
| ARHGEF25.  | 3. 27E-11 | -0. 10175 | 0. 031 | 0. 072 | 4. 88E-07 | AC-G | ARHGEF25  |
| RACGAP1    | 3. 29E-11 | -0. 12407 | 0. 045 | 0. 09  | 4. 92E-07 | AC-G | RACGAP1   |
| SEMA4C. 1  | 3. 35E-11 | -0. 13529 | 0. 055 | 0. 103 | 5. 01E-07 | AC-G | SEMA4C    |
| LPCAT4. 1  | 3. 67E-11 | -0. 11369 | 0. 034 | 0. 076 | 5. 48E-07 | AC-G | LPCAT4    |
| RP2. 1     | 3. 82E-11 | -0. 10497 | 0. 04  | 0. 084 | 5. 70E-07 | AC-G | RP2       |
| GHRL. 1    | 3. 82E-11 | -0. 15346 | 0. 025 | 0. 063 | 5. 71E-07 | AC-G | GHRL      |
| WAC-AS1    | 3. 86E-11 | -0. 10623 | 0. 09  | 0. 15  | 5. 77E-07 | AC-G | WAC-AS1   |
| C10orf128  | 3. 88E-11 | -0. 14798 | 0. 007 | 0. 035 | 5. 79E-07 | AC-G | C10orf128 |
| KLF11      | 3. 90E-11 | -0. 11226 | 0. 013 | 0. 045 | 5. 83E-07 | AC-G | KLF11     |
| CUL5. 1    | 3. 90E-11 | -0. 1297  | 0. 162 | 0. 234 | 5. 83E-07 | AC-G | CUL5      |
| LGI3       | 3. 94E-11 | -0. 14425 | 0. 001 | 0. 025 | 5. 88E-07 | AC-G | LGI3      |
| QRICH1. 1  | 4. 01E-11 | -0. 11132 | 0. 098 | 0. 159 | 5. 99E-07 | AC-G | QRICH1    |

|           |          |          |       |       |          |      |          |
|-----------|----------|----------|-------|-------|----------|------|----------|
| KDM5A.1   | 4.11E-11 | -0.16277 | 0.185 | 0.26  | 6.14E-07 | AC-G | KDM5A    |
| LIMK2.1   | 4.12E-11 | -0.1397  | 0.048 | 0.094 | 6.16E-07 | AC-G | LIMK2    |
| MLLT10.1  | 4.14E-11 | -0.10092 | 0.079 | 0.135 | 6.19E-07 | AC-G | MLLT10   |
| SMC6.1    | 4.17E-11 | -0.11034 | 0.106 | 0.167 | 6.22E-07 | AC-G | SMC6     |
| FAM177A1  | 4.19E-11 | -0.1064  | 0.304 | 0.404 | 6.26E-07 | AC-G | FAM177A1 |
| GCSH.1    | 4.22E-11 | -0.13645 | 0.276 | 0.361 | 6.31E-07 | AC-G | GCSH     |
| CYBRD1.1  | 4.26E-11 | 0.273261 | 0.22  | 0.168 | 6.37E-07 | AC-G | CYBRD1   |
| NUMA1.1   | 4.34E-11 | -0.12589 | 0.115 | 0.18  | 6.48E-07 | AC-G | NUMA1    |
| CHAMP1.1  | 4.34E-11 | -0.10506 | 0.081 | 0.138 | 6.49E-07 | AC-G | CHAMP1   |
| RCBTB1.1  | 4.50E-11 | -0.12635 | 0.036 | 0.079 | 6.72E-07 | AC-G | RCBTB1   |
| GCNT2     | 4.51E-11 | -0.11942 | 0.015 | 0.048 | 6.75E-07 | AC-G | GCNT2    |
| ZNF385A.1 | 4.63E-11 | -0.12716 | 0.088 | 0.146 | 6.93E-07 | AC-G | ZNF385A  |
| ABHD17B.1 | 4.67E-11 | -0.17308 | 0.08  | 0.133 | 6.97E-07 | AC-G | ABHD17B  |
| LEMD2.1   | 4.71E-11 | -0.12132 | 0.098 | 0.158 | 7.04E-07 | AC-G | LEMD2    |
| SLBP.1    | 4.76E-11 | -0.13033 | 0.241 | 0.324 | 7.11E-07 | AC-G | SLBP     |
| DHRS9     | 4.81E-11 | -0.15649 | 0.002 | 0.026 | 7.19E-07 | AC-G | DHRS9    |
| LRP6.1    | 4.94E-11 | -0.10851 | 0.068 | 0.12  | 7.39E-07 | AC-G | LRP6     |
| OSTM1.1   | 4.96E-11 | -0.14303 | 0.168 | 0.24  | 7.41E-07 | AC-G | OSTM1    |
| FGFR2     | 4.98E-11 | -0.17269 | 0.018 | 0.053 | 7.44E-07 | AC-G | FGFR2    |
| GSE1.1    | 4.98E-11 | -0.14847 | 0.052 | 0.099 | 7.44E-07 | AC-G | GSE1     |
| TREML1    | 5.04E-11 | -0.12334 | 0.002 | 0.025 | 7.54E-07 | AC-G | TREML1   |
| SENP6.1   | 5.15E-11 | -0.14811 | 0.159 | 0.23  | 7.69E-07 | AC-G | SENP6    |
| SCD5.1    | 5.19E-11 | -0.14066 | 0.32  | 0.409 | 7.75E-07 | AC-G | SCD5     |
| MAP4K1    | 5.26E-11 | -0.14328 | 0.006 | 0.034 | 7.86E-07 | AC-G | MAP4K1   |
| REPIN1.1  | 5.27E-11 | -0.11094 | 0.207 | 0.287 | 7.87E-07 | AC-G | REPIN1   |
| KIAA1109  | 5.32E-11 | -0.13471 | 0.075 | 0.129 | 7.95E-07 | AC-G | KIAA1109 |
| ITGAL     | 5.40E-11 | -0.12738 | 0.003 | 0.028 | 8.07E-07 | AC-G | ITGAL    |
| ATP5F1.1  | 5.50E-11 | 0.234986 | 0.639 | 0.645 | 8.22E-07 | AC-G | ATP5F1   |
| ADAM22.1  | 5.54E-11 | -0.12359 | 0.03  | 0.069 | 8.28E-07 | AC-G | ADAM22   |
| FAM53C.1  | 5.56E-11 | -0.10803 | 0.179 | 0.254 | 8.32E-07 | AC-G | FAM53C   |
| PPARD.1   | 5.66E-11 | -0.15387 | 0.066 | 0.117 | 8.46E-07 | AC-G | PPARD    |
| TFG       | 5.75E-11 | 0.242669 | 0.438 | 0.402 | 8.60E-07 | AC-G | TFG      |
| PIGX.1    | 5.80E-11 | -0.12172 | 0.189 | 0.265 | 8.66E-07 | AC-G | PIGX     |
| LRRC61.1  | 5.81E-11 | 0.11054  | 0.098 | 0.057 | 8.68E-07 | AC-G | LRRC61   |
| POMZP3.1  | 5.91E-11 | -0.12411 | 0.048 | 0.094 | 8.83E-07 | AC-G | POMZP3   |
| PHF3      | 5.92E-11 | -0.12852 | 0.138 | 0.205 | 8.84E-07 | AC-G | PHF3     |
| PSME4     | 6.16E-11 | -0.10401 | 0.088 | 0.145 | 9.21E-07 | AC-G | PSME4    |
| ZNF276.1  | 6.32E-11 | -0.14546 | 0.051 | 0.097 | 9.45E-07 | AC-G | ZNF276   |
| CCDC69    | 6.37E-11 | -0.12052 | 0.01  | 0.041 | 9.52E-07 | AC-G | CCDC69   |
| ADCY2     | 6.43E-11 | 0.143969 | 0.064 | 0.034 | 9.61E-07 | AC-G | ADCY2    |
| SENCR     | 6.44E-11 | -0.10765 | 0.001 | 0.023 | 9.62E-07 | AC-G | SENCR    |
| HVCN1.1   | 6.85E-11 | -0.1611  | 0.056 | 0.104 | 1.02E-06 | AC-G | HVCN1    |
| DENND4B.1 | 6.89E-11 | -0.12705 | 0.034 | 0.075 | 1.03E-06 | AC-G | DENND4B  |
| MAPRE2    | 7.04E-11 | -0.1617  | 0.132 | 0.197 | 1.05E-06 | AC-G | MAPRE2   |
| SGOL2     | 7.19E-11 | -0.16588 | 0.052 | 0.097 | 1.07E-06 | AC-G | SGOL2    |
| SP140     | 7.32E-11 | -0.13588 | 0.007 | 0.035 | 1.09E-06 | AC-G | SP140    |
| USP4      | 7.36E-11 | -0.13925 | 0.122 | 0.185 | 1.10E-06 | AC-G | USP4     |
| OTUD4.1   | 7.65E-11 | -0.10742 | 0.059 | 0.107 | 1.14E-06 | AC-G | OTUD4    |
| WIPI1.1   | 7.66E-11 | -0.18929 | 0.132 | 0.196 | 1.14E-06 | AC-G | WIPI1    |
| GAS7      | 7.67E-11 | -0.1634  | 0.067 | 0.118 | 1.15E-06 | AC-G | GAS7     |
| ORC6.1    | 7.86E-11 | -0.13528 | 0.052 | 0.099 | 1.17E-06 | AC-G | ORC6     |

|           |          |          |       |       |          |      |           |
|-----------|----------|----------|-------|-------|----------|------|-----------|
| PTPN22    | 7.95E-11 | -0.11954 | 0.005 | 0.031 | 1.19E-06 | AC-G | PTPN22    |
| MSC       | 7.96E-11 | 0.122487 | 0.018 | 0.005 | 1.19E-06 | AC-G | MSC       |
| WNT5A.1   | 8.21E-11 | -0.1671  | 0.027 | 0.065 | 1.23E-06 | AC-G | WNT5A     |
| HSPB11.1  | 8.33E-11 | -0.10881 | 0.254 | 0.343 | 1.25E-06 | AC-G | HSPB11    |
| ZFP91.1   | 8.59E-11 | -0.11398 | 0.087 | 0.145 | 1.28E-06 | AC-G | ZFP91     |
| CCDC74B   | 8.59E-11 | 0.111802 | 0.059 | 0.03  | 1.28E-06 | AC-G | CCDC74B   |
| CEACAM21  | 8.61E-11 | -0.10912 | 0.001 | 0.024 | 1.29E-06 | AC-G | CEACAM21  |
| IL17RB    | 8.69E-11 | 0.200884 | 0.073 | 0.04  | 1.30E-06 | AC-G | IL17RB    |
| TANGO2.1  | 8.81E-11 | -0.10062 | 0.048 | 0.093 | 1.32E-06 | AC-G | TANGO2    |
| TMEM129.1 | 8.82E-11 | -0.10562 | 0.119 | 0.183 | 1.32E-06 | AC-G | TMEM129   |
| FAM120AOS | 8.86E-11 | -0.11216 | 0.13  | 0.196 | 1.32E-06 | AC-G | FAM120AOS |
| SLC7A5.1  | 9.14E-11 | -0.26095 | 0.096 | 0.147 | 1.37E-06 | AC-G | SLC7A5    |
| DIP2A.1   | 9.29E-11 | -0.12304 | 0.07  | 0.122 | 1.39E-06 | AC-G | DIP2A     |
| RUFY2.1   | 9.33E-11 | -0.12179 | 0.099 | 0.159 | 1.39E-06 | AC-G | RUFY2     |
| RAPGEF6   | 9.38E-11 | -0.11148 | 0.019 | 0.054 | 1.40E-06 | AC-G | RAPGEF6   |
| ATOH8.1   | 9.49E-11 | -0.13545 | 0.023 | 0.059 | 1.42E-06 | AC-G | ATOH8     |
| COQ7.1    | 9.74E-11 | -0.11579 | 0.132 | 0.198 | 1.46E-06 | AC-G | COQ7      |
| NFATC1.1  | 9.85E-11 | -0.14757 | 0.022 | 0.058 | 1.47E-06 | AC-G | NFATC1    |
| RPH3A     | 1.02E-10 | -0.10126 | 0.008 | 0.037 | 1.52E-06 | AC-G | RPH3A     |
| AFMID.1   | 1.02E-10 | -0.1575  | 0.065 | 0.113 | 1.53E-06 | AC-G | AFMID     |
| TIMM17A.1 | 1.03E-10 | 0.328617 | 0.406 | 0.37  | 1.54E-06 | AC-G | TIMM17A   |
| CDC5L.1   | 1.03E-10 | -0.10342 | 0.214 | 0.294 | 1.54E-06 | AC-G | CDC5L     |
| CDK5R2    | 1.05E-10 | -0.11073 | 0.009 | 0.038 | 1.56E-06 | AC-G | CDK5R2    |
| HES4.1    | 1.05E-10 | -0.1331  | 0.134 | 0.197 | 1.57E-06 | AC-G | HES4      |
| HPS5.1    | 1.05E-10 | -0.11895 | 0.071 | 0.123 | 1.58E-06 | AC-G | HPS5      |
| NDUFAF6.1 | 1.06E-10 | -0.10348 | 0.126 | 0.191 | 1.58E-06 | AC-G | NDUFAF6   |
| FA2H      | 1.07E-10 | -0.14637 | 0.005 | 0.031 | 1.60E-06 | AC-G | FA2H      |
| OPHN1.1   | 1.09E-10 | -0.1133  | 0.036 | 0.078 | 1.62E-06 | AC-G | OPHN1     |
| IPCEF1    | 1.10E-10 | -0.10844 | 0.002 | 0.026 | 1.65E-06 | AC-G | IPCEF1    |
| HLTF.1    | 1.11E-10 | -0.10339 | 0.12  | 0.184 | 1.66E-06 | AC-G | HLTF      |
| HSP90B1.1 | 1.14E-10 | 0.221888 | 0.616 | 0.666 | 1.71E-06 | AC-G | HSP90B1   |
| DENND1B.1 | 1.15E-10 | -0.1515  | 0.053 | 0.099 | 1.72E-06 | AC-G | DENND1B   |
| NELL2     | 1.15E-10 | -0.13823 | 0.064 | 0.114 | 1.73E-06 | AC-G | NELL2     |
| PPP3R1.1  | 1.16E-10 | -0.14517 | 0.071 | 0.121 | 1.73E-06 | AC-G | PPP3R1    |
| RGL2.1    | 1.16E-10 | -0.12708 | 0.147 | 0.215 | 1.74E-06 | AC-G | RGL2      |
| CATSPER1  | 1.17E-10 | -0.12068 | 0.005 | 0.03  | 1.75E-06 | AC-G | CATSPER1  |
| YWHAQ.1   | 1.17E-10 | -0.10972 | 0.575 | 0.657 | 1.75E-06 | AC-G | YWHAQ     |
| KNSTRN.1  | 1.18E-10 | -0.12708 | 0.043 | 0.086 | 1.76E-06 | AC-G | KNSTRN    |
| CDK20     | 1.18E-10 | 0.126567 | 0.089 | 0.052 | 1.76E-06 | AC-G | CDK20     |
| TBC1D5.1  | 1.18E-10 | -0.14689 | 0.094 | 0.151 | 1.76E-06 | AC-G | TBC1D5    |
| DNAJC21   | 1.20E-10 | -0.11299 | 0.077 | 0.131 | 1.80E-06 | AC-G | DNAJC21   |
| LINC00461 | 1.21E-10 | -0.10169 | 0.254 | 0.333 | 1.81E-06 | AC-G | LINC00461 |
| VNN2      | 1.22E-10 | -0.11478 | 0.004 | 0.029 | 1.82E-06 | AC-G | VNN2      |
| GABARAPL2 | 1.22E-10 | 0.204355 | 0.723 | 0.747 | 1.82E-06 | AC-G | GABARAPL2 |
| ARL4D.1   | 1.23E-10 | -0.14303 | 0.119 | 0.179 | 1.84E-06 | AC-G | ARL4D     |
| EP400.1   | 1.26E-10 | -0.10711 | 0.073 | 0.125 | 1.88E-06 | AC-G | EP400     |
| FAM118A.1 | 1.26E-10 | -0.2051  | 0.089 | 0.141 | 1.89E-06 | AC-G | FAM118A   |
| FAM204A.1 | 1.26E-10 | -0.12027 | 0.195 | 0.269 | 1.89E-06 | AC-G | FAM204A   |
| FLT1      | 1.27E-10 | -0.10475 | 0.001 | 0.023 | 1.89E-06 | AC-G | FLT1      |
| MTAP.1    | 1.27E-10 | -0.11477 | 0.036 | 0.077 | 1.90E-06 | AC-G | MTAP      |
| PUM2.1    | 1.28E-10 | -0.1031  | 0.103 | 0.164 | 1.92E-06 | AC-G | PUM2      |

|           |          |          |       |       |          |      |              |
|-----------|----------|----------|-------|-------|----------|------|--------------|
| C9orf72.1 | 1.30E-10 | -0.2225  | 0.104 | 0.159 | 1.94E-06 | AC-G | C9orf72      |
| STX2.1    | 1.31E-10 | -0.11261 | 0.065 | 0.116 | 1.95E-06 | AC-G | STX2         |
| IGSF8.1   | 1.31E-10 | -0.11555 | 0.157 | 0.224 | 1.96E-06 | AC-G | IGSF8        |
| ACSL5     | 1.34E-10 | -0.13419 | 0.01  | 0.039 | 2.00E-06 | AC-G | ACSL5        |
| HPCA      | 1.40E-10 | -0.1144  | 0.028 | 0.066 | 2.10E-06 | AC-G | HPCA         |
| KCNK13    | 1.45E-10 | -0.10009 | 0.003 | 0.027 | 2.17E-06 | AC-G | KCNK13       |
| EIF4A1.1  | 1.51E-10 | 0.138968 | 0.795 | 0.874 | 2.26E-06 | AC-G | EIF4A1       |
| PNMAL1.1  | 1.51E-10 | -0.10011 | 0.056 | 0.104 | 2.26E-06 | AC-G | PNMAL1       |
| ELOF1     | 1.54E-10 | 0.301023 | 0.45  | 0.418 | 2.30E-06 | AC-G | ELOF1        |
| RETN      | 1.57E-10 | -0.12052 | 0.001 | 0.023 | 2.34E-06 | AC-G | RETN         |
| ZC2HC1A.1 | 1.58E-10 | -0.13126 | 0.156 | 0.221 | 2.36E-06 | AC-G | ZC2HC1A      |
| PNP       | 1.61E-10 | -0.16363 | 0.063 | 0.111 | 2.40E-06 | AC-G | PNP          |
| CCNG1.1   | 1.64E-10 | 0.222352 | 0.317 | 0.26  | 2.45E-06 | AC-G | CCNG1        |
| COMMD8.1  | 1.65E-10 | -0.1246  | 0.167 | 0.235 | 2.47E-06 | AC-G | COMMD8       |
| C2orf69.1 | 1.72E-10 | -0.11438 | 0.139 | 0.205 | 2.56E-06 | AC-G | C2orf69      |
| LRAT      | 1.72E-10 | 0.145363 | 0.028 | 0.01  | 2.57E-06 | AC-G | LRAT         |
| ZFP90.1   | 1.74E-10 | -0.11803 | 0.085 | 0.14  | 2.61E-06 | AC-G | ZFP90        |
| CYLD      | 1.78E-10 | -0.15908 | 0.115 | 0.174 | 2.66E-06 | AC-G | CYLD         |
| RP11-84C1 | 1.78E-10 | -0.12485 | 0.001 | 0.022 | 2.67E-06 | AC-G | RP11-84C10.2 |
| C16orf52. | 1.81E-10 | -0.10147 | 0.056 | 0.104 | 2.71E-06 | AC-G | C16orf52     |
| NRXN2.1   | 1.82E-10 | -0.15602 | 0.074 | 0.125 | 2.71E-06 | AC-G | NRXN2        |
| ADPRH     | 1.85E-10 | -0.11649 | 0.009 | 0.038 | 2.76E-06 | AC-G | ADPRH        |
| AFF3      | 1.86E-10 | -0.12724 | 0.023 | 0.058 | 2.78E-06 | AC-G | AFF3         |
| TNR.1     | 1.87E-10 | -0.13901 | 0.025 | 0.061 | 2.79E-06 | AC-G | TNR          |
| SNX11     | 1.89E-10 | -0.11355 | 0.059 | 0.107 | 2.83E-06 | AC-G | SNX11        |
| CDK5RAP1. | 1.90E-10 | -0.10666 | 0.108 | 0.168 | 2.83E-06 | AC-G | CDK5RAP1     |
| TARBP1.1  | 1.92E-10 | -0.10748 | 0.037 | 0.077 | 2.86E-06 | AC-G | TARBP1       |
| BIRC6.1   | 1.94E-10 | -0.10117 | 0.13  | 0.194 | 2.89E-06 | AC-G | BIRC6        |
| TPCN1.1   | 1.97E-10 | -0.1781  | 0.052 | 0.097 | 2.95E-06 | AC-G | TPCN1        |
| FGF7      | 1.97E-10 | 0.157312 | 0.047 | 0.022 | 2.95E-06 | AC-G | FGF7         |
| SMYD4.1   | 1.97E-10 | -0.10581 | 0.073 | 0.126 | 2.95E-06 | AC-G | SMYD4        |
| NDUFS8.1  | 1.99E-10 | 0.294168 | 0.606 | 0.609 | 2.97E-06 | AC-G | NDUFS8       |
| NXN       | 2.04E-10 | -0.1081  | 0.011 | 0.04  | 3.05E-06 | AC-G | NXN          |
| KCNIP1.1  | 2.05E-10 | -0.12344 | 0.059 | 0.106 | 3.07E-06 | AC-G | KCNIP1       |
| USF1.1    | 2.06E-10 | -0.14361 | 0.025 | 0.061 | 3.07E-06 | AC-G | USF1         |
| CTDSPL2   | 2.07E-10 | -0.10407 | 0.066 | 0.117 | 3.10E-06 | AC-G | CTDSPL2      |
| FAM177B   | 2.08E-10 | -0.12917 | 0.008 | 0.035 | 3.10E-06 | AC-G | FAM177B      |
| MAPK14.1  | 2.08E-10 | -0.10998 | 0.067 | 0.118 | 3.11E-06 | AC-G | MAPK14       |
| NEAT1     | 2.11E-10 | 0.159521 | 0.741 | 0.767 | 3.15E-06 | AC-G | NEAT1        |
| C19orf70. | 2.11E-10 | 0.246957 | 0.584 | 0.577 | 3.15E-06 | AC-G | C19orf70     |
| ZNF638.1  | 2.12E-10 | -0.10208 | 0.188 | 0.264 | 3.17E-06 | AC-G | ZNF638       |
| RPA3.1    | 2.13E-10 | 0.278856 | 0.382 | 0.335 | 3.18E-06 | AC-G | RPA3         |
| GTF2IRD2E | 2.14E-10 | -0.10857 | 0.09  | 0.146 | 3.19E-06 | AC-G | GTF2IRD2B    |
| PRRG4     | 2.18E-10 | -0.16682 | 0.018 | 0.05  | 3.26E-06 | AC-G | PRRG4        |
| TOMM70A.1 | 2.23E-10 | -0.1093  | 0.08  | 0.134 | 3.34E-06 | AC-G | TOMM70A      |
| PKP4.1    | 2.27E-10 | -0.10106 | 0.024 | 0.06  | 3.39E-06 | AC-G | PKP4         |
| XPNPEP1.1 | 2.30E-10 | -0.1162  | 0.096 | 0.152 | 3.44E-06 | AC-G | XPNPEP1      |
| SELL      | 2.36E-10 | -0.15545 | 0.012 | 0.042 | 3.53E-06 | AC-G | SELL         |
| KLHL36    | 2.39E-10 | -0.10812 | 0.055 | 0.102 | 3.58E-06 | AC-G | KLHL36       |
| HIST2H2AA | 2.41E-10 | -0.16331 | 0.031 | 0.07  | 3.59E-06 | AC-G | HIST2H2AA3   |
| ABTB1.1   | 2.42E-10 | -0.20193 | 0.065 | 0.112 | 3.62E-06 | AC-G | ABTB1        |

|           |          |          |       |       |          |      |               |
|-----------|----------|----------|-------|-------|----------|------|---------------|
| BCOR      | 2.43E-10 | -0.11619 | 0.024 | 0.06  | 3.63E-06 | AC-G | BCOR          |
| JAM2.1    | 2.43E-10 | 0.311725 | 0.292 | 0.245 | 3.63E-06 | AC-G | JAM2          |
| AGA.1     | 2.49E-10 | 0.24398  | 0.196 | 0.145 | 3.71E-06 | AC-G | AGA           |
| YPEL2.1   | 2.51E-10 | -0.15352 | 0.036 | 0.076 | 3.75E-06 | AC-G | YPEL2         |
| ALKBH6.1  | 2.68E-10 | -0.11661 | 0.064 | 0.113 | 4.00E-06 | AC-G | ALKBH6        |
| PINLYP    | 2.68E-10 | 0.196656 | 0.083 | 0.048 | 4.00E-06 | AC-G | PINLYP        |
| SAT1      | 2.68E-10 | 0.22712  | 0.781 | 0.807 | 4.01E-06 | AC-G | SAT1          |
| CRYZ      | 2.70E-10 | 0.298906 | 0.161 | 0.116 | 4.03E-06 | AC-G | CRYZ          |
| SEC24B    | 2.74E-10 | -0.11393 | 0.042 | 0.084 | 4.09E-06 | AC-G | SEC24B        |
| SHOC2.1   | 2.75E-10 | -0.13977 | 0.103 | 0.161 | 4.11E-06 | AC-G | SHOC2         |
| QTRT1.1   | 2.79E-10 | 0.320674 | 0.367 | 0.324 | 4.17E-06 | AC-G | QTRT1         |
| CAMLG.1   | 2.82E-10 | 0.234718 | 0.508 | 0.491 | 4.22E-06 | AC-G | CAMLG         |
| RNASEK    | 2.83E-10 | -0.15142 | 0.043 | 0.086 | 4.23E-06 | AC-G | RNASEK        |
| CNIH4     | 2.90E-10 | 0.266112 | 0.409 | 0.367 | 4.34E-06 | AC-G | CNIH4         |
| CPEB4.1   | 2.96E-10 | -0.13567 | 0.188 | 0.258 | 4.43E-06 | AC-G | CPEB4         |
| FOLH1     | 2.98E-10 | -0.11342 | 0.001 | 0.021 | 4.45E-06 | AC-G | FOLH1         |
| MAEA      | 3.11E-10 | -0.10571 | 0.176 | 0.246 | 4.65E-06 | AC-G | MAEA          |
| RP11-783K | 3.12E-10 | 0.291854 | 0.075 | 0.043 | 4.66E-06 | AC-G | RP11-783K16.5 |
| ABCC4     | 3.15E-10 | -0.112   | 0.018 | 0.05  | 4.71E-06 | AC-G | ABCC4         |
| PER1      | 3.16E-10 | -0.24118 | 0.137 | 0.194 | 4.72E-06 | AC-G | PER1          |
| LIPE      | 3.16E-10 | -0.10781 | 0.029 | 0.067 | 4.72E-06 | AC-G | LIPE          |
| NET1      | 3.22E-10 | -0.12825 | 0.015 | 0.045 | 4.80E-06 | AC-G | NET1          |
| MORC3.1   | 3.26E-10 | -0.12929 | 0.063 | 0.111 | 4.87E-06 | AC-G | MORC3         |
| IL6R.1    | 3.26E-10 | -0.23044 | 0.051 | 0.093 | 4.87E-06 | AC-G | IL6R          |
| LYPLA2.1  | 3.33E-10 | -0.10688 | 0.162 | 0.232 | 4.98E-06 | AC-G | LYPLA2        |
| CCK       | 3.38E-10 | 0.101713 | 0.019 | 0.005 | 5.05E-06 | AC-G | CCK           |
| ZNF124.1  | 3.45E-10 | -0.12137 | 0.029 | 0.066 | 5.16E-06 | AC-G | ZNF124        |
| GIMAP2.1  | 3.52E-10 | -0.1806  | 0.042 | 0.084 | 5.26E-06 | AC-G | GIMAP2        |
| ADD3      | 3.55E-10 | 0.258971 | 0.173 | 0.125 | 5.31E-06 | AC-G | ADD3          |
| HAUS4.1   | 3.57E-10 | -0.11158 | 0.03  | 0.067 | 5.34E-06 | AC-G | HAUS4         |
| YTHDC2.1  | 3.57E-10 | -0.13487 | 0.076 | 0.127 | 5.34E-06 | AC-G | YTHDC2        |
| ARMC1.1   | 3.62E-10 | -0.11268 | 0.201 | 0.276 | 5.41E-06 | AC-G | ARMC1         |
| ATPAF1.1  | 3.62E-10 | -0.15621 | 0.181 | 0.251 | 5.41E-06 | AC-G | ATPAF1        |
| TLR10     | 3.68E-10 | -0.11508 | 0.004 | 0.028 | 5.50E-06 | AC-G | TLR10         |
| RARA      | 3.73E-10 | -0.1062  | 0.057 | 0.103 | 5.57E-06 | AC-G | RARA          |
| LCOR.1    | 3.75E-10 | -0.11121 | 0.044 | 0.087 | 5.61E-06 | AC-G | LCOR          |
| BNIP3L.1  | 3.76E-10 | 0.213173 | 0.59  | 0.601 | 5.62E-06 | AC-G | BNIP3L        |
| RAP2C     | 3.96E-10 | -0.12003 | 0.081 | 0.134 | 5.91E-06 | AC-G | RAP2C         |
| PGM2L1    | 3.97E-10 | 0.325947 | 0.298 | 0.247 | 5.93E-06 | AC-G | PGM2L1        |
| GALT.1    | 4.06E-10 | -0.17884 | 0.046 | 0.088 | 6.07E-06 | AC-G | GALT          |
| IL6ST.1   | 4.09E-10 | -0.10479 | 0.191 | 0.266 | 6.11E-06 | AC-G | IL6ST         |
| SCN3A.1   | 4.10E-10 | -0.13031 | 0.039 | 0.078 | 6.13E-06 | AC-G | SCN3A         |
| TOMM5.1   | 4.56E-10 | -0.11878 | 0.154 | 0.22  | 6.82E-06 | AC-G | TOMM5         |
| EPDR1.1   | 4.59E-10 | 0.250714 | 0.164 | 0.119 | 6.86E-06 | AC-G | EPDR1         |
| MED15.1   | 4.61E-10 | -0.12515 | 0.095 | 0.152 | 6.89E-06 | AC-G | MED15         |
| RAB11FIP1 | 4.62E-10 | -0.10437 | 0.006 | 0.031 | 6.90E-06 | AC-G | RAB11FIP1     |
| TATDN3.1  | 4.69E-10 | -0.12078 | 0.107 | 0.163 | 7.02E-06 | AC-G | TATDN3        |
| LACC1     | 4.70E-10 | -0.1177  | 0.01  | 0.039 | 7.03E-06 | AC-G | LACC1         |
| PPP3CA.1  | 4.75E-10 | -0.13255 | 0.187 | 0.258 | 7.10E-06 | AC-G | PPP3CA        |
| SLC16A4   | 4.78E-10 | 0.180082 | 0.091 | 0.056 | 7.15E-06 | AC-G | SLC16A4       |
| SLC12A2   | 4.80E-10 | -0.16223 | 0.085 | 0.138 | 7.18E-06 | AC-G | SLC12A2       |

|           |             |           |        |        |           |      |               |
|-----------|-------------|-----------|--------|--------|-----------|------|---------------|
| NFATC2IP. | 4. 81E-10   | -0. 11304 | 0. 113 | 0. 172 | 7. 19E-06 | AC-G | NFATC2IP      |
| SUDS3.    | 1 4. 82E-10 | -0. 10388 | 0. 134 | 0. 199 | 7. 21E-06 | AC-G | SUDS3         |
| TMIGD2    | 4. 87E-10   | -0. 14831 | 0. 002 | 0. 023 | 7. 27E-06 | AC-G | TMIGD2        |
| NEDD9.    | 1 4. 97E-10 | -0. 12665 | 0. 162 | 0. 232 | 7. 42E-06 | AC-G | NEDD9         |
| TUBGCP3.  | 1 5. 00E-10 | -0. 12634 | 0. 065 | 0. 112 | 7. 47E-06 | AC-G | TUBGCP3       |
| PRKCZ.    | 1 5. 03E-10 | -0. 10353 | 0. 061 | 0. 108 | 7. 52E-06 | AC-G | PRKCZ         |
| ACO07228. | 5. 12E-10   | 0. 112738 | 0. 039 | 0. 017 | 7. 65E-06 | AC-G | ACO07228. 11  |
| AP2A1.    | 1 5. 38E-10 | -0. 11434 | 0. 177 | 0. 248 | 8. 04E-06 | AC-G | AP2A1         |
| ASXL2.    | 1 5. 38E-10 | -0. 11694 | 0. 059 | 0. 106 | 8. 05E-06 | AC-G | ASXL2         |
| UBQLN2.   | 1 5. 39E-10 | -0. 12962 | 0. 165 | 0. 231 | 8. 05E-06 | AC-G | UBQLN2        |
| RFX5.     | 1 5. 70E-10 | -0. 10309 | 0. 064 | 0. 112 | 8. 51E-06 | AC-G | RFX5          |
| LPAR2     | 5. 78E-10   | -0. 10179 | 0. 01  | 0. 037 | 8. 63E-06 | AC-G | LPAR2         |
| SLC29A3   | 5. 80E-10   | -0. 14664 | 0. 018 | 0. 049 | 8. 67E-06 | AC-G | SLC29A3       |
| NHSL1     | 5. 87E-10   | -0. 11546 | 0. 063 | 0. 111 | 8. 77E-06 | AC-G | NHSL1         |
| TMEM30A.  | 1 5. 96E-10 | -0. 10676 | 0. 265 | 0. 347 | 8. 91E-06 | AC-G | TMEM30A       |
| ARX       | 5. 96E-10   | -0. 11812 | 0. 015 | 0. 045 | 8. 91E-06 | AC-G | ARX           |
| RNF141.   | 1 6. 13E-10 | -0. 13062 | 0. 157 | 0. 225 | 9. 17E-06 | AC-G | RNF141        |
| SORBS3.   | 1 6. 17E-10 | -0. 1013  | 0. 12  | 0. 183 | 9. 22E-06 | AC-G | SORBS3        |
| E2F4.     | 1 6. 19E-10 | -0. 1368  | 0. 158 | 0. 225 | 9. 25E-06 | AC-G | E2F4          |
| RHOF      | 6. 19E-10   | -0. 11241 | 0. 023 | 0. 057 | 9. 26E-06 | AC-G | RHOF          |
| RNF125    | 6. 21E-10   | -0. 11754 | 0. 004 | 0. 028 | 9. 28E-06 | AC-G | RNF125        |
| HNRNPC.   | 1 6. 31E-10 | 0. 203911 | 0. 677 | 0. 697 | 9. 43E-06 | AC-G | HNRNPC        |
| BLVRA.    | 1 6. 60E-10 | 0. 392237 | 0. 372 | 0. 333 | 9. 86E-06 | AC-G | BLVRA         |
| KLHL8.    | 1 6. 62E-10 | -0. 11727 | 0. 088 | 0. 142 | 9. 89E-06 | AC-G | KLHL8         |
| KLHL42.   | 1 6. 67E-10 | -0. 10049 | 0. 109 | 0. 169 | 9. 96E-06 | AC-G | KLHL42        |
| BCL2.     | 1 6. 67E-10 | -0. 15458 | 0. 021 | 0. 054 | 9. 97E-06 | AC-G | BCL2          |
| CDCP1     | 6. 74E-10   | -0. 13123 | 0. 01  | 0. 038 | 1. 01E-05 | AC-G | CDCP1         |
| EXOC6.    | 1 6. 80E-10 | -0. 11201 | 0. 032 | 0. 07  | 1. 02E-05 | AC-G | EXOC6         |
| WDR81.    | 1 6. 91E-10 | -0. 10246 | 0. 019 | 0. 052 | 1. 03E-05 | AC-G | WDR81         |
| C12orf29. | 7. 02E-10   | 0. 255015 | 0. 193 | 0. 146 | 1. 05E-05 | AC-G | C12orf29      |
| LDLRAP1.  | 1 7. 04E-10 | -0. 11644 | 0. 027 | 0. 063 | 1. 05E-05 | AC-G | LDLRAP1       |
| PLCL1     | 7. 38E-10   | -0. 10761 | 0. 009 | 0. 036 | 1. 10E-05 | AC-G | PLCL1         |
| PHYKPL.   | 1 7. 66E-10 | -0. 10754 | 0. 149 | 0. 212 | 1. 15E-05 | AC-G | PHYKPL        |
| MLKL      | 7. 70E-10   | -0. 12803 | 0. 007 | 0. 032 | 1. 15E-05 | AC-G | MLKL          |
| AGO3      | 7. 79E-10   | -0. 11848 | 0. 138 | 0. 203 | 1. 16E-05 | AC-G | AGO3          |
| USP36.    | 1 7. 86E-10 | -0. 15317 | 0. 094 | 0. 147 | 1. 17E-05 | AC-G | USP36         |
| RCC1      | 7. 97E-10   | -0. 10403 | 0. 061 | 0. 107 | 1. 19E-05 | AC-G | RCC1          |
| CTD-2336C | 8. 14E-10   | -0. 10959 | 0. 166 | 0. 235 | 1. 22E-05 | AC-G | CTD-233602. 1 |
| SLC35F6.  | 1 8. 15E-10 | -0. 10196 | 0. 154 | 0. 22  | 1. 22E-05 | AC-G | SLC35F6       |
| TNNI2     | 8. 22E-10   | -0. 11161 | 0. 002 | 0. 023 | 1. 23E-05 | AC-G | TNNI2         |
| LINC00657 | 8. 37E-10   | -0. 12938 | 0. 264 | 0. 345 | 1. 25E-05 | AC-G | LINC00657     |
| FADS1.    | 1 8. 50E-10 | -0. 11202 | 0. 16  | 0. 229 | 1. 27E-05 | AC-G | FADS1         |
| SLC27A1.  | 1 8. 64E-10 | -0. 10974 | 0. 111 | 0. 17  | 1. 29E-05 | AC-G | SLC27A1       |
| QDPR.     | 1 8. 65E-10 | -0. 12639 | 0. 29  | 0. 374 | 1. 29E-05 | AC-G | QDPR          |
| GLYR1     | 8. 79E-10   | -0. 11397 | 0. 154 | 0. 22  | 1. 31E-05 | AC-G | GLYR1         |
| PRCD      | 8. 80E-10   | -0. 1312  | 0. 01  | 0. 038 | 1. 32E-05 | AC-G | PRCD          |
| TSPYL1.   | 1 9. 02E-10 | -0. 11495 | 0. 182 | 0. 249 | 1. 35E-05 | AC-G | TSPYL1        |
| ANKRD13A  | 9. 13E-10   | -0. 10132 | 0. 059 | 0. 104 | 1. 36E-05 | AC-G | ANKRD13A      |
| EDEM1     | 9. 18E-10   | -0. 12178 | 0. 044 | 0. 086 | 1. 37E-05 | AC-G | EDEM1         |
| MEMO1     | 9. 27E-10   | -0. 13295 | 0. 063 | 0. 109 | 1. 39E-05 | AC-G | MEMO1         |
| SRRM4     | 9. 32E-10   | -0. 10199 | 0. 009 | 0. 035 | 1. 39E-05 | AC-G | SRRM4         |

|           |          |          |       |       |          |      |            |
|-----------|----------|----------|-------|-------|----------|------|------------|
| SLFN11    | 9.54E-10 | -0.10651 | 0.017 | 0.048 | 1.43E-05 | AC-G | SLFN11     |
| RICTOR.1  | 9.59E-10 | -0.18249 | 0.137 | 0.196 | 1.43E-05 | AC-G | RICTOR     |
| ZC3H7A.1  | 9.89E-10 | -0.1423  | 0.103 | 0.158 | 1.48E-05 | AC-G | ZC3H7A     |
| NME1-NME2 | 9.90E-10 | -0.11403 | 0.056 | 0.101 | 1.48E-05 | AC-G | NME1-NME2  |
| PSAT1     | 9.90E-10 | 0.181321 | 0.244 | 0.195 | 1.48E-05 | AC-G | PSAT1      |
| ZMIZ2.1   | 9.92E-10 | -0.10524 | 0.061 | 0.106 | 1.48E-05 | AC-G | ZMIZ2      |
| SERPINI1. | 1.01E-09 | -0.12791 | 0.025 | 0.059 | 1.51E-05 | AC-G | SERPINI1   |
| SCP2.1    | 1.01E-09 | 0.258498 | 0.58  | 0.584 | 1.52E-05 | AC-G | SCP2       |
| YIPF5.1   | 1.02E-09 | 0.24175  | 0.301 | 0.254 | 1.52E-05 | AC-G | YIPF5      |
| SHPRH.1   | 1.05E-09 | -0.1187  | 0.083 | 0.135 | 1.57E-05 | AC-G | SHPRH      |
| PKN2.1    | 1.06E-09 | -0.10472 | 0.154 | 0.222 | 1.58E-05 | AC-G | PKN2       |
| PARP6.1   | 1.06E-09 | -0.11104 | 0.064 | 0.111 | 1.58E-05 | AC-G | PARP6      |
| TBC1D9.1  | 1.08E-09 | -0.12212 | 0.025 | 0.059 | 1.61E-05 | AC-G | TBC1D9     |
| L1CAM     | 1.10E-09 | -0.11479 | 0.011 | 0.039 | 1.65E-05 | AC-G | L1CAM      |
| PEX5L     | 1.16E-09 | -0.13056 | 0.004 | 0.026 | 1.73E-05 | AC-G | PEX5L      |
| TMEM37.1  | 1.17E-09 | 0.361998 | 0.091 | 0.057 | 1.74E-05 | AC-G | TMEM37     |
| EPB41     | 1.17E-09 | -0.12505 | 0.03  | 0.066 | 1.75E-05 | AC-G | EPB41      |
| CPED1     | 1.18E-09 | -0.11952 | 0.01  | 0.037 | 1.77E-05 | AC-G | CPED1      |
| IFRD1.1   | 1.25E-09 | 0.206685 | 0.512 | 0.482 | 1.86E-05 | AC-G | IFRD1      |
| TREM1     | 1.27E-09 | 0.339604 | 0.208 | 0.155 | 1.90E-05 | AC-G | TREM1      |
| FMN1      | 1.29E-09 | -0.1144  | 0.01  | 0.037 | 1.92E-05 | AC-G | FMN1       |
| TIPARP.1  | 1.30E-09 | 0.206483 | 0.21  | 0.161 | 1.94E-05 | AC-G | TIPARP     |
| ENOX2.1   | 1.33E-09 | -0.10839 | 0.041 | 0.081 | 1.99E-05 | AC-G | ENOX2      |
| FPR2      | 1.38E-09 | -0.10727 | 0.002 | 0.022 | 2.06E-05 | AC-G | FPR2       |
| STRIP1.1  | 1.39E-09 | -0.13177 | 0.083 | 0.133 | 2.07E-05 | AC-G | STRIP1     |
| FKBP9.1   | 1.42E-09 | 0.244182 | 0.213 | 0.17  | 2.12E-05 | AC-G | FKBP9      |
| AMPD2.1   | 1.44E-09 | -0.15651 | 0.107 | 0.161 | 2.15E-05 | AC-G | AMPD2      |
| NOA1.1    | 1.46E-09 | -0.1167  | 0.098 | 0.152 | 2.18E-05 | AC-G | NOA1       |
| P2RY6     | 1.46E-09 | -0.1012  | 0.01  | 0.037 | 2.19E-05 | AC-G | P2RY6      |
| PTAR1.1   | 1.51E-09 | -0.10198 | 0.091 | 0.145 | 2.26E-05 | AC-G | PTAR1      |
| KLHL18    | 1.54E-09 | -0.1132  | 0.077 | 0.127 | 2.30E-05 | AC-G | KLHL18     |
| STK38L    | 1.54E-09 | -0.13128 | 0.105 | 0.159 | 2.31E-05 | AC-G | STK38L     |
| PDXDC1    | 1.57E-09 | -0.12128 | 0.121 | 0.181 | 2.35E-05 | AC-G | PDXDC1     |
| HS3ST1.1  | 1.62E-09 | -0.16314 | 0.052 | 0.095 | 2.42E-05 | AC-G | HS3ST1     |
| EXOSC3.1  | 1.63E-09 | -0.10755 | 0.112 | 0.169 | 2.43E-05 | AC-G | EXOSC3     |
| FGF20     | 1.66E-09 | -0.12009 | 0.001 | 0.021 | 2.47E-05 | AC-G | FGF20      |
| FRAT2     | 1.70E-09 | -0.10165 | 0.019 | 0.051 | 2.54E-05 | AC-G | FRAT2      |
| PRR5.1    | 1.71E-09 | -0.13568 | 0.02  | 0.052 | 2.55E-05 | AC-G | PRR5       |
| TTC38     | 1.75E-09 | -0.11336 | 0.052 | 0.096 | 2.62E-05 | AC-G | TTC38      |
| ZDHHC21.1 | 1.79E-09 | -0.12239 | 0.061 | 0.106 | 2.67E-05 | AC-G | ZDHHC21    |
| SNX3.1    | 1.83E-09 | 0.116795 | 0.672 | 0.725 | 2.73E-05 | AC-G | SNX3       |
| TRIM47.1  | 1.89E-09 | 0.3065   | 0.216 | 0.172 | 2.82E-05 | AC-G | TRIM47     |
| NDFIP1.1  | 1.90E-09 | -0.10572 | 0.491 | 0.623 | 2.84E-05 | AC-G | NDFIP1     |
| MS4A14    | 1.91E-09 | -0.10627 | 0.004 | 0.026 | 2.86E-05 | AC-G | MS4A14     |
| RPF2      | 2.05E-09 | 0.320441 | 0.266 | 0.219 | 3.06E-05 | AC-G | RPF2       |
| PTPN2     | 2.06E-09 | -0.11549 | 0.193 | 0.259 | 3.08E-05 | AC-G | PTPN2      |
| GRM3      | 2.07E-09 | -0.13083 | 0.004 | 0.026 | 3.09E-05 | AC-G | GRM3       |
| STEAP2    | 2.14E-09 | 0.13263  | 0.034 | 0.015 | 3.20E-05 | AC-G | STEAP2     |
| PTPRJ     | 2.14E-09 | -0.111   | 0.008 | 0.034 | 3.20E-05 | AC-G | PTPRJ      |
| SRBD1.1   | 2.21E-09 | -0.1208  | 0.05  | 0.092 | 3.30E-05 | AC-G | SRBD1      |
| AL592183. | 2.24E-09 | -0.18139 | 0.119 | 0.174 | 3.35E-05 | AC-G | AL592183.1 |

|            |          |          |       |       |          |      |              |
|------------|----------|----------|-------|-------|----------|------|--------------|
| SPHK2.1    | 2.27E-09 | -0.10363 | 0.085 | 0.136 | 3.39E-05 | AC-G | SPHK2        |
| POLB       | 2.31E-09 | -0.10366 | 0.05  | 0.091 | 3.44E-05 | AC-G | POLB         |
| MEIS2.1    | 2.31E-09 | -0.17162 | 0.156 | 0.213 | 3.45E-05 | AC-G | MEIS2        |
| CREB5      | 2.35E-09 | -0.10855 | 0.178 | 0.246 | 3.51E-05 | AC-G | CREB5        |
| LACTB2.1   | 2.37E-09 | 0.187085 | 0.192 | 0.143 | 3.54E-05 | AC-G | LACTB2       |
| KCNE1      | 2.38E-09 | -0.1064  | 0.004 | 0.026 | 3.55E-05 | AC-G | KCNE1        |
| UPP1.1     | 2.42E-09 | 0.265537 | 0.296 | 0.246 | 3.61E-05 | AC-G | UPP1         |
| ERBB3      | 2.44E-09 | -0.13557 | 0.014 | 0.042 | 3.65E-05 | AC-G | ERBB3        |
| AKAP9.1    | 2.50E-09 | -0.10099 | 0.372 | 0.465 | 3.74E-05 | AC-G | AKAP9        |
| RNF150     | 2.52E-09 | -0.10352 | 0.016 | 0.046 | 3.76E-05 | AC-G | RNF150       |
| SPHK1.1    | 2.53E-09 | -0.10138 | 0.067 | 0.114 | 3.78E-05 | AC-G | SPHK1        |
| NPTN       | 2.53E-09 | -0.10421 | 0.032 | 0.068 | 3.78E-05 | AC-G | NPTN         |
| SWI5.1     | 2.54E-09 | 0.347555 | 0.282 | 0.238 | 3.80E-05 | AC-G | SWI5         |
| THOC6      | 2.59E-09 | -0.11101 | 0.121 | 0.179 | 3.87E-05 | AC-G | THOC6        |
| C1orf228   | 2.61E-09 | -0.11739 | 0.01  | 0.036 | 3.90E-05 | AC-G | C1orf228     |
| ZBED5.1    | 2.63E-09 | -0.10419 | 0.129 | 0.188 | 3.93E-05 | AC-G | ZBED5        |
| GAB2       | 2.64E-09 | -0.12304 | 0.035 | 0.072 | 3.94E-05 | AC-G | GAB2         |
| MGAT2.1    | 2.66E-09 | -0.10239 | 0.135 | 0.197 | 3.97E-05 | AC-G | MGAT2        |
| SMC2       | 2.71E-09 | -0.15779 | 0.151 | 0.209 | 4.04E-05 | AC-G | SMC2         |
| TIAM2.1    | 2.99E-09 | -0.12498 | 0.046 | 0.085 | 4.47E-05 | AC-G | TIAM2        |
| GLO1.1     | 3.04E-09 | 0.232155 | 0.435 | 0.406 | 4.55E-05 | AC-G | GLO1         |
| GCC2       | 3.05E-09 | -0.13355 | 0.215 | 0.283 | 4.56E-05 | AC-G | GCC2         |
| RP11-862L  | 3.07E-09 | -0.15042 | 0.001 | 0.02  | 4.58E-05 | AC-G | RP11-862L9.3 |
| FBXO17.1   | 3.10E-09 | 0.170766 | 0.181 | 0.136 | 4.64E-05 | AC-G | FBXO17       |
| CIDEB      | 3.13E-09 | -0.10211 | 0.006 | 0.029 | 4.68E-05 | AC-G | CIDEB        |
| CDKN1B.1   | 3.14E-09 | -0.15677 | 0.204 | 0.27  | 4.69E-05 | AC-G | CDKN1B       |
| RAB35.1    | 3.21E-09 | -0.10051 | 0.118 | 0.175 | 4.79E-05 | AC-G | RAB35        |
| GZF1.1     | 3.23E-09 | -0.10486 | 0.065 | 0.111 | 4.82E-05 | AC-G | GZF1         |
| AFG3L2.1   | 3.26E-09 | -0.1009  | 0.153 | 0.218 | 4.87E-05 | AC-G | AFG3L2       |
| SERPINF2   | 3.30E-09 | -0.12143 | 0.006 | 0.03  | 4.94E-05 | AC-G | SERPINF2     |
| GRK4       | 3.33E-09 | -0.10658 | 0.061 | 0.105 | 4.97E-05 | AC-G | GRK4         |
| WDR54.1    | 3.41E-09 | 0.286911 | 0.268 | 0.227 | 5.09E-05 | AC-G | WDR54        |
| CASC15.1   | 3.48E-09 | -0.11853 | 0.062 | 0.107 | 5.20E-05 | AC-G | CASC15       |
| HINT3.1    | 3.50E-09 | -0.11399 | 0.147 | 0.209 | 5.24E-05 | AC-G | HINT3        |
| C11orf1.1  | 3.75E-09 | 0.29755  | 0.182 | 0.137 | 5.60E-05 | AC-G | C11orf1      |
| NEK3.1     | 3.78E-09 | -0.12399 | 0.034 | 0.07  | 5.65E-05 | AC-G | NEK3         |
| TPTEP1     | 4.18E-09 | -0.12624 | 0.009 | 0.035 | 6.25E-05 | AC-G | TPTEP1       |
| PREP.1     | 4.19E-09 | -0.11914 | 0.061 | 0.104 | 6.26E-05 | AC-G | PREP         |
| MIR22HG    | 4.30E-09 | 0.26316  | 0.15  | 0.106 | 6.43E-05 | AC-G | MIR22HG      |
| BCL6.1     | 4.75E-09 | 0.135238 | 0.167 | 0.12  | 7.11E-05 | AC-G | BCL6         |
| GPR137B.1  | 4.83E-09 | -0.1117  | 0.175 | 0.24  | 7.22E-05 | AC-G | GPR137B      |
| ZCCHC24    | 5.00E-09 | -0.12786 | 0.063 | 0.107 | 7.48E-05 | AC-G | ZCCHC24      |
| C9orf85.1  | 5.05E-09 | -0.1262  | 0.06  | 0.103 | 7.55E-05 | AC-G | C9orf85      |
| PTPRN2.1   | 5.28E-09 | -0.13246 | 0.164 | 0.221 | 7.88E-05 | AC-G | PTPRN2       |
| PRRX1.1    | 5.32E-09 | 0.333836 | 0.206 | 0.164 | 7.95E-05 | AC-G | PRRX1        |
| TRPM4      | 5.52E-09 | -0.11251 | 0.016 | 0.045 | 8.25E-05 | AC-G | TRPM4        |
| TMEM258.1  | 5.52E-09 | 0.185479 | 0.696 | 0.735 | 8.25E-05 | AC-G | TMEM258      |
| ASNA1.1    | 5.54E-09 | 0.234616 | 0.538 | 0.516 | 8.28E-05 | AC-G | ASNA1        |
| GAR1.1     | 5.57E-09 | 0.291363 | 0.228 | 0.183 | 8.32E-05 | AC-G | GAR1         |
| TMEM255B.1 | 5.59E-09 | -0.16664 | 0.028 | 0.06  | 8.35E-05 | AC-G | TMEM255B     |
| CTSW       | 5.62E-09 | -0.19523 | 0.009 | 0.033 | 8.41E-05 | AC-G | CTSW         |



|           |          |          |       |       |          |      |               |
|-----------|----------|----------|-------|-------|----------|------|---------------|
| SMAD7     | 5.85E-09 | -0.11685 | 0.012 | 0.038 | 8.75E-05 | AC-G | SMAD7         |
| ATP1B1.1  | 5.93E-09 | -0.18387 | 0.189 | 0.243 | 8.86E-05 | AC-G | ATP1B1        |
| PINK1.1   | 6.07E-09 | -0.13794 | 0.156 | 0.217 | 9.07E-05 | AC-G | PINK1         |
| FAM13B.1  | 6.09E-09 | -0.10481 | 0.051 | 0.092 | 9.10E-05 | AC-G | FAM13B        |
| ITGB7     | 6.10E-09 | -0.10271 | 0.006 | 0.029 | 9.11E-05 | AC-G | ITGB7         |
| MYO7A     | 6.30E-09 | -0.13421 | 0.011 | 0.037 | 9.42E-05 | AC-G | MYO7A         |
| SLC44A1.1 | 6.40E-09 | -0.1408  | 0.248 | 0.326 | 9.57E-05 | AC-G | SLC44A1       |
| KIF5A.1   | 6.66E-09 | -0.15552 | 0.083 | 0.129 | 9.96E-05 | AC-G | KIF5A         |
| CHRNE     | 6.67E-09 | -0.12605 | 0.007 | 0.03  | 9.96E-05 | AC-G | CHRNE         |
| TSEN54.1  | 6.86E-09 | -0.11113 | 0.076 | 0.123 | 0.000103 | AC-G | TSEN54        |
| AC104653. | 6.88E-09 | 0.107865 | 0.018 | 0.005 | 0.000103 | AC-G | AC104653.1    |
| PCNXL2    | 7.09E-09 | -0.10759 | 0.05  | 0.09  | 0.000106 | AC-G | PCNXL2        |
| SLCO3A1   | 7.16E-09 | -0.10082 | 0.01  | 0.036 | 0.000107 | AC-G | SLCO3A1       |
| HOTAIRM1. | 7.20E-09 | -0.14055 | 0.137 | 0.191 | 0.000108 | AC-G | HOTAIRM1      |
| RP13-516M | 7.33E-09 | -0.12907 | 0.01  | 0.036 | 0.00011  | AC-G | RP13-516M14.4 |
| DENND6A.1 | 7.56E-09 | -0.10287 | 0.031 | 0.066 | 0.000113 | AC-G | DENND6A       |
| FEM1A     | 7.66E-09 | -0.10358 | 0.083 | 0.134 | 0.000114 | AC-G | FEM1A         |
| TMEM91.1  | 7.96E-09 | -0.12201 | 0.041 | 0.079 | 0.000119 | AC-G | TMEM91        |
| HHIP      | 7.99E-09 | -0.13871 | 0.007 | 0.03  | 0.000119 | AC-G | HHIP          |
| POFUT2.1  | 8.11E-09 | 0.133542 | 0.12  | 0.081 | 0.000121 | AC-G | POFUT2        |
| VTI1A.1   | 8.85E-09 | -0.12377 | 0.036 | 0.071 | 0.000132 | AC-G | VTI1A         |
| BRIX1.1   | 8.92E-09 | 0.248267 | 0.288 | 0.246 | 0.000133 | AC-G | BRIX1         |
| MAFF.1    | 9.03E-09 | -0.22786 | 0.131 | 0.179 | 0.000135 | AC-G | MAFF          |
| NDN.1     | 9.21E-09 | -0.1135  | 0.146 | 0.206 | 0.000138 | AC-G | NDN           |
| LAMP2.1   | 9.27E-09 | 0.21617  | 0.501 | 0.465 | 0.000139 | AC-G | LAMP2         |
| FZR1.1    | 9.65E-09 | -0.10265 | 0.11  | 0.164 | 0.000144 | AC-G | FZR1          |
| NRIP3     | 9.99E-09 | -0.10815 | 0.014 | 0.041 | 0.000149 | AC-G | NRIP3         |
| RP11-345J | 1.01E-08 | -0.11784 | 0.18  | 0.245 | 0.000152 | AC-G | RP11-345J4.5  |
| ZNF277    | 1.05E-08 | -0.10977 | 0.126 | 0.181 | 0.000157 | AC-G | ZNF277        |
| CBFA2T2.1 | 1.06E-08 | -0.10597 | 0.087 | 0.136 | 0.000158 | AC-G | CBFA2T2       |
| FAM214B.1 | 1.07E-08 | -0.12854 | 0.079 | 0.126 | 0.00016  | AC-G | FAM214B       |
| TRAPPC4.1 | 1.09E-08 | 0.23797  | 0.463 | 0.441 | 0.000163 | AC-G | TRAPPC4       |
| KIAA0895L | 1.13E-08 | -0.10345 | 0.057 | 0.098 | 0.000169 | AC-G | KIAA0895L     |
| NEUROD2   | 1.14E-08 | -0.11636 | 0.009 | 0.033 | 0.000171 | AC-G | NEUROD2       |
| C6orf15   | 1.15E-08 | -0.15511 | 0.008 | 0.032 | 0.000171 | AC-G | C6orf15       |
| ZEB2-AS1  | 1.15E-08 | -0.13003 | 0.013 | 0.038 | 0.000172 | AC-G | ZEB2-AS1      |
| C16orf54  | 1.17E-08 | -0.10201 | 0.001 | 0.019 | 0.000175 | AC-G | C16orf54      |
| PCSK6     | 1.18E-08 | -0.11005 | 0.002 | 0.02  | 0.000176 | AC-G | PCSK6         |
| PLXNB1.1  | 1.18E-08 | -0.11846 | 0.044 | 0.082 | 0.000176 | AC-G | PLXNB1        |
| LINC00599 | 1.19E-08 | -0.10009 | 0.013 | 0.039 | 0.000177 | AC-G | LINC00599     |
| NXPE3.1   | 1.21E-08 | -0.13137 | 0.054 | 0.094 | 0.000181 | AC-G | NXPE3         |
| NKAIN4.1  | 1.25E-08 | -0.14624 | 0.066 | 0.108 | 0.000187 | AC-G | NKAIN4        |
| RBBP7.1   | 1.27E-08 | 0.308664 | 0.446 | 0.42  | 0.00019  | AC-G | RBBP7         |
| CLN3      | 1.27E-08 | 0.14705  | 0.022 | 0.008 | 0.00019  | AC-G | CLN3          |
| MCM3.1    | 1.29E-08 | -0.14053 | 0.101 | 0.15  | 0.000193 | AC-G | MCM3          |
| SHMT1.1   | 1.37E-08 | -0.18156 | 0.08  | 0.125 | 0.000205 | AC-G | SHMT1         |
| UNC5B.1   | 1.38E-08 | -0.18961 | 0.052 | 0.09  | 0.000206 | AC-G | UNC5B         |
| CD3E      | 1.39E-08 | -0.17828 | 0.002 | 0.021 | 0.000207 | AC-G | CD3E          |
| YAP1      | 1.39E-08 | 0.133761 | 0.065 | 0.038 | 0.000208 | AC-G | YAP1          |
| ARV1.1    | 1.43E-08 | 0.214485 | 0.217 | 0.171 | 0.000214 | AC-G | ARV1          |
| GOLT1B.1  | 1.50E-08 | 0.237373 | 0.273 | 0.231 | 0.000225 | AC-G | GOLT1B        |

|           |          |          |       |       |          |      |            |
|-----------|----------|----------|-------|-------|----------|------|------------|
| LANCL2.1  | 1.51E-08 | -0.13864 | 0.11  | 0.16  | 0.000226 | AC-G | LANCL2     |
| LRRC8B.1  | 1.53E-08 | -0.10246 | 0.053 | 0.093 | 0.000228 | AC-G | LRRC8B     |
| KPNA6.1   | 1.56E-08 | -0.10699 | 0.18  | 0.245 | 0.000233 | AC-G | KPNA6      |
| TMEM106C  | 1.58E-08 | 0.314702 | 0.299 | 0.26  | 0.000237 | AC-G | TMEM106C   |
| FAM91A1.1 | 1.63E-08 | -0.11574 | 0.085 | 0.132 | 0.000244 | AC-G | FAM91A1    |
| CD200.1   | 1.65E-08 | -0.14166 | 0.074 | 0.117 | 0.000246 | AC-G | CD200      |
| UQCRH.1   | 1.67E-08 | 0.131106 | 0.739 | 0.789 | 0.000249 | AC-G | UQCRH      |
| TRADD.1   | 1.71E-08 | -0.12124 | 0.122 | 0.177 | 0.000256 | AC-G | TRADD      |
| ZNF703.1  | 1.72E-08 | -0.13456 | 0.063 | 0.104 | 0.000257 | AC-G | ZNF703     |
| FXYD1     | 1.74E-08 | 0.122604 | 0.053 | 0.028 | 0.00026  | AC-G | FXYD1      |
| C8orf46   | 1.78E-08 | -0.1321  | 0.099 | 0.147 | 0.000266 | AC-G | C8orf46    |
| TM2D2     | 1.83E-08 | 0.305405 | 0.372 | 0.334 | 0.000274 | AC-G | TM2D2      |
| GNL3.1    | 1.87E-08 | 0.27893  | 0.37  | 0.341 | 0.00028  | AC-G | GNL3       |
| HAAO      | 1.89E-08 | -0.11728 | 0.005 | 0.026 | 0.000282 | AC-G | HAAO       |
| XPR1.1    | 1.93E-08 | -0.10731 | 0.086 | 0.133 | 0.000289 | AC-G | XPR1       |
| SLC2A9    | 2.06E-08 | -0.10921 | 0.007 | 0.029 | 0.000308 | AC-G | SLC2A9     |
| PDCL      | 2.06E-08 | -0.13058 | 0.146 | 0.203 | 0.000308 | AC-G | PDCL       |
| SLAMF9    | 2.07E-08 | -0.12773 | 0.003 | 0.022 | 0.00031  | AC-G | SLAMF9     |
| TSHZ1.1   | 2.22E-08 | -0.10982 | 0.043 | 0.08  | 0.000331 | AC-G | TSHZ1      |
| GOLPH3L.1 | 2.28E-08 | 0.144306 | 0.11  | 0.074 | 0.000341 | AC-G | GOLPH3L    |
| SELK.1    | 2.28E-08 | 0.176124 | 0.683 | 0.704 | 0.000341 | AC-G | SELK       |
| ESYT1.1   | 2.30E-08 | -0.12713 | 0.082 | 0.128 | 0.000343 | AC-G | ESYT1      |
| PAPSS2    | 2.31E-08 | -0.10487 | 0.005 | 0.026 | 0.000345 | AC-G | PAPSS2     |
| KIAA1147  | 2.33E-08 | -0.12549 | 0.041 | 0.077 | 0.000348 | AC-G | KIAA1147   |
| C9orf116. | 2.38E-08 | 0.196397 | 0.104 | 0.071 | 0.000355 | AC-G | C9orf116   |
| PLA2G16.1 | 2.51E-08 | 0.206423 | 0.437 | 0.398 | 0.000376 | AC-G | PLA2G16    |
| SRP54.1   | 2.74E-08 | 0.270175 | 0.305 | 0.267 | 0.00041  | AC-G | SRP54      |
| PARK7.1   | 2.82E-08 | 0.246813 | 0.745 | 0.77  | 0.000421 | AC-G | PARK7      |
| EMG1      | 2.84E-08 | 0.287064 | 0.27  | 0.228 | 0.000425 | AC-G | EMG1       |
| TXNDC15   | 2.95E-08 | 0.266395 | 0.326 | 0.287 | 0.00044  | AC-G | TXNDC15    |
| BOD1L1.1  | 2.96E-08 | -0.11231 | 0.115 | 0.168 | 0.000443 | AC-G | BOD1L1     |
| NHLH1     | 3.03E-08 | -0.11204 | 0.007 | 0.028 | 0.000453 | AC-G | NHLH1      |
| NKAIN2    | 3.14E-08 | -0.10594 | 0.002 | 0.02  | 0.000469 | AC-G | NKAIN2     |
| NPHP1     | 3.17E-08 | 0.211048 | 0.096 | 0.064 | 0.000474 | AC-G | NPHP1      |
| FAM134C.1 | 3.18E-08 | -0.12485 | 0.083 | 0.127 | 0.000475 | AC-G | FAM134C    |
| C7orf26.1 | 3.23E-08 | -0.10655 | 0.115 | 0.166 | 0.000482 | AC-G | C7orf26    |
| DEPTOR    | 3.23E-08 | -0.12566 | 0.02  | 0.049 | 0.000482 | AC-G | DEPTOR     |
| PISD.1    | 3.30E-08 | -0.12055 | 0.069 | 0.112 | 0.000493 | AC-G | PISD       |
| ITPRIP.1  | 3.34E-08 | -0.14309 | 0.045 | 0.081 | 0.0005   | AC-G | ITPRIP     |
| PPP1R3B   | 3.36E-08 | -0.10684 | 0.038 | 0.072 | 0.000501 | AC-G | PPP1R3B    |
| FAM111A.1 | 3.45E-08 | -0.16156 | 0.074 | 0.116 | 0.000515 | AC-G | FAM111A    |
| CASP8.1   | 3.49E-08 | -0.10603 | 0.023 | 0.052 | 0.000522 | AC-G | CASP8      |
| ATP5G1.1  | 3.50E-08 | 0.229016 | 0.605 | 0.62  | 0.000523 | AC-G | ATP5G1     |
| HK1.1     | 3.62E-08 | -0.13077 | 0.148 | 0.204 | 0.000542 | AC-G | HK1        |
| UVRAG.1   | 3.72E-08 | -0.11838 | 0.056 | 0.096 | 0.000556 | AC-G | UVRAG      |
| SNRK.1    | 3.90E-08 | -0.10715 | 0.053 | 0.091 | 0.000583 | AC-G | SNRK       |
| OPALIN    | 3.91E-08 | -0.18889 | 0     | 0.016 | 0.000585 | AC-G | OPALIN     |
| AC004540. | 4.02E-08 | -0.11679 | 0.049 | 0.085 | 0.000601 | AC-G | AC004540.5 |
| AKTIP     | 4.06E-08 | 0.233093 | 0.204 | 0.161 | 0.000607 | AC-G | AKTIP      |
| SLC1A5.1  | 4.11E-08 | -0.17265 | 0.099 | 0.146 | 0.000614 | AC-G | SLC1A5     |
| SCD.1     | 4.16E-08 | -0.1471  | 0.16  | 0.222 | 0.000621 | AC-G | SCD        |

|           |          |          |       |       |          |      |           |
|-----------|----------|----------|-------|-------|----------|------|-----------|
| TMEM14A   | 4.22E-08 | 0.313368 | 0.349 | 0.319 | 0.000631 | AC-G | TMEM14A   |
| TOR3A.1   | 4.57E-08 | -0.13058 | 0.162 | 0.219 | 0.000683 | AC-G | TOR3A     |
| TMEM147   | 4.59E-08 | 0.223725 | 0.586 | 0.597 | 0.000686 | AC-G | TMEM147   |
| NANS.1    | 4.69E-08 | -0.14478 | 0.306 | 0.37  | 0.000701 | AC-G | NANS      |
| ANKRD28.1 | 4.71E-08 | 0.176671 | 0.146 | 0.106 | 0.000703 | AC-G | ANKRD28   |
| HES1.1    | 4.76E-08 | 0.22685  | 0.236 | 0.189 | 0.000711 | AC-G | HES1      |
| DNAJC19.1 | 4.76E-08 | 0.317617 | 0.408 | 0.385 | 0.000711 | AC-G | DNAJC19   |
| PPIA      | 4.76E-08 | 0.170652 | 0.815 | 0.887 | 0.000712 | AC-G | PPIA      |
| TCTEX1D2  | 4.88E-08 | 0.324812 | 0.259 | 0.221 | 0.000729 | AC-G | TCTEX1D2  |
| TUBA1B    | 4.92E-08 | 0.205882 | 0.842 | 0.906 | 0.000735 | AC-G | TUBA1B    |
| CAP2      | 5.04E-08 | 0.138525 | 0.083 | 0.052 | 0.000753 | AC-G | CAP2      |
| GRB10.1   | 5.16E-08 | 0.196716 | 0.1   | 0.068 | 0.000772 | AC-G | GRB10     |
| TRIO.1    | 5.38E-08 | -0.10044 | 0.126 | 0.181 | 0.000804 | AC-G | TRIO      |
| EMC8.1    | 5.50E-08 | -0.10111 | 0.218 | 0.282 | 0.000822 | AC-G | EMC8      |
| SGK3.1    | 5.59E-08 | -0.13656 | 0.039 | 0.073 | 0.000835 | AC-G | SGK3      |
| CD2       | 5.70E-08 | -0.18328 | 0.004 | 0.022 | 0.000852 | AC-G | CD2       |
| RGMB.1    | 5.73E-08 | -0.19895 | 0.096 | 0.139 | 0.000857 | AC-G | RGMB      |
| KIAA1033. | 5.92E-08 | -0.10163 | 0.189 | 0.248 | 0.000884 | AC-G | KIAA1033  |
| SDHD      | 6.01E-08 | 0.228034 | 0.426 | 0.39  | 0.000898 | AC-G | SDHD      |
| PLBD2.1   | 6.06E-08 | -0.10093 | 0.031 | 0.062 | 0.000905 | AC-G | PLBD2     |
| HSD3B7    | 6.08E-08 | 0.142136 | 0.104 | 0.07  | 0.000908 | AC-G | HSD3B7    |
| SDHC.1    | 6.18E-08 | 0.248634 | 0.558 | 0.557 | 0.000923 | AC-G | SDHC      |
| CCL20.1   | 6.18E-08 | -0.17072 | 0.034 | 0.066 | 0.000924 | AC-G | CCL20     |
| SPNS3     | 6.68E-08 | -0.1123  | 0.006 | 0.026 | 0.000998 | AC-G | SPNS3     |
| CCND2-AS1 | 6.80E-08 | 0.108255 | 0.042 | 0.022 | 0.001017 | AC-G | CCND2-AS1 |
| KIAA1551. | 6.91E-08 | -0.13061 | 0.055 | 0.093 | 0.001032 | AC-G | KIAA1551  |
| SLC9A3R1. | 7.04E-08 | -0.12962 | 0.109 | 0.158 | 0.001051 | AC-G | SLC9A3R1  |
| CD1D      | 7.20E-08 | -0.13537 | 0.016 | 0.042 | 0.001077 | AC-G | CD1D      |
| NAA60     | 7.21E-08 | 0.130092 | 0.025 | 0.01  | 0.001077 | AC-G | NAA60     |
| ATP6AP1L  | 7.31E-08 | 0.141683 | 0.068 | 0.041 | 0.001092 | AC-G | ATP6AP1L  |
| PGM2      | 7.68E-08 | -0.10516 | 0.108 | 0.156 | 0.001147 | AC-G | PGM2      |
| FRS2.1    | 7.77E-08 | -0.10364 | 0.076 | 0.118 | 0.001161 | AC-G | FRS2      |
| C9orf3    | 7.83E-08 | 0.161946 | 0.138 | 0.098 | 0.00117  | AC-G | C9orf3    |
| LIG1      | 7.94E-08 | -0.11707 | 0.043 | 0.077 | 0.001187 | AC-G | LIG1      |
| PHF1.1    | 7.98E-08 | 0.168804 | 0.205 | 0.162 | 0.001192 | AC-G | PHF1      |
| BAD       | 8.05E-08 | 0.231534 | 0.44  | 0.413 | 0.001203 | AC-G | BAD       |
| TPP2.1    | 8.13E-08 | -0.12176 | 0.085 | 0.13  | 0.001215 | AC-G | TPP2      |
| SLC31A1.1 | 8.20E-08 | -0.15368 | 0.126 | 0.176 | 0.001225 | AC-G | SLC31A1   |
| SCOC.1    | 8.63E-08 | 0.212521 | 0.436 | 0.41  | 0.001289 | AC-G | SCOC      |
| UBE2E1    | 8.66E-08 | 0.250214 | 0.459 | 0.449 | 0.001294 | AC-G | UBE2E1    |
| ITSN1.1   | 9.11E-08 | -0.1574  | 0.107 | 0.153 | 0.001361 | AC-G | ITSN1     |
| GLTP.1    | 9.62E-08 | -0.12156 | 0.215 | 0.279 | 0.001437 | AC-G | GLTP      |
| LEAP2.1   | 9.77E-08 | -0.10928 | 0.051 | 0.088 | 0.001459 | AC-G | LEAP2     |
| ARID5B.1  | 9.80E-08 | 0.273212 | 0.38  | 0.35  | 0.001465 | AC-G | ARID5B    |
| FUBP1.1   | 1.00E-07 | -0.1011  | 0.176 | 0.234 | 0.001501 | AC-G | FUBP1     |
| NDUFC2.1  | 1.01E-07 | 0.208281 | 0.715 | 0.76  | 0.001503 | AC-G | NDUFC2    |
| LONP2     | 1.03E-07 | -0.11377 | 0.196 | 0.258 | 0.001545 | AC-G | LONP2     |
| BMPR1B    | 1.05E-07 | 0.100377 | 0.038 | 0.019 | 0.001563 | AC-G | BMPR1B    |
| CCL5      | 1.06E-07 | -0.29285 | 0.031 | 0.06  | 0.00159  | AC-G | CCL5      |
| TUBE1     | 1.08E-07 | 0.142339 | 0.124 | 0.088 | 0.001614 | AC-G | TUBE1     |
| CIRBP.1   | 1.10E-07 | 0.135769 | 0.811 | 0.876 | 0.001646 | AC-G | CIRBP     |

|             |           |           |        |        |           |      |             |
|-------------|-----------|-----------|--------|--------|-----------|------|-------------|
| TMED4. 1    | 1. 11E-07 | 0. 272016 | 0. 449 | 0. 436 | 0. 001655 | AC-G | TMED4       |
| CAPN3       | 1. 17E-07 | -0. 22376 | 0. 021 | 0. 047 | 0. 001743 | AC-G | CAPN3       |
| SERGEF. 1   | 1. 17E-07 | 0. 224063 | 0. 201 | 0. 161 | 0. 001748 | AC-G | SERGEF      |
| XPOT. 1     | 1. 20E-07 | 0. 187611 | 0. 2   | 0. 161 | 0. 0018   | AC-G | XPOT        |
| DPYD        | 1. 22E-07 | 0. 109253 | 0. 135 | 0. 094 | 0. 00182  | AC-G | DPYD        |
| TSPYL2      | 1. 22E-07 | 0. 142969 | 0. 146 | 0. 106 | 0. 001828 | AC-G | TSPYL2      |
| GCLM        | 1. 27E-07 | 0. 177613 | 0. 191 | 0. 152 | 0. 001899 | AC-G | GCLM        |
| ARID3A      | 1. 28E-07 | -0. 11328 | 0. 078 | 0. 122 | 0. 001909 | AC-G | ARID3A      |
| SVIP. 1     | 1. 28E-07 | -0. 24819 | 0. 131 | 0. 177 | 0. 001915 | AC-G | SVIP        |
| C1QTNF3     | 1. 30E-07 | -0. 10089 | 0. 017 | 0. 043 | 0. 001937 | AC-G | C1QTNF3     |
| MCM4. 1     | 1. 31E-07 | -0. 10751 | 0. 063 | 0. 102 | 0. 001953 | AC-G | MCM4        |
| RGN. 1      | 1. 40E-07 | 0. 154565 | 0. 1   | 0. 067 | 0. 002099 | AC-G | RGN         |
| ZSWIM8. 1   | 1. 41E-07 | -0. 10371 | 0. 048 | 0. 084 | 0. 002102 | AC-G | ZSWIM8      |
| CCDC151     | 1. 42E-07 | 0. 153646 | 0. 089 | 0. 058 | 0. 002129 | AC-G | CCDC151     |
| AGTPBP1. 1  | 1. 45E-07 | -0. 10653 | 0. 027 | 0. 055 | 0. 002168 | AC-G | AGTPBP1     |
| PCGF1       | 1. 46E-07 | 0. 170804 | 0. 125 | 0. 089 | 0. 002182 | AC-G | PCGF1       |
| NDUFA6. 1   | 1. 47E-07 | 0. 266328 | 0. 571 | 0. 572 | 0. 002192 | AC-G | NDUFA6      |
| ZNF804A     | 1. 49E-07 | -0. 10093 | 0. 017 | 0. 042 | 0. 002223 | AC-G | ZNF804A     |
| CLOCK. 1    | 1. 51E-07 | -0. 10384 | 0. 091 | 0. 135 | 0. 002251 | AC-G | CLOCK       |
| MANF. 1     | 1. 52E-07 | 0. 24962  | 0. 46  | 0. 449 | 0. 002275 | AC-G | MANF        |
| ETV3. 1     | 1. 59E-07 | -0. 13248 | 0. 048 | 0. 082 | 0. 002382 | AC-G | ETV3        |
| PSMC2. 1    | 1. 60E-07 | 0. 259915 | 0. 474 | 0. 456 | 0. 002384 | AC-G | PSMC2       |
| PAK1IP1. 1  | 1. 66E-07 | 0. 228454 | 0. 25  | 0. 209 | 0. 002476 | AC-G | PAK1IP1     |
| TNFAIP8     | 1. 70E-07 | -0. 11983 | 0. 042 | 0. 075 | 0. 002534 | AC-G | TNFAIP8     |
| SPOCK1. 1   | 1. 74E-07 | -0. 14664 | 0. 052 | 0. 087 | 0. 002593 | AC-G | SPOCK1      |
| TNFRSF14. 1 | 1. 75E-07 | -0. 18399 | 0. 082 | 0. 122 | 0. 00262  | AC-G | TNFRSF14    |
| PLEKHA5. 1  | 1. 78E-07 | -0. 10404 | 0. 037 | 0. 069 | 0. 002657 | AC-G | PLEKHA5     |
| MCM7. 1     | 1. 79E-07 | -0. 14382 | 0. 207 | 0. 263 | 0. 002677 | AC-G | MCM7        |
| HOXC10      | 1. 87E-07 | 0. 132691 | 0. 078 | 0. 049 | 0. 002794 | AC-G | HOXC10      |
| C1orf109    | 1. 96E-07 | 0. 201532 | 0. 163 | 0. 126 | 0. 002936 | AC-G | C1orf109    |
| CA2. 1      | 1. 99E-07 | 0. 274375 | 0. 263 | 0. 218 | 0. 002975 | AC-G | CA2         |
| SH2B2. 1    | 2. 03E-07 | -0. 10564 | 0. 075 | 0. 115 | 0. 003031 | AC-G | SH2B2       |
| AC093673. 1 | 2. 05E-07 | 0. 221233 | 0. 211 | 0. 172 | 0. 003061 | AC-G | AC093673. 5 |
| ARG2        | 2. 05E-07 | -0. 13264 | 0. 067 | 0. 106 | 0. 003063 | AC-G | ARG2        |
| STK3        | 2. 12E-07 | 0. 185118 | 0. 139 | 0. 103 | 0. 00317  | AC-G | STK3        |
| HOXC9. 1    | 2. 19E-07 | -0. 13644 | 0. 056 | 0. 091 | 0. 003269 | AC-G | HOXC9       |
| KBTBD8      | 2. 21E-07 | -0. 10623 | 0. 011 | 0. 033 | 0. 003309 | AC-G | KBTBD8      |
| ZNF419      | 2. 22E-07 | 0. 159234 | 0. 087 | 0. 057 | 0. 003314 | AC-G | ZNF419      |
| OCIAD1. 1   | 2. 23E-07 | 0. 23201  | 0. 621 | 0. 639 | 0. 003337 | AC-G | OCIAD1      |
| ANAPC11. 1  | 2. 24E-07 | 0. 196357 | 0. 717 | 0. 728 | 0. 003342 | AC-G | ANAPC11     |
| C10orf76. 1 | 2. 31E-07 | -0. 1132  | 0. 031 | 0. 061 | 0. 003455 | AC-G | C10orf76    |
| MITD1. 1    | 2. 33E-07 | 0. 229336 | 0. 269 | 0. 227 | 0. 00348  | AC-G | MITD1       |
| PSMB7. 1    | 2. 36E-07 | 0. 208318 | 0. 629 | 0. 642 | 0. 003531 | AC-G | PSMB7       |
| FAM195B     | 2. 43E-07 | 0. 194828 | 0. 095 | 0. 063 | 0. 003629 | AC-G | FAM195B     |
| SERPINH1. 1 | 2. 47E-07 | 0. 235646 | 0. 24  | 0. 203 | 0. 003685 | AC-G | SERPINH1    |
| LINC00623   | 2. 62E-07 | 0. 145393 | 0. 022 | 0. 009 | 0. 00392  | AC-G | LINC00623   |
| ARL13B. 1   | 2. 71E-07 | 0. 180968 | 0. 176 | 0. 136 | 0. 004056 | AC-G | ARL13B      |
| ITGB5       | 2. 80E-07 | -0. 13893 | 0. 032 | 0. 061 | 0. 004182 | AC-G | ITGB5       |
| SPAG1       | 2. 86E-07 | 0. 107592 | 0. 067 | 0. 042 | 0. 00428  | AC-G | SPAG1       |
| NRARP       | 2. 90E-07 | -0. 10763 | 0. 016 | 0. 039 | 0. 004327 | AC-G | NRARP       |
| ELL2. 1     | 2. 94E-07 | -0. 19391 | 0. 157 | 0. 2   | 0. 0044   | AC-G | ELL2        |

|           |          |          |       |       |          |      |              |
|-----------|----------|----------|-------|-------|----------|------|--------------|
| SPG20     | 3.00E-07 | 0.169966 | 0.272 | 0.231 | 0.004483 | AC-G | SPG20        |
| APOL4     | 3.04E-07 | 0.118904 | 0.064 | 0.039 | 0.004537 | AC-G | APOL4        |
| MDH1      | 3.04E-07 | 0.219791 | 0.552 | 0.55  | 0.004548 | AC-G | MDH1         |
| CALHM2.1  | 3.05E-07 | -0.11629 | 0.034 | 0.065 | 0.004557 | AC-G | CALHM2       |
| NQO1.1    | 3.23E-07 | 0.316397 | 0.136 | 0.103 | 0.004822 | AC-G | NQO1         |
| MLLT11    | 3.23E-07 | -0.1073  | 0.411 | 0.462 | 0.004828 | AC-G | MLLT11       |
| ZDHHC14   | 3.24E-07 | -0.12814 | 0.049 | 0.083 | 0.004848 | AC-G | ZDHHC14      |
| NT5C2.1   | 3.39E-07 | -0.11624 | 0.094 | 0.136 | 0.005061 | AC-G | NT5C2        |
| TMX2      | 3.47E-07 | 0.249597 | 0.416 | 0.395 | 0.005184 | AC-G | TMX2         |
| COPZ1     | 3.54E-07 | 0.261555 | 0.496 | 0.483 | 0.005285 | AC-G | COPZ1        |
| CYSLTR1   | 3.54E-07 | -0.10131 | 0.008 | 0.028 | 0.005295 | AC-G | CYSLTR1      |
| SAR1B.1   | 3.58E-07 | 0.210046 | 0.347 | 0.317 | 0.005345 | AC-G | SAR1B        |
| FCER1A    | 3.70E-07 | -0.12391 | 0.008 | 0.027 | 0.005532 | AC-G | FCER1A       |
| DDIT3.1   | 3.87E-07 | 0.255739 | 0.44  | 0.426 | 0.00579  | AC-G | DDIT3        |
| KRBOX1    | 3.89E-07 | 0.109599 | 0.013 | 0.004 | 0.005813 | AC-G | KRBOX1       |
| GPBP1L1.1 | 4.04E-07 | -0.10148 | 0.16  | 0.215 | 0.006043 | AC-G | GPBP1L1      |
| SMOC1     | 4.10E-07 | -0.11584 | 0.015 | 0.038 | 0.00613  | AC-G | SMOC1        |
| C14orf1   | 4.22E-07 | 0.110951 | 0.229 | 0.305 | 0.006303 | AC-G | C14orf1      |
| ANKRD36.1 | 4.33E-07 | -0.15361 | 0.145 | 0.193 | 0.00647  | AC-G | ANKRD36      |
| NACAD.1   | 4.37E-07 | -0.10112 | 0.059 | 0.095 | 0.006538 | AC-G | NACAD        |
| PMM1.1    | 4.41E-07 | 0.313143 | 0.26  | 0.228 | 0.006593 | AC-G | PMM1         |
| FBXO8     | 4.61E-07 | 0.196464 | 0.176 | 0.138 | 0.006892 | AC-G | FBXO8        |
| KIAA2026. | 4.76E-07 | -0.12747 | 0.107 | 0.15  | 0.007112 | AC-G | KIAA2026     |
| SMIM14.1  | 4.81E-07 | 0.253483 | 0.359 | 0.325 | 0.007193 | AC-G | SMIM14       |
| CUTA.1    | 5.09E-07 | 0.138039 | 0.652 | 0.688 | 0.007607 | AC-G | CUTA         |
| S100A2    | 5.12E-07 | 0.136687 | 0.052 | 0.03  | 0.007645 | AC-G | S100A2       |
| RIPK2.1   | 5.16E-07 | -0.14474 | 0.13  | 0.175 | 0.007718 | AC-G | RIPK2        |
| ATG4C.1   | 5.20E-07 | -0.12207 | 0.102 | 0.146 | 0.007776 | AC-G | ATG4C        |
| SFXN5.1   | 5.30E-07 | 0.274388 | 0.218 | 0.182 | 0.007917 | AC-G | SFXN5        |
| HOXB2.1   | 5.51E-07 | -0.11363 | 0.056 | 0.09  | 0.008232 | AC-G | HOXB2        |
| NR3C1.1   | 5.72E-07 | -0.11602 | 0.2   | 0.258 | 0.008553 | AC-G | NR3C1        |
| MOCS2.1   | 5.77E-07 | 0.24961  | 0.293 | 0.257 | 0.008616 | AC-G | MOCS2        |
| SCML1.1   | 5.85E-07 | 0.135437 | 0.124 | 0.088 | 0.008747 | AC-G | SCML1        |
| KHDC1.1   | 6.03E-07 | 0.1002   | 0.09  | 0.059 | 0.009008 | AC-G | KHDC1        |
| SHMT2.1   | 6.67E-07 | 0.2697   | 0.26  | 0.226 | 0.009966 | AC-G | SHMT2        |
| PDLIM2    | 6.72E-07 | 0.28511  | 0.269 | 0.234 | 0.010048 | AC-G | PDLIM2       |
| NME5      | 7.05E-07 | 0.157005 | 0.07  | 0.045 | 0.010532 | AC-G | NME5         |
| DPM1.1    | 7.07E-07 | 0.283486 | 0.394 | 0.375 | 0.010564 | AC-G | DPM1         |
| METTL22.1 | 7.49E-07 | -0.12233 | 0.06  | 0.095 | 0.01119  | AC-G | METTL22      |
| CTSL.1    | 7.96E-07 | 0.164913 | 0.561 | 0.516 | 0.011889 | AC-G | CTSL         |
| CHRAC1.1  | 8.22E-07 | -0.10686 | 0.107 | 0.152 | 0.012283 | AC-G | CHRAC1       |
| ELN       | 8.33E-07 | 0.259885 | 0.138 | 0.102 | 0.012446 | AC-G | ELN          |
| YARS      | 8.36E-07 | 0.211096 | 0.246 | 0.212 | 0.012495 | AC-G | YARS         |
| PPP1R9A.1 | 8.39E-07 | -0.14216 | 0.046 | 0.076 | 0.012534 | AC-G | PPP1R9A      |
| HOPX      | 8.73E-07 | 0.147522 | 0.347 | 0.27  | 0.013051 | AC-G | HOPX         |
| C1QTNF9B- | 8.74E-07 | 0.134863 | 0.041 | 0.022 | 0.013059 | AC-G | C1QTNF9B-AS1 |
| FIBIN.1   | 8.78E-07 | 0.270616 | 0.262 | 0.22  | 0.013116 | AC-G | FIBIN        |
| BLZF1     | 9.14E-07 | 0.142722 | 0.147 | 0.111 | 0.013664 | AC-G | BLZF1        |
| PDLIM1.1  | 9.17E-07 | 0.219121 | 0.098 | 0.069 | 0.013701 | AC-G | PDLIM1       |
| SNX18.1   | 9.24E-07 | -0.12127 | 0.08  | 0.119 | 0.013807 | AC-G | SNX18        |
| IP6K2.1   | 9.32E-07 | 0.242327 | 0.452 | 0.431 | 0.01392  | AC-G | IP6K2        |

|           |          |          |       |       |          |      |              |
|-----------|----------|----------|-------|-------|----------|------|--------------|
| VPS26A    | 9.70E-07 | -0.13594 | 0.2   | 0.251 | 0.014489 | AC-G | VPS26A       |
| CYB5B.1   | 9.70E-07 | 0.22364  | 0.363 | 0.332 | 0.014503 | AC-G | CYB5B        |
| BACE1.1   | 9.78E-07 | -0.12187 | 0.085 | 0.124 | 0.01461  | AC-G | BACE1        |
| 3-Mar     | 9.97E-07 | 0.142308 | 0.135 | 0.099 | 0.014901 | AC-G | 3-Mar        |
| CNPY4.1   | 9.97E-07 | 0.202856 | 0.141 | 0.107 | 0.014905 | AC-G | CNPY4        |
| ATP5J     | 1.00E-06 | 0.200513 | 0.716 | 0.758 | 0.015009 | AC-G | ATP5J        |
| PSMB6     | 1.01E-06 | 0.212956 | 0.672 | 0.701 | 0.015099 | AC-G | PSMB6        |
| POR       | 1.02E-06 | 0.210582 | 0.295 | 0.259 | 0.015225 | AC-G | POR          |
| ATE1.1    | 1.02E-06 | -0.10869 | 0.028 | 0.055 | 0.015312 | AC-G | ATE1         |
| NDUFA1.1  | 1.03E-06 | 0.150921 | 0.688 | 0.731 | 0.015356 | AC-G | NDUFA1       |
| IFIT2.1   | 1.03E-06 | -0.13493 | 0.054 | 0.087 | 0.015398 | AC-G | IFIT2        |
| GPRC5C.1  | 1.05E-06 | -0.1349  | 0.044 | 0.074 | 0.015758 | AC-G | GPRC5C       |
| GBP4      | 1.06E-06 | -0.12942 | 0.042 | 0.072 | 0.015867 | AC-G | GBP4         |
| TULP3.1   | 1.08E-06 | 0.193796 | 0.154 | 0.12  | 0.016139 | AC-G | TULP3        |
| ZSCAN16.1 | 1.08E-06 | -0.11359 | 0.039 | 0.068 | 0.016153 | AC-G | ZSCAN16      |
| C9orf9.1  | 1.12E-06 | 0.203989 | 0.137 | 0.104 | 0.016703 | AC-G | C9orf9       |
| PCP4      | 1.14E-06 | 0.175754 | 0.059 | 0.035 | 0.016962 | AC-G | PCP4         |
| CA8.1     | 1.17E-06 | -0.12969 | 0.032 | 0.059 | 0.017454 | AC-G | CA8          |
| RAPH1     | 1.17E-06 | -0.10045 | 0.041 | 0.071 | 0.017506 | AC-G | RAPH1        |
| SLC1A4.1  | 1.19E-06 | -0.12122 | 0.046 | 0.078 | 0.017853 | AC-G | SLC1A4       |
| SPA17.1   | 1.20E-06 | 0.206977 | 0.106 | 0.076 | 0.017906 | AC-G | SPA17        |
| KLHL24.1  | 1.23E-06 | -0.11363 | 0.14  | 0.186 | 0.018378 | AC-G | KLHL24       |
| IDNK.1    | 1.39E-06 | 0.166607 | 0.123 | 0.089 | 0.020821 | AC-G | IDNK         |
| NPRL2.1   | 1.53E-06 | 0.19403  | 0.189 | 0.152 | 0.02285  | AC-G | NPRL2        |
| CYB561.1  | 1.57E-06 | 0.167808 | 0.104 | 0.075 | 0.023479 | AC-G | CYB561       |
| TMEM230   | 1.58E-06 | 0.216523 | 0.61  | 0.618 | 0.023544 | AC-G | TMEM230      |
| CAPN2     | 1.61E-06 | 0.193229 | 0.279 | 0.247 | 0.024046 | AC-G | CAPN2        |
| ANGPTL2   | 1.61E-06 | 0.171808 | 0.127 | 0.094 | 0.024077 | AC-G | ANGPTL2      |
| SUN1.1    | 1.61E-06 | 0.206453 | 0.239 | 0.202 | 0.024088 | AC-G | SUN1         |
| TCEAL2    | 1.62E-06 | 0.118762 | 0.222 | 0.171 | 0.024136 | AC-G | TCEAL2       |
| SCAMP1    | 1.66E-06 | -0.10432 | 0.172 | 0.222 | 0.024823 | AC-G | SCAMP1       |
| COPB2.1   | 1.67E-06 | 0.287507 | 0.327 | 0.302 | 0.024885 | AC-G | COPB2        |
| PCDHB10.1 | 1.72E-06 | -0.13143 | 0.073 | 0.108 | 0.025646 | AC-G | PCDHB10      |
| ATP6V1F.1 | 1.73E-06 | 0.163097 | 0.744 | 0.813 | 0.025851 | AC-G | ATP6V1F      |
| AAMDC.1   | 1.74E-06 | 0.237778 | 0.236 | 0.2   | 0.025994 | AC-G | AAMDC        |
| UPF2      | 1.85E-06 | -0.10997 | 0.174 | 0.226 | 0.027646 | AC-G | UPF2         |
| VPS4B.1   | 1.97E-06 | -0.10386 | 0.2   | 0.258 | 0.029409 | AC-G | VPS4B        |
| KRTCAP2   | 1.99E-06 | 0.199356 | 0.559 | 0.556 | 0.0297   | AC-G | KRTCAP2      |
| GARS.1    | 2.05E-06 | 0.21737  | 0.316 | 0.289 | 0.030575 | AC-G | GARS         |
| AAMP.1    | 2.07E-06 | 0.224402 | 0.438 | 0.425 | 0.030869 | AC-G | AAMP         |
| WNT3      | 2.19E-06 | 0.13144  | 0.045 | 0.026 | 0.032788 | AC-G | WNT3         |
| IFI35.1   | 2.28E-06 | 0.255345 | 0.261 | 0.225 | 0.034114 | AC-G | IFI35        |
| C8orf48   | 2.35E-06 | 0.107615 | 0.019 | 0.008 | 0.035054 | AC-G | C8orf48      |
| GPX8      | 2.41E-06 | 0.213011 | 0.084 | 0.059 | 0.036041 | AC-G | GPX8         |
| CLUAP1    | 2.41E-06 | 0.257399 | 0.197 | 0.162 | 0.036079 | AC-G | CLUAP1       |
| PFDN5.1   | 2.47E-06 | 0.125189 | 0.813 | 0.898 | 0.036977 | AC-G | PFDN5        |
| ECHDC2.1  | 2.51E-06 | 0.230821 | 0.218 | 0.182 | 0.03758  | AC-G | ECHDC2       |
| MOK       | 2.54E-06 | 0.125448 | 0.089 | 0.061 | 0.038009 | AC-G | MOK          |
| GNLY      | 2.56E-06 | -0.17654 | 0.013 | 0.033 | 0.038279 | AC-G | GNLY         |
| RP11-166C | 2.57E-06 | -0.1172  | 0.033 | 0.06  | 0.038377 | AC-G | RP11-16604.6 |
| CD3G      | 2.63E-06 | -0.10013 | 0.001 | 0.013 | 0.039276 | AC-G | CD3G         |

|            |           |           |        |        |           |      |                |
|------------|-----------|-----------|--------|--------|-----------|------|----------------|
| RAB40B. 1  | 2. 63E-06 | -0. 1215  | 0. 096 | 0. 136 | 0. 03932  | AC-G | RAB40B         |
| PLD2. 1    | 2. 64E-06 | -0. 10506 | 0. 058 | 0. 091 | 0. 039479 | AC-G | PLD2           |
| METTTL21B. | 2. 65E-06 | 0. 132174 | 0. 088 | 0. 06  | 0. 039536 | AC-G | METTTL21B      |
| PSORS1C1   | 2. 69E-06 | 0. 181571 | 0. 054 | 0. 033 | 0. 040213 | AC-G | PSORS1C1       |
| PTGR1. 1   | 2. 72E-06 | 0. 299148 | 0. 212 | 0. 18  | 0. 040617 | AC-G | PTGR1          |
| MTRNR2L12  | 2. 99E-06 | 0. 371199 | 0. 228 | 0. 19  | 0. 044665 | AC-G | MTRNR2L12      |
| CCP110. 1  | 2. 99E-06 | -0. 11721 | 0. 092 | 0. 13  | 0. 044716 | AC-G | CCP110         |
| ACP1. 1    | 3. 13E-06 | 0. 200992 | 0. 505 | 0. 497 | 0. 046726 | AC-G | ACP1           |
| INCA1      | 3. 20E-06 | 0. 119662 | 0. 031 | 0. 016 | 0. 047787 | AC-G | INCA1          |
| SEPT4. 1   | 3. 32E-06 | -0. 18397 | 0. 097 | 0. 136 | 0. 049576 | AC-G | 4-Sep          |
| CX3CL1     | 3. 33E-06 | 0. 133373 | 0. 057 | 0. 036 | 0. 049814 | AC-G | CX3CL1         |
| CMBL       | 3. 42E-06 | 0. 177275 | 0. 154 | 0. 121 | 0. 051069 | AC-G | CMBL           |
| ECH1. 1    | 3. 53E-06 | 0. 227777 | 0. 555 | 0. 559 | 0. 052797 | AC-G | ECH1           |
| TFB2M      | 3. 58E-06 | 0. 165767 | 0. 111 | 0. 08  | 0. 053489 | AC-G | TFB2M          |
| CD3D       | 3. 63E-06 | -0. 21191 | 0. 006 | 0. 021 | 0. 054263 | AC-G | CD3D           |
| NFKB2. 1   | 3. 66E-06 | -0. 13053 | 0. 038 | 0. 065 | 0. 054703 | AC-G | NFKB2          |
| PEX12. 1   | 3. 72E-06 | 0. 161775 | 0. 073 | 0. 048 | 0. 055561 | AC-G | PEX12          |
| TRAM1. 1   | 3. 76E-06 | 0. 162126 | 0. 45  | 0. 43  | 0. 056162 | AC-G | TRAM1          |
| EFHC1. 1   | 3. 98E-06 | 0. 298509 | 0. 231 | 0. 2   | 0. 059403 | AC-G | EFHC1          |
| PARP10     | 4. 16E-06 | -0. 12907 | 0. 06  | 0. 092 | 0. 062228 | AC-G | PARP10         |
| NKX2-2. 1  | 4. 23E-06 | -0. 11796 | 0. 114 | 0. 154 | 0. 063145 | AC-G | NKX2-2         |
| ISG20      | 4. 23E-06 | 0. 199799 | 0. 151 | 0. 116 | 0. 063146 | AC-G | ISG20          |
| AC002456.  | 4. 23E-06 | 0. 205615 | 0. 063 | 0. 04  | 0. 063178 | AC-G | AC002456. 2    |
| DNAJC25. 1 | 4. 34E-06 | 0. 132024 | 0. 109 | 0. 08  | 0. 064797 | AC-G | DNAJC25        |
| RP11-798M  | 4. 35E-06 | 0. 19155  | 0. 178 | 0. 143 | 0. 065009 | AC-G | RP11-798M19. 6 |
| COMTD1. 1  | 4. 49E-06 | -0. 10593 | 0. 038 | 0. 064 | 0. 067147 | AC-G | COMTD1         |
| CDC42EP2   | 4. 50E-06 | -0. 10614 | 0. 019 | 0. 04  | 0. 067306 | AC-G | CDC42EP2       |
| FAM229B    | 4. 63E-06 | 0. 213361 | 0. 316 | 0. 287 | 0. 069168 | AC-G | FAM229B        |
| RAB3IL1    | 4. 67E-06 | -0. 10328 | 0. 016 | 0. 036 | 0. 069743 | AC-G | RAB3IL1        |
| RP11-620J  | 4. 70E-06 | 0. 218887 | 0. 302 | 0. 263 | 0. 070216 | AC-G | RP11-620J15. 3 |
| LCK        | 4. 75E-06 | -0. 11898 | 0. 003 | 0. 017 | 0. 071056 | AC-G | LCK            |
| MCMBP. 1   | 4. 81E-06 | -0. 10755 | 0. 11  | 0. 151 | 0. 071855 | AC-G | MCMBP          |
| PTPRF. 1   | 4. 83E-06 | 0. 163264 | 0. 142 | 0. 11  | 0. 072225 | AC-G | PTPRF          |
| PCID2      | 5. 25E-06 | 0. 23404  | 0. 207 | 0. 174 | 0. 078529 | AC-G | PCID2          |
| IBSP       | 5. 35E-06 | -0. 15067 | 0. 009 | 0. 027 | 0. 080017 | AC-G | IBSP           |
| C5orf56. 1 | 5. 36E-06 | 0. 127789 | 0. 139 | 0. 106 | 0. 080041 | AC-G | C5orf56        |
| POLR1C. 1  | 5. 56E-06 | 0. 173604 | 0. 149 | 0. 116 | 0. 083137 | AC-G | POLR1C         |
| NR2F2      | 5. 92E-06 | 0. 104048 | 0. 064 | 0. 041 | 0. 088397 | AC-G | NR2F2          |
| HSD17B6    | 5. 97E-06 | 0. 106366 | 0. 032 | 0. 017 | 0. 089184 | AC-G | HSD17B6        |
| ISOC1      | 6. 21E-06 | 0. 149452 | 0. 195 | 0. 158 | 0. 092757 | AC-G | ISOC1          |
| CMTM5. 1   | 6. 33E-06 | -0. 25709 | 0. 074 | 0. 105 | 0. 094609 | AC-G | CMTM5          |
| PSMA7. 1   | 6. 60E-06 | 0. 169393 | 0. 758 | 0. 809 | 0. 098619 | AC-G | PSMA7          |
| NT5E       | 6. 72E-06 | 0. 141843 | 0. 083 | 0. 058 | 0. 100406 | AC-G | NT5E           |
| ABCA8      | 6. 78E-06 | 0. 177837 | 0. 097 | 0. 07  | 0. 101332 | AC-G | ABCA8          |
| OAT        | 6. 85E-06 | 0. 156124 | 0. 273 | 0. 23  | 0. 102298 | AC-G | OAT            |
| VRK2. 1    | 6. 93E-06 | -0. 1543  | 0. 034 | 0. 059 | 0. 103578 | AC-G | VRK2           |
| PTTG1. 1   | 7. 04E-06 | -0. 16668 | 0. 192 | 0. 238 | 0. 105203 | AC-G | PTTG1          |
| WDR19. 1   | 7. 15E-06 | 0. 118343 | 0. 066 | 0. 043 | 0. 106789 | AC-G | WDR19          |
| SEC62. 1   | 7. 47E-06 | 0. 167428 | 0. 65  | 0. 699 | 0. 111596 | AC-G | SEC62          |
| DGUOK      | 7. 75E-06 | 0. 259317 | 0. 515 | 0. 516 | 0. 115841 | AC-G | DGUOK          |
| LMAN2. 1   | 7. 79E-06 | 0. 213157 | 0. 564 | 0. 576 | 0. 11645  | AC-G | LMAN2          |

|             |           |           |        |        |           |      |                |
|-------------|-----------|-----------|--------|--------|-----------|------|----------------|
| MAD2L1. 1   | 8. 18E-06 | -0. 11032 | 0. 098 | 0. 134 | 0. 1223   | AC-G | MAD2L1         |
| SARS. 1     | 8. 34E-06 | 0. 198892 | 0. 448 | 0. 442 | 0. 124589 | AC-G | SARS           |
| RP11-1143   | 8. 99E-06 | -0. 14394 | 0. 031 | 0. 056 | 0. 134371 | AC-G | RP11-1143G9. 4 |
| PELO. 1     | 9. 07E-06 | 0. 13111  | 0. 133 | 0. 101 | 0. 135615 | AC-G | PELO           |
| SELM. 1     | 9. 10E-06 | 0. 114172 | 0. 222 | 0. 182 | 0. 135948 | AC-G | SELM           |
| GSTZ1. 1    | 9. 38E-06 | 0. 112727 | 0. 117 | 0. 165 | 0. 140231 | AC-G | GSTZ1          |
| QPCT. 1     | 9. 46E-06 | -0. 1449  | 0. 028 | 0. 051 | 0. 141432 | AC-G | QPCT           |
| HDHD3       | 9. 74E-06 | 0. 208216 | 0. 135 | 0. 104 | 0. 145485 | AC-G | HDHD3          |
| ZDHHC4. 1   | 1. 03E-05 | 0. 252408 | 0. 373 | 0. 351 | 0. 15348  | AC-G | ZDHHC4         |
| SERF2       | 1. 06E-05 | 0. 160261 | 0. 837 | 0. 907 | 0. 157763 | AC-G | SERF2          |
| OMG. 1      | 1. 09E-05 | -0. 13129 | 0. 055 | 0. 084 | 0. 162944 | AC-G | OMG            |
| TMEM43. 1   | 1. 12E-05 | 0. 141894 | 0. 22  | 0. 186 | 0. 167084 | AC-G | TMEM43         |
| GFPT1       | 1. 15E-05 | 0. 117164 | 0. 121 | 0. 09  | 0. 171529 | AC-G | GFPT1          |
| CCT8        | 1. 17E-05 | 0. 158747 | 0. 541 | 0. 534 | 0. 175375 | AC-G | CCT8           |
| NDUFB9. 1   | 1. 20E-05 | 0. 174026 | 0. 665 | 0. 694 | 0. 179501 | AC-G | NDUFB9         |
| SMS. 1      | 1. 21E-05 | 0. 217349 | 0. 565 | 0. 574 | 0. 180375 | AC-G | SMS            |
| NOP16. 1    | 1. 23E-05 | 0. 286829 | 0. 224 | 0. 194 | 0. 183356 | AC-G | NOP16          |
| HSPD1. 1    | 1. 26E-05 | 0. 161916 | 0. 582 | 0. 621 | 0. 188088 | AC-G | HSPD1          |
| DNAJB1      | 1. 26E-05 | 0. 252018 | 0. 608 | 0. 61  | 0. 188852 | AC-G | DNAJB1         |
| NIFK        | 1. 27E-05 | 0. 252296 | 0. 366 | 0. 345 | 0. 189574 | AC-G | NIFK           |
| LRRCC1. 1   | 1. 29E-05 | 0. 246646 | 0. 159 | 0. 131 | 0. 192952 | AC-G | LRRCC1         |
| CLDN12. 1   | 1. 29E-05 | 0. 167397 | 0. 165 | 0. 133 | 0. 193105 | AC-G | CLDN12         |
| FOSL1. 1    | 1. 32E-05 | 0. 113982 | 0. 065 | 0. 043 | 0. 197443 | AC-G | FOSL1          |
| ST5. 1      | 1. 33E-05 | 0. 19517  | 0. 177 | 0. 146 | 0. 199415 | AC-G | ST5            |
| NDUFS4      | 1. 36E-05 | 0. 237125 | 0. 503 | 0. 505 | 0. 203696 | AC-G | NDUFS4         |
| HS2ST1. 1   | 1. 41E-05 | 0. 275453 | 0. 198 | 0. 17  | 0. 211111 | AC-G | HS2ST1         |
| TXLNG       | 1. 45E-05 | 0. 155511 | 0. 16  | 0. 128 | 0. 21735  | AC-G | TXLNG          |
| MTURN       | 1. 51E-05 | -0. 1116  | 0. 055 | 0. 084 | 0. 225233 | AC-G | MTURN          |
| VBP1. 1     | 1. 56E-05 | 0. 212364 | 0. 495 | 0. 485 | 0. 233576 | AC-G | VBP1           |
| TXNDC12. 1  | 1. 57E-05 | 0. 144757 | 0. 448 | 0. 429 | 0. 234542 | AC-G | TXNDC12        |
| CCDC25. 1   | 1. 59E-05 | 0. 222404 | 0. 318 | 0. 293 | 0. 237134 | AC-G | CCDC25         |
| TPD52. 1    | 1. 63E-05 | 0. 208187 | 0. 262 | 0. 231 | 0. 242857 | AC-G | TPD52          |
| SLC46A3. 1  | 1. 64E-05 | -0. 13341 | 0. 037 | 0. 061 | 0. 245673 | AC-G | SLC46A3        |
| DPH3        | 1. 72E-05 | 0. 269163 | 0. 239 | 0. 208 | 0. 256486 | AC-G | DPH3           |
| PTPRCAP     | 1. 75E-05 | -0. 196   | 0. 012 | 0. 029 | 0. 261488 | AC-G | PTPRCAP        |
| ANPEP       | 1. 77E-05 | -0. 10194 | 0. 016 | 0. 035 | 0. 263854 | AC-G | ANPEP          |
| ORC5. 1     | 1. 77E-05 | 0. 183563 | 0. 123 | 0. 095 | 0. 264924 | AC-G | ORC5           |
| SOX2. 1     | 1. 81E-05 | -0. 11065 | 0. 396 | 0. 436 | 0. 270547 | AC-G | SOX2           |
| DPCD. 1     | 1. 82E-05 | 0. 205916 | 0. 187 | 0. 156 | 0. 272096 | AC-G | DPCD           |
| ATP5B. 1    | 1. 85E-05 | 0. 165797 | 0. 734 | 0. 784 | 0. 277047 | AC-G | ATP5B          |
| ZFAS1. 1    | 1. 95E-05 | 0. 202434 | 0. 664 | 0. 704 | 0. 291313 | AC-G | ZFAS1          |
| PARP12. 1   | 1. 99E-05 | -0. 1095  | 0. 052 | 0. 079 | 0. 297005 | AC-G | PARP12         |
| PRNP        | 2. 00E-05 | 0. 175827 | 0. 471 | 0. 464 | 0. 298519 | AC-G | PRNP           |
| S100A1      | 2. 05E-05 | -0. 21096 | 0. 021 | 0. 041 | 0. 306069 | AC-G | S100A1         |
| NFIL3. 1    | 2. 14E-05 | -0. 16931 | 0. 06  | 0. 088 | 0. 320118 | AC-G | NFIL3          |
| WWTR1. 1    | 2. 18E-05 | 0. 192994 | 0. 187 | 0. 155 | 0. 325744 | AC-G | WWTR1          |
| LBH. 1      | 2. 20E-05 | -0. 12486 | 0. 123 | 0. 159 | 0. 328147 | AC-G | LBH            |
| PPP1R15B. 1 | 2. 22E-05 | -0. 10267 | 0. 089 | 0. 123 | 0. 332381 | AC-G | PPP1R15B       |
| NMD3        | 2. 23E-05 | 0. 172266 | 0. 242 | 0. 21  | 0. 333442 | AC-G | NMD3           |
| CCL7        | 2. 38E-05 | 0. 121028 | 0. 023 | 0. 011 | 0. 355319 | AC-G | CCL7           |
| CTC-479C5   | 2. 43E-05 | -0. 11037 | 0. 032 | 0. 055 | 0. 363393 | AC-G | CTC-479C5. 12  |



|            |           |           |        |        |           |      |                |
|------------|-----------|-----------|--------|--------|-----------|------|----------------|
| TF. 1      | 2. 44E-05 | -0. 1219  | 0. 098 | 0. 068 | 0. 364462 | AC-G | TF             |
| DUSP22. 1  | 2. 47E-05 | -0. 13493 | 0. 085 | 0. 117 | 0. 368776 | AC-G | DUSP22         |
| TLR3       | 2. 50E-05 | -0. 10776 | 0. 017 | 0. 036 | 0. 373367 | AC-G | TLR3           |
| PTGS2. 1   | 2. 52E-05 | -0. 13458 | 0. 041 | 0. 065 | 0. 376778 | AC-G | PTGS2          |
| ARMCX2     | 2. 55E-05 | 0. 245076 | 0. 172 | 0. 141 | 0. 380479 | AC-G | ARMCX2         |
| CYB5A. 1   | 2. 59E-05 | 0. 314065 | 0. 355 | 0. 339 | 0. 387327 | AC-G | CYB5A          |
| SLC17A5. 1 | 2. 64E-05 | -0. 13213 | 0. 08  | 0. 111 | 0. 394087 | AC-G | SLC17A5        |
| RAB6B. 1   | 2. 67E-05 | 0. 10043  | 0. 085 | 0. 061 | 0. 399241 | AC-G | RAB6B          |
| MBNL2. 1   | 2. 76E-05 | -0. 11468 | 0. 071 | 0. 1   | 0. 412041 | AC-G | MBNL2          |
| PDIA5      | 2. 77E-05 | 0. 187871 | 0. 09  | 0. 066 | 0. 414521 | AC-G | PDIA5          |
| JAGN1. 1   | 2. 91E-05 | 0. 271199 | 0. 341 | 0. 316 | 0. 4351   | AC-G | JAGN1          |
| PIR        | 2. 93E-05 | 0. 132587 | 0. 076 | 0. 053 | 0. 437383 | AC-G | PIR            |
| RNF135. 1  | 2. 97E-05 | -0. 14291 | 0. 085 | 0. 116 | 0. 443423 | AC-G | RNF135         |
| IFI6. 1    | 3. 02E-05 | 0. 204931 | 0. 421 | 0. 404 | 0. 451074 | AC-G | IFI6           |
| DNAAF1     | 3. 14E-05 | -0. 12665 | 0. 013 | 0. 03  | 0. 469634 | AC-G | DNAAF1         |
| CTD-2015H  | 3. 17E-05 | 0. 119401 | 0. 059 | 0. 039 | 0. 474196 | AC-G | CTD-2015H6. 3  |
| TUBG2. 1   | 3. 37E-05 | 0. 177301 | 0. 134 | 0. 106 | 0. 503021 | AC-G | TUBG2          |
| GTF2H2     | 3. 40E-05 | 0. 212924 | 0. 21  | 0. 18  | 0. 508758 | AC-G | GTF2H2         |
| NOP58. 1   | 3. 74E-05 | 0. 206797 | 0. 312 | 0. 288 | 0. 558713 | AC-G | NOP58          |
| INSR. 1    | 3. 85E-05 | -0. 11854 | 0. 115 | 0. 151 | 0. 575192 | AC-G | INSR           |
| TMEM99. 1  | 3. 90E-05 | 0. 166129 | 0. 152 | 0. 123 | 0. 582897 | AC-G | TMEM99         |
| NR2C2AP    | 4. 32E-05 | 0. 234027 | 0. 189 | 0. 161 | 0. 645292 | AC-G | NR2C2AP        |
| NECAB1     | 4. 40E-05 | -0. 11642 | 0. 021 | 0. 04  | 0. 657522 | AC-G | NECAB1         |
| DNAJC1. 1  | 4. 41E-05 | -0. 10253 | 0. 15  | 0. 192 | 0. 658387 | AC-G | DNAJC1         |
| EVA1C. 1   | 4. 56E-05 | 0. 155911 | 0. 091 | 0. 068 | 0. 680787 | AC-G | EVA1C          |
| SLC25A4. 1 | 4. 68E-05 | 0. 211424 | 0. 44  | 0. 424 | 0. 699539 | AC-G | SLC25A4        |
| TAF1D. 1   | 4. 88E-05 | 0. 220794 | 0. 354 | 0. 341 | 0. 729949 | AC-G | TAF1D          |
| MTRR. 1    | 5. 10E-05 | 0. 128412 | 0. 105 | 0. 079 | 0. 762741 | AC-G | MTRR           |
| TMED5. 1   | 5. 21E-05 | 0. 170761 | 0. 33  | 0. 301 | 0. 778655 | AC-G | TMED5          |
| EML2. 1    | 5. 26E-05 | -0. 11629 | 0. 06  | 0. 087 | 0. 786464 | AC-G | EML2           |
| MEAF6. 1   | 5. 45E-05 | 0. 195987 | 0. 478 | 0. 477 | 0. 81399  | AC-G | MEAF6          |
| MYL12B. 1  | 5. 53E-05 | 0. 203357 | 0. 693 | 0. 734 | 0. 826839 | AC-G | MYL12B         |
| DDX39A. 1  | 5. 55E-05 | 0. 235357 | 0. 404 | 0. 39  | 0. 82901  | AC-G | DDX39A         |
| POT1       | 5. 81E-05 | 0. 120148 | 0. 103 | 0. 077 | 0. 868367 | AC-G | POT1           |
| UNC50      | 5. 88E-05 | 0. 189169 | 0. 369 | 0. 352 | 0. 878092 | AC-G | UNC50          |
| ZFP36L1    | 5. 93E-05 | 0. 200128 | 0. 561 | 0. 559 | 0. 886535 | AC-G | ZFP36L1        |
| SLC25A18   | 6. 80E-05 | 0. 305002 | 0. 107 | 0. 083 | 1         | AC-G | SLC25A18       |
| RP11-629G  | 6. 86E-05 | 0. 11658  | 0. 033 | 0. 019 | 1         | AC-G | RP11-629G13. 1 |
| FOSL2. 1   | 6. 98E-05 | -0. 11268 | 0. 153 | 0. 192 | 1         | AC-G | FOSL2          |
| CDC37L1    | 7. 05E-05 | 0. 142962 | 0. 164 | 0. 134 | 1         | AC-G | CDC37L1        |
| TMEM231    | 7. 16E-05 | 0. 120812 | 0. 081 | 0. 059 | 1         | AC-G | TMEM231        |
| KDM7A      | 7. 30E-05 | -0. 10653 | 0. 043 | 0. 066 | 1         | AC-G | KDM7A          |
| GZMA       | 7. 59E-05 | -0. 15417 | 0. 005 | 0. 016 | 1         | AC-G | GZMA           |
| NFKBIZ. 1  | 7. 82E-05 | 0. 145601 | 0. 204 | 0. 169 | 1         | AC-G | NFKBIZ         |
| TIMMDC1    | 7. 83E-05 | 0. 202793 | 0. 397 | 0. 385 | 1         | AC-G | TIMMDC1        |
| MKL2. 1    | 8. 02E-05 | 0. 12628  | 0. 097 | 0. 073 | 1         | AC-G | MKL2           |
| MTRNR2L8   | 8. 18E-05 | 0. 21333  | 0. 221 | 0. 185 | 1         | AC-G | MTRNR2L8       |
| MXD1       | 8. 39E-05 | -0. 14764 | 0. 103 | 0. 133 | 1         | AC-G | MXD1           |
| SLC35E3    | 8. 48E-05 | -0. 13968 | 0. 156 | 0. 193 | 1         | AC-G | SLC35E3        |
| EEF1D. 1   | 8. 81E-05 | 0. 128834 | 0. 782 | 0. 857 | 1         | AC-G | EEF1D          |
| NAF1. 1    | 8. 86E-05 | -0. 11187 | 0. 085 | 0. 114 | 1         | AC-G | NAF1           |

|            |           |           |        |        |        |          |
|------------|-----------|-----------|--------|--------|--------|----------|
| FLNA. 1    | 8. 95E-05 | 0. 184974 | 0. 273 | 0. 246 | 1 AC-G | FLNA     |
| MATN2      | 9. 02E-05 | 0. 137078 | 0. 085 | 0. 062 | 1 AC-G | MATN2    |
| MIR210HG   | 9. 26E-05 | 0. 160382 | 0. 112 | 0. 087 | 1 AC-G | MIR210HG |
| PTPRZ1. 1  | 9. 33E-05 | -0. 1016  | 0. 363 | 0. 388 | 1 AC-G | PTPRZ1   |
| TMEM216    | 9. 44E-05 | 0. 209495 | 0. 101 | 0. 076 | 1 AC-G | TMEM216  |
| LSM5       | 9. 59E-05 | 0. 200673 | 0. 503 | 0. 508 | 1 AC-G | LSM5     |
| C3. 1      | 9. 95E-05 | 0. 167269 | 0. 438 | 0. 394 | 1 AC-G | C3       |
| TROVE2     | 0. 0001   | 0. 169332 | 0. 433 | 0. 433 | 1 AC-G | TROVE2   |
| BZW1. 1    | 0. 000101 | 0. 166921 | 0. 521 | 0. 541 | 1 AC-G | BZW1     |
| YIPF3. 1   | 0. 000107 | 0. 225492 | 0. 48  | 0. 484 | 1 AC-G | YIPF3    |
| DYNC2H1    | 0. 00011  | 0. 112667 | 0. 068 | 0. 048 | 1 AC-G | DYNC2H1  |
| PIN4. 1    | 0. 00011  | 0. 237783 | 0. 422 | 0. 417 | 1 AC-G | PIN4     |
| HIBADH. 1  | 0. 000111 | 0. 219507 | 0. 25  | 0. 223 | 1 AC-G | HIBADH   |
| TXNDC17. 1 | 0. 000112 | 0. 250435 | 0. 525 | 0. 525 | 1 AC-G | TXNDC17  |
| COMMD6. 1  | 0. 000112 | 0. 164745 | 0. 726 | 0. 786 | 1 AC-G | COMMD6   |
| ZCRB1. 1   | 0. 000119 | 0. 264853 | 0. 48  | 0. 493 | 1 AC-G | ZCRB1    |
| NRCAM      | 0. 00012  | 0. 242264 | 0. 289 | 0. 266 | 1 AC-G | NRCAM    |
| PLS3. 1    | 0. 000121 | 0. 28494  | 0. 245 | 0. 216 | 1 AC-G | PLS3     |
| CALCOCO2.  | 0. 000125 | 0. 123163 | 0. 219 | 0. 188 | 1 AC-G | CALCOCO2 |
| OSCP1. 1   | 0. 000127 | 0. 109584 | 0. 084 | 0. 062 | 1 AC-G | OSCP1    |
| ATP6V1G1.  | 0. 00013  | 0. 1692   | 0. 718 | 0. 761 | 1 AC-G | ATP6V1G1 |
| CBR1       | 0. 000133 | 0. 175981 | 0. 476 | 0. 476 | 1 AC-G | CBR1     |
| IFIT3. 1   | 0. 000135 | -0. 1217  | 0. 084 | 0. 113 | 1 AC-G | IFIT3    |
| CD320      | 0. 000138 | 0. 15547  | 0. 339 | 0. 314 | 1 AC-G | CD320    |
| PLRG1. 1   | 0. 000142 | 0. 210132 | 0. 259 | 0. 233 | 1 AC-G | PLRG1    |
| TMEM47     | 0. 000142 | 0. 124299 | 0. 099 | 0. 076 | 1 AC-G | TMEM47   |
| ATF3. 1    | 0. 000142 | 0. 114156 | 0. 334 | 0. 296 | 1 AC-G | ATF3     |
| SEC11C. 1  | 0. 000147 | 0. 198685 | 0. 483 | 0. 5   | 1 AC-G | SEC11C   |
| CDK7. 1    | 0. 000148 | 0. 160675 | 0. 114 | 0. 089 | 1 AC-G | CDK7     |
| TMEM176B.  | 0. 000156 | -0. 2242  | 0. 335 | 0. 355 | 1 AC-G | TMEM176B |
| CEBPZ. 1   | 0. 000157 | 0. 201405 | 0. 289 | 0. 268 | 1 AC-G | CEBPZ    |
| NEIL2. 1   | 0. 000169 | 0. 245321 | 0. 217 | 0. 195 | 1 AC-G | NEIL2    |
| ZNF230     | 0. 000172 | 0. 104348 | 0. 067 | 0. 048 | 1 AC-G | ZNF230   |
| AGPAT5     | 0. 000177 | 0. 259037 | 0. 228 | 0. 206 | 1 AC-G | AGPAT5   |
| ZNF408. 1  | 0. 000179 | 0. 104189 | 0. 095 | 0. 072 | 1 AC-G | ZNF408   |
| RAD23A. 1  | 0. 000181 | 0. 129455 | 0. 569 | 0. 566 | 1 AC-G | RAD23A   |
| AARS       | 0. 000184 | 0. 150169 | 0. 251 | 0. 226 | 1 AC-G | AARS     |
| GOLGA7     | 0. 000184 | 0. 16346  | 0. 467 | 0. 463 | 1 AC-G | GOLGA7   |
| LRTOMT     | 0. 000184 | 0. 156255 | 0. 089 | 0. 068 | 1 AC-G | LRTOMT   |
| CCDC47. 1  | 0. 000185 | 0. 120487 | 0. 412 | 0. 403 | 1 AC-G | CCDC47   |
| PGM1. 1    | 0. 000186 | 0. 21563  | 0. 271 | 0. 247 | 1 AC-G | PGM1     |
| ZNF568     | 0. 000189 | 0. 137817 | 0. 119 | 0. 094 | 1 AC-G | ZNF568   |
| RPRM. 1    | 0. 000192 | -0. 12712 | 0. 048 | 0. 07  | 1 AC-G | RPRM     |
| OST4. 1    | 0. 000195 | 0. 186117 | 0. 734 | 0. 789 | 1 AC-G | OST4     |
| MX1        | 0. 000197 | -0. 17745 | 0. 097 | 0. 124 | 1 AC-G | MX1      |
| TMEFF2. 1  | 0. 000214 | -0. 11631 | 0. 058 | 0. 081 | 1 AC-G | TMEFF2   |
| CRY1       | 0. 000215 | 0. 208311 | 0. 157 | 0. 132 | 1 AC-G | CRY1     |
| GNG12      | 0. 000216 | 0. 213526 | 0. 157 | 0. 134 | 1 AC-G | GNG12    |
| SLC9A9. 1  | 0. 000216 | -0. 14822 | 0. 058 | 0. 082 | 1 AC-G | SLC9A9   |
| PTHLH      | 0. 00022  | 0. 100434 | 0. 046 | 0. 031 | 1 AC-G | PTHLH    |
| FERMT2. 1  | 0. 000229 | 0. 175409 | 0. 221 | 0. 199 | 1 AC-G | FERMT2   |

|            |          |          |       |       |        |              |
|------------|----------|----------|-------|-------|--------|--------------|
| VMP1. 1    | 0.000231 | 0.17156  | 0.472 | 0.472 | 1 AC-G | VMP1         |
| ZCCHC6. 1  | 0.000248 | -0.10823 | 0.109 | 0.14  | 1 AC-G | ZCCHC6       |
| ATOX1. 1   | 0.000255 | 0.231185 | 0.591 | 0.607 | 1 AC-G | ATOX1        |
| IRF1. 1    | 0.000256 | 0.162379 | 0.232 | 0.201 | 1 AC-G | IRF1         |
| TAX1BP1    | 0.000272 | 0.143841 | 0.493 | 0.516 | 1 AC-G | TAX1BP1      |
| RIT2. 1    | 0.000278 | 0.12621  | 0.096 | 0.072 | 1 AC-G | RIT2         |
| ATP1B2. 1  | 0.000287 | 0.17917  | 0.257 | 0.228 | 1 AC-G | ATP1B2       |
| TEX10. 1   | 0.000289 | 0.107269 | 0.096 | 0.073 | 1 AC-G | TEX10        |
| ABCF2. 1   | 0.000293 | 0.224488 | 0.236 | 0.212 | 1 AC-G | ABCF2        |
| LMAN1. 1   | 0.000294 | 0.235462 | 0.338 | 0.327 | 1 AC-G | LMAN1        |
| PRAF2. 1   | 0.000296 | 0.15814  | 0.311 | 0.3   | 1 AC-G | PRAF2        |
| ANXA4. 1   | 0.000301 | 0.174144 | 0.218 | 0.189 | 1 AC-G | ANXA4        |
| ANAPC13. 1 | 0.000303 | 0.168874 | 0.369 | 0.351 | 1 AC-G | ANAPC13      |
| COA3       | 0.000307 | 0.246274 | 0.466 | 0.479 | 1 AC-G | COA3         |
| NSG1. 1    | 0.000309 | -0.19118 | 0.155 | 0.18  | 1 AC-G | NSG1         |
| HEPACAM. 1 | 0.000321 | 0.234289 | 0.201 | 0.173 | 1 AC-G | HEPACAM      |
| CASP4. 1   | 0.000324 | 0.184275 | 0.255 | 0.222 | 1 AC-G | CASP4        |
| NEXN       | 0.000347 | 0.103962 | 0.045 | 0.03  | 1 AC-G | NEXN         |
| C1orf52. 1 | 0.000359 | 0.209396 | 0.322 | 0.304 | 1 AC-G | C1orf52      |
| CRISPLD1.  | 0.00036  | 0.136598 | 0.109 | 0.086 | 1 AC-G | CRISPLD1     |
| ROMO1. 1   | 0.000362 | 0.187793 | 0.579 | 0.598 | 1 AC-G | ROMO1        |
| CIB1. 1    | 0.000364 | 0.161685 | 0.5   | 0.491 | 1 AC-G | CIB1         |
| IARS       | 0.000368 | 0.179701 | 0.227 | 0.207 | 1 AC-G | IARS         |
| FBL. 1     | 0.000374 | 0.211398 | 0.387 | 0.376 | 1 AC-G | FBL          |
| LOXL3      | 0.000384 | -0.10143 | 0.054 | 0.077 | 1 AC-G | LOXL3        |
| NMB. 1     | 0.000385 | 0.193961 | 0.222 | 0.198 | 1 AC-G | NMB          |
| VAMP4      | 0.00039  | 0.132157 | 0.139 | 0.114 | 1 AC-G | VAMP4        |
| GMNN. 1    | 0.000399 | 0.21198  | 0.196 | 0.172 | 1 AC-G | GMNN         |
| NDUFV2. 1  | 0.000425 | 0.193067 | 0.576 | 0.594 | 1 AC-G | NDUFV2       |
| TVP23B. 1  | 0.000438 | 0.106275 | 0.122 | 0.098 | 1 AC-G | TVP23B       |
| SNRPG. 1   | 0.000449 | 0.156122 | 0.62  | 0.643 | 1 AC-G | SNRPG        |
| PCDH1      | 0.000471 | 0.116871 | 0.075 | 0.056 | 1 AC-G | PCDH1        |
| TNKS1BP1   | 0.000474 | 0.136272 | 0.09  | 0.07  | 1 AC-G | TNKS1BP1     |
| EGFL7      | 0.000488 | -0.10588 | 0.023 | 0.039 | 1 AC-G | EGFL7        |
| USE1. 1    | 0.000493 | 0.279485 | 0.341 | 0.328 | 1 AC-G | USE1         |
| OTUD7B     | 0.000505 | 0.130429 | 0.12  | 0.097 | 1 AC-G | OTUD7B       |
| GS1-124K5  | 0.000523 | 0.194648 | 0.134 | 0.11  | 1 AC-G | GS1-124K5. 4 |
| SIVA1. 1   | 0.000524 | 0.176313 | 0.485 | 0.486 | 1 AC-G | SIVA1        |
| LINC00116  | 0.000527 | 0.253357 | 0.368 | 0.364 | 1 AC-G | LINC00116    |
| TMEM222. 1 | 0.00054  | 0.169127 | 0.297 | 0.276 | 1 AC-G | TMEM222      |
| RWDD1. 1   | 0.000548 | 0.170823 | 0.516 | 0.529 | 1 AC-G | RWDD1        |
| TRIP10     | 0.000553 | 0.152594 | 0.117 | 0.095 | 1 AC-G | TRIP10       |
| PODXL. 1   | 0.000559 | 0.155197 | 0.086 | 0.067 | 1 AC-G | PODXL        |
| GNAI1. 1   | 0.000586 | -0.14095 | 0.086 | 0.109 | 1 AC-G | GNAI1        |
| TIMM44. 1  | 0.00059  | 0.201901 | 0.274 | 0.26  | 1 AC-G | TIMM44       |
| PSMA6. 1   | 0.000591 | 0.191979 | 0.245 | 0.219 | 1 AC-G | PSMA6        |
| B9D1       | 0.000591 | 0.297602 | 0.118 | 0.097 | 1 AC-G | B9D1         |
| GZMK       | 0.000603 | -0.11521 | 0.003 | 0.012 | 1 AC-G | GZMK         |
| RNU12      | 0.00061  | -0.11433 | 0.024 | 0.04  | 1 AC-G | RNU12        |
| THYN1. 1   | 0.000613 | 0.250455 | 0.41  | 0.406 | 1 AC-G | THYN1        |
| SH3GLB1. 1 | 0.000616 | 0.207677 | 0.431 | 0.43  | 1 AC-G | SH3GLB1      |

|           |          |          |       |       |        |             |
|-----------|----------|----------|-------|-------|--------|-------------|
| HNRNPA2B1 | 0.000616 | 0.15006  | 0.79  | 0.856 | 1 AC-G | HNRNPA2B1   |
| MORF4L1.1 | 0.00063  | 0.110979 | 0.711 | 0.751 | 1 AC-G | MORF4L1     |
| MIF.1     | 0.00064  | 0.14544  | 0.615 | 0.681 | 1 AC-G | MIF         |
| ZNF181    | 0.000676 | 0.164122 | 0.115 | 0.093 | 1 AC-G | ZNF181      |
| AIMP2.1   | 0.000678 | 0.203287 | 0.259 | 0.237 | 1 AC-G | AIMP2       |
| HSD17B12. | 0.000711 | 0.144349 | 0.417 | 0.413 | 1 AC-G | HSD17B12    |
| TRNT1.1   | 0.000712 | 0.234986 | 0.15  | 0.128 | 1 AC-G | TRNT1       |
| MAGED2.1  | 0.000715 | 0.158322 | 0.503 | 0.51  | 1 AC-G | MAGED2      |
| FAM221A.1 | 0.000718 | 0.1577   | 0.202 | 0.173 | 1 AC-G | FAM221A     |
| MUT.1     | 0.00073  | 0.107782 | 0.178 | 0.153 | 1 AC-G | MUT         |
| CLDN11    | 0.000731 | -0.14652 | 0.031 | 0.048 | 1 AC-G | CLDN11      |
| LYRM1.1   | 0.000733 | 0.269899 | 0.203 | 0.179 | 1 AC-G | LYRM1       |
| DNAJC2.1  | 0.00074  | 0.156765 | 0.312 | 0.295 | 1 AC-G | DNAJC2      |
| APIP.1    | 0.000754 | -0.10034 | 0.202 | 0.239 | 1 AC-G | APIP        |
| TOPORS.1  | 0.000765 | -0.11353 | 0.152 | 0.184 | 1 AC-G | TOPORS      |
| ZNF136    | 0.00077  | 0.126146 | 0.115 | 0.094 | 1 AC-G | ZNF136      |
| CCT3.1    | 0.000788 | 0.175123 | 0.563 | 0.58  | 1 AC-G | CCT3        |
| FHIT.1    | 0.000793 | -0.18193 | 0.096 | 0.12  | 1 AC-G | FHIT        |
| LINC00493 | 0.000796 | 0.192837 | 0.522 | 0.532 | 1 AC-G | LINC00493   |
| DCAKD.1   | 0.000837 | 0.102297 | 0.112 | 0.144 | 1 AC-G | DCAKD       |
| AHR.1     | 0.000843 | -0.14204 | 0.047 | 0.066 | 1 AC-G | AHR         |
| CDC42EP4. | 0.000856 | 0.114769 | 0.225 | 0.196 | 1 AC-G | CDC42EP4    |
| EIF2S2.1  | 0.000915 | 0.154725 | 0.564 | 0.593 | 1 AC-G | EIF2S2      |
| HOXA10.1  | 0.000934 | -0.10585 | 0.06  | 0.08  | 1 AC-G | HOXA10      |
| TMEM50A.1 | 0.000936 | 0.219531 | 0.567 | 0.597 | 1 AC-G | TMEM50A     |
| PCOLCE    | 0.001014 | 0.277359 | 0.097 | 0.078 | 1 AC-G | PCOLCE      |
| ADAMTS4   | 0.001071 | -0.10272 | 0.02  | 0.034 | 1 AC-G | ADAMTS4     |
| IFT46     | 0.001075 | 0.157776 | 0.127 | 0.106 | 1 AC-G | IFT46       |
| ALKBH2.1  | 0.001079 | 0.225008 | 0.212 | 0.192 | 1 AC-G | ALKBH2      |
| CHMP5     | 0.001083 | 0.144788 | 0.523 | 0.534 | 1 AC-G | CHMP5       |
| IQCK      | 0.001087 | 0.208843 | 0.143 | 0.123 | 1 AC-G | IQCK        |
| DYNLRB1   | 0.001088 | 0.173339 | 0.647 | 0.669 | 1 AC-G | DYNLRB1     |
| RP11-11N9 | 0.001199 | 0.108604 | 0.069 | 0.051 | 1 AC-G | RP11-11N9.4 |
| GALK1.1   | 0.001217 | 0.106246 | 0.169 | 0.211 | 1 AC-G | GALK1       |
| C1orf53   | 0.001237 | 0.223796 | 0.099 | 0.08  | 1 AC-G | C1orf53     |
| FOXP1     | 0.001253 | 0.276006 | 0.254 | 0.226 | 1 AC-G | FOXP1       |
| ZFAND2A.1 | 0.001287 | 0.254226 | 0.299 | 0.28  | 1 AC-G | ZFAND2A     |
| TSC22D4.1 | 0.001287 | 0.187315 | 0.476 | 0.469 | 1 AC-G | TSC22D4     |
| MICALL2   | 0.001289 | 0.10539  | 0.085 | 0.066 | 1 AC-G | MICALL2     |
| CAPZA2.1  | 0.001352 | 0.174737 | 0.611 | 0.662 | 1 AC-G | CAPZA2      |
| ABLIM1.1  | 0.001355 | 0.102235 | 0.067 | 0.05  | 1 AC-G | ABLIM1      |
| WBSCR22.1 | 0.001439 | 0.203187 | 0.483 | 0.495 | 1 AC-G | WBSCR22     |
| TMEM55A.1 | 0.001474 | 0.124198 | 0.251 | 0.229 | 1 AC-G | TMEM55A     |
| STK33     | 0.001478 | 0.11171  | 0.083 | 0.065 | 1 AC-G | STK33       |
| TMEM186.1 | 0.001529 | 0.128497 | 0.114 | 0.094 | 1 AC-G | TMEM186     |
| PTRH2.1   | 0.00153  | 0.155856 | 0.156 | 0.134 | 1 AC-G | PTRH2       |
| SNTG1     | 0.001555 | 0.364537 | 0.168 | 0.15  | 1 AC-G | SNTG1       |
| MAP9      | 0.001581 | 0.181936 | 0.206 | 0.185 | 1 AC-G | MAP9        |
| PHOSPHO2  | 0.001587 | 0.103855 | 0.057 | 0.042 | 1 AC-G | PHOSPHO2    |
| CDK18     | 0.001633 | -0.11584 | 0.061 | 0.081 | 1 AC-G | CDK18       |
| PDK1      | 0.001735 | 0.105797 | 0.101 | 0.081 | 1 AC-G | PDK1        |

|           |          |          |       |       |        |               |
|-----------|----------|----------|-------|-------|--------|---------------|
| AMD1      | 0.00177  | 0.1503   | 0.39  | 0.382 | 1 AC-G | AMD1          |
| TGFB1I1.1 | 0.001782 | 0.271062 | 0.141 | 0.123 | 1 AC-G | TGFB1I1       |
| SEC61A1   | 0.001784 | 0.150247 | 0.368 | 0.365 | 1 AC-G | SEC61A1       |
| CCT4      | 0.001804 | 0.170062 | 0.543 | 0.564 | 1 AC-G | CCT4          |
| NIP7.1    | 0.00181  | 0.149862 | 0.191 | 0.168 | 1 AC-G | NIP7          |
| ZNF211    | 0.001822 | 0.12726  | 0.081 | 0.063 | 1 AC-G | ZNF211        |
| TAPBPL.1  | 0.001858 | 0.156201 | 0.143 | 0.118 | 1 AC-G | TAPBPL        |
| MAP7      | 0.001917 | -0.12122 | 0.027 | 0.041 | 1 AC-G | MAP7          |
| PRPS1.1   | 0.001919 | 0.120013 | 0.21  | 0.186 | 1 AC-G | PRPS1         |
| ISOC2.1   | 0.001936 | 0.175529 | 0.359 | 0.347 | 1 AC-G | ISOC2         |
| NUDCD1.1  | 0.002001 | 0.109598 | 0.118 | 0.097 | 1 AC-G | NUDCD1        |
| SMYD3.1   | 0.002183 | 0.18297  | 0.157 | 0.135 | 1 AC-G | SMYD3         |
| GPX7      | 0.002194 | 0.124007 | 0.145 | 0.183 | 1 AC-G | GPX7          |
| EAPP.1    | 0.002216 | 0.258867 | 0.356 | 0.354 | 1 AC-G | EAPP          |
| ZNF503.1  | 0.002339 | -0.10764 | 0.085 | 0.107 | 1 AC-G | ZNF503        |
| RP11-421L | 0.002343 | 0.146508 | 0.097 | 0.078 | 1 AC-G | RP11-421L21.3 |
| EIF5B     | 0.002406 | 0.201629 | 0.51  | 0.524 | 1 AC-G | EIF5B         |
| LRRC8A    | 0.002456 | 0.150053 | 0.184 | 0.165 | 1 AC-G | LRRC8A        |
| MAP3K13.1 | 0.002533 | 0.184681 | 0.395 | 0.393 | 1 AC-G | MAP3K13       |
| RNF19A.1  | 0.002546 | 0.154002 | 0.219 | 0.199 | 1 AC-G | RNF19A        |
| TBCE      | 0.00261  | 0.128421 | 0.124 | 0.104 | 1 AC-G | TBCE          |
| ASL       | 0.002633 | 0.20048  | 0.189 | 0.167 | 1 AC-G | ASL           |
| DNAJB4.1  | 0.002648 | 0.10432  | 0.145 | 0.122 | 1 AC-G | DNAJB4        |
| TMEM60.1  | 0.002777 | 0.194147 | 0.262 | 0.244 | 1 AC-G | TMEM60        |
| UBE2D3    | 0.002865 | 0.122272 | 0.678 | 0.737 | 1 AC-G | UBE2D3        |
| TAF12.1   | 0.002928 | 0.205013 | 0.318 | 0.307 | 1 AC-G | TAF12         |
| PPP2R2B.1 | 0.002949 | 0.245296 | 0.234 | 0.216 | 1 AC-G | PPP2R2B       |
| EIF3M.1   | 0.003057 | 0.157232 | 0.513 | 0.528 | 1 AC-G | EIF3M         |
| PDE4DIP   | 0.003085 | 0.124227 | 0.287 | 0.259 | 1 AC-G | PDE4DIP       |
| SNHG12.1  | 0.003096 | 0.125975 | 0.154 | 0.13  | 1 AC-G | SNHG12        |
| TAF9.1    | 0.003297 | 0.14664  | 0.48  | 0.504 | 1 AC-G | TAF9          |
| MAGOH.1   | 0.003371 | 0.195899 | 0.411 | 0.415 | 1 AC-G | MAGOH         |
| RIOK2.1   | 0.003383 | 0.117758 | 0.14  | 0.118 | 1 AC-G | RIOK2         |
| TOM1L1.1  | 0.003408 | 0.121803 | 0.07  | 0.055 | 1 AC-G | TOM1L1        |
| GORAB.1   | 0.003412 | 0.104095 | 0.089 | 0.072 | 1 AC-G | GORAB         |
| PRMT5.1   | 0.003504 | 0.165574 | 0.168 | 0.147 | 1 AC-G | PRMT5         |
| PSMB5.1   | 0.003541 | 0.199609 | 0.578 | 0.598 | 1 AC-G | PSMB5         |
| FOPNL.1   | 0.003573 | 0.162822 | 0.21  | 0.19  | 1 AC-G | FOPNL         |
| NFYB      | 0.003575 | 0.199129 | 0.197 | 0.181 | 1 AC-G | NFYB          |
| GPI       | 0.003618 | 0.175506 | 0.361 | 0.355 | 1 AC-G | GPI           |
| NOVA1.1   | 0.003685 | -0.11233 | 0.495 | 0.476 | 1 AC-G | NOVA1         |
| KIAA1191  | 0.003833 | 0.213423 | 0.276 | 0.262 | 1 AC-G | KIAA1191      |
| C1orf21.1 | 0.003876 | 0.233595 | 0.213 | 0.198 | 1 AC-G | C1orf21       |
| KLHDC9    | 0.00393  | 0.112153 | 0.087 | 0.07  | 1 AC-G | KLHDC9        |
| CHD1L.1   | 0.004094 | 0.146742 | 0.156 | 0.134 | 1 AC-G | CHD1L         |
| TTC1.1    | 0.004102 | 0.181523 | 0.374 | 0.373 | 1 AC-G | TTC1          |
| TIMM21.1  | 0.004166 | 0.169338 | 0.162 | 0.144 | 1 AC-G | TIMM21        |
| PBXIP1.1  | 0.004242 | 0.179834 | 0.152 | 0.132 | 1 AC-G | PBXIP1        |
| POLR2G.1  | 0.004277 | 0.232585 | 0.544 | 0.572 | 1 AC-G | POLR2G        |
| ASNSD1.1  | 0.004503 | 0.161337 | 0.283 | 0.269 | 1 AC-G | ASNSD1        |
| RAB39B.1  | 0.004524 | 0.110504 | 0.106 | 0.087 | 1 AC-G | RAB39B        |

|            |          |          |       |       |            |             |
|------------|----------|----------|-------|-------|------------|-------------|
| ANKRA2     | 0.004531 | 0.157332 | 0.164 | 0.144 | 1 AC-G     | ANKRA2      |
| RPA2       | 0.004571 | 0.197322 | 0.328 | 0.318 | 1 AC-G     | RPA2        |
| SDCBP      | 0.004602 | 0.108211 | 0.684 | 0.737 | 1 AC-G     | SDCBP       |
| EPRS. 1    | 0.004657 | 0.162249 | 0.303 | 0.292 | 1 AC-G     | EPRS        |
| SLC24A2    | 0.004742 | -0.11288 | 0.021 | 0.033 | 1 AC-G     | SLC24A2     |
| PNMA2. 1   | 0.004749 | 0.141546 | 0.156 | 0.136 | 1 AC-G     | PNMA2       |
| ARL6IP1. 1 | 0.004829 | 0.121638 | 0.699 | 0.75  | 1 AC-G     | ARL6IP1     |
| LAMTOR3    | 0.004991 | 0.174982 | 0.272 | 0.258 | 1 AC-G     | LAMTOR3     |
| MANBAL. 1  | 0.005075 | 0.214304 | 0.343 | 0.333 | 1 AC-G     | MANBAL      |
| DLGAP1-AS  | 0.005094 | 0.178623 | 0.106 | 0.089 | 1 AC-G     | DLGAP1-AS1  |
| KIAA0907.  | 0.005135 | 0.135013 | 0.208 | 0.191 | 1 AC-G     | KIAA0907    |
| SCRG1. 1   | 0.005223 | 0.269388 | 0.344 | 0.346 | 1 AC-G     | SCRG1       |
| TTC32      | 0.005244 | 0.172865 | 0.166 | 0.146 | 1 AC-G     | TTC32       |
| SPRED3     | 0.005267 | 0.115903 | 0.026 | 0.017 | 1 AC-G     | SPRED3      |
| ATP5EP2. 1 | 0.005749 | 0.125311 | 0.383 | 0.459 | 1 AC-G     | ATP5EP2     |
| ARL2. 1    | 0.005773 | 0.182004 | 0.435 | 0.439 | 1 AC-G     | ARL2        |
| UBXN4. 1   | 0.005775 | 0.135151 | 0.513 | 0.55  | 1 AC-G     | UBXN4       |
| LINC00152  | 0.005865 | 0.270435 | 0.27  | 0.256 | 1 AC-G     | LINC00152   |
| PGRMC2. 1  | 0.006334 | 0.107802 | 0.24  | 0.223 | 1 AC-G     | PGRMC2      |
| NHP2. 1    | 0.006529 | 0.158138 | 0.561 | 0.584 | 1 AC-G     | NHP2        |
| RCHY1. 1   | 0.006675 | 0.124754 | 0.217 | 0.197 | 1 AC-G     | RCHY1       |
| C1orf27. 1 | 0.00669  | 0.13623  | 0.195 | 0.176 | 1 AC-G     | C1orf27     |
| AIMP1. 1   | 0.006699 | 0.222537 | 0.37  | 0.371 | 1 AC-G     | AIMP1       |
| C3orf14    | 0.006772 | 0.143857 | 0.279 | 0.262 | 1 AC-G     | C3orf14     |
| NPC2       | 0.006956 | 0.131922 | 0.683 | 0.693 | 1 AC-G     | NPC2        |
| ARHGAP5-A  | 0.007262 | 0.124825 | 0.042 | 0.031 | 1 AC-G     | ARHGAP5-AS1 |
| TCEAL1. 1  | 0.007283 | 0.205272 | 0.266 | 0.253 | 1 AC-G     | TCEAL1      |
| FKBP11. 1  | 0.007565 | 0.160533 | 0.131 | 0.113 | 1 AC-G     | FKBP11      |
| IFIT1      | 0.007664 | -0.10191 | 0.059 | 0.076 | 1 AC-G     | IFIT1       |
| FKBP1A. 1  | 0.007764 | 0.211478 | 0.648 | 0.71  | 1 AC-G     | FKBP1A      |
| PSMD6. 1   | 0.0079   | 0.223722 | 0.358 | 0.349 | 1 AC-G     | PSMD6       |
| CCBL2      | 0.008025 | 0.115686 | 0.142 | 0.123 | 1 AC-G     | CCBL2       |
| SON. 1     | 0.008231 | 0.158958 | 0.651 | 0.722 | 1 AC-G     | SON         |
| PDE8B      | 0.008295 | 0.102755 | 0.059 | 0.046 | 1 AC-G     | PDE8B       |
| SUGT1. 1   | 0.008342 | 0.15426  | 0.351 | 0.343 | 1 AC-G     | SUGT1       |
| PSMA3. 1   | 0.008347 | 0.23633  | 0.435 | 0.442 | 1 AC-G     | PSMA3       |
| ALG2. 1    | 0.008426 | 0.106936 | 0.179 | 0.16  | 1 AC-G     | ALG2        |
| STYXL1. 1  | 0.008486 | 0.124928 | 0.143 | 0.123 | 1 AC-G     | STYXL1      |
| BIN3. 1    | 0.008635 | 0.176686 | 0.17  | 0.152 | 1 AC-G     | BIN3        |
| NBEAL1     | 0.008691 | 0.165028 | 0.648 | 0.668 | 1 AC-G     | NBEAL1      |
| BAALC. 1   | 0.008947 | 0.110581 | 0.356 | 0.343 | 1 AC-G     | BAALC       |
| FKBP8      | 0.008964 | 0.158929 | 0.62  | 0.651 | 1 AC-G     | FKBP8       |
| C6orf1. 1  | 0.00907  | 0.186208 | 0.363 | 0.36  | 1 AC-G     | C6orf1      |
| ARFIP2. 1  | 0.009133 | 0.155766 | 0.255 | 0.242 | 1 AC-G     | ARFIP2      |
| C10orf107  | 0.009152 | 0.110888 | 0.048 | 0.036 | 1 AC-G     | C10orf107   |
| OXSM       | 0.009185 | 0.134958 | 0.094 | 0.079 | 1 AC-G     | OXSM        |
| HMCES      | 0.009842 | 0.144765 | 0.184 | 0.166 | 1 AC-G     | HMCES       |
| GPC1. 1    | 0.00991  | 0.11504  | 0.262 | 0.232 | 1 AC-G     | GPC1        |
| MALAT1. 2  | #####    | 0.531237 | 0.991 | 0.996 | ##### CSCL | MALAT1      |
| GAPDH. 2   | #####    | 0.582499 | 0.991 | 0.985 | ##### CSCL | GAPDH       |
| PTN. 2     | #####    | 0.936858 | 0.827 | 0.605 | ##### CSCL | PTN         |

|            |          |          |       |       |          |      |          |
|------------|----------|----------|-------|-------|----------|------|----------|
| MT3.2      | #####    | 1.205963 | 0.752 | 0.477 | #####    | CSCL | MT3      |
| GNB2L1.2   | #####    | 0.532251 | 0.916 | 0.943 | #####    | CSCL | GNB2L1   |
| DBI.2      | #####    | 0.73164  | 0.867 | 0.842 | #####    | CSCL | DBI      |
| TMSB4X.2   | #####    | 0.396188 | 0.977 | 0.998 | #####    | CSCL | TMSB4X   |
| ACTG1.2    | #####    | 0.416111 | 0.92  | 0.95  | #####    | CSCL | ACTG1    |
| B2M.2      | #####    | 0.506641 | 0.946 | 0.972 | #####    | CSCL | B2M      |
| MT2A.2     | #####    | 0.800887 | 0.848 | 0.781 | #####    | CSCL | MT2A     |
| H3F3B.2    | #####    | 0.388256 | 0.911 | 0.974 | #####    | CSCL | H3F3B    |
| TUBA1A.1   | #####    | 0.548885 | 0.864 | 0.805 | #####    | CSCL | TUBA1A   |
| FTL.2      | #####    | 0.399136 | 0.956 | 0.996 | #####    | CSCL | FTL      |
| GPM6B.2    | #####    | 0.721635 | 0.794 | 0.61  | #####    | CSCL | GPM6B    |
| CLU.2      | #####    | 0.69222  | 0.838 | 0.779 | 1.99E-97 | CSCL | CLU      |
| SEC61G.2   | 2.35E-97 | 0.768328 | 0.845 | 0.797 | 3.51E-93 | CSCL | SEC61G   |
| FAU.2      | 2.79E-95 | 0.459097 | 0.892 | 0.961 | 4.17E-91 | CSCL | FAU      |
| NDUFA4.1   | 3.18E-94 | 0.501622 | 0.857 | 0.897 | 4.75E-90 | CSCL | NDUFA4   |
| NGFRAP1.1  | 1.41E-91 | 0.760332 | 0.771 | 0.638 | 2.10E-87 | CSCL | NGFRAP1  |
| PTMA.2     | 4.94E-88 | 0.373547 | 0.895 | 0.97  | 7.39E-84 | CSCL | PTMA     |
| CD63.2     | 3.87E-87 | 0.517373 | 0.866 | 0.927 | 5.78E-83 | CSCL | CD63     |
| ACTB.2     | 3.50E-86 | 0.278353 | 0.934 | 0.995 | 5.22E-82 | CSCL | ACTB     |
| EEF1A1.2   | 4.75E-86 | 0.580968 | 0.82  | 0.826 | 7.10E-82 | CSCL | EEF1A1   |
| RNASET2.2  | 1.06E-85 | -1.1528  | 0.051 | 0.505 | 1.59E-81 | CSCL | RNASET2  |
| EIF1.2     | 9.91E-83 | 0.361683 | 0.899 | 0.978 | 1.48E-78 | CSCL | EIF1     |
| SRI.2      | 2.74E-79 | 0.709852 | 0.757 | 0.727 | 4.09E-75 | CSCL | SRI      |
| UBC.2      | 1.05E-77 | 0.379336 | 0.862 | 0.955 | 1.57E-73 | CSCL | UBC      |
| TMSB10.2   | 3.84E-76 | 0.394808 | 0.899 | 0.968 | 5.75E-72 | CSCL | TMSB10   |
| ARPC1B.2   | 3.94E-73 | -0.8413  | 0.101 | 0.553 | 5.88E-69 | CSCL | ARPC1B   |
| TPT1.2     | 4.14E-73 | 0.405813 | 0.873 | 0.957 | 6.19E-69 | CSCL | TPT1     |
| COTL1.2    | 2.18E-72 | -0.68998 | 0.084 | 0.531 | 3.25E-68 | CSCL | COTL1    |
| CYBA.2     | 4.55E-71 | -1.22483 | 0.028 | 0.424 | 6.80E-67 | CSCL | CYBA     |
| FCER1G.2   | 1.91E-70 | -1.26457 | 0.061 | 0.461 | 2.85E-66 | CSCL | FCER1G   |
| LAPTM5.2   | 3.29E-69 | -1.20279 | 0.058 | 0.455 | 4.92E-65 | CSCL | LAPTM5   |
| RGS1.2     | 5.35E-69 | -1.22378 | 0.07  | 0.466 | 8.00E-65 | CSCL | RGS1     |
| RAMP1.1    | 7.38E-68 | 0.916881 | 0.613 | 0.402 | 1.10E-63 | CSCL | RAMP1    |
| CXCL16.2   | 1.59E-67 | -0.79509 | 0.061 | 0.473 | 2.38E-63 | CSCL | CXCL16   |
| AIF1.2     | 1.79E-67 | -1.29248 | 0.045 | 0.429 | 2.67E-63 | CSCL | AIF1     |
| SKP1.1     | 1.44E-66 | 0.500326 | 0.798 | 0.868 | 2.15E-62 | CSCL | SKP1     |
| C1QC.2     | 1.62E-66 | -1.0666  | 0.117 | 0.521 | 2.42E-62 | CSCL | C1QC     |
| ATP1B3.2   | 2.26E-66 | -0.6101  | 0.119 | 0.566 | 3.37E-62 | CSCL | ATP1B3   |
| LDHB.1     | 6.64E-66 | 0.65865  | 0.75  | 0.78  | 9.93E-62 | CSCL | LDHB     |
| FAM49B.2   | 7.59E-66 | -0.62528 | 0.098 | 0.527 | 1.13E-61 | CSCL | FAM49B   |
| NINJ1.2    | 8.50E-66 | -0.78567 | 0.065 | 0.472 | 1.27E-61 | CSCL | NINJ1    |
| C1orf61.2  | 1.59E-65 | 0.895509 | 0.658 | 0.529 | 2.38E-61 | CSCL | C1orf61  |
| CFL1.1     | 3.33E-65 | 0.311685 | 0.857 | 0.954 | 4.98E-61 | CSCL | CFL1     |
| YWHAH.2    | 1.81E-64 | -0.58228 | 0.136 | 0.587 | 2.71E-60 | CSCL | YWHAH    |
| GRB2.2     | 3.16E-64 | -0.61243 | 0.082 | 0.501 | 4.72E-60 | CSCL | GRB2     |
| HSP90AA1.1 | 1.39E-63 | 0.42003  | 0.799 | 0.893 | 2.08E-59 | CSCL | HSP90AA1 |
| RNF130.2   | 9.47E-63 | -0.7273  | 0.08  | 0.482 | 1.42E-58 | CSCL | RNF130   |
| TYROBP.2   | 1.15E-61 | -1.09568 | 0.098 | 0.478 | 1.72E-57 | CSCL | TYROBP   |
| CD14.2     | 1.24E-61 | -1.14489 | 0.056 | 0.426 | 1.85E-57 | CSCL | CD14     |
| VSIG4.2    | 8.11E-61 | -1.27284 | 0.028 | 0.382 | 1.21E-56 | CSCL | VSIG4    |
| ALOX5AP.2  | 1.74E-60 | -1.19019 | 0.056 | 0.417 | 2.61E-56 | CSCL | ALOX5AP  |

|            |          |          |       |       |          |      |          |
|------------|----------|----------|-------|-------|----------|------|----------|
| RGS10.2    | 2.92E-60 | -1.21883 | 0.016 | 0.359 | 4.37E-56 | CSCL | RGS10    |
| ARHGDIB.2  | 3.28E-60 | -1.18723 | 0.035 | 0.389 | 4.89E-56 | CSCL | ARHGDIB  |
| FCGR3A.2   | 5.17E-60 | -1.3121  | 0.016 | 0.358 | 7.73E-56 | CSCL | FCGR3A   |
| SRGN.2     | 6.75E-59 | -0.98812 | 0.136 | 0.518 | 1.01E-54 | CSCL | SRGN     |
| ITGB2.2    | 2.16E-58 | -1.22567 | 0.009 | 0.34  | 3.23E-54 | CSCL | ITGB2    |
| IFNGR1.2   | 2.25E-58 | -0.76079 | 0.075 | 0.456 | 3.36E-54 | CSCL | IFNGR1   |
| RHOG.2     | 3.04E-58 | -0.77793 | 0.058 | 0.427 | 4.55E-54 | CSCL | RHOG     |
| VAMP8.2    | 3.30E-58 | -1.20011 | 0.021 | 0.36  | 4.93E-54 | CSCL | VAMP8    |
| C1QA.2     | 4.46E-58 | -0.8621  | 0.155 | 0.557 | 6.67E-54 | CSCL | C1QA     |
| PPIA.1     | 1.19E-57 | 0.448283 | 0.791 | 0.879 | 1.78E-53 | CSCL | PPIA     |
| CORO1A.2   | 1.70E-57 | -1.00712 | 0.04  | 0.39  | 2.54E-53 | CSCL | CORO1A   |
| C4orf48.2  | 1.99E-57 | -0.51283 | 0.126 | 0.546 | 2.98E-53 | CSCL | C4orf48  |
| PRDX2.2    | 4.03E-57 | 0.640399 | 0.716 | 0.7   | 6.02E-53 | CSCL | PRDX2    |
| Clorf162.2 | 2.67E-56 | -1.24162 | 0.012 | 0.338 | 4.00E-52 | CSCL | Clorf162 |
| MGAT1.2    | 2.79E-56 | -0.77395 | 0.033 | 0.374 | 4.17E-52 | CSCL | MGAT1    |
| BASP1.2    | 3.51E-56 | -0.78282 | 0.042 | 0.389 | 5.24E-52 | CSCL | BASP1    |
| MS4A6A.2   | 9.75E-56 | -1.20796 | 0.026 | 0.357 | 1.46E-51 | CSCL | MS4A6A   |
| UQCR11.2   | 2.79E-55 | 0.845115 | 0.312 | 0.105 | 4.17E-51 | CSCL | UQCR11   |
| GSN.1      | 5.11E-55 | -0.59737 | 0.124 | 0.529 | 7.63E-51 | CSCL | GSN      |
| CD53.2     | 2.43E-54 | -1.1931  | 0.014 | 0.331 | 3.63E-50 | CSCL | CD53     |
| CAPG.2     | 6.61E-54 | -0.86334 | 0.077 | 0.432 | 9.87E-50 | CSCL | CAPG     |
| SLC16A3.2  | 1.01E-53 | -0.95371 | 0.016 | 0.336 | 1.51E-49 | CSCL | SLC16A3  |
| C20orf24.2 | 2.34E-53 | -0.4957  | 0.101 | 0.486 | 3.49E-49 | CSCL | C20orf24 |
| MYL12A.1   | 3.33E-53 | -0.47389 | 0.143 | 0.564 | 4.98E-49 | CSCL | MYL12A   |
| TREM2.2    | 3.62E-53 | -1.12952 | 0.038 | 0.367 | 5.41E-49 | CSCL | TREM2    |
| RALY.2     | 4.15E-53 | -0.52124 | 0.094 | 0.475 | 6.20E-49 | CSCL | RALY     |
| ARRB2.2    | 6.27E-53 | -0.70608 | 0.066 | 0.417 | 9.37E-49 | CSCL | ARRB2    |
| GRN.2      | 7.94E-53 | -0.53487 | 0.175 | 0.59  | 1.19E-48 | CSCL | GRN      |
| CTSD.2     | 1.14E-52 | -0.4882  | 0.218 | 0.661 | 1.70E-48 | CSCL | CTSD     |
| SYNGR2.2   | 2.40E-52 | -0.8531  | 0.024 | 0.344 | 3.58E-48 | CSCL | SYNGR2   |
| BIN1.2     | 2.89E-52 | -0.76848 | 0.045 | 0.377 | 4.32E-48 | CSCL | BIN1     |
| CD68.2     | 8.69E-52 | -0.80197 | 0.099 | 0.459 | 1.30E-47 | CSCL | CD68     |
| CAP1.1     | 8.75E-52 | -0.38684 | 0.175 | 0.614 | 1.31E-47 | CSCL | CAP1     |
| ACTR2.2    | 1.52E-51 | -0.48674 | 0.099 | 0.477 | 2.27E-47 | CSCL | ACTR2    |
| MS4A7.2    | 1.78E-51 | -1.10813 | 0.031 | 0.347 | 2.66E-47 | CSCL | MS4A7    |
| CD9.1      | 2.09E-51 | 0.762353 | 0.66  | 0.561 | 3.12E-47 | CSCL | CD9      |
| CNPY3.2    | 4.05E-51 | -0.62907 | 0.077 | 0.429 | 6.06E-47 | CSCL | CNPY3    |
| CTSS.2     | 4.98E-51 | -0.93532 | 0.042 | 0.37  | 7.44E-47 | CSCL | CTSS     |
| APOC1.2    | 8.94E-51 | -0.73965 | 0.159 | 0.534 | 1.34E-46 | CSCL | APOC1    |
| GMFG.2     | 9.54E-51 | -1.12127 | 0.012 | 0.312 | 1.43E-46 | CSCL | GMFG     |
| LST1.2     | 1.12E-50 | -1.07776 | 0.021 | 0.328 | 1.68E-46 | CSCL | LST1     |
| SERP1.2    | 1.16E-50 | -0.39764 | 0.19  | 0.625 | 1.73E-46 | CSCL | SERP1    |
| TPI1.2     | 2.27E-50 | 0.459396 | 0.766 | 0.871 | 3.39E-46 | CSCL | TPI1     |
| ADIPOR1.2  | 2.29E-50 | -0.516   | 0.058 | 0.396 | 3.41E-46 | CSCL | ADIPOR1  |
| MAP1LC3B.4 | 2.0E-50  | -0.4022  | 0.166 | 0.586 | 6.27E-46 | CSCL | MAP1LC3B |
| KDELR2.1   | 7.03E-50 | -0.34349 | 0.164 | 0.589 | 1.05E-45 | CSCL | KDELR2   |
| GTF3A.2    | 7.58E-50 | -0.35515 | 0.127 | 0.524 | 1.13E-45 | CSCL | GTF3A    |
| TYMP.2     | 1.00E-49 | -0.94347 | 0.019 | 0.321 | 1.50E-45 | CSCL | TYMP     |
| CCL3.2     | 1.02E-49 | -0.90689 | 0.101 | 0.439 | 1.53E-45 | CSCL | CCL3     |
| BTF3.1     | 1.10E-49 | 0.405236 | 0.78  | 0.904 | 1.64E-45 | CSCL | BTF3     |
| CEBPB.2    | 1.16E-49 | -0.57265 | 0.094 | 0.452 | 1.73E-45 | CSCL | CEBPB    |



|             |           |           |        |        |           |      |          |
|-------------|-----------|-----------|--------|--------|-----------|------|----------|
| HLA-A. 2    | 1. 23E-49 | 0. 396144 | 0. 789 | 0. 901 | 1. 84E-45 | CSCL | HLA-A    |
| ATP6V1B2. 2 | 1. 14E-49 | -0. 54867 | 0. 077 | 0. 426 | 3. 20E-45 | CSCL | ATP6V1B2 |
| SGK1. 2     | 3. 16E-49 | -0. 66018 | 0. 099 | 0. 454 | 4. 73E-45 | CSCL | SGK1     |
| MTCH1. 1    | 3. 58E-49 | -0. 35188 | 0. 15  | 0. 554 | 5. 35E-45 | CSCL | MTCH1    |
| ZNF331. 2   | 4. 35E-49 | -0. 91575 | 0. 028 | 0. 33  | 6. 50E-45 | CSCL | ZNF331   |
| PPP4C. 1    | 7. 97E-49 | -0. 36102 | 0. 152 | 0. 563 | 1. 19E-44 | CSCL | PPP4C    |
| HERPUD1. 1  | 9. 41E-49 | -0. 49885 | 0. 234 | 0. 663 | 1. 41E-44 | CSCL | HERPUD1  |
| HLA-DMB. 2  | 9. 59E-49 | -1. 06728 | 0. 033 | 0. 335 | 1. 43E-44 | CSCL | HLA-DMB  |
| C6orf62. 2  | 9. 63E-49 | -0. 45094 | 0. 103 | 0. 47  | 1. 44E-44 | CSCL | C6orf62  |
| COX7C. 2    | 1. 89E-48 | 0. 425668 | 0. 77  | 0. 892 | 2. 83E-44 | CSCL | COX7C    |
| C10orf54. 2 | 2. 67E-48 | -1. 04253 | 0. 012 | 0. 302 | 3. 99E-44 | CSCL | C10orf54 |
| ISCU. 2     | 3. 03E-48 | -0. 36633 | 0. 171 | 0. 586 | 4. 53E-44 | CSCL | ISCU     |
| RER1. 1     | 3. 89E-48 | -0. 38609 | 0. 129 | 0. 516 | 5. 81E-44 | CSCL | RER1     |
| TMEM160. 2  | 4. 93E-48 | -0. 37534 | 0. 112 | 0. 484 | 7. 37E-44 | CSCL | TMEM160  |
| RNASE6. 2   | 5. 13E-48 | -1. 12771 | 0. 005 | 0. 289 | 7. 67E-44 | CSCL | RNASE6   |
| HEXB. 2     | 9. 46E-48 | -0. 45706 | 0. 079 | 0. 422 | 1. 41E-43 | CSCL | HEXB     |
| RAP1A. 2    | 9. 72E-48 | -0. 40524 | 0. 143 | 0. 535 | 1. 45E-43 | CSCL | RAP1A    |
| EIF4A3. 2   | 1. 18E-47 | -0. 35748 | 0. 103 | 0. 468 | 1. 76E-43 | CSCL | EIF4A3   |
| CD37. 2     | 1. 49E-47 | -1. 06356 | 0. 023 | 0. 315 | 2. 23E-43 | CSCL | CD37     |
| MS4A4A. 2   | 1. 93E-47 | -1. 14624 | 0. 014 | 0. 3   | 2. 88E-43 | CSCL | MS4A4A   |
| LIMS1. 2    | 2. 73E-47 | -0. 52338 | 0. 101 | 0. 457 | 4. 09E-43 | CSCL | LIMS1    |
| LY86. 2     | 3. 25E-47 | -1. 08762 | 0. 017 | 0. 306 | 4. 86E-43 | CSCL | LY86     |
| LAMP1. 2    | 3. 28E-47 | -0. 39612 | 0. 148 | 0. 54  | 4. 91E-43 | CSCL | LAMP1    |
| HLA-DPB1. 4 | 9. 44E-47 | -0. 7473  | 0. 155 | 0. 512 | 7. 38E-43 | CSCL | HLA-DPB1 |
| S100B. 1    | 5. 45E-47 | 0. 884743 | 0. 613 | 0. 523 | 8. 14E-43 | CSCL | S100B    |
| CTSC. 2     | 8. 70E-47 | -0. 76293 | 0. 073 | 0. 4   | 1. 30E-42 | CSCL | CTSC     |
| PNRC1. 2    | 1. 77E-46 | -0. 39231 | 0. 164 | 0. 559 | 2. 64E-42 | CSCL | PNRC1    |
| CPVL. 2     | 1. 91E-46 | -0. 85162 | 0. 054 | 0. 364 | 2. 85E-42 | CSCL | CPVL     |
| PYCARD. 2   | 2. 63E-46 | -0. 94121 | 0. 016 | 0. 298 | 3. 94E-42 | CSCL | PYCARD   |
| HLA-DQB1. 2 | 7. 3E-46  | -1. 00811 | 0. 042 | 0. 34  | 4. 07E-42 | CSCL | HLA-DQB1 |
| NANS. 2     | 3. 94E-46 | -0. 61886 | 0. 058 | 0. 375 | 5. 89E-42 | CSCL | NANS     |
| IFNGR2. 2   | 4. 66E-46 | -0. 41276 | 0. 073 | 0. 406 | 6. 97E-42 | CSCL | IFNGR2   |
| CAPZA1. 2   | 5. 15E-46 | -0. 45795 | 0. 075 | 0. 409 | 7. 70E-42 | CSCL | CAPZA1   |
| XBP1. 2     | 5. 92E-46 | -0. 57943 | 0. 066 | 0. 387 | 8. 85E-42 | CSCL | XBP1     |
| RGS19. 2    | 6. 30E-46 | -0. 75791 | 0. 01  | 0. 289 | 9. 41E-42 | CSCL | RGS19    |
| DEK. 2      | 7. 24E-46 | -0. 33334 | 0. 113 | 0. 482 | 1. 08E-41 | CSCL | DEK      |
| HCLS1. 2    | 8. 23E-46 | -1. 01521 | 0. 021 | 0. 304 | 1. 23E-41 | CSCL | HCLS1    |
| ATP6VOD1. 1 | 1. 18E-45 | -0. 39409 | 0. 145 | 0. 529 | 1. 77E-41 | CSCL | ATP6VOD1 |
| AKR1B1. 2   | 1. 33E-45 | -0. 37281 | 0. 215 | 0. 646 | 1. 99E-41 | CSCL | AKR1B1   |
| GNAI2. 2    | 1. 39E-45 | -0. 38235 | 0. 129 | 0. 5   | 2. 08E-41 | CSCL | GNAI2    |
| LIPA. 2     | 2. 17E-45 | -0. 70565 | 0. 045 | 0. 349 | 3. 25E-41 | CSCL | LIPA     |
| CXCR4. 1    | 2. 24E-45 | -0. 76137 | 0. 082 | 0. 404 | 3. 35E-41 | CSCL | CXCR4    |
| PLAUR. 2    | 2. 59E-45 | -0. 80519 | 0. 068 | 0. 382 | 3. 88E-41 | CSCL | PLAUR    |
| NAA10. 2    | 2. 65E-45 | -0. 33437 | 0. 094 | 0. 443 | 3. 97E-41 | CSCL | NAA10    |
| NDUFA7. 2   | 3. 05E-45 | 0. 726736 | 0. 157 | 0. 037 | 4. 55E-41 | CSCL | NDUFA7   |
| CALM2. 1    | 3. 09E-45 | 0. 290614 | 0. 815 | 0. 938 | 4. 62E-41 | CSCL | CALM2    |
| DDAH2. 2    | 4. 45E-45 | -0. 37557 | 0. 134 | 0. 507 | 6. 65E-41 | CSCL | DDAH2    |
| ALDOA. 2    | 4. 97E-45 | 0. 454374 | 0. 742 | 0. 851 | 7. 43E-41 | CSCL | ALDOA    |
| CREG1. 2    | 6. 00E-45 | -0. 71262 | 0. 024 | 0. 311 | 8. 97E-41 | CSCL | CREG1    |
| ANP32B. 2   | 6. 22E-45 | -0. 31709 | 0. 11  | 0. 467 | 9. 29E-41 | CSCL | ANP32B   |
| CREM. 2     | 6. 45E-45 | -0. 55891 | 0. 089 | 0. 423 | 9. 64E-41 | CSCL | CREM     |

|             |           |           |        |        |           |      |          |
|-------------|-----------|-----------|--------|--------|-----------|------|----------|
| DPP7. 2     | 6. 47E-45 | -0. 39467 | 0. 122 | 0. 485 | 9. 67E-41 | CSCL | DPP7     |
| FCGR2A. 2   | 1. 10E-44 | -0. 9522  | 0. 021 | 0. 303 | 1. 64E-40 | CSCL | FCGR2A   |
| CKLF. 2     | 1. 41E-44 | -0. 3306  | 0. 152 | 0. 538 | 2. 11E-40 | CSCL | CKLF     |
| S100A4. 2   | 1. 63E-44 | -0. 99352 | 0. 026 | 0. 309 | 2. 44E-40 | CSCL | S100A4   |
| GPR183. 2   | 2. 81E-44 | -1. 07654 | 0. 026 | 0. 303 | 4. 20E-40 | CSCL | GPR183   |
| SERPINA1. 2 | 2. 83E-44 | -0. 9347  | 0. 03  | 0. 313 | 4. 23E-40 | CSCL | SERPINA1 |
| EPB41L2. 2  | 3. 07E-44 | -0. 64537 | 0. 035 | 0. 325 | 4. 59E-40 | CSCL | EPB41L2  |
| HCST. 2     | 4. 45E-44 | -1. 02795 | 0. 021 | 0. 298 | 6. 65E-40 | CSCL | HCST     |
| CDC42. 1    | 4. 72E-44 | -0. 29124 | 0. 209 | 0. 642 | 7. 06E-40 | CSCL | CDC42    |
| NDUFS5. 2   | 4. 94E-44 | 0. 528172 | 0. 724 | 0. 815 | 7. 39E-40 | CSCL | NDUFS5   |
| TMEM70. 2   | 6. 28E-44 | -0. 44558 | 0. 084 | 0. 411 | 9. 38E-40 | CSCL | TMEM70   |
| FXYD5. 2    | 7. 76E-44 | -0. 81784 | 0. 054 | 0. 355 | 1. 16E-39 | CSCL | FXYD5    |
| OSTF1. 2    | 9. 22E-44 | -0. 73317 | 0. 024 | 0. 305 | 1. 38E-39 | CSCL | OSTF1    |
| CALM3. 2    | 1. 01E-43 | -0. 31323 | 0. 195 | 0. 613 | 1. 51E-39 | CSCL | CALM3    |
| SSNA1. 2    | 1. 17E-43 | -0. 3207  | 0. 11  | 0. 463 | 1. 75E-39 | CSCL | SSNA1    |
| FPR1. 2     | 1. 79E-43 | -1. 02366 | 0. 023 | 0. 298 | 2. 68E-39 | CSCL | FPR1     |
| GPR34. 2    | 1. 80E-43 | -1. 04966 | 0. 012 | 0. 28  | 2. 70E-39 | CSCL | GPR34    |
| JTB. 2      | 1. 96E-43 | -0. 2622  | 0. 206 | 0. 63  | 2. 93E-39 | CSCL | JTB      |
| SFT2D1. 2   | 2. 15E-43 | -0. 34473 | 0. 145 | 0. 52  | 3. 22E-39 | CSCL | SFT2D1   |
| NACA. 1     | 2. 43E-43 | 0. 345396 | 0. 785 | 0. 932 | 3. 62E-39 | CSCL | NACA     |
| CHCHD2. 1   | 3. 69E-43 | 0. 332548 | 0. 77  | 0. 886 | 5. 51E-39 | CSCL | CHCHD2   |
| MCL1. 2     | 3. 74E-43 | -0. 3483  | 0. 204 | 0. 619 | 5. 59E-39 | CSCL | MCL1     |
| LILRB4. 2   | 4. 42E-43 | -1. 05518 | 0. 007 | 0. 268 | 6. 61E-39 | CSCL | LILRB4   |
| CD83. 2     | 4. 44E-43 | -0. 85495 | 0. 03  | 0. 308 | 6. 64E-39 | CSCL | CD83     |
| CMTM6. 2    | 4. 67E-43 | -0. 44603 | 0. 105 | 0. 442 | 6. 97E-39 | CSCL | CMTM6    |
| TSC22D3. 1  | 4. 85E-43 | -0. 49198 | 0. 127 | 0. 473 | 7. 25E-39 | CSCL | TSC22D3  |
| GPSM3. 2    | 5. 19E-43 | -0. 96888 | 0. 01  | 0. 275 | 7. 76E-39 | CSCL | GPSM3    |
| ARL6IP4. 2  | 5. 48E-43 | -0. 31898 | 0. 216 | 0. 645 | 8. 18E-39 | CSCL | ARL6IP4  |
| CCDC109B. 6 | 5. 59E-43 | -0. 48142 | 0. 058 | 0. 364 | 9. 84E-39 | CSCL | CCDC109B |
| MYL6. 2     | 6. 66E-43 | 0. 296818 | 0. 815 | 0. 948 | 9. 95E-39 | CSCL | MYL6     |
| SAMSN1. 2   | 1. 09E-42 | -1. 00903 | 0. 005 | 0. 264 | 1. 63E-38 | CSCL | SAMSN1   |
| MFSD1. 2    | 1. 37E-42 | -0. 63254 | 0. 059 | 0. 358 | 2. 05E-38 | CSCL | MFSD1    |
| RB1. 2      | 1. 54E-42 | -0. 67041 | 0. 037 | 0. 319 | 2. 30E-38 | CSCL | RB1      |
| CD163. 2    | 1. 91E-42 | -0. 98636 | 0. 021 | 0. 289 | 2. 85E-38 | CSCL | CD163    |
| TACC1. 2    | 1. 94E-42 | -0. 51084 | 0. 04  | 0. 327 | 2. 90E-38 | CSCL | TACC1    |
| TNFRSF1A. 2 | 2. 29E-42 | -0. 45795 | 0. 073 | 0. 387 | 3. 43E-38 | CSCL | TNFRSF1A |
| APMAP. 2    | 2. 94E-42 | -0. 331   | 0. 157 | 0. 536 | 4. 39E-38 | CSCL | APMAP    |
| RAB10. 1    | 3. 11E-42 | -0. 23966 | 0. 138 | 0. 514 | 4. 64E-38 | CSCL | RAB10    |
| PTP4A1. 2   | 3. 43E-42 | -0. 37678 | 0. 094 | 0. 423 | 5. 13E-38 | CSCL | PTP4A1   |
| UCP2. 2     | 4. 07E-42 | -0. 87232 | 0. 019 | 0. 285 | 6. 09E-38 | CSCL | UCP2     |
| SCAMP2. 2   | 4. 20E-42 | -0. 48916 | 0. 077 | 0. 39  | 6. 28E-38 | CSCL | SCAMP2   |
| AP1S2. 2    | 5. 57E-42 | -0. 27303 | 0. 147 | 0. 518 | 8. 33E-38 | CSCL | AP1S2    |
| MAFB. 2     | 5. 77E-42 | -0. 72379 | 0. 044 | 0. 328 | 8. 62E-38 | CSCL | MAFB     |
| SPG21. 2    | 9. 41E-42 | -0. 29932 | 0. 08  | 0. 4   | 1. 41E-37 | CSCL | SPG21    |
| ABHD12. 2   | 1. 66E-41 | -0. 38485 | 0. 082 | 0. 397 | 2. 49E-37 | CSCL | ABHD12   |
| DUT. 2      | 1. 97E-41 | -0. 27402 | 0. 12  | 0. 472 | 2. 94E-37 | CSCL | DUT      |
| PPP1R18. 2  | 1. 97E-41 | -0. 58753 | 0. 031 | 0. 306 | 2. 94E-37 | CSCL | PPP1R18  |
| IL13RA1. 2  | 2. 31E-41 | -0. 72199 | 0. 007 | 0. 261 | 3. 45E-37 | CSCL | IL13RA1  |
| CHMP1B. 2   | 2. 53E-41 | -0. 39946 | 0. 117 | 0. 454 | 3. 78E-37 | CSCL | CHMP1B   |
| HSPA8. 1    | 3. 10E-41 | 0. 37277  | 0. 742 | 0. 872 | 4. 64E-37 | CSCL | HSPA8    |
| CIRBP. 2    | 3. 57E-41 | 0. 386062 | 0. 742 | 0. 872 | 5. 33E-37 | CSCL | CIRBP    |

|            |          |          |       |       |          |      |          |
|------------|----------|----------|-------|-------|----------|------|----------|
| DNAJB11.1  | 3.62E-41 | -0.32525 | 0.112 | 0.45  | 5.41E-37 | CSCL | DNAJB11  |
| CTSZ.2     | 3.83E-41 | -0.84405 | 0.012 | 0.269 | 5.73E-37 | CSCL | CTSZ     |
| CSF1R.2    | 3.88E-41 | -0.93013 | 0.019 | 0.281 | 5.80E-37 | CSCL | CSF1R    |
| LRRC59.1   | 5.24E-41 | -0.40854 | 0.068 | 0.373 | 7.83E-37 | CSCL | LRRC59   |
| ASAH1.2    | 5.40E-41 | -0.37024 | 0.248 | 0.672 | 8.08E-37 | CSCL | ASAH1    |
| FCGR1A.2   | 5.99E-41 | -0.98652 | 0.014 | 0.271 | 8.95E-37 | CSCL | FCGR1A   |
| COX4I1.2   | 6.66E-41 | 0.3725   | 0.766 | 0.918 | 9.95E-37 | CSCL | COX4I1   |
| SDF4.2     | 7.67E-41 | -0.31884 | 0.092 | 0.419 | 1.15E-36 | CSCL | SDF4     |
| PRELID1.2  | 1.27E-40 | -0.22439 | 0.183 | 0.579 | 1.90E-36 | CSCL | PRELID1  |
| CAPZB.1    | 1.40E-40 | -0.33459 | 0.272 | 0.724 | 2.09E-36 | CSCL | CAPZB    |
| PPT1.1     | 1.45E-40 | -0.33257 | 0.187 | 0.575 | 2.16E-36 | CSCL | PPT1     |
| SLC25A39.1 | 1.45E-40 | -0.29263 | 0.094 | 0.421 | 2.17E-36 | CSCL | SLC25A39 |
| C19orf24.1 | 1.70E-40 | -0.31716 | 0.072 | 0.38  | 2.54E-36 | CSCL | C19orf24 |
| HLA-DMA.2  | 1.81E-40 | -0.72305 | 0.112 | 0.423 | 2.71E-36 | CSCL | HLA-DMA  |
| ITGB1.1    | 1.94E-40 | -0.41246 | 0.086 | 0.401 | 2.90E-36 | CSCL | ITGB1    |
| SERPINB6.2 | 2.02E-40 | -0.29595 | 0.138 | 0.495 | 3.02E-36 | CSCL | SERPINB6 |
| COR01B.2   | 2.34E-40 | -0.37691 | 0.072 | 0.376 | 3.50E-36 | CSCL | COR01B   |
| CHCHD10.2  | 2.75E-40 | -0.37708 | 0.084 | 0.396 | 4.11E-36 | CSCL | CHCHD10  |
| GLIPR1.1   | 2.85E-40 | -0.56456 | 0.058 | 0.349 | 4.26E-36 | CSCL | GLIPR1   |
| PDIA3.2    | 2.86E-40 | -0.26447 | 0.199 | 0.603 | 4.27E-36 | CSCL | PDIA3    |
| RNF149.2   | 2.89E-40 | -0.69937 | 0.023 | 0.283 | 4.32E-36 | CSCL | RNF149   |
| SLC11A1.2  | 3.12E-40 | -0.7711  | 0.042 | 0.319 | 4.67E-36 | CSCL | SLC11A1  |
| SURF1.2    | 3.14E-40 | -0.35726 | 0.066 | 0.367 | 4.69E-36 | CSCL | SURF1    |
| C9orf142.4 | 4.10E-40 | -0.31266 | 0.08  | 0.391 | 6.12E-36 | CSCL | C9orf142 |
| RILPL2.2   | 4.11E-40 | -0.75899 | 0.016 | 0.271 | 6.14E-36 | CSCL | RILPL2   |
| PGLS.2     | 4.62E-40 | -0.24067 | 0.154 | 0.529 | 6.91E-36 | CSCL | PGLS     |
| FCGRT.1    | 4.95E-40 | -0.42346 | 0.194 | 0.568 | 7.39E-36 | CSCL | FCGRT    |
| CLTB.2     | 5.36E-40 | -0.24864 | 0.117 | 0.458 | 8.01E-36 | CSCL | CLTB     |
| ARPC2.1    | 5.78E-40 | -0.32198 | 0.323 | 0.797 | 8.63E-36 | CSCL | ARPC2    |
| BRD2.2     | 6.64E-40 | -0.32257 | 0.126 | 0.47  | 9.93E-36 | CSCL | BRD2     |
| OLR1.2     | 6.98E-40 | -0.98712 | 0.014 | 0.262 | 1.04E-35 | CSCL | OLR1     |
| CTSH.2     | 6.98E-40 | -0.78837 | 0.038 | 0.309 | 1.04E-35 | CSCL | CTSH     |
| CSNK1D.2   | 7.20E-40 | -0.38085 | 0.072 | 0.374 | 1.08E-35 | CSCL | CSNK1D   |
| ABRACL.2   | 7.53E-40 | -0.4971  | 0.042 | 0.318 | 1.13E-35 | CSCL | ABRACL   |
| RNF114.1   | 8.11E-40 | -0.30322 | 0.103 | 0.431 | 1.21E-35 | CSCL | RNF114   |
| WIPI2.2    | 8.33E-40 | -0.31887 | 0.094 | 0.413 | 1.25E-35 | CSCL | WIPI2    |
| EVL.2      | 8.41E-40 | -0.5954  | 0.073 | 0.366 | 1.26E-35 | CSCL | EVL      |
| COMMD7.2   | 8.44E-40 | -0.29601 | 0.094 | 0.415 | 1.26E-35 | CSCL | COMMD7   |
| C17orf62.9 | 9.15E-40 | -0.4287  | 0.079 | 0.383 | 1.37E-35 | CSCL | C17orf62 |
| SYAP1.1    | 9.81E-40 | -0.33211 | 0.087 | 0.402 | 1.47E-35 | CSCL | SYAP1    |
| PPM1G.2    | 9.83E-40 | -0.31819 | 0.106 | 0.434 | 1.47E-35 | CSCL | PPM1G    |
| ACTR3      | 1.22E-39 | -0.27984 | 0.188 | 0.578 | 1.83E-35 | CSCL | ACTR3    |
| GDI2.2     | 1.25E-39 | -0.21175 | 0.143 | 0.506 | 1.87E-35 | CSCL | GDI2     |
| PABPC4.2   | 1.33E-39 | -0.4165  | 0.056 | 0.343 | 1.98E-35 | CSCL | PABPC4   |
| ADORA3.2   | 1.39E-39 | -0.92373 | 0.019 | 0.273 | 2.08E-35 | CSCL | ADORA3   |
| CMPK1.2    | 1.70E-39 | -0.28335 | 0.105 | 0.432 | 2.54E-35 | CSCL | CMPK1    |
| AKIRIN1.2  | 1.70E-39 | -0.26058 | 0.077 | 0.383 | 2.54E-35 | CSCL | AKIRIN1  |
| H2AFJ.2    | 2.06E-39 | -0.63731 | 0.017 | 0.271 | 3.08E-35 | CSCL | H2AFJ    |
| SH3GLB1.2  | 2.06E-39 | -0.31846 | 0.113 | 0.446 | 3.08E-35 | CSCL | SH3GLB1  |
| TPM4.1     | 2.14E-39 | -0.32641 | 0.155 | 0.515 | 3.19E-35 | CSCL | TPM4     |
| AKIRIN2.2  | 2.28E-39 | -0.34692 | 0.087 | 0.396 | 3.41E-35 | CSCL | AKIRIN2  |

|            |          |          |       |       |          |      |          |
|------------|----------|----------|-------|-------|----------|------|----------|
| TBXAS1.2   | 2.36E-39 | -0.9387  | 0.009 | 0.253 | 3.53E-35 | CSCL | TBXAS1   |
| SRSF2.2    | 2.46E-39 | -0.26501 | 0.215 | 0.625 | 3.68E-35 | CSCL | SRSF2    |
| HNRNPM.2   | 2.82E-39 | -0.2342  | 0.175 | 0.562 | 4.22E-35 | CSCL | HNRNPM   |
| LRRFIP1.2  | 2.86E-39 | -0.37243 | 0.072 | 0.368 | 4.27E-35 | CSCL | LRRFIP1  |
| HMGA1.2    | 2.93E-39 | -0.37093 | 0.066 | 0.359 | 4.38E-35 | CSCL | HMGA1    |
| KTN1.2     | 5.02E-39 | -0.2875  | 0.171 | 0.545 | 7.50E-35 | CSCL | KTN1     |
| ARHGDI1.2  | 5.02E-39 | -0.25353 | 0.188 | 0.584 | 7.50E-35 | CSCL | ARHGDI1  |
| UBB.1      | 5.66E-39 | 0.309611 | 0.768 | 0.918 | 8.46E-35 | CSCL | UBB      |
| UBE2I.1    | 6.26E-39 | -0.24897 | 0.197 | 0.596 | 9.36E-35 | CSCL | UBE2I    |
| ATP6AP1.2  | 7.55E-39 | -0.24377 | 0.152 | 0.51  | 1.13E-34 | CSCL | ATP6AP1  |
| HIF1A.1    | 7.81E-39 | -0.3391  | 0.157 | 0.514 | 1.17E-34 | CSCL | HIF1A    |
| MSN.2      | 8.22E-39 | -0.37608 | 0.087 | 0.39  | 1.23E-34 | CSCL | MSN      |
| HMOX1.2    | 9.40E-39 | -0.74162 | 0.042 | 0.308 | 1.41E-34 | CSCL | HMOX1    |
| C3AR1.2    | 1.02E-38 | -0.96402 | 0.009 | 0.25  | 1.53E-34 | CSCL | C3AR1    |
| MAF1.2     | 1.12E-38 | -0.26364 | 0.115 | 0.444 | 1.67E-34 | CSCL | MAF1     |
| RBM17.2    | 1.15E-38 | -0.34385 | 0.08  | 0.383 | 1.71E-34 | CSCL | RBM17    |
| CMTM3.2    | 1.18E-38 | -0.43527 | 0.056 | 0.337 | 1.76E-34 | CSCL | CMTM3    |
| H2AFY.2    | 1.57E-38 | -0.27558 | 0.215 | 0.627 | 2.35E-34 | CSCL | H2AFY    |
| C19orf60.1 | 1.64E-38 | -0.23855 | 0.157 | 0.52  | 2.45E-34 | CSCL | C19orf60 |
| ARPC5L.1   | 1.73E-38 | -0.31306 | 0.08  | 0.384 | 2.59E-34 | CSCL | ARPC5L   |
| CLTA.2     | 1.74E-38 | -0.16505 | 0.225 | 0.649 | 2.60E-34 | CSCL | CLTA     |
| SCPEP1.1   | 1.81E-38 | -0.52883 | 0.07  | 0.36  | 2.71E-34 | CSCL | SCPEP1   |
| HAGH.2     | 1.87E-38 | -0.33549 | 0.072 | 0.368 | 2.80E-34 | CSCL | HAGH     |
| SPI1.2     | 1.91E-38 | -0.86488 | 0.01  | 0.251 | 2.85E-34 | CSCL | SPI1     |
| MAP7D1.2   | 2.04E-38 | -0.34813 | 0.068 | 0.36  | 3.05E-34 | CSCL | MAP7D1   |
| ALKBH5.1   | 2.23E-38 | -0.40316 | 0.056 | 0.337 | 3.33E-34 | CSCL | ALKBH5   |
| ARPC4.2    | 2.46E-38 | -0.22469 | 0.161 | 0.532 | 3.67E-34 | CSCL | ARPC4    |
| PICALM.2   | 2.58E-38 | -0.49582 | 0.033 | 0.294 | 3.85E-34 | CSCL | PICALM   |
| RGS2.1     | 3.10E-38 | -0.53025 | 0.136 | 0.461 | 4.63E-34 | CSCL | RGS2     |
| GYPC.2     | 3.23E-38 | -0.54435 | 0.049 | 0.323 | 4.83E-34 | CSCL | GYPC     |
| IDH2.2     | 3.98E-38 | -0.29568 | 0.115 | 0.442 | 5.95E-34 | CSCL | IDH2     |
| RTFDC1.1   | 5.56E-38 | -0.18844 | 0.18  | 0.557 | 8.32E-34 | CSCL | RTFDC1   |
| HAVCR2.2   | 6.51E-38 | -0.93814 | 0.007 | 0.243 | 9.73E-34 | CSCL | HAVCR2   |
| CHMP4B.2   | 6.90E-38 | -0.2499  | 0.129 | 0.471 | 1.03E-33 | CSCL | CHMP4B   |
| PSMD3.1    | 7.53E-38 | -0.26095 | 0.103 | 0.42  | 1.13E-33 | CSCL | PSMD3    |
| SUMO3.2    | 8.17E-38 | -0.29892 | 0.124 | 0.455 | 1.22E-33 | CSCL | SUMO3    |
| DCK.2      | 9.82E-38 | -0.54609 | 0.026 | 0.278 | 1.47E-33 | CSCL | DCK      |
| NR4A2.2    | 1.07E-37 | -0.86638 | 0.021 | 0.263 | 1.60E-33 | CSCL | NR4A2    |
| NFKBIA.1   | 1.12E-37 | -0.371   | 0.168 | 0.517 | 1.67E-33 | CSCL | NFKBIA   |
| REL.2      | 1.20E-37 | -0.64228 | 0.047 | 0.311 | 1.79E-33 | CSCL | REL      |
| SPCS3.2    | 1.26E-37 | -0.43911 | 0.059 | 0.339 | 1.88E-33 | CSCL | SPCS3    |
| UBE2J2.2   | 1.47E-37 | -0.25835 | 0.063 | 0.348 | 2.20E-33 | CSCL | UBE2J2   |
| MTDH.2     | 1.62E-37 | -0.29018 | 0.223 | 0.63  | 2.41E-33 | CSCL | MTDH     |
| MOB1A.2    | 1.63E-37 | -0.40079 | 0.068 | 0.354 | 2.43E-33 | CSCL | MOB1A    |
| FNTA.1     | 1.65E-37 | -0.31109 | 0.094 | 0.4   | 2.46E-33 | CSCL | FNTA     |
| FLOT1.2    | 1.67E-37 | -0.23952 | 0.159 | 0.52  | 2.50E-33 | CSCL | FLOT1    |
| EIF3F.2    | 1.70E-37 | -0.19987 | 0.215 | 0.625 | 2.55E-33 | CSCL | EIF3F    |
| ATG3.2     | 1.80E-37 | -0.23109 | 0.089 | 0.392 | 2.69E-33 | CSCL | ATG3     |
| CTSA.2     | 1.96E-37 | -0.26594 | 0.101 | 0.414 | 2.92E-33 | CSCL | CTSA     |
| GNAI3.1    | 3.73E-37 | -0.26583 | 0.098 | 0.408 | 5.58E-33 | CSCL | GNAI3    |
| ERP44      | 3.83E-37 | -0.35151 | 0.101 | 0.411 | 5.72E-33 | CSCL | ERP44    |

|           |    |          |          |       |       |          |      |           |
|-----------|----|----------|----------|-------|-------|----------|------|-----------|
| HLA-DQA1. | 4. | 22E-37   | -0.82278 | 0.054 | 0.319 | 6.30E-33 | CSCL | HLA-DQA1  |
| HNRNPA1.  | 1  | 4.24E-37 | 0.360135 | 0.742 | 0.884 | 6.34E-33 | CSCL | HNRNPA1   |
| POLD4     | 4. | 79E-37   | -0.37724 | 0.117 | 0.436 | 7.16E-33 | CSCL | POLD4     |
| TGOLN2.   | 2  | 5.45E-37 | -0.38504 | 0.089 | 0.387 | 8.14E-33 | CSCL | TGOLN2    |
| PITHD1.   | 1  | 6.52E-37 | -0.34236 | 0.073 | 0.36  | 9.75E-33 | CSCL | PITHD1    |
| GAA.      | 2  | 6.95E-37 | -0.43341 | 0.059 | 0.333 | 1.04E-32 | CSCL | GAA       |
| ANP32A.   | 2  | 7.49E-37 | -0.33088 | 0.122 | 0.444 | 1.12E-32 | CSCL | ANP32A    |
| STAU1.    | 1  | 7.52E-37 | -0.2705  | 0.084 | 0.381 | 1.12E-32 | CSCL | STAU1     |
| HNRNPA2B1 | 7. | 53E-37   | 0.362928 | 0.717 | 0.852 | 1.13E-32 | CSCL | HNRNPA2B1 |
| SNX2.     | 2  | 8.60E-37 | -0.31373 | 0.11  | 0.426 | 1.29E-32 | CSCL | SNX2      |
| PAFAH1B1. | 1. | 11E-36   | -0.34811 | 0.086 | 0.382 | 1.65E-32 | CSCL | PAFAH1B1  |
| TMEM183A. | 1. | 20E-36   | -0.28153 | 0.042 | 0.305 | 1.79E-32 | CSCL | TMEM183A  |
| CCDC50.   | 2  | 1.48E-36 | -0.31192 | 0.047 | 0.313 | 2.21E-32 | CSCL | CCDC50    |
| AKR1A1.   | 1  | 1.69E-36 | -0.25147 | 0.161 | 0.515 | 2.53E-32 | CSCL | AKR1A1    |
| IER3.     | 2  | 1.81E-36 | -0.85869 | 0.017 | 0.253 | 2.70E-32 | CSCL | IER3      |
| TSP0.     | 1  | 1.89E-36 | -0.29678 | 0.223 | 0.614 | 2.83E-32 | CSCL | TSP0      |
| CKB.      | 2  | 2.00E-36 | 0.66548  | 0.607 | 0.581 | 2.99E-32 | CSCL | CKB       |
| RBCK1.    | 1  | 2.02E-36 | -0.33092 | 0.07  | 0.351 | 3.02E-32 | CSCL | RBCK1     |
| SIRPA.    | 2  | 2.31E-36 | -0.54772 | 0.017 | 0.255 | 3.46E-32 | CSCL | SIRPA     |
| COX6C.    | 2  | 2.49E-36 | 0.435763 | 0.712 | 0.837 | 3.72E-32 | CSCL | COX6C     |
| HNRNPAB.  | 2  | 2.53E-36 | -0.23562 | 0.101 | 0.412 | 3.78E-32 | CSCL | HNRNPAB   |
| PPP1CA.   | 1  | 2.80E-36 | -0.23509 | 0.202 | 0.59  | 4.19E-32 | CSCL | PPP1CA    |
| TLN1.     | 2  | 3.15E-36 | -0.40589 | 0.04  | 0.297 | 4.71E-32 | CSCL | TLN1      |
| CCDC107.  | 2  | 3.18E-36 | -0.24605 | 0.099 | 0.405 | 4.75E-32 | CSCL | CCDC107   |
| KIF5B.    | 2  | 3.18E-36 | -0.20957 | 0.169 | 0.529 | 4.75E-32 | CSCL | KIF5B     |
| TGFB1.    | 2  | 3.18E-36 | -0.60355 | 0.019 | 0.256 | 4.76E-32 | CSCL | TGFB1     |
| THEMIS2.  | 2  | 3.44E-36 | -0.74796 | 0.017 | 0.253 | 5.14E-32 | CSCL | THEMIS2   |
| AUP1.     | 1  | 4.92E-36 | -0.24921 | 0.178 | 0.54  | 7.35E-32 | CSCL | AUP1      |
| HDAC2.    | 2  | 5.26E-36 | -0.24761 | 0.133 | 0.464 | 7.87E-32 | CSCL | HDAC2     |
| MEF2C.    | 2  | 5.46E-36 | -0.61795 | 0.042 | 0.295 | 8.16E-32 | CSCL | MEF2C     |
| IFITM2.   | 2  | 5.62E-36 | -0.6956  | 0.044 | 0.295 | 8.40E-32 | CSCL | IFITM2    |
| NUTF2.    | 1  | 5.94E-36 | -0.14523 | 0.133 | 0.466 | 8.88E-32 | CSCL | NUTF2     |
| FEZ2.     | 2  | 5.99E-36 | -0.25274 | 0.134 | 0.465 | 8.95E-32 | CSCL | FEZ2      |
| UBE2L3.   | 2  | 6.25E-36 | -0.1971  | 0.182 | 0.553 | 9.34E-32 | CSCL | UBE2L3    |
| GNB2.     | 2  | 6.84E-36 | -0.24184 | 0.202 | 0.588 | 1.02E-31 | CSCL | GNB2      |
| PTTG1IP.  | 1  | 8.37E-36 | -0.20619 | 0.138 | 0.472 | 1.25E-31 | CSCL | PTTG1IP   |
| CSDE1.    | 2  | 8.44E-36 | -0.23171 | 0.225 | 0.621 | 1.26E-31 | CSCL | CSDE1     |
| GNB1.     | 2  | 8.49E-36 | -0.21259 | 0.113 | 0.431 | 1.27E-31 | CSCL | GNB1      |
| SLCO2B1.  | 2  | 8.50E-36 | -0.89375 | 0.007 | 0.231 | 1.27E-31 | CSCL | SLCO2B1   |
| PCBP1.    | 2  | 8.81E-36 | -0.19583 | 0.213 | 0.607 | 1.32E-31 | CSCL | PCBP1     |
| SSR1.     | 1  | 8.86E-36 | -0.27407 | 0.148 | 0.485 | 1.32E-31 | CSCL | SSR1      |
| M6PR.     | 2  | 9.01E-36 | -0.29056 | 0.096 | 0.397 | 1.35E-31 | CSCL | M6PR      |
| C1QB.     | 2  | 9.79E-36 | -0.57684 | 0.25  | 0.586 | 1.46E-31 | CSCL | C1QB      |
| MTPN.     | 1  | 1.06E-35 | -0.13427 | 0.122 | 0.448 | 1.58E-31 | CSCL | MTPN      |
| UBE2D2.   | 2  | 1.16E-35 | -0.24329 | 0.216 | 0.607 | 1.73E-31 | CSCL | UBE2D2    |
| MLEC.     | 2  | 1.43E-35 | -0.18639 | 0.105 | 0.416 | 2.14E-31 | CSCL | MLEC      |
| TPM3.     | 2  | 1.72E-35 | -0.2156  | 0.197 | 0.577 | 2.56E-31 | CSCL | TPM3      |
| ALDH2.    | 2  | 1.77E-35 | -0.42454 | 0.094 | 0.385 | 2.64E-31 | CSCL | ALDH2     |
| SKIL.     | 2  | 2.14E-35 | -0.4027  | 0.044 | 0.298 | 3.20E-31 | CSCL | SKIL      |
| SPINT2.   | 2  | 2.22E-35 | -0.74933 | 0.005 | 0.227 | 3.32E-31 | CSCL | SPINT2    |
| BRI3.     | 2  | 2.64E-35 | -0.20022 | 0.143 | 0.484 | 3.94E-31 | CSCL | BRI3      |

|            |          |          |       |       |          |      |          |
|------------|----------|----------|-------|-------|----------|------|----------|
| PLEKHB2.2  | 3.31E-35 | -0.2563  | 0.108 | 0.414 | 4.95E-31 | CSCL | PLEKHB2  |
| ZFAND5.2   | 3.60E-35 | -0.25781 | 0.145 | 0.479 | 5.38E-31 | CSCL | ZFAND5   |
| SERPINB1.4 | 1.5E-35  | -0.69219 | 0.035 | 0.279 | 6.20E-31 | CSCL | SERPINB1 |
| MAPRE1.2   | 4.23E-35 | -0.1735  | 0.152 | 0.494 | 6.32E-31 | CSCL | MAPRE1   |
| LGALS9.2   | 4.27E-35 | -0.75587 | 0.019 | 0.251 | 6.38E-31 | CSCL | LGALS9   |
| CRELD2.2   | 4.54E-35 | -0.38937 | 0.042 | 0.295 | 6.78E-31 | CSCL | CRELD2   |
| ELF1.2     | 4.58E-35 | -0.60555 | 0.021 | 0.255 | 6.85E-31 | CSCL | ELF1     |
| UBL3.2     | 4.98E-35 | -0.26924 | 0.082 | 0.368 | 7.44E-31 | CSCL | UBL3     |
| TWF2.2     | 5.37E-35 | -0.37509 | 0.077 | 0.354 | 8.02E-31 | CSCL | TWF2     |
| SPNS1.2    | 6.14E-35 | -0.34278 | 0.047 | 0.303 | 9.18E-31 | CSCL | SPNS1    |
| TIMP2.2    | 6.83E-35 | -0.381   | 0.068 | 0.339 | 1.02E-30 | CSCL | TIMP2    |
| CCDC85B.2  | 7.18E-35 | -0.22763 | 0.115 | 0.429 | 1.07E-30 | CSCL | CCDC85B  |
| RNH1.1     | 8.33E-35 | -0.28158 | 0.192 | 0.555 | 1.25E-30 | CSCL | RNH1     |
| DHRS7.2    | 8.38E-35 | -0.33204 | 0.208 | 0.574 | 1.25E-30 | CSCL | DHRS7    |
| LSM12.1    | 1.02E-34 | -0.35415 | 0.03  | 0.271 | 1.52E-30 | CSCL | LSM12    |
| C20orf27.1 | 1.08E-34 | -0.25504 | 0.086 | 0.374 | 1.61E-30 | CSCL | C20orf27 |
| HNRNPF.1   | 1.13E-34 | -0.18336 | 0.171 | 0.525 | 1.69E-30 | CSCL | HNRNPF   |
| PAK2.2     | 1.42E-34 | -0.29958 | 0.082 | 0.366 | 2.12E-30 | CSCL | PAK2     |
| HSPH1.1    | 1.52E-34 | -0.2609  | 0.087 | 0.375 | 2.27E-30 | CSCL | HSPH1    |
| PFDN4.2    | 1.52E-34 | -0.19078 | 0.086 | 0.373 | 2.28E-30 | CSCL | PFDN4    |
| RAP1B.1    | 1.57E-34 | -0.23292 | 0.129 | 0.45  | 2.34E-30 | CSCL | RAP1B    |
| EIF3A.2    | 1.65E-34 | -0.26901 | 0.072 | 0.346 | 2.46E-30 | CSCL | EIF3A    |
| ACSL1.2    | 1.85E-34 | -0.69288 | 0.014 | 0.238 | 2.77E-30 | CSCL | ACSL1    |
| OSBPL8.2   | 1.90E-34 | -0.31082 | 0.059 | 0.324 | 2.83E-30 | CSCL | OSBPL8   |
| VPS4A.1    | 1.98E-34 | -0.266   | 0.058 | 0.321 | 2.96E-30 | CSCL | VPS4A    |
| C5AR1.2    | 2.11E-34 | -0.81707 | 0.021 | 0.249 | 3.16E-30 | CSCL | C5AR1    |
| DAP.2      | 2.19E-34 | -0.34298 | 0.04  | 0.288 | 3.27E-30 | CSCL | DAP      |
| LIMD2.2    | 2.30E-34 | -0.50628 | 0.026 | 0.26  | 3.44E-30 | CSCL | LIMD2    |
| TMEM123.1  | 2.54E-34 | -0.27415 | 0.108 | 0.411 | 3.79E-30 | CSCL | TMEM123  |
| OLFML3.2   | 2.79E-34 | -0.79598 | 0.014 | 0.237 | 4.16E-30 | CSCL | OLFML3   |
| VMA21.1    | 2.92E-34 | -0.31644 | 0.077 | 0.354 | 4.36E-30 | CSCL | VMA21    |
| MEG3.1     | 3.06E-34 | 0.875201 | 0.445 | 0.297 | 4.57E-30 | CSCL | MEG3     |
| CNDP2.2    | 3.51E-34 | -0.1793  | 0.127 | 0.446 | 5.25E-30 | CSCL | CNDP2    |
| CCL4.2     | 3.90E-34 | -0.79959 | 0.084 | 0.337 | 5.83E-30 | CSCL | CCL4     |
| ROCK1.2    | 4.21E-34 | -0.3199  | 0.059 | 0.321 | 6.29E-30 | CSCL | ROCK1    |
| APLP2.2    | 4.42E-34 | -0.22998 | 0.223 | 0.612 | 6.60E-30 | CSCL | APLP2    |
| MMD.2      | 4.43E-34 | -0.492   | 0.024 | 0.256 | 6.63E-30 | CSCL | MMD      |
| FYB.2      | 4.48E-34 | -0.8444  | 0.014 | 0.234 | 6.69E-30 | CSCL | FYB      |
| SEC63.1    | 4.67E-34 | -0.20205 | 0.105 | 0.402 | 6.98E-30 | CSCL | SEC63    |
| PKN1.2     | 4.77E-34 | -0.3523  | 0.023 | 0.254 | 7.13E-30 | CSCL | PKN1     |
| AKAP13.2   | 4.82E-34 | -0.41843 | 0.072 | 0.338 | 7.20E-30 | CSCL | AKAP13   |
| OGFR.2     | 4.92E-34 | -0.3316  | 0.047 | 0.299 | 7.36E-30 | CSCL | OGFR     |
| FBX07.2    | 5.12E-34 | -0.31341 | 0.061 | 0.322 | 7.65E-30 | CSCL | FBX07    |
| PPP1R15A.5 | 3.1E-34  | -0.30576 | 0.155 | 0.483 | 7.93E-30 | CSCL | PPP1R15A |
| FAM50A.2   | 5.72E-34 | -0.26667 | 0.096 | 0.387 | 8.55E-30 | CSCL | FAM50A   |
| HRAS.2     | 6.52E-34 | -0.2871  | 0.051 | 0.306 | 9.75E-30 | CSCL | HRAS     |
| PAIP1.2    | 7.22E-34 | -0.20958 | 0.108 | 0.41  | 1.08E-29 | CSCL | PAIP1    |
| PTPMT1.1   | 7.48E-34 | -0.25296 | 0.084 | 0.366 | 1.12E-29 | CSCL | PTPMT1   |
| ACAA1.2    | 8.68E-34 | -0.22771 | 0.082 | 0.363 | 1.30E-29 | CSCL | ACAA1    |
| AMD1.1     | 9.08E-34 | -0.2957  | 0.103 | 0.398 | 1.36E-29 | CSCL | AMD1     |
| NUDT3.2    | 9.52E-34 | -0.26756 | 0.113 | 0.414 | 1.42E-29 | CSCL | NUDT3    |

|           |          |          |       |       |          |      |           |
|-----------|----------|----------|-------|-------|----------|------|-----------|
| ADI1.1    | 1.03E-33 | -0.25222 | 0.117 | 0.421 | 1.54E-29 | CSCL | ADI1      |
| KPNA2.1   | 1.08E-33 | -0.37514 | 0.089 | 0.368 | 1.61E-29 | CSCL | KPNA2     |
| C16orf13. | 1.10E-33 | -0.16327 | 0.145 | 0.476 | 1.65E-29 | CSCL | C16orf13  |
| H3F3A     | 1.19E-33 | 0.437924 | 0.684 | 0.751 | 1.78E-29 | CSCL | H3F3A     |
| EIF3J.2   | 1.29E-33 | -0.23644 | 0.099 | 0.392 | 1.93E-29 | CSCL | EIF3J     |
| RBPJ.2    | 1.37E-33 | -0.18249 | 0.15  | 0.485 | 2.05E-29 | CSCL | RBPJ      |
| CD86.2    | 1.50E-33 | -0.84952 | 0.009 | 0.224 | 2.23E-29 | CSCL | CD86      |
| HMG1.2    | 1.52E-33 | -0.26391 | 0.267 | 0.685 | 2.28E-29 | CSCL | HMG1      |
| TOP1.2    | 1.88E-33 | -0.21227 | 0.105 | 0.404 | 2.81E-29 | CSCL | TOP1      |
| MMP24-AS1 | 2.02E-33 | -0.34333 | 0.063 | 0.324 | 3.02E-29 | CSCL | MMP24-AS1 |
| IFI30.2   | 2.12E-33 | -0.81576 | 0.012 | 0.23  | 3.17E-29 | CSCL | IFI30     |
| LEPROTL1. | 2.15E-33 | -0.26434 | 0.106 | 0.402 | 3.22E-29 | CSCL | LEPROTL1  |
| CITED2.2  | 2.19E-33 | -0.39476 | 0.089 | 0.366 | 3.28E-29 | CSCL | CITED2    |
| BCL7C.1   | 2.50E-33 | -0.39773 | 0.031 | 0.266 | 3.74E-29 | CSCL | BCL7C     |
| LYZ.2     | 2.76E-33 | -0.81671 | 0.005 | 0.216 | 4.13E-29 | CSCL | LYZ       |
| SLBP.2    | 2.83E-33 | -0.26592 | 0.063 | 0.324 | 4.23E-29 | CSCL | SLBP      |
| PRPF40A.1 | 3.13E-33 | -0.166   | 0.141 | 0.466 | 4.68E-29 | CSCL | PRPF40A   |
| RAB32.2   | 3.16E-33 | -0.40129 | 0.023 | 0.25  | 4.72E-29 | CSCL | RAB32     |
| PDXK.2    | 3.50E-33 | -0.3434  | 0.049 | 0.297 | 5.24E-29 | CSCL | PDXK      |
| CTDNEP1.2 | 3.55E-33 | -0.28586 | 0.065 | 0.326 | 5.31E-29 | CSCL | CTDNEP1   |
| VAMP3.1   | 3.61E-33 | -0.25079 | 0.084 | 0.362 | 5.39E-29 | CSCL | VAMP3     |
| RAB5C     | 4.31E-33 | -0.21206 | 0.255 | 0.673 | 6.44E-29 | CSCL | RAB5C     |
| DNAJC3    | 4.64E-33 | -0.29861 | 0.052 | 0.304 | 6.94E-29 | CSCL | DNAJC3    |
| HLA-E.2   | 4.80E-33 | -0.26908 | 0.236 | 0.615 | 7.17E-29 | CSCL | HLA-E     |
| PSMD11.1  | 5.02E-33 | -0.16774 | 0.117 | 0.422 | 7.51E-29 | CSCL | PSMD11    |
| ARL5A.2   | 5.26E-33 | -0.18146 | 0.182 | 0.534 | 7.87E-29 | CSCL | ARL5A     |
| FDX1.2    | 5.52E-33 | -0.3216  | 0.061 | 0.318 | 8.25E-29 | CSCL | FDX1      |
| BCKDK.2   | 5.57E-33 | -0.34563 | 0.066 | 0.327 | 8.32E-29 | CSCL | BCKDK     |
| ECHS1.1   | 5.75E-33 | -0.17672 | 0.133 | 0.45  | 8.60E-29 | CSCL | ECHS1     |
| JMJD6.1   | 6.87E-33 | -0.40015 | 0.049 | 0.295 | 1.03E-28 | CSCL | JMJD6     |
| NXT1.1    | 7.02E-33 | -0.30173 | 0.068 | 0.329 | 1.05E-28 | CSCL | NXT1      |
| PIGT.1    | 7.14E-33 | -0.21768 | 0.113 | 0.412 | 1.07E-28 | CSCL | PIGT      |
| GPAA1.2   | 7.18E-33 | -0.29366 | 0.112 | 0.408 | 1.07E-28 | CSCL | GPAA1     |
| SEPHS2.1  | 7.50E-33 | -0.23779 | 0.065 | 0.326 | 1.12E-28 | CSCL | SEPHS2    |
| KHDRBS1.2 | 8.19E-33 | -0.20013 | 0.164 | 0.502 | 1.22E-28 | CSCL | KHDRBS1   |
| SMARCA5.2 | 8.59E-33 | -0.24836 | 0.086 | 0.362 | 1.28E-28 | CSCL | SMARCA5   |
| CHD1.2    | 9.04E-33 | -0.40713 | 0.056 | 0.305 | 1.35E-28 | CSCL | CHD1      |
| TMEM165.2 | 9.84E-33 | -0.23421 | 0.148 | 0.472 | 1.47E-28 | CSCL | TMEM165   |
| RNF126.2  | 9.85E-33 | -0.29426 | 0.052 | 0.303 | 1.47E-28 | CSCL | RNF126    |
| ENO1.1    | 9.96E-33 | 0.48059  | 0.696 | 0.799 | 1.49E-28 | CSCL | ENO1      |
| ANXA11.2  | 1.03E-32 | -0.6024  | 0.012 | 0.226 | 1.54E-28 | CSCL | ANXA11    |
| GAMT.2    | 1.09E-32 | -0.27506 | 0.058 | 0.312 | 1.63E-28 | CSCL | GAMT      |
| GSTO1.1   | 1.10E-32 | -0.23355 | 0.15  | 0.472 | 1.64E-28 | CSCL | GSTO1     |
| TRABD.2   | 1.11E-32 | -0.45734 | 0.037 | 0.27  | 1.65E-28 | CSCL | TRABD     |
| BTG1.2    | 1.11E-32 | -0.30985 | 0.295 | 0.709 | 1.66E-28 | CSCL | BTG1      |
| SMAP2.2   | 1.12E-32 | -0.57286 | 0.024 | 0.247 | 1.67E-28 | CSCL | SMAP2     |
| PTP4A2.2  | 1.12E-32 | -0.16539 | 0.143 | 0.469 | 1.68E-28 | CSCL | PTP4A2    |
| SSR3.2    | 1.22E-32 | -0.20121 | 0.188 | 0.544 | 1.83E-28 | CSCL | SSR3      |
| FBXW5.2   | 1.23E-32 | -0.32423 | 0.052 | 0.3   | 1.83E-28 | CSCL | FBXW5     |
| EVI2B.2   | 1.24E-32 | -0.80776 | 0.005 | 0.213 | 1.86E-28 | CSCL | EVI2B     |
| TRAM1.2   | 1.26E-32 | -0.26413 | 0.136 | 0.449 | 1.88E-28 | CSCL | TRAM1     |

|             |           |           |        |        |           |      |          |
|-------------|-----------|-----------|--------|--------|-----------|------|----------|
| RRP7A. 2    | 1. 36E-32 | -0. 41659 | 0. 052 | 0. 299 | 2. 03E-28 | CSCL | RRP7A    |
| PPP1R2      | 1. 43E-32 | -0. 25767 | 0. 098 | 0. 382 | 2. 14E-28 | CSCL | PPP1R2   |
| CCNL1. 1    | 1. 57E-32 | -0. 26084 | 0. 194 | 0. 542 | 2. 34E-28 | CSCL | CCNL1    |
| NDUFAF3     | 1. 63E-32 | -0. 15905 | 0. 183 | 0. 534 | 2. 43E-28 | CSCL | NDUFAF3  |
| RAB20. 2    | 1. 78E-32 | -0. 63199 | 0. 024 | 0. 247 | 2. 66E-28 | CSCL | RAB20    |
| SYNCRIP. 2  | 1. 83E-32 | -0. 23724 | 0. 108 | 0. 398 | 2. 74E-28 | CSCL | SYNCRIP  |
| DRAM2. 2    | 1. 96E-32 | -0. 41444 | 0. 084 | 0. 349 | 2. 93E-28 | CSCL | DRAM2    |
| CSNK1A1. 2  | 2. 02E-32 | -0. 2229  | 0. 204 | 0. 576 | 3. 02E-28 | CSCL | CSNK1A1  |
| CDV3. 1     | 2. 07E-32 | -0. 3607  | 0. 045 | 0. 287 | 3. 09E-28 | CSCL | CDV3     |
| UBE2D1. 2   | 2. 20E-32 | -0. 32581 | 0. 04  | 0. 278 | 3. 29E-28 | CSCL | UBE2D1   |
| GDE1. 2     | 2. 25E-32 | -0. 31467 | 0. 059 | 0. 311 | 3. 37E-28 | CSCL | GDE1     |
| WHSC1L1. 2  | 2. 30E-32 | -0. 27506 | 0. 101 | 0. 387 | 3. 43E-28 | CSCL | WHSC1L1  |
| METTL9. 2   | 2. 41E-32 | -0. 11098 | 0. 152 | 0. 485 | 3. 60E-28 | CSCL | METTL9   |
| USF2. 2     | 2. 62E-32 | -0. 29188 | 0. 075 | 0. 339 | 3. 92E-28 | CSCL | USF2     |
| PFKL. 2     | 2. 81E-32 | -0. 24098 | 0. 096 | 0. 377 | 4. 20E-28 | CSCL | PFKL     |
| PTPRC. 2    | 3. 08E-32 | -0. 79132 | 0. 007 | 0. 213 | 4. 61E-28 | CSCL | PTPRC    |
| PLXDC2. 2   | 3. 36E-32 | -0. 76423 | 0. 01  | 0. 219 | 5. 02E-28 | CSCL | PLXDC2   |
| S100A9. 2   | 3. 41E-32 | -0. 89994 | 0. 019 | 0. 234 | 5. 09E-28 | CSCL | S100A9   |
| MKRN1. 2    | 3. 50E-32 | -0. 20883 | 0. 122 | 0. 423 | 5. 24E-28 | CSCL | MKRN1    |
| FKBP4. 1    | 3. 81E-32 | -0. 19866 | 0. 072 | 0. 334 | 5. 70E-28 | CSCL | FKBP4    |
| TM9SF2. 1   | 3. 82E-32 | -0. 30388 | 0. 084 | 0. 352 | 5. 71E-28 | CSCL | TM9SF2   |
| FNBP1. 2    | 4. 14E-32 | -0. 41724 | 0. 04  | 0. 274 | 6. 19E-28 | CSCL | FNBP1    |
| HP1BP3. 2   | 4. 51E-32 | -0. 21796 | 0. 141 | 0. 457 | 6. 74E-28 | CSCL | HP1BP3   |
| SH3KBP1. 2  | 4. 69E-32 | -0. 44595 | 0. 028 | 0. 252 | 7. 01E-28 | CSCL | SH3KBP1  |
| GBAS. 1     | 4. 82E-32 | -0. 12867 | 0. 117 | 0. 414 | 7. 20E-28 | CSCL | GBAS     |
| STK4. 2     | 4. 82E-32 | -0. 35089 | 0. 054 | 0. 299 | 7. 21E-28 | CSCL | STK4     |
| VSTM2A. 1   | 4. 91E-32 | 0. 850316 | 0. 237 | 0. 099 | 7. 34E-28 | CSCL | VSTM2A   |
| SLC25A11. 5 | 5. 19E-32 | -0. 14851 | 0. 127 | 0. 434 | 7. 76E-28 | CSCL | SLC25A11 |
| WDR1. 1     | 5. 33E-32 | -0. 2274  | 0. 127 | 0. 429 | 7. 96E-28 | CSCL | WDR1     |
| PLEKH01. 2  | 5. 84E-32 | -0. 35163 | 0. 047 | 0. 287 | 8. 73E-28 | CSCL | PLEKH01  |
| GSPT1. 2    | 6. 63E-32 | -0. 18774 | 0. 087 | 0. 362 | 9. 90E-28 | CSCL | GSPT1    |
| EIF2AK1. 1  | 7. 29E-32 | -0. 24234 | 0. 079 | 0. 345 | 1. 09E-27 | CSCL | EIF2AK1  |
| MPST. 2     | 7. 55E-32 | -0. 28548 | 0. 065 | 0. 319 | 1. 13E-27 | CSCL | MPST     |
| JAK1. 2     | 8. 44E-32 | -0. 3414  | 0. 035 | 0. 264 | 1. 26E-27 | CSCL | JAK1     |
| AP1B1. 2    | 8. 74E-32 | -0. 51184 | 0. 04  | 0. 27  | 1. 31E-27 | CSCL | AP1B1    |
| THRAP3. 2   | 9. 27E-32 | -0. 1387  | 0. 14  | 0. 453 | 1. 39E-27 | CSCL | THRAP3   |
| TGIF1. 1    | 9. 70E-32 | -0. 345   | 0. 096 | 0. 371 | 1. 45E-27 | CSCL | TGIF1    |
| HIST1H4C. 9 | 9. 82E-32 | -0. 30321 | 0. 136 | 0. 439 | 1. 47E-27 | CSCL | HIST1H4C |
| DBNL. 2     | 1. 03E-31 | -0. 22756 | 0. 136 | 0. 44  | 1. 53E-27 | CSCL | DBNL     |
| P4HB. 1     | 1. 11E-31 | -0. 19778 | 0. 218 | 0. 59  | 1. 66E-27 | CSCL | P4HB     |
| SAP30. 2    | 1. 20E-31 | -0. 3951  | 0. 028 | 0. 251 | 1. 79E-27 | CSCL | SAP30    |
| LAT2. 2     | 1. 25E-31 | -0. 77402 | 0. 009 | 0. 213 | 1. 87E-27 | CSCL | LAT2     |
| CNOT7. 1    | 1. 25E-31 | -0. 19413 | 0. 099 | 0. 382 | 1. 87E-27 | CSCL | CNOT7    |
| DPYSL2. 1   | 1. 25E-31 | -0. 21277 | 0. 134 | 0. 438 | 1. 87E-27 | CSCL | DPYSL2   |
| CD164. 1    | 1. 32E-31 | -0. 25161 | 0. 175 | 0. 507 | 1. 97E-27 | CSCL | CD164    |
| COPRS. 1    | 1. 48E-31 | -0. 23082 | 0. 08  | 0. 347 | 2. 21E-27 | CSCL | COPRS    |
| LY96. 2     | 1. 49E-31 | -0. 50601 | 0. 019 | 0. 233 | 2. 23E-27 | CSCL | LY96     |
| DDX21       | 1. 56E-31 | -0. 29681 | 0. 063 | 0. 312 | 2. 34E-27 | CSCL | DDX21    |
| NOL7. 1     | 1. 59E-31 | -0. 15728 | 0. 141 | 0. 454 | 2. 38E-27 | CSCL | NOL7     |
| LITAF. 2    | 1. 67E-31 | -0. 30258 | 0. 159 | 0. 474 | 2. 49E-27 | CSCL | LITAF    |
| HMGB2. 2    | 1. 78E-31 | -0. 32048 | 0. 187 | 0. 51  | 2. 67E-27 | CSCL | HMGB2    |



|             |           |           |        |        |           |      |          |
|-------------|-----------|-----------|--------|--------|-----------|------|----------|
| ABI3. 2     | 1. 80E-31 | -0. 79454 | 0. 002 | 0. 199 | 2. 70E-27 | CSCL | ABI3     |
| DDT         | 1. 84E-31 | -0. 20041 | 0. 19  | 0. 539 | 2. 74E-27 | CSCL | DDT      |
| RTCB. 2     | 2. 05E-31 | -0. 29814 | 0. 082 | 0. 346 | 3. 07E-27 | CSCL | RTCB     |
| PGP. 2      | 2. 07E-31 | -0. 41259 | 0. 017 | 0. 23  | 3. 10E-27 | CSCL | PGP      |
| PRKAR1A. 1  | 2. 21E-31 | -0. 21426 | 0. 162 | 0. 488 | 3. 30E-27 | CSCL | PRKAR1A  |
| APOC2. 2    | 2. 26E-31 | -1. 01408 | 0. 002 | 0. 199 | 3. 37E-27 | CSCL | APOC2    |
| CD300A. 2   | 2. 50E-31 | -0. 79637 | 0. 003 | 0. 201 | 3. 74E-27 | CSCL | CD300A   |
| ARL2. 2     | 2. 51E-31 | -0. 13913 | 0. 141 | 0. 454 | 3. 75E-27 | CSCL | ARL2     |
| PNPLA8. 2   | 2. 72E-31 | -0. 31916 | 0. 091 | 0. 36  | 4. 07E-27 | CSCL | PNPLA8   |
| VPS35       | 2. 76E-31 | -0. 2148  | 0. 14  | 0. 445 | 4. 13E-27 | CSCL | VPS35    |
| MATR3. 2    | 2. 93E-31 | -0. 15872 | 0. 169 | 0. 503 | 4. 38E-27 | CSCL | MATR3    |
| EZR. 2      | 3. 27E-31 | -0. 28329 | 0. 087 | 0. 355 | 4. 89E-27 | CSCL | EZR      |
| C17orf89. 3 | 2. 9E-31  | -0. 13717 | 0. 129 | 0. 436 | 4. 92E-27 | CSCL | C17orf89 |
| UBE2S. 2    | 3. 35E-31 | -0. 24133 | 0. 089 | 0. 357 | 5. 01E-27 | CSCL | UBE2S    |
| CD47. 1     | 3. 54E-31 | -0. 21435 | 0. 112 | 0. 398 | 5. 30E-27 | CSCL | CD47     |
| SERINC3. 1  | 4. 96E-31 | -0. 23744 | 0. 101 | 0. 379 | 7. 41E-27 | CSCL | SERINC3  |
| MCUR1. 2    | 5. 18E-31 | -0. 2538  | 0. 042 | 0. 273 | 7. 74E-27 | CSCL | MCUR1    |
| TPRKB. 1    | 5. 29E-31 | -0. 17904 | 0. 099 | 0. 377 | 7. 90E-27 | CSCL | TPRKB    |
| VASP. 2     | 5. 32E-31 | -0. 36368 | 0. 03  | 0. 251 | 7. 94E-27 | CSCL | VASP     |
| CXADR. 2    | 5. 40E-31 | -0. 3853  | 0. 07  | 0. 319 | 8. 08E-27 | CSCL | CXADR    |
| THOC7       | 5. 42E-31 | -0. 16317 | 0. 113 | 0. 403 | 8. 11E-27 | CSCL | THOC7    |
| SNX5. 1     | 5. 48E-31 | -0. 25853 | 0. 119 | 0. 408 | 8. 19E-27 | CSCL | SNX5     |
| ADAP2. 2    | 5. 58E-31 | -0. 75939 | 0      | 0. 193 | 8. 33E-27 | CSCL | ADAP2    |
| EGLN2. 2    | 5. 66E-31 | -0. 30736 | 0. 054 | 0. 295 | 8. 46E-27 | CSCL | EGLN2    |
| NPC2. 1     | 6. 00E-31 | -0. 31542 | 0. 311 | 0. 711 | 8. 97E-27 | CSCL | NPC2     |
| CISD3. 2    | 6. 43E-31 | -0. 35506 | 0. 038 | 0. 265 | 9. 61E-27 | CSCL | CISD3    |
| NAGK. 1     | 7. 08E-31 | -0. 29539 | 0. 113 | 0. 395 | 1. 06E-26 | CSCL | NAGK     |
| NR1H2. 2    | 7. 17E-31 | -0. 2739  | 0. 066 | 0. 315 | 1. 07E-26 | CSCL | NR1H2    |
| GRINA. 2    | 7. 28E-31 | -0. 19839 | 0. 143 | 0. 452 | 1. 09E-26 | CSCL | GRINA    |
| SNX10. 1    | 7. 69E-31 | -0. 4538  | 0. 024 | 0. 239 | 1. 15E-26 | CSCL | SNX10    |
| MPC2        | 8. 70E-31 | -0. 18824 | 0. 225 | 0. 6   | 1. 30E-26 | CSCL | MPC2     |
| SF1. 1      | 9. 07E-31 | -0. 20818 | 0. 185 | 0. 524 | 1. 35E-26 | CSCL | SF1      |
| MYCBP2. 2   | 9. 07E-31 | -0. 30954 | 0. 068 | 0. 317 | 1. 35E-26 | CSCL | MYCBP2   |
| STUB1. 2    | 9. 78E-31 | -0. 14664 | 0. 154 | 0. 477 | 1. 46E-26 | CSCL | STUB1    |
| G3BP2. 2    | 9. 78E-31 | -0. 31481 | 0. 051 | 0. 287 | 1. 46E-26 | CSCL | G3BP2    |
| BNIP2. 2    | 1. 03E-30 | -0. 41258 | 0. 045 | 0. 275 | 1. 54E-26 | CSCL | BNIP2    |
| STK25. 2    | 1. 08E-30 | -0. 31662 | 0. 066 | 0. 314 | 1. 62E-26 | CSCL | STK25    |
| EIF4B. 2    | 1. 12E-30 | -0. 12064 | 0. 108 | 0. 392 | 1. 67E-26 | CSCL | EIF4B    |
| TERF2IP. 2  | 1. 14E-30 | -0. 22797 | 0. 197 | 0. 534 | 1. 71E-26 | CSCL | TERF2IP  |
| TAPBP. 2    | 1. 18E-30 | -0. 23478 | 0. 089 | 0. 356 | 1. 77E-26 | CSCL | TAPBP    |
| BROX. 2     | 1. 21E-30 | -0. 39305 | 0. 028 | 0. 245 | 1. 81E-26 | CSCL | BROX     |
| PTPRE. 2    | 1. 26E-30 | -0. 39082 | 0. 049 | 0. 281 | 1. 89E-26 | CSCL | PTPRE    |
| BRMS1. 1    | 1. 34E-30 | -0. 27254 | 0. 072 | 0. 323 | 2. 00E-26 | CSCL | BRMS1    |
| RAB8A       | 1. 44E-30 | -0. 15005 | 0. 096 | 0. 369 | 2. 16E-26 | CSCL | RAB8A    |
| RALA. 1     | 1. 46E-30 | -0. 22932 | 0. 099 | 0. 373 | 2. 18E-26 | CSCL | RALA     |
| EMD         | 1. 48E-30 | -0. 32624 | 0. 056 | 0. 295 | 2. 22E-26 | CSCL | EMD      |
| SLC39A1     | 1. 52E-30 | -0. 24192 | 0. 115 | 0. 401 | 2. 26E-26 | CSCL | SLC39A1  |
| SHKBP1. 2   | 1. 54E-30 | -0. 38495 | 0. 03  | 0. 248 | 2. 31E-26 | CSCL | SHKBP1   |
| HLA-DRB5. 1 | 1. 56E-30 | -0. 59816 | 0. 138 | 0. 413 | 2. 34E-26 | CSCL | HLA-DRB5 |
| ADPGK. 2    | 1. 65E-30 | -0. 353   | 0. 044 | 0. 272 | 2. 46E-26 | CSCL | ADPGK    |
| GLTSCR2. 2  | 1. 69E-30 | -0. 10253 | 0. 216 | 0. 582 | 2. 53E-26 | CSCL | GLTSCR2  |

|             |           |           |        |        |           |      |          |
|-------------|-----------|-----------|--------|--------|-----------|------|----------|
| ABL2. 2     | 1. 76E-30 | -0. 46945 | 0. 049 | 0. 279 | 2. 63E-26 | CSCL | ABL2     |
| CD81. 2     | 1. 82E-30 | -0. 24463 | 0. 15  | 0. 453 | 2. 73E-26 | CSCL | CD81     |
| PLIN2. 1    | 1. 86E-30 | -0. 51421 | 0. 096 | 0. 355 | 2. 78E-26 | CSCL | PLIN2    |
| MARCH2. 2   | 2. 18E-30 | -0. 36857 | 0. 028 | 0. 243 | 3. 25E-26 | CSCL | 2-Mar    |
| FAM210B. 2  | 2. 22E-30 | -0. 35337 | 0. 049 | 0. 281 | 3. 31E-26 | CSCL | FAM210B  |
| DYNC1I2. 2  | 2. 28E-30 | -0. 17112 | 0. 161 | 0. 485 | 3. 40E-26 | CSCL | DYNC1I2  |
| COX16. 1    | 2. 32E-30 | -0. 14036 | 0. 178 | 0. 517 | 3. 46E-26 | CSCL | COX16    |
| LSM2        | 2. 33E-30 | -0. 12097 | 0. 147 | 0. 463 | 3. 48E-26 | CSCL | LSM2     |
| CHMP2B. 1   | 2. 35E-30 | -0. 25919 | 0. 07  | 0. 319 | 3. 51E-26 | CSCL | CHMP2B   |
| SLA. 2      | 2. 37E-30 | -0. 75541 | 0. 012 | 0. 212 | 3. 55E-26 | CSCL | SLA      |
| APPL1. 2    | 2. 49E-30 | -0. 25968 | 0. 063 | 0. 307 | 3. 73E-26 | CSCL | APPL1    |
| FXYD6. 2    | 2. 58E-30 | 0. 802169 | 0. 525 | 0. 457 | 3. 85E-26 | CSCL | FXYD6    |
| COMMD9. 1   | 2. 67E-30 | -0. 26683 | 0. 072 | 0. 322 | 3. 99E-26 | CSCL | COMMD9   |
| GNAQ. 2     | 2. 73E-30 | -0. 24792 | 0. 058 | 0. 298 | 4. 08E-26 | CSCL | GNAQ     |
| IDI1. 2     | 2. 83E-30 | -0. 18847 | 0. 079 | 0. 337 | 4. 23E-26 | CSCL | IDI1     |
| MLX. 2      | 2. 87E-30 | -0. 32329 | 0. 066 | 0. 311 | 4. 29E-26 | CSCL | MLX      |
| LAIR1. 2    | 2. 91E-30 | -0. 74481 | 0. 03  | 0. 241 | 4. 34E-26 | CSCL | LAIR1    |
| TALDO1. 2   | 3. 20E-30 | -0. 16373 | 0. 239 | 0. 616 | 4. 78E-26 | CSCL | TALDO1   |
| NT5C3B. 1   | 3. 22E-30 | -0. 25895 | 0. 084 | 0. 344 | 4. 82E-26 | CSCL | NT5C3B   |
| C12orf75. 3 | 3. 36E-30 | -0. 53865 | 0. 007 | 0. 202 | 5. 02E-26 | CSCL | C12orf75 |
| METTL23. 1  | 3. 60E-30 | -0. 237   | 0. 077 | 0. 331 | 5. 38E-26 | CSCL | METTL23  |
| ELP5. 1     | 3. 95E-30 | -0. 2836  | 0. 047 | 0. 278 | 5. 91E-26 | CSCL | ELP5     |
| UBE2R2. 2   | 4. 02E-30 | -0. 25119 | 0. 058 | 0. 298 | 6. 01E-26 | CSCL | UBE2R2   |
| H2AFV. 2    | 4. 61E-30 | -0. 12621 | 0. 192 | 0. 539 | 6. 89E-26 | CSCL | H2AFV    |
| TOMM22. 2   | 4. 89E-30 | -0. 11791 | 0. 161 | 0. 485 | 7. 31E-26 | CSCL | TOMM22   |
| SMARCB1. 2  | 5. 22E-30 | -0. 18561 | 0. 131 | 0. 428 | 7. 80E-26 | CSCL | SMARCB1  |
| HEBP2. 2    | 5. 30E-30 | -0. 34643 | 0. 021 | 0. 229 | 7. 93E-26 | CSCL | HEBP2    |
| KPNB1. 2    | 5. 95E-30 | -0. 1867  | 0. 152 | 0. 463 | 8. 90E-26 | CSCL | KPNB1    |
| PPA1. 1     | 6. 05E-30 | -0. 12173 | 0. 195 | 0. 546 | 9. 05E-26 | CSCL | PPA1     |
| SMAP1. 2    | 6. 19E-30 | -0. 17276 | 0. 065 | 0. 309 | 9. 25E-26 | CSCL | SMAP1    |
| KLHDC3. 2   | 6. 21E-30 | -0. 13467 | 0. 101 | 0. 375 | 9. 28E-26 | CSCL | KLHDC3   |
| ALKBH7. 2   | 6. 30E-30 | -0. 1119  | 0. 164 | 0. 487 | 9. 42E-26 | CSCL | ALKBH7   |
| SNRNP70. 2  | 6. 34E-30 | -0. 17788 | 0. 166 | 0. 491 | 9. 48E-26 | CSCL | SNRNP70  |
| PVRL2. 2    | 6. 40E-30 | -0. 327   | 0. 035 | 0. 254 | 9. 56E-26 | CSCL | PVRL2    |
| ETS2. 2     | 6. 48E-30 | -0. 61998 | 0. 016 | 0. 217 | 9. 69E-26 | CSCL | ETS2     |
| TUSC2. 1    | 6. 73E-30 | -0. 17919 | 0. 087 | 0. 348 | 1. 01E-25 | CSCL | TUSC2    |
| PEBP1. 2    | 6. 92E-30 | 0. 41668  | 0. 688 | 0. 81  | 1. 03E-25 | CSCL | PEBP1    |
| FUCA1. 2    | 7. 54E-30 | -0. 4792  | 0. 023 | 0. 23  | 1. 13E-25 | CSCL | FUCA1    |
| FAM173A. 2  | 7. 81E-30 | -0. 26073 | 0. 059 | 0. 299 | 1. 17E-25 | CSCL | FAM173A  |
| SMARCE1. 1  | 8. 64E-30 | -0. 191   | 0. 112 | 0. 392 | 1. 29E-25 | CSCL | SMARCE1  |
| CELF2. 2    | 9. 08E-30 | -0. 29755 | 0. 119 | 0. 397 | 1. 36E-25 | CSCL | CELF2    |
| PRR13       | 9. 55E-30 | -0. 13439 | 0. 206 | 0. 56  | 1. 43E-25 | CSCL | PRR13    |
| ARPC5. 1    | 9. 61E-30 | -0. 18799 | 0. 281 | 0. 692 | 1. 44E-25 | CSCL | ARPC5    |
| CCNH. 2     | 1. 00E-29 | -0. 23573 | 0. 134 | 0. 426 | 1. 50E-25 | CSCL | CCNH     |
| PSMD12. 1   | 1. 19E-29 | -0. 22906 | 0. 092 | 0. 356 | 1. 77E-25 | CSCL | PSMD12   |
| TMEM176B. 1 | 1. 21E-29 | -0. 51139 | 0. 105 | 0. 365 | 1. 81E-25 | CSCL | TMEM176B |
| TGFBI. 2    | 1. 21E-29 | -0. 73336 | 0. 016 | 0. 215 | 1. 81E-25 | CSCL | TGFBI    |
| UBAC2. 1    | 1. 27E-29 | -0. 3498  | 0. 052 | 0. 282 | 1. 89E-25 | CSCL | UBAC2    |
| WTAP. 2     | 1. 27E-29 | -0. 17117 | 0. 138 | 0. 435 | 1. 89E-25 | CSCL | WTAP     |
| CYBB. 2     | 1. 31E-29 | -0. 74521 | 0. 009 | 0. 201 | 1. 96E-25 | CSCL | CYBB     |
| UBQLN1. 1   | 1. 37E-29 | -0. 25915 | 0. 058 | 0. 293 | 2. 05E-25 | CSCL | UBQLN1   |

|            |           |           |        |        |           |      |          |
|------------|-----------|-----------|--------|--------|-----------|------|----------|
| BAG6. 1    | 1. 43E-29 | -0. 22132 | 0. 086 | 0. 344 | 2. 14E-25 | CSCL | BAG6     |
| WNK1. 2    | 1. 60E-29 | -0. 26632 | 0. 056 | 0. 29  | 2. 38E-25 | CSCL | WNK1     |
| EMC6. 1    | 1. 63E-29 | -0. 1794  | 0. 143 | 0. 449 | 2. 43E-25 | CSCL | EMC6     |
| ZYX. 2     | 1. 66E-29 | -0. 17429 | 0. 127 | 0. 416 | 2. 48E-25 | CSCL | ZYX      |
| ARL4C. 2   | 1. 68E-29 | -0. 28146 | 0. 113 | 0. 392 | 2. 51E-25 | CSCL | ARL4C    |
| SPTLC2. 2  | 1. 73E-29 | -0. 61248 | 0. 019 | 0. 22  | 2. 59E-25 | CSCL | SPTLC2   |
| PTPN1. 2   | 1. 74E-29 | -0. 32282 | 0. 03  | 0. 242 | 2. 60E-25 | CSCL | PTPN1    |
| JOSD2. 1   | 1. 76E-29 | -0. 24543 | 0. 089 | 0. 347 | 2. 62E-25 | CSCL | JOSD2    |
| MTIF3. 1   | 1. 89E-29 | -0. 11694 | 0. 092 | 0. 359 | 2. 83E-25 | CSCL | MTIF3    |
| FGFR10P2.  | 2. 12E-29 | -0. 23437 | 0. 079 | 0. 33  | 3. 16E-25 | CSCL | FGFR10P2 |
| TMEM9B. 1  | 2. 16E-29 | -0. 18283 | 0. 206 | 0. 553 | 3. 22E-25 | CSCL | TMEM9B   |
| NCOA4. 2   | 2. 21E-29 | -0. 27467 | 0. 047 | 0. 274 | 3. 31E-25 | CSCL | NCOA4    |
| SAFB. 1    | 2. 51E-29 | -0. 25831 | 0. 063 | 0. 301 | 3. 75E-25 | CSCL | SAFB     |
| IL18. 2    | 2. 64E-29 | -0. 77063 | 0. 01  | 0. 202 | 3. 95E-25 | CSCL | IL18     |
| QSOX1. 2   | 2. 74E-29 | -0. 35399 | 0. 033 | 0. 247 | 4. 09E-25 | CSCL | QSOX1    |
| MCOLN1. 2  | 2. 77E-29 | -0. 35667 | 0. 037 | 0. 254 | 4. 14E-25 | CSCL | MCOLN1   |
| CAPRIN1. 2 | 2. 84E-29 | -0. 14151 | 0. 079 | 0. 332 | 4. 25E-25 | CSCL | CAPRIN1  |
| POP7. 1    | 2. 96E-29 | -0. 16411 | 0. 122 | 0. 408 | 4. 43E-25 | CSCL | POP7     |
| SQSTM1. 2  | 3. 12E-29 | -0. 14059 | 0. 202 | 0. 54  | 4. 66E-25 | CSCL | SQSTM1   |
| UROS. 2    | 3. 14E-29 | -0. 29414 | 0. 042 | 0. 263 | 4. 69E-25 | CSCL | UROS     |
| KCTD12. 2  | 3. 17E-29 | -0. 40221 | 0. 033 | 0. 247 | 4. 74E-25 | CSCL | KCTD12   |
| CYFIP1. 2  | 3. 41E-29 | -0. 33609 | 0. 061 | 0. 294 | 5. 10E-25 | CSCL | CYFIP1   |
| BAX. 2     | 3. 66E-29 | -0. 12564 | 0. 222 | 0. 583 | 5. 48E-25 | CSCL | BAX      |
| TMEM259. 2 | 3. 68E-29 | -0. 18724 | 0. 089 | 0. 348 | 5. 50E-25 | CSCL | TMEM259  |
| TPD52L2. 1 | 3. 80E-29 | -0. 1263  | 0. 082 | 0. 336 | 5. 68E-25 | CSCL | TPD52L2  |
| CSF2RA. 2  | 3. 81E-29 | -0. 75826 | 0. 016 | 0. 212 | 5. 69E-25 | CSCL | CSF2RA   |
| DDRKG1. 1  | 4. 31E-29 | -0. 15307 | 0. 136 | 0. 432 | 6. 45E-25 | CSCL | DDRKG1   |
| ANAPC16    | 4. 37E-29 | -0. 13481 | 0. 201 | 0. 542 | 6. 54E-25 | CSCL | ANAPC16  |
| CCDC112. 2 | 4. 39E-29 | -0. 30821 | 0. 047 | 0. 272 | 6. 56E-25 | CSCL | CCDC112  |
| CLEC2B. 2  | 4. 42E-29 | -0. 69551 | 0. 017 | 0. 214 | 6. 60E-25 | CSCL | CLEC2B   |
| EPC1. 2    | 4. 44E-29 | -0. 27184 | 0. 065 | 0. 303 | 6. 64E-25 | CSCL | EPC1     |
| HEXA. 1    | 4. 79E-29 | -0. 2752  | 0. 124 | 0. 403 | 7. 15E-25 | CSCL | HEXA     |
| SLTM. 2    | 5. 02E-29 | -0. 13011 | 0. 098 | 0. 362 | 7. 51E-25 | CSCL | SLTM     |
| SRSF4. 2   | 5. 19E-29 | -0. 12144 | 0. 103 | 0. 373 | 7. 76E-25 | CSCL | SRSF4    |
| H1FX. 2    | 5. 25E-29 | -0. 2691  | 0. 122 | 0. 398 | 7. 84E-25 | CSCL | H1FX     |
| WDR45B. 1  | 5. 27E-29 | -0. 19791 | 0. 129 | 0. 417 | 7. 88E-25 | CSCL | WDR45B   |
| STX7. 2    | 5. 61E-29 | -0. 35031 | 0. 052 | 0. 279 | 8. 38E-25 | CSCL | STX7     |
| PAFAH1B2.  | 5. 70E-29 | -0. 19039 | 0. 084 | 0. 338 | 8. 52E-25 | CSCL | PAFAH1B2 |
| IFNAR1. 2  | 6. 39E-29 | -0. 26652 | 0. 065 | 0. 301 | 9. 55E-25 | CSCL | IFNAR1   |
| CAST. 1    | 6. 72E-29 | -0. 16749 | 0. 08  | 0. 33  | 1. 00E-24 | CSCL | CAST     |
| STIP1      | 7. 87E-29 | -0. 11378 | 0. 11  | 0. 385 | 1. 18E-24 | CSCL | STIP1    |
| RNF213. 2  | 8. 34E-29 | -0. 32794 | 0. 049 | 0. 272 | 1. 25E-24 | CSCL | RNF213   |
| PPIF. 2    | 8. 46E-29 | -0. 40758 | 0. 026 | 0. 231 | 1. 26E-24 | CSCL | PPIF     |
| ARF6. 2    | 8. 53E-29 | -0. 20224 | 0. 096 | 0. 356 | 1. 27E-24 | CSCL | ARF6     |
| ARGLU1. 2  | 8. 60E-29 | -0. 1736  | 0. 166 | 0. 484 | 1. 29E-24 | CSCL | ARGLU1   |
| NRBF2. 2   | 9. 17E-29 | -0. 25156 | 0. 054 | 0. 283 | 1. 37E-24 | CSCL | NRBF2    |
| NUDT14. 2  | 9. 70E-29 | -0. 50837 | 0. 01  | 0. 201 | 1. 45E-24 | CSCL | NUDT14   |
| SNX17      | 9. 88E-29 | -0. 16252 | 0. 157 | 0. 465 | 1. 48E-24 | CSCL | SNX17    |
| RNF145. 2  | 1. 04E-28 | -0. 23425 | 0. 115 | 0. 391 | 1. 55E-24 | CSCL | RNF145   |
| FCGBP. 2   | 1. 10E-28 | -0. 80423 | 0. 035 | 0. 239 | 1. 65E-24 | CSCL | FCGBP    |
| MPP1. 2    | 1. 15E-28 | -0. 52131 | 0. 016 | 0. 21  | 1. 72E-24 | CSCL | MPP1     |

|            |           |           |        |        |                |               |
|------------|-----------|-----------|--------|--------|----------------|---------------|
| IQGAP1. 2  | 1. 18E-28 | -0. 26312 | 0. 044 | 0. 263 | 1. 77E-24 CSCL | IQGAP1        |
| RHOT1. 2   | 1. 20E-28 | -0. 27659 | 0. 042 | 0. 259 | 1. 79E-24 CSCL | RHOT1         |
| DNASE2. 2  | 1. 22E-28 | -0. 22183 | 0. 12  | 0. 397 | 1. 82E-24 CSCL | DNASE2        |
| UFD1L. 2   | 1. 37E-28 | -0. 13594 | 0. 087 | 0. 343 | 2. 04E-24 CSCL | UFD1L         |
| GLRX3. 1   | 1. 37E-28 | -0. 24862 | 0. 073 | 0. 316 | 2. 05E-24 CSCL | GLRX3         |
| SCARB2. 2  | 1. 45E-28 | -0. 18775 | 0. 119 | 0. 395 | 2. 16E-24 CSCL | SCARB2        |
| NOP10. 2   | 1. 47E-28 | -0. 18083 | 0. 248 | 0. 625 | 2. 20E-24 CSCL | NOP10         |
| WAS. 2     | 1. 48E-28 | -0. 702   | 0. 002 | 0. 183 | 2. 21E-24 CSCL | WAS           |
| C1orf54. 2 | 1. 50E-28 | -0. 4956  | 0. 03  | 0. 236 | 2. 25E-24 CSCL | C1orf54       |
| SLC7A7. 2  | 1. 50E-28 | -0. 74076 | 0. 002 | 0. 183 | 2. 25E-24 CSCL | SLC7A7        |
| HMGB1      | 1. 51E-28 | 0. 330759 | 0. 728 | 0. 868 | 2. 25E-24 CSCL | HMGB1         |
| TMEM50A. 2 | 1. 55E-28 | -0. 13166 | 0. 237 | 0. 61  | 2. 32E-24 CSCL | TMEM50A       |
| ACADVL. 1  | 1. 59E-28 | -0. 10343 | 0. 155 | 0. 466 | 2. 37E-24 CSCL | ACADVL        |
| SNF8. 2    | 1. 63E-28 | -0. 14538 | 0. 162 | 0. 475 | 2. 43E-24 CSCL | SNF8          |
| ARID5A     | 1. 70E-28 | -0. 29384 | 0. 066 | 0. 301 | 2. 54E-24 CSCL | ARID5A        |
| PFKFB3. 2  | 1. 70E-28 | -0. 45677 | 0. 042 | 0. 254 | 2. 54E-24 CSCL | PFKFB3        |
| MGAT4A. 2  | 1. 71E-28 | -0. 58985 | 0. 028 | 0. 23  | 2. 56E-24 CSCL | MGAT4A        |
| BAZ1B. 2   | 1. 72E-28 | -0. 23988 | 0. 07  | 0. 31  | 2. 57E-24 CSCL | BAZ1B         |
| PRRC2C. 2  | 1. 93E-28 | -0. 11739 | 0. 175 | 0. 498 | 2. 89E-24 CSCL | PRRC2C        |
| RRBP1. 2   | 1. 96E-28 | -0. 26097 | 0. 07  | 0. 308 | 2. 93E-24 CSCL | RRBP1         |
| BLOC1S2. 1 | 1. 97E-28 | -0. 148   | 0. 11  | 0. 382 | 2. 95E-24 CSCL | BLOC1S2       |
| CCDC88A. 2 | 2. 08E-28 | -0. 17581 | 0. 14  | 0. 43  | 3. 11E-24 CSCL | CCDC88A       |
| MANF. 2    | 2. 08E-28 | -0. 19837 | 0. 161 | 0. 466 | 3. 11E-24 CSCL | MANF          |
| MAP3K8. 2  | 2. 13E-28 | -0. 68611 | 0. 007 | 0. 192 | 3. 19E-24 CSCL | MAP3K8        |
| GGNBP2     | 2. 19E-28 | -0. 2013  | 0. 126 | 0. 404 | 3. 28E-24 CSCL | GGNBP2        |
| FSCN1. 2   | 2. 25E-28 | -0. 19735 | 0. 192 | 0. 52  | 3. 37E-24 CSCL | FSCN1         |
| VOPP1. 1   | 2. 52E-28 | -0. 29949 | 0. 068 | 0. 302 | 3. 76E-24 CSCL | VOPP1         |
| TRPC4AP. 2 | 2. 82E-28 | -0. 26543 | 0. 044 | 0. 261 | 4. 21E-24 CSCL | TRPC4AP       |
| EWSR1. 1   | 2. 85E-28 | -0. 13989 | 0. 168 | 0. 48  | 4. 26E-24 CSCL | EWSR1         |
| RABEP1. 2  | 2. 88E-28 | -0. 2751  | 0. 045 | 0. 263 | 4. 30E-24 CSCL | RABEP1        |
| FAM195A. 2 | 2. 93E-28 | -0. 23001 | 0. 045 | 0. 265 | 4. 37E-24 CSCL | FAM195A       |
| SAMHD1. 2  | 2. 94E-28 | -0. 48505 | 0. 024 | 0. 224 | 4. 40E-24 CSCL | SAMHD1        |
| NARF       | 3. 14E-28 | -0. 238   | 0. 089 | 0. 342 | 4. 70E-24 CSCL | NARF          |
| MBOAT7. 2  | 3. 53E-28 | -0. 24035 | 0. 04  | 0. 253 | 5. 27E-24 CSCL | MBOAT7        |
| SHARPIN. 2 | 3. 59E-28 | -0. 20219 | 0. 073 | 0. 313 | 5. 37E-24 CSCL | SHARPIN       |
| GLRX. 1    | 3. 77E-28 | -0. 29328 | 0. 127 | 0. 402 | 5. 63E-24 CSCL | GLRX          |
| PARL. 2    | 3. 78E-28 | -0. 19494 | 0. 094 | 0. 35  | 5. 65E-24 CSCL | PARL          |
| ATP6V1A. 2 | 3. 82E-28 | -0. 35631 | 0. 016 | 0. 208 | 5. 71E-24 CSCL | ATP6V1A       |
| ARRDC3     | 4. 03E-28 | -0. 27747 | 0. 073 | 0. 313 | 6. 02E-24 CSCL | ARRDC3        |
| FMNL2. 2   | 4. 16E-28 | -0. 31203 | 0. 052 | 0. 276 | 6. 22E-24 CSCL | FMNL2         |
| RNPEP. 2   | 4. 29E-28 | -0. 35809 | 0. 03  | 0. 234 | 6. 40E-24 CSCL | RNPEP         |
| UBXN1. 2   | 4. 49E-28 | -0. 13273 | 0. 257 | 0. 639 | 6. 70E-24 CSCL | UBXN1         |
| RP11-345J  | 4. 82E-28 | -0. 20575 | 0. 035 | 0. 245 | 7. 20E-24 CSCL | RP11-345J4. 5 |
| DNMT1. 2   | 4. 89E-28 | -0. 18117 | 0. 065 | 0. 297 | 7. 30E-24 CSCL | DNMT1         |
| USB1. 1    | 4. 93E-28 | -0. 3357  | 0. 033 | 0. 24  | 7. 36E-24 CSCL | USB1          |
| PDCD10. 1  | 5. 04E-28 | -0. 21609 | 0. 063 | 0. 294 | 7. 53E-24 CSCL | PDCD10        |
| ELOVL5     | 5. 15E-28 | -0. 25488 | 0. 087 | 0. 336 | 7. 70E-24 CSCL | ELOVL5        |
| RRAGA. 1   | 5. 22E-28 | -0. 18626 | 0. 126 | 0. 402 | 7. 80E-24 CSCL | RRAGA         |
| PLK3. 2    | 6. 14E-28 | -0. 48813 | 0. 042 | 0. 251 | 9. 17E-24 CSCL | PLK3          |
| NFE2L2. 1  | 6. 23E-28 | -0. 13804 | 0. 171 | 0. 483 | 9. 31E-24 CSCL | NFE2L2        |
| YWHAG. 2   | 6. 39E-28 | -0. 11114 | 0. 124 | 0. 404 | 9. 55E-24 CSCL | YWHAG         |

|            |           |           |        |        |           |      |          |
|------------|-----------|-----------|--------|--------|-----------|------|----------|
| TMX4. 1    | 6. 72E-28 | -0. 26971 | 0. 042 | 0. 256 | 1. 00E-23 | CSCL | TMX4     |
| NSA2. 2    | 7. 21E-28 | -0. 11807 | 0. 129 | 0. 412 | 1. 08E-23 | CSCL | NSA2     |
| CSRP1. 1   | 7. 29E-28 | -0. 34137 | 0. 038 | 0. 248 | 1. 09E-23 | CSCL | CSRP1    |
| S100A8. 2  | 7. 54E-28 | -0. 88532 | 0. 01  | 0. 194 | 1. 13E-23 | CSCL | S100A8   |
| TAF10. 2   | 7. 99E-28 | -0. 30782 | 0. 031 | 0. 236 | 1. 19E-23 | CSCL | TAF10    |
| CCDC47. 2  | 8. 07E-28 | -0. 15024 | 0. 133 | 0. 419 | 1. 21E-23 | CSCL | CCDC47   |
| AP2B1. 1   | 8. 31E-28 | -0. 2161  | 0. 096 | 0. 353 | 1. 24E-23 | CSCL | AP2B1    |
| PPP1R7     | 8. 64E-28 | -0. 13217 | 0. 103 | 0. 366 | 1. 29E-23 | CSCL | PPP1R7   |
| HOMER3. 2  | 9. 02E-28 | -0. 25555 | 0. 04  | 0. 252 | 1. 35E-23 | CSCL | HOMER3   |
| MNDA. 2    | 9. 10E-28 | -0. 71781 | 0. 005 | 0. 186 | 1. 36E-23 | CSCL | MNDA     |
| STARD3     | 9. 69E-28 | -0. 30714 | 0. 049 | 0. 266 | 1. 45E-23 | CSCL | STARD3   |
| WIPF1. 2   | 1. 05E-27 | -0. 45381 | 0. 03  | 0. 229 | 1. 57E-23 | CSCL | WIPF1    |
| CEP170. 2  | 1. 05E-27 | -0. 27451 | 0. 052 | 0. 272 | 1. 57E-23 | CSCL | CEP170   |
| NRP2. 2    | 1. 08E-27 | -0. 3193  | 0. 03  | 0. 231 | 1. 61E-23 | CSCL | NRP2     |
| AGPAT2. 2  | 1. 13E-27 | -0. 46762 | 0. 007 | 0. 188 | 1. 70E-23 | CSCL | AGPAT2   |
| COX6B1. 2  | 1. 16E-27 | 0. 43803  | 0. 688 | 0. 854 | 1. 73E-23 | CSCL | COX6B1   |
| WASF2. 2   | 1. 22E-27 | -0. 10518 | 0. 155 | 0. 453 | 1. 82E-23 | CSCL | WASF2    |
| POLDIP2. 2 | 1. 24E-27 | -0. 14689 | 0. 099 | 0. 36  | 1. 86E-23 | CSCL | POLDIP2  |
| NDFIP1. 2  | 1. 25E-27 | -0. 18098 | 0. 243 | 0. 62  | 1. 86E-23 | CSCL | NDFIP1   |
| NEK6. 1    | 1. 25E-27 | -0. 23115 | 0. 068 | 0. 301 | 1. 87E-23 | CSCL | NEK6     |
| RTN4. 2    | 1. 27E-27 | -0. 25211 | 0. 309 | 0. 72  | 1. 89E-23 | CSCL | RTN4     |
| ETF1. 1    | 1. 35E-27 | -0. 21341 | 0. 101 | 0. 358 | 2. 01E-23 | CSCL | ETF1     |
| CISD2. 1   | 1. 46E-27 | -0. 13665 | 0. 134 | 0. 418 | 2. 19E-23 | CSCL | CISD2    |
| ADRM1      | 1. 51E-27 | -0. 12584 | 0. 195 | 0. 525 | 2. 25E-23 | CSCL | ADRM1    |
| FYTTD1. 1  | 1. 57E-27 | -0. 19689 | 0. 068 | 0. 3   | 2. 34E-23 | CSCL | FYTTD1   |
| XRCC5. 2   | 1. 57E-27 | -0. 15532 | 0. 227 | 0. 578 | 2. 35E-23 | CSCL | XRCC5    |
| CYTH2. 2   | 1. 64E-27 | -0. 14866 | 0. 098 | 0. 354 | 2. 46E-23 | CSCL | CYTH2    |
| POLR1D. 1  | 1. 67E-27 | -0. 10079 | 0. 14  | 0. 429 | 2. 50E-23 | CSCL | POLR1D   |
| PDCD6IP    | 1. 68E-27 | -0. 23024 | 0. 068 | 0. 3   | 2. 51E-23 | CSCL | PDCD6IP  |
| HINT1. 1   | 1. 69E-27 | 0. 400173 | 0. 686 | 0. 835 | 2. 53E-23 | CSCL | HINT1    |
| FGD5-AS1.  | 1. 69E-27 | -0. 20179 | 0. 082 | 0. 324 | 2. 53E-23 | CSCL | FGD5-AS1 |
| HSD17B11.  | 1. 79E-27 | -0. 3294  | 0. 124 | 0. 39  | 2. 68E-23 | CSCL | HSD17B11 |
| CTSB       | 1. 85E-27 | -0. 31727 | 0. 37  | 0. 776 | 2. 77E-23 | CSCL | CTSB     |
| NRBP1      | 1. 90E-27 | -0. 17259 | 0. 098 | 0. 353 | 2. 83E-23 | CSCL | NRBP1    |
| ACAT2. 2   | 1. 91E-27 | -0. 16255 | 0. 061 | 0. 289 | 2. 86E-23 | CSCL | ACAT2    |
| GPR137B. 2 | 1. 97E-27 | -0. 27989 | 0. 035 | 0. 239 | 2. 94E-23 | CSCL | GPR137B  |
| BECN1. 1   | 2. 02E-27 | -0. 27798 | 0. 035 | 0. 24  | 3. 02E-23 | CSCL | BECN1    |
| RTF1. 2    | 2. 03E-27 | -0. 1074  | 0. 148 | 0. 445 | 3. 04E-23 | CSCL | RTF1     |
| FOLR2. 2   | 2. 16E-27 | -0. 89059 | 0. 007 | 0. 186 | 3. 23E-23 | CSCL | FOLR2    |
| SH3BP5. 2  | 2. 18E-27 | -0. 39854 | 0. 019 | 0. 21  | 3. 26E-23 | CSCL | SH3BP5   |
| UNC93B1. 2 | 2. 21E-27 | -0. 4041  | 0. 019 | 0. 21  | 3. 31E-23 | CSCL | UNC93B1  |
| THOP1. 1   | 2. 22E-27 | -0. 26383 | 0. 019 | 0. 211 | 3. 32E-23 | CSCL | THOP1    |
| SLC43A2. 2 | 2. 31E-27 | -0. 42462 | 0. 045 | 0. 256 | 3. 46E-23 | CSCL | SLC43A2  |
| LTC4S. 2   | 2. 32E-27 | -0. 67641 | 0. 002 | 0. 177 | 3. 47E-23 | CSCL | LTC4S    |
| USP14. 1   | 2. 36E-27 | -0. 22998 | 0. 051 | 0. 268 | 3. 53E-23 | CSCL | USP14    |
| RAB14      | 2. 48E-27 | -0. 14785 | 0. 141 | 0. 431 | 3. 70E-23 | CSCL | RAB14    |
| PTS. 1     | 2. 60E-27 | -0. 11782 | 0. 089 | 0. 339 | 3. 89E-23 | CSCL | PTS      |
| CRYL1      | 2. 66E-27 | -0. 27263 | 0. 082 | 0. 321 | 3. 97E-23 | CSCL | CRYL1    |
| BTG3. 1    | 2. 67E-27 | -0. 21466 | 0. 119 | 0. 384 | 3. 99E-23 | CSCL | BTG3     |
| CELF1. 2   | 2. 74E-27 | -0. 21131 | 0. 08  | 0. 319 | 4. 10E-23 | CSCL | CELF1    |
| PTBP1. 2   | 2. 98E-27 | -0. 12019 | 0. 087 | 0. 335 | 4. 46E-23 | CSCL | PTBP1    |

|            |          |          |       |       |          |      |          |
|------------|----------|----------|-------|-------|----------|------|----------|
| ZDHC12.2   | 3.15E-27 | -0.24959 | 0.052 | 0.271 | 4.71E-23 | CSCL | ZDHC12   |
| IFNAR2.2   | 3.18E-27 | -0.36971 | 0.019 | 0.209 | 4.75E-23 | CSCL | IFNAR2   |
| TP53I13.2  | 3.33E-27 | -0.28058 | 0.044 | 0.255 | 4.98E-23 | CSCL | TP53I13  |
| UBE2F.1    | 3.36E-27 | -0.18962 | 0.092 | 0.342 | 5.01E-23 | CSCL | UBE2F    |
| BIRC2.1    | 3.39E-27 | -0.2003  | 0.065 | 0.292 | 5.06E-23 | CSCL | BIRC2    |
| TMUB1.1    | 3.40E-27 | -0.22144 | 0.056 | 0.277 | 5.08E-23 | CSCL | TMUB1    |
| MSR1.2     | 3.53E-27 | -0.69308 | 0.009 | 0.189 | 5.27E-23 | CSCL | MSR1     |
| PDCD2.2    | 3.57E-27 | -0.14841 | 0.072 | 0.306 | 5.34E-23 | CSCL | PDCD2    |
| SLC35B2.1  | 3.62E-27 | -0.2204  | 0.075 | 0.312 | 5.41E-23 | CSCL | SLC35B2  |
| MFS10.1    | 3.91E-27 | -0.22166 | 0.077 | 0.313 | 5.84E-23 | CSCL | MFS10    |
| GNA13.2    | 4.00E-27 | -0.49608 | 0.009 | 0.189 | 5.98E-23 | CSCL | GNA13    |
| TCP1       | 4.19E-27 | -0.15101 | 0.204 | 0.539 | 6.25E-23 | CSCL | TCP1     |
| CLEC7A.2   | 4.19E-27 | -0.71298 | 0.007 | 0.184 | 6.26E-23 | CSCL | CLEC7A   |
| OSTM1.2    | 4.19E-27 | -0.25299 | 0.035 | 0.238 | 6.26E-23 | CSCL | OSTM1    |
| FABP5.2    | 4.20E-27 | 0.949157 | 0.485 | 0.387 | 6.28E-23 | CSCL | FABP5    |
| KARS.1     | 4.33E-27 | -0.19032 | 0.119 | 0.387 | 6.47E-23 | CSCL | KARS     |
| TOR1A.2    | 4.50E-27 | -0.2656  | 0.054 | 0.272 | 6.73E-23 | CSCL | TOR1A    |
| GOLGB1.1   | 4.60E-27 | -0.32934 | 0.042 | 0.25  | 6.87E-23 | CSCL | GOLGB1   |
| CD302.2    | 4.60E-27 | -0.54039 | 0.023 | 0.214 | 6.88E-23 | CSCL | CD302    |
| PDCD6.1    | 4.66E-27 | -0.11494 | 0.208 | 0.551 | 6.97E-23 | CSCL | PDCD6    |
| SIGIRR.2   | 4.68E-27 | -0.38369 | 0.017 | 0.205 | 7.00E-23 | CSCL | SIGIRR   |
| CTNNB1.2   | 4.76E-27 | -0.26517 | 0.112 | 0.367 | 7.11E-23 | CSCL | CTNNB1   |
| TMEM248.1  | 4.82E-27 | -0.18463 | 0.073 | 0.307 | 7.21E-23 | CSCL | TMEM248  |
| HNRNP3.2   | 5.29E-27 | -0.12293 | 0.159 | 0.46  | 7.91E-23 | CSCL | HNRNP3   |
| SVIP.2     | 5.37E-27 | -0.58999 | 0.003 | 0.178 | 8.03E-23 | CSCL | SVIP     |
| HNRNPA0.2  | 5.38E-27 | -0.14439 | 0.271 | 0.661 | 8.04E-23 | CSCL | HNRNPA0  |
| NR4A1.2    | 5.46E-27 | -0.50125 | 0.065 | 0.283 | 8.16E-23 | CSCL | NR4A1    |
| SLC52A2.1  | 5.56E-27 | -0.22722 | 0.065 | 0.291 | 8.30E-23 | CSCL | SLC52A2  |
| CLIC1      | 5.59E-27 | -0.24286 | 0.271 | 0.641 | 8.35E-23 | CSCL | CLIC1    |
| TIMP1.2    | 6.00E-27 | 0.584599 | 0.62  | 0.62  | 8.96E-23 | CSCL | TIMP1    |
| PLEK.2     | 6.18E-27 | -0.72546 | 0.007 | 0.184 | 9.23E-23 | CSCL | PLEK     |
| SCO2.2     | 6.72E-27 | -0.3189  | 0.026 | 0.221 | 1.00E-22 | CSCL | SCO2     |
| HPCAL1.2   | 6.89E-27 | -0.34792 | 0.026 | 0.219 | 1.03E-22 | CSCL | HPCAL1   |
| PTPN6.2    | 7.19E-27 | -0.67486 | 0     | 0.17  | 1.07E-22 | CSCL | PTPN6    |
| TAX1BP3.1  | 7.25E-27 | -0.13758 | 0.126 | 0.395 | 1.08E-22 | CSCL | TAX1BP3  |
| MZT2A.1    | 7.34E-27 | -0.10798 | 0.141 | 0.428 | 1.10E-22 | CSCL | MZT2A    |
| HNRNPD.2   | 7.58E-27 | -0.15221 | 0.141 | 0.428 | 1.13E-22 | CSCL | HNRNPD   |
| NIPA2.2    | 7.73E-27 | -0.18267 | 0.056 | 0.275 | 1.15E-22 | CSCL | NIPA2    |
| NME3.2     | 7.73E-27 | -0.16325 | 0.145 | 0.431 | 1.16E-22 | CSCL | NME3     |
| TMED2.1    | 8.18E-27 | -0.14813 | 0.257 | 0.63  | 1.22E-22 | CSCL | TMED2    |
| VIMP.1     | 8.38E-27 | -0.14465 | 0.168 | 0.471 | 1.25E-22 | CSCL | VIMP     |
| EIF4EBP1.1 | 8.50E-27 | -0.1546  | 0.15  | 0.441 | 1.27E-22 | CSCL | EIF4EBP1 |
| ITFG1.2    | 8.69E-27 | -0.20692 | 0.105 | 0.361 | 1.30E-22 | CSCL | ITFG1    |
| TPP1.2     | 8.98E-27 | -0.28619 | 0.092 | 0.335 | 1.34E-22 | CSCL | TPP1     |
| IVNS1ABP.1 | 9.12E-27 | -0.37855 | 0.042 | 0.248 | 1.36E-22 | CSCL | IVNS1ABP |
| GPX1.2     | 9.72E-27 | -0.29228 | 0.396 | 0.835 | 1.45E-22 | CSCL | GPX1     |
| GHITM.1    | 9.72E-27 | -0.12057 | 0.208 | 0.539 | 1.45E-22 | CSCL | GHITM    |
| UBL5.1     | 1.10E-26 | 0.419513 | 0.684 | 0.839 | 1.65E-22 | CSCL | UBL5     |
| IFT27.2    | 1.17E-26 | -0.25804 | 0.052 | 0.267 | 1.74E-22 | CSCL | IFT27    |
| GINM1      | 1.22E-26 | -0.16868 | 0.075 | 0.308 | 1.82E-22 | CSCL | GINM1    |
| SCAF11.2   | 1.22E-26 | -0.15122 | 0.133 | 0.41  | 1.82E-22 | CSCL | SCAF11   |

|            |           |           |        |        |                |         |
|------------|-----------|-----------|--------|--------|----------------|---------|
| YIF1B      | 1. 22E-26 | -0. 16345 | 0. 096 | 0. 345 | 1. 83E-22 CSCL | YIF1B   |
| IL10RB. 2  | 1. 27E-26 | -0. 36057 | 0. 045 | 0. 253 | 1. 90E-22 CSCL | IL10RB  |
| SLC31A2. 2 | 1. 29E-26 | -0. 56428 | 0. 017 | 0. 201 | 1. 92E-22 CSCL | SLC31A2 |
| C1orf35. 1 | 1. 30E-26 | -0. 20347 | 0. 056 | 0. 274 | 1. 94E-22 CSCL | C1orf35 |
| SSRP1. 1   | 1. 31E-26 | -0. 12503 | 0. 108 | 0. 367 | 1. 95E-22 CSCL | SSRP1   |
| HCK. 2     | 1. 34E-26 | -0. 65836 | 0. 003 | 0. 176 | 2. 01E-22 CSCL | HCK     |
| NT5C. 2    | 1. 38E-26 | -0. 18386 | 0. 089 | 0. 332 | 2. 06E-22 CSCL | NT5C    |
| ARMC10. 1  | 1. 43E-26 | -0. 13824 | 0. 075 | 0. 308 | 2. 13E-22 CSCL | ARMC10  |
| CHD2. 2    | 1. 51E-26 | -0. 22835 | 0. 073 | 0. 303 | 2. 25E-22 CSCL | CHD2    |
| MGST2. 2   | 1. 51E-26 | -0. 44212 | 0. 052 | 0. 264 | 2. 26E-22 CSCL | MGST2   |
| UBE3A. 2   | 1. 52E-26 | -0. 21076 | 0. 07  | 0. 298 | 2. 26E-22 CSCL | UBE3A   |
| HBEGF. 2   | 1. 52E-26 | -0. 54856 | 0. 031 | 0. 225 | 2. 28E-22 CSCL | HBEGF   |
| MAP2K3. 2  | 1. 56E-26 | -0. 41616 | 0. 016 | 0. 198 | 2. 34E-22 CSCL | MAP2K3  |
| FAM26F. 2  | 1. 63E-26 | -0. 63951 | 0. 003 | 0. 175 | 2. 44E-22 CSCL | FAM26F  |
| DDX17. 2   | 1. 65E-26 | -0. 15706 | 0. 15  | 0. 438 | 2. 46E-22 CSCL | DDX17   |
| SRSF6. 2   | 1. 66E-26 | -0. 16385 | 0. 112 | 0. 372 | 2. 48E-22 CSCL | SRSF6   |
| MINOS1. 1  | 1. 71E-26 | -0. 12253 | 0. 271 | 0. 658 | 2. 56E-22 CSCL | MINOS1  |
| STXBP2. 2  | 1. 82E-26 | -0. 62965 | 0. 007 | 0. 181 | 2. 72E-22 CSCL | STXBP2  |
| RBBP6. 1   | 1. 88E-26 | -0. 18446 | 0. 086 | 0. 325 | 2. 81E-22 CSCL | RBBP6   |
| FAM89B. 2  | 1. 95E-26 | -0. 24553 | 0. 047 | 0. 257 | 2. 92E-22 CSCL | FAM89B  |
| BRD4. 1    | 1. 98E-26 | -0. 12666 | 0. 092 | 0. 339 | 2. 96E-22 CSCL | BRD4    |
| FERMT3. 2  | 2. 03E-26 | -0. 63809 | 0. 003 | 0. 175 | 3. 03E-22 CSCL | FERMT3  |
| UBE2J1. 2  | 2. 04E-26 | -0. 18894 | 0. 066 | 0. 292 | 3. 05E-22 CSCL | UBE2J1  |
| IKBIP. 1   | 2. 06E-26 | -0. 38864 | 0. 037 | 0. 236 | 3. 08E-22 CSCL | IKBIP   |
| C5orf24. 1 | 2. 14E-26 | -0. 16614 | 0. 075 | 0. 307 | 3. 20E-22 CSCL | C5orf24 |
| FAM105A. 2 | 2. 17E-26 | -0. 66768 | 0. 002 | 0. 171 | 3. 24E-22 CSCL | FAM105A |
| OGFRL1. 2  | 2. 20E-26 | -0. 52223 | 0. 012 | 0. 19  | 3. 29E-22 CSCL | OGFRL1  |
| UBE2K      | 2. 26E-26 | -0. 13728 | 0. 077 | 0. 31  | 3. 38E-22 CSCL | UBE2K   |
| SCAND1. 2  | 2. 28E-26 | -0. 15476 | 0. 234 | 0. 588 | 3. 40E-22 CSCL | SCAND1  |
| DNAJA1     | 2. 37E-26 | -0. 1447  | 0. 267 | 0. 647 | 3. 54E-22 CSCL | DNAJA1  |
| RDX. 1     | 2. 45E-26 | -0. 16161 | 0. 19  | 0. 506 | 3. 67E-22 CSCL | RDX     |
| MEF2A. 2   | 2. 46E-26 | -0. 46003 | 0. 031 | 0. 225 | 3. 68E-22 CSCL | MEF2A   |
| ATF6. 2    | 2. 51E-26 | -0. 2699  | 0. 049 | 0. 259 | 3. 75E-22 CSCL | ATF6    |
| ITGAV. 2   | 2. 57E-26 | -0. 21957 | 0. 066 | 0. 289 | 3. 84E-22 CSCL | ITGAV   |
| CDIPT. 1   | 2. 69E-26 | -0. 15763 | 0. 07  | 0. 297 | 4. 02E-22 CSCL | CDIPT   |
| TM7SF3. 2  | 3. 48E-26 | -0. 21059 | 0. 051 | 0. 261 | 5. 20E-22 CSCL | TM7SF3  |
| NQO2. 1    | 3. 48E-26 | -0. 27587 | 0. 052 | 0. 263 | 5. 21E-22 CSCL | NQO2    |
| EPN1. 2    | 3. 64E-26 | -0. 1284  | 0. 098 | 0. 347 | 5. 43E-22 CSCL | EPN1    |
| ORMDL2     | 3. 87E-26 | -0. 3329  | 0. 065 | 0. 283 | 5. 78E-22 CSCL | ORMDL2  |
| CHMP3. 1   | 3. 97E-26 | -0. 12858 | 0. 124 | 0. 392 | 5. 93E-22 CSCL | CHMP3   |
| ROGDI. 2   | 4. 04E-26 | -0. 3113  | 0. 038 | 0. 237 | 6. 03E-22 CSCL | ROGDI   |
| RHBDF2. 2  | 4. 20E-26 | -0. 60629 | 0. 01  | 0. 186 | 6. 27E-22 CSCL | RHBDF2  |
| TIMM10. 1  | 4. 24E-26 | -0. 10606 | 0. 11  | 0. 366 | 6. 34E-22 CSCL | TIMM10  |
| RPN1. 1    | 4. 43E-26 | -0. 14597 | 0. 143 | 0. 423 | 6. 61E-22 CSCL | RPN1    |
| ZNF207     | 4. 43E-26 | -0. 14626 | 0. 169 | 0. 47  | 6. 62E-22 CSCL | ZNF207  |
| LPAR6. 2   | 4. 44E-26 | -0. 47207 | 0. 045 | 0. 248 | 6. 63E-22 CSCL | LPAR6   |
| TUBB4B. 1  | 4. 45E-26 | -0. 17206 | 0. 192 | 0. 507 | 6. 66E-22 CSCL | TUBB4B  |
| CMTM7. 2   | 4. 49E-26 | -0. 56921 | 0. 003 | 0. 172 | 6. 71E-22 CSCL | CMTM7   |
| CAPNS1. 1  | 4. 49E-26 | -0. 15109 | 0. 101 | 0. 352 | 6. 71E-22 CSCL | CAPNS1  |
| NUDT5. 1   | 4. 65E-26 | -0. 11049 | 0. 082 | 0. 318 | 6. 94E-22 CSCL | NUDT5   |
| SAFB2. 1   | 4. 65E-26 | -0. 20114 | 0. 098 | 0. 343 | 6. 95E-22 CSCL | SAFB2   |

|            |          |          |       |       |          |      |          |
|------------|----------|----------|-------|-------|----------|------|----------|
| BLOC1S6.1  | 4.65E-26 | -0.2206  | 0.056 | 0.27  | 6.95E-22 | CSCL | BLOC1S6  |
| RAB7A.1    | 4.79E-26 | -0.11425 | 0.279 | 0.678 | 7.16E-22 | CSCL | RAB7A    |
| FGL2.2     | 4.80E-26 | -0.67676 | 0.01  | 0.185 | 7.18E-22 | CSCL | FGL2     |
| CFLAR.1    | 4.90E-26 | -0.25266 | 0.092 | 0.33  | 7.32E-22 | CSCL | CFLAR    |
| CD58.2     | 4.90E-26 | -0.33435 | 0.038 | 0.237 | 7.32E-22 | CSCL | CD58     |
| TNFRSF1B.5 | 5.00E-26 | -0.57661 | 0.017 | 0.197 | 7.47E-22 | CSCL | TNFRSF1B |
| RNF10.1    | 5.23E-26 | -0.10933 | 0.098 | 0.344 | 7.82E-22 | CSCL | RNF10    |
| UPP1.2     | 5.30E-26 | -0.30621 | 0.054 | 0.265 | 7.92E-22 | CSCL | UPP1     |
| TMEM33.2   | 5.44E-26 | -0.25083 | 0.072 | 0.296 | 8.13E-22 | CSCL | TMEM33   |
| DTD1.2     | 5.50E-26 | -0.12312 | 0.133 | 0.405 | 8.23E-22 | CSCL | DTD1     |
| YME1L1.1   | 5.64E-26 | -0.22864 | 0.058 | 0.271 | 8.42E-22 | CSCL | YME1L1   |
| NTAN1.2    | 5.82E-26 | -0.32065 | 0.023 | 0.209 | 8.70E-22 | CSCL | NTAN1    |
| MBNL1.2    | 6.26E-26 | -0.35669 | 0.037 | 0.233 | 9.36E-22 | CSCL | MBNL1    |
| PDK4.2     | 6.53E-26 | -0.69563 | 0.007 | 0.178 | 9.76E-22 | CSCL | PDK4     |
| CCM2.2     | 6.56E-26 | -0.16751 | 0.07  | 0.295 | 9.80E-22 | CSCL | CCM2     |
| DYNLL1.1   | 6.87E-26 | 0.344622 | 0.695 | 0.843 | 1.03E-21 | CSCL | DYNLL1   |
| DNM2.2     | 7.32E-26 | -0.25717 | 0.047 | 0.252 | 1.09E-21 | CSCL | DNM2     |
| GALNT1.2   | 7.38E-26 | -0.32163 | 0.026 | 0.215 | 1.10E-21 | CSCL | GALNT1   |
| PPP2R5E.2  | 7.43E-26 | -0.2183  | 0.049 | 0.257 | 1.11E-21 | CSCL | PPP2R5E  |
| ATG4B      | 7.88E-26 | -0.22697 | 0.066 | 0.287 | 1.18E-21 | CSCL | ATG4B    |
| DDX41.1    | 8.19E-26 | -0.22514 | 0.047 | 0.253 | 1.22E-21 | CSCL | DDX41    |
| MVP        | 8.37E-26 | -0.34686 | 0.038 | 0.235 | 1.25E-21 | CSCL | MVP      |
| RBM42.1    | 8.51E-26 | -0.11398 | 0.129 | 0.399 | 1.27E-21 | CSCL | RBM42    |
| BCL7B.2    | 8.62E-26 | -0.1658  | 0.092 | 0.334 | 1.29E-21 | CSCL | BCL7B    |
| E2F4.2     | 8.90E-26 | -0.27527 | 0.031 | 0.223 | 1.33E-21 | CSCL | E2F4     |
| AATF       | 8.94E-26 | -0.18172 | 0.075 | 0.302 | 1.34E-21 | CSCL | AATF     |
| NCOR1.2    | 9.07E-26 | -0.11084 | 0.175 | 0.479 | 1.35E-21 | CSCL | NCOR1    |
| NUFIP2.2   | 9.14E-26 | -0.21454 | 0.044 | 0.246 | 1.37E-21 | CSCL | NUFIP2   |
| LGMN.2     | 9.24E-26 | -0.23285 | 0.113 | 0.363 | 1.38E-21 | CSCL | LGMN     |
| RNASEH2B.9 | 9.68E-26 | -0.23891 | 0.045 | 0.249 | 1.45E-21 | CSCL | RNASEH2B |
| EIF2S1     | 9.78E-26 | -0.12438 | 0.091 | 0.331 | 1.46E-21 | CSCL | EIF2S1   |
| LLPH.1     | 1.02E-25 | -0.1632  | 0.061 | 0.279 | 1.52E-21 | CSCL | LLPH     |
| GPCPD1.2   | 1.03E-25 | -0.35124 | 0.023 | 0.207 | 1.55E-21 | CSCL | GPCPD1   |
| LARP7.1    | 1.04E-25 | -0.15133 | 0.115 | 0.372 | 1.55E-21 | CSCL | LARP7    |
| TMED3.1    | 1.04E-25 | -0.18264 | 0.086 | 0.319 | 1.55E-21 | CSCL | TMED3    |
| PLTP       | 1.08E-25 | -0.39801 | 0.194 | 0.484 | 1.62E-21 | CSCL | PLTP     |
| CKS2.2     | 1.13E-25 | -0.2959  | 0.126 | 0.379 | 1.68E-21 | CSCL | CKS2     |
| UBA2.1     | 1.13E-25 | -0.10854 | 0.113 | 0.371 | 1.69E-21 | CSCL | UBA2     |
| WAC.2      | 1.17E-25 | -0.20519 | 0.059 | 0.274 | 1.75E-21 | CSCL | WAC      |
| CTNNBIP1.1 | 1.20E-25 | -0.19693 | 0.031 | 0.224 | 1.79E-21 | CSCL | CTNNBIP1 |
| DDX27.1    | 1.22E-25 | -0.1626  | 0.07  | 0.293 | 1.82E-21 | CSCL | DDX27    |
| PARVG.2    | 1.22E-25 | -0.67716 | 0.003 | 0.17  | 1.83E-21 | CSCL | PARVG    |
| IRF8.2     | 1.25E-25 | -0.6649  | 0.002 | 0.166 | 1.87E-21 | CSCL | IRF8     |
| ADAM17.2   | 1.30E-25 | -0.31557 | 0.056 | 0.266 | 1.94E-21 | CSCL | ADAM17   |
| DOHH.1     | 1.35E-25 | -0.33563 | 0.021 | 0.203 | 2.01E-21 | CSCL | DOHH     |
| GID8       | 1.37E-25 | -0.20959 | 0.051 | 0.257 | 2.05E-21 | CSCL | GID8     |
| CDC5L.2    | 1.41E-25 | -0.19797 | 0.07  | 0.292 | 2.10E-21 | CSCL | CDC5L    |
| RAD21.2    | 1.41E-25 | -0.13275 | 0.119 | 0.379 | 2.11E-21 | CSCL | RAD21    |
| ABCF1.1    | 1.48E-25 | -0.15741 | 0.072 | 0.295 | 2.21E-21 | CSCL | ABCF1    |
| PDLIM7.1   | 1.50E-25 | -0.25129 | 0.045 | 0.248 | 2.24E-21 | CSCL | PDLIM7   |
| SF3B1.2    | 1.51E-25 | -0.12707 | 0.161 | 0.45  | 2.25E-21 | CSCL | SF3B1    |



|             |           |           |        |        |           |      |          |
|-------------|-----------|-----------|--------|--------|-----------|------|----------|
| PTGES2. 2   | 1. 54E-25 | -0. 14697 | 0. 061 | 0. 278 | 2. 30E-21 | CSCL | PTGES2   |
| SRSF9. 2    | 1. 57E-25 | -0. 11003 | 0. 229 | 0. 578 | 2. 35E-21 | CSCL | SRSF9    |
| RANBP2. 2   | 1. 65E-25 | -0. 31392 | 0. 03  | 0. 218 | 2. 46E-21 | CSCL | RANBP2   |
| MTMR14. 2   | 1. 72E-25 | -0. 29322 | 0. 037 | 0. 231 | 2. 57E-21 | CSCL | MTMR14   |
| MAPKAPK3. 1 | 1. 74E-25 | -0. 45544 | 0. 009 | 0. 179 | 2. 60E-21 | CSCL | MAPKAPK3 |
| COPS3       | 1. 79E-25 | -0. 11237 | 0. 12  | 0. 381 | 2. 67E-21 | CSCL | COPS3    |
| NEU1. 1     | 1. 92E-25 | -0. 24359 | 0. 079 | 0. 303 | 2. 87E-21 | CSCL | NEU1     |
| IMMT. 1     | 1. 95E-25 | -0. 12494 | 0. 082 | 0. 313 | 2. 92E-21 | CSCL | IMMT     |
| MAZ. 2      | 1. 99E-25 | -0. 19122 | 0. 052 | 0. 26  | 2. 98E-21 | CSCL | MAZ      |
| CHMP4A. 1   | 2. 07E-25 | -0. 12107 | 0. 18  | 0. 483 | 3. 09E-21 | CSCL | CHMP4A   |
| DEGS1       | 2. 12E-25 | -0. 12875 | 0. 175 | 0. 474 | 3. 16E-21 | CSCL | DEGS1    |
| PRPF38B. 2  | 2. 12E-25 | -0. 12816 | 0. 161 | 0. 449 | 3. 17E-21 | CSCL | PRPF38B  |
| IFRD1. 2    | 2. 18E-25 | -0. 19021 | 0. 195 | 0. 502 | 3. 25E-21 | CSCL | IFRD1    |
| G6PD. 1     | 2. 18E-25 | -0. 1837  | 0. 04  | 0. 238 | 3. 25E-21 | CSCL | G6PD     |
| CRTAP. 2    | 2. 25E-25 | -0. 26072 | 0. 045 | 0. 246 | 3. 37E-21 | CSCL | CRTAP    |
| ZDHHC3. 2   | 2. 32E-25 | -0. 2744  | 0. 024 | 0. 208 | 3. 46E-21 | CSCL | ZDHHC3   |
| SMARCC1. 2  | 2. 39E-25 | -0. 23632 | 0. 056 | 0. 265 | 3. 57E-21 | CSCL | SMARCC1  |
| SEC23B. 1   | 2. 43E-25 | -0. 15779 | 0. 065 | 0. 281 | 3. 63E-21 | CSCL | SEC23B   |
| C19orf25. 2 | 2. 45E-25 | -0. 13058 | 0. 08  | 0. 31  | 3. 66E-21 | CSCL | C19orf25 |
| IL1B. 2     | 2. 46E-25 | -0. 63448 | 0. 04  | 0. 231 | 3. 68E-21 | CSCL | IL1B     |
| CTSL. 2     | 2. 62E-25 | -0. 20883 | 0. 222 | 0. 539 | 3. 91E-21 | CSCL | CTSL     |
| SNAP23. 2   | 2. 65E-25 | -0. 32081 | 0. 051 | 0. 254 | 3. 97E-21 | CSCL | SNAP23   |
| FTH1. 2     | 2. 77E-25 | 0. 243423 | 0. 806 | 0. 939 | 4. 14E-21 | CSCL | FTH1     |
| UTP18. 1    | 2. 86E-25 | -0. 16606 | 0. 061 | 0. 274 | 4. 27E-21 | CSCL | UTP18    |
| CHCHD1. 2   | 2. 93E-25 | -0. 11652 | 0. 065 | 0. 281 | 4. 38E-21 | CSCL | CHCHD1   |
| SS18L2      | 3. 05E-25 | -0. 13863 | 0. 087 | 0. 322 | 4. 56E-21 | CSCL | SS18L2   |
| ME2. 1      | 3. 44E-25 | -0. 26081 | 0. 038 | 0. 233 | 5. 14E-21 | CSCL | ME2      |
| MFS12. 2    | 3. 65E-25 | -0. 32886 | 0. 021 | 0. 2   | 5. 45E-21 | CSCL | MFS12    |
| BID. 2      | 3. 65E-25 | -0. 11133 | 0. 115 | 0. 369 | 5. 46E-21 | CSCL | BID      |
| ECHDC1. 1   | 3. 69E-25 | -0. 14375 | 0. 098 | 0. 338 | 5. 52E-21 | CSCL | ECHDC1   |
| ADAM9. 1    | 3. 85E-25 | -0. 16889 | 0. 099 | 0. 342 | 5. 75E-21 | CSCL | ADAM9    |
| DEF8. 2     | 3. 89E-25 | -0. 12161 | 0. 065 | 0. 281 | 5. 82E-21 | CSCL | DEF8     |
| CCDC66. 1   | 3. 97E-25 | -0. 26796 | 0. 042 | 0. 239 | 5. 93E-21 | CSCL | CCDC66   |
| KDM6B. 2    | 4. 00E-25 | -0. 41018 | 0. 04  | 0. 232 | 5. 97E-21 | CSCL | KDM6B    |
| PCM1. 2     | 4. 21E-25 | -0. 13856 | 0. 096 | 0. 335 | 6. 30E-21 | CSCL | PCM1     |
| TUBGCP2. 2  | 4. 26E-25 | -0. 26569 | 0. 033 | 0. 222 | 6. 36E-21 | CSCL | TUBGCP2  |
| VTI1B. 2    | 4. 37E-25 | -0. 12971 | 0. 108 | 0. 359 | 6. 53E-21 | CSCL | VTI1B    |
| RAB31. 2    | 4. 38E-25 | -0. 14676 | 0. 178 | 0. 474 | 6. 55E-21 | CSCL | RAB31    |
| RBM27. 1    | 4. 47E-25 | -0. 2682  | 0. 04  | 0. 235 | 6. 69E-21 | CSCL | RBM27    |
| FOXO3. 2    | 4. 56E-25 | -0. 2114  | 0. 066 | 0. 282 | 6. 81E-21 | CSCL | FOXO3    |
| CAPN1. 1    | 4. 85E-25 | -0. 24647 | 0. 059 | 0. 269 | 7. 25E-21 | CSCL | CAPN1    |
| PPP2CB. 2   | 5. 12E-25 | -0. 19322 | 0. 08  | 0. 308 | 7. 65E-21 | CSCL | PPP2CB   |
| ZNF524. 2   | 5. 23E-25 | -0. 26724 | 0. 019 | 0. 196 | 7. 82E-21 | CSCL | ZNF524   |
| SWAP70. 2   | 5. 36E-25 | -0. 27366 | 0. 038 | 0. 231 | 8. 01E-21 | CSCL | SWAP70   |
| COX6A1. 2   | 5. 58E-25 | 0. 347532 | 0. 681 | 0. 853 | 8. 34E-21 | CSCL | COX6A1   |
| FAM120A. 2  | 5. 58E-25 | -0. 23738 | 0. 031 | 0. 219 | 8. 34E-21 | CSCL | FAM120A  |
| SND1        | 5. 73E-25 | -0. 23642 | 0. 058 | 0. 266 | 8. 57E-21 | CSCL | SND1     |
| CHCHD7. 1   | 5. 75E-25 | -0. 30369 | 0. 077 | 0. 297 | 8. 59E-21 | CSCL | CHCHD7   |
| DHX29. 1    | 5. 86E-25 | -0. 16319 | 0. 089 | 0. 321 | 8. 75E-21 | CSCL | DHX29    |
| ENOPH1. 1   | 5. 94E-25 | -0. 10341 | 0. 133 | 0. 402 | 8. 88E-21 | CSCL | ENOPH1   |
| RRAGC. 1    | 6. 16E-25 | -0. 18806 | 0. 052 | 0. 257 | 9. 20E-21 | CSCL | RRAGC    |

|            |          |          |       |       |          |      |              |
|------------|----------|----------|-------|-------|----------|------|--------------|
| RABGGTB.1  | 6.18E-25 | -0.18744 | 0.079 | 0.302 | 9.23E-21 | CSCL | RABGGTB      |
| COMT.2     | 6.27E-25 | -0.11207 | 0.223 | 0.564 | 9.36E-21 | CSCL | COMT         |
| ID2.1      | 6.78E-25 | -0.17412 | 0.3   | 0.672 | 1.01E-20 | CSCL | ID2          |
| TOMM7.1    | 6.84E-25 | 0.382771 | 0.695 | 0.86  | 1.02E-20 | CSCL | TOMM7        |
| ANXA7.1    | 6.93E-25 | -0.17678 | 0.106 | 0.35  | 1.04E-20 | CSCL | ANXA7        |
| RB1CC1.1   | 6.98E-25 | -0.25766 | 0.07  | 0.287 | 1.04E-20 | CSCL | RB1CC1       |
| PNPLA2.2   | 7.11E-25 | -0.28287 | 0.033 | 0.221 | 1.06E-20 | CSCL | PNPLA2       |
| BLOC1S4.2  | 7.14E-25 | -0.20378 | 0.051 | 0.253 | 1.07E-20 | CSCL | BLOC1S4      |
| MAD2L2.1   | 7.26E-25 | -0.12714 | 0.136 | 0.405 | 1.09E-20 | CSCL | MAD2L2       |
| BCL2A1.2   | 7.81E-25 | -0.65379 | 0.003 | 0.165 | 1.17E-20 | CSCL | BCL2A1       |
| NCBP2-AS2  | 7.91E-25 | -0.14977 | 0.07  | 0.287 | 1.18E-20 | CSCL | NCBP2-AS2    |
| APOE.2     | 8.29E-25 | -0.18412 | 0.33  | 0.704 | 1.24E-20 | CSCL | APOE         |
| TMED5.2    | 8.54E-25 | -0.14553 | 0.087 | 0.317 | 1.28E-20 | CSCL | TMED5        |
| MTRNR2L1C  | 8.69E-25 | 0.558755 | 0.182 | 0.069 | 1.30E-20 | CSCL | MTRNR2L10    |
| STX4.1     | 9.02E-25 | -0.22111 | 0.092 | 0.325 | 1.35E-20 | CSCL | STX4         |
| ZC3H13.2   | 9.56E-25 | -0.11181 | 0.103 | 0.346 | 1.43E-20 | CSCL | ZC3H13       |
| MID1IP1.1  | 9.64E-25 | -0.32726 | 0.063 | 0.272 | 1.44E-20 | CSCL | MID1IP1      |
| PLGRKT.1   | 9.64E-25 | -0.18812 | 0.065 | 0.278 | 1.44E-20 | CSCL | PLGRKT       |
| PTPN18.2   | 1.01E-24 | -0.34267 | 0.033 | 0.22  | 1.51E-20 | CSCL | PTPN18       |
| AKIP1.1    | 1.02E-24 | -0.20684 | 0.077 | 0.297 | 1.52E-20 | CSCL | AKIP1        |
| TNFSF13B.1 | 1.03E-24 | -0.51997 | 0.03  | 0.212 | 1.54E-20 | CSCL | TNFSF13B     |
| SCYL1.1    | 1.05E-24 | -0.25578 | 0.042 | 0.236 | 1.57E-20 | CSCL | SCYL1        |
| IST1.1     | 1.09E-24 | -0.28853 | 0.061 | 0.27  | 1.63E-20 | CSCL | IST1         |
| FCGR1B.2   | 1.12E-24 | -0.70809 | 0.007 | 0.171 | 1.67E-20 | CSCL | FCGR1B       |
| FAM204A.2  | 1.16E-24 | -0.22348 | 0.059 | 0.267 | 1.74E-20 | CSCL | FAM204A      |
| C9orf16.2  | 1.17E-24 | -0.12301 | 0.246 | 0.599 | 1.75E-20 | CSCL | C9orf16      |
| UNC119.2   | 1.18E-24 | -0.2744  | 0.037 | 0.226 | 1.76E-20 | CSCL | UNC119       |
| CLN8.2     | 1.18E-24 | -0.33399 | 0.068 | 0.279 | 1.77E-20 | CSCL | CLN8         |
| KRT10.1    | 1.18E-24 | -0.10158 | 0.23  | 0.575 | 1.77E-20 | CSCL | KRT10        |
| PLSCR1.2   | 1.19E-24 | -0.22854 | 0.12  | 0.371 | 1.78E-20 | CSCL | PLSCR1       |
| TUBA1B.1   | 1.27E-24 | 0.260814 | 0.735 | 0.904 | 1.90E-20 | CSCL | TUBA1B       |
| SLC25A33.1 | 1.27E-24 | -0.18058 | 0.037 | 0.227 | 1.90E-20 | CSCL | SLC25A33     |
| MYH9.2     | 1.30E-24 | -0.42262 | 0.021 | 0.197 | 1.94E-20 | CSCL | MYH9         |
| KRAS.2     | 1.31E-24 | -0.18095 | 0.058 | 0.264 | 1.96E-20 | CSCL | KRAS         |
| SEPT6.2    | 1.36E-24 | -0.4588  | 0.009 | 0.174 | 2.04E-20 | CSCL | 6-Sep        |
| YTHDC1.2   | 1.40E-24 | -0.13112 | 0.086 | 0.313 | 2.09E-20 | CSCL | YTHDC1       |
| COX5B.2    | 1.42E-24 | 0.323184 | 0.696 | 0.856 | 2.12E-20 | CSCL | COX5B        |
| AXL.2      | 1.43E-24 | -0.60306 | 0.017 | 0.189 | 2.14E-20 | CSCL | AXL          |
| CTD-2336C  | 1.48E-24 | -0.22864 | 0.04  | 0.233 | 2.22E-20 | CSCL | CTD-233602.1 |
| NBL1.2     | 1.51E-24 | -0.38936 | 0.016 | 0.187 | 2.26E-20 | CSCL | NBL1         |
| ENG.2      | 1.52E-24 | -0.57684 | 0.009 | 0.173 | 2.27E-20 | CSCL | ENG          |
| DAZAP2.1   | 1.53E-24 | -0.10512 | 0.223 | 0.552 | 2.28E-20 | CSCL | DAZAP2       |
| GNB4.2     | 1.59E-24 | -0.18505 | 0.045 | 0.242 | 2.37E-20 | CSCL | GNB4         |
| MAP2K1.2   | 1.60E-24 | -0.19767 | 0.066 | 0.279 | 2.39E-20 | CSCL | MAP2K1       |
| ANKRD11.2  | 1.60E-24 | -0.13814 | 0.094 | 0.327 | 2.39E-20 | CSCL | ANKRD11      |
| PIM3.2     | 1.62E-24 | -0.40002 | 0.023 | 0.199 | 2.42E-20 | CSCL | PIM3         |
| PPM1A.2    | 1.76E-24 | -0.33441 | 0.017 | 0.19  | 2.63E-20 | CSCL | PPM1A        |
| RAP2B.2    | 1.83E-24 | -0.41815 | 0.009 | 0.173 | 2.73E-20 | CSCL | RAP2B        |
| TSTA3.1    | 1.84E-24 | -0.14177 | 0.066 | 0.28  | 2.74E-20 | CSCL | TSTA3        |
| RNF11.2    | 1.87E-24 | -0.10357 | 0.089 | 0.319 | 2.80E-20 | CSCL | RNF11        |
| PCBD1      | 1.88E-24 | -0.13067 | 0.103 | 0.342 | 2.80E-20 | CSCL | PCBD1        |

|             |           |           |        |        |                |          |
|-------------|-----------|-----------|--------|--------|----------------|----------|
| LSP1. 2     | 1. 92E-24 | -0. 71382 | 0. 01  | 0. 174 | 2. 87E-20 CSCL | LSP1     |
| JUND. 2     | 2. 09E-24 | -0. 18765 | 0. 147 | 0. 412 | 3. 12E-20 CSCL | JUND     |
| KHSRP. 2    | 2. 12E-24 | -0. 17613 | 0. 049 | 0. 248 | 3. 17E-20 CSCL | KHSRP    |
| SRGAP2. 2   | 2. 14E-24 | -0. 30493 | 0. 047 | 0. 242 | 3. 19E-20 CSCL | SRGAP2   |
| CYB5R3. 1   | 2. 19E-24 | -0. 13372 | 0. 12  | 0. 373 | 3. 27E-20 CSCL | CYB5R3   |
| DNTTIP2. 1  | 2. 22E-24 | -0. 22344 | 0. 079 | 0. 297 | 3. 31E-20 CSCL | DNTTIP2  |
| DNAJC5. 2   | 2. 26E-24 | -0. 30547 | 0. 035 | 0. 221 | 3. 38E-20 CSCL | DNAJC5   |
| ETV5. 2     | 2. 26E-24 | -0. 18707 | 0. 061 | 0. 269 | 3. 38E-20 CSCL | ETV5     |
| A1BG. 1     | 2. 46E-24 | -0. 20034 | 0. 084 | 0. 31  | 3. 68E-20 CSCL | A1BG     |
| PSMA2. 2    | 2. 46E-24 | 0. 554617 | 0. 159 | 0. 056 | 3. 68E-20 CSCL | PSMA2    |
| STX5. 1     | 2. 49E-24 | -0. 18639 | 0. 068 | 0. 279 | 3. 73E-20 CSCL | STX5     |
| OGFOD3. 2   | 2. 54E-24 | -0. 22976 | 0. 04  | 0. 231 | 3. 79E-20 CSCL | OGFOD3   |
| RNASE2. 2   | 2. 57E-24 | -0. 71872 | 0. 005 | 0. 165 | 3. 84E-20 CSCL | RNASE2   |
| EBAG9. 1    | 2. 67E-24 | -0. 19296 | 0. 058 | 0. 262 | 3. 99E-20 CSCL | EBAG9    |
| RAB6A. 1    | 2. 67E-24 | -0. 12291 | 0. 14  | 0. 407 | 4. 00E-20 CSCL | RAB6A    |
| SFPQ. 2     | 2. 68E-24 | -0. 13549 | 0. 225 | 0. 558 | 4. 00E-20 CSCL | SFPQ     |
| CHD4. 2     | 2. 74E-24 | -0. 14963 | 0. 098 | 0. 334 | 4. 09E-20 CSCL | CHD4     |
| RNFT1. 2    | 2. 74E-24 | -0. 308   | 0. 03  | 0. 211 | 4. 10E-20 CSCL | RNFT1    |
| MPZL1. 2    | 3. 16E-24 | -0. 21634 | 0. 056 | 0. 258 | 4. 72E-20 CSCL | MPZL1    |
| REEP4. 2    | 3. 19E-24 | -0. 42426 | 0. 01  | 0. 175 | 4. 76E-20 CSCL | REEP4    |
| PHF20L1. 2  | 3. 20E-24 | -0. 13997 | 0. 089 | 0. 319 | 4. 78E-20 CSCL | PHF20L1  |
| FUCA2. 2    | 3. 21E-24 | -0. 20939 | 0. 052 | 0. 253 | 4. 80E-20 CSCL | FUCA2    |
| PARVB. 2    | 3. 44E-24 | -0. 37509 | 0. 009 | 0. 172 | 5. 14E-20 CSCL | PARVB    |
| CDK2AP2. 1  | 3. 46E-24 | -0. 10966 | 0. 101 | 0. 341 | 5. 17E-20 CSCL | CDK2AP2  |
| GTF2B. 1    | 3. 47E-24 | -0. 22129 | 0. 086 | 0. 311 | 5. 18E-20 CSCL | GTF2B    |
| WBP11. 1    | 3. 62E-24 | -0. 13436 | 0. 08  | 0. 302 | 5. 41E-20 CSCL | WBP11    |
| SAR1A. 2    | 3. 63E-24 | -0. 18369 | 0. 086 | 0. 309 | 5. 43E-20 CSCL | SAR1A    |
| COPB2. 2    | 3. 64E-24 | -0. 11415 | 0. 089 | 0. 317 | 5. 44E-20 CSCL | COPB2    |
| CHMP1A. 1   | 3. 66E-24 | -0. 1438  | 0. 07  | 0. 284 | 5. 47E-20 CSCL | CHMP1A   |
| GIMAP4. 2   | 3. 76E-24 | -0. 69992 | 0. 002 | 0. 157 | 5. 61E-20 CSCL | GIMAP4   |
| BOD1. 1     | 3. 88E-24 | -0. 14836 | 0. 087 | 0. 314 | 5. 81E-20 CSCL | BOD1     |
| ZFHX3. 2    | 4. 12E-24 | -0. 33121 | 0. 026 | 0. 204 | 6. 15E-20 CSCL | ZFHX3    |
| PRPSAP1. 2  | 4. 18E-24 | -0. 13662 | 0. 089 | 0. 317 | 6. 24E-20 CSCL | PRPSAP1  |
| FAM134A. 2  | 4. 27E-24 | -0. 17486 | 0. 086 | 0. 309 | 6. 38E-20 CSCL | FAM134A  |
| DYNLT3. 1   | 4. 33E-24 | -0. 13696 | 0. 082 | 0. 305 | 6. 47E-20 CSCL | DYNLT3   |
| CFD. 2      | 4. 45E-24 | -0. 63861 | 0. 005 | 0. 164 | 6. 64E-20 CSCL | CFD      |
| UBN1. 2     | 4. 47E-24 | -0. 32356 | 0. 01  | 0. 174 | 6. 68E-20 CSCL | UBN1     |
| GNPTG. 2    | 4. 57E-24 | -0. 16365 | 0. 061 | 0. 268 | 6. 82E-20 CSCL | GNPTG    |
| REEP3. 2    | 4. 63E-24 | -0. 17738 | 0. 054 | 0. 254 | 6. 92E-20 CSCL | REEP3    |
| ARID5B. 2   | 4. 66E-24 | -0. 14405 | 0. 12  | 0. 367 | 6. 96E-20 CSCL | ARID5B   |
| UBE2M. 2    | 4. 73E-24 | -0. 15686 | 0. 045 | 0. 24  | 7. 07E-20 CSCL | UBE2M    |
| RTCA. 1     | 4. 90E-24 | -0. 14355 | 0. 068 | 0. 28  | 7. 32E-20 CSCL | RTCA     |
| NBPF1. 2    | 5. 01E-24 | -0. 16515 | 0. 049 | 0. 245 | 7. 49E-20 CSCL | NBPF1    |
| ABI1. 2     | 5. 02E-24 | -0. 24192 | 0. 052 | 0. 25  | 7. 50E-20 CSCL | ABI1     |
| TOLLIP. 1   | 5. 05E-24 | -0. 18153 | 0. 066 | 0. 276 | 7. 54E-20 CSCL | TOLLIP   |
| SERPINF1. 1 | 5. 05E-24 | -0. 52544 | 0. 045 | 0. 233 | 7. 55E-20 CSCL | SERPINF1 |
| CIR1. 1     | 5. 22E-24 | -0. 14612 | 0. 103 | 0. 341 | 7. 79E-20 CSCL | CIR1     |
| PJA2. 1     | 5. 27E-24 | -0. 11067 | 0. 106 | 0. 347 | 7. 88E-20 CSCL | PJA2     |
| WDR46. 1    | 5. 31E-24 | -0. 21731 | 0. 049 | 0. 245 | 7. 93E-20 CSCL | WDR46    |
| SMIM19. 1   | 5. 38E-24 | -0. 12777 | 0. 099 | 0. 335 | 8. 04E-20 CSCL | SMIM19   |
| AIP         | 5. 90E-24 | -0. 13143 | 0. 089 | 0. 315 | 8. 82E-20 CSCL | AIP      |

|            |          |          |       |       |          |      |            |
|------------|----------|----------|-------|-------|----------|------|------------|
| TM6SF1.2   | 5.99E-24 | -0.68162 | 0.007 | 0.166 | 8.96E-20 | CSCL | TM6SF1     |
| PHF20.1    | 6.13E-24 | -0.1333  | 0.098 | 0.332 | 9.17E-20 | CSCL | PHF20      |
| ROB01.2    | 6.35E-24 | -0.33434 | 0.017 | 0.186 | 9.48E-20 | CSCL | ROB01      |
| CRYAB.2    | 6.36E-24 | 0.613515 | 0.56  | 0.496 | 9.51E-20 | CSCL | CRYAB      |
| CAMK1.1    | 6.55E-24 | -0.19225 | 0.044 | 0.235 | 9.79E-20 | CSCL | CAMK1      |
| KLF4.2     | 6.69E-24 | -0.52556 | 0.035 | 0.215 | 1.00E-19 | CSCL | KLF4       |
| PTTG1.2    | 6.73E-24 | -0.304   | 0.047 | 0.24  | 1.01E-19 | CSCL | PTTG1      |
| GTF2E2.2   | 6.74E-24 | -0.28591 | 0.023 | 0.196 | 1.01E-19 | CSCL | GTF2E2     |
| ADPRHL2.1  | 6.86E-24 | -0.16578 | 0.065 | 0.271 | 1.02E-19 | CSCL | ADPRHL2    |
| CD4.2      | 6.92E-24 | -0.61358 | 0.005 | 0.163 | 1.03E-19 | CSCL | CD4        |
| GGA1.2     | 6.92E-24 | -0.24465 | 0.082 | 0.3   | 1.03E-19 | CSCL | GGA1       |
| BSG.2      | 7.27E-24 | 0.433635 | 0.635 | 0.747 | 1.09E-19 | CSCL | BSG        |
| HYAL2.2    | 7.29E-24 | -0.20568 | 0.042 | 0.232 | 1.09E-19 | CSCL | HYAL2      |
| SF3A3.1    | 7.36E-24 | -0.14622 | 0.079 | 0.296 | 1.10E-19 | CSCL | SF3A3      |
| ABHD17A.2  | 7.55E-24 | -0.15921 | 0.049 | 0.245 | 1.13E-19 | CSCL | ABHD17A    |
| BHLHE41.2  | 7.58E-24 | -0.40135 | 0.035 | 0.217 | 1.13E-19 | CSCL | BHLHE41    |
| NUBP1.1    | 7.83E-24 | -0.32873 | 0.04  | 0.227 | 1.17E-19 | CSCL | NUBP1      |
| BHLHE40.1  | 7.92E-24 | -0.32365 | 0.026 | 0.202 | 1.18E-19 | CSCL | BHLHE40    |
| AC010642.1 | 7.94E-24 | -0.18604 | 0.042 | 0.232 | 1.19E-19 | CSCL | AC010642.1 |
| DTYMK.1    | 8.19E-24 | -0.10355 | 0.103 | 0.341 | 1.22E-19 | CSCL | DTYMK      |
| TEN1.2     | 8.38E-24 | -0.26104 | 0.017 | 0.186 | 1.25E-19 | CSCL | TEN1       |
| JMJD1C.2   | 8.44E-24 | -0.20067 | 0.108 | 0.346 | 1.26E-19 | CSCL | JMJD1C     |
| SLC2A5.2   | 8.76E-24 | -0.68325 | 0.014 | 0.178 | 1.31E-19 | CSCL | SLC2A5     |
| NMT1.1     | 8.90E-24 | -0.18463 | 0.068 | 0.278 | 1.33E-19 | CSCL | NMT1       |
| DYNLL2.2   | 8.91E-24 | -0.24305 | 0.033 | 0.215 | 1.33E-19 | CSCL | DYNLL2     |
| TMEM109.2  | 8.96E-24 | -0.40155 | 0.033 | 0.213 | 1.34E-19 | CSCL | TMEM109    |
| CERS2.1    | 9.19E-24 | -0.1827  | 0.047 | 0.241 | 1.37E-19 | CSCL | CERS2      |
| PBRM1.1    | 1.02E-23 | -0.22984 | 0.052 | 0.249 | 1.52E-19 | CSCL | PBRM1      |
| LPCAT2.2   | 1.02E-23 | -0.57993 | 0.002 | 0.155 | 1.53E-19 | CSCL | LPCAT2     |
| MAPK1.2    | 1.03E-23 | -0.22983 | 0.054 | 0.252 | 1.53E-19 | CSCL | MAPK1      |
| GORASP2.1  | 1.05E-23 | -0.12269 | 0.082 | 0.303 | 1.56E-19 | CSCL | GORASP2    |
| C19orf43.1 | 1.07E-23 | -0.10709 | 0.297 | 0.692 | 1.60E-19 | CSCL | C19orf43   |
| BCLAF1.2   | 1.08E-23 | -0.16216 | 0.138 | 0.398 | 1.62E-19 | CSCL | BCLAF1     |
| MAP1LC3A.1 | 1.14E-23 | -0.11302 | 0.124 | 0.377 | 1.70E-19 | CSCL | MAP1LC3A   |
| HSPA4.1    | 1.14E-23 | -0.1277  | 0.073 | 0.286 | 1.70E-19 | CSCL | HSPA4      |
| TSPAN14.2  | 1.14E-23 | -0.36987 | 0.038 | 0.221 | 1.70E-19 | CSCL | TSPAN14    |
| TNIP1.1    | 1.14E-23 | -0.24897 | 0.035 | 0.217 | 1.70E-19 | CSCL | TNIP1      |
| KATNBL1.2  | 1.15E-23 | -0.19906 | 0.059 | 0.261 | 1.72E-19 | CSCL | KATNBL1    |
| BAZ1A.2    | 1.16E-23 | -0.1699  | 0.099 | 0.331 | 1.74E-19 | CSCL | BAZ1A      |
| TMBIM1.1   | 1.18E-23 | -0.281   | 0.056 | 0.254 | 1.76E-19 | CSCL | TMBIM1     |
| NUDT16.2   | 1.18E-23 | -0.30151 | 0.042 | 0.228 | 1.76E-19 | CSCL | NUDT16     |
| APBB1IP.2  | 1.32E-23 | -0.57708 | 0.007 | 0.164 | 1.97E-19 | CSCL | APBB1IP    |
| PLD3.1     | 1.34E-23 | -0.10629 | 0.22  | 0.545 | 2.00E-19 | CSCL | PLD3       |
| HAMP.2     | 1.35E-23 | -0.80578 | 0.01  | 0.168 | 2.02E-19 | CSCL | HAMP       |
| LSM4.1     | 1.36E-23 | -0.11184 | 0.239 | 0.577 | 2.04E-19 | CSCL | LSM4       |
| STOM.1     | 1.39E-23 | -0.35188 | 0.061 | 0.261 | 2.08E-19 | CSCL | STOM       |
| TBL1XR1.2  | 1.41E-23 | -0.19508 | 0.058 | 0.258 | 2.10E-19 | CSCL | TBL1XR1    |
| CENPV.2    | 1.42E-23 | -0.32947 | 0.063 | 0.265 | 2.13E-19 | CSCL | CENPV      |
| IGSF6.2    | 1.43E-23 | -0.64656 | 0.005 | 0.161 | 2.14E-19 | CSCL | IGSF6      |
| UBE2D3.1   | 1.43E-23 | -0.18559 | 0.335 | 0.748 | 2.14E-19 | CSCL | UBE2D3     |
| TUBG1.1    | 1.46E-23 | -0.12692 | 0.049 | 0.243 | 2.18E-19 | CSCL | TUBG1      |

|           |          |          |       |       |          |      |          |
|-----------|----------|----------|-------|-------|----------|------|----------|
| TRAP1.1   | 1.47E-23 | -0.12766 | 0.063 | 0.268 | 2.19E-19 | CSCL | TRAP1    |
| SLC25A36  | 1.51E-23 | -0.15588 | 0.07  | 0.279 | 2.26E-19 | CSCL | SLC25A36 |
| NECAP2.1  | 1.51E-23 | -0.15692 | 0.084 | 0.302 | 2.26E-19 | CSCL | NECAP2   |
| RNF139.2  | 1.53E-23 | -0.23184 | 0.063 | 0.265 | 2.29E-19 | CSCL | RNF139   |
| SUN2.2    | 1.54E-23 | -0.36145 | 0.042 | 0.228 | 2.31E-19 | CSCL | SUN2     |
| COQ2.2    | 1.62E-23 | -0.30481 | 0.019 | 0.188 | 2.42E-19 | CSCL | COQ2     |
| ZFP36L2.2 | 1.65E-23 | -0.20487 | 0.223 | 0.531 | 2.47E-19 | CSCL | ZFP36L2  |
| TINF2.1   | 1.76E-23 | -0.15877 | 0.058 | 0.258 | 2.63E-19 | CSCL | TINF2    |
| CMC2      | 1.78E-23 | -0.11347 | 0.091 | 0.316 | 2.66E-19 | CSCL | CMC2     |
| RNASEH1.1 | 1.86E-23 | -0.2182  | 0.047 | 0.238 | 2.78E-19 | CSCL | RNASEH1  |
| EVI2A.2   | 1.87E-23 | -0.52692 | 0.045 | 0.232 | 2.80E-19 | CSCL | EVI2A    |
| STRADB    | 1.89E-23 | -0.1666  | 0.042 | 0.229 | 2.83E-19 | CSCL | STRADB   |
| CSF3R.2   | 1.95E-23 | -0.64151 | 0.005 | 0.16  | 2.91E-19 | CSCL | CSF3R    |
| STK17A.2  | 2.09E-23 | -0.11103 | 0.084 | 0.304 | 3.13E-19 | CSCL | STK17A   |
| SORT1.2   | 2.10E-23 | -0.14367 | 0.047 | 0.239 | 3.14E-19 | CSCL | SORT1    |
| NCF4.2    | 2.10E-23 | -0.6666  | 0.002 | 0.153 | 3.14E-19 | CSCL | NCF4     |
| AFF4.2    | 2.12E-23 | -0.18516 | 0.113 | 0.352 | 3.17E-19 | CSCL | AFF4     |
| ATF5.2    | 2.19E-23 | -0.37815 | 0.028 | 0.202 | 3.27E-19 | CSCL | ATF5     |
| TFPT.2    | 2.23E-23 | -0.12437 | 0.092 | 0.319 | 3.33E-19 | CSCL | TFPT     |
| PILRA.2   | 2.25E-23 | -0.64682 | 0.012 | 0.173 | 3.37E-19 | CSCL | PILRA    |
| PSIP1.2   | 2.28E-23 | -0.13393 | 0.14  | 0.396 | 3.41E-19 | CSCL | PSIP1    |
| GAS6.2    | 2.30E-23 | -0.39154 | 0.035 | 0.213 | 3.44E-19 | CSCL | GAS6     |
| ERICH1.2  | 2.34E-23 | -0.19783 | 0.073 | 0.283 | 3.49E-19 | CSCL | ERICH1   |
| PPIL3.1   | 2.38E-23 | -0.25108 | 0.038 | 0.222 | 3.55E-19 | CSCL | PPIL3    |
| SNX27.2   | 2.40E-23 | -0.14647 | 0.056 | 0.254 | 3.58E-19 | CSCL | SNX27    |
| RAF1.2    | 2.60E-23 | -0.1792  | 0.075 | 0.287 | 3.89E-19 | CSCL | RAF1     |
| PRNP.1    | 2.65E-23 | -0.101   | 0.185 | 0.48  | 3.96E-19 | CSCL | PRNP     |
| CECR5.2   | 2.70E-23 | -0.21239 | 0.061 | 0.261 | 4.04E-19 | CSCL | CECR5    |
| TXNRD1.1  | 2.75E-23 | -0.18512 | 0.052 | 0.247 | 4.11E-19 | CSCL | TXNRD1   |
| SMC3.1    | 2.77E-23 | -0.15919 | 0.08  | 0.296 | 4.14E-19 | CSCL | SMC3     |
| MYO1F.2   | 2.84E-23 | -0.46698 | 0.023 | 0.192 | 4.24E-19 | CSCL | MYO1F    |
| KLC1.2    | 3.00E-23 | -0.11174 | 0.124 | 0.372 | 4.48E-19 | CSCL | KLC1     |
| HSPA1A.2  | 3.01E-23 | -0.1761  | 0.209 | 0.506 | 4.50E-19 | CSCL | HSPA1A   |
| CD69.2    | 3.11E-23 | -0.76046 | 0.007 | 0.161 | 4.65E-19 | CSCL | CD69     |
| ORAI2.1   | 3.22E-23 | -0.18849 | 0.075 | 0.287 | 4.81E-19 | CSCL | ORAI2    |
| OXLD1.1   | 3.29E-23 | -0.15283 | 0.061 | 0.262 | 4.91E-19 | CSCL | OXLD1    |
| HPRT1.2   | 3.34E-23 | -0.27794 | 0.049 | 0.24  | 4.98E-19 | CSCL | HPRT1    |
| TMEM189.2 | 3.36E-23 | -0.25942 | 0.024 | 0.195 | 5.02E-19 | CSCL | TMEM189  |
| ARID4B.2  | 3.36E-23 | -0.11121 | 0.15  | 0.419 | 5.03E-19 | CSCL | ARID4B   |
| NDN.2     | 3.48E-23 | -0.18025 | 0.03  | 0.205 | 5.19E-19 | CSCL | NDN      |
| AZI2.1    | 3.68E-23 | -0.20948 | 0.092 | 0.312 | 5.50E-19 | CSCL | AZI2     |
| CCNC      | 3.72E-23 | -0.12563 | 0.087 | 0.306 | 5.56E-19 | CSCL | CCNC     |
| HLA-DPA1. | 3.78E-23 | -0.3661  | 0.257 | 0.547 | 5.65E-19 | CSCL | HLA-DPA1 |
| HLA-DRB1. | 3.85E-23 | -0.41791 | 0.265 | 0.547 | 5.76E-19 | CSCL | HLA-DRB1 |
| MYO9B.2   | 3.89E-23 | -0.217   | 0.072 | 0.279 | 5.81E-19 | CSCL | MYO9B    |
| ACTN1.2   | 3.99E-23 | -0.1979  | 0.063 | 0.265 | 5.96E-19 | CSCL | ACTN1    |
| GFER.2    | 4.12E-23 | -0.20502 | 0.037 | 0.218 | 6.15E-19 | CSCL | GFER     |
| ADAR.1    | 4.20E-23 | -0.11149 | 0.094 | 0.318 | 6.28E-19 | CSCL | ADAR     |
| SMPD1.1   | 4.21E-23 | -0.20903 | 0.052 | 0.246 | 6.30E-19 | CSCL | SMPD1    |
| IL6ST.2   | 4.37E-23 | -0.1822  | 0.063 | 0.264 | 6.53E-19 | CSCL | IL6ST    |
| PREX1.2   | 4.46E-23 | -0.17157 | 0.042 | 0.227 | 6.67E-19 | CSCL | PREX1    |

|             |           |           |        |        |                |          |
|-------------|-----------|-----------|--------|--------|----------------|----------|
| TTYH3. 2    | 4. 48E-23 | -0. 23485 | 0. 059 | 0. 257 | 6. 70E-19 CSCL | TTYH3    |
| MAT2A. 1    | 4. 70E-23 | -0. 11597 | 0. 138 | 0. 396 | 7. 03E-19 CSCL | MAT2A    |
| UBAC1. 2    | 4. 71E-23 | -0. 17716 | 0. 042 | 0. 227 | 7. 04E-19 CSCL | UBAC1    |
| UBE2Q2. 2   | 4. 74E-23 | -0. 23436 | 0. 035 | 0. 214 | 7. 09E-19 CSCL | UBE2Q2   |
| LMBRD1. 1   | 4. 78E-23 | -0. 31696 | 0. 042 | 0. 225 | 7. 14E-19 CSCL | LMBRD1   |
| COLGALT1. 4 | 8. 5E-23  | -0. 27607 | 0. 028 | 0. 2   | 7. 26E-19 CSCL | COLGALT1 |
| KIAA1143    | 4. 95E-23 | -0. 22405 | 0. 038 | 0. 219 | 7. 40E-19 CSCL | KIAA1143 |
| TAF15. 1    | 5. 03E-23 | -0. 13063 | 0. 073 | 0. 284 | 7. 51E-19 CSCL | TAF15    |
| PHC2. 2     | 5. 24E-23 | -0. 18374 | 0. 077 | 0. 287 | 7. 83E-19 CSCL | PHC2     |
| C22orf39.   | 5. 29E-23 | -0. 12151 | 0. 066 | 0. 269 | 7. 90E-19 CSCL | C22orf39 |
| DNAJB2. 1   | 5. 38E-23 | -0. 10357 | 0. 098 | 0. 325 | 8. 04E-19 CSCL | DNAJB2   |
| AZIN1. 1    | 5. 50E-23 | -0. 1004  | 0. 106 | 0. 341 | 8. 22E-19 CSCL | AZIN1    |
| VAT1. 1     | 5. 53E-23 | -0. 26247 | 0. 033 | 0. 21  | 8. 26E-19 CSCL | VAT1     |
| BUB3. 1     | 5. 75E-23 | -0. 2055  | 0. 096 | 0. 318 | 8. 59E-19 CSCL | BUB3     |
| SIGLEC10.   | 6. 35E-23 | -0. 57522 | 0. 012 | 0. 17  | 9. 49E-19 CSCL | SIGLEC10 |
| DAPK3. 1    | 6. 69E-23 | -0. 14401 | 0. 054 | 0. 248 | 9. 99E-19 CSCL | DAPK3    |
| SPRED1. 2   | 6. 75E-23 | -0. 2531  | 0. 033 | 0. 21  | 1. 01E-18 CSCL | SPRED1   |
| HDAC3. 1    | 6. 85E-23 | -0. 11261 | 0. 068 | 0. 273 | 1. 02E-18 CSCL | HDAC3    |
| RAB22A. 2   | 7. 20E-23 | -0. 12904 | 0. 054 | 0. 248 | 1. 08E-18 CSCL | RAB22A   |
| CTDSP1. 2   | 7. 70E-23 | -0. 25227 | 0. 045 | 0. 231 | 1. 15E-18 CSCL | CTDSP1   |
| PTPN2. 1    | 7. 71E-23 | -0. 27969 | 0. 061 | 0. 258 | 1. 15E-18 CSCL | PTPN2    |
| PROSC. 1    | 7. 86E-23 | -0. 15975 | 0. 063 | 0. 261 | 1. 17E-18 CSCL | PROSC    |
| DHRS4L2     | 8. 05E-23 | -0. 20149 | 0. 068 | 0. 272 | 1. 20E-18 CSCL | DHRS4L2  |
| JKAMP. 2    | 8. 14E-23 | -0. 19866 | 0. 091 | 0. 31  | 1. 22E-18 CSCL | JKAMP    |
| RUNX1. 2    | 8. 38E-23 | -0. 33503 | 0. 028 | 0. 199 | 1. 25E-18 CSCL | RUNX1    |
| APRT        | 9. 06E-23 | -0. 10834 | 0. 225 | 0. 547 | 1. 35E-18 CSCL | APRT     |
| LRRFIP2. 1  | 9. 28E-23 | -0. 19434 | 0. 026 | 0. 196 | 1. 39E-18 CSCL | LRRFIP2  |
| COPA. 2     | 9. 82E-23 | -0. 12494 | 0. 098 | 0. 324 | 1. 47E-18 CSCL | COPA     |
| UBE2G1. 2   | 1. 03E-22 | -0. 14842 | 0. 066 | 0. 268 | 1. 55E-18 CSCL | UBE2G1   |
| STAB1. 2    | 1. 05E-22 | -0. 5888  | 0. 012 | 0. 169 | 1. 57E-18 CSCL | STAB1    |
| MAP3K2. 2   | 1. 06E-22 | -0. 25469 | 0. 033 | 0. 209 | 1. 59E-18 CSCL | MAP3K2   |
| TAF11. 1    | 1. 08E-22 | -0. 12677 | 0. 077 | 0. 287 | 1. 62E-18 CSCL | TAF11    |
| EFCAB14. 2  | 1. 09E-22 | -0. 23283 | 0. 035 | 0. 212 | 1. 63E-18 CSCL | EFCAB14  |
| ATP6V1H     | 1. 11E-22 | -0. 10623 | 0. 105 | 0. 334 | 1. 66E-18 CSCL | ATP6V1H  |
| RHOQ. 2     | 1. 12E-22 | -0. 35255 | 0. 012 | 0. 169 | 1. 67E-18 CSCL | RHOQ     |
| ERBB2IP. 1  | 1. 14E-22 | -0. 1954  | 0. 045 | 0. 23  | 1. 70E-18 CSCL | ERBB2IP  |
| GMPS. 1     | 1. 15E-22 | -0. 2587  | 0. 024 | 0. 192 | 1. 71E-18 CSCL | GMPS     |
| PQLC3. 2    | 1. 15E-22 | -0. 26895 | 0. 024 | 0. 193 | 1. 72E-18 CSCL | PQLC3    |
| PRKCA. 1    | 1. 15E-22 | -0. 29428 | 0. 033 | 0. 207 | 1. 73E-18 CSCL | PRKCA    |
| VAPB. 1     | 1. 16E-22 | -0. 18309 | 0. 031 | 0. 206 | 1. 73E-18 CSCL | VAPB     |
| ANP32E. 1   | 1. 21E-22 | -0. 11132 | 0. 072 | 0. 278 | 1. 81E-18 CSCL | ANP32E   |
| GCA. 2      | 1. 21E-22 | -0. 22152 | 0. 091 | 0. 31  | 1. 81E-18 CSCL | GCA      |
| SKAP2. 1    | 1. 23E-22 | -0. 38366 | 0. 077 | 0. 28  | 1. 83E-18 CSCL | SKAP2    |
| TSSC4. 1    | 1. 32E-22 | -0. 11281 | 0. 098 | 0. 323 | 1. 97E-18 CSCL | TSSC4    |
| UBALD2. 2   | 1. 36E-22 | -0. 17043 | 0. 068 | 0. 269 | 2. 03E-18 CSCL | UBALD2   |
| SOCS3. 1    | 1. 36E-22 | -0. 1716  | 0. 124 | 0. 36  | 2. 04E-18 CSCL | SOCS3    |
| VMO1. 2     | 1. 37E-22 | -0. 65139 | 0. 012 | 0. 167 | 2. 05E-18 CSCL | VMO1     |
| FOXN3. 2    | 1. 39E-22 | -0. 31274 | 0. 068 | 0. 265 | 2. 07E-18 CSCL | FOXN3    |
| PHIP. 2     | 1. 41E-22 | -0. 12984 | 0. 11  | 0. 343 | 2. 11E-18 CSCL | PHIP     |
| MCRS1       | 1. 45E-22 | -0. 1138  | 0. 073 | 0. 28  | 2. 16E-18 CSCL | MCRS1    |
| LYN. 2      | 1. 46E-22 | -0. 41088 | 0. 019 | 0. 182 | 2. 18E-18 CSCL | LYN      |

|            |           |           |        |        |                |          |
|------------|-----------|-----------|--------|--------|----------------|----------|
| ZEB2. 2    | 1. 47E-22 | -0. 245   | 0. 096 | 0. 314 | 2. 19E-18 CSCL | ZEB2     |
| MTRF1L. 1  | 1. 48E-22 | -0. 23541 | 0. 028 | 0. 198 | 2. 21E-18 CSCL | MTRF1L   |
| EEA1. 1    | 1. 50E-22 | -0. 12339 | 0. 059 | 0. 255 | 2. 24E-18 CSCL | EEA1     |
| RNF166. 2  | 1. 50E-22 | -0. 37113 | 0. 026 | 0. 193 | 2. 25E-18 CSCL | RNF166   |
| CASC4. 2   | 1. 55E-22 | -0. 18737 | 0. 047 | 0. 233 | 2. 31E-18 CSCL | CASC4    |
| PLD4. 2    | 1. 56E-22 | -0. 62807 | 0. 009 | 0. 161 | 2. 33E-18 CSCL | PLD4     |
| USP22. 2   | 1. 56E-22 | -0. 13295 | 0. 103 | 0. 33  | 2. 33E-18 CSCL | USP22    |
| FUOM. 2    | 1. 66E-22 | -0. 54909 | 0. 002 | 0. 148 | 2. 48E-18 CSCL | FUOM     |
| FAM104A    | 1. 67E-22 | -0. 13413 | 0. 056 | 0. 249 | 2. 49E-18 CSCL | FAM104A  |
| SORL1. 2   | 1. 68E-22 | -0. 43905 | 0. 052 | 0. 236 | 2. 51E-18 CSCL | SORL1    |
| HOOK3. 2   | 1. 68E-22 | -0. 12068 | 0. 082 | 0. 294 | 2. 52E-18 CSCL | HOOK3    |
| ASH1L      | 1. 73E-22 | -0. 10146 | 0. 098 | 0. 321 | 2. 59E-18 CSCL | ASH1L    |
| TRMT1. 2   | 1. 75E-22 | -0. 24159 | 0. 068 | 0. 267 | 2. 62E-18 CSCL | TRMT1    |
| H2AFX. 2   | 1. 76E-22 | -0. 24642 | 0. 045 | 0. 228 | 2. 63E-18 CSCL | H2AFX    |
| DUSP1. 2   | 1. 81E-22 | -0. 1994  | 0. 271 | 0. 59  | 2. 70E-18 CSCL | DUSP1    |
| UBE2W. 1   | 1. 85E-22 | -0. 27537 | 0. 042 | 0. 222 | 2. 77E-18 CSCL | UBE2W    |
| ZNF511. 2  | 1. 86E-22 | -0. 20336 | 0. 031 | 0. 204 | 2. 79E-18 CSCL | ZNF511   |
| HSF1. 1    | 1. 92E-22 | -0. 13747 | 0. 079 | 0. 288 | 2. 87E-18 CSCL | HSF1     |
| POLE4. 1   | 1. 96E-22 | -0. 16396 | 0. 084 | 0. 295 | 2. 93E-18 CSCL | POLE4    |
| TXNDC9     | 2. 08E-22 | -0. 1162  | 0. 068 | 0. 27  | 3. 11E-18 CSCL | TXNDC9   |
| WSB2. 2    | 2. 11E-22 | -0. 1383  | 0. 047 | 0. 233 | 3. 15E-18 CSCL | WSB2     |
| RIT1. 1    | 2. 13E-22 | -0. 17997 | 0. 042 | 0. 223 | 3. 18E-18 CSCL | RIT1     |
| PLA2G16. 2 | 2. 20E-22 | -0. 17894 | 0. 159 | 0. 417 | 3. 29E-18 CSCL | PLA2G16  |
| CCDC106. 2 | 2. 20E-22 | -0. 15744 | 0. 052 | 0. 241 | 3. 29E-18 CSCL | CCDC106  |
| HTATIP2. 2 | 2. 24E-22 | -0. 44192 | 0. 005 | 0. 154 | 3. 35E-18 CSCL | HTATIP2  |
| SERPINB9.  | 2. 25E-22 | -0. 56997 | 0. 005 | 0. 154 | 3. 36E-18 CSCL | SERPINB9 |
| U2AF2. 1   | 2. 38E-22 | -0. 18028 | 0. 068 | 0. 267 | 3. 55E-18 CSCL | U2AF2    |
| DAZAP1. 2  | 2. 39E-22 | -0. 14797 | 0. 052 | 0. 241 | 3. 57E-18 CSCL | DAZAP1   |
| REPIN1. 2  | 2. 48E-22 | -0. 14004 | 0. 077 | 0. 284 | 3. 71E-18 CSCL | REPIN1   |
| MSRB2. 2   | 2. 53E-22 | -0. 17624 | 0. 066 | 0. 264 | 3. 78E-18 CSCL | MSRB2    |
| STX6. 2    | 2. 56E-22 | -0. 27426 | 0. 033 | 0. 206 | 3. 82E-18 CSCL | STX6     |
| A2M. 2     | 2. 61E-22 | -0. 15709 | 0. 19  | 0. 478 | 3. 90E-18 CSCL | A2M      |
| SNX4. 1    | 2. 65E-22 | -0. 15763 | 0. 063 | 0. 259 | 3. 96E-18 CSCL | SNX4     |
| CHP1. 2    | 2. 65E-22 | -0. 15851 | 0. 054 | 0. 244 | 3. 96E-18 CSCL | CHP1     |
| ATP6V1C1   | 2. 66E-22 | -0. 22847 | 0. 059 | 0. 253 | 3. 98E-18 CSCL | ATP6V1C1 |
| CHST11. 2  | 2. 78E-22 | -0. 25985 | 0. 042 | 0. 221 | 4. 16E-18 CSCL | CHST11   |
| EPHX1. 1   | 2. 81E-22 | -0. 26922 | 0. 054 | 0. 241 | 4. 20E-18 CSCL | EPHX1    |
| TMF1. 1    | 2. 81E-22 | -0. 21273 | 0. 045 | 0. 228 | 4. 20E-18 CSCL | TMF1     |
| SART1. 2   | 2. 88E-22 | -0. 16975 | 0. 033 | 0. 206 | 4. 30E-18 CSCL | SART1    |
| SRPRB. 1   | 2. 90E-22 | -0. 16974 | 0. 066 | 0. 265 | 4. 33E-18 CSCL | SRPRB    |
| CGGBP1. 1  | 3. 04E-22 | -0. 14643 | 0. 075 | 0. 279 | 4. 54E-18 CSCL | CGGBP1   |
| IER2. 2    | 3. 10E-22 | -0. 12121 | 0. 277 | 0. 632 | 4. 63E-18 CSCL | IER2     |
| TFDP1. 2   | 3. 16E-22 | -0. 16547 | 0. 03  | 0. 2   | 4. 73E-18 CSCL | TFDP1    |
| PRR7. 2    | 3. 17E-22 | -0. 25393 | 0. 028 | 0. 196 | 4. 73E-18 CSCL | PRR7     |
| SLC35F6. 2 | 3. 19E-22 | -0. 24112 | 0. 04  | 0. 218 | 4. 77E-18 CSCL | SLC35F6  |
| ELOVL1. 2  | 3. 29E-22 | -0. 22567 | 0. 052 | 0. 24  | 4. 92E-18 CSCL | ELOVL1   |
| C2orf69. 2 | 3. 31E-22 | -0. 23269 | 0. 031 | 0. 202 | 4. 94E-18 CSCL | C2orf69  |
| GPR108. 1  | 3. 34E-22 | -0. 15299 | 0. 073 | 0. 275 | 4. 99E-18 CSCL | GPR108   |
| CDKN1B. 2  | 3. 39E-22 | -0. 20761 | 0. 07  | 0. 269 | 5. 07E-18 CSCL | CDKN1B   |
| CKS1B      | 3. 42E-22 | -0. 15399 | 0. 068 | 0. 269 | 5. 10E-18 CSCL | CKS1B    |
| NAGA. 2    | 3. 42E-22 | -0. 35661 | 0. 026 | 0. 193 | 5. 11E-18 CSCL | NAGA     |

|            |           |           |        |        |                |           |
|------------|-----------|-----------|--------|--------|----------------|-----------|
| VPS37B. 2  | 3. 45E-22 | -0. 19082 | 0. 066 | 0. 264 | 5. 16E-18 CSCL | VPS37B    |
| PITPNA. 2  | 3. 46E-22 | -0. 23342 | 0. 024 | 0. 19  | 5. 17E-18 CSCL | PITPNA    |
| FOSL2. 2   | 3. 56E-22 | -0. 35463 | 0. 028 | 0. 194 | 5. 32E-18 CSCL | FOSL2     |
| NUDT22. 1  | 3. 65E-22 | -0. 11141 | 0. 075 | 0. 28  | 5. 45E-18 CSCL | NUDT22    |
| CCNL2      | 3. 74E-22 | -0. 13897 | 0. 087 | 0. 301 | 5. 60E-18 CSCL | CCNL2     |
| TMEM60. 2  | 3. 76E-22 | -0. 20324 | 0. 063 | 0. 257 | 5. 62E-18 CSCL | TMEM60    |
| B4GALT7. 2 | 3. 80E-22 | -0. 20043 | 0. 04  | 0. 218 | 5. 68E-18 CSCL | B4GALT7   |
| TMEM30A. 2 | 3. 96E-22 | -0. 1381  | 0. 113 | 0. 345 | 5. 91E-18 CSCL | TMEM30A   |
| RSBN1. 1   | 3. 98E-22 | -0. 27298 | 0. 045 | 0. 226 | 5. 95E-18 CSCL | RSBN1     |
| SCIN. 2    | 3. 98E-22 | -0. 69434 | 0. 009 | 0. 158 | 5. 95E-18 CSCL | SCIN      |
| LYSMD2. 2  | 4. 15E-22 | -0. 21818 | 0. 031 | 0. 201 | 6. 19E-18 CSCL | LYSMD2    |
| GNPMB. 2   | 4. 25E-22 | -0. 50144 | 0. 037 | 0. 209 | 6. 35E-18 CSCL | GNPMB     |
| TSPAN4     | 4. 42E-22 | -0. 32175 | 0. 024 | 0. 189 | 6. 60E-18 CSCL | TSPAN4    |
| MTFR1L. 1  | 4. 50E-22 | -0. 13036 | 0. 087 | 0. 301 | 6. 72E-18 CSCL | MTFR1L    |
| GLG1. 2    | 4. 51E-22 | -0. 12302 | 0. 073 | 0. 276 | 6. 75E-18 CSCL | GLG1      |
| MAP1S. 1   | 4. 57E-22 | -0. 28029 | 0. 019 | 0. 179 | 6. 83E-18 CSCL | MAP1S     |
| SIAH2. 2   | 4. 58E-22 | -0. 27418 | 0. 042 | 0. 219 | 6. 85E-18 CSCL | SIAH2     |
| HIST1H2BK  | 4. 62E-22 | -0. 2342  | 0. 04  | 0. 217 | 6. 91E-18 CSCL | HIST1H2BK |
| LHFPL2. 2  | 5. 23E-22 | -0. 4139  | 0. 014 | 0. 168 | 7. 82E-18 CSCL | LHFPL2    |
| BRWD1. 2   | 5. 28E-22 | -0. 17854 | 0. 059 | 0. 251 | 7. 89E-18 CSCL | BRWD1     |
| FBXL15. 2  | 5. 43E-22 | -0. 2591  | 0. 033 | 0. 204 | 8. 12E-18 CSCL | FBXL15    |
| CYB5R4. 2  | 5. 68E-22 | -0. 3262  | 0. 023 | 0. 184 | 8. 48E-18 CSCL | CYB5R4    |
| DDX19B     | 5. 68E-22 | -0. 27008 | 0. 037 | 0. 21  | 8. 49E-18 CSCL | DDX19B    |
| SLC4A7. 2  | 5. 69E-22 | -0. 232   | 0. 044 | 0. 223 | 8. 50E-18 CSCL | SLC4A7    |
| ENTPD1. 2  | 5. 72E-22 | -0. 55692 | 0. 016 | 0. 17  | 8. 55E-18 CSCL | ENTPD1    |
| SF3A2. 1   | 5. 76E-22 | -0. 19346 | 0. 07  | 0. 269 | 8. 61E-18 CSCL | SF3A2     |
| KIF2A. 2   | 5. 92E-22 | -0. 16516 | 0. 056 | 0. 244 | 8. 85E-18 CSCL | KIF2A     |
| SPECC1. 2  | 5. 93E-22 | -0. 14474 | 0. 091 | 0. 306 | 8. 85E-18 CSCL | SPECC1    |
| KLHDC2. 1  | 6. 01E-22 | -0. 10033 | 0. 094 | 0. 313 | 8. 97E-18 CSCL | KLHDC2    |
| DPH3. 1    | 6. 02E-22 | -0. 26154 | 0. 044 | 0. 222 | 9. 00E-18 CSCL | DPH3      |
| ARID1A. 2  | 6. 17E-22 | -0. 15156 | 0. 059 | 0. 251 | 9. 22E-18 CSCL | ARID1A    |
| PANK2. 2   | 6. 20E-22 | -0. 16705 | 0. 04  | 0. 217 | 9. 26E-18 CSCL | PANK2     |
| SBNO1. 1   | 6. 23E-22 | -0. 1446  | 0. 073 | 0. 275 | 9. 31E-18 CSCL | SBNO1     |
| KLHL5. 2   | 6. 26E-22 | -0. 28573 | 0. 019 | 0. 178 | 9. 35E-18 CSCL | KLHL5     |
| ABHD3. 2   | 6. 56E-22 | -0. 30656 | 0. 026 | 0. 19  | 9. 80E-18 CSCL | ABHD3     |
| ABCA1. 1   | 6. 59E-22 | -0. 28995 | 0. 059 | 0. 248 | 9. 84E-18 CSCL | ABCA1     |
| ATP5E. 1   | 6. 66E-22 | 0. 246896 | 0. 729 | 0. 923 | 9. 95E-18 CSCL | ATP5E     |
| ENC1. 2    | 6. 80E-22 | -0. 29228 | 0. 051 | 0. 233 | 1. 02E-17 CSCL | ENC1      |
| C1orf52. 2 | 7. 09E-22 | -0. 1148  | 0. 098 | 0. 317 | 1. 06E-17 CSCL | C1orf52   |
| RBMS1. 2   | 7. 51E-22 | -0. 15119 | 0. 065 | 0. 26  | 1. 12E-17 CSCL | RBMS1     |
| TGFBR1. 2  | 7. 60E-22 | -0. 42727 | 0. 016 | 0. 169 | 1. 14E-17 CSCL | TGFBR1    |
| MBD4. 1    | 7. 86E-22 | -0. 16988 | 0. 073 | 0. 273 | 1. 17E-17 CSCL | MBD4      |
| FABP7. 1   | 8. 04E-22 | 0. 775365 | 0. 461 | 0. 379 | 1. 20E-17 CSCL | FABP7     |
| MTX2       | 8. 07E-22 | -0. 10455 | 0. 106 | 0. 332 | 1. 21E-17 CSCL | MTX2      |
| ITSN2. 2   | 8. 21E-22 | -0. 28184 | 0. 026 | 0. 189 | 1. 23E-17 CSCL | ITSN2     |
| CEP350. 1  | 8. 32E-22 | -0. 15762 | 0. 031 | 0. 201 | 1. 24E-17 CSCL | CEP350    |
| FAM207A. 1 | 8. 37E-22 | -0. 16078 | 0. 038 | 0. 213 | 1. 25E-17 CSCL | FAM207A   |
| TMEM134. 2 | 8. 39E-22 | -0. 11202 | 0. 099 | 0. 32  | 1. 25E-17 CSCL | TMEM134   |
| CCNI. 2    | 8. 83E-22 | -0. 15358 | 0. 328 | 0. 725 | 1. 32E-17 CSCL | CCNI      |
| TRIM36. 2  | 9. 11E-22 | -0. 29039 | 0. 026 | 0. 19  | 1. 36E-17 CSCL | TRIM36    |
| FAM3A      | 9. 42E-22 | -0. 23996 | 0. 049 | 0. 23  | 1. 41E-17 CSCL | FAM3A     |



|             |          |          |       |       |          |      |           |
|-------------|----------|----------|-------|-------|----------|------|-----------|
| RELA. 1     | 9.46E-22 | -0.16541 | 0.038 | 0.212 | 1.41E-17 | CSCL | RELA      |
| PPP4R2      | 9.69E-22 | -0.11482 | 0.072 | 0.271 | 1.45E-17 | CSCL | PPP4R2    |
| ARCN1       | 9.73E-22 | -0.25172 | 0.023 | 0.183 | 1.45E-17 | CSCL | ARCN1     |
| DNAJC4. 1   | 1.01E-21 | -0.16715 | 0.052 | 0.237 | 1.51E-17 | CSCL | DNAJC4    |
| MIF4GD. 2   | 1.02E-21 | -0.15105 | 0.066 | 0.261 | 1.52E-17 | CSCL | MIF4GD    |
| CDKN1A. 1   | 1.02E-21 | -0.26442 | 0.103 | 0.318 | 1.52E-17 | CSCL | CDKN1A    |
| ARHGAP18. 1 | 1.03E-21 | -0.42607 | 0.021 | 0.18  | 1.54E-17 | CSCL | ARHGAP18  |
| VPS26B. 2   | 1.07E-21 | -0.15758 | 0.054 | 0.24  | 1.59E-17 | CSCL | VPS26B    |
| SLC30A9. 1  | 1.07E-21 | -0.13641 | 0.066 | 0.261 | 1.59E-17 | CSCL | SLC30A9   |
| SIPA1. 2    | 1.09E-21 | -0.43351 | 0.003 | 0.146 | 1.63E-17 | CSCL | SIPA1     |
| FOSB. 1     | 1.15E-21 | -0.24501 | 0.157 | 0.404 | 1.72E-17 | CSCL | FOSB      |
| SIRT7. 1    | 1.16E-21 | -0.19959 | 0.04  | 0.215 | 1.73E-17 | CSCL | SIRT7     |
| KDSR        | 1.20E-21 | -0.18232 | 0.068 | 0.263 | 1.79E-17 | CSCL | KDSR      |
| UBLCP1      | 1.21E-21 | -0.21044 | 0.035 | 0.206 | 1.81E-17 | CSCL | UBLCP1    |
| CPM. 2      | 1.21E-21 | -0.4602  | 0.059 | 0.244 | 1.81E-17 | CSCL | CPM       |
| NRP1. 2     | 1.25E-21 | -0.28841 | 0.017 | 0.173 | 1.87E-17 | CSCL | NRP1      |
| RABL6. 2    | 1.27E-21 | -0.11334 | 0.063 | 0.256 | 1.90E-17 | CSCL | RABL6     |
| GLA. 2      | 1.29E-21 | -0.3247  | 0.047 | 0.224 | 1.92E-17 | CSCL | GLA       |
| USP1. 1     | 1.33E-21 | -0.10533 | 0.07  | 0.268 | 1.99E-17 | CSCL | USP1      |
| SMCHD1. 2   | 1.34E-21 | -0.21071 | 0.03  | 0.195 | 2.00E-17 | CSCL | SMCHD1    |
| CAT. 1      | 1.38E-21 | -0.20023 | 0.099 | 0.315 | 2.06E-17 | CSCL | CAT       |
| NIPSNAP3A   | 1.39E-21 | -0.20385 | 0.037 | 0.208 | 2.08E-17 | CSCL | NIPSNAP3A |
| ALG3        | 1.40E-21 | -0.19146 | 0.056 | 0.241 | 2.09E-17 | CSCL | ALG3      |
| IL10RA. 2   | 1.41E-21 | -0.57387 | 0.003 | 0.145 | 2.11E-17 | CSCL | IL10RA    |
| RARS2       | 1.51E-21 | -0.19493 | 0.031 | 0.199 | 2.26E-17 | CSCL | RARS2     |
| EIF4G1. 1   | 1.55E-21 | -0.10258 | 0.082 | 0.287 | 2.31E-17 | CSCL | EIF4G1    |
| TMEM199     | 1.55E-21 | -0.10815 | 0.061 | 0.252 | 2.32E-17 | CSCL | TMEM199   |
| CHIC2. 1    | 1.63E-21 | -0.1909  | 0.063 | 0.253 | 2.44E-17 | CSCL | CHIC2     |
| NR4A3. 2    | 1.65E-21 | -0.5589  | 0.01  | 0.158 | 2.47E-17 | CSCL | NR4A3     |
| CEBPG. 1    | 1.68E-21 | -0.19405 | 0.066 | 0.258 | 2.50E-17 | CSCL | CEBPG     |
| RAB4B. 2    | 1.70E-21 | -0.11759 | 0.073 | 0.272 | 2.53E-17 | CSCL | RAB4B     |
| GALNT2. 1   | 1.75E-21 | -0.18036 | 0.063 | 0.253 | 2.62E-17 | CSCL | GALNT2    |
| TNFSF12. 2  | 1.79E-21 | -0.28839 | 0.03  | 0.194 | 2.68E-17 | CSCL | TNFSF12   |
| P2RX4. 2    | 1.82E-21 | -0.35581 | 0.024 | 0.184 | 2.72E-17 | CSCL | P2RX4     |
| HNMT. 2     | 1.82E-21 | -0.36888 | 0.049 | 0.227 | 2.72E-17 | CSCL | HNMT      |
| CBFB. 1     | 1.91E-21 | -0.11351 | 0.056 | 0.242 | 2.85E-17 | CSCL | CBFB      |
| WIPI1. 2    | 1.96E-21 | -0.32876 | 0.03  | 0.193 | 2.93E-17 | CSCL | WIPI1     |
| LINC01094   | 1.97E-21 | -0.56274 | 0.012 | 0.161 | 2.95E-17 | CSCL | LINC01094 |
| GPR137. 1   | 2.10E-21 | -0.14025 | 0.042 | 0.217 | 3.14E-17 | CSCL | GPR137    |
| PMEPA1. 2   | 2.18E-21 | -0.24787 | 0.038 | 0.209 | 3.26E-17 | CSCL | PMEPA1    |
| TMEM128. 1  | 2.20E-21 | -0.14435 | 0.091 | 0.302 | 3.29E-17 | CSCL | TMEM128   |
| SLAIN1. 2   | 2.38E-21 | -0.30022 | 0.04  | 0.211 | 3.56E-17 | CSCL | SLAIN1    |
| R3HDM4. 2   | 2.55E-21 | -0.20428 | 0.038 | 0.209 | 3.81E-17 | CSCL | R3HDM4    |
| SQRDL. 2    | 2.60E-21 | -0.4586  | 0.016 | 0.168 | 3.88E-17 | CSCL | SQRDL     |
| ABCE1       | 2.78E-21 | -0.13423 | 0.066 | 0.259 | 4.15E-17 | CSCL | ABCE1     |
| CDC42SE2. 2 | 2.90E-21 | -0.22157 | 0.049 | 0.227 | 4.33E-17 | CSCL | CDC42SE2  |
| VPS4B. 2    | 2.92E-21 | -0.10492 | 0.066 | 0.258 | 4.36E-17 | CSCL | VPS4B     |
| DERL1. 1    | 3.06E-21 | -0.12065 | 0.105 | 0.323 | 4.58E-17 | CSCL | DERL1     |
| OSM. 2      | 3.11E-21 | -0.67521 | 0.009 | 0.152 | 4.64E-17 | CSCL | OSM       |
| KIFAP3. 1   | 3.30E-21 | -0.26287 | 0.04  | 0.211 | 4.92E-17 | CSCL | KIFAP3    |
| CCND3. 1    | 3.30E-21 | -0.17462 | 0.073 | 0.269 | 4.93E-17 | CSCL | CCND3     |

|             |           |           |        |        |           |      |           |
|-------------|-----------|-----------|--------|--------|-----------|------|-----------|
| GRAMD1A. 2  | 3. 35E-21 | -0. 14401 | 0. 082 | 0. 285 | 5. 00E-17 | CSCL | GRAMD1A   |
| GPBP1L1. 2  | 3. 36E-21 | -0. 22634 | 0. 042 | 0. 214 | 5. 02E-17 | CSCL | GPBP1L1   |
| FNBP1L. 2   | 3. 42E-21 | -0. 23042 | 0. 03  | 0. 193 | 5. 11E-17 | CSCL | FNBP1L    |
| CUL5. 2     | 3. 45E-21 | -0. 13567 | 0. 051 | 0. 231 | 5. 15E-17 | CSCL | CUL5      |
| IER5. 2     | 3. 49E-21 | -0. 23794 | 0. 04  | 0. 211 | 5. 22E-17 | CSCL | IER5      |
| LMF2. 2     | 3. 51E-21 | -0. 28606 | 0. 04  | 0. 209 | 5. 25E-17 | CSCL | LMF2      |
| SLC25A19. 3 | 6. 1E-21  | -0. 38283 | 0. 021 | 0. 176 | 5. 40E-17 | CSCL | SLC25A19  |
| TMED7. 1    | 3. 64E-21 | -0. 15123 | 0. 08  | 0. 281 | 5. 44E-17 | CSCL | TMED7     |
| PPP2R5C. 1  | 3. 66E-21 | -0. 11611 | 0. 072 | 0. 267 | 5. 46E-17 | CSCL | PPP2R5C   |
| CDC16. 1    | 3. 74E-21 | -0. 20404 | 0. 037 | 0. 204 | 5. 59E-17 | CSCL | CDC16     |
| TMEM251. 1  | 3. 76E-21 | -0. 13742 | 0. 063 | 0. 252 | 5. 62E-17 | CSCL | TMEM251   |
| ANXA5. 2    | 3. 78E-21 | 0. 502776 | 0. 621 | 0. 732 | 5. 65E-17 | CSCL | ANXA5     |
| PSMB10. 2   | 3. 83E-21 | -0. 24211 | 0. 072 | 0. 264 | 5. 72E-17 | CSCL | PSMB10    |
| MT1X. 2     | 3. 86E-21 | 0. 66092  | 0. 576 | 0. 578 | 5. 77E-17 | CSCL | MT1X      |
| PRRC2B. 2   | 3. 97E-21 | -0. 17255 | 0. 059 | 0. 245 | 5. 94E-17 | CSCL | PRRC2B    |
| CIAO1. 1    | 3. 99E-21 | -0. 11492 | 0. 063 | 0. 252 | 5. 96E-17 | CSCL | CIAO1     |
| SRD5A3. 2   | 4. 08E-21 | -0. 28155 | 0. 017 | 0. 17  | 6. 09E-17 | CSCL | SRD5A3    |
| PELI1. 2    | 4. 12E-21 | -0. 38122 | 0. 045 | 0. 218 | 6. 16E-17 | CSCL | PELI1     |
| TOMM5. 2    | 4. 15E-21 | -0. 1573  | 0. 044 | 0. 218 | 6. 20E-17 | CSCL | TOMM5     |
| ARL8B. 1    | 4. 19E-21 | -0. 1939  | 0. 042 | 0. 214 | 6. 26E-17 | CSCL | ARL8B     |
| SNX9. 2     | 4. 26E-21 | -0. 2731  | 0. 033 | 0. 197 | 6. 37E-17 | CSCL | SNX9      |
| FBXO9. 2    | 4. 37E-21 | -0. 11219 | 0. 042 | 0. 215 | 6. 53E-17 | CSCL | FBXO9     |
| QARS. 2     | 4. 38E-21 | -0. 13518 | 0. 087 | 0. 292 | 6. 55E-17 | CSCL | QARS      |
| GABARAPL1   | 4. 45E-21 | -0. 20921 | 0. 098 | 0. 308 | 6. 65E-17 | CSCL | GABARAPL1 |
| ASCC2. 1    | 4. 72E-21 | -0. 2154  | 0. 042 | 0. 214 | 7. 06E-17 | CSCL | ASCC2     |
| RNF19A. 2   | 4. 84E-21 | -0. 25135 | 0. 04  | 0. 21  | 7. 23E-17 | CSCL | RNF19A    |
| ORC4. 1     | 5. 24E-21 | -0. 20562 | 0. 059 | 0. 244 | 7. 83E-17 | CSCL | ORC4      |
| ADAM28. 2   | 5. 29E-21 | -0. 61126 | 0. 007 | 0. 148 | 7. 90E-17 | CSCL | ADAM28    |
| SOAT1. 2    | 5. 53E-21 | -0. 28716 | 0. 038 | 0. 206 | 8. 26E-17 | CSCL | SOAT1     |
| HES4. 2     | 5. 60E-21 | -0. 20553 | 0. 031 | 0. 195 | 8. 37E-17 | CSCL | HES4      |
| HK1. 2      | 5. 65E-21 | -0. 22625 | 0. 037 | 0. 203 | 8. 45E-17 | CSCL | HK1       |
| ALOX5. 2    | 5. 84E-21 | -0. 53547 | 0. 005 | 0. 145 | 8. 72E-17 | CSCL | ALOX5     |
| CSTA. 2     | 5. 86E-21 | -0. 55002 | 0      | 0. 135 | 8. 76E-17 | CSCL | CSTA      |
| IPO7. 2     | 5. 95E-21 | -0. 13633 | 0. 045 | 0. 22  | 8. 90E-17 | CSCL | IPO7      |
| PADI2. 2    | 6. 01E-21 | -0. 55726 | 0. 003 | 0. 142 | 8. 99E-17 | CSCL | PADI2     |
| IRF7. 2     | 6. 13E-21 | -0. 34229 | 0. 017 | 0. 168 | 9. 16E-17 | CSCL | IRF7      |
| PLAU. 2     | 6. 55E-21 | -0. 39622 | 0. 019 | 0. 171 | 9. 79E-17 | CSCL | PLAU      |
| B3GNT5. 2   | 6. 71E-21 | -0. 39202 | 0. 007 | 0. 148 | 1. 00E-16 | CSCL | B3GNT5    |
| PAK1. 2     | 6. 72E-21 | -0. 40894 | 0. 023 | 0. 177 | 1. 00E-16 | CSCL | PAK1      |
| HLA-B. 2    | 6. 84E-21 | 0. 322661 | 0. 716 | 0. 859 | 1. 02E-16 | CSCL | HLA-B     |
| AP2A2. 2    | 6. 92E-21 | -0. 16493 | 0. 07  | 0. 261 | 1. 03E-16 | CSCL | AP2A2     |
| FCGR2B. 2   | 7. 04E-21 | -0. 63434 | 0. 009 | 0. 151 | 1. 05E-16 | CSCL | FCGR2B    |
| SNX1. 1     | 7. 05E-21 | -0. 2243  | 0. 052 | 0. 231 | 1. 05E-16 | CSCL | SNX1      |
| IMPDH1. 2   | 7. 18E-21 | -0. 27987 | 0. 016 | 0. 165 | 1. 07E-16 | CSCL | IMPDH1    |
| CAMK2N1. 2  | 7. 34E-21 | -0. 11893 | 0. 108 | 0. 327 | 1. 10E-16 | CSCL | CAMK2N1   |
| NPL. 2      | 7. 41E-21 | -0. 48504 | 0. 042 | 0. 209 | 1. 11E-16 | CSCL | NPL       |
| CCSER2. 2   | 7. 43E-21 | -0. 15256 | 0. 056 | 0. 237 | 1. 11E-16 | CSCL | CCSER2    |
| GOSR1. 1    | 7. 58E-21 | -0. 10155 | 0. 079 | 0. 277 | 1. 13E-16 | CSCL | GOSR1     |
| ZNF106. 2   | 7. 76E-21 | -0. 14257 | 0. 073 | 0. 267 | 1. 16E-16 | CSCL | ZNF106    |
| USP53. 2    | 7. 97E-21 | -0. 51296 | 0. 007 | 0. 148 | 1. 19E-16 | CSCL | USP53     |
| DAB2. 2     | 8. 33E-21 | -0. 53403 | 0. 012 | 0. 157 | 1. 24E-16 | CSCL | DAB2      |

|             |           |           |        |        |           |      |          |
|-------------|-----------|-----------|--------|--------|-----------|------|----------|
| ABHD14B. 1  | 8. 37E-21 | -0. 29621 | 0. 028 | 0. 187 | 1. 25E-16 | CSCL | ABHD14B  |
| PPP3CA. 2   | 8. 60E-21 | -0. 12641 | 0. 066 | 0. 255 | 1. 28E-16 | CSCL | PPP3CA   |
| INO80E. 1   | 8. 74E-21 | -0. 18422 | 0. 054 | 0. 234 | 1. 31E-16 | CSCL | INO80E   |
| SEL1L. 1    | 8. 78E-21 | -0. 21794 | 0. 024 | 0. 181 | 1. 31E-16 | CSCL | SEL1L    |
| SNCA. 2     | 8. 87E-21 | -0. 57734 | 0. 009 | 0. 151 | 1. 33E-16 | CSCL | SNCA     |
| CCNDBP1. 2  | 9. 31E-21 | -0. 31045 | 0. 044 | 0. 213 | 1. 39E-16 | CSCL | CCNDBP1  |
| TBC1D20. 1  | 9. 33E-21 | -0. 12253 | 0. 03  | 0. 191 | 1. 39E-16 | CSCL | TBC1D20  |
| CHMP6. 1    | 9. 70E-21 | -0. 13937 | 0. 037 | 0. 203 | 1. 45E-16 | CSCL | CHMP6    |
| MAN1B1      | 1. 01E-20 | -0. 13133 | 0. 052 | 0. 23  | 1. 51E-16 | CSCL | MAN1B1   |
| TMEM141. 2  | 1. 02E-20 | -0. 10112 | 0. 07  | 0. 262 | 1. 52E-16 | CSCL | TMEM141  |
| PTGS1. 2    | 1. 02E-20 | -0. 41265 | 0. 016 | 0. 164 | 1. 53E-16 | CSCL | PTGS1    |
| COQ10B. 1   | 1. 03E-20 | -0. 14907 | 0. 077 | 0. 272 | 1. 53E-16 | CSCL | COQ10B   |
| ATP5G2. 1   | 1. 03E-20 | 0. 338203 | 0. 691 | 0. 878 | 1. 54E-16 | CSCL | ATP5G2   |
| MIS18BP1. 1 | 1. 03E-20 | -0. 40898 | 0. 01  | 0. 154 | 1. 54E-16 | CSCL | MIS18BP1 |
| GCC2. 1     | 1. 07E-20 | -0. 14559 | 0. 082 | 0. 282 | 1. 60E-16 | CSCL | GCC2     |
| PRADC1. 1   | 1. 12E-20 | -0. 15991 | 0. 049 | 0. 225 | 1. 67E-16 | CSCL | PRADC1   |
| NUB1        | 1. 13E-20 | -0. 15985 | 0. 072 | 0. 262 | 1. 69E-16 | CSCL | NUB1     |
| GPR65. 2    | 1. 15E-20 | -0. 55474 | 0. 003 | 0. 14  | 1. 72E-16 | CSCL | GPR65    |
| ZBTB7A. 1   | 1. 18E-20 | -0. 2345  | 0. 028 | 0. 186 | 1. 77E-16 | CSCL | ZBTB7A   |
| ARL8A. 2    | 1. 19E-20 | -0. 10581 | 0. 082 | 0. 282 | 1. 77E-16 | CSCL | ARL8A    |
| CDC42SE1. 1 | 1. 20E-20 | -0. 12169 | 0. 101 | 0. 314 | 1. 80E-16 | CSCL | CDC42SE1 |
| WDR43. 1    | 1. 20E-20 | -0. 1783  | 0. 037 | 0. 202 | 1. 80E-16 | CSCL | WDR43    |
| SDCCAG8. 2  | 1. 24E-20 | -0. 13399 | 0. 119 | 0. 34  | 1. 86E-16 | CSCL | SDCCAG8  |
| ZC3H11A. 2  | 1. 30E-20 | -0. 20369 | 0. 04  | 0. 207 | 1. 94E-16 | CSCL | ZC3H11A  |
| MAX         | 1. 31E-20 | -0. 10632 | 0. 096 | 0. 304 | 1. 96E-16 | CSCL | MAX      |
| UBL7        | 1. 34E-20 | -0. 1674  | 0. 058 | 0. 239 | 2. 00E-16 | CSCL | UBL7     |
| SMCO4. 2    | 1. 34E-20 | -0. 48833 | 0. 003 | 0. 139 | 2. 00E-16 | CSCL | SMCO4    |
| CDC27. 2    | 1. 35E-20 | -0. 24522 | 0. 019 | 0. 17  | 2. 01E-16 | CSCL | CDC27    |
| DHX30. 1    | 1. 38E-20 | -0. 1051  | 0. 073 | 0. 267 | 2. 07E-16 | CSCL | DHX30    |
| UHMK1. 1    | 1. 39E-20 | -0. 15961 | 0. 042 | 0. 211 | 2. 07E-16 | CSCL | UHMK1    |
| TSPAN13. 2  | 1. 39E-20 | -0. 28483 | 0. 103 | 0. 309 | 2. 08E-16 | CSCL | TSPAN13  |
| TRIP12. 2   | 1. 40E-20 | -0. 20434 | 0. 021 | 0. 173 | 2. 10E-16 | CSCL | TRIP12   |
| AAED1. 2    | 1. 44E-20 | -0. 25668 | 0. 03  | 0. 189 | 2. 15E-16 | CSCL | AAED1    |
| SNN. 2      | 1. 45E-20 | -0. 20238 | 0. 056 | 0. 234 | 2. 16E-16 | CSCL | SNN      |
| ATG5        | 1. 51E-20 | -0. 20879 | 0. 045 | 0. 217 | 2. 26E-16 | CSCL | ATG5     |
| RPS6KB2. 1  | 1. 52E-20 | -0. 16111 | 0. 056 | 0. 236 | 2. 28E-16 | CSCL | RPS6KB2  |
| ZDHHC24. 2  | 1. 54E-20 | -0. 12968 | 0. 033 | 0. 196 | 2. 29E-16 | CSCL | ZDHHC24  |
| TSSC1       | 1. 55E-20 | -0. 12093 | 0. 075 | 0. 269 | 2. 32E-16 | CSCL | TSSC1    |
| TP53RK. 1   | 1. 55E-20 | -0. 1205  | 0. 035 | 0. 199 | 2. 32E-16 | CSCL | TP53RK   |
| PRPF8. 2    | 1. 57E-20 | -0. 10172 | 0. 073 | 0. 266 | 2. 35E-16 | CSCL | PRPF8    |
| TSPYL1. 2   | 1. 58E-20 | -0. 1973  | 0. 063 | 0. 247 | 2. 36E-16 | CSCL | TSPYL1   |
| MKNK1. 2    | 1. 64E-20 | -0. 41773 | 0. 024 | 0. 178 | 2. 45E-16 | CSCL | MKNK1    |
| PRKRIP1. 1  | 1. 65E-20 | -0. 13479 | 0. 065 | 0. 25  | 2. 47E-16 | CSCL | PRKRIP1  |
| GUSB. 1     | 1. 69E-20 | -0. 17057 | 0. 084 | 0. 282 | 2. 53E-16 | CSCL | GUSB     |
| TBRG1. 1    | 1. 75E-20 | -0. 11856 | 0. 066 | 0. 254 | 2. 61E-16 | CSCL | TBRG1    |
| AIDA        | 1. 82E-20 | -0. 11583 | 0. 061 | 0. 245 | 2. 72E-16 | CSCL | AIDA     |
| GNL1        | 1. 87E-20 | -0. 13664 | 0. 065 | 0. 251 | 2. 80E-16 | CSCL | GNL1     |
| SPSB3. 1    | 2. 03E-20 | -0. 12179 | 0. 103 | 0. 315 | 3. 03E-16 | CSCL | SPSB3    |
| GOLT1B. 2   | 2. 05E-20 | -0. 15044 | 0. 063 | 0. 247 | 3. 06E-16 | CSCL | GOLT1B   |
| SLC38A2. 1  | 2. 08E-20 | -0. 18573 | 0. 089 | 0. 289 | 3. 10E-16 | CSCL | SLC38A2  |
| TMEM55B. 1  | 2. 14E-20 | -0. 22103 | 0. 052 | 0. 227 | 3. 20E-16 | CSCL | TMEM55B  |

|            |           |           |        |        |           |      |                |
|------------|-----------|-----------|--------|--------|-----------|------|----------------|
| BFAR. 1    | 2. 17E-20 | -0. 17014 | 0. 058 | 0. 237 | 3. 24E-16 | CSCL | BFAR           |
| CCDC137. 1 | 2. 19E-20 | -0. 15949 | 0. 042 | 0. 21  | 3. 27E-16 | CSCL | CCDC137        |
| TAC01. 2   | 2. 22E-20 | -0. 15806 | 0. 026 | 0. 182 | 3. 31E-16 | CSCL | TAC01          |
| TOR3A. 2   | 2. 37E-20 | -0. 1671  | 0. 047 | 0. 219 | 3. 54E-16 | CSCL | TOR3A          |
| PKN2. 2    | 2. 39E-20 | -0. 1678  | 0. 047 | 0. 219 | 3. 58E-16 | CSCL | PKN2           |
| GALK1. 2   | 2. 41E-20 | -0. 17747 | 0. 044 | 0. 212 | 3. 60E-16 | CSCL | GALK1          |
| KPNA4. 2   | 2. 56E-20 | -0. 17992 | 0. 03  | 0. 188 | 3. 83E-16 | CSCL | KPNA4          |
| RNF14. 1   | 2. 61E-20 | -0. 20204 | 0. 038 | 0. 203 | 3. 90E-16 | CSCL | RNF14          |
| TBCC. 2    | 2. 79E-20 | -0. 21791 | 0. 054 | 0. 23  | 4. 16E-16 | CSCL | TBCC           |
| ATPAF2. 2  | 2. 84E-20 | -0. 13085 | 0. 049 | 0. 222 | 4. 25E-16 | CSCL | ATPAF2         |
| FNDC4      | 3. 04E-20 | -0. 15828 | 0. 04  | 0. 206 | 4. 54E-16 | CSCL | FNDC4          |
| GLRX2. 1   | 3. 08E-20 | -0. 27218 | 0. 021 | 0. 17  | 4. 61E-16 | CSCL | GLRX2          |
| COPS2. 1   | 3. 15E-20 | -0. 17518 | 0. 047 | 0. 218 | 4. 70E-16 | CSCL | COPS2          |
| TMEM218. 1 | 3. 22E-20 | -0. 17575 | 0. 054 | 0. 23  | 4. 82E-16 | CSCL | TMEM218        |
| ACER3. 2   | 3. 38E-20 | -0. 26376 | 0. 033 | 0. 193 | 5. 05E-16 | CSCL | ACER3          |
| MTF2. 2    | 3. 52E-20 | -0. 14603 | 0. 073 | 0. 263 | 5. 27E-16 | CSCL | MTF2           |
| TOB1       | 3. 62E-20 | -0. 19109 | 0. 075 | 0. 264 | 5. 41E-16 | CSCL | TOB1           |
| FLNA. 2    | 3. 78E-20 | -0. 15557 | 0. 072 | 0. 26  | 5. 65E-16 | CSCL | FLNA           |
| CBX3. 2    | 3. 85E-20 | -0. 10036 | 0. 248 | 0. 569 | 5. 75E-16 | CSCL | CBX3           |
| DESI1. 2   | 3. 87E-20 | -0. 24158 | 0. 028 | 0. 183 | 5. 79E-16 | CSCL | DESI1          |
| MAFG. 2    | 3. 91E-20 | -0. 18311 | 0. 033 | 0. 192 | 5. 84E-16 | CSCL | MAFG           |
| USO1. 1    | 3. 92E-20 | -0. 16756 | 0. 051 | 0. 224 | 5. 86E-16 | CSCL | USO1           |
| DCAF6. 2   | 3. 96E-20 | -0. 2749  | 0. 023 | 0. 173 | 5. 92E-16 | CSCL | DCAF6          |
| OSER1      | 4. 15E-20 | -0. 12023 | 0. 103 | 0. 312 | 6. 21E-16 | CSCL | OSER1          |
| LACTB. 2   | 4. 17E-20 | -0. 27736 | 0. 023 | 0. 173 | 6. 24E-16 | CSCL | LACTB          |
| FGD4. 2    | 4. 18E-20 | -0. 41646 | 0. 012 | 0. 153 | 6. 24E-16 | CSCL | FGD4           |
| CTBS. 1    | 4. 20E-20 | -0. 31969 | 0. 017 | 0. 163 | 6. 27E-16 | CSCL | CTBS           |
| DESI2. 1   | 4. 27E-20 | -0. 10583 | 0. 038 | 0. 202 | 6. 38E-16 | CSCL | DESI2          |
| CAB39. 2   | 4. 31E-20 | -0. 24366 | 0. 033 | 0. 191 | 6. 43E-16 | CSCL | CAB39          |
| LCP1. 1    | 4. 33E-20 | -0. 51773 | 0. 01  | 0. 149 | 6. 47E-16 | CSCL | LCP1           |
| APLP1. 2   | 4. 34E-20 | -0. 25846 | 0. 14  | 0. 362 | 6. 48E-16 | CSCL | APLP1          |
| NUDT2. 2   | 4. 37E-20 | -0. 24337 | 0. 028 | 0. 182 | 6. 53E-16 | CSCL | NUDT2          |
| GNS. 2     | 4. 52E-20 | -0. 20331 | 0. 042 | 0. 207 | 6. 76E-16 | CSCL | GNS            |
| FNDC3A. 1  | 4. 71E-20 | -0. 15783 | 0. 051 | 0. 223 | 7. 04E-16 | CSCL | FNDC3A         |
| UBQLN2. 2  | 4. 88E-20 | -0. 18031 | 0. 054 | 0. 229 | 7. 29E-16 | CSCL | UBQLN2         |
| GARS. 2    | 4. 89E-20 | -0. 13387 | 0. 098 | 0. 303 | 7. 31E-16 | CSCL | GARS           |
| TMEM242. 1 | 5. 06E-20 | -0. 16256 | 0. 066 | 0. 25  | 7. 55E-16 | CSCL | TMEM242        |
| ATP1B1. 2  | 5. 14E-20 | -0. 30255 | 0. 065 | 0. 243 | 7. 68E-16 | CSCL | ATP1B1         |
| ACOT7. 2   | 5. 14E-20 | -0. 10826 | 0. 058 | 0. 236 | 7. 69E-16 | CSCL | ACOT7          |
| FBXW11. 1  | 5. 15E-20 | -0. 21126 | 0. 031 | 0. 188 | 7. 69E-16 | CSCL | FBXW11         |
| RNF115. 1  | 5. 16E-20 | -0. 1686  | 0. 068 | 0. 252 | 7. 71E-16 | CSCL | RNF115         |
| SMC2. 1    | 5. 24E-20 | -0. 16999 | 0. 042 | 0. 208 | 7. 84E-16 | CSCL | SMC2           |
| TM9SF3. 2  | 5. 57E-20 | -0. 16119 | 0. 054 | 0. 228 | 8. 32E-16 | CSCL | TM9SF3         |
| DDX54. 1   | 5. 69E-20 | -0. 16635 | 0. 042 | 0. 207 | 8. 51E-16 | CSCL | DDX54          |
| DALRD3     | 5. 72E-20 | -0. 21277 | 0. 023 | 0. 173 | 8. 54E-16 | CSCL | DALRD3         |
| EGLN1. 1   | 5. 73E-20 | -0. 15616 | 0. 035 | 0. 195 | 8. 56E-16 | CSCL | EGLN1          |
| RP11-395G  | 5. 93E-20 | -0. 2374  | 0. 03  | 0. 185 | 8. 86E-16 | CSCL | RP11-395G23. 3 |
| AKAP17A. 1 | 5. 97E-20 | -0. 28033 | 0. 024 | 0. 175 | 8. 92E-16 | CSCL | AKAP17A        |
| GTPBP6. 2  | 5. 98E-20 | -0. 10174 | 0. 049 | 0. 22  | 8. 94E-16 | CSCL | GTPBP6         |
| ENTPD6. 2  | 6. 11E-20 | -0. 19547 | 0. 042 | 0. 207 | 9. 13E-16 | CSCL | ENTPD6         |
| SLC12A9. 2 | 6. 14E-20 | -0. 21958 | 0. 044 | 0. 209 | 9. 18E-16 | CSCL | SLC12A9        |

|            |           |           |        |        |           |      |           |
|------------|-----------|-----------|--------|--------|-----------|------|-----------|
| CSE1L. 1   | 6. 22E-20 | -0. 11617 | 0. 056 | 0. 231 | 9. 30E-16 | CSCL | CSE1L     |
| SYNRG. 1   | 6. 25E-20 | -0. 18631 | 0. 037 | 0. 197 | 9. 34E-16 | CSCL | SYNRG     |
| C6orf89    | 6. 52E-20 | -0. 16391 | 0. 054 | 0. 228 | 9. 74E-16 | CSCL | C6orf89   |
| KIAA1715.  | 6. 52E-20 | -0. 12836 | 0. 075 | 0. 264 | 9. 75E-16 | CSCL | KIAA1715  |
| ALG13. 1   | 6. 84E-20 | -0. 20093 | 0. 054 | 0. 228 | 1. 02E-15 | CSCL | ALG13     |
| DGKZ. 2    | 7. 00E-20 | -0. 14406 | 0. 04  | 0. 204 | 1. 05E-15 | CSCL | DGKZ      |
| TMEM223. 1 | 7. 09E-20 | -0. 15431 | 0. 058 | 0. 233 | 1. 06E-15 | CSCL | TMEM223   |
| SMARCD1. 2 | 7. 28E-20 | -0. 11462 | 0. 051 | 0. 223 | 1. 09E-15 | CSCL | SMARCD1   |
| MTHFD1L. 2 | 7. 38E-20 | -0. 32382 | 0. 007 | 0. 142 | 1. 10E-15 | CSCL | MTHFD1L   |
| USP15. 2   | 7. 67E-20 | -0. 27008 | 0. 07  | 0. 251 | 1. 15E-15 | CSCL | USP15     |
| IRF2BP2. 2 | 7. 79E-20 | -0. 11951 | 0. 112 | 0. 326 | 1. 16E-15 | CSCL | IRF2BP2   |
| TRADD. 2   | 7. 83E-20 | -0. 17798 | 0. 024 | 0. 175 | 1. 17E-15 | CSCL | TRADD     |
| IER3IP1. 2 | 8. 11E-20 | 0. 537239 | 0. 108 | 0. 035 | 1. 21E-15 | CSCL | IER3IP1   |
| SRGAP1. 2  | 8. 37E-20 | -0. 199   | 0. 058 | 0. 234 | 1. 25E-15 | CSCL | SRGAP1    |
| ZC3HAV1. 2 | 8. 93E-20 | -0. 22884 | 0. 03  | 0. 184 | 1. 33E-15 | CSCL | ZC3HAV1   |
| DNAJC1. 2  | 9. 19E-20 | -0. 1996  | 0. 035 | 0. 193 | 1. 37E-15 | CSCL | DNAJC1    |
| C17orf58.  | 9. 41E-20 | -0. 20793 | 0. 035 | 0. 194 | 1. 41E-15 | CSCL | C17orf58  |
| PAPD4. 1   | 9. 42E-20 | -0. 23781 | 0. 031 | 0. 187 | 1. 41E-15 | CSCL | PAPD4     |
| RNF13. 2   | 9. 44E-20 | -0. 1131  | 0. 213 | 0. 494 | 1. 41E-15 | CSCL | RNF13     |
| RPS6KA1. 2 | 9. 57E-20 | -0. 47729 | 0. 005 | 0. 137 | 1. 43E-15 | CSCL | RPS6KA1   |
| PUM1. 2    | 9. 63E-20 | -0. 12362 | 0. 065 | 0. 246 | 1. 44E-15 | CSCL | PUM1      |
| PIK3IP1. 2 | 9. 75E-20 | -0. 51184 | 0. 023 | 0. 168 | 1. 46E-15 | CSCL | PIK3IP1   |
| PES1. 2    | 9. 84E-20 | -0. 12119 | 0. 038 | 0. 2   | 1. 47E-15 | CSCL | PES1      |
| PRDX1. 2   | 9. 98E-20 | 0. 415244 | 0. 665 | 0. 815 | 1. 49E-15 | CSCL | PRDX1     |
| PCGF5      | 1. 01E-19 | -0. 24437 | 0. 031 | 0. 187 | 1. 51E-15 | CSCL | PCGF5     |
| THOC3. 1   | 1. 02E-19 | -0. 2167  | 0. 026 | 0. 177 | 1. 52E-15 | CSCL | THOC3     |
| TMPO. 2    | 1. 07E-19 | -0. 24828 | 0. 04  | 0. 201 | 1. 60E-15 | CSCL | TMPO      |
| DR1. 2     | 1. 09E-19 | -0. 1553  | 0. 065 | 0. 243 | 1. 62E-15 | CSCL | DR1       |
| CTTNBP2NL  | 1. 11E-19 | -0. 30861 | 0. 017 | 0. 16  | 1. 66E-15 | CSCL | CTTNBP2NL |
| PDE4B. 2   | 1. 12E-19 | -0. 14925 | 0. 089 | 0. 286 | 1. 68E-15 | CSCL | PDE4B     |
| ETNK1. 2   | 1. 15E-19 | -0. 19661 | 0. 058 | 0. 232 | 1. 72E-15 | CSCL | ETNK1     |
| CACUL1. 2  | 1. 15E-19 | -0. 22439 | 0. 047 | 0. 214 | 1. 72E-15 | CSCL | CACUL1    |
| CKAP2. 2   | 1. 16E-19 | -0. 25767 | 0. 026 | 0. 176 | 1. 73E-15 | CSCL | CKAP2     |
| VPS37A     | 1. 19E-19 | -0. 16335 | 0. 047 | 0. 214 | 1. 79E-15 | CSCL | VPS37A    |
| CSK. 2     | 1. 20E-19 | -0. 33376 | 0. 014 | 0. 154 | 1. 79E-15 | CSCL | CSK       |
| DTNBP1. 2  | 1. 21E-19 | -0. 15377 | 0. 047 | 0. 215 | 1. 81E-15 | CSCL | DTNBP1    |
| SP100. 1   | 1. 23E-19 | -0. 28787 | 0. 098 | 0. 296 | 1. 84E-15 | CSCL | SP100     |
| PRKAR2A    | 1. 23E-19 | -0. 1117  | 0. 072 | 0. 258 | 1. 85E-15 | CSCL | PRKAR2A   |
| KLF10. 1   | 1. 25E-19 | -0. 29034 | 0. 065 | 0. 242 | 1. 86E-15 | CSCL | KLF10     |
| FAM228B. 1 | 1. 26E-19 | -0. 12394 | 0. 052 | 0. 224 | 1. 89E-15 | CSCL | FAM228B   |
| ANKRD40. 1 | 1. 33E-19 | -0. 19192 | 0. 03  | 0. 182 | 1. 98E-15 | CSCL | ANKRD40   |
| NCF1. 2    | 1. 37E-19 | -0. 50684 | 0. 002 | 0. 13  | 2. 04E-15 | CSCL | NCF1      |
| CSRNP1. 2  | 1. 39E-19 | -0. 32122 | 0. 04  | 0. 198 | 2. 07E-15 | CSCL | CSRNP1    |
| SLC20A1    | 1. 40E-19 | -0. 23429 | 0. 031 | 0. 186 | 2. 09E-15 | CSCL | SLC20A1   |
| MRGBP. 1   | 1. 42E-19 | -0. 21621 | 0. 014 | 0. 154 | 2. 13E-15 | CSCL | MRGBP     |
| CTXN1. 2   | 1. 49E-19 | -0. 22804 | 0. 021 | 0. 167 | 2. 22E-15 | CSCL | CTXN1     |
| MARCH1. 2  | 1. 53E-19 | -0. 39043 | 0. 04  | 0. 198 | 2. 28E-15 | CSCL | 1-Mar     |
| ARFIP2. 2  | 1. 55E-19 | -0. 14749 | 0. 07  | 0. 253 | 2. 31E-15 | CSCL | ARFIP2    |
| SOCS6. 2   | 1. 55E-19 | -0. 10786 | 0. 061 | 0. 238 | 2. 32E-15 | CSCL | SOCS6     |
| FLII. 2    | 1. 56E-19 | -0. 20852 | 0. 037 | 0. 195 | 2. 34E-15 | CSCL | FLII      |
| PDCL3. 1   | 1. 59E-19 | -0. 10636 | 0. 099 | 0. 303 | 2. 38E-15 | CSCL | PDCL3     |

|            |          |          |       |       |          |      |           |
|------------|----------|----------|-------|-------|----------|------|-----------|
| EIF2AK4.2  | 1.60E-19 | -0.17799 | 0.033 | 0.189 | 2.38E-15 | CSCL | EIF2AK4   |
| CES2.1     | 1.60E-19 | -0.17555 | 0.035 | 0.192 | 2.39E-15 | CSCL | CES2      |
| TMEM87A.1  | 1.60E-19 | -0.10935 | 0.087 | 0.283 | 2.39E-15 | CSCL | TMEM87A   |
| UBAP1.1    | 1.61E-19 | -0.17478 | 0.035 | 0.192 | 2.40E-15 | CSCL | UBAP1     |
| BTBD10.1   | 1.74E-19 | -0.19702 | 0.033 | 0.189 | 2.61E-15 | CSCL | BTBD10    |
| SELM.2     | 1.75E-19 | -0.32899 | 0.038 | 0.196 | 2.61E-15 | CSCL | SELM      |
| ADCK2.2    | 1.77E-19 | -0.28356 | 0.01  | 0.146 | 2.64E-15 | CSCL | ADCK2     |
| AOAH.2     | 1.80E-19 | -0.56213 | 0.002 | 0.129 | 2.69E-15 | CSCL | AOAH      |
| SUCLG2     | 1.81E-19 | -0.16247 | 0.072 | 0.254 | 2.71E-15 | CSCL | SUCLG2    |
| TCERG1.1   | 1.87E-19 | -0.17313 | 0.047 | 0.212 | 2.79E-15 | CSCL | TCERG1    |
| SNHG15.1   | 1.87E-19 | -0.18025 | 0.058 | 0.23  | 2.80E-15 | CSCL | SNHG15    |
| SIL1.1     | 1.96E-19 | -0.11726 | 0.077 | 0.264 | 2.93E-15 | CSCL | SIL1      |
| EVA1B.2    | 2.03E-19 | -0.23738 | 0.002 | 0.129 | 3.03E-15 | CSCL | EVA1B     |
| CD84.2     | 2.06E-19 | -0.52715 | 0.005 | 0.135 | 3.09E-15 | CSCL | CD84      |
| C21orf2.2  | 2.08E-19 | -0.1965  | 0.042 | 0.202 | 3.11E-15 | CSCL | C21orf2   |
| HEXIM1.1   | 2.08E-19 | -0.20891 | 0.056 | 0.227 | 3.11E-15 | CSCL | HEXIM1    |
| JOSD1.2    | 2.09E-19 | -0.29779 | 0.021 | 0.165 | 3.12E-15 | CSCL | JOSD1     |
| FBXW2.2    | 2.18E-19 | -0.14874 | 0.04  | 0.2   | 3.25E-15 | CSCL | FBXW2     |
| LASP1.2    | 2.21E-19 | -0.18572 | 0.051 | 0.218 | 3.30E-15 | CSCL | LASP1     |
| KIF5C.2    | 2.21E-19 | -0.19279 | 0.086 | 0.277 | 3.30E-15 | CSCL | KIF5C     |
| TRAPPC12.2 | 2.21E-19 | -0.18594 | 0.044 | 0.205 | 3.31E-15 | CSCL | TRAPPC12  |
| LRRC47.1   | 2.22E-19 | -0.13274 | 0.054 | 0.225 | 3.32E-15 | CSCL | LRRC47    |
| TOB2.1     | 2.23E-19 | -0.26017 | 0.044 | 0.205 | 3.33E-15 | CSCL | TOB2      |
| C7orf49.1  | 2.27E-19 | -0.11867 | 0.049 | 0.216 | 3.39E-15 | CSCL | C7orf49   |
| GLYR1.1    | 2.29E-19 | -0.17427 | 0.051 | 0.218 | 3.42E-15 | CSCL | GLYR1     |
| LRRC58.1   | 2.49E-19 | -0.17047 | 0.049 | 0.214 | 3.73E-15 | CSCL | LRRC58    |
| USP34.2    | 2.51E-19 | -0.14319 | 0.051 | 0.218 | 3.76E-15 | CSCL | USP34     |
| NUP62.2    | 2.54E-19 | -0.11096 | 0.066 | 0.246 | 3.79E-15 | CSCL | NUP62     |
| TRAF7.2    | 2.59E-19 | -0.14519 | 0.038 | 0.197 | 3.86E-15 | CSCL | TRAF7     |
| PHLDA1.2   | 2.61E-19 | -0.10022 | 0.164 | 0.407 | 3.90E-15 | CSCL | PHLDA1    |
| RIF1.1     | 2.63E-19 | -0.11044 | 0.056 | 0.228 | 3.94E-15 | CSCL | RIF1      |
| SNAP29.2   | 2.70E-19 | -0.11487 | 0.059 | 0.233 | 4.04E-15 | CSCL | SNAP29    |
| FAM120AOS  | 2.72E-19 | -0.14008 | 0.037 | 0.193 | 4.06E-15 | CSCL | FAM120AOS |
| FAM58A.2   | 2.77E-19 | -0.23973 | 0.019 | 0.161 | 4.14E-15 | CSCL | FAM58A    |
| ATAT1.2    | 2.77E-19 | -0.11713 | 0.098 | 0.298 | 4.15E-15 | CSCL | ATAT1     |
| CCPG1.1    | 2.79E-19 | -0.14368 | 0.052 | 0.221 | 4.17E-15 | CSCL | CCPG1     |
| NCKAP1L.2  | 2.83E-19 | -0.52657 | 0.002 | 0.128 | 4.23E-15 | CSCL | NCKAP1L   |
| RRP36.2    | 2.86E-19 | -0.18868 | 0.014 | 0.152 | 4.28E-15 | CSCL | RRP36     |
| MTSS1.2    | 2.91E-19 | -0.27893 | 0.054 | 0.221 | 4.35E-15 | CSCL | MTSS1     |
| SPIN1.2    | 2.96E-19 | -0.25314 | 0.026 | 0.174 | 4.43E-15 | CSCL | SPIN1     |
| ZNF414.2   | 3.00E-19 | -0.15317 | 0.037 | 0.193 | 4.48E-15 | CSCL | ZNF414    |
| R3HDM2.2   | 3.15E-19 | -0.21459 | 0.026 | 0.174 | 4.71E-15 | CSCL | R3HDM2    |
| ATP6AP2.1  | 3.20E-19 | -0.14068 | 0.311 | 0.674 | 4.79E-15 | CSCL | ATP6AP2   |
| TCOF1.2    | 3.27E-19 | -0.27903 | 0.044 | 0.203 | 4.89E-15 | CSCL | TCOF1     |
| NGLY1.1    | 3.43E-19 | -0.14979 | 0.054 | 0.223 | 5.13E-15 | CSCL | NGLY1     |
| ARF1.1     | 3.65E-19 | -0.11236 | 0.33  | 0.713 | 5.45E-15 | CSCL | ARF1      |
| SEMA6D.2   | 3.71E-19 | -0.23502 | 0.021 | 0.164 | 5.55E-15 | CSCL | SEMA6D    |
| PPP2R5B.1  | 3.72E-19 | -0.19564 | 0.026 | 0.173 | 5.56E-15 | CSCL | PPP2R5B   |
| CDKN2D.2   | 3.77E-19 | -0.23729 | 0.023 | 0.167 | 5.64E-15 | CSCL | CDKN2D    |
| RPP14.1    | 3.79E-19 | -0.19362 | 0.038 | 0.195 | 5.67E-15 | CSCL | RPP14     |
| KIAA1033.3 | 3.80E-19 | -0.12405 | 0.068 | 0.247 | 5.68E-15 | CSCL | KIAA1033  |

|             |           |           |        |        |                |          |
|-------------|-----------|-----------|--------|--------|----------------|----------|
| SEPN1. 1    | 3. 83E-19 | -0. 1258  | 0. 051 | 0. 218 | 5. 73E-15 CSCL | SEPN1    |
| ATF3. 2     | 3. 90E-19 | -0. 11153 | 0. 108 | 0. 312 | 5. 83E-15 CSCL | ATF3     |
| RPIA. 1     | 3. 91E-19 | -0. 1864  | 0. 038 | 0. 195 | 5. 84E-15 CSCL | RPIA     |
| EIF4G2. 2   | 3. 91E-19 | -0. 16009 | 0. 318 | 0. 677 | 5. 84E-15 CSCL | EIF4G2   |
| UXS1. 1     | 3. 92E-19 | -0. 15179 | 0. 047 | 0. 211 | 5. 85E-15 CSCL | UXS1     |
| DEDD2. 1    | 4. 04E-19 | -0. 23447 | 0. 03  | 0. 179 | 6. 04E-15 CSCL | DEDD2    |
| NFE2L1. 1   | 4. 05E-19 | -0. 16502 | 0. 038 | 0. 195 | 6. 05E-15 CSCL | NFE2L1   |
| ZHX1. 1     | 4. 27E-19 | -0. 11891 | 0. 051 | 0. 217 | 6. 39E-15 CSCL | ZHX1     |
| MAEA. 1     | 4. 34E-19 | -0. 15604 | 0. 066 | 0. 243 | 6. 48E-15 CSCL | MAEA     |
| KMT2C. 2    | 4. 38E-19 | -0. 13716 | 0. 082 | 0. 271 | 6. 55E-15 CSCL | KMT2C    |
| PCYT2. 1    | 4. 46E-19 | -0. 17954 | 0. 023 | 0. 167 | 6. 67E-15 CSCL | PCYT2    |
| SDSL. 1     | 4. 63E-19 | -0. 19288 | 0. 038 | 0. 195 | 6. 92E-15 CSCL | SDSL     |
| HERPUD2. 1  | 4. 90E-19 | -0. 2218  | 0. 031 | 0. 182 | 7. 32E-15 CSCL | HERPUD2  |
| USP39. 1    | 4. 92E-19 | -0. 12252 | 0. 037 | 0. 192 | 7. 35E-15 CSCL | USP39    |
| CLEC11A. 2  | 5. 07E-19 | -0. 12111 | 0. 065 | 0. 24  | 7. 58E-15 CSCL | CLEC11A  |
| INSIG1. 2   | 5. 12E-19 | -0. 20605 | 0. 063 | 0. 235 | 7. 66E-15 CSCL | INSIG1   |
| LPIN2. 2    | 5. 19E-19 | -0. 27566 | 0. 017 | 0. 156 | 7. 75E-15 CSCL | LPIN2    |
| PSPC1. 2    | 5. 20E-19 | -0. 14708 | 0. 052 | 0. 219 | 7. 78E-15 CSCL | PSPC1    |
| MAPKAPK5. 5 | 5. 43E-19 | -0. 20722 | 0. 037 | 0. 191 | 8. 12E-15 CSCL | MAPKAPK5 |
| FNBP4. 1    | 5. 46E-19 | -0. 14487 | 0. 077 | 0. 261 | 8. 15E-15 CSCL | FNBP4    |
| CYLD. 1     | 5. 63E-19 | -0. 26981 | 0. 026 | 0. 172 | 8. 41E-15 CSCL | CYLD     |
| MOB2        | 5. 71E-19 | -0. 17516 | 0. 038 | 0. 195 | 8. 53E-15 CSCL | MOB2     |
| PCBP4. 2    | 5. 76E-19 | -0. 10703 | 0. 079 | 0. 265 | 8. 61E-15 CSCL | PCBP4    |
| ANKRD39. 2  | 6. 01E-19 | -0. 2948  | 0. 028 | 0. 174 | 8. 97E-15 CSCL | ANKRD39  |
| PSME3. 1    | 6. 01E-19 | -0. 11619 | 0. 061 | 0. 235 | 8. 98E-15 CSCL | PSME3    |
| VEZF1. 2    | 6. 18E-19 | -0. 11102 | 0. 068 | 0. 247 | 9. 23E-15 CSCL | VEZF1    |
| DIMT1. 1    | 6. 35E-19 | -0. 21486 | 0. 038 | 0. 194 | 9. 48E-15 CSCL | DIMT1    |
| SDC2. 2     | 6. 37E-19 | -0. 21513 | 0. 042 | 0. 2   | 9. 51E-15 CSCL | SDC2     |
| DDX52. 1    | 6. 65E-19 | -0. 16393 | 0. 072 | 0. 253 | 9. 94E-15 CSCL | DDX52    |
| RUFY2. 2    | 6. 75E-19 | -0. 24657 | 0. 017 | 0. 156 | 1. 01E-14 CSCL | RUFY2    |
| TOR1AIP2    | 6. 91E-19 | -0. 14195 | 0. 077 | 0. 26  | 1. 03E-14 CSCL | TOR1AIP2 |
| HNRNPK. 1   | 6. 96E-19 | 0. 361021 | 0. 634 | 0. 797 | 1. 04E-14 CSCL | HNRNPK   |
| ASH2L. 1    | 7. 07E-19 | -0. 19122 | 0. 033 | 0. 184 | 1. 06E-14 CSCL | ASH2L    |
| SNX14. 2    | 7. 12E-19 | -0. 12034 | 0. 052 | 0. 219 | 1. 06E-14 CSCL | SNX14    |
| MARCH5. 1   | 7. 17E-19 | -0. 20011 | 0. 042 | 0. 199 | 1. 07E-14 CSCL | 5-Mar    |
| PFDN5. 2    | 7. 23E-19 | 0. 301735 | 0. 695 | 0. 894 | 1. 08E-14 CSCL | PFDN5    |
| CERS4. 2    | 7. 26E-19 | -0. 11407 | 0. 045 | 0. 207 | 1. 08E-14 CSCL | CERS4    |
| RASSF5. 2   | 7. 27E-19 | -0. 43396 | 0. 002 | 0. 126 | 1. 09E-14 CSCL | RASSF5   |
| BRD3. 2     | 7. 32E-19 | -0. 11968 | 0. 091 | 0. 284 | 1. 09E-14 CSCL | BRD3     |
| TFRC. 2     | 7. 50E-19 | -0. 18719 | 0. 052 | 0. 217 | 1. 12E-14 CSCL | TFRC     |
| WIPF2       | 7. 57E-19 | -0. 13384 | 0. 047 | 0. 209 | 1. 13E-14 CSCL | WIPF2    |
| REST. 2     | 7. 60E-19 | -0. 16097 | 0. 045 | 0. 206 | 1. 14E-14 CSCL | REST     |
| PTAFR. 2    | 7. 62E-19 | -0. 51286 | 0. 005 | 0. 131 | 1. 14E-14 CSCL | PTAFR    |
| UCHL5. 1    | 7. 62E-19 | -0. 26752 | 0. 017 | 0. 156 | 1. 14E-14 CSCL | UCHL5    |
| SKI. 2      | 7. 91E-19 | -0. 2771  | 0. 019 | 0. 158 | 1. 18E-14 CSCL | SKI      |
| DOK1. 2     | 8. 04E-19 | -0. 31686 | 0. 021 | 0. 161 | 1. 20E-14 CSCL | DOK1     |
| KLF6. 1     | 8. 06E-19 | -0. 14726 | 0. 251 | 0. 546 | 1. 20E-14 CSCL | KLF6     |
| MMP2. 2     | 8. 22E-19 | -0. 1635  | 0. 063 | 0. 235 | 1. 23E-14 CSCL | MMP2     |
| TOP2B. 2    | 8. 33E-19 | -0. 11033 | 0. 068 | 0. 246 | 1. 24E-14 CSCL | TOP2B    |
| DPH7. 1     | 8. 38E-19 | -0. 19008 | 0. 028 | 0. 174 | 1. 25E-14 CSCL | DPH7     |
| GK. 2       | 8. 49E-19 | -0. 39311 | 0. 012 | 0. 145 | 1. 27E-14 CSCL | GK       |

|           |          |          |       |       |          |      |              |
|-----------|----------|----------|-------|-------|----------|------|--------------|
| CYB561D2  | 8.54E-19 | -0.19223 | 0.063 | 0.234 | 1.28E-14 | CSCL | CYB561D2     |
| RAC2.2    | 8.62E-19 | -0.53547 | 0.002 | 0.125 | 1.29E-14 | CSCL | RAC2         |
| IARS2     | 8.72E-19 | -0.14356 | 0.049 | 0.212 | 1.30E-14 | CSCL | IARS2        |
| ATP2C1.1  | 8.83E-19 | -0.16159 | 0.061 | 0.232 | 1.32E-14 | CSCL | ATP2C1       |
| SFSWAP.1  | 9.23E-19 | -0.14217 | 0.033 | 0.184 | 1.38E-14 | CSCL | SFSWAP       |
| KIAA0930. | 9.44E-19 | -0.33198 | 0.016 | 0.151 | 1.41E-14 | CSCL | KIAA0930     |
| CMIP.2    | 9.48E-19 | -0.21062 | 0.031 | 0.18  | 1.42E-14 | CSCL | CMIP         |
| SLC1A5.2  | 9.56E-19 | -0.37187 | 0.012 | 0.144 | 1.43E-14 | CSCL | SLC1A5       |
| ELL2.2    | 9.61E-19 | -0.33775 | 0.044 | 0.2   | 1.44E-14 | CSCL | ELL2         |
| C19orf52. | 9.65E-19 | -0.13426 | 0.031 | 0.181 | 1.44E-14 | CSCL | C19orf52     |
| NADK.2    | 9.83E-19 | -0.13829 | 0.028 | 0.174 | 1.47E-14 | CSCL | NADK         |
| MED30.1   | 9.83E-19 | -0.11945 | 0.079 | 0.262 | 1.47E-14 | CSCL | MED30        |
| TRIM24.2  | 1.00E-18 | -0.13433 | 0.042 | 0.199 | 1.50E-14 | CSCL | TRIM24       |
| LEMD2.2   | 1.01E-18 | -0.20457 | 0.017 | 0.155 | 1.50E-14 | CSCL | LEMD2        |
| THAP11.2  | 1.03E-18 | -0.17196 | 0.033 | 0.183 | 1.54E-14 | CSCL | THAP11       |
| RAB21.2   | 1.05E-18 | -0.11006 | 0.049 | 0.212 | 1.57E-14 | CSCL | RAB21        |
| TSC22D2.2 | 1.09E-18 | -0.28623 | 0.023 | 0.163 | 1.63E-14 | CSCL | TSC22D2      |
| APIP.2    | 1.11E-18 | -0.12483 | 0.066 | 0.242 | 1.67E-14 | CSCL | APIP         |
| SLC4A1AP  | 1.14E-18 | -0.15083 | 0.033 | 0.183 | 1.70E-14 | CSCL | SLC4A1AP     |
| FAM45A.1  | 1.14E-18 | -0.13563 | 0.042 | 0.199 | 1.70E-14 | CSCL | FAM45A       |
| NCK2.2    | 1.15E-18 | -0.23936 | 0.017 | 0.154 | 1.71E-14 | CSCL | NCK2         |
| KMT2A.2   | 1.17E-18 | -0.10348 | 0.068 | 0.245 | 1.75E-14 | CSCL | KMT2A        |
| OSBPL1A.2 | 1.20E-18 | -0.14974 | 0.042 | 0.198 | 1.79E-14 | CSCL | OSBPL1A      |
| TCEB3.1   | 1.22E-18 | -0.1675  | 0.033 | 0.183 | 1.82E-14 | CSCL | TCEB3        |
| EXOSC3.2  | 1.22E-18 | -0.21534 | 0.024 | 0.167 | 1.83E-14 | CSCL | EXOSC3       |
| UBL4A.1   | 1.24E-18 | -0.13087 | 0.037 | 0.19  | 1.86E-14 | CSCL | UBL4A        |
| TTC9C.1   | 1.27E-18 | -0.24509 | 0.033 | 0.182 | 1.89E-14 | CSCL | TTC9C        |
| CASP3.1   | 1.29E-18 | -0.16243 | 0.045 | 0.205 | 1.93E-14 | CSCL | CASP3        |
| CHTF8     | 1.32E-18 | -0.16787 | 0.035 | 0.186 | 1.97E-14 | CSCL | CHTF8        |
| PTGER4.2  | 1.33E-18 | -0.49885 | 0.005 | 0.13  | 1.99E-14 | CSCL | PTGER4       |
| USP3.2    | 1.35E-18 | -0.22862 | 0.028 | 0.173 | 2.02E-14 | CSCL | USP3         |
| HLA-DQA2. | 1.38E-18 | -0.61079 | 0.033 | 0.179 | 2.07E-14 | CSCL | HLA-DQA2     |
| FMNL1.2   | 1.41E-18 | -0.46803 | 0.005 | 0.13  | 2.10E-14 | CSCL | FMNL1        |
| HINT3.2   | 1.41E-18 | -0.16541 | 0.047 | 0.206 | 2.11E-14 | CSCL | HINT3        |
| MVD.2     | 1.43E-18 | -0.13355 | 0.035 | 0.186 | 2.13E-14 | CSCL | MVD          |
| GTF2H5.1  | 1.44E-18 | 0.111964 | 0.164 | 0.417 | 2.15E-14 | CSCL | GTF2H5       |
| MOB3A.2   | 1.45E-18 | -0.20707 | 0.026 | 0.17  | 2.17E-14 | CSCL | MOB3A        |
| EVI5.1    | 1.48E-18 | -0.10835 | 0.038 | 0.192 | 2.21E-14 | CSCL | EVI5         |
| GYG1      | 1.51E-18 | -0.13217 | 0.08  | 0.263 | 2.26E-14 | CSCL | GYG1         |
| CNOT8.1   | 1.53E-18 | -0.12825 | 0.037 | 0.189 | 2.29E-14 | CSCL | CNOT8        |
| DCAF11.2  | 1.56E-18 | -0.14264 | 0.042 | 0.198 | 2.33E-14 | CSCL | DCAF11       |
| EDEM2.1   | 1.59E-18 | -0.10451 | 0.072 | 0.249 | 2.37E-14 | CSCL | EDEM2        |
| RASGEF1B. | 1.66E-18 | -0.49206 | 0.003 | 0.127 | 2.48E-14 | CSCL | RASGEF1B     |
| MMP14.1   | 1.67E-18 | -0.15692 | 0.061 | 0.23  | 2.50E-14 | CSCL | MMP14        |
| THOC6.1   | 1.68E-18 | -0.15083 | 0.03  | 0.176 | 2.51E-14 | CSCL | THOC6        |
| GAR1.2    | 1.72E-18 | -0.12601 | 0.042 | 0.198 | 2.57E-14 | CSCL | GAR1         |
| USP9X.2   | 1.78E-18 | -0.14506 | 0.049 | 0.209 | 2.65E-14 | CSCL | USP9X        |
| ATM.2     | 1.82E-18 | -0.24567 | 0.042 | 0.196 | 2.73E-14 | CSCL | ATM          |
| RP11-552E | 1.86E-18 | -0.63713 | 0.003 | 0.126 | 2.78E-14 | CSCL | RP11-552D4.1 |
| ADSS.1    | 1.92E-18 | -0.12875 | 0.04  | 0.194 | 2.87E-14 | CSCL | ADSS         |
| FBP1.2    | 1.94E-18 | -0.47423 | 0.002 | 0.123 | 2.90E-14 | CSCL | FBP1         |



|            |           |           |        |        |           |      |          |
|------------|-----------|-----------|--------|--------|-----------|------|----------|
| CKAP5. 2   | 1. 96E-18 | -0. 17503 | 0. 023 | 0. 163 | 2. 93E-14 | CSCL | CKAP5    |
| LONP2. 1   | 2. 06E-18 | -0. 10823 | 0. 077 | 0. 257 | 3. 08E-14 | CSCL | LONP2    |
| SSH2. 2    | 2. 15E-18 | -0. 30493 | 0. 035 | 0. 183 | 3. 22E-14 | CSCL | SSH2     |
| DBN1. 2    | 2. 16E-18 | -0. 14772 | 0. 117 | 0. 321 | 3. 22E-14 | CSCL | DBN1     |
| TNIP2. 1   | 2. 18E-18 | -0. 14098 | 0. 028 | 0. 172 | 3. 26E-14 | CSCL | TNIP2    |
| TMEM173. 2 | 2. 21E-18 | -0. 49229 | 0. 007 | 0. 132 | 3. 30E-14 | CSCL | TMEM173  |
| HIVEP3. 2  | 2. 25E-18 | -0. 18466 | 0. 021 | 0. 159 | 3. 37E-14 | CSCL | HIVEP3   |
| MGRN1. 2   | 2. 27E-18 | -0. 22255 | 0. 054 | 0. 216 | 3. 40E-14 | CSCL | MGRN1    |
| TRIB1. 1   | 2. 40E-18 | -0. 36303 | 0. 024 | 0. 164 | 3. 59E-14 | CSCL | TRIB1    |
| LRPPRC. 1  | 2. 45E-18 | -0. 21459 | 0. 03  | 0. 175 | 3. 66E-14 | CSCL | LRPPRC   |
| MAP3K11. 2 | 2. 47E-18 | -0. 19271 | 0. 038 | 0. 19  | 3. 69E-14 | CSCL | MAP3K11  |
| UBE2Q1. 1  | 2. 55E-18 | -0. 18103 | 0. 026 | 0. 168 | 3. 81E-14 | CSCL | UBE2Q1   |
| TMSB15A. 2 | 2. 55E-18 | -0. 27678 | 0. 037 | 0. 186 | 3. 81E-14 | CSCL | TMSB15A  |
| HPS3. 1    | 2. 56E-18 | -0. 28426 | 0. 016 | 0. 149 | 3. 82E-14 | CSCL | HPS3     |
| ANKLE2     | 2. 58E-18 | -0. 21374 | 0. 037 | 0. 187 | 3. 86E-14 | CSCL | ANKLE2   |
| GAK. 2     | 2. 76E-18 | -0. 20816 | 0. 024 | 0. 165 | 4. 12E-14 | CSCL | GAK      |
| CASP4. 2   | 2. 80E-18 | -0. 273   | 0. 066 | 0. 236 | 4. 19E-14 | CSCL | CASP4    |
| SUZ12. 2   | 2. 84E-18 | -0. 11013 | 0. 045 | 0. 202 | 4. 24E-14 | CSCL | SUZ12    |
| EFR3A. 2   | 2. 85E-18 | -0. 2246  | 0. 016 | 0. 149 | 4. 27E-14 | CSCL | EFR3A    |
| POU2F2. 2  | 2. 86E-18 | -0. 40871 | 0. 012 | 0. 142 | 4. 27E-14 | CSCL | POU2F2   |
| CLCN7. 2   | 2. 92E-18 | -0. 2371  | 0. 023 | 0. 161 | 4. 37E-14 | CSCL | CLCN7    |
| CHST2. 1   | 2. 93E-18 | -0. 16611 | 0. 012 | 0. 142 | 4. 38E-14 | CSCL | CHST2    |
| RRP1. 1    | 2. 93E-18 | -0. 10457 | 0. 054 | 0. 218 | 4. 38E-14 | CSCL | RRP1     |
| ZNF800. 1  | 2. 98E-18 | -0. 15607 | 0. 038 | 0. 189 | 4. 45E-14 | CSCL | ZNF800   |
| ALG2. 2    | 2. 99E-18 | -0. 25645 | 0. 028 | 0. 17  | 4. 47E-14 | CSCL | ALG2     |
| BIN2. 2    | 3. 01E-18 | -0. 4977  | 0      | 0. 118 | 4. 50E-14 | CSCL | BIN2     |
| GSDMD. 1   | 3. 13E-18 | -0. 22732 | 0. 04  | 0. 192 | 4. 67E-14 | CSCL | GSDMD    |
| PPIL4. 1   | 3. 15E-18 | -0. 1161  | 0. 077 | 0. 255 | 4. 70E-14 | CSCL | PPIL4    |
| TCIRG1. 2  | 3. 25E-18 | -0. 39186 | 0. 007 | 0. 132 | 4. 86E-14 | CSCL | TCIRG1   |
| UTP6. 1    | 3. 41E-18 | -0. 13043 | 0. 054 | 0. 217 | 5. 09E-14 | CSCL | UTP6     |
| LAMP2. 2   | 3. 49E-18 | -0. 11816 | 0. 213 | 0. 484 | 5. 21E-14 | CSCL | LAMP2    |
| UAP1. 1    | 3. 49E-18 | -0. 18927 | 0. 04  | 0. 192 | 5. 22E-14 | CSCL | UAP1     |
| SNAPC1. 1  | 3. 55E-18 | -0. 13287 | 0. 042 | 0. 196 | 5. 30E-14 | CSCL | SNAPC1   |
| NOTCH2NL.  | 3. 60E-18 | -0. 186   | 0. 03  | 0. 173 | 5. 39E-14 | CSCL | NOTCH2NL |
| KIAA2013.  | 3. 61E-18 | -0. 24062 | 0. 021 | 0. 157 | 5. 40E-14 | CSCL | KIAA2013 |
| SACS. 2    | 3. 64E-18 | -0. 17108 | 0. 023 | 0. 161 | 5. 44E-14 | CSCL | SACS     |
| CDK11A. 1  | 3. 71E-18 | -0. 23157 | 0. 047 | 0. 204 | 5. 54E-14 | CSCL | CDK11A   |
| DSE. 2     | 3. 81E-18 | -0. 38878 | 0. 014 | 0. 144 | 5. 69E-14 | CSCL | DSE      |
| ACOX1. 1   | 3. 81E-18 | -0. 16257 | 0. 03  | 0. 173 | 5. 70E-14 | CSCL | ACOX1    |
| TOR2A. 2   | 3. 83E-18 | -0. 27865 | 0. 019 | 0. 154 | 5. 72E-14 | CSCL | TOR2A    |
| NUP214. 2  | 3. 91E-18 | -0. 23361 | 0. 047 | 0. 203 | 5. 85E-14 | CSCL | NUP214   |
| EGR2. 2    | 3. 99E-18 | -0. 2565  | 0. 045 | 0. 199 | 5. 96E-14 | CSCL | EGR2     |
| ZMYM2. 2   | 4. 01E-18 | -0. 16756 | 0. 052 | 0. 213 | 5. 99E-14 | CSCL | ZMYM2    |
| PDPK1. 2   | 4. 08E-18 | -0. 14767 | 0. 042 | 0. 195 | 6. 10E-14 | CSCL | PDPK1    |
| LCP2. 2    | 4. 14E-18 | -0. 48553 | 0. 002 | 0. 121 | 6. 19E-14 | CSCL | LCP2     |
| FBXO11. 2  | 4. 15E-18 | -0. 13681 | 0. 052 | 0. 214 | 6. 20E-14 | CSCL | FBXO11   |
| DOCK4. 2   | 4. 21E-18 | -0. 32395 | 0. 028 | 0. 169 | 6. 30E-14 | CSCL | DOCK4    |
| RHOT2. 1   | 4. 22E-18 | -0. 14018 | 0. 08  | 0. 26  | 6. 30E-14 | CSCL | RHOT2    |
| SLC38A10.  | 4. 25E-18 | -0. 15467 | 0. 049 | 0. 206 | 6. 35E-14 | CSCL | SLC38A10 |
| ACAP2. 2   | 4. 32E-18 | -0. 18433 | 0. 037 | 0. 185 | 6. 46E-14 | CSCL | ACAP2    |
| MZT1. 1    | 4. 42E-18 | -0. 12013 | 0. 084 | 0. 264 | 6. 60E-14 | CSCL | MZT1     |

|             |           |           |        |        |           |      |            |
|-------------|-----------|-----------|--------|--------|-----------|------|------------|
| KCMF1. 1    | 4. 49E-18 | -0. 10561 | 0. 044 | 0. 199 | 6. 71E-14 | CSCL | KCMF1      |
| NFKBID. 2   | 4. 54E-18 | -0. 44284 | 0. 016 | 0. 147 | 6. 79E-14 | CSCL | NFKBID     |
| YDJC. 2     | 4. 92E-18 | -0. 24041 | 0. 017 | 0. 15  | 7. 36E-14 | CSCL | YDJC       |
| STX11. 2    | 4. 98E-18 | -0. 50255 | 0. 002 | 0. 12  | 7. 45E-14 | CSCL | STX11      |
| CYTH1. 2    | 5. 18E-18 | -0. 33027 | 0. 026 | 0. 165 | 7. 75E-14 | CSCL | CYTH1      |
| VPS26A. 1   | 5. 42E-18 | -0. 13955 | 0. 075 | 0. 251 | 8. 11E-14 | CSCL | VPS26A     |
| LY6E. 1     | 5. 44E-18 | -0. 10247 | 0. 157 | 0. 387 | 8. 13E-14 | CSCL | LY6E       |
| FAM122A. 2  | 5. 49E-18 | -0. 22521 | 0. 017 | 0. 15  | 8. 20E-14 | CSCL | FAM122A    |
| HGSNAT. 2   | 5. 53E-18 | -0. 17081 | 0. 054 | 0. 214 | 8. 26E-14 | CSCL | HGSNAT     |
| THAP4. 1    | 5. 63E-18 | -0. 20811 | 0. 026 | 0. 166 | 8. 42E-14 | CSCL | THAP4      |
| KANSL1-AS   | 5. 76E-18 | -0. 12829 | 0. 045 | 0. 201 | 8. 61E-14 | CSCL | KANSL1-AS1 |
| SLC31A1. 2  | 5. 86E-18 | -0. 20953 | 0. 031 | 0. 175 | 8. 75E-14 | CSCL | SLC31A1    |
| HLA-F. 2    | 5. 98E-18 | -0. 37958 | 0. 019 | 0. 153 | 8. 94E-14 | CSCL | HLA-F      |
| PKM. 2      | 6. 04E-18 | 0. 381697 | 0. 642 | 0. 777 | 9. 02E-14 | CSCL | PKM        |
| PDXDC1. 1   | 6. 12E-18 | -0. 1551  | 0. 033 | 0. 178 | 9. 15E-14 | CSCL | PDXDC1     |
| F8A1. 2     | 6. 28E-18 | -0. 24792 | 0. 016 | 0. 146 | 9. 39E-14 | CSCL | F8A1       |
| ADNP. 1     | 6. 29E-18 | -0. 1421  | 0. 045 | 0. 2   | 9. 40E-14 | CSCL | ADNP       |
| MIA3. 1     | 6. 37E-18 | -0. 15163 | 0. 056 | 0. 217 | 9. 52E-14 | CSCL | MIA3       |
| CEP57. 1    | 6. 52E-18 | -0. 13435 | 0. 068 | 0. 238 | 9. 74E-14 | CSCL | CEP57      |
| ISG20L2. 1  | 6. 57E-18 | -0. 11135 | 0. 065 | 0. 233 | 9. 82E-14 | CSCL | ISG20L2    |
| POLR2A. 1   | 6. 70E-18 | -0. 1527  | 0. 058 | 0. 219 | 1. 00E-13 | CSCL | POLR2A     |
| ACLY. 2     | 6. 71E-18 | -0. 11599 | 0. 059 | 0. 224 | 1. 00E-13 | CSCL | ACLY       |
| ZFAND2B. 1  | 6. 74E-18 | -0. 13877 | 0. 054 | 0. 214 | 1. 01E-13 | CSCL | ZFAND2B    |
| FNDC3B. 1   | 6. 91E-18 | -0. 15514 | 0. 035 | 0. 181 | 1. 03E-13 | CSCL | FNDC3B     |
| RRP1B. 2    | 6. 95E-18 | -0. 18162 | 0. 024 | 0. 163 | 1. 04E-13 | CSCL | RRP1B      |
| SDAD1. 1    | 7. 27E-18 | -0. 10952 | 0. 061 | 0. 227 | 1. 09E-13 | CSCL | SDAD1      |
| CD33. 2     | 7. 32E-18 | -0. 52112 | 0. 005 | 0. 126 | 1. 09E-13 | CSCL | CD33       |
| GGA2. 2     | 7. 51E-18 | -0. 33151 | 0. 016 | 0. 145 | 1. 12E-13 | CSCL | GGA2       |
| MXD4. 2     | 7. 64E-18 | -0. 19743 | 0. 044 | 0. 196 | 1. 14E-13 | CSCL | MXD4       |
| NELFB. 2    | 7. 69E-18 | -0. 18428 | 0. 021 | 0. 155 | 1. 15E-13 | CSCL | NELFB      |
| SERGEF. 2   | 8. 11E-18 | -0. 1253  | 0. 031 | 0. 175 | 1. 21E-13 | CSCL | SERGEF     |
| OXA1L. 1    | 8. 28E-18 | -0. 10809 | 0. 113 | 0. 311 | 1. 24E-13 | CSCL | OXA1L      |
| VPS25       | 8. 34E-18 | 0. 10267  | 0. 126 | 0. 34  | 1. 25E-13 | CSCL | VPS25      |
| PREB. 1     | 8. 44E-18 | -0. 11589 | 0. 056 | 0. 218 | 1. 26E-13 | CSCL | PREB       |
| RNF168. 2   | 8. 73E-18 | -0. 23165 | 0. 021 | 0. 155 | 1. 30E-13 | CSCL | RNF168     |
| TIMM17B     | 8. 96E-18 | 0. 104978 | 0. 133 | 0. 353 | 1. 34E-13 | CSCL | TIMM17B    |
| APC. 2      | 9. 23E-18 | -0. 10468 | 0. 058 | 0. 221 | 1. 38E-13 | CSCL | APC        |
| UBE2Z. 1    | 9. 42E-18 | -0. 15976 | 0. 037 | 0. 183 | 1. 41E-13 | CSCL | UBE2Z      |
| CS. 2       | 9. 59E-18 | -0. 12018 | 0. 028 | 0. 168 | 1. 43E-13 | CSCL | CS         |
| CWC25       | 1. 03E-17 | -0. 2141  | 0. 052 | 0. 209 | 1. 54E-13 | CSCL | CWC25      |
| AHI1. 1     | 1. 03E-17 | -0. 15752 | 0. 054 | 0. 213 | 1. 54E-13 | CSCL | AHI1       |
| DUSP3. 1    | 1. 04E-17 | -0. 19288 | 0. 037 | 0. 183 | 1. 56E-13 | CSCL | DUSP3      |
| CUX1. 2     | 1. 05E-17 | -0. 10269 | 0. 075 | 0. 249 | 1. 56E-13 | CSCL | CUX1       |
| SPPL2A. 2   | 1. 08E-17 | -0. 19574 | 0. 042 | 0. 191 | 1. 61E-13 | CSCL | SPPL2A     |
| FRMD4A. 2   | 1. 19E-17 | -0. 31608 | 0. 045 | 0. 195 | 1. 78E-13 | CSCL | FRMD4A     |
| SAC3D1. 2   | 1. 22E-17 | -0. 11531 | 0. 033 | 0. 177 | 1. 82E-13 | CSCL | SAC3D1     |
| SLC25A37. 1 | 1. 22E-17 | -0. 14497 | 0. 119 | 0. 32  | 1. 83E-13 | CSCL | SLC25A37   |
| CHKA. 2     | 1. 23E-17 | -0. 16132 | 0. 044 | 0. 195 | 1. 84E-13 | CSCL | CHKA       |
| RASSF4. 2   | 1. 26E-17 | -0. 11191 | 0. 131 | 0. 339 | 1. 88E-13 | CSCL | RASSF4     |
| KLF3. 2     | 1. 26E-17 | -0. 1109  | 0. 059 | 0. 222 | 1. 89E-13 | CSCL | KLF3       |
| RNASE1. 2   | 1. 27E-17 | -0. 6648  | 0. 037 | 0. 176 | 1. 90E-13 | CSCL | RNASE1     |

|            |          |          |       |       |          |      |          |
|------------|----------|----------|-------|-------|----------|------|----------|
| KPNA1.1    | 1.28E-17 | -0.11046 | 0.03  | 0.171 | 1.92E-13 | CSCL | KPNA1    |
| YPEL3.2    | 1.31E-17 | -0.13641 | 0.079 | 0.253 | 1.96E-13 | CSCL | YPEL3    |
| BCAN.2     | 1.31E-17 | 0.923939 | 0.354 | 0.272 | 1.96E-13 | CSCL | BCAN     |
| DENND5A.1  | 1.32E-17 | -0.12925 | 0.038 | 0.186 | 1.97E-13 | CSCL | DENND5A  |
| HSPB11.2   | 1.35E-17 | 0.139746 | 0.126 | 0.339 | 2.01E-13 | CSCL | HSPB11   |
| CEP63.1    | 1.36E-17 | -0.14478 | 0.038 | 0.185 | 2.03E-13 | CSCL | CEP63    |
| ATP13A3.1  | 1.37E-17 | -0.20074 | 0.023 | 0.157 | 2.05E-13 | CSCL | ATP13A3  |
| TNFRSF21.1 | 1.40E-17 | -0.15154 | 0.03  | 0.17  | 2.10E-13 | CSCL | TNFRSF21 |
| PIP4K2A.2  | 1.41E-17 | -0.34478 | 0.016 | 0.143 | 2.10E-13 | CSCL | PIP4K2A  |
| SLC36A4.1  | 1.45E-17 | -0.10886 | 0.047 | 0.201 | 2.16E-13 | CSCL | SLC36A4  |
| RECQL.1    | 1.45E-17 | -0.11886 | 0.035 | 0.18  | 2.16E-13 | CSCL | RECQL    |
| SPATA13.2  | 1.48E-17 | -0.23755 | 0.031 | 0.172 | 2.21E-13 | CSCL | SPATA13  |
| NDUFB2.2   | 1.48E-17 | 0.389981 | 0.639 | 0.817 | 2.22E-13 | CSCL | NDUFB2   |
| VAC14.1    | 1.49E-17 | -0.18887 | 0.017 | 0.147 | 2.23E-13 | CSCL | VAC14    |
| SAMM50.2   | 1.51E-17 | -0.16056 | 0.061 | 0.223 | 2.26E-13 | CSCL | SAMM50   |
| PACSIN2.2  | 1.52E-17 | -0.21525 | 0.037 | 0.181 | 2.28E-13 | CSCL | PACSIN2  |
| ZNF672.2   | 1.55E-17 | -0.24958 | 0.017 | 0.147 | 2.32E-13 | CSCL | ZNF672   |
| LBR.2      | 1.75E-17 | -0.1914  | 0.072 | 0.241 | 2.61E-13 | CSCL | LBR      |
| DOCK8.2    | 1.76E-17 | -0.45697 | 0.007 | 0.127 | 2.62E-13 | CSCL | DOCK8    |
| HGS.1      | 1.77E-17 | -0.10421 | 0.061 | 0.224 | 2.65E-13 | CSCL | HGS      |
| TMEM176A.1 | 1.78E-17 | -0.33812 | 0.07  | 0.235 | 2.65E-13 | CSCL | TMEM176A |
| FAF2.1     | 1.78E-17 | -0.17216 | 0.045 | 0.197 | 2.67E-13 | CSCL | FAF2     |
| TMA7.2     | 1.80E-17 | 0.32132  | 0.674 | 0.86  | 2.68E-13 | CSCL | TMA7     |
| ENOSF1.2   | 1.85E-17 | -0.2016  | 0.009 | 0.13  | 2.76E-13 | CSCL | ENOSF1   |
| PHF3.1     | 1.88E-17 | -0.13477 | 0.049 | 0.202 | 2.81E-13 | CSCL | PHF3     |
| RGL2.2     | 1.89E-17 | -0.14487 | 0.054 | 0.212 | 2.83E-13 | CSCL | RGL2     |
| NAAA.2     | 1.90E-17 | -0.31078 | 0.014 | 0.14  | 2.83E-13 | CSCL | NAAA     |
| NCOR2.2    | 1.94E-17 | -0.11341 | 0.07  | 0.239 | 2.90E-13 | CSCL | NCOR2    |
| NISCH.2    | 1.96E-17 | -0.21924 | 0.038 | 0.183 | 2.93E-13 | CSCL | NISCH    |
| CORO7.2    | 2.00E-17 | -0.29812 | 0.028 | 0.165 | 2.99E-13 | CSCL | CORO7    |
| ELAVL3.2   | 2.04E-17 | -0.13132 | 0.12  | 0.32  | 3.05E-13 | CSCL | ELAVL3   |
| NFKBIE.2   | 2.11E-17 | -0.20304 | 0.014 | 0.14  | 3.15E-13 | CSCL | NFKBIE   |
| HN1L.1     | 2.13E-17 | -0.21185 | 0.024 | 0.159 | 3.18E-13 | CSCL | HN1L     |
| DCTN1.2    | 2.15E-17 | -0.10903 | 0.061 | 0.224 | 3.21E-13 | CSCL | DCTN1    |
| AGPAT1.1   | 2.20E-17 | -0.13197 | 0.068 | 0.235 | 3.29E-13 | CSCL | AGPAT1   |
| SLC25A29   | 2.20E-17 | -0.2025  | 0.024 | 0.159 | 3.29E-13 | CSCL | SLC25A29 |
| UBE2T.2    | 2.21E-17 | -0.33462 | 0.01  | 0.133 | 3.30E-13 | CSCL | UBE2T    |
| BCL2L12.1  | 2.26E-17 | -0.21239 | 0.01  | 0.133 | 3.38E-13 | CSCL | BCL2L12  |
| GNL2.1     | 2.28E-17 | -0.12587 | 0.056 | 0.214 | 3.41E-13 | CSCL | GNL2     |
| ARFGEF1.2  | 2.32E-17 | -0.23943 | 0.009 | 0.129 | 3.47E-13 | CSCL | ARFGEF1  |
| RBM47.2    | 2.36E-17 | -0.37063 | 0.005 | 0.122 | 3.52E-13 | CSCL | RBM47    |
| DCBLD2.1   | 2.40E-17 | -0.21098 | 0.019 | 0.149 | 3.58E-13 | CSCL | DCBLD2   |
| LRCH4.2    | 2.45E-17 | -0.29603 | 0.047 | 0.196 | 3.66E-13 | CSCL | LRCH4    |
| CLINT1.1   | 2.47E-17 | -0.13832 | 0.052 | 0.208 | 3.69E-13 | CSCL | CLINT1   |
| NPM1.2     | 2.56E-17 | 0.279914 | 0.686 | 0.878 | 3.82E-13 | CSCL | NPM1     |
| FAM129A.1  | 2.57E-17 | -0.20421 | 0.017 | 0.146 | 3.84E-13 | CSCL | FAM129A  |
| PTPN12.1   | 2.57E-17 | -0.10608 | 0.065 | 0.23  | 3.84E-13 | CSCL | PTPN12   |
| VPS41.1    | 2.59E-17 | -0.10026 | 0.052 | 0.209 | 3.87E-13 | CSCL | VPS41    |
| PFN1.2     | 2.60E-17 | -0.16135 | 0.417 | 0.829 | 3.89E-13 | CSCL | PFN1     |
| IRAK1.2    | 2.61E-17 | -0.15415 | 0.028 | 0.165 | 3.90E-13 | CSCL | IRAK1    |
| PHF1.2     | 2.62E-17 | -0.17935 | 0.035 | 0.176 | 3.92E-13 | CSCL | PHF1     |

|            |           |           |        |        |           |      |           |
|------------|-----------|-----------|--------|--------|-----------|------|-----------|
| PREPL      | 2. 67E-17 | -0. 12781 | 0. 045 | 0. 196 | 3. 98E-13 | CSCL | PREPL     |
| FNIP2. 2   | 2. 67E-17 | -0. 26909 | 0. 051 | 0. 203 | 3. 99E-13 | CSCL | FNIP2     |
| NRAS       | 2. 69E-17 | -0. 16163 | 0. 044 | 0. 192 | 4. 01E-13 | CSCL | NRAS      |
| SUB1. 1    | 2. 70E-17 | 0. 379623 | 0. 62  | 0. 763 | 4. 03E-13 | CSCL | SUB1      |
| NIPSNAP1.  | 2. 79E-17 | -0. 1594  | 0. 033 | 0. 174 | 4. 17E-13 | CSCL | NIPSNAP1  |
| NR3C1. 2   | 2. 82E-17 | -0. 11725 | 0. 082 | 0. 257 | 4. 21E-13 | CSCL | NR3C1     |
| SUDS3. 2   | 2. 84E-17 | -0. 12035 | 0. 045 | 0. 195 | 4. 24E-13 | CSCL | SUDS3     |
| CSNK1G2. 2 | 2. 84E-17 | -0. 13085 | 0. 019 | 0. 149 | 4. 24E-13 | CSCL | CSNK1G2   |
| GSK3B. 2   | 2. 90E-17 | -0. 12086 | 0. 051 | 0. 205 | 4. 34E-13 | CSCL | GSK3B     |
| ACBD5. 2   | 2. 94E-17 | -0. 14373 | 0. 033 | 0. 174 | 4. 39E-13 | CSCL | ACBD5     |
| RCSD1. 2   | 2. 94E-17 | -0. 46136 | 0. 007 | 0. 126 | 4. 39E-13 | CSCL | RCSD1     |
| PDS5A. 1   | 2. 94E-17 | -0. 18557 | 0. 028 | 0. 165 | 4. 39E-13 | CSCL | PDS5A     |
| PSAP. 1    | 2. 94E-17 | -0. 21464 | 0. 438 | 0. 838 | 4. 40E-13 | CSCL | PSAP      |
| C11orf24.  | 3. 04E-17 | -0. 2067  | 0. 019 | 0. 149 | 4. 54E-13 | CSCL | C11orf24  |
| RNF8. 1    | 3. 18E-17 | -0. 12971 | 0. 033 | 0. 174 | 4. 75E-13 | CSCL | RNF8      |
| KIDINS220  | 3. 22E-17 | -0. 10439 | 0. 094 | 0. 278 | 4. 81E-13 | CSCL | KIDINS220 |
| DUSP23. 1  | 3. 26E-17 | -0. 25172 | 0. 045 | 0. 195 | 4. 87E-13 | CSCL | DUSP23    |
| FRMD4B. 2  | 3. 27E-17 | -0. 35659 | 0. 03  | 0. 166 | 4. 89E-13 | CSCL | FRMD4B    |
| NRIP1. 2   | 3. 40E-17 | -0. 21241 | 0. 009 | 0. 129 | 5. 08E-13 | CSCL | NRIP1     |
| EML4. 2    | 3. 51E-17 | -0. 11343 | 0. 047 | 0. 198 | 5. 24E-13 | CSCL | EML4      |
| ABHD8. 2   | 3. 62E-17 | -0. 1877  | 0. 021 | 0. 151 | 5. 41E-13 | CSCL | ABHD8     |
| COX19. 1   | 3. 65E-17 | -0. 13519 | 0. 072 | 0. 239 | 5. 46E-13 | CSCL | COX19     |
| ABHD11. 1  | 3. 67E-17 | -0. 23883 | 0. 035 | 0. 176 | 5. 49E-13 | CSCL | ABHD11    |
| B3GALNT1.  | 3. 76E-17 | -0. 17333 | 0. 044 | 0. 191 | 5. 62E-13 | CSCL | B3GALNT1  |
| PLA2G15. 2 | 3. 77E-17 | -0. 28198 | 0. 017 | 0. 145 | 5. 63E-13 | CSCL | PLA2G15   |
| SLC29A1. 2 | 4. 11E-17 | -0. 37389 | 0. 017 | 0. 144 | 6. 14E-13 | CSCL | SLC29A1   |
| IL1RAP. 1  | 4. 24E-17 | -0. 23136 | 0. 03  | 0. 166 | 6. 34E-13 | CSCL | IL1RAP    |
| BLMH. 1    | 4. 25E-17 | -0. 14375 | 0. 038 | 0. 182 | 6. 35E-13 | CSCL | BLMH      |
| SMPDL3A. 1 | 4. 26E-17 | -0. 34457 | 0. 01  | 0. 131 | 6. 37E-13 | CSCL | SMPDL3A   |
| GRK6. 2    | 4. 32E-17 | -0. 16895 | 0. 016 | 0. 141 | 6. 45E-13 | CSCL | GRK6      |
| PHKB. 2    | 4. 54E-17 | -0. 14254 | 0. 049 | 0. 2   | 6. 78E-13 | CSCL | PHKB      |
| RAP2C. 1   | 4. 68E-17 | -0. 258   | 0. 01  | 0. 131 | 7. 00E-13 | CSCL | RAP2C     |
| RABIF. 1   | 4. 72E-17 | -0. 10805 | 0. 042 | 0. 188 | 7. 06E-13 | CSCL | RABIF     |
| HMHA1. 2   | 4. 82E-17 | -0. 45535 | 0. 002 | 0. 114 | 7. 21E-13 | CSCL | HMHA1     |
| RIOK3. 1   | 5. 00E-17 | -0. 10567 | 0. 049 | 0. 2   | 7. 47E-13 | CSCL | RIOK3     |
| FILIP1L. 2 | 5. 24E-17 | -0. 30389 | 0. 024 | 0. 156 | 7. 84E-13 | CSCL | FILIP1L   |
| MERTK. 2   | 5. 30E-17 | -0. 40411 | 0. 01  | 0. 13  | 7. 92E-13 | CSCL | MERTK     |
| INO80C. 1  | 5. 40E-17 | -0. 13608 | 0. 033 | 0. 172 | 8. 07E-13 | CSCL | INO80C    |
| PRKACA. 2  | 5. 41E-17 | -0. 1885  | 0. 024 | 0. 156 | 8. 09E-13 | CSCL | PRKACA    |
| GSTP1. 2   | 5. 44E-17 | 0. 369395 | 0. 653 | 0. 83  | 8. 13E-13 | CSCL | GSTP1     |
| C6orf47. 1 | 5. 68E-17 | -0. 11731 | 0. 019 | 0. 147 | 8. 49E-13 | CSCL | C6orf47   |
| TFDP2. 1   | 5. 69E-17 | -0. 14488 | 0. 061 | 0. 22  | 8. 50E-13 | CSCL | TFDP2     |
| NDUFB8     | 5. 84E-17 | 0. 484052 | 0. 134 | 0. 052 | 8. 73E-13 | CSCL | NDUFB8    |
| NOC4L. 1   | 5. 93E-17 | -0. 1765  | 0. 028 | 0. 163 | 8. 87E-13 | CSCL | NOC4L     |
| NDUFA13. 1 | 6. 03E-17 | 0. 380168 | 0. 632 | 0. 779 | 9. 00E-13 | CSCL | NDUFA13   |
| CNOT3. 1   | 6. 03E-17 | -0. 13675 | 0. 031 | 0. 169 | 9. 01E-13 | CSCL | CNOT3     |
| CREBL2. 2  | 6. 03E-17 | -0. 16544 | 0. 047 | 0. 196 | 9. 02E-13 | CSCL | CREBL2    |
| CASC3      | 6. 36E-17 | -0. 13462 | 0. 045 | 0. 193 | 9. 50E-13 | CSCL | CASC3     |
| MED16. 1   | 6. 43E-17 | -0. 14817 | 0. 03  | 0. 165 | 9. 61E-13 | CSCL | MED16     |
| PRR14. 1   | 6. 58E-17 | -0. 13891 | 0. 054 | 0. 208 | 9. 83E-13 | CSCL | PRR14     |
| CNOT1. 2   | 6. 64E-17 | -0. 19892 | 0. 024 | 0. 156 | 9. 92E-13 | CSCL | CNOT1     |

|            |          |          |       |       |          |      |          |
|------------|----------|----------|-------|-------|----------|------|----------|
| SP3.2      | 6.65E-17 | -0.10508 | 0.059 | 0.218 | 9.94E-13 | CSCL | SP3      |
| ZDHH6.1    | 6.77E-17 | -0.17813 | 0.035 | 0.175 | 1.01E-12 | CSCL | ZDHH6    |
| BMP2K.1    | 6.81E-17 | -0.37692 | 0.007 | 0.122 | 1.02E-12 | CSCL | BMP2K    |
| CEBPA.2    | 6.90E-17 | -0.4267  | 0     | 0.109 | 1.03E-12 | CSCL | CEBPA    |
| ZMYND11.2  | 6.96E-17 | -0.13473 | 0.023 | 0.153 | 1.04E-12 | CSCL | ZMYND11  |
| POLDIP3.1  | 7.06E-17 | -0.1113  | 0.045 | 0.193 | 1.05E-12 | CSCL | POLDIP3  |
| C8orf82.2  | 7.30E-17 | -0.11771 | 0.037 | 0.178 | 1.09E-12 | CSCL | C8orf82  |
| SERINC2    | 7.42E-17 | -0.25273 | 0.009 | 0.126 | 1.11E-12 | CSCL | SERINC2  |
| SEPT4.2    | 7.49E-17 | -0.38213 | 0.014 | 0.136 | 1.12E-12 | CSCL | 4-Sep    |
| TGFBR2.2   | 7.64E-17 | -0.34749 | 0.007 | 0.123 | 1.14E-12 | CSCL | TGFBR2   |
| IBTK.2     | 7.66E-17 | -0.15907 | 0.035 | 0.174 | 1.14E-12 | CSCL | IBTK     |
| DVL2.1     | 7.95E-17 | -0.15248 | 0.04  | 0.183 | 1.19E-12 | CSCL | DVL2     |
| TMEM131.2  | 7.96E-17 | -0.16085 | 0.023 | 0.152 | 1.19E-12 | CSCL | TMEM131  |
| FAM208A.1  | 8.11E-17 | -0.19521 | 0.019 | 0.146 | 1.21E-12 | CSCL | FAM208A  |
| DNAJC10.1  | 8.32E-17 | -0.13372 | 0.052 | 0.204 | 1.24E-12 | CSCL | DNAJC10  |
| B4GALT1.2  | 8.36E-17 | -0.39108 | 0.009 | 0.126 | 1.25E-12 | CSCL | B4GALT1  |
| TRIM13.2   | 8.82E-17 | -0.14141 | 0.084 | 0.258 | 1.32E-12 | CSCL | TRIM13   |
| RFFL.2     | 8.92E-17 | -0.13573 | 0.033 | 0.171 | 1.33E-12 | CSCL | RFFL     |
| TPST2.2    | 9.02E-17 | -0.1056  | 0.035 | 0.174 | 1.35E-12 | CSCL | TPST2    |
| CDK5RAP1.1 | 9.23E-17 | -0.16803 | 0.03  | 0.165 | 1.38E-12 | CSCL | CDK5RAP1 |
| NDEL1.1    | 9.42E-17 | -0.28309 | 0.028 | 0.16  | 1.41E-12 | CSCL | NDEL1    |
| FAM104B.1  | 9.76E-17 | -0.12884 | 0.049 | 0.198 | 1.46E-12 | CSCL | FAM104B  |
| AAK1.2     | 9.82E-17 | -0.12116 | 0.101 | 0.286 | 1.47E-12 | CSCL | AAK1     |
| CTR9.1     | 1.00E-16 | -0.18236 | 0.038 | 0.179 | 1.50E-12 | CSCL | CTR9     |
| TMEM181.2  | 1.05E-16 | -0.10212 | 0.033 | 0.17  | 1.57E-12 | CSCL | TMEM181  |
| ARHGAP4.2  | 1.06E-16 | -0.43234 | 0.007 | 0.121 | 1.58E-12 | CSCL | ARHGAP4  |
| FAH.1      | 1.09E-16 | -0.15235 | 0.03  | 0.164 | 1.62E-12 | CSCL | FAH      |
| SLAIN2.2   | 1.11E-16 | -0.20318 | 0.019 | 0.145 | 1.66E-12 | CSCL | SLAIN2   |
| NXF1.1     | 1.14E-16 | -0.14095 | 0.054 | 0.205 | 1.70E-12 | CSCL | NXF1     |
| MLXIP.2    | 1.16E-16 | -0.2059  | 0.045 | 0.19  | 1.74E-12 | CSCL | MLXIP    |
| RIN3.2     | 1.18E-16 | -0.42408 | 0.007 | 0.121 | 1.76E-12 | CSCL | RIN3     |
| ST8SIA4.2  | 1.19E-16 | -0.37783 | 0.009 | 0.125 | 1.77E-12 | CSCL | ST8SIA4  |
| GNA15.2    | 1.22E-16 | -0.42763 | 0.003 | 0.115 | 1.83E-12 | CSCL | GNA15    |
| EPS15.2    | 1.23E-16 | -0.24256 | 0.026 | 0.156 | 1.84E-12 | CSCL | EPS15    |
| GM2A.2     | 1.23E-16 | -0.34639 | 0.023 | 0.15  | 1.84E-12 | CSCL | GM2A     |
| EFHD2.2    | 1.23E-16 | -0.10602 | 0.061 | 0.218 | 1.84E-12 | CSCL | EFHD2    |
| ZC3H18.2   | 1.28E-16 | -0.17991 | 0.03  | 0.163 | 1.92E-12 | CSCL | ZC3H18   |
| CANT1.1    | 1.30E-16 | -0.12769 | 0.04  | 0.182 | 1.95E-12 | CSCL | CANT1    |
| MAPK3      | 1.32E-16 | -0.11013 | 0.059 | 0.214 | 1.98E-12 | CSCL | MAPK3    |
| SCAP.1     | 1.34E-16 | -0.14693 | 0.03  | 0.164 | 2.00E-12 | CSCL | SCAP     |
| ATXN2L     | 1.41E-16 | -0.14923 | 0.042 | 0.184 | 2.10E-12 | CSCL | ATXN2L   |
| SLC50A1.1  | 1.47E-16 | -0.24104 | 0.037 | 0.174 | 2.20E-12 | CSCL | SLC50A1  |
| FKBP1B     | 1.50E-16 | -0.17397 | 0.01  | 0.128 | 2.24E-12 | CSCL | FKBP1B   |
| MCM5.2     | 1.50E-16 | -0.26956 | 0.026 | 0.156 | 2.24E-12 | CSCL | MCM5     |
| DUSP11     | 1.52E-16 | -0.12841 | 0.045 | 0.19  | 2.27E-12 | CSCL | DUSP11   |
| E2F6.1     | 1.54E-16 | -0.14432 | 0.023 | 0.15  | 2.30E-12 | CSCL | E2F6     |
| WWTR1.2    | 1.56E-16 | -0.10027 | 0.031 | 0.167 | 2.33E-12 | CSCL | WWTR1    |
| SH3BP1.2   | 1.57E-16 | -0.32557 | 0.005 | 0.117 | 2.34E-12 | CSCL | SH3BP1   |
| RAB35.2    | 1.59E-16 | -0.10511 | 0.035 | 0.172 | 2.37E-12 | CSCL | RAB35    |
| TMOD3.2    | 1.62E-16 | -0.15855 | 0.023 | 0.15  | 2.41E-12 | CSCL | TMOD3    |
| PODXL2.2   | 1.67E-16 | -0.10043 | 0.12  | 0.317 | 2.49E-12 | CSCL | PODXL2   |

|            |          |          |       |       |          |      |             |
|------------|----------|----------|-------|-------|----------|------|-------------|
| COMMD8.2   | 1.68E-16 | -0.11134 | 0.07  | 0.232 | 2.51E-12 | CSCL | COMMD8      |
| MTG2.1     | 1.70E-16 | -0.15634 | 0.024 | 0.153 | 2.55E-12 | CSCL | MTG2        |
| FAM214B.2  | 1.71E-16 | -0.26772 | 0.009 | 0.124 | 2.55E-12 | CSCL | FAM214B     |
| VPS53.1    | 1.74E-16 | -0.15367 | 0.031 | 0.166 | 2.60E-12 | CSCL | VPS53       |
| NR2F6.1    | 1.76E-16 | -0.12226 | 0.021 | 0.147 | 2.63E-12 | CSCL | NR2F6       |
| PDHX.1     | 1.77E-16 | -0.11268 | 0.038 | 0.178 | 2.65E-12 | CSCL | PDHX        |
| DUSP4.2    | 1.79E-16 | -0.15218 | 0.044 | 0.186 | 2.67E-12 | CSCL | DUSP4       |
| FAM49A.1   | 1.82E-16 | -0.18173 | 0.038 | 0.177 | 2.73E-12 | CSCL | FAM49A      |
| C6orf120.1 | 1.88E-16 | -0.13818 | 0.019 | 0.144 | 2.81E-12 | CSCL | C6orf120    |
| TOM1.2     | 1.90E-16 | -0.25114 | 0.033 | 0.167 | 2.84E-12 | CSCL | TOM1        |
| CCDC28A.1  | 1.91E-16 | -0.2417  | 0.031 | 0.165 | 2.85E-12 | CSCL | CCDC28A     |
| EIF2B4.1   | 1.91E-16 | -0.1348  | 0.049 | 0.195 | 2.86E-12 | CSCL | EIF2B4      |
| TPRA1.1    | 1.94E-16 | -0.13013 | 0.033 | 0.168 | 2.90E-12 | CSCL | TPRA1       |
| EXT2.1     | 1.94E-16 | -0.11824 | 0.038 | 0.178 | 2.90E-12 | CSCL | EXT2        |
| PARK7.2    | 1.94E-16 | 0.446544 | 0.611 | 0.774 | 2.90E-12 | CSCL | PARK7       |
| FZR1.2     | 1.95E-16 | -0.16708 | 0.03  | 0.162 | 2.92E-12 | CSCL | FZR1        |
| RNF138     | 2.05E-16 | -0.10163 | 0.044 | 0.187 | 3.06E-12 | CSCL | RNF138      |
| KCNMA1.1   | 2.11E-16 | -0.24866 | 0.023 | 0.149 | 3.15E-12 | CSCL | KCNMA1      |
| RBM15B.2   | 2.18E-16 | -0.10605 | 0.038 | 0.178 | 3.26E-12 | CSCL | RBM15B      |
| FAM168A.2  | 2.22E-16 | -0.21258 | 0.014 | 0.133 | 3.32E-12 | CSCL | FAM168A     |
| NSRP1      | 2.25E-16 | 0.106858 | 0.147 | 0.367 | 3.37E-12 | CSCL | NSRP1       |
| ICAM3.2    | 2.32E-16 | -0.30956 | 0     | 0.106 | 3.47E-12 | CSCL | ICAM3       |
| ARHGAP35.2 | 2.35E-16 | -0.13817 | 0.024 | 0.153 | 3.51E-12 | CSCL | ARHGAP35    |
| ACOT9.2    | 2.38E-16 | -0.12452 | 0.045 | 0.189 | 3.55E-12 | CSCL | ACOT9       |
| ZNF385A.2  | 2.49E-16 | -0.27839 | 0.019 | 0.143 | 3.71E-12 | CSCL | ZNF385A     |
| MAP3K13.2  | 2.57E-16 | 0.124815 | 0.168 | 0.405 | 3.84E-12 | CSCL | MAP3K13     |
| NRSN2.1    | 2.78E-16 | -0.10669 | 0.035 | 0.171 | 4.15E-12 | CSCL | NRSN2       |
| ZYG11B.2   | 2.85E-16 | -0.17111 | 0.026 | 0.155 | 4.26E-12 | CSCL | ZYG11B      |
| SLC40A1.2  | 2.86E-16 | -0.25463 | 0.021 | 0.145 | 4.27E-12 | CSCL | SLC40A1     |
| MAPK6.1    | 2.90E-16 | -0.15678 | 0.04  | 0.179 | 4.33E-12 | CSCL | MAPK6       |
| ZCCHC6.2   | 2.91E-16 | -0.28603 | 0.019 | 0.141 | 4.35E-12 | CSCL | ZCCHC6      |
| PAQR4.2    | 2.96E-16 | -0.17672 | 0.035 | 0.171 | 4.42E-12 | CSCL | PAQR4       |
| LMBR1L.2   | 2.97E-16 | -0.20463 | 0.047 | 0.191 | 4.44E-12 | CSCL | LMBR1L      |
| TBCD.2     | 2.99E-16 | -0.14722 | 0.024 | 0.151 | 4.46E-12 | CSCL | TBCD        |
| MYADM.1    | 3.01E-16 | -0.16112 | 0.052 | 0.2   | 4.50E-12 | CSCL | MYADM       |
| LPAR5.2    | 3.04E-16 | -0.43241 | 0.002 | 0.109 | 4.54E-12 | CSCL | LPAR5       |
| CTA-29F11  | 3.05E-16 | -0.18023 | 0.058 | 0.208 | 4.56E-12 | CSCL | CTA-29F11.1 |
| LGALS3.2   | 3.12E-16 | 0.634026 | 0.501 | 0.48  | 4.67E-12 | CSCL | LGALS3      |
| NUP93.1    | 3.19E-16 | -0.10047 | 0.045 | 0.188 | 4.76E-12 | CSCL | NUP93       |
| ZNF330     | 3.21E-16 | -0.11866 | 0.066 | 0.223 | 4.79E-12 | CSCL | ZNF330      |
| UBXN2A.1   | 3.25E-16 | -0.11917 | 0.049 | 0.195 | 4.86E-12 | CSCL | UBXN2A      |
| RIN2.2     | 3.27E-16 | -0.33324 | 0.014 | 0.132 | 4.88E-12 | CSCL | RIN2        |
| CYC1.2     | 3.32E-16 | 0.106518 | 0.248 | 0.554 | 4.96E-12 | CSCL | CYC1        |
| PNPLA6.2   | 3.32E-16 | -0.13661 | 0.037 | 0.173 | 4.96E-12 | CSCL | PNPLA6      |
| LARP6.1    | 3.32E-16 | -0.10196 | 0.052 | 0.2   | 4.97E-12 | CSCL | LARP6       |
| P4HA1      | 3.35E-16 | -0.10276 | 0.072 | 0.232 | 5.01E-12 | CSCL | P4HA1       |
| MICAL1.2   | 3.46E-16 | -0.31733 | 0.023 | 0.147 | 5.17E-12 | CSCL | MICAL1      |
| ALDH16A1.3 | 3.50E-16 | -0.26473 | 0.01  | 0.125 | 5.23E-12 | CSCL | ALDH16A1    |
| SPHK1.2    | 3.51E-16 | -0.27094 | 0.003 | 0.112 | 5.25E-12 | CSCL | SPHK1       |
| PLEC.2     | 3.52E-16 | -0.13335 | 0.049 | 0.194 | 5.26E-12 | CSCL | PLEC        |
| C14orf119  | 3.53E-16 | 0.126398 | 0.122 | 0.323 | 5.28E-12 | CSCL | C14orf119   |

|              |          |          |       |       |          |      |           |
|--------------|----------|----------|-------|-------|----------|------|-----------|
| C6orf226. 3. | 5.9E-16  | -0.10219 | 0.051 | 0.197 | 5.36E-12 | CSCL | C6orf226  |
| FKBP5. 2     | 3.61E-16 | -0.12465 | 0.131 | 0.326 | 5.39E-12 | CSCL | FKBP5     |
| RENBP. 2     | 3.67E-16 | -0.31701 | 0.019 | 0.141 | 5.49E-12 | CSCL | RENBP     |
| PHF11. 2     | 3.70E-16 | -0.1916  | 0.023 | 0.148 | 5.53E-12 | CSCL | PHF11     |
| B3GALT6. 2   | 3.95E-16 | -0.13732 | 0.021 | 0.144 | 5.90E-12 | CSCL | B3GALT6   |
| SETX. 2      | 3.99E-16 | -0.10903 | 0.037 | 0.173 | 5.96E-12 | CSCL | SETX      |
| ZNF608       | 4.01E-16 | -0.12534 | 0.031 | 0.164 | 5.99E-12 | CSCL | ZNF608    |
| VAMP7. 1     | 4.05E-16 | -0.14495 | 0.037 | 0.173 | 6.05E-12 | CSCL | VAMP7     |
| DPYSL5. 2    | 4.12E-16 | -0.13511 | 0.035 | 0.169 | 6.16E-12 | CSCL | DPYSL5    |
| LINC00936    | 4.15E-16 | -0.30594 | 0.023 | 0.147 | 6.20E-12 | CSCL | LINC00936 |
| LDLRAD4. 2   | 4.18E-16 | -0.33946 | 0.026 | 0.152 | 6.25E-12 | CSCL | LDLRAD4   |
| KANSL1. 2    | 4.21E-16 | -0.16196 | 0.037 | 0.172 | 6.28E-12 | CSCL | KANSL1    |
| PELP1. 1     | 4.27E-16 | -0.13671 | 0.028 | 0.157 | 6.38E-12 | CSCL | PELP1     |
| LTA4H. 1     | 4.41E-16 | -0.11325 | 0.075 | 0.237 | 6.59E-12 | CSCL | LTA4H     |
| FAM168B. 1   | 4.47E-16 | -0.11999 | 0.035 | 0.169 | 6.68E-12 | CSCL | FAM168B   |
| SLC2A3. 1    | 4.52E-16 | -0.20687 | 0.092 | 0.263 | 6.76E-12 | CSCL | SLC2A3    |
| NDRG3. 2     | 4.62E-16 | -0.11298 | 0.044 | 0.184 | 6.90E-12 | CSCL | NDRG3     |
| CASP6. 1     | 4.64E-16 | -0.14634 | 0.035 | 0.169 | 6.93E-12 | CSCL | CASP6     |
| ATL3. 1      | 4.71E-16 | -0.18161 | 0.021 | 0.144 | 7.04E-12 | CSCL | ATL3      |
| OCEL1. 1     | 4.72E-16 | -0.1625  | 0.031 | 0.163 | 7.06E-12 | CSCL | OCEL1     |
| COL4A3BP. 4. | 7.4E-16  | -0.17329 | 0.024 | 0.15  | 7.08E-12 | CSCL | COL4A3BP  |
| UBE4A. 1     | 4.75E-16 | -0.19178 | 0.03  | 0.159 | 7.10E-12 | CSCL | UBE4A     |
| PARP14. 2    | 4.79E-16 | -0.14873 | 0.031 | 0.163 | 7.16E-12 | CSCL | PARP14    |
| SEPT7. 2     | 4.87E-16 | 0.462455 | 0.595 | 0.708 | 7.28E-12 | CSCL | 7-Sep     |
| CYTH4. 2     | 4.89E-16 | -0.41908 | 0.007 | 0.117 | 7.30E-12 | CSCL | CYTH4     |
| TAF3. 2      | 4.89E-16 | -0.23971 | 0.012 | 0.128 | 7.31E-12 | CSCL | TAF3      |
| SETD3. 2     | 4.90E-16 | -0.18662 | 0.031 | 0.162 | 7.32E-12 | CSCL | SETD3     |
| XAB2         | 4.91E-16 | -0.13134 | 0.044 | 0.184 | 7.33E-12 | CSCL | XAB2      |
| AFTPH. 1     | 4.95E-16 | -0.17924 | 0.03  | 0.159 | 7.40E-12 | CSCL | AFTPH     |
| ARHGEF1. 2   | 5.00E-16 | -0.18706 | 0.056 | 0.204 | 7.47E-12 | CSCL | ARHGEF1   |
| HIPK2. 2     | 5.03E-16 | -0.1367  | 0.07  | 0.229 | 7.52E-12 | CSCL | HIPK2     |
| PQBP1. 1     | 5.13E-16 | 0.1082   | 0.141 | 0.355 | 7.67E-12 | CSCL | PQBP1     |
| PLEKH02. 2   | 5.24E-16 | -0.33736 | 0.002 | 0.107 | 7.82E-12 | CSCL | PLEKH02   |
| LINC00493    | 5.36E-16 | 0.115725 | 0.244 | 0.545 | 8.01E-12 | CSCL | LINC00493 |
| LYST. 1      | 5.36E-16 | -0.13161 | 0.028 | 0.156 | 8.01E-12 | CSCL | LYST      |
| PHACTR1. 2   | 5.49E-16 | -0.48467 | 0.01  | 0.123 | 8.20E-12 | CSCL | PHACTR1   |
| POLR2M. 1    | 5.55E-16 | -0.10798 | 0.033 | 0.166 | 8.30E-12 | CSCL | POLR2M    |
| CD55. 2      | 5.61E-16 | -0.42879 | 0.01  | 0.123 | 8.38E-12 | CSCL | CD55      |
| IREB2. 1     | 5.63E-16 | -0.2193  | 0.031 | 0.161 | 8.41E-12 | CSCL | IREB2     |
| ANKH. 2      | 5.79E-16 | -0.24488 | 0.028 | 0.155 | 8.65E-12 | CSCL | ANKH      |
| ATP13A1. 1   | 6.19E-16 | -0.15792 | 0.035 | 0.168 | 9.24E-12 | CSCL | ATP13A1   |
| NSMCE4A. 2   | 6.42E-16 | -0.11237 | 0.03  | 0.159 | 9.60E-12 | CSCL | NSMCE4A   |
| SLC35A2      | 6.46E-16 | -0.20308 | 0.038 | 0.173 | 9.66E-12 | CSCL | SLC35A2   |
| GSPT2        | 6.68E-16 | -0.1823  | 0.028 | 0.155 | 9.98E-12 | CSCL | GSPT2     |
| PHYKPL. 2    | 6.73E-16 | -0.13181 | 0.059 | 0.209 | 1.01E-11 | CSCL | PHYKPL    |
| KLF2. 2      | 7.09E-16 | -0.41272 | 0.019 | 0.137 | 1.06E-11 | CSCL | KLF2      |
| PDCD4. 2     | 7.15E-16 | -0.26619 | 0.028 | 0.155 | 1.07E-11 | CSCL | PDCD4     |
| DCTPP1. 1    | 7.42E-16 | 0.132552 | 0.134 | 0.34  | 1.11E-11 | CSCL | DCTPP1    |
| SNRPD2. 2    | 7.92E-16 | 0.481447 | 0.606 | 0.755 | 1.18E-11 | CSCL | SNRPD2    |
| MESDC1. 2    | 8.19E-16 | -0.21207 | 0.014 | 0.129 | 1.22E-11 | CSCL | MESDC1    |
| FBX025. 1    | 8.33E-16 | -0.19572 | 0.03  | 0.158 | 1.24E-11 | CSCL | FBX025    |

|           |          |          |       |       |          |      |               |
|-----------|----------|----------|-------|-------|----------|------|---------------|
| PRKAB1.1  | 8.59E-16 | -0.17955 | 0.033 | 0.164 | 1.28E-11 | CSCL | PRKAB1        |
| LPXN.2    | 8.66E-16 | -0.40914 | 0.007 | 0.115 | 1.29E-11 | CSCL | LPXN          |
| RCBTB2.2  | 8.76E-16 | -0.27208 | 0.024 | 0.148 | 1.31E-11 | CSCL | RCBTB2        |
| MED13.1   | 8.82E-16 | -0.10015 | 0.035 | 0.167 | 1.32E-11 | CSCL | MED13         |
| RP11-452F | 8.92E-16 | -0.2906  | 0.016 | 0.133 | 1.33E-11 | CSCL | RP11-452F19.3 |
| NOC2L.1   | 9.15E-16 | 0.109897 | 0.124 | 0.322 | 1.37E-11 | CSCL | NOC2L         |
| LHX2.2    | 9.40E-16 | -0.16683 | 0.017 | 0.135 | 1.41E-11 | CSCL | LHX2          |
| UBE2C.2   | 9.42E-16 | -0.4156  | 0.01  | 0.122 | 1.41E-11 | CSCL | UBE2C         |
| RAB40B.2  | 9.43E-16 | -0.22358 | 0.017 | 0.135 | 1.41E-11 | CSCL | RAB40B        |
| FADD.1    | 9.48E-16 | -0.14506 | 0.021 | 0.142 | 1.42E-11 | CSCL | FADD          |
| TULP4.2   | 9.59E-16 | -0.16363 | 0.024 | 0.148 | 1.43E-11 | CSCL | TULP4         |
| PLXNB2.2  | 9.60E-16 | -0.17563 | 0.033 | 0.163 | 1.43E-11 | CSCL | PLXNB2        |
| TBC1D12.2 | 9.65E-16 | -0.28455 | 0.005 | 0.112 | 1.44E-11 | CSCL | TBC1D12       |
| UBE2N.1   | 9.68E-16 | 0.102846 | 0.244 | 0.536 | 1.45E-11 | CSCL | UBE2N         |
| C1orf174. | 9.95E-16 | -0.15498 | 0.031 | 0.16  | 1.49E-11 | CSCL | C1orf174      |
| SCO1      | 1.01E-15 | -0.10969 | 0.038 | 0.173 | 1.50E-11 | CSCL | SCO1          |
| TMEM101.1 | 1.01E-15 | -0.10196 | 0.063 | 0.214 | 1.51E-11 | CSCL | TMEM101       |
| C1GALT1.1 | 1.01E-15 | -0.18219 | 0.037 | 0.169 | 1.51E-11 | CSCL | C1GALT1       |
| RRAGD.1   | 1.03E-15 | -0.16012 | 0.017 | 0.135 | 1.54E-11 | CSCL | RRAGD         |
| TAB2.1    | 1.07E-15 | -0.19948 | 0.016 | 0.132 | 1.60E-11 | CSCL | TAB2          |
| TEX261.1  | 1.07E-15 | -0.13286 | 0.038 | 0.173 | 1.60E-11 | CSCL | TEX261        |
| PCID2.1   | 1.09E-15 | -0.15404 | 0.047 | 0.187 | 1.63E-11 | CSCL | PCID2         |
| AIFM1.1   | 1.11E-15 | -0.12873 | 0.026 | 0.151 | 1.66E-11 | CSCL | AIFM1         |
| TBC1D22A. | 1.15E-15 | -0.23918 | 0.014 | 0.128 | 1.71E-11 | CSCL | TBC1D22A      |
| APTX.1    | 1.16E-15 | -0.18448 | 0.023 | 0.144 | 1.74E-11 | CSCL | APTX          |
| WBSCR16.1 | 1.17E-15 | -0.10152 | 0.026 | 0.151 | 1.75E-11 | CSCL | WBSCR16       |
| NFATC2IP. | 1.17E-15 | -0.14068 | 0.037 | 0.169 | 1.75E-11 | CSCL | NFATC2IP      |
| GIT2.2    | 1.18E-15 | -0.23493 | 0.031 | 0.159 | 1.77E-11 | CSCL | GIT2          |
| KDM5B.2   | 1.21E-15 | -0.17249 | 0.037 | 0.168 | 1.80E-11 | CSCL | KDM5B         |
| SRFBP1.1  | 1.21E-15 | -0.10225 | 0.047 | 0.188 | 1.82E-11 | CSCL | SRFBP1        |
| ARL4D.2   | 1.22E-15 | -0.25654 | 0.042 | 0.175 | 1.83E-11 | CSCL | ARL4D         |
| ARSA.2    | 1.23E-15 | -0.27797 | 0.021 | 0.141 | 1.84E-11 | CSCL | ARSA          |
| MTMR6.2   | 1.24E-15 | -0.18752 | 0.026 | 0.151 | 1.86E-11 | CSCL | MTMR6         |
| SUCO      | 1.25E-15 | -0.1332  | 0.031 | 0.16  | 1.87E-11 | CSCL | SUCO          |
| ZSWIM6.2  | 1.28E-15 | -0.22785 | 0.017 | 0.134 | 1.91E-11 | CSCL | ZSWIM6        |
| SFT2D2.1  | 1.34E-15 | -0.17318 | 0.028 | 0.154 | 2.00E-11 | CSCL | SFT2D2        |
| PITPNB.1  | 1.34E-15 | -0.10844 | 0.042 | 0.178 | 2.01E-11 | CSCL | PITPNB        |
| TNFAIP3.2 | 1.36E-15 | -0.31252 | 0.038 | 0.17  | 2.03E-11 | CSCL | TNFAIP3       |
| KLHL24.2  | 1.36E-15 | -0.22448 | 0.047 | 0.186 | 2.04E-11 | CSCL | KLHL24        |
| VWA1.2    | 1.41E-15 | -0.15786 | 0.026 | 0.15  | 2.11E-11 | CSCL | VWA1          |
| MAPRE2.1  | 1.47E-15 | -0.10433 | 0.051 | 0.193 | 2.19E-11 | CSCL | MAPRE2        |
| UBALD1.1  | 1.58E-15 | -0.1424  | 0.04  | 0.174 | 2.36E-11 | CSCL | UBALD1        |
| SNX8.2    | 1.58E-15 | -0.20672 | 0.028 | 0.153 | 2.36E-11 | CSCL | SNX8          |
| IMPACT.1  | 1.59E-15 | -0.10017 | 0.037 | 0.169 | 2.37E-11 | CSCL | IMPACT        |
| NUMB.2    | 1.60E-15 | -0.16234 | 0.042 | 0.177 | 2.39E-11 | CSCL | NUMB          |
| KCTD17.2  | 1.60E-15 | -0.10518 | 0.021 | 0.141 | 2.39E-11 | CSCL | KCTD17        |
| RUSC1.1   | 1.64E-15 | -0.12722 | 0.023 | 0.144 | 2.44E-11 | CSCL | RUSC1         |
| CCNG2.2   | 1.64E-15 | -0.21524 | 0.049 | 0.188 | 2.45E-11 | CSCL | CCNG2         |
| RPS6KA4.2 | 1.68E-15 | -0.24726 | 0.014 | 0.127 | 2.50E-11 | CSCL | RPS6KA4       |
| BEND6.1   | 1.73E-15 | -0.16294 | 0.012 | 0.124 | 2.58E-11 | CSCL | BEND6         |
| MPHOSPH8. | 1.78E-15 | 0.111747 | 0.178 | 0.41  | 2.66E-11 | CSCL | MPHOSPH8      |



|             |           |           |        |        |                |              |
|-------------|-----------|-----------|--------|--------|----------------|--------------|
| SETD2. 2    | 1. 79E-15 | -0. 12874 | 0. 026 | 0. 15  | 2. 68E-11 CSCL | SETD2        |
| NOTCH2. 1   | 1. 82E-15 | -0. 13652 | 0. 028 | 0. 153 | 2. 71E-11 CSCL | NOTCH2       |
| SUSD3. 2    | 1. 88E-15 | -0. 45383 | 0      | 0. 1   | 2. 81E-11 CSCL | SUSD3        |
| SH3GLB2. 2  | 1. 89E-15 | -0. 23144 | 0. 012 | 0. 124 | 2. 82E-11 CSCL | SH3GLB2      |
| TLR2. 2     | 1. 98E-15 | -0. 45132 | 0. 009 | 0. 116 | 2. 96E-11 CSCL | TLR2         |
| PRPF18. 1   | 1. 98E-15 | -0. 17028 | 0. 023 | 0. 143 | 2. 96E-11 CSCL | PRPF18       |
| TUG1. 2     | 1. 98E-15 | -0. 12508 | 0. 045 | 0. 182 | 2. 97E-11 CSCL | TUG1         |
| EPB41L3. 2  | 1. 99E-15 | -0. 40585 | 0. 005 | 0. 11  | 2. 98E-11 CSCL | EPB41L3      |
| FRYL. 2     | 2. 02E-15 | -0. 13703 | 0. 052 | 0. 195 | 3. 02E-11 CSCL | FRYL         |
| RNPEPL1. 2  | 2. 03E-15 | -0. 25843 | 0. 019 | 0. 136 | 3. 03E-11 CSCL | RNPEPL1      |
| ZC3H7A. 2   | 2. 03E-15 | -0. 16062 | 0. 03  | 0. 155 | 3. 04E-11 CSCL | ZC3H7A       |
| DPM1. 2     | 2. 04E-15 | 0. 110874 | 0. 164 | 0. 389 | 3. 04E-11 CSCL | DPM1         |
| TMC6. 2     | 2. 14E-15 | -0. 39419 | 0. 009 | 0. 116 | 3. 20E-11 CSCL | TMC6         |
| OPA1. 2     | 2. 27E-15 | -0. 15414 | 0. 019 | 0. 136 | 3. 39E-11 CSCL | OPA1         |
| FAM217B. 2  | 2. 28E-15 | -0. 14705 | 0. 033 | 0. 161 | 3. 40E-11 CSCL | FAM217B      |
| TNFAIP8L2   | 2. 34E-15 | -0. 42397 | 0      | 0. 099 | 3. 50E-11 CSCL | TNFAIP8L2    |
| CPQ         | 2. 35E-15 | -0. 20632 | 0. 047 | 0. 184 | 3. 51E-11 CSCL | CPQ          |
| METTL21A. 2 | 3. 37E-15 | -0. 16316 | 0. 051 | 0. 19  | 3. 55E-11 CSCL | METTL21A     |
| KLC2. 1     | 2. 37E-15 | -0. 18338 | 0. 014 | 0. 127 | 3. 55E-11 CSCL | KLC2         |
| REPS1. 1    | 2. 41E-15 | -0. 15585 | 0. 017 | 0. 133 | 3. 60E-11 CSCL | REPS1        |
| CENPW. 2    | 2. 44E-15 | -0. 261   | 0. 012 | 0. 123 | 3. 64E-11 CSCL | CENPW        |
| PYGL. 1     | 2. 45E-15 | -0. 16327 | 0. 056 | 0. 199 | 3. 66E-11 CSCL | PYGL         |
| MIB2. 1     | 2. 45E-15 | -0. 12753 | 0. 03  | 0. 155 | 3. 66E-11 CSCL | MIB2         |
| TMEM41B     | 2. 46E-15 | -0. 12866 | 0. 045 | 0. 182 | 3. 68E-11 CSCL | TMEM41B      |
| IKBKG. 2    | 2. 48E-15 | -0. 17228 | 0. 021 | 0. 139 | 3. 71E-11 CSCL | IKBKG        |
| RALB. 1     | 2. 49E-15 | -0. 17046 | 0. 035 | 0. 163 | 3. 72E-11 CSCL | RALB         |
| DUSP2. 2    | 2. 55E-15 | -0. 46232 | 0. 009 | 0. 116 | 3. 81E-11 CSCL | DUSP2        |
| CTC-524C5   | 2. 58E-15 | -0. 16654 | 0. 012 | 0. 123 | 3. 86E-11 CSCL | CTC-524C5. 2 |
| KIF3B. 2    | 2. 62E-15 | -0. 15621 | 0. 019 | 0. 136 | 3. 92E-11 CSCL | KIF3B        |
| SOD1. 1     | 2. 63E-15 | 0. 441838 | 0. 604 | 0. 764 | 3. 94E-11 CSCL | SOD1         |
| TRIAP1      | 2. 69E-15 | 0. 130231 | 0. 126 | 0. 323 | 4. 02E-11 CSCL | TRIAP1       |
| ACAA2. 1    | 2. 69E-15 | -0. 12703 | 0. 066 | 0. 217 | 4. 02E-11 CSCL | ACAA2        |
| ALYREF. 2   | 2. 72E-15 | -0. 10376 | 0. 028 | 0. 152 | 4. 06E-11 CSCL | ALYREF       |
| TYMS. 2     | 2. 76E-15 | -0. 12301 | 0. 037 | 0. 167 | 4. 12E-11 CSCL | TYMS         |
| UBXN2B. 2   | 2. 77E-15 | -0. 20974 | 0. 031 | 0. 157 | 4. 14E-11 CSCL | UBXN2B       |
| MTMR4. 1    | 2. 78E-15 | -0. 10401 | 0. 037 | 0. 167 | 4. 15E-11 CSCL | MTMR4        |
| RNF41       | 2. 83E-15 | -0. 11192 | 0. 04  | 0. 173 | 4. 23E-11 CSCL | RNF41        |
| GAL3ST4. 2  | 2. 85E-15 | -0. 37399 | 0. 045 | 0. 178 | 4. 26E-11 CSCL | GAL3ST4      |
| NF2. 2      | 2. 86E-15 | -0. 10679 | 0. 031 | 0. 157 | 4. 27E-11 CSCL | NF2          |
| PCF11. 1    | 2. 86E-15 | -0. 11908 | 0. 063 | 0. 211 | 4. 28E-11 CSCL | PCF11        |
| PPP1R35. 2  | 2. 87E-15 | -0. 13498 | 0. 035 | 0. 164 | 4. 29E-11 CSCL | PPP1R35      |
| UBE2E2. 1   | 2. 91E-15 | -0. 141   | 0. 086 | 0. 248 | 4. 34E-11 CSCL | UBE2E2       |
| CLK3. 1     | 2. 93E-15 | -0. 13638 | 0. 038 | 0. 17  | 4. 38E-11 CSCL | CLK3         |
| DHX40. 1    | 2. 98E-15 | -0. 16862 | 0. 024 | 0. 145 | 4. 46E-11 CSCL | DHX40        |
| ODF3B. 2    | 3. 01E-15 | -0. 3526  | 0      | 0. 099 | 4. 50E-11 CSCL | ODF3B        |
| DENND3. 2   | 3. 01E-15 | -0. 41809 | 0. 003 | 0. 105 | 4. 51E-11 CSCL | DENND3       |
| TNKS. 2     | 3. 02E-15 | -0. 11827 | 0. 03  | 0. 155 | 4. 51E-11 CSCL | TNKS         |
| POLR2H. 1   | 3. 07E-15 | 0. 115526 | 0. 133 | 0. 332 | 4. 59E-11 CSCL | POLR2H       |
| DID01. 1    | 3. 10E-15 | -0. 14725 | 0. 03  | 0. 154 | 4. 63E-11 CSCL | DID01        |
| TMEM57. 2   | 3. 13E-15 | -0. 13667 | 0. 045 | 0. 181 | 4. 67E-11 CSCL | TMEM57       |
| AMDHD2. 2   | 3. 15E-15 | -0. 2139  | 0. 016 | 0. 129 | 4. 71E-11 CSCL | AMDHD2       |

|            |           |           |        |        |           |      |            |
|------------|-----------|-----------|--------|--------|-----------|------|------------|
| HDAC10. 2  | 3. 18E-15 | -0. 25272 | 0. 007 | 0. 112 | 4. 76E-11 | CSCL | HDAC10     |
| ATXN80S. 2 | 3. 19E-15 | 0. 4095   | 0. 166 | 0. 075 | 4. 76E-11 | CSCL | ATXN80S    |
| POGK. 1    | 3. 21E-15 | -0. 15369 | 0. 019 | 0. 135 | 4. 79E-11 | CSCL | POGK       |
| ANXA4. 2   | 3. 44E-15 | -0. 13627 | 0. 058 | 0. 201 | 5. 13E-11 | CSCL | ANXA4      |
| EEF2       | 3. 44E-15 | 0. 346036 | 0. 644 | 0. 839 | 5. 14E-11 | CSCL | EEF2       |
| ORAI3. 1   | 3. 55E-15 | -0. 17595 | 0. 026 | 0. 147 | 5. 30E-11 | CSCL | ORAI3      |
| SH3BP2. 1  | 3. 62E-15 | -0. 20571 | 0. 024 | 0. 144 | 5. 41E-11 | CSCL | SH3BP2     |
| MFSD3. 2   | 3. 63E-15 | -0. 15678 | 0. 014 | 0. 125 | 5. 42E-11 | CSCL | MFSD3      |
| CTSF. 1    | 3. 69E-15 | 0. 111939 | 0. 101 | 0. 278 | 5. 52E-11 | CSCL | CTSF       |
| TMEM106C.  | 3. 77E-15 | 0. 109535 | 0. 099 | 0. 275 | 5. 64E-11 | CSCL | TMEM106C   |
| CENPH. 1   | 3. 78E-15 | -0. 18813 | 0. 017 | 0. 132 | 5. 64E-11 | CSCL | CENPH      |
| GLDN. 2    | 3. 81E-15 | -0. 404   | 0. 002 | 0. 102 | 5. 69E-11 | CSCL | GLDN       |
| TXNDC11    | 4. 01E-15 | -0. 23561 | 0. 012 | 0. 122 | 5. 99E-11 | CSCL | TXNDC11    |
| PMF1. 1    | 4. 12E-15 | 0. 104607 | 0. 133 | 0. 33  | 6. 15E-11 | CSCL | PMF1       |
| STK38L. 1  | 4. 20E-15 | -0. 16427 | 0. 031 | 0. 156 | 6. 28E-11 | CSCL | STK38L     |
| UQCRQ. 2   | 4. 22E-15 | 0. 361778 | 0. 63  | 0. 808 | 6. 31E-11 | CSCL | UQCRQ      |
| ARRDC1. 2  | 4. 24E-15 | -0. 21577 | 0. 023 | 0. 14  | 6. 33E-11 | CSCL | ARRDC1     |
| LIN7B      | 4. 25E-15 | -0. 20245 | 0. 016 | 0. 128 | 6. 35E-11 | CSCL | LIN7B      |
| YY1AP1     | 4. 29E-15 | -0. 12945 | 0. 044 | 0. 177 | 6. 41E-11 | CSCL | YY1AP1     |
| CARD8. 1   | 4. 46E-15 | -0. 25034 | 0. 031 | 0. 155 | 6. 67E-11 | CSCL | CARD8      |
| GTF2H1     | 4. 46E-15 | -0. 10743 | 0. 047 | 0. 183 | 6. 67E-11 | CSCL | GTF2H1     |
| NFKBIZ. 2  | 4. 47E-15 | -0. 24606 | 0. 047 | 0. 182 | 6. 68E-11 | CSCL | NFKBIZ     |
| PIGS. 2    | 4. 52E-15 | -0. 10134 | 0. 051 | 0. 189 | 6. 76E-11 | CSCL | PIGS       |
| ST6GALNAC  | 4. 54E-15 | -0. 1825  | 0. 017 | 0. 131 | 6. 78E-11 | CSCL | ST6GALNAC4 |
| UTRN. 1    | 4. 59E-15 | -0. 20648 | 0. 009 | 0. 115 | 6. 86E-11 | CSCL | UTRN       |
| IL17RA. 2  | 4. 65E-15 | -0. 26185 | 0. 014 | 0. 125 | 6. 94E-11 | CSCL | IL17RA     |
| EBI3. 2    | 4. 66E-15 | -0. 43785 | 0. 002 | 0. 101 | 6. 96E-11 | CSCL | EBI3       |
| PPP6R2. 2  | 4. 67E-15 | -0. 14166 | 0. 031 | 0. 156 | 6. 98E-11 | CSCL | PPP6R2     |
| STK17B. 2  | 4. 69E-15 | -0. 39649 | 0. 023 | 0. 138 | 7. 01E-11 | CSCL | STK17B     |
| TMEM19. 2  | 4. 71E-15 | -0. 20597 | 0. 033 | 0. 159 | 7. 03E-11 | CSCL | TMEM19     |
| CLEC5A. 2  | 4. 75E-15 | -0. 45931 | 0. 003 | 0. 104 | 7. 10E-11 | CSCL | CLEC5A     |
| ANKRD13D.  | 4. 82E-15 | -0. 10742 | 0. 042 | 0. 174 | 7. 21E-11 | CSCL | ANKRD13D   |
| FUBP1. 2   | 4. 89E-15 | -0. 11387 | 0. 077 | 0. 232 | 7. 31E-11 | CSCL | FUBP1      |
| EIF4EBP2.  | 4. 94E-15 | -0. 13887 | 0. 026 | 0. 147 | 7. 38E-11 | CSCL | EIF4EBP2   |
| HAX1       | 4. 96E-15 | 0. 143397 | 0. 204 | 0. 458 | 7. 41E-11 | CSCL | HAX1       |
| NOVA1. 2   | 5. 06E-15 | 0. 503279 | 0. 482 | 0. 479 | 7. 56E-11 | CSCL | NOVA1      |
| SLC35B4. 1 | 5. 09E-15 | -0. 10759 | 0. 056 | 0. 198 | 7. 60E-11 | CSCL | SLC35B4    |
| PTPRZ1. 2  | 5. 12E-15 | 0. 688181 | 0. 421 | 0. 382 | 7. 66E-11 | CSCL | PTPRZ1     |
| ARPC3      | 5. 13E-15 | -0. 15121 | 0. 419 | 0. 824 | 7. 66E-11 | CSCL | ARPC3      |
| ITPR2. 2   | 5. 15E-15 | -0. 13977 | 0. 021 | 0. 137 | 7. 69E-11 | CSCL | ITPR2      |
| TBC1D16. 1 | 5. 20E-15 | -0. 21733 | 0. 023 | 0. 139 | 7. 77E-11 | CSCL | TBC1D16    |
| SYK. 2     | 5. 21E-15 | -0. 36613 | 0. 007 | 0. 111 | 7. 79E-11 | CSCL | SYK        |
| TTYH2. 2   | 5. 30E-15 | -0. 26173 | 0. 012 | 0. 121 | 7. 92E-11 | CSCL | TTYH2      |
| RBM33      | 5. 39E-15 | -0. 1962  | 0. 031 | 0. 155 | 8. 05E-11 | CSCL | RBM33      |
| OAZ1. 1    | 5. 40E-15 | 0. 17235  | 0. 736 | 0. 936 | 8. 07E-11 | CSCL | OAZ1       |
| RFWD2. 2   | 5. 42E-15 | -0. 10017 | 0. 04  | 0. 171 | 8. 10E-11 | CSCL | RFWD2      |
| GALNS. 1   | 5. 47E-15 | -0. 14271 | 0. 021 | 0. 137 | 8. 18E-11 | CSCL | GALNS      |
| APH1B. 1   | 5. 50E-15 | -0. 25038 | 0. 019 | 0. 133 | 8. 22E-11 | CSCL | APH1B      |
| DHRS11. 2  | 5. 55E-15 | -0. 17785 | 0. 005 | 0. 107 | 8. 30E-11 | CSCL | DHRS11     |
| ASRGL1. 2  | 5. 61E-15 | -0. 13386 | 0. 063 | 0. 208 | 8. 38E-11 | CSCL | ASRGL1     |
| CHD1L. 2   | 5. 79E-15 | -0. 11684 | 0. 024 | 0. 143 | 8. 65E-11 | CSCL | CHD1L      |

|             |          |          |       |       |          |      |          |
|-------------|----------|----------|-------|-------|----------|------|----------|
| RELB. 1     | 5.90E-15 | -0.23303 | 0.002 | 0.1   | 8.81E-11 | CSCL | RELB     |
| CWC15. 1    | 5.98E-15 | 0.113099 | 0.227 | 0.5   | 8.94E-11 | CSCL | CWC15    |
| TIMMDC1. 1  | 6.11E-15 | 0.104966 | 0.171 | 0.398 | 9.13E-11 | CSCL | TIMMDC1  |
| DARS. 2     | 6.14E-15 | 0.105492 | 0.182 | 0.414 | 9.17E-11 | CSCL | DARS     |
| ZNF771. 1   | 6.18E-15 | -0.11244 | 0.03  | 0.152 | 9.23E-11 | CSCL | ZNF771   |
| ANK2. 2     | 6.32E-15 | -0.117   | 0.04  | 0.17  | 9.44E-11 | CSCL | ANK2     |
| ZCCHC17. 1  | 6.38E-15 | 0.13686  | 0.15  | 0.362 | 9.53E-11 | CSCL | ZCCHC17  |
| TLE4. 2     | 6.57E-15 | -0.13952 | 0.04  | 0.17  | 9.81E-11 | CSCL | TLE4     |
| SLC30A7. 1  | 6.57E-15 | -0.11973 | 0.038 | 0.167 | 9.82E-11 | CSCL | SLC30A7  |
| ABR. 2      | 6.62E-15 | -0.2246  | 0.03  | 0.151 | 9.89E-11 | CSCL | ABR      |
| BAP1. 1     | 6.65E-15 | -0.16541 | 0.026 | 0.146 | 9.94E-11 | CSCL | BAP1     |
| ANAPC5. 1   | 6.65E-15 | 0.116301 | 0.176 | 0.407 | 9.94E-11 | CSCL | ANAPC5   |
| UCKL1       | 6.79E-15 | -0.10111 | 0.037 | 0.164 | 1.01E-10 | CSCL | UCKL1    |
| KLHL12. 1   | 6.83E-15 | -0.18696 | 0.017 | 0.13  | 1.02E-10 | CSCL | KLHL12   |
| PRKX. 2     | 7.13E-15 | -0.24197 | 0.01  | 0.117 | 1.07E-10 | CSCL | PRKX     |
| C3. 2       | 7.58E-15 | -0.16556 | 0.194 | 0.412 | 1.13E-10 | CSCL | C3       |
| BTBD1. 2    | 7.60E-15 | -0.15637 | 0.031 | 0.154 | 1.14E-10 | CSCL | BTBD1    |
| RPP30. 1    | 7.62E-15 | -0.1747  | 0.044 | 0.175 | 1.14E-10 | CSCL | RPP30    |
| PUSL1. 1    | 7.64E-15 | -0.14115 | 0.016 | 0.126 | 1.14E-10 | CSCL | PUSL1    |
| USP4. 1     | 7.74E-15 | -0.104   | 0.047 | 0.181 | 1.16E-10 | CSCL | USP4     |
| NCF2. 2     | 7.74E-15 | -0.38583 | 0.005 | 0.106 | 1.16E-10 | CSCL | NCF2     |
| CD99L2. 1   | 7.82E-15 | -0.13761 | 0.021 | 0.136 | 1.17E-10 | CSCL | CD99L2   |
| LRRC4B. 2   | 8.07E-15 | -0.14752 | 0.023 | 0.139 | 1.21E-10 | CSCL | LRRC4B   |
| CUEDC1. 2   | 8.07E-15 | -0.17156 | 0.012 | 0.12  | 1.21E-10 | CSCL | CUEDC1   |
| FAM118A. 2  | 8.11E-15 | -0.25607 | 0.023 | 0.138 | 1.21E-10 | CSCL | FAM118A  |
| EML3. 1     | 8.17E-15 | -0.17469 | 0.012 | 0.12  | 1.22E-10 | CSCL | EML3     |
| PFDN6. 1    | 8.23E-15 | 0.102598 | 0.152 | 0.363 | 1.23E-10 | CSCL | PFDN6    |
| DEF6. 2     | 8.48E-15 | -0.37567 | 0     | 0.096 | 1.27E-10 | CSCL | DEF6     |
| CENPF. 2    | 8.60E-15 | -0.36346 | 0.005 | 0.106 | 1.29E-10 | CSCL | CENPF    |
| CX3CR1. 2   | 8.60E-15 | -0.44693 | 0.005 | 0.106 | 1.29E-10 | CSCL | CX3CR1   |
| C9orf72. 2  | 8.64E-15 | -0.25064 | 0.033 | 0.156 | 1.29E-10 | CSCL | C9orf72  |
| DHRS3. 1    | 8.71E-15 | -0.20534 | 0.045 | 0.177 | 1.30E-10 | CSCL | DHRS3    |
| LYAR. 1     | 8.72E-15 | -0.11368 | 0.047 | 0.181 | 1.30E-10 | CSCL | LYAR     |
| FEN1. 1     | 8.80E-15 | -0.14708 | 0.024 | 0.142 | 1.32E-10 | CSCL | FEN1     |
| VHL. 1      | 8.88E-15 | -0.12683 | 0.04  | 0.169 | 1.33E-10 | CSCL | VHL      |
| CLN6. 2     | 9.07E-15 | -0.20315 | 0.021 | 0.135 | 1.36E-10 | CSCL | CLN6     |
| CNIH2. 2    | 9.11E-15 | -0.15293 | 0.021 | 0.135 | 1.36E-10 | CSCL | CNIH2    |
| SERF2. 1    | 9.14E-15 | 0.225209 | 0.703 | 0.905 | 1.37E-10 | CSCL | SERF2    |
| TATDN3. 2   | 9.24E-15 | -0.13447 | 0.035 | 0.16  | 1.38E-10 | CSCL | TATDN3   |
| RAB3A. 2    | 9.24E-15 | -0.23453 | 0.042 | 0.17  | 1.38E-10 | CSCL | RAB3A    |
| FOS. 2      | 9.27E-15 | 0.327552 | 0.667 | 0.85  | 1.39E-10 | CSCL | FOS      |
| WDR55. 1    | 9.38E-15 | -0.18769 | 0.014 | 0.123 | 1.40E-10 | CSCL | WDR55    |
| TSC22D4. 2  | 9.40E-15 | 0.687583 | 0.475 | 0.47  | 1.40E-10 | CSCL | TSC22D4  |
| CERCAM      | 9.53E-15 | -0.19114 | 0.021 | 0.135 | 1.42E-10 | CSCL | CERCAM   |
| HELZ. 2     | 9.58E-15 | -0.11501 | 0.061 | 0.203 | 1.43E-10 | CSCL | HELZ     |
| RNMTL1. 1   | 9.63E-15 | -0.15442 | 0.021 | 0.135 | 1.44E-10 | CSCL | RNMTL1   |
| EBNA1BP2. 1 | 9.66E-15 | 0.189177 | 0.152 | 0.364 | 1.44E-10 | CSCL | EBNA1BP2 |
| THBD. 2     | 9.69E-15 | -0.41956 | 0.002 | 0.099 | 1.45E-10 | CSCL | THBD     |
| S100A11. 2  | 9.70E-15 | -0.10333 | 0.34  | 0.673 | 1.45E-10 | CSCL | S100A11  |
| CERK. 2     | 9.98E-15 | -0.2201  | 0.009 | 0.112 | 1.49E-10 | CSCL | CERK     |
| MAN2A1. 2   | 1.00E-14 | -0.27426 | 0.01  | 0.115 | 1.49E-10 | CSCL | MAN2A1   |

|            |          |          |       |       |          |      |          |
|------------|----------|----------|-------|-------|----------|------|----------|
| MTHFD2.1   | 1.00E-14 | -0.10704 | 0.119 | 0.297 | 1.50E-10 | CSCL | MTHFD2   |
| TAGAP.2    | 1.02E-14 | -0.46092 | 0.005 | 0.105 | 1.52E-10 | CSCL | TAGAP    |
| MOGS.1     | 1.02E-14 | -0.19112 | 0.017 | 0.129 | 1.53E-10 | CSCL | MOGS     |
| RIPK2.2    | 1.02E-14 | -0.16194 | 0.044 | 0.174 | 1.53E-10 | CSCL | RIPK2    |
| DUS1L.2    | 1.03E-14 | -0.10923 | 0.023 | 0.138 | 1.54E-10 | CSCL | DUS1L    |
| STRN4.2    | 1.03E-14 | -0.14279 | 0.017 | 0.129 | 1.55E-10 | CSCL | STRN4    |
| ASL.1      | 1.06E-14 | -0.15991 | 0.045 | 0.177 | 1.58E-10 | CSCL | ASL      |
| FKBP15.2   | 1.07E-14 | -0.18181 | 0.026 | 0.144 | 1.61E-10 | CSCL | FKBP15   |
| KCNF1.2    | 1.08E-14 | -0.15559 | 0.017 | 0.129 | 1.61E-10 | CSCL | KCNF1    |
| LMNB2.2    | 1.08E-14 | -0.17884 | 0.014 | 0.122 | 1.61E-10 | CSCL | LMNB2    |
| GMCL1.1    | 1.11E-14 | -0.18481 | 0.038 | 0.165 | 1.66E-10 | CSCL | GMCL1    |
| HCFC1.2    | 1.11E-14 | -0.16066 | 0.028 | 0.147 | 1.66E-10 | CSCL | HCFC1    |
| CXorf40B.1 | 1.11E-14 | -0.11347 | 0.035 | 0.159 | 1.66E-10 | CSCL | CXorf40B |
| DLX6-AS1.1 | 1.12E-14 | -0.51307 | 0.023 | 0.135 | 1.68E-10 | CSCL | DLX6-AS1 |
| NCOA6.2    | 1.13E-14 | -0.10822 | 0.024 | 0.141 | 1.69E-10 | CSCL | NCOA6    |
| INPPL1.2   | 1.15E-14 | -0.16985 | 0.016 | 0.125 | 1.72E-10 | CSCL | INPPL1   |
| GPX3.1     | 1.18E-14 | -0.21952 | 0.035 | 0.159 | 1.76E-10 | CSCL | GPX3     |
| SLC25A46.1 | 1.18E-14 | -0.12539 | 0.035 | 0.159 | 1.77E-10 | CSCL | SLC25A46 |
| RBMXL1.1   | 1.19E-14 | -0.15251 | 0.035 | 0.159 | 1.78E-10 | CSCL | RBMXL1   |
| ALCAM.2    | 1.20E-14 | -0.13941 | 0.061 | 0.203 | 1.80E-10 | CSCL | ALCAM    |
| ARHGAP15.1 | 1.21E-14 | -0.41155 | 0.003 | 0.102 | 1.82E-10 | CSCL | ARHGAP15 |
| PER1.1     | 1.24E-14 | -0.24811 | 0.056 | 0.191 | 1.85E-10 | CSCL | PER1     |
| SPATA20.1  | 1.28E-14 | -0.22925 | 0.023 | 0.137 | 1.91E-10 | CSCL | SPATA20  |
| SCD.2      | 1.40E-14 | -0.10098 | 0.072 | 0.219 | 2.09E-10 | CSCL | SCD      |
| DYNC1LI2.1 | 1.41E-14 | 0.10159  | 0.148 | 0.354 | 2.11E-10 | CSCL | DYNC1LI2 |
| PLEKHF2.2  | 1.42E-14 | -0.18106 | 0.021 | 0.133 | 2.12E-10 | CSCL | PLEKHF2  |
| SELPLG.2   | 1.47E-14 | -0.42394 | 0.017 | 0.127 | 2.19E-10 | CSCL | SELPLG   |
| SESTD1.1   | 1.51E-14 | -0.12232 | 0.038 | 0.165 | 2.25E-10 | CSCL | SESTD1   |
| KDM2B.1    | 1.51E-14 | -0.14367 | 0.024 | 0.14  | 2.26E-10 | CSCL | KDM2B    |
| MBTPS1.1   | 1.51E-14 | -0.10181 | 0.047 | 0.18  | 2.26E-10 | CSCL | MBTPS1   |
| LMNB1.2    | 1.54E-14 | -0.16697 | 0.033 | 0.155 | 2.30E-10 | CSCL | LMNB1    |
| TOPORS.2   | 1.55E-14 | -0.1211  | 0.051 | 0.185 | 2.31E-10 | CSCL | TOPORS   |
| ZNRF1.2    | 1.59E-14 | -0.11064 | 0.014 | 0.121 | 2.37E-10 | CSCL | ZNRF1    |
| DCX.2      | 1.61E-14 | -0.21977 | 0.068 | 0.211 | 2.41E-10 | CSCL | DCX      |
| NABP1.1    | 1.61E-14 | -0.37458 | 0.019 | 0.129 | 2.41E-10 | CSCL | NABP1    |
| FAM118B.1  | 1.62E-14 | -0.10598 | 0.031 | 0.152 | 2.42E-10 | CSCL | FAM118B  |
| SLC7A5.2   | 1.64E-14 | -0.32215 | 0.028 | 0.144 | 2.45E-10 | CSCL | SLC7A5   |
| PBDC1.1    | 1.66E-14 | 0.116619 | 0.099 | 0.269 | 2.48E-10 | CSCL | PBDC1    |
| EHMT1.2    | 1.68E-14 | -0.13554 | 0.031 | 0.152 | 2.51E-10 | CSCL | EHMT1    |
| RPS6KA3.2  | 1.73E-14 | -0.15359 | 0.026 | 0.143 | 2.58E-10 | CSCL | RPS6KA3  |
| LRRC25.2   | 1.83E-14 | -0.40702 | 0.002 | 0.097 | 2.73E-10 | CSCL | LRRC25   |
| UTP23.1    | 1.84E-14 | -0.13028 | 0.033 | 0.155 | 2.74E-10 | CSCL | UTP23    |
| CCDC91.1   | 1.84E-14 | -0.1262  | 0.063 | 0.204 | 2.75E-10 | CSCL | CCDC91   |
| ORAI1.2    | 1.87E-14 | -0.11773 | 0.019 | 0.13  | 2.79E-10 | CSCL | ORAI1    |
| TXNRD2.2   | 1.88E-14 | -0.18603 | 0.016 | 0.123 | 2.81E-10 | CSCL | TXNRD2   |
| C8orf76.1  | 1.88E-14 | -0.12335 | 0.038 | 0.164 | 2.81E-10 | CSCL | C8orf76  |
| ICAM1.1    | 1.92E-14 | -0.18016 | 0.042 | 0.17  | 2.88E-10 | CSCL | ICAM1    |
| UGCG.1     | 1.93E-14 | -0.11951 | 0.038 | 0.164 | 2.88E-10 | CSCL | UGCG     |
| TAF13.1    | 1.94E-14 | -0.11304 | 0.026 | 0.143 | 2.90E-10 | CSCL | TAF13    |
| C7orf26.2  | 1.97E-14 | -0.13867 | 0.038 | 0.164 | 2.94E-10 | CSCL | C7orf26  |
| FAM91A1.2  | 2.01E-14 | -0.18646 | 0.019 | 0.129 | 3.00E-10 | CSCL | FAM91A1  |

|            |          |          |       |       |          |      |          |
|------------|----------|----------|-------|-------|----------|------|----------|
| CCRL2.2    | 2.03E-14 | -0.42198 | 0     | 0.093 | 3.04E-10 | CSCL | CCRL2    |
| SLC2A8.1   | 2.04E-14 | -0.17516 | 0.028 | 0.145 | 3.05E-10 | CSCL | SLC2A8   |
| DENND6B.2  | 2.10E-14 | -0.28196 | 0.007 | 0.107 | 3.14E-10 | CSCL | DENND6B  |
| NMRK1.1    | 2.11E-14 | -0.22214 | 0.028 | 0.145 | 3.16E-10 | CSCL | NMRK1    |
| TRIM8.2    | 2.12E-14 | -0.2655  | 0.005 | 0.103 | 3.16E-10 | CSCL | TRIM8    |
| NUP54.1    | 2.12E-14 | -0.12837 | 0.051 | 0.184 | 3.17E-10 | CSCL | NUP54    |
| NAA35      | 2.13E-14 | -0.13934 | 0.026 | 0.142 | 3.18E-10 | CSCL | NAA35    |
| ARID1B.2   | 2.14E-14 | -0.16987 | 0.021 | 0.133 | 3.20E-10 | CSCL | ARID1B   |
| PHKG2.1    | 2.25E-14 | -0.13114 | 0.037 | 0.161 | 3.36E-10 | CSCL | PHKG2    |
| PALD1.2    | 2.27E-14 | -0.34798 | 0.007 | 0.107 | 3.39E-10 | CSCL | PALD1    |
| RAB11A     | 2.27E-14 | 0.147699 | 0.218 | 0.479 | 3.39E-10 | CSCL | RAB11A   |
| TUBB2B.1   | 2.33E-14 | 0.392196 | 0.553 | 0.555 | 3.49E-10 | CSCL | TUBB2B   |
| DBF4.1     | 2.34E-14 | -0.22746 | 0.017 | 0.126 | 3.50E-10 | CSCL | DBF4     |
| PHTF1.1    | 2.36E-14 | -0.18057 | 0.017 | 0.126 | 3.53E-10 | CSCL | PHTF1    |
| RANBP9.1   | 2.37E-14 | -0.12912 | 0.035 | 0.157 | 3.55E-10 | CSCL | RANBP9   |
| TK2.2      | 2.38E-14 | -0.14274 | 0.019 | 0.129 | 3.56E-10 | CSCL | TK2      |
| ZNF267.2   | 2.39E-14 | -0.25534 | 0.024 | 0.138 | 3.58E-10 | CSCL | ZNF267   |
| PRKAG2.2   | 2.47E-14 | -0.29207 | 0.028 | 0.143 | 3.69E-10 | CSCL | PRKAG2   |
| CYB561A3.2 | 2.59E-14 | -0.19441 | 0.035 | 0.156 | 3.88E-10 | CSCL | CYB561A3 |
| DPYSL4.2   | 2.64E-14 | -0.13056 | 0.037 | 0.16  | 3.95E-10 | CSCL | DPYSL4   |
| FECH       | 2.65E-14 | -0.13504 | 0.017 | 0.126 | 3.96E-10 | CSCL | FECH     |
| CRNKL1.1   | 2.69E-14 | -0.10063 | 0.035 | 0.157 | 4.03E-10 | CSCL | CRNKL1   |
| SLC11A2.1  | 2.73E-14 | -0.12468 | 0.045 | 0.175 | 4.08E-10 | CSCL | SLC11A2  |
| PTEN.2     | 2.75E-14 | -0.18439 | 0.023 | 0.135 | 4.10E-10 | CSCL | PTEN     |
| KIAA0101.2 | 2.78E-14 | -0.27239 | 0.016 | 0.123 | 4.16E-10 | CSCL | KIAA0101 |
| DCP2.2     | 2.82E-14 | -0.11725 | 0.035 | 0.156 | 4.21E-10 | CSCL | DCP2     |
| SLC48A1.1  | 2.91E-14 | -0.19765 | 0.024 | 0.138 | 4.35E-10 | CSCL | SLC48A1  |
| TMEM14A.1  | 2.91E-14 | 0.104087 | 0.138 | 0.333 | 4.35E-10 | CSCL | TMEM14A  |
| MAPKAPK2.2 | 2.96E-14 | -0.11068 | 0.024 | 0.138 | 4.42E-10 | CSCL | MAPKAPK2 |
| CDKN2AIP.2 | 2.99E-14 | -0.15479 | 0.033 | 0.153 | 4.47E-10 | CSCL | CDKN2AIP |
| MOSPD1     | 2.99E-14 | -0.13027 | 0.023 | 0.135 | 4.47E-10 | CSCL | MOSPD1   |
| ATG4C.2    | 3.07E-14 | -0.15615 | 0.028 | 0.144 | 4.59E-10 | CSCL | ATG4C    |
| ICA1.1     | 3.09E-14 | -0.26451 | 0.014 | 0.118 | 4.61E-10 | CSCL | ICA1     |
| ATPAF1.2   | 3.12E-14 | 0.134268 | 0.087 | 0.248 | 4.67E-10 | CSCL | ATPAF1   |
| SLC35E2B.3 | 3.23E-14 | -0.13781 | 0.031 | 0.15  | 4.83E-10 | CSCL | SLC35E2B |
| NLRP3.2    | 3.24E-14 | -0.40874 | 0     | 0.092 | 4.84E-10 | CSCL | NLRP3    |
| ARHGAP30.3 | 3.24E-14 | -0.36038 | 0.003 | 0.099 | 4.85E-10 | CSCL | ARHGAP30 |
| DNAJC9.1   | 3.28E-14 | -0.13104 | 0.042 | 0.168 | 4.91E-10 | CSCL | DNAJC9   |
| NDUFV1.1   | 3.31E-14 | 0.119149 | 0.227 | 0.492 | 4.94E-10 | CSCL | NDUFV1   |
| APOD.1     | 3.38E-14 | 0.612872 | 0.255 | 0.156 | 5.05E-10 | CSCL | APOD     |
| SH3PXD2B.3 | 3.39E-14 | -0.11819 | 0.016 | 0.122 | 5.07E-10 | CSCL | SH3PXD2B |
| RRM1.1     | 3.41E-14 | -0.10507 | 0.056 | 0.192 | 5.10E-10 | CSCL | RRM1     |
| C18orf8.1  | 3.48E-14 | -0.15188 | 0.014 | 0.119 | 5.20E-10 | CSCL | C18orf8  |
| SYNE2.2    | 3.52E-14 | -0.12246 | 0.049 | 0.18  | 5.26E-10 | CSCL | SYNE2    |
| MCAT.1     | 3.58E-14 | -0.16957 | 0.023 | 0.134 | 5.36E-10 | CSCL | MCAT     |
| ATP6VOB.2  | 3.61E-14 | -0.10946 | 0.421 | 0.817 | 5.39E-10 | CSCL | ATP6VOB  |
| FAM107B.2  | 3.64E-14 | -0.25568 | 0.019 | 0.127 | 5.44E-10 | CSCL | FAM107B  |
| RASSF1.1   | 3.68E-14 | -0.11341 | 0.04  | 0.165 | 5.50E-10 | CSCL | RASSF1   |
| SIK1.2     | 3.69E-14 | -0.32934 | 0.007 | 0.105 | 5.51E-10 | CSCL | SIK1     |
| C12orf10   | 3.69E-14 | 0.142825 | 0.134 | 0.327 | 5.52E-10 | CSCL | C12orf10 |
| GOS2.1     | 3.71E-14 | -0.27227 | 0.058 | 0.191 | 5.55E-10 | CSCL | GOS2     |

|            |           |           |        |        |                |          |
|------------|-----------|-----------|--------|--------|----------------|----------|
| CBFA2T2. 2 | 3. 72E-14 | -0. 1754  | 0. 023 | 0. 134 | 5. 57E-10 CSCL | CBFA2T2  |
| ZDHHC7. 2  | 3. 75E-14 | -0. 14867 | 0. 033 | 0. 153 | 5. 60E-10 CSCL | ZDHHC7   |
| KAT8. 1    | 3. 76E-14 | -0. 14593 | 0. 051 | 0. 183 | 5. 61E-10 CSCL | KAT8     |
| SNHG12. 2  | 3. 76E-14 | -0. 28274 | 0. 026 | 0. 14  | 5. 62E-10 CSCL | SNHG12   |
| ZDHHC9. 2  | 3. 77E-14 | -0. 10318 | 0. 045 | 0. 174 | 5. 64E-10 CSCL | ZDHHC9   |
| RCE1. 1    | 3. 79E-14 | -0. 16977 | 0. 023 | 0. 134 | 5. 66E-10 CSCL | RCE1     |
| OPTN       | 3. 83E-14 | -0. 10465 | 0. 026 | 0. 141 | 5. 72E-10 CSCL | OPTN     |
| DCAF15. 1  | 3. 88E-14 | -0. 15875 | 0. 012 | 0. 115 | 5. 79E-10 CSCL | DCAF15   |
| ABCG1. 2   | 3. 90E-14 | -0. 30208 | 0. 024 | 0. 137 | 5. 83E-10 CSCL | ABCG1    |
| APBB1. 1   | 3. 92E-14 | -0. 13778 | 0. 059 | 0. 196 | 5. 86E-10 CSCL | APBB1    |
| OTUD5. 2   | 3. 93E-14 | -0. 16422 | 0. 026 | 0. 14  | 5. 87E-10 CSCL | OTUD5    |
| ANXA2. 1   | 4. 07E-14 | -0. 12008 | 0. 265 | 0. 526 | 6. 08E-10 CSCL | ANXA2    |
| PRDM1. 2   | 4. 07E-14 | -0. 38166 | 0. 007 | 0. 105 | 6. 08E-10 CSCL | PRDM1    |
| RPS6KB1. 1 | 4. 14E-14 | -0. 11907 | 0. 023 | 0. 134 | 6. 18E-10 CSCL | RPS6KB1  |
| DDX49. 1   | 4. 16E-14 | 0. 1033   | 0. 108 | 0. 283 | 6. 22E-10 CSCL | DDX49    |
| KLF7. 2    | 4. 20E-14 | -0. 11298 | 0. 07  | 0. 213 | 6. 27E-10 CSCL | KLF7     |
| CD200. 2   | 4. 20E-14 | -0. 20792 | 0. 012 | 0. 115 | 6. 27E-10 CSCL | CD200    |
| ERGIC2     | 4. 28E-14 | 0. 116053 | 0. 155 | 0. 362 | 6. 40E-10 CSCL | ERGIC2   |
| HMOX2. 1   | 4. 33E-14 | 0. 113462 | 0. 122 | 0. 304 | 6. 47E-10 CSCL | HMOX2    |
| ATP13A2. 2 | 4. 34E-14 | -0. 12227 | 0. 03  | 0. 146 | 6. 48E-10 CSCL | ATP13A2  |
| SIGLEC9. 2 | 4. 54E-14 | -0. 40552 | 0. 003 | 0. 097 | 6. 79E-10 CSCL | SIGLEC9  |
| ZCRB1. 2   | 4. 55E-14 | 0. 167036 | 0. 234 | 0. 504 | 6. 80E-10 CSCL | ZCRB1    |
| HSDL1. 1   | 4. 57E-14 | -0. 16313 | 0. 024 | 0. 136 | 6. 83E-10 CSCL | HSDL1    |
| ABCF3      | 4. 60E-14 | -0. 1337  | 0. 031 | 0. 149 | 6. 87E-10 CSCL | ABCF3    |
| SH2B1. 1   | 4. 62E-14 | -0. 1253  | 0. 035 | 0. 155 | 6. 90E-10 CSCL | SH2B1    |
| BARD1. 1   | 4. 65E-14 | -0. 11485 | 0. 033 | 0. 152 | 6. 95E-10 CSCL | BARD1    |
| AGFG1. 1   | 4. 75E-14 | -0. 12493 | 0. 024 | 0. 137 | 7. 10E-10 CSCL | AGFG1    |
| CNIH4. 1   | 4. 77E-14 | 0. 12087  | 0. 168 | 0. 384 | 7. 13E-10 CSCL | CNIH4    |
| LPGAT1. 2  | 4. 87E-14 | -0. 11809 | 0. 023 | 0. 133 | 7. 28E-10 CSCL | LPGAT1   |
| CTDSPL2. 1 | 5. 01E-14 | -0. 17067 | 0. 012 | 0. 114 | 7. 48E-10 CSCL | CTDSPL2  |
| ATXN1. 1   | 5. 05E-14 | -0. 12525 | 0. 044 | 0. 169 | 7. 55E-10 CSCL | ATXN1    |
| CDC42BPB.  | 5. 09E-14 | -0. 13406 | 0. 017 | 0. 124 | 7. 61E-10 CSCL | CDC42BPB |
| PQLC1. 2   | 5. 10E-14 | -0. 12266 | 0. 026 | 0. 14  | 7. 63E-10 CSCL | PQLC1    |
| CCZ1B. 1   | 5. 14E-14 | -0. 16194 | 0. 037 | 0. 157 | 7. 69E-10 CSCL | CCZ1B    |
| NSUN2. 1   | 5. 15E-14 | -0. 14598 | 0. 026 | 0. 14  | 7. 69E-10 CSCL | NSUN2    |
| MSH3       | 5. 17E-14 | -0. 18848 | 0. 01  | 0. 111 | 7. 72E-10 CSCL | MSH3     |
| CUL4A. 1   | 5. 46E-14 | -0. 12226 | 0. 033 | 0. 151 | 8. 16E-10 CSCL | CUL4A    |
| SOX12. 1   | 5. 52E-14 | -0. 12624 | 0. 016 | 0. 121 | 8. 26E-10 CSCL | SOX12    |
| ELMSAN1. 1 | 5. 66E-14 | -0. 18116 | 0. 026 | 0. 139 | 8. 46E-10 CSCL | ELMSAN1  |
| TP53I3. 1  | 5. 73E-14 | -0. 16078 | 0. 033 | 0. 151 | 8. 56E-10 CSCL | TP53I3   |
| NUP88. 1   | 5. 83E-14 | -0. 13381 | 0. 023 | 0. 133 | 8. 72E-10 CSCL | NUP88    |
| RANGAP1. 2 | 5. 84E-14 | -0. 19826 | 0. 009 | 0. 107 | 8. 73E-10 CSCL | RANGAP1  |
| HPGDS. 2   | 5. 87E-14 | -0. 44577 | 0. 002 | 0. 093 | 8. 77E-10 CSCL | HPGDS    |
| HYOU1. 1   | 5. 93E-14 | -0. 12316 | 0. 03  | 0. 145 | 8. 86E-10 CSCL | HYOU1    |
| BTK. 2     | 6. 03E-14 | -0. 37102 | 0      | 0. 09  | 9. 01E-10 CSCL | BTK      |
| RND3. 1    | 6. 21E-14 | -0. 18914 | 0. 096 | 0. 25  | 9. 28E-10 CSCL | RND3     |
| FAM32A. 1  | 6. 21E-14 | 0. 145593 | 0. 213 | 0. 464 | 9. 28E-10 CSCL | FAM32A   |
| USP36. 2   | 6. 31E-14 | -0. 17104 | 0. 03  | 0. 144 | 9. 43E-10 CSCL | USP36    |
| NAV1. 2    | 6. 38E-14 | -0. 1117  | 0. 044 | 0. 169 | 9. 53E-10 CSCL | NAV1     |
| ANKRD37    | 6. 40E-14 | -0. 2013  | 0. 031 | 0. 147 | 9. 56E-10 CSCL | ANKRD37  |
| ZFC3H1. 1  | 6. 70E-14 | -0. 13384 | 0. 021 | 0. 129 | 1. 00E-09 CSCL | ZFC3H1   |

|            |          |          |       |       |          |      |              |
|------------|----------|----------|-------|-------|----------|------|--------------|
| QSER1.2    | 6.71E-14 | -0.12056 | 0.017 | 0.123 | 1.00E-09 | CSCL | QSER1        |
| WIPF3.2    | 6.72E-14 | -0.23761 | 0.003 | 0.097 | 1.00E-09 | CSCL | WIPF3        |
| TBC1D14.2  | 6.82E-14 | -0.10421 | 0.049 | 0.177 | 1.02E-09 | CSCL | TBC1D14      |
| OSBPL2.1   | 6.88E-14 | -0.10513 | 0.026 | 0.139 | 1.03E-09 | CSCL | OSBPL2       |
| ZDHHC16.1  | 6.93E-14 | -0.12516 | 0.01  | 0.11  | 1.03E-09 | CSCL | ZDHHC16      |
| SNRPN.2    | 7.07E-14 | 0.659855 | 0.18  | 0.094 | 1.06E-09 | CSCL | SNRPN        |
| SMG1.2     | 7.21E-14 | -0.1342  | 0.044 | 0.168 | 1.08E-09 | CSCL | SMG1         |
| CDYL.2     | 7.22E-14 | -0.12498 | 0.016 | 0.12  | 1.08E-09 | CSCL | CDYL         |
| DUSP22.2   | 7.36E-14 | -0.24265 | 0.014 | 0.116 | 1.10E-09 | CSCL | DUSP22       |
| MAML1.2    | 7.38E-14 | -0.25567 | 0.017 | 0.122 | 1.10E-09 | CSCL | MAML1        |
| NCAPH2.2   | 7.52E-14 | -0.13684 | 0.024 | 0.135 | 1.12E-09 | CSCL | NCAPH2       |
| THAP2      | 7.62E-14 | -0.2048  | 0.023 | 0.132 | 1.14E-09 | CSCL | THAP2        |
| CYB5B.2    | 7.93E-14 | 0.154336 | 0.148 | 0.347 | 1.18E-09 | CSCL | CYB5B        |
| TBK1.1     | 8.05E-14 | -0.13119 | 0.037 | 0.156 | 1.20E-09 | CSCL | TBK1         |
| GNPAT.1    | 8.05E-14 | 0.107202 | 0.089 | 0.247 | 1.20E-09 | CSCL | GNPAT        |
| ATP5SL.1   | 8.09E-14 | 0.123439 | 0.084 | 0.238 | 1.21E-09 | CSCL | ATP5SL       |
| LILRB1.2   | 8.33E-14 | -0.37015 | 0.003 | 0.096 | 1.24E-09 | CSCL | LILRB1       |
| ZBTB43.1   | 8.38E-14 | -0.14123 | 0.037 | 0.156 | 1.25E-09 | CSCL | ZBTB43       |
| NDUFA10.1  | 8.38E-14 | 0.121558 | 0.206 | 0.45  | 1.25E-09 | CSCL | NDUFA10      |
| ARAP1.2    | 8.46E-14 | -0.26901 | 0.012 | 0.113 | 1.26E-09 | CSCL | ARAP1        |
| CDKN3.1    | 8.58E-14 | -0.2763  | 0.003 | 0.096 | 1.28E-09 | CSCL | CDKN3        |
| NUSAP1.2   | 8.60E-14 | -0.34232 | 0.01  | 0.109 | 1.29E-09 | CSCL | NUSAP1       |
| VEGFB.1    | 8.62E-14 | -0.11894 | 0.033 | 0.15  | 1.29E-09 | CSCL | VEGFB        |
| FAM210A.1  | 9.23E-14 | -0.13528 | 0.031 | 0.147 | 1.38E-09 | CSCL | FAM210A      |
| STRBP.2    | 9.43E-14 | -0.10993 | 0.023 | 0.132 | 1.41E-09 | CSCL | STRBP        |
| CCDC57.2   | 9.48E-14 | -0.2563  | 0.012 | 0.112 | 1.42E-09 | CSCL | CCDC57       |
| DOCK10.2   | 9.85E-14 | -0.19763 | 0.023 | 0.131 | 1.47E-09 | CSCL | DOCK10       |
| POP5.1     | 9.96E-14 | 0.136862 | 0.124 | 0.305 | 1.49E-09 | CSCL | POP5         |
| HLA-DQB2.1 | 9.97E-14 | -0.56479 | 0.007 | 0.102 | 1.49E-09 | CSCL | HLA-DQB2     |
| CHN2.2     | 9.97E-14 | -0.30877 | 0.007 | 0.102 | 1.49E-09 | CSCL | CHN2         |
| PSMG3.1    | 1.01E-13 | 0.120333 | 0.143 | 0.336 | 1.51E-09 | CSCL | PSMG3        |
| ABCB8.1    | 1.01E-13 | -0.11278 | 0.031 | 0.147 | 1.52E-09 | CSCL | ABCB8        |
| CEP78.2    | 1.02E-13 | -0.10928 | 0.016 | 0.119 | 1.53E-09 | CSCL | CEP78        |
| PCYT1A     | 1.03E-13 | -0.10315 | 0.024 | 0.135 | 1.54E-09 | CSCL | PCYT1A       |
| ADAM10.2   | 1.05E-13 | -0.11433 | 0.058 | 0.19  | 1.57E-09 | CSCL | ADAM10       |
| S100A6.2   | 1.06E-13 | 0.504829 | 0.574 | 0.647 | 1.59E-09 | CSCL | S100A6       |
| RNF135.2   | 1.08E-13 | -0.20231 | 0.014 | 0.116 | 1.62E-09 | CSCL | RNF135       |
| TBC1D1.2   | 1.11E-13 | -0.16575 | 0.021 | 0.128 | 1.66E-09 | CSCL | TBC1D1       |
| UQCC2      | 1.14E-13 | 0.140132 | 0.201 | 0.438 | 1.70E-09 | CSCL | UQCC2        |
| C11orf73.1 | 1.15E-13 | 0.133116 | 0.195 | 0.432 | 1.72E-09 | CSCL | C11orf73     |
| CCDC25.2   | 1.16E-13 | 0.173514 | 0.124 | 0.306 | 1.73E-09 | CSCL | CCDC25       |
| RNF2.1     | 1.17E-13 | -0.11265 | 0.035 | 0.152 | 1.75E-09 | CSCL | RNF2         |
| SENP5.1    | 1.18E-13 | -0.11416 | 0.03  | 0.143 | 1.76E-09 | CSCL | SENP5        |
| TMEM119.2  | 1.20E-13 | -0.44931 | 0.012 | 0.11  | 1.79E-09 | CSCL | TMEM119      |
| NDUFA8     | 1.27E-13 | 0.152898 | 0.234 | 0.504 | 1.89E-09 | CSCL | NDUFA8       |
| DGUOK.1    | 1.27E-13 | 0.108443 | 0.25  | 0.529 | 1.90E-09 | CSCL | DGUOK        |
| CTD-3184A  | 1.28E-13 | -0.15645 | 0.007 | 0.102 | 1.91E-09 | CSCL | CTD-3184A7.4 |
| IL10.2     | 1.30E-13 | -0.44269 | 0.012 | 0.111 | 1.95E-09 | CSCL | IL10         |
| PMPCA.1    | 1.31E-13 | 0.102768 | 0.094 | 0.254 | 1.96E-09 | CSCL | PMPCA        |
| POMT1.1    | 1.34E-13 | -0.11128 | 0.03  | 0.143 | 2.01E-09 | CSCL | POMT1        |
| PTDSS2.2   | 1.37E-13 | -0.10827 | 0.038 | 0.158 | 2.04E-09 | CSCL | PTDSS2       |

|             |           |           |        |        |           |      |          |
|-------------|-----------|-----------|--------|--------|-----------|------|----------|
| PXK. 1      | 1. 38E-13 | -0. 15046 | 0. 031 | 0. 146 | 2. 07E-09 | CSCL | PXK      |
| NONO. 2     | 1. 42E-13 | 0. 167505 | 0. 215 | 0. 467 | 2. 12E-09 | CSCL | NONO     |
| PPP3R1. 2   | 1. 42E-13 | -0. 1361  | 0. 016 | 0. 118 | 2. 13E-09 | CSCL | PPP3R1   |
| KLHL23. 2   | 1. 45E-13 | -0. 12322 | 0. 044 | 0. 167 | 2. 16E-09 | CSCL | KLHL23   |
| MFSD5. 1    | 1. 48E-13 | -0. 13536 | 0. 016 | 0. 118 | 2. 21E-09 | CSCL | MFSD5    |
| SIRT2. 2    | 1. 49E-13 | 0. 122118 | 0. 197 | 0. 427 | 2. 23E-09 | CSCL | SIRT2    |
| ANAPC13. 2  | 1. 50E-13 | 0. 164444 | 0. 159 | 0. 364 | 2. 24E-09 | CSCL | ANAPC13  |
| FBXW7. 1    | 1. 52E-13 | -0. 17461 | 0. 024 | 0. 133 | 2. 27E-09 | CSCL | FBXW7    |
| FAM111A. 2  | 1. 52E-13 | -0. 21176 | 0. 014 | 0. 114 | 2. 27E-09 | CSCL | FAM111A  |
| LGALS8. 1   | 1. 58E-13 | -0. 1073  | 0. 038 | 0. 157 | 2. 35E-09 | CSCL | LGALS8   |
| RILP. 2     | 1. 59E-13 | -0. 20866 | 0. 01  | 0. 108 | 2. 37E-09 | CSCL | RILP     |
| BRI3BP. 2   | 1. 60E-13 | -0. 13911 | 0. 016 | 0. 118 | 2. 40E-09 | CSCL | BRI3BP   |
| CREB3L2. 2  | 1. 62E-13 | -0. 26744 | 0. 023 | 0. 129 | 2. 42E-09 | CSCL | CREB3L2  |
| NCOA7. 1    | 1. 66E-13 | -0. 24267 | 0. 017 | 0. 12  | 2. 49E-09 | CSCL | NCOA7    |
| MARK2. 2    | 1. 67E-13 | -0. 13148 | 0. 023 | 0. 13  | 2. 49E-09 | CSCL | MARK2    |
| TOMM70A. 2  | 1. 67E-13 | -0. 1189  | 0. 023 | 0. 13  | 2. 50E-09 | CSCL | TOMM70A  |
| RC3H2. 1    | 1. 70E-13 | -0. 197   | 0. 007 | 0. 101 | 2. 55E-09 | CSCL | RC3H2    |
| PTAR1. 2    | 1. 71E-13 | -0. 10148 | 0. 03  | 0. 142 | 2. 55E-09 | CSCL | PTAR1    |
| TCAIM. 1    | 1. 73E-13 | -0. 10957 | 0. 03  | 0. 142 | 2. 59E-09 | CSCL | TCAIM    |
| PRPS2. 1    | 1. 74E-13 | -0. 11897 | 0. 023 | 0. 13  | 2. 60E-09 | CSCL | PRPS2    |
| NAGPA. 1    | 1. 74E-13 | -0. 19214 | 0. 014 | 0. 114 | 2. 61E-09 | CSCL | NAGPA    |
| SMAD4. 1    | 1. 75E-13 | -0. 10859 | 0. 021 | 0. 127 | 2. 61E-09 | CSCL | SMAD4    |
| CSTF1. 1    | 1. 75E-13 | -0. 1117  | 0. 026 | 0. 136 | 2. 62E-09 | CSCL | CSTF1    |
| CNTRL. 2    | 1. 79E-13 | -0. 16425 | 0. 019 | 0. 123 | 2. 67E-09 | CSCL | CNTRL    |
| NBPF10. 1   | 1. 81E-13 | -0. 1444  | 0. 035 | 0. 151 | 2. 70E-09 | CSCL | NBPF10   |
| CEP104. 1   | 1. 86E-13 | -0. 1286  | 0. 021 | 0. 127 | 2. 78E-09 | CSCL | CEP104   |
| ZWINT. 2    | 1. 87E-13 | -0. 28287 | 0. 005 | 0. 097 | 2. 79E-09 | CSCL | ZWINT    |
| ARHGAP9. 2  | 1. 88E-13 | -0. 34922 | 0. 002 | 0. 09  | 2. 81E-09 | CSCL | ARHGAP9  |
| KRBOX1. 1   | 1. 90E-13 | 0. 246798 | 0. 026 | 0. 004 | 2. 84E-09 | CSCL | KRBOX1   |
| TRAPPC10. 1 | 1. 93E-13 | -0. 23862 | 0. 005 | 0. 097 | 2. 89E-09 | CSCL | TRAPPC10 |
| SH2B3. 2    | 2. 01E-13 | -0. 25861 | 0. 014 | 0. 113 | 3. 01E-09 | CSCL | SH2B3    |
| TTL. 1      | 2. 07E-13 | -0. 18838 | 0. 019 | 0. 123 | 3. 09E-09 | CSCL | TTL      |
| RABL2B. 1   | 2. 07E-13 | -0. 13871 | 0. 024 | 0. 132 | 3. 10E-09 | CSCL | RABL2B   |
| PBX3. 2     | 2. 22E-13 | -0. 13697 | 0. 019 | 0. 123 | 3. 31E-09 | CSCL | PBX3     |
| PAXBP1. 1   | 2. 22E-13 | -0. 10873 | 0. 044 | 0. 165 | 3. 32E-09 | CSCL | PAXBP1   |
| LGR4. 2     | 2. 26E-13 | -0. 12747 | 0. 01  | 0. 107 | 3. 38E-09 | CSCL | LGR4     |
| SLC30A1. 1  | 2. 27E-13 | -0. 1838  | 0. 003 | 0. 093 | 3. 39E-09 | CSCL | SLC30A1  |
| SLC25A24. 1 | 2. 28E-13 | -0. 21645 | 0. 009 | 0. 103 | 3. 41E-09 | CSCL | SLC25A24 |
| TSPAN5. 2   | 2. 31E-13 | 0. 101335 | 0. 105 | 0. 27  | 3. 45E-09 | CSCL | TSPAN5   |
| PIAS1. 2    | 2. 32E-13 | -0. 15944 | 0. 044 | 0. 164 | 3. 47E-09 | CSCL | PIAS1    |
| CYTL1. 2    | 2. 35E-13 | -0. 4319  | 0. 016 | 0. 115 | 3. 51E-09 | CSCL | CYTL1    |
| SLC22A18. 1 | 2. 44E-13 | -0. 12487 | 0. 023 | 0. 129 | 3. 65E-09 | CSCL | SLC22A18 |
| KXD1. 2     | 2. 44E-13 | 0. 112835 | 0. 215 | 0. 461 | 3. 65E-09 | CSCL | KXD1     |
| HPS5. 2     | 2. 52E-13 | -0. 16201 | 0. 017 | 0. 119 | 3. 76E-09 | CSCL | HPS5     |
| CENPU. 2    | 2. 52E-13 | -0. 21256 | 0. 012 | 0. 11  | 3. 76E-09 | CSCL | CENPU    |
| SEPT10. 1   | 2. 54E-13 | -0. 13844 | 0. 019 | 0. 122 | 3. 79E-09 | CSCL | 10-Sep   |
| PAG1. 2     | 2. 56E-13 | -0. 18267 | 0. 051 | 0. 175 | 3. 83E-09 | CSCL | PAG1     |
| CYTIP. 2    | 2. 62E-13 | -0. 42143 | 0. 012 | 0. 109 | 3. 91E-09 | CSCL | CYTIP    |
| KCNMB4. 2   | 2. 62E-13 | -0. 17748 | 0. 023 | 0. 128 | 3. 92E-09 | CSCL | KCNMB4   |
| CERS6. 2    | 2. 65E-13 | -0. 10179 | 0. 024 | 0. 132 | 3. 96E-09 | CSCL | CERS6    |
| PTBP3. 2    | 2. 70E-13 | -0. 18998 | 0. 016 | 0. 116 | 4. 03E-09 | CSCL | PTBP3    |



|            |          |          |       |       |          |      |                  |
|------------|----------|----------|-------|-------|----------|------|------------------|
| PSMA4      | 2.73E-13 | 0.150929 | 0.26  | 0.552 | 4.07E-09 | CSCL | PSMA4            |
| EXOC3      | 2.84E-13 | -0.10472 | 0.026 | 0.135 | 4.24E-09 | CSCL | EXOC3            |
| RAB3GAP1.  | 2.86E-13 | -0.16694 | 0.031 | 0.143 | 4.27E-09 | CSCL | RAB3GAP1         |
| GLS. 2     | 2.89E-13 | -0.1754  | 0.026 | 0.134 | 4.32E-09 | CSCL | GLS              |
| CEP57L1. 1 | 2.93E-13 | -0.19753 | 0.016 | 0.116 | 4.37E-09 | CSCL | CEP57L1          |
| SLC35F2. 1 | 2.95E-13 | -0.16383 | 0.014 | 0.112 | 4.41E-09 | CSCL | SLC35F2          |
| NUP50. 2   | 2.96E-13 | -0.10834 | 0.019 | 0.122 | 4.42E-09 | CSCL | NUP50            |
| CDK9. 1    | 2.96E-13 | -0.10776 | 0.033 | 0.146 | 4.43E-09 | CSCL | CDK9             |
| INPP5K     | 2.99E-13 | -0.13161 | 0.021 | 0.125 | 4.46E-09 | CSCL | INPP5K           |
| SNRPD1     | 3.00E-13 | 0.107327 | 0.277 | 0.578 | 4.48E-09 | CSCL | SNRPD1           |
| GPT2       | 3.02E-13 | -0.12241 | 0.037 | 0.153 | 4.52E-09 | CSCL | GPT2             |
| COA4       | 3.05E-13 | 0.167493 | 0.178 | 0.397 | 4.56E-09 | CSCL | COA4             |
| S100A16. 1 | 3.08E-13 | 0.733624 | 0.363 | 0.304 | 4.60E-09 | CSCL | S100A16          |
| CDK19. 2   | 3.13E-13 | -0.18082 | 0.024 | 0.131 | 4.67E-09 | CSCL | CDK19            |
| PLBD1. 2   | 3.30E-13 | -0.30802 | 0.007 | 0.099 | 4.93E-09 | CSCL | PLBD1            |
| MINK1. 2   | 3.36E-13 | -0.1723  | 0.012 | 0.109 | 5.02E-09 | CSCL | MINK1            |
| NINJ2. 2   | 3.42E-13 | -0.42826 | 0.003 | 0.092 | 5.12E-09 | CSCL | NINJ2            |
| ITGAX. 2   | 3.45E-13 | -0.38485 | 0.005 | 0.095 | 5.16E-09 | CSCL | ITGAX            |
| RP11-1094  | 3.49E-13 | 0.123861 | 0.089 | 0.242 | 5.21E-09 | CSCL | RP11-1094M14. 11 |
| SEPT11. 2  | 3.57E-13 | 0.173    | 0.129 | 0.312 | 5.33E-09 | CSCL | 11-Sep           |
| SRM. 2     | 3.59E-13 | 0.170037 | 0.166 | 0.375 | 5.37E-09 | CSCL | SRM              |
| CHCHD5. 1  | 3.60E-13 | 0.138383 | 0.171 | 0.383 | 5.38E-09 | CSCL | CHCHD5           |
| FAM103A1.  | 3.64E-13 | 0.174097 | 0.094 | 0.25  | 5.45E-09 | CSCL | FAM103A1         |
| GAD1. 2    | 3.65E-13 | -0.18075 | 0.017 | 0.118 | 5.46E-09 | CSCL | GAD1             |
| POM121C. 1 | 3.68E-13 | -0.11522 | 0.033 | 0.146 | 5.51E-09 | CSCL | POM121C          |
| KYNU. 2    | 3.70E-13 | -0.37416 | 0.002 | 0.088 | 5.53E-09 | CSCL | KYNU             |
| FASN. 2    | 3.71E-13 | -0.12159 | 0.019 | 0.121 | 5.54E-09 | CSCL | FASN             |
| H2AFY2. 2  | 3.87E-13 | -0.12701 | 0.012 | 0.109 | 5.79E-09 | CSCL | H2AFY2           |
| ANKRD9. 2  | 3.88E-13 | -0.17698 | 0.003 | 0.092 | 5.79E-09 | CSCL | ANKRD9           |
| GCSH. 2    | 3.91E-13 | 0.211959 | 0.154 | 0.357 | 5.85E-09 | CSCL | GCSH             |
| THOC1. 1   | 3.92E-13 | -0.10223 | 0.037 | 0.152 | 5.86E-09 | CSCL | THOC1            |
| AGPS. 2    | 4.04E-13 | -0.10475 | 0.023 | 0.127 | 6.04E-09 | CSCL | AGPS             |
| PLAA. 1    | 4.10E-13 | -0.21256 | 0.007 | 0.098 | 6.12E-09 | CSCL | PLAA             |
| POLRMT. 1  | 4.12E-13 | -0.10044 | 0.028 | 0.136 | 6.16E-09 | CSCL | POLRMT           |
| NUTM2A-AS  | 4.14E-13 | -0.15462 | 0.026 | 0.133 | 6.19E-09 | CSCL | NUTM2A-AS1       |
| PMAIP1. 2  | 4.16E-13 | -0.45309 | 0.002 | 0.088 | 6.22E-09 | CSCL | PMAIP1           |
| CYSTM1. 2  | 4.46E-13 | 0.116275 | 0.145 | 0.334 | 6.66E-09 | CSCL | CYSTM1           |
| TMEM39B    | 4.47E-13 | -0.16201 | 0.026 | 0.133 | 6.67E-09 | CSCL | TMEM39B          |
| ADAM15. 1  | 4.51E-13 | -0.15615 | 0.019 | 0.121 | 6.74E-09 | CSCL | ADAM15           |
| FXN. 1     | 4.53E-13 | -0.15528 | 0.017 | 0.117 | 6.78E-09 | CSCL | FXN              |
| ZNF821. 2  | 4.54E-13 | -0.11064 | 0.047 | 0.169 | 6.79E-09 | CSCL | ZNF821           |
| MYLIP. 2   | 4.68E-13 | -0.31774 | 0.028 | 0.134 | 7.00E-09 | CSCL | MYLIP            |
| RFTN1. 1   | 4.78E-13 | -0.12797 | 0.016 | 0.114 | 7.15E-09 | CSCL | RFTN1            |
| KLHL9. 1   | 4.94E-13 | -0.20156 | 0.016 | 0.114 | 7.38E-09 | CSCL | KLHL9            |
| LINC00869  | 4.97E-13 | 0.371356 | 0.054 | 0.015 | 7.43E-09 | CSCL | LINC00869        |
| PXN. 1     | 5.01E-13 | -0.15238 | 0.024 | 0.129 | 7.48E-09 | CSCL | PXN              |
| HYI. 1     | 5.03E-13 | -0.14084 | 0.033 | 0.144 | 7.51E-09 | CSCL | HYI              |
| WRNIP1     | 5.07E-13 | -0.13487 | 0.012 | 0.108 | 7.58E-09 | CSCL | WRNIP1           |
| CSTF2T     | 5.12E-13 | -0.16636 | 0.023 | 0.126 | 7.65E-09 | CSCL | CSTF2T           |
| DCLRE1C. 1 | 5.15E-13 | -0.13528 | 0.028 | 0.135 | 7.70E-09 | CSCL | DCLRE1C          |
| MED1. 2    | 5.18E-13 | -0.10008 | 0.021 | 0.123 | 7.73E-09 | CSCL | MED1             |

|           |          |          |       |       |          |      |          |
|-----------|----------|----------|-------|-------|----------|------|----------|
| DUSP15.1  | 5.24E-13 | -0.13669 | 0.007 | 0.098 | 7.83E-09 | CSCL | DUSP15   |
| AP1G1.1   | 5.25E-13 | -0.13906 | 0.024 | 0.129 | 7.85E-09 | CSCL | AP1G1    |
| UNC50.1   | 5.32E-13 | 0.124143 | 0.162 | 0.364 | 7.95E-09 | CSCL | UNC50    |
| DEDD      | 5.33E-13 | -0.14999 | 0.021 | 0.123 | 7.96E-09 | CSCL | DEDD     |
| AGPAT3.2  | 5.47E-13 | -0.11737 | 0.028 | 0.135 | 8.17E-09 | CSCL | AGPAT3   |
| MYO5A.2   | 5.59E-13 | -0.16007 | 0.017 | 0.117 | 8.35E-09 | CSCL | MYO5A    |
| EFNB2.1   | 5.62E-13 | -0.11942 | 0.01  | 0.104 | 8.40E-09 | CSCL | EFNB2    |
| PSMA3.2   | 5.63E-13 | 0.115233 | 0.213 | 0.452 | 8.41E-09 | CSCL | PSMA3    |
| ERCC1.2   | 5.64E-13 | 0.136004 | 0.232 | 0.484 | 8.42E-09 | CSCL | ERCC1    |
| RALGAPA1. | 5.74E-13 | -0.12381 | 0.028 | 0.135 | 8.57E-09 | CSCL | RALGAPA1 |
| CNIH1.1   | 5.74E-13 | 0.100697 | 0.175 | 0.383 | 8.58E-09 | CSCL | CNIH1    |
| DAGLB.2   | 5.91E-13 | -0.26504 | 0.023 | 0.125 | 8.83E-09 | CSCL | DAGLB    |
| UBTD1.1   | 5.91E-13 | -0.12874 | 0.017 | 0.117 | 8.83E-09 | CSCL | UBTD1    |
| OTUD4.2   | 5.93E-13 | -0.15946 | 0.01  | 0.104 | 8.86E-09 | CSCL | OTUD4    |
| HNRNP2.1  | 6.03E-13 | 0.10137  | 0.19  | 0.411 | 9.02E-09 | CSCL | HNRNP2   |
| ESYT1.2   | 6.07E-13 | -0.19091 | 0.023 | 0.125 | 9.07E-09 | CSCL | ESYT1    |
| PHACTR2.2 | 6.16E-13 | -0.19261 | 0.002 | 0.087 | 9.20E-09 | CSCL | PHACTR2  |
| NDUF7.2   | 6.22E-13 | 0.448182 | 0.581 | 0.727 | 9.30E-09 | CSCL | NDUF7    |
| CDC37L1.1 | 6.32E-13 | -0.11294 | 0.033 | 0.144 | 9.45E-09 | CSCL | CDC37L1  |
| MILR1.2   | 6.33E-13 | -0.36277 | 0.01  | 0.103 | 9.46E-09 | CSCL | MILR1    |
| TMEM209.1 | 6.36E-13 | -0.13493 | 0.021 | 0.123 | 9.50E-09 | CSCL | TMEM209  |
| EAF2.2    | 6.48E-13 | -0.29863 | 0.007 | 0.097 | 9.68E-09 | CSCL | EAF2     |
| PARN.1    | 6.51E-13 | -0.17462 | 0.023 | 0.125 | 9.74E-09 | CSCL | PARN     |
| DTNB.2    | 6.54E-13 | -0.21409 | 0.009 | 0.1   | 9.77E-09 | CSCL | DTNB     |
| APPBP2.1  | 6.54E-13 | 0.110072 | 0.075 | 0.216 | 9.77E-09 | CSCL | APPBP2   |
| ZMIZ1.2   | 6.60E-13 | -0.10179 | 0.033 | 0.144 | 9.86E-09 | CSCL | ZMIZ1    |
| MAPK8.2   | 6.74E-13 | -0.17593 | 0.01  | 0.103 | 1.01E-08 | CSCL | MAPK8    |
| CENPK.1   | 6.75E-13 | -0.19063 | 0.01  | 0.104 | 1.01E-08 | CSCL | CENPK    |
| PTK2B.1   | 6.85E-13 | -0.10383 | 0.026 | 0.132 | 1.02E-08 | CSCL | PTK2B    |
| APOBEC3C. | 6.90E-13 | -0.23997 | 0.028 | 0.133 | 1.03E-08 | CSCL | APOBEC3C |
| CDKN1C.2  | 7.07E-13 | -0.26451 | 0.019 | 0.119 | 1.06E-08 | CSCL | CDKN1C   |
| OTUD1.2   | 7.22E-13 | -0.33775 | 0.01  | 0.103 | 1.08E-08 | CSCL | OTUD1    |
| EMG1.1    | 7.59E-13 | 0.117382 | 0.091 | 0.242 | 1.13E-08 | CSCL | EMG1     |
| DHCR7.1   | 7.72E-13 | 0.126466 | 0.056 | 0.184 | 1.15E-08 | CSCL | DHCR7    |
| CENPC     | 7.79E-13 | -0.2026  | 0.016 | 0.113 | 1.16E-08 | CSCL | CENPC    |
| HDHD2.1   | 7.83E-13 | 0.134664 | 0.105 | 0.265 | 1.17E-08 | CSCL | HDHD2    |
| HPS1.1    | 7.91E-13 | -0.28289 | 0.017 | 0.115 | 1.18E-08 | CSCL | HPS1     |
| KIAA1109. | 7.92E-13 | -0.11884 | 0.023 | 0.125 | 1.18E-08 | CSCL | KIAA1109 |
| CPT2.1    | 8.07E-13 | -0.17223 | 0.017 | 0.116 | 1.21E-08 | CSCL | CPT2     |
| BCL7A.2   | 8.36E-13 | -0.11314 | 0.04  | 0.155 | 1.25E-08 | CSCL | BCL7A    |
| NADSYN1.2 | 8.39E-13 | -0.11201 | 0.023 | 0.125 | 1.25E-08 | CSCL | NADSYN1  |
| PIK3C3    | 8.43E-13 | -0.13339 | 0.023 | 0.125 | 1.26E-08 | CSCL | PIK3C3   |
| WRAP73.1  | 8.46E-13 | -0.11742 | 0.038 | 0.152 | 1.26E-08 | CSCL | WRAP73   |
| TUBGCP4.1 | 8.58E-13 | -0.12725 | 0.024 | 0.128 | 1.28E-08 | CSCL | TUBGCP4  |
| TLE3.1    | 8.60E-13 | -0.19938 | 0.033 | 0.142 | 1.28E-08 | CSCL | TLE3     |
| CCR1.2    | 8.62E-13 | -0.33646 | 0.002 | 0.086 | 1.29E-08 | CSCL | CCR1     |
| COX17     | 8.73E-13 | 0.147647 | 0.255 | 0.531 | 1.30E-08 | CSCL | COX17    |
| ODF2.1    | 8.73E-13 | -0.11474 | 0.03  | 0.137 | 1.30E-08 | CSCL | ODF2     |
| GLIPR2.1  | 8.94E-13 | 0.119994 | 0.113 | 0.277 | 1.34E-08 | CSCL | GLIPR2   |
| GUCD1.2   | 9.03E-13 | -0.11835 | 0.024 | 0.128 | 1.35E-08 | CSCL | GUCD1    |
| IMMP1L.1  | 9.03E-13 | 0.106592 | 0.089 | 0.239 | 1.35E-08 | CSCL | IMMP1L   |

|             |           |           |        |        |           |      |          |
|-------------|-----------|-----------|--------|--------|-----------|------|----------|
| CD48. 2     | 9. 32E-13 | -0. 39263 | 0      | 0. 082 | 1. 39E-08 | CSCL | CD48     |
| SMARCA2. 1  | 9. 35E-13 | -0. 18648 | 0. 031 | 0. 14  | 1. 40E-08 | CSCL | SMARCA2  |
| EMC1. 1     | 9. 45E-13 | -0. 11548 | 0. 03  | 0. 137 | 1. 41E-08 | CSCL | EMC1     |
| DENND1B. 2  | 9. 49E-13 | -0. 20181 | 0. 007 | 0. 096 | 1. 42E-08 | CSCL | DENND1B  |
| EPN2. 2     | 9. 57E-13 | 0. 173439 | 0. 092 | 0. 244 | 1. 43E-08 | CSCL | EPN2     |
| SLC25A32. 1 | 9. 61E-13 | -0. 1971  | 0. 012 | 0. 105 | 1. 44E-08 | CSCL | SLC25A32 |
| KNOP1. 1    | 9. 79E-13 | 0. 134804 | 0. 106 | 0. 267 | 1. 46E-08 | CSCL | KNOP1    |
| APOO. 1     | 9. 87E-13 | 0. 176319 | 0. 087 | 0. 236 | 1. 48E-08 | CSCL | APOO     |
| MEAF6. 2    | 9. 92E-13 | 0. 140674 | 0. 234 | 0. 489 | 1. 48E-08 | CSCL | MEAF6    |
| KIFC3       | 1. 04E-12 | -0. 18301 | 0. 014 | 0. 109 | 1. 56E-08 | CSCL | KIFC3    |
| SPG11. 2    | 1. 06E-12 | -0. 14363 | 0. 021 | 0. 121 | 1. 58E-08 | CSCL | SPG11    |
| RALGAPB. 1  | 1. 10E-12 | -0. 10442 | 0. 017 | 0. 115 | 1. 64E-08 | CSCL | RALGAPB  |
| MFNG. 2     | 1. 13E-12 | -0. 294   | 0. 028 | 0. 132 | 1. 68E-08 | CSCL | MFNG     |
| NSMAF. 1    | 1. 13E-12 | -0. 11125 | 0. 021 | 0. 121 | 1. 69E-08 | CSCL | NSMAF    |
| MAPK14. 2   | 1. 13E-12 | -0. 15097 | 0. 017 | 0. 114 | 1. 69E-08 | CSCL | MAPK14   |
| RPUSD1. 2   | 1. 15E-12 | -0. 10582 | 0. 031 | 0. 139 | 1. 71E-08 | CSCL | RPUSD1   |
| WBP1L. 2    | 1. 18E-12 | -0. 23541 | 0. 017 | 0. 114 | 1. 76E-08 | CSCL | WBP1L    |
| MIOS. 2     | 1. 19E-12 | -0. 11363 | 0. 024 | 0. 127 | 1. 77E-08 | CSCL | MIOS     |
| SNX18. 2    | 1. 20E-12 | -0. 13325 | 0. 019 | 0. 118 | 1. 79E-08 | CSCL | SNX18    |
| NOM1. 1     | 1. 20E-12 | -0. 1497  | 0. 021 | 0. 121 | 1. 79E-08 | CSCL | NOM1     |
| NAF1. 2     | 1. 20E-12 | -0. 21213 | 0. 017 | 0. 114 | 1. 80E-08 | CSCL | NAF1     |
| IFFO1. 2    | 1. 21E-12 | -0. 21124 | 0. 023 | 0. 123 | 1. 81E-08 | CSCL | IFFO1    |
| UBE2V2. 1   | 1. 23E-12 | 0. 116433 | 0. 244 | 0. 508 | 1. 84E-08 | CSCL | UBE2V2   |
| DHX16       | 1. 25E-12 | -0. 16321 | 0. 016 | 0. 111 | 1. 87E-08 | CSCL | DHX16    |
| GNB5. 1     | 1. 26E-12 | -0. 12186 | 0. 017 | 0. 115 | 1. 88E-08 | CSCL | GNB5     |
| ATG16L2. 2  | 1. 26E-12 | -0. 27705 | 0. 005 | 0. 091 | 1. 89E-08 | CSCL | ATG16L2  |
| SLC25A44. 1 | 1. 27E-12 | -0. 1781  | 0. 009 | 0. 098 | 1. 90E-08 | CSCL | SLC25A44 |
| ELK1        | 1. 28E-12 | -0. 13563 | 0. 012 | 0. 105 | 1. 91E-08 | CSCL | ELK1     |
| VIM. 1      | 1. 28E-12 | 0. 424132 | 0. 588 | 0. 667 | 1. 92E-08 | CSCL | VIM      |
| YTHDC2. 2   | 1. 31E-12 | -0. 10436 | 0. 023 | 0. 123 | 1. 96E-08 | CSCL | YTHDC2   |
| SGPL1. 1    | 1. 33E-12 | -0. 12867 | 0. 03  | 0. 136 | 1. 99E-08 | CSCL | SGPL1    |
| DOCK2. 2    | 1. 34E-12 | -0. 34813 | 0      | 0. 081 | 2. 01E-08 | CSCL | DOCK2    |
| UBR4. 2     | 1. 35E-12 | -0. 12186 | 0. 038 | 0. 15  | 2. 01E-08 | CSCL | UBR4     |
| CCDC93. 1   | 1. 36E-12 | -0. 12616 | 0. 028 | 0. 132 | 2. 03E-08 | CSCL | CCDC93   |
| MITF. 1     | 1. 37E-12 | -0. 25961 | 0. 009 | 0. 098 | 2. 05E-08 | CSCL | MITF     |
| SHMT1. 2    | 1. 37E-12 | -0. 20464 | 0. 023 | 0. 123 | 2. 05E-08 | CSCL | SHMT1    |
| NABP2. 1    | 1. 39E-12 | 0. 163682 | 0. 117 | 0. 284 | 2. 08E-08 | CSCL | NABP2    |
| PPIP5K2. 1  | 1. 39E-12 | -0. 10502 | 0. 028 | 0. 132 | 2. 08E-08 | CSCL | PPIP5K2  |
| KCNMB1. 2   | 1. 41E-12 | -0. 37833 | 0. 014 | 0. 107 | 2. 10E-08 | CSCL | KCNMB1   |
| BCL10. 1    | 1. 42E-12 | -0. 12503 | 0. 03  | 0. 135 | 2. 12E-08 | CSCL | BCL10    |
| KIAA1551. 1 | 1. 42E-12 | -0. 24089 | 0. 005 | 0. 091 | 2. 12E-08 | CSCL | KIAA1551 |
| COG1. 1     | 1. 42E-12 | -0. 12155 | 0. 017 | 0. 114 | 2. 13E-08 | CSCL | COG1     |
| RABGAP1. 1  | 1. 46E-12 | -0. 12075 | 0. 026 | 0. 129 | 2. 19E-08 | CSCL | RABGAP1  |
| SLC12A2. 1  | 1. 47E-12 | -0. 16928 | 0. 03  | 0. 135 | 2. 19E-08 | CSCL | SLC12A2  |
| DSN1. 1     | 1. 49E-12 | -0. 19494 | 0. 012 | 0. 104 | 2. 23E-08 | CSCL | DSN1     |
| MAD1L1. 2   | 1. 50E-12 | -0. 10866 | 0. 045 | 0. 162 | 2. 24E-08 | CSCL | MAD1L1   |
| CHRAC1. 2   | 1. 52E-12 | -0. 11141 | 0. 038 | 0. 15  | 2. 27E-08 | CSCL | CHRAC1   |
| IRF2BP1. 1  | 1. 52E-12 | -0. 15497 | 0. 016 | 0. 111 | 2. 27E-08 | CSCL | IRF2BP1  |
| SLC39A13    | 1. 54E-12 | -0. 12834 | 0. 033 | 0. 141 | 2. 30E-08 | CSCL | SLC39A13 |
| CDK1. 2     | 1. 55E-12 | -0. 27247 | 0. 01  | 0. 101 | 2. 31E-08 | CSCL | CDK1     |
| ESD. 1      | 1. 57E-12 | 0. 181169 | 0. 239 | 0. 503 | 2. 35E-08 | CSCL | ESD      |

|            |           |           |        |        |           |      |                |
|------------|-----------|-----------|--------|--------|-----------|------|----------------|
| ACAD9. 1   | 1. 60E-12 | -0. 11954 | 0. 021 | 0. 12  | 2. 39E-08 | CSCL | ACAD9          |
| SNRPA1. 1  | 1. 60E-12 | 0. 116219 | 0. 129 | 0. 303 | 2. 40E-08 | CSCL | SNRPA1         |
| EAF1. 1    | 1. 60E-12 | -0. 16068 | 0. 026 | 0. 129 | 2. 40E-08 | CSCL | EAF1           |
| CCDC22. 1  | 1. 65E-12 | -0. 15097 | 0. 028 | 0. 132 | 2. 47E-08 | CSCL | CCDC22         |
| AHNAK      | 1. 66E-12 | -0. 13968 | 0. 023 | 0. 123 | 2. 48E-08 | CSCL | AHNAK          |
| CEPT1. 1   | 1. 69E-12 | -0. 11575 | 0. 045 | 0. 161 | 2. 53E-08 | CSCL | CEPT1          |
| PGS1. 1    | 1. 69E-12 | -0. 13255 | 0. 033 | 0. 141 | 2. 53E-08 | CSCL | PGS1           |
| RYBP. 2    | 1. 70E-12 | -0. 14129 | 0. 021 | 0. 12  | 2. 54E-08 | CSCL | RYBP           |
| PRKRIR. 2  | 1. 71E-12 | -0. 12638 | 0. 017 | 0. 114 | 2. 56E-08 | CSCL | PRKRIR         |
| SH3TC1. 2  | 1. 74E-12 | -0. 3445  | 0. 002 | 0. 084 | 2. 60E-08 | CSCL | SH3TC1         |
| MSH6. 1    | 1. 76E-12 | -0. 12527 | 0. 028 | 0. 132 | 2. 63E-08 | CSCL | MSH6           |
| PCMTD1. 1  | 1. 77E-12 | -0. 14103 | 0. 044 | 0. 158 | 2. 65E-08 | CSCL | PCMTD1         |
| HSF2. 1    | 1. 78E-12 | -0. 14963 | 0. 023 | 0. 122 | 2. 67E-08 | CSCL | HSF2           |
| LARP4B. 1  | 1. 80E-12 | -0. 18214 | 0. 007 | 0. 094 | 2. 69E-08 | CSCL | LARP4B         |
| CNOT6L. 2  | 1. 80E-12 | -0. 18699 | 0. 017 | 0. 113 | 2. 69E-08 | CSCL | CNOT6L         |
| CHPF2. 1   | 1. 80E-12 | -0. 11921 | 0. 044 | 0. 159 | 2. 70E-08 | CSCL | CHPF2          |
| MAFF. 2    | 1. 81E-12 | -0. 17231 | 0. 056 | 0. 177 | 2. 71E-08 | CSCL | MAFF           |
| MXD1. 1    | 1. 83E-12 | -0. 24098 | 0. 03  | 0. 134 | 2. 73E-08 | CSCL | MXD1           |
| PPP3CC. 1  | 1. 85E-12 | -0. 15092 | 0. 031 | 0. 138 | 2. 77E-08 | CSCL | PPP3CC         |
| SCIMP. 2   | 1. 96E-12 | -0. 34563 | 0. 003 | 0. 087 | 2. 93E-08 | CSCL | SCIMP          |
| STAMPB     | 1. 98E-12 | 0. 151565 | 0. 112 | 0. 274 | 2. 96E-08 | CSCL | STAMPB         |
| DCTN6. 1   | 2. 02E-12 | 0. 133749 | 0. 216 | 0. 455 | 3. 01E-08 | CSCL | DCTN6          |
| ADA. 2     | 2. 02E-12 | -0. 11419 | 0. 009 | 0. 097 | 3. 02E-08 | CSCL | ADA            |
| SEH1L. 1   | 2. 03E-12 | -0. 15031 | 0. 024 | 0. 125 | 3. 03E-08 | CSCL | SEH1L          |
| MGMT. 2    | 2. 07E-12 | -0. 21817 | 0. 044 | 0. 157 | 3. 10E-08 | CSCL | MGMT           |
| ST6GAL1. 2 | 2. 26E-12 | -0. 3102  | 0. 019 | 0. 115 | 3. 38E-08 | CSCL | ST6GAL1        |
| LARP1B. 1  | 2. 28E-12 | -0. 11623 | 0. 024 | 0. 125 | 3. 40E-08 | CSCL | LARP1B         |
| LINC00116  | 2. 29E-12 | 0. 134199 | 0. 171 | 0. 374 | 3. 42E-08 | CSCL | LINC00116      |
| ALAD. 1    | 2. 29E-12 | -0. 13694 | 0. 017 | 0. 112 | 3. 43E-08 | CSCL | ALAD           |
| ZC3H6. 1   | 2. 30E-12 | -0. 11515 | 0. 04  | 0. 152 | 3. 44E-08 | CSCL | ZC3H6          |
| ITGAM. 2   | 2. 33E-12 | -0. 34193 | 0      | 0. 08  | 3. 48E-08 | CSCL | ITGAM          |
| SREBF1. 1  | 2. 33E-12 | -0. 21906 | 0. 023 | 0. 121 | 3. 48E-08 | CSCL | SREBF1         |
| EGR3. 2    | 2. 33E-12 | -0. 3126  | 0. 016 | 0. 109 | 3. 49E-08 | CSCL | EGR3           |
| ELMOD3. 1  | 2. 34E-12 | -0. 1018  | 0. 033 | 0. 14  | 3. 49E-08 | CSCL | ELMOD3         |
| MPC1. 1    | 2. 34E-12 | 0. 103112 | 0. 244 | 0. 5   | 3. 49E-08 | CSCL | MPC1           |
| WBP4. 1    | 2. 36E-12 | 0. 19744  | 0. 136 | 0. 314 | 3. 53E-08 | CSCL | WBP4           |
| SUMO2      | 2. 38E-12 | 0. 301941 | 0. 642 | 0. 83  | 3. 55E-08 | CSCL | SUMO2          |
| CARHSP1. 1 | 2. 41E-12 | 0. 104259 | 0. 206 | 0. 434 | 3. 60E-08 | CSCL | CARHSP1        |
| WBP2. 1    | 2. 46E-12 | 0. 121149 | 0. 223 | 0. 464 | 3. 68E-08 | CSCL | WBP2           |
| MMGT1      | 2. 49E-12 | -0. 12361 | 0. 019 | 0. 116 | 3. 72E-08 | CSCL | MMGT1          |
| PGM1. 2    | 2. 50E-12 | 0. 136762 | 0. 103 | 0. 258 | 3. 73E-08 | CSCL | PGM1           |
| PLXND1. 2  | 2. 51E-12 | -0. 2596  | 0. 012 | 0. 103 | 3. 75E-08 | CSCL | PLXND1         |
| QRSL1. 1   | 2. 53E-12 | -0. 1228  | 0. 028 | 0. 13  | 3. 78E-08 | CSCL | QRSL1          |
| TRIOBP. 1  | 2. 56E-12 | -0. 16936 | 0. 007 | 0. 093 | 3. 83E-08 | CSCL | TRIOBP         |
| SNAPIN     | 2. 59E-12 | 0. 142383 | 0. 178 | 0. 387 | 3. 87E-08 | CSCL | SNAPIN         |
| BLVRB. 2   | 2. 61E-12 | 0. 108631 | 0. 178 | 0. 384 | 3. 89E-08 | CSCL | BLVRB          |
| RP11-472N  | 2. 64E-12 | -0. 18656 | 0. 017 | 0. 112 | 3. 95E-08 | CSCL | RP11-472N13. 3 |
| INPP5D. 2  | 2. 74E-12 | -0. 36369 | 0. 005 | 0. 089 | 4. 09E-08 | CSCL | INPP5D         |
| JMY. 1     | 2. 75E-12 | -0. 15889 | 0. 014 | 0. 106 | 4. 11E-08 | CSCL | JMY            |
| TRIM4. 1   | 2. 76E-12 | -0. 10114 | 0. 04  | 0. 151 | 4. 12E-08 | CSCL | TRIM4          |
| SLC8B1. 2  | 2. 80E-12 | -0. 23082 | 0. 012 | 0. 102 | 4. 19E-08 | CSCL | SLC8B1         |

|             |           |           |        |        |           |      |          |
|-------------|-----------|-----------|--------|--------|-----------|------|----------|
| SASH3. 2    | 2. 81E-12 | -0. 34053 | 0. 002 | 0. 082 | 4. 20E-08 | CSCL | SASH3    |
| GTPBP1. 1   | 2. 82E-12 | -0. 1882  | 0. 014 | 0. 106 | 4. 22E-08 | CSCL | GTPBP1   |
| PAPOLG. 2   | 2. 91E-12 | -0. 25902 | 0. 009 | 0. 096 | 4. 34E-08 | CSCL | PAPOLG   |
| C10orf11. 2 | 2. 91E-12 | -0. 23012 | 0. 014 | 0. 105 | 4. 35E-08 | CSCL | C10orf11 |
| USP42. 1    | 2. 96E-12 | -0. 13025 | 0. 026 | 0. 127 | 4. 43E-08 | CSCL | USP42    |
| CREBRF. 1   | 2. 97E-12 | -0. 1226  | 0. 031 | 0. 136 | 4. 44E-08 | CSCL | CREBRF   |
| PRDM2. 1    | 2. 99E-12 | -0. 1025  | 0. 042 | 0. 154 | 4. 46E-08 | CSCL | PRDM2    |
| MLLT6. 2    | 3. 01E-12 | -0. 12248 | 0. 031 | 0. 136 | 4. 50E-08 | CSCL | MLLT6    |
| USP46. 2    | 3. 06E-12 | -0. 10641 | 0. 035 | 0. 143 | 4. 57E-08 | CSCL | USP46    |
| TP53INP2. 3 | 3. 08E-12 | -0. 13126 | 0. 01  | 0. 099 | 4. 61E-08 | CSCL | TP53INP2 |
| MAD2L1. 2   | 3. 09E-12 | -0. 13696 | 0. 03  | 0. 133 | 4. 62E-08 | CSCL | MAD2L1   |
| FRMD8. 1    | 3. 11E-12 | -0. 12581 | 0. 023 | 0. 121 | 4. 65E-08 | CSCL | FRMD8    |
| ICOSLG. 2   | 3. 13E-12 | -0. 30063 | 0. 009 | 0. 095 | 4. 67E-08 | CSCL | ICOSLG   |
| HLA-DOA. 1  | 3. 17E-12 | -0. 33161 | 0. 01  | 0. 098 | 4. 74E-08 | CSCL | HLA-DOA  |
| HBB. 1      | 3. 21E-12 | 0. 171555 | 0. 202 | 0. 409 | 4. 79E-08 | CSCL | HBB      |
| FOXN2. 2    | 3. 21E-12 | -0. 12235 | 0. 031 | 0. 136 | 4. 80E-08 | CSCL | FOXN2    |
| DIP2B. 2    | 3. 22E-12 | -0. 12843 | 0. 024 | 0. 124 | 4. 81E-08 | CSCL | DIP2B    |
| DHRS13. 1   | 3. 25E-12 | -0. 10845 | 0. 012 | 0. 102 | 4. 86E-08 | CSCL | DHRS13   |
| CCDC90B. 1  | 3. 27E-12 | 0. 104414 | 0. 201 | 0. 42  | 4. 89E-08 | CSCL | CCDC90B  |
| HDCC2       | 3. 29E-12 | 0. 15565  | 0. 194 | 0. 411 | 4. 91E-08 | CSCL | HDCC2    |
| LYL1. 2     | 3. 31E-12 | -0. 31832 | 0. 003 | 0. 085 | 4. 95E-08 | CSCL | LYL1     |
| RNF38. 1    | 3. 35E-12 | -0. 13657 | 0. 01  | 0. 099 | 5. 00E-08 | CSCL | RNF38    |
| STK11. 1    | 3. 41E-12 | -0. 13487 | 0. 01  | 0. 099 | 5. 09E-08 | CSCL | STK11    |
| GGPS1. 1    | 3. 48E-12 | 0. 144677 | 0. 145 | 0. 326 | 5. 20E-08 | CSCL | GGPS1    |
| TELO2       | 3. 49E-12 | -0. 13305 | 0. 031 | 0. 135 | 5. 21E-08 | CSCL | TELO2    |
| GPATCH3. 1  | 3. 55E-12 | -0. 22126 | 0. 003 | 0. 085 | 5. 31E-08 | CSCL | GPATCH3  |
| MANBA. 2    | 3. 64E-12 | -0. 23395 | 0. 026 | 0. 125 | 5. 43E-08 | CSCL | MANBA    |
| STX8        | 3. 64E-12 | 0. 129441 | 0. 171 | 0. 37  | 5. 44E-08 | CSCL | STX8     |
| PPP1R21     | 3. 64E-12 | -0. 12864 | 0. 021 | 0. 117 | 5. 45E-08 | CSCL | PPP1R21  |
| RELT. 1     | 3. 66E-12 | -0. 22465 | 0. 005 | 0. 088 | 5. 47E-08 | CSCL | RELT     |
| SNX29. 2    | 3. 76E-12 | -0. 22541 | 0. 017 | 0. 11  | 5. 62E-08 | CSCL | SNX29    |
| MSH2. 1     | 3. 79E-12 | -0. 12335 | 0. 023 | 0. 121 | 5. 67E-08 | CSCL | MSH2     |
| BAK1. 2     | 3. 80E-12 | -0. 10125 | 0. 023 | 0. 12  | 5. 68E-08 | CSCL | BAK1     |
| AVPI1. 2    | 3. 84E-12 | -0. 28183 | 0. 01  | 0. 098 | 5. 74E-08 | CSCL | AVPI1    |
| PSMB4       | 3. 86E-12 | 0. 197314 | 0. 201 | 0. 428 | 5. 76E-08 | CSCL | PSMB4    |
| CHD3. 1     | 3. 91E-12 | -0. 15442 | 0. 023 | 0. 12  | 5. 84E-08 | CSCL | CHD3     |
| COPE. 2     | 3. 93E-12 | 0. 381378 | 0. 6   | 0. 779 | 5. 87E-08 | CSCL | COPE     |
| KLHL36. 1   | 3. 94E-12 | -0. 14944 | 0. 01  | 0. 098 | 5. 89E-08 | CSCL | KLHL36   |
| ZFAND6      | 3. 96E-12 | 0. 153734 | 0. 22  | 0. 462 | 5. 92E-08 | CSCL | ZFAND6   |
| HAUS2. 1    | 4. 02E-12 | -0. 11905 | 0. 014 | 0. 105 | 6. 01E-08 | CSCL | HAUS2    |
| ATXN1L      | 4. 05E-12 | -0. 17918 | 0. 003 | 0. 085 | 6. 05E-08 | CSCL | ATXN1L   |
| SIGLEC8. 2  | 4. 07E-12 | -0. 34499 | 0. 002 | 0. 081 | 6. 09E-08 | CSCL | SIGLEC8  |
| DHX38. 1    | 4. 14E-12 | -0. 11691 | 0. 023 | 0. 12  | 6. 19E-08 | CSCL | DHX38    |
| RTN2. 2     | 4. 14E-12 | -0. 28861 | 0. 005 | 0. 088 | 6. 19E-08 | CSCL | RTN2     |
| ATP11A. 2   | 4. 15E-12 | -0. 13116 | 0. 012 | 0. 101 | 6. 19E-08 | CSCL | ATP11A   |
| ARL5B. 2    | 4. 15E-12 | -0. 1691  | 0. 007 | 0. 092 | 6. 20E-08 | CSCL | ARL5B    |
| SUGP2. 1    | 4. 15E-12 | 0. 141323 | 0. 101 | 0. 254 | 6. 21E-08 | CSCL | SUGP2    |
| DHX8. 1     | 4. 19E-12 | -0. 13305 | 0. 019 | 0. 114 | 6. 27E-08 | CSCL | DHX8     |
| AUTS2. 2    | 4. 24E-12 | -0. 11969 | 0. 024 | 0. 123 | 6. 33E-08 | CSCL | AUTS2    |
| KLHDC8B. 1  | 4. 25E-12 | -0. 10774 | 0. 016 | 0. 108 | 6. 35E-08 | CSCL | KLHDC8B  |
| PPP3CB. 2   | 4. 25E-12 | -0. 16585 | 0. 019 | 0. 113 | 6. 36E-08 | CSCL | PPP3CB   |

|            |           |           |        |        |           |      |              |
|------------|-----------|-----------|--------|--------|-----------|------|--------------|
| CENPN. 1   | 4. 35E-12 | -0. 18264 | 0. 007 | 0. 091 | 6. 49E-08 | CSCL | CENPN        |
| PPP1R15B.  | 4. 40E-12 | -0. 1918  | 0. 024 | 0. 122 | 6. 58E-08 | CSCL | PPP1R15B     |
| ST3GAL6. 2 | 4. 46E-12 | -0. 26832 | 0. 021 | 0. 116 | 6. 67E-08 | CSCL | ST3GAL6      |
| C15orf57.  | 4. 51E-12 | -0. 12884 | 0. 028 | 0. 129 | 6. 74E-08 | CSCL | C15orf57     |
| MOB4. 1    | 4. 66E-12 | 0. 11929  | 0. 176 | 0. 382 | 6. 96E-08 | CSCL | MOB4         |
| CCNY. 2    | 4. 77E-12 | -0. 14887 | 0. 019 | 0. 113 | 7. 13E-08 | CSCL | CCNY         |
| ATP5J2. 2  | 4. 78E-12 | 0. 327462 | 0. 621 | 0. 817 | 7. 14E-08 | CSCL | ATP5J2       |
| RP11-108M  | 4. 78E-12 | -0. 28295 | 0. 016 | 0. 106 | 7. 15E-08 | CSCL | RP11-108M. 4 |
| ARID3A. 1  | 4. 81E-12 | -0. 23246 | 0. 023 | 0. 119 | 7. 18E-08 | CSCL | ARID3A       |
| GPR84. 2   | 4. 82E-12 | -0. 34639 | 0      | 0. 077 | 7. 21E-08 | CSCL | GPR84        |
| PRKCD. 2   | 4. 88E-12 | -0. 27755 | 0. 003 | 0. 084 | 7. 30E-08 | CSCL | PRKCD        |
| IRAK3. 2   | 4. 97E-12 | -0. 32711 | 0      | 0. 077 | 7. 43E-08 | CSCL | IRAK3        |
| SAT1. 1    | 5. 00E-12 | -0. 11059 | 0. 461 | 0. 82  | 7. 48E-08 | CSCL | SAT1         |
| BAG3. 1    | 5. 08E-12 | -0. 2093  | 0. 019 | 0. 112 | 7. 59E-08 | CSCL | BAG3         |
| USP7. 2    | 5. 35E-12 | -0. 10394 | 0. 035 | 0. 14  | 7. 99E-08 | CSCL | USP7         |
| ULK3. 1    | 5. 44E-12 | -0. 10089 | 0. 042 | 0. 151 | 8. 13E-08 | CSCL | ULK3         |
| FDX1L      | 5. 45E-12 | 0. 124835 | 0. 11  | 0. 267 | 8. 15E-08 | CSCL | FDX1L        |
| PIGF. 1    | 5. 47E-12 | 0. 136181 | 0. 127 | 0. 296 | 8. 18E-08 | CSCL | PIGF         |
| HTT. 2     | 5. 51E-12 | -0. 10202 | 0. 026 | 0. 125 | 8. 24E-08 | CSCL | HTT          |
| SH2B2. 2   | 5. 62E-12 | -0. 14796 | 0. 019 | 0. 113 | 8. 40E-08 | CSCL | SH2B2        |
| LIMK2. 2   | 5. 63E-12 | -0. 14785 | 0. 007 | 0. 091 | 8. 42E-08 | CSCL | LIMK2        |
| VCPIP1. 2  | 5. 74E-12 | -0. 15854 | 0. 009 | 0. 094 | 8. 58E-08 | CSCL | VCPIP1       |
| OBFC1      | 5. 77E-12 | -0. 18009 | 0. 007 | 0. 091 | 8. 62E-08 | CSCL | OBFC1        |
| GIMAP1. 2  | 5. 78E-12 | -0. 32621 | 0      | 0. 077 | 8. 64E-08 | CSCL | GIMAP1       |
| MAGEF1. 1  | 5. 79E-12 | 0. 128829 | 0. 173 | 0. 373 | 8. 66E-08 | CSCL | MAGEF1       |
| HERC4      | 5. 87E-12 | -0. 15621 | 0. 023 | 0. 119 | 8. 77E-08 | CSCL | HERC4        |
| IRF3       | 5. 89E-12 | 0. 105571 | 0. 101 | 0. 251 | 8. 80E-08 | CSCL | IRF3         |
| ITM2B. 2   | 5. 91E-12 | -0. 1046  | 0. 429 | 0. 818 | 8. 84E-08 | CSCL | ITM2B        |
| CYHR1. 1   | 5. 94E-12 | 0. 10513  | 0. 122 | 0. 286 | 8. 88E-08 | CSCL | CYHR1        |
| EPHA3. 2   | 5. 96E-12 | -0. 13865 | 0      | 0. 077 | 8. 91E-08 | CSCL | EPHA3        |
| CXorf21. 2 | 6. 04E-12 | -0. 3665  | 0. 002 | 0. 08  | 9. 02E-08 | CSCL | CXorf21      |
| ALKBH6. 2  | 6. 05E-12 | -0. 13236 | 0. 017 | 0. 11  | 9. 04E-08 | CSCL | ALKBH6       |
| NCOA3. 2   | 6. 10E-12 | -0. 14268 | 0. 03  | 0. 131 | 9. 12E-08 | CSCL | NCOA3        |
| MSTO1      | 6. 48E-12 | -0. 14473 | 0. 007 | 0. 09  | 9. 68E-08 | CSCL | MSTO1        |
| TOP2A. 2   | 6. 56E-12 | -0. 3032  | 0. 007 | 0. 09  | 9. 81E-08 | CSCL | TOP2A        |
| NFRKB. 1   | 6. 61E-12 | -0. 16878 | 0. 014 | 0. 103 | 9. 87E-08 | CSCL | NFRKB        |
| RNF7. 1    | 6. 79E-12 | 0. 147543 | 0. 265 | 0. 546 | 1. 01E-07 | CSCL | RNF7         |
| ARL3. 1    | 6. 80E-12 | 0. 165438 | 0. 162 | 0. 356 | 1. 02E-07 | CSCL | ARL3         |
| METRNL. 2  | 6. 80E-12 | -0. 24809 | 0. 005 | 0. 087 | 1. 02E-07 | CSCL | METRNL       |
| BOK. 2     | 7. 02E-12 | -0. 20394 | 0. 002 | 0. 08  | 1. 05E-07 | CSCL | BOK          |
| OSCAR. 2   | 7. 15E-12 | -0. 29653 | 0      | 0. 076 | 1. 07E-07 | CSCL | OSCAR        |
| LRRC45. 2  | 7. 15E-12 | -0. 14064 | 0. 009 | 0. 093 | 1. 07E-07 | CSCL | LRRC45       |
| NME2       | 7. 15E-12 | -0. 17469 | 0. 007 | 0. 09  | 1. 07E-07 | CSCL | NME2         |
| RNF144B. 1 | 7. 21E-12 | -0. 29798 | 0. 014 | 0. 103 | 1. 08E-07 | CSCL | RNF144B      |
| DLX5. 2    | 7. 22E-12 | -0. 38348 | 0. 044 | 0. 149 | 1. 08E-07 | CSCL | DLX5         |
| SCARB1. 1  | 7. 22E-12 | -0. 1543  | 0. 019 | 0. 112 | 1. 08E-07 | CSCL | SCARB1       |
| BACH1. 1   | 7. 29E-12 | -0. 17573 | 0. 019 | 0. 112 | 1. 09E-07 | CSCL | BACH1        |
| MIR22HG. 1 | 7. 36E-12 | -0. 2346  | 0. 023 | 0. 118 | 1. 10E-07 | CSCL | MIR22HG      |
| SDHD. 1    | 7. 43E-12 | 0. 116647 | 0. 192 | 0. 406 | 1. 11E-07 | CSCL | SDHD         |
| FAM199X. 1 | 7. 46E-12 | -0. 12115 | 0. 019 | 0. 112 | 1. 12E-07 | CSCL | FAM199X      |
| KLF13. 2   | 7. 59E-12 | -0. 10888 | 0. 03  | 0. 13  | 1. 13E-07 | CSCL | KLF13        |

|            |           |           |        |        |           |      |               |
|------------|-----------|-----------|--------|--------|-----------|------|---------------|
| TAF12. 2   | 7. 66E-12 | 0. 137922 | 0. 141 | 0. 317 | 1. 14E-07 | CSCL | TAF12         |
| FAM160A2.  | 7. 70E-12 | -0. 14664 | 0. 023 | 0. 118 | 1. 15E-07 | CSCL | FAM160A2      |
| GTF2F2     | 7. 84E-12 | 0. 180911 | 0. 134 | 0. 308 | 1. 17E-07 | CSCL | GTF2F2        |
| CHAF1A. 2  | 7. 85E-12 | -0. 16824 | 0. 009 | 0. 093 | 1. 17E-07 | CSCL | CHAF1A        |
| TARSL2. 1  | 7. 90E-12 | -0. 18598 | 0. 021 | 0. 115 | 1. 18E-07 | CSCL | TARSL2        |
| GABPB1. 1  | 7. 94E-12 | -0. 15477 | 0. 019 | 0. 112 | 1. 19E-07 | CSCL | GABPB1        |
| SEC16A. 1  | 8. 45E-12 | -0. 15562 | 0. 024 | 0. 121 | 1. 26E-07 | CSCL | SEC16A        |
| PAN3. 1    | 8. 64E-12 | -0. 17691 | 0. 03  | 0. 129 | 1. 29E-07 | CSCL | PAN3          |
| ZNF394. 1  | 8. 93E-12 | -0. 12119 | 0. 04  | 0. 147 | 1. 33E-07 | CSCL | ZNF394        |
| PIM1. 1    | 9. 19E-12 | -0. 11094 | 0. 033 | 0. 135 | 1. 37E-07 | CSCL | PIM1          |
| ZNF703. 2  | 9. 32E-12 | -0. 17343 | 0. 014 | 0. 102 | 1. 39E-07 | CSCL | ZNF703        |
| NEDD4L. 2  | 9. 44E-12 | -0. 17834 | 0. 023 | 0. 117 | 1. 41E-07 | CSCL | NEDD4L        |
| TNKS2. 2   | 9. 49E-12 | -0. 12423 | 0. 021 | 0. 114 | 1. 42E-07 | CSCL | TNKS2         |
| WHAMM      | 9. 70E-12 | -0. 11755 | 0. 019 | 0. 111 | 1. 45E-07 | CSCL | WHAMM         |
| PTPRO. 2   | 9. 89E-12 | -0. 25764 | 0. 003 | 0. 082 | 1. 48E-07 | CSCL | PTPRO         |
| CUEDC2. 2  | 1. 01E-11 | 0. 13764  | 0. 195 | 0. 411 | 1. 51E-07 | CSCL | CUEDC2        |
| SCAMP3. 1  | 1. 01E-11 | 0. 150112 | 0. 131 | 0. 298 | 1. 51E-07 | CSCL | SCAMP3        |
| FUT8. 2    | 1. 01E-11 | -0. 1277  | 0. 03  | 0. 129 | 1. 51E-07 | CSCL | FUT8          |
| PHTF2. 1   | 1. 03E-11 | -0. 16898 | 0. 01  | 0. 095 | 1. 54E-07 | CSCL | PHTF2         |
| MF         | 1. 03E-11 | 0. 115394 | 0. 244 | 0. 502 | 1. 54E-07 | CSCL | MF            |
| ING1. 1    | 1. 04E-11 | -0. 12748 | 0. 037 | 0. 141 | 1. 56E-07 | CSCL | ING1          |
| ABHD17B. 2 | 1. 04E-11 | -0. 13044 | 0. 03  | 0. 129 | 1. 56E-07 | CSCL | ABHD17B       |
| P2RY13. 2  | 1. 04E-11 | -0. 3914  | 0. 007 | 0. 088 | 1. 56E-07 | CSCL | P2RY13        |
| MON1B      | 1. 05E-11 | -0. 12463 | 0. 019 | 0. 111 | 1. 57E-07 | CSCL | MON1B         |
| MAST3. 2   | 1. 05E-11 | -0. 21295 | 0. 003 | 0. 082 | 1. 57E-07 | CSCL | MAST3         |
| SFXN1      | 1. 09E-11 | 0. 109273 | 0. 086 | 0. 224 | 1. 63E-07 | CSCL | SFXN1         |
| SPTY2D1. 1 | 1. 10E-11 | -0. 10662 | 0. 026 | 0. 123 | 1. 64E-07 | CSCL | SPTY2D1       |
| RPRD1B     | 1. 10E-11 | -0. 14048 | 0. 014 | 0. 101 | 1. 65E-07 | CSCL | RPRD1B        |
| RP11-25K1  | 1. 11E-11 | -0. 1247  | 0. 016 | 0. 105 | 1. 66E-07 | CSCL | RP11-25K19. 1 |
| ERC1       | 1. 13E-11 | -0. 10782 | 0. 028 | 0. 126 | 1. 69E-07 | CSCL | ERC1          |
| BEX1. 1    | 1. 13E-11 | 0. 734242 | 0. 384 | 0. 349 | 1. 69E-07 | CSCL | BEX1          |
| PSME4. 1   | 1. 15E-11 | -0. 10655 | 0. 037 | 0. 141 | 1. 71E-07 | CSCL | PSME4         |
| PITX1. 1   | 1. 16E-11 | -0. 10782 | 0. 007 | 0. 089 | 1. 73E-07 | CSCL | PITX1         |
| SIGLEC7. 2 | 1. 19E-11 | -0. 32843 | 0. 002 | 0. 078 | 1. 77E-07 | CSCL | SIGLEC7       |
| ARHGAP22.  | 1. 20E-11 | -0. 30695 | 0. 002 | 0. 078 | 1. 79E-07 | CSCL | ARHGAP22      |
| CECR1. 2   | 1. 23E-11 | -0. 32067 | 0      | 0. 075 | 1. 84E-07 | CSCL | CECR1         |
| PRPF31. 1  | 1. 24E-11 | 0. 147135 | 0. 19  | 0. 402 | 1. 85E-07 | CSCL | PRPF31        |
| CCDC71. 1  | 1. 25E-11 | -0. 11393 | 0. 014 | 0. 101 | 1. 86E-07 | CSCL | CCDC71        |
| SIK3. 2    | 1. 26E-11 | -0. 11877 | 0. 019 | 0. 111 | 1. 89E-07 | CSCL | SIK3          |
| HMG20A     | 1. 26E-11 | -0. 13842 | 0. 019 | 0. 11  | 1. 89E-07 | CSCL | HMG20A        |
| SLC17A5. 2 | 1. 27E-11 | -0. 18393 | 0. 019 | 0. 11  | 1. 90E-07 | CSCL | SLC17A5       |
| RBBP4      | 1. 30E-11 | 0. 133375 | 0. 213 | 0. 442 | 1. 94E-07 | CSCL | RBBP4         |
| CCNB1. 1   | 1. 31E-11 | -0. 23321 | 0. 01  | 0. 095 | 1. 96E-07 | CSCL | CCNB1         |
| PWP2. 2    | 1. 36E-11 | -0. 10783 | 0. 03  | 0. 129 | 2. 03E-07 | CSCL | PWP2          |
| LILRA2. 2  | 1. 36E-11 | -0. 34979 | 0. 007 | 0. 088 | 2. 04E-07 | CSCL | LILRA2        |
| LLGL1. 1   | 1. 38E-11 | -0. 12149 | 0. 016 | 0. 104 | 2. 06E-07 | CSCL | LLGL1         |
| AES. 2     | 1. 39E-11 | 0. 148333 | 0. 202 | 0. 421 | 2. 07E-07 | CSCL | AES           |
| TOX. 2     | 1. 40E-11 | -0. 15742 | 0. 009 | 0. 091 | 2. 09E-07 | CSCL | TOX           |
| CBL. 2     | 1. 40E-11 | -0. 10448 | 0. 017 | 0. 107 | 2. 09E-07 | CSCL | CBL           |
| UPF3A. 1   | 1. 46E-11 | 0. 189769 | 0. 162 | 0. 354 | 2. 18E-07 | CSCL | UPF3A         |
| AK2. 2     | 1. 46E-11 | 0. 189764 | 0. 19  | 0. 401 | 2. 18E-07 | CSCL | AK2           |

|            |          |          |       |       |          |      |            |
|------------|----------|----------|-------|-------|----------|------|------------|
| BCL2L1.1   | 1.46E-11 | 0.121202 | 0.115 | 0.272 | 2.18E-07 | CSCL | BCL2L1     |
| CAMK1D.2   | 1.49E-11 | -0.16749 | 0.023 | 0.116 | 2.23E-07 | CSCL | CAMK1D     |
| USP11.1    | 1.50E-11 | 0.143459 | 0.169 | 0.362 | 2.24E-07 | CSCL | USP11      |
| VAV1.2     | 1.53E-11 | -0.30068 | 0.002 | 0.077 | 2.28E-07 | CSCL | VAV1       |
| JAZF1.2    | 1.54E-11 | -0.17149 | 0.024 | 0.118 | 2.29E-07 | CSCL | JAZF1      |
| P2RY11.1   | 1.55E-11 | -0.20798 | 0.009 | 0.091 | 2.31E-07 | CSCL | P2RY11     |
| YARS2      | 1.59E-11 | -0.13389 | 0.019 | 0.11  | 2.37E-07 | CSCL | YARS2      |
| MTF1       | 1.59E-11 | -0.10526 | 0.021 | 0.113 | 2.38E-07 | CSCL | MTF1       |
| RABEP2.1   | 1.60E-11 | -0.10833 | 0.016 | 0.104 | 2.39E-07 | CSCL | RABEP2     |
| PCGF3.1    | 1.60E-11 | -0.11702 | 0.024 | 0.119 | 2.39E-07 | CSCL | PCGF3      |
| AFMID.2    | 1.60E-11 | -0.17713 | 0.019 | 0.11  | 2.40E-07 | CSCL | AFMID      |
| CNKSR3.1   | 1.61E-11 | -0.10521 | 0.026 | 0.122 | 2.40E-07 | CSCL | CNKSR3     |
| SAYSD1.1   | 1.61E-11 | -0.10015 | 0.026 | 0.122 | 2.41E-07 | CSCL | SAYSD1     |
| VRK3.1     | 1.62E-11 | 0.113695 | 0.087 | 0.225 | 2.41E-07 | CSCL | VRK3       |
| CST3.1     | 1.62E-11 | 0.449114 | 0.616 | 0.795 | 2.42E-07 | CSCL | CST3       |
| L3MBTL2.2  | 1.62E-11 | -0.13295 | 0.017 | 0.107 | 2.42E-07 | CSCL | L3MBTL2    |
| SGOL2.1    | 1.62E-11 | -0.19456 | 0.01  | 0.094 | 2.43E-07 | CSCL | SGOL2      |
| CACNA2D4.1 | 1.63E-11 | -0.32599 | 0.002 | 0.077 | 2.44E-07 | CSCL | CACNA2D4   |
| DHRS12     | 1.64E-11 | -0.19406 | 0.012 | 0.097 | 2.44E-07 | CSCL | DHRS12     |
| SESN1.2    | 1.64E-11 | -0.26175 | 0.017 | 0.106 | 2.45E-07 | CSCL | SESN1      |
| NCBP2      | 1.68E-11 | 0.139251 | 0.218 | 0.452 | 2.51E-07 | CSCL | NCBP2      |
| FAM20C.2   | 1.72E-11 | 0.100545 | 0.091 | 0.23  | 2.58E-07 | CSCL | FAM20C     |
| ARNTL.1    | 1.73E-11 | -0.10094 | 0.014 | 0.1   | 2.58E-07 | CSCL | ARNTL      |
| PPP2R1A.2  | 1.74E-11 | 0.162032 | 0.26  | 0.528 | 2.60E-07 | CSCL | PPP2R1A    |
| PPP2R2D.2  | 1.74E-11 | -0.13725 | 0.01  | 0.094 | 2.60E-07 | CSCL | PPP2R2D    |
| KIF3C.2    | 1.75E-11 | -0.14675 | 0.017 | 0.107 | 2.61E-07 | CSCL | KIF3C      |
| TAOK2      | 1.76E-11 | -0.14773 | 0.012 | 0.097 | 2.63E-07 | CSCL | TAOK2      |
| PPP1R12C   | 1.79E-11 | -0.16054 | 0.007 | 0.087 | 2.68E-07 | CSCL | PPP1R12C   |
| KTI12.1    | 1.80E-11 | -0.12341 | 0.019 | 0.109 | 2.69E-07 | CSCL | KTI12      |
| PLK2.1     | 1.81E-11 | -0.16435 | 0.038 | 0.142 | 2.71E-07 | CSCL | PLK2       |
| RRAGB.1    | 1.83E-11 | -0.11017 | 0.023 | 0.116 | 2.73E-07 | CSCL | RRAGB      |
| PDLIM2.1   | 1.84E-11 | 0.114778 | 0.101 | 0.247 | 2.74E-07 | CSCL | PDLIM2     |
| PRKAG2-AS  | 1.86E-11 | -0.23207 | 0.031 | 0.129 | 2.78E-07 | CSCL | PRKAG2-AS1 |
| ARRDC2.2   | 1.90E-11 | -0.26564 | 0.009 | 0.09  | 2.84E-07 | CSCL | ARRDC2     |
| FAM133B.1  | 1.99E-11 | 0.131316 | 0.237 | 0.483 | 2.97E-07 | CSCL | FAM133B    |
| ASXL2.2    | 2.01E-11 | -0.14771 | 0.016 | 0.103 | 3.00E-07 | CSCL | ASXL2      |
| TOPBP1.1   | 2.03E-11 | -0.10586 | 0.012 | 0.097 | 3.03E-07 | CSCL | TOPBP1     |
| MED28.1    | 2.03E-11 | 0.17779  | 0.161 | 0.348 | 3.04E-07 | CSCL | MED28      |
| SMIM13.1   | 2.04E-11 | -0.17028 | 0.009 | 0.09  | 3.05E-07 | CSCL | SMIM13     |
| ZDHHC21.2  | 2.07E-11 | -0.10296 | 0.016 | 0.103 | 3.09E-07 | CSCL | ZDHHC21    |
| MCM4.2     | 2.07E-11 | -0.15392 | 0.014 | 0.1   | 3.10E-07 | CSCL | MCM4       |
| CRADD.1    | 2.07E-11 | -0.1039  | 0.019 | 0.109 | 3.10E-07 | CSCL | CRADD      |
| TPD52.2    | 2.10E-11 | 0.103587 | 0.099 | 0.243 | 3.15E-07 | CSCL | TPD52      |
| TRIM14.2   | 2.19E-11 | -0.15049 | 0.012 | 0.096 | 3.27E-07 | CSCL | TRIM14     |
| FES.2      | 2.21E-11 | -0.28787 | 0.005 | 0.083 | 3.30E-07 | CSCL | FES        |
| ST14.2     | 2.22E-11 | -0.28003 | 0.002 | 0.076 | 3.31E-07 | CSCL | ST14       |
| E2F3.2     | 2.30E-11 | -0.15513 | 0.009 | 0.09  | 3.43E-07 | CSCL | E2F3       |
| HAUS6.1    | 2.31E-11 | -0.15937 | 0.01  | 0.093 | 3.45E-07 | CSCL | HAUS6      |
| CNEP1R1.1  | 2.38E-11 | -0.11097 | 0.023 | 0.115 | 3.56E-07 | CSCL | CNEP1R1    |
| ELK4       | 2.39E-11 | -0.12037 | 0.021 | 0.112 | 3.57E-07 | CSCL | ELK4       |
| TET1.1     | 2.45E-11 | -0.12025 | 0.007 | 0.086 | 3.66E-07 | CSCL | TET1       |



|           |          |          |       |       |          |      |          |
|-----------|----------|----------|-------|-------|----------|------|----------|
| VASH1.2   | 2.50E-11 | -0.1904  | 0.035 | 0.134 | 3.73E-07 | CSCL | VASH1    |
| SGPP1.2   | 2.50E-11 | -0.21238 | 0.005 | 0.083 | 3.73E-07 | CSCL | SGPP1    |
| EHD1.1    | 2.51E-11 | -0.11138 | 0.03  | 0.126 | 3.75E-07 | CSCL | EHD1     |
| DCPS.1    | 2.53E-11 | 0.126012 | 0.059 | 0.177 | 3.78E-07 | CSCL | DCPS     |
| MSM01.1   | 2.56E-11 | 0.122951 | 0.077 | 0.207 | 3.82E-07 | CSCL | MSM01    |
| CBX5.1    | 2.58E-11 | 0.129885 | 0.166 | 0.353 | 3.85E-07 | CSCL | CBX5     |
| CC2D1A.1  | 2.59E-11 | 0.101573 | 0.068 | 0.192 | 3.88E-07 | CSCL | CC2D1A   |
| ATAD2.1   | 2.62E-11 | -0.17432 | 0.003 | 0.079 | 3.91E-07 | CSCL | ATAD2    |
| TSPYL2.1  | 2.65E-11 | -0.14897 | 0.024 | 0.117 | 3.96E-07 | CSCL | TSPYL2   |
| NFKB1.2   | 2.65E-11 | -0.15644 | 0.019 | 0.108 | 3.96E-07 | CSCL | NFKB1    |
| TANGO2.2  | 2.66E-11 | -0.17749 | 0.009 | 0.089 | 3.97E-07 | CSCL | TANGO2   |
| RMND1     | 2.71E-11 | -0.12666 | 0.017 | 0.105 | 4.05E-07 | CSCL | RMND1    |
| HOXC9.2   | 2.72E-11 | -0.22509 | 0.009 | 0.089 | 4.06E-07 | CSCL | HOXC9    |
| NPM3.1    | 2.74E-11 | 0.112541 | 0.087 | 0.223 | 4.09E-07 | CSCL | NPM3     |
| NMRAL1    | 2.79E-11 | 0.109559 | 0.101 | 0.246 | 4.17E-07 | CSCL | NMRAL1   |
| ELK3      | 2.80E-11 | -0.15466 | 0.01  | 0.092 | 4.19E-07 | CSCL | ELK3     |
| POLR2E.1  | 2.81E-11 | 0.131672 | 0.272 | 0.548 | 4.20E-07 | CSCL | POLR2E   |
| KLHDC8A.2 | 2.82E-11 | 0.131331 | 0.108 | 0.258 | 4.21E-07 | CSCL | KLHDC8A  |
| HERC1     | 2.91E-11 | -0.13664 | 0.016 | 0.102 | 4.35E-07 | CSCL | HERC1    |
| PTPN7.2   | 3.09E-11 | -0.31246 | 0.005 | 0.082 | 4.61E-07 | CSCL | PTPN7    |
| UBASH3B.2 | 3.12E-11 | -0.18033 | 0.003 | 0.079 | 4.66E-07 | CSCL | UBASH3B  |
| SWI5.2    | 3.13E-11 | 0.241409 | 0.105 | 0.252 | 4.67E-07 | CSCL | SWI5     |
| C12orf76. | 3.19E-11 | 0.136669 | 0.119 | 0.274 | 4.77E-07 | CSCL | C12orf76 |
| CARKD.1   | 3.22E-11 | -0.1166  | 0.035 | 0.134 | 4.81E-07 | CSCL | CARKD    |
| EPB41L1.1 | 3.26E-11 | -0.1249  | 0.01  | 0.092 | 4.87E-07 | CSCL | EPB41L1  |
| EMB.2     | 3.27E-11 | -0.30606 | 0.003 | 0.079 | 4.88E-07 | CSCL | EMB      |
| CD2AP.2   | 3.30E-11 | -0.13547 | 0.007 | 0.085 | 4.93E-07 | CSCL | CD2AP    |
| HK2.1     | 3.33E-11 | -0.21608 | 0.009 | 0.089 | 4.98E-07 | CSCL | HK2      |
| DIS3L.2   | 3.34E-11 | -0.11476 | 0.019 | 0.107 | 4.99E-07 | CSCL | DIS3L    |
| MORN2.2   | 3.37E-11 | 0.225104 | 0.115 | 0.269 | 5.04E-07 | CSCL | MORN2    |
| STXBP1.1  | 3.47E-11 | -0.10205 | 0.03  | 0.126 | 5.19E-07 | CSCL | STXBP1   |
| GCLC.2    | 3.48E-11 | -0.14674 | 0.016 | 0.101 | 5.20E-07 | CSCL | GCLC     |
| DLX1.2    | 3.56E-11 | -0.22697 | 0.026 | 0.119 | 5.32E-07 | CSCL | DLX1     |
| DONSON.1  | 3.56E-11 | -0.11764 | 0.007 | 0.085 | 5.32E-07 | CSCL | DONSON   |
| CH25H.1   | 3.58E-11 | -0.33536 | 0.047 | 0.152 | 5.35E-07 | CSCL | CH25H    |
| TRIP4     | 3.62E-11 | -0.14079 | 0.024 | 0.116 | 5.42E-07 | CSCL | TRIP4    |
| TBRG4.1   | 3.64E-11 | 0.143826 | 0.101 | 0.245 | 5.44E-07 | CSCL | TBRG4    |
| G6PC3.1   | 3.66E-11 | 0.117181 | 0.169 | 0.356 | 5.47E-07 | CSCL | G6PC3    |
| BIRC5.2   | 3.69E-11 | -0.28444 | 0.021 | 0.109 | 5.51E-07 | CSCL | BIRC5    |
| ASNA1.2   | 3.74E-11 | 0.184417 | 0.262 | 0.533 | 5.58E-07 | CSCL | ASNA1    |
| LBH.2     | 3.86E-11 | -0.18977 | 0.051 | 0.159 | 5.77E-07 | CSCL | LBH      |
| TLR1.2    | 3.87E-11 | -0.30421 | 0     | 0.071 | 5.78E-07 | CSCL | TLR1     |
| DHX32.1   | 3.90E-11 | -0.1581  | 0.007 | 0.085 | 5.83E-07 | CSCL | DHX32    |
| RASA1.2   | 4.00E-11 | -0.12635 | 0.021 | 0.11  | 5.98E-07 | CSCL | RASA1    |
| DDX56.1   | 4.03E-11 | 0.117198 | 0.113 | 0.264 | 6.03E-07 | CSCL | DDX56    |
| PPARD.2   | 4.08E-11 | -0.1171  | 0.023 | 0.113 | 6.10E-07 | CSCL | PPARD    |
| DDHD2.1   | 4.12E-11 | -0.1292  | 0.021 | 0.11  | 6.16E-07 | CSCL | DDHD2    |
| DPP4      | 4.13E-11 | -0.10776 | 0.005 | 0.081 | 6.17E-07 | CSCL | DPP4     |
| SLC35A3.1 | 4.15E-11 | -0.10073 | 0.031 | 0.128 | 6.20E-07 | CSCL | SLC35A3  |
| TGIF2.1   | 4.19E-11 | -0.14418 | 0.009 | 0.088 | 6.26E-07 | CSCL | TGIF2    |
| ZNF480.1  | 4.23E-11 | -0.11522 | 0.021 | 0.11  | 6.32E-07 | CSCL | ZNF480   |

|            |           |           |        |        |           |      |               |
|------------|-----------|-----------|--------|--------|-----------|------|---------------|
| SFMBT2. 2  | 4. 24E-11 | -0. 32261 | 0. 005 | 0. 081 | 6. 33E-07 | CSCL | SFMBT2        |
| MED10. 2   | 4. 25E-11 | 0. 146154 | 0. 246 | 0. 496 | 6. 35E-07 | CSCL | MED10         |
| HLA-C. 1   | 4. 32E-11 | 0. 28744  | 0. 64  | 0. 811 | 6. 46E-07 | CSCL | HLA-C         |
| RPP25L     | 4. 35E-11 | 0. 121514 | 0. 058 | 0. 173 | 6. 50E-07 | CSCL | RPP25L        |
| IL4R. 2    | 4. 39E-11 | -0. 27996 | 0. 002 | 0. 074 | 6. 56E-07 | CSCL | IL4R          |
| NOB1. 1    | 4. 40E-11 | 0. 174111 | 0. 073 | 0. 199 | 6. 58E-07 | CSCL | NOB1          |
| CD93. 2    | 4. 44E-11 | -0. 30883 | 0. 002 | 0. 074 | 6. 64E-07 | CSCL | CD93          |
| CDK17. 1   | 4. 46E-11 | -0. 15865 | 0. 028 | 0. 121 | 6. 66E-07 | CSCL | CDK17         |
| UNC5B. 2   | 4. 50E-11 | -0. 24148 | 0. 009 | 0. 087 | 6. 73E-07 | CSCL | UNC5B         |
| ANKRD49    | 4. 53E-11 | -0. 10905 | 0. 023 | 0. 113 | 6. 77E-07 | CSCL | ANKRD49       |
| NDST1. 2   | 4. 59E-11 | -0. 1369  | 0. 01  | 0. 091 | 6. 86E-07 | CSCL | NDST1         |
| POLR3GL    | 4. 67E-11 | 0. 189072 | 0. 171 | 0. 36  | 6. 98E-07 | CSCL | POLR3GL       |
| AP001055.  | 4. 68E-11 | -0. 33859 | 0. 007 | 0. 084 | 6. 99E-07 | CSCL | AP001055. 6   |
| RMND5A. 1  | 4. 69E-11 | -0. 14061 | 0. 031 | 0. 128 | 7. 00E-07 | CSCL | RMND5A        |
| POLG. 2    | 4. 69E-11 | -0. 14467 | 0. 016 | 0. 1   | 7. 00E-07 | CSCL | POLG          |
| RHOH. 2    | 4. 74E-11 | -0. 35011 | 0. 005 | 0. 081 | 7. 08E-07 | CSCL | RHOH          |
| NDUF2. 2   | 4. 75E-11 | 0. 189592 | 0. 122 | 0. 28  | 7. 09E-07 | CSCL | NDUF2         |
| SLC26A11.  | 4. 79E-11 | -0. 10937 | 0. 021 | 0. 11  | 7. 16E-07 | CSCL | SLC26A11      |
| ZNF512B. 1 | 4. 90E-11 | -0. 12862 | 0. 003 | 0. 077 | 7. 32E-07 | CSCL | ZNF512B       |
| COMMD1     | 4. 93E-11 | 0. 143218 | 0. 175 | 0. 366 | 7. 36E-07 | CSCL | COMMD1        |
| SLC35B1    | 4. 93E-11 | 0. 126147 | 0. 192 | 0. 401 | 7. 36E-07 | CSCL | SLC35B1       |
| VCL. 1     | 5. 06E-11 | -0. 10428 | 0. 017 | 0. 103 | 7. 56E-07 | CSCL | VCL           |
| CD40. 2    | 5. 06E-11 | -0. 28869 | 0      | 0. 07  | 7. 57E-07 | CSCL | CD40          |
| MYO1C. 1   | 5. 11E-11 | -0. 13904 | 0. 019 | 0. 106 | 7. 64E-07 | CSCL | MYO1C         |
| KRIT1. 1   | 5. 15E-11 | 0. 116222 | 0. 089 | 0. 223 | 7. 70E-07 | CSCL | KRIT1         |
| ACSL4. 2   | 5. 37E-11 | -0. 17093 | 0. 009 | 0. 087 | 8. 02E-07 | CSCL | ACSL4         |
| DYNC1I1. 2 | 5. 42E-11 | -0. 26467 | 0. 021 | 0. 108 | 8. 10E-07 | CSCL | DYNC1I1       |
| RP3-428L1  | 5. 62E-11 | -0. 17352 | 0. 002 | 0. 074 | 8. 39E-07 | CSCL | RP3-428L16. 2 |
| HBA2. 1    | 5. 64E-11 | 0. 278541 | 0. 079 | 0. 203 | 8. 43E-07 | CSCL | HBA2          |
| LRR1. 1    | 5. 73E-11 | -0. 13136 | 0. 01  | 0. 09  | 8. 56E-07 | CSCL | LRR1          |
| TRIM38. 1  | 5. 73E-11 | -0. 23375 | 0. 017 | 0. 102 | 8. 57E-07 | CSCL | TRIM38        |
| GATM. 2    | 5. 74E-11 | 0. 115196 | 0. 173 | 0. 361 | 8. 57E-07 | CSCL | GATM          |
| ITPRIPL2.  | 5. 78E-11 | -0. 17486 | 0. 003 | 0. 077 | 8. 64E-07 | CSCL | ITPRIPL2      |
| TMTC4. 1   | 5. 80E-11 | -0. 1457  | 0. 017 | 0. 103 | 8. 67E-07 | CSCL | TMTC4         |
| PSMC6. 1   | 5. 88E-11 | 0. 12618  | 0. 192 | 0. 397 | 8. 79E-07 | CSCL | PSMC6         |
| NOL11. 1   | 5. 94E-11 | 0. 157836 | 0. 072 | 0. 195 | 8. 87E-07 | CSCL | NOL11         |
| TMEM5      | 6. 02E-11 | 0. 108096 | 0. 084 | 0. 215 | 9. 00E-07 | CSCL | TMEM5         |
| SLC39A9    | 6. 08E-11 | -0. 11655 | 0. 016 | 0. 099 | 9. 09E-07 | CSCL | SLC39A9       |
| ALG1. 1    | 6. 17E-11 | -0. 11943 | 0. 026 | 0. 118 | 9. 22E-07 | CSCL | ALG1          |
| TMEM208. 2 | 6. 30E-11 | 0. 182276 | 0. 237 | 0. 479 | 9. 41E-07 | CSCL | TMEM208       |
| SLC12A5. 2 | 6. 49E-11 | -0. 2173  | 0. 014 | 0. 096 | 9. 69E-07 | CSCL | SLC12A5       |
| TMEM222. 2 | 6. 60E-11 | 0. 185394 | 0. 127 | 0. 287 | 9. 87E-07 | CSCL | TMEM222       |
| PI4KB. 1   | 6. 67E-11 | 0. 136254 | 0. 086 | 0. 216 | 9. 97E-07 | CSCL | PI4KB         |
| CLNS1A. 1  | 6. 68E-11 | 0. 176678 | 0. 25  | 0. 504 | 9. 99E-07 | CSCL | CLNS1A        |
| EDEM1. 1   | 6. 82E-11 | -0. 21585 | 0. 007 | 0. 083 | 1. 02E-06 | CSCL | EDEM1         |
| UBE3C. 1   | 6. 94E-11 | -0. 11642 | 0. 024 | 0. 114 | 1. 04E-06 | CSCL | UBE3C         |
| STAC3. 2   | 6. 98E-11 | -0. 27397 | 0. 007 | 0. 083 | 1. 04E-06 | CSCL | STAC3         |
| TAF6L      | 7. 07E-11 | -0. 13892 | 0. 012 | 0. 093 | 1. 06E-06 | CSCL | TAF6L         |
| ZFYVE21. 1 | 7. 13E-11 | 0. 151734 | 0. 12  | 0. 274 | 1. 06E-06 | CSCL | ZFYVE21       |
| ACTR10. 1  | 7. 18E-11 | 0. 175182 | 0. 176 | 0. 369 | 1. 07E-06 | CSCL | ACTR10        |
| PROS1      | 7. 43E-11 | -0. 10233 | 0. 014 | 0. 096 | 1. 11E-06 | CSCL | PROS1         |

|            |           |           |        |        |           |      |                |
|------------|-----------|-----------|--------|--------|-----------|------|----------------|
| TPX2. 1    | 7. 43E-11 | -0. 20837 | 0. 009 | 0. 086 | 1. 11E-06 | CSCL | TPX2           |
| TFCP2      | 7. 55E-11 | -0. 1035  | 0. 026 | 0. 117 | 1. 13E-06 | CSCL | TFCP2          |
| RANBP1. 2  | 7. 67E-11 | 0. 195063 | 0. 298 | 0. 592 | 1. 15E-06 | CSCL | RANBP1         |
| PRKD3. 2   | 7. 98E-11 | -0. 10767 | 0. 047 | 0. 152 | 1. 19E-06 | CSCL | PRKD3          |
| SH3YL1. 1  | 7. 98E-11 | 0. 117745 | 0. 068 | 0. 187 | 1. 19E-06 | CSCL | SH3YL1         |
| NSL1. 1    | 8. 06E-11 | 0. 151296 | 0. 169 | 0. 356 | 1. 20E-06 | CSCL | NSL1           |
| MOSPD2. 1  | 8. 09E-11 | -0. 13193 | 0. 024 | 0. 114 | 1. 21E-06 | CSCL | MOSPD2         |
| ACTN4. 1   | 8. 15E-11 | 0. 173694 | 0. 161 | 0. 341 | 1. 22E-06 | CSCL | ACTN4          |
| CDKL3      | 8. 19E-11 | -0. 13521 | 0. 024 | 0. 114 | 1. 22E-06 | CSCL | CDKL3          |
| N4BP1. 1   | 8. 21E-11 | -0. 13317 | 0. 012 | 0. 092 | 1. 23E-06 | CSCL | N4BP1          |
| FARSB      | 8. 23E-11 | 0. 101833 | 0. 099 | 0. 239 | 1. 23E-06 | CSCL | FARSB          |
| RRM2B. 1   | 8. 27E-11 | -0. 17255 | 0. 021 | 0. 107 | 1. 24E-06 | CSCL | RRM2B          |
| TMEM39A    | 8. 29E-11 | -0. 20304 | 0. 014 | 0. 095 | 1. 24E-06 | CSCL | TMEM39A        |
| LCORL. 1   | 8. 55E-11 | -0. 11262 | 0. 017 | 0. 102 | 1. 28E-06 | CSCL | LCORL          |
| CARD9. 2   | 8. 63E-11 | -0. 26728 | 0. 002 | 0. 072 | 1. 29E-06 | CSCL | CARD9          |
| RLIM. 1    | 8. 69E-11 | -0. 12117 | 0. 023 | 0. 111 | 1. 30E-06 | CSCL | RLIM           |
| EED        | 8. 91E-11 | -0. 15297 | 0. 017 | 0. 101 | 1. 33E-06 | CSCL | EED            |
| KLHL2. 2   | 9. 03E-11 | -0. 11583 | 0. 01  | 0. 089 | 1. 35E-06 | CSCL | KLHL2          |
| MTFMT. 1   | 9. 07E-11 | -0. 12061 | 0. 019 | 0. 104 | 1. 36E-06 | CSCL | MTFMT          |
| CTD-2369F  | 9. 08E-11 | 0. 136117 | 0. 014 | 0. 001 | 1. 36E-06 | CSCL | CTD-2369P2. 10 |
| WDR45      | 9. 31E-11 | 0. 137428 | 0. 112 | 0. 258 | 1. 39E-06 | CSCL | WDR45          |
| CHN1. 1    | 9. 51E-11 | 0. 197119 | 0. 089 | 0. 222 | 1. 42E-06 | CSCL | CHN1           |
| MOB1B. 2   | 9. 56E-11 | -0. 18436 | 0. 002 | 0. 072 | 1. 43E-06 | CSCL | MOB1B          |
| PRKCZ. 2   | 9. 72E-11 | -0. 11538 | 0. 019 | 0. 105 | 1. 45E-06 | CSCL | PRKCZ          |
| FAM76B     | 9. 79E-11 | -0. 10629 | 0. 026 | 0. 116 | 1. 46E-06 | CSCL | FAM76B         |
| SRCAP. 1   | 9. 88E-11 | -0. 12733 | 0. 021 | 0. 107 | 1. 48E-06 | CSCL | SRCAP          |
| PPP1R9B. 1 | 9. 88E-11 | -0. 10886 | 0. 019 | 0. 104 | 1. 48E-06 | CSCL | PPP1R9B        |
| DMXL1      | 1. 01E-10 | -0. 15061 | 0. 012 | 0. 092 | 1. 51E-06 | CSCL | DMXL1          |
| FAM65A     | 1. 02E-10 | -0. 12824 | 0. 019 | 0. 104 | 1. 52E-06 | CSCL | FAM65A         |
| IL16. 2    | 1. 02E-10 | -0. 29842 | 0. 002 | 0. 072 | 1. 53E-06 | CSCL | IL16           |
| ANKRD22. 2 | 1. 04E-10 | -0. 31899 | 0      | 0. 068 | 1. 55E-06 | CSCL | ANKRD22        |
| KIF1A. 1   | 1. 04E-10 | -0. 12748 | 0. 035 | 0. 131 | 1. 56E-06 | CSCL | KIF1A          |
| GAS2L3. 2  | 1. 05E-10 | -0. 16373 | 0. 002 | 0. 072 | 1. 57E-06 | CSCL | GAS2L3         |
| RPF1. 1    | 1. 05E-10 | 0. 1517   | 0. 108 | 0. 252 | 1. 57E-06 | CSCL | RPF1           |
| NAIP. 2    | 1. 06E-10 | -0. 19755 | 0. 024 | 0. 113 | 1. 59E-06 | CSCL | NAIP           |
| SREK1. 1   | 1. 08E-10 | 0. 188381 | 0. 155 | 0. 331 | 1. 62E-06 | CSCL | SREK1          |
| SLC38A7. 1 | 1. 09E-10 | -0. 14303 | 0. 024 | 0. 113 | 1. 64E-06 | CSCL | SLC38A7        |
| RFC3. 1    | 1. 10E-10 | -0. 11918 | 0. 012 | 0. 091 | 1. 64E-06 | CSCL | RFC3           |
| TREM1. 1   | 1. 11E-10 | -0. 18457 | 0. 059 | 0. 169 | 1. 66E-06 | CSCL | TREM1          |
| OLFML2B. 2 | 1. 11E-10 | -0. 32251 | 0. 002 | 0. 071 | 1. 66E-06 | CSCL | OLFML2B        |
| APEX2. 1   | 1. 12E-10 | -0. 11133 | 0. 016 | 0. 098 | 1. 67E-06 | CSCL | APEX2          |
| D2HGDH. 2  | 1. 12E-10 | -0. 12248 | 0. 024 | 0. 113 | 1. 67E-06 | CSCL | D2HGDH         |
| PREP. 2    | 1. 13E-10 | -0. 14088 | 0. 017 | 0. 101 | 1. 68E-06 | CSCL | PREP           |
| TCEB2. 2   | 1. 15E-10 | 0. 299976 | 0. 623 | 0. 834 | 1. 72E-06 | CSCL | TCEB2          |
| TSPAN15. 1 | 1. 16E-10 | -0. 28051 | 0. 007 | 0. 081 | 1. 73E-06 | CSCL | TSPAN15        |
| NRROS. 1   | 1. 17E-10 | -0. 30908 | 0. 002 | 0. 071 | 1. 74E-06 | CSCL | NRROS          |
| SMARCD3. 1 | 1. 17E-10 | 0. 135118 | 0. 099 | 0. 238 | 1. 75E-06 | CSCL | SMARCD3        |
| PIK3AP1. 2 | 1. 17E-10 | -0. 25995 | 0      | 0. 068 | 1. 75E-06 | CSCL | PIK3AP1        |
| IKZF1. 2   | 1. 17E-10 | -0. 29316 | 0      | 0. 068 | 1. 75E-06 | CSCL | IKZF1          |
| SEMA4D. 2  | 1. 18E-10 | -0. 29143 | 0. 009 | 0. 084 | 1. 76E-06 | CSCL | SEMA4D         |
| KDM5C. 1   | 1. 18E-10 | -0. 13217 | 0. 024 | 0. 112 | 1. 77E-06 | CSCL | KDM5C          |

|            |          |          |       |       |          |      |            |
|------------|----------|----------|-------|-------|----------|------|------------|
| MGAT5.2    | 1.18E-10 | -0.20203 | 0.002 | 0.071 | 1.77E-06 | CSCL | MGAT5      |
| YPEL1.2    | 1.21E-10 | -0.11028 | 0.016 | 0.098 | 1.80E-06 | CSCL | YPEL1      |
| GALC.1     | 1.22E-10 | -0.12923 | 0.021 | 0.106 | 1.83E-06 | CSCL | GALC       |
| BCAP29.1   | 1.23E-10 | 0.124207 | 0.154 | 0.325 | 1.84E-06 | CSCL | BCAP29     |
| Clorf123   | 1.24E-10 | 0.206037 | 0.166 | 0.35  | 1.85E-06 | CSCL | Clorf123   |
| CSGALNACT1 | 1.24E-10 | -0.13807 | 0.016 | 0.097 | 1.85E-06 | CSCL | CSGALNACT2 |
| CCL4L2.2   | 1.25E-10 | -0.52181 | 0.012 | 0.09  | 1.87E-06 | CSCL | CCL4L2     |
| UBE2E1.1   | 1.26E-10 | 0.176329 | 0.23  | 0.462 | 1.89E-06 | CSCL | UBE2E1     |
| MX1.1      | 1.27E-10 | -0.15577 | 0.031 | 0.124 | 1.89E-06 | CSCL | MX1        |
| EXOSC8.1   | 1.27E-10 | 0.150621 | 0.136 | 0.297 | 1.90E-06 | CSCL | EXOSC8     |
| SS18L1     | 1.29E-10 | -0.11692 | 0.014 | 0.094 | 1.93E-06 | CSCL | SS18L1     |
| BBS7.1     | 1.30E-10 | -0.11457 | 0.017 | 0.1   | 1.95E-06 | CSCL | BBS7       |
| CDK5R1.2   | 1.34E-10 | -0.12347 | 0.016 | 0.097 | 2.01E-06 | CSCL | CDK5R1     |
| RYK.1      | 1.35E-10 | -0.11208 | 0.014 | 0.094 | 2.01E-06 | CSCL | RYK        |
| MARCH3.1   | 1.38E-10 | -0.17972 | 0.023 | 0.109 | 2.06E-06 | CSCL | 3-Mar      |
| NUAK1.2    | 1.40E-10 | -0.18652 | 0.003 | 0.074 | 2.08E-06 | CSCL | NUAK1      |
| CLOCK.2    | 1.40E-10 | -0.11263 | 0.037 | 0.133 | 2.09E-06 | CSCL | CLOCK      |
| GMIP.2     | 1.41E-10 | -0.23508 | 0.005 | 0.077 | 2.10E-06 | CSCL | GMIP       |
| FIG4.1     | 1.41E-10 | -0.11597 | 0.023 | 0.109 | 2.11E-06 | CSCL | FIG4       |
| SPATA2     | 1.42E-10 | -0.15757 | 0.002 | 0.071 | 2.12E-06 | CSCL | SPATA2     |
| PLEKHM1.1  | 1.43E-10 | -0.16841 | 0.005 | 0.078 | 2.13E-06 | CSCL | PLEKHM1    |
| PISD.2     | 1.43E-10 | -0.12569 | 0.023 | 0.109 | 2.14E-06 | CSCL | PISD       |
| MUM1.2     | 1.45E-10 | 0.133302 | 0.18  | 0.373 | 2.17E-06 | CSCL | MUM1       |
| EHP1L1.2   | 1.48E-10 | -0.17897 | 0.003 | 0.074 | 2.22E-06 | CSCL | EHP1L1     |
| HSBP1L1.1  | 1.49E-10 | -0.15351 | 0.005 | 0.078 | 2.23E-06 | CSCL | HSBP1L1    |
| UXT.1      | 1.50E-10 | 0.14189  | 0.279 | 0.551 | 2.23E-06 | CSCL | UXT        |
| FGR.2      | 1.50E-10 | -0.29004 | 0.01  | 0.087 | 2.24E-06 | CSCL | FGR        |
| SCN1B.2    | 1.56E-10 | -0.23175 | 0.003 | 0.074 | 2.33E-06 | CSCL | SCN1B      |
| IGFBP2.1   | 1.57E-10 | 0.73086  | 0.394 | 0.373 | 2.35E-06 | CSCL | IGFBP2     |
| COQ9.1     | 1.58E-10 | 0.183434 | 0.106 | 0.249 | 2.36E-06 | CSCL | COQ9       |
| SYNDIG1.2  | 1.63E-10 | -0.2408  | 0.014 | 0.093 | 2.43E-06 | CSCL | SYNDIG1    |
| TK1.2      | 1.63E-10 | -0.21241 | 0.003 | 0.074 | 2.43E-06 | CSCL | TK1        |
| PSMD14.1   | 1.64E-10 | 0.220644 | 0.237 | 0.479 | 2.46E-06 | CSCL | PSMD14     |
| GALNT7.2   | 1.65E-10 | -0.1368  | 0.014 | 0.093 | 2.47E-06 | CSCL | GALNT7     |
| NNAT.2     | 1.68E-10 | -0.31075 | 0.086 | 0.201 | 2.50E-06 | CSCL | NNAT       |
| TIMM9      | 1.72E-10 | 0.192557 | 0.129 | 0.284 | 2.57E-06 | CSCL | TIMM9      |
| ASB16-AS1  | 1.77E-10 | -0.11202 | 0.016 | 0.096 | 2.65E-06 | CSCL | ASB16-AS1  |
| SLAMF8.2   | 1.78E-10 | -0.27904 | 0     | 0.067 | 2.66E-06 | CSCL | SLAMF8     |
| RABEPK.1   | 1.79E-10 | 0.191206 | 0.08  | 0.205 | 2.68E-06 | CSCL | RABEPK     |
| GFPT1.1    | 1.79E-10 | -0.1598  | 0.017 | 0.099 | 2.68E-06 | CSCL | GFPT1      |
| HIPK3.1    | 1.80E-10 | -0.1277  | 0.014 | 0.093 | 2.69E-06 | CSCL | HIPK3      |
| C2.1       | 1.80E-10 | -0.25616 | 0.03  | 0.119 | 2.70E-06 | CSCL | C2         |
| SMPD4      | 1.81E-10 | -0.10021 | 0.023 | 0.108 | 2.71E-06 | CSCL | SMPD4      |
| FERMT2.2   | 1.82E-10 | 0.171444 | 0.082 | 0.208 | 2.72E-06 | CSCL | FERMT2     |
| YIPF6.1    | 1.83E-10 | 0.136633 | 0.152 | 0.321 | 2.73E-06 | CSCL | YIPF6      |
| CCNB2.2    | 1.83E-10 | -0.25591 | 0     | 0.067 | 2.74E-06 | CSCL | CCNB2      |
| PRC1.2     | 1.87E-10 | -0.18124 | 0.012 | 0.09  | 2.79E-06 | CSCL | PRC1       |
| FNIP1      | 1.88E-10 | -0.14045 | 0.023 | 0.108 | 2.81E-06 | CSCL | FNIP1      |
| ALG12.2    | 1.90E-10 | -0.1275  | 0.016 | 0.096 | 2.85E-06 | CSCL | ALG12      |
| APOBEC3G.  | 1.91E-10 | -0.14983 | 0.031 | 0.123 | 2.85E-06 | CSCL | APOBEC3G   |
| GCHFR.2    | 1.93E-10 | -0.25159 | 0.007 | 0.08  | 2.88E-06 | CSCL | GCHFR      |

|           |          |          |       |       |          |      |               |
|-----------|----------|----------|-------|-------|----------|------|---------------|
| RAD54L2.1 | 1.93E-10 | -0.10041 | 0.024 | 0.111 | 2.88E-06 | CSCL | RAD54L2       |
| DLX2.2    | 1.93E-10 | -0.27316 | 0.026 | 0.112 | 2.89E-06 | CSCL | DLX2          |
| LYPLAL1   | 2.00E-10 | 0.106488 | 0.105 | 0.243 | 2.99E-06 | CSCL | LYPLAL1       |
| PTPN23.1  | 2.04E-10 | -0.11256 | 0.007 | 0.08  | 3.05E-06 | CSCL | PTPN23        |
| CFDP1.1   | 2.05E-10 | 0.215222 | 0.211 | 0.426 | 3.06E-06 | CSCL | CFDP1         |
| SEPT1.1   | 2.07E-10 | -0.11452 | 0.024 | 0.111 | 3.09E-06 | CSCL | 1-Sep         |
| ZNF33A.2  | 2.11E-10 | -0.12602 | 0.021 | 0.105 | 3.15E-06 | CSCL | ZNF33A        |
| ARSG      | 2.13E-10 | -0.16826 | 0.012 | 0.089 | 3.18E-06 | CSCL | ARSG          |
| PRDM4.1   | 2.13E-10 | -0.10724 | 0.012 | 0.089 | 3.19E-06 | CSCL | PRDM4         |
| RP11-395A | 2.15E-10 | -0.11125 | 0.007 | 0.08  | 3.21E-06 | CSCL | RP11-395A13.2 |
| GSAP.1    | 2.22E-10 | -0.21667 | 0.009 | 0.083 | 3.32E-06 | CSCL | GSAP          |
| CCNG1.2   | 2.23E-10 | 0.116482 | 0.126 | 0.277 | 3.33E-06 | CSCL | CCNG1         |
| CBX4.2    | 2.28E-10 | -0.10672 | 0.03  | 0.12  | 3.40E-06 | CSCL | CBX4          |
| VPS18.1   | 2.29E-10 | -0.16478 | 0.009 | 0.083 | 3.42E-06 | CSCL | VPS18         |
| TP53I11.2 | 2.29E-10 | -0.20616 | 0.005 | 0.076 | 3.43E-06 | CSCL | TP53I11       |
| SGK223.1  | 2.40E-10 | -0.16214 | 0.005 | 0.076 | 3.58E-06 | CSCL | SGK223        |
| ACVR1B    | 2.42E-10 | -0.16498 | 0.012 | 0.089 | 3.62E-06 | CSCL | ACVR1B        |
| CHSY1.1   | 2.45E-10 | -0.11777 | 0.016 | 0.095 | 3.66E-06 | CSCL | CHSY1         |
| PCK2.1    | 2.45E-10 | -0.19346 | 0.003 | 0.073 | 3.66E-06 | CSCL | PCK2          |
| ARHGAP25. | 2.50E-10 | -0.23355 | 0.002 | 0.069 | 3.73E-06 | CSCL | ARHGAP25      |
| MVB12B.2  | 2.50E-10 | -0.1649  | 0.021 | 0.104 | 3.74E-06 | CSCL | MVB12B        |
| SLC16A10. | 2.53E-10 | -0.33984 | 0.014 | 0.091 | 3.78E-06 | CSCL | SLC16A10      |
| DNASE1L1. | 2.55E-10 | -0.21969 | 0.005 | 0.076 | 3.81E-06 | CSCL | DNASE1L1      |
| BBIP1.1   | 2.56E-10 | 0.11638  | 0.068 | 0.183 | 3.83E-06 | CSCL | BBIP1         |
| TAGLN2.2  | 2.61E-10 | 0.593224 | 0.471 | 0.517 | 3.90E-06 | CSCL | TAGLN2        |
| SERTAD2.1 | 2.65E-10 | -0.1069  | 0.033 | 0.125 | 3.96E-06 | CSCL | SERTAD2       |
| CDCA4.1   | 2.74E-10 | -0.13622 | 0.014 | 0.092 | 4.09E-06 | CSCL | CDCA4         |
| LRIF1.1   | 2.80E-10 | 0.158896 | 0.08  | 0.203 | 4.19E-06 | CSCL | LRIF1         |
| PSMC5     | 2.82E-10 | 0.145774 | 0.286 | 0.568 | 4.21E-06 | CSCL | PSMC5         |
| NUF2.2    | 2.86E-10 | -0.23163 | 0     | 0.065 | 4.28E-06 | CSCL | NUF2          |
| STAT1.1   | 2.88E-10 | 0.199258 | 0.099 | 0.236 | 4.30E-06 | CSCL | STAT1         |
| PAQR8.2   | 2.92E-10 | -0.20411 | 0.019 | 0.1   | 4.36E-06 | CSCL | PAQR8         |
| IL1RN.2   | 2.93E-10 | -0.28833 | 0.007 | 0.079 | 4.37E-06 | CSCL | IL1RN         |
| RP11-400F | 2.97E-10 | -0.11248 | 0.01  | 0.085 | 4.44E-06 | CSCL | RP11-400F19.6 |
| GSTK1     | 3.00E-10 | 0.129754 | 0.281 | 0.543 | 4.48E-06 | CSCL | GSTK1         |
| ZMYND8.2  | 3.01E-10 | 0.106724 | 0.087 | 0.214 | 4.49E-06 | CSCL | ZMYND8        |
| SGTB.1    | 3.02E-10 | -0.11166 | 0.014 | 0.092 | 4.51E-06 | CSCL | SGTB          |
| RETSAT.1  | 3.07E-10 | -0.13907 | 0.012 | 0.088 | 4.58E-06 | CSCL | RETSAT        |
| WDR41     | 3.16E-10 | 0.217769 | 0.098 | 0.232 | 4.73E-06 | CSCL | WDR41         |
| INSM1.2   | 3.21E-10 | -0.12248 | 0.031 | 0.121 | 4.79E-06 | CSCL | INSM1         |
| PLAC8.1   | 3.24E-10 | -0.34912 | 0.003 | 0.071 | 4.85E-06 | CSCL | PLAC8         |
| RASAL2    | 3.25E-10 | -0.17169 | 0.009 | 0.081 | 4.86E-06 | CSCL | RASAL2        |
| FAM213A.1 | 3.34E-10 | 0.117704 | 0.195 | 0.392 | 4.99E-06 | CSCL | FAM213A       |
| IGF1.1    | 3.42E-10 | -0.30991 | 0     | 0.065 | 5.11E-06 | CSCL | IGF1          |
| RNF111.2  | 3.43E-10 | -0.11546 | 0.01  | 0.085 | 5.12E-06 | CSCL | RNF111        |
| ARG2.1    | 3.43E-10 | -0.19666 | 0.021 | 0.103 | 5.12E-06 | CSCL | ARG2          |
| CHD7.2    | 3.46E-10 | 0.107688 | 0.14  | 0.296 | 5.18E-06 | CSCL | CHD7          |
| CHST14.1  | 3.46E-10 | -0.12925 | 0.009 | 0.081 | 5.18E-06 | CSCL | CHST14        |
| AREG.2    | 3.48E-10 | -0.44117 | 0.002 | 0.068 | 5.20E-06 | CSCL | AREG          |
| RFX1.1    | 3.48E-10 | -0.12138 | 0.016 | 0.094 | 5.21E-06 | CSCL | RFX1          |
| SYCE1L.1  | 3.49E-10 | -0.11145 | 0.005 | 0.075 | 5.21E-06 | CSCL | SYCE1L        |

|            |           |           |        |        |           |      |          |
|------------|-----------|-----------|--------|--------|-----------|------|----------|
| NIPAL3. 1  | 3. 55E-10 | -0. 18374 | 0. 01  | 0. 085 | 5. 30E-06 | CSCL | NIPAL3   |
| SPARC. 1   | 3. 55E-10 | 0. 62124  | 0. 403 | 0. 383 | 5. 31E-06 | CSCL | SPARC    |
| NFYC. 2    | 3. 63E-10 | 0. 143749 | 0. 096 | 0. 227 | 5. 42E-06 | CSCL | NFYC     |
| DENND4C. 1 | 3. 63E-10 | -0. 14874 | 0. 014 | 0. 091 | 5. 42E-06 | CSCL | DENND4C  |
| MED13L. 1  | 3. 65E-10 | -0. 13316 | 0. 033 | 0. 124 | 5. 46E-06 | CSCL | MED13L   |
| DHPS. 1    | 3. 69E-10 | 0. 153757 | 0. 232 | 0. 458 | 5. 52E-06 | CSCL | DHPS     |
| NSMCE1. 1  | 3. 71E-10 | 0. 191982 | 0. 206 | 0. 415 | 5. 54E-06 | CSCL | NSMCE1   |
| LMF1       | 3. 71E-10 | -0. 10574 | 0. 023 | 0. 106 | 5. 54E-06 | CSCL | LMF1     |
| CBWD5. 1   | 3. 71E-10 | -0. 13755 | 0. 035 | 0. 126 | 5. 55E-06 | CSCL | CBWD5    |
| PPIL1. 1   | 3. 71E-10 | 0. 221873 | 0. 079 | 0. 2   | 5. 55E-06 | CSCL | PPIL1    |
| PTRF. 2    | 3. 74E-10 | 0. 150999 | 0. 073 | 0. 191 | 5. 59E-06 | CSCL | PTRF     |
| RCL1       | 3. 89E-10 | -0. 16745 | 0. 009 | 0. 081 | 5. 82E-06 | CSCL | RCL1     |
| SELO. 2    | 3. 90E-10 | -0. 14976 | 0. 002 | 0. 068 | 5. 83E-06 | CSCL | SELO     |
| ADSSL1. 1  | 3. 95E-10 | -0. 15913 | 0. 01  | 0. 084 | 5. 90E-06 | CSCL | ADSSL1   |
| DYRK4. 1   | 3. 97E-10 | 0. 126197 | 0. 094 | 0. 223 | 5. 93E-06 | CSCL | DYRK4    |
| FUNDC1. 1  | 3. 98E-10 | 0. 147091 | 0. 112 | 0. 253 | 5. 95E-06 | CSCL | FUNDC1   |
| AURKA. 2   | 4. 01E-10 | -0. 18751 | 0. 009 | 0. 081 | 6. 00E-06 | CSCL | AURKA    |
| TIA1. 2    | 4. 03E-10 | 0. 127385 | 0. 113 | 0. 255 | 6. 02E-06 | CSCL | TIA1     |
| OARD1. 1   | 4. 09E-10 | 0. 163428 | 0. 103 | 0. 239 | 6. 11E-06 | CSCL | OARD1    |
| MYCBP. 1   | 4. 11E-10 | -0. 10111 | 0. 017 | 0. 097 | 6. 14E-06 | CSCL | MYCBP    |
| ABTB1. 2   | 4. 12E-10 | -0. 16087 | 0. 024 | 0. 108 | 6. 15E-06 | CSCL | ABTB1    |
| GPANK1. 1  | 4. 18E-10 | 0. 156423 | 0. 079 | 0. 199 | 6. 25E-06 | CSCL | GPANK1   |
| ZNF787     | 4. 23E-10 | -0. 11273 | 0. 007 | 0. 078 | 6. 32E-06 | CSCL | ZNF787   |
| SYTL3. 2   | 4. 23E-10 | -0. 30769 | 0. 002 | 0. 068 | 6. 33E-06 | CSCL | SYTL3    |
| C3orf58    | 4. 28E-10 | -0. 15967 | 0. 016 | 0. 093 | 6. 40E-06 | CSCL | C3orf58  |
| TM2D3. 1   | 4. 30E-10 | 0. 207178 | 0. 164 | 0. 339 | 6. 42E-06 | CSCL | TM2D3    |
| FBX021     | 4. 32E-10 | 0. 106065 | 0. 15  | 0. 316 | 6. 45E-06 | CSCL | FBX021   |
| WDTC1. 1   | 4. 32E-10 | -0. 10694 | 0. 021 | 0. 103 | 6. 46E-06 | CSCL | WDTC1    |
| WWP2. 2    | 4. 39E-10 | -0. 18912 | 0. 005 | 0. 074 | 6. 55E-06 | CSCL | WWP2     |
| ADRBK1. 2  | 4. 40E-10 | -0. 15624 | 0. 017 | 0. 096 | 6. 57E-06 | CSCL | ADRBK1   |
| CCT7. 1    | 4. 40E-10 | 0. 18139  | 0. 276 | 0. 543 | 6. 57E-06 | CSCL | CCT7     |
| JADE1. 1   | 4. 43E-10 | -0. 13246 | 0. 037 | 0. 128 | 6. 62E-06 | CSCL | JADE1    |
| RGS12. 2   | 4. 46E-10 | 0. 14286  | 0. 127 | 0. 278 | 6. 67E-06 | CSCL | RGS12    |
| ARHGAP21.  | 4. 48E-10 | 0. 113912 | 0. 115 | 0. 257 | 6. 70E-06 | CSCL | ARHGAP21 |
| GKAP1. 1   | 4. 50E-10 | -0. 10789 | 0. 016 | 0. 093 | 6. 72E-06 | CSCL | GKAP1    |
| AGO1. 2    | 4. 50E-10 | -0. 12882 | 0. 016 | 0. 093 | 6. 73E-06 | CSCL | AGO1     |
| MX2. 2     | 4. 51E-10 | -0. 29044 | 0. 002 | 0. 067 | 6. 74E-06 | CSCL | MX2      |
| MALT1. 2   | 4. 52E-10 | -0. 14725 | 0. 007 | 0. 077 | 6. 75E-06 | CSCL | MALT1    |
| THOC5. 1   | 4. 53E-10 | -0. 13171 | 0. 014 | 0. 09  | 6. 77E-06 | CSCL | THOC5    |
| RP2. 2     | 4. 53E-10 | -0. 16482 | 0. 009 | 0. 081 | 6. 77E-06 | CSCL | RP2      |
| CISD1. 2   | 4. 54E-10 | 0. 170278 | 0. 168 | 0. 345 | 6. 78E-06 | CSCL | CISD1    |
| BCL3. 2    | 4. 58E-10 | -0. 10213 | 0. 009 | 0. 081 | 6. 84E-06 | CSCL | BCL3     |
| UFC1. 1    | 4. 61E-10 | 0. 151144 | 0. 297 | 0. 575 | 6. 88E-06 | CSCL | UFC1     |
| NIFK. 1    | 4. 63E-10 | 0. 230001 | 0. 173 | 0. 357 | 6. 91E-06 | CSCL | NIFK     |
| CENPM. 2   | 4. 66E-10 | -0. 1802  | 0. 007 | 0. 077 | 6. 97E-06 | CSCL | CENPM    |
| RABGAP1L.  | 4. 67E-10 | -0. 12731 | 0. 028 | 0. 114 | 6. 98E-06 | CSCL | RABGAP1L |
| HECA. 2    | 4. 68E-10 | -0. 17862 | 0. 005 | 0. 074 | 6. 99E-06 | CSCL | HECA     |
| TDRD3      | 4. 71E-10 | -0. 10454 | 0. 017 | 0. 096 | 7. 04E-06 | CSCL | TDRD3    |
| PCBD2      | 4. 72E-10 | -0. 13735 | 0. 012 | 0. 087 | 7. 06E-06 | CSCL | PCBD2    |
| PYGO2. 1   | 4. 73E-10 | -0. 1201  | 0. 009 | 0. 081 | 7. 07E-06 | CSCL | PYGO2    |
| POMZP3. 2  | 4. 75E-10 | -0. 13003 | 0. 014 | 0. 09  | 7. 11E-06 | CSCL | POMZP3   |

|            |           |           |        |        |           |      |                |
|------------|-----------|-----------|--------|--------|-----------|------|----------------|
| BLNK. 2    | 4. 77E-10 | -0. 32765 | 0. 003 | 0. 07  | 7. 14E-06 | CSCL | BLNK           |
| SSBP2. 2   | 4. 87E-10 | 0. 129068 | 0. 127 | 0. 277 | 7. 28E-06 | CSCL | SSBP2          |
| TACC3. 2   | 4. 89E-10 | -0. 16819 | 0. 009 | 0. 08  | 7. 31E-06 | CSCL | TACC3          |
| GMDS. 1    | 4. 95E-10 | -0. 10154 | 0. 016 | 0. 093 | 7. 40E-06 | CSCL | GMDS           |
| GPR161. 2  | 4. 99E-10 | -0. 1491  | 0. 012 | 0. 087 | 7. 45E-06 | CSCL | GPR161         |
| INADL. 1   | 5. 04E-10 | -0. 2036  | 0. 003 | 0. 07  | 7. 53E-06 | CSCL | INADL          |
| PI4K2B. 1  | 5. 13E-10 | -0. 11238 | 0. 014 | 0. 09  | 7. 66E-06 | CSCL | PI4K2B         |
| ITGA6. 2   | 5. 27E-10 | -0. 10693 | 0. 009 | 0. 08  | 7. 88E-06 | CSCL | ITGA6          |
| RACGAP1. 1 | 5. 28E-10 | -0. 16032 | 0. 012 | 0. 087 | 7. 89E-06 | CSCL | RACGAP1        |
| SEC24D     | 5. 40E-10 | -0. 10053 | 0. 017 | 0. 096 | 8. 07E-06 | CSCL | SEC24D         |
| EPC2. 1    | 5. 45E-10 | -0. 12799 | 0. 019 | 0. 099 | 8. 14E-06 | CSCL | EPC2           |
| NCBP1. 1   | 5. 70E-10 | -0. 11086 | 0. 012 | 0. 086 | 8. 51E-06 | CSCL | NCBP1          |
| PRPF38A. 1 | 5. 90E-10 | 0. 209953 | 0. 14  | 0. 298 | 8. 82E-06 | CSCL | PRPF38A        |
| DIXDC1. 1  | 5. 98E-10 | -0. 11893 | 0. 019 | 0. 099 | 8. 94E-06 | CSCL | DIXDC1         |
| PAK3. 2    | 6. 01E-10 | -0. 12266 | 0. 049 | 0. 148 | 8. 99E-06 | CSCL | PAK3           |
| NDUFB5     | 6. 08E-10 | 0. 125389 | 0. 295 | 0. 575 | 9. 09E-06 | CSCL | NDUFB5         |
| THEM4. 1   | 6. 08E-10 | -0. 15906 | 0. 009 | 0. 08  | 9. 09E-06 | CSCL | THEM4          |
| SLC39A11.  | 6. 10E-10 | -0. 14918 | 0. 007 | 0. 076 | 9. 12E-06 | CSCL | SLC39A11       |
| PLD2. 2    | 6. 14E-10 | -0. 11698 | 0. 014 | 0. 089 | 9. 17E-06 | CSCL | PLD2           |
| SNRPD3. 2  | 6. 28E-10 | 0. 2299   | 0. 211 | 0. 424 | 9. 39E-06 | CSCL | SNRPD3         |
| SYNGR1. 2  | 6. 41E-10 | -0. 11702 | 0. 03  | 0. 116 | 9. 57E-06 | CSCL | SYNGR1         |
| AKAP10. 1  | 6. 41E-10 | -0. 12241 | 0. 017 | 0. 095 | 9. 57E-06 | CSCL | AKAP10         |
| ZZEF1. 1   | 6. 42E-10 | -0. 13237 | 0. 014 | 0. 089 | 9. 60E-06 | CSCL | ZZEF1          |
| RP11-386I  | 6. 45E-10 | -0. 28317 | 0. 003 | 0. 07  | 9. 63E-06 | CSCL | RP11-386I14. 4 |
| RAB5B. 1   | 6. 49E-10 | 0. 10513  | 0. 092 | 0. 22  | 9. 71E-06 | CSCL | RAB5B          |
| AUH. 1     | 6. 76E-10 | -0. 13187 | 0. 01  | 0. 083 | 1. 01E-05 | CSCL | AUH            |
| FAM20A. 2  | 6. 77E-10 | -0. 24671 | 0      | 0. 063 | 1. 01E-05 | CSCL | FAM20A         |
| BRIX1. 2   | 6. 81E-10 | 0. 183894 | 0. 117 | 0. 26  | 1. 02E-05 | CSCL | BRIX1          |
| PUS1. 1    | 6. 93E-10 | -0. 13487 | 0. 01  | 0. 083 | 1. 04E-05 | CSCL | PUS1           |
| VPS8. 1    | 6. 93E-10 | -0. 10304 | 0. 03  | 0. 116 | 1. 04E-05 | CSCL | VPS8           |
| TRIM11. 1  | 6. 93E-10 | -0. 10217 | 0. 021 | 0. 101 | 1. 04E-05 | CSCL | TRIM11         |
| UQCRB. 2   | 7. 01E-10 | 0. 106749 | 0. 363 | 0. 694 | 1. 05E-05 | CSCL | UQCRB          |
| MAML2. 1   | 7. 04E-10 | 0. 105309 | 0. 082 | 0. 204 | 1. 05E-05 | CSCL | MAML2          |
| RAD51AP1.  | 7. 09E-10 | -0. 17641 | 0. 003 | 0. 069 | 1. 06E-05 | CSCL | RAD51AP1       |
| C15orf48.  | 7. 22E-10 | -0. 31525 | 0. 005 | 0. 072 | 1. 08E-05 | CSCL | C15orf48       |
| TMEM220. 2 | 7. 31E-10 | -0. 18204 | 0. 005 | 0. 072 | 1. 09E-05 | CSCL | TMEM220        |
| FAM64A. 2  | 7. 32E-10 | -0. 2386  | 0. 005 | 0. 072 | 1. 09E-05 | CSCL | FAM64A         |
| RRM2. 2    | 7. 35E-10 | -0. 26019 | 0. 002 | 0. 066 | 1. 10E-05 | CSCL | RRM2           |
| SETD5. 2   | 7. 46E-10 | 0. 179792 | 0. 138 | 0. 296 | 1. 11E-05 | CSCL | SETD5          |
| TBCA. 2    | 7. 62E-10 | 0. 416112 | 0. 562 | 0. 718 | 1. 14E-05 | CSCL | TBCA           |
| UBA7. 2    | 7. 70E-10 | -0. 20466 | 0. 012 | 0. 085 | 1. 15E-05 | CSCL | UBA7           |
| CCDC12. 1  | 7. 82E-10 | 0. 141847 | 0. 225 | 0. 441 | 1. 17E-05 | CSCL | CCDC12         |
| C7orf43. 2 | 7. 92E-10 | -0. 15436 | 0. 005 | 0. 072 | 1. 18E-05 | CSCL | C7orf43        |
| AGAP3. 1   | 7. 94E-10 | -0. 13002 | 0. 023 | 0. 104 | 1. 19E-05 | CSCL | AGAP3          |
| GPM6A. 1   | 8. 01E-10 | 0. 465673 | 0. 471 | 0. 506 | 1. 20E-05 | CSCL | GPM6A          |
| AKNA. 1    | 8. 04E-10 | -0. 25008 | 0. 007 | 0. 075 | 1. 20E-05 | CSCL | AKNA           |
| RCAN3. 2   | 8. 08E-10 | -0. 17965 | 0      | 0. 062 | 1. 21E-05 | CSCL | RCAN3          |
| UBE4B. 1   | 8. 09E-10 | -0. 10661 | 0. 021 | 0. 101 | 1. 21E-05 | CSCL | UBE4B          |
| PDHB. 1    | 8. 18E-10 | 0. 205558 | 0. 185 | 0. 372 | 1. 22E-05 | CSCL | PDHB           |
| NUP133. 1  | 8. 50E-10 | -0. 11919 | 0. 019 | 0. 097 | 1. 27E-05 | CSCL | NUP133         |
| GNAI1. 2   | 8. 62E-10 | -0. 12925 | 0. 026 | 0. 109 | 1. 29E-05 | CSCL | GNAI1          |

|           |          |          |       |       |          |      |           |
|-----------|----------|----------|-------|-------|----------|------|-----------|
| SLC15A3.2 | 8.63E-10 | -0.24181 | 0.005 | 0.072 | 1.29E-05 | CSCL | SLC15A3   |
| FUNDC2.1  | 8.69E-10 | 0.211786 | 0.208 | 0.413 | 1.30E-05 | CSCL | FUNDC2    |
| UPF3B.1   | 8.80E-10 | 0.129202 | 0.117 | 0.258 | 1.32E-05 | CSCL | UPF3B     |
| ACVR2A    | 8.81E-10 | -0.13694 | 0.005 | 0.072 | 1.32E-05 | CSCL | ACVR2A    |
| IRF5.2    | 8.83E-10 | -0.26377 | 0     | 0.062 | 1.32E-05 | CSCL | IRF5      |
| MSRA.1    | 8.84E-10 | 0.128071 | 0.12  | 0.263 | 1.32E-05 | CSCL | MSRA      |
| APOPT1    | 8.87E-10 | 0.218582 | 0.194 | 0.391 | 1.33E-05 | CSCL | APOPT1    |
| CALM1.2   | 8.90E-10 | 0.382553 | 0.597 | 0.781 | 1.33E-05 | CSCL | CALM1     |
| BBC3.1    | 8.98E-10 | -0.14567 | 0.012 | 0.085 | 1.34E-05 | CSCL | BBC3      |
| RXRA.1    | 9.02E-10 | -0.12407 | 0.021 | 0.1   | 1.35E-05 | CSCL | RXRA      |
| PRRX1.2   | 9.15E-10 | 0.123684 | 0.066 | 0.176 | 1.37E-05 | CSCL | PRRX1     |
| OPN3.2    | 9.15E-10 | -0.14459 | 0.007 | 0.075 | 1.37E-05 | CSCL | OPN3      |
| DOK3.2    | 9.23E-10 | -0.22131 | 0.003 | 0.069 | 1.38E-05 | CSCL | DOK3      |
| KIAA0319L | 9.39E-10 | 0.102477 | 0.075 | 0.19  | 1.40E-05 | CSCL | KIAA0319L |
| ARMCX3.1  | 9.54E-10 | 0.172477 | 0.222 | 0.44  | 1.43E-05 | CSCL | ARMCX3    |
| AK4.2     | 9.54E-10 | 0.165835 | 0.072 | 0.185 | 1.43E-05 | CSCL | AK4       |
| SERPINB8  | 9.59E-10 | -0.1802  | 0.01  | 0.081 | 1.43E-05 | CSCL | SERPINB8  |
| HTRA1.2   | 9.63E-10 | 0.133263 | 0.244 | 0.471 | 1.44E-05 | CSCL | HTRA1     |
| MNAT1.1   | 9.69E-10 | 0.172915 | 0.08  | 0.199 | 1.45E-05 | CSCL | MNAT1     |
| ELP6      | 9.77E-10 | 0.142966 | 0.094 | 0.221 | 1.46E-05 | CSCL | ELP6      |
| TRUB2     | 9.78E-10 | 0.145811 | 0.092 | 0.219 | 1.46E-05 | CSCL | TRUB2     |
| EEPDI.1   | 1.00E-09 | -0.1929  | 0.007 | 0.075 | 1.50E-05 | CSCL | EEPDI     |
| PPM1M.2   | 1.01E-09 | -0.16948 | 0.009 | 0.078 | 1.51E-05 | CSCL | PPM1M     |
| TUBB6.1   | 1.03E-09 | 0.100805 | 0.075 | 0.19  | 1.53E-05 | CSCL | TUBB6     |
| CDC20.1   | 1.03E-09 | -0.23121 | 0.005 | 0.071 | 1.53E-05 | CSCL | CDC20     |
| CDC42BPA  | 1.03E-09 | 0.123459 | 0.072 | 0.184 | 1.55E-05 | CSCL | CDC42BPA  |
| CELF4.2   | 1.07E-09 | -0.21023 | 0.019 | 0.096 | 1.60E-05 | CSCL | CELF4     |
| CDK8.1    | 1.09E-09 | -0.10476 | 0.012 | 0.084 | 1.63E-05 | CSCL | CDK8      |
| IL4I1.2   | 1.09E-09 | -0.25262 | 0.003 | 0.068 | 1.64E-05 | CSCL | IL4I1     |
| PARP10.1  | 1.11E-09 | -0.17694 | 0.016 | 0.09  | 1.66E-05 | CSCL | PARP10    |
| CD300C.2  | 1.12E-09 | -0.28353 | 0.005 | 0.071 | 1.68E-05 | CSCL | CD300C    |
| CLP1.1    | 1.13E-09 | -0.1463  | 0.009 | 0.078 | 1.69E-05 | CSCL | CLP1      |
| EPHB2.2   | 1.14E-09 | -0.13614 | 0.014 | 0.087 | 1.70E-05 | CSCL | EPHB2     |
| FCHO2.2   | 1.15E-09 | -0.18987 | 0.009 | 0.078 | 1.72E-05 | CSCL | FCHO2     |
| RFX5.2    | 1.17E-09 | -0.11772 | 0.026 | 0.108 | 1.75E-05 | CSCL | RFX5      |
| ZNF22.1   | 1.19E-09 | 0.17553  | 0.133 | 0.283 | 1.77E-05 | CSCL | ZNF22     |
| GPR82.2   | 1.21E-09 | -0.13118 | 0.045 | 0.139 | 1.81E-05 | CSCL | GPR82     |
| TNFRSF14. | 1.21E-09 | -0.15189 | 0.033 | 0.119 | 1.81E-05 | CSCL | TNFRSF14  |
| TADA2A    | 1.22E-09 | -0.11055 | 0.009 | 0.078 | 1.82E-05 | CSCL | TADA2A    |
| PPP2R5D.1 | 1.22E-09 | -0.12669 | 0.009 | 0.078 | 1.83E-05 | CSCL | PPP2R5D   |
| PARP8.2   | 1.24E-09 | -0.18848 | 0.005 | 0.071 | 1.85E-05 | CSCL | PARP8     |
| TMEM158.1 | 1.25E-09 | 0.108153 | 0.047 | 0.144 | 1.86E-05 | CSCL | TMEM158   |
| MEF2D.1   | 1.29E-09 | -0.20664 | 0.009 | 0.077 | 1.92E-05 | CSCL | MEF2D     |
| PHRF1.2   | 1.30E-09 | -0.12779 | 0.014 | 0.087 | 1.94E-05 | CSCL | PHRF1     |
| UVRAG.2   | 1.31E-09 | -0.14746 | 0.017 | 0.093 | 1.96E-05 | CSCL | UVRAG     |
| EPS8.1    | 1.32E-09 | -0.13864 | 0.04  | 0.131 | 1.97E-05 | CSCL | EPS8      |
| ECSIT.1   | 1.33E-09 | 0.201544 | 0.127 | 0.275 | 1.99E-05 | CSCL | ECSIT     |
| ATP5B.2   | 1.34E-09 | 0.343556 | 0.586 | 0.785 | 2.00E-05 | CSCL | ATP5B     |
| PRR4.2    | 1.35E-09 | 0.133623 | 0.096 | 0.223 | 2.02E-05 | CSCL | PRR4      |
| ARHGAP24. | 1.37E-09 | -0.22323 | 0.056 | 0.153 | 2.04E-05 | CSCL | ARHGAP24  |
| CCL20.2   | 1.37E-09 | -0.31365 | 0.002 | 0.064 | 2.05E-05 | CSCL | CCL20     |



|            |           |           |        |        |           |      |           |
|------------|-----------|-----------|--------|--------|-----------|------|-----------|
| TMEM42. 1  | 1. 39E-09 | 0. 106299 | 0. 061 | 0. 166 | 2. 07E-05 | CSCL | TMEM42    |
| GCAT. 2    | 1. 40E-09 | 0. 123741 | 0. 061 | 0. 166 | 2. 09E-05 | CSCL | GCAT      |
| BANP. 1    | 1. 41E-09 | -0. 13734 | 0. 012 | 0. 083 | 2. 10E-05 | CSCL | BANP      |
| RASSF7. 2  | 1. 41E-09 | -0. 17154 | 0. 007 | 0. 074 | 2. 11E-05 | CSCL | RASSF7    |
| NFKB2. 2   | 1. 44E-09 | -0. 19191 | 0. 002 | 0. 064 | 2. 14E-05 | CSCL | NFKB2     |
| ERF. 2     | 1. 48E-09 | 0. 140406 | 0. 072 | 0. 183 | 2. 21E-05 | CSCL | ERF       |
| PAPD5. 2   | 1. 49E-09 | -0. 14929 | 0. 012 | 0. 083 | 2. 22E-05 | CSCL | PAPD5     |
| MAP3K3. 2  | 1. 49E-09 | -0. 18155 | 0. 003 | 0. 067 | 2. 23E-05 | CSCL | MAP3K3    |
| ZNF598. 1  | 1. 49E-09 | -0. 10099 | 0. 007 | 0. 074 | 2. 23E-05 | CSCL | ZNF598    |
| PRR11. 1   | 1. 49E-09 | -0. 1398  | 0. 003 | 0. 067 | 2. 23E-05 | CSCL | PRR11     |
| IQSEC1     | 1. 52E-09 | -0. 1414  | 0. 005 | 0. 07  | 2. 28E-05 | CSCL | IQSEC1    |
| LSM6       | 1. 54E-09 | 0. 227228 | 0. 166 | 0. 339 | 2. 30E-05 | CSCL | LSM6      |
| RAN. 2     | 1. 54E-09 | 0. 379364 | 0. 579 | 0. 766 | 2. 30E-05 | CSCL | RAN       |
| TRMT61B    | 1. 56E-09 | 0. 108622 | 0. 063 | 0. 168 | 2. 33E-05 | CSCL | TRMT61B   |
| ATP5L. 1   | 1. 57E-09 | 0. 274058 | 0. 63  | 0. 871 | 2. 34E-05 | CSCL | ATP5L     |
| IGSF21. 2  | 1. 57E-09 | -0. 11739 | 0. 065 | 0. 168 | 2. 35E-05 | CSCL | IGSF21    |
| BCAT1. 2   | 1. 60E-09 | 0. 196943 | 0. 105 | 0. 238 | 2. 39E-05 | CSCL | BCAT1     |
| SGMS1. 1   | 1. 62E-09 | -0. 16911 | 0. 002 | 0. 063 | 2. 42E-05 | CSCL | SGMS1     |
| HIGD1A. 1  | 1. 64E-09 | 0. 198486 | 0. 222 | 0. 438 | 2. 45E-05 | CSCL | HIGD1A    |
| ST3GAL1. 2 | 1. 65E-09 | -0. 20217 | 0. 026 | 0. 106 | 2. 46E-05 | CSCL | ST3GAL1   |
| YAF2. 1    | 1. 69E-09 | 0. 168235 | 0. 176 | 0. 355 | 2. 53E-05 | CSCL | YAF2      |
| DOK5. 1    | 1. 72E-09 | 0. 120286 | 0. 075 | 0. 188 | 2. 56E-05 | CSCL | DOK5      |
| SARS. 2    | 1. 75E-09 | 0. 221631 | 0. 23  | 0. 454 | 2. 62E-05 | CSCL | SARS      |
| HDAC9. 2   | 1. 75E-09 | -0. 10897 | 0. 04  | 0. 13  | 2. 62E-05 | CSCL | HDAC9     |
| IFT43. 1   | 1. 76E-09 | 0. 188978 | 0. 122 | 0. 264 | 2. 63E-05 | CSCL | IFT43     |
| ARHGEF12   | 1. 77E-09 | 0. 114086 | 0. 061 | 0. 165 | 2. 65E-05 | CSCL | ARHGEF12  |
| EHD4. 2    | 1. 77E-09 | -0. 12306 | 0. 019 | 0. 095 | 2. 65E-05 | CSCL | EHD4      |
| AGPAT5. 1  | 1. 77E-09 | 0. 120175 | 0. 092 | 0. 215 | 2. 65E-05 | CSCL | AGPAT5    |
| ADD2       | 1. 80E-09 | -0. 15185 | 0. 017 | 0. 092 | 2. 69E-05 | CSCL | ADD2      |
| ZNF24      | 1. 81E-09 | 0. 224645 | 0. 148 | 0. 308 | 2. 70E-05 | CSCL | ZNF24     |
| BLVRA. 2   | 1. 82E-09 | 0. 162964 | 0. 173 | 0. 348 | 2. 73E-05 | CSCL | BLVRA     |
| GAPT. 2    | 1. 88E-09 | -0. 27479 | 0. 002 | 0. 063 | 2. 81E-05 | CSCL | GAPT      |
| TNFRSF10E  | 1. 94E-09 | -0. 15751 | 0. 026 | 0. 106 | 2. 90E-05 | CSCL | TNFRSF10B |
| ASGR1. 2   | 1. 94E-09 | -0. 1929  | 0. 009 | 0. 076 | 2. 90E-05 | CSCL | ASGR1     |
| SCAF8. 1   | 1. 95E-09 | -0. 14024 | 0. 007 | 0. 073 | 2. 91E-05 | CSCL | SCAF8     |
| AFAP1      | 1. 98E-09 | -0. 11927 | 0. 016 | 0. 089 | 2. 97E-05 | CSCL | AFAP1     |
| PSMB9. 1   | 1. 98E-09 | 0. 206203 | 0. 211 | 0. 415 | 2. 97E-05 | CSCL | PSMB9     |
| PLEKHA8. 1 | 1. 99E-09 | -0. 14804 | 0. 003 | 0. 066 | 2. 97E-05 | CSCL | PLEKHA8   |
| TLN2. 2    | 2. 01E-09 | -0. 14236 | 0. 021 | 0. 097 | 3. 01E-05 | CSCL | TLN2      |
| CLUAP1. 1  | 2. 02E-09 | 0. 105723 | 0. 066 | 0. 173 | 3. 02E-05 | CSCL | CLUAP1    |
| CRLF3. 2   | 2. 04E-09 | -0. 14203 | 0. 033 | 0. 117 | 3. 05E-05 | CSCL | CRLF3     |
| SLC19A1. 1 | 2. 06E-09 | -0. 11153 | 0. 007 | 0. 073 | 3. 07E-05 | CSCL | SLC19A1   |
| SEC23IP. 1 | 2. 06E-09 | -0. 15083 | 0. 012 | 0. 082 | 3. 08E-05 | CSCL | SEC23IP   |
| YPEL2. 2   | 2. 06E-09 | -0. 20086 | 0. 007 | 0. 073 | 3. 08E-05 | CSCL | YPEL2     |
| ORC6. 2    | 2. 07E-09 | -0. 13174 | 0. 019 | 0. 095 | 3. 09E-05 | CSCL | ORC6      |
| NCAPD2. 2  | 2. 13E-09 | -0. 12819 | 0. 003 | 0. 066 | 3. 18E-05 | CSCL | NCAPD2    |
| FPR3. 2    | 2. 14E-09 | -0. 23828 | 0      | 0. 059 | 3. 20E-05 | CSCL | FPR3      |
| DOT1L. 1   | 2. 17E-09 | -0. 1065  | 0. 012 | 0. 082 | 3. 24E-05 | CSCL | DOT1L     |
| SLC1A4. 2  | 2. 18E-09 | -0. 1361  | 0. 009 | 0. 076 | 3. 25E-05 | CSCL | SLC1A4    |
| RFNG. 1    | 2. 22E-09 | -0. 10262 | 0. 024 | 0. 103 | 3. 32E-05 | CSCL | RFNG      |
| EPOR. 1    | 2. 24E-09 | -0. 17505 | 0. 007 | 0. 072 | 3. 35E-05 | CSCL | EPOR      |

|             |           |           |        |        |           |      |                |
|-------------|-----------|-----------|--------|--------|-----------|------|----------------|
| SUPT16H. 2  | 2. 25E-09 | 0. 206678 | 0. 117 | 0. 255 | 3. 36E-05 | CSCL | SUPT16H        |
| PRKCSH. 1   | 2. 27E-09 | 0. 130771 | 0. 229 | 0. 441 | 3. 39E-05 | CSCL | PRKCSH         |
| ANKRD13A. 2 | 3. 0E-09  | -0. 12704 | 0. 023 | 0. 1   | 3. 44E-05 | CSCL | ANKRD13A       |
| ZBTB25. 1   | 2. 39E-09 | -0. 11347 | 0. 017 | 0. 091 | 3. 57E-05 | CSCL | ZBTB25         |
| TIMM10B. 1  | 2. 41E-09 | 0. 105594 | 0. 072 | 0. 181 | 3. 60E-05 | CSCL | TIMM10B        |
| EAPP. 2     | 2. 43E-09 | 0. 19542  | 0. 183 | 0. 363 | 3. 62E-05 | CSCL | EAPP           |
| KIF20B. 2   | 2. 45E-09 | -0. 17674 | 0. 017 | 0. 091 | 3. 66E-05 | CSCL | KIF20B         |
| MKI67. 2    | 2. 47E-09 | -0. 19719 | 0. 003 | 0. 066 | 3. 69E-05 | CSCL | MKI67          |
| PCNP. 2     | 2. 49E-09 | 0. 133913 | 0. 283 | 0. 55  | 3. 72E-05 | CSCL | PCNP           |
| MFAP1. 1    | 2. 50E-09 | 0. 138256 | 0. 07  | 0. 178 | 3. 74E-05 | CSCL | MFAP1          |
| ZNF629      | 2. 51E-09 | -0. 10557 | 0. 007 | 0. 072 | 3. 74E-05 | CSCL | ZNF629         |
| STK10. 2    | 2. 52E-09 | -0. 21065 | 0. 009 | 0. 075 | 3. 77E-05 | CSCL | STK10          |
| COMMD10. 1  | 2. 55E-09 | 0. 17034  | 0. 103 | 0. 231 | 3. 81E-05 | CSCL | COMMD10        |
| GPC2. 2     | 2. 55E-09 | -0. 14466 | 0. 07  | 0. 173 | 3. 82E-05 | CSCL | GPC2           |
| LSM1        | 2. 55E-09 | 0. 19504  | 0. 241 | 0. 467 | 3. 82E-05 | CSCL | LSM1           |
| DYNC2LI1. 2 | 6. 2E-09  | 0. 124765 | 0. 065 | 0. 169 | 3. 91E-05 | CSCL | DYNC2LI1       |
| CAMTA2. 1   | 2. 71E-09 | -0. 10498 | 0. 012 | 0. 081 | 4. 04E-05 | CSCL | CAMTA2         |
| GHDC. 1     | 2. 71E-09 | -0. 10022 | 0. 021 | 0. 097 | 4. 06E-05 | CSCL | GHDC           |
| DENND4B. 2  | 2. 73E-09 | -0. 14936 | 0. 007 | 0. 072 | 4. 08E-05 | CSCL | DENND4B        |
| ZC3H14. 1   | 2. 73E-09 | 0. 184124 | 0. 089 | 0. 209 | 4. 08E-05 | CSCL | ZC3H14         |
| MBNL2. 2    | 2. 77E-09 | -0. 13255 | 0. 023 | 0. 099 | 4. 14E-05 | CSCL | MBNL2          |
| REXO2. 2    | 2. 80E-09 | 0. 138725 | 0. 162 | 0. 327 | 4. 18E-05 | CSCL | REXO2          |
| CCNYL1. 1   | 2. 81E-09 | -0. 13805 | 0. 002 | 0. 062 | 4. 20E-05 | CSCL | CCNYL1         |
| TRPV2. 2    | 2. 82E-09 | -0. 24394 | 0. 002 | 0. 062 | 4. 22E-05 | CSCL | TRPV2          |
| PSMC1. 1    | 2. 84E-09 | 0. 225301 | 0. 199 | 0. 394 | 4. 25E-05 | CSCL | PSMC1          |
| PIGZ        | 2. 86E-09 | -0. 10416 | 0. 003 | 0. 065 | 4. 27E-05 | CSCL | PIGZ           |
| SCP2. 2     | 2. 93E-09 | 0. 103468 | 0. 314 | 0. 597 | 4. 37E-05 | CSCL | SCP2           |
| MIR181A1H   | 2. 95E-09 | -0. 13391 | 0. 033 | 0. 117 | 4. 41E-05 | CSCL | MIR181A1HG     |
| MYT1L. 2    | 3. 00E-09 | -0. 21973 | 0. 002 | 0. 062 | 4. 48E-05 | CSCL | MYT1L          |
| CTNS        | 3. 07E-09 | -0. 10848 | 0. 016 | 0. 087 | 4. 59E-05 | CSCL | CTNS           |
| LRP1. 1     | 3. 08E-09 | 0. 160384 | 0. 182 | 0. 359 | 4. 61E-05 | CSCL | LRP1           |
| TPCN1. 2    | 3. 09E-09 | -0. 14756 | 0. 019 | 0. 093 | 4. 61E-05 | CSCL | TPCN1          |
| RREB1. 2    | 3. 11E-09 | -0. 1508  | 0. 009 | 0. 075 | 4. 65E-05 | CSCL | RREB1          |
| SRP14. 1    | 3. 27E-09 | 0. 215219 | 0. 64  | 0. 878 | 4. 89E-05 | CSCL | SRP14          |
| BRSK1       | 3. 29E-09 | -0. 11729 | 0. 016 | 0. 087 | 4. 91E-05 | CSCL | BRSK1          |
| SEC24A. 1   | 3. 29E-09 | -0. 10118 | 0. 01  | 0. 078 | 4. 92E-05 | CSCL | SEC24A         |
| UPRT        | 3. 32E-09 | -0. 11283 | 0. 017 | 0. 09  | 4. 96E-05 | CSCL | UPRT           |
| SYT1. 2     | 3. 32E-09 | -0. 25074 | 0. 026 | 0. 104 | 4. 97E-05 | CSCL | SYT1           |
| PRMT3. 1    | 3. 35E-09 | -0. 1056  | 0. 019 | 0. 093 | 5. 01E-05 | CSCL | PRMT3          |
| EMILIN2. 2  | 3. 37E-09 | -0. 1148  | 0. 014 | 0. 084 | 5. 04E-05 | CSCL | EMILIN2        |
| IL6R. 2     | 3. 41E-09 | -0. 23792 | 0. 017 | 0. 089 | 5. 09E-05 | CSCL | IL6R           |
| DRG2. 1     | 3. 41E-09 | 0. 173964 | 0. 087 | 0. 206 | 5. 09E-05 | CSCL | DRG2           |
| RP11-556E   | 3. 43E-09 | -0. 27838 | 0      | 0. 058 | 5. 13E-05 | CSCL | RP11-556E13. 1 |
| CCDC28B. 1  | 3. 48E-09 | 0. 207874 | 0. 099 | 0. 225 | 5. 20E-05 | CSCL | CCDC28B        |
| NTPCR. 1    | 3. 51E-09 | 0. 205561 | 0. 134 | 0. 28  | 5. 25E-05 | CSCL | NTPCR          |
| FMNL3. 2    | 3. 61E-09 | -0. 18174 | 0. 012 | 0. 08  | 5. 39E-05 | CSCL | FMNL3          |
| EML2. 2     | 3. 62E-09 | -0. 13906 | 0. 016 | 0. 086 | 5. 40E-05 | CSCL | EML2           |
| PRPS1. 2    | 3. 63E-09 | 0. 114019 | 0. 082 | 0. 195 | 5. 42E-05 | CSCL | PRPS1          |
| CFL2. 1     | 3. 65E-09 | 0. 199471 | 0. 168 | 0. 336 | 5. 46E-05 | CSCL | CFL2           |
| NLE1. 1     | 3. 74E-09 | -0. 105   | 0. 005 | 0. 068 | 5. 60E-05 | CSCL | NLE1           |
| FYN. 1      | 3. 82E-09 | 0. 174605 | 0. 166 | 0. 334 | 5. 71E-05 | CSCL | FYN            |

|           |          |          |       |       |          |      |            |
|-----------|----------|----------|-------|-------|----------|------|------------|
| ACAP1.1   | 3.87E-09 | -0.1348  | 0.014 | 0.083 | 5.78E-05 | CSCL | ACAP1      |
| PROSER1.1 | 4.00E-09 | -0.1228  | 0.01  | 0.077 | 5.98E-05 | CSCL | PROSER1    |
| CTHRC1.1  | 4.00E-09 | -0.10985 | 0.005 | 0.068 | 5.98E-05 | CSCL | CTHRC1     |
| GIMAP7.1  | 4.09E-09 | -0.28791 | 0     | 0.057 | 6.12E-05 | CSCL | GIMAP7     |
| CPPED1.2  | 4.10E-09 | -0.18916 | 0.007 | 0.071 | 6.13E-05 | CSCL | CPPED1     |
| CLEC4E.1  | 4.11E-09 | -0.33056 | 0.002 | 0.061 | 6.15E-05 | CSCL | CLEC4E     |
| TCEAL1.2  | 4.11E-09 | 0.112668 | 0.124 | 0.262 | 6.15E-05 | CSCL | TCEAL1     |
| TRIM26    | 4.15E-09 | -0.12499 | 0.024 | 0.101 | 6.21E-05 | CSCL | TRIM26     |
| HHEX.2    | 4.22E-09 | -0.26745 | 0.002 | 0.06  | 6.31E-05 | CSCL | HHEX       |
| ZC3H3.1   | 4.23E-09 | -0.12199 | 0.014 | 0.083 | 6.31E-05 | CSCL | ZC3H3      |
| MBD6.2    | 4.23E-09 | -0.10305 | 0.051 | 0.144 | 6.32E-05 | CSCL | MBD6       |
| KCNAB2.2  | 4.23E-09 | -0.20685 | 0.012 | 0.08  | 6.32E-05 | CSCL | KCNAB2     |
| GTSE1.1   | 4.28E-09 | -0.19546 | 0.002 | 0.06  | 6.39E-05 | CSCL | GTSE1      |
| SOS2.2    | 4.33E-09 | -0.10386 | 0.016 | 0.086 | 6.46E-05 | CSCL | SOS2       |
| ATG7.1    | 4.39E-09 | -0.12631 | 0.033 | 0.115 | 6.56E-05 | CSCL | ATG7       |
| ABHD15.2  | 4.39E-09 | -0.20134 | 0.002 | 0.06  | 6.56E-05 | CSCL | ABHD15     |
| TRIM47.2  | 4.48E-09 | 0.143576 | 0.075 | 0.185 | 6.70E-05 | CSCL | TRIM47     |
| SGOL1.1   | 4.52E-09 | -0.20264 | 0.002 | 0.06  | 6.75E-05 | CSCL | SGOL1      |
| PDE4DIP.1 | 4.53E-09 | 0.103998 | 0.131 | 0.271 | 6.77E-05 | CSCL | PDE4DIP    |
| MOCS2.2   | 4.54E-09 | 0.211352 | 0.127 | 0.27  | 6.78E-05 | CSCL | MOCS2      |
| INF2.2    | 4.56E-09 | -0.14799 | 0.017 | 0.089 | 6.82E-05 | CSCL | INF2       |
| ETV3.2    | 4.61E-09 | -0.15341 | 0.012 | 0.08  | 6.89E-05 | CSCL | ETV3       |
| PAQR3.1   | 4.63E-09 | -0.10548 | 0.012 | 0.08  | 6.92E-05 | CSCL | PAQR3      |
| MYO1G.2   | 4.66E-09 | -0.22047 | 0.003 | 0.064 | 6.96E-05 | CSCL | MYO1G      |
| DRAM1.1   | 4.80E-09 | -0.12463 | 0.01  | 0.077 | 7.17E-05 | CSCL | DRAM1      |
| LUC7L3    | 4.90E-09 | 0.139903 | 0.276 | 0.522 | 7.32E-05 | CSCL | LUC7L3     |
| SMAD5.1   | 4.92E-09 | 0.138404 | 0.07  | 0.176 | 7.35E-05 | CSCL | SMAD5      |
| RASAL3.2  | 4.94E-09 | -0.24319 | 0.002 | 0.06  | 7.39E-05 | CSCL | RASAL3     |
| B3GNTL1.1 | 4.99E-09 | -0.11895 | 0.003 | 0.063 | 7.46E-05 | CSCL | B3GNTL1    |
| KNSTRN.2  | 5.08E-09 | -0.14876 | 0.014 | 0.083 | 7.59E-05 | CSCL | KNSTRN     |
| CNN2.1    | 5.15E-09 | -0.18641 | 0.007 | 0.07  | 7.70E-05 | CSCL | CNN2       |
| LDLRAP1.2 | 5.24E-09 | -0.17146 | 0.002 | 0.06  | 7.83E-05 | CSCL | LDLRAP1    |
| PDK3.1    | 5.33E-09 | -0.16285 | 0.003 | 0.063 | 7.96E-05 | CSCL | PDK3       |
| CLIP3.1   | 5.34E-09 | 0.166493 | 0.087 | 0.203 | 7.98E-05 | CSCL | CLIP3      |
| PSRC1     | 5.39E-09 | 0.145715 | 0.129 | 0.271 | 8.06E-05 | CSCL | PSRC1      |
| HVCN1.2   | 5.44E-09 | -0.14151 | 0.024 | 0.1   | 8.13E-05 | CSCL | HVCN1      |
| TMCC3.2   | 5.44E-09 | -0.16753 | 0.01  | 0.076 | 8.13E-05 | CSCL | TMCC3      |
| ARNT.1    | 5.45E-09 | -0.10172 | 0.01  | 0.076 | 8.15E-05 | CSCL | ARNT       |
| ADCY7.2   | 5.55E-09 | -0.24507 | 0.005 | 0.066 | 8.29E-05 | CSCL | ADCY7      |
| SFXN5.2   | 5.60E-09 | 0.102655 | 0.082 | 0.194 | 8.37E-05 | CSCL | SFXN5      |
| SCFD1.1   | 5.67E-09 | 0.151823 | 0.122 | 0.259 | 8.48E-05 | CSCL | SCFD1      |
| FBXO34.2  | 5.68E-09 | -0.12255 | 0.021 | 0.094 | 8.49E-05 | CSCL | FBXO34     |
| ZMYND15.1 | 5.72E-09 | -0.15964 | 0.002 | 0.06  | 8.54E-05 | CSCL | ZMYND15    |
| DPYSL3.1  | 5.73E-09 | 0.127822 | 0.166 | 0.33  | 8.56E-05 | CSCL | DPYSL3     |
| ELOF1.1   | 5.79E-09 | 0.21868  | 0.223 | 0.434 | 8.65E-05 | CSCL | ELOF1      |
| RASA2.1   | 5.80E-09 | -0.11037 | 0.012 | 0.079 | 8.67E-05 | CSCL | RASA2      |
| HIST2H2AA | 5.88E-09 | -0.20555 | 0.005 | 0.066 | 8.79E-05 | CSCL | HIST2H2AA3 |
| WDR6.1    | 5.91E-09 | 0.106357 | 0.11  | 0.238 | 8.83E-05 | CSCL | WDR6       |
| TROVE2.1  | 6.03E-09 | 0.235691 | 0.23  | 0.443 | 9.01E-05 | CSCL | TROVE2     |
| PRAM1.2   | 6.17E-09 | -0.253   | 0     | 0.056 | 9.23E-05 | CSCL | PRAM1      |
| TNFAIP8.1 | 6.18E-09 | -0.23344 | 0.009 | 0.073 | 9.23E-05 | CSCL | TNFAIP8    |

|           |          |          |       |       |          |      |              |
|-----------|----------|----------|-------|-------|----------|------|--------------|
| WDSUB1.1  | 6.18E-09 | -0.11431 | 0.012 | 0.079 | 9.23E-05 | CSCL | WDSUB1       |
| LYRM5     | 6.25E-09 | 0.218447 | 0.176 | 0.349 | 9.35E-05 | CSCL | LYRM5        |
| MAN2A2.1  | 6.34E-09 | -0.10198 | 0.012 | 0.079 | 9.47E-05 | CSCL | MAN2A2       |
| SPARCL1.1 | 6.40E-09 | 0.593504 | 0.373 | 0.344 | 9.56E-05 | CSCL | SPARCL1      |
| PIEZ01.2  | 6.40E-09 | -0.11677 | 0.009 | 0.073 | 9.56E-05 | CSCL | PIEZ01       |
| LPCAT4.2  | 6.40E-09 | -0.12144 | 0.009 | 0.072 | 9.57E-05 | CSCL | LPCAT4       |
| RP11-138A | 6.42E-09 | -0.20082 | 0.044 | 0.129 | 9.59E-05 | CSCL | RP11-138A9.1 |
| B3GNT2.2  | 6.47E-09 | -0.13516 | 0.007 | 0.069 | 9.68E-05 | CSCL | B3GNT2       |
| TUSC1.1   | 6.60E-09 | -0.12252 | 0.014 | 0.082 | 9.86E-05 | CSCL | TUSC1        |
| STMN2.2   | 6.62E-09 | -0.30542 | 0.089 | 0.192 | 9.90E-05 | CSCL | STMN2        |
| PTPRS.2   | 6.72E-09 | 0.109619 | 0.127 | 0.265 | 0.0001   | CSCL | PTPRS        |
| KLHDC4.1  | 6.74E-09 | -0.15705 | 0.01  | 0.075 | 0.000101 | CSCL | KLHDC4       |
| SLC9A9.2  | 6.79E-09 | -0.19005 | 0.014 | 0.081 | 0.000102 | CSCL | SLC9A9       |
| ARHGAP20  | 6.82E-09 | -0.11023 | 0.003 | 0.063 | 0.000102 | CSCL | ARHGAP20     |
| GGCT.2    | 6.82E-09 | 0.222729 | 0.202 | 0.396 | 0.000102 | CSCL | GGCT         |
| ZMYM3.1   | 7.01E-09 | -0.11862 | 0.014 | 0.082 | 0.000105 | CSCL | ZMYM3        |
| NMI.1     | 7.12E-09 | 0.128907 | 0.079 | 0.188 | 0.000106 | CSCL | NMI          |
| ATAD5.1   | 7.15E-09 | -0.10836 | 0.012 | 0.079 | 0.000107 | CSCL | ATAD5        |
| FHOD1.2   | 7.20E-09 | -0.18832 | 0.002 | 0.059 | 0.000108 | CSCL | FHOD1        |
| ITPRIP.2  | 7.23E-09 | -0.17178 | 0.012 | 0.078 | 0.000108 | CSCL | ITPRIP       |
| TMEM156.2 | 7.27E-09 | -0.27623 | 0.002 | 0.059 | 0.000109 | CSCL | TMEM156      |
| MAP1A.1   | 7.40E-09 | 0.131656 | 0.11  | 0.236 | 0.000111 | CSCL | MAP1A        |
| HEATR3    | 7.49E-09 | -0.1604  | 0.002 | 0.059 | 0.000112 | CSCL | HEATR3       |
| EIF1AX.1  | 7.57E-09 | 0.130523 | 0.297 | 0.573 | 0.000113 | CSCL | EIF1AX       |
| PAOX.2    | 7.58E-09 | -0.14727 | 0     | 0.055 | 0.000113 | CSCL | PAOX         |
| TTC9B.2   | 7.60E-09 | -0.16407 | 0.04  | 0.124 | 0.000114 | CSCL | TTC9B        |
| ZNF669.1  | 7.73E-09 | -0.11062 | 0.024 | 0.099 | 0.000116 | CSCL | ZNF669       |
| ITGA5     | 7.97E-09 | -0.11106 | 0.017 | 0.087 | 0.000119 | CSCL | ITGA5        |
| ZNF37A.2  | 8.04E-09 | 0.103448 | 0.051 | 0.143 | 0.00012  | CSCL | ZNF37A       |
| TMEM144.2 | 8.06E-09 | -0.30119 | 0.014 | 0.081 | 0.00012  | CSCL | TMEM144      |
| LTBR.2    | 8.07E-09 | -0.18795 | 0.024 | 0.099 | 0.000121 | CSCL | LTBR         |
| TCTEX1D2. | 8.09E-09 | 0.247876 | 0.106 | 0.233 | 0.000121 | CSCL | TCTEX1D2     |
| GNGT2.2   | 8.28E-09 | -0.24181 | 0     | 0.055 | 0.000124 | CSCL | GNGT2        |
| PARP12.2  | 8.33E-09 | -0.12846 | 0.012 | 0.078 | 0.000125 | CSCL | PARP12       |
| LRRC8C.2  | 8.39E-09 | -0.16642 | 0.003 | 0.062 | 0.000125 | CSCL | LRRC8C       |
| DOK2.1    | 8.42E-09 | -0.2611  | 0.002 | 0.058 | 0.000126 | CSCL | DOK2         |
| FURIN.2   | 8.46E-09 | -0.15415 | 0.01  | 0.075 | 0.000126 | CSCL | FURIN        |
| STRAP.1   | 8.46E-09 | 0.106775 | 0.3   | 0.566 | 0.000126 | CSCL | STRAP        |
| SEZ6L2.1  | 8.62E-09 | 0.139795 | 0.136 | 0.28  | 0.000129 | CSCL | SEZ6L2       |
| ALDH3B1   | 8.73E-09 | -0.16584 | 0.01  | 0.075 | 0.00013  | CSCL | ALDH3B1      |
| GCDH      | 8.95E-09 | 0.127205 | 0.089 | 0.203 | 0.000134 | CSCL | GCDH         |
| MEX3D.1   | 8.99E-09 | -0.12043 | 0.005 | 0.065 | 0.000134 | CSCL | MEX3D        |
| S100A10.2 | 9.02E-09 | 0.514263 | 0.492 | 0.547 | 0.000135 | CSCL | S100A10      |
| PGAM5.1   | 9.05E-09 | -0.12773 | 0.002 | 0.058 | 0.000135 | CSCL | PGAM5        |
| DAPK1     | 9.12E-09 | -0.16014 | 0.003 | 0.062 | 0.000136 | CSCL | DAPK1        |
| MAP2.2    | 9.12E-09 | 0.131171 | 0.176 | 0.346 | 0.000136 | CSCL | MAP2         |
| UBR1.1    | 9.23E-09 | -0.12126 | 0.014 | 0.081 | 0.000138 | CSCL | UBR1         |
| WDR91.2   | 9.27E-09 | -0.12485 | 0.019 | 0.089 | 0.000139 | CSCL | WDR91        |
| FLI1.2    | 9.30E-09 | -0.24566 | 0     | 0.055 | 0.000139 | CSCL | FLI1         |
| ZDHHC4.2  | 9.39E-09 | 0.225735 | 0.185 | 0.363 | 0.00014  | CSCL | ZDHHC4       |
| TRAPPC8.1 | 9.39E-09 | -0.11735 | 0.009 | 0.071 | 0.00014  | CSCL | TRAPPC8      |

|           |          |          |       |       |          |      |               |
|-----------|----------|----------|-------|-------|----------|------|---------------|
| WDR36     | 9.42E-09 | -0.10427 | 0.014 | 0.081 | 0.000141 | CSCL | WDR36         |
| CRTC2.1   | 9.47E-09 | -0.10308 | 0.012 | 0.077 | 0.000142 | CSCL | CRTC2         |
| NFIL3.2   | 9.49E-09 | -0.1923  | 0.017 | 0.087 | 0.000142 | CSCL | NFIL3         |
| IL27RA.1  | 9.69E-09 | -0.13201 | 0.002 | 0.058 | 0.000145 | CSCL | IL27RA        |
| PI4K2A.2  | 9.72E-09 | -0.13697 | 0.007 | 0.068 | 0.000145 | CSCL | PI4K2A        |
| STOX2.2   | 9.73E-09 | -0.1071  | 0.023 | 0.096 | 0.000145 | CSCL | STOX2         |
| PEMT.1    | 9.78E-09 | 0.185267 | 0.098 | 0.218 | 0.000146 | CSCL | PEMT          |
| DNAJC19.2 | 9.82E-09 | 0.222995 | 0.206 | 0.398 | 0.000147 | CSCL | DNAJC19       |
| LHFP.2    | 9.98E-09 | 0.172126 | 0.11  | 0.238 | 0.000149 | CSCL | LHFP          |
| FAM195B.1 | 1.00E-08 | 0.575865 | 0.122 | 0.065 | 0.000149 | CSCL | FAM195B       |
| ZNF75A.1  | 1.03E-08 | 0.141697 | 0.099 | 0.22  | 0.000153 | CSCL | ZNF75A        |
| SPDL1.1   | 1.03E-08 | -0.11748 | 0.007 | 0.068 | 0.000155 | CSCL | SPDL1         |
| NSG1.2    | 1.04E-08 | -0.1383  | 0.079 | 0.181 | 0.000155 | CSCL | NSG1          |
| HPSE.2    | 1.04E-08 | -0.25152 | 0.003 | 0.061 | 0.000155 | CSCL | HPSE          |
| TRIP6.2   | 1.04E-08 | 0.140451 | 0.122 | 0.255 | 0.000156 | CSCL | TRIP6         |
| TUBB4A.2  | 1.05E-08 | -0.1943  | 0.04  | 0.122 | 0.000156 | CSCL | TUBB4A        |
| PET100.1  | 1.05E-08 | 0.130614 | 0.283 | 0.537 | 0.000157 | CSCL | PET100        |
| THAP3.1   | 1.05E-08 | 0.117145 | 0.049 | 0.139 | 0.000158 | CSCL | THAP3         |
| ATP5H.1   | 1.06E-08 | 0.120784 | 0.353 | 0.664 | 0.000159 | CSCL | ATP5H         |
| PCSK7.2   | 1.11E-08 | 0.121813 | 0.143 | 0.289 | 0.000165 | CSCL | PCSK7         |
| MR1       | 1.12E-08 | -0.12578 | 0.021 | 0.092 | 0.000167 | CSCL | MR1           |
| CLEC4A.2  | 1.13E-08 | -0.22061 | 0.005 | 0.064 | 0.000169 | CSCL | CLEC4A        |
| VRK2.2    | 1.18E-08 | -0.21679 | 0.002 | 0.057 | 0.000176 | CSCL | VRK2          |
| ZFAND2A.2 | 1.22E-08 | 0.182372 | 0.145 | 0.29  | 0.000183 | CSCL | ZFAND2A       |
| ABCA2.2   | 1.25E-08 | -0.22205 | 0.026 | 0.099 | 0.000187 | CSCL | ABCA2         |
| DECR1.1   | 1.27E-08 | 0.152088 | 0.222 | 0.422 | 0.00019  | CSCL | DECR1         |
| FAM13B.2  | 1.28E-08 | -0.12273 | 0.019 | 0.089 | 0.000191 | CSCL | FAM13B        |
| AKT2      | 1.28E-08 | 0.123147 | 0.082 | 0.191 | 0.000191 | CSCL | AKT2          |
| TMBIM6.1  | 1.30E-08 | 0.222361 | 0.623 | 0.849 | 0.000194 | CSCL | TMBIM6        |
| HIST2H2AC | 1.30E-08 | -0.11301 | 0.003 | 0.061 | 0.000195 | CSCL | HIST2H2AC     |
| KCTD2     | 1.31E-08 | -0.11451 | 0.007 | 0.067 | 0.000196 | CSCL | KCTD2         |
| KIAA1549. | 1.32E-08 | -0.11593 | 0.024 | 0.097 | 0.000198 | CSCL | KIAA1549      |
| ATG16L1   | 1.33E-08 | -0.11309 | 0.009 | 0.07  | 0.000198 | CSCL | ATG16L1       |
| PDE7A.2   | 1.33E-08 | -0.10997 | 0.017 | 0.086 | 0.000199 | CSCL | PDE7A         |
| MTURN.1   | 1.38E-08 | -0.14564 | 0.016 | 0.082 | 0.000207 | CSCL | MTURN         |
| ZFYVE27   | 1.38E-08 | -0.1289  | 0.016 | 0.082 | 0.000207 | CSCL | ZFYVE27       |
| FGD2.2    | 1.39E-08 | -0.27368 | 0.005 | 0.063 | 0.000208 | CSCL | FGD2          |
| RP11-284F | 1.40E-08 | 0.19621  | 0.03  | 0.007 | 0.000209 | CSCL | RP11-284F21.8 |
| NEK3.2    | 1.41E-08 | -0.12714 | 0.007 | 0.067 | 0.000211 | CSCL | NEK3          |
| C15orf40  | 1.41E-08 | 0.127888 | 0.066 | 0.166 | 0.000211 | CSCL | C15orf40      |
| TNS3.2    | 1.42E-08 | -0.1271  | 0.012 | 0.076 | 0.000213 | CSCL | TNS3          |
| PANX1.1   | 1.44E-08 | -0.11434 | 0.014 | 0.079 | 0.000215 | CSCL | PANX1         |
| GSE1.2    | 1.45E-08 | -0.10271 | 0.023 | 0.095 | 0.000217 | CSCL | GSE1          |
| NDUFA9    | 1.45E-08 | 0.21509  | 0.204 | 0.393 | 0.000217 | CSCL | NDUFA9        |
| CXXC5.2   | 1.50E-08 | 0.182265 | 0.202 | 0.389 | 0.000223 | CSCL | CXXC5         |
| MAGEH1.1  | 1.50E-08 | 0.126046 | 0.168 | 0.325 | 0.000224 | CSCL | MAGEH1        |
| SLC25A6.1 | 1.50E-08 | 0.19963  | 0.635 | 0.869 | 0.000224 | CSCL | SLC25A6       |
| METAP2.1  | 1.56E-08 | 0.220961 | 0.253 | 0.481 | 0.000234 | CSCL | METAP2        |
| TVP23B.2  | 1.59E-08 | -0.10423 | 0.03  | 0.105 | 0.000238 | CSCL | TVP23B        |
| TTL12.1   | 1.62E-08 | -0.12786 | 0.007 | 0.066 | 0.000242 | CSCL | TTL12         |
| ANG.1     | 1.62E-08 | -0.20304 | 0.019 | 0.087 | 0.000242 | CSCL | ANG           |

|             |           |           |        |        |           |      |           |
|-------------|-----------|-----------|--------|--------|-----------|------|-----------|
| DDX20. 1    | 1. 62E-08 | -0. 10842 | 0. 012 | 0. 076 | 0. 000242 | CSCL | DDX20     |
| FAM120B. 1  | 1. 63E-08 | -0. 13215 | 0. 017 | 0. 085 | 0. 000244 | CSCL | FAM120B   |
| ATXN7L3. 1  | 1. 63E-08 | -0. 10081 | 0. 007 | 0. 066 | 0. 000244 | CSCL | ATXN7L3   |
| TBC1D13. 1  | 1. 68E-08 | -0. 12091 | 0. 01  | 0. 073 | 0. 000252 | CSCL | TBC1D13   |
| REX01. 1    | 1. 70E-08 | -0. 10667 | 0. 01  | 0. 073 | 0. 000253 | CSCL | REX01     |
| CPNE2. 2    | 1. 70E-08 | 0. 238848 | 0. 077 | 0. 183 | 0. 000254 | CSCL | CPNE2     |
| TMEM91. 2   | 1. 74E-08 | -0. 14092 | 0. 012 | 0. 076 | 0. 000261 | CSCL | TMEM91    |
| USP37. 1    | 1. 79E-08 | -0. 13153 | 0. 009 | 0. 069 | 0. 000267 | CSCL | USP37     |
| YIF1A. 2    | 1. 80E-08 | 0. 193845 | 0. 227 | 0. 434 | 0. 000269 | CSCL | YIF1A     |
| LILRB2. 2   | 1. 81E-08 | -0. 24653 | 0. 002 | 0. 056 | 0. 00027  | CSCL | LILRB2    |
| IL7R. 2     | 1. 83E-08 | -0. 26355 | 0. 002 | 0. 056 | 0. 000273 | CSCL | IL7R      |
| TTC13. 1    | 1. 84E-08 | -0. 12522 | 0. 01  | 0. 072 | 0. 000274 | CSCL | TTC13     |
| ZRANB1. 1   | 1. 86E-08 | -0. 11828 | 0. 007 | 0. 066 | 0. 000277 | CSCL | ZRANB1    |
| GBGT1. 2    | 1. 88E-08 | -0. 20223 | 0      | 0. 052 | 0. 00028  | CSCL | GBGT1     |
| MTHFR. 1    | 1. 92E-08 | -0. 14391 | 0. 016 | 0. 081 | 0. 000287 | CSCL | MTHFR     |
| IKBKE. 2    | 1. 93E-08 | -0. 18244 | 0. 003 | 0. 059 | 0. 000289 | CSCL | IKBKE     |
| LAYN. 1     | 1. 95E-08 | -0. 10335 | 0. 003 | 0. 059 | 0. 000292 | CSCL | LAYN      |
| SETD9       | 2. 02E-08 | 0. 102821 | 0. 049 | 0. 137 | 0. 000303 | CSCL | SETD9     |
| PFDN2. 1    | 2. 04E-08 | 0. 126031 | 0. 332 | 0. 625 | 0. 000305 | CSCL | PFDN2     |
| ZWILCH. 2   | 2. 05E-08 | -0. 11246 | 0. 014 | 0. 078 | 0. 000306 | CSCL | ZWILCH    |
| LAPTM4B. 2  | 2. 05E-08 | 0. 218083 | 0. 173 | 0. 339 | 0. 000306 | CSCL | LAPTM4B   |
| SHCBP1. 2   | 2. 07E-08 | -0. 14322 | 0. 002 | 0. 056 | 0. 000309 | CSCL | SHCBP1    |
| PPP5C. 1    | 2. 08E-08 | 0. 18531  | 0. 077 | 0. 182 | 0. 00031  | CSCL | PPP5C     |
| RNGTT. 1    | 2. 08E-08 | -0. 12624 | 0. 014 | 0. 078 | 0. 000311 | CSCL | RNGTT     |
| LYRM9. 1    | 2. 10E-08 | 0. 101689 | 0. 075 | 0. 178 | 0. 000314 | CSCL | LYRM9     |
| MXD3. 2     | 2. 13E-08 | -0. 10335 | 0. 007 | 0. 066 | 0. 000318 | CSCL | MXD3      |
| FDPS. 1     | 2. 15E-08 | 0. 274128 | 0. 222 | 0. 426 | 0. 000322 | CSCL | FDPS      |
| REEP1. 2    | 2. 18E-08 | -0. 11883 | 0. 017 | 0. 084 | 0. 000325 | CSCL | REEP1     |
| PITPNM1. 1  | 2. 18E-08 | -0. 12698 | 0. 003 | 0. 059 | 0. 000325 | CSCL | PITPNM1   |
| GAB2. 1     | 2. 28E-08 | -0. 14514 | 0. 009 | 0. 069 | 0. 000341 | CSCL | GAB2      |
| TTC7A. 2    | 2. 29E-08 | -0. 16874 | 0. 014 | 0. 078 | 0. 000342 | CSCL | TTC7A     |
| SUPV3L1     | 2. 30E-08 | -0. 15272 | 0. 009 | 0. 069 | 0. 000344 | CSCL | SUPV3L1   |
| SRR. 1      | 2. 31E-08 | 0. 107377 | 0. 063 | 0. 159 | 0. 000345 | CSCL | SRR       |
| ECD. 1      | 2. 32E-08 | -0. 11464 | 0. 014 | 0. 078 | 0. 000346 | CSCL | ECD       |
| IGDCC3. 2   | 2. 32E-08 | -0. 10764 | 0. 007 | 0. 065 | 0. 000347 | CSCL | IGDCC3    |
| ACSF2. 1    | 2. 36E-08 | -0. 13046 | 0. 009 | 0. 068 | 0. 000352 | CSCL | ACSF2     |
| FGFR10P     | 2. 38E-08 | -0. 10162 | 0. 017 | 0. 084 | 0. 000356 | CSCL | FGFR10P   |
| TFEC. 2     | 2. 39E-08 | -0. 22345 | 0. 003 | 0. 059 | 0. 000358 | CSCL | TFEC      |
| TFEB. 2     | 2. 40E-08 | -0. 1071  | 0. 016 | 0. 081 | 0. 000359 | CSCL | TFEB      |
| ANLN. 1     | 2. 44E-08 | -0. 18785 | 0. 007 | 0. 065 | 0. 000364 | CSCL | ANLN      |
| MYLK        | 2. 46E-08 | -0. 18817 | 0. 005 | 0. 062 | 0. 000368 | CSCL | MYLK      |
| FBXL6       | 2. 47E-08 | -0. 11353 | 0. 01  | 0. 071 | 0. 00037  | CSCL | FBXL6     |
| RABL3       | 2. 49E-08 | -0. 12096 | 0. 009 | 0. 068 | 0. 000372 | CSCL | RABL3     |
| LINC00667   | 2. 50E-08 | 0. 19968  | 0. 12  | 0. 25  | 0. 000374 | CSCL | LINC00667 |
| AKAP7. 2    | 2. 51E-08 | 0. 129997 | 0. 089 | 0. 2   | 0. 000375 | CSCL | AKAP7     |
| ARL13B. 2   | 2. 55E-08 | 0. 142766 | 0. 056 | 0. 147 | 0. 000381 | CSCL | ARL13B    |
| RGS18. 2    | 2. 56E-08 | -0. 23641 | 0. 002 | 0. 055 | 0. 000382 | CSCL | RGS18     |
| ARHGAP23. 2 | 2. 60E-08 | -0. 14503 | 0. 002 | 0. 055 | 0. 000389 | CSCL | ARHGAP23  |
| TRAF3IP3. 2 | 2. 62E-08 | -0. 26146 | 0. 002 | 0. 055 | 0. 000392 | CSCL | TRAF3IP3  |
| RUNDC3A. 2  | 2. 65E-08 | -0. 10615 | 0. 028 | 0. 101 | 0. 000397 | CSCL | RUNDC3A   |
| KDM1B. 1    | 2. 68E-08 | -0. 12629 | 0. 005 | 0. 062 | 0. 0004   | CSCL | KDM1B     |

|            |           |           |        |        |           |      |                |
|------------|-----------|-----------|--------|--------|-----------|------|----------------|
| CDCA3. 1   | 2. 69E-08 | -0. 15147 | 0. 002 | 0. 055 | 0. 000402 | CSCL | CDCA3          |
| SEC11A. 1  | 2. 73E-08 | 0. 16489  | 0. 319 | 0. 605 | 0. 000407 | CSCL | SEC11A         |
| SPN. 2     | 2. 74E-08 | -0. 2284  | 0. 003 | 0. 058 | 0. 000409 | CSCL | SPN            |
| CLSPN. 2   | 2. 74E-08 | -0. 14411 | 0. 007 | 0. 065 | 0. 00041  | CSCL | CLSPN          |
| DCLK2. 2   | 2. 77E-08 | 0. 14967  | 0. 091 | 0. 201 | 0. 000415 | CSCL | DCLK2          |
| GOLM1. 1   | 2. 82E-08 | 0. 224358 | 0. 164 | 0. 324 | 0. 000422 | CSCL | GOLM1          |
| SEL1L3     | 2. 90E-08 | -0. 10841 | 0. 012 | 0. 074 | 0. 000434 | CSCL | SEL1L3         |
| ANKRD16. 1 | 2. 92E-08 | -0. 10259 | 0. 002 | 0. 055 | 0. 000436 | CSCL | ANKRD16        |
| MICU3. 2   | 2. 99E-08 | -0. 12691 | 0. 019 | 0. 086 | 0. 000447 | CSCL | MICU3          |
| UNC45A     | 3. 04E-08 | 0. 110968 | 0. 068 | 0. 165 | 0. 000455 | CSCL | UNC45A         |
| GBP2. 1    | 3. 10E-08 | 0. 105242 | 0. 099 | 0. 214 | 0. 000464 | CSCL | GBP2           |
| ELAVL2. 2  | 3. 11E-08 | -0. 15888 | 0. 017 | 0. 083 | 0. 000464 | CSCL | ELAVL2         |
| NUDC. 2    | 3. 12E-08 | 0. 184104 | 0. 314 | 0. 593 | 0. 000466 | CSCL | NUDC           |
| LRCH1      | 3. 13E-08 | -0. 13965 | 0. 005 | 0. 061 | 0. 000468 | CSCL | LRCH1          |
| SNRNP35. 1 | 3. 16E-08 | 0. 155945 | 0. 091 | 0. 201 | 0. 000473 | CSCL | SNRNP35        |
| CENPE. 2   | 3. 16E-08 | -0. 18246 | 0. 003 | 0. 058 | 0. 000473 | CSCL | CENPE          |
| ZNF226. 2  | 3. 27E-08 | 0. 176089 | 0. 096 | 0. 209 | 0. 000488 | CSCL | ZNF226         |
| SLC25A4. 2 | 3. 31E-08 | 0. 161514 | 0. 232 | 0. 436 | 0. 000494 | CSCL | SLC25A4        |
| UHRF1BP1L  | 3. 32E-08 | -0. 1171  | 0. 01  | 0. 071 | 0. 000496 | CSCL | UHRF1BP1L      |
| RASGRP2. 2 | 3. 36E-08 | -0. 18841 | 0. 002 | 0. 054 | 0. 000502 | CSCL | RASGRP2        |
| IFT57. 2   | 3. 37E-08 | 0. 172171 | 0. 124 | 0. 254 | 0. 000504 | CSCL | IFT57          |
| CELF5. 2   | 3. 43E-08 | -0. 15434 | 0. 024 | 0. 094 | 0. 000513 | CSCL | CELF5          |
| HOPX. 1    | 3. 46E-08 | 0. 66021  | 0. 321 | 0. 28  | 0. 000517 | CSCL | HOPX           |
| TCF19      | 3. 46E-08 | -0. 13965 | 0      | 0. 051 | 0. 000517 | CSCL | TCF19          |
| ARMC6      | 3. 51E-08 | 0. 13748  | 0. 068 | 0. 165 | 0. 000524 | CSCL | ARMC6          |
| GCC1. 1    | 3. 56E-08 | -0. 12443 | 0. 012 | 0. 073 | 0. 000532 | CSCL | GCC1           |
| PSMC3IP. 1 | 3. 57E-08 | -0. 10174 | 0. 012 | 0. 073 | 0. 000534 | CSCL | PSMC3IP        |
| MAPT. 2    | 3. 58E-08 | 0. 100847 | 0. 15  | 0. 292 | 0. 000534 | CSCL | MAPT           |
| SGK3. 2    | 3. 65E-08 | -0. 14378 | 0. 01  | 0. 07  | 0. 000545 | CSCL | SGK3           |
| RFWD3. 1   | 3. 66E-08 | -0. 12888 | 0. 005 | 0. 061 | 0. 000546 | CSCL | RFWD3          |
| KIF16B     | 3. 67E-08 | -0. 10997 | 0. 007 | 0. 064 | 0. 000548 | CSCL | KIF16B         |
| TBC1D4. 2  | 3. 67E-08 | -0. 19754 | 0      | 0. 05  | 0. 000548 | CSCL | TBC1D4         |
| FAM84A. 1  | 3. 68E-08 | 0. 134038 | 0. 058 | 0. 149 | 0. 000549 | CSCL | FAM84A         |
| RP11-480C  | 3. 78E-08 | -0. 28452 | 0      | 0. 05  | 0. 000565 | CSCL | RP11-480C22. 1 |
| LINC00152  | 3. 84E-08 | 0. 190789 | 0. 131 | 0. 265 | 0. 000574 | CSCL | LINC00152      |
| TCTN1. 1   | 3. 85E-08 | 0. 162209 | 0. 101 | 0. 218 | 0. 000575 | CSCL | TCTN1          |
| C19orf38.  | 3. 89E-08 | -0. 24102 | 0      | 0. 05  | 0. 000581 | CSCL | C19orf38       |
| HOXB2. 2   | 3. 92E-08 | -0. 17357 | 0. 021 | 0. 087 | 0. 000586 | CSCL | HOXB2          |
| MAN1A1. 1  | 4. 00E-08 | -0. 19551 | 0      | 0. 05  | 0. 000598 | CSCL | MAN1A1         |
| PLA2G7. 2  | 4. 04E-08 | -0. 20297 | 0. 002 | 0. 054 | 0. 000603 | CSCL | PLA2G7         |
| TSC22D1. 1 | 4. 04E-08 | 0. 458933 | 0. 459 | 0. 514 | 0. 000604 | CSCL | TSC22D1        |
| ILF3-AS1.  | 4. 06E-08 | 0. 213519 | 0. 162 | 0. 317 | 0. 000607 | CSCL | ILF3-AS1       |
| RGS16. 1   | 4. 09E-08 | 0. 182771 | 0. 143 | 0. 282 | 0. 000612 | CSCL | RGS16          |
| CLIC4. 1   | 4. 11E-08 | 0. 148983 | 0. 178 | 0. 34  | 0. 000614 | CSCL | CLIC4          |
| ACP5. 2    | 4. 12E-08 | -0. 223   | 0      | 0. 05  | 0. 000616 | CSCL | ACP5           |
| RBX1. 2    | 4. 13E-08 | 0. 106806 | 0. 36  | 0. 681 | 0. 000617 | CSCL | RBX1           |
| FAM13A     | 4. 15E-08 | -0. 13851 | 0. 03  | 0. 102 | 0. 000621 | CSCL | FAM13A         |
| WDR37      | 4. 18E-08 | -0. 13572 | 0. 005 | 0. 06  | 0. 000625 | CSCL | WDR37          |
| ANKRD44. 1 | 4. 22E-08 | -0. 14724 | 0. 028 | 0. 099 | 0. 000631 | CSCL | ANKRD44        |
| SMOX. 2    | 4. 29E-08 | 0. 235183 | 0. 124 | 0. 253 | 0. 000642 | CSCL | SMOX           |
| DHRS4. 1   | 4. 31E-08 | -0. 11064 | 0. 019 | 0. 085 | 0. 000645 | CSCL | DHRS4          |

|            |           |           |        |        |           |      |           |
|------------|-----------|-----------|--------|--------|-----------|------|-----------|
| CD59. 2    | 4. 34E-08 | 0. 133715 | 0. 304 | 0. 566 | 0. 000649 | CSCL | CD59      |
| ENPP4      | 4. 35E-08 | -0. 18651 | 0. 003 | 0. 057 | 0. 000651 | CSCL | ENPP4     |
| CLECL1. 2  | 4. 50E-08 | -0. 20171 | 0      | 0. 05  | 0. 000672 | CSCL | CLECL1    |
| SNUPN. 1   | 4. 51E-08 | 0. 15959  | 0. 07  | 0. 167 | 0. 000674 | CSCL | SNUPN     |
| CDT1. 1    | 4. 61E-08 | -0. 12404 | 0. 007 | 0. 063 | 0. 000689 | CSCL | CDT1      |
| PDDC1. 1   | 4. 65E-08 | 0. 10274  | 0. 059 | 0. 15  | 0. 000694 | CSCL | PDDC1     |
| MORN4. 1   | 4. 67E-08 | -0. 10295 | 0. 002 | 0. 053 | 0. 000698 | CSCL | MORN4     |
| METTL22. 2 | 4. 69E-08 | -0. 10941 | 0. 024 | 0. 093 | 0. 000701 | CSCL | METTL22   |
| ALKBH2. 2  | 4. 70E-08 | 0. 207462 | 0. 091 | 0. 2   | 0. 000702 | CSCL | ALKBH2    |
| TUBD1      | 4. 71E-08 | -0. 11921 | 0. 021 | 0. 087 | 0. 000704 | CSCL | TUBD1     |
| ARMC8. 1   | 4. 79E-08 | 0. 106154 | 0. 094 | 0. 206 | 0. 000715 | CSCL | ARMC8     |
| GIMAP5. 2  | 4. 90E-08 | -0. 22235 | 0. 002 | 0. 053 | 0. 000732 | CSCL | GIMAP5    |
| TMEM52B. 2 | 4. 91E-08 | -0. 23801 | 0      | 0. 05  | 0. 000734 | CSCL | TMEM52B   |
| ZNF574. 1  | 4. 94E-08 | -0. 10334 | 0. 023 | 0. 09  | 0. 000739 | CSCL | ZNF574    |
| PXMP4      | 5. 01E-08 | -0. 10131 | 0. 009 | 0. 066 | 0. 000749 | CSCL | PXMP4     |
| WDR54. 2   | 5. 04E-08 | 0. 216492 | 0. 115 | 0. 24  | 0. 000753 | CSCL | WDR54     |
| KLHL35. 1  | 5. 05E-08 | -0. 20131 | 0. 028 | 0. 097 | 0. 000754 | CSCL | KLHL35    |
| POMC. 2    | 5. 05E-08 | -0. 2209  | 0      | 0. 049 | 0. 000755 | CSCL | POMC      |
| RAB2B. 1   | 5. 12E-08 | -0. 10261 | 0. 019 | 0. 084 | 0. 000765 | CSCL | RAB2B     |
| KLHL6. 2   | 5. 15E-08 | -0. 24551 | 0. 002 | 0. 053 | 0. 00077  | CSCL | KLHL6     |
| ZNF300. 1  | 5. 16E-08 | -0. 11353 | 0. 012 | 0. 072 | 0. 000772 | CSCL | ZNF300    |
| ATG2A. 1   | 5. 25E-08 | -0. 14148 | 0. 016 | 0. 078 | 0. 000784 | CSCL | ATG2A     |
| APAF1. 2   | 5. 25E-08 | -0. 1388  | 0. 01  | 0. 069 | 0. 000785 | CSCL | APAF1     |
| MAGI1. 2   | 5. 26E-08 | 0. 150799 | 0. 092 | 0. 203 | 0. 000787 | CSCL | MAGI1     |
| ZSWIM8. 2  | 5. 27E-08 | -0. 12069 | 0. 017 | 0. 081 | 0. 000788 | CSCL | ZSWIM8    |
| TRMT1L. 1  | 5. 29E-08 | -0. 12881 | 0. 01  | 0. 069 | 0. 000791 | CSCL | TRMT1L    |
| RAB27A. 1  | 5. 30E-08 | -0. 11862 | 0. 017 | 0. 081 | 0. 000792 | CSCL | RAB27A    |
| PLEKHA4. 1 | 5. 31E-08 | 0. 147244 | 0. 047 | 0. 131 | 0. 000793 | CSCL | PLEKHA4   |
| SPOPL. 1   | 5. 34E-08 | -0. 13302 | 0. 003 | 0. 056 | 0. 000797 | CSCL | SPOPL     |
| CELF3. 2   | 5. 36E-08 | -0. 17661 | 0. 01  | 0. 069 | 0. 0008   | CSCL | CELF3     |
| PRR5. 2    | 5. 36E-08 | -0. 18706 | 0      | 0. 049 | 0. 0008   | CSCL | PRR5      |
| SLFN5      | 5. 54E-08 | -0. 15399 | 0. 007 | 0. 063 | 0. 000828 | CSCL | SLFN5     |
| RITA1      | 5. 57E-08 | 0. 149566 | 0. 051 | 0. 136 | 0. 000833 | CSCL | RITA1     |
| YJEFN3. 1  | 5. 58E-08 | -0. 11167 | 0. 009 | 0. 066 | 0. 000833 | CSCL | YJEFN3    |
| C14orf166  | 5. 70E-08 | 0. 180471 | 0. 316 | 0. 598 | 0. 000851 | CSCL | C14orf166 |
| NKG7. 1    | 5. 76E-08 | -0. 28442 | 0. 002 | 0. 052 | 0. 000861 | CSCL | NKG7      |
| RASGRP3. 1 | 5. 78E-08 | -0. 25482 | 0. 012 | 0. 071 | 0. 000864 | CSCL | RASGRP3   |
| HSPBAP1    | 5. 81E-08 | -0. 17345 | 0. 014 | 0. 075 | 0. 000868 | CSCL | HSPBAP1   |
| HSP90AB1.  | 5. 89E-08 | 0. 24591  | 0. 602 | 0. 832 | 0. 00088  | CSCL | HSP90AB1  |
| PDZD11. 1  | 5. 89E-08 | 0. 295126 | 0. 19  | 0. 367 | 0. 00088  | CSCL | PDZD11    |
| POC1A. 1   | 5. 90E-08 | -0. 12342 | 0. 005 | 0. 059 | 0. 000882 | CSCL | POC1A     |
| HOOK2      | 5. 93E-08 | 0. 219867 | 0. 117 | 0. 24  | 0. 000886 | CSCL | HOOK2     |
| PROCR. 1   | 6. 00E-08 | -0. 13483 | 0. 012 | 0. 072 | 0. 000897 | CSCL | PROCR     |
| AHR. 2     | 6. 01E-08 | -0. 1527  | 0. 009 | 0. 065 | 0. 000898 | CSCL | AHR       |
| TNFAIP8L1  | 6. 05E-08 | -0. 11063 | 0. 019 | 0. 084 | 0. 000904 | CSCL | TNFAIP8L1 |
| MORC2. 1   | 6. 13E-08 | -0. 10333 | 0. 007 | 0. 062 | 0. 000916 | CSCL | MORC2     |
| BEX4. 1    | 6. 15E-08 | 0. 11098  | 0. 269 | 0. 487 | 0. 000918 | CSCL | BEX4      |
| NNT-AS1. 1 | 6. 18E-08 | 0. 254393 | 0. 108 | 0. 227 | 0. 000924 | CSCL | NNT-AS1   |
| IFI27L1    | 6. 23E-08 | 0. 194765 | 0. 086 | 0. 191 | 0. 000931 | CSCL | IFI27L1   |
| SLC9A6. 1  | 6. 23E-08 | -0. 10884 | 0. 007 | 0. 062 | 0. 000932 | CSCL | SLC9A6    |
| THBS1. 1   | 6. 30E-08 | -0. 23902 | 0. 019 | 0. 083 | 0. 000941 | CSCL | THBS1     |



|           |          |          |       |       |          |      |              |
|-----------|----------|----------|-------|-------|----------|------|--------------|
| C21orf58. | 6.34E-08 | -0.10759 | 0.003 | 0.056 | 0.000947 | CSCL | C21orf58     |
| COX7A2L   | 6.42E-08 | 0.127137 | 0.337 | 0.627 | 0.000959 | CSCL | COX7A2L      |
| PAXIP1-AS | 6.43E-08 | 0.121407 | 0.068 | 0.163 | 0.00096  | CSCL | PAXIP1-AS1   |
| TIMM8B.1  | 6.43E-08 | 0.190972 | 0.295 | 0.557 | 0.000961 | CSCL | TIMM8B       |
| MLH1      | 6.50E-08 | 0.135274 | 0.065 | 0.157 | 0.000972 | CSCL | MLH1         |
| MAP3K5    | 6.53E-08 | -0.1433  | 0.002 | 0.052 | 0.000976 | CSCL | MAP3K5       |
| TNFAIP2.1 | 6.59E-08 | -0.1127  | 0.016 | 0.078 | 0.000984 | CSCL | TNFAIP2      |
| CCNA2.2   | 6.59E-08 | -0.16055 | 0.005 | 0.059 | 0.000985 | CSCL | CCNA2        |
| LY6H.1    | 6.61E-08 | -0.18679 | 0.023 | 0.089 | 0.000988 | CSCL | LY6H         |
| DLEU7.2   | 6.61E-08 | -0.21242 | 0.002 | 0.052 | 0.000988 | CSCL | DLEU7        |
| AKAP12.2  | 6.79E-08 | 0.133683 | 0.087 | 0.192 | 0.001014 | CSCL | AKAP12       |
| ECT2.1    | 6.82E-08 | -0.11283 | 0.002 | 0.052 | 0.001019 | CSCL | ECT2         |
| C10orf76. | 6.89E-08 | -0.15639 | 0.005 | 0.059 | 0.00103  | CSCL | C10orf76     |
| BRCA2     | 6.96E-08 | -0.13729 | 0     | 0.048 | 0.00104  | CSCL | BRCA2        |
| LCOR.2    | 7.08E-08 | -0.12191 | 0.019 | 0.083 | 0.001058 | CSCL | LCOR         |
| CMKLR1.2  | 7.10E-08 | -0.20923 | 0.002 | 0.052 | 0.00106  | CSCL | CMKLR1       |
| SLC22A17. | 7.12E-08 | 0.157271 | 0.148 | 0.291 | 0.001064 | CSCL | SLC22A17     |
| CCDC18.2  | 7.22E-08 | -0.13922 | 0.017 | 0.08  | 0.001079 | CSCL | CCDC18       |
| EIF2B2    | 7.25E-08 | 0.10096  | 0.079 | 0.178 | 0.001083 | CSCL | EIF2B2       |
| NCEH1.1   | 7.31E-08 | -0.10083 | 0.012 | 0.071 | 0.001092 | CSCL | NCEH1        |
| TIMELESS. | 7.33E-08 | -0.1077  | 0.009 | 0.065 | 0.001095 | CSCL | TIMELESS     |
| MDH1.1    | 7.34E-08 | 0.156945 | 0.3   | 0.563 | 0.001097 | CSCL | MDH1         |
| C6orf15.1 | 7.48E-08 | 0.57167  | 0.063 | 0.026 | 0.001117 | CSCL | C6orf15      |
| TAP1      | 7.70E-08 | 0.258061 | 0.129 | 0.26  | 0.001151 | CSCL | TAP1         |
| CENPA.2   | 7.77E-08 | -0.17312 | 0.002 | 0.051 | 0.001162 | CSCL | CENPA        |
| RASSF8-AS | 7.91E-08 | 0.100936 | 0.07  | 0.164 | 0.001182 | CSCL | RASSF8-AS1   |
| TFSM      | 7.98E-08 | 0.138818 | 0.145 | 0.283 | 0.001193 | CSCL | TFSM         |
| PDGFB.1   | 8.04E-08 | -0.23276 | 0     | 0.048 | 0.001202 | CSCL | PDGFB        |
| DPY30.1   | 8.10E-08 | 0.244367 | 0.271 | 0.507 | 0.001211 | CSCL | DPY30        |
| AAMDC.2   | 8.18E-08 | 0.20899  | 0.099 | 0.212 | 0.001223 | CSCL | AAMDC        |
| F2R.2     | 8.73E-08 | 0.170424 | 0.075 | 0.173 | 0.001305 | CSCL | F2R          |
| JDP2.2    | 8.77E-08 | -0.18714 | 0.014 | 0.073 | 0.001311 | CSCL | JDP2         |
| DPM3.1    | 8.79E-08 | 0.250256 | 0.188 | 0.361 | 0.001314 | CSCL | DPM3         |
| WNT5A.2   | 8.85E-08 | -0.15713 | 0.007 | 0.061 | 0.001323 | CSCL | WNT5A        |
| PLXNA4.1  | 8.86E-08 | -0.10461 | 0.017 | 0.079 | 0.001324 | CSCL | PLXNA4       |
| ALDH1L1.1 | 9.10E-08 | 0.544299 | 0.112 | 0.061 | 0.001359 | CSCL | ALDH1L1      |
| PTGS2.2   | 9.20E-08 | -0.20095 | 0.009 | 0.064 | 0.001375 | CSCL | PTGS2        |
| AP5B1     | 9.51E-08 | -0.14602 | 0.003 | 0.054 | 0.001421 | CSCL | AP5B1        |
| PBK.2     | 9.56E-08 | -0.12087 | 0.016 | 0.076 | 0.001429 | CSCL | PBK          |
| AMPD3.1   | 9.60E-08 | -0.16103 | 0.003 | 0.054 | 0.001434 | CSCL | AMPD3        |
| MCF2L.2   | 9.65E-08 | -0.12858 | 0.03  | 0.099 | 0.001442 | CSCL | MCF2L        |
| RP11-792A | 9.66E-08 | 0.147314 | 0.103 | 0.216 | 0.001444 | CSCL | RP11-792A8.4 |
| PSPH.1    | 9.92E-08 | 0.151747 | 0.068 | 0.162 | 0.001482 | CSCL | PSPH         |
| ZC3H12A.1 | 9.92E-08 | -0.12277 | 0.017 | 0.079 | 0.001483 | CSCL | ZC3H12A      |
| ZNF846.1  | 9.94E-08 | -0.15571 | 0.014 | 0.073 | 0.001485 | CSCL | ZNF846       |
| BLOC1S1.1 | 9.95E-08 | 0.100852 | 0.36  | 0.663 | 0.001487 | CSCL | BLOC1S1      |
| ZFHX4.2   | 1.01E-07 | 0.12095  | 0.065 | 0.156 | 0.00151  | CSCL | ZFHX4        |
| TRPM2.2   | 1.02E-07 | -0.1859  | 0.003 | 0.054 | 0.001525 | CSCL | TRPM2        |
| TSKU      | 1.02E-07 | 0.107042 | 0.023 | 0.088 | 0.001531 | CSCL | TSKU         |
| PDK1.1    | 1.04E-07 | -0.12155 | 0.023 | 0.088 | 0.001549 | CSCL | PDK1         |
| BET1.1    | 1.05E-07 | 0.130283 | 0.11  | 0.227 | 0.001562 | CSCL | BET1         |

|            |           |           |        |        |           |      |               |
|------------|-----------|-----------|--------|--------|-----------|------|---------------|
| PLCB2. 2   | 1. 06E-07 | -0. 19631 | 0. 009 | 0. 064 | 0. 001585 | CSCL | PLCB2         |
| LRMP. 1    | 1. 11E-07 | -0. 20871 | 0      | 0. 047 | 0. 001654 | CSCL | LRMP          |
| ENPP2. 1   | 1. 11E-07 | -0. 28812 | 0      | 0. 047 | 0. 001654 | CSCL | ENPP2         |
| ATP5D. 2   | 1. 13E-07 | 0. 178379 | 0. 332 | 0. 628 | 0. 001691 | CSCL | ATP5D         |
| SPATA33. 1 | 1. 13E-07 | 0. 181251 | 0. 061 | 0. 15  | 0. 001691 | CSCL | SPATA33       |
| SIRT1. 1   | 1. 14E-07 | -0. 1104  | 0. 009 | 0. 064 | 0. 001698 | CSCL | SIRT1         |
| USP31. 1   | 1. 15E-07 | -0. 10205 | 0. 003 | 0. 054 | 0. 00172  | CSCL | USP31         |
| NPAS3. 2   | 1. 16E-07 | 0. 154711 | 0. 07  | 0. 163 | 0. 001734 | CSCL | NPAS3         |
| SNX20. 1   | 1. 17E-07 | -0. 18825 | 0      | 0. 047 | 0. 001753 | CSCL | SNX20         |
| TMEM140    | 1. 19E-07 | -0. 18796 | 0. 002 | 0. 05  | 0. 001778 | CSCL | TMEM140       |
| OXCT1      | 1. 19E-07 | 0. 155914 | 0. 063 | 0. 152 | 0. 001781 | CSCL | OXCT1         |
| ZNF626     | 1. 20E-07 | 0. 132022 | 0. 059 | 0. 147 | 0. 001791 | CSCL | ZNF626        |
| C4orf33    | 1. 22E-07 | -0. 11332 | 0. 009 | 0. 063 | 0. 001816 | CSCL | C4orf33       |
| FAM96B. 2  | 1. 22E-07 | 0. 127218 | 0. 36  | 0. 673 | 0. 001828 | CSCL | FAM96B        |
| RBBP7. 2   | 1. 23E-07 | 0. 245265 | 0. 232 | 0. 434 | 0. 001842 | CSCL | RBBP7         |
| RP11-553L  | 1. 24E-07 | 0. 123679 | 0. 113 | 0. 232 | 0. 00185  | CSCL | RP11-553L6. 5 |
| ZNF791     | 1. 26E-07 | 0. 132137 | 0. 143 | 0. 277 | 0. 001876 | CSCL | ZNF791        |
| MMS19      | 1. 27E-07 | -0. 10655 | 0. 009 | 0. 063 | 0. 001898 | CSCL | MMS19         |
| DVL1       | 1. 27E-07 | -0. 10339 | 0. 003 | 0. 053 | 0. 001899 | CSCL | DVL1          |
| HSD3B7. 1  | 1. 28E-07 | -0. 12162 | 0. 017 | 0. 078 | 0. 001911 | CSCL | HSD3B7        |
| ARL6IP5    | 1. 29E-07 | 0. 118183 | 0. 361 | 0. 665 | 0. 001925 | CSCL | ARL6IP5       |
| VWA9. 1    | 1. 29E-07 | 0. 117738 | 0. 051 | 0. 132 | 0. 001928 | CSCL | VWA9          |
| ULK2. 1    | 1. 31E-07 | -0. 10842 | 0. 01  | 0. 066 | 0. 001955 | CSCL | ULK2          |
| ARMCX1. 1  | 1. 32E-07 | 0. 108552 | 0. 106 | 0. 219 | 0. 001972 | CSCL | ARMCX1        |
| IGFBP5. 2  | 1. 35E-07 | 0. 740082 | 0. 307 | 0. 266 | 0. 002015 | CSCL | IGFBP5        |
| SPAG5. 1   | 1. 36E-07 | -0. 13419 | 0      | 0. 046 | 0. 002026 | CSCL | SPAG5         |
| PIF1. 1    | 1. 36E-07 | -0. 13815 | 0. 003 | 0. 053 | 0. 002038 | CSCL | PIF1          |
| APBA2. 2   | 1. 37E-07 | 0. 16229  | 0. 101 | 0. 212 | 0. 002046 | CSCL | APBA2         |
| NUP85. 1   | 1. 39E-07 | 0. 105656 | 0. 047 | 0. 127 | 0. 00208  | CSCL | NUP85         |
| PLBD2. 2   | 1. 40E-07 | -0. 1161  | 0. 007 | 0. 06  | 0. 00209  | CSCL | PLBD2         |
| SLC16A1. 2 | 1. 43E-07 | 0. 173845 | 0. 119 | 0. 239 | 0. 00213  | CSCL | SLC16A1       |
| PLXNC1. 2  | 1. 44E-07 | -0. 14594 | 0. 012 | 0. 069 | 0. 002149 | CSCL | PLXNC1        |
| COMTD1. 2  | 1. 45E-07 | -0. 12825 | 0. 009 | 0. 063 | 0. 002174 | CSCL | COMTD1        |
| AGTPBP1. 2 | 1. 46E-07 | -0. 15439 | 0. 003 | 0. 053 | 0. 002175 | CSCL | AGTPBP1       |
| RNF157. 1  | 1. 47E-07 | 0. 143054 | 0. 054 | 0. 138 | 0. 002201 | CSCL | RNF157        |
| ANKS1A. 2  | 1. 48E-07 | -0. 11476 | 0. 009 | 0. 063 | 0. 002213 | CSCL | ANKS1A        |
| WARS. 2    | 1. 48E-07 | 0. 247748 | 0. 098 | 0. 207 | 0. 002217 | CSCL | WARS          |
| GHRL. 2    | 1. 49E-07 | -0. 16015 | 0. 007 | 0. 059 | 0. 002223 | CSCL | GHRL          |
| ASTE1. 1   | 1. 49E-07 | -0. 13297 | 0. 005 | 0. 056 | 0. 002229 | CSCL | ASTE1         |
| PRKCH. 1   | 1. 52E-07 | -0. 21866 | 0      | 0. 046 | 0. 002275 | CSCL | PRKCH         |
| SCRN1. 1   | 1. 54E-07 | 0. 182843 | 0. 084 | 0. 184 | 0. 002306 | CSCL | SCRN1         |
| DLX6. 2    | 1. 55E-07 | -0. 16208 | 0. 007 | 0. 059 | 0. 002318 | CSCL | DLX6          |
| RCBTB1. 2  | 1. 56E-07 | -0. 10254 | 0. 016 | 0. 075 | 0. 002334 | CSCL | RCBTB1        |
| SMPD2      | 1. 56E-07 | -0. 12304 | 0. 002 | 0. 049 | 0. 002337 | CSCL | SMPD2         |
| MKLN1      | 1. 62E-07 | 0. 173879 | 0. 117 | 0. 235 | 0. 002417 | CSCL | MKLN1         |
| PGAP2      | 1. 67E-07 | 0. 109002 | 0. 044 | 0. 121 | 0. 002492 | CSCL | PGAP2         |
| LYPD1      | 1. 67E-07 | 0. 220457 | 0. 094 | 0. 201 | 0. 002498 | CSCL | LYPD1         |
| SYNJ2BP. 1 | 1. 67E-07 | 0. 104512 | 0. 061 | 0. 148 | 0. 002501 | CSCL | SYNJ2BP       |
| CYB5D1     | 1. 71E-07 | -0. 14462 | 0. 005 | 0. 056 | 0. 002559 | CSCL | CYB5D1        |
| MPP2. 1    | 1. 75E-07 | -0. 10534 | 0. 009 | 0. 062 | 0. 002619 | CSCL | MPP2          |
| ASPM. 2    | 1. 77E-07 | -0. 15629 | 0. 002 | 0. 049 | 0. 002643 | CSCL | ASPM          |

|            |           |           |        |        |           |      |                |
|------------|-----------|-----------|--------|--------|-----------|------|----------------|
| PIGU. 1    | 1. 77E-07 | 0. 193141 | 0. 079 | 0. 176 | 0. 002651 | CSCL | PIGU           |
| NDRG4. 2   | 1. 80E-07 | 0. 158628 | 0. 072 | 0. 165 | 0. 002695 | CSCL | NDRG4          |
| ATP11C. 1  | 1. 84E-07 | -0. 12344 | 0. 003 | 0. 052 | 0. 002742 | CSCL | ATP11C         |
| MOXD1      | 1. 84E-07 | -0. 11096 | 0. 005 | 0. 056 | 0. 002745 | CSCL | MOXD1          |
| ADAM8. 1   | 1. 86E-07 | -0. 19791 | 0      | 0. 045 | 0. 002786 | CSCL | ADAM8          |
| DTX2. 1    | 1. 87E-07 | -0. 12357 | 0. 01  | 0. 065 | 0. 002789 | CSCL | DTX2           |
| ACYP2. 1   | 1. 88E-07 | 0. 229346 | 0. 168 | 0. 32  | 0. 002815 | CSCL | ACYP2          |
| SERPINI1.  | 1. 92E-07 | -0. 15888 | 0. 005 | 0. 055 | 0. 002875 | CSCL | SERPINI1       |
| SLC25A28   | 1. 98E-07 | -0. 10899 | 0. 005 | 0. 055 | 0. 002955 | CSCL | SLC25A28       |
| SUCLA2. 1  | 2. 00E-07 | 0. 214966 | 0. 154 | 0. 294 | 0. 002982 | CSCL | SUCLA2         |
| UFSP2      | 2. 00E-07 | 0. 268332 | 0. 108 | 0. 222 | 0. 002983 | CSCL | UFSP2          |
| RP6-91H8.  | 2. 02E-07 | -0. 24979 | 0. 007 | 0. 058 | 0. 003024 | CSCL | RP6-91H8. 3    |
| PEX11B. 1  | 2. 03E-07 | 0. 156573 | 0. 054 | 0. 136 | 0. 003027 | CSCL | PEX11B         |
| SFR1. 1    | 2. 11E-07 | -0. 12709 | 0. 014 | 0. 071 | 0. 003154 | CSCL | SFR1           |
| DPH5       | 2. 12E-07 | 0. 168828 | 0. 075 | 0. 169 | 0. 003161 | CSCL | DPH5           |
| RHOJ       | 2. 13E-07 | 0. 137675 | 0. 033 | 0. 103 | 0. 00318  | CSCL | RHOJ           |
| NUPR1. 1   | 2. 13E-07 | 0. 177665 | 0. 182 | 0. 331 | 0. 003189 | CSCL | NUPR1          |
| BNIP3. 1   | 2. 15E-07 | 0. 207236 | 0. 108 | 0. 22  | 0. 003208 | CSCL | BNIP3          |
| SYMPK. 1   | 2. 16E-07 | 0. 249037 | 0. 112 | 0. 229 | 0. 003227 | CSCL | SYMPK          |
| SBN02. 1   | 2. 17E-07 | -0. 10389 | 0. 007 | 0. 058 | 0. 003246 | CSCL | SBN02          |
| RP11-660L  | 2. 18E-07 | 0. 138598 | 0. 049 | 0. 128 | 0. 003255 | CSCL | RP11-660L16. 2 |
| TMEM163. 1 | 2. 18E-07 | -0. 14286 | 0. 01  | 0. 065 | 0. 003262 | CSCL | TMEM163        |
| TES. 2     | 2. 23E-07 | -0. 20791 | 0. 002 | 0. 048 | 0. 003327 | CSCL | TES            |
| TMEM63A. 1 | 2. 23E-07 | -0. 14036 | 0. 016 | 0. 073 | 0. 003331 | CSCL | TMEM63A        |
| PUF60. 1   | 2. 24E-07 | 0. 124018 | 0. 298 | 0. 554 | 0. 003343 | CSCL | PUF60          |
| TLR7. 2    | 2. 25E-07 | -0. 22077 | 0. 007 | 0. 058 | 0. 003365 | CSCL | TLR7           |
| SDS. 2     | 2. 26E-07 | -0. 22677 | 0. 009 | 0. 061 | 0. 003374 | CSCL | SDS            |
| MARCO      | 2. 26E-07 | -0. 27577 | 0. 009 | 0. 061 | 0. 003375 | CSCL | MARCO          |
| NDUFV2. 2  | 2. 26E-07 | 0. 152976 | 0. 325 | 0. 605 | 0. 003379 | CSCL | NDUFV2         |
| CBR4. 2    | 2. 27E-07 | 0. 115947 | 0. 091 | 0. 193 | 0. 003386 | CSCL | CBR4           |
| NPTN. 1    | 2. 30E-07 | -0. 10731 | 0. 01  | 0. 064 | 0. 003433 | CSCL | NPTN           |
| DOPEY2. 2  | 2. 33E-07 | -0. 1218  | 0. 014 | 0. 07  | 0. 003477 | CSCL | DOPEY2         |
| RFXANK     | 2. 36E-07 | 0. 321222 | 0. 175 | 0. 332 | 0. 003532 | CSCL | RFXANK         |
| CBR1. 1    | 2. 37E-07 | 0. 13426  | 0. 267 | 0. 487 | 0. 003537 | CSCL | CBR1           |
| RAB42. 2   | 2. 37E-07 | -0. 11536 | 0. 003 | 0. 052 | 0. 003543 | CSCL | RAB42          |
| TF. 2      | 2. 39E-07 | -0. 30573 | 0. 017 | 0. 076 | 0. 003575 | CSCL | TF             |
| ADRB2. 1   | 2. 41E-07 | -0. 23049 | 0. 002 | 0. 048 | 0. 003597 | CSCL | ADRB2          |
| RPP40. 1   | 2. 47E-07 | 0. 11229  | 0. 045 | 0. 122 | 0. 003684 | CSCL | RPP40          |
| SPC25. 2   | 2. 52E-07 | -0. 10776 | 0. 01  | 0. 064 | 0. 003768 | CSCL | SPC25          |
| TSPAN33. 1 | 2. 56E-07 | -0. 15675 | 0      | 0. 044 | 0. 003829 | CSCL | TSPAN33        |
| AURKB. 2   | 2. 58E-07 | -0. 17956 | 0. 003 | 0. 051 | 0. 003851 | CSCL | AURKB          |
| SPC24. 2   | 2. 64E-07 | -0. 12794 | 0. 003 | 0. 051 | 0. 003947 | CSCL | SPC24          |
| NT5DC1     | 2. 65E-07 | -0. 17096 | 0. 005 | 0. 054 | 0. 003957 | CSCL | NT5DC1         |
| CD300LF. 1 | 2. 65E-07 | -0. 18866 | 0. 002 | 0. 048 | 0. 003958 | CSCL | CD300LF        |
| MAN2B1. 2  | 2. 66E-07 | -0. 14075 | 0. 014 | 0. 07  | 0. 003972 | CSCL | MAN2B1         |
| SUSD1. 2   | 2. 71E-07 | -0. 1052  | 0. 007 | 0. 058 | 0. 004047 | CSCL | SUSD1          |
| FAM212A. 2 | 2. 71E-07 | -0. 21526 | 0. 003 | 0. 051 | 0. 004056 | CSCL | FAM212A        |
| FOXM1. 1   | 2. 73E-07 | -0. 10968 | 0. 005 | 0. 054 | 0. 004075 | CSCL | FOXM1          |
| CKAP2L. 1  | 2. 74E-07 | -0. 14308 | 0. 002 | 0. 048 | 0. 004092 | CSCL | CKAP2L         |
| MPEG1. 1   | 2. 79E-07 | -0. 18066 | 0      | 0. 044 | 0. 004176 | CSCL | MPEG1          |
| ARHGAP27.  | 2. 85E-07 | -0. 16395 | 0. 007 | 0. 057 | 0. 00426  | CSCL | ARHGAP27       |

|              |          |          |       |       |          |      |             |
|--------------|----------|----------|-------|-------|----------|------|-------------|
| AC074289. 2. | 8.6E-07  | -0.18702 | 0.01  | 0.064 | 0.004278 | CSCL | AC074289. 1 |
| KIF21A. 2    | 2.88E-07 | 0.300741 | 0.162 | 0.309 | 0.004303 | CSCL | KIF21A      |
| CCDC170. 1   | 3.04E-07 | -0.14612 | 0.002 | 0.047 | 0.004542 | CSCL | CCDC170     |
| GRASP. 2     | 3.08E-07 | -0.20905 | 0.005 | 0.054 | 0.004597 | CSCL | GRASP       |
| NAA38. 1     | 3.09E-07 | 0.239837 | 0.265 | 0.482 | 0.004624 | CSCL | NAA38       |
| SPRY1. 2     | 3.11E-07 | 0.148436 | 0.12  | 0.238 | 0.004654 | CSCL | SPRY1       |
| C5orf45. 1   | 3.13E-07 | 0.160391 | 0.079 | 0.172 | 0.004684 | CSCL | C5orf45     |
| RASSF3. 1    | 3.14E-07 | -0.15765 | 0     | 0.044 | 0.004687 | CSCL | RASSF3      |
| ATF7IP2. 1   | 3.14E-07 | -0.20853 | 0     | 0.044 | 0.004687 | CSCL | ATF7IP2     |
| FAM159A. 1   | 3.14E-07 | -0.18514 | 0.002 | 0.047 | 0.004688 | CSCL | FAM159A     |
| PRCP. 1      | 3.17E-07 | 0.204761 | 0.197 | 0.363 | 0.004731 | CSCL | PRCP        |
| AKTIP. 1     | 3.17E-07 | 0.165646 | 0.079 | 0.173 | 0.004734 | CSCL | AKTIP       |
| NIPA1        | 3.19E-07 | -0.12213 | 0.005 | 0.054 | 0.004766 | CSCL | NIPA1       |
| USP28        | 3.20E-07 | -0.10757 | 0.007 | 0.057 | 0.004784 | CSCL | USP28       |
| PLK1. 1      | 3.21E-07 | -0.12839 | 0.007 | 0.057 | 0.004794 | CSCL | PLK1        |
| BCL11A. 1    | 3.21E-07 | -0.12784 | 0.003 | 0.051 | 0.004795 | CSCL | BCL11A      |
| TIFA         | 3.22E-07 | -0.12799 | 0.009 | 0.06  | 0.004812 | CSCL | TIFA        |
| CCL3L3. 1    | 3.24E-07 | -0.59656 | 0.007 | 0.056 | 0.004835 | CSCL | CCL3L3      |
| ABCC4. 1     | 3.25E-07 | -0.12386 | 0.002 | 0.047 | 0.004851 | CSCL | ABCC4       |
| CLCN4. 1     | 3.28E-07 | -0.11204 | 0.007 | 0.057 | 0.004895 | CSCL | CLCN4       |
| NCAPG. 1     | 3.32E-07 | -0.12656 | 0     | 0.044 | 0.004966 | CSCL | NCAPG       |
| MYBL2. 1     | 3.34E-07 | -0.1036  | 0.002 | 0.047 | 0.004997 | CSCL | MYBL2       |
| DUOX1. 2     | 3.51E-07 | -0.12562 | 0.012 | 0.066 | 0.005248 | CSCL | DUOX1       |
| SLC46A3. 2   | 3.53E-07 | -0.12834 | 0.009 | 0.06  | 0.005274 | CSCL | SLC46A3     |
| ZNF738. 2    | 3.53E-07 | 0.109789 | 0.063 | 0.148 | 0.005281 | CSCL | ZNF738      |
| C16orf59     | 3.64E-07 | -0.10229 | 0.002 | 0.047 | 0.005433 | CSCL | C16orf59    |
| NDC80. 1     | 3.71E-07 | -0.14194 | 0.003 | 0.05  | 0.005537 | CSCL | NDC80       |
| KHDRBS3. 2   | 3.72E-07 | 0.253993 | 0.108 | 0.22  | 0.00556  | CSCL | KHDRBS3     |
| PSTPIP2. 1   | 3.73E-07 | -0.13483 | 0.002 | 0.047 | 0.005572 | CSCL | PSTPIP2     |
| CDK6. 2      | 3.76E-07 | 0.151232 | 0.103 | 0.211 | 0.005612 | CSCL | CDK6        |
| PSTPIP1. 1   | 3.84E-07 | -0.18603 | 0     | 0.043 | 0.005737 | CSCL | PSTPIP1     |
| SIGLEC14.    | 3.84E-07 | -0.19474 | 0.002 | 0.047 | 0.005744 | CSCL | SIGLEC14    |
| PKIA. 2      | 4.15E-07 | -0.11666 | 0.031 | 0.096 | 0.006196 | CSCL | PKIA        |
| PRKAR2B. 2   | 4.26E-07 | -0.10976 | 0.016 | 0.071 | 0.006367 | CSCL | PRKAR2B     |
| SNRPB2. 1    | 4.29E-07 | 0.199345 | 0.309 | 0.577 | 0.00641  | CSCL | SNRPB2      |
| GPSM2. 1     | 4.42E-07 | 0.101784 | 0.086 | 0.181 | 0.006606 | CSCL | GPSM2       |
| PLCG1        | 4.43E-07 | 0.107168 | 0.035 | 0.103 | 0.006621 | CSCL | PLCG1       |
| WIZ          | 4.45E-07 | 0.114562 | 0.042 | 0.114 | 0.006648 | CSCL | WIZ         |
| SLC29A3. 1   | 4.45E-07 | -0.16812 | 0.002 | 0.046 | 0.006648 | CSCL | SLC29A3     |
| SHQ1. 1      | 4.47E-07 | -0.11188 | 0.003 | 0.05  | 0.00668  | CSCL | SHQ1        |
| PPM1L. 1     | 4.47E-07 | -0.10545 | 0.003 | 0.05  | 0.006681 | CSCL | PPM1L       |
| IPMK         | 4.53E-07 | -0.12515 | 0.002 | 0.046 | 0.006773 | CSCL | IPMK        |
| TBC1D9. 2    | 4.57E-07 | -0.10786 | 0.007 | 0.056 | 0.006836 | CSCL | TBC1D9      |
| DDR1. 1      | 4.69E-07 | 0.213585 | 0.182 | 0.339 | 0.00701  | CSCL | DDR1        |
| ATPIF1       | 4.69E-07 | 0.150435 | 0.347 | 0.637 | 0.007015 | CSCL | ATPIF1      |
| PIM2. 1      | 4.73E-07 | -0.1457  | 0.007 | 0.056 | 0.007071 | CSCL | PIM2        |
| SLC37A1. 1   | 4.83E-07 | -0.11218 | 0.007 | 0.056 | 0.007217 | CSCL | SLC37A1     |
| PHF19. 2     | 4.93E-07 | 0.139414 | 0.054 | 0.133 | 0.007371 | CSCL | PHF19       |
| ITGB5. 1     | 4.95E-07 | -0.14498 | 0.009 | 0.059 | 0.007392 | CSCL | ITGB5       |
| INTS12       | 5.00E-07 | 0.178173 | 0.077 | 0.169 | 0.007479 | CSCL | INTS12      |
| PEF1. 1      | 5.06E-07 | 0.317316 | 0.175 | 0.327 | 0.007557 | CSCL | PEF1        |

|            |           |           |        |        |           |      |                |
|------------|-----------|-----------|--------|--------|-----------|------|----------------|
| SYT11. 2   | 5. 17E-07 | 0. 177524 | 0. 216 | 0. 392 | 0. 007728 | CSCL | SYT11          |
| QPCT. 2    | 5. 18E-07 | -0. 17    | 0. 003 | 0. 049 | 0. 007742 | CSCL | QPCT           |
| DZIP1. 1   | 5. 24E-07 | 0. 165819 | 0. 037 | 0. 106 | 0. 007826 | CSCL | DZIP1          |
| BUB1. 1    | 5. 27E-07 | -0. 12486 | 0      | 0. 042 | 0. 007879 | CSCL | BUB1           |
| DOLK. 1    | 5. 28E-07 | 0. 100212 | 0. 052 | 0. 13  | 0. 007886 | CSCL | DOLK           |
| CD7. 1     | 5. 37E-07 | -0. 27675 | 0. 002 | 0. 045 | 0. 008028 | CSCL | CD7            |
| DNAJA4. 2  | 5. 37E-07 | -0. 17567 | 0. 012 | 0. 064 | 0. 008031 | CSCL | DNAJA4         |
| ANKHD1. 1  | 5. 38E-07 | -0. 11246 | 0. 021 | 0. 079 | 0. 008036 | CSCL | ANKHD1         |
| CCS. 1     | 5. 44E-07 | 0. 225892 | 0. 14  | 0. 266 | 0. 008136 | CSCL | CCS            |
| RP11-841C  | 5. 69E-07 | -0. 13042 | 0. 009 | 0. 058 | 0. 008498 | CSCL | RP11-841020. 2 |
| SNRPF. 1   | 5. 73E-07 | 0. 223058 | 0. 304 | 0. 559 | 0. 008558 | CSCL | SNRPF          |
| ATP5J. 1   | 5. 74E-07 | 0. 362042 | 0. 558 | 0. 761 | 0. 008573 | CSCL | ATP5J          |
| TOMM40L. 1 | 5. 81E-07 | -0. 10867 | 0. 012 | 0. 064 | 0. 008688 | CSCL | TOMM40L        |
| ADRBK2. 2  | 5. 89E-07 | -0. 13781 | 0. 007 | 0. 055 | 0. 008805 | CSCL | ADRBK2         |
| IL2RG. 1   | 5. 93E-07 | -0. 25086 | 0. 002 | 0. 045 | 0. 008864 | CSCL | IL2RG          |
| BTAF1      | 5. 95E-07 | -0. 11609 | 0. 005 | 0. 052 | 0. 008892 | CSCL | BTAF1          |
| PHLDB1. 2  | 5. 96E-07 | 0. 116583 | 0. 063 | 0. 146 | 0. 008906 | CSCL | PHLDB1         |
| NFATC2. 1  | 5. 99E-07 | -0. 19357 | 0. 003 | 0. 048 | 0. 008958 | CSCL | NFATC2         |
| SETD4      | 6. 04E-07 | 0. 144972 | 0. 052 | 0. 129 | 0. 009027 | CSCL | SETD4          |
| ATP8B4. 1  | 6. 12E-07 | -0. 16703 | 0. 002 | 0. 045 | 0. 009146 | CSCL | ATP8B4         |
| PLIN3. 1   | 6. 13E-07 | 0. 229559 | 0. 199 | 0. 366 | 0. 009159 | CSCL | PLIN3          |
| TROAP. 2   | 6. 28E-07 | -0. 10891 | 0. 003 | 0. 049 | 0. 009379 | CSCL | TROAP          |
| WRB. 1     | 6. 41E-07 | 0. 22823  | 0. 236 | 0. 429 | 0. 009575 | CSCL | WRB            |
| RIN1. 1    | 6. 48E-07 | 0. 100377 | 0. 024 | 0. 085 | 0. 009691 | CSCL | RIN1           |
| EIF4A1. 2  | 6. 52E-07 | 0. 163955 | 0. 628 | 0. 873 | 0. 009745 | CSCL | EIF4A1         |
| HSPA13. 1  | 6. 55E-07 | 0. 142433 | 0. 101 | 0. 205 | 0. 009785 | CSCL | HSPA13         |
| NR2C2AP. 1 | 6. 82E-07 | 0. 22301  | 0. 079 | 0. 17  | 0. 010186 | CSCL | NR2C2AP        |
| HJURP. 1   | 6. 83E-07 | -0. 14157 | 0      | 0. 041 | 0. 010211 | CSCL | HJURP          |
| NFATC1. 2  | 6. 85E-07 | -0. 1435  | 0. 007 | 0. 055 | 0. 010242 | CSCL | NFATC1         |
| CD52. 1    | 6. 98E-07 | -0. 29382 | 0. 007 | 0. 054 | 0. 010435 | CSCL | CD52           |
| SEMA4A. 2  | 7. 02E-07 | -0. 13394 | 0. 005 | 0. 051 | 0. 010483 | CSCL | SEMA4A         |
| PARVA. 1   | 7. 07E-07 | 0. 10926  | 0. 033 | 0. 099 | 0. 010562 | CSCL | PARVA          |
| ZNF468     | 7. 09E-07 | -0. 10744 | 0. 003 | 0. 048 | 0. 010594 | CSCL | ZNF468         |
| WDR61      | 7. 11E-07 | 0. 284294 | 0. 194 | 0. 356 | 0. 010627 | CSCL | WDR61          |
| MMP19      | 7. 13E-07 | -0. 16227 | 0. 01  | 0. 061 | 0. 010657 | CSCL | MMP19          |
| CDCA7L. 1  | 7. 17E-07 | 0. 12825  | 0. 068 | 0. 153 | 0. 010719 | CSCL | CDCA7L         |
| ITGA4. 1   | 7. 20E-07 | -0. 16519 | 0. 002 | 0. 045 | 0. 010756 | CSCL | ITGA4          |
| KANSL3. 1  | 7. 20E-07 | -0. 10191 | 0. 014 | 0. 067 | 0. 010761 | CSCL | KANSL3         |
| UMPS       | 7. 23E-07 | 0. 116925 | 0. 058 | 0. 137 | 0. 010804 | CSCL | UMPS           |
| PARPBP     | 7. 28E-07 | -0. 11199 | 0. 003 | 0. 048 | 0. 010882 | CSCL | PARPBP         |
| GPRIN3. 2  | 7. 28E-07 | -0. 1364  | 0. 01  | 0. 061 | 0. 010886 | CSCL | GPRIN3         |
| IFI27L2. 1 | 7. 28E-07 | 0. 161177 | 0. 271 | 0. 481 | 0. 010887 | CSCL | IFI27L2        |
| COA3. 1    | 7. 42E-07 | 0. 237023 | 0. 269 | 0. 487 | 0. 011082 | CSCL | COA3           |
| STAT6. 2   | 7. 45E-07 | -0. 17198 | 0. 007 | 0. 054 | 0. 011139 | CSCL | STAT6          |
| TMC8. 1    | 7. 70E-07 | -0. 16211 | 0. 002 | 0. 045 | 0. 011502 | CSCL | TMC8           |
| ENO2. 2    | 7. 90E-07 | 0. 23743  | 0. 157 | 0. 29  | 0. 0118   | CSCL | ENO2           |
| LPAR1. 1   | 8. 02E-07 | -0. 10502 | 0. 005 | 0. 051 | 0. 011987 | CSCL | LPAR1          |
| SUCLG1. 1  | 8. 09E-07 | 0. 289197 | 0. 244 | 0. 446 | 0. 012091 | CSCL | SUCLG1         |
| METTL8. 1  | 8. 10E-07 | 0. 137864 | 0. 049 | 0. 123 | 0. 0121   | CSCL | METTL8         |
| ZNF883. 1  | 8. 13E-07 | 0. 146899 | 0. 063 | 0. 145 | 0. 012143 | CSCL | ZNF883         |
| NRCAM. 1   | 8. 13E-07 | 0. 149522 | 0. 147 | 0. 276 | 0. 012147 | CSCL | NRCAM          |

|           |          |          |       |       |          |      |            |
|-----------|----------|----------|-------|-------|----------|------|------------|
| MBOAT2.1  | 8.30E-07 | 0.262097 | 0.089 | 0.186 | 0.012409 | CSCL | MBOAT2     |
| ISOC2.2   | 8.36E-07 | 0.281415 | 0.194 | 0.357 | 0.012486 | CSCL | ISOC2      |
| PLB1.1    | 8.58E-07 | -0.16351 | 0.002 | 0.044 | 0.012817 | CSCL | PLB1       |
| PRKCB.1   | 8.64E-07 | -0.14465 | 0.002 | 0.044 | 0.012917 | CSCL | PRKCB      |
| FAM181B.2 | 8.71E-07 | 0.11251  | 0.105 | 0.208 | 0.013012 | CSCL | FAM181B    |
| SEPT8.2   | 8.73E-07 | 0.185034 | 0.099 | 0.201 | 0.013044 | CSCL | 8-Sep      |
| MORF4L2.1 | 8.89E-07 | 0.104251 | 0.353 | 0.639 | 0.013292 | CSCL | MORF4L2    |
| SPAG16.2  | 9.01E-07 | 0.214259 | 0.164 | 0.303 | 0.013464 | CSCL | SPAG16     |
| HS3ST1.2  | 9.20E-07 | -0.15351 | 0.03  | 0.091 | 0.013745 | CSCL | HS3ST1     |
| RUNX3.1   | 9.38E-07 | -0.18378 | 0     | 0.04  | 0.014015 | CSCL | RUNX3      |
| SBK1.2    | 9.69E-07 | -0.10363 | 0.019 | 0.074 | 0.014479 | CSCL | SBK1       |
| PRRG4.1   | 9.73E-07 | -0.16796 | 0.003 | 0.047 | 0.01454  | CSCL | PRRG4      |
| CYB5D2    | 9.74E-07 | 0.198437 | 0.124 | 0.238 | 0.014555 | CSCL | CYB5D2     |
| SLC41A2   | 9.79E-07 | -0.10935 | 0.003 | 0.047 | 0.014637 | CSCL | SLC41A2    |
| TCF12.2   | 9.84E-07 | 0.279297 | 0.154 | 0.29  | 0.014699 | CSCL | TCF12      |
| ARPC1A.2  | 1.01E-06 | 0.144316 | 0.316 | 0.571 | 0.015125 | CSCL | ARPC1A     |
| SLC38A9.1 | 1.02E-06 | -0.10742 | 0.014 | 0.066 | 0.015312 | CSCL | SLC38A9    |
| CRYBB1.1  | 1.05E-06 | -0.19954 | 0.002 | 0.044 | 0.015634 | CSCL | CRYBB1     |
| PRKCG.1   | 1.05E-06 | 0.358275 | 0.047 | 0.019 | 0.015646 | CSCL | PRKCG      |
| SNAI1.1   | 1.05E-06 | -0.16779 | 0.003 | 0.047 | 0.015677 | CSCL | SNAI1      |
| TTL7.2    | 1.05E-06 | 0.11259  | 0.129 | 0.243 | 0.015717 | CSCL | TTL7       |
| LYVE1.1   | 1.08E-06 | -0.30814 | 0     | 0.04  | 0.016184 | CSCL | LYVE1      |
| ARRB1.1   | 1.09E-06 | -0.1648  | 0.002 | 0.043 | 0.016233 | CSCL | ARRB1      |
| IL10RB-AS | 1.10E-06 | -0.17929 | 0.003 | 0.047 | 0.016458 | CSCL | IL10RB-AS1 |
| PLA2G5.1  | 1.10E-06 | 0.782665 | 0.157 | 0.106 | 0.016494 | CSCL | PLA2G5     |
| HOXA10.2  | 1.12E-06 | -0.11049 | 0.023 | 0.08  | 0.016789 | CSCL | HOXA10     |
| CCDC151.1 | 1.13E-06 | -0.11172 | 0.014 | 0.065 | 0.016876 | CSCL | CCDC151    |
| RCN1.2    | 1.14E-06 | 0.260087 | 0.197 | 0.362 | 0.017099 | CSCL | RCN1       |
| KIF9.2    | 1.15E-06 | 0.237991 | 0.086 | 0.179 | 0.017152 | CSCL | KIF9       |
| OIP5.1    | 1.15E-06 | -0.10418 | 0.002 | 0.043 | 0.01716  | CSCL | OIP5       |
| ZNF397    | 1.17E-06 | 0.109881 | 0.079 | 0.167 | 0.017537 | CSCL | ZNF397     |
| SHISA4.1  | 1.18E-06 | 0.289268 | 0.131 | 0.252 | 0.017618 | CSCL | SHISA4     |
| APOBR.1   | 1.18E-06 | -0.17057 | 0     | 0.04  | 0.017642 | CSCL | APOBR      |
| PMPCB.1   | 1.20E-06 | 0.254394 | 0.194 | 0.351 | 0.017911 | CSCL | PMPCB      |
| ZNF618.2  | 1.21E-06 | -0.141   | 0.005 | 0.05  | 0.018057 | CSCL | ZNF618     |
| ACAP3.2   | 1.21E-06 | 0.141039 | 0.113 | 0.221 | 0.018146 | CSCL | ACAP3      |
| LHPP.2    | 1.21E-06 | -0.13662 | 0.042 | 0.108 | 0.018155 | CSCL | LHPP       |
| CD72.1    | 1.22E-06 | -0.16246 | 0.007 | 0.053 | 0.018244 | CSCL | CD72       |
| LIMCH1.1  | 1.23E-06 | 0.138128 | 0.072 | 0.156 | 0.01834  | CSCL | LIMCH1     |
| ZC3H8     | 1.23E-06 | 0.135948 | 0.068 | 0.151 | 0.018403 | CSCL | ZC3H8      |
| MB21D2.1  | 1.24E-06 | -0.12712 | 0.009 | 0.056 | 0.018523 | CSCL | MB21D2     |
| MGLL.1    | 1.24E-06 | 0.221589 | 0.066 | 0.149 | 0.018529 | CSCL | MGLL       |
| UQCRH.2   | 1.25E-06 | 0.346216 | 0.569 | 0.792 | 0.018623 | CSCL | UQCRH      |
| GAP43.2   | 1.26E-06 | 0.395031 | 0.447 | 0.467 | 0.018785 | CSCL | GAP43      |
| C4orf3.2  | 1.26E-06 | 0.140247 | 0.36  | 0.661 | 0.018806 | CSCL | C4orf3     |
| RBM8A.1   | 1.27E-06 | 0.175463 | 0.344 | 0.627 | 0.019014 | CSCL | RBM8A      |
| AC009948. | 1.29E-06 | -0.12759 | 0.009 | 0.056 | 0.019219 | CSCL | AC009948.5 |
| KMT2E.1   | 1.29E-06 | 0.139098 | 0.307 | 0.549 | 0.019259 | CSCL | KMT2E      |
| CASP8.2   | 1.30E-06 | -0.13051 | 0.005 | 0.05  | 0.019389 | CSCL | CASP8      |
| PLAGL1.1  | 1.30E-06 | -0.1608  | 0.002 | 0.043 | 0.019394 | CSCL | PLAGL1     |
| EIF3K.1   | 1.31E-06 | 0.348673 | 0.571 | 0.768 | 0.019513 | CSCL | EIF3K      |

|           |    |        |          |       |       |          |      |              |
|-----------|----|--------|----------|-------|-------|----------|------|--------------|
| SLC25A51. | 1. | 32E-06 | -0.10146 | 0.009 | 0.056 | 0.019673 | CSCL | SLC25A51     |
| ADAP1.    | 1. | 34E-06 | -0.16332 | 0.002 | 0.043 | 0.020048 | CSCL | ADAP1        |
| PIK3R5.   | 2. | 34E-06 | -0.14742 | 0.005 | 0.049 | 0.020054 | CSCL | PIK3R5       |
| EXOSC5    | 1. | 36E-06 | 0.178728 | 0.091 | 0.185 | 0.020368 | CSCL | EXOSC5       |
| ANKRD46   | 1. | 37E-06 | 0.128919 | 0.075 | 0.161 | 0.020472 | CSCL | ANKRD46      |
| GSTM3     | 1. | 39E-06 | 0.293035 | 0.147 | 0.274 | 0.020742 | CSCL | GSTM3        |
| MASTL.    | 1. | 40E-06 | -0.10798 | 0     | 0.039 | 0.020963 | CSCL | MASTL        |
| SLC32A1.  | 1. | 40E-06 | -0.15731 | 0     | 0.039 | 0.020963 | CSCL | SLC32A1      |
| ASCL2.    | 1. | 44E-06 | -0.1566  | 0     | 0.039 | 0.021574 | CSCL | ASCL2        |
| AC109826. | 1. | 44E-06 | -0.18576 | 0     | 0.039 | 0.021574 | CSCL | AC109826.1   |
| NHSL2.    | 1. | 45E-06 | 0.312663 | 0.094 | 0.049 | 0.021643 | CSCL | NHSL2        |
| HNRNPC.   | 2. | 48E-06 | 0.399634 | 0.532 | 0.702 | 0.022072 | CSCL | HNRNPC       |
| CHML      | 1. | 48E-06 | -0.10662 | 0.002 | 0.042 | 0.022142 | CSCL | CHML         |
| DHTKD1.   | 1. | 50E-06 | 0.110675 | 0.054 | 0.129 | 0.022449 | CSCL | DHTKD1       |
| RP11-536K | 1. | 53E-06 | -0.21985 | 0     | 0.039 | 0.02285  | CSCL | RP11-536K7.3 |
| KCNQ10T1. | 1. | 54E-06 | 0.149737 | 0.155 | 0.284 | 0.023074 | CSCL | KCNQ10T1     |
| TXNDC17.  | 2. | 60E-06 | 0.217735 | 0.295 | 0.537 | 0.02389  | CSCL | TXNDC17      |
| FEZ1.     | 1. | 60E-06 | 0.133935 | 0.25  | 0.439 | 0.02392  | CSCL | FEZ1         |
| JAM2.     | 2. | 61E-06 | 0.196086 | 0.138 | 0.258 | 0.024016 | CSCL | JAM2         |
| SELL.     | 1. | 62E-06 | -0.20567 | 0     | 0.039 | 0.024201 | CSCL | SELL         |
| IQCG.     | 2. | 64E-06 | 0.143977 | 0.052 | 0.126 | 0.024557 | CSCL | IQCG         |
| MT1E.     | 2. | 66E-06 | 0.591272 | 0.38  | 0.38  | 0.024822 | CSCL | MT1E         |
| ZCCHC14.  | 1. | 71E-06 | -0.10127 | 0.007 | 0.052 | 0.025606 | CSCL | ZCCHC14      |
| CD180.    | 1. | 72E-06 | -0.1566  | 0     | 0.039 | 0.025632 | CSCL | CD180        |
| KIF2C.    | 1. | 73E-06 | -0.11793 | 0.003 | 0.045 | 0.02583  | CSCL | KIF2C        |
| CGRRF1.   | 1. | 73E-06 | 0.145404 | 0.08  | 0.168 | 0.025874 | CSCL | CGRRF1       |
| HSPA1B.   | 1. | 73E-06 | 0.124013 | 0.239 | 0.419 | 0.025913 | CSCL | HSPA1B       |
| HAUS4.    | 2. | 74E-06 | -0.14849 | 0.014 | 0.064 | 0.026046 | CSCL | HAUS4        |
| MYEOV2.   | 1. | 75E-06 | 0.117594 | 0.377 | 0.689 | 0.026206 | CSCL | MYEOV2       |
| SULT1A1.  | 1. | 77E-06 | -0.16176 | 0.007 | 0.052 | 0.026414 | CSCL | SULT1A1      |
| TESC      | 1. | 80E-06 | -0.11838 | 0.002 | 0.042 | 0.026935 | CSCL | TESC         |
| NME7.     | 2. | 81E-06 | 0.167387 | 0.079 | 0.165 | 0.027028 | CSCL | NME7         |
| CDK10.    | 1. | 85E-06 | 0.133449 | 0.08  | 0.168 | 0.027621 | CSCL | CDK10        |
| TNF.      | 1. | 86E-06 | -0.20864 | 0.003 | 0.045 | 0.027799 | CSCL | TNF          |
| MARVELD1  | 1. | 87E-06 | -0.1053  | 0.002 | 0.042 | 0.027934 | CSCL | MARVELD1     |
| DOCK5.    | 2. | 88E-06 | -0.18011 | 0.01  | 0.057 | 0.028112 | CSCL | DOCK5        |
| PRIM2     | 1. | 89E-06 | -0.10111 | 0.01  | 0.058 | 0.028233 | CSCL | PRIM2        |
| RP11-76E1 | 1. | 92E-06 | -0.21492 | 0     | 0.038 | 0.028752 | CSCL | RP11-76E17.3 |
| SRSF10.   | 1. | 95E-06 | 0.210202 | 0.131 | 0.246 | 0.029186 | CSCL | SRSF10       |
| TP53TG1.  | 2. | 99E-06 | 0.174471 | 0.103 | 0.202 | 0.029812 | CSCL | TP53TG1      |
| TMEM255B. | 2. | 04E-06 | -0.1503  | 0.01  | 0.057 | 0.030474 | CSCL | TMEM255B     |
| CDCA8.    | 1. | 07E-06 | -0.13432 | 0.002 | 0.041 | 0.030952 | CSCL | CDCA8        |
| GIMAP6.   | 1. | 10E-06 | -0.17696 | 0.003 | 0.045 | 0.031377 | CSCL | GIMAP6       |
| PKMYT1.   | 1. | 12E-06 | -0.11424 | 0.003 | 0.045 | 0.031652 | CSCL | PKMYT1       |
| TMEFF2.   | 2. | 12E-06 | -0.11346 | 0.024 | 0.08  | 0.031659 | CSCL | TMEFF2       |
| AP1S1.    | 2. | 12E-06 | 0.252897 | 0.265 | 0.478 | 0.031721 | CSCL | AP1S1        |
| PSMC3.    | 1. | 13E-06 | 0.201546 | 0.302 | 0.542 | 0.031784 | CSCL | PSMC3        |
| KLF11.    | 1. | 13E-06 | -0.12805 | 0.002 | 0.041 | 0.031882 | CSCL | KLF11        |
| NDUFB3.   | 1. | 15E-06 | 0.262173 | 0.305 | 0.566 | 0.032183 | CSCL | NDUFB3       |
| FGD3.     | 1. | 16E-06 | -0.15635 | 0.002 | 0.041 | 0.032226 | CSCL | FGD3         |
| SC5D.     | 1. | 16E-06 | 0.180697 | 0.087 | 0.178 | 0.032229 | CSCL | SC5D         |

|            |          |          |       |       |          |      |            |
|------------|----------|----------|-------|-------|----------|------|------------|
| GRAMD4.2   | 2.22E-06 | -0.10239 | 0.014 | 0.063 | 0.033228 | CSCL | GRAMD4     |
| ID3.2      | 2.27E-06 | 0.129059 | 0.15  | 0.27  | 0.033957 | CSCL | ID3        |
| TPK1.1     | 2.28E-06 | -0.15159 | 0.005 | 0.048 | 0.034119 | CSCL | TPK1       |
| SMURF1.1   | 2.32E-06 | -0.10793 | 0.007 | 0.051 | 0.034743 | CSCL | SMURF1     |
| JAG1.1     | 2.37E-06 | 0.249571 | 0.077 | 0.163 | 0.035471 | CSCL | JAG1       |
| INA.1      | 2.40E-06 | -0.12885 | 0.003 | 0.044 | 0.035838 | CSCL | INA        |
| RHOF.1     | 2.40E-06 | -0.13962 | 0.009 | 0.054 | 0.035921 | CSCL | RHOF       |
| TCF20.1    | 2.42E-06 | -0.10151 | 0.012 | 0.06  | 0.036116 | CSCL | TCF20      |
| C21orf62.2 | 2.42E-06 | 0.181169 | 0.077 | 0.162 | 0.036235 | CSCL | C21orf62   |
| TNFSF10    | 2.45E-06 | -0.13319 | 0.023 | 0.077 | 0.036582 | CSCL | TNFSF10    |
| MAP7.1     | 2.46E-06 | -0.20125 | 0.002 | 0.041 | 0.036784 | CSCL | MAP7       |
| NGDN.1     | 2.47E-06 | 0.200002 | 0.147 | 0.269 | 0.036939 | CSCL | NGDN       |
| FAM78A.1   | 2.49E-06 | -0.16678 | 0     | 0.037 | 0.037227 | CSCL | FAM78A     |
| RBP7.1     | 2.49E-06 | -0.16604 | 0.005 | 0.047 | 0.037232 | CSCL | RBP7       |
| TRMT13     | 2.53E-06 | 0.140427 | 0.063 | 0.14  | 0.037805 | CSCL | TRMT13     |
| CDC45.1    | 2.56E-06 | -0.10534 | 0     | 0.037 | 0.038311 | CSCL | CDC45      |
| C11orf1.2  | 2.62E-06 | 0.22441  | 0.068 | 0.148 | 0.039209 | CSCL | C11orf1    |
| KCNQ1.1    | 2.68E-06 | -0.16252 | 0.002 | 0.041 | 0.040039 | CSCL | KCNQ1      |
| NRF1       | 2.72E-06 | -0.10315 | 0     | 0.037 | 0.040573 | CSCL | NRF1       |
| SLC27A3.1  | 2.74E-06 | 0.134571 | 0.054 | 0.126 | 0.040926 | CSCL | SLC27A3    |
| DEPDC1     | 2.79E-06 | -0.1024  | 0     | 0.037 | 0.041754 | CSCL | DEPDC1     |
| DLGAP5.1   | 2.79E-06 | -0.11676 | 0     | 0.037 | 0.041754 | CSCL | DLGAP5     |
| CST7.1     | 2.79E-06 | -0.21171 | 0     | 0.037 | 0.041754 | CSCL | CST7       |
| MTRNR2L8.2 | 2.81E-06 | 0.485706 | 0.243 | 0.188 | 0.042043 | CSCL | MTRNR2L8   |
| AP1G2.1    | 2.82E-06 | -0.12331 | 0.009 | 0.053 | 0.042105 | CSCL | AP1G2      |
| TMEM69.1   | 2.83E-06 | 0.122675 | 0.086 | 0.173 | 0.042361 | CSCL | TMEM69     |
| ASNS.2     | 2.85E-06 | 0.135426 | 0.091 | 0.181 | 0.042518 | CSCL | ASNS       |
| ZNF544.1   | 2.88E-06 | 0.143333 | 0.054 | 0.126 | 0.043097 | CSCL | ZNF544     |
| MAP1LC3B2  | 2.91E-06 | -0.12353 | 0.03  | 0.087 | 0.043447 | CSCL | MAP1LC3B2  |
| DOCK11.2   | 2.91E-06 | -0.11537 | 0.01  | 0.056 | 0.043448 | CSCL | DOCK11     |
| DENND2D    | 3.06E-06 | -0.12654 | 0.005 | 0.047 | 0.045743 | CSCL | DENND2D    |
| NUDT18     | 3.09E-06 | -0.11226 | 0.002 | 0.04  | 0.046106 | CSCL | NUDT18     |
| PDZRN4.1   | 3.11E-06 | -0.14413 | 0.002 | 0.04  | 0.046482 | CSCL | PDZRN4     |
| BATF.1     | 3.12E-06 | -0.16058 | 0.002 | 0.04  | 0.046603 | CSCL | BATF       |
| CTB-61M7.3 | 3.18E-06 | -0.19429 | 0.002 | 0.04  | 0.047488 | CSCL | CTB-61M7.2 |
| HS3ST3B1   | 3.21E-06 | -0.12122 | 0.003 | 0.043 | 0.047957 | CSCL | HS3ST3B1   |
| CDK4       | 3.24E-06 | 0.203483 | 0.279 | 0.494 | 0.048483 | CSCL | CDK4       |
| NDUFS6.1   | 3.26E-06 | 0.136882 | 0.351 | 0.642 | 0.048712 | CSCL | NDUFS6     |
| ANAPC11.2  | 3.27E-06 | 0.367077 | 0.55  | 0.736 | 0.048844 | CSCL | ANAPC11    |
| FLVCR2     | 3.32E-06 | -0.14014 | 0     | 0.036 | 0.049593 | CSCL | FLVCR2     |
| CCND2.2    | 3.40E-06 | 0.243684 | 0.187 | 0.334 | 0.050827 | CSCL | CCND2      |
| POLR2F.2   | 3.53E-06 | 0.221244 | 0.311 | 0.554 | 0.052723 | CSCL | POLR2F     |
| ICAM2.1    | 3.62E-06 | -0.17888 | 0     | 0.036 | 0.054047 | CSCL | ICAM2      |
| EIF1B.2    | 3.65E-06 | 0.170425 | 0.339 | 0.601 | 0.054538 | CSCL | EIF1B      |
| MANBAL.2   | 3.65E-06 | 0.294073 | 0.188 | 0.342 | 0.054546 | CSCL | MANBAL     |
| CITED1.1   | 3.67E-06 | 0.235224 | 0.073 | 0.155 | 0.0549   | CSCL | CITED1     |
| ZC3HC1     | 3.73E-06 | 0.200084 | 0.056 | 0.128 | 0.055708 | CSCL | ZC3HC1     |
| ITGB3BP    | 3.79E-06 | 0.239483 | 0.068 | 0.147 | 0.05668  | CSCL | ITGB3BP    |
| ACSL5.1    | 3.83E-06 | -0.14913 | 0     | 0.036 | 0.057235 | CSCL | ACSL5      |
| ZNF462.2   | 3.86E-06 | 0.166496 | 0.091 | 0.181 | 0.057725 | CSCL | ZNF462     |
| TGM2.1     | 3.88E-06 | -0.13918 | 0.002 | 0.039 | 0.057963 | CSCL | TGM2       |



|            |           |           |        |        |           |      |                 |
|------------|-----------|-----------|--------|--------|-----------|------|-----------------|
| LMO4. 2    | 3. 88E-06 | 0. 161207 | 0. 283 | 0. 488 | 0. 057985 | CSCL | LMO4            |
| CD1D. 1    | 3. 92E-06 | -0. 18441 | 0. 002 | 0. 039 | 0. 058642 | CSCL | CD1D            |
| DPH2. 1    | 3. 95E-06 | 0. 132428 | 0. 051 | 0. 119 | 0. 059078 | CSCL | DPH2            |
| HOXA3. 1   | 4. 02E-06 | -0. 10818 | 0. 012 | 0. 058 | 0. 06003  | CSCL | HOXA3           |
| DENND1A    | 4. 05E-06 | -0. 10966 | 0. 01  | 0. 055 | 0. 060586 | CSCL | DENND1A         |
| MYOF       | 4. 08E-06 | -0. 13223 | 0. 005 | 0. 046 | 0. 060958 | CSCL | MYOF            |
| LRIG1. 1   | 4. 20E-06 | 0. 119201 | 0. 045 | 0. 111 | 0. 062728 | CSCL | LRIG1           |
| CLIC2      | 4. 26E-06 | -0. 14143 | 0. 005 | 0. 046 | 0. 063689 | CSCL | CLIC2           |
| TMEM59L. 1 | 4. 28E-06 | 0. 193859 | 0. 145 | 0. 264 | 0. 063994 | CSCL | TMEM59L         |
| MAG. 1     | 4. 29E-06 | -0. 36341 | 0. 002 | 0. 039 | 0. 064182 | CSCL | MAG             |
| F3. 2      | 4. 32E-06 | 0. 189864 | 0. 101 | 0. 196 | 0. 064505 | CSCL | F3              |
| FBL. 2     | 4. 38E-06 | 0. 26163  | 0. 218 | 0. 386 | 0. 0654   | CSCL | FBL             |
| RP11-386G  | 4. 38E-06 | 0. 100464 | 0. 07  | 0. 147 | 0. 065408 | CSCL | RP11-386G11. 10 |
| ZNF467. 1  | 4. 42E-06 | -0. 13477 | 0      | 0. 036 | 0. 066052 | CSCL | ZNF467          |
| TRIM44. 2  | 4. 45E-06 | 0. 309255 | 0. 161 | 0. 293 | 0. 066505 | CSCL | TRIM44          |
| ADAMDEC1.  | 4. 45E-06 | -0. 18176 | 0. 002 | 0. 039 | 0. 066547 | CSCL | ADAMDEC1        |
| ERV3-1. 1  | 4. 48E-06 | 0. 172927 | 0. 147 | 0. 266 | 0. 066928 | CSCL | ERV3-1          |
| ITM2C. 2   | 4. 49E-06 | 0. 130842 | 0. 248 | 0. 426 | 0. 06705  | CSCL | ITM2C           |
| TRIB2. 2   | 4. 50E-06 | 0. 323597 | 0. 145 | 0. 269 | 0. 067188 | CSCL | TRIB2           |
| PIN4. 2    | 4. 50E-06 | 0. 2735   | 0. 241 | 0. 427 | 0. 067202 | CSCL | PIN4            |
| NET1. 1    | 4. 53E-06 | -0. 12953 | 0. 003 | 0. 042 | 0. 067717 | CSCL | NET1            |
| IMPDH2. 2  | 4. 60E-06 | 0. 319081 | 0. 239 | 0. 426 | 0. 068789 | CSCL | IMPDH2          |
| DENND1C. 1 | 4. 68E-06 | -0. 16683 | 0      | 0. 035 | 0. 069947 | CSCL | DENND1C         |
| TMEM86A. 2 | 4. 73E-06 | -0. 14633 | 0. 007 | 0. 048 | 0. 070683 | CSCL | TMEM86A         |
| CDCP1. 1   | 4. 82E-06 | -0. 14926 | 0      | 0. 035 | 0. 07198  | CSCL | CDCP1           |
| CHID1. 1   | 4. 89E-06 | 0. 277748 | 0. 251 | 0. 446 | 0. 07314  | CSCL | CHID1           |
| TSTD1. 1   | 4. 92E-06 | 0. 251945 | 0. 105 | 0. 202 | 0. 073556 | CSCL | TSTD1           |
| DPEP2. 1   | 4. 96E-06 | -0. 17879 | 0      | 0. 035 | 0. 074071 | CSCL | DPEP2           |
| EIF5B. 1   | 5. 01E-06 | 0. 233504 | 0. 3   | 0. 533 | 0. 074832 | CSCL | EIF5B           |
| ABHD16A    | 5. 04E-06 | -0. 12417 | 0. 002 | 0. 039 | 0. 07536  | CSCL | ABHD16A         |
| BNIP1. 1   | 5. 09E-06 | 0. 131717 | 0. 054 | 0. 123 | 0. 076111 | CSCL | BNIP1           |
| C19orf53.  | 5. 16E-06 | 0. 412485 | 0. 534 | 0. 691 | 0. 077096 | CSCL | C19orf53        |
| PAFAH1B3.  | 5. 22E-06 | 0. 307342 | 0. 243 | 0. 433 | 0. 078036 | CSCL | PAFAH1B3        |
| NYAP1      | 5. 27E-06 | -0. 11293 | 0. 002 | 0. 038 | 0. 078797 | CSCL | NYAP1           |
| ARHGAP12.  | 5. 52E-06 | 0. 310528 | 0. 099 | 0. 194 | 0. 082499 | CSCL | ARHGAP12        |
| GPI. 1     | 5. 53E-06 | 0. 263481 | 0. 206 | 0. 364 | 0. 082701 | CSCL | GPI             |
| ATP8A1. 1  | 5. 54E-06 | -0. 11681 | 0. 005 | 0. 045 | 0. 082759 | CSCL | ATP8A1          |
| RAB3IL1. 1 | 5. 56E-06 | -0. 14221 | 0      | 0. 035 | 0. 083062 | CSCL | RAB3IL1         |
| ARX. 1     | 5. 59E-06 | -0. 121   | 0. 003 | 0. 042 | 0. 08357  | CSCL | ARX             |
| MBIP. 1    | 5. 65E-06 | 0. 15643  | 0. 094 | 0. 184 | 0. 08449  | CSCL | MBIP            |
| ATP1A2     | 5. 70E-06 | 0. 650921 | 0. 101 | 0. 06  | 0. 085136 | CSCL | ATP1A2          |
| P2RY6. 1   | 5. 72E-06 | -0. 14184 | 0      | 0. 035 | 0. 085474 | CSCL | P2RY6           |
| NOL3. 2    | 5. 72E-06 | 0. 130218 | 0. 086 | 0. 17  | 0. 085502 | CSCL | NOL3            |
| KIF23. 1   | 5. 74E-06 | -0. 10348 | 0. 003 | 0. 042 | 0. 085811 | CSCL | KIF23           |
| RBKS       | 5. 77E-06 | -0. 12425 | 0. 003 | 0. 041 | 0. 086275 | CSCL | RBKS            |
| HRH2       | 5. 87E-06 | -0. 14443 | 0. 003 | 0. 041 | 0. 08777  | CSCL | HRH2            |
| STAT5A. 2  | 5. 90E-06 | -0. 11374 | 0. 01  | 0. 054 | 0. 088096 | CSCL | STAT5A          |
| MAL. 1     | 5. 94E-06 | -0. 24827 | 0. 003 | 0. 041 | 0. 088703 | CSCL | MAL             |
| CERS1      | 6. 07E-06 | 0. 181512 | 0. 059 | 0. 131 | 0. 09075  | CSCL | CERS1           |
| TBC1D2B. 2 | 6. 16E-06 | -0. 10478 | 0. 01  | 0. 054 | 0. 092026 | CSCL | TBC1D2B         |
| KCNN4      | 6. 23E-06 | -0. 12666 | 0      | 0. 034 | 0. 09314  | CSCL | KCNN4           |

|            |           |           |        |        |           |      |               |
|------------|-----------|-----------|--------|--------|-----------|------|---------------|
| FAM50B     | 6. 27E-06 | -0. 13431 | 0. 005 | 0. 044 | 0. 093766 | CSCL | FAM50B        |
| ARHGFEF26. | 6. 36E-06 | 0. 179544 | 0. 058 | 0. 128 | 0. 095017 | CSCL | ARHGFEF26     |
| RP11-796E  | 6. 38E-06 | -0. 14296 | 0. 019 | 0. 068 | 0. 095349 | CSCL | RP11-796E2. 4 |
| ST18. 1    | 6. 39E-06 | -0. 15148 | 0. 003 | 0. 041 | 0. 095477 | CSCL | ST18          |
| ECHDC3. 1  | 6. 41E-06 | -0. 14539 | 0      | 0. 034 | 0. 095845 | CSCL | ECHDC3        |
| TMEM151A.  | 6. 56E-06 | -0. 14606 | 0. 005 | 0. 044 | 0. 09803  | CSCL | TMEM151A      |
| CLEC9A. 1  | 6. 60E-06 | -0. 21889 | 0      | 0. 034 | 0. 098628 | CSCL | CLEC9A        |
| ZNF814     | 6. 62E-06 | 0. 193271 | 0. 056 | 0. 126 | 0. 098886 | CSCL | ZNF814        |
| TLR5. 1    | 6. 68E-06 | -0. 16902 | 0. 007 | 0. 047 | 0. 099816 | CSCL | TLR5          |
| GSTA4. 1   | 6. 71E-06 | 0. 252206 | 0. 166 | 0. 296 | 0. 100256 | CSCL | GSTA4         |
| LTB. 1     | 6. 79E-06 | -0. 19935 | 0      | 0. 034 | 0. 101492 | CSCL | LTB           |
| FCH01. 1   | 6. 84E-06 | -0. 11276 | 0. 003 | 0. 041 | 0. 102154 | CSCL | FCH01         |
| FKBP10. 2  | 6. 89E-06 | 0. 240044 | 0. 115 | 0. 217 | 0. 102902 | CSCL | FKBP10        |
| METTL1. 1  | 6. 97E-06 | 0. 10843  | 0. 073 | 0. 151 | 0. 104103 | CSCL | METTL1        |
| PCED1B. 1  | 7. 00E-06 | -0. 1303  | 0. 002 | 0. 038 | 0. 104563 | CSCL | PCED1B        |
| GPR37L1. 1 | 7. 01E-06 | 0. 578454 | 0. 127 | 0. 082 | 0. 104799 | CSCL | GPR37L1       |
| F11R. 1    | 7. 07E-06 | -0. 10645 | 0. 014 | 0. 059 | 0. 105709 | CSCL | F11R          |
| RAPGEF5. 1 | 7. 11E-06 | -0. 18304 | 0. 005 | 0. 044 | 0. 106238 | CSCL | RAPGEF5       |
| HENMT1. 1  | 7. 19E-06 | -0. 15762 | 0      | 0. 034 | 0. 107471 | CSCL | HENMT1        |
| SCARA3. 1  | 7. 21E-06 | 0. 17615  | 0. 066 | 0. 141 | 0. 107784 | CSCL | SCARA3        |
| FAM53B. 2  | 7. 24E-06 | -0. 12009 | 0. 01  | 0. 053 | 0. 108264 | CSCL | FAM53B        |
| ARL11. 1   | 7. 37E-06 | -0. 14811 | 0. 003 | 0. 041 | 0. 110141 | CSCL | ARL11         |
| NELFA. 1   | 7. 41E-06 | 0. 139279 | 0. 068 | 0. 143 | 0. 110775 | CSCL | NELFA         |
| ZNF124. 2  | 7. 46E-06 | -0. 10618 | 0. 016 | 0. 062 | 0. 111489 | CSCL | ZNF124        |
| GNG10      | 7. 53E-06 | -0. 10072 | 0. 024 | 0. 076 | 0. 112471 | CSCL | GNG10         |
| ADORA1     | 7. 56E-06 | 0. 162389 | 0. 056 | 0. 125 | 0. 113027 | CSCL | ADORA1        |
| C1R. 2     | 7. 66E-06 | 0. 567867 | 0. 257 | 0. 213 | 0. 114507 | CSCL | C1R           |
| PSME1. 1   | 7. 72E-06 | 0. 219079 | 0. 333 | 0. 596 | 0. 115369 | CSCL | PSME1         |
| N6AMT2     | 7. 85E-06 | 0. 262669 | 0. 063 | 0. 136 | 0. 117263 | CSCL | N6AMT2        |
| C2orf80. 1 | 7. 86E-06 | 0. 118291 | 0. 054 | 0. 122 | 0. 117509 | CSCL | C2orf80       |
| IFT88      | 8. 01E-06 | 0. 111557 | 0. 047 | 0. 111 | 0. 119627 | CSCL | IFT88         |
| MGST1. 2   | 8. 05E-06 | 0. 486228 | 0. 195 | 0. 142 | 0. 120283 | CSCL | MGST1         |
| ZBTB7B     | 8. 06E-06 | -0. 10151 | 0. 005 | 0. 044 | 0. 120462 | CSCL | ZBTB7B        |
| ARNT2. 2   | 8. 16E-06 | 0. 123487 | 0. 049 | 0. 114 | 0. 121951 | CSCL | ARNT2         |
| FAM83D     | 8. 19E-06 | -0. 1036  | 0. 002 | 0. 037 | 0. 122418 | CSCL | FAM83D        |
| C16orf86   | 8. 27E-06 | -0. 11339 | 0. 003 | 0. 04  | 0. 123515 | CSCL | C16orf86      |
| IL15RA     | 8. 54E-06 | -0. 10148 | 0      | 0. 033 | 0. 1276   | CSCL | IL15RA        |
| IL2RA. 1   | 8. 54E-06 | -0. 24155 | 0      | 0. 033 | 0. 1276   | CSCL | IL2RA         |
| COPS8. 2   | 8. 56E-06 | 0. 250458 | 0. 272 | 0. 48  | 0. 127911 | CSCL | COPS8         |
| PIPOX. 1   | 8. 64E-06 | 0. 261545 | 0. 063 | 0. 136 | 0. 129168 | CSCL | PIPOX         |
| BMP7. 2    | 8. 67E-06 | 0. 219286 | 0. 086 | 0. 17  | 0. 129531 | CSCL | BMP7          |
| LRRC8A. 1  | 8. 73E-06 | 0. 2079   | 0. 087 | 0. 172 | 0. 130481 | CSCL | LRRC8A        |
| ZNF577. 1  | 8. 82E-06 | 0. 10131  | 0. 037 | 0. 095 | 0. 131817 | CSCL | ZNF577        |
| MFSD7. 1   | 9. 04E-06 | -0. 12278 | 0      | 0. 033 | 0. 135113 | CSCL | MFSD7         |
| ANPEP. 1   | 9. 04E-06 | -0. 14711 | 0      | 0. 033 | 0. 135113 | CSCL | ANPEP         |
| CREBZF. 1  | 9. 14E-06 | 0. 12753  | 0. 063 | 0. 135 | 0. 136598 | CSCL | CREBZF        |
| ATOX1. 2   | 9. 22E-06 | 0. 186664 | 0. 344 | 0. 618 | 0. 137843 | CSCL | ATOX1         |
| PAICS. 1   | 9. 27E-06 | 0. 319237 | 0. 176 | 0. 315 | 0. 138548 | CSCL | PAICS         |
| ZNF562. 1  | 9. 40E-06 | 0. 138765 | 0. 07  | 0. 145 | 0. 140543 | CSCL | ZNF562        |
| CCL5. 1    | 9. 43E-06 | -0. 25902 | 0. 014 | 0. 058 | 0. 140944 | CSCL | CCL5          |
| OTOA. 1    | 9. 57E-06 | -0. 14096 | 0      | 0. 033 | 0. 143068 | CSCL | OTOA          |

|           |          |          |       |       |          |      |               |
|-----------|----------|----------|-------|-------|----------|------|---------------|
| TSPAN31.1 | 9.60E-06 | 0.174026 | 0.173 | 0.301 | 0.143392 | CSCL | TSPAN31       |
| TM4SF1.2  | 9.67E-06 | 0.110073 | 0.051 | 0.116 | 0.144468 | CSCL | TM4SF1        |
| ZBTB20.1  | 9.73E-06 | 0.203452 | 0.225 | 0.394 | 0.145333 | CSCL | ZBTB20        |
| RP1-39G22 | 9.87E-06 | 0.187277 | 0.063 | 0.134 | 0.147428 | CSCL | RP1-39G22.7   |
| CSGALNACT | 9.94E-06 | -0.12124 | 0.026 | 0.077 | 0.148572 | CSCL | CSGALNACT1    |
| CNTN2.1   | 1.01E-05 | -0.2056  | 0.005 | 0.043 | 0.151192 | CSCL | CNTN2         |
| ISG15.2   | 1.02E-05 | 0.362795 | 0.208 | 0.364 | 0.151728 | CSCL | ISG15         |
| TMEM53    | 1.04E-05 | 0.134275 | 0.045 | 0.108 | 0.155933 | CSCL | TMEM53        |
| TLR4.1    | 1.08E-05 | -0.12924 | 0.005 | 0.043 | 0.161973 | CSCL | TLR4          |
| CNBP.2    | 1.09E-05 | 0.333856 | 0.553 | 0.758 | 0.162323 | CSCL | CNBP          |
| HIBCH.1   | 1.10E-05 | 0.238148 | 0.138 | 0.249 | 0.165106 | CSCL | HIBCH         |
| SEC14L2.1 | 1.11E-05 | 0.220039 | 0.052 | 0.118 | 0.165359 | CSCL | SEC14L2       |
| AC004158. | 1.13E-05 | 0.121706 | 0.058 | 0.126 | 0.168197 | CSCL | AC004158.3    |
| VEGFA.2   | 1.16E-05 | 0.205818 | 0.12  | 0.221 | 0.173432 | CSCL | VEGFA         |
| PSD4      | 1.17E-05 | -0.11703 | 0     | 0.033 | 0.174774 | CSCL | PSD4          |
| TAL1.1    | 1.18E-05 | -0.17068 | 0.002 | 0.036 | 0.17586  | CSCL | TAL1          |
| CBS.1     | 1.18E-05 | 0.229971 | 0.08  | 0.161 | 0.176525 | CSCL | CBS           |
| HLX       | 1.20E-05 | -0.11749 | 0.005 | 0.042 | 0.178969 | CSCL | HLX           |
| SYT5      | 1.20E-05 | -0.11217 | 0.007 | 0.045 | 0.178978 | CSCL | SYT5          |
| TMEM106A. | 1.24E-05 | -0.11296 | 0.019 | 0.066 | 0.185483 | CSCL | TMEM106A      |
| SMIM3.2   | 1.25E-05 | 0.292177 | 0.068 | 0.034 | 0.186979 | CSCL | SMIM3         |
| CD01.2    | 1.26E-05 | 0.257769 | 0.133 | 0.24  | 0.188594 | CSCL | CD01          |
| LACC1.1   | 1.28E-05 | -0.13254 | 0.002 | 0.036 | 0.191038 | CSCL | LACC1         |
| ZNF428.2  | 1.29E-05 | 0.194959 | 0.318 | 0.556 | 0.192353 | CSCL | ZNF428        |
| SP9.1     | 1.29E-05 | -0.11486 | 0.005 | 0.042 | 0.192782 | CSCL | SP9           |
| RP11-100C | 1.31E-05 | -0.12599 | 0.005 | 0.042 | 0.195708 | CSCL | RP11-1000B6.3 |
| SMAD7.1   | 1.35E-05 | -0.11742 | 0.002 | 0.036 | 0.201397 | CSCL | SMAD7         |
| RP11-403I | 1.35E-05 | -0.17603 | 0.002 | 0.036 | 0.201471 | CSCL | RP11-403I13.5 |
| RP11-742E | 1.35E-05 | -0.15462 | 0     | 0.032 | 0.20163  | CSCL | RP11-742B18.1 |
| CAPN3.1   | 1.36E-05 | -0.23244 | 0.007 | 0.045 | 0.203188 | CSCL | CAPN3         |
| NDUFS7    | 1.38E-05 | 0.154978 | 0.358 | 0.631 | 0.205525 | CSCL | NDUFS7        |
| MLC1.1    | 1.40E-05 | 0.214168 | 0.075 | 0.152 | 0.209125 | CSCL | MLC1          |
| IL15      | 1.40E-05 | -0.14382 | 0.003 | 0.039 | 0.209724 | CSCL | IL15          |
| RP11-89N1 | 1.44E-05 | 0.121099 | 0.007 | 0.001 | 0.214913 | CSCL | RP11-89N17.4  |
| SLPI.2    | 1.47E-05 | 0.508555 | 0.202 | 0.147 | 0.219611 | CSCL | SLPI          |
| CDIPT-AS1 | 1.48E-05 | 0.25309  | 0.024 | 0.008 | 0.22116  | CSCL | CDIPT-AS1     |
| MKL2.2    | 1.50E-05 | 0.107113 | 0.028 | 0.079 | 0.22404  | CSCL | MKL2          |
| DISC1.1   | 1.50E-05 | -0.10474 | 0.009 | 0.048 | 0.224869 | CSCL | DISC1         |
| TBC1D10C. | 1.51E-05 | -0.15573 | 0     | 0.032 | 0.22605  | CSCL | TBC1D10C      |
| RTKN.2    | 1.52E-05 | 0.222791 | 0.091 | 0.175 | 0.227244 | CSCL | RTKN          |
| NEDD8.1   | 1.54E-05 | 0.342217 | 0.557 | 0.755 | 0.230001 | CSCL | NEDD8         |
| LTB4R.1   | 1.55E-05 | -0.11649 | 0.002 | 0.035 | 0.231822 | CSCL | LTB4R         |
| SPINT1.1  | 1.58E-05 | -0.12379 | 0.002 | 0.035 | 0.236559 | CSCL | SPINT1        |
| NEK2.1    | 1.59E-05 | -0.10528 | 0.002 | 0.035 | 0.237343 | CSCL | NEK2          |
| CDC42EP2. | 1.60E-05 | -0.10337 | 0.003 | 0.038 | 0.239475 | CSCL | CDC42EP2      |
| KALRN     | 1.60E-05 | 0.140226 | 0.04  | 0.098 | 0.239637 | CSCL | KALRN         |
| CAMLG.2   | 1.61E-05 | 0.282455 | 0.288 | 0.504 | 0.239989 | CSCL | CAMLG         |
| SELK.2    | 1.69E-05 | 0.109368 | 0.4   | 0.716 | 0.252024 | CSCL | SELK          |
| MYO7A.1   | 1.69E-05 | -0.13408 | 0.002 | 0.035 | 0.253072 | CSCL | MYO7A         |
| HMBOX1.1  | 1.71E-05 | 0.217656 | 0.106 | 0.197 | 0.255988 | CSCL | HMBOX1        |
| ZNF536.1  | 1.72E-05 | -0.12248 | 0.007 | 0.044 | 0.256669 | CSCL | ZNF536        |

|           |    |        |          |       |       |          |      |               |
|-----------|----|--------|----------|-------|-------|----------|------|---------------|
| AC069363. | 1. | 73E-05 | -0.18255 | 0.012 | 0.053 | 0.258859 | CSCL | AC069363.1    |
| VCAN.1    | 1. | 75E-05 | 0.27919  | 0.141 | 0.251 | 0.261104 | CSCL | VCAN          |
| LAP3      | 1. | 76E-05 | 0.214745 | 0.288 | 0.502 | 0.262838 | CSCL | LAP3          |
| PLVAP.1   | 1. | 80E-05 | -0.15491 | 0     | 0.031 | 0.268327 | CSCL | PLVAP         |
| GPX8.1    | 1. | 83E-05 | 0.113675 | 0.019 | 0.065 | 0.272898 | CSCL | GPX8          |
| MLXIPL.1  | 1. | 84E-05 | -0.14159 | 0.005 | 0.041 | 0.274245 | CSCL | MLXIPL        |
| CHEK2.1   | 1. | 84E-05 | -0.12052 | 0.01  | 0.05  | 0.274456 | CSCL | CHEK2         |
| ERGIC3.1  | 1. | 84E-05 | 0.159318 | 0.333 | 0.588 | 0.274782 | CSCL | ERGIC3        |
| SLC17A9.1 | 1. | 85E-05 | -0.12945 | 0     | 0.031 | 0.276104 | CSCL | SLC17A9       |
| PAAF1.1   | 1. | 85E-05 | 0.270286 | 0.11  | 0.204 | 0.276254 | CSCL | PAAF1         |
| AC147651. | 1. | 86E-05 | -0.1358  | 0.003 | 0.038 | 0.277213 | CSCL | AC147651.4    |
| MYL6B.1   | 1. | 87E-05 | 0.246444 | 0.258 | 0.452 | 0.278933 | CSCL | MYL6B         |
| GRIA3.1   | 1. | 88E-05 | 0.250372 | 0.089 | 0.172 | 0.281105 | CSCL | GRIA3         |
| TSPAN3.1  | 1. | 89E-05 | 0.262761 | 0.265 | 0.47  | 0.282209 | CSCL | TSPAN3        |
| CEND1     | 1. | 98E-05 | 0.175303 | 0.07  | 0.142 | 0.295409 | CSCL | CEND1         |
| GAS1.2    | 1. | 99E-05 | 0.193916 | 0.073 | 0.148 | 0.296759 | CSCL | GAS1          |
| KIAA0907. | 2. | 04E-05 | 0.142532 | 0.108 | 0.198 | 0.30496  | CSCL | KIAA0907      |
| DSC2.1    | 2. | 05E-05 | -0.13187 | 0.002 | 0.034 | 0.30644  | CSCL | DSC2          |
| ALDH1A1.1 | 2. | 07E-05 | -0.15236 | 0     | 0.031 | 0.309529 | CSCL | ALDH1A1       |
| EIF3M.2   | 2. | 08E-05 | 0.241535 | 0.309 | 0.537 | 0.310512 | CSCL | EIF3M         |
| C14orf1.1 | 2. | 10E-05 | 0.321492 | 0.169 | 0.299 | 0.3141   | CSCL | C14orf1       |
| ST8SIA1   | 2. | 16E-05 | 0.100105 | 0.038 | 0.094 | 0.322355 | CSCL | ST8SIA1       |
| WLS       | 2. | 16E-05 | 0.263936 | 0.12  | 0.219 | 0.323391 | CSCL | WLS           |
| CCDC69.1  | 2. | 20E-05 | -0.1051  | 0.003 | 0.037 | 0.32816  | CSCL | CCDC69        |
| HSD17B7   | 2. | 24E-05 | 0.124053 | 0.056 | 0.121 | 0.334259 | CSCL | HSD17B7       |
| CHST8.1   | 2. | 25E-05 | 0.101211 | 0.023 | 0.07  | 0.335816 | CSCL | CHST8         |
| CACNG8    | 2. | 29E-05 | 0.14802  | 0.026 | 0.075 | 0.341613 | CSCL | CACNG8        |
| RPRM.2    | 2. | 29E-05 | -0.10227 | 0.023 | 0.069 | 0.342004 | CSCL | RPRM          |
| PID1.1    | 2. | 30E-05 | 0.101966 | 0.056 | 0.12  | 0.343003 | CSCL | PID1          |
| FMN1.1    | 2. | 30E-05 | -0.12573 | 0.002 | 0.034 | 0.343234 | CSCL | FMN1          |
| FAM162A.2 | 2. | 31E-05 | 0.277221 | 0.237 | 0.409 | 0.344502 | CSCL | FAM162A       |
| SIGLEC1.1 | 2. | 32E-05 | -0.1423  | 0     | 0.03  | 0.346993 | CSCL | SIGLEC1       |
| AP005530. | 2. | 32E-05 | -0.14937 | 0     | 0.03  | 0.346993 | CSCL | AP005530.2    |
| NXN.1     | 2. | 33E-05 | -0.10594 | 0.003 | 0.037 | 0.347465 | CSCL | NXN           |
| MAML3.1   | 2. | 37E-05 | -0.1113  | 0.003 | 0.037 | 0.353798 | CSCL | MAML3         |
| PMS2.1    | 2. | 38E-05 | 0.176188 | 0.063 | 0.131 | 0.355174 | CSCL | PMS2          |
| FAIM2.1   | 2. | 42E-05 | 0.205884 | 0.106 | 0.195 | 0.361901 | CSCL | FAIM2         |
| CHI3L1.2  | 2. | 53E-05 | 0.477446 | 0.475 | 0.527 | 0.37856  | CSCL | CHI3L1        |
| SOCS1.1   | 2. | 55E-05 | -0.12273 | 0.014 | 0.055 | 0.381104 | CSCL | SOCS1         |
| NAA60.1   | 2. | 58E-05 | 0.224092 | 0.031 | 0.012 | 0.38585  | CSCL | NAA60         |
| PSME2.1   | 2. | 59E-05 | 0.241028 | 0.325 | 0.569 | 0.38676  | CSCL | PSME2         |
| ZNF576.1  | 2. | 60E-05 | 0.230599 | 0.07  | 0.141 | 0.387932 | CSCL | ZNF576        |
| FABP6.1   | 2. | 61E-05 | -0.11974 | 0.005 | 0.04  | 0.389552 | CSCL | FABP6         |
| ZEB1.2    | 2. | 68E-05 | 0.295962 | 0.106 | 0.197 | 0.399807 | CSCL | ZEB1          |
| GORAB.2   | 2. | 72E-05 | 0.101958 | 0.028 | 0.077 | 0.406711 | CSCL | GORAB         |
| AP4M1     | 2. | 75E-05 | 0.204309 | 0.108 | 0.198 | 0.410719 | CSCL | AP4M1         |
| GNAS.2    | 2. | 77E-05 | 0.472157 | 0.497 | 0.655 | 0.413451 | CSCL | GNAS          |
| PNN.2     | 2. | 81E-05 | 0.285424 | 0.237 | 0.41  | 0.42034  | CSCL | PNN           |
| SOD2.1    | 2. | 98E-05 | 0.191263 | 0.33  | 0.547 | 0.445618 | CSCL | SOD2          |
| RP11-489C | 3. | 00E-05 | -0.15802 | 0     | 0.03  | 0.448685 | CSCL | RP11-489018.1 |
| LSS.1     | 3. | 05E-05 | 0.127339 | 0.044 | 0.101 | 0.455721 | CSCL | LSS           |

|            |          |          |       |       |          |      |               |
|------------|----------|----------|-------|-------|----------|------|---------------|
| UBXN11.1   | 3.25E-05 | 0.11225  | 0.07  | 0.139 | 0.485489 | CSCL | UBXN11        |
| CARD11.1   | 3.27E-05 | -0.11824 | 0     | 0.029 | 0.488812 | CSCL | CARD11        |
| ATXN3.1    | 3.29E-05 | 0.187391 | 0.084 | 0.16  | 0.491025 | CSCL | ATXN3         |
| ELOVL2.2   | 3.33E-05 | 0.14386  | 0.044 | 0.1   | 0.497705 | CSCL | ELOVL2        |
| IL12RB1.1  | 3.37E-05 | -0.14582 | 0.002 | 0.033 | 0.503968 | CSCL | IL12RB1       |
| WSB1.1     | 3.41E-05 | 0.103849 | 0.377 | 0.666 | 0.509213 | CSCL | WSB1          |
| CACNA2D3.3 | 3.44E-05 | -0.11679 | 0.002 | 0.033 | 0.513769 | CSCL | CACNA2D3      |
| PBX1.1     | 3.46E-05 | 0.212517 | 0.122 | 0.219 | 0.517727 | CSCL | PBX1          |
| NECAB1.1   | 3.47E-05 | -0.14059 | 0.005 | 0.039 | 0.518953 | CSCL | NECAB1        |
| ZNF680     | 3.48E-05 | 0.150655 | 0.096 | 0.178 | 0.520425 | CSCL | ZNF680        |
| KLK6.1     | 3.59E-05 | -0.25614 | 0.002 | 0.032 | 0.535843 | CSCL | KLK6          |
| CNPY2.1    | 3.60E-05 | 0.159474 | 0.328 | 0.581 | 0.537458 | CSCL | CNPY2         |
| LILRB3.1   | 3.60E-05 | -0.14837 | 0.007 | 0.042 | 0.537914 | CSCL | LILRB3        |
| HSPD1.2    | 3.60E-05 | 0.185408 | 0.36  | 0.628 | 0.538717 | CSCL | HSPD1         |
| DNAJC24.1  | 3.61E-05 | 0.115216 | 0.049 | 0.108 | 0.539356 | CSCL | DNAJC24       |
| RAMP2.1    | 3.62E-05 | 0.154206 | 0.07  | 0.139 | 0.540848 | CSCL | RAMP2         |
| SLC38A6.1  | 3.65E-05 | 0.107401 | 0.045 | 0.102 | 0.545193 | CSCL | SLC38A6       |
| PMP2.2     | 3.69E-05 | 0.509492 | 0.344 | 0.35  | 0.551036 | CSCL | PMP2          |
| AQP4.1     | 3.73E-05 | 0.683468 | 0.202 | 0.164 | 0.557039 | CSCL | AQP4          |
| NFAM1.1    | 3.73E-05 | -0.13884 | 0.003 | 0.035 | 0.557428 | CSCL | NFAM1         |
| SP140.1    | 3.76E-05 | -0.11897 | 0.002 | 0.032 | 0.56141  | CSCL | SP140         |
| GLDC       | 3.81E-05 | 0.114768 | 0.024 | 0.071 | 0.569927 | CSCL | GLDC          |
| ST5.2      | 3.82E-05 | 0.264971 | 0.08  | 0.155 | 0.571404 | CSCL | ST5           |
| PEA15.1    | 3.85E-05 | 0.329902 | 0.26  | 0.452 | 0.57472  | CSCL | PEA15         |
| RP11-347F  | 3.96E-05 | -0.16647 | 0.023 | 0.066 | 0.591216 | CSCL | RP11-347P5.1  |
| PRMT5.2    | 4.06E-05 | 0.21321  | 0.08  | 0.154 | 0.606078 | CSCL | PRMT5         |
| MAPK13.1   | 4.08E-05 | -0.11138 | 0.002 | 0.032 | 0.60954  | CSCL | MAPK13        |
| GPR132.1   | 4.10E-05 | -0.11033 | 0.002 | 0.032 | 0.612338 | CSCL | GPR132        |
| RP11-514C  | 4.23E-05 | -0.11873 | 0     | 0.028 | 0.632013 | CSCL | RP11-514012.4 |
| FGF1       | 4.29E-05 | 0.145324 | 0.042 | 0.097 | 0.64181  | CSCL | FGF1          |
| AC007405.4 | 4.53E-05 | 0.119455 | 0.024 | 0.07  | 0.677386 | CSCL | AC007405.6    |
| C6orf48.1  | 4.55E-05 | 0.1441   | 0.375 | 0.661 | 0.680182 | CSCL | C6orf48       |
| RP11-557H  | 4.61E-05 | -0.14768 | 0     | 0.028 | 0.68852  | CSCL | RP11-557H15.4 |
| PGGT1B.1   | 4.70E-05 | 0.121976 | 0.045 | 0.102 | 0.701831 | CSCL | PGGT1B        |
| ZNF521     | 4.74E-05 | 0.150858 | 0.035 | 0.086 | 0.708449 | CSCL | ZNF521        |
| PSAT1.1    | 4.81E-05 | 0.261929 | 0.117 | 0.208 | 0.719476 | CSCL | PSAT1         |
| DNAJC11.1  | 4.84E-05 | 0.15581  | 0.047 | 0.104 | 0.723756 | CSCL | DNAJC11       |
| PVR.1      | 4.85E-05 | 0.133155 | 0.024 | 0.07  | 0.724949 | CSCL | PVR           |
| RNASE3.1   | 4.88E-05 | -0.17966 | 0.003 | 0.035 | 0.729556 | CSCL | RNASE3        |
| AATK.1     | 4.89E-05 | -0.17635 | 0.003 | 0.035 | 0.730448 | CSCL | AATK          |
| VAMP5.1    | 5.01E-05 | 0.233706 | 0.241 | 0.405 | 0.748176 | CSCL | VAMP5         |
| HRH1.1     | 5.01E-05 | 0.173608 | 0.044 | 0.099 | 0.748509 | CSCL | HRH1          |
| SPA17.2    | 5.07E-05 | 0.103873 | 0.033 | 0.083 | 0.757209 | CSCL | SPA17         |
| PTPN22.1   | 5.16E-05 | -0.12124 | 0     | 0.028 | 0.771793 | CSCL | PTPN22        |
| SCARF1.1   | 5.16E-05 | -0.12413 | 0     | 0.028 | 0.771793 | CSCL | SCARF1        |
| KCNE3.1    | 5.31E-05 | -0.11632 | 0     | 0.028 | 0.794139 | CSCL | KCNE3         |
| C8orf4.1   | 5.42E-05 | 0.632031 | 0.262 | 0.226 | 0.809992 | CSCL | C8orf4        |
| CHRN1.1    | 5.44E-05 | 0.197915 | 0.08  | 0.152 | 0.813056 | CSCL | CHRN1         |
| CATSPER1.5 | 5.63E-05 | -0.14308 | 0     | 0.028 | 0.84079  | CSCL | CATSPER1      |
| MOBP.1     | 5.70E-05 | -0.27064 | 0.005 | 0.037 | 0.851386 | CSCL | MOBP          |
| WDFY4.1    | 5.79E-05 | -0.12467 | 0     | 0.027 | 0.865133 | CSCL | WDFY4         |

|              |           |           |        |        |           |        |             |
|--------------|-----------|-----------|--------|--------|-----------|--------|-------------|
| FFAR4. 1     | 5. 85E-05 | -0. 13223 | 0. 002 | 0. 031 | 0. 874744 | CSCL   | FFAR4       |
| HAPLN2. 1    | 5. 93E-05 | -0. 15096 | 0. 003 | 0. 034 | 0. 886024 | CSCL   | HAPLN2      |
| ACO18647. 6. | 07E-05    | -0. 13153 | 0. 009 | 0. 043 | 0. 907116 | CSCL   | ACO18647. 3 |
| MAP4K1. 1    | 6. 09E-05 | -0. 12047 | 0. 002 | 0. 031 | 0. 910749 | CSCL   | MAP4K1      |
| LAMB2        | 6. 31E-05 | 0. 152286 | 0. 044 | 0. 098 | 0. 943118 | CSCL   | LAMB2       |
| PLA2G4A      | 6. 38E-05 | -0. 1101  | 0. 003 | 0. 034 | 0. 953096 | CSCL   | PLA2G4A     |
| PEAK1. 2     | 6. 44E-05 | 0. 129516 | 0. 026 | 0. 071 | 0. 962183 | CSCL   | PEAK1       |
| LINC00665    | 6. 49E-05 | 0. 352898 | 0. 105 | 0. 19  | 0. 969743 | CSCL   | LINC00665   |
| NAP1L1       | 6. 84E-05 | 0. 134059 | 0. 387 | 0. 689 |           | 1 CSCL | NAP1L1      |
| NXPH1. 2     | 6. 91E-05 | 0. 113124 | 0. 072 | 0. 139 |           | 1 CSCL | NXPH1       |
| CCR5. 1      | 7. 07E-05 | -0. 11253 | 0      | 0. 027 |           | 1 CSCL | CCR5        |
| SKIV2L2. 1   | 7. 12E-05 | 0. 189423 | 0. 086 | 0. 16  |           | 1 CSCL | SKIV2L2     |
| SLC12A4. 1   | 7. 16E-05 | 0. 106457 | 0. 024 | 0. 068 |           | 1 CSCL | SLC12A4     |
| EPAS1. 1     | 7. 19E-05 | 0. 131154 | 0. 051 | 0. 107 |           | 1 CSCL | EPAS1       |
| TSHZ1. 2     | 7. 25E-05 | 0. 100889 | 0. 03  | 0. 076 |           | 1 CSCL | TSHZ1       |
| ERMN. 1      | 7. 32E-05 | -0. 2748  | 0. 007 | 0. 039 |           | 1 CSCL | ERMN        |
| RWDD1. 2     | 7. 33E-05 | 0. 291644 | 0. 309 | 0. 538 |           | 1 CSCL | RWDD1       |
| KANK1        | 7. 36E-05 | 0. 10209  | 0. 042 | 0. 095 |           | 1 CSCL | KANK1       |
| OCIAD2. 1    | 7. 43E-05 | 0. 586128 | 0. 365 | 0. 388 |           | 1 CSCL | OCIAD2      |
| SNRPE. 1     | 7. 50E-05 | 0. 264207 | 0. 339 | 0. 592 |           | 1 CSCL | SNRPE       |
| PLEKHH1. 1   | 7. 55E-05 | -0. 11353 | 0. 003 | 0. 033 |           | 1 CSCL | PLEKHH1     |
| DENND2A      | 7. 55E-05 | 0. 142932 | 0. 044 | 0. 097 |           | 1 CSCL | DENND2A     |
| TOR4A. 1     | 7. 70E-05 | -0. 10101 | 0      | 0. 027 |           | 1 CSCL | TOR4A       |
| ITGB7. 1     | 7. 70E-05 | -0. 11119 | 0      | 0. 027 |           | 1 CSCL | ITGB7       |
| MEIS1. 2     | 7. 71E-05 | 0. 122399 | 0. 038 | 0. 089 |           | 1 CSCL | MEIS1       |
| EDIL3. 1     | 7. 74E-05 | -0. 16508 | 0. 003 | 0. 033 |           | 1 CSCL | EDIL3       |
| TMEM25. 1    | 7. 79E-05 | 0. 172622 | 0. 063 | 0. 125 |           | 1 CSCL | TMEM25      |
| NOS1AP. 1    | 7. 79E-05 | 0. 224079 | 0. 033 | 0. 081 |           | 1 CSCL | NOS1AP      |
| AQP9         | 7. 86E-05 | -0. 11061 | 0. 002 | 0. 03  |           | 1 CSCL | AQP9        |
| VNN2. 1      | 7. 92E-05 | -0. 10998 | 0      | 0. 027 |           | 1 CSCL | VNN2        |
| METRN. 2     | 8. 14E-05 | 0. 245117 | 0. 178 | 0. 3   |           | 1 CSCL | METRN       |
| CPE. 1       | 8. 16E-05 | 0. 205169 | 0. 239 | 0. 397 |           | 1 CSCL | CPE         |
| RGMA. 1      | 8. 28E-05 | 0. 324943 | 0. 115 | 0. 205 |           | 1 CSCL | RGMA        |
| FUS. 1       | 8. 48E-05 | 0. 153179 | 0. 373 | 0. 657 |           | 1 CSCL | FUS         |
| FKBP7        | 8. 52E-05 | 0. 103313 | 0. 042 | 0. 094 |           | 1 CSCL | FKBP7       |
| HK3          | 8. 63E-05 | -0. 10141 | 0      | 0. 026 |           | 1 CSCL | HK3         |
| DLC1         | 8. 77E-05 | 0. 159134 | 0. 038 | 0. 089 |           | 1 CSCL | DLC1        |
| CARNS1. 1    | 8. 79E-05 | -0. 18954 | 0. 002 | 0. 03  |           | 1 CSCL | CARNS1      |
| CYSLTR1. 1   | 8. 88E-05 | -0. 11854 | 0      | 0. 026 |           | 1 CSCL | CYSLTR1     |
| TMEM177. 1   | 9. 06E-05 | 0. 100253 | 0. 033 | 0. 081 |           | 1 CSCL | TMEM177     |
| LDHA. 2      | 9. 13E-05 | 0. 282277 | 0. 579 | 0. 776 |           | 1 CSCL | LDHA        |
| PPARG. 1     | 9. 40E-05 | -0. 11336 | 0      | 0. 026 |           | 1 CSCL | PPARG       |
| FAM175B. 1   | 9. 44E-05 | 0. 115186 | 0. 035 | 0. 083 |           | 1 CSCL | FAM175B     |
| ARMCX2. 1    | 9. 46E-05 | 0. 184471 | 0. 08  | 0. 15  |           | 1 CSCL | ARMCX2      |
| LAT          | 9. 59E-05 | -0. 11648 | 0. 005 | 0. 036 |           | 1 CSCL | LAT         |
| NFIB. 2      | 9. 82E-05 | 0. 144421 | 0. 239 | 0. 385 |           | 1 CSCL | NFIB        |
| SUN1. 2      | 9. 85E-05 | 0. 243656 | 0. 122 | 0. 212 |           | 1 CSCL | SUN1        |
| SERPINE2.    | 9. 86E-05 | 0. 232449 | 0. 18  | 0. 299 |           | 1 CSCL | SERPINE2    |
| C16orf45.    | 9. 89E-05 | 0. 382567 | 0. 19  | 0. 325 |           | 1 CSCL | C16orf45    |
| WDR83OS. 2   | 9. 89E-05 | 0. 381234 | 0. 545 | 0. 754 |           | 1 CSCL | WDR83OS     |
| TNFRSF11A    | 9. 96E-05 | -0. 105   | 0      | 0. 026 |           | 1 CSCL | TNFRSF11A   |

|           |          |          |       |       |   |      |               |
|-----------|----------|----------|-------|-------|---|------|---------------|
| TMEM168.1 | 1.00E-04 | 0.149227 | 0.056 | 0.114 | 1 | CSCL | TMEM168       |
| AL592528. | 0.0001   | 0.147273 | 0.012 | 0.003 | 1 | CSCL | AL592528.1    |
| TIPIN.1   | 0.000103 | 0.226656 | 0.077 | 0.144 | 1 | CSCL | TIPIN         |
| CSF2RB.1  | 0.000105 | -0.10276 | 0     | 0.026 | 1 | CSCL | CSF2RB        |
| TLR10.1   | 0.000105 | -0.1187  | 0     | 0.026 | 1 | CSCL | TLR10         |
| CETN2.2   | 0.000107 | 0.335053 | 0.195 | 0.329 | 1 | CSCL | CETN2         |
| IFITM1    | 0.000107 | -0.16025 | 0.007 | 0.038 | 1 | CSCL | IFITM1        |
| GEMIN8.1  | 0.000109 | 0.111613 | 0.031 | 0.077 | 1 | CSCL | GEMIN8        |
| NAMPT.2   | 0.000109 | 0.149838 | 0.276 | 0.446 | 1 | CSCL | NAMPT         |
| CRYZ.1    | 0.000111 | 0.186183 | 0.065 | 0.126 | 1 | CSCL | CRYZ          |
| DAPP1.1   | 0.000111 | -0.10565 | 0.002 | 0.029 | 1 | CSCL | DAPP1         |
| METTL7A   | 0.000111 | 0.196947 | 0.133 | 0.225 | 1 | CSCL | METTL7A       |
| FAM177B.1 | 0.000112 | -0.13221 | 0.003 | 0.032 | 1 | CSCL | FAM177B       |
| OLFM1.1   | 0.000114 | 0.167712 | 0.084 | 0.154 | 1 | CSCL | OLFM1         |
| RP11-620J | 0.000115 | 0.253806 | 0.164 | 0.275 | 1 | CSCL | RP11-620J15.3 |
| CA12.2    | 0.000116 | 0.263083 | 0.073 | 0.139 | 1 | CSCL | CA12          |
| SOX8.2    | 0.000117 | 0.163863 | 0.103 | 0.181 | 1 | CSCL | SOX8          |
| MAGED2.2  | 0.000117 | 0.210999 | 0.305 | 0.519 | 1 | CSCL | MAGED2        |
| MTRNR2L12 | 0.000119 | 0.405487 | 0.237 | 0.194 | 1 | CSCL | MTRNR2L12     |
| RNF125.1  | 0.000122 | -0.12152 | 0     | 0.025 | 1 | CSCL | RNF125        |
| FBX017.2  | 0.000122 | 0.297404 | 0.079 | 0.147 | 1 | CSCL | FBX017        |
| TRIT1     | 0.000123 | 0.11442  | 0.04  | 0.09  | 1 | CSCL | TRIT1         |
| CEACAM4.1 | 0.000125 | -0.10843 | 0     | 0.025 | 1 | CSCL | CEACAM4       |
| IFNLR1.1  | 0.000125 | -0.12592 | 0     | 0.025 | 1 | CSCL | IFNLR1        |
| CTNND2.1  | 0.000128 | 0.23141  | 0.089 | 0.161 | 1 | CSCL | CTNND2        |
| PLEK2.1   | 0.000129 | -0.10464 | 0     | 0.025 | 1 | CSCL | PLEK2         |
| CXCL12    | 0.000129 | -0.1084  | 0.01  | 0.044 | 1 | CSCL | CXCL12        |
| DHODH.1   | 0.000131 | 0.111162 | 0.037 | 0.084 | 1 | CSCL | DHODH         |
| CTA-384D8 | 0.000132 | -0.10827 | 0     | 0.025 | 1 | CSCL | CTA-384D8.34  |
| SBDS.2    | 0.000135 | 0.135269 | 0.366 | 0.622 | 1 | CSCL | SBDS          |
| ITM2A.1   | 0.000137 | -0.12659 | 0.019 | 0.057 | 1 | CSCL | ITM2A         |
| CCDC181.1 | 0.000138 | 0.134312 | 0.035 | 0.082 | 1 | CSCL | CCDC181       |
| RAB11FIP1 | 0.000141 | -0.11058 | 0.002 | 0.028 | 1 | CSCL | RAB11FIP1     |
| NR2F2-AS1 | 0.000143 | 0.185984 | 0.028 | 0.011 | 1 | CSCL | NR2F2-AS1     |
| ARHGAP32  | 0.000144 | 0.1218   | 0.038 | 0.087 | 1 | CSCL | ARHGAP32      |
| NUP107.2  | 0.000145 | 0.232181 | 0.134 | 0.228 | 1 | CSCL | NUP107        |
| HELZ2.1   | 0.000147 | 0.155671 | 0.049 | 0.102 | 1 | CSCL | HELZ2         |
| EEF1D.2   | 0.000151 | 0.228193 | 0.611 | 0.857 | 1 | CSCL | EEF1D         |
| MTOR.1    | 0.000151 | 0.107389 | 0.028 | 0.071 | 1 | CSCL | MTOR          |
| CUTA.2    | 0.000151 | 0.117148 | 0.398 | 0.696 | 1 | CSCL | CUTA          |
| TTYH1.2   | 0.000152 | 0.746315 | 0.277 | 0.267 | 1 | CSCL | TTYH1         |
| CBLN4.2   | 0.000152 | 0.123077 | 0.035 | 0.081 | 1 | CSCL | CBLN4         |
| TENM1     | 0.000153 | 0.113154 | 0.03  | 0.074 | 1 | CSCL | TENM1         |
| 2-Sep     | 0.000154 | 0.203408 | 0.344 | 0.593 | 1 | CSCL | 2-Sep         |
| FAM229B.1 | 0.000155 | 0.389223 | 0.176 | 0.298 | 1 | CSCL | FAM229B       |
| PTCRA.1   | 0.000157 | -0.11633 | 0     | 0.024 | 1 | CSCL | PTCRA         |
| SPNS3.1   | 0.000157 | -0.12223 | 0     | 0.024 | 1 | CSCL | SPNS3         |
| RP11-597D | 0.000157 | -0.1385  | 0     | 0.024 | 1 | CSCL | RP11-597D13.8 |
| SIDT1.1   | 0.000157 | -0.13947 | 0     | 0.024 | 1 | CSCL | SIDT1         |
| IRF1.2    | 0.000159 | 0.183056 | 0.124 | 0.21  | 1 | CSCL | IRF1          |
| TMEM132B. | 0.000165 | 0.118739 | 0.051 | 0.104 | 1 | CSCL | TMEM132B      |

|           |          |          |       |       |        |               |
|-----------|----------|----------|-------|-------|--------|---------------|
| CDH6      | 0.000165 | 0.112933 | 0.028 | 0.071 | 1 CSCL | CDH6          |
| RP11-495F | 0.00017  | 0.121808 | 0.009 | 0.002 | 1 CSCL | RP11-495P10.1 |
| NME6      | 0.000175 | 0.155867 | 0.056 | 0.111 | 1 CSCL | NME6          |
| NDRG2     | 0.000178 | 0.603702 | 0.342 | 0.36  | 1 CSCL | NDRG2         |
| FAM149A.1 | 0.000178 | -0.10485 | 0.005 | 0.034 | 1 CSCL | FAM149A       |
| ALOX15B.1 | 0.000179 | -0.11879 | 0.002 | 0.027 | 1 CSCL | ALOX15B       |
| HEY1.1    | 0.00018  | 0.317638 | 0.148 | 0.252 | 1 CSCL | HEY1          |
| BPNT1.1   | 0.00018  | 0.16627  | 0.054 | 0.109 | 1 CSCL | BPNT1         |
| DPF1.1    | 0.000183 | 0.165395 | 0.079 | 0.144 | 1 CSCL | DPF1          |
| VDAC1.2   | 0.000183 | 0.157682 | 0.372 | 0.644 | 1 CSCL | VDAC1         |
| CHRNE.1   | 0.000185 | -0.12191 | 0.002 | 0.027 | 1 CSCL | CHRNE         |
| GPR89A.1  | 0.000185 | 0.10247  | 0.07  | 0.131 | 1 CSCL | GPR89A        |
| CNN3.2    | 0.000186 | 0.44221  | 0.417 | 0.471 | 1 CSCL | CNN3          |
| PSMC4.1   | 0.000186 | 0.275482 | 0.297 | 0.504 | 1 CSCL | PSMC4         |
| B3GALNT2. | 0.000187 | 0.102836 | 0.044 | 0.093 | 1 CSCL | B3GALNT2      |
| NLGN3.1   | 0.00019  | 0.212402 | 0.059 | 0.116 | 1 CSCL | NLGN3         |
| ALDOC.2   | 0.000193 | 0.620421 | 0.188 | 0.154 | 1 CSCL | ALDOC         |
| ALDH1L1-A | 0.000196 | 0.178902 | 0.026 | 0.01  | 1 CSCL | ALDH1L1-AS2   |
| DHRS9.1   | 0.000198 | -0.16901 | 0     | 0.024 | 1 CSCL | DHRS9         |
| LZTS1.1   | 0.000198 | 0.121792 | 0.023 | 0.062 | 1 CSCL | LZTS1         |
| PPP1R14A. | 0.000201 | -0.1171  | 0.058 | 0.109 | 1 CSCL | PPP1R14A      |
| VAMP2.1   | 0.000202 | 0.103892 | 0.375 | 0.635 | 1 CSCL | VAMP2         |
| EIF4EBP3. | 0.000204 | 0.111622 | 0.023 | 0.008 | 1 CSCL | EIF4EBP3      |
| PNKD      | 0.000205 | 0.298196 | 0.279 | 0.466 | 1 CSCL | PNKD          |
| ETV4.1    | 0.000206 | 0.202512 | 0.035 | 0.08  | 1 CSCL | ETV4          |
| MIR7-3HG  | 0.00021  | 0.509528 | 0.059 | 0.032 | 1 CSCL | MIR7-3HG      |
| IFI6.2    | 0.000212 | 0.346222 | 0.251 | 0.414 | 1 CSCL | IFI6          |
| NMT2.1    | 0.000216 | 0.111771 | 0.049 | 0.1   | 1 CSCL | NMT2          |
| AIM1      | 0.000216 | -0.10703 | 0.007 | 0.036 | 1 CSCL | AIM1          |
| SNCAIP.1  | 0.00022  | 0.127375 | 0.04  | 0.088 | 1 CSCL | SNCAIP        |
| MS4A14.1  | 0.000221 | -0.11292 | 0     | 0.023 | 1 CSCL | MS4A14        |
| SDR39U1   | 0.000222 | 0.379242 | 0.168 | 0.28  | 1 CSCL | SDR39U1       |
| DCAF13.1  | 0.000223 | 0.341719 | 0.194 | 0.324 | 1 CSCL | DCAF13        |
| EID1.1    | 0.000226 | 0.323745 | 0.532 | 0.716 | 1 CSCL | EID1          |
| HIP1      | 0.000232 | 0.236894 | 0.098 | 0.171 | 1 CSCL | HIP1          |
| FGF14.1   | 0.000232 | 0.153967 | 0.04  | 0.088 | 1 CSCL | FGF14         |
| BTN3A2.1  | 0.000237 | 0.210814 | 0.084 | 0.15  | 1 CSCL | BTN3A2        |
| GFAP.1    | 0.000238 | 0.507029 | 0.346 | 0.35  | 1 CSCL | GFAP          |
| ADM.2     | 0.000244 | 0.183763 | 0.112 | 0.189 | 1 CSCL | ADM           |
| SLC24A2.1 | 0.000244 | -0.11335 | 0.005 | 0.033 | 1 CSCL | SLC24A2       |
| FBX032.2  | 0.000245 | 0.186516 | 0.089 | 0.157 | 1 CSCL | FBX032        |
| IPCEF1.1  | 0.000248 | -0.10698 | 0     | 0.023 | 1 CSCL | IPCEF1        |
| ANXA2R.1  | 0.000252 | 0.224034 | 0.087 | 0.155 | 1 CSCL | ANXA2R        |
| PSENE1.2  | 0.000253 | 0.259375 | 0.3   | 0.502 | 1 CSCL | PSENE1        |
| CEP250    | 0.000257 | 0.122308 | 0.03  | 0.071 | 1 CSCL | CEP250        |
| SYP.2     | 0.000258 | 0.130834 | 0.075 | 0.137 | 1 CSCL | SYP           |
| ITGB2-AS1 | 0.000263 | -0.11139 | 0.003 | 0.029 | 1 CSCL | ITGB2-AS1     |
| FHL1.2    | 0.000263 | 0.285335 | 0.22  | 0.364 | 1 CSCL | FHL1          |
| MOG.1     | 0.000264 | -0.19255 | 0.005 | 0.032 | 1 CSCL | MOG           |
| TTC8      | 0.000265 | 0.153453 | 0.042 | 0.089 | 1 CSCL | TTC8          |
| WBSCR22.2 | 0.000267 | 0.252156 | 0.297 | 0.503 | 1 CSCL | WBSCR22       |



|           |          |          |       |       |   |      |              |
|-----------|----------|----------|-------|-------|---|------|--------------|
| GABARAPL2 | 0.000268 | 0.30237  | 0.541 | 0.753 | 1 | CSCL | GABARAPL2    |
| MLF2.2    | 0.000269 | 0.160484 | 0.36  | 0.622 | 1 | CSCL | MLF2         |
| RP3-47704 | 0.00027  | -0.10824 | 0.003 | 0.029 | 1 | CSCL | RP3-47704.14 |
| RP11-353N | 0.00027  | -0.10998 | 0     | 0.023 | 1 | CSCL | RP11-353N4.5 |
| FAM46A    | 0.000271 | 0.304835 | 0.117 | 0.2   | 1 | CSCL | FAM46A       |
| LINC00662 | 0.000272 | 0.283204 | 0.108 | 0.187 | 1 | CSCL | LINC00662    |
| KPTN.1    | 0.000274 | 0.145599 | 0.037 | 0.082 | 1 | CSCL | KPTN         |
| NDUFS2.1  | 0.000277 | 0.240878 | 0.326 | 0.562 | 1 | CSCL | NDUFS2       |
| TREML1.1  | 0.000278 | -0.11426 | 0     | 0.023 | 1 | CSCL | TREML1       |
| CNDP1.1   | 0.000283 | -0.161   | 0.007 | 0.035 | 1 | CSCL | CNDP1        |
| MYRF.1    | 0.000285 | -0.15603 | 0.005 | 0.032 | 1 | CSCL | MYRF         |
| TRPM3.1   | 0.000289 | 0.176687 | 0.03  | 0.071 | 1 | CSCL | TRPM3        |
| C1QL1.1   | 0.00029  | 0.20103  | 0.061 | 0.117 | 1 | CSCL | C1QL1        |
| GJB1.1    | 0.000293 | -0.1701  | 0.002 | 0.026 | 1 | CSCL | GJB1         |
| ZHX3      | 0.000294 | 0.208982 | 0.065 | 0.122 | 1 | CSCL | ZHX3         |
| LUC7L2    | 0.000295 | 0.159088 | 0.021 | 0.007 | 1 | CSCL | LUC7L2       |
| GS1-124K5 | 0.000295 | 0.167518 | 0.061 | 0.117 | 1 | CSCL | GS1-124K5.4  |
| AKAP6.1   | 0.000295 | 0.208267 | 0.052 | 0.104 | 1 | CSCL | AKAP6        |
| NCAM1.2   | 0.000296 | 0.23602  | 0.208 | 0.342 | 1 | CSCL | NCAM1        |
| SRCIN1.1  | 0.000296 | -0.10317 | 0.005 | 0.032 | 1 | CSCL | SRCIN1       |
| OR4N2     | 0.000302 | 0.225645 | 0.028 | 0.011 | 1 | CSCL | OR4N2        |
| ZNF90.1   | 0.000306 | 0.419196 | 0.372 | 0.38  | 1 | CSCL | ZNF90        |
| RNF180.1  | 0.00031  | 0.286894 | 0.098 | 0.171 | 1 | CSCL | RNF180       |
| CADM2.1   | 0.000321 | 0.159215 | 0.113 | 0.192 | 1 | CSCL | CADM2        |
| BCL2L15   | 0.000323 | 0.138868 | 0.026 | 0.01  | 1 | CSCL | BCL2L15      |
| NDUFS8.2  | 0.000324 | 0.212305 | 0.358 | 0.621 | 1 | CSCL | NDUFS8       |
| ROM1.1    | 0.000327 | 0.178856 | 0.061 | 0.116 | 1 | CSCL | ROM1         |
| SPTSSA.2  | 0.000331 | 0.301136 | 0.264 | 0.436 | 1 | CSCL | SPTSSA       |
| DPY19L3   | 0.000334 | 0.141445 | 0.044 | 0.091 | 1 | CSCL | DPY19L3      |
| NKX6-2.1  | 0.000335 | -0.15483 | 0.002 | 0.025 | 1 | CSCL | NKX6-2       |
| OBSL1.1   | 0.000335 | 0.172177 | 0.084 | 0.149 | 1 | CSCL | OBSL1        |
| ZIC1.1    | 0.000335 | 0.165376 | 0.061 | 0.117 | 1 | CSCL | ZIC1         |
| NRDE2.1   | 0.000342 | 0.156905 | 0.051 | 0.101 | 1 | CSCL | NRDE2        |
| GPR89B    | 0.000349 | 0.143112 | 0.017 | 0.006 | 1 | CSCL | GPR89B       |
| CRIM1.1   | 0.000349 | 0.10368  | 0.026 | 0.065 | 1 | CSCL | CRIM1        |
| TSEN2.1   | 0.000353 | 0.117242 | 0.044 | 0.091 | 1 | CSCL | TSEN2        |
| PRDX4.2   | 0.000358 | 0.220435 | 0.326 | 0.558 | 1 | CSCL | PRDX4        |
| LGI3.1    | 0.00036  | -0.1304  | 0     | 0.022 | 1 | CSCL | LGI3         |
| FCER1A.1  | 0.000362 | -0.12334 | 0.002 | 0.025 | 1 | CSCL | FCER1A       |
| TAC3      | 0.000364 | -0.10717 | 0.002 | 0.025 | 1 | CSCL | TAC3         |
| TEKT1     | 0.000366 | 0.116786 | 0.012 | 0.003 | 1 | CSCL | TEKT1        |
| FA2H.1    | 0.000367 | -0.13069 | 0.003 | 0.028 | 1 | CSCL | FA2H         |
| POLR2J3.1 | 0.000375 | 0.30163  | 0.209 | 0.345 | 1 | CSCL | POLR2J3      |
| DNAAF1.1  | 0.000377 | -0.15229 | 0.003 | 0.028 | 1 | CSCL | DNAAF1       |
| BGN.1     | 0.000387 | 0.431624 | 0.096 | 0.063 | 1 | CSCL | BGN          |
| PKD1      | 0.000395 | 0.200669 | 0.065 | 0.121 | 1 | CSCL | PKD1         |
| OLIG1.2   | 0.0004   | 0.580498 | 0.209 | 0.178 | 1 | CSCL | OLIG1        |
| GRAMD3.2  | 0.000401 | 0.21574  | 0.08  | 0.143 | 1 | CSCL | GRAMD3       |
| IPP       | 0.000408 | 0.119101 | 0.024 | 0.062 | 1 | CSCL | IPP          |
| ACSM5     | 0.000417 | -0.10564 | 0.007 | 0.034 | 1 | CSCL | ACSM5        |
| RPGRIP1L  | 0.000419 | 0.112266 | 0.023 | 0.059 | 1 | CSCL | RPGRIP1L     |

|            |          |          |       |       |        |                |
|------------|----------|----------|-------|-------|--------|----------------|
| RND2. 1    | 0.00042  | 0.292817 | 0.096 | 0.167 | 1 CSCL | RND2           |
| AP000439.  | 0.000421 | -0.11805 | 0.003 | 0.028 | 1 CSCL | AP000439. 1    |
| SHROOM3    | 0.000422 | 0.10051  | 0.012 | 0.043 | 1 CSCL | SHROOM3        |
| HSPE1. 2   | 0.000422 | 0.295149 | 0.538 | 0.739 | 1 CSCL | HSPE1          |
| VPS28. 1   | 0.000426 | 0.196437 | 0.379 | 0.649 | 1 CSCL | VPS28          |
| CEACAM21.  | 0.00044  | -0.10395 | 0     | 0.021 | 1 CSCL | CEACAM21       |
| SPRY4      | 0.000442 | 0.134942 | 0.03  | 0.069 | 1 CSCL | SPRY4          |
| POLR2G. 2  | 0.000445 | 0.224093 | 0.344 | 0.579 | 1 CSCL | POLR2G         |
| RP11-14N7  | 0.000455 | 0.351045 | 0.124 | 0.209 | 1 CSCL | RP11-14N7. 2   |
| CTSW. 1    | 0.000462 | -0.16814 | 0.005 | 0.031 | 1 CSCL | CTSW           |
| MT1A. 2    | 0.000469 | 0.337768 | 0.052 | 0.028 | 1 CSCL | MT1A           |
| PGM2L1. 1  | 0.000478 | 0.281114 | 0.159 | 0.26  | 1 CSCL | PGM2L1         |
| ZNF429. 1  | 0.000506 | 0.232984 | 0.073 | 0.132 | 1 CSCL | ZNF429         |
| PTPRCAP. 1 | 0.000511 | -0.16132 | 0.003 | 0.027 | 1 CSCL | PTPRCAP        |
| RETN. 1    | 0.000522 | -0.11224 | 0     | 0.021 | 1 CSCL | RETN           |
| RHBDF1     | 0.000522 | 0.143421 | 0.019 | 0.053 | 1 CSCL | RHBDF1         |
| NRXN2. 2   | 0.000529 | 0.126393 | 0.065 | 0.119 | 1 CSCL | NRXN2          |
| QTRT1. 2   | 0.000536 | 0.368824 | 0.206 | 0.337 | 1 CSCL | QTRT1          |
| P2RY12     | 0.000537 | -0.11789 | 0     | 0.021 | 1 CSCL | P2RY12         |
| IL1R2      | 0.000538 | -0.13697 | 0.005 | 0.03  | 1 CSCL | IL1R2          |
| RP11-212I  | 0.000541 | -0.10602 | 0.002 | 0.024 | 1 CSCL | RP11-212I21. 4 |
| MT1F. 2    | 0.000548 | 0.299232 | 0.192 | 0.311 | 1 CSCL | MT1F           |
| HAAO. 1    | 0.000554 | -0.11631 | 0.002 | 0.024 | 1 CSCL | HAAO           |
| PCOLCE. 1  | 0.000561 | 0.105519 | 0.04  | 0.083 | 1 CSCL | PCOLCE         |
| CARF. 1    | 0.000563 | 0.106736 | 0.037 | 0.078 | 1 CSCL | CARF           |
| FIS1. 1    | 0.000564 | 0.161886 | 0.382 | 0.651 | 1 CSCL | FIS1           |
| SDHC. 2    | 0.000566 | 0.286692 | 0.332 | 0.569 | 1 CSCL | SDHC           |
| CLEC10A    | 0.000569 | -0.1135  | 0     | 0.02  | 1 CSCL | CLEC10A        |
| POLR1C. 2  | 0.000576 | 0.26095  | 0.068 | 0.124 | 1 CSCL | POLR1C         |
| GADD45B. 1 | 0.000582 | 0.410489 | 0.433 | 0.493 | 1 CSCL | GADD45B        |
| CHMP2A. 2  | 0.000586 | 0.455347 | 0.49  | 0.663 | 1 CSCL | CHMP2A         |
| RP11-421L  | 0.000597 | 0.171091 | 0.04  | 0.083 | 1 CSCL | RP11-421L21. 3 |
| BCAT2. 1   | 0.0006   | 0.314841 | 0.08  | 0.141 | 1 CSCL | BCAT2          |
| TNNI2. 1   | 0.000603 | -0.10441 | 0     | 0.02  | 1 CSCL | TNNI2          |
| APP. 1     | 0.000607 | 0.171955 | 0.319 | 0.535 | 1 CSCL | APP            |
| ASB3. 1    | 0.000609 | 0.126042 | 0.016 | 0.005 | 1 CSCL | ASB3           |
| UBE2L6. 2  | 0.00061  | 0.303977 | 0.291 | 0.482 | 1 CSCL | UBE2L6         |
| RHOBTB3. 2 | 0.000611 | 0.293222 | 0.253 | 0.416 | 1 CSCL | RHOBTB3        |
| PSMA1. 2   | 0.000621 | 0.205522 | 0.368 | 0.624 | 1 CSCL | PSMA1          |
| TRMT5. 1   | 0.000632 | 0.107447 | 0.031 | 0.07  | 1 CSCL | TRMT5          |
| CLDN12. 2  | 0.000634 | 0.206903 | 0.08  | 0.141 | 1 CSCL | CLDN12         |
| LANCL2. 2  | 0.000639 | 0.247411 | 0.091 | 0.155 | 1 CSCL | LANCL2         |
| GTPBP10    | 0.000647 | 0.140996 | 0.051 | 0.098 | 1 CSCL | GTPBP10        |
| CAV1. 2    | 0.000688 | 0.441159 | 0.162 | 0.125 | 1 CSCL | CAV1           |
| SLC20A2. 1 | 0.000693 | 0.210019 | 0.063 | 0.115 | 1 CSCL | SLC20A2        |
| FPR2. 1    | 0.000695 | -0.10058 | 0     | 0.02  | 1 CSCL | FPR2           |
| CASK. 1    | 0.000696 | 0.11256  | 0.072 | 0.127 | 1 CSCL | CASK           |
| CDH11      | 0.000702 | 0.187356 | 0.065 | 0.118 | 1 CSCL | CDH11          |
| RFTN2. 2   | 0.000707 | 0.185497 | 0.073 | 0.13  | 1 CSCL | RFTN2          |
| HIST1H2BC  | 0.000734 | -0.12183 | 0.002 | 0.023 | 1 CSCL | HIST1H2BC      |
| AK5        | 0.000752 | -0.10942 | 0.003 | 0.026 | 1 CSCL | AK5            |

|           |          |          |       |       |   |      |               |
|-----------|----------|----------|-------|-------|---|------|---------------|
| SIDT2     | 0.000771 | 0.104656 | 0.037 | 0.077 | 1 | CSCL | SIDT2         |
| CCNB1IP1  | 0.000783 | 0.268186 | 0.099 | 0.168 | 1 | CSCL | CCNB1IP1      |
| HSPA6.1   | 0.000792 | 0.160992 | 0.054 | 0.101 | 1 | CSCL | HSPA6         |
| SCG3.2    | 0.000793 | 0.642654 | 0.272 | 0.266 | 1 | CSCL | SCG3          |
| GADD45A.2 | 0.000794 | 0.327976 | 0.176 | 0.284 | 1 | CSCL | GADD45A       |
| PRDX6.1   | 0.000806 | 0.368019 | 0.489 | 0.631 | 1 | CSCL | PRDX6         |
| HNRNPDL.1 | 0.000813 | 0.219409 | 0.565 | 0.809 | 1 | CSCL | HNRNPDL       |
| NES.2     | 0.000815 | 0.289727 | 0.175 | 0.281 | 1 | CSCL | NES           |
| RP11-51J9 | 0.000828 | 0.198657 | 0.084 | 0.144 | 1 | CSCL | RP11-51J9.5   |
| PHLPP1.2  | 0.000836 | 0.132532 | 0.044 | 0.087 | 1 | CSCL | PHLPP1        |
| RP11-1143 | 0.000839 | -0.10653 | 0.021 | 0.053 | 1 | CSCL | RP11-1143G9.4 |
| SPOCK3.1  | 0.000844 | -0.18831 | 0.009 | 0.034 | 1 | CSCL | SPOCK3        |
| USE1.2    | 0.000852 | 0.35177  | 0.209 | 0.336 | 1 | CSCL | USE1          |
| MAGED1.1  | 0.000868 | 0.352012 | 0.215 | 0.351 | 1 | CSCL | MAGED1        |
| PKIG.2    | 0.000878 | 0.366403 | 0.195 | 0.316 | 1 | CSCL | PKIG          |
| KLHL4     | 0.000891 | 0.299334 | 0.073 | 0.13  | 1 | CSCL | KLHL4         |
| PRKAA2.1  | 0.00091  | 0.11623  | 0.021 | 0.054 | 1 | CSCL | PRKAA2        |
| SLC35E3.1 | 0.000913 | 0.16494  | 0.117 | 0.19  | 1 | CSCL | SLC35E3       |
| NUCKS1.1  | 0.000935 | 0.197282 | 0.382 | 0.649 | 1 | CSCL | NUCKS1        |
| CTTNBP2.2 | 0.000963 | 0.101048 | 0.082 | 0.139 | 1 | CSCL | CTTNBP2       |
| CD3E.1    | 0.000981 | -0.16538 | 0     | 0.019 | 1 | CSCL | CD3E          |
| ZNF395.1  | 0.000984 | 0.106613 | 0.03  | 0.066 | 1 | CSCL | ZNF395        |
| DSTN.2    | 0.001006 | 0.103758 | 0.379 | 0.63  | 1 | CSCL | DSTN          |
| FGF20.1   | 0.00101  | -0.11081 | 0     | 0.019 | 1 | CSCL | FGF20         |
| DBX2.1    | 0.001012 | 0.152431 | 0.03  | 0.066 | 1 | CSCL | DBX2          |
| ZNF16     | 0.001022 | 0.139205 | 0.031 | 0.069 | 1 | CSCL | ZNF16         |
| RP11-539L | 0.001023 | 0.205458 | 0.052 | 0.098 | 1 | CSCL | RP11-539L10.3 |
| RNPC3     | 0.001035 | 0.104408 | 0.049 | 0.093 | 1 | CSCL | RNPC3         |
| C7orf73.2 | 0.001046 | 0.228217 | 0.337 | 0.566 | 1 | CSCL | C7orf73       |
| BBS2.2    | 0.001051 | 0.24015  | 0.106 | 0.176 | 1 | CSCL | BBS2          |
| ZNF667.1  | 0.00106  | 0.139513 | 0.042 | 0.084 | 1 | CSCL | ZNF667        |
| BDNF-AS.1 | 0.001061 | 0.101086 | 0.03  | 0.066 | 1 | CSCL | BDNF-AS       |
| TRIM9.1   | 0.001068 | 0.31654  | 0.147 | 0.237 | 1 | CSCL | TRIM9         |
| SLITRK4   | 0.001076 | 0.109187 | 0.012 | 0.003 | 1 | CSCL | SLITRK4       |
| TCF4.2    | 0.001077 | 0.140669 | 0.333 | 0.533 | 1 | CSCL | TCF4          |
| CDC42EP4. | 0.001078 | 0.402541 | 0.126 | 0.205 | 1 | CSCL | CDC42EP4      |
| ACSBG1    | 0.001166 | 0.178207 | 0.037 | 0.076 | 1 | CSCL | ACSBG1        |
| LHFPL3.2  | 0.001172 | 0.152382 | 0.07  | 0.122 | 1 | CSCL | LHFPL3        |
| ABAT.2    | 0.001175 | 0.213689 | 0.098 | 0.163 | 1 | CSCL | ABAT          |
| ACSS1.1   | 0.001195 | 0.10977  | 0.056 | 0.102 | 1 | CSCL | ACSS1         |
| C14orf2.1 | 0.001201 | 0.1824   | 0.389 | 0.668 | 1 | CSCL | C14orf2       |
| RNU12.1   | 0.00122  | -0.12233 | 0.012 | 0.039 | 1 | CSCL | RNU12         |
| RCAN1.2   | 0.001225 | 0.301676 | 0.173 | 0.273 | 1 | CSCL | RCAN1         |
| HINFP     | 0.001228 | 0.158153 | 0.051 | 0.095 | 1 | CSCL | HINFP         |
| MAGI2.1   | 0.001228 | 0.100138 | 0.059 | 0.107 | 1 | CSCL | MAGI2         |
| C7orf55.1 | 0.001261 | 0.320927 | 0.264 | 0.432 | 1 | CSCL | C7orf55       |
| APBB2.1   | 0.001286 | 0.241701 | 0.065 | 0.115 | 1 | CSCL | APBB2         |
| SLC35G2.2 | 0.001305 | 0.170593 | 0.068 | 0.119 | 1 | CSCL | SLC35G2       |
| NCALD.1   | 0.001334 | 0.179606 | 0.073 | 0.127 | 1 | CSCL | NCALD         |
| TSHR      | 0.001348 | 0.115042 | 0.012 | 0.004 | 1 | CSCL | TSHR          |
| BBS4      | 0.001365 | 0.151127 | 0.045 | 0.087 | 1 | CSCL | BBS4          |

|           |          |          |       |       |        |               |
|-----------|----------|----------|-------|-------|--------|---------------|
| C1orf21.2 | 0.001385 | 0.36325  | 0.126 | 0.204 | 1 CSCL | C1orf21       |
| NPPA.1    | 0.001393 | 0.330165 | 0.049 | 0.027 | 1 CSCL | NPPA          |
| SPEG      | 0.001425 | 0.115058 | 0.035 | 0.072 | 1 CSCL | SPEG          |
| TMEM67    | 0.001457 | 0.273995 | 0.052 | 0.097 | 1 CSCL | TMEM67        |
| NEAT1.1   | 0.00146  | 0.18747  | 0.581 | 0.772 | 1 CSCL | NEAT1         |
| GTF2IRD2. | 0.00147  | 0.126769 | 0.068 | 0.119 | 1 CSCL | GTF2IRD2      |
| HSD17B10. | 0.001478 | 0.369423 | 0.302 | 0.505 | 1 CSCL | HSD17B10      |
| SIAE      | 0.001483 | 0.152405 | 0.049 | 0.092 | 1 CSCL | SIAE          |
| BOLA2B    | 0.001527 | 0.155766 | 0.037 | 0.074 | 1 CSCL | BOLA2B        |
| CREB5.1   | 0.00159  | 0.300983 | 0.15  | 0.239 | 1 CSCL | CREB5         |
| PRDX5.2   | 0.001622 | 0.296952 | 0.532 | 0.753 | 1 CSCL | PRDX5         |
| SLC1A3.1  | 0.001646 | 0.245574 | 0.3   | 0.486 | 1 CSCL | SLC1A3        |
| ZMAT1.1   | 0.001671 | 0.137046 | 0.052 | 0.096 | 1 CSCL | ZMAT1         |
| ZBTB8A.1  | 0.001674 | 0.140372 | 0.059 | 0.106 | 1 CSCL | ZBTB8A        |
| CASP9.2   | 0.001676 | 0.109385 | 0.045 | 0.086 | 1 CSCL | CASP9         |
| SS18.1    | 0.001677 | 0.136522 | 0.044 | 0.084 | 1 CSCL | SS18          |
| IGSF11    | 0.001686 | 0.135774 | 0.033 | 0.069 | 1 CSCL | IGSF11        |
| MSX1      | 0.001709 | 0.118965 | 0.031 | 0.066 | 1 CSCL | MSX1          |
| CLN3.1    | 0.001742 | 0.158692 | 0.023 | 0.009 | 1 CSCL | CLN3          |
| PCDH17    | 0.001767 | 0.392209 | 0.12  | 0.195 | 1 CSCL | PCDH17        |
| SEZ6.2    | 0.001785 | 0.156067 | 0.086 | 0.142 | 1 CSCL | SEZ6          |
| SNAP25.1  | 0.001795 | 0.200495 | 0.087 | 0.145 | 1 CSCL | SNAP25        |
| CAMK2B.1  | 0.001805 | 0.291474 | 0.066 | 0.116 | 1 CSCL | CAMK2B        |
| ISG20.1   | 0.00182  | 0.161199 | 0.073 | 0.124 | 1 CSCL | ISG20         |
| PCDH15    | 0.001824 | 0.26606  | 0.03  | 0.014 | 1 CSCL | PCDH15        |
| CD2.1     | 0.001853 | -0.14223 | 0.002 | 0.02  | 1 CSCL | CD2           |
| BDH1.1    | 0.001862 | 0.136495 | 0.035 | 0.071 | 1 CSCL | BDH1          |
| NDUFA12.1 | 0.001871 | 0.336543 | 0.337 | 0.569 | 1 CSCL | NDUFA12       |
| RBM41.1   | 0.001871 | 0.110977 | 0.047 | 0.088 | 1 CSCL | RBM41         |
| EFHC1.2   | 0.00188  | 0.33802  | 0.131 | 0.209 | 1 CSCL | EFHC1         |
| PTPRF.2   | 0.001897 | 0.222794 | 0.068 | 0.118 | 1 CSCL | PTPRF         |
| SETDB1.1  | 0.001941 | 0.101102 | 0.035 | 0.071 | 1 CSCL | SETDB1        |
| RP11-390E | 0.001948 | 0.195543 | 0.075 | 0.127 | 1 CSCL | RP11-390E23.6 |
| BCAS4     | 0.001948 | 0.179875 | 0.047 | 0.088 | 1 CSCL | BCAS4         |
| SAT2.2    | 0.001953 | 0.254875 | 0.36  | 0.597 | 1 CSCL | SAT2          |
| COX7A2    | 0.001966 | 0.202598 | 0.567 | 0.823 | 1 CSCL | COX7A2        |
| HAPLN1    | 0.002    | 0.136995 | 0.021 | 0.009 | 1 CSCL | HAPLN1        |
| IGF1R     | 0.002001 | 0.175471 | 0.035 | 0.071 | 1 CSCL | IGF1R         |
| ZNF559.1  | 0.002025 | 0.267734 | 0.089 | 0.148 | 1 CSCL | ZNF559        |
| TNC.1     | 0.002058 | 0.311271 | 0.129 | 0.205 | 1 CSCL | TNC           |
| CD3D.1    | 0.002074 | -0.17635 | 0.002 | 0.02  | 1 CSCL | CD3D          |
| ETV1.2    | 0.002095 | 0.375635 | 0.157 | 0.249 | 1 CSCL | ETV1          |
| NDUFA3.1  | 0.002155 | 0.143044 | 0.391 | 0.662 | 1 CSCL | NDUFA3        |
| FAT3      | 0.002179 | 0.113002 | 0.026 | 0.058 | 1 CSCL | FAT3          |
| FMN2      | 0.002207 | 0.143851 | 0.035 | 0.07  | 1 CSCL | FMN2          |
| MYO10.1   | 0.002272 | 0.346849 | 0.124 | 0.198 | 1 CSCL | MYO10         |
| LAMA4     | 0.002276 | 0.188326 | 0.037 | 0.073 | 1 CSCL | LAMA4         |
| FABP3.1   | 0.002315 | 0.136561 | 0.021 | 0.05  | 1 CSCL | FABP3         |
| XIST.2    | 0.002326 | 0.21309  | 0.175 | 0.271 | 1 CSCL | XIST          |
| COL9A3.2  | 0.002335 | 0.345052 | 0.119 | 0.189 | 1 CSCL | COL9A3        |
| EZH1.1    | 0.00234  | 0.124362 | 0.044 | 0.082 | 1 CSCL | EZH1          |

|           |          |          |       |       |        |               |
|-----------|----------|----------|-------|-------|--------|---------------|
| RGS6      | 0.002358 | 0.272522 | 0.051 | 0.092 | 1 CSCL | RGS6          |
| TCEAL5    | 0.002393 | 0.157552 | 0.073 | 0.123 | 1 CSCL | TCEAL5        |
| CPNE5     | 0.00242  | 0.113666 | 0.023 | 0.052 | 1 CSCL | CPNE5         |
| THBS4     | 0.002436 | 0.102538 | 0.023 | 0.052 | 1 CSCL | THBS4         |
| LRRC69    | 0.00247  | -0.12011 | 0.01  | 0.034 | 1 CSCL | LRRC69        |
| PPP1R1C   | 0.002548 | 0.35648  | 0.045 | 0.026 | 1 CSCL | PPP1R1C       |
| DHRS4-AS1 | 0.002561 | 0.101898 | 0.016 | 0.006 | 1 CSCL | DHRS4-AS1     |
| STK33.1   | 0.002565 | 0.210015 | 0.035 | 0.07  | 1 CSCL | STK33         |
| NSUN6     | 0.002588 | 0.102763 | 0.04  | 0.077 | 1 CSCL | NSUN6         |
| SOX2.2    | 0.002594 | 0.451143 | 0.365 | 0.433 | 1 CSCL | SOX2          |
| HRASLS.1  | 0.002597 | 0.109294 | 0.021 | 0.05  | 1 CSCL | HRASLS        |
| PSMA7.2   | 0.002598 | 0.2028   | 0.572 | 0.813 | 1 CSCL | PSMA7         |
| CD82      | 0.002729 | 0.369553 | 0.155 | 0.244 | 1 CSCL | CD82          |
| GDAP1.2   | 0.002814 | 0.261672 | 0.096 | 0.155 | 1 CSCL | GDAP1         |
| B3GALT1   | 0.002814 | 0.109641 | 0.023 | 0.052 | 1 CSCL | B3GALT1       |
| RP11-299L | 0.00283  | 0.122737 | 0.017 | 0.007 | 1 CSCL | RP11-299L17.3 |
| KCND3.1   | 0.00285  | 0.142621 | 0.028 | 0.059 | 1 CSCL | KCND3         |
| ZFHx4-AS1 | 0.002855 | 0.109119 | 0.023 | 0.052 | 1 CSCL | ZFHx4-AS1     |
| RAB13.2   | 0.002912 | 0.353413 | 0.243 | 0.378 | 1 CSCL | RAB13         |
| TRIM32    | 0.002988 | 0.113135 | 0.028 | 0.059 | 1 CSCL | TRIM32        |
| UBE3D     | 0.003007 | 0.112423 | 0.028 | 0.059 | 1 CSCL | UBE3D         |
| RP11-1114 | 0.003018 | 0.10689  | 0.047 | 0.086 | 1 CSCL | RP11-1114A5.4 |
| STK32A.1  | 0.003063 | 0.190199 | 0.026 | 0.057 | 1 CSCL | STK32A        |
| HHLA3.2   | 0.003078 | 0.298964 | 0.087 | 0.142 | 1 CSCL | HHLA3         |
| CPT1C     | 0.003144 | 0.148518 | 0.063 | 0.107 | 1 CSCL | CPT1C         |
| ZNF783    | 0.003155 | 0.128368 | 0.028 | 0.059 | 1 CSCL | ZNF783        |
| TMEM100.2 | 0.003163 | 0.473561 | 0.115 | 0.087 | 1 CSCL | TMEM100       |
| HSPB1.1   | 0.003342 | 0.173026 | 0.403 | 0.667 | 1 CSCL | HSPB1         |
| ANGPTL1   | 0.003368 | 0.112792 | 0.016 | 0.041 | 1 CSCL | ANGPTL1       |
| COL16A1   | 0.003494 | 0.173714 | 0.04  | 0.076 | 1 CSCL | COL16A1       |
| TSGA10    | 0.003581 | 0.108348 | 0.031 | 0.063 | 1 CSCL | TSGA10        |
| C2orf74   | 0.003622 | 0.301173 | 0.044 | 0.025 | 1 CSCL | C2orf74       |
| TMED1.1   | 0.003669 | 0.433549 | 0.19  | 0.296 | 1 CSCL | TMED1         |
| CTD-2090I | 0.003685 | 0.185615 | 0.079 | 0.052 | 1 CSCL | CTD-2090I13.1 |
| CLYBL.1   | 0.003699 | 0.161866 | 0.031 | 0.063 | 1 CSCL | CLYBL         |
| DDAH1.1   | 0.00382  | 0.296866 | 0.077 | 0.127 | 1 CSCL | DDAH1         |
| CD74.1    | 0.003842 | 0.146223 | 0.621 | 0.758 | 1 CSCL | CD74          |
| RARRES2.1 | 0.003873 | 0.451637 | 0.176 | 0.148 | 1 CSCL | RARRES2       |
| PHB.1     | 0.003908 | 0.258623 | 0.34  | 0.565 | 1 CSCL | PHB           |
| MPV17L    | 0.003912 | 0.145975 | 0.04  | 0.075 | 1 CSCL | MPV17L        |
| WASF3     | 0.003918 | 0.208889 | 0.042 | 0.078 | 1 CSCL | WASF3         |
| SHROOM2.1 | 0.003985 | 0.129937 | 0.03  | 0.06  | 1 CSCL | SHROOM2       |
| PDCD5.2   | 0.004006 | 0.288533 | 0.337 | 0.55  | 1 CSCL | PDCD5         |
| U2AF1L4.1 | 0.004024 | 0.347673 | 0.129 | 0.2   | 1 CSCL | U2AF1L4       |
| HKR1.1    | 0.004027 | 0.217729 | 0.072 | 0.119 | 1 CSCL | HKR1          |
| ATP6V1G1. | 0.00405  | 0.285185 | 0.534 | 0.765 | 1 CSCL | ATP6V1G1      |
| KCNJ16.1  | 0.004108 | 0.126455 | 0.026 | 0.055 | 1 CSCL | KCNJ16        |
| SSR2.1    | 0.004108 | 0.11159  | 0.431 | 0.728 | 1 CSCL | SSR2          |
| BST2.1    | 0.00416  | 0.468827 | 0.403 | 0.49  | 1 CSCL | BST2          |
| NDP       | 0.004191 | 0.276554 | 0.068 | 0.114 | 1 CSCL | NDP           |
| HRSP12.2  | 0.004239 | 0.359724 | 0.129 | 0.202 | 1 CSCL | HRSP12        |

|            |          |          |       |       |        |               |
|------------|----------|----------|-------|-------|--------|---------------|
| CD99. 1    | 0.004252 | 0.312195 | 0.483 | 0.645 | 1 CSCL | CD99          |
| MDFI. 1    | 0.004316 | 0.216505 | 0.051 | 0.089 | 1 CSCL | MDFI          |
| ELP4. 1    | 0.004476 | 0.223089 | 0.054 | 0.094 | 1 CSCL | ELP4          |
| FAM221A. 2 | 0.004483 | 0.216321 | 0.117 | 0.181 | 1 CSCL | FAM221A       |
| AHCYL1. 2  | 0.004586 | 0.372388 | 0.215 | 0.333 | 1 CSCL | AHCYL1        |
| COQ3. 1    | 0.004687 | 0.113455 | 0.037 | 0.069 | 1 CSCL | COQ3          |
| SSBP1. 2   | 0.004724 | 0.223707 | 0.387 | 0.651 | 1 CSCL | SSBP1         |
| POLR2J. 2  | 0.004791 | 0.435467 | 0.475 | 0.652 | 1 CSCL | POLR2J        |
| ZNF273. 1  | 0.004802 | 0.129111 | 0.049 | 0.086 | 1 CSCL | ZNF273        |
| SCG2. 1    | 0.004802 | 0.32902  | 0.175 | 0.266 | 1 CSCL | SCG2          |
| ADAMTS9    | 0.005025 | 0.264023 | 0.044 | 0.079 | 1 CSCL | ADAMTS9       |
| ABLIM1. 2  | 0.005066 | 0.110274 | 0.026 | 0.054 | 1 CSCL | ABLIM1        |
| TMEM9. 2   | 0.005084 | 0.386675 | 0.239 | 0.374 | 1 CSCL | TMEM9         |
| HSPB6. 1   | 0.005184 | 0.137685 | 0.031 | 0.062 | 1 CSCL | HSPB6         |
| RP3-525N1  | 0.005307 | 0.203739 | 0.098 | 0.153 | 1 CSCL | RP3-525N10. 2 |
| FGGY       | 0.005326 | 0.220882 | 0.051 | 0.088 | 1 CSCL | FGGY          |
| GABBR1. 1  | 0.005346 | 0.120684 | 0.045 | 0.081 | 1 CSCL | GABBR1        |
| TMBIM4. 2  | 0.005391 | 0.123772 | 0.086 | 0.058 | 1 CSCL | TMBIM4        |
| DYNLRB1. 1 | 0.005445 | 0.18149  | 0.405 | 0.678 | 1 CSCL | DYNLRB1       |
| SHFM1. 1   | 0.005483 | 0.31066  | 0.515 | 0.734 | 1 CSCL | SHFM1         |
| CCDC8      | 0.005505 | 0.148802 | 0.023 | 0.049 | 1 CSCL | CCDC8         |
| ZNF398. 1  | 0.005516 | 0.122337 | 0.03  | 0.059 | 1 CSCL | ZNF398        |
| LGALS1. 2  | 0.005538 | 0.239162 | 0.539 | 0.712 | 1 CSCL | LGALS1        |
| FLRT3. 1   | 0.005552 | 0.133903 | 0.03  | 0.059 | 1 CSCL | FLRT3         |
| UQCR10. 1  | 0.005619 | 0.118045 | 0.443 | 0.757 | 1 CSCL | UQCR10        |
| NMB. 2     | 0.005725 | 0.500905 | 0.133 | 0.206 | 1 CSCL | NMB           |
| TMEM231. 1 | 0.005765 | 0.135219 | 0.033 | 0.064 | 1 CSCL | TMEM231       |
| PON2. 2    | 0.005834 | 0.51161  | 0.382 | 0.454 | 1 CSCL | PON2          |
| SETD1A     | 0.005979 | 0.112106 | 0.021 | 0.046 | 1 CSCL | SETD1A        |
| EXOG. 1    | 0.006035 | 0.34635  | 0.101 | 0.159 | 1 CSCL | EXOG          |
| TPPP3. 2   | 0.006243 | 0.278731 | 0.101 | 0.156 | 1 CSCL | TPPP3         |
| YWHAE. 1   | 0.006335 | 0.188672 | 0.55  | 0.763 | 1 CSCL | YWHAE         |
| THY1. 1    | 0.006383 | 0.317957 | 0.171 | 0.26  | 1 CSCL | THY1          |
| HIGD2A. 1  | 0.006566 | 0.243045 | 0.379 | 0.631 | 1 CSCL | HIGD2A        |
| PPP5D1. 1  | 0.006718 | 0.101241 | 0.023 | 0.048 | 1 CSCL | PPP5D1        |
| AHDC1. 1   | 0.00672  | 0.195446 | 0.063 | 0.103 | 1 CSCL | AHDC1         |
| METTL3     | 0.006856 | 0.218506 | 0.079 | 0.125 | 1 CSCL | METTL3        |
| ATP6VOE2.  | 0.006885 | 0.304677 | 0.29  | 0.461 | 1 CSCL | ATP6VOE2      |
| CCBE1      | 0.006947 | 0.109691 | 0.021 | 0.009 | 1 CSCL | CCBE1         |
| IFIT3. 2   | 0.006997 | 0.213124 | 0.068 | 0.11  | 1 CSCL | IFIT3         |
| IBSP. 1    | 0.007147 | -0.11892 | 0.007 | 0.025 | 1 CSCL | IBSP          |
| LRRN3. 1   | 0.007183 | 0.222314 | 0.072 | 0.115 | 1 CSCL | LRRN3         |
| SERPINE1.  | 0.007188 | 0.116576 | 0.063 | 0.102 | 1 CSCL | SERPINE1      |
| SLIRP      | 0.007206 | 0.207688 | 0.384 | 0.633 | 1 CSCL | SLIRP         |
| NR1D1. 1   | 0.007231 | 0.126104 | 0.024 | 0.05  | 1 CSCL | NR1D1         |
| GLRA3      | 0.007241 | 0.140353 | 0.021 | 0.01  | 1 CSCL | GLRA3         |
| SLC25A3. 1 | 0.007304 | 0.108486 | 0.45  | 0.761 | 1 CSCL | SLC25A3       |
| SNTG1. 1   | 0.007456 | 0.616596 | 0.171 | 0.152 | 1 CSCL | SNTG1         |
| FKBP3. 1   | 0.007535 | 0.336731 | 0.302 | 0.486 | 1 CSCL | FKBP3         |
| DIRAS3. 1  | 0.007539 | 0.5443   | 0.147 | 0.122 | 1 CSCL | DIRAS3        |
| BUD31. 2   | 0.007547 | 0.20812  | 0.386 | 0.64  | 1 CSCL | BUD31         |

|            |           |           |        |        |              |                |
|------------|-----------|-----------|--------|--------|--------------|----------------|
| EPSTI1. 2  | 0. 007601 | 0. 300046 | 0. 08  | 0. 127 | 1 CSCL       | EPSTI1         |
| MGP. 2     | 0. 007669 | 0. 410064 | 0. 131 | 0. 102 | 1 CSCL       | MGP            |
| CC2D2A. 1  | 0. 007709 | 0. 177529 | 0. 04  | 0. 072 | 1 CSCL       | CC2D2A         |
| CCDC30     | 0. 007709 | 0. 122659 | 0. 024 | 0. 05  | 1 CSCL       | CCDC30         |
| EIF3E. 1   | 0. 007728 | 0. 263206 | 0. 394 | 0. 66  | 1 CSCL       | EIF3E          |
| ZNF714     | 0. 007728 | 0. 151162 | 0. 065 | 0. 105 | 1 CSCL       | ZNF714         |
| DMD. 1     | 0. 007815 | 0. 215014 | 0. 051 | 0. 086 | 1 CSCL       | DMD            |
| METAP1D    | 0. 007948 | 0. 181016 | 0. 08  | 0. 126 | 1 CSCL       | METAP1D        |
| CLDN11. 1  | 0. 008011 | -0. 1205  | 0. 023 | 0. 047 | 1 CSCL       | CLDN11         |
| AASS       | 0. 008019 | 0. 160983 | 0. 073 | 0. 117 | 1 CSCL       | AASS           |
| LPL        | 0. 008036 | 0. 293969 | 0. 105 | 0. 161 | 1 CSCL       | LPL            |
| RP11-263K  | 0. 008155 | 0. 169227 | 0. 037 | 0. 067 | 1 CSCL       | RP11-263K19. 4 |
| CRIP2      | 0. 008263 | 0. 326813 | 0. 209 | 0. 319 | 1 CSCL       | CRIP2          |
| CCDC102B   | 0. 008305 | 0. 263897 | 0. 063 | 0. 103 | 1 CSCL       | CCDC102B       |
| COA7       | 0. 008631 | 0. 133801 | 0. 035 | 0. 064 | 1 CSCL       | COA7           |
| SEC62. 2   | 0. 008642 | 0. 139651 | 0. 419 | 0. 705 | 1 CSCL       | SEC62          |
| GZMA. 1    | 0. 00872  | -0. 12462 | 0. 002 | 0. 015 | 1 CSCL       | GZMA           |
| ATP1B2. 2  | 0. 008997 | 0. 318074 | 0. 157 | 0. 237 | 1 CSCL       | ATP1B2         |
| OAS3       | 0. 009155 | 0. 148079 | 0. 028 | 0. 054 | 1 CSCL       | OAS3           |
| APOL2. 1   | 0. 009472 | 0. 203583 | 0. 063 | 0. 101 | 1 CSCL       | APOL2          |
| DSEL. 2    | 0. 009515 | 0. 302251 | 0. 152 | 0. 229 | 1 CSCL       | DSEL           |
| ERH. 2     | 0. 009813 | 0. 333346 | 0. 504 | 0. 724 | 1 CSCL       | ERH            |
| FCER1A. 2  | 0         | 1. 633094 | 0. 615 | 0. 014 | 0 DC         | FCER1A         |
| AREG. 3    | 0         | 1. 517188 | 0. 749 | 0. 054 | 0 DC         | AREG           |
| CLEC10A. 1 | 0         | 1. 314866 | 0. 471 | 0. 012 | 0 DC         | CLEC10A        |
| CD1C       | 0         | 1. 283364 | 0. 369 | 0. 002 | 0 DC         | CD1C           |
| CD1E       | 0         | 1. 195941 | 0. 332 | 0. 002 | 0 DC         | CD1E           |
| CD1A       | #####     | 0. 60682  | 0. 123 | 0. 001 | ##### DC     | CD1A           |
| EREG       | #####     | 1. 055164 | 0. 348 | 0. 019 | ##### DC     | EREG           |
| IL1R2. 1   | #####     | 1. 09421  | 0. 358 | 0. 024 | ##### DC     | IL1R2          |
| CD1D. 2    | #####     | 1. 040838 | 0. 412 | 0. 032 | ##### DC     | CD1D           |
| IL18R1     | #####     | 0. 663384 | 0. 209 | 0. 008 | ##### DC     | IL18R1         |
| LSP1. 3    | #####     | 1. 200771 | 0. 824 | 0. 155 | ##### DC     | LSP1           |
| AKR1C3     | #####     | 0. 893188 | 0. 23  | 0. 013 | ##### DC     | AKR1C3         |
| FCGR2B. 3  | #####     | 1. 114918 | 0. 727 | 0. 135 | ##### DC     | FCGR2B         |
| CYTIP. 3   | #####     | 1. 087507 | 0. 599 | 0. 096 | ##### DC     | CYTIP          |
| C15orf48.  | #####     | 1. 261493 | 0. 471 | 0. 063 | ##### DC     | C15orf48       |
| CLEC5A. 3  | #####     | 1. 060313 | 0. 578 | 0. 092 | ##### DC     | CLEC5A         |
| LYZ. 3     | #####     | 1. 149797 | 0. 802 | 0. 196 | ##### DC     | LYZ            |
| CLEC4E. 2  | #####     | 0. 94503  | 0. 428 | 0. 052 | ##### DC     | CLEC4E         |
| CST7. 2    | 3. 22E-99 | 0. 999589 | 0. 316 | 0. 031 | 4. 82E-95 DC | CST7           |
| S100A4. 3  | 1. 02E-97 | 1. 031391 | 0. 963 | 0. 285 | 1. 52E-93 DC | S100A4         |
| HLA-DQA2.  | 1. 78E-95 | 1. 013786 | 0. 749 | 0. 163 | 2. 66E-91 DC | HLA-DQA2       |
| STK17B. 3  | 3. 40E-93 | 0. 993996 | 0. 626 | 0. 125 | 5. 08E-89 DC | STK17B         |
| HLA-DQB2.  | 7. 00E-93 | 1. 022505 | 0. 545 | 0. 09  | 1. 05E-88 DC | HLA-DQB2       |
| HLA-DQB1.  | 2. 90E-90 | 0. 956046 | 0. 989 | 0. 315 | 4. 33E-86 DC | HLA-DQB1       |
| FGR. 3     | 5. 10E-89 | 0. 913558 | 0. 481 | 0. 077 | 7. 61E-85 DC | FGR            |
| TACSTD2    | 2. 44E-88 | 0. 355951 | 0. 091 | 0. 002 | 3. 65E-84 DC | TACSTD2        |
| CFP        | 6. 86E-86 | 0. 700315 | 0. 193 | 0. 013 | 1. 02E-81 DC | CFP            |
| SDPR       | 8. 54E-84 | 0. 345576 | 0. 075 | 0. 001 | 1. 28E-79 DC | SDPR           |
| PLAC8. 2   | 4. 20E-83 | 0. 927015 | 0. 422 | 0. 062 | 6. 27E-79 DC | PLAC8          |

|           |             |           |        |        |           |    |                |
|-----------|-------------|-----------|--------|--------|-----------|----|----------------|
| IL2RG. 2  | 3. 50E-82   | 0. 816138 | 0. 326 | 0. 038 | 5. 23E-78 | DC | IL2RG          |
| Clorf162. | 3. 63E-82   | 0. 921348 | 0. 973 | 0. 312 | 5. 42E-78 | DC | Clorf162       |
| CEACAM4.  | 2 6. 49E-82 | 0. 665463 | 0. 235 | 0. 02  | 9. 70E-78 | DC | CEACAM4        |
| HLA-DQA1. | 1. 61E-80   | 0. 877927 | 0. 936 | 0. 296 | 2. 41E-76 | DC | HLA-DQA1       |
| LCP1.     | 2 2. 07E-79 | 0. 898558 | 0. 615 | 0. 134 | 3. 10E-75 | DC | LCP1           |
| RP11-404C | 2. 58E-79   | 0. 280921 | 0. 053 | 0. 001 | 3. 86E-75 | DC | RP11-404013. 5 |
| EVI2B.    | 3 4. 77E-79 | 0. 879305 | 0. 759 | 0. 194 | 7. 12E-75 | DC | EVI2B          |
| GPR183.   | 3 6. 76E-75 | 0. 893229 | 0. 888 | 0. 28  | 1. 01E-70 | DC | GPR183         |
| CSTA.     | 3 4. 12E-74 | 0. 879915 | 0. 561 | 0. 121 | 6. 16E-70 | DC | CSTA           |
| PHACTR1.  | 3 2. 06E-73 | 0. 906313 | 0. 54  | 0. 111 | 3. 08E-69 | DC | PHACTR1        |
| CD207     | 3. 98E-73   | 0. 295832 | 0. 048 | 0. 001 | 5. 94E-69 | DC | CD207          |
| GAPT.     | 3 7. 89E-73 | 0. 840802 | 0. 369 | 0. 055 | 1. 18E-68 | DC | GAPT           |
| RNASE6.   | 3 8. 59E-73 | 0. 873716 | 0. 877 | 0. 265 | 1. 28E-68 | DC | RNASE6         |
| LST1.     | 3 1. 12E-72 | 0. 861019 | 0. 925 | 0. 303 | 1. 67E-68 | DC | LST1           |
| TES.      | 3 1. 84E-72 | 0. 659986 | 0. 321 | 0. 042 | 2. 75E-68 | DC | TES            |
| CD55.     | 3 2. 83E-72 | 0. 883066 | 0. 535 | 0. 111 | 4. 23E-68 | DC | CD55           |
| HCLS1.    | 3 1. 64E-71 | 0. 840118 | 0. 893 | 0. 281 | 2. 46E-67 | DC | HCLS1          |
| CD52.     | 2 3. 30E-71 | 0. 790845 | 0. 342 | 0. 047 | 4. 93E-67 | DC | CD52           |
| ALOX5.    | 3 1. 19E-70 | 0. 865721 | 0. 583 | 0. 131 | 1. 78E-66 | DC | ALOX5          |
| MAP3K8.   | 3 1. 80E-70 | 0. 913313 | 0. 674 | 0. 175 | 2. 69E-66 | DC | MAP3K8         |
| CTSH.     | 3 2. 85E-68 | 0. 848962 | 0. 861 | 0. 286 | 4. 26E-64 | DC | CTSH           |
| CD86.     | 3 2. 34E-67 | 0. 82856  | 0. 738 | 0. 205 | 3. 49E-63 | DC | CD86           |
| MNDA.     | 3 5. 10E-67 | 0. 859964 | 0. 658 | 0. 169 | 7. 63E-63 | DC | MNDA           |
| IFI30.    | 3 1. 13E-66 | 0. 830701 | 0. 754 | 0. 211 | 1. 69E-62 | DC | IFI30          |
| NLRP3.    | 3 1. 71E-66 | 0. 84779  | 0. 439 | 0. 082 | 2. 55E-62 | DC | NLRP3          |
| GMFG.     | 3 2. 82E-66 | 0. 819048 | 0. 893 | 0. 288 | 4. 21E-62 | DC | GMFG           |
| FXVD5.    | 3 2. 05E-64 | 0. 810928 | 0. 925 | 0. 331 | 3. 06E-60 | DC | FXVD5          |
| MS4A6A.   | 3 2. 46E-64 | 0. 773493 | 0. 952 | 0. 331 | 3. 68E-60 | DC | MS4A6A         |
| CRIP1.    | 1 5. 09E-64 | 0. 69431  | 0. 278 | 0. 035 | 7. 61E-60 | DC | CRIP1          |
| QPCT.     | 3 2. 97E-63 | 0. 806632 | 0. 299 | 0. 043 | 4. 44E-59 | DC | QPCT           |
| FAM26F.   | 3 4. 39E-62 | 0. 868907 | 0. 61  | 0. 16  | 6. 57E-58 | DC | FAM26F         |
| CD48.     | 3 9. 23E-62 | 0. 78205  | 0. 401 | 0. 073 | 1. 38E-57 | DC | CD48           |
| HPGD      | 1. 09E-61   | 0. 323203 | 0. 091 | 0. 004 | 1. 62E-57 | DC | HPGD           |
| ICAM3.    | 3 1. 56E-61 | 0. 947963 | 0. 439 | 0. 095 | 2. 33E-57 | DC | ICAM3          |
| CNN2.     | 2 2. 53E-61 | 0. 801117 | 0. 358 | 0. 062 | 3. 78E-57 | DC | CNN2           |
| SAMSN1.   | 3 4. 23E-61 | 0. 820156 | 0. 786 | 0. 243 | 6. 32E-57 | DC | SAMSN1         |
| DUSP2.    | 3 1. 64E-60 | 0. 868991 | 0. 481 | 0. 104 | 2. 45E-56 | DC | DUSP2          |
| ARHGDIB.  | 3 2. 61E-60 | 0. 759098 | 0. 973 | 0. 362 | 3. 90E-56 | DC | ARHGDIB        |
| ST14.     | 3 5. 95E-60 | 0. 739169 | 0. 38  | 0. 068 | 8. 89E-56 | DC | ST14           |
| ITGB2.    | 3 6. 93E-60 | 0. 765632 | 0. 909 | 0. 314 | 1. 04E-55 | DC | ITGB2          |
| NR4A2.    | 3 2. 11E-59 | 0. 829081 | 0. 77  | 0. 243 | 3. 16E-55 | DC | NR4A2          |
| CXCR4.    | 2 1. 65E-58 | 0. 750859 | 0. 914 | 0. 38  | 2. 46E-54 | DC | CXCR4          |
| PLBD1.    | 3 5. 22E-58 | 0. 816988 | 0. 428 | 0. 089 | 7. 80E-54 | DC | PLBD1          |
| CLEC7A.   | 3 6. 64E-58 | 0. 752869 | 0. 626 | 0. 168 | 9. 92E-54 | DC | CLEC7A         |
| ADAM8.    | 2 2. 40E-57 | 0. 674845 | 0. 278 | 0. 039 | 3. 59E-53 | DC | ADAM8          |
| GPSM3.    | 3 2. 90E-57 | 0. 806089 | 0. 786 | 0. 254 | 4. 33E-53 | DC | GPSM3          |
| HLA-DOB   | 4. 59E-57   | 0. 409718 | 0. 107 | 0. 006 | 6. 86E-53 | DC | HLA-DOB        |
| FGL2.     | 3 1. 36E-56 | 0. 780211 | 0. 626 | 0. 169 | 2. 03E-52 | DC | FGL2           |
| TYMP.     | 3 3. 92E-56 | 0. 814215 | 0. 818 | 0. 298 | 5. 86E-52 | DC | TYMP           |
| CD83.     | 3 9. 34E-56 | 0. 799962 | 0. 807 | 0. 286 | 1. 40E-51 | DC | CD83           |
| FCGR2A.   | 3 4. 83E-55 | 0. 746955 | 0. 834 | 0. 28  | 7. 21E-51 | DC | FCGR2A         |



|             |           |           |        |        |           |    |          |
|-------------|-----------|-----------|--------|--------|-----------|----|----------|
| RHOH. 3     | 3. 74E-54 | 0. 699835 | 0. 38  | 0. 072 | 5. 58E-50 | DC | RHOH     |
| NR4A3. 3    | 2. 53E-53 | 0. 786097 | 0. 556 | 0. 144 | 3. 78E-49 | DC | NR4A3    |
| CSF2RA. 3   | 4. 29E-53 | 0. 745929 | 0. 663 | 0. 195 | 6. 41E-49 | DC | CSF2RA   |
| CTSS. 3     | 4. 41E-53 | 0. 694581 | 0. 914 | 0. 345 | 6. 60E-49 | DC | CTSS     |
| PKIB. 2     | 1. 29E-52 | 0. 831909 | 0. 717 | 0. 277 | 1. 93E-48 | DC | PKIB     |
| COR01A. 3   | 1. 94E-52 | 0. 719788 | 0. 898 | 0. 364 | 2. 90E-48 | DC | COR01A   |
| MALAT1. 3   | 1. 96E-52 | -0. 61708 | 1      | 0. 995 | 2. 93E-48 | DC | MALAT1   |
| PLAUR. 3    | 2. 37E-52 | 0. 731666 | 0. 893 | 0. 358 | 3. 54E-48 | DC | PLAUR    |
| RIPK2. 3    | 3. 18E-52 | 0. 832131 | 0. 551 | 0. 162 | 4. 75E-48 | DC | RIPK2    |
| FBP1. 3     | 4. 78E-52 | 0. 840215 | 0. 465 | 0. 111 | 7. 14E-48 | DC | FBP1     |
| DOK2. 2     | 1. 08E-51 | 0. 740776 | 0. 305 | 0. 051 | 1. 61E-47 | DC | DOK2     |
| THBD. 3     | 1. 14E-51 | 0. 836252 | 0. 412 | 0. 089 | 1. 71E-47 | DC | THBD     |
| IL13RA1. 3  | 2. 26E-51 | 0. 829228 | 0. 679 | 0. 242 | 3. 37E-47 | DC | IL13RA1  |
| HLA-DMA. 3  | 2. 92E-51 | 0. 66058  | 0. 968 | 0. 399 | 4. 36E-47 | DC | HLA-DMA  |
| PTPRC. 3    | 5. 08E-51 | 0. 772069 | 0. 652 | 0. 196 | 7. 59E-47 | DC | PTPRC    |
| SPINT2. 3   | 5. 59E-51 | 0. 795118 | 0. 647 | 0. 209 | 8. 35E-47 | DC | SPINT2   |
| IRF4        | 5. 95E-51 | 0. 370172 | 0. 086 | 0. 004 | 8. 89E-47 | DC | IRF4     |
| SERPINA1. 1 | 4. 4E-50  | 0. 750318 | 0. 813 | 0. 291 | 2. 15E-46 | DC | SERPINA1 |
| HLA-DRB5. 2 | 1. 4E-50  | 0. 626061 | 0. 952 | 0. 391 | 3. 20E-46 | DC | HLA-DRB5 |
| PLEK2. 2    | 3. 48E-50 | 0. 627334 | 0. 187 | 0. 021 | 5. 21E-46 | DC | PLEK2    |
| S100A12     | 1. 16E-49 | 0. 366848 | 0. 096 | 0. 006 | 1. 73E-45 | DC | S100A12  |
| VAMP8. 3    | 1. 50E-49 | 0. 689992 | 0. 898 | 0. 334 | 2. 25E-45 | DC | VAMP8    |
| RNF144B. 2  | 1. 82E-49 | 0. 740371 | 0. 417 | 0. 093 | 2. 72E-45 | DC | RNF144B  |
| NCF2. 3     | 2. 02E-49 | 0. 755854 | 0. 422 | 0. 096 | 3. 02E-45 | DC | NCF2     |
| HLA-DPB1. 2 | 0. 8E-49  | 0. 642446 | 1      | 0. 486 | 3. 11E-45 | DC | HLA-DPB1 |
| SPI1. 3     | 1. 93E-48 | 0. 765469 | 0. 711 | 0. 231 | 2. 89E-44 | DC | SPI1     |
| SNAI1. 2    | 3. 25E-48 | 0. 70883  | 0. 262 | 0. 041 | 4. 86E-44 | DC | SNAI1    |
| HLA-DMB. 3  | 3. 73E-48 | 0. 646563 | 0. 872 | 0. 311 | 5. 57E-44 | DC | HLA-DMB  |
| PTGER4. 3   | 6. 26E-48 | 0. 726302 | 0. 476 | 0. 118 | 9. 36E-44 | DC | PTGER4   |
| PTPN6. 3    | 9. 30E-48 | 0. 760495 | 0. 551 | 0. 156 | 1. 39E-43 | DC | PTPN6    |
| SERPINB9. 1 | 4. 8E-47  | 0. 708296 | 0. 524 | 0. 14  | 2. 22E-43 | DC | SERPINB9 |
| RAC2. 3     | 2. 15E-47 | 0. 7784   | 0. 46  | 0. 113 | 3. 21E-43 | DC | RAC2     |
| IFITM2. 3   | 2. 52E-47 | 0. 767527 | 0. 749 | 0. 275 | 3. 77E-43 | DC | IFITM2   |
| AIF1. 3     | 6. 73E-47 | 0. 63532  | 0. 984 | 0. 401 | 1. 01E-42 | DC | AIF1     |
| PARVG. 3    | 1. 02E-46 | 0. 725703 | 0. 551 | 0. 155 | 1. 53E-42 | DC | PARVG    |
| SPIB        | 1. 04E-46 | 0. 408407 | 0. 128 | 0. 011 | 1. 56E-42 | DC | SPIB     |
| FMNL1. 3    | 5. 47E-46 | 0. 686695 | 0. 465 | 0. 118 | 8. 17E-42 | DC | FMNL1    |
| LY86. 3     | 7. 04E-46 | 0. 654476 | 0. 818 | 0. 284 | 1. 05E-41 | DC | LY86     |
| HMHA1. 3    | 7. 58E-46 | 0. 668759 | 0. 433 | 0. 103 | 1. 13E-41 | DC | HMHA1    |
| ALOX5AP. 3  | 1. 07E-45 | 0. 664725 | 0. 947 | 0. 39  | 1. 59E-41 | DC | ALOX5AP  |
| GPR132. 2   | 1. 11E-45 | 0. 50165  | 0. 209 | 0. 028 | 1. 65E-41 | DC | GPR132   |
| HAS1        | 1. 44E-45 | 0. 487301 | 0. 134 | 0. 012 | 2. 16E-41 | DC | HAS1     |
| GPR65. 3    | 3. 29E-45 | 0. 727323 | 0. 487 | 0. 128 | 4. 92E-41 | DC | GPR65    |
| TBXAS1. 3   | 3. 41E-45 | 0. 6765   | 0. 701 | 0. 234 | 5. 09E-41 | DC | TBXAS1   |
| PYCARD. 3   | 4. 76E-45 | 0. 709296 | 0. 759 | 0. 277 | 7. 11E-41 | DC | PYCARD   |
| CREM. 3     | 5. 30E-45 | 0. 697462 | 0. 84  | 0. 399 | 7. 93E-41 | DC | CREM     |
| OGFRL1. 3   | 6. 65E-45 | 0. 815345 | 0. 545 | 0. 176 | 9. 94E-41 | DC | OGFRL1   |
| CTLA4       | 1. 30E-44 | 0. 424341 | 0. 112 | 0. 008 | 1. 94E-40 | DC | CTLA4    |
| CD53. 3     | 1. 55E-44 | 0. 653441 | 0. 84  | 0. 307 | 2. 32E-40 | DC | CD53     |
| TGFBI. 3    | 4. 46E-44 | 0. 750701 | 0. 62  | 0. 199 | 6. 67E-40 | DC | TGFBI    |
| FPR1. 3     | 4. 92E-44 | 0. 626906 | 0. 786 | 0. 276 | 7. 35E-40 | DC | FPR1     |

|            |          |          |       |       |          |    |          |
|------------|----------|----------|-------|-------|----------|----|----------|
| LGALS2     | 5.13E-44 | 0.247351 | 0.053 | 0.002 | 7.66E-40 | DC | LGALS2   |
| KYNU.3     | 5.45E-44 | 0.676797 | 0.364 | 0.08  | 8.14E-40 | DC | KYNU     |
| TYROBP.3   | 6.60E-44 | 0.605502 | 1     | 0.451 | 9.87E-40 | DC | TYROBP   |
| DAPP1.2    | 6.82E-44 | 0.500109 | 0.193 | 0.025 | 1.02E-39 | DC | DAPP1    |
| THEMIS2.3  | 7.19E-44 | 0.704839 | 0.674 | 0.235 | 1.07E-39 | DC | THEMIS2  |
| IL18.3     | 8.28E-44 | 0.661854 | 0.604 | 0.186 | 1.24E-39 | DC | IL18     |
| BCL2A1.3   | 2.40E-43 | 0.727064 | 0.524 | 0.151 | 3.59E-39 | DC | BCL2A1   |
| ETS2.3     | 3.00E-43 | 0.752163 | 0.604 | 0.201 | 4.49E-39 | DC | ETS2     |
| RGS1.3     | 3.23E-43 | 0.583894 | 0.973 | 0.438 | 4.82E-39 | DC | RGS1     |
| RILPL2.3   | 3.48E-43 | 0.722422 | 0.674 | 0.252 | 5.20E-39 | DC | RILPL2   |
| CD37.3     | 3.55E-43 | 0.63248  | 0.807 | 0.293 | 5.30E-39 | DC | CD37     |
| PLEK.3     | 3.74E-43 | 0.733279 | 0.556 | 0.169 | 5.59E-39 | DC | PLEK     |
| PTPRE.3    | 4.69E-43 | 0.832654 | 0.647 | 0.264 | 7.01E-39 | DC | PTPRE    |
| HCST.3     | 8.60E-43 | 0.657153 | 0.77  | 0.276 | 1.29E-38 | DC | HCST     |
| RGS2.2     | 9.16E-43 | 0.578859 | 0.92  | 0.438 | 1.37E-38 | DC | RGS2     |
| CYP2S1     | 1.83E-42 | 0.384173 | 0.139 | 0.014 | 2.74E-38 | DC | CYP2S1   |
| RGS10.3    | 2.35E-42 | 0.622727 | 0.856 | 0.334 | 3.51E-38 | DC | RGS10    |
| MYO1G.3    | 9.81E-42 | 0.61718  | 0.294 | 0.057 | 1.47E-37 | DC | MYO1G    |
| MYL12A.2   | 1.35E-41 | 0.550327 | 0.936 | 0.537 | 2.02E-37 | DC | MYL12A   |
| SRGN.3     | 3.06E-41 | 0.56436  | 0.995 | 0.491 | 4.57E-37 | DC | SRGN     |
| ARPC1B.3   | 3.16E-41 | 0.575069 | 0.947 | 0.524 | 4.72E-37 | DC | ARPC1B   |
| S1PR4      | 3.32E-41 | 0.37384  | 0.112 | 0.009 | 4.96E-37 | DC | S1PR4    |
| MYO1F.3    | 4.84E-41 | 0.654125 | 0.567 | 0.177 | 7.23E-37 | DC | MYO1F    |
| PSTPIP2.2  | 5.91E-41 | 0.597534 | 0.241 | 0.041 | 8.84E-37 | DC | PSTPIP2  |
| LAPTM5.3   | 8.97E-41 | 0.595096 | 0.963 | 0.427 | 1.34E-36 | DC | LAPTM5   |
| WAS.3      | 9.40E-41 | 0.686334 | 0.545 | 0.168 | 1.40E-36 | DC | WAS      |
| OLR1.3     | 1.35E-40 | 0.678419 | 0.695 | 0.243 | 2.02E-36 | DC | OLR1     |
| FCER1G.3   | 1.43E-40 | 0.58382  | 0.968 | 0.433 | 2.14E-36 | DC | FCER1G   |
| CAPG.3     | 1.59E-40 | 0.636753 | 0.893 | 0.407 | 2.37E-36 | DC | CAPG     |
| GLIPR1.2   | 2.21E-40 | 0.651376 | 0.749 | 0.328 | 3.30E-36 | DC | GLIPR1   |
| KLF4.3     | 2.86E-40 | 0.743469 | 0.583 | 0.2   | 4.27E-36 | DC | KLF4     |
| RIN3.3     | 3.92E-40 | 0.739779 | 0.417 | 0.11  | 5.86E-36 | DC | RIN3     |
| SMAP2.3    | 6.00E-40 | 0.756582 | 0.61  | 0.23  | 8.96E-36 | DC | SMAP2    |
| SAMHD1.3   | 6.58E-40 | 0.71698  | 0.583 | 0.209 | 9.83E-36 | DC | SAMHD1   |
| ITGA4.2    | 9.38E-40 | 0.561196 | 0.235 | 0.039 | 1.40E-35 | DC | ITGA4    |
| HS3ST3B1.1 | 1.12E-39 | 0.535096 | 0.23  | 0.038 | 1.67E-35 | DC | HS3ST3B1 |
| LAT2.3     | 1.49E-39 | 0.680147 | 0.599 | 0.196 | 2.23E-35 | DC | LAT2     |
| CLEC4A.3   | 1.91E-39 | 0.68307  | 0.289 | 0.058 | 2.86E-35 | DC | CLEC4A   |
| SPN.3      | 3.44E-39 | 0.597743 | 0.273 | 0.052 | 5.15E-35 | DC | SPN      |
| STK38L.2   | 3.62E-39 | 0.768886 | 0.465 | 0.145 | 5.41E-35 | DC | STK38L   |
| BTK.3      | 5.05E-39 | 0.589745 | 0.353 | 0.081 | 7.54E-35 | DC | BTK      |
| IRAK3.3    | 8.85E-39 | 0.584399 | 0.321 | 0.07  | 1.32E-34 | DC | IRAK3    |
| CYBA.3     | 2.08E-38 | 0.651878 | 0.893 | 0.397 | 3.11E-34 | DC | CYBA     |
| CCDC69.2   | 2.86E-38 | 0.509604 | 0.209 | 0.033 | 4.27E-34 | DC | CCDC69   |
| COTL1.3    | 3.67E-38 | 0.628468 | 0.85  | 0.504 | 5.48E-34 | DC | COTL1    |
| MAP4K1.2   | 4.96E-38 | 0.510662 | 0.187 | 0.027 | 7.42E-34 | DC | MAP4K1   |
| SERPINB1.1 | 1.05E-37 | 0.629994 | 0.701 | 0.26  | 1.56E-33 | DC | SERPINB1 |
| CKLF.3     | 1.33E-37 | 0.596032 | 0.872 | 0.514 | 1.98E-33 | DC | CKLF     |
| REL.3      | 1.70E-37 | 0.728673 | 0.684 | 0.292 | 2.55E-33 | DC | REL      |
| CSF3R.3    | 2.43E-37 | 0.660098 | 0.492 | 0.147 | 3.63E-33 | DC | CSF3R    |
| CD300LB    | 2.61E-37 | 0.312448 | 0.102 | 0.008 | 3.91E-33 | DC | CD300LB  |

|             |           |           |        |        |           |    |             |
|-------------|-----------|-----------|--------|--------|-----------|----|-------------|
| AHR. 3      | 4. 51E-37 | 0. 617481 | 0. 283 | 0. 059 | 6. 74E-33 | DC | AHR         |
| AIM1. 1     | 4. 89E-37 | 0. 522938 | 0. 203 | 0. 032 | 7. 31E-33 | DC | AIM1        |
| FAM105A. 3  | 6. 81E-37 | 0. 655039 | 0. 508 | 0. 157 | 1. 02E-32 | DC | FAM105A     |
| STXBP2. 3   | 9. 66E-37 | 0. 678976 | 0. 519 | 0. 167 | 1. 44E-32 | DC | STXBP2      |
| RGS18. 3    | 1. 59E-36 | 0. 564482 | 0. 257 | 0. 049 | 2. 37E-32 | DC | RGS18       |
| IL10RA. 3   | 1. 68E-36 | 0. 637869 | 0. 46  | 0. 133 | 2. 51E-32 | DC | IL10RA      |
| RASSF5. 3   | 1. 71E-36 | 0. 660892 | 0. 412 | 0. 115 | 2. 55E-32 | DC | RASSF5      |
| HCK. 3      | 1. 91E-36 | 0. 651532 | 0. 519 | 0. 162 | 2. 85E-32 | DC | HCK         |
| HLA-DPA1. 2 | 3. 32E-36 | 0. 501271 | 0. 995 | 0. 526 | 3. 47E-32 | DC | HLA-DPA1    |
| STX11. 3    | 2. 76E-36 | 0. 674211 | 0. 406 | 0. 11  | 4. 12E-32 | DC | STX11       |
| LILRA2. 3   | 3. 21E-36 | 0. 579911 | 0. 342 | 0. 08  | 4. 79E-32 | DC | LILRA2      |
| GNA15. 3    | 9. 25E-36 | 0. 656985 | 0. 39  | 0. 105 | 1. 38E-31 | DC | GNA15       |
| GRN. 3      | 1. 13E-35 | 0. 511188 | 0. 92  | 0. 564 | 1. 69E-31 | DC | GRN         |
| NR4A1. 3    | 1. 56E-35 | 0. 641469 | 0. 679 | 0. 266 | 2. 33E-31 | DC | NR4A1       |
| OSM. 3      | 2. 16E-35 | 0. 652188 | 0. 476 | 0. 14  | 3. 23E-31 | DC | OSM         |
| IGSF6. 3    | 2. 60E-35 | 0. 648043 | 0. 487 | 0. 148 | 3. 89E-31 | DC | IGSF6       |
| RP6-91H8. 7 | 4. 6E-35  | 0. 618445 | 0. 262 | 0. 052 | 1. 12E-30 | DC | RP6-91H8. 3 |
| PTN. 3      | 7. 67E-35 | -1. 41099 | 0. 16  | 0. 624 | 1. 15E-30 | DC | PTN         |
| CCL22       | 1. 19E-34 | 0. 203169 | 0. 059 | 0. 003 | 1. 78E-30 | DC | CCL22       |
| HLA-DRB1. 2 | 4. 8E-34  | 0. 488381 | 1      | 0. 525 | 3. 71E-30 | DC | HLA-DRB1    |
| LGALS9. 3   | 3. 41E-34 | 0. 597987 | 0. 642 | 0. 234 | 5. 10E-30 | DC | LGALS9      |
| PPT1. 2     | 4. 28E-34 | 0. 533359 | 0. 877 | 0. 55  | 6. 39E-30 | DC | PPT1        |
| ZNF331. 3   | 4. 91E-34 | 0. 640957 | 0. 706 | 0. 309 | 7. 34E-30 | DC | ZNF331      |
| MEF2C. 3    | 5. 27E-34 | 0. 630281 | 0. 663 | 0. 277 | 7. 87E-30 | DC | MEF2C       |
| AXL. 3      | 5. 28E-34 | 0. 641438 | 0. 519 | 0. 175 | 7. 88E-30 | DC | AXL         |
| DEF6. 3     | 6. 26E-34 | 0. 573402 | 0. 348 | 0. 087 | 9. 36E-30 | DC | DEF6        |
| GSN. 2      | 7. 90E-34 | 0. 533075 | 0. 914 | 0. 503 | 1. 18E-29 | DC | GSN         |
| CMTM7. 3    | 1. 16E-33 | 0. 600006 | 0. 487 | 0. 159 | 1. 73E-29 | DC | CMTM7       |
| EMP3. 2     | 1. 28E-33 | 0. 565245 | 0. 829 | 0. 443 | 1. 92E-29 | DC | EMP3        |
| GRASP. 3    | 1. 45E-33 | 0. 62102  | 0. 246 | 0. 048 | 2. 17E-29 | DC | GRASP       |
| MS4A7. 3    | 1. 63E-33 | 0. 56339  | 0. 797 | 0. 324 | 2. 43E-29 | DC | MS4A7       |
| NOVA1. 3    | 2. 15E-33 | -1. 51093 | 0. 016 | 0. 486 | 3. 21E-29 | DC | NOVA1       |
| PLXDC2. 3   | 2. 47E-33 | 0. 599945 | 0. 578 | 0. 203 | 3. 69E-29 | DC | PLXDC2      |
| TCIRG1. 3   | 3. 76E-33 | 0. 576441 | 0. 417 | 0. 121 | 5. 62E-29 | DC | TCIRG1      |
| LITAF. 3    | 4. 88E-33 | 0. 5426   | 0. 84  | 0. 453 | 7. 30E-29 | DC | LITAF       |
| TNFAIP8. 2  | 5. 18E-33 | 0. 580341 | 0. 289 | 0. 066 | 7. 74E-29 | DC | TNFAIP8     |
| LILRB3. 2   | 6. 40E-33 | 0. 56177  | 0. 209 | 0. 037 | 9. 56E-29 | DC | LILRB3      |
| CXCL16. 3   | 6. 52E-33 | 0. 560956 | 0. 84  | 0. 447 | 9. 74E-29 | DC | CXCL16      |
| ANXA11. 3   | 6. 54E-33 | 0. 650448 | 0. 556 | 0. 21  | 9. 78E-29 | DC | ANXA11      |
| PLSCR1. 3   | 7. 07E-33 | 0. 606526 | 0. 733 | 0. 353 | 1. 06E-28 | DC | PLSCR1      |
| LPCAT2. 3   | 8. 82E-33 | 0. 600958 | 0. 46  | 0. 142 | 1. 32E-28 | DC | LPCAT2      |
| SGK1. 3     | 8. 84E-33 | 0. 584667 | 0. 834 | 0. 43  | 1. 32E-28 | DC | SGK1        |
| RNASET2. 3  | 1. 03E-32 | 0. 575392 | 0. 898 | 0. 476 | 1. 54E-28 | DC | RNASET2     |
| TPSAB1      | 1. 08E-32 | 0. 451899 | 0. 15  | 0. 02  | 1. 61E-28 | DC | TPSAB1      |
| C10orf54. 1 | 9. 2E-32  | 0. 604457 | 0. 701 | 0. 281 | 2. 88E-28 | DC | C10orf54    |
| RAB11FIP1   | 2. 04E-32 | 0. 417795 | 0. 166 | 0. 025 | 3. 05E-28 | DC | RAB11FIP1   |
| FLT1. 1     | 3. 09E-32 | 0. 397261 | 0. 139 | 0. 018 | 4. 62E-28 | DC | FLT1        |
| CLEC2B. 3   | 3. 31E-32 | 0. 583797 | 0. 556 | 0. 199 | 4. 94E-28 | DC | CLEC2B      |
| HLA-DOA. 2  | 3. 73E-32 | 0. 548279 | 0. 348 | 0. 09  | 5. 57E-28 | DC | HLA-DOA     |
| ANXA1. 1    | 3. 84E-32 | 0. 450937 | 0. 882 | 0. 402 | 5. 74E-28 | DC | ANXA1       |
| CD300A. 3   | 3. 85E-32 | 0. 599778 | 0. 545 | 0. 186 | 5. 75E-28 | DC | CD300A      |

|             |           |           |        |        |           |    |                |
|-------------|-----------|-----------|--------|--------|-----------|----|----------------|
| HBEGF. 3    | 3. 89E-32 | 0. 709006 | 0. 551 | 0. 21  | 5. 81E-28 | DC | HBEGF          |
| MAP2K1. 3   | 4. 17E-32 | 0. 73845  | 0. 578 | 0. 264 | 6. 23E-28 | DC | MAP2K1         |
| NGFRAP1. 2  | 4. 18E-32 | -1. 10342 | 0. 193 | 0. 651 | 6. 25E-28 | DC | NGFRAP1        |
| DSE. 3      | 4. 43E-32 | 0. 644969 | 0. 428 | 0. 133 | 6. 62E-28 | DC | DSE            |
| ENTPD1. 3   | 4. 86E-32 | 0. 623812 | 0. 481 | 0. 157 | 7. 26E-28 | DC | ENTPD1         |
| VASP. 3     | 5. 06E-32 | 0. 728974 | 0. 551 | 0. 235 | 7. 56E-28 | DC | VASP           |
| TMSB4X. 3   | 5. 79E-32 | -0. 44348 | 1      | 0. 997 | 8. 66E-28 | DC | TMSB4X         |
| LYN. 3      | 5. 93E-32 | 0. 619295 | 0. 492 | 0. 169 | 8. 86E-28 | DC | LYN            |
| BANK1       | 1. 13E-31 | 0. 290081 | 0. 07  | 0. 005 | 1. 68E-27 | DC | BANK1          |
| DDIT4. 2    | 1. 60E-31 | 0. 575714 | 0. 791 | 0. 402 | 2. 39E-27 | DC | DDIT4          |
| GPM6B. 3    | 1. 63E-31 | -1. 24384 | 0. 23  | 0. 625 | 2. 44E-27 | DC | GPM6B          |
| CAT. 2      | 1. 80E-31 | 0. 647935 | 0. 642 | 0. 299 | 2. 70E-27 | DC | CAT            |
| CASP4. 3    | 1. 84E-31 | 0. 598345 | 0. 567 | 0. 222 | 2. 75E-27 | DC | CASP4          |
| ISG20. 2    | 3. 10E-31 | 0. 677538 | 0. 39  | 0. 117 | 4. 63E-27 | DC | ISG20          |
| CD163. 3    | 3. 19E-31 | 0. 567145 | 0. 679 | 0. 269 | 4. 77E-27 | DC | CD163          |
| CKB. 3      | 3. 37E-31 | -1. 16686 | 0. 171 | 0. 589 | 5. 03E-27 | DC | CKB            |
| RP11-1143   | 4. 82E-31 | 0. 626791 | 0. 235 | 0. 049 | 7. 21E-27 | DC | RP11-1143G9. 4 |
| CSF1R. 3    | 9. 60E-31 | 0. 528704 | 0. 69  | 0. 261 | 1. 43E-26 | DC | CSF1R          |
| IFNGR1. 3   | 9. 93E-31 | 0. 579773 | 0. 786 | 0. 431 | 1. 48E-26 | DC | IFNGR1         |
| ATF7IP2. 2  | 1. 55E-30 | 0. 533408 | 0. 209 | 0. 039 | 2. 32E-26 | DC | ATF7IP2        |
| TNFRSF1B. 2 | 0. 4E-30  | 0. 606624 | 0. 519 | 0. 183 | 3. 05E-26 | DC | TNFRSF1B       |
| THBS1. 2    | 2. 20E-30 | 0. 697698 | 0. 305 | 0. 077 | 3. 29E-26 | DC | THBS1          |
| NCKAP1L. 3  | 2. 93E-30 | 0. 541653 | 0. 401 | 0. 117 | 4. 38E-26 | DC | NCKAP1L        |
| PRKCH. 2    | 3. 51E-30 | 0. 471847 | 0. 214 | 0. 041 | 5. 24E-26 | DC | PRKCH          |
| TUBB2B. 2   | 4. 40E-30 | -1. 33144 | 0. 176 | 0. 561 | 6. 58E-26 | DC | TUBB2B         |
| ITGB2-AS1   | 5. 29E-30 | 0. 383585 | 0. 166 | 0. 026 | 7. 90E-26 | DC | ITGB2-AS1      |
| FXVD6. 3    | 1. 19E-29 | -1. 23648 | 0. 027 | 0. 468 | 1. 77E-25 | DC | FXVD6          |
| CLEC12A. 1  | 1. 22E-29 | 0. 396416 | 0. 134 | 0. 018 | 1. 83E-25 | DC | CLEC12A        |
| ADAM28. 3   | 1. 82E-29 | 0. 562949 | 0. 433 | 0. 137 | 2. 72E-25 | DC | ADAM28         |
| SMCO4. 3    | 1. 99E-29 | 0. 63672  | 0. 401 | 0. 128 | 2. 97E-25 | DC | SMCO4          |
| OSTF1. 3    | 2. 00E-29 | 0. 571205 | 0. 652 | 0. 285 | 2. 99E-25 | DC | OSTF1          |
| HERPUD1. 2  | 2. 39E-29 | 0. 438738 | 0. 936 | 0. 637 | 3. 57E-25 | DC | HERPUD1        |
| RNF149. 3   | 2. 43E-29 | 0. 605386 | 0. 62  | 0. 265 | 3. 64E-25 | DC | RNF149         |
| PAK1. 3     | 2. 94E-29 | 0. 670957 | 0. 455 | 0. 165 | 4. 39E-25 | DC | PAK1           |
| ACTB. 3     | 2. 96E-29 | -0. 40283 | 1      | 0. 992 | 4. 43E-25 | DC | ACTB           |
| ASGR2       | 3. 67E-29 | 0. 380071 | 0. 091 | 0. 009 | 5. 49E-25 | DC | ASGR2          |
| NET1. 2     | 4. 21E-29 | 0. 502862 | 0. 198 | 0. 038 | 6. 30E-25 | DC | NET1           |
| PLP2. 2     | 4. 93E-29 | 0. 591939 | 0. 668 | 0. 339 | 7. 36E-25 | DC | PLP2           |
| SEPT6. 3    | 5. 59E-29 | 0. 679277 | 0. 444 | 0. 161 | 8. 35E-25 | DC | 6-Sep          |
| TLR2. 3     | 6. 93E-29 | 0. 556678 | 0. 369 | 0. 107 | 1. 04E-24 | DC | TLR2           |
| AVPI1. 3    | 1. 09E-28 | 0. 654867 | 0. 321 | 0. 09  | 1. 63E-24 | DC | AVPI1          |
| SQRDL. 3    | 1. 18E-28 | 0. 581831 | 0. 455 | 0. 155 | 1. 76E-24 | DC | SQRDL          |
| FERMT3. 3   | 1. 44E-28 | 0. 612945 | 0. 471 | 0. 161 | 2. 15E-24 | DC | FERMT3         |
| VNN1        | 1. 83E-28 | 0. 295457 | 0. 096 | 0. 01  | 2. 73E-24 | DC | VNN1           |
| GK. 3       | 2. 13E-28 | 0. 621252 | 0. 401 | 0. 134 | 3. 18E-24 | DC | GK             |
| RP11-347F   | 2. 26E-28 | 0. 55295  | 0. 262 | 0. 061 | 3. 38E-24 | DC | RP11-347P5. 1  |
| SYTL3. 3    | 2. 84E-28 | 0. 507712 | 0. 262 | 0. 061 | 4. 24E-24 | DC | SYTL3          |
| LILRA5      | 2. 93E-28 | 0. 348291 | 0. 102 | 0. 011 | 4. 38E-24 | DC | LILRA5         |
| SPINT1. 2   | 3. 82E-28 | 0. 402435 | 0. 176 | 0. 031 | 5. 71E-24 | DC | SPINT1         |
| RP11-76E1   | 3. 87E-28 | 0. 419433 | 0. 187 | 0. 034 | 5. 78E-24 | DC | RP11-76E17. 3  |
| ARHGAP30. 4 | 0. 5E-28  | 0. 594874 | 0. 326 | 0. 091 | 6. 05E-24 | DC | ARHGAP30       |

|            |          |          |       |       |          |    |              |
|------------|----------|----------|-------|-------|----------|----|--------------|
| EFHD2.3    | 5.05E-28 | 0.655563 | 0.508 | 0.205 | 7.55E-24 | DC | EFHD2        |
| ITGB7.2    | 5.92E-28 | 0.431076 | 0.15  | 0.023 | 8.85E-24 | DC | ITGB7        |
| ZC3H12A.2  | 7.74E-28 | 0.557799 | 0.283 | 0.073 | 1.16E-23 | DC | ZC3H12A      |
| TREM1.2    | 8.09E-28 | 0.534276 | 0.471 | 0.159 | 1.21E-23 | DC | TREM1        |
| LDLRAD4.3  | 1.33E-27 | 0.675056 | 0.412 | 0.142 | 1.99E-23 | DC | LDLRAD4      |
| MAP1B.2    | 1.73E-27 | -1.1829  | 0.139 | 0.54  | 2.59E-23 | DC | MAP1B        |
| CASP1.2    | 1.80E-27 | 0.563749 | 0.545 | 0.221 | 2.70E-23 | DC | CASP1        |
| RHOG.3     | 2.14E-27 | 0.558846 | 0.759 | 0.404 | 3.19E-23 | DC | RHOG         |
| RETN.2     | 2.82E-27 | 0.422386 | 0.128 | 0.018 | 4.21E-23 | DC | RETN         |
| Clorf61.3  | 3.18E-27 | -1.18294 | 0.144 | 0.541 | 4.75E-23 | DC | Clorf61      |
| ARHGAP15.3 | 5.50E-27 | 0.533438 | 0.332 | 0.093 | 5.23E-23 | DC | ARHGAP15     |
| PTEN.3     | 5.85E-27 | 0.639627 | 0.374 | 0.125 | 8.74E-23 | DC | PTEN         |
| GPRIN3.3   | 6.12E-27 | 0.484209 | 0.241 | 0.055 | 9.14E-23 | DC | GPRIN3       |
| IL1B.3     | 6.40E-27 | 0.699298 | 0.54  | 0.216 | 9.56E-23 | DC | IL1B         |
| ARRB2.3    | 6.59E-27 | 0.5583   | 0.749 | 0.394 | 9.84E-23 | DC | ARRB2        |
| CLIC1.1    | 7.32E-27 | 0.39364  | 0.973 | 0.617 | 1.09E-22 | DC | CLIC1        |
| AKAP13.3   | 8.07E-27 | 0.587508 | 0.636 | 0.32  | 1.21E-22 | DC | AKAP13       |
| CXorf21.3  | 8.44E-27 | 0.531803 | 0.283 | 0.073 | 1.26E-22 | DC | CXorf21      |
| FILIP1L.3  | 8.44E-27 | 0.640667 | 0.406 | 0.145 | 1.26E-22 | DC | FILIP1L      |
| SERP1.3    | 8.75E-27 | 0.469139 | 0.856 | 0.6   | 1.31E-22 | DC | SERP1        |
| BIN2.3     | 9.32E-27 | 0.477113 | 0.364 | 0.108 | 1.39E-22 | DC | BIN2         |
| RP11-138A  | 1.03E-26 | 0.609665 | 0.374 | 0.121 | 1.54E-22 | DC | RP11-138A9.1 |
| CCR2       | 1.04E-26 | 0.189271 | 0.059 | 0.004 | 1.55E-22 | DC | CCR2         |
| ALDH2.3    | 1.28E-26 | 0.604861 | 0.674 | 0.366 | 1.92E-22 | DC | ALDH2        |
| SYK.3      | 1.35E-26 | 0.484657 | 0.348 | 0.102 | 2.02E-22 | DC | SYK          |
| FCGRT.2    | 1.46E-26 | 0.434567 | 0.925 | 0.544 | 2.19E-22 | DC | FCGRT        |
| SIGLEC10.1 | 1.87E-26 | 0.542923 | 0.455 | 0.157 | 2.80E-22 | DC | SIGLEC10     |
| OPN3.3     | 2.79E-26 | 0.616183 | 0.262 | 0.069 | 4.18E-22 | DC | OPN3         |
| LRRFIP1.3  | 3.97E-26 | 0.612689 | 0.647 | 0.349 | 5.93E-22 | DC | LRRFIP1      |
| CPVL.3     | 5.52E-26 | 0.522969 | 0.706 | 0.343 | 8.25E-22 | DC | CPVL         |
| SDS.3      | 5.71E-26 | 0.723086 | 0.235 | 0.056 | 8.54E-22 | DC | SDS          |
| MFSD1.3    | 6.25E-26 | 0.516285 | 0.684 | 0.338 | 9.35E-22 | DC | MFSD1        |
| METRNL.3   | 9.61E-26 | 0.548905 | 0.289 | 0.079 | 1.44E-21 | DC | METRNL       |
| CTSZ.3     | 9.85E-26 | 0.524106 | 0.62  | 0.25  | 1.47E-21 | DC | CTSZ         |
| CD300C.3   | 1.49E-25 | 0.575184 | 0.257 | 0.065 | 2.23E-21 | DC | CD300C       |
| TNFAIP3.3  | 2.23E-25 | 0.610149 | 0.439 | 0.159 | 3.33E-21 | DC | TNFAIP3      |
| CALD1.2    | 2.28E-25 | -1.07703 | 0.027 | 0.426 | 3.40E-21 | DC | CALD1        |
| SOX2.3     | 3.36E-25 | -1.17054 | 0.053 | 0.435 | 5.02E-21 | DC | SOX2         |
| VSIG4.3    | 3.41E-25 | 0.451741 | 0.781 | 0.358 | 5.09E-21 | DC | VSIG4        |
| TSC22D1.2  | 6.20E-25 | -1.02112 | 0.139 | 0.518 | 9.27E-21 | DC | TSC22D1      |
| RPS6KA1.3  | 6.55E-25 | 0.54936  | 0.38  | 0.127 | 9.79E-21 | DC | RPS6KA1      |
| CD58.3     | 8.28E-25 | 0.630069 | 0.513 | 0.223 | 1.24E-20 | DC | CD58         |
| CD302.3    | 9.14E-25 | 0.539158 | 0.497 | 0.2   | 1.37E-20 | DC | CD302        |
| SIK1.3     | 1.14E-24 | 0.587306 | 0.321 | 0.097 | 1.71E-20 | DC | SIK1         |
| PABPC1.2   | 1.28E-24 | 0.344018 | 0.952 | 0.741 | 1.91E-20 | DC | PABPC1       |
| GPM6A.2    | 1.53E-24 | -1.05118 | 0.128 | 0.51  | 2.28E-20 | DC | GPM6A        |
| EIF3L.1    | 1.87E-24 | 0.441772 | 0.872 | 0.602 | 2.80E-20 | DC | EIF3L        |
| HAVCR2.3   | 1.98E-24 | 0.480008 | 0.578 | 0.226 | 2.96E-20 | DC | HAVCR2       |
| GDI2.3     | 2.65E-24 | 0.500455 | 0.743 | 0.484 | 3.96E-20 | DC | GDI2         |
| ARHGAP9.3  | 2.96E-24 | 0.470434 | 0.294 | 0.083 | 4.43E-20 | DC | ARHGAP9      |
| PFN2.2     | 3.44E-24 | -1.0828  | 0.059 | 0.44  | 5.14E-20 | DC | PFN2         |

|             |           |           |        |        |           |    |          |
|-------------|-----------|-----------|--------|--------|-----------|----|----------|
| TSC22D3. 2  | 3. 50E-24 | 0. 455637 | 0. 791 | 0. 451 | 5. 22E-20 | DC | TSC22D3  |
| CD33. 3     | 3. 56E-24 | 0. 496371 | 0. 364 | 0. 116 | 5. 32E-20 | DC | CD33     |
| CLECL1. 3   | 3. 60E-24 | 0. 430132 | 0. 203 | 0. 045 | 5. 38E-20 | DC | CLECL1   |
| TUBA1A. 2   | 4. 23E-24 | -0. 67532 | 0. 754 | 0. 808 | 6. 33E-20 | DC | TUBA1A   |
| UCP2. 3     | 5. 10E-24 | 0. 563208 | 0. 594 | 0. 267 | 7. 62E-20 | DC | UCP2     |
| MSN. 3      | 6. 92E-24 | 0. 533375 | 0. 647 | 0. 371 | 1. 03E-19 | DC | MSN      |
| HLA-DRA. 2  | 9. 39E-24 | 0. 331902 | 1      | 0. 627 | 1. 40E-19 | DC | HLA-DRA  |
| PLIN2. 2    | 1. 18E-23 | 0. 444592 | 0. 717 | 0. 336 | 1. 76E-19 | DC | PLIN2    |
| NKG7. 2     | 1. 25E-23 | 0. 460811 | 0. 209 | 0. 047 | 1. 86E-19 | DC | NKG7     |
| SLC16A3. 3  | 1. 25E-23 | 0. 519842 | 0. 658 | 0. 315 | 1. 86E-19 | DC | SLC16A3  |
| ARHGAP18. 1 | 3. 0E-23  | 0. 525661 | 0. 449 | 0. 168 | 1. 95E-19 | DC | ARHGAP18 |
| GAP43. 3    | 1. 33E-23 | -1. 27523 | 0. 096 | 0. 472 | 1. 99E-19 | DC | GAP43    |
| CAP1. 2     | 1. 57E-23 | 0. 394019 | 0. 834 | 0. 588 | 2. 34E-19 | DC | CAP1     |
| PRR13. 1    | 1. 69E-23 | 0. 414459 | 0. 829 | 0. 538 | 2. 52E-19 | DC | PRR13    |
| CYBB. 3     | 1. 72E-23 | 0. 504517 | 0. 497 | 0. 187 | 2. 57E-19 | DC | CYBB     |
| MCL1. 3     | 2. 54E-23 | 0. 435076 | 0. 856 | 0. 594 | 3. 80E-19 | DC | MCL1     |
| CHMP1B. 3   | 2. 66E-23 | 0. 540502 | 0. 717 | 0. 433 | 3. 97E-19 | DC | CHMP1B   |
| FKBP5. 3    | 2. 67E-23 | 0. 51646  | 0. 626 | 0. 312 | 3. 99E-19 | DC | FKBP5    |
| B3GNT5. 3   | 2. 79E-23 | 0. 563774 | 0. 38  | 0. 138 | 4. 17E-19 | DC | B3GNT5   |
| ST3GAL1. 3  | 3. 02E-23 | 0. 523456 | 0. 316 | 0. 099 | 4. 51E-19 | DC | ST3GAL1  |
| TUBB2A. 2   | 3. 23E-23 | -0. 94    | 0. 112 | 0. 483 | 4. 83E-19 | DC | TUBB2A   |
| SASH3. 3    | 3. 75E-23 | 0. 435588 | 0. 273 | 0. 075 | 5. 60E-19 | DC | SASH3    |
| UCHL1. 1    | 4. 30E-23 | -1. 09839 | 0. 07  | 0. 442 | 6. 42E-19 | DC | UCHL1    |
| SLC16A10. 5 | 2. 5E-23  | 0. 558622 | 0. 289 | 0. 084 | 7. 85E-19 | DC | SLC16A10 |
| AOAH. 3     | 6. 43E-23 | 0. 498615 | 0. 364 | 0. 119 | 9. 60E-19 | DC | AOAH     |
| RBP1. 1     | 8. 52E-23 | -1. 10669 | 0. 107 | 0. 465 | 1. 27E-18 | DC | RBP1     |
| GAPDH. 3    | 9. 13E-23 | -0. 40339 | 1      | 0. 985 | 1. 37E-18 | DC | GAPDH    |
| SLC25A4. 3  | 9. 30E-23 | -0. 91196 | 0. 059 | 0. 432 | 1. 39E-18 | DC | SLC25A4  |
| IRF8. 3     | 1. 09E-22 | 0. 516847 | 0. 428 | 0. 154 | 1. 63E-18 | DC | IRF8     |
| FEZ1. 2     | 1. 46E-22 | -0. 95119 | 0. 064 | 0. 436 | 2. 18E-18 | DC | FEZ1     |
| PEBP1. 3    | 1. 48E-22 | -0. 58069 | 0. 652 | 0. 806 | 2. 21E-18 | DC | PEBP1    |
| B4GALT1. 3  | 1. 55E-22 | 0. 524899 | 0. 348 | 0. 117 | 2. 32E-18 | DC | B4GALT1  |
| FAM49B. 3   | 1. 59E-22 | 0. 47869  | 0. 781 | 0. 502 | 2. 38E-18 | DC | FAM49B   |
| CNPY3. 3    | 1. 65E-22 | 0. 482298 | 0. 727 | 0. 407 | 2. 46E-18 | DC | CNPY3    |
| MGAT1. 3    | 1. 86E-22 | 0. 534858 | 0. 647 | 0. 353 | 2. 78E-18 | DC | MGAT1    |
| CSRNP1. 3   | 1. 99E-22 | 0. 586702 | 0. 455 | 0. 186 | 2. 97E-18 | DC | CSRNP1   |
| IKZF1. 3    | 2. 02E-22 | 0. 460136 | 0. 241 | 0. 062 | 3. 02E-18 | DC | IKZF1    |
| PCSK1N. 2   | 2. 29E-22 | -1. 09541 | 0. 08  | 0. 426 | 3. 42E-18 | DC | PCSK1N   |
| FSCN1. 3    | 2. 97E-22 | -0. 85839 | 0. 15  | 0. 51  | 4. 45E-18 | DC | FSCN1    |
| ANPEP. 2    | 3. 00E-22 | 0. 35908  | 0. 155 | 0. 03  | 4. 49E-18 | DC | ANPEP    |
| LRRK2. 2    | 3. 35E-22 | 0. 472631 | 0. 225 | 0. 058 | 5. 00E-18 | DC | LRRK2    |
| FPR3. 3     | 3. 36E-22 | 0. 437324 | 0. 219 | 0. 054 | 5. 02E-18 | DC | FPR3     |
| WBP5. 2     | 3. 51E-22 | -0. 91407 | 0. 128 | 0. 509 | 5. 24E-18 | DC | WBP5     |
| CST6        | 3. 71E-22 | 0. 339303 | 0. 102 | 0. 014 | 5. 55E-18 | DC | CST6     |
| EEF1B2. 2   | 3. 73E-22 | 0. 267195 | 0. 968 | 0. 773 | 5. 58E-18 | DC | EEF1B2   |
| SKIL. 3     | 4. 66E-22 | 0. 543246 | 0. 561 | 0. 281 | 6. 96E-18 | DC | SKIL     |
| LIMS1. 3    | 4. 73E-22 | 0. 484701 | 0. 722 | 0. 435 | 7. 07E-18 | DC | LIMS1    |
| APOBR. 2    | 4. 82E-22 | 0. 429683 | 0. 171 | 0. 036 | 7. 20E-18 | DC | APOBR    |
| SH3KBP1. 3  | 5. 68E-22 | 0. 541375 | 0. 513 | 0. 237 | 8. 49E-18 | DC | SH3KBP1  |
| ACTG1. 3    | 7. 74E-22 | -0. 37805 | 0. 973 | 0. 948 | 1. 16E-17 | DC | ACTG1    |
| SCD5. 2     | 8. 08E-22 | -0. 9207  | 0. 037 | 0. 4   | 1. 21E-17 | DC | SCD5     |

|             |           |           |        |        |           |    |                |
|-------------|-----------|-----------|--------|--------|-----------|----|----------------|
| MX2. 3      | 8. 54E-22 | 0. 443061 | 0. 235 | 0. 061 | 1. 28E-17 | DC | MX2            |
| CARD16. 1   | 8. 88E-22 | 0. 4688   | 0. 524 | 0. 225 | 1. 33E-17 | DC | CARD16         |
| NFKBID. 3   | 1. 07E-21 | 0. 469076 | 0. 39  | 0. 136 | 1. 60E-17 | DC | NFKBID         |
| PDPN. 1     | 1. 30E-21 | -1. 03342 | 0. 086 | 0. 455 | 1. 94E-17 | DC | PDPN           |
| USP53. 3    | 1. 46E-21 | 0. 507638 | 0. 385 | 0. 137 | 2. 19E-17 | DC | USP53          |
| CNN3. 3     | 1. 47E-21 | -1. 01938 | 0. 123 | 0. 474 | 2. 20E-17 | DC | CNN3           |
| S100A6. 3   | 1. 79E-21 | 0. 23234  | 0. 968 | 0. 638 | 2. 68E-17 | DC | S100A6         |
| LTB. 2      | 1. 83E-21 | 0. 392206 | 0. 155 | 0. 031 | 2. 74E-17 | DC | LTB            |
| PMAIP1. 3   | 2. 03E-21 | 0. 479956 | 0. 278 | 0. 08  | 3. 03E-17 | DC | PMAIP1         |
| TMEM109. 3  | 2. 03E-21 | 0. 539193 | 0. 465 | 0. 2   | 3. 04E-17 | DC | TMEM109        |
| EVI2A. 3    | 2. 04E-21 | 0. 415742 | 0. 535 | 0. 218 | 3. 04E-17 | DC | EVI2A          |
| RASAL3. 3   | 2. 09E-21 | 0. 390276 | 0. 219 | 0. 054 | 3. 13E-17 | DC | RASAL3         |
| HMGB2. 3    | 2. 21E-21 | 0. 442872 | 0. 802 | 0. 489 | 3. 30E-17 | DC | HMGB2          |
| DOCK5. 3    | 2. 22E-21 | 0. 420126 | 0. 214 | 0. 053 | 3. 32E-17 | DC | DOCK5          |
| HEXB. 3     | 2. 34E-21 | 0. 504734 | 0. 674 | 0. 401 | 3. 50E-17 | DC | HEXB           |
| ZNF385A. 3  | 2. 72E-21 | 0. 536627 | 0. 364 | 0. 133 | 4. 07E-17 | DC | ZNF385A        |
| PPA1. 2     | 3. 14E-21 | 0. 438853 | 0. 775 | 0. 525 | 4. 69E-17 | DC | PPA1           |
| GCA. 3      | 3. 62E-21 | 0. 549829 | 0. 588 | 0. 294 | 5. 40E-17 | DC | GCA            |
| CLEC9A. 2   | 3. 74E-21 | 0. 437766 | 0. 155 | 0. 031 | 5. 59E-17 | DC | CLEC9A         |
| FABP7. 2    | 4. 99E-21 | -1. 29597 | 0. 053 | 0. 389 | 7. 46E-17 | DC | FABP7          |
| PARVB. 3    | 5. 05E-21 | 0. 600859 | 0. 396 | 0. 16  | 7. 54E-17 | DC | PARVB          |
| RHOBTB3. 3  | 5. 23E-21 | -0. 86642 | 0. 059 | 0. 414 | 7. 81E-17 | DC | RHOBTB3        |
| ITGAM. 3    | 6. 11E-21 | 0. 501907 | 0. 257 | 0. 073 | 9. 14E-17 | DC | ITGAM          |
| ARHGAP4. 3  | 6. 41E-21 | 0. 494899 | 0. 337 | 0. 112 | 9. 58E-17 | DC | ARHGAP4        |
| CIB1. 2     | 6. 44E-21 | 0. 440573 | 0. 765 | 0. 488 | 9. 63E-17 | DC | CIB1           |
| PRDX2. 3    | 6. 93E-21 | -0. 71043 | 0. 422 | 0. 706 | 1. 04E-16 | DC | PRDX2          |
| NFIB. 3     | 6. 96E-21 | -1. 01201 | 0. 037 | 0. 383 | 1. 04E-16 | DC | NFIB           |
| RASSF3. 2   | 6. 96E-21 | 0. 379526 | 0. 176 | 0. 039 | 1. 04E-16 | DC | RASSF3         |
| PSTPIP1. 2  | 7. 00E-21 | 0. 387259 | 0. 176 | 0. 039 | 1. 05E-16 | DC | PSTPIP1        |
| TPM3. 3     | 9. 21E-21 | 0. 386858 | 0. 797 | 0. 554 | 1. 38E-16 | DC | TPM3           |
| FCN1        | 9. 75E-21 | 0. 375185 | 0. 075 | 0. 008 | 1. 46E-16 | DC | FCN1           |
| MCM5. 3     | 1. 04E-20 | 0. 548902 | 0. 38  | 0. 146 | 1. 56E-16 | DC | MCM5           |
| RP11-386I   | 1. 07E-20 | 0. 439259 | 0. 235 | 0. 064 | 1. 59E-16 | DC | RP11-386I14. 4 |
| KCNE1. 1    | 1. 21E-20 | 0. 393511 | 0. 123 | 0. 021 | 1. 81E-16 | DC | KCNE1          |
| TLR10. 2    | 1. 43E-20 | 0. 359503 | 0. 128 | 0. 023 | 2. 13E-16 | DC | TLR10          |
| MDK. 2      | 1. 45E-20 | -0. 98872 | 0. 155 | 0. 496 | 2. 17E-16 | DC | MDK            |
| ATP1B3. 3   | 1. 51E-20 | 0. 452254 | 0. 77  | 0. 541 | 2. 26E-16 | DC | ATP1B3         |
| RGS19. 3    | 1. 69E-20 | 0. 548853 | 0. 551 | 0. 271 | 2. 52E-16 | DC | RGS19          |
| PLB1. 2     | 1. 73E-20 | 0. 431046 | 0. 176 | 0. 04  | 2. 59E-16 | DC | PLB1           |
| RNF130. 3   | 1. 79E-20 | 0. 49134  | 0. 722 | 0. 458 | 2. 67E-16 | DC | RNF130         |
| LPXN. 3     | 1. 92E-20 | 0. 470871 | 0. 321 | 0. 107 | 2. 88E-16 | DC | LPXN           |
| SLA. 3      | 2. 03E-20 | 0. 474022 | 0. 492 | 0. 197 | 3. 04E-16 | DC | SLA            |
| FES. 3      | 2. 05E-20 | 0. 439851 | 0. 262 | 0. 076 | 3. 06E-16 | DC | FES            |
| KCNK6. 1    | 2. 32E-20 | 0. 371546 | 0. 171 | 0. 037 | 3. 47E-16 | DC | KCNK6          |
| CATSPER1. 1 | 2. 88E-20 | 0. 389922 | 0. 134 | 0. 024 | 4. 30E-16 | DC | CATSPER1       |
| CEBPD. 1    | 2. 97E-20 | 0. 465954 | 0. 759 | 0. 454 | 4. 43E-16 | DC | CEBPD          |
| SYNGR2. 3   | 3. 00E-20 | 0. 473289 | 0. 626 | 0. 323 | 4. 48E-16 | DC | SYNGR2         |
| PTPN22. 2   | 3. 68E-20 | 0. 338255 | 0. 134 | 0. 025 | 5. 51E-16 | DC | PTPN22         |
| HSH2D       | 3. 79E-20 | 0. 243166 | 0. 07  | 0. 007 | 5. 66E-16 | DC | HSH2D          |
| SLC2A3. 2   | 4. 45E-20 | 0. 532039 | 0. 529 | 0. 25  | 6. 66E-16 | DC | SLC2A3         |
| TRPV2. 3    | 4. 80E-20 | 0. 475451 | 0. 214 | 0. 056 | 7. 17E-16 | DC | TRPV2          |

|           |          |          |       |       |          |    |            |
|-----------|----------|----------|-------|-------|----------|----|------------|
| CAMK2N1.3 | 5.21E-20 | -0.91849 | 0     | 0.322 | 7.79E-16 | DC | CAMK2N1    |
| TAGAP.3   | 5.84E-20 | 0.472405 | 0.305 | 0.097 | 8.73E-16 | DC | TAGAP      |
| CD14.3    | 7.30E-20 | 0.411758 | 0.781 | 0.402 | 1.09E-15 | DC | CD14       |
| PLD4.3    | 7.68E-20 | 0.490416 | 0.406 | 0.149 | 1.15E-15 | DC | PLD4       |
| RPPH1     | 7.92E-20 | 0.428167 | 0.144 | 0.029 | 1.18E-15 | DC | RPPH1      |
| DUSP5     | 8.03E-20 | 0.608164 | 0.235 | 0.07  | 1.20E-15 | DC | DUSP5      |
| CD68.3    | 1.07E-19 | 0.389855 | 0.834 | 0.435 | 1.61E-15 | DC | CD68       |
| CACNA2D4. | 1.07E-19 | 0.465105 | 0.246 | 0.071 | 1.61E-15 | DC | CACNA2D4   |
| SCG5.2    | 1.17E-19 | -0.97584 | 0.011 | 0.333 | 1.75E-15 | DC | SCG5       |
| CACNA2D3. | 1.21E-19 | 0.434007 | 0.144 | 0.029 | 1.80E-15 | DC | CACNA2D3   |
| MEST.2    | 1.30E-19 | -0.87655 | 0.053 | 0.392 | 1.94E-15 | DC | MEST       |
| MLLT11.1  | 1.30E-19 | -0.96038 | 0.123 | 0.459 | 1.94E-15 | DC | MLLT11     |
| ARPC3.1   | 1.34E-19 | 0.233635 | 0.984 | 0.801 | 2.00E-15 | DC | ARPC3      |
| SYAP1.2   | 1.44E-19 | 0.549947 | 0.62  | 0.383 | 2.15E-15 | DC | SYAP1      |
| H2AFY.3   | 1.56E-19 | 0.377578 | 0.813 | 0.604 | 2.33E-15 | DC | H2AFY      |
| PRKAG2-AS | 1.57E-19 | 0.557538 | 0.337 | 0.121 | 2.35E-15 | DC | PRKAG2-AS1 |
| SLC11A1.3 | 2.02E-19 | 0.468325 | 0.626 | 0.3   | 3.02E-15 | DC | SLC11A1    |
| TM6SF1.3  | 2.16E-19 | 0.47489  | 0.406 | 0.154 | 3.22E-15 | DC | TM6SF1     |
| MAP2.3    | 2.26E-19 | -0.84442 | 0.021 | 0.343 | 3.38E-15 | DC | MAP2       |
| SP100.2   | 2.30E-19 | 0.435929 | 0.578 | 0.282 | 3.44E-15 | DC | SP100      |
| LACTB.3   | 2.39E-19 | 0.553123 | 0.39  | 0.162 | 3.57E-15 | DC | LACTB      |
| ACTR2.3   | 3.14E-19 | 0.470271 | 0.69  | 0.455 | 4.68E-15 | DC | ACTR2      |
| NFIX.2    | 3.22E-19 | -0.81479 | 0.016 | 0.337 | 4.81E-15 | DC | NFIX       |
| NAAA.3    | 3.46E-19 | 0.504856 | 0.342 | 0.13  | 5.18E-15 | DC | NAAA       |
| ARPC5.2   | 3.76E-19 | 0.296027 | 0.882 | 0.669 | 5.62E-15 | DC | ARPC5      |
| RASGEF1B. | 4.32E-19 | 0.430265 | 0.337 | 0.117 | 6.46E-15 | DC | RASGEF1B   |
| CTSC.3    | 4.51E-19 | 0.394169 | 0.738 | 0.378 | 6.74E-15 | DC | CTSC       |
| GPX1.3    | 5.62E-19 | 0.224357 | 0.995 | 0.811 | 8.40E-15 | DC | GPX1       |
| MARCKS.2  | 5.90E-19 | -0.65715 | 0.337 | 0.602 | 8.82E-15 | DC | MARCKS     |
| CXXC5.3   | 6.11E-19 | -0.83256 | 0.059 | 0.385 | 9.13E-15 | DC | CXXC5      |
| TMEM173.3 | 6.16E-19 | 0.460301 | 0.348 | 0.123 | 9.21E-15 | DC | TMEM173    |
| DUSP23.2  | 7.96E-19 | 0.489689 | 0.444 | 0.184 | 1.19E-14 | DC | DUSP23     |
| CDKN1A.2  | 8.13E-19 | 0.474206 | 0.594 | 0.303 | 1.22E-14 | DC | CDKN1A     |
| MARCKSL1. | 8.83E-19 | -0.9476  | 0.316 | 0.548 | 1.32E-14 | DC | MARCKSL1   |
| IGFBP2.2  | 8.98E-19 | -1.09642 | 0.07  | 0.379 | 1.34E-14 | DC | IGFBP2     |
| SLC7A7.3  | 9.28E-19 | 0.455161 | 0.428 | 0.17  | 1.39E-14 | DC | SLC7A7     |
| ACSL6     | 1.07E-18 | 0.404014 | 0.182 | 0.045 | 1.59E-14 | DC | ACSL6      |
| NFKBIA.2  | 1.18E-18 | 0.438593 | 0.775 | 0.495 | 1.76E-14 | DC | NFKBIA     |
| CCNH.3    | 1.25E-18 | 0.476702 | 0.663 | 0.407 | 1.87E-14 | DC | CCNH       |
| ETV3.3    | 1.27E-18 | 0.526925 | 0.241 | 0.074 | 1.90E-14 | DC | ETV3       |
| TRABD.3   | 1.52E-18 | 0.528951 | 0.497 | 0.255 | 2.27E-14 | DC | TRABD      |
| ANAPC16.1 | 1.72E-18 | 0.360165 | 0.781 | 0.521 | 2.58E-14 | DC | ANAPC16    |
| SEC11A.2  | 1.79E-18 | 0.305638 | 0.829 | 0.587 | 2.67E-14 | DC | SEC11A     |
| C10orf128 | 1.82E-18 | 0.437019 | 0.139 | 0.029 | 2.73E-14 | DC | C10orf128  |
| MOB1A.3   | 2.31E-18 | 0.469559 | 0.594 | 0.336 | 3.45E-14 | DC | MOB1A      |
| GSTO1.2   | 2.34E-18 | 0.440634 | 0.722 | 0.452 | 3.50E-14 | DC | GSTO1      |
| STAT6.3   | 3.37E-18 | 0.397672 | 0.193 | 0.05  | 5.04E-14 | DC | STAT6      |
| FGD2.3    | 3.65E-18 | 0.33273  | 0.214 | 0.058 | 5.45E-14 | DC | FGD2       |
| ELF1.3    | 3.89E-18 | 0.45808  | 0.508 | 0.24  | 5.81E-14 | DC | ELF1       |
| SPTLC2.3  | 5.06E-18 | 0.463131 | 0.465 | 0.206 | 7.56E-14 | DC | SPTLC2     |
| ZNF667-AS | 5.44E-18 | -0.79994 | 0.07  | 0.393 | 8.13E-14 | DC | ZNF667-AS1 |



|           |          |          |       |       |          |    |           |
|-----------|----------|----------|-------|-------|----------|----|-----------|
| SH3BP1.3  | 6.09E-18 | 0.560712 | 0.299 | 0.109 | 9.10E-14 | DC | SH3BP1    |
| ETHE1     | 6.11E-18 | 0.510166 | 0.529 | 0.285 | 9.13E-14 | DC | ETHE1     |
| WRB.2     | 7.49E-18 | -0.74597 | 0.091 | 0.425 | 1.12E-13 | DC | WRB       |
| CELF2.3   | 7.88E-18 | 0.445896 | 0.636 | 0.379 | 1.18E-13 | DC | CELF2     |
| RGCC.2    | 7.89E-18 | 0.499067 | 0.519 | 0.246 | 1.18E-13 | DC | RGCC      |
| GOLM1.2   | 8.07E-18 | -0.73873 | 0.016 | 0.321 | 1.21E-13 | DC | GOLM1     |
| ANXA2.2   | 8.40E-18 | 0.333064 | 0.84  | 0.508 | 1.26E-13 | DC | ANXA2     |
| ELAVL3.3  | 8.56E-18 | -0.81511 | 0.016 | 0.315 | 1.28E-13 | DC | ELAVL3    |
| CD38      | 9.28E-18 | 0.372845 | 0.107 | 0.019 | 1.39E-13 | DC | CD38      |
| TSPO.2    | 9.90E-18 | 0.36544  | 0.84  | 0.591 | 1.48E-13 | DC | TSPO      |
| P2RY13.3  | 1.06E-17 | 0.393283 | 0.262 | 0.082 | 1.58E-13 | DC | P2RY13    |
| IER3.3    | 1.12E-17 | 0.455041 | 0.524 | 0.237 | 1.68E-13 | DC | IER3      |
| ETF1.2    | 1.14E-17 | 0.485869 | 0.578 | 0.342 | 1.70E-13 | DC | ETF1      |
| SLC25A5   | 1.22E-17 | 0.271862 | 0.92  | 0.718 | 1.82E-13 | DC | SLC25A5   |
| HHEX.3    | 1.36E-17 | 0.388374 | 0.203 | 0.055 | 2.03E-13 | DC | HHEX      |
| CMTM6.3   | 1.96E-17 | 0.437286 | 0.652 | 0.422 | 2.94E-13 | DC | CMTM6     |
| BAALC.2   | 1.97E-17 | -0.84656 | 0.048 | 0.35  | 2.94E-13 | DC | BAALC     |
| MEG3.2    | 2.05E-17 | -1.07313 | 0.016 | 0.309 | 3.06E-13 | DC | MEG3      |
| PMP2.3    | 2.24E-17 | -1.0228  | 0.053 | 0.355 | 3.34E-13 | DC | PMP2      |
| VRK2.3    | 2.45E-17 | 0.415885 | 0.193 | 0.052 | 3.65E-13 | DC | VRK2      |
| NFKB1.3   | 2.53E-17 | 0.507301 | 0.283 | 0.101 | 3.78E-13 | DC | NFKB1     |
| PTGS2.3   | 2.85E-17 | 0.45797  | 0.209 | 0.059 | 4.26E-13 | DC | PTGS2     |
| NCF4.3    | 2.89E-17 | 0.440305 | 0.369 | 0.142 | 4.32E-13 | DC | NCF4      |
| SH3BGRL.1 | 2.93E-17 | 0.312911 | 0.872 | 0.645 | 4.38E-13 | DC | SH3BGRL   |
| PTPRZ1.3  | 3.18E-17 | -0.90032 | 0.086 | 0.389 | 4.76E-13 | DC | PTPRZ1    |
| NPC2.2    | 3.22E-17 | 0.267366 | 0.989 | 0.687 | 4.81E-13 | DC | NPC2      |
| CCND3.2   | 3.29E-17 | 0.508142 | 0.492 | 0.256 | 4.92E-13 | DC | CCND3     |
| SERPINF2. | 3.77E-17 | 0.350179 | 0.123 | 0.024 | 5.64E-13 | DC | SERPINF2  |
| ARPC2.2   | 4.51E-17 | 0.256642 | 0.952 | 0.771 | 6.74E-13 | DC | ARPC2     |
| C19orf33  | 4.56E-17 | 0.152138 | 0.032 | 0.002 | 6.82E-13 | DC | C19orf33  |
| DRAM2.3   | 5.23E-17 | 0.441446 | 0.594 | 0.332 | 7.82E-13 | DC | DRAM2     |
| HBB.2     | 5.34E-17 | 0.383054 | 0.668 | 0.394 | 7.99E-13 | DC | HBB       |
| FHL1.3    | 5.41E-17 | -0.77049 | 0.059 | 0.361 | 8.09E-13 | DC | FHL1      |
| FAM49A.2  | 5.49E-17 | 0.524794 | 0.38  | 0.167 | 8.20E-13 | DC | FAM49A    |
| ACSL1.3   | 5.53E-17 | 0.484075 | 0.476 | 0.223 | 8.27E-13 | DC | ACSL1     |
| RCS1.3    | 6.01E-17 | 0.447623 | 0.321 | 0.117 | 8.99E-13 | DC | RCS1      |
| S100A10.3 | 6.12E-17 | 0.282951 | 0.845 | 0.54  | 9.15E-13 | DC | S100A10   |
| CHRNE.2   | 6.26E-17 | 0.28065  | 0.123 | 0.024 | 9.35E-13 | DC | CHRNE     |
| STMN3.1   | 6.26E-17 | -0.72208 | 0.021 | 0.311 | 9.35E-13 | DC | STMN3     |
| NCAM1.3   | 6.66E-17 | -0.78316 | 0.043 | 0.34  | 9.95E-13 | DC | NCAM1     |
| PABPC4.3  | 7.75E-17 | 0.527417 | 0.551 | 0.325 | 1.16E-12 | DC | PABPC4    |
| CCL17     | 7.78E-17 | 0.194762 | 0.048 | 0.004 | 1.16E-12 | DC | CCL17     |
| ICAM2.2   | 7.84E-17 | 0.412001 | 0.144 | 0.033 | 1.17E-12 | DC | ICAM2     |
| ABI3.3    | 9.54E-17 | 0.40379  | 0.444 | 0.186 | 1.42E-12 | DC | ABI3      |
| RHBDF2.3  | 1.00E-16 | 0.460023 | 0.412 | 0.174 | 1.50E-12 | DC | RHBDF2    |
| C3AR1.3   | 1.17E-16 | 0.337058 | 0.529 | 0.233 | 1.75E-12 | DC | C3AR1     |
| ODF3B.3   | 1.20E-16 | 0.43836  | 0.267 | 0.091 | 1.79E-12 | DC | ODF3B     |
| STMN1.2   | 1.20E-16 | -0.7254  | 0.353 | 0.635 | 1.80E-12 | DC | STMN1     |
| LINC00461 | 1.27E-16 | -0.76449 | 0.032 | 0.325 | 1.90E-12 | DC | LINC00461 |
| EAF2.3    | 1.32E-16 | 0.39428  | 0.267 | 0.09  | 1.97E-12 | DC | EAF2      |
| NFIA.2    | 1.36E-16 | -0.80648 | 0.08  | 0.384 | 2.04E-12 | DC | NFIA      |

|              |           |           |        |        |              |                |
|--------------|-----------|-----------|--------|--------|--------------|----------------|
| MT3. 3       | 1. 37E-16 | -1. 12174 | 0. 219 | 0. 495 | 2. 04E-12 DC | MT3            |
| LIMD2. 3     | 1. 42E-16 | 0. 572726 | 0. 465 | 0. 245 | 2. 12E-12 DC | LIMD2          |
| FTL. 3       | 1. 56E-16 | -0. 35645 | 1      | 0. 994 | 2. 34E-12 DC | FTL            |
| MAPT. 3      | 1. 63E-16 | -0. 79037 | 0. 011 | 0. 289 | 2. 44E-12 DC | MAPT           |
| CARD9. 3     | 1. 68E-16 | 0. 381659 | 0. 219 | 0. 066 | 2. 50E-12 DC | CARD9          |
| KIF21A. 3    | 1. 68E-16 | -0. 72181 | 0. 021 | 0. 307 | 2. 52E-12 DC | KIF21A         |
| TRIM38. 2    | 1. 72E-16 | 0. 45444  | 0. 273 | 0. 095 | 2. 57E-12 DC | TRIM38         |
| ACAP1. 2     | 1. 75E-16 | 0. 4642   | 0. 235 | 0. 077 | 2. 61E-12 DC | ACAP1          |
| CD44. 1      | 1. 84E-16 | 0. 294357 | 0. 684 | 0. 378 | 2. 75E-12 DC | CD44           |
| YWHAH. 3     | 1. 90E-16 | 0. 409706 | 0. 759 | 0. 562 | 2. 84E-12 DC | YWHAH          |
| NPDC1. 2     | 2. 01E-16 | -0. 7435  | 0. 043 | 0. 328 | 3. 00E-12 DC | NPDC1          |
| SLC1A5. 3    | 2. 12E-16 | 0. 515137 | 0. 337 | 0. 135 | 3. 17E-12 DC | SLC1A5         |
| DDX21. 1     | 2. 16E-16 | 0. 487112 | 0. 524 | 0. 296 | 3. 23E-12 DC | DDX21          |
| HLA-E. 3     | 2. 26E-16 | 0. 299675 | 0. 898 | 0. 591 | 3. 38E-12 DC | HLA-E          |
| ZBTB20. 2    | 2. 33E-16 | -0. 71784 | 0. 08  | 0. 39  | 3. 49E-12 DC | ZBTB20         |
| PODXL2. 3    | 2. 35E-16 | -0. 72575 | 0. 027 | 0. 312 | 3. 51E-12 DC | PODXL2         |
| EIF3F. 3     | 2. 40E-16 | 0. 333589 | 0. 786 | 0. 602 | 3. 59E-12 DC | EIF3F          |
| CDH2. 2      | 2. 53E-16 | -0. 67788 | 0. 011 | 0. 289 | 3. 78E-12 DC | CDH2           |
| BCL2. 2      | 2. 65E-16 | 0. 387173 | 0. 176 | 0. 047 | 3. 96E-12 DC | BCL2           |
| LTC4S. 3     | 2. 76E-16 | 0. 422017 | 0. 406 | 0. 164 | 4. 13E-12 DC | LTC4S          |
| CRIP2. 1     | 2. 81E-16 | -0. 70033 | 0. 027 | 0. 318 | 4. 20E-12 DC | CRIP2          |
| MS4A4A. 3    | 2. 86E-16 | 0. 324303 | 0. 61  | 0. 281 | 4. 27E-12 DC | MS4A4A         |
| BEX1. 2      | 2. 89E-16 | -0. 91551 | 0. 064 | 0. 355 | 4. 31E-12 DC | BEX1           |
| CEBPB. 3     | 2. 91E-16 | 0. 415776 | 0. 695 | 0. 431 | 4. 35E-12 DC | CEBPB          |
| CD2. 2       | 2. 97E-16 | 0. 209448 | 0. 102 | 0. 018 | 4. 44E-12 DC | CD2            |
| SOX4. 2      | 3. 08E-16 | -0. 98379 | 0. 166 | 0. 45  | 4. 61E-12 DC | SOX4           |
| PRKCB. 2     | 3. 17E-16 | 0. 348391 | 0. 16  | 0. 04  | 4. 74E-12 DC | PRKCB          |
| S100A11. 3   | 3. 44E-16 | 0. 231562 | 0. 989 | 0. 652 | 5. 14E-12 DC | S100A11        |
| APRT. 1      | 3. 75E-16 | 0. 318522 | 0. 765 | 0. 527 | 5. 61E-12 DC | APRT           |
| RP11-586D. 3 | 3. 79E-16 | 0. 215527 | 0. 059 | 0. 007 | 5. 67E-12 DC | RP11-586D19. 1 |
| GSTA4. 2     | 4. 01E-16 | -0. 76063 | 0. 016 | 0. 294 | 5. 99E-12 DC | GSTA4          |
| DSTN. 3      | 4. 14E-16 | -0. 61895 | 0. 385 | 0. 622 | 6. 19E-12 DC | DSTN           |
| H3F3B. 3     | 4. 28E-16 | -0. 2913  | 0. 995 | 0. 97  | 6. 40E-12 DC | H3F3B          |
| ATP6VOE2. 4  | 4. 53E-16 | -0. 71181 | 0. 16  | 0. 457 | 6. 76E-12 DC | ATP6VOE2       |
| KCNAB2. 3    | 4. 78E-16 | 0. 436272 | 0. 23  | 0. 074 | 7. 14E-12 DC | KCNAB2         |
| LAPTM4B. 3   | 5. 02E-16 | -0. 70406 | 0. 048 | 0. 336 | 7. 50E-12 DC | LAPTM4B        |
| FOSL2. 3     | 5. 04E-16 | 0. 555558 | 0. 39  | 0. 183 | 7. 53E-12 DC | FOSL2          |
| CCR7         | 5. 07E-16 | 0. 405566 | 0. 07  | 0. 009 | 7. 58E-12 DC | CCR7           |
| NT5DC1. 1    | 5. 28E-16 | 0. 40497  | 0. 182 | 0. 05  | 7. 89E-12 DC | NT5DC1         |
| CPPED1. 3    | 5. 30E-16 | 0. 418337 | 0. 214 | 0. 065 | 7. 92E-12 DC | CPPED1         |
| LILRB4. 3    | 6. 12E-16 | 0. 328604 | 0. 561 | 0. 25  | 9. 15E-12 DC | LILRB4         |
| MYL6B. 2     | 6. 31E-16 | -0. 70978 | 0. 139 | 0. 447 | 9. 42E-12 DC | MYL6B          |
| SERPINF1. 6  | 5. 59E-16 | 0. 45613  | 0. 471 | 0. 22  | 9. 86E-12 DC | SERPINF1       |
| SEC61G. 3    | 6. 61E-16 | -0. 75129 | 0. 743 | 0. 8   | 9. 87E-12 DC | SEC61G         |
| NABP1. 2     | 6. 82E-16 | 0. 447187 | 0. 316 | 0. 121 | 1. 02E-11 DC | NABP1          |
| QARS. 3      | 7. 44E-16 | 0. 48479  | 0. 503 | 0. 279 | 1. 11E-11 DC | QARS           |
| FAM229B. 2   | 7. 47E-16 | -0. 73797 | 0. 021 | 0. 296 | 1. 12E-11 DC | FAM229B        |
| SLC31A2. 3   | 7. 64E-16 | 0. 453918 | 0. 422 | 0. 189 | 1. 14E-11 DC | SLC31A2        |
| GBGT1. 3     | 7. 74E-16 | 0. 356942 | 0. 176 | 0. 048 | 1. 16E-11 DC | GBGT1          |
| STMN4. 2     | 8. 62E-16 | -1. 07988 | 0. 037 | 0. 31  | 1. 29E-11 DC | STMN4          |
| CD74. 2      | 8. 82E-16 | 0. 221203 | 1      | 0. 747 | 1. 32E-11 DC | CD74           |

|            |          |          |       |       |          |    |              |
|------------|----------|----------|-------|-------|----------|----|--------------|
| APLP1.3    | 9.07E-16 | -0.80643 | 0.064 | 0.356 | 1.36E-11 | DC | APLP1        |
| KIF5C.3    | 9.49E-16 | -0.70826 | 0.005 | 0.272 | 1.42E-11 | DC | KIF5C        |
| CAPZA1.3   | 9.98E-16 | 0.439482 | 0.599 | 0.389 | 1.49E-11 | DC | CAPZA1       |
| ZNF428.3   | 1.06E-15 | -0.61837 | 0.278 | 0.549 | 1.59E-11 | DC | ZNF428       |
| GPR34.3    | 1.24E-15 | 0.322712 | 0.572 | 0.262 | 1.85E-11 | DC | GPR34        |
| NES.3      | 1.42E-15 | -0.86406 | 0.016 | 0.28  | 2.12E-11 | DC | NES          |
| TSPAN7.1   | 1.46E-15 | -0.81381 | 0.037 | 0.314 | 2.19E-11 | DC | TSPAN7       |
| RUNX3.2    | 1.51E-15 | 0.338131 | 0.15  | 0.037 | 2.25E-11 | DC | RUNX3        |
| DPYSL3.2   | 1.61E-15 | -0.728   | 0.043 | 0.326 | 2.41E-11 | DC | DPYSL3       |
| GSTK1.1    | 1.63E-15 | 0.330783 | 0.765 | 0.526 | 2.44E-11 | DC | GSTK1        |
| IGFLR1     | 1.77E-15 | 0.363285 | 0.187 | 0.053 | 2.64E-11 | DC | IGFLR1       |
| TGIF1.2    | 1.83E-15 | 0.500371 | 0.578 | 0.354 | 2.73E-11 | DC | TGIF1        |
| TWF2.3     | 2.39E-15 | 0.517583 | 0.551 | 0.337 | 3.57E-11 | DC | TWF2         |
| LYL1.3     | 2.43E-15 | 0.358181 | 0.241 | 0.079 | 3.64E-11 | DC | LYL1         |
| CD320.1    | 2.47E-15 | -0.68714 | 0.043 | 0.322 | 3.69E-11 | DC | CD320        |
| C7orf55.2  | 2.86E-15 | -0.68822 | 0.123 | 0.428 | 4.27E-11 | DC | C7orf55      |
| ARF6.3     | 3.11E-15 | 0.492157 | 0.551 | 0.34  | 4.65E-11 | DC | ARF6         |
| YPEL5.1    | 3.22E-15 | 0.416083 | 0.663 | 0.449 | 4.81E-11 | DC | YPEL5        |
| RP11-24F1  | 3.22E-15 | 0.227762 | 0.086 | 0.014 | 4.81E-11 | DC | RP11-24F11.2 |
| PILRA.3    | 3.34E-15 | 0.44409  | 0.385 | 0.161 | 4.98E-11 | DC | PILRA        |
| PRAM1.3    | 3.53E-15 | 0.361376 | 0.182 | 0.051 | 5.27E-11 | DC | PRAM1        |
| TCEAL7.1   | 3.61E-15 | -0.76048 | 0.032 | 0.307 | 5.40E-11 | DC | TCEAL7       |
| MT1E.3     | 3.75E-15 | -1.01674 | 0.102 | 0.384 | 5.60E-11 | DC | MT1E         |
| SERPINE2.3 | 3.78E-15 | -0.74259 | 0.027 | 0.297 | 5.65E-11 | DC | SERPINE2     |
| DDR1.2     | 4.11E-15 | -0.68175 | 0.053 | 0.336 | 6.14E-11 | DC | DDR1         |
| OSTC.2     | 4.12E-15 | 0.348136 | 0.711 | 0.5   | 6.16E-11 | DC | OSTC         |
| SCG3.3     | 4.13E-15 | -0.83855 | 0.011 | 0.271 | 6.18E-11 | DC | SCG3         |
| SEZ6L2.2   | 4.26E-15 | -0.69997 | 0.016 | 0.278 | 6.36E-11 | DC | SEZ6L2       |
| SOX11.2    | 4.29E-15 | -0.84476 | 0.016 | 0.277 | 6.42E-11 | DC | SOX11        |
| SELL.2     | 4.31E-15 | 0.320737 | 0.144 | 0.035 | 6.44E-11 | DC | SELL         |
| TMSB10.3   | 4.54E-15 | -0.33231 | 1     | 0.964 | 6.79E-11 | DC | TMSB10       |
| LINC00937  | 4.77E-15 | 0.338568 | 0.134 | 0.031 | 7.13E-11 | DC | LINC00937    |
| KDM6B.3    | 4.79E-15 | 0.486165 | 0.444 | 0.219 | 7.16E-11 | DC | KDM6B        |
| IFNGR2.3   | 4.92E-15 | 0.459857 | 0.594 | 0.386 | 7.35E-11 | DC | IFNGR2       |
| PRDM1.3    | 5.12E-15 | 0.403612 | 0.273 | 0.097 | 7.64E-11 | DC | PRDM1        |
| VMO1.3     | 5.36E-15 | 0.485638 | 0.369 | 0.156 | 8.01E-11 | DC | VMO1         |
| ATAT1.3    | 5.48E-15 | -0.69337 | 0.027 | 0.293 | 8.18E-11 | DC | ATAT1        |
| NBEAL1.1   | 6.20E-15 | 0.231535 | 0.898 | 0.661 | 9.27E-11 | DC | NBEAL1       |
| CAMK1D.3   | 6.36E-15 | 0.511008 | 0.278 | 0.108 | 9.51E-11 | DC | CAMK1D       |
| TSPAN32    | 6.60E-15 | 0.202369 | 0.064 | 0.009 | 9.86E-11 | DC | TSPAN32      |
| CCRL2.3    | 7.10E-15 | 0.478298 | 0.251 | 0.086 | 1.06E-10 | DC | CCRL2        |
| SERPINB8   | 7.18E-15 | 0.431733 | 0.225 | 0.076 | 1.07E-10 | DC | SERPINB8     |
| CFL2.2     | 7.70E-15 | -0.74568 | 0.053 | 0.332 | 1.15E-10 | DC | CFL2         |
| PPP1R15A   | 7.85E-15 | 0.400602 | 0.706 | 0.463 | 1.17E-10 | DC | PPP1R15A     |
| PKIG.3     | 7.86E-15 | -0.71201 | 0.043 | 0.315 | 1.18E-10 | DC | PKIG         |
| ACRBP      | 8.22E-15 | 0.242672 | 0.075 | 0.011 | 1.23E-10 | DC | ACRBP        |
| ADAP2.3    | 8.25E-15 | 0.374443 | 0.422 | 0.18  | 1.23E-10 | DC | ADAP2        |
| SAT1.2     | 8.32E-15 | 0.179651 | 0.989 | 0.8   | 1.24E-10 | DC | SAT1         |
| ARID5A.1   | 8.67E-15 | 0.453084 | 0.508 | 0.286 | 1.30E-10 | DC | ARID5A       |
| KCNMB1.3   | 9.37E-15 | 0.391156 | 0.278 | 0.1   | 1.40E-10 | DC | KCNMB1       |
| DOCK8.3    | 9.77E-15 | 0.378159 | 0.31  | 0.118 | 1.46E-10 | DC | DOCK8        |

|           |          |          |       |       |          |    |              |
|-----------|----------|----------|-------|-------|----------|----|--------------|
| S100A16.2 | 9.93E-15 | -0.99795 | 0.043 | 0.311 | 1.48E-10 | DC | S100A16      |
| XBP1.3    | 1.02E-14 | 0.451996 | 0.599 | 0.367 | 1.53E-10 | DC | XBP1         |
| GLRX.2    | 1.07E-14 | 0.337863 | 0.652 | 0.384 | 1.60E-10 | DC | GLRX         |
| OXA1L.2   | 1.09E-14 | 0.432115 | 0.529 | 0.297 | 1.63E-10 | DC | OXA1L        |
| INSIG1.3  | 1.09E-14 | 0.556024 | 0.428 | 0.224 | 1.63E-10 | DC | INSIG1       |
| SNX20.2   | 1.12E-14 | 0.33172  | 0.16  | 0.043 | 1.67E-10 | DC | SNX20        |
| LRRK1     | 1.22E-14 | 0.270612 | 0.086 | 0.015 | 1.83E-10 | DC | LRRK1        |
| RP11-356I | 1.23E-14 | 0.255164 | 0.102 | 0.02  | 1.84E-10 | DC | RP11-356I2.4 |
| TMEM71    | 1.26E-14 | 0.312439 | 0.112 | 0.024 | 1.88E-10 | DC | TMEM71       |
| ENG.3     | 1.31E-14 | 0.414606 | 0.374 | 0.162 | 1.95E-10 | DC | ENG          |
| DNER.1    | 1.35E-14 | -0.80323 | 0.027 | 0.284 | 2.01E-10 | DC | DNER         |
| HOPX.2    | 1.36E-14 | -1.10112 | 0.032 | 0.286 | 2.03E-10 | DC | HOPX         |
| M6PR.3    | 1.39E-14 | 0.410297 | 0.599 | 0.379 | 2.07E-10 | DC | M6PR         |
| NCOA4.3   | 1.39E-14 | 0.502918 | 0.471 | 0.259 | 2.08E-10 | DC | NCOA4        |
| PALD1.3   | 1.45E-14 | 0.389782 | 0.273 | 0.099 | 2.17E-10 | DC | PALD1        |
| CRMP1.2   | 1.48E-14 | -0.75211 | 0.016 | 0.269 | 2.21E-10 | DC | CRMP1        |
| RGS13     | 1.51E-14 | 0.218439 | 0.075 | 0.012 | 2.26E-10 | DC | RGS13        |
| HIGD2A.2  | 1.59E-14 | 0.276107 | 0.824 | 0.615 | 2.37E-10 | DC | HIGD2A       |
| MTHFD2.2  | 1.81E-14 | 0.420882 | 0.519 | 0.285 | 2.70E-10 | DC | MTHFD2       |
| SH3TC1.3  | 1.85E-14 | 0.330281 | 0.235 | 0.077 | 2.76E-10 | DC | SH3TC1       |
| SNAP23.3  | 1.91E-14 | 0.456201 | 0.455 | 0.241 | 2.85E-10 | DC | SNAP23       |
| SPTBN1.1  | 1.95E-14 | -0.63914 | 0.021 | 0.279 | 2.92E-10 | DC | SPTBN1       |
| FAM159A.2 | 2.15E-14 | 0.332874 | 0.16  | 0.043 | 3.21E-10 | DC | FAM159A      |
| UNC13D.2  | 2.28E-14 | 0.418684 | 0.166 | 0.047 | 3.40E-10 | DC | UNC13D       |
| DOCK2.3   | 2.52E-14 | 0.423709 | 0.225 | 0.075 | 3.77E-10 | DC | DOCK2        |
| ROCK1.3   | 2.82E-14 | 0.479761 | 0.508 | 0.305 | 4.22E-10 | DC | ROCK1        |
| FYB.3     | 2.87E-14 | 0.403237 | 0.476 | 0.219 | 4.28E-10 | DC | FYB          |
| LCP2.3    | 3.16E-14 | 0.402091 | 0.294 | 0.112 | 4.72E-10 | DC | LCP2         |
| LIMA1.2   | 3.22E-14 | -0.71443 | 0.059 | 0.322 | 4.82E-10 | DC | LIMA1        |
| APBB1IP.3 | 3.25E-14 | 0.302327 | 0.38  | 0.153 | 4.86E-10 | DC | APBB1IP      |
| FOSB.2    | 3.33E-14 | 0.363135 | 0.668 | 0.387 | 4.97E-10 | DC | FOSB         |
| IMPA2.1   | 3.38E-14 | 0.346651 | 0.187 | 0.058 | 5.05E-10 | DC | IMPA2        |
| GNAI2.3   | 3.63E-14 | 0.39715  | 0.679 | 0.479 | 5.42E-10 | DC | GNAI2        |
| IL16.3    | 3.77E-14 | 0.369515 | 0.209 | 0.066 | 5.63E-10 | DC | IL16         |
| MAGED1.2  | 4.04E-14 | -0.66154 | 0.075 | 0.349 | 6.04E-10 | DC | MAGED1       |
| FZD3      | 4.35E-14 | -0.61527 | 0.027 | 0.28  | 6.50E-10 | DC | FZD3         |
| KCTD12.3  | 4.70E-14 | 0.437515 | 0.455 | 0.233 | 7.02E-10 | DC | KCTD12       |
| LILRB2.3  | 4.89E-14 | 0.378791 | 0.176 | 0.051 | 7.31E-10 | DC | LILRB2       |
| CXADR.3   | 4.94E-14 | -0.68498 | 0.048 | 0.311 | 7.39E-10 | DC | CXADR        |
| ACSL5.2   | 5.17E-14 | 0.272894 | 0.134 | 0.033 | 7.73E-10 | DC | ACSL5        |
| GNAI3.3   | 5.46E-14 | 0.51003  | 0.374 | 0.177 | 8.15E-10 | DC | GNAI3        |
| PRKAG2.3  | 5.47E-14 | 0.439435 | 0.321 | 0.134 | 8.17E-10 | DC | PRKAG2       |
| DBNL.3    | 6.08E-14 | 0.429277 | 0.62  | 0.422 | 9.09E-10 | DC | DBNL         |
| HSD17B11. | 6.15E-14 | 0.355482 | 0.626 | 0.373 | 9.19E-10 | DC | HSD17B11     |
| CD300E    | 6.34E-14 | 0.162655 | 0.064 | 0.009 | 9.47E-10 | DC | CD300E       |
| ZFP36.1   | 6.50E-14 | 0.236207 | 0.909 | 0.568 | 9.72E-10 | DC | ZFP36        |
| NCF1.3    | 6.80E-14 | 0.380268 | 0.31  | 0.12  | 1.02E-09 | DC | NCF1         |
| KRT18     | 7.08E-14 | 0.184147 | 0.053 | 0.007 | 1.06E-09 | DC | KRT18        |
| MILR1.3   | 7.21E-14 | 0.400757 | 0.262 | 0.096 | 1.08E-09 | DC | MILR1        |
| AP1S2.3   | 7.31E-14 | 0.39059  | 0.701 | 0.497 | 1.09E-09 | DC | AP1S2        |
| SCG2.2    | 8.17E-14 | -0.78869 | 0.021 | 0.266 | 1.22E-09 | DC | SCG2         |

|             |           |           |        |        |           |    |                |
|-------------|-----------|-----------|--------|--------|-----------|----|----------------|
| KCNN4. 1    | 8. 27E-14 | 0. 306158 | 0. 128 | 0. 031 | 1. 24E-09 | DC | KCNN4          |
| MYL12B. 2   | 8. 71E-14 | 0. 20568  | 0. 904 | 0. 724 | 1. 30E-09 | DC | MYL12B         |
| LY96. 3     | 9. 00E-14 | 0. 404345 | 0. 439 | 0. 219 | 1. 34E-09 | DC | LY96           |
| EIF3M. 3    | 9. 28E-14 | 0. 334243 | 0. 722 | 0. 523 | 1. 39E-09 | DC | EIF3M          |
| EIF3K. 2    | 9. 38E-14 | 0. 198809 | 0. 952 | 0. 755 | 1. 40E-09 | DC | EIF3K          |
| RAP1A. 3    | 1. 03E-13 | 0. 322056 | 0. 727 | 0. 512 | 1. 54E-09 | DC | RAP1A          |
| SOX9. 2     | 1. 04E-13 | -0. 6844  | 0. 027 | 0. 276 | 1. 55E-09 | DC | SOX9           |
| NRROS. 2    | 1. 18E-13 | 0. 389075 | 0. 203 | 0. 066 | 1. 76E-09 | DC | NRROS          |
| ANP32B. 3   | 1. 20E-13 | 0. 390607 | 0. 652 | 0. 446 | 1. 79E-09 | DC | ANP32B         |
| DENND3. 3   | 1. 24E-13 | 0. 332514 | 0. 267 | 0. 098 | 1. 85E-09 | DC | DENND3         |
| CADM4. 2    | 1. 24E-13 | -0. 59944 | 0. 021 | 0. 267 | 1. 86E-09 | DC | CADM4          |
| SKAP2. 2    | 1. 34E-13 | 0. 36274  | 0. 513 | 0. 266 | 2. 00E-09 | DC | SKAP2          |
| ITGAX. 3    | 1. 36E-13 | 0. 403594 | 0. 246 | 0. 088 | 2. 03E-09 | DC | ITGAX          |
| ATP6V1B2. 1 | 1. 52E-13 | 0. 420179 | 0. 615 | 0. 405 | 2. 28E-09 | DC | ATP6V1B2       |
| CENPV. 3    | 1. 54E-13 | -0. 66385 | 0. 021 | 0. 259 | 2. 30E-09 | DC | CENPV          |
| PELI1. 3    | 1. 69E-13 | 0. 517387 | 0. 406 | 0. 206 | 2. 52E-09 | DC | PELI1          |
| RNPEP. 3    | 1. 78E-13 | 0. 449803 | 0. 417 | 0. 221 | 2. 66E-09 | DC | RNPEP          |
| CTD-2006K   | 1. 81E-13 | 0. 190338 | 0. 027 | 0. 002 | 2. 71E-09 | DC | CTD-2006K23. 1 |
| TKT. 1      | 1. 87E-13 | 0. 345981 | 0. 695 | 0. 506 | 2. 79E-09 | DC | TKT            |
| TNFSF13B. 1 | 1. 89E-13 | 0. 379946 | 0. 428 | 0. 2   | 2. 82E-09 | DC | TNFSF13B       |
| NFE2L2. 2   | 1. 92E-13 | 0. 361243 | 0. 658 | 0. 465 | 2. 87E-09 | DC | NFE2L2         |
| UBB. 2      | 2. 21E-13 | -0. 28097 | 0. 936 | 0. 91  | 3. 31E-09 | DC | UBB            |
| PER1. 2     | 2. 31E-13 | 0. 40203  | 0. 385 | 0. 181 | 3. 45E-09 | DC | PER1           |
| KLHDC8A. 3  | 2. 41E-13 | -0. 62005 | 0. 016 | 0. 254 | 3. 60E-09 | DC | KLHDC8A        |
| CHST11. 3   | 2. 52E-13 | 0. 45203  | 0. 406 | 0. 21  | 3. 77E-09 | DC | CHST11         |
| CCR6        | 2. 77E-13 | 0. 228504 | 0. 053 | 0. 007 | 4. 14E-09 | DC | CCR6           |
| MIS18BP1. 2 | 2. 78E-13 | 0. 410818 | 0. 326 | 0. 144 | 4. 15E-09 | DC | MIS18BP1       |
| CD4. 3      | 2. 97E-13 | 0. 413151 | 0. 353 | 0. 152 | 4. 44E-09 | DC | CD4            |
| C16orf45. 3 | 3. 01E-13 | -0. 56733 | 0. 059 | 0. 322 | 4. 50E-09 | DC | C16orf45       |
| MYCL        | 3. 02E-13 | 0. 272014 | 0. 112 | 0. 026 | 4. 52E-09 | DC | MYCL           |
| PIK3R5. 3   | 3. 02E-13 | 0. 296941 | 0. 16  | 0. 045 | 4. 52E-09 | DC | PIK3R5         |
| APOBEC3A. 3 | 3. 18E-13 | 0. 199268 | 0. 043 | 0. 005 | 4. 75E-09 | DC | APOBEC3A       |
| SNHG8. 1    | 3. 33E-13 | 0. 337668 | 0. 679 | 0. 465 | 4. 97E-09 | DC | SNHG8          |
| SGCB        | 3. 41E-13 | -0. 66132 | 0. 07  | 0. 33  | 5. 10E-09 | DC | SGCB           |
| ETV1. 3     | 3. 43E-13 | -0. 69778 | 0. 016 | 0. 248 | 5. 12E-09 | DC | ETV1           |
| CD300LF. 2  | 3. 44E-13 | 0. 361777 | 0. 155 | 0. 044 | 5. 14E-09 | DC | CD300LF        |
| EIF3E. 2    | 3. 49E-13 | 0. 23865  | 0. 813 | 0. 644 | 5. 21E-09 | DC | EIF3E          |
| CYSLTR1. 2  | 3. 86E-13 | 0. 285307 | 0. 107 | 0. 024 | 5. 77E-09 | DC | CYSLTR1        |
| UBE2D3. 2   | 3. 92E-13 | 0. 219559 | 0. 888 | 0. 725 | 5. 86E-09 | DC | UBE2D3         |
| PCBP4. 3    | 4. 06E-13 | -0. 60664 | 0. 021 | 0. 259 | 6. 06E-09 | DC | PCBP4          |
| RHOF. 2     | 4. 24E-13 | 0. 370223 | 0. 166 | 0. 05  | 6. 33E-09 | DC | RHOF           |
| DPEP2. 2    | 4. 26E-13 | 0. 304503 | 0. 128 | 0. 032 | 6. 36E-09 | DC | DPEP2          |
| MT1M. 1     | 4. 36E-13 | -0. 87151 | 0. 016 | 0. 247 | 6. 52E-09 | DC | MT1M           |
| QSOX1. 3    | 4. 38E-13 | 0. 456299 | 0. 422 | 0. 233 | 6. 54E-09 | DC | QSOX1          |
| ENAH. 2     | 4. 67E-13 | -0. 55676 | 0. 027 | 0. 268 | 6. 98E-09 | DC | ENAH           |
| NFAM1. 2    | 5. 00E-13 | 0. 324546 | 0. 128 | 0. 032 | 7. 47E-09 | DC | NFAM1          |
| ZNF467. 2   | 5. 07E-13 | 0. 302002 | 0. 128 | 0. 032 | 7. 57E-09 | DC | ZNF467         |
| VDR         | 5. 36E-13 | 0. 292519 | 0. 08  | 0. 015 | 8. 00E-09 | DC | VDR            |
| LINC00528   | 5. 37E-13 | 0. 139201 | 0. 048 | 0. 006 | 8. 02E-09 | DC | LINC00528      |
| PCDH9. 1    | 5. 47E-13 | -0. 71144 | 0. 021 | 0. 259 | 8. 17E-09 | DC | PCDH9          |
| SDCBP. 1    | 5. 52E-13 | 0. 21902  | 0. 92  | 0. 725 | 8. 25E-09 | DC | SDCBP          |

|           |          |          |       |       |          |    |              |
|-----------|----------|----------|-------|-------|----------|----|--------------|
| RP11-796E | 5.53E-13 | 0.498147 | 0.193 | 0.063 | 8.26E-09 | DC | RP11-796E2.4 |
| FTH1.3    | 5.55E-13 | -0.19185 | 0.989 | 0.932 | 8.30E-09 | DC | FTH1         |
| PPP1CA.2  | 5.59E-13 | 0.329682 | 0.754 | 0.568 | 8.35E-09 | DC | PPP1CA       |
| CD01.3    | 5.87E-13 | -0.69881 | 0.011 | 0.238 | 8.78E-09 | DC | CD01         |
| TSPAN5.3  | 6.01E-13 | -0.56377 | 0.027 | 0.266 | 8.98E-09 | DC | TSPAN5       |
| GHITM.2   | 6.50E-13 | 0.304443 | 0.711 | 0.52  | 9.71E-09 | DC | GHITM        |
| DENND1C.2 | 6.50E-13 | 0.240173 | 0.128 | 0.032 | 9.71E-09 | DC | DENND1C      |
| SPNS3.2   | 7.10E-13 | 0.278886 | 0.102 | 0.022 | 1.06E-08 | DC | SPNS3        |
| STK4.3    | 7.44E-13 | 0.447541 | 0.481 | 0.284 | 1.11E-08 | DC | STK4         |
| TCF4.3    | 8.13E-13 | -0.61505 | 0.283 | 0.527 | 1.21E-08 | DC | TCF4         |
| RND3.2    | 8.18E-13 | -0.7227  | 0.016 | 0.246 | 1.22E-08 | DC | RND3         |
| CHPF.2    | 8.36E-13 | -0.55823 | 0.027 | 0.262 | 1.25E-08 | DC | CHPF         |
| RIC3.1    | 8.57E-13 | -0.70668 | 0.011 | 0.234 | 1.28E-08 | DC | RIC3         |
| SRI.3     | 9.10E-13 | -0.50135 | 0.578 | 0.731 | 1.36E-08 | DC | SRI          |
| EDEM1.2   | 9.12E-13 | 0.411802 | 0.214 | 0.077 | 1.36E-08 | DC | EDEM1        |
| C12orf57. | 9.35E-13 | -0.59181 | 0.267 | 0.541 | 1.40E-08 | DC | C12orf57     |
| HEY1.2    | 1.03E-12 | -0.63693 | 0.021 | 0.25  | 1.53E-08 | DC | HEY1         |
| SUSD3.3   | 1.03E-12 | 0.34817  | 0.251 | 0.093 | 1.54E-08 | DC | SUSD3        |
| CPE.2     | 1.04E-12 | -0.69489 | 0.134 | 0.394 | 1.55E-08 | DC | CPE          |
| SNX10.2   | 1.05E-12 | 0.449984 | 0.417 | 0.225 | 1.57E-08 | DC | SNX10        |
| TMEM59L.2 | 1.13E-12 | -0.5677  | 0.027 | 0.262 | 1.68E-08 | DC | TMEM59L      |
| GPC1.2    | 1.13E-12 | -0.69314 | 0.016 | 0.24  | 1.68E-08 | DC | GPC1         |
| CAPZB.2   | 1.26E-12 | 0.200293 | 0.898 | 0.698 | 1.88E-08 | DC | CAPZB        |
| EGFR.2    | 1.29E-12 | -0.71017 | 0.059 | 0.304 | 1.93E-08 | DC | EGFR         |
| CTTN.2    | 1.30E-12 | -0.57189 | 0.011 | 0.233 | 1.94E-08 | DC | CTTN         |
| DBN1.3    | 1.32E-12 | -0.60173 | 0.07  | 0.315 | 1.98E-08 | DC | DBN1         |
| MANBAL.3  | 1.34E-12 | -0.56387 | 0.08  | 0.339 | 2.00E-08 | DC | MANBAL       |
| HPS1.2    | 1.37E-12 | 0.359939 | 0.273 | 0.108 | 2.05E-08 | DC | HPS1         |
| HSP90AA1. | 1.42E-12 | -0.29678 | 0.877 | 0.888 | 2.13E-08 | DC | HSP90AA1     |
| ATP5C1.2  | 1.53E-12 | 0.269062 | 0.759 | 0.584 | 2.28E-08 | DC | ATP5C1       |
| IL17RA.3  | 1.54E-12 | 0.439219 | 0.278 | 0.117 | 2.30E-08 | DC | IL17RA       |
| PGRMC1.1  | 1.62E-12 | -0.53    | 0.182 | 0.451 | 2.42E-08 | DC | PGRMC1       |
| SH2B3.3   | 1.64E-12 | 0.477945 | 0.262 | 0.106 | 2.45E-08 | DC | SH2B3        |
| RAP1B.2   | 1.64E-12 | 0.33131  | 0.62  | 0.431 | 2.45E-08 | DC | RAP1B        |
| CECR1.3   | 1.69E-12 | 0.321329 | 0.203 | 0.069 | 2.52E-08 | DC | CECR1        |
| METRN.3   | 1.75E-12 | -0.68058 | 0.064 | 0.298 | 2.61E-08 | DC | METRN        |
| NREP.2    | 1.91E-12 | -0.6235  | 0.043 | 0.276 | 2.86E-08 | DC | NREP         |
| CSRP2.1   | 1.92E-12 | -0.90429 | 0.064 | 0.305 | 2.87E-08 | DC | CSRP2        |
| PTPRS.3   | 1.95E-12 | -0.6279  | 0.032 | 0.262 | 2.92E-08 | DC | PTPRS        |
| ZNF302.2  | 1.96E-12 | -0.57077 | 0.064 | 0.319 | 2.93E-08 | DC | ZNF302       |
| PTPN1.3   | 1.97E-12 | 0.524492 | 0.401 | 0.229 | 2.95E-08 | DC | PTPN1        |
| CDC42SE2. | 2.01E-12 | 0.484819 | 0.396 | 0.216 | 3.01E-08 | DC | CDC42SE2     |
| MIR22HG.2 | 2.11E-12 | 0.436394 | 0.267 | 0.111 | 3.15E-08 | DC | MIR22HG      |
| GTF2B.2   | 2.11E-12 | 0.431775 | 0.503 | 0.297 | 3.15E-08 | DC | GTF2B        |
| POU3F2.2  | 2.27E-12 | -0.59774 | 0.005 | 0.219 | 3.40E-08 | DC | POU3F2       |
| POLD4.1   | 2.30E-12 | 0.324796 | 0.642 | 0.417 | 3.44E-08 | DC | POLD4        |
| ITSN2.3   | 2.32E-12 | 0.411864 | 0.358 | 0.179 | 3.46E-08 | DC | ITSN2        |
| MT1F.3    | 2.41E-12 | -0.66185 | 0.064 | 0.309 | 3.61E-08 | DC | MT1F         |
| OTUD1.3   | 2.51E-12 | 0.357858 | 0.251 | 0.096 | 3.75E-08 | DC | OTUD1        |
| HNRNPF.2  | 2.54E-12 | 0.314012 | 0.684 | 0.505 | 3.79E-08 | DC | HNRNPF       |
| TNFAIP8L2 | 2.71E-12 | 0.344594 | 0.246 | 0.092 | 4.04E-08 | DC | TNFAIP8L2    |

|           |          |          |       |       |          |    |              |
|-----------|----------|----------|-------|-------|----------|----|--------------|
| DNAJC15.1 | 2.76E-12 | 0.383737 | 0.578 | 0.387 | 4.13E-08 | DC | DNAJC15      |
| PTPN7.3   | 2.91E-12 | 0.407078 | 0.214 | 0.076 | 4.35E-08 | DC | PTPN7        |
| LRRC25.3  | 3.03E-12 | 0.367031 | 0.241 | 0.09  | 4.53E-08 | DC | LRRC25       |
| CHN1.2    | 3.09E-12 | -0.52537 | 0.005 | 0.219 | 4.62E-08 | DC | CHN1         |
| LRCH4.3   | 3.12E-12 | 0.459986 | 0.369 | 0.185 | 4.67E-08 | DC | LRCH4        |
| KCNQ2.2   | 3.20E-12 | -0.57333 | 0.005 | 0.218 | 4.78E-08 | DC | KCNQ2        |
| EPN2.3    | 3.24E-12 | -0.4715  | 0.016 | 0.241 | 4.84E-08 | DC | EPN2         |
| TRIM2.1   | 3.36E-12 | -0.55503 | 0.011 | 0.227 | 5.01E-08 | DC | TRIM2        |
| FAM127B.2 | 3.52E-12 | -0.64997 | 0.064 | 0.304 | 5.26E-08 | DC | FAM127B      |
| LMO4.3    | 3.62E-12 | -0.57133 | 0.23  | 0.482 | 5.41E-08 | DC | LMO4         |
| ALOX15B.2 | 3.76E-12 | 0.254674 | 0.107 | 0.025 | 5.62E-08 | DC | ALOX15B      |
| CHPT1.2   | 3.77E-12 | 0.501285 | 0.476 | 0.3   | 5.64E-08 | DC | CHPT1        |
| OSCAR.3   | 3.78E-12 | 0.369719 | 0.203 | 0.07  | 5.64E-08 | DC | OSCAR        |
| INHBA     | 4.17E-12 | 0.366915 | 0.091 | 0.019 | 6.23E-08 | DC | INHBA        |
| TMEM161B- | 4.36E-12 | -0.6689  | 0.059 | 0.293 | 6.51E-08 | DC | TMEM161B-AS1 |
| TRIB2.3   | 4.37E-12 | -0.59111 | 0.037 | 0.266 | 6.53E-08 | DC | TRIB2        |
| GRIA2.2   | 4.39E-12 | -0.58197 | 0.005 | 0.215 | 6.56E-08 | DC | GRIA2        |
| CYTH4.3   | 4.46E-12 | 0.313013 | 0.278 | 0.109 | 6.66E-08 | DC | CYTH4        |
| IL7R.3    | 4.70E-12 | 0.374024 | 0.166 | 0.052 | 7.02E-08 | DC | IL7R         |
| TSPAN13.3 | 4.82E-12 | -0.63619 | 0.064 | 0.303 | 7.20E-08 | DC | TSPAN13      |
| AC016831. | 5.10E-12 | 0.341816 | 0.198 | 0.069 | 7.63E-08 | DC | AC016831.7   |
| FAM181B.3 | 5.11E-12 | -0.60466 | 0     | 0.207 | 7.64E-08 | DC | FAM181B      |
| SP140.2   | 5.15E-12 | 0.249052 | 0.118 | 0.029 | 7.70E-08 | DC | SP140        |
| POLR1D.2  | 5.39E-12 | 0.416981 | 0.594 | 0.412 | 8.05E-08 | DC | POLR1D       |
| WIPF1.3   | 5.49E-12 | 0.41917  | 0.406 | 0.217 | 8.20E-08 | DC | WIPF1        |
| ADPGK.3   | 5.72E-12 | 0.40496  | 0.455 | 0.258 | 8.54E-08 | DC | ADPGK        |
| NRCAM.2   | 5.80E-12 | -0.57743 | 0.043 | 0.273 | 8.67E-08 | DC | NRCAM        |
| SLC22A17. | 5.81E-12 | -0.57093 | 0.053 | 0.288 | 8.68E-08 | DC | SLC22A17     |
| LTA4H.2   | 6.01E-12 | 0.498859 | 0.412 | 0.226 | 8.98E-08 | DC | LTA4H        |
| ERP44.1   | 6.13E-12 | 0.321548 | 0.599 | 0.392 | 9.16E-08 | DC | ERP44        |
| FKBP10.3  | 6.33E-12 | -0.53754 | 0.005 | 0.215 | 9.46E-08 | DC | FKBP10       |
| BNIP2.3   | 6.61E-12 | 0.449561 | 0.444 | 0.261 | 9.88E-08 | DC | BNIP2        |
| FJX1.2    | 6.63E-12 | -0.58189 | 0     | 0.205 | 9.90E-08 | DC | FJX1         |
| CHP1.3    | 6.98E-12 | 0.475628 | 0.406 | 0.232 | 1.04E-07 | DC | CHP1         |
| MT2A.3    | 6.98E-12 | -0.6852  | 0.727 | 0.785 | 1.04E-07 | DC | MT2A         |
| ATP6VOD1. | 7.22E-12 | 0.355892 | 0.69  | 0.507 | 1.08E-07 | DC | ATP6VOD1     |
| TMEM98.1  | 7.26E-12 | -0.60358 | 0.021 | 0.238 | 1.09E-07 | DC | TMEM98       |
| NDUFA4.2  | 7.56E-12 | -0.27561 | 0.941 | 0.894 | 1.13E-07 | DC | NDUFA4       |
| LY75      | 7.86E-12 | 0.174281 | 0.08  | 0.016 | 1.18E-07 | DC | LY75         |
| NLRP1.2   | 8.59E-12 | -0.55311 | 0.091 | 0.343 | 1.28E-07 | DC | NLRP1        |
| TBC1D22A. | 8.60E-12 | 0.461845 | 0.273 | 0.12  | 1.29E-07 | DC | TBC1D22A     |
| FIBIN.2   | 8.75E-12 | -0.65208 | 0.016 | 0.23  | 1.31E-07 | DC | FIBIN        |
| GPB1.1    | 8.82E-12 | 0.179442 | 0.048 | 0.006 | 1.32E-07 | DC | GPB1         |
| CFLAR.2   | 9.36E-12 | 0.415963 | 0.503 | 0.316 | 1.40E-07 | DC | CFLAR        |
| AP1G2.2   | 9.42E-12 | 0.268245 | 0.16  | 0.049 | 1.41E-07 | DC | AP1G2        |
| GCSH.3    | 9.44E-12 | -0.55127 | 0.107 | 0.351 | 1.41E-07 | DC | GCSH         |
| RBFOX2.2  | 1.01E-11 | -0.56253 | 0.011 | 0.219 | 1.50E-07 | DC | RBFOX2       |
| CYB5R4.3  | 1.02E-11 | 0.476625 | 0.342 | 0.173 | 1.52E-07 | DC | CYB5R4       |
| TTYH1.3   | 1.04E-11 | -0.72651 | 0.048 | 0.271 | 1.56E-07 | DC | TTYH1        |
| RBM47.3   | 1.06E-11 | 0.434171 | 0.267 | 0.114 | 1.59E-07 | DC | RBM47        |
| FNDC4.1   | 1.07E-11 | -0.48081 | 0     | 0.201 | 1.60E-07 | DC | FNDC4        |

|           |          |          |       |       |          |    |              |
|-----------|----------|----------|-------|-------|----------|----|--------------|
| ATG16L2.3 | 1.10E-11 | 0.329932 | 0.225 | 0.085 | 1.64E-07 | DC | ATG16L2      |
| EMILIN2.3 | 1.14E-11 | 0.385748 | 0.209 | 0.078 | 1.71E-07 | DC | EMILIN2      |
| PBX1.2    | 1.35E-11 | -0.5149  | 0.011 | 0.218 | 2.02E-07 | DC | PBX1         |
| DCX.3     | 1.39E-11 | -0.6732  | 0.005 | 0.208 | 2.08E-07 | DC | DCX          |
| HES6.2    | 1.48E-11 | -0.72912 | 0.064 | 0.289 | 2.21E-07 | DC | HES6         |
| DUSP1.3   | 1.48E-11 | 0.310005 | 0.84  | 0.57  | 2.22E-07 | DC | DUSP1        |
| NAE1.1    | 1.49E-11 | -0.53936 | 0.096 | 0.344 | 2.23E-07 | DC | NAE1         |
| DEPTOR.1  | 1.49E-11 | 0.31066  | 0.144 | 0.042 | 2.23E-07 | DC | DEPTOR       |
| FGD4.3    | 1.53E-11 | 0.434947 | 0.316 | 0.144 | 2.29E-07 | DC | FGD4         |
| PTGS1.3   | 1.63E-11 | 0.393318 | 0.332 | 0.153 | 2.44E-07 | DC | PTGS1        |
| CBFA2T3   | 1.78E-11 | 0.130213 | 0.043 | 0.005 | 2.66E-07 | DC | CBFA2T3      |
| MEIS2.2   | 1.82E-11 | -0.64181 | 0.005 | 0.207 | 2.72E-07 | DC | MEIS2        |
| REEP2.1   | 1.94E-11 | -0.46186 | 0.005 | 0.205 | 2.89E-07 | DC | REEP2        |
| PTRHD1    | 2.02E-11 | 0.418423 | 0.492 | 0.316 | 3.02E-07 | DC | PTRHD1       |
| CBR1.2    | 2.03E-11 | -0.58076 | 0.225 | 0.48  | 3.04E-07 | DC | CBR1         |
| LAIR1.3   | 2.09E-11 | 0.321222 | 0.455 | 0.227 | 3.12E-07 | DC | LAIR1        |
| MAP1LC3A. | 2.11E-11 | -0.56125 | 0.128 | 0.369 | 3.15E-07 | DC | MAP1LC3A     |
| PHF14.2   | 2.15E-11 | -0.50468 | 0.166 | 0.427 | 3.21E-07 | DC | PHF14        |
| AP2S1.2   | 2.18E-11 | 0.254252 | 0.824 | 0.658 | 3.25E-07 | DC | AP2S1        |
| NLRP2     | 2.29E-11 | 0.113048 | 0.048 | 0.006 | 3.42E-07 | DC | NLRP2        |
| CACUL1.3  | 2.33E-11 | 0.461107 | 0.374 | 0.203 | 3.49E-07 | DC | CACUL1       |
| CTSW.2    | 2.37E-11 | 0.218487 | 0.112 | 0.028 | 3.55E-07 | DC | CTSW         |
| PDCL3.2   | 2.38E-11 | 0.451503 | 0.465 | 0.29  | 3.55E-07 | DC | PDCL3        |
| SYT11.3   | 2.40E-11 | -0.55073 | 0.139 | 0.388 | 3.59E-07 | DC | SYT11        |
| TNNI2.2   | 2.42E-11 | 0.288992 | 0.086 | 0.018 | 3.62E-07 | DC | TNNI2        |
| SLC43A2.3 | 2.59E-11 | 0.43704  | 0.428 | 0.243 | 3.87E-07 | DC | SLC43A2      |
| HVCN1.3   | 2.64E-11 | 0.460242 | 0.235 | 0.094 | 3.95E-07 | DC | HVCN1        |
| COL6A1.2  | 2.68E-11 | -0.56458 | 0.021 | 0.232 | 4.01E-07 | DC | COL6A1       |
| CKAP4.1   | 2.72E-11 | -0.46178 | 0.011 | 0.213 | 4.06E-07 | DC | CKAP4        |
| MB21D2.2  | 2.73E-11 | 0.344885 | 0.16  | 0.052 | 4.08E-07 | DC | MB21D2       |
| MSI2.1    | 2.75E-11 | -0.60653 | 0.096 | 0.325 | 4.11E-07 | DC | MSI2         |
| PGM2L1.2  | 2.97E-11 | -0.57862 | 0.043 | 0.259 | 4.44E-07 | DC | PGM2L1       |
| SHKBP1.3  | 3.22E-11 | 0.423845 | 0.406 | 0.234 | 4.81E-07 | DC | SHKBP1       |
| RAB3IP.1  | 3.37E-11 | -0.622   | 0.037 | 0.25  | 5.04E-07 | DC | RAB3IP       |
| POMC.3    | 3.42E-11 | 0.324017 | 0.15  | 0.045 | 5.11E-07 | DC | POMC         |
| SEMA6A.2  | 3.49E-11 | -0.48338 | 0.005 | 0.203 | 5.21E-07 | DC | SEMA6A       |
| CHD7.3    | 3.82E-11 | -0.57628 | 0.07  | 0.292 | 5.70E-07 | DC | CHD7         |
| TBC1D10C. | 3.96E-11 | 0.263275 | 0.112 | 0.029 | 5.91E-07 | DC | TBC1D10C     |
| CTA-384D8 | 4.06E-11 | 0.270146 | 0.096 | 0.023 | 6.06E-07 | DC | CTA-384D8.34 |
| EBI3.3    | 4.21E-11 | 0.320719 | 0.241 | 0.094 | 6.30E-07 | DC | EBI3         |
| NR1H2.3   | 4.24E-11 | 0.422621 | 0.471 | 0.301 | 6.34E-07 | DC | NR1H2        |
| NCKAP1.1  | 4.34E-11 | -0.44063 | 0     | 0.191 | 6.48E-07 | DC | NCKAP1       |
| FMNL2.3   | 4.34E-11 | -0.51054 | 0.048 | 0.269 | 6.49E-07 | DC | FMNL2        |
| CD79B     | 4.36E-11 | 0.175111 | 0.043 | 0.005 | 6.51E-07 | DC | CD79B        |
| RHOA.1    | 4.39E-11 | 0.180209 | 0.92  | 0.752 | 6.57E-07 | DC | RHOA         |
| MT1X.3    | 4.55E-11 | -0.90276 | 0.364 | 0.581 | 6.80E-07 | DC | MT1X         |
| TMEM54.1  | 4.86E-11 | -0.46275 | 0.005 | 0.198 | 7.26E-07 | DC | TMEM54       |
| S100Z     | 5.12E-11 | 0.208774 | 0.064 | 0.011 | 7.65E-07 | DC | S100Z        |
| HPRT1.3   | 5.19E-11 | 0.375466 | 0.417 | 0.227 | 7.76E-07 | DC | HPRT1        |
| SLAIN1.3  | 5.29E-11 | -0.59417 | 0.011 | 0.206 | 7.91E-07 | DC | SLAIN1       |
| SCOC.2    | 5.32E-11 | -0.52564 | 0.171 | 0.418 | 7.95E-07 | DC | SCOC         |



|           |          |          |       |       |          |    |               |
|-----------|----------|----------|-------|-------|----------|----|---------------|
| Clorf122  | 5.46E-11 | -0.54577 | 0.251 | 0.492 | 8.16E-07 | DC | Clorf122      |
| PRKCD.3   | 5.55E-11 | 0.340873 | 0.209 | 0.078 | 8.30E-07 | DC | PRKCD         |
| MSR1.3    | 5.90E-11 | 0.351703 | 0.374 | 0.177 | 8.82E-07 | DC | MSR1          |
| FOXN3.3   | 5.99E-11 | 0.378953 | 0.439 | 0.252 | 8.95E-07 | DC | FOXN3         |
| ASCL1.2   | 6.37E-11 | -0.61918 | 0     | 0.189 | 9.53E-07 | DC | ASCL1         |
| WBP1L.3   | 6.54E-11 | 0.377371 | 0.251 | 0.107 | 9.78E-07 | DC | WBP1L         |
| RUFY3.2   | 6.57E-11 | -0.51694 | 0.08  | 0.309 | 9.82E-07 | DC | RUFY3         |
| KLHL6.3   | 6.67E-11 | 0.271698 | 0.155 | 0.049 | 9.97E-07 | DC | KLHL6         |
| NAALADL1  | 6.82E-11 | 0.284256 | 0.08  | 0.017 | 1.02E-06 | DC | NAALADL1      |
| KIF1B.2   | 7.30E-11 | -0.53935 | 0.075 | 0.297 | 1.09E-06 | DC | KIF1B         |
| TMEM106B  | 7.32E-11 | -0.55963 | 0.102 | 0.334 | 1.09E-06 | DC | TMEM106B      |
| TNFSF14   | 7.38E-11 | 0.197915 | 0.059 | 0.01  | 1.10E-06 | DC | TNFSF14       |
| ANKRD44.2 | 7.61E-11 | 0.265414 | 0.235 | 0.093 | 1.14E-06 | DC | ANKRD44       |
| SOCS3.2   | 7.87E-11 | 0.360296 | 0.556 | 0.345 | 1.18E-06 | DC | SOCS3         |
| KIAA0513  | 8.29E-11 | 0.37195  | 0.139 | 0.043 | 1.24E-06 | DC | KIAA0513      |
| NIPAL2    | 8.34E-11 | 0.249587 | 0.07  | 0.013 | 1.25E-06 | DC | NIPAL2        |
| MXD1.2    | 8.38E-11 | 0.416789 | 0.278 | 0.126 | 1.25E-06 | DC | MXD1          |
| PSME1.2   | 8.61E-11 | 0.203661 | 0.781 | 0.58  | 1.29E-06 | DC | PSME1         |
| GALNT3    | 8.84E-11 | 0.170154 | 0.043 | 0.006 | 1.32E-06 | DC | GALNT3        |
| F3.3      | 9.12E-11 | -0.5585  | 0.005 | 0.194 | 1.36E-06 | DC | F3            |
| PICK1.2   | 9.25E-11 | 0.404289 | 0.214 | 0.086 | 1.38E-06 | DC | PICK1         |
| S100A9.3  | 9.37E-11 | 0.397255 | 0.417 | 0.221 | 1.40E-06 | DC | S100A9        |
| NDFIP2.1  | 9.51E-11 | -0.48657 | 0.005 | 0.195 | 1.42E-06 | DC | NDFIP2        |
| PNRC1.3   | 9.96E-11 | 0.318687 | 0.706 | 0.537 | 1.49E-06 | DC | PNRC1         |
| PSRC1.1   | 9.97E-11 | -0.6052  | 0.053 | 0.267 | 1.49E-06 | DC | PSRC1         |
| MYD88.1   | 1.01E-10 | 0.460848 | 0.273 | 0.128 | 1.52E-06 | DC | MYD88         |
| PABPC3    | 1.02E-10 | 0.250548 | 0.096 | 0.023 | 1.53E-06 | DC | PABPC3        |
| ID4.2     | 1.03E-10 | -0.62491 | 0.021 | 0.218 | 1.53E-06 | DC | ID4           |
| RP11-620J | 1.07E-10 | -0.64613 | 0.059 | 0.273 | 1.60E-06 | DC | RP11-620J15.3 |
| RP11-553L | 1.09E-10 | -0.47322 | 0.027 | 0.229 | 1.63E-06 | DC | RP11-553L6.5  |
| C1QA.3    | 1.09E-10 | 0.224199 | 0.824 | 0.533 | 1.63E-06 | DC | C1QA          |
| MARCH1.3  | 1.10E-10 | 0.367676 | 0.374 | 0.187 | 1.64E-06 | DC | 1-Mar         |
| NFKBIZ.3  | 1.11E-10 | 0.402809 | 0.342 | 0.172 | 1.66E-06 | DC | NFKBIZ        |
| SEMA4A.3  | 1.12E-10 | 0.329533 | 0.15  | 0.048 | 1.67E-06 | DC | SEMA4A        |
| PSMB10.3  | 1.12E-10 | 0.414196 | 0.444 | 0.252 | 1.67E-06 | DC | PSMB10        |
| DKK3.1    | 1.12E-10 | -0.47449 | 0.011 | 0.203 | 1.68E-06 | DC | DKK3          |
| RDX.2     | 1.14E-10 | -0.48645 | 0.251 | 0.494 | 1.70E-06 | DC | RDX           |
| APO01055. | 1.15E-10 | 0.318455 | 0.209 | 0.078 | 1.72E-06 | DC | APO01055.6    |
| JAM2.3    | 1.15E-10 | -0.54386 | 0.043 | 0.256 | 1.72E-06 | DC | JAM2          |
| MRFAP1.2  | 1.15E-10 | -0.46016 | 0.481 | 0.674 | 1.72E-06 | DC | MRFAP1        |
| PCDH17.1  | 1.20E-10 | -0.47531 | 0.005 | 0.194 | 1.79E-06 | DC | PCDH17        |
| MAPK8IP1. | 1.21E-10 | -0.49417 | 0.005 | 0.194 | 1.80E-06 | DC | MAPK8IP1      |
| SIGLEC7.3 | 1.21E-10 | 0.329679 | 0.198 | 0.072 | 1.81E-06 | DC | SIGLEC7       |
| CSF2RB.2  | 1.24E-10 | 0.220316 | 0.096 | 0.023 | 1.85E-06 | DC | CSF2RB        |
| RGMA.2    | 1.28E-10 | -0.50216 | 0.011 | 0.203 | 1.92E-06 | DC | RGMA          |
| BCAN.3    | 1.40E-10 | -0.78164 | 0.07  | 0.279 | 2.10E-06 | DC | BCAN          |
| HAUS4.3   | 1.43E-10 | 0.389621 | 0.171 | 0.059 | 2.14E-06 | DC | HAUS4         |
| MYO6.1    | 1.44E-10 | -0.49759 | 0.027 | 0.228 | 2.15E-06 | DC | MYO6          |
| GAMT.3    | 1.45E-10 | -0.46512 | 0.075 | 0.303 | 2.17E-06 | DC | GAMT          |
| TAGLN3.2  | 1.47E-10 | -0.65207 | 0.005 | 0.191 | 2.20E-06 | DC | TAGLN3        |
| TTLL7.3   | 1.48E-10 | -0.45715 | 0.032 | 0.241 | 2.21E-06 | DC | TTLL7         |

|             |           |           |        |        |           |    |                |
|-------------|-----------|-----------|--------|--------|-----------|----|----------------|
| MAGEF1. 2   | 1. 50E-10 | -0. 4873  | 0. 128 | 0. 367 | 2. 25E-06 | DC | MAGEF1         |
| MAGI1. 3    | 1. 51E-10 | -0. 52145 | 0. 011 | 0. 2   | 2. 26E-06 | DC | MAGI1          |
| HBA2. 2     | 1. 64E-10 | 0. 312234 | 0. 369 | 0. 195 | 2. 45E-06 | DC | HBA2           |
| CXCL2. 1    | 1. 66E-10 | 0. 342139 | 0. 219 | 0. 084 | 2. 48E-06 | DC | CXCL2          |
| DDOST. 1    | 1. 66E-10 | 0. 313004 | 0. 631 | 0. 462 | 2. 48E-06 | DC | DDOST          |
| FUOM. 3     | 1. 67E-10 | 0. 383427 | 0. 299 | 0. 138 | 2. 50E-06 | DC | FUOM           |
| HEPN1. 2    | 1. 71E-10 | -0. 64999 | 0. 016 | 0. 207 | 2. 56E-06 | DC | HEPN1          |
| H2AFJ. 3    | 1. 74E-10 | 0. 400672 | 0. 439 | 0. 256 | 2. 60E-06 | DC | H2AFJ          |
| RP11-442H   | 1. 83E-10 | 0. 249679 | 0. 059 | 0. 01  | 2. 73E-06 | DC | RP11-442H21. 2 |
| MEX3A. 2    | 1. 84E-10 | -0. 49438 | 0      | 0. 181 | 2. 75E-06 | DC | MEX3A          |
| PICALM. 3   | 1. 84E-10 | 0. 434819 | 0. 455 | 0. 278 | 2. 76E-06 | DC | PICALM         |
| WASF2. 3    | 1. 85E-10 | 0. 290684 | 0. 626 | 0. 435 | 2. 77E-06 | DC | WASF2          |
| TET2. 2     | 1. 87E-10 | 0. 387387 | 0. 214 | 0. 086 | 2. 79E-06 | DC | TET2           |
| GNGT2. 3    | 1. 89E-10 | 0. 30727  | 0. 155 | 0. 051 | 2. 82E-06 | DC | GNGT2          |
| DEXI. 1     | 1. 89E-10 | -0. 4249  | 0. 016 | 0. 21  | 2. 82E-06 | DC | DEXI           |
| PSAT1. 2    | 1. 91E-10 | -0. 57548 | 0. 016 | 0. 206 | 2. 85E-06 | DC | PSAT1          |
| FMNL3. 3    | 1. 95E-10 | 0. 3811   | 0. 198 | 0. 075 | 2. 91E-06 | DC | FMNL3          |
| KNOP1. 2    | 2. 14E-10 | -0. 50264 | 0. 053 | 0. 263 | 3. 20E-06 | DC | KNOP1          |
| EFEMP2. 1   | 2. 24E-10 | -0. 47557 | 0. 021 | 0. 217 | 3. 35E-06 | DC | EFEMP2         |
| PIP4K2A. 3  | 2. 24E-10 | 0. 378191 | 0. 289 | 0. 135 | 3. 35E-06 | DC | PIP4K2A        |
| MGAT4A. 3   | 2. 47E-10 | 0. 336258 | 0. 417 | 0. 217 | 3. 70E-06 | DC | MGAT4A         |
| TM7SF2. 2   | 2. 65E-10 | -0. 44325 | 0. 032 | 0. 234 | 3. 96E-06 | DC | TM7SF2         |
| CD7. 2      | 2. 65E-10 | 0. 194681 | 0. 139 | 0. 042 | 3. 96E-06 | DC | CD7            |
| TRAF4. 2    | 2. 71E-10 | -0. 44401 | 0. 059 | 0. 272 | 4. 05E-06 | DC | TRAF4          |
| CLU. 3      | 2. 72E-10 | -0. 62948 | 0. 69  | 0. 784 | 4. 07E-06 | DC | CLU            |
| VGLL4. 1    | 2. 77E-10 | -0. 47715 | 0. 096 | 0. 321 | 4. 13E-06 | DC | VGLL4          |
| S100A8. 3   | 2. 80E-10 | 0. 372642 | 0. 364 | 0. 182 | 4. 18E-06 | DC | S100A8         |
| NAMPT. 3    | 2. 83E-10 | 0. 145918 | 0. 674 | 0. 434 | 4. 22E-06 | DC | NAMPT          |
| PPIC. 1     | 2. 88E-10 | -0. 50654 | 0. 005 | 0. 186 | 4. 30E-06 | DC | PPIC           |
| RAMP1. 2    | 2. 95E-10 | -0. 81032 | 0. 193 | 0. 415 | 4. 40E-06 | DC | RAMP1          |
| PAFAH1B3. 3 | 3. 06E-10 | -0. 46775 | 0. 187 | 0. 428 | 4. 57E-06 | DC | PAFAH1B3       |
| CHD1. 3     | 3. 18E-10 | 0. 471152 | 0. 444 | 0. 29  | 4. 75E-06 | DC | CHD1           |
| SV2A. 1     | 3. 25E-10 | -0. 42486 | 0. 016 | 0. 205 | 4. 85E-06 | DC | SV2A           |
| AK1. 1      | 3. 37E-10 | -0. 51035 | 0. 107 | 0. 339 | 5. 04E-06 | DC | AK1            |
| IL15. 1     | 3. 54E-10 | 0. 261129 | 0. 123 | 0. 036 | 5. 29E-06 | DC | IL15           |
| CRYAB. 3    | 3. 55E-10 | -0. 95487 | 0. 289 | 0. 503 | 5. 31E-06 | DC | CRYAB          |
| KMO         | 3. 59E-10 | 0. 2157   | 0. 08  | 0. 018 | 5. 36E-06 | DC | KMO            |
| CCDC57. 3   | 3. 67E-10 | 0. 424186 | 0. 241 | 0. 105 | 5. 49E-06 | DC | CCDC57         |
| CMTM3. 3    | 3. 78E-10 | 0. 400051 | 0. 487 | 0. 321 | 5. 65E-06 | DC | CMTM3          |
| NRN1. 1     | 3. 91E-10 | -0. 54447 | 0. 048 | 0. 257 | 5. 84E-06 | DC | NRN1           |
| PPP2R2B. 2  | 4. 07E-10 | -0. 53098 | 0. 027 | 0. 222 | 6. 09E-06 | DC | PPP2R2B        |
| HRAS. 3     | 4. 11E-10 | -0. 4584  | 0. 08  | 0. 297 | 6. 14E-06 | DC | HRAS           |
| PVRL2. 3    | 4. 14E-10 | 0. 458441 | 0. 401 | 0. 241 | 6. 19E-06 | DC | PVRL2          |
| MYADM. 2    | 4. 22E-10 | 0. 371177 | 0. 353 | 0. 19  | 6. 31E-06 | DC | MYADM          |
| RP11-108M   | 4. 31E-10 | 0. 374172 | 0. 235 | 0. 1   | 6. 45E-06 | DC | RP11-108M9. 4  |
| ZFAND5. 3   | 4. 61E-10 | 0. 358144 | 0. 604 | 0. 46  | 6. 89E-06 | DC | ZFAND5         |
| DSEL. 3     | 4. 74E-10 | -0. 50474 | 0. 032 | 0. 228 | 7. 08E-06 | DC | DSEL           |
| TGFB1. 3    | 4. 80E-10 | 0. 371715 | 0. 417 | 0. 242 | 7. 17E-06 | DC | TGFB1          |
| PSIP1. 3    | 4. 84E-10 | -0. 4752  | 0. 155 | 0. 387 | 7. 23E-06 | DC | PSIP1          |
| EIF3H. 1    | 4. 88E-10 | 0. 223895 | 0. 813 | 0. 666 | 7. 29E-06 | DC | EIF3H          |
| EIF3D. 2    | 4. 93E-10 | 0. 300091 | 0. 636 | 0. 474 | 7. 37E-06 | DC | EIF3D          |

|             |           |           |        |        |           |    |                |
|-------------|-----------|-----------|--------|--------|-----------|----|----------------|
| KBTBD8. 1   | 4. 96E-10 | 0. 24967  | 0. 107 | 0. 029 | 7. 41E-06 | DC | KBTBD8         |
| GTF3A. 3    | 4. 97E-10 | 0. 317336 | 0. 652 | 0. 502 | 7. 43E-06 | DC | GTF3A          |
| TAX1BP3. 2  | 4. 98E-10 | 0. 374594 | 0. 545 | 0. 379 | 7. 45E-06 | DC | TAX1BP3        |
| POP7. 2     | 5. 05E-10 | -0. 48137 | 0. 16  | 0. 398 | 7. 55E-06 | DC | POP7           |
| MAP4K4. 1   | 5. 14E-10 | -0. 46317 | 0. 048 | 0. 251 | 7. 67E-06 | DC | MAP4K4         |
| ITGB8. 1    | 5. 28E-10 | -0. 43667 | 0. 043 | 0. 243 | 7. 89E-06 | DC | ITGB8          |
| NANS. 3     | 5. 32E-10 | 0. 316099 | 0. 551 | 0. 357 | 7. 95E-06 | DC | NANS           |
| CSDE1. 3    | 5. 41E-10 | 0. 247336 | 0. 749 | 0. 599 | 8. 08E-06 | DC | CSDE1          |
| CD69. 3     | 5. 52E-10 | 0. 248845 | 0. 332 | 0. 15  | 8. 24E-06 | DC | CD69           |
| GLIPR2. 2   | 5. 67E-10 | 0. 425886 | 0. 433 | 0. 266 | 8. 47E-06 | DC | GLIPR2         |
| KHDRBS3. 3  | 5. 76E-10 | -0. 47139 | 0. 027 | 0. 218 | 8. 61E-06 | DC | KHDRBS3        |
| PPIAL4G     | 5. 81E-10 | 0. 123438 | 0. 043 | 0. 006 | 8. 68E-06 | DC | PPIAL4G        |
| TCEA2. 2    | 5. 84E-10 | -0. 51319 | 0. 144 | 0. 372 | 8. 72E-06 | DC | TCEA2          |
| APC. 3      | 5. 94E-10 | -0. 4556  | 0. 027 | 0. 216 | 8. 87E-06 | DC | APC            |
| DCK. 3      | 5. 99E-10 | 0. 387488 | 0. 433 | 0. 263 | 8. 96E-06 | DC | DCK            |
| DYNLL1. 2   | 6. 02E-10 | -0. 30595 | 0. 824 | 0. 836 | 9. 00E-06 | DC | DYNLL1         |
| PJA2. 2     | 6. 12E-10 | -0. 48    | 0. 118 | 0. 339 | 9. 15E-06 | DC | PJA2           |
| TRIM9. 2    | 6. 28E-10 | -0. 42947 | 0. 037 | 0. 236 | 9. 38E-06 | DC | TRIM9          |
| ANXA7. 2    | 6. 36E-10 | 0. 365976 | 0. 508 | 0. 336 | 9. 50E-06 | DC | ANXA7          |
| HSD11B1L. 6 | 5. 2E-10  | -0. 417   | 0. 021 | 0. 208 | 9. 74E-06 | DC | HSD11B1L       |
| OLIG2. 2    | 6. 59E-10 | -0. 57873 | 0. 005 | 0. 181 | 9. 85E-06 | DC | OLIG2          |
| SLC7A5. 3   | 6. 60E-10 | 0. 405079 | 0. 289 | 0. 136 | 9. 86E-06 | DC | SLC7A5         |
| PLS3. 2     | 6. 88E-10 | -0. 51839 | 0. 032 | 0. 224 | 1. 03E-05 | DC | PLS3           |
| C10orf11. 6 | 9. 5E-10  | 0. 325884 | 0. 235 | 0. 099 | 1. 04E-05 | DC | C10orf11       |
| EMB. 3      | 7. 00E-10 | 0. 362092 | 0. 193 | 0. 073 | 1. 05E-05 | DC | EMB            |
| GGA2. 3     | 7. 14E-10 | 0. 334955 | 0. 289 | 0. 137 | 1. 07E-05 | DC | GGA2           |
| SP110. 2    | 7. 36E-10 | 0. 330733 | 0. 364 | 0. 195 | 1. 10E-05 | DC | SP110          |
| SDC3. 1     | 7. 98E-10 | -0. 50087 | 0. 016 | 0. 199 | 1. 19E-05 | DC | SDC3           |
| SOX8. 3     | 8. 05E-10 | -0. 53047 | 0. 005 | 0. 18  | 1. 20E-05 | DC | SOX8           |
| SCRG1. 2    | 8. 12E-10 | -0. 66874 | 0. 139 | 0. 349 | 1. 21E-05 | DC | SCRG1          |
| TMEM39A. 1  | 8. 26E-10 | 0. 361618 | 0. 214 | 0. 089 | 1. 23E-05 | DC | TMEM39A        |
| CNDP2. 3    | 8. 69E-10 | 0. 310794 | 0. 588 | 0. 428 | 1. 30E-05 | DC | CNDP2          |
| FARP1. 1    | 8. 76E-10 | -0. 43473 | 0. 011 | 0. 189 | 1. 31E-05 | DC | FARP1          |
| RNF24       | 8. 77E-10 | -0. 42673 | 0. 048 | 0. 252 | 1. 31E-05 | DC | RNF24          |
| ALCAM. 3    | 8. 78E-10 | 0. 409019 | 0. 353 | 0. 193 | 1. 31E-05 | DC | ALCAM          |
| ACY3        | 8. 79E-10 | 0. 26383  | 0. 08  | 0. 018 | 1. 31E-05 | DC | ACY3           |
| FCGR3A. 3   | 8. 81E-10 | 0. 255161 | 0. 61  | 0. 337 | 1. 32E-05 | DC | FCGR3A         |
| MYO10. 2    | 8. 92E-10 | -0. 47165 | 0. 016 | 0. 197 | 1. 33E-05 | DC | MYO10          |
| SPAG16. 3   | 9. 00E-10 | -0. 49747 | 0. 086 | 0. 299 | 1. 34E-05 | DC | SPAG16         |
| RP3-47704   | 9. 10E-10 | 0. 277673 | 0. 102 | 0. 027 | 1. 36E-05 | DC | RP3-47704. 14  |
| IP6K2. 2    | 9. 39E-10 | -0. 53335 | 0. 203 | 0. 438 | 1. 40E-05 | DC | IP6K2          |
| MAPK10. 2   | 9. 62E-10 | -0. 45435 | 0. 016 | 0. 198 | 1. 44E-05 | DC | MAPK10         |
| GIT2. 3     | 9. 80E-10 | 0. 37857  | 0. 299 | 0. 151 | 1. 46E-05 | DC | GIT2           |
| RP11-110C   | 9. 82E-10 | 0. 19893  | 0. 07  | 0. 014 | 1. 47E-05 | DC | RP11-1100L3. 8 |
| BMP7. 3     | 9. 90E-10 | -0. 43038 | 0      | 0. 168 | 1. 48E-05 | DC | BMP7           |
| PTPRA. 2    | 1. 02E-09 | -0. 45786 | 0. 134 | 0. 358 | 1. 52E-05 | DC | PTPRA          |
| HNRNPA1L2   | 1. 04E-09 | 0. 410194 | 0. 353 | 0. 198 | 1. 55E-05 | DC | HNRNPA1L2      |
| PTRF. 3     | 1. 09E-09 | -0. 45377 | 0. 011 | 0. 188 | 1. 63E-05 | DC | PTRF           |
| PNMA1. 2    | 1. 11E-09 | -0. 43683 | 0. 075 | 0. 287 | 1. 65E-05 | DC | PNMA1          |
| ATG3. 3     | 1. 12E-09 | 0. 337392 | 0. 524 | 0. 375 | 1. 67E-05 | DC | ATG3           |
| IL1RN. 3    | 1. 13E-09 | 0. 346127 | 0. 193 | 0. 073 | 1. 69E-05 | DC | IL1RN          |

|            |           |           |        |        |           |    |           |
|------------|-----------|-----------|--------|--------|-----------|----|-----------|
| LARP6. 2   | 1. 15E-09 | -0. 48184 | 0. 016 | 0. 196 | 1. 71E-05 | DC | LARP6     |
| PPP2CB. 3  | 1. 15E-09 | -0. 46748 | 0. 091 | 0. 3   | 1. 72E-05 | DC | PPP2CB    |
| PGAP1. 2   | 1. 21E-09 | -0. 42233 | 0. 011 | 0. 186 | 1. 80E-05 | DC | PGAP1     |
| JOSD1. 3   | 1. 24E-09 | 0. 462465 | 0. 299 | 0. 155 | 1. 85E-05 | DC | JOSD1     |
| HMGA1. 3   | 1. 27E-09 | 0. 389129 | 0. 497 | 0. 343 | 1. 90E-05 | DC | HMGA1     |
| EIF4A3. 3  | 1. 28E-09 | 0. 370201 | 0. 594 | 0. 447 | 1. 91E-05 | DC | EIF4A3    |
| NME1-NME2  | 1. 33E-09 | 0. 364419 | 0. 214 | 0. 092 | 1. 99E-05 | DC | NME1-NME2 |
| BST2. 2    | 1. 35E-09 | 0. 1911   | 0. 781 | 0. 481 | 2. 01E-05 | DC | BST2      |
| SYNE2. 3   | 1. 35E-09 | -0. 43096 | 0. 005 | 0. 177 | 2. 02E-05 | DC | SYNE2     |
| RAC3. 2    | 1. 35E-09 | -0. 3885  | 0. 011 | 0. 186 | 2. 02E-05 | DC | RAC3      |
| MS4A4E     | 1. 39E-09 | 0. 118477 | 0. 021 | 0. 002 | 2. 08E-05 | DC | MS4A4E    |
| WLS. 1     | 1. 39E-09 | -0. 45561 | 0. 032 | 0. 217 | 2. 08E-05 | DC | WLS       |
| DNAJB2. 2  | 1. 39E-09 | -0. 42746 | 0. 096 | 0. 318 | 2. 08E-05 | DC | DNAJB2    |
| STMN2. 3   | 1. 40E-09 | -0. 94044 | 0. 016 | 0. 189 | 2. 09E-05 | DC | STMN2     |
| VPS26A. 2  | 1. 41E-09 | 0. 407135 | 0. 401 | 0. 24  | 2. 10E-05 | DC | VPS26A    |
| MFNG. 3    | 1. 42E-09 | 0. 271462 | 0. 278 | 0. 124 | 2. 13E-05 | DC | MFNG      |
| SLC8A1. 2  | 1. 53E-09 | 0. 360108 | 0. 289 | 0. 142 | 2. 28E-05 | DC | SLC8A1    |
| LYPD1. 1   | 1. 60E-09 | -0. 52634 | 0. 021 | 0. 198 | 2. 39E-05 | DC | LYPD1     |
| FAM92A1. 1 | 1. 60E-09 | -0. 40729 | 0. 021 | 0. 204 | 2. 40E-05 | DC | FAM92A1   |
| WDR1. 2    | 1. 61E-09 | 0. 338847 | 0. 567 | 0. 412 | 2. 40E-05 | DC | WDR1      |
| EZR. 3     | 1. 62E-09 | 0. 356388 | 0. 503 | 0. 34  | 2. 43E-05 | DC | EZR       |
| PRRX1. 3   | 1. 73E-09 | -0. 44713 | 0. 005 | 0. 174 | 2. 58E-05 | DC | PRRX1     |
| TAOK3. 2   | 1. 73E-09 | 0. 336674 | 0. 54  | 0. 384 | 2. 58E-05 | DC | TAOK3     |
| ENC1. 3    | 1. 76E-09 | -0. 50159 | 0. 037 | 0. 227 | 2. 62E-05 | DC | ENC1      |
| LRRC8C. 3  | 1. 76E-09 | 0. 275735 | 0. 16  | 0. 057 | 2. 63E-05 | DC | LRRC8C    |
| AP2B1. 2   | 1. 77E-09 | -0. 40342 | 0. 118 | 0. 344 | 2. 64E-05 | DC | AP2B1     |
| TRIM47. 3  | 1. 78E-09 | -0. 44017 | 0. 011 | 0. 182 | 2. 65E-05 | DC | TRIM47    |
| RTN3. 1    | 1. 85E-09 | -0. 41898 | 0. 465 | 0. 658 | 2. 76E-05 | DC | RTN3      |
| KLHL23. 3  | 1. 89E-09 | -0. 44206 | 0      | 0. 164 | 2. 82E-05 | DC | KLHL23    |
| NAT14      | 1. 90E-09 | -0. 38616 | 0. 011 | 0. 182 | 2. 84E-05 | DC | NAT14     |
| CFD. 3     | 1. 91E-09 | 0. 33062  | 0. 321 | 0. 153 | 2. 85E-05 | DC | CFD       |
| FDX1L. 1   | 1. 92E-09 | -0. 4305  | 0. 059 | 0. 262 | 2. 88E-05 | DC | FDX1L     |
| CADM2. 2   | 1. 97E-09 | -0. 51036 | 0. 016 | 0. 191 | 2. 95E-05 | DC | CADM2     |
| CDC42. 2   | 1. 99E-09 | 0. 197999 | 0. 77  | 0. 618 | 2. 97E-05 | DC | CDC42     |
| FLII. 3    | 2. 00E-09 | 0. 447441 | 0. 332 | 0. 185 | 2. 99E-05 | DC | FLII      |
| SH3BGRL3   | 2. 01E-09 | 0. 149016 | 0. 936 | 0. 775 | 3. 01E-05 | DC | SH3BGRL3  |
| NIPSNAP3B  | 2. 02E-09 | 0. 157806 | 0. 07  | 0. 015 | 3. 02E-05 | DC | NIPSNAP3B |
| TJP1. 1    | 2. 02E-09 | -0. 38089 | 0. 011 | 0. 183 | 3. 02E-05 | DC | TJP1      |
| CRNDE      | 2. 05E-09 | -0. 41134 | 0. 011 | 0. 182 | 3. 07E-05 | DC | CRNDE     |
| TRAM1. 3   | 2. 08E-09 | 0. 305027 | 0. 599 | 0. 431 | 3. 10E-05 | DC | TRAM1     |
| F2R. 3     | 2. 08E-09 | -0. 40433 | 0. 005 | 0. 171 | 3. 11E-05 | DC | F2R       |
| FLI1. 3    | 2. 09E-09 | 0. 222401 | 0. 15  | 0. 05  | 3. 12E-05 | DC | FLI1      |
| OCIAD2. 2  | 2. 16E-09 | -0. 90305 | 0. 209 | 0. 39  | 3. 23E-05 | DC | OCIAD2    |
| PCBP2. 2   | 2. 23E-09 | 0. 238202 | 0. 813 | 0. 66  | 3. 33E-05 | DC | PCBP2     |
| APBA2. 3   | 2. 25E-09 | -0. 40497 | 0. 027 | 0. 21  | 3. 36E-05 | DC | APBA2     |
| BEX2. 2    | 2. 28E-09 | -0. 67629 | 0. 07  | 0. 26  | 3. 40E-05 | DC | BEX2      |
| GADD45G. 2 | 2. 31E-09 | -0. 58716 | 0. 064 | 0. 258 | 3. 45E-05 | DC | GADD45G   |
| MAPRE3. 1  | 2. 43E-09 | -0. 40208 | 0. 011 | 0. 182 | 3. 63E-05 | DC | MAPRE3    |
| KIF3A. 1   | 2. 44E-09 | -0. 4899  | 0. 048 | 0. 237 | 3. 64E-05 | DC | KIF3A     |
| MAGED2. 3  | 2. 45E-09 | -0. 46026 | 0. 278 | 0. 512 | 3. 67E-05 | DC | MAGED2    |
| BCHE. 1    | 2. 45E-09 | -0. 47395 | 0. 016 | 0. 189 | 3. 67E-05 | DC | BCHE      |

|             |           |           |        |        |           |    |               |
|-------------|-----------|-----------|--------|--------|-----------|----|---------------|
| IGFBP5. 3   | 2. 50E-09 | -0. 78239 | 0. 075 | 0. 271 | 3. 74E-05 | DC | IGFBP5        |
| CAMK2D. 1   | 2. 56E-09 | -0. 46913 | 0. 053 | 0. 247 | 3. 83E-05 | DC | CAMK2D        |
| DCLK2. 3    | 2. 58E-09 | -0. 41532 | 0. 021 | 0. 199 | 3. 85E-05 | DC | DCLK2         |
| RP11-138A   | 2. 65E-09 | 0. 325285 | 0. 225 | 0. 097 | 3. 95E-05 | DC | RP11-138A9. 2 |
| RBPJ. 3     | 2. 65E-09 | 0. 339885 | 0. 615 | 0. 467 | 3. 96E-05 | DC | RBPJ          |
| GRIA3. 2    | 2. 71E-09 | -0. 39099 | 0. 005 | 0. 171 | 4. 04E-05 | DC | GRIA3         |
| ATP6AP1. 3  | 2. 77E-09 | 0. 270884 | 0. 642 | 0. 49  | 4. 13E-05 | DC | ATP6AP1       |
| CD72. 2     | 2. 86E-09 | 0. 308408 | 0. 144 | 0. 049 | 4. 27E-05 | DC | CD72          |
| GHRL. 3     | 2. 90E-09 | 0. 278773 | 0. 155 | 0. 055 | 4. 33E-05 | DC | GHRL          |
| SPARCL1. 2  | 2. 92E-09 | -0. 78764 | 0. 15  | 0. 349 | 4. 36E-05 | DC | SPARCL1       |
| RNF180. 2   | 2. 93E-09 | -0. 40351 | 0. 005 | 0. 17  | 4. 37E-05 | DC | RNF180        |
| RP11-161M   | 2. 95E-09 | -0. 51959 | 0. 005 | 0. 169 | 4. 41E-05 | DC | RP11-161M6. 2 |
| ZFP36L2. 3  | 2. 98E-09 | 0. 26655  | 0. 69  | 0. 513 | 4. 45E-05 | DC | ZFP36L2       |
| ARRDC1. 3   | 3. 00E-09 | 0. 43143  | 0. 267 | 0. 132 | 4. 48E-05 | DC | ARRDC1        |
| RNASE2. 3   | 3. 00E-09 | 0. 342974 | 0. 321 | 0. 155 | 4. 48E-05 | DC | RNASE2        |
| RCN2. 2     | 3. 06E-09 | -0. 43916 | 0. 262 | 0. 47  | 4. 58E-05 | DC | RCN2          |
| FAIM2. 2    | 3. 07E-09 | -0. 55197 | 0. 021 | 0. 194 | 4. 58E-05 | DC | FAIM2         |
| RAB31. 3    | 3. 07E-09 | 0. 315069 | 0. 615 | 0. 457 | 4. 59E-05 | DC | RAB31         |
| TMEM9. 3    | 3. 08E-09 | -0. 48817 | 0. 144 | 0. 371 | 4. 60E-05 | DC | TMEM9         |
| CBS. 2      | 3. 08E-09 | -0. 38192 | 0      | 0. 16  | 4. 61E-05 | DC | CBS           |
| KLHL7. 1    | 3. 14E-09 | -0. 45407 | 0. 08  | 0. 282 | 4. 70E-05 | DC | KLHL7         |
| TMEM14A. 2  | 3. 24E-09 | -0. 49889 | 0. 112 | 0. 327 | 4. 85E-05 | DC | TMEM14A       |
| IDH2. 3     | 3. 27E-09 | 0. 321015 | 0. 583 | 0. 424 | 4. 89E-05 | DC | IDH2          |
| SNCA. 3     | 3. 32E-09 | 0. 235212 | 0. 305 | 0. 141 | 4. 96E-05 | DC | SNCA          |
| EIF2S3. 1   | 3. 35E-09 | 0. 409588 | 0. 444 | 0. 292 | 5. 01E-05 | DC | EIF2S3        |
| C3orf14. 1  | 3. 38E-09 | -0. 49846 | 0. 07  | 0. 268 | 5. 05E-05 | DC | C3orf14       |
| MGST2. 3    | 3. 39E-09 | 0. 239582 | 0. 449 | 0. 25  | 5. 07E-05 | DC | MGST2         |
| TUBB. 1     | 3. 44E-09 | -0. 34581 | 0. 722 | 0. 771 | 5. 14E-05 | DC | TUBB          |
| MORN2. 3    | 3. 46E-09 | -0. 45415 | 0. 064 | 0. 265 | 5. 18E-05 | DC | MORN2         |
| MYH9. 3     | 3. 48E-09 | 0. 492543 | 0. 337 | 0. 186 | 5. 21E-05 | DC | MYH9          |
| SOCS2. 2    | 3. 49E-09 | -0. 42008 | 0      | 0. 159 | 5. 22E-05 | DC | SOCS2         |
| FOXP1. 1    | 3. 58E-09 | 0. 209898 | 0. 412 | 0. 227 | 5. 35E-05 | DC | FOXP1         |
| SLC39A6. 1  | 3. 65E-09 | -0. 45557 | 0. 118 | 0. 332 | 5. 45E-05 | DC | SLC39A6       |
| MAPKAPK3. 3 | 3. 73E-09 | 0. 406009 | 0. 316 | 0. 168 | 5. 57E-05 | DC | MAPKAPK3      |
| COMMD8. 3   | 3. 74E-09 | 0. 372655 | 0. 38  | 0. 222 | 5. 59E-05 | DC | COMMD8        |
| CD93. 3     | 3. 81E-09 | 0. 319937 | 0. 182 | 0. 069 | 5. 70E-05 | DC | CD93          |
| PHGDH. 2    | 3. 87E-09 | -0. 56185 | 0. 027 | 0. 202 | 5. 78E-05 | DC | PHGDH         |
| FAM213A. 2  | 3. 88E-09 | -0. 48471 | 0. 16  | 0. 386 | 5. 80E-05 | DC | FAM213A       |
| POLR2I. 2   | 3. 91E-09 | -0. 4724  | 0. 326 | 0. 556 | 5. 85E-05 | DC | POLR2I        |
| GPRC5B. 1   | 3. 94E-09 | -0. 48337 | 0. 037 | 0. 222 | 5. 89E-05 | DC | GPRC5B        |
| MVP. 1      | 3. 95E-09 | 0. 389578 | 0. 38  | 0. 223 | 5. 90E-05 | DC | MVP           |
| SH3BP5. 3   | 3. 95E-09 | 0. 446274 | 0. 342 | 0. 199 | 5. 90E-05 | DC | SH3BP5        |
| C8orf4. 2   | 4. 10E-09 | -0. 87445 | 0. 048 | 0. 231 | 6. 12E-05 | DC | C8orf4        |
| ACP5. 3     | 4. 17E-09 | 0. 251422 | 0. 139 | 0. 046 | 6. 23E-05 | DC | ACP5          |
| NRXN1. 2    | 4. 20E-09 | -0. 58528 | 0. 005 | 0. 165 | 6. 28E-05 | DC | NRXN1         |
| PROX1. 2    | 4. 21E-09 | -0. 43114 | 0. 005 | 0. 167 | 6. 28E-05 | DC | PROX1         |
| RAPGEF1. 1  | 4. 23E-09 | 0. 447857 | 0. 246 | 0. 115 | 6. 33E-05 | DC | RAPGEF1       |
| TCEAL2. 1   | 4. 28E-09 | -0. 6276  | 0. 016 | 0. 182 | 6. 39E-05 | DC | TCEAL2        |
| C16orf54. 4 | 4. 29E-09 | 0. 196033 | 0. 07  | 0. 015 | 6. 41E-05 | DC | C16orf54      |
| SAP30. 3    | 4. 29E-09 | 0. 45421  | 0. 38  | 0. 238 | 6. 42E-05 | DC | SAP30         |
| STAC3. 3    | 4. 45E-09 | 0. 380499 | 0. 193 | 0. 077 | 6. 65E-05 | DC | STAC3         |

|            |          |          |       |       |          |    |               |
|------------|----------|----------|-------|-------|----------|----|---------------|
| NRSN2.2    | 4.47E-09 | -0.35826 | 0.005 | 0.167 | 6.68E-05 | DC | NRSN2         |
| MED31      | 4.50E-09 | -0.45184 | 0.037 | 0.219 | 6.72E-05 | DC | MED31         |
| PROCR.2    | 4.51E-09 | 0.291517 | 0.176 | 0.067 | 6.74E-05 | DC | PROCR         |
| C1orf21.3  | 4.54E-09 | -0.44395 | 0.027 | 0.203 | 6.78E-05 | DC | C1orf21       |
| TMEM156.3  | 4.65E-09 | 0.242615 | 0.155 | 0.054 | 6.95E-05 | DC | TMEM156       |
| POU3F3.2   | 4.69E-09 | -0.38889 | 0     | 0.157 | 7.01E-05 | DC | POU3F3        |
| WDR34.1    | 4.70E-09 | -0.41808 | 0.032 | 0.21  | 7.02E-05 | DC | WDR34         |
| SLC04A1.1  | 4.97E-09 | 0.258062 | 0.112 | 0.034 | 7.43E-05 | DC | SLC04A1       |
| OLIG1.3    | 4.98E-09 | -0.63616 | 0.016 | 0.183 | 7.44E-05 | DC | OLIG1         |
| PGK1.1     | 5.01E-09 | 0.143726 | 0.914 | 0.751 | 7.48E-05 | DC | PGK1          |
| TOM1.3     | 5.01E-09 | 0.449206 | 0.299 | 0.158 | 7.49E-05 | DC | TOM1          |
| LHFP.3     | 5.02E-09 | -0.51995 | 0.048 | 0.235 | 7.50E-05 | DC | LHFP          |
| TNRC6C.2   | 5.17E-09 | -0.41217 | 0.011 | 0.174 | 7.72E-05 | DC | TNRC6C        |
| NINJ2.3    | 5.22E-09 | 0.257447 | 0.209 | 0.085 | 7.80E-05 | DC | NINJ2         |
| TMSB15B.2  | 5.30E-09 | -0.41821 | 0.016 | 0.184 | 7.92E-05 | DC | TMSB15B       |
| FOXG1.2    | 5.38E-09 | -0.35166 | 0     | 0.156 | 8.03E-05 | DC | FOXG1         |
| ANKRD22.3  | 5.57E-09 | 0.245925 | 0.171 | 0.063 | 8.33E-05 | DC | ANKRD22       |
| PCGF2.1    | 5.61E-09 | -0.36523 | 0.005 | 0.165 | 8.38E-05 | DC | PCGF2         |
| PLEKHB1.1  | 5.80E-09 | -0.56107 | 0.037 | 0.216 | 8.66E-05 | DC | PLEKHB1       |
| RP11-395G  | 5.90E-09 | -0.45395 | 0.016 | 0.18  | 8.82E-05 | DC | RP11-395G23.3 |
| MAGEH1.2   | 5.97E-09 | -0.48703 | 0.112 | 0.321 | 8.93E-05 | DC | MAGEH1        |
| GRB2.3     | 6.05E-09 | 0.299352 | 0.636 | 0.478 | 9.03E-05 | DC | GRB2          |
| ICAM1.2    | 6.12E-09 | 0.343966 | 0.316 | 0.161 | 9.14E-05 | DC | ICAM1         |
| ENSA.1     | 6.19E-09 | 0.246228 | 0.652 | 0.498 | 9.25E-05 | DC | ENSA          |
| CD164.2    | 6.22E-09 | 0.263112 | 0.652 | 0.488 | 9.30E-05 | DC | CD164         |
| CFL1.2     | 6.33E-09 | -0.18744 | 0.995 | 0.949 | 9.46E-05 | DC | CFL1          |
| ENO2.3     | 6.34E-09 | -0.4581  | 0.086 | 0.287 | 9.48E-05 | DC | ENO2          |
| IMMP1L.2   | 6.40E-09 | -0.4443  | 0.048 | 0.235 | 9.56E-05 | DC | IMMP1L        |
| TNFSF8     | 6.41E-09 | 0.154861 | 0.048 | 0.008 | 9.57E-05 | DC | TNFSF8        |
| ZFHX4.3    | 6.44E-09 | -0.35841 | 0     | 0.154 | 9.62E-05 | DC | ZFHX4         |
| MAP9.1     | 6.44E-09 | -0.40992 | 0.021 | 0.191 | 9.63E-05 | DC | MAP9          |
| COL9A3.3   | 6.48E-09 | -0.53304 | 0.021 | 0.189 | 9.68E-05 | DC | COL9A3        |
| THY1.2     | 6.60E-09 | -0.48155 | 0.064 | 0.259 | 9.86E-05 | DC | THY1          |
| NSG1.3     | 6.61E-09 | -0.6771  | 0.016 | 0.178 | 9.88E-05 | DC | NSG1          |
| GUSB.2     | 6.75E-09 | 0.331562 | 0.433 | 0.269 | 0.000101 | DC | GUSB          |
| DPP6.1     | 6.80E-09 | -0.41006 | 0.005 | 0.164 | 0.000102 | DC | DPP6          |
| NBL1.3     | 6.94E-09 | -0.44596 | 0.016 | 0.181 | 0.000104 | DC | NBL1          |
| DCLK1.1    | 6.97E-09 | -0.40581 | 0     | 0.154 | 0.000104 | DC | DCLK1         |
| JAKMIP2.1  | 7.21E-09 | -0.37885 | 0     | 0.153 | 0.000108 | DC | JAKMIP2       |
| BASP1.3    | 7.36E-09 | 0.394568 | 0.54  | 0.37  | 0.00011  | DC | BASP1         |
| GLTSCR2.3  | 7.37E-09 | 0.254578 | 0.69  | 0.562 | 0.00011  | DC | GLTSCR2       |
| ECHDC3.2   | 7.38E-09 | 0.263743 | 0.107 | 0.032 | 0.00011  | DC | ECHDC3        |
| GMIP.3     | 7.39E-09 | 0.324206 | 0.182 | 0.072 | 0.000111 | DC | GMIP          |
| SCPEP1.2   | 7.46E-09 | 0.273887 | 0.545 | 0.343 | 0.000111 | DC | SCPEP1        |
| NPAS3.3    | 7.70E-09 | -0.39243 | 0.005 | 0.161 | 0.000115 | DC | NPAS3         |
| TCTEX1D2.7 | 7.82E-09 | -0.48264 | 0.048 | 0.23  | 0.000117 | DC | TCTEX1D2      |
| SLC41A2.1  | 7.93E-09 | 0.300939 | 0.128 | 0.044 | 0.000118 | DC | SLC41A2       |
| CTSF.2     | 8.00E-09 | -0.43443 | 0.08  | 0.273 | 0.00012  | DC | CTSF          |
| GOS2.2     | 8.10E-09 | 0.482576 | 0.332 | 0.182 | 0.000121 | DC | GOS2          |
| EIF1.3     | 8.11E-09 | -0.25169 | 1     | 0.974 | 0.000121 | DC | EIF1          |
| RP3-525N1  | 8.25E-09 | -0.46415 | 0     | 0.152 | 0.000123 | DC | RP3-525N10.2  |

|            |          |          |       |       |          |    |               |
|------------|----------|----------|-------|-------|----------|----|---------------|
| ATP8B4.2   | 8.41E-09 | 0.252113 | 0.128 | 0.042 | 0.000126 | DC | ATP8B4        |
| CTXN1.3    | 8.52E-09 | -0.35045 | 0.005 | 0.162 | 0.000127 | DC | CTXN1         |
| AKAP12.3   | 8.52E-09 | -0.44037 | 0.021 | 0.19  | 0.000127 | DC | AKAP12        |
| C9orf72.3  | 8.55E-09 | 0.383925 | 0.289 | 0.148 | 0.000128 | DC | C9orf72       |
| HEXA.2     | 8.57E-09 | 0.298558 | 0.551 | 0.387 | 0.000128 | DC | HEXA          |
| PRR7.3     | 8.58E-09 | -0.35939 | 0.021 | 0.191 | 0.000128 | DC | PRR7          |
| GPNMB.3    | 9.06E-09 | 0.296019 | 0.374 | 0.198 | 0.000135 | DC | GPNMB         |
| TRIB1.2    | 9.28E-09 | 0.370499 | 0.299 | 0.154 | 0.000139 | DC | TRIB1         |
| MXRA7.1    | 9.38E-09 | -0.39232 | 0.011 | 0.17  | 0.00014  | DC | MXRA7         |
| ERP29      | 9.78E-09 | 0.210009 | 0.754 | 0.609 | 0.000146 | DC | ERP29         |
| ARPC1A.3   | 9.78E-09 | -0.43967 | 0.348 | 0.562 | 0.000146 | DC | ARPC1A        |
| OLFM2.1    | 9.87E-09 | -0.50684 | 0.027 | 0.194 | 0.000147 | DC | OLFM2         |
| ZDHHC9.3   | 1.03E-08 | -0.46354 | 0.011 | 0.17  | 0.000155 | DC | ZDHHC9        |
| RP11-443E  | 1.05E-08 | 0.122033 | 0.059 | 0.012 | 0.000157 | DC | RP11-443B7.1  |
| ZNF462.3   | 1.07E-08 | -0.41591 | 0.016 | 0.179 | 0.00016  | DC | ZNF462        |
| MICAL1.3   | 1.08E-08 | 0.367475 | 0.278 | 0.139 | 0.000161 | DC | MICAL1        |
| SEMA6D.3   | 1.09E-08 | -0.4127  | 0.005 | 0.159 | 0.000163 | DC | SEMA6D        |
| FNBP1L.3   | 1.11E-08 | -0.40871 | 0.021 | 0.187 | 0.000166 | DC | FNBP1L        |
| ODC1.2     | 1.11E-08 | -0.4831  | 0.198 | 0.397 | 0.000166 | DC | ODC1          |
| NNT-AS1.2  | 1.12E-08 | -0.40049 | 0.043 | 0.224 | 0.000167 | DC | NNT-AS1       |
| PSD3.2     | 1.13E-08 | -0.39188 | 0.027 | 0.197 | 0.000169 | DC | PSD3          |
| CDC42EP4.1 | 1.14E-08 | -0.46332 | 0.032 | 0.203 | 0.00017  | DC | CDC42EP4      |
| MCTP1      | 1.14E-08 | 0.203296 | 0.08  | 0.02  | 0.000171 | DC | MCTP1         |
| CARD11.2   | 1.14E-08 | 0.203048 | 0.096 | 0.027 | 0.000171 | DC | CARD11        |
| RP11-325F  | 1.19E-08 | 0.129953 | 0.027 | 0.003 | 0.000177 | DC | RP11-325F22.2 |
| GLB1       | 1.21E-08 | 0.357435 | 0.396 | 0.242 | 0.00018  | DC | GLB1          |
| CBX1.2     | 1.21E-08 | -0.37737 | 0.155 | 0.37  | 0.000181 | DC | CBX1          |
| ST3GAL6.3  | 1.22E-08 | 0.289413 | 0.241 | 0.109 | 0.000182 | DC | ST3GAL6       |
| C1R.3      | 1.24E-08 | -0.77011 | 0.043 | 0.218 | 0.000185 | DC | C1R           |
| SOCS1.2    | 1.24E-08 | 0.273276 | 0.144 | 0.051 | 0.000186 | DC | SOCS1         |
| SUPT4H1    | 1.25E-08 | 0.280489 | 0.636 | 0.492 | 0.000186 | DC | SUPT4H1       |
| OSBPL6     | 1.28E-08 | -0.3345  | 0.005 | 0.159 | 0.000192 | DC | OSBPL6        |
| ARPC4.3    | 1.34E-08 | 0.255327 | 0.631 | 0.512 | 0.0002   | DC | ARPC4         |
| ACSL4.3    | 1.39E-08 | 0.334481 | 0.193 | 0.082 | 0.000208 | DC | ACSL4         |
| C4orf32    | 1.40E-08 | 0.17998  | 0.07  | 0.016 | 0.000209 | DC | C4orf32       |
| BHLHE40.2  | 1.42E-08 | 0.376376 | 0.337 | 0.191 | 0.000212 | DC | BHLHE40       |
| DPYSL4.3   | 1.44E-08 | -0.36665 | 0.005 | 0.157 | 0.000216 | DC | DPYSL4        |
| FN1.1      | 1.45E-08 | 0.512734 | 0.289 | 0.152 | 0.000217 | DC | FN1           |
| ATF3.3     | 1.47E-08 | 0.308526 | 0.487 | 0.299 | 0.00022  | DC | ATF3          |
| CD63.3     | 1.48E-08 | -0.31964 | 0.947 | 0.924 | 0.000221 | DC | CD63          |
| C12orf76.1 | 1.49E-08 | -0.43509 | 0.075 | 0.269 | 0.000222 | DC | C12orf76      |
| IL23A      | 1.51E-08 | 0.16509  | 0.048 | 0.008 | 0.000225 | DC | IL23A         |
| CCNDBP1.3  | 1.52E-08 | 0.374158 | 0.353 | 0.202 | 0.000227 | DC | CCNDBP1       |
| APBB1.2    | 1.52E-08 | -0.43793 | 0.027 | 0.192 | 0.000227 | DC | APBB1         |
| RP11-214C  | 1.54E-08 | 0.136465 | 0.048 | 0.008 | 0.000231 | DC | RP11-21401.3  |
| PTMS.2     | 1.56E-08 | -0.4154  | 0.439 | 0.555 | 0.000233 | DC | PTMS          |
| APOL1      | 1.62E-08 | 0.296977 | 0.118 | 0.038 | 0.000242 | DC | APOL1         |
| KIAA1191.1 | 1.62E-08 | -0.42863 | 0.075 | 0.267 | 0.000243 | DC | KIAA1191      |
| CDH26      | 1.68E-08 | 0.149481 | 0.053 | 0.01  | 0.000251 | DC | CDH26         |
| COL6A2.2   | 1.69E-08 | -0.48382 | 0.011 | 0.165 | 0.000253 | DC | COL6A2        |
| NFIC.1     | 1.72E-08 | -0.46807 | 0.235 | 0.437 | 0.000257 | DC | NFIC          |

|             |           |           |        |        |           |    |          |
|-------------|-----------|-----------|--------|--------|-----------|----|----------|
| CRTAP. 3    | 1. 75E-08 | 0. 37402  | 0. 38  | 0. 234 | 0. 000261 | DC | CRTAP    |
| AGT. 1      | 1. 84E-08 | -0. 61479 | 0. 048 | 0. 223 | 0. 000275 | DC | AGT      |
| FBXO17. 3   | 1. 84E-08 | -0. 361   | 0      | 0. 146 | 0. 000275 | DC | FBXO17   |
| DRAXIN. 2   | 1. 85E-08 | -0. 39594 | 0. 005 | 0. 155 | 0. 000277 | DC | DRAXIN   |
| SATB1. 2    | 1. 92E-08 | 0. 402686 | 0. 257 | 0. 128 | 0. 000286 | DC | SATB1    |
| LIMCH1. 2   | 1. 95E-08 | -0. 4276  | 0. 005 | 0. 154 | 0. 000291 | DC | LIMCH1   |
| SNTG1. 2    | 1. 98E-08 | -0. 48645 | 0. 005 | 0. 156 | 0. 000295 | DC | SNTG1    |
| LSAMP. 1    | 2. 01E-08 | -0. 46094 | 0. 016 | 0. 175 | 0. 0003   | DC | LSAMP    |
| NDN. 3      | 2. 05E-08 | -0. 39279 | 0. 032 | 0. 199 | 0. 000306 | DC | NDN      |
| RTKN. 3     | 2. 13E-08 | -0. 4009  | 0. 016 | 0. 173 | 0. 000318 | DC | RTKN     |
| RASGRP3. 2  | 2. 14E-08 | 0. 339927 | 0. 171 | 0. 067 | 0. 00032  | DC | RASGRP3  |
| SPPL2A. 3   | 2. 16E-08 | 0. 376224 | 0. 321 | 0. 182 | 0. 000323 | DC | SPPL2A   |
| TSPAN33. 2  | 2. 17E-08 | 0. 256837 | 0. 123 | 0. 041 | 0. 000324 | DC | TSPAN33  |
| C21orf59    | 2. 19E-08 | -0. 40236 | 0. 112 | 0. 319 | 0. 000327 | DC | C21orf59 |
| IL27RA. 2   | 2. 24E-08 | 0. 315409 | 0. 144 | 0. 054 | 0. 000335 | DC | IL27RA   |
| CLIP3. 2    | 2. 25E-08 | -0. 4022  | 0. 032 | 0. 2   | 0. 000337 | DC | CLIP3    |
| MEF2A. 3    | 2. 29E-08 | 0. 38863  | 0. 369 | 0. 213 | 0. 000342 | DC | MEF2A    |
| ZKSCAN1. 2  | 2. 32E-08 | -0. 36826 | 0. 112 | 0. 32  | 0. 000347 | DC | ZKSCAN1  |
| RGS17. 1    | 2. 32E-08 | -0. 37844 | 0. 011 | 0. 165 | 0. 000347 | DC | RGS17    |
| YWHAQ. 2    | 2. 36E-08 | -0. 36461 | 0. 535 | 0. 645 | 0. 000353 | DC | YWHAQ    |
| OLFM1. 2    | 2. 37E-08 | -0. 41956 | 0. 005 | 0. 153 | 0. 000354 | DC | OLFM1    |
| C1QB. 3     | 2. 40E-08 | 0. 169963 | 0. 818 | 0. 566 | 0. 000358 | DC | C1QB     |
| IL12RB1. 2  | 2. 45E-08 | 0. 207299 | 0. 102 | 0. 03  | 0. 000366 | DC | IL12RB1  |
| RNH1. 2     | 2. 46E-08 | 0. 214174 | 0. 684 | 0. 535 | 0. 000368 | DC | RNH1     |
| AFF3. 1     | 2. 49E-08 | 0. 364864 | 0. 139 | 0. 051 | 0. 000372 | DC | AFF3     |
| CD180. 2    | 2. 53E-08 | 0. 244734 | 0. 112 | 0. 035 | 0. 000378 | DC | CD180    |
| GPC2. 3     | 2. 55E-08 | -0. 50328 | 0. 016 | 0. 17  | 0. 000381 | DC | GPC2     |
| SOX6. 2     | 2. 57E-08 | -0. 40265 | 0      | 0. 144 | 0. 000384 | DC | SOX6     |
| SLAMF9. 1   | 2. 58E-08 | 0. 211385 | 0. 075 | 0. 018 | 0. 000386 | DC | SLAMF9   |
| YWHAE. 2    | 2. 61E-08 | -0. 2354  | 0. 743 | 0. 752 | 0. 00039  | DC | YWHAE    |
| SIPA1. 3    | 2. 63E-08 | 0. 333573 | 0. 273 | 0. 137 | 0. 000393 | DC | SIPA1    |
| GPATCH8. 1  | 2. 65E-08 | -0. 40968 | 0. 107 | 0. 307 | 0. 000397 | DC | GPATCH8  |
| UPP1. 3     | 2. 73E-08 | 0. 382596 | 0. 401 | 0. 252 | 0. 000408 | DC | UPP1     |
| CHCHD2. 2   | 2. 77E-08 | -0. 21981 | 0. 909 | 0. 88  | 0. 000413 | DC | CHCHD2   |
| MACC1       | 2. 78E-08 | 0. 177948 | 0. 07  | 0. 016 | 0. 000416 | DC | MACC1    |
| SMARCD3. 2  | 2. 82E-08 | -0. 34615 | 0. 053 | 0. 234 | 0. 000421 | DC | SMARCD3  |
| PSMA1. 3    | 2. 84E-08 | 0. 214229 | 0. 743 | 0. 609 | 0. 000425 | DC | PSMA1    |
| PJA1. 1     | 2. 85E-08 | -0. 41957 | 0. 032 | 0. 195 | 0. 000426 | DC | PJA1     |
| RPAIN. 1    | 2. 85E-08 | -0. 4405  | 0. 278 | 0. 489 | 0. 000426 | DC | RPAIN    |
| BEST1. 1    | 2. 89E-08 | 0. 373275 | 0. 428 | 0. 272 | 0. 000432 | DC | BEST1    |
| RASGRP2. 3  | 2. 95E-08 | 0. 346724 | 0. 139 | 0. 05  | 0. 000441 | DC | RASGRP2  |
| TNFRSF14. 2 | 2. 98E-08 | 0. 31834  | 0. 241 | 0. 113 | 0. 000446 | DC | TNFRSF14 |
| RFX4. 1     | 2. 99E-08 | -0. 41852 | 0. 005 | 0. 153 | 0. 000447 | DC | RFX4     |
| BICD1. 1    | 3. 04E-08 | -0. 30343 | 0. 037 | 0. 207 | 0. 000454 | DC | BICD1    |
| DENND6B. 3  | 3. 07E-08 | 0. 347736 | 0. 219 | 0. 1   | 0. 000459 | DC | DENND6B  |
| MPEG1. 2    | 3. 10E-08 | 0. 227077 | 0. 123 | 0. 041 | 0. 000463 | DC | MPEG1    |
| PCDHB16. 1  | 3. 10E-08 | -0. 34521 | 0      | 0. 142 | 0. 000464 | DC | PCDHB16  |
| DAPK1. 1    | 3. 12E-08 | 0. 322192 | 0. 15  | 0. 057 | 0. 000467 | DC | DAPK1    |
| NDRG4. 3    | 3. 14E-08 | -0. 3605  | 0. 011 | 0. 162 | 0. 00047  | DC | NDRG4    |
| DAGLB. 3    | 3. 16E-08 | 0. 324327 | 0. 246 | 0. 118 | 0. 000472 | DC | DAGLB    |
| COX5A. 2    | 3. 18E-08 | 0. 255835 | 0. 727 | 0. 596 | 0. 000475 | DC | COX5A    |



|             |           |           |        |        |           |    |            |
|-------------|-----------|-----------|--------|--------|-----------|----|------------|
| BPGM        | 3. 22E-08 | -0. 42054 | 0. 059 | 0. 237 | 0. 000481 | DC | BPGM       |
| C8orf46. 1  | 3. 24E-08 | -0. 44539 | 0      | 0. 142 | 0. 000484 | DC | C8orf46    |
| JAM3        | 3. 34E-08 | -0. 36816 | 0. 005 | 0. 151 | 0. 000499 | DC | JAM3       |
| MLF1. 1     | 3. 36E-08 | -0. 43015 | 0. 064 | 0. 245 | 0. 000502 | DC | MLF1       |
| DUSP22. 3   | 3. 42E-08 | 0. 364042 | 0. 23  | 0. 109 | 0. 000511 | DC | DUSP22     |
| CALM1. 3    | 3. 42E-08 | -0. 2762  | 0. 738 | 0. 772 | 0. 000511 | DC | CALM1      |
| FAM96A. 1   | 3. 46E-08 | 0. 323495 | 0. 508 | 0. 354 | 0. 000517 | DC | FAM96A     |
| C19orf38. 3 | 3. 49E-08 | 0. 223601 | 0. 134 | 0. 046 | 0. 000521 | DC | C19orf38   |
| ZNF608. 1   | 3. 57E-08 | -0. 34029 | 0. 011 | 0. 16  | 0. 000534 | DC | ZNF608     |
| RGS16. 2    | 3. 59E-08 | -0. 52035 | 0. 091 | 0. 278 | 0. 000536 | DC | RGS16      |
| PRAF2. 2    | 3. 59E-08 | -0. 38904 | 0. 107 | 0. 305 | 0. 000536 | DC | PRAF2      |
| ACSF2. 2    | 3. 61E-08 | 0. 364668 | 0. 16  | 0. 064 | 0. 000539 | DC | ACSF2      |
| MYEF2. 2    | 3. 68E-08 | -0. 32526 | 0. 032 | 0. 196 | 0. 00055  | DC | MYEF2      |
| GDI1. 2     | 3. 71E-08 | -0. 43444 | 0. 278 | 0. 489 | 0. 000554 | DC | GDI1       |
| MIR181A1H   | 3. 94E-08 | 0. 419466 | 0. 23  | 0. 111 | 0. 000588 | DC | MIR181A1HG |
| NDUFS5. 3   | 3. 95E-08 | -0. 27016 | 0. 791 | 0. 811 | 0. 00059  | DC | NDUFS5     |
| PPP1R14B. 3 | 3. 96E-08 | -0. 39393 | 0. 15  | 0. 348 | 0. 000591 | DC | PPP1R14B   |
| NLGN1. 2    | 4. 00E-08 | -0. 32797 | 0      | 0. 14  | 0. 000597 | DC | NLGN1      |
| THRA. 1     | 4. 00E-08 | -0. 40042 | 0. 064 | 0. 242 | 0. 000598 | DC | THRA       |
| CPQ. 1      | 4. 11E-08 | 0. 36356  | 0. 321 | 0. 175 | 0. 000614 | DC | CPQ        |
| UPK3A       | 4. 13E-08 | 0. 107477 | 0. 043 | 0. 007 | 0. 000617 | DC | UPK3A      |
| MIF4GD. 3   | 4. 15E-08 | 0. 411693 | 0. 39  | 0. 25  | 0. 00062  | DC | MIF4GD     |
| APP. 2      | 4. 19E-08 | -0. 45118 | 0. 353 | 0. 527 | 0. 000626 | DC | APP        |
| S100A13. 1  | 4. 27E-08 | -0. 618   | 0. 112 | 0. 299 | 0. 000638 | DC | S100A13    |
| LINC00954   | 4. 29E-08 | 0. 209862 | 0. 048 | 0. 009 | 0. 000641 | DC | LINC00954  |
| ITPR1       | 4. 34E-08 | 0. 214419 | 0. 107 | 0. 033 | 0. 000649 | DC | ITPR1      |
| IL10RB. 3   | 4. 34E-08 | 0. 397209 | 0. 385 | 0. 241 | 0. 000649 | DC | IL10RB     |
| PTPN2. 2    | 4. 38E-08 | 0. 319012 | 0. 396 | 0. 246 | 0. 000654 | DC | PTPN2      |
| ARC. 1      | 4. 39E-08 | -0. 57106 | 0. 048 | 0. 21  | 0. 000656 | DC | ARC        |
| TMEM106C. 4 | 4. 46E-08 | -0. 49791 | 0. 086 | 0. 269 | 0. 000667 | DC | TMEM106C   |
| CYP27A1. 1  | 4. 50E-08 | -0. 39972 | 0. 016 | 0. 167 | 0. 000673 | DC | CYP27A1    |
| PPFIBP1. 1  | 4. 66E-08 | -0. 3537  | 0. 011 | 0. 158 | 0. 000696 | DC | PPFIBP1    |
| RABEPK. 2   | 4. 67E-08 | -0. 41664 | 0. 037 | 0. 202 | 0. 000698 | DC | RABEPK     |
| IGFBP3. 1   | 4. 68E-08 | -0. 64094 | 0. 037 | 0. 197 | 0. 0007   | DC | IGFBP3     |
| POLR2J3. 2  | 4. 73E-08 | -0. 42889 | 0. 139 | 0. 342 | 0. 000707 | DC | POLR2J3    |
| TPM2        | 4. 82E-08 | -0. 44801 | 0. 016 | 0. 165 | 0. 00072  | DC | TPM2       |
| SRPK2. 1    | 4. 85E-08 | -0. 42661 | 0. 203 | 0. 414 | 0. 000725 | DC | SRPK2      |
| COA3. 2     | 4. 91E-08 | -0. 42311 | 0. 262 | 0. 48  | 0. 000733 | DC | COA3       |
| WDR60       | 4. 94E-08 | -0. 34522 | 0. 059 | 0. 235 | 0. 000738 | DC | WDR60      |
| SIRPB2      | 5. 07E-08 | 0. 234369 | 0. 064 | 0. 015 | 0. 000757 | DC | SIRPB2     |
| DPF3        | 5. 09E-08 | -0. 33877 | 0      | 0. 138 | 0. 00076  | DC | DPF3       |
| SIGLEC9. 3  | 5. 14E-08 | 0. 294388 | 0. 209 | 0. 091 | 0. 000768 | DC | SIGLEC9    |
| DPYSL5. 3   | 5. 16E-08 | -0. 3767  | 0. 016 | 0. 165 | 0. 000771 | DC | DPYSL5     |
| GGT7. 1     | 5. 23E-08 | -0. 31936 | 0. 016 | 0. 168 | 0. 000782 | DC | GGT7       |
| VAMP2. 2    | 5. 24E-08 | -0. 41252 | 0. 471 | 0. 625 | 0. 000784 | DC | VAMP2      |
| SPTAN1. 1   | 5. 29E-08 | -0. 39587 | 0. 08  | 0. 263 | 0. 00079  | DC | SPTAN1     |
| SPG21. 3    | 5. 37E-08 | 0. 327322 | 0. 519 | 0. 383 | 0. 000803 | DC | SPG21      |
| DAG1. 1     | 5. 42E-08 | -0. 32708 | 0. 021 | 0. 176 | 0. 000809 | DC | DAG1       |
| ZYX. 3      | 5. 43E-08 | 0. 330056 | 0. 545 | 0. 399 | 0. 000811 | DC | ZYX        |
| EIF3A. 3    | 5. 44E-08 | 0. 375881 | 0. 46  | 0. 33  | 0. 000813 | DC | EIF3A      |
| SLC1A2. 1   | 5. 55E-08 | -0. 40536 | 0      | 0. 137 | 0. 00083  | DC | SLC1A2     |

|            |          |          |       |       |          |    |          |
|------------|----------|----------|-------|-------|----------|----|----------|
| GSTM3.1    | 5.72E-08 | -0.44216 | 0.086 | 0.271 | 0.000854 | DC | GSTM3    |
| C5orf24.2  | 5.76E-08 | -0.35207 | 0.102 | 0.299 | 0.00086  | DC | C5orf24  |
| ELM01.2    | 5.82E-08 | 0.301438 | 0.348 | 0.187 | 0.00087  | DC | ELM01    |
| GAS1.3     | 5.92E-08 | -0.38236 | 0.005 | 0.147 | 0.000884 | DC | GAS1     |
| PDIA3.3    | 5.92E-08 | 0.218069 | 0.711 | 0.581 | 0.000884 | DC | PDIA3    |
| FMN1.2     | 5.96E-08 | 0.219064 | 0.102 | 0.031 | 0.000891 | DC | FMN1     |
| SMARCA1.1  | 6.02E-08 | -0.33587 | 0.021 | 0.174 | 0.0009   | DC | SMARCA1  |
| APOD.2     | 6.07E-08 | -0.88774 | 0.016 | 0.163 | 0.000906 | DC | APOD     |
| FSD1.2     | 6.10E-08 | -0.31606 | 0.011 | 0.157 | 0.000911 | DC | FSD1     |
| ZNF75A.2   | 6.12E-08 | -0.3961  | 0.048 | 0.217 | 0.000914 | DC | ZNF75A   |
| USP3.3     | 6.13E-08 | 0.334137 | 0.294 | 0.164 | 0.000916 | DC | USP3     |
| TMEM132A.6 | 6.17E-08 | -0.30466 | 0.005 | 0.147 | 0.000922 | DC | TMEM132A |
| SSR1.2     | 6.22E-08 | 0.276129 | 0.604 | 0.466 | 0.00093  | DC | SSR1     |
| RNF187.1   | 6.43E-08 | -0.41738 | 0.171 | 0.381 | 0.000961 | DC | RNF187   |
| DCBLD2.2   | 6.53E-08 | -0.34108 | 0.005 | 0.145 | 0.000976 | DC | DCBLD2   |
| HILPDA.2   | 6.55E-08 | -0.60292 | 0.059 | 0.23  | 0.000979 | DC | HILPDA   |
| JAK3       | 6.63E-08 | 0.179184 | 0.091 | 0.026 | 0.000992 | DC | JAK3     |
| BIRC3.1    | 6.66E-08 | 0.239811 | 0.16  | 0.063 | 0.000995 | DC | BIRC3    |
| ARL4D.3    | 6.68E-08 | -0.46611 | 0.021 | 0.171 | 0.000998 | DC | ARL4D    |
| NUDT14.3   | 6.89E-08 | 0.350347 | 0.337 | 0.19  | 0.001029 | DC | NUDT14   |
| IDH1.2     | 6.94E-08 | -0.43497 | 0.176 | 0.383 | 0.001037 | DC | IDH1     |
| SNAI3      | 7.01E-08 | 0.127927 | 0.064 | 0.015 | 0.001047 | DC | SNAI3    |
| TAGLN2.3   | 7.27E-08 | 0.17484  | 0.701 | 0.511 | 0.001086 | DC | TAGLN2   |
| ROB01.3    | 7.27E-08 | -0.35949 | 0.027 | 0.18  | 0.001086 | DC | ROB01    |
| CSK.3      | 7.33E-08 | 0.351603 | 0.278 | 0.145 | 0.001096 | DC | CSK      |
| ELAVL4.2   | 7.36E-08 | -0.63457 | 0.032 | 0.181 | 0.0011   | DC | ELAVL4   |
| LRRC4B.3   | 7.38E-08 | -0.29959 | 0     | 0.135 | 0.001102 | DC | LRRC4B   |
| CDKN2C.1   | 7.44E-08 | -0.48232 | 0.102 | 0.285 | 0.001112 | DC | CDKN2C   |
| CNP.2      | 7.70E-08 | -0.5053  | 0.176 | 0.38  | 0.001151 | DC | CNP      |
| HYAL2.3    | 7.72E-08 | -0.32132 | 0.053 | 0.225 | 0.001153 | DC | HYAL2    |
| ZFAND1     | 7.78E-08 | 0.378956 | 0.31  | 0.175 | 0.001163 | DC | ZFAND1   |
| PLAGL1.2   | 8.01E-08 | 0.198742 | 0.118 | 0.04  | 0.001196 | DC | PLAGL1   |
| KIFAP3.2   | 8.02E-08 | -0.39128 | 0.043 | 0.205 | 0.001199 | DC | KIFAP3   |
| BCAR1.1    | 8.04E-08 | -0.3199  | 0.021 | 0.174 | 0.001202 | DC | BCAR1    |
| TRAF3IP3.8 | 8.24E-08 | 0.255675 | 0.139 | 0.051 | 0.001232 | DC | TRAF3IP3 |
| HIF1A.2    | 8.49E-08 | 0.292231 | 0.631 | 0.495 | 0.001268 | DC | HIF1A    |
| C11orf49.8 | 8.57E-08 | -0.35073 | 0.064 | 0.24  | 0.00128  | DC | C11orf49 |
| CD82.1     | 8.69E-08 | -0.53178 | 0.075 | 0.242 | 0.001299 | DC | CD82     |
| DPF1.2     | 8.72E-08 | -0.39443 | 0.005 | 0.143 | 0.001303 | DC | DPF1     |
| CITED1.2   | 8.84E-08 | -0.43921 | 0.011 | 0.153 | 0.001321 | DC | CITED1   |
| CASS4      | 8.85E-08 | 0.155773 | 0.064 | 0.015 | 0.001323 | DC | CASS4    |
| JUN        | 8.94E-08 | -0.36058 | 0.561 | 0.674 | 0.001336 | DC | JUN      |
| GCAT.3     | 8.97E-08 | -0.27138 | 0.016 | 0.163 | 0.00134  | DC | GCAT     |
| SUM03.3    | 9.00E-08 | 0.276695 | 0.583 | 0.437 | 0.001345 | DC | SUM03    |
| PHYHIPL.1  | 9.00E-08 | -0.49542 | 0.032 | 0.188 | 0.001345 | DC | PHYHIPL  |
| ST5.3      | 9.17E-08 | -0.35791 | 0.011 | 0.153 | 0.00137  | DC | ST5      |
| SLC1A3.2   | 9.33E-08 | -0.4598  | 0.283 | 0.48  | 0.001394 | DC | SLC1A3   |
| ARHGAP27.9 | 9.53E-08 | 0.213483 | 0.144 | 0.054 | 0.001424 | DC | ARHGAP27 |
| PTPN18.3   | 9.57E-08 | 0.366491 | 0.348 | 0.208 | 0.00143  | DC | PTPN18   |
| PCBP1.3    | 9.61E-08 | 0.220341 | 0.701 | 0.586 | 0.001436 | DC | PCBP1    |
| IQGAP1.3   | 9.62E-08 | 0.367702 | 0.385 | 0.25  | 0.001438 | DC | IQGAP1   |

|            |           |           |        |        |           |    |              |
|------------|-----------|-----------|--------|--------|-----------|----|--------------|
| ZNF90. 2   | 9. 68E-08 | 0. 250924 | 0. 567 | 0. 377 | 0. 001446 | DC | ZNF90        |
| TMEM45A. 1 | 9. 94E-08 | -0. 49702 | 0. 027 | 0. 179 | 0. 001486 | DC | TMEM45A      |
| GPSM2. 2   | 1. 01E-07 | -0. 34119 | 0. 027 | 0. 179 | 0. 001504 | DC | GPSM2        |
| FKBP9. 2   | 1. 01E-07 | -0. 33411 | 0. 027 | 0. 179 | 0. 001509 | DC | FKBP9        |
| RELT. 2    | 1. 01E-07 | 0. 36575  | 0. 187 | 0. 083 | 0. 001515 | DC | RELT         |
| PTOV1. 2   | 1. 02E-07 | -0. 395   | 0. 235 | 0. 442 | 0. 001524 | DC | PTOV1        |
| LINC00665  | 1. 04E-07 | -0. 36533 | 0. 032 | 0. 188 | 0. 001549 | DC | LINC00665    |
| YES1       | 1. 04E-07 | -0. 29553 | 0      | 0. 132 | 0. 001561 | DC | YES1         |
| ATP6V1G2.  | 1. 06E-07 | -0. 37531 | 0. 011 | 0. 151 | 0. 001589 | DC | ATP6V1G2     |
| EPHX1. 2   | 1. 08E-07 | -0. 45679 | 0. 064 | 0. 235 | 0. 001621 | DC | EPHX1        |
| NKX2-2. 2  | 1. 09E-07 | -0. 4596  | 0. 011 | 0. 15  | 0. 001622 | DC | NKX2-2       |
| HOMER3. 3  | 1. 10E-07 | -0. 37452 | 0. 07  | 0. 244 | 0. 001642 | DC | HOMER3       |
| CNIH2. 3   | 1. 10E-07 | -0. 30568 | 0      | 0. 132 | 0. 001648 | DC | CNIH2        |
| CNTFR. 2   | 1. 10E-07 | -0. 3441  | 0      | 0. 132 | 0. 001648 | DC | CNTFR        |
| TMEM219. 2 | 1. 12E-07 | 0. 203651 | 0. 701 | 0. 558 | 0. 001679 | DC | TMEM219      |
| LHX2. 3    | 1. 13E-07 | -0. 31736 | 0      | 0. 132 | 0. 001684 | DC | LHX2         |
| KLF6. 2    | 1. 16E-07 | 0. 187315 | 0. 727 | 0. 528 | 0. 001733 | DC | KLF6         |
| LPAR6. 3   | 1. 16E-07 | 0. 289119 | 0. 396 | 0. 235 | 0. 001741 | DC | LPAR6        |
| CTNND2. 2  | 1. 17E-07 | -0. 35975 | 0. 016 | 0. 16  | 0. 001743 | DC | CTNND2       |
| METTL7B    | 1. 17E-07 | -0. 64412 | 0. 053 | 0. 215 | 0. 001754 | DC | METTL7B      |
| NOL3. 3    | 1. 20E-07 | -0. 40773 | 0. 021 | 0. 168 | 0. 00179  | DC | NOL3         |
| TMEM158. 2 | 1. 21E-07 | -0. 33771 | 0. 005 | 0. 142 | 0. 001806 | DC | TMEM158      |
| POSTN. 2   | 1. 22E-07 | -0. 44367 | 0      | 0. 131 | 0. 001817 | DC | POSTN        |
| LAMTOR1. 1 | 1. 24E-07 | 0. 159891 | 0. 802 | 0. 652 | 0. 001858 | DC | LAMTOR1      |
| ATP1B2. 3  | 1. 25E-07 | -0. 36138 | 0. 064 | 0. 236 | 0. 001873 | DC | ATP1B2       |
| APC2. 2    | 1. 26E-07 | -0. 3598  | 0. 011 | 0. 15  | 0. 00188  | DC | APC2         |
| PYCR1      | 1. 28E-07 | -0. 3453  | 0. 032 | 0. 187 | 0. 001913 | DC | PYCR1        |
| ARHGAP26.  | 1. 29E-07 | 0. 350293 | 0. 198 | 0. 09  | 0. 001935 | DC | ARHGAP26     |
| COL4A2     | 1. 31E-07 | -0. 29279 | 0      | 0. 131 | 0. 00196  | DC | COL4A2       |
| TMSB15A. 3 | 1. 32E-07 | -0. 47234 | 0. 032 | 0. 181 | 0. 001974 | DC | TMSB15A      |
| RP11-14N7  | 1. 34E-07 | -0. 39775 | 0. 048 | 0. 207 | 0. 002009 | DC | RP11-14N7. 2 |
| CEND1. 1   | 1. 35E-07 | -0. 33375 | 0. 005 | 0. 141 | 0. 002015 | DC | CEND1        |
| PMP22. 2   | 1. 35E-07 | -0. 50462 | 0. 235 | 0. 431 | 0. 00202  | DC | PMP22        |
| TNC. 2     | 1. 37E-07 | -0. 44941 | 0. 043 | 0. 203 | 0. 00205  | DC | TNC          |
| SGCE. 1    | 1. 38E-07 | -0. 57567 | 0. 011 | 0. 148 | 0. 002056 | DC | SGCE         |
| IL10. 3    | 1. 38E-07 | 0. 341955 | 0. 225 | 0. 104 | 0. 002059 | DC | IL10         |
| CERS1. 1   | 1. 41E-07 | -0. 31536 | 0      | 0. 13  | 0. 002114 | DC | CERS1        |
| DST. 2     | 1. 43E-07 | -0. 37612 | 0. 171 | 0. 38  | 0. 002138 | DC | DST          |
| FCH01. 2   | 1. 43E-07 | 0. 281614 | 0. 112 | 0. 038 | 0. 002141 | DC | FCH01        |
| AHNAK. 1   | 1. 45E-07 | 0. 398757 | 0. 23  | 0. 116 | 0. 00217  | DC | AHNAK        |
| PTMA. 3    | 1. 46E-07 | -0. 2359  | 1      | 0. 966 | 0. 002187 | DC | PTMA         |
| ASPHD1. 1  | 1. 47E-07 | -0. 36997 | 0. 005 | 0. 14  | 0. 002195 | DC | ASPHD1       |
| ABRACL. 3  | 1. 51E-07 | 0. 38108  | 0. 439 | 0. 302 | 0. 002252 | DC | ABRACL       |
| COX6C. 3   | 1. 52E-07 | -0. 26815 | 0. 802 | 0. 831 | 0. 002269 | DC | COX6C        |
| DOK5. 2    | 1. 54E-07 | -0. 37726 | 0. 032 | 0. 185 | 0. 002307 | DC | DOK5         |
| KIAA1715.  | 1. 55E-07 | -0. 36748 | 0. 08  | 0. 258 | 0. 002324 | DC | KIAA1715     |
| PSME2. 2   | 1. 57E-07 | 0. 171871 | 0. 711 | 0. 555 | 0. 00235  | DC | PSME2        |
| CCDC28B. 2 | 1. 59E-07 | -0. 27772 | 0. 053 | 0. 222 | 0. 002369 | DC | CCDC28B      |
| PLXNC1. 3  | 1. 60E-07 | 0. 235492 | 0. 16  | 0. 065 | 0. 002385 | DC | PLXNC1       |
| ARRDC2. 3  | 1. 60E-07 | 0. 244409 | 0. 193 | 0. 084 | 0. 002387 | DC | ARRDC2       |
| LTB4R. 2   | 1. 61E-07 | 0. 22527  | 0. 102 | 0. 032 | 0. 002406 | DC | LTB4R        |

|            |    |        |          |       |       |          |    |               |
|------------|----|--------|----------|-------|-------|----------|----|---------------|
| STARD4-AS  | 1. | 61E-07 | -0.33045 | 0     | 0.129 | 0.002407 | DC | STARD4-AS1    |
| KLHL4.     | 1. | 63E-07 | -0.32449 | 0     | 0.129 | 0.002433 | DC | KLHL4         |
| MAFK       | 1. | 63E-07 | 0.212781 | 0.112 | 0.038 | 0.002438 | DC | MAFK          |
| CDC34.     | 2. | 65E-07 | -0.37171 | 0.07  | 0.237 | 0.002473 | DC | CDC34         |
| EIF4B.     | 3. | 66E-07 | 0.3079   | 0.508 | 0.376 | 0.002486 | DC | EIF4B         |
| SRGAP1.    | 3. | 67E-07 | 0.34852  | 0.358 | 0.223 | 0.0025   | DC | SRGAP1        |
| ZNF771.    | 2. | 73E-07 | -0.2811  | 0.011 | 0.148 | 0.002587 | DC | ZNF771        |
| IVNS1ABP.  | 1. | 73E-07 | 0.31822  | 0.374 | 0.235 | 0.002593 | DC | IVNS1ABP      |
| PLEKH02.   | 3. | 74E-07 | 0.328449 | 0.214 | 0.1   | 0.002597 | DC | PLEKH02       |
| RP11-71N1  | 1. | 78E-07 | -0.36072 | 0.005 | 0.138 | 0.002667 | DC | RP11-71N10.1  |
| CLN8.      | 3. | 79E-07 | 0.330442 | 0.417 | 0.266 | 0.00268  | DC | CLN8          |
| MSI1.      | 1. | 81E-07 | -0.33184 | 0.005 | 0.137 | 0.002705 | DC | MSI1          |
| CDC25B.    | 1. | 81E-07 | -0.38928 | 0.043 | 0.196 | 0.002706 | DC | CDC25B        |
| MBNL1.     | 3. | 83E-07 | 0.351296 | 0.358 | 0.222 | 0.002738 | DC | MBNL1         |
| CA12.      | 3. | 85E-07 | -0.36373 | 0.005 | 0.138 | 0.002763 | DC | CA12          |
| LIPA.      | 3. | 88E-07 | 0.253247 | 0.513 | 0.331 | 0.002814 | DC | LIPA          |
| SLFN12     | 1. | 89E-07 | 0.169957 | 0.086 | 0.025 | 0.002824 | DC | SLFN12        |
| TCOF1.     | 3. | 92E-07 | 0.42678  | 0.321 | 0.193 | 0.002862 | DC | TCOF1         |
| ALKBH4.    | 1. | 94E-07 | -0.28901 | 0.043 | 0.201 | 0.002895 | DC | ALKBH4        |
| EEF1D.     | 3. | 95E-07 | 0.102307 | 0.989 | 0.843 | 0.002917 | DC | EEF1D         |
| SACS.      | 3. | 95E-07 | -0.28974 | 0.016 | 0.157 | 0.002919 | DC | SACS          |
| TWF1.      | 1. | 01E-07 | -0.3398  | 0.086 | 0.266 | 0.003004 | DC | TWF1          |
| SLC25A3.   | 2. | 02E-07 | 0.126346 | 0.872 | 0.744 | 0.003016 | DC | SLC25A3       |
| ENDOV      | 2. | 02E-07 | -0.34706 | 0.059 | 0.223 | 0.003026 | DC | ENDOV         |
| OPTN.      | 1. | 05E-07 | -0.32612 | 0.005 | 0.137 | 0.003062 | DC | OPTN          |
| PGM2.      | 1. | 06E-07 | 0.263658 | 0.273 | 0.146 | 0.003076 | DC | PGM2          |
| MGMT.      | 3. | 09E-07 | 0.257439 | 0.289 | 0.149 | 0.003122 | DC | MGMT          |
| SYP.       | 3. | 09E-07 | -0.4224  | 0.005 | 0.136 | 0.00313  | DC | SYP           |
| ARSJ.      | 1. | 13E-07 | -0.30244 | 0     | 0.127 | 0.003184 | DC | ARSJ          |
| NKAIN3.    | 2. | 13E-07 | -0.32283 | 0     | 0.127 | 0.003184 | DC | NKAIN3        |
| RPS6KA4.   | 3. | 13E-07 | 0.353783 | 0.235 | 0.12  | 0.003187 | DC | RPS6KA4       |
| SPRY1.     | 3. | 15E-07 | -0.45634 | 0.07  | 0.235 | 0.003207 | DC | SPRY1         |
| FCGR1A.    | 3. | 15E-07 | 0.207566 | 0.46  | 0.255 | 0.003211 | DC | FCGR1A        |
| P4HTM.     | 1. | 18E-07 | -0.325   | 0.086 | 0.264 | 0.003261 | DC | P4HTM         |
| PRDX1.     | 3. | 19E-07 | -0.33163 | 0.711 | 0.81  | 0.003276 | DC | PRDX1         |
| TNIK.      | 1. | 27E-07 | -0.29308 | 0.011 | 0.146 | 0.003393 | DC | TNIK          |
| SLC39A8.   | 2. | 33E-07 | 0.283403 | 0.144 | 0.057 | 0.003477 | DC | SLC39A8       |
| GADD45GIP1 | 2. | 33E-07 | -0.35633 | 0.433 | 0.565 | 0.003481 | DC | GADD45GIP1    |
| STX6.      | 3. | 34E-07 | 0.365581 | 0.326 | 0.195 | 0.003492 | DC | STX6          |
| ALDH3B1.   | 1. | 34E-07 | 0.292037 | 0.166 | 0.07  | 0.003496 | DC | ALDH3B1       |
| RP11-660L  | 2. | 35E-07 | -0.3387  | 0     | 0.126 | 0.003507 | DC | RP11-660L16.2 |
| MYH10.     | 1. | 37E-07 | -0.32621 | 0.016 | 0.155 | 0.003538 | DC | MYH10         |
| HRH2.      | 1. | 38E-07 | 0.241703 | 0.112 | 0.038 | 0.003562 | DC | HRH2          |
| FAM84A.    | 2. | 40E-07 | -0.2829  | 0.011 | 0.146 | 0.003591 | DC | FAM84A        |
| JARID2.    | 1. | 41E-07 | 0.349898 | 0.235 | 0.12  | 0.003597 | DC | JARID2        |
| SNX8.      | 3. | 44E-07 | 0.38436  | 0.267 | 0.145 | 0.003645 | DC | SNX8          |
| ZNF711.    | 2. | 46E-07 | -0.36171 | 0.011 | 0.144 | 0.003673 | DC | ZNF711        |
| TCTN1.     | 2. | 48E-07 | -0.36201 | 0.053 | 0.214 | 0.003711 | DC | TCTN1         |
| SPATS2.    | 1. | 49E-07 | -0.37068 | 0.086 | 0.261 | 0.003727 | DC | SPATS2        |
| CHST12.    | 1. | 52E-07 | -0.34209 | 0.075 | 0.249 | 0.003767 | DC | CHST12        |
| RNF157.    | 2. | 52E-07 | -0.27816 | 0.005 | 0.136 | 0.00377  | DC | RNF157        |

|             |           |           |        |        |           |    |             |
|-------------|-----------|-----------|--------|--------|-----------|----|-------------|
| SMAD1. 1    | 2. 55E-07 | -0. 31392 | 0. 032 | 0. 18  | 0. 003804 | DC | SMAD1       |
| KCNF1. 3    | 2. 56E-07 | -0. 33169 | 0      | 0. 125 | 0. 003821 | DC | KCNF1       |
| CDC42BPA. 2 | 2. 56E-07 | -0. 31075 | 0. 032 | 0. 181 | 0. 003822 | DC | CDC42BPA    |
| PLCG2. 1    | 2. 57E-07 | 0. 172604 | 0. 128 | 0. 046 | 0. 003834 | DC | PLCG2       |
| MIAT. 2     | 2. 58E-07 | -0. 43799 | 0. 027 | 0. 17  | 0. 003855 | DC | MIAT        |
| SNAP25. 2   | 2. 59E-07 | -0. 45077 | 0. 011 | 0. 145 | 0. 003864 | DC | SNAP25      |
| NDRG2. 1    | 2. 60E-07 | 0. 178613 | 0. 551 | 0. 356 | 0. 003893 | DC | NDRG2       |
| EDNRB. 1    | 2. 61E-07 | -0. 38125 | 0. 037 | 0. 189 | 0. 003902 | DC | EDNRB       |
| TPP1. 3     | 2. 62E-07 | 0. 29712  | 0. 471 | 0. 32  | 0. 003916 | DC | TPP1        |
| TMEM237. 1  | 2. 64E-07 | -0. 29764 | 0. 037 | 0. 189 | 0. 003942 | DC | TMEM237     |
| CNIH3       | 2. 70E-07 | -0. 34318 | 0. 027 | 0. 171 | 0. 004037 | DC | CNIH3       |
| NUPR1. 2    | 2. 72E-07 | -0. 57001 | 0. 144 | 0. 327 | 0. 004058 | DC | NUPR1       |
| HEPACAM. 2  | 2. 75E-07 | -0. 44191 | 0. 032 | 0. 18  | 0. 004103 | DC | HEPACAM     |
| AC004540. 2 | 2. 76E-07 | -0. 44075 | 0      | 0. 125 | 0. 004119 | DC | AC004540. 4 |
| STAT5A. 3   | 2. 80E-07 | 0. 231333 | 0. 134 | 0. 05  | 0. 004181 | DC | STAT5A      |
| NDUFB7. 3   | 2. 80E-07 | -0. 33055 | 0. 631 | 0. 722 | 0. 004191 | DC | NDUFB7      |
| SEPT8. 3    | 2. 82E-07 | -0. 36978 | 0. 043 | 0. 198 | 0. 004216 | DC | 8-Sep       |
| NAGA. 3     | 2. 91E-07 | 0. 307558 | 0. 321 | 0. 182 | 0. 004347 | DC | NAGA        |
| FBL. 3      | 2. 97E-07 | 0. 244128 | 0. 508 | 0. 375 | 0. 004435 | DC | FBL         |
| PDRG1. 1    | 3. 04E-07 | -0. 3831  | 0. 096 | 0. 271 | 0. 004547 | DC | PDRG1       |
| PDE6G       | 3. 11E-07 | 0. 148773 | 0. 053 | 0. 012 | 0. 004648 | DC | PDE6G       |
| NR2F6. 2    | 3. 16E-07 | -0. 28324 | 0. 011 | 0. 143 | 0. 004717 | DC | NR2F6       |
| PSMB5. 2    | 3. 17E-07 | -0. 39818 | 0. 406 | 0. 598 | 0. 004734 | DC | PSMB5       |
| FGFR1       | 3. 17E-07 | -0. 29399 | 0. 027 | 0. 173 | 0. 00474  | DC | FGFR1       |
| ZNF710      | 3. 19E-07 | 0. 249205 | 0. 102 | 0. 034 | 0. 00476  | DC | ZNF710      |
| ZNF91       | 3. 20E-07 | -0. 33751 | 0. 053 | 0. 212 | 0. 004782 | DC | ZNF91       |
| TLE1. 1     | 3. 21E-07 | -0. 28984 | 0. 027 | 0. 172 | 0. 004803 | DC | TLE1        |
| ENHO. 2     | 3. 23E-07 | -0. 29911 | 0. 016 | 0. 153 | 0. 004829 | DC | ENHO        |
| RNASEH1-AS1 | 3. 25E-07 | -0. 28742 | 0. 032 | 0. 18  | 0. 004853 | DC | RNASEH1-AS1 |
| VPS29. 1    | 3. 25E-07 | 0. 225018 | 0. 674 | 0. 551 | 0. 004856 | DC | VPS29       |
| HADHA. 1    | 3. 26E-07 | 0. 26941  | 0. 567 | 0. 439 | 0. 004877 | DC | HADHA       |
| HCAR3       | 3. 27E-07 | 0. 136645 | 0. 032 | 0. 005 | 0. 004885 | DC | HCAR3       |
| OSER1-AS1   | 3. 28E-07 | -0. 33918 | 0. 005 | 0. 133 | 0. 004894 | DC | OSER1-AS1   |
| CADM1. 1    | 3. 28E-07 | -0. 34423 | 0. 134 | 0. 328 | 0. 004899 | DC | CADM1       |
| RIMKLB. 1   | 3. 29E-07 | -0. 3291  | 0. 016 | 0. 153 | 0. 004913 | DC | RIMKLB      |
| TIMM22      | 3. 29E-07 | -0. 32084 | 0. 075 | 0. 245 | 0. 004923 | DC | TIMM22      |
| GNG5. 2     | 3. 36E-07 | 0. 160935 | 0. 856 | 0. 641 | 0. 005023 | DC | GNG5        |
| HSPBP1      | 3. 43E-07 | -0. 29625 | 0. 107 | 0. 29  | 0. 005122 | DC | HSPBP1      |
| SRPX. 2     | 3. 51E-07 | -0. 39544 | 0. 032 | 0. 179 | 0. 005252 | DC | SRPX        |
| EXTL2. 1    | 3. 55E-07 | -0. 27045 | 0. 027 | 0. 17  | 0. 005311 | DC | EXTL2       |
| PLCB2. 3    | 3. 67E-07 | 0. 2307   | 0. 15  | 0. 06  | 0. 005482 | DC | PLCB2       |
| WSCD1. 2    | 3. 70E-07 | -0. 3041  | 0. 005 | 0. 133 | 0. 005536 | DC | WSCD1       |
| TSPAN12. 1  | 3. 72E-07 | -0. 33013 | 0      | 0. 122 | 0. 005556 | DC | TSPAN12     |
| ASCL2. 2    | 3. 76E-07 | 0. 207938 | 0. 107 | 0. 036 | 0. 005615 | DC | ASCL2       |
| HS2ST1. 2   | 3. 88E-07 | -0. 34941 | 0. 032 | 0. 177 | 0. 005795 | DC | HS2ST1      |
| NDUFA5. 1   | 3. 91E-07 | -0. 40647 | 0. 39  | 0. 58  | 0. 005848 | DC | NDUFA5      |
| GSPT2. 1    | 3. 92E-07 | -0. 31493 | 0. 016 | 0. 151 | 0. 005864 | DC | GSPT2       |
| FAM3C. 2    | 3. 96E-07 | -0. 34639 | 0. 246 | 0. 44  | 0. 005913 | DC | FAM3C       |
| C1S. 1      | 4. 02E-07 | -0. 70444 | 0. 027 | 0. 164 | 0. 006007 | DC | C1S         |
| C21orf62. 4 | 4. 08E-07 | -0. 38322 | 0. 021 | 0. 16  | 0. 006095 | DC | C21orf62    |
| GRIA4. 2    | 4. 10E-07 | -0. 34715 | 0. 005 | 0. 131 | 0. 00612  | DC | GRIA4       |

|           |          |          |       |       |          |    |            |
|-----------|----------|----------|-------|-------|----------|----|------------|
| FERMT2.3  | 4.11E-07 | -0.31571 | 0.048 | 0.205 | 0.006136 | DC | FERMT2     |
| DLX5.3    | 4.17E-07 | -0.6825  | 0.016 | 0.146 | 0.006237 | DC | DLX5       |
| ATP6VOB.3 | 4.20E-07 | 0.129071 | 0.93  | 0.796 | 0.006278 | DC | ATP6VOB    |
| TREM2.3   | 4.24E-07 | 0.208714 | 0.578 | 0.347 | 0.006343 | DC | TREM2      |
| PNMA2.2   | 4.27E-07 | -0.3248  | 0.011 | 0.141 | 0.006381 | DC | PNMA2      |
| HGSNAT.3  | 4.31E-07 | 0.407726 | 0.326 | 0.204 | 0.006442 | DC | HGSNAT     |
| MEIS3.1   | 4.39E-07 | -0.28191 | 0.005 | 0.131 | 0.006559 | DC | MEIS3      |
| RAB7A.2   | 4.41E-07 | 0.17871  | 0.759 | 0.657 | 0.006587 | DC | RAB7A      |
| KRIT1.2   | 4.59E-07 | -0.33215 | 0.059 | 0.219 | 0.006859 | DC | KRIT1      |
| NIPSNAP3A | 4.72E-07 | 0.349232 | 0.326 | 0.198 | 0.007049 | DC | NIPSNAP3A  |
| RCN1.3    | 4.77E-07 | -0.32609 | 0.166 | 0.357 | 0.007125 | DC | RCN1       |
| MAFF.3    | 4.80E-07 | 0.317292 | 0.299 | 0.169 | 0.007179 | DC | MAFF       |
| NR2F1     | 4.82E-07 | -0.29393 | 0.027 | 0.168 | 0.007205 | DC | NR2F1      |
| GNG12.1   | 5.02E-07 | -0.27951 | 0.011 | 0.14  | 0.007498 | DC | GNG12      |
| VAPA.1    | 5.03E-07 | 0.209928 | 0.775 | 0.631 | 0.007522 | DC | VAPA       |
| RAB32.3   | 5.13E-07 | 0.39055  | 0.364 | 0.236 | 0.007663 | DC | RAB32      |
| DLL3.2    | 5.16E-07 | -0.53476 | 0.016 | 0.146 | 0.007718 | DC | DLL3       |
| GTF2I.2   | 5.22E-07 | -0.4236  | 0.246 | 0.43  | 0.007798 | DC | GTF2I      |
| THSD7A.2  | 5.31E-07 | -0.4838  | 0.016 | 0.145 | 0.007933 | DC | THSD7A     |
| CETN2.3   | 5.32E-07 | -0.42027 | 0.144 | 0.325 | 0.007955 | DC | CETN2      |
| NUDT11.1  | 5.34E-07 | -0.3588  | 0.005 | 0.128 | 0.007986 | DC | NUDT11     |
| HLTF.2    | 5.35E-07 | -0.29687 | 0.032 | 0.176 | 0.007988 | DC | HLTF       |
| ZMAT3.1   | 5.35E-07 | -0.38162 | 0.053 | 0.205 | 0.008002 | DC | ZMAT3      |
| TNFSF12.3 | 5.36E-07 | 0.310193 | 0.316 | 0.183 | 0.008013 | DC | TNFSF12    |
| SENCR.1   | 5.37E-07 | 0.139265 | 0.07  | 0.019 | 0.008019 | DC | SENCR      |
| INSR.2    | 5.53E-07 | 0.440499 | 0.257 | 0.143 | 0.008263 | DC | INSR       |
| PDE4A.2   | 5.54E-07 | 0.311783 | 0.187 | 0.088 | 0.008283 | DC | PDE4A      |
| BBOX1.2   | 5.59E-07 | -0.37567 | 0.011 | 0.139 | 0.008357 | DC | BBOX1      |
| EIF4E2.1  | 5.69E-07 | 0.364975 | 0.449 | 0.331 | 0.008499 | DC | EIF4E2     |
| ACOT9.3   | 5.70E-07 | 0.336374 | 0.305 | 0.18  | 0.008511 | DC | ACOT9      |
| PHAX.1    | 5.71E-07 | -0.35236 | 0.123 | 0.308 | 0.008529 | DC | PHAX       |
| AKNA.2    | 5.76E-07 | 0.259629 | 0.166 | 0.071 | 0.008611 | DC | AKNA       |
| PDE4B.3   | 5.78E-07 | 0.401565 | 0.401 | 0.274 | 0.00863  | DC | PDE4B      |
| CYB5D2.1  | 5.79E-07 | -0.4261  | 0.075 | 0.235 | 0.00865  | DC | CYB5D2     |
| PLOD2.2   | 5.80E-07 | -0.34962 | 0.027 | 0.164 | 0.008673 | DC | PLOD2      |
| ATXN2.1   | 5.81E-07 | -0.33847 | 0.064 | 0.224 | 0.008687 | DC | ATXN2      |
| PXMP2.1   | 5.98E-07 | -0.30243 | 0.064 | 0.226 | 0.008935 | DC | PXMP2      |
| SMARCA4.2 | 6.04E-07 | -0.3854  | 0.176 | 0.364 | 0.009021 | DC | SMARCA4    |
| SUGP2.2   | 6.07E-07 | -0.30195 | 0.08  | 0.249 | 0.009074 | DC | SUGP2      |
| PITPNA-AS | 6.21E-07 | -0.33955 | 0.048 | 0.198 | 0.009281 | DC | PITPNA-AS1 |
| ARV1.2    | 6.37E-07 | -0.38537 | 0.037 | 0.181 | 0.009526 | DC | ARV1       |
| GNG4.2    | 6.39E-07 | -0.30984 | 0     | 0.118 | 0.009552 | DC | GNG4       |
| DUSP14.2  | 6.49E-07 | -0.3194  | 0.037 | 0.182 | 0.009705 | DC | DUSP14     |
| OBSL1.2   | 6.50E-07 | -0.28365 | 0.016 | 0.148 | 0.009716 | DC | OBSL1      |
| LRWD1     | 6.57E-07 | -0.29049 | 0.032 | 0.172 | 0.009816 | DC | LRWD1      |
| DTX3      | 6.57E-07 | -0.47591 | 0.096 | 0.258 | 0.009824 | DC | DTX3       |
| RND2.2    | 6.58E-07 | -0.34461 | 0.027 | 0.165 | 0.009833 | DC | RND2       |
| RPS6KA3.3 | 6.62E-07 | 0.387892 | 0.246 | 0.135 | 0.009891 | DC | RPS6KA3    |
| SOBP.2    | 6.67E-07 | -0.3225  | 0.011 | 0.136 | 0.009966 | DC | SOBP       |
| TAF9B     | 6.67E-07 | -0.27326 | 0.016 | 0.147 | 0.00997  | DC | TAF9B      |
| POLD2.2   | 6.74E-07 | -0.3742  | 0.225 | 0.424 | 0.010065 | DC | POLD2      |

|             |           |           |        |        |           |    |                |
|-------------|-----------|-----------|--------|--------|-----------|----|----------------|
| CARHSP1. 2  | 6. 81E-07 | -0. 39202 | 0. 23  | 0. 426 | 0. 010179 | DC | CARHSP1        |
| SIRPA. 3    | 6. 83E-07 | 0. 300325 | 0. 38  | 0. 241 | 0. 010203 | DC | SIRPA          |
| PPDPF       | 6. 86E-07 | -0. 28686 | 0. 69  | 0. 711 | 0. 01025  | DC | PPDPF          |
| PLA2G4A. 1  | 6. 94E-07 | 0. 196398 | 0. 096 | 0. 031 | 0. 010366 | DC | PLA2G4A        |
| ASNS. 3     | 6. 99E-07 | -0. 35423 | 0. 037 | 0. 179 | 0. 010451 | DC | ASNS           |
| DNAJB12. 2  | 7. 05E-07 | 0. 29295  | 0. 267 | 0. 146 | 0. 010533 | DC | DNAJB12        |
| TEAD1. 1    | 7. 07E-07 | -0. 25453 | 0. 016 | 0. 147 | 0. 010567 | DC | TEAD1          |
| PAK3. 3     | 7. 08E-07 | -0. 39643 | 0. 016 | 0. 145 | 0. 010585 | DC | PAK3           |
| PTAFR. 3    | 7. 15E-07 | 0. 223132 | 0. 251 | 0. 123 | 0. 010681 | DC | PTAFR          |
| TMEM198. 1  | 7. 18E-07 | -0. 26654 | 0      | 0. 117 | 0. 010731 | DC | TMEM198        |
| SNRPB. 1    | 7. 22E-07 | 0. 25203  | 0. 727 | 0. 575 | 0. 010788 | DC | SNRPB          |
| NPM3. 2     | 7. 30E-07 | 0. 408319 | 0. 337 | 0. 215 | 0. 01091  | DC | NPM3           |
| SFXN5. 3    | 7. 38E-07 | -0. 33925 | 0. 043 | 0. 191 | 0. 011032 | DC | SFXN5          |
| PCYOX1      | 7. 48E-07 | -0. 25614 | 0. 037 | 0. 183 | 0. 011171 | DC | PCYOX1         |
| ABHD15. 3   | 7. 50E-07 | 0. 264993 | 0. 139 | 0. 056 | 0. 011208 | DC | ABHD15         |
| PRR4. 3     | 7. 64E-07 | -0. 33645 | 0. 064 | 0. 219 | 0. 011422 | DC | PRR4           |
| C1QL1. 2    | 7. 65E-07 | -0. 32241 | 0      | 0. 116 | 0. 011433 | DC | C1QL1          |
| DOK3. 3     | 7. 72E-07 | 0. 224688 | 0. 155 | 0. 064 | 0. 011529 | DC | DOK3           |
| RSPRY1. 1   | 7. 72E-07 | -0. 34369 | 0. 086 | 0. 251 | 0. 011536 | DC | RSPRY1         |
| LINC00152   | 7. 78E-07 | 0. 375709 | 0. 385 | 0. 256 | 0. 011623 | DC | LINC00152      |
| RASA2. 2    | 7. 83E-07 | 0. 309165 | 0. 166 | 0. 074 | 0. 011697 | DC | RASA2          |
| FAM20C. 3   | 7. 89E-07 | -0. 3996  | 0. 07  | 0. 226 | 0. 011798 | DC | FAM20C         |
| PFKL. 3     | 7. 90E-07 | 0. 32774  | 0. 481 | 0. 361 | 0. 011803 | DC | PFKL           |
| NBPF1. 3    | 7. 91E-07 | -0. 27507 | 0. 075 | 0. 238 | 0. 011816 | DC | NBPF1          |
| DDAH1. 2    | 8. 23E-07 | -0. 24203 | 0. 005 | 0. 126 | 0. 012292 | DC | DDAH1          |
| ZNF704. 2   | 8. 24E-07 | -0. 3195  | 0. 005 | 0. 125 | 0. 012318 | DC | ZNF704         |
| ANXA4. 3    | 8. 36E-07 | 0. 333443 | 0. 316 | 0. 192 | 0. 012493 | DC | ANXA4          |
| CALU. 2     | 8. 39E-07 | -0. 38465 | 0. 209 | 0. 406 | 0. 012532 | DC | CALU           |
| CDCA7. 2    | 8. 47E-07 | -0. 3882  | 0. 005 | 0. 125 | 0. 012651 | DC | CDCA7          |
| USP15. 3    | 8. 50E-07 | 0. 327506 | 0. 374 | 0. 24  | 0. 012703 | DC | USP15          |
| ANXA2R. 2   | 8. 78E-07 | -0. 33348 | 0. 021 | 0. 154 | 0. 013126 | DC | ANXA2R         |
| ASIC4. 2    | 8. 84E-07 | -0. 49882 | 0. 016 | 0. 141 | 0. 013204 | DC | ASIC4          |
| PDCD5. 3    | 8. 88E-07 | -0. 39901 | 0. 348 | 0. 542 | 0. 013265 | DC | PDCD5          |
| BOD1. 2     | 8. 89E-07 | -0. 32754 | 0. 128 | 0. 306 | 0. 013281 | DC | BOD1           |
| IRF7. 3     | 8. 89E-07 | 0. 342838 | 0. 278 | 0. 159 | 0. 013281 | DC | IRF7           |
| GATM. 3     | 9. 11E-07 | -0. 43172 | 0. 176 | 0. 355 | 0. 013611 | DC | GATM           |
| HENMT1. 2   | 9. 15E-07 | 0. 166646 | 0. 096 | 0. 031 | 0. 013678 | DC | HENMT1         |
| ST8SIA4. 3  | 9. 18E-07 | 0. 347158 | 0. 23  | 0. 117 | 0. 013724 | DC | ST8SIA4        |
| AC004158. 9 | 9. 29E-07 | -0. 32856 | 0. 005 | 0. 124 | 0. 01388  | DC | AC004158. 3    |
| NUMB. 3     | 9. 40E-07 | 0. 361583 | 0. 289 | 0. 169 | 0. 014049 | DC | NUMB           |
| SSR3. 3     | 9. 43E-07 | 0. 179079 | 0. 652 | 0. 524 | 0. 014097 | DC | SSR3           |
| ZNF3. 1     | 9. 54E-07 | -0. 37612 | 0. 059 | 0. 208 | 0. 014263 | DC | ZNF3           |
| WWTR1. 3    | 9. 57E-07 | -0. 32282 | 0. 027 | 0. 162 | 0. 014306 | DC | WWTR1          |
| ZNF664. 1   | 9. 62E-07 | -0. 31062 | 0. 021 | 0. 151 | 0. 01438  | DC | ZNF664         |
| AC092484. 9 | 9. 74E-07 | 0. 138937 | 0. 053 | 0. 012 | 0. 01455  | DC | AC092484. 1    |
| RP11-849I   | 9. 76E-07 | -0. 34063 | 0. 011 | 0. 134 | 0. 014578 | DC | RP11-849I19. 1 |
| GADD45A. 3  | 9. 80E-07 | -0. 45041 | 0. 112 | 0. 281 | 0. 014651 | DC | GADD45A        |
| INHBA-AS1   | 9. 84E-07 | 0. 106181 | 0. 027 | 0. 004 | 0. 014702 | DC | INHBA-AS1      |
| GBP2. 2     | 9. 93E-07 | 0. 269079 | 0. 342 | 0. 206 | 0. 014837 | DC | GBP2           |
| SMOX. 3     | 9. 96E-07 | -0. 39649 | 0. 086 | 0. 25  | 0. 014889 | DC | SMOX           |
| ZNF883. 2   | 9. 99E-07 | -0. 3066  | 0. 016 | 0. 143 | 0. 014925 | DC | ZNF883         |

|            |           |           |        |        |           |    |               |
|------------|-----------|-----------|--------|--------|-----------|----|---------------|
| CIDEB. 1   | 9. 99E-07 | 0. 227691 | 0. 08  | 0. 024 | 0. 014925 | DC | CIDEB         |
| MTX2. 1    | 1. 01E-06 | -0. 39337 | 0. 144 | 0. 324 | 0. 015161 | DC | MTX2          |
| ACAD8      | 1. 02E-06 | -0. 29625 | 0. 043 | 0. 185 | 0. 01521  | DC | ACAD8         |
| PIK3R3. 1  | 1. 02E-06 | -0. 37638 | 0. 011 | 0. 134 | 0. 015289 | DC | PIK3R3        |
| PPP2R5B. 2 | 1. 04E-06 | -0. 30582 | 0. 032 | 0. 168 | 0. 015506 | DC | PPP2R5B       |
| IL3RA      | 1. 05E-06 | 0. 173862 | 0. 053 | 0. 013 | 0. 01571  | DC | IL3RA         |
| QDPR. 2    | 1. 07E-06 | -0. 40363 | 0. 176 | 0. 363 | 0. 015937 | DC | QDPR          |
| IL10RB-AS1 | 1. 10E-06 | 0. 247559 | 0. 118 | 0. 043 | 0. 016415 | DC | IL10RB-AS1    |
| SFT2D1. 3  | 1. 10E-06 | 0. 203132 | 0. 626 | 0. 499 | 0. 016504 | DC | SFT2D1        |
| PTK2B. 2   | 1. 10E-06 | 0. 305826 | 0. 235 | 0. 125 | 0. 016513 | DC | PTK2B         |
| COMMD6. 2  | 1. 11E-06 | 0. 129705 | 0. 909 | 0. 774 | 0. 016552 | DC | COMMD6        |
| NTM. 1     | 1. 12E-06 | -0. 44613 | 0      | 0. 113 | 0. 016706 | DC | NTM           |
| GABARAPL1  | 1. 13E-06 | 0. 325801 | 0. 428 | 0. 295 | 0. 016817 | DC | GABARAPL1     |
| FAM216A. 1 | 1. 13E-06 | -0. 25334 | 0. 005 | 0. 124 | 0. 016822 | DC | FAM216A       |
| ERCC1. 3   | 1. 13E-06 | 0. 238413 | 0. 604 | 0. 47  | 0. 016879 | DC | ERCC1         |
| TMEM88     | 1. 13E-06 | 0. 191127 | 0. 075 | 0. 022 | 0. 016938 | DC | TMEM88        |
| TCEAL5. 1  | 1. 14E-06 | -0. 4325  | 0. 005 | 0. 122 | 0. 01706  | DC | TCEAL5        |
| TTC9B. 3   | 1. 14E-06 | -0. 4492  | 0. 005 | 0. 122 | 0. 017091 | DC | TTC9B         |
| DMWD. 2    | 1. 15E-06 | -0. 21421 | 0. 016 | 0. 143 | 0. 017161 | DC | DMWD          |
| LRMP. 2    | 1. 15E-06 | 0. 244274 | 0. 118 | 0. 044 | 0. 017229 | DC | LRMP          |
| VMA21. 2   | 1. 18E-06 | 0. 349897 | 0. 455 | 0. 339 | 0. 017628 | DC | VMA21         |
| TPPP3. 3   | 1. 19E-06 | -0. 52576 | 0. 027 | 0. 156 | 0. 017768 | DC | TPPP3         |
| NRBP2. 2   | 1. 20E-06 | -0. 26946 | 0. 005 | 0. 123 | 0. 017871 | DC | NRBP2         |
| PGM3. 2    | 1. 22E-06 | -0. 30025 | 0. 037 | 0. 176 | 0. 018291 | DC | PGM3          |
| TSPAN6. 2  | 1. 22E-06 | -0. 31394 | 0. 021 | 0. 152 | 0. 018299 | DC | TSPAN6        |
| COL4A1     | 1. 23E-06 | -0. 23983 | 0      | 0. 112 | 0. 018362 | DC | COL4A1        |
| ARF3. 2    | 1. 24E-06 | 0. 275801 | 0. 492 | 0. 376 | 0. 018501 | DC | ARF3          |
| TCF3. 2    | 1. 24E-06 | -0. 26736 | 0. 011 | 0. 131 | 0. 018541 | DC | TCF3          |
| CD84. 3    | 1. 24E-06 | 0. 202186 | 0. 257 | 0. 127 | 0. 018584 | DC | CD84          |
| SCO2. 3    | 1. 24E-06 | 0. 354805 | 0. 332 | 0. 209 | 0. 018589 | DC | SCO2          |
| FNBP1. 3   | 1. 26E-06 | 0. 337734 | 0. 385 | 0. 261 | 0. 018857 | DC | FNBP1         |
| IFT81. 1   | 1. 27E-06 | -0. 22428 | 0. 027 | 0. 161 | 0. 01891  | DC | IFT81         |
| PNKD. 1    | 1. 27E-06 | -0. 37048 | 0. 262 | 0. 46  | 0. 018942 | DC | PNKD          |
| WNK3. 1    | 1. 28E-06 | -0. 28384 | 0. 005 | 0. 122 | 0. 019123 | DC | WNK3          |
| AK4. 3     | 1. 29E-06 | -0. 36535 | 0. 043 | 0. 182 | 0. 019323 | DC | AK4           |
| SLC37A3. 1 | 1. 29E-06 | -0. 31767 | 0. 011 | 0. 131 | 0. 019343 | DC | SLC37A3       |
| WEE1. 1    | 1. 30E-06 | -0. 23635 | 0. 021 | 0. 152 | 0. 019445 | DC | WEE1          |
| ATN1. 1    | 1. 31E-06 | -0. 28467 | 0. 043 | 0. 186 | 0. 019584 | DC | ATN1          |
| HLA-F. 3   | 1. 32E-06 | 0. 26181  | 0. 273 | 0. 144 | 0. 019682 | DC | HLA-F         |
| LHFPL3. 3  | 1. 32E-06 | -0. 34373 | 0. 005 | 0. 121 | 0. 019694 | DC | LHFPL3        |
| ZNF439. 2  | 1. 34E-06 | -0. 27512 | 0. 021 | 0. 15  | 0. 019951 | DC | ZNF439        |
| RAB20. 3   | 1. 36E-06 | 0. 328476 | 0. 38  | 0. 234 | 0. 020303 | DC | RAB20         |
| TRIM36. 3  | 1. 37E-06 | -0. 316   | 0. 043 | 0. 184 | 0. 020499 | DC | TRIM36        |
| GPT2. 1    | 1. 38E-06 | -0. 30857 | 0. 021 | 0. 149 | 0. 020603 | DC | GPT2          |
| ATP5A1. 1  | 1. 38E-06 | 0. 138333 | 0. 802 | 0. 672 | 0. 02065  | DC | ATP5A1        |
| CLDN12. 3  | 1. 42E-06 | -0. 28427 | 0. 016 | 0. 14  | 0. 021214 | DC | CLDN12        |
| C2orf80. 2 | 1. 43E-06 | -0. 33494 | 0. 005 | 0. 121 | 0. 021398 | DC | C2orf80       |
| EFNA1. 1   | 1. 46E-06 | -0. 40968 | 0. 011 | 0. 13  | 0. 021763 | DC | EFNA1         |
| UNC93B1. 3 | 1. 46E-06 | 0. 280449 | 0. 332 | 0. 199 | 0. 021833 | DC | UNC93B1       |
| TCF12. 3   | 1. 48E-06 | -0. 34508 | 0. 118 | 0. 286 | 0. 02216  | DC | TCF12         |
| RP11-345F  | 1. 50E-06 | -0. 2926  | 0. 032 | 0. 166 | 0. 022377 | DC | RP11-345P4. 9 |



|            |          |          |       |       |          |    |           |
|------------|----------|----------|-------|-------|----------|----|-----------|
| ZNF821.3   | 1.50E-06 | -0.33317 | 0.032 | 0.165 | 0.022476 | DC | ZNF821    |
| SCD.3      | 1.51E-06 | -0.43552 | 0.064 | 0.215 | 0.022501 | DC | SCD       |
| CES1       | 1.51E-06 | 0.150458 | 0.048 | 0.011 | 0.022516 | DC | CES1      |
| BCAM.1     | 1.52E-06 | -0.25659 | 0     | 0.111 | 0.022644 | DC | BCAM      |
| XRRA1.1    | 1.52E-06 | -0.27    | 0.011 | 0.131 | 0.022766 | DC | XRRA1     |
| FAM221A.3  | 1.53E-06 | -0.4169  | 0.043 | 0.18  | 0.022938 | DC | FAM221A   |
| NXPH1.3    | 1.54E-06 | -0.34293 | 0.016 | 0.138 | 0.022941 | DC | NXPH1     |
| ITGA7.1    | 1.54E-06 | -0.24687 | 0.016 | 0.139 | 0.023018 | DC | ITGA7     |
| RHBDD2.2   | 1.55E-06 | -0.38136 | 0.267 | 0.462 | 0.0231   | DC | RHBDD2    |
| LSM6.1     | 1.55E-06 | 0.302422 | 0.455 | 0.329 | 0.023119 | DC | LSM6      |
| MFGE8      | 1.56E-06 | -0.27767 | 0.048 | 0.193 | 0.023376 | DC | MFGE8     |
| TMEM178A.1 | 1.57E-06 | -0.28929 | 0.005 | 0.12  | 0.023526 | DC | TMEM178A  |
| GLCCI1.2   | 1.58E-06 | -0.42987 | 0.027 | 0.153 | 0.02365  | DC | GLCCI1    |
| SLC4A4.1   | 1.60E-06 | -0.31755 | 0     | 0.11  | 0.02386  | DC | SLC4A4    |
| BLOC1S6.2  | 1.60E-06 | 0.368843 | 0.374 | 0.258 | 0.023885 | DC | BLOC1S6   |
| KIF1A.2    | 1.61E-06 | -0.39985 | 0.011 | 0.128 | 0.024049 | DC | KIF1A     |
| BRD8.1     | 1.63E-06 | -0.33729 | 0.032 | 0.164 | 0.024311 | DC | BRD8      |
| CSPG5.2    | 1.65E-06 | -0.37059 | 0     | 0.11  | 0.024621 | DC | CSPG5     |
| B2M.3      | 1.65E-06 | -0.27471 | 1     | 0.97  | 0.024633 | DC | B2M       |
| C1QC.3     | 1.66E-06 | 0.133485 | 0.738 | 0.497 | 0.024793 | DC | C1QC      |
| KDM1A.1    | 1.67E-06 | -0.32926 | 0.059 | 0.206 | 0.025004 | DC | KDM1A     |
| SIRPB1     | 1.69E-06 | 0.132147 | 0.048 | 0.011 | 0.025287 | DC | SIRPB1    |
| NPTXR.2    | 1.70E-06 | -0.25655 | 0.011 | 0.129 | 0.0254   | DC | NPTXR     |
| PPP1R3B.1  | 1.72E-06 | 0.244803 | 0.15  | 0.065 | 0.025639 | DC | PPP1R3B   |
| FAM161A.1  | 1.72E-06 | -0.28904 | 0     | 0.11  | 0.025672 | DC | FAM161A   |
| MSM01.2    | 1.74E-06 | -0.36492 | 0.059 | 0.203 | 0.026017 | DC | MSM01     |
| SCARA3.2   | 1.75E-06 | -0.22217 | 0.016 | 0.14  | 0.026112 | DC | SCARA3    |
| INSM1.3    | 1.77E-06 | -0.32246 | 0.005 | 0.119 | 0.026407 | DC | INSM1     |
| MGLL.2     | 1.77E-06 | -0.33809 | 0.021 | 0.147 | 0.026473 | DC | MGLL      |
| DEK.3      | 1.77E-06 | 0.274109 | 0.588 | 0.462 | 0.02648  | DC | DEK       |
| PIK3AP1.3  | 1.77E-06 | 0.241678 | 0.15  | 0.063 | 0.026484 | DC | PIK3AP1   |
| PELI2      | 1.78E-06 | 0.20331  | 0.08  | 0.025 | 0.026586 | DC | PELI2     |
| SEPT10.2   | 1.81E-06 | -0.27568 | 0.005 | 0.119 | 0.026996 | DC | 10-Sep    |
| CPNE2.3    | 1.81E-06 | -0.3541  | 0.043 | 0.18  | 0.027113 | DC | CPNE2     |
| NFIL3.3    | 1.83E-06 | 0.28554  | 0.176 | 0.082 | 0.027327 | DC | NFIL3     |
| CNRIP1.1   | 1.83E-06 | -0.34917 | 0.059 | 0.207 | 0.027372 | DC | CNRIP1    |
| AKAP7.3    | 1.85E-06 | -0.30035 | 0.053 | 0.197 | 0.027661 | DC | AKAP7     |
| ATP5F1.2   | 1.89E-06 | 0.127495 | 0.754 | 0.642 | 0.028314 | DC | ATP5F1    |
| ZNF358.2   | 1.91E-06 | -0.22301 | 0.032 | 0.167 | 0.028576 | DC | ZNF358    |
| RYR1       | 1.92E-06 | 0.146639 | 0.059 | 0.015 | 0.028665 | DC | RYR1      |
| TXNIP.1    | 1.92E-06 | 0.217319 | 0.594 | 0.444 | 0.028692 | DC | TXNIP     |
| ICOSLG.3   | 1.98E-06 | 0.338999 | 0.187 | 0.089 | 0.029613 | DC | ICOSLG    |
| AQP4.2     | 1.98E-06 | -0.49587 | 0.037 | 0.168 | 0.029635 | DC | AQP4      |
| PPAT.1     | 1.99E-06 | -0.28455 | 0.021 | 0.146 | 0.029799 | DC | PPAT      |
| RFK.1      | 2.00E-06 | -0.33354 | 0.086 | 0.24  | 0.029849 | DC | RFK       |
| SPATC1L.2  | 2.00E-06 | -0.23883 | 0.053 | 0.197 | 0.029912 | DC | SPATC1L   |
| KIDINS220  | 2.01E-06 | -0.32916 | 0.107 | 0.271 | 0.029971 | DC | KIDINS220 |
| MED19      | 2.02E-06 | -0.33206 | 0.112 | 0.284 | 0.030137 | DC | MED19     |
| GNAQ.3     | 2.02E-06 | 0.373703 | 0.401 | 0.285 | 0.030248 | DC | GNAQ      |
| RSL1D1.1   | 2.05E-06 | 0.218603 | 0.61  | 0.495 | 0.030673 | DC | RSL1D1    |
| IQCK.1     | 2.06E-06 | -0.28609 | 0.011 | 0.128 | 0.03072  | DC | IQCK      |

|            |           |           |        |        |           |    |               |
|------------|-----------|-----------|--------|--------|-----------|----|---------------|
| ANK2. 3    | 2. 06E-06 | -0. 24973 | 0. 032 | 0. 166 | 0. 030791 | DC | ANK2          |
| CDK4. 1    | 2. 07E-06 | -0. 42584 | 0. 305 | 0. 487 | 0. 03095  | DC | CDK4          |
| GNA11      | 2. 07E-06 | -0. 24579 | 0      | 0. 108 | 0. 030977 | DC | GNA11         |
| TMEM181. 3 | 2. 08E-06 | -0. 20495 | 0. 032 | 0. 166 | 0. 031034 | DC | TMEM181       |
| RP4-665J2  | 2. 13E-06 | -0. 28913 | 0. 011 | 0. 127 | 0. 031863 | DC | RP4-665J23. 1 |
| BAK1. 3    | 2. 13E-06 | 0. 359947 | 0. 214 | 0. 114 | 0. 031894 | DC | BAK1          |
| PRTFDC1    | 2. 15E-06 | -0. 31189 | 0. 016 | 0. 137 | 0. 032182 | DC | PRTFDC1       |
| NNMT. 1    | 2. 17E-06 | -0. 65273 | 0. 032 | 0. 16  | 0. 032416 | DC | NNMT          |
| VWA1. 3    | 2. 20E-06 | -0. 28815 | 0. 021 | 0. 146 | 0. 032834 | DC | VWA1          |
| SDC2. 3    | 2. 20E-06 | 0. 456633 | 0. 305 | 0. 19  | 0. 032933 | DC | SDC2          |
| KIF2A. 3   | 2. 22E-06 | -0. 35114 | 0. 086 | 0. 238 | 0. 033104 | DC | KIF2A         |
| ATP1A1. 1  | 2. 22E-06 | 0. 21597  | 0. 594 | 0. 471 | 0. 03321  | DC | ATP1A1        |
| C11orf96.  | 2. 23E-06 | -0. 35993 | 0. 016 | 0. 136 | 0. 033389 | DC | C11orf96      |
| SLC16A1. 3 | 2. 24E-06 | -0. 3406  | 0. 08  | 0. 236 | 0. 033501 | DC | SLC16A1       |
| MAP1A. 2   | 2. 25E-06 | -0. 30387 | 0. 075 | 0. 232 | 0. 033585 | DC | MAP1A         |
| SOX12. 2   | 2. 27E-06 | -0. 24268 | 0. 005 | 0. 117 | 0. 033982 | DC | SOX12         |
| EFS. 1     | 2. 28E-06 | -0. 30416 | 0      | 0. 107 | 0. 034021 | DC | EFS           |
| SLC35F1. 1 | 2. 31E-06 | -0. 22833 | 0. 011 | 0. 128 | 0. 034452 | DC | SLC35F1       |
| MAT2A. 2   | 2. 31E-06 | 0. 331597 | 0. 497 | 0. 382 | 0. 034552 | DC | MAT2A         |
| UQCRB. 3   | 2. 31E-06 | 0. 135428 | 0. 781 | 0. 676 | 0. 034575 | DC | UQCRB         |
| GIPC1. 1   | 2. 32E-06 | -0. 33548 | 0. 107 | 0. 27  | 0. 034706 | DC | GIPC1         |
| TMEM255B.  | 2. 32E-06 | 0. 243093 | 0. 134 | 0. 054 | 0. 034706 | DC | TMEM255B      |
| DLX1. 3    | 2. 33E-06 | -0. 41426 | 0. 005 | 0. 117 | 0. 034751 | DC | DLX1          |
| SEMA4D. 3  | 2. 33E-06 | 0. 196354 | 0. 176 | 0. 079 | 0. 034871 | DC | SEMA4D        |
| MSANTD4    | 2. 34E-06 | -0. 27918 | 0. 011 | 0. 127 | 0. 034913 | DC | MSANTD4       |
| RARRES2. 2 | 2. 34E-06 | -0. 66096 | 0. 027 | 0. 151 | 0. 034944 | DC | RARRES2       |
| PTX3. 2    | 2. 35E-06 | -0. 33122 | 0. 005 | 0. 117 | 0. 0351   | DC | PTX3          |
| ACYP1      | 2. 35E-06 | -0. 33104 | 0. 043 | 0. 179 | 0. 035122 | DC | ACYP1         |
| CARD8. 2   | 2. 37E-06 | 0. 272063 | 0. 262 | 0. 147 | 0. 035492 | DC | CARD8         |
| PNPLA2. 3  | 2. 38E-06 | 0. 329088 | 0. 326 | 0. 21  | 0. 035558 | DC | PNPLA2        |
| TNPO2. 1   | 2. 38E-06 | -0. 25437 | 0. 043 | 0. 182 | 0. 035608 | DC | TNPO2         |
| RASSF8-AS  | 2. 39E-06 | -0. 32864 | 0. 032 | 0. 162 | 0. 035647 | DC | RASSF8-AS1    |
| TNFRSF19.  | 2. 50E-06 | -0. 22251 | 0      | 0. 107 | 0. 03736  | DC | TNFRSF19      |
| SPARC. 2   | 2. 50E-06 | -0. 53253 | 0. 214 | 0. 387 | 0. 03743  | DC | SPARC         |
| AMER2. 2   | 2. 54E-06 | -0. 44222 | 0. 005 | 0. 116 | 0. 037903 | DC | AMER2         |
| SIGIRR. 3  | 2. 54E-06 | 0. 394815 | 0. 31  | 0. 194 | 0. 037905 | DC | SIGIRR        |
| DAAM1. 1   | 2. 56E-06 | -0. 38449 | 0. 091 | 0. 243 | 0. 038261 | DC | DAAM1         |
| ROCK2      | 2. 58E-06 | -0. 25401 | 0. 027 | 0. 154 | 0. 03851  | DC | ROCK2         |
| KCNE4. 1   | 2. 58E-06 | -0. 25139 | 0      | 0. 106 | 0. 038544 | DC | KCNE4         |
| CPXM1. 2   | 2. 59E-06 | -0. 27043 | 0. 011 | 0. 126 | 0. 038732 | DC | CPXM1         |
| ZSCAN18. 1 | 2. 63E-06 | -0. 26718 | 0. 08  | 0. 234 | 0. 03927  | DC | ZSCAN18       |
| FRMD4B. 3  | 2. 63E-06 | 0. 254436 | 0. 283 | 0. 157 | 0. 039346 | DC | FRMD4B        |
| CHL1. 1    | 2. 65E-06 | -0. 2843  | 0. 027 | 0. 155 | 0. 039552 | DC | CHL1          |
| DTNA. 2    | 2. 65E-06 | -0. 38926 | 0. 096 | 0. 255 | 0. 039666 | DC | DTNA          |
| CLIC2. 1   | 2. 67E-06 | 0. 321797 | 0. 112 | 0. 043 | 0. 039889 | DC | CLIC2         |
| ZNF827. 2  | 2. 73E-06 | -0. 24368 | 0. 005 | 0. 116 | 0. 040722 | DC | ZNF827        |
| CTC-428H1  | 2. 73E-06 | 0. 199268 | 0. 07  | 0. 02  | 0. 040767 | DC | CTC-428H11. 2 |
| ALDH7A1    | 2. 73E-06 | -0. 27753 | 0. 112 | 0. 278 | 0. 040862 | DC | ALDH7A1       |
| FLOT1. 3   | 2. 75E-06 | 0. 2329   | 0. 615 | 0. 501 | 0. 041053 | DC | FLOT1         |
| PDLIM3. 2  | 2. 77E-06 | -0. 40056 | 0. 005 | 0. 116 | 0. 041326 | DC | PDLIM3        |
| NT5C3B. 2  | 2. 77E-06 | -0. 33851 | 0. 16  | 0. 334 | 0. 041386 | DC | NT5C3B        |

|             |           |           |        |        |           |    |               |
|-------------|-----------|-----------|--------|--------|-----------|----|---------------|
| PALM. 1     | 2. 77E-06 | -0. 23822 | 0      | 0. 106 | 0. 041451 | DC | PALM          |
| ARL9. 2     | 2. 77E-06 | -0. 24629 | 0      | 0. 106 | 0. 041451 | DC | ARL9          |
| TSPAN3. 2   | 2. 78E-06 | -0. 31508 | 0. 283 | 0. 462 | 0. 041563 | DC | TSPAN3        |
| SEPP1. 2    | 2. 79E-06 | -0. 67186 | 0. 176 | 0. 331 | 0. 041677 | DC | SEPP1         |
| SLC25A23. 2 | 2. 80E-06 | -0. 22468 | 0. 016 | 0. 135 | 0. 041916 | DC | SLC25A23      |
| PDGFRA. 2   | 2. 84E-06 | -0. 37217 | 0. 027 | 0. 15  | 0. 042378 | DC | PDGFRA        |
| SMDT1. 1    | 2. 84E-06 | 0. 176357 | 0. 668 | 0. 557 | 0. 042403 | DC | SMDT1         |
| EHMT2. 2    | 2. 85E-06 | -0. 30014 | 0. 059 | 0. 203 | 0. 042571 | DC | EHMT2         |
| AHCYL1. 3   | 2. 87E-06 | -0. 39663 | 0. 155 | 0. 33  | 0. 042874 | DC | AHCYL1        |
| ABAT. 3     | 2. 87E-06 | -0. 28501 | 0. 032 | 0. 162 | 0. 042955 | DC | ABAT          |
| MTDH. 3     | 2. 90E-06 | 0. 195028 | 0. 727 | 0. 608 | 0. 04332  | DC | MTDH          |
| PPP1R18. 3  | 2. 90E-06 | 0. 328278 | 0. 417 | 0. 291 | 0. 043344 | DC | PPP1R18       |
| HMGB3. 2    | 2. 93E-06 | -0. 33591 | 0. 118 | 0. 281 | 0. 04376  | DC | HMGB3         |
| DNALI1. 2   | 2. 94E-06 | -0. 2905  | 0. 005 | 0. 115 | 0. 043888 | DC | DNALI1        |
| ID3. 3      | 2. 95E-06 | 0. 138827 | 0. 412 | 0. 262 | 0. 044063 | DC | ID3           |
| CAMK1. 2    | 2. 95E-06 | 0. 414728 | 0. 337 | 0. 224 | 0. 044147 | DC | CAMK1         |
| RPAP2. 1    | 2. 95E-06 | -0. 28434 | 0. 048 | 0. 187 | 0. 044159 | DC | RPAP2         |
| ZBTB8A. 2   | 2. 98E-06 | -0. 30009 | 0      | 0. 105 | 0. 044574 | DC | ZBTB8A        |
| RP11-792A   | 3. 00E-06 | -0. 37067 | 0. 07  | 0. 212 | 0. 044782 | DC | RP11-792A8. 4 |
| UCHL3. 1    | 3. 03E-06 | 0. 336123 | 0. 369 | 0. 245 | 0. 045262 | DC | UCHL3         |
| LGALS3BP. 3 | 3. 04E-06 | -0. 46571 | 0. 273 | 0. 452 | 0. 045386 | DC | LGALS3BP      |
| PIPOX. 2    | 3. 06E-06 | -0. 27687 | 0. 016 | 0. 134 | 0. 045722 | DC | PIPOX         |
| IKBIP. 2    | 3. 10E-06 | 0. 234206 | 0. 353 | 0. 224 | 0. 046383 | DC | IKBIP         |
| CBR4. 3     | 3. 12E-06 | -0. 35425 | 0. 053 | 0. 19  | 0. 046638 | DC | CBR4          |
| MACF1. 1    | 3. 13E-06 | -0. 25857 | 0. 144 | 0. 325 | 0. 046803 | DC | MACF1         |
| SPATS2L. 2  | 3. 14E-06 | -0. 33541 | 0. 155 | 0. 335 | 0. 046935 | DC | SPATS2L       |
| LTBP3. 1    | 3. 16E-06 | -0. 32041 | 0. 07  | 0. 212 | 0. 047234 | DC | LTBP3         |
| CAMSAP2. 1  | 3. 16E-06 | -0. 26924 | 0. 027 | 0. 151 | 0. 04727  | DC | CAMSAP2       |
| TLN1. 3     | 3. 20E-06 | 0. 298981 | 0. 406 | 0. 283 | 0. 047894 | DC | TLN1          |
| JMJD1C. 3   | 3. 25E-06 | 0. 357317 | 0. 444 | 0. 332 | 0. 048507 | DC | JMJD1C        |
| KLHL42. 2   | 3. 26E-06 | -0. 23596 | 0. 032 | 0. 161 | 0. 048684 | DC | KLHL42        |
| EIF4EBP2. 3 | 3. 26E-06 | 0. 327638 | 0. 246 | 0. 139 | 0. 048751 | DC | EIF4EBP2      |
| LYRM9. 2    | 3. 27E-06 | -0. 3585  | 0. 043 | 0. 175 | 0. 048869 | DC | LYRM9         |
| MESP1       | 3. 29E-06 | -0. 24784 | 0. 016 | 0. 133 | 0. 049129 | DC | MESP1         |
| DIRAS1. 1   | 3. 30E-06 | -0. 24232 | 0. 005 | 0. 115 | 0. 049322 | DC | DIRAS1        |
| LAMC1. 1    | 3. 34E-06 | -0. 20932 | 0      | 0. 104 | 0. 049958 | DC | LAMC1         |
| ADORA1. 1   | 3. 36E-06 | -0. 28969 | 0. 011 | 0. 124 | 0. 050263 | DC | ADORA1        |
| ATP9A. 2    | 3. 41E-06 | -0. 26884 | 0. 005 | 0. 114 | 0. 050912 | DC | ATP9A         |
| SHISA4. 2   | 3. 42E-06 | -0. 28593 | 0. 091 | 0. 249 | 0. 051089 | DC | SHISA4        |
| ANKIB1. 2   | 3. 44E-06 | -0. 2794  | 0. 064 | 0. 211 | 0. 051451 | DC | ANKIB1        |
| TRIM24. 3   | 3. 47E-06 | -0. 26552 | 0. 053 | 0. 194 | 0. 0518   | DC | TRIM24        |
| GTF2H2. 1   | 3. 52E-06 | -0. 25348 | 0. 048 | 0. 187 | 0. 052569 | DC | GTF2H2        |
| MTUS1. 2    | 3. 53E-06 | -0. 37833 | 0. 027 | 0. 149 | 0. 052729 | DC | MTUS1         |
| FRYL. 3     | 3. 55E-06 | -0. 24791 | 0. 053 | 0. 19  | 0. 053001 | DC | FRYL          |
| DBI. 3      | 3. 60E-06 | -0. 32755 | 0. 861 | 0. 843 | 0. 053822 | DC | DBI           |
| GPR84. 3    | 3. 60E-06 | 0. 32339  | 0. 16  | 0. 072 | 0. 053867 | DC | GPR84         |
| TMEM132B. 3 | 3. 63E-06 | -0. 23795 | 0      | 0. 103 | 0. 054271 | DC | TMEM132B      |
| AKAP6. 2    | 3. 63E-06 | -0. 28472 | 0      | 0. 103 | 0. 054271 | DC | AKAP6         |
| SUN1. 3     | 3. 72E-06 | -0. 30188 | 0. 064 | 0. 21  | 0. 055591 | DC | SUN1          |
| ATP1A3. 2   | 3. 73E-06 | -0. 38456 | 0. 011 | 0. 122 | 0. 055762 | DC | ATP1A3        |
| SERP2. 1    | 3. 75E-06 | -0. 29963 | 0      | 0. 103 | 0. 055982 | DC | SERP2         |

|            |          |          |       |       |          |    |           |
|------------|----------|----------|-------|-------|----------|----|-----------|
| ACTR3.1    | 3.76E-06 | 0.187412 | 0.642 | 0.558 | 0.056186 | DC | ACTR3     |
| PFKFB3.3   | 3.77E-06 | 0.388718 | 0.364 | 0.242 | 0.056302 | DC | PFKFB3    |
| SCIMP.3    | 3.77E-06 | 0.246293 | 0.176 | 0.081 | 0.056363 | DC | SCIMP     |
| MUM1.3     | 3.78E-06 | -0.33993 | 0.187 | 0.367 | 0.056485 | DC | MUM1      |
| NDP.1      | 3.79E-06 | -0.30538 | 0.005 | 0.113 | 0.056578 | DC | NDP       |
| ID1.1      | 3.81E-06 | -0.34089 | 0.011 | 0.122 | 0.056869 | DC | ID1       |
| MARCH9.2   | 3.84E-06 | -0.3742  | 0.032 | 0.156 | 0.057391 | DC | 9-Mar     |
| PSMA4.1    | 3.85E-06 | 0.177803 | 0.652 | 0.536 | 0.057473 | DC | PSMA4     |
| NT5DC2.2   | 3.85E-06 | -0.27076 | 0.037 | 0.166 | 0.057473 | DC | NT5DC2    |
| HOXA7.1    | 3.86E-06 | -0.35999 | 0     | 0.103 | 0.057745 | DC | HOXA7     |
| ITGB1.2    | 3.87E-06 | 0.241967 | 0.524 | 0.383 | 0.057862 | DC | ITGB1     |
| DAZAP2.2   | 3.89E-06 | 0.221827 | 0.642 | 0.535 | 0.058196 | DC | DAZAP2    |
| LAMA5.1    | 3.98E-06 | -0.21101 | 0.005 | 0.113 | 0.059492 | DC | LAMA5     |
| PXDN       | 3.99E-06 | -0.23897 | 0     | 0.103 | 0.059564 | DC | PXDN      |
| H1FX.3     | 4.00E-06 | -0.36687 | 0.214 | 0.387 | 0.059807 | DC | H1FX      |
| ARHGAP21.1 | 4.06E-06 | -0.34447 | 0.096 | 0.253 | 0.060697 | DC | ARHGAP21  |
| C5AR1.3    | 4.08E-06 | 0.227611 | 0.39  | 0.235 | 0.060929 | DC | C5AR1     |
| DTYMK.2    | 4.08E-06 | -0.35651 | 0.16  | 0.332 | 0.061045 | DC | DTYMK     |
| NAP1L1.1   | 4.12E-06 | 0.133517 | 0.786 | 0.672 | 0.061571 | DC | NAP1L1    |
| CD200.3    | 4.16E-06 | -0.31838 | 0.005 | 0.112 | 0.062183 | DC | CD200     |
| ARHGAP12.1 | 4.17E-06 | -0.30162 | 0.053 | 0.191 | 0.062304 | DC | ARHGAP12  |
| SNAPC3.1   | 4.19E-06 | -0.31522 | 0.021 | 0.138 | 0.062648 | DC | SNAPC3    |
| RENBP.3    | 4.29E-06 | 0.25539  | 0.251 | 0.134 | 0.064141 | DC | RENBP     |
| COLGALT2.1 | 4.40E-06 | -0.26233 | 0.021 | 0.141 | 0.06577  | DC | COLGALT2  |
| LINC00094  | 4.44E-06 | -0.24176 | 0.016 | 0.131 | 0.066369 | DC | LINC00094 |
| HSPA5.2    | 4.46E-06 | 0.137285 | 0.807 | 0.654 | 0.066716 | DC | HSPA5     |
| PLCG1.1    | 4.47E-06 | -0.23047 | 0     | 0.102 | 0.066729 | DC | PLCG1     |
| MAP4.1     | 4.47E-06 | -0.30847 | 0.16  | 0.338 | 0.066818 | DC | MAP4      |
| YWHAG.3    | 4.52E-06 | -0.34404 | 0.214 | 0.393 | 0.067483 | DC | YWHAG     |
| SHD.2      | 4.52E-06 | -0.40507 | 0.016 | 0.128 | 0.067493 | DC | SHD       |
| ZNF677.1   | 4.54E-06 | -0.26557 | 0.059 | 0.199 | 0.067861 | DC | ZNF677    |
| CLCN3.1    | 4.58E-06 | -0.29077 | 0.096 | 0.251 | 0.068507 | DC | CLCN3     |
| B3GNT2.3   | 4.59E-06 | 0.291705 | 0.144 | 0.065 | 0.06859  | DC | B3GNT2    |
| TGFBR1.3   | 4.60E-06 | 0.300819 | 0.278 | 0.16  | 0.068668 | DC | TGFBR1    |
| RNF125.2   | 4.61E-06 | 0.1545   | 0.075 | 0.023 | 0.068849 | DC | RNF125    |
| EFHC1.3    | 4.61E-06 | -0.32337 | 0.064 | 0.207 | 0.068964 | DC | EFHC1     |
| EEF1A1.3   | 4.62E-06 | -0.28125 | 0.898 | 0.824 | 0.068986 | DC | EEF1A1    |
| SOGA1.2    | 4.68E-06 | -0.28135 | 0.032 | 0.157 | 0.069952 | DC | SOGA1     |
| JUNB.1     | 4.68E-06 | 0.153873 | 0.85  | 0.722 | 0.069995 | DC | JUNB      |
| EFNB2.2    | 4.75E-06 | -0.2024  | 0     | 0.101 | 0.070989 | DC | EFNB2     |
| NUP160.1   | 4.76E-06 | -0.3228  | 0.037 | 0.164 | 0.071074 | DC | NUP160    |
| SRSF10.2   | 4.77E-06 | -0.37807 | 0.091 | 0.242 | 0.071274 | DC | SRSF10    |
| SLAMF8.3   | 4.78E-06 | 0.234691 | 0.144 | 0.062 | 0.071367 | DC | SLAMF8    |
| GPR108.2   | 4.79E-06 | 0.340035 | 0.374 | 0.264 | 0.071581 | DC | GPR108    |
| AGAP1.1    | 4.82E-06 | -0.25497 | 0.011 | 0.121 | 0.071983 | DC | AGAP1     |
| IGSF10     | 4.85E-06 | -0.21717 | 0     | 0.101 | 0.072468 | DC | IGSF10    |
| TRAPPC6A.1 | 4.86E-06 | 0.295147 | 0.385 | 0.257 | 0.07262  | DC | TRAPPC6A  |
| MORF4L2.2  | 4.86E-06 | -0.32592 | 0.449 | 0.628 | 0.07267  | DC | MORF4L2   |
| PHLDA3     | 4.87E-06 | -0.2579  | 0.043 | 0.173 | 0.072722 | DC | PHLDA3    |
| SKP1.2     | 4.87E-06 | -0.25979 | 0.877 | 0.864 | 0.072766 | DC | SKP1      |
| RFTN2.3    | 4.94E-06 | -0.34333 | 0.016 | 0.129 | 0.073854 | DC | RFTN2     |

|           |          |          |       |       |          |    |               |
|-----------|----------|----------|-------|-------|----------|----|---------------|
| PSMB8.1   | 5.00E-06 | 0.225628 | 0.54  | 0.413 | 0.074648 | DC | PSMB8         |
| AUTS2.3   | 5.05E-06 | -0.27202 | 0.011 | 0.12  | 0.075469 | DC | AUTS2         |
| KLHL13.2  | 5.11E-06 | -0.2313  | 0     | 0.101 | 0.076299 | DC | KLHL13        |
| COPS8.3   | 5.12E-06 | -0.43584 | 0.299 | 0.472 | 0.076538 | DC | COPS8         |
| RP11-262H | 5.14E-06 | -0.26891 | 0.011 | 0.12  | 0.07685  | DC | RP11-262H14.4 |
| FBX03.1   | 5.15E-06 | -0.29804 | 0.043 | 0.172 | 0.076997 | DC | FBX03         |
| PAM.2     | 5.15E-06 | -0.20987 | 0.037 | 0.167 | 0.077005 | DC | PAM           |
| MAML3.2   | 5.21E-06 | 0.183164 | 0.096 | 0.034 | 0.077885 | DC | MAML3         |
| FBX032.3  | 5.22E-06 | -0.37963 | 0.032 | 0.156 | 0.077958 | DC | FBX032        |
| ANKS1B.2  | 5.28E-06 | -0.41474 | 0.005 | 0.109 | 0.078886 | DC | ANKS1B        |
| PLA2G5.2  | 5.31E-06 | -0.4739  | 0.005 | 0.11  | 0.079395 | DC | PLA2G5        |
| CDC42EP1. | 5.32E-06 | -0.2812  | 0.016 | 0.13  | 0.079575 | DC | CDC42EP1      |
| ASRGL1.3  | 5.47E-06 | -0.3002  | 0.064 | 0.203 | 0.081796 | DC | ASRGL1        |
| TMEM51.2  | 5.50E-06 | 0.279075 | 0.219 | 0.117 | 0.082176 | DC | TMEM51        |
| PDCD4.3   | 5.51E-06 | 0.234792 | 0.262 | 0.147 | 0.082355 | DC | PDCD4         |
| SEZ6L.2   | 5.54E-06 | -0.33365 | 0.021 | 0.137 | 0.082827 | DC | SEZ6L         |
| RP11-47L3 | 5.54E-06 | 0.126237 | 0.043 | 0.009 | 0.082858 | DC | RP11-47L3.1   |
| ANKRD35   | 5.63E-06 | -0.23268 | 0.021 | 0.139 | 0.084156 | DC | ANKRD35       |
| TMEM99.2  | 5.64E-06 | -0.25258 | 0.016 | 0.129 | 0.084286 | DC | TMEM99        |
| RIPK3.1   | 5.64E-06 | 0.129805 | 0.064 | 0.018 | 0.08434  | DC | RIPK3         |
| LANCL2.3  | 5.70E-06 | -0.29953 | 0.032 | 0.154 | 0.085208 | DC | LANCL2        |
| GDAP1.3   | 5.70E-06 | -0.33846 | 0.032 | 0.154 | 0.085208 | DC | GDAP1         |
| GABARAP.1 | 5.74E-06 | 0.217267 | 0.583 | 0.459 | 0.085735 | DC | GABARAP       |
| WHSC1.2   | 5.82E-06 | -0.25849 | 0.032 | 0.155 | 0.086977 | DC | WHSC1         |
| ZEB1.3    | 5.83E-06 | -0.26803 | 0.059 | 0.195 | 0.087188 | DC | ZEB1          |
| DCTN4.2   | 5.85E-06 | -0.30659 | 0.053 | 0.187 | 0.087446 | DC | DCTN4         |
| ELN.1     | 5.89E-06 | -0.32778 | 0.005 | 0.11  | 0.08809  | DC | ELN           |
| FAM78A.2  | 5.90E-06 | 0.189776 | 0.096 | 0.035 | 0.088138 | DC | FAM78A        |
| ACAP3.3   | 5.93E-06 | -0.31062 | 0.075 | 0.218 | 0.08857  | DC | ACAP3         |
| PRDX3.1   | 5.94E-06 | 0.197696 | 0.588 | 0.465 | 0.088708 | DC | PRDX3         |
| JDP2.3    | 6.01E-06 | 0.223165 | 0.155 | 0.069 | 0.089847 | DC | JDP2          |
| THAP5.1   | 6.03E-06 | -0.28175 | 0.048 | 0.181 | 0.090134 | DC | THAP5         |
| GRK4.1    | 6.08E-06 | -0.26398 | 0     | 0.099 | 0.090884 | DC | GRK4          |
| CEP70.1   | 6.08E-06 | -0.26784 | 0     | 0.099 | 0.090884 | DC | CEP70         |
| TMEM52B.3 | 6.12E-06 | 0.167107 | 0.118 | 0.046 | 0.091403 | DC | TMEM52B       |
| PLEKHA4.2 | 6.18E-06 | -0.2404  | 0.016 | 0.128 | 0.092416 | DC | PLEKHA4       |
| ANP32A.3  | 6.18E-06 | 0.227681 | 0.54  | 0.426 | 0.092417 | DC | ANP32A        |
| VEZF1.3   | 6.18E-06 | -0.31418 | 0.091 | 0.24  | 0.092427 | DC | VEZF1         |
| UQCRC2    | 6.19E-06 | 0.184999 | 0.62  | 0.511 | 0.092561 | DC | UQCRC2        |
| FZD7      | 6.21E-06 | -0.21418 | 0     | 0.099 | 0.092771 | DC | FZD7          |
| PREPL.1   | 6.24E-06 | -0.25787 | 0.053 | 0.191 | 0.093183 | DC | PREPL         |
| JAG1.2    | 6.24E-06 | -0.28791 | 0.037 | 0.161 | 0.093289 | DC | JAG1          |
| USMG5.2   | 6.28E-06 | 0.140239 | 0.733 | 0.618 | 0.093898 | DC | USMG5         |
| RP11-514C | 6.33E-06 | 0.180019 | 0.08  | 0.026 | 0.094656 | DC | RP11-514012.4 |
| SPCS3.3   | 6.34E-06 | 0.320822 | 0.433 | 0.324 | 0.094683 | DC | SPCS3         |
| CBY1.1    | 6.35E-06 | -0.30274 | 0.037 | 0.161 | 0.09488  | DC | CBY1          |
| C19orf12. | 6.40E-06 | -0.28936 | 0.027 | 0.144 | 0.095626 | DC | C19orf12      |
| LRRN1.2   | 6.43E-06 | -0.29968 | 0.005 | 0.108 | 0.096105 | DC | LRRN1         |
| CYR61.1   | 6.52E-06 | -0.43655 | 0.043 | 0.17  | 0.097448 | DC | CYR61         |
| POU2F2.3  | 6.56E-06 | 0.281937 | 0.246 | 0.133 | 0.097982 | DC | POU2F2        |
| POU2F1.2  | 6.62E-06 | -0.26659 | 0.037 | 0.163 | 0.098907 | DC | POU2F1        |

|           |          |          |       |       |          |    |               |
|-----------|----------|----------|-------|-------|----------|----|---------------|
| ZNF420.1  | 6.64E-06 | -0.28539 | 0.005 | 0.108 | 0.099269 | DC | ZNF420        |
| ARRB1.2   | 6.65E-06 | 0.151115 | 0.107 | 0.04  | 0.099367 | DC | ARRB1         |
| CDKN2D.3  | 6.66E-06 | -0.27917 | 0.037 | 0.162 | 0.099477 | DC | CDKN2D        |
| SFMBT2.3  | 6.66E-06 | 0.247426 | 0.166 | 0.076 | 0.09957  | DC | SFMBT2        |
| RASSF7.3  | 6.67E-06 | 0.295298 | 0.15  | 0.069 | 0.099683 | DC | RASSF7        |
| SLC10A4.2 | 6.81E-06 | -0.20591 | 0     | 0.098 | 0.101753 | DC | SLC10A4       |
| SELK.3    | 6.83E-06 | 0.121347 | 0.802 | 0.699 | 0.102142 | DC | SELK          |
| UXT.2     | 6.84E-06 | 0.195606 | 0.647 | 0.536 | 0.102191 | DC | UXT           |
| LBH.3     | 6.85E-06 | -0.44365 | 0.037 | 0.155 | 0.102373 | DC | LBH           |
| NAIP.3    | 6.96E-06 | 0.247495 | 0.209 | 0.107 | 0.103941 | DC | NAIP          |
| NELL2.1   | 7.05E-06 | -0.29603 | 0.005 | 0.108 | 0.10532  | DC | NELL2         |
| SOD1.2    | 7.05E-06 | -0.3246  | 0.684 | 0.758 | 0.105342 | DC | SOD1          |
| MAP6.1    | 7.09E-06 | -0.21895 | 0     | 0.098 | 0.106016 | DC | MAP6          |
| CTSA.3    | 7.10E-06 | 0.300013 | 0.508 | 0.397 | 0.106071 | DC | CTSA          |
| CTD-2020K | 7.10E-06 | 0.133855 | 0.075 | 0.023 | 0.106159 | DC | CTD-2020K17.1 |
| TGFB1I1.2 | 7.12E-06 | -0.21168 | 0.016 | 0.128 | 0.106469 | DC | TGFB1I1       |
| ENDOD1.1  | 7.16E-06 | -0.2449  | 0.027 | 0.145 | 0.106951 | DC | ENDOD1        |
| ORMDL2.1  | 7.22E-06 | 0.291022 | 0.401 | 0.27  | 0.107845 | DC | ORMDL2        |
| ATL1      | 7.29E-06 | -0.29503 | 0.011 | 0.118 | 0.108876 | DC | ATL1          |
| NUFIP1.1  | 7.37E-06 | -0.28889 | 0.011 | 0.117 | 0.110123 | DC | NUFIP1        |
| GGPS1.2   | 7.56E-06 | -0.30312 | 0.15  | 0.32  | 0.112954 | DC | GGPS1         |
| ZNRF1.3   | 7.56E-06 | -0.20035 | 0.011 | 0.118 | 0.112994 | DC | ZNRF1         |
| NLN.1     | 7.56E-06 | -0.25599 | 0.053 | 0.187 | 0.113016 | DC | NLN           |
| RAB9A.1   | 7.64E-06 | -0.3702  | 0.144 | 0.306 | 0.1141   | DC | RAB9A         |
| TMEM243.1 | 7.64E-06 | 0.322029 | 0.321 | 0.2   | 0.114145 | DC | TMEM243       |
| CCDC34.1  | 7.72E-06 | -0.29842 | 0.043 | 0.169 | 0.115359 | DC | CCDC34        |
| CDH11.1   | 7.74E-06 | -0.26126 | 0.011 | 0.117 | 0.11561  | DC | CDH11         |
| DIRAS3.2  | 7.79E-06 | -0.50775 | 0.016 | 0.125 | 0.116444 | DC | DIRAS3        |
| P2RY6.2   | 7.84E-06 | 0.184781 | 0.091 | 0.032 | 0.117235 | DC | P2RY6         |
| LRRC4C.1  | 7.86E-06 | -0.30406 | 0     | 0.097 | 0.11746  | DC | LRRC4C        |
| GATAD1.1  | 7.90E-06 | -0.24588 | 0.064 | 0.203 | 0.118117 | DC | GATAD1        |
| TMEM121.2 | 7.91E-06 | -0.23513 | 0.005 | 0.107 | 0.118133 | DC | TMEM121       |
| LINC01003 | 8.02E-06 | -0.26499 | 0.059 | 0.194 | 0.119904 | DC | LINC01003     |
| AASS.1    | 8.11E-06 | -0.26229 | 0.011 | 0.117 | 0.121237 | DC | AASS          |
| DYNC1I1.3 | 8.23E-06 | -0.38015 | 0.005 | 0.106 | 0.122964 | DC | DYNC1I1       |
| SQLE.1    | 8.24E-06 | -0.31064 | 0.102 | 0.251 | 0.123132 | DC | SQLE          |
| TMEM25.2  | 8.26E-06 | -0.28011 | 0.016 | 0.124 | 0.123494 | DC | TMEM25        |
| MANBA.3   | 8.30E-06 | 0.35794  | 0.219 | 0.119 | 0.124016 | DC | MANBA         |
| MMAB.1    | 8.30E-06 | -0.29866 | 0.064 | 0.199 | 0.124076 | DC | MMAB          |
| FAM210B.3 | 8.36E-06 | -0.28477 | 0.118 | 0.272 | 0.124863 | DC | FAM210B       |
| ATP5L2    | 8.38E-06 | 0.188838 | 0.187 | 0.091 | 0.125245 | DC | ATP5L2        |
| DNASE1L1  | 8.42E-06 | 0.253072 | 0.155 | 0.071 | 0.125775 | DC | DNASE1L1      |
| TBCB.1    | 8.43E-06 | -0.32508 | 0.535 | 0.66  | 0.126043 | DC | TBCB          |
| HTRA1.3   | 8.44E-06 | -0.34358 | 0.278 | 0.463 | 0.12616  | DC | HTRA1         |
| SEC14L2.2 | 8.48E-06 | -0.23076 | 0.011 | 0.117 | 0.126662 | DC | SEC14L2       |
| SRRM1     | 8.49E-06 | 0.221442 | 0.615 | 0.516 | 0.126874 | DC | SRRM1         |
| ANKS3.1   | 8.51E-06 | -0.23214 | 0.043 | 0.17  | 0.127117 | DC | ANKS3         |
| CPT1C.1   | 8.56E-06 | -0.25605 | 0.005 | 0.107 | 0.127952 | DC | CPT1C         |
| CBX5.2    | 8.60E-06 | -0.34982 | 0.176 | 0.347 | 0.128528 | DC | CBX5          |
| CSNK1E.2  | 8.70E-06 | -0.28144 | 0.144 | 0.309 | 0.129987 | DC | CSNK1E        |
| ZNF254    | 8.70E-06 | -0.28186 | 0.027 | 0.143 | 0.130078 | DC | ZNF254        |

|             |           |           |        |        |           |    |                |
|-------------|-----------|-----------|--------|--------|-----------|----|----------------|
| INPP5D. 3   | 8. 75E-06 | 0. 235078 | 0. 176 | 0. 084 | 0. 130803 | DC | INPP5D         |
| LINC00657   | 8. 78E-06 | -0. 31852 | 0. 16  | 0. 334 | 0. 131141 | DC | LINC00657      |
| CSF1. 1     | 8. 89E-06 | -0. 24669 | 0      | 0. 096 | 0. 132812 | DC | CSF1           |
| SH3YL1. 2   | 8. 89E-06 | -0. 32239 | 0. 053 | 0. 184 | 0. 132889 | DC | SH3YL1         |
| FGD3. 2     | 8. 98E-06 | 0. 219192 | 0. 102 | 0. 038 | 0. 134181 | DC | FGD3           |
| TRAPPC1     | 9. 00E-06 | 0. 135894 | 0. 733 | 0. 613 | 0. 134537 | DC | TRAPPC1        |
| TTC3. 2     | 9. 03E-06 | -0. 36262 | 0. 38  | 0. 518 | 0. 134891 | DC | TTC3           |
| NFE2L3      | 9. 12E-06 | 0. 269583 | 0. 086 | 0. 03  | 0. 136262 | DC | NFE2L3         |
| ZNF579. 2   | 9. 12E-06 | -0. 21258 | 0. 011 | 0. 116 | 0. 136309 | DC | ZNF579         |
| THSD1. 1    | 9. 16E-06 | -0. 20041 | 0      | 0. 096 | 0. 136949 | DC | THSD1          |
| FGF1. 1     | 9. 35E-06 | -0. 30926 | 0      | 0. 095 | 0. 139778 | DC | FGF1           |
| ABCA7       | 9. 38E-06 | 0. 139937 | 0. 053 | 0. 014 | 0. 140202 | DC | ABCA7          |
| TRIM22. 2   | 9. 39E-06 | 0. 244588 | 0. 241 | 0. 133 | 0. 140308 | DC | TRIM22         |
| ADRBK2. 3   | 9. 39E-06 | 0. 275335 | 0. 123 | 0. 052 | 0. 140356 | DC | ADRBK2         |
| TM4SF1. 3   | 9. 40E-06 | -0. 3245  | 0. 011 | 0. 114 | 0. 140464 | DC | TM4SF1         |
| IPO9. 1     | 9. 46E-06 | -0. 20716 | 0. 086 | 0. 234 | 0. 14143  | DC | IPO9           |
| NLGN3. 2    | 9. 49E-06 | -0. 26941 | 0. 011 | 0. 115 | 0. 141858 | DC | NLGN3          |
| TMEM14C. 1  | 9. 50E-06 | 0. 145964 | 0. 695 | 0. 589 | 0. 141978 | DC | TMEM14C        |
| KIAA1549. 9 | 9. 55E-06 | -0. 25733 | 0      | 0. 095 | 0. 142664 | DC | KIAA1549       |
| SECISBP2L   | 9. 59E-06 | -0. 29874 | 0. 048 | 0. 176 | 0. 143371 | DC | SECISBP2L      |
| MTSS1L. 1   | 9. 64E-06 | -0. 23525 | 0      | 0. 095 | 0. 14413  | DC | MTSS1L         |
| PTRH1. 1    | 9. 66E-06 | -0. 11772 | 0. 053 | 0. 189 | 0. 14438  | DC | PTRH1          |
| CAMK2B. 2   | 9. 68E-06 | -0. 26389 | 0. 011 | 0. 115 | 0. 14461  | DC | CAMK2B         |
| TSPYL5      | 9. 69E-06 | 0. 103821 | 0. 043 | 0. 01  | 0. 144823 | DC | TSPYL5         |
| COPS7B      | 9. 70E-06 | -0. 30647 | 0. 064 | 0. 199 | 0. 145019 | DC | COPS7B         |
| CORO1B. 3   | 9. 74E-06 | 0. 243979 | 0. 471 | 0. 359 | 0. 145577 | DC | CORO1B         |
| NACA2       | 9. 76E-06 | 0. 286682 | 0. 283 | 0. 166 | 0. 145914 | DC | NACA2          |
| COX7B. 1    | 9. 80E-06 | 0. 131086 | 0. 781 | 0. 64  | 0. 146498 | DC | COX7B          |
| NTRK2. 2    | 1. 00E-05 | -0. 4653  | 0. 016 | 0. 122 | 0. 150005 | DC | NTRK2          |
| LRRC58. 2   | 1. 00E-05 | -0. 21115 | 0. 07  | 0. 209 | 0. 150161 | DC | LRRC58         |
| FYN. 2      | 1. 01E-05 | -0. 3308  | 0. 16  | 0. 329 | 0. 150747 | DC | FYN            |
| PIM2. 2     | 1. 01E-05 | 0. 288841 | 0. 123 | 0. 052 | 0. 151074 | DC | PIM2           |
| ATXN7L3B. 1 | 1. 03E-05 | -0. 24369 | 0. 053 | 0. 183 | 0. 153402 | DC | ATXN7L3B       |
| MMP16. 1    | 1. 03E-05 | -0. 23065 | 0. 005 | 0. 105 | 0. 153998 | DC | MMP16          |
| PFKM        | 1. 03E-05 | -0. 25992 | 0. 053 | 0. 186 | 0. 15444  | DC | PFKM           |
| VPS35. 1    | 1. 03E-05 | 0. 220262 | 0. 529 | 0. 429 | 0. 154535 | DC | VPS35          |
| GAD1. 3     | 1. 03E-05 | -0. 26219 | 0. 011 | 0. 115 | 0. 154603 | DC | GAD1           |
| CCDC80. 2   | 1. 04E-05 | -0. 32444 | 0. 011 | 0. 114 | 0. 154874 | DC | CCDC80         |
| KIF3B. 3    | 1. 04E-05 | -0. 2333  | 0. 021 | 0. 132 | 0. 155154 | DC | KIF3B          |
| CCL3. 3     | 1. 04E-05 | 0. 104212 | 0. 61  | 0. 419 | 0. 155634 | DC | CCL3           |
| CDK5R1. 3   | 1. 05E-05 | -0. 27614 | 0      | 0. 095 | 0. 156399 | DC | CDK5R1         |
| SMARCD1. 3  | 1. 05E-05 | -0. 21151 | 0. 075 | 0. 217 | 0. 156731 | DC | SMARCD1        |
| SOX21       | 1. 06E-05 | -0. 19876 | 0      | 0. 094 | 0. 158003 | DC | SOX21          |
| POLR2F. 3   | 1. 08E-05 | -0. 35078 | 0. 39  | 0. 544 | 0. 161442 | DC | POLR2F         |
| DYNLL2. 3   | 1. 08E-05 | -0. 23859 | 0. 07  | 0. 208 | 0. 162025 | DC | DYNLL2         |
| CPNE4. 1    | 1. 09E-05 | -0. 19588 | 0      | 0. 094 | 0. 162915 | DC | CPNE4          |
| SEPT4. 3    | 1. 09E-05 | -0. 42082 | 0. 021 | 0. 132 | 0. 162963 | DC | 4-Sep          |
| APBB2. 2    | 1. 11E-05 | -0. 25263 | 0. 011 | 0. 114 | 0. 166322 | DC | APBB2          |
| PCDHB10. 2  | 1. 15E-05 | -0. 28194 | 0. 005 | 0. 104 | 0. 171128 | DC | PCDHB10        |
| RP11-742E   | 1. 15E-05 | 0. 175499 | 0. 086 | 0. 03  | 0. 171215 | DC | RP11-742B18. 1 |
| KIF9. 3     | 1. 15E-05 | -0. 27569 | 0. 048 | 0. 176 | 0. 171669 | DC | KIF9           |

|             |           |           |        |        |           |    |           |
|-------------|-----------|-----------|--------|--------|-----------|----|-----------|
| FAM57B. 2   | 1. 16E-05 | -0. 29091 | 0      | 0. 094 | 0. 173194 | DC | FAM57B    |
| CERCAM. 1   | 1. 17E-05 | -0. 27867 | 0. 021 | 0. 131 | 0. 174561 | DC | CERCAM    |
| DZIP1. 2    | 1. 17E-05 | -0. 19355 | 0. 005 | 0. 104 | 0. 174877 | DC | DZIP1     |
| NRP2. 3     | 1. 17E-05 | -0. 33045 | 0. 086 | 0. 223 | 0. 175143 | DC | NRP2      |
| LRRTM2. 2   | 1. 18E-05 | -0. 19875 | 0. 005 | 0. 104 | 0. 175956 | DC | LRRTM2    |
| CHCHD6. 1   | 1. 18E-05 | -0. 23805 | 0. 091 | 0. 238 | 0. 1763   | DC | CHCHD6    |
| RSU1        | 1. 19E-05 | 0. 312272 | 0. 374 | 0. 267 | 0. 17722  | DC | RSU1      |
| LGR4. 3     | 1. 19E-05 | -0. 1895  | 0. 005 | 0. 104 | 0. 17815  | DC | LGR4      |
| CASP3. 2    | 1. 20E-05 | -0. 27873 | 0. 064 | 0. 199 | 0. 178771 | DC | CASP3     |
| GALK1. 3    | 1. 20E-05 | 0. 296802 | 0. 31  | 0. 202 | 0. 178779 | DC | GALK1     |
| SMAD5. 2    | 1. 20E-05 | -0. 29237 | 0. 048 | 0. 173 | 0. 178957 | DC | SMAD5     |
| NME7. 3     | 1. 21E-05 | -0. 31554 | 0. 043 | 0. 163 | 0. 180383 | DC | NME7      |
| MCC. 1      | 1. 21E-05 | -0. 19906 | 0. 016 | 0. 123 | 0. 180812 | DC | MCC       |
| TAPBP. 3    | 1. 21E-05 | 0. 259251 | 0. 449 | 0. 341 | 0. 181289 | DC | TAPBP     |
| FAM127A     | 1. 21E-05 | -0. 28207 | 0. 273 | 0. 462 | 0. 181504 | DC | FAM127A   |
| GDAP1L1. 2  | 1. 22E-05 | -0. 3623  | 0. 005 | 0. 102 | 0. 18225  | DC | GDAP1L1   |
| SFXN1. 1    | 1. 23E-05 | -0. 29698 | 0. 08  | 0. 219 | 0. 183079 | DC | SFXN1     |
| TUBB4A. 3   | 1. 25E-05 | -0. 49366 | 0. 016 | 0. 12  | 0. 186327 | DC | TUBB4A    |
| FAM171B. 1  | 1. 25E-05 | -0. 2528  | 0. 011 | 0. 112 | 0. 187268 | DC | FAM171B   |
| ST8SIA1. 1  | 1. 26E-05 | -0. 21144 | 0      | 0. 093 | 0. 187902 | DC | ST8SIA1   |
| PEMT. 2     | 1. 26E-05 | -0. 28875 | 0. 075 | 0. 215 | 0. 188355 | DC | PEMT      |
| SCCPDH. 1   | 1. 26E-05 | -0. 36628 | 0. 209 | 0. 38  | 0. 188986 | DC | SCCPDH    |
| FOXJ3. 1    | 1. 27E-05 | -0. 23291 | 0. 011 | 0. 113 | 0. 1891   | DC | FOXJ3     |
| ACSS3. 1    | 1. 28E-05 | -0. 204   | 0. 011 | 0. 113 | 0. 190941 | DC | ACSS3     |
| ARNT2. 3    | 1. 28E-05 | -0. 21967 | 0. 011 | 0. 113 | 0. 191695 | DC | ARNT2     |
| LINC00632   | 1. 28E-05 | -0. 34164 | 0      | 0. 093 | 0. 191768 | DC | LINC00632 |
| LAMB1       | 1. 28E-05 | -0. 2175  | 0. 005 | 0. 103 | 0. 191773 | DC | LAMB1     |
| DCAKD. 2    | 1. 29E-05 | -0. 24534 | 0. 027 | 0. 14  | 0. 192033 | DC | DCAKD     |
| USP46. 3    | 1. 30E-05 | -0. 25566 | 0. 027 | 0. 139 | 0. 193543 | DC | USP46     |
| ADORA3. 3   | 1. 30E-05 | 0. 174991 | 0. 439 | 0. 258 | 0. 193826 | DC | ADORA3    |
| SEPT7. 3    | 1. 30E-05 | -0. 32819 | 0. 631 | 0. 704 | 0. 193907 | DC | 7-Sep     |
| NEIL2. 2    | 1. 30E-05 | -0. 22565 | 0. 064 | 0. 201 | 0. 194402 | DC | NEIL2     |
| SYT1. 3     | 1. 30E-05 | -0. 40076 | 0. 005 | 0. 101 | 0. 195011 | DC | SYT1      |
| ALKBH2. 3   | 1. 31E-05 | -0. 24693 | 0. 064 | 0. 197 | 0. 196164 | DC | ALKBH2    |
| COMMD9. 2   | 1. 32E-05 | 0. 400019 | 0. 406 | 0. 308 | 0. 197238 | DC | COMMD9    |
| STK25. 3    | 1. 32E-05 | -0. 27791 | 0. 144 | 0. 305 | 0. 1973   | DC | STK25     |
| DNAL4. 1    | 1. 33E-05 | -0. 26519 | 0. 021 | 0. 129 | 0. 198134 | DC | DNAL4     |
| B4GALNT1. 1 | 1. 33E-05 | -0. 3873  | 0. 032 | 0. 145 | 0. 198315 | DC | B4GALNT1  |
| TUBG1. 1    | 1. 34E-05 | -0. 2629  | 0. 091 | 0. 236 | 0. 200402 | DC | TUBG1     |
| SLC2A9. 1   | 1. 34E-05 | 0. 124049 | 0. 075 | 0. 024 | 0. 200727 | DC | SLC2A9    |
| C20orf27. 1 | 1. 34E-05 | 0. 252009 | 0. 465 | 0. 358 | 0. 200968 | DC | C20orf27  |
| RBM4B. 1    | 1. 35E-05 | -0. 30947 | 0. 064 | 0. 194 | 0. 202297 | DC | RBM4B     |
| KLC1. 3     | 1. 36E-05 | -0. 29519 | 0. 193 | 0. 362 | 0. 203045 | DC | KLC1      |
| CCDC102B. 1 | 1. 37E-05 | -0. 26046 | 0. 005 | 0. 102 | 0. 204245 | DC | CCDC102B  |
| TNFAIP8L3   | 1. 37E-05 | 0. 224497 | 0. 08  | 0. 028 | 0. 204612 | DC | TNFAIP8L3 |
| ZHX3. 1     | 1. 37E-05 | -0. 19103 | 0. 016 | 0. 121 | 0. 205314 | DC | ZHX3      |
| CADM3. 1    | 1. 38E-05 | -0. 4351  | 0. 005 | 0. 102 | 0. 206248 | DC | CADM3     |
| NKAIN4. 2   | 1. 38E-05 | -0. 37792 | 0. 005 | 0. 102 | 0. 206428 | DC | NKAIN4    |
| ZNF385D. 1  | 1. 38E-05 | -0. 22922 | 0. 011 | 0. 112 | 0. 206538 | DC | ZNF385D   |
| BIVM. 1     | 1. 38E-05 | -0. 22902 | 0. 011 | 0. 112 | 0. 206754 | DC | BIVM      |
| VDAC2       | 1. 38E-05 | 0. 129077 | 0. 759 | 0. 637 | 0. 206787 | DC | VDAC2     |



|            |          |          |       |       |          |    |           |
|------------|----------|----------|-------|-------|----------|----|-----------|
| MAN2B1.3   | 1.39E-05 | 0.217343 | 0.144 | 0.066 | 0.207128 | DC | MAN2B1    |
| ITPRIP.3   | 1.39E-05 | 0.262066 | 0.155 | 0.074 | 0.20713  | DC | ITPRIP    |
| LIFR       | 1.40E-05 | -0.25423 | 0.011 | 0.111 | 0.209049 | DC | LIFR      |
| CD59.3     | 1.40E-05 | -0.41342 | 0.39  | 0.556 | 0.209365 | DC | CD59      |
| YAE1D1.1   | 1.41E-05 | -0.30792 | 0.043 | 0.162 | 0.210959 | DC | YAE1D1    |
| RAB3A.3    | 1.41E-05 | -0.38292 | 0.048 | 0.166 | 0.21121  | DC | RAB3A     |
| CLASP1.2   | 1.42E-05 | -0.24094 | 0.027 | 0.14  | 0.211747 | DC | CLASP1    |
| TOR4A.2    | 1.42E-05 | 0.140662 | 0.075 | 0.024 | 0.212001 | DC | TOR4A     |
| TLE2.2     | 1.42E-05 | -0.24562 | 0     | 0.092 | 0.212306 | DC | TLE2      |
| TNFAIP6.1  | 1.43E-05 | -0.43597 | 0.011 | 0.111 | 0.213923 | DC | TNFAIP6   |
| B9D1.1     | 1.45E-05 | -0.25851 | 0.005 | 0.102 | 0.217292 | DC | B9D1      |
| LINC00511  | 1.46E-05 | -0.25064 | 0.016 | 0.121 | 0.217645 | DC | LINC00511 |
| ZNF146.1   | 1.46E-05 | -0.2253  | 0.086 | 0.23  | 0.21793  | DC | ZNF146    |
| UBXN1.3    | 1.46E-05 | 0.174858 | 0.717 | 0.619 | 0.218252 | DC | UBXN1     |
| ZNF559.2   | 1.47E-05 | -0.29147 | 0.032 | 0.147 | 0.219109 | DC | ZNF559    |
| MBD3.1     | 1.49E-05 | -0.21283 | 0.043 | 0.166 | 0.222212 | DC | MBD3      |
| PTS.2      | 1.49E-05 | -0.2938  | 0.166 | 0.329 | 0.22337  | DC | PTS       |
| CMTM5.2    | 1.50E-05 | -0.47998 | 0.005 | 0.101 | 0.223845 | DC | CMTM5     |
| TEAD2.2    | 1.51E-05 | -0.1924  | 0     | 0.091 | 0.225657 | DC | TEAD2     |
| LINC00936  | 1.52E-05 | 0.339753 | 0.241 | 0.139 | 0.226838 | DC | LINC00936 |
| DNAJC4.2   | 1.52E-05 | 0.281244 | 0.337 | 0.227 | 0.227065 | DC | DNAJC4    |
| LAMP5.2    | 1.52E-05 | -0.23926 | 0.011 | 0.111 | 0.227493 | DC | LAMP5     |
| GSAP.2     | 1.54E-05 | 0.25984  | 0.16  | 0.078 | 0.229497 | DC | GSAP      |
| LRRC8A.2   | 1.54E-05 | -0.29014 | 0.048 | 0.17  | 0.230613 | DC | LRRC8A    |
| ARL6IP4.3  | 1.55E-05 | 0.182251 | 0.722 | 0.623 | 0.231368 | DC | ARL6IP4   |
| SSBP3.2    | 1.55E-05 | -0.23777 | 0.021 | 0.13  | 0.232062 | DC | SSBP3     |
| IFI16.2    | 1.55E-05 | 0.145217 | 0.54  | 0.391 | 0.232247 | DC | IFI16     |
| STRBP.3    | 1.56E-05 | -0.24837 | 0.021 | 0.128 | 0.233403 | DC | STRBP     |
| TMED1.2    | 1.57E-05 | -0.34798 | 0.139 | 0.294 | 0.233994 | DC | TMED1     |
| IFT57.3    | 1.57E-05 | -0.31792 | 0.102 | 0.25  | 0.234096 | DC | IFT57     |
| SCAMP2.3   | 1.57E-05 | 0.264961 | 0.492 | 0.372 | 0.235199 | DC | SCAMP2    |
| TPM1.1     | 1.57E-05 | -0.28156 | 0.107 | 0.255 | 0.235364 | DC | TPM1      |
| TAF7.2     | 1.58E-05 | -0.36041 | 0.401 | 0.556 | 0.236446 | DC | TAF7      |
| ADIPOR1.3  | 1.58E-05 | 0.284442 | 0.481 | 0.378 | 0.236449 | DC | ADIPOR1   |
| SLC6A8.1   | 1.59E-05 | -0.29618 | 0.016 | 0.119 | 0.237699 | DC | SLC6A8    |
| EIF3J-AS1  | 1.59E-05 | -0.29287 | 0.021 | 0.129 | 0.237975 | DC | EIF3J-AS1 |
| PTK2.1     | 1.60E-05 | -0.22587 | 0.053 | 0.18  | 0.238783 | DC | PTK2      |
| SNRNP27.1  | 1.60E-05 | -0.31657 | 0.187 | 0.355 | 0.239429 | DC | SNRNP27   |
| PPFIA3.1   | 1.60E-05 | -0.19978 | 0     | 0.091 | 0.239835 | DC | PPFIA3    |
| RAD51C.1   | 1.61E-05 | -0.2215  | 0.112 | 0.269 | 0.240362 | DC | RAD51C    |
| RALB.2     | 1.61E-05 | 0.301266 | 0.257 | 0.155 | 0.241224 | DC | RALB      |
| CMPK1.3    | 1.62E-05 | 0.238698 | 0.508 | 0.415 | 0.241926 | DC | CMPK1     |
| LAP3.1     | 1.63E-05 | 0.131346 | 0.631 | 0.489 | 0.242852 | DC | LAP3      |
| TMX1.1     | 1.64E-05 | 0.260151 | 0.508 | 0.401 | 0.24506  | DC | TMX1      |
| DLX6-AS1.1 | 1.64E-05 | -0.65292 | 0.027 | 0.132 | 0.24535  | DC | DLX6-AS1  |
| CHST7.1    | 1.66E-05 | -0.20667 | 0.011 | 0.111 | 0.247389 | DC | CHST7     |
| SNX21      | 1.66E-05 | -0.21512 | 0.016 | 0.12  | 0.248776 | DC | SNX21     |
| SEC22C.1   | 1.68E-05 | -0.26601 | 0.086 | 0.23  | 0.25127  | DC | SEC22C    |
| GSK3A.2    | 1.70E-05 | -0.27126 | 0.064 | 0.192 | 0.25342  | DC | GSK3A     |
| NRXN2.3    | 1.70E-05 | -0.30106 | 0.016 | 0.118 | 0.254217 | DC | NRXN2     |
| NAPEPLD    | 1.70E-05 | -0.2554  | 0.005 | 0.1   | 0.25472  | DC | NAPEPLD   |

|            |           |           |        |        |           |    |          |
|------------|-----------|-----------|--------|--------|-----------|----|----------|
| PIM3. 3    | 1. 72E-05 | 0. 321923 | 0. 294 | 0. 189 | 0. 256644 | DC | PIM3     |
| ARL10      | 1. 76E-05 | -0. 21038 | 0      | 0. 09  | 0. 262769 | DC | ARL10    |
| CSRNP3. 2  | 1. 76E-05 | -0. 29115 | 0. 005 | 0. 1   | 0. 263076 | DC | CSRNP3   |
| NME1. 1    | 1. 80E-05 | -0. 2982  | 0. 422 | 0. 57  | 0. 268937 | DC | NME1     |
| MTSS1. 3   | 1. 80E-05 | -0. 39243 | 0. 086 | 0. 215 | 0. 269455 | DC | MTSS1    |
| TANC1. 1   | 1. 81E-05 | -0. 21059 | 0. 011 | 0. 11  | 0. 27085  | DC | TANC1    |
| KCNIP1. 2  | 1. 81E-05 | -0. 27738 | 0. 005 | 0. 1   | 0. 271037 | DC | KCNIP1   |
| SESN1. 3   | 1. 82E-05 | 0. 256519 | 0. 193 | 0. 1   | 0. 272192 | DC | SESN1    |
| USP4. 2    | 1. 83E-05 | 0. 343306 | 0. 273 | 0. 173 | 0. 273876 | DC | USP4     |
| CNKSR3. 2  | 1. 83E-05 | -0. 19379 | 0. 016 | 0. 119 | 0. 274198 | DC | CNKSR3   |
| ARF1. 2    | 1. 84E-05 | 0. 10962  | 0. 802 | 0. 692 | 0. 275657 | DC | ARF1     |
| DHCR7. 2   | 1. 85E-05 | -0. 25916 | 0. 053 | 0. 18  | 0. 275965 | DC | DHCR7    |
| NAP1L5. 1  | 1. 87E-05 | -0. 26444 | 0. 027 | 0. 136 | 0. 278721 | DC | NAP1L5   |
| ADD2. 1    | 1. 87E-05 | -0. 23394 | 0      | 0. 09  | 0. 279248 | DC | ADD2     |
| TSPAN15. 2 | 1. 88E-05 | 0. 203838 | 0. 16  | 0. 076 | 0. 281466 | DC | TSPAN15  |
| LRIG1. 2   | 1. 88E-05 | -0. 22535 | 0. 011 | 0. 11  | 0. 281609 | DC | LRIG1    |
| XIST. 3    | 1. 89E-05 | 0. 196618 | 0. 417 | 0. 263 | 0. 282    | DC | XIST     |
| XRCC6      | 1. 90E-05 | 0. 14521  | 0. 647 | 0. 556 | 0. 283647 | DC | XRCC6    |
| BAZ1B. 3   | 1. 90E-05 | -0. 21861 | 0. 144 | 0. 3   | 0. 284408 | DC | BAZ1B    |
| BPHL. 1    | 1. 91E-05 | -0. 28269 | 0. 053 | 0. 176 | 0. 284783 | DC | BPHL     |
| YTHDF1     | 1. 91E-05 | -0. 27003 | 0. 059 | 0. 185 | 0. 286002 | DC | YTHDF1   |
| DTD1. 3    | 1. 92E-05 | -0. 25533 | 0. 23  | 0. 394 | 0. 286981 | DC | DTD1     |
| ROBO2. 2   | 1. 92E-05 | -0. 21185 | 0. 011 | 0. 109 | 0. 28743  | DC | ROBO2    |
| LDOC1. 2   | 1. 95E-05 | -0. 33819 | 0      | 0. 089 | 0. 290796 | DC | LDOC1    |
| TULP3. 2   | 1. 96E-05 | -0. 23269 | 0. 021 | 0. 127 | 0. 292891 | DC | TULP3    |
| PCYT2. 2   | 1. 97E-05 | -0. 21876 | 0. 043 | 0. 162 | 0. 29415  | DC | PCYT2    |
| LTBR. 3    | 1. 98E-05 | 0. 181563 | 0. 187 | 0. 094 | 0. 295739 | DC | LTBR     |
| UPF3A. 2   | 1. 98E-05 | -0. 32505 | 0. 182 | 0. 347 | 0. 29633  | DC | UPF3A    |
| DUSP26. 2  | 1. 99E-05 | -0. 34762 | 0      | 0. 089 | 0. 296746 | DC | DUSP26   |
| REEP5. 2   | 1. 99E-05 | 0. 130411 | 0. 706 | 0. 583 | 0. 29692  | DC | REEP5    |
| APAF1. 3   | 2. 00E-05 | 0. 281837 | 0. 139 | 0. 065 | 0. 2992   | DC | APAF1    |
| NAP1L4. 2  | 2. 00E-05 | -0. 33115 | 0. 235 | 0. 406 | 0. 299362 | DC | NAP1L4   |
| EEF1G      | 2. 02E-05 | 0. 24389  | 0. 193 | 0. 101 | 0. 301428 | DC | EEF1G    |
| SFRP1. 2   | 2. 02E-05 | -0. 20341 | 0. 005 | 0. 099 | 0. 301754 | DC | SFRP1    |
| GDE1. 3    | 2. 03E-05 | -0. 26445 | 0. 144 | 0. 302 | 0. 302661 | DC | GDE1     |
| ADO. 2     | 2. 03E-05 | -0. 18316 | 0. 021 | 0. 128 | 0. 303227 | DC | ADO      |
| HK1. 3     | 2. 04E-05 | 0. 294392 | 0. 299 | 0. 194 | 0. 304373 | DC | HK1      |
| ELOVL2. 3  | 2. 04E-05 | -0. 20754 | 0. 005 | 0. 099 | 0. 304669 | DC | ELOVL2   |
| ADAP1. 2   | 2. 05E-05 | 0. 214211 | 0. 102 | 0. 04  | 0. 306137 | DC | ADAP1    |
| BAD. 1     | 2. 06E-05 | -0. 30718 | 0. 246 | 0. 42  | 0. 307841 | DC | BAD      |
| EIF3C      | 2. 06E-05 | 0. 1922   | 0. 086 | 0. 031 | 0. 308471 | DC | EIF3C    |
| MKKS. 1    | 2. 07E-05 | 0. 242616 | 0. 508 | 0. 402 | 0. 308651 | DC | MKKS     |
| ARHGEF12.  | 2. 08E-05 | -0. 18448 | 0. 043 | 0. 162 | 0. 311113 | DC | ARHGEF12 |
| ACPP       | 2. 09E-05 | 0. 117838 | 0. 048 | 0. 013 | 0. 311685 | DC | ACPP     |
| MYL6. 3    | 2. 10E-05 | -0. 19334 | 0. 984 | 0. 941 | 0. 313845 | DC | MYL6     |
| MSANTD3. 1 | 2. 11E-05 | -0. 21475 | 0      | 0. 089 | 0. 315327 | DC | MSANTD3  |
| RIF1. 2    | 2. 11E-05 | -0. 2769  | 0. 086 | 0. 222 | 0. 31593  | DC | RIF1     |
| HKR1. 2    | 2. 12E-05 | -0. 21349 | 0. 016 | 0. 118 | 0. 316231 | DC | HKR1     |
| ERRFI1. 1  | 2. 12E-05 | -0. 25792 | 0. 037 | 0. 153 | 0. 316986 | DC | ERRFI1   |
| PLA2G12A.  | 2. 13E-05 | -0. 26671 | 0. 096 | 0. 236 | 0. 317792 | DC | PLA2G12A |
| BTG1. 3    | 2. 13E-05 | 0. 163375 | 0. 834 | 0. 686 | 0. 318726 | DC | BTG1     |

|           |          |          |       |       |          |    |           |
|-----------|----------|----------|-------|-------|----------|----|-----------|
| CIITA     | 2.14E-05 | 0.188035 | 0.096 | 0.037 | 0.319433 | DC | CIITA     |
| ZIC1.2    | 2.15E-05 | -0.26084 | 0.016 | 0.116 | 0.320663 | DC | ZIC1      |
| CTU2      | 2.15E-05 | -0.24981 | 0.027 | 0.135 | 0.321055 | DC | CTU2      |
| CHRAC1.3  | 2.16E-05 | 0.355839 | 0.241 | 0.143 | 0.322098 | DC | CHRAC1    |
| TMEM68.1  | 2.16E-05 | -0.22302 | 0.048 | 0.169 | 0.322576 | DC | TMEM68    |
| FAF2.2    | 2.16E-05 | -0.2827  | 0.064 | 0.191 | 0.322703 | DC | FAF2      |
| FAM200A   | 2.16E-05 | -0.25731 | 0.005 | 0.098 | 0.323329 | DC | FAM200A   |
| ENY2.1    | 2.17E-05 | 0.128005 | 0.711 | 0.602 | 0.32418  | DC | ENY2      |
| ZNF322.1  | 2.17E-05 | -0.23178 | 0.027 | 0.135 | 0.324592 | DC | ZNF322    |
| LINC00662 | 2.17E-05 | -0.24668 | 0.059 | 0.185 | 0.324778 | DC | LINC00662 |
| FKBP1A.2  | 2.17E-05 | 0.112755 | 0.834 | 0.697 | 0.324822 | DC | FKBP1A    |
| ARHGEF26. | 2.18E-05 | -0.23427 | 0.021 | 0.127 | 0.325519 | DC | ARHGEF26  |
| C4orf27.1 | 2.18E-05 | -0.26698 | 0.155 | 0.321 | 0.325529 | DC | C4orf27   |
| PLAU.3    | 2.18E-05 | 0.310026 | 0.267 | 0.161 | 0.326262 | DC | PLAU      |
| SLC12A9.3 | 2.19E-05 | 0.294962 | 0.305 | 0.2   | 0.326606 | DC | SLC12A9   |
| TRIAP1.1  | 2.19E-05 | -0.26425 | 0.15  | 0.316 | 0.327614 | DC | TRIAP1    |
| ERLEC1.1  | 2.21E-05 | -0.29035 | 0.198 | 0.364 | 0.330848 | DC | ERLEC1    |
| CDH4.2    | 2.22E-05 | -0.20631 | 0     | 0.088 | 0.331686 | DC | CDH4      |
| C1orf198. | 2.23E-05 | -0.3257  | 0.011 | 0.106 | 0.333221 | DC | C1orf198  |
| LDOC1L.2  | 2.24E-05 | -0.19352 | 0     | 0.088 | 0.335057 | DC | LDOC1L    |
| ZNF566.1  | 2.25E-05 | -0.28112 | 0.016 | 0.117 | 0.336717 | DC | ZNF566    |
| AIF1L.2   | 2.26E-05 | -0.38974 | 0.016 | 0.115 | 0.337577 | DC | AIF1L     |
| ENPP4.1   | 2.28E-05 | 0.21678  | 0.123 | 0.053 | 0.341135 | DC | ENPP4     |
| FUCA2.3   | 2.29E-05 | 0.272673 | 0.353 | 0.241 | 0.34175  | DC | FUCA2     |
| PRPSAP1.3 | 2.29E-05 | -0.28891 | 0.15  | 0.309 | 0.341854 | DC | PRPSAP1   |
| MAGI2.2   | 2.29E-05 | -0.27153 | 0.011 | 0.107 | 0.342889 | DC | MAGI2     |
| ATPAF1.3  | 2.30E-05 | -0.29581 | 0.102 | 0.242 | 0.344317 | DC | ATPAF1    |
| GABPB1.2  | 2.31E-05 | 0.396577 | 0.193 | 0.106 | 0.345837 | DC | GABPB1    |
| MTMR14.3  | 2.36E-05 | 0.358348 | 0.321 | 0.22  | 0.352516 | DC | MTMR14    |
| PLEKHB2.3 | 2.36E-05 | 0.2731   | 0.492 | 0.398 | 0.35339  | DC | PLEKHB2   |
| MRFAP1L1. | 2.37E-05 | -0.2981  | 0.086 | 0.222 | 0.35386  | DC | MRFAP1L1  |
| NCALD.2   | 2.37E-05 | -0.22237 | 0.021 | 0.126 | 0.35445  | DC | NCALD     |
| TUBA1B.2  | 2.37E-05 | -0.19534 | 0.957 | 0.894 | 0.35456  | DC | TUBA1B    |
| RGS3.1    | 2.38E-05 | -0.19427 | 0.011 | 0.108 | 0.356303 | DC | RGS3      |
| TMEM53.1  | 2.39E-05 | -0.27397 | 0.011 | 0.106 | 0.357219 | DC | TMEM53    |
| CCDC90B.2 | 2.40E-05 | -0.3205  | 0.241 | 0.412 | 0.359035 | DC | CCDC90B   |
| C9orf3.1  | 2.40E-05 | -0.35733 | 0.011 | 0.106 | 0.359311 | DC | C9orf3    |
| RNF19A.3  | 2.41E-05 | -0.29748 | 0.075 | 0.204 | 0.360563 | DC | RNF19A    |
| SORL1.3   | 2.41E-05 | 0.278815 | 0.353 | 0.225 | 0.360589 | DC | SORL1     |
| SMIM7.2   | 2.42E-05 | -0.36876 | 0.337 | 0.508 | 0.361233 | DC | SMIM7     |
| MOCS2.3   | 2.44E-05 | -0.27589 | 0.118 | 0.266 | 0.365232 | DC | MOCS2     |
| SH3BGR.2  | 2.45E-05 | -0.36702 | 0.021 | 0.125 | 0.365666 | DC | SH3BGR    |
| TOB1.1    | 2.46E-05 | 0.349091 | 0.348 | 0.253 | 0.368128 | DC | TOB1      |
| RABEP1.3  | 2.47E-05 | -0.25174 | 0.107 | 0.255 | 0.368535 | DC | RABEP1    |
| ENOPH1.2  | 2.49E-05 | -0.31012 | 0.225 | 0.392 | 0.371505 | DC | ENOPH1    |
| NUBP2.1   | 2.49E-05 | -0.29516 | 0.209 | 0.384 | 0.372777 | DC | NUBP2     |
| GFOD2     | 2.50E-05 | -0.25113 | 0.027 | 0.133 | 0.373225 | DC | GFOD2     |
| SIPA1L2   | 2.51E-05 | -0.28801 | 0.021 | 0.123 | 0.374712 | DC | SIPA1L2   |
| PLP1.2    | 2.55E-05 | -0.79389 | 0.059 | 0.173 | 0.380383 | DC | PLP1      |
| NLGN4X.1  | 2.56E-05 | -0.20825 | 0.011 | 0.107 | 0.381949 | DC | NLGN4X    |
| KCNMB4.3  | 2.57E-05 | -0.27868 | 0.021 | 0.125 | 0.383899 | DC | KCNMB4    |

|             |           |           |        |        |           |    |          |
|-------------|-----------|-----------|--------|--------|-----------|----|----------|
| CYTH1. 3    | 2. 58E-05 | 0. 20579  | 0. 267 | 0. 156 | 0. 386265 | DC | CYTH1    |
| ASAP2. 2    | 2. 59E-05 | -0. 18665 | 0. 005 | 0. 097 | 0. 387597 | DC | ASAP2    |
| COX11. 1    | 2. 60E-05 | -0. 28103 | 0. 16  | 0. 321 | 0. 387912 | DC | COX11    |
| SLC39A14. 2 | 2. 61E-05 | -0. 2947  | 0. 005 | 0. 096 | 0. 390722 | DC | SLC39A14 |
| MAN1A1. 2   | 2. 62E-05 | 0. 203861 | 0. 112 | 0. 047 | 0. 390916 | DC | MAN1A1   |
| METTL2A. 1  | 2. 62E-05 | -0. 19545 | 0. 043 | 0. 16  | 0. 391274 | DC | METTL2A  |
| KALRN. 1    | 2. 62E-05 | -0. 2204  | 0. 005 | 0. 097 | 0. 391724 | DC | KALRN    |
| PARVA. 2    | 2. 62E-05 | -0. 17913 | 0. 005 | 0. 097 | 0. 392008 | DC | PARVA    |
| USP1. 2     | 2. 63E-05 | -0. 25063 | 0. 112 | 0. 261 | 0. 393045 | DC | USP1     |
| ANKRD37. 1  | 2. 63E-05 | 0. 281297 | 0. 241 | 0. 14  | 0. 393184 | DC | ANKRD37  |
| SRSF2. 3    | 2. 63E-05 | 0. 1896   | 0. 722 | 0. 603 | 0. 39349  | DC | SRSF2    |
| AGPAT2. 3   | 2. 63E-05 | 0. 326361 | 0. 278 | 0. 178 | 0. 393588 | DC | AGPAT2   |
| FGF14. 2    | 2. 64E-05 | -0. 2137  | 0      | 0. 087 | 0. 39383  | DC | FGF14    |
| HDAC1. 1    | 2. 64E-05 | 0. 301325 | 0. 321 | 0. 224 | 0. 39499  | DC | HDAC1    |
| RUFY2. 3    | 2. 66E-05 | -0. 24113 | 0. 037 | 0. 151 | 0. 396786 | DC | RUFY2    |
| TSKU. 1     | 2. 66E-05 | -0. 18057 | 0      | 0. 087 | 0. 397824 | DC | TSKU     |
| DHCR24      | 2. 66E-05 | -0. 19503 | 0. 005 | 0. 097 | 0. 397842 | DC | DHCR24   |
| CPEB4. 2    | 2. 68E-05 | -0. 2838  | 0. 107 | 0. 249 | 0. 400373 | DC | CPEB4    |
| PQBP1. 2    | 2. 68E-05 | 0. 283444 | 0. 444 | 0. 343 | 0. 400955 | DC | PQBP1    |
| DALRD3. 1   | 2. 69E-05 | -0. 2018  | 0. 048 | 0. 167 | 0. 401599 | DC | DALRD3   |
| SNTA1. 1    | 2. 69E-05 | -0. 17542 | 0      | 0. 086 | 0. 401858 | DC | SNTA1    |
| AP4M1. 1    | 2. 73E-05 | -0. 31271 | 0. 07  | 0. 195 | 0. 408626 | DC | AP4M1    |
| TMEM67. 1   | 2. 74E-05 | -0. 22343 | 0. 005 | 0. 097 | 0. 408889 | DC | TMEM67   |
| OSMR. 1     | 2. 74E-05 | -0. 1998  | 0      | 0. 086 | 0. 410048 | DC | OSMR     |
| ABI2. 1     | 2. 78E-05 | -0. 28218 | 0. 198 | 0. 364 | 0. 416004 | DC | ABI2     |
| DUSP4. 3    | 2. 79E-05 | 0. 417259 | 0. 273 | 0. 178 | 0. 417479 | DC | DUSP4    |
| PSMB9. 2    | 2. 80E-05 | 0. 173278 | 0. 529 | 0. 403 | 0. 418812 | DC | PSMB9    |
| CRYZ. 2     | 2. 82E-05 | -0. 23308 | 0. 021 | 0. 125 | 0. 421735 | DC | CRYZ     |
| ADRBK1. 3   | 2. 83E-05 | 0. 27355  | 0. 176 | 0. 091 | 0. 42229  | DC | ADRBK1   |
| CHST10      | 2. 84E-05 | -0. 22575 | 0. 032 | 0. 141 | 0. 425029 | DC | CHST10   |
| IRF2BPL. 2  | 2. 87E-05 | -0. 24909 | 0. 102 | 0. 244 | 0. 428561 | DC | IRF2BPL  |
| LRRN3. 2    | 2. 88E-05 | -0. 29867 | 0. 016 | 0. 115 | 0. 429801 | DC | LRRN3    |
| RSBN1L. 1   | 2. 90E-05 | -0. 33721 | 0. 203 | 0. 357 | 0. 433621 | DC | RSBN1L   |
| DDT. 1      | 2. 91E-05 | 0. 167123 | 0. 636 | 0. 52  | 0. 434199 | DC | DDT      |
| CYTL1. 3    | 2. 91E-05 | -0. 50129 | 0. 016 | 0. 112 | 0. 434601 | DC | CYTL1    |
| PRELID1. 3  | 2. 91E-05 | 0. 237137 | 0. 647 | 0. 558 | 0. 435407 | DC | PRELID1  |
| KCNE3. 2    | 2. 92E-05 | 0. 156955 | 0. 075 | 0. 026 | 0. 435716 | DC | KCNE3    |
| CKAP5. 3    | 2. 92E-05 | -0. 23946 | 0. 043 | 0. 158 | 0. 436883 | DC | CKAP5    |
| DENND2A. 1  | 2. 93E-05 | -0. 21352 | 0. 005 | 0. 096 | 0. 438263 | DC | DENND2A  |
| IL1RL2      | 2. 94E-05 | 0. 113445 | 0. 027 | 0. 005 | 0. 438838 | DC | IL1RL2   |
| DCHS1. 2    | 2. 94E-05 | -0. 19254 | 0      | 0. 086 | 0. 440033 | DC | DCHS1    |
| AKAP8L. 1   | 2. 96E-05 | -0. 24863 | 0. 107 | 0. 251 | 0. 441881 | DC | AKAP8L   |
| PDZD11. 2   | 2. 96E-05 | -0. 32229 | 0. 193 | 0. 361 | 0. 442656 | DC | PDZD11   |
| MBOAT2. 2   | 3. 00E-05 | -0. 24973 | 0. 059 | 0. 184 | 0. 447835 | DC | MBOAT2   |
| ZNF426      | 3. 03E-05 | -0. 25249 | 0. 016 | 0. 114 | 0. 452091 | DC | ZNF426   |
| IL6ST. 3    | 3. 03E-05 | -0. 29671 | 0. 112 | 0. 256 | 0. 453221 | DC | IL6ST    |
| EPM2AIP1. 3 | 3. 03E-05 | -0. 18375 | 0. 07  | 0. 2   | 0. 45328  | DC | EPM2AIP1 |
| CACNG7. 1   | 3. 03E-05 | -0. 18129 | 0      | 0. 085 | 0. 453538 | DC | CACNG7   |
| MMP7. 1     | 3. 05E-05 | 0. 206524 | 0. 08  | 0. 028 | 0. 455574 | DC | MMP7     |
| PPP1R10. 2  | 3. 06E-05 | 0. 272312 | 0. 396 | 0. 286 | 0. 457051 | DC | PPP1R10  |
| WASF1       | 3. 06E-05 | -0. 22849 | 0. 005 | 0. 096 | 0. 457065 | DC | WASF1    |

|             |          |          |       |       |          |    |           |
|-------------|----------|----------|-------|-------|----------|----|-----------|
| CAPRIN2.1   | 3.08E-05 | -0.17636 | 0.011 | 0.106 | 0.460389 | DC | CAPRIN2   |
| STXBP1.2    | 3.09E-05 | -0.2372  | 0.021 | 0.123 | 0.46184  | DC | STXBP1    |
| CTNNAL1.2   | 3.10E-05 | -0.2527  | 0.037 | 0.149 | 0.463819 | DC | CTNNAL1   |
| SPOCD1.1    | 3.11E-05 | -0.44319 | 0.086 | 0.22  | 0.464135 | DC | SPOCD1    |
| FSTL1.1     | 3.11E-05 | -0.18682 | 0.016 | 0.115 | 0.464626 | DC | FSTL1     |
| CLASP2.2    | 3.13E-05 | -0.32527 | 0.075 | 0.199 | 0.467439 | DC | CLASP2    |
| FAM222B.2   | 3.13E-05 | -0.17581 | 0.016 | 0.115 | 0.468368 | DC | FAM222B   |
| PTPN4.2     | 3.14E-05 | -0.25103 | 0.011 | 0.104 | 0.469776 | DC | PTPN4     |
| SLC17A9.2   | 3.18E-05 | 0.237104 | 0.08  | 0.029 | 0.474692 | DC | SLC17A9   |
| VOPP1.2     | 3.18E-05 | 0.256397 | 0.401 | 0.289 | 0.474698 | DC | VOPP1     |
| FAU.3       | 3.18E-05 | -0.19842 | 0.995 | 0.957 | 0.475835 | DC | FAU       |
| BRSK1.1     | 3.19E-05 | -0.21837 | 0     | 0.085 | 0.476961 | DC | BRSK1     |
| DPYSL2.2    | 3.21E-05 | -0.29878 | 0.251 | 0.426 | 0.480166 | DC | DPYSL2    |
| PSMG3.2     | 3.22E-05 | -0.28299 | 0.171 | 0.33  | 0.481083 | DC | PSMG3     |
| NFASC.1     | 3.22E-05 | -0.32528 | 0.011 | 0.104 | 0.481589 | DC | NFASC     |
| ZNF521.1    | 3.22E-05 | -0.19048 | 0     | 0.085 | 0.481788 | DC | ZNF521    |
| CCDC106.3   | 3.26E-05 | -0.22963 | 0.096 | 0.234 | 0.48663  | DC | CCDC106   |
| CHI3L1.3    | 3.26E-05 | -0.75984 | 0.39  | 0.527 | 0.486722 | DC | CHI3L1    |
| STK17A.3    | 3.27E-05 | 0.301243 | 0.396 | 0.292 | 0.488559 | DC | STK17A    |
| TMEM255A.3  | 3.29E-05 | -0.22689 | 0.011 | 0.104 | 0.491343 | DC | TMEM255A  |
| DUSP15.2    | 3.31E-05 | -0.18368 | 0.005 | 0.095 | 0.495317 | DC | DUSP15    |
| PRKAR1B.1   | 3.32E-05 | -0.27626 | 0.027 | 0.129 | 0.495443 | DC | PRKAR1B   |
| PACSIN2.3   | 3.33E-05 | 0.310529 | 0.273 | 0.173 | 0.498105 | DC | PACSIN2   |
| APOBEC3C.3  | 3.33E-05 | 0.229106 | 0.225 | 0.127 | 0.498264 | DC | APOBEC3C  |
| DNAJC3.1    | 3.34E-05 | 0.250247 | 0.396 | 0.29  | 0.498665 | DC | DNAJC3    |
| PTGFRN.3    | 3.34E-05 | -0.15081 | 0.011 | 0.105 | 0.499207 | DC | PTGFRN    |
| ERV3-1.2    | 3.35E-05 | -0.25416 | 0.118 | 0.263 | 0.50015  | DC | ERV3-1    |
| RAP2B.3     | 3.36E-05 | 0.292493 | 0.262 | 0.164 | 0.501649 | DC | RAP2B     |
| PRCC.3      | 3.36E-05 | -0.31169 | 0.15  | 0.306 | 0.501917 | DC | PRCC      |
| LAMTOR2.1   | 3.36E-05 | 0.141047 | 0.701 | 0.585 | 0.502621 | DC | LAMTOR2   |
| WIPF3.3     | 3.38E-05 | -0.27063 | 0.005 | 0.094 | 0.504439 | DC | WIPF3     |
| KIF3C.3     | 3.38E-05 | -0.23046 | 0.011 | 0.104 | 0.504931 | DC | KIF3C     |
| HIST2H2BE.3 | 3.38E-05 | -0.28581 | 0.037 | 0.149 | 0.505759 | DC | HIST2H2BE |
| FAM217B.3   | 3.39E-05 | -0.23348 | 0.043 | 0.157 | 0.506673 | DC | FAM217B   |
| SCAMP1.1    | 3.40E-05 | -0.2274  | 0.08  | 0.216 | 0.508299 | DC | SCAMP1    |
| TOP2B.3     | 3.44E-05 | -0.26491 | 0.102 | 0.239 | 0.51427  | DC | TOP2B     |
| PKIA.3      | 3.44E-05 | -0.27976 | 0.005 | 0.095 | 0.514703 | DC | PKIA      |
| SLC25A36.3  | 3.49E-05 | -0.24403 | 0.123 | 0.271 | 0.521526 | DC | SLC25A36  |
| PTDSS1.2    | 3.57E-05 | 0.334142 | 0.299 | 0.2   | 0.533705 | DC | PTDSS1    |
| PYGB.1      | 3.57E-05 | -0.21777 | 0.08  | 0.213 | 0.533706 | DC | PYGB      |
| BTBD3.2     | 3.58E-05 | -0.2224  | 0.032 | 0.139 | 0.535124 | DC | BTBD3     |
| LMO3.3      | 3.60E-05 | -0.32587 | 0     | 0.084 | 0.538167 | DC | LMO3      |
| SREK1.2     | 3.62E-05 | -0.31269 | 0.171 | 0.325 | 0.540524 | DC | SREK1     |
| PARP4.1     | 3.63E-05 | 0.330296 | 0.16  | 0.082 | 0.541814 | DC | PARP4     |
| GAB3.1      | 3.65E-05 | 0.19787  | 0.086 | 0.032 | 0.546073 | DC | GAB3      |
| TET1.2      | 3.67E-05 | -0.17288 | 0     | 0.084 | 0.549096 | DC | TET1      |
| ITM2C.3     | 3.68E-05 | -0.36415 | 0.251 | 0.42  | 0.55043  | DC | ITM2C     |
| KLRC2.2     | 3.69E-05 | -0.34258 | 0.016 | 0.111 | 0.551748 | DC | KLRC2     |
| SLC29A4.3   | 3.71E-05 | -0.21724 | 0     | 0.084 | 0.554643 | DC | SLC29A4   |
| B3GALT6.3   | 3.72E-05 | -0.21246 | 0.032 | 0.14  | 0.555956 | DC | B3GALT6   |
| PSMA6.2     | 3.72E-05 | 0.217179 | 0.337 | 0.222 | 0.556481 | DC | PSMA6     |

|             |           |           |        |        |           |    |           |
|-------------|-----------|-----------|--------|--------|-----------|----|-----------|
| CELSR2. 2   | 3. 75E-05 | -0. 20926 | 0. 005 | 0. 094 | 0. 560485 | DC | CELSR2    |
| CTDSP1. 3   | 3. 80E-05 | 0. 274317 | 0. 326 | 0. 22  | 0. 567535 | DC | CTDSP1    |
| IARS. 1     | 3. 80E-05 | -0. 22122 | 0. 08  | 0. 212 | 0. 56801  | DC | IARS      |
| ZNF429. 2   | 3. 81E-05 | -0. 23435 | 0. 027 | 0. 131 | 0. 568818 | DC | ZNF429    |
| CALM2. 2    | 3. 81E-05 | -0. 18925 | 0. 979 | 0. 932 | 0. 569201 | DC | CALM2     |
| PCOLCE2. 1  | 3. 83E-05 | -0. 26103 | 0      | 0. 083 | 0. 571618 | DC | PCOLCE2   |
| SCRN3. 1    | 3. 83E-05 | -0. 22962 | 0. 011 | 0. 102 | 0. 572744 | DC | SCRN3     |
| TMEM35. 2   | 3. 84E-05 | -0. 27164 | 0. 005 | 0. 093 | 0. 573931 | DC | TMEM35    |
| AKTIP. 2    | 3. 86E-05 | -0. 29402 | 0. 053 | 0. 17  | 0. 577016 | DC | AKTIP     |
| AHDC1. 2    | 3. 88E-05 | -0. 2495  | 0. 011 | 0. 103 | 0. 579915 | DC | AHDC1     |
| RHO. 2      | 3. 89E-05 | -0. 32207 | 0. 032 | 0. 136 | 0. 580837 | DC | RHO       |
| CHD6. 2     | 3. 90E-05 | -0. 2142  | 0. 107 | 0. 247 | 0. 583186 | DC | CHD6      |
| PIANP. 1    | 3. 90E-05 | -0. 1862  | 0      | 0. 083 | 0. 583218 | DC | PIANP     |
| C3orf70. 2  | 3. 93E-05 | -0. 24466 | 0. 011 | 0. 102 | 0. 587674 | DC | C3orf70   |
| OXR1. 2     | 3. 93E-05 | -0. 2731  | 0. 112 | 0. 254 | 0. 587812 | DC | OXR1      |
| RAB8A. 1    | 3. 97E-05 | 0. 192983 | 0. 455 | 0. 354 | 0. 593605 | DC | RAB8A     |
| EFEMP1. 2   | 3. 98E-05 | -0. 64547 | 0. 096 | 0. 223 | 0. 594855 | DC | EFEMP1    |
| STOX2. 3    | 3. 98E-05 | -0. 21586 | 0. 005 | 0. 094 | 0. 595314 | DC | STOX2     |
| ASTN1       | 4. 04E-05 | -0. 19506 | 0. 005 | 0. 093 | 0. 60305  | DC | ASTN1     |
| IFI27L1. 1  | 4. 05E-05 | -0. 2316  | 0. 064 | 0. 187 | 0. 60506  | DC | IFI27L1   |
| C1orf52. 3  | 4. 08E-05 | -0. 30023 | 0. 155 | 0. 309 | 0. 609401 | DC | C1orf52   |
| FAM129A. 2  | 4. 09E-05 | 0. 303948 | 0. 23  | 0. 138 | 0. 611635 | DC | FAM129A   |
| ORAI3. 2    | 4. 11E-05 | 0. 271845 | 0. 235 | 0. 14  | 0. 614049 | DC | ORAI3     |
| C12orf73. 4 | 4. 12E-05 | -0. 20317 | 0. 043 | 0. 156 | 0. 615664 | DC | C12orf73  |
| HIP1R. 2    | 4. 18E-05 | -0. 27343 | 0. 016 | 0. 11  | 0. 624643 | DC | HIP1R     |
| DYNC1LI2. 4 | 4. 18E-05 | -0. 25214 | 0. 187 | 0. 347 | 0. 625131 | DC | DYNC1LI2  |
| TMEM63B     | 4. 24E-05 | -0. 21787 | 0. 032 | 0. 137 | 0. 633121 | DC | TMEM63B   |
| WASL. 1     | 4. 24E-05 | -0. 24452 | 0. 064 | 0. 185 | 0. 634221 | DC | WASL      |
| TMEM206. 2  | 4. 24E-05 | -0. 21999 | 0. 096 | 0. 233 | 0. 634326 | DC | TMEM206   |
| SLC25A45    | 4. 25E-05 | 0. 211621 | 0. 107 | 0. 045 | 0. 635435 | DC | SLC25A45  |
| BID. 3      | 4. 25E-05 | 0. 298064 | 0. 46  | 0. 355 | 0. 635846 | DC | BID       |
| LILRB1. 3   | 4. 26E-05 | 0. 174127 | 0. 182 | 0. 09  | 0. 636504 | DC | LILRB1    |
| IQCE. 1     | 4. 26E-05 | -0. 22741 | 0. 021 | 0. 12  | 0. 636684 | DC | IQCE      |
| MED10. 3    | 4. 27E-05 | -0. 317   | 0. 31  | 0. 486 | 0. 638322 | DC | MED10     |
| COQ7. 2     | 4. 28E-05 | -0. 3334  | 0. 07  | 0. 189 | 0. 638868 | DC | COQ7      |
| CELF5. 3    | 4. 33E-05 | -0. 30156 | 0. 005 | 0. 092 | 0. 647735 | DC | CELF5     |
| DENND1B. 3  | 4. 34E-05 | 0. 296345 | 0. 171 | 0. 09  | 0. 648029 | DC | DENND1B   |
| HIVEP3. 3   | 4. 34E-05 | -0. 22216 | 0. 043 | 0. 154 | 0. 649181 | DC | HIVEP3    |
| ZNF846. 2   | 4. 37E-05 | 0. 213253 | 0. 144 | 0. 069 | 0. 653144 | DC | ZNF846    |
| NDUFAF5     | 4. 37E-05 | -0. 27173 | 0. 032 | 0. 135 | 0. 65344  | DC | NDUFAF5   |
| MNAT1. 2    | 4. 38E-05 | -0. 22645 | 0. 07  | 0. 195 | 0. 654975 | DC | MNAT1     |
| CORO2B. 1   | 4. 40E-05 | -0. 20603 | 0. 011 | 0. 102 | 0. 656926 | DC | CORO2B    |
| UBC. 3      | 4. 40E-05 | -0. 22256 | 0. 973 | 0. 95  | 0. 657712 | DC | UBC       |
| ALDH6A1. 1  | 4. 44E-05 | -0. 2692  | 0. 08  | 0. 209 | 0. 663219 | DC | ALDH6A1   |
| TCEAL4. 1   | 4. 44E-05 | -0. 32079 | 0. 401 | 0. 574 | 0. 66387  | DC | TCEAL4    |
| REEP1. 3    | 4. 45E-05 | -0. 23008 | 0      | 0. 082 | 0. 664503 | DC | REEP1     |
| MIR4458HG   | 4. 46E-05 | -0. 42128 | 0. 053 | 0. 162 | 0. 666826 | DC | MIR4458HG |
| CKS2. 3     | 4. 47E-05 | 0. 205342 | 0. 497 | 0. 364 | 0. 668358 | DC | CKS2      |
| TALDO1. 3   | 4. 49E-05 | 0. 139888 | 0. 695 | 0. 596 | 0. 671519 | DC | TALDO1    |
| SLC25A51. 4 | 4. 52E-05 | 0. 230392 | 0. 118 | 0. 052 | 0. 675811 | DC | SLC25A51  |
| FAM110B. 2  | 4. 53E-05 | -0. 22457 | 0. 064 | 0. 189 | 0. 677624 | DC | FAM110B   |

|            |           |           |        |        |           |    |                |
|------------|-----------|-----------|--------|--------|-----------|----|----------------|
| ING4. 1    | 4. 61E-05 | -0. 30509 | 0. 128 | 0. 269 | 0. 689022 | DC | ING4           |
| NDUFC1. 2  | 4. 61E-05 | -0. 34093 | 0. 38  | 0. 555 | 0. 689135 | DC | NDUFC1         |
| TRPM4. 1   | 4. 62E-05 | 0. 302441 | 0. 096 | 0. 039 | 0. 690185 | DC | TRPM4          |
| SYNC. 1    | 4. 64E-05 | -0. 22176 | 0. 059 | 0. 178 | 0. 693245 | DC | SYNC           |
| ELP6. 1    | 4. 66E-05 | -0. 25338 | 0. 086 | 0. 217 | 0. 696587 | DC | ELP6           |
| ADPRH. 1   | 4. 71E-05 | 0. 186012 | 0. 086 | 0. 032 | 0. 703476 | DC | ADPRH          |
| RP11-556E  | 4. 71E-05 | 0. 144544 | 0. 123 | 0. 054 | 0. 704214 | DC | RP11-556E13. 1 |
| RHOJ. 1    | 4. 71E-05 | -0. 19034 | 0. 011 | 0. 101 | 0. 704404 | DC | RHOJ           |
| MPPED2. 1  | 4. 72E-05 | -0. 23467 | 0. 005 | 0. 091 | 0. 705961 | DC | MPPED2         |
| ZFP82. 1   | 4. 73E-05 | -0. 22881 | 0. 016 | 0. 111 | 0. 706325 | DC | ZFP82          |
| UBE2D4. 1  | 4. 73E-05 | -0. 23745 | 0. 07  | 0. 191 | 0. 70757  | DC | UBE2D4         |
| PTDSS2. 3  | 4. 79E-05 | -0. 21288 | 0. 043 | 0. 154 | 0. 716105 | DC | PTDSS2         |
| RGS6. 1    | 4. 80E-05 | -0. 21114 | 0. 005 | 0. 092 | 0. 71729  | DC | RGS6           |
| C14orf1. 2 | 4. 81E-05 | -0. 2726  | 0. 144 | 0. 295 | 0. 719399 | DC | C14orf1        |
| ISYNA1. 1  | 4. 87E-05 | -0. 24671 | 0. 032 | 0. 135 | 0. 727174 | DC | ISYNA1         |
| RAMP2. 2   | 4. 92E-05 | -0. 24382 | 0. 032 | 0. 137 | 0. 734531 | DC | RAMP2          |
| ILDR2. 2   | 4. 92E-05 | -0. 15888 | 0      | 0. 081 | 0. 734561 | DC | ILDR2          |
| ARL11. 2   | 4. 92E-05 | 0. 190896 | 0. 096 | 0. 038 | 0. 735556 | DC | ARL11          |
| RP11-332H  | 4. 92E-05 | -0. 21959 | 0. 027 | 0. 128 | 0. 735732 | DC | RP11-332H14. 2 |
| ECE1. 1    | 4. 96E-05 | -0. 22994 | 0      | 0. 081 | 0. 741956 | DC | ECE1           |
| HTATIP2. 3 | 4. 98E-05 | 0. 317953 | 0. 241 | 0. 145 | 0. 744877 | DC | HTATIP2        |
| ANKRD46. 1 | 4. 99E-05 | -0. 3144  | 0. 048 | 0. 159 | 0. 745441 | DC | ANKRD46        |
| STX7. 3    | 5. 04E-05 | 0. 275654 | 0. 374 | 0. 266 | 0. 752646 | DC | STX7           |
| JAK2       | 5. 04E-05 | 0. 152033 | 0. 086 | 0. 032 | 0. 753113 | DC | JAK2           |
| ORMDL3. 1  | 5. 04E-05 | -0. 23424 | 0. 027 | 0. 128 | 0. 753373 | DC | ORMDL3         |
| DFNA5. 1   | 5. 06E-05 | -0. 30164 | 0. 075 | 0. 197 | 0. 756368 | DC | DFNA5          |
| VAX2. 2    | 5. 07E-05 | -0. 20019 | 0      | 0. 081 | 0. 756967 | DC | VAX2           |
| TIMP3. 1   | 5. 09E-05 | -0. 27078 | 0. 027 | 0. 127 | 0. 760454 | DC | TIMP3          |
| ELOVL4. 1  | 5. 12E-05 | -0. 20666 | 0      | 0. 081 | 0. 764585 | DC | ELOVL4         |
| ODF2L. 1   | 5. 13E-05 | -0. 27155 | 0. 059 | 0. 177 | 0. 766966 | DC | ODF2L          |
| ZNF593. 1  | 5. 13E-05 | -0. 19289 | 0. 144 | 0. 304 | 0. 767098 | DC | ZNF593         |
| FASN. 3    | 5. 14E-05 | -0. 15075 | 0. 021 | 0. 118 | 0. 768016 | DC | FASN           |
| B3GAT1. 2  | 5. 15E-05 | -0. 26166 | 0. 005 | 0. 091 | 0. 769255 | DC | B3GAT1         |
| CCDC130. 1 | 5. 16E-05 | -0. 28366 | 0. 096 | 0. 23  | 0. 770895 | DC | CCDC130        |
| IGF2BP3. 2 | 5. 16E-05 | -0. 197   | 0. 016 | 0. 109 | 0. 771472 | DC | IGF2BP3        |
| CMBL. 1    | 5. 18E-05 | -0. 21526 | 0. 027 | 0. 128 | 0. 773985 | DC | CMBL           |
| RHOC. 2    | 5. 21E-05 | 0. 145379 | 0. 695 | 0. 53  | 0. 779048 | DC | RHOC           |
| CCDC181. 2 | 5. 22E-05 | -0. 23549 | 0      | 0. 081 | 0. 780049 | DC | CCDC181        |
| NAV2       | 5. 26E-05 | -0. 23168 | 0. 021 | 0. 119 | 0. 786527 | DC | NAV2           |
| NUMBL. 1   | 5. 28E-05 | -0. 18929 | 0. 005 | 0. 091 | 0. 789039 | DC | NUMBL          |
| RNF135. 3  | 5. 30E-05 | 0. 248456 | 0. 198 | 0. 109 | 0. 792587 | DC | RNF135         |
| TMEM100. 3 | 5. 32E-05 | -0. 34958 | 0. 005 | 0. 09  | 0. 795034 | DC | TMEM100        |
| DOLK. 2    | 5. 33E-05 | -0. 21241 | 0. 027 | 0. 128 | 0. 797052 | DC | DOLK           |
| EPDR1. 2   | 5. 34E-05 | -0. 201   | 0. 027 | 0. 128 | 0. 797671 | DC | EPDR1          |
| AASDH. 1   | 5. 35E-05 | -0. 30329 | 0. 053 | 0. 166 | 0. 799548 | DC | AASDH          |
| SNHG15. 2  | 5. 35E-05 | 0. 260779 | 0. 321 | 0. 22  | 0. 800186 | DC | SNHG15         |
| PCDHB2. 1  | 5. 38E-05 | -0. 18299 | 0      | 0. 08  | 0. 803826 | DC | PCDHB2         |
| HPS4. 2    | 5. 42E-05 | -0. 2624  | 0. 064 | 0. 185 | 0. 809529 | DC | HPS4           |
| NQO1. 2    | 5. 43E-05 | -0. 21789 | 0. 016 | 0. 11  | 0. 812082 | DC | NQO1           |
| PFDN6. 2   | 5. 46E-05 | -0. 27313 | 0. 193 | 0. 355 | 0. 815728 | DC | PFDN6          |
| NUP107. 3  | 5. 48E-05 | -0. 34086 | 0. 096 | 0. 225 | 0. 819065 | DC | NUP107         |

|           |          |          |       |       |          |    |                 |
|-----------|----------|----------|-------|-------|----------|----|-----------------|
| LDLR      | 5.49E-05 | -0.23204 | 0.011 | 0.1   | 0.819682 | DC | LDLR            |
| CBLN4.3   | 5.54E-05 | -0.23631 | 0     | 0.08  | 0.82832  | DC | CBLN4           |
| BSDC1.1   | 5.62E-05 | -0.2462  | 0.144 | 0.293 | 0.839157 | DC | BSDC1           |
| EHBP1.1   | 5.64E-05 | -0.22164 | 0.053 | 0.169 | 0.842456 | DC | EHBP1           |
| PDGFD.1   | 5.65E-05 | -0.15866 | 0     | 0.08  | 0.845058 | DC | PDGFD           |
| TRABD2A   | 5.66E-05 | 0.143232 | 0.043 | 0.011 | 0.846243 | DC | TRABD2A         |
| PSPH.2    | 5.73E-05 | -0.22155 | 0.048 | 0.159 | 0.855545 | DC | PSPH            |
| SMPD1.2   | 5.73E-05 | -0.23334 | 0.102 | 0.239 | 0.856138 | DC | SMPD1           |
| PPARD.3   | 5.80E-05 | 0.266025 | 0.193 | 0.107 | 0.866567 | DC | PPARD           |
| PLD3.2    | 5.80E-05 | -0.33126 | 0.369 | 0.532 | 0.867332 | DC | PLD3            |
| GPR137.2  | 5.85E-05 | -0.22069 | 0.08  | 0.211 | 0.873914 | DC | GPR137          |
| ATP6V1E1. | 5.89E-05 | 0.219974 | 0.524 | 0.431 | 0.879534 | DC | ATP6V1E1        |
| ZDHHC4.3  | 5.95E-05 | -0.328   | 0.198 | 0.357 | 0.88933  | DC | ZDHHC4          |
| CACNB4    | 5.99E-05 | -0.20702 | 0.005 | 0.09  | 0.89546  | DC | CACNB4          |
| MECR.1    | 6.00E-05 | -0.14534 | 0.048 | 0.163 | 0.896174 | DC | MECR            |
| PTP4A3    | 6.02E-05 | -0.21332 | 0.005 | 0.089 | 0.898897 | DC | PTP4A3          |
| FASTK.1   | 6.02E-05 | -0.26107 | 0.176 | 0.34  | 0.899411 | DC | FASTK           |
| AP1S1.3   | 6.06E-05 | -0.34992 | 0.31  | 0.47  | 0.905312 | DC | AP1S1           |
| CEP290.1  | 6.06E-05 | -0.2302  | 0.048 | 0.159 | 0.906252 | DC | CEP290          |
| UTRN.2    | 6.07E-05 | 0.271635 | 0.193 | 0.108 | 0.907049 | DC | UTRN            |
| ALG13.2   | 6.08E-05 | 0.292071 | 0.321 | 0.218 | 0.909283 | DC | ALG13           |
| GLUD1.2   | 6.12E-05 | 0.195088 | 0.364 | 0.246 | 0.914978 | DC | GLUD1           |
| SOX5.1    | 6.12E-05 | -0.1882  | 0.005 | 0.09  | 0.915141 | DC | SOX5            |
| ETV4.2    | 6.13E-05 | -0.18935 | 0     | 0.079 | 0.915417 | DC | ETV4            |
| KIF5A.2   | 6.15E-05 | -0.31388 | 0.027 | 0.123 | 0.919242 | DC | KIF5A           |
| RHBDD3.1  | 6.18E-05 | -0.22642 | 0.043 | 0.151 | 0.923934 | DC | RHBDD3          |
| PIGF.2    | 6.23E-05 | -0.31473 | 0.144 | 0.29  | 0.930596 | DC | PIGF            |
| USE1.3    | 6.23E-05 | -0.33944 | 0.176 | 0.332 | 0.931037 | DC | USE1            |
| PAXBP1.2  | 6.23E-05 | -0.1891  | 0.048 | 0.161 | 0.93131  | DC | PAXBP1          |
| EPB41L3.3 | 6.26E-05 | 0.181099 | 0.198 | 0.104 | 0.935342 | DC | EPB41L3         |
| C20orf96. | 6.33E-05 | -0.15489 | 0.043 | 0.152 | 0.946166 | DC | C20orf96        |
| TRIO.2    | 6.34E-05 | -0.27839 | 0.059 | 0.174 | 0.947972 | DC | TRIO            |
| IPMK.1    | 6.39E-05 | 0.243338 | 0.102 | 0.043 | 0.955248 | DC | IPMK            |
| MDFI.2    | 6.41E-05 | -0.23074 | 0.005 | 0.089 | 0.957432 | DC | MDFI            |
| PPME1.1   | 6.47E-05 | -0.25159 | 0.064 | 0.183 | 0.966484 | DC | PPME1           |
| SLC2A4RG. | 6.48E-05 | -0.17041 | 0.027 | 0.127 | 0.967886 | DC | SLC2A4RG        |
| NUBP1.2   | 6.50E-05 | 0.300212 | 0.316 | 0.216 | 0.971028 | DC | NUBP1           |
| LOXL1.1   | 6.50E-05 | -0.15472 | 0     | 0.079 | 0.971959 | DC | LOXL1           |
| PPP1R37.1 | 6.51E-05 | -0.17429 | 0.032 | 0.136 | 0.973251 | DC | PPP1R37         |
| CSAD.1    | 6.53E-05 | -0.20371 | 0.053 | 0.17  | 0.976525 | DC | CSAD            |
| FIGN.1    | 6.55E-05 | -0.18524 | 0.005 | 0.089 | 0.979167 | DC | FIGN            |
| CIB2.1    | 6.57E-05 | -0.15123 | 0     | 0.079 | 0.981713 | DC | CIB2            |
| QKI.2     | 6.58E-05 | -0.32665 | 0.337 | 0.473 | 0.982738 | DC | QKI             |
| PDGFA.1   | 6.62E-05 | -0.25947 | 0.011 | 0.098 | 0.98955  | DC | PDGFA           |
| XXbac-B13 | 6.65E-05 | 0.127225 | 0.059 | 0.019 | 0.994215 | DC | XXbac-B135H6.15 |
| PTPRF.3   | 6.69E-05 | -0.21252 | 0.021 | 0.117 | 0.999671 | DC | PTPRF           |
| ZNF512.1  | 6.70E-05 | -0.2222  | 0.027 | 0.125 | 1        | DC | ZNF512          |
| SPIN2B.1  | 6.72E-05 | -0.21978 | 0.016 | 0.108 | 1        | DC | SPIN2B          |
| HNRNPM.3  | 6.72E-05 | 0.199876 | 0.631 | 0.542 | 1        | DC | HNRNPM          |
| UPF2.1    | 6.75E-05 | 0.269023 | 0.316 | 0.216 | 1        | DC | UPF2            |
| CNPY1.2   | 6.77E-05 | -0.22702 | 0     | 0.079 | 1        | DC | CNPY1           |



|           |          |          |       |       |      |              |
|-----------|----------|----------|-------|-------|------|--------------|
| KDM4C     | 6.77E-05 | 0.258745 | 0.096 | 0.04  | 1 DC | KDM4C        |
| SRSF5     | 6.77E-05 | 0.116097 | 0.791 | 0.692 | 1 DC | SRSF5        |
| OAT.1     | 6.77E-05 | 0.274857 | 0.342 | 0.236 | 1 DC | OAT          |
| TIA1.3    | 6.79E-05 | -0.25277 | 0.112 | 0.25  | 1 DC | TIA1         |
| RUNDC3A.3 | 6.81E-05 | -0.24082 | 0.011 | 0.099 | 1 DC | RUNDC3A      |
| TRIM28.1  | 6.85E-05 | -0.24025 | 0.112 | 0.252 | 1 DC | TRIM28       |
| RNF166.3  | 6.88E-05 | 0.221505 | 0.289 | 0.183 | 1 DC | RNF166       |
| FAM84B.2  | 6.89E-05 | -0.23928 | 0.005 | 0.088 | 1 DC | FAM84B       |
| UBTF.2    | 6.89E-05 | -0.21744 | 0.096 | 0.229 | 1 DC | UBTF         |
| SYBU.1    | 6.91E-05 | -0.21204 | 0.005 | 0.088 | 1 DC | SYBU         |
| ADD1.1    | 6.93E-05 | -0.2671  | 0.16  | 0.31  | 1 DC | ADD1         |
| COPRS.2   | 6.98E-05 | -0.22861 | 0.187 | 0.336 | 1 DC | COPRS        |
| TMEM205.2 | 6.98E-05 | -0.35465 | 0.337 | 0.498 | 1 DC | TMEM205      |
| ADCY7.3   | 7.04E-05 | 0.17724  | 0.134 | 0.062 | 1 DC | ADCY7        |
| FAM69C.2  | 7.04E-05 | -0.16622 | 0     | 0.078 | 1 DC | FAM69C       |
| MEIS1.3   | 7.08E-05 | -0.19329 | 0.005 | 0.088 | 1 DC | MEIS1        |
| POMZP3.3  | 7.16E-05 | -0.2092  | 0.005 | 0.087 | 1 DC | POMZP3       |
| CYLD.2    | 7.19E-05 | 0.281114 | 0.262 | 0.163 | 1 DC | CYLD         |
| POMGNT2.1 | 7.21E-05 | -0.19581 | 0.037 | 0.142 | 1 DC | POMGNT2      |
| ELOF1.2   | 7.21E-05 | -0.31269 | 0.262 | 0.426 | 1 DC | ELOF1        |
| CNPY2.2   | 7.22E-05 | -0.27933 | 0.406 | 0.571 | 1 DC | CNPY2        |
| SMIM15    | 7.29E-05 | -0.27368 | 0.176 | 0.335 | 1 DC | SMIM15       |
| VTI1A.2   | 7.36E-05 | 0.280513 | 0.134 | 0.064 | 1 DC | VTI1A        |
| CTTNBP2.3 | 7.37E-05 | -0.31608 | 0.037 | 0.138 | 1 DC | CTTNBP2      |
| LINC01116 | 7.43E-05 | -0.20826 | 0.032 | 0.134 | 1 DC | LINC01116    |
| YIPF6.2   | 7.45E-05 | -0.33513 | 0.166 | 0.316 | 1 DC | YIPF6        |
| HOXD11.1  | 7.48E-05 | -0.16115 | 0     | 0.078 | 1 DC | HOXD11       |
| FAM171A1  | 7.48E-05 | -0.19079 | 0     | 0.078 | 1 DC | FAM171A1     |
| ZNF582-AS | 7.48E-05 | -0.27212 | 0     | 0.078 | 1 DC | ZNF582-AS1   |
| DIXDC1.2  | 7.48E-05 | -0.23727 | 0.011 | 0.096 | 1 DC | DIXDC1       |
| TMEM5.1   | 7.54E-05 | -0.26368 | 0.086 | 0.21  | 1 DC | TMEM5        |
| LONP2.2   | 7.54E-05 | 0.305427 | 0.342 | 0.246 | 1 DC | LONP2        |
| RMND5B.1  | 7.60E-05 | -0.21673 | 0.053 | 0.166 | 1 DC | RMND5B       |
| HOXC9.3   | 7.63E-05 | -0.28891 | 0.005 | 0.087 | 1 DC | HOXC9        |
| NMI.2     | 7.63E-05 | 0.258476 | 0.283 | 0.181 | 1 DC | NMI          |
| DMRTA2    | 7.63E-05 | -0.16491 | 0     | 0.077 | 1 DC | DMRTA2       |
| SESN2.2   | 7.63E-05 | 0.283033 | 0.187 | 0.103 | 1 DC | SESN2        |
| MLC1.2    | 7.67E-05 | -0.23142 | 0.043 | 0.15  | 1 DC | MLC1         |
| IFT43.2   | 7.69E-05 | -0.28423 | 0.118 | 0.259 | 1 DC | IFT43        |
| ZFP90.2   | 7.70E-05 | -0.21627 | 0.032 | 0.133 | 1 DC | ZFP90        |
| TTC28.1   | 7.72E-05 | -0.21106 | 0.011 | 0.097 | 1 DC | TTC28        |
| PXK.2     | 7.74E-05 | 0.279743 | 0.23  | 0.139 | 1 DC | PXK          |
| DLC1.1    | 7.74E-05 | -0.18702 | 0.005 | 0.088 | 1 DC | DLC1         |
| WDR83.1   | 7.74E-05 | -0.2004  | 0.059 | 0.173 | 1 DC | WDR83        |
| KLF9.1    | 7.75E-05 | 0.275325 | 0.219 | 0.129 | 1 DC | KLF9         |
| MKLN1.1   | 7.82E-05 | -0.25134 | 0.102 | 0.232 | 1 DC | MKLN1        |
| HSBP1.2   | 7.85E-05 | -0.25475 | 0.636 | 0.716 | 1 DC | HSBP1        |
| EZH2.2    | 7.85E-05 | -0.2589  | 0.048 | 0.155 | 1 DC | EZH2         |
| BOK.3     | 7.86E-05 | -0.21683 | 0     | 0.077 | 1 DC | BOK          |
| TSR1.1    | 7.91E-05 | -0.20199 | 0.07  | 0.191 | 1 DC | TSR1         |
| MAPKAPK5- | 7.92E-05 | -0.31505 | 0.096 | 0.225 | 1 DC | MAPKAPK5-AS1 |

|           |          |          |       |       |      |             |
|-----------|----------|----------|-------|-------|------|-------------|
| BEND5.1   | 7.98E-05 | -0.26981 | 0.037 | 0.138 | 1 DC | BEND5       |
| DNAJC18   | 8.00E-05 | -0.21197 | 0.027 | 0.124 | 1 DC | DNAJC18     |
| EXOC7.2   | 8.01E-05 | -0.28986 | 0.198 | 0.354 | 1 DC | EXOC7       |
| ITGA5.1   | 8.01E-05 | 0.212072 | 0.16  | 0.082 | 1 DC | ITGA5       |
| DPP7.3    | 8.02E-05 | 0.17313  | 0.572 | 0.465 | 1 DC | DPP7        |
| C17orf58. | 8.03E-05 | -0.21866 | 0.07  | 0.188 | 1 DC | C17orf58    |
| FAXC.2    | 8.11E-05 | -0.22124 | 0.005 | 0.087 | 1 DC | FAXC        |
| SNCAIP.2  | 8.12E-05 | -0.19892 | 0.005 | 0.087 | 1 DC | SNCAIP      |
| ATCAY.2   | 8.13E-05 | -0.27935 | 0.027 | 0.122 | 1 DC | ATCAY       |
| CACNA1A.2 | 8.14E-05 | -0.27447 | 0.011 | 0.097 | 1 DC | CACNA1A     |
| AGPAT5.2  | 8.15E-05 | -0.28019 | 0.086 | 0.211 | 1 DC | AGPAT5      |
| SEPW1.1   | 8.23E-05 | -0.29095 | 0.578 | 0.674 | 1 DC | SEPW1       |
| LAMB2.1   | 8.26E-05 | -0.20578 | 0.011 | 0.097 | 1 DC | LAMB2       |
| ATP2B1.2  | 8.29E-05 | 0.25289  | 0.449 | 0.353 | 1 DC | ATP2B1      |
| PSMG2.1   | 8.31E-05 | 0.197638 | 0.503 | 0.411 | 1 DC | PSMG2       |
| VASH1.3   | 8.33E-05 | 0.327562 | 0.219 | 0.128 | 1 DC | VASH1       |
| PEG10.1   | 8.33E-05 | -0.32693 | 0.016 | 0.104 | 1 DC | PEG10       |
| POMGNT1.2 | 8.38E-05 | -0.23282 | 0.118 | 0.26  | 1 DC | POMGNT1     |
| HES4.3    | 8.45E-05 | -0.21847 | 0.07  | 0.189 | 1 DC | HES4        |
| PHLDA1.3  | 8.48E-05 | -0.34985 | 0.273 | 0.397 | 1 DC | PHLDA1      |
| MS4A14.2  | 8.48E-05 | 0.147395 | 0.064 | 0.021 | 1 DC | MS4A14      |
| LXN       | 8.54E-05 | 0.217392 | 0.07  | 0.024 | 1 DC | LXN         |
| EIF2AK4.3 | 8.61E-05 | 0.358487 | 0.267 | 0.18  | 1 DC | EIF2AK4     |
| SHOC2.2   | 8.62E-05 | 0.260129 | 0.241 | 0.15  | 1 DC | SHOC2       |
| LMAN2L    | 8.69E-05 | -0.18307 | 0.021 | 0.115 | 1 DC | LMAN2L      |
| SEMA5A.1  | 8.78E-05 | -0.22827 | 0.016 | 0.105 | 1 DC | SEMA5A      |
| DHX40.2   | 8.83E-05 | -0.18447 | 0.037 | 0.141 | 1 DC | DHX40       |
| TSTD1.2   | 8.90E-05 | 0.209867 | 0.305 | 0.195 | 1 DC | TSTD1       |
| GORAB.3   | 8.95E-05 | -0.19087 | 0     | 0.076 | 1 DC | GORAB       |
| C17orf107 | 8.95E-05 | 0.191878 | 0.048 | 0.014 | 1 DC | C17orf107   |
| MAP1LC3B. | 8.95E-05 | 0.208908 | 0.647 | 0.565 | 1 DC | MAP1LC3B    |
| SUMO2.1   | 8.99E-05 | -0.14963 | 0.85  | 0.821 | 1 DC | SUMO2       |
| THOC6.2   | 9.03E-05 | 0.31828  | 0.262 | 0.168 | 1 DC | THOC6       |
| CNPY4.2   | 9.03E-05 | -0.22792 | 0.021 | 0.114 | 1 DC | CNPY4       |
| SEPT9.1   | 9.04E-05 | -0.29899 | 0.198 | 0.343 | 1 DC | 9-Sep       |
| ZNF775.2  | 9.07E-05 | -0.18521 | 0.011 | 0.096 | 1 DC | ZNF775      |
| PRKAR1A.2 | 9.08E-05 | 0.177216 | 0.561 | 0.47  | 1 DC | PRKAR1A     |
| GGH.1     | 9.13E-05 | -0.23592 | 0.128 | 0.265 | 1 DC | GGH         |
| LMO1.2    | 9.22E-05 | -0.27196 | 0     | 0.076 | 1 DC | LMO1        |
| RP1-39G22 | 9.25E-05 | -0.16784 | 0.032 | 0.132 | 1 DC | RP1-39G22.7 |
| SCARB2.3  | 9.27E-05 | -0.27508 | 0.225 | 0.384 | 1 DC | SCARB2      |
| RBX1.3    | 9.33E-05 | 0.120264 | 0.765 | 0.664 | 1 DC | RBX1        |
| SPRY2.2   | 9.35E-05 | -0.28743 | 0.096 | 0.22  | 1 DC | SPRY2       |
| GPR37L1.2 | 9.40E-05 | -0.3742  | 0.005 | 0.086 | 1 DC | GPR37L1     |
| SPATA33.2 | 9.45E-05 | -0.23805 | 0.043 | 0.147 | 1 DC | SPATA33     |
| MLST8.1   | 9.47E-05 | -0.15114 | 0.102 | 0.238 | 1 DC | MLST8       |
| FAM57A.1  | 9.48E-05 | -0.14269 | 0.011 | 0.096 | 1 DC | FAM57A      |
| SURF2.2   | 9.52E-05 | -0.2404  | 0.102 | 0.234 | 1 DC | SURF2       |
| KLC2.2    | 9.55E-05 | -0.17427 | 0.027 | 0.123 | 1 DC | KLC2        |
| DSCAM     | 9.59E-05 | -0.24212 | 0     | 0.075 | 1 DC | DSCAM       |
| KRT8      | 9.61E-05 | 0.15086  | 0.048 | 0.014 | 1 DC | KRT8        |

|             |           |           |        |        |      |          |
|-------------|-----------|-----------|--------|--------|------|----------|
| PITX1. 2    | 9. 62E-05 | -0. 13735 | 0. 005 | 0. 086 | 1 DC | PITX1    |
| MLLT3. 1    | 9. 63E-05 | -0. 21149 | 0. 011 | 0. 095 | 1 DC | MLLT3    |
| CENPT. 1    | 9. 64E-05 | -0. 2729  | 0. 075 | 0. 192 | 1 DC | CENPT    |
| NAP1L3. 1   | 9. 67E-05 | -0. 25739 | 0. 016 | 0. 103 | 1 DC | NAP1L3   |
| AZI2. 2     | 9. 67E-05 | 0. 323786 | 0. 39  | 0. 299 | 1 DC | AZI2     |
| DOCK10. 3   | 9. 71E-05 | 0. 300763 | 0. 214 | 0. 124 | 1 DC | DOCK10   |
| MAP2K2. 2   | 9. 72E-05 | -0. 2907  | 0. 166 | 0. 304 | 1 DC | MAP2K2   |
| ZMYND11. 3  | 9. 73E-05 | -0. 183   | 0. 043 | 0. 148 | 1 DC | ZMYND11  |
| ZNF639. 2   | 9. 78E-05 | -0. 21446 | 0. 037 | 0. 138 | 1 DC | ZNF639   |
| POLR2B. 2   | 9. 83E-05 | -0. 28791 | 0. 128 | 0. 264 | 1 DC | POLR2B   |
| THAP7. 1    | 9. 86E-05 | -0. 19804 | 0. 086 | 0. 211 | 1 DC | THAP7    |
| EI24. 1     | 9. 86E-05 | -0. 26852 | 0. 273 | 0. 436 | 1 DC | EI24     |
| LRRC17. 1   | 9. 88E-05 | -0. 22287 | 0      | 0. 075 | 1 DC | LRRC17   |
| COL16A1. 1  | 9. 98E-05 | -0. 19034 | 0      | 0. 075 | 1 DC | COL16A1  |
| SAMD1. 1    | 0. 000101 | -0. 20206 | 0. 016 | 0. 104 | 1 DC | SAMD1    |
| PTPRN. 2    | 0. 000101 | -0. 26786 | 0      | 0. 075 | 1 DC | PTPRN    |
| MAP2K3. 3   | 0. 000101 | 0. 29833  | 0. 283 | 0. 188 | 1 DC | MAP2K3   |
| ZFP14. 1    | 0. 000102 | -0. 24654 | 0. 021 | 0. 113 | 1 DC | ZFP14    |
| CAB39L. 1   | 0. 000102 | -0. 20215 | 0      | 0. 075 | 1 DC | CAB39L   |
| FADS2. 1    | 0. 000103 | -0. 20838 | 0. 037 | 0. 138 | 1 DC | FADS2    |
| RUVBL1      | 0. 000103 | -0. 24123 | 0. 128 | 0. 268 | 1 DC | RUVBL1   |
| NNAT. 3     | 0. 000104 | -0. 69295 | 0. 096 | 0. 197 | 1 DC | NNAT     |
| CELF4. 3    | 0. 000104 | -0. 31287 | 0. 011 | 0. 094 | 1 DC | CELF4    |
| VIPR2. 2    | 0. 000104 | -0. 31009 | 0. 005 | 0. 084 | 1 DC | VIPR2    |
| DDX1. 1     | 0. 000106 | -0. 26997 | 0. 203 | 0. 362 | 1 DC | DDX1     |
| SDHAF1. 1   | 0. 000106 | -0. 19708 | 0. 064 | 0. 178 | 1 DC | SDHAF1   |
| TLR1. 3     | 0. 000106 | 0. 190028 | 0. 139 | 0. 067 | 1 DC | TLR1     |
| DLX2. 3     | 0. 000108 | -0. 37679 | 0. 021 | 0. 11  | 1 DC | DLX2     |
| NSMAF. 2    | 0. 000108 | 0. 27383  | 0. 198 | 0. 115 | 1 DC | NSMAF    |
| KEAP1. 1    | 0. 000109 | -0. 23036 | 0. 134 | 0. 274 | 1 DC | KEAP1    |
| KLHDC9. 1   | 0. 000109 | -0. 19762 | 0      | 0. 074 | 1 DC | KLHDC9   |
| C14orf37. 1 | 0. 00011  | -0. 15917 | 0. 021 | 0. 113 | 1 DC | C14orf37 |
| SALL1. 2    | 0. 00011  | -0. 1711  | 0. 037 | 0. 139 | 1 DC | SALL1    |
| CLUAP1. 2   | 0. 00011  | -0. 25177 | 0. 059 | 0. 17  | 1 DC | CLUAP1   |
| SORBS1. 1   | 0. 00011  | -0. 17486 | 0. 011 | 0. 094 | 1 DC | SORBS1   |
| GCHFR. 3    | 0. 000111 | 0. 200416 | 0. 15  | 0. 075 | 1 DC | GCHFR    |
| RARA. 1     | 0. 000111 | 0. 290098 | 0. 171 | 0. 095 | 1 DC | RARA     |
| MPP6. 1     | 0. 000111 | -0. 17306 | 0      | 0. 074 | 1 DC | MPP6     |
| PRDX4. 3    | 0. 000111 | -0. 31614 | 0. 385 | 0. 549 | 1 DC | PRDX4    |
| USP32       | 0. 000112 | 0. 315334 | 0. 176 | 0. 099 | 1 DC | USP32    |
| PRRC2A. 2   | 0. 000112 | -0. 12449 | 0. 107 | 0. 245 | 1 DC | PRRC2A   |
| CCDC92. 1   | 0. 000112 | -0. 18175 | 0. 016 | 0. 103 | 1 DC | CCDC92   |
| CUTA. 3     | 0. 000112 | -0. 2755  | 0. 583 | 0. 683 | 1 DC | CUTA     |
| DNM1        | 0. 000112 | -0. 14902 | 0      | 0. 074 | 1 DC | DNM1     |
| ELOVL6. 1   | 0. 000113 | -0. 17072 | 0. 011 | 0. 094 | 1 DC | ELOVL6   |
| DIAPH1. 2   | 0. 000114 | 0. 38046  | 0. 219 | 0. 137 | 1 DC | DIAPH1   |
| HSPA4L. 2   | 0. 000114 | -0. 22979 | 0      | 0. 074 | 1 DC | HSPA4L   |
| ARHGEF1. 3  | 0. 000114 | 0. 318765 | 0. 289 | 0. 195 | 1 DC | ARHGEF1  |
| MARCH2. 3   | 0. 000114 | 0. 282724 | 0. 326 | 0. 231 | 1 DC | 2-Mar    |
| EIF2AK3. 1  | 0. 000115 | 0. 252412 | 0. 112 | 0. 052 | 1 DC | EIF2AK3  |
| SATB2       | 0. 000115 | -0. 15286 | 0      | 0. 074 | 1 DC | SATB2    |

|                     |          |       |       |      |                |
|---------------------|----------|-------|-------|------|----------------|
| AC069363. 0.000115  | 0.206077 | 0.112 | 0.05  | 1 DC | AC069363. 1    |
| TBL2. 1 0.000115    | -0.24172 | 0.075 | 0.191 | 1 DC | TBL2           |
| AKIRIN2. 3 0.000115 | 0.259482 | 0.46  | 0.38  | 1 DC | AKIRIN2        |
| KANK1. 1 0.000116   | -0.20508 | 0.011 | 0.093 | 1 DC | KANK1          |
| HNRNPA3. 1 0.000116 | 0.132107 | 0.642 | 0.553 | 1 DC | HNRNPA3        |
| GIMAP4. 3 0.000116  | 0.104174 | 0.262 | 0.148 | 1 DC | GIMAP4         |
| RPS6KL1. 2 0.000116 | -0.23571 | 0.016 | 0.102 | 1 DC | RPS6KL1        |
| MAP6D1. 2 0.000116  | -0.22654 | 0.005 | 0.084 | 1 DC | MAP6D1         |
| KMT2A. 3 0.000117   | -0.22435 | 0.107 | 0.238 | 1 DC | KMT2A          |
| CTSL. 3 0.000117    | -0.38788 | 0.38  | 0.526 | 1 DC | CTSL           |
| SLC2A5. 3 0.000118  | -0.53085 | 0.07  | 0.172 | 1 DC | SLC2A5         |
| ZNF577. 2 0.000118  | -0.17278 | 0.011 | 0.093 | 1 DC | ZNF577         |
| PRKRIP1. 2 0.000119 | -0.18453 | 0.112 | 0.243 | 1 DC | PRKRIP1        |
| USP22. 3 0.000119   | -0.24278 | 0.171 | 0.322 | 1 DC | USP22          |
| TXNDC11. 1 0.000119 | 0.267165 | 0.198 | 0.115 | 1 DC | TXNDC11        |
| SERINC2. 1 0.000119 | -0.15144 | 0.027 | 0.122 | 1 DC | SERINC2        |
| RP13-516M 0.000119  | 0.169421 | 0.08  | 0.031 | 1 DC | RP13-516M14. 4 |
| MFSD7. 2 0.000119   | 0.159164 | 0.08  | 0.031 | 1 DC | MFSD7          |
| MAD2L2. 2 0.00012   | -0.33607 | 0.257 | 0.394 | 1 DC | MAD2L2         |
| KHSRP. 3 0.00012    | -0.22278 | 0.107 | 0.24  | 1 DC | KHSRP          |
| FAM198B. 1 0.000121 | 0.132771 | 0.128 | 0.06  | 1 DC | FAM198B        |
| RAB5C. 1 0.000122   | 0.109703 | 0.759 | 0.651 | 1 DC | RAB5C          |
| EMID1. 2 0.000122   | -0.17053 | 0     | 0.073 | 1 DC | EMID1          |
| B4GALT5. 1 0.000122 | -0.22737 | 0.08  | 0.198 | 1 DC | B4GALT5        |
| FAM102B 0.000122    | 0.140152 | 0.075 | 0.028 | 1 DC | FAM102B        |
| BOLA1. 1 0.000122   | -0.24239 | 0.048 | 0.153 | 1 DC | BOLA1          |
| DLG1. 2 0.000122    | -0.24239 | 0.059 | 0.167 | 1 DC | DLG1           |
| JAZF1. 3 0.000123   | 0.220563 | 0.198 | 0.112 | 1 DC | JAZF1          |
| HABP4 0.000123      | -0.16139 | 0.027 | 0.121 | 1 DC | HABP4          |
| CTC-444N2 0.000123  | -0.21087 | 0.037 | 0.137 | 1 DC | CTC-444N24. 11 |
| HAAO. 2 0.000123    | 0.190216 | 0.064 | 0.022 | 1 DC | HAAO           |
| KIAA0895L 0.000124  | -0.20687 | 0.011 | 0.093 | 1 DC | KIAA0895L      |
| DPH7. 2 0.000124    | -0.21891 | 0.059 | 0.169 | 1 DC | DPH7           |
| ENKUR. 1 0.000124   | -0.23307 | 0     | 0.073 | 1 DC | ENKUR          |
| SRRM3. 2 0.000124   | -0.26317 | 0     | 0.073 | 1 DC | SRRM3          |
| CASP10 0.000124     | 0.150578 | 0.07  | 0.025 | 1 DC | CASP10         |
| ADPRHL2. 2 0.000124 | -0.20449 | 0.123 | 0.263 | 1 DC | ADPRHL2        |
| ZNF267. 3 0.000124  | 0.264985 | 0.219 | 0.131 | 1 DC | ZNF267         |
| OTUD7B. 1 0.000125  | -0.20602 | 0.016 | 0.102 | 1 DC | OTUD7B         |
| C14orf132 0.000125  | -0.27888 | 0.011 | 0.093 | 1 DC | C14orf132      |
| SCN3B. 1 0.000125   | -0.26654 | 0     | 0.073 | 1 DC | SCN3B          |
| CCDC136. 1 0.000126 | -0.23403 | 0.011 | 0.092 | 1 DC | CCDC136        |
| LONRF2. 1 0.000126  | -0.18452 | 0.011 | 0.093 | 1 DC | LONRF2         |
| AMOTL2 0.000127     | -0.25645 | 0.005 | 0.082 | 1 DC | AMOTL2         |
| CBX8. 1 0.000128    | -0.18136 | 0     | 0.073 | 1 DC | CBX8           |
| KCNQ10T1. 0.000128  | -0.33242 | 0.15  | 0.28  | 1 DC | KCNQ10T1       |
| CYHR1. 2 0.000128   | -0.17987 | 0.139 | 0.281 | 1 DC | CYHR1          |
| DDX55. 1 0.000128   | -0.21881 | 0.027 | 0.119 | 1 DC | DDX55          |
| FAM168A. 3 0.000129 | -0.19119 | 0.032 | 0.129 | 1 DC | FAM168A        |
| NTN1 0.000129       | -0.1367  | 0.005 | 0.083 | 1 DC | NTN1           |
| HSPE1. 3 0.000129   | -0.23869 | 0.69  | 0.73  | 1 DC | HSPE1          |

|           |          |          |       |       |      |            |
|-----------|----------|----------|-------|-------|------|------------|
| DDX42.1   | 0.000129 | -0.24562 | 0.096 | 0.22  | 1 DC | DDX42      |
| TYRO3.2   | 0.00013  | -0.20922 | 0.021 | 0.111 | 1 DC | TYRO3      |
| THAP3.2   | 0.00013  | -0.23425 | 0.037 | 0.136 | 1 DC | THAP3      |
| CASC15.2  | 0.000131 | -0.2576  | 0.016 | 0.101 | 1 DC | CASC15     |
| LATS2     | 0.000131 | 0.207756 | 0.091 | 0.038 | 1 DC | LATS2      |
| STAMPB.1  | 0.000131 | -0.21711 | 0.128 | 0.268 | 1 DC | STAMPB     |
| RASGRP4   | 0.000132 | 0.146639 | 0.059 | 0.019 | 1 DC | RASGRP4    |
| TNFSF10.1 | 0.000132 | 0.145369 | 0.15  | 0.073 | 1 DC | TNFSF10    |
| SBK1.3    | 0.000132 | -0.22166 | 0     | 0.073 | 1 DC | SBK1       |
| GCLM.1    | 0.000132 | -0.18731 | 0.053 | 0.16  | 1 DC | GCLM       |
| CCDC43.1  | 0.000132 | -0.24103 | 0.08  | 0.201 | 1 DC | CCDC43     |
| ZNF786.1  | 0.000133 | -0.18272 | 0     | 0.073 | 1 DC | ZNF786     |
| TIPARP.2  | 0.000133 | 0.253539 | 0.262 | 0.167 | 1 DC | TIPARP     |
| ID2.2     | 0.000133 | 0.123834 | 0.802 | 0.652 | 1 DC | ID2        |
| SWAP70.3  | 0.000134 | 0.223451 | 0.321 | 0.22  | 1 DC | SWAP70     |
| HSPA8.2   | 0.000134 | -0.21777 | 0.861 | 0.866 | 1 DC | HSPA8      |
| SETD4.1   | 0.000134 | -0.23888 | 0.032 | 0.127 | 1 DC | SETD4      |
| CASP2     | 0.000135 | -0.20619 | 0.016 | 0.101 | 1 DC | CASP2      |
| ABTB1.3   | 0.000135 | 0.196256 | 0.187 | 0.103 | 1 DC | ABTB1      |
| LMNB2.3   | 0.000135 | -0.1982  | 0.027 | 0.118 | 1 DC | LMNB2      |
| NUDCD3.1  | 0.000136 | -0.22596 | 0.08  | 0.2   | 1 DC | NUDCD3     |
| PPP1R9A.2 | 0.000136 | -0.2439  | 0     | 0.072 | 1 DC | PPP1R9A    |
| CHTOP.1   | 0.000136 | -0.3153  | 0.219 | 0.369 | 1 DC | CHTOP      |
| CREB1.2   | 0.000137 | -0.30988 | 0.118 | 0.243 | 1 DC | CREB1      |
| FAM188A.1 | 0.000137 | -0.2042  | 0.011 | 0.092 | 1 DC | FAM188A    |
| PGAM1.1   | 0.000138 | 0.158652 | 0.578 | 0.5   | 1 DC | PGAM1      |
| ZNF667.2  | 0.000138 | -0.17937 | 0.005 | 0.083 | 1 DC | ZNF667     |
| ORC4.2    | 0.000139 | -0.22012 | 0.107 | 0.237 | 1 DC | ORC4       |
| TSPAN31.2 | 0.000139 | -0.2715  | 0.16  | 0.297 | 1 DC | TSPAN31    |
| RGMB.2    | 0.000139 | -0.29906 | 0.037 | 0.133 | 1 DC | RGMB       |
| PAXIP1-AS | 0.000139 | -0.15599 | 0.053 | 0.16  | 1 DC | PAXIP1-AS1 |
| CEP41     | 0.00014  | -0.21508 | 0.048 | 0.153 | 1 DC | CEP41      |
| RGS14     | 0.00014  | 0.180976 | 0.086 | 0.034 | 1 DC | RGS14      |
| CNOT4     | 0.00014  | -0.22416 | 0.139 | 0.274 | 1 DC | CNOT4      |
| KANK2     | 0.00014  | -0.16369 | 0.011 | 0.092 | 1 DC | KANK2      |
| PPM1M.3   | 0.000141 | 0.252896 | 0.144 | 0.074 | 1 DC | PPM1M      |
| MAML2.2   | 0.000141 | -0.21758 | 0.08  | 0.2   | 1 DC | MAML2      |
| FAM162A.3 | 0.000141 | 0.160785 | 0.503 | 0.399 | 1 DC | FAM162A    |
| HMGCR.1   | 0.000142 | -0.18807 | 0.021 | 0.11  | 1 DC | HMGCR      |
| NRARP.1   | 0.000142 | 0.204346 | 0.086 | 0.034 | 1 DC | NRARP      |
| TPM4.2    | 0.000142 | 0.165863 | 0.604 | 0.495 | 1 DC | TPM4       |
| CRISPLD1. | 0.000142 | -0.21827 | 0.011 | 0.091 | 1 DC | CRISPLD1   |
| LLGL1.2   | 0.000143 | -0.16536 | 0.016 | 0.101 | 1 DC | LLGL1      |
| C17orf10C | 0.000144 | -0.16942 | 0.011 | 0.092 | 1 DC | C17orf100  |
| BEND6.2   | 0.000144 | -0.11955 | 0.027 | 0.12  | 1 DC | BEND6      |
| MYLIP.3   | 0.000145 | 0.159781 | 0.225 | 0.127 | 1 DC | MYLIP      |
| TLCD1.1   | 0.000145 | -0.1472  | 0.005 | 0.082 | 1 DC | TLCD1      |
| ARHGAP25. | 0.000145 | 0.179558 | 0.134 | 0.065 | 1 DC | ARHGAP25   |
| WNT5A.3   | 0.000146 | 0.171045 | 0.123 | 0.057 | 1 DC | WNT5A      |
| HEXIM2.1  | 0.000146 | -0.19476 | 0.005 | 0.082 | 1 DC | HEXIM2     |
| ANKRD17.2 | 0.000147 | -0.20904 | 0.096 | 0.219 | 1 DC | ANKRD17    |

|           |          |          |       |       |      |            |
|-----------|----------|----------|-------|-------|------|------------|
| RP9.1     | 0.000147 | -0.15124 | 0.07  | 0.181 | 1 DC | RP9        |
| UBL5.2    | 0.000148 | -0.21119 | 0.834 | 0.831 | 1 DC | UBL5       |
| PRRT2.1   | 0.000149 | -0.14071 | 0.011 | 0.092 | 1 DC | PRRT2      |
| CHCHD10.3 | 0.00015  | 0.187285 | 0.487 | 0.379 | 1 DC | CHCHD10    |
| CEACAM21. | 0.00015  | 0.118485 | 0.059 | 0.019 | 1 DC | CEACAM21   |
| TMEM108.1 | 0.000151 | -0.17626 | 0.005 | 0.081 | 1 DC | TMEM108    |
| LINC01102 | 0.000151 | -0.2558  | 0     | 0.071 | 1 DC | LINC01102  |
| PLTP.1    | 0.000151 | -0.41567 | 0.321 | 0.472 | 1 DC | PLTP       |
| DYNC1H1.2 | 0.000152 | -0.2677  | 0.193 | 0.34  | 1 DC | DYNC1H1    |
| ZNF260    | 0.000152 | -0.17896 | 0.016 | 0.101 | 1 DC | ZNF260     |
| ELAVL2.3  | 0.000152 | -0.26783 | 0.005 | 0.081 | 1 DC | ELAVL2     |
| UBE20.2   | 0.000152 | -0.18301 | 0.027 | 0.118 | 1 DC | UBE20      |
| POLR2C.2  | 0.000153 | -0.23577 | 0.198 | 0.352 | 1 DC | POLR2C     |
| PTBP2.1   | 0.000154 | -0.26082 | 0.021 | 0.107 | 1 DC | PTBP2      |
| GRAMD3.3  | 0.000155 | -0.25464 | 0.043 | 0.142 | 1 DC | GRAMD3     |
| NACC1     | 0.000155 | -0.18873 | 0.048 | 0.152 | 1 DC | NACC1      |
| TAF6      | 0.000156 | -0.21573 | 0.107 | 0.238 | 1 DC | TAF6       |
| AC091729. | 0.000156 | -0.1616  | 0.005 | 0.082 | 1 DC | AC091729.9 |
| METAP1D.1 | 0.000157 | -0.21411 | 0.032 | 0.126 | 1 DC | METAP1D    |
| CHFR.2    | 0.000157 | 0.275394 | 0.203 | 0.121 | 1 DC | CHFR       |
| SYDE1     | 0.000158 | -0.13882 | 0     | 0.071 | 1 DC | SYDE1      |
| LRRC1.1   | 0.000158 | -0.20952 | 0     | 0.071 | 1 DC | LRRC1      |
| HELZ2.2   | 0.000158 | -0.15563 | 0.016 | 0.101 | 1 DC | HELZ2      |
| SLC4A3    | 0.000159 | -0.15807 | 0.011 | 0.091 | 1 DC | SLC4A3     |
| MBOAT7.3  | 0.000159 | 0.304398 | 0.321 | 0.242 | 1 DC | MBOAT7     |
| RAB27A.2  | 0.000159 | 0.182179 | 0.15  | 0.077 | 1 DC | RAB27A     |
| TMEM47.1  | 0.000159 | -0.16463 | 0.005 | 0.081 | 1 DC | TMEM47     |
| AC004540. | 0.00016  | -0.24153 | 0.005 | 0.081 | 1 DC | AC004540.5 |
| SLC35G2.3 | 0.000161 | -0.18795 | 0.027 | 0.118 | 1 DC | SLC35G2    |
| MUT.2     | 0.000161 | -0.20157 | 0.053 | 0.159 | 1 DC | MUT        |
| CSNK2B    | 0.000162 | 0.147248 | 0.684 | 0.607 | 1 DC | CSNK2B     |
| PAK4.1    | 0.000163 | -0.1968  | 0.027 | 0.117 | 1 DC | PAK4       |
| BIK       | 0.000165 | 0.133363 | 0.043 | 0.012 | 1 DC | BIK        |
| TPK1.2    | 0.000165 | 0.184765 | 0.102 | 0.045 | 1 DC | TPK1       |
| HMGB1.1   | 0.000165 | -0.17922 | 0.92  | 0.86  | 1 DC | HMGB1      |
| PDE1B     | 0.000165 | 0.118016 | 0.059 | 0.02  | 1 DC | PDE1B      |
| SPOCK2.1  | 0.000165 | -0.26231 | 0.043 | 0.141 | 1 DC | SPOCK2     |
| MAPK12.1  | 0.000165 | -0.13836 | 0     | 0.071 | 1 DC | MAPK12     |
| TMEM55A.2 | 0.000166 | -0.22724 | 0.107 | 0.235 | 1 DC | TMEM55A    |
| C8orf33   | 0.000166 | -0.22892 | 0.171 | 0.321 | 1 DC | C8orf33    |
| FBX044.1  | 0.000167 | -0.21723 | 0.043 | 0.143 | 1 DC | FBX044     |
| GPR171    | 0.000167 | 0.193735 | 0.059 | 0.02  | 1 DC | GPR171     |
| CCDC167.1 | 0.000167 | -0.20706 | 0.235 | 0.385 | 1 DC | CCDC167    |
| DPY19L3.1 | 0.00017  | -0.19457 | 0.011 | 0.09  | 1 DC | DPY19L3    |
| HMG1.3    | 0.000171 | 0.147941 | 0.791 | 0.663 | 1 DC | HMG1       |
| ACTR3B    | 0.000172 | -0.16529 | 0.021 | 0.109 | 1 DC | ACTR3B     |
| CDADC1.1  | 0.000172 | -0.23861 | 0.021 | 0.108 | 1 DC | CDADC1     |
| THAP8     | 0.000172 | -0.21778 | 0.005 | 0.08  | 1 DC | THAP8      |
| NOS1AP.2  | 0.000173 | -0.18058 | 0.005 | 0.08  | 1 DC | NOS1AP     |
| FKBP4.2   | 0.000174 | -0.25043 | 0.182 | 0.323 | 1 DC | FKBP4      |
| PACSIN3.1 | 0.000174 | -0.15038 | 0     | 0.07  | 1 DC | PACSIN3    |

|           |          |          |       |       |      |               |
|-----------|----------|----------|-------|-------|------|---------------|
| S100B.2   | 0.000174 | -0.37077 | 0.38  | 0.53  | 1 DC | S100B         |
| IGF1R.1   | 0.000176 | -0.19499 | 0     | 0.07  | 1 DC | IGF1R         |
| FAM64A.3  | 0.000176 | -0.25967 | 0     | 0.07  | 1 DC | FAM64A        |
| SNX9.3    | 0.000177 | 0.329427 | 0.278 | 0.188 | 1 DC | SNX9          |
| RNF219    | 0.000177 | -0.2338  | 0.027 | 0.116 | 1 DC | RNF219        |
| SLC30A9.2 | 0.000177 | -0.2049  | 0.123 | 0.254 | 1 DC | SLC30A9       |
| CSNK1D.3  | 0.000177 | 0.220543 | 0.449 | 0.358 | 1 DC | CSNK1D        |
| CUEDC1.3  | 0.000179 | -0.19171 | 0.027 | 0.116 | 1 DC | CUEDC1        |
| CAV1.3    | 0.000179 | -0.7007  | 0.037 | 0.128 | 1 DC | CAV1          |
| POM121C.2 | 0.00018  | -0.20361 | 0.043 | 0.142 | 1 DC | POM121C       |
| IRF2BP1.2 | 0.00018  | -0.16604 | 0.021 | 0.107 | 1 DC | IRF2BP1       |
| B3GAT3.1  | 0.00018  | -0.27291 | 0.23  | 0.381 | 1 DC | B3GAT3        |
| LINC00685 | 0.000181 | -0.19356 | 0.048 | 0.151 | 1 DC | LINC00685     |
| TLR5.2    | 0.000181 | 0.180482 | 0.102 | 0.044 | 1 DC | TLR5          |
| RASGRP1.2 | 0.000181 | -0.14846 | 0     | 0.07  | 1 DC | RASGRP1       |
| CHCHD7.2  | 0.000182 | 0.202816 | 0.401 | 0.284 | 1 DC | CHCHD7        |
| FMN2.1    | 0.000183 | -0.17298 | 0     | 0.07  | 1 DC | FMN2          |
| LNX1      | 0.000183 | -0.22275 | 0     | 0.07  | 1 DC | LNX1          |
| DHRS7.3   | 0.000183 | 0.127372 | 0.674 | 0.554 | 1 DC | DHRS7         |
| SH3RF1.1  | 0.000183 | -0.17345 | 0.021 | 0.108 | 1 DC | SH3RF1        |
| SIDT1.2   | 0.000183 | 0.167802 | 0.064 | 0.023 | 1 DC | SIDT1         |
| ZNF397.1  | 0.000184 | -0.22981 | 0.059 | 0.164 | 1 DC | ZNF397        |
| SRRD.2    | 0.000184 | -0.11054 | 0.027 | 0.118 | 1 DC | SRRD          |
| MEOX2.1   | 0.000184 | -0.20661 | 0.005 | 0.08  | 1 DC | MEOX2         |
| MGST3.2   | 0.000185 | -0.31534 | 0.567 | 0.695 | 1 DC | MGST3         |
| RRP1B.3   | 0.000186 | -0.19229 | 0.053 | 0.157 | 1 DC | RRP1B         |
| L3HYPDH.1 | 0.000187 | -0.16732 | 0.032 | 0.126 | 1 DC | L3HYPDH       |
| CDH6.1    | 0.000188 | -0.14869 | 0     | 0.07  | 1 DC | CDH6          |
| CARKD.2   | 0.000189 | -0.2471  | 0.037 | 0.131 | 1 DC | CARKD         |
| BIRC5.3   | 0.000189 | -0.33733 | 0.021 | 0.106 | 1 DC | BIRC5         |
| TMEM177.2 | 0.000189 | -0.18827 | 0.005 | 0.08  | 1 DC | TMEM177       |
| ATMIN.2   | 0.000189 | -0.17049 | 0.027 | 0.117 | 1 DC | ATMIN         |
| ING2.1    | 0.000189 | -0.2015  | 0.091 | 0.208 | 1 DC | ING2          |
| GLDC.1    | 0.00019  | -0.16362 | 0     | 0.07  | 1 DC | GLDC          |
| RSAD1.1   | 0.00019  | -0.16699 | 0.048 | 0.15  | 1 DC | RSAD1         |
| EPAS1.2   | 0.00019  | -0.26768 | 0.021 | 0.106 | 1 DC | EPAS1         |
| PLEKHA3.2 | 0.000191 | -0.20494 | 0.107 | 0.233 | 1 DC | PLEKHA3       |
| PMM1.2    | 0.000191 | -0.32885 | 0.112 | 0.235 | 1 DC | PMM1          |
| NDUFS3.1  | 0.000192 | -0.24294 | 0.321 | 0.492 | 1 DC | NDUFS3        |
| MYC.2     | 0.000193 | -0.28647 | 0.064 | 0.171 | 1 DC | MYC           |
| RP11-597E | 0.000194 | 0.121695 | 0.064 | 0.023 | 1 DC | RP11-597D13.8 |
| PAX6.1    | 0.000195 | -0.14104 | 0.005 | 0.08  | 1 DC | PAX6          |
| TMEM136.1 | 0.000195 | -0.17308 | 0.011 | 0.089 | 1 DC | TMEM136       |
| TCEAL1.3  | 0.000195 | -0.24167 | 0.128 | 0.257 | 1 DC | TCEAL1        |
| FAM134B.1 | 0.000195 | -0.17899 | 0.059 | 0.167 | 1 DC | FAM134B       |
| NFKB2.3   | 0.000196 | 0.255848 | 0.123 | 0.06  | 1 DC | NFKB2         |
| BCL2L1.2  | 0.000197 | -0.22565 | 0.134 | 0.266 | 1 DC | BCL2L1        |
| ZNF436.1  | 0.000198 | -0.14879 | 0.005 | 0.079 | 1 DC | ZNF436        |
| HHLA3.3   | 0.000198 | -0.16689 | 0.043 | 0.141 | 1 DC | HHLA3         |
| CLHC1     | 0.0002   | -0.18017 | 0     | 0.069 | 1 DC | CLHC1         |
| PLL.P.2   | 0.0002   | -0.35117 | 0     | 0.069 | 1 DC | PLL.P         |

|            |          |          |       |       |      |            |
|------------|----------|----------|-------|-------|------|------------|
| WDFY4.2    | 0.0002   | 0.129792 | 0.07  | 0.025 | 1 DC | WDFY4      |
| CPED1.1    | 0.0002   | 0.140617 | 0.08  | 0.032 | 1 DC | CPED1      |
| GNL1.1     | 0.0002   | -0.17703 | 0.112 | 0.244 | 1 DC | GNL1       |
| PHACTR3.2  | 0.0002   | -0.25686 | 0.005 | 0.079 | 1 DC | PHACTR3    |
| DBNDD1.1   | 0.000202 | -0.16099 | 0     | 0.069 | 1 DC | DBNDD1     |
| ADAMTS9.1  | 0.000202 | -0.17208 | 0.005 | 0.079 | 1 DC | ADAMTS9    |
| ZNF583.1   | 0.000203 | -0.20591 | 0.021 | 0.107 | 1 DC | ZNF583     |
| AC007405.0 | 0.000204 | -0.15712 | 0     | 0.069 | 1 DC | AC007405.6 |
| EXT2.2     | 0.000204 | -0.19065 | 0.064 | 0.173 | 1 DC | EXT2       |
| ERCC4.1    | 0.000205 | -0.23895 | 0.037 | 0.131 | 1 DC | ERCC4      |
| FAM228B.2  | 0.000205 | -0.23846 | 0.096 | 0.217 | 1 DC | FAM228B    |
| FREM2.2    | 0.000206 | -0.12541 | 0     | 0.069 | 1 DC | FREM2      |
| PNP.1      | 0.000206 | 0.241664 | 0.182 | 0.102 | 1 DC | PNP        |
| CXXC4.2    | 0.000206 | -0.19186 | 0.005 | 0.079 | 1 DC | CXXC4      |
| OSBPL1A.3  | 0.000207 | -0.26236 | 0.08  | 0.193 | 1 DC | OSBPL1A    |
| N4BP2L1.1  | 0.000207 | 0.267572 | 0.246 | 0.156 | 1 DC | N4BP2L1    |
| LY6H.2     | 0.000207 | -0.3282  | 0.011 | 0.087 | 1 DC | LY6H       |
| SSFA2.1    | 0.000207 | -0.22319 | 0.075 | 0.188 | 1 DC | SSFA2      |
| HRH1.2     | 0.000207 | -0.22551 | 0.016 | 0.097 | 1 DC | HRH1       |
| EPSTI1.3   | 0.000207 | 0.156503 | 0.214 | 0.124 | 1 DC | EPSTI1     |
| VSTM2A.2   | 0.000208 | -0.40595 | 0.021 | 0.107 | 1 DC | VSTM2A     |
| SDHD.2     | 0.000208 | 0.207084 | 0.476 | 0.394 | 1 DC | SDHD       |
| LRP10.1    | 0.000208 | 0.250905 | 0.348 | 0.25  | 1 DC | LRP10      |
| BARD1.2    | 0.000209 | -0.21691 | 0.048 | 0.148 | 1 DC | BARD1      |
| PDE4DIP.2  | 0.000209 | -0.19378 | 0.134 | 0.266 | 1 DC | PDE4DIP    |
| B3GALNT1.0 | 0.00021  | -0.24322 | 0.075 | 0.185 | 1 DC | B3GALNT1   |
| ASXL1.2    | 0.00021  | -0.20906 | 0.07  | 0.179 | 1 DC | ASXL1      |
| KCTD13.2   | 0.00021  | -0.20311 | 0.043 | 0.14  | 1 DC | KCTD13     |
| RBM28.1    | 0.000211 | -0.19698 | 0.059 | 0.165 | 1 DC | RBM28      |
| CHST8.2    | 0.000212 | -0.1558  | 0     | 0.069 | 1 DC | CHST8      |
| SOWAHC.1   | 0.000212 | -0.16572 | 0     | 0.069 | 1 DC | SOWAHC     |
| RNF165.2   | 0.000212 | -0.18531 | 0     | 0.069 | 1 DC | RNF165     |
| UBE2L3.3   | 0.000212 | 0.189978 | 0.594 | 0.534 | 1 DC | UBE2L3     |
| PBRM1.2    | 0.000212 | -0.25746 | 0.118 | 0.242 | 1 DC | PBRM1      |
| C16orf52.0 | 0.000212 | -0.17044 | 0.016 | 0.097 | 1 DC | C16orf52   |
| LIN7B.1    | 0.000213 | -0.1919  | 0.032 | 0.124 | 1 DC | LIN7B      |
| TNKS.3     | 0.000213 | -0.14618 | 0.048 | 0.15  | 1 DC | TNKS       |
| FHL3.2     | 0.000214 | 0.29187  | 0.241 | 0.158 | 1 DC | FHL3       |
| ATF4.1     | 0.000214 | 0.162923 | 0.61  | 0.515 | 1 DC | ATF4       |
| FHOD1.3    | 0.000215 | 0.157403 | 0.118 | 0.055 | 1 DC | FHOD1      |
| PPA2.1     | 0.000215 | 0.226928 | 0.401 | 0.314 | 1 DC | PPA2       |
| MED22.1    | 0.000215 | -0.19342 | 0.021 | 0.107 | 1 DC | MED22      |
| DPY19L1.1  | 0.000215 | -0.1922  | 0.021 | 0.106 | 1 DC | DPY19L1    |
| FAM168B.2  | 0.000215 | -0.19822 | 0.059 | 0.165 | 1 DC | FAM168B    |
| MPP1.3     | 0.000215 | 0.211961 | 0.305 | 0.199 | 1 DC | MPP1       |
| MIR497HG.0 | 0.000216 | -0.2481  | 0     | 0.068 | 1 DC | MIR497HG   |
| CCDC14.1   | 0.000216 | -0.26744 | 0.107 | 0.229 | 1 DC | CCDC14     |
| SCAMP5.1   | 0.000217 | -0.19079 | 0.016 | 0.097 | 1 DC | SCAMP5     |
| BOC.1      | 0.000217 | -0.15438 | 0.011 | 0.088 | 1 DC | BOC        |
| LRRC47.2   | 0.000217 | -0.20628 | 0.096 | 0.218 | 1 DC | LRRC47     |
| CDKN2A.2   | 0.000218 | -0.35723 | 0.021 | 0.104 | 1 DC | CDKN2A     |



|           |          |          |       |       |      |                |
|-----------|----------|----------|-------|-------|------|----------------|
| IGSF11.1  | 0.000218 | -0.17422 | 0     | 0.068 | 1 DC | IGSF11         |
| RP11-277F | 0.000218 | -0.22447 | 0     | 0.068 | 1 DC | RP11-277P12.20 |
| NCAM2.1   | 0.000218 | -0.24007 | 0     | 0.068 | 1 DC | NCAM2          |
| TOX3.2    | 0.000218 | -0.2516  | 0     | 0.068 | 1 DC | TOX3           |
| GTF2H2C   | 0.000219 | -0.20443 | 0.011 | 0.088 | 1 DC | GTF2H2C        |
| PNMAL1.2  | 0.000219 | -0.17797 | 0.016 | 0.097 | 1 DC | PNMAL1         |
| PLEKHJ1.1 | 0.00022  | -0.20919 | 0.214 | 0.369 | 1 DC | PLEKHJ1        |
| MARK1     | 0.00022  | -0.13962 | 0     | 0.068 | 1 DC | MARK1          |
| INADL.2   | 0.00022  | -0.22109 | 0     | 0.068 | 1 DC | INADL          |
| CSGALNACT | 0.000222 | 0.240993 | 0.166 | 0.092 | 1 DC | CSGALNACT2     |
| UFC1.2    | 0.000222 | 0.140066 | 0.631 | 0.56  | 1 DC | UFC1           |
| KCNQ1.2   | 0.000222 | 0.121543 | 0.091 | 0.038 | 1 DC | KCNQ1          |
| ZC3H8.1   | 0.000224 | -0.17745 | 0.048 | 0.149 | 1 DC | ZC3H8          |
| AEBP1.2   | 0.000224 | -0.25362 | 0.032 | 0.123 | 1 DC | AEBP1          |
| CEP89.1   | 0.000225 | -0.18595 | 0.037 | 0.132 | 1 DC | CEP89          |
| UBE2M.3   | 0.000227 | -0.15972 | 0.107 | 0.232 | 1 DC | UBE2M          |
| SEC11C.2  | 0.000228 | -0.29115 | 0.348 | 0.499 | 1 DC | SEC11C         |
| CCDC124   | 0.000229 | -0.29332 | 0.321 | 0.473 | 1 DC | CCDC124        |
| SLC12A2.2 | 0.00023  | -0.22794 | 0.037 | 0.131 | 1 DC | SLC12A2        |
| CLNS1A.2  | 0.00023  | 0.196568 | 0.567 | 0.49  | 1 DC | CLNS1A         |
| RP11-66N1 | 0.00023  | -0.18958 | 0.011 | 0.088 | 1 DC | RP11-66N11.8   |
| MPP5.1    | 0.000231 | -0.12729 | 0.016 | 0.097 | 1 DC | MPP5           |
| IL6R.3    | 0.000231 | 0.225568 | 0.16  | 0.085 | 1 DC | IL6R           |
| FAM127C   | 0.000231 | -0.22746 | 0.021 | 0.105 | 1 DC | FAM127C        |
| LRP6.2    | 0.000231 | -0.20331 | 0.027 | 0.113 | 1 DC | LRP6           |
| PLCD3     | 0.000231 | -0.13258 | 0     | 0.068 | 1 DC | PLCD3          |
| SLC22A23  | 0.000231 | -0.17022 | 0     | 0.068 | 1 DC | SLC22A23       |
| SLC44A2.1 | 0.000232 | -0.17785 | 0.086 | 0.204 | 1 DC | SLC44A2        |
| PLXNA4.2  | 0.000232 | -0.2139  | 0.005 | 0.077 | 1 DC | PLXNA4         |
| LPL.1     | 0.000232 | -0.33188 | 0.059 | 0.16  | 1 DC | LPL            |
| TPT1-AS1. | 0.000233 | -0.18068 | 0.043 | 0.14  | 1 DC | TPT1-AS1       |
| CLIP2.2   | 0.000234 | -0.21431 | 0.07  | 0.178 | 1 DC | CLIP2          |
| MCMBP.2   | 0.000234 | 0.280716 | 0.225 | 0.143 | 1 DC | MCMBP          |
| SDR39U1.1 | 0.000235 | -0.25659 | 0.144 | 0.277 | 1 DC | SDR39U1        |
| MPDZ.1    | 0.000236 | -0.16409 | 0.011 | 0.087 | 1 DC | MPDZ           |
| ZNF43.1   | 0.000236 | -0.19504 | 0.043 | 0.139 | 1 DC | ZNF43          |
| YIPF3.2   | 0.000236 | -0.29491 | 0.326 | 0.486 | 1 DC | YIPF3          |
| SERPINH1. | 0.000237 | -0.14176 | 0.091 | 0.211 | 1 DC | SERPINH1       |
| TBC1D9.3  | 0.000238 | 0.18858  | 0.112 | 0.053 | 1 DC | TBC1D9         |
| FBLN1.2   | 0.000239 | -0.28518 | 0.011 | 0.086 | 1 DC | FBLN1          |
| SAMD4A    | 0.000243 | -0.18467 | 0.011 | 0.087 | 1 DC | SAMD4A         |
| TRIM52    | 0.000244 | -0.19278 | 0.005 | 0.077 | 1 DC | TRIM52         |
| ZNF682    | 0.000244 | -0.18497 | 0.005 | 0.077 | 1 DC | ZNF682         |
| SCAF1.2   | 0.000244 | -0.16398 | 0.053 | 0.155 | 1 DC | SCAF1          |
| AGPAT4.1  | 0.000246 | -0.2279  | 0.021 | 0.104 | 1 DC | AGPAT4         |
| NUDT3.3   | 0.000246 | 0.217443 | 0.476 | 0.399 | 1 DC | NUDT3          |
| DENND5B.2 | 0.000246 | -0.13107 | 0.016 | 0.097 | 1 DC | DENND5B        |
| MUL1      | 0.000246 | -0.2046  | 0.059 | 0.162 | 1 DC | MUL1           |
| POLR3F.1  | 0.000246 | -0.19189 | 0.043 | 0.138 | 1 DC | POLR3F         |
| PLAT      | 0.000247 | -0.24733 | 0.032 | 0.121 | 1 DC | PLAT           |
| CCDC82    | 0.000248 | -0.16884 | 0.134 | 0.274 | 1 DC | CCDC82         |

|           |          |          |       |       |      |               |
|-----------|----------|----------|-------|-------|------|---------------|
| ANAPC11.3 | 0.000249 | -0.21315 | 0.668 | 0.728 | 1 DC | ANAPC11       |
| TRIM69.1  | 0.00025  | -0.2489  | 0.086 | 0.199 | 1 DC | TRIM69        |
| FKBP14    | 0.000252 | -0.17021 | 0.016 | 0.096 | 1 DC | FKBP14        |
| SRR.2     | 0.000252 | -0.19679 | 0.053 | 0.155 | 1 DC | SRR           |
| FAM131B.1 | 0.000253 | -0.18556 | 0.005 | 0.077 | 1 DC | FAM131B       |
| UBE2S.3   | 0.000254 | -0.27688 | 0.209 | 0.346 | 1 DC | UBE2S         |
| JRKL.1    | 0.000254 | -0.16437 | 0.005 | 0.077 | 1 DC | JRKL          |
| PDDC1.2   | 0.000255 | -0.18513 | 0.048 | 0.147 | 1 DC | PDDC1         |
| CELF3.3   | 0.000255 | -0.23122 | 0     | 0.067 | 1 DC | CELF3         |
| SYTL2.1   | 0.000256 | -0.27348 | 0.005 | 0.077 | 1 DC | SYTL2         |
| HNRNPUL1. | 0.000256 | 0.228197 | 0.46  | 0.382 | 1 DC | HNRNPUL1      |
| GCLC.3    | 0.000257 | 0.243128 | 0.171 | 0.096 | 1 DC | GCLC          |
| FAM181A.1 | 0.000258 | -0.24408 | 0     | 0.067 | 1 DC | FAM181A       |
| KLHDC8B.2 | 0.000259 | -0.19515 | 0.021 | 0.105 | 1 DC | KLHDC8B       |
| RP11-115C | 0.000261 | -0.16253 | 0.011 | 0.087 | 1 DC | RP11-115C21.2 |
| SSBP2.3   | 0.000262 | -0.20748 | 0.134 | 0.272 | 1 DC | SSBP2         |
| MED28.2   | 0.000262 | 0.216566 | 0.422 | 0.337 | 1 DC | MED28         |
| FRS2.2    | 0.000263 | -0.22876 | 0.027 | 0.113 | 1 DC | FRS2          |
| ZNF506.1  | 0.000263 | -0.16811 | 0.032 | 0.123 | 1 DC | ZNF506        |
| SWI5.3    | 0.000263 | -0.23803 | 0.118 | 0.247 | 1 DC | SWI5          |
| FBXW9     | 0.000263 | -0.17388 | 0.027 | 0.113 | 1 DC | FBXW9         |
| ZSCAN21.1 | 0.000264 | -0.21803 | 0.021 | 0.103 | 1 DC | ZSCAN21       |
| MED24.2   | 0.000266 | -0.17259 | 0.064 | 0.17  | 1 DC | MED24         |
| AFAP1.1   | 0.000266 | -0.16159 | 0.011 | 0.086 | 1 DC | AFAP1         |
| DNAAF1.2  | 0.000267 | 0.277225 | 0.07  | 0.026 | 1 DC | DNAAF1        |
| TOMM5.3   | 0.000269 | 0.369409 | 0.289 | 0.208 | 1 DC | TOMM5         |
| PEX10.1   | 0.00027  | -0.18393 | 0.08  | 0.194 | 1 DC | PEX10         |
| VAV1.3    | 0.00027  | 0.152007 | 0.144 | 0.073 | 1 DC | VAV1          |
| NOL4.1    | 0.000274 | -0.18497 | 0     | 0.066 | 1 DC | NOL4          |
| RAB8B.2   | 0.000275 | 0.283524 | 0.235 | 0.153 | 1 DC | RAB8B         |
| DIP2C.2   | 0.000275 | -0.20608 | 0.011 | 0.086 | 1 DC | DIP2C         |
| PLXNB1.2  | 0.000275 | -0.19644 | 0.005 | 0.077 | 1 DC | PLXNB1        |
| GTF2IRD2E | 0.000276 | -0.19814 | 0.043 | 0.138 | 1 DC | GTF2IRD2B     |
| CMSS1     | 0.000276 | -0.23668 | 0.155 | 0.292 | 1 DC | CMSS1         |
| XPOT.2    | 0.000277 | -0.20012 | 0.064 | 0.169 | 1 DC | XPOT          |
| C5orf42.1 | 0.000278 | -0.15606 | 0.016 | 0.095 | 1 DC | C5orf42       |
| PDCL.1    | 0.00028  | -0.23491 | 0.086 | 0.196 | 1 DC | PDCL          |
| GPRASP2.1 | 0.000282 | -0.17583 | 0     | 0.066 | 1 DC | GPRASP2       |
| RPRD1A.1  | 0.000282 | -0.14165 | 0.091 | 0.209 | 1 DC | RPRD1A        |
| PIK3IP1.3 | 0.000282 | 0.142369 | 0.262 | 0.159 | 1 DC | PIK3IP1       |
| CCL2.1    | 0.000283 | -0.58316 | 0.118 | 0.227 | 1 DC | CCL2          |
| SNHG10    | 0.000283 | -0.17081 | 0.016 | 0.095 | 1 DC | SNHG10        |
| GNB2L1.3  | 0.000283 | -0.17492 | 0.989 | 0.941 | 1 DC | GNB2L1        |
| RP11-1114 | 0.000284 | -0.19383 | 0.011 | 0.085 | 1 DC | RP11-1114A5.4 |
| ARHGAP32. | 0.000284 | -0.1786  | 0.011 | 0.086 | 1 DC | ARHGAP32      |
| PDGFB.2   | 0.000284 | 0.117156 | 0.102 | 0.045 | 1 DC | PDGFB         |
| PDGFC     | 0.000286 | -0.17168 | 0.032 | 0.121 | 1 DC | PDGFC         |
| C1orf54.3 | 0.000287 | 0.203099 | 0.332 | 0.224 | 1 DC | C1orf54       |
| VIM.2     | 0.000289 | 0.133243 | 0.941 | 0.659 | 1 DC | VIM           |
| TSC2.1    | 0.000289 | -0.19945 | 0.043 | 0.137 | 1 DC | TSC2          |
| DNAAF2.2  | 0.000289 | -0.19098 | 0.07  | 0.174 | 1 DC | DNAAF2        |

|            |          |          |       |       |      |                |
|------------|----------|----------|-------|-------|------|----------------|
| TLE3. 2    | 0.00029  | 0.19968  | 0.225 | 0.136 | 1 DC | TLE3           |
| PEG3. 1    | 0.00029  | -0.1938  | 0     | 0.066 | 1 DC | PEG3           |
| HLA-A. 3   | 0.000291 | -0.22453 | 0.963 | 0.895 | 1 DC | HLA-A          |
| FEZ2. 3    | 0.000292 | -0.22915 | 0.294 | 0.451 | 1 DC | FEZ2           |
| DOCK11. 3  | 0.000293 | 0.252357 | 0.112 | 0.053 | 1 DC | DOCK11         |
| RAB6B. 2   | 0.000293 | -0.16416 | 0     | 0.066 | 1 DC | RAB6B          |
| UQCRQ. 3   | 0.000294 | -0.20624 | 0.786 | 0.799 | 1 DC | UQCRQ          |
| ZNF680. 1  | 0.000295 | -0.23761 | 0.07  | 0.176 | 1 DC | ZNF680         |
| DERA. 1    | 0.000296 | 0.215223 | 0.342 | 0.25  | 1 DC | DERA           |
| RORA       | 0.000297 | -0.19872 | 0.005 | 0.076 | 1 DC | RORA           |
| ABCA8. 1   | 0.000298 | -0.2829  | 0.005 | 0.075 | 1 DC | ABCA8          |
| RP11-410L  | 0.000299 | -0.17596 | 0.037 | 0.13  | 1 DC | RP11-410L14. 2 |
| CTHRC1. 2  | 0.000299 | -0.13554 | 0     | 0.066 | 1 DC | CTHRC1         |
| BNIP3. 2   | 0.000299 | -0.33073 | 0.102 | 0.217 | 1 DC | BNIP3          |
| NACC2. 1   | 0.0003   | -0.14999 | 0.021 | 0.104 | 1 DC | NACC2          |
| C17orf80.  | 0.000301 | -0.16498 | 0.011 | 0.085 | 1 DC | C17orf80       |
| PTK7       | 0.000301 | -0.12924 | 0.016 | 0.095 | 1 DC | PTK7           |
| GNAS. 3    | 0.000301 | -0.24107 | 0.61  | 0.648 | 1 DC | GNAS           |
| SOX21-AS1  | 0.000302 | -0.14007 | 0     | 0.065 | 1 DC | SOX21-AS1      |
| KHDC1. 2   | 0.000302 | -0.19304 | 0     | 0.065 | 1 DC | KHDC1          |
| SLC46A3. 3 | 0.000302 | 0.169762 | 0.118 | 0.057 | 1 DC | SLC46A3        |
| VBP1. 2    | 0.000302 | -0.23162 | 0.321 | 0.49  | 1 DC | VBP1           |
| PGLS. 3    | 0.000302 | 0.167924 | 0.61  | 0.509 | 1 DC | PGLS           |
| GLT8D1     | 0.000304 | -0.2123  | 0.144 | 0.278 | 1 DC | GLT8D1         |
| KCTD1. 1   | 0.000305 | -0.15344 | 0     | 0.065 | 1 DC | KCTD1          |
| FBXO21. 1  | 0.000306 | -0.23569 | 0.171 | 0.31  | 1 DC | FBXO21         |
| SCYL2. 2   | 0.000306 | -0.17728 | 0.043 | 0.137 | 1 DC | SCYL2          |
| RMDN3. 2   | 0.000307 | -0.21673 | 0.118 | 0.242 | 1 DC | RMDN3          |
| ZDHHC12. 3 | 0.000307 | 0.321654 | 0.348 | 0.259 | 1 DC | ZDHHC12        |
| NAGPA. 2   | 0.000307 | 0.288914 | 0.182 | 0.108 | 1 DC | NAGPA          |
| ABL1       | 0.000308 | -0.19983 | 0.016 | 0.094 | 1 DC | ABL1           |
| RDH5. 1    | 0.000308 | -0.16756 | 0.021 | 0.104 | 1 DC | RDH5           |
| PLK2. 2    | 0.000308 | 0.294412 | 0.219 | 0.136 | 1 DC | PLK2           |
| ZNF793     | 0.000309 | -0.21019 | 0.027 | 0.112 | 1 DC | ZNF793         |
| FAM110A. 2 | 0.000311 | 0.214827 | 0.139 | 0.072 | 1 DC | FAM110A        |
| BLCAP      | 0.000311 | -0.23185 | 0.16  | 0.292 | 1 DC | BLCAP          |
| BTG3. 2    | 0.000312 | -0.22959 | 0.225 | 0.373 | 1 DC | BTG3           |
| POLR3D. 1  | 0.000313 | -0.20165 | 0.037 | 0.127 | 1 DC | POLR3D         |
| TUBG2. 2   | 0.000314 | -0.20608 | 0.027 | 0.112 | 1 DC | TUBG2          |
| SLC2A10. 1 | 0.000314 | -0.13193 | 0     | 0.065 | 1 DC | SLC2A10        |
| SERPINE1.  | 0.000316 | -0.40905 | 0.021 | 0.101 | 1 DC | SERPINE1       |
| YDJC. 3    | 0.000316 | 0.322648 | 0.219 | 0.142 | 1 DC | YDJC           |
| RALGAPA2.  | 0.000318 | -0.14042 | 0.027 | 0.112 | 1 DC | RALGAPA2       |
| ASB8       | 0.000318 | -0.22162 | 0.102 | 0.219 | 1 DC | ASB8           |
| UBA6-AS1.  | 0.000318 | -0.17117 | 0.011 | 0.084 | 1 DC | UBA6-AS1       |
| TRIB3. 2   | 0.000319 | -0.21011 | 0.005 | 0.075 | 1 DC | TRIB3          |
| LANCL1. 2  | 0.000319 | -0.22327 | 0.032 | 0.118 | 1 DC | LANCL1         |
| FAM179B. 1 | 0.000319 | -0.2051  | 0.032 | 0.12  | 1 DC | FAM179B        |
| CDC42BPB.  | 0.000319 | -0.16519 | 0.032 | 0.12  | 1 DC | CDC42BPB       |
| ZNF444. 1  | 0.000321 | -0.16077 | 0.059 | 0.162 | 1 DC | ZNF444         |
| NVL. 1     | 0.000325 | -0.22609 | 0.027 | 0.11  | 1 DC | NVL            |

|             |          |          |       |       |      |                |
|-------------|----------|----------|-------|-------|------|----------------|
| GNG3. 1     | 0.000325 | -0.28693 | 0.005 | 0.075 | 1 DC | GNG3           |
| ANGPTL2. 1  | 0.000325 | -0.26675 | 0.021 | 0.101 | 1 DC | ANGPTL2        |
| FTX. 1      | 0.000326 | -0.2487  | 0.021 | 0.101 | 1 DC | FTX            |
| GJC1. 1     | 0.000327 | -0.12793 | 0     | 0.065 | 1 DC | GJC1           |
| PLEKHH3. 1  | 0.000327 | -0.11512 | 0.011 | 0.085 | 1 DC | PLEKHH3        |
| PBK. 3      | 0.000328 | -0.29184 | 0.005 | 0.074 | 1 DC | PBK            |
| PLA2G16. 3  | 0.000332 | -0.32139 | 0.251 | 0.407 | 1 DC | PLA2G16        |
| CIRBP. 3    | 0.000335 | -0.18127 | 0.888 | 0.865 | 1 DC | CIRBP          |
| GPR37       | 0.000337 | -0.32191 | 0.005 | 0.074 | 1 DC | GPR37          |
| ESF1. 1     | 0.000339 | -0.2168  | 0.203 | 0.348 | 1 DC | ESF1           |
| SHOX2. 1    | 0.00034  | -0.13363 | 0     | 0.064 | 1 DC | SHOX2          |
| ICA1L       | 0.000341 | -0.22583 | 0.021 | 0.101 | 1 DC | ICA1L          |
| TIMP4. 1    | 0.000342 | -0.30952 | 0.021 | 0.102 | 1 DC | TIMP4          |
| PRUNE2. 1   | 0.000342 | -0.29325 | 0.032 | 0.118 | 1 DC | PRUNE2         |
| RP11-448A   | 0.000343 | -0.14581 | 0.016 | 0.093 | 1 DC | RP11-448A19. 1 |
| SEZ6. 3     | 0.000343 | -0.26424 | 0.048 | 0.14  | 1 DC | SEZ6           |
| TRIM33. 2   | 0.000346 | -0.26688 | 0.08  | 0.184 | 1 DC | TRIM33         |
| PPIF. 3     | 0.000346 | 0.266938 | 0.316 | 0.219 | 1 DC | PPIF           |
| MMP15. 2    | 0.000346 | -0.13774 | 0     | 0.064 | 1 DC | MMP15          |
| NLGN2. 1    | 0.000346 | -0.15917 | 0.016 | 0.093 | 1 DC | NLGN2          |
| GPR161. 3   | 0.000348 | -0.15699 | 0.011 | 0.084 | 1 DC | GPR161         |
| IFT46. 1    | 0.000349 | -0.19114 | 0.027 | 0.111 | 1 DC | IFT46          |
| ABHD17C     | 0.000351 | -0.12497 | 0.011 | 0.084 | 1 DC | ABHD17C        |
| CAST. 2     | 0.000351 | 0.273727 | 0.401 | 0.317 | 1 DC | CAST           |
| RBM26. 1    | 0.000354 | -0.16689 | 0.096 | 0.215 | 1 DC | RBM26          |
| PTPRD. 2    | 0.000354 | -0.2458  | 0.005 | 0.074 | 1 DC | PTPRD          |
| MTHFR. 2    | 0.000354 | 0.251778 | 0.144 | 0.077 | 1 DC | MTHFR          |
| CNR1. 1     | 0.000355 | -0.10526 | 0.005 | 0.074 | 1 DC | CNR1           |
| ABCD3. 1    | 0.000356 | -0.18367 | 0.086 | 0.197 | 1 DC | ABCD3          |
| DIRAS2. 1   | 0.000357 | -0.16882 | 0     | 0.064 | 1 DC | DIRAS2         |
| ADAM22. 2   | 0.000357 | -0.18622 | 0     | 0.064 | 1 DC | ADAM22         |
| SLC25A37. 1 | 0.000358 | 0.213631 | 0.401 | 0.308 | 1 DC | SLC25A37       |
| TPX2. 2     | 0.000358 | -0.232   | 0.011 | 0.084 | 1 DC | TPX2           |
| MIB1. 1     | 0.00036  | -0.14569 | 0.016 | 0.093 | 1 DC | MIB1           |
| PIK3CD. 1   | 0.000362 | 0.14888  | 0.075 | 0.03  | 1 DC | PIK3CD         |
| NXPH4. 1    | 0.000364 | -0.21219 | 0     | 0.064 | 1 DC | NXPH4          |
| CLIC4. 2    | 0.000365 | -0.29619 | 0.198 | 0.334 | 1 DC | CLIC4          |
| SRSF12. 1   | 0.000366 | -0.1605  | 0.005 | 0.074 | 1 DC | SRSF12         |
| PGPEP1. 1   | 0.000367 | -0.18965 | 0.043 | 0.135 | 1 DC | PGPEP1         |
| TM2D2. 1    | 0.000368 | -0.26364 | 0.198 | 0.343 | 1 DC | TM2D2          |
| COX7A2L. 1  | 0.000368 | 0.106261 | 0.695 | 0.611 | 1 DC | COX7A2L        |
| GRB10. 2    | 0.000369 | -0.17124 | 0.005 | 0.074 | 1 DC | GRB10          |
| CACNG8. 1   | 0.00037  | -0.13871 | 0.005 | 0.074 | 1 DC | CACNG8         |
| GATS        | 0.000371 | -0.19015 | 0     | 0.064 | 1 DC | GATS           |
| SDHB        | 0.000372 | 0.156073 | 0.503 | 0.423 | 1 DC | SDHB           |
| ZCCHC24. 1  | 0.000373 | -0.23661 | 0.021 | 0.101 | 1 DC | ZCCHC24        |
| MT1G. 2     | 0.000375 | -0.58465 | 0.043 | 0.129 | 1 DC | MT1G           |
| SCN3A. 2    | 0.000376 | -0.2176  | 0.005 | 0.073 | 1 DC | SCN3A          |
| TRMT11. 1   | 0.000377 | -0.18857 | 0.032 | 0.118 | 1 DC | TRMT11         |
| DMXL2. 2    | 0.000378 | -0.21375 | 0.011 | 0.082 | 1 DC | DMXL2          |
| SMPDL3A. 2  | 0.000378 | -0.2447  | 0.037 | 0.126 | 1 DC | SMPDL3A        |

|            |          |          |       |       |      |                |
|------------|----------|----------|-------|-------|------|----------------|
| NDEL1. 2   | 0.000378 | 0.257267 | 0.235 | 0.152 | 1 DC | NDEL1          |
| NANOS3. 1  | 0.000378 | -0.14162 | 0     | 0.063 | 1 DC | NANOS3         |
| PTPRG      | 0.000379 | -0.16306 | 0.005 | 0.074 | 1 DC | PTPRG          |
| RNF220. 2  | 0.000381 | -0.21901 | 0.053 | 0.149 | 1 DC | RNF220         |
| MICU3. 3   | 0.000381 | -0.18588 | 0.011 | 0.084 | 1 DC | MICU3          |
| ZNF334     | 0.000384 | -0.1576  | 0.005 | 0.073 | 1 DC | ZNF334         |
| VANGL2. 1  | 0.000384 | -0.12671 | 0.005 | 0.074 | 1 DC | VANGL2         |
| COL5A2. 1  | 0.000386 | -0.12331 | 0     | 0.063 | 1 DC | COL5A2         |
| AGAP3. 2   | 0.000387 | -0.15863 | 0.021 | 0.101 | 1 DC | AGAP3          |
| HOXA2. 2   | 0.000387 | -0.22838 | 0.005 | 0.073 | 1 DC | HOXA2          |
| RB1. 3     | 0.00039  | 0.223796 | 0.406 | 0.303 | 1 DC | RB1            |
| LINC00667  | 0.00039  | -0.26351 | 0.123 | 0.246 | 1 DC | LINC00667      |
| IFT88. 1   | 0.00039  | -0.16408 | 0.027 | 0.11  | 1 DC | IFT88          |
| FAM98A. 1  | 0.00039  | -0.18407 | 0.048 | 0.143 | 1 DC | FAM98A         |
| PWAR6      | 0.000391 | -0.15314 | 0.005 | 0.073 | 1 DC | PWAR6          |
| ZNF138. 1  | 0.000393 | -0.23448 | 0.053 | 0.147 | 1 DC | ZNF138         |
| AP1G1. 2   | 0.000394 | -0.20743 | 0.037 | 0.126 | 1 DC | AP1G1          |
| CREG1. 3   | 0.000395 | 0.173991 | 0.417 | 0.295 | 1 DC | CREG1          |
| GKAP1. 2   | 0.000395 | -0.19922 | 0.016 | 0.091 | 1 DC | GKAP1          |
| PPP1R2. 1  | 0.000397 | 0.206102 | 0.455 | 0.367 | 1 DC | PPP1R2         |
| FUBP3. 1   | 0.000401 | -0.12747 | 0.118 | 0.242 | 1 DC | FUBP3          |
| TMTC4. 2   | 0.000402 | -0.21931 | 0.021 | 0.1   | 1 DC | TMTC4          |
| ELMOD1. 1  | 0.000403 | -0.12287 | 0.011 | 0.083 | 1 DC | ELMOD1         |
| CREB3L1    | 0.000405 | -0.12223 | 0     | 0.063 | 1 DC | CREB3L1        |
| GIMAP8     | 0.000405 | 0.134633 | 0.053 | 0.018 | 1 DC | GIMAP8         |
| CYB5A. 2   | 0.000408 | -0.32353 | 0.209 | 0.344 | 1 DC | CYB5A          |
| CD151. 2   | 0.000409 | -0.31506 | 0.337 | 0.484 | 1 DC | CD151          |
| RP13-516M  | 0.00041  | 0.113135 | 0.043 | 0.013 | 1 DC | RP13-516M14. 1 |
| SLC50A1. 2 | 0.000411 | 0.248586 | 0.251 | 0.166 | 1 DC | SLC50A1        |
| GNPDA2     | 0.000413 | -0.13628 | 0.037 | 0.126 | 1 DC | GNPDA2         |
| CNKSR2. 1  | 0.000413 | -0.13517 | 0     | 0.063 | 1 DC | CNKSR2         |
| EVA1C. 2   | 0.000414 | -0.166   | 0.005 | 0.073 | 1 DC | EVA1C          |
| PCDHB7. 1  | 0.000416 | -0.2095  | 0.005 | 0.072 | 1 DC | PCDHB7         |
| UNG        | 0.000417 | -0.24643 | 0.037 | 0.123 | 1 DC | UNG            |
| GPD2       | 0.000417 | -0.17782 | 0.016 | 0.091 | 1 DC | GPD2           |
| TBC1D8     | 0.000418 | 0.218618 | 0.096 | 0.044 | 1 DC | TBC1D8         |
| TRUB2. 1   | 0.000419 | -0.1688  | 0.096 | 0.214 | 1 DC | TRUB2          |
| NDUFB3. 2  | 0.000421 | 0.123389 | 0.631 | 0.552 | 1 DC | NDUFB3         |
| ZNF528. 1  | 0.000421 | -0.16239 | 0.027 | 0.109 | 1 DC | ZNF528         |
| PIAS4      | 0.000423 | -0.20085 | 0.043 | 0.133 | 1 DC | PIAS4          |
| GTF2IRD2.  | 0.000424 | -0.19975 | 0.032 | 0.118 | 1 DC | GTF2IRD2       |
| EPHA4      | 0.000425 | -0.15115 | 0.011 | 0.082 | 1 DC | EPHA4          |
| MOB3B. 2   | 0.000427 | 0.199587 | 0.166 | 0.093 | 1 DC | MOB3B          |
| NACAD. 2   | 0.000427 | -0.22954 | 0.016 | 0.09  | 1 DC | NACAD          |
| EHD2. 1    | 0.000427 | -0.13766 | 0.011 | 0.082 | 1 DC | EHD2           |
| SPA17. 3   | 0.000428 | -0.20793 | 0.011 | 0.082 | 1 DC | SPA17          |
| SLC25A14   | 0.000429 | -0.18293 | 0.016 | 0.091 | 1 DC | SLC25A14       |
| GPR160     | 0.000431 | 0.154531 | 0.064 | 0.024 | 1 DC | GPR160         |
| ABCA1. 2   | 0.000432 | -0.25111 | 0.123 | 0.241 | 1 DC | ABCA1          |
| CEP95      | 0.000433 | -0.18237 | 0.037 | 0.125 | 1 DC | CEP95          |
| SYNM. 1    | 0.000433 | -0.12958 | 0.005 | 0.073 | 1 DC | SYNM           |

|           |          |          |       |       |      |              |
|-----------|----------|----------|-------|-------|------|--------------|
| ITGA3.1   | 0.000434 | -0.17073 | 0.021 | 0.1   | 1 DC | ITGA3        |
| HYOU1.2   | 0.000435 | -0.21057 | 0.048 | 0.141 | 1 DC | HYOU1        |
| CD47.2    | 0.000437 | 0.225677 | 0.465 | 0.383 | 1 DC | CD47         |
| HOMER1.2  | 0.000439 | -0.17538 | 0.059 | 0.158 | 1 DC | HOMER1       |
| TENM1.1   | 0.000439 | -0.14774 | 0.005 | 0.072 | 1 DC | TENM1        |
| Clorf109. | 0.00044  | -0.17059 | 0.043 | 0.134 | 1 DC | Clorf109     |
| HSDL1.2   | 0.00044  | -0.16584 | 0.043 | 0.132 | 1 DC | HSDL1        |
| AVIL.1    | 0.000444 | -0.22582 | 0.016 | 0.09  | 1 DC | AVIL         |
| LSS.2     | 0.000444 | -0.19472 | 0.021 | 0.099 | 1 DC | LSS          |
| EXTL3.1   | 0.000445 | -0.18212 | 0.043 | 0.133 | 1 DC | EXTL3        |
| EEA1.2    | 0.000447 | -0.20374 | 0.123 | 0.247 | 1 DC | EEA1         |
| FAM102A   | 0.000447 | -0.22257 | 0.021 | 0.099 | 1 DC | FAM102A      |
| CNTRL.3   | 0.000448 | 0.264197 | 0.193 | 0.117 | 1 DC | CNTRL        |
| EID2B.1   | 0.000449 | -0.17348 | 0.016 | 0.091 | 1 DC | EID2B        |
| SRSF6.3   | 0.00045  | 0.255955 | 0.433 | 0.358 | 1 DC | SRSF6        |
| RAB3GAP2. | 0.00045  | -0.2032  | 0.07  | 0.172 | 1 DC | RAB3GAP2     |
| SMIM18.2  | 0.000451 | -0.21305 | 0     | 0.062 | 1 DC | SMIM18       |
| AC004951. | 0.000452 | -0.1675  | 0.059 | 0.158 | 1 DC | AC004951.6   |
| HRSP12.3  | 0.000453 | -0.23628 | 0.091 | 0.2   | 1 DC | HRSP12       |
| NOVA2.1   | 0.000454 | -0.15832 | 0.011 | 0.082 | 1 DC | NOVA2        |
| ZNF232.1  | 0.000456 | -0.17621 | 0.011 | 0.081 | 1 DC | ZNF232       |
| UBE2K.1   | 0.000461 | 0.280099 | 0.374 | 0.297 | 1 DC | UBE2K        |
| PLK3.3    | 0.000463 | 0.234276 | 0.337 | 0.239 | 1 DC | PLK3         |
| MIS18A.1  | 0.000465 | -0.20708 | 0.027 | 0.107 | 1 DC | MIS18A       |
| ZDHHC15.1 | 0.000465 | -0.14212 | 0     | 0.062 | 1 DC | ZDHHC15      |
| CRLF3.3   | 0.000465 | 0.261522 | 0.187 | 0.112 | 1 DC | CRLF3        |
| SPON2     | 0.000466 | 0.184494 | 0.059 | 0.021 | 1 DC | SPON2        |
| LAMA4.1   | 0.000469 | -0.14261 | 0.005 | 0.072 | 1 DC | LAMA4        |
| PPP1R14C. | 0.000469 | -0.13545 | 0     | 0.062 | 1 DC | PPP1R14C     |
| NELFA.2   | 0.000471 | -0.18882 | 0.048 | 0.141 | 1 DC | NELFA        |
| SMKR1     | 0.000471 | -0.16951 | 0.005 | 0.072 | 1 DC | SMKR1        |
| PIK3CG.1  | 0.000474 | 0.168746 | 0.059 | 0.021 | 1 DC | PIK3CG       |
| YWHAZ.1   | 0.000474 | 0.148785 | 0.626 | 0.534 | 1 DC | YWHAZ        |
| CTC-479C5 | 0.000474 | 0.14288  | 0.107 | 0.05  | 1 DC | CTC-479C5.12 |
| SMAD9.1   | 0.000477 | -0.18868 | 0.005 | 0.071 | 1 DC | SMAD9        |
| SOX15.1   | 0.000478 | -0.23021 | 0.005 | 0.071 | 1 DC | SOX15        |
| ZNF337    | 0.000479 | -0.14837 | 0.005 | 0.072 | 1 DC | ZNF337       |
| YBEY      | 0.000479 | -0.20048 | 0.107 | 0.223 | 1 DC | YBEY         |
| HSPA13.2  | 0.000481 | -0.19822 | 0.091 | 0.201 | 1 DC | HSPA13       |
| AP006222. | 0.000482 | -0.22064 | 0.096 | 0.213 | 1 DC | AP006222.2   |
| TRIM37.1  | 0.000485 | -0.13072 | 0.053 | 0.151 | 1 DC | TRIM37       |
| ROM1.2    | 0.000485 | -0.26058 | 0.032 | 0.115 | 1 DC | ROM1         |
| SLC25A19. | 0.000488 | 0.274502 | 0.257 | 0.167 | 1 DC | SLC25A19     |
| CETN3.1   | 0.000488 | -0.21444 | 0.053 | 0.148 | 1 DC | CETN3        |
| NOTCH3    | 0.000488 | -0.12381 | 0     | 0.061 | 1 DC | NOTCH3       |
| KBTBD6.1  | 0.000489 | -0.1854  | 0.043 | 0.133 | 1 DC | KBTBD6       |
| LRRC45.3  | 0.00049  | -0.14506 | 0.016 | 0.09  | 1 DC | LRRC45       |
| REEP4.3   | 0.000491 | 0.201484 | 0.257 | 0.166 | 1 DC | REEP4        |
| CFDP1.2   | 0.000492 | -0.30399 | 0.267 | 0.418 | 1 DC | CFDP1        |
| MTHFD2L.1 | 0.000493 | -0.214   | 0.096 | 0.208 | 1 DC | MTHFD2L      |
| GDF15.2   | 0.000493 | -0.30485 | 0.005 | 0.071 | 1 DC | GDF15        |

|            |          |          |       |       |      |               |
|------------|----------|----------|-------|-------|------|---------------|
| NELFCD. 1  | 0.000494 | -0.26324 | 0.203 | 0.339 | 1 DC | NELFCD        |
| NCBP2-AS2  | 0.000495 | -0.159   | 0.15  | 0.279 | 1 DC | NCBP2-AS2     |
| GLRX3. 2   | 0.000496 | 0.236102 | 0.385 | 0.303 | 1 DC | GLRX3         |
| STARD8     | 0.000497 | 0.140452 | 0.037 | 0.011 | 1 DC | STARD8        |
| PELO. 2    | 0.000497 | -0.14521 | 0.027 | 0.108 | 1 DC | PELO          |
| PCDH19. 1  | 0.000498 | -0.13168 | 0     | 0.061 | 1 DC | PCDH19        |
| IPP. 1     | 0.000498 | -0.1486  | 0     | 0.061 | 1 DC | IPP           |
| TIAM2. 2   | 0.000499 | -0.20393 | 0.011 | 0.08  | 1 DC | TIAM2         |
| WDR48. 1   | 0.000501 | -0.19078 | 0.048 | 0.14  | 1 DC | WDR48         |
| CD226      | 0.000502 | 0.129442 | 0.043 | 0.013 | 1 DC | CD226         |
| WDR82. 2   | 0.000502 | -0.19154 | 0.134 | 0.256 | 1 DC | WDR82         |
| VPS37D. 1  | 0.000503 | -0.15938 | 0     | 0.061 | 1 DC | VPS37D        |
| PLCB1. 1   | 0.000503 | -0.13486 | 0.011 | 0.081 | 1 DC | PLCB1         |
| KAT2A. 1   | 0.000506 | -0.18627 | 0.064 | 0.162 | 1 DC | KAT2A         |
| ZNF124. 3  | 0.000507 | 0.205749 | 0.118 | 0.059 | 1 DC | ZNF124        |
| CCNL2. 1   | 0.000508 | -0.13244 | 0.16  | 0.292 | 1 DC | CCNL2         |
| HP1BP3. 3  | 0.00051  | -0.24824 | 0.299 | 0.444 | 1 DC | HP1BP3        |
| RP3-428L1  | 0.000511 | -0.14809 | 0.005 | 0.071 | 1 DC | RP3-428L16. 2 |
| MDGA1. 1   | 0.000512 | -0.10395 | 0.005 | 0.071 | 1 DC | MDGA1         |
| STK10. 3   | 0.000513 | 0.253881 | 0.134 | 0.071 | 1 DC | STK10         |
| TP53BP1    | 0.000514 | -0.17095 | 0.021 | 0.098 | 1 DC | TP53BP1       |
| CRKL. 1    | 0.000515 | -0.13838 | 0.037 | 0.123 | 1 DC | CRKL          |
| CTB-113I2  | 0.000518 | -0.1337  | 0     | 0.061 | 1 DC | CTB-113I20. 2 |
| PAICS. 2   | 0.00052  | -0.22078 | 0.176 | 0.31  | 1 DC | PAICS         |
| SIGLEC14.  | 0.00052  | 0.20114  | 0.096 | 0.044 | 1 DC | SIGLEC14      |
| TMED4. 2   | 0.000522 | -0.29456 | 0.294 | 0.44  | 1 DC | TMED4         |
| UBE2H. 2   | 0.000523 | -0.19803 | 0.134 | 0.261 | 1 DC | UBE2H         |
| ARHGEF19   | 0.000525 | 0.158188 | 0.048 | 0.016 | 1 DC | ARHGEF19      |
| SNAP47. 1  | 0.000527 | -0.18315 | 0.091 | 0.204 | 1 DC | SNAP47        |
| PCDH1. 1   | 0.000528 | -0.14044 | 0     | 0.061 | 1 DC | PCDH1         |
| HPCA. 1    | 0.000528 | -0.20328 | 0     | 0.061 | 1 DC | HPCA          |
| POLR3H. 1  | 0.000529 | -0.17473 | 0.102 | 0.216 | 1 DC | POLR3H        |
| SBDS. 3    | 0.000529 | -0.31111 | 0.492 | 0.612 | 1 DC | SBDS          |
| TCF25. 2   | 0.000531 | 0.11953  | 0.626 | 0.55  | 1 DC | TCF25         |
| MED17      | 0.000532 | -0.20711 | 0.086 | 0.191 | 1 DC | MED17         |
| PRKCA. 2   | 0.000533 | -0.20463 | 0.091 | 0.2   | 1 DC | PRKCA         |
| NIP7. 2    | 0.000533 | -0.24102 | 0.075 | 0.174 | 1 DC | NIP7          |
| MPP2. 2    | 0.000533 | -0.15417 | 0     | 0.06  | 1 DC | MPP2          |
| ZNF37A. 3  | 0.000535 | -0.1707  | 0.048 | 0.14  | 1 DC | ZNF37A        |
| MITF. 2    | 0.000535 | 0.180058 | 0.166 | 0.093 | 1 DC | MITF          |
| NT5C3A. 1  | 0.000538 | -0.2517  | 0.171 | 0.296 | 1 DC | NT5C3A        |
| BAMBI. 1   | 0.000538 | -0.16143 | 0.005 | 0.07  | 1 DC | BAMBI         |
| ZNF300. 2  | 0.00054  | -0.17628 | 0.005 | 0.07  | 1 DC | ZNF300        |
| CTC-250I1  | 0.00054  | 0.177041 | 0.064 | 0.025 | 1 DC | CTC-250I14. 6 |
| ZNF629. 1  | 0.000541 | -0.15118 | 0.005 | 0.07  | 1 DC | ZNF629        |
| ZNF181. 1  | 0.000542 | -0.16585 | 0.021 | 0.098 | 1 DC | ZNF181        |
| GLRB. 1    | 0.000544 | -0.14116 | 0     | 0.06  | 1 DC | GLRB          |
| SAC3D1. 3  | 0.000549 | -0.16198 | 0.07  | 0.171 | 1 DC | SAC3D1        |
| GAL3ST3. 1 | 0.000549 | -0.13808 | 0     | 0.06  | 1 DC | GAL3ST3       |
| KIAA0319L  | 0.000552 | -0.17718 | 0.08  | 0.186 | 1 DC | KIAA0319L     |
| NPRL3. 1   | 0.000554 | -0.18512 | 0.086 | 0.192 | 1 DC | NPRL3         |

|           |          |          |       |       |      |         |
|-----------|----------|----------|-------|-------|------|---------|
| TTI1      | 0.000554 | -0.13825 | 0.021 | 0.098 | 1 DC | TTI1    |
| BAX.3     | 0.000554 | 0.149436 | 0.642 | 0.564 | 1 DC | BAX     |
| PTRH2.2   | 0.000554 | -0.14312 | 0.048 | 0.139 | 1 DC | PTRH2   |
| ABHD14A.2 | 0.000557 | -0.17437 | 0.107 | 0.224 | 1 DC | ABHD14A |
| RAI14.1   | 0.000558 | -0.17126 | 0.005 | 0.07  | 1 DC | RAI14   |
| SAT2.3    | 0.00056  | -0.25252 | 0.449 | 0.588 | 1 DC | SAT2    |
| TGS1      | 0.00056  | -0.22913 | 0.064 | 0.162 | 1 DC | TGS1    |
| FXYD7.2   | 0.000562 | -0.28473 | 0.011 | 0.079 | 1 DC | FXYD7   |
| ZNF48.1   | 0.000565 | -0.15452 | 0.021 | 0.098 | 1 DC | ZNF48   |
| USP11.2   | 0.000566 | -0.20958 | 0.209 | 0.355 | 1 DC | USP11   |
| BAG5.1    | 0.000568 | -0.20942 | 0.08  | 0.187 | 1 DC | BAG5    |
| LRRCC1.2  | 0.00057  | -0.22215 | 0.048 | 0.137 | 1 DC | LRRCC1  |
| PAPOLA.1  | 0.00057  | 0.160493 | 0.556 | 0.483 | 1 DC | PAPOLA  |
| SHROOM2.2 | 0.000571 | -0.14419 | 0     | 0.06  | 1 DC | SHROOM2 |
| GBP4.1    | 0.000573 | 0.189258 | 0.128 | 0.066 | 1 DC | GBP4    |
| HSPA2     | 0.000574 | -0.44277 | 0.043 | 0.126 | 1 DC | HSPA2   |
| EGR1.1    | 0.000575 | -0.34086 | 0.396 | 0.497 | 1 DC | EGR1    |
| IRF5.3    | 0.000575 | 0.139013 | 0.118 | 0.058 | 1 DC | IRF5    |
| TGOLN2.3  | 0.000576 | 0.255307 | 0.449 | 0.371 | 1 DC | TGOLN2  |
| SPSB4.2   | 0.000577 | -0.1276  | 0     | 0.06  | 1 DC | SPSB4   |
| TMEM60.3  | 0.000577 | -0.20836 | 0.128 | 0.249 | 1 DC | TMEM60  |
| ZBTB1.2   | 0.000578 | 0.34705  | 0.241 | 0.163 | 1 DC | ZBTB1   |
| TMCC1.2   | 0.000579 | -0.16075 | 0.032 | 0.115 | 1 DC | TMCC1   |
| PAN3.2    | 0.000579 | 0.254374 | 0.198 | 0.123 | 1 DC | PAN3    |
| CACFD1.1  | 0.00058  | -0.16407 | 0.016 | 0.088 | 1 DC | CACFD1  |
| RRAS2.1   | 0.00058  | -0.12527 | 0.011 | 0.079 | 1 DC | RRAS2   |
| MRAS.1    | 0.000581 | -0.1749  | 0.07  | 0.169 | 1 DC | MRAS    |
| FAM200B.1 | 0.000581 | -0.24493 | 0.23  | 0.368 | 1 DC | FAM200B |
| ALDH3A2.1 | 0.000582 | -0.22487 | 0.118 | 0.234 | 1 DC | ALDH3A2 |
| MCHR1.1   | 0.000582 | -0.12265 | 0     | 0.06  | 1 DC | MCHR1   |
| MICALL2.1 | 0.000584 | -0.13171 | 0.005 | 0.07  | 1 DC | MICALL2 |
| CRCP.1    | 0.000587 | -0.21353 | 0.08  | 0.183 | 1 DC | CRCP    |
| COQ5.1    | 0.000588 | -0.2105  | 0.091 | 0.198 | 1 DC | COQ5    |
| BUD31.3   | 0.00059  | -0.27239 | 0.513 | 0.63  | 1 DC | BUD31   |
| MOSPD1.1  | 0.000591 | -0.14954 | 0.043 | 0.131 | 1 DC | MOSPD1  |
| DNAJC30.1 | 0.000592 | -0.13708 | 0.059 | 0.155 | 1 DC | DNAJC30 |
| PLEKHH2   | 0.000592 | -0.1408  | 0.005 | 0.07  | 1 DC | PLEKHH2 |
| CAPN10.1  | 0.000596 | -0.18696 | 0.016 | 0.088 | 1 DC | CAPN10  |
| MACROD1.1 | 0.000596 | -0.13784 | 0.037 | 0.124 | 1 DC | MACROD1 |
| TRPM2.3   | 0.000597 | 0.185919 | 0.107 | 0.051 | 1 DC | TRPM2   |
| NRP1.3    | 0.000598 | -0.17537 | 0.07  | 0.167 | 1 DC | NRP1    |
| TUSC2.2   | 0.0006   | -0.1643  | 0.193 | 0.337 | 1 DC | TUSC2   |
| F12.1     | 0.0006   | -0.14664 | 0.011 | 0.079 | 1 DC | F12     |
| SCIN.3    | 0.000601 | -0.46113 | 0.064 | 0.152 | 1 DC | SCIN    |
| PTPRN2.2  | 0.000602 | -0.35484 | 0.112 | 0.213 | 1 DC | PTPRN2  |
| COQ4.1    | 0.000602 | -0.22055 | 0.144 | 0.269 | 1 DC | COQ4    |
| GSDMD.2   | 0.000603 | 0.188322 | 0.273 | 0.183 | 1 DC | GSDMD   |
| AAMDC.3   | 0.000603 | -0.34572 | 0.102 | 0.208 | 1 DC | AAMDC   |
| LONP1.1   | 0.000603 | -0.14903 | 0.096 | 0.206 | 1 DC | LONP1   |
| UBE2E2.2  | 0.000603 | 0.19086  | 0.337 | 0.239 | 1 DC | UBE2E2  |
| CDK20.1   | 0.000605 | -0.16179 | 0     | 0.059 | 1 DC | CDK20   |



|           |          |          |       |       |      |               |
|-----------|----------|----------|-------|-------|------|---------------|
| POMT1.2   | 0.000607 | -0.14649 | 0.048 | 0.139 | 1 DC | POMT1         |
| SLC25A22. | 0.000607 | -0.14987 | 0.032 | 0.114 | 1 DC | SLC25A22      |
| DEF8.3    | 0.000608 | -0.179   | 0.144 | 0.272 | 1 DC | DEF8          |
| EIF1AY.2  | 0.000609 | -0.16098 | 0.075 | 0.179 | 1 DC | EIF1AY        |
| RNFT2.2   | 0.00061  | -0.12991 | 0.005 | 0.07  | 1 DC | RNFT2         |
| FAM69B.1  | 0.000611 | -0.11359 | 0     | 0.059 | 1 DC | FAM69B        |
| LRRC37B.2 | 0.000613 | -0.16008 | 0.032 | 0.114 | 1 DC | LRRC37B       |
| SNX2.3    | 0.000613 | 0.143255 | 0.497 | 0.409 | 1 DC | SNX2          |
| ZC2HC1A.2 | 0.000613 | -0.27808 | 0.107 | 0.212 | 1 DC | ZC2HC1A       |
| PAPOLG.3  | 0.000615 | 0.227799 | 0.16  | 0.09  | 1 DC | PAPOLG        |
| ITGAV.3   | 0.000616 | -0.18823 | 0.155 | 0.28  | 1 DC | ITGAV         |
| RAP1GDS1. | 0.000616 | 0.289072 | 0.251 | 0.172 | 1 DC | RAP1GDS1      |
| RDH10.2   | 0.000616 | -0.22243 | 0.016 | 0.087 | 1 DC | RDH10         |
| ALYREF.3  | 0.000617 | -0.15688 | 0.053 | 0.147 | 1 DC | ALYREF        |
| C12orf29. | 0.00062  | -0.19665 | 0.059 | 0.155 | 1 DC | C12orf29      |
| GIMAP2.2  | 0.000622 | 0.146306 | 0.144 | 0.076 | 1 DC | GIMAP2        |
| KRTCAP2.1 | 0.000622 | 0.122112 | 0.642 | 0.555 | 1 DC | KRTCAP2       |
| RP11-698N | 0.000623 | -0.16592 | 0     | 0.059 | 1 DC | RP11-698N11.2 |
| UBR4.3    | 0.000629 | -0.18885 | 0.053 | 0.146 | 1 DC | UBR4          |
| TMEM169.1 | 0.00063  | -0.15241 | 0     | 0.059 | 1 DC | TMEM169       |
| STK33.2   | 0.000633 | -0.13424 | 0.005 | 0.069 | 1 DC | STK33         |
| ARHGEF9.2 | 0.000633 | -0.20829 | 0.037 | 0.121 | 1 DC | ARHGEF9       |
| PDCD2L.1  | 0.000634 | -0.12347 | 0.027 | 0.106 | 1 DC | PDCD2L        |
| ACTL6B.2  | 0.000634 | -0.2585  | 0.011 | 0.078 | 1 DC | ACTL6B        |
| HOXA10.3  | 0.000634 | -0.21954 | 0.011 | 0.078 | 1 DC | HOXA10        |
| KBTBD7.1  | 0.000635 | -0.18205 | 0.016 | 0.088 | 1 DC | KBTBD7        |
| C5orf56.2 | 0.000639 | -0.17035 | 0.032 | 0.113 | 1 DC | C5orf56       |
| KCND3.2   | 0.000642 | -0.1392  | 0     | 0.059 | 1 DC | KCND3         |
| PSMG4.1   | 0.000642 | -0.18038 | 0.091 | 0.2   | 1 DC | PSMG4         |
| VPS72.1   | 0.000643 | -0.19152 | 0.15  | 0.278 | 1 DC | VPS72         |
| SLC35E2B. | 0.000643 | -0.16857 | 0.053 | 0.146 | 1 DC | SLC35E2B      |
| LSG1.1    | 0.000643 | -0.1799  | 0.043 | 0.129 | 1 DC | LSG1          |
| DPP4.1    | 0.000643 | -0.127   | 0.011 | 0.079 | 1 DC | DPP4          |
| BACE1.2   | 0.000645 | -0.22976 | 0.037 | 0.119 | 1 DC | BACE1         |
| ARL13B.3  | 0.000645 | -0.24474 | 0.053 | 0.144 | 1 DC | ARL13B        |
| TFEC.3    | 0.000647 | 0.183277 | 0.112 | 0.055 | 1 DC | TFEC          |
| ALG10B    | 0.000647 | 0.136943 | 0.037 | 0.011 | 1 DC | ALG10B        |
| SYT17.1   | 0.000649 | -0.18517 | 0.064 | 0.161 | 1 DC | SYT17         |
| PINK1.2   | 0.000649 | -0.22851 | 0.102 | 0.209 | 1 DC | PINK1         |
| COMT.3    | 0.000649 | 0.118407 | 0.647 | 0.546 | 1 DC | COMT          |
| TMEM11    | 0.000651 | -0.19408 | 0.187 | 0.321 | 1 DC | TMEM11        |
| GPR75-ASE | 0.000653 | -0.17002 | 0.016 | 0.087 | 1 DC | GPR75-ASB3    |
| HIRIP3.1  | 0.000654 | -0.23764 | 0.07  | 0.167 | 1 DC | HIRIP3        |
| ZNF584.1  | 0.000655 | -0.13105 | 0.016 | 0.087 | 1 DC | ZNF584        |
| PCDH10.1  | 0.000655 | -0.14607 | 0.005 | 0.069 | 1 DC | PCDH10        |
| GAS2L1.2  | 0.000659 | -0.14539 | 0.059 | 0.153 | 1 DC | GAS2L1        |
| CAPN1.2   | 0.00066  | 0.246968 | 0.342 | 0.257 | 1 DC | CAPN1         |
| CRB1      | 0.000661 | -0.20843 | 0.005 | 0.068 | 1 DC | CRB1          |
| FLRT3.2   | 0.000661 | -0.14712 | 0     | 0.059 | 1 DC | FLRT3         |
| ABI1.3    | 0.000662 | 0.285624 | 0.321 | 0.239 | 1 DC | ABI1          |
| RRP1.2    | 0.000663 | -0.17743 | 0.102 | 0.212 | 1 DC | RRP1          |

|            |          |          |       |       |      |               |
|------------|----------|----------|-------|-------|------|---------------|
| UTP23. 2   | 0.000666 | -0.21616 | 0.059 | 0.151 | 1 DC | UTP23         |
| FAM98B. 2  | 0.000667 | -0.14657 | 0.021 | 0.096 | 1 DC | FAM98B        |
| CEP19. 1   | 0.000668 | -0.18652 | 0.011 | 0.078 | 1 DC | CEP19         |
| RIT2. 2    | 0.000669 | -0.28862 | 0.011 | 0.077 | 1 DC | RIT2          |
| TTC37. 2   | 0.000672 | -0.16638 | 0.08  | 0.185 | 1 DC | TTC37         |
| SHFM1. 2   | 0.000674 | -0.30411 | 0.668 | 0.724 | 1 DC | SHFM1         |
| YKT6. 1    | 0.000681 | -0.16963 | 0.123 | 0.24  | 1 DC | YKT6          |
| PRRG4. 2   | 0.000681 | 0.144913 | 0.096 | 0.044 | 1 DC | PRRG4         |
| PCMTD2. 2  | 0.000685 | -0.16871 | 0.112 | 0.229 | 1 DC | PCMTD2        |
| LUC7L3. 1  | 0.000686 | -0.26445 | 0.385 | 0.512 | 1 DC | LUC7L3        |
| CSGALNACT  | 0.000686 | 0.184751 | 0.139 | 0.074 | 1 DC | CSGALNACT1    |
| CARF. 2    | 0.000687 | -0.18357 | 0.011 | 0.077 | 1 DC | CARF          |
| SHC4       | 0.000687 | -0.14131 | 0     | 0.058 | 1 DC | SHC4          |
| GAR1. 3    | 0.000689 | -0.17896 | 0.086 | 0.192 | 1 DC | GAR1          |
| AGRN. 1    | 0.000689 | -0.15502 | 0.021 | 0.095 | 1 DC | AGRN          |
| SGSM2. 1   | 0.000692 | -0.15423 | 0.027 | 0.104 | 1 DC | SGSM2         |
| EYA4. 1    | 0.000694 | -0.10327 | 0     | 0.058 | 1 DC | EYA4          |
| LRRC27. 1  | 0.000696 | -0.16671 | 0.016 | 0.086 | 1 DC | LRRC27        |
| B4GALT2    | 0.000699 | -0.1335  | 0.011 | 0.078 | 1 DC | B4GALT2       |
| CTU1. 1    | 0.0007   | -0.12753 | 0.011 | 0.078 | 1 DC | CTU1          |
| C10orf35   | 0.000701 | -0.21323 | 0     | 0.058 | 1 DC | C10orf35      |
| DOK1. 3    | 0.000706 | 0.191103 | 0.235 | 0.153 | 1 DC | DOK1          |
| COPA. 3    | 0.000707 | -0.21034 | 0.182 | 0.315 | 1 DC | COPA          |
| HNRNPL. 2  | 0.000708 | -0.24527 | 0.144 | 0.266 | 1 DC | HNRNPL        |
| FARSB. 1   | 0.00071  | -0.14771 | 0.118 | 0.234 | 1 DC | FARSB         |
| BCAS4. 1   | 0.000712 | -0.13469 | 0.016 | 0.087 | 1 DC | BCAS4         |
| JMJD6. 2   | 0.000714 | 0.21069  | 0.369 | 0.281 | 1 DC | JMJD6         |
| AMH. 1     | 0.000715 | -0.13429 | 0     | 0.058 | 1 DC | AMH           |
| SIX1. 1    | 0.000715 | -0.15433 | 0     | 0.058 | 1 DC | SIX1          |
| CDKN3. 2   | 0.000715 | -0.28476 | 0.021 | 0.093 | 1 DC | CDKN3         |
| NDUFS1. 1  | 0.000716 | -0.1859  | 0.134 | 0.257 | 1 DC | NDUFS1        |
| FAM53C. 2  | 0.000717 | 0.171868 | 0.332 | 0.24  | 1 DC | FAM53C        |
| CEP57L1. 2 | 0.000717 | -0.18701 | 0.032 | 0.112 | 1 DC | CEP57L1       |
| PHF23. 1   | 0.000718 | -0.14469 | 0.096 | 0.209 | 1 DC | PHF23         |
| SLX1A      | 0.00072  | 0.124979 | 0.043 | 0.014 | 1 DC | SLX1A         |
| CTA-445C9  | 0.000722 | -0.14852 | 0     | 0.058 | 1 DC | CTA-445C9. 14 |
| DLX6. 3    | 0.000722 | -0.22258 | 0     | 0.058 | 1 DC | DLX6          |
| PTPRK      | 0.000722 | -0.22614 | 0     | 0.058 | 1 DC | PTPRK         |
| PAPSS2. 1  | 0.000722 | 0.142151 | 0.059 | 0.022 | 1 DC | PAPSS2        |
| LDLRAD3. 2 | 0.000723 | -0.13327 | 0.075 | 0.177 | 1 DC | LDLRAD3       |
| GDPD1. 1   | 0.000724 | -0.14835 | 0.005 | 0.068 | 1 DC | GDPD1         |
| PSMA5. 1   | 0.000726 | 0.184206 | 0.513 | 0.441 | 1 DC | PSMA5         |
| RP11-83A2  | 0.000727 | -0.16171 | 0.048 | 0.137 | 1 DC | RP11-83A24. 2 |
| PKD1. 1    | 0.000728 | -0.18685 | 0.037 | 0.119 | 1 DC | PKD1          |
| ASNSD1. 2  | 0.000729 | -0.24283 | 0.15  | 0.273 | 1 DC | ASNSD1        |
| NIPSNAP1.  | 0.000731 | -0.16308 | 0.07  | 0.169 | 1 DC | NIPSNAP1      |
| ZNF16. 1   | 0.000731 | -0.1736  | 0.005 | 0.068 | 1 DC | ZNF16         |
| NCBP2. 1   | 0.000732 | -0.2132  | 0.305 | 0.443 | 1 DC | NCBP2         |
| PPP2R2A    | 0.000733 | -0.231   | 0.171 | 0.302 | 1 DC | PPP2R2A       |
| CBX2. 1    | 0.000733 | -0.14546 | 0.005 | 0.068 | 1 DC | CBX2          |
| UBE2C. 3   | 0.000735 | -0.33426 | 0.037 | 0.118 | 1 DC | UBE2C         |

|             |          |          |       |       |      |                  |
|-------------|----------|----------|-------|-------|------|------------------|
| ABCA3. 1    | 0.000735 | -0.14683 | 0.011 | 0.077 | 1 DC | ABCA3            |
| GPHN        | 0.000738 | -0.16526 | 0.005 | 0.068 | 1 DC | GPHN             |
| RP11-1094   | 0.000739 | -0.16018 | 0.118 | 0.236 | 1 DC | RP11-1094M14. 11 |
| ZNF768. 1   | 0.000745 | -0.11533 | 0.021 | 0.096 | 1 DC | ZNF768           |
| DLG5        | 0.000745 | -0.14824 | 0.011 | 0.077 | 1 DC | DLG5             |
| YPEL1. 3    | 0.000745 | -0.1433  | 0.021 | 0.095 | 1 DC | YPEL1            |
| RUNX2       | 0.000745 | 0.100348 | 0.07  | 0.028 | 1 DC | RUNX2            |
| ZFYVE21. 2  | 0.000748 | -0.22467 | 0.144 | 0.268 | 1 DC | ZFYVE21          |
| KLF12. 2    | 0.000748 | -0.16152 | 0.016 | 0.086 | 1 DC | KLF12            |
| FLCN. 1     | 0.00075  | -0.16278 | 0.048 | 0.137 | 1 DC | FLCN             |
| LAYN. 2     | 0.00075  | -0.12494 | 0     | 0.057 | 1 DC | LAYN             |
| PDAP1. 1    | 0.000757 | -0.2453  | 0.401 | 0.538 | 1 DC | PDAP1            |
| FAT3. 1     | 0.000758 | -0.12743 | 0     | 0.057 | 1 DC | FAT3             |
| ANKRD52     | 0.00076  | -0.11359 | 0.011 | 0.077 | 1 DC | ANKRD52          |
| PIGX. 2     | 0.000762 | -0.18868 | 0.134 | 0.255 | 1 DC | PIGX             |
| NCOA6. 3    | 0.000763 | -0.13791 | 0.048 | 0.137 | 1 DC | NCOA6            |
| RCC2. 2     | 0.000763 | 0.311304 | 0.251 | 0.173 | 1 DC | RCC2             |
| SLC25A39. 0 | 0.000766 | 0.227998 | 0.465 | 0.404 | 1 DC | SLC25A39         |
| MPHOSPH10   | 0.000768 | -0.16989 | 0.123 | 0.24  | 1 DC | MPHOSPH10        |
| CEP97. 1    | 0.000768 | -0.15959 | 0.011 | 0.077 | 1 DC | CEP97            |
| KCNH2. 1    | 0.00077  | -0.1884  | 0.005 | 0.067 | 1 DC | KCNH2            |
| GLA. 3      | 0.000771 | 0.237244 | 0.305 | 0.214 | 1 DC | GLA              |
| ZBTB16      | 0.000777 | 0.13626  | 0.246 | 0.154 | 1 DC | ZBTB16           |
| ZNF493. 1   | 0.000778 | -0.17614 | 0.064 | 0.159 | 1 DC | ZNF493           |
| NTRK3       | 0.00078  | -0.17636 | 0.005 | 0.067 | 1 DC | NTRK3            |
| DHFR. 1     | 0.000781 | -0.13045 | 0.059 | 0.152 | 1 DC | DHFR             |
| STARD5      | 0.000782 | 0.112531 | 0.048 | 0.016 | 1 DC | STARD5           |
| CDC42SE1. 0 | 0.000782 | 0.250679 | 0.385 | 0.303 | 1 DC | CDC42SE1         |
| SP3. 3      | 0.000784 | -0.16763 | 0.102 | 0.212 | 1 DC | SP3              |
| ASUN. 1     | 0.000786 | -0.14706 | 0.032 | 0.112 | 1 DC | ASUN             |
| FAT1. 1     | 0.000787 | -0.11279 | 0.005 | 0.067 | 1 DC | FAT1             |
| WASF3. 1    | 0.000787 | -0.14741 | 0.011 | 0.077 | 1 DC | WASF3            |
| AMOTL1. 1   | 0.000787 | -0.10554 | 0.005 | 0.067 | 1 DC | AMOTL1           |
| SAPCD2. 2   | 0.000788 | -0.15841 | 0     | 0.057 | 1 DC | SAPCD2           |
| NEDD1       | 0.000789 | -0.13903 | 0.016 | 0.086 | 1 DC | NEDD1            |
| LMBR1. 1    | 0.000791 | -0.15223 | 0.032 | 0.111 | 1 DC | LMBR1            |
| SEC61A1. 1  | 0.000791 | -0.25344 | 0.225 | 0.368 | 1 DC | SEC61A1          |
| DPY19L4. 1  | 0.000795 | -0.1189  | 0.021 | 0.095 | 1 DC | DPY19L4          |
| HSD17B1. 1  | 0.000796 | -0.11471 | 0     | 0.057 | 1 DC | HSD17B1          |
| GLYCTK      | 0.000796 | 0.110068 | 0.07  | 0.028 | 1 DC | GLYCTK           |
| IL1R1. 1    | 0.000797 | 0.121968 | 0.048 | 0.016 | 1 DC | IL1R1            |
| RGPD5       | 0.000797 | 0.113997 | 0.053 | 0.019 | 1 DC | RGPD5            |
| NME4. 1     | 0.000797 | -0.1875  | 0.241 | 0.384 | 1 DC | NME4             |
| DNP1. 1     | 0.000797 | -0.24447 | 0.246 | 0.379 | 1 DC | DNP1             |
| RBMX. 2     | 0.000799 | 0.125939 | 0.663 | 0.565 | 1 DC | RBMX             |
| TRMT61B. 1  | 0.000802 | -0.22355 | 0.07  | 0.164 | 1 DC | TRMT61B          |
| PM20D2. 1   | 0.000803 | -0.12703 | 0.016 | 0.086 | 1 DC | PM20D2           |
| HOXA3. 2    | 0.000804 | -0.18751 | 0     | 0.057 | 1 DC | HOXA3            |
| ILF3-AS1. 0 | 0.000805 | -0.18506 | 0.176 | 0.312 | 1 DC | ILF3-AS1         |
| TMEM41B. 1  | 0.000806 | -0.12568 | 0.075 | 0.177 | 1 DC | TMEM41B          |
| TMC6. 3     | 0.000809 | 0.138565 | 0.193 | 0.11  | 1 DC | TMC6             |

|              |          |          |       |       |      |                |
|--------------|----------|----------|-------|-------|------|----------------|
| ACLY. 3      | 0.000812 | -0.18786 | 0.107 | 0.218 | 1 DC | ACLY           |
| FER. 1       | 0.000813 | -0.13692 | 0.021 | 0.095 | 1 DC | FER            |
| RMND1. 1     | 0.000814 | -0.19273 | 0.027 | 0.102 | 1 DC | RMND1          |
| DDX27. 2     | 0.000819 | 0.244027 | 0.358 | 0.281 | 1 DC | DDX27          |
| ABCD4. 2     | 0.00082  | -0.21291 | 0.139 | 0.258 | 1 DC | ABCD4          |
| MAGOH. 2     | 0.000822 | 0.190121 | 0.492 | 0.413 | 1 DC | MAGOH          |
| C9orf9. 2    | 0.000824 | -0.17334 | 0.032 | 0.111 | 1 DC | C9orf9         |
| REPIN1. 3    | 0.000826 | -0.14579 | 0.15  | 0.276 | 1 DC | REPIN1         |
| MOK. 1       | 0.000826 | -0.15532 | 0.005 | 0.067 | 1 DC | MOK            |
| TTYH3. 3     | 0.000829 | -0.18242 | 0.128 | 0.249 | 1 DC | TTYH3          |
| TMEM128. 2   | 0.000829 | -0.2104  | 0.166 | 0.293 | 1 DC | TMEM128        |
| MAFG-AS1. 1  | 0.00083  | -0.11374 | 0.005 | 0.066 | 1 DC | MAFG-AS1       |
| VAMP7. 2     | 0.000831 | 0.260261 | 0.241 | 0.165 | 1 DC | VAMP7          |
| PPP1R35. 3   | 0.000831 | -0.16219 | 0.064 | 0.159 | 1 DC | PPP1R35        |
| ZNF844. 1    | 0.000834 | -0.17615 | 0.011 | 0.076 | 1 DC | ZNF844         |
| GPX4. 2      | 0.000835 | -0.19006 | 0.861 | 0.842 | 1 DC | GPX4           |
| MAF. 2       | 0.000835 | -0.3543  | 0.053 | 0.136 | 1 DC | MAF            |
| ARHGEF25. 1  | 0.000837 | -0.17633 | 0.005 | 0.066 | 1 DC | ARHGEF25       |
| ZNF532. 1    | 0.000837 | -0.1435  | 0.021 | 0.094 | 1 DC | ZNF532         |
| MF12-AS1. 1  | 0.00084  | -0.14026 | 0.011 | 0.076 | 1 DC | MF12-AS1       |
| C19orf52. 1  | 0.000841 | -0.14658 | 0.075 | 0.175 | 1 DC | C19orf52       |
| RABGAP1L. 1  | 0.000841 | 0.268176 | 0.182 | 0.109 | 1 DC | RABGAP1L       |
| OSCP1. 2     | 0.000842 | -0.13717 | 0.005 | 0.067 | 1 DC | OSCP1          |
| TNFAIP1. 1   | 0.000849 | -0.13194 | 0.075 | 0.177 | 1 DC | TNFAIP1        |
| COPG2. 1     | 0.000853 | -0.17471 | 0.037 | 0.119 | 1 DC | COPG2          |
| SMYD5. 1     | 0.000856 | -0.1308  | 0.005 | 0.067 | 1 DC | SMYD5          |
| ZKSCAN5. 1   | 0.000858 | -0.13217 | 0.005 | 0.067 | 1 DC | ZKSCAN5        |
| STT3B. 2     | 0.000858 | 0.287086 | 0.278 | 0.203 | 1 DC | STT3B          |
| PAIP1. 3     | 0.000858 | -0.1929  | 0.251 | 0.398 | 1 DC | PAIP1          |
| AKAP11. 2    | 0.00086  | -0.1506  | 0.059 | 0.151 | 1 DC | AKAP11         |
| STOML1. 1    | 0.00086  | -0.18607 | 0.027 | 0.102 | 1 DC | STOML1         |
| SSB. 2       | 0.000864 | -0.27084 | 0.46  | 0.594 | 1 DC | SSB            |
| HSPA1B. 2    | 0.000865 | -0.36826 | 0.299 | 0.412 | 1 DC | HSPA1B         |
| MAN2A1. 3    | 0.000866 | 0.190603 | 0.182 | 0.109 | 1 DC | MAN2A1         |
| METTL16. 1   | 0.000868 | -0.16945 | 0.032 | 0.11  | 1 DC | METTL16        |
| ITM2A. 2     | 0.000869 | -0.2726  | 0     | 0.056 | 1 DC | ITM2A          |
| RP11-263K. 1 | 0.000871 | -0.13296 | 0.005 | 0.066 | 1 DC | RP11-263K19. 4 |
| STK32A. 2    | 0.000877 | -0.11686 | 0     | 0.056 | 1 DC | STK32A         |
| EBF4. 1      | 0.000877 | -0.11841 | 0     | 0.056 | 1 DC | EBF4           |
| EPC1. 3      | 0.00088  | 0.305639 | 0.364 | 0.29  | 1 DC | EPC1           |
| ZNF253. 1    | 0.00088  | -0.16922 | 0.016 | 0.084 | 1 DC | ZNF253         |
| DUT. 3       | 0.000883 | 0.211995 | 0.529 | 0.454 | 1 DC | DUT            |
| ECI2. 1      | 0.000885 | -0.30535 | 0.198 | 0.325 | 1 DC | ECI2           |
| MAN1C1. 1    | 0.000889 | -0.13575 | 0.016 | 0.085 | 1 DC | MAN1C1         |
| HMOX1. 3     | 0.00089  | 0.100929 | 0.422 | 0.292 | 1 DC | HMOX1          |
| TMEM222. 3   | 0.00089  | -0.15631 | 0.155 | 0.282 | 1 DC | TMEM222        |
| RSRC1. 1     | 0.000891 | -0.20189 | 0.176 | 0.307 | 1 DC | RSRC1          |
| ZNF599. 1    | 0.000892 | -0.16638 | 0.011 | 0.075 | 1 DC | ZNF599         |
| SLC48A1. 2   | 0.000892 | -0.24199 | 0.048 | 0.134 | 1 DC | SLC48A1        |
| MNS1. 1      | 0.000897 | -0.14438 | 0.011 | 0.076 | 1 DC | MNS1           |
| PFN1. 3      | 0.000897 | 0.128954 | 0.93  | 0.807 | 1 DC | PFN1           |

|           |          |          |       |       |      |               |
|-----------|----------|----------|-------|-------|------|---------------|
| RABGAP1.2 | 0.000897 | -0.19159 | 0.043 | 0.126 | 1 DC | RABGAP1       |
| STOM.2    | 0.000908 | 0.15233  | 0.353 | 0.25  | 1 DC | STOM          |
| MAPK11    | 0.000912 | -0.10475 | 0     | 0.056 | 1 DC | MAPK11        |
| IL13RA2.2 | 0.000912 | -0.26019 | 0     | 0.056 | 1 DC | IL13RA2       |
| ANKH.3    | 0.000918 | 0.216244 | 0.23  | 0.147 | 1 DC | ANKH          |
| DYNLRB1.2 | 0.00092  | -0.22407 | 0.594 | 0.666 | 1 DC | DYNLRB1       |
| USP36.3   | 0.000921 | 0.223693 | 0.214 | 0.137 | 1 DC | USP36         |
| UQCC1.1   | 0.000923 | -0.14494 | 0.07  | 0.167 | 1 DC | UQCC1         |
| MSX1.1    | 0.000925 | -0.13833 | 0.005 | 0.066 | 1 DC | MSX1          |
| WNK1.3    | 0.000926 | 0.212988 | 0.358 | 0.277 | 1 DC | WNK1          |
| KCTD3     | 0.000932 | -0.10733 | 0.053 | 0.144 | 1 DC | KCTD3         |
| CCDC88B   | 0.000934 | 0.235232 | 0.144 | 0.08  | 1 DC | CCDC88B       |
| ZNF205    | 0.000935 | -0.15294 | 0.032 | 0.11  | 1 DC | ZNF205        |
| ZNF12.1   | 0.000935 | -0.16152 | 0.043 | 0.125 | 1 DC | ZNF12         |
| RP11-563K | 0.000938 | -0.16295 | 0.005 | 0.065 | 1 DC | RP11-563K23.1 |
| PRPF6.1   | 0.000939 | -0.2231  | 0.219 | 0.355 | 1 DC | PRPF6         |
| PEX5.1    | 0.000939 | -0.19858 | 0.021 | 0.092 | 1 DC | PEX5          |
| HES1.2    | 0.000939 | -0.25829 | 0.096 | 0.198 | 1 DC | HES1          |
| FOXO1     | 0.000941 | -0.18317 | 0.011 | 0.075 | 1 DC | FOXO1         |
| TCF7.1    | 0.000942 | -0.20206 | 0.053 | 0.141 | 1 DC | TCF7          |
| XAB2.1    | 0.000947 | -0.20899 | 0.08  | 0.178 | 1 DC | XAB2          |
| DLG4      | 0.000949 | -0.16878 | 0.011 | 0.074 | 1 DC | DLG4          |
| QTRT1.3   | 0.000951 | -0.30105 | 0.203 | 0.333 | 1 DC | QTRT1         |
| GON4L.1   | 0.000953 | -0.14791 | 0.107 | 0.216 | 1 DC | GON4L         |
| ELK3.1    | 0.000956 | 0.276534 | 0.15  | 0.087 | 1 DC | ELK3          |
| ACYP2.2   | 0.000956 | -0.23235 | 0.187 | 0.314 | 1 DC | ACYP2         |
| VAPB.2    | 0.000957 | -0.20458 | 0.096 | 0.199 | 1 DC | VAPB          |
| GAPVD1    | 0.000958 | -0.18205 | 0.08  | 0.177 | 1 DC | GAPVD1        |
| R3HCC1.1  | 0.000959 | -0.1765  | 0.16  | 0.288 | 1 DC | R3HCC1        |
| RAB11B-AS | 0.000959 | -0.16985 | 0.048 | 0.133 | 1 DC | RAB11B-AS1    |
| ARFGAP1.1 | 0.000961 | -0.17118 | 0.059 | 0.149 | 1 DC | ARFGAP1       |
| DBX2.2    | 0.000963 | -0.12335 | 0.005 | 0.065 | 1 DC | DBX2          |
| CTDP1.1   | 0.000964 | 0.220884 | 0.128 | 0.07  | 1 DC | CTDP1         |
| FAM212B.2 | 0.000965 | -0.15889 | 0.027 | 0.1   | 1 DC | FAM212B       |
| NKX2-5.1  | 0.000965 | -0.19111 | 0.005 | 0.065 | 1 DC | NKX2-5        |
| ISOC2.3   | 0.000965 | -0.18511 | 0.209 | 0.351 | 1 DC | ISOC2         |
| NIM1K.2   | 0.000966 | -0.17685 | 0.005 | 0.065 | 1 DC | NIM1K         |
| LYRM1.2   | 0.000971 | -0.21347 | 0.086 | 0.185 | 1 DC | LYRM1         |
| SAMD14    | 0.000972 | -0.15536 | 0.005 | 0.065 | 1 DC | SAMD14        |
| RP11-25K1 | 0.000975 | -0.1345  | 0.027 | 0.102 | 1 DC | RP11-25K19.1  |
| MCM7.2    | 0.000976 | -0.26302 | 0.144 | 0.256 | 1 DC | MCM7          |
| CHST3.1   | 0.000977 | -0.11952 | 0.005 | 0.065 | 1 DC | CHST3         |
| ATG9A.1   | 0.00098  | -0.16457 | 0.037 | 0.118 | 1 DC | ATG9A         |
| ALDH1L1.2 | 0.00098  | -0.27985 | 0.005 | 0.064 | 1 DC | ALDH1L1       |
| ILK.1     | 0.000981 | 0.200098 | 0.444 | 0.364 | 1 DC | ILK           |
| E4F1      | 0.000985 | -0.1882  | 0.037 | 0.116 | 1 DC | E4F1          |
| FAM173B.1 | 0.000986 | -0.15193 | 0.005 | 0.065 | 1 DC | FAM173B       |
| DGCR6     | 0.000987 | -0.17739 | 0.064 | 0.155 | 1 DC | DGCR6         |
| FAM126B.1 | 0.000989 | -0.17757 | 0.053 | 0.141 | 1 DC | FAM126B       |
| TMED3.2   | 0.000991 | 0.236125 | 0.38  | 0.307 | 1 DC | TMED3         |
| SLC23A2.1 | 0.000991 | -0.177   | 0.032 | 0.108 | 1 DC | SLC23A2       |

|            |          |          |       |       |      |          |
|------------|----------|----------|-------|-------|------|----------|
| TSMF. 1    | 0.000992 | -0.2484  | 0.16  | 0.278 | 1 DC | TSMF     |
| ZNF512B. 2 | 0.000993 | -0.10791 | 0.011 | 0.075 | 1 DC | ZNF512B  |
| CAHM. 2    | 0.000994 | -0.16168 | 0.021 | 0.092 | 1 DC | CAHM     |
| RASL11B. 2 | 0.000996 | -0.23765 | 0     | 0.055 | 1 DC | RASL11B  |
| PPM1F. 2   | 0.000999 | 0.211522 | 0.123 | 0.066 | 1 DC | PPM1F    |
| AP3M2. 1   | 0.001001 | -0.11639 | 0.021 | 0.093 | 1 DC | AP3M2    |
| MALT1. 3   | 0.001001 | 0.193397 | 0.134 | 0.073 | 1 DC | MALT1    |
| KCNJ16. 2  | 0.001005 | -0.12861 | 0     | 0.055 | 1 DC | KCNJ16   |
| POFUT1. 1  | 0.001007 | -0.15671 | 0.037 | 0.118 | 1 DC | POFUT1   |
| SPPL3. 2   | 0.001008 | -0.20297 | 0.096 | 0.199 | 1 DC | SPPL3    |
| SEL1L3. 1  | 0.001011 | 0.232277 | 0.128 | 0.07  | 1 DC | SEL1L3   |
| HMG3. 2    | 0.001012 | 0.116191 | 0.69  | 0.608 | 1 DC | HMG3     |
| SLC16A2    | 0.001015 | -0.11242 | 0     | 0.055 | 1 DC | SLC16A2  |
| SCAF11. 3  | 0.001016 | 0.201129 | 0.46  | 0.395 | 1 DC | SCAF11   |
| EFNB3. 1   | 0.001018 | -0.11547 | 0.011 | 0.075 | 1 DC | EFNB3    |
| TCEB2. 3   | 0.001019 | -0.14307 | 0.856 | 0.823 | 1 DC | TCEB2    |
| ZC3HC1. 1  | 0.00102  | -0.16129 | 0.043 | 0.126 | 1 DC | ZC3HC1   |
| GLG1. 3    | 0.00102  | -0.1843  | 0.15  | 0.268 | 1 DC | GLG1     |
| TTYH2. 3   | 0.001023 | -0.22512 | 0.037 | 0.117 | 1 DC | TTYH2    |
| MAEA. 2    | 0.001026 | -0.22308 | 0.123 | 0.237 | 1 DC | MAEA     |
| ORC5. 2    | 0.001026 | -0.18707 | 0.027 | 0.1   | 1 DC | ORC5     |
| MIB2. 2    | 0.001029 | -0.13193 | 0.059 | 0.151 | 1 DC | MIB2     |
| HOXC10. 1  | 0.001035 | -0.18086 | 0     | 0.055 | 1 DC | HOXC10   |
| SNRPN. 3   | 0.001037 | -0.41547 | 0.027 | 0.1   | 1 DC | SNRPN    |
| VKORC1L1   | 0.001038 | -0.11515 | 0.048 | 0.133 | 1 DC | VKORC1L1 |
| NFE2L1. 2  | 0.001038 | -0.12748 | 0.086 | 0.189 | 1 DC | NFE2L1   |
| ZNF226. 3  | 0.00104  | -0.27939 | 0.102 | 0.205 | 1 DC | ZNF226   |
| SORBS3. 2  | 0.001045 | -0.11926 | 0.075 | 0.174 | 1 DC | SORBS3   |
| FAIM. 1    | 0.001045 | -0.20331 | 0.059 | 0.148 | 1 DC | FAIM     |
| NCOA5. 1   | 0.001047 | -0.15233 | 0.016 | 0.083 | 1 DC | NCOA5    |
| BRINP2. 2  | 0.001052 | -0.15491 | 0.011 | 0.073 | 1 DC | BRINP2   |
| PPP5C. 2   | 0.001053 | -0.18482 | 0.08  | 0.178 | 1 DC | PPP5C    |
| RUNX1. 3   | 0.001054 | 0.281729 | 0.267 | 0.189 | 1 DC | RUNX1    |
| LRPAP1. 1  | 0.001054 | 0.105205 | 0.626 | 0.546 | 1 DC | LRPAP1   |
| CLDN15. 1  | 0.001056 | -0.17842 | 0.005 | 0.064 | 1 DC | CLDN15   |
| GPSM1. 2   | 0.001057 | -0.1556  | 0.011 | 0.074 | 1 DC | GPSM1    |
| DMAP1. 1   | 0.00106  | -0.18378 | 0.134 | 0.253 | 1 DC | DMAP1    |
| THOP1. 2   | 0.001063 | -0.14177 | 0.096 | 0.203 | 1 DC | THOP1    |
| NUDT16. 3  | 0.001064 | 0.245333 | 0.299 | 0.218 | 1 DC | NUDT16   |
| ACD. 1     | 0.001069 | -0.20019 | 0.075 | 0.169 | 1 DC | ACD      |
| CSTF3. 1   | 0.001077 | -0.13872 | 0.15  | 0.269 | 1 DC | CSTF3    |
| NADK2      | 0.001079 | -0.12895 | 0.027 | 0.101 | 1 DC | NADK2    |
| CRIM1. 2   | 0.00108  | -0.13396 | 0.005 | 0.064 | 1 DC | CRIM1    |
| DSC2. 2    | 0.001085 | 0.11074  | 0.075 | 0.032 | 1 DC | DSC2     |
| CCDC144A   | 0.001087 | -0.1481  | 0.016 | 0.083 | 1 DC | CCDC144A |
| MAOB. 1    | 0.001087 | -0.26974 | 0.027 | 0.1   | 1 DC | MAOB     |
| GOLIM4. 2  | 0.001087 | -0.21276 | 0.203 | 0.329 | 1 DC | GOLIM4   |
| PPIE. 1    | 0.001088 | 0.253225 | 0.358 | 0.282 | 1 DC | PPIE     |
| C22orf29.  | 0.001089 | -0.14509 | 0.005 | 0.064 | 1 DC | C22orf29 |
| TFEB. 3    | 0.001092 | 0.167226 | 0.139 | 0.077 | 1 DC | TFEB     |
| FAM174A. 1 | 0.001092 | -0.16885 | 0.112 | 0.224 | 1 DC | FAM174A  |

|           |          |          |       |       |      |           |
|-----------|----------|----------|-------|-------|------|-----------|
| KBTBD4.1  | 0.001092 | -0.19899 | 0.021 | 0.091 | 1 DC | KBTBD4    |
| IER5L.1   | 0.001095 | -0.17467 | 0.027 | 0.099 | 1 DC | IER5L     |
| CCND2.3   | 0.001099 | -0.2965  | 0.209 | 0.329 | 1 DC | CCND2     |
| GTF3C1    | 0.0011   | -0.16859 | 0.032 | 0.108 | 1 DC | GTF3C1    |
| TMEM203.2 | 0.001107 | -0.10552 | 0.134 | 0.254 | 1 DC | TMEM203   |
| MOXD1.1   | 0.001108 | -0.13852 | 0     | 0.054 | 1 DC | MOXD1     |
| RAB39B.2  | 0.001109 | -0.15458 | 0.021 | 0.091 | 1 DC | RAB39B    |
| CTNNB1.3  | 0.001111 | 0.205491 | 0.439 | 0.354 | 1 DC | CTNNB1    |
| NFKBIE.3  | 0.001113 | 0.260411 | 0.203 | 0.133 | 1 DC | NFKBIE    |
| NOP16.2   | 0.001114 | -0.18922 | 0.096 | 0.2   | 1 DC | NOP16     |
| ANKRD54.1 | 0.001116 | -0.14906 | 0.053 | 0.141 | 1 DC | ANKRD54   |
| FGFBP3.2  | 0.001116 | -0.1031  | 0.027 | 0.101 | 1 DC | FGFBP3    |
| SLC37A2   | 0.001119 | 0.140435 | 0.053 | 0.02  | 1 DC | SLC37A2   |
| SERPINI1  | 0.001119 | -0.19521 | 0     | 0.054 | 1 DC | SERPINI1  |
| PREX1.3   | 0.00112  | 0.228919 | 0.299 | 0.217 | 1 DC | PREX1     |
| C16orf58  | 0.001123 | -0.17597 | 0.037 | 0.116 | 1 DC | C16orf58  |
| FBX08.1   | 0.001127 | -0.19695 | 0.059 | 0.146 | 1 DC | FBX08     |
| LGALSL.1  | 0.001133 | -0.15277 | 0.005 | 0.063 | 1 DC | LGALSL    |
| GPX8.2    | 0.001134 | -0.13981 | 0.005 | 0.064 | 1 DC | GPX8      |
| DLL1.1    | 0.001135 | -0.24509 | 0.011 | 0.072 | 1 DC | DLL1      |
| BRF2.1    | 0.001137 | -0.1766  | 0.021 | 0.091 | 1 DC | BRF2      |
| ZNF606.1  | 0.001138 | -0.15467 | 0.016 | 0.082 | 1 DC | ZNF606    |
| KLHDC10.1 | 0.001139 | -0.16176 | 0.048 | 0.131 | 1 DC | KLHDC10   |
| THAP6.1   | 0.00114  | -0.15646 | 0.016 | 0.082 | 1 DC | THAP6     |
| IGDCC3.3  | 0.001142 | -0.13253 | 0.005 | 0.063 | 1 DC | IGDCC3    |
| CUX1.3    | 0.001145 | -0.19839 | 0.128 | 0.243 | 1 DC | CUX1      |
| PAQR6.1   | 0.001146 | -0.19249 | 0.011 | 0.073 | 1 DC | PAQR6     |
| AGAP2-AS1 | 0.001147 | -0.29951 | 0.027 | 0.096 | 1 DC | AGAP2-AS1 |
| HS6ST2    | 0.001148 | -0.1078  | 0.005 | 0.063 | 1 DC | HS6ST2    |
| UTP20.1   | 0.00115  | -0.14192 | 0.005 | 0.064 | 1 DC | UTP20     |
| HRK.1     | 0.001151 | -0.17974 | 0.005 | 0.064 | 1 DC | HRK       |
| SPOCK1.2  | 0.001151 | -0.21767 | 0.016 | 0.082 | 1 DC | SPOCK1    |
| AAED1.3   | 0.001151 | 0.240905 | 0.257 | 0.18  | 1 DC | AAED1     |
| ANLN.2    | 0.001152 | -0.26024 | 0.005 | 0.063 | 1 DC | ANLN      |
| SDSL.2    | 0.001154 | 0.277705 | 0.262 | 0.186 | 1 DC | SDSL      |
| ETAA1     | 0.001163 | -0.13209 | 0     | 0.053 | 1 DC | ETAA1     |
| ISCA1.1   | 0.001165 | -0.15977 | 0.166 | 0.299 | 1 DC | ISCA1     |
| ENDOG.2   | 0.001165 | -0.10714 | 0.059 | 0.149 | 1 DC | ENDOG     |
| SH3BP2.2  | 0.00117  | 0.166265 | 0.214 | 0.137 | 1 DC | SH3BP2    |
| RIMKLA    | 0.001175 | -0.10819 | 0     | 0.053 | 1 DC | RIMKLA    |
| TMEM18    | 0.001177 | -0.28307 | 0.107 | 0.209 | 1 DC | TMEM18    |
| ALG14.1   | 0.00118  | -0.22597 | 0.064 | 0.153 | 1 DC | ALG14     |
| PEX11G.1  | 0.00118  | -0.13565 | 0.011 | 0.073 | 1 DC | PEX11G    |
| C11orf68  | 0.001181 | -0.13832 | 0.032 | 0.108 | 1 DC | C11orf68  |
| NUF2.3    | 0.001182 | -0.21077 | 0.005 | 0.063 | 1 DC | NUF2      |
| SPIRE1    | 0.001191 | -0.13911 | 0.027 | 0.099 | 1 DC | SPIRE1    |
| ASF1A.2   | 0.0012   | -0.15423 | 0.123 | 0.236 | 1 DC | ASF1A     |
| UBE2T.3   | 0.001201 | -0.25111 | 0.048 | 0.128 | 1 DC | UBE2T     |
| ABCA2.3   | 0.001202 | -0.32289 | 0.027 | 0.097 | 1 DC | ABCA2     |
| SGTA.1    | 0.001205 | -0.20317 | 0.187 | 0.318 | 1 DC | SGTA      |
| CWC27.1   | 0.001206 | -0.18215 | 0.144 | 0.266 | 1 DC | CWC27     |

|           |          |          |       |       |      |           |
|-----------|----------|----------|-------|-------|------|-----------|
| ZNF649.2  | 0.001208 | -0.12383 | 0.021 | 0.091 | 1 DC | ZNF649    |
| GYPC.3    | 0.001208 | -0.32124 | 0.203 | 0.311 | 1 DC | GYPC      |
| ARHGAP23. | 0.00121  | -0.14734 | 0     | 0.053 | 1 DC | ARHGAP23  |
| PSMD5-AS1 | 0.001211 | -0.21822 | 0.086 | 0.183 | 1 DC | PSMD5-AS1 |
| CCPG1.2   | 0.001213 | 0.331933 | 0.283 | 0.212 | 1 DC | CCPG1     |
| TBCK.1    | 0.001215 | -0.15086 | 0.016 | 0.082 | 1 DC | TBCK      |
| MEX3D.2   | 0.001216 | -0.1321  | 0.005 | 0.063 | 1 DC | MEX3D     |
| NMT2.2    | 0.001218 | -0.11281 | 0.027 | 0.099 | 1 DC | NMT2      |
| TRIM16.1  | 0.001224 | -0.16552 | 0.048 | 0.131 | 1 DC | TRIM16    |
| COQ9.2    | 0.001229 | -0.20892 | 0.128 | 0.244 | 1 DC | COQ9      |
| TEAD4.1   | 0.001233 | -0.10174 | 0     | 0.053 | 1 DC | TEAD4     |
| BEST3.2   | 0.001235 | -0.28403 | 0.021 | 0.088 | 1 DC | BEST3     |
| MYSM1.1   | 0.001237 | -0.16782 | 0.016 | 0.081 | 1 DC | MYSM1     |
| TNFRSF10E | 0.001237 | 0.171043 | 0.171 | 0.101 | 1 DC | TNFRSF10B |
| SCARF1.2  | 0.001237 | 0.106751 | 0.064 | 0.026 | 1 DC | SCARF1    |
| ITGA2.1   | 0.001251 | -0.11233 | 0.005 | 0.063 | 1 DC | ITGA2     |
| RAB6A.2   | 0.001251 | -0.16354 | 0.251 | 0.396 | 1 DC | RAB6A     |
| PIGZ.1    | 0.001253 | -0.11    | 0.005 | 0.063 | 1 DC | PIGZ      |
| DDX60L.1  | 0.001254 | 0.195218 | 0.107 | 0.054 | 1 DC | DDX60L    |
| PRKAA2.2  | 0.001258 | -0.12186 | 0     | 0.053 | 1 DC | PRKAA2    |
| KAZN.1    | 0.001258 | -0.14913 | 0.011 | 0.072 | 1 DC | KAZN      |
| DCP2.3    | 0.001258 | 0.323019 | 0.219 | 0.149 | 1 DC | DCP2      |
| TXLNA.1   | 0.001261 | -0.13114 | 0.053 | 0.141 | 1 DC | TXLNA     |
| RIC8A     | 0.001262 | -0.20308 | 0.166 | 0.288 | 1 DC | RIC8A     |
| CD99L2.2  | 0.001264 | -0.16912 | 0.048 | 0.131 | 1 DC | CD99L2    |
| WDR92.1   | 0.001265 | -0.18573 | 0.016 | 0.08  | 1 DC | WDR92     |
| UBE2V2.2  | 0.001265 | -0.24788 | 0.358 | 0.497 | 1 DC | UBE2V2    |
| ZNF277.1  | 0.001266 | 0.216831 | 0.251 | 0.171 | 1 DC | ZNF277    |
| ASIC1.1   | 0.00127  | -0.15957 | 0     | 0.053 | 1 DC | ASIC1     |
| ACOT13.1  | 0.001271 | -0.22142 | 0.112 | 0.219 | 1 DC | ACOT13    |
| LRTOMT.1  | 0.001276 | -0.15946 | 0.011 | 0.072 | 1 DC | LRTOMT    |
| KLHL35.2  | 0.001277 | -0.31204 | 0.027 | 0.095 | 1 DC | KLHL35    |
| LPCAT1.1  | 0.001279 | -0.17856 | 0.086 | 0.183 | 1 DC | LPCAT1    |
| SEMA3E    | 0.001282 | -0.12435 | 0     | 0.053 | 1 DC | SEMA3E    |
| LRRTM3.1  | 0.001295 | -0.10433 | 0     | 0.053 | 1 DC | LRRTM3    |
| ERBB2IP.2 | 0.001296 | -0.18518 | 0.118 | 0.223 | 1 DC | ERBB2IP   |
| GRWD1     | 0.001297 | -0.149   | 0.064 | 0.156 | 1 DC | GRWD1     |
| DUSP6     | 0.001298 | -0.23848 | 0.134 | 0.246 | 1 DC | DUSP6     |
| POLR1C.3  | 0.001302 | -0.18646 | 0.043 | 0.123 | 1 DC | POLR1C    |
| HIP1.1    | 0.001305 | -0.17816 | 0.075 | 0.169 | 1 DC | HIP1      |
| TRIM23    | 0.001306 | -0.1508  | 0.016 | 0.081 | 1 DC | TRIM23    |
| NOP10.3   | 0.001307 | 0.126707 | 0.695 | 0.605 | 1 DC | NOP10     |
| SPC25.3   | 0.001308 | -0.19767 | 0.005 | 0.062 | 1 DC | SPC25     |
| MTFR1L.2  | 0.00131  | -0.22138 | 0.171 | 0.292 | 1 DC | MTFR1L    |
| UNC50.2   | 0.00131  | -0.25104 | 0.225 | 0.357 | 1 DC | UNC50     |
| ITGB3BP.1 | 0.001315 | -0.21375 | 0.059 | 0.144 | 1 DC | ITGB3BP   |
| STK32B.1  | 0.001316 | -0.12214 | 0.005 | 0.063 | 1 DC | STK32B    |
| NHLRC3.1  | 0.001317 | -0.21232 | 0.155 | 0.272 | 1 DC | NHLRC3    |
| UROD.2    | 0.001319 | -0.27232 | 0.23  | 0.361 | 1 DC | UROD      |
| SKA2.1    | 0.00132  | -0.23006 | 0.187 | 0.309 | 1 DC | SKA2      |
| SMO.1     | 0.00132  | -0.10737 | 0     | 0.052 | 1 DC | SMO       |



|           |          |          |       |       |      |              |
|-----------|----------|----------|-------|-------|------|--------------|
| NAA16.1   | 0.001322 | -0.16853 | 0.043 | 0.122 | 1 DC | NAA16        |
| TSEN2.2   | 0.001323 | -0.15716 | 0.021 | 0.089 | 1 DC | TSEN2        |
| TRAPPC4.2 | 0.001327 | -0.28754 | 0.316 | 0.447 | 1 DC | TRAPPC4      |
| TBC1D24.1 | 0.001331 | -0.1215  | 0.011 | 0.072 | 1 DC | TBC1D24      |
| PRRT1     | 0.001333 | -0.13724 | 0     | 0.052 | 1 DC | PRRT1        |
| C1orf43   | 0.001333 | 0.127882 | 0.679 | 0.595 | 1 DC | C1orf43      |
| CTD-3184A | 0.001335 | -0.13001 | 0.027 | 0.098 | 1 DC | CTD-3184A7.4 |
| C6orf120. | 0.001336 | -0.13552 | 0.053 | 0.139 | 1 DC | C6orf120     |
| CDCA7L.2  | 0.001344 | -0.22296 | 0.064 | 0.15  | 1 DC | CDCA7L       |
| FGF14-AS2 | 0.001359 | -0.13352 | 0     | 0.052 | 1 DC | FGF14-AS2    |
| MRC2.1    | 0.001359 | -0.17396 | 0.08  | 0.175 | 1 DC | MRC2         |
| KCNMA1.2  | 0.001362 | -0.22782 | 0.059 | 0.144 | 1 DC | KCNMA1       |
| FAM126A.1 | 0.001363 | -0.11368 | 0.053 | 0.138 | 1 DC | FAM126A      |
| UBE2R2.3  | 0.001364 | 0.219151 | 0.358 | 0.285 | 1 DC | UBE2R2       |
| RNF8.2    | 0.001365 | -0.1682  | 0.075 | 0.169 | 1 DC | RNF8         |
| JAK1.3    | 0.001367 | 0.264716 | 0.321 | 0.252 | 1 DC | JAK1         |
| BSG.3     | 0.001368 | -0.21029 | 0.733 | 0.742 | 1 DC | BSG          |
| NFYB.1    | 0.00137  | -0.15294 | 0.086 | 0.185 | 1 DC | NFYB         |
| XPA.1     | 0.001371 | -0.20084 | 0.118 | 0.223 | 1 DC | XPA          |
| PGBD1.1   | 0.001372 | -0.12136 | 0.011 | 0.072 | 1 DC | PGBD1        |
| NR3C1.3   | 0.001376 | 0.266273 | 0.321 | 0.247 | 1 DC | NR3C1        |
| TUSC1.2   | 0.001379 | -0.18662 | 0.016 | 0.079 | 1 DC | TUSC1        |
| ZNF703.3  | 0.00138  | -0.14408 | 0.027 | 0.099 | 1 DC | ZNF703       |
| PAQR4.3   | 0.00138  | -0.20225 | 0.075 | 0.165 | 1 DC | PAQR4        |
| ROMO1.2   | 0.001381 | -0.24454 | 0.487 | 0.597 | 1 DC | ROMO1        |
| ADH5.1    | 0.001382 | -0.24521 | 0.257 | 0.391 | 1 DC | ADH5         |
| CENPB.1   | 0.001383 | -0.15145 | 0.032 | 0.106 | 1 DC | CENPB        |
| SOAT1.3   | 0.001384 | 0.149766 | 0.283 | 0.196 | 1 DC | SOAT1        |
| RP1-79C4. | 0.001386 | -0.10739 | 0     | 0.052 | 1 DC | RP1-79C4.4   |
| MCAT.2    | 0.00139  | -0.12624 | 0.048 | 0.13  | 1 DC | MCAT         |
| ERGIC1.1  | 0.001393 | 0.226214 | 0.358 | 0.288 | 1 DC | ERGIC1       |
| TRAF1     | 0.001397 | 0.159326 | 0.059 | 0.023 | 1 DC | TRAF1        |
| EFNA2.1   | 0.001399 | -0.12136 | 0     | 0.052 | 1 DC | EFNA2        |
| CSNK2A1.1 | 0.001403 | -0.18675 | 0.193 | 0.318 | 1 DC | CSNK2A1      |
| DDX23.1   | 0.001404 | -0.18058 | 0.07  | 0.16  | 1 DC | DDX23        |
| AMPD2.2   | 0.001405 | 0.218174 | 0.225 | 0.151 | 1 DC | AMPD2        |
| C1orf216. | 0.001408 | -0.15691 | 0.048 | 0.129 | 1 DC | C1orf216     |
| FAM73A    | 0.001408 | -0.14334 | 0.021 | 0.089 | 1 DC | FAM73A       |
| MED12L.1  | 0.001409 | -0.10872 | 0.005 | 0.062 | 1 DC | MED12L       |
| CPNE5.1   | 0.001413 | -0.11071 | 0     | 0.052 | 1 DC | CPNE5        |
| THBS4.1   | 0.001413 | -0.12216 | 0     | 0.052 | 1 DC | THBS4        |
| CA14.2    | 0.001413 | -0.19655 | 0     | 0.052 | 1 DC | CA14         |
| FAM134A.3 | 0.001414 | -0.21368 | 0.176 | 0.3   | 1 DC | FAM134A      |
| WHSC1L1.3 | 0.001415 | -0.22435 | 0.246 | 0.375 | 1 DC | WHSC1L1      |
| PCNA.1    | 0.001418 | -0.23644 | 0.193 | 0.317 | 1 DC | PCNA         |
| C1orf35.2 | 0.001419 | -0.15875 | 0.15  | 0.265 | 1 DC | C1orf35      |
| PDE9A.1   | 0.001421 | -0.11584 | 0.011 | 0.072 | 1 DC | PDE9A        |
| SLC46A1.2 | 0.001422 | -0.14768 | 0.005 | 0.062 | 1 DC | SLC46A1      |
| POLDIP2.3 | 0.001422 | -0.1747  | 0.219 | 0.349 | 1 DC | POLDIP2      |
| CACNB3.1  | 0.001424 | -0.14033 | 0.005 | 0.061 | 1 DC | CACNB3       |
| HOOK2.1   | 0.001425 | -0.17198 | 0.123 | 0.236 | 1 DC | HOOK2        |

|           |          |          |       |       |      |              |
|-----------|----------|----------|-------|-------|------|--------------|
| PRKD1     | 0.001427 | -0.11082 | 0     | 0.052 | 1 DC | PRKD1        |
| C19orf53. | 0.001428 | -0.23172 | 0.615 | 0.684 | 1 DC | C19orf53     |
| YTHDF2.1  | 0.001431 | -0.22787 | 0.299 | 0.433 | 1 DC | YTHDF2       |
| EXOC6.2   | 0.001436 | 0.194707 | 0.118 | 0.063 | 1 DC | EXOC6        |
| CCT8.1    | 0.001438 | 0.129185 | 0.61  | 0.534 | 1 DC | CCT8         |
| GABBR1.2  | 0.001442 | -0.1502  | 0.016 | 0.08  | 1 DC | GABBR1       |
| UBA7.3    | 0.001444 | 0.179513 | 0.144 | 0.081 | 1 DC | UBA7         |
| AARS.1    | 0.001445 | -0.15937 | 0.123 | 0.232 | 1 DC | AARS         |
| PSMD7     | 0.001447 | 0.180131 | 0.545 | 0.489 | 1 DC | PSMD7        |
| MORN4.2   | 0.001455 | -0.12698 | 0     | 0.052 | 1 DC | MORN4        |
| DUSP8.1   | 0.001455 | -0.15165 | 0     | 0.052 | 1 DC | DUSP8        |
| COG6      | 0.001463 | -0.18884 | 0.027 | 0.096 | 1 DC | COG6         |
| BAZ1A.3   | 0.001464 | 0.168955 | 0.401 | 0.319 | 1 DC | BAZ1A        |
| EHD1.2    | 0.001471 | -0.129   | 0.043 | 0.123 | 1 DC | EHD1         |
| MORC4.1   | 0.001472 | -0.11482 | 0.005 | 0.062 | 1 DC | MORC4        |
| FIBP.1    | 0.001478 | 0.16304  | 0.556 | 0.481 | 1 DC | FIBP         |
| BMF       | 0.001478 | 0.137307 | 0.053 | 0.02  | 1 DC | BMF          |
| ZNF618.3  | 0.00148  | 0.128922 | 0.096 | 0.047 | 1 DC | ZNF618       |
| SORBS2.1  | 0.001484 | -0.17969 | 0     | 0.051 | 1 DC | SORBS2       |
| ZFAND2A.3 | 0.001484 | -0.24983 | 0.166 | 0.285 | 1 DC | ZFAND2A      |
| SASH1     | 0.001484 | -0.14699 | 0.011 | 0.071 | 1 DC | SASH1        |
| SPEG.1    | 0.001492 | -0.12973 | 0.011 | 0.071 | 1 DC | SPEG         |
| RBM39.1   | 0.001494 | 0.104357 | 0.77  | 0.652 | 1 DC | RBM39        |
| B3GALT1.1 | 0.001498 | -0.10283 | 0     | 0.051 | 1 DC | B3GALT1      |
| LTBP1.1   | 0.001498 | -0.1109  | 0     | 0.051 | 1 DC | LTBP1        |
| ZNF14     | 0.001498 | -0.13841 | 0     | 0.051 | 1 DC | ZNF14        |
| FGF9.2    | 0.001498 | -0.18535 | 0     | 0.051 | 1 DC | FGF9         |
| CARS.1    | 0.001502 | -0.24386 | 0.118 | 0.221 | 1 DC | CARS         |
| UBE2E3.2  | 0.001503 | -0.20996 | 0.337 | 0.462 | 1 DC | UBE2E3       |
| PRSS23.1  | 0.001515 | -0.25856 | 0.016 | 0.079 | 1 DC | PRSS23       |
| NCS1.1    | 0.001518 | -0.11005 | 0.005 | 0.061 | 1 DC | NCS1         |
| TOP2A.3   | 0.001519 | -0.2146  | 0.021 | 0.087 | 1 DC | TOP2A        |
| EFNA3     | 0.001521 | -0.18611 | 0.005 | 0.061 | 1 DC | EFNA3        |
| AC093323. | 0.001521 | -0.13419 | 0.027 | 0.097 | 1 DC | AC093323.3   |
| TMEM123.2 | 0.001523 | 0.226037 | 0.46  | 0.395 | 1 DC | TMEM123      |
| VGf.1     | 0.001525 | -0.2129  | 0.011 | 0.07  | 1 DC | VGf          |
| LCA5      | 0.001527 | -0.12331 | 0     | 0.051 | 1 DC | LCA5         |
| TMEM38A.2 | 0.001527 | -0.1495  | 0     | 0.051 | 1 DC | TMEM38A      |
| ARMC9.1   | 0.00153  | -0.15484 | 0.011 | 0.07  | 1 DC | ARMC9        |
| RP11-305L | 0.001537 | 0.112554 | 0.032 | 0.009 | 1 DC | RP11-305L7.3 |
| BST1      | 0.001539 | 0.17251  | 0.08  | 0.037 | 1 DC | BST1         |
| CLTC.2    | 0.001541 | -0.17979 | 0.219 | 0.351 | 1 DC | CLTC         |
| MVK       | 0.001543 | -0.15324 | 0.016 | 0.079 | 1 DC | MVK          |
| C8orf44   | 0.001545 | -0.13401 | 0.005 | 0.061 | 1 DC | C8orf44      |
| TTC7A.3   | 0.001546 | 0.185532 | 0.134 | 0.074 | 1 DC | TTC7A        |
| ARHGEF10  | 0.001553 | -0.20364 | 0.011 | 0.07  | 1 DC | ARHGEF10     |
| COA5.1    | 0.001555 | -0.18431 | 0.182 | 0.308 | 1 DC | COA5         |
| TMEFF2.3  | 0.001557 | -0.22301 | 0.016 | 0.079 | 1 DC | TMEFF2       |
| ARPP21.1  | 0.001557 | -0.1629  | 0     | 0.051 | 1 DC | ARPP21       |
| LZTS1.2   | 0.001565 | -0.12571 | 0.005 | 0.061 | 1 DC | LZTS1        |
| NUDT10    | 0.001573 | -0.1542  | 0     | 0.051 | 1 DC | NUDT10       |

|           |          |          |       |       |      |            |
|-----------|----------|----------|-------|-------|------|------------|
| ZCCHC6.3  | 0.001578 | 0.192444 | 0.209 | 0.134 | 1 DC | ZCCHC6     |
| PDXK.3    | 0.001581 | 0.176988 | 0.364 | 0.283 | 1 DC | PDXK       |
| PPCS      | 0.001584 | 0.126173 | 0.406 | 0.319 | 1 DC | PPCS       |
| CCDC58.1  | 0.001586 | -0.12677 | 0.059 | 0.145 | 1 DC | CCDC58     |
| SGIP1     | 0.001588 | -0.18386 | 0     | 0.051 | 1 DC | SGIP1      |
| HNRNPH2.2 | 0.001588 | 0.150888 | 0.476 | 0.399 | 1 DC | HNRNPH2    |
| DGKA      | 0.001588 | 0.122503 | 0.08  | 0.037 | 1 DC | DGKA       |
| NAA30.2   | 0.00159  | -0.16188 | 0.021 | 0.088 | 1 DC | NAA30      |
| DYNC2LI1. | 0.001591 | -0.21623 | 0.075 | 0.166 | 1 DC | DYNC2LI1   |
| FAM104A.1 | 0.001594 | -0.1487  | 0.128 | 0.242 | 1 DC | FAM104A    |
| COMMD2.1  | 0.001597 | -0.21253 | 0.171 | 0.291 | 1 DC | COMMD2     |
| PADI2.3   | 0.001598 | 0.119432 | 0.219 | 0.133 | 1 DC | PADI2      |
| NSA2.3    | 0.001602 | 0.22731  | 0.455 | 0.397 | 1 DC | NSA2       |
| PPP4C.2   | 0.001609 | 0.175309 | 0.599 | 0.542 | 1 DC | PPP4C      |
| PHACTR2.3 | 0.001611 | 0.277755 | 0.139 | 0.082 | 1 DC | PHACTR2    |
| TTC8.1    | 0.001612 | -0.14553 | 0.021 | 0.088 | 1 DC | TTC8       |
| ARHGEF7.2 | 0.00162  | -0.148   | 0.07  | 0.159 | 1 DC | ARHGEF7    |
| C16orf91. | 0.001621 | -0.16644 | 0.096 | 0.197 | 1 DC | C16orf91   |
| NPHP1.1   | 0.00163  | -0.14125 | 0.011 | 0.07  | 1 DC | NPHP1      |
| ZNF660    | 0.001635 | -0.11913 | 0     | 0.05  | 1 DC | ZNF660     |
| WDR73.1   | 0.001637 | -0.18748 | 0.059 | 0.143 | 1 DC | WDR73      |
| COX5B.3   | 0.001641 | -0.14111 | 0.904 | 0.847 | 1 DC | COX5B      |
| PSEN2.1   | 0.001645 | -0.15389 | 0.037 | 0.113 | 1 DC | PSEN2      |
| BROX.3    | 0.001646 | 0.272782 | 0.299 | 0.234 | 1 DC | BROX       |
| ACTL6A.1  | 0.001646 | -0.25108 | 0.15  | 0.259 | 1 DC | ACTL6A     |
| FNTB.1    | 0.001649 | -0.19212 | 0.021 | 0.087 | 1 DC | FNTB       |
| INTU      | 0.00165  | -0.143   | 0.011 | 0.07  | 1 DC | INTU       |
| SLC25A18. | 0.00165  | -0.11719 | 0.021 | 0.088 | 1 DC | SLC25A18   |
| DNAL1     | 0.001655 | -0.10289 | 0.032 | 0.105 | 1 DC | DNAL1      |
| SRD5A3.3  | 0.001656 | 0.23221  | 0.235 | 0.161 | 1 DC | SRD5A3     |
| RINT1.1   | 0.001656 | -0.16771 | 0.027 | 0.096 | 1 DC | RINT1      |
| MRPS23.1  | 0.001661 | -0.2352  | 0.235 | 0.369 | 1 DC | MRPS23     |
| ZNF620    | 0.001662 | -0.1486  | 0.005 | 0.06  | 1 DC | ZNF620     |
| KRI1      | 0.001662 | -0.11436 | 0.032 | 0.105 | 1 DC | KRI1       |
| ZNF625    | 0.001667 | -0.12203 | 0     | 0.05  | 1 DC | ZNF625     |
| ANKRD13B. | 0.001667 | -0.1252  | 0     | 0.05  | 1 DC | ANKRD13B   |
| CACNG4    | 0.001667 | -0.13511 | 0     | 0.05  | 1 DC | CACNG4     |
| GNAI3.2   | 0.00167  | 0.172485 | 0.46  | 0.392 | 1 DC | GNAI3      |
| IL32.1    | 0.00167  | -0.41071 | 0.032 | 0.101 | 1 DC | IL32       |
| CYP3A5    | 0.00167  | -0.13835 | 0.005 | 0.06  | 1 DC | CYP3A5     |
| PIH1D1.1  | 0.001675 | -0.23981 | 0.257 | 0.392 | 1 DC | PIH1D1     |
| AC109826. | 0.001679 | 0.168836 | 0.08  | 0.036 | 1 DC | AC109826.1 |
| GYG1.1    | 0.001679 | 0.250874 | 0.326 | 0.253 | 1 DC | GYG1       |
| ST3GAL3.1 | 0.00168  | -0.14531 | 0.021 | 0.087 | 1 DC | ST3GAL3    |
| C19orf25. | 0.001681 | -0.16668 | 0.176 | 0.301 | 1 DC | C19orf25   |
| TPT1.3    | 0.001682 | -0.17833 | 0.995 | 0.952 | 1 DC | TPT1       |
| SLC25A17. | 0.001684 | -0.17875 | 0.07  | 0.158 | 1 DC | SLC25A17   |
| PARD3.1   | 0.001691 | -0.10214 | 0.005 | 0.06  | 1 DC | PARD3      |
| DHX33.1   | 0.001694 | -0.10449 | 0.043 | 0.122 | 1 DC | DHX33      |
| MBIP.2    | 0.001695 | -0.19473 | 0.086 | 0.181 | 1 DC | MBIP       |
| CAPNS1.2  | 0.001702 | 0.205207 | 0.406 | 0.338 | 1 DC | CAPNS1     |

|            |          |          |       |       |      |               |
|------------|----------|----------|-------|-------|------|---------------|
| FIZ1. 1    | 0.001716 | -0.11802 | 0     | 0.05  | 1 DC | FIZ1          |
| ZNF212     | 0.00172  | -0.16357 | 0.011 | 0.069 | 1 DC | ZNF212        |
| ZNF530. 1  | 0.001723 | -0.13415 | 0.005 | 0.06  | 1 DC | ZNF530        |
| BCKDK. 3   | 0.001724 | 0.175337 | 0.39  | 0.313 | 1 DC | BCKDK         |
| CTC-338M1  | 0.001725 | -0.177   | 0.011 | 0.07  | 1 DC | CTC-338M12. 5 |
| STARD10    | 0.001733 | -0.14148 | 0.016 | 0.079 | 1 DC | STARD10       |
| RFC4. 1    | 0.001735 | -0.18092 | 0.07  | 0.158 | 1 DC | RFC4          |
| TMEM97. 1  | 0.001735 | -0.16385 | 0.08  | 0.173 | 1 DC | TMEM97        |
| REX02. 3   | 0.001741 | -0.34175 | 0.203 | 0.321 | 1 DC | REX02         |
| CCZ1B. 2   | 0.001741 | -0.12701 | 0.064 | 0.153 | 1 DC | CCZ1B         |
| WDR5. 1    | 0.001741 | -0.13285 | 0.043 | 0.12  | 1 DC | WDR5          |
| SNW1       | 0.001745 | 0.204665 | 0.417 | 0.352 | 1 DC | SNW1          |
| ANKRD50. 1 | 0.00175  | -0.12522 | 0     | 0.05  | 1 DC | ANKRD50       |
| ABHD14B. 2 | 0.001753 | 0.161869 | 0.257 | 0.178 | 1 DC | ABHD14B       |
| PRADC1. 2  | 0.001756 | -0.16476 | 0.112 | 0.218 | 1 DC | PRADC1        |
| B3GNT7     | 0.001757 | 0.183833 | 0.064 | 0.027 | 1 DC | B3GNT7        |
| ESYT1. 3   | 0.001758 | 0.213275 | 0.187 | 0.119 | 1 DC | ESYT1         |
| GSG1L      | 0.001761 | -0.18444 | 0.005 | 0.06  | 1 DC | GSG1L         |
| ZNF529. 1  | 0.001762 | -0.15828 | 0.005 | 0.06  | 1 DC | ZNF529        |
| CENPF. 3   | 0.001762 | -0.25705 | 0.032 | 0.102 | 1 DC | CENPF         |
| PHLDB1. 3  | 0.001764 | -0.1651  | 0.059 | 0.143 | 1 DC | PHLDB1        |
| ERCC6L2. 1 | 0.00178  | -0.10145 | 0.021 | 0.087 | 1 DC | ERCC6L2       |
| ADNP. 2    | 0.001784 | -0.11377 | 0.096 | 0.194 | 1 DC | ADNP          |
| EPB41L5. 1 | 0.001784 | -0.13391 | 0     | 0.05  | 1 DC | EPB41L5       |
| SPC24. 3   | 0.001784 | -0.15253 | 0     | 0.05  | 1 DC | SPC24         |
| ARPP19. 1  | 0.001793 | -0.25848 | 0.289 | 0.428 | 1 DC | ARPP19        |
| PURA. 2    | 0.001794 | -0.17114 | 0.107 | 0.21  | 1 DC | PURA          |
| MED16. 2   | 0.001794 | -0.11781 | 0.07  | 0.16  | 1 DC | MED16         |
| RGL1. 2    | 0.001795 | -0.16014 | 0.021 | 0.087 | 1 DC | RGL1          |
| PGRMC2. 2  | 0.001796 | -0.17419 | 0.123 | 0.227 | 1 DC | PGRMC2        |
| COBL. 1    | 0.001798 | -0.18079 | 0.011 | 0.068 | 1 DC | COBL          |
| NUP62. 3   | 0.001798 | -0.22201 | 0.134 | 0.239 | 1 DC | NUP62         |
| ZNF776     | 0.0018   | -0.12236 | 0.005 | 0.06  | 1 DC | ZNF776        |
| MARC1. 1   | 0.001806 | -0.11475 | 0.005 | 0.06  | 1 DC | 1-Mar         |
| TMEM161A.  | 0.001808 | -0.15617 | 0.08  | 0.173 | 1 DC | TMEM161A      |
| RNF25      | 0.001811 | -0.16364 | 0.032 | 0.103 | 1 DC | RNF25         |
| RNF26. 1   | 0.001812 | -0.12347 | 0.07  | 0.159 | 1 DC | RNF26         |
| PRR3. 1    | 0.001816 | -0.14474 | 0.032 | 0.104 | 1 DC | PRR3          |
| RNF182. 1  | 0.001819 | -0.1275  | 0     | 0.05  | 1 DC | RNF182        |
| GPR137C    | 0.001819 | -0.13608 | 0     | 0.05  | 1 DC | GPR137C       |
| KCTD7. 1   | 0.001822 | -0.14806 | 0.005 | 0.06  | 1 DC | KCTD7         |
| EMP2. 1    | 0.001823 | -0.2751  | 0.037 | 0.109 | 1 DC | EMP2          |
| ADCK4. 1   | 0.001824 | -0.13113 | 0.048 | 0.128 | 1 DC | ADCK4         |
| GOSR2. 1   | 0.001825 | -0.18346 | 0.091 | 0.187 | 1 DC | GOSR2         |
| MON1A. 1   | 0.001826 | -0.11731 | 0.021 | 0.087 | 1 DC | MON1A         |
| SIRT3. 1   | 0.001827 | -0.1146  | 0.032 | 0.104 | 1 DC | SIRT3         |
| GPR162. 1  | 0.001827 | -0.16203 | 0.032 | 0.103 | 1 DC | GPR162        |
| CD40. 3    | 0.001829 | 0.208758 | 0.123 | 0.066 | 1 DC | CD40          |
| IL4R. 3    | 0.001832 | 0.195119 | 0.128 | 0.07  | 1 DC | IL4R          |
| PPIL1. 2   | 0.001834 | -0.16901 | 0.096 | 0.196 | 1 DC | PPIL1         |
| IFIT3. 3   | 0.001838 | -0.23504 | 0.037 | 0.109 | 1 DC | IFIT3         |

|           |    |          |          |       |       |      |                |
|-----------|----|----------|----------|-------|-------|------|----------------|
| AC004069. | 0. | 0.001841 | 0.125937 | 0.053 | 0.021 | 1 DC | AC004069.2     |
| ABHD17B.  | 3  | 0.001842 | -0.19778 | 0.048 | 0.126 | 1 DC | ABHD17B        |
| C17orf51. | 0. | 0.001851 | -0.12421 | 0.011 | 0.069 | 1 DC | C17orf51       |
| SLC35B2.  | 2  | 0.001854 | -0.11573 | 0.176 | 0.302 | 1 DC | SLC35B2        |
| RP11-488L | 0. | 0.001855 | 0.170894 | 0.102 | 0.052 | 1 DC | RP11-488L18.10 |
| TTL.      | 2  | 0.001856 | -0.17237 | 0.043 | 0.119 | 1 DC | TTL            |
| CREB5.    | 2  | 0.001869 | -0.18406 | 0.128 | 0.237 | 1 DC | CREB5          |
| GARS.     | 3  | 0.001871 | -0.13393 | 0.176 | 0.295 | 1 DC | GARS           |
| TSC22D4.  | 3  | 0.001873 | -0.43173 | 0.385 | 0.471 | 1 DC | TSC22D4        |
| MYT1L.    | 3  | 0.001883 | -0.16864 | 0.005 | 0.06  | 1 DC | MYT1L          |
| SEPN1.    | 2  | 0.001885 | -0.14029 | 0.107 | 0.211 | 1 DC | SEPN1          |
| ZNF268.   | 1  | 0.001898 | -0.18563 | 0.043 | 0.118 | 1 DC | ZNF268         |
| SEPT3.    | 2  | 0.001899 | -0.17075 | 0.011 | 0.068 | 1 DC | 3-Sep          |
| POLDIP3.  | 2  | 0.001901 | -0.15249 | 0.091 | 0.187 | 1 DC | POLDIP3        |
| EFHD1     | 0. | 0.001903 | -0.26176 | 0.005 | 0.059 | 1 DC | EFHD1          |
| PRRC2C.   | 3  | 0.001903 | 0.134249 | 0.545 | 0.481 | 1 DC | PRRC2C         |
| TDP2.     | 1  | 0.001904 | -0.21796 | 0.091 | 0.184 | 1 DC | TDP2           |
| TANGO2.   | 3  | 0.001905 | 0.192202 | 0.144 | 0.084 | 1 DC | TANGO2         |
| CD36      | 0. | 0.001911 | 0.136056 | 0.043 | 0.015 | 1 DC | CD36           |
| BMPR1A.   | 1  | 0.001913 | -0.13372 | 0.011 | 0.069 | 1 DC | BMPR1A         |
| FOLR2.    | 3  | 0.001928 | -0.605   | 0.102 | 0.179 | 1 DC | FOLR2          |
| LMLN      | 0. | 0.001928 | -0.11276 | 0     | 0.049 | 1 DC | LMLN           |
| SPRY4.    | 1  | 0.001929 | -0.12188 | 0.011 | 0.068 | 1 DC | SPRY4          |
| SEC13.    | 1  | 0.00193  | 0.246177 | 0.428 | 0.367 | 1 DC | SEC13          |
| HMGCS1.   | 1  | 0.00194  | -0.19525 | 0.091 | 0.184 | 1 DC | HMGCS1         |
| POLE4.    | 2  | 0.001944 | 0.234798 | 0.364 | 0.283 | 1 DC | POLE4          |
| SEPT11.   | 3  | 0.001945 | -0.20937 | 0.187 | 0.305 | 1 DC | 11-Sep         |
| GPD1.     | 2  | 0.001947 | -0.2177  | 0     | 0.049 | 1 DC | GPD1           |
| TCF7L2.   | 1  | 0.001951 | -0.14262 | 0.027 | 0.095 | 1 DC | TCF7L2         |
| NEDD9.    | 2  | 0.001953 | 0.225909 | 0.294 | 0.219 | 1 DC | NEDD9          |
| LINC00844 | 0. | 0.001954 | -0.32094 | 0.037 | 0.108 | 1 DC | LINC00844      |
| RBBP9.    | 1  | 0.001955 | -0.11173 | 0.027 | 0.095 | 1 DC | RBBP9          |
| IGBP1.    | 1  | 0.001955 | 0.208282 | 0.417 | 0.344 | 1 DC | IGBP1          |
| OGFOD1    | 0. | 0.001956 | -0.15542 | 0.064 | 0.152 | 1 DC | OGFOD1         |
| IMPAD1.   | 1  | 0.001956 | -0.16325 | 0.091 | 0.188 | 1 DC | IMPAD1         |
| RPRM.     | 3  | 0.001958 | -0.23492 | 0.011 | 0.067 | 1 DC | RPRM           |
| EID2.     | 2  | 0.001961 | -0.10461 | 0.037 | 0.112 | 1 DC | EID2           |
| SETD5.    | 3  | 0.001965 | -0.15047 | 0.171 | 0.29  | 1 DC | SETD5          |
| DEAF1.    | 2  | 0.001966 | -0.13047 | 0.107 | 0.214 | 1 DC | DEAF1          |
| LASP1.    | 3  | 0.001969 | 0.199809 | 0.283 | 0.208 | 1 DC | LASP1          |
| ZNF692.   | 1  | 0.001971 | -0.16954 | 0.037 | 0.11  | 1 DC | ZNF692         |
| ZNF414.   | 3  | 0.001977 | -0.15096 | 0.091 | 0.187 | 1 DC | ZNF414         |
| PRRC2B.   | 3  | 0.00198  | -0.16352 | 0.128 | 0.238 | 1 DC | PRRC2B         |
| WSB2.     | 3  | 0.001982 | -0.18825 | 0.123 | 0.225 | 1 DC | WSB2           |
| OSTM1.    | 3  | 0.001983 | 0.300126 | 0.294 | 0.227 | 1 DC | OSTM1          |
| LENG1.    | 1  | 0.001984 | -0.15899 | 0.102 | 0.203 | 1 DC | LENG1          |
| TMEM246.  | 1  | 0.001985 | -0.1624  | 0     | 0.049 | 1 DC | TMEM246        |
| CTNNA2.   | 1  | 0.001994 | -0.18021 | 0.005 | 0.059 | 1 DC | CTNNA2         |
| NLK.      | 2  | 0.001996 | -0.12086 | 0.016 | 0.077 | 1 DC | NLK            |
| PLXNA1.   | 1  | 0.001997 | -0.10685 | 0.021 | 0.086 | 1 DC | PLXNA1         |
| SLC41A1   | 0. | 0.002003 | -0.13704 | 0.011 | 0.068 | 1 DC | SLC41A1        |

|           |          |          |       |       |      |                |
|-----------|----------|----------|-------|-------|------|----------------|
| RP11-480C | 0.002005 | -0.27621 | 0     | 0.049 | 1 DC | RP11-480C22.1  |
| PEX11A    | 0.002011 | -0.14863 | 0.005 | 0.059 | 1 DC | PEX11A         |
| ASGR1.3   | 0.002021 | 0.201054 | 0.128 | 0.072 | 1 DC | ASGR1          |
| DLG2      | 0.002024 | -0.16006 | 0     | 0.049 | 1 DC | DLG2           |
| FGF12     | 0.002024 | -0.19631 | 0     | 0.049 | 1 DC | FGF12          |
| CD109     | 0.002026 | 0.125872 | 0.059 | 0.024 | 1 DC | CD109          |
| GGA1.3    | 0.002026 | 0.276936 | 0.358 | 0.288 | 1 DC | GGA1           |
| TLR4.2    | 0.002028 | 0.119993 | 0.086 | 0.04  | 1 DC | TLR4           |
| ZNF341    | 0.002029 | 0.162094 | 0.048 | 0.018 | 1 DC | ZNF341         |
| COG1.2    | 0.002033 | -0.13794 | 0.037 | 0.111 | 1 DC | COG1           |
| ZNF638.2  | 0.002038 | -0.17858 | 0.144 | 0.253 | 1 DC | ZNF638         |
| TTC26.2   | 0.002044 | -0.14912 | 0     | 0.048 | 1 DC | TTC26          |
| RP11-398K | 0.002047 | -0.13354 | 0.016 | 0.077 | 1 DC | RP11-398K22.12 |
| ZYG11B.3  | 0.002047 | -0.12529 | 0.064 | 0.15  | 1 DC | ZYG11B         |
| SEC14L1.2 | 0.00205  | 0.30995  | 0.358 | 0.291 | 1 DC | SEC14L1        |
| CROT.2    | 0.002058 | -0.16274 | 0.053 | 0.133 | 1 DC | CROT           |
| ZNF398.2  | 0.002061 | -0.14067 | 0.005 | 0.058 | 1 DC | ZNF398         |
| RBM18.1   | 0.002062 | -0.14021 | 0.107 | 0.208 | 1 DC | RBM18          |
| ZNF853.1  | 0.002064 | -0.10423 | 0     | 0.048 | 1 DC | ZNF853         |
| WWC3.1    | 0.002064 | -0.12354 | 0     | 0.048 | 1 DC | WWC3           |
| EMC9      | 0.002066 | -0.20501 | 0.086 | 0.178 | 1 DC | EMC9           |
| NAT9.1    | 0.002079 | -0.22893 | 0.107 | 0.204 | 1 DC | NAT9           |
| UBE2G1.3  | 0.002081 | -0.12966 | 0.144 | 0.26  | 1 DC | UBE2G1         |
| WBP4.2    | 0.002089 | -0.16562 | 0.182 | 0.307 | 1 DC | WBP4           |
| ACOX3.1   | 0.002094 | -0.15955 | 0.027 | 0.093 | 1 DC | ACOX3          |
| SLC12A5.3 | 0.002104 | -0.18913 | 0.027 | 0.093 | 1 DC | SLC12A5        |
| SLC16A9.1 | 0.002104 | -0.10739 | 0     | 0.048 | 1 DC | SLC16A9        |
| RPGRIP1L  | 0.002107 | -0.13789 | 0.005 | 0.058 | 1 DC | RPGRIP1L       |
| ZBED5.2   | 0.002109 | -0.14216 | 0.086 | 0.18  | 1 DC | ZBED5          |
| C8orf59.1 | 0.002116 | 0.159708 | 0.455 | 0.392 | 1 DC | C8orf59        |
| DHRS7B    | 0.002122 | -0.1372  | 0.091 | 0.188 | 1 DC | DHRS7B         |
| NEK11.1   | 0.002125 | -0.13759 | 0     | 0.048 | 1 DC | NEK11          |
| CCDC77    | 0.002125 | -0.14681 | 0.005 | 0.058 | 1 DC | CCDC77         |
| TPMT.1    | 0.002133 | 0.200381 | 0.267 | 0.19  | 1 DC | TPMT           |
| MAPK7.1   | 0.00214  | -0.1285  | 0.048 | 0.126 | 1 DC | MAPK7          |
| ZNF273.2  | 0.002141 | -0.17709 | 0.021 | 0.085 | 1 DC | ZNF273         |
| FGFR2.1   | 0.002145 | -0.20274 | 0     | 0.048 | 1 DC | FGFR2          |
| ACTR6     | 0.002146 | -0.15684 | 0.128 | 0.236 | 1 DC | ACTR6          |
| ZNF514.1  | 0.002155 | -0.16353 | 0.021 | 0.085 | 1 DC | ZNF514         |
| PRKCZ.3   | 0.002161 | -0.15    | 0.032 | 0.101 | 1 DC | PRKCZ          |
| C5orf30.1 | 0.002162 | -0.15757 | 0.016 | 0.076 | 1 DC | C5orf30        |
| ZNF454.1  | 0.002166 | -0.11942 | 0     | 0.048 | 1 DC | ZNF454         |
| RAB30.1   | 0.002172 | -0.13283 | 0.016 | 0.076 | 1 DC | RAB30          |
| LUC7L.1   | 0.002174 | -0.20917 | 0.139 | 0.247 | 1 DC | LUC7L          |
| TSEN15.1  | 0.002187 | -0.1409  | 0.128 | 0.235 | 1 DC | TSEN15         |
| PDZD4.1   | 0.002187 | -0.13259 | 0     | 0.048 | 1 DC | PDZD4          |
| GTF3C4.1  | 0.002188 | -0.11512 | 0.011 | 0.067 | 1 DC | GTF3C4         |
| RP11-195F | 0.002189 | -0.21988 | 0.027 | 0.092 | 1 DC | RP11-195F19.5  |
| KLHL20    | 0.002194 | -0.16886 | 0.059 | 0.14  | 1 DC | KLHL20         |
| PTPN13.1  | 0.002196 | -0.11805 | 0.027 | 0.094 | 1 DC | PTPN13         |
| URGCP     | 0.002198 | -0.17548 | 0.043 | 0.117 | 1 DC | URGCP          |

|            |           |           |        |        |      |                |
|------------|-----------|-----------|--------|--------|------|----------------|
| TDRD3. 1   | 0. 0022   | -0. 13176 | 0. 027 | 0. 093 | 1 DC | TDRD3          |
| SRGAP3. 2  | 0. 002219 | -0. 19193 | 0. 064 | 0. 147 | 1 DC | SRGAP3         |
| COQ10A     | 0. 002221 | -0. 11333 | 0. 032 | 0. 102 | 1 DC | COQ10A         |
| RAF1. 3    | 0. 002224 | -0. 14758 | 0. 16  | 0. 279 | 1 DC | RAF1           |
| SAMD10     | 0. 00223  | -0. 1009  | 0. 005 | 0. 058 | 1 DC | SAMD10         |
| SESTD1. 2  | 0. 00223  | -0. 19153 | 0. 075 | 0. 16  | 1 DC | SESTD1         |
| BLOC1S2. 2 | 0. 002236 | 0. 179601 | 0. 439 | 0. 367 | 1 DC | BLOC1S2        |
| FUNDC1. 2  | 0. 002258 | -0. 2019  | 0. 139 | 0. 247 | 1 DC | FUNDC1         |
| DMTF1. 1   | 0. 002262 | -0. 14153 | 0. 064 | 0. 149 | 1 DC | DMTF1          |
| ASCC2. 2   | 0. 002266 | 0. 294041 | 0. 273 | 0. 204 | 1 DC | ASCC2          |
| METTL14. 1 | 0. 002269 | -0. 13678 | 0. 027 | 0. 093 | 1 DC | METTL14        |
| XKR4. 1    | 0. 002272 | -0. 1473  | 0. 005 | 0. 058 | 1 DC | XKR4           |
| RITA1. 1   | 0. 002288 | -0. 15515 | 0. 053 | 0. 133 | 1 DC | RITA1          |
| MLLT4. 2   | 0. 002289 | -0. 11259 | 0. 075 | 0. 163 | 1 DC | MLLT4          |
| THEM6. 1   | 0. 002296 | -0. 14881 | 0. 021 | 0. 084 | 1 DC | THEM6          |
| FIS1. 2    | 0. 0023   | -0. 24326 | 0. 54  | 0. 639 | 1 DC | FIS1           |
| ESCO1      | 0. 002301 | -0. 15075 | 0. 048 | 0. 125 | 1 DC | ESCO1          |
| FAHD1. 1   | 0. 00231  | -0. 16484 | 0. 086 | 0. 177 | 1 DC | FAHD1          |
| CREBZF. 2  | 0. 00231  | -0. 16103 | 0. 053 | 0. 132 | 1 DC | CREBZF         |
| RANBP2. 3  | 0. 002311 | 0. 241307 | 0. 283 | 0. 208 | 1 DC | RANBP2         |
| ARL5B. 3   | 0. 002318 | 0. 224359 | 0. 144 | 0. 086 | 1 DC | ARL5B          |
| CHPF2. 2   | 0. 002327 | -0. 17939 | 0. 07  | 0. 154 | 1 DC | CHPF2          |
| TMCC3. 3   | 0. 00233  | 0. 169832 | 0. 128 | 0. 072 | 1 DC | TMCC3          |
| LINC00116  | 0. 002336 | -0. 1884  | 0. 23  | 0. 367 | 1 DC | LINC00116      |
| IFIT5. 1   | 0. 002338 | -0. 15145 | 0. 021 | 0. 084 | 1 DC | IFIT5          |
| TYW5       | 0. 00236  | -0. 1902  | 0. 027 | 0. 093 | 1 DC | TYW5           |
| PAK7. 2    | 0. 002364 | -0. 15701 | 0      | 0. 047 | 1 DC | PAK7           |
| RLF. 1     | 0. 002366 | 0. 217314 | 0. 166 | 0. 104 | 1 DC | RLF            |
| CCDC66. 2  | 0. 002367 | -0. 13249 | 0. 123 | 0. 231 | 1 DC | CCDC66         |
| TMEM178B.  | 0. 002368 | -0. 13131 | 0. 005 | 0. 057 | 1 DC | TMEM178B       |
| RP11-390E  | 0. 00237  | -0. 10326 | 0. 048 | 0. 126 | 1 DC | RP11-390E23. 6 |
| ZNF580. 2  | 0. 002371 | -0. 16059 | 0. 176 | 0. 293 | 1 DC | ZNF580         |
| BEX5. 1    | 0. 002381 | -0. 31488 | 0. 032 | 0. 097 | 1 DC | BEX5           |
| PIR. 1     | 0. 00239  | -0. 16071 | 0. 005 | 0. 057 | 1 DC | PIR            |
| FDXR. 1    | 0. 002392 | -0. 18115 | 0. 043 | 0. 115 | 1 DC | FDXR           |
| CDKN1C. 3  | 0. 002399 | -0. 21778 | 0. 043 | 0. 115 | 1 DC | CDKN1C         |
| NUCB1. 2   | 0. 002399 | 0. 147256 | 0. 513 | 0. 444 | 1 DC | NUCB1          |
| CASP6. 2   | 0. 00241  | -0. 1495  | 0. 075 | 0. 164 | 1 DC | CASP6          |
| COR07. 3   | 0. 002416 | 0. 246712 | 0. 23  | 0. 157 | 1 DC | COR07          |
| IPO13. 1   | 0. 002419 | -0. 17409 | 0. 037 | 0. 108 | 1 DC | IPO13          |
| SNRPA1. 2  | 0. 002422 | -0. 20067 | 0. 176 | 0. 297 | 1 DC | SNRPA1         |
| ZNF140     | 0. 002433 | -0. 1357  | 0. 037 | 0. 108 | 1 DC | ZNF140         |
| SLC35F6. 3 | 0. 002434 | -0. 18738 | 0. 112 | 0. 211 | 1 DC | SLC35F6        |
| GPATCH2. 1 | 0. 002441 | -0. 17121 | 0. 075 | 0. 163 | 1 DC | GPATCH2        |
| RAPH1. 1   | 0. 002444 | 0. 178493 | 0. 118 | 0. 065 | 1 DC | RAPH1          |
| PLXNA3     | 0. 002445 | -0. 1087  | 0. 011 | 0. 066 | 1 DC | PLXNA3         |
| SAP30L. 2  | 0. 002452 | -0. 10765 | 0. 027 | 0. 093 | 1 DC | SAP30L         |
| RER1. 2    | 0. 002453 | 0. 169395 | 0. 561 | 0. 496 | 1 DC | RER1           |
| DOK4. 1    | 0. 002457 | -0. 12007 | 0      | 0. 047 | 1 DC | DOK4           |
| LEMD1      | 0. 002457 | -0. 14384 | 0      | 0. 047 | 1 DC | LEMD1          |
| TRIP6. 3   | 0. 002463 | -0. 16079 | 0. 139 | 0. 251 | 1 DC | TRIP6          |

|             |          |          |       |       |      |                |
|-------------|----------|----------|-------|-------|------|----------------|
| IMMP2L. 1   | 0.002464 | -0.21627 | 0.064 | 0.146 | 1 DC | IMMP2L         |
| TROVE2. 2   | 0.002465 | -0.22891 | 0.294 | 0.435 | 1 DC | TROVE2         |
| RDH11. 2    | 0.002467 | -0.24505 | 0.267 | 0.39  | 1 DC | RDH11          |
| TLL1        | 0.002469 | -0.15144 | 0.027 | 0.092 | 1 DC | TLL1           |
| RERE. 2     | 0.002471 | -0.18023 | 0.112 | 0.212 | 1 DC | RERE           |
| AKT1S1. 1   | 0.002477 | -0.1136  | 0.134 | 0.242 | 1 DC | AKT1S1         |
| GRID2. 1    | 0.002481 | -0.13776 | 0     | 0.047 | 1 DC | GRID2          |
| MED21       | 0.002481 | -0.21019 | 0.112 | 0.212 | 1 DC | MED21          |
| PLCE1. 1    | 0.002487 | -0.13632 | 0.011 | 0.066 | 1 DC | PLCE1          |
| TF. 3       | 0.002503 | -0.40299 | 0.016 | 0.074 | 1 DC | TF             |
| AC009501. 0 | 0.002506 | -0.41191 | 0.075 | 0.158 | 1 DC | AC009501. 4    |
| ADAR. 2     | 0.002508 | -0.158   | 0.187 | 0.309 | 1 DC | ADAR           |
| CDK2AP2. 2  | 0.002518 | 0.239679 | 0.39  | 0.328 | 1 DC | CDK2AP2        |
| PRPF38B. 3  | 0.002529 | 0.221073 | 0.492 | 0.434 | 1 DC | PRPF38B        |
| CD276. 1    | 0.00254  | -0.17721 | 0.123 | 0.224 | 1 DC | CD276          |
| COG5. 1     | 0.002548 | -0.12176 | 0.032 | 0.101 | 1 DC | COG5           |
| RP11-212F   | 0.002551 | -0.13315 | 0.027 | 0.092 | 1 DC | RP11-212P7. 2  |
| IL17RB. 1   | 0.002555 | -0.15274 | 0     | 0.046 | 1 DC | IL17RB         |
| ARHGEF2. 2  | 0.002557 | -0.25032 | 0.182 | 0.29  | 1 DC | ARHGEF2        |
| TBC1D12. 3  | 0.002561 | 0.183644 | 0.171 | 0.106 | 1 DC | TBC1D12        |
| RAE1. 1     | 0.002564 | -0.17672 | 0.155 | 0.269 | 1 DC | RAE1           |
| SETBP1. 1   | 0.002568 | -0.12628 | 0.016 | 0.075 | 1 DC | SETBP1         |
| GNPAT. 2    | 0.002577 | -0.16574 | 0.134 | 0.241 | 1 DC | GNPAT          |
| BOLA3. 1    | 0.002577 | -0.24868 | 0.214 | 0.337 | 1 DC | BOLA3          |
| RP11-486G   | 0.00258  | -0.12869 | 0     | 0.046 | 1 DC | RP11-486G15. 2 |
| WDR3        | 0.002603 | -0.13126 | 0.032 | 0.101 | 1 DC | WDR3           |
| ABL2. 3     | 0.002603 | 0.227325 | 0.348 | 0.267 | 1 DC | ABL2           |
| AIFM1. 2    | 0.002608 | 0.224682 | 0.209 | 0.144 | 1 DC | AIFM1          |
| NECAP1. 1   | 0.002611 | -0.23406 | 0.107 | 0.2   | 1 DC | NECAP1         |
| GALM. 2     | 0.002613 | 0.203018 | 0.193 | 0.124 | 1 DC | GALM           |
| ZNF131. 2   | 0.002613 | -0.15877 | 0.128 | 0.234 | 1 DC | ZNF131         |
| VPS53. 2    | 0.002614 | -0.19257 | 0.075 | 0.16  | 1 DC | VPS53          |
| FAM172A. 1  | 0.002616 | -0.17705 | 0.102 | 0.198 | 1 DC | FAM172A        |
| INTS5       | 0.00262  | -0.10628 | 0.021 | 0.084 | 1 DC | INTS5          |
| FAM199X. 2  | 0.002621 | -0.11884 | 0.037 | 0.109 | 1 DC | FAM199X        |
| RPIA. 2     | 0.002634 | 0.263984 | 0.257 | 0.187 | 1 DC | RPIA           |
| MAGI3       | 0.002639 | -0.11097 | 0.005 | 0.056 | 1 DC | MAGI3          |
| CHORDC1. 1  | 0.002647 | -0.22653 | 0.118 | 0.214 | 1 DC | CHORDC1        |
| NDFIP1. 3   | 0.002657 | -0.17649 | 0.535 | 0.602 | 1 DC | NDFIP1         |
| FKRP. 1     | 0.002658 | -0.10329 | 0.005 | 0.056 | 1 DC | FKRP           |
| ZNF433      | 0.002664 | -0.12702 | 0.005 | 0.056 | 1 DC | ZNF433         |
| ADAM9. 2    | 0.002667 | -0.20232 | 0.214 | 0.332 | 1 DC | ADAM9          |
| PELP1. 2    | 0.002674 | -0.17336 | 0.07  | 0.152 | 1 DC | PELP1          |
| CLDN10. 1   | 0.002676 | -0.28614 | 0.005 | 0.056 | 1 DC | CLDN10         |
| FRMD3. 1    | 0.002677 | -0.12009 | 0.005 | 0.056 | 1 DC | FRMD3          |
| C2orf69. 3  | 0.002678 | -0.16304 | 0.102 | 0.196 | 1 DC | C2orf69        |
| DLGAP1      | 0.002682 | -0.12741 | 0     | 0.046 | 1 DC | DLGAP1         |
| CDCA5. 1    | 0.002682 | -0.13194 | 0     | 0.046 | 1 DC | CDCA5          |
| ATP6AP1L. 0 | 0.002682 | -0.14621 | 0     | 0.046 | 1 DC | ATP6AP1L       |
| CYSTM1. 3   | 0.002687 | -0.30565 | 0.214 | 0.326 | 1 DC | CYSTM1         |
| PIN1. 1     | 0.002697 | -0.21872 | 0.433 | 0.538 | 1 DC | PIN1           |



|           |          |          |       |       |      |               |
|-----------|----------|----------|-------|-------|------|---------------|
| SPIN1.3   | 0.002701 | -0.15243 | 0.08  | 0.168 | 1 DC | SPIN1         |
| SMARCAD1. | 0.002708 | -0.11258 | 0.037 | 0.108 | 1 DC | SMARCAD1      |
| MAML1.3   | 0.002717 | 0.211121 | 0.182 | 0.116 | 1 DC | MAML1         |
| ZNF324.1  | 0.002718 | -0.13442 | 0.021 | 0.083 | 1 DC | ZNF324        |
| FBX06     | 0.00272  | 0.18467  | 0.128 | 0.074 | 1 DC | FBX06         |
| PUS3.1    | 0.00272  | -0.12764 | 0.043 | 0.115 | 1 DC | PUS3          |
| CSPP1.1   | 0.002721 | -0.14887 | 0.037 | 0.107 | 1 DC | CSPP1         |
| RYK.2     | 0.002736 | -0.14216 | 0.027 | 0.091 | 1 DC | RYK           |
| C1orf50.1 | 0.002738 | -0.19925 | 0.091 | 0.181 | 1 DC | C1orf50       |
| RFX1.2    | 0.002741 | -0.11568 | 0.027 | 0.091 | 1 DC | RFX1          |
| HK3.1     | 0.002745 | 0.106807 | 0.059 | 0.024 | 1 DC | HK3           |
| SIL1.2    | 0.002756 | 0.209689 | 0.326 | 0.253 | 1 DC | SIL1          |
| RAB34.1   | 0.002767 | 0.213616 | 0.369 | 0.282 | 1 DC | RAB34         |
| HIST1H4C. | 0.002769 | -0.31113 | 0.342 | 0.426 | 1 DC | HIST1H4C      |
| SYNDIG1.3 | 0.002774 | -0.20937 | 0.027 | 0.09  | 1 DC | SYNDIG1       |
| RIN1.2    | 0.002776 | -0.11531 | 0.021 | 0.083 | 1 DC | RIN1          |
| FAM229A   | 0.002788 | -0.1205  | 0     | 0.046 | 1 DC | FAM229A       |
| CYFIP2.2  | 0.002791 | -0.16321 | 0.043 | 0.115 | 1 DC | CYFIP2        |
| UBE4A.2   | 0.002795 | -0.13568 | 0.07  | 0.154 | 1 DC | UBE4A         |
| ZNF830.1  | 0.002804 | -0.15607 | 0.096 | 0.192 | 1 DC | ZNF830        |
| NEU4.2    | 0.002809 | -0.23972 | 0.011 | 0.064 | 1 DC | NEU4          |
| ARVCF.1   | 0.00281  | -0.10311 | 0.005 | 0.056 | 1 DC | ARVCF         |
| CCER2.2   | 0.002811 | -0.1765  | 0.005 | 0.056 | 1 DC | CCER2         |
| EIF2B2.1  | 0.002813 | -0.15    | 0.086 | 0.175 | 1 DC | EIF2B2        |
| B4GALNT4  | 0.002815 | -0.11263 | 0     | 0.046 | 1 DC | B4GALNT4      |
| RP5-1177M | 0.002815 | -0.2005  | 0     | 0.046 | 1 DC | RP5-1177M21.1 |
| LOX.1     | 0.002815 | -0.21765 | 0     | 0.046 | 1 DC | LOX           |
| TRMT10C.1 | 0.002815 | -0.19396 | 0.144 | 0.251 | 1 DC | TRMT10C       |
| CLCN4.2   | 0.002828 | -0.1475  | 0.005 | 0.055 | 1 DC | CLCN4         |
| FTSJ2.1   | 0.002836 | -0.18644 | 0.134 | 0.239 | 1 DC | FTSJ2         |
| GRIK3     | 0.002842 | -0.11273 | 0     | 0.046 | 1 DC | GRIK3         |
| ZNF117.1  | 0.002844 | -0.16431 | 0.037 | 0.106 | 1 DC | ZNF117        |
| MFAP3L.1  | 0.002844 | -0.1179  | 0.005 | 0.056 | 1 DC | MFAP3L        |
| DNASE1    | 0.002845 | -0.14709 | 0.021 | 0.083 | 1 DC | DNASE1        |
| LARP1.1   | 0.002851 | -0.15778 | 0.144 | 0.254 | 1 DC | LARP1         |
| PGD.2     | 0.002861 | 0.229577 | 0.358 | 0.292 | 1 DC | PGD           |
| MCF2L.3   | 0.002864 | -0.21156 | 0.032 | 0.097 | 1 DC | MCF2L         |
| UBL4A.2   | 0.002867 | -0.14179 | 0.091 | 0.184 | 1 DC | UBL4A         |
| CASKIN2   | 0.00287  | -0.1107  | 0     | 0.045 | 1 DC | CASKIN2       |
| TIMM8A    | 0.002882 | -0.16667 | 0.032 | 0.099 | 1 DC | TIMM8A        |
| ENKD1.1   | 0.002888 | -0.11798 | 0.011 | 0.065 | 1 DC | ENKD1         |
| PIK3R1.2  | 0.002888 | -0.27396 | 0.209 | 0.309 | 1 DC | PIK3R1        |
| C16orf59. | 0.002898 | -0.11005 | 0     | 0.045 | 1 DC | C16orf59      |
| NEO1.1    | 0.002904 | -0.13981 | 0.016 | 0.073 | 1 DC | NEO1          |
| LRRC61.2  | 0.002913 | -0.1662  | 0.011 | 0.065 | 1 DC | LRRC61        |
| IER5.3    | 0.00292  | 0.222248 | 0.273 | 0.201 | 1 DC | IER5          |
| TMEM87B.2 | 0.00292  | 0.163928 | 0.118 | 0.066 | 1 DC | TMEM87B       |
| TMEM199.1 | 0.002932 | -0.14305 | 0.139 | 0.244 | 1 DC | TMEM199       |
| COL1A2.1  | 0.002934 | 0.122931 | 0.043 | 0.015 | 1 DC | COL1A2        |
| FBX031    | 0.002936 | -0.10892 | 0.005 | 0.055 | 1 DC | FBX031        |
| NUDT16L1. | 0.002937 | -0.14913 | 0.166 | 0.283 | 1 DC | NUDT16L1      |

|            |          |          |       |       |      |          |
|------------|----------|----------|-------|-------|------|----------|
| AP1B1. 3   | 0.002944 | 0.158988 | 0.348 | 0.257 | 1 DC | AP1B1    |
| FAM114A2   | 0.002944 | -0.19577 | 0.053 | 0.128 | 1 DC | FAM114A2 |
| DPYD. 1    | 0.002945 | 0.115938 | 0.166 | 0.099 | 1 DC | DPYD     |
| ZNF136. 1  | 0.002949 | -0.17723 | 0.032 | 0.098 | 1 DC | ZNF136   |
| HSPB1. 2   | 0.002955 | -0.24477 | 0.61  | 0.655 | 1 DC | HSPB1    |
| MAFG. 3    | 0.002964 | -0.19218 | 0.096 | 0.186 | 1 DC | MAFG     |
| ANAPC13. 3 | 0.002965 | -0.23096 | 0.235 | 0.356 | 1 DC | ANAPC13  |
| MARK4. 1   | 0.002969 | -0.12376 | 0.016 | 0.073 | 1 DC | MARK4    |
| CCDC157. 1 | 0.00298  | -0.1181  | 0.005 | 0.055 | 1 DC | CCDC157  |
| CDYL. 3    | 0.00298  | -0.1007  | 0.043 | 0.116 | 1 DC | CDYL     |
| TECPR1. 2  | 0.002983 | -0.13533 | 0.048 | 0.121 | 1 DC | TECPR1   |
| ZNF573     | 0.002986 | -0.13974 | 0.011 | 0.065 | 1 DC | ZNF573   |
| FAM120A. 3 | 0.002991 | 0.248456 | 0.273 | 0.209 | 1 DC | FAM120A  |
| COX6A1. 3  | 0.002992 | -0.15849 | 0.866 | 0.844 | 1 DC | COX6A1   |
| BNIP1. 2   | 0.002995 | -0.19643 | 0.048 | 0.121 | 1 DC | BNIP1    |
| RBM48. 1   | 0.003007 | -0.13015 | 0.027 | 0.091 | 1 DC | RBM48    |
| MKRN3      | 0.003012 | -0.13397 | 0     | 0.045 | 1 DC | MKRN3    |
| SYNGAP1. 1 | 0.003018 | -0.1196  | 0.005 | 0.055 | 1 DC | SYNGAP1  |
| BRAT1. 1   | 0.00302  | -0.18601 | 0.096 | 0.185 | 1 DC | BRAT1    |
| GPX3. 2    | 0.003026 | 0.222797 | 0.225 | 0.152 | 1 DC | GPX3     |
| EN1        | 0.003028 | -0.13224 | 0.011 | 0.065 | 1 DC | EN1      |
| RNF214     | 0.003032 | -0.13812 | 0.037 | 0.107 | 1 DC | RNF214   |
| PCDHB14    | 0.003039 | -0.10055 | 0.005 | 0.055 | 1 DC | PCDHB14  |
| TMEM186. 2 | 0.003043 | -0.17062 | 0.032 | 0.098 | 1 DC | TMEM186  |
| RGN. 2     | 0.003046 | -0.13633 | 0.016 | 0.073 | 1 DC | RGN      |
| STEAP3. 2  | 0.003051 | -0.24826 | 0.08  | 0.163 | 1 DC | STEAP3   |
| RCOR3      | 0.003052 | -0.17126 | 0.053 | 0.129 | 1 DC | RCOR3    |
| RUVBL2     | 0.003055 | -0.20221 | 0.198 | 0.32  | 1 DC | RUVBL2   |
| C11orf74.  | 0.003056 | -0.16338 | 0.086 | 0.173 | 1 DC | C11orf74 |
| HN1. 2     | 0.003059 | -0.21011 | 0.647 | 0.675 | 1 DC | HN1      |
| NR2C2AP. 2 | 0.003061 | -0.18635 | 0.08  | 0.167 | 1 DC | NR2C2AP  |
| MFAP4. 1   | 0.003064 | -0.17627 | 0.005 | 0.055 | 1 DC | MFAP4    |
| BRD7. 2    | 0.00307  | -0.13524 | 0.144 | 0.256 | 1 DC | BRD7     |
| GPR155. 2  | 0.003076 | -0.16786 | 0.096 | 0.188 | 1 DC | GPR155   |
| PKP4. 2    | 0.003077 | -0.13062 | 0.005 | 0.055 | 1 DC | PKP4     |
| SREK1IP1.  | 0.00308  | -0.24204 | 0.219 | 0.34  | 1 DC | SREK1IP1 |
| BCR. 1     | 0.00309  | -0.15387 | 0.011 | 0.064 | 1 DC | BCR      |
| PITHD1. 2  | 0.003091 | -0.21328 | 0.23  | 0.348 | 1 DC | PITHD1   |
| ABCF1. 2   | 0.003093 | -0.1243  | 0.171 | 0.286 | 1 DC | ABCF1    |
| ARHGEF4    | 0.003098 | -0.11864 | 0.005 | 0.055 | 1 DC | ARHGEF4  |
| BACE2. 2   | 0.003099 | -0.10215 | 0.005 | 0.055 | 1 DC | BACE2    |
| ZNF781     | 0.003101 | -0.12561 | 0     | 0.045 | 1 DC | ZNF781   |
| DUOX1. 3   | 0.003102 | -0.14735 | 0.011 | 0.064 | 1 DC | DUOX1    |
| VCAM1. 1   | 0.003106 | -0.22788 | 0.016 | 0.073 | 1 DC | VCAM1    |
| PHACTR4. 2 | 0.003109 | -0.12926 | 0.107 | 0.204 | 1 DC | PHACTR4  |
| NDUFAF6. 2 | 0.003115 | -0.11249 | 0.091 | 0.182 | 1 DC | NDUFAF6  |
| PINLYP. 1  | 0.003121 | -0.1865  | 0.005 | 0.054 | 1 DC | PINLYP   |
| CRB2. 1    | 0.003131 | -0.1655  | 0     | 0.045 | 1 DC | CRB2     |
| TNIP1. 1   | 0.003134 | 0.248696 | 0.273 | 0.207 | 1 DC | TNIP1    |
| FBXL16     | 0.003162 | -0.10715 | 0     | 0.045 | 1 DC | FBXL16   |
| REPS2      | 0.003165 | 0.108164 | 0.043 | 0.016 | 1 DC | REPS2    |

|           |          |          |       |       |      |               |
|-----------|----------|----------|-------|-------|------|---------------|
| ZNF654    | 0.003171 | -0.10586 | 0.005 | 0.055 | 1 DC | ZNF654        |
| GALNT13   | 0.003193 | -0.16652 | 0     | 0.044 | 1 DC | GALNT13       |
| GALNT11.1 | 0.003196 | -0.17305 | 0.128 | 0.228 | 1 DC | GALNT11       |
| PRR14L.2  | 0.003196 | -0.10546 | 0.027 | 0.09  | 1 DC | PRR14L        |
| BTBD2.1   | 0.003204 | -0.11103 | 0.032 | 0.099 | 1 DC | BTBD2         |
| RGS12.3   | 0.003217 | -0.20395 | 0.166 | 0.272 | 1 DC | RGS12         |
| BBS2.3    | 0.003223 | -0.17679 | 0.086 | 0.174 | 1 DC | BBS2          |
| FKTN      | 0.003229 | -0.11346 | 0.011 | 0.064 | 1 DC | FKTN          |
| PMEPA1.3  | 0.003231 | -0.21993 | 0.112 | 0.202 | 1 DC | PMEPA1        |
| PYGL.2    | 0.003231 | 0.129226 | 0.273 | 0.191 | 1 DC | PYGL          |
| STX3.1    | 0.003233 | 0.215982 | 0.128 | 0.074 | 1 DC | STX3          |
| RP11-379H | 0.003237 | -0.11517 | 0.016 | 0.073 | 1 DC | RP11-379H18.1 |
| SRA1.2    | 0.003239 | 0.211196 | 0.449 | 0.398 | 1 DC | SRA1          |
| KLHL28.1  | 0.003241 | -0.18452 | 0.048 | 0.12  | 1 DC | KLHL28        |
| KDM2B.2   | 0.003245 | 0.208677 | 0.198 | 0.134 | 1 DC | KDM2B         |
| NCK2.3    | 0.003248 | -0.19058 | 0.07  | 0.149 | 1 DC | NCK2          |
| SYT5.1    | 0.003255 | -0.15182 | 0     | 0.044 | 1 DC | SYT5          |
| HSD17B4.1 | 0.003257 | 0.163593 | 0.316 | 0.24  | 1 DC | HSD17B4       |
| GOT2.1    | 0.003257 | -0.11376 | 0.102 | 0.198 | 1 DC | GOT2          |
| SSH2.3    | 0.00326  | 0.219876 | 0.246 | 0.175 | 1 DC | SSH2          |
| METTL1.2  | 0.003263 | -0.20608 | 0.07  | 0.149 | 1 DC | METTL1        |
| IGF2BP2.1 | 0.003265 | -0.11811 | 0.021 | 0.081 | 1 DC | IGF2BP2       |
| HEG1.1    | 0.00327  | -0.10059 | 0.016 | 0.073 | 1 DC | HEG1          |
| BLOC1S4.3 | 0.003283 | -0.162   | 0.139 | 0.245 | 1 DC | BLOC1S4       |
| NDUFB1.1  | 0.003283 | 0.100796 | 0.668 | 0.592 | 1 DC | NDUFB1        |
| PON2.3    | 0.003285 | -0.30874 | 0.353 | 0.452 | 1 DC | PON2          |
| PLA2G4C   | 0.003287 | -0.13051 | 0     | 0.044 | 1 DC | PLA2G4C       |
| ANKMY2    | 0.003288 | -0.20268 | 0.048 | 0.119 | 1 DC | ANKMY2        |
| TESC.1    | 0.003292 | 0.222926 | 0.08  | 0.039 | 1 DC | TESC          |
| NR2C1.1   | 0.003302 | -0.12849 | 0.032 | 0.098 | 1 DC | NR2C1         |
| NUAK1.3   | 0.003307 | -0.16454 | 0.016 | 0.072 | 1 DC | NUAK1         |
| ZP3.1     | 0.003307 | -0.16081 | 0.016 | 0.072 | 1 DC | ZP3           |
| PIGU.2    | 0.003314 | -0.17456 | 0.086 | 0.172 | 1 DC | PIGU          |
| N6AMT1    | 0.003314 | -0.10152 | 0.011 | 0.064 | 1 DC | N6AMT1        |
| SLC35E3.2 | 0.003317 | -0.21569 | 0.102 | 0.188 | 1 DC | SLC35E3       |
| PMS2.2    | 0.003328 | -0.13806 | 0.053 | 0.129 | 1 DC | PMS2          |
| SYMPK.2   | 0.00333  | -0.1733  | 0.123 | 0.224 | 1 DC | SYMPK         |
| ONECUT2   | 0.003351 | -0.14472 | 0     | 0.044 | 1 DC | ONECUT2       |
| SLC27A5.1 | 0.003351 | -0.13424 | 0.059 | 0.137 | 1 DC | SLC27A5       |
| ZFR.1     | 0.003359 | -0.14944 | 0.187 | 0.307 | 1 DC | ZFR           |
| ZNF24.1   | 0.003394 | -0.1232  | 0.182 | 0.302 | 1 DC | ZNF24         |
| CDH13     | 0.003395 | -0.20428 | 0.005 | 0.054 | 1 DC | CDH13         |
| ATP5E.2   | 0.003401 | -0.12384 | 0.979 | 0.913 | 1 DC | ATP5E         |
| ATP1A2.1  | 0.003407 | -0.26187 | 0.011 | 0.063 | 1 DC | ATP1A2        |
| NGRN.1    | 0.00341  | -0.15295 | 0.021 | 0.081 | 1 DC | NGRN          |
| PLEKHF1   | 0.003417 | -0.10024 | 0     | 0.044 | 1 DC | PLEKHF1       |
| ZDHHC22.1 | 0.003417 | -0.12909 | 0     | 0.044 | 1 DC | ZDHHC22       |
| RP11-22P6 | 0.003417 | -0.1647  | 0     | 0.044 | 1 DC | RP11-22P6.2   |
| BRIX1.3   | 0.003417 | -0.17117 | 0.15  | 0.255 | 1 DC | BRIX1         |
| MIEF2.1   | 0.003421 | -0.13108 | 0.011 | 0.063 | 1 DC | MIEF2         |
| GTF3C5.1  | 0.003442 | -0.16821 | 0.096 | 0.187 | 1 DC | GTF3C5        |

|           |          |          |       |       |      |            |
|-----------|----------|----------|-------|-------|------|------------|
| ZBTB17    | 0.003464 | -0.15356 | 0.043 | 0.113 | 1 DC | ZBTB17     |
| RAB40C.1  | 0.00347  | -0.12759 | 0.021 | 0.08  | 1 DC | RAB40C     |
| NMD3.1    | 0.003472 | -0.15731 | 0.118 | 0.216 | 1 DC | NMD3       |
| KLHL25.1  | 0.003476 | -0.1069  | 0.005 | 0.054 | 1 DC | KLHL25     |
| RAB9B     | 0.003485 | -0.1569  | 0.005 | 0.053 | 1 DC | RAB9B      |
| SND1.1    | 0.003486 | 0.173759 | 0.326 | 0.254 | 1 DC | SND1       |
| YY1.2     | 0.003495 | 0.222454 | 0.396 | 0.339 | 1 DC | YY1        |
| RILP.3    | 0.003495 | 0.289881 | 0.16  | 0.102 | 1 DC | RILP       |
| HOXB7.1   | 0.003498 | -0.22666 | 0.011 | 0.062 | 1 DC | HOXB7      |
| TMEM115.1 | 0.003514 | -0.16505 | 0.112 | 0.209 | 1 DC | TMEM115    |
| TXN.2     | 0.003514 | -0.28363 | 0.61  | 0.667 | 1 DC | TXN        |
| BCKDHB.1  | 0.003519 | -0.12996 | 0.027 | 0.089 | 1 DC | BCKDHB     |
| CWC15.2   | 0.003525 | -0.28504 | 0.353 | 0.489 | 1 DC | CWC15      |
| B3GALT4   | 0.003534 | 0.13775  | 0.086 | 0.042 | 1 DC | B3GALT4    |
| ARMCX1.2  | 0.00355  | -0.188   | 0.118 | 0.215 | 1 DC | ARMCX1     |
| CCDC28A.2 | 0.003558 | 0.228886 | 0.225 | 0.157 | 1 DC | CCDC28A    |
| CIC.1     | 0.003559 | -0.12972 | 0.048 | 0.12  | 1 DC | CIC        |
| RSF1.1    | 0.003561 | -0.18309 | 0.294 | 0.419 | 1 DC | RSF1       |
| ERI3.1    | 0.003578 | -0.10865 | 0.241 | 0.371 | 1 DC | ERI3       |
| ZBTB41    | 0.003586 | -0.10487 | 0     | 0.043 | 1 DC | ZBTB41     |
| SHF       | 0.003586 | -0.1177  | 0     | 0.043 | 1 DC | SHF        |
| SDCCAG3.2 | 0.003586 | -0.13299 | 0.032 | 0.096 | 1 DC | SDCCAG3    |
| HDAC2.3   | 0.00359  | -0.23327 | 0.332 | 0.45  | 1 DC | HDAC2      |
| PARP2     | 0.003603 | -0.1794  | 0.043 | 0.112 | 1 DC | PARP2      |
| PIP4K2C.1 | 0.003603 | -0.20336 | 0.043 | 0.11  | 1 DC | PIP4K2C    |
| KAT8.2    | 0.003605 | 0.212978 | 0.246 | 0.175 | 1 DC | KAT8       |
| ZNF567    | 0.00361  | -0.13371 | 0.032 | 0.097 | 1 DC | ZNF567     |
| SART3.1   | 0.003624 | -0.18006 | 0.053 | 0.126 | 1 DC | SART3      |
| KLHDC2.2  | 0.003627 | -0.17902 | 0.187 | 0.304 | 1 DC | KLHDC2     |
| SPECC1.3  | 0.003633 | -0.14068 | 0.182 | 0.298 | 1 DC | SPECC1     |
| RAB11B.1  | 0.003635 | -0.18798 | 0.369 | 0.506 | 1 DC | RAB11B     |
| UBL3.3    | 0.003637 | 0.238626 | 0.406 | 0.353 | 1 DC | UBL3       |
| ST8SIA5   | 0.003657 | -0.12626 | 0     | 0.043 | 1 DC | ST8SIA5    |
| AC005618. | 0.003657 | -0.14447 | 0     | 0.043 | 1 DC | AC005618.6 |
| MUC12.1   | 0.003657 | -0.1935  | 0     | 0.043 | 1 DC | MUC12      |
| RREB1.3   | 0.003664 | 0.193265 | 0.123 | 0.071 | 1 DC | RREB1      |
| TMEM57.3  | 0.003674 | -0.18174 | 0.091 | 0.176 | 1 DC | TMEM57     |
| IGSF21.3  | 0.003682 | -0.28691 | 0.086 | 0.165 | 1 DC | IGSF21     |
| CYB561.2  | 0.003686 | -0.11075 | 0.021 | 0.081 | 1 DC | CYB561     |
| LINC00526 | 0.003689 | -0.11256 | 0.021 | 0.08  | 1 DC | LINC00526  |
| RNF144A   | 0.003692 | -0.13628 | 0     | 0.043 | 1 DC | RNF144A    |
| BCAS1     | 0.003692 | -0.22802 | 0     | 0.043 | 1 DC | BCAS1      |
| PARP1.2   | 0.003697 | -0.22151 | 0.353 | 0.474 | 1 DC | PARP1      |
| ZC4H2.1   | 0.003707 | -0.15127 | 0.005 | 0.053 | 1 DC | ZC4H2      |
| GFPT1.2   | 0.00371  | -0.15269 | 0.032 | 0.096 | 1 DC | GFPT1      |
| VPS52.1   | 0.003712 | -0.16265 | 0.027 | 0.088 | 1 DC | VPS52      |
| CDCA3.2   | 0.003712 | -0.16893 | 0.005 | 0.053 | 1 DC | CDCA3      |
| REPS1.2   | 0.003717 | -0.11264 | 0.053 | 0.128 | 1 DC | REPS1      |
| ACP2.2    | 0.003727 | -0.22083 | 0.144 | 0.245 | 1 DC | ACP2       |
| GMNN.2    | 0.003729 | -0.18021 | 0.091 | 0.178 | 1 DC | GMNN       |
| ZNF561.1  | 0.003739 | -0.1522  | 0.043 | 0.112 | 1 DC | ZNF561     |

|           |          |          |       |       |      |            |
|-----------|----------|----------|-------|-------|------|------------|
| SERINC1   | 0.003744 | -0.21614 | 0.294 | 0.42  | 1 DC | SERINC1    |
| SLC25A1.2 | 0.003746 | -0.12142 | 0.102 | 0.196 | 1 DC | SLC25A1    |
| SERPINB6. | 0.003756 | 0.153748 | 0.545 | 0.477 | 1 DC | SERPINB6   |
| RNF170.1  | 0.003761 | -0.1307  | 0.08  | 0.166 | 1 DC | RNF170     |
| MAPK8IP2  | 0.003764 | -0.12443 | 0     | 0.043 | 1 DC | MAPK8IP2   |
| SUV39H2   | 0.003772 | -0.14589 | 0.011 | 0.062 | 1 DC | SUV39H2    |
| IMPDH2.3  | 0.003777 | 0.107234 | 0.481 | 0.415 | 1 DC | IMPDH2     |
| TMOD1.1   | 0.003782 | -0.26755 | 0.08  | 0.158 | 1 DC | TMOD1      |
| BTBD17.2  | 0.003793 | -0.16857 | 0.005 | 0.053 | 1 DC | BTBD17     |
| ANKFY1.1  | 0.003795 | -0.1125  | 0.059 | 0.137 | 1 DC | ANKFY1     |
| INTS12.1  | 0.003809 | -0.15614 | 0.08  | 0.166 | 1 DC | INTS12     |
| STK38.1   | 0.003814 | 0.163433 | 0.123 | 0.071 | 1 DC | STK38      |
| IRGQ.1    | 0.003839 | -0.1133  | 0.027 | 0.088 | 1 DC | IRGQ       |
| BEX4.2    | 0.003854 | 0.129151 | 0.561 | 0.475 | 1 DC | BEX4       |
| PHF6.2    | 0.003857 | -0.13687 | 0.086 | 0.171 | 1 DC | PHF6       |
| TXLNG.1   | 0.003861 | -0.15971 | 0.059 | 0.135 | 1 DC | TXLNG      |
| PDK3.2    | 0.003864 | 0.247312 | 0.107 | 0.06  | 1 DC | PDK3       |
| TOX.3     | 0.003869 | -0.12448 | 0.027 | 0.088 | 1 DC | TOX        |
| MCAM      | 0.003876 | -0.1266  | 0     | 0.043 | 1 DC | MCAM       |
| CKAP2.3   | 0.003877 | -0.17217 | 0.086 | 0.17  | 1 DC | CKAP2      |
| COX14.1   | 0.003878 | 0.179822 | 0.513 | 0.459 | 1 DC | COX14      |
| MYLPF     | 0.003886 | 0.121493 | 0.043 | 0.016 | 1 DC | MYLPF      |
| EXOG.2    | 0.003903 | -0.13051 | 0.075 | 0.157 | 1 DC | EXOG       |
| PUS7L     | 0.003906 | -0.16342 | 0.08  | 0.163 | 1 DC | PUS7L      |
| MTHFS.1   | 0.003913 | 0.25834  | 0.257 | 0.188 | 1 DC | MTHFS      |
| TERF2IP.3 | 0.00392  | -0.21734 | 0.412 | 0.519 | 1 DC | TERF2IP    |
| VTA1      | 0.00394  | -0.14186 | 0.096 | 0.185 | 1 DC | VTA1       |
| CPLX1     | 0.003951 | -0.15558 | 0     | 0.043 | 1 DC | CPLX1      |
| ZNF174.1  | 0.003954 | -0.11194 | 0.016 | 0.071 | 1 DC | ZNF174     |
| RBM6.1    | 0.003956 | -0.17338 | 0.198 | 0.315 | 1 DC | RBM6       |
| SENP2.1   | 0.003961 | -0.12677 | 0.059 | 0.134 | 1 DC | SENP2      |
| SLC39A4.1 | 0.003967 | 0.136243 | 0.15  | 0.089 | 1 DC | SLC39A4    |
| SPG20.1   | 0.003967 | -0.19338 | 0.139 | 0.239 | 1 DC | SPG20      |
| PVRL1.2   | 0.003973 | -0.1428  | 0.011 | 0.062 | 1 DC | PVRL1      |
| ZMAT1.2   | 0.003999 | -0.13802 | 0.032 | 0.095 | 1 DC | ZMAT1      |
| YIF1B.1   | 0.004003 | 0.243768 | 0.385 | 0.332 | 1 DC | YIF1B      |
| GPBP1L1.3 | 0.004006 | 0.328668 | 0.267 | 0.205 | 1 DC | GPBP1L1    |
| UBN2      | 0.004012 | -0.15754 | 0.043 | 0.11  | 1 DC | UBN2       |
| ARAP2.1   | 0.004027 | -0.16972 | 0.027 | 0.086 | 1 DC | ARAP2      |
| NINJ1.3   | 0.00403  | 0.117233 | 0.551 | 0.45  | 1 DC | NINJ1      |
| COIL.1    | 0.004039 | -0.14116 | 0.096 | 0.187 | 1 DC | COIL       |
| BCYRN1    | 0.004041 | -0.14138 | 0.005 | 0.053 | 1 DC | BCYRN1     |
| CD99.2    | 0.004054 | -0.29785 | 0.604 | 0.638 | 1 DC | CD99       |
| RSPH3     | 0.004055 | -0.1254  | 0.021 | 0.079 | 1 DC | RSPH3      |
| FICD.1    | 0.004067 | -0.14151 | 0.021 | 0.079 | 1 DC | FICD       |
| AC018647. | 0.004068 | -0.22761 | 0     | 0.042 | 1 DC | AC018647.3 |
| TMEM145.1 | 0.004095 | -0.14037 | 0.016 | 0.07  | 1 DC | TMEM145    |
| USP31.2   | 0.004102 | -0.12654 | 0.005 | 0.052 | 1 DC | USP31      |
| RPP40.2   | 0.004106 | -0.12666 | 0.048 | 0.119 | 1 DC | RPP40      |
| LIN7A     | 0.004108 | -0.10107 | 0     | 0.042 | 1 DC | LIN7A      |
| GNAZ.1    | 0.004108 | -0.13311 | 0.011 | 0.061 | 1 DC | GNAZ       |

|           |          |          |       |       |      |            |
|-----------|----------|----------|-------|-------|------|------------|
| CHERP     | 0.004109 | -0.1716  | 0.086 | 0.17  | 1 DC | CHERP      |
| CHURC1.1  | 0.004112 | 0.149547 | 0.46  | 0.4   | 1 DC | CHURC1     |
| C15orf41  | 0.004118 | -0.13325 | 0.005 | 0.052 | 1 DC | C15orf41   |
| NUDT9.1   | 0.004122 | -0.10823 | 0.123 | 0.224 | 1 DC | NUDT9      |
| HBS1L.1   | 0.004124 | -0.12896 | 0.102 | 0.193 | 1 DC | HBS1L      |
| SDF2      | 0.004127 | -0.16866 | 0.241 | 0.358 | 1 DC | SDF2       |
| PCMTD1.2  | 0.004135 | 0.216714 | 0.219 | 0.151 | 1 DC | PCMTD1     |
| GMPR2.1   | 0.004142 | 0.304712 | 0.278 | 0.214 | 1 DC | GMPR2      |
| DOLPP1.1  | 0.004155 | -0.16717 | 0.037 | 0.102 | 1 DC | DOLPP1     |
| HSPBAP1.1 | 0.004163 | 0.204839 | 0.123 | 0.071 | 1 DC | HSPBAP1    |
| RALGDS.2  | 0.004177 | -0.20151 | 0.075 | 0.153 | 1 DC | RALGDS     |
| PC        | 0.004179 | -0.13207 | 0.016 | 0.071 | 1 DC | PC         |
| MTHFD1L.3 | 0.004186 | 0.209878 | 0.198 | 0.135 | 1 DC | MTHFD1L    |
| UMPS.1    | 0.004189 | -0.15841 | 0.059 | 0.134 | 1 DC | UMPS       |
| PTCD3.1   | 0.00419  | -0.18173 | 0.134 | 0.231 | 1 DC | PTCD3      |
| ARMCX2.2  | 0.004192 | -0.20735 | 0.07  | 0.148 | 1 DC | ARMCX2     |
| CSRNP2.1  | 0.004194 | -0.12298 | 0.027 | 0.087 | 1 DC | CSRNP2     |
| PARP6.2   | 0.004195 | -0.12401 | 0.037 | 0.104 | 1 DC | PARP6      |
| NOC2L.2   | 0.004216 | -0.12433 | 0.193 | 0.315 | 1 DC | NOC2L      |
| MAP7D3    | 0.004216 | -0.16491 | 0.048 | 0.118 | 1 DC | MAP7D3     |
| KMT2B.1   | 0.004225 | -0.13942 | 0.016 | 0.07  | 1 DC | KMT2B      |
| SEMA7A    | 0.004226 | 0.142787 | 0.08  | 0.04  | 1 DC | SEMA7A     |
| EFCAB7    | 0.004235 | -0.13157 | 0.016 | 0.07  | 1 DC | EFCAB7     |
| RFFL.3    | 0.004238 | -0.14311 | 0.08  | 0.166 | 1 DC | RFFL       |
| TARSL2.2  | 0.004245 | -0.12569 | 0.043 | 0.111 | 1 DC | TARSL2     |
| ZFP37     | 0.004249 | -0.13213 | 0.005 | 0.052 | 1 DC | ZFP37      |
| ANK3.2    | 0.004253 | -0.18356 | 0.011 | 0.061 | 1 DC | ANK3       |
| DHPS.2    | 0.004259 | -0.18326 | 0.316 | 0.449 | 1 DC | DHPS       |
| ZNF92.1   | 0.004265 | -0.17542 | 0.07  | 0.147 | 1 DC | ZNF92      |
| CHMP7.2   | 0.004268 | -0.11428 | 0.091 | 0.178 | 1 DC | CHMP7      |
| GNG7.2    | 0.00427  | -0.25769 | 0.198 | 0.301 | 1 DC | GNG7       |
| CLCF1.1   | 0.00427  | -0.1631  | 0     | 0.042 | 1 DC | CLCF1      |
| ACVR1B.1  | 0.004277 | -0.15543 | 0.027 | 0.086 | 1 DC | ACVR1B     |
| WDR54.3   | 0.004282 | -0.15083 | 0.134 | 0.235 | 1 DC | WDR54      |
| KAT7.1    | 0.004287 | -0.1301  | 0.07  | 0.149 | 1 DC | KAT7       |
| RPS6KB2.2 | 0.004292 | 0.200115 | 0.289 | 0.226 | 1 DC | RPS6KB2    |
| ST6GALNAC | 0.004306 | -0.15486 | 0.075 | 0.155 | 1 DC | ST6GALNAC6 |
| SLC05A1.1 | 0.004311 | -0.14582 | 0     | 0.042 | 1 DC | SLC05A1    |
| RNF213.3  | 0.004329 | 0.208031 | 0.326 | 0.26  | 1 DC | RNF213     |
| LRP3      | 0.004346 | -0.12009 | 0.011 | 0.061 | 1 DC | LRP3       |
| PSD2      | 0.004353 | -0.14077 | 0     | 0.042 | 1 DC | PSD2       |
| GLRX5.2   | 0.004355 | -0.17214 | 0.182 | 0.298 | 1 DC | GLRX5      |
| SLC2A1.2  | 0.004357 | -0.2053  | 0.064 | 0.139 | 1 DC | SLC2A1     |
| SECTM1    | 0.00436  | 0.185942 | 0.048 | 0.019 | 1 DC | SECTM1     |
| MRI1.1    | 0.004368 | -0.10693 | 0.043 | 0.111 | 1 DC | MRI1       |
| SRP9.1    | 0.00437  | -0.17879 | 0.599 | 0.682 | 1 DC | SRP9       |
| TBC1D1.3  | 0.004371 | 0.267143 | 0.182 | 0.122 | 1 DC | TBC1D1     |
| TCEAL3.1  | 0.004377 | -0.21105 | 0.225 | 0.344 | 1 DC | TCEAL3     |
| LINC00672 | 0.004397 | -0.15842 | 0.005 | 0.052 | 1 DC | LINC00672  |
| MAZ.3     | 0.004412 | -0.10848 | 0.144 | 0.252 | 1 DC | MAZ        |
| NDUFV3.1  | 0.004428 | -0.17485 | 0.278 | 0.412 | 1 DC | NDUFV3     |

|           |          |          |       |       |      |            |
|-----------|----------|----------|-------|-------|------|------------|
| ZSWIM4    | 0.004429 | -0.14325 | 0.005 | 0.052 | 1 DC | ZSWIM4     |
| ANAPC7.1  | 0.004433 | -0.12843 | 0.086 | 0.173 | 1 DC | ANAPC7     |
| PQLC3.3   | 0.004437 | 0.270246 | 0.246 | 0.183 | 1 DC | PQLC3      |
| NMNAT1    | 0.004438 | -0.15553 | 0.021 | 0.078 | 1 DC | NMNAT1     |
| SALL3     | 0.004439 | -0.10206 | 0     | 0.042 | 1 DC | SALL3      |
| CKMT2-AS1 | 0.004439 | -0.12549 | 0     | 0.042 | 1 DC | CKMT2-AS1  |
| RAPGEF2.1 | 0.004443 | -0.1482  | 0.016 | 0.07  | 1 DC | RAPGEF2    |
| TM9SF2.2  | 0.004449 | 0.179165 | 0.396 | 0.338 | 1 DC | TM9SF2     |
| GOSR1.2   | 0.00445  | -0.11059 | 0.16  | 0.269 | 1 DC | GOSR1      |
| HSPB6.2   | 0.004462 | -0.12906 | 0.011 | 0.061 | 1 DC | HSPB6      |
| EVI5L     | 0.004474 | -0.12696 | 0.011 | 0.06  | 1 DC | EVI5L      |
| SAA1.2    | 0.004475 | -0.87009 | 0.053 | 0.12  | 1 DC | SAA1       |
| RNF150.1  | 0.004482 | -0.13779 | 0     | 0.041 | 1 DC | RNF150     |
| DPH3.2    | 0.004482 | -0.14296 | 0.118 | 0.215 | 1 DC | DPH3       |
| TAPBPL.2  | 0.004496 | 0.124586 | 0.187 | 0.121 | 1 DC | TAPBPL     |
| RIC8B.1   | 0.004499 | -0.14841 | 0.032 | 0.094 | 1 DC | RIC8B      |
| ZNF585A   | 0.004504 | -0.12013 | 0.011 | 0.061 | 1 DC | ZNF585A    |
| IDH3G.2   | 0.004512 | 0.112324 | 0.465 | 0.402 | 1 DC | IDH3G      |
| PCGF5.1   | 0.004516 | 0.233327 | 0.246 | 0.178 | 1 DC | PCGF5      |
| ZNF471    | 0.004526 | -0.1047  | 0     | 0.041 | 1 DC | ZNF471     |
| USP2      | 0.004526 | -0.11889 | 0     | 0.041 | 1 DC | USP2       |
| TRPM3.2   | 0.00453  | -0.10646 | 0.016 | 0.07  | 1 DC | TRPM3      |
| ARSD      | 0.004543 | 0.224875 | 0.144 | 0.09  | 1 DC | ARSD       |
| AC018816. | 0.004557 | 0.100361 | 0.037 | 0.013 | 1 DC | AC018816.3 |
| ZNF71.1   | 0.004558 | -0.15552 | 0.027 | 0.085 | 1 DC | ZNF71      |
| METTL15.1 | 0.004563 | 0.24477  | 0.187 | 0.127 | 1 DC | METTL15    |
| LINC-PINT | 0.004564 | 0.221047 | 0.166 | 0.105 | 1 DC | LINC-PINT  |
| ZNF627    | 0.004573 | -0.10208 | 0.021 | 0.078 | 1 DC | ZNF627     |
| FAM193B.1 | 0.00458  | -0.12541 | 0.011 | 0.061 | 1 DC | FAM193B    |
| RFC1.1    | 0.004607 | -0.18784 | 0.171 | 0.278 | 1 DC | RFC1       |
| SNN.3     | 0.004618 | -0.1795  | 0.134 | 0.227 | 1 DC | SNN        |
| SUCLA2.2  | 0.004624 | -0.19888 | 0.182 | 0.289 | 1 DC | SUCLA2     |
| MSANTD2   | 0.00463  | -0.10474 | 0.011 | 0.061 | 1 DC | MSANTD2    |
| PTCH1     | 0.004632 | -0.11736 | 0.005 | 0.051 | 1 DC | PTCH1      |
| LMCD1.1   | 0.004641 | -0.11912 | 0.027 | 0.086 | 1 DC | LMCD1      |
| POLR2E.2  | 0.004652 | 0.12816  | 0.594 | 0.534 | 1 DC | POLR2E     |
| PRPF18.2  | 0.004656 | 0.255754 | 0.198 | 0.136 | 1 DC | PRPF18     |
| SP9.2     | 0.004659 | -0.15472 | 0     | 0.041 | 1 DC | SP9        |
| NRSN1.1   | 0.004664 | -0.12923 | 0.011 | 0.061 | 1 DC | NRSN1      |
| PTPN14.1  | 0.00467  | -0.10705 | 0.016 | 0.069 | 1 DC | PTPN14     |
| JPH4      | 0.004676 | -0.12482 | 0.011 | 0.061 | 1 DC | JPH4       |
| LRRC24.1  | 0.00468  | -0.1141  | 0.016 | 0.069 | 1 DC | LRRC24     |
| ZNF180    | 0.004704 | -0.10731 | 0     | 0.041 | 1 DC | ZNF180     |
| RNF169.1  | 0.004706 | -0.11234 | 0.021 | 0.078 | 1 DC | RNF169     |
| POLR3A    | 0.004734 | -0.11571 | 0.011 | 0.06  | 1 DC | POLR3A     |
| GAS8      | 0.004741 | -0.11759 | 0.016 | 0.069 | 1 DC | GAS8       |
| TBC1D14.3 | 0.004753 | -0.19139 | 0.091 | 0.173 | 1 DC | TBC1D14    |
| MTMR4.2   | 0.004762 | -0.14835 | 0.08  | 0.162 | 1 DC | MTMR4      |
| VRK3.2    | 0.004768 | -0.1296  | 0.123 | 0.22  | 1 DC | VRK3       |
| YTHDF3-AS | 0.004778 | -0.11054 | 0.011 | 0.06  | 1 DC | YTHDF3-AS1 |
| SH3PXD2B. | 0.004791 | -0.11878 | 0.048 | 0.118 | 1 DC | SH3PXD2B   |

|           |          |          |       |       |      |           |
|-----------|----------|----------|-------|-------|------|-----------|
| N6AMT2.1  | 0.004792 | -0.13587 | 0.059 | 0.134 | 1 DC | N6AMT2    |
| C19orf68  | 0.004796 | -0.10634 | 0     | 0.041 | 1 DC | C19orf68  |
| CD163L1   | 0.004796 | -0.1465  | 0     | 0.041 | 1 DC | CD163L1   |
| MARCH6.2  | 0.0048   | -0.21918 | 0.241 | 0.359 | 1 DC | 6-Mar     |
| ARHGAP35. | 0.004803 | -0.12822 | 0.07  | 0.147 | 1 DC | ARHGAP35  |
| STX1A.1   | 0.004821 | -0.16969 | 0.016 | 0.068 | 1 DC | STX1A     |
| EIF5A.1   | 0.004827 | 0.104257 | 0.588 | 0.526 | 1 DC | EIF5A     |
| COL8A2    | 0.004832 | 0.108192 | 0.053 | 0.023 | 1 DC | COL8A2    |
| AGFG2.1   | 0.004843 | -0.10925 | 0     | 0.041 | 1 DC | AGFG2     |
| OBFC1.1   | 0.004855 | 0.227545 | 0.139 | 0.086 | 1 DC | OBFC1     |
| LYPLA1.2  | 0.004859 | 0.199013 | 0.46  | 0.406 | 1 DC | LYPLA1    |
| PCF11.2   | 0.004863 | 0.2194   | 0.267 | 0.203 | 1 DC | PCF11     |
| HPGDS.3   | 0.004886 | 0.109819 | 0.15  | 0.088 | 1 DC | HPGDS     |
| NRG2      | 0.00489  | -0.10546 | 0     | 0.041 | 1 DC | NRG2      |
| NDUFA4L2. | 0.00489  | -0.17465 | 0     | 0.041 | 1 DC | NDUFA4L2  |
| MED7.1    | 0.004891 | -0.1651  | 0.048 | 0.116 | 1 DC | MED7      |
| PIK3R2.1  | 0.004898 | -0.12539 | 0.005 | 0.051 | 1 DC | PIK3R2    |
| ATP5J2.3  | 0.004918 | -0.19454 | 0.791 | 0.808 | 1 DC | ATP5J2    |
| FERMT1.1  | 0.004921 | -0.17358 | 0.005 | 0.05  | 1 DC | FERMT1    |
| PHLPP1.3  | 0.004922 | -0.13281 | 0.027 | 0.086 | 1 DC | PHLPP1    |
| VPS51.2   | 0.004933 | 0.24171  | 0.321 | 0.262 | 1 DC | VPS51     |
| FAM13C    | 0.004938 | -0.13161 | 0     | 0.041 | 1 DC | FAM13C    |
| CA9.1     | 0.004938 | -0.17962 | 0     | 0.041 | 1 DC | CA9       |
| EIF2B3    | 0.004946 | -0.21293 | 0.091 | 0.174 | 1 DC | EIF2B3    |
| FEM1C     | 0.004952 | -0.13042 | 0.064 | 0.141 | 1 DC | FEM1C     |
| UGT8.2    | 0.004963 | -0.23161 | 0.005 | 0.05  | 1 DC | UGT8      |
| PYCRL.1   | 0.004964 | -0.10445 | 0.005 | 0.051 | 1 DC | PYCRL     |
| AEBP2.1   | 0.004966 | -0.11778 | 0.027 | 0.085 | 1 DC | AEBP2     |
| C6orf89.1 | 0.004968 | -0.14591 | 0.123 | 0.221 | 1 DC | C6orf89   |
| FAM129B.1 | 0.004977 | 0.154922 | 0.123 | 0.073 | 1 DC | FAM129B   |
| RPUSD2    | 0.004984 | -0.11812 | 0.016 | 0.069 | 1 DC | RPUSD2    |
| PHTF1.2   | 0.00499  | 0.270228 | 0.176 | 0.12  | 1 DC | PHTF1     |
| HADHB.1   | 0.005018 | 0.131837 | 0.524 | 0.46  | 1 DC | HADHB     |
| TNFRSF12A | 0.005025 | -0.28282 | 0.203 | 0.288 | 1 DC | TNFRSF12A |
| ENTPD5.1  | 0.005031 | -0.1071  | 0.005 | 0.05  | 1 DC | ENTPD5    |
| ARX.2     | 0.005035 | -0.14436 | 0     | 0.04  | 1 DC | ARX       |
| PRRT3     | 0.005062 | -0.11397 | 0.016 | 0.069 | 1 DC | PRRT3     |
| EIF4G3.2  | 0.005065 | -0.14521 | 0.091 | 0.176 | 1 DC | EIF4G3    |
| RBM43     | 0.005073 | -0.14025 | 0.005 | 0.05  | 1 DC | RBM43     |
| GIN1.1    | 0.005075 | -0.13094 | 0.005 | 0.05  | 1 DC | GIN1      |
| SLC38A7.2 | 0.005075 | -0.13022 | 0.043 | 0.109 | 1 DC | SLC38A7   |
| MID1      | 0.00508  | -0.10315 | 0.005 | 0.051 | 1 DC | MID1      |
| RABL2A    | 0.005107 | -0.10479 | 0.021 | 0.077 | 1 DC | RABL2A    |
| BECN1.2   | 0.005119 | 0.252424 | 0.289 | 0.229 | 1 DC | BECN1     |
| SNAI2     | 0.005133 | -0.10032 | 0     | 0.04  | 1 DC | SNAI2     |
| SLC1A4.3  | 0.005142 | 0.181581 | 0.123 | 0.072 | 1 DC | SLC1A4    |
| CHKB.1    | 0.005149 | 0.159265 | 0.102 | 0.056 | 1 DC | CHKB      |
| RBM22.1   | 0.005169 | -0.17047 | 0.193 | 0.304 | 1 DC | RBM22     |
| TMEM119.3 | 0.005169 | -0.25573 | 0.043 | 0.106 | 1 DC | TMEM119   |
| KIFC2     | 0.005171 | -0.1042  | 0.016 | 0.068 | 1 DC | KIFC2     |
| SLC8B1.3  | 0.005173 | 0.162479 | 0.155 | 0.097 | 1 DC | SLC8B1    |



|            |          |          |       |       |      |              |
|------------|----------|----------|-------|-------|------|--------------|
| RTN1. 2    | 0.005175 | 0.252568 | 0.203 | 0.142 | 1 DC | RTN1         |
| ZNF501     | 0.005183 | -0.12007 | 0     | 0.04  | 1 DC | ZNF501       |
| HDAC3. 2   | 0.005195 | 0.246141 | 0.321 | 0.262 | 1 DC | HDAC3        |
| RDH14      | 0.005196 | -0.13865 | 0.102 | 0.189 | 1 DC | RDH14        |
| PIFO. 1    | 0.005198 | -0.21824 | 0.005 | 0.05  | 1 DC | PIFO         |
| EIF4E. 2   | 0.005201 | 0.125667 | 0.529 | 0.488 | 1 DC | EIF4E        |
| KDM5C. 2   | 0.00521  | -0.1332  | 0.043 | 0.109 | 1 DC | KDM5C        |
| BOLA3-AS1  | 0.005234 | -0.10813 | 0     | 0.04  | 1 DC | BOLA3-AS1    |
| MAL. 2     | 0.005234 | -0.26721 | 0     | 0.04  | 1 DC | MAL          |
| TSHZ2. 1   | 0.005256 | -0.16693 | 0.005 | 0.05  | 1 DC | TSHZ2        |
| ZNF446     | 0.005265 | -0.12776 | 0.021 | 0.076 | 1 DC | ZNF446       |
| TARBP2. 1  | 0.005278 | -0.10535 | 0.07  | 0.148 | 1 DC | TARBP2       |
| SOD3. 1    | 0.005285 | -0.10471 | 0     | 0.04  | 1 DC | SOD3         |
| BRSK2      | 0.005285 | -0.10995 | 0     | 0.04  | 1 DC | BRSK2        |
| RALA. 2    | 0.005298 | 0.27506  | 0.406 | 0.359 | 1 DC | RALA         |
| CBX4. 3    | 0.005323 | -0.13438 | 0.048 | 0.116 | 1 DC | CBX4         |
| SYNE1      | 0.005326 | -0.14889 | 0.053 | 0.124 | 1 DC | SYNE1        |
| ERBB4. 2   | 0.00533  | -0.15221 | 0.011 | 0.059 | 1 DC | ERBB4        |
| HOTAIRM1.  | 0.005334 | 0.228575 | 0.257 | 0.181 | 1 DC | HOTAIRM1     |
| ADAM19. 2  | 0.005342 | 0.230161 | 0.128 | 0.079 | 1 DC | ADAM19       |
| MLH3       | 0.005352 | -0.18175 | 0.043 | 0.107 | 1 DC | MLH3         |
| APTX. 2    | 0.005354 | -0.11526 | 0.064 | 0.14  | 1 DC | APTX         |
| CENPA. 3   | 0.005365 | -0.15303 | 0.005 | 0.05  | 1 DC | CENPA        |
| HIST2H2AA  | 0.005367 | 0.125481 | 0.112 | 0.062 | 1 DC | HIST2H2AA3   |
| NR1D1. 2   | 0.005375 | -0.13555 | 0.005 | 0.05  | 1 DC | NR1D1        |
| WDYHV1. 1  | 0.005385 | -0.19562 | 0.053 | 0.122 | 1 DC | WDYHV1       |
| DDX25      | 0.005388 | -0.12169 | 0     | 0.04  | 1 DC | DDX25        |
| C15orf61.  | 0.005405 | -0.14016 | 0.091 | 0.175 | 1 DC | C15orf61     |
| NEDD4L. 3  | 0.005406 | -0.19348 | 0.048 | 0.114 | 1 DC | NEDD4L       |
| SPATA5L1.  | 0.005417 | -0.10621 | 0.011 | 0.059 | 1 DC | SPATA5L1     |
| CHRNA9     | 0.005421 | -0.11875 | 0.005 | 0.05  | 1 DC | CHRNA9       |
| ST3GAL5. 1 | 0.005478 | -0.21183 | 0.107 | 0.192 | 1 DC | ST3GAL5      |
| MYT1. 1    | 0.005494 | -0.14155 | 0     | 0.04  | 1 DC | MYT1         |
| RNF34. 1   | 0.005497 | -0.11215 | 0.107 | 0.196 | 1 DC | RNF34        |
| STX2. 2    | 0.005498 | -0.10898 | 0.043 | 0.109 | 1 DC | STX2         |
| SARNP      | 0.005505 | 0.212661 | 0.182 | 0.121 | 1 DC | SARNP        |
| PIGH. 1    | 0.005516 | -0.18263 | 0.118 | 0.209 | 1 DC | PIGH         |
| ZSCAN32    | 0.005519 | -0.11805 | 0.016 | 0.068 | 1 DC | ZSCAN32      |
| PANK3. 1   | 0.005521 | -0.14658 | 0.048 | 0.115 | 1 DC | PANK3        |
| ZNF106. 3  | 0.005532 | 0.248661 | 0.316 | 0.256 | 1 DC | ZNF106       |
| NXF1. 2    | 0.005539 | 0.241485 | 0.262 | 0.197 | 1 DC | NXF1         |
| SYNJ2BP. 2 | 0.005552 | -0.18549 | 0.07  | 0.145 | 1 DC | SYNJ2BP      |
| NME5. 1    | 0.005576 | -0.10391 | 0.005 | 0.05  | 1 DC | NME5         |
| NFATC1. 3  | 0.005577 | 0.131901 | 0.096 | 0.052 | 1 DC | NFATC1       |
| CDK2. 1    | 0.005578 | -0.12799 | 0.027 | 0.085 | 1 DC | CDK2         |
| PCP4. 1    | 0.005601 | -0.213   | 0     | 0.039 | 1 DC | PCP4         |
| RASSF4. 3  | 0.005613 | 0.131436 | 0.412 | 0.328 | 1 DC | RASSF4       |
| ZHX1. 2    | 0.00563  | -0.15294 | 0.118 | 0.211 | 1 DC | ZHX1         |
| CHST13     | 0.005633 | 0.112843 | 0.043 | 0.017 | 1 DC | CHST13       |
| ADCY2. 1   | 0.005656 | -0.10912 | 0     | 0.039 | 1 DC | ADCY2        |
| GS1-124K5  | 0.005666 | -0.1828  | 0.048 | 0.115 | 1 DC | GS1-124K5. 4 |

|            |          |          |       |       |      |                |
|------------|----------|----------|-------|-------|------|----------------|
| FANCL. 1   | 0.005671 | -0.1016  | 0.07  | 0.144 | 1 DC | FANCL          |
| ANKRD36C.  | 0.005674 | -0.18883 | 0.086 | 0.163 | 1 DC | ANKRD36C       |
| SLC12A7    | 0.005721 | 0.159224 | 0.08  | 0.041 | 1 DC | SLC12A7        |
| GAS6. 3    | 0.005724 | 0.125413 | 0.289 | 0.203 | 1 DC | GAS6           |
| EIF5AL1. 1 | 0.005735 | 0.233476 | 0.176 | 0.119 | 1 DC | EIF5AL1        |
| STARD13. 1 | 0.005747 | -0.12684 | 0.005 | 0.049 | 1 DC | STARD13        |
| WBSCR16. 2 | 0.005747 | -0.11821 | 0.07  | 0.146 | 1 DC | WBSCR16        |
| ZCCHC7. 1  | 0.005753 | -0.14199 | 0.07  | 0.144 | 1 DC | ZCCHC7         |
| LUZP2      | 0.00576  | -0.15173 | 0.005 | 0.049 | 1 DC | LUZP2          |
| FAM63B     | 0.005761 | -0.11213 | 0.112 | 0.206 | 1 DC | FAM63B         |
| FDXACB1    | 0.005766 | -0.12489 | 0     | 0.039 | 1 DC | FDXACB1        |
| FANCF. 1   | 0.005776 | -0.11555 | 0.032 | 0.093 | 1 DC | FANCF          |
| BCS1L. 1   | 0.005778 | -0.10467 | 0.086 | 0.167 | 1 DC | BCS1L          |
| TGFB2. 2   | 0.005781 | -0.11175 | 0.016 | 0.068 | 1 DC | TGFB2          |
| MLF2. 3    | 0.005799 | -0.22088 | 0.524 | 0.61  | 1 DC | MLF2           |
| GOLGA4. 1  | 0.005805 | -0.21193 | 0.241 | 0.348 | 1 DC | GOLGA4         |
| FAM8A1     | 0.005806 | -0.11254 | 0.027 | 0.084 | 1 DC | FAM8A1         |
| ATOX1. 3   | 0.005812 | -0.216   | 0.513 | 0.606 | 1 DC | ATOX1          |
| CHRNB1. 2  | 0.005846 | -0.20965 | 0.075 | 0.15  | 1 DC | CHRNB1         |
| ELK4. 1    | 0.005848 | -0.10557 | 0.043 | 0.108 | 1 DC | ELK4           |
| PGAM2. 2   | 0.005856 | -0.21602 | 0.005 | 0.049 | 1 DC | PGAM2          |
| TBCC. 3    | 0.005865 | -0.19769 | 0.134 | 0.223 | 1 DC | TBCC           |
| ZNF93      | 0.005926 | -0.1214  | 0.011 | 0.058 | 1 DC | ZNF93          |
| C1orf53. 1 | 0.005926 | -0.12847 | 0.027 | 0.084 | 1 DC | C1orf53        |
| EIF5A2     | 0.005927 | -0.1172  | 0.011 | 0.058 | 1 DC | EIF5A2         |
| ARHGAP11A  | 0.005937 | -0.1079  | 0     | 0.039 | 1 DC | ARHGAP11A      |
| ZNF595. 1  | 0.005937 | -0.14382 | 0.021 | 0.075 | 1 DC | ZNF595         |
| STAM. 1    | 0.00594  | -0.11538 | 0.037 | 0.1   | 1 DC | STAM           |
| TOMM22. 3  | 0.005948 | 0.150196 | 0.513 | 0.468 | 1 DC | TOMM22         |
| JAGN1. 2   | 0.005978 | -0.1932  | 0.203 | 0.322 | 1 DC | JAGN1          |
| ZFR2       | 0.005994 | -0.13183 | 0     | 0.039 | 1 DC | ZFR2           |
| FABP6. 2   | 0.005994 | -0.15129 | 0     | 0.039 | 1 DC | FABP6          |
| SRPX2. 1   | 0.005997 | -0.14088 | 0.011 | 0.058 | 1 DC | SRPX2          |
| IZUMO4. 1  | 0.006011 | -0.1103  | 0.016 | 0.067 | 1 DC | IZUMO4         |
| DHFRL1     | 0.006013 | -0.10489 | 0.016 | 0.067 | 1 DC | DHFRL1         |
| TUBGCP2. 3 | 0.006014 | 0.205756 | 0.273 | 0.211 | 1 DC | TUBGCP2        |
| SHB. 1     | 0.006036 | -0.10103 | 0.011 | 0.058 | 1 DC | SHB            |
| ARMC1. 2   | 0.006057 | -0.11429 | 0.16  | 0.266 | 1 DC | ARMC1          |
| DHODH. 2   | 0.006081 | -0.17322 | 0.027 | 0.083 | 1 DC | DHODH          |
| FOXO3. 3   | 0.006105 | 0.235081 | 0.332 | 0.271 | 1 DC | FOXO3          |
| LZTFL1. 1  | 0.006107 | -0.12366 | 0.021 | 0.075 | 1 DC | LZTFL1         |
| LRRC42. 1  | 0.00611  | -0.13956 | 0.07  | 0.145 | 1 DC | LRRC42         |
| LYRM5. 1   | 0.006111 | -0.19388 | 0.23  | 0.343 | 1 DC | LYRM5          |
| CDK16. 1   | 0.006117 | -0.14657 | 0.139 | 0.237 | 1 DC | CDK16          |
| PDZRN3. 1  | 0.00612  | -0.13387 | 0.011 | 0.058 | 1 DC | PDZRN3         |
| DGKG. 1    | 0.006122 | -0.10468 | 0.005 | 0.049 | 1 DC | DGKG           |
| LYRM7. 1   | 0.006131 | -0.16417 | 0.112 | 0.203 | 1 DC | LYRM7          |
| AZGP1. 1   | 0.006133 | -0.24154 | 0.011 | 0.057 | 1 DC | AZGP1          |
| RP11-635N  | 0.006162 | -0.1224  | 0.011 | 0.058 | 1 DC | RP11-635N19. 1 |
| FAH. 2     | 0.006173 | 0.278841 | 0.219 | 0.157 | 1 DC | FAH            |
| CHKA. 3    | 0.006195 | 0.232796 | 0.246 | 0.186 | 1 DC | CHKA           |

|           |          |          |       |       |      |               |
|-----------|----------|----------|-------|-------|------|---------------|
| ZNF738.3  | 0.006202 | -0.14137 | 0.07  | 0.145 | 1 DC | ZNF738        |
| FAM169A   | 0.00622  | -0.10768 | 0.005 | 0.049 | 1 DC | FAM169A       |
| ZCCHC3.2  | 0.006237 | -0.11029 | 0.043 | 0.107 | 1 DC | ZCCHC3        |
| UBN1.3    | 0.006239 | -0.10572 | 0.086 | 0.168 | 1 DC | UBN1          |
| TBC1D17.1 | 0.006253 | -0.14801 | 0.08  | 0.156 | 1 DC | TBC1D17       |
| MSRA.2    | 0.006256 | 0.244824 | 0.321 | 0.255 | 1 DC | MSRA          |
| USP54.1   | 0.00628  | -0.16425 | 0.005 | 0.048 | 1 DC | USP54         |
| CLDND1.1  | 0.006282 | -0.28647 | 0.273 | 0.395 | 1 DC | CLDND1        |
| CTD-2139E | 0.006287 | 0.107138 | 0.037 | 0.014 | 1 DC | CTD-2139B15.2 |
| RP2.3     | 0.006291 | 0.134669 | 0.128 | 0.076 | 1 DC | RP2           |
| AC093627. | 0.006293 | 0.103502 | 0.043 | 0.017 | 1 DC | AC093627.10   |
| BGN.2     | 0.006327 | -0.27104 | 0.016 | 0.065 | 1 DC | BGN           |
| ZC3H7B    | 0.006347 | -0.13381 | 0.043 | 0.107 | 1 DC | ZC3H7B        |
| C3orf18   | 0.006353 | -0.10196 | 0     | 0.038 | 1 DC | C3orf18       |
| RORB      | 0.006353 | -0.14241 | 0     | 0.038 | 1 DC | RORB          |
| ERBB3.1   | 0.006353 | -0.17821 | 0     | 0.038 | 1 DC | ERBB3         |
| DLGAP4    | 0.006354 | -0.12021 | 0.182 | 0.295 | 1 DC | DLGAP4        |
| TACC2     | 0.006361 | -0.10529 | 0.011 | 0.058 | 1 DC | TACC2         |
| SETD6.1   | 0.006364 | -0.11877 | 0.032 | 0.091 | 1 DC | SETD6         |
| MIS12.1   | 0.00637  | -0.16836 | 0.07  | 0.143 | 1 DC | MIS12         |
| ZDHHC17.1 | 0.006372 | -0.13226 | 0.043 | 0.106 | 1 DC | ZDHHC17       |
| PLOD3.1   | 0.006395 | -0.15116 | 0.128 | 0.219 | 1 DC | PLOD3         |
| PPIL6.2   | 0.006404 | -0.11694 | 0.005 | 0.048 | 1 DC | PPIL6         |
| NCAN.1    | 0.006411 | -0.20617 | 0.027 | 0.081 | 1 DC | NCAN          |
| PMVK.1    | 0.006432 | -0.21763 | 0.31  | 0.439 | 1 DC | PMVK          |
| DDR2.1    | 0.006436 | -0.12004 | 0.011 | 0.058 | 1 DC | DDR2          |
| HECTD2    | 0.00645  | -0.11904 | 0.005 | 0.048 | 1 DC | HECTD2        |
| DIP2B.3   | 0.006451 | -0.16446 | 0.053 | 0.12  | 1 DC | DIP2B         |
| DNAJC19.3 | 0.006454 | -0.15487 | 0.262 | 0.391 | 1 DC | DNAJC19       |
| PROSER1.2 | 0.006461 | -0.11338 | 0.021 | 0.075 | 1 DC | PROSER1       |
| BCL7A.3   | 0.006463 | -0.13951 | 0.075 | 0.151 | 1 DC | BCL7A         |
| VWA3B     | 0.006478 | -0.10244 | 0     | 0.038 | 1 DC | VWA3B         |
| BTBD6     | 0.006478 | -0.10397 | 0     | 0.038 | 1 DC | BTBD6         |
| THBS2     | 0.006478 | -0.12837 | 0     | 0.038 | 1 DC | THBS2         |
| THYN1.2   | 0.006504 | -0.24642 | 0.294 | 0.408 | 1 DC | THYN1         |
| NCDN      | 0.006517 | -0.10992 | 0.032 | 0.091 | 1 DC | NCDN          |
| RCAN1.3   | 0.006538 | -0.28099 | 0.171 | 0.27  | 1 DC | RCAN1         |
| SCHIP1    | 0.006541 | -0.10648 | 0     | 0.038 | 1 DC | SCHIP1        |
| PIK3R4    | 0.006541 | -0.1093  | 0     | 0.038 | 1 DC | PIK3R4        |
| TOPORS-AS | 0.006549 | -0.19361 | 0.075 | 0.148 | 1 DC | TOPORS-AS1    |
| ZC3H13.3  | 0.006552 | -0.16115 | 0.225 | 0.336 | 1 DC | ZC3H13        |
| C6orf203. | 0.006556 | -0.165   | 0.086 | 0.167 | 1 DC | C6orf203      |
| PCOLCE.2  | 0.006561 | -0.19624 | 0.027 | 0.082 | 1 DC | PCOLCE        |
| COA6.1    | 0.006567 | -0.10898 | 0.171 | 0.278 | 1 DC | COA6          |
| ZNF275.1  | 0.006572 | -0.12066 | 0.011 | 0.057 | 1 DC | ZNF275        |
| CTBP1.2   | 0.006576 | -0.11879 | 0.128 | 0.224 | 1 DC | CTBP1         |
| NKTR.1    | 0.006581 | -0.21291 | 0.246 | 0.359 | 1 DC | NKTR          |
| RTN4.3    | 0.006605 | -0.13641 | 0.738 | 0.699 | 1 DC | RTN4          |
| COQ6.1    | 0.006611 | -0.12765 | 0.043 | 0.107 | 1 DC | COQ6          |
| C17orf97  | 0.006614 | -0.10685 | 0.011 | 0.057 | 1 DC | C17orf97      |
| PRIM1.2   | 0.006616 | -0.12076 | 0.027 | 0.082 | 1 DC | PRIM1         |

|           |          |          |       |       |      |             |
|-----------|----------|----------|-------|-------|------|-------------|
| SLC7A6OS. | 0.006623 | -0.1628  | 0.064 | 0.135 | 1 DC | SLC7A6OS    |
| TMEM256.1 | 0.006641 | 0.118435 | 0.497 | 0.429 | 1 DC | TMEM256     |
| BAG1.2    | 0.006642 | 0.181464 | 0.412 | 0.351 | 1 DC | BAG1        |
| ASL.2     | 0.006653 | 0.193451 | 0.235 | 0.17  | 1 DC | ASL         |
| ARHGAP33. | 0.006659 | -0.10779 | 0.027 | 0.083 | 1 DC | ARHGAP33    |
| TNK2.2    | 0.006664 | -0.12518 | 0.059 | 0.128 | 1 DC | TNK2        |
| CDC37     | 0.006665 | 0.107354 | 0.583 | 0.543 | 1 DC | CDC37       |
| NECAB1.2  | 0.006669 | -0.1759  | 0     | 0.038 | 1 DC | NECAB1      |
| F11R.2    | 0.006675 | 0.129159 | 0.102 | 0.056 | 1 DC | F11R        |
| SLC39A3.2 | 0.006701 | -0.15478 | 0.225 | 0.34  | 1 DC | SLC39A3     |
| SIAE.1    | 0.006709 | -0.11017 | 0.032 | 0.091 | 1 DC | SIAE        |
| FNDC3A.2  | 0.006714 | -0.13009 | 0.123 | 0.216 | 1 DC | FNDC3A      |
| PRKAR2A.1 | 0.006725 | -0.10523 | 0.15  | 0.25  | 1 DC | PRKAR2A     |
| FAM124A   | 0.006734 | -0.1296  | 0     | 0.038 | 1 DC | FAM124A     |
| WDR19.2   | 0.006746 | -0.11517 | 0.005 | 0.048 | 1 DC | WDR19       |
| DSTYK.1   | 0.00676  | -0.12198 | 0.053 | 0.122 | 1 DC | DSTYK       |
| RGS11     | 0.00677  | -0.10082 | 0.005 | 0.048 | 1 DC | RGS11       |
| THUMPD3   | 0.006788 | -0.12541 | 0.107 | 0.195 | 1 DC | THUMPD3     |
| AARSD1    | 0.006789 | -0.12822 | 0.043 | 0.106 | 1 DC | AARSD1      |
| UBAP2L    | 0.006792 | -0.10121 | 0.123 | 0.218 | 1 DC | UBAP2L      |
| HIST1H2AC | 0.006801 | -0.2489  | 0.091 | 0.168 | 1 DC | HIST1H2AC   |
| ZNF568.1  | 0.006809 | -0.12507 | 0.037 | 0.099 | 1 DC | ZNF568      |
| GIT1.1    | 0.006824 | -0.10442 | 0.043 | 0.107 | 1 DC | GIT1        |
| APITD1    | 0.006829 | -0.10951 | 0.027 | 0.083 | 1 DC | APITD1      |
| RND1      | 0.006836 | -0.18215 | 0.016 | 0.065 | 1 DC | RND1        |
| WDR12.1   | 0.006839 | -0.13462 | 0.07  | 0.144 | 1 DC | WDR12       |
| USB1.2    | 0.006842 | 0.310013 | 0.283 | 0.229 | 1 DC | USB1        |
| TMEM79    | 0.006843 | -0.12354 | 0.011 | 0.057 | 1 DC | TMEM79      |
| ZDHHC7.3  | 0.006844 | 0.240918 | 0.203 | 0.146 | 1 DC | ZDHHC7      |
| C1QTNF4.1 | 0.006844 | -0.13385 | 0.011 | 0.057 | 1 DC | C1QTNF4     |
| PRNP.2    | 0.006849 | -0.22878 | 0.342 | 0.467 | 1 DC | PRNP        |
| HOXA-AS2  | 0.006866 | -0.14067 | 0     | 0.038 | 1 DC | HOXA-AS2    |
| UBQLN2.3  | 0.006868 | -0.10328 | 0.128 | 0.222 | 1 DC | UBQLN2      |
| PPP5D1.2  | 0.006886 | -0.11738 | 0.005 | 0.048 | 1 DC | PPP5D1      |
| SIRT2.3   | 0.006894 | -0.2435  | 0.294 | 0.418 | 1 DC | SIRT2       |
| ASPM.3    | 0.006895 | -0.15363 | 0.005 | 0.047 | 1 DC | ASPM        |
| ETFA.2    | 0.006897 | 0.193809 | 0.417 | 0.371 | 1 DC | ETFA        |
| NPEPL1.1  | 0.006902 | -0.11794 | 0.043 | 0.106 | 1 DC | NPEPL1      |
| CTC-459F4 | 0.006911 | -0.12126 | 0.016 | 0.066 | 1 DC | CTC-459F4.3 |
| ST6GAL2.1 | 0.006933 | -0.11553 | 0     | 0.038 | 1 DC | ST6GAL2     |
| APLP2.3   | 0.006982 | 0.101311 | 0.658 | 0.592 | 1 DC | APLP2       |
| SPAG9.2   | 0.007014 | -0.10381 | 0.235 | 0.355 | 1 DC | SPAG9       |
| APO0.2    | 0.007021 | -0.13222 | 0.134 | 0.23  | 1 DC | APO0        |
| GANAB.2   | 0.007021 | -0.17042 | 0.171 | 0.274 | 1 DC | GANAB       |
| CYP46A1   | 0.007044 | -0.11253 | 0.005 | 0.047 | 1 DC | CYP46A1     |
| GPALPP1.1 | 0.007044 | -0.12869 | 0.053 | 0.121 | 1 DC | GPALPP1     |
| ZSCAN16-A | 0.007056 | -0.18598 | 0.16  | 0.259 | 1 DC | ZSCAN16-AS1 |
| RFC5      | 0.007066 | -0.11597 | 0.032 | 0.091 | 1 DC | RFC5        |
| TIGD1     | 0.007111 | -0.12747 | 0.016 | 0.065 | 1 DC | TIGD1       |
| TSN.1     | 0.007127 | -0.17718 | 0.262 | 0.379 | 1 DC | TSN         |
| SH3D21    | 0.007136 | 0.131075 | 0.053 | 0.023 | 1 DC | SH3D21      |

|              |          |          |       |       |      |             |
|--------------|----------|----------|-------|-------|------|-------------|
| MTFR1. 1     | 0.007155 | -0.14185 | 0.037 | 0.097 | 1 DC | MTFR1       |
| PET117       | 0.007159 | -0.11459 | 0.096 | 0.181 | 1 DC | PET117      |
| SLC39A7      | 0.007162 | -0.178   | 0.198 | 0.307 | 1 DC | SLC39A7     |
| TXNDC16. 1   | 0.00717  | -0.13074 | 0.011 | 0.056 | 1 DC | TXNDC16     |
| CALCOCO2. AR | 0.007177 | 0.209834 | 0.251 | 0.192 | 1 DC | CALCOCO2    |
| AR           | 0.00718  | -0.10719 | 0.005 | 0.047 | 1 DC | AR          |
| HPCAL1. 3    | 0.007181 | 0.287394 | 0.267 | 0.209 | 1 DC | HPCAL1      |
| METTL21B.    | 0.007188 | -0.10451 | 0.016 | 0.066 | 1 DC | METTL21B    |
| FBX05        | 0.007191 | -0.13155 | 0.037 | 0.097 | 1 DC | FBX05       |
| PXN-AS1      | 0.007193 | -0.12466 | 0.027 | 0.082 | 1 DC | PXN-AS1     |
| DISC1. 2     | 0.007204 | 0.14634  | 0.086 | 0.045 | 1 DC | DISC1       |
| CCNF         | 0.007207 | -0.10238 | 0     | 0.037 | 1 DC | CCNF        |
| NYAP1. 1     | 0.007207 | -0.11625 | 0     | 0.037 | 1 DC | NYAP1       |
| CGRRF1. 2    | 0.00721  | -0.1007  | 0.086 | 0.165 | 1 DC | CGRRF1      |
| PRKD2. 1     | 0.007228 | -0.13379 | 0.027 | 0.081 | 1 DC | PRKD2       |
| HEATR5A. 1   | 0.00724  | -0.1452  | 0.027 | 0.082 | 1 DC | HEATR5A     |
| DEGS1. 1     | 0.007257 | 0.138931 | 0.508 | 0.459 | 1 DC | DEGS1       |
| AP2A2. 3     | 0.007258 | -0.18615 | 0.16  | 0.253 | 1 DC | AP2A2       |
| MED20        | 0.007258 | -0.10965 | 0.011 | 0.056 | 1 DC | MED20       |
| TFAP2A       | 0.007278 | -0.12883 | 0     | 0.037 | 1 DC | TFAP2A      |
| SLC16A1-A    | 0.007298 | -0.16464 | 0.005 | 0.047 | 1 DC | SLC16A1-AS1 |
| BDNF-AS. 2   | 0.007309 | -0.12232 | 0.016 | 0.065 | 1 DC | BDNF-AS     |
| TMPO. 3      | 0.007312 | 0.27493  | 0.257 | 0.193 | 1 DC | TMPO        |
| WFS1         | 0.00733  | -0.12753 | 0.011 | 0.056 | 1 DC | WFS1        |
| RAD50        | 0.007332 | -0.12498 | 0.16  | 0.267 | 1 DC | RAD50       |
| NGFR         | 0.007349 | -0.1309  | 0     | 0.037 | 1 DC | NGFR        |
| MAP3K2. 3    | 0.00735  | 0.241562 | 0.257 | 0.199 | 1 DC | MAP3K2      |
| ZNF22. 2     | 0.007396 | -0.17127 | 0.176 | 0.277 | 1 DC | ZNF22       |
| CA8. 2       | 0.007409 | -0.18442 | 0.011 | 0.056 | 1 DC | CA8         |
| BRMS1. 2     | 0.007409 | 0.258684 | 0.358 | 0.31  | 1 DC | BRMS1       |
| THRAP3. 3    | 0.007424 | 0.158556 | 0.497 | 0.437 | 1 DC | THRAP3      |
| GTPBP10. 1   | 0.007445 | -0.15249 | 0.037 | 0.097 | 1 DC | GTPBP10     |
| APH1A. 1     | 0.007458 | 0.122211 | 0.54  | 0.484 | 1 DC | APH1A       |
| SAR1A. 3     | 0.007465 | 0.190967 | 0.364 | 0.297 | 1 DC | SAR1A       |
| NEK1         | 0.007492 | -0.13954 | 0.059 | 0.127 | 1 DC | NEK1        |
| PSORS1C1.    | 0.007492 | -0.137   | 0     | 0.037 | 1 DC | PSORS1C1    |
| CYB5R3. 2    | 0.007499 | 0.207771 | 0.406 | 0.36  | 1 DC | CYB5R3      |
| C12orf45.    | 0.007511 | 0.253092 | 0.235 | 0.177 | 1 DC | C12orf45    |
| SPRTN. 1     | 0.007517 | -0.12849 | 0.059 | 0.127 | 1 DC | SPRTN       |
| FGD5-AS1.    | 0.00755  | -0.12628 | 0.198 | 0.314 | 1 DC | FGD5-AS1    |
| SNRPD3. 3    | 0.007587 | 0.149535 | 0.46  | 0.413 | 1 DC | SNRPD3      |
| SLC25A40.    | 0.007601 | 0.181772 | 0.107 | 0.062 | 1 DC | SLC25A40    |
| FBLIM1       | 0.007602 | -0.15378 | 0.032 | 0.09  | 1 DC | FBLIM1      |
| NUDT5. 2     | 0.007651 | 0.222627 | 0.358 | 0.305 | 1 DC | NUDT5       |
| CISD1. 3     | 0.007652 | -0.24657 | 0.23  | 0.338 | 1 DC | CISD1       |
| CCDC97       | 0.007662 | -0.103   | 0.043 | 0.105 | 1 DC | CCDC97      |
| RRP7A. 3     | 0.007672 | 0.143839 | 0.353 | 0.286 | 1 DC | RRP7A       |
| NABP2. 2     | 0.007683 | -0.1244  | 0.171 | 0.278 | 1 DC | NABP2       |
| ZNF44. 1     | 0.007701 | -0.11068 | 0.043 | 0.105 | 1 DC | ZNF44       |
| TNR. 2       | 0.007704 | -0.18612 | 0.011 | 0.055 | 1 DC | TNR         |
| CSNK1A1. 3   | 0.007705 | 0.117948 | 0.631 | 0.557 | 1 DC | CSNK1A1     |

|           |          |          |       |       |      |              |
|-----------|----------|----------|-------|-------|------|--------------|
| ANKZF1.1  | 0.007713 | -0.12911 | 0.064 | 0.135 | 1 DC | ANKZF1       |
| RCOR2.1   | 0.007734 | -0.12236 | 0.005 | 0.046 | 1 DC | RCOR2        |
| TTC21B    | 0.0078   | -0.10189 | 0.005 | 0.047 | 1 DC | TTC21B       |
| EXOSC8.2  | 0.00782  | -0.20705 | 0.187 | 0.291 | 1 DC | EXOSC8       |
| AC084219. | 0.007865 | -0.10713 | 0     | 0.036 | 1 DC | AC084219.4   |
| COCH      | 0.007865 | -0.1425  | 0     | 0.036 | 1 DC | COCH         |
| RECQL.2   | 0.007866 | 0.216841 | 0.23  | 0.172 | 1 DC | RECQL        |
| CSE1L.2   | 0.007883 | -0.16514 | 0.134 | 0.224 | 1 DC | CSE1L        |
| OTUD6B.1  | 0.007906 | -0.1048  | 0.053 | 0.12  | 1 DC | OTUD6B       |
| SLC41A3   | 0.007937 | -0.15323 | 0.075 | 0.148 | 1 DC | SLC41A3      |
| LINGO1    | 0.007942 | -0.11482 | 0     | 0.036 | 1 DC | LINGO1       |
| C1orf123. | 0.007956 | -0.2309  | 0.23  | 0.343 | 1 DC | C1orf123     |
| EPHB1     | 0.007969 | -0.11308 | 0.005 | 0.046 | 1 DC | EPHB1        |
| C11orf57  | 0.008    | -0.15566 | 0.08  | 0.155 | 1 DC | C11orf57     |
| KCND2     | 0.008019 | -0.10964 | 0     | 0.036 | 1 DC | KCND2        |
| TCEAL6    | 0.008019 | -0.15598 | 0     | 0.036 | 1 DC | TCEAL6       |
| CC2D1A.2  | 0.008031 | -0.1107  | 0.102 | 0.188 | 1 DC | CC2D1A       |
| EHD4.3    | 0.008061 | 0.13903  | 0.144 | 0.09  | 1 DC | EHD4         |
| TMC7      | 0.008072 | -0.10517 | 0.005 | 0.046 | 1 DC | TMC7         |
| TMOD2.2   | 0.008082 | -0.13729 | 0.048 | 0.111 | 1 DC | TMOD2        |
| KCNN2     | 0.008097 | -0.10034 | 0     | 0.036 | 1 DC | KCNN2        |
| MOBP.2    | 0.008097 | -0.31577 | 0     | 0.036 | 1 DC | MOBP         |
| ANGPT2.1  | 0.008098 | -0.15794 | 0.005 | 0.046 | 1 DC | ANGPT2       |
| CDC14B    | 0.008115 | -0.10283 | 0.016 | 0.064 | 1 DC | CDC14B       |
| MMS22L.1  | 0.008117 | -0.13143 | 0.016 | 0.064 | 1 DC | MMS22L       |
| GAN.1     | 0.008132 | -0.10328 | 0.07  | 0.143 | 1 DC | GAN          |
| SMARCC2.2 | 0.008143 | -0.1685  | 0.166 | 0.265 | 1 DC | SMARCC2      |
| ZNF236.1  | 0.008164 | -0.12692 | 0.021 | 0.072 | 1 DC | ZNF236       |
| TMEM63A.2 | 0.008166 | -0.19112 | 0.021 | 0.071 | 1 DC | TMEM63A      |
| ABCE1.1   | 0.008222 | -0.1695  | 0.155 | 0.252 | 1 DC | ABCE1        |
| CHD2.3    | 0.008248 | 0.269793 | 0.342 | 0.291 | 1 DC | CHD2         |
| MAF1.3    | 0.008275 | 0.135549 | 0.476 | 0.427 | 1 DC | MAF1         |
| SFSWAP.2  | 0.00829  | -0.13446 | 0.096 | 0.178 | 1 DC | SFSWAP       |
| RCAN3.3   | 0.008292 | 0.166663 | 0.102 | 0.058 | 1 DC | RCAN3        |
| VPS36.2   | 0.008319 | 0.198855 | 0.262 | 0.2   | 1 DC | VPS36        |
| TTLL5     | 0.008339 | -0.10467 | 0.011 | 0.055 | 1 DC | TTLL5        |
| ERN1.1    | 0.008347 | 0.18221  | 0.096 | 0.054 | 1 DC | ERN1         |
| DZIP3.1   | 0.008353 | -0.16612 | 0.064 | 0.132 | 1 DC | DZIP3        |
| CKAP2L.2  | 0.00836  | -0.11001 | 0.005 | 0.046 | 1 DC | CKAP2L       |
| NAPA.1    | 0.008365 | 0.143435 | 0.444 | 0.393 | 1 DC | NAPA         |
| APBA3.1   | 0.008388 | -0.1095  | 0.032 | 0.089 | 1 DC | APBA3        |
| TRAF3IP2- | 0.0084   | -0.1121  | 0.027 | 0.081 | 1 DC | TRAF3IP2-AS1 |
| ALG6.1    | 0.008402 | -0.11866 | 0.043 | 0.104 | 1 DC | ALG6         |
| ULK3.2    | 0.008404 | -0.13093 | 0.075 | 0.147 | 1 DC | ULK3         |
| HMBOX1.2  | 0.008434 | -0.18123 | 0.112 | 0.194 | 1 DC | HMBOX1       |
| MVB12A.1  | 0.008472 | -0.19175 | 0.198 | 0.304 | 1 DC | MVB12A       |
| DHX57     | 0.008486 | -0.12713 | 0.037 | 0.096 | 1 DC | DHX57        |
| ARL6IP1.2 | 0.008487 | -0.19113 | 0.701 | 0.743 | 1 DC | ARL6IP1      |
| TRPT1.1   | 0.008492 | -0.19525 | 0.134 | 0.225 | 1 DC | TRPT1        |
| COA7.1    | 0.0085   | -0.14226 | 0.016 | 0.064 | 1 DC | COA7         |
| DLGAP5.2  | 0.0085   | -0.11307 | 0     | 0.036 | 1 DC | DLGAP5       |

|           |          |          |       |       |      |               |
|-----------|----------|----------|-------|-------|------|---------------|
| RP11-315A | 0.0085   | -0.11325 | 0     | 0.036 | 1 DC | RP11-315A16.1 |
| PPFIA1    | 0.008523 | -0.14117 | 0.091 | 0.168 | 1 DC | PPFIA1        |
| PNPT1.1   | 0.00855  | -0.15294 | 0.112 | 0.198 | 1 DC | PNPT1         |
| GPR19     | 0.008578 | -0.15026 | 0.005 | 0.046 | 1 DC | GPR19         |
| KIAA1147. | 0.008588 | -0.12574 | 0.021 | 0.072 | 1 DC | KIAA1147      |
| IGF1.2    | 0.008607 | -0.24375 | 0.016 | 0.062 | 1 DC | IGF1          |
| CCP110.2  | 0.008613 | -0.1447  | 0.059 | 0.125 | 1 DC | CCP110        |
| SENP7.1   | 0.008626 | -0.13237 | 0.032 | 0.087 | 1 DC | SENP7         |
| BRD4.2    | 0.008628 | -0.15815 | 0.219 | 0.329 | 1 DC | BRD4          |
| DYNLT1.1  | 0.008643 | -0.1801  | 0.545 | 0.63  | 1 DC | DYNLT1        |
| TTC9C.2   | 0.008648 | -0.16585 | 0.096 | 0.176 | 1 DC | TTC9C         |
| MYBL2.2   | 0.008658 | -0.10449 | 0.005 | 0.046 | 1 DC | MYBL2         |
| TMC01.2   | 0.008734 | -0.2286  | 0.455 | 0.577 | 1 DC | TMC01         |
| SLC2A8.2  | 0.008741 | -0.13441 | 0.07  | 0.14  | 1 DC | SLC2A8        |
| LINC00599 | 0.008751 | -0.13581 | 0     | 0.035 | 1 DC | LINC00599     |
| MFHAS1.1  | 0.008753 | -0.10715 | 0.016 | 0.063 | 1 DC | MFHAS1        |
| MAX.1     | 0.008755 | 0.191995 | 0.353 | 0.293 | 1 DC | MAX           |
| VPS13A    | 0.00877  | -0.10741 | 0.027 | 0.08  | 1 DC | VPS13A        |
| IL33.1    | 0.008771 | -0.11201 | 0.005 | 0.046 | 1 DC | IL33          |
| UBAC2.2   | 0.008809 | 0.237599 | 0.326 | 0.27  | 1 DC | UBAC2         |
| NR2F2.1   | 0.008813 | -0.13279 | 0.005 | 0.045 | 1 DC | NR2F2         |
| ZNF790    | 0.008819 | -0.12052 | 0.037 | 0.096 | 1 DC | ZNF790        |
| TTL4      | 0.008825 | -0.118   | 0.021 | 0.072 | 1 DC | TTL4          |
| NR1H3     | 0.008837 | -0.15934 | 0.011 | 0.054 | 1 DC | NR1H3         |
| ZNF574.2  | 0.008839 | -0.11385 | 0.032 | 0.088 | 1 DC | ZNF574        |
| NFS1.1    | 0.008844 | -0.10555 | 0.064 | 0.135 | 1 DC | NFS1          |
| TNFRSF11E | 0.008853 | -0.1652  | 0.011 | 0.054 | 1 DC | TNFRSF11B     |
| DNAJB9.2  | 0.008879 | 0.102645 | 0.46  | 0.384 | 1 DC | DNAJB9        |
| TIMELESS. | 0.008908 | -0.12036 | 0.016 | 0.063 | 1 DC | TIMELESS      |
| POLR2K    | 0.008927 | -0.17263 | 0.364 | 0.491 | 1 DC | POLR2K        |
| LARP4B.2  | 0.008932 | 0.161091 | 0.139 | 0.089 | 1 DC | LARP4B        |
| SUCLG2.1  | 0.008943 | 0.18991  | 0.305 | 0.244 | 1 DC | SUCLG2        |
| GCNT1     | 0.00896  | 0.112276 | 0.053 | 0.024 | 1 DC | GCNT1         |
| HAMP.3    | 0.008973 | -0.42353 | 0.096 | 0.162 | 1 DC | HAMP          |
| IL11RA.1  | 0.008994 | -0.10692 | 0.016 | 0.063 | 1 DC | IL11RA        |
| TSGA10.1  | 0.009056 | -0.13064 | 0.016 | 0.063 | 1 DC | TSGA10        |
| NPEPPS    | 0.00907  | -0.13194 | 0.134 | 0.226 | 1 DC | NPEPPS        |
| NUDT22.2  | 0.009079 | 0.171941 | 0.326 | 0.269 | 1 DC | NUDT22        |
| ZC3H14.2  | 0.009087 | -0.14187 | 0.118 | 0.204 | 1 DC | ZC3H14        |
| DHRS1     | 0.009125 | -0.15283 | 0.08  | 0.156 | 1 DC | DHRS1         |
| CDC23.1   | 0.009151 | -0.14271 | 0.059 | 0.126 | 1 DC | CDC23         |
| APOPT1.1  | 0.009223 | -0.22376 | 0.267 | 0.383 | 1 DC | APOPT1        |
| FAR2.1    | 0.00923  | 0.236522 | 0.096 | 0.055 | 1 DC | FAR2          |
| NAA15.1   | 0.009241 | -0.15863 | 0.128 | 0.217 | 1 DC | NAA15         |
| CELSR3    | 0.009277 | -0.1001  | 0     | 0.035 | 1 DC | CELSR3        |
| MR1.1     | 0.009303 | 0.196487 | 0.139 | 0.088 | 1 DC | MR1           |
| PSMC3IP.2 | 0.009341 | -0.11206 | 0.021 | 0.071 | 1 DC | PSMC3IP       |
| ZBTB37    | 0.009361 | -0.10276 | 0.011 | 0.054 | 1 DC | ZBTB37        |
| MAST2     | 0.009379 | -0.124   | 0.021 | 0.07  | 1 DC | MAST2         |
| ALKBH5.2  | 0.009382 | -0.15293 | 0.219 | 0.325 | 1 DC | ALKBH5        |
| C21orf58. | 0.009392 | -0.10658 | 0.011 | 0.054 | 1 DC | C21orf58      |

|             |           |           |        |        |      |                |
|-------------|-----------|-----------|--------|--------|------|----------------|
| TIMM21. 2   | 0. 009397 | -0. 14592 | 0. 075 | 0. 148 | 1 DC | TIMM21         |
| ENOSF1. 3   | 0. 009417 | -0. 12561 | 0. 059 | 0. 126 | 1 DC | ENOSF1         |
| BLOC1S5. 1  | 0. 009429 | -0. 13042 | 0. 027 | 0. 079 | 1 DC | BLOC1S5        |
| CAD         | 0. 009449 | -0. 10904 | 0. 011 | 0. 054 | 1 DC | CAD            |
| FBXL15. 3   | 0. 009461 | 0. 209709 | 0. 257 | 0. 194 | 1 DC | FBXL15         |
| SLC25A44. 0 | 0. 009489 | -0. 11234 | 0. 037 | 0. 095 | 1 DC | SLC25A44       |
| NBPF12      | 0. 009551 | -0. 10116 | 0      | 0. 035 | 1 DC | NBPF12         |
| RUNX1T1     | 0. 009551 | -0. 10128 | 0      | 0. 035 | 1 DC | RUNX1T1        |
| ABCG1. 3    | 0. 009555 | 0. 120382 | 0. 198 | 0. 13  | 1 DC | ABCG1          |
| CHMP4A. 2   | 0. 009624 | 0. 108759 | 0. 524 | 0. 467 | 1 DC | CHMP4A         |
| SLITRK2     | 0. 009644 | -0. 10904 | 0      | 0. 035 | 1 DC | SLITRK2        |
| FAM45A. 2   | 0. 009659 | -0. 16774 | 0. 112 | 0. 192 | 1 DC | FAM45A         |
| RAB5B. 2    | 0. 009675 | -0. 12538 | 0. 128 | 0. 215 | 1 DC | RAB5B          |
| EXOC6B. 1   | 0. 009685 | -0. 10284 | 0. 016 | 0. 063 | 1 DC | EXOC6B         |
| MYOM2       | 0. 009712 | -0. 11401 | 0. 005 | 0. 045 | 1 DC | MYOM2          |
| MARVELD1. 0 | 0. 009751 | 0. 161187 | 0. 075 | 0. 039 | 1 DC | MARVELD1       |
| ZNF222. 1   | 0. 009769 | -0. 11079 | 0. 011 | 0. 054 | 1 DC | ZNF222         |
| HGS. 2      | 0. 009779 | -0. 10363 | 0. 128 | 0. 218 | 1 DC | HGS            |
| PDE3B. 1    | 0. 009802 | 0. 156392 | 0. 075 | 0. 039 | 1 DC | PDE3B          |
| DNMT3A. 2   | 0. 009812 | -0. 13789 | 0. 043 | 0. 101 | 1 DC | DNMT3A         |
| SCRN1. 2    | 0. 009812 | -0. 15542 | 0. 102 | 0. 181 | 1 DC | SCRN1          |
| LINC00237   | 0. 009834 | -0. 10297 | 0      | 0. 034 | 1 DC | LINC00237      |
| NDUF4F4. 1  | 0. 009886 | -0. 13069 | 0. 134 | 0. 223 | 1 DC | NDUF4F4        |
| COQ10B. 2   | 0. 009902 | 0. 253626 | 0. 316 | 0. 262 | 1 DC | COQ10B         |
| RP11-102N   | 0. 009929 | 0. 1037   | 0. 043 | 0. 018 | 1 DC | RP11-102N12. 3 |
| PPHLN1. 1   | 0. 009932 | 0. 225406 | 0. 406 | 0. 366 | 1 DC | PPHLN1         |
| ACHE        | 0. 009967 | -0. 1194  | 0. 005 | 0. 044 | 1 DC | ACHE           |
| SASS6       | 0. 009968 | -0. 12225 | 0. 016 | 0. 062 | 1 DC | SASS6          |
| OSBPL8. 3   | 0. 00997  | 0. 202751 | 0. 358 | 0. 311 | 1 DC | OSBPL8         |
| LGALS8. 2   | 0. 009986 | 0. 192419 | 0. 209 | 0. 151 | 1 DC | LGALS8         |
| PHC1. 1     | 0. 009991 | -0. 10489 | 0. 027 | 0. 079 | 1 DC | PHC1           |
| RAB40B. 3   | 0. 009998 | -0. 11355 | 0. 064 | 0. 131 | 1 DC | RAB40B         |
| CD83. 4     | 0         | 1. 37207  | 0. 819 | 0. 189 | 0 M1 | CD83           |
| IL1B. 4     | 0         | 1. 318572 | 0. 645 | 0. 136 | 0 M1 | IL1B           |
| OLR1. 4     | 0         | 1. 31801  | 0. 762 | 0. 147 | 0 M1 | OLR1           |
| GPR183. 4   | 0         | 1. 30168  | 0. 81  | 0. 185 | 0 M1 | GPR183         |
| NR4A2. 4    | 0         | 1. 264021 | 0. 727 | 0. 156 | 0 M1 | NR4A2          |
| HLA-DMB. 4  | 0         | 1. 245278 | 0. 899 | 0. 204 | 0 M1 | HLA-DMB        |
| C5AR1. 4    | 0         | 1. 236866 | 0. 702 | 0. 145 | 0 M1 | C5AR1          |
| MS4A7. 4    | 0         | 1. 236615 | 0. 912 | 0. 216 | 0 M1 | MS4A7          |
| IER3. 4     | 0         | 1. 217332 | 0. 68  | 0. 153 | 0 M1 | IER3           |
| OSM. 4      | 0         | 1. 209506 | 0. 495 | 0. 075 | 0 M1 | OSM            |
| GPR34. 4    | 0         | 1. 205934 | 0. 785 | 0. 163 | 0 M1 | GPR34          |
| LY86. 4     | 0         | 1. 199875 | 0. 832 | 0. 184 | 0 M1 | LY86           |
| FPR1. 4     | 0         | 1. 183846 | 0. 798 | 0. 181 | 0 M1 | FPR1           |
| C3AR1. 4    | 0         | 1. 181988 | 0. 711 | 0. 143 | 0 M1 | C3AR1          |
| FCGR1A. 4   | 0         | 1. 180792 | 0. 748 | 0. 16  | 0 M1 | FCGR1A         |
| C10orf54. 0 | 0         | 1. 179503 | 0. 794 | 0. 186 | 0 M1 | C10orf54       |
| TREM2. 4    | 0         | 1. 17036  | 0. 918 | 0. 237 | 0 M1 | TREM2          |
| HLA-DQB1. 0 | 0         | 1. 170179 | 0. 865 | 0. 217 | 0 M1 | HLA-DQB1       |
| LILRB4. 4   | 0         | 1. 169458 | 0. 743 | 0. 157 | 0 M1 | LILRB4         |



|            |   |          |       |       |      |               |
|------------|---|----------|-------|-------|------|---------------|
| NR4A1. 4   | 0 | 1.163448 | 0.701 | 0.187 | 0 M1 | NR4A1         |
| NR4A3. 4   | 0 | 1.152534 | 0.507 | 0.079 | 0 M1 | NR4A3         |
| CSF2RA. 4  | 0 | 1.151605 | 0.627 | 0.117 | 0 M1 | CSF2RA        |
| SLC11A1. 4 | 0 | 1.145752 | 0.776 | 0.211 | 0 M1 | SLC11A1       |
| FCGR3A. 4  | 0 | 1.144157 | 0.898 | 0.23  | 0 M1 | FCGR3A        |
| APOC2. 3   | 0 | 1.141357 | 0.6   | 0.107 | 0 M1 | APOC2         |
| TBXAS1. 4  | 0 | 1.140559 | 0.69  | 0.151 | 0 M1 | TBXAS1        |
| CCL4. 3    | 0 | 1.134266 | 0.719 | 0.245 | 0 M1 | CCL4          |
| MS4A6A. 4  | 0 | 1.132866 | 0.899 | 0.229 | 0 M1 | MS4A6A        |
| FCGR2A. 4  | 0 | 1.132486 | 0.785 | 0.19  | 0 M1 | FCGR2A        |
| ZNF331. 4  | 0 | 1.13123  | 0.717 | 0.235 | 0 M1 | ZNF331        |
| CD69. 4    | 0 | 1.131226 | 0.529 | 0.078 | 0 M1 | CD69          |
| CCL3. 4    | 0 | 1.126151 | 0.883 | 0.33  | 0 M1 | CCL3          |
| RNASE6. 4  | 0 | 1.119904 | 0.756 | 0.178 | 0 M1 | RNASE6        |
| PLD4. 4    | 0 | 1.118331 | 0.543 | 0.075 | 0 M1 | PLD4          |
| CD37. 4    | 0 | 1.118037 | 0.814 | 0.198 | 0 M1 | CD37          |
| LST1. 4    | 0 | 1.116422 | 0.818 | 0.211 | 0 M1 | LST1          |
| CSF1R. 4   | 0 | 1.112176 | 0.741 | 0.173 | 0 M1 | CSF1R         |
| RGS10. 4   | 0 | 1.111036 | 0.854 | 0.239 | 0 M1 | RGS10         |
| KLF4. 4    | 0 | 1.110277 | 0.566 | 0.134 | 0 M1 | KLF4          |
| IFI30. 4   | 0 | 1.107808 | 0.625 | 0.138 | 0 M1 | IFI30         |
| TM6SF1. 4  | 0 | 1.107443 | 0.518 | 0.086 | 0 M1 | TM6SF1        |
| HAVCR2. 4  | 0 | 1.106527 | 0.662 | 0.145 | 0 M1 | HAVCR2        |
| NFKBID. 4  | 0 | 1.101156 | 0.479 | 0.072 | 0 M1 | NFKBID        |
| ADORA3. 4  | 0 | 1.100751 | 0.707 | 0.171 | 0 M1 | ADORA3        |
| SGK1. 4    | 0 | 1.094535 | 0.897 | 0.344 | 0 M1 | SGK1          |
| HLA-DMA. 4 | 0 | 1.088697 | 0.949 | 0.3   | 0 M1 | HLA-DMA       |
| PLAUR. 4   | 0 | 1.085636 | 0.825 | 0.275 | 0 M1 | PLAUR         |
| HBEGF. 4   | 0 | 1.083828 | 0.546 | 0.149 | 0 M1 | HBEGF         |
| RP11-552C  | 0 | 1.0808   | 0.44  | 0.056 | 0 M1 | RP11-552D4. 1 |
| PDK4. 3    | 0 | 1.075032 | 0.497 | 0.104 | 0 M1 | PDK4          |
| VSIG4. 4   | 0 | 1.074237 | 0.912 | 0.255 | 0 M1 | VSIG4         |
| RGS1. 4    | 0 | 1.073837 | 0.99  | 0.338 | 0 M1 | RGS1          |
| HCLS1. 4   | 0 | 1.071294 | 0.773 | 0.193 | 0 M1 | HCLS1         |
| IRF8. 4    | 0 | 1.07068  | 0.507 | 0.088 | 0 M1 | IRF8          |
| CH25H. 2   | 0 | 1.066501 | 0.457 | 0.084 | 0 M1 | CH25H         |
| CSF3R. 4   | 0 | 1.065897 | 0.496 | 0.084 | 0 M1 | CSF3R         |
| RAB20. 4   | 0 | 1.062993 | 0.584 | 0.166 | 0 M1 | RAB20         |
| C1orf162.  | 0 | 1.062981 | 0.833 | 0.219 | 0 M1 | C1orf162      |
| MS4A4A. 4  | 0 | 1.059997 | 0.771 | 0.189 | 0 M1 | MS4A4A        |
| CCL4L2. 3  | 0 | 1.059143 | 0.343 | 0.035 | 0 M1 | CCL4L2        |
| SAMSN1. 4  | 0 | 1.055739 | 0.682 | 0.165 | 0 M1 | SAMSN1        |
| IL18. 4    | 0 | 1.049604 | 0.562 | 0.119 | 0 M1 | IL18          |
| CXCR4. 3   | 0 | 1.046349 | 0.814 | 0.303 | 0 M1 | CXCR4         |
| HAMP. 4    | 0 | 1.044528 | 0.471 | 0.098 | 0 M1 | HAMP          |
| FCGR1B. 3  | 0 | 1.043699 | 0.511 | 0.093 | 0 M1 | FCGR1B        |
| CD86. 4    | 0 | 1.038836 | 0.594 | 0.137 | 0 M1 | CD86          |
| CTSS. 4    | 0 | 1.037257 | 0.85  | 0.254 | 0 M1 | CTSS          |
| HLA-DQA1.  | 0 | 1.035227 | 0.801 | 0.207 | 0 M1 | HLA-DQA1      |
| CD14. 4    | 0 | 1.033837 | 0.93  | 0.304 | 0 M1 | CD14          |
| AIF1. 4    | 0 | 1.032337 | 0.954 | 0.302 | 0 M1 | AIF1          |

|            |   |          |       |       |      |          |
|------------|---|----------|-------|-------|------|----------|
| OLFML3. 3  | 0 | 1.030327 | 0.603 | 0.151 | 0 M1 | OLFML3   |
| PLXDC2. 4  | 0 | 1.027422 | 0.586 | 0.134 | 0 M1 | PLXDC2   |
| CD53. 4    | 0 | 1.027017 | 0.81  | 0.216 | 0 M1 | CD53     |
| CLEC7A. 4  | 0 | 1.026848 | 0.516 | 0.107 | 0 M1 | CLEC7A   |
| LAT2. 4    | 0 | 1.026796 | 0.575 | 0.128 | 0 M1 | LAT2     |
| FGL2. 4    | 0 | 1.025592 | 0.517 | 0.108 | 0 M1 | FGL2     |
| SERPINA1.  | 0 | 1.02434  | 0.766 | 0.206 | 0 M1 | SERPINA1 |
| RNASET2. 4 | 0 | 1.024333 | 0.888 | 0.401 | 0 M1 | RNASET2  |
| FCER1G. 4  | 0 | 1.022679 | 0.975 | 0.334 | 0 M1 | FCER1G   |
| FYB. 4     | 0 | 1.021633 | 0.606 | 0.146 | 0 M1 | FYB      |
| SERPINB9.  | 0 | 1.021334 | 0.464 | 0.083 | 0 M1 | SERPINB9 |
| SLCO2B1. 3 | 0 | 1.018497 | 0.617 | 0.141 | 0 M1 | SLCO2B1  |
| CPVL. 4    | 0 | 1.015892 | 0.772 | 0.264 | 0 M1 | CPVL     |
| SCIN. 4    | 0 | 1.01426  | 0.475 | 0.086 | 0 M1 | SCIN     |
| KLF2. 3    | 0 | 1.01404  | 0.385 | 0.081 | 0 M1 | KLF2     |
| REL. 4     | 0 | 1.01358  | 0.637 | 0.23  | 0 M1 | REL      |
| RILPL2. 4  | 0 | 1.012831 | 0.579 | 0.194 | 0 M1 | RILPL2   |
| TYROBP. 4  | 0 | 1.011159 | 0.992 | 0.353 | 0 M1 | TYROBP   |
| CYBA. 4    | 0 | 1.008976 | 0.869 | 0.312 | 0 M1 | CYBA     |
| ALOX5AP. 4 | 0 | 1.006244 | 0.918 | 0.295 | 0 M1 | ALOX5AP  |
| PLEK. 4    | 0 | 1.001843 | 0.512 | 0.107 | 0 M1 | PLEK     |
| MAP3K8. 4  | 0 | 0.992766 | 0.505 | 0.119 | 0 M1 | MAP3K8   |
| SLC2A5. 4  | 0 | 0.992589 | 0.511 | 0.102 | 0 M1 | SLC2A5   |
| BCL2A1. 4  | 0 | 0.990598 | 0.457 | 0.097 | 0 M1 | BCL2A1   |
| LAPTM5. 4  | 0 | 0.988502 | 0.966 | 0.329 | 0 M1 | LAPTM5   |
| CXCL16. 4  | 0 | 0.986414 | 0.841 | 0.376 | 0 M1 | CXCL16   |
| ARHGDIB. 4 | 0 | 0.981478 | 0.886 | 0.268 | 0 M1 | ARHGDIB  |
| HCST. 4    | 0 | 0.981446 | 0.717 | 0.198 | 0 M1 | HCST     |
| LTC4S. 4   | 0 | 0.978477 | 0.504 | 0.101 | 0 M1 | LTC4S    |
| C1QC. 4    | 0 | 0.977927 | 0.995 | 0.402 | 0 M1 | C1QC     |
| PHACTR1. 4 | 0 | 0.977867 | 0.365 | 0.068 | 0 M1 | PHACTR1  |
| ITGB2. 4   | 0 | 0.976042 | 0.792 | 0.23  | 0 M1 | ITGB2    |
| STX11. 4   | 0 | 0.973273 | 0.381 | 0.061 | 0 M1 | STX11    |
| EVI2B. 4   | 0 | 0.964641 | 0.56  | 0.131 | 0 M1 | EVI2B    |
| AXL. 4     | 0 | 0.964626 | 0.495 | 0.117 | 0 M1 | AXL      |
| LAIR1. 4   | 0 | 0.959135 | 0.596 | 0.157 | 0 M1 | LAIR1    |
| GPSM3. 4   | 0 | 0.956254 | 0.672 | 0.18  | 0 M1 | GPSM3    |
| IGSF6. 4   | 0 | 0.955896 | 0.452 | 0.094 | 0 M1 | IGSF6    |
| ADAM28. 4  | 0 | 0.955197 | 0.431 | 0.083 | 0 M1 | ADAM28   |
| RHBDF2. 4  | 0 | 0.955085 | 0.498 | 0.113 | 0 M1 | RHBDF2   |
| PILRA. 4   | 0 | 0.954131 | 0.477 | 0.102 | 0 M1 | PILRA    |
| THEMIS2. 4 | 0 | 0.949542 | 0.581 | 0.174 | 0 M1 | THEMIS2  |
| GMFG. 4    | 0 | 0.948853 | 0.738 | 0.209 | 0 M1 | GMFG     |
| TYMP. 4    | 0 | 0.94714  | 0.678 | 0.232 | 0 M1 | TYMP     |
| CD300A. 4  | 0 | 0.946274 | 0.531 | 0.123 | 0 M1 | CD300A   |
| C1QA. 4    | 0 | 0.94299  | 0.995 | 0.445 | 0 M1 | C1QA     |
| ABI3. 4    | 0 | 0.941002 | 0.534 | 0.121 | 0 M1 | ABI3     |
| CREM. 4    | 0 | 0.939332 | 0.716 | 0.344 | 0 M1 | CREM     |
| CD68. 4    | 0 | 0.938658 | 0.919 | 0.346 | 0 M1 | CD68     |
| CYBB. 4    | 0 | 0.936858 | 0.53  | 0.124 | 0 M1 | CYBB     |
| SPI1. 4    | 0 | 0.934809 | 0.62  | 0.162 | 0 M1 | SPI1     |

|            |            |       |       |      |          |
|------------|------------|-------|-------|------|----------|
| FCGBP. 3   | 0 0.933391 | 0.569 | 0.161 | 0 M1 | FCGBP    |
| SRGN. 4    | 0 0.926415 | 0.989 | 0.401 | 0 M1 | SRGN     |
| HLA-DQA2.  | 0 0.926158 | 0.473 | 0.112 | 0 M1 | HLA-DQA2 |
| LGALS9. 4  | 0 0.926141 | 0.598 | 0.168 | 0 M1 | LGALS9   |
| PYCARD. 4  | 0 0.926092 | 0.666 | 0.208 | 0 M1 | PYCARD   |
| HLA-DPB1.  | 0 0.924532 | 0.975 | 0.398 | 0 M1 | HLA-DPB1 |
| CTSH. 4    | 0 0.9239   | 0.681 | 0.218 | 0 M1 | CTSH     |
| VAMP8. 4   | 0 0.922596 | 0.813 | 0.249 | 0 M1 | VAMP8    |
| APBB1IP. 4 | 0 0.918095 | 0.459 | 0.096 | 0 M1 | APBB1IP  |
| TMEM119. 4 | 0 0.91669  | 0.36  | 0.054 | 0 M1 | TMEM119  |
| MSR1. 4    | 0 0.915857 | 0.507 | 0.114 | 0 M1 | MSR1     |
| SIGLEC10.  | 0 0.914896 | 0.461 | 0.102 | 0 M1 | SIGLEC10 |
| SERPINF1.  | 0 0.908229 | 0.549 | 0.159 | 0 M1 | SERPINF1 |
| PADI2. 4   | 0 0.905408 | 0.4   | 0.082 | 0 M1 | PADI2    |
| FXVD5. 4   | 0 0.904576 | 0.76  | 0.256 | 0 M1 | FXVD5    |
| C3. 3      | 0 0.903742 | 0.864 | 0.308 | 0 M1 | C3       |
| CPM. 3     | 0 0.903519 | 0.546 | 0.172 | 0 M1 | CPM      |
| APOC1. 3   | 0 0.901985 | 0.951 | 0.428 | 0 M1 | APOC1    |
| CD163. 4   | 0 0.899559 | 0.653 | 0.2   | 0 M1 | CD163    |
| PTGER4. 4  | 0 0.89929  | 0.391 | 0.07  | 0 M1 | PTGER4   |
| TAGAP. 4   | 0 0.899094 | 0.341 | 0.052 | 0 M1 | TAGAP    |
| PTPRC. 4   | 0 0.898774 | 0.537 | 0.136 | 0 M1 | PTPRC    |
| ADAP2. 4   | 0 0.89731  | 0.495 | 0.122 | 0 M1 | ADAP2    |
| FOLR2. 4   | 0 0.896704 | 0.49  | 0.115 | 0 M1 | FOLR2    |
| CORO1A. 4  | 0 0.896323 | 0.782 | 0.291 | 0 M1 | CORO1A   |
| C1QB. 4    | 0 0.895246 | 0.997 | 0.484 | 0 M1 | C1QB     |
| FAM105A. 4 | 0 0.893774 | 0.452 | 0.104 | 0 M1 | FAM105A  |
| CTSC. 4    | 0 0.888834 | 0.803 | 0.299 | 0 M1 | CTSC     |
| ENTPD1. 4  | 0 0.883206 | 0.442 | 0.106 | 0 M1 | ENTPD1   |
| MNDA. 4    | 0 0.883018 | 0.476 | 0.117 | 0 M1 | MNDA     |
| SLA. 4     | 0 0.881022 | 0.528 | 0.136 | 0 M1 | SLA      |
| AOAH. 4    | 0 0.880709 | 0.381 | 0.071 | 0 M1 | AOAH     |
| LPCAT2. 4  | 0 0.872712 | 0.422 | 0.092 | 0 M1 | LPCAT2   |
| TNFRSF1B.  | 0 0.869995 | 0.483 | 0.129 | 0 M1 | TNFRSF1B |
| CX3CR1. 3  | 0 0.867193 | 0.355 | 0.05  | 0 M1 | CX3CR1   |
| IFNGR1. 4  | 0 0.860774 | 0.739 | 0.376 | 0 M1 | IFNGR1   |
| IFITM2. 4  | 0 0.851726 | 0.624 | 0.214 | 0 M1 | IFITM2   |
| HLA-DRB5.  | 0 0.848189 | 0.844 | 0.31  | 0 M1 | HLA-DRB5 |
| CNPY3. 4   | 0 0.847632 | 0.71  | 0.352 | 0 M1 | CNPY3    |
| TMEM176B.  | 0 0.843993 | 0.71  | 0.28  | 0 M1 | TMEM176B |
| SCPEP1. 3  | 0 0.840862 | 0.65  | 0.285 | 0 M1 | SCPEP1   |
| PLIN2. 3   | 0 0.84084  | 0.709 | 0.269 | 0 M1 | PLIN2    |
| CAPG. 4    | 0 0.835944 | 0.799 | 0.337 | 0 M1 | CAPG     |
| SLC7A7. 4  | 0 0.832685 | 0.463 | 0.116 | 0 M1 | SLC7A7   |
| HLA-DPA1.  | 0 0.818187 | 0.992 | 0.441 | 0 M1 | HLA-DPA1 |
| RGS2. 3    | 0 0.806329 | 0.846 | 0.365 | 0 M1 | RGS2     |
| FCGRT. 3   | 0 0.801225 | 0.929 | 0.474 | 0 M1 | FCGRT    |
| ARPC1B. 4  | 0 0.79582  | 0.881 | 0.461 | 0 M1 | ARPC1B   |
| HMOX1. 4   | 0 0.793797 | 0.631 | 0.227 | 0 M1 | HMOX1    |
| SERPINB1.  | 0 0.791356 | 0.611 | 0.198 | 0 M1 | SERPINB1 |
| HLA-DRB1.  | 0 0.787473 | 0.995 | 0.44  | 0 M1 | HLA-DRB1 |

|            |                |       |       |          |          |
|------------|----------------|-------|-------|----------|----------|
| KLF6. 3    | 0 0.787058     | 0.853 | 0.467 | 0 M1     | KLF6     |
| FOSB. 3    | 0 0.784978     | 0.709 | 0.328 | 0 M1     | FOSB     |
| HLA-E. 4   | 0 0.747926     | 0.94  | 0.527 | 0 M1     | HLA-E    |
| DUSP1. 4   | 0 0.718372     | 0.864 | 0.517 | 0 M1     | DUSP1    |
| GSN. 3     | 0 0.704783     | 0.836 | 0.444 | 0 M1     | GSN      |
| MCL1. 4    | 0 0.7018       | 0.82  | 0.554 | 0 M1     | MCL1     |
| HERPUD1. 3 | 0 0.662616     | 0.899 | 0.59  | 0 M1     | HERPUD1  |
| GRN. 4     | 0 0.656047     | 0.836 | 0.517 | 0 M1     | GRN      |
| ZFP36. 2   | 0 0.622479     | 0.944 | 0.499 | 0 M1     | ZFP36    |
| ID2. 3     | 0 0.604165     | 0.914 | 0.602 | 0 M1     | ID2      |
| HLA-DRA. 3 | 0 0.574742     | 0.997 | 0.56  | 0 M1     | HLA-DRA  |
| NPC2. 3    | 0 0.564639     | 0.977 | 0.634 | 0 M1     | NPC2     |
| SAT1. 3    | 0 0.477781     | 0.997 | 0.764 | 0 M1     | SAT1     |
| CD74. 3    | 0 0.465858     | 1     | 0.701 | 0 M1     | CD74     |
| CTSB. 1    | 0 0.459235     | 0.978 | 0.712 | 0 M1     | CTSB     |
| GPX1. 4    | 0 0.451631     | 0.972 | 0.782 | 0 M1     | GPX1     |
| MALAT1. 4  | 0 -0.49706     | 0.999 | 0.995 | 0 M1     | MALAT1   |
| TUBA1A. 3  | 0 -0.92837     | 0.573 | 0.855 | 0 M1     | TUBA1A   |
| NGFRAP1. 3 | 0 -1.25461     | 0.197 | 0.734 | 0 M1     | NGFRAP1  |
| MAP1B. 3   | 0 -1.28509     | 0.104 | 0.62  | 0 M1     | MAP1B    |
| GPM6B. 4   | 0 -1.36134     | 0.174 | 0.708 | 0 M1     | GPM6B    |
| TUBB2B. 3  | 0 -1.43756     | 0.145 | 0.637 | 0 M1     | TUBB2B   |
| PTN. 4     | 0 -1.45181     | 0.167 | 0.706 | 0 M1     | PTN      |
| NOVA1. 4   | 0 -1.51347     | 0.039 | 0.567 | 0 M1     | NOVA1    |
| PSAP. 2    | ##### 0.400544 | 0.963 | 0.79  | ##### M1 | PSAP     |
| IL10. 4    | ##### 0.942985 | 0.338 | 0.06  | ##### M1 | IL10     |
| EBI3. 4    | ##### 0.843091 | 0.318 | 0.052 | ##### M1 | EBI3     |
| CCRL2. 4   | ##### 0.863601 | 0.301 | 0.046 | ##### M1 | CCRL2    |
| ARRB2. 4   | ##### 0.799266 | 0.694 | 0.341 | ##### M1 | ARRB2    |
| RBP1. 2    | ##### -1.2788  | 0.068 | 0.538 | ##### M1 | RBP1     |
| SOX2. 4    | ##### -1.27826 | 0.045 | 0.506 | ##### M1 | SOX2     |
| RASGEF1B.  | ##### 0.865268 | 0.36  | 0.073 | ##### M1 | RASGEF1B |
| A2M. 3     | ##### 0.610341 | 0.796 | 0.397 | ##### M1 | A2M      |
| SLC16A3. 4 | ##### 0.804026 | 0.63  | 0.258 | ##### M1 | SLC16A3  |
| MEF2C. 4   | ##### 0.865758 | 0.572 | 0.225 | ##### M1 | MEF2C    |
| C1orf61. 4 | ##### -1.1977  | 0.16  | 0.61  | ##### M1 | C1orf61  |
| ASAH1. 3   | ##### 0.575831 | 0.851 | 0.611 | ##### M1 | ASAH1    |
| PARVG. 4   | ##### 0.832878 | 0.429 | 0.108 | ##### M1 | PARVG    |
| MARCKSL1.  | ##### -1.20333 | 0.199 | 0.614 | ##### M1 | MARCKSL1 |
| CNN3. 4    | ##### -1.19148 | 0.077 | 0.546 | ##### M1 | CNN3     |
| LPAR5. 3   | ##### 0.754839 | 0.327 | 0.059 | ##### M1 | LPAR5    |
| TSC22D1. 3 | ##### -1.0744  | 0.124 | 0.59  | ##### M1 | TSC22D1  |
| GPR65. 4   | ##### 0.794644 | 0.379 | 0.084 | ##### M1 | GPR65    |
| HCK. 4     | ##### 0.801487 | 0.436 | 0.113 | ##### M1 | HCK      |
| GYPC. 4    | ##### 0.814115 | 0.606 | 0.25  | ##### M1 | GYPC     |
| CFD. 4     | ##### 0.856271 | 0.416 | 0.104 | ##### M1 | CFD      |
| NINJ1. 4   | ##### 0.754077 | 0.71  | 0.4   | ##### M1 | NINJ1    |
| LITAF. 4   | ##### 0.738652 | 0.728 | 0.405 | ##### M1 | LITAF    |
| GIMAP4. 4  | ##### 0.77113  | 0.409 | 0.098 | ##### M1 | GIMAP4   |
| CALD1. 3   | ##### -1.14864 | 0.041 | 0.496 | ##### M1 | CALD1    |
| TNFSF13B.  | ##### 0.805077 | 0.485 | 0.147 | ##### M1 | TNFSF13B |

|             |       |          |       |       |       |    |          |
|-------------|-------|----------|-------|-------|-------|----|----------|
| PALD1. 4    | ##### | 0.799746 | 0.317 | 0.059 | ##### | M1 | PALD1    |
| RCS1. 4     | ##### | 0.775374 | 0.354 | 0.073 | ##### | M1 | RCS1     |
| WAS. 4      | ##### | 0.809714 | 0.442 | 0.121 | ##### | M1 | WAS      |
| MYO1F. 4    | ##### | 0.838096 | 0.453 | 0.13  | ##### | M1 | MYO1F    |
| GAP43. 4    | ##### | -1.33693 | 0.088 | 0.542 | ##### | M1 | GAP43    |
| OTUD1. 4    | ##### | 0.853564 | 0.305 | 0.057 | ##### | M1 | OTUD1    |
| MAFB. 3     | ##### | 0.80097  | 0.606 | 0.256 | ##### | M1 | MAFB     |
| FEZ1. 3     | ##### | -1.08018 | 0.053 | 0.505 | ##### | M1 | FEZ1     |
| DUSP2. 4    | ##### | 0.764357 | 0.333 | 0.066 | ##### | M1 | DUSP2    |
| SORL1. 4    | ##### | 0.86038  | 0.5   | 0.172 | ##### | M1 | SORL1    |
| TMEM173. 4  | ##### | 0.814785 | 0.361 | 0.079 | ##### | M1 | TMEM173  |
| PFN2. 3     | ##### | -1.10896 | 0.059 | 0.509 | ##### | M1 | PFN2     |
| CTS1. 4     | ##### | 0.788492 | 0.554 | 0.196 | ##### | M1 | CTS1     |
| FAM26F. 4   | ##### | 0.759862 | 0.428 | 0.114 | ##### | M1 | FAM26F   |
| S100A11. 4  | ##### | 0.413267 | 0.953 | 0.598 | ##### | M1 | S100A11  |
| APOE. 3     | ##### | 0.51594  | 0.857 | 0.651 | ##### | M1 | APOE     |
| IL10RA. 4   | ##### | 0.787206 | 0.378 | 0.09  | ##### | M1 | IL10RA   |
| FXYD6. 4    | ##### | -1.10378 | 0.094 | 0.534 | ##### | M1 | FXYD6    |
| UCHL1. 2    | ##### | -1.15639 | 0.071 | 0.509 | ##### | M1 | UCHL1    |
| CDKN1A. 3   | ##### | 0.811412 | 0.591 | 0.25  | ##### | M1 | CDKN1A   |
| PPP1R15A. 4 | ##### | 0.7351   | 0.706 | 0.419 | ##### | M1 | PPP1R15A |
| UCP2. 4     | ##### | 0.780758 | 0.559 | 0.215 | ##### | M1 | UCP2     |
| MFSD1. 4    | ##### | 0.797382 | 0.615 | 0.289 | ##### | M1 | MFSD1    |
| LPAR6. 4    | ##### | 0.865478 | 0.507 | 0.184 | ##### | M1 | LPAR6    |
| ACSL1. 4    | ##### | 0.850047 | 0.491 | 0.174 | ##### | M1 | ACSL1    |
| CEBPB. 4    | ##### | 0.733009 | 0.681 | 0.385 | ##### | M1 | CEBPB    |
| MGAT4A. 4   | ##### | 0.854016 | 0.485 | 0.167 | ##### | M1 | MGAT4A   |
| PCSK1N. 3   | ##### | -1.15912 | 0.071 | 0.49  | ##### | M1 | PCSK1N   |
| OSTF1. 4    | ##### | 0.804879 | 0.57  | 0.235 | ##### | M1 | OSTF1    |
| P2RY13. 4   | ##### | 0.809932 | 0.277 | 0.046 | ##### | M1 | P2RY13   |
| MDK. 3      | ##### | -1.10734 | 0.126 | 0.564 | ##### | M1 | MDK      |
| HLA-DQB2. 4 | ##### | 0.937212 | 0.301 | 0.056 | ##### | M1 | HLA-DQB2 |
| SEC61G. 4   | ##### | -0.98033 | 0.58  | 0.843 | ##### | M1 | SEC61G   |
| ELF1. 4     | ##### | 0.859514 | 0.502 | 0.192 | ##### | M1 | ELF1     |
| CYTL1. 4    | ##### | 0.855383 | 0.322 | 0.068 | ##### | M1 | CYTL1    |
| MGST2. 4    | ##### | 0.797032 | 0.524 | 0.199 | ##### | M1 | MGST2    |
| USP53. 4    | ##### | 0.863909 | 0.37  | 0.095 | ##### | M1 | USP53    |
| ETS2. 4     | ##### | 0.803856 | 0.468 | 0.155 | ##### | M1 | ETS2     |
| PABPC1. 3   | ##### | 0.437485 | 0.886 | 0.716 | ##### | M1 | PABPC1   |
| NFIB. 4     | ##### | -1.1322  | 0.033 | 0.447 | ##### | M1 | NFIB     |
| NLRP3. 4    | ##### | 0.780824 | 0.278 | 0.049 | ##### | M1 | NLRP3    |
| DHRS7. 4    | ##### | 0.646822 | 0.767 | 0.514 | ##### | M1 | DHRS7    |
| CD84. 4     | ##### | 0.761703 | 0.354 | 0.084 | ##### | M1 | CD84     |
| GPM6A. 3    | ##### | -0.96002 | 0.136 | 0.578 | ##### | M1 | GPM6A    |
| NFKBIA. 3   | ##### | 0.64873  | 0.737 | 0.452 | ##### | M1 | NFKBIA   |
| RNF149. 4   | ##### | 0.814959 | 0.532 | 0.218 | ##### | M1 | RNF149   |
| CD302. 4    | ##### | 0.851357 | 0.453 | 0.155 | ##### | M1 | CD302    |
| IL13RA1. 4  | ##### | 0.828531 | 0.502 | 0.198 | ##### | M1 | IL13RA1  |
| CTSD. 3     | ##### | 0.504797 | 0.831 | 0.601 | ##### | M1 | CTSD     |
| SUSD3. 4    | ##### | 0.751412 | 0.292 | 0.056 | ##### | M1 | SUSD3    |
| BST2. 3     | ##### | 0.55261  | 0.803 | 0.422 | ##### | M1 | BST2     |

|            |       |           |        |        |       |    |             |
|------------|-------|-----------|--------|--------|-------|----|-------------|
| SH3TC1. 4  | ##### | 0. 729492 | 0. 26  | 0. 044 | ##### | M1 | SH3TC1      |
| ZNF667-AS  | ##### | -0. 96379 | 0. 042 | 0. 458 | ##### | M1 | ZNF667-AS1  |
| RHOG. 4    | ##### | 0. 711978 | 0. 675 | 0. 356 | ##### | M1 | RHOG        |
| CD4. 4     | ##### | 0. 729299 | 0. 394 | 0. 107 | ##### | M1 | CD4         |
| IGFBP2. 3  | ##### | -1. 23644 | 0. 042 | 0. 441 | ##### | M1 | IGFBP2      |
| ATF3. 4    | ##### | 0. 808714 | 0. 559 | 0. 251 | ##### | M1 | ATF3        |
| CAPZB. 3   | ##### | 0. 44995  | 0. 85  | 0. 672 | ##### | M1 | CAPZB       |
| PPT1. 3    | ##### | 0. 600515 | 0. 75  | 0. 517 | ##### | M1 | PPT1        |
| PMAIP1. 4  | ##### | 0. 796069 | 0. 265 | 0. 047 | ##### | M1 | PMAIP1      |
| SNCA. 4    | ##### | 0. 766426 | 0. 373 | 0. 098 | ##### | M1 | SNCA        |
| PTPN6. 4   | ##### | 0. 723526 | 0. 403 | 0. 114 | ##### | M1 | PTPN6       |
| TSPO. 3    | ##### | 0. 534075 | 0. 793 | 0. 555 | ##### | M1 | TSPO        |
| PRDX2. 4   | ##### | -0. 76191 | 0. 385 | 0. 765 | ##### | M1 | PRDX2       |
| HPGDS. 4   | ##### | 0. 682766 | 0. 277 | 0. 051 | ##### | M1 | HPGDS       |
| FABP7. 3   | ##### | -1. 31865 | 0. 061 | 0. 448 | ##### | M1 | FABP7       |
| LINC01094  | ##### | 0. 773559 | 0. 385 | 0. 107 | ##### | M1 | LINC01094   |
| ARHGAP24.  | ##### | 0. 77799  | 0. 377 | 0. 102 | ##### | M1 | ARHGAP24    |
| EVI2A. 4   | ##### | 0. 694566 | 0. 492 | 0. 169 | ##### | M1 | EVI2A       |
| AP001055.  | ##### | 0. 736175 | 0. 255 | 0. 045 | ##### | M1 | AP001055. 6 |
| NFIX. 3    | ##### | -0. 92762 | 0. 015 | 0. 396 | ##### | M1 | NFIX        |
| PTAFR. 4   | ##### | 0. 753782 | 0. 337 | 0. 083 | ##### | M1 | PTAFR       |
| CEBPD. 2   | ##### | 0. 656655 | 0. 699 | 0. 411 | ##### | M1 | CEBPD       |
| RNASE2. 4  | ##### | 0. 742318 | 0. 395 | 0. 11  | ##### | M1 | RNASE2      |
| SPTLC2. 4  | ##### | 0. 825964 | 0. 448 | 0. 162 | ##### | M1 | SPTLC2      |
| FHL1. 4    | ##### | -0. 91454 | 0. 032 | 0. 422 | ##### | M1 | FHL1        |
| SIGLEC8. 3 | ##### | 0. 689953 | 0. 248 | 0. 043 | ##### | M1 | SIGLEC8     |
| RASSF5. 4  | ##### | 0. 747503 | 0. 32  | 0. 079 | ##### | M1 | RASSF5      |
| VM01. 4    | ##### | 0. 804752 | 0. 388 | 0. 114 | ##### | M1 | VM01        |
| SOX4. 3    | ##### | -1. 15338 | 0. 126 | 0. 509 | ##### | M1 | SOX4        |
| CSRNP1. 4  | ##### | 0. 80104  | 0. 418 | 0. 145 | ##### | M1 | CSRNP1      |
| MGAT1. 4   | ##### | 0. 773797 | 0. 59  | 0. 311 | ##### | M1 | MGAT1       |
| EVL. 3     | ##### | 0. 777142 | 0. 596 | 0. 303 | ##### | M1 | EVL         |
| CPE. 3     | ##### | -0. 96278 | 0. 064 | 0. 455 | ##### | M1 | CPE         |
| EPB41L2. 3 | ##### | 0. 805021 | 0. 539 | 0. 265 | ##### | M1 | EPB41L2     |
| FYN. 3     | ##### | -0. 87183 | 0. 017 | 0. 388 | ##### | M1 | FYN         |
| PLSCR1. 4  | ##### | 0. 72383  | 0. 605 | 0. 31  | ##### | M1 | PLSCR1      |
| BEX1. 3    | ##### | -1. 08361 | 0. 039 | 0. 413 | ##### | M1 | BEX1        |
| FAM49B. 4  | ##### | 0. 62976  | 0. 698 | 0. 467 | ##### | M1 | FAM49B      |
| S100A4. 4  | ##### | 0. 615149 | 0. 586 | 0. 237 | ##### | M1 | S100A4      |
| MAP2. 4    | ##### | -0. 89778 | 0. 03  | 0. 4   | ##### | M1 | MAP2        |
| GADD45B. 2 | ##### | 0. 486622 | 0. 771 | 0. 434 | ##### | M1 | GADD45B     |
| SCG5. 3    | ##### | -0. 98889 | 0. 022 | 0. 389 | ##### | M1 | SCG5        |
| ELAVL3. 4  | ##### | -0. 90838 | 0. 012 | 0. 371 | ##### | M1 | ELAVL3      |
| CAMK2N1. 4 | ##### | -0. 94165 | 0. 016 | 0. 377 | ##### | M1 | CAMK2N1     |
| NPDC1. 3   | ##### | -0. 86964 | 0. 021 | 0. 384 | ##### | M1 | NPDC1       |
| ARPC3. 2   | ##### | 0. 326025 | 0. 915 | 0. 782 | ##### | M1 | ARPC3       |
| MLLT11. 2  | ##### | -0. 94888 | 0. 127 | 0. 519 | ##### | M1 | MLLT11      |
| LILRB1. 4  | ##### | 0. 670433 | 0. 269 | 0. 056 | ##### | M1 | LILRB1      |
| ALOX5. 4   | ##### | 0. 680644 | 0. 35  | 0. 096 | ##### | M1 | ALOX5       |
| LINC00461  | ##### | -0. 91613 | 0. 021 | 0. 38  | ##### | M1 | LINC00461   |
| APLP1. 4   | ##### | -0. 95262 | 0. 043 | 0. 413 | ##### | M1 | APLP1       |

|             |       |          |       |       |       |    |                |
|-------------|-------|----------|-------|-------|-------|----|----------------|
| KIF21A. 4   | ##### | -0.86649 | 0.01  | 0.361 | ##### | M1 | KIF21A         |
| KCNMB1. 4   | ##### | 0.738356 | 0.288 | 0.065 | ##### | M1 | KCNMB1         |
| SCD5. 3     | ##### | -0.88057 | 0.075 | 0.458 | ##### | M1 | SCD5           |
| APP. 3      | ##### | -0.73923 | 0.183 | 0.593 | ##### | M1 | APP            |
| BLNK. 3     | ##### | 0.680086 | 0.221 | 0.036 | ##### | M1 | BLNK           |
| ACTG1. 4    | ##### | -0.42689 | 0.894 | 0.959 | ##### | M1 | ACTG1          |
| CKB. 4      | ##### | -0.82532 | 0.309 | 0.637 | ##### | M1 | CKB            |
| TUBB2A. 3   | ##### | -0.85555 | 0.157 | 0.542 | ##### | M1 | TUBB2A         |
| ELL2. 3     | ##### | 0.735502 | 0.418 | 0.147 | ##### | M1 | ELL2           |
| DOCK8. 4    | ##### | 0.7164   | 0.318 | 0.081 | ##### | M1 | DOCK8          |
| LAPTM4B. 4  | ##### | -0.81632 | 0.029 | 0.392 | ##### | M1 | LAPTM4B        |
| HLA-DOA. 3  | ##### | 0.642173 | 0.272 | 0.058 | ##### | M1 | HLA-DOA        |
| SDCBP. 2    | ##### | 0.402987 | 0.861 | 0.702 | ##### | M1 | SDCBP          |
| CD33. 4     | ##### | 0.724212 | 0.317 | 0.08  | ##### | M1 | CD33           |
| TLR2. 4     | ##### | 0.723816 | 0.301 | 0.073 | ##### | M1 | TLR2           |
| BIN1. 3     | ##### | 0.69304  | 0.589 | 0.315 | ##### | M1 | BIN1           |
| CEBPA. 3    | ##### | 0.676846 | 0.287 | 0.067 | ##### | M1 | CEBPA          |
| STXBP2. 4   | ##### | 0.701683 | 0.398 | 0.127 | ##### | M1 | STXBP2         |
| CXorf21. 4  | ##### | 0.743865 | 0.236 | 0.044 | ##### | M1 | CXorf21        |
| ST6GAL1. 3  | ##### | 0.694274 | 0.297 | 0.073 | ##### | M1 | ST6GAL1        |
| ITGAX. 4    | ##### | 0.739571 | 0.263 | 0.056 | ##### | M1 | ITGAX          |
| TRIB1. 3    | ##### | 0.812281 | 0.36  | 0.116 | ##### | M1 | TRIB1          |
| AKR1B1. 3   | ##### | 0.505658 | 0.776 | 0.595 | ##### | M1 | AKR1B1         |
| CLEC2B. 4   | ##### | 0.664415 | 0.444 | 0.157 | ##### | M1 | CLEC2B         |
| SMAP2. 4    | ##### | 0.802376 | 0.457 | 0.192 | ##### | M1 | SMAP2          |
| WBP5. 3     | ##### | -0.76554 | 0.16  | 0.571 | ##### | M1 | WBP5           |
| LIMS1. 4    | ##### | 0.653114 | 0.642 | 0.399 | ##### | M1 | LIMS1          |
| PPDPF. 1    | ##### | -0.62616 | 0.462 | 0.761 | ##### | M1 | PPDPF          |
| ANKRD22. 4  | ##### | 0.644749 | 0.213 | 0.035 | ##### | M1 | ANKRD22        |
| RP11-480C   | ##### | 0.579301 | 0.178 | 0.022 | ##### | M1 | RP11-480C22. 1 |
| RGS19. 4    | ##### | 0.771364 | 0.499 | 0.231 | ##### | M1 | RGS19          |
| HSD17B11. 4 | ##### | 0.690691 | 0.611 | 0.33  | ##### | M1 | HSD17B11       |
| FERMT3. 4   | ##### | 0.652556 | 0.388 | 0.122 | ##### | M1 | FERMT3         |
| C16orf45. 4 | ##### | -0.82722 | 0.026 | 0.377 | ##### | M1 | C16orf45       |
| NCF4. 4     | ##### | 0.706711 | 0.357 | 0.104 | ##### | M1 | NCF4           |
| STMN3. 2    | ##### | -0.78946 | 0.019 | 0.364 | ##### | M1 | STMN3          |
| LCP2. 4     | ##### | 0.713522 | 0.303 | 0.077 | ##### | M1 | LCP2           |
| DPYSL3. 3   | ##### | -0.82745 | 0.03  | 0.381 | ##### | M1 | DPYSL3         |
| KCTD12. 4   | ##### | 0.723427 | 0.46  | 0.191 | ##### | M1 | KCTD12         |
| LIPA. 4     | ##### | 0.690159 | 0.566 | 0.288 | ##### | M1 | LIPA           |
| NCAM1. 4    | ##### | -0.8164  | 0.039 | 0.395 | ##### | M1 | NCAM1          |
| SIK1. 4     | ##### | 0.704708 | 0.275 | 0.065 | ##### | M1 | SIK1           |
| PTPRZ1. 4   | ##### | -0.93811 | 0.087 | 0.444 | ##### | M1 | PTPRZ1         |
| PTGS1. 4    | ##### | 0.741492 | 0.359 | 0.116 | ##### | M1 | PTGS1          |
| ATP6VOE2. 4 | ##### | -0.7746  | 0.139 | 0.515 | ##### | M1 | ATP6VOE2       |
| SYNGR2. 4   | ##### | 0.702447 | 0.558 | 0.282 | ##### | M1 | SYNGR2         |
| DENND3. 4   | ##### | 0.661834 | 0.277 | 0.065 | ##### | M1 | DENND3         |
| CDH2. 3     | ##### | -0.79555 | 0.009 | 0.34  | ##### | M1 | CDH2           |
| PODXL2. 4   | ##### | -0.80804 | 0.024 | 0.365 | ##### | M1 | PODXL2         |
| CYTH4. 4    | ##### | 0.665573 | 0.298 | 0.075 | ##### | M1 | CYTH4          |
| BIN2. 4     | ##### | 0.661306 | 0.299 | 0.075 | ##### | M1 | BIN2           |

|             |       |          |       |       |       |    |             |
|-------------|-------|----------|-------|-------|-------|----|-------------|
| NEAT1. 2    | ##### | 0.364709 | 0.98  | 0.719 | ##### | M1 | NEAT1       |
| GOLM1. 3    | ##### | -0.77864 | 0.029 | 0.373 | ##### | M1 | GOLM1       |
| CD320. 2    | ##### | -0.77625 | 0.03  | 0.376 | ##### | M1 | CD320       |
| MYL12A. 3   | ##### | 0.473077 | 0.755 | 0.501 | ##### | M1 | MYL12A      |
| CLIC1. 2    | ##### | 0.425668 | 0.844 | 0.578 | ##### | M1 | CLIC1       |
| RB1. 4      | ##### | 0.749637 | 0.524 | 0.261 | ##### | M1 | RB1         |
| CXXC5. 4    | ##### | -0.79164 | 0.076 | 0.441 | ##### | M1 | CXXC5       |
| NRROS. 3    | ##### | 0.664571 | 0.215 | 0.038 | ##### | M1 | NRROS       |
| KDM6B. 4    | ##### | 0.787288 | 0.435 | 0.18  | ##### | M1 | KDM6B       |
| PLK3. 4     | ##### | 0.779928 | 0.453 | 0.198 | ##### | M1 | PLK3        |
| NPL. 3      | ##### | 0.660922 | 0.427 | 0.155 | ##### | M1 | NPL         |
| RP6-91H8. 3 | ##### | 0.6831   | 0.191 | 0.029 | ##### | M1 | RP6-91H8. 3 |
| MERTK. 3    | ##### | 0.697314 | 0.312 | 0.087 | ##### | M1 | MERTK       |
| SGCB. 1     | ##### | -0.81387 | 0.039 | 0.383 | ##### | M1 | SGCB        |
| DBN1. 4     | ##### | -0.8001  | 0.031 | 0.367 | ##### | M1 | DBN1        |
| LYN. 4      | ##### | 0.678818 | 0.384 | 0.132 | ##### | M1 | LYN         |
| ZFP36L1. 1  | ##### | 0.473851 | 0.759 | 0.52  | ##### | M1 | ZFP36L1     |
| SLC31A2. 4  | ##### | 0.724529 | 0.411 | 0.149 | ##### | M1 | SLC31A2     |
| LILRA2. 4   | ##### | 0.635021 | 0.246 | 0.051 | ##### | M1 | LILRA2      |
| SELPLG. 3   | ##### | 0.75353  | 0.308 | 0.084 | ##### | M1 | SELPLG      |
| TMEM176A. 3 | ##### | 0.699593 | 0.455 | 0.181 | ##### | M1 | TMEM176A    |
| OCIAD2. 3   | ##### | -1.12533 | 0.092 | 0.446 | ##### | M1 | OCIAD2      |
| ABL2. 4     | ##### | 0.817081 | 0.476 | 0.226 | ##### | M1 | ABL2        |
| TSC22D3. 3  | ##### | 0.601463 | 0.666 | 0.414 | ##### | M1 | TSC22D3     |
| TCEAL7. 2   | ##### | -0.8715  | 0.026 | 0.358 | ##### | M1 | TCEAL7      |
| CREG1. 4    | ##### | 0.682513 | 0.52  | 0.252 | ##### | M1 | CREG1       |
| HMHA1. 4    | ##### | 0.64657  | 0.287 | 0.073 | ##### | M1 | HMHA1       |
| DDR1. 3     | ##### | -0.77238 | 0.046 | 0.388 | ##### | M1 | DDR1        |
| COTL1. 4    | ##### | 0.554837 | 0.686 | 0.474 | ##### | M1 | COTL1       |
| EGR2. 3     | ##### | 0.861939 | 0.388 | 0.152 | ##### | M1 | EGR2        |
| MT3. 4      | ##### | -1.13406 | 0.208 | 0.547 | ##### | M1 | MT3         |
| PMP2. 4     | ##### | -1.04094 | 0.068 | 0.406 | ##### | M1 | PMP2        |
| GRASP. 4    | ##### | 0.57487  | 0.179 | 0.026 | ##### | M1 | GRASP       |
| EGR3. 3     | ##### | 0.744952 | 0.274 | 0.07  | ##### | M1 | EGR3        |
| RHOBTB3. 4  | ##### | -0.73125 | 0.103 | 0.47  | ##### | M1 | RHOBTB3     |
| BAALC. 3    | ##### | -0.84069 | 0.06  | 0.403 | ##### | M1 | BAALC       |
| PTGS2. 4    | ##### | 0.574076 | 0.199 | 0.034 | ##### | M1 | PTGS2       |
| JUNB. 2     | ##### | 0.386551 | 0.856 | 0.697 | ##### | M1 | JUNB        |
| TNFAIP3. 4  | ##### | 0.708773 | 0.368 | 0.122 | ##### | M1 | TNFAIP3     |
| NES. 4      | ##### | -0.93768 | 0.013 | 0.329 | ##### | M1 | NES         |
| ZBTB20. 3   | ##### | -0.71357 | 0.084 | 0.446 | ##### | M1 | ZBTB20      |
| TSPAN7. 2   | ##### | -0.86175 | 0.034 | 0.366 | ##### | M1 | TSPAN7      |
| CRIP2. 2    | ##### | -0.78052 | 0.034 | 0.37  | ##### | M1 | CRIP2       |
| PDGFB. 3    | ##### | 0.612048 | 0.165 | 0.022 | ##### | M1 | PDGFB       |
| MAPT. 4     | ##### | -0.81872 | 0.018 | 0.338 | ##### | M1 | MAPT        |
| GAS6. 4     | ##### | 0.704327 | 0.411 | 0.163 | ##### | M1 | GAS6        |
| SP100. 3    | ##### | 0.623082 | 0.519 | 0.24  | ##### | M1 | SP100       |
| SEZ6L2. 3   | ##### | -0.76304 | 0.011 | 0.326 | ##### | M1 | SEZ6L2      |
| CMTM7. 4    | ##### | 0.689117 | 0.363 | 0.124 | ##### | M1 | CMTM7       |
| SKIL. 4     | ##### | 0.763215 | 0.485 | 0.246 | ##### | M1 | SKIL        |
| CSRP2. 2    | ##### | -1.05494 | 0.03  | 0.356 | ##### | M1 | CSRP2       |



|             |       |          |       |       |       |    |               |
|-------------|-------|----------|-------|-------|-------|----|---------------|
| CMTM6. 4    | ##### | 0.66099  | 0.608 | 0.389 | ##### | M1 | CMTM6         |
| RNF130. 4   | ##### | 0.599959 | 0.647 | 0.426 | ##### | M1 | RNF130        |
| ZFP36L2. 4  | ##### | 0.542692 | 0.7   | 0.478 | ##### | M1 | ZFP36L2       |
| CD55. 4     | ##### | 0.676239 | 0.298 | 0.082 | ##### | M1 | CD55          |
| XBP1. 4     | ##### | 0.684723 | 0.57  | 0.331 | ##### | M1 | XBP1          |
| SCAMP2. 4   | ##### | 0.677932 | 0.578 | 0.333 | ##### | M1 | SCAMP2        |
| S100A16. 3  | ##### | -1.09315 | 0.036 | 0.361 | ##### | M1 | S100A16       |
| DRAM2. 4    | ##### | 0.744446 | 0.543 | 0.295 | ##### | M1 | DRAM2         |
| SPINT2. 4   | ##### | 0.66503  | 0.438 | 0.172 | ##### | M1 | SPINT2        |
| LYZ. 4      | ##### | 0.649437 | 0.433 | 0.161 | ##### | M1 | LYZ           |
| SERPINE2. 4 | ##### | -0.79574 | 0.026 | 0.347 | ##### | M1 | SERPINE2      |
| SOX11. 3    | ##### | -0.92595 | 0.017 | 0.324 | ##### | M1 | SOX11         |
| TMEM156. 4  | ##### | 0.574555 | 0.185 | 0.03  | ##### | M1 | TMEM156       |
| GAL3ST4. 3  | ##### | 0.735407 | 0.371 | 0.131 | ##### | M1 | GAL3ST4       |
| MYL6B. 3    | ##### | -0.67283 | 0.132 | 0.504 | ##### | M1 | MYL6B         |
| KIF5C. 4    | ##### | -0.74347 | 0.013 | 0.319 | ##### | M1 | KIF5C         |
| FKBP5. 4    | ##### | 0.672337 | 0.532 | 0.273 | ##### | M1 | FKBP5         |
| Clorf54. 4  | ##### | 0.689453 | 0.436 | 0.183 | ##### | M1 | Clorf54       |
| SH3BGRL. 2  | ##### | 0.44044  | 0.778 | 0.622 | ##### | M1 | SH3BGRL       |
| SLC29A1. 3  | ##### | 0.710322 | 0.321 | 0.101 | ##### | M1 | SLC29A1       |
| RASSF4. 4   | ##### | 0.679602 | 0.537 | 0.287 | ##### | M1 | RASSF4        |
| SYT11. 4    | ##### | -0.68376 | 0.091 | 0.443 | ##### | M1 | SYT11         |
| OGFRL1. 4   | ##### | 0.759479 | 0.373 | 0.143 | ##### | M1 | OGFRL1        |
| SCG3. 4     | ##### | -0.88797 | 0.014 | 0.317 | ##### | M1 | SCG3          |
| SCG2. 3     | ##### | -0.90173 | 0.012 | 0.312 | ##### | M1 | SCG2          |
| ENAH. 3     | ##### | -0.67842 | 0.013 | 0.314 | ##### | M1 | ENAH          |
| CFL2. 3     | ##### | -0.77471 | 0.055 | 0.383 | ##### | M1 | CFL2          |
| MEST. 3     | ##### | -0.76089 | 0.103 | 0.443 | ##### | M1 | MEST          |
| AKAP13. 4   | ##### | 0.743367 | 0.521 | 0.286 | ##### | M1 | AKAP13        |
| DDIT4. 3    | ##### | 0.594853 | 0.63  | 0.364 | ##### | M1 | DDIT4         |
| RP11-76E1   | ##### | 0.557181 | 0.14  | 0.016 | ##### | M1 | RP11-76E17. 3 |
| MKNK1. 3    | ##### | 0.718933 | 0.363 | 0.132 | ##### | M1 | MKNK1         |
| FAM229B. 3  | ##### | -0.71955 | 0.032 | 0.344 | ##### | M1 | FAM229B       |
| EEF1B2. 3   | ##### | 0.28725  | 0.87  | 0.757 | ##### | M1 | EEF1B2        |
| MEF2A. 4    | ##### | 0.742034 | 0.412 | 0.176 | ##### | M1 | MEF2A         |
| GSTA4. 3    | ##### | -0.76182 | 0.033 | 0.341 | ##### | M1 | GSTA4         |
| CRMP1. 3    | ##### | -0.80557 | 0.017 | 0.315 | ##### | M1 | CRMP1         |
| STMN4. 3    | ##### | -1.07235 | 0.05  | 0.357 | ##### | M1 | STMN4         |
| NLRP1. 3    | ##### | -0.71395 | 0.066 | 0.393 | ##### | M1 | NLRP1         |
| TSPAN5. 4   | ##### | -0.69019 | 0.015 | 0.312 | ##### | M1 | TSPAN5        |
| CELF2. 4    | ##### | 0.693387 | 0.569 | 0.346 | ##### | M1 | CELF2         |
| BTG2. 2     | ##### | 0.565749 | 0.654 | 0.43  | ##### | M1 | BTG2          |
| MEG3. 3     | ##### | -0.99208 | 0.047 | 0.356 | ##### | M1 | MEG3          |
| GLDN. 3     | ##### | 0.573385 | 0.257 | 0.065 | ##### | M1 | GLDN          |
| POP7. 3     | ##### | -0.65981 | 0.104 | 0.452 | ##### | M1 | POP7          |
| BTK. 4      | ##### | 0.599047 | 0.236 | 0.056 | ##### | M1 | BTK           |
| ATAT1. 4    | ##### | -0.69957 | 0.033 | 0.34  | ##### | M1 | ATAT1         |
| PCBP4. 4    | ##### | -0.69725 | 0.012 | 0.304 | ##### | M1 | PCBP4         |
| ATP6VOB. 4  | ##### | 0.327945 | 0.895 | 0.779 | ##### | M1 | ATP6VOB       |
| CADM4. 3    | ##### | -0.67164 | 0.017 | 0.313 | ##### | M1 | CADM4         |
| STMN1. 3    | ##### | -0.73407 | 0.371 | 0.683 | ##### | M1 | STMN1         |

|                |       |          |       |       |       |    |                |
|----------------|-------|----------|-------|-------|-------|----|----------------|
| TNF. 2         | ##### | 0.566098 | 0.153 | 0.021 | ##### | M1 | TNF            |
| STAB1. 3       | ##### | 0.631679 | 0.36  | 0.122 | ##### | M1 | STAB1          |
| NREP. 3        | ##### | -0.71453 | 0.024 | 0.322 | ##### | M1 | NREP           |
| LIMA1. 3       | ##### | -0.74206 | 0.057 | 0.37  | ##### | M1 | LIMA1          |
| FZD3. 1        | ##### | -0.64902 | 0.025 | 0.327 | ##### | M1 | FZD3           |
| TRIB2. 4       | ##### | -0.72163 | 0.018 | 0.312 | ##### | M1 | TRIB2          |
| ENO2. 4        | ##### | -0.73672 | 0.031 | 0.335 | ##### | M1 | ENO2           |
| SPTBN1. 2      | ##### | -0.65172 | 0.024 | 0.325 | ##### | M1 | SPTBN1         |
| SOX9. 3        | ##### | -0.80549 | 0.026 | 0.321 | ##### | M1 | SOX9           |
| LGMN. 3        | ##### | 0.625972 | 0.547 | 0.311 | ##### | M1 | LGMN           |
| FGD4. 4        | ##### | 0.725455 | 0.325 | 0.111 | ##### | M1 | FGD4           |
| ZNF428. 4      | ##### | -0.62438 | 0.265 | 0.601 | ##### | M1 | ZNF428         |
| CENPV. 4       | ##### | -0.72056 | 0.014 | 0.303 | ##### | M1 | CENPV          |
| GPR84. 4       | ##### | 0.638814 | 0.212 | 0.046 | ##### | M1 | GPR84          |
| RAP1A. 4       | ##### | 0.52868  | 0.677 | 0.483 | ##### | M1 | RAP1A          |
| PCDH9. 2       | ##### | -0.82316 | 0.014 | 0.303 | ##### | M1 | PCDH9          |
| GNA13. 4       | ##### | 0.743078 | 0.364 | 0.143 | ##### | M1 | GNA13          |
| KLHDC8A. 4     | ##### | -0.73551 | 0.013 | 0.298 | ##### | M1 | KLHDC8A        |
| PIK3IP1. 4     | ##### | 0.643044 | 0.35  | 0.123 | ##### | M1 | PIK3IP1        |
| AP1B1. 4       | ##### | 0.702817 | 0.456 | 0.219 | ##### | M1 | AP1B1          |
| DNER. 2        | ##### | -0.82751 | 0.036 | 0.329 | ##### | M1 | DNER           |
| NCKAP1L. 4     | ##### | 0.608467 | 0.293 | 0.087 | ##### | M1 | NCKAP1L        |
| ARHGAP4. 4     | ##### | 0.593673 | 0.283 | 0.082 | ##### | M1 | ARHGAP4        |
| SCIMP. 4       | ##### | 0.61678  | 0.227 | 0.054 | ##### | M1 | SCIMP          |
| SLC25A4. 4     | ##### | -0.64055 | 0.136 | 0.485 | ##### | M1 | SLC25A4        |
| DAB2. 3        | ##### | 0.625628 | 0.337 | 0.113 | ##### | M1 | DAB2           |
| PKIG. 4        | ##### | -0.72529 | 0.053 | 0.362 | ##### | M1 | PKIG           |
| TMEM59L. 3     | ##### | -0.66118 | 0.02  | 0.306 | ##### | M1 | TMEM59L        |
| MAGED1. 3      | ##### | -0.65198 | 0.076 | 0.399 | ##### | M1 | MAGED1         |
| CTB-61M7. 2    | ##### | 0.502446 | 0.14  | 0.018 | ##### | M1 | CTB-61M7. 2    |
| CCL3L3. 2      | ##### | 0.757989 | 0.175 | 0.03  | ##### | M1 | CCL3L3         |
| CLEC4E. 3      | ##### | 0.640134 | 0.18  | 0.033 | ##### | M1 | CLEC4E         |
| THY1. 3        | ##### | -0.73797 | 0.02  | 0.303 | ##### | M1 | THY1           |
| MLXIPL. 2      | ##### | 0.496204 | 0.142 | 0.019 | ##### | M1 | MLXIPL         |
| PRDM1. 4       | ##### | 0.612451 | 0.254 | 0.069 | ##### | M1 | PRDM1          |
| GAPDH. 4       | ##### | -0.38028 | 0.972 | 0.987 | ##### | M1 | GAPDH          |
| GAA. 3         | ##### | 0.663342 | 0.505 | 0.282 | ##### | M1 | GAA            |
| ARHGAP15. 2    | ##### | 0.607071 | 0.251 | 0.066 | ##### | M1 | ARHGAP15       |
| LYL1. 4        | ##### | 0.559906 | 0.223 | 0.053 | ##### | M1 | LYL1           |
| C7orf55. 3     | ##### | -0.6365  | 0.135 | 0.481 | ##### | M1 | C7orf55        |
| TLR5. 3        | ##### | 0.516905 | 0.154 | 0.023 | ##### | M1 | TLR5           |
| FRMD4A. 3      | ##### | 0.709871 | 0.374 | 0.15  | ##### | M1 | FRMD4A         |
| PLAC8. 3       | ##### | 0.558227 | 0.2   | 0.042 | ##### | M1 | PLAC8          |
| INPP5D. 4      | ##### | 0.602593 | 0.23  | 0.056 | ##### | M1 | INPP5D         |
| PAFAH1B3. 2    | ##### | -0.60267 | 0.143 | 0.48  | ##### | M1 | PAFAH1B3       |
| SPARC. 3       | ##### | -0.87274 | 0.117 | 0.438 | ##### | M1 | SPARC          |
| RNF144B. 3     | ##### | 0.645652 | 0.251 | 0.068 | ##### | M1 | RNF144B        |
| PFKFB3. 4      | ##### | 0.725134 | 0.43  | 0.207 | ##### | M1 | PFKFB3         |
| HEY1. 3        | ##### | -0.69952 | 0.017 | 0.293 | ##### | M1 | HEY1           |
| NRN1. 2        | ##### | -0.78674 | 0.021 | 0.3   | ##### | M1 | NRN1           |
| RP11-386I14. 4 | ##### | 0.62465  | 0.194 | 0.041 | ##### | M1 | RP11-386I14. 4 |

|                 |          |          |       |       |       |              |         |
|-----------------|----------|----------|-------|-------|-------|--------------|---------|
| SLC22A17. ##### | -0.62711 | 0.04     | 0.333 | ##### | M1    | SLC22A17     |         |
| TXN. 3          | #####    | -0.59955 | 0.398 | 0.72  | ##### | M1           | TXN     |
| GPC1. 3         | #####    | -0.75997 | 0.012 | 0.282 | ##### | M1           | GPC1    |
| TLR7. 3         | #####    | 0.536689 | 0.174 | 0.032 | ##### | M1           | TLR7    |
| CYFIP1. 3       | #####    | 0.666846 | 0.466 | 0.246 | ##### | M1           | CYFIP1  |
| TMEM98. 2       | #####    | -0.69968 | 0.012 | 0.28  | ##### | M1           | TMEM98  |
| NCF1. 4         | #####    | 0.544768 | 0.292 | 0.089 | ##### | M1           | NCF1    |
| PRAF2. 3        | #####    | -0.59543 | 0.053 | 0.352 | ##### | M1           | PRAF2   |
| UNC93B1. 4      | #####    | 0.671791 | 0.382 | 0.164 | ##### | M1           | UNC93B1 |
| S100B. 3        | #####    | -0.80218 | 0.263 | 0.581 | ##### | M1           | S100B   |
| PSIP1. 4        | #####    | -0.61151 | 0.117 | 0.437 | ##### | M1           | PSIP1   |
| FMNL1. 4        | #####    | 0.616981 | 0.288 | 0.091 | ##### | M1           | FMNL1   |
| DNASE2. 3       | #####    | 0.629285 | 0.549 | 0.35  | ##### | M1           | DNASE2  |
| CKLF. 4         | #####    | 0.520789 | 0.67  | 0.489 | ##### | M1           | CKLF    |
| CSTA. 4         | #####    | 0.578109 | 0.298 | 0.094 | ##### | M1           | CSTA    |
| DSE. 4          | #####    | 0.644847 | 0.305 | 0.104 | ##### | M1           | DSE     |
| ARHGAP18. ##### | 0.622086 | 0.357    | 0.135 | ##### | M1    | ARHGAP18     |         |
| DSTN. 4         | #####    | -0.56377 | 0.352 | 0.672 | ##### | M1           | DSTN    |
| POLD2. 3        | #####    | -0.62202 | 0.141 | 0.477 | ##### | M1           | POLD2   |
| RHOB. 2         | #####    | 0.447022 | 0.742 | 0.582 | ##### | M1           | RHOB    |
| POU3F2. 3       | #####    | -0.67344 | 0.003 | 0.259 | ##### | M1           | POU3F2  |
| CTTN. 3         | #####    | -0.62578 | 0.011 | 0.273 | ##### | M1           | CTTN    |
| CTSL. 4         | #####    | 0.445322 | 0.7   | 0.488 | ##### | M1           | CTSL    |
| TTYH1. 4        | #####    | -0.84365 | 0.039 | 0.314 | ##### | M1           | TTYH1   |
| PHF14. 3        | #####    | -0.55084 | 0.143 | 0.479 | ##### | M1           | PHF14   |
| NFIA. 3         | #####    | -0.68252 | 0.12  | 0.431 | ##### | M1           | NFIA    |
| RCN1. 4         | #####    | -0.64077 | 0.097 | 0.406 | ##### | M1           | RCN1    |
| TRIM2. 2        | #####    | -0.61828 | 0.008 | 0.267 | ##### | M1           | TRIM2   |
| ARPC2. 3        | #####    | 0.274335 | 0.861 | 0.756 | ##### | M1           | ARPC2   |
| PTOV1. 3        | #####    | -0.57265 | 0.16  | 0.494 | ##### | M1           | PTOV1   |
| RIC3. 2         | #####    | -0.73613 | 0.013 | 0.275 | ##### | M1           | RIC3    |
| TMEM161B- ##### | -0.7005  | 0.052    | 0.336 | ##### | M1    | TMEM161B-AS1 |         |
| IP6K2. 3        | #####    | -0.58538 | 0.152 | 0.491 | ##### | M1           | IP6K2   |
| PTPRE. 4        | #####    | 0.772744 | 0.443 | 0.235 | ##### | M1           | PTPRE   |
| YWHAQ. 3        | #####    | -0.51741 | 0.401 | 0.692 | ##### | M1           | YWHAQ   |
| PLS3. 3         | #####    | -0.66556 | 0.008 | 0.264 | ##### | M1           | PLS3    |
| ATP1B3. 4       | #####    | 0.532362 | 0.664 | 0.521 | ##### | M1           | ATP1B3  |
| METRN. 4        | #####    | -0.68143 | 0.056 | 0.342 | ##### | M1           | METRN   |
| NAGA. 4         | #####    | 0.666804 | 0.362 | 0.149 | ##### | M1           | NAGA    |
| RUFY3. 3        | #####    | -0.574   | 0.061 | 0.354 | ##### | M1           | RUFY3   |
| FIBIN. 3        | #####    | -0.74044 | 0.012 | 0.27  | ##### | M1           | FIBIN   |
| DEF6. 4         | #####    | 0.514639 | 0.234 | 0.062 | ##### | M1           | DEF6    |
| CHMP1B. 4       | #####    | 0.66214  | 0.583 | 0.409 | ##### | M1           | CHMP1B  |
| IGFBP5. 4       | #####    | -1.01015 | 0.041 | 0.314 | ##### | M1           | IGFBP5  |
| TNFAIP8L2 ##### | 0.540696 | 0.24     | 0.065 | ##### | M1    | TNFAIP8L2    |         |
| ALDH2. 4        | #####    | 0.629907 | 0.547 | 0.336 | ##### | M1           | ALDH2   |
| SRPK2. 2        | #####    | -0.56399 | 0.138 | 0.465 | ##### | M1           | SRPK2   |
| PGM2L1. 3       | #####    | -0.64898 | 0.03  | 0.301 | ##### | M1           | PGM2L1  |
| LHFP. 4         | #####    | -0.68213 | 0.016 | 0.275 | ##### | M1           | LHFP    |
| CLEC9A. 3       | #####    | 0.500596 | 0.122 | 0.015 | ##### | M1           | CLEC9A  |
| TLR1. 4         | #####    | 0.552664 | 0.192 | 0.043 | ##### | M1           | TLR1    |

|            |       |          |       |       |       |    |             |
|------------|-------|----------|-------|-------|-------|----|-------------|
| NME1. 2    | ##### | -0.58404 | 0.296 | 0.622 | ##### | M1 | NME1        |
| CARHSP1. 3 | ##### | -0.59809 | 0.15  | 0.478 | ##### | M1 | CARHSP1     |
| NRCAM. 3   | ##### | -0.57631 | 0.038 | 0.316 | ##### | M1 | NRCAM       |
| IGF1. 3    | ##### | 0.542917 | 0.18  | 0.038 | ##### | M1 | IGF1        |
| BEX2. 3    | ##### | -0.80815 | 0.035 | 0.302 | ##### | M1 | BEX2        |
| SMARCA4. 3 | ##### | -0.55402 | 0.104 | 0.412 | ##### | M1 | SMARCA4     |
| ITM2B. 3   | ##### | 0.256653 | 0.871 | 0.785 | ##### | M1 | ITM2B       |
| THBD. 4    | ##### | 0.600628 | 0.236 | 0.066 | ##### | M1 | THBD        |
| CHN1. 3    | ##### | -0.57181 | 0.009 | 0.257 | ##### | M1 | CHN1        |
| C12orf57.  | ##### | -0.58004 | 0.241 | 0.596 | ##### | M1 | C12orf57    |
| CLIC4. 3   | ##### | -0.61255 | 0.082 | 0.383 | ##### | M1 | CLIC4       |
| CD01. 4    | ##### | -0.71633 | 0.02  | 0.278 | ##### | M1 | CD01        |
| AP005530.  | ##### | 0.363424 | 0.112 | 0.012 | ##### | M1 | AP005530. 2 |
| NT5C3B. 3  | ##### | -0.53693 | 0.083 | 0.382 | ##### | M1 | NT5C3B      |
| TMSB4X. 4  | ##### | -0.32756 | 1     | 0.996 | ##### | M1 | TMSB4X      |
| MT1M. 2    | ##### | -0.86897 | 0.027 | 0.287 | ##### | M1 | MT1M        |
| CLU. 4     | ##### | -0.73029 | 0.62  | 0.815 | ##### | M1 | CLU         |
| TAL1. 2    | ##### | 0.487872 | 0.124 | 0.016 | ##### | M1 | TAL1        |
| ACTB. 4    | ##### | -0.31832 | 0.994 | 0.992 | ##### | M1 | ACTB        |
| MAP1LC3A.  | ##### | -0.58565 | 0.113 | 0.416 | ##### | M1 | MAP1LC3A    |
| ID4. 3     | ##### | -0.73824 | 0.01  | 0.257 | ##### | M1 | ID4         |
| TRAF4. 3   | ##### | -0.59728 | 0.043 | 0.314 | ##### | M1 | TRAF4       |
| B4GALT1. 4 | ##### | 0.638898 | 0.274 | 0.089 | ##### | M1 | B4GALT1     |
| SPARCL1. 3 | ##### | -0.92409 | 0.108 | 0.393 | ##### | M1 | SPARCL1     |
| PTPRS. 4   | ##### | -0.64797 | 0.036 | 0.302 | ##### | M1 | PTPRS       |
| HMGB3. 3   | ##### | -0.63374 | 0.05  | 0.325 | ##### | M1 | HMGB3       |
| ATP6VOE1.  | ##### | 0.240289 | 0.856 | 0.741 | ##### | M1 | ATP6VOE1    |
| RBFOX2. 3  | ##### | -0.62062 | 0.011 | 0.257 | ##### | M1 | RBFOX2      |
| COL6A1. 3  | ##### | -0.65281 | 0.018 | 0.271 | ##### | M1 | COL6A1      |
| STOM. 3    | ##### | 0.575701 | 0.44  | 0.213 | ##### | M1 | STOM        |
| IKZF1. 4   | ##### | 0.504137 | 0.184 | 0.041 | ##### | M1 | IKZF1       |
| EGFR. 3    | ##### | -0.73254 | 0.068 | 0.347 | ##### | M1 | EGFR        |
| SFMBT2. 4  | ##### | 0.58935  | 0.206 | 0.052 | ##### | M1 | SFMBT2      |
| KLHL6. 4   | ##### | 0.531554 | 0.156 | 0.029 | ##### | M1 | KLHL6       |
| NANS. 4    | ##### | 0.620178 | 0.53  | 0.325 | ##### | M1 | NANS        |
| ANXA11. 4  | ##### | 0.600766 | 0.396 | 0.18  | ##### | M1 | ANXA11      |
| HLA-F. 4   | ##### | 0.609733 | 0.311 | 0.113 | ##### | M1 | HLA-F       |
| VAV1. 4    | ##### | 0.510926 | 0.199 | 0.049 | ##### | M1 | VAV1        |
| SKAP2. 3   | ##### | 0.577467 | 0.46  | 0.232 | ##### | M1 | SKAP2       |
| GCSH. 4    | ##### | -0.60421 | 0.103 | 0.396 | ##### | M1 | GCSH        |
| RPS6KA1. 4 | ##### | 0.569375 | 0.288 | 0.099 | ##### | M1 | RPS6KA1     |
| CHPF. 3    | ##### | -0.54461 | 0.038 | 0.303 | ##### | M1 | CHPF        |
| GLIPR1. 3  | ##### | 0.575173 | 0.521 | 0.297 | ##### | M1 | GLIPR1      |
| ETV1. 4    | ##### | -0.67019 | 0.031 | 0.287 | ##### | M1 | ETV1        |
| TGFB1. 4   | ##### | 0.655856 | 0.415 | 0.21  | ##### | M1 | TGFB1       |
| MSI2. 2    | ##### | -0.58213 | 0.081 | 0.37  | ##### | M1 | MSI2        |
| PPP2R2B. 3 | ##### | -0.64034 | 0.014 | 0.26  | ##### | M1 | PPP2R2B     |
| FKBP10. 4  | ##### | -0.5836  | 0.011 | 0.252 | ##### | M1 | FKBP10      |
| POLR2I. 3  | ##### | -0.58227 | 0.27  | 0.609 | ##### | M1 | POLR2I      |
| RIN3. 4    | ##### | 0.558722 | 0.265 | 0.085 | ##### | M1 | RIN3        |
| LMO4. 4    | ##### | -0.57883 | 0.218 | 0.53  | ##### | M1 | LMO4        |

|            |       |          |       |       |       |    |               |
|------------|-------|----------|-------|-------|-------|----|---------------|
| FJX1. 3    | ##### | -0.63182 | 0.006 | 0.241 | ##### | M1 | FJX1          |
| SV2A. 2    | ##### | -0.51276 | 0.006 | 0.241 | ##### | M1 | SV2A          |
| NABP1. 3   | ##### | 0.568466 | 0.278 | 0.093 | ##### | M1 | NABP1         |
| MILR1. 4   | ##### | 0.585886 | 0.24  | 0.07  | ##### | M1 | MILR1         |
| PNMA1. 3   | ##### | -0.5273  | 0.056 | 0.329 | ##### | M1 | PNMA1         |
| KCNQ2. 3   | ##### | -0.59155 | 0.013 | 0.255 | ##### | M1 | KCNQ2         |
| MAP1A. 3   | ##### | -0.59231 | 0.022 | 0.271 | ##### | M1 | MAP1A         |
| FAM181B. 4 | ##### | -0.64582 | 0.008 | 0.243 | ##### | M1 | FAM181B       |
| GRIA2. 3   | ##### | -0.60916 | 0.013 | 0.252 | ##### | M1 | GRIA2         |
| PBX1. 3    | ##### | -0.5576  | 0.014 | 0.254 | ##### | M1 | PBX1          |
| REEP2. 2   | ##### | -0.50929 | 0.007 | 0.241 | ##### | M1 | REEP2         |
| RP11-553L  | ##### | -0.5228  | 0.021 | 0.267 | ##### | M1 | RP11-553L6. 5 |
| PPP1R14B.  | ##### | -0.57965 | 0.103 | 0.393 | ##### | M1 | PPP1R14B      |
| TRIM9. 3   | ##### | -0.53976 | 0.024 | 0.274 | ##### | M1 | TRIM9         |
| SIGLEC9. 4 | ##### | 0.514188 | 0.23  | 0.065 | ##### | M1 | SIGLEC9       |
| TTC3. 3    | ##### | -0.5401  | 0.261 | 0.567 | ##### | M1 | TTC3          |
| YWHAH. 4   | ##### | 0.440319 | 0.662 | 0.546 | ##### | M1 | YWHAH         |
| SLC39A6. 2 | ##### | -0.49959 | 0.087 | 0.376 | ##### | M1 | SLC39A6       |
| JDP2. 4    | ##### | 0.545334 | 0.19  | 0.047 | ##### | M1 | JDP2          |
| ENG. 4     | ##### | 0.556274 | 0.333 | 0.131 | ##### | M1 | ENG           |
| LHFPL2. 3  | ##### | 0.635866 | 0.319 | 0.129 | ##### | M1 | LHFPL2        |
| RAB3IP. 2  | ##### | -0.61143 | 0.035 | 0.289 | ##### | M1 | RAB3IP        |
| HLA-B. 3   | ##### | 0.139776 | 0.991 | 0.824 | ##### | M1 | HLA-B         |
| APBA2. 4   | ##### | -0.51571 | 0.013 | 0.246 | ##### | M1 | APBA2         |
| IL6R. 4    | ##### | 0.5674   | 0.214 | 0.06  | ##### | M1 | IL6R          |
| AES. 3     | ##### | -0.52255 | 0.152 | 0.462 | ##### | M1 | AES           |
| SEMA6A. 3  | ##### | -0.52234 | 0.009 | 0.238 | ##### | M1 | SEMA6A        |
| SPP1. 2    | ##### | 0.162266 | 0.938 | 0.837 | ##### | M1 | SPP1          |
| STK17B. 4  | ##### | 0.5963   | 0.286 | 0.102 | ##### | M1 | STK17B        |
| TCIRG1. 4  | ##### | 0.539517 | 0.276 | 0.095 | ##### | M1 | TCIRG1        |
| CRYAB. 4   | ##### | -0.98429 | 0.261 | 0.548 | ##### | M1 | CRYAB         |
| DOCK2. 4   | ##### | 0.501099 | 0.201 | 0.052 | ##### | M1 | DOCK2         |
| FERMT2. 4  | ##### | -0.49398 | 0.011 | 0.241 | ##### | M1 | FERMT2        |
| GLRX. 3    | ##### | 0.472489 | 0.576 | 0.351 | ##### | M1 | GLRX          |
| TREM1. 3   | ##### | 0.482531 | 0.339 | 0.129 | ##### | M1 | TREM1         |
| RCN2. 3    | ##### | -0.5264  | 0.213 | 0.518 | ##### | M1 | RCN2          |
| PLVAP. 2   | ##### | 0.373241 | 0.109 | 0.014 | ##### | M1 | PLVAP         |
| CCDC167. 2 | ##### | -0.53683 | 0.134 | 0.433 | ##### | M1 | CCDC167       |
| MANBAL. 4  | ##### | -0.49473 | 0.096 | 0.383 | ##### | M1 | MANBAL        |
| COPS8. 4   | ##### | -0.52988 | 0.197 | 0.524 | ##### | M1 | COPS8         |
| HEPN1. 3   | ##### | -0.71623 | 0.014 | 0.243 | ##### | M1 | HEPN1         |
| RGMA. 3    | ##### | -0.57374 | 0.011 | 0.238 | ##### | M1 | RGMA          |
| CCND2. 4   | ##### | -0.5791  | 0.095 | 0.373 | ##### | M1 | CCND2         |
| SLC7A5. 4  | ##### | 0.621372 | 0.289 | 0.108 | ##### | M1 | SLC7A5        |
| SCRG1. 3   | ##### | -0.71214 | 0.119 | 0.391 | ##### | M1 | SCRG1         |
| FNDC4. 2   | ##### | -0.49944 | 0.01  | 0.236 | ##### | M1 | FNDC4         |
| TCEA2. 3   | ##### | -0.50783 | 0.124 | 0.417 | ##### | M1 | TCEA2         |
| CLN8. 4    | ##### | 0.674484 | 0.433 | 0.236 | ##### | M1 | CLN8          |
| GAPT. 4    | ##### | 0.481446 | 0.17  | 0.038 | ##### | M1 | GAPT          |
| SEPT7. 4   | ##### | -0.51152 | 0.476 | 0.748 | ##### | M1 | 7-Sep         |
| CCNH. 4    | ##### | 0.637531 | 0.555 | 0.383 | ##### | M1 | CCNH          |

|             |       |          |       |       |       |    |          |
|-------------|-------|----------|-------|-------|-------|----|----------|
| CD81. 3     | ##### | 0.529612 | 0.592 | 0.408 | ##### | M1 | CD81     |
| LARP6. 3    | ##### | -0.56763 | 0.007 | 0.23  | ##### | M1 | LARP6    |
| FAM177B. 2  | ##### | 0.3971   | 0.111 | 0.015 | ##### | M1 | FAM177B  |
| MAPK10. 3   | ##### | -0.55353 | 0.009 | 0.232 | ##### | M1 | MAPK10   |
| HLA-C. 2    | ##### | 0.177469 | 0.941 | 0.775 | ##### | M1 | HLA-C    |
| PRAM1. 4    | ##### | 0.478609 | 0.156 | 0.032 | ##### | M1 | PRAM1    |
| NBEAL1. 2   | ##### | 0.318045 | 0.798 | 0.638 | ##### | M1 | NBEAL1   |
| PCDH17. 2   | ##### | -0.53933 | 0.007 | 0.228 | ##### | M1 | PCDH17   |
| TMEM52B. 4  | ##### | 0.472936 | 0.145 | 0.028 | ##### | M1 | TMEM52B  |
| FGD2. 4     | ##### | 0.507105 | 0.17  | 0.039 | ##### | M1 | FGD2     |
| TTL7. 4     | ##### | -0.45952 | 0.033 | 0.278 | ##### | M1 | TTL7     |
| FBP1. 4     | ##### | 0.485547 | 0.265 | 0.087 | ##### | M1 | FBP1     |
| TAF7. 3     | ##### | -0.51431 | 0.278 | 0.609 | ##### | M1 | TAF7     |
| DKK3. 2     | ##### | -0.51274 | 0.012 | 0.237 | ##### | M1 | DKK3     |
| NCKAP1. 2   | ##### | -0.45521 | 0.006 | 0.225 | ##### | M1 | NCKAP1   |
| MEIS2. 3    | ##### | -0.67041 | 0.015 | 0.241 | ##### | M1 | MEIS2    |
| SLAIN1. 4   | ##### | -0.62008 | 0.015 | 0.241 | ##### | M1 | SLAIN1   |
| CASP1. 3    | ##### | 0.557558 | 0.4   | 0.191 | ##### | M1 | CASP1    |
| VGLL4. 2    | ##### | -0.48519 | 0.088 | 0.363 | ##### | M1 | VGLL4    |
| DCX. 4      | ##### | -0.69281 | 0.017 | 0.242 | ##### | M1 | DCX      |
| YWHAE. 3    | ##### | -0.37389 | 0.589 | 0.785 | ##### | M1 | YWHAE    |
| IL1RN. 4    | ##### | 0.544593 | 0.194 | 0.051 | ##### | M1 | IL1RN    |
| C1orf21. 4  | ##### | -0.55118 | 0.013 | 0.238 | ##### | M1 | C1orf21  |
| COL9A3. 4   | ##### | -0.65548 | 0.006 | 0.222 | ##### | M1 | COL9A3   |
| C10orf11. 4 | ##### | 0.515954 | 0.234 | 0.074 | ##### | M1 | C10orf11 |
| DYNC1LI2. 4 | ##### | -0.47255 | 0.106 | 0.392 | ##### | M1 | DYNC1LI2 |
| WDR54. 4    | ##### | -0.52248 | 0.034 | 0.274 | ##### | M1 | WDR54    |
| GGH. 2      | ##### | -0.54645 | 0.053 | 0.305 | ##### | M1 | GGH      |
| VCAN. 2     | ##### | -0.58248 | 0.043 | 0.287 | ##### | M1 | VCAN     |
| CCDC28B. 3  | ##### | -0.48746 | 0.024 | 0.258 | ##### | M1 | CCDC28B  |
| PRR13. 2    | ##### | 0.408003 | 0.675 | 0.517 | ##### | M1 | PRR13    |
| CA2. 2      | ##### | -0.82398 | 0.032 | 0.264 | ##### | M1 | CA2      |
| SRP9. 2     | ##### | -0.43691 | 0.434 | 0.73  | ##### | M1 | SRP9     |
| IL4R. 4     | ##### | 0.514298 | 0.185 | 0.048 | ##### | M1 | IL4R     |
| KLHL7. 2    | ##### | -0.47383 | 0.064 | 0.322 | ##### | M1 | KLHL7    |
| BLVRA. 3    | ##### | -0.55631 | 0.107 | 0.386 | ##### | M1 | BLVRA    |
| ACOT7. 3    | ##### | -0.54894 | 0.032 | 0.266 | ##### | M1 | ACOT7    |
| RASAL3. 4   | ##### | 0.437644 | 0.162 | 0.036 | ##### | M1 | RASAL3   |
| SYK. 4      | ##### | 0.504943 | 0.243 | 0.078 | ##### | M1 | SYK      |
| GPRC5B. 2   | ##### | -0.54123 | 0.026 | 0.257 | ##### | M1 | GPRC5B   |
| THRA. 2     | ##### | -0.56378 | 0.04  | 0.279 | ##### | M1 | THRA     |
| AP1S1. 4    | ##### | -0.51212 | 0.207 | 0.52  | ##### | M1 | AP1S1    |
| BUD31. 4    | ##### | -0.49188 | 0.362 | 0.681 | ##### | M1 | BUD31    |
| PNRC1. 4    | ##### | 0.43653  | 0.64  | 0.52  | ##### | M1 | PNRC1    |
| RNF24. 1    | ##### | -0.48992 | 0.045 | 0.289 | ##### | M1 | RNF24    |
| MT1E. 4     | ##### | -0.85281 | 0.156 | 0.425 | ##### | M1 | MT1E     |
| DOCK4. 3    | ##### | 0.638512 | 0.311 | 0.132 | ##### | M1 | DOCK4    |
| EFEMP2. 2   | ##### | -0.52977 | 0.025 | 0.252 | ##### | M1 | EFEMP2   |
| DSEL. 4     | ##### | -0.5549  | 0.032 | 0.264 | ##### | M1 | DSEL     |
| POU2F2. 4   | ##### | 0.586145 | 0.281 | 0.106 | ##### | M1 | POU2F2   |
| WRB. 3      | ##### | -0.47629 | 0.164 | 0.471 | ##### | M1 | WRB      |

|            |       |          |       |       |          |    |                |
|------------|-------|----------|-------|-------|----------|----|----------------|
| CREB5. 3   | ##### | -0.53005 | 0.037 | 0.275 | #####    | M1 | CREB5          |
| BOD1. 3    | ##### | -0.46132 | 0.08  | 0.347 | #####    | M1 | BOD1           |
| MEX3A. 3   | ##### | -0.54243 | 0.004 | 0.213 | #####    | M1 | MEX3A          |
| TCTEX1D2.  | ##### | -0.53816 | 0.033 | 0.266 | #####    | M1 | TCTEX1D2       |
| RGS18. 4   | ##### | 0.436361 | 0.152 | 0.032 | #####    | M1 | RGS18          |
| LY96. 4    | ##### | 0.56677  | 0.384 | 0.19  | #####    | M1 | LY96           |
| ARHGAP9. 4 | ##### | 0.495787 | 0.21  | 0.061 | #####    | M1 | ARHGAP9        |
| SQLE. 2    | ##### | -0.46371 | 0.045 | 0.289 | #####    | M1 | SQLE           |
| ITGB8. 2   | ##### | -0.4586  | 0.04  | 0.28  | #####    | M1 | ITGB8          |
| ATP1B2. 4  | ##### | -0.5175  | 0.035 | 0.272 | #####    | M1 | ATP1B2         |
| SIPA1. 4   | ##### | 0.587665 | 0.281 | 0.111 | #####    | M1 | SIPA1          |
| ICOSLG. 4  | ##### | 0.555018 | 0.215 | 0.066 | #####    | M1 | ICOSLG         |
| PYCR1. 1   | ##### | -0.46648 | 0.008 | 0.22  | #####    | M1 | PYCR1          |
| FAM92A1. 2 | ##### | -0.49909 | 0.018 | 0.238 | #####    | M1 | FAM92A1        |
| GNA15. 4   | ##### | 0.501034 | 0.247 | 0.082 | #####    | M1 | GNA15          |
| SMCO4. 4   | ##### | 0.542251 | 0.277 | 0.104 | #####    | M1 | SMCO4          |
| EMB. 4     | ##### | 0.44187  | 0.193 | 0.051 | #####    | M1 | EMB            |
| SLC1A3. 3  | ##### | 0.453529 | 0.635 | 0.445 | #####    | M1 | SLC1A3         |
| FLNA. 3    | ##### | -0.49344 | 0.048 | 0.291 | #####    | M1 | FLNA           |
| MAGI1. 4   | ##### | -0.53256 | 0.016 | 0.234 | #####    | M1 | MAGI1          |
| HIF1A. 3   | ##### | 0.478409 | 0.61  | 0.474 | #####    | M1 | HIF1A          |
| ARC. 2     | ##### | -0.69775 | 0.025 | 0.245 | #####    | M1 | ARC            |
| NELFCD. 2  | ##### | -0.46651 | 0.108 | 0.383 | #####    | M1 | NELFCD         |
| RP11-620J  | ##### | -0.64036 | 0.066 | 0.311 | #####    | M1 | RP11-620J15. 3 |
| RP11-556E  | ##### | 0.451313 | 0.156 | 0.035 | #####    | M1 | RP11-556E13. 1 |
| PAICS. 3   | ##### | -0.52228 | 0.088 | 0.352 | #####    | M1 | PAICS          |
| F3. 4      | ##### | -0.56041 | 0.013 | 0.227 | #####    | M1 | F3             |
| FGR. 4     | ##### | 0.502686 | 0.204 | 0.059 | #####    | M1 | FGR            |
| ASCL1. 3   | ##### | -0.64868 | 0.011 | 0.221 | #####    | M1 | ASCL1          |
| BCHE. 2    | ##### | -0.54855 | 0.011 | 0.222 | #####    | M1 | BCHE           |
| FBXO21. 2  | ##### | -0.46497 | 0.087 | 0.352 | #####    | M1 | FBXO21         |
| POLD4. 2   | ##### | 0.449963 | 0.577 | 0.39  | #####    | M1 | POLD4          |
| CBX1. 3    | ##### | -0.50018 | 0.134 | 0.414 | 1.01E-99 | M1 | CBX1           |
| TCOF1. 4   | ##### | 0.714088 | 0.342 | 0.165 | 1.14E-99 | M1 | TCOF1          |
| SPAG16. 4  | ##### | -0.4938  | 0.079 | 0.34  | 2.12E-99 | M1 | SPAG16         |
| CADM2. 3   | ##### | -0.60648 | 0.013 | 0.223 | 2.13E-99 | M1 | CADM2          |
| ZNF302. 3  | ##### | -0.41998 | 0.088 | 0.36  | 3.10E-99 | M1 | ZNF302         |
| DCLK2. 4   | ##### | -0.49748 | 0.017 | 0.232 | 3.25E-99 | M1 | DCLK2          |
| SRI. 4     | ##### | -0.49514 | 0.535 | 0.768 | 7.14E-99 | M1 | SRI            |
| RP11-489C  | ##### | 0.363053 | 0.101 | 0.013 | 1.02E-98 | M1 | RP11-489018. 1 |
| TNC. 3     | ##### | -0.61732 | 0.019 | 0.237 | 1.16E-98 | M1 | TNC            |
| AKR1A1. 2  | ##### | 0.49553  | 0.616 | 0.474 | 1.53E-98 | M1 | AKR1A1         |
| LRRC25. 4  | ##### | 0.503774 | 0.219 | 0.067 | 1.79E-98 | M1 | LRRC25         |
| PTRF. 4    | ##### | -0.50809 | 0.011 | 0.22  | 1.83E-98 | M1 | PTRF           |
| PPIC. 2    | ##### | -0.53464 | 0.01  | 0.218 | 2.14E-98 | M1 | PPIC           |
| CAPN2. 1   | ##### | -0.4569  | 0.051 | 0.293 | 2.71E-98 | M1 | CAPN2          |
| SYTL3. 4   | ##### | 0.504018 | 0.172 | 0.043 | 3.35E-98 | M1 | SYTL3          |
| PLTP. 2    | ##### | 0.444856 | 0.61  | 0.442 | 4.26E-98 | M1 | PLTP           |
| NAE1. 2    | ##### | -0.47632 | 0.111 | 0.386 | 4.65E-98 | M1 | NAE1           |
| CSNK1E. 3  | ##### | -0.43438 | 0.087 | 0.35  | 9.04E-98 | M1 | CSNK1E         |
| TCF4. 4    | ##### | -0.50522 | 0.287 | 0.57  | 1.85E-97 | M1 | TCF4           |

|            |          |          |       |       |          |    |              |
|------------|----------|----------|-------|-------|----------|----|--------------|
| KIF3A. 2   | #####    | -0.48637 | 0.041 | 0.273 | 2.74E-97 | M1 | KIF3A        |
| OLFML2B. 3 | #####    | 0.541351 | 0.177 | 0.046 | 3.70E-97 | M1 | OLFML2B      |
| NDUFA5. 2  | #####    | -0.4587  | 0.311 | 0.63  | 4.20E-97 | M1 | NDUFA5       |
| LYPD1. 2   | #####    | -0.55674 | 0.018 | 0.231 | 7.34E-97 | M1 | LYPD1        |
| MYEF2. 3   | #####    | -0.43491 | 0.017 | 0.229 | 8.36E-97 | M1 | MYEF2        |
| SAMHD1. 4  | #####    | 0.579373 | 0.373 | 0.183 | 9.89E-97 | M1 | SAMHD1       |
| IL16. 4    | #####    | 0.459431 | 0.178 | 0.046 | 1.09E-96 | M1 | IL16         |
| DNAAF1. 3  | #####    | 0.457891 | 0.098 | 0.013 | 1.35E-96 | M1 | DNAAF1       |
| PRR7. 4    | #####    | -0.43033 | 0.014 | 0.223 | 1.72E-96 | M1 | PRR7         |
| SPATS2. 2  | #####    | -0.42592 | 0.056 | 0.299 | 1.87E-96 | M1 | SPATS2       |
| HOPX. 3    | #####    | -0.90969 | 0.092 | 0.321 | 2.28E-96 | M1 | HOPX         |
| TBCA. 3    | #####    | -0.44573 | 0.492 | 0.754 | 2.41E-96 | M1 | TBCA         |
| GLUL. 1    | #####    | 0.154787 | 0.892 | 0.765 | 2.45E-96 | M1 | GLUL         |
| CLIP3. 3   | #####    | -0.4866  | 0.019 | 0.233 | 2.49E-96 | M1 | CLIP3        |
| TAGLN3. 3  | #####    | -0.67882 | 0.016 | 0.222 | 3.56E-96 | M1 | TAGLN3       |
| PLCB2. 4   | #####    | 0.463153 | 0.165 | 0.04  | 4.11E-96 | M1 | PLCB2        |
| LGALS3. 3  | #####    | -0.84324 | 0.271 | 0.523 | 4.72E-96 | M1 | LGALS3       |
| UBA7. 4    | #####    | 0.546864 | 0.198 | 0.058 | 4.82E-96 | M1 | UBA7         |
| C1R. 4     | #####    | -0.8736  | 0.032 | 0.252 | 4.83E-96 | M1 | C1R          |
| MAPK8IP1.  | #####    | -0.50241 | 0.016 | 0.226 | 5.83E-96 | M1 | MAPK8IP1     |
| SRGAP2. 3  | #####    | 0.706023 | 0.378 | 0.203 | 6.20E-96 | M1 | SRGAP2       |
| ENC1. 4    | #####    | -0.555   | 0.038 | 0.262 | 9.34E-96 | M1 | ENC1         |
| RND3. 3    | #####    | -0.5963  | 0.049 | 0.282 | 9.65E-96 | M1 | RND3         |
| PTMS. 3    | #####    | -0.50378 | 0.354 | 0.593 | 1.09E-95 | M1 | PTMS         |
| KB-1507C5  | #####    | 0.341359 | 0.09  | 0.01  | 1.21E-95 | M1 | KB-1507C5. 4 |
| ISCU. 3    | #####    | 0.419764 | 0.652 | 0.549 | 1.46E-95 | M1 | ISCU         |
| CKAP4. 2   | 1.09E-99 | -0.42491 | 0.027 | 0.246 | 1.64E-95 | M1 | CKAP4        |
| BNIP3. 3   | 1.18E-99 | -0.59518 | 0.031 | 0.252 | 1.76E-95 | M1 | BNIP3        |
| SRSF5. 1   | 1.34E-99 | 0.342752 | 0.763 | 0.68  | 2.00E-95 | M1 | SRSF5        |
| ST3GAL6. 4 | 1.50E-99 | 0.610742 | 0.241 | 0.085 | 2.24E-95 | M1 | ST3GAL6      |
| AK1. 2     | 1.58E-99 | -0.43263 | 0.109 | 0.381 | 2.36E-95 | M1 | AK1          |
| TGIF1. 3   | 1.99E-99 | 0.631399 | 0.496 | 0.33  | 2.97E-95 | M1 | TGIF1        |
| CDC42BPA.  | 2.04E-99 | -0.43372 | 0.01  | 0.213 | 3.05E-95 | M1 | CDC42BPA     |
| SMAD1. 2   | 2.19E-99 | -0.45808 | 0.009 | 0.211 | 3.27E-95 | M1 | SMAD1        |
| SCOC. 3    | 2.72E-99 | -0.45273 | 0.169 | 0.463 | 4.07E-95 | M1 | SCOC         |
| TMSB15A. 4 | 7.05E-99 | -0.60145 | 0.011 | 0.212 | 1.05E-94 | M1 | TMSB15A      |
| MBOAT2. 3  | 7.18E-99 | -0.45097 | 0.012 | 0.216 | 1.07E-94 | M1 | MBOAT2       |
| IGFBP7. 2  | 7.87E-99 | -0.73382 | 0.074 | 0.308 | 1.18E-94 | M1 | IGFBP7       |
| TMC6. 4    | 7.91E-99 | 0.499331 | 0.244 | 0.084 | 1.18E-94 | M1 | TMC6         |
| GRIA3. 3   | 1.90E-98 | -0.44019 | 0.005 | 0.201 | 2.84E-94 | M1 | GRIA3        |
| NR2F1. 1   | 2.27E-98 | -0.42981 | 0.003 | 0.198 | 3.40E-94 | M1 | NR2F1        |
| EEF1D. 4   | 2.61E-98 | 0.190527 | 0.926 | 0.829 | 3.89E-94 | M1 | EEF1D        |
| RAC3. 3    | 4.74E-98 | -0.43666 | 0.013 | 0.217 | 7.09E-94 | M1 | RAC3         |
| MAGEF1. 3  | 5.02E-98 | -0.45225 | 0.131 | 0.41  | 7.51E-94 | M1 | MAGEF1       |
| ODC1. 3    | 5.42E-98 | -0.51193 | 0.167 | 0.439 | 8.09E-94 | M1 | ODC1         |
| HRAS. 4    | 6.40E-98 | -0.42921 | 0.082 | 0.336 | 9.56E-94 | M1 | HRAS         |
| SKA2. 2    | 7.60E-98 | -0.4906  | 0.095 | 0.349 | 1.14E-93 | M1 | SKA2         |
| HHEX. 4    | 8.22E-98 | 0.471033 | 0.157 | 0.038 | 1.23E-93 | M1 | HHEX         |
| AGT. 2     | 8.72E-98 | -0.70573 | 0.037 | 0.257 | 1.30E-93 | M1 | AGT          |
| RHOA. 2    | 1.03E-97 | 0.212997 | 0.824 | 0.741 | 1.54E-93 | M1 | RHOA         |
| SIGLEC14.  | 1.29E-97 | 0.411822 | 0.133 | 0.027 | 1.93E-93 | M1 | SIGLEC14     |



|             |           |           |        |        |              |          |
|-------------|-----------|-----------|--------|--------|--------------|----------|
| PSAT1. 3    | 1. 40E-97 | -0. 56965 | 0. 026 | 0. 239 | 2. 09E-93 M1 | PSAT1    |
| TPM3. 4     | 2. 19E-97 | 0. 39767  | 0. 656 | 0. 539 | 3. 27E-93 M1 | TPM3     |
| PRRX1. 4    | 2. 44E-97 | -0. 48829 | 0. 007 | 0. 204 | 3. 64E-93 M1 | PRRX1    |
| CRNDE. 1    | 4. 17E-97 | -0. 4639  | 0. 012 | 0. 212 | 6. 23E-93 M1 | CRNDE    |
| TMEM106B. 4 | 6. 67E-97 | -0. 41566 | 0. 107 | 0. 375 | 6. 97E-93 M1 | TMEM106B |
| MFNG. 4     | 6. 49E-97 | 0. 509445 | 0. 265 | 0. 099 | 9. 69E-93 M1 | MFNG     |
| SEPT9. 2    | 6. 89E-97 | -0. 49801 | 0. 122 | 0. 385 | 1. 03E-92 M1 | 9-Sep    |
| SHISA4. 3   | 7. 24E-97 | -0. 48415 | 0. 053 | 0. 285 | 1. 08E-92 M1 | SHISA4   |
| SIDT1. 3    | 1. 02E-96 | 0. 407685 | 0. 088 | 0. 01  | 1. 53E-92 M1 | SIDT1    |
| PGRMC1. 2   | 1. 27E-96 | -0. 42251 | 0. 2   | 0. 497 | 1. 90E-92 M1 | PGRMC1   |
| AKAP12. 4   | 1. 54E-96 | -0. 54203 | 0. 017 | 0. 221 | 2. 30E-92 M1 | AKAP12   |
| CBX5. 3     | 1. 57E-96 | -0. 44077 | 0. 12  | 0. 389 | 2. 34E-92 M1 | CBX5     |
| FAIM2. 3    | 1. 83E-96 | -0. 56554 | 0. 019 | 0. 226 | 2. 74E-92 M1 | FAIM2    |
| SRPX. 3     | 2. 13E-96 | -0. 59301 | 0. 011 | 0. 21  | 3. 19E-92 M1 | SRPX     |
| ICAM1. 3    | 3. 42E-96 | 0. 590698 | 0. 309 | 0. 135 | 5. 11E-92 M1 | ICAM1    |
| HES6. 3     | 3. 49E-96 | -0. 64163 | 0. 087 | 0. 326 | 5. 22E-92 M1 | HES6     |
| PXMP2. 2    | 3. 49E-96 | -0. 41447 | 0. 038 | 0. 26  | 5. 22E-92 M1 | PXMP2    |
| CYSTM1. 4   | 4. 35E-96 | -0. 51237 | 0. 109 | 0. 368 | 6. 50E-92 M1 | CYSTM1   |
| RGS17. 2    | 4. 68E-96 | -0. 48108 | 0. 003 | 0. 194 | 6. 99E-92 M1 | RGS17    |
| PHYHIPL. 2  | 5. 01E-96 | -0. 62875 | 0. 017 | 0. 219 | 7. 48E-92 M1 | PHYHIPL  |
| WDR34. 2    | 6. 52E-96 | -0. 41287 | 0. 029 | 0. 243 | 9. 74E-92 M1 | WDR34    |
| ROB01. 4    | 9. 29E-96 | -0. 45095 | 0. 012 | 0. 211 | 1. 39E-91 M1 | ROB01    |
| TCEAL2. 2   | 9. 59E-96 | -0. 69058 | 0. 014 | 0. 213 | 1. 43E-91 M1 | TCEAL2   |
| DHPS. 3     | 9. 81E-96 | -0. 45606 | 0. 199 | 0. 497 | 1. 47E-91 M1 | DHPS     |
| FUOM. 4     | 1. 02E-95 | 0. 586418 | 0. 281 | 0. 113 | 1. 52E-91 M1 | FUOM     |
| EPN2. 4     | 1. 04E-95 | -0. 44053 | 0. 047 | 0. 275 | 1. 55E-91 M1 | EPN2     |
| TMSB15B. 3  | 1. 36E-95 | -0. 47043 | 0. 014 | 0. 215 | 2. 03E-91 M1 | TMSB15B  |
| RGCC. 3     | 1. 38E-95 | 0. 516137 | 0. 415 | 0. 217 | 2. 06E-91 M1 | RGCC     |
| TIMM22. 1   | 1. 45E-95 | -0. 39608 | 0. 05  | 0. 281 | 2. 17E-91 M1 | TIMM22   |
| SMARCD3. 3  | 1. 65E-95 | -0. 42566 | 0. 044 | 0. 269 | 2. 46E-91 M1 | SMARCD3  |
| C8orf4. 3   | 1. 70E-95 | -0. 90279 | 0. 045 | 0. 264 | 2. 54E-91 M1 | C8orf4   |
| LSP1. 4     | 1. 82E-95 | 0. 485399 | 0. 326 | 0. 134 | 2. 72E-91 M1 | LSP1     |
| TMEM45A. 2  | 2. 30E-95 | -0. 63235 | 0. 012 | 0. 209 | 3. 43E-91 M1 | TMEM45A  |
| NAT14. 1    | 5. 89E-95 | -0. 40545 | 0. 013 | 0. 213 | 8. 80E-91 M1 | NAT14    |
| TPST1. 2    | 6. 77E-95 | -0. 42075 | 0. 048 | 0. 278 | 1. 01E-90 M1 | TPST1    |
| PLBD1. 4    | 7. 94E-95 | 0. 497389 | 0. 214 | 0. 07  | 1. 19E-90 M1 | PLBD1    |
| RAMP1. 3    | 7. 97E-95 | -0. 75995 | 0. 194 | 0. 456 | 1. 19E-90 M1 | RAMP1    |
| CCR1. 3     | 7. 99E-95 | 0. 512355 | 0. 196 | 0. 059 | 1. 19E-90 M1 | CCR1     |
| HEXA. 3     | 1. 10E-94 | 0. 544134 | 0. 527 | 0. 362 | 1. 65E-90 M1 | HEXA     |
| ARHGAP30. 1 | 2. 3E-94  | 0. 472914 | 0. 217 | 0. 07  | 1. 84E-90 M1 | ARHGAP30 |
| PTPN7. 4    | 1. 31E-94 | 0. 489951 | 0. 191 | 0. 056 | 1. 96E-90 M1 | PTPN7    |
| TMEM14A. 3  | 2. 49E-94 | -0. 46742 | 0. 109 | 0. 367 | 3. 73E-90 M1 | TMEM14A  |
| MAD2L2. 3   | 2. 63E-94 | -0. 46393 | 0. 164 | 0. 438 | 3. 93E-90 M1 | MAD2L2   |
| BCAR1. 2    | 2. 71E-94 | -0. 43294 | 0. 01  | 0. 204 | 4. 04E-90 M1 | BCAR1    |
| CTXN1. 4    | 2. 88E-94 | -0. 40638 | 0. 003 | 0. 191 | 4. 30E-90 M1 | CTXN1    |
| CDC42EP4. 3 | 3. 38E-94 | -0. 50112 | 0. 027 | 0. 236 | 5. 05E-90 M1 | CDC42EP4 |
| IGFBP3. 2   | 4. 43E-94 | -0. 79187 | 0. 026 | 0. 228 | 6. 62E-90 M1 | IGFBP3   |
| PHGDH. 3    | 5. 45E-94 | -0. 6151  | 0. 028 | 0. 234 | 8. 14E-90 M1 | PHGDH    |
| HSD11B1L. 6 | 8. 5E-94  | -0. 41612 | 0. 029 | 0. 24  | 1. 02E-89 M1 | HSD11B1L |
| LRMP. 3     | 7. 14E-94 | 0. 404507 | 0. 131 | 0. 027 | 1. 07E-89 M1 | LRMP     |
| PDRG1. 2    | 8. 50E-94 | -0. 38495 | 0. 067 | 0. 308 | 1. 27E-89 M1 | PDRG1    |

|            |           |           |        |        |              |              |
|------------|-----------|-----------|--------|--------|--------------|--------------|
| SOX8. 4    | 1. 77E-93 | -0. 56579 | 0. 014 | 0. 21  | 2. 65E-89 M1 | SOX8         |
| SEPT11. 4  | 1. 78E-93 | -0. 4381  | 0. 094 | 0. 345 | 2. 66E-89 M1 | 11-Sep       |
| PRKCD. 4   | 1. 85E-93 | 0. 491976 | 0. 191 | 0. 058 | 2. 77E-89 M1 | PRKCD        |
| POLR2J3. 3 | 2. 11E-93 | -0. 38577 | 0. 117 | 0. 383 | 3. 15E-89 M1 | POLR2J3      |
| RP11-14N7  | 2. 50E-93 | -0. 46499 | 0. 03  | 0. 24  | 3. 74E-89 M1 | RP11-14N7. 2 |
| NDN. 4     | 2. 88E-93 | -0. 44469 | 0. 025 | 0. 231 | 4. 30E-89 M1 | NDN          |
| RALA. 3    | 3. 29E-93 | -0. 42898 | 0. 135 | 0. 405 | 4. 92E-89 M1 | RALA         |
| MAP3K13. 3 | 3. 43E-93 | -0. 43039 | 0. 157 | 0. 441 | 5. 13E-89 M1 | MAP3K13      |
| DTD1. 4    | 4. 50E-93 | -0. 42849 | 0. 159 | 0. 438 | 6. 73E-89 M1 | DTD1         |
| SERP1. 4   | 5. 40E-93 | 0. 360895 | 0. 672 | 0. 59  | 8. 06E-89 M1 | SERP1        |
| NPAS3. 4   | 5. 55E-93 | -0. 43411 | 0. 004 | 0. 19  | 8. 30E-89 M1 | NPAS3        |
| MAGEH1. 3  | 6. 39E-93 | -0. 45982 | 0. 106 | 0. 36  | 9. 55E-89 M1 | MAGEH1       |
| AK4. 4     | 6. 70E-93 | -0. 48787 | 0. 015 | 0. 212 | 1. 00E-88 M1 | AK4          |
| HILPDA. 3  | 7. 92E-93 | -0. 66832 | 0. 045 | 0. 263 | 1. 18E-88 M1 | HILPDA       |
| LSAMP. 2   | 9. 28E-93 | -0. 5679  | 0. 012 | 0. 204 | 1. 39E-88 M1 | LSAMP        |
| C3orf14. 2 | 1. 14E-92 | -0. 49452 | 0. 071 | 0. 303 | 1. 71E-88 M1 | C3orf14      |
| MOB1A. 4   | 1. 16E-92 | 0. 53832  | 0. 481 | 0. 312 | 1. 73E-88 M1 | MOB1A        |
| F2R. 4     | 1. 35E-92 | -0. 39837 | 0. 009 | 0. 201 | 2. 02E-88 M1 | F2R          |
| PER1. 3    | 1. 75E-92 | 0. 585659 | 0. 331 | 0. 155 | 2. 62E-88 M1 | PER1         |
| ZNF462. 4  | 1. 82E-92 | -0. 47815 | 0. 014 | 0. 209 | 2. 72E-88 M1 | ZNF462       |
| IRAK3. 4   | 2. 07E-92 | 0. 491623 | 0. 181 | 0. 052 | 3. 10E-88 M1 | IRAK3        |
| CALU. 3    | 2. 08E-92 | -0. 44773 | 0. 169 | 0. 45  | 3. 11E-88 M1 | CALU         |
| AREG. 4    | 5. 01E-92 | 0. 563874 | 0. 167 | 0. 044 | 7. 49E-88 M1 | AREG         |
| CNIH3. 1   | 5. 39E-92 | -0. 44839 | 0. 01  | 0. 2   | 8. 05E-88 M1 | CNIH3        |
| ADRB2. 2   | 1. 04E-91 | 0. 45345  | 0. 133 | 0. 028 | 1. 56E-87 M1 | ADRB2        |
| DPP7. 4    | 1. 25E-91 | 0. 472559 | 0. 578 | 0. 445 | 1. 87E-87 M1 | DPP7         |
| DLEU7. 3   | 1. 66E-91 | 0. 424127 | 0. 14  | 0. 032 | 2. 49E-87 M1 | DLEU7        |
| NDFIP2. 2  | 1. 69E-91 | -0. 41327 | 0. 023 | 0. 226 | 2. 52E-87 M1 | NDFIP2       |
| GPC2. 4    | 2. 56E-91 | -0. 57372 | 0. 011 | 0. 2   | 3. 82E-87 M1 | GPC2         |
| C8orf33. 1 | 2. 73E-91 | -0. 3991  | 0. 105 | 0. 361 | 4. 08E-87 M1 | C8orf33      |
| SNTG1. 3   | 2. 98E-91 | -0. 57251 | 0. 002 | 0. 184 | 4. 45E-87 M1 | SNTG1        |
| EI24. 2    | 2. 99E-91 | -0. 40223 | 0. 19  | 0. 482 | 4. 46E-87 M1 | EI24         |
| KLHL23. 4  | 3. 66E-91 | -0. 46627 | 0. 007 | 0. 192 | 5. 47E-87 M1 | KLHL23       |
| FAM134B. 2 | 4. 66E-91 | -0. 42062 | 0. 009 | 0. 197 | 6. 96E-87 M1 | FAM134B      |
| ZFHX4. 4   | 6. 14E-91 | -0. 40452 | 0. 002 | 0. 182 | 9. 18E-87 M1 | ZFHX4        |
| NAP1L4. 3  | 6. 31E-91 | -0. 43538 | 0. 17  | 0. 45  | 9. 42E-87 M1 | NAP1L4       |
| CD40. 4    | 6. 44E-91 | 0. 421224 | 0. 17  | 0. 046 | 9. 62E-87 M1 | CD40         |
| CDC34. 3   | 1. 03E-90 | -0. 39808 | 0. 05  | 0. 272 | 1. 53E-86 M1 | CDC34        |
| NRXN1. 3   | 1. 04E-90 | -0. 63366 | 0. 009 | 0. 194 | 1. 55E-86 M1 | NRXN1        |
| MYO6. 2    | 1. 14E-90 | -0. 43195 | 0. 045 | 0. 261 | 1. 71E-86 M1 | MYO6         |
| TM7SF2. 3  | 1. 38E-90 | -0. 43844 | 0. 048 | 0. 267 | 2. 06E-86 M1 | TM7SF2       |
| PEBP1. 4   | 1. 57E-90 | -0. 39464 | 0. 65  | 0. 835 | 2. 35E-86 M1 | PEBP1        |
| JAG1. 3    | 1. 76E-90 | -0. 41625 | 0. 006 | 0. 19  | 2. 63E-86 M1 | JAG1         |
| FAM127A. 1 | 1. 93E-90 | -0. 42839 | 0. 214 | 0. 508 | 2. 89E-86 M1 | FAM127A      |
| PDCD5. 4   | 2. 05E-90 | -0. 47924 | 0. 286 | 0. 59  | 3. 07E-86 M1 | PDCD5        |
| BCAN. 4    | 2. 27E-90 | -0. 73508 | 0. 09  | 0. 313 | 3. 39E-86 M1 | BCAN         |
| NSG1. 4    | 2. 49E-90 | -0. 73773 | 0. 018 | 0. 207 | 3. 73E-86 M1 | NSG1         |
| DYNLL1. 3  | 3. 13E-90 | -0. 37733 | 0. 698 | 0. 864 | 4. 68E-86 M1 | DYNLL1       |
| TERF2IP. 4 | 3. 34E-90 | -0. 47979 | 0. 287 | 0. 564 | 5. 00E-86 M1 | TERF2IP      |
| TMEM9. 4   | 3. 77E-90 | -0. 43848 | 0. 141 | 0. 412 | 5. 63E-86 M1 | TMEM9        |
| CBS. 3     | 4. 02E-90 | -0. 40858 | 0. 005 | 0. 188 | 6. 01E-86 M1 | CBS          |

|           |          |          |       |       |          |    |           |
|-----------|----------|----------|-------|-------|----------|----|-----------|
| DLGAP4.1  | 6.75E-90 | -0.41841 | 0.09  | 0.334 | 1.01E-85 | M1 | DLGAP4    |
| MYO10.3   | 7.07E-90 | -0.45373 | 0.026 | 0.228 | 1.06E-85 | M1 | MYO10     |
| TMEM54.2  | 7.58E-90 | -0.40146 | 0.027 | 0.229 | 1.13E-85 | M1 | TMEM54    |
| BAZ1B.4   | 9.26E-90 | -0.40908 | 0.094 | 0.339 | 1.38E-85 | M1 | BAZ1B     |
| RNF180.3  | 1.10E-89 | -0.42683 | 0.011 | 0.199 | 1.65E-85 | M1 | RNF180    |
| MAP9.2    | 1.19E-89 | -0.42433 | 0.023 | 0.222 | 1.78E-85 | M1 | MAP9      |
| VBP1.3    | 1.38E-89 | -0.42283 | 0.238 | 0.537 | 2.06E-85 | M1 | VBP1      |
| TLE1.2    | 1.89E-89 | -0.38276 | 0.012 | 0.201 | 2.83E-85 | M1 | TLE1      |
| LINC00665 | 2.03E-89 | -0.38917 | 0.021 | 0.219 | 3.04E-85 | M1 | LINC00665 |
| TROVE2.3  | 2.25E-89 | -0.42767 | 0.195 | 0.481 | 3.36E-85 | M1 | TROVE2    |
| GDI1.3    | 2.43E-89 | -0.38474 | 0.238 | 0.535 | 3.63E-85 | M1 | GDI1      |
| CD72.3    | 2.61E-89 | 0.400005 | 0.14  | 0.033 | 3.90E-85 | M1 | CD72      |
| IFT57.4   | 4.30E-89 | -0.44894 | 0.06  | 0.285 | 6.43E-85 | M1 | IFT57     |
| NRSN2.3   | 5.84E-89 | -0.37193 | 0.01  | 0.195 | 8.73E-85 | M1 | NRSN2     |
| SOCS2.3   | 7.11E-89 | -0.44847 | 0.006 | 0.187 | 1.06E-84 | M1 | SOCS2     |
| DPYSL4.4  | 9.18E-89 | -0.40616 | 0.005 | 0.184 | 1.37E-84 | M1 | DPYSL4    |
| WDR60.1   | 9.55E-89 | -0.41302 | 0.051 | 0.268 | 1.43E-84 | M1 | WDR60     |
| S100A9.4  | 9.76E-89 | 0.465038 | 0.393 | 0.19  | 1.46E-84 | M1 | S100A9    |
| DPYSL5.4  | 9.81E-89 | -0.41951 | 0.009 | 0.194 | 1.47E-84 | M1 | DPYSL5    |
| FOXG1.3   | 1.78E-88 | -0.37546 | 0.004 | 0.183 | 2.66E-84 | M1 | FOXG1     |
| HDAC2.4   | 2.31E-88 | -0.41188 | 0.214 | 0.495 | 3.46E-84 | M1 | HDAC2     |
| PLOD2.3   | 2.96E-88 | -0.44219 | 0.009 | 0.193 | 4.42E-84 | M1 | PLOD2     |
| SFXN1.2   | 2.97E-88 | -0.39855 | 0.041 | 0.252 | 4.43E-84 | M1 | SFXN1     |
| OLIG2.3   | 3.26E-88 | -0.58355 | 0.02  | 0.21  | 4.87E-84 | M1 | OLIG2     |
| PGAP1.3   | 3.63E-88 | -0.39877 | 0.021 | 0.216 | 5.42E-84 | M1 | PGAP1     |
| GSTO1.3   | 4.87E-88 | 0.430268 | 0.6   | 0.427 | 7.27E-84 | M1 | GSTO1     |
| MIAT.3    | 5.95E-88 | -0.55265 | 0.013 | 0.199 | 8.89E-84 | M1 | MIAT      |
| SH2B3.4   | 6.49E-88 | 0.583972 | 0.228 | 0.085 | 9.69E-84 | M1 | SH2B3     |
| PRR4.4    | 6.87E-88 | -0.41841 | 0.042 | 0.251 | 1.03E-83 | M1 | PRR4      |
| MCM7.3    | 7.95E-88 | -0.50975 | 0.07  | 0.291 | 1.19E-83 | M1 | MCM7      |
| COL6A2.3  | 8.22E-88 | -0.52698 | 0.01  | 0.193 | 1.23E-83 | M1 | COL6A2    |
| DTNA.3    | 1.17E-87 | -0.52662 | 0.066 | 0.29  | 1.75E-83 | M1 | DTNA      |
| NNT-AS1.3 | 2.42E-87 | -0.40806 | 0.045 | 0.257 | 3.62E-83 | M1 | NNT-AS1   |
| KIF1B.3   | 3.10E-87 | -0.39486 | 0.093 | 0.334 | 4.64E-83 | M1 | KIF1B     |
| RHBDD2.3  | 3.92E-87 | -0.40729 | 0.22  | 0.507 | 5.86E-83 | M1 | RHBDD2    |
| ZKSCAN1.3 | 5.12E-87 | -0.36185 | 0.107 | 0.358 | 7.66E-83 | M1 | ZKSCAN1   |
| CHL1.2    | 7.18E-87 | -0.44278 | 0.005 | 0.182 | 1.07E-82 | M1 | CHL1      |
| SPOCD1.2  | 1.07E-86 | -0.6996  | 0.044 | 0.252 | 1.60E-82 | M1 | SPOCD1    |
| UPF3A.3   | 1.15E-86 | -0.40384 | 0.129 | 0.388 | 1.71E-82 | M1 | UPF3A     |
| HINT1.2   | 1.29E-86 | -0.37306 | 0.683 | 0.857 | 1.92E-82 | M1 | HINT1     |
| TJP1.2    | 1.42E-86 | -0.39994 | 0.021 | 0.212 | 2.12E-82 | M1 | TJP1      |
| NT5DC2.3  | 1.49E-86 | -0.38534 | 0.012 | 0.195 | 2.23E-82 | M1 | NT5DC2    |
| BMP7.4    | 1.69E-86 | -0.42035 | 0.013 | 0.196 | 2.52E-82 | M1 | BMP7      |
| PPFIBP1.2 | 1.74E-86 | -0.40836 | 0.007 | 0.186 | 2.61E-82 | M1 | PPFIBP1   |
| JAKMIP2.2 | 1.82E-86 | -0.40478 | 0.005 | 0.18  | 2.72E-82 | M1 | JAKMIP2   |
| UBE2V2.3  | 1.88E-86 | -0.429   | 0.252 | 0.544 | 2.81E-82 | M1 | UBE2V2    |
| POU3F3.3  | 1.93E-86 | -0.41388 | 0.007 | 0.184 | 2.89E-82 | M1 | POU3F3    |
| ANK2.4    | 2.06E-86 | -0.3841  | 0.012 | 0.194 | 3.07E-82 | M1 | ANK2      |
| TUBB.2    | 2.47E-86 | -0.39381 | 0.631 | 0.799 | 3.70E-82 | M1 | TUBB      |
| FFAR4.2   | 3.08E-86 | 0.337991 | 0.098 | 0.016 | 4.61E-82 | M1 | FFAR4     |
| NDRG4.4   | 3.32E-86 | -0.4238  | 0.01  | 0.19  | 4.96E-82 | M1 | NDRG4     |

|            |           |           |        |        |              |               |
|------------|-----------|-----------|--------|--------|--------------|---------------|
| SYNE2. 4   | 3. 71E-86 | -0. 44    | 0. 018 | 0. 205 | 5. 54E-82 M1 | SYNE2         |
| FNBPI1L. 4 | 4. 57E-86 | -0. 44569 | 0. 025 | 0. 217 | 6. 83E-82 M1 | FNBPI1L       |
| OLIG1. 4   | 4. 85E-86 | -0. 70317 | 0. 023 | 0. 211 | 7. 25E-82 M1 | OLIG1         |
| ATP6V1B2.  | 7. 02E-86 | 0. 525186 | 0. 53  | 0. 384 | 1. 05E-81 M1 | ATP6V1B2      |
| MORN2. 4   | 1. 01E-85 | -0. 46773 | 0. 074 | 0. 3   | 1. 52E-81 M1 | MORN2         |
| EFEMP1. 3  | 1. 06E-85 | -0. 84214 | 0. 049 | 0. 255 | 1. 58E-81 M1 | EFEMP1        |
| PMP22. 3   | 1. 10E-85 | -0. 57133 | 0. 215 | 0. 47  | 1. 64E-81 M1 | PMP22         |
| SASH3. 4   | 1. 14E-85 | 0. 438263 | 0. 185 | 0. 057 | 1. 71E-81 M1 | SASH3         |
| TFRC. 3    | 1. 51E-85 | 0. 616859 | 0. 345 | 0. 182 | 2. 25E-81 M1 | TFRC          |
| DOK5. 3    | 1. 60E-85 | -0. 43222 | 0. 023 | 0. 215 | 2. 40E-81 M1 | DOK5          |
| LUC7L3. 2  | 2. 59E-85 | -0. 40534 | 0. 267 | 0. 559 | 3. 87E-81 M1 | LUC7L3        |
| TEAD1. 2   | 2. 71E-85 | -0. 34306 | 0. 002 | 0. 173 | 4. 04E-81 M1 | TEAD1         |
| IFNGR2. 4  | 2. 97E-85 | 0. 509254 | 0. 502 | 0. 367 | 4. 44E-81 M1 | IFNGR2        |
| HNMT. 3    | 4. 61E-85 | 0. 489786 | 0. 371 | 0. 188 | 6. 89E-81 M1 | HNMT          |
| RENBP. 4   | 5. 16E-85 | 0. 514658 | 0. 266 | 0. 109 | 7. 72E-81 M1 | RENBP         |
| PHAX. 2    | 7. 60E-85 | -0. 41553 | 0. 103 | 0. 346 | 1. 14E-80 M1 | PHAX          |
| RP11-161M  | 8. 44E-85 | -0. 52754 | 0. 015 | 0. 197 | 1. 26E-80 M1 | RP11-161M6. 2 |
| HSPBP1. 1  | 9. 35E-85 | -0. 36786 | 0. 09  | 0. 327 | 1. 40E-80 M1 | HSPBP1        |
| ASNS. 4    | 1. 08E-84 | -0. 48384 | 0. 021 | 0. 208 | 1. 62E-80 M1 | ASNS          |
| WWTR1. 4   | 1. 84E-84 | -0. 40326 | 0. 011 | 0. 19  | 2. 75E-80 M1 | WWTR1         |
| GIPC1. 2   | 1. 87E-84 | -0. 3934  | 0. 077 | 0. 306 | 2. 79E-80 M1 | GIPC1         |
| WASF2. 4   | 1. 99E-84 | 0. 480106 | 0. 549 | 0. 416 | 2. 98E-80 M1 | WASF2         |
| BICD1. 2   | 2. 23E-84 | -0. 36278 | 0. 037 | 0. 238 | 3. 34E-80 M1 | BICD1         |
| ALDH7A1. 1 | 2. 99E-84 | -0. 43843 | 0. 085 | 0. 314 | 4. 47E-80 M1 | ALDH7A1       |
| PITPNA-AS  | 3. 33E-84 | -0. 41187 | 0. 032 | 0. 228 | 4. 98E-80 M1 | PITPNA-AS1    |
| ARL5A. 3   | 3. 89E-84 | 0. 421445 | 0. 596 | 0. 501 | 5. 81E-80 M1 | ARL5A         |
| SEPT8. 4   | 6. 07E-84 | -0. 45231 | 0. 033 | 0. 228 | 9. 07E-80 M1 | 8-Sep         |
| APBB1. 3   | 6. 59E-84 | -0. 41391 | 0. 029 | 0. 222 | 9. 85E-80 M1 | APBB1         |
| MX2. 4     | 6. 83E-84 | 0. 454998 | 0. 16  | 0. 045 | 1. 02E-79 M1 | MX2           |
| PTS. 3     | 6. 96E-84 | -0. 39454 | 0. 118 | 0. 368 | 1. 04E-79 M1 | PTS           |
| JAM3. 1    | 8. 09E-84 | -0. 41437 | 0. 006 | 0. 178 | 1. 21E-79 M1 | JAM3          |
| RND2. 3    | 8. 16E-84 | -0. 40873 | 0. 013 | 0. 193 | 1. 22E-79 M1 | RND2          |
| DMWD. 3    | 9. 32E-84 | -0. 3447  | 0. 002 | 0. 169 | 1. 39E-79 M1 | DMWD          |
| FAM84A. 3  | 9. 61E-84 | -0. 40479 | 0. 003 | 0. 173 | 1. 44E-79 M1 | FAM84A        |
| TMEM219. 3 | 1. 17E-83 | 0. 374226 | 0. 651 | 0. 542 | 1. 76E-79 M1 | TMEM219       |
| PIGX. 3    | 1. 18E-83 | -0. 34882 | 0. 068 | 0. 29  | 1. 77E-79 M1 | PIGX          |
| KIF2A. 4   | 1. 26E-83 | -0. 38318 | 0. 058 | 0. 271 | 1. 89E-79 M1 | KIF2A         |
| ENHO. 3    | 1. 35E-83 | -0. 38864 | 0. 007 | 0. 179 | 2. 01E-79 M1 | ENHO          |
| ACAP3. 4   | 1. 35E-83 | -0. 43603 | 0. 046 | 0. 25  | 2. 02E-79 M1 | ACAP3         |
| CITED1. 3  | 1. 37E-83 | -0. 51624 | 0. 007 | 0. 18  | 2. 05E-79 M1 | CITED1        |
| PPP2CB. 4  | 1. 55E-83 | -0. 4014  | 0. 1   | 0. 336 | 2. 31E-79 M1 | PPP2CB        |
| CARD9. 4   | 1. 92E-83 | 0. 441274 | 0. 167 | 0. 049 | 2. 86E-79 M1 | CARD9         |
| ACO69363.  | 2. 08E-83 | 0. 45363  | 0. 138 | 0. 034 | 3. 11E-79 M1 | ACO69363. 1   |
| KNOP1. 3   | 2. 14E-83 | -0. 39216 | 0. 074 | 0. 297 | 3. 20E-79 M1 | KNOP1         |
| CBR1. 3    | 2. 40E-83 | -0. 47832 | 0. 248 | 0. 522 | 3. 59E-79 M1 | CBR1          |
| IFT81. 2   | 2. 46E-83 | -0. 35683 | 0. 011 | 0. 189 | 3. 68E-79 M1 | IFT81         |
| TGFBI. 4   | 2. 48E-83 | 0. 449367 | 0. 368 | 0. 173 | 3. 70E-79 M1 | TGFBI         |
| ELAVL4. 3  | 2. 74E-83 | -0. 68763 | 0. 026 | 0. 209 | 4. 10E-79 M1 | ELAVL4        |
| SEC11A. 3  | 3. 13E-83 | 0. 330488 | 0. 676 | 0. 574 | 4. 68E-79 M1 | SEC11A        |
| METTL7B. 1 | 3. 64E-83 | -0. 69844 | 0. 047 | 0. 245 | 5. 44E-79 M1 | METTL7B       |
| GADD45A. 4 | 4. 07E-83 | -0. 51464 | 0. 089 | 0. 317 | 6. 09E-79 M1 | GADD45A       |

|             |          |          |       |       |          |    |            |
|-------------|----------|----------|-------|-------|----------|----|------------|
| FBX017.4    | 7.12E-83 | -0.39632 | 0.004 | 0.172 | 1.06E-78 | M1 | FBX017     |
| MED19.1     | 7.33E-83 | -0.37232 | 0.088 | 0.32  | 1.10E-78 | M1 | MED19      |
| ACTN4.2     | 7.84E-83 | -0.39192 | 0.125 | 0.374 | 1.17E-78 | M1 | ACTN4      |
| B3GNT5.4    | 9.50E-83 | 0.664143 | 0.263 | 0.117 | 1.42E-78 | M1 | B3GNT5     |
| DPP6.2      | 9.96E-83 | -0.40638 | 0.013 | 0.191 | 1.49E-78 | M1 | DPP6       |
| LDLRAD3.3   | 1.00E-82 | -0.38029 | 0.021 | 0.207 | 1.50E-78 | M1 | LDLRAD3    |
| TMEM132A.1  | 1.10E-82 | -0.35324 | 0.004 | 0.173 | 1.64E-78 | M1 | TMEM132A   |
| CDKN2C.2    | 1.15E-82 | -0.51697 | 0.095 | 0.32  | 1.72E-78 | M1 | CDKN2C     |
| RDX.3       | 1.50E-82 | -0.42124 | 0.267 | 0.535 | 2.23E-78 | M1 | RDX        |
| GOS2.3      | 1.57E-82 | 0.576406 | 0.321 | 0.156 | 2.35E-78 | M1 | GOS2       |
| TMEM106C.1  | 1.70E-82 | -0.42554 | 0.079 | 0.304 | 2.54E-78 | M1 | TMEM106C   |
| FOXN3.4     | 1.73E-82 | 0.579977 | 0.392 | 0.228 | 2.58E-78 | M1 | FOXN3      |
| GPSM2.3     | 1.76E-82 | -0.41461 | 0.022 | 0.208 | 2.63E-78 | M1 | GPSM2      |
| HIST2H2AA.1 | 1.98E-82 | 0.492805 | 0.157 | 0.044 | 2.96E-78 | M1 | HIST2H2AA3 |
| UBE2S.4     | 2.51E-82 | -0.45054 | 0.138 | 0.385 | 3.76E-78 | M1 | UBE2S      |
| CAP1.3      | 3.42E-82 | 0.334996 | 0.662 | 0.578 | 5.11E-78 | M1 | CAP1       |
| GCA.4       | 4.01E-82 | 0.535028 | 0.442 | 0.27  | 5.99E-78 | M1 | GCA        |
| GPNMB.4     | 7.04E-82 | 0.484001 | 0.354 | 0.17  | 1.05E-77 | M1 | GPNMB      |
| CCNL1.2     | 7.15E-82 | 0.434293 | 0.616 | 0.506 | 1.07E-77 | M1 | CCNL1      |
| BHLHE41.3   | 8.74E-82 | 0.613936 | 0.342 | 0.181 | 1.31E-77 | M1 | BHLHE41    |
| TRIM47.4    | 8.91E-82 | -0.42269 | 0.025 | 0.21  | 1.33E-77 | M1 | TRIM47     |
| HPSE.3      | 9.90E-82 | 0.404703 | 0.15  | 0.04  | 1.48E-77 | M1 | HPSE       |
| FAM20A.3    | 1.55E-81 | 0.420734 | 0.151 | 0.041 | 2.31E-77 | M1 | FAM20A     |
| SEMA6D.4    | 1.86E-81 | -0.40333 | 0.012 | 0.186 | 2.79E-77 | M1 | SEMA6D     |
| BPGM.1      | 2.02E-81 | -0.40063 | 0.059 | 0.269 | 3.01E-77 | M1 | BPGM       |
| TGFBR1.4    | 2.21E-81 | 0.549795 | 0.291 | 0.136 | 3.31E-77 | M1 | TGFBR1     |
| SSBP2.4     | 2.27E-81 | -0.41131 | 0.082 | 0.308 | 3.39E-77 | M1 | SSBP2      |
| ACTN1.3     | 2.70E-81 | -0.43361 | 0.074 | 0.291 | 4.04E-77 | M1 | ACTN1      |
| WEE1.2      | 2.96E-81 | -0.37013 | 0.008 | 0.178 | 4.42E-77 | M1 | WEE1       |
| BMP2K.2     | 2.96E-81 | 0.519133 | 0.234 | 0.093 | 4.42E-77 | M1 | BMP2K      |
| RFX4.2      | 3.28E-81 | -0.47305 | 0.009 | 0.179 | 4.90E-77 | M1 | RFX4       |
| NDUFA4.3    | 3.62E-81 | -0.31789 | 0.824 | 0.909 | 5.42E-77 | M1 | NDUFA4     |
| HEPACAM.3   | 3.64E-81 | -0.53566 | 0.025 | 0.208 | 5.44E-77 | M1 | HEPACAM    |
| LINCO1003.3 | 3.73E-81 | -0.36756 | 0.033 | 0.224 | 5.57E-77 | M1 | LINCO1003  |
| FAM200B.2   | 4.32E-81 | -0.37257 | 0.15  | 0.41  | 6.46E-77 | M1 | FAM200B    |
| HTRA1.4     | 7.99E-81 | 0.410012 | 0.58  | 0.436 | 1.19E-76 | M1 | HTRA1      |
| VAMP2.3     | 8.61E-81 | -0.40824 | 0.399 | 0.667 | 1.29E-76 | M1 | VAMP2      |
| ZNF3.2      | 1.08E-80 | -0.39648 | 0.042 | 0.238 | 1.62E-76 | M1 | ZNF3       |
| FSD1.3      | 1.29E-80 | -0.35455 | 0.011 | 0.183 | 1.92E-76 | M1 | FSD1       |
| C11orf49.1  | 1.29E-80 | -0.37047 | 0.061 | 0.272 | 1.92E-76 | M1 | C11orf49   |
| EMP1.2      | 1.37E-80 | -0.505   | 0.025 | 0.209 | 2.05E-76 | M1 | EMP1       |
| UBE2D3.3    | 1.41E-80 | 0.248011 | 0.772 | 0.719 | 2.11E-76 | M1 | UBE2D3     |
| TMEM158.3   | 2.10E-80 | -0.39106 | 0.003 | 0.167 | 3.14E-76 | M1 | TMEM158    |
| APC.4       | 2.27E-80 | -0.36019 | 0.046 | 0.247 | 3.39E-76 | M1 | APC        |
| DDX49.2     | 2.68E-80 | -0.37154 | 0.086 | 0.312 | 4.00E-76 | M1 | DDX49      |
| MYLIP.4     | 2.98E-80 | 0.531121 | 0.253 | 0.104 | 4.45E-76 | M1 | MYLIP      |
| NKX2-2.3    | 3.82E-80 | -0.51902 | 0.008 | 0.175 | 5.71E-76 | M1 | NKX2-2     |
| PCDHB16.2   | 4.15E-80 | -0.3724  | 0.004 | 0.167 | 6.21E-76 | M1 | PCDHB16    |
| CDKN2D.4    | 4.40E-80 | -0.4216  | 0.015 | 0.189 | 6.57E-76 | M1 | CDKN2D     |
| ABI2.2      | 4.85E-80 | -0.33787 | 0.147 | 0.405 | 7.24E-76 | M1 | ABI2       |
| TRIM24.4    | 8.38E-80 | -0.33337 | 0.033 | 0.223 | 1.25E-75 | M1 | TRIM24     |

|            |          |          |       |       |             |            |
|------------|----------|----------|-------|-------|-------------|------------|
| RGS16.3    | 9.01E-80 | 0.560095 | 0.41  | 0.249 | 1.35E-75 M1 | RGS16      |
| SNAP25.3   | 1.02E-79 | -0.56695 | 0.006 | 0.17  | 1.53E-75 M1 | SNAP25     |
| FGF20.2    | 1.26E-79 | 0.321716 | 0.069 | 0.007 | 1.88E-75 M1 | FGF20      |
| CALM1.4    | 1.68E-79 | -0.33248 | 0.643 | 0.797 | 2.51E-75 M1 | CALM1      |
| S100A6.4   | 1.98E-79 | -0.64767 | 0.472 | 0.678 | 2.97E-75 M1 | S100A6     |
| OLFM1.3    | 2.07E-79 | -0.43038 | 0.01  | 0.179 | 3.09E-75 M1 | OLFM1      |
| HEXB.4     | 2.07E-79 | 0.479829 | 0.522 | 0.382 | 3.10E-75 M1 | HEXB       |
| SGCE.2     | 2.35E-79 | -0.65037 | 0.008 | 0.174 | 3.52E-75 M1 | SGCE       |
| PDAP1.2    | 3.35E-79 | -0.38232 | 0.296 | 0.584 | 5.01E-75 M1 | PDAP1      |
| TSPAN6.3   | 5.23E-79 | -0.40469 | 0.01  | 0.178 | 7.81E-75 M1 | TSPAN6     |
| SUN1.4     | 5.70E-79 | -0.3684  | 0.044 | 0.241 | 8.52E-75 M1 | SUN1       |
| NCF2.4     | 6.44E-79 | 0.418764 | 0.218 | 0.078 | 9.62E-75 M1 | NCF2       |
| B4GALT5.2  | 7.72E-79 | -0.37974 | 0.038 | 0.228 | 1.15E-74 M1 | B4GALT5    |
| DRAXIN.3   | 7.83E-79 | -0.36038 | 0.011 | 0.181 | 1.17E-74 M1 | DRAXIN     |
| SOAT1.4    | 1.06E-78 | 0.566791 | 0.329 | 0.171 | 1.59E-74 M1 | SOAT1      |
| IRF5.4     | 1.37E-78 | 0.465022 | 0.148 | 0.041 | 2.05E-74 M1 | IRF5       |
| CHRNE.3    | 1.74E-78 | 0.343239 | 0.087 | 0.014 | 2.59E-74 M1 | CHRNE      |
| APC2.3     | 1.83E-78 | -0.39587 | 0.009 | 0.176 | 2.74E-74 M1 | APC2       |
| NOL3.4     | 2.11E-78 | -0.43513 | 0.02  | 0.195 | 3.15E-74 M1 | NOL3       |
| DCLK1.2    | 2.14E-78 | -0.40489 | 0.011 | 0.179 | 3.20E-74 M1 | DCLK1      |
| ANXA6      | 2.69E-78 | -0.42584 | 0.032 | 0.215 | 4.02E-74 M1 | ANXA6      |
| ARPC1A.4   | 3.03E-78 | -0.3972  | 0.317 | 0.607 | 4.53E-74 M1 | ARPC1A     |
| DPF3.1     | 4.13E-78 | -0.36902 | 0.003 | 0.163 | 6.17E-74 M1 | DPF3       |
| DPF1.3     | 4.22E-78 | -0.4252  | 0.006 | 0.167 | 6.31E-74 M1 | DPF1       |
| FCGR2B.4   | 4.44E-78 | 0.5635   | 0.275 | 0.118 | 6.63E-74 M1 | FCGR2B     |
| YWHAG.4    | 4.58E-78 | -0.39643 | 0.18  | 0.433 | 6.85E-74 M1 | YWHAG      |
| GARS.4     | 5.24E-78 | -0.38409 | 0.104 | 0.331 | 7.82E-74 M1 | GARS       |
| CNP.3      | 5.29E-78 | -0.53679 | 0.169 | 0.419 | 7.90E-74 M1 | CNP        |
| MYH10.2    | 5.89E-78 | -0.37927 | 0.013 | 0.181 | 8.81E-74 M1 | MYH10      |
| LPXN.4     | 6.82E-78 | 0.503974 | 0.226 | 0.087 | 1.02E-73 M1 | LPXN       |
| KHDRBS3.4  | 9.96E-78 | -0.38836 | 0.049 | 0.248 | 1.49E-73 M1 | KHDRBS3    |
| AQP4.3     | 9.99E-78 | -0.61274 | 0.021 | 0.194 | 1.49E-73 M1 | AQP4       |
| ZC2HC1A.3  | 1.04E-77 | -0.43064 | 0.049 | 0.243 | 1.55E-73 M1 | ZC2HC1A    |
| SLC16A1.4  | 1.26E-77 | -0.43891 | 0.064 | 0.267 | 1.88E-73 M1 | SLC16A1    |
| ATP6V1G2.1 | 1.50E-77 | -0.41455 | 0.011 | 0.177 | 2.24E-73 M1 | ATP6V1G2   |
| RNF187.2   | 1.55E-77 | -0.41293 | 0.167 | 0.42  | 2.32E-73 M1 | RNF187     |
| CBX6.2     | 1.55E-77 | -0.37544 | 0.067 | 0.275 | 2.32E-73 M1 | CBX6       |
| CCZ1.1     | 1.79E-77 | -0.34461 | 0.143 | 0.393 | 2.68E-73 M1 | CCZ1       |
| PABPC4.4   | 2.03E-77 | 0.556243 | 0.445 | 0.305 | 3.03E-73 M1 | PABPC4     |
| C1orf122.2 | 2.04E-77 | -0.44809 | 0.269 | 0.532 | 3.04E-73 M1 | C1orf122   |
| KIF9.4     | 2.22E-77 | -0.37982 | 0.025 | 0.204 | 3.31E-73 M1 | KIF9       |
| PREPL.2    | 2.92E-77 | -0.38214 | 0.035 | 0.219 | 4.37E-73 M1 | PREPL      |
| AC074289.3 | 3.05E-77 | 0.488004 | 0.151 | 0.043 | 4.55E-73 M1 | AC074289.1 |
| PROX1.3    | 3.36E-77 | -0.37125 | 0.019 | 0.193 | 5.03E-73 M1 | PROX1      |
| LTBR.4     | 3.52E-77 | 0.472006 | 0.204 | 0.073 | 5.26E-73 M1 | LTBR       |
| PTCRA.2    | 4.10E-77 | 0.303156 | 0.08  | 0.012 | 6.12E-73 M1 | PTCRA      |
| PSD3.3     | 4.56E-77 | -0.35923 | 0.038 | 0.226 | 6.82E-73 M1 | PSD3       |
| MLF2.4     | 6.54E-77 | -0.38595 | 0.382 | 0.654 | 9.77E-73 M1 | MLF2       |
| UBE2E3.3   | 7.61E-77 | -0.40114 | 0.241 | 0.504 | 1.14E-72 M1 | UBE2E3     |
| C21orf62.7 | 7.79E-77 | -0.43723 | 0.016 | 0.186 | 1.16E-72 M1 | C21orf62   |
| ENDOV.1    | 9.04E-77 | -0.32337 | 0.053 | 0.254 | 1.35E-72 M1 | ENDOV      |

|            |          |          |       |       |          |    |              |
|------------|----------|----------|-------|-------|----------|----|--------------|
| TCHH       | 9.38E-77 | 0.276139 | 0.07  | 0.008 | 1.40E-72 | M1 | TCHH         |
| THSD7A.3   | 1.14E-76 | -0.55918 | 0.009 | 0.169 | 1.70E-72 | M1 | THSD7A       |
| DAG1.2     | 1.24E-76 | -0.32032 | 0.025 | 0.203 | 1.86E-72 | M1 | DAG1         |
| SMOX.4     | 1.37E-76 | -0.43206 | 0.072 | 0.282 | 2.04E-72 | M1 | SMOX         |
| PCGF2.2    | 1.41E-76 | -0.32572 | 0.019 | 0.191 | 2.11E-72 | M1 | PCGF2        |
| TSC22D4.4  | 1.47E-76 | -0.57456 | 0.268 | 0.51  | 2.19E-72 | M1 | TSC22D4      |
| PCMTD2.3   | 1.49E-76 | -0.33982 | 0.059 | 0.261 | 2.23E-72 | M1 | PCMTD2       |
| ACSM5.1    | 1.60E-76 | 0.334643 | 0.1   | 0.019 | 2.40E-72 | M1 | ACSM5        |
| CDK4.2     | 1.61E-76 | -0.46304 | 0.261 | 0.529 | 2.40E-72 | M1 | CDK4         |
| TNFSF10.2  | 1.88E-76 | 0.386007 | 0.174 | 0.054 | 2.82E-72 | M1 | TNFSF10      |
| FAM3C.3    | 3.23E-76 | -0.38447 | 0.219 | 0.481 | 4.83E-72 | M1 | FAM3C        |
| PICALM.4   | 3.30E-76 | 0.561116 | 0.406 | 0.256 | 4.94E-72 | M1 | PICALM       |
| MIS18BP1.3 | 4.7E-76  | 0.563426 | 0.267 | 0.122 | 5.19E-72 | M1 | MIS18BP1     |
| ZSCAN18.2  | 4.18E-76 | -0.35048 | 0.062 | 0.265 | 6.25E-72 | M1 | ZSCAN18      |
| CEND1.2    | 4.39E-76 | -0.37357 | 0.006 | 0.165 | 6.56E-72 | M1 | CEND1        |
| TPGS2.1    | 5.24E-76 | -0.36976 | 0.137 | 0.379 | 7.83E-72 | M1 | TPGS2        |
| NT5C3A.2   | 5.66E-76 | -0.36523 | 0.106 | 0.332 | 8.46E-72 | M1 | NT5C3A       |
| SQRDL.4    | 7.46E-76 | 0.486266 | 0.292 | 0.134 | 1.11E-71 | M1 | SQRDL        |
| EHBP1.2    | 8.50E-76 | -0.32129 | 0.022 | 0.196 | 1.27E-71 | M1 | EHBP1        |
| GCAT.4     | 1.12E-75 | -0.30429 | 0.019 | 0.19  | 1.67E-71 | M1 | GCAT         |
| POSTN.3    | 1.27E-75 | -0.49754 | 0.002 | 0.155 | 1.90E-71 | M1 | POSTN        |
| MAF.3      | 1.36E-75 | 0.486063 | 0.257 | 0.11  | 2.03E-71 | M1 | MAF          |
| KLC1.4     | 1.44E-75 | -0.35229 | 0.154 | 0.401 | 2.15E-71 | M1 | KLC1         |
| C5orf24.3  | 2.13E-75 | -0.34131 | 0.106 | 0.334 | 3.18E-71 | M1 | C5orf24      |
| NFATC2.2   | 2.22E-75 | 0.369237 | 0.125 | 0.03  | 3.31E-71 | M1 | NFATC2       |
| DTX3.1     | 2.83E-75 | -0.50243 | 0.084 | 0.289 | 4.23E-71 | M1 | DTX3         |
| RBM4B.2    | 3.45E-75 | -0.34673 | 0.038 | 0.223 | 5.15E-71 | M1 | RBM4B        |
| RP3-525N1  | 3.54E-75 | -0.43672 | 0.013 | 0.177 | 5.29E-71 | M1 | RP3-525N10.2 |
| SETD5.4    | 3.83E-75 | -0.36652 | 0.101 | 0.326 | 5.72E-71 | M1 | SETD5        |
| CCT2       | 4.11E-75 | -0.45094 | 0.322 | 0.59  | 6.14E-71 | M1 | CCT2         |
| LRRC4B.4   | 4.20E-75 | -0.32123 | 0.004 | 0.159 | 6.28E-71 | M1 | LRRC4B       |
| NLGN1.3    | 4.21E-75 | -0.34272 | 0.007 | 0.164 | 6.29E-71 | M1 | NLGN1        |
| DCTN3      | 4.21E-75 | -0.38131 | 0.285 | 0.563 | 6.29E-71 | M1 | DCTN3        |
| TPM2.1     | 4.68E-75 | -0.44009 | 0.021 | 0.191 | 6.99E-71 | M1 | TPM2         |
| KIAA1191.4 | 4.87E-75 | -0.3435  | 0.085 | 0.3   | 7.28E-71 | M1 | KIAA1191     |
| COLGALT2.4 | 4.98E-75 | -0.34611 | 0.007 | 0.165 | 7.44E-71 | M1 | COLGALT2     |
| ASNSD1.3   | 5.69E-75 | -0.33572 | 0.09  | 0.307 | 8.50E-71 | M1 | ASNSD1       |
| IPO9.2     | 5.81E-75 | -0.317   | 0.062 | 0.265 | 8.68E-71 | M1 | IPO9         |
| NUDT16L1.8 | 0.6E-75  | -0.32893 | 0.097 | 0.318 | 1.20E-70 | M1 | NUDT16L1     |
| CSTF3.2    | 8.80E-75 | -0.36825 | 0.088 | 0.303 | 1.31E-70 | M1 | CSTF3        |
| KCNQ10T1.9 | 0.1E-75  | -0.41874 | 0.098 | 0.314 | 1.35E-70 | M1 | KCNQ10T1     |
| CTNNAL1.3  | 9.54E-75 | -0.34363 | 0.012 | 0.174 | 1.43E-70 | M1 | CTNNAL1      |
| S100A8.4   | 9.89E-75 | 0.397596 | 0.329 | 0.156 | 1.48E-70 | M1 | S100A8       |
| ZNF75A.3   | 1.02E-74 | -0.34293 | 0.052 | 0.247 | 1.52E-70 | M1 | ZNF75A       |
| ST8SIA4.4  | 1.04E-74 | 0.523123 | 0.233 | 0.096 | 1.55E-70 | M1 | ST8SIA4      |
| TMEM237.2  | 1.04E-74 | -0.34641 | 0.035 | 0.217 | 1.56E-70 | M1 | TMEM237      |
| LHX2.4     | 1.13E-74 | -0.34858 | 0.003 | 0.155 | 1.69E-70 | M1 | LHX2         |
| FOS.3      | 1.17E-74 | 0.145301 | 0.959 | 0.817 | 1.74E-70 | M1 | FOS          |
| ELOF1.3    | 1.25E-74 | -0.38894 | 0.204 | 0.468 | 1.87E-70 | M1 | ELOF1        |
| CFDP1.3    | 1.27E-74 | -0.35925 | 0.194 | 0.46  | 1.89E-70 | M1 | CFDP1        |
| APMAP.3    | 1.38E-74 | 0.438265 | 0.586 | 0.504 | 2.06E-70 | M1 | APMAP        |

|            |          |          |       |       |             |              |
|------------|----------|----------|-------|-------|-------------|--------------|
| ZNF608.2   | 1.60E-74 | -0.31666 | 0.018 | 0.185 | 2.39E-70 M1 | ZNF608       |
| LIMCH1.3   | 1.75E-74 | -0.41255 | 0.015 | 0.179 | 2.62E-70 M1 | LIMCH1       |
| CTNND2.3   | 1.82E-74 | -0.37188 | 0.018 | 0.186 | 2.71E-70 M1 | CTNND2       |
| NUCB2.1    | 1.97E-74 | -0.36876 | 0.147 | 0.387 | 2.94E-70 M1 | NUCB2        |
| PAK3.4     | 2.00E-74 | -0.45568 | 0.01  | 0.17  | 2.99E-70 M1 | PAK3         |
| IFNLR1.2   | 3.17E-74 | 0.296552 | 0.081 | 0.012 | 4.74E-70 M1 | IFNLR1       |
| ASPHD1.2   | 3.27E-74 | -0.40787 | 0.007 | 0.164 | 4.88E-70 M1 | ASPHD1       |
| NXPH1.4    | 3.66E-74 | -0.41912 | 0.007 | 0.162 | 5.47E-70 M1 | NXPH1        |
| MXRA7.2    | 3.78E-74 | -0.34499 | 0.024 | 0.196 | 5.66E-70 M1 | MXRA7        |
| SCARA3.3   | 3.90E-74 | -0.34167 | 0.007 | 0.164 | 5.82E-70 M1 | SCARA3       |
| SSRP1.2    | 3.97E-74 | -0.35948 | 0.151 | 0.396 | 5.94E-70 M1 | SSRP1        |
| PIK3R5.4   | 5.87E-74 | 0.381352 | 0.126 | 0.032 | 8.77E-70 M1 | PIK3R5       |
| BBOX1.3    | 6.17E-74 | -0.4691  | 0.007 | 0.163 | 9.23E-70 M1 | BBOX1        |
| PTPRA.3    | 9.23E-74 | -0.38127 | 0.155 | 0.394 | 1.38E-69 M1 | PTPRA        |
| TYMS.3     | 1.11E-73 | -0.43499 | 0.022 | 0.189 | 1.66E-69 M1 | TYMS         |
| CDC25B.2   | 1.13E-73 | -0.36317 | 0.041 | 0.225 | 1.69E-69 M1 | CDC25B       |
| GIMAP1.3   | 1.15E-73 | 0.422716 | 0.169 | 0.054 | 1.72E-69 M1 | GIMAP1       |
| TNRC6C.3   | 1.27E-73 | -0.36535 | 0.028 | 0.201 | 1.90E-69 M1 | TNRC6C       |
| CHST12.2   | 1.36E-73 | -0.30178 | 0.073 | 0.28  | 2.04E-69 M1 | CHST12       |
| MLLT4.3    | 1.45E-73 | -0.37192 | 0.022 | 0.19  | 2.16E-69 M1 | MLLT4        |
| C19orf38.1 | 1.58E-73 | 0.431404 | 0.126 | 0.032 | 2.36E-69 M1 | C19orf38     |
| SLC2A3.3   | 1.85E-73 | 0.534233 | 0.392 | 0.227 | 2.77E-69 M1 | SLC2A3       |
| SOBP.3     | 2.24E-73 | -0.3759  | 0.006 | 0.16  | 3.35E-69 M1 | SOBP         |
| ITGAM.4    | 2.37E-73 | 0.403864 | 0.173 | 0.056 | 3.54E-69 M1 | ITGAM        |
| CLCN3.2    | 2.41E-73 | -0.34566 | 0.077 | 0.283 | 3.60E-69 M1 | CLCN3        |
| RP11-71N1  | 3.07E-73 | -0.39267 | 0.007 | 0.162 | 4.59E-69 M1 | RP11-71N10.1 |
| CHST2.2    | 3.31E-73 | -0.32083 | 0.007 | 0.162 | 4.95E-69 M1 | CHST2        |
| SLC25A5.1  | 3.40E-73 | 0.222162 | 0.782 | 0.709 | 5.09E-69 M1 | SLC25A5      |
| CISD1.4    | 3.46E-73 | -0.4271  | 0.141 | 0.376 | 5.17E-69 M1 | CISD1        |
| MPP1.4     | 4.34E-73 | 0.507827 | 0.334 | 0.174 | 6.48E-69 M1 | MPP1         |
| PELI1.4    | 4.55E-73 | 0.590129 | 0.336 | 0.184 | 6.80E-69 M1 | PELI1        |
| CBX3.3     | 4.80E-73 | -0.36301 | 0.328 | 0.599 | 7.17E-69 M1 | CBX3         |
| EAF2.4     | 4.86E-73 | 0.521026 | 0.196 | 0.072 | 7.26E-69 M1 | EAF2         |
| IMMP1L.3   | 4.93E-73 | -0.32777 | 0.065 | 0.265 | 7.37E-69 M1 | IMMP1L       |
| STMN2.4    | 5.53E-73 | -0.90841 | 0.046 | 0.215 | 8.27E-69 M1 | STMN2        |
| NAMPT.4    | 5.63E-73 | 0.231571 | 0.59  | 0.407 | 8.42E-69 M1 | NAMPT        |
| CHD7.4     | 6.07E-73 | -0.38069 | 0.107 | 0.325 | 9.08E-69 M1 | CHD7         |
| SUGP2.3    | 6.61E-73 | -0.30379 | 0.074 | 0.281 | 9.87E-69 M1 | SUGP2        |
| CNIH2.4    | 6.68E-73 | -0.33104 | 0.004 | 0.155 | 9.99E-69 M1 | CNIH2        |
| MAP4.2     | 6.81E-73 | -0.32974 | 0.137 | 0.375 | 1.02E-68 M1 | MAP4         |
| SLC15A3.3  | 7.02E-73 | 0.400831 | 0.161 | 0.05  | 1.05E-68 M1 | SLC15A3      |
| KEAP1.2    | 7.44E-73 | -0.28927 | 0.091 | 0.308 | 1.11E-68 M1 | KEAP1        |
| CERS1.2    | 8.08E-73 | -0.33794 | 0.003 | 0.153 | 1.21E-68 M1 | CERS1        |
| RP11-353N  | 1.14E-72 | 0.28115  | 0.075 | 0.011 | 1.71E-68 M1 | RP11-353N4.5 |
| ZNF711.3   | 1.25E-72 | -0.38953 | 0.011 | 0.168 | 1.87E-68 M1 | ZNF711       |
| LINC00662  | 1.40E-72 | -0.38296 | 0.035 | 0.213 | 2.09E-68 M1 | LINC00662    |
| GNG12.2    | 1.64E-72 | -0.32092 | 0.009 | 0.164 | 2.45E-68 M1 | GNG12        |
| ALKBH4.2   | 1.65E-72 | -0.31321 | 0.044 | 0.229 | 2.47E-68 M1 | ALKBH4       |
| C8orf46.2  | 1.73E-72 | -0.45981 | 0.01  | 0.165 | 2.58E-68 M1 | C8orf46      |
| GTF2I.3    | 1.79E-72 | -0.39079 | 0.224 | 0.467 | 2.68E-68 M1 | GTF2I        |
| KCNF1.4    | 1.98E-72 | -0.378   | 0.001 | 0.148 | 2.96E-68 M1 | KCNF1        |



|            |          |          |       |       |          |    |               |
|------------|----------|----------|-------|-------|----------|----|---------------|
| DTYMK.3    | 2.00E-72 | -0.39182 | 0.137 | 0.368 | 3.00E-68 | M1 | DTYMK         |
| LCP1.3     | 2.26E-72 | 0.39508  | 0.271 | 0.116 | 3.38E-68 | M1 | LCP1          |
| RSBN1L.2   | 2.74E-72 | -0.30928 | 0.153 | 0.396 | 4.10E-68 | M1 | RSBN1L        |
| NPTXR.3    | 2.95E-72 | -0.31749 | 0.003 | 0.152 | 4.41E-68 | M1 | NPTXR         |
| MSI1.2     | 3.02E-72 | -0.35954 | 0.008 | 0.161 | 4.51E-68 | M1 | MSI1          |
| RAMP2.3    | 3.12E-72 | -0.39084 | 0.008 | 0.161 | 4.66E-68 | M1 | RAMP2         |
| TGFBR2.3   | 3.27E-72 | 0.519929 | 0.227 | 0.095 | 4.89E-68 | M1 | TGFBR2        |
| IFT52.1    | 3.83E-72 | -0.30912 | 0.082 | 0.291 | 5.72E-68 | M1 | IFT52         |
| KLHL4.2    | 3.96E-72 | -0.35418 | 0.003 | 0.152 | 5.92E-68 | M1 | KLHL4         |
| ZNF146.2   | 4.08E-72 | -0.33172 | 0.063 | 0.26  | 6.10E-68 | M1 | ZNF146        |
| STX4.2     | 4.29E-72 | 0.54528  | 0.433 | 0.29  | 6.42E-68 | M1 | STX4          |
| SLC35F1.2  | 4.37E-72 | -0.30761 | 0.003 | 0.151 | 6.53E-68 | M1 | SLC35F1       |
| CXADR.4    | 4.37E-72 | -0.40992 | 0.124 | 0.344 | 6.54E-68 | M1 | CXADR         |
| SMARCD1.4  | 4.64E-72 | -0.32119 | 0.055 | 0.246 | 6.93E-68 | M1 | SMARCD1       |
| CA12.4     | 5.20E-72 | -0.40097 | 0.008 | 0.162 | 7.76E-68 | M1 | CA12          |
| CECR1.4    | 5.42E-72 | 0.384303 | 0.165 | 0.052 | 8.10E-68 | M1 | CECR1         |
| PEMT.3     | 5.53E-72 | -0.36413 | 0.054 | 0.244 | 8.27E-68 | M1 | PEMT          |
| IFT43.3    | 5.83E-72 | -0.36809 | 0.083 | 0.292 | 8.71E-68 | M1 | IFT43         |
| LRRC8A.3   | 6.44E-72 | -0.37363 | 0.027 | 0.197 | 9.63E-68 | M1 | LRRC8A        |
| PNMA2.3    | 7.38E-72 | -0.33998 | 0.01  | 0.165 | 1.10E-67 | M1 | PNMA2         |
| C4orf27.2  | 7.87E-72 | -0.36225 | 0.127 | 0.357 | 1.18E-67 | M1 | C4orf27       |
| CCDC34.2   | 8.41E-72 | -0.38859 | 0.026 | 0.195 | 1.26E-67 | M1 | CCDC34        |
| RP11-597D  | 8.76E-72 | 0.346029 | 0.078 | 0.012 | 1.31E-67 | M1 | RP11-597D13.8 |
| PLEKH02.4  | 9.53E-72 | 0.467677 | 0.208 | 0.081 | 1.42E-67 | M1 | PLEKH02       |
| RFK.2      | 9.55E-72 | -0.33844 | 0.071 | 0.271 | 1.43E-67 | M1 | RFK           |
| NIFK.2     | 1.12E-71 | -0.36568 | 0.15  | 0.388 | 1.67E-67 | M1 | NIFK          |
| AASDHPPT.1 | 1.13E-71 | -0.34163 | 0.104 | 0.325 | 1.69E-67 | M1 | AASDHPPT      |
| CD164.3    | 1.14E-71 | 0.406547 | 0.581 | 0.472 | 1.70E-67 | M1 | CD164         |
| SPATC1L.3  | 1.22E-71 | -0.32486 | 0.043 | 0.225 | 1.82E-67 | M1 | SPATC1L       |
| KIFAP3.3   | 1.33E-71 | -0.36295 | 0.049 | 0.234 | 1.99E-67 | M1 | KIFAP3        |
| WSCD1.3    | 1.34E-71 | -0.35226 | 0.006 | 0.156 | 2.00E-67 | M1 | WSCD1         |
| TNIK.2     | 1.50E-71 | -0.29699 | 0.013 | 0.17  | 2.23E-67 | M1 | TNIK          |
| SLC25A19.1 | 1.84E-71 | 0.554201 | 0.29  | 0.144 | 2.76E-67 | M1 | SLC25A19      |
| POLR2J.3   | 1.95E-71 | -0.39474 | 0.414 | 0.689 | 2.91E-67 | M1 | POLR2J        |
| C2.2       | 2.02E-71 | 0.442472 | 0.229 | 0.092 | 3.02E-67 | M1 | C2            |
| MEIS3.2    | 2.10E-71 | -0.34769 | 0.005 | 0.154 | 3.13E-67 | M1 | MEIS3         |
| CLECL1.4   | 2.41E-71 | 0.3134   | 0.125 | 0.032 | 3.59E-67 | M1 | CLECL1        |
| TLR3.1     | 3.06E-71 | 0.322129 | 0.098 | 0.02  | 4.57E-67 | M1 | TLR3          |
| CLUAP1.3   | 4.57E-71 | -0.3608  | 0.028 | 0.196 | 6.83E-67 | M1 | CLUAP1        |
| C1S.2      | 4.90E-71 | -0.6845  | 0.024 | 0.19  | 7.32E-67 | M1 | C1S           |
| TLK1.1     | 5.32E-71 | -0.3172  | 0.065 | 0.261 | 7.95E-67 | M1 | TLK1          |
| WASL.2     | 6.40E-71 | -0.29425 | 0.036 | 0.213 | 9.56E-67 | M1 | WASL          |
| RNASEH1-A  | 7.50E-71 | -0.33158 | 0.034 | 0.207 | 1.12E-66 | M1 | RNASEH1-AS1   |
| VDAC3.1    | 7.65E-71 | -0.36701 | 0.241 | 0.509 | 1.14E-66 | M1 | VDAC3         |
| KYNU.4     | 8.22E-71 | 0.461145 | 0.183 | 0.064 | 1.23E-66 | M1 | KYNU          |
| ING4.2     | 8.35E-71 | -0.3152  | 0.092 | 0.302 | 1.25E-66 | M1 | ING4          |
| USP1.3     | 1.09E-70 | -0.35764 | 0.087 | 0.293 | 1.63E-66 | M1 | USP1          |
| C12orf76.1 | 1.12E-70 | -0.29028 | 0.089 | 0.302 | 1.67E-66 | M1 | C12orf76      |
| CCDC14.2   | 1.15E-70 | -0.31126 | 0.064 | 0.259 | 1.72E-66 | M1 | CCDC14        |
| NETO2.2    | 1.26E-70 | -0.29866 | 0.023 | 0.189 | 1.89E-66 | M1 | NETO2         |
| EIF3L.2    | 1.27E-70 | 0.339607 | 0.673 | 0.593 | 1.89E-66 | M1 | EIF3L         |

|              |          |          |       |       |          |    |              |
|--------------|----------|----------|-------|-------|----------|----|--------------|
| ITGA7.2      | 1.40E-70 | -0.29941 | 0.01  | 0.162 | 2.10E-66 | M1 | ITGA7        |
| RPAIN.2      | 1.71E-70 | -0.33594 | 0.261 | 0.53  | 2.56E-66 | M1 | RPAIN        |
| P4HTM.2      | 1.78E-70 | -0.29322 | 0.087 | 0.296 | 2.67E-66 | M1 | P4HTM        |
| SPTAN1.2     | 2.17E-70 | -0.31495 | 0.086 | 0.295 | 3.24E-66 | M1 | SPTAN1       |
| IFI44L.2     | 2.28E-70 | 0.495589 | 0.263 | 0.117 | 3.41E-66 | M1 | IFI44L       |
| ATF7IP2.3    | 2.29E-70 | 0.376928 | 0.114 | 0.027 | 3.42E-66 | M1 | ATF7IP2      |
| SLC43A2.4    | 2.37E-70 | 0.576541 | 0.364 | 0.222 | 3.54E-66 | M1 | SLC43A2      |
| C11orf96.2   | 2.55E-70 | -0.44302 | 0.009 | 0.159 | 3.82E-66 | M1 | C11orf96     |
| NR2F6.3      | 2.65E-70 | -0.29338 | 0.012 | 0.167 | 3.96E-66 | M1 | NR2F6        |
| YES1.1       | 2.97E-70 | -0.30788 | 0.007 | 0.155 | 4.45E-66 | M1 | YES1         |
| REEP4.4      | 3.28E-70 | 0.534706 | 0.286 | 0.143 | 4.90E-66 | M1 | REEP4        |
| KDM1A.2      | 3.45E-70 | -0.3226  | 0.05  | 0.234 | 5.16E-66 | M1 | KDM1A        |
| PJA1.2       | 3.76E-70 | -0.36801 | 0.044 | 0.222 | 5.62E-66 | M1 | PJA1         |
| C14orf1.3    | 4.10E-70 | -0.37064 | 0.11  | 0.329 | 6.13E-66 | M1 | C14orf1      |
| RAB3A.4      | 4.47E-70 | -0.41379 | 0.026 | 0.191 | 6.69E-66 | M1 | RAB3A        |
| COL4A2.1     | 4.65E-70 | -0.2988  | 0.006 | 0.153 | 6.95E-66 | M1 | COL4A2       |
| LSM5.1       | 5.16E-70 | -0.38358 | 0.287 | 0.551 | 7.71E-66 | M1 | LSM5         |
| ARHGAP22.5   | 1.7E-70  | 0.500177 | 0.167 | 0.056 | 7.73E-66 | M1 | ARHGAP22     |
| SLAMF8.4     | 6.24E-70 | 0.411493 | 0.15  | 0.046 | 9.33E-66 | M1 | SLAMF8       |
| S100A10.4    | 6.31E-70 | -0.59064 | 0.364 | 0.581 | 9.43E-66 | M1 | S100A10      |
| CLDN12.4     | 6.56E-70 | -0.36557 | 0.011 | 0.164 | 9.81E-66 | M1 | CLDN12       |
| NNMT.2       | 6.76E-70 | -0.7403  | 0.024 | 0.185 | 1.01E-65 | M1 | NNMT         |
| ANAPC16.2    | 8.22E-70 | 0.363535 | 0.616 | 0.507 | 1.23E-65 | M1 | ANAPC16      |
| ABCG1.4      | 8.64E-70 | 0.478477 | 0.247 | 0.108 | 1.29E-65 | M1 | ABCG1        |
| GAS1.4       | 9.52E-70 | -0.39349 | 0.015 | 0.17  | 1.42E-65 | M1 | GAS1         |
| NCBP2.2      | 9.73E-70 | -0.31069 | 0.219 | 0.485 | 1.45E-65 | M1 | NCBP2        |
| PPP2R1A.3    | 1.09E-69 | -0.35018 | 0.286 | 0.561 | 1.63E-65 | M1 | PPP2R1A      |
| RP11-345F.1  | 1.60E-69 | -0.30107 | 0.026 | 0.192 | 2.39E-65 | M1 | RP11-345P4.9 |
| FAM210B.4    | 1.60E-69 | -0.3732  | 0.097 | 0.304 | 2.39E-65 | M1 | FAM210B      |
| RP9.2        | 1.65E-69 | -0.33854 | 0.036 | 0.208 | 2.47E-65 | M1 | RP9          |
| MPLKIP.1     | 1.78E-69 | -0.34037 | 0.221 | 0.489 | 2.66E-65 | M1 | MPLKIP       |
| ARSJ.2       | 1.82E-69 | -0.32387 | 0.004 | 0.149 | 2.73E-65 | M1 | ARSJ         |
| GRIA4.3      | 1.83E-69 | -0.38233 | 0.007 | 0.154 | 2.73E-65 | M1 | GRIA4        |
| SLC1A2.2     | 2.12E-69 | -0.40818 | 0.01  | 0.16  | 3.17E-65 | M1 | SLC1A2       |
| DCBLD2.3     | 2.33E-69 | -0.3161  | 0.014 | 0.169 | 3.49E-65 | M1 | DCBLD2       |
| SPOCK2.2     | 2.81E-69 | -0.37659 | 0.012 | 0.165 | 4.19E-65 | M1 | SPOCK2       |
| RP11-347F.1  | 3.00E-69 | 0.47248  | 0.152 | 0.047 | 4.48E-65 | M1 | RP11-347P5.1 |
| STARD4-AS1.3 | 3.32E-69 | -0.34956 | 0.006 | 0.151 | 4.96E-65 | M1 | STARD4-AS1   |
| S100A13.2    | 3.67E-69 | -0.59453 | 0.122 | 0.331 | 5.49E-65 | M1 | S100A13      |
| KMT2A.4      | 4.02E-69 | -0.31157 | 0.072 | 0.269 | 6.01E-65 | M1 | KMT2A        |
| BEND5.2      | 4.37E-69 | -0.37911 | 0.011 | 0.162 | 6.53E-65 | M1 | BEND5        |
| TMEM97.2     | 4.93E-69 | -0.31466 | 0.032 | 0.2   | 7.36E-65 | M1 | TMEM97       |
| OSBPL6.1     | 5.05E-69 | -0.27339 | 0.022 | 0.183 | 7.54E-65 | M1 | OSBPL6       |
| PFDN4.3      | 5.78E-69 | -0.3551  | 0.16  | 0.399 | 8.63E-65 | M1 | PFDN4        |
| TFEC.4       | 9.73E-69 | 0.398211 | 0.138 | 0.039 | 1.45E-64 | M1 | TFEC         |
| TPPP3.4      | 9.83E-69 | -0.55567 | 0.022 | 0.18  | 1.47E-64 | M1 | TPPP3        |
| MLC1.3       | 1.04E-68 | -0.33947 | 0.018 | 0.175 | 1.55E-64 | M1 | MLC1         |
| MAFF.4       | 1.23E-68 | 0.519522 | 0.291 | 0.147 | 1.84E-64 | M1 | MAFF         |
| ASIC4.3      | 1.41E-68 | -0.54952 | 0.014 | 0.165 | 2.11E-64 | M1 | ASIC4        |
| ST14.4       | 1.42E-68 | 0.381177 | 0.165 | 0.054 | 2.12E-64 | M1 | ST14         |
| NABP2.3      | 1.43E-68 | -0.32744 | 0.099 | 0.311 | 2.14E-64 | M1 | NABP2        |

|            |          |          |       |       |          |    |               |
|------------|----------|----------|-------|-------|----------|----|---------------|
| SLC44A1.2  | 2.16E-68 | -0.38761 | 0.129 | 0.35  | 3.23E-64 | M1 | SLC44A1       |
| ZNF292.2   | 2.17E-68 | -0.31391 | 0.092 | 0.298 | 3.24E-64 | M1 | ZNF292        |
| WHSC1L1.4  | 2.23E-68 | -0.31061 | 0.171 | 0.413 | 3.34E-64 | M1 | WHSC1L1       |
| LYRM7.2    | 2.50E-68 | -0.30473 | 0.05  | 0.231 | 3.74E-64 | M1 | LYRM7         |
| QTRT1.4    | 2.58E-68 | -0.35451 | 0.14  | 0.369 | 3.86E-64 | M1 | QTRT1         |
| LRWD1.1    | 2.61E-68 | -0.29939 | 0.031 | 0.198 | 3.90E-64 | M1 | LRWD1         |
| TRIAP1.2   | 3.34E-68 | -0.32326 | 0.125 | 0.351 | 5.00E-64 | M1 | TRIAP1        |
| HSPA1A.3   | 3.46E-68 | 0.409939 | 0.623 | 0.466 | 5.16E-64 | M1 | HSPA1A        |
| CNTFR.3    | 3.53E-68 | -0.35249 | 0.008 | 0.154 | 5.27E-64 | M1 | CNTFR         |
| STAC3.4    | 3.84E-68 | 0.423422 | 0.173 | 0.06  | 5.74E-64 | M1 | STAC3         |
| TREML1.2   | 4.77E-68 | 0.302952 | 0.073 | 0.011 | 7.13E-64 | M1 | TREML1        |
| ACO04158.4 | 4.94E-68 | -0.3523  | 0.004 | 0.146 | 7.38E-64 | M1 | ACO04158.3    |
| ARMC1.3    | 5.89E-68 | -0.33025 | 0.093 | 0.298 | 8.80E-64 | M1 | ARMC1         |
| NKAIN3.3   | 5.96E-68 | -0.34741 | 0.006 | 0.149 | 8.90E-64 | M1 | NKAIN3        |
| SLC25A23.6 | 2.2E-68  | -0.28992 | 0.01  | 0.158 | 9.29E-64 | M1 | SLC25A23      |
| DLX5.4     | 6.56E-68 | -0.74139 | 0.019 | 0.169 | 9.80E-64 | M1 | DLX5          |
| GTF2H2.2   | 7.49E-68 | -0.29364 | 0.04  | 0.213 | 1.12E-63 | M1 | GTF2H2        |
| NAF1.3     | 7.68E-68 | 0.545689 | 0.212 | 0.089 | 1.15E-63 | M1 | NAF1          |
| NUDT11.2   | 7.80E-68 | -0.39554 | 0.007 | 0.15  | 1.17E-63 | M1 | NUDT11        |
| CHCHD10.4  | 8.10E-68 | 0.394124 | 0.489 | 0.36  | 1.21E-63 | M1 | CHCHD10       |
| DCAF13.2   | 9.34E-68 | -0.3256  | 0.13  | 0.355 | 1.40E-63 | M1 | DCAF13        |
| C7orf73.3  | 9.42E-68 | -0.38325 | 0.328 | 0.6   | 1.41E-63 | M1 | C7orf73       |
| PPP1R18.4  | 1.00E-67 | 0.540006 | 0.412 | 0.269 | 1.50E-63 | M1 | PPP1R18       |
| NDUFB7.4   | 1.04E-67 | -0.37353 | 0.535 | 0.757 | 1.55E-63 | M1 | NDUFB7        |
| MESP1.1    | 1.25E-67 | -0.29608 | 0.009 | 0.156 | 1.87E-63 | M1 | MESP1         |
| KIF1A.3    | 1.30E-67 | -0.44881 | 0.007 | 0.15  | 1.95E-63 | M1 | KIF1A         |
| PGM1.3     | 1.64E-67 | -0.34266 | 0.085 | 0.284 | 2.45E-63 | M1 | PGM1          |
| KRT10.2    | 1.82E-67 | -0.36402 | 0.347 | 0.6   | 2.71E-63 | M1 | KRT10         |
| SEZ6L.3    | 2.15E-67 | -0.40368 | 0.012 | 0.16  | 3.22E-63 | M1 | SEZ6L         |
| ZDHHC9.4   | 2.26E-67 | -0.37179 | 0.031 | 0.195 | 3.38E-63 | M1 | ZDHHC9        |
| DAPK3.2    | 2.37E-67 | -0.30364 | 0.075 | 0.271 | 3.54E-63 | M1 | DAPK3         |
| BCL7A.4    | 2.80E-67 | -0.32104 | 0.02  | 0.176 | 4.19E-63 | M1 | BCL7A         |
| GNG7.3     | 4.65E-67 | 0.504756 | 0.421 | 0.274 | 6.94E-63 | M1 | GNG7          |
| HIP1.2     | 5.77E-67 | -0.33296 | 0.031 | 0.195 | 8.62E-63 | M1 | HIP1          |
| REPIN1.4   | 7.92E-67 | -0.30654 | 0.1   | 0.309 | 1.18E-62 | M1 | REPIN1        |
| FKBP9.3    | 8.07E-67 | -0.30331 | 0.036 | 0.205 | 1.21E-62 | M1 | FKBP9         |
| RFTN2.4    | 8.65E-67 | -0.42405 | 0.008 | 0.151 | 1.29E-62 | M1 | RFTN2         |
| TSN.2      | 9.32E-67 | -0.31939 | 0.176 | 0.417 | 1.39E-62 | M1 | TSN           |
| NUDT14.4   | 9.66E-67 | 0.537679 | 0.31  | 0.168 | 1.44E-62 | M1 | NUDT14        |
| OLFM2.2    | 9.99E-67 | -0.42995 | 0.047 | 0.22  | 1.49E-62 | M1 | OLFM2         |
| TUBG1.2    | 1.38E-66 | -0.32432 | 0.074 | 0.266 | 2.06E-62 | M1 | TUBG1         |
| PAQR4.4    | 1.61E-66 | -0.36336 | 0.03  | 0.191 | 2.40E-62 | M1 | PAQR4         |
| TMED4.3    | 1.94E-66 | -0.36697 | 0.229 | 0.48  | 2.90E-62 | M1 | TMED4         |
| DDAH1.3    | 2.54E-66 | -0.32338 | 0.007 | 0.148 | 3.80E-62 | M1 | DDAH1         |
| MAPRE3.2   | 2.56E-66 | -0.32735 | 0.039 | 0.207 | 3.83E-62 | M1 | MAPRE3        |
| H1FX.4     | 2.77E-66 | -0.35628 | 0.186 | 0.424 | 4.14E-62 | M1 | H1FX          |
| VWA1.4     | 3.14E-66 | -0.3287  | 0.018 | 0.169 | 4.69E-62 | M1 | VWA1          |
| POLR2H.2   | 3.20E-66 | -0.32061 | 0.136 | 0.36  | 4.77E-62 | M1 | POLR2H        |
| RP11-849I  | 3.35E-66 | -0.39272 | 0.011 | 0.156 | 5.00E-62 | M1 | RP11-849I19.1 |
| TGFB1I1.3  | 3.40E-66 | -0.30946 | 0.008 | 0.15  | 5.08E-62 | M1 | TGFB1I1       |
| TBCB.2     | 3.45E-66 | -0.39582 | 0.452 | 0.699 | 5.16E-62 | M1 | TBCB          |

|            |    |        |          |       |       |          |    |               |
|------------|----|--------|----------|-------|-------|----------|----|---------------|
| C21orf59.  | 3. | 51E-66 | -0.28012 | 0.128 | 0.354 | 5.24E-62 | M1 | C21orf59      |
| AP2B1.     | 3. | 73E-66 | -0.3006  | 0.147 | 0.379 | 5.57E-62 | M1 | AP2B1         |
| MFGE8.     | 1. | 04E-66 | -0.3117  | 0.045 | 0.219 | 6.03E-62 | M1 | MFGE8         |
| PDGFRA.    | 3. | 24E-66 | -0.42914 | 0.021 | 0.174 | 6.33E-62 | M1 | PDGFRA        |
| ARID5A.    | 2. | 40E-66 | 0.5181   | 0.406 | 0.267 | 6.57E-62 | M1 | ARID5A        |
| ZEB1.      | 4. | 44E-66 | -0.30871 | 0.047 | 0.222 | 6.63E-62 | M1 | ZEB1          |
| ECSIT.     | 2. | 96E-66 | -0.32051 | 0.097 | 0.302 | 7.42E-62 | M1 | ECSIT         |
| MAN1A1.    | 3. | 00E-66 | 0.376961 | 0.122 | 0.033 | 7.47E-62 | M1 | MAN1A1        |
| TRPM2.     | 4. | 19E-66 | 0.368651 | 0.129 | 0.036 | 9.25E-62 | M1 | TRPM2         |
| SLC37A3.   | 2. | 30E-66 | -0.33687 | 0.01  | 0.153 | 9.42E-62 | M1 | SLC37A3       |
| NCBP2-AS2. | 6. | 36E-66 | -0.30455 | 0.102 | 0.312 | 9.50E-62 | M1 | NCBP2-AS2     |
| SMPD1.     | 3. | 61E-66 | -0.27418 | 0.074 | 0.269 | 9.87E-62 | M1 | SMPD1         |
| GSPT2.     | 2. | 08E-66 | -0.32482 | 0.021 | 0.175 | 1.06E-61 | M1 | GSPT2         |
| TNFAIP1.   | 2. | 43E-66 | -0.28377 | 0.036 | 0.203 | 1.11E-61 | M1 | TNFAIP1       |
| FLI1.      | 4. | 44E-66 | 0.387377 | 0.129 | 0.036 | 1.11E-61 | M1 | FLI1          |
| BRIX1.     | 4. | 08E-66 | -0.30918 | 0.087 | 0.287 | 1.36E-61 | M1 | BRIX1         |
| PIPOX.     | 3. | 26E-65 | -0.31003 | 0.011 | 0.156 | 1.88E-61 | M1 | PIPOX         |
| DEXI.      | 2. | 29E-65 | -0.29958 | 0.057 | 0.237 | 1.93E-61 | M1 | DEXI          |
| ZNF771.    | 3. | 30E-65 | -0.27252 | 0.019 | 0.172 | 1.94E-61 | M1 | ZNF771        |
| CDC42EP1.  | 1. | 39E-65 | -0.34666 | 0.009 | 0.152 | 2.08E-61 | M1 | CDC42EP1      |
| KIAA1715.  | 1. | 40E-65 | -0.29419 | 0.089 | 0.288 | 2.09E-61 | M1 | KIAA1715      |
| PLCG2.     | 2. | 42E-65 | 0.340772 | 0.122 | 0.033 | 2.12E-61 | M1 | PLCG2         |
| SMARCE1.   | 2. | 42E-65 | -0.31372 | 0.178 | 0.419 | 2.12E-61 | M1 | SMARCE1       |
| TSPAN12.   | 2. | 64E-65 | -0.34891 | 0.005 | 0.143 | 2.46E-61 | M1 | TSPAN12       |
| WSB2.      | 4. | 84E-65 | -0.28615 | 0.067 | 0.255 | 2.75E-61 | M1 | WSB2          |
| EFHC1.     | 4. | 88E-65 | -0.32011 | 0.056 | 0.235 | 2.80E-61 | M1 | EFHC1         |
| LANCL2.    | 4. | 95E-65 | -0.40682 | 0.024 | 0.178 | 2.92E-61 | M1 | LANCL2        |
| KCNQ1.     | 3. | 99E-65 | 0.325699 | 0.106 | 0.025 | 2.98E-61 | M1 | KCNQ1         |
| ZCCHC17.   | 2. | 13E-65 | -0.3127  | 0.157 | 0.391 | 3.18E-61 | M1 | ZCCHC17       |
| ZNF439.    | 3. | 15E-65 | -0.28557 | 0.02  | 0.173 | 3.22E-61 | M1 | ZNF439        |
| RP11-701P. | 2. | 40E-65 | 0.259187 | 0.055 | 0.006 | 3.58E-61 | M1 | RP11-701P16.2 |
| SLC38A1.   | 1. | 77E-65 | -0.44368 | 0.018 | 0.166 | 4.13E-61 | M1 | SLC38A1       |
| ANKIB1.    | 3. | 12E-65 | -0.29134 | 0.058 | 0.238 | 4.66E-61 | M1 | ANKIB1        |
| FRMD4B.    | 4. | 37E-65 | 0.505537 | 0.279 | 0.135 | 5.04E-61 | M1 | FRMD4B        |
| SOX6.      | 3. | 60E-65 | -0.31458 | 0.017 | 0.166 | 5.38E-61 | M1 | SOX6          |
| UBE2H.     | 3. | 98E-65 | -0.28348 | 0.091 | 0.293 | 5.95E-61 | M1 | UBE2H         |
| PAM.       | 3. | 11E-65 | -0.29537 | 0.031 | 0.192 | 6.13E-61 | M1 | PAM           |
| MATR3.     | 3. | 29E-65 | -0.31797 | 0.267 | 0.53  | 6.41E-61 | M1 | MATR3         |
| SACS.      | 4. | 65E-65 | -0.26569 | 0.024 | 0.181 | 6.95E-61 | M1 | SACS          |
| AC004540.  | 5. | 29E-65 | -0.46274 | 0.007 | 0.146 | 7.90E-61 | M1 | AC004540.4    |
| MED10.     | 4. | 47E-65 | -0.33654 | 0.259 | 0.529 | 9.67E-61 | M1 | MED10         |
| HIST1H4C.  | 6. | 71E-65 | -0.38138 | 0.227 | 0.464 | 1.00E-60 | M1 | HIST1H4C      |
| CD58.      | 4. | 61E-65 | 0.564203 | 0.346 | 0.203 | 1.14E-60 | M1 | CD58          |
| TMEM109.   | 4. | 18E-65 | 0.493158 | 0.324 | 0.181 | 1.22E-60 | M1 | TMEM109       |
| KLHL42.    | 3. | 20E-65 | -0.28513 | 0.028 | 0.185 | 1.23E-60 | M1 | KLHL42        |
| TSPAN14.   | 3. | 46E-65 | 0.553399 | 0.328 | 0.189 | 1.26E-60 | M1 | TSPAN14       |
| STRA13.    | 9. | 20E-65 | -0.34273 | 0.237 | 0.494 | 1.38E-60 | M1 | STRA13        |
| EFNA1.     | 2. | 34E-65 | -0.44417 | 0.01  | 0.152 | 1.40E-60 | M1 | EFNA1         |
| ZNF680.    | 2. | 02E-64 | -0.33028 | 0.037 | 0.201 | 1.53E-60 | M1 | ZNF680        |
| KDM5B.     | 3. | 05E-64 | -0.30191 | 0.03  | 0.189 | 1.58E-60 | M1 | KDM5B         |
| DLG1.      | 3. | 11E-64 | -0.30533 | 0.032 | 0.192 | 1.65E-60 | M1 | DLG1          |

|             |          |          |       |       |          |    |                 |
|-------------|----------|----------|-------|-------|----------|----|-----------------|
| INSM1.4     | 1.20E-64 | -0.36601 | 0.004 | 0.14  | 1.79E-60 | M1 | INSM1           |
| MTHFD2L.2   | 1.31E-64 | -0.26807 | 0.057 | 0.236 | 1.96E-60 | M1 | MTHFD2L         |
| ITGB1BP1.1  | 1.33E-64 | -0.34824 | 0.186 | 0.427 | 1.99E-60 | M1 | ITGB1BP1        |
| EPDR1.3     | 1.39E-64 | -0.28933 | 0.009 | 0.15  | 2.08E-60 | M1 | EPDR1           |
| CDCA7L.3    | 1.41E-64 | -0.35507 | 0.022 | 0.174 | 2.11E-60 | M1 | CDCA7L          |
| C7orf55-L.1 | 1.66E-64 | -0.28544 | 0.149 | 0.377 | 2.48E-60 | M1 | C7orf55-LUC7L2  |
| RBM10.1     | 1.81E-64 | -0.28223 | 0.055 | 0.232 | 2.70E-60 | M1 | RBM10           |
| SERPINH1.1  | 1.88E-64 | -0.32791 | 0.06  | 0.239 | 2.81E-60 | M1 | SERPINH1        |
| TTC7A.4     | 2.41E-64 | 0.436613 | 0.163 | 0.057 | 3.61E-60 | M1 | TTC7A           |
| GPT2.2      | 2.54E-64 | -0.30341 | 0.021 | 0.172 | 3.80E-60 | M1 | GPT2            |
| IARS.2      | 3.29E-64 | -0.27858 | 0.06  | 0.241 | 4.92E-60 | M1 | IARS            |
| CHCHD7.3    | 3.68E-64 | 0.46634  | 0.407 | 0.262 | 5.49E-60 | M1 | CHCHD7          |
| BAD.2       | 4.00E-64 | -0.32874 | 0.209 | 0.459 | 5.98E-60 | M1 | BAD             |
| PMM1.3      | 4.11E-64 | -0.33513 | 0.076 | 0.265 | 6.14E-60 | M1 | PMM1            |
| ENDOD1.2    | 4.21E-64 | -0.31323 | 0.019 | 0.168 | 6.29E-60 | M1 | ENDOD1          |
| PSPH.3      | 4.95E-64 | -0.30991 | 0.028 | 0.183 | 7.39E-60 | M1 | PSPH            |
| OPTN.2      | 5.05E-64 | -0.32924 | 0.015 | 0.159 | 7.55E-60 | M1 | OPTN            |
| ZFR.2       | 5.54E-64 | -0.31316 | 0.125 | 0.342 | 8.28E-60 | M1 | ZFR             |
| WNK3.2      | 5.83E-64 | -0.30421 | 0.006 | 0.143 | 8.72E-60 | M1 | WNK3            |
| FADS1.2     | 7.18E-64 | -0.26111 | 0.065 | 0.249 | 1.07E-59 | M1 | FADS1           |
| ARL16.1     | 7.75E-64 | -0.29694 | 0.133 | 0.356 | 1.16E-59 | M1 | ARL16           |
| AGAP1.2     | 8.46E-64 | -0.32784 | 0.006 | 0.142 | 1.26E-59 | M1 | AGAP1           |
| BEND6.3     | 8.70E-64 | -0.26298 | 0.006 | 0.141 | 1.30E-59 | M1 | BEND6           |
| RNF157.3    | 8.70E-64 | -0.26273 | 0.014 | 0.158 | 1.30E-59 | M1 | RNF157          |
| ILF3.2      | 8.87E-64 | -0.29916 | 0.203 | 0.453 | 1.33E-59 | M1 | ILF3            |
| ZNF704.3    | 9.43E-64 | -0.33003 | 0.008 | 0.146 | 1.41E-59 | M1 | ZNF704          |
| UBTF.3      | 1.31E-63 | -0.30317 | 0.072 | 0.258 | 1.96E-59 | M1 | UBTF            |
| DUSP23.3    | 1.44E-63 | 0.397647 | 0.319 | 0.162 | 2.15E-59 | M1 | DUSP23          |
| EEF1E1.1    | 1.59E-63 | -0.33661 | 0.134 | 0.352 | 2.38E-59 | M1 | EEF1E1          |
| RP11-536K.1 | 1.63E-63 | 0.366929 | 0.102 | 0.024 | 2.44E-59 | M1 | RP11-536K7.3    |
| ARL6IP5.1   | 1.73E-63 | 0.268714 | 0.705 | 0.639 | 2.58E-59 | M1 | ARL6IP5         |
| SOCS3.3     | 1.80E-63 | 0.471524 | 0.461 | 0.326 | 2.69E-59 | M1 | SOCS3           |
| SLC35B2.3   | 1.86E-63 | -0.29792 | 0.122 | 0.336 | 2.78E-59 | M1 | SLC35B2         |
| OSCAR.4     | 2.02E-63 | 0.38258  | 0.16  | 0.055 | 3.02E-59 | M1 | OSCAR           |
| MSM01.3     | 2.21E-63 | -0.34287 | 0.057 | 0.23  | 3.30E-59 | M1 | MSM01           |
| GNG4.3      | 2.22E-63 | -0.33469 | 0.005 | 0.138 | 3.32E-59 | M1 | GNG4            |
| RAE1.2      | 2.24E-63 | -0.28328 | 0.098 | 0.301 | 3.35E-59 | M1 | RAE1            |
| SEC14L2.3   | 2.24E-63 | -0.30722 | 0.004 | 0.137 | 3.35E-59 | M1 | SEC14L2         |
| ASRGL1.4    | 2.28E-63 | -0.33134 | 0.056 | 0.23  | 3.40E-59 | M1 | ASRGL1          |
| TMEM198.2   | 2.37E-63 | -0.29063 | 0.004 | 0.137 | 3.55E-59 | M1 | TMEM198         |
| PSRC1.2     | 2.86E-63 | -0.3579  | 0.099 | 0.297 | 4.27E-59 | M1 | PSRC1           |
| PIK3AP1.4   | 3.05E-63 | 0.367824 | 0.148 | 0.048 | 4.55E-59 | M1 | PIK3AP1         |
| CSNK2A1.2   | 3.16E-63 | -0.29703 | 0.134 | 0.353 | 4.73E-59 | M1 | CSNK2A1         |
| RP11-1094.1 | 3.39E-63 | -0.26427 | 0.076 | 0.266 | 5.07E-59 | M1 | RP11-1094M14.11 |
| CPXM1.3     | 3.63E-63 | -0.31408 | 0.009 | 0.147 | 5.43E-59 | M1 | CPXM1           |
| DCAF7.2     | 4.40E-63 | -0.28065 | 0.135 | 0.358 | 6.58E-59 | M1 | DCAF7           |
| RP13-516M.1 | 4.57E-63 | 0.392463 | 0.091 | 0.02  | 6.83E-59 | M1 | RP13-516M14.4   |
| CCL20.3     | 4.61E-63 | 0.459458 | 0.142 | 0.045 | 6.90E-59 | M1 | CCL20           |
| RNF19A.4    | 5.01E-63 | -0.3101  | 0.057 | 0.231 | 7.48E-59 | M1 | RNF19A          |
| TLR10.3     | 5.39E-63 | 0.2725   | 0.077 | 0.014 | 8.05E-59 | M1 | TLR10           |
| WDFY4.3     | 5.43E-63 | 0.281293 | 0.081 | 0.015 | 8.12E-59 | M1 | WDFY4           |

|             |          |          |       |       |          |    |           |
|-------------|----------|----------|-------|-------|----------|----|-----------|
| IL17RA.4    | 6.56E-63 | 0.47749  | 0.222 | 0.098 | 9.81E-59 | M1 | IL17RA    |
| SNRPE.2     | 8.14E-63 | -0.36529 | 0.364 | 0.623 | 1.22E-58 | M1 | SNRPE     |
| ARL8A.3     | 9.46E-63 | -0.30927 | 0.104 | 0.306 | 1.41E-58 | M1 | ARL8A     |
| GLA.4       | 9.99E-63 | 0.522766 | 0.332 | 0.192 | 1.49E-58 | M1 | GLA       |
| PPP1R16A.1  | 0.03E-62 | -0.3068  | 0.036 | 0.196 | 1.54E-58 | M1 | PPP1R16A  |
| TCTN1.3     | 1.04E-62 | -0.32558 | 0.064 | 0.242 | 1.56E-58 | M1 | TCTN1     |
| DAGLB.4     | 1.06E-62 | 0.521828 | 0.223 | 0.1   | 1.59E-58 | M1 | DAGLB     |
| LAPTM4A.2   | 1.12E-62 | 0.150099 | 0.827 | 0.761 | 1.67E-58 | M1 | LAPTM4A   |
| CHST11.4    | 1.13E-62 | 0.5164   | 0.327 | 0.19  | 1.68E-58 | M1 | CHST11    |
| BAX.4       | 1.21E-62 | 0.332634 | 0.625 | 0.554 | 1.80E-58 | M1 | BAX       |
| BZW2.1      | 1.24E-62 | -0.32136 | 0.104 | 0.303 | 1.85E-58 | M1 | BZW2      |
| CHST10.1    | 1.64E-62 | -0.29287 | 0.018 | 0.164 | 2.45E-58 | M1 | CHST10    |
| NOC2L.3     | 1.67E-62 | -0.28132 | 0.131 | 0.349 | 2.49E-58 | M1 | NOC2L     |
| DNALI1.3    | 1.96E-62 | -0.32064 | 0.004 | 0.135 | 2.92E-58 | M1 | DNALI1    |
| RUVBL1.1    | 2.09E-62 | -0.3224  | 0.1   | 0.299 | 3.12E-58 | M1 | RUVBL1    |
| C2orf80.3   | 2.15E-62 | -0.3661  | 0.007 | 0.141 | 3.22E-58 | M1 | C2orf80   |
| LINC00936.2 | 2.27E-62 | 0.607814 | 0.245 | 0.12  | 3.39E-58 | M1 | LINC00936 |
| FAM89B.3    | 2.86E-62 | -0.29668 | 0.087 | 0.278 | 4.28E-58 | M1 | FAM89B    |
| SELL.3      | 2.91E-62 | 0.287722 | 0.101 | 0.024 | 4.35E-58 | M1 | SELL      |
| BCAP31.1    | 3.15E-62 | 0.288907 | 0.67  | 0.608 | 4.70E-58 | M1 | BCAP31    |
| IQCK.2      | 3.47E-62 | -0.31842 | 0.011 | 0.149 | 5.18E-58 | M1 | IQCK      |
| DHRS9.2     | 3.50E-62 | 0.313781 | 0.073 | 0.012 | 5.23E-58 | M1 | DHRS9     |
| B4GALNT1.4  | 4.15E-62 | -0.48714 | 0.023 | 0.167 | 6.20E-58 | M1 | B4GALNT1  |
| PPAT.2      | 4.92E-62 | -0.29685 | 0.021 | 0.168 | 7.35E-58 | M1 | PPAT      |
| EBNA1BP2.5  | 5.10E-62 | -0.30669 | 0.162 | 0.392 | 7.62E-58 | M1 | EBNA1BP2  |
| TIMM44.2    | 6.33E-62 | -0.28385 | 0.097 | 0.295 | 9.45E-58 | M1 | TIMM44    |
| MRFAP1L1.6  | 6.38E-62 | -0.28793 | 0.069 | 0.25  | 9.54E-58 | M1 | MRFAP1L1  |
| MTRF1L.2    | 7.01E-62 | -0.26478 | 0.049 | 0.218 | 1.05E-57 | M1 | MTRF1L    |
| CMKLR1.3    | 7.83E-62 | 0.386561 | 0.122 | 0.035 | 1.17E-57 | M1 | CMKLR1    |
| BRD7.3      | 8.27E-62 | -0.28461 | 0.091 | 0.287 | 1.24E-57 | M1 | BRD7      |
| FAM32A.2    | 8.45E-62 | -0.3329  | 0.239 | 0.495 | 1.26E-57 | M1 | FAM32A    |
| RTKN.4      | 9.06E-62 | -0.33219 | 0.038 | 0.198 | 1.35E-57 | M1 | RTKN      |
| LBH.4       | 9.16E-62 | -0.46769 | 0.029 | 0.178 | 1.37E-57 | M1 | LBH       |
| CAMK2B.3    | 9.20E-62 | -0.33912 | 0.005 | 0.135 | 1.37E-57 | M1 | CAMK2B    |
| ZNF827.3    | 1.14E-61 | -0.27808 | 0.005 | 0.136 | 1.71E-57 | M1 | ZNF827    |
| TMC8.2      | 1.33E-61 | 0.323978 | 0.111 | 0.029 | 1.99E-57 | M1 | TMC8      |
| COIL.2      | 1.38E-61 | -0.267   | 0.047 | 0.213 | 2.06E-57 | M1 | COIL      |
| CMSS1.1     | 1.60E-61 | -0.32015 | 0.117 | 0.324 | 2.38E-57 | M1 | CMSS1     |
| SP110.3     | 1.65E-61 | 0.497468 | 0.313 | 0.175 | 2.47E-57 | M1 | SP110     |
| YAE1D1.2    | 1.66E-61 | -0.34158 | 0.032 | 0.186 | 2.48E-57 | M1 | YAE1D1    |
| PRPF6.2     | 1.79E-61 | -0.2835  | 0.163 | 0.391 | 2.68E-57 | M1 | PRPF6     |
| PHLDA3.1    | 1.83E-61 | -0.32609 | 0.039 | 0.197 | 2.73E-57 | M1 | PHLDA3    |
| ZNF493.2    | 1.92E-61 | -0.32341 | 0.031 | 0.183 | 2.87E-57 | M1 | ZNF493    |
| CDCA7.3     | 1.94E-61 | -0.40021 | 0.01  | 0.145 | 2.90E-57 | M1 | CDCA7     |
| ENOPH1.3    | 2.34E-61 | -0.29883 | 0.19  | 0.429 | 3.50E-57 | M1 | ENOPH1    |
| P2RX4.3     | 2.54E-61 | 0.491338 | 0.29  | 0.154 | 3.79E-57 | M1 | P2RX4     |
| BPTF.2      | 2.55E-61 | -0.31059 | 0.133 | 0.346 | 3.82E-57 | M1 | BPTF      |
| MAP2K2.3    | 2.73E-61 | -0.32506 | 0.128 | 0.337 | 4.08E-57 | M1 | MAP2K2    |
| CDH11.2     | 2.73E-61 | -0.32323 | 0.006 | 0.137 | 4.08E-57 | M1 | CDH11     |
| C17orf58.2  | 2.92E-61 | -0.28057 | 0.048 | 0.213 | 4.37E-57 | M1 | C17orf58  |
| USP47.2     | 2.93E-61 | -0.27861 | 0.086 | 0.277 | 4.38E-57 | M1 | USP47     |

|           |          |          |       |       |          |    |              |
|-----------|----------|----------|-------|-------|----------|----|--------------|
| C1QL1.3   | 3.08E-61 | -0.34202 | 0.006 | 0.136 | 4.61E-57 | M1 | C1QL1        |
| FES.4     | 3.14E-61 | 0.402393 | 0.169 | 0.061 | 4.70E-57 | M1 | FES          |
| GDAP1.4   | 4.12E-61 | -0.38267 | 0.028 | 0.177 | 6.16E-57 | M1 | GDAP1        |
| TMEM203.3 | 4.57E-61 | -0.26672 | 0.091 | 0.285 | 6.83E-57 | M1 | TMEM203      |
| ADORA1.2  | 4.83E-61 | -0.30455 | 0.01  | 0.144 | 7.22E-57 | M1 | ADORA1       |
| MRAS.2    | 4.90E-61 | -0.28896 | 0.037 | 0.194 | 7.32E-57 | M1 | MRAS         |
| TRIM38.3  | 5.04E-61 | 0.462609 | 0.194 | 0.079 | 7.53E-57 | M1 | TRIM38       |
| CSE1L.3   | 6.17E-61 | -0.2883  | 0.072 | 0.253 | 9.22E-57 | M1 | CSE1L        |
| LONP1.2   | 6.57E-61 | -0.25894 | 0.06  | 0.234 | 9.81E-57 | M1 | LONP1        |
| LSM7.1    | 7.15E-61 | -0.34497 | 0.439 | 0.669 | 1.07E-56 | M1 | LSM7         |
| RP11-792A | 7.62E-61 | -0.31557 | 0.064 | 0.239 | 1.14E-56 | M1 | RP11-792A8.4 |
| CLEC5A.4  | 7.79E-61 | 0.45149  | 0.2   | 0.079 | 1.16E-56 | M1 | CLEC5A       |
| RARRES2.3 | 8.07E-61 | -0.77249 | 0.029 | 0.173 | 1.21E-56 | M1 | RARRES2      |
| CD200.4   | 8.08E-61 | -0.35788 | 0.004 | 0.131 | 1.21E-56 | M1 | CD200        |
| SFT2D1.4  | 8.22E-61 | 0.36084  | 0.574 | 0.487 | 1.23E-56 | M1 | SFT2D1       |
| UBXN2A.2  | 8.32E-61 | -0.23853 | 0.049 | 0.215 | 1.24E-56 | M1 | UBXN2A       |
| LAMP5.3   | 8.53E-61 | -0.30644 | 0.003 | 0.13  | 1.27E-56 | M1 | LAMP5        |
| TRAF3IP3. | 8.71E-61 | 0.368256 | 0.127 | 0.037 | 1.30E-56 | M1 | TRAF3IP3     |
| MED31.1   | 8.80E-61 | -0.25127 | 0.067 | 0.246 | 1.31E-56 | M1 | MED31        |
| CCDC82.1  | 9.09E-61 | -0.28886 | 0.105 | 0.305 | 1.36E-56 | M1 | CCDC82       |
| RAB6A.3   | 9.34E-61 | -0.27908 | 0.194 | 0.434 | 1.40E-56 | M1 | RAB6A        |
| ERI3.2    | 1.00E-60 | -0.28927 | 0.174 | 0.408 | 1.50E-56 | M1 | ERI3         |
| DHFR.2    | 1.15E-60 | -0.30489 | 0.027 | 0.176 | 1.72E-56 | M1 | DHFR         |
| ZCRB1.3   | 1.17E-60 | -0.33163 | 0.275 | 0.534 | 1.76E-56 | M1 | ZCRB1        |
| EDNRB.2   | 1.23E-60 | -0.36729 | 0.05  | 0.214 | 1.84E-56 | M1 | EDNRB        |
| PYGB.2    | 1.50E-60 | -0.26093 | 0.064 | 0.24  | 2.23E-56 | M1 | PYGB         |
| IGF2BP3.3 | 1.50E-60 | -0.25957 | 0.003 | 0.129 | 2.25E-56 | M1 | IGF2BP3      |
| ACYP1.1   | 1.60E-60 | -0.3202  | 0.043 | 0.204 | 2.39E-56 | M1 | ACYP1        |
| ACAT2.3   | 1.60E-60 | -0.28641 | 0.11  | 0.311 | 2.39E-56 | M1 | ACAT2        |
| NFYB.2    | 1.78E-60 | -0.3039  | 0.047 | 0.211 | 2.67E-56 | M1 | NFYB         |
| NDP.2     | 1.94E-60 | -0.34593 | 0.005 | 0.133 | 2.90E-56 | M1 | NDP          |
| COL4A1.1  | 2.06E-60 | -0.24871 | 0.004 | 0.132 | 3.07E-56 | M1 | COL4A1       |
| GNAS.4    | 2.07E-60 | -0.34124 | 0.48  | 0.681 | 3.09E-56 | M1 | GNAS         |
| CNPY2.3   | 2.22E-60 | -0.33615 | 0.346 | 0.613 | 3.32E-56 | M1 | CNPY2        |
| PRKRIP1.3 | 2.24E-60 | -0.26757 | 0.085 | 0.273 | 3.34E-56 | M1 | PRKRIP1      |
| ZNF385D.2 | 2.24E-60 | -0.28345 | 0.004 | 0.132 | 3.35E-56 | M1 | ZNF385D      |
| LYRM1.3   | 2.33E-60 | -0.34307 | 0.047 | 0.21  | 3.48E-56 | M1 | LYRM1        |
| SLC2A1.3  | 2.52E-60 | -0.38095 | 0.02  | 0.161 | 3.77E-56 | M1 | SLC2A1       |
| CIAPIN1.1 | 2.53E-60 | -0.29969 | 0.099 | 0.292 | 3.78E-56 | M1 | CIAPIN1      |
| FAM221A.4 | 2.72E-60 | -0.37857 | 0.045 | 0.204 | 4.07E-56 | M1 | FAM221A      |
| DHRS3.2   | 2.85E-60 | 0.424452 | 0.288 | 0.148 | 4.26E-56 | M1 | DHRS3        |
| SH3BP1.4  | 2.89E-60 | 0.46501  | 0.21  | 0.092 | 4.31E-56 | M1 | SH3BP1       |
| BSDC1.2   | 2.90E-60 | -0.26546 | 0.119 | 0.325 | 4.34E-56 | M1 | BSDC1        |
| ATP9A.3   | 2.98E-60 | -0.30053 | 0.005 | 0.134 | 4.46E-56 | M1 | ATP9A        |
| CLDND1.2  | 3.03E-60 | -0.40221 | 0.197 | 0.433 | 4.53E-56 | M1 | CLDND1       |
| FBXO32.4  | 3.26E-60 | -0.42505 | 0.03  | 0.179 | 4.88E-56 | M1 | FBXO32       |
| TMCO3     | 3.37E-60 | -0.25146 | 0.06  | 0.233 | 5.03E-56 | M1 | TMCO3        |
| C16orf91. | 3.40E-60 | -0.28414 | 0.055 | 0.224 | 5.09E-56 | M1 | C16orf91     |
| KRIT1.3   | 3.62E-60 | -0.24849 | 0.068 | 0.246 | 5.41E-56 | M1 | KRIT1        |
| AKTIP.3   | 3.67E-60 | -0.32843 | 0.038 | 0.194 | 5.48E-56 | M1 | AKTIP        |
| SOGA1.3   | 3.86E-60 | -0.24756 | 0.03  | 0.18  | 5.76E-56 | M1 | SOGA1        |

|              |           |           |        |        |           |    |                |
|--------------|-----------|-----------|--------|--------|-----------|----|----------------|
| VEZF1. 4     | 4. 00E-60 | -0. 2713  | 0. 083 | 0. 269 | 5. 98E-56 | M1 | VEZF1          |
| PLA2G12A. 4. | 15E-60    | -0. 26688 | 0. 08  | 0. 265 | 6. 21E-56 | M1 | PLA2G12A       |
| NTHL1. 1     | 5. 66E-60 | -0. 25946 | 0. 049 | 0. 215 | 8. 45E-56 | M1 | NTHL1          |
| DEAF1. 3     | 5. 80E-60 | -0. 25182 | 0. 065 | 0. 241 | 8. 66E-56 | M1 | DEAF1          |
| ADCY7. 4     | 5. 98E-60 | 0. 385859 | 0. 144 | 0. 047 | 8. 93E-56 | M1 | ADCY7          |
| ZNF91. 1     | 6. 36E-60 | -0. 23292 | 0. 064 | 0. 239 | 9. 51E-56 | M1 | ZNF91          |
| FSTL1. 2     | 6. 47E-60 | -0. 26231 | 0. 006 | 0. 135 | 9. 67E-56 | M1 | FSTL1          |
| FAM127B. 3   | 6. 84E-60 | -0. 35519 | 0. 131 | 0. 334 | 1. 02E-55 | M1 | FAM127B        |
| ENDOG. 3     | 7. 07E-60 | -0. 27158 | 0. 025 | 0. 172 | 1. 06E-55 | M1 | ENDOG          |
| ZIC1. 3      | 7. 33E-60 | -0. 31264 | 0. 007 | 0. 136 | 1. 09E-55 | M1 | ZIC1           |
| RSPRY1. 2    | 8. 49E-60 | -0. 26464 | 0. 09  | 0. 28  | 1. 27E-55 | M1 | RSPRY1         |
| GABARAP. 2   | 1. 01E-59 | 0. 418624 | 0. 551 | 0. 443 | 1. 51E-55 | M1 | GABARAP        |
| RBM47. 4     | 1. 03E-59 | 0. 465629 | 0. 217 | 0. 097 | 1. 54E-55 | M1 | RBM47          |
| UBE2M. 4     | 1. 05E-59 | -0. 30234 | 0. 078 | 0. 261 | 1. 57E-55 | M1 | UBE2M          |
| EHMT2. 3     | 1. 12E-59 | -0. 2886  | 0. 059 | 0. 229 | 1. 67E-55 | M1 | EHMT2          |
| ACSS3. 2     | 1. 21E-59 | -0. 2375  | 0. 005 | 0. 133 | 1. 80E-55 | M1 | ACSS3          |
| TRPV2. 4     | 1. 21E-59 | 0. 376171 | 0. 136 | 0. 043 | 1. 82E-55 | M1 | TRPV2          |
| GAD1. 4      | 1. 23E-59 | -0. 32213 | 0. 006 | 0. 134 | 1. 84E-55 | M1 | GAD1           |
| NRXN2. 4     | 1. 32E-59 | -0. 35707 | 0. 008 | 0. 138 | 1. 97E-55 | M1 | NRXN2          |
| COQ9. 3      | 1. 39E-59 | -0. 26952 | 0. 086 | 0. 273 | 2. 07E-55 | M1 | COQ9           |
| MCC. 2       | 1. 72E-59 | -0. 23866 | 0. 011 | 0. 144 | 2. 58E-55 | M1 | MCC            |
| CHCHD2. 3    | 1. 75E-59 | -0. 25805 | 0. 805 | 0. 895 | 2. 62E-55 | M1 | CHCHD2         |
| MRFAP1. 3    | 1. 76E-59 | -0. 32537 | 0. 47  | 0. 711 | 2. 62E-55 | M1 | MRFAP1         |
| DCUN1D5      | 1. 78E-59 | -0. 27926 | 0. 117 | 0. 321 | 2. 65E-55 | M1 | DCUN1D5        |
| RSBN1. 2     | 1. 91E-59 | -0. 30939 | 0. 071 | 0. 246 | 2. 85E-55 | M1 | RSBN1          |
| RUFY2. 4     | 2. 00E-59 | -0. 27532 | 0. 027 | 0. 174 | 2. 99E-55 | M1 | RUFY2          |
| ARL9. 3      | 2. 24E-59 | -0. 27876 | 0. 002 | 0. 125 | 3. 35E-55 | M1 | ARL9           |
| FUCA1. 3     | 2. 56E-59 | 0. 525327 | 0. 332 | 0. 197 | 3. 82E-55 | M1 | FUCA1          |
| SYP. 4       | 2. 73E-59 | -0. 37326 | 0. 018 | 0. 157 | 4. 08E-55 | M1 | SYP            |
| OLA1. 1      | 2. 87E-59 | -0. 30388 | 0. 275 | 0. 531 | 4. 29E-55 | M1 | OLA1           |
| SYNC. 2      | 3. 21E-59 | -0. 2914  | 0. 044 | 0. 202 | 4. 80E-55 | M1 | SYNC           |
| MARCH9. 3    | 3. 48E-59 | -0. 38286 | 0. 032 | 0. 179 | 5. 20E-55 | M1 | 9-Mar          |
| PSMB10. 4    | 3. 63E-59 | 0. 443158 | 0. 376 | 0. 231 | 5. 43E-55 | M1 | PSMB10         |
| KCTD3. 1     | 3. 67E-59 | -0. 24865 | 0. 023 | 0. 166 | 5. 49E-55 | M1 | KCTD3          |
| PAPOLG. 4    | 3. 76E-59 | 0. 487946 | 0. 182 | 0. 073 | 5. 62E-55 | M1 | PAPOLG         |
| KIDINS220    | 3. 85E-59 | -0. 27788 | 0. 107 | 0. 301 | 5. 76E-55 | M1 | KIDINS220      |
| ANKS3. 2     | 4. 39E-59 | -0. 27985 | 0. 039 | 0. 194 | 6. 56E-55 | M1 | ANKS3          |
| MFF. 1       | 4. 53E-59 | -0. 30729 | 0. 273 | 0. 533 | 6. 76E-55 | M1 | MFF            |
| RPAP2. 2     | 4. 87E-59 | -0. 26433 | 0. 049 | 0. 212 | 7. 28E-55 | M1 | RPAP2          |
| EXTL3. 2     | 4. 90E-59 | -0. 26344 | 0. 017 | 0. 154 | 7. 32E-55 | M1 | EXTL3          |
| ZNF677. 2    | 5. 39E-59 | -0. 2293  | 0. 057 | 0. 225 | 8. 06E-55 | M1 | ZNF677         |
| URI1. 1      | 5. 40E-59 | -0. 26259 | 0. 072 | 0. 251 | 8. 07E-55 | M1 | URI1           |
| KHSRP. 4     | 5. 75E-59 | -0. 24931 | 0. 084 | 0. 269 | 8. 60E-55 | M1 | KHSRP          |
| BRD3. 3      | 6. 55E-59 | -0. 26735 | 0. 11  | 0. 308 | 9. 79E-55 | M1 | BRD3           |
| MTX2. 2      | 6. 74E-59 | -0. 27486 | 0. 144 | 0. 357 | 1. 01E-54 | M1 | MTX2           |
| RP11-395G    | 6. 87E-59 | -0. 34055 | 0. 046 | 0. 204 | 1. 03E-54 | M1 | RP11-395G23. 3 |
| TSEN15. 2    | 7. 77E-59 | -0. 27114 | 0. 081 | 0. 263 | 1. 16E-54 | M1 | TSEN15         |
| PEF1. 2      | 8. 13E-59 | -0. 30306 | 0. 142 | 0. 355 | 1. 21E-54 | M1 | PEF1           |
| CKS2. 4      | 8. 48E-59 | 0. 463083 | 0. 475 | 0. 345 | 1. 27E-54 | M1 | CKS2           |
| SEPT4. 4     | 8. 91E-59 | -0. 49367 | 0. 017 | 0. 153 | 1. 33E-54 | M1 | 4-Sep          |
| CIB1. 3      | 9. 17E-59 | 0. 327997 | 0. 582 | 0. 474 | 1. 37E-54 | M1 | CIB1           |



|           |    |          |          |       |       |          |    |               |
|-----------|----|----------|----------|-------|-------|----------|----|---------------|
| STARD3NL. | 1. | 1.11E-58 | -0.27388 | 0.2   | 0.437 | 1.66E-54 | M1 | STARD3NL      |
| TMEM25.   | 3  | 1.25E-58 | -0.29823 | 0.012 | 0.144 | 1.87E-54 | M1 | TMEM25        |
| SLC6A8.   | 2  | 1.34E-58 | -0.34723 | 0.01  | 0.139 | 2.00E-54 | M1 | SLC6A8        |
| SLC1A5.   | 4  | 1.44E-58 | 0.502127 | 0.241 | 0.117 | 2.15E-54 | M1 | SLC1A5        |
| TCEAL5.   | 2  | 1.47E-58 | -0.44591 | 0.012 | 0.142 | 2.19E-54 | M1 | TCEAL5        |
| ALYREF.   | 4  | 1.56E-58 | -0.24362 | 0.025 | 0.17  | 2.33E-54 | M1 | ALYREF        |
| SHD.      | 3  | 1.72E-58 | -0.44142 | 0.015 | 0.148 | 2.58E-54 | M1 | SHD           |
| CC2D1A.   | 3  | 1.74E-58 | -0.24793 | 0.05  | 0.213 | 2.59E-54 | M1 | CC2D1A        |
| NFIL3.    | 4  | 1.76E-58 | 0.449732 | 0.171 | 0.066 | 2.64E-54 | M1 | NFIL3         |
| TMEM181.  | 4  | 1.86E-58 | -0.26348 | 0.037 | 0.189 | 2.78E-54 | M1 | TMEM181       |
| ANP32A.   | 4  | 2.05E-58 | 0.417632 | 0.511 | 0.412 | 3.06E-54 | M1 | ANP32A        |
| NLGN4X.   | 2  | 2.19E-58 | -0.27358 | 0.003 | 0.126 | 3.27E-54 | M1 | NLGN4X        |
| CSGALNACT | 2. | 2.23E-58 | 0.433893 | 0.158 | 0.058 | 3.33E-54 | M1 | CSGALNACT1    |
| MT1F.     | 4  | 2.41E-58 | -0.39353 | 0.138 | 0.339 | 3.60E-54 | M1 | MT1F          |
| RRM1.     | 2  | 2.53E-58 | -0.3149  | 0.051 | 0.212 | 3.79E-54 | M1 | RRM1          |
| DOHH.     | 2  | 2.55E-58 | -0.28712 | 0.057 | 0.221 | 3.81E-54 | M1 | DOHH          |
| CETN2.    | 4  | 2.62E-58 | -0.39815 | 0.149 | 0.357 | 3.91E-54 | M1 | CETN2         |
| TIMM13.   | 1  | 2.82E-58 | -0.33574 | 0.388 | 0.632 | 4.22E-54 | M1 | TIMM13        |
| RP11-452F | 2. | 2.83E-58 | 0.496238 | 0.228 | 0.106 | 4.23E-54 | M1 | RP11-452F19.3 |
| AHCYL1.   | 4  | 2.90E-58 | -0.32597 | 0.15  | 0.363 | 4.33E-54 | M1 | AHCYL1        |
| CDK16.    | 2  | 2.95E-58 | -0.23054 | 0.082 | 0.266 | 4.41E-54 | M1 | CDK16         |
| GNLY.     | 1  | 3.14E-58 | 0.328026 | 0.086 | 0.018 | 4.69E-54 | M1 | GNLY          |
| OBSL1.    | 3  | 3.39E-58 | -0.26223 | 0.026 | 0.17  | 5.06E-54 | M1 | OBSL1         |
| MAN1A2.   | 2  | 3.80E-58 | -0.26103 | 0.063 | 0.232 | 5.67E-54 | M1 | MAN1A2        |
| NRARP.    | 2  | 3.87E-58 | 0.325482 | 0.095 | 0.023 | 5.78E-54 | M1 | NRARP         |
| ZNF791.   | 1  | 4.54E-58 | -0.25145 | 0.107 | 0.303 | 6.79E-54 | M1 | ZNF791        |
| CYR61.    | 2  | 4.63E-58 | -0.52798 | 0.042 | 0.193 | 6.92E-54 | M1 | CYR61         |
| ROBO2.    | 3  | 5.85E-58 | -0.26273 | 0.005 | 0.128 | 8.73E-54 | M1 | ROBO2         |
| CCDC80.   | 3  | 6.15E-58 | -0.39438 | 0.008 | 0.134 | 9.19E-54 | M1 | CCDC80        |
| RUVBL2.   | 1  | 6.20E-58 | -0.25344 | 0.141 | 0.353 | 9.26E-54 | M1 | RUVBL2        |
| SNAP47.   | 2  | 6.33E-58 | -0.25579 | 0.062 | 0.231 | 9.46E-54 | M1 | SNAP47        |
| HMGCS1.   | 2  | 6.41E-58 | -0.28069 | 0.049 | 0.21  | 9.59E-54 | M1 | HMGCS1        |
| SRPK1.    | 2  | 6.61E-58 | -0.2952  | 0.039 | 0.191 | 9.87E-54 | M1 | SRPK1         |
| CLEC4A.   | 4  | 6.61E-58 | 0.463334 | 0.139 | 0.046 | 9.88E-54 | M1 | CLEC4A        |
| TSEN34.   | 1  | 6.69E-58 | -0.27037 | 0.176 | 0.407 | 9.99E-54 | M1 | TSEN34        |
| DLL3.     | 3  | 6.91E-58 | -0.53458 | 0.028 | 0.167 | 1.03E-53 | M1 | DLL3          |
| NBPF1.    | 4  | 7.01E-58 | -0.23044 | 0.083 | 0.266 | 1.05E-53 | M1 | NBPF1         |
| PTK2.     | 2  | 7.74E-58 | -0.28025 | 0.046 | 0.204 | 1.16E-53 | M1 | PTK2          |
| ODF3B.    | 4  | 7.94E-58 | 0.416792 | 0.186 | 0.075 | 1.19E-53 | M1 | ODF3B         |
| SRR.      | 3  | 8.77E-58 | -0.25762 | 0.031 | 0.178 | 1.31E-53 | M1 | SRR           |
| PLA2G5.   | 3  | 9.31E-58 | -0.54938 | 0.006 | 0.129 | 1.39E-53 | M1 | PLA2G5        |
| DIRAS3.   | 3  | 9.81E-58 | -0.53109 | 0.014 | 0.145 | 1.47E-53 | M1 | DIRAS3        |
| ARPC5L.   | 2  | 1.14E-57 | -0.29102 | 0.181 | 0.407 | 1.70E-53 | M1 | ARPC5L        |
| EZH2.     | 3  | 1.18E-57 | -0.32769 | 0.032 | 0.178 | 1.77E-53 | M1 | EZH2          |
| CDKN1B.   | 3  | 1.21E-57 | -0.30108 | 0.102 | 0.29  | 1.80E-53 | M1 | CDKN1B        |
| SPATA33.  | 3  | 1.28E-57 | -0.27035 | 0.026 | 0.17  | 1.92E-53 | M1 | SPATA33       |
| TIMM8B.   | 2  | 1.38E-57 | -0.34291 | 0.338 | 0.585 | 2.06E-53 | M1 | TIMM8B        |
| LINC00511 | 1. | 1.48E-57 | -0.26444 | 0.011 | 0.141 | 2.21E-53 | M1 | LINC00511     |
| APBB2.    | 3  | 1.51E-57 | -0.30008 | 0.008 | 0.134 | 2.26E-53 | M1 | APBB2         |
| KCNMB4.   | 4  | 1.54E-57 | -0.34766 | 0.014 | 0.145 | 2.30E-53 | M1 | KCNMB4        |
| AMER2.    | 3  | 1.56E-57 | -0.48409 | 0.009 | 0.135 | 2.33E-53 | M1 | AMER2         |

|              |          |          |       |       |          |    |               |
|--------------|----------|----------|-------|-------|----------|----|---------------|
| PAXBP1.3     | 1.56E-57 | -0.23482 | 0.035 | 0.184 | 2.34E-53 | M1 | PAXBP1        |
| SLC4A4.2     | 1.67E-57 | -0.33517 | 0.006 | 0.129 | 2.49E-53 | M1 | SLC4A4        |
| PALLD.1      | 1.67E-57 | -0.2591  | 0.06  | 0.226 | 2.49E-53 | M1 | PALLD         |
| ATP1A3.3     | 1.72E-57 | -0.41184 | 0.013 | 0.142 | 2.57E-53 | M1 | ATP1A3        |
| POLR2K.1     | 1.83E-57 | -0.31561 | 0.28  | 0.531 | 2.73E-53 | M1 | POLR2K        |
| CCT7.2       | 1.88E-57 | -0.31646 | 0.316 | 0.572 | 2.81E-53 | M1 | CCT7          |
| SH3BGRL3.2   | 2.03E-57 | 0.107197 | 0.849 | 0.763 | 3.04E-53 | M1 | SH3BGRL3      |
| EFS.2        | 2.08E-57 | -0.32663 | 0.004 | 0.126 | 3.10E-53 | M1 | EFS           |
| NAV2.1       | 2.21E-57 | -0.30092 | 0.011 | 0.139 | 3.31E-53 | M1 | NAV2          |
| APOD.3       | 2.39E-57 | -0.83248 | 0.04  | 0.185 | 3.57E-53 | M1 | APOD          |
| TMEM132B.2   | 2.44E-57 | -0.26394 | 0.002 | 0.122 | 3.65E-53 | M1 | TMEM132B      |
| ASF1A.3      | 2.66E-57 | -0.24975 | 0.084 | 0.264 | 3.97E-53 | M1 | ASF1A         |
| CDK6.3       | 2.72E-57 | -0.3483  | 0.067 | 0.233 | 4.07E-53 | M1 | CDK6          |
| ATCAY.3      | 3.04E-57 | -0.36669 | 0.013 | 0.142 | 4.55E-53 | M1 | ATCAY         |
| KCNE4.2      | 3.06E-57 | -0.26677 | 0.004 | 0.125 | 4.58E-53 | M1 | KCNE4         |
| KLRC2.3      | 3.12E-57 | -0.41965 | 0.007 | 0.13  | 4.66E-53 | M1 | KLRC2         |
| HS2ST1.3     | 3.26E-57 | -0.28497 | 0.045 | 0.2   | 4.88E-53 | M1 | HS2ST1        |
| TYRO3.3      | 3.27E-57 | -0.28334 | 0.006 | 0.13  | 4.88E-53 | M1 | TYRO3         |
| WHSC1.3      | 3.37E-57 | -0.26949 | 0.032 | 0.178 | 5.03E-53 | M1 | WHSC1         |
| DVL2.2       | 3.51E-57 | -0.24483 | 0.046 | 0.203 | 5.25E-53 | M1 | DVL2          |
| AKAP8L.2     | 3.81E-57 | -0.26216 | 0.093 | 0.28  | 5.70E-53 | M1 | AKAP8L        |
| DZIP1.3      | 3.86E-57 | -0.23984 | 0.003 | 0.122 | 5.78E-53 | M1 | DZIP1         |
| HS3ST1.3     | 4.12E-57 | 0.463987 | 0.177 | 0.07  | 6.15E-53 | M1 | HS3ST1        |
| BRD8.2       | 4.40E-57 | -0.26829 | 0.037 | 0.187 | 6.58E-53 | M1 | BRD8          |
| GSTK1.2      | 4.46E-57 | 0.298886 | 0.603 | 0.515 | 6.66E-53 | M1 | GSTK1         |
| CD300C.4     | 4.79E-57 | 0.397867 | 0.149 | 0.052 | 7.16E-53 | M1 | CD300C        |
| MPHOSPH10.5  | 5.34E-57 | -0.28135 | 0.087 | 0.268 | 7.98E-53 | M1 | MPHOSPH10     |
| ISCA1.2      | 5.39E-57 | -0.23113 | 0.127 | 0.331 | 8.06E-53 | M1 | ISCA1         |
| RFC4.2       | 5.49E-57 | -0.32735 | 0.035 | 0.181 | 8.20E-53 | M1 | RFC4          |
| APOO.3       | 5.79E-57 | -0.28089 | 0.08  | 0.259 | 8.66E-53 | M1 | APOO          |
| GIMAP6.2     | 5.97E-57 | 0.3116   | 0.109 | 0.029 | 8.92E-53 | M1 | GIMAP6        |
| NTM.2        | 6.33E-57 | -0.46025 | 0.008 | 0.132 | 9.46E-53 | M1 | NTM           |
| MX1.2        | 6.38E-57 | 0.421223 | 0.221 | 0.1   | 9.53E-53 | M1 | MX1           |
| PSMD14.2     | 7.18E-57 | -0.31083 | 0.259 | 0.509 | 1.07E-52 | M1 | PSMD14        |
| SNX21.1      | 8.03E-57 | -0.23628 | 0.011 | 0.14  | 1.20E-52 | M1 | SNX21         |
| RAD21.3      | 8.28E-57 | -0.29848 | 0.182 | 0.403 | 1.24E-52 | M1 | RAD21         |
| PAPSS1.1     | 9.21E-57 | -0.27426 | 0.128 | 0.328 | 1.38E-52 | M1 | PAPSS1        |
| ALKBH2.4     | 9.26E-57 | -0.25887 | 0.058 | 0.223 | 1.38E-52 | M1 | ALKBH2        |
| RB1CC1.2     | 9.41E-57 | -0.26102 | 0.114 | 0.309 | 1.41E-52 | M1 | RB1CC1        |
| TRIM16.2     | 9.81E-57 | -0.25507 | 0.018 | 0.152 | 1.47E-52 | M1 | TRIM16        |
| TNPO2.2      | 1.05E-56 | -0.2277  | 0.048 | 0.206 | 1.58E-52 | M1 | TNPO2         |
| PPP2R5B.3    | 1.08E-56 | -0.26071 | 0.04  | 0.191 | 1.61E-52 | M1 | PPP2R5B       |
| DPEP2.3      | 1.16E-56 | 0.357218 | 0.092 | 0.022 | 1.74E-52 | M1 | DPEP2         |
| TTC9B.4      | 1.25E-56 | -0.46315 | 0.014 | 0.141 | 1.87E-52 | M1 | TTC9B         |
| PSMG3.3      | 1.38E-56 | -0.26816 | 0.15  | 0.363 | 2.07E-52 | M1 | PSMG3         |
| IFI27L1.2    | 1.45E-56 | -0.30833 | 0.053 | 0.212 | 2.16E-52 | M1 | IFI27L1       |
| ERV3-1.3     | 1.53E-56 | -0.29357 | 0.104 | 0.292 | 2.29E-52 | M1 | ERV3-1        |
| MGST1.3      | 1.59E-56 | -0.88177 | 0.03  | 0.168 | 2.37E-52 | M1 | MGST1         |
| RP11-410L.14 | 1.60E-56 | -0.26157 | 0.017 | 0.15  | 2.38E-52 | M1 | RP11-410L14.2 |
| ARNT2.4      | 1.68E-56 | -0.23926 | 0.008 | 0.132 | 2.51E-52 | M1 | ARNT2         |
| TIMP3.2      | 1.70E-56 | -0.35629 | 0.016 | 0.147 | 2.54E-52 | M1 | TIMP3         |

|             |           |           |        |        |              |              |
|-------------|-----------|-----------|--------|--------|--------------|--------------|
| GOT2. 2     | 1. 78E-56 | -0. 26448 | 0. 06  | 0. 224 | 2. 65E-52 M1 | GOT2         |
| PRPSAP1. 4  | 1. 84E-56 | -0. 21965 | 0. 133 | 0. 341 | 2. 76E-52 M1 | PRPSAP1      |
| RBBP4. 1    | 1. 87E-56 | -0. 30197 | 0. 231 | 0. 471 | 2. 79E-52 M1 | RBBP4        |
| ARHGAP27. 2 | 2. 24E-56 | 0. 358639 | 0. 128 | 0. 04  | 3. 34E-52 M1 | ARHGAP27     |
| POLR2C. 3   | 2. 27E-56 | -0. 30803 | 0. 169 | 0. 386 | 3. 39E-52 M1 | POLR2C       |
| NELL2. 2    | 2. 30E-56 | -0. 32929 | 0. 005 | 0. 126 | 3. 44E-52 M1 | NELL2        |
| PTPRF. 4    | 2. 33E-56 | -0. 2959  | 0. 01  | 0. 136 | 3. 48E-52 M1 | PTPRF        |
| ATP8B4. 3   | 2. 36E-56 | 0. 329492 | 0. 109 | 0. 03  | 3. 52E-52 M1 | ATP8B4       |
| PRPSAP2. 1  | 2. 51E-56 | -0. 26217 | 0. 107 | 0. 298 | 3. 75E-52 M1 | PRPSAP2      |
| LIFR. 1     | 2. 62E-56 | -0. 28647 | 0. 007 | 0. 13  | 3. 91E-52 M1 | LIFR         |
| FAM78A. 3   | 2. 71E-56 | 0. 309617 | 0. 095 | 0. 024 | 4. 05E-52 M1 | FAM78A       |
| OAS1. 2     | 2. 75E-56 | 0. 405813 | 0. 239 | 0. 111 | 4. 10E-52 M1 | OAS1         |
| C19orf25. 3 | 3. 05E-56 | -0. 22661 | 0. 128 | 0. 334 | 4. 56E-52 M1 | C19orf25     |
| NAIP. 4     | 3. 08E-56 | 0. 446547 | 0. 203 | 0. 09  | 4. 61E-52 M1 | NAIP         |
| DLX1. 4     | 3. 18E-56 | -0. 44162 | 0. 011 | 0. 136 | 4. 75E-52 M1 | DLX1         |
| AUTS2. 4    | 3. 35E-56 | -0. 29042 | 0. 012 | 0. 14  | 5. 01E-52 M1 | AUTS2        |
| ZNF883. 3   | 3. 35E-56 | -0. 2687  | 0. 025 | 0. 164 | 5. 01E-52 M1 | ZNF883       |
| TNFRSF19. 3 | 3. 46E-56 | -0. 22705 | 0. 005 | 0. 125 | 5. 17E-52 M1 | TNFRSF19     |
| SEZ6. 4     | 3. 51E-56 | -0. 34854 | 0. 024 | 0. 162 | 5. 24E-52 M1 | SEZ6         |
| USP11. 3    | 3. 80E-56 | -0. 29644 | 0. 171 | 0. 389 | 5. 68E-52 M1 | USP11        |
| TPP1. 4     | 3. 83E-56 | 0. 467027 | 0. 43  | 0. 301 | 5. 72E-52 M1 | TPP1         |
| TMEM121. 3  | 3. 87E-56 | -0. 27454 | 0. 005 | 0. 126 | 5. 78E-52 M1 | TMEM121      |
| SWI5. 4     | 3. 99E-56 | -0. 28566 | 0. 093 | 0. 276 | 5. 96E-52 M1 | SWI5         |
| ANKS1B. 3   | 4. 73E-56 | -0. 43207 | 0. 007 | 0. 128 | 7. 07E-52 M1 | ANKS1B       |
| SNHG9. 1    | 5. 25E-56 | -0. 2467  | 0. 133 | 0. 339 | 7. 85E-52 M1 | SNHG9        |
| GGT7. 2     | 5. 38E-56 | -0. 22484 | 0. 04  | 0. 191 | 8. 04E-52 M1 | GGT7         |
| RP1-39G22   | 5. 78E-56 | -0. 27704 | 0. 019 | 0. 153 | 8. 64E-52 M1 | RP1-39G22. 7 |
| EPB41L3. 4  | 6. 20E-56 | 0. 363646 | 0. 203 | 0. 085 | 9. 26E-52 M1 | EPB41L3      |
| ATL1. 1     | 7. 19E-56 | -0. 3305  | 0. 011 | 0. 137 | 1. 07E-51 M1 | ATL1         |
| ASPH. 1     | 7. 24E-56 | -0. 27121 | 0. 116 | 0. 309 | 1. 08E-51 M1 | ASPH         |
| ANXA2R. 3   | 7. 40E-56 | -0. 32093 | 0. 033 | 0. 176 | 1. 11E-51 M1 | ANXA2R       |
| TNFAIP6. 2  | 7. 45E-56 | -0. 50476 | 0. 008 | 0. 13  | 1. 11E-51 M1 | TNFAIP6      |
| TMX4. 2     | 8. 15E-56 | -0. 24061 | 0. 093 | 0. 276 | 1. 22E-51 M1 | TMX4         |
| MMP16. 2    | 8. 22E-56 | -0. 26843 | 0. 004 | 0. 123 | 1. 23E-51 M1 | MMP16        |
| AEBP1. 3    | 8. 22E-56 | -0. 38339 | 0. 014 | 0. 143 | 1. 23E-51 M1 | AEBP1        |
| GNGT2. 4    | 8. 88E-56 | 0. 375391 | 0. 123 | 0. 038 | 1. 33E-51 M1 | GNGT2        |
| MGMT. 4     | 8. 97E-56 | 0. 429463 | 0. 262 | 0. 129 | 1. 34E-51 M1 | MGMT         |
| ROM1. 3     | 9. 56E-56 | -0. 3414  | 0. 01  | 0. 134 | 1. 43E-51 M1 | ROM1         |
| GPATCH8. 2  | 9. 69E-56 | -0. 23105 | 0. 131 | 0. 338 | 1. 45E-51 M1 | GPATCH8      |
| PPME1. 2    | 1. 20E-55 | -0. 22172 | 0. 05  | 0. 208 | 1. 80E-51 M1 | PPME1        |
| GLT8D1. 1   | 1. 21E-55 | -0. 24596 | 0. 113 | 0. 309 | 1. 81E-51 M1 | GLT8D1       |
| GK. 4       | 1. 30E-55 | 0. 472927 | 0. 239 | 0. 118 | 1. 95E-51 M1 | GK           |
| ADH5. 2     | 1. 38E-55 | -0. 28868 | 0. 199 | 0. 427 | 2. 06E-51 M1 | ADH5         |
| ECHDC3. 3   | 1. 45E-55 | 0. 297367 | 0. 09  | 0. 021 | 2. 16E-51 M1 | ECHDC3       |
| ZNF326. 2   | 1. 49E-55 | -0. 23184 | 0. 094 | 0. 278 | 2. 23E-51 M1 | ZNF326       |
| ZNF664. 2   | 1. 54E-55 | -0. 25065 | 0. 031 | 0. 173 | 2. 30E-51 M1 | ZNF664       |
| STXBP1. 3   | 1. 60E-55 | -0. 2811  | 0. 014 | 0. 142 | 2. 39E-51 M1 | STXBP1       |
| CYFIP2. 3   | 1. 74E-55 | -0. 2982  | 0. 01  | 0. 134 | 2. 60E-51 M1 | CYFIP2       |
| DGUOK. 2    | 1. 76E-55 | -0. 32261 | 0. 301 | 0. 559 | 2. 63E-51 M1 | DGUOK        |
| TM4SF1. 4   | 1. 76E-55 | -0. 35579 | 0. 01  | 0. 133 | 2. 64E-51 M1 | TM4SF1       |
| FKBP4. 3    | 1. 93E-55 | -0. 29158 | 0. 15  | 0. 355 | 2. 88E-51 M1 | FKBP4        |

|            |           |           |        |        |              |               |
|------------|-----------|-----------|--------|--------|--------------|---------------|
| NHP2. 2    | 1. 98E-55 | -0. 32762 | 0. 366 | 0. 623 | 2. 96E-51 M1 | NHP2          |
| TIA1. 4    | 2. 05E-55 | -0. 23315 | 0. 095 | 0. 279 | 3. 07E-51 M1 | TIA1          |
| NMB. 3     | 2. 10E-55 | -0. 39558 | 0. 067 | 0. 229 | 3. 14E-51 M1 | NMB           |
| RP4-665J2  | 2. 22E-55 | -0. 2745  | 0. 017 | 0. 147 | 3. 32E-51 M1 | RP4-665J23. 1 |
| ATN1. 2    | 2. 38E-55 | -0. 22855 | 0. 052 | 0. 21  | 3. 55E-51 M1 | ATN1          |
| GLCCI1. 3  | 2. 42E-55 | -0. 39811 | 0. 034 | 0. 175 | 3. 62E-51 M1 | GLCCI1        |
| RP11-25K1  | 2. 63E-55 | -0. 27029 | 0. 003 | 0. 12  | 3. 93E-51 M1 | RP11-25K19. 1 |
| BTBD3. 3   | 3. 02E-55 | -0. 24033 | 0. 023 | 0. 16  | 4. 51E-51 M1 | BTBD3         |
| ABCD3. 2   | 3. 07E-55 | -0. 23869 | 0. 06  | 0. 223 | 4. 59E-51 M1 | ABCD3         |
| IER2. 3    | 3. 09E-55 | 0. 291454 | 0. 718 | 0. 594 | 4. 62E-51 M1 | IER2          |
| RNF166. 4  | 3. 19E-55 | 0. 499512 | 0. 289 | 0. 164 | 4. 77E-51 M1 | RNF166        |
| NME7. 4    | 3. 45E-55 | -0. 29727 | 0. 039 | 0. 186 | 5. 16E-51 M1 | NME7          |
| FZD7. 1    | 3. 52E-55 | -0. 24047 | 0. 002 | 0. 117 | 5. 27E-51 M1 | FZD7          |
| PTX3. 3    | 3. 70E-55 | -0. 32792 | 0. 011 | 0. 136 | 5. 52E-51 M1 | PTX3          |
| GRB2. 4    | 4. 04E-55 | 0. 371441 | 0. 544 | 0. 468 | 6. 04E-51 M1 | GRB2          |
| FAM104A. 2 | 4. 08E-55 | -0. 25222 | 0. 089 | 0. 27  | 6. 10E-51 M1 | FAM104A       |
| PDLIM3. 3  | 4. 19E-55 | -0. 40435 | 0. 011 | 0. 135 | 6. 26E-51 M1 | PDLIM3        |
| DNAJB2. 3  | 4. 27E-55 | -0. 28481 | 0. 144 | 0. 348 | 6. 37E-51 M1 | DNAJB2        |
| STRADB. 1  | 4. 42E-55 | -0. 24149 | 0. 076 | 0. 249 | 6. 60E-51 M1 | STRADB        |
| FDX1L. 2   | 4. 52E-55 | -0. 29712 | 0. 104 | 0. 29  | 6. 75E-51 M1 | FDX1L         |
| GSK3A. 3   | 4. 81E-55 | -0. 22098 | 0. 057 | 0. 217 | 7. 19E-51 M1 | GSK3A         |
| M6PR. 4    | 5. 30E-55 | 0. 430611 | 0. 47  | 0. 364 | 7. 92E-51 M1 | M6PR          |
| KLHL13. 3  | 5. 56E-55 | -0. 25151 | 0. 003 | 0. 118 | 8. 32E-51 M1 | KLHL13        |
| SLC25A6. 2 | 5. 70E-55 | 0. 130606 | 0. 914 | 0. 846 | 8. 51E-51 M1 | SLC25A6       |
| FHIT. 2    | 5. 74E-55 | 0. 481057 | 0. 212 | 0. 097 | 8. 58E-51 M1 | FHIT          |
| ZHX3. 2    | 5. 87E-55 | -0. 23783 | 0. 014 | 0. 141 | 8. 77E-51 M1 | ZHX3          |
| GPR137. 3  | 6. 28E-55 | -0. 24693 | 0. 068 | 0. 237 | 9. 39E-51 M1 | GPR137        |
| EPSTI1. 4  | 6. 34E-55 | 0. 414831 | 0. 225 | 0. 105 | 9. 48E-51 M1 | EPSTI1        |
| ADPGK. 4   | 6. 56E-55 | 0. 483053 | 0. 365 | 0. 24  | 9. 80E-51 M1 | ADPGK         |
| WLS. 2     | 7. 35E-55 | -0. 22779 | 0. 072 | 0. 243 | 1. 10E-50 M1 | WLS           |
| CARD16. 2  | 7. 42E-55 | 0. 353629 | 0. 356 | 0. 204 | 1. 11E-50 M1 | CARD16        |
| SFRP1. 3   | 7. 97E-55 | -0. 24561 | 0. 002 | 0. 117 | 1. 19E-50 M1 | SFRP1         |
| CSPG5. 3   | 8. 01E-55 | -0. 38749 | 0. 008 | 0. 128 | 1. 20E-50 M1 | CSPG5         |
| TPM1. 2    | 8. 07E-55 | -0. 26453 | 0. 1   | 0. 283 | 1. 21E-50 M1 | TPM1          |
| SESTD1. 3  | 8. 31E-55 | -0. 30791 | 0. 038 | 0. 183 | 1. 24E-50 M1 | SESTD1        |
| CORO2B. 2  | 8. 37E-55 | -0. 26073 | 0. 004 | 0. 12  | 1. 25E-50 M1 | CORO2B        |
| PRKAG2-AS  | 8. 85E-55 | 0. 462871 | 0. 224 | 0. 105 | 1. 32E-50 M1 | PRKAG2-AS1    |
| NFKBIZ. 4  | 8. 94E-55 | 0. 479458 | 0. 282 | 0. 154 | 1. 34E-50 M1 | NFKBIZ        |
| CKS1B. 1   | 9. 92E-55 | -0. 36748 | 0. 107 | 0. 289 | 1. 48E-50 M1 | CKS1B         |
| NAP1L5. 2  | 1. 00E-54 | -0. 28876 | 0. 023 | 0. 157 | 1. 50E-50 M1 | NAP1L5        |
| FILIP1L. 4 | 1. 07E-54 | 0. 553912 | 0. 247 | 0. 13  | 1. 59E-50 M1 | FILIP1L       |
| TRIM22. 3  | 1. 16E-54 | 0. 464697 | 0. 234 | 0. 114 | 1. 73E-50 M1 | TRIM22        |
| LILRA4. 1  | 1. 17E-54 | 0. 304636 | 0. 071 | 0. 014 | 1. 74E-50 M1 | LILRA4        |
| GTF2B. 3   | 1. 20E-54 | 0. 523137 | 0. 4   | 0. 28  | 1. 79E-50 M1 | GTF2B         |
| RHOH. 4    | 1. 21E-54 | 0. 437271 | 0. 16  | 0. 06  | 1. 81E-50 M1 | RHOH          |
| ZNRF1. 4   | 1. 25E-54 | -0. 24588 | 0. 012 | 0. 137 | 1. 86E-50 M1 | ZNRF1         |
| PCYT2. 3   | 1. 36E-54 | -0. 22818 | 0. 038 | 0. 184 | 2. 04E-50 M1 | PCYT2         |
| LRRN3. 3   | 1. 37E-54 | -0. 34431 | 0. 011 | 0. 134 | 2. 05E-50 M1 | LRRN3         |
| ST3GAL4. 2 | 1. 42E-54 | -0. 2676  | 0. 016 | 0. 144 | 2. 12E-50 M1 | ST3GAL4       |
| PCDHB10. 3 | 1. 48E-54 | -0. 31606 | 0. 005 | 0. 122 | 2. 21E-50 M1 | PCDHB10       |
| EIF2AK1. 2 | 1. 53E-54 | -0. 26125 | 0. 156 | 0. 367 | 2. 28E-50 M1 | EIF2AK1       |

|            |          |          |       |       |          |    |           |
|------------|----------|----------|-------|-------|----------|----|-----------|
| ZNF414.4   | 1.54E-54 | -0.22919 | 0.054 | 0.212 | 2.30E-50 | M1 | ZNF414    |
| OXCT1.1    | 1.56E-54 | -0.25762 | 0.031 | 0.172 | 2.33E-50 | M1 | OXCT1     |
| ARL6IP6    | 1.57E-54 | -0.26259 | 0.121 | 0.313 | 2.35E-50 | M1 | ARL6IP6   |
| EIF3B.1    | 1.65E-54 | -0.2521  | 0.095 | 0.277 | 2.46E-50 | M1 | EIF3B     |
| LTBP3.2    | 1.65E-54 | -0.23612 | 0.07  | 0.238 | 2.46E-50 | M1 | LTBP3     |
| TSPAN3.3   | 1.71E-54 | -0.28743 | 0.259 | 0.5   | 2.56E-50 | M1 | TSPAN3    |
| ERH.3      | 1.74E-54 | -0.36121 | 0.525 | 0.751 | 2.59E-50 | M1 | ERH       |
| POLR2F.4   | 2.04E-54 | -0.30075 | 0.334 | 0.584 | 3.04E-50 | M1 | POLR2F    |
| DLX2.4     | 2.06E-54 | -0.4759  | 0.009 | 0.128 | 3.09E-50 | M1 | DLX2      |
| CRIP1      | 2.33E-54 | -0.24815 | 0.152 | 0.361 | 3.48E-50 | M1 | CRIP1     |
| EIF3K.3    | 2.35E-54 | 0.160083 | 0.798 | 0.75  | 3.51E-50 | M1 | EIF3K     |
| STK39.2    | 2.72E-54 | -0.24422 | 0.005 | 0.121 | 4.06E-50 | M1 | STK39     |
| RABEPK.3   | 2.77E-54 | -0.2567  | 0.064 | 0.227 | 4.13E-50 | M1 | RABEPK    |
| ZNHIT1.1   | 2.83E-54 | -0.34375 | 0.44  | 0.694 | 4.22E-50 | M1 | ZNHIT1    |
| RAB11B.2   | 2.87E-54 | -0.27152 | 0.291 | 0.547 | 4.28E-50 | M1 | RAB11B    |
| SOD2.2     | 3.05E-54 | 0.124768 | 0.66  | 0.511 | 4.55E-50 | M1 | SOD2      |
| FAM171B.2  | 3.17E-54 | -0.27508 | 0.01  | 0.131 | 4.74E-50 | M1 | FAM171B   |
| ZNF397.2   | 3.26E-54 | -0.23228 | 0.04  | 0.187 | 4.87E-50 | M1 | ZNF397    |
| NDUFS5.4   | 3.31E-54 | -0.29754 | 0.683 | 0.837 | 4.95E-50 | M1 | NDUFS5    |
| LAMC1.2    | 3.49E-54 | -0.21987 | 0.005 | 0.122 | 5.22E-50 | M1 | LAMC1     |
| DOK3.4     | 3.49E-54 | 0.331131 | 0.143 | 0.05  | 5.22E-50 | M1 | DOK3      |
| LINC00094  | 3.57E-54 | -0.22324 | 0.02  | 0.151 | 5.34E-50 | M1 | LINC00094 |
| C7orf50.1  | 3.86E-54 | -0.30749 | 0.305 | 0.548 | 5.77E-50 | M1 | C7orf50   |
| AKAP7.4    | 3.86E-54 | -0.27109 | 0.061 | 0.221 | 5.77E-50 | M1 | AKAP7     |
| SHFM1.3    | 4.03E-54 | -0.35347 | 0.54  | 0.76  | 6.02E-50 | M1 | SHFM1     |
| USP22.4    | 4.06E-54 | -0.22469 | 0.145 | 0.354 | 6.07E-50 | M1 | USP22     |
| SMARCA5.3  | 4.24E-54 | -0.24987 | 0.168 | 0.385 | 6.33E-50 | M1 | SMARCA5   |
| SUB1.2     | 4.71E-54 | -0.26786 | 0.638 | 0.78  | 7.04E-50 | M1 | SUB1      |
| TAF9B.1    | 4.91E-54 | -0.27205 | 0.03  | 0.168 | 7.33E-50 | M1 | TAF9B     |
| LRRC4C.2   | 5.69E-54 | -0.33475 | 0.002 | 0.114 | 8.50E-50 | M1 | LRRC4C    |
| PGM3.3     | 6.97E-54 | -0.25946 | 0.048 | 0.2   | 1.04E-49 | M1 | PGM3      |
| PXDN.1     | 7.21E-54 | -0.24753 | 0.005 | 0.12  | 1.08E-49 | M1 | PXDN      |
| TAC01.3    | 7.39E-54 | -0.24089 | 0.048 | 0.2   | 1.10E-49 | M1 | TAC01     |
| CCDC25.3   | 7.83E-54 | -0.29759 | 0.133 | 0.33  | 1.17E-49 | M1 | CCDC25    |
| ASAP2.3    | 8.53E-54 | -0.21917 | 0.002 | 0.114 | 1.27E-49 | M1 | ASAP2     |
| LAMA5.2    | 8.68E-54 | -0.20679 | 0.01  | 0.132 | 1.30E-49 | M1 | LAMA5     |
| TULP3.3    | 8.80E-54 | -0.26075 | 0.018 | 0.147 | 1.31E-49 | M1 | TULP3     |
| FBXO3.2    | 9.24E-54 | -0.25626 | 0.046 | 0.195 | 1.38E-49 | M1 | FBXO3     |
| EXOG.3     | 9.40E-54 | -0.27164 | 0.037 | 0.18  | 1.41E-49 | M1 | EXOG      |
| PHF23.2    | 9.53E-54 | -0.23772 | 0.069 | 0.235 | 1.42E-49 | M1 | PHF23     |
| CPD.1      | 9.70E-54 | -0.26917 | 0.039 | 0.184 | 1.45E-49 | M1 | CPD       |
| SERP2.2    | 1.03E-53 | -0.3149  | 0.005 | 0.121 | 1.54E-49 | M1 | SERP2     |
| SLC2A4RG.1 | 1.05E-53 | -0.22067 | 0.018 | 0.147 | 1.56E-49 | M1 | SLC2A4RG  |
| PAIP1.4    | 1.08E-53 | -0.265   | 0.204 | 0.434 | 1.61E-49 | M1 | PAIP1     |
| ORC4.3     | 1.08E-53 | -0.25617 | 0.089 | 0.264 | 1.61E-49 | M1 | ORC4      |
| SKP1.3     | 1.12E-53 | -0.31753 | 0.758 | 0.886 | 1.67E-49 | M1 | SKP1      |
| TAF6.1     | 1.16E-53 | -0.229   | 0.089 | 0.266 | 1.73E-49 | M1 | TAF6      |
| CLIP2.3    | 1.17E-53 | -0.27107 | 0.05  | 0.202 | 1.74E-49 | M1 | CLIP2     |
| PPIL1.3    | 1.18E-53 | -0.28396 | 0.062 | 0.221 | 1.76E-49 | M1 | PPIL1     |
| HDGF.1     | 1.21E-53 | -0.23771 | 0.114 | 0.305 | 1.81E-49 | M1 | HDGF      |
| SOX12.3    | 1.27E-53 | -0.21134 | 0.013 | 0.136 | 1.89E-49 | M1 | SOX12     |

|             |           |           |        |        |              |                |
|-------------|-----------|-----------|--------|--------|--------------|----------------|
| STRAP. 2    | 1. 29E-53 | -0. 28895 | 0. 338 | 0. 597 | 1. 93E-49 M1 | STRAP          |
| DLD. 2      | 1. 32E-53 | -0. 28113 | 0. 168 | 0. 379 | 1. 98E-49 M1 | DLD            |
| CWC27. 2    | 1. 52E-53 | -0. 24294 | 0. 108 | 0. 295 | 2. 27E-49 M1 | CWC27          |
| LAP3. 2     | 1. 58E-53 | 0. 298116 | 0. 571 | 0. 476 | 2. 36E-49 M1 | LAP3           |
| ARL4D. 4    | 1. 63E-53 | -0. 34526 | 0. 046 | 0. 193 | 2. 43E-49 M1 | ARL4D          |
| ZNF43. 2    | 1. 67E-53 | -0. 23682 | 0. 025 | 0. 16  | 2. 50E-49 M1 | ZNF43          |
| NCALD. 3    | 1. 69E-53 | -0. 26785 | 0. 018 | 0. 146 | 2. 52E-49 M1 | NCALD          |
| PFKM. 1     | 1. 72E-53 | -0. 29233 | 0. 055 | 0. 209 | 2. 57E-49 M1 | PFKM           |
| SNRPG. 2    | 1. 76E-53 | -0. 32889 | 0. 443 | 0. 679 | 2. 64E-49 M1 | SNRPG          |
| OXA1L. 3    | 1. 82E-53 | 0. 455081 | 0. 408 | 0. 28  | 2. 72E-49 M1 | OXA1L          |
| DHCR7. 3    | 1. 95E-53 | -0. 28519 | 0. 051 | 0. 203 | 2. 92E-49 M1 | DHCR7          |
| VAPB. 3     | 2. 01E-53 | -0. 21716 | 0. 063 | 0. 224 | 3. 01E-49 M1 | VAPB           |
| LHFPL3. 4   | 2. 17E-53 | -0. 32591 | 0. 016 | 0. 14  | 3. 25E-49 M1 | LHFPL3         |
| RP11-660L   | 2. 31E-53 | -0. 28344 | 0. 018 | 0. 145 | 3. 45E-49 M1 | RP11-660L16. 2 |
| PLEKHB1. 2  | 2. 38E-53 | -0. 39949 | 0. 076 | 0. 24  | 3. 55E-49 M1 | PLEKHB1        |
| TSR1. 2     | 2. 44E-53 | -0. 21495 | 0. 058 | 0. 216 | 3. 64E-49 M1 | TSR1           |
| TCF3. 3     | 2. 46E-53 | -0. 22725 | 0. 021 | 0. 151 | 3. 68E-49 M1 | TCF3           |
| STIM2. 1    | 2. 51E-53 | -0. 20587 | 0. 04  | 0. 186 | 3. 76E-49 M1 | STIM2          |
| MAP6. 2     | 2. 56E-53 | -0. 24109 | 0. 003 | 0. 115 | 3. 82E-49 M1 | MAP6           |
| DDX52. 2    | 2. 58E-53 | -0. 20894 | 0. 094 | 0. 274 | 3. 85E-49 M1 | DDX52          |
| WBP4. 3     | 2. 61E-53 | -0. 25452 | 0. 137 | 0. 339 | 3. 89E-49 M1 | WBP4           |
| MLST8. 2    | 2. 71E-53 | -0. 21339 | 0. 089 | 0. 266 | 4. 05E-49 M1 | MLST8          |
| ECI2. 2     | 2. 80E-53 | -0. 30681 | 0. 156 | 0. 356 | 4. 18E-49 M1 | ECI2           |
| ALOX15B. 3  | 3. 16E-53 | 0. 295775 | 0. 076 | 0. 016 | 4. 72E-49 M1 | ALOX15B        |
| C12orf10. 3 | 3. 23E-53 | -0. 25303 | 0. 146 | 0. 352 | 4. 83E-49 M1 | C12orf10       |
| SERPINB6. 3 | 3. 35E-53 | 0. 326491 | 0. 548 | 0. 464 | 5. 01E-49 M1 | SERPINB6       |
| C17orf107   | 3. 39E-53 | 0. 220344 | 0. 052 | 0. 007 | 5. 06E-49 M1 | C17orf107      |
| FIP1L1. 1   | 3. 60E-53 | -0. 2746  | 0. 133 | 0. 329 | 5. 38E-49 M1 | FIP1L1         |
| SLC10A4. 3  | 3. 89E-53 | -0. 23205 | 0. 003 | 0. 115 | 5. 82E-49 M1 | SLC10A4        |
| AGGF1. 1    | 3. 90E-53 | -0. 21501 | 0. 077 | 0. 248 | 5. 83E-49 M1 | AGGF1          |
| COA3. 3     | 4. 13E-53 | -0. 31439 | 0. 273 | 0. 518 | 6. 18E-49 M1 | COA3           |
| P2RY12. 1   | 4. 17E-53 | 0. 244589 | 0. 063 | 0. 011 | 6. 23E-49 M1 | P2RY12         |
| ARAP1. 3    | 4. 34E-53 | 0. 44342  | 0. 199 | 0. 089 | 6. 49E-49 M1 | ARAP1          |
| RNASE3. 2   | 4. 52E-53 | 0. 308553 | 0. 09  | 0. 022 | 6. 75E-49 M1 | RNASE3         |
| TWF1. 2     | 4. 59E-53 | -0. 22434 | 0. 107 | 0. 295 | 6. 86E-49 M1 | TWF1           |
| PDDC1. 3    | 4. 70E-53 | -0. 22696 | 0. 031 | 0. 169 | 7. 02E-49 M1 | PDDC1          |
| CNKSR3. 3   | 4. 78E-53 | -0. 19399 | 0. 014 | 0. 138 | 7. 14E-49 M1 | CNKSR3         |
| P2RY11. 2   | 4. 92E-53 | 0. 400648 | 0. 171 | 0. 07  | 7. 35E-49 M1 | P2RY11         |
| B9D1. 2     | 5. 50E-53 | -0. 30118 | 0. 005 | 0. 12  | 8. 22E-49 M1 | B9D1           |
| HIBCH. 2    | 5. 87E-53 | -0. 25018 | 0. 095 | 0. 274 | 8. 77E-49 M1 | HIBCH          |
| ASCL2. 3    | 6. 41E-53 | 0. 263985 | 0. 096 | 0. 025 | 9. 57E-49 M1 | ASCL2          |
| TSPAN13. 4  | 6. 76E-53 | -0. 37285 | 0. 147 | 0. 329 | 1. 01E-48 M1 | TSPAN13        |
| YTHDF2. 2   | 7. 01E-53 | -0. 24744 | 0. 231 | 0. 471 | 1. 05E-48 M1 | YTHDF2         |
| EPM2AIP1. 7 | 7. 05E-53 | -0. 25062 | 0. 065 | 0. 225 | 1. 05E-48 M1 | EPM2AIP1       |
| COMMD2. 2   | 7. 09E-53 | -0. 24146 | 0. 127 | 0. 321 | 1. 06E-48 M1 | COMMD2         |
| TRIM37. 2   | 7. 15E-53 | -0. 2008  | 0. 033 | 0. 173 | 1. 07E-48 M1 | TRIM37         |
| APPBP2. 2   | 9. 55E-53 | -0. 21517 | 0. 071 | 0. 237 | 1. 43E-48 M1 | APPBP2         |
| METTL2B     | 9. 63E-53 | -0. 23417 | 0. 065 | 0. 225 | 1. 44E-48 M1 | METTL2B        |
| RFC1. 2     | 9. 95E-53 | -0. 24329 | 0. 118 | 0. 308 | 1. 49E-48 M1 | RFC1           |
| RSF1. 2     | 1. 01E-52 | -0. 23258 | 0. 221 | 0. 456 | 1. 51E-48 M1 | RSF1           |
| AKAP6. 3    | 1. 03E-52 | -0. 29386 | 0. 006 | 0. 121 | 1. 54E-48 M1 | AKAP6          |

|             |           |           |        |        |              |                |
|-------------|-----------|-----------|--------|--------|--------------|----------------|
| PRKCH. 3    | 1. 04E-52 | 0. 305943 | 0. 108 | 0. 031 | 1. 55E-48 M1 | PRKCH          |
| HNRNPR      | 1. 05E-52 | -0. 29242 | 0. 317 | 0. 56  | 1. 56E-48 M1 | HNRNPR         |
| FMNL3. 4    | 1. 10E-52 | 0. 432861 | 0. 157 | 0. 061 | 1. 65E-48 M1 | FMNL3          |
| TSM. 2      | 1. 15E-52 | -0. 3513  | 0. 125 | 0. 306 | 1. 73E-48 M1 | TSM            |
| PALM. 2     | 1. 22E-52 | -0. 21076 | 0. 007 | 0. 123 | 1. 82E-48 M1 | PALM           |
| LRP6. 3     | 1. 30E-52 | -0. 25256 | 0. 012 | 0. 132 | 1. 95E-48 M1 | LRP6           |
| SYT1. 4     | 1. 35E-52 | -0. 44591 | 0. 006 | 0. 119 | 2. 01E-48 M1 | SYT1           |
| RASGRP3. 3  | 1. 36E-52 | 0. 373781 | 0. 147 | 0. 053 | 2. 04E-48 M1 | RASGRP3        |
| TOP2B. 4    | 1. 38E-52 | -0. 23765 | 0. 091 | 0. 266 | 2. 06E-48 M1 | TOP2B          |
| SCCPDH. 2   | 1. 38E-52 | -0. 27732 | 0. 192 | 0. 414 | 2. 07E-48 M1 | SCCPDH         |
| ARHGEF12. 1 | 1. 48E-52 | -0. 20369 | 0. 04  | 0. 184 | 2. 21E-48 M1 | ARHGEF12       |
| CDKN2AIPN   | 1. 57E-52 | -0. 2365  | 0. 098 | 0. 279 | 2. 35E-48 M1 | CDKN2AIPNL     |
| CBY1. 2     | 1. 64E-52 | -0. 24022 | 0. 04  | 0. 183 | 2. 45E-48 M1 | CBY1           |
| TCP1. 1     | 1. 83E-52 | -0. 2835  | 0. 319 | 0. 564 | 2. 73E-48 M1 | TCP1           |
| RNF13. 3    | 2. 06E-52 | 0. 380516 | 0. 554 | 0. 466 | 3. 08E-48 M1 | RNF13          |
| LONRF2. 2   | 2. 29E-52 | -0. 25865 | 0. 001 | 0. 11  | 3. 43E-48 M1 | LONRF2         |
| AP000439. 2 | 2. 31E-52 | 0. 261851 | 0. 077 | 0. 017 | 3. 45E-48 M1 | AP000439. 1    |
| PPM1G. 3    | 2. 32E-52 | -0. 27547 | 0. 23  | 0. 456 | 3. 47E-48 M1 | PPM1G          |
| NAP1L3. 2   | 2. 63E-52 | -0. 32378 | 0. 007 | 0. 121 | 3. 93E-48 M1 | NAP1L3         |
| CSAD. 2     | 2. 73E-52 | -0. 20113 | 0. 045 | 0. 192 | 4. 08E-48 M1 | CSAD           |
| GDAP1L1. 3  | 3. 09E-52 | -0. 39779 | 0. 006 | 0. 12  | 4. 62E-48 M1 | GDAP1L1        |
| MAD2L1. 3   | 3. 14E-52 | -0. 37729 | 0. 022 | 0. 149 | 4. 69E-48 M1 | MAD2L1         |
| ZNF254. 1   | 3. 16E-52 | -0. 29085 | 0. 03  | 0. 164 | 4. 72E-48 M1 | ZNF254         |
| WDR18. 2    | 3. 19E-52 | -0. 22989 | 0. 124 | 0. 318 | 4. 77E-48 M1 | WDR18          |
| OTUD7B. 2   | 3. 19E-52 | -0. 28486 | 0. 006 | 0. 12  | 4. 77E-48 M1 | OTUD7B         |
| PLP2. 3     | 3. 38E-52 | -0. 38857 | 0. 177 | 0. 377 | 5. 05E-48 M1 | PLP2           |
| C1orf131. 3 | 3. 42E-52 | -0. 2514  | 0. 067 | 0. 227 | 5. 11E-48 M1 | C1orf131       |
| DNAJC19. 4  | 3. 43E-52 | -0. 29081 | 0. 203 | 0. 426 | 5. 13E-48 M1 | DNAJC19        |
| INPP1. 1    | 3. 76E-52 | -0. 29564 | 0. 036 | 0. 174 | 5. 62E-48 M1 | INPP1          |
| PLEKHA4. 3  | 4. 08E-52 | -0. 22581 | 0. 02  | 0. 148 | 6. 10E-48 M1 | PLEKHA4        |
| NAV1. 3     | 4. 27E-52 | -0. 22875 | 0. 042 | 0. 187 | 6. 38E-48 M1 | NAV1           |
| RPRD1A. 2   | 4. 33E-52 | -0. 21936 | 0. 071 | 0. 235 | 6. 48E-48 M1 | RPRD1A         |
| ROCK2. 1    | 4. 41E-52 | -0. 19707 | 0. 035 | 0. 175 | 6. 59E-48 M1 | ROCK2          |
| CYTH2. 3    | 4. 68E-52 | -0. 223   | 0. 165 | 0. 377 | 6. 99E-48 M1 | CYTH2          |
| SERINC2. 2  | 4. 85E-52 | -0. 24345 | 0. 017 | 0. 141 | 7. 25E-48 M1 | SERINC2        |
| TRABD. 4    | 4. 86E-52 | 0. 497999 | 0. 357 | 0. 239 | 7. 26E-48 M1 | TRABD          |
| MTMR4. 3    | 5. 05E-52 | -0. 23388 | 0. 041 | 0. 184 | 7. 55E-48 M1 | MTMR4          |
| ZNF821. 4   | 5. 11E-52 | -0. 26296 | 0. 044 | 0. 187 | 7. 63E-48 M1 | ZNF821         |
| LRRN1. 3    | 5. 88E-52 | -0. 30351 | 0. 009 | 0. 125 | 8. 79E-48 M1 | LRRN1          |
| SBN01. 2    | 6. 16E-52 | -0. 20744 | 0. 111 | 0. 297 | 9. 21E-48 M1 | SBN01          |
| RHOJ. 2     | 6. 97E-52 | -0. 22424 | 0. 006 | 0. 119 | 1. 04E-47 M1 | RHOJ           |
| YEATS4. 2   | 7. 13E-52 | -0. 34274 | 0. 107 | 0. 28  | 1. 07E-47 M1 | YEATS4         |
| RP11-332H   | 7. 33E-52 | -0. 24185 | 0. 021 | 0. 148 | 1. 10E-47 M1 | RP11-332H14. 2 |
| SOX21. 1    | 7. 89E-52 | -0. 21464 | 0. 002 | 0. 111 | 1. 18E-47 M1 | SOX21          |
| UBA2. 2     | 8. 99E-52 | -0. 25595 | 0. 179 | 0. 394 | 1. 34E-47 M1 | UBA2           |
| ABAT. 4     | 9. 29E-52 | -0. 27741 | 0. 042 | 0. 183 | 1. 39E-47 M1 | ABAT           |
| SWAP70. 4   | 9. 61E-52 | 0. 503322 | 0. 32  | 0. 202 | 1. 44E-47 M1 | SWAP70         |
| TERF1. 1    | 9. 83E-52 | -0. 25546 | 0. 153 | 0. 358 | 1. 47E-47 M1 | TERF1          |
| ELOVL2. 4   | 9. 90E-52 | -0. 23384 | 0. 005 | 0. 116 | 1. 48E-47 M1 | ELOVL2         |
| LRRC58. 3   | 9. 95E-52 | -0. 23562 | 0. 071 | 0. 234 | 1. 49E-47 M1 | LRRC58         |
| LINC00578   | 1. 04E-51 | 0. 17433  | 0. 039 | 0. 003 | 1. 56E-47 M1 | LINC00578      |

|             |           |           |        |        |              |              |
|-------------|-----------|-----------|--------|--------|--------------|--------------|
| PARVA. 3    | 1. 07E-51 | -0. 2062  | 0. 004 | 0. 114 | 1. 59E-47 M1 | PARVA        |
| COA5. 2     | 1. 09E-51 | -0. 25217 | 0. 141 | 0. 339 | 1. 62E-47 M1 | COA5         |
| PJA2. 3     | 1. 12E-51 | -0. 27542 | 0. 168 | 0. 369 | 1. 67E-47 M1 | PJA2         |
| PPP1R8. 1   | 1. 15E-51 | -0. 25504 | 0. 082 | 0. 251 | 1. 72E-47 M1 | PPP1R8       |
| HIPK2. 3    | 1. 18E-51 | -0. 31197 | 0. 085 | 0. 248 | 1. 77E-47 M1 | HIPK2        |
| VPS72. 2    | 1. 30E-51 | -0. 22158 | 0. 119 | 0. 308 | 1. 94E-47 M1 | VPS72        |
| ZNF738. 4   | 1. 38E-51 | -0. 30058 | 0. 032 | 0. 166 | 2. 06E-47 M1 | ZNF738       |
| KALRN. 2    | 1. 49E-51 | -0. 25215 | 0. 004 | 0. 114 | 2. 23E-47 M1 | KALRN        |
| PID1. 2     | 1. 51E-51 | -0. 30302 | 0. 016 | 0. 137 | 2. 26E-47 M1 | PID1         |
| MTMR9. 2    | 1. 57E-51 | -0. 2216  | 0. 061 | 0. 215 | 2. 34E-47 M1 | MTMR9        |
| NRBP2. 3    | 1. 63E-51 | -0. 23005 | 0. 018 | 0. 142 | 2. 43E-47 M1 | NRBP2        |
| SNRNP25. 1  | 1. 63E-51 | -0. 2501  | 0. 173 | 0. 385 | 2. 43E-47 M1 | SNRNP25      |
| FADS2. 2    | 1. 77E-51 | -0. 23057 | 0. 027 | 0. 158 | 2. 64E-47 M1 | FADS2        |
| DDX1. 2     | 1. 86E-51 | -0. 27368 | 0. 183 | 0. 395 | 2. 78E-47 M1 | DDX1         |
| HEBP2. 3    | 1. 89E-51 | -0. 25032 | 0. 08  | 0. 247 | 2. 83E-47 M1 | HEBP2        |
| FNIP2. 3    | 2. 22E-51 | 0. 550668 | 0. 296 | 0. 175 | 3. 31E-47 M1 | FNIP2        |
| PRKRA. 1    | 2. 23E-51 | -0. 25968 | 0. 182 | 0. 397 | 3. 34E-47 M1 | PRKRA        |
| CFLAR. 3    | 2. 69E-51 | 0. 434235 | 0. 416 | 0. 299 | 4. 03E-47 M1 | CFLAR        |
| PAXIP1-AS   | 2. 95E-51 | -0. 25515 | 0. 041 | 0. 182 | 4. 40E-47 M1 | PAXIP1-AS1   |
| CPNE3. 1    | 3. 05E-51 | -0. 25451 | 0. 159 | 0. 365 | 4. 55E-47 M1 | CPNE3        |
| INHBA. 1    | 3. 06E-51 | 0. 281915 | 0. 064 | 0. 012 | 4. 57E-47 M1 | INHBA        |
| SDC3. 2     | 3. 27E-51 | -0. 25215 | 0. 065 | 0. 222 | 4. 89E-47 M1 | SDC3         |
| TRAPPC4. 3  | 3. 32E-51 | -0. 264   | 0. 249 | 0. 484 | 4. 96E-47 M1 | TRAPPC4      |
| ATXN7L3B. 3 | 3. 37E-51 | -0. 20978 | 0. 055 | 0. 206 | 5. 03E-47 M1 | ATXN7L3B     |
| SIRPA. 4    | 3. 41E-51 | 0. 478471 | 0. 344 | 0. 223 | 5. 10E-47 M1 | SIRPA        |
| EXTL2. 2    | 3. 69E-51 | -0. 23609 | 0. 046 | 0. 192 | 5. 52E-47 M1 | EXTL2        |
| THAP5. 2    | 3. 80E-51 | -0. 24467 | 0. 054 | 0. 204 | 5. 68E-47 M1 | THAP5        |
| METTL2A. 2  | 3. 92E-51 | -0. 21575 | 0. 041 | 0. 182 | 5. 86E-47 M1 | METTL2A      |
| MOB4. 2     | 4. 04E-51 | -0. 23762 | 0. 19  | 0. 408 | 6. 03E-47 M1 | MOB4         |
| ITM2C. 4    | 4. 06E-51 | -0. 34268 | 0. 231 | 0. 455 | 6. 07E-47 M1 | ITM2C        |
| RIMKLB. 2   | 4. 33E-51 | -0. 23941 | 0. 036 | 0. 173 | 6. 47E-47 M1 | RIMKLB       |
| TRIM28. 2   | 4. 61E-51 | -0. 24467 | 0. 101 | 0. 279 | 6. 89E-47 M1 | TRIM28       |
| DAAM1. 2    | 4. 70E-51 | -0. 23016 | 0. 096 | 0. 27  | 7. 02E-47 M1 | DAAM1        |
| TBCC. 4     | 5. 04E-51 | -0. 26058 | 0. 084 | 0. 249 | 7. 53E-47 M1 | TBCC         |
| RIN2. 3     | 5. 05E-51 | 0. 468368 | 0. 219 | 0. 107 | 7. 55E-47 M1 | RIN2         |
| LGR4. 4     | 5. 23E-51 | -0. 19754 | 0. 008 | 0. 121 | 7. 81E-47 M1 | LGR4         |
| POMGNT2. 2  | 5. 34E-51 | -0. 23162 | 0. 03  | 0. 163 | 7. 97E-47 M1 | POMGNT2      |
| CTB-3102C   | 5. 41E-51 | -0. 22797 | 0. 014 | 0. 134 | 8. 09E-47 M1 | CTB-31020. 2 |
| CTNNBIP1. 6 | 0. 09E-51 | -0. 24562 | 0. 078 | 0. 242 | 9. 10E-47 M1 | CTNNBIP1     |
| NDUFAF2. 3  | 7. 30E-51 | -0. 28757 | 0. 12  | 0. 303 | 1. 09E-46 M1 | NDUFAF2      |
| NLN. 2      | 7. 42E-51 | -0. 24378 | 0. 059 | 0. 211 | 1. 11E-46 M1 | NLN          |
| GNA11. 1    | 7. 44E-51 | -0. 21892 | 0. 01  | 0. 126 | 1. 11E-46 M1 | GNA11        |
| NLGN3. 3    | 7. 67E-51 | -0. 27275 | 0. 014 | 0. 133 | 1. 15E-46 M1 | NLGN3        |
| MANBA. 4    | 7. 76E-51 | 0. 472252 | 0. 213 | 0. 102 | 1. 16E-46 M1 | MANBA        |
| NINJ2. 4    | 8. 10E-51 | 0. 338889 | 0. 173 | 0. 07  | 1. 21E-46 M1 | NINJ2        |
| SSBP3. 3    | 8. 16E-51 | -0. 25639 | 0. 023 | 0. 149 | 1. 22E-46 M1 | SSBP3        |
| AIF1L. 3    | 8. 33E-51 | -0. 40979 | 0. 015 | 0. 133 | 1. 25E-46 M1 | AIF1L        |
| TRIM44. 3   | 8. 78E-51 | -0. 27197 | 0. 13  | 0. 318 | 1. 31E-46 M1 | TRIM44       |
| RBBP7. 3    | 1. 22E-50 | -0. 31272 | 0. 232 | 0. 463 | 1. 82E-46 M1 | RBBP7        |
| DIRAS1. 2   | 1. 23E-50 | -0. 25132 | 0. 014 | 0. 133 | 1. 84E-46 M1 | DIRAS1       |
| ZNF12. 2    | 1. 31E-50 | -0. 22492 | 0. 02  | 0. 145 | 1. 96E-46 M1 | ZNF12        |



|           |          |          |       |       |          |    |               |
|-----------|----------|----------|-------|-------|----------|----|---------------|
| NR2C2AP.3 | 1.34E-50 | -0.29454 | 0.047 | 0.189 | 2.01E-46 | M1 | NR2C2AP       |
| HIGD2A.3  | 1.36E-50 | 0.241355 | 0.669 | 0.608 | 2.03E-46 | M1 | HIGD2A        |
| YTHDF1.1  | 1.40E-50 | -0.22165 | 0.057 | 0.208 | 2.09E-46 | M1 | YTHDF1        |
| MAZ.4     | 1.57E-50 | -0.2403  | 0.102 | 0.28  | 2.35E-46 | M1 | MAZ           |
| ATP6V1F.2 | 1.58E-50 | 0.133855 | 0.826 | 0.796 | 2.36E-46 | M1 | ATP6V1F       |
| CAMSAP2.2 | 1.65E-50 | -0.21973 | 0.036 | 0.172 | 2.46E-46 | M1 | CAMSAP2       |
| CCT6A.1   | 1.72E-50 | -0.29002 | 0.375 | 0.615 | 2.57E-46 | M1 | CCT6A         |
| NFASC.2   | 1.72E-50 | -0.34316 | 0.009 | 0.122 | 2.57E-46 | M1 | NFASC         |
| RNF126.3  | 1.80E-50 | -0.21874 | 0.13  | 0.323 | 2.69E-46 | M1 | RNF126        |
| CTC-444N2 | 2.20E-50 | -0.20824 | 0.027 | 0.157 | 3.29E-46 | M1 | CTC-444N24.11 |
| ST8SIA1.2 | 2.23E-50 | -0.23295 | 0.003 | 0.109 | 3.33E-46 | M1 | ST8SIA1       |
| PLA2G15.3 | 2.36E-50 | 0.428364 | 0.234 | 0.119 | 3.53E-46 | M1 | PLA2G15       |
| CAV1.4    | 2.38E-50 | -0.81379 | 0.024 | 0.147 | 3.55E-46 | M1 | CAV1          |
| SNAI1.3   | 2.54E-50 | 0.337554 | 0.107 | 0.032 | 3.79E-46 | M1 | SNAI1         |
| LINC00632 | 2.71E-50 | -0.35398 | 0.003 | 0.109 | 4.05E-46 | M1 | LINC00632     |
| RGS6.2    | 2.78E-50 | -0.25548 | 0.002 | 0.108 | 4.15E-46 | M1 | RGS6          |
| BCAT1.3   | 2.97E-50 | -0.24151 | 0.09  | 0.26  | 4.44E-46 | M1 | BCAT1         |
| ZNF593.2  | 3.32E-50 | -0.27187 | 0.14  | 0.334 | 4.96E-46 | M1 | ZNF593        |
| ZFPL1.1   | 3.39E-50 | -0.22237 | 0.092 | 0.264 | 5.07E-46 | M1 | ZFPL1         |
| COX20     | 3.67E-50 | -0.27673 | 0.264 | 0.499 | 5.48E-46 | M1 | COX20         |
| DDX5.2    | 3.91E-50 | 0.147384 | 0.88  | 0.804 | 5.84E-46 | M1 | DDX5          |
| ERAL1.1   | 4.17E-50 | -0.21987 | 0.096 | 0.27  | 6.23E-46 | M1 | ERAL1         |
| ZNF429.3  | 4.21E-50 | -0.26024 | 0.024 | 0.15  | 6.29E-46 | M1 | ZNF429        |
| LAMB1.1   | 4.33E-50 | -0.21806 | 0.008 | 0.12  | 6.47E-46 | M1 | LAMB1         |
| SRM.3     | 4.56E-50 | -0.30114 | 0.191 | 0.4   | 6.81E-46 | M1 | SRM           |
| DYNC1I1.4 | 4.74E-50 | -0.41417 | 0.011 | 0.123 | 7.09E-46 | M1 | DYNC1I1       |
| SNHG8.2   | 4.84E-50 | 0.354365 | 0.544 | 0.453 | 7.23E-46 | M1 | SNHG8         |
| TOMM40.2  | 4.86E-50 | -0.24628 | 0.158 | 0.362 | 7.26E-46 | M1 | TOMM40        |
| NUP107.4  | 4.97E-50 | -0.33225 | 0.088 | 0.25  | 7.43E-46 | M1 | NUP107        |
| FAM159A.3 | 5.06E-50 | 0.28578  | 0.108 | 0.032 | 7.56E-46 | M1 | FAM159A       |
| SEMA5A.2  | 5.15E-50 | -0.26641 | 0.01  | 0.123 | 7.70E-46 | M1 | SEMA5A        |
| NQO1.3    | 5.35E-50 | -0.27674 | 0.012 | 0.128 | 8.00E-46 | M1 | NQO1          |
| HOXA7.2   | 5.64E-50 | -0.37429 | 0.009 | 0.12  | 8.42E-46 | M1 | HOXA7         |
| PLB1.3    | 5.99E-50 | 0.33295  | 0.102 | 0.03  | 8.95E-46 | M1 | PLB1          |
| PABPN1.2  | 6.18E-50 | -0.24345 | 0.179 | 0.39  | 9.23E-46 | M1 | PABPN1        |
| ANAPC11.4 | 6.19E-50 | -0.3025  | 0.563 | 0.76  | 9.25E-46 | M1 | ANAPC11       |
| NTRK2.3   | 7.54E-50 | -0.49928 | 0.021 | 0.141 | 1.13E-45 | M1 | NTRK2         |
| CPNE4.2   | 7.65E-50 | -0.20068 | 0.004 | 0.111 | 1.14E-45 | M1 | CPNE4         |
| SNRNP27.2 | 7.83E-50 | -0.21933 | 0.176 | 0.387 | 1.17E-45 | M1 | SNRNP27       |
| RNF34.2   | 8.05E-50 | -0.21572 | 0.066 | 0.221 | 1.20E-45 | M1 | RNF34         |
| MTA1.2    | 8.34E-50 | -0.21167 | 0.062 | 0.216 | 1.25E-45 | M1 | MTA1          |
| ACTR3B.1  | 8.41E-50 | -0.23708 | 0.012 | 0.126 | 1.26E-45 | M1 | ACTR3B        |
| COPRS.3   | 9.60E-50 | -0.26821 | 0.166 | 0.367 | 1.43E-45 | M1 | COPRS         |
| FBXW9.1   | 9.84E-50 | -0.22552 | 0.014 | 0.131 | 1.47E-45 | M1 | FBXW9         |
| MDFI.3    | 9.99E-50 | -0.27945 | 0.001 | 0.105 | 1.49E-45 | M1 | MDFI          |
| DEPTOR.2  | 1.18E-49 | 0.32797  | 0.106 | 0.032 | 1.76E-45 | M1 | DEPTOR        |
| ZNF358.3  | 1.18E-49 | -0.19861 | 0.046 | 0.189 | 1.77E-45 | M1 | ZNF358        |
| CBR3.1    | 1.22E-49 | -0.23869 | 0.011 | 0.124 | 1.83E-45 | M1 | CBR3          |
| ZNF92.2   | 1.23E-49 | -0.29158 | 0.036 | 0.168 | 1.83E-45 | M1 | ZNF92         |
| TMSB10.4  | 1.27E-49 | -0.25504 | 0.991 | 0.959 | 1.90E-45 | M1 | TMSB10        |
| RP11-403I | 1.27E-49 | 0.366493 | 0.089 | 0.023 | 1.90E-45 | M1 | RP11-403I13.5 |

|             |           |           |        |        |              |            |
|-------------|-----------|-----------|--------|--------|--------------|------------|
| FAM172A. 2  | 1. 33E-49 | -0. 21458 | 0. 066 | 0. 222 | 1. 99E-45 M1 | FAM172A    |
| GMNN. 3     | 1. 49E-49 | -0. 26546 | 0. 055 | 0. 201 | 2. 22E-45 M1 | GMNN       |
| ADAMTSL2    | 1. 55E-49 | 0. 17803  | 0. 049 | 0. 007 | 2. 31E-45 M1 | ADAMTSL2   |
| IFI16. 3    | 1. 57E-49 | 0. 296517 | 0. 499 | 0. 372 | 2. 35E-45 M1 | IFI16      |
| MT1X. 4     | 1. 65E-49 | -0. 6972  | 0. 425 | 0. 608 | 2. 47E-45 M1 | MT1X       |
| CRYBB1. 2   | 1. 66E-49 | 0. 290658 | 0. 102 | 0. 029 | 2. 48E-45 M1 | CRYBB1     |
| NNAT. 4     | 1. 74E-49 | -0. 76079 | 0. 084 | 0. 218 | 2. 60E-45 M1 | NNAT       |
| SAC3D1. 4   | 1. 92E-49 | -0. 22556 | 0. 05  | 0. 194 | 2. 87E-45 M1 | SAC3D1     |
| SH3KBP1. 4  | 2. 00E-49 | 0. 449647 | 0. 341 | 0. 221 | 2. 99E-45 M1 | SH3KBP1    |
| CST3. 2     | 2. 02E-49 | 0. 124024 | 0. 878 | 0. 768 | 3. 02E-45 M1 | CST3       |
| NKTR. 2     | 2. 09E-49 | -0. 197   | 0. 179 | 0. 392 | 3. 13E-45 M1 | NKTR       |
| CANT1. 2    | 2. 19E-49 | -0. 21558 | 0. 053 | 0. 199 | 3. 27E-45 M1 | CANT1      |
| PTK7. 1     | 2. 20E-49 | -0. 19173 | 0. 005 | 0. 112 | 3. 29E-45 M1 | PTK7       |
| IGSF8. 2    | 2. 21E-49 | -0. 27258 | 0. 079 | 0. 24  | 3. 30E-45 M1 | IGSF8      |
| TEAD2. 3    | 2. 21E-49 | -0. 2003  | 0. 003 | 0. 107 | 3. 31E-45 M1 | TEAD2      |
| PRCC. 1     | 2. 31E-49 | -0. 24003 | 0. 141 | 0. 336 | 3. 45E-45 M1 | PRCC       |
| DHCR24. 1   | 2. 31E-49 | -0. 24804 | 0. 006 | 0. 114 | 3. 45E-45 M1 | DHCR24     |
| SNAP23. 4   | 2. 56E-49 | 0. 532165 | 0. 34  | 0. 225 | 3. 82E-45 M1 | SNAP23     |
| ZNF512. 2   | 2. 75E-49 | -0. 26048 | 0. 022 | 0. 144 | 4. 11E-45 M1 | ZNF512     |
| VASH1. 4    | 2. 92E-49 | 0. 45651  | 0. 222 | 0. 111 | 4. 36E-45 M1 | VASH1      |
| FGFBP3. 3   | 3. 07E-49 | -0. 23494 | 0. 008 | 0. 118 | 4. 59E-45 M1 | FGFBP3     |
| GADD45GIP1  | 3. 08E-49 | -0. 30933 | 0. 4   | 0. 596 | 4. 60E-45 M1 | GADD45GIP1 |
| ACP1. 2     | 3. 10E-49 | -0. 26713 | 0. 293 | 0. 54  | 4. 63E-45 M1 | ACP1       |
| CD300LF. 3  | 3. 14E-49 | 0. 296571 | 0. 108 | 0. 033 | 4. 70E-45 M1 | CD300LF    |
| BLOC1S4. 4  | 3. 70E-49 | -0. 21506 | 0. 098 | 0. 272 | 5. 53E-45 M1 | BLOC1S4    |
| MARCH6. 3   | 3. 82E-49 | -0. 25075 | 0. 182 | 0. 392 | 5. 71E-45 M1 | 6-Mar      |
| NDUFS1. 2   | 3. 84E-49 | -0. 21496 | 0. 107 | 0. 285 | 5. 73E-45 M1 | NDUFS1     |
| BAG5. 2     | 4. 01E-49 | -0. 2435  | 0. 06  | 0. 21  | 5. 99E-45 M1 | BAG5       |
| KIF3B. 4    | 4. 01E-49 | -0. 19972 | 0. 025 | 0. 151 | 5. 99E-45 M1 | KIF3B      |
| FAM57B. 3   | 4. 07E-49 | -0. 31168 | 0. 004 | 0. 11  | 6. 08E-45 M1 | FAM57B     |
| CAPRIN1. 3  | 4. 15E-49 | -0. 24012 | 0. 153 | 0. 354 | 6. 20E-45 M1 | CAPRIN1    |
| DCTN2       | 4. 34E-49 | -0. 35775 | 0. 318 | 0. 545 | 6. 48E-45 M1 | DCTN2      |
| BCAM. 2     | 4. 43E-49 | -0. 21517 | 0. 013 | 0. 128 | 6. 62E-45 M1 | BCAM       |
| TMEM11. 1   | 4. 67E-49 | -0. 20082 | 0. 152 | 0. 352 | 6. 98E-45 M1 | TMEM11     |
| FAM161A. 2  | 4. 82E-49 | -0. 25    | 0. 013 | 0. 127 | 7. 21E-45 M1 | FAM161A    |
| YARS. 1     | 4. 87E-49 | -0. 25612 | 0. 083 | 0. 244 | 7. 28E-45 M1 | YARS       |
| THSD1. 2    | 5. 56E-49 | -0. 20321 | 0. 005 | 0. 112 | 8. 31E-45 M1 | THSD1      |
| SCAMP5. 2   | 5. 63E-49 | -0. 24168 | 0. 006 | 0. 114 | 8. 42E-45 M1 | SCAMP5     |
| PTPN13. 2   | 6. 12E-49 | -0. 21402 | 0. 005 | 0. 111 | 9. 14E-45 M1 | PTPN13     |
| DIXDC1. 3   | 6. 16E-49 | -0. 25002 | 0. 006 | 0. 113 | 9. 20E-45 M1 | DIXDC1     |
| TSSC4. 2    | 6. 21E-49 | -0. 1925  | 0. 146 | 0. 345 | 9. 28E-45 M1 | TSSC4      |
| TMEM35. 3   | 6. 54E-49 | -0. 31427 | 0. 004 | 0. 109 | 9. 77E-45 M1 | TMEM35     |
| RAB11B-AS   | 6. 66E-49 | -0. 21648 | 0. 027 | 0. 153 | 9. 95E-45 M1 | RAB11B-AS1 |
| TNFSF12. 4  | 6. 93E-49 | 0. 468112 | 0. 283 | 0. 166 | 1. 04E-44 M1 | TNFSF12    |
| KLHDC10. 2  | 7. 23E-49 | -0. 22037 | 0. 026 | 0. 151 | 1. 08E-44 M1 | KLHDC10    |
| KIAA1549. 7 | 3. 8E-49  | -0. 25639 | 0. 005 | 0. 112 | 1. 10E-44 M1 | KIAA1549   |
| KCTD6       | 8. 13E-49 | -0. 22386 | 0. 018 | 0. 137 | 1. 22E-44 M1 | KCTD6      |
| PAFAH1B2. 9 | 5. 3E-49  | -0. 21953 | 0. 159 | 0. 359 | 1. 42E-44 M1 | PAFAH1B2   |
| B3GAT1. 3   | 9. 77E-49 | -0. 31245 | 0. 003 | 0. 107 | 1. 46E-44 M1 | B3GAT1     |
| PITPNC1. 2  | 9. 96E-49 | -0. 23421 | 0. 022 | 0. 143 | 1. 49E-44 M1 | PITPNC1    |
| CCDC124. 1  | 1. 08E-48 | -0. 27209 | 0. 273 | 0. 51  | 1. 61E-44 M1 | CCDC124    |

|             |           |           |        |        |              |          |
|-------------|-----------|-----------|--------|--------|--------------|----------|
| FASN. 4     | 1. 15E-48 | -0. 20659 | 0. 018 | 0. 136 | 1. 71E-44 M1 | FASN     |
| MPPED2. 2   | 1. 17E-48 | -0. 2674  | 0. 003 | 0. 107 | 1. 75E-44 M1 | MPPED2   |
| GFOD2. 1    | 1. 21E-48 | -0. 25009 | 0. 028 | 0. 153 | 1. 81E-44 M1 | GFOD2    |
| MAGI2. 3    | 1. 29E-48 | -0. 28271 | 0. 012 | 0. 124 | 1. 93E-44 M1 | MAGI2    |
| PLCG1. 2    | 1. 35E-48 | -0. 21438 | 0. 009 | 0. 118 | 2. 02E-44 M1 | PLCG1    |
| IRF2BPL. 3  | 1. 49E-48 | -0. 2239  | 0. 099 | 0. 27  | 2. 22E-44 M1 | IRF2BPL  |
| PAK1IP1. 2  | 1. 50E-48 | -0. 23475 | 0. 081 | 0. 242 | 2. 24E-44 M1 | PAK1IP1  |
| PPP2R2A. 1  | 1. 51E-48 | -0. 21514 | 0. 14  | 0. 332 | 2. 26E-44 M1 | PPP2R2A  |
| LRRTM2. 3   | 1. 55E-48 | -0. 24136 | 0. 01  | 0. 121 | 2. 31E-44 M1 | LRRTM2   |
| DCTPP1. 2   | 1. 68E-48 | -0. 27105 | 0. 165 | 0. 363 | 2. 50E-44 M1 | DCTPP1   |
| SUCLA2. 3   | 1. 76E-48 | -0. 23909 | 0. 132 | 0. 318 | 2. 63E-44 M1 | SUCLA2   |
| SF3A2. 2    | 1. 78E-48 | -0. 21937 | 0. 111 | 0. 289 | 2. 66E-44 M1 | SF3A2    |
| TRMT10C. 2  | 1. 88E-48 | -0. 22091 | 0. 105 | 0. 279 | 2. 81E-44 M1 | TRMT10C  |
| C6orf203. 1 | 1. 90E-48 | -0. 23301 | 0. 048 | 0. 189 | 2. 84E-44 M1 | C6orf203 |
| FGF14. 3    | 2. 27E-48 | -0. 2421  | 0. 001 | 0. 102 | 3. 39E-44 M1 | FGF14    |
| CCDC137. 2  | 2. 38E-48 | -0. 21112 | 0. 072 | 0. 228 | 3. 56E-44 M1 | CCDC137  |
| TFG. 1      | 2. 42E-48 | -0. 25812 | 0. 225 | 0. 445 | 3. 61E-44 M1 | TFG      |
| ELN. 2      | 2. 56E-48 | -0. 3345  | 0. 014 | 0. 127 | 3. 82E-44 M1 | ELN      |
| TOX. 4      | 2. 71E-48 | -0. 2662  | 0. 002 | 0. 104 | 4. 04E-44 M1 | TOX      |
| GOLGA7. 1   | 2. 81E-48 | -0. 25016 | 0. 266 | 0. 503 | 4. 20E-44 M1 | GOLGA7   |
| GTF2F2. 1   | 2. 83E-48 | -0. 24057 | 0. 141 | 0. 331 | 4. 23E-44 M1 | GTF2F2   |
| NLGN2. 2    | 2. 85E-48 | -0. 22321 | 0. 005 | 0. 109 | 4. 27E-44 M1 | NLGN2    |
| KBTBD8. 2   | 2. 93E-48 | 0. 306152 | 0. 08  | 0. 02  | 4. 38E-44 M1 | KBTBD8   |
| ARHGAP5. 1  | 3. 08E-48 | -0. 22409 | 0. 067 | 0. 219 | 4. 61E-44 M1 | ARHGAP5  |
| SEC11C. 3   | 3. 11E-48 | -0. 28375 | 0. 299 | 0. 537 | 4. 64E-44 M1 | SEC11C   |
| LRRC47. 3   | 3. 16E-48 | -0. 22801 | 0. 082 | 0. 243 | 4. 72E-44 M1 | LRRC47   |
| PTP4A3. 1   | 3. 41E-48 | -0. 24831 | 0. 003 | 0. 105 | 5. 10E-44 M1 | PTP4A3   |
| MTMR2. 1    | 3. 43E-48 | -0. 19815 | 0. 036 | 0. 168 | 5. 13E-44 M1 | MTMR2    |
| SYMPK. 3    | 3. 81E-48 | -0. 22762 | 0. 087 | 0. 25  | 5. 70E-44 M1 | SYMPK    |
| C12orf29. 4 | 4. 02E-48 | -0. 26939 | 0. 041 | 0. 176 | 6. 01E-44 M1 | C12orf29 |
| GDI2. 4     | 4. 14E-48 | 0. 369712 | 0. 546 | 0. 477 | 6. 18E-44 M1 | GDI2     |
| DHX29. 2    | 4. 25E-48 | -0. 21017 | 0. 147 | 0. 342 | 6. 35E-44 M1 | DHX29    |
| FLAD1. 1    | 4. 25E-48 | -0. 23313 | 0. 093 | 0. 26  | 6. 36E-44 M1 | FLAD1    |
| TLE2. 3     | 4. 34E-48 | -0. 26482 | 0. 004 | 0. 108 | 6. 49E-44 M1 | TLE2     |
| FLYWCH2. 1  | 4. 47E-48 | -0. 26819 | 0. 149 | 0. 342 | 6. 68E-44 M1 | FLYWCH2  |
| FGFR1. 1    | 4. 47E-48 | -0. 20661 | 0. 052 | 0. 194 | 6. 68E-44 M1 | FGFR1    |
| CDH4. 3     | 4. 57E-48 | -0. 22364 | 0. 002 | 0. 104 | 6. 82E-44 M1 | CDH4     |
| GON4L. 2    | 4. 60E-48 | -0. 20941 | 0. 08  | 0. 241 | 6. 88E-44 M1 | GON4L    |
| NFE2L2. 3   | 4. 73E-48 | 0. 364258 | 0. 527 | 0. 456 | 7. 07E-44 M1 | NFE2L2   |
| DCAKD. 3    | 4. 85E-48 | -0. 21534 | 0. 032 | 0. 16  | 7. 25E-44 M1 | DCAKD    |
| MKLN1. 2    | 5. 11E-48 | -0. 21781 | 0. 092 | 0. 257 | 7. 64E-44 M1 | MKLN1    |
| DNAJA1. 1   | 5. 30E-48 | 0. 26943  | 0. 667 | 0. 621 | 7. 92E-44 M1 | DNAJA1   |
| SOX5. 2     | 5. 30E-48 | -0. 25427 | 0. 003 | 0. 106 | 7. 92E-44 M1 | SOX5     |
| ZNF138. 2   | 5. 54E-48 | -0. 2675  | 0. 037 | 0. 167 | 8. 28E-44 M1 | ZNF138   |
| R3HCC1. 2   | 5. 94E-48 | -0. 21872 | 0. 131 | 0. 317 | 8. 88E-44 M1 | R3HCC1   |
| CARS. 2     | 6. 05E-48 | -0. 24194 | 0. 085 | 0. 246 | 9. 04E-44 M1 | CARS     |
| SEPN1. 3    | 6. 12E-48 | -0. 23317 | 0. 078 | 0. 236 | 9. 14E-44 M1 | SEPN1    |
| CSRNP3. 3   | 7. 04E-48 | -0. 32455 | 0. 009 | 0. 117 | 1. 05E-43 M1 | CSRNP3   |
| ZNF444. 2   | 7. 12E-48 | -0. 20085 | 0. 045 | 0. 183 | 1. 06E-43 M1 | ZNF444   |
| SNRNP200    | 7. 22E-48 | -0. 2152  | 0. 13  | 0. 315 | 1. 08E-43 M1 | SNRNP200 |
| C3orf70. 3  | 7. 43E-48 | -0. 25685 | 0. 01  | 0. 118 | 1. 11E-43 M1 | C3orf70  |

|            |          |          |       |       |          |    |              |
|------------|----------|----------|-------|-------|----------|----|--------------|
| AP4M1.2    | 8.00E-48 | -0.24148 | 0.068 | 0.219 | 1.20E-43 | M1 | AP4M1        |
| MPC2.1     | 8.92E-48 | 0.284796 | 0.61  | 0.576 | 1.33E-43 | M1 | MPC2         |
| USP46.4    | 9.94E-48 | -0.22421 | 0.032 | 0.159 | 1.48E-43 | M1 | USP46        |
| NPRL3.2    | 1.00E-47 | -0.21673 | 0.065 | 0.215 | 1.50E-43 | M1 | NPRL3        |
| HTATSF1.1  | 1.03E-47 | -0.26889 | 0.126 | 0.304 | 1.54E-43 | M1 | HTATSF1      |
| KCTD13.3   | 1.09E-47 | -0.25354 | 0.033 | 0.16  | 1.63E-43 | M1 | KCTD13       |
| PKIA.4     | 1.23E-47 | -0.32981 | 0.006 | 0.111 | 1.84E-43 | M1 | PKIA         |
| SLC4A3.1   | 1.24E-47 | -0.21607 | 0.004 | 0.107 | 1.85E-43 | M1 | SLC4A3       |
| LARS.1     | 1.28E-47 | -0.22082 | 0.173 | 0.375 | 1.91E-43 | M1 | LARS         |
| C9orf9.3   | 1.33E-47 | -0.24462 | 0.015 | 0.129 | 1.98E-43 | M1 | C9orf9       |
| SCRN1.3    | 1.35E-47 | -0.22001 | 0.058 | 0.204 | 2.01E-43 | M1 | SCRN1        |
| NUDT16.4   | 1.41E-47 | 0.510257 | 0.315 | 0.2   | 2.11E-43 | M1 | NUDT16       |
| RAD1       | 1.41E-47 | -0.25809 | 0.058 | 0.202 | 2.11E-43 | M1 | RAD1         |
| FRYL.4     | 1.44E-47 | -0.23552 | 0.064 | 0.212 | 2.15E-43 | M1 | FRYL         |
| SELK.4     | 1.57E-47 | 0.220071 | 0.705 | 0.7   | 2.34E-43 | M1 | SELK         |
| RPA3.2     | 1.61E-47 | -0.31414 | 0.18  | 0.375 | 2.41E-43 | M1 | RPA3         |
| ARL4C.3    | 1.77E-47 | -0.24914 | 0.206 | 0.413 | 2.64E-43 | M1 | ARL4C        |
| DENND2A.2  | 1.79E-47 | -0.2009  | 0.007 | 0.112 | 2.68E-43 | M1 | DENND2A      |
| CHCHD3.1   | 1.81E-47 | -0.21594 | 0.191 | 0.404 | 2.71E-43 | M1 | CHCHD3       |
| LDLRAD4.4  | 1.84E-47 | 0.446232 | 0.241 | 0.127 | 2.75E-43 | M1 | LDLRAD4      |
| CREBL2.3   | 1.90E-47 | 0.459078 | 0.286 | 0.169 | 2.84E-43 | M1 | CREBL2       |
| ZNF559.3   | 1.91E-47 | -0.25365 | 0.037 | 0.167 | 2.86E-43 | M1 | ZNF559       |
| KLC2.3     | 1.95E-47 | -0.2133  | 0.022 | 0.141 | 2.92E-43 | M1 | KLC2         |
| ARL2BP.1   | 1.97E-47 | -0.26549 | 0.223 | 0.442 | 2.94E-43 | M1 | ARL2BP       |
| CPT1C.2    | 2.01E-47 | -0.27928 | 0.013 | 0.124 | 3.00E-43 | M1 | CPT1C        |
| FAXC.3     | 2.10E-47 | -0.26706 | 0.002 | 0.102 | 3.14E-43 | M1 | FAXC         |
| SLC25A22.2 | 2.15E-47 | -0.22376 | 0.017 | 0.132 | 3.22E-43 | M1 | SLC25A22     |
| BOC.2      | 2.20E-47 | -0.2022  | 0.003 | 0.104 | 3.29E-43 | M1 | BOC          |
| FIGN.2     | 2.27E-47 | -0.21228 | 0.003 | 0.105 | 3.40E-43 | M1 | FIGN         |
| HSPA6.2    | 2.34E-47 | 0.421407 | 0.186 | 0.082 | 3.49E-43 | M1 | HSPA6        |
| CD93.4     | 2.37E-47 | 0.36137  | 0.146 | 0.056 | 3.54E-43 | M1 | CD93         |
| C9orf3.2   | 2.39E-47 | -0.35984 | 0.013 | 0.123 | 3.57E-43 | M1 | C9orf3       |
| ZNF626.1   | 2.64E-47 | -0.20162 | 0.035 | 0.164 | 3.94E-43 | M1 | ZNF626       |
| C17orf10C  | 2.67E-47 | -0.19966 | 0.005 | 0.108 | 3.98E-43 | M1 | C17orf100    |
| SMC4.2     | 2.82E-47 | -0.29223 | 0.083 | 0.238 | 4.21E-43 | M1 | SMC4         |
| CELF4.4    | 2.83E-47 | -0.38898 | 0.006 | 0.11  | 4.23E-43 | M1 | CELF4        |
| SMARCA1.2  | 2.91E-47 | -0.21223 | 0.053 | 0.195 | 4.35E-43 | M1 | SMARCA1      |
| PCYOX1.1   | 2.93E-47 | -0.1951  | 0.059 | 0.205 | 4.38E-43 | M1 | PCYOX1       |
| MAPK6.2    | 2.96E-47 | -0.16397 | 0.053 | 0.196 | 4.43E-43 | M1 | MAPK6        |
| COPS7B.1   | 3.19E-47 | -0.19805 | 0.07  | 0.222 | 4.77E-43 | M1 | COPS7B       |
| RAB39B.3   | 3.21E-47 | -0.23246 | 0.005 | 0.107 | 4.80E-43 | M1 | RAB39B       |
| NARF.1     | 3.23E-47 | -0.20994 | 0.164 | 0.362 | 4.82E-43 | M1 | NARF         |
| MAPKAPK5   | 3.39E-47 | -0.24891 | 0.089 | 0.25  | 5.07E-43 | M1 | MAPKAPK5-AS1 |
| CD151.3    | 3.45E-47 | -0.367   | 0.302 | 0.518 | 5.15E-43 | M1 | CD151        |
| CKAP2.4    | 3.47E-47 | -0.27268 | 0.053 | 0.192 | 5.19E-43 | M1 | CKAP2        |
| SAE1.2     | 3.82E-47 | -0.26625 | 0.124 | 0.303 | 5.71E-43 | M1 | SAE1         |
| TSSC1.1    | 3.82E-47 | -0.22237 | 0.114 | 0.289 | 5.71E-43 | M1 | TSSC1        |
| ELOVL6.2   | 3.85E-47 | -0.21888 | 0.006 | 0.11  | 5.75E-43 | M1 | ELOVL6       |
| EFNB2.3    | 3.97E-47 | -0.17796 | 0.01  | 0.118 | 5.94E-43 | M1 | EFNB2        |
| TBC1D4.3   | 3.98E-47 | 0.320072 | 0.11  | 0.035 | 5.95E-43 | M1 | TBC1D4       |
| TMEM183A   | 4.16E-47 | -0.23933 | 0.138 | 0.323 | 6.22E-43 | M1 | TMEM183A     |

|            |          |          |       |       |          |    |               |
|------------|----------|----------|-------|-------|----------|----|---------------|
| MTFR1L.3   | 4.46E-47 | -0.20556 | 0.134 | 0.322 | 6.66E-43 | M1 | MTFR1L        |
| DHX40.3    | 4.56E-47 | -0.20212 | 0.033 | 0.16  | 6.82E-43 | M1 | DHX40         |
| SDHAF1.2   | 4.59E-47 | -0.22242 | 0.057 | 0.2   | 6.86E-43 | M1 | SDHAF1        |
| ABHD17A.3  | 4.61E-47 | -0.23323 | 0.097 | 0.263 | 6.89E-43 | M1 | ABHD17A       |
| SLC35F2.2  | 4.81E-47 | -0.19232 | 0.014 | 0.126 | 7.18E-43 | M1 | SLC35F2       |
| LRIF1.2    | 4.81E-47 | -0.24091 | 0.071 | 0.223 | 7.18E-43 | M1 | LRIF1         |
| MNAT1.3    | 4.87E-47 | -0.2396  | 0.068 | 0.218 | 7.27E-43 | M1 | MNAT1         |
| MEIS1.4    | 4.96E-47 | -0.2303  | 0.003 | 0.104 | 7.41E-43 | M1 | MEIS1         |
| MSANTD4.1  | 5.11E-47 | -0.24518 | 0.025 | 0.145 | 7.64E-43 | M1 | MSANTD4       |
| GCLM.2     | 5.26E-47 | -0.22629 | 0.046 | 0.181 | 7.86E-43 | M1 | GCLM          |
| VSTM2A.3   | 5.31E-47 | -0.56605 | 0.014 | 0.124 | 7.93E-43 | M1 | VSTM2A        |
| COPS6.2    | 5.39E-47 | -0.2913  | 0.399 | 0.645 | 8.06E-43 | M1 | COPS6         |
| SPNS3.3    | 5.53E-47 | 0.234805 | 0.068 | 0.014 | 8.26E-43 | M1 | SPNS3         |
| ABCF2.2    | 5.76E-47 | -0.22227 | 0.084 | 0.242 | 8.60E-43 | M1 | ABCF2         |
| SLC9A3R2.5 | 5.79E-47 | -0.20824 | 0.017 | 0.131 | 8.66E-43 | M1 | SLC9A3R2      |
| CNOT4.1    | 5.97E-47 | -0.21119 | 0.123 | 0.302 | 8.92E-43 | M1 | CNOT4         |
| ANKRD46.2  | 6.07E-47 | -0.30095 | 0.046 | 0.179 | 9.07E-43 | M1 | ANKRD46       |
| THAP3.3    | 6.11E-47 | -0.23452 | 0.031 | 0.155 | 9.14E-43 | M1 | THAP3         |
| GGA2.4     | 6.60E-47 | 0.410879 | 0.232 | 0.12  | 9.86E-43 | M1 | GGA2          |
| CMBL.2     | 6.74E-47 | -0.20695 | 0.025 | 0.147 | 1.01E-42 | M1 | CMBL          |
| ATXN2.2    | 7.05E-47 | -0.15636 | 0.087 | 0.249 | 1.05E-42 | M1 | ATXN2         |
| UBE2C.4    | 7.26E-47 | -0.45533 | 0.021 | 0.136 | 1.08E-42 | M1 | UBE2C         |
| DNAJA3.1   | 7.30E-47 | -0.23961 | 0.056 | 0.197 | 1.09E-42 | M1 | DNAJA3        |
| POMC.4     | 7.62E-47 | 0.311878 | 0.109 | 0.035 | 1.14E-42 | M1 | POMC          |
| TRMT6.1    | 7.73E-47 | -0.22946 | 0.059 | 0.202 | 1.16E-42 | M1 | TRMT6         |
| DYNC2LI1.7 | 7.81E-47 | -0.26028 | 0.05  | 0.187 | 1.17E-42 | M1 | DYNC2LI1      |
| CELF5.4    | 7.93E-47 | -0.34831 | 0.006 | 0.108 | 1.18E-42 | M1 | CELF5         |
| ERLEC1.2   | 7.97E-47 | -0.25675 | 0.188 | 0.396 | 1.19E-42 | M1 | ERLEC1        |
| MOSPD3.1   | 8.47E-47 | -0.237   | 0.134 | 0.318 | 1.27E-42 | M1 | MOSPD3        |
| ARMC6.1    | 8.79E-47 | -0.22629 | 0.047 | 0.183 | 1.31E-42 | M1 | ARMC6         |
| PDLIM2.2   | 9.01E-47 | -0.28124 | 0.102 | 0.268 | 1.35E-42 | M1 | PDLIM2        |
| C19orf52.9 | 9.25E-47 | -0.1832  | 0.055 | 0.198 | 1.38E-42 | M1 | C19orf52      |
| AKT1S1.2   | 9.29E-47 | -0.22125 | 0.1   | 0.268 | 1.39E-42 | M1 | AKT1S1        |
| STOX2.4    | 9.50E-47 | -0.25344 | 0.006 | 0.109 | 1.42E-42 | M1 | STOX2         |
| BARD1.3    | 9.91E-47 | -0.25024 | 0.039 | 0.168 | 1.48E-42 | M1 | BARD1         |
| CHD6.3     | 9.91E-47 | -0.20688 | 0.103 | 0.273 | 1.48E-42 | M1 | CHD6          |
| HCAR2.9    | 9.94E-47 | 0.201998 | 0.043 | 0.005 | 1.49E-42 | M1 | HCAR2         |
| ANKRD54.2  | 1.00E-46 | -0.19293 | 0.034 | 0.161 | 1.50E-42 | M1 | ANKRD54       |
| PEX10.2    | 1.08E-46 | -0.18974 | 0.067 | 0.217 | 1.61E-42 | M1 | PEX10         |
| DDX42.2    | 1.10E-46 | -0.19656 | 0.085 | 0.245 | 1.65E-42 | M1 | DDX42         |
| HBS1L.2    | 1.12E-46 | -0.20709 | 0.067 | 0.216 | 1.67E-42 | M1 | HBS1L         |
| PRKCZ.4    | 1.17E-46 | -0.24081 | 0.011 | 0.118 | 1.74E-42 | M1 | PRKCZ         |
| TET1.3     | 1.19E-46 | -0.19492 | 0.001 | 0.099 | 1.78E-42 | M1 | TET1          |
| DHX33.2    | 1.21E-46 | -0.20935 | 0.022 | 0.141 | 1.81E-42 | M1 | DHX33         |
| GLTP.2     | 1.25E-46 | -0.29976 | 0.124 | 0.297 | 1.86E-42 | M1 | GLTP          |
| MLLT3.2    | 1.31E-46 | -0.24174 | 0.007 | 0.111 | 1.96E-42 | M1 | MLLT3         |
| MPDZ.2     | 1.41E-46 | -0.21812 | 0.003 | 0.103 | 2.11E-42 | M1 | MPDZ          |
| RP11-212I1 | 1.46E-46 | 0.263703 | 0.067 | 0.014 | 2.18E-42 | M1 | RP11-212I21.4 |
| PWP1.1     | 1.58E-46 | -0.22168 | 0.146 | 0.334 | 2.36E-42 | M1 | PWP1          |
| HLTF.3     | 1.60E-46 | -0.21518 | 0.056 | 0.197 | 2.40E-42 | M1 | HLTF          |
| OSER1-AS1  | 1.66E-46 | -0.22624 | 0.029 | 0.152 | 2.48E-42 | M1 | OSER1-AS1     |

|             |           |           |        |        |              |           |
|-------------|-----------|-----------|--------|--------|--------------|-----------|
| PPP5C. 3    | 1. 81E-46 | -0. 20996 | 0. 058 | 0. 2   | 2. 70E-42 M1 | PPP5C     |
| DESI2. 2    | 1. 83E-46 | -0. 18834 | 0. 069 | 0. 219 | 2. 74E-42 M1 | DESI2     |
| ABHD17C. 1  | 1. 84E-46 | -0. 18727 | 0. 002 | 0. 1   | 2. 75E-42 M1 | ABHD17C   |
| PSMB5. 3    | 1. 93E-46 | -0. 32306 | 0. 389 | 0. 636 | 2. 88E-42 M1 | PSMB5     |
| ZNF322. 2   | 1. 94E-46 | -0. 19156 | 0. 03  | 0. 154 | 2. 90E-42 M1 | ZNF322    |
| CHTOP. 2    | 2. 27E-46 | -0. 23415 | 0. 191 | 0. 402 | 3. 39E-42 M1 | CHTOP     |
| RTN3. 2     | 2. 39E-46 | -0. 27631 | 0. 47  | 0. 692 | 3. 57E-42 M1 | RTN3      |
| NUBP2. 2    | 2. 41E-46 | -0. 21886 | 0. 203 | 0. 417 | 3. 60E-42 M1 | NUBP2     |
| DAXX        | 2. 73E-46 | -0. 20592 | 0. 075 | 0. 229 | 4. 08E-42 M1 | DAXX      |
| PSMD1. 1    | 2. 73E-46 | -0. 22605 | 0. 16  | 0. 355 | 4. 08E-42 M1 | PSMD1     |
| RAB3GAP2. 2 | 2. 88E-46 | -0. 19876 | 0. 053 | 0. 194 | 4. 30E-42 M1 | RAB3GAP2  |
| ALDH1A1. 2  | 3. 04E-46 | 0. 288817 | 0. 078 | 0. 019 | 4. 54E-42 M1 | ALDH1A1   |
| LINC01116   | 3. 08E-46 | -0. 21411 | 0. 03  | 0. 153 | 4. 61E-42 M1 | LINC01116 |
| NCOA6. 4    | 3. 09E-46 | -0. 17749 | 0. 032 | 0. 156 | 4. 61E-42 M1 | NCOA6     |
| TSR3. 2     | 3. 24E-46 | -0. 22429 | 0. 126 | 0. 306 | 4. 84E-42 M1 | TSR3      |
| TRUB2. 2    | 3. 53E-46 | -0. 21587 | 0. 082 | 0. 239 | 5. 28E-42 M1 | TRUB2     |
| PITX1. 3    | 3. 65E-46 | -0. 17576 | 0. 003 | 0. 101 | 5. 45E-42 M1 | PITX1     |
| CSNK1G3. 2  | 3. 96E-46 | -0. 19468 | 0. 043 | 0. 175 | 5. 92E-42 M1 | CSNK1G3   |
| ZNF521. 2   | 4. 05E-46 | -0. 20551 | 0. 002 | 0. 1   | 6. 06E-42 M1 | ZNF521    |
| HABP4. 1    | 4. 18E-46 | -0. 18033 | 0. 022 | 0. 139 | 6. 24E-42 M1 | HABP4     |
| MAGOHB. 1   | 4. 21E-46 | -0. 24668 | 0. 101 | 0. 265 | 6. 29E-42 M1 | MAGOHB    |
| AGPAT5. 3   | 4. 27E-46 | -0. 2341  | 0. 08  | 0. 235 | 6. 38E-42 M1 | AGPAT5    |
| CNOT7. 2    | 4. 38E-46 | -0. 21101 | 0. 195 | 0. 403 | 6. 54E-42 M1 | CNOT7     |
| SNX20. 3    | 4. 40E-46 | 0. 28569  | 0. 104 | 0. 033 | 6. 58E-42 M1 | SNX20     |
| POLR2B. 3   | 4. 50E-46 | -0. 24087 | 0. 119 | 0. 291 | 6. 72E-42 M1 | POLR2B    |
| CYB5D2. 2   | 4. 51E-46 | -0. 19551 | 0. 096 | 0. 26  | 6. 74E-42 M1 | CYB5D2    |
| TLN1. 4     | 4. 67E-46 | 0. 456806 | 0. 373 | 0. 267 | 6. 98E-42 M1 | TLN1      |
| SBDS. 4     | 5. 18E-46 | -0. 31102 | 0. 405 | 0. 651 | 7. 74E-42 M1 | SBDS      |
| GPRIN3. 4   | 5. 35E-46 | 0. 322704 | 0. 126 | 0. 045 | 7. 99E-42 M1 | GPRIN3    |
| ITGA3. 2    | 5. 47E-46 | -0. 19692 | 0. 01  | 0. 116 | 8. 17E-42 M1 | ITGA3     |
| GIMAP2. 3   | 5. 51E-46 | 0. 395044 | 0. 152 | 0. 062 | 8. 24E-42 M1 | GIMAP2    |
| ZNF793. 1   | 5. 93E-46 | -0. 18193 | 0. 017 | 0. 129 | 8. 86E-42 M1 | ZNF793    |
| ANGPTL2. 2  | 6. 02E-46 | -0. 32318 | 0. 011 | 0. 117 | 9. 00E-42 M1 | ANGPTL2   |
| VPS26B. 3   | 6. 11E-46 | -0. 22735 | 0. 096 | 0. 258 | 9. 13E-42 M1 | VPS26B    |
| CACNG7. 2   | 6. 33E-46 | -0. 2004  | 0. 003 | 0. 1   | 9. 46E-42 M1 | CACNG7    |
| TWF2. 4     | 6. 47E-46 | 0. 432713 | 0. 425 | 0. 324 | 9. 67E-42 M1 | TWF2      |
| NTN1. 1     | 6. 49E-46 | -0. 20167 | 0. 002 | 0. 098 | 9. 69E-42 M1 | NTN1      |
| HAS1. 1     | 6. 61E-46 | 0. 228587 | 0. 048 | 0. 007 | 9. 88E-42 M1 | HAS1      |
| WASF1. 1    | 7. 52E-46 | -0. 24912 | 0. 008 | 0. 112 | 1. 12E-41 M1 | WASF1     |
| HARS        | 7. 69E-46 | -0. 22693 | 0. 13  | 0. 311 | 1. 15E-41 M1 | HARS      |
| EEF1A1. 4   | 8. 00E-46 | -0. 29819 | 0. 796 | 0. 832 | 1. 20E-41 M1 | EEF1A1    |
| ATG16L2. 4  | 8. 03E-46 | 0. 433716 | 0. 165 | 0. 072 | 1. 20E-41 M1 | ATG16L2   |
| TRIM36. 4   | 8. 25E-46 | -0. 22987 | 0. 063 | 0. 206 | 1. 23E-41 M1 | TRIM36    |
| FGF1. 2     | 8. 35E-46 | -0. 30687 | 0. 008 | 0. 111 | 1. 25E-41 M1 | FGF1      |
| SDR39U1. 2  | 8. 58E-46 | -0. 22424 | 0. 126 | 0. 304 | 1. 28E-41 M1 | SDR39U1   |
| SYBU. 2     | 9. 23E-46 | -0. 24014 | 0. 004 | 0. 103 | 1. 38E-41 M1 | SYBU      |
| MZT1. 2     | 1. 02E-45 | -0. 19912 | 0. 113 | 0. 284 | 1. 53E-41 M1 | MZT1      |
| SH3BGR. 3   | 1. 05E-45 | -0. 37944 | 0. 026 | 0. 143 | 1. 57E-41 M1 | SH3BGR    |
| ARFIP2. 3   | 1. 08E-45 | -0. 17829 | 0. 104 | 0. 272 | 1. 61E-41 M1 | ARFIP2    |
| SLC12A2. 3  | 1. 15E-45 | -0. 24394 | 0. 029 | 0. 15  | 1. 72E-41 M1 | SLC12A2   |
| MZT2A. 2    | 1. 17E-45 | -0. 2432  | 0. 233 | 0. 45  | 1. 75E-41 M1 | MZT2A     |

|            |           |           |        |        |           |    |         |
|------------|-----------|-----------|--------|--------|-----------|----|---------|
| PDLIM7. 2  | 1. 28E-45 | -0. 22373 | 0. 101 | 0. 266 | 1. 92E-41 | M1 | PDLIM7  |
| CAMK2D. 2  | 1. 30E-45 | -0. 25223 | 0. 106 | 0. 271 | 1. 95E-41 | M1 | CAMK2D  |
| PDZD11. 3  | 1. 36E-45 | -0. 27698 | 0. 192 | 0. 392 | 2. 03E-41 | M1 | PDZD11  |
| ZNF22. 3   | 1. 54E-45 | -0. 24828 | 0. 128 | 0. 305 | 2. 31E-41 | M1 | ZNF22   |
| ETF1. 3    | 1. 66E-45 | 0. 452449 | 0. 422 | 0. 33  | 2. 48E-41 | M1 | ETF1    |
| PDE4B. 4   | 1. 86E-45 | 0. 516748 | 0. 365 | 0. 258 | 2. 77E-41 | M1 | PDE4B   |
| DNAJC2. 2  | 2. 15E-45 | -0. 19647 | 0. 144 | 0. 329 | 3. 21E-41 | M1 | DNAJC2  |
| CREB3      | 2. 18E-45 | -0. 22535 | 0. 128 | 0. 307 | 3. 26E-41 | M1 | CREB3   |
| MTSS1L. 2  | 2. 19E-45 | -0. 21983 | 0. 008 | 0. 111 | 3. 27E-41 | M1 | MTSS1L  |
| ZNHIT3     | 2. 22E-45 | -0. 19582 | 0. 206 | 0. 42  | 3. 31E-41 | M1 | ZNHIT3  |
| CHAMP1. 2  | 2. 38E-45 | -0. 19798 | 0. 029 | 0. 149 | 3. 56E-41 | M1 | CHAMP1  |
| HMGB1. 2   | 2. 39E-45 | -0. 24807 | 0. 778 | 0. 878 | 3. 57E-41 | M1 | HMGB1   |
| ARRDC2. 4  | 2. 42E-45 | 0. 399981 | 0. 164 | 0. 07  | 3. 62E-41 | M1 | ARRDC2  |
| TAOK1. 2   | 2. 52E-45 | -0. 21494 | 0. 116 | 0. 288 | 3. 77E-41 | M1 | TAOK1   |
| SPAG9. 3   | 2. 56E-45 | -0. 20541 | 0. 184 | 0. 387 | 3. 83E-41 | M1 | SPAG9   |
| NPEPPS. 1  | 2. 59E-45 | -0. 17025 | 0. 091 | 0. 252 | 3. 88E-41 | M1 | NPEPPS  |
| SRRT. 1    | 2. 81E-45 | -0. 21718 | 0. 087 | 0. 243 | 4. 20E-41 | M1 | SRRT    |
| TMEM108. 2 | 2. 91E-45 | -0. 20962 | 0. 001 | 0. 096 | 4. 34E-41 | M1 | TMEM108 |
| CDK5R1. 4  | 3. 11E-45 | -0. 27318 | 0. 008 | 0. 11  | 4. 64E-41 | M1 | CDK5R1  |
| PRRT2. 2   | 3. 26E-45 | -0. 20144 | 0. 007 | 0. 108 | 4. 87E-41 | M1 | PRRT2   |
| TMEM115. 2 | 3. 54E-45 | -0. 20155 | 0. 079 | 0. 234 | 5. 29E-41 | M1 | TMEM115 |
| ILDR2. 3   | 3. 62E-45 | -0. 18015 | 0. 001 | 0. 096 | 5. 41E-41 | M1 | ILDR2   |
| GAN. 2     | 3. 74E-45 | -0. 18328 | 0. 037 | 0. 162 | 5. 59E-41 | M1 | GAN     |
| KIF5A. 3   | 4. 01E-45 | -0. 32915 | 0. 026 | 0. 141 | 6. 00E-41 | M1 | KIF5A   |
| GNB5. 2    | 4. 06E-45 | -0. 18315 | 0. 017 | 0. 128 | 6. 07E-41 | M1 | GNB5    |
| TCEAL4. 2  | 4. 48E-45 | -0. 30661 | 0. 369 | 0. 612 | 6. 70E-41 | M1 | TCEAL4  |
| STAMPB. 2  | 4. 56E-45 | -0. 21815 | 0. 12  | 0. 295 | 6. 82E-41 | M1 | STAMPB  |
| CALM3. 3   | 4. 65E-45 | -0. 30034 | 0. 405 | 0. 63  | 6. 95E-41 | M1 | CALM3   |
| MMAB. 2    | 4. 70E-45 | -0. 22756 | 0. 073 | 0. 222 | 7. 02E-41 | M1 | MMAB    |
| PDGFD. 2   | 4. 80E-45 | -0. 18049 | 0. 001 | 0. 095 | 7. 17E-41 | M1 | PDGFD   |
| TMEM99. 3  | 4. 88E-45 | -0. 21943 | 0. 029 | 0. 147 | 7. 30E-41 | M1 | TMEM99  |
| KHDRBS1. 3 | 5. 02E-45 | -0. 28043 | 0. 302 | 0. 523 | 7. 50E-41 | M1 | KHDRBS1 |
| DVL3. 2    | 5. 04E-45 | -0. 18827 | 0. 044 | 0. 175 | 7. 53E-41 | M1 | DVL3    |
| WIPF1. 4   | 5. 05E-45 | 0. 46142  | 0. 315 | 0. 2   | 7. 55E-41 | M1 | WIPF1   |
| COX11. 2   | 5. 08E-45 | -0. 19473 | 0. 157 | 0. 351 | 7. 59E-41 | M1 | COX11   |
| DYNLL2. 4  | 5. 15E-45 | -0. 21496 | 0. 079 | 0. 231 | 7. 69E-41 | M1 | DYNLL2  |
| ZNF667. 3  | 5. 63E-45 | -0. 23072 | 0. 002 | 0. 097 | 8. 41E-41 | M1 | ZNF667  |
| SLC35B1. 1 | 5. 78E-45 | -0. 22769 | 0. 215 | 0. 426 | 8. 63E-41 | M1 | SLC35B1 |
| POLR3F. 2  | 5. 88E-45 | -0. 21025 | 0. 034 | 0. 158 | 8. 79E-41 | M1 | POLR3F  |
| RUNDC3A. 4 | 5. 89E-45 | -0. 30173 | 0. 011 | 0. 115 | 8. 80E-41 | M1 | RUNDC3A |
| ACBD6. 1   | 6. 23E-45 | -0. 19153 | 0. 127 | 0. 307 | 9. 31E-41 | M1 | ACBD6   |
| CREBZF. 3  | 6. 37E-45 | -0. 21638 | 0. 031 | 0. 151 | 9. 52E-41 | M1 | CREBZF  |
| RWDD4      | 6. 74E-45 | -0. 17985 | 0. 093 | 0. 254 | 1. 01E-40 | M1 | RWDD4   |
| ZNF638. 3  | 6. 74E-45 | -0. 18548 | 0. 111 | 0. 28  | 1. 01E-40 | M1 | ZNF638  |
| ITPRIP. 4  | 7. 17E-45 | 0. 387423 | 0. 147 | 0. 06  | 1. 07E-40 | M1 | ITPRIP  |
| GLRX5. 3   | 7. 58E-45 | -0. 23726 | 0. 142 | 0. 327 | 1. 13E-40 | M1 | GLRX5   |
| DPH7. 3    | 7. 71E-45 | -0. 19339 | 0. 053 | 0. 19  | 1. 15E-40 | M1 | DPH7    |
| BSG. 4     | 7. 74E-45 | -0. 28409 | 0. 602 | 0. 769 | 1. 16E-40 | M1 | BSG     |
| GRAMD3. 4  | 7. 79E-45 | -0. 25423 | 0. 037 | 0. 161 | 1. 16E-40 | M1 | GRAMD3  |
| SRSF10. 3  | 8. 22E-45 | -0. 21765 | 0. 103 | 0. 267 | 1. 23E-40 | M1 | SRSF10  |
| ATP5G1. 2  | 8. 22E-45 | -0. 30519 | 0. 421 | 0. 657 | 1. 23E-40 | M1 | ATP5G1  |

|            |          |          |       |       |          |    |               |
|------------|----------|----------|-------|-------|----------|----|---------------|
| SLC30A9.3  | 8.33E-45 | -0.18382 | 0.111 | 0.28  | 1.25E-40 | M1 | SLC30A9       |
| LSM1.1     | 8.67E-45 | -0.20043 | 0.264 | 0.494 | 1.30E-40 | M1 | LSM1          |
| ZNF775.3   | 9.06E-45 | -0.21273 | 0.009 | 0.112 | 1.35E-40 | M1 | ZNF775        |
| LYRM2.1    | 9.22E-45 | -0.17302 | 0.14  | 0.325 | 1.38E-40 | M1 | LYRM2         |
| PTCD3.2    | 9.57E-45 | -0.2049  | 0.096 | 0.257 | 1.43E-40 | M1 | PTCD3         |
| PET117.1   | 9.69E-45 | -0.20563 | 0.062 | 0.203 | 1.45E-40 | M1 | PET117        |
| SNTA1.2    | 1.01E-44 | -0.1837  | 0.004 | 0.101 | 1.51E-40 | M1 | SNTA1         |
| UBE2G1.4   | 1.05E-44 | -0.20731 | 0.115 | 0.286 | 1.58E-40 | M1 | UBE2G1        |
| PCDHB2.2   | 1.06E-44 | -0.20602 | 0.001 | 0.095 | 1.58E-40 | M1 | PCDHB2        |
| ROMO1.3    | 1.09E-44 | -0.2905  | 0.41  | 0.632 | 1.64E-40 | M1 | ROMO1         |
| CPED1.2    | 1.10E-44 | 0.258179 | 0.083 | 0.022 | 1.64E-40 | M1 | CPED1         |
| LRRC42.2   | 1.12E-44 | -0.23116 | 0.039 | 0.165 | 1.67E-40 | M1 | LRRC42        |
| M1AP       | 1.14E-44 | 0.171982 | 0.039 | 0.004 | 1.71E-40 | M1 | M1AP          |
| RITA1.2    | 1.15E-44 | -0.22623 | 0.032 | 0.152 | 1.72E-40 | M1 | RITA1         |
| HBB.3      | 1.17E-44 | 0.280427 | 0.503 | 0.378 | 1.75E-40 | M1 | HBB           |
| ESF1.2     | 1.28E-44 | -0.24403 | 0.181 | 0.378 | 1.92E-40 | M1 | ESF1          |
| TMEM255B.1 | 1.31E-44 | 0.390968 | 0.12  | 0.042 | 1.96E-40 | M1 | TMEM255B      |
| FDPS.2     | 1.31E-44 | -0.27741 | 0.238 | 0.451 | 1.96E-40 | M1 | FDPS          |
| CBLN4.4    | 1.32E-44 | -0.26969 | 0.001 | 0.095 | 1.98E-40 | M1 | CBLN4         |
| MBD3.2     | 1.60E-44 | -0.18896 | 0.051 | 0.186 | 2.40E-40 | M1 | MBD3          |
| LRRCC1.3   | 1.74E-44 | -0.25217 | 0.034 | 0.156 | 2.61E-40 | M1 | LRRCC1        |
| PPP1CC.2   | 1.77E-44 | -0.24173 | 0.26  | 0.482 | 2.64E-40 | M1 | PPP1CC        |
| IL15.2     | 1.92E-44 | 0.281628 | 0.091 | 0.026 | 2.87E-40 | M1 | IL15          |
| PTTG1.3    | 1.96E-44 | -0.37837 | 0.103 | 0.256 | 2.93E-40 | M1 | PTTG1         |
| UQCC1.2    | 2.10E-44 | -0.19483 | 0.053 | 0.188 | 3.14E-40 | M1 | UQCC1         |
| SLN.1      | 2.21E-44 | -0.67777 | 0.053 | 0.183 | 3.30E-40 | M1 | SLN           |
| QDPR.3     | 2.23E-44 | -0.32796 | 0.197 | 0.393 | 3.33E-40 | M1 | QDPR          |
| SNCAIP.3   | 2.28E-44 | -0.21659 | 0.005 | 0.102 | 3.40E-40 | M1 | SNCAIP        |
| WIZ.1      | 2.44E-44 | -0.19671 | 0.019 | 0.129 | 3.64E-40 | M1 | WIZ           |
| EIF1AY.3   | 2.45E-44 | -0.20522 | 0.061 | 0.201 | 3.65E-40 | M1 | EIF1AY        |
| TP53RK.2   | 2.48E-44 | -0.16441 | 0.069 | 0.215 | 3.70E-40 | M1 | TP53RK        |
| GTF2H5.2   | 2.48E-44 | -0.30654 | 0.23  | 0.439 | 3.71E-40 | M1 | GTF2H5        |
| GAMT.4     | 2.60E-44 | -0.22622 | 0.146 | 0.33  | 3.88E-40 | M1 | GAMT          |
| MCRS1.1    | 2.64E-44 | -0.22099 | 0.124 | 0.299 | 3.95E-40 | M1 | MCRS1         |
| TCF12.4    | 2.64E-44 | -0.24613 | 0.139 | 0.313 | 3.95E-40 | M1 | TCF12         |
| BIRC5.4    | 2.67E-44 | -0.4144  | 0.016 | 0.122 | 3.98E-40 | M1 | BIRC5         |
| TMX2.1     | 2.69E-44 | -0.23952 | 0.222 | 0.433 | 4.02E-40 | M1 | TMX2          |
| CAMLG.3    | 2.88E-44 | -0.23865 | 0.299 | 0.533 | 4.31E-40 | M1 | CAMLG         |
| PDLIM5.1   | 2.93E-44 | -0.19275 | 0.089 | 0.246 | 4.38E-40 | M1 | PDLIM5        |
| FBXO5.1    | 3.12E-44 | -0.22466 | 0.011 | 0.113 | 4.67E-40 | M1 | FBXO5         |
| EPHA4.1    | 3.33E-44 | -0.21866 | 0.003 | 0.097 | 4.97E-40 | M1 | EPHA4         |
| NOP56      | 3.52E-44 | -0.2471  | 0.233 | 0.45  | 5.27E-40 | M1 | NOP56         |
| EPRS.2     | 3.58E-44 | -0.21518 | 0.143 | 0.324 | 5.35E-40 | M1 | EPRS          |
| ARMC10.2   | 3.78E-44 | -0.21291 | 0.144 | 0.327 | 5.65E-40 | M1 | ARMC10        |
| RP11-390E  | 3.86E-44 | -0.27542 | 0.028 | 0.144 | 5.77E-40 | M1 | RP11-390E23.6 |
| TCEA1      | 3.99E-44 | -0.29214 | 0.301 | 0.521 | 5.97E-40 | M1 | TCEA1         |
| MACF1.2    | 4.19E-44 | -0.22136 | 0.164 | 0.353 | 6.26E-40 | M1 | MACF1         |
| RGMB.3     | 4.29E-44 | -0.32969 | 0.033 | 0.152 | 6.41E-40 | M1 | RGMB          |
| SMARCC2.3  | 4.31E-44 | -0.16079 | 0.119 | 0.292 | 6.44E-40 | M1 | SMARCC2       |
| ZHX1.3     | 4.51E-44 | -0.21825 | 0.083 | 0.234 | 6.74E-40 | M1 | ZHX1          |
| DUSP15.3   | 4.61E-44 | -0.18243 | 0.009 | 0.11  | 6.89E-40 | M1 | DUSP15        |



|            |          |          |       |       |          |    |           |
|------------|----------|----------|-------|-------|----------|----|-----------|
| ARMCX1.3   | 4.89E-44 | -0.21162 | 0.087 | 0.239 | 7.30E-40 | M1 | ARMCX1    |
| RCAN1.4    | 4.99E-44 | -0.38758 | 0.128 | 0.296 | 7.45E-40 | M1 | RCAN1     |
| ARHGFEF26. | 5.09E-44 | -0.18298 | 0.028 | 0.144 | 7.61E-40 | M1 | ARHGFEF26 |
| THOP1.3    | 5.15E-44 | -0.17146 | 0.077 | 0.226 | 7.70E-40 | M1 | THOP1     |
| SLC39A7.1  | 5.44E-44 | -0.22273 | 0.151 | 0.336 | 8.13E-40 | M1 | SLC39A7   |
| LRIG1.3    | 5.53E-44 | -0.22    | 0.018 | 0.126 | 8.26E-40 | M1 | LRIG1     |
| ANAPC7.2   | 5.64E-44 | -0.20669 | 0.058 | 0.195 | 8.43E-40 | M1 | ANAPC7    |
| DUSP12.1   | 5.80E-44 | -0.196   | 0.1   | 0.262 | 8.67E-40 | M1 | DUSP12    |
| ELMOD1.2   | 6.01E-44 | -0.16065 | 0.003 | 0.098 | 8.97E-40 | M1 | ELMOD1    |
| ALDH3A2.2  | 6.03E-44 | -0.20568 | 0.098 | 0.259 | 9.02E-40 | M1 | ALDH3A2   |
| CERCAM.2   | 6.04E-44 | -0.25395 | 0.031 | 0.149 | 9.03E-40 | M1 | CERCAM    |
| FAM69C.3   | 6.08E-44 | -0.19218 | 0.001 | 0.092 | 9.09E-40 | M1 | FAM69C    |
| DNAJC18.1  | 6.08E-44 | -0.2196  | 0.026 | 0.142 | 9.09E-40 | M1 | DNAJC18   |
| GPX3.3     | 6.12E-44 | 0.444612 | 0.246 | 0.134 | 9.15E-40 | M1 | GPX3      |
| NACC1.1    | 6.34E-44 | -0.15943 | 0.043 | 0.172 | 9.47E-40 | M1 | NACC1     |
| GNL1.2     | 6.44E-44 | -0.18213 | 0.104 | 0.27  | 9.62E-40 | M1 | GNL1      |
| KIAA0907.  | 6.57E-44 | -0.19372 | 0.072 | 0.218 | 9.82E-40 | M1 | KIAA0907  |
| ADD2.2     | 6.62E-44 | -0.23941 | 0.007 | 0.105 | 9.90E-40 | M1 | ADD2      |
| NAGK.2     | 6.81E-44 | 0.376838 | 0.457 | 0.366 | 1.02E-39 | M1 | NAGK      |
| BRSK1.2    | 6.81E-44 | -0.22805 | 0.004 | 0.1   | 1.02E-39 | M1 | BRSK1     |
| TCEB2.4    | 6.99E-44 | -0.25425 | 0.718 | 0.845 | 1.04E-39 | M1 | TCEB2     |
| POLR3H.2   | 7.07E-44 | -0.21622 | 0.086 | 0.24  | 1.06E-39 | M1 | POLR3H    |
| FAHD1.2    | 7.20E-44 | -0.20954 | 0.061 | 0.199 | 1.08E-39 | M1 | FAHD1     |
| ARL6IP4.4  | 7.27E-44 | 0.234237 | 0.65  | 0.619 | 1.09E-39 | M1 | ARL6IP4   |
| CMTM5.3    | 7.74E-44 | -0.49185 | 0.014 | 0.117 | 1.16E-39 | M1 | CMTM5     |
| AP3D1.2    | 7.92E-44 | -0.18327 | 0.152 | 0.34  | 1.18E-39 | M1 | AP3D1     |
| DUSP26.3   | 8.35E-44 | -0.36468 | 0.007 | 0.104 | 1.25E-39 | M1 | DUSP26    |
| DPP4.2     | 8.36E-44 | -0.19136 | 0.001 | 0.093 | 1.25E-39 | M1 | DPP4      |
| IMPAD1.2   | 8.54E-44 | -0.19929 | 0.067 | 0.21  | 1.28E-39 | M1 | IMPAD1    |
| BIVM.2     | 8.88E-44 | -0.21098 | 0.019 | 0.129 | 1.33E-39 | M1 | BIVM      |
| CCP110.3   | 8.98E-44 | -0.27944 | 0.028 | 0.143 | 1.34E-39 | M1 | CCP110    |
| CYHR1.3    | 9.04E-44 | -0.21506 | 0.131 | 0.308 | 1.35E-39 | M1 | CYHR1     |
| BCS1L.2    | 9.08E-44 | -0.21855 | 0.055 | 0.188 | 1.36E-39 | M1 | BCS1L     |
| FARSB.2    | 9.12E-44 | -0.21041 | 0.099 | 0.259 | 1.36E-39 | M1 | FARSB     |
| DHX30.2    | 9.19E-44 | -0.16896 | 0.115 | 0.286 | 1.37E-39 | M1 | DHX30     |
| NOVA2.2    | 9.71E-44 | -0.22081 | 0.003 | 0.096 | 1.45E-39 | M1 | NOVA2     |
| LOXL1.2    | 9.94E-44 | -0.17384 | 0.001 | 0.093 | 1.49E-39 | M1 | LOXL1     |
| PAX6.2     | 1.02E-43 | -0.19802 | 0.002 | 0.094 | 1.52E-39 | M1 | PAX6      |
| PRKDC.1    | 1.06E-43 | -0.18553 | 0.141 | 0.322 | 1.59E-39 | M1 | PRKDC     |
| CUL5.3     | 1.10E-43 | -0.17387 | 0.091 | 0.249 | 1.65E-39 | M1 | CUL5      |
| MSANTD3.2  | 1.10E-43 | -0.212   | 0.006 | 0.103 | 1.65E-39 | M1 | MSANTD3   |
| PLA2G4A.2  | 1.16E-43 | 0.250305 | 0.083 | 0.022 | 1.73E-39 | M1 | PLA2G4A   |
| CPSF4.1    | 1.21E-43 | -0.1856  | 0.074 | 0.22  | 1.80E-39 | M1 | CPSF4     |
| CASP4.4    | 1.26E-43 | 0.416601 | 0.329 | 0.207 | 1.88E-39 | M1 | CASP4     |
| RARS2.1    | 1.30E-43 | -0.18836 | 0.07  | 0.215 | 1.94E-39 | M1 | RARS2     |
| COX6C.4    | 1.32E-43 | -0.26796 | 0.736 | 0.85  | 1.97E-39 | M1 | COX6C     |
| UBA1.1     | 1.33E-43 | -0.20675 | 0.177 | 0.375 | 1.99E-39 | M1 | UBA1      |
| MUM1.4     | 1.44E-43 | -0.23016 | 0.196 | 0.397 | 2.16E-39 | M1 | MUM1      |
| HIP1R.3    | 1.45E-43 | -0.25403 | 0.019 | 0.127 | 2.16E-39 | M1 | HIP1R     |
| PEG10.2    | 1.48E-43 | -0.36506 | 0.016 | 0.12  | 2.21E-39 | M1 | PEG10     |
| MARCH1.4   | 1.49E-43 | 0.399992 | 0.292 | 0.17  | 2.23E-39 | M1 | 1-Mar     |

|           |          |          |       |       |          |    |           |
|-----------|----------|----------|-------|-------|----------|----|-----------|
| TXNL4A.2  | 1.54E-43 | -0.25376 | 0.233 | 0.446 | 2.30E-39 | M1 | TXNL4A    |
| MRPS23.2  | 1.58E-43 | -0.24802 | 0.198 | 0.4   | 2.36E-39 | M1 | MRPS23    |
| RFFL.4    | 1.69E-43 | -0.20032 | 0.053 | 0.187 | 2.52E-39 | M1 | RFFL      |
| AP3M2.2   | 1.71E-43 | -0.21233 | 0.009 | 0.108 | 2.55E-39 | M1 | AP3M2     |
| NOS1AP.3  | 1.73E-43 | -0.21518 | 0.002 | 0.095 | 2.59E-39 | M1 | NOS1AP    |
| MAOB.2    | 1.80E-43 | -0.35649 | 0.013 | 0.116 | 2.70E-39 | M1 | MAOB      |
| REEP1.4   | 1.84E-43 | -0.2528  | 0.003 | 0.096 | 2.74E-39 | M1 | REEP1     |
| NELFA.3   | 1.88E-43 | -0.20136 | 0.038 | 0.16  | 2.81E-39 | M1 | NELFA     |
| DUSP14.3  | 1.89E-43 | -0.17643 | 0.063 | 0.203 | 2.83E-39 | M1 | DUSP14    |
| PLCB1.2   | 1.89E-43 | -0.21368 | 0.003 | 0.096 | 2.83E-39 | M1 | PLCB1     |
| SARS.3    | 1.90E-43 | -0.22734 | 0.256 | 0.48  | 2.83E-39 | M1 | SARS      |
| RNPS1     | 1.94E-43 | -0.24675 | 0.34  | 0.573 | 2.90E-39 | M1 | RNPS1     |
| COA4.1    | 2.08E-43 | -0.27981 | 0.217 | 0.42  | 3.11E-39 | M1 | COA4      |
| C12orf73. | 2.15E-43 | -0.21481 | 0.047 | 0.176 | 3.21E-39 | M1 | C12orf73  |
| TXNDC17.3 | 2.23E-43 | -0.3228  | 0.349 | 0.56  | 3.33E-39 | M1 | TXNDC17   |
| GPR162.2  | 2.24E-43 | -0.22567 | 0.015 | 0.119 | 3.34E-39 | M1 | GPR162    |
| C11orf57. | 2.50E-43 | -0.22184 | 0.047 | 0.175 | 3.73E-39 | M1 | C11orf57  |
| TLCD1.2   | 2.54E-43 | -0.16142 | 0.003 | 0.096 | 3.80E-39 | M1 | TLCD1     |
| NUDCD2.1  | 2.60E-43 | -0.25604 | 0.225 | 0.436 | 3.88E-39 | M1 | NUDCD2    |
| CARD11.3  | 2.62E-43 | 0.222374 | 0.074 | 0.019 | 3.91E-39 | M1 | CARD11    |
| ELAVL2.4  | 2.82E-43 | -0.31264 | 0.003 | 0.095 | 4.21E-39 | M1 | ELAVL2    |
| CXXC4.3   | 2.85E-43 | -0.24037 | 0.002 | 0.093 | 4.27E-39 | M1 | CXXC4     |
| TMEM178A. | 2.96E-43 | -0.24209 | 0.025 | 0.137 | 4.42E-39 | M1 | TMEM178A  |
| TNPO3     | 3.10E-43 | -0.25059 | 0.04  | 0.163 | 4.63E-39 | M1 | TNPO3     |
| UBXN1.4   | 3.17E-43 | 0.278994 | 0.638 | 0.617 | 4.74E-39 | M1 | UBXN1     |
| ELOVL4.2  | 3.21E-43 | -0.21922 | 0.003 | 0.095 | 4.80E-39 | M1 | ELOVL4    |
| TRIO.3    | 3.23E-43 | -0.24118 | 0.06  | 0.195 | 4.82E-39 | M1 | TRIO      |
| PHF6.3    | 3.35E-43 | -0.18294 | 0.057 | 0.193 | 5.00E-39 | M1 | PHF6      |
| CKAP5.4   | 3.44E-43 | -0.20752 | 0.048 | 0.178 | 5.14E-39 | M1 | CKAP5     |
| SLC25A18. | 3.69E-43 | -0.26083 | 0.007 | 0.103 | 5.51E-39 | M1 | SLC25A18  |
| ACTR10.2  | 4.32E-43 | -0.24129 | 0.194 | 0.393 | 6.46E-39 | M1 | ACTR10    |
| SREK1.3   | 4.44E-43 | -0.20444 | 0.165 | 0.354 | 6.63E-39 | M1 | SREK1     |
| RBM4.2    | 4.55E-43 | -0.17321 | 0.091 | 0.246 | 6.80E-39 | M1 | RBM4      |
| CSF1.2    | 4.58E-43 | -0.21924 | 0.011 | 0.111 | 6.84E-39 | M1 | CSF1      |
| NOP10.4   | 4.66E-43 | 0.251273 | 0.644 | 0.598 | 6.96E-39 | M1 | NOP10     |
| TMEM205.3 | 4.73E-43 | -0.3653  | 0.319 | 0.531 | 7.07E-39 | M1 | TMEM205   |
| CASC15.3  | 4.87E-43 | -0.2476  | 0.014 | 0.116 | 7.28E-39 | M1 | CASC15    |
| VNN2.2    | 4.98E-43 | 0.241902 | 0.069 | 0.016 | 7.44E-39 | M1 | VNN2      |
| CRCP.2    | 5.93E-43 | -0.17823 | 0.065 | 0.205 | 8.86E-39 | M1 | CRCP      |
| HRH1.3    | 6.16E-43 | -0.22271 | 0.012 | 0.113 | 9.20E-39 | M1 | HRH1      |
| DPF2.1    | 7.05E-43 | -0.17352 | 0.093 | 0.25  | 1.05E-38 | M1 | DPF2      |
| PIANP.2   | 7.12E-43 | -0.19045 | 0.004 | 0.098 | 1.06E-38 | M1 | PIANP     |
| AHCY.1    | 7.30E-43 | -0.19513 | 0.145 | 0.324 | 1.09E-38 | M1 | AHCY      |
| FANCL.2   | 7.61E-43 | -0.26417 | 0.041 | 0.163 | 1.14E-38 | M1 | FANCL     |
| PRRG4.3   | 7.87E-43 | 0.332915 | 0.102 | 0.033 | 1.18E-38 | M1 | PRRG4     |
| PUF60.2   | 8.08E-43 | -0.24681 | 0.345 | 0.581 | 1.21E-38 | M1 | PUF60     |
| MED21.1   | 8.49E-43 | -0.21675 | 0.085 | 0.235 | 1.27E-38 | M1 | MED21     |
| LINC00685 | 8.56E-43 | -0.19026 | 0.044 | 0.17  | 1.28E-38 | M1 | LINC00685 |
| UBL4A.3   | 8.63E-43 | -0.18571 | 0.066 | 0.206 | 1.29E-38 | M1 | UBL4A     |
| CMAS.1    | 8.83E-43 | -0.20344 | 0.125 | 0.295 | 1.32E-38 | M1 | CMAS      |
| VAX2.3    | 9.92E-43 | -0.21828 | 0.003 | 0.095 | 1.48E-38 | M1 | VAX2      |

|           |          |          |       |       |          |    |           |
|-----------|----------|----------|-------|-------|----------|----|-----------|
| SUDS3.3   | 1.06E-42 | -0.16947 | 0.069 | 0.212 | 1.59E-38 | M1 | SUDS3     |
| TMEM5.2   | 1.16E-42 | -0.22867 | 0.085 | 0.233 | 1.73E-38 | M1 | TMEM5     |
| VKORC1L1. | 1.17E-42 | -0.19721 | 0.033 | 0.151 | 1.75E-38 | M1 | VKORC1L1  |
| MAGED2.4  | 1.19E-42 | -0.27134 | 0.322 | 0.546 | 1.78E-38 | M1 | MAGED2    |
| VEZT.2    | 1.20E-42 | -0.16123 | 0.096 | 0.253 | 1.79E-38 | M1 | VEZT      |
| BOLA3.2   | 1.21E-42 | -0.26528 | 0.176 | 0.367 | 1.81E-38 | M1 | BOLA3     |
| PTBP2.2   | 1.23E-42 | -0.2687  | 0.018 | 0.123 | 1.84E-38 | M1 | PTBP2     |
| CCDC181.3 | 1.26E-42 | -0.25674 | 0.003 | 0.095 | 1.89E-38 | M1 | CCDC181   |
| PLAT.1    | 1.29E-42 | -0.2513  | 0.026 | 0.138 | 1.93E-38 | M1 | PLAT      |
| TMEM41B.2 | 1.31E-42 | -0.19699 | 0.062 | 0.199 | 1.95E-38 | M1 | TMEM41B   |
| TMTC4.3   | 1.34E-42 | -0.25306 | 0.014 | 0.115 | 2.00E-38 | M1 | TMTC4     |
| EPB41L1.2 | 1.37E-42 | -0.20388 | 0.008 | 0.104 | 2.05E-38 | M1 | EPB41L1   |
| PIK3R3.2  | 1.42E-42 | -0.16299 | 0.033 | 0.152 | 2.12E-38 | M1 | PIK3R3    |
| CLASP1.3  | 1.49E-42 | -0.19349 | 0.037 | 0.158 | 2.23E-38 | M1 | CLASP1    |
| F12.2     | 1.57E-42 | -0.19218 | 0.002 | 0.093 | 2.34E-38 | M1 | F12       |
| MED17.1   | 1.57E-42 | -0.1899  | 0.071 | 0.213 | 2.34E-38 | M1 | MED17     |
| DHRS11.3  | 1.61E-42 | -0.15696 | 0.016 | 0.12  | 2.40E-38 | M1 | DHRS11    |
| ATP6AP1.4 | 1.63E-42 | 0.345075 | 0.536 | 0.484 | 2.43E-38 | M1 | ATP6AP1   |
| TIMP4.2   | 1.64E-42 | -0.41895 | 0.015 | 0.118 | 2.45E-38 | M1 | TIMP4     |
| DLX6-AS1. | 1.66E-42 | -0.65117 | 0.037 | 0.149 | 2.48E-38 | M1 | DLX6-AS1  |
| LINC00152 | 1.71E-42 | -0.30927 | 0.123 | 0.286 | 2.56E-38 | M1 | LINC00152 |
| TMEM136.2 | 1.72E-42 | -0.20511 | 0.008 | 0.104 | 2.57E-38 | M1 | TMEM136   |
| TPT1-AS1. | 1.72E-42 | -0.16356 | 0.038 | 0.159 | 2.57E-38 | M1 | TPT1-AS1  |
| IGF2BP2.2 | 1.76E-42 | -0.20555 | 0.004 | 0.096 | 2.63E-38 | M1 | IGF2BP2   |
| BLCAP.1   | 1.77E-42 | -0.21776 | 0.143 | 0.32  | 2.64E-38 | M1 | BLCAP     |
| PIGU.3    | 1.79E-42 | -0.25715 | 0.06  | 0.193 | 2.67E-38 | M1 | PIGU      |
| LMNB2.4   | 1.84E-42 | -0.18667 | 0.024 | 0.135 | 2.75E-38 | M1 | LMNB2     |
| PCOLCE2.2 | 1.84E-42 | -0.2702  | 0.005 | 0.098 | 2.75E-38 | M1 | PCOLCE2   |
| KBTBD6.2  | 1.86E-42 | -0.19784 | 0.033 | 0.151 | 2.79E-38 | M1 | KBTBD6    |
| USP48     | 1.89E-42 | -0.17806 | 0.088 | 0.24  | 2.83E-38 | M1 | USP48     |
| IL32.2    | 2.01E-42 | -0.48952 | 0.015 | 0.117 | 3.00E-38 | M1 | IL32      |
| PIGF.3    | 2.04E-42 | -0.21819 | 0.141 | 0.317 | 3.04E-38 | M1 | PIGF      |
| TARDBP    | 2.21E-42 | -0.19238 | 0.145 | 0.324 | 3.30E-38 | M1 | TARDBP    |
| TMEM70.3  | 2.22E-42 | 0.434317 | 0.46  | 0.382 | 3.32E-38 | M1 | TMEM70    |
| HP1BP3.4  | 2.29E-42 | -0.23436 | 0.259 | 0.479 | 3.42E-38 | M1 | HP1BP3    |
| ZBED5.3   | 2.29E-42 | -0.16918 | 0.064 | 0.202 | 3.42E-38 | M1 | ZBED5     |
| TMEM199.2 | 2.29E-42 | -0.16242 | 0.107 | 0.269 | 3.43E-38 | M1 | TMEM199   |
| AMOTL2.1  | 2.35E-42 | -0.28252 | 0.004 | 0.096 | 3.51E-38 | M1 | AMOTL2    |
| DMRTA2.1  | 2.36E-42 | -0.18411 | 0.002 | 0.091 | 3.52E-38 | M1 | DMRTA2    |
| LEO1.1    | 2.59E-42 | -0.22491 | 0.042 | 0.164 | 3.88E-38 | M1 | LEO1      |
| RNF8.3    | 2.69E-42 | -0.19236 | 0.057 | 0.189 | 4.02E-38 | M1 | RNF8      |
| ATG4D.1   | 2.73E-42 | -0.18002 | 0.052 | 0.182 | 4.08E-38 | M1 | ATG4D     |
| HDDC2.1   | 2.75E-42 | -0.27271 | 0.228 | 0.435 | 4.10E-38 | M1 | HDDC2     |
| FAM57A.2  | 2.76E-42 | -0.16318 | 0.011 | 0.111 | 4.13E-38 | M1 | FAM57A    |
| CCT3.2    | 2.76E-42 | -0.27214 | 0.376 | 0.618 | 4.13E-38 | M1 | CCT3      |
| PSMC3.2   | 2.82E-42 | -0.25696 | 0.333 | 0.57  | 4.22E-38 | M1 | PSMC3     |
| ZNF544.2  | 2.87E-42 | -0.19419 | 0.028 | 0.141 | 4.29E-38 | M1 | ZNF544    |
| HSF2.2    | 2.91E-42 | -0.24739 | 0.025 | 0.136 | 4.35E-38 | M1 | HSF2      |
| DID01.2   | 2.93E-42 | -0.15029 | 0.044 | 0.169 | 4.38E-38 | M1 | DID01     |
| ASTN1.1   | 3.06E-42 | -0.15817 | 0.01  | 0.108 | 4.57E-38 | M1 | ASTN1     |
| GALNT11.2 | 3.24E-42 | -0.17263 | 0.097 | 0.252 | 4.84E-38 | M1 | GALNT11   |

|             |           |           |        |        |              |               |
|-------------|-----------|-----------|--------|--------|--------------|---------------|
| MXI1. 1     | 3. 37E-42 | -0. 29174 | 0. 036 | 0. 153 | 5. 03E-38 M1 | MXI1          |
| TMEM100. 4  | 3. 42E-42 | -0. 36601 | 0. 009 | 0. 105 | 5. 12E-38 M1 | TMEM100       |
| CLPP. 1     | 3. 45E-42 | -0. 23726 | 0. 224 | 0. 433 | 5. 15E-38 M1 | CLPP          |
| FAM63B. 1   | 3. 77E-42 | -0. 19121 | 0. 082 | 0. 229 | 5. 64E-38 M1 | FAM63B        |
| PSMB7. 2    | 3. 81E-42 | -0. 28572 | 0. 444 | 0. 68  | 5. 70E-38 M1 | PSMB7         |
| ILKAP. 2    | 3. 82E-42 | -0. 19664 | 0. 099 | 0. 255 | 5. 70E-38 M1 | ILKAP         |
| HSD17B10. 3 | 3. 87E-42 | -0. 2917  | 0. 306 | 0. 533 | 5. 78E-38 M1 | HSD17B10      |
| AC004951. 4 | 4. 11E-42 | -0. 14788 | 0. 049 | 0. 178 | 6. 14E-38 M1 | AC004951. 6   |
| CCDC106. 4  | 4. 38E-42 | -0. 17195 | 0. 1   | 0. 258 | 6. 55E-38 M1 | CCDC106       |
| HOOK2. 2    | 4. 39E-42 | -0. 15835 | 0. 101 | 0. 261 | 6. 57E-38 M1 | HOOK2         |
| THUMPD3. 1  | 4. 63E-42 | -0. 18349 | 0. 074 | 0. 218 | 6. 92E-38 M1 | THUMPD3       |
| ATG9A. 2    | 4. 95E-42 | -0. 17069 | 0. 024 | 0. 135 | 7. 39E-38 M1 | ATG9A         |
| GLOD4. 1    | 5. 21E-42 | -0. 22319 | 0. 215 | 0. 424 | 7. 79E-38 M1 | GLOD4         |
| GPR132. 3   | 5. 22E-42 | 0. 267878 | 0. 078 | 0. 021 | 7. 80E-38 M1 | GPR132        |
| HKR1. 3     | 5. 31E-42 | -0. 2275  | 0. 025 | 0. 135 | 7. 93E-38 M1 | HKR1          |
| TNKS. 4     | 5. 49E-42 | -0. 15546 | 0. 044 | 0. 169 | 8. 21E-38 M1 | TNKS          |
| FAM102A. 1  | 5. 62E-42 | -0. 24398 | 0. 014 | 0. 114 | 8. 41E-38 M1 | FAM102A       |
| MEOX2. 2    | 5. 66E-42 | -0. 23714 | 0. 003 | 0. 094 | 8. 45E-38 M1 | MEOX2         |
| EMC6. 2     | 5. 70E-42 | -0. 23286 | 0. 257 | 0. 469 | 8. 52E-38 M1 | EMC6          |
| SLC25A17. 5 | 5. 80E-42 | -0. 21161 | 0. 05  | 0. 178 | 8. 67E-38 M1 | SLC25A17      |
| ZC3H8. 2    | 5. 83E-42 | -0. 21276 | 0. 044 | 0. 168 | 8. 70E-38 M1 | ZC3H8         |
| TBRG4. 2    | 5. 83E-42 | -0. 1899  | 0. 105 | 0. 264 | 8. 71E-38 M1 | TBRG4         |
| HYAL2. 4    | 5. 98E-42 | -0. 16591 | 0. 094 | 0. 249 | 8. 93E-38 M1 | HYAL2         |
| CTD-3184A   | 6. 00E-42 | -0. 1782  | 0. 013 | 0. 114 | 8. 96E-38 M1 | CTD-3184A7. 4 |
| EMC9. 1     | 6. 01E-42 | -0. 22699 | 0. 064 | 0. 2   | 8. 99E-38 M1 | EMC9          |
| ING2. 2     | 6. 42E-42 | -0. 1851  | 0. 084 | 0. 231 | 9. 60E-38 M1 | ING2          |
| RNF10. 2    | 6. 48E-42 | -0. 17622 | 0. 172 | 0. 365 | 9. 68E-38 M1 | RNF10         |
| RRP36. 3    | 6. 68E-42 | -0. 15552 | 0. 042 | 0. 166 | 9. 98E-38 M1 | RRP36         |
| TTF1. 1     | 7. 16E-42 | -0. 16835 | 0. 081 | 0. 227 | 1. 07E-37 M1 | TTF1          |
| HOXC9. 4    | 7. 23E-42 | -0. 31123 | 0. 007 | 0. 101 | 1. 08E-37 M1 | HOXC9         |
| PSMB2. 2    | 7. 41E-42 | -0. 31327 | 0. 374 | 0. 614 | 1. 11E-37 M1 | PSMB2         |
| COR01B. 4   | 7. 41E-42 | 0. 400129 | 0. 433 | 0. 347 | 1. 11E-37 M1 | COR01B        |
| MAPK7. 2    | 7. 50E-42 | -0. 19234 | 0. 03  | 0. 144 | 1. 12E-37 M1 | MAPK7         |
| YIPF3. 3    | 7. 74E-42 | -0. 22618 | 0. 289 | 0. 522 | 1. 16E-37 M1 | YIPF3         |
| PPP1CA. 3   | 8. 11E-42 | 0. 260862 | 0. 609 | 0. 564 | 1. 21E-37 M1 | PPP1CA        |
| GGPS1. 3    | 8. 62E-42 | -0. 20329 | 0. 162 | 0. 349 | 1. 29E-37 M1 | GGPS1         |
| IQCE. 2     | 8. 76E-42 | -0. 20076 | 0. 026 | 0. 137 | 1. 31E-37 M1 | IQCE          |
| AC093673. 5 | 9. 17E-42 | -0. 19251 | 0. 064 | 0. 201 | 1. 37E-37 M1 | AC093673. 5   |
| TOM1L2. 1   | 9. 27E-42 | -0. 20681 | 0. 027 | 0. 138 | 1. 39E-37 M1 | TOM1L2        |
| OSMR. 2     | 9. 66E-42 | -0. 17531 | 0. 007 | 0. 101 | 1. 44E-37 M1 | OSMR          |
| SMC6. 2     | 1. 01E-41 | -0. 19401 | 0. 05  | 0. 178 | 1. 51E-37 M1 | SMC6          |
| ETV4. 3     | 1. 05E-41 | -0. 20101 | 0. 003 | 0. 093 | 1. 56E-37 M1 | ETV4          |
| NOP16. 3    | 1. 05E-41 | -0. 24993 | 0. 08  | 0. 223 | 1. 57E-37 M1 | NOP16         |
| NOL11. 2    | 1. 09E-41 | -0. 20526 | 0. 072 | 0. 212 | 1. 63E-37 M1 | NOL11         |
| LMCD1. 2    | 1. 12E-41 | -0. 20688 | 0. 007 | 0. 101 | 1. 67E-37 M1 | LMCD1         |
| BOLA1. 2    | 1. 12E-41 | -0. 20438 | 0. 047 | 0. 172 | 1. 67E-37 M1 | BOLA1         |
| TMEM47. 2   | 1. 13E-41 | -0. 19058 | 0. 004 | 0. 095 | 1. 69E-37 M1 | TMEM47        |
| UBQLN2. 4   | 1. 19E-41 | -0. 17315 | 0. 094 | 0. 246 | 1. 77E-37 M1 | UBQLN2        |
| SH3GL1. 1   | 1. 20E-41 | -0. 21646 | 0. 113 | 0. 277 | 1. 80E-37 M1 | SH3GL1        |
| TFAM. 1     | 1. 28E-41 | -0. 16595 | 0. 066 | 0. 204 | 1. 91E-37 M1 | TFAM          |
| DNM1L. 2    | 1. 38E-41 | -0. 15358 | 0. 1   | 0. 258 | 2. 06E-37 M1 | DNM1L         |

|             |           |           |        |        |              |           |
|-------------|-----------|-----------|--------|--------|--------------|-----------|
| EPHA3. 3    | 1. 39E-41 | -0. 15263 | 0. 001 | 0. 088 | 2. 08E-37 M1 | EPHA3     |
| ZNF436. 2   | 1. 42E-41 | -0. 16557 | 0. 003 | 0. 093 | 2. 12E-37 M1 | ZNF436    |
| ARHGAP26. 1 | 1. 50E-41 | 0. 404941 | 0. 167 | 0. 076 | 2. 25E-37 M1 | ARHGAP26  |
| DNAL4. 2    | 1. 53E-41 | -0. 17792 | 0. 032 | 0. 147 | 2. 29E-37 M1 | DNAL4     |
| SORBS1. 2   | 1. 54E-41 | -0. 16026 | 0. 011 | 0. 109 | 2. 30E-37 M1 | SORBS1    |
| TARS. 1     | 1. 70E-41 | -0. 16417 | 0. 097 | 0. 253 | 2. 55E-37 M1 | TARS      |
| SPOCK1. 3   | 1. 82E-41 | -0. 34198 | 0. 005 | 0. 096 | 2. 71E-37 M1 | SPOCK1    |
| ZNF814. 1   | 1. 93E-41 | -0. 20045 | 0. 029 | 0. 141 | 2. 89E-37 M1 | ZNF814    |
| CADM3. 2    | 1. 94E-41 | -0. 41506 | 0. 016 | 0. 117 | 2. 90E-37 M1 | CADM3     |
| NDUF4F4. 2  | 1. 99E-41 | -0. 21879 | 0. 095 | 0. 247 | 2. 98E-37 M1 | NDUF4F4   |
| ADAM19. 3   | 2. 02E-41 | -0. 20717 | 0. 004 | 0. 095 | 3. 01E-37 M1 | ADAM19    |
| VIPR2. 3    | 2. 09E-41 | -0. 34209 | 0. 006 | 0. 098 | 3. 12E-37 M1 | VIPR2     |
| LDLR. 1     | 2. 38E-41 | -0. 18902 | 0. 015 | 0. 116 | 3. 56E-37 M1 | LDLR      |
| TNFAIP2. 2  | 2. 39E-41 | 0. 344341 | 0. 145 | 0. 061 | 3. 57E-37 M1 | TNFAIP2   |
| GMCL1. 2    | 2. 47E-41 | -0. 20546 | 0. 052 | 0. 18  | 3. 69E-37 M1 | GMCL1     |
| SH3PXD2B. 2 | 2. 64E-41 | -0. 16586 | 0. 025 | 0. 135 | 3. 95E-37 M1 | SH3PXD2B  |
| HOXD11. 2   | 2. 66E-41 | -0. 17401 | 0. 003 | 0. 091 | 3. 97E-37 M1 | HOXD11    |
| ADAMTS9. 2  | 2. 70E-41 | -0. 19171 | 0. 003 | 0. 092 | 4. 04E-37 M1 | ADAMTS9   |
| AASS. 2     | 2. 71E-41 | -0. 20373 | 0. 024 | 0. 133 | 4. 05E-37 M1 | AASS      |
| NAA35. 1    | 2. 80E-41 | -0. 1819  | 0. 038 | 0. 157 | 4. 19E-37 M1 | NAA35     |
| TMED1. 3    | 2. 83E-41 | -0. 24911 | 0. 145 | 0. 321 | 4. 24E-37 M1 | TMED1     |
| DOCK7       | 2. 86E-41 | -0. 15986 | 0. 031 | 0. 145 | 4. 28E-37 M1 | DOCK7     |
| CACNA2D4. 3 | 3. 08E-41 | 0. 365547 | 0. 145 | 0. 059 | 4. 60E-37 M1 | CACNA2D4  |
| SNAPC2      | 3. 30E-41 | -0. 17906 | 0. 082 | 0. 228 | 4. 93E-37 M1 | SNAPC2    |
| TANC1. 2    | 3. 31E-41 | -0. 16798 | 0. 02  | 0. 126 | 4. 95E-37 M1 | TANC1     |
| TRAP1. 2    | 3. 36E-41 | -0. 19019 | 0. 12  | 0. 286 | 5. 02E-37 M1 | TRAP1     |
| ZNF639. 3   | 3. 37E-41 | -0. 17438 | 0. 038 | 0. 156 | 5. 04E-37 M1 | ZNF639    |
| STK25. 4    | 3. 38E-41 | -0. 15479 | 0. 15  | 0. 333 | 5. 05E-37 M1 | STK25     |
| NKAIN4. 3   | 3. 39E-41 | -0. 38866 | 0. 017 | 0. 118 | 5. 07E-37 M1 | NKAIN4    |
| RRAS2. 2    | 3. 41E-41 | -0. 17581 | 0. 004 | 0. 093 | 5. 10E-37 M1 | RRAS2     |
| VTA1. 1     | 3. 46E-41 | -0. 19427 | 0. 069 | 0. 207 | 5. 17E-37 M1 | VTA1      |
| ZNF48. 2    | 3. 62E-41 | -0. 18356 | 0. 014 | 0. 113 | 5. 41E-37 M1 | ZNF48     |
| ANKRD28. 2  | 3. 72E-41 | -0. 28362 | 0. 024 | 0. 131 | 5. 55E-37 M1 | ANKRD28   |
| FBLN1. 3    | 3. 74E-41 | -0. 33009 | 0. 008 | 0. 101 | 5. 59E-37 M1 | FBLN1     |
| EIF4A3. 4   | 3. 89E-41 | 0. 396186 | 0. 492 | 0. 441 | 5. 82E-37 M1 | EIF4A3    |
| CCZ1B. 3    | 3. 93E-41 | -0. 17285 | 0. 047 | 0. 172 | 5. 87E-37 M1 | CCZ1B     |
| NOP58. 2    | 4. 09E-41 | -0. 2395  | 0. 148 | 0. 321 | 6. 12E-37 M1 | NOP58     |
| RBM15B. 3   | 4. 19E-41 | -0. 15534 | 0. 06  | 0. 193 | 6. 27E-37 M1 | RBM15B    |
| CHD4. 3     | 4. 24E-41 | -0. 20055 | 0. 168 | 0. 353 | 6. 34E-37 M1 | CHD4      |
| COQ4. 2     | 4. 28E-41 | -0. 1738  | 0. 126 | 0. 296 | 6. 40E-37 M1 | COQ4      |
| NAPEPLD. 1  | 4. 31E-41 | -0. 21424 | 0. 015 | 0. 116 | 6. 45E-37 M1 | NAPEPLD   |
| LSM14A. 1   | 4. 32E-41 | -0. 2098  | 0. 211 | 0. 415 | 6. 46E-37 M1 | LSM14A    |
| C14orf132   | 5. 23E-41 | -0. 30598 | 0. 011 | 0. 107 | 7. 82E-37 M1 | C14orf132 |
| SLBP. 3     | 5. 29E-41 | -0. 21929 | 0. 161 | 0. 341 | 7. 90E-37 M1 | SLBP      |
| RDH5. 2     | 5. 90E-41 | -0. 19872 | 0. 017 | 0. 12  | 8. 81E-37 M1 | RDH5      |
| SLC39A14. 6 | 1. 7E-41  | -0. 26832 | 0. 013 | 0. 111 | 9. 22E-37 M1 | SLC39A14  |
| KLHL35. 3   | 6. 19E-41 | -0. 37809 | 0. 013 | 0. 11  | 9. 25E-37 M1 | KLHL35    |
| ZNF579. 3   | 6. 40E-41 | -0. 14777 | 0. 024 | 0. 132 | 9. 56E-37 M1 | ZNF579    |
| TSKU. 2     | 6. 81E-41 | -0. 17839 | 0. 008 | 0. 101 | 1. 02E-36 M1 | TSKU      |
| SUCO. 1     | 6. 91E-41 | -0. 16789 | 0. 049 | 0. 175 | 1. 03E-36 M1 | SUCO      |
| APOPT1. 2   | 7. 02E-41 | -0. 21416 | 0. 21  | 0. 415 | 1. 05E-36 M1 | APOPT1    |

|            |           |           |        |        |           |    |           |
|------------|-----------|-----------|--------|--------|-----------|----|-----------|
| LILRB2. 4  | 7. 07E-41 | 0. 316652 | 0. 115 | 0. 041 | 1. 06E-36 | M1 | LILRB2    |
| EFNB3. 2   | 7. 32E-41 | -0. 1938  | 0. 002 | 0. 088 | 1. 09E-36 | M1 | EFNB3     |
| SLC35A5    | 7. 65E-41 | -0. 18897 | 0. 071 | 0. 21  | 1. 14E-36 | M1 | SLC35A5   |
| CERS4. 3   | 7. 96E-41 | -0. 17851 | 0. 079 | 0. 223 | 1. 19E-36 | M1 | CERS4     |
| ITGAE      | 8. 02E-41 | -0. 19785 | 0. 198 | 0. 398 | 1. 20E-36 | M1 | ITGAE     |
| SH3RF1. 2  | 8. 06E-41 | -0. 18184 | 0. 02  | 0. 124 | 1. 20E-36 | M1 | SH3RF1    |
| ASAP1. 2   | 8. 07E-41 | -0. 19271 | 0. 1   | 0. 253 | 1. 21E-36 | M1 | ASAP1     |
| ARL10. 1   | 8. 53E-41 | -0. 17413 | 0. 01  | 0. 105 | 1. 27E-36 | M1 | ARL10     |
| ZNF506. 2  | 8. 71E-41 | -0. 15459 | 0. 029 | 0. 14  | 1. 30E-36 | M1 | ZNF506    |
| RGS3. 2    | 8. 80E-41 | -0. 20062 | 0. 02  | 0. 124 | 1. 31E-36 | M1 | RGS3      |
| LRRFIP1. 4 | 8. 89E-41 | 0. 449425 | 0. 425 | 0. 339 | 1. 33E-36 | M1 | LRRFIP1   |
| LMNB1. 3   | 8. 98E-41 | -0. 25899 | 0. 048 | 0. 17  | 1. 34E-36 | M1 | LMNB1     |
| CCT5. 1    | 9. 10E-41 | -0. 25874 | 0. 297 | 0. 519 | 1. 36E-36 | M1 | CCT5      |
| TIMP1. 3   | 9. 14E-41 | -0. 54408 | 0. 507 | 0. 643 | 1. 37E-36 | M1 | TIMP1     |
| LCMT1      | 9. 46E-41 | -0. 18884 | 0. 124 | 0. 29  | 1. 41E-36 | M1 | LCMT1     |
| FBX044. 2  | 9. 51E-41 | -0. 22506 | 0. 042 | 0. 161 | 1. 42E-36 | M1 | FBX044    |
| CASP10. 1  | 9. 97E-41 | 0. 230899 | 0. 069 | 0. 017 | 1. 49E-36 | M1 | CASP10    |
| CENPH. 2   | 1. 01E-40 | -0. 23522 | 0. 033 | 0. 145 | 1. 51E-36 | M1 | CENPH     |
| ZNF644. 1  | 1. 01E-40 | -0. 15892 | 0. 116 | 0. 28  | 1. 51E-36 | M1 | ZNF644    |
| NEIL2. 3   | 1. 06E-40 | -0. 17248 | 0. 079 | 0. 222 | 1. 58E-36 | M1 | NEIL2     |
| PKD1. 2    | 1. 06E-40 | -0. 19016 | 0. 027 | 0. 136 | 1. 58E-36 | M1 | PKD1      |
| NGDN. 2    | 1. 08E-40 | -0. 1827  | 0. 125 | 0. 291 | 1. 62E-36 | M1 | NGDN      |
| CRK. 1     | 1. 10E-40 | -0. 17124 | 0. 161 | 0. 348 | 1. 64E-36 | M1 | CRK       |
| C11orf73.  | 1. 11E-40 | -0. 22275 | 0. 241 | 0. 456 | 1. 66E-36 | M1 | C11orf73  |
| TRMT13. 1  | 1. 13E-40 | -0. 21414 | 0. 039 | 0. 156 | 1. 68E-36 | M1 | TRMT13    |
| ZNF566. 2  | 1. 14E-40 | -0. 22426 | 0. 025 | 0. 133 | 1. 71E-36 | M1 | ZNF566    |
| FKBP1B. 1  | 1. 15E-40 | -0. 17598 | 0. 03  | 0. 141 | 1. 71E-36 | M1 | FKBP1B    |
| BBS2. 4    | 1. 17E-40 | -0. 22781 | 0. 062 | 0. 194 | 1. 75E-36 | M1 | BBS2      |
| CNPY1. 3   | 1. 21E-40 | -0. 23966 | 0. 004 | 0. 092 | 1. 80E-36 | M1 | CNPY1     |
| GNPDA2. 1  | 1. 21E-40 | -0. 1914  | 0. 031 | 0. 143 | 1. 81E-36 | M1 | GNPDA2    |
| TBC1D20. 2 | 1. 23E-40 | -0. 16582 | 0. 068 | 0. 206 | 1. 84E-36 | M1 | TBC1D20   |
| DLG5. 1    | 1. 24E-40 | -0. 20532 | 0. 003 | 0. 091 | 1. 85E-36 | M1 | DLG5      |
| BCL2. 3    | 1. 30E-40 | 0. 322914 | 0. 107 | 0. 037 | 1. 94E-36 | M1 | BCL2      |
| CLASP2. 3  | 1. 32E-40 | -0. 25808 | 0. 081 | 0. 22  | 1. 97E-36 | M1 | CLASP2    |
| PTDSS2. 4  | 1. 33E-40 | -0. 15238 | 0. 048 | 0. 173 | 1. 99E-36 | M1 | PTDSS2    |
| DDA1       | 1. 42E-40 | -0. 18809 | 0. 172 | 0. 36  | 2. 12E-36 | M1 | DDA1      |
| KLHDC9. 2  | 1. 43E-40 | -0. 22416 | 0. 002 | 0. 088 | 2. 13E-36 | M1 | KLHDC9    |
| SMARCC1. 3 | 1. 46E-40 | -0. 16539 | 0. 119 | 0. 282 | 2. 18E-36 | M1 | SMARCC1   |
| SCARF1. 3  | 1. 48E-40 | 0. 232604 | 0. 07  | 0. 018 | 2. 20E-36 | M1 | SCARF1    |
| TUBB4A. 4  | 1. 48E-40 | -0. 45584 | 0. 029 | 0. 136 | 2. 21E-36 | M1 | TUBB4A    |
| METTL1. 3  | 1. 50E-40 | -0. 26804 | 0. 047 | 0. 167 | 2. 24E-36 | M1 | METTL1    |
| EID2. 3    | 1. 53E-40 | -0. 18604 | 0. 023 | 0. 129 | 2. 29E-36 | M1 | EID2      |
| LINC00844  | 1. 56E-40 | -0. 40855 | 0. 021 | 0. 123 | 2. 33E-36 | M1 | LINC00844 |
| IGFLR1. 1  | 1. 56E-40 | 0. 323706 | 0. 117 | 0. 043 | 2. 33E-36 | M1 | IGFLR1    |
| HSPA13. 3  | 1. 63E-40 | -0. 19549 | 0. 082 | 0. 223 | 2. 44E-36 | M1 | HSPA13    |
| TMEM222. 4 | 1. 64E-40 | -0. 21629 | 0. 138 | 0. 308 | 2. 45E-36 | M1 | TMEM222   |
| U2SURP. 1  | 1. 66E-40 | -0. 17939 | 0. 202 | 0. 403 | 2. 48E-36 | M1 | U2SURP    |
| DST. 3     | 1. 70E-40 | -0. 23599 | 0. 218 | 0. 408 | 2. 54E-36 | M1 | DST       |
| ACTR6. 1   | 1. 73E-40 | -0. 20164 | 0. 105 | 0. 26  | 2. 58E-36 | M1 | ACTR6     |
| ECI1. 2    | 1. 74E-40 | -0. 16477 | 0. 088 | 0. 238 | 2. 60E-36 | M1 | ECI1      |
| RNU12. 2   | 1. 75E-40 | 0. 304296 | 0. 089 | 0. 027 | 2. 61E-36 | M1 | RNU12     |

|            |           |           |        |        |              |                |
|------------|-----------|-----------|--------|--------|--------------|----------------|
| TTC14      | 1. 77E-40 | -0. 13584 | 0. 127 | 0. 298 | 2. 65E-36 M1 | TTC14          |
| STAU1. 2   | 1. 80E-40 | -0. 21304 | 0. 202 | 0. 399 | 2. 70E-36 M1 | STAU1          |
| UFSP2. 1   | 1. 83E-40 | -0. 20917 | 0. 092 | 0. 241 | 2. 74E-36 M1 | UFSP2          |
| NUPL2. 1   | 1. 83E-40 | -0. 15509 | 0. 128 | 0. 296 | 2. 74E-36 M1 | NUPL2          |
| HMCES. 1   | 1. 86E-40 | -0. 19296 | 0. 06  | 0. 191 | 2. 77E-36 M1 | HMCES          |
| ENKUR. 2   | 1. 88E-40 | -0. 26337 | 0. 001 | 0. 086 | 2. 80E-36 M1 | ENKUR          |
| NSFL1C. 1  | 1. 90E-40 | -0. 20102 | 0. 229 | 0. 436 | 2. 84E-36 M1 | NSFL1C         |
| RUNDC1     | 2. 00E-40 | -0. 17205 | 0. 038 | 0. 155 | 2. 99E-36 M1 | RUNDC1         |
| ZCCHC11. 1 | 2. 19E-40 | -0. 17142 | 0. 107 | 0. 265 | 3. 27E-36 M1 | ZCCHC11        |
| AGRN. 2    | 2. 20E-40 | -0. 18765 | 0. 013 | 0. 11  | 3. 29E-36 M1 | AGRN           |
| REX04. 1   | 2. 23E-40 | -0. 17129 | 0. 074 | 0. 214 | 3. 33E-36 M1 | REX04          |
| GMIP. 4    | 2. 24E-40 | 0. 332925 | 0. 143 | 0. 06  | 3. 34E-36 M1 | GMIP           |
| RASSF8-AS  | 2. 26E-40 | -0. 20105 | 0. 054 | 0. 181 | 3. 38E-36 M1 | RASSF8-AS1     |
| ARHGEF2. 3 | 2. 30E-40 | -0. 23596 | 0. 148 | 0. 317 | 3. 44E-36 M1 | ARHGEF2        |
| GLG1. 4    | 2. 52E-40 | -0. 16731 | 0. 126 | 0. 294 | 3. 77E-36 M1 | GLG1           |
| LMAN2L. 1  | 2. 55E-40 | -0. 21238 | 0. 025 | 0. 131 | 3. 81E-36 M1 | LMAN2L         |
| SRSF12. 2  | 2. 60E-40 | -0. 19846 | 0. 002 | 0. 087 | 3. 88E-36 M1 | SRSF12         |
| STRBP. 4   | 2. 60E-40 | -0. 17257 | 0. 033 | 0. 145 | 3. 88E-36 M1 | STRBP          |
| IGSF10. 1  | 2. 64E-40 | -0. 14943 | 0. 016 | 0. 116 | 3. 95E-36 M1 | IGSF10         |
| LY6H. 3    | 2. 76E-40 | -0. 37765 | 0. 009 | 0. 101 | 4. 12E-36 M1 | LY6H           |
| C19orf48.  | 2. 94E-40 | -0. 20703 | 0. 101 | 0. 253 | 4. 39E-36 M1 | C19orf48       |
| CRY1. 1    | 3. 06E-40 | -0. 22371 | 0. 039 | 0. 156 | 4. 57E-36 M1 | CRY1           |
| KIAA0232.  | 3. 11E-40 | -0. 17563 | 0. 049 | 0. 172 | 4. 65E-36 M1 | KIAA0232       |
| RIF1. 3    | 3. 22E-40 | -0. 18211 | 0. 094 | 0. 245 | 4. 81E-36 M1 | RIF1           |
| CEBPZ. 2   | 3. 30E-40 | -0. 20037 | 0. 132 | 0. 299 | 4. 93E-36 M1 | CEBPZ          |
| FAM171A1.  | 3. 42E-40 | -0. 20606 | 0. 004 | 0. 091 | 5. 10E-36 M1 | FAM171A1       |
| SEC61A1. 2 | 3. 43E-40 | -0. 17518 | 0. 2   | 0. 398 | 5. 13E-36 M1 | SEC61A1        |
| CIB2. 2    | 3. 45E-40 | -0. 15169 | 0. 004 | 0. 092 | 5. 15E-36 M1 | CIB2           |
| GBGT1. 4   | 3. 51E-40 | 0. 265474 | 0. 109 | 0. 038 | 5. 24E-36 M1 | GBGT1          |
| PFKP       | 3. 53E-40 | -0. 23057 | 0. 049 | 0. 172 | 5. 27E-36 M1 | PFKP           |
| LSM12. 2   | 3. 75E-40 | -0. 17874 | 0. 122 | 0. 287 | 5. 60E-36 M1 | LSM12          |
| SPN. 4     | 3. 86E-40 | 0. 311275 | 0. 117 | 0. 043 | 5. 77E-36 M1 | SPN            |
| LSS. 3     | 4. 01E-40 | -0. 22492 | 0. 016 | 0. 115 | 5. 99E-36 M1 | LSS            |
| USP5       | 4. 13E-40 | -0. 20478 | 0. 099 | 0. 25  | 6. 17E-36 M1 | USP5           |
| SYNE1. 1   | 4. 24E-40 | -0. 23187 | 0. 031 | 0. 141 | 6. 33E-36 M1 | SYNE1          |
| MIR4458HG  | 4. 27E-40 | -0. 3709  | 0. 058 | 0. 181 | 6. 38E-36 M1 | MIR4458HG      |
| ALDH6A1. 2 | 4. 37E-40 | -0. 19858 | 0. 086 | 0. 231 | 6. 53E-36 M1 | ALDH6A1        |
| DLC1. 2    | 4. 66E-40 | -0. 21685 | 0. 009 | 0. 102 | 6. 96E-36 M1 | DLC1           |
| SELT. 1    | 4. 75E-40 | 0. 214619 | 0. 67  | 0. 657 | 7. 09E-36 M1 | SELT           |
| GLO1. 2    | 4. 79E-40 | -0. 23065 | 0. 237 | 0. 445 | 7. 15E-36 M1 | GLO1           |
| TLR4. 3    | 4. 79E-40 | 0. 308159 | 0. 094 | 0. 03  | 7. 15E-36 M1 | TLR4           |
| CNR1. 2    | 4. 83E-40 | -0. 18356 | 0. 002 | 0. 088 | 7. 21E-36 M1 | CNR1           |
| SAMD4B. 1  | 5. 32E-40 | -0. 15836 | 0. 096 | 0. 248 | 7. 95E-36 M1 | SAMD4B         |
| PIN1. 2    | 5. 81E-40 | -0. 25131 | 0. 358 | 0. 573 | 8. 69E-36 M1 | PIN1           |
| POR. 1     | 5. 82E-40 | -0. 21319 | 0. 128 | 0. 293 | 8. 69E-36 M1 | POR            |
| RAB5C. 2   | 6. 06E-40 | 0. 191706 | 0. 664 | 0. 651 | 9. 06E-36 M1 | RAB5C          |
| LARP1. 2   | 6. 10E-40 | -0. 18307 | 0. 118 | 0. 279 | 9. 11E-36 M1 | LARP1          |
| RP11-156K  | 6. 24E-40 | 0. 237877 | 0. 056 | 0. 011 | 9. 33E-36 M1 | RP11-156K13. 3 |
| FAM20C. 4  | 6. 33E-40 | -0. 23872 | 0. 099 | 0. 248 | 9. 46E-36 M1 | FAM20C         |
| ZNF24. 2   | 6. 41E-40 | -0. 17136 | 0. 151 | 0. 33  | 9. 57E-36 M1 | ZNF24          |
| C19orf12.  | 6. 58E-40 | -0. 18489 | 0. 043 | 0. 162 | 9. 83E-36 M1 | C19orf12       |

|              |           |           |        |        |           |    |               |
|--------------|-----------|-----------|--------|--------|-----------|----|---------------|
| FAM53C. 3    | 6. 68E-40 | 0. 479187 | 0. 326 | 0. 225 | 9. 98E-36 | M1 | FAM53C        |
| MGARP. 1     | 6. 79E-40 | -0. 15505 | 0. 006 | 0. 095 | 1. 01E-35 | M1 | MGARP         |
| SUCLG1. 2    | 6. 88E-40 | -0. 20992 | 0. 255 | 0. 473 | 1. 03E-35 | M1 | SUCLG1        |
| CASS4. 1     | 6. 91E-40 | 0. 205052 | 0. 049 | 0. 009 | 1. 03E-35 | M1 | CASS4         |
| SRRM3. 3     | 6. 94E-40 | -0. 29453 | 0. 002 | 0. 086 | 1. 04E-35 | M1 | SRRM3         |
| FAM168B. 3   | 6. 99E-40 | -0. 1656  | 0. 057 | 0. 184 | 1. 05E-35 | M1 | FAM168B       |
| GTF3C5. 2    | 7. 17E-40 | -0. 17707 | 0. 072 | 0. 209 | 1. 07E-35 | M1 | GTF3C5        |
| SGTA. 2      | 7. 31E-40 | -0. 186   | 0. 163 | 0. 346 | 1. 09E-35 | M1 | SGTA          |
| SLC29A4. 1   | 7. 50E-40 | -0. 21392 | 0. 007 | 0. 097 | 1. 12E-35 | M1 | SLC29A4       |
| SUZ12. 3     | 7. 66E-40 | -0. 15549 | 0. 077 | 0. 218 | 1. 14E-35 | M1 | SUZ12         |
| SLC25A38. 7  | 7. 95E-40 | -0. 22228 | 0. 046 | 0. 166 | 1. 19E-35 | M1 | SLC25A38      |
| CCR5. 2      | 8. 00E-40 | 0. 212713 | 0. 068 | 0. 017 | 1. 20E-35 | M1 | CCR5          |
| CAND1. 1     | 8. 14E-40 | -0. 17321 | 0. 106 | 0. 261 | 1. 22E-35 | M1 | CAND1         |
| CCDC112. 3   | 8. 16E-40 | -0. 18663 | 0. 125 | 0. 288 | 1. 22E-35 | M1 | CCDC112       |
| CEP70. 2     | 8. 32E-40 | -0. 2236  | 0. 016 | 0. 114 | 1. 24E-35 | M1 | CEP70         |
| SOD1. 3      | 8. 35E-40 | -0. 31974 | 0. 605 | 0. 787 | 1. 25E-35 | M1 | SOD1          |
| AARS. 2      | 8. 45E-40 | -0. 22626 | 0. 104 | 0. 256 | 1. 26E-35 | M1 | AARS          |
| B4GALT2. 1   | 9. 02E-40 | -0. 18176 | 0. 004 | 0. 091 | 1. 35E-35 | M1 | B4GALT2       |
| C1orf109. 9  | 9. 24E-40 | -0. 17459 | 0. 037 | 0. 151 | 1. 38E-35 | M1 | C1orf109      |
| TPD52. 3     | 9. 35E-40 | -0. 26082 | 0. 109 | 0. 262 | 1. 40E-35 | M1 | TPD52         |
| ADNP. 3      | 9. 35E-40 | -0. 16058 | 0. 076 | 0. 216 | 1. 40E-35 | M1 | ADNP          |
| DYNC1H1. 3   | 9. 61E-40 | -0. 20564 | 0. 181 | 0. 369 | 1. 44E-35 | M1 | DYNC1H1       |
| CTCF. 2      | 1. 01E-39 | -0. 17431 | 0. 057 | 0. 185 | 1. 51E-35 | M1 | CTCF          |
| SECISBP2L. 1 | 1. 02E-39 | -0. 20845 | 0. 065 | 0. 196 | 1. 52E-35 | M1 | SECISBP2L     |
| LMO3. 1      | 1. 04E-39 | -0. 33219 | 0. 008 | 0. 098 | 1. 56E-35 | M1 | LMO3          |
| EHD2. 2      | 1. 20E-39 | -0. 16821 | 0. 007 | 0. 096 | 1. 80E-35 | M1 | EHD2          |
| PLXNA4. 3    | 1. 23E-39 | -0. 2428  | 0. 004 | 0. 091 | 1. 83E-35 | M1 | PLXNA4        |
| RP11-796E. 1 | 1. 23E-39 | 0. 435837 | 0. 13  | 0. 052 | 1. 84E-35 | M1 | RP11-796E2. 4 |
| RRP1. 3      | 1. 23E-39 | -0. 17627 | 0. 089 | 0. 234 | 1. 84E-35 | M1 | RRP1          |
| NUMBL. 2     | 1. 26E-39 | -0. 17495 | 0. 011 | 0. 105 | 1. 88E-35 | M1 | NUMBL         |
| FPR3. 4      | 1. 29E-39 | 0. 26233  | 0. 118 | 0. 044 | 1. 93E-35 | M1 | FPR3          |
| CCDC66. 3    | 1. 34E-39 | -0. 14217 | 0. 101 | 0. 255 | 2. 00E-35 | M1 | CCDC66        |
| COPS5. 1     | 1. 38E-39 | -0. 20571 | 0. 236 | 0. 445 | 2. 07E-35 | M1 | COPS5         |
| ERP44. 2     | 1. 52E-39 | 0. 368918 | 0. 467 | 0. 381 | 2. 28E-35 | M1 | ERP44         |
| PPP1R14A. 1  | 1. 55E-39 | -0. 54339 | 0. 023 | 0. 124 | 2. 32E-35 | M1 | PPP1R14A      |
| NONO. 3      | 1. 59E-39 | -0. 24953 | 0. 278 | 0. 491 | 2. 37E-35 | M1 | NONO          |
| ALDOC. 3     | 1. 70E-39 | -0. 41537 | 0. 056 | 0. 175 | 2. 54E-35 | M1 | ALDOC         |
| CRISPLD1. 1  | 1. 74E-39 | -0. 22097 | 0. 012 | 0. 105 | 2. 61E-35 | M1 | CRISPLD1      |
| MDH2. 1      | 1. 81E-39 | -0. 26673 | 0. 477 | 0. 697 | 2. 70E-35 | M1 | MDH2          |
| EXOC7. 3     | 1. 85E-39 | -0. 15401 | 0. 19  | 0. 385 | 2. 76E-35 | M1 | EXOC7         |
| FEN1. 2      | 1. 93E-39 | -0. 25438 | 0. 041 | 0. 155 | 2. 88E-35 | M1 | FEN1          |
| MRGBP. 2     | 1. 95E-39 | -0. 13028 | 0. 046 | 0. 167 | 2. 91E-35 | M1 | MRGBP         |
| TADA3. 1     | 1. 95E-39 | -0. 21078 | 0. 221 | 0. 424 | 2. 92E-35 | M1 | TADA3         |
| ANKMY2. 1    | 2. 18E-39 | -0. 25329 | 0. 029 | 0. 136 | 3. 26E-35 | M1 | ANKMY2        |
| ATP6V1D. 1   | 2. 21E-39 | -0. 20565 | 0. 206 | 0. 403 | 3. 31E-35 | M1 | ATP6V1D       |
| CCDC90B. 3   | 2. 28E-39 | -0. 19857 | 0. 235 | 0. 444 | 3. 40E-35 | M1 | CCDC90B       |
| PIN4. 3      | 2. 29E-39 | -0. 23917 | 0. 245 | 0. 453 | 3. 43E-35 | M1 | PIN4          |
| PRTFDC1. 1   | 2. 31E-39 | -0. 22443 | 0. 04  | 0. 154 | 3. 45E-35 | M1 | PRTFDC1       |
| MFSD7. 3     | 2. 44E-39 | 0. 236198 | 0. 078 | 0. 022 | 3. 64E-35 | M1 | MFSD7         |
| RNASEH2A. 2  | 2. 56E-39 | -0. 24071 | 0. 092 | 0. 235 | 3. 83E-35 | M1 | RNASEH2A      |
| CDKN3. 3     | 2. 66E-39 | -0. 30669 | 0. 013 | 0. 107 | 3. 98E-35 | M1 | CDKN3         |



|            |          |          |       |       |          |    |            |
|------------|----------|----------|-------|-------|----------|----|------------|
| IRF2BP1.3  | 2.68E-39 | -0.14489 | 0.021 | 0.123 | 4.01E-35 | M1 | IRF2BP1    |
| MDGA1.2    | 2.76E-39 | -0.14511 | 0.001 | 0.084 | 4.12E-35 | M1 | MDGA1      |
| ARFRP1.1   | 2.96E-39 | -0.16785 | 0.115 | 0.274 | 4.42E-35 | M1 | ARFRP1     |
| POLDIP2.4  | 3.01E-39 | -0.20597 | 0.191 | 0.378 | 4.50E-35 | M1 | POLDIP2    |
| UNG.1      | 3.13E-39 | -0.24785 | 0.032 | 0.14  | 4.68E-35 | M1 | UNG        |
| GRB10.3    | 3.21E-39 | -0.21779 | 0.003 | 0.087 | 4.80E-35 | M1 | GRB10      |
| GRK4.2     | 3.24E-39 | -0.19387 | 0.016 | 0.114 | 4.84E-35 | M1 | GRK4       |
| PPP1R37.2  | 3.39E-39 | -0.17089 | 0.039 | 0.153 | 5.06E-35 | M1 | PPP1R37    |
| PPP4R2.1   | 3.55E-39 | -0.15124 | 0.124 | 0.289 | 5.30E-35 | M1 | PPP4R2     |
| TUBGCP4.2  | 3.58E-39 | -0.14808 | 0.032 | 0.141 | 5.35E-35 | M1 | TUBGCP4    |
| C20orf96.3 | 3.62E-39 | -0.15285 | 0.049 | 0.171 | 5.40E-35 | M1 | C20orf96   |
| NACAD.3    | 3.65E-39 | -0.25584 | 0.012 | 0.105 | 5.45E-35 | M1 | NACAD      |
| REXO2.4    | 3.78E-39 | -0.33598 | 0.174 | 0.348 | 5.64E-35 | M1 | REXO2      |
| LRRC40.1   | 3.83E-39 | -0.20996 | 0.045 | 0.162 | 5.73E-35 | M1 | LRRC40     |
| SNTB2.1    | 4.01E-39 | -0.16159 | 0.015 | 0.111 | 5.99E-35 | M1 | SNTB2      |
| MAML2.3    | 4.08E-39 | -0.16479 | 0.08  | 0.221 | 6.10E-35 | M1 | MAML2      |
| AC007405.4 | 4.16E-39 | -0.18319 | 0     | 0.081 | 6.21E-35 | M1 | AC007405.6 |
| EAPP.3     | 4.30E-39 | -0.23841 | 0.197 | 0.386 | 6.43E-35 | M1 | EAPP       |
| PFDN6.3    | 4.40E-39 | -0.23007 | 0.194 | 0.384 | 6.57E-35 | M1 | PFDN6      |
| WDR82.3    | 4.43E-39 | -0.1716  | 0.121 | 0.281 | 6.62E-35 | M1 | WDR82      |
| ZFP82.2    | 4.53E-39 | -0.18696 | 0.023 | 0.126 | 6.77E-35 | M1 | ZFP82      |
| FAM217B.4  | 4.67E-39 | -0.16245 | 0.052 | 0.176 | 6.97E-35 | M1 | FAM217B    |
| SLC35B4.2  | 4.92E-39 | -0.18609 | 0.077 | 0.214 | 7.36E-35 | M1 | SLC35B4    |
| LDOC1.3    | 4.98E-39 | -0.32823 | 0.011 | 0.103 | 7.44E-35 | M1 | LDOC1      |
| FUNDC1.3   | 5.15E-39 | -0.23253 | 0.116 | 0.272 | 7.70E-35 | M1 | FUNDC1     |
| DMTF1.2    | 5.32E-39 | -0.16257 | 0.048 | 0.168 | 7.95E-35 | M1 | DMTF1      |
| FAIM.2     | 5.55E-39 | -0.2115  | 0.047 | 0.166 | 8.29E-35 | M1 | FAIM       |
| OGFOD1.1   | 5.55E-39 | -0.18112 | 0.049 | 0.17  | 8.29E-35 | M1 | OGFOD1     |
| ZC3HC1.2   | 5.71E-39 | -0.1985  | 0.033 | 0.143 | 8.53E-35 | M1 | ZC3HC1     |
| ZC3H12A.3  | 5.84E-39 | 0.32064  | 0.145 | 0.062 | 8.72E-35 | M1 | ZC3H12A    |
| PRRC2B.4   | 6.03E-39 | -0.18106 | 0.108 | 0.262 | 9.01E-35 | M1 | PRRC2B     |
| OGG1       | 6.06E-39 | -0.16054 | 0.049 | 0.17  | 9.05E-35 | M1 | OGG1       |
| GNPAT.3    | 6.17E-39 | -0.13413 | 0.109 | 0.266 | 9.23E-35 | M1 | GNPAT      |
| ZSCAN21.2  | 6.20E-39 | -0.21204 | 0.019 | 0.118 | 9.26E-35 | M1 | ZSCAN21    |
| REV3L.1    | 6.26E-39 | -0.1886  | 0.09  | 0.233 | 9.36E-35 | M1 | REV3L      |
| ADPRHL2.3  | 6.29E-39 | -0.16288 | 0.125 | 0.289 | 9.40E-35 | M1 | ADPRHL2    |
| CDH6.2     | 6.47E-39 | -0.17079 | 0.001 | 0.082 | 9.67E-35 | M1 | CDH6       |
| HMBS.1     | 6.70E-39 | -0.14489 | 0.08  | 0.22  | 1.00E-34 | M1 | HMBS       |
| ACTL6A.2   | 6.95E-39 | -0.20817 | 0.124 | 0.284 | 1.04E-34 | M1 | ACTL6A     |
| NUP160.2   | 7.04E-39 | -0.18377 | 0.058 | 0.183 | 1.05E-34 | M1 | NUP160     |
| RGN.3      | 7.04E-39 | -0.26253 | 0.003 | 0.086 | 1.05E-34 | M1 | RGN        |
| FKBP3.2    | 7.17E-39 | -0.27715 | 0.298 | 0.513 | 1.07E-34 | M1 | FKBP3      |
| ACD.2      | 7.22E-39 | -0.20048 | 0.062 | 0.189 | 1.08E-34 | M1 | ACD        |
| SUPT20H.2  | 7.31E-39 | -0.15998 | 0.087 | 0.231 | 1.09E-34 | M1 | SUPT20H    |
| BOK.4      | 7.42E-39 | -0.22629 | 0.005 | 0.09  | 1.11E-34 | M1 | BOK        |
| TMEM53.2   | 7.71E-39 | -0.19165 | 0.021 | 0.122 | 1.15E-34 | M1 | TMEM53     |
| PAAF1.2    | 7.94E-39 | -0.18195 | 0.083 | 0.222 | 1.19E-34 | M1 | PAAF1      |
| PRKAR1B.2  | 8.17E-39 | -0.24153 | 0.036 | 0.146 | 1.22E-34 | M1 | PRKAR1B    |
| CLSTN1.2   | 8.39E-39 | -0.18911 | 0.142 | 0.311 | 1.25E-34 | M1 | CLSTN1     |
| PDCD7.1    | 8.52E-39 | -0.16541 | 0.096 | 0.246 | 1.27E-34 | M1 | PDCD7      |
| LRRC17.2   | 8.58E-39 | -0.24098 | 0.004 | 0.088 | 1.28E-34 | M1 | LRRC17     |

|             |           |           |        |        |              |                |
|-------------|-----------|-----------|--------|--------|--------------|----------------|
| GIN52. 2    | 8. 78E-39 | -0. 2495  | 0. 018 | 0. 116 | 1. 31E-34 M1 | GIN52          |
| DDX23. 2    | 9. 46E-39 | -0. 18461 | 0. 056 | 0. 18  | 1. 41E-34 M1 | DDX23          |
| CEP290. 2   | 9. 58E-39 | -0. 17739 | 0. 055 | 0. 178 | 1. 43E-34 M1 | CEP290         |
| EIF2B1      | 9. 93E-39 | -0. 18633 | 0. 142 | 0. 311 | 1. 48E-34 M1 | EIF2B1         |
| RYR1. 1     | 9. 95E-39 | 0. 213605 | 0. 049 | 0. 009 | 1. 49E-34 M1 | RYR1           |
| PTGFRN. 1   | 1. 03E-38 | -0. 17648 | 0. 02  | 0. 12  | 1. 54E-34 M1 | PTGFRN         |
| CHRN1. 3    | 1. 04E-38 | -0. 21296 | 0. 049 | 0. 169 | 1. 56E-34 M1 | CHRN1          |
| TMEM67. 2   | 1. 08E-38 | -0. 17245 | 0. 015 | 0. 111 | 1. 61E-34 M1 | TMEM67         |
| CCDC136. 2  | 1. 08E-38 | -0. 23912 | 0. 013 | 0. 106 | 1. 62E-34 M1 | CCDC136        |
| POMGNT1. 3  | 1. 09E-38 | -0. 14741 | 0. 121 | 0. 285 | 1. 62E-34 M1 | POMGNT1        |
| ZNF880      | 1. 10E-38 | -0. 18858 | 0. 046 | 0. 165 | 1. 65E-34 M1 | ZNF880         |
| ARHGAP25. 1 | 1. 10E-38 | 0. 327543 | 0. 13  | 0. 053 | 1. 65E-34 M1 | ARHGAP25       |
| LAMTOR5. 2  | 1. 11E-38 | -0. 30169 | 0. 521 | 0. 726 | 1. 65E-34 M1 | LAMTOR5        |
| SLC35G2. 4  | 1. 11E-38 | -0. 20123 | 0. 029 | 0. 135 | 1. 66E-34 M1 | SLC35G2        |
| BHLHE40. 3  | 1. 13E-38 | 0. 425809 | 0. 279 | 0. 176 | 1. 68E-34 M1 | BHLHE40        |
| MPP6. 2     | 1. 17E-38 | -0. 1768  | 0. 003 | 0. 087 | 1. 74E-34 M1 | MPP6           |
| PHLPP1. 4   | 1. 22E-38 | -0. 247   | 0. 01  | 0. 1   | 1. 82E-34 M1 | PHLPP1         |
| MAML1. 4    | 1. 22E-38 | 0. 42712  | 0. 195 | 0. 102 | 1. 82E-34 M1 | MAML1          |
| HOXA10. 4   | 1. 23E-38 | -0. 28341 | 0. 006 | 0. 091 | 1. 83E-34 M1 | HOXA10         |
| PMPCA. 2    | 1. 23E-38 | -0. 17562 | 0. 116 | 0. 272 | 1. 84E-34 M1 | PMPCA          |
| DHRS13. 2   | 1. 24E-38 | -0. 15303 | 0. 017 | 0. 114 | 1. 85E-34 M1 | DHRS13         |
| DNAAF2. 3   | 1. 24E-38 | -0. 17477 | 0. 065 | 0. 194 | 1. 85E-34 M1 | DNAAF2         |
| ZNF426. 1   | 1. 24E-38 | -0. 19253 | 0. 026 | 0. 13  | 1. 86E-34 M1 | ZNF426         |
| ALKBH5. 3   | 1. 27E-38 | -0. 19753 | 0. 174 | 0. 353 | 1. 89E-34 M1 | ALKBH5         |
| SLC25A36. 1 | 1. 28E-38 | -0. 17477 | 0. 132 | 0. 297 | 1. 91E-34 M1 | SLC25A36       |
| GNAO1. 2    | 1. 28E-38 | -0. 30826 | 0. 013 | 0. 106 | 1. 91E-34 M1 | GNAO1          |
| DNMT1. 3    | 1. 29E-38 | -0. 18737 | 0. 146 | 0. 314 | 1. 93E-34 M1 | DNMT1          |
| TUBG2. 3    | 1. 30E-38 | -0. 19798 | 0. 024 | 0. 127 | 1. 94E-34 M1 | TUBG2          |
| CEP89. 2    | 1. 30E-38 | -0. 19256 | 0. 037 | 0. 149 | 1. 94E-34 M1 | CEP89          |
| NACC2. 2    | 1. 36E-38 | -0. 16816 | 0. 02  | 0. 119 | 2. 03E-34 M1 | NACC2          |
| CTDSP1. 4   | 1. 41E-38 | 0. 511761 | 0. 302 | 0. 205 | 2. 11E-34 M1 | CTDSP1         |
| THYN1. 3    | 1. 42E-38 | -0. 23859 | 0. 237 | 0. 44  | 2. 13E-34 M1 | THYN1          |
| FAM134A. 4  | 1. 53E-38 | -0. 16918 | 0. 152 | 0. 327 | 2. 29E-34 M1 | FAM134A        |
| GORASP2. 2  | 1. 56E-38 | -0. 15463 | 0. 149 | 0. 321 | 2. 33E-34 M1 | GORASP2        |
| STX2. 3     | 1. 58E-38 | -0. 16146 | 0. 023 | 0. 125 | 2. 36E-34 M1 | STX2           |
| PRKCI       | 1. 60E-38 | -0. 18328 | 0. 02  | 0. 12  | 2. 39E-34 M1 | PRKCI          |
| SBK1. 4     | 1. 64E-38 | -0. 24459 | 0. 003 | 0. 085 | 2. 45E-34 M1 | SBK1           |
| KPNB1. 3    | 1. 75E-38 | -0. 24005 | 0. 273 | 0. 483 | 2. 62E-34 M1 | KPNB1          |
| FAM98A. 2   | 1. 77E-38 | -0. 20899 | 0. 045 | 0. 161 | 2. 65E-34 M1 | FAM98A         |
| RP11-262H   | 1. 78E-38 | -0. 16127 | 0. 03  | 0. 136 | 2. 67E-34 M1 | RP11-262H14. 4 |
| AASDH. 2    | 1. 85E-38 | -0. 2055  | 0. 06  | 0. 185 | 2. 77E-34 M1 | AASDH          |
| C16orf13. 1 | 1. 86E-38 | -0. 22764 | 0. 282 | 0. 496 | 2. 77E-34 M1 | C16orf13       |
| PDS5B. 2    | 1. 91E-38 | -0. 16992 | 0. 061 | 0. 189 | 2. 86E-34 M1 | PDS5B          |
| SMG6        | 1. 97E-38 | -0. 14274 | 0. 032 | 0. 141 | 2. 95E-34 M1 | SMG6           |
| PWWP2A. 1   | 2. 01E-38 | -0. 19022 | 0. 035 | 0. 145 | 3. 01E-34 M1 | PWWP2A         |
| RP11-108M   | 2. 09E-38 | 0. 399289 | 0. 178 | 0. 087 | 3. 12E-34 M1 | RP11-108M9. 4  |
| FXYD7. 3    | 2. 09E-38 | -0. 35168 | 0. 006 | 0. 092 | 3. 13E-34 M1 | FXYD7          |
| IPO5. 2     | 2. 14E-38 | -0. 16562 | 0. 094 | 0. 24  | 3. 20E-34 M1 | IPO5           |
| TXLNA. 2    | 2. 16E-38 | -0. 17021 | 0. 043 | 0. 159 | 3. 22E-34 M1 | TXLNA          |
| HMOX2. 2    | 2. 30E-38 | -0. 23769 | 0. 153 | 0. 323 | 3. 43E-34 M1 | HMOX2          |
| TMEM131. 3  | 2. 30E-38 | -0. 14021 | 0. 047 | 0. 166 | 3. 44E-34 M1 | TMEM131        |

|            |          |          |       |       |          |    |          |
|------------|----------|----------|-------|-------|----------|----|----------|
| ZNF830.2   | 2.36E-38 | -0.16898 | 0.077 | 0.214 | 3.52E-34 | M1 | ZNF830   |
| TMIGD2.1   | 2.37E-38 | 0.229304 | 0.057 | 0.012 | 3.55E-34 | M1 | TMIGD2   |
| FAM222B.3  | 2.38E-38 | -0.14638 | 0.026 | 0.131 | 3.55E-34 | M1 | FAM222B  |
| SYNM.2     | 2.48E-38 | -0.15956 | 0.003 | 0.085 | 3.70E-34 | M1 | SYNM     |
| ANAPC15.2  | 2.51E-38 | -0.19042 | 0.127 | 0.288 | 3.75E-34 | M1 | ANAPC15  |
| TENM1.2    | 2.56E-38 | -0.18472 | 0.003 | 0.085 | 3.83E-34 | M1 | TENM1    |
| GLDC.2     | 2.65E-38 | -0.18629 | 0.001 | 0.082 | 3.95E-34 | M1 | GLDC     |
| ACYP2.3    | 2.74E-38 | -0.25012 | 0.167 | 0.341 | 4.10E-34 | M1 | ACYP2    |
| PHACTR3.3  | 2.85E-38 | -0.28822 | 0.006 | 0.092 | 4.26E-34 | M1 | PHACTR3  |
| FUZ.1      | 3.03E-38 | -0.18618 | 0.058 | 0.182 | 4.53E-34 | M1 | FUZ      |
| FAM131B.2  | 3.06E-38 | -0.21163 | 0.005 | 0.09  | 4.58E-34 | M1 | FAM131B  |
| RNF11.3    | 3.11E-38 | -0.17094 | 0.16  | 0.337 | 4.64E-34 | M1 | RNF11    |
| RAD23B.1   | 3.11E-38 | -0.21943 | 0.214 | 0.413 | 4.65E-34 | M1 | RAD23B   |
| RAB33A.2   | 3.14E-38 | -0.33375 | 0.023 | 0.123 | 4.69E-34 | M1 | RAB33A   |
| PRRC2A.3   | 3.39E-38 | -0.14694 | 0.113 | 0.269 | 5.07E-34 | M1 | PRRC2A   |
| N6AMT2.2   | 3.56E-38 | -0.22138 | 0.039 | 0.151 | 5.32E-34 | M1 | N6AMT2   |
| ANKRD35.1  | 3.57E-38 | -0.18917 | 0.042 | 0.156 | 5.34E-34 | M1 | ANKRD35  |
| FTSJ2.2    | 3.61E-38 | -0.18208 | 0.11  | 0.262 | 5.40E-34 | M1 | FTSJ2    |
| TRMT61B.2  | 3.62E-38 | -0.19841 | 0.06  | 0.184 | 5.41E-34 | M1 | TRMT61B  |
| DZIP3.2    | 3.72E-38 | -0.20013 | 0.038 | 0.149 | 5.57E-34 | M1 | DZIP3    |
| FADD.2     | 3.76E-38 | -0.1738  | 0.041 | 0.155 | 5.62E-34 | M1 | FADD     |
| VRK3.3     | 3.77E-38 | -0.15557 | 0.096 | 0.243 | 5.63E-34 | M1 | VRK3     |
| MED16.3    | 3.78E-38 | -0.13837 | 0.056 | 0.18  | 5.65E-34 | M1 | MED16    |
| MTHFD1.1   | 3.83E-38 | -0.19552 | 0.075 | 0.21  | 5.72E-34 | M1 | MTHFD1   |
| ABCA5.1    | 3.83E-38 | -0.19319 | 0.011 | 0.102 | 5.72E-34 | M1 | ABCA5    |
| ZBTB8A.3   | 3.86E-38 | -0.19905 | 0.021 | 0.12  | 5.77E-34 | M1 | ZBTB8A   |
| E2F6.2     | 3.91E-38 | -0.12379 | 0.046 | 0.164 | 5.85E-34 | M1 | E2F6     |
| SPNS1.3    | 4.10E-38 | -0.1555  | 0.146 | 0.319 | 6.13E-34 | M1 | SPNS1    |
| EFTUD2.2   | 4.12E-38 | -0.18753 | 0.095 | 0.239 | 6.16E-34 | M1 | EFTUD2   |
| KATNAL1.1  | 4.20E-38 | -0.18871 | 0.008 | 0.096 | 6.28E-34 | M1 | KATNAL1  |
| FUBP3.2    | 4.20E-38 | -0.16037 | 0.111 | 0.266 | 6.28E-34 | M1 | FUBP3    |
| ILF3-AS1.4 | 4.24E-38 | -0.17098 | 0.162 | 0.339 | 6.34E-34 | M1 | ILF3-AS1 |
| KCMF1.2    | 4.49E-38 | -0.13469 | 0.077 | 0.214 | 6.71E-34 | M1 | KCMF1    |
| DENND5B.3  | 4.49E-38 | -0.16237 | 0.016 | 0.112 | 6.72E-34 | M1 | DENND5B  |
| MRT04      | 4.77E-38 | -0.18417 | 0.116 | 0.272 | 7.13E-34 | M1 | MRT04    |
| XRR1.2     | 4.82E-38 | -0.16453 | 0.037 | 0.148 | 7.20E-34 | M1 | XRR1     |
| LAMA4.2    | 5.20E-38 | -0.2045  | 0.003 | 0.085 | 7.77E-34 | M1 | LAMA4    |
| PPFIA3.2   | 5.45E-38 | -0.16034 | 0.013 | 0.105 | 8.15E-34 | M1 | PPFIA3   |
| GNG3.2     | 5.57E-38 | -0.32817 | 0.004 | 0.087 | 8.32E-34 | M1 | GNG3     |
| ACSBG1.1   | 5.66E-38 | -0.17785 | 0.004 | 0.088 | 8.46E-34 | M1 | ACSBG1   |
| ATP6AP2.2  | 5.71E-38 | 0.207044 | 0.669 | 0.654 | 8.53E-34 | M1 | ATP6AP2  |
| STIP1.1    | 5.79E-38 | -0.18413 | 0.209 | 0.404 | 8.65E-34 | M1 | STIP1    |
| HPS1.3     | 5.93E-38 | 0.354372 | 0.19  | 0.095 | 8.86E-34 | M1 | HPS1     |
| NUCKS1.2   | 5.94E-38 | -0.2679  | 0.472 | 0.669 | 8.88E-34 | M1 | NUCKS1   |
| CENPF.4    | 5.95E-38 | -0.34937 | 0.021 | 0.117 | 8.90E-34 | M1 | CENPF    |
| POU2F1.3   | 5.98E-38 | -0.2046  | 0.058 | 0.181 | 8.94E-34 | M1 | POU2F1   |
| C1orf198.6 | 6.28E-38 | -0.27701 | 0.022 | 0.121 | 9.38E-34 | M1 | C1orf198 |
| ANKRD17.3  | 6.29E-38 | -0.14068 | 0.095 | 0.242 | 9.41E-34 | M1 | ANKRD17  |
| BEST3.3    | 6.31E-38 | -0.34565 | 0.012 | 0.102 | 9.42E-34 | M1 | BEST3    |
| ZNF181.2   | 6.62E-38 | -0.19971 | 0.017 | 0.113 | 9.90E-34 | M1 | ZNF181   |
| KLHDC2.3   | 6.90E-38 | -0.19025 | 0.157 | 0.331 | 1.03E-33 | M1 | KLHDC2   |

|              |           |           |        |        |              |          |
|--------------|-----------|-----------|--------|--------|--------------|----------|
| POLDIP3. 3   | 7. 33E-38 | -0. 17724 | 0. 074 | 0. 208 | 1. 10E-33 M1 | POLDIP3  |
| DDX56. 2     | 7. 74E-38 | -0. 18593 | 0. 125 | 0. 283 | 1. 16E-33 M1 | DDX56    |
| SSX2IP. 1    | 7. 84E-38 | -0. 12756 | 0. 017 | 0. 112 | 1. 17E-33 M1 | SSX2IP   |
| CELSR2. 3    | 7. 89E-38 | -0. 18718 | 0. 015 | 0. 108 | 1. 18E-33 M1 | CELSR2   |
| HOXA2. 3     | 7. 91E-38 | -0. 27417 | 0. 004 | 0. 086 | 1. 18E-33 M1 | HOXA2    |
| PDE6D. 2     | 8. 02E-38 | -0. 17415 | 0. 077 | 0. 211 | 1. 20E-33 M1 | PDE6D    |
| PBK. 4       | 8. 12E-38 | -0. 32333 | 0. 004 | 0. 087 | 1. 21E-33 M1 | PBK      |
| NOL8. 1      | 8. 17E-38 | -0. 17449 | 0. 074 | 0. 207 | 1. 22E-33 M1 | NOL8     |
| TRMT1. 3     | 8. 41E-38 | 0. 493856 | 0. 336 | 0. 241 | 1. 26E-33 M1 | TRMT1    |
| URGCP. 1     | 8. 58E-38 | -0. 18213 | 0. 029 | 0. 133 | 1. 28E-33 M1 | URGCP    |
| SMARCB1. 3   | 8. 73E-38 | -0. 20939 | 0. 246 | 0. 448 | 1. 31E-33 M1 | SMARCB1  |
| MIEF1        | 8. 93E-38 | -0. 16964 | 0. 048 | 0. 165 | 1. 33E-33 M1 | MIEF1    |
| KAZN. 2      | 9. 23E-38 | -0. 19892 | 0. 003 | 0. 085 | 1. 38E-33 M1 | KAZN     |
| MIR21OHG. 9. | 38E-38    | -0. 20376 | 0. 014 | 0. 107 | 1. 40E-33 M1 | MIR21OHG |
| TMEM55A. 3   | 9. 43E-38 | -0. 19123 | 0. 108 | 0. 258 | 1. 41E-33 M1 | TMEM55A  |
| ZMYND11. 4   | 9. 64E-38 | -0. 14012 | 0. 048 | 0. 166 | 1. 44E-33 M1 | ZMYND11  |
| TTC19. 2     | 1. 03E-37 | -0. 14703 | 0. 195 | 0. 388 | 1. 54E-33 M1 | TTC19    |
| PCNA. 2      | 1. 08E-37 | -0. 23304 | 0. 17  | 0. 344 | 1. 61E-33 M1 | PCNA     |
| NCOR1. 3     | 1. 12E-37 | -0. 22363 | 0. 291 | 0. 499 | 1. 67E-33 M1 | NCOR1    |
| FEM1C. 1     | 1. 13E-37 | -0. 14775 | 0. 044 | 0. 159 | 1. 69E-33 M1 | FEM1C    |
| TNRC6A       | 1. 15E-37 | -0. 17095 | 0. 094 | 0. 239 | 1. 72E-33 M1 | TNRC6A   |
| PNN. 3       | 1. 27E-37 | -0. 21882 | 0. 235 | 0. 435 | 1. 90E-33 M1 | PNN      |
| RORA. 1      | 1. 27E-37 | -0. 2499  | 0. 005 | 0. 089 | 1. 90E-33 M1 | RORA     |
| ABCF1. 3     | 1. 28E-37 | -0. 12774 | 0. 143 | 0. 312 | 1. 91E-33 M1 | ABCF1    |
| HRSP12. 4    | 1. 29E-37 | -0. 24463 | 0. 085 | 0. 221 | 1. 93E-33 M1 | HRSP12   |
| SPECC1. 4    | 1. 35E-37 | -0. 17978 | 0. 154 | 0. 324 | 2. 02E-33 M1 | SPECC1   |
| IGSF21. 4    | 1. 41E-37 | 0. 391085 | 0. 252 | 0. 146 | 2. 11E-33 M1 | IGSF21   |
| UBE2T. 4     | 1. 42E-37 | -0. 28905 | 0. 037 | 0. 145 | 2. 12E-33 M1 | UBE2T    |
| MKRN1. 3     | 1. 46E-37 | -0. 22072 | 0. 246 | 0. 441 | 2. 18E-33 M1 | MKRN1    |
| METAP2. 2    | 1. 52E-37 | -0. 23668 | 0. 288 | 0. 507 | 2. 28E-33 M1 | METAP2   |
| PDCD4. 4     | 1. 54E-37 | 0. 392835 | 0. 232 | 0. 132 | 2. 30E-33 M1 | PDCD4    |
| MARK1. 1     | 1. 56E-37 | -0. 15808 | 0. 001 | 0. 08  | 2. 33E-33 M1 | MARK1    |
| PTPRD. 3     | 1. 57E-37 | -0. 28492 | 0. 004 | 0. 086 | 2. 34E-33 M1 | PTPRD    |
| PIAS4. 1     | 1. 62E-37 | -0. 15987 | 0. 039 | 0. 15  | 2. 42E-33 M1 | PIAS4    |
| CDH26. 1     | 1. 68E-37 | 0. 191336 | 0. 038 | 0. 005 | 2. 51E-33 M1 | CDH26    |
| GPR161. 4    | 1. 72E-37 | -0. 17054 | 0. 01  | 0. 098 | 2. 56E-33 M1 | GPR161   |
| SYDE1. 1     | 1. 73E-37 | -0. 14732 | 0. 003 | 0. 084 | 2. 59E-33 M1 | SYDE1    |
| GPR37. 1     | 1. 75E-37 | -0. 35374 | 0. 004 | 0. 086 | 2. 61E-33 M1 | GPR37    |
| ASB8. 1      | 1. 77E-37 | -0. 15458 | 0. 097 | 0. 242 | 2. 64E-33 M1 | ASB8     |
| SLC17A9. 3   | 1. 82E-37 | 0. 23032  | 0. 074 | 0. 021 | 2. 71E-33 M1 | SLC17A9  |
| PPP2R5E. 3   | 1. 83E-37 | -0. 15907 | 0. 118 | 0. 273 | 2. 74E-33 M1 | PPP2R5E  |
| Clorf216. 1. | 92E-37    | -0. 1814  | 0. 037 | 0. 146 | 2. 86E-33 M1 | Clorf216 |
| SIRT6. 1     | 1. 94E-37 | -0. 15933 | 0. 08  | 0. 218 | 2. 89E-33 M1 | SIRT6    |
| IWS1. 1      | 2. 01E-37 | -0. 14858 | 0. 093 | 0. 237 | 3. 01E-33 M1 | IWS1     |
| TEX30. 1     | 2. 12E-37 | -0. 17064 | 0. 061 | 0. 186 | 3. 17E-33 M1 | TEX30    |
| TUBB6. 2     | 2. 19E-37 | -0. 25729 | 0. 076 | 0. 206 | 3. 27E-33 M1 | TUBB6    |
| HOMER1. 3    | 2. 24E-37 | -0. 14824 | 0. 055 | 0. 177 | 3. 34E-33 M1 | HOMER1   |
| ABCA8. 2     | 2. 35E-37 | -0. 31879 | 0. 005 | 0. 088 | 3. 52E-33 M1 | ABCA8    |
| SCRN3. 2     | 2. 48E-37 | -0. 19129 | 0. 02  | 0. 117 | 3. 71E-33 M1 | SCRN3    |
| UBTD2. 1     | 2. 54E-37 | -0. 17003 | 0. 023 | 0. 122 | 3. 79E-33 M1 | UBTD2    |
| PDLIM1. 2    | 2. 61E-37 | -0. 19465 | 0. 005 | 0. 087 | 3. 90E-33 M1 | PDLIM1   |

|             |          |          |       |       |          |    |           |
|-------------|----------|----------|-------|-------|----------|----|-----------|
| ZRANB2      | 2.63E-37 | -0.15791 | 0.176 | 0.36  | 3.93E-33 | M1 | ZRANB2    |
| RANBP2.4    | 2.73E-37 | 0.484686 | 0.287 | 0.193 | 4.08E-33 | M1 | RANBP2    |
| SLC29A3.2   | 2.82E-37 | 0.312243 | 0.097 | 0.033 | 4.22E-33 | M1 | SLC29A3   |
| EXOSC8.3    | 2.83E-37 | -0.20024 | 0.15  | 0.317 | 4.23E-33 | M1 | EXOSC8    |
| HVCN1.4     | 2.90E-37 | 0.401174 | 0.169 | 0.082 | 4.34E-33 | M1 | HVCN1     |
| TNFRSF1A.2  | 2.94E-37 | 0.346874 | 0.441 | 0.358 | 4.39E-33 | M1 | TNFRSF1A  |
| ID1.2       | 2.95E-37 | -0.25401 | 0.033 | 0.138 | 4.41E-33 | M1 | ID1       |
| DCHS1.3     | 3.04E-37 | -0.17404 | 0.011 | 0.099 | 4.54E-33 | M1 | DCHS1     |
| PLRG1.2     | 3.19E-37 | -0.15899 | 0.112 | 0.263 | 4.76E-33 | M1 | PLRG1     |
| IL12RB1.3   | 3.19E-37 | 0.238287 | 0.076 | 0.022 | 4.77E-33 | M1 | IL12RB1   |
| ELP6.2      | 3.21E-37 | -0.17717 | 0.096 | 0.239 | 4.80E-33 | M1 | ELP6      |
| CNIH4.2     | 3.25E-37 | -0.22145 | 0.213 | 0.406 | 4.86E-33 | M1 | CNIH4     |
| UGDH.2      | 3.27E-37 | -0.22968 | 0.058 | 0.178 | 4.88E-33 | M1 | UGDH      |
| MAP6D1.3    | 3.37E-37 | -0.22119 | 0.01  | 0.097 | 5.03E-33 | M1 | MAP6D1    |
| SPTSSA.3    | 3.37E-37 | -0.28728 | 0.26  | 0.462 | 5.03E-33 | M1 | SPTSSA    |
| SLC25A1.3   | 3.48E-37 | -0.1478  | 0.08  | 0.217 | 5.20E-33 | M1 | SLC25A1   |
| DPY19L1.2   | 3.50E-37 | -0.17427 | 0.022 | 0.121 | 5.23E-33 | M1 | DPY19L1   |
| ZC3H14.3    | 3.57E-37 | -0.1535  | 0.087 | 0.226 | 5.33E-33 | M1 | ZC3H14    |
| CNRIP1.2    | 3.57E-37 | -0.1798  | 0.09  | 0.227 | 5.33E-33 | M1 | CNRIP1    |
| TMTC3       | 3.60E-37 | -0.15325 | 0.014 | 0.105 | 5.37E-33 | M1 | TMTC3     |
| COBL.2      | 3.61E-37 | -0.22973 | 0.002 | 0.081 | 5.40E-33 | M1 | COBL      |
| RDH10.3     | 3.63E-37 | -0.23033 | 0.012 | 0.101 | 5.42E-33 | M1 | RDH10     |
| PPARG.2     | 3.64E-37 | 0.203252 | 0.065 | 0.017 | 5.44E-33 | M1 | PPARG     |
| LRCH3.2     | 3.77E-37 | -0.13924 | 0.043 | 0.157 | 5.63E-33 | M1 | LRCH3     |
| CHST8.3     | 3.77E-37 | -0.17303 | 0.002 | 0.081 | 5.63E-33 | M1 | CHST8     |
| NAAA.4      | 3.81E-37 | 0.473804 | 0.211 | 0.118 | 5.70E-33 | M1 | NAAA      |
| MARK3.2     | 3.90E-37 | -0.17325 | 0.147 | 0.315 | 5.83E-33 | M1 | MARK3     |
| MAFG-AS1.4  | 4.06E-37 | -0.14168 | 0.001 | 0.078 | 6.06E-33 | M1 | MAFG-AS1  |
| ACTL6B.3    | 4.15E-37 | -0.30354 | 0.007 | 0.091 | 6.20E-33 | M1 | ACTL6B    |
| ELMOD3.2    | 4.17E-37 | -0.16831 | 0.042 | 0.154 | 6.23E-33 | M1 | ELMOD3    |
| CDC5L.3     | 4.20E-37 | -0.172   | 0.143 | 0.309 | 6.27E-33 | M1 | CDC5L     |
| PRSS23.2    | 4.48E-37 | -0.299   | 0.007 | 0.092 | 6.69E-33 | M1 | PRSS23    |
| ARID4B.3    | 4.49E-37 | -0.1862  | 0.237 | 0.44  | 6.71E-33 | M1 | ARID4B    |
| STAT6.4     | 4.52E-37 | 0.293051 | 0.11  | 0.041 | 6.75E-33 | M1 | STAT6     |
| ZNF576.2    | 4.69E-37 | -0.18913 | 0.043 | 0.156 | 7.01E-33 | M1 | ZNF576    |
| RGS13.1     | 4.71E-37 | 0.167383 | 0.042 | 0.007 | 7.03E-33 | M1 | RGS13     |
| LYRM5.2     | 4.73E-37 | -0.20993 | 0.19  | 0.371 | 7.06E-33 | M1 | LYRM5     |
| MOCS2.4     | 4.92E-37 | -0.18733 | 0.131 | 0.29  | 7.35E-33 | M1 | MOCS2     |
| LDOC1L.3    | 4.94E-37 | -0.16698 | 0.012 | 0.102 | 7.38E-33 | M1 | LDOC1L    |
| CXCL12.1    | 5.00E-37 | 0.346937 | 0.094 | 0.032 | 7.48E-33 | M1 | CXCL12    |
| HNRNP.3     | 5.06E-37 | -0.20452 | 0.248 | 0.448 | 7.56E-33 | M1 | HNRNP     |
| GHITM.3     | 5.07E-37 | 0.267335 | 0.564 | 0.515 | 7.58E-33 | M1 | GHITM     |
| VG.2        | 5.22E-37 | -0.27645 | 0.003 | 0.082 | 7.80E-33 | M1 | VG        |
| SOX15.2     | 5.51E-37 | -0.25499 | 0.003 | 0.084 | 8.23E-33 | M1 | SOX15     |
| PRKAG2.4    | 5.90E-37 | 0.421162 | 0.219 | 0.121 | 8.82E-33 | M1 | PRKAG2    |
| POGZ.2      | 5.92E-37 | -0.14633 | 0.092 | 0.234 | 8.85E-33 | M1 | POGZ      |
| PTPN18.4    | 6.07E-37 | 0.439531 | 0.293 | 0.194 | 9.08E-33 | M1 | PTPN18    |
| GTF2IRD2B.6 | 6.09E-37 | -0.18174 | 0.043 | 0.156 | 9.09E-33 | M1 | GTF2IRD2B |
| SPOP.1      | 6.13E-37 | -0.14611 | 0.16  | 0.338 | 9.16E-33 | M1 | SPOP      |
| SNRNP40.1   | 6.24E-37 | -0.2039  | 0.179 | 0.359 | 9.33E-33 | M1 | SNRNP40   |
| SRSF1       | 6.28E-37 | -0.18651 | 0.229 | 0.431 | 9.39E-33 | M1 | SRSF1     |

|             |           |           |        |        |           |    |                |
|-------------|-----------|-----------|--------|--------|-----------|----|----------------|
| MCM4. 3     | 6. 59E-37 | -0. 20985 | 0. 018 | 0. 111 | 9. 85E-33 | M1 | MCM4           |
| NELFB. 3    | 6. 70E-37 | -0. 16009 | 0. 051 | 0. 169 | 1. 00E-32 | M1 | NELFB          |
| SATB2. 1    | 7. 24E-37 | -0. 15516 | 0. 005 | 0. 086 | 1. 08E-32 | M1 | SATB2          |
| WIPF2. 1    | 7. 33E-37 | -0. 15198 | 0. 086 | 0. 225 | 1. 10E-32 | M1 | WIPF2          |
| GIT1. 2     | 7. 68E-37 | -0. 1352  | 0. 023 | 0. 122 | 1. 15E-32 | M1 | GIT1           |
| SREBF2. 1   | 7. 69E-37 | -0. 15256 | 0. 032 | 0. 137 | 1. 15E-32 | M1 | SREBF2         |
| YKT6. 2     | 7. 70E-37 | -0. 16436 | 0. 113 | 0. 264 | 1. 15E-32 | M1 | YKT6           |
| RAD50. 1    | 7. 78E-37 | -0. 1588  | 0. 131 | 0. 292 | 1. 16E-32 | M1 | RAD50          |
| ADD1. 2     | 8. 25E-37 | -0. 16561 | 0. 161 | 0. 337 | 1. 23E-32 | M1 | ADD1           |
| AC147651. 4 | 8. 26E-37 | 0. 240189 | 0. 085 | 0. 026 | 1. 23E-32 | M1 | AC147651. 4    |
| VPS25. 1    | 8. 52E-37 | -0. 22428 | 0. 18  | 0. 36  | 1. 27E-32 | M1 | VPS25          |
| BET1. 2     | 8. 53E-37 | -0. 2132  | 0. 102 | 0. 245 | 1. 27E-32 | M1 | BET1           |
| KIF3C. 4    | 8. 98E-37 | -0. 19836 | 0. 022 | 0. 118 | 1. 34E-32 | M1 | KIF3C          |
| AFAP1. 2    | 9. 42E-37 | -0. 17898 | 0. 012 | 0. 1   | 1. 41E-32 | M1 | AFAP1          |
| IL10RB-AS   | 9. 48E-37 | 0. 354682 | 0. 097 | 0. 034 | 1. 42E-32 | M1 | IL10RB-AS1     |
| ANKRD36C. 9 | 9. 51E-37 | -0. 21286 | 0. 061 | 0. 182 | 1. 42E-32 | M1 | ANKRD36C       |
| SURF2. 3    | 9. 60E-37 | -0. 14927 | 0. 107 | 0. 257 | 1. 44E-32 | M1 | SURF2          |
| SCD. 4      | 9. 72E-37 | -0. 32146 | 0. 098 | 0. 235 | 1. 45E-32 | M1 | SCD            |
| TMEFF2. 4   | 9. 81E-37 | -0. 28908 | 0. 008 | 0. 092 | 1. 47E-32 | M1 | TMEFF2         |
| U2AF2. 2    | 9. 89E-37 | -0. 14096 | 0. 124 | 0. 284 | 1. 48E-32 | M1 | U2AF2          |
| CENPK. 2    | 1. 00E-36 | -0. 2022  | 0. 02  | 0. 115 | 1. 50E-32 | M1 | CENPK          |
| GABBR1. 3   | 1. 00E-36 | -0. 19645 | 0. 008 | 0. 093 | 1. 50E-32 | M1 | GABBR1         |
| MYO7A. 2    | 1. 02E-36 | 0. 282552 | 0. 079 | 0. 024 | 1. 53E-32 | M1 | MYO7A          |
| RALGAPB. 2  | 1. 11E-36 | -0. 14507 | 0. 026 | 0. 127 | 1. 65E-32 | M1 | RALGAPB        |
| MSLN        | 1. 12E-36 | 0. 15755  | 0. 035 | 0. 004 | 1. 68E-32 | M1 | MSLN           |
| SIAH1. 2    | 1. 18E-36 | -0. 14689 | 0. 106 | 0. 253 | 1. 76E-32 | M1 | SIAH1          |
| RBM27. 2    | 1. 18E-36 | -0. 13769 | 0. 103 | 0. 251 | 1. 77E-32 | M1 | RBM27          |
| ELMO2. 1    | 1. 19E-36 | -0. 15638 | 0. 038 | 0. 146 | 1. 78E-32 | M1 | ELMO2          |
| RP11-557H   | 1. 21E-36 | 0. 248647 | 0. 069 | 0. 018 | 1. 81E-32 | M1 | RP11-557H15. 4 |
| MPRIP. 1    | 1. 22E-36 | -0. 14667 | 0. 056 | 0. 177 | 1. 82E-32 | M1 | MPRIP          |
| NUDCD3. 2   | 1. 24E-36 | -0. 19011 | 0. 086 | 0. 221 | 1. 85E-32 | M1 | NUDCD3         |
| AGAP2-AS1   | 1. 27E-36 | -0. 34028 | 0. 019 | 0. 111 | 1. 90E-32 | M1 | AGAP2-AS1      |
| TMEM208. 3  | 1. 38E-36 | -0. 2086  | 0. 287 | 0. 503 | 2. 06E-32 | M1 | TMEM208        |
| LMO1. 3     | 1. 44E-36 | -0. 27337 | 0. 006 | 0. 088 | 2. 15E-32 | M1 | LMO1           |
| RBM26. 2    | 1. 44E-36 | -0. 11961 | 0. 094 | 0. 237 | 2. 16E-32 | M1 | RBM26          |
| CTHRC1. 3   | 1. 45E-36 | -0. 15497 | 0. 001 | 0. 077 | 2. 17E-32 | M1 | CTHRC1         |
| DCAF16. 1   | 1. 46E-36 | -0. 15105 | 0. 032 | 0. 137 | 2. 18E-32 | M1 | DCAF16         |
| HN1L. 2     | 1. 47E-36 | -0. 1642  | 0. 054 | 0. 172 | 2. 20E-32 | M1 | HN1L           |
| CCDC43. 2   | 1. 52E-36 | -0. 15308 | 0. 085 | 0. 222 | 2. 28E-32 | M1 | CCDC43         |
| ZNF90. 3    | 1. 62E-36 | 0. 346318 | 0. 471 | 0. 361 | 2. 42E-32 | M1 | ZNF90          |
| DNM3. 2     | 1. 74E-36 | -0. 25051 | 0. 014 | 0. 103 | 2. 60E-32 | M1 | DNM3           |
| CD1D. 3     | 1. 92E-36 | 0. 262357 | 0. 087 | 0. 028 | 2. 87E-32 | M1 | CD1D           |
| MPHOSPH8. 1 | 1. 98E-36 | -0. 17611 | 0. 231 | 0. 433 | 2. 95E-32 | M1 | MPHOSPH8       |
| CHST7. 2    | 2. 00E-36 | -0. 15254 | 0. 026 | 0. 126 | 2. 98E-32 | M1 | CHST7          |
| STK33. 3    | 2. 06E-36 | -0. 16519 | 0. 003 | 0. 081 | 3. 07E-32 | M1 | STK33          |
| DEF8. 4     | 2. 14E-36 | -0. 13246 | 0. 135 | 0. 298 | 3. 20E-32 | M1 | DEF8           |
| GPS1. 2     | 2. 18E-36 | -0. 15502 | 0. 174 | 0. 354 | 3. 26E-32 | M1 | GPS1           |
| FASTK. 2    | 2. 22E-36 | -0. 18383 | 0. 185 | 0. 368 | 3. 32E-32 | M1 | FASTK          |
| PDK2. 1     | 2. 25E-36 | -0. 13779 | 0. 062 | 0. 185 | 3. 36E-32 | M1 | PDK2           |
| MIS18A. 2   | 2. 29E-36 | -0. 20356 | 0. 024 | 0. 122 | 3. 43E-32 | M1 | MIS18A         |
| RBM18. 2    | 2. 37E-36 | -0. 19248 | 0. 092 | 0. 229 | 3. 54E-32 | M1 | RBM18          |

|             |           |           |        |        |           |    |             |
|-------------|-----------|-----------|--------|--------|-----------|----|-------------|
| DNM1. 1     | 2. 37E-36 | -0. 12804 | 0. 005 | 0. 087 | 3. 55E-32 | M1 | DNM1        |
| CACNG8. 2   | 2. 41E-36 | -0. 14443 | 0. 005 | 0. 087 | 3. 61E-32 | M1 | CACNG8      |
| ICAM2. 3    | 2. 49E-36 | 0. 2468   | 0. 082 | 0. 025 | 3. 73E-32 | M1 | ICAM2       |
| BCL7C. 2    | 2. 55E-36 | -0. 17709 | 0. 125 | 0. 281 | 3. 82E-32 | M1 | BCL7C       |
| FAM84B. 3   | 2. 57E-36 | -0. 22903 | 0. 013 | 0. 102 | 3. 85E-32 | M1 | FAM84B      |
| SMAD5. 3    | 2. 66E-36 | -0. 15108 | 0. 066 | 0. 192 | 3. 98E-32 | M1 | SMAD5       |
| GNG2. 2     | 2. 67E-36 | -0. 20795 | 0. 074 | 0. 2   | 3. 98E-32 | M1 | GNG2        |
| CRAT. 1     | 2. 83E-36 | -0. 14938 | 0. 059 | 0. 181 | 4. 23E-32 | M1 | CRAT        |
| ZNF195. 2   | 2. 88E-36 | -0. 16408 | 0. 061 | 0. 183 | 4. 31E-32 | M1 | ZNF195      |
| RASGRP1. 3  | 2. 93E-36 | -0. 15791 | 0. 003 | 0. 082 | 4. 38E-32 | M1 | RASGRP1     |
| MITF. 3     | 3. 04E-36 | 0. 346178 | 0. 165 | 0. 079 | 4. 54E-32 | M1 | MITF        |
| FAM200A. 1  | 3. 28E-36 | -0. 21059 | 0. 019 | 0. 112 | 4. 90E-32 | M1 | FAM200A     |
| RNASEH1. 2  | 3. 31E-36 | -0. 11964 | 0. 106 | 0. 254 | 4. 94E-32 | M1 | RNASEH1     |
| RPRM. 4     | 3. 47E-36 | -0. 30581 | 0. 002 | 0. 079 | 5. 19E-32 | M1 | RPRM        |
| ZNF253. 2   | 3. 51E-36 | -0. 18466 | 0. 011 | 0. 098 | 5. 24E-32 | M1 | ZNF253      |
| FAM103A1. 3 | 3. 54E-36 | -0. 22361 | 0. 117 | 0. 268 | 5. 29E-32 | M1 | FAM103A1    |
| PMS2. 3     | 3. 60E-36 | -0. 17258 | 0. 038 | 0. 145 | 5. 39E-32 | M1 | PMS2        |
| ORC6. 3     | 3. 64E-36 | -0. 19859 | 0. 016 | 0. 106 | 5. 45E-32 | M1 | ORC6        |
| DCAF10. 1   | 3. 65E-36 | -0. 14066 | 0. 071 | 0. 199 | 5. 46E-32 | M1 | DCAF10      |
| NCAN. 2     | 3. 65E-36 | -0. 28926 | 0. 01  | 0. 094 | 5. 46E-32 | M1 | NCAN        |
| FREM2. 3    | 3. 66E-36 | -0. 13421 | 0. 003 | 0. 081 | 5. 47E-32 | M1 | FREM2       |
| FAF2. 3     | 3. 68E-36 | -0. 13936 | 0. 079 | 0. 211 | 5. 51E-32 | M1 | FAF2        |
| RTF1. 3     | 3. 70E-36 | -0. 19471 | 0. 258 | 0. 465 | 5. 53E-32 | M1 | RTF1        |
| GATAD2B. 2  | 3. 75E-36 | -0. 15013 | 0. 06  | 0. 181 | 5. 60E-32 | M1 | GATAD2B     |
| UBFD1. 1    | 3. 81E-36 | -0. 15269 | 0. 023 | 0. 12  | 5. 69E-32 | M1 | UBFD1       |
| ECE1. 2     | 3. 83E-36 | -0. 17659 | 0. 009 | 0. 094 | 5. 72E-32 | M1 | ECE1        |
| DOLPP1. 2   | 3. 95E-36 | -0. 18358 | 0. 022 | 0. 117 | 5. 90E-32 | M1 | DOLPP1      |
| CBX2. 2     | 4. 20E-36 | -0. 17855 | 0. 002 | 0. 08  | 6. 27E-32 | M1 | CBX2        |
| PHLDB1. 4   | 4. 20E-36 | -0. 19468 | 0. 047 | 0. 16  | 6. 28E-32 | M1 | PHLDB1      |
| CASC3. 1    | 4. 23E-36 | -0. 14595 | 0. 077 | 0. 207 | 6. 33E-32 | M1 | CASC3       |
| ARL3. 2     | 4. 25E-36 | -0. 20787 | 0. 193 | 0. 377 | 6. 35E-32 | M1 | ARL3        |
| MAPK12. 2   | 4. 29E-36 | -0. 13912 | 0. 004 | 0. 083 | 6. 41E-32 | M1 | MAPK12      |
| SETD4. 2    | 4. 31E-36 | -0. 19467 | 0. 037 | 0. 144 | 6. 44E-32 | M1 | SETD4       |
| VCAM1. 2    | 4. 42E-36 | -0. 34217 | 0. 005 | 0. 086 | 6. 61E-32 | M1 | VCAM1       |
| ANAPC13. 4  | 4. 46E-36 | -0. 24288 | 0. 205 | 0. 384 | 6. 67E-32 | M1 | ANAPC13     |
| LRP12. 1    | 4. 68E-36 | -0. 17772 | 0. 017 | 0. 108 | 7. 00E-32 | M1 | LRP12       |
| ERRFI1. 2   | 4. 79E-36 | -0. 21641 | 0. 055 | 0. 171 | 7. 15E-32 | M1 | ERRFI1      |
| SIRT7. 2    | 4. 89E-36 | -0. 13954 | 0. 09  | 0. 23  | 7. 31E-32 | M1 | SIRT7       |
| C18orf21. 4 | 4. 95E-36 | -0. 15694 | 0. 063 | 0. 186 | 7. 39E-32 | M1 | C18orf21    |
| SLC9A9. 3   | 5. 07E-36 | 0. 331642 | 0. 145 | 0. 065 | 7. 58E-32 | M1 | SLC9A9      |
| RALBP1. 1   | 5. 15E-36 | -0. 18094 | 0. 16  | 0. 331 | 7. 70E-32 | M1 | RALBP1      |
| GAR1. 4     | 5. 16E-36 | -0. 19283 | 0. 08  | 0. 212 | 7. 71E-32 | M1 | GAR1        |
| MFI2-AS1. 5 | 5. 18E-36 | -0. 1628  | 0. 007 | 0. 089 | 7. 74E-32 | M1 | MFI2-AS1    |
| EID2B. 2    | 5. 39E-36 | -0. 17545 | 0. 015 | 0. 104 | 8. 06E-32 | M1 | EID2B       |
| TOX3. 3     | 5. 42E-36 | -0. 27895 | 0. 003 | 0. 08  | 8. 11E-32 | M1 | TOX3        |
| IFT88. 2    | 5. 46E-36 | -0. 20502 | 0. 026 | 0. 125 | 8. 17E-32 | M1 | IFT88       |
| HMGCR. 2    | 5. 47E-36 | -0. 17158 | 0. 026 | 0. 125 | 8. 17E-32 | M1 | HMGCR       |
| HMG2. 2     | 5. 59E-36 | -0. 33479 | 0. 507 | 0. 656 | 8. 36E-32 | M1 | HMG2        |
| AC093323. 5 | 5. 66E-36 | -0. 14428 | 0. 018 | 0. 111 | 8. 46E-32 | M1 | AC093323. 3 |
| TRIM33. 3   | 5. 67E-36 | -0. 17113 | 0. 075 | 0. 204 | 8. 47E-32 | M1 | TRIM33      |
| CACFD1. 2   | 5. 78E-36 | -0. 18207 | 0. 014 | 0. 102 | 8. 63E-32 | M1 | CACFD1      |

|              |           |           |        |        |           |    |               |
|--------------|-----------|-----------|--------|--------|-----------|----|---------------|
| CHID1. 2     | 5. 79E-36 | -0. 22443 | 0. 265 | 0. 471 | 8. 66E-32 | M1 | CHID1         |
| ZNF205. 1    | 5. 80E-36 | -0. 17325 | 0. 026 | 0. 125 | 8. 66E-32 | M1 | ZNF205        |
| PCDHB7. 2    | 5. 82E-36 | -0. 23384 | 0. 005 | 0. 084 | 8. 70E-32 | M1 | PCDHB7        |
| LSM14B. 2    | 6. 28E-36 | -0. 15479 | 0. 021 | 0. 116 | 9. 39E-32 | M1 | LSM14B        |
| SOX21-AS1    | 6. 30E-36 | -0. 15408 | 0. 001 | 0. 077 | 9. 41E-32 | M1 | SOX21-AS1     |
| TMEM184B. 6. | 39E-36    | -0. 17753 | 0. 045 | 0. 157 | 9. 55E-32 | M1 | TMEM184B      |
| FAM126A. 2   | 6. 40E-36 | -0. 14229 | 0. 044 | 0. 155 | 9. 56E-32 | M1 | FAM126A       |
| TMEM206. 3   | 6. 44E-36 | -0. 14834 | 0. 109 | 0. 255 | 9. 63E-32 | M1 | TMEM206       |
| RRP9. 1      | 6. 47E-36 | -0. 19021 | 0. 058 | 0. 176 | 9. 67E-32 | M1 | RRP9          |
| FAT1. 2      | 6. 58E-36 | -0. 14827 | 0. 002 | 0. 079 | 9. 83E-32 | M1 | FAT1          |
| C1orf52. 4   | 6. 62E-36 | -0. 13225 | 0. 163 | 0. 336 | 9. 89E-32 | M1 | C1orf52       |
| SNRPF. 2     | 6. 74E-36 | -0. 2427  | 0. 361 | 0. 584 | 1. 01E-31 | M1 | SNRPF         |
| FANCF. 2     | 6. 75E-36 | -0. 19457 | 0. 016 | 0. 107 | 1. 01E-31 | M1 | FANCF         |
| RBM28. 2     | 7. 09E-36 | -0. 17142 | 0. 062 | 0. 183 | 1. 06E-31 | M1 | RBM28         |
| ZNF568. 2    | 7. 12E-36 | -0. 22416 | 0. 02  | 0. 114 | 1. 06E-31 | M1 | ZNF568        |
| NOL4. 2      | 7. 19E-36 | -0. 20231 | 0. 002 | 0. 078 | 1. 07E-31 | M1 | NOL4          |
| FAHD2A. 1    | 7. 20E-36 | -0. 16443 | 0. 068 | 0. 193 | 1. 08E-31 | M1 | FAHD2A        |
| KCNIP1. 3    | 7. 43E-36 | -0. 2164  | 0. 02  | 0. 114 | 1. 11E-31 | M1 | KCNIP1        |
| ZNF268. 2    | 7. 47E-36 | -0. 16536 | 0. 032 | 0. 134 | 1. 12E-31 | M1 | ZNF268        |
| KATNB1. 2    | 7. 52E-36 | -0. 16722 | 0. 034 | 0. 137 | 1. 12E-31 | M1 | KATNB1        |
| RP3-428L1    | 7. 63E-36 | -0. 17976 | 0. 004 | 0. 083 | 1. 14E-31 | M1 | RP3-428L16. 2 |
| AGPAT4. 2    | 7. 88E-36 | -0. 18228 | 0. 023 | 0. 119 | 1. 18E-31 | M1 | AGPAT4        |
| PODXL. 2     | 7. 98E-36 | -0. 17593 | 0. 004 | 0. 083 | 1. 19E-31 | M1 | PODXL         |
| YRDC. 1      | 8. 21E-36 | -0. 15585 | 0. 06  | 0. 181 | 1. 23E-31 | M1 | YRDC          |
| PSMD3. 2     | 8. 43E-36 | -0. 16239 | 0. 237 | 0. 438 | 1. 26E-31 | M1 | PSMD3         |
| GALNS. 2     | 8. 45E-36 | -0. 13581 | 0. 041 | 0. 15  | 1. 26E-31 | M1 | GALNS         |
| CRLS1. 2     | 8. 51E-36 | -0. 18445 | 0. 146 | 0. 311 | 1. 27E-31 | M1 | CRLS1         |
| CES2. 2      | 8. 68E-36 | -0. 14341 | 0. 075 | 0. 206 | 1. 30E-31 | M1 | CES2          |
| ATAD3A. 1    | 9. 32E-36 | -0. 14142 | 0. 054 | 0. 171 | 1. 39E-31 | M1 | ATAD3A        |
| CHCHD6. 2    | 9. 32E-36 | -0. 16138 | 0. 112 | 0. 26  | 1. 39E-31 | M1 | CHCHD6        |
| UBE2Q1. 2    | 9. 33E-36 | -0. 16268 | 0. 061 | 0. 182 | 1. 39E-31 | M1 | UBE2Q1        |
| DGCR6. 1     | 9. 85E-36 | -0. 14889 | 0. 056 | 0. 174 | 1. 47E-31 | M1 | DGCR6         |
| ETV3. 4      | 9. 90E-36 | 0. 360803 | 0. 141 | 0. 063 | 1. 48E-31 | M1 | ETV3          |
| PNO1. 1      | 1. 00E-35 | -0. 17223 | 0. 089 | 0. 225 | 1. 49E-31 | M1 | PNO1          |
| PRPF38A. 2   | 1. 01E-35 | -0. 13915 | 0. 15  | 0. 318 | 1. 51E-31 | M1 | PRPF38A       |
| SMKR1. 1     | 1. 03E-35 | -0. 20185 | 0. 005 | 0. 084 | 1. 54E-31 | M1 | SMKR1         |
| ARPC5. 3     | 1. 06E-35 | 0. 15663  | 0. 689 | 0. 669 | 1. 58E-31 | M1 | ARPC5         |
| DBNDD1. 2    | 1. 07E-35 | -0. 15962 | 0. 003 | 0. 081 | 1. 60E-31 | M1 | DBNDD1        |
| HDHD2. 2     | 1. 08E-35 | -0. 17943 | 0. 128 | 0. 283 | 1. 61E-31 | M1 | HDHD2         |
| UBE2J2. 3    | 1. 10E-35 | -0. 17246 | 0. 183 | 0. 365 | 1. 65E-31 | M1 | UBE2J2        |
| P4HA2        | 1. 11E-35 | -0. 20304 | 0. 01  | 0. 095 | 1. 65E-31 | M1 | P4HA2         |
| CHST3. 2     | 1. 12E-35 | -0. 1407  | 0. 001 | 0. 077 | 1. 67E-31 | M1 | CHST3         |
| RABEP1. 4    | 1. 12E-35 | -0. 12973 | 0. 123 | 0. 279 | 1. 68E-31 | M1 | RABEP1        |
| CCDC102B. 1. | 14E-35    | -0. 17936 | 0. 022 | 0. 117 | 1. 71E-31 | M1 | CCDC102B      |
| SNRPD1. 1    | 1. 17E-35 | -0. 25169 | 0. 384 | 0. 6   | 1. 74E-31 | M1 | SNRPD1        |
| RAD51C. 2    | 1. 17E-35 | -0. 14077 | 0. 133 | 0. 293 | 1. 74E-31 | M1 | RAD51C        |
| CASC4. 3     | 1. 17E-35 | -0. 1108  | 0. 102 | 0. 248 | 1. 74E-31 | M1 | CASC4         |
| HIST1H2BK    | 1. 21E-35 | 0. 434879 | 0. 289 | 0. 192 | 1. 80E-31 | M1 | HIST1H2BK     |
| SMIM15. 1    | 1. 25E-35 | -0. 19973 | 0. 183 | 0. 362 | 1. 87E-31 | M1 | SMIM15        |
| ACLY. 4      | 1. 26E-35 | -0. 11771 | 0. 097 | 0. 24  | 1. 89E-31 | M1 | ACLY          |
| CREB3L1. 1   | 1. 30E-35 | -0. 14291 | 0      | 0. 074 | 1. 94E-31 | M1 | CREB3L1       |



|           |          |          |       |       |          |    |               |
|-----------|----------|----------|-------|-------|----------|----|---------------|
| TCERG1.2  | 1.31E-35 | -0.12444 | 0.09  | 0.227 | 1.95E-31 | M1 | TCERG1        |
| ZNF37A.4  | 1.32E-35 | -0.17107 | 0.046 | 0.157 | 1.97E-31 | M1 | ZNF37A        |
| KAT7.2    | 1.37E-35 | -0.15533 | 0.051 | 0.167 | 2.05E-31 | M1 | KAT7          |
| TBPL1     | 1.38E-35 | -0.16868 | 0.1   | 0.241 | 2.06E-31 | M1 | TBPL1         |
| PPP1R35.4 | 1.42E-35 | -0.12108 | 0.058 | 0.177 | 2.12E-31 | M1 | PPP1R35       |
| METTL7A.1 | 1.46E-35 | 0.369696 | 0.311 | 0.203 | 2.18E-31 | M1 | METTL7A       |
| GNAI2.4   | 1.49E-35 | 0.301393 | 0.52  | 0.475 | 2.23E-31 | M1 | GNAI2         |
| RNF219.1  | 1.52E-35 | -0.22143 | 0.031 | 0.131 | 2.28E-31 | M1 | RNF219        |
| PAK4.2    | 1.54E-35 | -0.14931 | 0.031 | 0.133 | 2.31E-31 | M1 | PAK4          |
| SMAD9.2   | 1.55E-35 | -0.21456 | 0.005 | 0.084 | 2.31E-31 | M1 | SMAD9         |
| SRP68.1   | 1.58E-35 | -0.13861 | 0.107 | 0.254 | 2.37E-31 | M1 | SRP68         |
| MTHFD2.3  | 1.66E-35 | 0.375368 | 0.376 | 0.271 | 2.48E-31 | M1 | MTHFD2        |
| RPS6KL1.3 | 1.67E-35 | -0.22332 | 0.022 | 0.116 | 2.50E-31 | M1 | RPS6KL1       |
| PDIA3.4   | 1.68E-35 | 0.208297 | 0.607 | 0.578 | 2.51E-31 | M1 | PDIA3         |
| PCIF1.2   | 1.71E-35 | -0.15549 | 0.049 | 0.162 | 2.55E-31 | M1 | PCIF1         |
| GOSR2.2   | 1.75E-35 | -0.17194 | 0.078 | 0.207 | 2.62E-31 | M1 | GOSR2         |
| ZNF281.2  | 1.77E-35 | -0.16706 | 0.078 | 0.206 | 2.64E-31 | M1 | ZNF281        |
| MORF4L2.3 | 1.77E-35 | -0.2441  | 0.448 | 0.661 | 2.65E-31 | M1 | MORF4L2       |
| GPR37L1.3 | 1.78E-35 | -0.34156 | 0.013 | 0.099 | 2.66E-31 | M1 | GPR37L1       |
| RNF165.3  | 1.78E-35 | -0.19807 | 0.003 | 0.08  | 2.66E-31 | M1 | RNF165        |
| LRFN4.1   | 1.83E-35 | -0.13638 | 0.006 | 0.087 | 2.73E-31 | M1 | LRFN4         |
| H2AFJ.4   | 1.91E-35 | 0.449145 | 0.34  | 0.243 | 2.86E-31 | M1 | H2AFJ         |
| HSPE1.4   | 1.92E-35 | -0.24796 | 0.594 | 0.756 | 2.87E-31 | M1 | HSPE1         |
| TPX2.3    | 1.97E-35 | -0.27535 | 0.012 | 0.097 | 2.95E-31 | M1 | TPX2          |
| RP11-263K | 1.98E-35 | -0.19244 | 0.002 | 0.078 | 2.96E-31 | M1 | RP11-263K19.4 |
| SPRY2.3   | 2.01E-35 | -0.16117 | 0.1   | 0.242 | 3.00E-31 | M1 | SPRY2         |
| HS6ST2.1  | 2.02E-35 | -0.13351 | 0.001 | 0.075 | 3.02E-31 | M1 | HS6ST2        |
| COL16A1.2 | 2.06E-35 | -0.1846  | 0.007 | 0.087 | 3.08E-31 | M1 | COL16A1       |
| TIAM2.3   | 2.07E-35 | -0.22486 | 0.01  | 0.093 | 3.09E-31 | M1 | TIAM2         |
| IL4I1.3   | 2.09E-35 | 0.271404 | 0.127 | 0.052 | 3.12E-31 | M1 | IL4I1         |
| DFFA.1    | 2.10E-35 | -0.12771 | 0.101 | 0.243 | 3.14E-31 | M1 | DFFA          |
| YIPF5.2   | 2.19E-35 | -0.17368 | 0.132 | 0.288 | 3.28E-31 | M1 | YIPF5         |
| RIT2.3    | 2.22E-35 | -0.32895 | 0.008 | 0.09  | 3.32E-31 | M1 | RIT2          |
| MAP2K7.1  | 2.25E-35 | -0.14598 | 0.085 | 0.218 | 3.37E-31 | M1 | MAP2K7        |
| LRRC1.2   | 2.27E-35 | -0.2186  | 0.005 | 0.083 | 3.39E-31 | M1 | LRRC1         |
| C16orf87. | 2.28E-35 | -0.13912 | 0.091 | 0.227 | 3.41E-31 | M1 | C16orf87      |
| DBX2.3    | 2.30E-35 | -0.15458 | 0.002 | 0.077 | 3.44E-31 | M1 | DBX2          |
| WDR13.1   | 2.37E-35 | -0.17909 | 0.149 | 0.313 | 3.54E-31 | M1 | WDR13         |
| ACOT8     | 2.45E-35 | -0.13333 | 0.091 | 0.229 | 3.66E-31 | M1 | ACOT8         |
| CCDC130.2 | 2.50E-35 | -0.12828 | 0.106 | 0.252 | 3.73E-31 | M1 | CCDC130       |
| LONRF1.1  | 2.57E-35 | -0.13158 | 0.02  | 0.113 | 3.84E-31 | M1 | LONRF1        |
| SNRPA1.3  | 2.63E-35 | -0.17906 | 0.156 | 0.322 | 3.93E-31 | M1 | SNRPA1        |
| NIPSNAP1. | 2.69E-35 | -0.16762 | 0.066 | 0.188 | 4.02E-31 | M1 | NIPSNAP1      |
| ITGA2.2   | 2.80E-35 | -0.16791 | 0.001 | 0.075 | 4.18E-31 | M1 | ITGA2         |
| CCNB1.2   | 2.92E-35 | -0.30895 | 0.017 | 0.105 | 4.37E-31 | M1 | CCNB1         |
| C1orf123. | 2.95E-35 | -0.20407 | 0.191 | 0.371 | 4.41E-31 | M1 | C1orf123      |
| PPID      | 3.00E-35 | -0.15191 | 0.094 | 0.233 | 4.48E-31 | M1 | PPID          |
| RP11-66N1 | 3.04E-35 | -0.16918 | 0.014 | 0.101 | 4.55E-31 | M1 | RP11-66N11.8  |
| LLGL1.3   | 3.06E-35 | -0.15559 | 0.022 | 0.116 | 4.57E-31 | M1 | LLGL1         |
| AKT2.1    | 3.15E-35 | -0.18022 | 0.078 | 0.207 | 4.71E-31 | M1 | AKT2          |
| MYL12B.3  | 3.45E-35 | 0.110242 | 0.739 | 0.725 | 5.15E-31 | M1 | MYL12B        |

|            |          |          |       |       |          |    |            |
|------------|----------|----------|-------|-------|----------|----|------------|
| SIGLEC7.4  | 3.48E-35 | 0.289674 | 0.14  | 0.061 | 5.20E-31 | M1 | SIGLEC7    |
| PAK1.4     | 3.53E-35 | 0.405614 | 0.253 | 0.153 | 5.28E-31 | M1 | PAK1       |
| AVIL.2     | 3.58E-35 | -0.23306 | 0.016 | 0.104 | 5.35E-31 | M1 | AVIL       |
| WDR6.2     | 3.60E-35 | -0.17912 | 0.111 | 0.256 | 5.38E-31 | M1 | WDR6       |
| SLC30A5.1  | 3.61E-35 | -0.14073 | 0.091 | 0.228 | 5.39E-31 | M1 | SLC30A5    |
| MSH2.2     | 3.71E-35 | -0.19006 | 0.032 | 0.133 | 5.54E-31 | M1 | MSH2       |
| RPS6KA4.4  | 3.75E-35 | 0.409546 | 0.194 | 0.107 | 5.60E-31 | M1 | RPS6KA4    |
| SEC23B.2   | 3.93E-35 | -0.17918 | 0.138 | 0.297 | 5.87E-31 | M1 | SEC23B     |
| PLAGL1.3   | 3.96E-35 | 0.297112 | 0.09  | 0.031 | 5.91E-31 | M1 | PLAGL1     |
| THAP11.3   | 3.99E-35 | -0.12405 | 0.071 | 0.197 | 5.96E-31 | M1 | THAP11     |
| NEK1.1     | 4.00E-35 | -0.16935 | 0.039 | 0.144 | 5.98E-31 | M1 | NEK1       |
| CDC16.2    | 4.25E-35 | -0.15203 | 0.086 | 0.218 | 6.35E-31 | M1 | CDC16      |
| PPP1R9A.3  | 4.42E-35 | -0.24957 | 0.006 | 0.084 | 6.61E-31 | M1 | PPP1R9A    |
| SNAI3.1    | 4.54E-35 | 0.189066 | 0.047 | 0.009 | 6.79E-31 | M1 | SNAI3      |
| ABHD15.4   | 4.61E-35 | 0.355876 | 0.114 | 0.046 | 6.88E-31 | M1 | ABHD15     |
| FMN2.2     | 4.75E-35 | -0.16672 | 0.004 | 0.082 | 7.10E-31 | M1 | FMN2       |
| ZCCHC7.2   | 4.81E-35 | -0.18518 | 0.05  | 0.162 | 7.19E-31 | M1 | ZCCHC7     |
| AC004540.4 | 4.86E-35 | -0.22659 | 0.01  | 0.093 | 7.26E-31 | M1 | AC004540.5 |
| ABCA3.2    | 5.30E-35 | -0.15659 | 0.008 | 0.09  | 7.92E-31 | M1 | ABCA3      |
| LINC01102  | 5.36E-35 | -0.26222 | 0.005 | 0.083 | 8.01E-31 | M1 | LINC01102  |
| PLCD3.1    | 5.46E-35 | -0.13743 | 0.003 | 0.079 | 8.16E-31 | M1 | PLCD3      |
| EXOC5.1    | 5.63E-35 | -0.16886 | 0.074 | 0.201 | 8.41E-31 | M1 | EXOC5      |
| ACIN1.2    | 5.71E-35 | -0.15515 | 0.134 | 0.291 | 8.53E-31 | M1 | ACIN1      |
| DENND1C.3  | 6.03E-35 | 0.269275 | 0.079 | 0.025 | 9.02E-31 | M1 | DENND1C    |
| ZMYND8.3   | 6.25E-35 | -0.15041 | 0.094 | 0.23  | 9.35E-31 | M1 | ZMYND8     |
| TUBA1C.2   | 6.29E-35 | -0.27139 | 0.23  | 0.41  | 9.39E-31 | M1 | TUBA1C     |
| SPEG.2     | 6.90E-35 | -0.18387 | 0.005 | 0.083 | 1.03E-30 | M1 | SPEG       |
| RBM42.2    | 6.93E-35 | -0.17453 | 0.225 | 0.419 | 1.04E-30 | M1 | RBM42      |
| LANCL1.3   | 7.10E-35 | -0.23664 | 0.034 | 0.134 | 1.06E-30 | M1 | LANCL1     |
| SEC22C.2   | 7.18E-35 | -0.15724 | 0.107 | 0.252 | 1.07E-30 | M1 | SEC22C     |
| IGDCC3.4   | 7.47E-35 | -0.16157 | 0.001 | 0.075 | 1.12E-30 | M1 | IGDCC3     |
| SESN1.4    | 7.76E-35 | 0.354584 | 0.174 | 0.087 | 1.16E-30 | M1 | SESN1      |
| GTF2H3.1   | 7.81E-35 | -0.14118 | 0.048 | 0.16  | 1.17E-30 | M1 | GTF2H3     |
| ADAMTS6.1  | 7.89E-35 | -0.15423 | 0.003 | 0.078 | 1.18E-30 | M1 | ADAMTS6    |
| OXLD1.2    | 8.00E-35 | -0.18223 | 0.126 | 0.278 | 1.20E-30 | M1 | OXLD1      |
| NSD1.2     | 8.04E-35 | -0.13885 | 0.112 | 0.257 | 1.20E-30 | M1 | NSD1       |
| PSMG4.2    | 8.06E-35 | -0.1716  | 0.087 | 0.22  | 1.20E-30 | M1 | PSMG4      |
| RNF170.2   | 8.11E-35 | -0.13818 | 0.064 | 0.185 | 1.21E-30 | M1 | RNF170     |
| C16orf52.8 | 8.26E-35 | -0.14292 | 0.02  | 0.111 | 1.24E-30 | M1 | C16orf52   |
| RAI14.2    | 8.49E-35 | -0.19413 | 0.005 | 0.082 | 1.27E-30 | M1 | RAI14      |
| SLC48A1.3  | 8.55E-35 | -0.27717 | 0.044 | 0.15  | 1.28E-30 | M1 | SLC48A1    |
| SLC36A4.2  | 8.60E-35 | -0.14445 | 0.084 | 0.215 | 1.29E-30 | M1 | SLC36A4    |
| PELP1.3    | 8.69E-35 | -0.18034 | 0.055 | 0.17  | 1.30E-30 | M1 | PELP1      |
| MECR.2     | 9.06E-35 | -0.145   | 0.061 | 0.181 | 1.35E-30 | M1 | MECR       |
| C7orf26.3  | 9.44E-35 | -0.16923 | 0.06  | 0.177 | 1.41E-30 | M1 | C7orf26    |
| COL22A1    | 9.79E-35 | -0.13878 | 0.006 | 0.085 | 1.46E-30 | M1 | COL22A1    |
| RBM38.2    | 1.02E-34 | -0.14505 | 0.045 | 0.154 | 1.52E-30 | M1 | RBM38      |
| KIAA1586.1 | 1.02E-34 | -0.18506 | 0.032 | 0.132 | 1.52E-30 | M1 | KIAA1586   |
| SCN3A.3    | 1.08E-34 | -0.21608 | 0.006 | 0.085 | 1.62E-30 | M1 | SCN3A      |
| RBBP9.2    | 1.10E-34 | -0.12175 | 0.019 | 0.109 | 1.65E-30 | M1 | RBBP9      |
| SMIM7.3    | 1.14E-34 | -0.22882 | 0.322 | 0.542 | 1.70E-30 | M1 | SMIM7      |

|            |           |           |        |        |           |    |                |
|------------|-----------|-----------|--------|--------|-----------|----|----------------|
| SEMA4A. 4  | 1. 18E-34 | 0. 246846 | 0. 103 | 0. 038 | 1. 76E-30 | M1 | SEMA4A         |
| RNF40. 1   | 1. 19E-34 | -0. 14544 | 0. 071 | 0. 196 | 1. 77E-30 | M1 | RNF40          |
| MBIP. 3    | 1. 20E-34 | -0. 16219 | 0. 074 | 0. 201 | 1. 79E-30 | M1 | MBIP           |
| CELF3. 4   | 1. 23E-34 | -0. 25257 | 0. 003 | 0. 078 | 1. 83E-30 | M1 | CELF3          |
| ZCCHC3. 3  | 1. 29E-34 | -0. 13666 | 0. 026 | 0. 122 | 1. 93E-30 | M1 | ZCCHC3         |
| PSMD8. 2   | 1. 32E-34 | -0. 29493 | 0. 502 | 0. 708 | 1. 97E-30 | M1 | PSMD8          |
| DMPK. 1    | 1. 32E-34 | -0. 14172 | 0. 003 | 0. 078 | 1. 98E-30 | M1 | DMPK           |
| SAP30L. 3  | 1. 36E-34 | -0. 14787 | 0. 018 | 0. 107 | 2. 03E-30 | M1 | SAP30L         |
| SULF2. 2   | 1. 40E-34 | -0. 12215 | 0. 06  | 0. 179 | 2. 08E-30 | M1 | SULF2          |
| PNPT1. 2   | 1. 42E-34 | -0. 14746 | 0. 087 | 0. 219 | 2. 12E-30 | M1 | PNPT1          |
| FAM212A. 3 | 1. 43E-34 | 0. 337641 | 0. 102 | 0. 038 | 2. 13E-30 | M1 | FAM212A        |
| XIAP. 2    | 1. 43E-34 | -0. 11417 | 0. 097 | 0. 237 | 2. 14E-30 | M1 | XIAP           |
| MIB2. 3    | 1. 45E-34 | -0. 12347 | 0. 053 | 0. 168 | 2. 16E-30 | M1 | MIB2           |
| RP11-196G  | 1. 48E-34 | 0. 172784 | 0. 045 | 0. 009 | 2. 21E-30 | M1 | RP11-196G11. 2 |
| MUT. 3     | 1. 54E-34 | -0. 15464 | 0. 06  | 0. 177 | 2. 29E-30 | M1 | MUT            |
| DDB1       | 1. 59E-34 | -0. 16936 | 0. 153 | 0. 317 | 2. 38E-30 | M1 | DDB1           |
| EID1. 2    | 1. 59E-34 | -0. 22246 | 0. 55  | 0. 739 | 2. 38E-30 | M1 | EID1           |
| PES1. 3    | 1. 63E-34 | -0. 12784 | 0. 083 | 0. 214 | 2. 44E-30 | M1 | PES1           |
| HIRIP3. 2  | 1. 65E-34 | -0. 19079 | 0. 066 | 0. 185 | 2. 47E-30 | M1 | HIRIP3         |
| BRINP2. 3  | 1. 69E-34 | -0. 16936 | 0. 007 | 0. 086 | 2. 52E-30 | M1 | BRINP2         |
| C9orf116.  | 1. 74E-34 | -0. 14346 | 0. 009 | 0. 09  | 2. 60E-30 | M1 | C9orf116       |
| FAM181A. 2 | 1. 80E-34 | -0. 2589  | 0. 003 | 0. 078 | 2. 69E-30 | M1 | FAM181A        |
| TBC1D8. 1  | 1. 82E-34 | 0. 268902 | 0. 095 | 0. 034 | 2. 72E-30 | M1 | TBC1D8         |
| MSH6. 2    | 1. 93E-34 | -0. 16421 | 0. 04  | 0. 144 | 2. 89E-30 | M1 | MSH6           |
| ZNF260. 1  | 1. 97E-34 | -0. 14472 | 0. 022 | 0. 115 | 2. 95E-30 | M1 | ZNF260         |
| BYSL. 1    | 1. 98E-34 | -0. 18182 | 0. 028 | 0. 123 | 2. 96E-30 | M1 | BYSL           |
| RAB9A. 2   | 2. 06E-34 | -0. 15657 | 0. 162 | 0. 332 | 3. 08E-30 | M1 | RAB9A          |
| GGCT. 3    | 2. 07E-34 | -0. 23873 | 0. 229 | 0. 418 | 3. 09E-30 | M1 | GGCT           |
| GJC1. 2    | 2. 08E-34 | -0. 12529 | 0. 002 | 0. 076 | 3. 10E-30 | M1 | GJC1           |
| PRR5. 3    | 2. 09E-34 | 0. 281116 | 0. 099 | 0. 036 | 3. 12E-30 | M1 | PRR5           |
| GAS2L1. 3  | 2. 12E-34 | -0. 14524 | 0. 056 | 0. 171 | 3. 16E-30 | M1 | GAS2L1         |
| MED9. 1    | 2. 21E-34 | -0. 16523 | 0. 018 | 0. 107 | 3. 31E-30 | M1 | MED9           |
| TRIB3. 3   | 2. 24E-34 | -0. 22117 | 0. 008 | 0. 087 | 3. 35E-30 | M1 | TRIB3          |
| ST5. 4     | 2. 27E-34 | -0. 17103 | 0. 056 | 0. 17  | 3. 40E-30 | M1 | ST5            |
| WASF3. 2   | 2. 28E-34 | -0. 17802 | 0. 009 | 0. 089 | 3. 41E-30 | M1 | WASF3          |
| C12orf43   | 2. 41E-34 | -0. 15558 | 0. 06  | 0. 176 | 3. 60E-30 | M1 | C12orf43       |
| NDUFAF6. 3 | 2. 43E-34 | -0. 12435 | 0. 075 | 0. 202 | 3. 62E-30 | M1 | NDUFAF6        |
| CSK. 4     | 2. 47E-34 | 0. 3948   | 0. 225 | 0. 132 | 3. 69E-30 | M1 | CSK            |
| PWAR6. 1   | 2. 48E-34 | -0. 1595  | 0. 007 | 0. 085 | 3. 71E-30 | M1 | PWAR6          |
| HRK. 2     | 2. 56E-34 | -0. 22074 | 0. 002 | 0. 075 | 3. 83E-30 | M1 | HRK            |
| TTC32. 1   | 2. 58E-34 | -0. 19493 | 0. 055 | 0. 168 | 3. 85E-30 | M1 | TTC32          |
| TSPYL4. 1  | 2. 65E-34 | -0. 18699 | 0. 025 | 0. 119 | 3. 97E-30 | M1 | TSPYL4         |
| CNOT3. 2   | 2. 70E-34 | -0. 11317 | 0. 063 | 0. 182 | 4. 03E-30 | M1 | CNOT3          |
| PDHA1. 1   | 2. 75E-34 | -0. 16458 | 0. 164 | 0. 331 | 4. 10E-30 | M1 | PDHA1          |
| MZT2B. 2   | 2. 80E-34 | -0. 25288 | 0. 441 | 0. 624 | 4. 19E-30 | M1 | MZT2B          |
| TNFRSF14.  | 2. 85E-34 | 0. 403892 | 0. 19  | 0. 1   | 4. 27E-30 | M1 | TNFRSF14       |
| ADPRH. 2   | 3. 00E-34 | 0. 257259 | 0. 077 | 0. 024 | 4. 48E-30 | M1 | ADPRH          |
| METAP1D. 2 | 3. 19E-34 | -0. 20523 | 0. 039 | 0. 141 | 4. 76E-30 | M1 | METAP1D        |
| WDR48. 2   | 3. 21E-34 | -0. 17854 | 0. 048 | 0. 157 | 4. 80E-30 | M1 | WDR48          |
| SHOX2. 2   | 3. 26E-34 | -0. 14326 | 0. 002 | 0. 076 | 4. 87E-30 | M1 | SHOX2          |
| PCID2. 2   | 3. 32E-34 | -0. 15597 | 0. 076 | 0. 201 | 4. 97E-30 | M1 | PCID2          |

|             |           |           |        |        |              |                |
|-------------|-----------|-----------|--------|--------|--------------|----------------|
| GOPC. 2     | 3. 33E-34 | -0. 13012 | 0. 13  | 0. 283 | 4. 98E-30 M1 | GOPC           |
| C5orf42. 2  | 3. 38E-34 | -0. 14361 | 0. 019 | 0. 109 | 5. 04E-30 M1 | C5orf42        |
| USE1. 4     | 3. 39E-34 | -0. 18388 | 0. 183 | 0. 359 | 5. 06E-30 M1 | USE1           |
| BRWD1. 3    | 3. 60E-34 | -0. 16819 | 0. 119 | 0. 266 | 5. 38E-30 M1 | BRWD1          |
| PRUNE2. 2   | 3. 68E-34 | -0. 31755 | 0. 035 | 0. 133 | 5. 50E-30 M1 | PRUNE2         |
| ICA1L. 1    | 3. 79E-34 | -0. 15759 | 0. 023 | 0. 115 | 5. 66E-30 M1 | ICA1L          |
| TIMM21. 3   | 3. 85E-34 | -0. 16717 | 0. 053 | 0. 166 | 5. 75E-30 M1 | TIMM21         |
| R3HDM1. 1   | 3. 88E-34 | -0. 16921 | 0. 04  | 0. 144 | 5. 80E-30 M1 | R3HDM1         |
| ADO. 3      | 4. 13E-34 | -0. 13362 | 0. 039 | 0. 144 | 6. 17E-30 M1 | ADO            |
| MMP15. 3    | 4. 16E-34 | -0. 15117 | 0. 002 | 0. 075 | 6. 21E-30 M1 | MMP15          |
| PDE4D. 1    | 4. 22E-34 | -0. 1738  | 0. 022 | 0. 113 | 6. 31E-30 M1 | PDE4D          |
| METTL5. 1   | 4. 25E-34 | -0. 15983 | 0. 205 | 0. 391 | 6. 35E-30 M1 | METTL5         |
| EMC8. 2     | 4. 29E-34 | -0. 14751 | 0. 139 | 0. 298 | 6. 41E-30 M1 | EMC8           |
| CBR4. 4     | 4. 59E-34 | -0. 12646 | 0. 081 | 0. 21  | 6. 85E-30 M1 | CBR4           |
| PEG3. 2     | 4. 86E-34 | -0. 21584 | 0. 003 | 0. 077 | 7. 27E-30 M1 | PEG3           |
| MAP4K4. 2   | 5. 05E-34 | -0. 20655 | 0. 126 | 0. 272 | 7. 54E-30 M1 | MAP4K4         |
| ZNF708. 1   | 5. 27E-34 | -0. 17281 | 0. 022 | 0. 113 | 7. 87E-30 M1 | ZNF708         |
| TP53BP1. 1  | 5. 41E-34 | -0. 13882 | 0. 021 | 0. 112 | 8. 08E-30 M1 | TP53BP1        |
| SPA17. 4    | 5. 49E-34 | -0. 19984 | 0. 012 | 0. 094 | 8. 20E-30 M1 | SPA17          |
| CD7. 3      | 5. 54E-34 | 0. 207526 | 0. 095 | 0. 033 | 8. 28E-30 M1 | CD7            |
| DHX15. 1    | 5. 66E-34 | -0. 16285 | 0. 122 | 0. 269 | 8. 46E-30 M1 | DHX15          |
| PTPN4. 3    | 5. 71E-34 | -0. 18886 | 0. 025 | 0. 118 | 8. 53E-30 M1 | PTPN4          |
| SCN3B. 2    | 5. 86E-34 | -0. 26088 | 0. 007 | 0. 085 | 8. 76E-30 M1 | SCN3B          |
| NXPH4. 2    | 5. 90E-34 | -0. 23857 | 0. 002 | 0. 075 | 8. 82E-30 M1 | NXPH4          |
| EN1. 1      | 6. 01E-34 | -0. 20354 | 0. 003 | 0. 076 | 8. 98E-30 M1 | EN1            |
| ADA. 3      | 6. 03E-34 | -0. 14904 | 0. 019 | 0. 108 | 9. 02E-30 M1 | ADA            |
| SPPL3. 3    | 6. 30E-34 | -0. 11742 | 0. 087 | 0. 219 | 9. 41E-30 M1 | SPPL3          |
| KANSL2. 1   | 6. 30E-34 | -0. 17495 | 0. 056 | 0. 168 | 9. 42E-30 M1 | KANSL2         |
| RHBDD3. 2   | 6. 36E-34 | -0. 13355 | 0. 055 | 0. 168 | 9. 50E-30 M1 | RHBDD3         |
| NDUF5. 1    | 6. 50E-34 | -0. 15317 | 0. 045 | 0. 152 | 9. 72E-30 M1 | NDUF5          |
| CHERP. 1    | 6. 56E-34 | -0. 15723 | 0. 068 | 0. 189 | 9. 81E-30 M1 | CHERP          |
| PTPRN. 3    | 6. 95E-34 | -0. 25359 | 0. 008 | 0. 087 | 1. 04E-29 M1 | PTPRN          |
| GLTSCR2. 4  | 6. 97E-34 | 0. 222184 | 0. 59  | 0. 559 | 1. 04E-29 M1 | GLTSCR2        |
| NAT9. 2     | 7. 23E-34 | -0. 11888 | 0. 091 | 0. 225 | 1. 08E-29 M1 | NAT9           |
| SLC26A11. 7 | 7. 81E-34 | -0. 12279 | 0. 026 | 0. 121 | 1. 17E-29 M1 | SLC26A11       |
| FAM96A. 2   | 8. 03E-34 | 0. 372789 | 0. 423 | 0. 343 | 1. 20E-29 M1 | FAM96A         |
| PNKD. 2     | 8. 04E-34 | -0. 20912 | 0. 285 | 0. 491 | 1. 20E-29 M1 | PNKD           |
| TTC37. 3    | 8. 05E-34 | -0. 13748 | 0. 078 | 0. 205 | 1. 20E-29 M1 | TTC37          |
| FTO. 1      | 8. 36E-34 | -0. 14536 | 0. 045 | 0. 152 | 1. 25E-29 M1 | FTO            |
| BASP1. 4    | 8. 67E-34 | 0. 330496 | 0. 455 | 0. 356 | 1. 30E-29 M1 | BASP1          |
| RAC2. 4     | 8. 74E-34 | 0. 283063 | 0. 2   | 0. 103 | 1. 31E-29 M1 | RAC2           |
| ARHGEF9. 3  | 8. 77E-34 | -0. 1751  | 0. 036 | 0. 137 | 1. 31E-29 M1 | ARHGEF9        |
| RP11-514C   | 8. 79E-34 | 0. 225479 | 0. 067 | 0. 019 | 1. 31E-29 M1 | RP11-514012. 4 |
| SLC8B1. 4   | 8. 79E-34 | 0. 389662 | 0. 165 | 0. 084 | 1. 31E-29 M1 | SLC8B1         |
| SMC3. 2     | 8. 80E-34 | -0. 16616 | 0. 153 | 0. 312 | 1. 32E-29 M1 | SMC3           |
| MCHR1. 2    | 8. 82E-34 | -0. 1434  | 0      | 0. 07  | 1. 32E-29 M1 | MCHR1          |
| GPSM1. 3    | 8. 82E-34 | -0. 18552 | 0. 008 | 0. 086 | 1. 32E-29 M1 | GPSM1          |
| CSRP1. 2    | 8. 91E-34 | -0. 27386 | 0. 12  | 0. 262 | 1. 33E-29 M1 | CSRP1          |
| FAF1        | 9. 13E-34 | -0. 15553 | 0. 066 | 0. 185 | 1. 36E-29 M1 | FAF1           |
| RAB5B. 3    | 9. 53E-34 | -0. 14859 | 0. 1   | 0. 237 | 1. 42E-29 M1 | RAB5B          |
| ADD3. 1     | 9. 60E-34 | -0. 2395  | 0. 045 | 0. 15  | 1. 43E-29 M1 | ADD3           |

|           |          |          |       |       |          |    |               |
|-----------|----------|----------|-------|-------|----------|----|---------------|
| SDC4.1    | 9.61E-34 | -0.24826 | 0.021 | 0.111 | 1.44E-29 | M1 | SDC4          |
| RSAD1.2   | 9.73E-34 | -0.1338  | 0.054 | 0.167 | 1.45E-29 | M1 | RSAD1         |
| C8orf82.3 | 9.81E-34 | -0.13212 | 0.07  | 0.191 | 1.47E-29 | M1 | C8orf82       |
| SLC35C2.1 | 9.83E-34 | -0.16257 | 0.127 | 0.279 | 1.47E-29 | M1 | SLC35C2       |
| MAD2L1BP  | 1.01E-33 | -0.15157 | 0.063 | 0.18  | 1.51E-29 | M1 | MAD2L1BP      |
| QSER1.3   | 1.02E-33 | -0.12219 | 0.035 | 0.135 | 1.53E-29 | M1 | QSER1         |
| HSBP1.3   | 1.04E-33 | -0.26942 | 0.555 | 0.747 | 1.55E-29 | M1 | HSBP1         |
| GSTM3.2   | 1.09E-33 | -0.13878 | 0.137 | 0.295 | 1.63E-29 | M1 | GSTM3         |
| GLIS3.1   | 1.10E-33 | -0.13502 | 0.01  | 0.091 | 1.65E-29 | M1 | GLIS3         |
| MS4A14.3  | 1.18E-33 | 0.217785 | 0.059 | 0.015 | 1.76E-29 | M1 | MS4A14        |
| DYNC1I2.3 | 1.19E-33 | -0.22181 | 0.302 | 0.503 | 1.78E-29 | M1 | DYNC1I2       |
| SAMD14.1  | 1.25E-33 | -0.19047 | 0.003 | 0.077 | 1.86E-29 | M1 | SAMD14        |
| GPX7.1    | 1.25E-33 | -0.12483 | 0.073 | 0.198 | 1.86E-29 | M1 | GPX7          |
| TDG.2     | 1.26E-33 | -0.12772 | 0.141 | 0.3   | 1.88E-29 | M1 | TDG           |
| MNS1.2    | 1.27E-33 | -0.15834 | 0.009 | 0.088 | 1.90E-29 | M1 | MNS1          |
| NFKB2.4   | 1.27E-33 | 0.339322 | 0.118 | 0.049 | 1.90E-29 | M1 | NFKB2         |
| NF1.2     | 1.28E-33 | -0.14144 | 0.106 | 0.247 | 1.91E-29 | M1 | NF1           |
| RAB22A.3  | 1.28E-33 | -0.11968 | 0.115 | 0.263 | 1.91E-29 | M1 | RAB22A        |
| ST7       | 1.30E-33 | -0.21547 | 0.028 | 0.122 | 1.95E-29 | M1 | ST7           |
| PSMD5-AS1 | 1.31E-33 | -0.15779 | 0.078 | 0.203 | 1.96E-29 | M1 | PSMD5-AS1     |
| BRMS1L.1  | 1.32E-33 | -0.18202 | 0.022 | 0.113 | 1.97E-29 | M1 | BRMS1L        |
| BBIP1.2   | 1.32E-33 | -0.1512  | 0.075 | 0.199 | 1.97E-29 | M1 | BBIP1         |
| TIMM8A.1  | 1.33E-33 | -0.19367 | 0.022 | 0.113 | 1.99E-29 | M1 | TIMM8A        |
| DSTYK.2   | 1.34E-33 | -0.15461 | 0.037 | 0.137 | 2.01E-29 | M1 | DSTYK         |
| ZNF532.2  | 1.34E-33 | -0.15665 | 0.019 | 0.107 | 2.01E-29 | M1 | ZNF532        |
| RP11-563K | 1.36E-33 | -0.18632 | 0.003 | 0.077 | 2.03E-29 | M1 | RP11-563K23.1 |
| TXNRD1.2  | 1.37E-33 | -0.14718 | 0.118 | 0.262 | 2.04E-29 | M1 | TXNRD1        |
| CHMP2A.3  | 1.38E-33 | -0.30784 | 0.477 | 0.691 | 2.06E-29 | M1 | CHMP2A        |
| ACAD8.1   | 1.39E-33 | -0.15628 | 0.078 | 0.204 | 2.08E-29 | M1 | ACAD8         |
| E2F5.1    | 1.42E-33 | -0.1126  | 0.004 | 0.078 | 2.12E-29 | M1 | E2F5          |
| KTI12.2   | 1.47E-33 | -0.17084 | 0.027 | 0.121 | 2.20E-29 | M1 | KTI12         |
| WDR83.2   | 1.52E-33 | -0.12764 | 0.07  | 0.191 | 2.27E-29 | M1 | WDR83         |
| C22orf39. | 1.55E-33 | -0.14496 | 0.132 | 0.285 | 2.32E-29 | M1 | C22orf39      |
| FAM69B.2  | 1.56E-33 | -0.13291 | 0     | 0.07  | 2.33E-29 | M1 | FAM69B        |
| NEO1.2    | 1.58E-33 | -0.18118 | 0.008 | 0.086 | 2.36E-29 | M1 | NEO1          |
| LMBR1.2   | 1.58E-33 | -0.15862 | 0.03  | 0.126 | 2.36E-29 | M1 | LMBR1         |
| NUP214.3  | 1.59E-33 | 0.488069 | 0.274 | 0.179 | 2.37E-29 | M1 | NUP214        |
| ISOC2.4   | 1.60E-33 | -0.20288 | 0.201 | 0.379 | 2.39E-29 | M1 | ISOC2         |
| SFSWAP.3  | 1.61E-33 | -0.10202 | 0.073 | 0.197 | 2.40E-29 | M1 | SFSWAP        |
| FAM219A.1 | 1.66E-33 | -0.1652  | 0.018 | 0.105 | 2.48E-29 | M1 | FAM219A       |
| GAL3ST3.2 | 1.71E-33 | -0.15797 | 0.001 | 0.071 | 2.56E-29 | M1 | GAL3ST3       |
| MAP4K5.2  | 1.72E-33 | -0.13298 | 0.059 | 0.174 | 2.57E-29 | M1 | MAP4K5        |
| MEN1      | 1.75E-33 | -0.13908 | 0.034 | 0.133 | 2.61E-29 | M1 | MEN1          |
| EXOC1.1   | 1.80E-33 | -0.19282 | 0.128 | 0.273 | 2.69E-29 | M1 | EXOC1         |
| PCED1A.1  | 1.82E-33 | -0.12977 | 0.043 | 0.148 | 2.73E-29 | M1 | PCED1A        |
| AAAS.1    | 1.85E-33 | -0.15151 | 0.081 | 0.207 | 2.76E-29 | M1 | AAAS          |
| TTC28.2   | 1.85E-33 | -0.14543 | 0.021 | 0.11  | 2.77E-29 | M1 | TTC28         |
| ODF2.2    | 1.88E-33 | -0.16487 | 0.044 | 0.15  | 2.82E-29 | M1 | ODF2          |
| RNMTL1.2  | 1.89E-33 | -0.11482 | 0.042 | 0.147 | 2.82E-29 | M1 | RNMTL1        |
| EVA1C.3   | 1.92E-33 | -0.15959 | 0.007 | 0.084 | 2.87E-29 | M1 | EVA1C         |
| ENPP1     | 1.99E-33 | 0.170423 | 0.046 | 0.01  | 2.97E-29 | M1 | ENPP1         |

|             |           |           |        |        |           |    |                |
|-------------|-----------|-----------|--------|--------|-----------|----|----------------|
| ACSL3. 2    | 1. 99E-33 | -0. 14334 | 0. 193 | 0. 371 | 2. 97E-29 | M1 | ACSL3          |
| DGCR2. 1    | 2. 04E-33 | -0. 14439 | 0. 058 | 0. 171 | 3. 05E-29 | M1 | DGCR2          |
| GART. 1     | 2. 09E-33 | -0. 13035 | 0. 09  | 0. 222 | 3. 12E-29 | M1 | GART           |
| XPOT. 3     | 2. 18E-33 | -0. 14801 | 0. 068 | 0. 187 | 3. 26E-29 | M1 | XPOT           |
| DYNLRB1. 3  | 2. 20E-33 | -0. 23405 | 0. 494 | 0. 699 | 3. 28E-29 | M1 | DYNLRB1        |
| TNFRSF21. 2 | 2. 20E-33 | -0. 16686 | 0. 065 | 0. 183 | 3. 29E-29 | M1 | TNFRSF21       |
| ST20        | 2. 23E-33 | -0. 16304 | 0. 031 | 0. 127 | 3. 34E-29 | M1 | ST20           |
| CTU2. 1     | 2. 30E-33 | -0. 12654 | 0. 045 | 0. 15  | 3. 43E-29 | M1 | CTU2           |
| RP11-111M   | 2. 33E-33 | -0. 17731 | 0. 021 | 0. 111 | 3. 48E-29 | M1 | RP11-111M22. 3 |
| SEPHS2. 2   | 2. 42E-33 | -0. 17014 | 0. 173 | 0. 341 | 3. 61E-29 | M1 | SEPHS2         |
| RRP8        | 2. 43E-33 | -0. 17117 | 0. 041 | 0. 144 | 3. 63E-29 | M1 | RRP8           |
| TIMM17A. 2  | 2. 46E-33 | -0. 18432 | 0. 22  | 0. 407 | 3. 68E-29 | M1 | TIMM17A        |
| FAM64A. 4   | 2. 47E-33 | -0. 26773 | 0. 006 | 0. 082 | 3. 69E-29 | M1 | FAM64A         |
| TMEM9B. 2   | 2. 55E-33 | 0. 279167 | 0. 554 | 0. 533 | 3. 81E-29 | M1 | TMEM9B         |
| CEP95. 1    | 2. 56E-33 | -0. 15082 | 0. 039 | 0. 141 | 3. 82E-29 | M1 | CEP95          |
| RP11-115C   | 2. 56E-33 | -0. 19369 | 0. 015 | 0. 099 | 3. 83E-29 | M1 | RP11-115C21. 2 |
| BZW1. 2     | 2. 63E-33 | -0. 23624 | 0. 365 | 0. 573 | 3. 93E-29 | M1 | BZW1           |
| PLA2G7. 3   | 2. 67E-33 | 0. 245881 | 0. 105 | 0. 04  | 3. 99E-29 | M1 | PLA2G7         |
| HMGB2. 4    | 2. 71E-33 | 0. 2606   | 0. 564 | 0. 48  | 4. 05E-29 | M1 | HMGB2          |
| SSB. 3      | 2. 92E-33 | -0. 24528 | 0. 409 | 0. 629 | 4. 37E-29 | M1 | SSB            |
| ATMIN. 3    | 3. 05E-33 | -0. 14592 | 0. 034 | 0. 132 | 4. 55E-29 | M1 | ATMIN          |
| PLXNB1. 3   | 3. 06E-33 | -0. 2063  | 0. 01  | 0. 089 | 4. 58E-29 | M1 | PLXNB1         |
| ITGB3BP. 2  | 3. 08E-33 | -0. 18144 | 0. 052 | 0. 161 | 4. 60E-29 | M1 | ITGB3BP        |
| ZNF131. 3   | 3. 12E-33 | -0. 15334 | 0. 114 | 0. 256 | 4. 66E-29 | M1 | ZNF131         |
| SPRY4. 2    | 3. 13E-33 | -0. 14958 | 0. 005 | 0. 08  | 4. 67E-29 | M1 | SPRY4          |
| NRSN1. 2    | 3. 23E-33 | -0. 19273 | 0. 001 | 0. 071 | 4. 83E-29 | M1 | NRSN1          |
| ZZZ3. 1     | 3. 35E-33 | -0. 15029 | 0. 03  | 0. 125 | 5. 00E-29 | M1 | ZZZ3           |
| CNKSR2. 2   | 3. 35E-33 | -0. 14547 | 0. 002 | 0. 074 | 5. 01E-29 | M1 | CNKSR2         |
| PIK3CG. 2   | 3. 53E-33 | 0. 190941 | 0. 058 | 0. 015 | 5. 28E-29 | M1 | PIK3CG         |
| DDHD2. 2    | 3. 54E-33 | -0. 16856 | 0. 028 | 0. 121 | 5. 29E-29 | M1 | DDHD2          |
| PDIA4. 2    | 3. 57E-33 | -0. 2425  | 0. 293 | 0. 495 | 5. 34E-29 | M1 | PDIA4          |
| KCNH2. 2    | 3. 61E-33 | -0. 21837 | 0. 005 | 0. 079 | 5. 39E-29 | M1 | KCNH2          |
| UPF3B. 2    | 3. 61E-33 | -0. 12421 | 0. 127 | 0. 276 | 5. 40E-29 | M1 | UPF3B          |
| PACSIN3. 2  | 3. 69E-33 | -0. 14489 | 0. 006 | 0. 082 | 5. 51E-29 | M1 | PACSIN3        |
| AGBL5. 1    | 3. 78E-33 | -0. 12209 | 0. 014 | 0. 097 | 5. 64E-29 | M1 | AGBL5          |
| ABHD17B. 4  | 3. 95E-33 | -0. 2113  | 0. 041 | 0. 141 | 5. 90E-29 | M1 | ABHD17B        |
| SNX2. 4     | 4. 00E-33 | 0. 367328 | 0. 464 | 0. 399 | 5. 97E-29 | M1 | SNX2           |
| MT2A. 4     | 4. 03E-33 | -0. 51603 | 0. 744 | 0. 792 | 6. 02E-29 | M1 | MT2A           |
| RRS1. 1     | 4. 05E-33 | -0. 15035 | 0. 051 | 0. 161 | 6. 05E-29 | M1 | RRS1           |
| C2orf69. 4  | 4. 13E-33 | -0. 14225 | 0. 088 | 0. 215 | 6. 17E-29 | M1 | C2orf69        |
| CDK14       | 4. 20E-33 | -0. 15957 | 0. 011 | 0. 092 | 6. 28E-29 | M1 | CDK14          |
| KMT2E. 2    | 4. 26E-33 | -0. 1946  | 0. 361 | 0. 573 | 6. 36E-29 | M1 | KMT2E          |
| WDR3. 1     | 4. 32E-33 | -0. 16248 | 0. 024 | 0. 115 | 6. 45E-29 | M1 | WDR3           |
| MPP2. 3     | 4. 32E-33 | -0. 17588 | 0. 001 | 0. 071 | 6. 45E-29 | M1 | MPP2           |
| C1orf53. 2  | 4. 32E-33 | -0. 19179 | 0. 014 | 0. 097 | 6. 46E-29 | M1 | C1orf53        |
| IFT27. 3    | 4. 45E-33 | -0. 13534 | 0. 131 | 0. 282 | 6. 65E-29 | M1 | IFT27          |
| GNAI1. 3    | 4. 47E-33 | -0. 25459 | 0. 029 | 0. 121 | 6. 68E-29 | M1 | GNAI1          |
| SPIN2B. 2   | 4. 55E-33 | -0. 13602 | 0. 028 | 0. 122 | 6. 79E-29 | M1 | SPIN2B         |
| KCTD1. 2    | 4. 59E-33 | -0. 15122 | 0. 004 | 0. 077 | 6. 86E-29 | M1 | KCTD1          |
| RAB30. 2    | 4. 61E-33 | -0. 15894 | 0. 01  | 0. 089 | 6. 89E-29 | M1 | RAB30          |
| VANGL2. 2   | 4. 78E-33 | -0. 15849 | 0. 008 | 0. 086 | 7. 15E-29 | M1 | VANGL2         |

|           |          |          |       |       |          |    |                |
|-----------|----------|----------|-------|-------|----------|----|----------------|
| FRMD5.1   | 4.84E-33 | -0.13433 | 0     | 0.069 | 7.23E-29 | M1 | FRMD5          |
| CHGB.1    | 5.00E-33 | -0.23695 | 0.017 | 0.101 | 7.47E-29 | M1 | CHGB           |
| SLC25A29. | 5.07E-33 | -0.12246 | 0.058 | 0.171 | 7.58E-29 | M1 | SLC25A29       |
| ZNF226.4  | 5.55E-33 | -0.20854 | 0.095 | 0.226 | 8.30E-29 | M1 | ZNF226         |
| BCAS4.2   | 5.62E-33 | -0.14414 | 0.016 | 0.1   | 8.40E-29 | M1 | BCAS4          |
| COL5A2.2  | 5.64E-33 | -0.12725 | 0.003 | 0.074 | 8.42E-29 | M1 | COL5A2         |
| CDK5.2    | 5.72E-33 | -0.1308  | 0.118 | 0.262 | 8.55E-29 | M1 | CDK5           |
| UBE3A.3   | 5.81E-33 | -0.14484 | 0.153 | 0.314 | 8.68E-29 | M1 | UBE3A          |
| LRRC41.1  | 5.91E-33 | -0.16871 | 0.12  | 0.265 | 8.83E-29 | M1 | LRRC41         |
| SHC4.1    | 6.07E-33 | -0.16497 | 0     | 0.069 | 9.07E-29 | M1 | SHC4           |
| GPRASP2.2 | 6.20E-33 | -0.17579 | 0.004 | 0.077 | 9.27E-29 | M1 | GPRASP2        |
| DMAP1.2   | 6.24E-33 | -0.14309 | 0.127 | 0.276 | 9.33E-29 | M1 | DMAP1          |
| CCDC58.2  | 6.36E-33 | -0.13531 | 0.052 | 0.162 | 9.50E-29 | M1 | CCDC58         |
| TXNL1.1   | 6.46E-33 | -0.21813 | 0.298 | 0.506 | 9.65E-29 | M1 | TXNL1          |
| PCDH10.2  | 6.47E-33 | -0.16241 | 0.006 | 0.08  | 9.67E-29 | M1 | PCDH10         |
| CHEK1     | 6.80E-33 | -0.18454 | 0.013 | 0.094 | 1.02E-28 | M1 | CHEK1          |
| MCCC2.1   | 6.81E-33 | -0.14173 | 0.046 | 0.151 | 1.02E-28 | M1 | MCCC2          |
| KANK1.2   | 6.91E-33 | -0.20055 | 0.02  | 0.106 | 1.03E-28 | M1 | KANK1          |
| LIN7B.2   | 6.95E-33 | -0.15092 | 0.039 | 0.139 | 1.04E-28 | M1 | LIN7B          |
| GNB4.3    | 7.29E-33 | 0.432397 | 0.304 | 0.218 | 1.09E-28 | M1 | GNB4           |
| UBA5.1    | 7.54E-33 | -0.15233 | 0.08  | 0.205 | 1.13E-28 | M1 | UBA5           |
| DIRAS2.2  | 7.79E-33 | -0.17868 | 0.003 | 0.075 | 1.16E-28 | M1 | DIRAS2         |
| HES4.4    | 7.80E-33 | -0.17763 | 0.083 | 0.208 | 1.17E-28 | M1 | HES4           |
| UNK       | 7.80E-33 | -0.13766 | 0.041 | 0.144 | 1.17E-28 | M1 | UNK            |
| PCDH19.2  | 7.85E-33 | -0.14013 | 0.002 | 0.072 | 1.17E-28 | M1 | PCDH19         |
| SLC4A1AP. | 7.90E-33 | -0.15122 | 0.074 | 0.196 | 1.18E-28 | M1 | SLC4A1AP       |
| PNMAL1.3  | 7.90E-33 | -0.11991 | 0.022 | 0.111 | 1.18E-28 | M1 | PNMAL1         |
| MED24.3   | 8.34E-33 | -0.15594 | 0.07  | 0.188 | 1.25E-28 | M1 | MED24          |
| UQCRQ.4   | 8.35E-33 | -0.2441  | 0.686 | 0.822 | 1.25E-28 | M1 | UQCRQ          |
| SETBP1.2  | 8.41E-33 | -0.16086 | 0.009 | 0.087 | 1.26E-28 | M1 | SETBP1         |
| COA1.1    | 8.43E-33 | -0.13795 | 0.234 | 0.43  | 1.26E-28 | M1 | COA1           |
| TNKS1BP1. | 8.58E-33 | -0.12811 | 0.009 | 0.086 | 1.28E-28 | M1 | TNKS1BP1       |
| SRD5A1.1  | 8.75E-33 | -0.16754 | 0.031 | 0.126 | 1.31E-28 | M1 | SRD5A1         |
| MEX3C.1   | 8.78E-33 | -0.13339 | 0.021 | 0.109 | 1.31E-28 | M1 | MEX3C          |
| RRAGD.2   | 8.82E-33 | -0.14017 | 0.043 | 0.147 | 1.32E-28 | M1 | RRAGD          |
| C1QBP.2   | 8.89E-33 | -0.24412 | 0.397 | 0.586 | 1.33E-28 | M1 | C1QBP          |
| ZFP90.3   | 9.21E-33 | -0.11446 | 0.044 | 0.148 | 1.38E-28 | M1 | ZFP90          |
| SIKE1.1   | 9.23E-33 | -0.12711 | 0.083 | 0.209 | 1.38E-28 | M1 | SIKE1          |
| RIC8B.2   | 9.50E-33 | -0.16997 | 0.02  | 0.107 | 1.42E-28 | M1 | RIC8B          |
| RP11-277F | 9.89E-33 | -0.23318 | 0.006 | 0.08  | 1.48E-28 | M1 | RP11-277P12.20 |
| FAM213B.1 | 1.02E-32 | -0.15836 | 0.018 | 0.103 | 1.52E-28 | M1 | FAM213B        |
| RIN1.3    | 1.03E-32 | -0.12968 | 0.014 | 0.096 | 1.54E-28 | M1 | RIN1           |
| NOL10.1   | 1.03E-32 | -0.16153 | 0.061 | 0.174 | 1.54E-28 | M1 | NOL10          |
| GHRL.4    | 1.06E-32 | 0.361501 | 0.111 | 0.046 | 1.58E-28 | M1 | GHRL           |
| SNHG10.1  | 1.07E-32 | -0.1369  | 0.021 | 0.109 | 1.60E-28 | M1 | SNHG10         |
| UBL5.3    | 1.11E-32 | -0.27342 | 0.732 | 0.851 | 1.66E-28 | M1 | UBL5           |
| SEC61A2   | 1.14E-32 | -0.16156 | 0.013 | 0.093 | 1.70E-28 | M1 | SEC61A2        |
| PLEKHJ1.2 | 1.15E-32 | -0.13461 | 0.212 | 0.397 | 1.72E-28 | M1 | PLEKHJ1        |
| FARSA.1   | 1.16E-32 | -0.15175 | 0.177 | 0.348 | 1.73E-28 | M1 | FARSA          |
| MIR497HG. | 1.17E-32 | -0.2412  | 0.006 | 0.08  | 1.74E-28 | M1 | MIR497HG       |
| RP11-212F | 1.18E-32 | -0.14464 | 0.019 | 0.106 | 1.76E-28 | M1 | RP11-212P7.2   |

|           |          |          |       |       |          |    |               |
|-----------|----------|----------|-------|-------|----------|----|---------------|
| UCKL1.1   | 1.23E-32 | -0.12441 | 0.062 | 0.177 | 1.84E-28 | M1 | UCKL1         |
| NAA15.2   | 1.25E-32 | -0.15981 | 0.103 | 0.238 | 1.87E-28 | M1 | NAA15         |
| ACTR2.4   | 1.26E-32 | 0.3324   | 0.492 | 0.452 | 1.88E-28 | M1 | ACTR2         |
| PBRM1.3   | 1.27E-32 | -0.12522 | 0.12  | 0.264 | 1.89E-28 | M1 | PBRM1         |
| FBX09.3   | 1.27E-32 | -0.12786 | 0.096 | 0.228 | 1.90E-28 | M1 | FBX09         |
| NFATC1.4  | 1.27E-32 | 0.328241 | 0.105 | 0.042 | 1.90E-28 | M1 | NFATC1        |
| ZDHHC15.2 | 1.28E-32 | -0.14798 | 0.002 | 0.072 | 1.91E-28 | M1 | ZDHHC15       |
| FOXRED2.1 | 1.28E-32 | -0.13755 | 0.014 | 0.096 | 1.91E-28 | M1 | FOXRED2       |
| YBEY.1    | 1.29E-32 | -0.16266 | 0.107 | 0.244 | 1.92E-28 | M1 | YBEY          |
| CROT.3    | 1.30E-32 | -0.17197 | 0.046 | 0.149 | 1.94E-28 | M1 | CROT          |
| BDP1.1    | 1.34E-32 | -0.14213 | 0.124 | 0.269 | 2.00E-28 | M1 | BDP1          |
| PREB.2    | 1.34E-32 | -0.13518 | 0.098 | 0.232 | 2.01E-28 | M1 | PREB          |
| DNTTIP1.1 | 1.35E-32 | -0.14682 | 0.185 | 0.359 | 2.02E-28 | M1 | DNTTIP1       |
| ZNF770.1  | 1.39E-32 | -0.12704 | 0.044 | 0.147 | 2.07E-28 | M1 | ZNF770        |
| SLC52A2.2 | 1.41E-32 | -0.14236 | 0.148 | 0.307 | 2.10E-28 | M1 | SLC52A2       |
| PDGFC.1   | 1.42E-32 | -0.13104 | 0.037 | 0.136 | 2.12E-28 | M1 | PDGFC         |
| KIAA0895L | 1.43E-32 | -0.18301 | 0.02  | 0.106 | 2.13E-28 | M1 | KIAA0895L     |
| GPANK1.2  | 1.54E-32 | -0.13796 | 0.087 | 0.214 | 2.30E-28 | M1 | GPANK1        |
| GS1-124K5 | 1.55E-32 | -0.20713 | 0.034 | 0.13  | 2.32E-28 | M1 | GS1-124K5.4   |
| SMIM14.2  | 1.55E-32 | -0.17915 | 0.187 | 0.359 | 2.32E-28 | M1 | SMIM14        |
| CIITA.1   | 1.60E-32 | 0.246084 | 0.084 | 0.028 | 2.39E-28 | M1 | CIITA         |
| SLC39A3.3 | 1.64E-32 | -0.15702 | 0.192 | 0.367 | 2.44E-28 | M1 | SLC39A3       |
| MATN2.1   | 1.65E-32 | -0.19469 | 0.005 | 0.078 | 2.46E-28 | M1 | MATN2         |
| LPGAT1.3  | 1.67E-32 | -0.16227 | 0.043 | 0.145 | 2.50E-28 | M1 | LPGAT1        |
| YPEL1.4   | 1.77E-32 | -0.12787 | 0.021 | 0.108 | 2.64E-28 | M1 | YPEL1         |
| AAR2.1    | 1.81E-32 | -0.13815 | 0.048 | 0.154 | 2.71E-28 | M1 | AAR2          |
| INTS12.2  | 1.84E-32 | -0.1728  | 0.068 | 0.184 | 2.76E-28 | M1 | INTS12        |
| HSDL1.3   | 2.00E-32 | -0.18397 | 0.045 | 0.148 | 2.99E-28 | M1 | HSDL1         |
| DIAPH1.3  | 2.02E-32 | -0.13948 | 0.05  | 0.156 | 3.01E-28 | M1 | DIAPH1        |
| NIM1K.3   | 2.03E-32 | -0.19755 | 0.004 | 0.076 | 3.03E-28 | M1 | NIM1K         |
| TNFRSF10E | 2.05E-32 | 0.383499 | 0.17  | 0.089 | 3.06E-28 | M1 | TNFRSF10B     |
| SCO1.1    | 2.06E-32 | -0.12253 | 0.068 | 0.186 | 3.08E-28 | M1 | SCO1          |
| MCAT.3    | 2.09E-32 | -0.13557 | 0.043 | 0.146 | 3.13E-28 | M1 | MCAT          |
| DRG2.2    | 2.10E-32 | -0.13815 | 0.092 | 0.222 | 3.14E-28 | M1 | DRG2          |
| CCDC93.2  | 2.15E-32 | -0.18131 | 0.043 | 0.144 | 3.21E-28 | M1 | CCDC93        |
| FMN1.3    | 2.20E-32 | 0.2412   | 0.075 | 0.024 | 3.28E-28 | M1 | FMN1          |
| BDNF-AS.3 | 2.25E-32 | -0.16412 | 0.004 | 0.076 | 3.36E-28 | M1 | BDNF-AS       |
| ACY3.1    | 2.25E-32 | 0.246067 | 0.052 | 0.012 | 3.36E-28 | M1 | ACY3          |
| AP1M1.1   | 2.25E-32 | -0.12833 | 0.108 | 0.246 | 3.37E-28 | M1 | AP1M1         |
| OSBPL2.2  | 2.28E-32 | -0.13502 | 0.046 | 0.151 | 3.40E-28 | M1 | OSBPL2        |
| TBC1D24.2 | 2.31E-32 | -0.164   | 0.008 | 0.084 | 3.45E-28 | M1 | TBC1D24       |
| PSMC3IP.3 | 2.33E-32 | -0.18221 | 0.008 | 0.083 | 3.49E-28 | M1 | PSMC3IP       |
| SIAE.2    | 2.36E-32 | -0.17934 | 0.019 | 0.104 | 3.53E-28 | M1 | SIAE          |
| RP11-698N | 2.43E-32 | -0.19106 | 0.001 | 0.07  | 3.64E-28 | M1 | RP11-698N11.2 |
| ITGB2-AS1 | 2.57E-32 | 0.259689 | 0.068 | 0.02  | 3.84E-28 | M1 | ITGB2-AS1     |
| TNFRSF12A | 2.57E-32 | -0.31501 | 0.172 | 0.31  | 3.84E-28 | M1 | TNFRSF12A     |
| BBS7.2    | 2.63E-32 | -0.1656  | 0.023 | 0.111 | 3.93E-28 | M1 | BBS7          |
| TMEM88.1  | 2.64E-32 | 0.202143 | 0.059 | 0.015 | 3.95E-28 | M1 | TMEM88        |
| ASNA1.3   | 2.71E-32 | -0.21434 | 0.345 | 0.554 | 4.05E-28 | M1 | ASNA1         |
| RNF14.2   | 2.74E-32 | -0.11743 | 0.088 | 0.216 | 4.09E-28 | M1 | RNF14         |
| MUS81.1   | 2.81E-32 | -0.12046 | 0.073 | 0.194 | 4.20E-28 | M1 | MUS81         |



|            |          |          |       |       |          |    |               |
|------------|----------|----------|-------|-------|----------|----|---------------|
| ZNF420.2   | 2.82E-32 | -0.1678  | 0.03  | 0.122 | 4.22E-28 | M1 | ZNF420        |
| ZMYND15.2  | 2.84E-32 | 0.321363 | 0.111 | 0.046 | 4.24E-28 | M1 | ZMYND15       |
| SYNDIG1.4  | 3.04E-32 | 0.371326 | 0.154 | 0.076 | 4.54E-28 | M1 | SYNDIG1       |
| CD82.2     | 3.05E-32 | -0.26271 | 0.126 | 0.262 | 4.56E-28 | M1 | CD82          |
| HEY2       | 3.05E-32 | -0.13683 | 0.004 | 0.076 | 4.56E-28 | M1 | HEY2          |
| WRNIP1.1   | 3.09E-32 | -0.12581 | 0.027 | 0.118 | 4.62E-28 | M1 | WRNIP1        |
| CBFA2T2.3  | 3.11E-32 | -0.12087 | 0.043 | 0.145 | 4.65E-28 | M1 | CBFA2T2       |
| EIF3F.4    | 3.17E-32 | 0.216039 | 0.609 | 0.605 | 4.74E-28 | M1 | EIF3F         |
| PDLIM4.2   | 3.20E-32 | -0.30529 | 0.009 | 0.085 | 4.79E-28 | M1 | PDLIM4        |
| TRIM16L.1  | 3.23E-32 | -0.13754 | 0.009 | 0.086 | 4.82E-28 | M1 | TRIM16L       |
| ZNF649.3   | 3.26E-32 | -0.13414 | 0.019 | 0.104 | 4.88E-28 | M1 | ZNF649        |
| YIF1A.3    | 3.30E-32 | -0.22458 | 0.265 | 0.456 | 4.93E-28 | M1 | YIF1A         |
| RP11-195F  | 3.30E-32 | -0.235   | 0.02  | 0.105 | 4.94E-28 | M1 | RP11-195F19.5 |
| TAF15.2    | 3.36E-32 | -0.17624 | 0.145 | 0.299 | 5.02E-28 | M1 | TAF15         |
| GSG1L.1    | 3.39E-32 | -0.22021 | 0.002 | 0.07  | 5.06E-28 | M1 | GSG1L         |
| RPP40.3    | 3.41E-32 | -0.18194 | 0.037 | 0.135 | 5.09E-28 | M1 | RPP40         |
| TARBP2.2   | 3.43E-32 | -0.11064 | 0.055 | 0.165 | 5.12E-28 | M1 | TARBP2        |
| MSX1.2     | 3.45E-32 | -0.14798 | 0.005 | 0.077 | 5.16E-28 | M1 | MSX1          |
| EBPL.2     | 3.46E-32 | -0.18832 | 0.167 | 0.329 | 5.16E-28 | M1 | EBPL          |
| XXYLT1.2   | 3.47E-32 | -0.11905 | 0.042 | 0.143 | 5.19E-28 | M1 | XXYLT1        |
| ZNF714.1   | 3.64E-32 | -0.20242 | 0.028 | 0.118 | 5.44E-28 | M1 | ZNF714        |
| SNAPC3.2   | 3.69E-32 | -0.14847 | 0.048 | 0.153 | 5.51E-28 | M1 | SNAPC3        |
| NPRL2.2    | 3.77E-32 | -0.15697 | 0.064 | 0.176 | 5.64E-28 | M1 | NPRL2         |
| AP2A1.2    | 3.83E-32 | -0.12065 | 0.117 | 0.26  | 5.73E-28 | M1 | AP2A1         |
| ZNF267.4   | 3.88E-32 | 0.447463 | 0.203 | 0.118 | 5.80E-28 | M1 | ZNF267        |
| PTPN11.1   | 3.91E-32 | -0.14112 | 0.057 | 0.167 | 5.84E-28 | M1 | PTPN11        |
| NADK2.1    | 4.00E-32 | -0.13251 | 0.025 | 0.114 | 5.97E-28 | M1 | NADK2         |
| GPX8.3     | 4.12E-32 | -0.14418 | 0.004 | 0.075 | 6.15E-28 | M1 | GPX8          |
| POM121C.3  | 4.35E-32 | -0.144   | 0.051 | 0.158 | 6.51E-28 | M1 | POM121C       |
| LYRM9.3    | 4.48E-32 | -0.1759  | 0.074 | 0.193 | 6.70E-28 | M1 | LYRM9         |
| INO80E.2   | 4.50E-32 | -0.13011 | 0.111 | 0.249 | 6.72E-28 | M1 | INO80E        |
| RRN3       | 4.54E-32 | -0.18204 | 0.048 | 0.151 | 6.78E-28 | M1 | RRN3          |
| TLL1.1     | 4.56E-32 | -0.17326 | 0.02  | 0.105 | 6.82E-28 | M1 | TLL1          |
| PCOLCE.3   | 4.61E-32 | -0.24187 | 0.014 | 0.095 | 6.89E-28 | M1 | PCOLCE        |
| SEC23A.1   | 4.62E-32 | -0.128   | 0.088 | 0.214 | 6.90E-28 | M1 | SEC23A        |
| TMEM8B     | 4.68E-32 | -0.1374  | 0.004 | 0.074 | 6.99E-28 | M1 | TMEM8B        |
| CD48.4     | 4.69E-32 | 0.284792 | 0.143 | 0.065 | 7.00E-28 | M1 | CD48          |
| CCAR2.1    | 4.90E-32 | -0.18557 | 0.056 | 0.165 | 7.33E-28 | M1 | CCAR2         |
| B3GALNT1.4 | 4.97E-32 | -0.14433 | 0.082 | 0.204 | 7.43E-28 | M1 | B3GALNT1      |
| HELZ2.3    | 5.01E-32 | -0.11643 | 0.025 | 0.115 | 7.49E-28 | M1 | HELZ2         |
| ZNF790.1   | 5.10E-32 | -0.17628 | 0.022 | 0.109 | 7.62E-28 | M1 | ZNF790        |
| FAM46A.1   | 5.24E-32 | -0.1346  | 0.09  | 0.217 | 7.83E-28 | M1 | FAM46A        |
| NANOS3.2   | 5.36E-32 | -0.14815 | 0.004 | 0.074 | 8.01E-28 | M1 | NANOS3        |
| CENPT.2    | 5.37E-32 | -0.10248 | 0.085 | 0.211 | 8.02E-28 | M1 | CENPT         |
| CSTB.2     | 5.42E-32 | 0.135677 | 0.706 | 0.687 | 8.10E-28 | M1 | CSTB          |
| KANK2.1    | 5.63E-32 | -0.11004 | 0.02  | 0.105 | 8.42E-28 | M1 | KANK2         |
| ACACA.1    | 5.64E-32 | -0.1299  | 0.021 | 0.108 | 8.43E-28 | M1 | ACACA         |
| ALG14.2    | 5.66E-32 | -0.15881 | 0.06  | 0.17  | 8.47E-28 | M1 | ALG14         |
| AC091729.5 | 5.72E-32 | -0.16037 | 0.014 | 0.094 | 8.54E-28 | M1 | AC091729.9    |
| NMT2.3     | 5.95E-32 | -0.1708  | 0.024 | 0.113 | 8.89E-28 | M1 | NMT2          |
| AP5S1.1    | 5.96E-32 | -0.12965 | 0.024 | 0.112 | 8.91E-28 | M1 | AP5S1         |

|            |          |          |       |       |          |    |          |
|------------|----------|----------|-------|-------|----------|----|----------|
| NKIRAS2.1  | 6.20E-32 | -0.1159  | 0.137 | 0.289 | 9.26E-28 | M1 | NKIRAS2  |
| OXR1.3     | 6.20E-32 | -0.13461 | 0.129 | 0.276 | 9.26E-28 | M1 | OXR1     |
| BIK.1      | 6.21E-32 | 0.169381 | 0.039 | 0.007 | 9.29E-28 | M1 | BIK      |
| ERBB2IP.3  | 6.27E-32 | -0.14174 | 0.107 | 0.244 | 9.37E-28 | M1 | ERBB2IP  |
| CECR5.3    | 6.64E-32 | -0.16621 | 0.129 | 0.276 | 9.92E-28 | M1 | CECR5    |
| LUC7L.2    | 6.70E-32 | -0.12087 | 0.124 | 0.27  | 1.00E-27 | M1 | LUC7L    |
| ZFAND2A.4  | 6.76E-32 | -0.15033 | 0.153 | 0.309 | 1.01E-27 | M1 | ZFAND2A  |
| KIAA0101.7 | 0.2E-32  | -0.24585 | 0.038 | 0.133 | 1.05E-27 | M1 | KIAA0101 |
| GPALPP1.2  | 7.18E-32 | -0.12727 | 0.039 | 0.137 | 1.07E-27 | M1 | GPALPP1  |
| ARHGAP35.7 | 2.2E-32  | -0.10168 | 0.055 | 0.165 | 1.08E-27 | M1 | ARHGAP35 |
| BMPR2.2    | 7.27E-32 | -0.11578 | 0.077 | 0.198 | 1.09E-27 | M1 | BMPR2    |
| CEP97.2    | 7.27E-32 | -0.17414 | 0.011 | 0.089 | 1.09E-27 | M1 | CEP97    |
| TBC1D2B.3  | 7.41E-32 | 0.321596 | 0.103 | 0.041 | 1.11E-27 | M1 | TBC1D2B  |
| NUP35.1    | 7.41E-32 | -0.20041 | 0.034 | 0.128 | 1.11E-27 | M1 | NUP35    |
| CUEDC1.4   | 7.45E-32 | -0.12593 | 0.035 | 0.131 | 1.11E-27 | M1 | CUEDC1   |
| PRADC1.3   | 7.54E-32 | -0.15349 | 0.105 | 0.239 | 1.13E-27 | M1 | PRADC1   |
| VPS4A.2    | 7.63E-32 | -0.11625 | 0.169 | 0.336 | 1.14E-27 | M1 | VPS4A    |
| PLEKHH2.1  | 7.72E-32 | -0.13388 | 0.007 | 0.081 | 1.15E-27 | M1 | PLEKHH2  |
| PARD3.2    | 7.92E-32 | -0.12067 | 0.002 | 0.071 | 1.18E-27 | M1 | PARD3    |
| ZNF528.2   | 7.98E-32 | -0.14356 | 0.031 | 0.123 | 1.19E-27 | M1 | ZNF528   |
| SRRD.3     | 8.50E-32 | -0.11414 | 0.036 | 0.132 | 1.27E-27 | M1 | SRRD     |
| EPS15L1.8  | 5.2E-32  | -0.11356 | 0.069 | 0.185 | 1.27E-27 | M1 | EPS15L1  |
| YIPF6.3    | 9.09E-32 | -0.11969 | 0.173 | 0.341 | 1.36E-27 | M1 | YIPF6    |
| TUSC2.3    | 9.30E-32 | -0.14693 | 0.191 | 0.364 | 1.39E-27 | M1 | TUSC2    |
| PVRL1.3    | 9.39E-32 | -0.19934 | 0.003 | 0.073 | 1.40E-27 | M1 | PVRL1    |
| RHO.3      | 9.66E-32 | -0.22986 | 0.049 | 0.151 | 1.44E-27 | M1 | RHO      |
| FAM192A.2  | 9.67E-32 | -0.15855 | 0.207 | 0.388 | 1.44E-27 | M1 | FAM192A  |
| TMEM50B.2  | 9.74E-32 | -0.14969 | 0.167 | 0.33  | 1.46E-27 | M1 | TMEM50B  |
| IP6K1.1    | 9.89E-32 | -0.13978 | 0.059 | 0.17  | 1.48E-27 | M1 | IP6K1    |
| ZFP14.2    | 9.97E-32 | -0.1811  | 0.033 | 0.127 | 1.49E-27 | M1 | ZFP14    |
| TLR6.1     | 1.00E-31 | 0.200629 | 0.051 | 0.012 | 1.50E-27 | M1 | TLR6     |
| EBAG9.2    | 1.03E-31 | -0.15234 | 0.131 | 0.277 | 1.54E-27 | M1 | EBAG9    |
| DIS3.1     | 1.08E-31 | -0.14305 | 0.059 | 0.169 | 1.62E-27 | M1 | DIS3     |
| PRMT6.1    | 1.12E-31 | -0.13799 | 0.021 | 0.106 | 1.67E-27 | M1 | PRMT6    |
| RAPGEF1.2  | 1.16E-31 | 0.394462 | 0.186 | 0.103 | 1.73E-27 | M1 | RAPGEF1  |
| UBN2.1     | 1.16E-31 | -0.11919 | 0.032 | 0.125 | 1.73E-27 | M1 | UBN2     |
| CEP78.3    | 1.16E-31 | -0.13924 | 0.035 | 0.129 | 1.74E-27 | M1 | CEP78    |
| ZNF512B.3  | 1.17E-31 | -0.12469 | 0.01  | 0.087 | 1.75E-27 | M1 | ZNF512B  |
| HGS.3      | 1.23E-31 | -0.12816 | 0.104 | 0.239 | 1.83E-27 | M1 | HGS      |
| XPR1.2     | 1.24E-31 | -0.16584 | 0.042 | 0.142 | 1.85E-27 | M1 | XPR1     |
| C11orf68.1 | 2.5E-31  | -0.13954 | 0.03  | 0.122 | 1.86E-27 | M1 | C11orf68 |
| ZNF577.3   | 1.27E-31 | -0.11537 | 0.021 | 0.106 | 1.89E-27 | M1 | ZNF577   |
| NELFE.1    | 1.31E-31 | -0.154   | 0.222 | 0.408 | 1.96E-27 | M1 | NELFE    |
| ISYNA1.2   | 1.34E-31 | -0.14644 | 0.048 | 0.151 | 2.01E-27 | M1 | ISYNA1   |
| EXT2.3     | 1.37E-31 | -0.114   | 0.073 | 0.191 | 2.04E-27 | M1 | EXT2     |
| PDPK1.3    | 1.41E-31 | -0.10491 | 0.084 | 0.208 | 2.11E-27 | M1 | PDPK1    |
| ABHD12.3   | 1.46E-31 | 0.335044 | 0.431 | 0.371 | 2.19E-27 | M1 | ABHD12   |
| TPRKB.2    | 1.47E-31 | -0.20295 | 0.216 | 0.393 | 2.20E-27 | M1 | TPRKB    |
| KHDC1.3    | 1.51E-31 | -0.197   | 0.005 | 0.076 | 2.26E-27 | M1 | KHDC1    |
| TOP2A.4    | 1.56E-31 | -0.32653 | 0.018 | 0.1   | 2.33E-27 | M1 | TOP2A    |
| SS18L1.1   | 1.57E-31 | -0.13307 | 0.02  | 0.104 | 2.35E-27 | M1 | SS18L1   |

|            |          |          |       |       |          |    |                |
|------------|----------|----------|-------|-------|----------|----|----------------|
| TOMM70A.3  | 1.67E-31 | -0.10806 | 0.042 | 0.142 | 2.49E-27 | M1 | TOMM70A        |
| C6orf48.2  | 1.71E-31 | 0.18295  | 0.657 | 0.645 | 2.56E-27 | M1 | C6orf48        |
| TARSL2.3   | 1.74E-31 | -0.16783 | 0.033 | 0.126 | 2.59E-27 | M1 | TARSL2         |
| FAM129B.2  | 1.75E-31 | -0.17028 | 0.01  | 0.086 | 2.61E-27 | M1 | FAM129B        |
| CDCA4.2    | 1.77E-31 | -0.18077 | 0.019 | 0.102 | 2.64E-27 | M1 | CDCA4          |
| FAM174A.2  | 1.77E-31 | -0.13534 | 0.109 | 0.245 | 2.64E-27 | M1 | FAM174A        |
| SRPX2.2    | 1.77E-31 | -0.24707 | 0.002 | 0.069 | 2.65E-27 | M1 | SRPX2          |
| PPP1R14C.1 | 1.81E-31 | -0.14338 | 0.003 | 0.072 | 2.71E-27 | M1 | PPP1R14C       |
| ARHGAP33.1 | 1.84E-31 | -0.17743 | 0.015 | 0.095 | 2.75E-27 | M1 | ARHGAP33       |
| CRNKL1.2   | 1.84E-31 | -0.10698 | 0.059 | 0.169 | 2.76E-27 | M1 | CRNKL1         |
| GNAZ.2     | 1.86E-31 | -0.18157 | 0.003 | 0.072 | 2.78E-27 | M1 | GNAZ           |
| TRPM3.3    | 1.87E-31 | -0.13417 | 0.008 | 0.081 | 2.79E-27 | M1 | TRPM3          |
| ZMYM4.2    | 1.92E-31 | -0.12713 | 0.042 | 0.142 | 2.87E-27 | M1 | ZMYM4          |
| GOSR1.3    | 1.97E-31 | -0.12507 | 0.141 | 0.293 | 2.94E-27 | M1 | GOSR1          |
| SIK3.3     | 2.02E-31 | -0.1521  | 0.03  | 0.121 | 3.02E-27 | M1 | SIK3           |
| DNASE1L1.2 | 2.05E-31 | 0.330838 | 0.132 | 0.06  | 3.06E-27 | M1 | DNASE1L1       |
| TMEM177.3  | 2.05E-31 | -0.16882 | 0.013 | 0.092 | 3.07E-27 | M1 | TMEM177        |
| USP10.1    | 2.08E-31 | -0.12731 | 0.123 | 0.267 | 3.10E-27 | M1 | USP10          |
| TMEM209.2  | 2.16E-31 | -0.11969 | 0.037 | 0.134 | 3.22E-27 | M1 | TMEM209        |
| DPY30.2    | 2.17E-31 | -0.17839 | 0.32  | 0.53  | 3.25E-27 | M1 | DPY30          |
| LENG8.1    | 2.20E-31 | -0.12178 | 0.11  | 0.246 | 3.29E-27 | M1 | LENG8          |
| TXNDC9.1   | 2.22E-31 | -0.16809 | 0.138 | 0.285 | 3.31E-27 | M1 | TXNDC9         |
| EIF5B.2    | 2.22E-31 | -0.22774 | 0.345 | 0.557 | 3.32E-27 | M1 | EIF5B          |
| ERBB4.3    | 2.25E-31 | -0.21985 | 0.002 | 0.07  | 3.36E-27 | M1 | ERBB4          |
| RAB2A.1    | 2.25E-31 | -0.23378 | 0.419 | 0.626 | 3.36E-27 | M1 | RAB2A          |
| FAM212B.3  | 2.30E-31 | -0.11971 | 0.025 | 0.114 | 3.44E-27 | M1 | FAM212B        |
| LAYN.3     | 2.37E-31 | -0.1406  | 0.001 | 0.068 | 3.55E-27 | M1 | LAYN           |
| STX7.4     | 2.39E-31 | 0.443299 | 0.338 | 0.253 | 3.58E-27 | M1 | STX7           |
| PELO.3     | 2.42E-31 | -0.18328 | 0.031 | 0.122 | 3.62E-27 | M1 | PELO           |
| PUS3.2     | 2.46E-31 | -0.15559 | 0.035 | 0.13  | 3.68E-27 | M1 | PUS3           |
| PHF20L1.3  | 2.49E-31 | -0.14082 | 0.171 | 0.335 | 3.72E-27 | M1 | PHF20L1        |
| RP11-398K  | 2.55E-31 | -0.14017 | 0.012 | 0.089 | 3.81E-27 | M1 | RP11-398K22.12 |
| GLRB.2     | 2.62E-31 | -0.1517  | 0.003 | 0.071 | 3.92E-27 | M1 | GLRB           |
| CYTIP.4    | 2.62E-31 | 0.280181 | 0.177 | 0.089 | 3.92E-27 | M1 | CYTIP          |
| CPNE2.4    | 2.68E-31 | -0.17168 | 0.078 | 0.197 | 4.01E-27 | M1 | CPNE2          |
| ZNF273.3   | 2.68E-31 | -0.19619 | 0.017 | 0.098 | 4.01E-27 | M1 | ZNF273         |
| SLC2A6.1   | 2.69E-31 | -0.14064 | 0.009 | 0.083 | 4.01E-27 | M1 | SLC2A6         |
| ARHGAP32.2 | 2.69E-31 | -0.15124 | 0.017 | 0.098 | 4.02E-27 | M1 | ARHGAP32       |
| TSC22D2.3  | 2.70E-31 | 0.418005 | 0.228 | 0.142 | 4.04E-27 | M1 | TSC22D2        |
| RFC3.2     | 2.74E-31 | -0.18164 | 0.019 | 0.101 | 4.09E-27 | M1 | RFC3           |
| CHI3L1.4   | 2.77E-31 | -0.70333 | 0.404 | 0.548 | 4.14E-27 | M1 | CHI3L1         |
| ZNF430.1   | 2.79E-31 | -0.16099 | 0.087 | 0.21  | 4.17E-27 | M1 | ZNF430         |
| UBE20.3    | 2.82E-31 | -0.10706 | 0.037 | 0.133 | 4.22E-27 | M1 | UBE20          |
| COPB2.3    | 2.89E-31 | -0.19454 | 0.172 | 0.333 | 4.32E-27 | M1 | COPB2          |
| UBALD1.2   | 2.90E-31 | -0.10085 | 0.07  | 0.187 | 4.33E-27 | M1 | UBALD1         |
| NFAM1.3    | 2.94E-31 | 0.221953 | 0.077 | 0.025 | 4.39E-27 | M1 | NFAM1          |
| RGAG4.1    | 2.95E-31 | -0.12489 | 0.004 | 0.074 | 4.41E-27 | M1 | RGAG4          |
| STX1A.2    | 3.00E-31 | -0.22076 | 0.007 | 0.08  | 4.48E-27 | M1 | STX1A          |
| ADAM22.3   | 3.03E-31 | -0.18667 | 0.005 | 0.075 | 4.53E-27 | M1 | ADAM22         |
| SCAF1.3    | 3.04E-31 | -0.12015 | 0.061 | 0.172 | 4.54E-27 | M1 | SCAF1          |
| HNRNPLL.2  | 3.10E-31 | -0.15752 | 0.088 | 0.211 | 4.64E-27 | M1 | HNRNPLL        |

|            |          |          |       |       |          |    |           |
|------------|----------|----------|-------|-------|----------|----|-----------|
| ZNF300.3   | 3.15E-31 | -0.18289 | 0.008 | 0.082 | 4.71E-27 | M1 | ZNF300    |
| Clorf35.3  | 3.20E-31 | -0.15081 | 0.139 | 0.288 | 4.78E-27 | M1 | Clorf35   |
| LRRC8C.4   | 3.23E-31 | 0.293713 | 0.113 | 0.048 | 4.83E-27 | M1 | LRRC8C    |
| DPY19L3.2  | 3.26E-31 | -0.14431 | 0.019 | 0.102 | 4.87E-27 | M1 | DPY19L3   |
| TCTA.1     | 3.35E-31 | -0.16472 | 0.067 | 0.18  | 5.01E-27 | M1 | TCTA      |
| VPS37D.2   | 3.51E-31 | -0.16975 | 0.003 | 0.071 | 5.24E-27 | M1 | VPS37D    |
| TRMU       | 3.51E-31 | -0.13495 | 0.047 | 0.149 | 5.25E-27 | M1 | TRMU      |
| EYA4.2     | 3.68E-31 | -0.11205 | 0.002 | 0.068 | 5.51E-27 | M1 | EYA4      |
| SMIM18.3   | 3.72E-31 | -0.22571 | 0.004 | 0.072 | 5.56E-27 | M1 | SMIM18    |
| TMEM63B.1  | 3.80E-31 | -0.10105 | 0.049 | 0.153 | 5.67E-27 | M1 | TMEM63B   |
| RABL6.3    | 4.06E-31 | -0.10944 | 0.125 | 0.271 | 6.06E-27 | M1 | RABL6     |
| AIMP2.2    | 4.11E-31 | -0.16184 | 0.124 | 0.264 | 6.14E-27 | M1 | AIMP2     |
| POLR2D.1   | 4.20E-31 | -0.13175 | 0.051 | 0.156 | 6.27E-27 | M1 | POLR2D    |
| NCDN.1     | 4.23E-31 | -0.1411  | 0.02  | 0.104 | 6.32E-27 | M1 | NCDN      |
| ATRN.1     | 4.25E-31 | -0.12147 | 0.042 | 0.141 | 6.35E-27 | M1 | ATRN      |
| RAB6B.3    | 4.34E-31 | -0.15335 | 0.006 | 0.077 | 6.49E-27 | M1 | RAB6B     |
| ARHGEF25.4 | 4.44E-31 | -0.19055 | 0.006 | 0.077 | 6.64E-27 | M1 | ARHGEF25  |
| LNX1.1     | 4.44E-31 | -0.22095 | 0.008 | 0.081 | 6.64E-27 | M1 | LNX1      |
| ZFHx3.3    | 4.53E-31 | 0.444678 | 0.267 | 0.181 | 6.77E-27 | M1 | ZFHx3     |
| ADAL       | 4.56E-31 | -0.12148 | 0.035 | 0.13  | 6.81E-27 | M1 | ADAL      |
| OGFOD3.3   | 4.60E-31 | -0.15648 | 0.11  | 0.244 | 6.87E-27 | M1 | OGFOD3    |
| CBX8.2     | 4.69E-31 | -0.14544 | 0.01  | 0.084 | 7.01E-27 | M1 | CBX8      |
| MAPKAPK3.4 | 4.79E-31 | 0.380245 | 0.245 | 0.156 | 7.16E-27 | M1 | MAPKAPK3  |
| EIF3J-AS1  | 4.84E-31 | -0.11275 | 0.044 | 0.144 | 7.24E-27 | M1 | EIF3J-AS1 |
| DCK.4      | 4.91E-31 | 0.44032  | 0.334 | 0.253 | 7.34E-27 | M1 | DCK       |
| NFS1.2     | 5.13E-31 | -0.10345 | 0.048 | 0.151 | 7.66E-27 | M1 | NFS1      |
| CAMK1.3    | 5.14E-31 | -0.14936 | 0.113 | 0.248 | 7.68E-27 | M1 | CAMK1     |
| TMEM68.2   | 5.57E-31 | -0.13683 | 0.071 | 0.186 | 8.33E-27 | M1 | TMEM68    |
| PTPRG.1    | 5.76E-31 | -0.14714 | 0.01  | 0.085 | 8.60E-27 | M1 | PTPRG     |
| CAPRIN2.2  | 5.82E-31 | -0.11518 | 0.029 | 0.119 | 8.69E-27 | M1 | CAPRIN2   |
| CDYL.4     | 5.86E-31 | -0.1008  | 0.036 | 0.131 | 8.76E-27 | M1 | CDYL      |
| MFAP1.2    | 5.94E-31 | -0.14845 | 0.075 | 0.193 | 8.87E-27 | M1 | MFAP1     |
| BTBD10.2   | 6.09E-31 | -0.14311 | 0.08  | 0.201 | 9.10E-27 | M1 | BTBD10    |
| EIF2B5.1   | 6.10E-31 | -0.12588 | 0.083 | 0.204 | 9.12E-27 | M1 | EIF2B5    |
| SSFA2.2    | 6.20E-31 | -0.12135 | 0.084 | 0.206 | 9.26E-27 | M1 | SSFA2     |
| IGSF11.2   | 6.21E-31 | -0.15025 | 0.007 | 0.079 | 9.28E-27 | M1 | IGSF11    |
| DNAJC30.2  | 6.28E-31 | -0.15763 | 0.063 | 0.172 | 9.38E-27 | M1 | DNAJC30   |
| MOAP1.2    | 6.38E-31 | -0.13492 | 0.106 | 0.24  | 9.54E-27 | M1 | MOAP1     |
| AARSD1.1   | 6.54E-31 | -0.14942 | 0.03  | 0.12  | 9.77E-27 | M1 | AARSD1    |
| KLHL22.1   | 6.66E-31 | -0.16484 | 0.019 | 0.101 | 9.95E-27 | M1 | KLHL22    |
| ANKRA2.1   | 6.69E-31 | -0.14507 | 0.058 | 0.165 | 9.99E-27 | M1 | ANKRA2    |
| C2orf76.1  | 6.75E-31 | -0.15048 | 0.069 | 0.183 | 1.01E-26 | M1 | C2orf76   |
| ZNF786.2   | 6.78E-31 | -0.1617  | 0.01  | 0.084 | 1.01E-26 | M1 | ZNF786    |
| MED13.2    | 6.78E-31 | -0.1008  | 0.066 | 0.18  | 1.01E-26 | M1 | MED13     |
| ZNF584.2   | 6.84E-31 | -0.12802 | 0.018 | 0.1   | 1.02E-26 | M1 | ZNF584    |
| RAN.3      | 6.86E-31 | -0.24699 | 0.614 | 0.785 | 1.03E-26 | M1 | RAN       |
| GTF3C1.1   | 6.91E-31 | -0.14151 | 0.031 | 0.122 | 1.03E-26 | M1 | GTF3C1    |
| ARMCX3.2   | 7.14E-31 | -0.15302 | 0.264 | 0.463 | 1.07E-26 | M1 | ARMCX3    |
| ANTXR1.2   | 7.42E-31 | -0.14345 | 0.021 | 0.104 | 1.11E-26 | M1 | ANTXR1    |
| SPIRE1.1   | 7.50E-31 | -0.13167 | 0.025 | 0.112 | 1.12E-26 | M1 | SPIRE1    |
| SLC9A3R1.7 | 7.57E-31 | -0.13613 | 0.06  | 0.168 | 1.13E-26 | M1 | SLC9A3R1  |

|             |           |           |        |        |           |    |                |
|-------------|-----------|-----------|--------|--------|-----------|----|----------------|
| WDR73. 2    | 7. 74E-31 | -0. 10644 | 0. 053 | 0. 159 | 1. 16E-26 | M1 | WDR73          |
| BPHL. 2     | 7. 85E-31 | -0. 14588 | 0. 076 | 0. 194 | 1. 17E-26 | M1 | BPHL           |
| MKRN2       | 7. 85E-31 | -0. 1359  | 0. 061 | 0. 17  | 1. 17E-26 | M1 | MKRN2          |
| CD99L2. 3   | 7. 92E-31 | -0. 16314 | 0. 046 | 0. 147 | 1. 18E-26 | M1 | CD99L2         |
| ZNF334. 1   | 8. 08E-31 | -0. 13209 | 0. 01  | 0. 085 | 1. 21E-26 | M1 | ZNF334         |
| TMEM186. 3  | 8. 09E-31 | -0. 16409 | 0. 025 | 0. 111 | 1. 21E-26 | M1 | TMEM186        |
| CARKD. 3    | 8. 09E-31 | -0. 16574 | 0. 046 | 0. 146 | 1. 21E-26 | M1 | CARKD          |
| LRPAP1. 2   | 8. 35E-31 | 0. 257914 | 0. 571 | 0. 542 | 1. 25E-26 | M1 | LRPAP1         |
| ZNF395. 2   | 8. 47E-31 | -0. 18724 | 0. 006 | 0. 076 | 1. 27E-26 | M1 | ZNF395         |
| LRRFIP2. 2  | 8. 74E-31 | -0. 10289 | 0. 085 | 0. 208 | 1. 31E-26 | M1 | LRRFIP2        |
| DCTN1. 3    | 9. 30E-31 | -0. 16484 | 0. 107 | 0. 237 | 1. 39E-26 | M1 | DCTN1          |
| PLEKHG1     | 9. 41E-31 | -0. 11432 | 0. 001 | 0. 066 | 1. 41E-26 | M1 | PLEKHG1        |
| DRG1. 1     | 9. 82E-31 | -0. 11421 | 0. 127 | 0. 269 | 1. 47E-26 | M1 | DRG1           |
| FAT3. 2     | 9. 85E-31 | -0. 1403  | 0. 002 | 0. 067 | 1. 47E-26 | M1 | FAT3           |
| CBX4. 4     | 9. 87E-31 | -0. 18449 | 0. 037 | 0. 131 | 1. 47E-26 | M1 | CBX4           |
| RERE. 3     | 1. 01E-30 | -0. 11786 | 0. 102 | 0. 232 | 1. 50E-26 | M1 | RERE           |
| B4GALT3. 1  | 1. 06E-30 | -0. 13949 | 0. 107 | 0. 24  | 1. 58E-26 | M1 | B4GALT3        |
| TOM1L1. 2   | 1. 07E-30 | -0. 11768 | 0. 002 | 0. 068 | 1. 59E-26 | M1 | TOM1L1         |
| MGLL. 3     | 1. 07E-30 | -0. 20287 | 0. 058 | 0. 163 | 1. 60E-26 | M1 | MGLL           |
| KLF12. 3    | 1. 09E-30 | -0. 16253 | 0. 018 | 0. 098 | 1. 63E-26 | M1 | KLF12          |
| NOTCH3. 1   | 1. 11E-30 | -0. 10175 | 0. 004 | 0. 072 | 1. 66E-26 | M1 | NOTCH3         |
| RP13-1032   | 1. 12E-30 | -0. 13253 | 0. 014 | 0. 092 | 1. 67E-26 | M1 | RP13-1032I1. 7 |
| RRM2. 3     | 1. 12E-30 | -0. 26994 | 0. 005 | 0. 074 | 1. 68E-26 | M1 | RRM2           |
| PSMD7. 1    | 1. 18E-30 | -0. 19896 | 0. 316 | 0. 525 | 1. 77E-26 | M1 | PSMD7          |
| SMAD4. 2    | 1. 19E-30 | -0. 10706 | 0. 041 | 0. 138 | 1. 77E-26 | M1 | SMAD4          |
| GNL3. 2     | 1. 22E-30 | -0. 19106 | 0. 204 | 0. 374 | 1. 82E-26 | M1 | GNL3           |
| PGRMC2. 3   | 1. 24E-30 | -0. 12805 | 0. 113 | 0. 248 | 1. 85E-26 | M1 | PGRMC2         |
| DPYSL2. 3   | 1. 28E-30 | -0. 21298 | 0. 27  | 0. 454 | 1. 91E-26 | M1 | DPYSL2         |
| OSCP1. 3    | 1. 28E-30 | -0. 14512 | 0. 007 | 0. 078 | 1. 91E-26 | M1 | OSCP1          |
| PRMT1. 1    | 1. 29E-30 | -0. 22221 | 0. 378 | 0. 589 | 1. 93E-26 | M1 | PRMT1          |
| NPHP3. 1    | 1. 31E-30 | -0. 12148 | 0. 033 | 0. 124 | 1. 96E-26 | M1 | NPHP3          |
| PTRH1. 2    | 1. 33E-30 | -0. 10961 | 0. 085 | 0. 207 | 1. 99E-26 | M1 | PTRH1          |
| MKKS. 2     | 1. 35E-30 | -0. 13364 | 0. 247 | 0. 436 | 2. 01E-26 | M1 | MKKS           |
| TES. 4      | 1. 38E-30 | 0. 297092 | 0. 095 | 0. 036 | 2. 06E-26 | M1 | TES            |
| SAMD10. 1   | 1. 41E-30 | -0. 13345 | 0. 002 | 0. 068 | 2. 11E-26 | M1 | SAMD10         |
| ORMDL3. 2   | 1. 44E-30 | -0. 1741  | 0. 045 | 0. 143 | 2. 16E-26 | M1 | ORMDL3         |
| NKX2-5. 2   | 1. 51E-30 | -0. 22854 | 0. 006 | 0. 076 | 2. 26E-26 | M1 | NKX2-5         |
| FH. 1       | 1. 52E-30 | -0. 16147 | 0. 113 | 0. 248 | 2. 27E-26 | M1 | FH             |
| C17orf89. 1 | 1. 56E-30 | -0. 2183  | 0. 273 | 0. 451 | 2. 33E-26 | M1 | C17orf89       |
| METTL16. 2  | 1. 65E-30 | -0. 12907 | 0. 033 | 0. 124 | 2. 46E-26 | M1 | METTL16        |
| INADL. 3    | 1. 70E-30 | -0. 19613 | 0. 008 | 0. 079 | 2. 55E-26 | M1 | INADL          |
| CNPY4. 3    | 1. 74E-30 | -0. 13854 | 0. 035 | 0. 128 | 2. 59E-26 | M1 | CNPY4          |
| ACBD3. 1    | 1. 74E-30 | -0. 12237 | 0. 076 | 0. 194 | 2. 59E-26 | M1 | ACBD3          |
| PTPN2. 3    | 1. 77E-30 | 0. 422871 | 0. 319 | 0. 234 | 2. 65E-26 | M1 | PTPN2          |
| PRPF31. 2   | 1. 79E-30 | -0. 15404 | 0. 236 | 0. 423 | 2. 68E-26 | M1 | PRPF31         |
| TRMT11. 2   | 1. 79E-30 | -0. 14219 | 0. 038 | 0. 133 | 2. 68E-26 | M1 | TRMT11         |
| MPHOSPH9. 1 | 1. 81E-30 | -0. 15001 | 0. 038 | 0. 133 | 2. 71E-26 | M1 | MPHOSPH9       |
| PSMB4. 1    | 1. 82E-30 | -0. 19492 | 0. 256 | 0. 45  | 2. 71E-26 | M1 | PSMB4          |
| TATDN1. 1   | 1. 86E-30 | -0. 12409 | 0. 121 | 0. 259 | 2. 78E-26 | M1 | TATDN1         |
| ANLN. 3     | 1. 95E-30 | -0. 27641 | 0. 005 | 0. 074 | 2. 91E-26 | M1 | ANLN           |
| SPSB4. 3    | 2. 00E-30 | -0. 12972 | 0. 003 | 0. 07  | 2. 98E-26 | M1 | SPSB4          |

|            |           |           |        |        |           |    |                |
|------------|-----------|-----------|--------|--------|-----------|----|----------------|
| ATP5SL. 2  | 2. 00E-30 | -0. 12776 | 0. 117 | 0. 254 | 2. 99E-26 | M1 | ATP5SL         |
| KXD1. 3    | 2. 00E-30 | -0. 20348 | 0. 286 | 0. 481 | 2. 99E-26 | M1 | KXD1           |
| HPCA. 2    | 2. 04E-30 | -0. 21778 | 0. 004 | 0. 071 | 3. 05E-26 | M1 | HPCA           |
| TXLNG. 2   | 2. 07E-30 | -0. 16022 | 0. 049 | 0. 15  | 3. 09E-26 | M1 | TXLNG          |
| TUG1. 3    | 2. 11E-30 | -0. 10316 | 0. 077 | 0. 195 | 3. 15E-26 | M1 | TUG1           |
| RP11-192H  | 2. 12E-30 | -0. 11772 | 0. 036 | 0. 13  | 3. 17E-26 | M1 | RP11-192H23. 6 |
| SSBP4. 2   | 2. 14E-30 | -0. 14624 | 0. 145 | 0. 295 | 3. 20E-26 | M1 | SSBP4          |
| SORBS3. 3  | 2. 17E-30 | -0. 11163 | 0. 075 | 0. 192 | 3. 24E-26 | M1 | SORBS3         |
| MAP7D1. 3  | 2. 17E-30 | -0. 14043 | 0. 201 | 0. 375 | 3. 24E-26 | M1 | MAP7D1         |
| SCAMP3. 2  | 2. 18E-30 | -0. 14674 | 0. 159 | 0. 316 | 3. 26E-26 | M1 | SCAMP3         |
| NTRK3. 1   | 2. 25E-30 | -0. 16114 | 0. 007 | 0. 078 | 3. 36E-26 | M1 | NTRK3          |
| PCDH1. 2   | 2. 32E-30 | -0. 14698 | 0. 004 | 0. 071 | 3. 46E-26 | M1 | PCDH1          |
| APITD1. 1  | 2. 33E-30 | -0. 1611  | 0. 016 | 0. 095 | 3. 48E-26 | M1 | APITD1         |
| KCNK13. 1  | 2. 34E-30 | 0. 192267 | 0. 059 | 0. 016 | 3. 50E-26 | M1 | KCNK13         |
| FAM104B. 2 | 2. 35E-30 | -0. 15784 | 0. 089 | 0. 211 | 3. 52E-26 | M1 | FAM104B        |
| NDUFS4. 1  | 2. 37E-30 | -0. 21307 | 0. 331 | 0. 54  | 3. 54E-26 | M1 | NDUFS4         |
| EHD1. 3    | 2. 43E-30 | -0. 16633 | 0. 042 | 0. 137 | 3. 64E-26 | M1 | EHD1           |
| HMBOX1. 3  | 2. 45E-30 | -0. 16025 | 0. 091 | 0. 213 | 3. 66E-26 | M1 | HMBOX1         |
| SETD6. 2   | 2. 47E-30 | -0. 14125 | 0. 021 | 0. 104 | 3. 69E-26 | M1 | SETD6          |
| NAPB       | 2. 51E-30 | -0. 16677 | 0. 014 | 0. 091 | 3. 74E-26 | M1 | NAPB           |
| BRF2. 2    | 2. 52E-30 | -0. 1798  | 0. 021 | 0. 104 | 3. 76E-26 | M1 | BRF2           |
| TULP4. 3   | 2. 57E-30 | -0. 16806 | 0. 056 | 0. 16  | 3. 85E-26 | M1 | TULP4          |
| TAF9. 2    | 2. 62E-30 | -0. 17968 | 0. 323 | 0. 535 | 3. 92E-26 | M1 | TAF9           |
| RAD17. 1   | 2. 67E-30 | -0. 13336 | 0. 047 | 0. 146 | 3. 99E-26 | M1 | RAD17          |
| CTU1. 2    | 2. 73E-30 | -0. 12085 | 0. 013 | 0. 09  | 4. 08E-26 | M1 | CTU1           |
| DHX36. 2   | 2. 76E-30 | -0. 15014 | 0. 263 | 0. 459 | 4. 13E-26 | M1 | DHX36          |
| THAP7. 2   | 2. 85E-30 | -0. 12252 | 0. 101 | 0. 231 | 4. 25E-26 | M1 | THAP7          |
| EIF2B2. 2  | 2. 85E-30 | -0. 12932 | 0. 076 | 0. 193 | 4. 25E-26 | M1 | EIF2B2         |
| CHMP7. 3   | 2. 90E-30 | -0. 15384 | 0. 079 | 0. 196 | 4. 33E-26 | M1 | CHMP7          |
| LILRA1     | 2. 94E-30 | 0. 155357 | 0. 045 | 0. 01  | 4. 40E-26 | M1 | LILRA1         |
| PLL. 3     | 2. 95E-30 | -0. 35277 | 0. 009 | 0. 08  | 4. 42E-26 | M1 | PLL            |
| STRN4. 3   | 3. 06E-30 | -0. 11132 | 0. 042 | 0. 14  | 4. 57E-26 | M1 | STRN4          |
| CAPN5. 1   | 3. 14E-30 | -0. 13252 | 0. 009 | 0. 081 | 4. 69E-26 | M1 | CAPN5          |
| LRRC24. 2  | 3. 16E-30 | -0. 15768 | 0. 009 | 0. 08  | 4. 72E-26 | M1 | LRRC24         |
| TTI1. 1    | 3. 26E-30 | -0. 13183 | 0. 025 | 0. 111 | 4. 87E-26 | M1 | TTI1           |
| IPCEF1. 2  | 3. 27E-30 | 0. 183447 | 0. 056 | 0. 015 | 4. 88E-26 | M1 | IPCEF1         |
| CETN3. 2   | 3. 38E-30 | -0. 16036 | 0. 059 | 0. 164 | 5. 05E-26 | M1 | CETN3          |
| SLC2A10. 2 | 3. 42E-30 | -0. 11396 | 0. 006 | 0. 076 | 5. 11E-26 | M1 | SLC2A10        |
| PCDHB14. 1 | 3. 43E-30 | -0. 18356 | 0. 001 | 0. 065 | 5. 13E-26 | M1 | PCDHB14        |
| UBQLN1. 2  | 3. 46E-30 | -0. 11521 | 0. 153 | 0. 307 | 5. 17E-26 | M1 | UBQLN1         |
| TMCC1. 3   | 3. 56E-30 | -0. 13886 | 0. 036 | 0. 129 | 5. 32E-26 | M1 | TMCC1          |
| USP13. 2   | 3. 57E-30 | -0. 14709 | 0. 011 | 0. 084 | 5. 34E-26 | M1 | USP13          |
| JAGN1. 3   | 3. 71E-30 | -0. 15265 | 0. 181 | 0. 348 | 5. 55E-26 | M1 | JAGN1          |
| EIF2B4. 2  | 3. 84E-30 | -0. 14139 | 0. 087 | 0. 208 | 5. 74E-26 | M1 | EIF2B4         |
| AKNA. 3    | 3. 91E-30 | 0. 308192 | 0. 131 | 0. 06  | 5. 84E-26 | M1 | AKNA           |
| SPAST. 2   | 3. 94E-30 | -0. 12661 | 0. 035 | 0. 127 | 5. 89E-26 | M1 | SPAST          |
| SYAP1. 3   | 3. 95E-30 | 0. 417615 | 0. 426 | 0. 379 | 5. 91E-26 | M1 | SYAP1          |
| JPH4. 1    | 3. 96E-30 | -0. 23199 | 0. 004 | 0. 071 | 5. 91E-26 | M1 | JPH4           |
| FAM3B      | 4. 02E-30 | 0. 17586  | 0. 034 | 0. 006 | 6. 00E-26 | M1 | FAM3B          |
| ZNHIT2. 1  | 4. 10E-30 | -0. 13483 | 0. 018 | 0. 098 | 6. 12E-26 | M1 | ZNHIT2         |
| C5orf30. 2 | 4. 10E-30 | -0. 18108 | 0. 013 | 0. 088 | 6. 13E-26 | M1 | C5orf30        |

|            |           |           |        |        |           |    |               |
|------------|-----------|-----------|--------|--------|-----------|----|---------------|
| MYLK. 1    | 4. 17E-30 | -0. 26054 | 0. 004 | 0. 07  | 6. 23E-26 | M1 | MYLK          |
| CEACAM21.  | 4. 20E-30 | 0. 169903 | 0. 053 | 0. 014 | 6. 28E-26 | M1 | CEACAM21      |
| CEP57L1. 3 | 4. 24E-30 | -0. 14454 | 0. 035 | 0. 126 | 6. 34E-26 | M1 | CEP57L1       |
| SUGT1. 2   | 4. 44E-30 | -0. 14362 | 0. 201 | 0. 373 | 6. 63E-26 | M1 | SUGT1         |
| URM1       | 4. 52E-30 | -0. 16032 | 0. 212 | 0. 387 | 6. 76E-26 | M1 | URM1          |
| LZTS1. 3   | 4. 58E-30 | -0. 14227 | 0. 004 | 0. 071 | 6. 85E-26 | M1 | LZTS1         |
| JAM2. 4    | 4. 59E-30 | -0. 12552 | 0. 133 | 0. 276 | 6. 86E-26 | M1 | JAM2          |
| IPP. 2     | 4. 62E-30 | -0. 14725 | 0. 004 | 0. 071 | 6. 90E-26 | M1 | IPP           |
| STK16. 1   | 4. 62E-30 | -0. 12537 | 0. 087 | 0. 208 | 6. 90E-26 | M1 | STK16         |
| GEMIN2     | 4. 63E-30 | -0. 15795 | 0. 035 | 0. 126 | 6. 92E-26 | M1 | GEMIN2        |
| TEX261. 2  | 4. 76E-30 | -0. 11193 | 0. 071 | 0. 185 | 7. 11E-26 | M1 | TEX261        |
| SPC25. 4   | 4. 83E-30 | -0. 22943 | 0. 005 | 0. 073 | 7. 22E-26 | M1 | SPC25         |
| ERCC4. 2   | 4. 85E-30 | -0. 13826 | 0. 047 | 0. 146 | 7. 24E-26 | M1 | ERCC4         |
| RFC5. 1    | 5. 12E-30 | -0. 16353 | 0. 021 | 0. 103 | 7. 65E-26 | M1 | RFC5          |
| USP33      | 5. 15E-30 | -0. 11739 | 0. 081 | 0. 199 | 7. 69E-26 | M1 | USP33         |
| EBF4. 1    | 5. 47E-30 | -0. 12662 | 0. 002 | 0. 066 | 8. 18E-26 | M1 | EBF4          |
| S100Z. 1   | 5. 48E-30 | 0. 138674 | 0. 038 | 0. 007 | 8. 19E-26 | M1 | S100Z         |
| CCNL2. 2   | 5. 55E-30 | -0. 12579 | 0. 161 | 0. 316 | 8. 30E-26 | M1 | CCNL2         |
| CYB561. 3  | 5. 67E-30 | -0. 14377 | 0. 015 | 0. 093 | 8. 48E-26 | M1 | CYB561        |
| RAF1. 4    | 5. 70E-30 | -0. 10458 | 0. 15  | 0. 302 | 8. 51E-26 | M1 | RAF1          |
| SIX1. 2    | 5. 70E-30 | -0. 16918 | 0. 003 | 0. 068 | 8. 52E-26 | M1 | SIX1          |
| FAM60A. 2  | 5. 82E-30 | -0. 14553 | 0. 078 | 0. 194 | 8. 69E-26 | M1 | FAM60A        |
| KBTBD7. 2  | 5. 91E-30 | -0. 16213 | 0. 02  | 0. 1   | 8. 83E-26 | M1 | KBTBD7        |
| RFXAP. 1   | 5. 95E-30 | -0. 14774 | 0. 025 | 0. 109 | 8. 89E-26 | M1 | RFXAP         |
| NAP1L1. 2  | 6. 03E-30 | 0. 144815 | 0. 679 | 0. 673 | 9. 01E-26 | M1 | NAP1L1        |
| FAM198B. 2 | 6. 14E-30 | 0. 248987 | 0. 116 | 0. 05  | 9. 18E-26 | M1 | FAM198B       |
| RP11-345J  | 6. 21E-30 | -0. 12674 | 0. 119 | 0. 258 | 9. 28E-26 | M1 | RP11-345J4. 5 |
| TSC2. 2    | 6. 24E-30 | -0. 10359 | 0. 051 | 0. 152 | 9. 33E-26 | M1 | TSC2          |
| FAM127C. 1 | 6. 26E-30 | -0. 18245 | 0. 031 | 0. 119 | 9. 36E-26 | M1 | FAM127C       |
| SHROOM2. 3 | 6. 31E-30 | -0. 14434 | 0. 004 | 0. 07  | 9. 43E-26 | M1 | SHROOM2       |
| CACYBP. 1  | 6. 41E-30 | -0. 17595 | 0. 334 | 0. 54  | 9. 58E-26 | M1 | CACYBP        |
| IZUMO4. 2  | 6. 54E-30 | -0. 14221 | 0. 008 | 0. 078 | 9. 77E-26 | M1 | IZUMO4        |
| ATXN10. 1  | 6. 67E-30 | -0. 16445 | 0. 264 | 0. 452 | 9. 97E-26 | M1 | ATXN10        |
| DSCAM. 1   | 6. 95E-30 | -0. 18204 | 0. 012 | 0. 087 | 1. 04E-25 | M1 | DSCAM         |
| CENPU. 3   | 7. 33E-30 | -0. 22666 | 0. 032 | 0. 12  | 1. 10E-25 | M1 | CENPU         |
| CACNB3. 2  | 7. 38E-30 | -0. 1393  | 0. 005 | 0. 072 | 1. 10E-25 | M1 | CACNB3        |
| RNF4       | 7. 49E-30 | -0. 13608 | 0. 08  | 0. 197 | 1. 12E-25 | M1 | RNF4          |
| POFUT1. 2  | 7. 55E-30 | -0. 10023 | 0. 038 | 0. 132 | 1. 13E-25 | M1 | POFUT1        |
| CUL3. 2    | 7. 59E-30 | -0. 11395 | 0. 096 | 0. 221 | 1. 13E-25 | M1 | CUL3          |
| PARP2. 1   | 7. 78E-30 | -0. 18265 | 0. 036 | 0. 126 | 1. 16E-25 | M1 | PARP2         |
| CRYZ. 3    | 8. 08E-30 | -0. 16591 | 0. 043 | 0. 14  | 1. 21E-25 | M1 | CRYZ          |
| ASXL1. 3   | 8. 11E-30 | -0. 11806 | 0. 079 | 0. 196 | 1. 21E-25 | M1 | ASXL1         |
| PPIF. 4    | 8. 22E-30 | 0. 40121  | 0. 291 | 0. 207 | 1. 23E-25 | M1 | PPIF          |
| PDCD2L. 2  | 8. 28E-30 | -0. 16032 | 0. 031 | 0. 119 | 1. 24E-25 | M1 | PDCD2L        |
| PLOD3. 2   | 8. 78E-30 | -0. 11902 | 0. 108 | 0. 24  | 1. 31E-25 | M1 | PLOD3         |
| GSDMD. 3   | 9. 39E-30 | 0. 392564 | 0. 258 | 0. 17  | 1. 40E-25 | M1 | GSDMD         |
| IER5. 4    | 9. 50E-30 | 0. 471196 | 0. 27  | 0. 189 | 1. 42E-25 | M1 | IER5          |
| TP53I3. 2  | 9. 51E-30 | -0. 15065 | 0. 059 | 0. 163 | 1. 42E-25 | M1 | TP53I3        |
| DGCR8. 1   | 9. 57E-30 | -0. 14397 | 0. 017 | 0. 096 | 1. 43E-25 | M1 | DGCR8         |
| EPAS1. 3   | 9. 64E-30 | -0. 20471 | 0. 032 | 0. 119 | 1. 44E-25 | M1 | EPAS1         |
| MICAL1. 4  | 9. 67E-30 | 0. 380698 | 0. 211 | 0. 127 | 1. 45E-25 | M1 | MICAL1        |

|              |           |           |        |        |           |    |               |
|--------------|-----------|-----------|--------|--------|-----------|----|---------------|
| CRTC3. 1     | 9. 98E-30 | -0. 13592 | 0. 038 | 0. 131 | 1. 49E-25 | M1 | CRTC3         |
| CRIM1. 3     | 1. 03E-29 | -0. 13532 | 0. 006 | 0. 075 | 1. 54E-25 | M1 | CRIM1         |
| TMEM14C. 2   | 1. 06E-29 | 0. 213423 | 0. 603 | 0. 588 | 1. 59E-25 | M1 | TMEM14C       |
| IMMP2L. 2    | 1. 07E-29 | -0. 18226 | 0. 059 | 0. 162 | 1. 60E-25 | M1 | IMMP2L        |
| ATG12        | 1. 10E-29 | -0. 10023 | 0. 201 | 0. 374 | 1. 64E-25 | M1 | ATG12         |
| ZNF451. 1    | 1. 12E-29 | -0. 14745 | 0. 07  | 0. 181 | 1. 67E-25 | M1 | ZNF451        |
| RAB40B. 4    | 1. 16E-29 | -0. 20165 | 0. 049 | 0. 146 | 1. 74E-25 | M1 | RAB40B        |
| FAM228B. 3   | 1. 17E-29 | -0. 12707 | 0. 107 | 0. 237 | 1. 74E-25 | M1 | FAM228B       |
| SDAD1. 2     | 1. 18E-29 | -0. 13235 | 0. 11  | 0. 24  | 1. 77E-25 | M1 | SDAD1         |
| SCAI. 1      | 1. 23E-29 | -0. 15179 | 0. 018 | 0. 096 | 1. 84E-25 | M1 | SCAI          |
| FGFRL1       | 1. 24E-29 | -0. 1157  | 0. 002 | 0. 066 | 1. 85E-25 | M1 | FGFRL1        |
| ARF1. 3      | 1. 25E-29 | 0. 151209 | 0. 695 | 0. 694 | 1. 87E-25 | M1 | ARF1          |
| PSPC1. 3     | 1. 25E-29 | -0. 11771 | 0. 104 | 0. 232 | 1. 87E-25 | M1 | PSPC1         |
| BRD4. 3      | 1. 29E-29 | -0. 12993 | 0. 188 | 0. 355 | 1. 93E-25 | M1 | BRD4          |
| TMEM178B. 1  | 1. 33E-29 | -0. 16008 | 0. 003 | 0. 067 | 1. 99E-25 | M1 | TMEM178B      |
| C1orf50. 2   | 1. 35E-29 | -0. 1226  | 0. 082 | 0. 2   | 2. 01E-25 | M1 | C1orf50       |
| ZFP1. 1      | 1. 36E-29 | -0. 13794 | 0. 008 | 0. 078 | 2. 03E-25 | M1 | ZFP1          |
| OARD1. 2     | 1. 36E-29 | -0. 15175 | 0. 119 | 0. 255 | 2. 04E-25 | M1 | OARD1         |
| IGF1R. 2     | 1. 39E-29 | -0. 17118 | 0. 01  | 0. 081 | 2. 08E-25 | M1 | IGF1R         |
| MAP3K7. 1    | 1. 39E-29 | -0. 11964 | 0. 1   | 0. 226 | 2. 08E-25 | M1 | MAP3K7        |
| SLC35E3. 3   | 1. 43E-29 | -0. 2242  | 0. 091 | 0. 206 | 2. 14E-25 | M1 | SLC35E3       |
| NCAM2. 2     | 1. 44E-29 | -0. 22348 | 0. 009 | 0. 079 | 2. 15E-25 | M1 | NCAM2         |
| RHBDF1. 1    | 1. 45E-29 | -0. 12576 | 0      | 0. 062 | 2. 16E-25 | M1 | RHBDF1        |
| NUFIP1. 2    | 1. 45E-29 | -0. 15304 | 0. 038 | 0. 13  | 2. 16E-25 | M1 | NUFIP1        |
| PIP4K2B. 1   | 1. 58E-29 | -0. 11239 | 0. 03  | 0. 118 | 2. 36E-25 | M1 | PIP4K2B       |
| DLL1. 2      | 1. 71E-29 | -0. 25448 | 0. 011 | 0. 083 | 2. 56E-25 | M1 | DLL1          |
| THAP1        | 1. 75E-29 | -0. 14742 | 0. 056 | 0. 158 | 2. 62E-25 | M1 | THAP1         |
| SYTL2. 2     | 1. 76E-29 | -0. 23887 | 0. 014 | 0. 088 | 2. 64E-25 | M1 | SYTL2         |
| SLC16A4. 1   | 1. 79E-29 | -0. 12861 | 0. 006 | 0. 073 | 2. 67E-25 | M1 | SLC16A4       |
| AC113189. 1  | 1. 80E-29 | -0. 18733 | 0. 008 | 0. 077 | 2. 69E-25 | M1 | AC113189. 5   |
| MEX3B. 2     | 1. 84E-29 | -0. 18679 | 0. 006 | 0. 074 | 2. 75E-25 | M1 | MEX3B         |
| STK32A. 3    | 1. 87E-29 | -0. 12785 | 0. 002 | 0. 066 | 2. 80E-25 | M1 | STK32A        |
| SAPCD2. 3    | 1. 90E-29 | -0. 17236 | 0. 003 | 0. 067 | 2. 84E-25 | M1 | SAPCD2        |
| ZNF567. 1    | 1. 98E-29 | -0. 14765 | 0. 026 | 0. 11  | 2. 97E-25 | M1 | ZNF567        |
| TEAD4. 2     | 2. 00E-29 | -0. 1133  | 0. 001 | 0. 062 | 2. 99E-25 | M1 | TEAD4         |
| ADCK4. 2     | 2. 01E-29 | -0. 13512 | 0. 046 | 0. 143 | 3. 01E-25 | M1 | ADCK4         |
| RP1-79C4. 2  | 2. 03E-29 | -0. 12572 | 0      | 0. 061 | 3. 03E-25 | M1 | RP1-79C4. 4   |
| PHF19. 3     | 2. 11E-29 | -0. 16831 | 0. 048 | 0. 145 | 3. 15E-25 | M1 | PHF19         |
| CENPM. 3     | 2. 11E-29 | -0. 19908 | 0. 013 | 0. 086 | 3. 15E-25 | M1 | CENPM         |
| ZDHHC4. 4    | 2. 13E-29 | -0. 15364 | 0. 211 | 0. 384 | 3. 18E-25 | M1 | ZDHHC4        |
| ARVCF. 2     | 2. 14E-29 | -0. 13445 | 0. 002 | 0. 066 | 3. 20E-25 | M1 | ARVCF         |
| HNRNPAB. 3   | 2. 19E-29 | -0. 17377 | 0. 248 | 0. 427 | 3. 28E-25 | M1 | HNRNPAB       |
| DHX9. 2      | 2. 23E-29 | -0. 12643 | 0. 153 | 0. 303 | 3. 33E-25 | M1 | DHX9          |
| CTA-445C9. 2 | 2. 29E-29 | -0. 16065 | 0. 003 | 0. 068 | 3. 42E-25 | M1 | CTA-445C9. 14 |
| LRRN2        | 2. 29E-29 | -0. 1084  | 0. 003 | 0. 067 | 3. 43E-25 | M1 | LRRN2         |
| SPHK2. 2     | 2. 30E-29 | -0. 1297  | 0. 047 | 0. 144 | 3. 43E-25 | M1 | SPHK2         |
| TNFRSF10D    | 2. 40E-29 | 0. 140666 | 0. 036 | 0. 007 | 3. 59E-25 | M1 | TNFRSF10D     |
| GPATCH2. 2   | 2. 47E-29 | -0. 12203 | 0. 069 | 0. 18  | 3. 69E-25 | M1 | GPATCH2       |
| SMC2. 2      | 2. 50E-29 | -0. 189   | 0. 099 | 0. 22  | 3. 73E-25 | M1 | SMC2          |
| AMN1         | 2. 50E-29 | -0. 16601 | 0. 045 | 0. 14  | 3. 73E-25 | M1 | AMN1          |
| POMT1. 3     | 2. 53E-29 | -0. 11591 | 0. 053 | 0. 154 | 3. 78E-25 | M1 | POMT1         |



|            |          |          |       |       |          |    |               |
|------------|----------|----------|-------|-------|----------|----|---------------|
| IFT46.2    | 2.53E-29 | -0.15328 | 0.035 | 0.124 | 3.79E-25 | M1 | IFT46         |
| FZR1.3     | 2.56E-29 | -0.10035 | 0.065 | 0.173 | 3.82E-25 | M1 | FZR1          |
| IL13RA2.3  | 2.60E-29 | -0.2893  | 0.002 | 0.065 | 3.88E-25 | M1 | IL13RA2       |
| SLC16A2.1  | 2.63E-29 | -0.1261  | 0.002 | 0.064 | 3.92E-25 | M1 | SLC16A2       |
| CTC-338M1  | 2.75E-29 | -0.19504 | 0.01  | 0.08  | 4.10E-25 | M1 | CTC-338M12.5  |
| ILF2.1     | 2.77E-29 | -0.20351 | 0.403 | 0.608 | 4.13E-25 | M1 | ILF2          |
| NSMF.1     | 2.93E-29 | -0.12075 | 0.039 | 0.132 | 4.39E-25 | M1 | NSMF          |
| WIPI1.3    | 2.95E-29 | 0.435457 | 0.255 | 0.171 | 4.40E-25 | M1 | WIPI1         |
| MUL1.1     | 2.96E-29 | -0.12309 | 0.069 | 0.179 | 4.43E-25 | M1 | MUL1          |
| PLEKHA3.3  | 3.01E-29 | -0.12642 | 0.119 | 0.254 | 4.50E-25 | M1 | PLEKHA3       |
| SEPT3.3    | 3.03E-29 | -0.19845 | 0.009 | 0.079 | 4.52E-25 | M1 | 3-Sep         |
| C17orf51.3 | 3.23E-29 | -0.13227 | 0.009 | 0.08  | 4.82E-25 | M1 | C17orf51      |
| DALRD3.2   | 3.25E-29 | -0.10729 | 0.072 | 0.184 | 4.85E-25 | M1 | DALRD3        |
| NEDD9.3    | 3.26E-29 | 0.52575  | 0.286 | 0.207 | 4.87E-25 | M1 | NEDD9         |
| ANKRD36.2  | 3.29E-29 | -0.13359 | 0.087 | 0.205 | 4.92E-25 | M1 | ANKRD36       |
| ZNF580.3   | 3.34E-29 | -0.15497 | 0.164 | 0.317 | 4.99E-25 | M1 | ZNF580        |
| FLRT3.3    | 3.37E-29 | -0.14476 | 0.004 | 0.068 | 5.03E-25 | M1 | FLRT3         |
| MLH3.1     | 3.38E-29 | -0.14706 | 0.033 | 0.12  | 5.05E-25 | M1 | MLH3          |
| BANF1.2    | 3.44E-29 | -0.26329 | 0.491 | 0.696 | 5.14E-25 | M1 | BANF1         |
| SENCR.2    | 3.48E-29 | 0.210103 | 0.051 | 0.013 | 5.20E-25 | M1 | SENCR         |
| GPBP1.1    | 3.75E-29 | -0.15274 | 0.283 | 0.482 | 5.60E-25 | M1 | GPBP1         |
| CIC.2      | 3.89E-29 | -0.10895 | 0.041 | 0.135 | 5.81E-25 | M1 | CIC           |
| CAHM.3     | 3.98E-29 | -0.13975 | 0.023 | 0.105 | 5.94E-25 | M1 | CAHM          |
| CRB1.1     | 3.99E-29 | -0.21044 | 0.009 | 0.079 | 5.96E-25 | M1 | CRB1          |
| RANBP1.3   | 4.24E-29 | -0.24187 | 0.426 | 0.608 | 6.34E-25 | M1 | RANBP1        |
| C9orf72.4  | 4.43E-29 | 0.420509 | 0.221 | 0.136 | 6.61E-25 | M1 | C9orf72       |
| LINC00526  | 4.46E-29 | -0.15107 | 0.016 | 0.092 | 6.66E-25 | M1 | LINC00526     |
| PCED1B.2   | 4.46E-29 | 0.202779 | 0.078 | 0.027 | 6.67E-25 | M1 | PCED1B        |
| LSM2.1     | 4.50E-29 | -0.17724 | 0.286 | 0.48  | 6.72E-25 | M1 | LSM2          |
| SNRPB2.2   | 4.61E-29 | -0.23014 | 0.4   | 0.597 | 6.89E-25 | M1 | SNRPB2        |
| ACOX2.1    | 4.62E-29 | -0.13535 | 0.001 | 0.063 | 6.90E-25 | M1 | ACOX2         |
| GM2A.3     | 4.64E-29 | 0.388839 | 0.214 | 0.129 | 6.94E-25 | M1 | GM2A          |
| RP11-448A  | 4.69E-29 | -0.13146 | 0.024 | 0.106 | 7.00E-25 | M1 | RP11-448A19.1 |
| ABCA2.4    | 4.80E-29 | -0.29099 | 0.027 | 0.109 | 7.17E-25 | M1 | ABCA2         |
| MBP.1      | 4.87E-29 | 0.166609 | 0.329 | 0.22  | 7.27E-25 | M1 | MBP           |
| ATRX.2     | 4.90E-29 | -0.17951 | 0.287 | 0.476 | 7.32E-25 | M1 | ATRX          |
| ZNF682.1   | 4.94E-29 | -0.13377 | 0.014 | 0.089 | 7.38E-25 | M1 | ZNF682        |
| H3F3B.4    | 5.01E-29 | -0.15855 | 0.988 | 0.967 | 7.48E-25 | M1 | H3F3B         |
| RP11-379H  | 5.12E-29 | -0.11708 | 0.012 | 0.084 | 7.65E-25 | M1 | RP11-379H18.1 |
| LRCH4.4    | 5.13E-29 | 0.40348  | 0.26  | 0.174 | 7.66E-25 | M1 | LRCH4         |
| SLC12A5.4  | 5.22E-29 | 0.364986 | 0.154 | 0.08  | 7.80E-25 | M1 | SLC12A5       |
| DSC2.3     | 5.50E-29 | 0.21868  | 0.073 | 0.024 | 8.21E-25 | M1 | DSC2          |
| RP11-305L  | 5.53E-29 | 0.175901 | 0.032 | 0.005 | 8.26E-25 | M1 | RP11-305L7.3  |
| NR2E1.1    | 5.55E-29 | -0.1176  | 0.003 | 0.066 | 8.30E-25 | M1 | NR2E1         |
| PM20D2.2   | 5.67E-29 | -0.11502 | 0.019 | 0.098 | 8.47E-25 | M1 | PM20D2        |
| EIF4H.1    | 5.77E-29 | -0.22092 | 0.371 | 0.574 | 8.63E-25 | M1 | EIF4H         |
| CLDN10.2   | 5.95E-29 | -0.33294 | 0.003 | 0.066 | 8.89E-25 | M1 | CLDN10        |
| NDUFA12.2  | 6.20E-29 | -0.24179 | 0.385 | 0.593 | 9.27E-25 | M1 | NDUFA12       |
| MYT1L.4    | 6.21E-29 | -0.24102 | 0.005 | 0.07  | 9.27E-25 | M1 | MYT1L         |
| TTC1.2     | 6.32E-29 | -0.15473 | 0.226 | 0.403 | 9.45E-25 | M1 | TTC1          |
| RPP14.2    | 6.44E-29 | -0.10848 | 0.088 | 0.207 | 9.63E-25 | M1 | RPP14         |

|            |           |           |        |        |              |          |
|------------|-----------|-----------|--------|--------|--------------|----------|
| MARC1. 2   | 7. 07E-29 | -0. 1354  | 0. 005 | 0. 07  | 1. 06E-24 M1 | 1-Mar    |
| ASH1L. 1   | 7. 41E-29 | -0. 10773 | 0. 177 | 0. 336 | 1. 11E-24 M1 | ASH1L    |
| BABAM1     | 7. 43E-29 | -0. 1625  | 0. 25  | 0. 437 | 1. 11E-24 M1 | BABAM1   |
| LGALSL. 2  | 7. 44E-29 | -0. 14558 | 0. 007 | 0. 074 | 1. 11E-24 M1 | LGALSL   |
| SHISA5     | 7. 53E-29 | -0. 18072 | 0. 19  | 0. 352 | 1. 13E-24 M1 | SHISA5   |
| POLRMT. 2  | 7. 77E-29 | -0. 12024 | 0. 049 | 0. 147 | 1. 16E-24 M1 | POLRMT   |
| DYNC1LI1.  | 7. 91E-29 | -0. 15156 | 0. 148 | 0. 29  | 1. 18E-24 M1 | DYNC1LI1 |
| CARD8. 3   | 8. 00E-29 | 0. 385859 | 0. 219 | 0. 134 | 1. 20E-24 M1 | CARD8    |
| RIC8A. 1   | 8. 02E-29 | -0. 13282 | 0. 159 | 0. 311 | 1. 20E-24 M1 | RIC8A    |
| LRRC49     | 8. 14E-29 | -0. 14703 | 0. 005 | 0. 07  | 1. 22E-24 M1 | LRRC49   |
| TASP1. 1   | 8. 31E-29 | -0. 14457 | 0. 024 | 0. 106 | 1. 24E-24 M1 | TASP1    |
| AAMP. 2    | 8. 39E-29 | -0. 15476 | 0. 266 | 0. 459 | 1. 25E-24 M1 | AAMP     |
| SLC25A37.  | 8. 51E-29 | 0. 406375 | 0. 372 | 0. 297 | 1. 27E-24 M1 | SLC25A37 |
| FN1. 2     | 8. 61E-29 | -0. 25801 | 0. 068 | 0. 172 | 1. 29E-24 M1 | FN1      |
| ANKRD44. 3 | 8. 74E-29 | 0. 381328 | 0. 158 | 0. 083 | 1. 31E-24 M1 | ANKRD44  |
| AZGP1. 2   | 8. 82E-29 | -0. 30907 | 0. 004 | 0. 067 | 1. 32E-24 M1 | AZGP1    |
| KCNJ16. 3  | 8. 98E-29 | -0. 14082 | 0. 002 | 0. 064 | 1. 34E-24 M1 | KCNJ16   |
| GPN1. 1    | 9. 15E-29 | -0. 15271 | 0. 115 | 0. 246 | 1. 37E-24 M1 | GPN1     |
| PRKAA2. 3  | 9. 25E-29 | -0. 13628 | 0. 001 | 0. 062 | 1. 38E-24 M1 | PRKAA2   |
| DENR. 2    | 9. 29E-29 | -0. 13768 | 0. 185 | 0. 348 | 1. 39E-24 M1 | DENR     |
| IQCG. 3    | 9. 43E-29 | -0. 18618 | 0. 044 | 0. 138 | 1. 41E-24 M1 | IQCG     |
| INIP. 1    | 9. 47E-29 | -0. 14023 | 0. 096 | 0. 217 | 1. 42E-24 M1 | INIP     |
| TMEM161A.  | 9. 58E-29 | -0. 12519 | 0. 077 | 0. 19  | 1. 43E-24 M1 | TMEM161A |
| MINOS1. 2  | 9. 72E-29 | 0. 149225 | 0. 644 | 0. 638 | 1. 45E-24 M1 | MINOS1   |
| ZBTB38     | 9. 88E-29 | -0. 14777 | 0. 089 | 0. 207 | 1. 48E-24 M1 | ZBTB38   |
| ELMO1. 3   | 1. 01E-28 | 0. 35365  | 0. 27  | 0. 174 | 1. 50E-24 M1 | ELMO1    |
| GKAP1. 3   | 1. 01E-28 | -0. 14408 | 0. 023 | 0. 103 | 1. 52E-24 M1 | GKAP1    |
| ARV1. 3    | 1. 03E-28 | -0. 14129 | 0. 083 | 0. 198 | 1. 54E-24 M1 | ARV1     |
| SYNRG. 2   | 1. 05E-28 | -0. 10025 | 0. 089 | 0. 209 | 1. 57E-24 M1 | SYNRG    |
| HOXC10. 2  | 1. 07E-28 | -0. 20256 | 0. 002 | 0. 064 | 1. 60E-24 M1 | HOXC10   |
| SERTAD1. 2 | 1. 07E-28 | 0. 308101 | 0. 384 | 0. 302 | 1. 60E-24 M1 | SERTAD1  |
| ZNF599. 2  | 1. 10E-28 | -0. 12785 | 0. 013 | 0. 086 | 1. 65E-24 M1 | ZNF599   |
| MAPK11. 1  | 1. 14E-28 | -0. 10291 | 0. 003 | 0. 065 | 1. 70E-24 M1 | MAPK11   |
| MKI67. 3   | 1. 16E-28 | -0. 25103 | 0. 007 | 0. 074 | 1. 73E-24 M1 | MKI67    |
| SUPT16H. 3 | 1. 16E-28 | -0. 13985 | 0. 133 | 0. 271 | 1. 73E-24 M1 | SUPT16H  |
| SGOL1. 2   | 1. 17E-28 | -0. 21247 | 0. 004 | 0. 068 | 1. 74E-24 M1 | SGOL1    |
| PDHX. 2    | 1. 23E-28 | -0. 1191  | 0. 077 | 0. 19  | 1. 83E-24 M1 | PDHX     |
| LRRTM3. 2  | 1. 24E-28 | -0. 11445 | 0. 001 | 0. 062 | 1. 86E-24 M1 | LRRTM3   |
| NPB        | 1. 32E-28 | -0. 14843 | 0. 01  | 0. 079 | 1. 97E-24 M1 | NPB      |
| NUSAP1. 3  | 1. 33E-28 | -0. 31271 | 0. 034 | 0. 119 | 1. 99E-24 M1 | NUSAP1   |
| TPR. 1     | 1. 35E-28 | -0. 15303 | 0. 249 | 0. 436 | 2. 02E-24 M1 | TPR      |
| ZNF583. 2  | 1. 36E-28 | -0. 13227 | 0. 033 | 0. 12  | 2. 03E-24 M1 | ZNF583   |
| SRP72. 1   | 1. 43E-28 | -0. 1673  | 0. 298 | 0. 49  | 2. 14E-24 M1 | SRP72    |
| YJEFN3. 2  | 1. 46E-28 | -0. 13132 | 0. 007 | 0. 074 | 2. 18E-24 M1 | YJEFN3   |
| MEX3D. 3   | 1. 52E-28 | -0. 13273 | 0. 007 | 0. 073 | 2. 27E-24 M1 | MEX3D    |
| SLU7       | 1. 53E-28 | -0. 12731 | 0. 181 | 0. 34  | 2. 29E-24 M1 | SLU7     |
| ZC3H6. 2   | 1. 53E-28 | -0. 13602 | 0. 061 | 0. 164 | 2. 29E-24 M1 | ZC3H6    |
| SYT17. 2   | 1. 55E-28 | -0. 12274 | 0. 069 | 0. 177 | 2. 32E-24 M1 | SYT17    |
| RIMKLA. 1  | 1. 57E-28 | -0. 11528 | 0. 002 | 0. 063 | 2. 34E-24 M1 | RIMKLA   |
| RUSC1. 2   | 1. 57E-28 | -0. 11515 | 0. 055 | 0. 155 | 2. 35E-24 M1 | RUSC1    |
| SLC2A9. 2  | 1. 59E-28 | 0. 200717 | 0. 061 | 0. 018 | 2. 37E-24 M1 | SLC2A9   |

|             |           |           |        |        |              |               |
|-------------|-----------|-----------|--------|--------|--------------|---------------|
| VIM. 3      | 1. 62E-28 | -0. 26916 | 0. 659 | 0. 664 | 2. 42E-24 M1 | VIM           |
| RASD1. 2    | 1. 63E-28 | -0. 29686 | 0. 054 | 0. 15  | 2. 43E-24 M1 | RASD1         |
| TSEN2. 3    | 1. 65E-28 | -0. 15542 | 0. 022 | 0. 102 | 2. 46E-24 M1 | TSEN2         |
| HENMT1. 3   | 1. 67E-28 | 0. 224733 | 0. 072 | 0. 024 | 2. 50E-24 M1 | HENMT1        |
| TMEM43. 2   | 1. 68E-28 | -0. 1176  | 0. 091 | 0. 211 | 2. 51E-24 M1 | TMEM43        |
| ZNF846. 3   | 1. 69E-28 | 0. 362292 | 0. 125 | 0. 059 | 2. 53E-24 M1 | ZNF846        |
| GATS. 1     | 1. 70E-28 | -0. 18138 | 0. 007 | 0. 074 | 2. 55E-24 M1 | GATS          |
| ARAP3. 1    | 1. 74E-28 | -0. 12388 | 0. 008 | 0. 076 | 2. 59E-24 M1 | ARAP3         |
| SET. 2      | 1. 76E-28 | -0. 22963 | 0. 416 | 0. 59  | 2. 63E-24 M1 | SET           |
| AAED1. 4    | 1. 77E-28 | 0. 434889 | 0. 247 | 0. 168 | 2. 64E-24 M1 | AAED1         |
| RP3-47704   | 1. 77E-28 | 0. 200583 | 0. 066 | 0. 021 | 2. 64E-24 M1 | RP3-47704. 14 |
| ZNF117. 2   | 1. 89E-28 | -0. 12574 | 0. 033 | 0. 12  | 2. 82E-24 M1 | ZNF117        |
| STUB1. 3    | 1. 93E-28 | -0. 19398 | 0. 302 | 0. 493 | 2. 88E-24 M1 | STUB1         |
| DPYD. 2     | 1. 97E-28 | 0. 301721 | 0. 166 | 0. 087 | 2. 94E-24 M1 | DPYD          |
| R3HDM4. 3   | 1. 97E-28 | -0. 10834 | 0. 098 | 0. 221 | 2. 94E-24 M1 | R3HDM4        |
| DGCR14      | 1. 97E-28 | -0. 12427 | 0. 042 | 0. 135 | 2. 95E-24 M1 | DGCR14        |
| CEP19. 2    | 2. 02E-28 | -0. 14755 | 0. 015 | 0. 089 | 3. 02E-24 M1 | CEP19         |
| DAZAP2. 3   | 2. 03E-28 | 0. 278592 | 0. 555 | 0. 533 | 3. 04E-24 M1 | DAZAP2        |
| REV1. 2     | 2. 04E-28 | -0. 12032 | 0. 075 | 0. 186 | 3. 05E-24 M1 | REV1          |
| SCAMP4. 2   | 2. 12E-28 | -0. 11    | 0. 146 | 0. 293 | 3. 17E-24 M1 | SCAMP4        |
| MICALL2. 2  | 2. 12E-28 | -0. 13671 | 0. 011 | 0. 081 | 3. 18E-24 M1 | MICALL2       |
| MGAT4B. 1   | 2. 14E-28 | -0. 10231 | 0. 032 | 0. 118 | 3. 20E-24 M1 | MGAT4B        |
| PITHD1. 3   | 2. 16E-28 | -0. 15783 | 0. 207 | 0. 374 | 3. 23E-24 M1 | PITHD1        |
| CTNNA2. 2   | 2. 27E-28 | -0. 20979 | 0. 005 | 0. 069 | 3. 39E-24 M1 | CTNNA2        |
| COG4. 2     | 2. 28E-28 | -0. 11833 | 0. 091 | 0. 211 | 3. 41E-24 M1 | COG4          |
| FAM179B. 2  | 2. 30E-28 | -0. 10599 | 0. 042 | 0. 134 | 3. 44E-24 M1 | FAM179B       |
| RDH14. 1    | 2. 40E-28 | -0. 12289 | 0. 089 | 0. 207 | 3. 59E-24 M1 | RDH14         |
| GTF2IRD2. 2 | 2. 50E-28 | -0. 14782 | 0. 041 | 0. 131 | 3. 73E-24 M1 | GTF2IRD2      |
| HOXA3. 3    | 2. 50E-28 | -0. 20052 | 0. 004 | 0. 066 | 3. 74E-24 M1 | HOXA3         |
| NUP88. 2    | 2. 61E-28 | -0. 12513 | 0. 048 | 0. 144 | 3. 90E-24 M1 | NUP88         |
| RBMX2. 1    | 2. 61E-28 | -0. 1178  | 0. 124 | 0. 258 | 3. 90E-24 M1 | RBMX2         |
| METTL3. 1   | 2. 67E-28 | -0. 14936 | 0. 045 | 0. 138 | 4. 00E-24 M1 | METTL3        |
| CINP        | 2. 84E-28 | -0. 15196 | 0. 136 | 0. 275 | 4. 24E-24 M1 | CINP          |
| AMH. 2      | 2. 87E-28 | -0. 1287  | 0. 004 | 0. 068 | 4. 29E-24 M1 | AMH           |
| ATF2        | 2. 90E-28 | -0. 15677 | 0. 071 | 0. 178 | 4. 34E-24 M1 | ATF2          |
| RBM14. 1    | 2. 91E-28 | -0. 10657 | 0. 092 | 0. 212 | 4. 35E-24 M1 | RBM14         |
| TAF13. 1    | 2. 94E-28 | -0. 10828 | 0. 054 | 0. 154 | 4. 39E-24 M1 | TAF13         |
| CSRP2BP     | 3. 04E-28 | -0. 12171 | 0. 015 | 0. 089 | 4. 54E-24 M1 | CSRP2BP       |
| KLHL9. 2    | 3. 13E-28 | -0. 1143  | 0. 036 | 0. 124 | 4. 68E-24 M1 | KLHL9         |
| BAMBI. 2    | 3. 16E-28 | -0. 1458  | 0. 011 | 0. 081 | 4. 72E-24 M1 | BAMBI         |
| NUDT10. 1   | 3. 23E-28 | -0. 17651 | 0. 001 | 0. 06  | 4. 83E-24 M1 | NUDT10        |
| TMEM145. 2  | 3. 24E-28 | -0. 16172 | 0. 011 | 0. 081 | 4. 84E-24 M1 | TMEM145       |
| NFKBIL1. 1  | 3. 26E-28 | -0. 10148 | 0. 101 | 0. 225 | 4. 87E-24 M1 | NFKBIL1       |
| CDC23. 2    | 3. 46E-28 | -0. 13875 | 0. 046 | 0. 141 | 5. 16E-24 M1 | CDC23         |
| RNFT2. 3    | 3. 59E-28 | -0. 12517 | 0. 011 | 0. 08  | 5. 37E-24 M1 | RNFT2         |
| MFAP3L. 2   | 3. 80E-28 | -0. 13423 | 0. 003 | 0. 065 | 5. 68E-24 M1 | MFAP3L        |
| LINC00657   | 3. 84E-28 | -0. 11129 | 0. 195 | 0. 359 | 5. 73E-24 M1 | LINC00657     |
| MIEN1       | 3. 97E-28 | -0. 17575 | 0. 316 | 0. 518 | 5. 94E-24 M1 | MIEN1         |
| TBC1D12. 4  | 4. 11E-28 | 0. 363705 | 0. 17  | 0. 095 | 6. 15E-24 M1 | TBC1D12       |
| ZNF620. 1   | 4. 19E-28 | -0. 15387 | 0. 006 | 0. 07  | 6. 26E-24 M1 | ZNF620        |
| CRADD. 2    | 4. 21E-28 | -0. 15451 | 0. 034 | 0. 119 | 6. 30E-24 M1 | CRADD         |

|           |          |          |       |       |          |    |             |
|-----------|----------|----------|-------|-------|----------|----|-------------|
| MTMR11.1  | 4.22E-28 | -0.15072 | 0.012 | 0.083 | 6.30E-24 | M1 | MTMR11      |
| VASP.4    | 4.22E-28 | 0.380734 | 0.307 | 0.226 | 6.31E-24 | M1 | VASP        |
| GPHN.1    | 4.27E-28 | -0.14054 | 0.01  | 0.078 | 6.39E-24 | M1 | GPHN        |
| LDHB.2    | 4.29E-28 | -0.24233 | 0.657 | 0.803 | 6.41E-24 | M1 | LDHB        |
| RP3-522D1 | 4.33E-28 | 0.260968 | 0.079 | 0.029 | 6.48E-24 | M1 | RP3-522D1.1 |
| HAGH.3    | 4.39E-28 | -0.11828 | 0.21  | 0.382 | 6.56E-24 | M1 | HAGH        |
| Clorf228. | 4.46E-28 | 0.240129 | 0.071 | 0.024 | 6.66E-24 | M1 | Clorf228    |
| CLSTN3.1  | 4.46E-28 | -0.15457 | 0.005 | 0.069 | 6.66E-24 | M1 | CLSTN3      |
| DCP1A.1   | 4.49E-28 | -0.12189 | 0.118 | 0.248 | 6.71E-24 | M1 | DCP1A       |
| GIMAP5.3  | 4.51E-28 | 0.245748 | 0.099 | 0.041 | 6.74E-24 | M1 | GIMAP5      |
| ZNF354A.1 | 4.62E-28 | -0.12105 | 0.043 | 0.136 | 6.90E-24 | M1 | ZNF354A     |
| SEMA3A    | 5.07E-28 | -0.10782 | 0.001 | 0.06  | 7.58E-24 | M1 | SEMA3A      |
| RFXANK.1  | 5.13E-28 | -0.16089 | 0.193 | 0.351 | 7.66E-24 | M1 | RFXANK      |
| NT5E.1    | 5.27E-28 | -0.16845 | 0.007 | 0.073 | 7.87E-24 | M1 | NT5E        |
| ZBTB17.1  | 5.30E-28 | -0.13249 | 0.038 | 0.126 | 7.91E-24 | M1 | ZBTB17      |
| SCMH1     | 5.36E-28 | -0.12709 | 0.017 | 0.091 | 8.01E-24 | M1 | SCMH1       |
| MTPN.2    | 5.39E-28 | -0.13617 | 0.274 | 0.464 | 8.06E-24 | M1 | MTPN        |
| CENPN.2   | 5.63E-28 | -0.17981 | 0.022 | 0.1   | 8.41E-24 | M1 | CENPN       |
| RRP15.1   | 5.70E-28 | -0.13849 | 0.113 | 0.241 | 8.51E-24 | M1 | RRP15       |
| LAMB2.2   | 5.75E-28 | -0.10078 | 0.027 | 0.109 | 8.60E-24 | M1 | LAMB2       |
| CERS6.3   | 5.77E-28 | -0.1435  | 0.048 | 0.142 | 8.62E-24 | M1 | CERS6       |
| DPM1.3    | 6.11E-28 | -0.13605 | 0.229 | 0.408 | 9.13E-24 | M1 | DPM1        |
| STK4.4    | 6.34E-28 | 0.458533 | 0.344 | 0.275 | 9.47E-24 | M1 | STK4        |
| SEPW1.2   | 6.39E-28 | -0.24388 | 0.515 | 0.704 | 9.54E-24 | M1 | SEPW1       |
| IPO13.2   | 6.40E-28 | -0.1321  | 0.035 | 0.122 | 9.56E-24 | M1 | IPO13       |
| PSME3.2   | 6.42E-28 | -0.13127 | 0.118 | 0.248 | 9.59E-24 | M1 | PSME3       |
| OMG.2     | 6.76E-28 | -0.31066 | 0.018 | 0.092 | 1.01E-23 | M1 | OMG         |
| PFN1.4    | 6.93E-28 | 0.105204 | 0.848 | 0.801 | 1.04E-23 | M1 | PFN1        |
| AMOTL1.2  | 6.93E-28 | -0.10985 | 0.01  | 0.078 | 1.04E-23 | M1 | AMOTL1      |
| PDCD2.3   | 7.07E-28 | -0.11741 | 0.166 | 0.32  | 1.06E-23 | M1 | PDCD2       |
| EXOSC4.1  | 7.11E-28 | -0.12453 | 0.136 | 0.275 | 1.06E-23 | M1 | EXOSC4      |
| JMY.2     | 7.15E-28 | -0.12436 | 0.031 | 0.115 | 1.07E-23 | M1 | JMY         |
| POLR3D.2  | 7.27E-28 | -0.12179 | 0.047 | 0.141 | 1.09E-23 | M1 | POLR3D      |
| WSB1.2    | 7.40E-28 | 0.199378 | 0.662 | 0.65  | 1.11E-23 | M1 | WSB1        |
| SLC46A3.4 | 7.42E-28 | 0.304008 | 0.108 | 0.047 | 1.11E-23 | M1 | SLC46A3     |
| PARD6A.1  | 7.51E-28 | -0.12182 | 0.027 | 0.108 | 1.12E-23 | M1 | PARD6A      |
| ZNF467.3  | 7.54E-28 | 0.219787 | 0.074 | 0.026 | 1.13E-23 | M1 | ZNF467      |
| SEMA4B    | 7.56E-28 | -0.12544 | 0.002 | 0.062 | 1.13E-23 | M1 | SEMA4B      |
| DOK1.4    | 7.87E-28 | 0.411317 | 0.221 | 0.141 | 1.18E-23 | M1 | DOK1        |
| DNAL1.1   | 8.07E-28 | -0.10705 | 0.033 | 0.118 | 1.21E-23 | M1 | DNAL1       |
| ARRB1.3   | 8.16E-28 | 0.240878 | 0.086 | 0.033 | 1.22E-23 | M1 | ARRB1       |
| ZNF232.2  | 8.24E-28 | -0.12017 | 0.018 | 0.092 | 1.23E-23 | M1 | ZNF232      |
| ZBTB80S.1 | 8.25E-28 | -0.11528 | 0.168 | 0.319 | 1.23E-23 | M1 | ZBTB80S     |
| CIZ1.1    | 8.33E-28 | -0.10477 | 0.084 | 0.199 | 1.24E-23 | M1 | CIZ1        |
| ANKZF1.2  | 8.52E-28 | -0.12026 | 0.053 | 0.15  | 1.27E-23 | M1 | ANKZF1      |
| ISCA2.1   | 8.66E-28 | -0.19321 | 0.16  | 0.306 | 1.29E-23 | M1 | ISCA2       |
| NDRG3.3   | 8.80E-28 | -0.11677 | 0.083 | 0.196 | 1.32E-23 | M1 | NDRG3       |
| EFCAB7.1  | 9.62E-28 | -0.15208 | 0.012 | 0.081 | 1.44E-23 | M1 | EFCAB7      |
| KDM4B.2   | 9.63E-28 | -0.11307 | 0.051 | 0.148 | 1.44E-23 | M1 | KDM4B       |
| ARHGEF4.1 | 9.65E-28 | -0.12525 | 0.003 | 0.064 | 1.44E-23 | M1 | ARHGEF4     |
| PTPN12.2  | 9.66E-28 | -0.11736 | 0.115 | 0.243 | 1.44E-23 | M1 | PTPN12      |

|            |          |          |       |       |          |    |               |
|------------|----------|----------|-------|-------|----------|----|---------------|
| ATP13A2.3  | 9.79E-28 | -0.11089 | 0.057 | 0.157 | 1.46E-23 | M1 | ATP13A2       |
| GORAB.4    | 9.84E-28 | -0.10563 | 0.015 | 0.087 | 1.47E-23 | M1 | GORAB         |
| MIS12.2    | 9.96E-28 | -0.103   | 0.058 | 0.159 | 1.49E-23 | M1 | MIS12         |
| LPIN1.1    | 1.01E-27 | -0.13028 | 0.056 | 0.153 | 1.50E-23 | M1 | LPIN1         |
| SMARCAD1.1 | 1.02E-27 | -0.12147 | 0.035 | 0.121 | 1.53E-23 | M1 | SMARCAD1      |
| HAAO.3     | 1.04E-27 | 0.252754 | 0.056 | 0.016 | 1.56E-23 | M1 | HAAO          |
| SNAPIN.1   | 1.05E-27 | -0.1395  | 0.23  | 0.406 | 1.57E-23 | M1 | SNAPIN        |
| KCND3.3    | 1.05E-27 | -0.1219  | 0.005 | 0.068 | 1.57E-23 | M1 | KCND3         |
| RP11-1114  | 1.06E-27 | -0.12594 | 0.02  | 0.097 | 1.59E-23 | M1 | RP11-1114A5.4 |
| NTPCR.2    | 1.09E-27 | -0.13649 | 0.153 | 0.297 | 1.63E-23 | M1 | NTPCR         |
| BMI1.2     | 1.11E-27 | -0.11403 | 0.057 | 0.156 | 1.66E-23 | M1 | BMI1          |
| EFNA2.2    | 1.12E-27 | -0.13233 | 0.002 | 0.061 | 1.68E-23 | M1 | EFNA2         |
| BNIP2.4    | 1.16E-27 | 0.429157 | 0.323 | 0.252 | 1.73E-23 | M1 | BNIP2         |
| BACE1.3    | 1.17E-27 | -0.16891 | 0.043 | 0.133 | 1.75E-23 | M1 | BACE1         |
| EIF1AX.2   | 1.18E-27 | -0.21201 | 0.389 | 0.594 | 1.77E-23 | M1 | EIF1AX        |
| DUS4L.1    | 1.19E-27 | -0.14525 | 0.018 | 0.092 | 1.78E-23 | M1 | DUS4L         |
| KIF22.1    | 1.21E-27 | -0.20063 | 0.1   | 0.216 | 1.81E-23 | M1 | KIF22         |
| ASIC1.2    | 1.22E-27 | -0.17202 | 0.002 | 0.062 | 1.82E-23 | M1 | ASIC1         |
| LARP1B.2   | 1.26E-27 | -0.1089  | 0.044 | 0.135 | 1.88E-23 | M1 | LARP1B        |
| SASH1.1    | 1.26E-27 | -0.16354 | 0.012 | 0.082 | 1.89E-23 | M1 | SASH1         |
| ZNF766     | 1.27E-27 | -0.1108  | 0.048 | 0.142 | 1.90E-23 | M1 | ZNF766        |
| ZBED1.2    | 1.30E-27 | -0.11418 | 0.057 | 0.156 | 1.95E-23 | M1 | ZBED1         |
| USP16.1    | 1.41E-27 | -0.12222 | 0.218 | 0.392 | 2.11E-23 | M1 | USP16         |
| BGN.3      | 1.45E-27 | -0.30365 | 0.009 | 0.076 | 2.17E-23 | M1 | BGN           |
| PRKD1.1    | 1.45E-27 | -0.10291 | 0.002 | 0.061 | 2.17E-23 | M1 | PRKD1         |
| ARHGAP1.1  | 1.46E-27 | -0.14318 | 0.072 | 0.177 | 2.18E-23 | M1 | ARHGAP1       |
| MON1A.2    | 1.47E-27 | -0.12716 | 0.022 | 0.099 | 2.19E-23 | M1 | MON1A         |
| CCDC51     | 1.48E-27 | -0.10643 | 0.031 | 0.114 | 2.22E-23 | M1 | CCDC51        |
| PXN-AS1.1  | 1.52E-27 | -0.12591 | 0.019 | 0.093 | 2.28E-23 | M1 | PXN-AS1       |
| RHNO1.1    | 1.57E-27 | -0.1424  | 0.097 | 0.215 | 2.34E-23 | M1 | RHNO1         |
| OSBP       | 1.57E-27 | -0.11605 | 0.025 | 0.104 | 2.35E-23 | M1 | OSBP          |
| FDFT1.2    | 1.60E-27 | -0.12623 | 0.177 | 0.332 | 2.40E-23 | M1 | FDFT1         |
| LRRC59.2   | 1.63E-27 | -0.12836 | 0.217 | 0.386 | 2.44E-23 | M1 | LRRC59        |
| EXD2       | 1.66E-27 | -0.10781 | 0.027 | 0.108 | 2.48E-23 | M1 | EXD2          |
| ZNF227.1   | 1.72E-27 | -0.13454 | 0.03  | 0.113 | 2.57E-23 | M1 | ZNF227        |
| RAB9B.1    | 1.77E-27 | -0.18111 | 0.003 | 0.063 | 2.64E-23 | M1 | RAB9B         |
| SLC27A3.2  | 1.83E-27 | -0.16129 | 0.046 | 0.138 | 2.74E-23 | M1 | SLC27A3       |
| DUOX1.4    | 1.84E-27 | -0.17646 | 0.009 | 0.074 | 2.75E-23 | M1 | DUOX1         |
| NIFK-AS1   | 1.84E-27 | -0.16829 | 0.023 | 0.101 | 2.75E-23 | M1 | NIFK-AS1      |
| ISOC1.1    | 1.87E-27 | -0.13334 | 0.075 | 0.182 | 2.80E-23 | M1 | ISOC1         |
| RNF20.1    | 1.88E-27 | -0.1265  | 0.064 | 0.166 | 2.81E-23 | M1 | RNF20         |
| TAX1BP1.1  | 1.88E-27 | -0.19653 | 0.347 | 0.545 | 2.82E-23 | M1 | TAX1BP1       |
| TMEM42.2   | 2.02E-27 | -0.12824 | 0.072 | 0.179 | 3.02E-23 | M1 | TMEM42        |
| GIMAP7.2   | 2.02E-27 | 0.215282 | 0.105 | 0.044 | 3.02E-23 | M1 | GIMAP7        |
| DLX6.4     | 2.03E-27 | -0.23651 | 0.005 | 0.067 | 3.04E-23 | M1 | DLX6          |
| ZNF582-AS  | 2.05E-27 | -0.19186 | 0.016 | 0.088 | 3.07E-23 | M1 | ZNF582-AS1    |
| C5orf51    | 2.13E-27 | -0.10839 | 0.026 | 0.106 | 3.18E-23 | M1 | C5orf51       |
| PEX2.1     | 2.14E-27 | -0.13066 | 0.149 | 0.292 | 3.20E-23 | M1 | PEX2          |
| CCDC126.1  | 2.17E-27 | -0.16385 | 0.042 | 0.13  | 3.24E-23 | M1 | CCDC126       |
| TCEB3.2    | 2.20E-27 | -0.10202 | 0.082 | 0.195 | 3.29E-23 | M1 | TCEB3         |
| FBXW7.2    | 2.27E-27 | -0.12808 | 0.049 | 0.143 | 3.39E-23 | M1 | FBXW7         |

|           |          |          |       |       |          |    |             |
|-----------|----------|----------|-------|-------|----------|----|-------------|
| ZNF337.1  | 2.27E-27 | -0.12696 | 0.013 | 0.082 | 3.39E-23 | M1 | ZNF337      |
| CACNG4.1  | 2.28E-27 | -0.15212 | 0.001 | 0.059 | 3.41E-23 | M1 | CACNG4      |
| TFPI.1    | 2.30E-27 | -0.1793  | 0.003 | 0.063 | 3.44E-23 | M1 | TFPI        |
| RNF135.4  | 2.33E-27 | 0.346552 | 0.173 | 0.098 | 3.47E-23 | M1 | RNF135      |
| ZNF134    | 2.34E-27 | -0.1415  | 0.017 | 0.089 | 3.49E-23 | M1 | ZNF134      |
| REPS1.3   | 2.35E-27 | -0.11221 | 0.049 | 0.143 | 3.52E-23 | M1 | REPS1       |
| TCHP.1    | 2.38E-27 | -0.11113 | 0.038 | 0.126 | 3.56E-23 | M1 | TCHP        |
| CDC20.2   | 2.41E-27 | -0.24043 | 0.012 | 0.08  | 3.61E-23 | M1 | CDC20       |
| NENF.2    | 2.41E-27 | -0.2441  | 0.348 | 0.523 | 3.61E-23 | M1 | NENF        |
| CCER2.3   | 2.45E-27 | -0.22494 | 0.004 | 0.065 | 3.66E-23 | M1 | CCER2       |
| LTBP1.2   | 2.51E-27 | -0.11788 | 0.002 | 0.06  | 3.76E-23 | M1 | LTBP1       |
| UNC119B.1 | 2.53E-27 | -0.12035 | 0.008 | 0.074 | 3.78E-23 | M1 | UNC119B     |
| PTPRK.1   | 2.58E-27 | -0.23404 | 0.005 | 0.067 | 3.85E-23 | M1 | PTPRK       |
| USP42.2   | 2.60E-27 | -0.12415 | 0.046 | 0.138 | 3.88E-23 | M1 | USP42       |
| PCM1.3    | 2.64E-27 | -0.10478 | 0.189 | 0.351 | 3.95E-23 | M1 | PCM1        |
| TP53I11.3 | 2.65E-27 | 0.297788 | 0.128 | 0.062 | 3.95E-23 | M1 | TP53I11     |
| PDZRN3.2  | 2.68E-27 | -0.16613 | 0.005 | 0.067 | 4.00E-23 | M1 | PDZRN3      |
| CA8.3     | 2.75E-27 | -0.23973 | 0.004 | 0.065 | 4.10E-23 | M1 | CA8         |
| FAM19A5.1 | 2.76E-27 | -0.16433 | 0     | 0.057 | 4.12E-23 | M1 | FAM19A5     |
| FBXO22    | 2.77E-27 | -0.15414 | 0.057 | 0.154 | 4.14E-23 | M1 | FBXO22      |
| ZFHx4-AS1 | 2.77E-27 | -0.10845 | 0.002 | 0.06  | 4.14E-23 | M1 | ZFHx4-AS1   |
| C17orf80. | 2.85E-27 | -0.10395 | 0.021 | 0.097 | 4.25E-23 | M1 | C17orf80    |
| CPQ.2     | 2.90E-27 | 0.358503 | 0.25  | 0.163 | 4.34E-23 | M1 | CPQ         |
| POGK.2    | 2.95E-27 | -0.10961 | 0.05  | 0.145 | 4.40E-23 | M1 | POGK        |
| LINC00667 | 2.98E-27 | -0.11674 | 0.131 | 0.266 | 4.45E-23 | M1 | LINC00667   |
| DLEU1     | 3.04E-27 | -0.12097 | 0.024 | 0.102 | 4.55E-23 | M1 | DLEU1       |
| NFKB1.4   | 3.10E-27 | 0.381376 | 0.165 | 0.092 | 4.63E-23 | M1 | NFKB1       |
| GPKOW.1   | 3.18E-27 | -0.13656 | 0.057 | 0.154 | 4.75E-23 | M1 | GPKOW       |
| OTUD6B.2  | 3.19E-27 | -0.10531 | 0.044 | 0.135 | 4.76E-23 | M1 | OTUD6B      |
| TACC2.1   | 3.23E-27 | -0.1206  | 0.005 | 0.067 | 4.82E-23 | M1 | TACC2       |
| DHX57.1   | 3.29E-27 | -0.13604 | 0.028 | 0.108 | 4.91E-23 | M1 | DHX57       |
| MZF1      | 3.34E-27 | -0.12222 | 0.026 | 0.105 | 5.00E-23 | M1 | MZF1        |
| ZNF408.2  | 3.46E-27 | -0.11441 | 0.016 | 0.087 | 5.17E-23 | M1 | ZNF408      |
| NUDC.3    | 3.50E-27 | -0.19992 | 0.409 | 0.614 | 5.23E-23 | M1 | NUDC        |
| MFSD6.1   | 3.53E-27 | -0.15761 | 0.009 | 0.075 | 5.28E-23 | M1 | MFSD6       |
| CTC-524C5 | 3.57E-27 | -0.1129  | 0.043 | 0.133 | 5.34E-23 | M1 | CTC-524C5.2 |
| LSG1.2    | 3.71E-27 | -0.13132 | 0.05  | 0.144 | 5.54E-23 | M1 | LSG1        |
| ZNF136.2  | 3.77E-27 | -0.14539 | 0.03  | 0.111 | 5.64E-23 | M1 | ZNF136      |
| TMEM17.1  | 3.81E-27 | -0.13897 | 0.004 | 0.065 | 5.69E-23 | M1 | TMEM17      |
| TRAF3IP2  | 3.84E-27 | -0.13262 | 0.029 | 0.109 | 5.74E-23 | M1 | TRAF3IP2    |
| FAM216A.2 | 3.87E-27 | -0.13265 | 0.046 | 0.137 | 5.78E-23 | M1 | FAM216A     |
| TMEM231.2 | 3.92E-27 | -0.12814 | 0.008 | 0.073 | 5.86E-23 | M1 | TMEM231     |
| ADAM23.1  | 3.98E-27 | -0.12294 | 0.001 | 0.059 | 5.94E-23 | M1 | ADAM23      |
| ZCCHC24.2 | 4.04E-27 | -0.20539 | 0.032 | 0.113 | 6.04E-23 | M1 | ZCCHC24     |
| PHPT1.2   | 4.06E-27 | -0.23137 | 0.5   | 0.682 | 6.07E-23 | M1 | PHPT1       |
| FAM184A.1 | 4.12E-27 | -0.12228 | 0.002 | 0.061 | 6.15E-23 | M1 | FAM184A     |
| CLEC12A.2 | 4.13E-27 | 0.175038 | 0.05  | 0.014 | 6.17E-23 | M1 | CLEC12A     |
| PSMD6.2   | 4.17E-27 | -0.15356 | 0.212 | 0.378 | 6.23E-23 | M1 | PSMD6       |
| CTNNA1.1  | 4.25E-27 | -0.18887 | 0.27  | 0.452 | 6.35E-23 | M1 | CTNNA1      |
| DLAT.1    | 4.31E-27 | -0.11178 | 0.048 | 0.142 | 6.43E-23 | M1 | DLAT        |
| TIMM10.2  | 4.32E-27 | -0.1764  | 0.216 | 0.382 | 6.46E-23 | M1 | TIMM10      |

|             |          |          |       |       |          |    |             |
|-------------|----------|----------|-------|-------|----------|----|-------------|
| RNF146.1    | 4.32E-27 | -0.10817 | 0.139 | 0.278 | 6.46E-23 | M1 | RNF146      |
| THBS4.2     | 4.44E-27 | -0.13353 | 0.002 | 0.061 | 6.63E-23 | M1 | THBS4       |
| ZBED3.2     | 4.55E-27 | -0.11411 | 0.024 | 0.101 | 6.80E-23 | M1 | ZBED3       |
| SALL1.3     | 4.60E-27 | -0.11295 | 0.056 | 0.154 | 6.88E-23 | M1 | SALL1       |
| SMCR5.2     | 4.76E-27 | -0.10356 | 0.026 | 0.105 | 7.11E-23 | M1 | SMCR5       |
| NDUFS3.2    | 4.88E-27 | -0.19149 | 0.324 | 0.523 | 7.29E-23 | M1 | NDUFS3      |
| ZNF174.2    | 4.97E-27 | -0.12101 | 0.013 | 0.082 | 7.43E-23 | M1 | ZNF174      |
| UBQLN4.1    | 5.04E-27 | -0.11932 | 0.033 | 0.116 | 7.53E-23 | M1 | UBQLN4      |
| CCDC8.1     | 5.30E-27 | -0.12005 | 0.001 | 0.057 | 7.93E-23 | M1 | CCDC8       |
| PHB.2       | 5.47E-27 | -0.22406 | 0.398 | 0.586 | 8.18E-23 | M1 | PHB         |
| ZNF530.2    | 5.48E-27 | -0.13882 | 0.007 | 0.07  | 8.19E-23 | M1 | ZNF530      |
| LSM4.2      | 5.49E-27 | -0.20666 | 0.404 | 0.592 | 8.21E-23 | M1 | LSM4        |
| TNNI2.3     | 5.50E-27 | 0.192532 | 0.049 | 0.013 | 8.22E-23 | M1 | TNNI2       |
| MSRB1.1     | 5.56E-27 | -0.10186 | 0.114 | 0.241 | 8.30E-23 | M1 | MSRB1       |
| DUSP8.2     | 5.79E-27 | -0.16671 | 0.002 | 0.06  | 8.66E-23 | M1 | DUSP8       |
| ANK3.3      | 5.80E-27 | -0.20034 | 0.007 | 0.071 | 8.67E-23 | M1 | ANK3        |
| MTCH2.1     | 5.96E-27 | -0.15995 | 0.274 | 0.459 | 8.90E-23 | M1 | MTCH2       |
| POMT2       | 5.98E-27 | -0.11737 | 0.014 | 0.083 | 8.93E-23 | M1 | POMT2       |
| ZFP64.1     | 6.00E-27 | -0.12045 | 0.017 | 0.089 | 8.96E-23 | M1 | ZFP64       |
| AADAT.1     | 6.01E-27 | -0.12505 | 0.003 | 0.062 | 8.98E-23 | M1 | AADAT       |
| CPSF6.2     | 6.10E-27 | -0.13276 | 0.199 | 0.356 | 9.11E-23 | M1 | CPSF6       |
| SUPT7L      | 6.27E-27 | -0.10546 | 0.092 | 0.209 | 9.37E-23 | M1 | SUPT7L      |
| TBC1D10B.6  | 6.28E-27 | -0.12618 | 0.032 | 0.113 | 9.39E-23 | M1 | TBC1D10B    |
| P2RY8       | 6.29E-27 | 0.142122 | 0.04  | 0.009 | 9.39E-23 | M1 | P2RY8       |
| RNF220.3    | 6.32E-27 | -0.13188 | 0.064 | 0.165 | 9.44E-23 | M1 | RNF220      |
| DNASE1.1    | 6.55E-27 | -0.12228 | 0.02  | 0.094 | 9.79E-23 | M1 | DNASE1      |
| PDE8B.1     | 6.60E-27 | -0.12307 | 0.001 | 0.057 | 9.86E-23 | M1 | PDE8B       |
| EIF2S1.1    | 6.63E-27 | -0.14231 | 0.188 | 0.346 | 9.91E-23 | M1 | EIF2S1      |
| ZNF514.2    | 6.70E-27 | -0.15611 | 0.021 | 0.096 | 1.00E-22 | M1 | ZNF514      |
| ZSCAN16-A.6 | 6.84E-27 | -0.12171 | 0.142 | 0.281 | 1.02E-22 | M1 | ZSCAN16-AS1 |
| EFNA3.1     | 6.93E-27 | -0.18935 | 0.007 | 0.07  | 1.04E-22 | M1 | EFNA3       |
| LRTOMT.2    | 6.99E-27 | -0.16011 | 0.014 | 0.083 | 1.04E-22 | M1 | LRTOMT      |
| FKBP11.2    | 7.33E-27 | -0.17953 | 0.043 | 0.131 | 1.09E-22 | M1 | FKBP11      |
| MSN.4       | 7.48E-27 | 0.338317 | 0.423 | 0.366 | 1.12E-22 | M1 | MSN         |
| ST3GAL3.2   | 7.65E-27 | -0.11351 | 0.023 | 0.099 | 1.14E-22 | M1 | ST3GAL3     |
| TMEM169.2   | 7.66E-27 | -0.14115 | 0.006 | 0.068 | 1.14E-22 | M1 | TMEM169     |
| ORC5.3      | 7.77E-27 | -0.18234 | 0.032 | 0.113 | 1.16E-22 | M1 | ORC5        |
| ING5.1      | 7.94E-27 | -0.12693 | 0.042 | 0.131 | 1.19E-22 | M1 | ING5        |
| B3GAT3.2    | 8.10E-27 | -0.18331 | 0.236 | 0.407 | 1.21E-22 | M1 | B3GAT3      |
| FGF9.3      | 8.14E-27 | -0.2043  | 0.002 | 0.06  | 1.22E-22 | M1 | FGF9        |
| HIGD1A.2    | 8.19E-27 | -0.18777 | 0.276 | 0.458 | 1.22E-22 | M1 | HIGD1A      |
| GPR75-ASE.8 | 8.36E-27 | -0.14064 | 0.023 | 0.099 | 1.25E-22 | M1 | GPR75-ASB3  |
| CAP2.1      | 8.57E-27 | -0.16424 | 0.006 | 0.067 | 1.28E-22 | M1 | CAP2        |
| ARHGAP23.8  | 8.71E-27 | -0.15443 | 0.003 | 0.062 | 1.30E-22 | M1 | ARHGAP23    |
| B3GALT1.2   | 8.87E-27 | -0.11044 | 0.002 | 0.06  | 1.33E-22 | M1 | B3GALT1     |
| VPS16.1     | 9.48E-27 | -0.10199 | 0.083 | 0.193 | 1.42E-22 | M1 | VPS16       |
| HID1.1      | 9.58E-27 | -0.14813 | 0.003 | 0.062 | 1.43E-22 | M1 | HID1        |
| HAUS4.4     | 9.89E-27 | 0.32168  | 0.112 | 0.051 | 1.48E-22 | M1 | HAUS4       |
| LGALS1.3    | 1.00E-26 | -0.30871 | 0.67  | 0.711 | 1.50E-22 | M1 | LGALS1      |
| XKR4.2      | 1.02E-26 | -0.16468 | 0.006 | 0.067 | 1.53E-22 | M1 | XKR4        |
| TRIM23.1    | 1.06E-26 | -0.14902 | 0.019 | 0.092 | 1.58E-22 | M1 | TRIM23      |

|             |           |           |        |        |              |                |
|-------------|-----------|-----------|--------|--------|--------------|----------------|
| CPSF3L. 1   | 1. 09E-26 | -0. 11962 | 0. 155 | 0. 298 | 1. 63E-22 M1 | CPSF3L         |
| TOR4A. 3    | 1. 10E-26 | 0. 17512  | 0. 06  | 0. 018 | 1. 65E-22 M1 | TOR4A          |
| LCA5. 1     | 1. 14E-26 | -0. 12554 | 0. 002 | 0. 06  | 1. 70E-22 M1 | LCA5           |
| PAQR3. 2    | 1. 16E-26 | -0. 13414 | 0. 017 | 0. 089 | 1. 73E-22 M1 | PAQR3          |
| CXCL14. 1   | 1. 16E-26 | -0. 20842 | 0. 06  | 0. 158 | 1. 73E-22 M1 | CXCL14         |
| BTBD17. 3   | 1. 26E-26 | -0. 20044 | 0. 003 | 0. 062 | 1. 88E-22 M1 | BTBD17         |
| KCNK6. 2    | 1. 31E-26 | 0. 242528 | 0. 082 | 0. 031 | 1. 95E-22 M1 | KCNK6          |
| CYP3A5. 1   | 1. 31E-26 | -0. 13887 | 0. 007 | 0. 07  | 1. 96E-22 M1 | CYP3A5         |
| BCR. 2      | 1. 32E-26 | -0. 13931 | 0. 009 | 0. 074 | 1. 97E-22 M1 | BCR            |
| STK38L. 3   | 1. 35E-26 | 0. 424235 | 0. 215 | 0. 137 | 2. 02E-22 M1 | STK38L         |
| TMEM38B. 1  | 1. 39E-26 | -0. 16163 | 0. 078 | 0. 184 | 2. 08E-22 M1 | TMEM38B        |
| ALDH1L1. 3  | 1. 42E-26 | -0. 26735 | 0. 01  | 0. 074 | 2. 12E-22 M1 | ALDH1L1        |
| RAB4A. 2    | 1. 54E-26 | -0. 11029 | 0. 203 | 0. 369 | 2. 30E-22 M1 | RAB4A          |
| NPHP1. 2    | 1. 55E-26 | -0. 12356 | 0. 013 | 0. 08  | 2. 31E-22 M1 | NPHP1          |
| SYNCRIP. 3  | 1. 56E-26 | -0. 13672 | 0. 238 | 0. 413 | 2. 32E-22 M1 | SYNCRIP        |
| ATPAF1. 4   | 1. 59E-26 | -0. 11988 | 0. 13  | 0. 262 | 2. 38E-22 M1 | ATPAF1         |
| CTC-459F4   | 1. 61E-26 | -0. 12399 | 0. 01  | 0. 076 | 2. 41E-22 M1 | CTC-459F4. 3   |
| ACO16831. 1 | 1. 63E-26 | 0. 320467 | 0. 125 | 0. 06  | 2. 44E-22 M1 | ACO16831. 7    |
| CPNE5. 2    | 1. 67E-26 | -0. 10952 | 0. 003 | 0. 061 | 2. 49E-22 M1 | CPNE5          |
| GTF2H1. 1   | 1. 77E-26 | -0. 10253 | 0. 085 | 0. 195 | 2. 64E-22 M1 | GTF2H1         |
| RP11-421L   | 1. 77E-26 | -0. 15951 | 0. 02  | 0. 094 | 2. 65E-22 M1 | RP11-421L21. 3 |
| NME5. 2     | 1. 81E-26 | -0. 13466 | 0. 002 | 0. 058 | 2. 71E-22 M1 | NME5           |
| POLR1E. 1   | 1. 82E-26 | -0. 12662 | 0. 04  | 0. 127 | 2. 72E-22 M1 | POLR1E         |
| BLM         | 1. 88E-26 | -0. 12668 | 0. 019 | 0. 092 | 2. 81E-22 M1 | BLM            |
| SKIV2L2. 2  | 1. 89E-26 | -0. 12221 | 0. 07  | 0. 173 | 2. 83E-22 M1 | SKIV2L2        |
| FUBP1. 3    | 1. 97E-26 | -0. 14166 | 0. 121 | 0. 245 | 2. 94E-22 M1 | FUBP1          |
| MKS1        | 2. 03E-26 | -0. 11595 | 0. 026 | 0. 103 | 3. 03E-22 M1 | MKS1           |
| UMPS. 2     | 2. 05E-26 | -0. 13188 | 0. 055 | 0. 149 | 3. 07E-22 M1 | UMPS           |
| RP11-66B2   | 2. 06E-26 | 0. 153097 | 0. 036 | 0. 007 | 3. 08E-22 M1 | RP11-66B24. 2  |
| CHRNA9. 1   | 2. 08E-26 | -0. 13602 | 0. 002 | 0. 058 | 3. 10E-22 M1 | CHRNA9         |
| CDIP1       | 2. 17E-26 | -0. 10179 | 0. 092 | 0. 205 | 3. 24E-22 M1 | CDIP1          |
| SNN. 4      | 2. 18E-26 | -0. 14775 | 0. 123 | 0. 246 | 3. 25E-22 M1 | SNN            |
| AKAP11. 3   | 2. 25E-26 | -0. 12493 | 0. 066 | 0. 167 | 3. 36E-22 M1 | AKAP11         |
| PRC1. 3     | 2. 26E-26 | -0. 21334 | 0. 024 | 0. 098 | 3. 38E-22 M1 | PRC1           |
| DBF4. 2     | 2. 27E-26 | -0. 16509 | 0. 047 | 0. 136 | 3. 39E-22 M1 | DBF4           |
| FRS2. 3     | 2. 29E-26 | -0. 18637 | 0. 041 | 0. 125 | 3. 42E-22 M1 | FRS2           |
| SCFD1. 2    | 2. 29E-26 | -0. 11663 | 0. 14  | 0. 275 | 3. 43E-22 M1 | SCFD1          |
| CTPS1. 1    | 2. 30E-26 | -0. 12596 | 0. 036 | 0. 12  | 3. 44E-22 M1 | CTPS1          |
| GEMIN6. 1   | 2. 37E-26 | -0. 14185 | 0. 075 | 0. 18  | 3. 54E-22 M1 | GEMIN6         |
| ACO11043. 1 | 2. 39E-26 | -0. 13249 | 0. 009 | 0. 073 | 3. 57E-22 M1 | ACO11043. 1    |
| NVL. 2      | 2. 43E-26 | -0. 14136 | 0. 038 | 0. 123 | 3. 63E-22 M1 | NVL            |
| KCTD17. 3   | 2. 47E-26 | -0. 11508 | 0. 056 | 0. 151 | 3. 69E-22 M1 | KCTD17         |
| ARRDC1. 4   | 2. 53E-26 | 0. 396527 | 0. 197 | 0. 122 | 3. 78E-22 M1 | ARRDC1         |
| HOMER2      | 2. 53E-26 | -0. 10361 | 0. 005 | 0. 065 | 3. 78E-22 M1 | HOMER2         |
| ARL1. 2     | 2. 64E-26 | -0. 19184 | 0. 189 | 0. 338 | 3. 94E-22 M1 | ARL1           |
| DENND5A. 2  | 2. 73E-26 | -0. 10909 | 0. 086 | 0. 197 | 4. 08E-22 M1 | DENND5A        |
| RUNX1. 4    | 2. 76E-26 | 0. 42613  | 0. 253 | 0. 178 | 4. 12E-22 M1 | RUNX1          |
| EIF3E. 3    | 2. 78E-26 | 0. 166394 | 0. 641 | 0. 648 | 4. 16E-22 M1 | EIF3E          |
| CDT1. 2     | 2. 90E-26 | -0. 1601  | 0. 008 | 0. 071 | 4. 33E-22 M1 | CDT1           |
| SCRIB. 1    | 2. 90E-26 | -0. 1141  | 0. 026 | 0. 104 | 4. 34E-22 M1 | SCRIB          |
| SAMD1. 2    | 2. 97E-26 | -0. 11837 | 0. 034 | 0. 116 | 4. 44E-22 M1 | SAMD1          |



|           |          |          |       |       |          |    |          |
|-----------|----------|----------|-------|-------|----------|----|----------|
| PCDH8     | 2.99E-26 | -0.13806 | 0.001 | 0.057 | 4.46E-22 | M1 | PCDH8    |
| CDCA3.3   | 3.05E-26 | -0.18307 | 0.004 | 0.062 | 4.56E-22 | M1 | CDCA3    |
| EXOC4.1   | 3.22E-26 | -0.11801 | 0.076 | 0.181 | 4.82E-22 | M1 | EXOC4    |
| MICU2.1   | 3.29E-26 | -0.1109  | 0.127 | 0.256 | 4.91E-22 | M1 | MICU2    |
| LRP4.1    | 3.31E-26 | -0.15271 | 0.007 | 0.069 | 4.95E-22 | M1 | LRP4     |
| PCNP.3    | 3.36E-26 | -0.18004 | 0.368 | 0.571 | 5.01E-22 | M1 | PCNP     |
| UBA6-AS1. | 3.38E-26 | -0.15684 | 0.022 | 0.096 | 5.06E-22 | M1 | UBA6-AS1 |
| PSMC2.2   | 3.46E-26 | -0.18205 | 0.299 | 0.491 | 5.17E-22 | M1 | PSMC2    |
| JADE1.2   | 3.54E-26 | -0.14731 | 0.049 | 0.139 | 5.30E-22 | M1 | JADE1    |
| HCG18.1   | 3.55E-26 | -0.1132  | 0.041 | 0.127 | 5.31E-22 | M1 | HCG18    |
| E4F1.1    | 3.56E-26 | -0.11451 | 0.042 | 0.13  | 5.32E-22 | M1 | E4F1     |
| TOP1MT.1  | 3.73E-26 | -0.12561 | 0.016 | 0.085 | 5.57E-22 | M1 | TOP1MT   |
| NDUFB9.2  | 3.85E-26 | -0.23472 | 0.532 | 0.72  | 5.76E-22 | M1 | NDUFB9   |
| ZNF133.1  | 3.92E-26 | -0.10937 | 0.019 | 0.091 | 5.85E-22 | M1 | ZNF133   |
| ILVBL.1   | 4.12E-26 | -0.12159 | 0.139 | 0.274 | 6.16E-22 | M1 | ILVBL    |
| RGS11.1   | 4.14E-26 | -0.14737 | 0.001 | 0.057 | 6.18E-22 | M1 | RGS11    |
| PSME1.3   | 4.19E-26 | 0.156942 | 0.615 | 0.577 | 6.26E-22 | M1 | PSME1    |
| ANAPC5.2  | 4.22E-26 | -0.11129 | 0.247 | 0.426 | 6.30E-22 | M1 | ANAPC5   |
| TRIP6.4   | 4.26E-26 | -0.17565 | 0.139 | 0.271 | 6.36E-22 | M1 | TRIP6    |
| TMEM106A. | 4.27E-26 | 0.279647 | 0.115 | 0.053 | 6.39E-22 | M1 | TMEM106A |
| SCAP.2    | 4.32E-26 | -0.11587 | 0.071 | 0.174 | 6.45E-22 | M1 | SCAP     |
| WDR25.1   | 4.35E-26 | -0.1003  | 0.031 | 0.111 | 6.50E-22 | M1 | WDR25    |
| PCDH12    | 4.37E-26 | 0.153663 | 0.043 | 0.01  | 6.53E-22 | M1 | PCDH12   |
| EYA2.1    | 4.43E-26 | -0.10868 | 0.018 | 0.09  | 6.62E-22 | M1 | EYA2     |
| ABLIM1.3  | 4.47E-26 | -0.13213 | 0.004 | 0.063 | 6.68E-22 | M1 | ABLIM1   |
| RIOK3.2   | 4.60E-26 | -0.10923 | 0.097 | 0.212 | 6.87E-22 | M1 | RIOK3    |
| RHPN1.1   | 5.12E-26 | -0.12184 | 0.002 | 0.059 | 7.65E-22 | M1 | RHPN1    |
| SEPT6.4   | 5.23E-26 | 0.401687 | 0.232 | 0.153 | 7.82E-22 | M1 | 6-Sep    |
| POM121.1  | 5.39E-26 | -0.10777 | 0.071 | 0.174 | 8.05E-22 | M1 | POM121   |
| LEMD1.1   | 5.45E-26 | -0.16267 | 0.001 | 0.055 | 8.14E-22 | M1 | LEMD1    |
| RASSF3.3  | 5.46E-26 | 0.239473 | 0.084 | 0.033 | 8.16E-22 | M1 | RASSF3   |
| ARL14EP.1 | 5.47E-26 | -0.12667 | 0.089 | 0.199 | 8.17E-22 | M1 | ARL14EP  |
| LAMTOR1.2 | 5.63E-26 | 0.141149 | 0.662 | 0.653 | 8.41E-22 | M1 | LAMTOR1  |
| ZNF768.2  | 5.71E-26 | -0.10752 | 0.029 | 0.108 | 8.53E-22 | M1 | ZNF768   |
| VPS45.1   | 5.73E-26 | -0.11931 | 0.08  | 0.186 | 8.57E-22 | M1 | VPS45    |
| PMEPA1.4  | 5.75E-26 | -0.13141 | 0.104 | 0.221 | 8.59E-22 | M1 | PMEPA1   |
| HAP1.1    | 5.85E-26 | -0.14137 | 0.013 | 0.079 | 8.74E-22 | M1 | HAP1     |
| RNF115.2  | 5.87E-26 | -0.10588 | 0.133 | 0.265 | 8.77E-22 | M1 | RNF115   |
| IRGQ.2    | 5.87E-26 | -0.12487 | 0.024 | 0.1   | 8.77E-22 | M1 | IRGQ     |
| CLHC1.1   | 5.99E-26 | -0.13666 | 0.013 | 0.079 | 8.95E-22 | M1 | CLHC1    |
| LAMTOR3.1 | 6.02E-26 | -0.10418 | 0.146 | 0.283 | 9.00E-22 | M1 | LAMTOR3  |
| C1QTNF4.2 | 6.05E-26 | -0.18038 | 0.006 | 0.066 | 9.05E-22 | M1 | C1QTNF4  |
| ERBB2     | 6.12E-26 | -0.13733 | 0.007 | 0.069 | 9.14E-22 | M1 | ERBB2    |
| GTPBP3.1  | 6.13E-26 | -0.13056 | 0.041 | 0.127 | 9.16E-22 | M1 | GTPBP3   |
| SDC1.1    | 6.14E-26 | -0.11305 | 0.002 | 0.057 | 9.18E-22 | M1 | SDC1     |
| SEMA3E.1  | 6.36E-26 | -0.12401 | 0.004 | 0.061 | 9.50E-22 | M1 | SEMA3E   |
| ARL11.3   | 6.40E-26 | 0.219268 | 0.08  | 0.031 | 9.57E-22 | M1 | ARL11    |
| ZSCAN32.1 | 6.82E-26 | -0.12843 | 0.012 | 0.078 | 1.02E-21 | M1 | ZSCAN32  |
| OTP       | 6.90E-26 | -0.10733 | 0     | 0.054 | 1.03E-21 | M1 | OTP      |
| C3orf17.1 | 7.03E-26 | -0.12657 | 0.062 | 0.159 | 1.05E-21 | M1 | C3orf17  |
| MPP5.2    | 7.08E-26 | -0.13453 | 0.03  | 0.109 | 1.06E-21 | M1 | MPP5     |

|            |          |          |       |       |          |    |               |
|------------|----------|----------|-------|-------|----------|----|---------------|
| ZNF585A.1  | 7.13E-26 | -0.12636 | 0.008 | 0.07  | 1.07E-21 | M1 | ZNF585A       |
| PRPF40A.2  | 7.54E-26 | -0.15826 | 0.292 | 0.482 | 1.13E-21 | M1 | PRPF40A       |
| RRAS       | 7.63E-26 | -0.10953 | 0.037 | 0.12  | 1.14E-21 | M1 | RRAS          |
| GBE1.2     | 7.67E-26 | -0.20546 | 0.095 | 0.203 | 1.15E-21 | M1 | GBE1          |
| IGFBP6.2   | 7.88E-26 | -0.21961 | 0.012 | 0.077 | 1.18E-21 | M1 | IGFBP6        |
| GRIA1      | 7.92E-26 | -0.10586 | 0.002 | 0.057 | 1.18E-21 | M1 | GRIA1         |
| P2RY1      | 8.25E-26 | -0.10079 | 0.001 | 0.056 | 1.23E-21 | M1 | P2RY1         |
| GAS8.1     | 8.25E-26 | -0.13803 | 0.013 | 0.079 | 1.23E-21 | M1 | GAS8          |
| POLR1C.4   | 8.42E-26 | -0.12267 | 0.047 | 0.136 | 1.26E-21 | M1 | POLR1C        |
| RP11-798M  | 8.61E-26 | -0.13222 | 0.066 | 0.165 | 1.29E-21 | M1 | RP11-798M19.6 |
| SMO.2      | 8.78E-26 | -0.10901 | 0.004 | 0.061 | 1.31E-21 | M1 | SMO           |
| SYNGAP1.2  | 8.88E-26 | -0.13196 | 0.005 | 0.064 | 1.33E-21 | M1 | SYNGAP1       |
| RP11-486G  | 9.18E-26 | -0.14863 | 0.001 | 0.055 | 1.37E-21 | M1 | RP11-486G15.2 |
| CHMP1A.2   | 9.50E-26 | -0.10837 | 0.156 | 0.297 | 1.42E-21 | M1 | CHMP1A        |
| TSHZ2.2    | 9.85E-26 | -0.22377 | 0.003 | 0.059 | 1.47E-21 | M1 | TSHZ2         |
| C5orf56.3  | 9.92E-26 | -0.14371 | 0.041 | 0.125 | 1.48E-21 | M1 | C5orf56       |
| COL8A2.1   | 9.92E-26 | 0.188038 | 0.055 | 0.017 | 1.48E-21 | M1 | COL8A2        |
| CTSF.3     | 1.05E-25 | -0.12327 | 0.153 | 0.293 | 1.56E-21 | M1 | CTSF          |
| ST3GAL1.4  | 1.05E-25 | 0.338119 | 0.163 | 0.09  | 1.58E-21 | M1 | ST3GAL1       |
| IDH3B.1    | 1.12E-25 | -0.14149 | 0.271 | 0.454 | 1.67E-21 | M1 | IDH3B         |
| SHC3       | 1.14E-25 | -0.10018 | 0.002 | 0.058 | 1.71E-21 | M1 | SHC3          |
| GFPT2.1    | 1.22E-25 | -0.15779 | 0.004 | 0.062 | 1.83E-21 | M1 | GFPT2         |
| SLC16A9.2  | 1.23E-25 | -0.11576 | 0.002 | 0.057 | 1.84E-21 | M1 | SLC16A9       |
| SLC45A1.1  | 1.24E-25 | -0.12689 | 0.003 | 0.06  | 1.85E-21 | M1 | SLC45A1       |
| GTSE1.2    | 1.25E-25 | -0.16349 | 0.007 | 0.068 | 1.87E-21 | M1 | GTSE1         |
| PHF21A.1   | 1.30E-25 | -0.10218 | 0.041 | 0.127 | 1.94E-21 | M1 | PHF21A        |
| FBLN7      | 1.31E-25 | -0.10733 | 0.002 | 0.057 | 1.96E-21 | M1 | FBLN7         |
| TMA16.1    | 1.36E-25 | -0.11324 | 0.104 | 0.22  | 2.03E-21 | M1 | TMA16         |
| DECR2      | 1.41E-25 | -0.15559 | 0.029 | 0.105 | 2.11E-21 | M1 | DECR2         |
| C21orf58.1 | 1.43E-25 | -0.12705 | 0.005 | 0.063 | 2.13E-21 | M1 | C21orf58      |
| MOXD1.2    | 1.43E-25 | -0.12774 | 0.005 | 0.063 | 2.14E-21 | M1 | MOXD1         |
| KRI1.1     | 1.76E-25 | -0.12386 | 0.036 | 0.117 | 2.63E-21 | M1 | KRI1          |
| SH2B2.3    | 1.78E-25 | -0.12377 | 0.039 | 0.122 | 2.65E-21 | M1 | SH2B2         |
| KAT6B.2    | 1.78E-25 | -0.12266 | 0.048 | 0.137 | 2.67E-21 | M1 | KAT6B         |
| CCNA2.3    | 1.79E-25 | -0.18926 | 0.007 | 0.066 | 2.68E-21 | M1 | CCNA2         |
| GOLGA8B    | 1.82E-25 | -0.1241  | 0.003 | 0.059 | 2.73E-21 | M1 | GOLGA8B       |
| AATF.1     | 1.86E-25 | -0.10479 | 0.169 | 0.315 | 2.78E-21 | M1 | AATF          |
| RASGRP4.1  | 1.89E-25 | 0.177208 | 0.05  | 0.014 | 2.82E-21 | M1 | RASGRP4       |
| METTL6     | 1.95E-25 | -0.11816 | 0.036 | 0.118 | 2.91E-21 | M1 | METTL6        |
| ELK1.1     | 1.96E-25 | -0.10898 | 0.034 | 0.114 | 2.93E-21 | M1 | ELK1          |
| MGP.3      | 2.02E-25 | -0.77528 | 0.039 | 0.117 | 3.01E-21 | M1 | MGP           |
| UBA6.1     | 2.03E-25 | -0.12694 | 0.1   | 0.214 | 3.04E-21 | M1 | UBA6          |
| SPC24.4    | 2.07E-25 | -0.1616  | 0.003 | 0.058 | 3.09E-21 | M1 | SPC24         |
| CTDNEP1.3  | 2.08E-25 | -0.13145 | 0.19  | 0.338 | 3.11E-21 | M1 | CTDNEP1       |
| NOM1.2     | 2.14E-25 | -0.11698 | 0.044 | 0.13  | 3.19E-21 | M1 | NOM1          |
| APRT.2     | 2.16E-25 | 0.17919  | 0.561 | 0.525 | 3.23E-21 | M1 | APRT          |
| LINC00909  | 2.22E-25 | -0.10958 | 0.041 | 0.126 | 3.32E-21 | M1 | LINC00909     |
| BBX.1      | 2.22E-25 | -0.14481 | 0.259 | 0.436 | 3.32E-21 | M1 | BBX           |
| AURKB.3    | 2.26E-25 | -0.20931 | 0.003 | 0.058 | 3.38E-21 | M1 | AURKB         |
| ZNF324.2   | 2.35E-25 | -0.12477 | 0.022 | 0.094 | 3.51E-21 | M1 | ZNF324        |
| MKL2.3     | 2.37E-25 | -0.1193  | 0.019 | 0.089 | 3.55E-21 | M1 | MKL2          |

|             |           |           |        |        |           |    |                |
|-------------|-----------|-----------|--------|--------|-----------|----|----------------|
| LRPPRC. 2   | 2. 48E-25 | -0. 11946 | 0. 08  | 0. 185 | 3. 70E-21 | M1 | LRPPRC         |
| SORBS2. 2   | 2. 51E-25 | -0. 18905 | 0. 004 | 0. 06  | 3. 75E-21 | M1 | SORBS2         |
| ZNF286A. 1  | 2. 59E-25 | -0. 14001 | 0. 008 | 0. 069 | 3. 87E-21 | M1 | ZNF286A        |
| WDR41. 1    | 2. 61E-25 | -0. 10966 | 0. 122 | 0. 246 | 3. 91E-21 | M1 | WDR41          |
| TTL4. 1     | 2. 65E-25 | -0. 1392  | 0. 015 | 0. 082 | 3. 96E-21 | M1 | TTL4           |
| ST3GAL2. 1  | 2. 68E-25 | -0. 10341 | 0. 033 | 0. 113 | 4. 01E-21 | M1 | ST3GAL2        |
| NCS1. 2     | 2. 78E-25 | -0. 12753 | 0. 009 | 0. 071 | 4. 15E-21 | M1 | NCS1           |
| RNF182. 2   | 2. 83E-25 | -0. 13451 | 0. 003 | 0. 058 | 4. 23E-21 | M1 | RNF182         |
| IL17RB. 2   | 2. 88E-25 | -0. 1735  | 0. 001 | 0. 055 | 4. 31E-21 | M1 | IL17RB         |
| NIP7. 3     | 2. 91E-25 | -0. 10233 | 0. 084 | 0. 19  | 4. 35E-21 | M1 | NIP7           |
| HSD17B14. 2 | 2. 93E-25 | 0. 330972 | 0. 151 | 0. 08  | 4. 38E-21 | M1 | HSD17B14       |
| AVPI1. 4    | 2. 95E-25 | 0. 35641  | 0. 151 | 0. 082 | 4. 41E-21 | M1 | AVPI1          |
| GDPD1. 2    | 2. 97E-25 | -0. 10963 | 0. 013 | 0. 078 | 4. 44E-21 | M1 | GDPD1          |
| PEX11B. 2   | 3. 00E-25 | -0. 12747 | 0. 056 | 0. 148 | 4. 49E-21 | M1 | PEX11B         |
| ZEB2-AS1. 3 | 3. 05E-25 | 0. 286619 | 0. 072 | 0. 026 | 4. 56E-21 | M1 | ZEB2-AS1       |
| JOSD2. 2    | 3. 06E-25 | -0. 14136 | 0. 205 | 0. 361 | 4. 58E-21 | M1 | JOSD2          |
| MOB3B. 3    | 3. 11E-25 | -0. 16853 | 0. 03  | 0. 107 | 4. 64E-21 | M1 | MOB3B          |
| NOA1. 2     | 3. 21E-25 | -0. 13114 | 0. 064 | 0. 159 | 4. 80E-21 | M1 | NOA1           |
| MCM6        | 3. 25E-25 | -0. 15012 | 0. 029 | 0. 105 | 4. 85E-21 | M1 | MCM6           |
| ZFYVE21. 3  | 3. 26E-25 | -0. 14626 | 0. 153 | 0. 289 | 4. 87E-21 | M1 | ZFYVE21        |
| RASSF8. 1   | 3. 30E-25 | -0. 10574 | 0. 025 | 0. 1   | 4. 93E-21 | M1 | RASSF8         |
| GAB1. 2     | 3. 32E-25 | -0. 10363 | 0. 035 | 0. 115 | 4. 95E-21 | M1 | GAB1           |
| AGK. 1      | 3. 32E-25 | -0. 13414 | 0. 034 | 0. 113 | 4. 95E-21 | M1 | AGK            |
| STOML1. 2   | 3. 38E-25 | -0. 14196 | 0. 035 | 0. 114 | 5. 05E-21 | M1 | STOML1         |
| MED8. 1     | 3. 45E-25 | -0. 14223 | 0. 121 | 0. 245 | 5. 15E-21 | M1 | MED8           |
| HAS2. 1     | 3. 46E-25 | -0. 13891 | 0. 005 | 0. 062 | 5. 17E-21 | M1 | HAS2           |
| HS3ST3B1. 3 | 3. 49E-25 | 0. 201379 | 0. 083 | 0. 033 | 5. 21E-21 | M1 | HS3ST3B1       |
| DPH2. 2     | 3. 53E-25 | -0. 12345 | 0. 045 | 0. 13  | 5. 28E-21 | M1 | DPH2           |
| ERCC1. 4    | 3. 54E-25 | 0. 317829 | 0. 497 | 0. 467 | 5. 30E-21 | M1 | ERCC1          |
| EFHD1. 1    | 3. 55E-25 | -0. 29164 | 0. 008 | 0. 068 | 5. 30E-21 | M1 | EFHD1          |
| PGBD1. 2    | 3. 58E-25 | -0. 10368 | 0. 015 | 0. 082 | 5. 35E-21 | M1 | PGBD1          |
| G3BP1. 1    | 3. 71E-25 | -0. 11558 | 0. 186 | 0. 339 | 5. 55E-21 | M1 | G3BP1          |
| SLC25A13    | 3. 71E-25 | -0. 13789 | 0. 052 | 0. 142 | 5. 55E-21 | M1 | SLC25A13       |
| SDF2. 1     | 3. 78E-25 | -0. 10237 | 0. 218 | 0. 384 | 5. 65E-21 | M1 | SDF2           |
| PPP2R3A. 1  | 3. 78E-25 | -0. 11482 | 0. 009 | 0. 071 | 5. 65E-21 | M1 | PPP2R3A        |
| PIGZ. 2     | 3. 80E-25 | -0. 10969 | 0. 01  | 0. 073 | 5. 67E-21 | M1 | PIGZ           |
| COG8. 1     | 3. 84E-25 | -0. 11592 | 0. 029 | 0. 105 | 5. 73E-21 | M1 | COG8           |
| KLF10. 2    | 3. 87E-25 | 0. 371235 | 0. 301 | 0. 219 | 5. 78E-21 | M1 | KLF10          |
| RP11-362F   | 4. 11E-25 | 0. 174026 | 0. 042 | 0. 01  | 6. 14E-21 | M1 | RP11-362F19. 1 |
| DNAJC6. 1   | 4. 21E-25 | -0. 1607  | 0. 005 | 0. 062 | 6. 30E-21 | M1 | DNAJC6         |
| CCDC74A. 2  | 4. 22E-25 | -0. 13804 | 0. 003 | 0. 058 | 6. 30E-21 | M1 | CCDC74A        |
| HECTD4. 1   | 4. 26E-25 | -0. 12004 | 0. 028 | 0. 103 | 6. 36E-21 | M1 | HECTD4         |
| PAK7. 3     | 4. 31E-25 | -0. 17496 | 0. 002 | 0. 055 | 6. 44E-21 | M1 | PAK7           |
| CCNB1IP1. 4 | 4. 46E-25 | -0. 10254 | 0. 079 | 0. 182 | 6. 66E-21 | M1 | CCNB1IP1       |
| F13A1. 1    | 4. 48E-25 | 0. 13675  | 0. 237 | 0. 143 | 6. 69E-21 | M1 | F13A1          |
| WDR45B. 2   | 4. 53E-25 | -0. 13696 | 0. 255 | 0. 433 | 6. 77E-21 | M1 | WDR45B         |
| CCDC92. 2   | 4. 60E-25 | -0. 13074 | 0. 035 | 0. 115 | 6. 87E-21 | M1 | CCDC92         |
| FAM96B. 3   | 4. 68E-25 | -0. 20886 | 0. 492 | 0. 691 | 7. 00E-21 | M1 | FAM96B         |
| TF. 4       | 4. 82E-25 | -0. 39909 | 0. 017 | 0. 084 | 7. 21E-21 | M1 | TF             |
| ZNF558. 1   | 4. 93E-25 | -0. 12448 | 0. 019 | 0. 089 | 7. 36E-21 | M1 | ZNF558         |
| HSPB6. 3    | 5. 10E-25 | -0. 14542 | 0. 009 | 0. 07  | 7. 62E-21 | M1 | HSPB6          |

|             |           |           |        |        |              |                |
|-------------|-----------|-----------|--------|--------|--------------|----------------|
| PIP4K2C. 2  | 5. 12E-25 | -0. 18841 | 0. 041 | 0. 123 | 7. 65E-21 M1 | PIP4K2C        |
| BNIP1. 3    | 5. 15E-25 | -0. 16529 | 0. 048 | 0. 134 | 7. 69E-21 M1 | BNIP1          |
| ARPP21. 2   | 5. 20E-25 | -0. 1708  | 0. 004 | 0. 059 | 7. 77E-21 M1 | ARPP21         |
| TMEM185A. 5 | 5. 21E-25 | -0. 1046  | 0. 021 | 0. 092 | 7. 79E-21 M1 | TMEM185A       |
| WDR47. 1    | 5. 42E-25 | -0. 13201 | 0. 037 | 0. 117 | 8. 10E-21 M1 | WDR47          |
| MCUR1. 3    | 5. 44E-25 | -0. 10484 | 0. 148 | 0. 285 | 8. 13E-21 M1 | MCUR1          |
| PRMT5. 3    | 5. 74E-25 | -0. 17237 | 0. 07  | 0. 167 | 8. 57E-21 M1 | PRMT5          |
| ZCCHC6. 4   | 5. 85E-25 | 0. 378452 | 0. 197 | 0. 123 | 8. 74E-21 M1 | ZCCHC6         |
| CAB39L. 2   | 5. 86E-25 | -0. 12587 | 0. 017 | 0. 085 | 8. 75E-21 M1 | CAB39L         |
| FRMD3. 2    | 5. 88E-25 | -0. 17793 | 0. 007 | 0. 065 | 8. 79E-21 M1 | FRMD3          |
| GLMN. 1     | 5. 92E-25 | -0. 14349 | 0. 028 | 0. 103 | 8. 84E-21 M1 | GLMN           |
| EIF5A2. 1   | 5. 94E-25 | -0. 12123 | 0. 008 | 0. 067 | 8. 87E-21 M1 | EIF5A2         |
| PDZD4. 2    | 6. 08E-25 | -0. 14558 | 0. 002 | 0. 056 | 9. 08E-21 M1 | PDZD4          |
| IFT80. 1    | 6. 27E-25 | -0. 1012  | 0. 015 | 0. 082 | 9. 38E-21 M1 | IFT80          |
| RPUSD2. 1   | 6. 33E-25 | -0. 11001 | 0. 014 | 0. 079 | 9. 46E-21 M1 | RPUSD2         |
| YAF2. 2     | 6. 44E-25 | -0. 10596 | 0. 213 | 0. 373 | 9. 62E-21 M1 | YAF2           |
| COX7A2. 1   | 6. 45E-25 | -0. 18504 | 0. 725 | 0. 827 | 9. 63E-21 M1 | COX7A2         |
| SGIP1. 1    | 6. 53E-25 | -0. 18981 | 0. 004 | 0. 059 | 9. 76E-21 M1 | SGIP1          |
| MYNN        | 6. 69E-25 | -0. 11886 | 0. 036 | 0. 116 | 1. 00E-20 M1 | MYNN           |
| ZFYVE9      | 6. 85E-25 | -0. 12079 | 0. 003 | 0. 057 | 1. 02E-20 M1 | ZFYVE9         |
| KDEL3       | 6. 87E-25 | -0. 11868 | 0. 009 | 0. 07  | 1. 03E-20 M1 | KDEL3          |
| NUDCD1. 2   | 7. 17E-25 | -0. 11212 | 0. 035 | 0. 114 | 1. 07E-20 M1 | NUDCD1         |
| VAV3. 1     | 7. 47E-25 | -0. 10754 | 0. 012 | 0. 076 | 1. 12E-20 M1 | VAV3           |
| MID1. 1     | 7. 83E-25 | -0. 13797 | 0. 004 | 0. 059 | 1. 17E-20 M1 | MID1           |
| CSPP1. 2    | 7. 84E-25 | -0. 12017 | 0. 038 | 0. 119 | 1. 17E-20 M1 | CSPP1          |
| COQ5. 2     | 8. 16E-25 | -0. 10494 | 0. 101 | 0. 215 | 1. 22E-20 M1 | COQ5           |
| GINS1. 1    | 8. 37E-25 | -0. 11496 | 0. 006 | 0. 064 | 1. 25E-20 M1 | GINS1          |
| CHD3. 2     | 8. 60E-25 | -0. 15887 | 0. 045 | 0. 129 | 1. 28E-20 M1 | CHD3           |
| TMEM161B    | 8. 94E-25 | -0. 1121  | 0. 013 | 0. 077 | 1. 34E-20 M1 | TMEM161B       |
| PRPF4B. 2   | 9. 06E-25 | -0. 11806 | 0. 157 | 0. 297 | 1. 35E-20 M1 | PRPF4B         |
| NARS2       | 9. 11E-25 | -0. 10575 | 0. 044 | 0. 129 | 1. 36E-20 M1 | NARS2          |
| PLSCR4. 1   | 9. 21E-25 | -0. 12923 | 0. 002 | 0. 056 | 1. 38E-20 M1 | PLSCR4         |
| RP11-24F1   | 9. 42E-25 | 0. 123579 | 0. 041 | 0. 01  | 1. 41E-20 M1 | RP11-24F11. 2  |
| TIGD1. 1    | 9. 50E-25 | -0. 1213  | 0. 012 | 0. 075 | 1. 42E-20 M1 | TIGD1          |
| RABL2A. 1   | 9. 53E-25 | -0. 14583 | 0. 019 | 0. 088 | 1. 42E-20 M1 | RABL2A         |
| FN3KRP. 1   | 9. 56E-25 | -0. 12069 | 0. 12  | 0. 241 | 1. 43E-20 M1 | FN3KRP         |
| CYSLTR1. 3  | 1. 04E-24 | 0. 175979 | 0. 058 | 0. 018 | 1. 55E-20 M1 | CYSLTR1        |
| ZNF627. 1   | 1. 06E-24 | -0. 10583 | 0. 02  | 0. 089 | 1. 59E-20 M1 | ZNF627         |
| PSMD11. 2   | 1. 08E-24 | -0. 13798 | 0. 259 | 0. 437 | 1. 62E-20 M1 | PSMD11         |
| SGOL2. 2    | 1. 08E-24 | -0. 14606 | 0. 028 | 0. 102 | 1. 62E-20 M1 | SGOL2          |
| LOXL3. 1    | 1. 09E-24 | 0. 300544 | 0. 125 | 0. 063 | 1. 62E-20 M1 | LOXL3          |
| EHD4. 4     | 1. 09E-24 | 0. 322051 | 0. 147 | 0. 08  | 1. 63E-20 M1 | EHD4           |
| CAPZA1. 4   | 1. 14E-24 | 0. 311415 | 0. 422 | 0. 386 | 1. 70E-20 M1 | CAPZA1         |
| GTF2H2C. 1  | 1. 16E-24 | -0. 10304 | 0. 025 | 0. 099 | 1. 74E-20 M1 | GTF2H2C        |
| ANKRD13B. 1 | 1. 18E-24 | -0. 12789 | 0. 004 | 0. 059 | 1. 76E-20 M1 | ANKRD13B       |
| NME4. 2     | 1. 22E-24 | -0. 13899 | 0. 243 | 0. 41  | 1. 83E-20 M1 | NME4           |
| CEP85L. 1   | 1. 23E-24 | -0. 10349 | 0. 043 | 0. 127 | 1. 84E-20 M1 | CEP85L         |
| CASP6. 3    | 1. 24E-24 | -0. 11212 | 0. 078 | 0. 18  | 1. 85E-20 M1 | CASP6          |
| RP11-783K   | 1. 25E-24 | -0. 17333 | 0. 003 | 0. 058 | 1. 86E-20 M1 | RP11-783K16. 5 |
| JMJD6. 3    | 1. 25E-24 | 0. 424253 | 0. 335 | 0. 272 | 1. 87E-20 M1 | JMJD6          |
| ZNF74. 1    | 1. 27E-24 | -0. 12003 | 0. 008 | 0. 068 | 1. 90E-20 M1 | ZNF74          |

|            |           |           |        |        |              |          |
|------------|-----------|-----------|--------|--------|--------------|----------|
| ITGAL. 1   | 1. 28E-24 | 0. 15822  | 0. 057 | 0. 018 | 1. 92E-20 M1 | ITGAL    |
| GBP2. 3    | 1. 30E-24 | 0. 24259  | 0. 283 | 0. 193 | 1. 95E-20 M1 | GBP2     |
| PUS7L. 1   | 1. 38E-24 | -0. 10374 | 0. 077 | 0. 179 | 2. 06E-20 M1 | PUS7L    |
| PKP4. 3    | 1. 41E-24 | -0. 12685 | 0. 006 | 0. 064 | 2. 11E-20 M1 | PKP4     |
| SNUPN. 2   | 1. 46E-24 | -0. 10655 | 0. 077 | 0. 179 | 2. 18E-20 M1 | SNUPN    |
| KCTD15     | 1. 52E-24 | -0. 12478 | 0. 002 | 0. 054 | 2. 28E-20 M1 | KCTD15   |
| YAP1. 1    | 1. 52E-24 | -0. 10334 | 0      | 0. 051 | 2. 28E-20 M1 | YAP1     |
| GPATCH1. 1 | 1. 53E-24 | -0. 14138 | 0. 018 | 0. 086 | 2. 29E-20 M1 | GPATCH1  |
| ANP32E. 2  | 1. 56E-24 | -0. 13518 | 0. 156 | 0. 29  | 2. 33E-20 M1 | ANP32E   |
| GTF3C6. 1  | 1. 58E-24 | -0. 18701 | 0. 35  | 0. 547 | 2. 36E-20 M1 | GTF3C6   |
| TROAP. 3   | 1. 63E-24 | -0. 16039 | 0. 002 | 0. 055 | 2. 43E-20 M1 | TROAP    |
| ARL13B. 4  | 1. 64E-24 | -0. 12914 | 0. 064 | 0. 158 | 2. 45E-20 M1 | ARL13B   |
| PINK1. 3   | 1. 64E-24 | -0. 10609 | 0. 11  | 0. 227 | 2. 45E-20 M1 | PINK1    |
| SNHG7. 1   | 1. 73E-24 | -0. 11225 | 0. 213 | 0. 373 | 2. 59E-20 M1 | SNHG7    |
| FTH1. 4    | 1. 74E-24 | -0. 11353 | 0. 97  | 0. 925 | 2. 60E-20 M1 | FTH1     |
| RNF5. 1    | 1. 74E-24 | -0. 14051 | 0. 25  | 0. 418 | 2. 60E-20 M1 | RNF5     |
| CAPN10. 2  | 1. 79E-24 | -0. 1234  | 0. 026 | 0. 099 | 2. 67E-20 M1 | CAPN10   |
| MARCH3. 2  | 1. 82E-24 | 0. 36495  | 0. 163 | 0. 093 | 2. 71E-20 M1 | 3-Mar    |
| CA14. 3    | 1. 87E-24 | -0. 18931 | 0. 005 | 0. 06  | 2. 79E-20 M1 | CA14     |
| NDUFS6. 2  | 1. 88E-24 | -0. 23618 | 0. 487 | 0. 656 | 2. 80E-20 M1 | NDUFS6   |
| N4BP2. 2   | 1. 88E-24 | -0. 11533 | 0. 046 | 0. 131 | 2. 80E-20 M1 | N4BP2    |
| ETFDH. 1   | 1. 88E-24 | -0. 14295 | 0. 05  | 0. 136 | 2. 81E-20 M1 | ETFDH    |
| PLK1. 2    | 1. 90E-24 | -0. 19241 | 0. 007 | 0. 064 | 2. 84E-20 M1 | PLK1     |
| SEPHS1. 2  | 1. 91E-24 | -0. 10372 | 0. 043 | 0. 127 | 2. 86E-20 M1 | SEPHS1   |
| TM2D1. 1   | 2. 01E-24 | -0. 10442 | 0. 24  | 0. 416 | 3. 01E-20 M1 | TM2D1    |
| DNAJC24. 2 | 2. 04E-24 | -0. 11494 | 0. 038 | 0. 118 | 3. 04E-20 M1 | DNAJC24  |
| AKAP8. 1   | 2. 09E-24 | -0. 12227 | 0. 059 | 0. 15  | 3. 12E-20 M1 | AKAP8    |
| ZNF454. 2  | 2. 11E-24 | -0. 1143  | 0. 003 | 0. 056 | 3. 15E-20 M1 | ZNF454   |
| KCNJ10. 2  | 2. 15E-24 | -0. 19367 | 0. 005 | 0. 061 | 3. 22E-20 M1 | KCNJ10   |
| FBXL3. 1   | 2. 16E-24 | -0. 1089  | 0. 088 | 0. 194 | 3. 22E-20 M1 | FBXL3    |
| PRDM4. 2   | 2. 32E-24 | -0. 10487 | 0. 025 | 0. 098 | 3. 47E-20 M1 | PRDM4    |
| SNRPA. 1   | 2. 34E-24 | -0. 10804 | 0. 144 | 0. 274 | 3. 50E-20 M1 | SNRPA    |
| PSMC6. 2   | 2. 38E-24 | -0. 13883 | 0. 245 | 0. 416 | 3. 56E-20 M1 | PSMC6    |
| TMEM246. 2 | 2. 51E-24 | -0. 16815 | 0. 003 | 0. 057 | 3. 76E-20 M1 | TMEM246  |
| PEA15. 2   | 2. 62E-24 | -0. 18684 | 0. 297 | 0. 472 | 3. 91E-20 M1 | PEA15    |
| ZBTB10     | 2. 66E-24 | -0. 11716 | 0. 028 | 0. 102 | 3. 97E-20 M1 | ZBTB10   |
| GPR19. 1   | 2. 72E-24 | -0. 19483 | 0. 002 | 0. 054 | 4. 06E-20 M1 | GPR19    |
| TXNL4B. 1  | 2. 75E-24 | -0. 14032 | 0. 032 | 0. 108 | 4. 11E-20 M1 | TXNL4B   |
| ATAD2. 2   | 2. 93E-24 | -0. 12585 | 0. 019 | 0. 087 | 4. 37E-20 M1 | ATAD2    |
| PLCE1. 2   | 2. 93E-24 | -0. 10601 | 0. 013 | 0. 075 | 4. 38E-20 M1 | PLCE1    |
| SUMO2. 2   | 2. 97E-24 | -0. 1622  | 0. 751 | 0. 835 | 4. 44E-20 M1 | SUMO2    |
| SLC44A2. 2 | 2. 97E-24 | -0. 10297 | 0. 106 | 0. 222 | 4. 44E-20 M1 | SLC44A2  |
| B4GALNT4   | 3. 02E-24 | -0. 12615 | 0. 002 | 0. 054 | 4. 51E-20 M1 | B4GALNT4 |
| FOXRED1    | 3. 15E-24 | -0. 14183 | 0. 04  | 0. 12  | 4. 71E-20 M1 | FOXRED1  |
| YLPM1. 2   | 3. 24E-24 | -0. 10656 | 0. 045 | 0. 129 | 4. 85E-20 M1 | YLPM1    |
| RCOR2. 2   | 3. 32E-24 | -0. 15121 | 0. 002 | 0. 055 | 4. 96E-20 M1 | RCOR2    |
| WWOX. 1    | 3. 38E-24 | -0. 11075 | 0. 034 | 0. 111 | 5. 05E-20 M1 | WWOX     |
| FERMT1. 2  | 3. 39E-24 | -0. 17415 | 0. 004 | 0. 059 | 5. 07E-20 M1 | FERMT1   |
| SF3B3. 1   | 3. 50E-24 | -0. 12885 | 0. 098 | 0. 208 | 5. 23E-20 M1 | SF3B3    |
| PINX1      | 3. 65E-24 | -0. 13419 | 0. 035 | 0. 112 | 5. 46E-20 M1 | PINX1    |
| GLI4. 2    | 3. 72E-24 | -0. 11399 | 0. 043 | 0. 125 | 5. 56E-20 M1 | GLI4     |

|            |    |        |          |       |       |          |    |          |
|------------|----|--------|----------|-------|-------|----------|----|----------|
| FAM118B.2  | 3. | 85E-24 | -0.11506 | 0.067 | 0.162 | 5.76E-20 | M1 | FAM118B  |
| ZMIZ2.2    | 4. | 02E-24 | -0.1073  | 0.035 | 0.112 | 6.01E-20 | M1 | ZMIZ2    |
| CASKIN2.1  | 4. | 05E-24 | -0.12026 | 0.002 | 0.053 | 6.06E-20 | M1 | CASKIN2  |
| ITGA9      | 4. | 07E-24 | 0.15297  | 0.04  | 0.01  | 6.09E-20 | M1 | ITGA9    |
| ZNF853.2   | 4. | 14E-24 | -0.10197 | 0.003 | 0.057 | 6.19E-20 | M1 | ZNF853   |
| YBX1.2     | 4. | 15E-24 | -0.13544 | 0.736 | 0.769 | 6.20E-20 | M1 | YBX1     |
| SLMAP.1    | 4. | 18E-24 | -0.10851 | 0.053 | 0.142 | 6.24E-20 | M1 | SLMAP    |
| PPFIA2     | 4. | 41E-24 | -0.17339 | 0.002 | 0.054 | 6.59E-20 | M1 | PPFIA2   |
| PIFO.2     | 4. | 45E-24 | -0.24995 | 0.004 | 0.058 | 6.65E-20 | M1 | PIFO     |
| CCDC88A.3  | 4. | 62E-24 | -0.10435 | 0.269 | 0.446 | 6.90E-20 | M1 | CCDC88A  |
| GJA1.1     | 4. | 62E-24 | -0.25884 | 0.022 | 0.09  | 6.91E-20 | M1 | GJA1     |
| SYT5.2     | 4. | 77E-24 | -0.17084 | 0.001 | 0.052 | 7.13E-20 | M1 | SYT5     |
| CDK20.2    | 4. | 82E-24 | -0.13615 | 0.009 | 0.068 | 7.20E-20 | M1 | CDK20    |
| YPEL5.2    | 4. | 85E-24 | 0.34471  | 0.476 | 0.447 | 7.24E-20 | M1 | YPEL5    |
| HSPA4.2    | 5. | 09E-24 | -0.12019 | 0.161 | 0.299 | 7.61E-20 | M1 | HSPA4    |
| E2F1.1     | 5. | 60E-24 | -0.12941 | 0.007 | 0.064 | 8.37E-20 | M1 | E2F1     |
| PRDX4.4    | 5. | 67E-24 | -0.21374 | 0.386 | 0.579 | 8.48E-20 | M1 | PRDX4    |
| PYGL.3     | 5. | 94E-24 | 0.324444 | 0.259 | 0.179 | 8.88E-20 | M1 | PYGL     |
| MANSC1.1   | 5. | 97E-24 | -0.11205 | 0.009 | 0.067 | 8.92E-20 | M1 | MANSC1   |
| ITM2A.3    | 6. | 07E-24 | -0.26804 | 0.008 | 0.065 | 9.08E-20 | M1 | ITM2A    |
| LRP5.1     | 6. | 07E-24 | -0.10897 | 0.005 | 0.06  | 9.08E-20 | M1 | LRP5     |
| RPGRIP1L.6 | 6. | 08E-24 | -0.11572 | 0.009 | 0.067 | 9.09E-20 | M1 | RPGRIP1L |
| DBNL.4     | 6. | 09E-24 | 0.299408 | 0.457 | 0.419 | 9.10E-20 | M1 | DBNL     |
| STAU2.2    | 6. | 12E-24 | -0.12608 | 0.087 | 0.191 | 9.14E-20 | M1 | STAU2    |
| SCAMP1.2   | 6. | 19E-24 | -0.1024  | 0.116 | 0.234 | 9.26E-20 | M1 | SCAMP1   |
| DNAJC9.2   | 6. | 25E-24 | -0.13163 | 0.079 | 0.179 | 9.34E-20 | M1 | DNAJC9   |
| ANKRD37.2  | 6. | 28E-24 | 0.373951 | 0.203 | 0.129 | 9.39E-20 | M1 | ANKRD37  |
| WBP1L.4    | 6. | 33E-24 | 0.369216 | 0.167 | 0.098 | 9.46E-20 | M1 | WBP1L    |
| ZNF274.1   | 6. | 36E-24 | -0.12739 | 0.043 | 0.125 | 9.50E-20 | M1 | ZNF274   |
| HDLBP.1    | 6. | 37E-24 | -0.10916 | 0.205 | 0.362 | 9.52E-20 | M1 | HDLBP    |
| SYNJ2      | 6. | 47E-24 | -0.13875 | 0.002 | 0.054 | 9.67E-20 | M1 | SYNJ2    |
| ONECUT2.1  | 6. | 48E-24 | -0.16365 | 0.001 | 0.052 | 9.68E-20 | M1 | ONECUT2  |
| HGF        | 6. | 59E-24 | 0.208038 | 0.063 | 0.022 | 9.84E-20 | M1 | HGF      |
| CHCHD4.1   | 6. | 81E-24 | -0.10984 | 0.045 | 0.128 | 1.02E-19 | M1 | CHCHD4   |
| NAA16.2    | 7. | 12E-24 | -0.10194 | 0.05  | 0.136 | 1.06E-19 | M1 | NAA16    |
| METRNL.4   | 7. | 13E-24 | 0.316068 | 0.137 | 0.072 | 1.06E-19 | M1 | METRNL   |
| AKAP9.2    | 7. | 42E-24 | -0.1394  | 0.302 | 0.479 | 1.11E-19 | M1 | AKAP9    |
| LIPE.1     | 7. | 42E-24 | -0.12419 | 0.011 | 0.071 | 1.11E-19 | M1 | LIPE     |
| SREK1IP1.7 | 7. | 52E-24 | -0.10008 | 0.207 | 0.365 | 1.12E-19 | M1 | SREK1IP1 |
| GPC4.1     | 7. | 53E-24 | -0.11226 | 0.006 | 0.061 | 1.13E-19 | M1 | GPC4     |
| ZNF433.1   | 7. | 56E-24 | -0.1257  | 0.008 | 0.065 | 1.13E-19 | M1 | ZNF433   |
| SMAD7.2    | 7. | 59E-24 | 0.228842 | 0.071 | 0.026 | 1.13E-19 | M1 | SMAD7    |
| UNC45A.1   | 7. | 64E-24 | -0.10356 | 0.077 | 0.177 | 1.14E-19 | M1 | UNC45A   |
| YY1.3      | 7. | 67E-24 | -0.12252 | 0.207 | 0.367 | 1.15E-19 | M1 | YY1      |
| TSHZ1.3    | 7. | 79E-24 | -0.14444 | 0.019 | 0.085 | 1.16E-19 | M1 | TSHZ1    |
| UBXN6.2    | 7. | 90E-24 | -0.11804 | 0.178 | 0.323 | 1.18E-19 | M1 | UBXN6    |
| ABI1.4     | 7. | 98E-24 | 0.397504 | 0.299 | 0.229 | 1.19E-19 | M1 | ABI1     |
| ZFP37.1    | 8. | 09E-24 | -0.11917 | 0.005 | 0.06  | 1.21E-19 | M1 | ZFP37    |
| ZNF573.1   | 8. | 53E-24 | -0.13572 | 0.013 | 0.074 | 1.27E-19 | M1 | ZNF573   |
| DNAJB1.1   | 8. | 80E-24 | 0.168178 | 0.62  | 0.608 | 1.32E-19 | M1 | DNAJB1   |
| ZNF569.1   | 9. | 14E-24 | -0.12465 | 0.016 | 0.08  | 1.37E-19 | M1 | ZNF569   |

|             |           |           |        |        |              |           |
|-------------|-----------|-----------|--------|--------|--------------|-----------|
| SHMT2. 2    | 9. 18E-24 | -0. 1357  | 0. 13  | 0. 252 | 1. 37E-19 M1 | SHMT2     |
| PPP1CB. 1   | 9. 19E-24 | -0. 21091 | 0. 374 | 0. 532 | 1. 37E-19 M1 | PPP1CB    |
| SENP2. 2    | 9. 40E-24 | -0. 12057 | 0. 058 | 0. 147 | 1. 41E-19 M1 | SENP2     |
| AFF3. 2     | 9. 62E-24 | -0. 14676 | 0. 006 | 0. 062 | 1. 44E-19 M1 | AFF3      |
| PPP1R11. 1  | 1. 01E-23 | -0. 13119 | 0. 225 | 0. 387 | 1. 51E-19 M1 | PPP1R11   |
| ZNF598. 2   | 1. 07E-23 | -0. 10357 | 0. 017 | 0. 081 | 1. 60E-19 M1 | ZNF598    |
| INTS3. 1    | 1. 08E-23 | -0. 10254 | 0. 042 | 0. 123 | 1. 61E-19 M1 | INTS3     |
| ANKRD39. 3  | 1. 09E-23 | -0. 10276 | 0. 083 | 0. 184 | 1. 63E-19 M1 | ANKRD39   |
| MOSPD1. 2   | 1. 09E-23 | -0. 11143 | 0. 056 | 0. 144 | 1. 63E-19 M1 | MOSPD1    |
| RELT. 3     | 1. 09E-23 | 0. 323566 | 0. 137 | 0. 074 | 1. 63E-19 M1 | RELT      |
| DYNLT1. 2   | 1. 09E-23 | -0. 20267 | 0. 47  | 0. 66  | 1. 64E-19 M1 | DYNLT1    |
| TTC26. 3    | 1. 10E-23 | -0. 15899 | 0. 004 | 0. 057 | 1. 64E-19 M1 | TTC26     |
| PTCH1. 1    | 1. 11E-23 | -0. 1288  | 0. 005 | 0. 06  | 1. 66E-19 M1 | PTCH1     |
| MCM2. 1     | 1. 16E-23 | -0. 13233 | 0. 014 | 0. 076 | 1. 73E-19 M1 | MCM2      |
| CYB5R3. 3   | 1. 18E-23 | -0. 10081 | 0. 226 | 0. 388 | 1. 76E-19 M1 | CYB5R3    |
| ST7L. 1     | 1. 18E-23 | -0. 10388 | 0. 044 | 0. 127 | 1. 77E-19 M1 | ST7L      |
| GRIK3. 1    | 1. 27E-23 | -0. 12047 | 0. 002 | 0. 053 | 1. 90E-19 M1 | GRIK3     |
| IGFBP4      | 1. 31E-23 | -0. 16208 | 0. 014 | 0. 076 | 1. 96E-19 M1 | IGFBP4    |
| CYP27A1. 2  | 1. 32E-23 | -0. 12246 | 0. 082 | 0. 181 | 1. 98E-19 M1 | CYP27A1   |
| ZNF446. 1   | 1. 34E-23 | -0. 10915 | 0. 02  | 0. 086 | 2. 00E-19 M1 | ZNF446    |
| THAP8. 1    | 1. 35E-23 | -0. 14036 | 0. 022 | 0. 091 | 2. 02E-19 M1 | THAP8     |
| JAZF1. 4    | 1. 44E-23 | 0. 394439 | 0. 171 | 0. 102 | 2. 15E-19 M1 | JAZF1     |
| CDCP1. 2    | 1. 44E-23 | 0. 210583 | 0. 07  | 0. 026 | 2. 15E-19 M1 | CDCP1     |
| PGAP2. 1    | 1. 46E-23 | -0. 11332 | 0. 047 | 0. 131 | 2. 19E-19 M1 | PGAP2     |
| PPP3CC. 2   | 1. 47E-23 | -0. 12967 | 0. 059 | 0. 147 | 2. 20E-19 M1 | PPP3CC    |
| AR. 1       | 1. 50E-23 | -0. 12714 | 0. 003 | 0. 055 | 2. 24E-19 M1 | AR        |
| FGF14-AS2   | 1. 53E-23 | -0. 11811 | 0. 006 | 0. 06  | 2. 29E-19 M1 | FGF14-AS2 |
| C11orf74. 1 | 1. 58E-23 | -0. 11376 | 0. 086 | 0. 189 | 2. 37E-19 M1 | C11orf74  |
| ZNF93. 1    | 1. 74E-23 | -0. 11922 | 0. 009 | 0. 067 | 2. 60E-19 M1 | ZNF93     |
| KIFC2. 1    | 1. 78E-23 | -0. 11531 | 0. 015 | 0. 078 | 2. 66E-19 M1 | KIFC2     |
| LSM3        | 1. 87E-23 | -0. 20703 | 0. 4   | 0. 592 | 2. 79E-19 M1 | LSM3      |
| EFNB1. 1    | 1. 98E-23 | -0. 12219 | 0. 034 | 0. 108 | 2. 95E-19 M1 | EFNB1     |
| COQ10A. 1   | 2. 00E-23 | -0. 11953 | 0. 037 | 0. 113 | 2. 99E-19 M1 | COQ10A    |
| C6orf52     | 2. 00E-23 | -0. 12429 | 0. 003 | 0. 054 | 2. 99E-19 M1 | C6orf52   |
| PIGM        | 2. 01E-23 | -0. 12605 | 0. 026 | 0. 097 | 3. 00E-19 M1 | PIGM      |
| HRASLS. 2   | 2. 11E-23 | -0. 11406 | 0. 004 | 0. 057 | 3. 15E-19 M1 | HRASLS    |
| CHD1. 4     | 2. 21E-23 | 0. 413164 | 0. 338 | 0. 284 | 3. 31E-19 M1 | CHD1      |
| DLGAP1. 1   | 2. 24E-23 | -0. 13333 | 0. 003 | 0. 054 | 3. 35E-19 M1 | DLGAP1    |
| LZTFL1. 2   | 2. 25E-23 | -0. 13753 | 0. 02  | 0. 086 | 3. 36E-19 M1 | LZTFL1    |
| RAB32. 4    | 2. 25E-23 | 0. 396246 | 0. 292 | 0. 228 | 3. 36E-19 M1 | RAB32     |
| TIGD7       | 2. 32E-23 | -0. 11548 | 0. 003 | 0. 055 | 3. 47E-19 M1 | TIGD7     |
| ZNF275. 2   | 2. 34E-23 | -0. 11993 | 0. 009 | 0. 066 | 3. 49E-19 M1 | ZNF275    |
| CCND1. 2    | 2. 37E-23 | 0. 346088 | 0. 284 | 0. 206 | 3. 54E-19 M1 | CCND1     |
| MTFP1       | 2. 37E-23 | -0. 15598 | 0. 015 | 0. 078 | 3. 55E-19 M1 | MTFP1     |
| RGP1. 1     | 2. 39E-23 | -0. 11892 | 0. 03  | 0. 103 | 3. 58E-19 M1 | RGP1      |
| CDC37L1. 2  | 2. 47E-23 | -0. 11184 | 0. 063 | 0. 154 | 3. 70E-19 M1 | CDC37L1   |
| QRICH1. 2   | 2. 50E-23 | -0. 10204 | 0. 07  | 0. 165 | 3. 74E-19 M1 | QRICH1    |
| PLXNA3. 1   | 2. 61E-23 | -0. 13448 | 0. 014 | 0. 076 | 3. 90E-19 M1 | PLXNA3    |
| ICK. 2      | 2. 62E-23 | -0. 10629 | 0. 026 | 0. 097 | 3. 91E-19 M1 | ICK       |
| NUCB1. 3    | 2. 64E-23 | 0. 279567 | 0. 472 | 0. 44  | 3. 94E-19 M1 | NUCB1     |
| PTMA. 4     | 2. 69E-23 | -0. 18196 | 0. 984 | 0. 963 | 4. 02E-19 M1 | PTMA      |

|             |           |           |        |        |              |                |
|-------------|-----------|-----------|--------|--------|--------------|----------------|
| DDX55. 2    | 2. 78E-23 | -0. 10661 | 0. 048 | 0. 132 | 4. 15E-19 M1 | DDX55          |
| CENPJ       | 2. 81E-23 | -0. 12802 | 0. 014 | 0. 076 | 4. 20E-19 M1 | CENPJ          |
| LSM6. 2     | 2. 82E-23 | -0. 12621 | 0. 207 | 0. 356 | 4. 21E-19 M1 | LSM6           |
| TMOD1. 2    | 2. 85E-23 | -0. 19519 | 0. 079 | 0. 173 | 4. 25E-19 M1 | TMOD1          |
| ZKSCAN5. 2  | 2. 85E-23 | -0. 11082 | 0. 014 | 0. 076 | 4. 26E-19 M1 | ZKSCAN5        |
| BACE2. 3    | 2. 89E-23 | -0. 13329 | 0. 008 | 0. 064 | 4. 32E-19 M1 | BACE2          |
| PLEKHF1. 1  | 2. 96E-23 | -0. 10909 | 0. 002 | 0. 052 | 4. 42E-19 M1 | PLEKHF1        |
| NEDD4L. 4   | 2. 97E-23 | -0. 12743 | 0. 045 | 0. 126 | 4. 43E-19 M1 | NEDD4L         |
| TMTC2. 1    | 3. 02E-23 | -0. 15642 | 0. 006 | 0. 06  | 4. 52E-19 M1 | TMTC2          |
| CDR2L. 1    | 3. 06E-23 | -0. 1159  | 0. 013 | 0. 074 | 4. 57E-19 M1 | CDR2L          |
| POMZP3. 4   | 3. 24E-23 | -0. 1178  | 0. 028 | 0. 098 | 4. 85E-19 M1 | POMZP3         |
| CPSF7       | 3. 33E-23 | -0. 10886 | 0. 098 | 0. 205 | 4. 98E-19 M1 | CPSF7          |
| SMPD4. 1    | 3. 37E-23 | -0. 10187 | 0. 039 | 0. 117 | 5. 03E-19 M1 | SMPD4          |
| FAM169A. 1  | 3. 38E-23 | -0. 12168 | 0. 004 | 0. 057 | 5. 05E-19 M1 | FAM169A        |
| AP006621. 1 | 3. 77E-23 | -0. 10187 | 0. 012 | 0. 071 | 5. 63E-19 M1 | AP006621. 5    |
| PRPF3       | 3. 85E-23 | -0. 13077 | 0. 047 | 0. 128 | 5. 76E-19 M1 | PRPF3          |
| NR2F2. 2    | 3. 96E-23 | -0. 16943 | 0. 003 | 0. 053 | 5. 91E-19 M1 | NR2F2          |
| MAST4. 1    | 4. 09E-23 | -0. 16519 | 0. 007 | 0. 061 | 6. 11E-19 M1 | MAST4          |
| EMC2        | 4. 16E-23 | -0. 16144 | 0. 125 | 0. 242 | 6. 22E-19 M1 | EMC2           |
| FIBP. 2     | 4. 23E-23 | -0. 14386 | 0. 326 | 0. 514 | 6. 33E-19 M1 | FIBP           |
| FBXL16. 1   | 4. 28E-23 | -0. 11387 | 0. 002 | 0. 052 | 6. 40E-19 M1 | FBXL16         |
| C2orf42     | 4. 44E-23 | -0. 11122 | 0. 011 | 0. 07  | 6. 63E-19 M1 | C2orf42        |
| NOMO1. 1    | 4. 47E-23 | -0. 10834 | 0. 037 | 0. 114 | 6. 69E-19 M1 | NOMO1          |
| ORAOV1. 1   | 4. 59E-23 | -0. 11203 | 0. 025 | 0. 094 | 6. 85E-19 M1 | ORAOV1         |
| WARS. 3     | 4. 59E-23 | -0. 12973 | 0. 11  | 0. 22  | 6. 87E-19 M1 | WARS           |
| TMEM150C    | 4. 66E-23 | -0. 13952 | 0. 003 | 0. 053 | 6. 97E-19 M1 | TMEM150C       |
| CNDP2. 4    | 4. 76E-23 | 0. 280454 | 0. 451 | 0. 427 | 7. 11E-19 M1 | CNDP2          |
| PLAU. 4     | 4. 85E-23 | 0. 394391 | 0. 224 | 0. 151 | 7. 25E-19 M1 | PLAU           |
| GPD1. 3     | 5. 17E-23 | -0. 23129 | 0. 005 | 0. 057 | 7. 72E-19 M1 | GPD1           |
| DLG4. 1     | 5. 39E-23 | -0. 1047  | 0. 019 | 0. 084 | 8. 05E-19 M1 | DLG4           |
| PVR. 2      | 5. 41E-23 | -0. 1078  | 0. 016 | 0. 078 | 8. 08E-19 M1 | PVR            |
| CLCN4. 3    | 5. 52E-23 | -0. 14507 | 0. 008 | 0. 064 | 8. 26E-19 M1 | CLCN4          |
| GNB1. 3     | 6. 02E-23 | -0. 1217  | 0. 27  | 0. 444 | 9. 00E-19 M1 | GNB1           |
| NMRAL1. 1   | 6. 05E-23 | -0. 17533 | 0. 139 | 0. 259 | 9. 04E-19 M1 | NMRAL1         |
| ZNF250. 1   | 6. 10E-23 | -0. 1445  | 0. 024 | 0. 092 | 9. 12E-19 M1 | ZNF250         |
| MYEOV2. 2   | 6. 16E-23 | -0. 22179 | 0. 523 | 0. 704 | 9. 20E-19 M1 | MYEOV2         |
| ACHE. 1     | 6. 18E-23 | -0. 14783 | 0. 002 | 0. 052 | 9. 23E-19 M1 | ACHE           |
| CKAP2L. 3   | 6. 42E-23 | -0. 15074 | 0. 003 | 0. 054 | 9. 59E-19 M1 | CKAP2L         |
| NEK8        | 6. 43E-23 | -0. 10257 | 0. 008 | 0. 063 | 9. 61E-19 M1 | NEK8           |
| P2RX7. 1    | 6. 76E-23 | 0. 320629 | 0. 135 | 0. 072 | 1. 01E-18 M1 | P2RX7          |
| LIN7A. 1    | 6. 78E-23 | -0. 11227 | 0. 001 | 0. 05  | 1. 01E-18 M1 | LIN7A          |
| NUF2. 4     | 6. 93E-23 | -0. 17402 | 0. 013 | 0. 072 | 1. 04E-18 M1 | NUF2           |
| SOCS6. 3    | 7. 18E-23 | 0. 42678  | 0. 282 | 0. 219 | 1. 07E-18 M1 | SOCS6          |
| ZNF587      | 7. 22E-23 | -0. 11096 | 0. 026 | 0. 095 | 1. 08E-18 M1 | ZNF587         |
| ATAD5. 2    | 7. 38E-23 | -0. 12065 | 0. 021 | 0. 086 | 1. 10E-18 M1 | ATAD5          |
| CBLL1. 1    | 7. 51E-23 | -0. 12147 | 0. 042 | 0. 12  | 1. 12E-18 M1 | CBLL1          |
| PTP4A2. 3   | 7. 52E-23 | -0. 19581 | 0. 317 | 0. 48  | 1. 12E-18 M1 | PTP4A2         |
| RP11-539L   | 7. 75E-23 | -0. 14534 | 0. 035 | 0. 108 | 1. 16E-18 M1 | RP11-539L10. 3 |
| SDS. 4      | 7. 89E-23 | 0. 232207 | 0. 106 | 0. 049 | 1. 18E-18 M1 | SDS            |
| FAM8A1. 1   | 8. 08E-23 | -0. 1047  | 0. 026 | 0. 095 | 1. 21E-18 M1 | FAM8A1         |
| ZBTB44. 1   | 8. 19E-23 | -0. 12492 | 0. 051 | 0. 134 | 1. 22E-18 M1 | ZBTB44         |



|            |           |           |        |        |              |             |
|------------|-----------|-----------|--------|--------|--------------|-------------|
| CNOT8. 2   | 9. 15E-23 | -0. 11267 | 0. 094 | 0. 199 | 1. 37E-18 M1 | CNOT8       |
| NDUFS8. 3  | 9. 31E-23 | -0. 22022 | 0. 45  | 0. 64  | 1. 39E-18 M1 | NDUFS8      |
| C16orf46.  | 9. 87E-23 | -0. 10058 | 0. 005 | 0. 058 | 1. 48E-18 M1 | C16orf46    |
| OXTR       | 9. 92E-23 | -0. 10332 | 0. 002 | 0. 05  | 1. 48E-18 M1 | OXTR        |
| KLHL28. 2  | 1. 01E-22 | -0. 12003 | 0. 05  | 0. 133 | 1. 51E-18 M1 | KLHL28      |
| PDXK. 4    | 1. 02E-22 | 0. 364105 | 0. 334 | 0. 275 | 1. 52E-18 M1 | PDXK        |
| MELK. 1    | 1. 02E-22 | -0. 13697 | 0. 004 | 0. 055 | 1. 53E-18 M1 | MELK        |
| OPHN1. 2   | 1. 04E-22 | -0. 14102 | 0. 018 | 0. 082 | 1. 55E-18 M1 | OPHN1       |
| PEX12. 2   | 1. 06E-22 | -0. 12064 | 0. 007 | 0. 061 | 1. 58E-18 M1 | PEX12       |
| APOBEC3C.  | 1. 06E-22 | 0. 321548 | 0. 188 | 0. 116 | 1. 58E-18 M1 | APOBEC3C    |
| ZNF140. 1  | 1. 06E-22 | -0. 12309 | 0. 042 | 0. 12  | 1. 58E-18 M1 | ZNF140      |
| MFAP4. 2   | 1. 07E-22 | -0. 1757  | 0. 008 | 0. 063 | 1. 60E-18 M1 | MFAP4       |
| CDC42EP3.  | 1. 10E-22 | -0. 16283 | 0. 055 | 0. 138 | 1. 64E-18 M1 | CDC42EP3    |
| PSMA3. 3   | 1. 10E-22 | -0. 1733  | 0. 294 | 0. 47  | 1. 65E-18 M1 | PSMA3       |
| MYH9. 4    | 1. 11E-22 | 0. 372078 | 0. 25  | 0. 176 | 1. 66E-18 M1 | MYH9        |
| LACTB. 4   | 1. 12E-22 | 0. 345457 | 0. 227 | 0. 154 | 1. 67E-18 M1 | LACTB       |
| ZNF71. 2   | 1. 15E-22 | -0. 11036 | 0. 027 | 0. 096 | 1. 71E-18 M1 | ZNF71       |
| STARD10. 1 | 1. 15E-22 | -0. 10752 | 0. 022 | 0. 089 | 1. 72E-18 M1 | STARD10     |
| PARP10. 2  | 1. 18E-22 | 0. 290691 | 0. 14  | 0. 076 | 1. 76E-18 M1 | PARP10      |
| BMP1. 1    | 1. 20E-22 | -0. 10065 | 0. 014 | 0. 074 | 1. 79E-18 M1 | BMP1        |
| FAM188A. 2 | 1. 22E-22 | -0. 10809 | 0. 031 | 0. 103 | 1. 82E-18 M1 | FAM188A     |
| C1orf27. 2 | 1. 22E-22 | -0. 1157  | 0. 093 | 0. 196 | 1. 82E-18 M1 | C1orf27     |
| DDR2. 2    | 1. 23E-22 | -0. 10868 | 0. 01  | 0. 066 | 1. 84E-18 M1 | DDR2        |
| MDM1       | 1. 27E-22 | -0. 10552 | 0. 019 | 0. 083 | 1. 89E-18 M1 | MDM1        |
| CRB2. 2    | 1. 29E-22 | -0. 17296 | 0. 003 | 0. 052 | 1. 93E-18 M1 | CRB2        |
| CGREF1     | 1. 31E-22 | -0. 10331 | 0. 001 | 0. 049 | 1. 95E-18 M1 | CGREF1      |
| PSMD2. 1   | 1. 37E-22 | -0. 15153 | 0. 311 | 0. 491 | 2. 04E-18 M1 | PSMD2       |
| POT1. 1    | 1. 39E-22 | -0. 12186 | 0. 025 | 0. 093 | 2. 08E-18 M1 | POT1        |
| C17orf97.  | 1. 39E-22 | -0. 12246 | 0. 01  | 0. 066 | 2. 08E-18 M1 | C17orf97    |
| ZNHIT6. 1  | 1. 42E-22 | -0. 10367 | 0. 033 | 0. 106 | 2. 13E-18 M1 | ZNHIT6      |
| LYSMD2. 3  | 1. 44E-22 | 0. 369797 | 0. 248 | 0. 182 | 2. 14E-18 M1 | LYSMD2      |
| TMEM245. 1 | 1. 53E-22 | -0. 1075  | 0. 061 | 0. 148 | 2. 28E-18 M1 | TMEM245     |
| FKBP7. 1   | 1. 53E-22 | -0. 13865 | 0. 032 | 0. 103 | 2. 29E-18 M1 | FKBP7       |
| JAK3. 1    | 1. 57E-22 | 0. 160457 | 0. 06  | 0. 021 | 2. 34E-18 M1 | JAK3        |
| SALL3. 1   | 1. 59E-22 | -0. 11517 | 0. 001 | 0. 049 | 2. 38E-18 M1 | SALL3       |
| SPATA2. 1  | 1. 60E-22 | -0. 1092  | 0. 016 | 0. 078 | 2. 39E-18 M1 | SPATA2      |
| BBS4. 1    | 1. 63E-22 | -0. 11019 | 0. 028 | 0. 097 | 2. 43E-18 M1 | BBS4        |
| RUNX2. 1   | 1. 63E-22 | 0. 195042 | 0. 062 | 0. 022 | 2. 44E-18 M1 | RUNX2       |
| PRKAR2B. 3 | 1. 72E-22 | -0. 15247 | 0. 017 | 0. 079 | 2. 57E-18 M1 | PRKAR2B     |
| GJB2. 1    | 1. 80E-22 | -0. 16842 | 0. 006 | 0. 058 | 2. 69E-18 M1 | GJB2        |
| RINT1. 2   | 1. 81E-22 | -0. 13359 | 0. 035 | 0. 107 | 2. 71E-18 M1 | RINT1       |
| VPS41. 2   | 1. 83E-22 | -0. 11601 | 0. 11  | 0. 219 | 2. 73E-18 M1 | VPS41       |
| CADPS. 2   | 1. 88E-22 | -0. 22414 | 0. 002 | 0. 051 | 2. 81E-18 M1 | CADPS       |
| CASD1. 2   | 1. 89E-22 | -0. 13292 | 0. 022 | 0. 088 | 2. 82E-18 M1 | CASD1       |
| TIPRL. 1   | 1. 93E-22 | -0. 12177 | 0. 158 | 0. 287 | 2. 89E-18 M1 | TIPRL       |
| DSCC1. 1   | 1. 99E-22 | -0. 1206  | 0. 012 | 0. 069 | 2. 98E-18 M1 | DSCC1       |
| CTH. 1     | 2. 06E-22 | -0. 13572 | 0. 009 | 0. 065 | 3. 08E-18 M1 | CTH         |
| DYNC2H1. 1 | 2. 11E-22 | -0. 11142 | 0. 007 | 0. 06  | 3. 15E-18 M1 | DYNC2H1     |
| ZNF212. 1  | 2. 12E-22 | -0. 10898 | 0. 017 | 0. 078 | 3. 17E-18 M1 | ZNF212      |
| SCFD2. 1   | 2. 14E-22 | -0. 1384  | 0. 03  | 0. 1   | 3. 20E-18 M1 | SCFD2       |
| AC005618.  | 2. 15E-22 | -0. 15141 | 0. 002 | 0. 051 | 3. 22E-18 M1 | AC005618. 6 |

|             |           |           |        |        |              |          |
|-------------|-----------|-----------|--------|--------|--------------|----------|
| CCNE2. 1    | 2. 18E-22 | -0. 18593 | 0. 011 | 0. 068 | 3. 26E-18 M1 | CCNE2    |
| AIMP1. 2    | 2. 21E-22 | -0. 13555 | 0. 238 | 0. 398 | 3. 31E-18 M1 | AIMP1    |
| KBTBD4. 2   | 2. 30E-22 | -0. 11891 | 0. 031 | 0. 101 | 3. 43E-18 M1 | KBTBD4   |
| PDE1B. 1    | 2. 32E-22 | 0. 141128 | 0. 048 | 0. 015 | 3. 46E-18 M1 | PDE1B    |
| NCAPG2. 1   | 2. 33E-22 | -0. 12261 | 0. 014 | 0. 073 | 3. 48E-18 M1 | NCAPG2   |
| COQ3. 2     | 2. 34E-22 | -0. 13012 | 0. 017 | 0. 078 | 3. 49E-18 M1 | COQ3     |
| COPG2. 2    | 2. 43E-22 | -0. 11454 | 0. 05  | 0. 131 | 3. 63E-18 M1 | COPG2    |
| CACNA1A. 3  | 2. 51E-22 | -0. 20379 | 0. 036 | 0. 108 | 3. 75E-18 M1 | CACNA1A  |
| FHOD1. 4    | 2. 52E-22 | 0. 258922 | 0. 1   | 0. 047 | 3. 77E-18 M1 | FHOD1    |
| PNISR. 1    | 2. 56E-22 | -0. 15598 | 0. 452 | 0. 644 | 3. 83E-18 M1 | PNISR    |
| MEGF9. 1    | 2. 68E-22 | -0. 10957 | 0. 033 | 0. 105 | 4. 01E-18 M1 | MEGF9    |
| TBC1D19     | 2. 84E-22 | -0. 12416 | 0. 013 | 0. 071 | 4. 24E-18 M1 | TBC1D19  |
| NGRN. 2     | 2. 85E-22 | -0. 10003 | 0. 024 | 0. 091 | 4. 25E-18 M1 | NGRN     |
| NDRG1. 1    | 2. 88E-22 | -0. 3862  | 0. 096 | 0. 187 | 4. 30E-18 M1 | NDRG1    |
| SLC25A42    | 2. 89E-22 | -0. 10831 | 0. 006 | 0. 058 | 4. 31E-18 M1 | SLC25A42 |
| DTD2. 1     | 2. 97E-22 | -0. 12549 | 0. 019 | 0. 081 | 4. 43E-18 M1 | DTD2     |
| TMEM151A. 3 | 0.3E-22   | -0. 18397 | 0. 002 | 0. 05  | 4. 52E-18 M1 | TMEM151A |
| DCUN1D4. 1  | 3. 37E-22 | -0. 10938 | 0. 038 | 0. 112 | 5. 03E-18 M1 | DCUN1D4  |
| RACGAP1. 2  | 3. 47E-22 | -0. 16419 | 0. 027 | 0. 094 | 5. 19E-18 M1 | RACGAP1  |
| KIAA1524. 3 | 3. 58E-22 | -0. 12924 | 0. 006 | 0. 058 | 5. 35E-18 M1 | KIAA1524 |
| SERPINI1. 3 | 3. 64E-22 | -0. 18217 | 0. 008 | 0. 062 | 5. 44E-18 M1 | SERPINI1 |
| GSPT1. 3    | 3. 66E-22 | -0. 12545 | 0. 218 | 0. 374 | 5. 47E-18 M1 | GSPT1    |
| UAP1. 2     | 3. 66E-22 | -0. 10335 | 0. 098 | 0. 202 | 5. 47E-18 M1 | UAP1     |
| ASPM. 4     | 3. 71E-22 | -0. 17096 | 0. 005 | 0. 055 | 5. 54E-18 M1 | ASPM     |
| FAM229A. 1  | 3. 94E-22 | -0. 11671 | 0. 004 | 0. 053 | 5. 89E-18 M1 | FAM229A  |
| COPS4       | 4. 03E-22 | -0. 13269 | 0. 203 | 0. 348 | 6. 02E-18 M1 | COPS4    |
| SC5D. 2     | 4. 11E-22 | -0. 1303  | 0. 091 | 0. 19  | 6. 14E-18 M1 | SC5D     |
| TOPBP1. 2   | 4. 25E-22 | -0. 10521 | 0. 033 | 0. 105 | 6. 35E-18 M1 | TOPBP1   |
| HRH2. 2     | 4. 51E-22 | 0. 254255 | 0. 077 | 0. 032 | 6. 74E-18 M1 | HRH2     |
| ZFP30       | 4. 66E-22 | -0. 10321 | 0. 006 | 0. 058 | 6. 96E-18 M1 | ZFP30    |
| CA9. 2      | 5. 02E-22 | -0. 20411 | 0. 001 | 0. 048 | 7. 50E-18 M1 | CA9      |
| STOML2. 1   | 5. 08E-22 | -0. 10623 | 0. 275 | 0. 45  | 7. 59E-18 M1 | STOML2   |
| LUZP2. 1    | 5. 16E-22 | -0. 1656  | 0. 006 | 0. 057 | 7. 71E-18 M1 | LUZP2    |
| COQ2. 3     | 5. 19E-22 | 0. 370945 | 0. 236 | 0. 168 | 7. 76E-18 M1 | COQ2     |
| FAM173B. 2  | 5. 29E-22 | -0. 10675 | 0. 015 | 0. 074 | 7. 91E-18 M1 | FAM173B  |
| AP5B1. 1    | 5. 78E-22 | 0. 247995 | 0. 094 | 0. 043 | 8. 64E-18 M1 | AP5B1    |
| TPSAB1. 1   | 6. 29E-22 | 0. 220447 | 0. 051 | 0. 016 | 9. 40E-18 M1 | TPSAB1   |
| ZNF536. 2   | 6. 38E-22 | -0. 1789  | 0. 003 | 0. 051 | 9. 54E-18 M1 | ZNF536   |
| DNAJC25. 2  | 6. 43E-22 | -0. 11101 | 0. 028 | 0. 096 | 9. 61E-18 M1 | DNAJC25  |
| BRAP        | 6. 62E-22 | -0. 10609 | 0. 043 | 0. 119 | 9. 90E-18 M1 | BRAP     |
| FOXO1. 1    | 6. 98E-22 | -0. 12304 | 0. 021 | 0. 084 | 1. 04E-17 M1 | FOXO1    |
| CCNB2. 3    | 7. 03E-22 | -0. 1924  | 0. 015 | 0. 073 | 1. 05E-17 M1 | CCNB2    |
| ORMDL2. 2   | 7. 07E-22 | 0. 352703 | 0. 332 | 0. 26  | 1. 06E-17 M1 | ORMDL2   |
| MUC12. 2    | 7. 09E-22 | -0. 20611 | 0. 003 | 0. 051 | 1. 06E-17 M1 | MUC12    |
| BID. 4      | 7. 10E-22 | 0. 353632 | 0. 397 | 0. 349 | 1. 06E-17 M1 | BID      |
| CHI3L2. 2   | 7. 16E-22 | -0. 73342 | 0. 107 | 0. 195 | 1. 07E-17 M1 | CHI3L2   |
| SERPINF2. 7 | 7. 24E-22 | 0. 179427 | 0. 057 | 0. 02  | 1. 08E-17 M1 | SERPINF2 |
| TNRC6B. 2   | 7. 35E-22 | -0. 10356 | 0. 224 | 0. 378 | 1. 10E-17 M1 | TNRC6B   |
| TMBIM1. 1   | 7. 47E-22 | 0. 340119 | 0. 303 | 0. 233 | 1. 12E-17 M1 | TMBIM1   |
| TUBE1. 1    | 7. 67E-22 | -0. 10726 | 0. 034 | 0. 106 | 1. 15E-17 M1 | TUBE1    |
| PEX1        | 7. 76E-22 | -0. 10168 | 0. 025 | 0. 092 | 1. 16E-17 M1 | PEX1     |

|           |          |          |       |       |          |    |               |
|-----------|----------|----------|-------|-------|----------|----|---------------|
| SUGP1.1   | 7.88E-22 | -0.11132 | 0.063 | 0.15  | 1.18E-17 | M1 | SUGP1         |
| RANBP6.1  | 8.42E-22 | -0.12088 | 0.018 | 0.079 | 1.26E-17 | M1 | RANBP6        |
| SNAI2.1   | 8.47E-22 | -0.10887 | 0.001 | 0.047 | 1.27E-17 | M1 | SNAI2         |
| CYB5A.3   | 9.05E-22 | -0.14782 | 0.218 | 0.366 | 1.35E-17 | M1 | CYB5A         |
| MED22.2   | 9.11E-22 | -0.12333 | 0.042 | 0.118 | 1.36E-17 | M1 | MED22         |
| RPN2      | 9.24E-22 | 0.160256 | 0.629 | 0.622 | 1.38E-17 | M1 | RPN2          |
| C10orf128 | 9.25E-22 | 0.213564 | 0.064 | 0.024 | 1.38E-17 | M1 | C10orf128     |
| RP11-707A | 9.56E-22 | 0.103317 | 0.02  | 0.003 | 1.43E-17 | M1 | RP11-707A18.1 |
| NUP188    | 9.68E-22 | -0.10355 | 0.026 | 0.093 | 1.45E-17 | M1 | NUP188        |
| AP000476  | 9.71E-22 | 0.105552 | 0.031 | 0.007 | 1.45E-17 | M1 | AP000476.1    |
| ZC3H15.1  | 9.75E-22 | -0.1422  | 0.347 | 0.535 | 1.46E-17 | M1 | ZC3H15        |
| DLG2.1    | 1.03E-21 | -0.14955 | 0.006 | 0.056 | 1.54E-17 | M1 | DLG2          |
| CDK5RAP2  | 1.04E-21 | -0.13547 | 0.047 | 0.126 | 1.56E-17 | M1 | CDK5RAP2      |
| ZIK1.1    | 1.05E-21 | -0.12082 | 0.008 | 0.06  | 1.58E-17 | M1 | ZIK1          |
| C17orf75  | 1.08E-21 | -0.11805 | 0.035 | 0.107 | 1.61E-17 | M1 | C17orf75      |
| CUL1      | 1.13E-21 | -0.11665 | 0.137 | 0.254 | 1.69E-17 | M1 | CUL1          |
| NDUFA9.1  | 1.14E-21 | -0.13143 | 0.249 | 0.411 | 1.70E-17 | M1 | NDUFA9        |
| UBR7.1    | 1.15E-21 | -0.11567 | 0.05  | 0.13  | 1.72E-17 | M1 | UBR7          |
| GPR137C.1 | 1.16E-21 | -0.11494 | 0.006 | 0.057 | 1.74E-17 | M1 | GPR137C       |
| CHAF1A.3  | 1.18E-21 | -0.10052 | 0.031 | 0.1   | 1.77E-17 | M1 | CHAF1A        |
| MAPK8IP3  | 1.20E-21 | -0.12351 | 0.031 | 0.1   | 1.79E-17 | M1 | MAPK8IP3      |
| CCDC57.4  | 1.22E-21 | 0.332479 | 0.162 | 0.096 | 1.82E-17 | M1 | CCDC57        |
| APOA1BP   | 1.22E-21 | -0.11907 | 0.241 | 0.402 | 1.82E-17 | M1 | APOA1BP       |
| PSMF1.1   | 1.28E-21 | -0.13522 | 0.26  | 0.427 | 1.91E-17 | M1 | PSMF1         |
| PHC1.2    | 1.30E-21 | -0.10338 | 0.024 | 0.089 | 1.95E-17 | M1 | PHC1          |
| SLC05A1.2 | 1.33E-21 | -0.15789 | 0.002 | 0.049 | 1.99E-17 | M1 | SLC05A1       |
| AP5M1.1   | 1.37E-21 | -0.10556 | 0.078 | 0.171 | 2.05E-17 | M1 | AP5M1         |
| CLSPN.3   | 1.38E-21 | -0.16019 | 0.014 | 0.072 | 2.06E-17 | M1 | CLSPN         |
| RP4-639F2 | 1.39E-21 | -0.10237 | 0.002 | 0.048 | 2.08E-17 | M1 | RP4-639F20.1  |
| PPIL6.3   | 1.42E-21 | -0.12267 | 0.006 | 0.056 | 2.13E-17 | M1 | PPIL6         |
| SETMAR.1  | 1.44E-21 | -0.14064 | 0.01  | 0.065 | 2.15E-17 | M1 | SETMAR        |
| DNAJA4.3  | 1.46E-21 | 0.290493 | 0.107 | 0.053 | 2.18E-17 | M1 | DNAJA4        |
| NIF3L1    | 1.52E-21 | -0.13297 | 0.053 | 0.134 | 2.27E-17 | M1 | NIF3L1        |
| ATOX1.4   | 1.53E-21 | -0.23248 | 0.461 | 0.634 | 2.29E-17 | M1 | ATOX1         |
| UCK2.1    | 1.53E-21 | -0.10249 | 0.03  | 0.098 | 2.29E-17 | M1 | UCK2          |
| NRG2.1    | 1.65E-21 | -0.11633 | 0.002 | 0.048 | 2.46E-17 | M1 | NRG2          |
| UBE3C.2   | 1.78E-21 | -0.10695 | 0.046 | 0.123 | 2.66E-17 | M1 | UBE3C         |
| IRAK2     | 1.78E-21 | 0.275781 | 0.091 | 0.042 | 2.67E-17 | M1 | IRAK2         |
| PRKAB2    | 1.82E-21 | -0.11528 | 0.013 | 0.07  | 2.71E-17 | M1 | PRKAB2        |
| EVI5L.1   | 1.83E-21 | -0.10355 | 0.013 | 0.069 | 2.74E-17 | M1 | EVI5L         |
| CDK17.2   | 2.10E-21 | -0.11235 | 0.05  | 0.13  | 3.14E-17 | M1 | CDK17         |
| GSE1.3    | 2.27E-21 | -0.15241 | 0.034 | 0.103 | 3.39E-17 | M1 | GSE1          |
| GSTZ1.2   | 2.29E-21 | -0.15023 | 0.08  | 0.173 | 3.43E-17 | M1 | GSTZ1         |
| SPTSSB.1  | 2.38E-21 | -0.16247 | 0     | 0.044 | 3.56E-17 | M1 | SPTSSB        |
| SEMA4D.4  | 2.40E-21 | 0.254757 | 0.132 | 0.07  | 3.59E-17 | M1 | SEMA4D        |
| ST8SIA5.1 | 2.42E-21 | -0.12681 | 0.003 | 0.051 | 3.61E-17 | M1 | ST8SIA5       |
| TGFB2.3   | 2.44E-21 | -0.12857 | 0.017 | 0.077 | 3.64E-17 | M1 | TGFB2         |
| CWC22.1   | 2.44E-21 | -0.10615 | 0.058 | 0.141 | 3.65E-17 | M1 | CWC22         |
| CIPC      | 2.45E-21 | -0.12797 | 0.025 | 0.089 | 3.66E-17 | M1 | CIPC          |
| PIK3CD.2  | 2.48E-21 | 0.181344 | 0.064 | 0.024 | 3.71E-17 | M1 | PIK3CD        |
| PUS7.1    | 2.56E-21 | -0.10697 | 0.014 | 0.07  | 3.82E-17 | M1 | PUS7          |

|             |          |          |       |       |             |               |
|-------------|----------|----------|-------|-------|-------------|---------------|
| AAGAB. 1    | 2.59E-21 | -0.10652 | 0.049 | 0.128 | 3.88E-17 M1 | AAGAB         |
| DACT3. 2    | 2.60E-21 | -0.12874 | 0.024 | 0.088 | 3.88E-17 M1 | DACT3         |
| NUP37. 1    | 2.67E-21 | -0.12684 | 0.061 | 0.145 | 3.99E-17 M1 | NUP37         |
| SIRT2. 4    | 2.78E-21 | -0.16928 | 0.28  | 0.443 | 4.15E-17 M1 | SIRT2         |
| TUBA4A. 1   | 2.85E-21 | -0.23139 | 0.01  | 0.063 | 4.25E-17 M1 | TUBA4A        |
| SP9. 3      | 2.90E-21 | -0.17174 | 0.002 | 0.048 | 4.34E-17 M1 | SP9           |
| Clorf174. 2 | 2.92E-21 | -0.10517 | 0.077 | 0.169 | 4.36E-17 M1 | Clorf174      |
| SLX4IP      | 2.96E-21 | -0.1001  | 0.012 | 0.067 | 4.42E-17 M1 | SLX4IP        |
| ZC4H2. 2    | 3.01E-21 | -0.14913 | 0.009 | 0.061 | 4.49E-17 M1 | ZC4H2         |
| DOK4. 2     | 3.01E-21 | -0.11766 | 0.005 | 0.054 | 4.49E-17 M1 | DOK4          |
| KITLG       | 3.03E-21 | -0.10238 | 0.003 | 0.05  | 4.52E-17 M1 | KITLG         |
| H2AFX. 3    | 3.04E-21 | -0.12174 | 0.127 | 0.238 | 4.55E-17 M1 | H2AFX         |
| FAM149A. 2  | 3.08E-21 | 0.223047 | 0.066 | 0.026 | 4.61E-17 M1 | FAM149A       |
| NAV3        | 3.26E-21 | 0.178074 | 0.06  | 0.021 | 4.87E-17 M1 | NAV3          |
| XRCC2       | 3.28E-21 | -0.1167  | 0.003 | 0.049 | 4.90E-17 M1 | XRCC2         |
| AGAP3. 3    | 3.29E-21 | -0.10742 | 0.039 | 0.112 | 4.92E-17 M1 | AGAP3         |
| ECM1        | 3.31E-21 | -0.137   | 0.003 | 0.049 | 4.94E-17 M1 | ECM1          |
| CCSAP. 1    | 3.34E-21 | -0.12505 | 0.039 | 0.112 | 4.99E-17 M1 | CCSAP         |
| ZDHHC22. 2  | 3.52E-21 | -0.1339  | 0.004 | 0.051 | 5.26E-17 M1 | ZDHHC22       |
| CAPNS1. 3   | 3.57E-21 | -0.11943 | 0.215 | 0.364 | 5.33E-17 M1 | CAPNS1        |
| SF3B2. 1    | 3.66E-21 | -0.13925 | 0.367 | 0.556 | 5.47E-17 M1 | SF3B2         |
| PRRT1. 1    | 3.66E-21 | -0.10631 | 0.008 | 0.06  | 5.48E-17 M1 | PRRT1         |
| GAB3. 2     | 3.70E-21 | 0.219945 | 0.067 | 0.026 | 5.53E-17 M1 | GAB3          |
| EIF4E2. 2   | 3.75E-21 | -0.10001 | 0.208 | 0.358 | 5.61E-17 M1 | EIF4E2        |
| UFM1        | 3.87E-21 | -0.10164 | 0.218 | 0.367 | 5.79E-17 M1 | UFM1          |
| FOXMI. 2    | 3.98E-21 | -0.13783 | 0.009 | 0.061 | 5.94E-17 M1 | FOXMI         |
| PROC        | 4.10E-21 | 0.132925 | 0.03  | 0.006 | 6.13E-17 M1 | PROC          |
| BEST1. 2    | 4.13E-21 | 0.38912  | 0.33  | 0.264 | 6.17E-17 M1 | BEST1         |
| KIFC1. 2    | 4.15E-21 | -0.13869 | 0.013 | 0.068 | 6.21E-17 M1 | KIFC1         |
| RP11-138A   | 4.46E-21 | 0.35361  | 0.182 | 0.114 | 6.67E-17 M1 | RP11-138A9. 1 |
| MFSD2A. 2   | 4.47E-21 | -0.14153 | 0.039 | 0.111 | 6.68E-17 M1 | MFSD2A        |
| IL33. 2     | 4.60E-21 | -0.12699 | 0.005 | 0.053 | 6.88E-17 M1 | IL33          |
| SLC9B2      | 4.66E-21 | -0.12909 | 0.005 | 0.053 | 6.97E-17 M1 | SLC9B2        |
| MED4        | 4.77E-21 | -0.11187 | 0.273 | 0.445 | 7.13E-17 M1 | MED4          |
| HIST1H2BC   | 5.08E-21 | 0.231556 | 0.05  | 0.016 | 7.60E-17 M1 | HIST1H2BC     |
| PSD2. 1     | 5.10E-21 | -0.14724 | 0.003 | 0.049 | 7.62E-17 M1 | PSD2          |
| ZNF211. 1   | 5.12E-21 | -0.1204  | 0.017 | 0.076 | 7.66E-17 M1 | ZNF211        |
| MMP19. 1    | 5.14E-21 | 0.234436 | 0.102 | 0.049 | 7.69E-17 M1 | MMP19         |
| FGFR2. 2    | 5.20E-21 | -0.19906 | 0.006 | 0.056 | 7.78E-17 M1 | FGFR2         |
| IL10RB. 4   | 5.38E-21 | 0.386942 | 0.298 | 0.232 | 8.03E-17 M1 | IL10RB        |
| PRMT2. 1    | 6.03E-21 | -0.11492 | 0.301 | 0.479 | 9.00E-17 M1 | PRMT2         |
| CPPED1. 4   | 6.03E-21 | 0.227473 | 0.115 | 0.058 | 9.01E-17 M1 | CPPED1        |
| ZC3H13. 4   | 6.06E-21 | -0.10036 | 0.212 | 0.358 | 9.06E-17 M1 | ZC3H13        |
| NEK11. 2    | 6.12E-21 | -0.13027 | 0.006 | 0.056 | 9.15E-17 M1 | NEK11         |
| TLN2. 3     | 6.56E-21 | 0.379059 | 0.144 | 0.084 | 9.81E-17 M1 | TLN2          |
| NDUFB6. 1   | 6.91E-21 | -0.14781 | 0.344 | 0.528 | 1.03E-16 M1 | NDUFB6        |
| FKBPL. 1    | 7.02E-21 | -0.10597 | 0.017 | 0.075 | 1.05E-16 M1 | FKBPL         |
| ARMCX2. 3   | 7.11E-21 | -0.11375 | 0.072 | 0.161 | 1.06E-16 M1 | ARMCX2        |
| UGT8. 3     | 7.87E-21 | -0.24654 | 0.008 | 0.058 | 1.18E-16 M1 | UGT8          |
| KCNJ5       | 8.00E-21 | 0.178727 | 0.049 | 0.016 | 1.20E-16 M1 | KCNJ5         |
| FBLN5. 1    | 8.00E-21 | -0.20733 | 0.002 | 0.047 | 1.20E-16 M1 | FBLN5         |

|            |           |           |        |        |              |                |
|------------|-----------|-----------|--------|--------|--------------|----------------|
| PTGDS. 1   | 8. 37E-21 | -0. 64238 | 0. 1   | 0. 184 | 1. 25E-16 M1 | PTGDS          |
| SMIM10. 1  | 8. 55E-21 | -0. 12622 | 0. 007 | 0. 056 | 1. 28E-16 M1 | SMIM10         |
| MAST2. 1   | 8. 62E-21 | -0. 1122  | 0. 02  | 0. 08  | 1. 29E-16 M1 | MAST2          |
| POLD3      | 8. 79E-21 | -0. 10331 | 0. 037 | 0. 108 | 1. 31E-16 M1 | POLD3          |
| NET1. 3    | 9. 27E-21 | 0. 284209 | 0. 077 | 0. 033 | 1. 39E-16 M1 | NET1           |
| POC1A. 2   | 9. 45E-21 | -0. 1247  | 0. 012 | 0. 066 | 1. 41E-16 M1 | POC1A          |
| SIGLEC11   | 9. 58E-21 | 0. 142884 | 0. 033 | 0. 008 | 1. 43E-16 M1 | SIGLEC11       |
| ZNF776. 1  | 9. 72E-21 | -0. 11306 | 0. 013 | 0. 068 | 1. 45E-16 M1 | ZNF776         |
| BMPER      | 9. 84E-21 | -0. 12271 | 0      | 0. 043 | 1. 47E-16 M1 | BMPER          |
| FAM49A. 3  | 1. 02E-20 | 0. 424433 | 0. 226 | 0. 16  | 1. 52E-16 M1 | FAM49A         |
| KIF2C. 2   | 1. 04E-20 | -0. 14131 | 0. 004 | 0. 051 | 1. 55E-16 M1 | KIF2C          |
| CLOCK. 3   | 1. 06E-20 | -0. 11751 | 0. 06  | 0. 142 | 1. 58E-16 M1 | CLOCK          |
| FHL2. 1    | 1. 06E-20 | -0. 11477 | 0. 006 | 0. 054 | 1. 59E-16 M1 | FHL2           |
| BTBD19     | 1. 09E-20 | 0. 162583 | 0. 046 | 0. 015 | 1. 63E-16 M1 | BTBD19         |
| KCNN2. 1   | 1. 10E-20 | -0. 11754 | 0      | 0. 043 | 1. 64E-16 M1 | KCNN2          |
| VWA3B. 1   | 1. 17E-20 | -0. 10675 | 0. 001 | 0. 045 | 1. 75E-16 M1 | VWA3B          |
| GUCY1A2    | 1. 20E-20 | -0. 11704 | 0. 001 | 0. 044 | 1. 79E-16 M1 | GUCY1A2        |
| ECT2. 2    | 1. 21E-20 | -0. 12188 | 0. 008 | 0. 058 | 1. 81E-16 M1 | ECT2           |
| TMEM86A. 3 | 1. 22E-20 | 0. 227462 | 0. 086 | 0. 039 | 1. 82E-16 M1 | TMEM86A        |
| SSH2. 4    | 1. 22E-20 | 0. 395675 | 0. 232 | 0. 165 | 1. 82E-16 M1 | SSH2           |
| ALDOA. 3   | 1. 25E-20 | -0. 22833 | 0. 796 | 0. 855 | 1. 87E-16 M1 | ALDOA          |
| EIF3H. 2   | 1. 31E-20 | 0. 149851 | 0. 653 | 0. 672 | 1. 96E-16 M1 | EIF3H          |
| AACS       | 1. 31E-20 | -0. 11176 | 0. 016 | 0. 073 | 1. 96E-16 M1 | AACS           |
| ACTN2      | 1. 32E-20 | -0. 11422 | 0. 004 | 0. 05  | 1. 97E-16 M1 | ACTN2          |
| RHPN2. 1   | 1. 34E-20 | -0. 124   | 0. 002 | 0. 046 | 2. 00E-16 M1 | RHPN2          |
| VWA5A. 2   | 1. 35E-20 | -0. 14751 | 0. 034 | 0. 101 | 2. 01E-16 M1 | VWA5A          |
| SCN1B. 3   | 1. 36E-20 | 0. 307637 | 0. 116 | 0. 061 | 2. 03E-16 M1 | SCN1B          |
| BRSK2. 1   | 1. 40E-20 | -0. 11682 | 0. 002 | 0. 047 | 2. 09E-16 M1 | BRSK2          |
| HNRNPK. 2  | 1. 40E-20 | -0. 18614 | 0. 678 | 0. 811 | 2. 10E-16 M1 | HNRNPK         |
| BTG1. 4    | 1. 41E-20 | 0. 121136 | 0. 736 | 0. 679 | 2. 10E-16 M1 | BTG1           |
| NECAB1. 3  | 1. 45E-20 | -0. 20026 | 0. 001 | 0. 045 | 2. 17E-16 M1 | NECAB1         |
| LRRC23     | 1. 48E-20 | -0. 10691 | 0. 061 | 0. 144 | 2. 21E-16 M1 | LRRC23         |
| PLXND1. 3  | 1. 50E-20 | 0. 337743 | 0. 15  | 0. 088 | 2. 25E-16 M1 | PLXND1         |
| SNRPC. 1   | 1. 51E-20 | -0. 15441 | 0. 354 | 0. 544 | 2. 25E-16 M1 | SNRPC          |
| UBE2E1. 2  | 1. 51E-20 | -0. 13674 | 0. 307 | 0. 48  | 2. 25E-16 M1 | UBE2E1         |
| FLVCR2. 1  | 1. 53E-20 | 0. 17372  | 0. 069 | 0. 028 | 2. 29E-16 M1 | FLVCR2         |
| PDZRN4. 2  | 1. 54E-20 | -0. 16653 | 0. 002 | 0. 046 | 2. 29E-16 M1 | PDZRN4         |
| KLF15      | 1. 56E-20 | -0. 12694 | 0. 002 | 0. 047 | 2. 33E-16 M1 | KLF15          |
| SYN1       | 1. 59E-20 | -0. 13038 | 0. 001 | 0. 045 | 2. 38E-16 M1 | SYN1           |
| MMD. 3     | 1. 60E-20 | 0. 364886 | 0. 295 | 0. 234 | 2. 39E-16 M1 | MMD            |
| HHLA3. 4   | 1. 66E-20 | -0. 12551 | 0. 068 | 0. 154 | 2. 48E-16 M1 | HHLA3          |
| FBXO16     | 1. 74E-20 | -0. 12213 | 0. 003 | 0. 048 | 2. 60E-16 M1 | FBXO16         |
| PSMC5. 1   | 1. 78E-20 | -0. 18058 | 0. 401 | 0. 585 | 2. 65E-16 M1 | PSMC5          |
| RP11-430H  | 1. 83E-20 | -0. 11212 | 0. 002 | 0. 046 | 2. 73E-16 M1 | RP11-430H10. 1 |
| RP11-315A  | 1. 89E-20 | -0. 13251 | 0      | 0. 042 | 2. 83E-16 M1 | RP11-315A16. 1 |
| GFPT1. 3   | 1. 91E-20 | -0. 11324 | 0. 037 | 0. 107 | 2. 85E-16 M1 | GFPT1          |
| SH3YL1. 3  | 2. 06E-20 | -0. 12701 | 0. 099 | 0. 198 | 3. 07E-16 M1 | SH3YL1         |
| AC018647.  | 2. 12E-20 | -0. 24928 | 0. 004 | 0. 049 | 3. 16E-16 M1 | AC018647. 3    |
| BNC2       | 2. 16E-20 | 0. 194205 | 0. 056 | 0. 02  | 3. 23E-16 M1 | BNC2           |
| ARX. 3     | 2. 21E-20 | -0. 15933 | 0. 003 | 0. 047 | 3. 31E-16 M1 | ARX            |
| KCNQ3. 1   | 2. 26E-20 | 0. 221653 | 0. 079 | 0. 034 | 3. 37E-16 M1 | KCNQ3          |

|            |           |           |        |        |           |    |                |
|------------|-----------|-----------|--------|--------|-----------|----|----------------|
| SAA1. 3    | 2. 31E-20 | -0. 94708 | 0. 059 | 0. 131 | 3. 45E-16 | M1 | SAA1           |
| ARG2. 2    | 2. 39E-20 | 0. 333944 | 0. 151 | 0. 089 | 3. 57E-16 | M1 | ARG2           |
| EGLN3. 1   | 2. 54E-20 | -0. 18076 | 0. 016 | 0. 072 | 3. 80E-16 | M1 | EGLN3          |
| PGAM2. 3   | 2. 61E-20 | -0. 19635 | 0. 007 | 0. 056 | 3. 90E-16 | M1 | PGAM2          |
| SLC6A9     | 2. 62E-20 | -0. 13217 | 0. 005 | 0. 051 | 3. 92E-16 | M1 | SLC6A9         |
| C22orf29.  | 2. 65E-20 | -0. 11002 | 0. 016 | 0. 073 | 3. 95E-16 | M1 | C22orf29       |
| INTS7      | 2. 73E-20 | -0. 12392 | 0. 014 | 0. 068 | 4. 08E-16 | M1 | INTS7          |
| RNF144A. 1 | 2. 74E-20 | -0. 13882 | 0. 004 | 0. 05  | 4. 09E-16 | M1 | RNF144A        |
| NARS. 1    | 2. 75E-20 | -0. 13958 | 0. 292 | 0. 466 | 4. 11E-16 | M1 | NARS           |
| RP11-412E  | 2. 79E-20 | -0. 11142 | 0. 004 | 0. 049 | 4. 17E-16 | M1 | RP11-412D9. 4  |
| GRHPR. 2   | 3. 01E-20 | -0. 10784 | 0. 259 | 0. 419 | 4. 49E-16 | M1 | GRHPR          |
| TAGLN2. 4  | 3. 17E-20 | -0. 2813  | 0. 406 | 0. 536 | 4. 73E-16 | M1 | TAGLN2         |
| MKRN3. 1   | 3. 21E-20 | -0. 12192 | 0. 005 | 0. 052 | 4. 79E-16 | M1 | MKRN3          |
| PPP1R10. 3 | 3. 23E-20 | 0. 400759 | 0. 33  | 0. 279 | 4. 83E-16 | M1 | PPP1R10        |
| RP5-1177M  | 3. 35E-20 | -0. 20334 | 0. 006 | 0. 053 | 5. 01E-16 | M1 | RP5-1177M21. 1 |
| SAAL1      | 3. 39E-20 | -0. 12146 | 0. 061 | 0. 141 | 5. 07E-16 | M1 | SAAL1          |
| MRPS25     | 3. 42E-20 | -0. 12119 | 0. 16  | 0. 285 | 5. 11E-16 | M1 | MRPS25         |
| ZNF441     | 3. 48E-20 | -0. 1031  | 0. 006 | 0. 053 | 5. 20E-16 | M1 | ZNF441         |
| WDR86      | 3. 52E-20 | -0. 1105  | 0. 005 | 0. 051 | 5. 27E-16 | M1 | WDR86          |
| C19orf60.  | 3. 55E-20 | 0. 219034 | 0. 512 | 0. 5   | 5. 31E-16 | M1 | C19orf60       |
| KCND2. 1   | 3. 57E-20 | -0. 12429 | 0. 001 | 0. 043 | 5. 34E-16 | M1 | KCND2          |
| RALGPS1. 1 | 3. 62E-20 | -0. 11908 | 0. 011 | 0. 062 | 5. 41E-16 | M1 | RALGPS1        |
| PDE1C      | 3. 66E-20 | -0. 16447 | 0. 003 | 0. 047 | 5. 47E-16 | M1 | PDE1C          |
| DEPDC1B    | 3. 92E-20 | -0. 11241 | 0. 001 | 0. 043 | 5. 86E-16 | M1 | DEPDC1B        |
| EPHB1. 1   | 3. 97E-20 | -0. 13837 | 0. 006 | 0. 054 | 5. 93E-16 | M1 | EPHB1          |
| BCO2       | 4. 03E-20 | 0. 3319   | 0. 085 | 0. 039 | 6. 02E-16 | M1 | BCO2           |
| MCM5. 4    | 4. 03E-20 | 0. 340684 | 0. 207 | 0. 138 | 6. 03E-16 | M1 | MCM5           |
| SPATA13. 3 | 4. 14E-20 | 0. 416755 | 0. 218 | 0. 154 | 6. 18E-16 | M1 | SPATA13        |
| NBL1. 4    | 4. 15E-20 | 0. 396076 | 0. 23  | 0. 168 | 6. 20E-16 | M1 | NBL1           |
| NSMCE1. 2  | 4. 18E-20 | -0. 13053 | 0. 27  | 0. 431 | 6. 25E-16 | M1 | NSMCE1         |
| MEAF6. 3   | 4. 27E-20 | -0. 11136 | 0. 325 | 0. 507 | 6. 39E-16 | M1 | MEAF6          |
| PCMT1. 2   | 4. 28E-20 | -0. 14859 | 0. 385 | 0. 572 | 6. 39E-16 | M1 | PCMT1          |
| VRK2. 4    | 4. 38E-20 | 0. 263456 | 0. 096 | 0. 046 | 6. 54E-16 | M1 | VRK2           |
| SOD3. 2    | 4. 52E-20 | -0. 11109 | 0. 003 | 0. 047 | 6. 75E-16 | M1 | SOD3           |
| RP11-127E  | 4. 64E-20 | -0. 10409 | 0. 007 | 0. 055 | 6. 93E-16 | M1 | RP11-127B20. 2 |
| RALGDS. 3  | 4. 73E-20 | -0. 15642 | 0. 08  | 0. 167 | 7. 06E-16 | M1 | RALGDS         |
| MYBL2. 3   | 4. 78E-20 | -0. 10337 | 0. 006 | 0. 053 | 7. 15E-16 | M1 | MYBL2          |
| RIPPLY2    | 5. 03E-20 | -0. 10579 | 0. 002 | 0. 045 | 7. 52E-16 | M1 | RIPPLY2        |
| CENPA. 4   | 5. 40E-20 | -0. 15117 | 0. 008 | 0. 057 | 8. 06E-16 | M1 | CENPA          |
| CPLX1. 1   | 5. 47E-20 | -0. 16027 | 0. 004 | 0. 05  | 8. 18E-16 | M1 | CPLX1          |
| SNX9. 4    | 5. 48E-20 | 0. 391904 | 0. 242 | 0. 179 | 8. 18E-16 | M1 | SNX9           |
| NDUFA6. 2  | 5. 50E-20 | -0. 21349 | 0. 423 | 0. 601 | 8. 22E-16 | M1 | NDUFA6         |
| DDX25. 1   | 5. 59E-20 | -0. 12799 | 0. 003 | 0. 047 | 8. 35E-16 | M1 | DDX25          |
| CDKAL1. 1  | 5. 86E-20 | -0. 1216  | 0. 037 | 0. 105 | 8. 75E-16 | M1 | CDKAL1         |
| CCT4. 1    | 5. 87E-20 | -0. 14187 | 0. 402 | 0. 592 | 8. 77E-16 | M1 | CCT4           |
| DHFRL1. 1  | 5. 97E-20 | -0. 1119  | 0. 018 | 0. 075 | 8. 93E-16 | M1 | DHFRL1         |
| SUSD4. 1   | 6. 05E-20 | -0. 13567 | 0. 004 | 0. 048 | 9. 04E-16 | M1 | SUSD4          |
| GPC6. 1    | 6. 14E-20 | -0. 12799 | 0. 004 | 0. 049 | 9. 18E-16 | M1 | GPC6           |
| C15orf48.  | 6. 29E-20 | 0. 229365 | 0. 117 | 0. 06  | 9. 40E-16 | M1 | C15orf48       |
| TTC39C. 1  | 6. 40E-20 | -0. 11179 | 0. 028 | 0. 091 | 9. 57E-16 | M1 | TTC39C         |
| SLC39A4. 2 | 6. 49E-20 | 0. 248761 | 0. 142 | 0. 08  | 9. 70E-16 | M1 | SLC39A4        |

|             |          |          |       |       |          |    |              |
|-------------|----------|----------|-------|-------|----------|----|--------------|
| TNR. 3      | 6.60E-20 | -0.18652 | 0.012 | 0.063 | 9.87E-16 | M1 | TNR          |
| CLEC11A. 3  | 6.76E-20 | -0.10192 | 0.138 | 0.25  | 1.01E-15 | M1 | CLEC11A      |
| DEPDC1. 1   | 6.77E-20 | -0.11395 | 0.001 | 0.042 | 1.01E-15 | M1 | DEPDC1       |
| DLGAP5. 3   | 6.86E-20 | -0.1283  | 0.001 | 0.042 | 1.03E-15 | M1 | DLGAP5       |
| RUNX1T1. 1  | 6.99E-20 | -0.11862 | 0     | 0.041 | 1.04E-15 | M1 | RUNX1T1      |
| ID3. 4      | 7.42E-20 | -0.28306 | 0.17  | 0.283 | 1.11E-15 | M1 | ID3          |
| STAT5A. 4   | 7.42E-20 | 0.213192 | 0.092 | 0.044 | 1.11E-15 | M1 | STAT5A       |
| SHMT1. 3    | 7.48E-20 | 0.375917 | 0.17  | 0.107 | 1.12E-15 | M1 | SHMT1        |
| SGPP1. 3    | 7.64E-20 | 0.261689 | 0.126 | 0.069 | 1.14E-15 | M1 | SGPP1        |
| NDC80. 2    | 7.76E-20 | -0.15566 | 0.008 | 0.056 | 1.16E-15 | M1 | NDC80        |
| EEF1A2      | 7.85E-20 | -0.1055  | 0.002 | 0.045 | 1.17E-15 | M1 | EEF1A2       |
| UNC80       | 7.95E-20 | -0.10304 | 0.003 | 0.047 | 1.19E-15 | M1 | UNC80        |
| MND1. 1     | 8.11E-20 | -0.11817 | 0.006 | 0.052 | 1.21E-15 | M1 | MND1         |
| METTL14. 2  | 8.13E-20 | -0.10527 | 0.036 | 0.104 | 1.21E-15 | M1 | METTL14      |
| C14orf37. 8 | 8.39E-20 | -0.11367 | 0.05  | 0.124 | 1.25E-15 | M1 | C14orf37     |
| ATP1A2. 2   | 8.84E-20 | -0.2704  | 0.017 | 0.071 | 1.32E-15 | M1 | ATP1A2       |
| KCNMA1. 3   | 8.95E-20 | 0.372361 | 0.197 | 0.132 | 1.34E-15 | M1 | KCNMA1       |
| RAB31. 4    | 9.44E-20 | 0.250679 | 0.484 | 0.455 | 1.41E-15 | M1 | RAB31        |
| KIF23. 2    | 9.56E-20 | -0.11983 | 0.003 | 0.047 | 1.43E-15 | M1 | KIF23        |
| ADCYAP1R1   | 9.73E-20 | -0.11856 | 0.008 | 0.056 | 1.45E-15 | M1 | ADCYAP1R1    |
| DICER1-AS   | 9.82E-20 | -0.13111 | 0.011 | 0.062 | 1.47E-15 | M1 | DICER1-AS1   |
| FHOD3       | 9.91E-20 | -0.10457 | 0.001 | 0.043 | 1.48E-15 | M1 | FHOD3        |
| KRT7. 1     | 9.97E-20 | -0.15833 | 0.003 | 0.046 | 1.49E-15 | M1 | KRT7         |
| ZNF14. 1    | 1.00E-19 | -0.11122 | 0.009 | 0.059 | 1.50E-15 | M1 | ZNF14        |
| EPB41L4A-   | 1.01E-19 | -0.12089 | 0.187 | 0.315 | 1.52E-15 | M1 | EPB41L4A-AS1 |
| NUDT3. 4    | 1.03E-19 | 0.326986 | 0.418 | 0.396 | 1.53E-15 | M1 | NUDT3        |
| LINGO1. 1   | 1.09E-19 | -0.12977 | 0.001 | 0.043 | 1.63E-15 | M1 | LINGO1       |
| LIMD2. 4    | 1.13E-19 | 0.411246 | 0.296 | 0.239 | 1.69E-15 | M1 | LIMD2        |
| ERP29. 1    | 1.16E-19 | 0.168582 | 0.606 | 0.612 | 1.74E-15 | M1 | ERP29        |
| MIR7-3HG.   | 1.20E-19 | -0.20837 | 0     | 0.041 | 1.80E-15 | M1 | MIR7-3HG     |
| MAL. 3      | 1.21E-19 | -0.28086 | 0.003 | 0.047 | 1.80E-15 | M1 | MAL          |
| MAPK8IP2.   | 1.23E-19 | -0.10908 | 0.005 | 0.05  | 1.83E-15 | M1 | MAPK8IP2     |
| GPR160. 1   | 1.23E-19 | 0.154515 | 0.053 | 0.019 | 1.83E-15 | M1 | GPR160       |
| UBE2N. 2    | 1.23E-19 | -0.1449  | 0.366 | 0.553 | 1.84E-15 | M1 | UBE2N        |
| ALPK3       | 1.27E-19 | 0.161396 | 0.048 | 0.016 | 1.89E-15 | M1 | ALPK3        |
| HPRT1. 4    | 1.31E-19 | 0.339894 | 0.289 | 0.219 | 1.96E-15 | M1 | HPRT1        |
| BCL11A. 2   | 1.32E-19 | -0.13053 | 0.008 | 0.056 | 1.98E-15 | M1 | BCL11A       |
| TRO. 1      | 1.33E-19 | -0.11202 | 0.016 | 0.071 | 1.98E-15 | M1 | TRO          |
| TJP2. 1     | 1.38E-19 | -0.14757 | 0.011 | 0.062 | 2.06E-15 | M1 | TJP2         |
| HNRNPH3. 3  | 1.41E-19 | -0.1099  | 0.303 | 0.474 | 2.10E-15 | M1 | HNRNPH3      |
| APOBR. 3    | 1.45E-19 | 0.187553 | 0.073 | 0.031 | 2.17E-15 | M1 | APOBR        |
| ERGIC3. 2   | 1.47E-19 | -0.18894 | 0.44  | 0.603 | 2.20E-15 | M1 | ERGIC3       |
| OIP5. 2     | 1.48E-19 | -0.11309 | 0.004 | 0.049 | 2.22E-15 | M1 | OIP5         |
| NGFR. 1     | 1.59E-19 | -0.14187 | 0.002 | 0.043 | 2.37E-15 | M1 | NGFR         |
| CITED2. 3   | 1.59E-19 | 0.318737 | 0.395 | 0.344 | 2.38E-15 | M1 | CITED2       |
| GIMAP8. 1   | 1.64E-19 | 0.145619 | 0.044 | 0.014 | 2.45E-15 | M1 | GIMAP8       |
| ZNF385A. 4  | 1.64E-19 | 0.310059 | 0.192 | 0.125 | 2.46E-15 | M1 | ZNF385A      |
| CLGN        | 1.66E-19 | -0.13342 | 0.002 | 0.043 | 2.48E-15 | M1 | CLGN         |
| SUMO3. 4    | 1.68E-19 | 0.267641 | 0.463 | 0.434 | 2.51E-15 | M1 | SUMO3        |
| PFDN2. 2    | 1.70E-19 | -0.16529 | 0.452 | 0.642 | 2.55E-15 | M1 | PFDN2        |
| FABP6. 3    | 1.72E-19 | -0.16277 | 0.003 | 0.045 | 2.57E-15 | M1 | FABP6        |

|           |          |          |       |       |          |    |               |
|-----------|----------|----------|-------|-------|----------|----|---------------|
| SCAND1.3  | 1.81E-19 | -0.15195 | 0.438 | 0.597 | 2.71E-15 | M1 | SCAND1        |
| SLC32A1.2 | 1.85E-19 | -0.16841 | 0.002 | 0.044 | 2.76E-15 | M1 | SLC32A1       |
| NR1D1.3   | 1.91E-19 | -0.10801 | 0.009 | 0.057 | 2.86E-15 | M1 | NR1D1         |
| SPIB.1    | 1.96E-19 | 0.145466 | 0.033 | 0.008 | 2.93E-15 | M1 | SPIB          |
| SPTLC3    | 1.97E-19 | 0.16878  | 0.038 | 0.011 | 2.95E-15 | M1 | SPTLC3        |
| BCAT2.2   | 1.98E-19 | -0.12607 | 0.07  | 0.152 | 2.96E-15 | M1 | BCAT2         |
| PSORS1C1. | 2.00E-19 | -0.14908 | 0.002 | 0.043 | 2.99E-15 | M1 | PSORS1C1      |
| NAT8L.1   | 2.13E-19 | -0.10563 | 0.009 | 0.058 | 3.19E-15 | M1 | NAT8L         |
| CD180.3   | 2.14E-19 | 0.206211 | 0.071 | 0.03  | 3.20E-15 | M1 | CD180         |
| HMMR.1    | 2.23E-19 | -0.13499 | 0.004 | 0.047 | 3.33E-15 | M1 | HMMR          |
| RMI1.1    | 2.29E-19 | -0.11366 | 0.015 | 0.069 | 3.42E-15 | M1 | RMI1          |
| UTP3.1    | 2.33E-19 | -0.10138 | 0.069 | 0.152 | 3.48E-15 | M1 | UTP3          |
| ZNF419.1  | 2.38E-19 | -0.12301 | 0.017 | 0.071 | 3.55E-15 | M1 | ZNF419        |
| PKMYT1.2  | 2.40E-19 | -0.12194 | 0.005 | 0.05  | 3.59E-15 | M1 | PKMYT1        |
| AP3S1.1   | 2.43E-19 | -0.10629 | 0.288 | 0.455 | 3.63E-15 | M1 | AP3S1         |
| EXOSC2.1  | 2.48E-19 | -0.10288 | 0.037 | 0.104 | 3.71E-15 | M1 | EXOSC2        |
| DNAJC3-AS | 2.52E-19 | -0.12288 | 0.009 | 0.058 | 3.77E-15 | M1 | DNAJC3-AS1    |
| C11orf95  | 2.55E-19 | -0.1001  | 0.005 | 0.05  | 3.81E-15 | M1 | C11orf95      |
| ZWINT.3   | 2.60E-19 | -0.16354 | 0.038 | 0.104 | 3.89E-15 | M1 | ZWINT         |
| SCN9A.1   | 2.60E-19 | -0.15668 | 0.001 | 0.042 | 3.89E-15 | M1 | SCN9A         |
| FAHD2B.1  | 2.62E-19 | -0.10785 | 0.03  | 0.093 | 3.91E-15 | M1 | FAHD2B        |
| RP4-798A1 | 2.72E-19 | -0.10974 | 0.004 | 0.047 | 4.06E-15 | M1 | RP4-798A10.7  |
| ZNF550.2  | 2.77E-19 | -0.12485 | 0.008 | 0.056 | 4.14E-15 | M1 | ZNF550        |
| FSD1L.1   | 2.82E-19 | -0.1001  | 0.01  | 0.059 | 4.22E-15 | M1 | FSD1L         |
| GDF15.3   | 2.86E-19 | -0.23933 | 0.022 | 0.079 | 4.28E-15 | M1 | GDF15         |
| PA2G4     | 2.97E-19 | -0.17235 | 0.385 | 0.57  | 4.43E-15 | M1 | PA2G4         |
| CAT.3     | 3.01E-19 | 0.311988 | 0.353 | 0.295 | 4.50E-15 | M1 | CAT           |
| SSR3.4    | 3.04E-19 | 0.186676 | 0.538 | 0.524 | 4.54E-15 | M1 | SSR3          |
| TRIT1.1   | 3.13E-19 | -0.11037 | 0.034 | 0.098 | 4.68E-15 | M1 | TRIT1         |
| CHST13.1  | 3.15E-19 | 0.115989 | 0.041 | 0.012 | 4.71E-15 | M1 | CHST13        |
| NCAPG.2   | 3.19E-19 | -0.12316 | 0.005 | 0.049 | 4.77E-15 | M1 | NCAPG         |
| BCL11B.1  | 3.20E-19 | -0.15588 | 0     | 0.04  | 4.78E-15 | M1 | BCL11B        |
| GABARAPL1 | 3.28E-19 | 0.384582 | 0.343 | 0.288 | 4.90E-15 | M1 | GABARAPL1     |
| ERBB3.2   | 3.35E-19 | -0.1911  | 0.003 | 0.045 | 5.01E-15 | M1 | ERBB3         |
| RNF112    | 3.43E-19 | -0.10409 | 0.002 | 0.044 | 5.12E-15 | M1 | RNF112        |
| RORB.1    | 3.45E-19 | -0.14954 | 0.003 | 0.045 | 5.15E-15 | M1 | RORB          |
| DAPP1.3   | 3.68E-19 | 0.175716 | 0.058 | 0.022 | 5.50E-15 | M1 | DAPP1         |
| INA.2     | 3.69E-19 | -0.14567 | 0.005 | 0.05  | 5.52E-15 | M1 | INA           |
| RAPGEF5.2 | 3.70E-19 | -0.21641 | 0.005 | 0.05  | 5.53E-15 | M1 | RAPGEF5       |
| TCEAL6.1  | 4.09E-19 | -0.17385 | 0.002 | 0.043 | 6.11E-15 | M1 | TCEAL6        |
| CDK5R2.1  | 4.31E-19 | -0.14172 | 0.001 | 0.04  | 6.44E-15 | M1 | CDK5R2        |
| RHOC.3    | 4.44E-19 | -0.22049 | 0.416 | 0.557 | 6.64E-15 | M1 | RHOC          |
| BCYRN1.1  | 4.61E-19 | -0.10939 | 0.011 | 0.06  | 6.89E-15 | M1 | BCYRN1        |
| CD300LB.1 | 4.70E-19 | 0.124093 | 0.028 | 0.006 | 7.03E-15 | M1 | CD300LB       |
| FIS1.3    | 4.88E-19 | -0.18072 | 0.483 | 0.669 | 7.29E-15 | M1 | FIS1          |
| ARMCX5.1  | 5.16E-19 | -0.10433 | 0.025 | 0.085 | 7.71E-15 | M1 | ARMCX5        |
| ZNF398.3  | 5.19E-19 | -0.10377 | 0.014 | 0.066 | 7.75E-15 | M1 | ZNF398        |
| MCAM.1    | 5.23E-19 | -0.10452 | 0.005 | 0.05  | 7.82E-15 | M1 | MCAM          |
| PAQR6.2   | 5.23E-19 | -0.14026 | 0.024 | 0.082 | 7.82E-15 | M1 | PAQR6         |
| RP11-930F | 5.40E-19 | 0.111797 | 0.017 | 0.002 | 8.07E-15 | M1 | RP11-930P14.1 |
| ZFR2.1    | 5.67E-19 | -0.13219 | 0.003 | 0.045 | 8.47E-15 | M1 | ZFR2          |



|            |          |          |       |       |          |    |                |
|------------|----------|----------|-------|-------|----------|----|----------------|
| COMT. 4    | 5.86E-19 | 0.178525 | 0.555 | 0.546 | 8.76E-15 | M1 | COMT           |
| RIPK2. 4   | 5.97E-19 | 0.376098 | 0.222 | 0.157 | 8.93E-15 | M1 | RIPK2          |
| LINC01004  | 5.99E-19 | 0.146939 | 0.037 | 0.01  | 8.95E-15 | M1 | LINC01004      |
| ARPP19. 2  | 6.00E-19 | -0.10894 | 0.287 | 0.453 | 8.96E-15 | M1 | ARPP19         |
| HPS3. 2    | 6.03E-19 | 0.372045 | 0.193 | 0.132 | 9.00E-15 | M1 | HPS3           |
| RP11-1143  | 6.31E-19 | 0.237464 | 0.091 | 0.044 | 9.44E-15 | M1 | RP11-1143G9. 4 |
| USP31. 3   | 6.48E-19 | -0.10554 | 0.011 | 0.06  | 9.68E-15 | M1 | USP31          |
| RAB3C      | 6.48E-19 | -0.14118 | 0.003 | 0.045 | 9.69E-15 | M1 | RAB3C          |
| CDCA5. 2   | 6.89E-19 | -0.11685 | 0.007 | 0.053 | 1.03E-14 | M1 | CDCA5          |
| LRRC61. 3  | 7.02E-19 | -0.15142 | 0.019 | 0.073 | 1.05E-14 | M1 | LRRC61         |
| NOVA1-AS1  | 7.17E-19 | -0.10355 | 0.001 | 0.041 | 1.07E-14 | M1 | NOVA1-AS1      |
| CTDSP2. 2  | 7.32E-19 | -0.13805 | 0.178 | 0.296 | 1.09E-14 | M1 | CTDSP2         |
| LRCH2      | 7.33E-19 | -0.11678 | 0.001 | 0.04  | 1.10E-14 | M1 | LRCH2          |
| MSRA. 3    | 7.59E-19 | -0.12482 | 0.161 | 0.275 | 1.13E-14 | M1 | MSRA           |
| MLKL. 1    | 7.80E-19 | 0.174569 | 0.058 | 0.022 | 1.17E-14 | M1 | MLKL           |
| MASP1. 1   | 8.49E-19 | -0.14811 | 0.004 | 0.047 | 1.27E-14 | M1 | MASP1          |
| PGAM1. 2   | 9.44E-19 | -0.19964 | 0.365 | 0.529 | 1.41E-14 | M1 | PGAM1          |
| PERP. 1    | 9.56E-19 | -0.11204 | 0.002 | 0.043 | 1.43E-14 | M1 | PERP           |
| IBSP. 2    | 9.56E-19 | 0.193987 | 0.051 | 0.018 | 1.43E-14 | M1 | IBSP           |
| DECR1. 2   | 9.69E-19 | -0.13368 | 0.281 | 0.438 | 1.45E-14 | M1 | DECR1          |
| METTL18    | 1.02E-18 | -0.10768 | 0.022 | 0.078 | 1.52E-14 | M1 | METTL18        |
| H2AFV. 3   | 1.03E-18 | -0.17407 | 0.384 | 0.55  | 1.54E-14 | M1 | H2AFV          |
| ATP6VOD1.  | 1.06E-18 | 0.228883 | 0.509 | 0.51  | 1.58E-14 | M1 | ATP6VOD1       |
| LOX. 2     | 1.09E-18 | -0.19854 | 0.007 | 0.052 | 1.63E-14 | M1 | LOX            |
| CNTN2. 2   | 1.16E-18 | -0.28764 | 0.005 | 0.048 | 1.73E-14 | M1 | CNTN2          |
| RABGAP1L.  | 1.16E-18 | 0.297492 | 0.16  | 0.1   | 1.74E-14 | M1 | RABGAP1L       |
| FOSL2. 4   | 1.25E-18 | 0.375925 | 0.238 | 0.176 | 1.86E-14 | M1 | FOSL2          |
| MCM3. 2    | 1.30E-18 | -0.12678 | 0.074 | 0.156 | 1.94E-14 | M1 | MCM3           |
| PACRG. 1   | 1.42E-18 | -0.13832 | 0.003 | 0.043 | 2.12E-14 | M1 | PACRG          |
| C8orf59. 2 | 1.42E-18 | -0.13612 | 0.262 | 0.419 | 2.13E-14 | M1 | C8orf59        |
| L1CAM. 1   | 1.45E-18 | -0.14968 | 0.002 | 0.041 | 2.17E-14 | M1 | L1CAM          |
| FBRSL1. 1  | 1.45E-18 | -0.10441 | 0.013 | 0.063 | 2.17E-14 | M1 | FBRSL1         |
| CADM1. 2   | 1.50E-18 | -0.12872 | 0.215 | 0.347 | 2.25E-14 | M1 | CADM1          |
| TFAP2A. 1  | 1.51E-18 | -0.13876 | 0.003 | 0.043 | 2.25E-14 | M1 | TFAP2A         |
| EIF6       | 1.51E-18 | -0.14367 | 0.375 | 0.55  | 2.25E-14 | M1 | EIF6           |
| CALCRL     | 1.51E-18 | -0.12125 | 0.005 | 0.048 | 2.26E-14 | M1 | CALCRL         |
| GSDMA      | 1.54E-18 | 0.106675 | 0.039 | 0.012 | 2.30E-14 | M1 | GSDMA          |
| PNP. 2     | 1.57E-18 | 0.31793  | 0.153 | 0.093 | 2.34E-14 | M1 | PNP            |
| CSF2RB. 3  | 1.58E-18 | 0.165955 | 0.052 | 0.019 | 2.35E-14 | M1 | CSF2RB         |
| HJURP. 2   | 1.58E-18 | -0.12386 | 0.004 | 0.046 | 2.37E-14 | M1 | HJURP          |
| GPR173     | 1.63E-18 | -0.10189 | 0.002 | 0.042 | 2.44E-14 | M1 | GPR173         |
| PABPC3. 1  | 1.64E-18 | 0.166656 | 0.052 | 0.019 | 2.46E-14 | M1 | PABPC3         |
| FCGR3B     | 1.67E-18 | 0.11876  | 0.02  | 0.003 | 2.50E-14 | M1 | FCGR3B         |
| C19orf53.  | 1.69E-18 | -0.22198 | 0.569 | 0.706 | 2.53E-14 | M1 | C19orf53       |
| FLT1. 2    | 1.71E-18 | 0.142658 | 0.045 | 0.015 | 2.55E-14 | M1 | FLT1           |
| BUB3. 2    | 1.72E-18 | -0.1078  | 0.2   | 0.329 | 2.57E-14 | M1 | BUB3           |
| ANXA7. 3   | 1.81E-18 | 0.311058 | 0.376 | 0.331 | 2.71E-14 | M1 | ANXA7          |
| WDR19. 3   | 1.88E-18 | -0.10352 | 0.009 | 0.055 | 2.81E-14 | M1 | WDR19          |
| MEA1       | 1.91E-18 | -0.12821 | 0.295 | 0.461 | 2.85E-14 | M1 | MEA1           |
| ACO06129.  | 1.91E-18 | 0.168523 | 0.034 | 0.009 | 2.85E-14 | M1 | ACO06129. 2    |
| OSGEPL1    | 1.99E-18 | -0.10783 | 0.022 | 0.078 | 2.98E-14 | M1 | OSGEPL1        |

|             |           |           |        |        |           |    |               |
|-------------|-----------|-----------|--------|--------|-----------|----|---------------|
| MAP2K3. 4   | 2. 00E-18 | 0. 382659 | 0. 238 | 0. 179 | 2. 99E-14 | M1 | MAP2K3        |
| DARS. 3     | 2. 04E-18 | -0. 12451 | 0. 274 | 0. 428 | 3. 05E-14 | M1 | DARS          |
| FANCI. 2    | 2. 07E-18 | -0. 10397 | 0. 008 | 0. 054 | 3. 09E-14 | M1 | FANCI         |
| ANXA1. 2    | 2. 09E-18 | 0. 115543 | 0. 497 | 0. 392 | 3. 13E-14 | M1 | ANXA1         |
| CCDC109B. 2 | 2. 14E-18 | -0. 13644 | 0. 239 | 0. 371 | 3. 20E-14 | M1 | CCDC109B      |
| NBEA        | 2. 19E-18 | -0. 11924 | 0. 01  | 0. 057 | 3. 27E-14 | M1 | NBEA          |
| SIRPB2. 1   | 2. 19E-18 | 0. 141743 | 0. 038 | 0. 011 | 3. 28E-14 | M1 | SIRPB2        |
| FAM124A. 1  | 2. 22E-18 | -0. 125   | 0. 003 | 0. 044 | 3. 32E-14 | M1 | FAM124A       |
| NEK2. 2     | 2. 24E-18 | -0. 12708 | 0. 001 | 0. 04  | 3. 35E-14 | M1 | NEK2          |
| FAM13C. 1   | 2. 32E-18 | -0. 12534 | 0. 005 | 0. 047 | 3. 47E-14 | M1 | FAM13C        |
| MAT2A. 3    | 2. 40E-18 | 0. 315258 | 0. 407 | 0. 379 | 3. 59E-14 | M1 | MAT2A         |
| PLA2G4C. 1  | 2. 45E-18 | -0. 10982 | 0. 007 | 0. 051 | 3. 65E-14 | M1 | PLA2G4C       |
| ALPK1       | 2. 53E-18 | 0. 214496 | 0. 069 | 0. 03  | 3. 78E-14 | M1 | ALPK1         |
| TK1. 3      | 2. 84E-18 | -0. 17202 | 0. 024 | 0. 08  | 4. 24E-14 | M1 | TK1           |
| HOXB2. 3    | 2. 85E-18 | -0. 1696  | 0. 034 | 0. 094 | 4. 26E-14 | M1 | HOXB2         |
| KCNC3       | 2. 87E-18 | 0. 149098 | 0. 04  | 0. 012 | 4. 29E-14 | M1 | KCNC3         |
| CTSK. 2     | 2. 90E-18 | -0. 12401 | 0. 011 | 0. 058 | 4. 34E-14 | M1 | CTSK          |
| HNRNPA2B1   | 3. 11E-18 | -0. 16799 | 0. 792 | 0. 856 | 4. 64E-14 | M1 | HNRNPA2B1     |
| MXD3. 3     | 3. 12E-18 | -0. 13069 | 0. 019 | 0. 072 | 4. 66E-14 | M1 | MXD3          |
| RP11-138A   | 3. 21E-18 | 0. 292734 | 0. 148 | 0. 089 | 4. 80E-14 | M1 | RP11-138A9. 2 |
| ZNF236. 2   | 3. 33E-18 | -0. 10458 | 0. 024 | 0. 081 | 4. 98E-14 | M1 | ZNF236        |
| MTHFD1L. 4  | 3. 36E-18 | 0. 355241 | 0. 185 | 0. 126 | 5. 02E-14 | M1 | MTHFD1L       |
| SLITRK2. 1  | 3. 41E-18 | -0. 11805 | 0. 002 | 0. 041 | 5. 10E-14 | M1 | SLITRK2       |
| TMEM126B    | 3. 48E-18 | -0. 11022 | 0. 199 | 0. 331 | 5. 19E-14 | M1 | TMEM126B      |
| TMEM160. 3  | 3. 48E-18 | -0. 13307 | 0. 327 | 0. 494 | 5. 20E-14 | M1 | TMEM160       |
| KIAA1107    | 3. 62E-18 | -0. 13498 | 0. 007 | 0. 05  | 5. 41E-14 | M1 | KIAA1107      |
| METTL9. 3   | 3. 68E-18 | -0. 14023 | 0. 331 | 0. 496 | 5. 50E-14 | M1 | METTL9        |
| STC2. 1     | 3. 71E-18 | -0. 17286 | 0. 006 | 0. 048 | 5. 55E-14 | M1 | STC2          |
| SDCBP2. 1   | 3. 72E-18 | -0. 1142  | 0. 007 | 0. 051 | 5. 55E-14 | M1 | SDCBP2        |
| C20orf24. 3 | 3. 88E-18 | -0. 13907 | 0. 33  | 0. 495 | 5. 80E-14 | M1 | C20orf24      |
| LINC01114   | 3. 97E-18 | -0. 12881 | 0. 001 | 0. 039 | 5. 94E-14 | M1 | LINC01114     |
| ATP5J. 2    | 4. 16E-18 | -0. 20561 | 0. 627 | 0. 776 | 6. 21E-14 | M1 | ATP5J         |
| WIPF3. 4    | 4. 25E-18 | 0. 303074 | 0. 138 | 0. 083 | 6. 36E-14 | M1 | WIPF3         |
| YBX3. 1     | 4. 33E-18 | 0. 258094 | 0. 431 | 0. 399 | 6. 48E-14 | M1 | YBX3          |
| CDCA8. 2    | 4. 34E-18 | -0. 1274  | 0. 005 | 0. 046 | 6. 49E-14 | M1 | CDCA8         |
| WDR91. 3    | 4. 38E-18 | 0. 330959 | 0. 131 | 0. 077 | 6. 54E-14 | M1 | WDR91         |
| MTRR. 2     | 4. 39E-18 | -0. 10128 | 0. 033 | 0. 094 | 6. 56E-14 | M1 | MTRR          |
| NME8        | 4. 44E-18 | 0. 102465 | 0. 02  | 0. 003 | 6. 64E-14 | M1 | NME8          |
| RCAN2. 1    | 4. 44E-18 | -0. 16004 | 0. 007 | 0. 051 | 6. 64E-14 | M1 | RCAN2         |
| NYAP1. 2    | 4. 64E-18 | -0. 12004 | 0. 003 | 0. 043 | 6. 94E-14 | M1 | NYAP1         |
| CLCF1. 2    | 4. 65E-18 | -0. 14886 | 0. 006 | 0. 048 | 6. 95E-14 | M1 | CLCF1         |
| LDHD        | 4. 66E-18 | 0. 140267 | 0. 047 | 0. 016 | 6. 96E-14 | M1 | LDHD          |
| DDX21. 2    | 4. 90E-18 | 0. 342096 | 0. 341 | 0. 292 | 7. 32E-14 | M1 | DDX21         |
| HOXC8       | 4. 92E-18 | -0. 14247 | 0. 002 | 0. 04  | 7. 35E-14 | M1 | HOXC8         |
| HSPD1. 3    | 5. 06E-18 | -0. 17386 | 0. 47  | 0. 644 | 7. 56E-14 | M1 | HSPD1         |
| LIFR-AS1    | 5. 52E-18 | -0. 10693 | 0. 001 | 0. 039 | 8. 25E-14 | M1 | LIFR-AS1      |
| COA7. 2     | 5. 58E-18 | -0. 10149 | 0. 019 | 0. 072 | 8. 34E-14 | M1 | COA7          |
| IL17D       | 5. 59E-18 | -0. 10447 | 0. 002 | 0. 04  | 8. 35E-14 | M1 | IL17D         |
| RAB14. 1    | 5. 74E-18 | -0. 11159 | 0. 281 | 0. 444 | 8. 57E-14 | M1 | RAB14         |
| ALDH18A1. 5 | 5. 79E-18 | -0. 10721 | 0. 034 | 0. 095 | 8. 66E-14 | M1 | ALDH18A1      |
| BUB1. 2     | 6. 03E-18 | -0. 11242 | 0. 005 | 0. 047 | 9. 01E-14 | M1 | BUB1          |

|            |           |           |        |        |           |    |               |
|------------|-----------|-----------|--------|--------|-----------|----|---------------|
| EIF3D. 3   | 6. 37E-18 | 0. 276397 | 0. 477 | 0. 476 | 9. 52E-14 | M1 | EIF3D         |
| PRCD. 1    | 6. 55E-18 | -0. 19334 | 0. 002 | 0. 04  | 9. 79E-14 | M1 | PRCD          |
| FGF12. 1   | 6. 69E-18 | -0. 1575  | 0. 01  | 0. 055 | 9. 99E-14 | M1 | FGF12         |
| DOCK11. 4  | 7. 50E-18 | 0. 239011 | 0. 093 | 0. 046 | 1. 12E-13 | M1 | DOCK11        |
| SIRPB1. 1  | 7. 64E-18 | 0. 112058 | 0. 03  | 0. 008 | 1. 14E-13 | M1 | SIRPB1        |
| MAP3K7CL.  | 7. 76E-18 | -0. 12263 | 0. 007 | 0. 05  | 1. 16E-13 | M1 | MAP3K7CL      |
| REC8. 2    | 8. 58E-18 | -0. 13087 | 0. 029 | 0. 087 | 1. 28E-13 | M1 | REC8          |
| STAT1. 2   | 8. 81E-18 | -0. 10411 | 0. 141 | 0. 247 | 1. 32E-13 | M1 | STAT1         |
| HBA2. 3    | 8. 93E-18 | 0. 197533 | 0. 256 | 0. 186 | 1. 33E-13 | M1 | HBA2          |
| CCDC142    | 9. 46E-18 | -0. 10747 | 0. 02  | 0. 073 | 1. 41E-13 | M1 | CCDC142       |
| TRAPPC2L.  | 1. 05E-17 | -0. 12721 | 0. 288 | 0. 446 | 1. 57E-13 | M1 | TRAPPC2L      |
| MPEG1. 3   | 1. 07E-17 | 0. 184298 | 0. 077 | 0. 035 | 1. 61E-13 | M1 | MPEG1         |
| COL4A5     | 1. 09E-17 | -0. 12183 | 0. 001 | 0. 037 | 1. 63E-13 | M1 | COL4A5        |
| PIR. 2     | 1. 09E-17 | -0. 13392 | 0. 015 | 0. 065 | 1. 63E-13 | M1 | PIR           |
| STAP2      | 1. 09E-17 | -0. 11508 | 0. 005 | 0. 047 | 1. 64E-13 | M1 | STAP2         |
| ABTB1. 4   | 1. 10E-17 | 0. 321558 | 0. 152 | 0. 094 | 1. 65E-13 | M1 | ABTB1         |
| TECR. 2    | 1. 22E-17 | -0. 18497 | 0. 406 | 0. 57  | 1. 82E-13 | M1 | TECR          |
| DPCD. 2    | 1. 24E-17 | -0. 11372 | 0. 09  | 0. 175 | 1. 85E-13 | M1 | DPCD          |
| AC084219.  | 1. 26E-17 | -0. 10972 | 0. 003 | 0. 042 | 1. 89E-13 | M1 | AC084219. 4   |
| LOXL2. 1   | 1. 31E-17 | -0. 10773 | 0. 001 | 0. 038 | 1. 96E-13 | M1 | LOXL2         |
| SLC8A1. 3  | 1. 39E-17 | 0. 336378 | 0. 195 | 0. 135 | 2. 07E-13 | M1 | SLC8A1        |
| CLIC2. 2   | 1. 39E-17 | 0. 187582 | 0. 079 | 0. 037 | 2. 08E-13 | M1 | CLIC2         |
| LINC00237  | 1. 42E-17 | -0. 10789 | 0. 002 | 0. 04  | 2. 12E-13 | M1 | LINC00237     |
| CD44. 2    | 1. 44E-17 | -0. 32454 | 0. 288 | 0. 402 | 2. 15E-13 | M1 | CD44          |
| SHROOM1    | 1. 44E-17 | -0. 10545 | 0. 019 | 0. 071 | 2. 15E-13 | M1 | SHROOM1       |
| HOXA9      | 1. 50E-17 | -0. 12976 | 0. 003 | 0. 041 | 2. 24E-13 | M1 | HOXA9         |
| XRCC6BP1   | 1. 57E-17 | -0. 14398 | 0. 032 | 0. 09  | 2. 35E-13 | M1 | XRCC6BP1      |
| SRSF9. 3   | 1. 58E-17 | -0. 16195 | 0. 431 | 0. 588 | 2. 36E-13 | M1 | SRSF9         |
| RP11-455F  | 1. 68E-17 | -0. 10786 | 0. 002 | 0. 04  | 2. 52E-13 | M1 | RP11-455F5. 3 |
| PLP1. 3    | 1. 80E-17 | -0. 49326 | 0. 104 | 0. 184 | 2. 70E-13 | M1 | PLP1          |
| TAF1A      | 1. 94E-17 | -0. 1167  | 0. 015 | 0. 064 | 2. 90E-13 | M1 | TAF1A         |
| PSMB9. 3   | 1. 94E-17 | 0. 174756 | 0. 448 | 0. 397 | 2. 90E-13 | M1 | PSMB9         |
| CDK18. 1   | 2. 06E-17 | -0. 17417 | 0. 03  | 0. 087 | 3. 08E-13 | M1 | CDK18         |
| MYT1. 2    | 2. 08E-17 | -0. 13823 | 0. 005 | 0. 046 | 3. 12E-13 | M1 | MYT1          |
| TSPAN15. 3 | 2. 27E-17 | 0. 240755 | 0. 122 | 0. 069 | 3. 40E-13 | M1 | TSPAN15       |
| AIM2       | 2. 31E-17 | 0. 128113 | 0. 036 | 0. 011 | 3. 45E-13 | M1 | AIM2          |
| FAM83D. 1  | 2. 43E-17 | -0. 10163 | 0. 003 | 0. 042 | 3. 63E-13 | M1 | FAM83D        |
| SERINC5. 1 | 2. 52E-17 | -0. 10585 | 0. 022 | 0. 076 | 3. 77E-13 | M1 | SERINC5       |
| PPARD. 4   | 2. 61E-17 | 0. 354547 | 0. 155 | 0. 099 | 3. 90E-13 | M1 | PPARD         |
| PYURF. 1   | 2. 78E-17 | -0. 14298 | 0. 397 | 0. 569 | 4. 16E-13 | M1 | PYURF         |
| KCNMB2     | 2. 91E-17 | -0. 12461 | 0. 002 | 0. 039 | 4. 35E-13 | M1 | KCNMB2        |
| WFDC2      | 2. 92E-17 | -0. 12159 | 0. 001 | 0. 036 | 4. 37E-13 | M1 | WFDC2         |
| GSTP1. 3   | 2. 94E-17 | -0. 21696 | 0. 731 | 0. 84  | 4. 39E-13 | M1 | GSTP1         |
| FNTB. 2    | 3. 09E-17 | -0. 10082 | 0. 036 | 0. 096 | 4. 61E-13 | M1 | FNTB          |
| HSPA2. 1   | 3. 17E-17 | -0. 35969 | 0. 068 | 0. 136 | 4. 73E-13 | M1 | HSPA2         |
| KIF4A      | 3. 28E-17 | -0. 10207 | 0. 003 | 0. 041 | 4. 91E-13 | M1 | KIF4A         |
| ST6GAL2. 2 | 3. 31E-17 | -0. 1053  | 0. 004 | 0. 044 | 4. 95E-13 | M1 | ST6GAL2       |
| CLDN15. 2  | 3. 39E-17 | -0. 10282 | 0. 02  | 0. 072 | 5. 07E-13 | M1 | CLDN15        |
| KAT2B. 2   | 3. 44E-17 | -0. 11191 | 0. 026 | 0. 081 | 5. 14E-13 | M1 | KAT2B         |
| SLC44A3. 1 | 3. 60E-17 | -0. 13341 | 0. 001 | 0. 036 | 5. 38E-13 | M1 | SLC44A3       |
| FGD3. 3    | 3. 65E-17 | 0. 207575 | 0. 072 | 0. 033 | 5. 46E-13 | M1 | FGD3          |

|           |          |          |       |       |          |    |               |
|-----------|----------|----------|-------|-------|----------|----|---------------|
| SEPT2.1   | 3.76E-17 | -0.17174 | 0.439 | 0.61  | 5.61E-13 | M1 | 2-Sep         |
| SLIRP.1   | 3.92E-17 | -0.18904 | 0.489 | 0.648 | 5.86E-13 | M1 | SLIRP         |
| CLTB.3    | 4.21E-17 | -0.1217  | 0.307 | 0.468 | 6.29E-13 | M1 | CLTB          |
| USF2.3    | 4.35E-17 | 0.317699 | 0.358 | 0.319 | 6.51E-13 | M1 | USF2          |
| EMILIN3.1 | 4.40E-17 | -0.11182 | 0.002 | 0.038 | 6.58E-13 | M1 | EMILIN3       |
| HCFC1R1.1 | 4.77E-17 | -0.12509 | 0.187 | 0.301 | 7.12E-13 | M1 | HCFC1R1       |
| MVB12B.3  | 4.96E-17 | -0.1122  | 0.046 | 0.111 | 7.41E-13 | M1 | MVB12B        |
| HDAC11.1  | 5.08E-17 | -0.13427 | 0.021 | 0.073 | 7.60E-13 | M1 | HDAC11        |
| SMIM1     | 5.15E-17 | 0.162811 | 0.039 | 0.013 | 7.70E-13 | M1 | SMIM1         |
| WBSCR22.3 | 5.32E-17 | -0.12744 | 0.349 | 0.522 | 7.95E-13 | M1 | WBSCR22       |
| RP3-369A1 | 5.39E-17 | 0.127066 | 0.03  | 0.008 | 8.06E-13 | M1 | RP3-369A17.4  |
| APOLD1.1  | 5.55E-17 | -0.10441 | 0.011 | 0.056 | 8.30E-13 | M1 | APOLD1        |
| COX5B.4   | 5.57E-17 | -0.17515 | 0.777 | 0.862 | 8.33E-13 | M1 | COX5B         |
| ASXL3     | 6.00E-17 | -0.10165 | 0.001 | 0.037 | 8.96E-13 | M1 | ASXL3         |
| RPPH1.1   | 6.03E-17 | 0.21761  | 0.06  | 0.025 | 9.00E-13 | M1 | RPPH1         |
| ANGPTL6   | 6.11E-17 | 0.130466 | 0.033 | 0.009 | 9.14E-13 | M1 | ANGPTL6       |
| B3GALT2   | 6.22E-17 | -0.12381 | 0.003 | 0.041 | 9.29E-13 | M1 | B3GALT2       |
| TMEM116.1 | 6.33E-17 | -0.10346 | 0.02  | 0.072 | 9.46E-13 | M1 | TMEM116       |
| HLX.1     | 6.39E-17 | 0.259115 | 0.073 | 0.034 | 9.55E-13 | M1 | HLX           |
| CLVS1     | 6.46E-17 | -0.13059 | 0.001 | 0.037 | 9.66E-13 | M1 | CLVS1         |
| CA10.1    | 6.63E-17 | -0.14556 | 0.002 | 0.038 | 9.91E-13 | M1 | CA10          |
| EIF3I.2   | 6.78E-17 | -0.1805  | 0.447 | 0.633 | 1.01E-12 | M1 | EIF3I         |
| ABCC4.2   | 6.80E-17 | 0.242561 | 0.079 | 0.038 | 1.02E-12 | M1 | ABCC4         |
| PRKCSH.2  | 6.81E-17 | -0.11498 | 0.299 | 0.457 | 1.02E-12 | M1 | PRKCSH        |
| SLC40A1.3 | 7.57E-17 | 0.3867   | 0.186 | 0.129 | 1.13E-12 | M1 | SLC40A1       |
| AURKAIP1  | 7.70E-17 | -0.15473 | 0.467 | 0.634 | 1.15E-12 | M1 | AURKAIP1      |
| FAM155A   | 7.94E-17 | -0.1082  | 0     | 0.034 | 1.19E-12 | M1 | FAM155A       |
| TRAPPC2P1 | 8.01E-17 | -0.10598 | 0.14  | 0.241 | 1.20E-12 | M1 | TRAPPC2P1     |
| MSRB2.3   | 8.30E-17 | 0.310843 | 0.3   | 0.246 | 1.24E-12 | M1 | MSRB2         |
| HOXA-AS2  | 8.35E-17 | -0.13466 | 0.005 | 0.044 | 1.25E-12 | M1 | HOXA-AS2      |
| APOBEC3B  | 8.61E-17 | -0.10549 | 0.003 | 0.04  | 1.29E-12 | M1 | APOBEC3B      |
| PMFBP1    | 8.64E-17 | 0.140437 | 0.045 | 0.016 | 1.29E-12 | M1 | PMFBP1        |
| C5orf63.1 | 8.75E-17 | -0.11174 | 0.023 | 0.076 | 1.31E-12 | M1 | C5orf63       |
| WNT5A.4   | 8.90E-17 | 0.198596 | 0.097 | 0.051 | 1.33E-12 | M1 | WNT5A         |
| F11R.3    | 9.22E-17 | 0.231738 | 0.095 | 0.049 | 1.38E-12 | M1 | F11R          |
| C10orf10  | 9.31E-17 | -0.35606 | 0.041 | 0.101 | 1.39E-12 | M1 | C10orf10      |
| DBI.4     | 9.41E-17 | -0.26537 | 0.821 | 0.848 | 1.41E-12 | M1 | DBI           |
| PEX5.2    | 9.42E-17 | -0.10565 | 0.04  | 0.101 | 1.41E-12 | M1 | PEX5          |
| TPMT.2    | 9.58E-17 | 0.342476 | 0.239 | 0.182 | 1.43E-12 | M1 | TPMT          |
| KCNE3.3   | 9.71E-17 | 0.179259 | 0.053 | 0.021 | 1.45E-12 | M1 | KCNE3         |
| EIF4G2.3  | 1.00E-16 | -0.17106 | 0.544 | 0.682 | 1.50E-12 | M1 | EIF4G2        |
| RPH3A.1   | 1.01E-16 | -0.13099 | 0.002 | 0.038 | 1.51E-12 | M1 | RPH3A         |
| AGAP2.2   | 1.03E-16 | -0.13386 | 0.016 | 0.064 | 1.55E-12 | M1 | AGAP2         |
| FIGNL1.1  | 1.04E-16 | -0.10292 | 0.01  | 0.054 | 1.55E-12 | M1 | FIGNL1        |
| ERICH1.3  | 1.05E-16 | 0.336313 | 0.316 | 0.264 | 1.56E-12 | M1 | ERICH1        |
| CCNG2.3   | 1.05E-16 | -0.10116 | 0.108 | 0.196 | 1.56E-12 | M1 | CCNG2         |
| RIPK3.2   | 1.07E-16 | 0.148842 | 0.042 | 0.014 | 1.59E-12 | M1 | RIPK3         |
| PLXNC1.4  | 1.12E-16 | 0.236843 | 0.106 | 0.058 | 1.67E-12 | M1 | PLXNC1        |
| RP11-436K | 1.13E-16 | -0.10704 | 0.001 | 0.036 | 1.68E-12 | M1 | RP11-436K8.1  |
| CAMTA1.2  | 1.17E-16 | -0.12777 | 0.318 | 0.476 | 1.74E-12 | M1 | CAMTA1        |
| RP11-676J | 1.18E-16 | -0.12796 | 0.002 | 0.037 | 1.76E-12 | M1 | RP11-676J15.1 |

|             |           |           |        |        |              |               |
|-------------|-----------|-----------|--------|--------|--------------|---------------|
| HELLS. 1    | 1. 20E-16 | -0. 1276  | 0. 021 | 0. 072 | 1. 79E-12 M1 | HELLS         |
| APLN. 1     | 1. 22E-16 | -0. 14729 | 0. 002 | 0. 038 | 1. 82E-12 M1 | APLN          |
| HCN2        | 1. 22E-16 | -0. 10899 | 0      | 0. 034 | 1. 83E-12 M1 | HCN2          |
| VAPA. 2     | 1. 24E-16 | 0. 167282 | 0. 614 | 0. 637 | 1. 86E-12 M1 | VAPA          |
| FPR2. 2     | 1. 25E-16 | 0. 148964 | 0. 042 | 0. 014 | 1. 87E-12 M1 | FPR2          |
| GAL         | 1. 27E-16 | -0. 15301 | 0. 005 | 0. 043 | 1. 90E-12 M1 | GAL           |
| LAMP1. 3    | 1. 37E-16 | 0. 182373 | 0. 518 | 0. 522 | 2. 04E-12 M1 | LAMP1         |
| RPF2. 1     | 1. 47E-16 | -0. 10409 | 0. 141 | 0. 244 | 2. 19E-12 M1 | RPF2          |
| ZNF502      | 1. 49E-16 | -0. 10517 | 0. 008 | 0. 049 | 2. 23E-12 M1 | ZNF502        |
| PSMB8. 2    | 1. 50E-16 | 0. 215991 | 0. 442 | 0. 41  | 2. 24E-12 M1 | PSMB8         |
| EDIL3. 2    | 1. 51E-16 | -0. 24525 | 0. 002 | 0. 038 | 2. 25E-12 M1 | EDIL3         |
| LHX1        | 1. 55E-16 | -0. 13325 | 0. 001 | 0. 036 | 2. 31E-12 M1 | LHX1          |
| PAG1. 3     | 1. 56E-16 | 0. 341712 | 0. 219 | 0. 159 | 2. 33E-12 M1 | PAG1          |
| GALNT15. 1  | 1. 69E-16 | -0. 18426 | 0. 006 | 0. 046 | 2. 52E-12 M1 | GALNT15       |
| TAPBP. 4    | 1. 70E-16 | 0. 302875 | 0. 371 | 0. 337 | 2. 54E-12 M1 | TAPBP         |
| CFL1. 3     | 1. 88E-16 | -0. 13405 | 0. 96  | 0. 948 | 2. 82E-12 M1 | CFL1          |
| ZFAND5. 4   | 1. 95E-16 | 0. 271121 | 0. 464 | 0. 463 | 2. 92E-12 M1 | ZFAND5        |
| INSIG1. 4   | 1. 98E-16 | 0. 412449 | 0. 269 | 0. 218 | 2. 97E-12 M1 | INSIG1        |
| UBXN4. 2    | 2. 01E-16 | -0. 13737 | 0. 397 | 0. 574 | 3. 00E-12 M1 | UBXN4         |
| PCP4. 2     | 2. 02E-16 | -0. 20226 | 0. 006 | 0. 045 | 3. 02E-12 M1 | PCP4          |
| ABHD3. 3    | 2. 20E-16 | 0. 344927 | 0. 229 | 0. 173 | 3. 29E-12 M1 | ABHD3         |
| CTD-3074C   | 2. 26E-16 | -0. 10003 | 0. 018 | 0. 067 | 3. 38E-12 M1 | CTD-307407. 5 |
| PDHB. 2     | 2. 36E-16 | -0. 10265 | 0. 246 | 0. 386 | 3. 53E-12 M1 | PDHB          |
| HAPLN2. 2   | 2. 37E-16 | -0. 17265 | 0. 003 | 0. 039 | 3. 55E-12 M1 | HAPLN2        |
| ADM. 3      | 2. 46E-16 | -0. 26732 | 0. 115 | 0. 199 | 3. 68E-12 M1 | ADM           |
| MYO15B      | 2. 52E-16 | 0. 173933 | 0. 053 | 0. 021 | 3. 76E-12 M1 | MYO15B        |
| HSPA9. 2    | 2. 55E-16 | -0. 15834 | 0. 354 | 0. 514 | 3. 81E-12 M1 | HSPA9         |
| UNC5B. 3    | 2. 59E-16 | 0. 253626 | 0. 127 | 0. 075 | 3. 87E-12 M1 | UNC5B         |
| PITX2       | 3. 09E-16 | -0. 11072 | 0. 001 | 0. 034 | 4. 61E-12 M1 | PITX2         |
| TNFSF8. 1   | 3. 11E-16 | 0. 100223 | 0. 024 | 0. 006 | 4. 65E-12 M1 | TNFSF8        |
| MXD1. 3     | 3. 16E-16 | 0. 345608 | 0. 175 | 0. 119 | 4. 72E-12 M1 | MXD1          |
| ITPR1. 1    | 3. 24E-16 | 0. 195049 | 0. 065 | 0. 029 | 4. 84E-12 M1 | ITPR1         |
| AC002456. 3 | 3. 26E-16 | -0. 1219  | 0. 009 | 0. 051 | 4. 87E-12 M1 | AC002456. 2   |
| SLC27A5. 2  | 3. 33E-16 | -0. 10935 | 0. 073 | 0. 149 | 4. 98E-12 M1 | SLC27A5       |
| ARF6. 4     | 3. 34E-16 | 0. 303634 | 0. 371 | 0. 338 | 4. 98E-12 M1 | ARF6          |
| HSPA1B. 3   | 3. 63E-16 | 0. 25234  | 0. 46  | 0. 401 | 5. 42E-12 M1 | HSPA1B        |
| NDFIP1. 4   | 3. 83E-16 | -0. 15315 | 0. 474 | 0. 627 | 5. 73E-12 M1 | NDFIP1        |
| ACSL5. 3    | 3. 97E-16 | 0. 186562 | 0. 064 | 0. 028 | 5. 93E-12 M1 | ACSL5         |
| TMC01. 3    | 4. 04E-16 | -0. 15786 | 0. 422 | 0. 606 | 6. 04E-12 M1 | TMC01         |
| RAD51AP1. 4 | 4. 13E-16 | -0. 12972 | 0. 024 | 0. 075 | 6. 16E-12 M1 | RAD51AP1      |
| NDUFA4L2. 4 | 4. 32E-16 | -0. 16185 | 0. 007 | 0. 047 | 6. 46E-12 M1 | NDUFA4L2      |
| SRRM4. 1    | 4. 39E-16 | -0. 13283 | 0. 002 | 0. 037 | 6. 57E-12 M1 | SRRM4         |
| STARD5. 1   | 4. 48E-16 | 0. 152674 | 0. 038 | 0. 013 | 6. 69E-12 M1 | STARD5        |
| EGR1. 2     | 5. 26E-16 | 0. 17454  | 0. 548 | 0. 485 | 7. 85E-12 M1 | EGR1          |
| CDC6        | 5. 26E-16 | -0. 10106 | 0. 004 | 0. 04  | 7. 86E-12 M1 | CDC6          |
| TIMMDC1. 2  | 5. 28E-16 | -0. 10335 | 0. 264 | 0. 412 | 7. 89E-12 M1 | TIMMDC1       |
| PRDX5. 3    | 5. 65E-16 | -0. 22083 | 0. 627 | 0. 765 | 8. 44E-12 M1 | PRDX5         |
| PCSK1. 1    | 5. 85E-16 | -0. 14281 | 0. 004 | 0. 04  | 8. 74E-12 M1 | PCSK1         |
| TMEM243. 2  | 6. 24E-16 | 0. 344816 | 0. 25  | 0. 192 | 9. 32E-12 M1 | TMEM243       |
| SOWAHD      | 6. 25E-16 | 0. 10798  | 0. 037 | 0. 012 | 9. 34E-12 M1 | SOWAHD        |
| PINLYP. 2   | 6. 32E-16 | -0. 14806 | 0. 016 | 0. 061 | 9. 45E-12 M1 | PINLYP        |

|           |          |          |       |       |          |    |               |
|-----------|----------|----------|-------|-------|----------|----|---------------|
| HOXC6     | 6.71E-16 | -0.11156 | 0.001 | 0.034 | 1.00E-11 | M1 | HOXC6         |
| PCL0      | 7.40E-16 | -0.10603 | 0.004 | 0.039 | 1.11E-11 | M1 | PCL0          |
| OAS2.1    | 7.49E-16 | 0.186995 | 0.071 | 0.033 | 1.12E-11 | M1 | OAS2          |
| C5orf38   | 8.19E-16 | -0.10932 | 0.003 | 0.037 | 1.22E-11 | M1 | C5orf38       |
| NHSL2.2   | 8.31E-16 | 0.338026 | 0.087 | 0.044 | 1.24E-11 | M1 | NHSL2         |
| XRCC5.3   | 8.35E-16 | -0.13941 | 0.419 | 0.589 | 1.25E-11 | M1 | XRCC5         |
| ADAMDEC1. | 8.63E-16 | 0.213059 | 0.068 | 0.031 | 1.29E-11 | M1 | ADAMDEC1      |
| IL21R     | 8.69E-16 | 0.113505 | 0.039 | 0.013 | 1.30E-11 | M1 | IL21R         |
| C10orf35. | 9.14E-16 | -0.13636 | 0.018 | 0.065 | 1.37E-11 | M1 | C10orf35      |
| CMYA5.1   | 9.16E-16 | -0.10562 | 0.002 | 0.035 | 1.37E-11 | M1 | CMYA5         |
| ADAMTS1   | 9.18E-16 | -0.10185 | 0.002 | 0.036 | 1.37E-11 | M1 | ADAMTS1       |
| GABARAPL2 | 9.49E-16 | -0.18371 | 0.619 | 0.768 | 1.42E-11 | M1 | GABARAPL2     |
| HOXA5.1   | 9.75E-16 | -0.12316 | 0.02  | 0.068 | 1.46E-11 | M1 | HOXA5         |
| CACNA2D1  | 9.91E-16 | -0.1118  | 0.002 | 0.036 | 1.48E-11 | M1 | CACNA2D1      |
| NEUROD1.1 | 1.04E-15 | -0.11823 | 0.006 | 0.044 | 1.55E-11 | M1 | NEUROD1       |
| METTL21B. | 1.04E-15 | -0.10326 | 0.023 | 0.073 | 1.56E-11 | M1 | METTL21B      |
| AP2S1.3   | 1.05E-15 | 0.118777 | 0.644 | 0.664 | 1.57E-11 | M1 | AP2S1         |
| ALDH3B1.2 | 1.08E-15 | 0.236252 | 0.112 | 0.063 | 1.61E-11 | M1 | ALDH3B1       |
| LINC00599 | 1.12E-15 | -0.13486 | 0.005 | 0.041 | 1.67E-11 | M1 | LINC00599     |
| CLMN      | 1.18E-15 | -0.11706 | 0.008 | 0.047 | 1.77E-11 | M1 | CLMN          |
| MAML3.3   | 1.21E-15 | 0.209948 | 0.065 | 0.029 | 1.80E-11 | M1 | MAML3         |
| MAG.2     | 1.21E-15 | -0.38962 | 0.006 | 0.043 | 1.81E-11 | M1 | MAG           |
| C12orf75. | 1.24E-15 | 0.371082 | 0.236 | 0.184 | 1.85E-11 | M1 | C12orf75      |
| LNP1      | 1.24E-15 | -0.10265 | 0.002 | 0.036 | 1.86E-11 | M1 | LNP1          |
| PIAS1.3   | 1.34E-15 | 0.340589 | 0.205 | 0.149 | 2.00E-11 | M1 | PIAS1         |
| CARNS1.2  | 1.35E-15 | -0.24986 | 0.001 | 0.034 | 2.02E-11 | M1 | CARNS1        |
| CYC1.3    | 1.35E-15 | -0.1526  | 0.403 | 0.567 | 2.02E-11 | M1 | CYC1          |
| RP11-499E | 1.42E-15 | -0.10761 | 0.003 | 0.037 | 2.12E-11 | M1 | RP11-499E18.1 |
| HOXB3     | 1.49E-15 | -0.10721 | 0.004 | 0.039 | 2.23E-11 | M1 | HOXB3         |
| NFKBIE.4  | 1.52E-15 | 0.346992 | 0.177 | 0.125 | 2.27E-11 | M1 | NFKBIE        |
| RASL11B.3 | 1.55E-15 | -0.18029 | 0.017 | 0.061 | 2.32E-11 | M1 | RASL11B       |
| SCN2A     | 1.58E-15 | -0.11507 | 0.002 | 0.035 | 2.37E-11 | M1 | SCN2A         |
| ARHGEF10. | 1.61E-15 | -0.11021 | 0.026 | 0.078 | 2.41E-11 | M1 | ARHGEF10      |
| APOBEC3G. | 1.67E-15 | 0.311726 | 0.165 | 0.109 | 2.50E-11 | M1 | APOBEC3G      |
| PRDX3.2   | 1.70E-15 | 0.225566 | 0.478 | 0.464 | 2.54E-11 | M1 | PRDX3         |
| CNTN1     | 1.73E-15 | -0.12763 | 0.007 | 0.045 | 2.58E-11 | M1 | CNTN1         |
| AC109826. | 1.75E-15 | 0.179623 | 0.068 | 0.031 | 2.62E-11 | M1 | AC109826.1    |
| CYB5D1.1  | 1.76E-15 | 0.232162 | 0.088 | 0.046 | 2.63E-11 | M1 | CYB5D1        |
| SNCB      | 1.79E-15 | -0.10626 | 0.003 | 0.037 | 2.67E-11 | M1 | SNCB          |
| VPS29.2   | 1.85E-15 | 0.177455 | 0.543 | 0.556 | 2.77E-11 | M1 | VPS29         |
| TFAP2B    | 2.05E-15 | -0.11759 | 0.002 | 0.034 | 3.07E-11 | M1 | TFAP2B        |
| FAR2.2    | 2.07E-15 | 0.242055 | 0.091 | 0.048 | 3.10E-11 | M1 | FAR2          |
| CWC15.3   | 2.10E-15 | -0.12323 | 0.345 | 0.516 | 3.14E-11 | M1 | CWC15         |
| TMEM196   | 2.16E-15 | -0.10306 | 0.001 | 0.033 | 3.22E-11 | M1 | TMEM196       |
| SLC16A10. | 2.19E-15 | 0.289384 | 0.131 | 0.078 | 3.28E-11 | M1 | SLC16A10      |
| C6orf141. | 2.25E-15 | -0.12043 | 0.002 | 0.035 | 3.36E-11 | M1 | C6orf141      |
| C7orf61   | 2.39E-15 | -0.12738 | 0.004 | 0.038 | 3.57E-11 | M1 | C7orf61       |
| WNT3.1    | 2.68E-15 | -0.10315 | 0.002 | 0.034 | 4.00E-11 | M1 | WNT3          |
| CNFN      | 2.69E-15 | 0.187392 | 0.053 | 0.022 | 4.02E-11 | M1 | CNFN          |
| RP11-350G | 2.80E-15 | 0.104024 | 0.025 | 0.006 | 4.18E-11 | M1 | RP11-350G8.5  |
| ASF1B.2   | 2.82E-15 | -0.11843 | 0.021 | 0.068 | 4.22E-11 | M1 | ASF1B         |

|            |          |          |       |       |          |    |               |
|------------|----------|----------|-------|-------|----------|----|---------------|
| SLC24A2.2  | 2.91E-15 | -0.17198 | 0.003 | 0.037 | 4.35E-11 | M1 | SLC24A2       |
| CREB3L2.3  | 2.94E-15 | 0.330639 | 0.169 | 0.115 | 4.40E-11 | M1 | CREB3L2       |
| HSPBAP1.2  | 2.96E-15 | 0.279509 | 0.111 | 0.064 | 4.42E-11 | M1 | HSPBAP1       |
| AC016700.3 | 3.44E-15 | -0.11625 | 0.004 | 0.038 | 5.14E-11 | M1 | AC016700.5    |
| SUCLG2.2   | 3.48E-15 | 0.350297 | 0.286 | 0.237 | 5.19E-11 | M1 | SUCLG2        |
| TNS3.3     | 3.49E-15 | 0.257957 | 0.113 | 0.065 | 5.21E-11 | M1 | TNS3          |
| FAM72A.1   | 3.56E-15 | 0.284186 | 0.072 | 0.035 | 5.32E-11 | M1 | FAM72A        |
| LMAN1.2    | 3.73E-15 | -0.10395 | 0.223 | 0.351 | 5.57E-11 | M1 | LMAN1         |
| PPP1R1C.1  | 3.74E-15 | -0.12725 | 0.001 | 0.032 | 5.59E-11 | M1 | PPP1R1C       |
| MR1.2      | 3.89E-15 | 0.302359 | 0.13  | 0.08  | 5.82E-11 | M1 | MR1           |
| STYXL1.2   | 3.91E-15 | -0.11042 | 0.069 | 0.138 | 5.84E-11 | M1 | STYXL1        |
| EMX2.1     | 4.04E-15 | -0.1044  | 0.002 | 0.034 | 6.03E-11 | M1 | EMX2          |
| MYOF.1     | 4.06E-15 | 0.211362 | 0.076 | 0.037 | 6.07E-11 | M1 | MYOF          |
| PRDM8      | 4.17E-15 | -0.11073 | 0.002 | 0.035 | 6.23E-11 | M1 | PRDM8         |
| DENND6B.4  | 4.19E-15 | 0.349862 | 0.145 | 0.094 | 6.26E-11 | M1 | DENND6B       |
| CDK1.3     | 4.25E-15 | -0.18153 | 0.048 | 0.106 | 6.35E-11 | M1 | CDK1          |
| ERMN.2     | 4.29E-15 | -0.34733 | 0.007 | 0.044 | 6.42E-11 | M1 | ERMN          |
| MIF4GD.4   | 4.49E-15 | 0.360577 | 0.29  | 0.244 | 6.71E-11 | M1 | MIF4GD        |
| ADRBK1.4   | 4.50E-15 | 0.284593 | 0.134 | 0.084 | 6.73E-11 | M1 | ADRBK1        |
| FCAR       | 4.66E-15 | 0.109518 | 0.021 | 0.005 | 6.97E-11 | M1 | FCAR          |
| NMRK1.2    | 4.78E-15 | 0.356609 | 0.186 | 0.13  | 7.15E-11 | M1 | NMRK1         |
| GNG11.1    | 5.05E-15 | -0.15544 | 0.007 | 0.043 | 7.55E-11 | M1 | GNG11         |
| MANF.3     | 5.24E-15 | -0.13919 | 0.322 | 0.477 | 7.84E-11 | M1 | MANF          |
| USP36.4    | 5.27E-15 | 0.340316 | 0.183 | 0.13  | 7.87E-11 | M1 | USP36         |
| UBE2I.2    | 5.53E-15 | -0.14398 | 0.433 | 0.606 | 8.26E-11 | M1 | UBE2I         |
| FSCN1.4    | 5.67E-15 | -0.1438  | 0.382 | 0.529 | 8.48E-11 | M1 | FSCN1         |
| CTC-428H1  | 5.67E-15 | 0.168813 | 0.044 | 0.016 | 8.48E-11 | M1 | CTC-428H11.2  |
| NDUFB10.1  | 5.83E-15 | -0.16462 | 0.502 | 0.668 | 8.71E-11 | M1 | NDUFB10       |
| IFI27      | 5.90E-15 | 0.246171 | 0.16  | 0.103 | 8.81E-11 | M1 | IFI27         |
| GALNT13.1  | 6.25E-15 | -0.12635 | 0.011 | 0.05  | 9.34E-11 | M1 | GALNT13       |
| SSBP1.3    | 6.34E-15 | -0.18444 | 0.493 | 0.668 | 9.47E-11 | M1 | SSBP1         |
| AK2.3      | 6.43E-15 | -0.15931 | 0.275 | 0.414 | 9.61E-11 | M1 | AK2           |
| EFHD2.4    | 6.46E-15 | 0.276132 | 0.259 | 0.201 | 9.65E-11 | M1 | EFHD2         |
| GSAP.3     | 6.60E-15 | 0.274804 | 0.119 | 0.071 | 9.86E-11 | M1 | GSAP          |
| GLIPR2.3   | 6.62E-15 | -0.10418 | 0.179 | 0.286 | 9.89E-11 | M1 | GLIPR2        |
| SRCIN1.2   | 6.74E-15 | -0.14185 | 0.003 | 0.036 | 1.01E-10 | M1 | SRCIN1        |
| CHGA       | 7.32E-15 | -0.11342 | 0.001 | 0.032 | 1.09E-10 | M1 | CHGA          |
| C4orf47.1  | 7.55E-15 | -0.10293 | 0.003 | 0.036 | 1.13E-10 | M1 | C4orf47       |
| PTER       | 8.35E-15 | 0.118306 | 0.043 | 0.016 | 1.25E-10 | M1 | PTER          |
| SDCCAG8.3  | 8.42E-15 | 0.348956 | 0.354 | 0.325 | 1.26E-10 | M1 | SDCCAG8       |
| JAKMIP1    | 8.55E-15 | -0.11275 | 0.004 | 0.037 | 1.28E-10 | M1 | JAKMIP1       |
| USMG5.3    | 9.69E-15 | 0.116558 | 0.602 | 0.624 | 1.45E-10 | M1 | USMG5         |
| C4orf48.3  | 9.93E-15 | -0.17167 | 0.429 | 0.545 | 1.48E-10 | M1 | C4orf48       |
| RP11-445F  | 9.99E-15 | -0.13841 | 0.002 | 0.034 | 1.49E-10 | M1 | RP11-445F12.1 |
| FAXDC2.1   | 1.08E-14 | -0.10428 | 0.02  | 0.065 | 1.61E-10 | M1 | FAXDC2        |
| RAB1A.1    | 1.11E-14 | 0.152599 | 0.593 | 0.625 | 1.65E-10 | M1 | RAB1A         |
| DGCR5      | 1.12E-14 | -0.10174 | 0.002 | 0.034 | 1.67E-10 | M1 | DGCR5         |
| TNFAIP8L3  | 1.13E-14 | 0.158375 | 0.055 | 0.023 | 1.68E-10 | M1 | TNFAIP8L3     |
| TEX14      | 1.15E-14 | 0.107007 | 0.029 | 0.008 | 1.72E-10 | M1 | TEX14         |
| SSR1.3     | 1.17E-14 | 0.274163 | 0.463 | 0.469 | 1.74E-10 | M1 | SSR1          |
| RPS19BP1   | 1.17E-14 | -0.1068  | 0.355 | 0.517 | 1.75E-10 | M1 | RPS19BP1      |

|            |          |          |       |       |          |    |               |
|------------|----------|----------|-------|-------|----------|----|---------------|
| EIF3G.1    | 1.19E-14 | 0.141475 | 0.604 | 0.623 | 1.78E-10 | M1 | EIF3G         |
| FAM222A.1  | 1.21E-14 | -0.10694 | 0.003 | 0.035 | 1.81E-10 | M1 | FAM222A       |
| SCO2.4     | 1.24E-14 | 0.361239 | 0.251 | 0.203 | 1.86E-10 | M1 | SCO2          |
| DDX39A.2   | 1.27E-14 | -0.11332 | 0.279 | 0.415 | 1.90E-10 | M1 | DDX39A        |
| RALYL      | 1.30E-14 | -0.10777 | 0.003 | 0.036 | 1.94E-10 | M1 | RALYL         |
| DGKB       | 1.36E-14 | -0.10418 | 0.005 | 0.039 | 2.03E-10 | M1 | DGKB          |
| ANXA2.3    | 1.39E-14 | -0.30247 | 0.457 | 0.525 | 2.08E-10 | M1 | ANXA2         |
| UQCRC1.1   | 1.40E-14 | -0.13833 | 0.353 | 0.515 | 2.09E-10 | M1 | UQCRC1        |
| ANGPTL4.1  | 1.40E-14 | -0.27591 | 0.053 | 0.111 | 2.09E-10 | M1 | ANGPTL4       |
| LILRB3.3   | 1.42E-14 | 0.213103 | 0.07  | 0.034 | 2.12E-10 | M1 | LILRB3        |
| ZFPM2      | 1.44E-14 | -0.12603 | 0.002 | 0.034 | 2.15E-10 | M1 | ZFPM2         |
| IFRD1.3    | 1.45E-14 | 0.259578 | 0.487 | 0.487 | 2.16E-10 | M1 | IFRD1         |
| CTA-29F11  | 1.54E-14 | 0.404699 | 0.242 | 0.192 | 2.30E-10 | M1 | CTA-29F11.1   |
| CMTM3.4    | 1.62E-14 | 0.296806 | 0.348 | 0.319 | 2.43E-10 | M1 | CMTM3         |
| MAN2B1.4   | 1.62E-14 | 0.239602 | 0.104 | 0.06  | 2.43E-10 | M1 | MAN2B1        |
| GNB2.3     | 1.87E-14 | -0.15155 | 0.439 | 0.595 | 2.80E-10 | M1 | GNB2          |
| YPEL4      | 1.89E-14 | -0.1128  | 0.009 | 0.047 | 2.83E-10 | M1 | YPEL4         |
| ACO09501.1 | 1.91E-14 | -0.21558 | 0.093 | 0.169 | 2.86E-10 | M1 | ACO09501.4    |
| CAV2       | 1.97E-14 | -0.10464 | 0.011 | 0.05  | 2.95E-10 | M1 | CAV2          |
| PCSK2      | 2.08E-14 | -0.1269  | 0.002 | 0.032 | 3.10E-10 | M1 | PCSK2         |
| EMP3.3     | 2.23E-14 | -0.20076 | 0.345 | 0.47  | 3.33E-10 | M1 | EMP3          |
| CAMKMT.1   | 2.49E-14 | -0.10318 | 0.033 | 0.083 | 3.72E-10 | M1 | CAMKMT        |
| UBB.3      | 2.52E-14 | -0.13444 | 0.924 | 0.908 | 3.77E-10 | M1 | UBB           |
| RP11-713F  | 2.66E-14 | -0.12001 | 0.002 | 0.033 | 3.97E-10 | M1 | RP11-713P17.3 |
| CAMK1D.4   | 2.73E-14 | 0.298908 | 0.153 | 0.103 | 4.08E-10 | M1 | CAMK1D        |
| PTCH2      | 2.79E-14 | 0.182806 | 0.054 | 0.023 | 4.17E-10 | M1 | PTCH2         |
| RASGEF1C   | 2.81E-14 | 0.122963 | 0.032 | 0.01  | 4.20E-10 | M1 | RASGEF1C      |
| HHIP.1     | 2.94E-14 | -0.16381 | 0.001 | 0.031 | 4.40E-10 | M1 | HHIP          |
| POLR2G.3   | 3.02E-14 | -0.16824 | 0.424 | 0.596 | 4.52E-10 | M1 | POLR2G        |
| LRRK1.1    | 3.25E-14 | 0.146581 | 0.035 | 0.012 | 4.85E-10 | M1 | LRRK1         |
| HOXC-AS1   | 3.25E-14 | -0.1019  | 0     | 0.029 | 4.86E-10 | M1 | HOXC-AS1      |
| CLDN7      | 3.33E-14 | 0.144626 | 0.04  | 0.015 | 4.98E-10 | M1 | CLDN7         |
| USP15.4    | 3.41E-14 | 0.350572 | 0.284 | 0.234 | 5.09E-10 | M1 | USP15         |
| CEACAM4.3  | 3.46E-14 | 0.1609   | 0.047 | 0.019 | 5.17E-10 | M1 | CEACAM4       |
| UQCRCFS1.2 | 3.50E-14 | -0.13623 | 0.407 | 0.572 | 5.23E-10 | M1 | UQCRCFS1      |
| IKBIP.3    | 3.69E-14 | 0.361217 | 0.265 | 0.219 | 5.51E-10 | M1 | IKBIP         |
| MTRNR2L1.4 | 4.02E-14 | 0.252331 | 0.248 | 0.181 | 6.00E-10 | M1 | MTRNR2L1      |
| CCL5.2     | 4.29E-14 | 0.1172   | 0.091 | 0.048 | 6.41E-10 | M1 | CCL5          |
| SLC39A8.3  | 4.36E-14 | -0.11335 | 0.021 | 0.066 | 6.52E-10 | M1 | SLC39A8       |
| NEK6.2     | 4.52E-14 | -0.15357 | 0.204 | 0.307 | 6.76E-10 | M1 | NEK6          |
| KBTBD11    | 4.69E-14 | -0.10239 | 0.002 | 0.032 | 7.00E-10 | M1 | KBTBD11       |
| APOL4.1    | 4.76E-14 | -0.13378 | 0.011 | 0.049 | 7.12E-10 | M1 | APOL4         |
| LINC00882  | 5.01E-14 | -0.12642 | 0.004 | 0.035 | 7.48E-10 | M1 | LINC00882     |
| SRSF11.1   | 5.04E-14 | -0.10372 | 0.396 | 0.568 | 7.53E-10 | M1 | SRSF11        |
| NDUFC1.3   | 5.04E-14 | -0.17852 | 0.419 | 0.579 | 7.54E-10 | M1 | NDUFC1        |
| NPPA.2     | 5.06E-14 | -0.14669 | 0.003 | 0.033 | 7.56E-10 | M1 | NPPA          |
| THSD4      | 5.09E-14 | -0.11465 | 0.001 | 0.03  | 7.61E-10 | M1 | THSD4         |
| ARGLU1.3   | 5.13E-14 | -0.10183 | 0.347 | 0.493 | 7.67E-10 | M1 | ARGLU1        |
| FOLR1.1    | 5.32E-14 | -0.17259 | 0.006 | 0.04  | 7.95E-10 | M1 | FOLR1         |
| GLIPR1L2.5 | 5.36E-14 | -0.11518 | 0.008 | 0.044 | 8.00E-10 | M1 | GLIPR1L2      |
| EIF1B.3    | 5.43E-14 | -0.12179 | 0.444 | 0.617 | 8.12E-10 | M1 | EIF1B         |



|           |          |          |       |       |          |    |               |
|-----------|----------|----------|-------|-------|----------|----|---------------|
| PREX1.4   | 6.10E-14 | 0.342302 | 0.258 | 0.21  | 9.12E-10 | M1 | PREX1         |
| EPHX2.1   | 6.15E-14 | -0.10339 | 0.009 | 0.045 | 9.18E-10 | M1 | EPHX2         |
| QPRT.1    | 6.18E-14 | 0.256751 | 0.159 | 0.106 | 9.24E-10 | M1 | QPRT          |
| STEAP1.1  | 6.55E-14 | -0.13662 | 0.002 | 0.031 | 9.80E-10 | M1 | STEAP1        |
| RABAC1.2  | 7.00E-14 | -0.17609 | 0.527 | 0.692 | 1.05E-09 | M1 | RABAC1        |
| QARS.4    | 7.26E-14 | 0.327761 | 0.314 | 0.276 | 1.08E-09 | M1 | QARS          |
| RP11-693J | 7.38E-14 | 0.155006 | 0.043 | 0.017 | 1.10E-09 | M1 | RP11-693J15.5 |
| PSMB6.1   | 7.52E-14 | -0.17472 | 0.567 | 0.722 | 1.12E-09 | M1 | PSMB6         |
| CDH13.1   | 7.74E-14 | -0.15006 | 0.018 | 0.06  | 1.16E-09 | M1 | CDH13         |
| CCDC151.2 | 8.07E-14 | 0.187614 | 0.099 | 0.056 | 1.21E-09 | M1 | CCDC151       |
| SPOCK3.2  | 8.75E-14 | -0.23835 | 0.006 | 0.038 | 1.31E-09 | M1 | SPOCK3        |
| MIF.2     | 8.97E-14 | -0.16637 | 0.562 | 0.692 | 1.34E-09 | M1 | MIF           |
| IMPDH2.4  | 9.15E-14 | -0.13918 | 0.301 | 0.44  | 1.37E-09 | M1 | IMPDH2        |
| SLC12A9.4 | 9.21E-14 | 0.357104 | 0.239 | 0.194 | 1.38E-09 | M1 | SLC12A9       |
| PPP1R15B. | 9.49E-14 | 0.336679 | 0.158 | 0.109 | 1.42E-09 | M1 | PPP1R15B      |
| CYB5R2    | 1.01E-13 | -0.1377  | 0.004 | 0.036 | 1.51E-09 | M1 | CYB5R2        |
| TAGLN.1   | 1.04E-13 | -0.34936 | 0.031 | 0.078 | 1.55E-09 | M1 | TAGLN         |
| CENPE.3   | 1.07E-13 | -0.13766 | 0.02  | 0.062 | 1.60E-09 | M1 | CENPE         |
| CPB2-AS1  | 1.12E-13 | -0.1009  | 0.003 | 0.033 | 1.67E-09 | M1 | CPB2-AS1      |
| KLK6.2    | 1.18E-13 | -0.29014 | 0.005 | 0.036 | 1.76E-09 | M1 | KLK6          |
| ITGB1.3   | 1.25E-13 | 0.192789 | 0.412 | 0.38  | 1.87E-09 | M1 | ITGB1         |
| CFI.2     | 1.26E-13 | -0.10264 | 0.023 | 0.068 | 1.88E-09 | M1 | CFI           |
| PLEKHG3.1 | 1.32E-13 | -0.10941 | 0.003 | 0.034 | 1.97E-09 | M1 | PLEKHG3       |
| RREB1.4   | 1.35E-13 | 0.281515 | 0.107 | 0.064 | 2.02E-09 | M1 | RREB1         |
| CITED4    | 1.46E-13 | 0.161412 | 0.047 | 0.019 | 2.18E-09 | M1 | CITED4        |
| SAA2.2    | 1.66E-13 | -0.60038 | 0.018 | 0.059 | 2.48E-09 | M1 | SAA2          |
| ARSA.3    | 1.68E-13 | 0.28688  | 0.177 | 0.126 | 2.51E-09 | M1 | ARSA          |
| KB-1980E6 | 1.69E-13 | -0.10378 | 0.002 | 0.03  | 2.53E-09 | M1 | KB-1980E6.3   |
| DES       | 1.71E-13 | -0.10256 | 0.001 | 0.028 | 2.55E-09 | M1 | DES           |
| GBP1.1    | 1.86E-13 | -0.27654 | 0.097 | 0.165 | 2.78E-09 | M1 | GBP1          |
| ADRBK2.4  | 1.98E-13 | 0.222828 | 0.085 | 0.046 | 2.95E-09 | M1 | ADRBK2        |
| C6orf15.2 | 2.07E-13 | -0.18263 | 0.003 | 0.033 | 3.09E-09 | M1 | C6orf15       |
| AC068535. | 2.23E-13 | -0.11663 | 0     | 0.027 | 3.33E-09 | M1 | AC068535.2    |
| CIDEB.2   | 2.26E-13 | 0.123058 | 0.048 | 0.02  | 3.38E-09 | M1 | CIDEB         |
| COCH.1    | 2.30E-13 | -0.11381 | 0.008 | 0.042 | 3.44E-09 | M1 | COCH          |
| RAMP3.1   | 2.35E-13 | -0.13058 | 0.002 | 0.031 | 3.51E-09 | M1 | RAMP3         |
| PI3.2     | 2.36E-13 | -0.3722  | 0.019 | 0.059 | 3.53E-09 | M1 | PI3           |
| APOL2.2   | 2.47E-13 | -0.21692 | 0.052 | 0.109 | 3.70E-09 | M1 | APOL2         |
| KIRREL3   | 2.70E-13 | -0.10151 | 0.003 | 0.032 | 4.04E-09 | M1 | KIRREL3       |
| HNRNPF.3  | 2.87E-13 | 0.175907 | 0.496 | 0.511 | 4.29E-09 | M1 | HNRNPF        |
| AC114730. | 3.01E-13 | -0.12933 | 0.004 | 0.034 | 4.50E-09 | M1 | AC114730.3    |
| ARID5B.3  | 3.03E-13 | 0.285395 | 0.378 | 0.351 | 4.54E-09 | M1 | ARID5B        |
| DIO2      | 3.15E-13 | -0.13235 | 0.008 | 0.041 | 4.70E-09 | M1 | DIO2          |
| DIAPH2.1  | 3.15E-13 | 0.235884 | 0.1   | 0.058 | 4.71E-09 | M1 | DIAPH2        |
| KCNE1.2   | 3.42E-13 | 0.144868 | 0.045 | 0.018 | 5.11E-09 | M1 | KCNE1         |
| PIK3R6    | 3.59E-13 | 0.110418 | 0.029 | 0.009 | 5.36E-09 | M1 | PIK3R6        |
| APH1B.2   | 3.93E-13 | 0.354522 | 0.168 | 0.119 | 5.87E-09 | M1 | APH1B         |
| DCXR.1    | 4.41E-13 | -0.10658 | 0.331 | 0.477 | 6.58E-09 | M1 | DCXR          |
| SPCS3.4   | 4.74E-13 | 0.296888 | 0.352 | 0.32  | 7.08E-09 | M1 | SPCS3         |
| TPCN1.3   | 4.94E-13 | 0.261218 | 0.128 | 0.082 | 7.38E-09 | M1 | TPCN1         |
| ABCB4     | 4.97E-13 | 0.109587 | 0.025 | 0.007 | 7.43E-09 | M1 | ABCB4         |

|            |           |           |        |        |           |    |                  |
|------------|-----------|-----------|--------|--------|-----------|----|------------------|
| VMP1. 2    | 5. 05E-13 | 0. 207933 | 0. 475 | 0. 471 | 7. 55E-09 | M1 | VMP1             |
| AMPD3. 2   | 5. 52E-13 | 0. 187073 | 0. 084 | 0. 046 | 8. 24E-09 | M1 | AMPD3            |
| TMCC2      | 5. 54E-13 | -0. 10486 | 0. 004 | 0. 033 | 8. 27E-09 | M1 | TMCC2            |
| XAF1. 1    | 5. 62E-13 | 0. 259495 | 0. 15  | 0. 1   | 8. 40E-09 | M1 | XAF1             |
| RAB3IL1. 2 | 5. 69E-13 | 0. 186641 | 0. 059 | 0. 028 | 8. 51E-09 | M1 | RAB3IL1          |
| C16orf54.  | 5. 70E-13 | 0. 102193 | 0. 035 | 0. 012 | 8. 51E-09 | M1 | C16orf54         |
| ATP8A1. 2  | 5. 90E-13 | -0. 11741 | 0. 013 | 0. 049 | 8. 81E-09 | M1 | ATP8A1           |
| ASS1. 1    | 5. 98E-13 | -0. 14114 | 0. 004 | 0. 033 | 8. 94E-09 | M1 | ASS1             |
| RP11-109G  | 5. 99E-13 | 0. 159708 | 0. 037 | 0. 014 | 8. 95E-09 | M1 | RP11-109G23. 3   |
| GTF2A2. 1  | 6. 01E-13 | -0. 13315 | 0. 364 | 0. 526 | 8. 98E-09 | M1 | GTF2A2           |
| SNRPD2. 3  | 6. 03E-13 | -0. 19657 | 0. 632 | 0. 771 | 9. 01E-09 | M1 | SNRPD2           |
| PON2. 4    | 7. 36E-13 | -0. 19456 | 0. 35  | 0. 47  | 1. 10E-08 | M1 | PON2             |
| TMEM50A. 3 | 8. 82E-13 | 0. 131338 | 0. 571 | 0. 596 | 1. 32E-08 | M1 | TMEM50A          |
| ACAP1. 3   | 9. 17E-13 | -0. 11416 | 0. 039 | 0. 088 | 1. 37E-08 | M1 | ACAP1            |
| AP1S2. 4   | 9. 25E-13 | -0. 12877 | 0. 399 | 0. 52  | 1. 38E-08 | M1 | AP1S2            |
| ZNRF2      | 9. 68E-13 | 0. 142875 | 0. 053 | 0. 024 | 1. 45E-08 | M1 | ZNRF2            |
| AK5. 1     | 9. 78E-13 | -0. 13494 | 0. 002 | 0. 03  | 1. 46E-08 | M1 | AK5              |
| THBS1. 3   | 1. 01E-12 | 0. 244041 | 0. 119 | 0. 073 | 1. 51E-08 | M1 | THBS1            |
| IRF1. 3    | 1. 02E-12 | -0. 11853 | 0. 138 | 0. 22  | 1. 53E-08 | M1 | IRF1             |
| STC1       | 1. 03E-12 | -0. 11297 | 0. 002 | 0. 03  | 1. 54E-08 | M1 | STC1             |
| TKT. 2     | 1. 09E-12 | 0. 196251 | 0. 502 | 0. 51  | 1. 62E-08 | M1 | TKT              |
| PSMC1. 2   | 1. 15E-12 | -0. 11006 | 0. 272 | 0. 407 | 1. 72E-08 | M1 | PSMC1            |
| ZDHHC19    | 1. 28E-12 | 0. 125766 | 0. 02  | 0. 005 | 1. 91E-08 | M1 | ZDHHC19          |
| REEP5. 3   | 1. 34E-12 | 0. 148819 | 0. 564 | 0. 589 | 2. 00E-08 | M1 | REEP5            |
| GJB1. 2    | 1. 40E-12 | -0. 19569 | 0. 002 | 0. 029 | 2. 10E-08 | M1 | GJB1             |
| NCL. 2     | 1. 43E-12 | -0. 14102 | 0. 428 | 0. 58  | 2. 14E-08 | M1 | NCL              |
| TNFRSF11A  | 1. 49E-12 | 0. 120107 | 0. 047 | 0. 02  | 2. 22E-08 | M1 | TNFRSF11A        |
| DUSP22. 4  | 1. 67E-12 | 0. 302237 | 0. 15  | 0. 104 | 2. 49E-08 | M1 | DUSP22           |
| SPINT1. 3  | 1. 74E-12 | 0. 150663 | 0. 059 | 0. 028 | 2. 59E-08 | M1 | SPINT1           |
| SOX10. 1   | 1. 75E-12 | -0. 1554  | 0. 005 | 0. 034 | 2. 61E-08 | M1 | SOX10            |
| CP. 1      | 1. 93E-12 | -0. 13379 | 0. 004 | 0. 033 | 2. 89E-08 | M1 | CP               |
| RP3-402G1  | 2. 02E-12 | 0. 12086  | 0. 019 | 0. 005 | 3. 02E-08 | M1 | RP3-402G11. 25   |
| FA2H. 2    | 2. 08E-12 | -0. 14609 | 0. 004 | 0. 032 | 3. 11E-08 | M1 | FA2H             |
| NKX6-2. 2  | 2. 18E-12 | -0. 19175 | 0. 002 | 0. 029 | 3. 26E-08 | M1 | NKX6-2           |
| HTATIP2. 4 | 2. 32E-12 | 0. 29993  | 0. 187 | 0. 138 | 3. 46E-08 | M1 | HTATIP2          |
| PTGES3. 1  | 2. 41E-12 | -0. 16594 | 0. 594 | 0. 744 | 3. 60E-08 | M1 | PTGES3           |
| QPCT. 4    | 2. 52E-12 | 0. 249624 | 0. 076 | 0. 041 | 3. 77E-08 | M1 | QPCT             |
| ZC3HAV1. 3 | 2. 63E-12 | 0. 36312  | 0. 212 | 0. 169 | 3. 93E-08 | M1 | ZC3HAV1          |
| SIGLEC5    | 2. 66E-12 | 0. 139133 | 0. 032 | 0. 011 | 3. 97E-08 | M1 | SIGLEC5          |
| XXbac-B13  | 2. 77E-12 | 0. 121682 | 0. 039 | 0. 015 | 4. 14E-08 | M1 | XXbac-B135H6. 15 |
| SEC14L1. 3 | 2. 79E-12 | 0. 345844 | 0. 316 | 0. 287 | 4. 16E-08 | M1 | SEC14L1          |
| ENO1. 2    | 2. 81E-12 | -0. 2252  | 0. 742 | 0. 805 | 4. 19E-08 | M1 | ENO1             |
| ATP1A1. 2  | 2. 86E-12 | 0. 178356 | 0. 474 | 0. 473 | 4. 27E-08 | M1 | ATP1A1           |
| PRKCB. 3   | 2. 89E-12 | 0. 12627  | 0. 071 | 0. 036 | 4. 32E-08 | M1 | PRKCB            |
| SP140. 3   | 3. 02E-12 | 0. 120531 | 0. 056 | 0. 026 | 4. 52E-08 | M1 | SP140            |
| AHR. 4     | 3. 34E-12 | 0. 233983 | 0. 095 | 0. 056 | 4. 99E-08 | M1 | AHR              |
| MT1A. 3    | 3. 35E-12 | -0. 18357 | 0. 005 | 0. 034 | 5. 01E-08 | M1 | MT1A             |
| COPZ1. 1   | 3. 51E-12 | -0. 11308 | 0. 355 | 0. 512 | 5. 25E-08 | M1 | COPZ1            |
| MYRF. 2    | 3. 53E-12 | -0. 17858 | 0. 006 | 0. 036 | 5. 28E-08 | M1 | MYRF             |
| CNDP1. 2   | 4. 13E-12 | -0. 25235 | 0. 008 | 0. 039 | 6. 17E-08 | M1 | CNDP1            |
| PLXDC1     | 4. 19E-12 | 0. 157361 | 0. 046 | 0. 02  | 6. 26E-08 | M1 | PLXDC1           |

|            |           |           |        |        |              |                |
|------------|-----------|-----------|--------|--------|--------------|----------------|
| GUSB. 3    | 4. 21E-12 | 0. 270795 | 0. 307 | 0. 265 | 6. 28E-08 M1 | GUSB           |
| BMF. 1     | 4. 57E-12 | 0. 144655 | 0. 041 | 0. 017 | 6. 83E-08 M1 | BMF            |
| RP11-586D  | 5. 12E-12 | 0. 109095 | 0. 02  | 0. 005 | 7. 64E-08 M1 | RP11-586D19. 1 |
| MYBPC1. 1  | 5. 84E-12 | -0. 1411  | 0. 015 | 0. 05  | 8. 73E-08 M1 | MYBPC1         |
| LY75. 1    | 5. 97E-12 | 0. 106797 | 0. 035 | 0. 013 | 8. 92E-08 M1 | LY75           |
| OCIAD1. 2  | 6. 34E-12 | -0. 11619 | 0. 499 | 0. 664 | 9. 47E-08 M1 | OCIAD1         |
| PGM2. 2    | 6. 67E-12 | 0. 306723 | 0. 187 | 0. 141 | 9. 97E-08 M1 | PGM2           |
| MARCH2. 4  | 6. 89E-12 | 0. 335021 | 0. 262 | 0. 227 | 1. 03E-07 M1 | 2-Mar          |
| EDEM1. 3   | 7. 04E-12 | 0. 25126  | 0. 114 | 0. 072 | 1. 05E-07 M1 | EDEM1          |
| MYL6. 4    | 7. 09E-12 | -0. 16993 | 0. 941 | 0. 942 | 1. 06E-07 M1 | MYL6           |
| MAP4K1. 3  | 7. 26E-12 | 0. 157806 | 0. 053 | 0. 025 | 1. 08E-07 M1 | MAP4K1         |
| H3F3A. 1   | 7. 63E-12 | -0. 14516 | 0. 738 | 0. 749 | 1. 14E-07 M1 | H3F3A          |
| CRIP1. 2   | 7. 63E-12 | -0. 18182 | 0. 012 | 0. 045 | 1. 14E-07 M1 | CRIP1          |
| LAMP2. 3   | 7. 99E-12 | 0. 178752 | 0. 48  | 0. 469 | 1. 19E-07 M1 | LAMP2          |
| PARP14. 3  | 8. 25E-12 | 0. 352045 | 0. 193 | 0. 149 | 1. 23E-07 M1 | PARP14         |
| VPS37B. 3  | 9. 22E-12 | 0. 387754 | 0. 28  | 0. 249 | 1. 38E-07 M1 | VPS37B         |
| PDCD1LG2   | 9. 66E-12 | 0. 15284  | 0. 047 | 0. 021 | 1. 44E-07 M1 | PDCD1LG2       |
| NDUFB3. 3  | 9. 84E-12 | -0. 14875 | 0. 419 | 0. 58  | 1. 47E-07 M1 | NDUFB3         |
| RP4-613B2  | 9. 92E-12 | -0. 10701 | 0. 009 | 0. 039 | 1. 48E-07 M1 | RP4-613B23. 1  |
| UNC13D. 3  | 1. 07E-11 | 0. 179205 | 0. 077 | 0. 043 | 1. 60E-07 M1 | UNC13D         |
| RP5-899E9  | 1. 12E-11 | 0. 158052 | 0. 03  | 0. 01  | 1. 68E-07 M1 | RP5-899E9. 1   |
| P2RY6. 3   | 1. 25E-11 | 0. 126625 | 0. 058 | 0. 028 | 1. 87E-07 M1 | P2RY6          |
| GRM3. 1    | 1. 28E-11 | -0. 12896 | 0. 002 | 0. 026 | 1. 92E-07 M1 | GRM3           |
| KCNK1      | 1. 28E-11 | -0. 11155 | 0      | 0. 023 | 1. 92E-07 M1 | KCNK1          |
| NUMB. 4    | 1. 29E-11 | 0. 334076 | 0. 208 | 0. 163 | 1. 93E-07 M1 | NUMB           |
| PTPRO. 3   | 1. 46E-11 | 0. 203714 | 0. 113 | 0. 071 | 2. 19E-07 M1 | PTPRO          |
| ABCC3. 1   | 1. 54E-11 | -0. 10044 | 0. 056 | 0. 108 | 2. 30E-07 M1 | ABCC3          |
| HHATL      | 1. 59E-11 | -0. 13357 | 0      | 0. 023 | 2. 37E-07 M1 | HHATL          |
| UQCC2. 1   | 1. 70E-11 | -0. 10608 | 0. 315 | 0. 449 | 2. 54E-07 M1 | UQCC2          |
| ARPC4. 4   | 1. 76E-11 | 0. 159416 | 0. 498 | 0. 517 | 2. 63E-07 M1 | ARPC4          |
| CDC42SE1.  | 1. 83E-11 | 0. 291405 | 0. 329 | 0. 299 | 2. 74E-07 M1 | CDC42SE1       |
| BEX5. 2    | 1. 84E-11 | -0. 16356 | 0. 055 | 0. 105 | 2. 75E-07 M1 | BEX5           |
| MOG. 2     | 1. 92E-11 | -0. 22968 | 0. 007 | 0. 036 | 2. 87E-07 M1 | MOG            |
| C20orf27.  | 1. 92E-11 | 0. 277909 | 0. 374 | 0. 357 | 2. 87E-07 M1 | C20orf27       |
| ECH1. 2    | 1. 99E-11 | -0. 12952 | 0. 421 | 0. 586 | 2. 98E-07 M1 | ECH1           |
| PRRG1      | 2. 03E-11 | -0. 10663 | 0. 004 | 0. 031 | 3. 03E-07 M1 | PRRG1          |
| RGPD5. 1   | 2. 04E-11 | 0. 132315 | 0. 039 | 0. 016 | 3. 05E-07 M1 | RGPD5          |
| RAD23A. 2  | 2. 06E-11 | -0. 11106 | 0. 444 | 0. 591 | 3. 08E-07 M1 | RAD23A         |
| PEX5L. 1   | 2. 12E-11 | -0. 13284 | 0. 002 | 0. 027 | 3. 17E-07 M1 | PEX5L          |
| FLOT1. 4   | 2. 19E-11 | 0. 188625 | 0. 493 | 0. 505 | 3. 27E-07 M1 | FLOT1          |
| TMEM220. 3 | 2. 25E-11 | 0. 248962 | 0. 101 | 0. 063 | 3. 36E-07 M1 | TMEM220        |
| FAM72B     | 2. 25E-11 | 0. 140215 | 0. 041 | 0. 017 | 3. 36E-07 M1 | FAM72B         |
| COLGALT1.  | 2. 30E-11 | 0. 318654 | 0. 226 | 0. 185 | 3. 44E-07 M1 | COLGALT1       |
| RNF213. 4  | 2. 33E-11 | 0. 322925 | 0. 289 | 0. 256 | 3. 48E-07 M1 | RNF213         |
| ADAM17. 3  | 2. 34E-11 | 0. 382076 | 0. 279 | 0. 25  | 3. 49E-07 M1 | ADAM17         |
| MBNL1. 4   | 2. 53E-11 | 0. 332445 | 0. 256 | 0. 217 | 3. 78E-07 M1 | MBNL1          |
| CTGF. 1    | 2. 54E-11 | -0. 14884 | 0. 006 | 0. 034 | 3. 80E-07 M1 | CTGF           |
| COX6A1. 4  | 2. 60E-11 | -0. 14109 | 0. 783 | 0. 857 | 3. 88E-07 M1 | COX6A1         |
| HLA-G      | 2. 62E-11 | 0. 249251 | 0. 081 | 0. 046 | 3. 91E-07 M1 | HLA-G          |
| CUTA. 4    | 2. 62E-11 | -0. 13154 | 0. 553 | 0. 708 | 3. 91E-07 M1 | CUTA           |
| AGPAT2. 4  | 2. 80E-11 | 0. 316842 | 0. 214 | 0. 172 | 4. 18E-07 M1 | AGPAT2         |

|            |           |           |        |        |           |    |                |
|------------|-----------|-----------|--------|--------|-----------|----|----------------|
| HES1. 3    | 2. 82E-11 | 0. 267769 | 0. 235 | 0. 189 | 4. 22E-07 | M1 | HES1           |
| AATK. 2    | 2. 90E-11 | -0. 17642 | 0. 009 | 0. 038 | 4. 33E-07 | M1 | AATK           |
| HOTAIRM1.  | 2. 99E-11 | -0. 10091 | 0. 124 | 0. 194 | 4. 47E-07 | M1 | HOTAIRM1       |
| AUP1. 2    | 3. 08E-11 | 0. 193336 | 0. 499 | 0. 527 | 4. 61E-07 | M1 | AUP1           |
| GGA1. 4    | 3. 10E-11 | 0. 387861 | 0. 309 | 0. 285 | 4. 63E-07 | M1 | GGA1           |
| GSN-AS1    | 3. 11E-11 | 0. 115833 | 0. 021 | 0. 006 | 4. 65E-07 | M1 | GSN-AS1        |
| SULT1A1. 2 | 3. 13E-11 | 0. 161253 | 0. 078 | 0. 044 | 4. 68E-07 | M1 | SULT1A1        |
| CTD-2090I  | 3. 17E-11 | 0. 25847  | 0. 083 | 0. 047 | 4. 74E-07 | M1 | CTD-2090I13. 1 |
| ITSN2. 4   | 3. 20E-11 | 0. 31224  | 0. 217 | 0. 174 | 4. 78E-07 | M1 | ITSN2          |
| TMEM125. 1 | 3. 45E-11 | -0. 15908 | 0. 002 | 0. 026 | 5. 16E-07 | M1 | TMEM125        |
| GPR82. 3   | 3. 51E-11 | 0. 243166 | 0. 174 | 0. 127 | 5. 25E-07 | M1 | GPR82          |
| IRF7. 4    | 3. 75E-11 | 0. 307631 | 0. 197 | 0. 154 | 5. 60E-07 | M1 | IRF7           |
| NHLH1. 1   | 3. 81E-11 | -0. 12224 | 0. 004 | 0. 029 | 5. 69E-07 | M1 | NHLH1          |
| ADIPOR1. 4 | 4. 17E-11 | 0. 312586 | 0. 381 | 0. 379 | 6. 23E-07 | M1 | ADIPOR1        |
| LTA4H. 3   | 4. 85E-11 | 0. 29513  | 0. 264 | 0. 222 | 7. 25E-07 | M1 | LTA4H          |
| NCOA4. 4   | 5. 11E-11 | 0. 323319 | 0. 29  | 0. 257 | 7. 63E-07 | M1 | NCOA4          |
| HK3. 2     | 5. 48E-11 | 0. 100211 | 0. 046 | 0. 021 | 8. 19E-07 | M1 | HK3            |
| TNS1       | 5. 54E-11 | -0. 10166 | 0. 02  | 0. 055 | 8. 28E-07 | M1 | TNS1           |
| NDUFB4. 2  | 5. 55E-11 | -0. 16513 | 0. 554 | 0. 705 | 8. 29E-07 | M1 | NDUFB4         |
| SLC25A45.  | 5. 90E-11 | 0. 190652 | 0. 073 | 0. 04  | 8. 82E-07 | M1 | SLC25A45       |
| SLC39A1. 1 | 6. 27E-11 | 0. 259043 | 0. 39  | 0. 386 | 9. 37E-07 | M1 | SLC39A1        |
| KIAA1683   | 6. 51E-11 | 0. 133977 | 0. 036 | 0. 015 | 9. 73E-07 | M1 | KIAA1683       |
| B3GALT4. 1 | 6. 69E-11 | 0. 180067 | 0. 069 | 0. 038 | 1. 00E-06 | M1 | B3GALT4        |
| TPI1. 3    | 7. 00E-11 | -0. 19472 | 0. 835 | 0. 872 | 1. 05E-06 | M1 | TPI1           |
| SYNGR1. 3  | 7. 44E-11 | 0. 34964  | 0. 146 | 0. 105 | 1. 11E-06 | M1 | SYNGR1         |
| RP11-1398  | 7. 85E-11 | 0. 100993 | 0. 033 | 0. 013 | 1. 17E-06 | M1 | RP11-1398P2. 1 |
| MRO        | 8. 01E-11 | 0. 141285 | 0. 039 | 0. 017 | 1. 20E-06 | M1 | MRO            |
| PKM. 3     | 8. 26E-11 | -0. 24158 | 0. 725 | 0. 779 | 1. 23E-06 | M1 | PKM            |
| PHF11. 3   | 8. 75E-11 | 0. 282079 | 0. 178 | 0. 134 | 1. 31E-06 | M1 | PHF11          |
| TMEM51. 3  | 8. 80E-11 | 0. 259759 | 0. 154 | 0. 112 | 1. 32E-06 | M1 | TMEM51         |
| CTSA. 4    | 8. 91E-11 | 0. 206609 | 0. 408 | 0. 397 | 1. 33E-06 | M1 | CTSA           |
| ADRM1. 1   | 9. 66E-11 | -0. 10459 | 0. 382 | 0. 535 | 1. 44E-06 | M1 | ADRM1          |
| C1QTNF3. 1 | 1. 12E-10 | -0. 10481 | 0. 013 | 0. 044 | 1. 68E-06 | M1 | C1QTNF3        |
| LRRK2. 3   | 1. 15E-10 | 0. 200799 | 0. 09  | 0. 054 | 1. 72E-06 | M1 | LRRK2          |
| TSPAN33. 3 | 1. 30E-10 | 0. 177523 | 0. 068 | 0. 037 | 1. 94E-06 | M1 | TSPAN33        |
| ABHD14B. 3 | 1. 53E-10 | 0. 326004 | 0. 213 | 0. 172 | 2. 28E-06 | M1 | ABHD14B        |
| CTD-2020K  | 1. 65E-10 | 0. 181395 | 0. 044 | 0. 02  | 2. 47E-06 | M1 | CTD-2020K17. 1 |
| RAB11FIP1  | 1. 66E-10 | 0. 125738 | 0. 048 | 0. 023 | 2. 49E-06 | M1 | RAB11FIP1      |
| SUMO1      | 1. 71E-10 | -0. 10837 | 0. 526 | 0. 683 | 2. 56E-06 | M1 | SUMO1          |
| JUND. 3    | 1. 72E-10 | 0. 263228 | 0. 403 | 0. 398 | 2. 57E-06 | M1 | JUND           |
| RTN4. 4    | 1. 74E-10 | -0. 11484 | 0. 651 | 0. 71  | 2. 60E-06 | M1 | RTN4           |
| LAMTOR2. 2 | 1. 75E-10 | 0. 109286 | 0. 56  | 0. 592 | 2. 61E-06 | M1 | LAMTOR2        |
| ST18. 2    | 1. 76E-10 | -0. 11934 | 0. 014 | 0. 044 | 2. 62E-06 | M1 | ST18           |
| HSD3B7. 2  | 1. 77E-10 | 0. 195474 | 0. 107 | 0. 069 | 2. 65E-06 | M1 | HSD3B7         |
| SLC19A2    | 1. 82E-10 | 0. 198018 | 0. 069 | 0. 038 | 2. 72E-06 | M1 | SLC19A2        |
| LTB4R. 3   | 1. 83E-10 | 0. 15077  | 0. 057 | 0. 029 | 2. 73E-06 | M1 | LTB4R          |
| LGI3. 2    | 2. 01E-10 | -0. 13331 | 0. 002 | 0. 024 | 3. 00E-06 | M1 | LGI3           |
| RP11-443E  | 2. 03E-10 | 0. 125623 | 0. 027 | 0. 01  | 3. 04E-06 | M1 | RP11-443B7. 1  |
| ANPEP. 3   | 2. 05E-10 | -0. 1037  | 0. 009 | 0. 036 | 3. 07E-06 | M1 | ANPEP          |
| MT1G. 3    | 2. 09E-10 | -0. 35464 | 0. 084 | 0. 137 | 3. 12E-06 | M1 | MT1G           |
| C6orf62. 3 | 2. 14E-10 | 0. 211235 | 0. 437 | 0. 455 | 3. 20E-06 | M1 | C6orf62        |

|             |           |           |        |        |           |    |                |
|-------------|-----------|-----------|--------|--------|-----------|----|----------------|
| ENPP4. 2    | 2. 65E-10 | 0. 17442  | 0. 083 | 0. 048 | 3. 96E-06 | M1 | ENPP4          |
| SPNS2       | 2. 74E-10 | 0. 133552 | 0. 053 | 0. 026 | 4. 10E-06 | M1 | SPNS2          |
| PROCR. 3    | 2. 77E-10 | 0. 229115 | 0. 1   | 0. 063 | 4. 14E-06 | M1 | PROCR          |
| FUCA2. 4    | 2. 80E-10 | 0. 316322 | 0. 27  | 0. 237 | 4. 19E-06 | M1 | FUCA2          |
| PSMA7. 3    | 3. 08E-10 | -0. 14101 | 0. 732 | 0. 815 | 4. 61E-06 | M1 | PSMA7          |
| CLDN11. 2   | 3. 14E-10 | -0. 31683 | 0. 019 | 0. 051 | 4. 69E-06 | M1 | CLDN11         |
| SLC38A10. 3 | 3. 37E-10 | 0. 309245 | 0. 229 | 0. 193 | 5. 03E-06 | M1 | SLC38A10       |
| SLFN11. 1   | 3. 45E-10 | 0. 143856 | 0. 068 | 0. 038 | 5. 16E-06 | M1 | SLFN11         |
| SH3D21. 1   | 3. 73E-10 | 0. 128344 | 0. 043 | 0. 02  | 5. 57E-06 | M1 | SH3D21         |
| DENND2D. 1  | 3. 85E-10 | 0. 175175 | 0. 071 | 0. 04  | 5. 75E-06 | M1 | DENND2D        |
| RP11-22N1   | 3. 99E-10 | 0. 205366 | 0. 056 | 0. 029 | 5. 96E-06 | M1 | RP11-22N19. 2  |
| PLEKHH1. 2  | 4. 03E-10 | -0. 1017  | 0. 009 | 0. 037 | 6. 02E-06 | M1 | PLEKHH1        |
| CTNNB1. 4   | 4. 13E-10 | 0. 286953 | 0. 366 | 0. 353 | 6. 18E-06 | M1 | CTNNB1         |
| ATF6. 3     | 4. 45E-10 | 0. 378412 | 0. 271 | 0. 244 | 6. 66E-06 | M1 | ATF6           |
| H2AFY. 4    | 4. 73E-10 | 0. 126432 | 0. 582 | 0. 612 | 7. 06E-06 | M1 | H2AFY          |
| GLB1. 1     | 5. 13E-10 | 0. 303261 | 0. 272 | 0. 239 | 7. 67E-06 | M1 | GLB1           |
| FOLH1. 1    | 5. 15E-10 | -0. 11029 | 0. 001 | 0. 021 | 7. 69E-06 | M1 | FOLH1          |
| BNIP3L. 2   | 5. 37E-10 | -0. 10848 | 0. 466 | 0. 626 | 8. 02E-06 | M1 | BNIP3L         |
| CYTH1. 4    | 5. 58E-10 | 0. 260554 | 0. 195 | 0. 151 | 8. 34E-06 | M1 | CYTH1          |
| SP140L. 1   | 5. 85E-10 | 0. 247749 | 0. 109 | 0. 072 | 8. 74E-06 | M1 | SP140L         |
| RUNX3. 3    | 6. 09E-10 | 0. 125269 | 0. 063 | 0. 034 | 9. 10E-06 | M1 | RUNX3          |
| TSLP. 2     | 6. 41E-10 | -0. 12895 | 0. 002 | 0. 023 | 9. 58E-06 | M1 | TSLP           |
| TRA2B. 2    | 6. 75E-10 | 0. 199389 | 0. 512 | 0. 545 | 1. 01E-05 | M1 | TRA2B          |
| PPM1M. 4    | 6. 88E-10 | 0. 191324 | 0. 105 | 0. 069 | 1. 03E-05 | M1 | PPM1M          |
| NAT1        | 6. 93E-10 | 0. 100338 | 0. 04  | 0. 018 | 1. 04E-05 | M1 | NAT1           |
| LTF. 2      | 8. 53E-10 | -0. 66558 | 0. 11  | 0. 159 | 1. 28E-05 | M1 | LTF            |
| ATF5. 3     | 8. 62E-10 | 0. 28617  | 0. 228 | 0. 187 | 1. 29E-05 | M1 | ATF5           |
| PTPRJ. 1    | 8. 80E-10 | 0. 170379 | 0. 05  | 0. 025 | 1. 31E-05 | M1 | PTPRJ          |
| CCDC88B. 1  | 8. 91E-10 | 0. 230541 | 0. 113 | 0. 075 | 1. 33E-05 | M1 | CCDC88B        |
| C14orf2. 2  | 9. 11E-10 | -0. 17472 | 0. 539 | 0. 678 | 1. 36E-05 | M1 | C14orf2        |
| PARVB. 4    | 1. 02E-09 | 0. 269587 | 0. 198 | 0. 157 | 1. 53E-05 | M1 | PARVB          |
| ITPR2. 3    | 1. 03E-09 | 0. 327591 | 0. 163 | 0. 125 | 1. 53E-05 | M1 | ITPR2          |
| RP11-472N   | 1. 15E-09 | 0. 355517 | 0. 138 | 0. 101 | 1. 72E-05 | M1 | RP11-472N13. 3 |
| C5AR2       | 1. 16E-09 | 0. 121127 | 0. 032 | 0. 013 | 1. 73E-05 | M1 | C5AR2          |
| H3F3C       | 1. 26E-09 | 0. 249221 | 0. 08  | 0. 048 | 1. 88E-05 | M1 | H3F3C          |
| YME1L1. 2   | 1. 33E-09 | 0. 371738 | 0. 278 | 0. 257 | 1. 99E-05 | M1 | YME1L1         |
| DISP1       | 1. 33E-09 | 0. 182576 | 0. 058 | 0. 031 | 1. 99E-05 | M1 | DISP1          |
| LINC0032C   | 1. 36E-09 | -0. 15597 | 0. 004 | 0. 026 | 2. 03E-05 | M1 | LINC00320      |
| CTA-384D8   | 1. 57E-09 | 0. 146985 | 0. 042 | 0. 02  | 2. 35E-05 | M1 | CTA-384D8. 34  |
| PRKCG. 2    | 1. 60E-09 | -0. 15272 | 0. 003 | 0. 023 | 2. 39E-05 | M1 | PRKCG          |
| SLC01A2     | 1. 70E-09 | -0. 10339 | 0. 001 | 0. 02  | 2. 55E-05 | M1 | SLC01A2        |
| BCAS1. 1    | 1. 72E-09 | -0. 1199  | 0. 017 | 0. 048 | 2. 56E-05 | M1 | BCAS1          |
| MYO1G. 4    | 1. 82E-09 | 0. 145278 | 0. 09  | 0. 055 | 2. 72E-05 | M1 | MYO1G          |
| PDCD4-AS1   | 1. 85E-09 | 0. 120556 | 0. 042 | 0. 02  | 2. 76E-05 | M1 | PDCD4-AS1      |
| GALM. 3     | 1. 86E-09 | 0. 229189 | 0. 16  | 0. 118 | 2. 79E-05 | M1 | GALM           |
| NMI. 3      | 2. 02E-09 | 0. 23577  | 0. 217 | 0. 175 | 3. 02E-05 | M1 | NMI            |
| CTBS. 2     | 2. 05E-09 | 0. 306135 | 0. 188 | 0. 15  | 3. 07E-05 | M1 | CTBS           |
| ARID3A. 2   | 2. 16E-09 | 0. 279497 | 0. 147 | 0. 108 | 3. 23E-05 | M1 | ARID3A         |
| RILP. 4     | 2. 46E-09 | 0. 25037  | 0. 134 | 0. 097 | 3. 68E-05 | M1 | RILP           |
| DNAJB12. 3  | 2. 55E-09 | 0. 292379 | 0. 181 | 0. 141 | 3. 82E-05 | M1 | DNAJB12        |
| ESD. 2      | 2. 82E-09 | -0. 10347 | 0. 37  | 0. 514 | 4. 21E-05 | M1 | ESD            |

|             |           |           |        |        |           |    |               |
|-------------|-----------|-----------|--------|--------|-----------|----|---------------|
| MAP7. 2     | 2. 87E-09 | -0. 16778 | 0. 015 | 0. 044 | 4. 29E-05 | M1 | MAP7          |
| TPK1. 3     | 3. 15E-09 | 0. 198972 | 0. 07  | 0. 041 | 4. 70E-05 | M1 | TPK1          |
| MOBP. 3     | 3. 22E-09 | -0. 28196 | 0. 013 | 0. 04  | 4. 81E-05 | M1 | MOBP          |
| MOB3C       | 3. 24E-09 | 0. 140218 | 0. 06  | 0. 033 | 4. 84E-05 | M1 | MOB3C         |
| CA5A        | 3. 32E-09 | 0. 110307 | 0. 019 | 0. 006 | 4. 96E-05 | M1 | CA5A          |
| LYVE1. 2    | 3. 33E-09 | 0. 17753  | 0. 061 | 0. 033 | 4. 98E-05 | M1 | LYVE1         |
| ANG. 2      | 3. 38E-09 | 0. 187173 | 0. 116 | 0. 078 | 5. 05E-05 | M1 | ANG           |
| ACOT9. 4    | 3. 55E-09 | 0. 315939 | 0. 211 | 0. 176 | 5. 30E-05 | M1 | ACOT9         |
| BAG3. 2     | 3. 65E-09 | 0. 336717 | 0. 138 | 0. 102 | 5. 45E-05 | M1 | BAG3          |
| MDH1. 2     | 3. 66E-09 | -0. 11293 | 0. 421 | 0. 577 | 5. 47E-05 | M1 | MDH1          |
| OTOA. 2     | 4. 06E-09 | 0. 123354 | 0. 052 | 0. 027 | 6. 06E-05 | M1 | OTOA          |
| FXYD1. 1    | 4. 08E-09 | -0. 10093 | 0. 011 | 0. 036 | 6. 09E-05 | M1 | FXYD1         |
| XIST. 4     | 4. 14E-09 | 0. 190005 | 0. 309 | 0. 257 | 6. 19E-05 | M1 | XIST          |
| PSTPIP1. 3  | 4. 22E-09 | 0. 134928 | 0. 065 | 0. 036 | 6. 30E-05 | M1 | PSTPIP1       |
| APLP2. 4    | 4. 65E-09 | 0. 100525 | 0. 573 | 0. 597 | 6. 94E-05 | M1 | APLP2         |
| BIRC3. 2    | 4. 83E-09 | 0. 112689 | 0. 093 | 0. 058 | 7. 22E-05 | M1 | BIRC3         |
| SLC37A2. 1  | 4. 89E-09 | 0. 119151 | 0. 037 | 0. 017 | 7. 30E-05 | M1 | SLC37A2       |
| RP11-862L   | 4. 91E-09 | 0. 196486 | 0. 033 | 0. 014 | 7. 34E-05 | M1 | RP11-862L9. 3 |
| PEPD. 1     | 5. 55E-09 | 0. 186554 | 0. 42  | 0. 431 | 8. 30E-05 | M1 | PEPD          |
| DOCK10. 4   | 5. 63E-09 | 0. 237929 | 0. 158 | 0. 119 | 8. 41E-05 | M1 | DOCK10        |
| TBC1D22A. 5 | 6. 3E-09  | 0. 271795 | 0. 154 | 0. 116 | 8. 42E-05 | M1 | TBC1D22A      |
| CCR7. 1     | 5. 83E-09 | 0. 10589  | 0. 022 | 0. 008 | 8. 72E-05 | M1 | CCR7          |
| EIF2S2. 2   | 6. 32E-09 | -0. 11588 | 0. 472 | 0. 611 | 9. 45E-05 | M1 | EIF2S2        |
| TAPBPL. 3   | 6. 42E-09 | 0. 199457 | 0. 156 | 0. 116 | 9. 59E-05 | M1 | TAPBPL        |
| TALDO1. 4   | 6. 87E-09 | 0. 115462 | 0. 562 | 0. 604 | 0. 000103 | M1 | TALDO1        |
| ARHGAP6     | 7. 14E-09 | 0. 156892 | 0. 037 | 0. 017 | 0. 000107 | M1 | ARHGAP6       |
| JUN. 1      | 7. 39E-09 | -0. 13322 | 0. 599 | 0. 687 | 0. 00011  | M1 | JUN           |
| FAM53B. 3   | 7. 81E-09 | 0. 203753 | 0. 076 | 0. 046 | 0. 000117 | M1 | FAM53B        |
| CHADL. 1    | 7. 91E-09 | -0. 13136 | 0. 018 | 0. 046 | 0. 000118 | M1 | CHADL         |
| CA3. 1      | 9. 12E-09 | -0. 22097 | 0. 017 | 0. 045 | 0. 000136 | M1 | CA3           |
| ATXN8OS. 3  | 9. 41E-09 | 0. 225383 | 0. 11  | 0. 073 | 0. 000141 | M1 | ATXN8OS       |
| ZBTB16. 1   | 9. 47E-09 | 0. 264157 | 0. 191 | 0. 149 | 0. 000141 | M1 | ZBTB16        |
| CCDC28A. 3  | 9. 97E-09 | 0. 279045 | 0. 19  | 0. 152 | 0. 000149 | M1 | CCDC28A       |
| TNFRSF11E   | 1. 08E-08 | 0. 20431  | 0. 078 | 0. 049 | 0. 000161 | M1 | TNFRSF11B     |
| MIR22HG. 3  | 1. 12E-08 | 0. 233271 | 0. 144 | 0. 107 | 0. 000168 | M1 | MIR22HG       |
| HIST1H2BG   | 1. 19E-08 | 0. 133072 | 0. 02  | 0. 007 | 0. 000177 | M1 | HIST1H2BG     |
| UGCG. 2     | 1. 25E-08 | 0. 282097 | 0. 187 | 0. 152 | 0. 000187 | M1 | UGCG          |
| PWWP2B. 1   | 1. 34E-08 | 0. 164679 | 0. 054 | 0. 03  | 0. 000201 | M1 | PWWP2B        |
| SNRPN. 4    | 1. 36E-08 | -0. 15613 | 0. 062 | 0. 106 | 0. 000203 | M1 | SNRPN         |
| MTRNR2L8. 1 | 1. 39E-08 | 0. 267195 | 0. 226 | 0. 183 | 0. 000208 | M1 | MTRNR2L8      |
| SPAG4. 1    | 1. 41E-08 | -0. 10692 | 0. 022 | 0. 053 | 0. 00021  | M1 | SPAG4         |
| SAMD9L      | 1. 44E-08 | 0. 224691 | 0. 129 | 0. 094 | 0. 000216 | M1 | SAMD9L        |
| AGMAT       | 1. 48E-08 | 0. 135557 | 0. 035 | 0. 016 | 0. 000222 | M1 | AGMAT         |
| RAB13. 3    | 1. 51E-08 | -0. 16411 | 0. 291 | 0. 388 | 0. 000226 | M1 | RAB13         |
| AP1G2. 3    | 1. 54E-08 | 0. 169049 | 0. 076 | 0. 046 | 0. 000231 | M1 | AP1G2         |
| HNRNPC. 3   | 1. 69E-08 | -0. 16066 | 0. 572 | 0. 718 | 0. 000253 | M1 | HNRNPC        |
| CRTAP. 4    | 1. 86E-08 | 0. 286036 | 0. 259 | 0. 232 | 0. 000278 | M1 | CRTAP         |
| MMP2. 3     | 1. 96E-08 | 0. 291468 | 0. 251 | 0. 222 | 0. 000293 | M1 | MMP2          |
| NDST2       | 2. 07E-08 | 0. 115616 | 0. 043 | 0. 022 | 0. 000309 | M1 | NDST2         |
| MARCO. 1    | 2. 11E-08 | -0. 20787 | 0. 032 | 0. 064 | 0. 000315 | M1 | MARCO         |
| PDE3B. 2    | 2. 15E-08 | 0. 178724 | 0. 061 | 0. 035 | 0. 000321 | M1 | PDE3B         |

|             |           |           |        |        |           |    |              |
|-------------|-----------|-----------|--------|--------|-----------|----|--------------|
| RTN2. 3     | 2. 17E-08 | 0. 25404  | 0. 112 | 0. 078 | 0. 000324 | M1 | RTN2         |
| GRINA. 3    | 2. 27E-08 | 0. 227501 | 0. 423 | 0. 439 | 0. 00034  | M1 | GRINA        |
| SMPDL3A. 3  | 2. 30E-08 | 0. 297179 | 0. 154 | 0. 119 | 0. 000343 | M1 | SMPDL3A      |
| IVNS1ABP. 2 | 2. 42E-08 | 0. 295854 | 0. 26  | 0. 233 | 0. 000362 | M1 | IVNS1ABP     |
| SPATA20. 2  | 2. 44E-08 | 0. 27656  | 0. 16  | 0. 125 | 0. 000364 | M1 | SPATA20      |
| HSP90AA1. 2 | 2. 54E-08 | -0. 10136 | 0. 878 | 0. 89  | 0. 000379 | M1 | HSP90AA1     |
| ARL5B. 4    | 2. 67E-08 | 0. 272508 | 0. 114 | 0. 082 | 0. 000399 | M1 | ARL5B        |
| TMBIM4. 3   | 2. 69E-08 | 0. 206846 | 0. 085 | 0. 054 | 0. 000402 | M1 | TMBIM4       |
| NACA2. 1    | 2. 83E-08 | 0. 298642 | 0. 201 | 0. 161 | 0. 000422 | M1 | NACA2        |
| HDAC10. 3   | 2. 85E-08 | 0. 273219 | 0. 135 | 0. 102 | 0. 000426 | M1 | HDAC10       |
| NIPSNAP3B   | 3. 13E-08 | 0. 116572 | 0. 03  | 0. 013 | 0. 000467 | M1 | NIPSNAP3B    |
| IL1R2. 2    | 3. 32E-08 | 0. 113898 | 0. 048 | 0. 025 | 0. 000496 | M1 | IL1R2        |
| SLC03A1. 1  | 3. 38E-08 | -0. 10385 | 0. 012 | 0. 036 | 0. 000505 | M1 | SLC03A1      |
| PGM5        | 3. 50E-08 | 0. 145467 | 0. 045 | 0. 023 | 0. 000522 | M1 | PGM5         |
| PDIA6. 2    | 3. 63E-08 | -0. 16436 | 0. 528 | 0. 672 | 0. 000542 | M1 | PDIA6        |
| MAP3K5. 1   | 4. 06E-08 | 0. 205797 | 0. 072 | 0. 045 | 0. 000607 | M1 | MAP3K5       |
| DAPL1       | 4. 38E-08 | -0. 13158 | 0. 029 | 0. 059 | 0. 000655 | M1 | DAPL1        |
| TMEM19. 3   | 4. 43E-08 | 0. 299645 | 0. 18  | 0. 147 | 0. 000662 | M1 | TMEM19       |
| ATP5D. 3    | 4. 45E-08 | -0. 12773 | 0. 534 | 0. 63  | 0. 000665 | M1 | ATP5D        |
| GUK1. 1     | 4. 64E-08 | -0. 12724 | 0. 608 | 0. 723 | 0. 000693 | M1 | GUK1         |
| PIP5K1B     | 4. 78E-08 | 0. 101328 | 0. 042 | 0. 021 | 0. 000714 | M1 | PIP5K1B      |
| RBPJ. 4     | 4. 83E-08 | 0. 214689 | 0. 45  | 0. 473 | 0. 000722 | M1 | RBPJ         |
| NDUFB2. 3   | 4. 88E-08 | -0. 17555 | 0. 727 | 0. 825 | 0. 000729 | M1 | NDUFB2       |
| PPIA. 2     | 4. 95E-08 | -0. 13399 | 0. 83  | 0. 884 | 0. 00074  | M1 | PPIA         |
| AC079305. 5 | 5. 21E-08 | 0. 114039 | 0. 026 | 0. 011 | 0. 000779 | M1 | AC079305. 10 |
| CCDC69. 3   | 5. 41E-08 | 0. 115315 | 0. 056 | 0. 032 | 0. 000808 | M1 | CCDC69       |
| HSBP1L1. 2  | 5. 96E-08 | 0. 202659 | 0. 1   | 0. 069 | 0. 000891 | M1 | HSBP1L1      |
| SHKBP1. 4   | 6. 12E-08 | 0. 307044 | 0. 256 | 0. 233 | 0. 000915 | M1 | SHKBP1       |
| AIDA. 1     | 6. 43E-08 | 0. 285997 | 0. 254 | 0. 232 | 0. 00096  | M1 | AIDA         |
| CYB5R4. 4   | 6. 47E-08 | 0. 337374 | 0. 202 | 0. 171 | 0. 000967 | M1 | CYB5R4       |
| C19orf70. 6 | 6. 60E-08 | -0. 13252 | 0. 476 | 0. 599 | 0. 000986 | M1 | C19orf70     |
| TBC1D9. 4   | 6. 77E-08 | 0. 199029 | 0. 077 | 0. 049 | 0. 001011 | M1 | TBC1D9       |
| DOCK5. 4    | 7. 09E-08 | 0. 150894 | 0. 08  | 0. 05  | 0. 001059 | M1 | DOCK5        |
| TACC1. 3    | 7. 17E-08 | 0. 295056 | 0. 319 | 0. 312 | 0. 001072 | M1 | TACC1        |
| UBL3. 4     | 7. 32E-08 | 0. 256411 | 0. 353 | 0. 354 | 0. 001095 | M1 | UBL3         |
| COR07. 4    | 7. 77E-08 | 0. 266846 | 0. 187 | 0. 152 | 0. 001161 | M1 | COR07        |
| C11orf58    | 8. 08E-08 | -0. 10224 | 0. 564 | 0. 712 | 0. 001207 | M1 | C11orf58     |
| EHP1L1. 3   | 8. 59E-08 | 0. 217168 | 0. 096 | 0. 066 | 0. 001283 | M1 | EHP1L1       |
| TMEM91. 3   | 8. 75E-08 | 0. 235661 | 0. 098 | 0. 067 | 0. 001307 | M1 | TMEM91       |
| MEF2D. 2    | 9. 10E-08 | 0. 220066 | 0. 099 | 0. 069 | 0. 00136  | M1 | MEF2D        |
| IL2RA. 2    | 9. 41E-08 | 0. 149817 | 0. 051 | 0. 028 | 0. 001406 | M1 | IL2RA        |
| VAMP3. 2    | 9. 41E-08 | 0. 242442 | 0. 35  | 0. 348 | 0. 001406 | M1 | VAMP3        |
| IKBKE. 3    | 9. 74E-08 | 0. 226376 | 0. 08  | 0. 052 | 0. 001456 | M1 | IKBKE        |
| FRAT1       | 9. 76E-08 | 0. 127    | 0. 04  | 0. 02  | 0. 001459 | M1 | FRAT1        |
| SRSF7. 1    | 1. 03E-07 | 0. 121641 | 0. 553 | 0. 598 | 0. 001536 | M1 | SRSF7        |
| CSNK1D. 4   | 1. 03E-07 | 0. 298359 | 0. 353 | 0. 361 | 0. 001543 | M1 | CSNK1D       |
| SLFN12. 1   | 1. 06E-07 | 0. 109177 | 0. 043 | 0. 022 | 0. 001578 | M1 | SLFN12       |
| OASL        | 1. 15E-07 | 0. 117375 | 0. 047 | 0. 025 | 0. 001715 | M1 | OASL         |
| SLC15A2     | 1. 22E-07 | 0. 154064 | 0. 041 | 0. 021 | 0. 001818 | M1 | SLC15A2      |
| FTL. 4      | 1. 28E-07 | -0. 18708 | 1      | 0. 993 | 0. 001907 | M1 | FTL          |
| TMEM39A. 2  | 1. 28E-07 | 0. 231098 | 0. 118 | 0. 086 | 0. 001911 | M1 | TMEM39A      |

|            |           |           |        |        |           |    |                |
|------------|-----------|-----------|--------|--------|-----------|----|----------------|
| TNFAIP8. 3 | 1. 30E-07 | 0. 141764 | 0. 096 | 0. 064 | 0. 001941 | M1 | TNFAIP8        |
| ARHGDIA. 3 | 1. 32E-07 | 0. 117441 | 0. 526 | 0. 572 | 0. 00197  | M1 | ARHGDIA        |
| NUDT2. 3   | 1. 33E-07 | 0. 104431 | 0. 121 | 0. 185 | 0. 001993 | M1 | NUDT2          |
| ZNF703. 4  | 1. 38E-07 | 0. 293456 | 0. 123 | 0. 092 | 0. 002063 | M1 | ZNF703         |
| RCC2. 3    | 1. 45E-07 | 0. 311434 | 0. 199 | 0. 17  | 0. 002166 | M1 | RCC2           |
| RNPEP. 4   | 1. 46E-07 | 0. 265428 | 0. 244 | 0. 22  | 0. 002178 | M1 | RNPEP          |
| CAPN3. 2   | 1. 49E-07 | -0. 22721 | 0. 021 | 0. 047 | 0. 002231 | M1 | CAPN3          |
| PLA2G2A. 1 | 1. 49E-07 | -0. 34214 | 0. 017 | 0. 041 | 0. 002232 | M1 | PLA2G2A        |
| DOPEY2. 3  | 1. 50E-07 | 0. 209891 | 0. 092 | 0. 063 | 0. 002237 | M1 | DOPEY2         |
| PQLC3. 4   | 1. 54E-07 | 0. 288445 | 0. 209 | 0. 18  | 0. 002306 | M1 | PQLC3          |
| SPPL2A. 4  | 1. 54E-07 | 0. 27135  | 0. 209 | 0. 179 | 0. 002306 | M1 | SPPL2A         |
| RP11-437L  | 1. 57E-07 | -0. 10381 | 0. 001 | 0. 015 | 0. 002351 | M1 | RP11-437L7. 1  |
| CTC-479C5  | 1. 61E-07 | 0. 176029 | 0. 074 | 0. 047 | 0. 0024   | M1 | CTC-479C5. 12  |
| FAH. 3     | 1. 62E-07 | 0. 25115  | 0. 187 | 0. 152 | 0. 002428 | M1 | FAH            |
| PCBP1. 4   | 1. 67E-07 | 0. 108345 | 0. 548 | 0. 596 | 0. 002503 | M1 | PCBP1          |
| ADAMTS4. 1 | 1. 71E-07 | -0. 10501 | 0. 013 | 0. 035 | 0. 002553 | M1 | ADAMTS4        |
| SYNPO2L    | 1. 72E-07 | 0. 169777 | 0. 031 | 0. 014 | 0. 002576 | M1 | SYNPO2L        |
| FAM107B. 3 | 1. 85E-07 | -0. 13224 | 0. 086 | 0. 129 | 0. 002771 | M1 | FAM107B        |
| IFI44. 2   | 1. 88E-07 | 0. 248455 | 0. 212 | 0. 179 | 0. 002816 | M1 | IFI44          |
| ATP5I. 1   | 1. 89E-07 | -0. 14646 | 0. 638 | 0. 774 | 0. 002826 | M1 | ATP5I          |
| ADAM8. 3   | 1. 96E-07 | -0. 10666 | 0. 021 | 0. 048 | 0. 002932 | M1 | ADAM8          |
| IFI35. 2   | 2. 03E-07 | 0. 218055 | 0. 257 | 0. 226 | 0. 003041 | M1 | IFI35          |
| RBKS. 1    | 2. 16E-07 | 0. 145454 | 0. 06  | 0. 036 | 0. 003226 | M1 | RBKS           |
| IRS2. 1    | 2. 24E-07 | 0. 258217 | 0. 348 | 0. 348 | 0. 003344 | M1 | IRS2           |
| AMPD2. 3   | 2. 29E-07 | 0. 290505 | 0. 177 | 0. 147 | 0. 003415 | M1 | AMPD2          |
| CALHM2. 2  | 2. 43E-07 | 0. 210823 | 0. 083 | 0. 055 | 0. 003635 | M1 | CALHM2         |
| ZNF124. 4  | 2. 65E-07 | 0. 209779 | 0. 083 | 0. 055 | 0. 003962 | M1 | ZNF124         |
| TMCC3. 4   | 2. 75E-07 | 0. 189879 | 0. 098 | 0. 068 | 0. 004108 | M1 | TMCC3          |
| PIM3. 4    | 2. 76E-07 | 0. 242251 | 0. 216 | 0. 185 | 0. 004129 | M1 | PIM3           |
| RP11-110C  | 3. 11E-07 | 0. 121888 | 0. 028 | 0. 013 | 0. 004644 | M1 | RP11-1100L3. 8 |
| UBE2E2. 3  | 3. 14E-07 | 0. 245266 | 0. 265 | 0. 235 | 0. 004696 | M1 | UBE2E2         |
| CD3D. 2    | 3. 33E-07 | -0. 20492 | 0. 005 | 0. 022 | 0. 00498  | M1 | CD3D           |
| SLC7A8     | 3. 46E-07 | 0. 148311 | 0. 065 | 0. 04  | 0. 005171 | M1 | SLC7A8         |
| BCAS2. 1   | 3. 48E-07 | 0. 241526 | 0. 439 | 0. 468 | 0. 005204 | M1 | BCAS2          |
| ATHL1      | 3. 67E-07 | 0. 166328 | 0. 052 | 0. 031 | 0. 005486 | M1 | ATHL1          |
| PTEN. 4    | 3. 70E-07 | 0. 278063 | 0. 155 | 0. 124 | 0. 005535 | M1 | PTEN           |
| LCK. 1     | 3. 83E-07 | -0. 11441 | 0. 002 | 0. 017 | 0. 005722 | M1 | LCK            |
| SNX29. 3   | 3. 92E-07 | 0. 267056 | 0. 132 | 0. 101 | 0. 005865 | M1 | SNX29          |
| ZNF106. 4  | 3. 99E-07 | 0. 326702 | 0. 269 | 0. 255 | 0. 005959 | M1 | ZNF106         |
| ACTR3. 2   | 4. 06E-07 | 0. 139539 | 0. 52  | 0. 567 | 0. 006068 | M1 | ACTR3          |
| GADD45G. 3 | 4. 11E-07 | -0. 12047 | 0. 205 | 0. 266 | 0. 006147 | M1 | GADD45G        |
| SLC4A7. 3  | 4. 22E-07 | 0. 296386 | 0. 233 | 0. 21  | 0. 006311 | M1 | SLC4A7         |
| RP11-834C  | 4. 34E-07 | 0. 222002 | 0. 124 | 0. 091 | 0. 00649  | M1 | RP11-834C11. 4 |
| NEU1. 2    | 4. 43E-07 | 0. 297533 | 0. 298 | 0. 291 | 0. 006626 | M1 | NEU1           |
| CCND3. 3   | 4. 50E-07 | 0. 267945 | 0. 276 | 0. 256 | 0. 00673  | M1 | CCND3          |
| APOL3      | 4. 63E-07 | 0. 147736 | 0. 055 | 0. 032 | 0. 006923 | M1 | APOL3          |
| PTPRCAP. 2 | 4. 90E-07 | -0. 17222 | 0. 01  | 0. 029 | 0. 007317 | M1 | PTPRCAP        |
| NRIP3. 1   | 5. 35E-07 | 0. 188417 | 0. 055 | 0. 033 | 0. 008001 | M1 | NRIP3          |
| LRCH1. 1   | 5. 38E-07 | 0. 17551  | 0. 08  | 0. 054 | 0. 008035 | M1 | LRCH1          |
| EIF4E. 3   | 5. 41E-07 | 0. 222696 | 0. 448 | 0. 496 | 0. 008077 | M1 | EIF4E          |
| RAB8A. 2   | 5. 48E-07 | 0. 222823 | 0. 352 | 0. 356 | 0. 008195 | M1 | RAB8A          |



|             |           |           |        |        |           |    |               |
|-------------|-----------|-----------|--------|--------|-----------|----|---------------|
| CD2. 3      | 5. 62E-07 | -0. 17226 | 0. 005 | 0. 022 | 0. 008405 | M1 | CD2           |
| ETV6. 2     | 5. 87E-07 | 0. 295955 | 0. 171 | 0. 143 | 0. 008766 | M1 | ETV6          |
| TOM1. 4     | 5. 93E-07 | 0. 267639 | 0. 186 | 0. 155 | 0. 008868 | M1 | TOM1          |
| RP4-728D4   | 6. 07E-07 | 0. 108031 | 0. 029 | 0. 013 | 0. 009071 | M1 | RP4-728D4. 2  |
| VMA21. 3    | 6. 16E-07 | 0. 260203 | 0. 34  | 0. 34  | 0. 009207 | M1 | VMA21         |
| PNPO. 1     | 6. 27E-07 | 0. 204471 | 0. 103 | 0. 074 | 0. 009363 | M1 | PNPO          |
| SLPI. 3     | 7. 28E-07 | -0. 70837 | 0. 119 | 0. 156 | 0. 010874 | M1 | SLPI          |
| ALG13. 3    | 7. 44E-07 | 0. 329808 | 0. 239 | 0. 215 | 0. 011125 | M1 | ALG13         |
| TRAM1. 4    | 7. 67E-07 | 0. 173436 | 0. 419 | 0. 436 | 0. 01146  | M1 | TRAM1         |
| SNX5. 2     | 7. 87E-07 | 0. 209563 | 0. 384 | 0. 396 | 0. 011768 | M1 | SNX5          |
| H2AFZ. 1    | 7. 94E-07 | -0. 11909 | 0. 659 | 0. 755 | 0. 011869 | M1 | H2AFZ         |
| OPALIN. 1   | 8. 28E-07 | -0. 1781  | 0. 002 | 0. 015 | 0. 012371 | M1 | OPALIN        |
| ATP5C1. 3   | 8. 88E-07 | 0. 117601 | 0. 545 | 0. 595 | 0. 013278 | M1 | ATP5C1        |
| VPS26A. 3   | 8. 89E-07 | 0. 248723 | 0. 263 | 0. 239 | 0. 013292 | M1 | VPS26A        |
| ACER3. 3    | 9. 03E-07 | 0. 265211 | 0. 208 | 0. 18  | 0. 013501 | M1 | ACER3         |
| CHST15      | 9. 22E-07 | 0. 132251 | 0. 058 | 0. 035 | 0. 013783 | M1 | CHST15        |
| CYLD. 3     | 9. 37E-07 | 0. 2794   | 0. 189 | 0. 16  | 0. 014005 | M1 | CYLD          |
| INO80C. 2   | 9. 98E-07 | 0. 114092 | 0. 117 | 0. 175 | 0. 014921 | M1 | INO80C        |
| PSD4. 1     | 1. 05E-06 | 0. 119032 | 0. 048 | 0. 028 | 0. 01566  | M1 | PSD4          |
| DAAM2       | 1. 09E-06 | -0. 1073  | 0. 007 | 0. 024 | 0. 016322 | M1 | DAAM2         |
| FZD1        | 1. 11E-06 | 0. 174469 | 0. 063 | 0. 04  | 0. 01662  | M1 | FZD1          |
| HSPB8. 1    | 1. 20E-06 | -0. 10448 | 0. 02  | 0. 043 | 0. 017947 | M1 | HSPB8         |
| PLD2. 3     | 1. 21E-06 | 0. 222378 | 0. 109 | 0. 081 | 0. 018069 | M1 | PLD2          |
| SLC17A5. 3  | 1. 21E-06 | 0. 275582 | 0. 13  | 0. 101 | 0. 018125 | M1 | SLC17A5       |
| ZDHHC12. 4  | 1. 24E-06 | 0. 261061 | 0. 275 | 0. 258 | 0. 018468 | M1 | ZDHHC12       |
| OPRL1       | 1. 25E-06 | 0. 106646 | 0. 039 | 0. 021 | 0. 018751 | M1 | OPRL1         |
| CD3E. 2     | 1. 31E-06 | -0. 14439 | 0. 005 | 0. 02  | 0. 019531 | M1 | CD3E          |
| TLE3. 3     | 1. 56E-06 | 0. 185349 | 0. 165 | 0. 132 | 0. 023367 | M1 | TLE3          |
| TANGO2. 4   | 1. 57E-06 | 0. 207062 | 0. 109 | 0. 081 | 0. 023488 | M1 | TANGO2        |
| JAK2. 1     | 1. 58E-06 | 0. 116974 | 0. 05  | 0. 03  | 0. 023576 | M1 | JAK2          |
| VIM-AS1     | 1. 60E-06 | 0. 102611 | 0. 075 | 0. 119 | 0. 023863 | M1 | VIM-AS1       |
| LRP10. 2    | 1. 67E-06 | 0. 242817 | 0. 266 | 0. 248 | 0. 024922 | M1 | LRP10         |
| CACUL1. 4   | 1. 68E-06 | 0. 303025 | 0. 224 | 0. 202 | 0. 025045 | M1 | CACUL1        |
| ORAI3. 3    | 1. 68E-06 | 0. 241415 | 0. 166 | 0. 136 | 0. 025137 | M1 | ORAI3         |
| TMEM179B. 1 | 1. 72E-06 | 0. 223041 | 0. 398 | 0. 417 | 0. 025693 | M1 | TMEM179B      |
| MTRNR2L6    | 1. 73E-06 | 0. 119066 | 0. 022 | 0. 01  | 0. 025877 | M1 | MTRNR2L6      |
| LINC00937   | 1. 74E-06 | 0. 146295 | 0. 05  | 0. 03  | 0. 025951 | M1 | LINC00937     |
| SAA4. 1     | 1. 89E-06 | -0. 10533 | 0      | 0. 011 | 0. 028287 | M1 | SAA4          |
| NDUFB11. 1  | 1. 91E-06 | -0. 11919 | 0. 627 | 0. 757 | 0. 02855  | M1 | NDUFB11       |
| UBAC2. 3    | 2. 07E-06 | 0. 291841 | 0. 28  | 0. 269 | 0. 030902 | M1 | UBAC2         |
| RP11-46H1   | 2. 16E-06 | 0. 249773 | 0. 042 | 0. 024 | 0. 032284 | M1 | RP11-46H11. 3 |
| CHN2. 3     | 2. 40E-06 | 0. 276893 | 0. 121 | 0. 093 | 0. 035842 | M1 | CHN2          |
| ZNF618. 4   | 2. 51E-06 | 0. 165527 | 0. 067 | 0. 044 | 0. 037517 | M1 | ZNF618        |
| CD52. 3     | 2. 67E-06 | -0. 26182 | 0. 031 | 0. 056 | 0. 039945 | M1 | CD52          |
| VDAC1. 3    | 2. 74E-06 | -0. 11877 | 0. 507 | 0. 656 | 0. 041005 | M1 | VDAC1         |
| IFIT2. 2    | 2. 75E-06 | 0. 181294 | 0. 105 | 0. 077 | 0. 041053 | M1 | IFIT2         |
| LSMEM1      | 2. 77E-06 | 0. 105766 | 0. 031 | 0. 016 | 0. 041427 | M1 | LSMEM1        |
| SDSL. 3     | 2. 89E-06 | 0. 300085 | 0. 207 | 0. 183 | 0. 043163 | M1 | SDSL          |
| CHMP4A. 3   | 3. 03E-06 | 0. 173626 | 0. 444 | 0. 473 | 0. 045247 | M1 | CHMP4A        |
| RSAD2       | 3. 04E-06 | 0. 109844 | 0. 05  | 0. 03  | 0. 045433 | M1 | RSAD2         |
| PCF11. 3    | 3. 09E-06 | 0. 302427 | 0. 221 | 0. 2   | 0. 046107 | M1 | PCF11         |

|            |           |           |        |        |           |    |                |
|------------|-----------|-----------|--------|--------|-----------|----|----------------|
| PDPN. 2    | 3. 24E-06 | -0. 20173 | 0. 372 | 0. 465 | 0. 048352 | M1 | PDPN           |
| PLEKHG5    | 3. 30E-06 | 0. 135001 | 0. 032 | 0. 016 | 0. 049248 | M1 | PLEKHG5        |
| LINC0092C  | 3. 32E-06 | 0. 10296  | 0. 025 | 0. 012 | 0. 049627 | M1 | LINC00920      |
| SLC25A39.  | 3. 51E-06 | 0. 198317 | 0. 388 | 0. 409 | 0. 052491 | M1 | SLC25A39       |
| PPM1N      | 3. 55E-06 | 0. 16286  | 0. 056 | 0. 035 | 0. 053059 | M1 | PPM1N          |
| ZNF710. 1  | 3. 92E-06 | 0. 13727  | 0. 051 | 0. 032 | 0. 058583 | M1 | ZNF710         |
| ZRSR2. 1   | 4. 07E-06 | 0. 225426 | 0. 148 | 0. 119 | 0. 060853 | M1 | ZRSR2          |
| PPA1. 3    | 4. 07E-06 | 0. 123419 | 0. 492 | 0. 536 | 0. 060856 | M1 | PPA1           |
| ARHGEF1. 4 | 4. 11E-06 | 0. 271505 | 0. 216 | 0. 192 | 0. 061484 | M1 | ARHGEF1        |
| ATP5EP2. 2 | 4. 40E-06 | 0. 191325 | 0. 429 | 0. 45  | 0. 065771 | M1 | ATP5EP2        |
| GBP4. 2    | 4. 67E-06 | 0. 15591  | 0. 089 | 0. 063 | 0. 069793 | M1 | GBP4           |
| SGK3. 3    | 4. 73E-06 | 0. 16793  | 0. 089 | 0. 063 | 0. 070729 | M1 | SGK3           |
| BEX4. 3    | 5. 04E-06 | 0. 132301 | 0. 474 | 0. 477 | 0. 075344 | M1 | BEX4           |
| STAMBPL1   | 5. 09E-06 | 0. 124126 | 0. 042 | 0. 024 | 0. 07604  | M1 | STAMBPL1       |
| NOXA1      | 5. 62E-06 | 0. 129729 | 0. 039 | 0. 022 | 0. 084005 | M1 | NOXA1          |
| RNASE4     | 5. 66E-06 | 0. 145769 | 0. 052 | 0. 032 | 0. 084548 | M1 | RNASE4         |
| RP11-244H  | 5. 72E-06 | 0. 128504 | 0. 03  | 0. 015 | 0. 085543 | M1 | RP11-244H3. 4  |
| SLC22A18.  | 5. 73E-06 | 0. 271537 | 0. 146 | 0. 119 | 0. 085613 | M1 | SLC22A18       |
| SH3BP2. 3  | 6. 33E-06 | 0. 251859 | 0. 161 | 0. 133 | 0. 094596 | M1 | SH3BP2         |
| HP. 1      | 6. 55E-06 | -0. 23336 | 0. 01  | 0. 027 | 0. 097913 | M1 | HP             |
| CRLF3. 4   | 6. 62E-06 | 0. 250379 | 0. 136 | 0. 109 | 0. 098908 | M1 | CRLF3          |
| JOSD1. 4   | 6. 63E-06 | 0. 321301 | 0. 176 | 0. 154 | 0. 099007 | M1 | JOSD1          |
| RGS12. 4   | 6. 80E-06 | 0. 309631 | 0. 277 | 0. 269 | 0. 101637 | M1 | RGS12          |
| SH3RF3     | 6. 82E-06 | 0. 139666 | 0. 051 | 0. 031 | 0. 101917 | M1 | SH3RF3         |
| ACAA2. 2   | 7. 00E-06 | 0. 165011 | 0. 233 | 0. 205 | 0. 104585 | M1 | ACAA2          |
| RAP2B. 4   | 7. 29E-06 | 0. 246022 | 0. 186 | 0. 161 | 0. 108878 | M1 | RAP2B          |
| TMEM256. 2 | 7. 32E-06 | 0. 197846 | 0. 416 | 0. 433 | 0. 10942  | M1 | TMEM256        |
| PCK2. 2    | 7. 88E-06 | 0. 18407  | 0. 09  | 0. 065 | 0. 117815 | M1 | PCK2           |
| ATP5B. 3   | 8. 12E-06 | -0. 13013 | 0. 689 | 0. 793 | 0. 12134  | M1 | ATP5B          |
| MTRNR2L12  | 8. 36E-06 | 0. 155628 | 0. 224 | 0. 191 | 0. 124935 | M1 | MTRNR2L12      |
| CYB561A3.  | 8. 86E-06 | 0. 229997 | 0. 174 | 0. 146 | 0. 132423 | M1 | CYB561A3       |
| HECA. 3    | 9. 96E-06 | 0. 184398 | 0. 091 | 0. 066 | 0. 148801 | M1 | HECA           |
| KLHL5. 3   | 1. 01E-05 | 0. 308509 | 0. 187 | 0. 167 | 0. 151251 | M1 | KLHL5          |
| GSTM4. 2   | 1. 08E-05 | 0. 30613  | 0. 219 | 0. 202 | 0. 162093 | M1 | GSTM4          |
| CASP8. 3   | 1. 10E-05 | 0. 130515 | 0. 066 | 0. 044 | 0. 164899 | M1 | CASP8          |
| PACSIN2. 4 | 1. 13E-05 | 0. 242131 | 0. 194 | 0. 17  | 0. 16868  | M1 | PACSIN2        |
| HMG3. 3    | 1. 14E-05 | 0. 101977 | 0. 566 | 0. 617 | 0. 170175 | M1 | HMG3           |
| BEND7. 1   | 1. 18E-05 | 0. 24114  | 0. 077 | 0. 054 | 0. 175952 | M1 | BEND7          |
| RP11-100C  | 1. 22E-05 | 0. 170758 | 0. 057 | 0. 037 | 0. 182067 | M1 | RP11-1000B6. 3 |
| KRTCAP2. 2 | 1. 32E-05 | 0. 113393 | 0. 517 | 0. 565 | 0. 197735 | M1 | KRTCAP2        |
| HK2. 2     | 1. 38E-05 | 0. 163769 | 0. 106 | 0. 08  | 0. 20678  | M1 | HK2            |
| EIF4B. 4   | 1. 39E-05 | 0. 205282 | 0. 366 | 0. 381 | 0. 208    | M1 | EIF4B          |
| SNHG12. 3  | 1. 49E-05 | 0. 213387 | 0. 158 | 0. 129 | 0. 222492 | M1 | SNHG12         |
| FAM162A. 4 | 1. 67E-05 | -0. 1076  | 0. 325 | 0. 416 | 0. 250274 | M1 | FAM162A        |
| OSR1. 1    | 1. 81E-05 | -0. 11008 | 0. 003 | 0. 015 | 0. 269801 | M1 | OSR1           |
| TMA7. 3    | 1. 83E-05 | -0. 12057 | 0. 803 | 0. 861 | 0. 272946 | M1 | TMA7           |
| CISD3. 3   | 1. 84E-05 | 0. 248656 | 0. 263 | 0. 252 | 0. 275072 | M1 | CISD3          |
| POLR2L. 1  | 1. 85E-05 | -0. 12351 | 0. 594 | 0. 707 | 0. 276388 | M1 | POLR2L         |
| ATP6VOA1.  | 1. 97E-05 | 0. 115449 | 0. 215 | 0. 299 | 0. 29439  | M1 | ATP6VOA1       |
| DHX58      | 2. 08E-05 | 0. 191934 | 0. 057 | 0. 037 | 0. 310635 | M1 | DHX58          |
| RP2. 4     | 2. 10E-05 | 0. 203599 | 0. 097 | 0. 073 | 0. 314482 | M1 | RP2            |

|           |          |          |       |       |          |    |               |
|-----------|----------|----------|-------|-------|----------|----|---------------|
| ZNF562.2  | 2.12E-05 | 0.105312 | 0.102 | 0.149 | 0.31704  | M1 | ZNF562        |
| POLR2A.2  | 2.17E-05 | 0.108888 | 0.158 | 0.222 | 0.324865 | M1 | POLR2A        |
| RAP1B.3   | 2.24E-05 | 0.13158  | 0.411 | 0.439 | 0.334891 | M1 | RAP1B         |
| ATP5J2.4  | 2.26E-05 | -0.13622 | 0.739 | 0.821 | 0.337083 | M1 | ATP5J2        |
| ECHDC2.2  | 2.29E-05 | 0.107815 | 0.14  | 0.198 | 0.342425 | M1 | ECHDC2        |
| ITGA4.3   | 2.32E-05 | 0.117791 | 0.06  | 0.039 | 0.347023 | M1 | ITGA4         |
| ISG20L2.2 | 2.37E-05 | 0.282477 | 0.235 | 0.223 | 0.354537 | M1 | ISG20L2       |
| CAST.3    | 2.41E-05 | 0.227823 | 0.316 | 0.319 | 0.360382 | M1 | CAST          |
| IL15RA.1  | 2.47E-05 | 0.141353 | 0.046 | 0.029 | 0.369783 | M1 | IL15RA        |
| NDUFA7.3  | 2.69E-05 | -0.16676 | 0.025 | 0.046 | 0.401686 | M1 | NDUFA7        |
| MBD4.2    | 2.77E-05 | 0.246162 | 0.273 | 0.262 | 0.414095 | M1 | MBD4          |
| NCOA7.2   | 2.77E-05 | 0.214433 | 0.136 | 0.111 | 0.414126 | M1 | NCOA7         |
| NUBP1.3   | 2.85E-05 | 0.275071 | 0.231 | 0.215 | 0.426053 | M1 | NUBP1         |
| APH1A.2   | 2.89E-05 | 0.166555 | 0.444 | 0.493 | 0.432362 | M1 | APH1A         |
| ABR.3     | 3.00E-05 | 0.267508 | 0.165 | 0.141 | 0.447625 | M1 | ABR           |
| KLHL15    | 3.02E-05 | 0.108435 | 0.041 | 0.025 | 0.45078  | M1 | KLHL15        |
| C17orf62. | 3.07E-05 | 0.193539 | 0.353 | 0.371 | 0.458145 | M1 | C17orf62      |
| LASP1.4   | 3.11E-05 | 0.275079 | 0.223 | 0.207 | 0.465277 | M1 | LASP1         |
| NDUFC2.2  | 3.30E-05 | -0.1378  | 0.651 | 0.773 | 0.493425 | M1 | NDUFC2        |
| TFEB.4    | 3.52E-05 | 0.161525 | 0.098 | 0.074 | 0.526506 | M1 | TFEB          |
| GPR155.3  | 3.66E-05 | 0.133228 | 0.14  | 0.196 | 0.547165 | M1 | GPR155        |
| DISC1.3   | 3.68E-05 | 0.128443 | 0.063 | 0.043 | 0.550111 | M1 | DISC1         |
| PGLS.4    | 3.71E-05 | 0.113106 | 0.475 | 0.517 | 0.554726 | M1 | PGLS          |
| FKBP8.1   | 3.84E-05 | -0.11651 | 0.534 | 0.668 | 0.573995 | M1 | FKBP8         |
| ZCCHC2    | 3.99E-05 | 0.141766 | 0.06  | 0.04  | 0.595975 | M1 | ZCCHC2        |
| COMMD8.4  | 4.00E-05 | 0.269312 | 0.238 | 0.221 | 0.597498 | M1 | COMMD8        |
| SLC18B1.2 | 4.14E-05 | 0.266431 | 0.196 | 0.175 | 0.618077 | M1 | SLC18B1       |
| NDRG2.2   | 4.18E-05 | -0.15567 | 0.31  | 0.369 | 0.624326 | M1 | NDRG2         |
| ACSL4.4   | 4.55E-05 | 0.184082 | 0.103 | 0.079 | 0.679708 | M1 | ACSL4         |
| MB21D2.3  | 4.74E-05 | 0.212324 | 0.071 | 0.05  | 0.708829 | M1 | MB21D2        |
| MIR181A1H | 5.07E-05 | 0.241728 | 0.132 | 0.109 | 0.757362 | M1 | MIR181A1HG    |
| NDUFA11.1 | 5.50E-05 | -0.10894 | 0.666 | 0.756 | 0.822359 | M1 | NDUFA11       |
| TGOLN2.4  | 5.75E-05 | 0.240202 | 0.357 | 0.376 | 0.859548 | M1 | TGOLN2        |
| C10orf76. | 5.78E-05 | 0.182784 | 0.073 | 0.053 | 0.863805 | M1 | C10orf76      |
| TIPARP.3  | 6.15E-05 | 0.2219   | 0.186 | 0.165 | 0.919179 | M1 | TIPARP        |
| MYADM.3   | 6.17E-05 | 0.277634 | 0.207 | 0.19  | 0.922053 | M1 | MYADM         |
| IFITM10.2 | 6.21E-05 | 0.188903 | 0.148 | 0.121 | 0.927939 | M1 | IFITM10       |
| PPFIBP2   | 7.02E-05 | 0.150783 | 0.066 | 0.047 | 1        | M1 | PPFIBP2       |
| RP1-313I6 | 7.13E-05 | 0.151749 | 0.069 | 0.049 | 1        | M1 | RP1-313I6.12  |
| STK10.4   | 7.49E-05 | 0.202599 | 0.09  | 0.068 | 1        | M1 | STK10         |
| NR1H2.4   | 7.50E-05 | 0.267256 | 0.299 | 0.304 | 1        | M1 | NR1H2         |
| MAX.2     | 7.58E-05 | 0.262766 | 0.293 | 0.294 | 1        | M1 | MAX           |
| EPOR.2    | 7.92E-05 | 0.219753 | 0.087 | 0.066 | 1        | M1 | EPOR          |
| PARK7.3   | 7.96E-05 | -0.14909 | 0.684 | 0.782 | 1        | M1 | PARK7         |
| TMX1.2    | 8.03E-05 | 0.19921  | 0.383 | 0.407 | 1        | M1 | TMX1          |
| GTF3A.4   | 8.38E-05 | 0.122891 | 0.466 | 0.512 | 1        | M1 | GTF3A         |
| PRDX1.4   | 8.81E-05 | -0.16045 | 0.741 | 0.822 | 1        | M1 | PRDX1         |
| CTD-2341M | 8.94E-05 | 0.1048   | 0.023 | 0.012 | 1        | M1 | CTD-2341M24.1 |
| ROCK1.4   | 8.99E-05 | 0.263608 | 0.302 | 0.31  | 1        | M1 | ROCK1         |
| UFC1.3    | 9.47E-05 | 0.116581 | 0.51  | 0.571 | 1        | M1 | UFC1          |
| GIT2.4    | 9.51E-05 | 0.273553 | 0.17  | 0.15  | 1        | M1 | GIT2          |

|           |          |          |       |       |      |           |
|-----------|----------|----------|-------|-------|------|-----------|
| FBXL15.4  | 9.53E-05 | 0.211657 | 0.211 | 0.192 | 1 M1 | FBXL15    |
| ZMYM2.3   | 0.0001   | 0.100035 | 0.156 | 0.214 | 1 M1 | ZMYM2     |
| MTRNR2L1C | 0.0001   | 0.204755 | 0.093 | 0.07  | 1 M1 | MTRNR2L10 |
| ENSA.2    | 0.000107 | 0.109769 | 0.467 | 0.507 | 1 M1 | ENSA      |
| C1orf56.2 | 0.000109 | 0.26368  | 0.215 | 0.199 | 1 M1 | C1orf56   |
| SLC50A1.3 | 0.000109 | 0.298511 | 0.184 | 0.164 | 1 M1 | SLC50A1   |
| UBAC1.3   | 0.000109 | 0.114471 | 0.165 | 0.229 | 1 M1 | UBAC1     |
| SKI.3     | 0.000111 | 0.256902 | 0.168 | 0.148 | 1 M1 | SKI       |
| N4BP2L1.2 | 0.000111 | 0.246872 | 0.176 | 0.154 | 1 M1 | N4BP2L1   |
| LHPP.3    | 0.000118 | -0.1743  | 0.08  | 0.11  | 1 M1 | LHPP      |
| PPCS.1    | 0.000122 | 0.201191 | 0.32  | 0.321 | 1 M1 | PPCS      |
| CNOT1.3   | 0.00014  | 0.110861 | 0.112 | 0.157 | 1 M1 | CNOT1     |
| PCTP.1    | 0.000146 | 0.226546 | 0.09  | 0.069 | 1 M1 | PCTP      |
| AFF4.3    | 0.000149 | 0.123182 | 0.259 | 0.357 | 1 M1 | AFF4      |
| CYB561D2. | 0.000151 | 0.26181  | 0.235 | 0.224 | 1 M1 | CYB561D2  |
| PHKG2.2   | 0.000151 | 0.244433 | 0.171 | 0.151 | 1 M1 | PHKG2     |
| FAM118A.3 | 0.000155 | 0.241472 | 0.151 | 0.129 | 1 M1 | FAM118A   |
| ETHE1.1   | 0.000171 | 0.244044 | 0.289 | 0.288 | 1 M1 | ETHE1     |
| FOXP1.2   | 0.000173 | 0.137995 | 0.25  | 0.227 | 1 M1 | FOXP1     |
| LEPROT    | 0.000174 | 0.204708 | 0.368 | 0.395 | 1 M1 | LEPROT    |
| PNPLA4.1  | 0.000175 | 0.116161 | 0.08  | 0.059 | 1 M1 | PNPLA4    |
| FCHO2.3   | 0.000186 | 0.208742 | 0.091 | 0.071 | 1 M1 | FCHO2     |
| GAB2.2    | 0.000193 | 0.161052 | 0.083 | 0.062 | 1 M1 | GAB2      |
| TP53I13.3 | 0.000202 | 0.109397 | 0.186 | 0.256 | 1 M1 | TP53I13   |
| SERPING1. | 0.000207 | -0.16091 | 0.273 | 0.226 | 1 M1 | SERPING1  |
| CLN6.3    | 0.000213 | 0.232331 | 0.146 | 0.126 | 1 M1 | CLN6      |
| TTC17.1   | 0.000228 | 0.102767 | 0.169 | 0.228 | 1 M1 | TTC17     |
| RNF19B.1  | 0.00023  | 0.172053 | 0.067 | 0.049 | 1 M1 | RNF19B    |
| ABCD1.2   | 0.000231 | 0.143817 | 0.061 | 0.043 | 1 M1 | ABCD1     |
| SSH1.1    | 0.000238 | 0.234433 | 0.1   | 0.08  | 1 M1 | SSH1      |
| ALDH16A1. | 0.000247 | 0.195196 | 0.137 | 0.116 | 1 M1 | ALDH16A1  |
| APAF1.4   | 0.000251 | 0.228766 | 0.082 | 0.063 | 1 M1 | APAF1     |
| TPST2.3   | 0.000255 | 0.291327 | 0.18  | 0.164 | 1 M1 | TPST2     |
| MAP2K1.4  | 0.000258 | 0.226195 | 0.269 | 0.268 | 1 M1 | MAP2K1    |
| MVP.2     | 0.000264 | 0.184314 | 0.237 | 0.223 | 1 M1 | MVP       |
| DOK2.3    | 0.00028  | 0.121279 | 0.072 | 0.052 | 1 M1 | DOK2      |
| MYO9B.3   | 0.000317 | 0.276885 | 0.267 | 0.27  | 1 M1 | MYO9B     |
| PLEKH01.3 | 0.000323 | 0.266767 | 0.271 | 0.276 | 1 M1 | PLEKH01   |
| MMP14.2   | 0.000334 | 0.185837 | 0.235 | 0.219 | 1 M1 | MMP14     |
| SIPA1L2.1 | 0.000338 | 0.10137  | 0.091 | 0.128 | 1 M1 | SIPA1L2   |
| MTAP.2    | 0.000343 | 0.173204 | 0.087 | 0.067 | 1 M1 | MTAP      |
| SLC1A4.4  | 0.00036  | 0.178631 | 0.089 | 0.069 | 1 M1 | SLC1A4    |
| MFSD11    | 0.000376 | 0.106997 | 0.149 | 0.203 | 1 M1 | MFSD11    |
| TBC1D1.4  | 0.000378 | 0.220813 | 0.139 | 0.119 | 1 M1 | TBC1D1    |
| FAM122A.3 | 0.000383 | 0.11053  | 0.109 | 0.151 | 1 M1 | FAM122A   |
| TMED5.3   | 0.000388 | 0.244108 | 0.3   | 0.307 | 1 M1 | TMED5     |
| ELF2.1    | 0.000402 | 0.100132 | 0.14  | 0.189 | 1 M1 | ELF2      |
| LRRC69.1  | 0.000408 | 0.217237 | 0.045 | 0.03  | 1 M1 | LRRC69    |
| EPC1.4    | 0.000414 | 0.155787 | 0.224 | 0.304 | 1 M1 | EPC1      |
| MFI2      | 0.000438 | 0.106061 | 0.04  | 0.026 | 1 M1 | MFI2      |
| ATOH8.2   | 0.000438 | 0.140777 | 0.068 | 0.05  | 1 M1 | ATOH8     |

|            |          |          |       |       |      |          |
|------------|----------|----------|-------|-------|------|----------|
| BACH1.2    | 0.000449 | 0.241445 | 0.123 | 0.104 | 1 M1 | BACH1    |
| KLF11.2    | 0.000483 | 0.130383 | 0.052 | 0.037 | 1 M1 | KLF11    |
| UQCRC2.1   | 0.000505 | 0.15388  | 0.468 | 0.522 | 1 M1 | UQCRC2   |
| MAN2A1.4   | 0.000506 | 0.215103 | 0.127 | 0.107 | 1 M1 | MAN2A1   |
| MID1IP1.2  | 0.000544 | 0.2053   | 0.268 | 0.26  | 1 M1 | MID1IP1  |
| TMEM163.2  | 0.000557 | 0.135436 | 0.077 | 0.059 | 1 M1 | TMEM163  |
| ATM.3      | 0.000559 | 0.296715 | 0.198 | 0.187 | 1 M1 | ATM      |
| ITGB5.2    | 0.000571 | 0.154252 | 0.071 | 0.053 | 1 M1 | ITGB5    |
| SERPINB8.0 | 0.000578 | 0.186619 | 0.094 | 0.075 | 1 M1 | SERPINB8 |
| TOR1AIP1.0 | 0.000627 | 0.100487 | 0.142 | 0.19  | 1 M1 | TOR1AIP1 |
| LUCAT1.0   | 0.000646 | 0.116302 | 0.048 | 0.033 | 1 M1 | LUCAT1   |
| TCF25.3    | 0.000646 | 0.129477 | 0.5   | 0.561 | 1 M1 | TCF25    |
| GLS.3      | 0.000671 | 0.238011 | 0.143 | 0.126 | 1 M1 | GLS      |
| ELL.1      | 0.000701 | 0.202173 | 0.116 | 0.097 | 1 M1 | ELL      |
| SERPINE1.0 | 0.000702 | 0.156316 | 0.118 | 0.097 | 1 M1 | SERPINE1 |
| NDUFA13.2  | 0.00072  | -0.14213 | 0.701 | 0.786 | 1 M1 | NDUFA13  |
| USP3.4     | 0.000732 | 0.124418 | 0.128 | 0.173 | 1 M1 | USP3     |
| RNF122.0   | 0.000799 | 0.140334 | 0.048 | 0.033 | 1 M1 | RNF122   |
| PI4K2A.3   | 0.000808 | 0.183591 | 0.079 | 0.062 | 1 M1 | PI4K2A   |
| TMEM192.0  | 0.000814 | 0.123171 | 0.15  | 0.198 | 1 M1 | TMEM192  |
| CCNDBP1.4  | 0.000844 | 0.237518 | 0.214 | 0.203 | 1 M1 | CCNDBP1  |
| CNTRL.4    | 0.000923 | 0.260647 | 0.132 | 0.115 | 1 M1 | CNTRL    |
| ME2.2      | 0.000942 | 0.234577 | 0.229 | 0.223 | 1 M1 | ME2      |
| CTNND1.2   | 0.000954 | 0.116329 | 0.168 | 0.224 | 1 M1 | CTNND1   |
| ADCK2.3    | 0.000968 | 0.237003 | 0.153 | 0.137 | 1 M1 | ADCK2    |
| EIF2S3.2   | 0.000971 | 0.216735 | 0.289 | 0.295 | 1 M1 | EIF2S3   |
| IFIT1.1    | 0.000988 | 0.126046 | 0.089 | 0.07  | 1 M1 | IFIT1    |
| SIL1.3     | 0.001007 | 0.24971  | 0.255 | 0.255 | 1 M1 | SIL1     |
| ZSWIM4.1   | 0.001044 | 0.169712 | 0.064 | 0.048 | 1 M1 | ZSWIM4   |
| MAPK3.1    | 0.001059 | 0.108519 | 0.163 | 0.216 | 1 M1 | MAPK3    |
| GZMK.1     | 0.00106  | -0.10441 | 0.004 | 0.012 | 1 M1 | GZMK     |
| CHP1.4     | 0.001087 | 0.220953 | 0.238 | 0.234 | 1 M1 | CHP1     |
| IDH2.4     | 0.001095 | 0.162917 | 0.394 | 0.433 | 1 M1 | IDH2     |
| CLK1.2     | 0.00112  | 0.18369  | 0.409 | 0.425 | 1 M1 | CLK1     |
| MFSD12.3   | 0.001122 | 0.126025 | 0.148 | 0.2   | 1 M1 | MFSD12   |
| LMBRD1.2   | 0.001142 | 0.233661 | 0.224 | 0.215 | 1 M1 | LMBRD1   |
| USB1.3     | 0.001162 | 0.107703 | 0.181 | 0.239 | 1 M1 | USB1     |
| LMBR1L.3   | 0.001171 | 0.111926 | 0.146 | 0.192 | 1 M1 | LMBR1L   |
| ATG7.2     | 0.001173 | 0.205831 | 0.126 | 0.108 | 1 M1 | ATG7     |
| SPCS2.2    | 0.001241 | -0.10366 | 0.625 | 0.751 | 1 M1 | SPCS2    |
| AHSA2.1    | 0.001282 | 0.102576 | 0.095 | 0.129 | 1 M1 | AHSA2    |
| GALT.2     | 0.001287 | 0.206032 | 0.096 | 0.078 | 1 M1 | GALT     |
| MB21D1.0   | 0.001342 | 0.135938 | 0.046 | 0.033 | 1 M1 | MB21D1   |
| ZYX.4      | 0.001343 | 0.154562 | 0.381 | 0.406 | 1 M1 | ZYX      |
| PRDX6.2    | 0.001358 | -0.1822  | 0.569 | 0.635 | 1 M1 | PRDX6    |
| HM13.0     | 0.001367 | 0.122339 | 0.441 | 0.482 | 1 M1 | HM13     |
| PFKFB2.0   | 0.001415 | 0.131487 | 0.047 | 0.034 | 1 M1 | PFKFB2   |
| PPARGC1B.0 | 0.00142  | 0.117489 | 0.039 | 0.026 | 1 M1 | PPARGC1B |
| MAP3K3.3   | 0.001432 | 0.182848 | 0.077 | 0.061 | 1 M1 | MAP3K3   |
| HPS5.3     | 0.001629 | 0.214122 | 0.128 | 0.111 | 1 M1 | HPS5     |
| DCAF6.3    | 0.001644 | 0.254518 | 0.175 | 0.164 | 1 M1 | DCAF6    |

|            |          |          |       |       |      |          |
|------------|----------|----------|-------|-------|------|----------|
| DNAJC4.3   | 0.001668 | 0.239875 | 0.232 | 0.228 | 1 M1 | DNAJC4   |
| CCL8       | 0.001677 | 0.134087 | 0.021 | 0.012 | 1 M1 | CCL8     |
| PRPF38B.4  | 0.001683 | 0.190791 | 0.4   | 0.442 | 1 M1 | PRPF38B  |
| STX6.4     | 0.001721 | 0.228158 | 0.205 | 0.196 | 1 M1 | STX6     |
| PPP1R3B.2  | 0.001742 | 0.190497 | 0.08  | 0.064 | 1 M1 | PPP1R3B  |
| MTHFR.3    | 0.001833 | 0.221394 | 0.092 | 0.075 | 1 M1 | MTHFR    |
| SCML1.2    | 0.001916 | 0.18209  | 0.109 | 0.091 | 1 M1 | SCML1    |
| RCBTB2.3   | 0.001928 | 0.222822 | 0.156 | 0.139 | 1 M1 | RCBTB2   |
| RASGRP2.4  | 0.00196  | 0.117162 | 0.065 | 0.049 | 1 M1 | RASGRP2  |
| WDR830S.3  | 0.001993 | -0.15161 | 0.648 | 0.763 | 1 M1 | WDR830S  |
| ERMAP      | 0.002018 | 0.124854 | 0.057 | 0.042 | 1 M1 | ERMAP    |
| SETX.3     | 0.002058 | 0.144329 | 0.129 | 0.173 | 1 M1 | SETX     |
| KLHL36.2   | 0.002061 | 0.100844 | 0.071 | 0.098 | 1 M1 | KLHL36   |
| SNX6.2     | 0.00207  | 0.163195 | 0.395 | 0.437 | 1 M1 | SNX6     |
| ACSF2.3    | 0.002076 | 0.217553 | 0.078 | 0.063 | 1 M1 | ACSF2    |
| TOR2A.3    | 0.002215 | 0.232288 | 0.158 | 0.145 | 1 M1 | TOR2A    |
| ELK3.2     | 0.002274 | 0.209627 | 0.101 | 0.086 | 1 M1 | ELK3     |
| DNM2.3     | 0.002295 | 0.237028 | 0.241 | 0.243 | 1 M1 | DNM2     |
| HIC1       | 0.002311 | 0.11033  | 0.033 | 0.022 | 1 M1 | HIC1     |
| MALT1.4    | 0.002392 | 0.172773 | 0.087 | 0.071 | 1 M1 | MALT1    |
| GZMA.2     | 0.002422 | -0.1272  | 0.007 | 0.016 | 1 M1 | GZMA     |
| ZFX.1      | 0.002471 | 0.104456 | 0.092 | 0.124 | 1 M1 | ZFX      |
| NR3C1.4    | 0.002525 | 0.134684 | 0.197 | 0.259 | 1 M1 | NR3C1    |
| SCNM1.1    | 0.002546 | 0.123233 | 0.267 | 0.354 | 1 M1 | SCNM1    |
| IRF2BP2.3  | 0.002551 | 0.10848  | 0.253 | 0.328 | 1 M1 | IRF2BP2  |
| ICA1.2     | 0.002588 | 0.259947 | 0.126 | 0.111 | 1 M1 | ICA1     |
| APOL1.1    | 0.002632 | 0.147362 | 0.05  | 0.037 | 1 M1 | APOL1    |
| MTMR14.4   | 0.002717 | 0.237873 | 0.223 | 0.221 | 1 M1 | MTMR14   |
| CXCL3.1    | 0.002719 | -0.12435 | 0.056 | 0.075 | 1 M1 | CXCL3    |
| AIG1.1     | 0.002726 | 0.198077 | 0.32  | 0.337 | 1 M1 | AIG1     |
| PWP2.3     | 0.00274  | 0.196255 | 0.137 | 0.121 | 1 M1 | PWP2     |
| RNF141.2   | 0.002945 | 0.110664 | 0.172 | 0.223 | 1 M1 | RNF141   |
| PSMD9.1    | 0.002956 | 0.107718 | 0.225 | 0.292 | 1 M1 | PSMD9    |
| FKBP15.3   | 0.003014 | 0.197121 | 0.15  | 0.136 | 1 M1 | FKBP15   |
| MTHFS.2    | 0.00307  | 0.18087  | 0.198 | 0.187 | 1 M1 | MTHFS    |
| C16orf86.0 | 0.003169 | 0.126995 | 0.049 | 0.036 | 1 M1 | C16orf86 |
| RIT1.2     | 0.003189 | 0.141459 | 0.169 | 0.223 | 1 M1 | RIT1     |
| UTRN.3     | 0.003197 | 0.20541  | 0.122 | 0.107 | 1 M1 | UTRN     |
| KATNBL1.3  | 0.003261 | 0.155698 | 0.198 | 0.262 | 1 M1 | KATNBL1  |
| SUPT4H1.1  | 0.003556 | 0.126464 | 0.447 | 0.504 | 1 M1 | SUPT4H1  |
| AKAP17A.2  | 0.003737 | 0.127943 | 0.133 | 0.174 | 1 M1 | AKAP17A  |
| DGKA.1     | 0.003767 | 0.136932 | 0.048 | 0.035 | 1 M1 | DGKA     |
| JMJD1C.4   | 0.003779 | 0.259385 | 0.312 | 0.339 | 1 M1 | JMJD1C   |
| CCDC50.3   | 0.003785 | 0.225974 | 0.288 | 0.302 | 1 M1 | CCDC50   |
| GFAP.2     | 0.003998 | -0.24664 | 0.319 | 0.356 | 1 M1 | GFAP     |
| PSMA2.3    | 0.004013 | -0.16266 | 0.046 | 0.064 | 1 M1 | PSMA2    |
| GSTM2      | 0.004069 | 0.112554 | 0.034 | 0.023 | 1 M1 | GSTM2    |
| LPIN2.3    | 0.00407  | 0.256643 | 0.158 | 0.147 | 1 M1 | LPIN2    |
| ANP32B.4   | 0.004093 | 0.122035 | 0.415 | 0.456 | 1 M1 | ANP32B   |
| NCEH1.2    | 0.00416  | 0.1434   | 0.08  | 0.066 | 1 M1 | NCEH1    |
| ABHD5      | 0.004255 | 0.191426 | 0.123 | 0.109 | 1 M1 | ABHD5    |

|            |          |          |       |       |      |               |
|------------|----------|----------|-------|-------|------|---------------|
| ZNF581.1   | 0.00428  | 0.111335 | 0.138 | 0.18  | 1 M1 | ZNF581        |
| MCMBP.3    | 0.004356 | 0.108975 | 0.115 | 0.15  | 1 M1 | MCMBP         |
| FCHSD2.2   | 0.004364 | 0.171582 | 0.094 | 0.078 | 1 M1 | FCHSD2        |
| SETD7.1    | 0.004469 | 0.116036 | 0.08  | 0.108 | 1 M1 | SETD7         |
| CD63.4     | 0.004587 | -0.10453 | 0.974 | 0.915 | 1 M1 | CD63          |
| TM9SF3.3   | 0.004727 | 0.114909 | 0.175 | 0.229 | 1 M1 | TM9SF3        |
| EIF1.4     | 0.004747 | -0.11943 | 0.992 | 0.97  | 1 M1 | EIF1          |
| RHOQ.3     | 0.004817 | 0.268097 | 0.167 | 0.16  | 1 M1 | RHOQ          |
| RFT1       | 0.004908 | 0.137507 | 0.107 | 0.141 | 1 M1 | RFT1          |
| GHDC.2     | 0.004961 | 0.211729 | 0.105 | 0.091 | 1 M1 | GHDC          |
| MOB3A.3    | 0.005134 | 0.106541 | 0.13  | 0.169 | 1 M1 | MOB3A         |
| CCDC91.2   | 0.00524  | 0.100828 | 0.159 | 0.204 | 1 M1 | CCDC91        |
| CLN5.1     | 0.005498 | 0.121529 | 0.177 | 0.23  | 1 M1 | CLN5          |
| TMEM140.1  | 0.005579 | 0.102376 | 0.059 | 0.046 | 1 M1 | TMEM140       |
| FABP5.3    | 0.005628 | -0.457   | 0.37  | 0.397 | 1 M1 | FABP5         |
| BCKDK.4    | 0.005688 | 0.188422 | 0.3   | 0.317 | 1 M1 | BCKDK         |
| RAB8B.3    | 0.005721 | 0.101687 | 0.124 | 0.161 | 1 M1 | RAB8B         |
| PLEKHA2.2  | 0.005825 | 0.217203 | 0.125 | 0.112 | 1 M1 | PLEKHA2       |
| NCOR2.3    | 0.005998 | 0.11829  | 0.186 | 0.24  | 1 M1 | NCOR2         |
| IQGAP1.4   | 0.00611  | 0.239089 | 0.248 | 0.254 | 1 M1 | IQGAP1        |
| DNAJC5.3   | 0.006166 | 0.122378 | 0.169 | 0.221 | 1 M1 | DNAJC5        |
| CCDC22.2   | 0.006343 | 0.14785  | 0.1   | 0.132 | 1 M1 | CCDC22        |
| CD46       | 0.006371 | 0.249057 | 0.232 | 0.234 | 1 M1 | CD46          |
| IDI1.3     | 0.006383 | 0.244841 | 0.305 | 0.328 | 1 M1 | IDI1          |
| PQLC1.3    | 0.006452 | 0.138517 | 0.106 | 0.14  | 1 M1 | PQLC1         |
| IFFO1.3    | 0.006721 | 0.230776 | 0.129 | 0.116 | 1 M1 | IFFO1         |
| CLEC2D     | 0.006788 | 0.121601 | 0.035 | 0.025 | 1 M1 | CLEC2D        |
| SUSD1.3    | 0.0069   | 0.138472 | 0.066 | 0.053 | 1 M1 | SUSD1         |
| KLHL18.1   | 0.006922 | 0.104418 | 0.095 | 0.124 | 1 M1 | KLHL18        |
| SLC12A7.1  | 0.00693  | 0.130348 | 0.051 | 0.039 | 1 M1 | SLC12A7       |
| TAZ.2      | 0.007089 | 0.228197 | 0.144 | 0.132 | 1 M1 | TAZ           |
| FAM65C     | 0.007289 | 0.12023  | 0.038 | 0.027 | 1 M1 | FAM65C        |
| CALM2.3    | 0.007439 | -0.11088 | 0.934 | 0.932 | 1 M1 | CALM2         |
| ATF1       | 0.007481 | 0.109    | 0.116 | 0.149 | 1 M1 | ATF1          |
| NAA20.1    | 0.007637 | 0.143232 | 0.444 | 0.507 | 1 M1 | NAA20         |
| RP11-493L  | 0.008155 | 0.115631 | 0.029 | 0.02  | 1 M1 | RP11-493L12.4 |
| RNF111.3   | 0.008409 | 0.100683 | 0.063 | 0.085 | 1 M1 | RNF111        |
| MIDN.2     | 0.008424 | 0.106082 | 0.331 | 0.431 | 1 M1 | MIDN          |
| DNAJC15.2  | 0.008528 | 0.151654 | 0.365 | 0.395 | 1 M1 | DNAJC15       |
| SPHK1.3    | 0.008533 | 0.211627 | 0.117 | 0.104 | 1 M1 | SPHK1         |
| SLC39A11.0 | 0.008554 | 0.177019 | 0.084 | 0.071 | 1 M1 | SLC39A11      |
| NCOA3.3    | 0.008695 | 0.148747 | 0.1   | 0.131 | 1 M1 | NCOA3         |
| CHKA.4     | 0.008788 | 0.26556  | 0.19  | 0.187 | 1 M1 | CHKA          |
| IKBKG.3    | 0.008921 | 0.111953 | 0.106 | 0.138 | 1 M1 | IKBKG         |
| TBC1D9B.2  | 0.009809 | 0.105868 | 0.13  | 0.166 | 1 M1 | TBC1D9B       |
| EFR3A.3    | 0.009946 | 0.108272 | 0.114 | 0.148 | 1 M1 | EFR3A         |
| S100A9.5   | 0        | 1.32377  | 0.876 | 0.177 | 0 M2 | S100A9        |
| TGFBI.5    | 0        | 1.304618 | 0.801 | 0.163 | 0 M2 | TGFBI         |
| FCGR2B.5   | 0        | 1.260359 | 0.679 | 0.106 | 0 M2 | FCGR2B        |
| MARCO.2    | 0        | 1.237859 | 0.415 | 0.033 | 0 M2 | MARCO         |
| S100A8.5   | 0        | 1.170883 | 0.718 | 0.147 | 0 M2 | S100A8        |

|           |       |          |       |       |       |    |          |
|-----------|-------|----------|-------|-------|-------|----|----------|
| SLC16A10. | 0     | 1.15559  | 0.504 | 0.057 | 0     | M2 | SLC16A10 |
| S100A4.5  | 0     | 1.116636 | 0.912 | 0.252 | 0     | M2 | S100A4   |
| CD163.5   | 0     | 1.018934 | 0.854 | 0.234 | 0     | M2 | CD163    |
| VAMP8.5   | 0     | 0.971468 | 0.939 | 0.301 | 0     | M2 | VAMP8    |
| SLAMF9.2  | 0     | 0.83136  | 0.199 | 0.006 | 0     | M2 | SLAMF9   |
| ADAM8.4   | ##### | 0.892057 | 0.303 | 0.025 | ##### | M2 | ADAM8    |
| RNASE1.3  | ##### | 1.175208 | 0.639 | 0.136 | ##### | M2 | RNASE1   |
| C1orf162. | ##### | 0.947718 | 0.907 | 0.28  | ##### | M2 | C1orf162 |
| GPNMB.5   | ##### | 1.02102  | 0.672 | 0.167 | ##### | M2 | GPNMB    |
| CLEC5A.5  | ##### | 1.019725 | 0.465 | 0.073 | ##### | M2 | CLEC5A   |
| ALOX5AP.5 | ##### | 0.890088 | 0.967 | 0.358 | ##### | M2 | ALOX5AP  |
| CD14.5    | ##### | 0.867242 | 0.964 | 0.369 | ##### | M2 | CD14     |
| PLAUR.5   | ##### | 0.910576 | 0.914 | 0.328 | ##### | M2 | PLAUR    |
| ANPEP.4   | ##### | 0.796657 | 0.243 | 0.017 | ##### | M2 | ANPEP    |
| STAB1.4   | ##### | 1.050916 | 0.595 | 0.131 | ##### | M2 | STAB1    |
| FCER1G.5  | ##### | 0.844036 | 0.995 | 0.402 | ##### | M2 | FCER1G   |
| AIF1.5    | ##### | 0.847691 | 0.981 | 0.37  | ##### | M2 | AIF1     |
| LAPTM5.5  | ##### | 0.827005 | 0.997 | 0.396 | ##### | M2 | LAPTM5   |
| HMOX1.5   | ##### | 0.97409  | 0.784 | 0.26  | ##### | M2 | HMOX1    |
| LYZ.5     | ##### | 1.015476 | 0.66  | 0.174 | ##### | M2 | LYZ      |
| SLC16A3.5 | ##### | 0.985454 | 0.798 | 0.286 | ##### | M2 | SLC16A3  |
| CD68.5    | ##### | 0.815731 | 0.959 | 0.404 | ##### | M2 | CD68     |
| TYROBP.5  | ##### | 0.796929 | 0.999 | 0.421 | ##### | M2 | TYROBP   |
| SLC11A1.5 | ##### | 0.902981 | 0.82  | 0.268 | ##### | M2 | SLC11A1  |
| SERPINA1. | ##### | 0.874114 | 0.81  | 0.263 | ##### | M2 | SERPINA1 |
| PLIN2.4   | ##### | 0.857807 | 0.833 | 0.307 | ##### | M2 | PLIN2    |
| ITGB2.5   | ##### | 0.852153 | 0.844 | 0.287 | ##### | M2 | ITGB2    |
| GMFG.5    | ##### | 0.86836  | 0.811 | 0.261 | ##### | M2 | GMFG     |
| C5AR1.5   | ##### | 0.889043 | 0.7   | 0.205 | ##### | M2 | C5AR1    |
| TREM1.4   | ##### | 0.92449  | 0.564 | 0.135 | ##### | M2 | TREM1    |
| LYVE1.3   | ##### | 0.836402 | 0.249 | 0.023 | ##### | M2 | LYVE1    |
| CXCL3.2   | ##### | 1.030055 | 0.351 | 0.052 | ##### | M2 | CXCL3    |
| C15orf48. | ##### | 0.990253 | 0.342 | 0.05  | ##### | M2 | C15orf48 |
| SRGN.5    | ##### | 0.71614  | 0.999 | 0.463 | ##### | M2 | SRGN     |
| VSIG4.5   | ##### | 0.757975 | 0.898 | 0.327 | ##### | M2 | VSIG4    |
| ARHGDIB.5 | ##### | 0.791263 | 0.905 | 0.334 | ##### | M2 | ARHGDIB  |
| SERPINB1. | ##### | 0.859632 | 0.731 | 0.234 | ##### | M2 | SERPINB1 |
| FXYP5.5   | ##### | 0.815627 | 0.842 | 0.305 | ##### | M2 | FXYP5    |
| FCGR3A.5  | ##### | 0.772179 | 0.866 | 0.304 | ##### | M2 | FCGR3A   |
| GPSM3.5   | ##### | 0.83543  | 0.729 | 0.229 | ##### | M2 | GPSM3    |
| FBP1.5    | ##### | 0.926679 | 0.448 | 0.093 | ##### | M2 | FBP1     |
| FCGR2A.5  | ##### | 0.824974 | 0.768 | 0.255 | ##### | M2 | FCGR2A   |
| GSTO1.4   | ##### | 0.808257 | 0.851 | 0.428 | ##### | M2 | GSTO1    |
| HCST.5    | ##### | 0.836468 | 0.757 | 0.251 | ##### | M2 | HCST     |
| ENG.5     | ##### | 0.939913 | 0.531 | 0.139 | ##### | M2 | ENG      |
| CTSZ.5    | ##### | 0.925736 | 0.676 | 0.226 | ##### | M2 | CTSZ     |
| C1QC.5    | ##### | 0.682056 | 0.98  | 0.467 | ##### | M2 | C1QC     |
| RNASE2.5  | ##### | 0.924561 | 0.53  | 0.131 | ##### | M2 | RNASE2   |
| LSP1.5    | ##### | 0.924279 | 0.539 | 0.139 | ##### | M2 | LSP1     |
| PYCARD.5  | ##### | 0.838207 | 0.732 | 0.253 | ##### | M2 | PYCARD   |
| GPR183.5  | ##### | 0.768337 | 0.766 | 0.256 | ##### | M2 | GPR183   |



|            |       |          |       |       |       |    |             |
|------------|-------|----------|-------|-------|-------|----|-------------|
| FCGRT. 4   | ##### | 0.69746  | 0.954 | 0.521 | ##### | M2 | FCGRT       |
| C1QA. 5    | ##### | 0.680486 | 0.98  | 0.506 | ##### | M2 | C1QA        |
| MS4A4A. 5  | ##### | 0.753824 | 0.754 | 0.253 | ##### | M2 | MS4A4A      |
| TYMP. 5    | ##### | 0.848514 | 0.737 | 0.276 | ##### | M2 | TYMP        |
| CAPG. 5    | ##### | 0.77744  | 0.856 | 0.383 | ##### | M2 | CAPG        |
| NCF2. 5    | ##### | 0.826406 | 0.401 | 0.08  | ##### | M2 | NCF2        |
| FPR1. 5    | ##### | 0.749637 | 0.752 | 0.251 | ##### | M2 | FPR1        |
| RNASE6. 5  | ##### | 0.751516 | 0.742 | 0.242 | ##### | M2 | RNASE6      |
| CTSS. 5    | ##### | 0.733673 | 0.834 | 0.32  | ##### | M2 | CTSS        |
| DAB2. 4    | ##### | 0.874048 | 0.496 | 0.125 | ##### | M2 | DAB2        |
| CTSD. 4    | ##### | 0.615257 | 0.928 | 0.619 | ##### | M2 | CTSD        |
| EMP3. 4    | ##### | 0.738628 | 0.84  | 0.421 | ##### | M2 | EMP3        |
| MS4A7. 5   | ##### | 0.74061  | 0.805 | 0.298 | ##### | M2 | MS4A7       |
| CYBA. 5    | ##### | 0.760187 | 0.866 | 0.372 | ##### | M2 | CYBA        |
| CTSL. 5    | ##### | 0.697284 | 0.871 | 0.499 | ##### | M2 | CTSL        |
| THBS1. 4   | ##### | 0.922282 | 0.341 | 0.062 | ##### | M2 | THBS1       |
| TREM2. 5   | ##### | 0.719303 | 0.831 | 0.316 | ##### | M2 | TREM2       |
| AC092484.  | ##### | 0.5207   | 0.123 | 0.005 | ##### | M2 | AC092484. 1 |
| C1QB. 5    | ##### | 0.621401 | 0.972 | 0.541 | ##### | M2 | C1QB        |
| CACNA2D4.  | ##### | 0.773334 | 0.323 | 0.056 | ##### | M2 | CACNA2D4    |
| MALAT1. 5  | ##### | -0.54853 | 1     | 0.995 | ##### | M2 | MALAT1      |
| CSTA. 5    | ##### | 0.774829 | 0.446 | 0.106 | ##### | M2 | CSTA        |
| LCP1. 4    | ##### | 0.759881 | 0.473 | 0.118 | ##### | M2 | LCP1        |
| GNA15. 5   | ##### | 0.78164  | 0.402 | 0.088 | ##### | M2 | GNA15       |
| CD300A. 5  | ##### | 0.783775 | 0.563 | 0.165 | ##### | M2 | CD300A      |
| THBD. 5    | ##### | 0.825331 | 0.369 | 0.075 | ##### | M2 | THBD        |
| RNASET2. 5 | ##### | 0.732629 | 0.874 | 0.455 | ##### | M2 | RNASET2     |
| IFI30. 5   | ##### | 0.809137 | 0.61  | 0.191 | ##### | M2 | IFI30       |
| ARHGAP18.  | ##### | 0.800749 | 0.51  | 0.148 | ##### | M2 | ARHGAP18    |
| IL4I1. 4   | ##### | 0.778749 | 0.289 | 0.049 | ##### | M2 | IL4I1       |
| LST1. 5    | ##### | 0.717191 | 0.752 | 0.281 | ##### | M2 | LST1        |
| RGS1. 5    | ##### | 0.620922 | 0.908 | 0.414 | ##### | M2 | RGS1        |
| S100A10. 5 | ##### | 0.562783 | 0.927 | 0.517 | ##### | M2 | S100A10     |
| SAMSN1. 5  | ##### | 0.729139 | 0.658 | 0.223 | ##### | M2 | SAMSN1      |
| HNMT. 4    | ##### | 0.794932 | 0.573 | 0.193 | ##### | M2 | HNMT        |
| CD53. 5    | ##### | 0.650173 | 0.769 | 0.283 | ##### | M2 | CD53        |
| CD36. 1    | ##### | 0.516597 | 0.128 | 0.007 | ##### | M2 | CD36        |
| CXCL2. 2   | ##### | 0.856797 | 0.341 | 0.068 | ##### | M2 | CXCL2       |
| PLTP. 3    | ##### | 0.679521 | 0.817 | 0.445 | ##### | M2 | PLTP        |
| CTSH. 5    | ##### | 0.72834  | 0.704 | 0.266 | ##### | M2 | CTSH        |
| CD93. 5    | ##### | 0.708618 | 0.303 | 0.054 | ##### | M2 | CD93        |
| VMO1. 5    | ##### | 0.905124 | 0.479 | 0.137 | ##### | M2 | VMO1        |
| CLIC1. 3   | ##### | 0.527038 | 0.96  | 0.599 | ##### | M2 | CLIC1       |
| SPI1. 5    | ##### | 0.746999 | 0.623 | 0.211 | ##### | M2 | SPI1        |
| ARPC1B. 5  | ##### | 0.604605 | 0.88  | 0.506 | ##### | M2 | ARPC1B      |
| MYL12A. 4  | ##### | 0.583751 | 0.876 | 0.52  | ##### | M2 | MYL12A      |
| STXBP2. 5  | ##### | 0.740072 | 0.506 | 0.149 | ##### | M2 | STXBP2      |
| AQP9. 1    | ##### | 0.558746 | 0.176 | 0.018 | ##### | M2 | AQP9        |
| FCGBP. 4   | ##### | 0.891129 | 0.581 | 0.204 | ##### | M2 | FCGBP       |
| CYTIP. 5   | ##### | 0.732576 | 0.375 | 0.084 | ##### | M2 | CYTIP       |
| APOC1. 4   | ##### | 0.592517 | 0.908 | 0.488 | ##### | M2 | APOC1       |

|            |       |           |        |        |       |    |          |
|------------|-------|-----------|--------|--------|-------|----|----------|
| RGS10. 5   | ##### | 0. 645875 | 0. 778 | 0. 311 | ##### | M2 | RGS10    |
| KYNU. 5    | ##### | 0. 738062 | 0. 327 | 0. 067 | ##### | M2 | KYNU     |
| AP2S1. 4   | ##### | 0. 545429 | 0. 891 | 0. 644 | ##### | M2 | AP2S1    |
| CTSB. 2    | ##### | 0. 419991 | 0. 994 | 0. 74  | ##### | M2 | CTSB     |
| CATSPER1.  | ##### | 0. 603177 | 0. 166 | 0. 016 | ##### | M2 | CATSPER1 |
| CD86. 5    | ##### | 0. 67912  | 0. 584 | 0. 187 | ##### | M2 | CD86     |
| NPC2. 4    | ##### | 0. 472395 | 0. 999 | 0. 67  | ##### | M2 | NPC2     |
| CTSC. 5    | ##### | 0. 642711 | 0. 787 | 0. 355 | ##### | M2 | CTSC     |
| ANXA2. 4   | ##### | 0. 523927 | 0. 9   | 0. 486 | ##### | M2 | ANXA2    |
| H2AFJ. 5   | ##### | 0. 871795 | 0. 581 | 0. 236 | ##### | M2 | H2AFJ    |
| GPM6B. 5   | ##### | -1. 32298 | 0. 193 | 0. 649 | ##### | M2 | GPM6B    |
| ANXA1. 3   | ##### | 0. 569942 | 0. 833 | 0. 38  | ##### | M2 | ANXA1    |
| ANGPTL4. 2 | ##### | 0. 82168  | 0. 356 | 0. 083 | ##### | M2 | ANGPTL4  |
| RETN. 3    | ##### | 0. 595817 | 0. 138 | 0. 011 | ##### | M2 | RETN     |
| IL7R. 4    | ##### | 0. 596402 | 0. 246 | 0. 04  | ##### | M2 | IL7R     |
| MAP3K8. 5  | ##### | 0. 74182  | 0. 511 | 0. 16  | ##### | M2 | MAP3K8   |
| NCF4. 5    | ##### | 0. 734765 | 0. 444 | 0. 124 | ##### | M2 | NCF4     |
| SIGLEC7. 5 | ##### | 0. 712599 | 0. 294 | 0. 058 | ##### | M2 | SIGLEC7  |
| HLA-DRB5.  | ##### | 0. 542591 | 0. 847 | 0. 368 | ##### | M2 | HLA-DRB5 |
| CSTB. 3    | ##### | 0. 477195 | 0. 909 | 0. 674 | ##### | M2 | CSTB     |
| LAIR1. 5   | ##### | 0. 698031 | 0. 585 | 0. 205 | ##### | M2 | LAIR1    |
| MPP1. 5    | ##### | 0. 784306 | 0. 508 | 0. 179 | ##### | M2 | MPP1     |
| SLC7A7. 5  | ##### | 0. 71334  | 0. 493 | 0. 151 | ##### | M2 | SLC7A7   |
| FERMT3. 5  | ##### | 0. 71074  | 0. 474 | 0. 144 | ##### | M2 | FERMT3   |
| GRN. 5     | ##### | 0. 548388 | 0. 856 | 0. 55  | ##### | M2 | GRN      |
| NOVA1. 5   | ##### | -1. 44338 | 0. 049 | 0. 51  | ##### | M2 | NOVA1    |
| LY86. 5    | ##### | 0. 633085 | 0. 692 | 0. 263 | ##### | M2 | LY86     |
| UPP1. 4    | ##### | 0. 81493  | 0. 562 | 0. 233 | ##### | M2 | UPP1     |
| MMP19. 2   | ##### | 0. 734747 | 0. 249 | 0. 045 | ##### | M2 | MMP19    |
| S100A11. 5 | ##### | 0. 414715 | 0. 996 | 0. 633 | ##### | M2 | S100A11  |
| CKB. 5     | ##### | -1. 16539 | 0. 186 | 0. 61  | ##### | M2 | CKB      |
| SQRDL. 5   | ##### | 0. 731182 | 0. 448 | 0. 14  | ##### | M2 | SQRDL    |
| MYO1G. 5   | ##### | 0. 601238 | 0. 255 | 0. 047 | ##### | M2 | MYO1G    |
| TUBA1A. 4  | ##### | -0. 81304 | 0. 65  | 0. 819 | ##### | M2 | TUBA1A   |
| MS4A6A. 5  | ##### | 0. 591041 | 0. 747 | 0. 312 | ##### | M2 | MS4A6A   |
| LGALS9. 5  | ##### | 0. 668967 | 0. 589 | 0. 215 | ##### | M2 | LGALS9   |
| TSPO. 4    | ##### | 0. 530364 | 0. 861 | 0. 576 | ##### | M2 | TSPO     |
| F13A1. 2   | ##### | 0. 620558 | 0. 461 | 0. 137 | ##### | M2 | F13A1    |
| FCN1. 1    | ##### | 0. 402473 | 0. 088 | 0. 004 | ##### | M2 | FCN1     |
| RHOG. 5    | ##### | 0. 67757  | 0. 741 | 0. 386 | ##### | M2 | RHOG     |
| METRNL. 5  | ##### | 0. 770398 | 0. 3   | 0. 067 | ##### | M2 | METRNL   |
| DOK2. 4    | ##### | 0. 584579 | 0. 241 | 0. 042 | ##### | M2 | DOK2     |
| CORO1A. 5  | ##### | 0. 648226 | 0. 742 | 0. 346 | ##### | M2 | CORO1A   |
| RAC2. 5    | ##### | 0. 709091 | 0. 379 | 0. 1   | ##### | M2 | RAC2     |
| HLA-DRB1.  | ##### | 0. 479728 | 0. 966 | 0. 502 | ##### | M2 | HLA-DRB1 |
| ATF5. 4    | ##### | 0. 864158 | 0. 478 | 0. 173 | ##### | M2 | ATF5     |
| TMEM176B.  | ##### | 0. 665918 | 0. 709 | 0. 327 | ##### | M2 | TMEM176B |
| SLA. 5     | ##### | 0. 685666 | 0. 527 | 0. 179 | ##### | M2 | SLA      |
| CREM. 5    | ##### | 0. 696169 | 0. 723 | 0. 384 | ##### | M2 | CREM     |
| FCGR1A. 5  | ##### | 0. 610255 | 0. 631 | 0. 232 | ##### | M2 | FCGR1A   |
| CD300E. 1  | ##### | 0. 425797 | 0. 089 | 0. 004 | ##### | M2 | CD300E   |

|            |          |          |       |       |          |    |                |
|------------|----------|----------|-------|-------|----------|----|----------------|
| GOS2. 4    | #####    | 0.824112 | 0.471 | 0.164 | #####    | M2 | GOS2           |
| NPL. 4     | #####    | 0.733171 | 0.502 | 0.179 | #####    | M2 | NPL            |
| TUBB2B. 4  | #####    | -1.28278 | 0.19  | 0.581 | #####    | M2 | TUBB2B         |
| CCL3. 5    | #####    | 0.597125 | 0.78  | 0.397 | #####    | M2 | CCL3           |
| ETS2. 5    | #####    | 0.71306  | 0.512 | 0.185 | #####    | M2 | ETS2           |
| SDS. 5     | #####    | 0.80652  | 0.241 | 0.046 | #####    | M2 | SDS            |
| CXCL1      | #####    | 0.470982 | 0.088 | 0.004 | #####    | M2 | CXCL1          |
| CD4. 5     | #####    | 0.662518 | 0.442 | 0.135 | #####    | M2 | CD4            |
| CD37. 5    | #####    | 0.583955 | 0.687 | 0.273 | #####    | M2 | CD37           |
| PRR13. 3   | #####    | 0.538032 | 0.82  | 0.523 | #####    | M2 | PRR13          |
| THEMIS2. 5 | #####    | 0.65822  | 0.567 | 0.219 | #####    | M2 | THEMIS2        |
| FAM26F. 5  | #####    | 0.655489 | 0.457 | 0.146 | #####    | M2 | FAM26F         |
| HLA-DPB1.  | #####    | 0.491502 | 0.902 | 0.465 | #####    | M2 | HLA-DPB1       |
| PTPN6. 5   | #####    | 0.661839 | 0.448 | 0.141 | #####    | M2 | PTPN6          |
| IL1RN. 5   | #####    | 0.722373 | 0.276 | 0.061 | #####    | M2 | IL1RN          |
| HCLS1. 5   | #####    | 0.595765 | 0.663 | 0.264 | #####    | M2 | HCLS1          |
| ALOX5. 5   | #####    | 0.61214  | 0.407 | 0.119 | #####    | M2 | ALOX5          |
| FPR3. 5    | #####    | 0.541217 | 0.234 | 0.044 | #####    | M2 | FPR3           |
| RP11-742E  | #####    | 0.576703 | 0.162 | 0.021 | #####    | M2 | RP11-742B18. 1 |
| LIMS1. 5   | #####    | 0.641631 | 0.718 | 0.42  | #####    | M2 | LIMS1          |
| MAP1B. 4   | #####    | -1.16964 | 0.147 | 0.562 | #####    | M2 | MAP1B          |
| BCL2A1. 5  | #####    | 0.645895 | 0.437 | 0.137 | #####    | M2 | BCL2A1         |
| SH3BGRL3.  | #####    | 0.348029 | 0.983 | 0.762 | #####    | M2 | SH3BGRL3       |
| SLC2A3. 4  | #####    | 0.77753  | 0.55  | 0.233 | #####    | M2 | SLC2A3         |
| SOX2. 5    | #####    | -1.23575 | 0.046 | 0.457 | #####    | M2 | SOX2           |
| CD300C. 5  | #####    | 0.638221 | 0.258 | 0.054 | #####    | M2 | CD300C         |
| GPX1. 5    | #####    | 0.316235 | 0.978 | 0.802 | #####    | M2 | GPX1           |
| SLC02B1. 4 | #####    | 0.627701 | 0.54  | 0.198 | #####    | M2 | SLC02B1        |
| IER3. 5    | #####    | 0.692801 | 0.556 | 0.219 | #####    | M2 | IER3           |
| SAT1. 4    | #####    | 0.324306 | 0.999 | 0.789 | #####    | M2 | SAT1           |
| CLEC2B. 5  | #####    | 0.605016 | 0.506 | 0.183 | #####    | M2 | CLEC2B         |
| MAPK13. 2  | #####    | 0.478328 | 0.16  | 0.021 | #####    | M2 | MAPK13         |
| CFD. 5     | #####    | 0.683775 | 0.428 | 0.137 | #####    | M2 | CFD            |
| ADORA3. 5  | #####    | 0.61029  | 0.603 | 0.236 | #####    | M2 | ADORA3         |
| TNFSF13B.  | #####    | 0.644222 | 0.501 | 0.182 | #####    | M2 | TNFSF13B       |
| ITGAM. 5   | #####    | 0.569863 | 0.275 | 0.061 | #####    | M2 | ITGAM          |
| MGAT1. 5   | #####    | 0.708882 | 0.642 | 0.337 | #####    | M2 | MGAT1          |
| CSF1R. 5   | #####    | 0.583192 | 0.619 | 0.243 | #####    | M2 | CSF1R          |
| RAB20. 5   | #####    | 0.695218 | 0.536 | 0.215 | #####    | M2 | RAB20          |
| PAPSS2. 2  | #####    | 0.407759 | 0.133 | 0.015 | 2.44E-99 | M2 | PAPSS2         |
| ARPC3. 3   | #####    | 0.325811 | 0.967 | 0.793 | 2.18E-98 | M2 | ARPC3          |
| IL2RA. 3   | #####    | 0.535213 | 0.162 | 0.023 | 1.42E-97 | M2 | IL2RA          |
| OSCAR. 5   | #####    | 0.581966 | 0.262 | 0.059 | 2.57E-97 | M2 | OSCAR          |
| ARRB2. 5   | #####    | 0.609052 | 0.697 | 0.379 | 4.76E-97 | M2 | ARRB2          |
| OSTF1. 5   | #####    | 0.658248 | 0.599 | 0.269 | 9.39E-97 | M2 | OSTF1          |
| FUOM. 5    | #####    | 0.743497 | 0.386 | 0.123 | 1.06E-96 | M2 | FUOM           |
| TNFRSF1B.  | 1.62E-99 | 0.658728 | 0.471 | 0.168 | 2.42E-95 | M2 | TNFRSF1B       |
| PFN2. 4    | 1.78E-99 | -1.08217 | 0.056 | 0.461 | 2.66E-95 | M2 | PFN2           |
| FEZ1. 4    | 1.99E-99 | -1.05926 | 0.056 | 0.456 | 2.98E-95 | M2 | FEZ1           |
| CNN3. 5    | 1.32E-98 | -1.14926 | 0.103 | 0.494 | 1.98E-94 | M2 | CNN3           |
| TBXAS1. 5  | 1.78E-98 | 0.573809 | 0.563 | 0.218 | 2.66E-94 | M2 | TBXAS1         |

|             |           |           |        |        |              |          |
|-------------|-----------|-----------|--------|--------|--------------|----------|
| SGK1. 5     | 2. 03E-98 | 0. 540909 | 0. 768 | 0. 413 | 3. 03E-94 M2 | SGK1     |
| HLA-DMA. 5  | 5. 46E-98 | 0. 48303  | 0. 794 | 0. 381 | 8. 16E-94 M2 | HLA-DMA  |
| C1orf61. 5  | 6. 34E-98 | -1. 11608 | 0. 192 | 0. 559 | 9. 48E-94 M2 | C1orf61  |
| TCIRG1. 5   | 6. 48E-98 | 0. 609931 | 0. 361 | 0. 109 | 9. 68E-94 M2 | TCIRG1   |
| MDK. 4      | 1. 87E-97 | -1. 11765 | 0. 124 | 0. 517 | 2. 79E-93 M2 | MDK      |
| CD33. 5     | 2. 00E-97 | 0. 652592 | 0. 354 | 0. 103 | 3. 00E-93 M2 | CD33     |
| CAPZB. 4    | 2. 08E-97 | 0. 391685 | 0. 889 | 0. 688 | 3. 11E-93 M2 | CAPZB    |
| HLA-E. 5    | 8. 44E-97 | 0. 43229  | 0. 897 | 0. 575 | 1. 26E-92 M2 | HLA-E    |
| IRAK3. 5    | 1. 69E-96 | 0. 555104 | 0. 262 | 0. 06  | 2. 53E-92 M2 | IRAK3    |
| CCL20. 4    | 3. 82E-96 | 0. 706583 | 0. 23  | 0. 049 | 5. 71E-92 M2 | CCL20    |
| NINJ1. 5    | 4. 86E-96 | 0. 588816 | 0. 722 | 0. 432 | 7. 27E-92 M2 | NINJ1    |
| GLRX. 4     | 4. 95E-96 | 0. 568512 | 0. 691 | 0. 367 | 7. 39E-92 M2 | GLRX     |
| FXVD6. 5    | 1. 70E-95 | -1. 06324 | 0. 095 | 0. 487 | 2. 55E-91 M2 | FXVD6    |
| CD44. 3     | 5. 05E-95 | 0. 468407 | 0. 697 | 0. 36  | 7. 54E-91 M2 | CD44     |
| CALD1. 4    | 5. 40E-95 | -1. 03992 | 0. 051 | 0. 446 | 8. 07E-91 M2 | CALD1    |
| NOP10. 5    | 7. 83E-95 | 0. 459343 | 0. 822 | 0. 591 | 1. 17E-90 M2 | NOP10    |
| MARCKSL1. 7 | 0. 4E-94  | -1. 08106 | 0. 234 | 0. 567 | 1. 05E-89 M2 | MARCKSL1 |
| SYNGR2. 5   | 1. 22E-93 | 0. 636829 | 0. 616 | 0. 307 | 1. 82E-89 M2 | SYNGR2   |
| KCNAB2. 4   | 1. 54E-93 | 0. 652709 | 0. 261 | 0. 063 | 2. 30E-89 M2 | KCNAB2   |
| ST14. 5     | 1. 92E-93 | 0. 582795 | 0. 255 | 0. 06  | 2. 86E-89 M2 | ST14     |
| NR4A2. 5    | 1. 06E-92 | 0. 619212 | 0. 557 | 0. 23  | 1. 58E-88 M2 | NR4A2    |
| GPM6A. 4    | 1. 09E-92 | -0. 95563 | 0. 132 | 0. 531 | 1. 63E-88 M2 | GPM6A    |
| SLC2A5. 5   | 1. 18E-92 | 0. 63648  | 0. 436 | 0. 152 | 1. 76E-88 M2 | SLC2A5   |
| PTN. 5      | 1. 21E-92 | -1. 04747 | 0. 294 | 0. 639 | 1. 81E-88 M2 | PTN      |
| RGS2. 4     | 1. 48E-92 | 0. 476889 | 0. 769 | 0. 422 | 2. 21E-88 M2 | RGS2     |
| HAVCR2. 5   | 7. 22E-92 | 0. 546085 | 0. 543 | 0. 209 | 1. 08E-87 M2 | HAVCR2   |
| FOLR2. 5    | 4. 26E-91 | 0. 59041  | 0. 448 | 0. 158 | 6. 36E-87 M2 | FOLR2    |
| MSR1. 5     | 4. 55E-91 | 0. 583606 | 0. 452 | 0. 161 | 6. 80E-87 M2 | MSR1     |
| CDCP1. 3    | 1. 67E-90 | 0. 46498  | 0. 158 | 0. 025 | 2. 49E-86 M2 | CDCP1    |
| UCHL1. 3    | 2. 20E-90 | -1. 07929 | 0. 082 | 0. 461 | 3. 28E-86 M2 | UCHL1    |
| FGR. 5      | 4. 36E-90 | 0. 571654 | 0. 275 | 0. 069 | 6. 51E-86 M2 | FGR      |
| HLA-DPA1. 1 | 1. 12E-89 | 0. 396961 | 0. 916 | 0. 506 | 1. 68E-85 M2 | HLA-DPA1 |
| GK. 5       | 1. 22E-89 | 0. 657909 | 0. 364 | 0. 122 | 1. 82E-85 M2 | GK       |
| OLR1. 5     | 1. 36E-89 | 0. 534956 | 0. 567 | 0. 228 | 2. 04E-85 M2 | OLR1     |
| PGK1. 2     | 1. 89E-89 | 0. 329787 | 0. 935 | 0. 741 | 2. 82E-85 M2 | PGK1     |
| DUSP23. 4   | 2. 41E-88 | 0. 607147 | 0. 453 | 0. 169 | 3. 60E-84 M2 | DUSP23   |
| PCSK1N. 4   | 9. 60E-88 | -1. 0829  | 0. 087 | 0. 444 | 1. 43E-83 M2 | PCSK1N   |
| CPVL. 5     | 1. 45E-87 | 0. 541968 | 0. 658 | 0. 327 | 2. 16E-83 M2 | CPVL     |
| LGALS1. 4   | 2. 46E-87 | 0. 337234 | 0. 981 | 0. 684 | 3. 67E-83 M2 | LGALS1   |
| PSAP. 3     | 5. 59E-87 | 0. 278418 | 0. 964 | 0. 808 | 8. 36E-83 M2 | PSAP     |
| PARVB. 5    | 8. 61E-87 | 0. 714074 | 0. 392 | 0. 148 | 1. 29E-82 M2 | PARVB    |
| BLVRB. 3    | 9. 78E-87 | 0. 591122 | 0. 636 | 0. 355 | 1. 46E-82 M2 | BLVRB    |
| GCHFR. 4    | 1. 45E-86 | 0. 685662 | 0. 252 | 0. 064 | 2. 17E-82 M2 | GCHFR    |
| HCK. 5      | 7. 98E-86 | 0. 591971 | 0. 421 | 0. 149 | 1. 19E-81 M2 | HCK      |
| PLEK. 5     | 1. 61E-85 | 0. 550586 | 0. 436 | 0. 156 | 2. 41E-81 M2 | PLEK     |
| HSD17B11. 1 | 1. 05E-84 | 0. 572966 | 0. 656 | 0. 357 | 1. 56E-80 M2 | HSD17B11 |
| KLF6. 4     | 4. 18E-84 | 0. 457949 | 0. 811 | 0. 511 | 6. 25E-80 M2 | KLF6     |
| LILRB4. 5   | 1. 30E-83 | 0. 509284 | 0. 567 | 0. 233 | 1. 94E-79 M2 | LILRB4   |
| P4HA1. 1    | 1. 33E-83 | 0. 702755 | 0. 461 | 0. 207 | 1. 99E-79 M2 | P4HA1    |
| EPB41L3. 5  | 2. 94E-83 | 0. 574925 | 0. 308 | 0. 091 | 4. 39E-79 M2 | EPB41L3  |
| ANG. 3      | 5. 07E-83 | 0. 638128 | 0. 264 | 0. 071 | 7. 58E-79 M2 | ANG      |

|             |           |           |        |        |              |            |
|-------------|-----------|-----------|--------|--------|--------------|------------|
| EVI2B. 5    | 5. 44E-83 | 0. 5146   | 0. 481 | 0. 183 | 8. 13E-79 M2 | EVI2B      |
| ADAP2. 5    | 7. 04E-83 | 0. 560578 | 0. 446 | 0. 165 | 1. 05E-78 M2 | ADAP2      |
| NFIB. 5     | 8. 89E-83 | -1. 03015 | 0. 049 | 0. 401 | 1. 33E-78 M2 | NFIB       |
| TSC22D1. 4  | 9. 63E-83 | -0. 89521 | 0. 178 | 0. 536 | 1. 44E-78 M2 | TSC22D1    |
| RAB13. 4    | 2. 13E-82 | 0. 54642  | 0. 633 | 0. 353 | 3. 18E-78 M2 | RAB13      |
| CLEC7A. 5   | 2. 33E-82 | 0. 543404 | 0. 433 | 0. 157 | 3. 49E-78 M2 | CLEC7A     |
| C4orf3. 3   | 2. 49E-82 | 0. 377708 | 0. 829 | 0. 633 | 3. 72E-78 M2 | C4orf3     |
| ELL2. 4     | 2. 87E-82 | 0. 623173 | 0. 441 | 0. 175 | 4. 28E-78 M2 | ELL2       |
| TPM3. 5     | 3. 19E-82 | 0. 490335 | 0. 755 | 0. 544 | 4. 77E-78 M2 | TPM3       |
| RHOA. 3     | 1. 02E-81 | 0. 313022 | 0. 918 | 0. 743 | 1. 52E-77 M2 | RHOA       |
| SYK. 5      | 1. 50E-81 | 0. 560805 | 0. 309 | 0. 091 | 2. 24E-77 M2 | SYK        |
| RNF149. 5   | 1. 08E-80 | 0. 618655 | 0. 535 | 0. 252 | 1. 62E-76 M2 | RNF149     |
| BCAP31. 2   | 1. 10E-80 | 0. 431513 | 0. 807 | 0. 605 | 1. 65E-76 M2 | BCAP31     |
| CXCL16. 5   | 1. 91E-80 | 0. 538627 | 0. 708 | 0. 435 | 2. 86E-76 M2 | CXCL16     |
| C10orf54. 2 | 0. 7E-80  | 0. 509575 | 0. 609 | 0. 265 | 3. 09E-76 M2 | C10orf54   |
| ARPC2. 4    | 3. 86E-80 | 0. 289709 | 0. 917 | 0. 763 | 5. 77E-76 M2 | ARPC2      |
| FHL1. 5     | 4. 08E-80 | -0. 85814 | 0. 032 | 0. 38  | 6. 09E-76 M2 | FHL1       |
| ZNF667-AS   | 4. 56E-80 | -0. 83934 | 0. 052 | 0. 412 | 6. 81E-76 M2 | ZNF667-AS1 |
| GLUL. 2     | 4. 82E-80 | 0. 243776 | 0. 959 | 0. 774 | 7. 21E-76 M2 | GLUL       |
| IFITM2. 5   | 1. 86E-79 | 0. 617609 | 0. 559 | 0. 263 | 2. 77E-75 M2 | IFITM2     |
| APOC2. 4    | 2. 60E-79 | 0. 630195 | 0. 444 | 0. 171 | 3. 88E-75 M2 | APOC2      |
| SIGLEC9. 5  | 2. 80E-79 | 0. 561309 | 0. 281 | 0. 079 | 4. 19E-75 M2 | SIGLEC9    |
| MEI1        | 6. 25E-79 | 0. 371977 | 0. 105 | 0. 012 | 9. 34E-75 M2 | MEI1       |
| P4HB. 2     | 9. 01E-79 | 0. 456421 | 0. 747 | 0. 559 | 1. 35E-74 M2 | P4HB       |
| HLA-DRA. 4  | 9. 81E-79 | 0. 301578 | 0. 974 | 0. 609 | 1. 47E-74 M2 | HLA-DRA    |
| APLP2. 5    | 1. 05E-78 | 0. 455781 | 0. 779 | 0. 58  | 1. 57E-74 M2 | APLP2      |
| SLC25A19. 1 | 4. 9E-78  | 0. 646797 | 0. 395 | 0. 153 | 2. 23E-74 M2 | SLC25A19   |
| LRRC25. 5   | 2. 87E-78 | 0. 540223 | 0. 28  | 0. 079 | 4. 28E-74 M2 | LRRC25     |
| NCAM1. 5    | 4. 24E-77 | -0. 85875 | 0. 024 | 0. 357 | 6. 34E-73 M2 | NCAM1      |
| NFIX. 4     | 4. 29E-77 | -0. 8386  | 0. 023 | 0. 354 | 6. 41E-73 M2 | NFIX       |
| FAH. 4      | 6. 02E-77 | 0. 683284 | 0. 373 | 0. 142 | 8. 99E-73 M2 | FAH        |
| MAP2. 5     | 7. 43E-77 | -0. 86475 | 0. 028 | 0. 36  | 1. 11E-72 M2 | MAP2       |
| NKG7. 3     | 7. 63E-77 | 0. 486017 | 0. 189 | 0. 04  | 1. 14E-72 M2 | NKG7       |
| C3AR1. 5    | 1. 44E-76 | 0. 449758 | 0. 533 | 0. 217 | 2. 15E-72 M2 | C3AR1      |
| COTL1. 5    | 5. 25E-76 | 0. 512315 | 0. 723 | 0. 494 | 7. 84E-72 M2 | COTL1      |
| FES. 5      | 1. 34E-75 | 0. 565893 | 0. 249 | 0. 067 | 2. 00E-71 M2 | FES        |
| SOX4. 4     | 2. 89E-75 | -1. 08749 | 0. 139 | 0. 467 | 4. 32E-71 M2 | SOX4       |
| ACSL1. 5    | 2. 91E-75 | 0. 584541 | 0. 478 | 0. 209 | 4. 35E-71 M2 | ACSL1      |
| UCP2. 5     | 2. 96E-75 | 0. 541786 | 0. 545 | 0. 253 | 4. 43E-71 M2 | UCP2       |
| MFSD1. 5    | 3. 99E-75 | 0. 542499 | 0. 602 | 0. 325 | 5. 97E-71 M2 | MFSD1      |
| FN1. 3      | 1. 01E-74 | 0. 801134 | 0. 359 | 0. 14  | 1. 51E-70 M2 | FN1        |
| APLP1. 5    | 1. 35E-74 | -0. 92314 | 0. 041 | 0. 374 | 2. 02E-70 M2 | APLP1      |
| C1orf54. 5  | 5. 62E-74 | 0. 608915 | 0. 467 | 0. 208 | 8. 39E-70 M2 | C1orf54    |
| COLEC12     | 6. 17E-74 | 0. 439592 | 0. 146 | 0. 026 | 9. 23E-70 M2 | COLEC12    |
| CD81. 4     | 6. 40E-74 | 0. 58496  | 0. 67  | 0. 422 | 9. 56E-70 M2 | CD81       |
| SCD5. 4     | 8. 22E-74 | -0. 86246 | 0. 08  | 0. 417 | 1. 23E-69 M2 | SCD5       |
| SLC31A2. 5  | 9. 37E-74 | 0. 53534  | 0. 437 | 0. 175 | 1. 40E-69 M2 | SLC31A2    |
| VAMP2. 4    | 1. 03E-73 | -0. 67072 | 0. 309 | 0. 645 | 1. 53E-69 M2 | VAMP2      |
| GSN. 4      | 1. 41E-73 | 0. 434989 | 0. 784 | 0. 49  | 2. 10E-69 M2 | GSN        |
| NCF1. 5     | 1. 65E-73 | 0. 579692 | 0. 326 | 0. 109 | 2. 46E-69 M2 | NCF1       |
| SPINT2. 5   | 1. 68E-73 | 0. 552777 | 0. 469 | 0. 198 | 2. 50E-69 M2 | SPINT2     |

|             |           |           |        |        |              |           |
|-------------|-----------|-----------|--------|--------|--------------|-----------|
| FABP7. 4    | 1. 85E-73 | -1. 18607 | 0. 088 | 0. 404 | 2. 76E-69 M2 | FABP7     |
| ITGB5. 3    | 2. 21E-73 | 0. 536148 | 0. 198 | 0. 046 | 3. 31E-69 M2 | ITGB5     |
| CPE. 4      | 4. 18E-73 | -0. 92013 | 0. 082 | 0. 412 | 6. 25E-69 M2 | CPE       |
| SGCB. 2     | 6. 08E-73 | -0. 80527 | 0. 026 | 0. 347 | 9. 09E-69 M2 | SGCB      |
| RBP1. 3     | 6. 95E-73 | -0. 94717 | 0. 157 | 0. 481 | 1. 04E-68 M2 | RBP1      |
| MEST. 4     | 7. 60E-73 | -0. 87288 | 0. 078 | 0. 408 | 1. 14E-68 M2 | MEST      |
| ELAVL3. 5   | 1. 17E-72 | -0. 82878 | 0. 015 | 0. 332 | 1. 74E-68 M2 | ELAVL3    |
| WAS. 5      | 1. 55E-72 | 0. 517509 | 0. 415 | 0. 157 | 2. 32E-68 M2 | WAS       |
| RIN3. 5     | 1. 72E-72 | 0. 520747 | 0. 313 | 0. 101 | 2. 56E-68 M2 | RIN3      |
| ATP6VOE2. 1 | 1. 75E-72 | -0. 77587 | 0. 138 | 0. 475 | 2. 61E-68 M2 | ATP6VOE2  |
| PILRA. 5    | 1. 83E-72 | 0. 557488 | 0. 395 | 0. 148 | 2. 74E-68 M2 | PILRA     |
| LILRB2. 5   | 2. 18E-72 | 0. 493396 | 0. 193 | 0. 043 | 3. 26E-68 M2 | LILRB2    |
| CAMK2N1. 5  | 3. 19E-72 | -0. 86299 | 0. 022 | 0. 338 | 4. 77E-68 M2 | CAMK2N1   |
| VKORC1. 1   | 7. 59E-72 | 0. 507022 | 0. 695 | 0. 482 | 1. 13E-67 M2 | VKORC1    |
| TMEM176A. 7 | 6. 64E-72 | 0. 608205 | 0. 469 | 0. 209 | 1. 14E-67 M2 | TMEM176A  |
| BEX1. 4     | 7. 96E-72 | -0. 9646  | 0. 047 | 0. 373 | 1. 19E-67 M2 | BEX1      |
| MGAT4A. 5   | 8. 51E-72 | 0. 556049 | 0. 467 | 0. 203 | 1. 27E-67 M2 | MGAT4A    |
| LINC01094   | 1. 06E-71 | 0. 497304 | 0. 377 | 0. 138 | 1. 58E-67 M2 | LINC01094 |
| SDC2. 4     | 1. 10E-71 | 0. 723732 | 0. 405 | 0. 177 | 1. 65E-67 M2 | SDC2      |
| LINC00461   | 1. 19E-71 | -0. 83465 | 0. 024 | 0. 342 | 1. 77E-67 M2 | LINC00461 |
| PLSCR1. 5   | 1. 35E-71 | 0. 539599 | 0. 613 | 0. 341 | 2. 01E-67 M2 | PLSCR1    |
| ZBTB20. 4   | 1. 74E-71 | -0. 77009 | 0. 072 | 0. 408 | 2. 59E-67 M2 | ZBTB20    |
| RILPL2. 5   | 1. 77E-71 | 0. 57329  | 0. 507 | 0. 241 | 2. 64E-67 M2 | RILPL2    |
| CIB1. 4     | 3. 35E-71 | 0. 458565 | 0. 711 | 0. 477 | 5. 00E-67 M2 | CIB1      |
| MLLT11. 3   | 3. 50E-71 | -0. 86403 | 0. 135 | 0. 477 | 5. 23E-67 M2 | MLLT11    |
| MMP14. 3    | 3. 57E-71 | 0. 695017 | 0. 439 | 0. 206 | 5. 34E-67 M2 | MMP14     |
| NFIA. 4     | 2. 47E-70 | -0. 844   | 0. 074 | 0. 401 | 3. 69E-66 M2 | NFIA      |
| TCEAL7. 3   | 2. 51E-70 | -0. 89665 | 0. 015 | 0. 323 | 3. 75E-66 M2 | TCEAL7    |
| IL10. 5     | 1. 00E-69 | 0. 614103 | 0. 292 | 0. 093 | 1. 50E-65 M2 | IL10      |
| CYBB. 5     | 1. 27E-69 | 0. 536965 | 0. 437 | 0. 174 | 1. 90E-65 M2 | CYBB      |
| CREG1. 5    | 1. 76E-69 | 0. 562375 | 0. 535 | 0. 28  | 2. 64E-65 M2 | CREG1     |
| NGFRAP1. 4  | 7. 86E-69 | -0. 72803 | 0. 367 | 0. 664 | 1. 17E-64 M2 | NGFRAP1   |
| TWF2. 5     | 1. 91E-68 | 0. 574868 | 0. 562 | 0. 325 | 2. 85E-64 M2 | TWF2      |
| NANS. 5     | 2. 01E-68 | 0. 531779 | 0. 596 | 0. 343 | 3. 01E-64 M2 | NANS      |
| TAGLN2. 5   | 2. 22E-68 | 0. 375461 | 0. 775 | 0. 496 | 3. 31E-64 M2 | TAGLN2    |
| ATP6VOE1. 2 | 4. 1E-68  | 0. 253107 | 0. 921 | 0. 749 | 3. 60E-64 M2 | ATP6VOE1  |
| GOLM1. 4    | 4. 26E-68 | -0. 75485 | 0. 031 | 0. 336 | 6. 36E-64 M2 | GOLM1     |
| KLF4. 5     | 4. 76E-68 | 0. 553853 | 0. 447 | 0. 189 | 7. 12E-64 M2 | KLF4      |
| DOK3. 5     | 4. 78E-68 | 0. 470111 | 0. 213 | 0. 055 | 7. 15E-64 M2 | DOK3      |
| CD83. 5     | 7. 81E-68 | 0. 491593 | 0. 57  | 0. 275 | 1. 17E-63 M2 | CD83      |
| ADM. 4      | 9. 46E-68 | 0. 596999 | 0. 404 | 0. 169 | 1. 41E-63 M2 | ADM       |
| KIF21A. 5   | 1. 19E-67 | -0. 77413 | 0. 023 | 0. 322 | 1. 78E-63 M2 | KIF21A    |
| LITAF. 5    | 1. 21E-67 | 0. 461188 | 0. 697 | 0. 442 | 1. 80E-63 M2 | LITAF     |
| NCKAP1L. 5  | 3. 92E-67 | 0. 503001 | 0. 318 | 0. 108 | 5. 85E-63 M2 | NCKAP1L   |
| STMN3. 3    | 4. 75E-67 | -0. 72846 | 0. 026 | 0. 327 | 7. 10E-63 M2 | STMN3     |
| DOCK8. 5    | 5. 15E-67 | 0. 485    | 0. 318 | 0. 107 | 7. 70E-63 M2 | DOCK8     |
| LAPTM4B. 5  | 6. 84E-67 | -0. 74213 | 0. 042 | 0. 352 | 1. 02E-62 M2 | LAPTM4B   |
| MNDA. 5     | 7. 04E-67 | 0. 492409 | 0. 415 | 0. 16  | 1. 05E-62 M2 | MNDA      |
| CD74. 4     | 9. 37E-67 | 0. 249487 | 0. 992 | 0. 734 | 1. 40E-62 M2 | CD74      |
| BAALC. 4    | 9. 84E-67 | -0. 81857 | 0. 055 | 0. 366 | 1. 47E-62 M2 | BAALC     |
| TMSB4X. 5   | 9. 91E-67 | -0. 35784 | 1      | 0. 996 | 1. 48E-62 M2 | TMSB4X    |

|             |           |           |        |        |              |          |
|-------------|-----------|-----------|--------|--------|--------------|----------|
| PLP2. 4     | 1. 62E-66 | 0. 518748 | 0. 571 | 0. 328 | 2. 42E-62 M2 | PLP2     |
| PMP2. 5     | 1. 79E-66 | -1. 04658 | 0. 069 | 0. 37  | 2. 67E-62 M2 | PMP2     |
| LDHA. 3     | 2. 21E-66 | 0. 214393 | 0. 964 | 0. 752 | 3. 30E-62 M2 | LDHA     |
| SLC25A4. 5  | 2. 74E-66 | -0. 73219 | 0. 119 | 0. 448 | 4. 10E-62 M2 | SLC25A4  |
| GPR84. 5    | 3. 08E-66 | 0. 448984 | 0. 23  | 0. 062 | 4. 61E-62 M2 | GPR84    |
| CR1         | 3. 33E-66 | 0. 29606  | 0. 072 | 0. 006 | 4. 98E-62 M2 | CR1      |
| S100A6. 5   | 3. 89E-66 | 0. 220776 | 0. 894 | 0. 626 | 5. 81E-62 M2 | S100A6   |
| NFKBIA. 4   | 4. 04E-66 | 0. 48118  | 0. 718 | 0. 484 | 6. 04E-62 M2 | NFKBIA   |
| NUP214. 4   | 4. 70E-66 | 0. 649043 | 0. 405 | 0. 18  | 7. 03E-62 M2 | NUP214   |
| CRIP2. 3    | 5. 08E-66 | -0. 75726 | 0. 031 | 0. 334 | 7. 59E-62 M2 | CRIP2    |
| RAP1A. 5    | 5. 26E-66 | 0. 46746  | 0. 711 | 0. 502 | 7. 86E-62 M2 | RAP1A    |
| MYO1F. 5    | 5. 81E-66 | 0. 496368 | 0. 416 | 0. 167 | 8. 68E-62 M2 | MYO1F    |
| RENBP. 5    | 7. 91E-66 | 0. 518977 | 0. 335 | 0. 121 | 1. 18E-61 M2 | RENBP    |
| PTAFR. 5    | 8. 73E-66 | 0. 484608 | 0. 323 | 0. 111 | 1. 30E-61 M2 | PTAFR    |
| PTPRZ1. 5   | 1. 00E-65 | -0. 86125 | 0. 091 | 0. 405 | 1. 50E-61 M2 | PTPRZ1   |
| PODXL2. 5   | 1. 17E-65 | -0. 75001 | 0. 029 | 0. 328 | 1. 74E-61 M2 | PODXL2   |
| HLA-DQB1. 1 | 1. 96E-65 | 0. 432544 | 0. 631 | 0. 304 | 2. 92E-61 M2 | HLA-DQB1 |
| RNF181. 1   | 2. 75E-65 | 0. 430138 | 0. 731 | 0. 542 | 4. 12E-61 M2 | RNF181   |
| PTPRC. 5    | 3. 55E-65 | 0. 456924 | 0. 456 | 0. 185 | 5. 31E-61 M2 | PTPRC    |
| ITGB7. 3    | 5. 76E-65 | 0. 326943 | 0. 117 | 0. 019 | 8. 60E-61 M2 | ITGB7    |
| CYTH4. 5    | 6. 62E-65 | 0. 505317 | 0. 299 | 0. 099 | 9. 89E-61 M2 | CYTH4    |
| RAMP1. 4    | 1. 45E-64 | -1. 00956 | 0. 112 | 0. 433 | 2. 16E-60 M2 | RAMP1    |
| ATP6VOB. 5  | 2. 39E-64 | 0. 263693 | 0. 92  | 0. 789 | 3. 57E-60 M2 | ATP6VOB  |
| ACVRL1      | 2. 45E-64 | 0. 262112 | 0. 07  | 0. 006 | 3. 67E-60 M2 | ACVRL1   |
| TPP1. 5     | 2. 70E-64 | 0. 57457  | 0. 545 | 0. 307 | 4. 04E-60 M2 | TPP1     |
| CCR1. 4     | 6. 95E-64 | 0. 473782 | 0. 241 | 0. 07  | 1. 04E-59 M2 | CCR1     |
| FYN. 4      | 8. 77E-64 | -0. 74402 | 0. 047 | 0. 346 | 1. 31E-59 M2 | FYN      |
| LYN. 5      | 9. 19E-64 | 0. 535397 | 0. 387 | 0. 159 | 1. 37E-59 M2 | LYN      |
| SPCS3. 5    | 9. 44E-64 | 0. 612612 | 0. 533 | 0. 311 | 1. 41E-59 M2 | SPCS3    |
| CDH2. 4     | 1. 35E-63 | -0. 70475 | 0. 017 | 0. 303 | 2. 01E-59 M2 | CDH2     |
| TNFRSF14. 1 | 1. 39E-63 | 0. 489222 | 0. 298 | 0. 102 | 2. 07E-59 M2 | TNFRSF14 |
| ARHGAP30. 1 | 1. 78E-63 | 0. 445013 | 0. 266 | 0. 082 | 2. 66E-59 M2 | ARHGAP30 |
| C16orf45. 2 | 2. 81E-63 | -0. 71966 | 0. 041 | 0. 338 | 4. 19E-59 M2 | C16orf45 |
| CEBPB. 5    | 3. 71E-63 | 0. 506035 | 0. 655 | 0. 419 | 5. 55E-59 M2 | CEBPB    |
| DBN1. 5     | 3. 80E-63 | -0. 73679 | 0. 037 | 0. 331 | 5. 68E-59 M2 | DBN1     |
| HK3. 3      | 7. 67E-63 | 0. 327134 | 0. 115 | 0. 019 | 1. 15E-58 M2 | HK3      |
| SLC7A8. 1   | 7. 96E-63 | 0. 39156  | 0. 162 | 0. 035 | 1. 19E-58 M2 | SLC7A8   |
| IGFBP2. 4   | 8. 05E-63 | -0. 96871 | 0. 105 | 0. 393 | 1. 20E-58 M2 | IGFBP2   |
| KCNN4. 2    | 1. 19E-62 | 0. 327565 | 0. 135 | 0. 025 | 1. 77E-58 M2 | KCNN4    |
| MEG3. 4     | 1. 23E-62 | -0. 99681 | 0. 034 | 0. 324 | 1. 84E-58 M2 | MEG3     |
| SPP1. 3     | 2. 16E-62 | 0. 178419 | 0. 983 | 0. 844 | 3. 23E-58 M2 | SPP1     |
| DSE. 5      | 2. 81E-62 | 0. 488876 | 0. 333 | 0. 124 | 4. 21E-58 M2 | DSE      |
| TNFAIP3. 5  | 2. 96E-62 | 0. 540328 | 0. 372 | 0. 148 | 4. 42E-58 M2 | TNFAIP3  |
| MAFB. 4     | 4. 17E-62 | 0. 502905 | 0. 566 | 0. 296 | 6. 23E-58 M2 | MAFB     |
| SDCBP. 3    | 9. 38E-62 | 0. 282365 | 0. 867 | 0. 718 | 1. 40E-57 M2 | SDCBP    |
| SOD2. 3     | 9. 44E-62 | 0. 261216 | 0. 784 | 0. 518 | 1. 41E-57 M2 | SOD2     |
| RNF144B. 4  | 1. 09E-61 | 0. 473127 | 0. 271 | 0. 086 | 1. 63E-57 M2 | RNF144B  |
| FYB. 5      | 1. 21E-61 | 0. 468601 | 0. 475 | 0. 205 | 1. 81E-57 M2 | FYB      |
| MCL1. 5     | 1. 54E-61 | 0. 398668 | 0. 774 | 0. 586 | 2. 30E-57 M2 | MCL1     |
| CRYAB. 5    | 1. 58E-61 | -1. 07239 | 0. 204 | 0. 521 | 2. 37E-57 M2 | CRYAB    |
| NLRP1. 4    | 2. 00E-61 | -0. 72498 | 0. 06  | 0. 358 | 3. 00E-57 M2 | NLRP1    |

|            |           |           |        |        |              |         |
|------------|-----------|-----------|--------|--------|--------------|---------|
| LPXN. 5    | 4. 83E-61 | 0. 506904 | 0. 286 | 0. 098 | 7. 22E-57 M2 | LPXN    |
| DPYSL3. 4  | 1. 08E-60 | -0. 72338 | 0. 05  | 0. 341 | 1. 61E-56 M2 | DPYSL3  |
| EEF1B2. 4  | 1. 11E-60 | 0. 23866  | 0. 907 | 0. 767 | 1. 66E-56 M2 | EEF1B2  |
| PARVG. 5   | 1. 27E-60 | 0. 507425 | 0. 372 | 0. 147 | 1. 90E-56 M2 | PARVG   |
| GYPC. 5    | 1. 57E-60 | 0. 515174 | 0. 547 | 0. 293 | 2. 35E-56 M2 | GYPC    |
| GBGT1. 5   | 1. 61E-60 | 0. 445231 | 0. 172 | 0. 041 | 2. 40E-56 M2 | GBGT1   |
| GALM. 4    | 2. 16E-60 | 0. 580248 | 0. 301 | 0. 112 | 3. 22E-56 M2 | GALM    |
| ASAH1. 4   | 2. 32E-60 | 0. 330543 | 0. 799 | 0. 641 | 3. 47E-56 M2 | ASAH1   |
| ODF3B. 5   | 3. 37E-60 | 0. 511265 | 0. 255 | 0. 082 | 5. 03E-56 M2 | ODF3B   |
| KIF5C. 5   | 3. 86E-60 | -0. 70609 | 0. 014 | 0. 286 | 5. 76E-56 M2 | KIF5C   |
| MSI2. 3    | 4. 45E-60 | -0. 72593 | 0. 051 | 0. 341 | 6. 64E-56 M2 | MSI2    |
| CARD16. 3  | 1. 05E-59 | 0. 498654 | 0. 461 | 0. 213 | 1. 57E-55 M2 | CARD16  |
| DDR1. 4    | 1. 15E-59 | -0. 68592 | 0. 06  | 0. 351 | 1. 72E-55 M2 | DDR1    |
| IFNGR1. 5  | 1. 22E-59 | 0. 429715 | 0. 672 | 0. 42  | 1. 83E-55 M2 | IFNGR1  |
| TCF4. 5    | 1. 32E-59 | -0. 66718 | 0. 244 | 0. 543 | 1. 97E-55 M2 | TCF4    |
| LY96. 5    | 1. 33E-59 | 0. 529857 | 0. 432 | 0. 208 | 1. 99E-55 M2 | LY96    |
| BST2. 4    | 1. 96E-59 | 0. 345029 | 0. 782 | 0. 465 | 2. 93E-55 M2 | BST2    |
| SIGLEC1. 2 | 2. 11E-59 | 0. 391708 | 0. 123 | 0. 022 | 3. 16E-55 M2 | SIGLEC1 |
| APOBR. 4   | 2. 13E-59 | 0. 411987 | 0. 144 | 0. 03  | 3. 18E-55 M2 | APOBR   |
| MAPT. 5    | 2. 14E-59 | -0. 72378 | 0. 026 | 0. 303 | 3. 19E-55 M2 | MAPT    |
| TSPAN7. 3  | 4. 18E-59 | -0. 77303 | 0. 043 | 0. 329 | 6. 25E-55 M2 | TSPAN7  |
| TIMP1. 4   | 6. 19E-59 | 0. 155201 | 0. 89  | 0. 601 | 9. 26E-55 M2 | TIMP1   |
| FRMD4B. 5  | 1. 35E-58 | 0. 534381 | 0. 358 | 0. 145 | 2. 02E-54 M2 | FRMD4B  |
| ZNF331. 5  | 3. 18E-58 | 0. 521664 | 0. 55  | 0. 299 | 4. 76E-54 M2 | ZNF331  |
| MT3. 5     | 3. 39E-58 | -1. 00853 | 0. 221 | 0. 509 | 5. 07E-54 M2 | MT3     |
| MPEG1. 4   | 4. 29E-58 | 0. 388673 | 0. 153 | 0. 034 | 6. 42E-54 M2 | MPEG1   |
| SOX11. 4   | 4. 75E-58 | -0. 83204 | 0. 022 | 0. 29  | 7. 09E-54 M2 | SOX11   |
| C7orf55. 4 | 5. 83E-58 | -0. 66933 | 0. 133 | 0. 444 | 8. 71E-54 M2 | C7orf55 |
| HBEGF. 5   | 9. 59E-58 | 0. 571951 | 0. 43  | 0. 2   | 1. 43E-53 M2 | HBEGF   |
| TSPAN5. 5  | 1. 07E-57 | -0. 65488 | 0. 015 | 0. 28  | 1. 59E-53 M2 | TSPAN5  |
| SCG5. 4    | 1. 20E-57 | -0. 77943 | 0. 059 | 0. 347 | 1. 79E-53 M2 | SCG5    |
| IL13RA1. 5 | 1. 26E-57 | 0. 529675 | 0. 466 | 0. 234 | 1. 89E-53 M2 | IL13RA1 |
| PLXDC2. 5  | 1. 61E-57 | 0. 417691 | 0. 447 | 0. 192 | 2. 40E-53 M2 | PLXDC2  |
| CFL2. 4    | 1. 76E-57 | -0. 70584 | 0. 06  | 0. 347 | 2. 63E-53 M2 | CFL2    |
| FZD3. 2    | 2. 01E-57 | -0. 63924 | 0. 023 | 0. 294 | 3. 01E-53 M2 | FZD3    |
| GRB2. 5    | 2. 91E-57 | 0. 490387 | 0. 64  | 0. 469 | 4. 35E-53 M2 | GRB2    |
| SLAMF8. 5  | 3. 03E-57 | 0. 392519 | 0. 198 | 0. 054 | 4. 53E-53 M2 | SLAMF8  |
| GAP43. 5   | 3. 44E-57 | -0. 94674 | 0. 209 | 0. 485 | 5. 14E-53 M2 | GAP43   |
| CD52. 4    | 4. 53E-57 | 0. 444148 | 0. 175 | 0. 043 | 6. 78E-53 M2 | CD52    |
| SEZ6L2. 4  | 6. 13E-57 | -0. 69487 | 0. 026 | 0. 291 | 9. 16E-53 M2 | SEZ6L2  |
| LIPA. 5    | 6. 53E-57 | 0. 476024 | 0. 557 | 0. 318 | 9. 75E-53 M2 | LIPA    |
| CD40. 5    | 8. 94E-57 | 0. 409773 | 0. 204 | 0. 057 | 1. 34E-52 M2 | CD40    |
| ENAH. 4    | 9. 86E-57 | -0. 62901 | 0. 019 | 0. 281 | 1. 47E-52 M2 | ENAH    |
| ACP5. 4    | 1. 12E-56 | 0. 433223 | 0. 163 | 0. 039 | 1. 67E-52 M2 | ACP5    |
| LIMA1. 4   | 1. 17E-56 | -0. 69788 | 0. 06  | 0. 336 | 1. 74E-52 M2 | LIMA1   |
| ITM2C. 5   | 1. 17E-56 | -0. 70123 | 0. 132 | 0. 438 | 1. 75E-52 M2 | ITM2C   |
| ATAT1. 5   | 1. 55E-56 | -0. 66559 | 0. 036 | 0. 307 | 2. 32E-52 M2 | ATAT1   |
| ACTB. 5    | 1. 62E-56 | -0. 32395 | 0. 996 | 0. 992 | 2. 43E-52 M2 | ACTB    |
| ANAPC16. 3 | 2. 07E-56 | 0. 397769 | 0. 71  | 0. 512 | 3. 09E-52 M2 | ANAPC16 |
| CSRP2. 3   | 2. 11E-56 | -0. 93575 | 0. 045 | 0. 32  | 3. 15E-52 M2 | CSRP2   |
| SCG3. 5    | 2. 31E-56 | -0. 82451 | 0. 022 | 0. 284 | 3. 45E-52 M2 | SCG3    |



|            |           |           |        |        |              |           |
|------------|-----------|-----------|--------|--------|--------------|-----------|
| HEXA. 4    | 2. 69E-56 | 0. 50447  | 0. 589 | 0. 375 | 4. 02E-52 M2 | HEXA      |
| SLC22A17.  | 2. 77E-56 | -0. 64858 | 0. 032 | 0. 302 | 4. 14E-52 M2 | SLC22A17  |
| CENPV. 5   | 2. 95E-56 | -0. 68442 | 0. 014 | 0. 272 | 4. 41E-52 M2 | CENPV     |
| RASGEF1B.  | 5. 61E-56 | 0. 46243  | 0. 299 | 0. 108 | 8. 38E-52 M2 | RASGEF1B  |
| NPDC1. 4   | 8. 34E-56 | -0. 65533 | 0. 064 | 0. 342 | 1. 25E-51 M2 | NPDC1     |
| IL18. 5    | 1. 16E-55 | 0. 428096 | 0. 418 | 0. 177 | 1. 73E-51 M2 | IL18      |
| FURIN. 3   | 1. 58E-55 | 0. 551947 | 0. 206 | 0. 062 | 2. 36E-51 M2 | FURIN     |
| MUM1. 5    | 1. 91E-55 | -0. 60837 | 0. 091 | 0. 383 | 2. 86E-51 M2 | MUM1      |
| PSTPIP1. 4 | 2. 36E-55 | 0. 398602 | 0. 148 | 0. 033 | 3. 52E-51 M2 | PSTPIP1   |
| MAGEF1. 4  | 4. 97E-55 | -0. 58027 | 0. 091 | 0. 383 | 7. 43E-51 M2 | MAGEF1    |
| TRPV2. 5   | 8. 14E-55 | 0. 400447 | 0. 185 | 0. 05  | 1. 22E-50 M2 | TRPV2     |
| HEXB. 5    | 1. 12E-54 | 0. 509367 | 0. 591 | 0. 392 | 1. 67E-50 M2 | HEXB      |
| TSPAN4. 1  | 1. 16E-54 | 0. 655423 | 0. 356 | 0. 168 | 1. 74E-50 M2 | TSPAN4    |
| FAM229B. 4 | 1. 18E-54 | -0. 65986 | 0. 041 | 0. 31  | 1. 76E-50 M2 | FAM229B   |
| RBM47. 5   | 1. 25E-54 | 0. 50664  | 0. 282 | 0. 105 | 1. 86E-50 M2 | RBM47     |
| NES. 5     | 1. 32E-54 | -0. 8213  | 0. 037 | 0. 293 | 1. 97E-50 M2 | NES       |
| SYT11. 5   | 1. 60E-54 | -0. 63118 | 0. 112 | 0. 403 | 2. 38E-50 M2 | SYT11     |
| DOCK2. 5   | 1. 64E-54 | 0. 434719 | 0. 221 | 0. 067 | 2. 46E-50 M2 | DOCK2     |
| SCRG1. 4   | 1. 75E-54 | -0. 81251 | 0. 088 | 0. 364 | 2. 61E-50 M2 | SCRG1     |
| SOX9. 4    | 2. 56E-54 | -0. 7666  | 0. 034 | 0. 288 | 3. 82E-50 M2 | SOX9      |
| PPP1CA. 4  | 3. 14E-54 | 0. 365078 | 0. 728 | 0. 56  | 4. 70E-50 M2 | PPP1CA    |
| TNFSF15    | 4. 44E-54 | 0. 277411 | 0. 069 | 0. 008 | 6. 64E-50 M2 | TNFSF15   |
| PKM. 4     | 5. 25E-54 | 0. 182813 | 0. 94  | 0. 758 | 7. 84E-50 M2 | PKM       |
| IL1B. 5    | 5. 63E-54 | 0. 522045 | 0. 437 | 0. 206 | 8. 41E-50 M2 | IL1B      |
| SAMHD1. 5  | 5. 91E-54 | 0. 525615 | 0. 419 | 0. 2   | 8. 83E-50 M2 | SAMHD1    |
| CD320. 3   | 7. 96E-54 | -0. 61734 | 0. 061 | 0. 336 | 1. 19E-49 M2 | CD320     |
| MAP1LC3A.  | 1. 00E-53 | -0. 63893 | 0. 107 | 0. 383 | 1. 49E-49 M2 | MAP1LC3A  |
| DNER. 3    | 1. 39E-53 | -0. 77532 | 0. 038 | 0. 297 | 2. 07E-49 M2 | DNER      |
| TNFAIP8L2  | 1. 57E-53 | 0. 447339 | 0. 252 | 0. 083 | 2. 35E-49 M2 | TNFAIP8L2 |
| ENO1. 3    | 3. 91E-53 | 0. 187984 | 0. 948 | 0. 783 | 5. 84E-49 M2 | ENO1      |
| PCDH9. 3   | 7. 55E-53 | -0. 75023 | 0. 019 | 0. 272 | 1. 13E-48 M2 | PCDH9     |
| LRRFIP1. 5 | 9. 81E-53 | 0. 569209 | 0. 54  | 0. 34  | 1. 47E-48 M2 | LRRFIP1   |
| SRI. 5     | 1. 14E-52 | -0. 55955 | 0. 536 | 0. 743 | 1. 70E-48 M2 | SRI       |
| POLD4. 3   | 1. 94E-52 | 0. 434152 | 0. 623 | 0. 406 | 2. 90E-48 M2 | POLD4     |
| LMNA. 1    | 2. 24E-52 | 0. 483952 | 0. 594 | 0. 403 | 3. 35E-48 M2 | LMNA      |
| RUFY3. 4   | 2. 35E-52 | -0. 58173 | 0. 055 | 0. 323 | 3. 51E-48 M2 | RUFY3     |
| SLC6A6. 1  | 2. 73E-52 | 0. 421811 | 0. 19  | 0. 054 | 4. 07E-48 M2 | SLC6A6    |
| SNAI1. 4   | 3. 07E-52 | 0. 39648  | 0. 153 | 0. 037 | 4. 59E-48 M2 | SNAI1     |
| CASP4. 5   | 4. 15E-52 | 0. 514235 | 0. 429 | 0. 213 | 6. 20E-48 M2 | CASP4     |
| GSTA4. 4   | 4. 15E-52 | -0. 68783 | 0. 047 | 0. 307 | 6. 21E-48 M2 | GSTA4     |
| THY1. 4    | 4. 44E-52 | -0. 69262 | 0. 024 | 0. 272 | 6. 64E-48 M2 | THY1      |
| KLHDC8A. 5 | 5. 76E-52 | -0. 64903 | 0. 02  | 0. 267 | 8. 61E-48 M2 | KLHDC8A   |
| SPTBN1. 3  | 5. 95E-52 | -0. 57038 | 0. 033 | 0. 292 | 8. 89E-48 M2 | SPTBN1    |
| ANXA11. 5  | 1. 02E-51 | 0. 504361 | 0. 416 | 0. 202 | 1. 53E-47 M2 | ANXA11    |
| BLOC1S1. 2 | 1. 03E-51 | 0. 309344 | 0. 791 | 0. 638 | 1. 54E-47 M2 | BLOC1S1   |
| RCN2. 4    | 1. 04E-51 | -0. 58263 | 0. 209 | 0. 485 | 1. 55E-47 M2 | RCN2      |
| GPX3. 4    | 1. 08E-51 | 0. 601806 | 0. 327 | 0. 14  | 1. 61E-47 M2 | GPX3      |
| SCG2. 4    | 1. 17E-51 | -0. 79411 | 0. 032 | 0. 278 | 1. 75E-47 M2 | SCG2      |
| ATP6V1F. 3 | 1. 29E-51 | 0. 21889  | 0. 913 | 0. 793 | 1. 92E-47 M2 | ATP6V1F   |
| RAB42. 3   | 1. 37E-51 | 0. 404114 | 0. 16  | 0. 041 | 2. 05E-47 M2 | RAB42     |
| STMN4. 4   | 1. 80E-51 | -0. 94709 | 0. 066 | 0. 323 | 2. 69E-47 M2 | STMN4     |

|             |           |           |        |        |              |             |
|-------------|-----------|-----------|--------|--------|--------------|-------------|
| CNPY3. 5    | 1. 87E-51 | 0. 447035 | 0. 623 | 0. 397 | 2. 80E-47 M2 | CNPY3       |
| CADM4. 4    | 1. 96E-51 | -0. 59034 | 0. 029 | 0. 28  | 2. 93E-47 M2 | CADM4       |
| TMEM59L. 4  | 3. 04E-51 | -0. 58753 | 0. 026 | 0. 275 | 4. 55E-47 M2 | TMEM59L     |
| AC109826. 3 | 3. 15E-51 | 0. 356434 | 0. 135 | 0. 03  | 4. 70E-47 M2 | AC109826. 1 |
| MAGED1. 4   | 3. 21E-51 | -0. 61185 | 0. 088 | 0. 363 | 4. 80E-47 M2 | MAGED1      |
| TCEA2. 4    | 4. 59E-51 | -0. 60688 | 0. 111 | 0. 386 | 6. 86E-47 M2 | TCEA2       |
| SMCO4. 5    | 4. 64E-51 | 0. 488784 | 0. 304 | 0. 12  | 6. 93E-47 M2 | SMCO4       |
| TUBB2A. 4   | 5. 60E-51 | -0. 67921 | 0. 231 | 0. 495 | 8. 37E-47 M2 | TUBB2A      |
| CHD7. 5     | 6. 04E-51 | -0. 63375 | 0. 049 | 0. 306 | 9. 02E-47 M2 | CHD7        |
| LMO4. 5     | 6. 63E-51 | -0. 60918 | 0. 218 | 0. 496 | 9. 90E-47 M2 | LMO4        |
| OLFML2B. 4  | 8. 87E-51 | 0. 395872 | 0. 199 | 0. 059 | 1. 33E-46 M2 | OLFML2B     |
| PTPRS. 5    | 1. 08E-50 | -0. 63175 | 0. 027 | 0. 274 | 1. 61E-46 M2 | PTPRS       |
| P2RX4. 4    | 1. 08E-50 | 0. 503777 | 0. 359 | 0. 164 | 1. 62E-46 M2 | P2RX4       |
| CRMP1. 4    | 1. 47E-50 | -0. 70052 | 0. 034 | 0. 282 | 2. 20E-46 M2 | CRMP1       |
| PKIG. 5     | 1. 89E-50 | -0. 64241 | 0. 064 | 0. 328 | 2. 82E-46 M2 | PKIG        |
| TLR2. 5     | 2. 25E-50 | 0. 407708 | 0. 276 | 0. 099 | 3. 36E-46 M2 | TLR2        |
| KMO. 1      | 2. 57E-50 | 0. 306127 | 0. 088 | 0. 014 | 3. 84E-46 M2 | KMO         |
| RAB3IP. 3   | 2. 78E-50 | -0. 71781 | 0. 022 | 0. 262 | 4. 16E-46 M2 | RAB3IP      |
| LHFP. 5     | 4. 12E-50 | -0. 68251 | 0. 013 | 0. 247 | 6. 16E-46 M2 | LHFP        |
| NREP. 4     | 4. 77E-50 | -0. 61277 | 0. 04  | 0. 289 | 7. 13E-46 M2 | NREP        |
| VCAN. 3     | 8. 01E-50 | 0. 725164 | 0. 409 | 0. 234 | 1. 20E-45 M2 | VCAN        |
| FAM49B. 5   | 1. 05E-49 | 0. 403005 | 0. 678 | 0. 494 | 1. 57E-45 M2 | FAM49B      |
| STMN1. 4    | 1. 24E-49 | -0. 66491 | 0. 414 | 0. 646 | 1. 85E-45 M2 | STMN1       |
| PCBP4. 5    | 1. 27E-49 | -0. 5952  | 0. 029 | 0. 272 | 1. 90E-45 M2 | PCBP4       |
| CRIP1. 3    | 2. 23E-49 | 0. 417543 | 0. 138 | 0. 032 | 3. 33E-45 M2 | CRIP1       |
| PLXND1. 4   | 2. 63E-49 | 0. 498429 | 0. 244 | 0. 088 | 3. 93E-45 M2 | PLXND1      |
| SERPINE2. 3 | 3. 15E-49 | -0. 64754 | 0. 055 | 0. 31  | 4. 71E-45 M2 | SERPINE2    |
| BEX2. 4     | 3. 58E-49 | -0. 80387 | 0. 032 | 0. 273 | 5. 35E-45 M2 | BEX2        |
| PSIP1. 5    | 4. 46E-49 | -0. 59113 | 0. 128 | 0. 402 | 6. 66E-45 M2 | PSIP1       |
| SLC15A3. 4  | 5. 08E-49 | 0. 41428  | 0. 197 | 0. 06  | 7. 58E-45 M2 | SLC15A3     |
| SULT1A1. 3  | 5. 37E-49 | 0. 423518 | 0. 158 | 0. 042 | 8. 03E-45 M2 | SULT1A1     |
| ARHGAP4. 5  | 7. 39E-49 | 0. 434752 | 0. 278 | 0. 104 | 1. 10E-44 M2 | ARHGAP4     |
| PLEK2. 3    | 1. 01E-48 | 0. 281926 | 0. 101 | 0. 018 | 1. 50E-44 M2 | PLEK2       |
| S100A16. 4  | 1. 06E-48 | -0. 89938 | 0. 073 | 0. 324 | 1. 58E-44 M2 | S100A16     |
| BCAN. 5     | 1. 31E-48 | -0. 87331 | 0. 05  | 0. 292 | 1. 95E-44 M2 | BCAN        |
| RGCC. 4     | 1. 63E-48 | 0. 480496 | 0. 456 | 0. 235 | 2. 43E-44 M2 | RGCC        |
| MAP1A. 4    | 1. 63E-48 | -0. 61933 | 0. 014 | 0. 245 | 2. 44E-44 M2 | MAP1A       |
| PNMA1. 4    | 1. 75E-48 | -0. 55219 | 0. 051 | 0. 3   | 2. 61E-44 M2 | PNMA1       |
| PPP1R15A. 1 | 1. 79E-48 | 0. 432964 | 0. 659 | 0. 453 | 2. 67E-44 M2 | PPP1R15A    |
| PLEKH02. 5  | 2. 82E-48 | 0. 480524 | 0. 25  | 0. 092 | 4. 21E-44 M2 | PLEKH02     |
| UBE2D3. 4   | 3. 13E-48 | 0. 248566 | 0. 84  | 0. 72  | 4. 68E-44 M2 | UBE2D3      |
| ZNF385A. 5  | 5. 22E-48 | 0. 530523 | 0. 299 | 0. 125 | 7. 80E-44 M2 | ZNF385A     |
| TSPAN15. 4  | 6. 46E-48 | 0. 363824 | 0. 212 | 0. 068 | 9. 65E-44 M2 | TSPAN15     |
| TMEM98. 3   | 8. 02E-48 | -0. 62193 | 0. 019 | 0. 25  | 1. 20E-43 M2 | TMEM98      |
| TOM1. 5     | 8. 44E-48 | 0. 546844 | 0. 327 | 0. 148 | 1. 26E-43 M2 | TOM1        |
| EIF4EBP1. 8 | 6. 68E-48 | 0. 506525 | 0. 59  | 0. 415 | 1. 30E-43 M2 | EIF4EBP1    |
| GCSH. 5     | 9. 63E-48 | -0. 60175 | 0. 107 | 0. 364 | 1. 44E-43 M2 | GCSH        |
| TNS3. 4     | 9. 97E-48 | 0. 417572 | 0. 202 | 0. 064 | 1. 49E-43 M2 | TNS3        |
| TTYH1. 5    | 1. 01E-47 | -0. 80507 | 0. 047 | 0. 284 | 1. 51E-43 M2 | TTYH1       |
| GPI. 2      | 1. 07E-47 | 0. 525259 | 0. 53  | 0. 344 | 1. 61E-43 M2 | GPI         |
| BNIP3L. 3   | 1. 18E-47 | 0. 366    | 0. 738 | 0. 589 | 1. 77E-43 M2 | BNIP3L      |

|            |           |           |        |        |              |                 |
|------------|-----------|-----------|--------|--------|--------------|-----------------|
| PMP22. 4   | 1. 19E-47 | 0. 387938 | 0. 632 | 0. 413 | 1. 78E-43 M2 | PMP22           |
| PRAF2. 4   | 1. 32E-47 | -0. 52476 | 0. 063 | 0. 319 | 1. 98E-43 M2 | PRAF2           |
| EGFR. 4    | 1. 66E-47 | -0. 73606 | 0. 069 | 0. 317 | 2. 48E-43 M2 | EGFR            |
| PDK4. 4    | 1. 78E-47 | 0. 412954 | 0. 363 | 0. 156 | 2. 66E-43 M2 | PDK4            |
| RHOBTB3. 5 | 1. 90E-47 | -0. 60144 | 0. 16  | 0. 426 | 2. 83E-43 M2 | RHOBTB3         |
| DHRS3. 3   | 2. 12E-47 | 0. 488255 | 0. 351 | 0. 158 | 3. 17E-43 M2 | DHRS3           |
| OTOA. 3    | 2. 19E-47 | 0. 310953 | 0. 119 | 0. 025 | 3. 27E-43 M2 | OTOA            |
| HEY1. 4    | 3. 76E-47 | -0. 60204 | 0. 028 | 0. 262 | 5. 61E-43 M2 | HEY1            |
| RAB5C. 3   | 4. 12E-47 | 0. 297517 | 0. 769 | 0. 645 | 6. 15E-43 M2 | RAB5C           |
| HTATIP2. 5 | 4. 36E-47 | 0. 53717  | 0. 309 | 0. 135 | 6. 52E-43 M2 | HTATIP2         |
| SPINT1. 4  | 4. 76E-47 | 0. 303458 | 0. 123 | 0. 027 | 7. 11E-43 M2 | SPINT1          |
| CD55. 5    | 5. 99E-47 | 0. 39996  | 0. 281 | 0. 106 | 8. 95E-43 M2 | CD55            |
| IP6K2. 4   | 6. 32E-47 | -0. 58203 | 0. 172 | 0. 453 | 9. 44E-43 M2 | IP6K2           |
| HES6. 4    | 6. 36E-47 | -0. 74107 | 0. 059 | 0. 302 | 9. 51E-43 M2 | HES6            |
| CD164. 4   | 8. 38E-47 | 0. 397689 | 0. 651 | 0. 479 | 1. 25E-42 M2 | CD164           |
| ZFP36. 3   | 8. 62E-47 | 0. 238693 | 0. 851 | 0. 553 | 1. 29E-42 M2 | ZFP36           |
| AVPI1. 5   | 9. 94E-47 | 0. 488639 | 0. 234 | 0. 084 | 1. 48E-42 M2 | AVPI1           |
| POU3F2. 4  | 1. 00E-46 | -0. 60607 | 0. 011 | 0. 231 | 1. 50E-42 M2 | POU3F2          |
| HPS1. 4    | 1. 03E-46 | 0. 413588 | 0. 267 | 0. 099 | 1. 54E-42 M2 | HPS1            |
| NBEAL1. 3  | 1. 09E-46 | 0. 261384 | 0. 844 | 0. 652 | 1. 63E-42 M2 | NBEAL1          |
| TNFRSF11A  | 1. 34E-46 | 0. 310108 | 0. 101 | 0. 019 | 2. 00E-42 M2 | TNFRSF11A       |
| TTL7. 5    | 1. 46E-46 | -0. 56238 | 0. 022 | 0. 253 | 2. 18E-42 M2 | TTL7            |
| GPR34. 5   | 1. 69E-46 | 0. 337073 | 0. 515 | 0. 249 | 2. 52E-42 M2 | GPR34           |
| LCP2. 5    | 1. 75E-46 | 0. 450386 | 0. 272 | 0. 103 | 2. 61E-42 M2 | LCP2            |
| RP11-1008  | 1. 84E-46 | 0. 174315 | 0. 045 | 0. 003 | 2. 74E-42 M2 | RP11-1008C21. 1 |
| SIGLEC10.  | 1. 85E-46 | 0. 412111 | 0. 35  | 0. 148 | 2. 77E-42 M2 | SIGLEC10        |
| IL1R2. 3   | 1. 99E-46 | 0. 473492 | 0. 111 | 0. 023 | 2. 97E-42 M2 | IL1R2           |
| MERTK. 4   | 2. 04E-46 | 0. 454839 | 0. 285 | 0. 113 | 3. 05E-42 M2 | MERTK           |
| ACTR2. 5   | 2. 08E-46 | 0. 4438   | 0. 605 | 0. 448 | 3. 11E-42 M2 | ACTR2           |
| GPC1. 4    | 2. 09E-46 | -0. 68072 | 0. 027 | 0. 252 | 3. 13E-42 M2 | GPC1            |
| RIC3. 3    | 2. 52E-46 | -0. 67542 | 0. 02  | 0. 246 | 3. 77E-42 M2 | RIC3            |
| TRIM2. 3   | 2. 61E-46 | -0. 54988 | 0. 015 | 0. 238 | 3. 90E-42 M2 | TRIM2           |
| METRN. 5   | 2. 85E-46 | -0. 65178 | 0. 069 | 0. 31  | 4. 26E-42 M2 | METRN           |
| NRCAM. 4   | 3. 01E-46 | -0. 54564 | 0. 045 | 0. 286 | 4. 50E-42 M2 | NRCAM           |
| APP. 4     | 4. 03E-46 | -0. 56007 | 0. 281 | 0. 542 | 6. 02E-42 M2 | APP             |
| AREG. 5    | 4. 13E-46 | 0. 415311 | 0. 188 | 0. 056 | 6. 17E-42 M2 | AREG            |
| FLT1. 3    | 4. 71E-46 | 0. 297297 | 0. 088 | 0. 015 | 7. 03E-42 M2 | FLT1            |
| ETV1. 5    | 5. 46E-46 | -0. 64482 | 0. 031 | 0. 26  | 8. 16E-42 M2 | ETV1            |
| DSEL. 5    | 5. 81E-46 | -0. 56941 | 0. 017 | 0. 24  | 8. 69E-42 M2 | DSEL            |
| ZFP36L1. 2 | 5. 97E-46 | 0. 304612 | 0. 757 | 0. 545 | 8. 92E-42 M2 | ZFP36L1         |
| FNDC3B. 2  | 6. 78E-46 | 0. 568299 | 0. 331 | 0. 162 | 1. 01E-41 M2 | FNDC3B          |
| LGMN. 4    | 7. 45E-46 | 0. 455732 | 0. 536 | 0. 338 | 1. 11E-41 M2 | LGMN            |
| PSRC1. 3   | 7. 50E-46 | -0. 63599 | 0. 043 | 0. 28  | 1. 12E-41 M2 | PSRC1           |
| PYGL. 4    | 9. 29E-46 | 0. 489847 | 0. 368 | 0. 18  | 1. 39E-41 M2 | PYGL            |
| SV2A. 3    | 1. 24E-45 | -0. 48779 | 0. 004 | 0. 216 | 1. 86E-41 M2 | SV2A            |
| TMEM161B-  | 1. 63E-45 | -0. 64647 | 0. 064 | 0. 305 | 2. 44E-41 M2 | TMEM161B-AS1    |
| NLRP3. 5   | 2. 27E-45 | 0. 397686 | 0. 227 | 0. 077 | 3. 39E-41 M2 | NLRP3           |
| PBX1. 4    | 2. 42E-45 | -0. 52262 | 0. 011 | 0. 229 | 3. 62E-41 M2 | PBX1            |
| AP000695.  | 3. 15E-45 | 0. 173101 | 0. 038 | 0. 002 | 4. 70E-41 M2 | AP000695. 4     |
| GRIA2. 4   | 4. 30E-45 | -0. 56331 | 0. 01  | 0. 226 | 6. 42E-41 M2 | GRIA2           |
| ABLIM3     | 5. 74E-45 | 0. 306875 | 0. 077 | 0. 012 | 8. 58E-41 M2 | ABLIM3          |

|             |           |           |        |        |              |               |
|-------------|-----------|-----------|--------|--------|--------------|---------------|
| APBA2. 5    | 6. 10E-45 | -0. 51984 | 0. 008 | 0. 221 | 9. 11E-41 M2 | APBA2         |
| ID4. 4      | 6. 68E-45 | -0. 68639 | 0. 015 | 0. 23  | 9. 98E-41 M2 | ID4           |
| DSC2. 4     | 6. 71E-45 | 0. 289924 | 0. 119 | 0. 026 | 1. 00E-40 M2 | DSC2          |
| TTC3. 4     | 7. 28E-45 | -0. 53499 | 0. 281 | 0. 533 | 1. 09E-40 M2 | TTC3          |
| ABL2. 5     | 7. 99E-45 | 0. 562067 | 0. 447 | 0. 255 | 1. 19E-40 M2 | ABL2          |
| ICAM1. 4    | 1. 18E-44 | 0. 493359 | 0. 335 | 0. 152 | 1. 76E-40 M2 | ICAM1         |
| ADSSL1. 2   | 1. 20E-44 | 0. 545599 | 0. 204 | 0. 072 | 1. 80E-40 M2 | ADSSL1        |
| FCGR1B. 4   | 1. 22E-44 | 0. 408875 | 0. 347 | 0. 15  | 1. 82E-40 M2 | FCGR1B        |
| TERF2IP. 5  | 1. 47E-44 | -0. 54165 | 0. 276 | 0. 535 | 2. 20E-40 M2 | TERF2IP       |
| TRAF4. 4    | 1. 89E-44 | -0. 54449 | 0. 05  | 0. 285 | 2. 82E-40 M2 | TRAF4         |
| LACTB. 5    | 2. 83E-44 | 0. 506028 | 0. 33  | 0. 154 | 4. 23E-40 M2 | LACTB         |
| FOSB. 4     | 3. 11E-44 | 0. 424655 | 0. 607 | 0. 376 | 4. 65E-40 M2 | FOSB          |
| RP11-553L   | 3. 15E-44 | -0. 51342 | 0. 022 | 0. 241 | 4. 71E-40 M2 | RP11-553L6. 5 |
| POMC. 5     | 3. 94E-44 | 0. 398321 | 0. 148 | 0. 04  | 5. 89E-40 M2 | POMC          |
| SPARC. 4    | 4. 25E-44 | -0. 79875 | 0. 152 | 0. 401 | 6. 35E-40 M2 | SPARC         |
| MT1H        | 5. 62E-44 | 0. 390622 | 0. 087 | 0. 015 | 8. 39E-40 M2 | MT1H          |
| EEF1D. 5    | 6. 27E-44 | 0. 176014 | 0. 971 | 0. 836 | 9. 36E-40 M2 | EEF1D         |
| ARPC5. 4    | 6. 58E-44 | 0. 253182 | 0. 78  | 0. 665 | 9. 83E-40 M2 | ARPC5         |
| BATF. 2     | 8. 13E-44 | 0. 312947 | 0. 13  | 0. 032 | 1. 22E-39 M2 | BATF          |
| DKK3. 3     | 8. 34E-44 | -0. 5101  | 0. 006 | 0. 213 | 1. 25E-39 M2 | DKK3          |
| FGL2. 5     | 1. 10E-43 | 0. 445264 | 0. 361 | 0. 163 | 1. 64E-39 M2 | FGL2          |
| FKBP10. 5   | 1. 30E-43 | -0. 53492 | 0. 014 | 0. 226 | 1. 94E-39 M2 | FKBP10        |
| HK2. 3      | 1. 36E-43 | 0. 530475 | 0. 211 | 0. 076 | 2. 04E-39 M2 | HK2           |
| FAM20A. 4   | 1. 46E-43 | 0. 402241 | 0. 172 | 0. 051 | 2. 19E-39 M2 | FAM20A        |
| PPP2R2B. 4  | 1. 55E-43 | -0. 58853 | 0. 018 | 0. 233 | 2. 31E-39 M2 | PPP2R2B       |
| HOPX. 4     | 2. 31E-43 | -0. 97401 | 0. 077 | 0. 297 | 3. 45E-39 M2 | HOPX          |
| ZNF428. 5   | 2. 51E-43 | -0. 4941  | 0. 326 | 0. 56  | 3. 75E-39 M2 | ZNF428        |
| DCX. 5      | 2. 79E-43 | -0. 67946 | 0. 011 | 0. 218 | 4. 16E-39 M2 | DCX           |
| BOD1. 4     | 3. 01E-43 | -0. 4826  | 0. 074 | 0. 319 | 4. 50E-39 M2 | BOD1          |
| TRIB2. 5    | 3. 34E-43 | -0. 53472 | 0. 047 | 0. 278 | 4. 99E-39 M2 | TRIB2         |
| FAM181B. 5  | 3. 56E-43 | -0. 58879 | 0. 01  | 0. 217 | 5. 31E-39 M2 | FAM181B       |
| CTTN. 4     | 3. 62E-43 | -0. 50753 | 0. 026 | 0. 244 | 5. 41E-39 M2 | CTTN          |
| SLAIN1. 5   | 4. 16E-43 | -0. 60757 | 0. 01  | 0. 217 | 6. 22E-39 M2 | SLAIN1        |
| TNFAIP2. 3  | 4. 56E-43 | 0. 369517 | 0. 199 | 0. 066 | 6. 82E-39 M2 | TNFAIP2       |
| HIST1H4C. 6 | 7. 2E-43  | -0. 57966 | 0. 184 | 0. 442 | 1. 00E-38 M2 | HIST1H4C      |
| APOE. 4     | 1. 02E-42 | 0. 289705 | 0. 831 | 0. 675 | 1. 52E-38 M2 | APOE          |
| HEPN1. 4    | 1. 13E-42 | -0. 66352 | 0. 011 | 0. 218 | 1. 69E-38 M2 | HEPN1         |
| MAGEH1. 4   | 1. 34E-42 | -0. 53724 | 0. 087 | 0. 334 | 2. 01E-38 M2 | MAGEH1        |
| REEP2. 3    | 1. 53E-42 | -0. 45249 | 0. 01  | 0. 216 | 2. 29E-38 M2 | REEP2         |
| APRT. 3     | 1. 71E-42 | 0. 342566 | 0. 687 | 0. 52  | 2. 56E-38 M2 | APRT          |
| SSR4. 2     | 2. 11E-42 | 0. 202593 | 0. 872 | 0. 755 | 3. 15E-38 M2 | SSR4          |
| TRAPPC1. 1  | 2. 46E-42 | 0. 287006 | 0. 751 | 0. 606 | 3. 67E-38 M2 | TRAPPC1       |
| OCIAD2. 4   | 2. 54E-42 | -0. 86342 | 0. 162 | 0. 403 | 3. 79E-38 M2 | OCIAD2        |
| SPAG16. 5   | 3. 15E-42 | -0. 54182 | 0. 073 | 0. 312 | 4. 70E-38 M2 | SPAG16        |
| CD01. 5     | 3. 21E-42 | -0. 59644 | 0. 031 | 0. 249 | 4. 79E-38 M2 | CD01          |
| IL10RB-AS   | 3. 27E-42 | 0. 334582 | 0. 142 | 0. 038 | 4. 89E-38 M2 | IL10RB-AS1    |
| MRO. 1      | 4. 28E-42 | 0. 322117 | 0. 087 | 0. 016 | 6. 40E-38 M2 | MRO           |
| GNAI2. 5    | 4. 45E-42 | 0. 417804 | 0. 619 | 0. 473 | 6. 64E-38 M2 | GNAI2         |
| RBFOX2. 4   | 4. 62E-42 | -0. 53111 | 0. 02  | 0. 23  | 6. 90E-38 M2 | RBFOX2        |
| PHF14. 4    | 5. 82E-42 | -0. 52124 | 0. 181 | 0. 44  | 8. 70E-38 M2 | PHF14         |
| PRDM1. 5    | 5. 86E-42 | 0. 387927 | 0. 241 | 0. 09  | 8. 76E-38 M2 | PRDM1         |

|            |          |          |       |       |             |           |
|------------|----------|----------|-------|-------|-------------|-----------|
| MAPK10.4   | 6.41E-42 | -0.52537 | 0.008 | 0.208 | 9.59E-38 M2 | MAPK10    |
| CHN1.4     | 6.48E-42 | -0.46299 | 0.02  | 0.23  | 9.69E-38 M2 | CHN1      |
| DTX3.2     | 6.79E-42 | -0.61211 | 0.047 | 0.27  | 1.01E-37 M2 | DTX3      |
| HIF1A-AS2  | 7.01E-42 | 0.197585 | 0.047 | 0.004 | 1.05E-37 M2 | HIF1A-AS2 |
| ODC1.4     | 7.30E-42 | -0.54819 | 0.163 | 0.41  | 1.09E-37 M2 | ODC1      |
| CCND2.5    | 7.73E-42 | -0.59041 | 0.101 | 0.343 | 1.15E-37 M2 | CCND2     |
| CMTM7.5    | 7.99E-42 | 0.444044 | 0.333 | 0.152 | 1.19E-37 M2 | CMTM7     |
| EREG.1     | 8.64E-42 | 0.38496  | 0.097 | 0.02  | 1.29E-37 M2 | EREG      |
| MYO6.3     | 9.17E-42 | -0.52361 | 0.027 | 0.239 | 1.37E-37 M2 | MYO6      |
| B4GALT1.5  | 9.20E-42 | 0.461988 | 0.268 | 0.11  | 1.37E-37 M2 | B4GALT1   |
| ERP44.3    | 1.07E-41 | 0.433533 | 0.562 | 0.384 | 1.60E-37 M2 | ERP44     |
| PCDH17.3   | 1.58E-41 | -0.50504 | 0.006 | 0.205 | 2.37E-37 M2 | PCDH17    |
| ACTG1.5    | 1.65E-41 | -0.29657 | 0.972 | 0.947 | 2.46E-37 M2 | ACTG1     |
| TES.5      | 1.65E-41 | 0.323134 | 0.144 | 0.039 | 2.47E-37 M2 | TES       |
| ARL6IP4.5  | 2.00E-41 | 0.315933 | 0.743 | 0.616 | 2.99E-37 M2 | ARL6IP4   |
| LUC7L3.3   | 2.31E-41 | -0.50645 | 0.263 | 0.528 | 3.45E-37 M2 | LUC7L3    |
| SLC43A3    | 2.84E-41 | 0.507476 | 0.285 | 0.127 | 4.25E-37 M2 | SLC43A3   |
| KHDRBS3.5  | 2.84E-41 | -0.51999 | 0.022 | 0.229 | 4.25E-37 M2 | KHDRBS3   |
| ITGAX.5    | 2.92E-41 | 0.36788  | 0.226 | 0.081 | 4.37E-37 M2 | ITGAX     |
| FIBIN.4    | 3.03E-41 | -0.61509 | 0.029 | 0.241 | 4.53E-37 M2 | FIBIN     |
| ARHGAP9.5  | 3.21E-41 | 0.367262 | 0.217 | 0.077 | 4.80E-37 M2 | ARHGAP9   |
| CDKN1A.4   | 3.65E-41 | 0.42195  | 0.506 | 0.293 | 5.46E-37 M2 | CDKN1A    |
| RBP4       | 3.71E-41 | 0.245814 | 0.07  | 0.011 | 5.54E-37 M2 | RBP4      |
| COL6A1.4   | 3.94E-41 | -0.58443 | 0.032 | 0.243 | 5.90E-37 M2 | COL6A1    |
| DST.4      | 5.17E-41 | -0.53798 | 0.148 | 0.393 | 7.72E-37 M2 | DST       |
| NRP1.4     | 6.91E-41 | 0.508465 | 0.317 | 0.155 | 1.03E-36 M2 | NRP1      |
| AGPAT2.5   | 8.63E-41 | 0.51685  | 0.335 | 0.168 | 1.29E-36 M2 | AGPAT2    |
| TALDO1.5   | 8.94E-41 | 0.30475  | 0.711 | 0.589 | 1.34E-36 M2 | TALDO1    |
| NRN1.3     | 9.49E-41 | -0.63012 | 0.047 | 0.268 | 1.42E-36 M2 | NRN1      |
| CADM2.4    | 1.07E-40 | -0.58896 | 0.006 | 0.201 | 1.60E-36 M2 | CADM2     |
| PLEKHB1.3  | 1.07E-40 | -0.65175 | 0.022 | 0.227 | 1.60E-36 M2 | PLEKHB1   |
| TRIM9.4    | 1.29E-40 | -0.49095 | 0.033 | 0.247 | 1.93E-36 M2 | TRIM9     |
| IL10RB.5   | 1.76E-40 | 0.521403 | 0.407 | 0.232 | 2.64E-36 M2 | IL10RB    |
| CAP1.4     | 1.82E-40 | 0.300784 | 0.709 | 0.584 | 2.72E-36 M2 | CAP1      |
| USP11.4    | 2.02E-40 | -0.51628 | 0.119 | 0.369 | 3.02E-36 M2 | USP11     |
| SOCS3.4    | 2.15E-40 | 0.470293 | 0.529 | 0.335 | 3.22E-36 M2 | SOCS3     |
| MINOS1.3   | 2.29E-40 | 0.252641 | 0.757 | 0.631 | 3.42E-36 M2 | MINOS1    |
| PIK3AP1.5  | 2.35E-40 | 0.345911 | 0.178 | 0.056 | 3.50E-36 M2 | PIK3AP1   |
| C12orf57.2 | 2.44E-40 | -0.499   | 0.276 | 0.555 | 3.65E-36 M2 | C12orf57  |
| IRF8.5     | 2.49E-40 | 0.360864 | 0.335 | 0.146 | 3.73E-36 M2 | IRF8      |
| EPN2.5     | 2.51E-40 | -0.48746 | 0.038 | 0.251 | 3.75E-36 M2 | EPN2      |
| SEMA6A.4   | 2.60E-40 | -0.44003 | 0.014 | 0.213 | 3.89E-36 M2 | SEMA6A    |
| LAT2.5     | 2.63E-40 | 0.352419 | 0.4   | 0.189 | 3.92E-36 M2 | LAT2      |
| ARL11.4    | 3.23E-40 | 0.312488 | 0.128 | 0.033 | 4.82E-36 M2 | ARL11     |
| PLEC.3     | 3.63E-40 | 0.572538 | 0.34  | 0.176 | 5.42E-36 M2 | PLEC      |
| TNFAIP8.4  | 3.99E-40 | 0.328305 | 0.186 | 0.061 | 5.96E-36 M2 | TNFAIP8   |
| ASCL1.4    | 4.01E-40 | -0.61739 | 0.006 | 0.198 | 5.99E-36 M2 | ASCL1     |
| ATP1B3.5   | 4.31E-40 | 0.370248 | 0.67  | 0.536 | 6.44E-36 M2 | ATP1B3    |
| OSM.5      | 4.50E-40 | 0.435752 | 0.308 | 0.134 | 6.72E-36 M2 | OSM       |
| RGS19.5    | 4.79E-40 | 0.447093 | 0.453 | 0.263 | 7.15E-36 M2 | RGS19     |
| SPAG4.2    | 5.20E-40 | 0.402485 | 0.143 | 0.041 | 7.77E-36 M2 | SPAG4     |

|             |           |           |        |        |           |    |                |
|-------------|-----------|-----------|--------|--------|-----------|----|----------------|
| WIPF1. 5    | 6. 02E-40 | 0. 461103 | 0. 387 | 0. 208 | 9. 00E-36 | M2 | WIPF1          |
| TMEM219. 4  | 7. 75E-40 | 0. 321781 | 0. 692 | 0. 551 | 1. 16E-35 | M2 | TMEM219        |
| ANKH. 4     | 7. 85E-40 | 0. 506382 | 0. 298 | 0. 138 | 1. 17E-35 | M2 | ANKH           |
| ST8SIA4. 5  | 8. 34E-40 | 0. 445288 | 0. 262 | 0. 109 | 1. 25E-35 | M2 | ST8SIA4        |
| MAGI1. 5    | 8. 48E-40 | -0. 52438 | 0. 014 | 0. 21  | 1. 27E-35 | M2 | MAGI1          |
| PGM2L1. 4   | 9. 11E-40 | -0. 55101 | 0. 054 | 0. 27  | 1. 36E-35 | M2 | PGM2L1         |
| PHYHIPL. 3  | 9. 99E-40 | -0. 61891 | 0. 006 | 0. 198 | 1. 49E-35 | M2 | PHYHIPL        |
| GSTM3. 3    | 1. 05E-39 | -0. 55822 | 0. 061 | 0. 283 | 1. 57E-35 | M2 | GSTM3          |
| PPIF. 5     | 1. 20E-39 | 0. 501318 | 0. 383 | 0. 209 | 1. 79E-35 | M2 | PPIF           |
| SFT2D1. 5   | 1. 21E-39 | 0. 342592 | 0. 636 | 0. 492 | 1. 80E-35 | M2 | SFT2D1         |
| SPATS2. 3   | 1. 30E-39 | -0. 45064 | 0. 052 | 0. 273 | 1. 95E-35 | M2 | SPATS2         |
| NEAT1. 3    | 1. 30E-39 | 0. 224854 | 0. 958 | 0. 749 | 1. 95E-35 | M2 | NEAT1          |
| IFNGR2. 5   | 1. 51E-39 | 0. 458707 | 0. 534 | 0. 379 | 2. 25E-35 | M2 | IFNGR2         |
| IGFBP5. 5   | 1. 52E-39 | -0. 89405 | 0. 066 | 0. 283 | 2. 27E-35 | M2 | IGFBP5         |
| KCNQ2. 4    | 1. 61E-39 | -0. 5178  | 0. 027 | 0. 228 | 2. 41E-35 | M2 | KCNQ2          |
| LHFPL2. 4   | 1. 95E-39 | 0. 486519 | 0. 317 | 0. 149 | 2. 92E-35 | M2 | LHFPL2         |
| CTB-61M7. 2 | 2. 03E-39 | 0. 348968 | 0. 125 | 0. 032 | 3. 03E-35 | M2 | CTB-61M7. 2    |
| LTBR. 5     | 2. 42E-39 | 0. 412752 | 0. 227 | 0. 086 | 3. 61E-35 | M2 | LTBR           |
| PLS3. 4     | 2. 46E-39 | -0. 50498 | 0. 028 | 0. 235 | 3. 68E-35 | M2 | PLS3           |
| PSMB10. 5   | 2. 98E-39 | 0. 480688 | 0. 427 | 0. 243 | 4. 45E-35 | M2 | PSMB10         |
| C2. 3       | 3. 15E-39 | 0. 431218 | 0. 257 | 0. 105 | 4. 70E-35 | M2 | C2             |
| ANXA5. 3    | 3. 32E-39 | 0. 183978 | 0. 876 | 0. 716 | 4. 95E-35 | M2 | ANXA5          |
| PLAU. 5     | 3. 58E-39 | 0. 542045 | 0. 314 | 0. 152 | 5. 36E-35 | M2 | PLAU           |
| LARP6. 4    | 4. 38E-39 | -0. 51403 | 0. 013 | 0. 206 | 6. 55E-35 | M2 | LARP6          |
| LRP1. 2     | 5. 37E-39 | 0. 520042 | 0. 504 | 0. 339 | 8. 02E-35 | M2 | LRP1           |
| MAPK8IP1. 6 | 6. 41E-39 | -0. 47583 | 0. 011 | 0. 204 | 9. 57E-35 | M2 | MAPK8IP1       |
| PNP. 3      | 6. 77E-39 | 0. 470184 | 0. 234 | 0. 094 | 1. 01E-34 | M2 | PNP            |
| SLC39A8. 4  | 7. 39E-39 | 0. 368291 | 0. 162 | 0. 051 | 1. 11E-34 | M2 | SLC39A8        |
| AP1B1. 5    | 7. 89E-39 | 0. 50646  | 0. 428 | 0. 247 | 1. 18E-34 | M2 | AP1B1          |
| PLBD1. 5    | 8. 06E-39 | 0. 371968 | 0. 226 | 0. 085 | 1. 20E-34 | M2 | PLBD1          |
| MANBAL. 5   | 8. 78E-39 | -0. 47872 | 0. 11  | 0. 351 | 1. 31E-34 | M2 | MANBAL         |
| THRA. 3     | 9. 61E-39 | -0. 5317  | 0. 045 | 0. 253 | 1. 44E-34 | M2 | THRA           |
| GPRC5B. 3   | 1. 08E-38 | -0. 48444 | 0. 028 | 0. 232 | 1. 61E-34 | M2 | GPRC5B         |
| UBE2E3. 4   | 1. 09E-38 | -0. 48321 | 0. 227 | 0. 477 | 1. 63E-34 | M2 | UBE2E3         |
| FBXO21. 3   | 1. 48E-38 | -0. 5171  | 0. 096 | 0. 323 | 2. 21E-34 | M2 | FBXO21         |
| LILRA5. 1   | 1. 56E-38 | 0. 196993 | 0. 063 | 0. 009 | 2. 33E-34 | M2 | LILRA5         |
| DCLK2. 5    | 1. 68E-38 | -0. 47475 | 0. 017 | 0. 209 | 2. 51E-34 | M2 | DCLK2          |
| FOSL2. 5    | 1. 75E-38 | 0. 549288 | 0. 338 | 0. 175 | 2. 62E-34 | M2 | FOSL2          |
| HSP90B1. 2  | 1. 86E-38 | 0. 257266 | 0. 77  | 0. 65  | 2. 78E-34 | M2 | HSP90B1        |
| SOX8. 5     | 2. 26E-38 | -0. 55956 | 0. 005 | 0. 189 | 3. 38E-34 | M2 | SOX8           |
| MAP9. 3     | 2. 29E-38 | -0. 43716 | 0. 011 | 0. 201 | 3. 42E-34 | M2 | MAP9           |
| FNDC4. 3    | 2. 48E-38 | -0. 43679 | 0. 018 | 0. 211 | 3. 71E-34 | M2 | FNDC4          |
| PAFAH1B3. 2 | 2. 59E-38 | -0. 49803 | 0. 186 | 0. 441 | 3. 87E-34 | M2 | PAFAH1B3       |
| OLIG1. 5    | 2. 71E-38 | -0. 74067 | 0. 008 | 0. 192 | 4. 05E-34 | M2 | OLIG1          |
| RP11-556E   | 2. 86E-38 | 0. 323027 | 0. 157 | 0. 048 | 4. 27E-34 | M2 | RP11-556E13. 1 |
| FPR2. 3     | 4. 01E-38 | 0. 266071 | 0. 079 | 0. 014 | 5. 99E-34 | M2 | FPR2           |
| KCTD12. 5   | 4. 26E-38 | 0. 416187 | 0. 41  | 0. 224 | 6. 36E-34 | M2 | KCTD12         |
| IFI27L2. 2  | 4. 29E-38 | 0. 368528 | 0. 636 | 0. 459 | 6. 41E-34 | M2 | IFI27L2        |
| SPECC1. 5   | 4. 29E-38 | -0. 4642  | 0. 086 | 0. 311 | 6. 42E-34 | M2 | SPECC1         |
| PSAT1. 4    | 4. 57E-38 | -0. 55929 | 0. 022 | 0. 216 | 6. 83E-34 | M2 | PSAT1          |
| AC147651. 4 | 4. 72E-38 | 0. 344804 | 0. 119 | 0. 03  | 7. 05E-34 | M2 | AC147651. 4    |

|             |           |           |        |        |              |                |
|-------------|-----------|-----------|--------|--------|--------------|----------------|
| SQLE. 3     | 4. 90E-38 | -0. 45162 | 0. 05  | 0. 263 | 7. 32E-34 M2 | SQLE           |
| TMEM54. 3   | 5. 05E-38 | -0. 42654 | 0. 017 | 0. 208 | 7. 55E-34 M2 | TMEM54         |
| RHOH. 5     | 5. 06E-38 | 0. 315105 | 0. 198 | 0. 068 | 7. 56E-34 M2 | RHOH           |
| ARPC4. 5    | 5. 28E-38 | 0. 362227 | 0. 632 | 0. 505 | 7. 89E-34 M2 | ARPC4          |
| SUM03. 5    | 5. 59E-38 | 0. 411259 | 0. 581 | 0. 429 | 8. 35E-34 M2 | SUM03          |
| PTOV1. 4    | 6. 01E-38 | -0. 47919 | 0. 209 | 0. 455 | 8. 99E-34 M2 | PTOV1          |
| SIRPA. 5    | 6. 69E-38 | 0. 501544 | 0. 401 | 0. 232 | 9. 99E-34 M2 | SIRPA          |
| SASH3. 5    | 6. 83E-38 | 0. 359247 | 0. 198 | 0. 07  | 1. 02E-33 M2 | SASH3          |
| IQGAP1. 5   | 6. 90E-38 | 0. 507314 | 0. 404 | 0. 242 | 1. 03E-33 M2 | IQGAP1         |
| PDIA3. 5    | 6. 93E-38 | 0. 32006  | 0. 69  | 0. 575 | 1. 04E-33 M2 | PDIA3          |
| PFDN5. 3    | 7. 25E-38 | 0. 132865 | 0. 98  | 0. 877 | 1. 08E-33 M2 | PFDN5          |
| PRRX1. 5    | 7. 94E-38 | -0. 47136 | 0. 003 | 0. 183 | 1. 19E-33 M2 | PRRX1          |
| ARC. 3      | 8. 25E-38 | -0. 62038 | 0. 026 | 0. 221 | 1. 23E-33 M2 | ARC            |
| PPIB. 1     | 8. 48E-38 | 0. 179554 | 0. 829 | 0. 717 | 1. 27E-33 M2 | PPIB           |
| HLA-DQA1. 9 | 9. 21E-38 | 0. 288975 | 0. 534 | 0. 29  | 1. 38E-33 M2 | HLA-DQA1       |
| CCL4. 4     | 1. 01E-37 | 0. 375813 | 0. 517 | 0. 311 | 1. 51E-33 M2 | CCL4           |
| RP11-620J   | 1. 02E-37 | -0. 57528 | 0. 068 | 0. 284 | 1. 52E-33 M2 | RP11-620J15. 3 |
| SNX2. 5     | 1. 03E-37 | 0. 430628 | 0. 554 | 0. 4   | 1. 55E-33 M2 | SNX2           |
| F3. 5       | 1. 10E-37 | -0. 54753 | 0. 017 | 0. 204 | 1. 65E-33 M2 | F3             |
| YWHAQ. 4    | 1. 18E-37 | -0. 41752 | 0. 466 | 0. 656 | 1. 76E-33 M2 | YWHAQ          |
| WIPI1. 4    | 1. 30E-37 | 0. 51644  | 0. 336 | 0. 175 | 1. 94E-33 M2 | WIPI1          |
| PSME1. 4    | 1. 63E-37 | 0. 266712 | 0. 733 | 0. 573 | 2. 44E-33 M2 | PSME1          |
| MXD1. 4     | 1. 64E-37 | 0. 461237 | 0. 268 | 0. 118 | 2. 45E-33 M2 | MXD1           |
| MOB1A. 5    | 1. 80E-37 | 0. 424478 | 0. 504 | 0. 328 | 2. 69E-33 M2 | MOB1A          |
| NCKAP1. 3   | 1. 84E-37 | -0. 40897 | 0. 014 | 0. 201 | 2. 74E-33 M2 | NCKAP1         |
| FJX1. 4     | 1. 87E-37 | -0. 50043 | 0. 023 | 0. 214 | 2. 79E-33 M2 | FJX1           |
| PPARG. 3    | 1. 94E-37 | 0. 237302 | 0. 093 | 0. 02  | 2. 90E-33 M2 | PPARG          |
| RGMA. 4     | 2. 12E-37 | -0. 51419 | 0. 023 | 0. 213 | 3. 17E-33 M2 | RGMA           |
| ZKSCAN1. 4  | 2. 31E-37 | -0. 44823 | 0. 098 | 0. 332 | 3. 45E-33 M2 | ZKSCAN1        |
| MEX3A. 4    | 2. 55E-37 | -0. 47373 | 0. 008 | 0. 19  | 3. 82E-33 M2 | MEX3A          |
| COL9A3. 5   | 3. 32E-37 | -0. 58421 | 0. 014 | 0. 198 | 4. 96E-33 M2 | COL9A3         |
| CXXC5. 5    | 5. 28E-37 | -0. 46054 | 0. 157 | 0. 396 | 7. 89E-33 M2 | CXXC5          |
| ITGB8. 3    | 5. 91E-37 | -0. 40289 | 0. 046 | 0. 253 | 8. 83E-33 M2 | ITGB8          |
| MYEF2. 4    | 6. 52E-37 | -0. 40237 | 0. 018 | 0. 206 | 9. 75E-33 M2 | MYEF2          |
| FAIM2. 4    | 7. 11E-37 | -0. 54423 | 0. 017 | 0. 204 | 1. 06E-32 M2 | FAIM2          |
| SERPINB6. 7 | 7. 26E-37 | 0. 377253 | 0. 609 | 0. 468 | 1. 09E-32 M2 | SERPINB6       |
| RCN1. 5     | 7. 31E-37 | -0. 49312 | 0. 139 | 0. 369 | 1. 09E-32 M2 | RCN1           |
| SLC39A6. 3  | 8. 69E-37 | -0. 47816 | 0. 115 | 0. 343 | 1. 30E-32 M2 | SLC39A6        |
| KCNQ10T1. 8 | 9. 97E-37 | -0. 53727 | 0. 077 | 0. 293 | 1. 34E-32 M2 | KCNQ10T1       |
| SMPDL3A. 4  | 9. 17E-37 | 0. 508048 | 0. 258 | 0. 115 | 1. 37E-32 M2 | SMPDL3A        |
| NAP1L4. 4   | 9. 26E-37 | -0. 43671 | 0. 174 | 0. 42  | 1. 38E-32 M2 | NAP1L4         |
| SRPK2. 3    | 1. 10E-36 | -0. 47185 | 0. 183 | 0. 427 | 1. 64E-32 M2 | SRPK2          |
| SPRY1. 4    | 1. 16E-36 | -0. 5642  | 0. 045 | 0. 246 | 1. 73E-32 M2 | SPRY1          |
| CD48. 5     | 1. 26E-36 | 0. 351776 | 0. 197 | 0. 07  | 1. 88E-32 M2 | CD48           |
| NR2F1. 2    | 1. 36E-36 | -0. 40195 | 0. 003 | 0. 177 | 2. 03E-32 M2 | NR2F1          |
| USMG5. 4    | 1. 50E-36 | 0. 278207 | 0. 723 | 0. 613 | 2. 24E-32 M2 | USMG5          |
| NUCB1. 4    | 1. 82E-36 | 0. 406459 | 0. 579 | 0. 435 | 2. 72E-32 M2 | NUCB1          |
| LAMTOR2. 3  | 2. 08E-36 | 0. 319371 | 0. 699 | 0. 579 | 3. 11E-32 M2 | LAMTOR2        |
| LYPD1. 3    | 2. 17E-36 | -0. 54726 | 0. 023 | 0. 208 | 3. 24E-32 M2 | LYPD1          |
| PDXK. 5     | 2. 22E-36 | 0. 476999 | 0. 436 | 0. 274 | 3. 32E-32 M2 | PDXK           |
| FAM162A. 5  | 2. 25E-36 | 0. 425737 | 0. 549 | 0. 39  | 3. 37E-32 M2 | FAM162A        |

|            |          |          |       |       |             |                |
|------------|----------|----------|-------|-------|-------------|----------------|
| POMP. 1    | 2.47E-36 | 0.180918 | 0.819 | 0.729 | 3.69E-32 M2 | POMP           |
| NFAM1. 4   | 2.51E-36 | 0.322466 | 0.112 | 0.028 | 3.75E-32 M2 | NFAM1          |
| PRKCB. 4   | 2.91E-36 | 0.292614 | 0.129 | 0.036 | 4.35E-32 M2 | PRKCB          |
| AKAP12. 5  | 2.93E-36 | -0.54095 | 0.017 | 0.199 | 4.38E-32 M2 | AKAP12         |
| SH3BGRL. 3 | 2.96E-36 | 0.254434 | 0.764 | 0.64  | 4.42E-32 M2 | SH3BGRL        |
| STAC3. 5   | 2.96E-36 | 0.362775 | 0.195 | 0.071 | 4.43E-32 M2 | STAC3          |
| HLA-DMB. 5 | 4.06E-36 | 0.289751 | 0.55  | 0.304 | 6.06E-32 M2 | HLA-DMB        |
| MYL12B. 4  | 4.23E-36 | 0.182144 | 0.829 | 0.72  | 6.32E-32 M2 | MYL12B         |
| CLIP3. 4   | 5.15E-36 | -0.42664 | 0.022 | 0.21  | 7.70E-32 M2 | CLIP3          |
| GTF2I. 4   | 5.74E-36 | -0.46137 | 0.206 | 0.443 | 8.57E-32 M2 | GTF2I          |
| KIF3A. 3   | 5.93E-36 | -0.50368 | 0.049 | 0.247 | 8.87E-32 M2 | KIF3A          |
| MEIS2. 4   | 6.34E-36 | -0.57957 | 0.028 | 0.216 | 9.47E-32 M2 | MEIS2          |
| ZNF462. 5  | 6.92E-36 | -0.45091 | 0.01  | 0.189 | 1.03E-31 M2 | ZNF462         |
| MRC1       | 7.12E-36 | 0.226784 | 0.05  | 0.006 | 1.06E-31 M2 | MRC1           |
| TSC22D3. 4 | 7.42E-36 | 0.325828 | 0.625 | 0.444 | 1.11E-31 M2 | TSC22D3        |
| BCHE. 3    | 7.56E-36 | -0.4881  | 0.017 | 0.199 | 1.13E-31 M2 | BCHE           |
| PTPRA. 4   | 7.63E-36 | -0.46381 | 0.144 | 0.369 | 1.14E-31 M2 | PTPRA          |
| ABRACL. 4  | 8.50E-36 | 0.484743 | 0.453 | 0.294 | 1.27E-31 M2 | ABRACL         |
| MGMT. 5    | 9.30E-36 | 0.405465 | 0.304 | 0.141 | 1.39E-31 M2 | MGMT           |
| ABI2. 3    | 1.00E-35 | -0.42647 | 0.139 | 0.377 | 1.49E-31 M2 | ABI2           |
| PTMS. 4    | 1.05E-35 | -0.45755 | 0.375 | 0.566 | 1.57E-31 M2 | PTMS           |
| CD84. 5    | 1.24E-35 | 0.416629 | 0.275 | 0.119 | 1.85E-31 M2 | CD84           |
| FERMT2. 5  | 1.32E-35 | -0.3982  | 0.027 | 0.215 | 1.98E-31 M2 | FERMT2         |
| AHR. 5     | 1.33E-35 | 0.34999  | 0.166 | 0.055 | 1.99E-31 M2 | AHR            |
| LILRB3. 4  | 1.48E-35 | 0.332008 | 0.124 | 0.034 | 2.21E-31 M2 | LILRB3         |
| OLIG2. 4   | 1.64E-35 | -0.57565 | 0.013 | 0.19  | 2.46E-31 M2 | OLIG2          |
| PGD. 3     | 1.82E-35 | 0.520554 | 0.436 | 0.283 | 2.72E-31 M2 | PGD            |
| TGM2. 2    | 2.18E-35 | 0.378707 | 0.117 | 0.032 | 3.25E-31 M2 | TGM2           |
| SSR3. 5    | 2.32E-35 | 0.297133 | 0.662 | 0.517 | 3.46E-31 M2 | SSR3           |
| TGFBR2. 4  | 2.46E-35 | 0.41744  | 0.249 | 0.108 | 3.67E-31 M2 | TGFBR2         |
| TMEM91. 4  | 2.73E-35 | 0.488586 | 0.179 | 0.065 | 4.08E-31 M2 | TMEM91         |
| HIF1A. 4   | 2.84E-35 | 0.337032 | 0.626 | 0.488 | 4.24E-31 M2 | HIF1A          |
| IRAK1. 3   | 3.15E-35 | 0.589429 | 0.291 | 0.149 | 4.71E-31 M2 | IRAK1          |
| RP11-161M  | 3.54E-35 | -0.53104 | 0.006 | 0.178 | 5.29E-31 M2 | RP11-161M6. 2  |
| ZNF3. 3    | 3.61E-35 | -0.47465 | 0.031 | 0.218 | 5.40E-31 M2 | ZNF3           |
| PROCR. 4   | 3.67E-35 | 0.322817 | 0.176 | 0.061 | 5.48E-31 M2 | PROCR          |
| CYP19A1    | 4.05E-35 | 0.24155  | 0.091 | 0.02  | 6.06E-31 M2 | CYP19A1        |
| OLFM2. 3   | 4.44E-35 | -0.52534 | 0.022 | 0.204 | 6.63E-31 M2 | OLFM2          |
| RP11-395G  | 4.48E-35 | -0.44458 | 0.013 | 0.189 | 6.70E-31 M2 | RP11-395G23. 3 |
| CPPED1. 5  | 4.50E-35 | 0.373731 | 0.174 | 0.06  | 6.72E-31 M2 | CPPED1         |
| RAB31. 5   | 4.56E-35 | 0.384339 | 0.586 | 0.451 | 6.82E-31 M2 | RAB31          |
| EMB. 5     | 5.10E-35 | 0.362847 | 0.188 | 0.067 | 7.62E-31 M2 | EMB            |
| NR4A1. 5   | 5.36E-35 | 0.422762 | 0.453 | 0.26  | 8.00E-31 M2 | NR4A1          |
| VMA21. 4   | 5.65E-35 | 0.486556 | 0.479 | 0.331 | 8.45E-31 M2 | VMA21          |
| TMSB15B. 4 | 5.89E-35 | -0.45791 | 0.017 | 0.193 | 8.81E-31 M2 | TMSB15B        |
| CCDC28B. 4 | 6.65E-35 | -0.43275 | 0.038 | 0.232 | 9.93E-31 M2 | CCDC28B        |
| PABPC1. 4  | 6.89E-35 | 0.198087 | 0.842 | 0.738 | 1.03E-30 M2 | PABPC1         |
| DOK5. 4    | 7.14E-35 | -0.47185 | 0.017 | 0.194 | 1.07E-30 M2 | DOK5           |
| OSTC. 3    | 7.15E-35 | 0.331049 | 0.619 | 0.495 | 1.07E-30 M2 | OSTC           |
| PFN1. 5    | 9.29E-35 | 0.201192 | 0.913 | 0.801 | 1.39E-30 M2 | PFN1           |
| TAGLN3. 4  | 9.30E-35 | -0.61278 | 0.022 | 0.2   | 1.39E-30 M2 | TAGLN3         |



|             |           |           |        |        |              |          |
|-------------|-----------|-----------|--------|--------|--------------|----------|
| TMSB15A. 5  | 1. 05E-34 | -0. 54382 | 0. 015 | 0. 19  | 1. 57E-30 M2 | TMSB15A  |
| GDI2. 5     | 1. 23E-34 | 0. 363415 | 0. 614 | 0. 48  | 1. 83E-30 M2 | GDI2     |
| MBOAT2. 4   | 1. 25E-34 | -0. 40786 | 0. 017 | 0. 193 | 1. 87E-30 M2 | MBOAT2   |
| RGS17. 3    | 1. 26E-34 | -0. 44092 | 0. 005 | 0. 173 | 1. 89E-30 M2 | RGS17    |
| TSPAN3. 4   | 1. 28E-34 | -0. 42578 | 0. 229 | 0. 476 | 1. 92E-30 M2 | TSPAN3   |
| CTXN1. 5    | 1. 44E-34 | -0. 37672 | 0. 004 | 0. 171 | 2. 15E-30 M2 | CTXN1    |
| SKA2. 3     | 1. 56E-34 | -0. 44364 | 0. 103 | 0. 321 | 2. 33E-30 M2 | SKA2     |
| STAT6. 5    | 1. 64E-34 | 0. 354018 | 0. 146 | 0. 045 | 2. 45E-30 M2 | STAT6    |
| TSC22D4. 5  | 1. 72E-34 | -0. 63092 | 0. 264 | 0. 485 | 2. 56E-30 M2 | TSC22D4  |
| MIAT. 4     | 1. 73E-34 | -0. 54133 | 0. 009 | 0. 179 | 2. 59E-30 M2 | MIAT     |
| GRIA3. 4    | 1. 75E-34 | -0. 39702 | 0. 009 | 0. 18  | 2. 62E-30 M2 | GRIA3    |
| GNS. 3      | 1. 80E-34 | 0. 505895 | 0. 34  | 0. 189 | 2. 69E-30 M2 | GNS      |
| NPAS3. 5    | 1. 93E-34 | -0. 41207 | 0. 004 | 0. 17  | 2. 89E-30 M2 | NPAS3    |
| ASGR1. 4    | 1. 96E-34 | 0. 459766 | 0. 178 | 0. 065 | 2. 92E-30 M2 | ASGR1    |
| CSF2RA. 5   | 2. 25E-34 | 0. 3176   | 0. 383 | 0. 189 | 3. 37E-30 M2 | CSF2RA   |
| AKAP8L. 3   | 2. 44E-34 | -0. 44546 | 0. 063 | 0. 262 | 3. 65E-30 M2 | AKAP8L   |
| IL3RA. 1    | 2. 65E-34 | 0. 200634 | 0. 061 | 0. 01  | 3. 96E-30 M2 | IL3RA    |
| CSNK1E. 4   | 2. 72E-34 | -0. 41569 | 0. 101 | 0. 321 | 4. 07E-30 M2 | CSNK1E   |
| ABI3. 5     | 2. 81E-34 | 0. 32158  | 0. 368 | 0. 177 | 4. 20E-30 M2 | ABI3     |
| SERF2. 2    | 2. 91E-34 | 0. 117478 | 0. 995 | 0. 888 | 4. 34E-30 M2 | SERF2    |
| VASP. 5     | 3. 09E-34 | 0. 503994 | 0. 386 | 0. 229 | 4. 62E-30 M2 | VASP     |
| UBE2S. 5    | 3. 27E-34 | -0. 50316 | 0. 14  | 0. 359 | 4. 88E-30 M2 | UBE2S    |
| NAMPT. 5    | 3. 47E-34 | 0. 205206 | 0. 63  | 0. 424 | 5. 19E-30 M2 | NAMPT    |
| DPYSL5. 5   | 3. 60E-34 | -0. 41617 | 0. 006 | 0. 174 | 5. 38E-30 M2 | DPYSL5   |
| STX11. 5    | 3. 73E-34 | 0. 385317 | 0. 249 | 0. 105 | 5. 58E-30 M2 | STX11    |
| DPP7. 5     | 4. 04E-34 | 0. 370505 | 0. 595 | 0. 458 | 6. 03E-30 M2 | DPP7     |
| RNF180. 4   | 4. 20E-34 | -0. 40053 | 0. 009 | 0. 179 | 6. 28E-30 M2 | RNF180   |
| FAM129B. 3  | 4. 69E-34 | 0. 477527 | 0. 176 | 0. 066 | 7. 01E-30 M2 | FAM129B  |
| ATP6V1B2. 5 | 4. 3E-34  | 0. 373004 | 0. 553 | 0. 398 | 8. 11E-30 M2 | ATP6V1B2 |
| NRXN1. 4    | 5. 75E-34 | -0. 59391 | 0. 008 | 0. 174 | 8. 59E-30 M2 | NRXN1    |
| ENC1. 5     | 7. 01E-34 | -0. 51087 | 0. 047 | 0. 237 | 1. 05E-29 M2 | ENC1     |
| GHITM. 4    | 7. 10E-34 | 0. 316245 | 0. 641 | 0. 515 | 1. 06E-29 M2 | GHITM    |
| TFRC. 4     | 7. 21E-34 | 0. 475463 | 0. 359 | 0. 199 | 1. 08E-29 M2 | TFRC     |
| C10orf11. 7 | 6. 9E-34  | 0. 357123 | 0. 226 | 0. 092 | 1. 15E-29 M2 | C10orf11 |
| CD58. 5     | 7. 71E-34 | 0. 443954 | 0. 381 | 0. 216 | 1. 15E-29 M2 | CD58     |
| TRIM24. 5   | 8. 52E-34 | -0. 3637  | 0. 024 | 0. 203 | 1. 27E-29 M2 | TRIM24   |
| ANK2. 5     | 9. 05E-34 | -0. 3779  | 0. 008 | 0. 175 | 1. 35E-29 M2 | ANK2     |
| ZNF791. 2   | 1. 11E-33 | -0. 38449 | 0. 075 | 0. 284 | 1. 65E-29 M2 | ZNF791   |
| ADAMTSL4    | 1. 29E-33 | 0. 23938  | 0. 083 | 0. 018 | 1. 93E-29 M2 | ADAMTSL4 |
| ZSCAN18. 3  | 1. 38E-33 | -0. 42711 | 0. 051 | 0. 244 | 2. 06E-29 M2 | ZSCAN18  |
| STOM. 4     | 1. 42E-33 | 0. 367488 | 0. 42  | 0. 239 | 2. 13E-29 M2 | STOM     |
| TFEC. 5     | 1. 84E-33 | 0. 303141 | 0. 152 | 0. 049 | 2. 75E-29 M2 | TFEC     |
| HEPACAM. 4  | 1. 84E-33 | -0. 55332 | 0. 017 | 0. 189 | 2. 75E-29 M2 | HEPACAM  |
| MIF. 3      | 2. 06E-33 | 0. 279378 | 0. 775 | 0. 663 | 3. 08E-29 M2 | MIF      |
| MANBA. 5    | 2. 07E-33 | 0. 455734 | 0. 249 | 0. 111 | 3. 09E-29 M2 | MANBA    |
| RPAIN. 3    | 2. 11E-33 | -0. 44179 | 0. 267 | 0. 501 | 3. 15E-29 M2 | RPAIN    |
| NSG1. 5     | 2. 19E-33 | -0. 68769 | 0. 018 | 0. 187 | 3. 27E-29 M2 | NSG1     |
| GPC2. 5     | 2. 32E-33 | -0. 56146 | 0. 013 | 0. 179 | 3. 47E-29 M2 | GPC2     |
| CRYBB1. 3   | 2. 41E-33 | 0. 363346 | 0. 124 | 0. 036 | 3. 61E-29 M2 | CRYBB1   |
| AHNAK. 2    | 2. 61E-33 | 0. 488757 | 0. 241 | 0. 109 | 3. 90E-29 M2 | AHNAK    |
| BTK. 5      | 2. 64E-33 | 0. 290004 | 0. 204 | 0. 077 | 3. 95E-29 M2 | BTK      |

|           |   |          |          |       |       |          |    |          |
|-----------|---|----------|----------|-------|-------|----------|----|----------|
| RAPGEF1.  | 3 | 2.79E-33 | 0.464078 | 0.243 | 0.108 | 4.17E-29 | M2 | RAPGEF1  |
| JUN.      | 2 | 2.97E-33 | -0.41438 | 0.506 | 0.684 | 4.44E-29 | M2 | JUN      |
| CCL7.     | 1 | 3.29E-33 | 0.235873 | 0.06  | 0.01  | 4.91E-29 | M2 | CCL7     |
| FNBP1L.   | 5 | 3.32E-33 | -0.44299 | 0.023 | 0.196 | 4.96E-29 | M2 | FNBP1L   |
| BMP7.     | 5 | 3.66E-33 | -0.40143 | 0.01  | 0.177 | 5.48E-29 | M2 | BMP7     |
| SEC11A.   | 4 | 3.77E-33 | 0.24702  | 0.709 | 0.582 | 5.64E-29 | M2 | SEC11A   |
| PVRL2.    | 4 | 3.91E-33 | 0.484652 | 0.383 | 0.233 | 5.84E-29 | M2 | PVRL2    |
| FAM134B.  | 3 | 4.13E-33 | -0.39889 | 0.01  | 0.177 | 6.17E-29 | M2 | FAM134B  |
| BCAR1.    | 3 | 4.57E-33 | -0.38752 | 0.014 | 0.183 | 6.83E-29 | M2 | BCAR1    |
| ROB01.    | 5 | 5.54E-33 | -0.40719 | 0.019 | 0.189 | 8.27E-29 | M2 | ROB01    |
| LPAR6.    | 5 | 5.59E-33 | 0.371639 | 0.407 | 0.226 | 8.36E-29 | M2 | LPAR6    |
| CALR.     | 2 | 5.94E-33 | 0.205329 | 0.798 | 0.684 | 8.88E-29 | M2 | CALR     |
| TJP1.     | 3 | 6.12E-33 | -0.36912 | 0.02  | 0.192 | 9.14E-29 | M2 | TJP1     |
| NELFCD.   | 3 | 6.14E-33 | -0.40494 | 0.13  | 0.351 | 9.17E-29 | M2 | NELFCD   |
| KLHL23.   | 5 | 7.01E-33 | -0.41155 | 0.008 | 0.172 | 1.05E-28 | M2 | KLHL23   |
| LSAMP.    | 3 | 7.52E-33 | -0.52502 | 0.015 | 0.183 | 1.12E-28 | M2 | LSAMP    |
| FOXG1.    | 4 | 8.09E-33 | -0.35462 | 0.004 | 0.164 | 1.21E-28 | M2 | FOXG1    |
| F2R.      | 5 | 8.22E-33 | -0.37557 | 0.013 | 0.18  | 1.23E-28 | M2 | F2R      |
| SCAMP2.   | 5 | 8.57E-33 | 0.402    | 0.526 | 0.363 | 1.28E-28 | M2 | SCAMP2   |
| SNTG1.    | 4 | 8.79E-33 | -0.49535 | 0.004 | 0.164 | 1.31E-28 | M2 | SNTG1    |
| CD99.     | 3 | 9.12E-33 | 0.170033 | 0.819 | 0.625 | 1.36E-28 | M2 | CD99     |
| DAAM1.    | 3 | 1.04E-32 | -0.45783 | 0.06  | 0.254 | 1.55E-28 | M2 | DAAM1    |
| TGIF1.    | 4 | 1.10E-32 | 0.398449 | 0.507 | 0.347 | 1.64E-28 | M2 | TGIF1    |
| PHGDH.    | 4 | 1.10E-32 | -0.54136 | 0.033 | 0.212 | 1.64E-28 | M2 | PHGDH    |
| HMGB2.    | 5 | 1.21E-32 | 0.294881 | 0.656 | 0.483 | 1.81E-28 | M2 | HMGB2    |
| GNGT2.    | 5 | 1.32E-32 | 0.308127 | 0.144 | 0.046 | 1.98E-28 | M2 | GNGT2    |
| OSBPL6.   | 2 | 1.47E-32 | -0.34237 | 0.006 | 0.167 | 2.20E-28 | M2 | OSBPL6   |
| ZFHX4.    | 5 | 1.56E-32 | -0.36185 | 0.004 | 0.162 | 2.33E-28 | M2 | ZFHX4    |
| TCEAL2.   | 3 | 2.01E-32 | -0.60303 | 0.022 | 0.191 | 3.00E-28 | M2 | TCEAL2   |
| SEMA6D.   | 5 | 2.05E-32 | -0.41385 | 0.008 | 0.167 | 3.07E-28 | M2 | SEMA6D   |
| POLR2J3.  | 4 | 2.64E-32 | -0.42087 | 0.132 | 0.354 | 3.95E-28 | M2 | POLR2J3  |
| ZEB1.     | 5 | 2.83E-32 | -0.38866 | 0.028 | 0.204 | 4.22E-28 | M2 | ZEB1     |
| SLC39A4.  | 3 | 2.85E-32 | 0.419133 | 0.203 | 0.082 | 4.26E-28 | M2 | SLC39A4  |
| LUCAT1.   | 1 | 2.92E-32 | 0.345306 | 0.11  | 0.03  | 4.37E-28 | M2 | LUCAT1   |
| HMGB1.    | 3 | 3.25E-32 | -0.31564 | 0.779 | 0.867 | 4.86E-28 | M2 | HMGB1    |
| BICD1.    | 3 | 3.42E-32 | -0.3458  | 0.036 | 0.216 | 5.11E-28 | M2 | BICD1    |
| CDC42EP4. | 3 | 3.49E-32 | -0.44983 | 0.034 | 0.213 | 5.21E-28 | M2 | CDC42EP4 |
| HSD11B1L. | 3 | 3.81E-32 | -0.34797 | 0.036 | 0.217 | 5.69E-28 | M2 | HSD11B1L |
| A2M.      | 4 | 3.86E-32 | 0.255519 | 0.651 | 0.45  | 5.77E-28 | M2 | A2M      |
| SMAD1.    | 3 | 4.39E-32 | -0.39795 | 0.02  | 0.188 | 6.57E-28 | M2 | SMAD1    |
| TRPM2.    | 5 | 5.90E-32 | 0.329574 | 0.142 | 0.045 | 8.82E-28 | M2 | TRPM2    |
| MYO7A.    | 3 | 5.99E-32 | 0.284844 | 0.106 | 0.028 | 8.94E-28 | M2 | MYO7A    |
| BST1.     | 1 | 6.28E-32 | 0.303832 | 0.114 | 0.032 | 9.39E-28 | M2 | BST1     |
| RND2.     | 4 | 6.38E-32 | -0.40457 | 0.011 | 0.174 | 9.53E-28 | M2 | RND2     |
| CTNND2.   | 4 | 6.40E-32 | -0.40581 | 0.009 | 0.168 | 9.56E-28 | M2 | CTNND2   |
| CLU.      | 5 | 6.66E-32 | -0.59961 | 0.725 | 0.786 | 9.95E-28 | M2 | CLU      |
| ELAVL4.   | 4 | 7.30E-32 | -0.66777 | 0.024 | 0.189 | 1.09E-27 | M2 | ELAVL4   |
| NT5C3A.   | 3 | 7.38E-32 | -0.41893 | 0.101 | 0.308 | 1.10E-27 | M2 | NT5C3A   |
| DRAM2.    | 5 | 7.81E-32 | 0.401423 | 0.492 | 0.325 | 1.17E-27 | M2 | DRAM2    |
| RNF130.   | 5 | 7.94E-32 | 0.360855 | 0.598 | 0.453 | 1.19E-27 | M2 | RNF130   |
| PRR4.     | 5 | 8.42E-32 | -0.4216  | 0.046 | 0.229 | 1.26E-27 | M2 | PRR4     |

|            |          |          |       |       |          |    |               |
|------------|----------|----------|-------|-------|----------|----|---------------|
| ABCA1.3    | 9.15E-32 | 0.472983 | 0.377 | 0.229 | 1.37E-27 | M2 | ABCA1         |
| REPIN1.5   | 9.39E-32 | -0.36873 | 0.086 | 0.288 | 1.40E-27 | M2 | REPIN1        |
| SMARCA4.4  | 1.03E-31 | -0.39778 | 0.156 | 0.376 | 1.53E-27 | M2 | SMARCA4       |
| IL10RA.5   | 1.15E-31 | 0.298717 | 0.284 | 0.128 | 1.72E-27 | M2 | IL10RA        |
| TAF7.4     | 1.17E-31 | -0.46661 | 0.336 | 0.569 | 1.76E-27 | M2 | TAF7          |
| PGAM1.3    | 1.21E-31 | 0.313546 | 0.608 | 0.494 | 1.80E-27 | M2 | PGAM1         |
| JAM2.5     | 1.29E-31 | -0.44355 | 0.069 | 0.266 | 1.92E-27 | M2 | JAM2          |
| PRR7.5     | 1.42E-31 | -0.35618 | 0.028 | 0.199 | 2.12E-27 | M2 | PRR7          |
| LINC00665  | 1.45E-31 | -0.40304 | 0.027 | 0.197 | 2.17E-27 | M2 | LINC00665     |
| MFNG.5     | 1.60E-31 | 0.370268 | 0.262 | 0.117 | 2.39E-27 | M2 | MFNG          |
| ZNF302.4   | 1.76E-31 | -0.39017 | 0.112 | 0.329 | 2.63E-27 | M2 | ZNF302        |
| ATP6VOD1.1 | 1.84E-31 | 0.366042 | 0.613 | 0.503 | 2.75E-27 | M2 | ATP6VOD1      |
| AGT.3      | 2.04E-31 | -0.62842 | 0.051 | 0.232 | 3.05E-27 | M2 | AGT           |
| NEDD8.2    | 2.13E-31 | 0.180457 | 0.847 | 0.738 | 3.18E-27 | M2 | NEDD8         |
| DAZAP2.4   | 2.39E-31 | 0.320971 | 0.644 | 0.529 | 3.57E-27 | M2 | DAZAP2        |
| FAM92A1.3  | 2.41E-31 | -0.36528 | 0.036 | 0.213 | 3.61E-27 | M2 | FAM92A1       |
| ATP6V1G2.2 | 2.53E-31 | -0.41825 | 0.005 | 0.159 | 3.78E-27 | M2 | ATP6V1G2      |
| JAKMIP2.3  | 2.58E-31 | -0.3789  | 0.006 | 0.161 | 3.86E-27 | M2 | JAKMIP2       |
| CBX1.4     | 2.63E-31 | -0.42424 | 0.163 | 0.381 | 3.93E-27 | M2 | CBX1          |
| TLE1.3     | 2.68E-31 | -0.35934 | 0.018 | 0.181 | 4.01E-27 | M2 | TLE1          |
| CBX5.4     | 2.77E-31 | -0.39924 | 0.139 | 0.359 | 4.15E-27 | M2 | CBX5          |
| SYNE2.5    | 2.81E-31 | -0.41988 | 0.02  | 0.185 | 4.20E-27 | M2 | SYNE2         |
| MITF.4     | 2.95E-31 | 0.346039 | 0.208 | 0.086 | 4.41E-27 | M2 | MITF          |
| SEPT7.5    | 3.46E-31 | -0.42384 | 0.536 | 0.715 | 5.16E-27 | M2 | 7-Sep         |
| TMEM14A.4  | 3.66E-31 | -0.4626  | 0.128 | 0.338 | 5.46E-27 | M2 | TMEM14A       |
| C1R.5      | 3.91E-31 | -0.7949  | 0.049 | 0.227 | 5.84E-27 | M2 | C1R           |
| FBXO17.5   | 3.95E-31 | -0.36976 | 0.003 | 0.154 | 5.90E-27 | M2 | FBXO17        |
| RHBDF2.5   | 4.01E-31 | 0.367855 | 0.333 | 0.166 | 5.99E-27 | M2 | RHBDF2        |
| RP11-514C  | 4.02E-31 | 0.250689 | 0.092 | 0.022 | 6.01E-27 | M2 | RP11-514012.4 |
| EFEMP2.3   | 4.56E-31 | -0.3947  | 0.046 | 0.226 | 6.81E-27 | M2 | EFEMP2        |
| RB1.5      | 4.69E-31 | 0.397467 | 0.457 | 0.294 | 7.01E-27 | M2 | RB1           |
| TGFB1.5    | 5.10E-31 | 0.41867  | 0.393 | 0.234 | 7.62E-27 | M2 | TGFB1         |
| EFHD2.5    | 5.70E-31 | 0.460762 | 0.352 | 0.2   | 8.52E-27 | M2 | EFHD2         |
| PGAP1.4    | 5.84E-31 | -0.36202 | 0.026 | 0.195 | 8.72E-27 | M2 | PGAP1         |
| APC2.4     | 6.04E-31 | -0.39447 | 0.005 | 0.158 | 9.02E-27 | M2 | APC2          |
| CSNK2B.1   | 6.06E-31 | 0.277529 | 0.701 | 0.601 | 9.06E-27 | M2 | CSNK2B        |
| TMBIM1.2   | 7.28E-31 | 0.418917 | 0.392 | 0.234 | 1.09E-26 | M2 | TMBIM1        |
| SP100.4    | 7.29E-31 | 0.288944 | 0.462 | 0.274 | 1.09E-26 | M2 | SP100         |
| CTA-384D8  | 7.37E-31 | 0.234303 | 0.084 | 0.019 | 1.10E-26 | M2 | CTA-384D8.34  |
| NUDT14.5   | 7.53E-31 | 0.415584 | 0.336 | 0.182 | 1.13E-26 | M2 | NUDT14        |
| ZNF608.3   | 7.96E-31 | -0.35293 | 0.011 | 0.168 | 1.19E-26 | M2 | ZNF608        |
| PYCR1.2    | 8.02E-31 | -0.36034 | 0.027 | 0.196 | 1.20E-26 | M2 | PYCR1         |
| SYTL3.5    | 9.65E-31 | 0.340811 | 0.162 | 0.057 | 1.44E-26 | M2 | SYTL3         |
| BNIP3.4    | 1.01E-30 | 0.538129 | 0.346 | 0.206 | 1.52E-26 | M2 | BNIP3         |
| CNIH3.2    | 1.20E-30 | -0.39121 | 0.018 | 0.179 | 1.79E-26 | M2 | CNIH3         |
| KCNMA1.4   | 1.26E-30 | 0.513256 | 0.267 | 0.134 | 1.88E-26 | M2 | KCNMA1        |
| OLFM1.4    | 1.37E-30 | -0.41571 | 0.008 | 0.161 | 2.04E-26 | M2 | OLFM1         |
| WDR34.3    | 1.39E-30 | -0.36117 | 0.042 | 0.219 | 2.07E-26 | M2 | WDR34         |
| MGST2.5    | 1.59E-30 | 0.334425 | 0.419 | 0.241 | 2.38E-26 | M2 | MGST2         |
| POU3F3.4   | 1.61E-30 | -0.37552 | 0.01  | 0.164 | 2.41E-26 | M2 | POU3F3        |
| MYH10.3    | 1.76E-30 | -0.36405 | 0.009 | 0.163 | 2.62E-26 | M2 | MYH10         |

|             |           |           |        |        |              |              |
|-------------|-----------|-----------|--------|--------|--------------|--------------|
| TLR4. 4     | 1. 84E-30 | 0. 257395 | 0. 12  | 0. 035 | 2. 75E-26 M2 | TLR4         |
| ERV3-1. 4   | 1. 87E-30 | -0. 47459 | 0. 083 | 0. 273 | 2. 79E-26 M2 | ERV3-1       |
| C12orf76. 2 | 2. 39E-30 | -0. 41222 | 0. 082 | 0. 279 | 3. 57E-26 M2 | C12orf76     |
| FSD1. 4     | 2. 40E-30 | -0. 33628 | 0. 01  | 0. 165 | 3. 58E-26 M2 | FSD1         |
| SRPX. 4     | 2. 41E-30 | -0. 50516 | 0. 024 | 0. 188 | 3. 61E-26 M2 | SRPX         |
| SNX20. 4    | 2. 41E-30 | 0. 260107 | 0. 126 | 0. 039 | 3. 61E-26 M2 | SNX20        |
| NKX2-2. 4   | 2. 45E-30 | -0. 47651 | 0. 006 | 0. 157 | 3. 66E-26 M2 | NKX2-2       |
| M6PR. 5     | 2. 47E-30 | 0. 392738 | 0. 508 | 0. 373 | 3. 69E-26 M2 | M6PR         |
| SHISA4. 4   | 2. 51E-30 | -0. 4026  | 0. 07  | 0. 259 | 3. 75E-26 M2 | SHISA4       |
| PCBD1. 1    | 2. 71E-30 | 0. 453564 | 0. 462 | 0. 321 | 4. 04E-26 M2 | PCBD1        |
| GAA. 4      | 2. 72E-30 | 0. 452329 | 0. 458 | 0. 31  | 4. 07E-26 M2 | GAA          |
| MCM7. 4     | 2. 83E-30 | -0. 45847 | 0. 077 | 0. 267 | 4. 23E-26 M2 | MCM7         |
| TCTEX1D2. 2 | 2. 85E-30 | -0. 42942 | 0. 057 | 0. 239 | 4. 26E-26 M2 | TCTEX1D2     |
| PRPSAP1. 5  | 2. 88E-30 | -0. 38775 | 0. 117 | 0. 32  | 4. 30E-26 M2 | PRPSAP1      |
| NAT14. 2    | 3. 02E-30 | -0. 34252 | 0. 026 | 0. 19  | 4. 51E-26 M2 | NAT14        |
| RPS6KA1. 5  | 3. 70E-30 | 0. 324907 | 0. 264 | 0. 121 | 5. 53E-26 M2 | RPS6KA1      |
| AKAP9. 3    | 3. 76E-30 | -0. 42655 | 0. 239 | 0. 465 | 5. 63E-26 M2 | AKAP9        |
| ATP1B2. 5   | 3. 97E-30 | -0. 43951 | 0. 061 | 0. 245 | 5. 94E-26 M2 | ATP1B2       |
| CNDP2. 5    | 4. 16E-30 | 0. 371968 | 0. 547 | 0. 423 | 6. 21E-26 M2 | CNDP2        |
| PIM3. 5     | 4. 16E-30 | 0. 429723 | 0. 326 | 0. 181 | 6. 21E-26 M2 | PIM3         |
| ITGA5. 2    | 4. 21E-30 | 0. 418143 | 0. 188 | 0. 076 | 6. 29E-26 M2 | ITGA5        |
| CRNDE. 2    | 4. 26E-30 | -0. 36789 | 0. 026 | 0. 19  | 6. 37E-26 M2 | CRNDE        |
| CDC42BPA. 4 | 4. 35E-30 | -0. 3743  | 0. 027 | 0. 19  | 6. 50E-26 M2 | CDC42BPA     |
| DPP6. 3     | 4. 41E-30 | -0. 3854  | 0. 015 | 0. 172 | 6. 58E-26 M2 | DPP6         |
| ACAP3. 5    | 4. 50E-30 | -0. 40965 | 0. 051 | 0. 228 | 6. 72E-26 M2 | ACAP3        |
| IFITM3. 1   | 4. 80E-30 | 0. 181372 | 0. 704 | 0. 489 | 7. 17E-26 M2 | IFITM3       |
| LTC4S. 5    | 4. 83E-30 | 0. 34805  | 0. 319 | 0. 157 | 7. 21E-26 M2 | LTC4S        |
| ENOPH1. 4   | 5. 02E-30 | -0. 38788 | 0. 181 | 0. 404 | 7. 50E-26 M2 | ENOPH1       |
| RIPK2. 5    | 5. 36E-30 | 0. 483255 | 0. 299 | 0. 159 | 8. 01E-26 M2 | RIPK2        |
| LRPAP1. 3   | 6. 01E-30 | 0. 273864 | 0. 649 | 0. 54  | 8. 98E-26 M2 | LRPAP1       |
| FMNL1. 5    | 6. 09E-30 | 0. 369165 | 0. 253 | 0. 115 | 9. 10E-26 M2 | FMNL1        |
| HPCAL1. 4   | 6. 27E-30 | 0. 449389 | 0. 344 | 0. 2   | 9. 36E-26 M2 | HPCAL1       |
| TM7SF2. 4   | 7. 13E-30 | -0. 38262 | 0. 061 | 0. 242 | 1. 07E-25 M2 | TM7SF2       |
| BCKDK. 5    | 7. 34E-30 | 0. 464424 | 0. 441 | 0. 305 | 1. 10E-25 M2 | BCKDK        |
| POP7. 4     | 7. 38E-30 | -0. 40802 | 0. 186 | 0. 409 | 1. 10E-25 M2 | POP7         |
| NR4A3. 5    | 7. 98E-30 | 0. 41411  | 0. 29  | 0. 141 | 1. 19E-25 M2 | NR4A3        |
| NDFIP2. 3   | 8. 55E-30 | -0. 3689  | 0. 034 | 0. 204 | 1. 28E-25 M2 | NDFIP2       |
| RP11-14N7   | 8. 75E-30 | -0. 39686 | 0. 043 | 0. 216 | 1. 31E-25 M2 | RP11-14N7. 2 |
| LILRB1. 5   | 8. 99E-30 | 0. 343187 | 0. 206 | 0. 084 | 1. 34E-25 M2 | LILRB1       |
| GIMAP4. 5   | 9. 61E-30 | 0. 292041 | 0. 296 | 0. 139 | 1. 44E-25 M2 | GIMAP4       |
| FAM84A. 4   | 1. 01E-29 | -0. 3648  | 0. 006 | 0. 154 | 1. 50E-25 M2 | FAM84A       |
| GPR65. 5    | 1. 04E-29 | 0. 294574 | 0. 272 | 0. 123 | 1. 55E-25 M2 | GPR65        |
| FLVCR2. 2   | 1. 06E-29 | 0. 246148 | 0. 106 | 0. 03  | 1. 58E-25 M2 | FLVCR2       |
| EVI2A. 5    | 1. 07E-29 | 0. 238288 | 0. 402 | 0. 21  | 1. 59E-25 M2 | EVI2A        |
| PTPN22. 3   | 1. 10E-29 | 0. 225526 | 0. 089 | 0. 022 | 1. 65E-25 M2 | PTPN22       |
| FKBP2. 2    | 1. 18E-29 | 0. 251097 | 0. 704 | 0. 582 | 1. 77E-25 M2 | FKBP2        |
| CDK4. 3     | 1. 26E-29 | -0. 47321 | 0. 278 | 0. 499 | 1. 88E-25 M2 | CDK4         |
| ADAMDEC1. 1 | 1. 27E-29 | 0. 26256  | 0. 111 | 0. 032 | 1. 89E-25 M2 | ADAMDEC1     |
| PROX1. 4    | 1. 28E-29 | -0. 39438 | 0. 018 | 0. 174 | 1. 91E-25 M2 | PROX1        |
| NLGN1. 4    | 1. 33E-29 | -0. 3275  | 0. 003 | 0. 147 | 1. 98E-25 M2 | NLGN1        |
| GADD45B. 3  | 1. 36E-29 | 0. 178148 | 0. 693 | 0. 476 | 2. 03E-25 M2 | GADD45B      |

|            |           |           |        |        |              |               |
|------------|-----------|-----------|--------|--------|--------------|---------------|
| SCIMP. 5   | 1. 38E-29 | 0. 323105 | 0. 192 | 0. 075 | 2. 07E-25 M2 | SCIMP         |
| TMEM132A.  | 1. 39E-29 | -0. 31378 | 0. 006 | 0. 154 | 2. 08E-25 M2 | TMEM132A      |
| CCDC14. 3  | 1. 44E-29 | -0. 41169 | 0. 06  | 0. 239 | 2. 15E-25 M2 | CCDC14        |
| EFHC1. 5   | 1. 47E-29 | -0. 40978 | 0. 043 | 0. 217 | 2. 19E-25 M2 | EFHC1         |
| PTGS1. 5   | 1. 60E-29 | 0. 373567 | 0. 294 | 0. 146 | 2. 39E-25 M2 | PTGS1         |
| CXCL5      | 1. 68E-29 | 0. 250643 | 0. 047 | 0. 007 | 2. 50E-25 M2 | CXCL5         |
| DCLK1. 3   | 1. 68E-29 | -0. 3654  | 0. 01  | 0. 161 | 2. 50E-25 M2 | DCLK1         |
| GNA13. 5   | 1. 76E-29 | 0. 435114 | 0. 315 | 0. 17  | 2. 63E-25 M2 | GNA13         |
| IPO9. 3    | 1. 80E-29 | -0. 34897 | 0. 061 | 0. 243 | 2. 69E-25 M2 | IPO9          |
| VDR. 1     | 2. 08E-29 | 0. 210052 | 0. 064 | 0. 012 | 3. 10E-25 M2 | VDR           |
| RP3-525N1  | 2. 31E-29 | -0. 43363 | 0. 01  | 0. 16  | 3. 45E-25 M2 | RP3-525N10. 2 |
| TMC6. 5    | 2. 36E-29 | 0. 322308 | 0. 235 | 0. 102 | 3. 53E-25 M2 | TMC6          |
| DMWD. 4    | 2. 75E-29 | -0. 29244 | 0. 005 | 0. 151 | 4. 11E-25 M2 | DMWD          |
| WEE1. 3    | 2. 76E-29 | -0. 33593 | 0. 01  | 0. 16  | 4. 12E-25 M2 | WEE1          |
| TMEM255B.  | 2. 95E-29 | 0. 357456 | 0. 143 | 0. 049 | 4. 41E-25 M2 | TMEM255B      |
| CHPF. 4    | 3. 05E-29 | -0. 39337 | 0. 083 | 0. 271 | 4. 56E-25 M2 | CHPF          |
| CITED1. 4  | 3. 18E-29 | -0. 43276 | 0. 011 | 0. 161 | 4. 75E-25 M2 | CITED1        |
| COL6A2. 4  | 3. 28E-29 | -0. 48165 | 0. 019 | 0. 173 | 4. 90E-25 M2 | COL6A2        |
| ENHO. 4    | 3. 39E-29 | -0. 35348 | 0. 011 | 0. 16  | 5. 06E-25 M2 | ENHO          |
| APBB1. 4   | 3. 50E-29 | -0. 39562 | 0. 036 | 0. 201 | 5. 23E-25 M2 | APBB1         |
| IL4R. 5    | 3. 88E-29 | 0. 335016 | 0. 17  | 0. 064 | 5. 80E-25 M2 | IL4R          |
| SERPINB9.  | 4. 16E-29 | 0. 304407 | 0. 289 | 0. 136 | 6. 22E-25 M2 | SERPINB9      |
| REEP5. 4   | 4. 28E-29 | 0. 245397 | 0. 688 | 0. 577 | 6. 40E-25 M2 | REEP5         |
| PLP1. 4    | 4. 28E-29 | -0. 89584 | 0. 026 | 0. 181 | 6. 40E-25 M2 | PLP1          |
| AKR1A1. 3  | 4. 58E-29 | 0. 325394 | 0. 607 | 0. 49  | 6. 85E-25 M2 | AKR1A1        |
| C3. 4      | 4. 76E-29 | 0. 255021 | 0. 619 | 0. 386 | 7. 12E-25 M2 | C3            |
| RBMX. 3    | 5. 07E-29 | -0. 39746 | 0. 349 | 0. 582 | 7. 57E-25 M2 | RBMX          |
| EGR1. 3    | 5. 22E-29 | -0. 46154 | 0. 295 | 0. 51  | 7. 80E-25 M2 | EGR1          |
| MLC1. 4    | 5. 59E-29 | -0. 36175 | 0. 01  | 0. 158 | 8. 36E-25 M2 | MLC1          |
| SGCE. 3    | 5. 70E-29 | -0. 5821  | 0. 009 | 0. 156 | 8. 52E-25 M2 | SGCE          |
| DTNA. 4    | 6. 02E-29 | -0. 48642 | 0. 079 | 0. 265 | 9. 00E-25 M2 | DTNA          |
| EMILIN2. 4 | 6. 43E-29 | 0. 398864 | 0. 18  | 0. 073 | 9. 61E-25 M2 | EMILIN2       |
| EGFL7. 1   | 6. 57E-29 | 0. 361311 | 0. 107 | 0. 031 | 9. 82E-25 M2 | EGFL7         |
| LIMCH1. 4  | 6. 69E-29 | -0. 40376 | 0. 013 | 0. 162 | 1. 00E-24 M2 | LIMCH1        |
| DUSP1. 5   | 6. 90E-29 | 0. 272753 | 0. 745 | 0. 562 | 1. 03E-24 M2 | DUSP1         |
| MAGED2. 5  | 6. 92E-29 | -0. 4155  | 0. 294 | 0. 524 | 1. 03E-24 M2 | MAGED2        |
| THSD7A. 4  | 6. 98E-29 | -0. 52058 | 0. 008 | 0. 152 | 1. 04E-24 M2 | THSD7A        |
| RP3-47704  | 7. 07E-29 | 0. 250467 | 0. 092 | 0. 024 | 1. 06E-24 M2 | RP3-47704. 14 |
| WRB. 4     | 7. 21E-29 | -0. 39576 | 0. 208 | 0. 435 | 1. 08E-24 M2 | WRB           |
| IGFBP7. 3  | 7. 22E-29 | -0. 6368  | 0. 103 | 0. 281 | 1. 08E-24 M2 | IGFBP7        |
| POMGNT1. 4 | 7. 47E-29 | -0. 38097 | 0. 084 | 0. 27  | 1. 12E-24 M2 | POMGNT1       |
| NDRG4. 5   | 7. 52E-29 | -0. 37528 | 0. 018 | 0. 17  | 1. 12E-24 M2 | NDRG4         |
| PGRMC1. 3  | 8. 13E-29 | -0. 37702 | 0. 24  | 0. 462 | 1. 22E-24 M2 | PGRMC1        |
| CHST15. 1  | 8. 90E-29 | 0. 35821  | 0. 112 | 0. 034 | 1. 33E-24 M2 | CHST15        |
| CREB5. 4   | 9. 53E-29 | -0. 3954  | 0. 065 | 0. 247 | 1. 42E-24 M2 | CREB5         |
| DRAXIN. 4  | 9. 64E-29 | -0. 35798 | 0. 013 | 0. 162 | 1. 44E-24 M2 | DRAXIN        |
| RP11-71N1  | 9. 93E-29 | -0. 38611 | 0. 004 | 0. 145 | 1. 48E-24 M2 | RP11-71N10. 1 |
| DEF6. 5    | 1. 02E-28 | 0. 292428 | 0. 204 | 0. 083 | 1. 53E-24 M2 | DEF6          |
| SMARCA1. 3 | 1. 04E-28 | -0. 32364 | 0. 024 | 0. 182 | 1. 56E-24 M2 | SMARCA1       |
| GAL3ST4. 4 | 1. 08E-28 | 0. 407656 | 0. 309 | 0. 161 | 1. 61E-24 M2 | GAL3ST4       |
| SEPT8. 5   | 1. 29E-28 | -0. 40002 | 0. 041 | 0. 207 | 1. 92E-24 M2 | 8-Sep         |

|           |          |          |       |       |          |    |            |
|-----------|----------|----------|-------|-------|----------|----|------------|
| PCDHB16.3 | 1.31E-28 | -0.343   | 0.006 | 0.149 | 1.96E-24 | M2 | PCDHB16    |
| MAPKAPK3. | 1.42E-28 | 0.424838 | 0.299 | 0.161 | 2.12E-24 | M2 | MAPKAPK3   |
| DPF1.4    | 1.56E-28 | -0.38518 | 0.006 | 0.15  | 2.33E-24 | M2 | DPF1       |
| TERF1.2   | 1.84E-28 | -0.35289 | 0.129 | 0.337 | 2.75E-24 | M2 | TERF1      |
| PTGER4.5  | 1.88E-28 | 0.292385 | 0.255 | 0.114 | 2.81E-24 | M2 | PTGER4     |
| MSI1.3    | 1.95E-28 | -0.33916 | 0.004 | 0.144 | 2.91E-24 | M2 | MSI1       |
| ARGLU1.4  | 1.99E-28 | -0.38126 | 0.264 | 0.483 | 2.98E-24 | M2 | ARGLU1     |
| CHL1.3    | 2.03E-28 | -0.35956 | 0.014 | 0.163 | 3.03E-24 | M2 | CHL1       |
| RNF24.2   | 2.04E-28 | -0.36031 | 0.077 | 0.261 | 3.05E-24 | M2 | RNF24      |
| ORMDL2.3  | 2.09E-28 | 0.41046  | 0.414 | 0.262 | 3.13E-24 | M2 | ORMDL2     |
| OFD1.1    | 2.21E-28 | -0.40675 | 0.093 | 0.287 | 3.30E-24 | M2 | OFD1       |
| PAK3.5    | 2.53E-28 | -0.44282 | 0.009 | 0.153 | 3.79E-24 | M2 | PAK3       |
| NDN.5     | 2.55E-28 | -0.34657 | 0.041 | 0.208 | 3.81E-24 | M2 | NDN        |
| MAN1A1.4  | 2.62E-28 | 0.265346 | 0.129 | 0.042 | 3.92E-24 | M2 | MAN1A1     |
| RAB3A.5   | 2.62E-28 | -0.43887 | 0.022 | 0.174 | 3.92E-24 | M2 | RAB3A      |
| CBS.4     | 2.83E-28 | -0.33844 | 0.018 | 0.167 | 4.22E-24 | M2 | CBS        |
| SNX6.3    | 3.00E-28 | 0.38386  | 0.54  | 0.422 | 4.49E-24 | M2 | SNX6       |
| DAG1.3    | 3.22E-28 | -0.32425 | 0.027 | 0.184 | 4.81E-24 | M2 | DAG1       |
| HCFC1R1.2 | 3.25E-28 | 0.461877 | 0.415 | 0.273 | 4.86E-24 | M2 | HCFC1R1    |
| NRSN2.4   | 3.31E-28 | -0.31606 | 0.022 | 0.174 | 4.94E-24 | M2 | NRSN2      |
| SLC22A18A | 3.78E-28 | 0.222876 | 0.05  | 0.008 | 5.64E-24 | M2 | SLC22A18AS |
| SCARA3.4  | 3.95E-28 | -0.33673 | 0.006 | 0.147 | 5.90E-24 | M2 | SCARA3     |
| SBDS.5    | 4.03E-28 | -0.39415 | 0.401 | 0.625 | 6.02E-24 | M2 | SBDS       |
| SSBP2.5   | 4.08E-28 | -0.41655 | 0.091 | 0.283 | 6.09E-24 | M2 | SSBP2      |
| TSPAN6.4  | 4.15E-28 | -0.37046 | 0.013 | 0.159 | 6.21E-24 | M2 | TSPAN6     |
| CNP.4     | 4.19E-28 | -0.53243 | 0.185 | 0.391 | 6.26E-24 | M2 | CNP        |
| NXPH1.5   | 4.28E-28 | -0.3836  | 0.005 | 0.145 | 6.40E-24 | M2 | NXPH1      |
| DPF3.2    | 4.32E-28 | -0.32623 | 0.005 | 0.145 | 6.46E-24 | M2 | DPF3       |
| PIGX.4    | 4.45E-28 | -0.33259 | 0.082 | 0.265 | 6.65E-24 | M2 | PIGX       |
| SOCS2.4   | 4.70E-28 | -0.39737 | 0.019 | 0.166 | 7.02E-24 | M2 | SOCS2      |
| PDRG1.3   | 4.85E-28 | -0.35478 | 0.091 | 0.281 | 7.24E-24 | M2 | PDRG1      |
| B4GALNT1. | 4.92E-28 | -0.49737 | 0.01  | 0.153 | 7.35E-24 | M2 | B4GALNT1   |
| HS3ST1.4  | 4.94E-28 | 0.358201 | 0.194 | 0.08  | 7.38E-24 | M2 | HS3ST1     |
| CD72.4    | 5.34E-28 | 0.312889 | 0.133 | 0.045 | 7.98E-24 | M2 | CD72       |
| WDR60.2   | 5.37E-28 | -0.35415 | 0.066 | 0.244 | 8.02E-24 | M2 | WDR60      |
| JAM3.2    | 5.81E-28 | -0.34125 | 0.013 | 0.159 | 8.68E-24 | M2 | JAM3       |
| USP1.4    | 6.03E-28 | -0.34885 | 0.086 | 0.271 | 9.01E-24 | M2 | USP1       |
| IL6R.5    | 6.13E-28 | 0.331063 | 0.192 | 0.078 | 9.16E-24 | M2 | IL6R       |
| MXRA7.3   | 6.80E-28 | -0.35307 | 0.024 | 0.177 | 1.02E-23 | M2 | MXRA7      |
| APOD.4    | 7.70E-28 | -0.8778  | 0.022 | 0.17  | 1.15E-23 | M2 | APOD       |
| RFX4.3    | 9.32E-28 | -0.39759 | 0.014 | 0.16  | 1.39E-23 | M2 | RFX4       |
| TEAD1.3   | 9.48E-28 | -0.29994 | 0.011 | 0.154 | 1.42E-23 | M2 | TEAD1      |
| CHMP1B.5  | 9.69E-28 | 0.394315 | 0.558 | 0.429 | 1.45E-23 | M2 | CHMP1B     |
| TLK1.2    | 1.02E-27 | -0.31777 | 0.064 | 0.24  | 1.53E-23 | M2 | TLK1       |
| TNC.4     | 1.02E-27 | -0.46709 | 0.046 | 0.212 | 1.53E-23 | M2 | TNC        |
| GAS1.5    | 1.07E-27 | -0.38292 | 0.011 | 0.154 | 1.60E-23 | M2 | GAS1       |
| ADAM28.5  | 1.14E-27 | 0.30653  | 0.277 | 0.132 | 1.70E-23 | M2 | ADAM28     |
| PPP1R18.5 | 1.19E-27 | 0.411838 | 0.43  | 0.283 | 1.78E-23 | M2 | PPP1R18    |
| LRRC4B.5  | 1.25E-27 | -0.30482 | 0.005 | 0.142 | 1.87E-23 | M2 | LRRC4B     |
| C5AR2.1   | 1.26E-27 | 0.230769 | 0.064 | 0.013 | 1.88E-23 | M2 | C5AR2      |
| CNIH4.3   | 1.33E-27 | 0.422494 | 0.488 | 0.365 | 1.99E-23 | M2 | CNIH4      |

|            |           |           |        |        |           |    |               |
|------------|-----------|-----------|--------|--------|-----------|----|---------------|
| APC. 5     | 1. 34E-27 | -0. 34371 | 0. 055 | 0. 224 | 2. 01E-23 | M2 | APC           |
| ZNF680. 3  | 1. 36E-27 | -0. 36443 | 0. 029 | 0. 184 | 2. 03E-23 | M2 | ZNF680        |
| RP11-84C1  | 1. 43E-27 | 0. 267719 | 0. 069 | 0. 015 | 2. 14E-23 | M2 | RP11-84C10. 2 |
| EIF3K. 4   | 1. 44E-27 | 0. 149313 | 0. 845 | 0. 752 | 2. 15E-23 | M2 | EIF3K         |
| RAMP2. 4   | 1. 57E-27 | -0. 37966 | 0. 006 | 0. 145 | 2. 35E-23 | M2 | RAMP2         |
| MVP. 3     | 1. 58E-27 | 0. 437855 | 0. 356 | 0. 216 | 2. 35E-23 | M2 | MVP           |
| IBSP. 3    | 1. 66E-27 | 0. 356823 | 0. 08  | 0. 02  | 2. 48E-23 | M2 | IBSP          |
| ZNF711. 4  | 1. 70E-27 | -0. 36233 | 0. 01  | 0. 151 | 2. 54E-23 | M2 | ZNF711        |
| SF3B5. 1   | 1. 82E-27 | 0. 243789 | 0. 722 | 0. 623 | 2. 71E-23 | M2 | SF3B5         |
| SEZ6L. 4   | 1. 86E-27 | -0. 4079  | 0. 006 | 0. 144 | 2. 77E-23 | M2 | SEZ6L         |
| WSCD1. 4   | 1. 91E-27 | -0. 33839 | 0. 004 | 0. 14  | 2. 86E-23 | M2 | WSCD1         |
| GPSM2. 4   | 1. 96E-27 | -0. 38714 | 0. 032 | 0. 187 | 2. 92E-23 | M2 | GPSM2         |
| KLC1. 5    | 2. 11E-27 | -0. 39229 | 0. 17  | 0. 373 | 3. 15E-23 | M2 | KLC1          |
| SELPLG. 4  | 2. 21E-27 | 0. 321513 | 0. 246 | 0. 112 | 3. 31E-23 | M2 | SELPLG        |
| CD109. 1   | 2. 23E-27 | 0. 271099 | 0. 082 | 0. 021 | 3. 34E-23 | M2 | CD109         |
| RAP2B. 5   | 2. 24E-27 | 0. 432507 | 0. 289 | 0. 156 | 3. 34E-23 | M2 | RAP2B         |
| ASNS. 5    | 2. 33E-27 | -0. 38847 | 0. 032 | 0. 187 | 3. 48E-23 | M2 | ASNS          |
| ABCG1. 5   | 2. 39E-27 | 0. 348796 | 0. 255 | 0. 122 | 3. 58E-23 | M2 | ABCG1         |
| SPINK6     | 2. 51E-27 | 0. 103225 | 0. 026 | 0. 002 | 3. 76E-23 | M2 | SPINK6        |
| CCRL2. 5   | 2. 52E-27 | 0. 339844 | 0. 195 | 0. 081 | 3. 76E-23 | M2 | CCRL2         |
| CTSF. 4    | 2. 53E-27 | -0. 37213 | 0. 097 | 0. 282 | 3. 78E-23 | M2 | CTSF          |
| CFLAR. 4   | 2. 54E-27 | 0. 390903 | 0. 455 | 0. 309 | 3. 80E-23 | M2 | CFLAR         |
| KNOP1. 4   | 2. 56E-27 | -0. 34984 | 0. 088 | 0. 272 | 3. 82E-23 | M2 | KNOP1         |
| CERS1. 3   | 2. 59E-27 | -0. 32176 | 0. 003 | 0. 137 | 3. 87E-23 | M2 | CERS1         |
| NKTR. 3    | 2. 63E-27 | -0. 36545 | 0. 158 | 0. 371 | 3. 92E-23 | M2 | NKTR          |
| PTRF. 5    | 2. 80E-27 | -0. 38081 | 0. 037 | 0. 196 | 4. 18E-23 | M2 | PTRF          |
| SPARCL1. 4 | 2. 85E-27 | -0. 64987 | 0. 172 | 0. 358 | 4. 26E-23 | M2 | SPARCL1       |
| VBP1. 4    | 2. 92E-27 | -0. 39408 | 0. 28  | 0. 502 | 4. 37E-23 | M2 | VBP1          |
| SMARCD3. 4 | 3. 03E-27 | -0. 32211 | 0. 068 | 0. 243 | 4. 52E-23 | M2 | SMARCD3       |
| ZNF267. 5  | 3. 34E-27 | 0. 433634 | 0. 249 | 0. 124 | 4. 99E-23 | M2 | ZNF267        |
| KMT2A. 5   | 3. 38E-27 | -0. 3733  | 0. 074 | 0. 248 | 5. 04E-23 | M2 | KMT2A         |
| CD209      | 3. 41E-27 | 0. 137049 | 0. 047 | 0. 007 | 5. 10E-23 | M2 | CD209         |
| PNMA2. 4   | 3. 52E-27 | -0. 34246 | 0. 009 | 0. 148 | 5. 26E-23 | M2 | PNMA2         |
| YWHAE. 4   | 3. 56E-27 | -0. 27069 | 0. 681 | 0. 757 | 5. 32E-23 | M2 | YWHAE         |
| CNIH2. 5   | 3. 63E-27 | -0. 29886 | 0. 004 | 0. 139 | 5. 43E-23 | M2 | CNIH2         |
| SPOCK2. 3  | 3. 66E-27 | -0. 36883 | 0. 009 | 0. 149 | 5. 47E-23 | M2 | SPOCK2        |
| TRIM44. 4  | 3. 95E-27 | -0. 36673 | 0. 112 | 0. 299 | 5. 90E-23 | M2 | TRIM44        |
| ATP5C1. 4  | 4. 06E-27 | 0. 260266 | 0. 672 | 0. 58  | 6. 06E-23 | M2 | ATP5C1        |
| HPSE. 4    | 4. 18E-27 | 0. 302068 | 0. 146 | 0. 052 | 6. 25E-23 | M2 | HPSE          |
| CYB5R4. 5  | 4. 22E-27 | 0. 421067 | 0. 3   | 0. 167 | 6. 31E-23 | M2 | CYB5R4        |
| DPYSL4. 5  | 4. 49E-27 | -0. 30386 | 0. 018 | 0. 164 | 6. 72E-23 | M2 | DPYSL4        |
| SUN1. 5    | 4. 62E-27 | -0. 35845 | 0. 052 | 0. 219 | 6. 90E-23 | M2 | SUN1          |
| C5orf24. 4 | 4. 75E-27 | -0. 34127 | 0. 116 | 0. 309 | 7. 10E-23 | M2 | C5orf24       |
| PJA1. 3    | 4. 81E-27 | -0. 37411 | 0. 043 | 0. 203 | 7. 20E-23 | M2 | PJA1          |
| GM2A. 4    | 5. 03E-27 | 0. 44205  | 0. 263 | 0. 135 | 7. 52E-23 | M2 | GM2A          |
| NNT-AS1. 4 | 5. 23E-27 | -0. 36743 | 0. 061 | 0. 233 | 7. 82E-23 | M2 | NNT-AS1       |
| PCMTD2. 4  | 5. 38E-27 | -0. 32266 | 0. 066 | 0. 239 | 8. 05E-23 | M2 | PCMTD2        |
| SNCA. 5    | 5. 52E-27 | 0. 292479 | 0. 278 | 0. 134 | 8. 25E-23 | M2 | SNCA          |
| APBB1IP. 5 | 5. 88E-27 | 0. 270228 | 0. 301 | 0. 146 | 8. 78E-23 | M2 | APBB1IP       |
| SNAP25. 4  | 6. 03E-27 | -0. 47992 | 0. 011 | 0. 152 | 9. 01E-23 | M2 | SNAP25        |
| DPYD. 3    | 6. 13E-27 | 0. 312981 | 0. 211 | 0. 093 | 9. 16E-23 | M2 | DPYD          |

|             |           |           |        |        |           |    |                |
|-------------|-----------|-----------|--------|--------|-----------|----|----------------|
| BIN2. 5     | 6. 56E-27 | 0. 245268 | 0. 235 | 0. 104 | 9. 81E-23 | M2 | BIN2           |
| H3F3B. 5    | 6. 84E-27 | -0. 2303  | 0. 987 | 0. 969 | 1. 02E-22 | M2 | H3F3B          |
| RAC3. 4     | 6. 86E-27 | -0. 32689 | 0. 037 | 0. 193 | 1. 03E-22 | M2 | RAC3           |
| LHX2. 5     | 7. 82E-27 | -0. 32102 | 0. 005 | 0. 139 | 1. 17E-22 | M2 | LHX2           |
| VIM. 4      | 7. 94E-27 | 0. 224037 | 0. 925 | 0. 645 | 1. 19E-22 | M2 | VIM            |
| BPGM. 2     | 8. 15E-27 | -0. 37794 | 0. 072 | 0. 245 | 1. 22E-22 | M2 | BPGM           |
| FIP1L1. 2   | 8. 72E-27 | -0. 39189 | 0. 12  | 0. 309 | 1. 30E-22 | M2 | FIP1L1         |
| C8orf4. 4   | 9. 39E-27 | -0. 75353 | 0. 07  | 0. 239 | 1. 40E-22 | M2 | C8orf4         |
| SEMA4A. 5   | 9. 70E-27 | 0. 291986 | 0. 129 | 0. 044 | 1. 45E-22 | M2 | SEMA4A         |
| PPM1K. 1    | 9. 94E-27 | -0. 41244 | 0. 066 | 0. 235 | 1. 49E-22 | M2 | PPM1K          |
| NAE1. 3     | 1. 00E-26 | -0. 36608 | 0. 151 | 0. 354 | 1. 49E-22 | M2 | NAE1           |
| C11orf49. 1 | 1. 00E-26 | -0. 34113 | 0. 072 | 0. 249 | 1. 50E-22 | M2 | C11orf49       |
| CCL13       | 1. 03E-26 | 0. 126539 | 0. 041 | 0. 006 | 1. 54E-22 | M2 | CCL13          |
| COLGALT2. 1 | 1. 05E-26 | -0. 32283 | 0. 01  | 0. 148 | 1. 56E-22 | M2 | COLGALT2       |
| CERS4. 4    | 1. 09E-26 | -0. 33941 | 0. 049 | 0. 21  | 1. 63E-22 | M2 | CERS4          |
| ELF1. 5     | 1. 12E-26 | 0. 359804 | 0. 392 | 0. 233 | 1. 68E-22 | M2 | ELF1           |
| POLR2L. 2   | 1. 14E-26 | 0. 201414 | 0. 791 | 0. 68  | 1. 70E-22 | M2 | POLR2L         |
| TMEM51. 4   | 1. 27E-26 | 0. 412791 | 0. 23  | 0. 111 | 1. 89E-22 | M2 | TMEM51         |
| ZNF75A. 4   | 1. 32E-26 | -0. 33794 | 0. 057 | 0. 225 | 1. 97E-22 | M2 | ZNF75A         |
| GLIPR2. 4   | 1. 39E-26 | 0. 478251 | 0. 392 | 0. 26  | 2. 08E-22 | M2 | GLIPR2         |
| POLD2. 4    | 1. 44E-26 | -0. 37316 | 0. 218 | 0. 436 | 2. 15E-22 | M2 | POLD2          |
| CST7. 3     | 1. 49E-26 | 0. 236032 | 0. 103 | 0. 03  | 2. 23E-22 | M2 | CST7           |
| CNN2. 3     | 1. 54E-26 | 0. 378911 | 0. 156 | 0. 06  | 2. 29E-22 | M2 | CNN2           |
| KLHL4. 3    | 1. 62E-26 | -0. 31664 | 0. 004 | 0. 136 | 2. 42E-22 | M2 | KLHL4          |
| RASGRP4. 2  | 1. 64E-26 | 0. 22046  | 0. 072 | 0. 016 | 2. 46E-22 | M2 | RASGRP4        |
| NPTXR. 4    | 1. 73E-26 | -0. 28584 | 0. 004 | 0. 136 | 2. 58E-22 | M2 | NPTXR          |
| TMEM106B. 1 | 1. 82E-26 | -0. 35354 | 0. 143 | 0. 344 | 2. 72E-22 | M2 | TMEM106B       |
| REL. 5      | 1. 83E-26 | 0. 351706 | 0. 453 | 0. 287 | 2. 74E-22 | M2 | REL            |
| CDKN2C. 3   | 1. 86E-26 | -0. 47366 | 0. 111 | 0. 294 | 2. 77E-22 | M2 | CDKN2C         |
| TROVE2. 4   | 1. 99E-26 | -0. 41609 | 0. 239 | 0. 447 | 2. 98E-22 | M2 | TROVE2         |
| C21orf62. 2 | 2. 30E-26 | -0. 41631 | 0. 023 | 0. 167 | 3. 44E-22 | M2 | C21orf62       |
| C8orf46. 3  | 2. 32E-26 | -0. 41111 | 0. 011 | 0. 149 | 3. 46E-22 | M2 | C8orf46        |
| ZC2HC1A. 4  | 2. 33E-26 | -0. 41023 | 0. 059 | 0. 221 | 3. 49E-22 | M2 | ZC2HC1A        |
| ZNF146. 3   | 2. 33E-26 | -0. 32606 | 0. 068 | 0. 239 | 3. 49E-22 | M2 | ZNF146         |
| TFPT. 3     | 2. 59E-26 | 0. 428384 | 0. 428 | 0. 3   | 3. 86E-22 | M2 | TFPT           |
| ABAT. 5     | 2. 67E-26 | -0. 3585  | 0. 024 | 0. 169 | 3. 99E-22 | M2 | ABAT           |
| C1orf21. 5  | 2. 69E-26 | -0. 39172 | 0. 051 | 0. 211 | 4. 02E-22 | M2 | C1orf21        |
| MAF. 4      | 2. 69E-26 | 0. 305356 | 0. 259 | 0. 126 | 4. 02E-22 | M2 | MAF            |
| KLHL7. 3    | 2. 74E-26 | -0. 3623  | 0. 107 | 0. 291 | 4. 09E-22 | M2 | KLHL7          |
| PRKAG2-AS   | 2. 89E-26 | 0. 412032 | 0. 241 | 0. 116 | 4. 32E-22 | M2 | PRKAG2-AS1     |
| TIA1. 5     | 3. 10E-26 | -0. 33945 | 0. 082 | 0. 26  | 4. 63E-22 | M2 | TIA1           |
| NAGA. 5     | 3. 35E-26 | 0. 381145 | 0. 317 | 0. 175 | 5. 01E-22 | M2 | NAGA           |
| PPCS. 2     | 3. 77E-26 | 0. 40903  | 0. 448 | 0. 311 | 5. 63E-22 | M2 | PPCS           |
| KIFC3. 1    | 3. 81E-26 | 0. 424993 | 0. 208 | 0. 097 | 5. 69E-22 | M2 | KIFC3          |
| CSTF3. 3    | 3. 88E-26 | -0. 36286 | 0. 096 | 0. 279 | 5. 80E-22 | M2 | CSTF3          |
| DLL3. 4     | 3. 89E-26 | -0. 55022 | 0. 015 | 0. 153 | 5. 81E-22 | M2 | DLL3           |
| ASF1A. 4    | 4. 02E-26 | -0. 33682 | 0. 073 | 0. 246 | 6. 01E-22 | M2 | ASF1A          |
| CXorf21. 5  | 4. 20E-26 | 0. 256572 | 0. 175 | 0. 069 | 6. 28E-22 | M2 | CXorf21        |
| SMARCC2. 4  | 4. 54E-26 | -0. 34379 | 0. 095 | 0. 275 | 6. 78E-22 | M2 | SMARCC2        |
| RP11-849I   | 4. 62E-26 | -0. 37224 | 0. 008 | 0. 141 | 6. 91E-22 | M2 | RP11-849I19. 1 |
| GPATCH8. 3  | 4. 64E-26 | -0. 37446 | 0. 128 | 0. 316 | 6. 94E-22 | M2 | GPATCH8        |



|            |           |           |        |        |              |             |
|------------|-----------|-----------|--------|--------|--------------|-------------|
| GDI1. 4    | 4. 91E-26 | -0. 3551  | 0. 286 | 0. 5   | 7. 34E-22 M2 | GDI1        |
| HPRT1. 5   | 4. 96E-26 | 0. 388658 | 0. 367 | 0. 221 | 7. 42E-22 M2 | HPRT1       |
| NDRG1. 2   | 5. 14E-26 | 0. 333024 | 0. 305 | 0. 162 | 7. 69E-22 M2 | NDRG1       |
| AC004158.  | 5. 18E-26 | -0. 34778 | 0. 003 | 0. 131 | 7. 74E-22 M2 | AC004158. 3 |
| MILR1. 5   | 5. 26E-26 | 0. 272663 | 0. 209 | 0. 091 | 7. 87E-22 M2 | MILR1       |
| STX4. 3    | 5. 78E-26 | 0. 434417 | 0. 441 | 0. 305 | 8. 63E-22 M2 | STX4        |
| NKAIN3. 4  | 5. 93E-26 | -0. 31881 | 0. 004 | 0. 133 | 8. 85E-22 M2 | NKAIN3      |
| TRIM36. 5  | 6. 08E-26 | -0. 29733 | 0. 038 | 0. 192 | 9. 08E-22 M2 | TRIM36      |
| CALHM2. 3  | 6. 11E-26 | 0. 32118  | 0. 144 | 0. 054 | 9. 12E-22 M2 | CALHM2      |
| BCL7A. 5   | 6. 56E-26 | -0. 36131 | 0. 019 | 0. 159 | 9. 81E-22 M2 | BCL7A       |
| GPR35      | 6. 69E-26 | 0. 148558 | 0. 063 | 0. 013 | 9. 99E-22 M2 | GPR35       |
| OBSL1. 4   | 6. 94E-26 | -0. 33366 | 0. 017 | 0. 155 | 1. 04E-21 M2 | OBSL1       |
| PPBP       | 8. 16E-26 | 0. 185805 | 0. 026 | 0. 002 | 1. 22E-21 M2 | PPBP        |
| ARL4D. 5   | 8. 64E-26 | -0. 39814 | 0. 031 | 0. 179 | 1. 29E-21 M2 | ARL4D       |
| PXMP2. 3   | 9. 28E-26 | -0. 3366  | 0. 069 | 0. 234 | 1. 39E-21 M2 | PXMP2       |
| RNASEH1-A  | 1. 02E-25 | -0. 31028 | 0. 036 | 0. 188 | 1. 52E-21 M2 | RNASEH1-AS1 |
| GPRIN3. 5  | 1. 02E-25 | 0. 299731 | 0. 143 | 0. 052 | 1. 53E-21 M2 | GPRIN3      |
| MS4A14. 4  | 1. 04E-25 | 0. 243265 | 0. 075 | 0. 018 | 1. 55E-21 M2 | MS4A14      |
| SLC35F1. 3 | 1. 11E-25 | -0. 25312 | 0. 005 | 0. 134 | 1. 66E-21 M2 | SLC35F1     |
| BBOX1. 4   | 1. 12E-25 | -0. 42266 | 0. 011 | 0. 146 | 1. 67E-21 M2 | BBOX1       |
| RSBN1L. 3  | 1. 14E-25 | -0. 36229 | 0. 17  | 0. 368 | 1. 70E-21 M2 | RSBN1L      |
| CD302. 5   | 1. 16E-25 | 0. 356257 | 0. 342 | 0. 195 | 1. 73E-21 M2 | CD302       |
| CNTFR. 4   | 1. 16E-25 | -0. 33156 | 0. 008 | 0. 139 | 1. 74E-21 M2 | CNTFR       |
| PNISR. 2   | 1. 20E-25 | -0. 34546 | 0. 416 | 0. 626 | 1. 79E-21 M2 | PNISR       |
| IFT81. 3   | 1. 34E-25 | -0. 26678 | 0. 024 | 0. 168 | 2. 00E-21 M2 | IFT81       |
| HRAS. 5    | 1. 38E-25 | -0. 33655 | 0. 123 | 0. 306 | 2. 06E-21 M2 | HRAS        |
| LAMTOR4    | 1. 47E-25 | 0. 155296 | 0. 848 | 0. 758 | 2. 19E-21 M2 | LAMTOR4     |
| DENND3. 5  | 1. 50E-25 | 0. 364994 | 0. 208 | 0. 093 | 2. 24E-21 M2 | DENND3      |
| LINC00662  | 1. 50E-25 | -0. 34862 | 0. 04  | 0. 193 | 2. 24E-21 M2 | LINC00662   |
| TSN. 3     | 1. 53E-25 | -0. 3325  | 0. 183 | 0. 391 | 2. 28E-21 M2 | TSN         |
| PPFIBP1. 3 | 1. 65E-25 | -0. 31329 | 0. 023 | 0. 165 | 2. 47E-21 M2 | PPFIBP1     |
| PIK3R5. 5  | 1. 70E-25 | 0. 267304 | 0. 124 | 0. 042 | 2. 54E-21 M2 | PIK3R5      |
| ALKBH4. 3  | 1. 82E-25 | -0. 33883 | 0. 051 | 0. 209 | 2. 72E-21 M2 | ALKBH4      |
| SOBP. 4    | 1. 85E-25 | -0. 30205 | 0. 01  | 0. 143 | 2. 76E-21 M2 | SOBP        |
| ZFR. 3     | 2. 02E-25 | -0. 34377 | 0. 128 | 0. 318 | 3. 02E-21 M2 | ZFR         |
| FAM195A. 3 | 2. 04E-25 | 0. 444576 | 0. 372 | 0. 246 | 3. 05E-21 M2 | FAM195A     |
| LBH. 5     | 2. 13E-25 | -0. 46768 | 0. 023 | 0. 163 | 3. 18E-21 M2 | LBH         |
| MED19. 2   | 2. 25E-25 | -0. 34196 | 0. 11  | 0. 294 | 3. 36E-21 M2 | MED19       |
| PLA2G7. 4  | 2. 29E-25 | 0. 326463 | 0. 129 | 0. 046 | 3. 42E-21 M2 | PLA2G7      |
| TMED9. 2   | 2. 46E-25 | 0. 152006 | 0. 77  | 0. 683 | 3. 67E-21 M2 | TMED9       |
| KCNF1. 5   | 2. 50E-25 | -0. 33499 | 0. 005 | 0. 132 | 3. 74E-21 M2 | KCNF1       |
| RTKN. 5    | 2. 53E-25 | -0. 34033 | 0. 033 | 0. 181 | 3. 78E-21 M2 | RTKN        |
| SLC16A1. 5 | 2. 65E-25 | -0. 38042 | 0. 077 | 0. 245 | 3. 96E-21 M2 | SLC16A1     |
| RASGRP3. 4 | 2. 73E-25 | 0. 308048 | 0. 16  | 0. 062 | 4. 07E-21 M2 | RASGRP3     |
| CCL3L3. 3  | 2. 87E-25 | 0. 324861 | 0. 137 | 0. 048 | 4. 29E-21 M2 | CCL3L3      |
| BRIX1. 5   | 2. 97E-25 | -0. 37205 | 0. 089 | 0. 265 | 4. 44E-21 M2 | BRIX1       |
| PIPOX. 4   | 3. 07E-25 | -0. 3102  | 0. 01  | 0. 141 | 4. 58E-21 M2 | PIPOX       |
| ST3GAL1. 5 | 3. 24E-25 | 0. 344796 | 0. 208 | 0. 095 | 4. 84E-21 M2 | ST3GAL1     |
| CCT2. 1    | 3. 25E-25 | -0. 41435 | 0. 344 | 0. 56  | 4. 86E-21 M2 | CCT2        |
| BPTF. 3    | 3. 27E-25 | -0. 34185 | 0. 137 | 0. 323 | 4. 89E-21 M2 | BPTF        |
| BEND6. 4   | 3. 33E-25 | -0. 25774 | 0. 003 | 0. 127 | 4. 98E-21 M2 | BEND6       |

|            |           |           |        |        |              |               |
|------------|-----------|-----------|--------|--------|--------------|---------------|
| SEPT4. 5   | 3. 36E-25 | -0. 5118  | 0. 009 | 0. 138 | 5. 02E-21 M2 | 4-Sep         |
| DHPS. 4    | 3. 37E-25 | -0. 36522 | 0. 244 | 0. 461 | 5. 03E-21 M2 | DHPS          |
| DLX5. 5    | 3. 37E-25 | -0. 68473 | 0. 019 | 0. 153 | 5. 03E-21 M2 | DLX5          |
| WASL. 3    | 3. 46E-25 | -0. 29535 | 0. 041 | 0. 194 | 5. 16E-21 M2 | WASL          |
| TPPP3. 5   | 3. 48E-25 | -0. 51714 | 0. 023 | 0. 163 | 5. 20E-21 M2 | TPPP3         |
| PDGFRA. 4  | 3. 53E-25 | -0. 39938 | 0. 02  | 0. 157 | 5. 28E-21 M2 | PDGFRA        |
| TNRC6C. 4  | 3. 67E-25 | -0. 33343 | 0. 034 | 0. 181 | 5. 48E-21 M2 | TNRC6C        |
| CCZ1. 2    | 3. 69E-25 | -0. 30969 | 0. 162 | 0. 364 | 5. 51E-21 M2 | CCZ1          |
| GLA. 5     | 3. 92E-25 | 0. 372298 | 0. 347 | 0. 206 | 5. 86E-21 M2 | GLA           |
| MATR3. 4   | 3. 96E-25 | -0. 33826 | 0. 292 | 0. 5   | 5. 92E-21 M2 | MATR3         |
| AQP4. 4    | 4. 10E-25 | -0. 54102 | 0. 032 | 0. 175 | 6. 13E-21 M2 | AQP4          |
| MT1G. 4    | 4. 20E-25 | 0. 293613 | 0. 243 | 0. 119 | 6. 28E-21 M2 | MT1G          |
| ATP1A3. 4  | 4. 29E-25 | -0. 42205 | 0. 004 | 0. 129 | 6. 42E-21 M2 | ATP1A3        |
| SLC37A3. 3 | 4. 34E-25 | -0. 34265 | 0. 009 | 0. 138 | 6. 49E-21 M2 | SLC37A3       |
| PHLDA3. 2  | 4. 77E-25 | -0. 33364 | 0. 034 | 0. 181 | 7. 13E-21 M2 | PHLDA3        |
| RNF157. 4  | 4. 83E-25 | -0. 31468 | 0. 011 | 0. 143 | 7. 22E-21 M2 | RNF157        |
| LMAN2. 2   | 4. 91E-25 | 0. 237292 | 0. 658 | 0. 568 | 7. 34E-21 M2 | LMAN2         |
| FSCN1. 5   | 4. 94E-25 | -0. 37831 | 0. 323 | 0. 517 | 7. 38E-21 M2 | FSCN1         |
| ASIC4. 4   | 4. 95E-25 | -0. 50154 | 0. 015 | 0. 148 | 7. 40E-21 M2 | ASIC4         |
| BEND5. 3   | 5. 26E-25 | -0. 33355 | 0. 013 | 0. 146 | 7. 86E-21 M2 | BEND5         |
| CEND1. 3   | 5. 28E-25 | -0. 31417 | 0. 014 | 0. 147 | 7. 89E-21 M2 | CEND1         |
| HIBCH. 3   | 5. 37E-25 | -0. 37886 | 0. 086 | 0. 255 | 8. 02E-21 M2 | HIBCH         |
| NUP107. 5  | 5. 55E-25 | -0. 49163 | 0. 074 | 0. 234 | 8. 29E-21 M2 | NUP107        |
| PHC2. 3    | 5. 73E-25 | 0. 53412  | 0. 391 | 0. 269 | 8. 57E-21 M2 | PHC2          |
| AMPD3. 3   | 6. 02E-25 | 0. 27532  | 0. 13  | 0. 046 | 8. 99E-21 M2 | AMPD3         |
| ATP5H. 2   | 6. 22E-25 | 0. 189667 | 0. 741 | 0. 643 | 9. 29E-21 M2 | ATP5H         |
| TSPAN12. 3 | 6. 29E-25 | -0. 32123 | 0. 004 | 0. 129 | 9. 40E-21 M2 | TSPAN12       |
| TCF12. 5   | 6. 41E-25 | -0. 37242 | 0. 119 | 0. 296 | 9. 58E-21 M2 | TCF12         |
| KDM1A. 3   | 6. 55E-25 | -0. 31642 | 0. 056 | 0. 214 | 9. 78E-21 M2 | KDM1A         |
| WHSC1L1. 5 | 6. 69E-25 | -0. 33577 | 0. 189 | 0. 386 | 9. 99E-21 M2 | WHSC1L1       |
| BHLHE40. 4 | 7. 01E-25 | 0. 466916 | 0. 313 | 0. 185 | 1. 05E-20 M2 | BHLHE40       |
| PFKM. 2    | 7. 22E-25 | -0. 35131 | 0. 043 | 0. 193 | 1. 08E-20 M2 | PFKM          |
| DDAH1. 4   | 7. 26E-25 | -0. 29644 | 0. 006 | 0. 133 | 1. 08E-20 M2 | DDAH1         |
| CHST12. 3  | 7. 69E-25 | -0. 32873 | 0. 087 | 0. 257 | 1. 15E-20 M2 | CHST12        |
| CST6. 1    | 7. 80E-25 | 0. 249551 | 0. 059 | 0. 012 | 1. 17E-20 M2 | CST6          |
| OTUD1. 5   | 8. 04E-25 | 0. 313726 | 0. 204 | 0. 091 | 1. 20E-20 M2 | OTUD1         |
| ASPHD1. 3  | 8. 30E-25 | -0. 33742 | 0. 014 | 0. 146 | 1. 24E-20 M2 | ASPHD1        |
| XBP1. 5    | 8. 55E-25 | 0. 354208 | 0. 497 | 0. 362 | 1. 28E-20 M2 | XBP1          |
| ALDH7A1. 2 | 8. 60E-25 | -0. 35465 | 0. 109 | 0. 287 | 1. 28E-20 M2 | ALDH7A1       |
| PSD3. 4    | 8. 64E-25 | -0. 31327 | 0. 05  | 0. 205 | 1. 29E-20 M2 | PSD3          |
| SELT. 2    | 8. 82E-25 | 0. 196056 | 0. 731 | 0. 654 | 1. 32E-20 M2 | SELT          |
| SLC1A2. 3  | 8. 93E-25 | -0. 36054 | 0. 013 | 0. 144 | 1. 33E-20 M2 | SLC1A2        |
| KCNMB4. 5  | 9. 82E-25 | -0. 3704  | 0. 006 | 0. 132 | 1. 47E-20 M2 | KCNMB4        |
| TMEM173. 5 | 1. 00E-24 | 0. 299089 | 0. 248 | 0. 118 | 1. 50E-20 M2 | TMEM173       |
| HLX. 2     | 1. 19E-24 | 0. 268927 | 0. 11  | 0. 036 | 1. 79E-20 M2 | HLX           |
| SLC17A9. 4 | 1. 20E-24 | 0. 239453 | 0. 089 | 0. 025 | 1. 80E-20 M2 | SLC17A9       |
| BAZ1B. 5   | 1. 27E-24 | -0. 31565 | 0. 129 | 0. 31  | 1. 89E-20 M2 | BAZ1B         |
| ZNF397. 3  | 1. 29E-24 | -0. 34077 | 0. 031 | 0. 172 | 1. 92E-20 M2 | ZNF397        |
| RP4-665J2  | 1. 36E-24 | -0. 30718 | 0. 008 | 0. 134 | 2. 03E-20 M2 | RP4-665J23. 1 |
| ALKBH2. 5  | 1. 38E-24 | -0. 34257 | 0. 051 | 0. 205 | 2. 06E-20 M2 | ALKBH2        |
| AC004540.  | 1. 41E-24 | -0. 43165 | 0. 006 | 0. 131 | 2. 10E-20 M2 | AC004540. 4   |

|            |          |          |       |       |             |            |
|------------|----------|----------|-------|-------|-------------|------------|
| UPF3A.4    | 1.45E-24 | -0.34731 | 0.161 | 0.358 | 2.17E-20 M2 | UPF3A      |
| SLC44A2.3  | 1.46E-24 | -0.35454 | 0.057 | 0.213 | 2.19E-20 M2 | SLC44A2    |
| RDX.4      | 1.47E-24 | -0.36991 | 0.318 | 0.503 | 2.20E-20 M2 | RDX        |
| SMARCD1.5  | 1.49E-24 | -0.28458 | 0.063 | 0.225 | 2.23E-20 M2 | SMARCD1    |
| SLC38A1.2  | 1.59E-24 | -0.41535 | 0.018 | 0.15  | 2.38E-20 M2 | SLC38A1    |
| VAV1.5     | 1.67E-24 | 0.26506  | 0.167 | 0.067 | 2.49E-20 M2 | VAV1       |
| ITGA4.4    | 1.76E-24 | 0.250633 | 0.114 | 0.038 | 2.62E-20 M2 | ITGA4      |
| SEZ6.5     | 1.76E-24 | -0.3907  | 0.017 | 0.148 | 2.64E-20 M2 | SEZ6       |
| PTPRE.5    | 1.77E-24 | 0.393234 | 0.397 | 0.261 | 2.64E-20 M2 | PTPRE      |
| KCNE3.4    | 1.84E-24 | 0.204566 | 0.083 | 0.022 | 2.74E-20 M2 | KCNE3      |
| GADD45A.5  | 1.86E-24 | -0.40878 | 0.111 | 0.291 | 2.78E-20 M2 | GADD45A    |
| KIF1A.4    | 1.92E-24 | -0.41606 | 0.009 | 0.134 | 2.88E-20 M2 | KIF1A      |
| WWTR1.5    | 1.93E-24 | -0.33328 | 0.029 | 0.169 | 2.89E-20 M2 | WWTR1      |
| EHMT2.4    | 2.03E-24 | -0.30313 | 0.055 | 0.211 | 3.03E-20 M2 | EHMT2      |
| WNK3.3     | 2.03E-24 | -0.28826 | 0.005 | 0.128 | 3.04E-20 M2 | WNK3       |
| EEF1A1.5   | 2.09E-24 | -0.34055 | 0.816 | 0.826 | 3.13E-20 M2 | EEF1A1     |
| GRIA4.4    | 2.16E-24 | -0.33202 | 0.01  | 0.138 | 3.22E-20 M2 | GRIA4      |
| COLGALT1.2 | 2.16E-24 | 0.44701  | 0.308 | 0.184 | 3.23E-20 M2 | COLGALT1   |
| C14orf1.4  | 2.21E-24 | -0.34546 | 0.121 | 0.304 | 3.30E-20 M2 | C14orf1    |
| LINC01003  | 2.24E-24 | -0.28377 | 0.049 | 0.202 | 3.35E-20 M2 | LINC01003  |
| GCAT.5     | 2.31E-24 | -0.25571 | 0.029 | 0.17  | 3.46E-20 M2 | GCAT       |
| CLDN7.1    | 2.64E-24 | 0.154136 | 0.066 | 0.015 | 3.95E-20 M2 | CLDN7      |
| VWA1.5     | 2.80E-24 | -0.30761 | 0.019 | 0.153 | 4.18E-20 M2 | VWA1       |
| HMHA1.5    | 3.16E-24 | 0.299074 | 0.22  | 0.1   | 4.72E-20 M2 | HMHA1      |
| DYNC1LI2.3 | 3.27E-24 | -0.32084 | 0.165 | 0.357 | 4.89E-20 M2 | DYNC1LI2   |
| MSMO1.4    | 3.28E-24 | -0.37236 | 0.059 | 0.211 | 4.90E-20 M2 | MSMO1      |
| ZNF827.4   | 3.57E-24 | -0.26976 | 0.003 | 0.122 | 5.34E-20 M2 | ZNF827     |
| SYP.5      | 3.75E-24 | -0.39439 | 0.014 | 0.142 | 5.61E-20 M2 | SYP        |
| MARCH6.4   | 3.77E-24 | -0.33388 | 0.172 | 0.37  | 5.63E-20 M2 | 6-Mar      |
| PPIC.3     | 3.79E-24 | -0.35694 | 0.045 | 0.193 | 5.67E-20 M2 | PPIC       |
| MSN.5      | 3.80E-24 | 0.379491 | 0.485 | 0.368 | 5.67E-20 M2 | MSN        |
| SPG21.4    | 3.88E-24 | 0.387426 | 0.484 | 0.378 | 5.80E-20 M2 | SPG21      |
| PER1.4     | 4.04E-24 | 0.425128 | 0.305 | 0.176 | 6.04E-20 M2 | PER1       |
| CASP1.4    | 4.14E-24 | 0.319483 | 0.365 | 0.216 | 6.18E-20 M2 | CASP1      |
| TIMP3.3    | 4.29E-24 | -0.36117 | 0.009 | 0.134 | 6.40E-20 M2 | TIMP3      |
| PITPNA-AS  | 4.32E-24 | -0.29102 | 0.051 | 0.206 | 6.46E-20 M2 | PITPNA-AS1 |
| TMED4.4    | 4.48E-24 | -0.36559 | 0.243 | 0.452 | 6.69E-20 M2 | TMED4      |
| TIMM44.3   | 4.54E-24 | -0.31798 | 0.101 | 0.274 | 6.79E-20 M2 | TIMM44     |
| TMEM97.3   | 4.64E-24 | -0.31144 | 0.037 | 0.181 | 6.94E-20 M2 | TMEM97     |
| TMEM50A.4  | 5.27E-24 | 0.200074 | 0.674 | 0.586 | 7.87E-20 M2 | TMEM50A    |
| EHD4.5     | 5.47E-24 | 0.306979 | 0.189 | 0.084 | 8.17E-20 M2 | EHD4       |
| NR2F6.4    | 5.57E-24 | -0.25688 | 0.018 | 0.15  | 8.33E-20 M2 | NR2F6      |
| NDUFA4.4   | 5.71E-24 | -0.2753  | 0.87  | 0.897 | 8.54E-20 M2 | NDUFA4     |
| OST4.2     | 5.82E-24 | 0.114256 | 0.865 | 0.774 | 8.69E-20 M2 | OST4       |
| CD151.4    | 5.87E-24 | 0.238299 | 0.607 | 0.473 | 8.77E-20 M2 | CD151      |
| ARID4B.4   | 6.05E-24 | -0.32339 | 0.215 | 0.419 | 9.04E-20 M2 | ARID4B     |
| COX11.3    | 6.12E-24 | -0.35787 | 0.144 | 0.331 | 9.15E-20 M2 | COX11      |
| NAALADL1.6 | 6.44E-24 | 0.165781 | 0.064 | 0.015 | 9.62E-20 M2 | NAALADL1   |
| PPAT.3     | 6.61E-24 | -0.28794 | 0.02  | 0.153 | 9.88E-20 M2 | PPAT       |
| AKAP7.5    | 6.68E-24 | -0.33187 | 0.054 | 0.205 | 9.98E-20 M2 | AKAP7      |
| RNH1.3     | 6.72E-24 | 0.257368 | 0.619 | 0.532 | 1.00E-19 M2 | RNH1       |

|             |          |          |       |       |             |              |
|-------------|----------|----------|-------|-------|-------------|--------------|
| MYO10.4     | 6.77E-24 | -0.31166 | 0.052 | 0.204 | 1.01E-19 M2 | MYO10        |
| SUB1.3      | 7.06E-24 | -0.28508 | 0.662 | 0.763 | 1.05E-19 M2 | SUB1         |
| ECM1.1      | 7.16E-24 | 0.368773 | 0.109 | 0.037 | 1.07E-19 M2 | ECM1         |
| ZNF131.4    | 7.19E-24 | -0.31402 | 0.078 | 0.243 | 1.08E-19 M2 | ZNF131       |
| FABP3.2     | 7.22E-24 | 0.308985 | 0.123 | 0.043 | 1.08E-19 M2 | FABP3        |
| TLN1.5      | 7.56E-24 | 0.429061 | 0.405 | 0.276 | 1.13E-19 M2 | TLN1         |
| BRD3.4      | 7.87E-24 | -0.32463 | 0.111 | 0.286 | 1.18E-19 M2 | BRD3         |
| LHFPL3.5    | 7.93E-24 | -0.35366 | 0.006 | 0.128 | 1.18E-19 M2 | LHFPL3       |
| TBCB.3      | 8.03E-24 | -0.36967 | 0.496 | 0.67  | 1.20E-19 M2 | TBCB         |
| ZNF83.1     | 8.08E-24 | -0.28584 | 0.054 | 0.208 | 1.21E-19 M2 | ZNF83        |
| TMEM25.4    | 8.14E-24 | -0.29693 | 0.008 | 0.131 | 1.22E-19 M2 | TMEM25       |
| FUCA2.5     | 8.48E-24 | 0.414894 | 0.363 | 0.234 | 1.27E-19 M2 | FUCA2        |
| ZNF91.2     | 9.18E-24 | -0.28341 | 0.061 | 0.22  | 1.37E-19 M2 | ZNF91        |
| EFNA1.3     | 1.03E-23 | -0.41771 | 0.011 | 0.137 | 1.53E-19 M2 | EFNA1        |
| C1QL1.4     | 1.05E-23 | -0.32553 | 0.004 | 0.122 | 1.57E-19 M2 | C1QL1        |
| INSM1.5     | 1.06E-23 | -0.33041 | 0.005 | 0.125 | 1.59E-19 M2 | INSM1        |
| UQCR10.2    | 1.08E-23 | 0.163958 | 0.831 | 0.735 | 1.62E-19 M2 | UQCR10       |
| CDC34.4     | 1.10E-23 | -0.30312 | 0.082 | 0.246 | 1.64E-19 M2 | CDC34        |
| DRAM1.2     | 1.11E-23 | 0.335809 | 0.16  | 0.067 | 1.65E-19 M2 | DRAM1        |
| CDKN2D.5    | 1.23E-23 | -0.3118  | 0.031 | 0.169 | 1.84E-19 M2 | CDKN2D       |
| RFTN2.5     | 1.24E-23 | -0.3791  | 0.011 | 0.136 | 1.85E-19 M2 | RFTN2        |
| GLCCI1.4    | 1.27E-23 | -0.42924 | 0.027 | 0.16  | 1.90E-19 M2 | GLCCI1       |
| RNASE4.1    | 1.27E-23 | 0.342283 | 0.098 | 0.031 | 1.90E-19 M2 | RNASE4       |
| ARSJ.3      | 1.31E-23 | -0.2919  | 0.01  | 0.133 | 1.96E-19 M2 | ARSJ         |
| YES1.2      | 1.35E-23 | -0.25466 | 0.013 | 0.139 | 2.02E-19 M2 | YES1         |
| SIGIRR.4    | 1.39E-23 | 0.436862 | 0.312 | 0.188 | 2.07E-19 M2 | SIGIRR       |
| S100A12.1   | 1.40E-23 | 0.126501 | 0.036 | 0.005 | 2.10E-19 M2 | S100A12      |
| STK17B.5    | 1.45E-23 | 0.313142 | 0.25  | 0.124 | 2.17E-19 M2 | STK17B       |
| NCOR1.4     | 1.55E-23 | -0.3209  | 0.28  | 0.477 | 2.31E-19 M2 | NCOR1        |
| PPP1R16A.1  | 1.60E-23 | -0.3005  | 0.037 | 0.179 | 2.39E-19 M2 | PPP1R16A     |
| SLC25A5.2   | 1.64E-23 | 0.144842 | 0.799 | 0.716 | 2.46E-19 M2 | SLC25A5      |
| CFP.1       | 1.65E-23 | 0.197185 | 0.059 | 0.013 | 2.46E-19 M2 | CFP          |
| TMOD1.3     | 1.80E-23 | -0.43136 | 0.031 | 0.166 | 2.69E-19 M2 | TMOD1        |
| ITGA7.3     | 1.85E-23 | -0.22699 | 0.017 | 0.145 | 2.76E-19 M2 | ITGA7        |
| CKLF.5      | 1.86E-23 | 0.268884 | 0.623 | 0.512 | 2.78E-19 M2 | CKLF         |
| UBE2L3.4    | 1.87E-23 | 0.290397 | 0.609 | 0.53  | 2.80E-19 M2 | UBE2L3       |
| EPM2AIP1.1  | 1.91E-23 | -0.32754 | 0.056 | 0.208 | 2.85E-19 M2 | EPM2AIP1     |
| HIGD2A.4    | 1.91E-23 | 0.191318 | 0.713 | 0.612 | 2.86E-19 M2 | HIGD2A       |
| CAMK2D.3    | 1.92E-23 | -0.35781 | 0.092 | 0.254 | 2.87E-19 M2 | CAMK2D       |
| ILF3-AS1.1  | 1.95E-23 | -0.29919 | 0.133 | 0.322 | 2.91E-19 M2 | ILF3-AS1     |
| RP11-345F.1 | 1.99E-23 | -0.27974 | 0.033 | 0.173 | 2.98E-19 M2 | RP11-345P4.9 |
| LINC00152.1 | 2.00E-23 | 0.400189 | 0.378 | 0.25  | 2.99E-19 M2 | LINC00152    |
| HNRNPA2B1.1 | 2.05E-23 | -0.28222 | 0.76  | 0.851 | 3.06E-19 M2 | HNRNPA2B1    |
| DENND1C.4   | 2.07E-23 | 0.23925  | 0.096 | 0.029 | 3.09E-19 M2 | DENND1C      |
| MYL6B.4     | 2.09E-23 | -0.31234 | 0.258 | 0.455 | 3.13E-19 M2 | MYL6B        |
| ANKIB1.4    | 2.16E-23 | -0.27533 | 0.063 | 0.219 | 3.22E-19 M2 | ANKIB1       |
| SDF2L1.2    | 2.19E-23 | 0.395879 | 0.466 | 0.352 | 3.28E-19 M2 | SDF2L1       |
| KIF2A.5     | 2.20E-23 | -0.33583 | 0.086 | 0.246 | 3.29E-19 M2 | KIF2A        |
| COX14.2     | 2.23E-23 | 0.301043 | 0.562 | 0.453 | 3.33E-19 M2 | COX14        |
| KIF5A.4     | 2.29E-23 | -0.3786  | 0.009 | 0.13  | 3.43E-19 M2 | KIF5A        |
| TMEM237.3   | 2.32E-23 | -0.31468 | 0.05  | 0.196 | 3.47E-19 M2 | TMEM237      |

|            |           |           |        |        |              |            |
|------------|-----------|-----------|--------|--------|--------------|------------|
| CLCN3. 3   | 2. 35E-23 | -0. 31326 | 0. 095 | 0. 259 | 3. 51E-19 M2 | CLCN3      |
| IFT57. 5   | 2. 41E-23 | -0. 37998 | 0. 093 | 0. 258 | 3. 60E-19 M2 | IFT57      |
| COMT. 5    | 2. 48E-23 | 0. 259466 | 0. 641 | 0. 54  | 3. 71E-19 M2 | COMT       |
| RGMB. 4    | 2. 49E-23 | -0. 40654 | 0. 015 | 0. 14  | 3. 73E-19 M2 | RGMB       |
| MFSD7. 4   | 2. 52E-23 | 0. 200337 | 0. 092 | 0. 027 | 3. 77E-19 M2 | MFSD7      |
| ANKS3. 3   | 2. 57E-23 | -0. 30877 | 0. 037 | 0. 178 | 3. 84E-19 M2 | ANKS3      |
| TPM2. 2    | 2. 77E-23 | -0. 37724 | 0. 036 | 0. 172 | 4. 14E-19 M2 | TPM2       |
| COPS8. 5   | 2. 79E-23 | -0. 35205 | 0. 271 | 0. 484 | 4. 17E-19 M2 | COPS8      |
| STARD4-AS  | 2. 85E-23 | -0. 28499 | 0. 011 | 0. 135 | 4. 26E-19 M2 | STARD4-AS1 |
| STMN2. 5   | 2. 90E-23 | -0. 79174 | 0. 059 | 0. 196 | 4. 33E-19 M2 | STMN2      |
| SALL1. 4   | 2. 91E-23 | -0. 27008 | 0. 018 | 0. 146 | 4. 34E-19 M2 | SALL1      |
| ZNF43. 3   | 3. 05E-23 | -0. 26834 | 0. 018 | 0. 146 | 4. 56E-19 M2 | ZNF43      |
| CHST10. 2  | 3. 20E-23 | -0. 25767 | 0. 019 | 0. 148 | 4. 78E-19 M2 | CHST10     |
| ZNF771. 4  | 3. 23E-23 | -0. 26859 | 0. 024 | 0. 155 | 4. 82E-19 M2 | ZNF771     |
| ADORA1. 3  | 3. 29E-23 | -0. 29539 | 0. 009 | 0. 13  | 4. 92E-19 M2 | ADORA1     |
| CLIC4. 4   | 3. 41E-23 | -0. 38617 | 0. 161 | 0. 345 | 5. 09E-19 M2 | CLIC4      |
| ZNF439. 4  | 3. 41E-23 | -0. 27401 | 0. 024 | 0. 157 | 5. 09E-19 M2 | ZNF439     |
| RXRA. 2    | 3. 50E-23 | 0. 412776 | 0. 192 | 0. 09  | 5. 23E-19 M2 | RXRA       |
| ZNF493. 3  | 3. 56E-23 | -0. 28793 | 0. 031 | 0. 167 | 5. 33E-19 M2 | ZNF493     |
| HSPBP1. 2  | 3. 62E-23 | -0. 3047  | 0. 123 | 0. 299 | 5. 41E-19 M2 | HSPBP1     |
| ARF1. 4    | 3. 90E-23 | 0. 150928 | 0. 76  | 0. 689 | 5. 83E-19 M2 | ARF1       |
| NT5C3B. 4  | 4. 11E-23 | -0. 30851 | 0. 158 | 0. 344 | 6. 15E-19 M2 | NT5C3B     |
| ARMC1. 4   | 4. 13E-23 | -0. 32896 | 0. 106 | 0. 275 | 6. 18E-19 M2 | ARMC1      |
| NRXN2. 5   | 4. 26E-23 | -0. 34116 | 0. 006 | 0. 124 | 6. 37E-19 M2 | NRXN2      |
| DIRAS3. 4  | 4. 31E-23 | -0. 52939 | 0. 01  | 0. 132 | 6. 44E-19 M2 | DIRAS3     |
| LINC00511  | 4. 57E-23 | -0. 28509 | 0. 008 | 0. 127 | 6. 83E-19 M2 | LINC00511  |
| CD180. 4   | 4. 58E-23 | 0. 211441 | 0. 101 | 0. 032 | 6. 85E-19 M2 | CD180      |
| TAF9B. 2   | 4. 70E-23 | -0. 29128 | 0. 023 | 0. 153 | 7. 03E-19 M2 | TAF9B      |
| SOX6. 4    | 4. 91E-23 | -0. 29964 | 0. 02  | 0. 15  | 7. 34E-19 M2 | SOX6       |
| RHBDD2. 4  | 5. 01E-23 | -0. 33591 | 0. 269 | 0. 473 | 7. 48E-19 M2 | RHBDD2     |
| EHBP1. 3   | 5. 08E-23 | -0. 25638 | 0. 037 | 0. 176 | 7. 59E-19 M2 | EHBP1      |
| ACSS3. 3   | 5. 37E-23 | -0. 24112 | 0. 004 | 0. 119 | 8. 03E-19 M2 | ACSS3      |
| PMAIP1. 5  | 5. 65E-23 | 0. 286223 | 0. 179 | 0. 077 | 8. 44E-19 M2 | PMAIP1     |
| IRF2BPL. 4 | 5. 65E-23 | -0. 32097 | 0. 089 | 0. 252 | 8. 45E-19 M2 | IRF2BPL    |
| RBBP7. 4   | 5. 87E-23 | -0. 35504 | 0. 236 | 0. 438 | 8. 78E-19 M2 | RBBP7      |
| TIMM22. 2  | 5. 98E-23 | -0. 31725 | 0. 091 | 0. 254 | 8. 93E-19 M2 | TIMM22     |
| NTHL1. 2   | 6. 04E-23 | -0. 30633 | 0. 05  | 0. 197 | 9. 03E-19 M2 | NTHL1      |
| LRWD1. 2   | 6. 07E-23 | -0. 27467 | 0. 04  | 0. 179 | 9. 06E-19 M2 | LRWD1      |
| CISD3. 4   | 6. 47E-23 | 0. 408506 | 0. 368 | 0. 246 | 9. 67E-19 M2 | CISD3      |
| MTMR4. 4   | 6. 55E-23 | -0. 2836  | 0. 033 | 0. 169 | 9. 79E-19 M2 | MTMR4      |
| MEIS3. 3   | 6. 87E-23 | -0. 26931 | 0. 014 | 0. 138 | 1. 03E-18 M2 | MEIS3      |
| SEC61G. 5  | 7. 02E-23 | -0. 58531 | 0. 777 | 0. 801 | 1. 05E-18 M2 | SEC61G     |
| TMED5. 4   | 7. 10E-23 | 0. 385797 | 0. 418 | 0. 298 | 1. 06E-18 M2 | TMED5      |
| SNX8. 4    | 7. 51E-23 | 0. 402788 | 0. 254 | 0. 139 | 1. 12E-18 M2 | SNX8       |
| HERPUD1. 4 | 7. 60E-23 | 0. 182728 | 0. 757 | 0. 634 | 1. 14E-18 M2 | HERPUD1    |
| CNKSR3. 4  | 8. 05E-23 | -0. 26015 | 0. 008 | 0. 125 | 1. 20E-18 M2 | CNKSR3     |
| CSAD. 3    | 8. 60E-23 | -0. 26067 | 0. 038 | 0. 177 | 1. 28E-18 M2 | CSAD       |
| NAV2. 2    | 8. 71E-23 | -0. 29462 | 0. 008 | 0. 126 | 1. 30E-18 M2 | NAV2       |
| CDH11. 3   | 8. 88E-23 | -0. 27804 | 0. 006 | 0. 123 | 1. 33E-18 M2 | CDH11      |
| RSPRY1. 3  | 8. 94E-23 | -0. 28346 | 0. 092 | 0. 259 | 1. 34E-18 M2 | RSPRY1     |
| SOX12. 4   | 9. 26E-23 | -0. 23978 | 0. 006 | 0. 123 | 1. 38E-18 M2 | SOX12      |

|             |           |           |        |        |              |              |
|-------------|-----------|-----------|--------|--------|--------------|--------------|
| GGT7. 3     | 9. 37E-23 | -0. 27376 | 0. 037 | 0. 175 | 1. 40E-18 M2 | GGT7         |
| RPAP2. 3    | 9. 74E-23 | -0. 29355 | 0. 05  | 0. 194 | 1. 46E-18 M2 | RPAP2        |
| AMER2. 4    | 1. 01E-22 | -0. 4619  | 0. 006 | 0. 122 | 1. 51E-18 M2 | AMER2        |
| CCR5. 3     | 1. 02E-22 | 0. 18588  | 0. 079 | 0. 022 | 1. 52E-18 M2 | CCR5         |
| RPRD1A. 3   | 1. 03E-22 | -0. 30181 | 0. 066 | 0. 217 | 1. 54E-18 M2 | RPRD1A       |
| GGA2. 5     | 1. 03E-22 | 0. 336994 | 0. 252 | 0. 131 | 1. 55E-18 M2 | GGA2         |
| ZNF821. 5   | 1. 06E-22 | -0. 30396 | 0. 036 | 0. 172 | 1. 59E-18 M2 | ZNF821       |
| ENDOV. 2    | 1. 08E-22 | -0. 26248 | 0. 072 | 0. 231 | 1. 61E-18 M2 | ENDOV        |
| HOMER1. 4   | 1. 09E-22 | -0. 29615 | 0. 032 | 0. 165 | 1. 62E-18 M2 | HOMER1       |
| DCBLD2. 4   | 1. 11E-22 | -0. 2781  | 0. 023 | 0. 152 | 1. 65E-18 M2 | DCBLD2       |
| SPATC1L. 4  | 1. 11E-22 | -0. 25877 | 0. 056 | 0. 204 | 1. 65E-18 M2 | SPATC1L      |
| RBM4. 3     | 1. 12E-22 | -0. 31208 | 0. 074 | 0. 23  | 1. 67E-18 M2 | RBM4         |
| COL4A2. 2   | 1. 12E-22 | -0. 24023 | 0. 014 | 0. 137 | 1. 68E-18 M2 | COL4A2       |
| ACSL5. 4    | 1. 15E-22 | 0. 200978 | 0. 096 | 0. 03  | 1. 71E-18 M2 | ACSL5        |
| TMEM258. 2  | 1. 18E-22 | 0. 153072 | 0. 805 | 0. 723 | 1. 76E-18 M2 | TMEM258      |
| ING4. 3     | 1. 22E-22 | -0. 30748 | 0. 107 | 0. 278 | 1. 82E-18 M2 | ING4         |
| AGAP1. 3    | 1. 22E-22 | -0. 27866 | 0. 009 | 0. 127 | 1. 83E-18 M2 | AGAP1        |
| PRPSAP2. 2  | 1. 24E-22 | -0. 3192  | 0. 109 | 0. 278 | 1. 85E-18 M2 | PRPSAP2      |
| NCALD. 4    | 1. 26E-22 | -0. 31493 | 0. 011 | 0. 132 | 1. 89E-18 M2 | NCALD        |
| MOB4. 3     | 1. 27E-22 | -0. 33506 | 0. 189 | 0. 385 | 1. 89E-18 M2 | MOB4         |
| CMBL. 3     | 1. 31E-22 | -0. 25685 | 0. 013 | 0. 134 | 1. 96E-18 M2 | CMBL         |
| CD200. 5    | 1. 37E-22 | -0. 32752 | 0. 004 | 0. 117 | 2. 05E-18 M2 | CD200        |
| P4HTM. 3    | 1. 39E-22 | -0. 29435 | 0. 105 | 0. 273 | 2. 07E-18 M2 | P4HTM        |
| ROBO2. 4    | 1. 44E-22 | -0. 24726 | 0. 003 | 0. 115 | 2. 16E-18 M2 | ROBO2        |
| NUPR1. 3    | 1. 48E-22 | 0. 34751  | 0. 447 | 0. 315 | 2. 22E-18 M2 | NUPR1        |
| HYAL2. 5    | 1. 64E-22 | -0. 28348 | 0. 078 | 0. 233 | 2. 45E-18 M2 | HYAL2        |
| GSPT2. 3    | 1. 69E-22 | -0. 275   | 0. 027 | 0. 158 | 2. 52E-18 M2 | GSPT2        |
| LAMP5. 4    | 1. 80E-22 | -0. 27619 | 0. 004 | 0. 117 | 2. 69E-18 M2 | LAMP5        |
| NXT1. 2     | 1. 82E-22 | -0. 27057 | 0. 146 | 0. 329 | 2. 71E-18 M2 | NXT1         |
| NTM. 3      | 1. 87E-22 | -0. 43656 | 0. 005 | 0. 119 | 2. 80E-18 M2 | NTM          |
| KIFAP3. 4   | 1. 92E-22 | -0. 31975 | 0. 064 | 0. 213 | 2. 87E-18 M2 | KIFAP3       |
| TMEM70. 4   | 1. 97E-22 | 0. 363518 | 0. 503 | 0. 387 | 2. 94E-18 M2 | TMEM70       |
| AUTS2. 5    | 2. 08E-22 | -0. 27389 | 0. 009 | 0. 126 | 3. 11E-18 M2 | AUTS2        |
| ZNF429. 4   | 2. 09E-22 | -0. 29554 | 0. 015 | 0. 137 | 3. 13E-18 M2 | ZNF429       |
| SOAT1. 5    | 2. 16E-22 | 0. 33868  | 0. 318 | 0. 189 | 3. 22E-18 M2 | SOAT1        |
| RP1-39G22   | 2. 21E-22 | -0. 30512 | 0. 017 | 0. 139 | 3. 31E-18 M2 | RP1-39G22. 7 |
| PSPH. 4     | 2. 24E-22 | -0. 27967 | 0. 032 | 0. 166 | 3. 35E-18 M2 | PSPH         |
| RUNX3. 4    | 2. 32E-22 | 0. 219691 | 0. 103 | 0. 034 | 3. 46E-18 M2 | RUNX3        |
| MATK        | 2. 34E-22 | 0. 157308 | 0. 061 | 0. 014 | 3. 49E-18 M2 | MATK         |
| SACS. 5     | 2. 34E-22 | -0. 25058 | 0. 031 | 0. 163 | 3. 50E-18 M2 | SACS         |
| TAF6. 2     | 2. 43E-22 | -0. 30029 | 0. 087 | 0. 247 | 3. 63E-18 M2 | TAF6         |
| GAMT. 5     | 2. 43E-22 | -0. 30732 | 0. 134 | 0. 311 | 3. 63E-18 M2 | GAMT         |
| FSTL1. 3    | 2. 47E-22 | -0. 24123 | 0. 006 | 0. 121 | 3. 69E-18 M2 | FSTL1        |
| ACOT7. 4    | 2. 48E-22 | -0. 33723 | 0. 082 | 0. 237 | 3. 71E-18 M2 | ACOT7        |
| ARMCX3. 3   | 2. 76E-22 | -0. 31649 | 0. 24  | 0. 443 | 4. 12E-18 M2 | ARMCX3       |
| FAM228B. 4  | 2. 78E-22 | -0. 30374 | 0. 072 | 0. 226 | 4. 15E-18 M2 | FAM228B      |
| KIAA0907. 2 | 2. 79E-22 | -0. 32521 | 0. 057 | 0. 204 | 4. 17E-18 M2 | KIAA0907     |
| DNAJC15. 3  | 2. 83E-22 | 0. 344245 | 0. 49  | 0. 383 | 4. 22E-18 M2 | DNAJC15      |
| MAP4K4. 3   | 2. 83E-22 | -0. 32543 | 0. 096 | 0. 259 | 4. 23E-18 M2 | MAP4K4       |
| PILRB. 1    | 2. 87E-22 | -0. 32139 | 0. 036 | 0. 17  | 4. 28E-18 M2 | PILRB        |
| IMMP1L. 4   | 2. 91E-22 | -0. 29092 | 0. 082 | 0. 242 | 4. 35E-18 M2 | IMMP1L       |

|            |          |          |       |       |          |    |            |
|------------|----------|----------|-------|-------|----------|----|------------|
| SEC14L2.4  | 2.96E-22 | -0.27276 | 0.008 | 0.123 | 4.43E-18 | M2 | SEC14L2    |
| PRDX3.3    | 3.02E-22 | 0.280775 | 0.57  | 0.459 | 4.51E-18 | M2 | PRDX3      |
| PTPRF.5    | 3.04E-22 | -0.29761 | 0.008 | 0.123 | 4.54E-18 | M2 | PTPRF      |
| TMEM198.3  | 3.36E-22 | -0.25119 | 0.008 | 0.123 | 5.03E-18 | M2 | TMEM198    |
| RASSF8-AS  | 3.42E-22 | -0.33861 | 0.036 | 0.169 | 5.10E-18 | M2 | RASSF8-AS1 |
| COR01B.5   | 3.42E-22 | 0.355469 | 0.465 | 0.354 | 5.11E-18 | M2 | COR01B     |
| DDIT4.4    | 3.48E-22 | 0.258356 | 0.554 | 0.398 | 5.20E-18 | M2 | DDIT4      |
| NELL2.3    | 3.52E-22 | -0.30843 | 0.003 | 0.113 | 5.26E-18 | M2 | NELL2      |
| LRRC8A.4   | 3.61E-22 | -0.29498 | 0.04  | 0.177 | 5.40E-18 | M2 | LRRC8A     |
| UNC93B1.5  | 3.61E-22 | 0.369621 | 0.321 | 0.192 | 5.40E-18 | M2 | UNC93B1    |
| DEAF1.4    | 3.65E-22 | -0.28624 | 0.07  | 0.222 | 5.45E-18 | M2 | DEAF1      |
| TTC14.1    | 3.70E-22 | -0.30249 | 0.11  | 0.28  | 5.53E-18 | M2 | TTC14      |
| FKBP9.4    | 3.74E-22 | -0.27216 | 0.045 | 0.186 | 5.58E-18 | M2 | FKBP9      |
| S100A13.3  | 3.93E-22 | -0.56401 | 0.142 | 0.307 | 5.87E-18 | M2 | S100A13    |
| ZNF704.4   | 4.05E-22 | -0.29987 | 0.013 | 0.131 | 6.05E-18 | M2 | ZNF704     |
| BCAT1.4    | 4.26E-22 | 0.443563 | 0.338 | 0.224 | 6.36E-18 | M2 | BCAT1      |
| METTL2B.1  | 4.28E-22 | -0.31556 | 0.061 | 0.208 | 6.40E-18 | M2 | METTL2B    |
| FAM221A.5  | 4.35E-22 | -0.35702 | 0.047 | 0.187 | 6.49E-18 | M2 | FAM221A    |
| PEBP1.5    | 4.37E-22 | -0.31687 | 0.713 | 0.81  | 6.54E-18 | M2 | PEBP1      |
| ARHGAP6.1  | 4.64E-22 | 0.18582  | 0.068 | 0.017 | 6.93E-18 | M2 | ARHGAP6    |
| AKAP13.5   | 4.71E-22 | 0.384036 | 0.443 | 0.317 | 7.05E-18 | M2 | AKAP13     |
| STIM2.2    | 4.74E-22 | -0.25801 | 0.036 | 0.171 | 7.08E-18 | M2 | STIM2      |
| KLHDC2.4   | 4.78E-22 | -0.31057 | 0.137 | 0.314 | 7.15E-18 | M2 | KLHDC2     |
| SLC25A23.4 | 4.88E-22 | -0.24633 | 0.019 | 0.142 | 7.29E-18 | M2 | SLC25A23   |
| ZIC1.4     | 5.38E-22 | -0.27243 | 0.008 | 0.122 | 8.04E-18 | M2 | ZIC1       |
| PCGF2.3    | 5.41E-22 | -0.22517 | 0.036 | 0.172 | 8.08E-18 | M2 | PCGF2      |
| TNPO2.3    | 5.51E-22 | -0.26475 | 0.047 | 0.189 | 8.24E-18 | M2 | TNPO2      |
| KCNE4.3    | 5.58E-22 | -0.25753 | 0.003 | 0.112 | 8.34E-18 | M2 | KCNE4      |
| ASRGL1.5   | 5.70E-22 | -0.33524 | 0.065 | 0.21  | 8.51E-18 | M2 | ASRGL1     |
| C3orf14.3  | 5.73E-22 | -0.34553 | 0.111 | 0.275 | 8.56E-18 | M2 | C3orf14    |
| BSDC1.3    | 5.81E-22 | -0.29895 | 0.128 | 0.302 | 8.68E-18 | M2 | BSDC1      |
| TCEAL5.3   | 5.81E-22 | -0.40864 | 0.011 | 0.128 | 8.68E-18 | M2 | TCEAL5     |
| ACAT2.4    | 6.03E-22 | -0.27308 | 0.119 | 0.289 | 9.00E-18 | M2 | ACAT2      |
| SOGA1.4    | 6.13E-22 | -0.24097 | 0.032 | 0.164 | 9.16E-18 | M2 | SOGA1      |
| CDK6.4     | 6.22E-22 | -0.34574 | 0.068 | 0.215 | 9.30E-18 | M2 | CDK6       |
| TMEM178A.6 | 6.35E-22 | -0.2723  | 0.01  | 0.126 | 9.49E-18 | M2 | TMEM178A   |
| PCDHB10.4  | 6.62E-22 | -0.31137 | 0.001 | 0.109 | 9.89E-18 | M2 | PCDHB10    |
| PRDX2.5    | 6.64E-22 | -0.35895 | 0.594 | 0.709 | 9.92E-18 | M2 | PRDX2      |
| FAM127A.2  | 6.66E-22 | -0.3043  | 0.268 | 0.473 | 9.95E-18 | M2 | FAM127A    |
| SHD.4      | 6.74E-22 | -0.40071 | 0.015 | 0.134 | 1.01E-17 | M2 | SHD        |
| TMEM256.3  | 6.80E-22 | 0.315989 | 0.536 | 0.422 | 1.02E-17 | M2 | TMEM256    |
| KDEL2.2    | 7.00E-22 | 0.273463 | 0.639 | 0.563 | 1.05E-17 | M2 | KDEL2      |
| COL4A1.2   | 7.06E-22 | -0.23847 | 0.006 | 0.118 | 1.06E-17 | M2 | COL4A1     |
| KIF9.5     | 7.48E-22 | -0.25344 | 0.043 | 0.184 | 1.12E-17 | M2 | KIF9       |
| WLS.3      | 7.81E-22 | -0.28413 | 0.072 | 0.225 | 1.17E-17 | M2 | WLS        |
| GNG4.4     | 8.39E-22 | -0.27788 | 0.009 | 0.124 | 1.25E-17 | M2 | GNG4       |
| SERP2.3    | 8.71E-22 | -0.30829 | 0.001 | 0.109 | 1.30E-17 | M2 | SERP2      |
| TCN2.1     | 8.83E-22 | 0.419902 | 0.192 | 0.093 | 1.32E-17 | M2 | TCN2       |
| RAB34.2    | 9.29E-22 | 0.378058 | 0.409 | 0.274 | 1.39E-17 | M2 | RAB34      |
| GDAP1.5    | 9.34E-22 | -0.3572  | 0.032 | 0.16  | 1.40E-17 | M2 | GDAP1      |
| CCDC69.4   | 1.00E-21 | 0.20318  | 0.097 | 0.031 | 1.50E-17 | M2 | CCDC69     |

|             |           |           |        |        |              |                |
|-------------|-----------|-----------|--------|--------|--------------|----------------|
| KIDINS22C   | 1. 01E-21 | -0. 29998 | 0. 115 | 0. 28  | 1. 50E-17 M2 | KIDINS220      |
| CCL18       | 1. 03E-21 | 0. 201059 | 0. 041 | 0. 007 | 1. 54E-17 M2 | CCL18          |
| GTF2H2. 3   | 1. 04E-21 | -0. 28757 | 0. 052 | 0. 194 | 1. 55E-17 M2 | GTF2H2         |
| ATP9A. 4    | 1. 05E-21 | -0. 2815  | 0. 008 | 0. 12  | 1. 57E-17 M2 | ATP9A          |
| NDUFA5. 3   | 1. 10E-21 | -0. 33064 | 0. 383 | 0. 591 | 1. 65E-17 M2 | NDUFA5         |
| PDCD7. 2    | 1. 11E-21 | -0. 27926 | 0. 078 | 0. 231 | 1. 66E-17 M2 | PDCD7          |
| MT1M. 3     | 1. 12E-21 | -0. 4928  | 0. 097 | 0. 254 | 1. 67E-17 M2 | MT1M           |
| RP11-362F   | 1. 12E-21 | 0. 234888 | 0. 056 | 0. 013 | 1. 68E-17 M2 | RP11-362F19. 1 |
| DAD1. 2     | 1. 21E-21 | 0. 143789 | 0. 787 | 0. 716 | 1. 81E-17 M2 | DAD1           |
| RP11-660L   | 1. 22E-21 | -0. 27595 | 0. 014 | 0. 132 | 1. 82E-17 M2 | RP11-660L16. 2 |
| CLTA. 3     | 1. 25E-21 | 0. 217329 | 0. 678 | 0. 624 | 1. 87E-17 M2 | CLTA           |
| C2orf80. 4  | 1. 27E-21 | -0. 31065 | 0. 011 | 0. 127 | 1. 89E-17 M2 | C2orf80        |
| SCOC. 4     | 1. 27E-21 | -0. 34937 | 0. 235 | 0. 427 | 1. 90E-17 M2 | SCOC           |
| C4orf27. 3  | 1. 29E-21 | -0. 31743 | 0. 151 | 0. 33  | 1. 93E-17 M2 | C4orf27        |
| FAM3C. 4    | 1. 33E-21 | -0. 34715 | 0. 262 | 0. 449 | 1. 98E-17 M2 | FAM3C          |
| KLRC2. 4    | 1. 38E-21 | -0. 39226 | 0. 006 | 0. 117 | 2. 06E-17 M2 | KLRC2          |
| PHAX. 3     | 1. 39E-21 | -0. 33207 | 0. 142 | 0. 317 | 2. 08E-17 M2 | PHAX           |
| RP11-410L   | 1. 40E-21 | -0. 25276 | 0. 017 | 0. 136 | 2. 09E-17 M2 | RP11-410L14. 2 |
| SETD5. 5    | 1. 46E-21 | -0. 27176 | 0. 126 | 0. 3   | 2. 19E-17 M2 | SETD5          |
| CHD9. 2     | 1. 49E-21 | -0. 32098 | 0. 28  | 0. 481 | 2. 22E-17 M2 | CHD9           |
| LIFR. 2     | 1. 49E-21 | -0. 27634 | 0. 006 | 0. 117 | 2. 23E-17 M2 | LIFR           |
| RBM4B. 3    | 1. 54E-21 | -0. 27791 | 0. 057 | 0. 201 | 2. 29E-17 M2 | RBM4B          |
| ZNF326. 3   | 1. 57E-21 | -0. 2673  | 0. 097 | 0. 258 | 2. 34E-17 M2 | ZNF326         |
| NBPF1. 5    | 1. 57E-21 | -0. 28063 | 0. 089 | 0. 246 | 2. 34E-17 M2 | NBPF1          |
| CD38. 1     | 1. 57E-21 | 0. 19851  | 0. 066 | 0. 017 | 2. 35E-17 M2 | CD38           |
| CYFIP1. 4   | 1. 58E-21 | 0. 341542 | 0. 404 | 0. 274 | 2. 36E-17 M2 | CYFIP1         |
| LANCL2. 5   | 1. 60E-21 | -0. 36779 | 0. 033 | 0. 161 | 2. 39E-17 M2 | LANCL2         |
| CDC25B. 3   | 1. 71E-21 | -0. 29001 | 0. 063 | 0. 203 | 2. 56E-17 M2 | CDC25B         |
| KCNE1. 3    | 1. 75E-21 | 0. 231309 | 0. 072 | 0. 019 | 2. 62E-17 M2 | KCNE1          |
| SMARCE1. 3  | 1. 86E-21 | -0. 29934 | 0. 202 | 0. 391 | 2. 79E-17 M2 | SMARCE1        |
| TYRO3. 4    | 1. 87E-21 | -0. 27569 | 0. 006 | 0. 116 | 2. 80E-17 M2 | TYRO3          |
| HIP1R. 4    | 1. 98E-21 | -0. 3155  | 0. 006 | 0. 116 | 2. 96E-17 M2 | HIP1R          |
| GAPDH. 5    | 2. 00E-21 | -0. 26928 | 0. 999 | 0. 984 | 2. 99E-17 M2 | GAPDH          |
| LAMTOR1. 3  | 2. 01E-21 | 0. 177869 | 0. 732 | 0. 649 | 3. 01E-17 M2 | LAMTOR1        |
| NDP. 3      | 2. 01E-21 | -0. 30944 | 0. 008 | 0. 119 | 3. 01E-17 M2 | NDP            |
| ZDHHC12. 5  | 2. 02E-21 | 0. 398777 | 0. 372 | 0. 253 | 3. 01E-17 M2 | ZDHHC12        |
| NLGN3. 4    | 2. 02E-21 | -0. 27958 | 0. 009 | 0. 121 | 3. 02E-17 M2 | NLGN3          |
| LRRN3. 4    | 2. 04E-21 | -0. 3538  | 0. 009 | 0. 121 | 3. 05E-17 M2 | LRRN3          |
| LAP3. 3     | 2. 32E-21 | 0. 249277 | 0. 594 | 0. 484 | 3. 47E-17 M2 | LAP3           |
| HSD3B7. 3   | 2. 33E-21 | 0. 340111 | 0. 158 | 0. 069 | 3. 48E-17 M2 | HSD3B7         |
| HM13. 1     | 2. 34E-21 | 0. 297356 | 0. 557 | 0. 469 | 3. 49E-17 M2 | HM13           |
| KLHL42. 4   | 2. 36E-21 | -0. 27907 | 0. 037 | 0. 168 | 3. 52E-17 M2 | KLHL42         |
| EPDR1. 4    | 2. 42E-21 | -0. 25816 | 0. 017 | 0. 135 | 3. 62E-17 M2 | EPDR1          |
| TGFB1I1. 4  | 2. 52E-21 | -0. 25763 | 0. 017 | 0. 134 | 3. 77E-17 M2 | TGFB1I1        |
| TMEM132B. 2 | 2. 54E-21 | -0. 24203 | 0. 003 | 0. 109 | 3. 80E-17 M2 | TMEM132B       |
| CSPG5. 4    | 2. 60E-21 | -0. 36433 | 0. 006 | 0. 116 | 3. 89E-17 M2 | CSPG5          |
| HIP1. 3     | 2. 64E-21 | -0. 30624 | 0. 042 | 0. 177 | 3. 94E-17 M2 | HIP1           |
| CTNNAL1. 4  | 2. 76E-21 | -0. 278   | 0. 029 | 0. 155 | 4. 12E-17 M2 | CTNNAL1        |
| PPP2CB. 5   | 2. 87E-21 | -0. 27679 | 0. 135 | 0. 308 | 4. 29E-17 M2 | PPP2CB         |
| IGF2BP3. 4  | 2. 95E-21 | -0. 23786 | 0. 006 | 0. 115 | 4. 41E-17 M2 | IGF2BP3        |
| ARNT2. 5    | 3. 03E-21 | -0. 22805 | 0. 008 | 0. 118 | 4. 53E-17 M2 | ARNT2          |



|            |           |           |        |        |              |            |
|------------|-----------|-----------|--------|--------|--------------|------------|
| NOL11. 3   | 3. 04E-21 | -0. 30265 | 0. 056 | 0. 198 | 4. 54E-17 M2 | NOL11      |
| CMSS1. 2   | 3. 05E-21 | -0. 28843 | 0. 128 | 0. 301 | 4. 55E-17 M2 | CMSS1      |
| PIK3R3. 3  | 3. 07E-21 | -0. 35746 | 0. 02  | 0. 14  | 4. 58E-17 M2 | PIK3R3     |
| ENDOD1. 3  | 3. 07E-21 | -0. 25842 | 0. 027 | 0. 152 | 4. 59E-17 M2 | ENDOD1     |
| CXCR4. 4   | 3. 15E-21 | 0. 208759 | 0. 54  | 0. 378 | 4. 71E-17 M2 | CXCR4      |
| SCRN1. 4   | 3. 38E-21 | -0. 24857 | 0. 051 | 0. 189 | 5. 05E-17 M2 | SCRN1      |
| EXTL2. 3   | 3. 40E-21 | -0. 24741 | 0. 042 | 0. 177 | 5. 08E-17 M2 | EXTL2      |
| MYH9. 5    | 3. 44E-21 | 0. 367972 | 0. 301 | 0. 18  | 5. 14E-17 M2 | MYH9       |
| ZNF385D. 3 | 3. 47E-21 | -0. 25878 | 0. 008 | 0. 118 | 5. 19E-17 M2 | ZNF385D    |
| BMP2K. 3   | 3. 50E-21 | 0. 327541 | 0. 217 | 0. 11  | 5. 23E-17 M2 | BMP2K      |
| QTRT1. 5   | 3. 61E-21 | -0. 32354 | 0. 162 | 0. 343 | 5. 39E-17 M2 | QTRT1      |
| PTGDS. 2   | 3. 77E-21 | -0. 84645 | 0. 049 | 0. 179 | 5. 64E-17 M2 | PTGDS      |
| NCBP2. 3   | 3. 78E-21 | -0. 28224 | 0. 25  | 0. 454 | 5. 64E-17 M2 | NCBP2      |
| PAXIP1-AS  | 3. 89E-21 | -0. 2905  | 0. 037 | 0. 167 | 5. 82E-17 M2 | PAXIP1-AS1 |
| FAM210B. 5 | 4. 05E-21 | -0. 33213 | 0. 121 | 0. 28  | 6. 05E-17 M2 | FAM210B    |
| NDRG2. 3   | 4. 15E-21 | -0. 51107 | 0. 209 | 0. 37  | 6. 21E-17 M2 | NDRG2      |
| CBX3. 4    | 4. 18E-21 | -0. 31446 | 0. 377 | 0. 566 | 6. 24E-17 M2 | CBX3       |
| HLTF. 4    | 4. 22E-21 | -0. 26821 | 0. 046 | 0. 182 | 6. 31E-17 M2 | HLTF       |
| NUDT11. 3  | 4. 23E-21 | -0. 28763 | 0. 017 | 0. 134 | 6. 32E-17 M2 | NUDT11     |
| CSF3R. 5   | 4. 24E-21 | 0. 24819  | 0. 277 | 0. 144 | 6. 34E-17 M2 | CSF3R      |
| STRADB. 2  | 4. 36E-21 | -0. 27394 | 0. 079 | 0. 23  | 6. 52E-17 M2 | STRADB     |
| KMT2E. 3   | 4. 41E-21 | -0. 30048 | 0. 346 | 0. 551 | 6. 59E-17 M2 | KMT2E      |
| NOP56. 1   | 4. 53E-21 | -0. 31843 | 0. 232 | 0. 427 | 6. 77E-17 M2 | NOP56      |
| AIF1L. 4   | 4. 57E-21 | -0. 42411 | 0. 01  | 0. 121 | 6. 82E-17 M2 | AIF1L      |
| AASS. 3    | 4. 65E-21 | -0. 25791 | 0. 01  | 0. 122 | 6. 95E-17 M2 | AASS       |
| AEBP1. 4   | 4. 70E-21 | -0. 36147 | 0. 014 | 0. 129 | 7. 02E-17 M2 | AEBP1      |
| SNHG12. 4  | 4. 71E-21 | 0. 387435 | 0. 236 | 0. 127 | 7. 04E-17 M2 | SNHG12     |
| CLIP2. 4   | 4. 75E-21 | -0. 29575 | 0. 05  | 0. 185 | 7. 10E-17 M2 | CLIP2      |
| MMP16. 3   | 4. 90E-21 | -0. 24158 | 0. 004 | 0. 11  | 7. 32E-17 M2 | MMP16      |
| ZNF883. 4  | 4. 92E-21 | -0. 24362 | 0. 026 | 0. 149 | 7. 35E-17 M2 | ZNF883     |
| ARL16. 2   | 4. 93E-21 | -0. 27538 | 0. 151 | 0. 331 | 7. 37E-17 M2 | ARL16      |
| DLGAP3     | 5. 08E-21 | 0. 167539 | 0. 063 | 0. 016 | 7. 59E-17 M2 | DLGAP3     |
| ANKRD46. 3 | 5. 23E-21 | -0. 36501 | 0. 038 | 0. 165 | 7. 82E-17 M2 | ANKRD46    |
| PNN. 4     | 5. 36E-21 | -0. 3203  | 0. 222 | 0. 414 | 8. 02E-17 M2 | PNN        |
| CBR1. 4    | 5. 45E-21 | -0. 37989 | 0. 303 | 0. 488 | 8. 14E-17 M2 | CBR1       |
| CYTH1. 5   | 5. 50E-21 | 0. 375871 | 0. 267 | 0. 15  | 8. 22E-17 M2 | CYTH1      |
| SAR1A. 4   | 5. 53E-21 | 0. 38042  | 0. 407 | 0. 29  | 8. 26E-17 M2 | SAR1A      |
| ATCAY. 4   | 5. 65E-21 | -0. 32073 | 0. 014 | 0. 128 | 8. 44E-17 M2 | ATCAY      |
| BARD1. 4   | 5. 75E-21 | -0. 28952 | 0. 031 | 0. 155 | 8. 59E-17 M2 | BARD1      |
| SAP18. 1   | 5. 79E-21 | 0. 128914 | 0. 834 | 0. 761 | 8. 65E-17 M2 | SAP18      |
| KIF1B. 4   | 5. 82E-21 | -0. 25622 | 0. 133 | 0. 305 | 8. 70E-17 M2 | KIF1B      |
| PPM1G. 4   | 5. 82E-21 | -0. 30186 | 0. 248 | 0. 431 | 8. 70E-17 M2 | PPM1G      |
| SUGP2. 4   | 6. 18E-21 | -0. 26046 | 0. 096 | 0. 257 | 9. 23E-17 M2 | SUGP2      |
| SPPL2A. 5  | 6. 26E-21 | 0. 365679 | 0. 292 | 0. 176 | 9. 36E-17 M2 | SPPL2A     |
| SFRP1. 4   | 6. 44E-21 | -0. 22712 | 0. 001 | 0. 105 | 9. 62E-17 M2 | SFRP1      |
| GLIPR1. 4  | 6. 51E-21 | 0. 294373 | 0. 465 | 0. 325 | 9. 73E-17 M2 | GLIPR1     |
| SKAP2. 4   | 6. 52E-21 | 0. 290725 | 0. 409 | 0. 26  | 9. 74E-17 M2 | SKAP2      |
| EDF1       | 6. 54E-21 | 0. 132749 | 0. 868 | 0. 78  | 9. 77E-17 M2 | EDF1       |
| PREPL. 3   | 6. 59E-21 | -0. 26692 | 0. 057 | 0. 198 | 9. 85E-17 M2 | PREPL      |
| CALM3. 4   | 6. 94E-21 | 0. 250944 | 0. 658 | 0. 588 | 1. 04E-16 M2 | CALM3      |
| RAD21. 4   | 7. 02E-21 | -0. 31849 | 0. 197 | 0. 378 | 1. 05E-16 M2 | RAD21      |

|            |          |          |       |       |          |    |            |
|------------|----------|----------|-------|-------|----------|----|------------|
| SLC44A1.3  | 7.12E-21 | -0.3753  | 0.155 | 0.325 | 1.06E-16 | M2 | SLC44A1    |
| IQCK.3     | 7.25E-21 | -0.27326 | 0.018 | 0.134 | 1.08E-16 | M2 | IQCK       |
| LAMP1.4    | 7.29E-21 | 0.288532 | 0.584 | 0.517 | 1.09E-16 | M2 | LAMP1      |
| TTC9B.5    | 8.05E-21 | -0.42829 | 0.015 | 0.128 | 1.20E-16 | M2 | TTC9B      |
| PPME1.3    | 8.14E-21 | -0.2738  | 0.052 | 0.191 | 1.22E-16 | M2 | PPME1      |
| TNIK.3     | 8.21E-21 | -0.25209 | 0.029 | 0.152 | 1.23E-16 | M2 | TNIK       |
| TUBB4A.5   | 8.24E-21 | -0.52208 | 0.014 | 0.125 | 1.23E-16 | M2 | TUBB4A     |
| VPS29.3    | 8.35E-21 | 0.242964 | 0.623 | 0.548 | 1.25E-16 | M2 | VPS29      |
| TRMT112.2  | 8.57E-21 | 0.133625 | 0.789 | 0.701 | 1.28E-16 | M2 | TRMT112    |
| TRMT13.2   | 8.69E-21 | -0.29624 | 0.024 | 0.144 | 1.30E-16 | M2 | TRMT13     |
| IGSF6.5    | 9.11E-21 | 0.209067 | 0.278 | 0.145 | 1.36E-16 | M2 | IGSF6      |
| ICAM2.4    | 9.78E-21 | 0.237126 | 0.093 | 0.03  | 1.46E-16 | M2 | ICAM2      |
| SLC25A22.1 | 0.01E-20 | -0.24062 | 0.01  | 0.12  | 1.50E-16 | M2 | SLC25A22   |
| CSF2RB.4   | 1.04E-20 | 0.183303 | 0.074 | 0.021 | 1.56E-16 | M2 | CSF2RB     |
| FMN1.4     | 1.04E-20 | 0.184401 | 0.089 | 0.028 | 1.56E-16 | M2 | FMN1       |
| URI1.2     | 1.05E-20 | -0.25872 | 0.08  | 0.231 | 1.56E-16 | M2 | URI1       |
| FAM96A.3   | 1.06E-20 | 0.302204 | 0.464 | 0.349 | 1.58E-16 | M2 | FAM96A     |
| LRRN1.4    | 1.08E-20 | -0.29001 | 0.006 | 0.113 | 1.62E-16 | M2 | LRRN1      |
| OXCT1.2    | 1.11E-20 | -0.26856 | 0.032 | 0.156 | 1.65E-16 | M2 | OXCT1      |
| KLHL13.4   | 1.12E-20 | -0.22583 | 0.003 | 0.106 | 1.67E-16 | M2 | KLHL13     |
| FAM198B.3  | 1.12E-20 | 0.239573 | 0.138 | 0.055 | 1.68E-16 | M2 | FAM198B    |
| USP22.5    | 1.14E-20 | -0.24935 | 0.155 | 0.331 | 1.71E-16 | M2 | USP22      |
| SLC35G2.5  | 1.17E-20 | -0.30601 | 0.013 | 0.124 | 1.75E-16 | M2 | SLC35G2    |
| TSR3.3     | 1.18E-20 | -0.24027 | 0.121 | 0.287 | 1.77E-16 | M2 | TSR3       |
| MPHOSPH1C  | 1.29E-20 | -0.34345 | 0.096 | 0.248 | 1.93E-16 | M2 | MPHOSPH10  |
| HMGCS1.3   | 1.29E-20 | -0.29288 | 0.055 | 0.192 | 1.93E-16 | M2 | HMGCS1     |
| CIDEB.3    | 1.32E-20 | 0.17937  | 0.075 | 0.021 | 1.97E-16 | M2 | CIDEB      |
| EZH2.4     | 1.33E-20 | -0.30841 | 0.036 | 0.162 | 1.99E-16 | M2 | EZH2       |
| FKBP1A.3   | 1.34E-20 | 0.145288 | 0.794 | 0.693 | 2.01E-16 | M2 | FKBP1A     |
| C2orf69.5  | 1.36E-20 | -0.26608 | 0.063 | 0.203 | 2.03E-16 | M2 | C2orf69    |
| MAP6.3     | 1.37E-20 | -0.22424 | 0.001 | 0.103 | 2.04E-16 | M2 | MAP6       |
| YAE1D1.3   | 1.37E-20 | -0.29187 | 0.04  | 0.169 | 2.04E-16 | M2 | YAE1D1     |
| SYMPK.4    | 1.42E-20 | -0.2777  | 0.082 | 0.233 | 2.12E-16 | M2 | SYMPK      |
| NLGN4X.3   | 1.43E-20 | -0.23446 | 0.006 | 0.112 | 2.13E-16 | M2 | NLGN4X     |
| ADCY7.5    | 1.45E-20 | 0.248414 | 0.142 | 0.058 | 2.16E-16 | M2 | ADCY7      |
| RNF7.2     | 1.61E-20 | 0.239249 | 0.619 | 0.526 | 2.40E-16 | M2 | RNF7       |
| OSER1-AS1  | 1.66E-20 | -0.28419 | 0.022 | 0.139 | 2.48E-16 | M2 | OSER1-AS1  |
| PPM1M.5    | 1.66E-20 | 0.340282 | 0.156 | 0.069 | 2.48E-16 | M2 | PPM1M      |
| TMEM121.4  | 1.69E-20 | -0.23527 | 0.006 | 0.113 | 2.52E-16 | M2 | TMEM121    |
| HNRNPR.1   | 1.70E-20 | -0.33203 | 0.342 | 0.532 | 2.54E-16 | M2 | HNRNPR     |
| SYT1.5     | 1.74E-20 | -0.41455 | 0.004 | 0.107 | 2.60E-16 | M2 | SYT1       |
| NABP1.4    | 1.77E-20 | 0.289461 | 0.229 | 0.116 | 2.65E-16 | M2 | NABP1      |
| AC004951.1 | 1.80E-20 | -0.25119 | 0.037 | 0.165 | 2.69E-16 | M2 | AC004951.6 |
| ZNF92.3    | 1.80E-20 | -0.32548 | 0.032 | 0.154 | 2.69E-16 | M2 | ZNF92      |
| GPR137B.3  | 1.88E-20 | 0.427539 | 0.332 | 0.222 | 2.81E-16 | M2 | GPR137B    |
| DYNC1I1.5  | 1.90E-20 | -0.39215 | 0.006 | 0.111 | 2.85E-16 | M2 | DYNC1I1    |
| CAMK2B.4   | 1.95E-20 | -0.27871 | 0.011 | 0.121 | 2.91E-16 | M2 | CAMK2B     |
| LINC01116  | 2.00E-20 | -0.29178 | 0.023 | 0.14  | 2.99E-16 | M2 | LINC01116  |
| VGLL4.3    | 2.00E-20 | -0.26807 | 0.155 | 0.329 | 2.99E-16 | M2 | VGLL4      |
| LXN.1      | 2.04E-20 | 0.149554 | 0.075 | 0.022 | 3.05E-16 | M2 | LXN        |
| CLUAP1.4   | 2.04E-20 | -0.28243 | 0.045 | 0.177 | 3.05E-16 | M2 | CLUAP1     |

|            |          |          |       |       |          |    |               |
|------------|----------|----------|-------|-------|----------|----|---------------|
| LINC00844  | 2.06E-20 | -0.4382  | 0.008 | 0.113 | 3.08E-16 | M2 | LINC00844     |
| ENY2.2     | 2.07E-20 | 0.215749 | 0.669 | 0.599 | 3.09E-16 | M2 | ENY2          |
| LDLRAD3.4  | 2.10E-20 | -0.25543 | 0.05  | 0.185 | 3.14E-16 | M2 | LDLRAD3       |
| GAD1.5     | 2.20E-20 | -0.28186 | 0.011 | 0.12  | 3.29E-16 | M2 | GAD1          |
| ADPGK.5    | 2.22E-20 | 0.391961 | 0.373 | 0.253 | 3.31E-16 | M2 | ADPGK         |
| LGR4.5     | 2.22E-20 | -0.199   | 0.005 | 0.109 | 3.31E-16 | M2 | LGR4          |
| CEACAM4.4  | 2.24E-20 | 0.179173 | 0.073 | 0.02  | 3.34E-16 | M2 | CEACAM4       |
| RP11-680A  | 2.25E-20 | 0.192502 | 0.054 | 0.012 | 3.36E-16 | M2 | RP11-680A11.5 |
| ORC4.4     | 2.36E-20 | -0.27023 | 0.093 | 0.245 | 3.53E-16 | M2 | ORC4          |
| CMTM5.4    | 2.43E-20 | -0.5083  | 0.004 | 0.106 | 3.63E-16 | M2 | CMTM5         |
| SLC4A4.3   | 2.50E-20 | -0.30097 | 0.009 | 0.116 | 3.74E-16 | M2 | SLC4A4        |
| AP4M1.3    | 2.65E-20 | -0.26473 | 0.063 | 0.203 | 3.96E-16 | M2 | AP4M1         |
| SH2B3.5    | 2.72E-20 | 0.355579 | 0.203 | 0.102 | 4.06E-16 | M2 | SH2B3         |
| TRIM37.3   | 2.81E-20 | -0.22176 | 0.033 | 0.158 | 4.20E-16 | M2 | TRIM37        |
| RSBN1.3    | 2.87E-20 | -0.28774 | 0.08  | 0.227 | 4.28E-16 | M2 | RSBN1         |
| DAPK1.2    | 2.88E-20 | 0.276466 | 0.132 | 0.054 | 4.30E-16 | M2 | DAPK1         |
| UBA2.3     | 2.91E-20 | -0.29471 | 0.19  | 0.37  | 4.35E-16 | M2 | UBA2          |
| FAM171B.3  | 2.99E-20 | -0.26348 | 0.01  | 0.118 | 4.48E-16 | M2 | FAM171B       |
| PHF6.4     | 3.01E-20 | -0.28179 | 0.049 | 0.179 | 4.51E-16 | M2 | PHF6          |
| TUBA1C.3   | 3.06E-20 | 0.285537 | 0.488 | 0.372 | 4.57E-16 | M2 | TUBA1C        |
| DIRAS1.3   | 3.09E-20 | -0.24187 | 0.011 | 0.12  | 4.62E-16 | M2 | DIRAS1        |
| SEMA5A.3   | 3.13E-20 | -0.27715 | 0.006 | 0.111 | 4.68E-16 | M2 | SEMA5A        |
| LMNB1.4    | 3.35E-20 | -0.31088 | 0.034 | 0.158 | 5.01E-16 | M2 | LMNB1         |
| PCK2.3     | 3.38E-20 | 0.244574 | 0.148 | 0.064 | 5.06E-16 | M2 | PCK2          |
| EFS.3      | 3.39E-20 | -0.29509 | 0.008 | 0.113 | 5.06E-16 | M2 | EFS           |
| SLC10A4.4  | 3.46E-20 | -0.21053 | 0.003 | 0.103 | 5.17E-16 | M2 | SLC10A4       |
| DDX52.3    | 3.71E-20 | -0.21512 | 0.098 | 0.254 | 5.54E-16 | M2 | DDX52         |
| GNG5.3     | 3.73E-20 | 0.14314  | 0.783 | 0.634 | 5.58E-16 | M2 | GNG5          |
| GRINA.4    | 3.79E-20 | 0.35449  | 0.516 | 0.431 | 5.66E-16 | M2 | GRINA         |
| USP46.5    | 3.82E-20 | -0.27274 | 0.027 | 0.145 | 5.71E-16 | M2 | USP46         |
| RP9.3      | 3.95E-20 | -0.2759  | 0.054 | 0.188 | 5.91E-16 | M2 | RP9           |
| LRP6.4     | 4.25E-20 | -0.26321 | 0.011 | 0.119 | 6.35E-16 | M2 | LRP6          |
| APBB2.4    | 4.30E-20 | -0.26847 | 0.011 | 0.12  | 6.43E-16 | M2 | APBB2         |
| PFKL.4     | 4.33E-20 | 0.381288 | 0.458 | 0.356 | 6.47E-16 | M2 | PFKL          |
| DNASE1L1.4 | 4.34E-20 | 0.297976 | 0.153 | 0.067 | 6.48E-16 | M2 | DNASE1L1      |
| GPT2.3     | 4.34E-20 | -0.22254 | 0.032 | 0.155 | 6.49E-16 | M2 | GPT2          |
| CDC42EP1.4 | 4.44E-20 | -0.27114 | 0.02  | 0.135 | 6.63E-16 | M2 | CDC42EP1      |
| ZNF512.3   | 4.47E-20 | -0.26773 | 0.018 | 0.131 | 6.68E-16 | M2 | ZNF512        |
| NUPL2.2    | 5.37E-20 | -0.29888 | 0.116 | 0.279 | 8.03E-16 | M2 | NUPL2         |
| CLDN12.5   | 5.86E-20 | -0.29471 | 0.028 | 0.146 | 8.76E-16 | M2 | CLDN12        |
| ZNF430.2   | 6.10E-20 | -0.32474 | 0.063 | 0.198 | 9.11E-16 | M2 | ZNF430        |
| GLT8D1.2   | 6.49E-20 | -0.2734  | 0.123 | 0.287 | 9.70E-16 | M2 | GLT8D1        |
| NAT9.3     | 6.73E-20 | -0.28388 | 0.07  | 0.212 | 1.01E-15 | M2 | NAT9          |
| CHD6.4     | 6.77E-20 | -0.27299 | 0.101 | 0.255 | 1.01E-15 | M2 | CHD6          |
| LDHB.3     | 6.88E-20 | -0.3263  | 0.656 | 0.787 | 1.03E-15 | M2 | LDHB          |
| EI24.3     | 6.94E-20 | -0.28544 | 0.259 | 0.446 | 1.04E-15 | M2 | EI24          |
| PDLIM3.4   | 7.00E-20 | -0.35193 | 0.013 | 0.121 | 1.05E-15 | M2 | PDLIM3        |
| HOOK2.3    | 7.04E-20 | -0.27388 | 0.092 | 0.245 | 1.05E-15 | M2 | HOOK2         |
| METTL7B.2  | 7.31E-20 | -0.51891 | 0.08  | 0.221 | 1.09E-15 | M2 | METTL7B       |
| ANKS1B.4   | 7.39E-20 | -0.4106  | 0.01  | 0.115 | 1.10E-15 | M2 | ANKS1B        |
| DZIP1.4    | 7.40E-20 | -0.20123 | 0.006 | 0.109 | 1.11E-15 | M2 | DZIP1         |

|             |           |           |        |        |              |           |
|-------------|-----------|-----------|--------|--------|--------------|-----------|
| P2RY6. 4    | 7. 43E-20 | 0. 200952 | 0. 089 | 0. 029 | 1. 11E-15 M2 | P2RY6     |
| ACTR6. 2    | 7. 64E-20 | -0. 30519 | 0. 093 | 0. 244 | 1. 14E-15 M2 | ACTR6     |
| AKAP6. 4    | 7. 71E-20 | -0. 26969 | 0. 006 | 0. 109 | 1. 15E-15 M2 | AKAP6     |
| CPXM1. 4    | 7. 83E-20 | -0. 25704 | 0. 019 | 0. 131 | 1. 17E-15 M2 | CPXM1     |
| PLA2G5. 4   | 7. 92E-20 | -0. 47034 | 0. 01  | 0. 116 | 1. 18E-15 M2 | PLA2G5    |
| GOPC. 3     | 8. 04E-20 | -0. 30979 | 0. 114 | 0. 268 | 1. 20E-15 M2 | GOPC      |
| PLXNC1. 5   | 8. 12E-20 | 0. 268301 | 0. 143 | 0. 061 | 1. 21E-15 M2 | PLXNC1    |
| ARL9. 4     | 8. 34E-20 | -0. 23445 | 0. 008 | 0. 111 | 1. 25E-15 M2 | ARL9      |
| LAMA5. 3    | 8. 37E-20 | -0. 18947 | 0. 011 | 0. 119 | 1. 25E-15 M2 | LAMA5     |
| HDAC9. 3    | 8. 49E-20 | -0. 31407 | 0. 02  | 0. 133 | 1. 27E-15 M2 | HDAC9     |
| FADS1. 3    | 9. 49E-20 | -0. 26315 | 0. 082 | 0. 228 | 1. 42E-15 M2 | FADS1     |
| STXBP1. 4   | 9. 58E-20 | -0. 259   | 0. 018 | 0. 128 | 1. 43E-15 M2 | STXBP1    |
| THYN1. 4    | 9. 74E-20 | -0. 31249 | 0. 23  | 0. 419 | 1. 46E-15 M2 | THYN1     |
| EFNB2. 4    | 9. 94E-20 | -0. 18362 | 0. 005 | 0. 106 | 1. 49E-15 M2 | EFNB2     |
| MARCKS. 3   | 1. 01E-19 | -0. 29274 | 0. 474 | 0. 606 | 1. 52E-15 M2 | MARCKS    |
| SIAH1. 3    | 1. 03E-19 | -0. 29294 | 0. 091 | 0. 239 | 1. 54E-15 M2 | SIAH1     |
| CDC42. 3    | 1. 05E-19 | 0. 186668 | 0. 686 | 0. 616 | 1. 57E-15 M2 | CDC42     |
| METTL9. 4   | 1. 09E-19 | -0. 29895 | 0. 292 | 0. 481 | 1. 63E-15 M2 | METTL9    |
| POSTN. 4    | 1. 09E-19 | -0. 40561 | 0. 026 | 0. 137 | 1. 63E-15 M2 | POSTN     |
| CD300LF. 4  | 1. 12E-19 | 0. 21399  | 0. 111 | 0. 041 | 1. 67E-15 M2 | CD300LF   |
| CORO2B. 3   | 1. 13E-19 | -0. 24234 | 0. 006 | 0. 107 | 1. 69E-15 M2 | CORO2B    |
| TTC19. 3    | 1. 15E-19 | -0. 26125 | 0. 188 | 0. 368 | 1. 71E-15 M2 | TTC19     |
| DPF2. 2     | 1. 20E-19 | -0. 27786 | 0. 087 | 0. 234 | 1. 80E-15 M2 | DPF2      |
| PALM. 3     | 1. 20E-19 | -0. 21153 | 0. 008 | 0. 111 | 1. 80E-15 M2 | PALM      |
| SDR39U1. 3  | 1. 21E-19 | -0. 2949  | 0. 123 | 0. 285 | 1. 81E-15 M2 | SDR39U1   |
| CEP290. 3   | 1. 22E-19 | -0. 2479  | 0. 041 | 0. 166 | 1. 82E-15 M2 | CEP290    |
| POMGNT2. 3  | 1. 26E-19 | -0. 243   | 0. 031 | 0. 148 | 1. 88E-15 M2 | POMGNT2   |
| HSPE1. 5    | 1. 27E-19 | -0. 30052 | 0. 595 | 0. 739 | 1. 90E-15 M2 | HSPE1     |
| PXDN. 2     | 1. 30E-19 | -0. 22718 | 0. 006 | 0. 108 | 1. 94E-15 M2 | PXDN      |
| EXOG. 4     | 1. 32E-19 | -0. 29813 | 0. 041 | 0. 164 | 1. 97E-15 M2 | EXOG      |
| OGFRL1. 5   | 1. 33E-19 | 0. 296607 | 0. 296 | 0. 173 | 1. 98E-15 M2 | OGFRL1    |
| DNALI1. 4   | 1. 34E-19 | -0. 23721 | 0. 013 | 0. 12  | 2. 01E-15 M2 | DNALI1    |
| VEZF1. 5    | 1. 35E-19 | -0. 25438 | 0. 097 | 0. 248 | 2. 01E-15 M2 | VEZF1     |
| AKTIP. 4    | 1. 35E-19 | -0. 27575 | 0. 049 | 0. 177 | 2. 02E-15 M2 | AKTIP     |
| DNAAF2. 4   | 1. 36E-19 | -0. 2718  | 0. 051 | 0. 181 | 2. 03E-15 M2 | DNAAF2    |
| ST8SIA1. 3  | 1. 37E-19 | -0. 22005 | 0. 001 | 0. 098 | 2. 05E-15 M2 | ST8SIA1   |
| CYB5D2. 3   | 1. 39E-19 | -0. 32886 | 0. 095 | 0. 243 | 2. 08E-15 M2 | CYB5D2    |
| FAM49A. 4   | 1. 39E-19 | 0. 373067 | 0. 275 | 0. 163 | 2. 08E-15 M2 | FAM49A    |
| C1orf109. 1 | 1. 43E-19 | -0. 23408 | 0. 024 | 0. 14  | 2. 14E-15 M2 | C1orf109  |
| GDAP1L1. 4  | 1. 49E-19 | -0. 3605  | 0. 006 | 0. 107 | 2. 23E-15 M2 | GDAP1L1   |
| TSPAN13. 5  | 1. 51E-19 | -0. 36712 | 0. 152 | 0. 309 | 2. 25E-15 M2 | TSPAN13   |
| ST5. 5      | 1. 59E-19 | -0. 25346 | 0. 037 | 0. 159 | 2. 38E-15 M2 | ST5       |
| SPOP. 2     | 1. 59E-19 | -0. 28637 | 0. 152 | 0. 32  | 2. 38E-15 M2 | SPOP      |
| C3orf70. 4  | 1. 71E-19 | -0. 25875 | 0. 006 | 0. 107 | 2. 55E-15 M2 | C3orf70   |
| SNTB1       | 1. 72E-19 | 0. 230344 | 0. 082 | 0. 026 | 2. 57E-15 M2 | SNTB1     |
| CA2. 3      | 1. 78E-19 | -0. 45745 | 0. 091 | 0. 235 | 2. 66E-15 M2 | CA2       |
| ALDH6A1. 3  | 1. 78E-19 | -0. 29279 | 0. 075 | 0. 216 | 2. 67E-15 M2 | ALDH6A1   |
| CCDC112. 4  | 1. 84E-19 | -0. 27102 | 0. 117 | 0. 271 | 2. 75E-15 M2 | CCDC112   |
| ACYP2. 4    | 1. 85E-19 | -0. 34172 | 0. 157 | 0. 323 | 2. 77E-15 M2 | ACYP2     |
| RBM6. 2     | 1. 93E-19 | -0. 24123 | 0. 153 | 0. 325 | 2. 89E-15 M2 | RBM6      |
| GTF2IRD2E   | 1. 94E-19 | -0. 26945 | 0. 028 | 0. 145 | 2. 90E-15 M2 | GTF2IRD2B |

|             |           |           |        |        |              |                |
|-------------|-----------|-----------|--------|--------|--------------|----------------|
| ERP29. 2    | 1. 98E-19 | 0. 193934 | 0. 673 | 0. 606 | 2. 96E-15 M2 | ERP29          |
| CTSA. 5     | 2. 01E-19 | 0. 314113 | 0. 493 | 0. 392 | 3. 00E-15 M2 | CTSA           |
| SCPEP1. 4   | 2. 10E-19 | 0. 27876  | 0. 469 | 0. 338 | 3. 14E-15 M2 | SCPEP1         |
| CDCA7. 4    | 2. 17E-19 | -0. 33682 | 0. 02  | 0. 13  | 3. 24E-15 M2 | CDCA7          |
| TNFRSF19. 2 | 2. 19E-19 | -0. 17716 | 0. 009 | 0. 112 | 3. 27E-15 M2 | TNFRSF19       |
| ZNF626. 2   | 2. 20E-19 | -0. 25643 | 0. 032 | 0. 15  | 3. 28E-15 M2 | ZNF626         |
| FANCL. 3    | 2. 24E-19 | -0. 2967  | 0. 032 | 0. 151 | 3. 34E-15 M2 | FANCL          |
| ETFB. 1     | 2. 25E-19 | 0. 250575 | 0. 581 | 0. 494 | 3. 36E-15 M2 | ETFB           |
| HP1BP3. 5   | 2. 26E-19 | -0. 28262 | 0. 263 | 0. 455 | 3. 38E-15 M2 | HP1BP3         |
| ELOVL6. 3   | 2. 27E-19 | -0. 22861 | 0. 003 | 0. 099 | 3. 39E-15 M2 | ELOVL6         |
| PTPN4. 4    | 2. 28E-19 | -0. 25538 | 0. 008 | 0. 109 | 3. 41E-15 M2 | PTPN4          |
| CNOT4. 2    | 2. 47E-19 | -0. 30641 | 0. 125 | 0. 283 | 3. 69E-15 M2 | CNOT4          |
| RHOJ. 3     | 2. 53E-19 | -0. 21403 | 0. 006 | 0. 106 | 3. 78E-15 M2 | RHOJ           |
| FZD7. 2     | 2. 54E-19 | -0. 21101 | 0. 005 | 0. 104 | 3. 80E-15 M2 | FZD7           |
| RAP1B. 4    | 2. 77E-19 | 0. 268214 | 0. 515 | 0. 428 | 4. 15E-15 M2 | RAP1B          |
| TRIM47. 5   | 2. 82E-19 | -0. 3094  | 0. 059 | 0. 188 | 4. 22E-15 M2 | TRIM47         |
| IGSF10. 2   | 3. 06E-19 | -0. 20818 | 0. 006 | 0. 106 | 4. 58E-15 M2 | IGSF10         |
| CSE1L. 4    | 3. 11E-19 | -0. 24114 | 0. 086 | 0. 232 | 4. 64E-15 M2 | CSE1L          |
| GGH. 3      | 3. 22E-19 | -0. 29026 | 0. 116 | 0. 273 | 4. 81E-15 M2 | GGH            |
| PLAT. 2     | 3. 23E-19 | -0. 27574 | 0. 018 | 0. 127 | 4. 83E-15 M2 | PLAT           |
| CMTM6. 5    | 3. 24E-19 | 0. 258544 | 0. 524 | 0. 419 | 4. 85E-15 M2 | CMTM6          |
| DLG1. 4     | 3. 25E-19 | -0. 26127 | 0. 047 | 0. 174 | 4. 85E-15 M2 | DLG1           |
| STK39. 3    | 3. 30E-19 | -0. 20668 | 0. 008 | 0. 108 | 4. 93E-15 M2 | STK39          |
| NISCH. 3    | 3. 36E-19 | 0. 458692 | 0. 276 | 0. 169 | 5. 02E-15 M2 | NISCH          |
| NCOA6. 5    | 3. 39E-19 | -0. 21296 | 0. 028 | 0. 143 | 5. 06E-15 M2 | NCOA6          |
| RUNX1. 5    | 3. 42E-19 | 0. 418237 | 0. 291 | 0. 183 | 5. 10E-15 M2 | RUNX1          |
| RIF1. 4     | 3. 42E-19 | -0. 25572 | 0. 084 | 0. 229 | 5. 11E-15 M2 | RIF1           |
| FBX03. 3    | 3. 56E-19 | -0. 26652 | 0. 051 | 0. 179 | 5. 32E-15 M2 | FBX03          |
| BTBD3. 4    | 3. 77E-19 | -0. 23275 | 0. 029 | 0. 145 | 5. 63E-15 M2 | BTBD3          |
| STOX2. 5    | 3. 89E-19 | -0. 25575 | 0. 003 | 0. 099 | 5. 81E-15 M2 | STOX2          |
| B3GAT1. 4   | 3. 91E-19 | -0. 29424 | 0. 001 | 0. 096 | 5. 84E-15 M2 | B3GAT1         |
| CCDC34. 3   | 4. 19E-19 | -0. 27837 | 0. 049 | 0. 176 | 6. 26E-15 M2 | CCDC34         |
| TMEM35. 4   | 4. 23E-19 | -0. 29372 | 0. 003 | 0. 098 | 6. 32E-15 M2 | TMEM35         |
| CLASP2. 4   | 4. 28E-19 | -0. 30846 | 0. 072 | 0. 206 | 6. 40E-15 M2 | CLASP2         |
| SLFN11. 2   | 4. 29E-19 | 0. 230174 | 0. 105 | 0. 038 | 6. 41E-15 M2 | SLFN11         |
| RUFY2. 5    | 4. 31E-19 | -0. 25934 | 0. 037 | 0. 157 | 6. 43E-15 M2 | RUFY2          |
| GIMAP1. 4   | 4. 42E-19 | 0. 187407 | 0. 156 | 0. 067 | 6. 60E-15 M2 | GIMAP1         |
| PLEKHA4. 4  | 4. 46E-19 | -0. 22927 | 0. 023 | 0. 134 | 6. 67E-15 M2 | PLEKHA4        |
| OTUD7B. 3   | 4. 51E-19 | -0. 23891 | 0. 008 | 0. 108 | 6. 75E-15 M2 | OTUD7B         |
| TOP2B. 5    | 4. 60E-19 | -0. 24291 | 0. 1   | 0. 247 | 6. 88E-15 M2 | TOP2B          |
| RP11-262H   | 4. 60E-19 | -0. 24143 | 0. 018 | 0. 126 | 6. 88E-15 M2 | RP11-262H14. 4 |
| ZNF738. 5   | 4. 63E-19 | -0. 20697 | 0. 033 | 0. 152 | 6. 92E-15 M2 | ZNF738         |
| ZNF793. 2   | 4. 64E-19 | -0. 23179 | 0. 013 | 0. 117 | 6. 94E-15 M2 | ZNF793         |
| CKAP4. 3    | 4. 66E-19 | -0. 2094  | 0. 077 | 0. 219 | 6. 96E-15 M2 | CKAP4          |
| SECTM1. 1   | 4. 71E-19 | 0. 150679 | 0. 063 | 0. 017 | 7. 03E-15 M2 | SECTM1         |
| CDH4. 4     | 5. 00E-19 | -0. 2164  | 0      | 0. 093 | 7. 47E-15 M2 | CDH4           |
| DLX1. 5     | 5. 09E-19 | -0. 38336 | 0. 017 | 0. 122 | 7. 60E-15 M2 | DLX1           |
| NIFK. 3     | 5. 15E-19 | -0. 28654 | 0. 183 | 0. 36  | 7. 70E-15 M2 | NIFK           |
| MTA1. 3     | 5. 16E-19 | -0. 21601 | 0. 064 | 0. 199 | 7. 72E-15 M2 | MTA1           |
| ZNF559. 4   | 5. 23E-19 | -0. 25692 | 0. 034 | 0. 153 | 7. 81E-15 M2 | ZNF559         |
| MFGE8. 2    | 5. 39E-19 | -0. 25318 | 0. 065 | 0. 199 | 8. 05E-15 M2 | MFGE8          |

|            |           |           |        |        |              |                |
|------------|-----------|-----------|--------|--------|--------------|----------------|
| PYGB. 3    | 5. 41E-19 | -0. 2036  | 0. 078 | 0. 22  | 8. 08E-15 M2 | PYGB           |
| GNB5. 3    | 5. 41E-19 | -0. 22929 | 0. 013 | 0. 117 | 8. 09E-15 M2 | GNB5           |
| HIVEP3. 4  | 5. 49E-19 | -0. 24168 | 0. 04  | 0. 16  | 8. 21E-15 M2 | HIVEP3         |
| CYFIP2. 4  | 5. 73E-19 | -0. 26127 | 0. 015 | 0. 12  | 8. 56E-15 M2 | CYFIP2         |
| KRIT1. 4   | 5. 86E-19 | -0. 23943 | 0. 082 | 0. 226 | 8. 75E-15 M2 | KRIT1          |
| ESF1. 3    | 5. 87E-19 | -0. 29169 | 0. 184 | 0. 357 | 8. 77E-15 M2 | ESF1           |
| METAP1D. 3 | 5. 89E-19 | -0. 26187 | 0. 022 | 0. 131 | 8. 80E-15 M2 | METAP1D        |
| NFASC. 3   | 6. 08E-19 | -0. 31295 | 0. 009 | 0. 11  | 9. 08E-15 M2 | NFASC          |
| WBP5. 4    | 6. 15E-19 | -0. 34579 | 0. 319 | 0. 516 | 9. 19E-15 M2 | WBP5           |
| RARRES2. 4 | 6. 47E-19 | -0. 63065 | 0. 041 | 0. 157 | 9. 68E-15 M2 | RARRES2        |
| NAP1L5. 3  | 6. 55E-19 | -0. 26658 | 0. 028 | 0. 142 | 9. 79E-15 M2 | NAP1L5         |
| CLN8. 5    | 6. 65E-19 | 0. 343022 | 0. 384 | 0. 26  | 9. 94E-15 M2 | CLN8           |
| C7orf55-L  | 6. 68E-19 | -0. 25906 | 0. 178 | 0. 35  | 9. 98E-15 M2 | C7orf55-LUC7L2 |
| CELF5. 5   | 6. 86E-19 | -0. 32758 | 0. 003 | 0. 097 | 1. 03E-14 M2 | CELF5          |
| CYP1B1     | 7. 28E-19 | 0. 174367 | 0. 06  | 0. 016 | 1. 09E-14 M2 | CYP1B1         |
| GPR160. 2  | 7. 32E-19 | 0. 123382 | 0. 073 | 0. 021 | 1. 09E-14 M2 | GPR160         |
| LRRC4C. 3  | 7. 43E-19 | -0. 28326 | 0. 005 | 0. 102 | 1. 11E-14 M2 | LRRC4C         |
| VEZT. 3    | 7. 49E-19 | -0. 24426 | 0. 091 | 0. 236 | 1. 12E-14 M2 | VEZT           |
| TUBGCP2. 4 | 7. 53E-19 | 0. 448379 | 0. 308 | 0. 206 | 1. 13E-14 M2 | TUBGCP2        |
| AGTRAP. 2  | 7. 57E-19 | 0. 305709 | 0. 388 | 0. 274 | 1. 13E-14 M2 | AGTRAP         |
| MESP1. 2   | 7. 61E-19 | -0. 18699 | 0. 026 | 0. 139 | 1. 14E-14 M2 | MESP1          |
| TMEM167A   | 7. 78E-19 | 0. 331745 | 0. 497 | 0. 415 | 1. 16E-14 M2 | TMEM167A       |
| SOX21. 2   | 7. 84E-19 | -0. 1973  | 0. 004 | 0. 099 | 1. 17E-14 M2 | SOX21          |
| IL6ST. 4   | 7. 94E-19 | -0. 26223 | 0. 112 | 0. 264 | 1. 19E-14 M2 | IL6ST          |
| CCDC80. 4  | 7. 97E-19 | -0. 33708 | 0. 015 | 0. 12  | 1. 19E-14 M2 | CCDC80         |
| BAZ2B. 2   | 8. 15E-19 | -0. 24342 | 0. 162 | 0. 331 | 1. 22E-14 M2 | BAZ2B          |
| KCTD3. 2   | 8. 29E-19 | -0. 20003 | 0. 033 | 0. 15  | 1. 24E-14 M2 | KCTD3          |
| ZNF644. 2  | 8. 39E-19 | -0. 25015 | 0. 109 | 0. 263 | 1. 25E-14 M2 | ZNF644         |
| ACYP1. 2   | 8. 56E-19 | -0. 23674 | 0. 055 | 0. 185 | 1. 28E-14 M2 | ACYP1          |
| ELN. 3     | 8. 57E-19 | -0. 33736 | 0. 013 | 0. 115 | 1. 28E-14 M2 | ELN            |
| HNRNPH1. 1 | 8. 71E-19 | -0. 34288 | 0. 287 | 0. 469 | 1. 30E-14 M2 | HNRNPH1        |
| FGD5       | 8. 79E-19 | 0. 111465 | 0. 023 | 0. 003 | 1. 31E-14 M2 | FGD5           |
| UBQLN2. 5  | 9. 05E-19 | -0. 27888 | 0. 089 | 0. 23  | 1. 35E-14 M2 | UBQLN2         |
| ROM1. 4    | 9. 17E-19 | -0. 27732 | 0. 015 | 0. 12  | 1. 37E-14 M2 | ROM1           |
| PTBP2. 3   | 9. 28E-19 | -0. 2933  | 0. 011 | 0. 112 | 1. 39E-14 M2 | PTBP2          |
| KCNK6. 3   | 9. 28E-19 | 0. 183592 | 0. 1   | 0. 035 | 1. 39E-14 M2 | KCNK6          |
| DVL2. 3    | 9. 42E-19 | -0. 19391 | 0. 055 | 0. 185 | 1. 41E-14 M2 | DVL2           |
| MAPRE3. 3  | 9. 81E-19 | -0. 2577  | 0. 059 | 0. 187 | 1. 47E-14 M2 | MAPRE3         |
| ANGPTL2. 3 | 9. 83E-19 | -0. 30047 | 0. 008 | 0. 106 | 1. 47E-14 M2 | ANGPTL2        |
| PURA. 3    | 9. 93E-19 | -0. 26305 | 0. 079 | 0. 217 | 1. 48E-14 M2 | PURA           |
| PAQR4. 5   | 9. 93E-19 | -0. 30654 | 0. 05  | 0. 172 | 1. 48E-14 M2 | PAQR4          |
| DMXL2. 3   | 9. 95E-19 | 0. 359164 | 0. 16  | 0. 076 | 1. 49E-14 M2 | DMXL2          |
| DPYSL2. 4  | 9. 96E-19 | -0. 30607 | 0. 257 | 0. 435 | 1. 49E-14 M2 | DPYSL2         |
| TNRC6B. 3  | 1. 00E-18 | -0. 28111 | 0. 193 | 0. 364 | 1. 50E-14 M2 | TNRC6B         |
| SAFB. 2    | 1. 03E-18 | -0. 25357 | 0. 138 | 0. 3   | 1. 54E-14 M2 | SAFB           |
| PTCD3. 3   | 1. 09E-18 | -0. 23632 | 0. 092 | 0. 24  | 1. 63E-14 M2 | PTCD3          |
| HOXA7. 3   | 1. 09E-18 | -0. 32946 | 0. 009 | 0. 108 | 1. 63E-14 M2 | HOXA7          |
| FUCA1. 4   | 1. 10E-18 | 0. 400488 | 0. 321 | 0. 213 | 1. 64E-14 M2 | FUCA1          |
| PAIP1. 5   | 1. 10E-18 | -0. 2624  | 0. 226 | 0. 408 | 1. 65E-14 M2 | PAIP1          |
| PNPLA4. 2  | 1. 11E-18 | 0. 237701 | 0. 137 | 0. 057 | 1. 66E-14 M2 | PNPLA4         |
| ETF1. 4    | 1. 12E-18 | 0. 340948 | 0. 441 | 0. 339 | 1. 67E-14 M2 | ETF1           |

|             |           |           |        |        |              |                  |
|-------------|-----------|-----------|--------|--------|--------------|------------------|
| DLX2. 5     | 1. 14E-18 | -0. 43151 | 0. 014 | 0. 115 | 1. 70E-14 M2 | DLX2             |
| RTN4. 5     | 1. 16E-18 | -0. 25177 | 0. 605 | 0. 707 | 1. 73E-14 M2 | RTN4             |
| DCAKD. 4    | 1. 17E-18 | -0. 21312 | 0. 031 | 0. 146 | 1. 75E-14 M2 | DCAKD            |
| USP48. 1    | 1. 27E-18 | -0. 25262 | 0. 084 | 0. 224 | 1. 90E-14 M2 | USP48            |
| DENND2A. 3  | 1. 28E-18 | -0. 20776 | 0. 005 | 0. 101 | 1. 91E-14 M2 | DENND2A          |
| FGF1. 3     | 1. 44E-18 | -0. 30096 | 0. 005 | 0. 1   | 2. 16E-14 M2 | FGF1             |
| SMS. 2      | 1. 59E-18 | 0. 201349 | 0. 658 | 0. 566 | 2. 38E-14 M2 | SMS              |
| ACAD8. 2    | 1. 62E-18 | -0. 24209 | 0. 061 | 0. 192 | 2. 43E-14 M2 | ACAD8            |
| RIMKLB. 3   | 1. 65E-18 | -0. 25009 | 0. 04  | 0. 158 | 2. 47E-14 M2 | RIMKLB           |
| NRBP2. 4    | 1. 67E-18 | -0. 2008  | 0. 02  | 0. 128 | 2. 49E-14 M2 | NRBP2            |
| LINC00632   | 1. 69E-18 | -0. 33221 | 0. 004 | 0. 098 | 2. 52E-14 M2 | LINC00632        |
| PUF60. 3    | 1. 75E-18 | -0. 30014 | 0. 365 | 0. 554 | 2. 62E-14 M2 | PUF60            |
| CLEC10A. 2  | 1. 80E-18 | 0. 153798 | 0. 061 | 0. 016 | 2. 69E-14 M2 | CLEC10A          |
| NUP160. 3   | 1. 81E-18 | -0. 29705 | 0. 049 | 0. 17  | 2. 70E-14 M2 | NUP160           |
| IGSF8. 3    | 1. 86E-18 | -0. 26468 | 0. 083 | 0. 222 | 2. 78E-14 M2 | IGSF8            |
| CBX6. 3     | 1. 87E-18 | -0. 27353 | 0. 103 | 0. 25  | 2. 80E-14 M2 | CBX6             |
| CACNA1A. 4  | 2. 02E-18 | -0. 34563 | 0. 006 | 0. 102 | 3. 01E-14 M2 | CACNA1A          |
| CPNE4. 3    | 2. 09E-18 | -0. 19764 | 0. 005 | 0. 099 | 3. 12E-14 M2 | CPNE4            |
| UBTF. 4     | 2. 12E-18 | -0. 22175 | 0. 091 | 0. 236 | 3. 17E-14 M2 | UBTF             |
| PIGU. 4     | 2. 13E-18 | -0. 23918 | 0. 052 | 0. 179 | 3. 18E-14 M2 | PIGU             |
| MAML2. 4    | 2. 13E-18 | -0. 26309 | 0. 073 | 0. 207 | 3. 19E-14 M2 | MAML2            |
| PNMAL1. 4   | 2. 14E-18 | -0. 20719 | 0. 006 | 0. 102 | 3. 20E-14 M2 | PNMAL1           |
| SH3TC1. 5   | 2. 17E-18 | 0. 225255 | 0. 163 | 0. 074 | 3. 24E-14 M2 | SH3TC1           |
| SLC39A3. 4  | 2. 21E-18 | -0. 2594  | 0. 184 | 0. 349 | 3. 30E-14 M2 | SLC39A3          |
| APOO. 4     | 2. 23E-18 | -0. 2478  | 0. 095 | 0. 238 | 3. 33E-14 M2 | APOO             |
| RILP. 5     | 2. 24E-18 | 0. 353855 | 0. 188 | 0. 097 | 3. 35E-14 M2 | RILP             |
| CELF4. 5    | 2. 29E-18 | -0. 3701  | 0. 005 | 0. 099 | 3. 42E-14 M2 | CELF4            |
| RFC4. 3     | 2. 31E-18 | -0. 27572 | 0. 045 | 0. 165 | 3. 46E-14 M2 | RFC4             |
| S100B. 4    | 2. 38E-18 | -0. 43875 | 0. 372 | 0. 539 | 3. 56E-14 M2 | S100B            |
| C11orf96. 2 | 2. 41E-18 | -0. 29404 | 0. 029 | 0. 142 | 3. 61E-14 M2 | C11orf96         |
| SET. 3      | 2. 47E-18 | -0. 31543 | 0. 415 | 0. 571 | 3. 69E-14 M2 | SET              |
| ANKRD36. 3  | 2. 48E-18 | -0. 295   | 0. 065 | 0. 194 | 3. 70E-14 M2 | ANKRD36          |
| PCYT2. 4    | 2. 50E-18 | -0. 24068 | 0. 047 | 0. 168 | 3. 73E-14 M2 | PCYT2            |
| ZC3H12A. 4  | 2. 56E-18 | 0. 284364 | 0. 155 | 0. 071 | 3. 83E-14 M2 | ZC3H12A          |
| HABP4. 2    | 2. 57E-18 | -0. 20311 | 0. 02  | 0. 126 | 3. 84E-14 M2 | HABP4            |
| SMIM4. 1    | 2. 60E-18 | 0. 441857 | 0. 359 | 0. 261 | 3. 89E-14 M2 | SMIM4            |
| RP11-443E   | 2. 64E-18 | 0. 170103 | 0. 046 | 0. 01  | 3. 94E-14 M2 | RP11-443B7. 1    |
| ATN1. 3     | 2. 67E-18 | -0. 23797 | 0. 063 | 0. 192 | 3. 99E-14 M2 | ATN1             |
| SYNC. 3     | 2. 72E-18 | -0. 25263 | 0. 057 | 0. 184 | 4. 07E-14 M2 | SYNC             |
| RGS6. 3     | 2. 78E-18 | -0. 22324 | 0. 004 | 0. 097 | 4. 16E-14 M2 | RGS6             |
| FAM161A. 3  | 2. 83E-18 | -0. 25534 | 0. 014 | 0. 115 | 4. 24E-14 M2 | FAM161A          |
| TLE2. 4     | 2. 85E-18 | -0. 24175 | 0. 004 | 0. 097 | 4. 26E-14 M2 | TLE2             |
| PALLD. 2    | 2. 87E-18 | -0. 25112 | 0. 073 | 0. 207 | 4. 28E-14 M2 | PALLD            |
| ASAP2. 4    | 2. 97E-18 | -0. 18337 | 0. 006 | 0. 101 | 4. 44E-14 M2 | ASAP2            |
| UBE2H. 4    | 3. 00E-18 | -0. 24675 | 0. 117 | 0. 269 | 4. 49E-14 M2 | UBE2H            |
| KALRN. 3    | 3. 06E-18 | -0. 21258 | 0. 006 | 0. 102 | 4. 57E-14 M2 | KALRN            |
| RP11-1094   | 3. 12E-18 | -0. 23465 | 0. 097 | 0. 244 | 4. 66E-14 M2 | RP11-1094M14. 11 |
| ZHX3. 3     | 3. 26E-18 | -0. 18692 | 0. 02  | 0. 126 | 4. 88E-14 M2 | ZHX3             |
| EIF2AK1. 3  | 3. 50E-18 | -0. 22413 | 0. 17  | 0. 343 | 5. 23E-14 M2 | EIF2AK1          |
| TEAD2. 4    | 3. 58E-18 | -0. 19035 | 0. 004 | 0. 096 | 5. 35E-14 M2 | TEAD2            |
| PLA2G12A. 3 | 3. 69E-18 | -0. 22756 | 0. 098 | 0. 244 | 5. 52E-14 M2 | PLA2G12A         |

|            |          |          |       |       |             |           |
|------------|----------|----------|-------|-------|-------------|-----------|
| ENTPD1.5   | 3.75E-18 | 0.255502 | 0.277 | 0.154 | 5.60E-14 M2 | ENTPD1    |
| CRISPLD1.  | 3.96E-18 | -0.24316 | 0.004 | 0.096 | 5.92E-14 M2 | CRISPLD1  |
| SMARCA5.4  | 3.99E-18 | -0.25896 | 0.189 | 0.36  | 5.97E-14 M2 | SMARCA5   |
| CCDC66.4   | 4.00E-18 | -0.23266 | 0.096 | 0.239 | 5.98E-14 M2 | CCDC66    |
| CHCHD7.4   | 4.12E-18 | 0.294179 | 0.401 | 0.278 | 6.16E-14 M2 | CHCHD7    |
| ARAP1.4    | 4.22E-18 | 0.302873 | 0.198 | 0.101 | 6.31E-14 M2 | ARAP1     |
| B4GALT5.3  | 4.34E-18 | -0.24367 | 0.074 | 0.205 | 6.49E-14 M2 | B4GALT5   |
| TYMS.4     | 4.73E-18 | -0.27806 | 0.049 | 0.169 | 7.07E-14 M2 | TYMS      |
| ATRX.3     | 4.76E-18 | -0.28102 | 0.277 | 0.456 | 7.11E-14 M2 | ATRX      |
| CPT1C.3    | 4.79E-18 | -0.23963 | 0.013 | 0.112 | 7.16E-14 M2 | CPT1C     |
| DHX29.3    | 4.80E-18 | -0.26561 | 0.156 | 0.321 | 7.18E-14 M2 | DHX29     |
| NTN1.2     | 5.05E-18 | -0.18593 | 0     | 0.088 | 7.55E-14 M2 | NTN1      |
| CPNE8      | 5.10E-18 | 0.172951 | 0.064 | 0.018 | 7.62E-14 M2 | CPNE8     |
| MAGI2.4    | 5.44E-18 | -0.24899 | 0.013 | 0.112 | 8.13E-14 M2 | MAGI2     |
| FNIP2.4    | 5.47E-18 | 0.369068 | 0.301 | 0.188 | 8.17E-14 M2 | FNIP2     |
| PPP2R2A.2  | 5.48E-18 | -0.28054 | 0.152 | 0.31  | 8.19E-14 M2 | PPP2R2A   |
| FGFR1.2    | 5.53E-18 | -0.20927 | 0.054 | 0.179 | 8.26E-14 M2 | FGFR1     |
| SYBU.3     | 5.57E-18 | -0.22716 | 0.003 | 0.093 | 8.33E-14 M2 | SYBU      |
| TMEM100.5  | 5.76E-18 | -0.3688  | 0.004 | 0.095 | 8.61E-14 M2 | TMEM100   |
| MEIS1.5    | 5.78E-18 | -0.20617 | 0.003 | 0.093 | 8.64E-14 M2 | MEIS1     |
| BOC.3      | 5.93E-18 | -0.18785 | 0.003 | 0.093 | 8.86E-14 M2 | BOC       |
| NTRK2.4    | 5.95E-18 | -0.46843 | 0.024 | 0.127 | 8.88E-14 M2 | NTRK2     |
| ATL1.2     | 5.99E-18 | -0.30494 | 0.02  | 0.123 | 8.95E-14 M2 | ATL1      |
| ARHGFEF26. | 6.04E-18 | -0.21228 | 0.024 | 0.132 | 9.03E-14 M2 | ARHGFEF26 |
| NAP1L3.3   | 6.07E-18 | -0.28141 | 0.011 | 0.108 | 9.07E-14 M2 | NAP1L3    |
| NKAIN4.4   | 6.12E-18 | -0.404   | 0.011 | 0.107 | 9.15E-14 M2 | NKAIN4    |
| NDST2.1    | 6.19E-18 | 0.163332 | 0.072 | 0.022 | 9.25E-14 M2 | NDST2     |
| ZDHHC9.5   | 6.27E-18 | -0.27744 | 0.052 | 0.176 | 9.37E-14 M2 | ZDHHC9    |
| ZFP82.3    | 6.31E-18 | -0.23713 | 0.015 | 0.116 | 9.42E-14 M2 | ZFP82     |
| MKNK1.4    | 6.53E-18 | 0.247643 | 0.281 | 0.162 | 9.75E-14 M2 | MKNK1     |
| ATG4D.2    | 6.64E-18 | -0.20625 | 0.047 | 0.168 | 9.93E-14 M2 | ATG4D     |
| ADNP.4     | 6.77E-18 | -0.22212 | 0.069 | 0.202 | 1.01E-13 M2 | ADNP      |
| RPN1.2     | 6.81E-18 | 0.324639 | 0.494 | 0.404 | 1.02E-13 M2 | RPN1      |
| USP47.1    | 6.85E-18 | -0.27318 | 0.11  | 0.254 | 1.02E-13 M2 | USP47     |
| GIPC1.3    | 6.94E-18 | -0.24857 | 0.125 | 0.278 | 1.04E-13 M2 | GIPC1     |
| TRIM16.3   | 7.05E-18 | -0.21757 | 0.028 | 0.137 | 1.05E-13 M2 | TRIM16    |
| DHCR7.4    | 7.06E-18 | -0.27465 | 0.061 | 0.186 | 1.06E-13 M2 | DHCR7     |
| PSMB3.2    | 7.09E-18 | 0.106041 | 0.768 | 0.699 | 1.06E-13 M2 | PSMB3     |
| NFIL3.5    | 7.19E-18 | 0.31373  | 0.162 | 0.077 | 1.07E-13 M2 | NFIL3     |
| LPCAT2.5   | 7.27E-18 | 0.23031  | 0.258 | 0.139 | 1.09E-13 M2 | LPCAT2    |
| OXR1.4     | 7.28E-18 | -0.2573  | 0.114 | 0.262 | 1.09E-13 M2 | OXR1      |
| WHSC1.4    | 7.49E-18 | -0.21361 | 0.043 | 0.161 | 1.12E-13 M2 | WHSC1     |
| DHX33.3    | 7.50E-18 | -0.15208 | 0.022 | 0.128 | 1.12E-13 M2 | DHX33     |
| SHKBP1.5   | 7.54E-18 | 0.372661 | 0.335 | 0.23  | 1.13E-13 M2 | SHKBP1    |
| AP2B1.4    | 7.72E-18 | -0.21878 | 0.181 | 0.352 | 1.15E-13 M2 | AP2B1     |
| MPDZ.3     | 7.81E-18 | -0.19305 | 0.003 | 0.092 | 1.17E-13 M2 | MPDZ      |
| FTO.2      | 7.87E-18 | -0.26903 | 0.032 | 0.141 | 1.18E-13 M2 | FTO       |
| PARVA.4    | 8.06E-18 | -0.18397 | 0.008 | 0.102 | 1.20E-13 M2 | PARVA     |
| PRRT2.3    | 8.34E-18 | -0.20699 | 0.005 | 0.097 | 1.25E-13 M2 | PRRT2     |
| EIF4A2.2   | 8.47E-18 | -0.28515 | 0.564 | 0.73  | 1.27E-13 M2 | EIF4A2    |
| TXNDC12.2  | 8.56E-18 | 0.298632 | 0.517 | 0.426 | 1.28E-13 M2 | TXNDC12   |



|            |           |           |        |        |              |                |
|------------|-----------|-----------|--------|--------|--------------|----------------|
| ZYX. 5     | 8. 57E-18 | 0. 318404 | 0. 492 | 0. 395 | 1. 28E-13 M2 | ZYX            |
| RBX1. 4    | 8. 75E-18 | 0. 154857 | 0. 733 | 0. 66  | 1. 31E-13 M2 | RBX1           |
| CCNL2. 3   | 8. 88E-18 | -0. 23452 | 0. 14  | 0. 301 | 1. 33E-13 M2 | CCNL2          |
| CAT. 4     | 8. 93E-18 | 0. 275214 | 0. 413 | 0. 297 | 1. 33E-13 M2 | CAT            |
| CKAP5. 5   | 9. 00E-18 | -0. 23611 | 0. 046 | 0. 164 | 1. 34E-13 M2 | CKAP5          |
| PFKFB3. 5  | 9. 32E-18 | 0. 351398 | 0. 351 | 0. 236 | 1. 39E-13 M2 | PFKFB3         |
| CBY1. 3    | 9. 93E-18 | -0. 24395 | 0. 047 | 0. 167 | 1. 48E-13 M2 | CBY1           |
| ACTR3B. 2  | 1. 00E-17 | -0. 22796 | 0. 015 | 0. 114 | 1. 50E-13 M2 | ACTR3B         |
| ZNF254. 2  | 1. 02E-17 | -0. 2428  | 0. 036 | 0. 149 | 1. 52E-13 M2 | ZNF254         |
| PNPT1. 3   | 1. 03E-17 | -0. 22753 | 0. 073 | 0. 206 | 1. 54E-13 M2 | PNPT1          |
| RAB39B. 4  | 1. 05E-17 | -0. 21834 | 0. 005 | 0. 096 | 1. 56E-13 M2 | RAB39B         |
| HIST2H2BE  | 1. 07E-17 | -0. 28076 | 0. 04  | 0. 154 | 1. 61E-13 M2 | HIST2H2BE      |
| VAPB. 4    | 1. 09E-17 | -0. 22079 | 0. 074 | 0. 206 | 1. 62E-13 M2 | VAPB           |
| MIB2. 4    | 1. 13E-17 | -0. 2137  | 0. 041 | 0. 157 | 1. 70E-13 M2 | MIB2           |
| RSF1. 3    | 1. 14E-17 | -0. 27588 | 0. 248 | 0. 429 | 1. 71E-13 M2 | RSF1           |
| STRBP. 5   | 1. 15E-17 | -0. 21394 | 0. 027 | 0. 134 | 1. 71E-13 M2 | STRBP          |
| ACBD6. 2   | 1. 19E-17 | -0. 23764 | 0. 133 | 0. 287 | 1. 78E-13 M2 | ACBD6          |
| ARHGAP21.  | 1. 21E-17 | -0. 27147 | 0. 114 | 0. 26  | 1. 80E-13 M2 | ARHGAP21       |
| VPS26A. 4  | 1. 23E-17 | 0. 335322 | 0. 346 | 0. 235 | 1. 83E-13 M2 | VPS26A         |
| C14orf37.  | 1. 23E-17 | -0. 23992 | 0. 018 | 0. 118 | 1. 83E-13 M2 | C14orf37       |
| NLGN2. 3   | 1. 23E-17 | -0. 20971 | 0. 006 | 0. 098 | 1. 84E-13 M2 | NLGN2          |
| FGF14. 4   | 1. 25E-17 | -0. 2098  | 0. 003 | 0. 091 | 1. 88E-13 M2 | FGF14          |
| C1S. 3     | 1. 29E-17 | -0. 54802 | 0. 052 | 0. 17  | 1. 92E-13 M2 | C1S            |
| MPPED2. 3  | 1. 30E-17 | -0. 2383  | 0. 005 | 0. 096 | 1. 94E-13 M2 | MPPED2         |
| ZFAS1. 2   | 1. 30E-17 | 0. 132232 | 0. 787 | 0. 691 | 1. 95E-13 M2 | ZFAS1          |
| CSRNP3. 4  | 1. 30E-17 | -0. 27878 | 0. 01  | 0. 105 | 1. 95E-13 M2 | CSRNP3         |
| APPBP2. 3  | 1. 42E-17 | -0. 20697 | 0. 082 | 0. 218 | 2. 13E-13 M2 | APPBP2         |
| RP11-332H  | 1. 45E-17 | -0. 21943 | 0. 027 | 0. 134 | 2. 16E-13 M2 | RP11-332H14. 2 |
| VDAC1. 4   | 1. 45E-17 | 0. 153213 | 0. 695 | 0. 626 | 2. 17E-13 M2 | VDAC1          |
| PRTFDC1. 2 | 1. 46E-17 | -0. 30702 | 0. 033 | 0. 142 | 2. 18E-13 M2 | PRTFDC1        |
| ILDR2. 4   | 1. 46E-17 | -0. 16684 | 0      | 0. 086 | 2. 19E-13 M2 | ILDR2          |
| SSX2IP. 2  | 1. 47E-17 | -0. 17186 | 0. 009 | 0. 102 | 2. 20E-13 M2 | SSX2IP         |
| EIF1AY. 4  | 1. 53E-17 | -0. 22462 | 0. 061 | 0. 186 | 2. 29E-13 M2 | EIF1AY         |
| R3HCC1. 3  | 1. 54E-17 | -0. 21965 | 0. 139 | 0. 297 | 2. 30E-13 M2 | R3HCC1         |
| RUNDC3A. 5 | 1. 56E-17 | -0. 29288 | 0. 01  | 0. 104 | 2. 33E-13 M2 | RUNDC3A        |
| ZHX1. 4    | 1. 57E-17 | -0. 22663 | 0. 082 | 0. 218 | 2. 34E-13 M2 | ZHX1           |
| ECSIT. 3   | 1. 60E-17 | -0. 28065 | 0. 128 | 0. 278 | 2. 39E-13 M2 | ECSIT          |
| RP11-25K1  | 1. 61E-17 | -0. 21745 | 0. 011 | 0. 107 | 2. 41E-13 M2 | RP11-25K19. 1  |
| TMEM158. 4 | 1. 62E-17 | -0. 22992 | 0. 036 | 0. 147 | 2. 42E-13 M2 | TMEM158        |
| TOX. 5     | 1. 62E-17 | -0. 23082 | 0. 004 | 0. 093 | 2. 42E-13 M2 | TOX            |
| THSD1. 3   | 1. 64E-17 | -0. 1748  | 0. 008 | 0. 1   | 2. 46E-13 M2 | THSD1          |
| C20orf96.  | 1. 65E-17 | -0. 21537 | 0. 042 | 0. 158 | 2. 47E-13 M2 | C20orf96       |
| ACADVL. 2  | 1. 68E-17 | 0. 297891 | 0. 52  | 0. 445 | 2. 51E-13 M2 | ACADVL         |
| HDHD2. 3   | 1. 69E-17 | -0. 2721  | 0. 119 | 0. 267 | 2. 53E-13 M2 | HDHD2          |
| PTK7. 2    | 1. 71E-17 | -0. 18144 | 0. 008 | 0. 1   | 2. 55E-13 M2 | PTK7           |
| LINC00094  | 1. 73E-17 | -0. 19886 | 0. 028 | 0. 136 | 2. 59E-13 M2 | LINC00094      |
| CLDND1. 3  | 1. 75E-17 | -0. 40922 | 0. 232 | 0. 405 | 2. 61E-13 M2 | CLDND1         |
| NOC2L. 4   | 1. 78E-17 | -0. 26628 | 0. 163 | 0. 323 | 2. 65E-13 M2 | NOC2L          |
| IARS. 3    | 1. 78E-17 | -0. 19011 | 0. 082 | 0. 22  | 2. 66E-13 M2 | IARS           |
| YAF2. 3    | 1. 80E-17 | -0. 26984 | 0. 186 | 0. 358 | 2. 69E-13 M2 | YAF2           |
| PPP1R14A.  | 1. 83E-17 | -0. 54027 | 0. 017 | 0. 113 | 2. 73E-13 M2 | PPP1R14A       |

|              |           |           |        |        |              |                |
|--------------|-----------|-----------|--------|--------|--------------|----------------|
| CHERP. 2     | 1. 83E-17 | -0. 21334 | 0. 055 | 0. 177 | 2. 73E-13 M2 | CHERP          |
| FAM102A. 2   | 1. 83E-17 | -0. 27369 | 0. 01  | 0. 104 | 2. 74E-13 M2 | FAM102A        |
| ZNF358. 4    | 1. 87E-17 | -0. 18474 | 0. 051 | 0. 173 | 2. 79E-13 M2 | ZNF358         |
| CACNG7. 3    | 1. 88E-17 | -0. 18616 | 0. 003 | 0. 09  | 2. 81E-13 M2 | CACNG7         |
| KCNIP1. 4    | 1. 88E-17 | -0. 25361 | 0. 01  | 0. 105 | 2. 81E-13 M2 | KCNIP1         |
| MCC. 3       | 1. 90E-17 | -0. 2028  | 0. 024 | 0. 129 | 2. 83E-13 M2 | MCC            |
| ASTN1. 2     | 1. 90E-17 | -0. 1894  | 0. 006 | 0. 097 | 2. 85E-13 M2 | ASTN1          |
| PAXBP1. 4    | 1. 92E-17 | -0. 20456 | 0. 049 | 0. 167 | 2. 87E-13 M2 | PAXBP1         |
| LRRTM2. 4    | 1. 93E-17 | -0. 21909 | 0. 013 | 0. 109 | 2. 88E-13 M2 | LRRTM2         |
| KIAA1549. 1  | 1. 94E-17 | -0. 21762 | 0. 008 | 0. 1   | 2. 89E-13 M2 | KIAA1549       |
| ATP6V1G1. 2  | 2. 01E-17 | 0. 124786 | 0. 807 | 0. 75  | 3. 01E-13 M2 | ATP6V1G1       |
| MPHOSPH8. 2  | 2. 04E-17 | -0. 24995 | 0. 235 | 0. 411 | 3. 05E-13 M2 | MPHOSPH8       |
| FAM60A. 3    | 2. 05E-17 | -0. 27928 | 0. 061 | 0. 183 | 3. 07E-13 M2 | FAM60A         |
| FKBP8. 2     | 2. 30E-17 | 0. 167831 | 0. 702 | 0. 642 | 3. 44E-13 M2 | FKBP8          |
| GCA. 5       | 2. 31E-17 | 0. 271842 | 0. 415 | 0. 291 | 3. 45E-13 M2 | GCA            |
| C1orf131. 2  | 2. 42E-17 | -0. 27155 | 0. 078 | 0. 209 | 3. 62E-13 M2 | C1orf131       |
| CDK5R1. 5    | 2. 43E-17 | -0. 255   | 0. 008 | 0. 099 | 3. 63E-13 M2 | CDK5R1         |
| ZNF414. 5    | 2. 45E-17 | -0. 2266  | 0. 068 | 0. 194 | 3. 66E-13 M2 | ZNF414         |
| SERP1. 5     | 2. 45E-17 | 0. 203116 | 0. 646 | 0. 601 | 3. 66E-13 M2 | SERP1          |
| SRGAP3. 3    | 2. 48E-17 | -0. 29768 | 0. 042 | 0. 153 | 3. 71E-13 M2 | SRGAP3         |
| NNMT. 3      | 2. 54E-17 | -0. 59274 | 0. 051 | 0. 165 | 3. 80E-13 M2 | NNMT           |
| DNM3. 3      | 2. 64E-17 | -0. 27847 | 0. 005 | 0. 094 | 3. 95E-13 M2 | DNM3           |
| COQ9. 4      | 2. 67E-17 | -0. 22541 | 0. 107 | 0. 252 | 3. 99E-13 M2 | COQ9           |
| CCDC136. 3   | 2. 67E-17 | -0. 24106 | 0. 006 | 0. 097 | 4. 00E-13 M2 | CCDC136        |
| PRKAG2. 5    | 2. 75E-17 | 0. 331626 | 0. 232 | 0. 131 | 4. 11E-13 M2 | PRKAG2         |
| ORAI3. 4     | 2. 77E-17 | 0. 337735 | 0. 232 | 0. 135 | 4. 14E-13 M2 | ORAI3          |
| LRIG1. 4     | 2. 87E-17 | -0. 22078 | 0. 017 | 0. 115 | 4. 29E-13 M2 | LRIG1          |
| SERTAD1. 3   | 2. 89E-17 | 0. 279325 | 0. 421 | 0. 308 | 4. 31E-13 M2 | SERTAD1        |
| ABCD3. 3     | 2. 92E-17 | -0. 19532 | 0. 073 | 0. 204 | 4. 36E-13 M2 | ABCD3          |
| DTD1. 5      | 2. 93E-17 | -0. 24996 | 0. 234 | 0. 403 | 4. 38E-13 M2 | DTD1           |
| ARHGDI1. 4   | 2. 95E-17 | 0. 206198 | 0. 619 | 0. 561 | 4. 40E-13 M2 | ARHGDI1        |
| TM6SF1. 5    | 2. 95E-17 | 0. 190834 | 0. 273 | 0. 15  | 4. 41E-13 M2 | TM6SF1         |
| C17orf100. 3 | 3. 00E-17 | -0. 1873  | 0. 006 | 0. 096 | 4. 48E-13 M2 | C17orf100      |
| MEN1. 1      | 3. 04E-17 | -0. 20623 | 0. 022 | 0. 123 | 4. 54E-13 M2 | MEN1           |
| TMEM80. 3    | 3. 05E-17 | -0. 21418 | 0. 055 | 0. 177 | 4. 56E-13 M2 | TMEM80         |
| PTDSS2. 5    | 3. 13E-17 | -0. 20366 | 0. 045 | 0. 16  | 4. 68E-13 M2 | PTDSS2         |
| ENDOG. 4     | 3. 15E-17 | -0. 20809 | 0. 041 | 0. 155 | 4. 71E-13 M2 | ENDOG          |
| CTC-444N2. 3 | 3. 18E-17 | -0. 22006 | 0. 033 | 0. 142 | 4. 75E-13 M2 | CTC-444N24. 11 |
| TPD52L2. 2   | 3. 39E-17 | 0. 383587 | 0. 406 | 0. 318 | 5. 07E-13 M2 | TPD52L2        |
| MARCH9. 4    | 3. 43E-17 | -0. 33909 | 0. 049 | 0. 162 | 5. 12E-13 M2 | 9-Mar          |
| FBLN1. 4     | 3. 53E-17 | -0. 32505 | 0. 004 | 0. 091 | 5. 27E-13 M2 | FBLN1          |
| CASC15. 4    | 3. 56E-17 | -0. 2468  | 0. 011 | 0. 106 | 5. 32E-13 M2 | CASC15         |
| VIPR2. 4     | 3. 72E-17 | -0. 32804 | 0. 003 | 0. 088 | 5. 56E-13 M2 | VIPR2          |
| SYT17. 3     | 3. 75E-17 | -0. 24268 | 0. 05  | 0. 167 | 5. 60E-13 M2 | SYT17          |
| BBS2. 5      | 3. 75E-17 | -0. 31452 | 0. 06  | 0. 18  | 5. 61E-13 M2 | BBS2           |
| RASSF3. 4    | 3. 83E-17 | 0. 177462 | 0. 1   | 0. 038 | 5. 72E-13 M2 | RASSF3         |
| SPRY2. 4     | 3. 97E-17 | -0. 21934 | 0. 092 | 0. 227 | 5. 94E-13 M2 | SPRY2          |
| ANXA4. 4     | 3. 99E-17 | 0. 316653 | 0. 292 | 0. 187 | 5. 96E-13 M2 | ANXA4          |
| KCNQ1. 4     | 4. 04E-17 | 0. 23099  | 0. 095 | 0. 035 | 6. 04E-13 M2 | KCNQ1          |
| F11R. 4      | 4. 05E-17 | 0. 22515  | 0. 124 | 0. 052 | 6. 06E-13 M2 | F11R           |
| HLA-DQA2. 4  | 4. 15E-17 | 0. 19391  | 0. 289 | 0. 164 | 6. 21E-13 M2 | HLA-DQA2       |

|             |           |           |        |        |              |            |
|-------------|-----------|-----------|--------|--------|--------------|------------|
| GSDMD. 4    | 4. 29E-17 | 0. 297391 | 0. 285 | 0. 178 | 6. 41E-13 M2 | GSDMD      |
| ANKRD28. 3  | 4. 38E-17 | 0. 391162 | 0. 195 | 0. 107 | 6. 54E-13 M2 | ANKRD28    |
| PKD2L1      | 4. 48E-17 | 0. 15423  | 0. 055 | 0. 015 | 6. 69E-13 M2 | PKD2L1     |
| LINC00685   | 4. 58E-17 | -0. 24545 | 0. 043 | 0. 157 | 6. 84E-13 M2 | LINC00685  |
| Clorf35. 4  | 4. 68E-17 | -0. 22657 | 0. 124 | 0. 273 | 6. 99E-13 M2 | Clorf35    |
| COMTD1. 3   | 4. 78E-17 | 0. 310593 | 0. 126 | 0. 055 | 7. 14E-13 M2 | COMTD1     |
| TET1. 4     | 4. 89E-17 | -0. 17193 | 0. 003 | 0. 088 | 7. 30E-13 M2 | TET1       |
| YRDC. 2     | 4. 92E-17 | -0. 2281  | 0. 051 | 0. 169 | 7. 36E-13 M2 | YRDC       |
| ZBED5. 4    | 4. 96E-17 | -0. 2308  | 0. 063 | 0. 187 | 7. 41E-13 M2 | ZBED5      |
| ADIPOR1. 5  | 4. 96E-17 | 0. 352766 | 0. 457 | 0. 374 | 7. 42E-13 M2 | ADIPOR1    |
| PEMT. 4     | 5. 12E-17 | -0. 18931 | 0. 086 | 0. 222 | 7. 65E-13 M2 | PEMT       |
| MAP6D1. 4   | 5. 12E-17 | -0. 22901 | 0. 003 | 0. 088 | 7. 65E-13 M2 | MAP6D1     |
| ZNF692. 2   | 5. 18E-17 | -0. 21192 | 0. 018 | 0. 116 | 7. 73E-13 M2 | ZNF692     |
| FBXO32. 5   | 5. 20E-17 | -0. 34773 | 0. 047 | 0. 161 | 7. 78E-13 M2 | FBXO32     |
| SLC39A10. 5 | 5. 22E-17 | -0. 20882 | 0. 049 | 0. 165 | 7. 81E-13 M2 | SLC39A10   |
| ATF3. 5     | 5. 49E-17 | 0. 327436 | 0. 413 | 0. 294 | 8. 20E-13 M2 | ATF3       |
| TRMT61B. 3  | 5. 51E-17 | -0. 24091 | 0. 052 | 0. 171 | 8. 23E-13 M2 | TRMT61B    |
| ZNF579. 4   | 5. 51E-17 | -0. 17428 | 0. 02  | 0. 121 | 8. 23E-13 M2 | ZNF579     |
| TSEN15. 3   | 5. 62E-17 | -0. 27211 | 0. 105 | 0. 242 | 8. 40E-13 M2 | TSEN15     |
| RDH5. 3     | 5. 64E-17 | -0. 22739 | 0. 014 | 0. 109 | 8. 43E-13 M2 | RDH5       |
| XRR1. 3     | 5. 67E-17 | -0. 23325 | 0. 031 | 0. 136 | 8. 47E-13 M2 | XRR1       |
| ELAVL2. 5   | 5. 71E-17 | -0. 29023 | 0. 001 | 0. 085 | 8. 54E-13 M2 | ELAVL2     |
| GPR37L1. 4  | 5. 79E-17 | -0. 39925 | 0. 004 | 0. 09  | 8. 65E-13 M2 | GPR37L1    |
| PITX1. 4    | 5. 87E-17 | -0. 14635 | 0. 004 | 0. 09  | 8. 77E-13 M2 | PITX1      |
| MTSS1L. 3   | 5. 96E-17 | -0. 20076 | 0. 009 | 0. 1   | 8. 90E-13 M2 | MTSS1L     |
| RSAD1. 3    | 6. 03E-17 | -0. 18945 | 0. 042 | 0. 156 | 9. 01E-13 M2 | RSAD1      |
| ELOVL4. 3   | 6. 06E-17 | -0. 20852 | 0. 001 | 0. 085 | 9. 05E-13 M2 | ELOVL4     |
| CEP70. 3    | 6. 17E-17 | -0. 24069 | 0. 011 | 0. 104 | 9. 22E-13 M2 | CEP70      |
| FGFBP3. 4   | 6. 24E-17 | -0. 19828 | 0. 013 | 0. 106 | 9. 32E-13 M2 | FGFBP3     |
| SH3BGR. 4   | 6. 37E-17 | -0. 34126 | 0. 027 | 0. 13  | 9. 51E-13 M2 | SH3BGR     |
| PLEKHA3. 4  | 6. 37E-17 | -0. 2477  | 0. 103 | 0. 241 | 9. 52E-13 M2 | PLEKHA3    |
| CSGALNACT   | 6. 51E-17 | 0. 339936 | 0. 171 | 0. 088 | 9. 73E-13 M2 | CSGALNACT2 |
| NECAP2. 2   | 6. 52E-17 | 0. 360806 | 0. 383 | 0. 285 | 9. 75E-13 M2 | NECAP2     |
| GNA11. 2    | 6. 86E-17 | -0. 19197 | 0. 017 | 0. 113 | 1. 03E-12 M2 | GNA11      |
| ILF3. 3     | 6. 91E-17 | -0. 2366  | 0. 245 | 0. 423 | 1. 03E-12 M2 | ILF3       |
| TRIO. 4     | 6. 97E-17 | -0. 24051 | 0. 059 | 0. 18  | 1. 04E-12 M2 | TRIO       |
| PTPN2. 4    | 7. 01E-17 | 0. 321337 | 0. 35  | 0. 241 | 1. 05E-12 M2 | PTPN2      |
| RFFL. 5     | 7. 08E-17 | -0. 22741 | 0. 055 | 0. 172 | 1. 06E-12 M2 | RFFL       |
| MTX2. 3     | 7. 19E-17 | -0. 24826 | 0. 17  | 0. 332 | 1. 07E-12 M2 | MTX2       |
| TPT1-AS1.   | 7. 21E-17 | -0. 2319  | 0. 037 | 0. 146 | 1. 08E-12 M2 | TPT1-AS1   |
| ZNF138. 3   | 7. 26E-17 | -0. 22629 | 0. 042 | 0. 153 | 1. 09E-12 M2 | ZNF138     |
| CBLN4. 5    | 7. 32E-17 | -0. 24599 | 0. 001 | 0. 085 | 1. 09E-12 M2 | CBLN4      |
| ANAPC5. 3   | 7. 56E-17 | -0. 23714 | 0. 231 | 0. 408 | 1. 13E-12 M2 | ANAPC5     |
| TM4SF1. 5   | 7. 63E-17 | -0. 27362 | 0. 02  | 0. 119 | 1. 14E-12 M2 | TM4SF1     |
| CPSF4. 2    | 7. 64E-17 | -0. 2636  | 0. 078 | 0. 204 | 1. 14E-12 M2 | CPSF4      |
| PTK2. 3     | 7. 81E-17 | -0. 2162  | 0. 063 | 0. 186 | 1. 17E-12 M2 | PTK2       |
| SPATA33. 4  | 7. 95E-17 | -0. 19726 | 0. 041 | 0. 153 | 1. 19E-12 M2 | SPATA33    |
| KHDRBS1. 4  | 8. 25E-17 | -0. 27505 | 0. 326 | 0. 497 | 1. 23E-12 M2 | KHDRBS1    |
| ZNF521. 3   | 8. 40E-17 | -0. 18925 | 0. 004 | 0. 089 | 1. 26E-12 M2 | ZNF521     |
| DLX6-AS1.   | 8. 53E-17 | -0. 63585 | 0. 036 | 0. 137 | 1. 28E-12 M2 | DLX6-AS1   |
| CAV1. 5     | 8. 58E-17 | -0. 74545 | 0. 032 | 0. 134 | 1. 28E-12 M2 | CAV1       |

|           |          |          |       |       |          |    |           |
|-----------|----------|----------|-------|-------|----------|----|-----------|
| UBALD1.3  | 8.94E-17 | -0.20144 | 0.056 | 0.175 | 1.34E-12 | M2 | UBALD1    |
| MSH2.3    | 9.29E-17 | -0.23622 | 0.023 | 0.122 | 1.39E-12 | M2 | MSH2      |
| EIF3J-AS1 | 9.43E-17 | -0.22091 | 0.029 | 0.134 | 1.41E-12 | M2 | EIF3J-AS1 |
| DMRTA2.2  | 9.43E-17 | -0.17315 | 0     | 0.082 | 1.41E-12 | M2 | DMRTA2    |
| TNFAIP1.3 | 9.54E-17 | -0.16331 | 0.06  | 0.183 | 1.43E-12 | M2 | TNFAIP1   |
| EPB41L1.3 | 9.57E-17 | -0.19991 | 0.006 | 0.094 | 1.43E-12 | M2 | EPB41L1   |
| MAD2L2.4  | 9.63E-17 | -0.25641 | 0.236 | 0.403 | 1.44E-12 | M2 | MAD2L2    |
| FAXC.4    | 9.89E-17 | -0.23148 | 0.005 | 0.091 | 1.48E-12 | M2 | FAXC      |
| CELSR2.4  | 9.98E-17 | -0.20067 | 0.009 | 0.098 | 1.49E-12 | M2 | CELSR2    |
| KIAA1715. | 1.00E-16 | -0.25189 | 0.121 | 0.265 | 1.50E-12 | M2 | KIAA1715  |
| SFXN1.3   | 1.00E-16 | -0.20771 | 0.091 | 0.226 | 1.50E-12 | M2 | SFXN1     |
| FAM57B.4  | 1.01E-16 | -0.26736 | 0.009 | 0.098 | 1.51E-12 | M2 | FAM57B    |
| ECI2.3    | 1.02E-16 | -0.32883 | 0.181 | 0.333 | 1.52E-12 | M2 | ECI2      |
| HAMP.5    | 1.02E-16 | 0.213634 | 0.272 | 0.153 | 1.53E-12 | M2 | HAMP      |
| HKR1.4    | 1.02E-16 | -0.21424 | 0.023 | 0.123 | 1.53E-12 | M2 | HKR1      |
| BEST3.4   | 1.04E-16 | -0.34869 | 0.006 | 0.093 | 1.55E-12 | M2 | BEST3     |
| ZNF506.3  | 1.04E-16 | -0.19083 | 0.026 | 0.128 | 1.56E-12 | M2 | ZNF506    |
| DID01.3   | 1.05E-16 | -0.19402 | 0.043 | 0.156 | 1.56E-12 | M2 | DID01     |
| ATP6AP2.3 | 1.10E-16 | 0.134741 | 0.692 | 0.654 | 1.65E-12 | M2 | ATP6AP2   |
| BDP1.2    | 1.10E-16 | -0.25476 | 0.115 | 0.254 | 1.65E-12 | M2 | BDP1      |
| FDFT1.3   | 1.11E-16 | -0.29799 | 0.162 | 0.316 | 1.66E-12 | M2 | FDFT1     |
| SAC3D1.5  | 1.13E-16 | -0.22485 | 0.059 | 0.178 | 1.69E-12 | M2 | SAC3D1    |
| NOVA2.3   | 1.16E-16 | -0.2057  | 0.003 | 0.086 | 1.73E-12 | M2 | NOVA2     |
| PPP5C.4   | 1.17E-16 | -0.21714 | 0.063 | 0.185 | 1.75E-12 | M2 | PPP5C     |
| SLC4A3.2  | 1.17E-16 | -0.1912  | 0.008 | 0.096 | 1.75E-12 | M2 | SLC4A3    |
| ZNF766.1  | 1.18E-16 | -0.22504 | 0.029 | 0.133 | 1.77E-12 | M2 | ZNF766    |
| DHX9.3    | 1.22E-16 | -0.20122 | 0.138 | 0.288 | 1.82E-12 | M2 | DHX9      |
| PSMD5-AS1 | 1.23E-16 | -0.20307 | 0.066 | 0.19  | 1.83E-12 | M2 | PSMD5-AS1 |
| HOXC9.5   | 1.24E-16 | -0.28564 | 0.005 | 0.091 | 1.85E-12 | M2 | HOXC9     |
| LONRF2.3  | 1.26E-16 | -0.21047 | 0.009 | 0.098 | 1.89E-12 | M2 | LONRF2    |
| TNKS.5    | 1.36E-16 | -0.19216 | 0.043 | 0.156 | 2.03E-12 | M2 | TNKS      |
| RPS6KL1.4 | 1.36E-16 | -0.24225 | 0.014 | 0.106 | 2.03E-12 | M2 | RPS6KL1   |
| GTF2F2.2  | 1.37E-16 | -0.28217 | 0.16  | 0.309 | 2.05E-12 | M2 | GTF2F2    |
| UXT.3     | 1.40E-16 | 0.219893 | 0.604 | 0.533 | 2.09E-12 | M2 | UXT       |
| MAOB.3    | 1.40E-16 | -0.3349  | 0.013 | 0.104 | 2.10E-12 | M2 | MAOB      |
| BRD8.3    | 1.45E-16 | -0.23324 | 0.054 | 0.17  | 2.16E-12 | M2 | BRD8      |
| IL15.3    | 1.51E-16 | 0.207277 | 0.091 | 0.033 | 2.25E-12 | M2 | IL15      |
| CXXC4.4   | 1.51E-16 | -0.2178  | 0.001 | 0.083 | 2.26E-12 | M2 | CXXC4     |
| ZNF12.3   | 1.60E-16 | -0.19107 | 0.028 | 0.131 | 2.40E-12 | M2 | ZNF12     |
| SLC25A18. | 1.62E-16 | -0.23881 | 0.006 | 0.093 | 2.42E-12 | M2 | SLC25A18  |
| PLCG1.3   | 1.64E-16 | -0.20009 | 0.014 | 0.106 | 2.46E-12 | M2 | PLCG1     |
| FAM84B.4  | 1.66E-16 | -0.23953 | 0.006 | 0.093 | 2.48E-12 | M2 | FAM84B    |
| IGFBP3.3  | 1.67E-16 | -0.53854 | 0.087 | 0.202 | 2.49E-12 | M2 | IGFBP3    |
| IPO5.3    | 1.70E-16 | -0.21372 | 0.091 | 0.225 | 2.53E-12 | M2 | IPO5      |
| RAD50.2   | 1.70E-16 | -0.23204 | 0.129 | 0.275 | 2.54E-12 | M2 | RAD50     |
| TMEM47.3  | 1.71E-16 | -0.17923 | 0.003 | 0.086 | 2.56E-12 | M2 | TMEM47    |
| ID1.3     | 1.75E-16 | -0.27183 | 0.027 | 0.127 | 2.62E-12 | M2 | ID1       |
| KLC2.4    | 1.80E-16 | -0.18655 | 0.027 | 0.128 | 2.69E-12 | M2 | KLC2      |
| HDAC2.5   | 1.80E-16 | -0.25799 | 0.285 | 0.459 | 2.69E-12 | M2 | HDAC2     |
| ICAM4     | 1.81E-16 | 0.122462 | 0.04  | 0.008 | 2.70E-12 | M2 | ICAM4     |
| DUSP14.4  | 1.89E-16 | -0.22103 | 0.065 | 0.187 | 2.83E-12 | M2 | DUSP14    |

|            |          |          |       |       |          |    |            |
|------------|----------|----------|-------|-------|----------|----|------------|
| SYNRG.3    | 1.91E-16 | -0.20119 | 0.073 | 0.197 | 2.85E-12 | M2 | SYNRG      |
| GNAO1.3    | 1.95E-16 | -0.29959 | 0.009 | 0.096 | 2.91E-12 | M2 | GNAO1      |
| C14orf132  | 1.96E-16 | -0.29585 | 0.009 | 0.097 | 2.92E-12 | M2 | C14orf132  |
| TGFBR1.5   | 1.99E-16 | 0.277393 | 0.261 | 0.155 | 2.97E-12 | M2 | TGFBR1     |
| ZNRF1.5    | 2.00E-16 | -0.15242 | 0.023 | 0.123 | 2.98E-12 | M2 | ZNRF1      |
| RAB27A.3   | 2.01E-16 | 0.28615  | 0.151 | 0.073 | 3.01E-12 | M2 | RAB27A     |
| ZNF580.4   | 2.03E-16 | -0.24466 | 0.153 | 0.301 | 3.03E-12 | M2 | ZNF580     |
| DYNLL2.5   | 2.06E-16 | -0.19134 | 0.084 | 0.214 | 3.08E-12 | M2 | DYNLL2     |
| TANC1.3    | 2.07E-16 | -0.18047 | 0.019 | 0.115 | 3.10E-12 | M2 | TANC1      |
| TMEM203.4  | 2.08E-16 | -0.20229 | 0.119 | 0.262 | 3.10E-12 | M2 | TMEM203    |
| LMO1.4     | 2.10E-16 | -0.28483 | 0     | 0.08  | 3.14E-12 | M2 | LMO1       |
| SOX5.3     | 2.10E-16 | -0.22225 | 0.008 | 0.094 | 3.14E-12 | M2 | SOX5       |
| WNT5A.5    | 2.12E-16 | 0.240277 | 0.124 | 0.054 | 3.17E-12 | M2 | WNT5A      |
| ZNF708.2   | 2.13E-16 | -0.19554 | 0.013 | 0.104 | 3.18E-12 | M2 | ZNF708     |
| CCDC181.4  | 2.15E-16 | -0.23233 | 0.003 | 0.085 | 3.22E-12 | M2 | CCDC181    |
| SPOCD1.3   | 2.19E-16 | -0.42976 | 0.096 | 0.226 | 3.27E-12 | M2 | SPOCD1     |
| TKT.3      | 2.19E-16 | 0.234114 | 0.575 | 0.504 | 3.27E-12 | M2 | TKT        |
| RRM1.3     | 2.20E-16 | -0.23444 | 0.07  | 0.193 | 3.29E-12 | M2 | RRM1       |
| MAP2K1.5   | 2.24E-16 | 0.352364 | 0.361 | 0.262 | 3.35E-12 | M2 | MAP2K1     |
| TBCC.5     | 2.26E-16 | -0.26205 | 0.098 | 0.23  | 3.38E-12 | M2 | TBCC       |
| ATXN7L3B.2 | 2.27E-16 | -0.16344 | 0.066 | 0.189 | 3.40E-12 | M2 | ATXN7L3B   |
| TPGS2.2    | 2.30E-16 | -0.22239 | 0.189 | 0.349 | 3.44E-12 | M2 | TPGS2      |
| AHCYL1.5   | 2.32E-16 | -0.30783 | 0.178 | 0.338 | 3.47E-12 | M2 | AHCYL1     |
| POU2F1.4   | 2.49E-16 | -0.19783 | 0.052 | 0.168 | 3.72E-12 | M2 | POU2F1     |
| SLN.2      | 2.51E-16 | -0.68311 | 0.057 | 0.169 | 3.75E-12 | M2 | SLN        |
| NEIL2.4    | 2.53E-16 | -0.23237 | 0.079 | 0.207 | 3.78E-12 | M2 | NEIL2      |
| ZFP90.4    | 2.55E-16 | -0.18176 | 0.033 | 0.138 | 3.80E-12 | M2 | ZFP90      |
| SEPT11.5   | 2.55E-16 | -0.24947 | 0.163 | 0.313 | 3.82E-12 | M2 | 11-Sep     |
| RUNDC1.1   | 2.56E-16 | -0.22252 | 0.037 | 0.142 | 3.82E-12 | M2 | RUNDC1     |
| CSNK2A1.3  | 2.58E-16 | -0.21626 | 0.169 | 0.327 | 3.86E-12 | M2 | CSNK2A1    |
| EPHA4.2    | 2.59E-16 | -0.20139 | 0.004 | 0.087 | 3.87E-12 | M2 | EPHA4      |
| TCF3.4     | 2.60E-16 | -0.16195 | 0.032 | 0.136 | 3.89E-12 | M2 | TCF3       |
| GLRX5.4    | 2.66E-16 | -0.26212 | 0.156 | 0.306 | 3.97E-12 | M2 | GLRX5      |
| C1orf52.5  | 2.69E-16 | -0.23904 | 0.162 | 0.317 | 4.02E-12 | M2 | C1orf52    |
| PTPN13.3   | 2.70E-16 | -0.17331 | 0.01  | 0.099 | 4.03E-12 | M2 | PTPN13     |
| AP001055.2 | 2.72E-16 | 0.261889 | 0.157 | 0.074 | 4.07E-12 | M2 | AP001055.6 |
| CAMSAP2.3  | 2.76E-16 | -0.18315 | 0.045 | 0.157 | 4.12E-12 | M2 | CAMSAP2    |
| LRRC17.3   | 2.82E-16 | -0.23368 | 0     | 0.079 | 4.21E-12 | M2 | LRRC17     |
| ACTL6B.4   | 2.85E-16 | -0.30318 | 0.001 | 0.082 | 4.26E-12 | M2 | ACTL6B     |
| DUSP26.4   | 2.87E-16 | -0.32653 | 0.008 | 0.093 | 4.29E-12 | M2 | DUSP26     |
| FAM171A1.2 | 2.89E-16 | -0.19569 | 0.001 | 0.082 | 4.33E-12 | M2 | FAM171A1   |
| IWS1.2     | 2.90E-16 | -0.24556 | 0.091 | 0.222 | 4.34E-12 | M2 | IWS1       |
| CXADR.5    | 2.94E-16 | -0.29316 | 0.167 | 0.317 | 4.40E-12 | M2 | CXADR      |
| TLCD1.3    | 2.95E-16 | -0.16295 | 0.004 | 0.086 | 4.41E-12 | M2 | TLCD1      |
| ACAA2.3    | 2.97E-16 | 0.281288 | 0.313 | 0.202 | 4.44E-12 | M2 | ACAA2      |
| PRMT1.2    | 3.02E-16 | -0.29046 | 0.382 | 0.566 | 4.51E-12 | M2 | PRMT1      |
| AGPAT5.4   | 3.02E-16 | -0.2538  | 0.088 | 0.218 | 4.52E-12 | M2 | AGPAT5     |
| HOXD11.3   | 3.03E-16 | -0.15617 | 0.001 | 0.082 | 4.52E-12 | M2 | HOXD11     |
| PAM.4      | 3.03E-16 | -0.17323 | 0.055 | 0.173 | 4.53E-12 | M2 | PAM        |
| AMOTL2.2   | 3.09E-16 | -0.25691 | 0.004 | 0.087 | 4.62E-12 | M2 | AMOTL2     |
| LDOC1.4    | 3.09E-16 | -0.31352 | 0.008 | 0.094 | 4.62E-12 | M2 | LDOC1      |

|              |          |          |       |       |             |                |
|--------------|----------|----------|-------|-------|-------------|----------------|
| AASDHPPT. 3. | 2.3E-16  | -0.24865 | 0.148 | 0.298 | 4.83E-12 M2 | AASDHPPT       |
| SLC29A1. 4   | 3.26E-16 | 0.282466 | 0.232 | 0.131 | 4.87E-12 M2 | SLC29A1        |
| TMX4. 3      | 3.31E-16 | -0.22572 | 0.115 | 0.255 | 4.95E-12 M2 | TMX4           |
| NUDT16L1. 3. | 3.35E-16 | -0.19465 | 0.139 | 0.292 | 5.00E-12 M2 | NUDT16L1       |
| GABARAP. 3   | 3.37E-16 | 0.275319 | 0.539 | 0.455 | 5.04E-12 M2 | GABARAP        |
| COIL. 3      | 3.37E-16 | -0.20685 | 0.07  | 0.193 | 5.04E-12 M2 | COIL           |
| MEOX2. 3     | 3.45E-16 | -0.21963 | 0.003 | 0.084 | 5.16E-12 M2 | MEOX2          |
| LMCD1. 3     | 3.47E-16 | -0.18729 | 0.006 | 0.091 | 5.18E-12 M2 | LMCD1          |
| EAF2. 5      | 3.50E-16 | 0.26614  | 0.174 | 0.087 | 5.23E-12 M2 | EAF2           |
| TMTC4. 4     | 3.53E-16 | -0.24792 | 0.014 | 0.104 | 5.28E-12 M2 | TMTC4          |
| PRKACB. 2    | 3.58E-16 | -0.24856 | 0.093 | 0.224 | 5.34E-12 M2 | PRKACB         |
| ZBTB16. 2    | 3.59E-16 | -0.38458 | 0.052 | 0.163 | 5.37E-12 M2 | ZBTB16         |
| BOK. 5       | 3.60E-16 | -0.22117 | 0.001 | 0.081 | 5.37E-12 M2 | BOK            |
| TOM1L2. 2    | 3.61E-16 | -0.2092  | 0.027 | 0.126 | 5.39E-12 M2 | TOM1L2         |
| C9orf3. 3    | 3.66E-16 | -0.3212  | 0.018 | 0.111 | 5.47E-12 M2 | C9orf3         |
| RAB3GAP2. 3. | 3.69E-16 | -0.24186 | 0.061 | 0.178 | 5.51E-12 M2 | RAB3GAP2       |
| C1orf198. 3. | 3.71E-16 | -0.27713 | 0.018 | 0.111 | 5.54E-12 M2 | C1orf198       |
| SMAD5. 4     | 3.73E-16 | -0.20164 | 0.06  | 0.178 | 5.57E-12 M2 | SMAD5          |
| FAM216A. 3   | 3.74E-16 | -0.20721 | 0.028 | 0.129 | 5.59E-12 M2 | FAM216A        |
| KCTD6. 1     | 3.85E-16 | -0.20785 | 0.026 | 0.124 | 5.75E-12 M2 | KCTD6          |
| MGST3. 3     | 3.85E-16 | 0.12199  | 0.752 | 0.689 | 5.75E-12 M2 | MGST3          |
| ANXA2R. 4    | 3.86E-16 | -0.2071  | 0.047 | 0.159 | 5.77E-12 M2 | ANXA2R         |
| FANCF. 3     | 3.87E-16 | -0.23261 | 0.01  | 0.098 | 5.78E-12 M2 | FANCF          |
| RP11-1398    | 3.87E-16 | 0.138408 | 0.051 | 0.013 | 5.78E-12 M2 | RP11-1398P2. 1 |
| JAG1. 4      | 3.88E-16 | -0.20796 | 0.052 | 0.166 | 5.79E-12 M2 | JAG1           |
| ABHD17C. 2   | 3.90E-16 | -0.15176 | 0.005 | 0.089 | 5.83E-12 M2 | ABHD17C        |
| UBXN2A. 3    | 3.99E-16 | -0.2157  | 0.073 | 0.196 | 5.96E-12 M2 | UBXN2A         |
| CYHR1. 4     | 4.02E-16 | -0.25004 | 0.14  | 0.288 | 6.00E-12 M2 | CYHR1          |
| BBX. 2       | 4.05E-16 | -0.28386 | 0.249 | 0.418 | 6.05E-12 M2 | BBX            |
| CRY1. 2      | 4.14E-16 | -0.25493 | 0.038 | 0.143 | 6.19E-12 M2 | CRY1           |
| PRKCZ. 5     | 4.24E-16 | -0.21921 | 0.015 | 0.106 | 6.34E-12 M2 | PRKCZ          |
| SSR1. 4      | 4.30E-16 | 0.263991 | 0.531 | 0.464 | 6.42E-12 M2 | SSR1           |
| ABCD4. 3     | 4.31E-16 | -0.26374 | 0.125 | 0.266 | 6.44E-12 M2 | ABCD4          |
| YPEL1. 5     | 4.43E-16 | -0.1984  | 0.011 | 0.099 | 6.62E-12 M2 | YPEL1          |
| HES4. 5      | 4.44E-16 | -0.21443 | 0.072 | 0.195 | 6.63E-12 M2 | HES4           |
| DNAJB2. 4    | 4.44E-16 | -0.21305 | 0.167 | 0.325 | 6.64E-12 M2 | DNAJB2         |
| TMED10. 2    | 4.55E-16 | 0.129316 | 0.678 | 0.608 | 6.80E-12 M2 | TMED10         |
| MX2. 5       | 4.63E-16 | 0.224558 | 0.133 | 0.059 | 6.92E-12 M2 | MX2            |
| MANF. 4      | 4.78E-16 | 0.292306 | 0.513 | 0.446 | 7.14E-12 M2 | MANF           |
| DHCR24. 2    | 4.80E-16 | -0.21667 | 0.013 | 0.101 | 7.18E-12 M2 | DHCR24         |
| RAB40B. 5    | 4.89E-16 | -0.26656 | 0.034 | 0.137 | 7.31E-12 M2 | RAB40B         |
| MRC2. 2      | 4.94E-16 | -0.20115 | 0.063 | 0.181 | 7.38E-12 M2 | MRC2           |
| FAM89B. 4    | 5.02E-16 | -0.20188 | 0.117 | 0.256 | 7.50E-12 M2 | FAM89B         |
| MTMR9. 3     | 5.09E-16 | -0.22762 | 0.075 | 0.197 | 7.60E-12 M2 | MTMR9          |
| B9D1. 3      | 5.10E-16 | -0.23804 | 0.015 | 0.107 | 7.62E-12 M2 | B9D1           |
| SNHG10. 2    | 5.10E-16 | -0.20658 | 0.011 | 0.1   | 7.63E-12 M2 | SNHG10         |
| CETN3. 3     | 5.12E-16 | -0.23103 | 0.045 | 0.154 | 7.66E-12 M2 | CETN3          |
| PLCB1. 3     | 5.21E-16 | -0.18802 | 0.004 | 0.085 | 7.79E-12 M2 | PLCB1          |
| WBP4. 4      | 5.24E-16 | -0.24288 | 0.16  | 0.316 | 7.83E-12 M2 | WBP4           |
| CCDC28A. 4   | 5.26E-16 | 0.367345 | 0.249 | 0.152 | 7.86E-12 M2 | CCDC28A        |
| MLLT4. 4     | 5.34E-16 | -0.24935 | 0.056 | 0.169 | 7.98E-12 M2 | MLLT4          |

|           |          |          |       |       |          |    |              |
|-----------|----------|----------|-------|-------|----------|----|--------------|
| QSOX1.4   | 5.36E-16 | 0.384446 | 0.326 | 0.23  | 8.01E-12 | M2 | QSOX1        |
| DCAF13.3  | 5.37E-16 | -0.2717  | 0.172 | 0.328 | 8.02E-12 | M2 | DCAF13       |
| DUSP15.4  | 5.42E-16 | -0.17383 | 0.011 | 0.099 | 8.09E-12 | M2 | DUSP15       |
| SNHG9.2   | 5.57E-16 | -0.16888 | 0.153 | 0.315 | 8.32E-12 | M2 | SNHG9        |
| CST3.3    | 5.63E-16 | 0.114165 | 0.905 | 0.778 | 8.41E-12 | M2 | CST3         |
| ZNF566.3  | 5.73E-16 | -0.21852 | 0.024 | 0.122 | 8.56E-12 | M2 | ZNF566       |
| FAM217B.5 | 5.75E-16 | -0.18039 | 0.05  | 0.163 | 8.59E-12 | M2 | FAM217B      |
| RP11-83A2 | 5.79E-16 | -0.22776 | 0.037 | 0.142 | 8.65E-12 | M2 | RP11-83A24.2 |
| MGARP.2   | 5.84E-16 | -0.15999 | 0.004 | 0.085 | 8.73E-12 | M2 | MGARP        |
| CDKN1B.4  | 5.93E-16 | -0.25959 | 0.128 | 0.268 | 8.86E-12 | M2 | CDKN1B       |
| SCARF1.4  | 5.97E-16 | 0.149707 | 0.072 | 0.023 | 8.93E-12 | M2 | SCARF1       |
| UQCRH.3   | 6.02E-16 | 0.10248  | 0.845 | 0.776 | 9.00E-12 | M2 | UQCRH        |
| ACOT9.5   | 6.14E-16 | 0.367873 | 0.275 | 0.175 | 9.18E-12 | M2 | ACOT9        |
| BIVM.3    | 6.22E-16 | -0.18618 | 0.022 | 0.117 | 9.30E-12 | M2 | BIVM         |
| FBXO11.3  | 6.33E-16 | -0.25074 | 0.088 | 0.214 | 9.46E-12 | M2 | FBXO11       |
| GAN.3     | 6.46E-16 | -0.1702  | 0.041 | 0.149 | 9.66E-12 | M2 | GAN          |
| RUVBL1.2  | 6.49E-16 | -0.25207 | 0.132 | 0.276 | 9.70E-12 | M2 | RUVBL1       |
| ELMOD1.3  | 6.53E-16 | -0.15307 | 0.005 | 0.087 | 9.75E-12 | M2 | ELMOD1       |
| PIANP.3   | 6.63E-16 | -0.17311 | 0.005 | 0.087 | 9.91E-12 | M2 | PIANP        |
| PDGFA.2   | 6.76E-16 | -0.26784 | 0.014 | 0.103 | 1.01E-11 | M2 | PDGFA        |
| TRIM13.3  | 6.83E-16 | -0.24165 | 0.119 | 0.258 | 1.02E-11 | M2 | TRIM13       |
| TUBG1.3   | 6.86E-16 | -0.23056 | 0.107 | 0.243 | 1.03E-11 | M2 | TUBG1        |
| ZNF638.4  | 6.89E-16 | -0.19589 | 0.12  | 0.261 | 1.03E-11 | M2 | ZNF638       |
| SPSB3.2   | 6.91E-16 | -0.2542  | 0.163 | 0.314 | 1.03E-11 | M2 | SPSB3        |
| ZNF467.4  | 6.93E-16 | 0.154584 | 0.084 | 0.03  | 1.04E-11 | M2 | ZNF467       |
| PRCC.2    | 7.16E-16 | -0.24907 | 0.162 | 0.313 | 1.07E-11 | M2 | PRCC         |
| ADD2.3    | 7.43E-16 | -0.21079 | 0.009 | 0.094 | 1.11E-11 | M2 | ADD2         |
| MARCH1.5  | 7.60E-16 | 0.23619  | 0.299 | 0.183 | 1.14E-11 | M2 | 1-Mar        |
| CCDC130.3 | 7.60E-16 | -0.19581 | 0.101 | 0.237 | 1.14E-11 | M2 | CCDC130      |
| ZNF667.4  | 7.62E-16 | -0.20972 | 0.005 | 0.087 | 1.14E-11 | M2 | ZNF667       |
| ELOVL2.5  | 8.04E-16 | -0.14491 | 0.014 | 0.104 | 1.20E-11 | M2 | ELOVL2       |
| RFC1.3    | 8.25E-16 | -0.21316 | 0.138 | 0.286 | 1.23E-11 | M2 | RFC1         |
| AGAP2-AS1 | 8.49E-16 | -0.35006 | 0.014 | 0.101 | 1.27E-11 | M2 | AGAP2-AS1    |
| MAPKAPK5- | 8.73E-16 | -0.20501 | 0.098 | 0.232 | 1.30E-11 | M2 | MAPKAPK5-AS1 |
| SSR2.2    | 8.82E-16 | 0.141091 | 0.766 | 0.71  | 1.32E-11 | M2 | SSR2         |
| ARMCX1.4  | 8.96E-16 | -0.29636 | 0.097 | 0.222 | 1.34E-11 | M2 | ARMCX1       |
| PDGFD.3   | 8.98E-16 | -0.15547 | 0.004 | 0.084 | 1.34E-11 | M2 | PDGFD        |
| REEP1.5   | 9.01E-16 | -0.22167 | 0.005 | 0.086 | 1.35E-11 | M2 | REEP1        |
| ZEB2.3    | 9.11E-16 | 0.336923 | 0.401 | 0.297 | 1.36E-11 | M2 | ZEB2         |
| ANAPC7.3  | 9.16E-16 | -0.23082 | 0.064 | 0.179 | 1.37E-11 | M2 | ANAPC7       |
| CHCHD1.3  | 9.24E-16 | 0.395983 | 0.355 | 0.264 | 1.38E-11 | M2 | CHCHD1       |
| NAPEPLD.2 | 9.65E-16 | -0.21358 | 0.015 | 0.105 | 1.44E-11 | M2 | NAPEPLD      |
| DLGAP4.2  | 9.70E-16 | -0.22264 | 0.155 | 0.303 | 1.45E-11 | M2 | DLGAP4       |
| DHX36.3   | 9.81E-16 | -0.24005 | 0.266 | 0.437 | 1.47E-11 | M2 | DHX36        |
| DGCR6.2   | 1.01E-15 | -0.15397 | 0.05  | 0.161 | 1.50E-11 | M2 | DGCR6        |
| C9orf9.4  | 1.01E-15 | -0.19003 | 0.022 | 0.116 | 1.50E-11 | M2 | C9orf9       |
| PHIP.3    | 1.02E-15 | -0.23483 | 0.185 | 0.342 | 1.52E-11 | M2 | PHIP         |
| ROCK2.2   | 1.04E-15 | -0.18379 | 0.049 | 0.159 | 1.55E-11 | M2 | ROCK2        |
| MNAT1.4   | 1.07E-15 | -0.19231 | 0.077 | 0.201 | 1.59E-11 | M2 | MNAT1        |
| P4HA2.1   | 1.07E-15 | 0.369523 | 0.149 | 0.076 | 1.60E-11 | M2 | P4HA2        |
| SNCAIP.4  | 1.08E-15 | -0.19244 | 0.008 | 0.091 | 1.62E-11 | M2 | SNCAIP       |

|            |          |          |       |       |          |    |            |
|------------|----------|----------|-------|-------|----------|----|------------|
| RNF216     | 1.09E-15 | -0.19336 | 0.105 | 0.239 | 1.63E-11 | M2 | RNF216     |
| SFPQ.3     | 1.12E-15 | -0.23697 | 0.383 | 0.554 | 1.68E-11 | M2 | SFPQ       |
| FAM131B.3  | 1.13E-15 | -0.20713 | 0.003 | 0.081 | 1.69E-11 | M2 | FAM131B    |
| ZNF577.4   | 1.14E-15 | -0.17279 | 0.011 | 0.098 | 1.70E-11 | M2 | ZNF577     |
| CDKN2AIPN  | 1.14E-15 | -0.25631 | 0.121 | 0.258 | 1.70E-11 | M2 | CDKN2AIPNL |
| RNPS1.1    | 1.20E-15 | -0.23239 | 0.363 | 0.546 | 1.80E-11 | M2 | RNPS1      |
| MAU2.1     | 1.21E-15 | -0.19096 | 0.031 | 0.13  | 1.81E-11 | M2 | MAU2       |
| RRAS2.3    | 1.23E-15 | -0.16519 | 0.004 | 0.083 | 1.84E-11 | M2 | RRAS2      |
| CSNK1G3.3  | 1.23E-15 | -0.18324 | 0.05  | 0.16  | 1.84E-11 | M2 | CSNK1G3    |
| COPS7B.2   | 1.25E-15 | -0.20925 | 0.08  | 0.205 | 1.86E-11 | M2 | COPS7B     |
| SCAMP5.3   | 1.28E-15 | -0.18384 | 0.014 | 0.102 | 1.91E-11 | M2 | SCAMP5     |
| C11orf31.1 | 1.31E-15 | 0.131474 | 0.713 | 0.665 | 1.96E-11 | M2 | C11orf31   |
| ZNF814.2   | 1.31E-15 | -0.22499 | 0.031 | 0.129 | 1.96E-11 | M2 | ZNF814     |
| NME7.5     | 1.32E-15 | -0.23071 | 0.056 | 0.169 | 1.98E-11 | M2 | NME7       |
| HERC2.2    | 1.34E-15 | -0.21024 | 0.075 | 0.196 | 2.01E-11 | M2 | HERC2      |
| ZSCAN21.3  | 1.36E-15 | -0.22542 | 0.018 | 0.108 | 2.03E-11 | M2 | ZSCAN21    |
| KBTBD6.3   | 1.37E-15 | -0.20458 | 0.036 | 0.138 | 2.05E-11 | M2 | KBTBD6     |
| ETV4.4     | 1.38E-15 | -0.17652 | 0.004 | 0.083 | 2.06E-11 | M2 | ETV4       |
| PDS5B.3    | 1.39E-15 | -0.17097 | 0.06  | 0.175 | 2.08E-11 | M2 | PDS5B      |
| ELOVL5.1   | 1.39E-15 | -0.26178 | 0.179 | 0.334 | 2.08E-11 | M2 | ELOVL5     |
| KLF12.4    | 1.40E-15 | -0.20422 | 0.008 | 0.09  | 2.09E-11 | M2 | KLF12      |
| NR1H3.1    | 1.40E-15 | 0.266182 | 0.114 | 0.049 | 2.10E-11 | M2 | NR1H3      |
| INPP5D.5   | 1.40E-15 | 0.264223 | 0.162 | 0.079 | 2.10E-11 | M2 | INPP5D     |
| SMARCC1.4  | 1.41E-15 | -0.19578 | 0.124 | 0.264 | 2.11E-11 | M2 | SMARCC1    |
| BAX.5      | 1.41E-15 | 0.217146 | 0.616 | 0.562 | 2.11E-11 | M2 | BAX        |
| MARK3.3    | 1.43E-15 | -0.19691 | 0.148 | 0.297 | 2.13E-11 | M2 | MARK3      |
| ADD1.3     | 1.43E-15 | -0.22571 | 0.165 | 0.317 | 2.14E-11 | M2 | ADD1       |
| PELP1.4    | 1.49E-15 | -0.18951 | 0.049 | 0.158 | 2.22E-11 | M2 | PELP1      |
| TMEM108.3  | 1.50E-15 | -0.17753 | 0.005 | 0.086 | 2.25E-11 | M2 | TMEM108    |
| NUDCD3.3   | 1.51E-15 | -0.2035  | 0.082 | 0.206 | 2.25E-11 | M2 | NUDCD3     |
| SNX21.2    | 1.55E-15 | -0.13964 | 0.027 | 0.125 | 2.32E-11 | M2 | SNX21      |
| IFT43.4    | 1.56E-15 | -0.2171  | 0.123 | 0.266 | 2.33E-11 | M2 | IFT43      |
| CMKLR1.4   | 1.56E-15 | 0.187486 | 0.11  | 0.045 | 2.34E-11 | M2 | CMKLR1     |
| CALM2.4    | 1.57E-15 | -0.22451 | 0.923 | 0.933 | 2.35E-11 | M2 | CALM2      |
| KCNK13.2   | 1.58E-15 | 0.124914 | 0.065 | 0.02  | 2.35E-11 | M2 | KCNK13     |
| FAM105A.5  | 1.59E-15 | 0.174955 | 0.273 | 0.155 | 2.37E-11 | M2 | FAM105A    |
| MPP6.3     | 1.61E-15 | -0.17323 | 0.001 | 0.078 | 2.40E-11 | M2 | MPP6       |
| SLC29A4.2  | 1.63E-15 | -0.18829 | 0.006 | 0.088 | 2.43E-11 | M2 | SLC29A4    |
| CTBS.3     | 1.63E-15 | 0.34077  | 0.244 | 0.15  | 2.43E-11 | M2 | CTBS       |
| LOXL1.3    | 1.64E-15 | -0.1479  | 0.004 | 0.083 | 2.45E-11 | M2 | LOXL1      |
| ZNF583.3   | 1.69E-15 | -0.23978 | 0.02  | 0.112 | 2.53E-11 | M2 | ZNF583     |
| FADS2.3    | 1.69E-15 | -0.18032 | 0.04  | 0.143 | 2.53E-11 | M2 | FADS2      |
| CACNB4.1   | 1.76E-15 | -0.21683 | 0.01  | 0.094 | 2.63E-11 | M2 | CACNB4     |
| RFXAP.2    | 1.77E-15 | -0.20666 | 0.014 | 0.101 | 2.64E-11 | M2 | RFXAP      |
| VAX2.4     | 1.77E-15 | -0.19112 | 0.005 | 0.085 | 2.64E-11 | M2 | VAX2       |
| MFI2-AS1.1 | 1.78E-15 | -0.17862 | 0.003 | 0.08  | 2.65E-11 | M2 | MFI2-AS1   |
| ICA1L.2    | 1.78E-15 | -0.21799 | 0.017 | 0.106 | 2.66E-11 | M2 | ICA1L      |
| MOAP1.3    | 1.82E-15 | -0.21662 | 0.096 | 0.226 | 2.72E-11 | M2 | MOAP1      |
| ARHGAP15.1 | 1.89E-15 | 0.255766 | 0.179 | 0.091 | 2.82E-11 | M2 | ARHGAP15   |
| RAD51C.3   | 1.93E-15 | -0.18875 | 0.132 | 0.276 | 2.88E-11 | M2 | RAD51C     |
| H2AFY.5    | 1.96E-15 | 0.198815 | 0.633 | 0.605 | 2.93E-11 | M2 | H2AFY      |



|            |          |          |       |       |          |    |          |
|------------|----------|----------|-------|-------|----------|----|----------|
| IRF2BP1.4  | 1.97E-15 | -0.16479 | 0.02  | 0.112 | 2.95E-11 | M2 | IRF2BP1  |
| HLA-F.5    | 1.98E-15 | 0.216198 | 0.244 | 0.139 | 2.95E-11 | M2 | HLA-F    |
| TSSC4.3    | 1.99E-15 | -0.2003  | 0.166 | 0.322 | 2.97E-11 | M2 | TSSC4    |
| DYSF       | 2.01E-15 | 0.198747 | 0.033 | 0.007 | 3.01E-11 | M2 | DYSF     |
| MMP9       | 2.05E-15 | 0.235714 | 0.073 | 0.025 | 3.06E-11 | M2 | MMP9     |
| NOS1AP.4   | 2.10E-15 | -0.19422 | 0.005 | 0.084 | 3.14E-11 | M2 | NOS1AP   |
| TTC28.3    | 2.10E-15 | -0.18101 | 0.014 | 0.101 | 3.14E-11 | M2 | TTC28    |
| RNF146.2   | 2.11E-15 | -0.26939 | 0.128 | 0.264 | 3.15E-11 | M2 | RNF146   |
| LYRM7.3    | 2.12E-15 | -0.24179 | 0.088 | 0.209 | 3.17E-11 | M2 | LYRM7    |
| ARMC6.2    | 2.14E-15 | -0.22852 | 0.057 | 0.168 | 3.20E-11 | M2 | ARMC6    |
| LANCL1.4   | 2.18E-15 | -0.26772 | 0.028 | 0.123 | 3.26E-11 | M2 | LANCL1   |
| EMID1.3    | 2.21E-15 | -0.17598 | 0.001 | 0.077 | 3.31E-11 | M2 | EMID1    |
| ARL10.2    | 2.22E-15 | -0.17346 | 0.01  | 0.094 | 3.32E-11 | M2 | ARL10    |
| VSTM1      | 2.28E-15 | 0.150499 | 0.032 | 0.006 | 3.41E-11 | M2 | VSTM1    |
| MPLKIP.2   | 2.29E-15 | -0.29101 | 0.285 | 0.456 | 3.43E-11 | M2 | MPLKIP   |
| ATP8B4.4   | 2.31E-15 | 0.133647 | 0.1   | 0.039 | 3.46E-11 | M2 | ATP8B4   |
| RUVBL2.2   | 2.32E-15 | -0.26474 | 0.178 | 0.328 | 3.47E-11 | M2 | RUVBL2   |
| PCSK7.3    | 2.35E-15 | -0.23657 | 0.146 | 0.292 | 3.51E-11 | M2 | PCSK7    |
| ELMO2.2    | 2.43E-15 | -0.1688  | 0.034 | 0.135 | 3.63E-11 | M2 | ELMO2    |
| ZNF24.3    | 2.46E-15 | -0.26403 | 0.162 | 0.31  | 3.68E-11 | M2 | ZNF24    |
| PCDHB2.3   | 2.50E-15 | -0.16808 | 0.005 | 0.085 | 3.73E-11 | M2 | PCDHB2   |
| IFI27L1.3  | 2.50E-15 | -0.2137  | 0.073 | 0.194 | 3.73E-11 | M2 | IFI27L1  |
| GAB1.3     | 2.52E-15 | -0.19384 | 0.018 | 0.108 | 3.77E-11 | M2 | GAB1     |
| CECR1.5    | 2.58E-15 | 0.205753 | 0.142 | 0.066 | 3.85E-11 | M2 | CECR1    |
| ARHGAP12.2 | 2.58E-15 | -0.25418 | 0.078 | 0.197 | 3.86E-11 | M2 | ARHGAP12 |
| C21orf59.2 | 2.61E-15 | -0.21467 | 0.172 | 0.326 | 3.90E-11 | M2 | C21orf59 |
| RBM26.3    | 2.64E-15 | -0.22923 | 0.096 | 0.221 | 3.94E-11 | M2 | RBM26    |
| TIAM2.4    | 2.72E-15 | -0.2237  | 0.005 | 0.084 | 4.07E-11 | M2 | TIAM2    |
| NDUFB8.1   | 2.74E-15 | 0.312857 | 0.12  | 0.052 | 4.10E-11 | M2 | NDUFB8   |
| DSCAM.2    | 2.74E-15 | -0.2392  | 0.003 | 0.079 | 4.10E-11 | M2 | DSCAM    |
| PLXNA4.4   | 2.78E-15 | -0.22675 | 0.004 | 0.082 | 4.15E-11 | M2 | PLXNA4   |
| POLR2B.4   | 2.81E-15 | -0.26324 | 0.135 | 0.271 | 4.20E-11 | M2 | POLR2B   |
| ARHGEF12.2 | 2.87E-15 | -0.19538 | 0.056 | 0.168 | 4.29E-11 | M2 | ARHGEF12 |
| TRABD.5    | 2.91E-15 | 0.346412 | 0.35  | 0.252 | 4.34E-11 | M2 | TRABD    |
| ERI3.3     | 3.00E-15 | -0.20099 | 0.213 | 0.38  | 4.48E-11 | M2 | ERI3     |
| SORBS1.3   | 3.02E-15 | -0.14391 | 0.013 | 0.099 | 4.51E-11 | M2 | SORBS1   |
| C12orf73.3 | 3.03E-15 | -0.19986 | 0.052 | 0.162 | 4.53E-11 | M2 | C12orf73 |
| SLC35F2.3  | 3.05E-15 | -0.15491 | 0.022 | 0.114 | 4.56E-11 | M2 | SLC35F2  |
| C19orf38.3 | 3.10E-15 | 0.210581 | 0.106 | 0.044 | 4.63E-11 | M2 | C19orf38 |
| LRRC40.2   | 3.12E-15 | -0.22012 | 0.045 | 0.149 | 4.66E-11 | M2 | LRRC40   |
| ECI1.3     | 3.16E-15 | -0.17834 | 0.095 | 0.222 | 4.73E-11 | M2 | ECI1     |
| PKIA.5     | 3.26E-15 | -0.26623 | 0.014 | 0.099 | 4.88E-11 | M2 | PKIA     |
| SERPINH1.3 | 3.33E-15 | -0.22243 | 0.092 | 0.217 | 4.97E-11 | M2 | SERPINH1 |
| DDX49.3    | 3.36E-15 | -0.2079  | 0.14  | 0.284 | 5.02E-11 | M2 | DDX49    |
| BRI3.3     | 3.37E-15 | 0.251674 | 0.525 | 0.464 | 5.03E-11 | M2 | BRI3     |
| WASF1.2    | 3.45E-15 | -0.2021  | 0.014 | 0.1   | 5.15E-11 | M2 | WASF1    |
| PAX6.3     | 3.47E-15 | -0.16388 | 0.005 | 0.084 | 5.18E-11 | M2 | PAX6     |
| FIGN.3     | 3.47E-15 | -0.16426 | 0.01  | 0.093 | 5.19E-11 | M2 | FIGN     |
| PPP1R35.5  | 3.48E-15 | -0.1932  | 0.055 | 0.165 | 5.21E-11 | M2 | PPP1R35  |
| OTUD6B.3   | 3.53E-15 | -0.17729 | 0.029 | 0.126 | 5.27E-11 | M2 | OTUD6B   |
| MEX3C.2    | 3.55E-15 | -0.16016 | 0.014 | 0.1   | 5.31E-11 | M2 | MEX3C    |

|              |           |           |        |        |              |               |
|--------------|-----------|-----------|--------|--------|--------------|---------------|
| PARP1. 3     | 3. 60E-15 | -0. 20966 | 0. 301 | 0. 484 | 5. 37E-11 M2 | PARP1         |
| DMTF1. 3     | 3. 70E-15 | -0. 21155 | 0. 049 | 0. 155 | 5. 52E-11 M2 | DMTF1         |
| RASD1. 3     | 3. 76E-15 | -0. 32997 | 0. 04  | 0. 14  | 5. 61E-11 M2 | RASD1         |
| NUMBL. 3     | 3. 86E-15 | -0. 15787 | 0. 011 | 0. 095 | 5. 77E-11 M2 | NUMBL         |
| MCRS1. 2     | 3. 89E-15 | -0. 21166 | 0. 137 | 0. 28  | 5. 81E-11 M2 | MCRS1         |
| MSANTD4. 2   | 3. 89E-15 | -0. 19088 | 0. 033 | 0. 132 | 5. 81E-11 M2 | MSANTD4       |
| CHGB. 2      | 3. 99E-15 | -0. 268   | 0. 01  | 0. 093 | 5. 96E-11 M2 | CHGB          |
| NCAN. 3      | 4. 02E-15 | -0. 27782 | 0. 006 | 0. 085 | 6. 01E-11 M2 | NCAN          |
| CLEC4A. 5    | 4. 06E-15 | 0. 158126 | 0. 128 | 0. 057 | 6. 07E-11 M2 | CLEC4A        |
| ITGA3. 3     | 4. 07E-15 | -0. 15746 | 0. 017 | 0. 104 | 6. 08E-11 M2 | ITGA3         |
| TRMT10C. 3   | 4. 12E-15 | -0. 21039 | 0. 123 | 0. 259 | 6. 15E-11 M2 | TRMT10C       |
| MLLT3. 3     | 4. 13E-15 | -0. 20468 | 0. 014 | 0. 099 | 6. 18E-11 M2 | MLLT3         |
| ZNF436. 3    | 4. 17E-15 | -0. 15459 | 0. 005 | 0. 083 | 6. 23E-11 M2 | ZNF436        |
| COQ7. 3      | 4. 20E-15 | -0. 22874 | 0. 077 | 0. 195 | 6. 28E-11 M2 | COQ7          |
| KLHDC9. 3    | 4. 23E-15 | -0. 20209 | 0. 003 | 0. 078 | 6. 32E-11 M2 | KLHDC9        |
| EPHA3. 4     | 4. 27E-15 | -0. 13783 | 0. 003 | 0. 078 | 6. 38E-11 M2 | EPHA3         |
| UBB. 4       | 4. 33E-15 | -0. 19857 | 0. 918 | 0. 91  | 6. 48E-11 M2 | UBB           |
| CLEC11A. 4   | 4. 34E-15 | 0. 373645 | 0. 314 | 0. 226 | 6. 48E-11 M2 | CLEC11A       |
| MUS81. 2     | 4. 34E-15 | -0. 20121 | 0. 066 | 0. 182 | 6. 48E-11 M2 | MUS81         |
| VPS26B. 4    | 4. 35E-15 | -0. 20186 | 0. 109 | 0. 24  | 6. 49E-11 M2 | VPS26B        |
| ZNF426. 2    | 4. 36E-15 | -0. 20796 | 0. 026 | 0. 119 | 6. 52E-11 M2 | ZNF426        |
| GSTK1. 3     | 4. 39E-15 | 0. 186595 | 0. 596 | 0. 525 | 6. 56E-11 M2 | GSTK1         |
| IP6K1. 2     | 4. 52E-15 | -0. 19106 | 0. 051 | 0. 158 | 6. 75E-11 M2 | IP6K1         |
| MED17. 2     | 4. 52E-15 | -0. 23764 | 0. 079 | 0. 197 | 6. 75E-11 M2 | MED17         |
| RBM28. 3     | 4. 87E-15 | -0. 1902  | 0. 059 | 0. 17  | 7. 28E-11 M2 | RBM28         |
| TM2D3. 2     | 4. 88E-15 | -0. 2319  | 0. 188 | 0. 341 | 7. 29E-11 M2 | TM2D3         |
| DDX42. 3     | 4. 90E-15 | -0. 19181 | 0. 098 | 0. 227 | 7. 33E-11 M2 | DDX42         |
| CC2D1A. 4    | 4. 97E-15 | -0. 17995 | 0. 075 | 0. 194 | 7. 43E-11 M2 | CC2D1A        |
| DTYMK. 4     | 5. 04E-15 | -0. 24682 | 0. 189 | 0. 339 | 7. 53E-11 M2 | DTYMK         |
| STK33. 4     | 5. 05E-15 | -0. 1653  | 0      | 0. 073 | 7. 54E-11 M2 | STK33         |
| SMC3. 3      | 5. 20E-15 | -0. 25658 | 0. 153 | 0. 295 | 7. 77E-11 M2 | SMC3          |
| RP11-212P. 2 | 5. 36E-15 | -0. 1849  | 0. 013 | 0. 097 | 8. 01E-11 M2 | RP11-212P7. 2 |
| ARHGEF9. 4   | 5. 37E-15 | -0. 22281 | 0. 031 | 0. 126 | 8. 02E-11 M2 | ARHGEF9       |
| CLK4. 1      | 5. 39E-15 | -0. 23554 | 0. 059 | 0. 17  | 8. 05E-11 M2 | CLK4          |
| GPR137. 4    | 5. 53E-15 | -0. 16772 | 0. 091 | 0. 217 | 8. 27E-11 M2 | GPR137        |
| DDT. 2       | 5. 57E-15 | 0. 214056 | 0. 586 | 0. 518 | 8. 33E-11 M2 | DDT           |
| CRK. 2       | 5. 61E-15 | -0. 1953  | 0. 176 | 0. 326 | 8. 38E-11 M2 | CRK           |
| F12. 3       | 5. 64E-15 | -0. 15792 | 0. 005 | 0. 083 | 8. 42E-11 M2 | F12           |
| BRWD1. 4     | 5. 71E-15 | -0. 1989  | 0. 117 | 0. 25  | 8. 53E-11 M2 | BRWD1         |
| ECHS1. 2     | 5. 72E-15 | 0. 270124 | 0. 502 | 0. 429 | 8. 54E-11 M2 | ECHS1         |
| WDR6. 3      | 5. 75E-15 | -0. 17139 | 0. 107 | 0. 241 | 8. 60E-11 M2 | WDR6          |
| ZFP14. 3     | 5. 90E-15 | -0. 23261 | 0. 026 | 0. 118 | 8. 82E-11 M2 | ZFP14         |
| MR1. 3       | 6. 00E-15 | 0. 275061 | 0. 162 | 0. 083 | 8. 97E-11 M2 | MR1           |
| KEAP1. 3     | 6. 01E-15 | -0. 16814 | 0. 139 | 0. 281 | 8. 98E-11 M2 | KEAP1         |
| SRR. 4       | 6. 07E-15 | -0. 15761 | 0. 052 | 0. 161 | 9. 06E-11 M2 | SRR           |
| SPAG9. 4     | 6. 08E-15 | -0. 196   | 0. 201 | 0. 364 | 9. 09E-11 M2 | SPAG9         |
| ANKRA2. 2    | 6. 17E-15 | -0. 24981 | 0. 05  | 0. 154 | 9. 21E-11 M2 | ANKRA2        |
| TTF1. 2      | 6. 18E-15 | -0. 20547 | 0. 088 | 0. 211 | 9. 23E-11 M2 | TTF1          |
| MLF1. 2      | 6. 20E-15 | -0. 19638 | 0. 117 | 0. 251 | 9. 26E-11 M2 | MLF1          |
| PEG10. 3     | 6. 27E-15 | -0. 30744 | 0. 02  | 0. 108 | 9. 37E-11 M2 | PEG10         |
| FLI1. 5      | 6. 28E-15 | 0. 178943 | 0. 112 | 0. 048 | 9. 38E-11 M2 | FLI1          |

|            |          |          |       |       |          |    |               |
|------------|----------|----------|-------|-------|----------|----|---------------|
| DHRS13.3   | 6.38E-15 | -0.14507 | 0.017 | 0.103 | 9.54E-11 | M2 | DHRS13        |
| PTPRG.2    | 6.40E-15 | -0.18171 | 0.003 | 0.078 | 9.57E-11 | M2 | PTPRG         |
| NLRC4      | 6.51E-15 | 0.127634 | 0.043 | 0.011 | 9.72E-11 | M2 | NLRC4         |
| ICOSLG.5   | 6.54E-15 | 0.265644 | 0.167 | 0.085 | 9.77E-11 | M2 | ICOSLG        |
| DEXI.3     | 6.57E-15 | -0.19412 | 0.091 | 0.215 | 9.82E-11 | M2 | DEXI          |
| ASCL2.4    | 6.76E-15 | 0.164997 | 0.088 | 0.033 | 1.01E-10 | M2 | ASCL2         |
| BRINP2.4   | 6.76E-15 | -0.1758  | 0.003 | 0.077 | 1.01E-10 | M2 | BRINP2        |
| TMEM86A.4  | 6.92E-15 | 0.143303 | 0.103 | 0.042 | 1.03E-10 | M2 | TMEM86A       |
| FAM69C.4   | 6.97E-15 | -0.15671 | 0.005 | 0.082 | 1.04E-10 | M2 | FAM69C        |
| MRFAP1L1.7 | 7.01E-15 | -0.1817  | 0.1   | 0.228 | 1.05E-10 | M2 | MRFAP1L1      |
| UNC13D.4   | 7.28E-15 | 0.180306 | 0.106 | 0.044 | 1.09E-10 | M2 | UNC13D        |
| TSPYL4.2   | 7.29E-15 | -0.18564 | 0.02  | 0.109 | 1.09E-10 | M2 | TSPYL4        |
| GNAI1.4    | 7.58E-15 | -0.27758 | 0.023 | 0.111 | 1.13E-10 | M2 | GNAI1         |
| ZNF420.3   | 7.60E-15 | -0.22334 | 0.023 | 0.113 | 1.14E-10 | M2 | ZNF420        |
| RP11-390E  | 7.70E-15 | -0.20532 | 0.033 | 0.131 | 1.15E-10 | M2 | RP11-390E23.6 |
| RAB11FIP1  | 7.75E-15 | 0.163566 | 0.07  | 0.024 | 1.16E-10 | M2 | RAB11FIP1     |
| ABCA8.3    | 7.81E-15 | -0.30292 | 0.004 | 0.079 | 1.17E-10 | M2 | ABCA8         |
| CTD-3184A  | 7.85E-15 | -0.1234  | 0.017 | 0.103 | 1.17E-10 | M2 | CTD-3184A7.4  |
| PTP4A3.2   | 7.87E-15 | -0.19468 | 0.011 | 0.093 | 1.18E-10 | M2 | PTP4A3        |
| PHACTR1.5  | 8.06E-15 | 0.233256 | 0.206 | 0.111 | 1.20E-10 | M2 | PHACTR1       |
| INSR.3     | 8.26E-15 | -0.26752 | 0.049 | 0.152 | 1.23E-10 | M2 | INSR          |
| PPP4C.3    | 8.38E-15 | 0.213314 | 0.591 | 0.54  | 1.25E-10 | M2 | PPP4C         |
| SPOCK1.4   | 8.60E-15 | -0.28886 | 0.008 | 0.086 | 1.28E-10 | M2 | SPOCK1        |
| LILRB5     | 8.73E-15 | 0.114498 | 0.038 | 0.009 | 1.30E-10 | M2 | LILRB5        |
| SKIV2L2.3  | 9.03E-15 | -0.19441 | 0.055 | 0.163 | 1.35E-10 | M2 | SKIV2L2       |
| YTHDC1.3   | 9.22E-15 | -0.21615 | 0.166 | 0.312 | 1.38E-10 | M2 | YTHDC1        |
| NDUFAF6.4  | 9.23E-15 | -0.21463 | 0.074 | 0.188 | 1.38E-10 | M2 | NDUFAF6       |
| RNF167.1   | 9.28E-15 | -0.2362  | 0.254 | 0.418 | 1.39E-10 | M2 | RNF167        |
| VSTM2A.4   | 9.36E-15 | -0.47165 | 0.023 | 0.111 | 1.40E-10 | M2 | VSTM2A        |
| DPY19L1.3  | 9.67E-15 | -0.19616 | 0.022 | 0.11  | 1.45E-10 | M2 | DPY19L1       |
| SIRPB2.2   | 9.79E-15 | 0.164242 | 0.049 | 0.013 | 1.46E-10 | M2 | SIRPB2        |
| CTB-3102C  | 9.88E-15 | -0.15197 | 0.027 | 0.12  | 1.48E-10 | M2 | CTB-31020.2   |
| TENM1.3    | 1.01E-14 | -0.17583 | 0.003 | 0.076 | 1.51E-10 | M2 | TENM1         |
| SYNM.3     | 1.04E-14 | -0.14834 | 0.003 | 0.076 | 1.55E-10 | M2 | SYNM          |
| WDR83.3    | 1.04E-14 | -0.16264 | 0.065 | 0.179 | 1.56E-10 | M2 | WDR83         |
| GON4L.3    | 1.05E-14 | -0.1935  | 0.097 | 0.223 | 1.57E-10 | M2 | GON4L         |
| KAZN.3     | 1.06E-14 | -0.18993 | 0.003 | 0.076 | 1.59E-10 | M2 | KAZN          |
| SBK1.5     | 1.07E-14 | -0.21734 | 0.003 | 0.076 | 1.60E-10 | M2 | SBK1          |
| TLR1.5     | 1.08E-14 | 0.209912 | 0.135 | 0.063 | 1.61E-10 | M2 | TLR1          |
| NAPB.1     | 1.08E-14 | -0.20937 | 0.006 | 0.084 | 1.61E-10 | M2 | NAPB          |
| TMX2.2     | 1.08E-14 | -0.25812 | 0.245 | 0.409 | 1.62E-10 | M2 | TMX2          |
| EFNB3.3    | 1.09E-14 | -0.17084 | 0.004 | 0.079 | 1.62E-10 | M2 | EFNB3         |
| ZNF444.3   | 1.09E-14 | -0.16655 | 0.059 | 0.167 | 1.63E-10 | M2 | ZNF444        |
| ACSBG1.2   | 1.10E-14 | -0.17865 | 0.004 | 0.079 | 1.64E-10 | M2 | ACSBG1        |
| FAHD2A.2   | 1.10E-14 | -0.18367 | 0.066 | 0.18  | 1.65E-10 | M2 | FAHD2A        |
| ZNF205.2   | 1.12E-14 | -0.16679 | 0.024 | 0.115 | 1.68E-10 | M2 | ZNF205        |
| ATXN80S.4  | 1.13E-14 | 0.312199 | 0.152 | 0.074 | 1.70E-10 | M2 | ATXN80S       |
| HSPA2.2    | 1.14E-14 | -0.46668 | 0.037 | 0.131 | 1.70E-10 | M2 | HSPA2         |
| CRCP.3     | 1.14E-14 | -0.19838 | 0.074 | 0.189 | 1.70E-10 | M2 | CRCP          |
| CAMLG.4    | 1.15E-14 | -0.23781 | 0.33  | 0.506 | 1.72E-10 | M2 | CAMLG         |
| IL17RA.5   | 1.15E-14 | 0.313508 | 0.201 | 0.113 | 1.72E-10 | M2 | IL17RA        |

|             |           |           |        |        |              |                |
|-------------|-----------|-----------|--------|--------|--------------|----------------|
| GGPS1. 4    | 1. 16E-14 | -0. 23666 | 0. 176 | 0. 328 | 1. 73E-10 M2 | GGPS1          |
| RERE. 4     | 1. 17E-14 | -0. 2201  | 0. 096 | 0. 219 | 1. 75E-10 M2 | RERE           |
| TXLNG. 3    | 1. 17E-14 | -0. 19947 | 0. 041 | 0. 14  | 1. 75E-10 M2 | TXLNG          |
| MACROD1. 2  | 1. 22E-14 | -0. 18496 | 0. 033 | 0. 129 | 1. 82E-10 M2 | MACROD1        |
| SEC61B. 2   | 1. 23E-14 | 0. 106363 | 0. 784 | 0. 733 | 1. 83E-10 M2 | SEC61B         |
| NFYB. 3     | 1. 23E-14 | -0. 20608 | 0. 075 | 0. 191 | 1. 83E-10 M2 | NFYB           |
| FMN2. 3     | 1. 26E-14 | -0. 1766  | 0. 001 | 0. 074 | 1. 88E-10 M2 | FMN2           |
| MDFI. 4     | 1. 27E-14 | -0. 19339 | 0. 011 | 0. 093 | 1. 90E-10 M2 | MDFI           |
| PHACTR3. 4  | 1. 28E-14 | -0. 26044 | 0. 006 | 0. 083 | 1. 91E-10 M2 | PHACTR3        |
| TTC32. 2    | 1. 33E-14 | -0. 19175 | 0. 051 | 0. 156 | 1. 99E-10 M2 | TTC32          |
| FXYD7. 4    | 1. 34E-14 | -0. 31924 | 0. 006 | 0. 083 | 2. 00E-10 M2 | FXYD7          |
| NAA15. 3    | 1. 35E-14 | -0. 20326 | 0. 1   | 0. 224 | 2. 02E-10 M2 | NAA15          |
| CDCA7L. 4   | 1. 36E-14 | -0. 26435 | 0. 052 | 0. 156 | 2. 03E-10 M2 | CDCA7L         |
| CTD-2319I   | 1. 38E-14 | 0. 120736 | 0. 042 | 0. 01  | 2. 06E-10 M2 | CTD-2319I12. 2 |
| ACADM. 1    | 1. 39E-14 | -0. 23579 | 0. 189 | 0. 341 | 2. 07E-10 M2 | ACADM          |
| NACAD. 4    | 1. 40E-14 | -0. 21985 | 0. 013 | 0. 095 | 2. 09E-10 M2 | NACAD          |
| REPS1. 4    | 1. 41E-14 | -0. 18637 | 0. 037 | 0. 134 | 2. 11E-10 M2 | REPS1          |
| NR2C2AP. 4  | 1. 41E-14 | -0. 20414 | 0. 063 | 0. 173 | 2. 11E-10 M2 | NR2C2AP        |
| ECHDC3. 4   | 1. 43E-14 | 0. 135604 | 0. 08  | 0. 029 | 2. 14E-10 M2 | ECHDC3         |
| SGTA. 3     | 1. 43E-14 | -0. 1989  | 0. 174 | 0. 326 | 2. 14E-10 M2 | SGTA           |
| CDH6. 3     | 1. 44E-14 | -0. 15112 | 0. 001 | 0. 073 | 2. 16E-10 M2 | CDH6           |
| DSTN. 5     | 1. 48E-14 | -0. 27848 | 0. 502 | 0. 626 | 2. 21E-10 M2 | DSTN           |
| EHBP1L1. 4  | 1. 49E-14 | 0. 269643 | 0. 135 | 0. 066 | 2. 22E-10 M2 | EHBP1L1        |
| STAMPB. 3   | 1. 50E-14 | -0. 22403 | 0. 135 | 0. 275 | 2. 24E-10 M2 | STAMPB         |
| DUSP12. 2   | 1. 54E-14 | -0. 21906 | 0. 114 | 0. 244 | 2. 30E-10 M2 | DUSP12         |
| ZNF677. 3   | 1. 57E-14 | -0. 12134 | 0. 083 | 0. 205 | 2. 35E-10 M2 | ZNF677         |
| ZNF195. 3   | 1. 59E-14 | -0. 17798 | 0. 06  | 0. 17  | 2. 37E-10 M2 | ZNF195         |
| SSPN. 2     | 1. 61E-14 | -0. 23239 | 0. 023 | 0. 112 | 2. 41E-10 M2 | SSPN           |
| DPH7. 4     | 1. 63E-14 | -0. 17718 | 0. 064 | 0. 175 | 2. 44E-10 M2 | DPH7           |
| CWC27. 3    | 1. 64E-14 | -0. 2024  | 0. 135 | 0. 273 | 2. 46E-10 M2 | CWC27          |
| SLC25A24. 1 | 1. 70E-14 | 0. 288945 | 0. 172 | 0. 093 | 2. 54E-10 M2 | SLC25A24       |
| ADAMTS9. 3  | 1. 72E-14 | -0. 1629  | 0. 006 | 0. 083 | 2. 57E-10 M2 | ADAMTS9        |
| GPBP1. 2    | 1. 73E-14 | -0. 2291  | 0. 284 | 0. 46  | 2. 59E-10 M2 | GPBP1          |
| PTPRD. 4    | 1. 73E-14 | -0. 26053 | 0. 004 | 0. 077 | 2. 59E-10 M2 | PTPRD          |
| CACNG8. 3   | 1. 75E-14 | -0. 16136 | 0. 004 | 0. 078 | 2. 61E-10 M2 | CACNG8         |
| TMSB10. 5   | 1. 79E-14 | -0. 22643 | 1      | 0. 962 | 2. 68E-10 M2 | TMSB10         |
| ASH1L. 2    | 1. 80E-14 | -0. 21937 | 0. 175 | 0. 319 | 2. 70E-10 M2 | ASH1L          |
| RAB14. 2    | 1. 81E-14 | -0. 24705 | 0. 259 | 0. 428 | 2. 70E-10 M2 | RAB14          |
| GTF2IRD2. 1 | 1. 83E-14 | -0. 18252 | 0. 029 | 0. 122 | 2. 73E-10 M2 | GTF2IRD2       |
| CTTNBP2. 4  | 1. 85E-14 | -0. 29958 | 0. 046 | 0. 143 | 2. 77E-10 M2 | CTTNBP2        |
| TRAP1. 3    | 1. 86E-14 | -0. 19612 | 0. 132 | 0. 267 | 2. 77E-10 M2 | TRAP1          |
| LMAN2L. 2   | 1. 86E-14 | -0. 17296 | 0. 028 | 0. 12  | 2. 79E-10 M2 | LMAN2L         |
| TMEM136. 3  | 1. 89E-14 | -0. 1804  | 0. 013 | 0. 093 | 2. 83E-10 M2 | TMEM136        |
| GPR37. 2    | 1. 95E-14 | -0. 32149 | 0. 004 | 0. 077 | 2. 92E-10 M2 | GPR37          |
| ZNF664. 3   | 1. 97E-14 | -0. 1843  | 0. 051 | 0. 156 | 2. 95E-10 M2 | ZNF664         |
| LDLR. 2     | 2. 01E-14 | -0. 19996 | 0. 019 | 0. 105 | 3. 00E-10 M2 | LDLR           |
| SOX15. 3    | 2. 03E-14 | -0. 24425 | 0. 003 | 0. 075 | 3. 04E-10 M2 | SOX15          |
| TMEM67. 3   | 2. 07E-14 | -0. 16602 | 0. 017 | 0. 101 | 3. 09E-10 M2 | TMEM67         |
| LRRCC1. 4   | 2. 07E-14 | -0. 22345 | 0. 043 | 0. 142 | 3. 10E-10 M2 | LRRCC1         |
| ZBTB8A. 4   | 2. 15E-14 | -0. 18572 | 0. 022 | 0. 109 | 3. 21E-10 M2 | ZBTB8A         |
| DHFR. 3     | 2. 15E-14 | -0. 19849 | 0. 054 | 0. 158 | 3. 22E-10 M2 | DHFR           |

|             |           |           |        |        |              |          |
|-------------|-----------|-----------|--------|--------|--------------|----------|
| REV3L. 2    | 2. 19E-14 | -0. 20112 | 0. 095 | 0. 217 | 3. 28E-10 M2 | REV3L    |
| ZNF334. 2   | 2. 22E-14 | -0. 16827 | 0. 004 | 0. 077 | 3. 31E-10 M2 | ZNF334   |
| KLHL6. 5    | 2. 22E-14 | 0. 177105 | 0. 109 | 0. 046 | 3. 31E-10 M2 | KLHL6    |
| PWAR6. 2    | 2. 23E-14 | -0. 16691 | 0. 004 | 0. 077 | 3. 33E-10 M2 | PWAR6    |
| ARHGEF7. 3  | 2. 25E-14 | -0. 237   | 0. 059 | 0. 165 | 3. 36E-10 M2 | ARHGEF7  |
| GSK3A. 4    | 2. 26E-14 | -0. 14972 | 0. 08  | 0. 198 | 3. 38E-10 M2 | GSK3A    |
| SRGAP1. 4   | 2. 30E-14 | -0. 19896 | 0. 107 | 0. 233 | 3. 43E-10 M2 | SRGAP1   |
| FN3KRP. 2   | 2. 36E-14 | -0. 22928 | 0. 103 | 0. 229 | 3. 53E-10 M2 | FN3KRP   |
| AVIL. 3     | 2. 39E-14 | -0. 26327 | 0. 014 | 0. 094 | 3. 57E-10 M2 | AVIL     |
| RBM15B. 4   | 2. 42E-14 | -0. 13925 | 0. 066 | 0. 179 | 3. 61E-10 M2 | RBM15B   |
| KLF11. 3    | 2. 44E-14 | 0. 249837 | 0. 089 | 0. 036 | 3. 64E-10 M2 | KLF11    |
| MTRF1L. 3   | 2. 48E-14 | -0. 18769 | 0. 082 | 0. 198 | 3. 70E-10 M2 | MTRF1L   |
| CYP2S1. 1   | 2. 49E-14 | 0. 119239 | 0. 049 | 0. 013 | 3. 72E-10 M2 | CYP2S1   |
| SDHAF1. 3   | 2. 52E-14 | -0. 19861 | 0. 072 | 0. 184 | 3. 77E-10 M2 | SDHAF1   |
| SEMA6B. 1   | 2. 53E-14 | 0. 254408 | 0. 105 | 0. 045 | 3. 78E-10 M2 | SEMA6B   |
| HOXA2. 4    | 2. 54E-14 | -0. 24143 | 0. 004 | 0. 077 | 3. 79E-10 M2 | HOXA2    |
| ME2. 3      | 2. 54E-14 | 0. 394343 | 0. 309 | 0. 218 | 3. 80E-10 M2 | ME2      |
| LRRC47. 4   | 2. 55E-14 | -0. 19586 | 0. 1   | 0. 225 | 3. 82E-10 M2 | LRRC47   |
| KIAA1191. 2 | 2. 57E-14 | -0. 19641 | 0. 135 | 0. 273 | 3. 84E-10 M2 | KIAA1191 |
| ENKUR. 3    | 2. 57E-14 | -0. 22668 | 0. 004 | 0. 077 | 3. 84E-10 M2 | ENKUR    |
| GUK1. 2     | 2. 60E-14 | 0. 142605 | 0. 75  | 0. 7   | 3. 88E-10 M2 | GUK1     |
| TOR4A. 4    | 2. 61E-14 | 0. 169961 | 0. 066 | 0. 022 | 3. 90E-10 M2 | TOR4A    |
| DHRS11. 4   | 2. 63E-14 | -0. 14609 | 0. 022 | 0. 108 | 3. 93E-10 M2 | DHRS11   |
| ZC3H8. 3    | 2. 67E-14 | -0. 19981 | 0. 051 | 0. 154 | 3. 99E-10 M2 | ZC3H8    |
| SUPT20H. 3  | 2. 73E-14 | -0. 17174 | 0. 093 | 0. 215 | 4. 08E-10 M2 | SUPT20H  |
| TMEM179B. 2 | 2. 81E-14 | 0. 276109 | 0. 487 | 0. 408 | 4. 19E-10 M2 | TMEM179B |
| RBBP9. 3    | 2. 82E-14 | -0. 15751 | 0. 017 | 0. 1   | 4. 21E-10 M2 | RBBP9    |
| POLR3D. 3   | 2. 91E-14 | -0. 19727 | 0. 037 | 0. 132 | 4. 35E-10 M2 | POLR3D   |
| TMEM141. 3  | 2. 93E-14 | 0. 407264 | 0. 333 | 0. 247 | 4. 38E-10 M2 | TMEM141  |
| ANKRD54. 3  | 2. 95E-14 | -0. 19328 | 0. 046 | 0. 146 | 4. 41E-10 M2 | ANKRD54  |
| YTHDF2. 3   | 2. 98E-14 | -0. 22813 | 0. 275 | 0. 442 | 4. 45E-10 M2 | YTHDF2   |
| MAN1A2. 3   | 3. 02E-14 | -0. 1729  | 0. 091 | 0. 212 | 4. 52E-10 M2 | MAN1A2   |
| CLEC4E. 4   | 3. 04E-14 | 0. 209354 | 0. 12  | 0. 053 | 4. 54E-10 M2 | CLEC4E   |
| COL16A1. 3  | 3. 08E-14 | -0. 17746 | 0. 005 | 0. 079 | 4. 61E-10 M2 | COL16A1  |
| PACSIN3. 3  | 3. 10E-14 | -0. 15309 | 0. 003 | 0. 074 | 4. 63E-10 M2 | PACSIN3  |
| C5orf42. 3  | 3. 12E-14 | -0. 14401 | 0. 017 | 0. 099 | 4. 66E-10 M2 | C5orf42  |
| HSPA8. 3    | 3. 12E-14 | -0. 23301 | 0. 814 | 0. 869 | 4. 66E-10 M2 | HSPA8    |
| SLC25A29. 3 | 3. 14E-14 | -0. 17029 | 0. 055 | 0. 159 | 4. 69E-10 M2 | SLC25A29 |
| LMO3. 2     | 3. 15E-14 | -0. 27811 | 0. 01  | 0. 088 | 4. 71E-10 M2 | LMO3     |
| NDUFA1. 2   | 3. 25E-14 | 0. 103173 | 0. 765 | 0. 721 | 4. 85E-10 M2 | NDUFA1   |
| BCAM. 3     | 3. 28E-14 | -0. 15385 | 0. 026 | 0. 115 | 4. 90E-10 M2 | BCAM     |
| SLC12A2. 4  | 3. 34E-14 | -0. 20336 | 0. 04  | 0. 136 | 4. 99E-10 M2 | SLC12A2  |
| THAP5. 3    | 3. 45E-14 | -0. 20708 | 0. 074 | 0. 187 | 5. 15E-10 M2 | THAP5    |
| PDDC1. 4    | 3. 47E-14 | -0. 12293 | 0. 049 | 0. 153 | 5. 18E-10 M2 | PDDC1    |
| FUZ. 2      | 3. 52E-14 | -0. 196   | 0. 061 | 0. 168 | 5. 25E-10 M2 | FUZ      |
| ANKRD36C. 3 | 3. 52E-14 | -0. 24521 | 0. 064 | 0. 169 | 5. 26E-10 M2 | ANKRD36C |
| FARSB. 3    | 3. 52E-14 | -0. 23244 | 0. 114 | 0. 241 | 5. 26E-10 M2 | FARSB    |
| TPM4. 3     | 3. 53E-14 | 0. 20482  | 0. 576 | 0. 491 | 5. 27E-10 M2 | TPM4     |
| TBC1D2. 3   | 3. 54E-14 | 0. 150419 | 0. 077 | 0. 028 | 5. 28E-10 M2 | TBC1D2   |
| CACFD1. 3   | 3. 54E-14 | -0. 16576 | 0. 013 | 0. 092 | 5. 29E-10 M2 | CACFD1   |
| TRAM1. 5    | 3. 59E-14 | 0. 25635  | 0. 499 | 0. 429 | 5. 36E-10 M2 | TRAM1    |

|            |          |          |       |       |             |               |
|------------|----------|----------|-------|-------|-------------|---------------|
| TMEFF2.5   | 3.63E-14 | -0.26965 | 0.008 | 0.083 | 5.43E-10 M2 | TMEFF2        |
| TMEM209.3  | 3.68E-14 | -0.18704 | 0.032 | 0.124 | 5.50E-10 M2 | TMEM209       |
| RP11-452F  | 3.71E-14 | 0.281176 | 0.209 | 0.121 | 5.54E-10 M2 | RP11-452F19.3 |
| H1FX.5     | 3.73E-14 | -0.26255 | 0.244 | 0.395 | 5.58E-10 M2 | H1FX          |
| LY6H.4     | 3.75E-14 | -0.33045 | 0.013 | 0.091 | 5.60E-10 M2 | LY6H          |
| B3GALT4.2  | 3.76E-14 | 0.165722 | 0.096 | 0.039 | 5.62E-10 M2 | B3GALT4       |
| LILRA2.5   | 3.78E-14 | 0.209958 | 0.157 | 0.079 | 5.64E-10 M2 | LILRA2        |
| NNAT.5     | 3.81E-14 | -0.671   | 0.105 | 0.202 | 5.70E-10 M2 | NNAT          |
| ERAL1.2    | 3.83E-14 | -0.16113 | 0.117 | 0.249 | 5.73E-10 M2 | ERAL1         |
| CHST3.3    | 3.84E-14 | -0.1351  | 0     | 0.069 | 5.75E-10 M2 | CHST3         |
| KLHL20.1   | 3.85E-14 | -0.18665 | 0.046 | 0.146 | 5.75E-10 M2 | KLHL20        |
| PSMB8.3    | 3.85E-14 | 0.240576 | 0.497 | 0.409 | 5.75E-10 M2 | PSMB8         |
| ZC3H6.3    | 3.86E-14 | -0.23876 | 0.052 | 0.154 | 5.77E-10 M2 | ZC3H6         |
| LNX1.2     | 3.86E-14 | -0.22324 | 0.003 | 0.073 | 5.77E-10 M2 | LNX1          |
| LONP2.3    | 3.87E-14 | -0.17805 | 0.125 | 0.257 | 5.78E-10 M2 | LONP2         |
| ARL6IP6.1  | 3.89E-14 | -0.23305 | 0.153 | 0.29  | 5.81E-10 M2 | ARL6IP6       |
| PPFIA3.3   | 3.90E-14 | -0.147   | 0.014 | 0.095 | 5.82E-10 M2 | PPFIA3        |
| EEDP1.2    | 3.91E-14 | 0.248817 | 0.137 | 0.067 | 5.85E-10 M2 | EEDP1         |
| KCNH2.3    | 4.01E-14 | -0.21799 | 0.001 | 0.071 | 5.99E-10 M2 | KCNH2         |
| ZNF639.4   | 4.02E-14 | -0.1471  | 0.043 | 0.143 | 6.01E-10 M2 | ZNF639        |
| EPS15L1.1  | 4.02E-14 | -0.17366 | 0.064 | 0.173 | 6.01E-10 M2 | EPS15L1       |
| PSMA1.4    | 4.04E-14 | 0.155679 | 0.65  | 0.608 | 6.03E-10 M2 | PSMA1         |
| C16orf91.4 | 4.04E-14 | -0.21651 | 0.086 | 0.203 | 6.04E-10 M2 | C16orf91      |
| EXOC7.4    | 4.06E-14 | -0.18172 | 0.206 | 0.362 | 6.06E-10 M2 | EXOC7         |
| ZBTB10.1   | 4.12E-14 | -0.18062 | 0.014 | 0.095 | 6.16E-10 M2 | ZBTB10        |
| ARHGAP33.4 | 4.14E-14 | -0.20095 | 0.01  | 0.087 | 6.19E-10 M2 | ARHGAP33      |
| C5orf30.3  | 4.15E-14 | -0.19866 | 0.006 | 0.08  | 6.20E-10 M2 | C5orf30       |
| EN1.2      | 4.18E-14 | -0.19405 | 0     | 0.068 | 6.24E-10 M2 | EN1           |
| PHLPP1.5   | 4.21E-14 | -0.20866 | 0.011 | 0.09  | 6.29E-10 M2 | PHLPP1        |
| CNPY1.4    | 4.41E-14 | -0.21472 | 0.008 | 0.082 | 6.59E-10 M2 | CNPY1         |
| LAMB1.2    | 4.41E-14 | -0.15978 | 0.022 | 0.107 | 6.59E-10 M2 | LAMB1         |
| PTS.4      | 4.49E-14 | -0.21658 | 0.185 | 0.336 | 6.71E-10 M2 | PTS           |
| TMPO.4     | 4.49E-14 | -0.23739 | 0.086 | 0.201 | 6.71E-10 M2 | TMPO          |
| MATN2.2    | 4.50E-14 | -0.19685 | 0.001 | 0.071 | 6.72E-10 M2 | MATN2         |
| DLC1.3     | 4.52E-14 | -0.19515 | 0.013 | 0.092 | 6.75E-10 M2 | DLC1          |
| DMD.2      | 4.56E-14 | -0.19206 | 0.011 | 0.09  | 6.81E-10 M2 | DMD           |
| EEA1.3     | 4.56E-14 | -0.24092 | 0.128 | 0.253 | 6.82E-10 M2 | EEA1          |
| RFK.3      | 4.64E-14 | -0.22383 | 0.12  | 0.246 | 6.93E-10 M2 | RFK           |
| TPST1.3    | 4.65E-14 | -0.22536 | 0.119 | 0.248 | 6.95E-10 M2 | TPST1         |
| DNAJA3.2   | 4.66E-14 | -0.19684 | 0.07  | 0.181 | 6.96E-10 M2 | DNAJA3        |
| PTGS2.5    | 4.66E-14 | 0.21556  | 0.124 | 0.057 | 6.96E-10 M2 | PTGS2         |
| SMKR1.2    | 4.77E-14 | -0.19337 | 0.004 | 0.076 | 7.14E-10 M2 | SMKR1         |
| OXLD1.3    | 4.87E-14 | -0.20536 | 0.13  | 0.261 | 7.28E-10 M2 | OXLD1         |
| METTL2A.3  | 4.90E-14 | -0.15674 | 0.059 | 0.165 | 7.33E-10 M2 | METTL2A       |
| DAPK3.3    | 4.93E-14 | -0.18426 | 0.119 | 0.247 | 7.37E-10 M2 | DAPK3         |
| ELMOD3.3   | 4.98E-14 | -0.18438 | 0.043 | 0.142 | 7.45E-10 M2 | ELMOD3        |
| C17orf80.5 | 5.03E-14 | -0.16792 | 0.011 | 0.089 | 7.52E-10 M2 | C17orf80      |
| CIB2.3     | 5.14E-14 | -0.13611 | 0.008 | 0.083 | 7.68E-10 M2 | CIB2          |
| TMEM14C.3  | 5.15E-14 | 0.166925 | 0.635 | 0.588 | 7.70E-10 M2 | TMEM14C       |
| HOXA10.5   | 5.18E-14 | -0.24681 | 0.008 | 0.082 | 7.74E-10 M2 | HOXA10        |
| UGP2.1     | 5.28E-14 | 0.24646  | 0.52  | 0.456 | 7.89E-10 M2 | UGP2          |

|             |           |           |        |        |              |                |
|-------------|-----------|-----------|--------|--------|--------------|----------------|
| PTX3. 4     | 5. 33E-14 | -0. 22403 | 0. 031 | 0. 121 | 7. 96E-10 M2 | PTX3           |
| TCHH. 1     | 5. 37E-14 | 0. 123303 | 0. 054 | 0. 016 | 8. 03E-10 M2 | TCHH           |
| CHMP4A. 4   | 5. 38E-14 | 0. 240472 | 0. 531 | 0. 464 | 8. 04E-10 M2 | CHMP4A         |
| PLL. 4      | 5. 43E-14 | -0. 35342 | 0. 003 | 0. 073 | 8. 12E-10 M2 | PLL            |
| SRSF12. 3   | 5. 51E-14 | -0. 16943 | 0. 005 | 0. 078 | 8. 24E-10 M2 | SRSF12         |
| ADO. 4      | 5. 63E-14 | -0. 1851  | 0. 038 | 0. 132 | 8. 41E-10 M2 | ADO            |
| PCYOX1. 2   | 5. 66E-14 | -0. 17117 | 0. 075 | 0. 188 | 8. 46E-10 M2 | PCYOX1         |
| TSEN2. 4    | 5. 68E-14 | -0. 19404 | 0. 014 | 0. 094 | 8. 48E-10 M2 | TSEN2          |
| CENPF. 5    | 5. 82E-14 | -0. 33929 | 0. 023 | 0. 107 | 8. 69E-10 M2 | CENPF          |
| CAND1. 2    | 5. 86E-14 | -0. 21285 | 0. 116 | 0. 243 | 8. 76E-10 M2 | CAND1          |
| EXTL3. 3    | 5. 91E-14 | -0. 15943 | 0. 041 | 0. 138 | 8. 83E-10 M2 | EXTL3          |
| PRR14. 2    | 5. 93E-14 | -0. 19373 | 0. 091 | 0. 208 | 8. 87E-10 M2 | PRR14          |
| CLASP1. 4   | 5. 98E-14 | -0. 15081 | 0. 045 | 0. 144 | 8. 93E-10 M2 | CLASP1         |
| THAP11. 4   | 6. 17E-14 | -0. 15783 | 0. 073 | 0. 183 | 9. 22E-10 M2 | THAP11         |
| YTHDF1. 2   | 6. 22E-14 | -0. 13247 | 0. 075 | 0. 19  | 9. 30E-10 M2 | YTHDF1         |
| RP3-428L1   | 6. 23E-14 | -0. 17302 | 0. 004 | 0. 075 | 9. 31E-10 M2 | RP3-428L16. 2  |
| RGN. 4      | 6. 29E-14 | -0. 23872 | 0. 005 | 0. 077 | 9. 39E-10 M2 | RGN            |
| FGD4. 5     | 6. 31E-14 | 0. 279588 | 0. 235 | 0. 14  | 9. 42E-10 M2 | FGD4           |
| DIRAS2. 3   | 6. 31E-14 | -0. 17723 | 0      | 0. 067 | 9. 43E-10 M2 | DIRAS2         |
| HCG18. 2    | 6. 31E-14 | -0. 17952 | 0. 029 | 0. 119 | 9. 43E-10 M2 | HCG18          |
| ASXL1. 4    | 6. 32E-14 | -0. 15836 | 0. 073 | 0. 184 | 9. 44E-10 M2 | ASXL1          |
| ADAMTS6. 2  | 6. 34E-14 | -0. 14921 | 0. 001 | 0. 07  | 9. 48E-10 M2 | ADAMTS6        |
| SRSF10. 4   | 6. 42E-14 | -0. 21151 | 0. 119 | 0. 249 | 9. 60E-10 M2 | SRSF10         |
| TULP4. 4    | 6. 53E-14 | -0. 20501 | 0. 05  | 0. 149 | 9. 75E-10 M2 | TULP4          |
| AC007405. 6 | 6. 63E-14 | -0. 1501  | 0. 003 | 0. 072 | 9. 91E-10 M2 | AC007405. 6    |
| ATP1B1. 3   | 6. 68E-14 | -0. 39904 | 0. 128 | 0. 242 | 9. 98E-10 M2 | ATP1B1         |
| ABCA2. 5    | 6. 68E-14 | -0. 32149 | 0. 019 | 0. 101 | 9. 99E-10 M2 | ABCA2          |
| FAM212B. 4  | 6. 75E-14 | -0. 16373 | 0. 02  | 0. 105 | 1. 01E-09 M2 | FAM212B        |
| ABHD17B. 5  | 6. 78E-14 | -0. 19039 | 0. 037 | 0. 131 | 1. 01E-09 M2 | ABHD17B        |
| LLGL1. 4    | 6. 82E-14 | -0. 19286 | 0. 022 | 0. 106 | 1. 02E-09 M2 | LLGL1          |
| IKBKE. 4    | 6. 85E-14 | 0. 234615 | 0. 115 | 0. 052 | 1. 02E-09 M2 | IKBKE          |
| FAM127B. 4  | 6. 97E-14 | -0. 26348 | 0. 171 | 0. 309 | 1. 04E-09 M2 | FAM127B        |
| IER2. 4     | 6. 99E-14 | -0. 26529 | 0. 508 | 0. 623 | 1. 04E-09 M2 | IER2           |
| ARPC1A. 5   | 7. 06E-14 | -0. 25214 | 0. 4   | 0. 569 | 1. 06E-09 M2 | ARPC1A         |
| GKAP1. 4    | 7. 09E-14 | -0. 19091 | 0. 015 | 0. 095 | 1. 06E-09 M2 | GKAP1          |
| C19orf48. 7 | 7. 14E-14 | -0. 22121 | 0. 11  | 0. 236 | 1. 07E-09 M2 | C19orf48       |
| PRKRA. 2    | 7. 29E-14 | -0. 20616 | 0. 216 | 0. 371 | 1. 09E-09 M2 | PRKRA          |
| COBL. 3     | 7. 39E-14 | -0. 20516 | 0. 003 | 0. 072 | 1. 10E-09 M2 | COBL           |
| RP11-403I   | 7. 45E-14 | 0. 231743 | 0. 08  | 0. 031 | 1. 11E-09 M2 | RP11-403I13. 5 |
| POP5. 2     | 7. 53E-14 | -0. 21827 | 0. 162 | 0. 305 | 1. 12E-09 M2 | POP5           |
| C16orf52. 7 | 7. 70E-14 | -0. 17238 | 0. 019 | 0. 101 | 1. 15E-09 M2 | C16orf52       |
| ACP2. 3     | 7. 71E-14 | 0. 360637 | 0. 322 | 0. 238 | 1. 15E-09 M2 | ACP2           |
| GRK4. 3     | 7. 73E-14 | -0. 20457 | 0. 02  | 0. 103 | 1. 16E-09 M2 | GRK4           |
| AES. 4      | 7. 75E-14 | -0. 22236 | 0. 264 | 0. 421 | 1. 16E-09 M2 | AES            |
| DLEU7. 4    | 7. 78E-14 | 0. 186001 | 0. 106 | 0. 046 | 1. 16E-09 M2 | DLEU7          |
| SETBP1. 3   | 7. 89E-14 | -0. 18016 | 0. 006 | 0. 079 | 1. 18E-09 M2 | SETBP1         |
| CHST8. 4    | 7. 97E-14 | -0. 14899 | 0. 003 | 0. 072 | 1. 19E-09 M2 | CHST8          |
| VPS72. 3    | 8. 02E-14 | -0. 16226 | 0. 144 | 0. 285 | 1. 20E-09 M2 | VPS72          |
| SP140. 4    | 8. 09E-14 | 0. 177666 | 0. 075 | 0. 028 | 1. 21E-09 M2 | SP140          |
| DYNC1H1. 4  | 8. 12E-14 | -0. 19091 | 0. 198 | 0. 348 | 1. 21E-09 M2 | DYNC1H1        |
| FASN. 5     | 8. 22E-14 | -0. 15201 | 0. 032 | 0. 122 | 1. 23E-09 M2 | FASN           |

|            |          |          |       |       |          |    |               |
|------------|----------|----------|-------|-------|----------|----|---------------|
| SLC35B2.4  | 8.28E-14 | -0.186   | 0.169 | 0.31  | 1.24E-09 | M2 | SLC35B2       |
| INADL.4    | 8.29E-14 | -0.22254 | 0.003 | 0.072 | 1.24E-09 | M2 | INADL         |
| COMMD2.3   | 8.33E-14 | -0.19777 | 0.157 | 0.298 | 1.25E-09 | M2 | COMMD2        |
| TOX3.4     | 8.40E-14 | -0.24876 | 0.003 | 0.072 | 1.26E-09 | M2 | TOX3          |
| COL22A1.1  | 8.41E-14 | -0.14117 | 0.005 | 0.077 | 1.26E-09 | M2 | COL22A1       |
| GRAMD3.5   | 8.42E-14 | -0.24726 | 0.049 | 0.147 | 1.26E-09 | M2 | GRAMD3        |
| HRH1.4     | 8.47E-14 | -0.19841 | 0.019 | 0.102 | 1.27E-09 | M2 | HRH1          |
| BLCAP.2    | 8.53E-14 | -0.25999 | 0.165 | 0.299 | 1.28E-09 | M2 | BLCAP         |
| CSRNP1.5   | 8.80E-14 | 0.306597 | 0.281 | 0.184 | 1.31E-09 | M2 | CSRNP1        |
| ST3GAL4.3  | 8.85E-14 | -0.18146 | 0.036 | 0.129 | 1.32E-09 | M2 | ST3GAL4       |
| EXOSC8.4   | 8.87E-14 | -0.22158 | 0.158 | 0.298 | 1.33E-09 | M2 | EXOSC8        |
| VAMP3.3    | 8.92E-14 | 0.29317  | 0.424 | 0.343 | 1.33E-09 | M2 | VAMP3         |
| STK25.5    | 8.97E-14 | -0.17337 | 0.166 | 0.312 | 1.34E-09 | M2 | STK25         |
| AKAP1.1    | 9.03E-14 | -0.17228 | 0.036 | 0.128 | 1.35E-09 | M2 | AKAP1         |
| SRRD.4     | 9.17E-14 | -0.14477 | 0.032 | 0.122 | 1.37E-09 | M2 | SRRD          |
| TMC8.3     | 9.21E-14 | 0.153621 | 0.095 | 0.039 | 1.38E-09 | M2 | TMC8          |
| ORMDL3.3   | 9.44E-14 | -0.21589 | 0.04  | 0.133 | 1.41E-09 | M2 | ORMDL3        |
| SESN3.2    | 9.48E-14 | -0.18965 | 0.055 | 0.157 | 1.42E-09 | M2 | SESN3         |
| SYTL2.3    | 9.48E-14 | -0.2813  | 0.008 | 0.081 | 1.42E-09 | M2 | SYTL2         |
| DNAJC18.2  | 9.66E-14 | -0.17052 | 0.036 | 0.129 | 1.44E-09 | M2 | DNAJC18       |
| RNF19A.5   | 9.79E-14 | -0.22718 | 0.095 | 0.21  | 1.46E-09 | M2 | RNF19A        |
| LUC7L.3    | 9.80E-14 | -0.16244 | 0.121 | 0.254 | 1.46E-09 | M2 | LUC7L         |
| PM20D2.3   | 9.86E-14 | -0.17069 | 0.013 | 0.09  | 1.47E-09 | M2 | PM20D2        |
| SAFB2.2    | 9.89E-14 | -0.19751 | 0.193 | 0.341 | 1.48E-09 | M2 | SAFB2         |
| NKX2-5.3   | 1.00E-13 | -0.23347 | 0.001 | 0.069 | 1.50E-09 | M2 | NKX2-5        |
| WASF3.3    | 1.01E-13 | -0.18721 | 0.008 | 0.081 | 1.50E-09 | M2 | WASF3         |
| TMED3.3    | 1.01E-13 | 0.362951 | 0.382 | 0.303 | 1.50E-09 | M2 | TMED3         |
| C12orf29.1 | 1.01E-13 | -0.19156 | 0.057 | 0.16  | 1.51E-09 | M2 | C12orf29      |
| CWF19L2.1  | 1.02E-13 | -0.25499 | 0.072 | 0.179 | 1.52E-09 | M2 | CWF19L2       |
| PJA2.4     | 1.02E-13 | -0.23418 | 0.204 | 0.344 | 1.52E-09 | M2 | PJA2          |
| RPP25      | 1.03E-13 | 0.14806  | 0.072 | 0.026 | 1.53E-09 | M2 | RPP25         |
| ZCCHC11.2  | 1.03E-13 | -0.17707 | 0.119 | 0.247 | 1.54E-09 | M2 | ZCCHC11       |
| SF3A2.3    | 1.04E-13 | -0.17505 | 0.133 | 0.268 | 1.55E-09 | M2 | SF3A2         |
| TRPM3.4    | 1.05E-13 | -0.16288 | 0.004 | 0.074 | 1.57E-09 | M2 | TRPM3         |
| DBX2.4     | 1.05E-13 | -0.14105 | 0.001 | 0.069 | 1.57E-09 | M2 | DBX2          |
| SOX21-AS1  | 1.06E-13 | -0.1369  | 0.001 | 0.069 | 1.59E-09 | M2 | SOX21-AS1     |
| IFT88.3    | 1.07E-13 | -0.16536 | 0.027 | 0.114 | 1.60E-09 | M2 | IFT88         |
| GNG12.3    | 1.07E-13 | -0.12885 | 0.046 | 0.144 | 1.60E-09 | M2 | GNG12         |
| ARMCX2.4   | 1.09E-13 | -0.25331 | 0.054 | 0.153 | 1.63E-09 | M2 | ARMCX2        |
| AP2A2.4    | 1.10E-13 | 0.373757 | 0.33  | 0.246 | 1.64E-09 | M2 | AP2A2         |
| PLXNB1.4   | 1.13E-13 | -0.21677 | 0.008 | 0.08  | 1.69E-09 | M2 | PLXNB1        |
| ENO2.5     | 1.13E-13 | -0.18301 | 0.151 | 0.294 | 1.69E-09 | M2 | ENO2          |
| RAD1.1     | 1.14E-13 | -0.20273 | 0.075 | 0.185 | 1.71E-09 | M2 | RAD1          |
| CUL1.1     | 1.17E-13 | -0.18767 | 0.117 | 0.243 | 1.75E-09 | M2 | CUL1          |
| USP10.2    | 1.17E-13 | -0.19058 | 0.124 | 0.251 | 1.75E-09 | M2 | USP10         |
| KCTD13.4   | 1.21E-13 | -0.17059 | 0.047 | 0.145 | 1.81E-09 | M2 | KCTD13        |
| RP11-802E  | 1.21E-13 | 0.122139 | 0.046 | 0.013 | 1.81E-09 | M2 | RP11-802E16.3 |
| ZRANB2.1   | 1.21E-13 | -0.21565 | 0.189 | 0.339 | 1.81E-09 | M2 | ZRANB2        |
| FAM134A.5  | 1.23E-13 | -0.18575 | 0.169 | 0.307 | 1.83E-09 | M2 | FAM134A       |
| SPHK1.4    | 1.25E-13 | 0.317103 | 0.179 | 0.101 | 1.87E-09 | M2 | SPHK1         |
| FAM184B.1  | 1.25E-13 | -0.17114 | 0.027 | 0.114 | 1.87E-09 | M2 | FAM184B       |



|           |          |          |       |       |          |    |               |
|-----------|----------|----------|-------|-------|----------|----|---------------|
| CYTH2.4   | 1.31E-13 | -0.22795 | 0.204 | 0.351 | 1.96E-09 | M2 | CYTH2         |
| PON2.5    | 1.31E-13 | -0.33609 | 0.317 | 0.46  | 1.96E-09 | M2 | PON2          |
| TMEM131.4 | 1.32E-13 | -0.15351 | 0.052 | 0.153 | 1.97E-09 | M2 | TMEM131       |
| CHCHD6.3  | 1.33E-13 | -0.19307 | 0.116 | 0.244 | 1.99E-09 | M2 | CHCHD6        |
| AMZ2.1    | 1.34E-13 | -0.22113 | 0.231 | 0.391 | 2.00E-09 | M2 | AMZ2          |
| TNRC6A.1  | 1.36E-13 | -0.20669 | 0.102 | 0.223 | 2.03E-09 | M2 | TNRC6A        |
| CBR4.5    | 1.39E-13 | -0.21387 | 0.083 | 0.196 | 2.08E-09 | M2 | CBR4          |
| PCDHB7.3  | 1.40E-13 | -0.19141 | 0.005 | 0.076 | 2.09E-09 | M2 | PCDHB7        |
| KANK2.2   | 1.41E-13 | -0.151   | 0.017 | 0.096 | 2.10E-09 | M2 | KANK2         |
| LEO1.2    | 1.42E-13 | -0.17523 | 0.051 | 0.15  | 2.12E-09 | M2 | LEO1          |
| HS6ST1    | 1.42E-13 | -0.17866 | 0.028 | 0.114 | 2.13E-09 | M2 | HS6ST1        |
| C8orf33.2 | 1.44E-13 | -0.1588  | 0.179 | 0.328 | 2.15E-09 | M2 | C8orf33       |
| PKIB.3    | 1.47E-13 | 0.37152  | 0.364 | 0.278 | 2.19E-09 | M2 | PKIB          |
| LINC01102 | 1.48E-13 | -0.24848 | 0.005 | 0.075 | 2.22E-09 | M2 | LINC01102     |
| DIXDC1.4  | 1.49E-13 | -0.17988 | 0.019 | 0.1   | 2.23E-09 | M2 | DIXDC1        |
| SMC2.3    | 1.52E-13 | -0.23321 | 0.093 | 0.207 | 2.27E-09 | M2 | SMC2          |
| ECE1.3    | 1.53E-13 | -0.17751 | 0.01  | 0.085 | 2.29E-09 | M2 | ECE1          |
| SF3B3.2   | 1.53E-13 | -0.16961 | 0.083 | 0.197 | 2.29E-09 | M2 | SF3B3         |
| AKR1C3.1  | 1.53E-13 | 0.150568 | 0.049 | 0.014 | 2.29E-09 | M2 | AKR1C3        |
| TCEAL1.4  | 1.55E-13 | -0.23652 | 0.134 | 0.264 | 2.32E-09 | M2 | TCEAL1        |
| GLDC.3    | 1.56E-13 | -0.15661 | 0.004 | 0.073 | 2.33E-09 | M2 | GLDC          |
| SRSF1.1   | 1.58E-13 | -0.21784 | 0.249 | 0.408 | 2.36E-09 | M2 | SRSF1         |
| RP11-1114 | 1.63E-13 | -0.17491 | 0.013 | 0.089 | 2.43E-09 | M2 | RP11-1114A5.4 |
| NDUF5.2   | 1.64E-13 | -0.18188 | 0.045 | 0.14  | 2.45E-09 | M2 | NDUF5         |
| RBBP4.2   | 1.64E-13 | -0.17405 | 0.276 | 0.442 | 2.45E-09 | M2 | RBBP4         |
| MDM4.2    | 1.66E-13 | -0.17842 | 0.125 | 0.255 | 2.48E-09 | M2 | MDM4          |
| LRPPRC.3  | 1.67E-13 | -0.17988 | 0.068 | 0.175 | 2.50E-09 | M2 | LRPPRC        |
| DCHS1.4   | 1.67E-13 | -0.13841 | 0.013 | 0.089 | 2.50E-09 | M2 | DCHS1         |
| CISD2.2   | 1.67E-13 | 0.306358 | 0.466 | 0.4   | 2.50E-09 | M2 | CISD2         |
| C1orf216. | 1.70E-13 | -0.16485 | 0.041 | 0.134 | 2.53E-09 | M2 | C1orf216      |
| CHST7.3   | 1.70E-13 | -0.13824 | 0.028 | 0.115 | 2.55E-09 | M2 | CHST7         |
| GUSB.4    | 1.71E-13 | 0.320716 | 0.359 | 0.266 | 2.55E-09 | M2 | GUSB          |
| RP11-192H | 1.71E-13 | -0.16895 | 0.032 | 0.12  | 2.56E-09 | M2 | RP11-192H23.6 |
| DCAF16.2  | 1.74E-13 | -0.15455 | 0.034 | 0.125 | 2.59E-09 | M2 | DCAF16        |
| RORA.2    | 1.74E-13 | -0.22194 | 0.008 | 0.08  | 2.60E-09 | M2 | RORA          |
| ZNF48.3   | 1.76E-13 | -0.15267 | 0.02  | 0.102 | 2.64E-09 | M2 | ZNF48         |
| PLA2G16.4 | 1.78E-13 | -0.33892 | 0.259 | 0.414 | 2.66E-09 | M2 | PLA2G16       |
| PDCL3.3   | 1.78E-13 | 0.363723 | 0.368 | 0.288 | 2.66E-09 | M2 | PDCL3         |
| NEK1.2    | 1.78E-13 | -0.15963 | 0.04  | 0.133 | 2.67E-09 | M2 | NEK1          |
| CEP95.2   | 1.80E-13 | -0.18465 | 0.038 | 0.13  | 2.69E-09 | M2 | CEP95         |
| CCT6A.2   | 1.84E-13 | -0.22795 | 0.421 | 0.585 | 2.75E-09 | M2 | CCT6A         |
| SATB2.2   | 1.84E-13 | -0.13698 | 0.006 | 0.077 | 2.75E-09 | M2 | SATB2         |
| FREM2.4   | 1.85E-13 | -0.12529 | 0.004 | 0.072 | 2.76E-09 | M2 | FREM2         |
| SLC37A2.2 | 1.86E-13 | 0.152011 | 0.056 | 0.018 | 2.77E-09 | M2 | SLC37A2       |
| UQCC1.3   | 1.88E-13 | -0.15493 | 0.065 | 0.172 | 2.82E-09 | M2 | UQCC1         |
| SH3KBP1.5 | 1.90E-13 | 0.268476 | 0.332 | 0.235 | 2.84E-09 | M2 | SH3KBP1       |
| ARHGFE25. | 1.90E-13 | -0.19651 | 0.003 | 0.07  | 2.85E-09 | M2 | ARHGFE25      |
| SMAD9.3   | 1.92E-13 | -0.18852 | 0.005 | 0.075 | 2.86E-09 | M2 | SMAD9         |
| RIT2.4    | 1.93E-13 | -0.31506 | 0.009 | 0.081 | 2.88E-09 | M2 | RIT2          |
| MDGA1.3   | 1.93E-13 | -0.12519 | 0.005 | 0.075 | 2.88E-09 | M2 | MDGA1         |
| GOT2.3    | 1.94E-13 | -0.17751 | 0.089 | 0.205 | 2.89E-09 | M2 | GOT2          |

|             |           |           |        |        |              |                 |
|-------------|-----------|-----------|--------|--------|--------------|-----------------|
| FUBP3. 3    | 1. 95E-13 | -0. 18568 | 0. 121 | 0. 248 | 2. 92E-09 M2 | FUBP3           |
| SCO2. 5     | 1. 96E-13 | 0. 368832 | 0. 292 | 0. 205 | 2. 93E-09 M2 | SCO2            |
| FBXO44. 3   | 1. 98E-13 | -0. 17182 | 0. 05  | 0. 148 | 2. 96E-09 M2 | FBXO44          |
| GNPDA2. 2   | 1. 98E-13 | -0. 17055 | 0. 038 | 0. 131 | 2. 96E-09 M2 | GNPDA2          |
| RNF165. 4   | 1. 99E-13 | -0. 1861  | 0. 004 | 0. 072 | 2. 97E-09 M2 | RNF165          |
| ZNF250. 2   | 2. 06E-13 | -0. 20697 | 0. 011 | 0. 086 | 3. 08E-09 M2 | ZNF250          |
| IMMP2L. 3   | 2. 08E-13 | -0. 2375  | 0. 052 | 0. 151 | 3. 10E-09 M2 | IMMP2L          |
| NARFL. 1    | 2. 08E-13 | -0. 17725 | 0. 052 | 0. 152 | 3. 10E-09 M2 | NARFL           |
| DBNDD1. 3   | 2. 08E-13 | -0. 13761 | 0. 004 | 0. 072 | 3. 11E-09 M2 | DBNDD1          |
| E2F5. 2     | 2. 09E-13 | -0. 1224  | 0. 003 | 0. 07  | 3. 12E-09 M2 | E2F5            |
| PKD1. 3     | 2. 09E-13 | -0. 19356 | 0. 034 | 0. 124 | 3. 13E-09 M2 | PKD1            |
| SLC36A1     | 2. 15E-13 | 0. 174376 | 0. 073 | 0. 027 | 3. 21E-09 M2 | SLC36A1         |
| IRF5. 5     | 2. 16E-13 | 0. 171272 | 0. 119 | 0. 054 | 3. 23E-09 M2 | IRF5            |
| PCDH10. 3   | 2. 18E-13 | -0. 14961 | 0. 004 | 0. 072 | 3. 25E-09 M2 | PCDH10          |
| TTYH2. 4    | 2. 19E-13 | -0. 2394  | 0. 033 | 0. 121 | 3. 27E-09 M2 | TTYH2           |
| SYDE1. 2    | 2. 22E-13 | -0. 12692 | 0. 005 | 0. 075 | 3. 31E-09 M2 | SYDE1           |
| TSPYL1. 3   | 2. 23E-13 | -0. 21479 | 0. 123 | 0. 246 | 3. 34E-09 M2 | TSPYL1          |
| NDUFS1. 3   | 2. 24E-13 | -0. 19531 | 0. 134 | 0. 264 | 3. 34E-09 M2 | NDUFS1          |
| DYNC2LI1. 2 | 2. 24E-13 | -0. 1846  | 0. 066 | 0. 171 | 3. 34E-09 M2 | DYNC2LI1        |
| B3GALT6. 4  | 2. 28E-13 | -0. 12035 | 0. 047 | 0. 145 | 3. 41E-09 M2 | B3GALT6         |
| ALDH3B1. 3  | 2. 29E-13 | 0. 231198 | 0. 135 | 0. 067 | 3. 42E-09 M2 | ALDH3B1         |
| HMBOX1. 4   | 2. 31E-13 | -0. 21472 | 0. 088 | 0. 2   | 3. 45E-09 M2 | HMBOX1          |
| EXOC1. 2    | 2. 34E-13 | -0. 21745 | 0. 132 | 0. 258 | 3. 49E-09 M2 | EXOC1           |
| PDHX. 3     | 2. 35E-13 | -0. 22654 | 0. 073 | 0. 178 | 3. 50E-09 M2 | PDHX            |
| KIF3B. 5    | 2. 37E-13 | -0. 11821 | 0. 042 | 0. 136 | 3. 54E-09 M2 | KIF3B           |
| MSANTD3. 3  | 2. 37E-13 | -0. 16764 | 0. 015 | 0. 092 | 3. 54E-09 M2 | MSANTD3         |
| HNRNPAB. 4  | 2. 40E-13 | -0. 21286 | 0. 253 | 0. 407 | 3. 59E-09 M2 | HNRNPAB         |
| CAHM. 4     | 2. 41E-13 | -0. 19495 | 0. 018 | 0. 097 | 3. 60E-09 M2 | CAHM            |
| C11orf57. 2 | 2. 44E-13 | -0. 1462  | 0. 059 | 0. 161 | 3. 65E-09 M2 | C11orf57        |
| HRK. 3      | 2. 44E-13 | -0. 20377 | 0. 001 | 0. 067 | 3. 65E-09 M2 | HRK             |
| PLA2G15. 4  | 2. 50E-13 | 0. 312239 | 0. 218 | 0. 133 | 3. 74E-09 M2 | PLA2G15         |
| CDK2AP1. 2  | 2. 52E-13 | -0. 16313 | 0. 026 | 0. 109 | 3. 76E-09 M2 | CDK2AP1         |
| ZNF90. 4    | 2. 54E-13 | 0. 278046 | 0. 465 | 0. 374 | 3. 80E-09 M2 | ZNF90           |
| ZNF117. 3   | 2. 56E-13 | -0. 20047 | 0. 027 | 0. 111 | 3. 82E-09 M2 | ZNF117          |
| IGDCC3. 5   | 2. 56E-13 | -0. 14486 | 0. 001 | 0. 067 | 3. 83E-09 M2 | IGDCC3          |
| MTHFD2L. 3  | 2. 58E-13 | -0. 17523 | 0. 096 | 0. 214 | 3. 85E-09 M2 | MTHFD2L         |
| VNN2. 3     | 2. 58E-13 | 0. 10251  | 0. 065 | 0. 022 | 3. 86E-09 M2 | VNN2            |
| CTU2. 2     | 2. 63E-13 | -0. 18164 | 0. 045 | 0. 139 | 3. 92E-09 M2 | CTU2            |
| AFAP1. 3    | 2. 66E-13 | -0. 15953 | 0. 014 | 0. 09  | 3. 97E-09 M2 | AFAP1           |
| MAPK12. 3   | 2. 67E-13 | -0. 11729 | 0. 005 | 0. 074 | 3. 99E-09 M2 | MAPK12          |
| LRRC16A. 1  | 2. 72E-13 | -0. 14958 | 0. 008 | 0. 079 | 4. 06E-09 M2 | LRRC16A         |
| ASPSCR1. 2  | 2. 77E-13 | -0. 20032 | 0. 121 | 0. 245 | 4. 14E-09 M2 | ASPSCR1         |
| SCN3A. 4    | 2. 78E-13 | -0. 20602 | 0. 006 | 0. 076 | 4. 15E-09 M2 | SCN3A           |
| OGFOD1. 2   | 2. 81E-13 | -0. 1565  | 0. 056 | 0. 157 | 4. 20E-09 M2 | OGFOD1          |
| RP11-277F   | 2. 81E-13 | -0. 21197 | 0. 004 | 0. 072 | 4. 20E-09 M2 | RP11-277P12. 20 |
| ZNF181. 3   | 2. 83E-13 | -0. 18813 | 0. 022 | 0. 102 | 4. 23E-09 M2 | ZNF181          |
| RNASE3. 3   | 2. 88E-13 | 0. 262011 | 0. 078 | 0. 03  | 4. 31E-09 M2 | RNASE3          |
| FAM131A. 1  | 2. 89E-13 | -0. 19019 | 0. 041 | 0. 132 | 4. 31E-09 M2 | FAM131A         |
| AP3S1. 2    | 2. 93E-13 | 0. 276951 | 0. 487 | 0. 422 | 4. 37E-09 M2 | AP3S1           |
| MARK1. 2    | 2. 94E-13 | -0. 12943 | 0. 004 | 0. 072 | 4. 40E-09 M2 | MARK1           |
| COL5A2. 3   | 2. 96E-13 | -0. 12222 | 0. 001 | 0. 067 | 4. 42E-09 M2 | COL5A2          |

|             |          |          |       |       |             |                 |
|-------------|----------|----------|-------|-------|-------------|-----------------|
| ZFPL1.2     | 2.97E-13 | -0.1948  | 0.119 | 0.243 | 4.44E-09 M2 | ZFPL1           |
| ZNF775.4    | 3.01E-13 | -0.17903 | 0.02  | 0.1   | 4.49E-09 M2 | ZNF775          |
| NRSN1.3     | 3.01E-13 | -0.17943 | 0     | 0.064 | 4.49E-09 M2 | NRSN1           |
| C5orf56.4   | 3.01E-13 | -0.21076 | 0.031 | 0.117 | 4.50E-09 M2 | C5orf56         |
| PMEPA1.5    | 3.02E-13 | -0.23352 | 0.097 | 0.208 | 4.52E-09 M2 | PMEPA1          |
| PEX10.3     | 3.03E-13 | -0.14944 | 0.087 | 0.2   | 4.53E-09 M2 | PEX10           |
| SNTB2.2     | 3.05E-13 | -0.17083 | 0.02  | 0.1   | 4.56E-09 M2 | SNTB2           |
| NSD1.3      | 3.07E-13 | -0.21323 | 0.119 | 0.241 | 4.59E-09 M2 | NSD1            |
| CTHRC1.4    | 3.08E-13 | -0.13269 | 0.003 | 0.069 | 4.60E-09 M2 | CTHRC1          |
| TMEM99.4    | 3.08E-13 | -0.16187 | 0.041 | 0.134 | 4.60E-09 M2 | TMEM99          |
| TMEM37.2    | 3.09E-13 | 0.125746 | 0.124 | 0.058 | 4.61E-09 M2 | TMEM37          |
| PMS2.4      | 3.09E-13 | -0.15251 | 0.041 | 0.134 | 4.61E-09 M2 | PMS2            |
| B3GALNT1.3  | 3.09E-13 | -0.16458 | 0.08  | 0.191 | 4.61E-09 M2 | B3GALNT1        |
| FLNB.1      | 3.10E-13 | 0.293911 | 0.103 | 0.047 | 4.64E-09 M2 | FLNB            |
| ACIN1.3     | 3.11E-13 | -0.19044 | 0.14  | 0.274 | 4.65E-09 M2 | ACIN1           |
| CCDC102B.3  | 3.15E-13 | -0.15276 | 0.024 | 0.106 | 4.70E-09 M2 | CCDC102B        |
| UBXN1.5     | 3.15E-13 | 0.170955 | 0.659 | 0.618 | 4.71E-09 M2 | UBXN1           |
| VGFB.3      | 3.18E-13 | -0.2341  | 0.005 | 0.074 | 4.75E-09 M2 | VGFB            |
| PHF23.3     | 3.18E-13 | -0.18108 | 0.097 | 0.215 | 4.76E-09 M2 | PHF23           |
| RABEPK.4    | 3.19E-13 | -0.19521 | 0.092 | 0.207 | 4.77E-09 M2 | RABEPK          |
| NDUFA2.3    | 3.27E-13 | 0.160613 | 0.649 | 0.6   | 4.89E-09 M2 | NDUFA2          |
| HARS.1      | 3.29E-13 | -0.19176 | 0.155 | 0.29  | 4.91E-09 M2 | HARS            |
| RCBTB2.4    | 3.29E-13 | 0.319081 | 0.222 | 0.136 | 4.92E-09 M2 | RCBTB2          |
| POLR3F.3    | 3.33E-13 | -0.14589 | 0.047 | 0.143 | 4.98E-09 M2 | POLR3F          |
| IGF2BP2.3   | 3.35E-13 | -0.15717 | 0.011 | 0.085 | 5.01E-09 M2 | IGF2BP2         |
| FMNL2.4     | 3.42E-13 | -0.23733 | 0.146 | 0.274 | 5.12E-09 M2 | FMNL2           |
| CREB3L1.2   | 3.44E-13 | -0.126   | 0.001 | 0.066 | 5.14E-09 M2 | CREB3L1         |
| RP11-563K.3 | 3.54E-13 | -0.17368 | 0.003 | 0.069 | 5.30E-09 M2 | RP11-563K23.1   |
| PPP2R5E.4   | 3.60E-13 | -0.15992 | 0.129 | 0.255 | 5.39E-09 M2 | PPP2R5E         |
| TBPL1.1     | 3.66E-13 | -0.17764 | 0.105 | 0.225 | 5.46E-09 M2 | TBPL1           |
| TF.5        | 3.67E-13 | -0.46001 | 0.008 | 0.077 | 5.48E-09 M2 | TF              |
| USP5.1      | 3.68E-13 | -0.18977 | 0.112 | 0.232 | 5.49E-09 M2 | USP5            |
| PARD3.3     | 3.69E-13 | -0.11818 | 0     | 0.064 | 5.52E-09 M2 | PARD3           |
| DDX5.3      | 3.69E-13 | -0.19185 | 0.771 | 0.82  | 5.52E-09 M2 | DDX5            |
| NIM1K.4     | 3.72E-13 | -0.19273 | 0.003 | 0.068 | 5.55E-09 M2 | NIM1K           |
| ACO04540.3  | 3.77E-13 | -0.22543 | 0.011 | 0.084 | 5.64E-09 M2 | ACO04540.5      |
| ALOX15B.4   | 3.78E-13 | 0.147431 | 0.066 | 0.023 | 5.65E-09 M2 | ALOX15B         |
| HTATSF1.2   | 3.79E-13 | -0.19603 | 0.149 | 0.283 | 5.67E-09 M2 | HTATSF1         |
| CNR1.3      | 3.80E-13 | -0.13754 | 0.008 | 0.078 | 5.68E-09 M2 | CNR1            |
| MED9.2      | 3.81E-13 | -0.17015 | 0.019 | 0.098 | 5.69E-09 M2 | MED9            |
| SLC7A5.5    | 3.82E-13 | 0.287589 | 0.22  | 0.133 | 5.71E-09 M2 | SLC7A5          |
| FBLIM1.1    | 3.92E-13 | -0.17136 | 0.017 | 0.094 | 5.86E-09 M2 | FBLIM1          |
| DOLK.3      | 3.95E-13 | -0.18634 | 0.041 | 0.132 | 5.90E-09 M2 | DOLK            |
| HEY2.1      | 4.01E-13 | -0.14005 | 0.003 | 0.068 | 5.99E-09 M2 | HEY2            |
| PLEKHH2.2   | 4.02E-13 | -0.14901 | 0.005 | 0.073 | 6.01E-09 M2 | PLEKHH2         |
| SRSF4.3     | 4.04E-13 | -0.18931 | 0.22  | 0.37  | 6.04E-09 M2 | SRSF4           |
| PPP2R5B.4   | 4.10E-13 | -0.17178 | 0.069 | 0.173 | 6.12E-09 M2 | PPP2R5B         |
| WIPI2.3     | 4.10E-13 | -0.21286 | 0.255 | 0.408 | 6.13E-09 M2 | WIPI2           |
| XXbac-B13.4 | 4.11E-13 | 0.101626 | 0.054 | 0.017 | 6.15E-09 M2 | XXbac-B135H6.15 |
| FBXW7.3     | 4.20E-13 | -0.16527 | 0.042 | 0.134 | 6.27E-09 M2 | FBXW7           |
| ZNF532.3    | 4.27E-13 | -0.14015 | 0.019 | 0.098 | 6.38E-09 M2 | ZNF532          |

|             |           |           |        |        |              |               |
|-------------|-----------|-----------|--------|--------|--------------|---------------|
| CSF1. 3     | 4. 27E-13 | -0. 16723 | 0. 02  | 0. 1   | 6. 39E-09 M2 | CSF1          |
| FAT1. 3     | 4. 32E-13 | -0. 12781 | 0. 004 | 0. 071 | 6. 46E-09 M2 | FAT1          |
| KDM5B. 4    | 4. 34E-13 | -0. 15905 | 0. 065 | 0. 169 | 6. 48E-09 M2 | KDM5B         |
| RNF11. 4    | 4. 35E-13 | -0. 18152 | 0. 176 | 0. 317 | 6. 50E-09 M2 | RNF11         |
| COG4. 3     | 4. 35E-13 | -0. 17876 | 0. 087 | 0. 198 | 6. 51E-09 M2 | COG4          |
| HPS4. 3     | 4. 36E-13 | -0. 12802 | 0. 079 | 0. 19  | 6. 52E-09 M2 | HPS4          |
| AKT1S1. 3   | 4. 49E-13 | -0. 14276 | 0. 121 | 0. 248 | 6. 70E-09 M2 | AKT1S1        |
| PABPN1. 3   | 4. 51E-13 | -0. 17082 | 0. 212 | 0. 365 | 6. 73E-09 M2 | PABPN1        |
| SETD4. 3    | 4. 54E-13 | -0. 19946 | 0. 041 | 0. 132 | 6. 78E-09 M2 | SETD4         |
| CARD9. 5    | 4. 57E-13 | 0. 199398 | 0. 132 | 0. 064 | 6. 83E-09 M2 | CARD9         |
| PTBP3. 3    | 4. 58E-13 | 0. 285651 | 0. 183 | 0. 106 | 6. 85E-09 M2 | PTBP3         |
| PTK2B. 3    | 4. 62E-13 | 0. 409334 | 0. 199 | 0. 122 | 6. 91E-09 M2 | PTK2B         |
| SETD6. 3    | 4. 62E-13 | -0. 16544 | 0. 018 | 0. 096 | 6. 91E-09 M2 | SETD6         |
| BPNT1. 2    | 4. 67E-13 | -0. 18543 | 0. 028 | 0. 112 | 6. 99E-09 M2 | BPNT1         |
| NEO1. 3     | 4. 73E-13 | -0. 18283 | 0. 008 | 0. 077 | 7. 06E-09 M2 | NEO1          |
| RP11-505K   | 4. 82E-13 | -0. 11933 | 0. 011 | 0. 085 | 7. 20E-09 M2 | RP11-505K9. 1 |
| PTER. 1     | 4. 86E-13 | 0. 141265 | 0. 056 | 0. 018 | 7. 26E-09 M2 | PTER          |
| ARHGAP35. 4 | 4. 90E-13 | -0. 15834 | 0. 055 | 0. 153 | 7. 32E-09 M2 | ARHGAP35      |
| GPSM1. 4    | 4. 93E-13 | -0. 17023 | 0. 008 | 0. 077 | 7. 37E-09 M2 | GPSM1         |
| PAQR6. 3    | 5. 03E-13 | -0. 24009 | 0. 008 | 0. 077 | 7. 51E-09 M2 | PAQR6         |
| KLHDC10. 3  | 5. 06E-13 | -0. 1332  | 0. 043 | 0. 136 | 7. 56E-09 M2 | KLHDC10       |
| VANGL2. 3   | 5. 08E-13 | -0. 16272 | 0. 008 | 0. 077 | 7. 59E-09 M2 | VANGL2        |
| PVRL1. 4    | 5. 12E-13 | -0. 19278 | 0. 001 | 0. 065 | 7. 65E-09 M2 | PVRL1         |
| FAM213A. 3  | 5. 14E-13 | -0. 23046 | 0. 24  | 0. 393 | 7. 68E-09 M2 | FAM213A       |
| MARS. 1     | 5. 24E-13 | -0. 19267 | 0. 098 | 0. 214 | 7. 83E-09 M2 | MARS          |
| CIZ1. 2     | 5. 26E-13 | -0. 15549 | 0. 078 | 0. 187 | 7. 86E-09 M2 | CIZ1          |
| RBM10. 2    | 5. 28E-13 | -0. 12345 | 0. 093 | 0. 21  | 7. 88E-09 M2 | RBM10         |
| JOSD2. 3    | 5. 28E-13 | 0. 323869 | 0. 405 | 0. 33  | 7. 90E-09 M2 | JOSD2         |
| PPP1CB. 2   | 5. 29E-13 | -0. 28754 | 0. 387 | 0. 514 | 7. 90E-09 M2 | PPP1CB        |
| ADCK3. 1    | 5. 35E-13 | -0. 21554 | 0. 043 | 0. 134 | 7. 99E-09 M2 | ADCK3         |
| RFC3. 3     | 5. 39E-13 | -0. 19025 | 0. 017 | 0. 093 | 8. 06E-09 M2 | RFC3          |
| SPAST. 3    | 5. 44E-13 | -0. 16849 | 0. 032 | 0. 118 | 8. 13E-09 M2 | SPAST         |
| PRMT6. 2    | 5. 47E-13 | -0. 16553 | 0. 019 | 0. 097 | 8. 18E-09 M2 | PRMT6         |
| CNPY4. 4    | 5. 51E-13 | -0. 17895 | 0. 032 | 0. 118 | 8. 23E-09 M2 | CNPY4         |
| RAB8B. 4    | 5. 52E-13 | 0. 358184 | 0. 23  | 0. 149 | 8. 26E-09 M2 | RAB8B         |
| AGO3. 1     | 5. 55E-13 | -0. 17392 | 0. 088 | 0. 2   | 8. 30E-09 M2 | AGO3          |
| DHRS7. 5    | 5. 59E-13 | 0. 143639 | 0. 628 | 0. 551 | 8. 36E-09 M2 | DHRS7         |
| PLEKHH3. 2  | 5. 62E-13 | -0. 14292 | 0. 014 | 0. 089 | 8. 39E-09 M2 | PLEKHH3       |
| SNRNP70. 3  | 5. 66E-13 | -0. 20976 | 0. 324 | 0. 486 | 8. 45E-09 M2 | SNRNP70       |
| SPTAN1. 3   | 5. 70E-13 | -0. 12912 | 0. 138 | 0. 269 | 8. 52E-09 M2 | SPTAN1        |
| KIF3C. 5    | 5. 72E-13 | -0. 14899 | 0. 026 | 0. 108 | 8. 55E-09 M2 | KIF3C         |
| GS1-124K5   | 5. 77E-13 | -0. 19389 | 0. 033 | 0. 12  | 8. 63E-09 M2 | GS1-124K5. 4  |
| KDELRL1. 1  | 5. 86E-13 | 0. 22713  | 0. 545 | 0. 489 | 8. 75E-09 M2 | KDELRL1       |
| FAM118B. 3  | 5. 93E-13 | -0. 15016 | 0. 055 | 0. 153 | 8. 86E-09 M2 | FAM118B       |
| LRRC1. 3    | 5. 95E-13 | -0. 19264 | 0. 006 | 0. 075 | 8. 89E-09 M2 | LRRC1         |
| SESN2. 3    | 5. 96E-13 | 0. 322617 | 0. 175 | 0. 099 | 8. 90E-09 M2 | SESN2         |
| LYRM5. 3    | 5. 96E-13 | -0. 22422 | 0. 207 | 0. 35  | 8. 91E-09 M2 | LYRM5         |
| HNRNPH3. 4  | 6. 00E-13 | -0. 2023  | 0. 291 | 0. 456 | 8. 97E-09 M2 | HNRNPH3       |
| GATAD2B. 3  | 6. 02E-13 | -0. 16439 | 0. 065 | 0. 167 | 9. 00E-09 M2 | GATAD2B       |
| FAM69B. 3   | 6. 03E-13 | -0. 11942 | 0      | 0. 062 | 9. 01E-09 M2 | FAM69B        |
| MTSS1. 4    | 6. 03E-13 | 0. 323321 | 0. 301 | 0. 207 | 9. 02E-09 M2 | MTSS1         |

|             |           |           |        |        |              |               |
|-------------|-----------|-----------|--------|--------|--------------|---------------|
| ILKAP. 3    | 6. 07E-13 | -0. 18462 | 0. 116 | 0. 237 | 9. 07E-09 M2 | ILKAP         |
| CPNE2. 5    | 6. 07E-13 | -0. 19466 | 0. 078 | 0. 184 | 9. 08E-09 M2 | CPNE2         |
| DOLPP1. 3   | 6. 09E-13 | -0. 19936 | 0. 026 | 0. 107 | 9. 10E-09 M2 | DOLPP1        |
| RP11-108M   | 6. 14E-13 | 0. 305051 | 0. 174 | 0. 097 | 9. 17E-09 M2 | RP11-108M9. 4 |
| SNN. 5      | 6. 15E-13 | -0. 23692 | 0. 117 | 0. 233 | 9. 19E-09 M2 | SNN           |
| LTB4R. 4    | 6. 17E-13 | 0. 178784 | 0. 078 | 0. 03  | 9. 22E-09 M2 | LTB4R         |
| TPR. 2      | 6. 19E-13 | -0. 19781 | 0. 258 | 0. 415 | 9. 25E-09 M2 | TPR           |
| PHF11. 4    | 6. 24E-13 | 0. 28518  | 0. 22  | 0. 136 | 9. 33E-09 M2 | PHF11         |
| QSER1. 4    | 6. 32E-13 | -0. 14605 | 0. 036 | 0. 124 | 9. 44E-09 M2 | QSER1         |
| NOL4. 3     | 6. 33E-13 | -0. 18007 | 0. 004 | 0. 07  | 9. 47E-09 M2 | NOL4          |
| C7orf26. 4  | 6. 44E-13 | -0. 20682 | 0. 065 | 0. 164 | 9. 62E-09 M2 | C7orf26       |
| SRRM3. 4    | 6. 46E-13 | -0. 23998 | 0. 008 | 0. 077 | 9. 65E-09 M2 | SRRM3         |
| CTCF. 3     | 6. 47E-13 | -0. 16384 | 0. 068 | 0. 17  | 9. 66E-09 M2 | CTCF          |
| PODXL. 3    | 6. 52E-13 | -0. 15396 | 0. 006 | 0. 074 | 9. 74E-09 M2 | PODXL         |
| KRTCAP2. 3  | 6. 53E-13 | 0. 207293 | 0. 612 | 0. 553 | 9. 76E-09 M2 | KRTCAP2       |
| ID2. 4      | 6. 54E-13 | 0. 119866 | 0. 746 | 0. 647 | 9. 78E-09 M2 | ID2           |
| C17orf51. 6 | 6. 56E-13 | -0. 14911 | 0. 005 | 0. 072 | 9. 80E-09 M2 | C17orf51      |
| AAAS. 2     | 6. 56E-13 | -0. 18538 | 0. 083 | 0. 193 | 9. 80E-09 M2 | AAAS          |
| MPHOSPH9. 6 | 6. 58E-13 | -0. 17862 | 0. 036 | 0. 123 | 9. 83E-09 M2 | MPHOSPH9      |
| ISG15. 3    | 6. 60E-13 | 0. 293807 | 0. 436 | 0. 351 | 9. 87E-09 M2 | ISG15         |
| TNFRSF1A. 6 | 6. 84E-13 | 0. 25699  | 0. 451 | 0. 366 | 1. 02E-08 M2 | TNFRSF1A      |
| GPRASP2. 3  | 6. 89E-13 | -0. 17287 | 0. 004 | 0. 069 | 1. 03E-08 M2 | GPRASP2       |
| TOP2A. 5    | 6. 90E-13 | -0. 32439 | 0. 017 | 0. 091 | 1. 03E-08 M2 | TOP2A         |
| NPB. 1      | 6. 95E-13 | -0. 16932 | 0. 005 | 0. 072 | 1. 04E-08 M2 | NPB           |
| PCED1A. 2   | 6. 97E-13 | -0. 12584 | 0. 043 | 0. 137 | 1. 04E-08 M2 | PCED1A        |
| CHST2. 3    | 7. 03E-13 | -0. 15789 | 0. 049 | 0. 142 | 1. 05E-08 M2 | CHST2         |
| DHX40. 4    | 7. 15E-13 | -0. 13361 | 0. 05  | 0. 145 | 1. 07E-08 M2 | DHX40         |
| SMCR5. 3    | 7. 18E-13 | -0. 15019 | 0. 019 | 0. 097 | 1. 07E-08 M2 | SMCR5         |
| LARS. 2     | 7. 19E-13 | -0. 18918 | 0. 204 | 0. 351 | 1. 07E-08 M2 | LARS          |
| SNX9. 5     | 7. 20E-13 | 0. 360697 | 0. 268 | 0. 184 | 1. 08E-08 M2 | SNX9          |
| TCP1. 2     | 7. 25E-13 | -0. 22683 | 0. 372 | 0. 534 | 1. 08E-08 M2 | TCP1          |
| HBB. 4      | 7. 33E-13 | 0. 101477 | 0. 502 | 0. 391 | 1. 10E-08 M2 | HBB           |
| WDR74       | 7. 55E-13 | -0. 19433 | 0. 125 | 0. 253 | 1. 13E-08 M2 | WDR74         |
| THOP1. 4    | 7. 56E-13 | -0. 14118 | 0. 095 | 0. 209 | 1. 13E-08 M2 | THOP1         |
| WDR12. 2    | 7. 63E-13 | -0. 20216 | 0. 054 | 0. 149 | 1. 14E-08 M2 | WDR12         |
| GTF3C5. 3   | 7. 76E-13 | -0. 16141 | 0. 083 | 0. 193 | 1. 16E-08 M2 | GTF3C5        |
| ANTXR1. 3   | 7. 84E-13 | -0. 18518 | 0. 019 | 0. 096 | 1. 17E-08 M2 | ANTXR1        |
| MIR497HG.   | 7. 87E-13 | -0. 22115 | 0. 005 | 0. 072 | 1. 18E-08 M2 | MIR497HG      |
| LYRM1. 4    | 8. 00E-13 | -0. 19523 | 0. 083 | 0. 19  | 1. 19E-08 M2 | LYRM1         |
| PEG3. 3     | 8. 01E-13 | -0. 18487 | 0. 004 | 0. 069 | 1. 20E-08 M2 | PEG3          |
| AHDC1. 3    | 8. 18E-13 | -0. 18636 | 0. 026 | 0. 107 | 1. 22E-08 M2 | AHDC1         |
| NUFIP1. 3   | 8. 26E-13 | -0. 18498 | 0. 034 | 0. 121 | 1. 23E-08 M2 | NUFIP1        |
| TMEM8B. 1   | 8. 28E-13 | -0. 12995 | 0. 003 | 0. 067 | 1. 24E-08 M2 | TMEM8B        |
| OSMR. 3     | 8. 29E-13 | -0. 13674 | 0. 015 | 0. 09  | 1. 24E-08 M2 | OSMR          |
| E2F6. 3     | 8. 31E-13 | -0. 15354 | 0. 054 | 0. 151 | 1. 24E-08 M2 | E2F6          |
| LINC00969   | 8. 32E-13 | -0. 21033 | 0. 128 | 0. 251 | 1. 24E-08 M2 | LINC00969     |
| SEN7. 2     | 8. 38E-13 | -0. 18447 | 0. 017 | 0. 092 | 1. 25E-08 M2 | SEN7          |
| SNTA1. 3    | 8. 47E-13 | -0. 1283  | 0. 015 | 0. 09  | 1. 27E-08 M2 | SNTA1         |
| NFKBID. 5   | 8. 51E-13 | 0. 229297 | 0. 229 | 0. 134 | 1. 27E-08 M2 | NFKBID        |
| ITGA2. 3    | 8. 61E-13 | -0. 14587 | 0. 003 | 0. 067 | 1. 29E-08 M2 | ITGA2         |
| HIRIP3. 3   | 8. 64E-13 | -0. 18425 | 0. 069 | 0. 172 | 1. 29E-08 M2 | HIRIP3        |

|              |           |           |        |        |              |             |
|--------------|-----------|-----------|--------|--------|--------------|-------------|
| RNF135. 5    | 8. 66E-13 | 0. 229786 | 0. 185 | 0. 105 | 1. 29E-08 M2 | RNF135      |
| TRA2A. 1     | 8. 85E-13 | -0. 24251 | 0. 211 | 0. 353 | 1. 32E-08 M2 | TRA2A       |
| HSF2. 3      | 8. 99E-13 | -0. 20744 | 0. 037 | 0. 123 | 1. 34E-08 M2 | HSF2        |
| ZNF786. 3    | 9. 01E-13 | -0. 16172 | 0. 008 | 0. 076 | 1. 35E-08 M2 | ZNF786      |
| KHDC1. 4     | 9. 03E-13 | -0. 19192 | 0. 004 | 0. 069 | 1. 35E-08 M2 | KHDC1       |
| PAK4. 3      | 9. 04E-13 | -0. 19826 | 0. 036 | 0. 121 | 1. 35E-08 M2 | PAK4        |
| MAGOHB. 2    | 9. 05E-13 | -0. 2206  | 0. 124 | 0. 246 | 1. 35E-08 M2 | MAGOHB      |
| FCHO2. 4     | 9. 13E-13 | 0. 21521  | 0. 137 | 0. 07  | 1. 36E-08 M2 | FCHO2       |
| HNRNPA0. 3   | 9. 15E-13 | -0. 22834 | 0. 506 | 0. 651 | 1. 37E-08 M2 | HNRNPA0     |
| THAP9-AS1    | 9. 30E-13 | -0. 18139 | 0. 11  | 0. 229 | 1. 39E-08 M2 | THAP9-AS1   |
| LTA4H. 4     | 9. 41E-13 | 0. 302943 | 0. 315 | 0. 223 | 1. 41E-08 M2 | LTA4H       |
| ZNF714. 2    | 9. 50E-13 | -0. 22073 | 0. 027 | 0. 108 | 1. 42E-08 M2 | ZNF714      |
| PIP4K2B. 2   | 9. 59E-13 | -0. 14293 | 0. 027 | 0. 108 | 1. 43E-08 M2 | PIP4K2B     |
| FUT8. 3      | 9. 65E-13 | -0. 1729  | 0. 041 | 0. 13  | 1. 44E-08 M2 | FUT8        |
| IFT52. 2     | 9. 70E-13 | -0. 16201 | 0. 137 | 0. 265 | 1. 45E-08 M2 | IFT52       |
| RER1. 3      | 9. 75E-13 | 0. 218913 | 0. 548 | 0. 493 | 1. 46E-08 M2 | RER1        |
| INSIG1. 5    | 9. 79E-13 | 0. 371504 | 0. 307 | 0. 221 | 1. 46E-08 M2 | INSIG1      |
| BPHL. 3      | 9. 81E-13 | -0. 1865  | 0. 077 | 0. 181 | 1. 47E-08 M2 | BPHL        |
| TMEM106C. 9. | 9. 90E-13 | -0. 20577 | 0. 146 | 0. 275 | 1. 48E-08 M2 | TMEM106C    |
| GDPD1. 3     | 1. 01E-12 | -0. 15291 | 0. 005 | 0. 071 | 1. 51E-08 M2 | GDPD1       |
| RASGRP1. 4   | 1. 01E-12 | -0. 13438 | 0. 006 | 0. 073 | 1. 52E-08 M2 | RASGRP1     |
| KLF7. 3      | 1. 03E-12 | -0. 23562 | 0. 102 | 0. 213 | 1. 54E-08 M2 | KLF7        |
| NOL3. 5      | 1. 03E-12 | -0. 19908 | 0. 07  | 0. 173 | 1. 55E-08 M2 | NOL3        |
| CCDC90B. 4   | 1. 04E-12 | -0. 19283 | 0. 257 | 0. 42  | 1. 55E-08 M2 | CCDC90B     |
| SYNDIG1. 5   | 1. 05E-12 | -0. 27881 | 0. 019 | 0. 094 | 1. 57E-08 M2 | SYNDIG1     |
| WIZ. 2       | 1. 06E-12 | -0. 14577 | 0. 032 | 0. 116 | 1. 58E-08 M2 | WIZ         |
| SAMD14. 2    | 1. 06E-12 | -0. 17163 | 0. 004 | 0. 069 | 1. 58E-08 M2 | SAMD14      |
| MCF2L. 4     | 1. 07E-12 | -0. 23012 | 0. 023 | 0. 101 | 1. 60E-08 M2 | MCF2L       |
| H2AFX. 4     | 1. 08E-12 | -0. 231   | 0. 112 | 0. 227 | 1. 62E-08 M2 | H2AFX       |
| ZNF292. 3    | 1. 08E-12 | -0. 14124 | 0. 142 | 0. 272 | 1. 62E-08 M2 | ZNF292      |
| CISD1. 5     | 1. 10E-12 | -0. 21449 | 0. 202 | 0. 346 | 1. 64E-08 M2 | CISD1       |
| BDNF-AS. 4   | 1. 12E-12 | -0. 16498 | 0. 004 | 0. 068 | 1. 68E-08 M2 | BDNF-AS     |
| EFEMP1. 4    | 1. 14E-12 | -0. 54557 | 0. 119 | 0. 228 | 1. 70E-08 M2 | EFEMP1      |
| NIPSNAP1. 1. | 1. 14E-12 | -0. 16234 | 0. 072 | 0. 174 | 1. 70E-08 M2 | NIPSNAP1    |
| NETO2. 3     | 1. 15E-12 | -0. 12989 | 0. 065 | 0. 168 | 1. 71E-08 M2 | NETO2       |
| NABP2. 4     | 1. 15E-12 | -0. 17169 | 0. 151 | 0. 285 | 1. 72E-08 M2 | NABP2       |
| NMT2. 4      | 1. 16E-12 | -0. 18004 | 0. 024 | 0. 103 | 1. 73E-08 M2 | NMT2        |
| GLRB. 3      | 1. 18E-12 | -0. 14546 | 0. 001 | 0. 063 | 1. 76E-08 M2 | GLRB        |
| UBE2T. 5     | 1. 20E-12 | -0. 23106 | 0. 043 | 0. 133 | 1. 79E-08 M2 | UBE2T       |
| RNF34. 3     | 1. 20E-12 | -0. 17808 | 0. 091 | 0. 202 | 1. 79E-08 M2 | RNF34       |
| XKR4. 3      | 1. 21E-12 | -0. 18022 | 0      | 0. 061 | 1. 80E-08 M2 | XKR4        |
| PDGFC. 2     | 1. 22E-12 | -0. 16663 | 0. 038 | 0. 125 | 1. 82E-08 M2 | PDGFC       |
| MON1A. 3     | 1. 22E-12 | -0. 15437 | 0. 017 | 0. 091 | 1. 83E-08 M2 | MON1A       |
| KAT6B. 3     | 1. 23E-12 | -0. 21375 | 0. 041 | 0. 128 | 1. 83E-08 M2 | KAT6B       |
| AC159540. 1. | 1. 23E-12 | -0. 17602 | 0. 015 | 0. 089 | 1. 84E-08 M2 | AC159540. 1 |
| CHPT1. 3     | 1. 24E-12 | -0. 24563 | 0. 185 | 0. 311 | 1. 85E-08 M2 | CHPT1       |
| RAB30. 3     | 1. 25E-12 | -0. 14961 | 0. 01  | 0. 08  | 1. 86E-08 M2 | RAB30       |
| ZNF446. 2    | 1. 26E-12 | -0. 15409 | 0. 01  | 0. 08  | 1. 88E-08 M2 | ZNF446      |
| GAL3ST3. 3   | 1. 29E-12 | -0. 13737 | 0. 001 | 0. 063 | 1. 92E-08 M2 | GAL3ST3     |
| DNASE1. 2    | 1. 29E-12 | -0. 19032 | 0. 014 | 0. 086 | 1. 93E-08 M2 | DNASE1      |
| MORN2. 5     | 1. 30E-12 | -0. 20745 | 0. 142 | 0. 271 | 1. 94E-08 M2 | MORN2       |

|             |           |           |        |        |              |                 |
|-------------|-----------|-----------|--------|--------|--------------|-----------------|
| NTRK3. 2    | 1. 30E-12 | -0. 18504 | 0. 005 | 0. 07  | 1. 94E-08 M2 | NTRK3           |
| BRSK1. 3    | 1. 30E-12 | -0. 17447 | 0. 015 | 0. 089 | 1. 95E-08 M2 | BRSK1           |
| UNG. 2      | 1. 33E-12 | -0. 23562 | 0. 041 | 0. 128 | 1. 98E-08 M2 | UNG             |
| PTTG1IP. 2  | 1. 33E-12 | 0. 288098 | 0. 506 | 0. 453 | 1. 98E-08 M2 | PTTG1IP         |
| TNKS1BP1. 1 | 1. 33E-12 | -0. 13368 | 0. 009 | 0. 078 | 1. 99E-08 M2 | TNKS1BP1        |
| LSM14A. 2   | 1. 39E-12 | -0. 20731 | 0. 239 | 0. 391 | 2. 08E-08 M2 | LSM14A          |
| NCDN. 2     | 1. 41E-12 | -0. 16168 | 0. 019 | 0. 095 | 2. 10E-08 M2 | NCDN            |
| ZNF322. 3   | 1. 42E-12 | -0. 13613 | 0. 047 | 0. 139 | 2. 13E-08 M2 | ZNF322          |
| DNM1. 2     | 1. 42E-12 | -0. 12703 | 0. 009 | 0. 077 | 2. 13E-08 M2 | DNM1            |
| GSG1L. 2    | 1. 43E-12 | -0. 20534 | 0. 001 | 0. 063 | 2. 14E-08 M2 | GSG1L           |
| CELF3. 5    | 1. 44E-12 | -0. 21611 | 0. 005 | 0. 07  | 2. 15E-08 M2 | CELF3           |
| CEP78. 4    | 1. 45E-12 | -0. 14882 | 0. 034 | 0. 119 | 2. 17E-08 M2 | CEP78           |
| GFOD2. 2    | 1. 46E-12 | -0. 13055 | 0. 046 | 0. 138 | 2. 19E-08 M2 | GFOD2           |
| SPSB4. 4    | 1. 46E-12 | -0. 13212 | 0. 001 | 0. 063 | 2. 19E-08 M2 | SPSB4           |
| CCNG2. 4    | 1. 47E-12 | -0. 25369 | 0. 086 | 0. 188 | 2. 19E-08 M2 | CCNG2           |
| MCHR1. 3    | 1. 48E-12 | -0. 12744 | 0. 001 | 0. 063 | 2. 21E-08 M2 | MCHR1           |
| GJC1. 3     | 1. 49E-12 | -0. 11665 | 0. 004 | 0. 068 | 2. 23E-08 M2 | GJC1            |
| ZNF253. 3   | 1. 50E-12 | -0. 17052 | 0. 015 | 0. 088 | 2. 24E-08 M2 | ZNF253          |
| HSPA13. 4   | 1. 50E-12 | -0. 167   | 0. 095 | 0. 207 | 2. 24E-08 M2 | HSPA13          |
| FAM181A. 3  | 1. 50E-12 | -0. 23522 | 0. 005 | 0. 07  | 2. 24E-08 M2 | FAM181A         |
| MYCBP2. 3   | 1. 51E-12 | -0. 22978 | 0. 185 | 0. 313 | 2. 26E-08 M2 | MYCBP2          |
| CHRN1. 4    | 1. 54E-12 | -0. 21414 | 0. 059 | 0. 155 | 2. 30E-08 M2 | CHRN1           |
| TMEM178B. 1 | 1. 54E-12 | -0. 15444 | 0      | 0. 06  | 2. 31E-08 M2 | TMEM178B        |
| LINC00526   | 1. 56E-12 | -0. 12547 | 0. 013 | 0. 084 | 2. 33E-08 M2 | LINC00526       |
| PMFBP1. 1   | 1. 59E-12 | 0. 214275 | 0. 055 | 0. 018 | 2. 37E-08 M2 | PMFBP1          |
| PHF20L1. 4  | 1. 59E-12 | -0. 18103 | 0. 179 | 0. 317 | 2. 38E-08 M2 | PHF20L1         |
| SH3RF1. 3   | 1. 60E-12 | -0. 14078 | 0. 029 | 0. 112 | 2. 39E-08 M2 | SH3RF1          |
| VPS45. 2    | 1. 61E-12 | -0. 20603 | 0. 073 | 0. 175 | 2. 40E-08 M2 | VPS45           |
| SHOX2. 3    | 1. 69E-12 | -0. 1246  | 0. 004 | 0. 068 | 2. 52E-08 M2 | SHOX2           |
| EIF3D. 4    | 1. 69E-12 | 0. 216093 | 0. 534 | 0. 472 | 2. 53E-08 M2 | EIF3D           |
| NINJ2. 5    | 1. 69E-12 | 0. 184712 | 0. 157 | 0. 082 | 2. 53E-08 M2 | NINJ2           |
| LETM1. 2    | 1. 71E-12 | -0. 17621 | 0. 084 | 0. 192 | 2. 56E-08 M2 | LETM1           |
| AGGF1. 2    | 1. 75E-12 | -0. 17461 | 0. 111 | 0. 227 | 2. 62E-08 M2 | AGGF1           |
| NECAP1. 2   | 1. 75E-12 | -0. 16728 | 0. 093 | 0. 206 | 2. 62E-08 M2 | NECAP1          |
| PRKRIP1. 4  | 1. 93E-12 | -0. 15565 | 0. 125 | 0. 249 | 2. 88E-08 M2 | PRKRIP1         |
| SPATA6. 2   | 1. 95E-12 | -0. 15898 | 0. 063 | 0. 162 | 2. 92E-08 M2 | SPATA6          |
| FTSJ2. 3    | 1. 96E-12 | -0. 20573 | 0. 124 | 0. 245 | 2. 92E-08 M2 | FTSJ2           |
| CBFA2T2. 4  | 1. 96E-12 | -0. 16609 | 0. 045 | 0. 134 | 2. 93E-08 M2 | CBFA2T2         |
| CBR3. 2     | 1. 98E-12 | -0. 16176 | 0. 029 | 0. 111 | 2. 95E-08 M2 | CBR3            |
| GPR161. 5   | 1. 98E-12 | -0. 1139  | 0. 015 | 0. 088 | 2. 95E-08 M2 | GPR161          |
| RP11-263K   | 1. 98E-12 | -0. 16128 | 0. 005 | 0. 07  | 2. 96E-08 M2 | RP11-263K19. 4  |
| TARDBP. 1   | 2. 01E-12 | -0. 18538 | 0. 17  | 0. 303 | 3. 00E-08 M2 | TARDBP          |
| OSBPL1A. 4  | 2. 01E-12 | -0. 20902 | 0. 091 | 0. 198 | 3. 01E-08 M2 | OSBPL1A         |
| APBB3       | 2. 02E-12 | 0. 339432 | 0. 147 | 0. 08  | 3. 02E-08 M2 | APBB3           |
| ZDHHC15. 3  | 2. 06E-12 | -0. 13672 | 0. 003 | 0. 065 | 3. 08E-08 M2 | ZDHHC15         |
| SLC9A3R2. 2 | 2. 06E-12 | -0. 13207 | 0. 033 | 0. 117 | 3. 08E-08 M2 | SLC9A3R2        |
| RP11-398K   | 2. 07E-12 | -0. 17815 | 0. 011 | 0. 08  | 3. 09E-08 M2 | RP11-398K22. 12 |
| EHD2. 3     | 2. 09E-12 | -0. 12165 | 0. 014 | 0. 086 | 3. 12E-08 M2 | EHD2            |
| EFHD1. 2    | 2. 10E-12 | -0. 29485 | 0. 001 | 0. 062 | 3. 14E-08 M2 | EFHD1           |
| DENND5B. 4  | 2. 12E-12 | -0. 13677 | 0. 023 | 0. 101 | 3. 17E-08 M2 | DENND5B         |
| SSRP1. 3    | 2. 12E-12 | -0. 19973 | 0. 22  | 0. 364 | 3. 17E-08 M2 | SSRP1           |

|            |          |          |       |       |          |    |            |
|------------|----------|----------|-------|-------|----------|----|------------|
| ABCA3.3    | 2.13E-12 | -0.15601 | 0.011 | 0.081 | 3.18E-08 | M2 | ABCA3      |
| PBK.5      | 2.13E-12 | -0.28499 | 0.01  | 0.078 | 3.18E-08 | M2 | PBK        |
| NXPH4.3    | 2.20E-12 | -0.20147 | 0.004 | 0.067 | 3.29E-08 | M2 | NXPH4      |
| CETN2.5    | 2.20E-12 | -0.27506 | 0.195 | 0.331 | 3.29E-08 | M2 | CETN2      |
| TMEM57.4   | 2.21E-12 | -0.20066 | 0.079 | 0.181 | 3.31E-08 | M2 | TMEM57     |
| PRPF6.3    | 2.22E-12 | -0.13396 | 0.213 | 0.363 | 3.32E-08 | M2 | PRPF6      |
| CUL3.3     | 2.25E-12 | -0.18646 | 0.097 | 0.207 | 3.36E-08 | M2 | CUL3       |
| TCTN1.4    | 2.25E-12 | -0.14136 | 0.103 | 0.22  | 3.37E-08 | M2 | TCTN1      |
| KBTBD7.3   | 2.26E-12 | -0.18737 | 0.018 | 0.092 | 3.37E-08 | M2 | KBTBD7     |
| DLG5.2     | 2.31E-12 | -0.1495  | 0.011 | 0.081 | 3.46E-08 | M2 | DLG5       |
| GNG3.3     | 2.34E-12 | -0.27168 | 0.01  | 0.078 | 3.49E-08 | M2 | GNG3       |
| SLC4A8     | 2.37E-12 | -0.13843 | 0.01  | 0.079 | 3.54E-08 | M2 | SLC4A8     |
| DDX56.3    | 2.39E-12 | -0.19614 | 0.139 | 0.265 | 3.57E-08 | M2 | DDX56      |
| GAR1.5     | 2.39E-12 | -0.17962 | 0.088 | 0.198 | 3.58E-08 | M2 | GAR1       |
| PRPF19.1   | 2.42E-12 | -0.20159 | 0.138 | 0.262 | 3.61E-08 | M2 | PRPF19     |
| AC093673.2 | 2.43E-12 | -0.17067 | 0.079 | 0.185 | 3.63E-08 | M2 | AC093673.5 |
| ANLN.4     | 2.44E-12 | -0.27482 | 0.004 | 0.067 | 3.65E-08 | M2 | ANLN       |
| ZC3HC1.3   | 2.45E-12 | -0.17119 | 0.042 | 0.13  | 3.66E-08 | M2 | ZC3HC1     |
| DDX1.3     | 2.46E-12 | -0.22564 | 0.225 | 0.37  | 3.67E-08 | M2 | DDX1       |
| C22orf39.2 | 2.46E-12 | -0.16941 | 0.14  | 0.268 | 3.68E-08 | M2 | C22orf39   |
| SEC61A2.1  | 2.48E-12 | -0.17038 | 0.014 | 0.085 | 3.71E-08 | M2 | SEC61A2    |
| EPRS.3     | 2.49E-12 | -0.19612 | 0.17  | 0.303 | 3.73E-08 | M2 | EPRS       |
| ARHGEF2.4  | 2.53E-12 | -0.20724 | 0.167 | 0.297 | 3.78E-08 | M2 | ARHGEF2    |
| PCDH19.3   | 2.53E-12 | -0.1329  | 0.003 | 0.064 | 3.79E-08 | M2 | PCDH19     |
| TCEAL4.3   | 2.54E-12 | -0.23014 | 0.42  | 0.582 | 3.79E-08 | M2 | TCEAL4     |
| TBC1D20.3  | 2.55E-12 | -0.14083 | 0.083 | 0.19  | 3.81E-08 | M2 | TBC1D20    |
| ZNF300.4   | 2.56E-12 | -0.17436 | 0.008 | 0.074 | 3.82E-08 | M2 | ZNF300     |
| KPNA2.2    | 2.60E-12 | -0.25484 | 0.227 | 0.364 | 3.88E-08 | M2 | KPNA2      |
| STRN3.1    | 2.60E-12 | -0.17172 | 0.046 | 0.136 | 3.89E-08 | M2 | STRN3      |
| GTF2H2C.2  | 2.61E-12 | -0.17314 | 0.018 | 0.091 | 3.90E-08 | M2 | GTF2H2C    |
| C5orf45.2  | 2.62E-12 | -0.15764 | 0.072 | 0.175 | 3.92E-08 | M2 | C5orf45    |
| SPTLC2.5   | 2.62E-12 | 0.254227 | 0.303 | 0.204 | 3.92E-08 | M2 | SPTLC2     |
| ZNF584.3   | 2.62E-12 | -0.136   | 0.018 | 0.091 | 3.92E-08 | M2 | ZNF584     |
| PAAF1.3    | 2.64E-12 | -0.23201 | 0.097 | 0.206 | 3.95E-08 | M2 | PAAF1      |
| IGSF11.3   | 2.67E-12 | -0.15037 | 0.006 | 0.072 | 3.99E-08 | M2 | IGSF11     |
| HTRA2.1    | 2.68E-12 | -0.18628 | 0.115 | 0.232 | 4.00E-08 | M2 | HTRA2      |
| FAM172A.3  | 2.74E-12 | -0.12071 | 0.092 | 0.204 | 4.09E-08 | M2 | FAM172A    |
| SMG6.1     | 2.79E-12 | -0.14204 | 0.041 | 0.129 | 4.17E-08 | M2 | SMG6       |
| SF1.2      | 2.79E-12 | -0.20038 | 0.356 | 0.518 | 4.17E-08 | M2 | SF1        |
| FLAD1.2    | 2.84E-12 | -0.20962 | 0.123 | 0.24  | 4.25E-08 | M2 | FLAD1      |
| AASDH.3    | 2.85E-12 | -0.18843 | 0.07  | 0.17  | 4.25E-08 | M2 | AASDH      |
| MAPKAPK5.2 | 2.86E-12 | -0.14522 | 0.084 | 0.19  | 4.28E-08 | M2 | MAPKAPK5   |
| TMEM68.3   | 2.87E-12 | -0.17644 | 0.073 | 0.174 | 4.30E-08 | M2 | TMEM68     |
| PSENN.3    | 2.87E-12 | 0.181057 | 0.552 | 0.488 | 4.30E-08 | M2 | PSENN      |
| DAXX.1     | 2.91E-12 | -0.17176 | 0.1   | 0.211 | 4.34E-08 | M2 | DAXX       |
| ANKRD35.2  | 2.94E-12 | -0.12337 | 0.05  | 0.143 | 4.39E-08 | M2 | ANKRD35    |
| TMEM11.2   | 2.94E-12 | -0.16873 | 0.185 | 0.328 | 4.40E-08 | M2 | TMEM11     |
| PCDH1.3    | 3.03E-12 | -0.14383 | 0.003 | 0.064 | 4.52E-08 | M2 | PCDH1      |
| KCTD1.3    | 3.04E-12 | -0.14646 | 0.005 | 0.069 | 4.55E-08 | M2 | KCTD1      |
| NAIP.5     | 3.09E-12 | 0.232269 | 0.181 | 0.103 | 4.61E-08 | M2 | NAIP       |
| OPTN.3     | 3.09E-12 | -0.20638 | 0.051 | 0.141 | 4.61E-08 | M2 | OPTN       |



|            |           |           |        |        |           |    |          |
|------------|-----------|-----------|--------|--------|-----------|----|----------|
| SHC4. 2    | 3. 10E-12 | -0. 14593 | 0. 001 | 0. 061 | 4. 63E-08 | M2 | SHC4     |
| RALGAPA2.  | 3. 10E-12 | -0. 11437 | 0. 033 | 0. 116 | 4. 63E-08 | M2 | RALGAPA2 |
| SMC4. 3    | 3. 16E-12 | -0. 22817 | 0. 109 | 0. 219 | 4. 72E-08 | M2 | SMC4     |
| NUSAP1. 4  | 3. 17E-12 | -0. 32775 | 0. 031 | 0. 11  | 4. 73E-08 | M2 | NUSAP1   |
| WRNIP1. 2  | 3. 17E-12 | -0. 13083 | 0. 028 | 0. 108 | 4. 74E-08 | M2 | WRNIP1   |
| EYA4. 3    | 3. 18E-12 | -0. 10677 | 0. 001 | 0. 061 | 4. 76E-08 | M2 | EYA4     |
| SNAP47. 3  | 3. 19E-12 | -0. 15128 | 0. 098 | 0. 21  | 4. 77E-08 | M2 | SNAP47   |
| MAPK11. 2  | 3. 21E-12 | -0. 11015 | 0      | 0. 059 | 4. 80E-08 | M2 | MAPK11   |
| RTN1. 3    | 3. 21E-12 | -0. 3035  | 0. 057 | 0. 149 | 4. 80E-08 | M2 | RTN1     |
| PKN2. 3    | 3. 22E-12 | -0. 13863 | 0. 102 | 0. 218 | 4. 81E-08 | M2 | PKN2     |
| MIEF1. 1   | 3. 26E-12 | -0. 14975 | 0. 057 | 0. 152 | 4. 87E-08 | M2 | MIEF1    |
| SIRT7. 3   | 3. 27E-12 | -0. 13372 | 0. 1   | 0. 214 | 4. 88E-08 | M2 | SIRT7    |
| ST7L. 2    | 3. 28E-12 | -0. 12249 | 0. 034 | 0. 119 | 4. 91E-08 | M2 | ST7L     |
| MAP4. 3    | 3. 29E-12 | -0. 17625 | 0. 201 | 0. 344 | 4. 91E-08 | M2 | MAP4     |
| EID2. 4    | 3. 32E-12 | -0. 13494 | 0. 033 | 0. 116 | 4. 96E-08 | M2 | EID2     |
| DXO        | 3. 36E-12 | -0. 16136 | 0. 041 | 0. 127 | 5. 03E-08 | M2 | DXO      |
| RNF13. 4   | 3. 37E-12 | 0. 185537 | 0. 539 | 0. 476 | 5. 04E-08 | M2 | RNF13    |
| CA12. 5    | 3. 41E-12 | -0. 15044 | 0. 05  | 0. 142 | 5. 10E-08 | M2 | CA12     |
| CAPZA1. 5  | 3. 42E-12 | 0. 251111 | 0. 448 | 0. 388 | 5. 10E-08 | M2 | CAPZA1   |
| CKAP2. 5   | 3. 46E-12 | -0. 19436 | 0. 075 | 0. 176 | 5. 17E-08 | M2 | CKAP2    |
| UBE2C. 5   | 3. 54E-12 | -0. 37419 | 0. 04  | 0. 122 | 5. 29E-08 | M2 | UBE2C    |
| SFXN5. 4   | 3. 55E-12 | -0. 11261 | 0. 086 | 0. 196 | 5. 31E-08 | M2 | SFXN5    |
| RNASEH2C   | 3. 58E-12 | 0. 311261 | 0. 437 | 0. 369 | 5. 35E-08 | M2 | RNASEH2C |
| CROT. 4    | 3. 60E-12 | -0. 23176 | 0. 049 | 0. 138 | 5. 37E-08 | M2 | CROT     |
| UTP14C. 1  | 3. 61E-12 | -0. 12503 | 0. 015 | 0. 087 | 5. 40E-08 | M2 | UTP14C   |
| CNKSR2. 3  | 3. 68E-12 | -0. 12522 | 0. 004 | 0. 066 | 5. 51E-08 | M2 | CNKSR2   |
| TBC1D22A.  | 3. 69E-12 | 0. 278751 | 0. 194 | 0. 118 | 5. 51E-08 | M2 | TBC1D22A |
| RDH10. 4   | 3. 73E-12 | -0. 16806 | 0. 018 | 0. 091 | 5. 57E-08 | M2 | RDH10    |
| UBE2A. 1   | 3. 76E-12 | 0. 272247 | 0. 476 | 0. 418 | 5. 61E-08 | M2 | UBE2A    |
| PCDHB14. 2 | 3. 78E-12 | -0. 16974 | 0      | 0. 058 | 5. 64E-08 | M2 | PCDHB14  |
| BID. 5     | 3. 81E-12 | 0. 258397 | 0. 428 | 0. 352 | 5. 69E-08 | M2 | BID      |
| ERF. 3     | 3. 87E-12 | -0. 15957 | 0. 079 | 0. 184 | 5. 78E-08 | M2 | ERF      |
| FAIM. 3    | 3. 87E-12 | -0. 19726 | 0. 059 | 0. 153 | 5. 79E-08 | M2 | FAIM     |
| NAA25      | 3. 88E-12 | -0. 15471 | 0. 056 | 0. 15  | 5. 80E-08 | M2 | NAA25    |
| HMBS. 2    | 3. 90E-12 | -0. 11029 | 0. 093 | 0. 204 | 5. 83E-08 | M2 | HMBS     |
| ZNF627. 2  | 3. 94E-12 | -0. 16062 | 0. 013 | 0. 082 | 5. 88E-08 | M2 | ZNF627   |
| PTPRK. 2   | 3. 97E-12 | -0. 2284  | 0. 001 | 0. 061 | 5. 93E-08 | M2 | PTPRK    |
| COQ10A. 2  | 4. 00E-12 | -0. 15461 | 0. 027 | 0. 106 | 5. 97E-08 | M2 | COQ10A   |
| POLR3H. 3  | 4. 01E-12 | -0. 16047 | 0. 107 | 0. 222 | 5. 99E-08 | M2 | POLR3H   |
| IZUM04. 3  | 4. 03E-12 | -0. 14726 | 0. 006 | 0. 071 | 6. 02E-08 | M2 | IZUM04   |
| ITGB1. 4   | 4. 05E-12 | 0. 209225 | 0. 464 | 0. 38  | 6. 06E-08 | M2 | ITGB1    |
| ABCF2. 3   | 4. 06E-12 | -0. 1794  | 0. 109 | 0. 223 | 6. 07E-08 | M2 | ABCF2    |
| ING5. 2    | 4. 06E-12 | -0. 14153 | 0. 037 | 0. 122 | 6. 07E-08 | M2 | ING5     |
| KLHL35. 4  | 4. 08E-12 | -0. 31018 | 0. 024 | 0. 099 | 6. 09E-08 | M2 | KLHL35   |
| CCDC137. 3 | 4. 12E-12 | -0. 1633  | 0. 098 | 0. 209 | 6. 16E-08 | M2 | CCDC137  |
| GRB10. 4   | 4. 24E-12 | -0. 15701 | 0. 01  | 0. 077 | 6. 34E-08 | M2 | GRB10    |
| CCP110. 4  | 4. 24E-12 | -0. 215   | 0. 043 | 0. 13  | 6. 34E-08 | M2 | CCP110   |
| PSME2. 3   | 4. 27E-12 | 0. 137517 | 0. 613 | 0. 553 | 6. 38E-08 | M2 | PSME2    |
| INPP1. 2   | 4. 27E-12 | -0. 19849 | 0. 063 | 0. 158 | 6. 39E-08 | M2 | INPP1    |
| USP33. 1   | 4. 29E-12 | -0. 1797  | 0. 083 | 0. 186 | 6. 42E-08 | M2 | USP33    |
| ZNF37A. 5  | 4. 30E-12 | -0. 11974 | 0. 052 | 0. 145 | 6. 43E-08 | M2 | ZNF37A   |

|            |          |          |       |       |             |            |
|------------|----------|----------|-------|-------|-------------|------------|
| CEP19.3    | 4.34E-12 | -0.18271 | 0.013 | 0.081 | 6.49E-08 M2 | CEP19      |
| GNL3.3     | 4.38E-12 | -0.19194 | 0.208 | 0.355 | 6.55E-08 M2 | GNL3       |
| ANKRD17.4  | 4.47E-12 | -0.1665  | 0.112 | 0.225 | 6.67E-08 M2 | ANKRD17    |
| DOHH.3     | 4.48E-12 | -0.15701 | 0.093 | 0.201 | 6.70E-08 M2 | DOHH       |
| PHLDB1.5   | 4.51E-12 | -0.19008 | 0.055 | 0.148 | 6.74E-08 M2 | PHLDB1     |
| MAD2L1.4   | 4.54E-12 | -0.2546  | 0.047 | 0.134 | 6.78E-08 M2 | MAD2L1     |
| TCHP.2     | 4.57E-12 | -0.13374 | 0.034 | 0.117 | 6.83E-08 M2 | TCHP       |
| MCCC1.1    | 4.59E-12 | -0.18517 | 0.06  | 0.153 | 6.86E-08 M2 | MCCC1      |
| LRP4.2     | 4.59E-12 | -0.17572 | 0.003 | 0.063 | 6.86E-08 M2 | LRP4       |
| SLC2A9.3   | 4.64E-12 | 0.135069 | 0.063 | 0.022 | 6.93E-08 M2 | SLC2A9     |
| CCDC109B.4 | 4.70E-12 | 0.278803 | 0.427 | 0.343 | 7.02E-08 M2 | CCDC109B   |
| AKIRIN1.3  | 4.70E-12 | -0.20225 | 0.234 | 0.378 | 7.03E-08 M2 | AKIRIN1    |
| MARC1.3    | 4.79E-12 | -0.12775 | 0.003 | 0.063 | 7.16E-08 M2 | 1-Mar      |
| FAT3.3     | 4.80E-12 | -0.13005 | 0.001 | 0.06  | 7.17E-08 M2 | FAT3       |
| CCNDBP1.5  | 4.82E-12 | 0.296052 | 0.285 | 0.199 | 7.21E-08 M2 | CCNDBP1    |
| ZNF770.2   | 4.88E-12 | -0.15781 | 0.047 | 0.136 | 7.29E-08 M2 | ZNF770     |
| USP42.3    | 4.92E-12 | -0.16922 | 0.042 | 0.128 | 7.35E-08 M2 | USP42      |
| LRRC49.1   | 4.95E-12 | -0.15815 | 0.003 | 0.063 | 7.40E-08 M2 | LRRC49     |
| FBXL15.5   | 4.97E-12 | 0.303049 | 0.275 | 0.19  | 7.42E-08 M2 | FBXL15     |
| FRYL.5     | 4.99E-12 | -0.13442 | 0.087 | 0.195 | 7.46E-08 M2 | FRYL       |
| RNASEH2A.5 | 5.02E-12 | -0.17999 | 0.106 | 0.218 | 7.50E-08 M2 | RNASEH2A   |
| CARKD.4    | 5.06E-12 | -0.18402 | 0.047 | 0.135 | 7.56E-08 M2 | CARKD      |
| AC093323.5 | 5.15E-12 | -0.12473 | 0.024 | 0.101 | 7.69E-08 M2 | AC093323.3 |
| BRD7.4     | 5.16E-12 | -0.14073 | 0.139 | 0.262 | 7.72E-08 M2 | BRD7       |
| GBP2.4     | 5.20E-12 | 0.211006 | 0.298 | 0.202 | 7.77E-08 M2 | GBP2       |
| RRP36.4    | 5.27E-12 | -0.14987 | 0.059 | 0.152 | 7.87E-08 M2 | RRP36      |
| HHEX.5     | 5.29E-12 | 0.173316 | 0.114 | 0.053 | 7.90E-08 M2 | HHEX       |
| ZNF576.3   | 5.32E-12 | -0.17471 | 0.052 | 0.143 | 7.95E-08 M2 | ZNF576     |
| TMEM177.4  | 5.32E-12 | -0.16503 | 0.014 | 0.083 | 7.95E-08 M2 | TMEM177    |
| VAPA.3     | 5.35E-12 | 0.149106 | 0.658 | 0.631 | 8.00E-08 M2 | VAPA       |
| C19orf60.5 | 5.40E-12 | 0.227128 | 0.547 | 0.499 | 8.07E-08 M2 | C19orf60   |
| HOXC10.3   | 5.44E-12 | -0.18982 | 0     | 0.057 | 8.13E-08 M2 | HOXC10     |
| TSKU.3     | 5.48E-12 | -0.12699 | 0.018 | 0.09  | 8.18E-08 M2 | TSKU       |
| B4GALT2.2  | 5.51E-12 | -0.12873 | 0.013 | 0.081 | 8.24E-08 M2 | B4GALT2    |
| VKORC1L1.5 | 5.65E-12 | -0.16383 | 0.049 | 0.137 | 8.45E-08 M2 | VKORC1L1   |
| NUP35.2    | 5.69E-12 | -0.21787 | 0.036 | 0.117 | 8.51E-08 M2 | NUP35      |
| PXN-AS1.2  | 5.72E-12 | -0.12549 | 0.015 | 0.086 | 8.55E-08 M2 | PXN-AS1    |
| CEP89.3    | 5.76E-12 | -0.15881 | 0.047 | 0.136 | 8.61E-08 M2 | CEP89      |
| ZNF260.2   | 5.79E-12 | -0.13898 | 0.027 | 0.104 | 8.66E-08 M2 | ZNF260     |
| DCAF8.1    | 5.83E-12 | -0.17038 | 0.105 | 0.215 | 8.71E-08 M2 | DCAF8      |
| ORAI2.2    | 5.84E-12 | -0.1976  | 0.158 | 0.285 | 8.72E-08 M2 | ORAI2      |
| CADM1.3    | 5.86E-12 | -0.22064 | 0.199 | 0.334 | 8.76E-08 M2 | CADM1      |
| STOML1.3   | 5.94E-12 | -0.2126  | 0.028 | 0.106 | 8.88E-08 M2 | STOML1     |
| PAICS.4    | 5.97E-12 | -0.20109 | 0.183 | 0.317 | 8.91E-08 M2 | PAICS      |
| SEN2.3     | 5.97E-12 | -0.13888 | 0.049 | 0.139 | 8.92E-08 M2 | SEN2       |
| DGCR2.2    | 5.98E-12 | -0.14442 | 0.063 | 0.159 | 8.94E-08 M2 | DGCR2      |
| ZCCHC3.4   | 6.03E-12 | -0.11109 | 0.031 | 0.111 | 9.01E-08 M2 | ZCCHC3     |
| YJEFN3.3   | 6.03E-12 | -0.14364 | 0.005 | 0.067 | 9.01E-08 M2 | YJEFN3     |
| HOXA3.4    | 6.03E-12 | -0.19142 | 0.001 | 0.06  | 9.01E-08 M2 | HOXA3      |
| FAM110B.3  | 6.06E-12 | -0.18332 | 0.088 | 0.194 | 9.06E-08 M2 | FAM110B    |
| POGZ.3     | 6.09E-12 | -0.18791 | 0.106 | 0.218 | 9.11E-08 M2 | POGZ       |

|             |           |           |        |        |              |                 |
|-------------|-----------|-----------|--------|--------|--------------|-----------------|
| RP11-698N   | 6. 14E-12 | -0. 16982 | 0. 003 | 0. 062 | 9. 17E-08 M2 | RP11-698N11. 2  |
| SUCLA2. 4   | 6. 16E-12 | -0. 16808 | 0. 163 | 0. 296 | 9. 21E-08 M2 | SUCLA2          |
| FAM200A. 2  | 6. 28E-12 | -0. 19041 | 0. 026 | 0. 101 | 9. 39E-08 M2 | FAM200A         |
| MLH3. 2     | 6. 34E-12 | -0. 20883 | 0. 032 | 0. 111 | 9. 48E-08 M2 | MLH3            |
| CLSTN1. 3   | 6. 41E-12 | -0. 15388 | 0. 161 | 0. 291 | 9. 58E-08 M2 | CLSTN1          |
| PAK1IP1. 3  | 6. 43E-12 | -0. 20576 | 0. 111 | 0. 223 | 9. 61E-08 M2 | PAK1IP1         |
| CCDC151. 3  | 6. 44E-12 | 0. 242117 | 0. 119 | 0. 059 | 9. 63E-08 M2 | CCDC151         |
| AC091729. 6 | 6. 50E-12 | -0. 13989 | 0. 015 | 0. 085 | 9. 71E-08 M2 | AC091729. 9     |
| TUBGCP4. 3  | 6. 53E-12 | -0. 17473 | 0. 043 | 0. 129 | 9. 76E-08 M2 | TUBGCP4         |
| ZNF121. 1   | 6. 54E-12 | -0. 16498 | 0. 034 | 0. 116 | 9. 78E-08 M2 | ZNF121          |
| CENPT. 3    | 6. 58E-12 | -0. 15786 | 0. 091 | 0. 197 | 9. 84E-08 M2 | CENPT           |
| RFX3. 1     | 6. 65E-12 | -0. 14096 | 0. 011 | 0. 079 | 9. 94E-08 M2 | RFX3            |
| SLC25A38. 6 | 6. 67E-12 | -0. 17752 | 0. 059 | 0. 152 | 9. 97E-08 M2 | SLC25A38        |
| PTPRN. 4    | 6. 70E-12 | -0. 21761 | 0. 011 | 0. 078 | 1. 00E-07 M2 | PTPRN           |
| GRAMD4. 3   | 6. 74E-12 | 0. 258437 | 0. 115 | 0. 057 | 1. 01E-07 M2 | GRAMD4          |
| BAMBI. 3    | 6. 80E-12 | -0. 1547  | 0. 009 | 0. 074 | 1. 02E-07 M2 | BAMBI           |
| CEP164. 1   | 6. 98E-12 | -0. 15384 | 0. 064 | 0. 159 | 1. 04E-07 M2 | CEP164          |
| GPR155. 4   | 7. 25E-12 | -0. 1896  | 0. 089 | 0. 194 | 1. 08E-07 M2 | GPR155          |
| CCDC107. 3  | 7. 28E-12 | 0. 304375 | 0. 448 | 0. 386 | 1. 09E-07 M2 | CCDC107         |
| PPP1R9A. 4  | 7. 56E-12 | -0. 20308 | 0. 01  | 0. 076 | 1. 13E-07 M2 | PPP1R9A         |
| GPX8. 4     | 7. 57E-12 | -0. 12972 | 0. 005 | 0. 067 | 1. 13E-07 M2 | GPX8            |
| DBNL. 5     | 7. 62E-12 | 0. 237016 | 0. 484 | 0. 421 | 1. 14E-07 M2 | DBNL            |
| CDC23. 3    | 7. 63E-12 | -0. 19148 | 0. 045 | 0. 131 | 1. 14E-07 M2 | CDC23           |
| GNG7. 4     | 7. 64E-12 | -0. 25707 | 0. 181 | 0. 307 | 1. 14E-07 M2 | GNG7            |
| HOMER2. 1   | 7. 65E-12 | -0. 12845 | 0. 001 | 0. 059 | 1. 14E-07 M2 | HOMER2          |
| PPP1CC. 3   | 7. 72E-12 | -0. 19567 | 0. 303 | 0. 455 | 1. 15E-07 M2 | PPP1CC          |
| FBX05. 2    | 7. 76E-12 | -0. 16082 | 0. 026 | 0. 101 | 1. 16E-07 M2 | FBX05           |
| GPR75-ASE   | 7. 79E-12 | -0. 1665  | 0. 019 | 0. 091 | 1. 16E-07 M2 | GPR75-ASB3      |
| ARAP3. 2    | 7. 86E-12 | -0. 14609 | 0. 006 | 0. 069 | 1. 17E-07 M2 | ARAP3           |
| IFNAR1. 3   | 7. 89E-12 | 0. 341027 | 0. 356 | 0. 285 | 1. 18E-07 M2 | IFNAR1          |
| VPS37D. 3   | 8. 05E-12 | -0. 1553  | 0. 004 | 0. 064 | 1. 20E-07 M2 | VPS37D          |
| NANOS3. 3   | 8. 08E-12 | -0. 13033 | 0. 005 | 0. 067 | 1. 21E-07 M2 | NANOS3          |
| RBM5. 2     | 8. 20E-12 | -0. 17896 | 0. 158 | 0. 287 | 1. 23E-07 M2 | RBM5            |
| RP11-1275   | 8. 28E-12 | -0. 17823 | 0. 004 | 0. 064 | 1. 24E-07 M2 | RP11-1275H24. 1 |
| CNRIP1. 3   | 8. 29E-12 | -0. 22438 | 0. 105 | 0. 211 | 1. 24E-07 M2 | CNRIP1          |
| PDCD2L. 3   | 8. 32E-12 | -0. 15114 | 0. 031 | 0. 11  | 1. 24E-07 M2 | PDCD2L          |
| TBC1D24. 3  | 8. 40E-12 | -0. 14046 | 0. 01  | 0. 076 | 1. 26E-07 M2 | TBC1D24         |
| PDAP1. 3    | 8. 40E-12 | -0. 22065 | 0. 39  | 0. 546 | 1. 26E-07 M2 | PDAP1           |
| FLRT3. 4    | 8. 72E-12 | -0. 14427 | 0. 003 | 0. 062 | 1. 30E-07 M2 | FLRT3           |
| AOAH. 5     | 8. 84E-12 | 0. 147558 | 0. 206 | 0. 117 | 1. 32E-07 M2 | AOAH            |
| DZIP3. 3    | 8. 91E-12 | -0. 15789 | 0. 049 | 0. 137 | 1. 33E-07 M2 | DZIP3           |
| ZNF398. 4   | 8. 93E-12 | -0. 15209 | 0. 003 | 0. 061 | 1. 34E-07 M2 | ZNF398          |
| BEST1. 3    | 9. 07E-12 | 0. 245041 | 0. 363 | 0. 269 | 1. 35E-07 M2 | BEST1           |
| EBF4. 2     | 9. 07E-12 | -0. 11406 | 0. 001 | 0. 059 | 1. 36E-07 M2 | EBF4            |
| ZNF16. 2    | 9. 09E-12 | -0. 16583 | 0. 008 | 0. 071 | 1. 36E-07 M2 | ZNF16           |
| SLC35A5. 1  | 9. 14E-12 | -0. 16656 | 0. 089 | 0. 193 | 1. 37E-07 M2 | SLC35A5         |
| RP11-325F   | 9. 20E-12 | 0. 103563 | 0. 017 | 0. 002 | 1. 37E-07 M2 | RP11-325F22. 2  |
| EVA1C. 4    | 9. 26E-12 | -0. 12596 | 0. 01  | 0. 076 | 1. 38E-07 M2 | EVA1C           |
| RXR         | 9. 28E-12 | -0. 15871 | 0. 074 | 0. 173 | 1. 39E-07 M2 | RXR             |
| CEP57L1. 4  | 9. 37E-12 | -0. 12754 | 0. 034 | 0. 116 | 1. 40E-07 M2 | CEP57L1         |
| ATP13A3. 2  | 9. 38E-12 | 0. 304184 | 0. 221 | 0. 145 | 1. 40E-07 M2 | ATP13A3         |

|            |          |          |       |       |             |          |
|------------|----------|----------|-------|-------|-------------|----------|
| CCER2.4    | 9.38E-12 | -0.2126  | 0.001 | 0.059 | 1.40E-07 M2 | CCER2    |
| PUS3.3     | 9.40E-12 | -0.13806 | 0.037 | 0.119 | 1.40E-07 M2 | PUS3     |
| EIF3E.4    | 9.60E-12 | 0.110012 | 0.677 | 0.645 | 1.43E-07 M2 | EIF3E    |
| RGS3.3     | 9.79E-12 | -0.13595 | 0.032 | 0.112 | 1.46E-07 M2 | RGS3     |
| ARID1A.3   | 9.80E-12 | -0.1564  | 0.13  | 0.25  | 1.47E-07 M2 | ARID1A   |
| COPRS.4    | 9.91E-12 | -0.1876  | 0.209 | 0.343 | 1.48E-07 M2 | COPRS    |
| MFAP3L.3   | 9.97E-12 | -0.13824 | 0.001 | 0.059 | 1.49E-07 M2 | MFAP3L   |
| NCK1.1     | 1.00E-11 | -0.2425  | 0.135 | 0.252 | 1.50E-07 M2 | NCK1     |
| IL6.1      | 1.01E-11 | 0.203494 | 0.086 | 0.037 | 1.51E-07 M2 | IL6      |
| GMNN.4     | 1.01E-11 | -0.19697 | 0.082 | 0.183 | 1.51E-07 M2 | GMNN     |
| IL13RA2.4  | 1.02E-11 | -0.26615 | 0.001 | 0.059 | 1.52E-07 M2 | IL13RA2  |
| FAM222B.4  | 1.02E-11 | -0.11944 | 0.037 | 0.119 | 1.53E-07 M2 | FAM222B  |
| MTHFD2.4   | 1.03E-11 | 0.246355 | 0.379 | 0.282 | 1.54E-07 M2 | MTHFD2   |
| DSCC1.2    | 1.03E-11 | -0.14182 | 0.004 | 0.064 | 1.54E-07 M2 | DSCC1    |
| GMIP.5     | 1.03E-11 | 0.219268 | 0.134 | 0.07  | 1.54E-07 M2 | GMIP     |
| LONRF1.2   | 1.03E-11 | -0.12807 | 0.027 | 0.103 | 1.54E-07 M2 | LONRF1   |
| LRRC24.3   | 1.04E-11 | -0.15106 | 0.009 | 0.073 | 1.55E-07 M2 | LRRC24   |
| HLA-DQB2.1 | 1.05E-11 | 0.209909 | 0.169 | 0.092 | 1.57E-07 M2 | HLA-DQB2 |
| KATNAL1.2  | 1.06E-11 | -0.11944 | 0.017 | 0.086 | 1.58E-07 M2 | KATNAL1  |
| MSH6.3     | 1.06E-11 | -0.15411 | 0.046 | 0.132 | 1.58E-07 M2 | MSH6     |
| SSBP3.4    | 1.06E-11 | -0.15947 | 0.047 | 0.134 | 1.58E-07 M2 | SSBP3    |
| BRMS1L.2   | 1.06E-11 | -0.17575 | 0.027 | 0.102 | 1.59E-07 M2 | BRMS1L   |
| SERPINF1.1 | 1.07E-11 | 0.209514 | 0.324 | 0.217 | 1.60E-07 M2 | SERPINF1 |
| ABCD1.3    | 1.07E-11 | 0.185842 | 0.095 | 0.043 | 1.60E-07 M2 | ABCD1    |
| C19orf25.1 | 1.08E-11 | -0.11565 | 0.172 | 0.308 | 1.61E-07 M2 | C19orf25 |
| CHDH       | 1.08E-11 | -0.13166 | 0.008 | 0.071 | 1.61E-07 M2 | CHDH     |
| SRRT.2     | 1.09E-11 | -0.1586  | 0.112 | 0.224 | 1.63E-07 M2 | SRRT     |
| PFKP.1     | 1.09E-11 | 0.342388 | 0.22  | 0.146 | 1.64E-07 M2 | PFKP     |
| SQSTM1.3   | 1.10E-11 | 0.200462 | 0.576 | 0.52  | 1.64E-07 M2 | SQSTM1   |
| REXO4.2    | 1.11E-11 | -0.16331 | 0.092 | 0.197 | 1.66E-07 M2 | REXO4    |
| TNS1.1     | 1.12E-11 | 0.29468  | 0.098 | 0.046 | 1.68E-07 M2 | TNS1     |
| ANXA7.4    | 1.16E-11 | 0.260033 | 0.41  | 0.333 | 1.73E-07 M2 | ANXA7    |
| ZNF574.3   | 1.16E-11 | -0.16815 | 0.02  | 0.092 | 1.74E-07 M2 | ZNF574   |
| UBN2.2     | 1.16E-11 | -0.15758 | 0.034 | 0.114 | 1.74E-07 M2 | UBN2     |
| PSPC1.4    | 1.16E-11 | -0.18737 | 0.11  | 0.218 | 1.74E-07 M2 | PSPC1    |
| TMEM222.5  | 1.17E-11 | -0.18743 | 0.158 | 0.288 | 1.74E-07 M2 | TMEM222  |
| PCOLCE.4   | 1.17E-11 | -0.21193 | 0.017 | 0.086 | 1.75E-07 M2 | PCOLCE   |
| GLOD4.2    | 1.18E-11 | -0.19366 | 0.25  | 0.399 | 1.76E-07 M2 | GLOD4    |
| SIX1.3     | 1.18E-11 | -0.15076 | 0.003 | 0.061 | 1.76E-07 M2 | SIX1     |
| TRIM16L.2  | 1.18E-11 | -0.12488 | 0.011 | 0.077 | 1.76E-07 M2 | TRIM16L  |
| SEN6.2     | 1.19E-11 | -0.16832 | 0.112 | 0.226 | 1.78E-07 M2 | SEN6     |
| CCDC12.2   | 1.21E-11 | -0.20029 | 0.284 | 0.441 | 1.81E-07 M2 | CCDC12   |
| LYL1.5     | 1.21E-11 | 0.128895 | 0.148 | 0.076 | 1.81E-07 M2 | LYL1     |
| PRKAA2.4   | 1.22E-11 | -0.12808 | 0     | 0.056 | 1.83E-07 M2 | PRKAA2   |
| VRK2.5     | 1.23E-11 | 0.205248 | 0.107 | 0.051 | 1.84E-07 M2 | VRK2     |
| CARS.3     | 1.24E-11 | -0.17389 | 0.114 | 0.227 | 1.85E-07 M2 | CARS     |
| SIK1.5     | 1.26E-11 | 0.254235 | 0.169 | 0.095 | 1.88E-07 M2 | SIK1     |
| SLC8B1.5   | 1.26E-11 | 0.266147 | 0.163 | 0.093 | 1.89E-07 M2 | SLC8B1   |
| MICU3.4    | 1.28E-11 | -0.19975 | 0.018 | 0.087 | 1.92E-07 M2 | MICU3    |
| SREBF2.2   | 1.29E-11 | -0.1234  | 0.041 | 0.125 | 1.92E-07 M2 | SREBF2   |
| FUS.2      | 1.29E-11 | -0.23948 | 0.502 | 0.653 | 1.93E-07 M2 | FUS      |

|           |          |          |       |       |          |    |             |
|-----------|----------|----------|-------|-------|----------|----|-------------|
| PRADC1.4  | 1.30E-11 | -0.17171 | 0.114 | 0.224 | 1.95E-07 | M2 | PRADC1      |
| B3GALNT2. | 1.31E-11 | -0.16031 | 0.023 | 0.096 | 1.96E-07 | M2 | B3GALNT2    |
| PSMC3IP.4 | 1.33E-11 | -0.14386 | 0.01  | 0.075 | 1.99E-07 | M2 | PSMC3IP     |
| ZNF528.3  | 1.35E-11 | -0.10292 | 0.033 | 0.113 | 2.02E-07 | M2 | ZNF528      |
| POLK.1    | 1.36E-11 | -0.20081 | 0.087 | 0.187 | 2.03E-07 | M2 | POLK        |
| LINC00936 | 1.37E-11 | 0.346192 | 0.212 | 0.135 | 2.04E-07 | M2 | LINC00936   |
| SPN.5     | 1.38E-11 | 0.151043 | 0.11  | 0.052 | 2.06E-07 | M2 | SPN         |
| LRRTM3.3  | 1.38E-11 | -0.1097  | 0     | 0.055 | 2.06E-07 | M2 | LRRTM3      |
| SLC30A5.2 | 1.39E-11 | -0.12401 | 0.102 | 0.212 | 2.07E-07 | M2 | SLC30A5     |
| RASL11B.4 | 1.41E-11 | -0.24518 | 0.001 | 0.058 | 2.11E-07 | M2 | RASL11B     |
| SLFN12.2  | 1.43E-11 | 0.140813 | 0.063 | 0.023 | 2.13E-07 | M2 | SLFN12      |
| GSDMA.1   | 1.43E-11 | 0.103128 | 0.046 | 0.014 | 2.14E-07 | M2 | GSDMA       |
| MTHFD1.2  | 1.44E-11 | -0.1997  | 0.092 | 0.194 | 2.15E-07 | M2 | MTHFD1      |
| CCDC106.5 | 1.45E-11 | -0.13227 | 0.123 | 0.24  | 2.16E-07 | M2 | CCDC106     |
| NCBP2-AS2 | 1.46E-11 | -0.14085 | 0.157 | 0.285 | 2.18E-07 | M2 | NCBP2-AS2   |
| ZNF595.2  | 1.50E-11 | -0.16801 | 0.013 | 0.079 | 2.24E-07 | M2 | ZNF595      |
| CHTOP.3   | 1.50E-11 | -0.191   | 0.232 | 0.376 | 2.24E-07 | M2 | CHTOP       |
| INTS12.3  | 1.50E-11 | -0.19748 | 0.074 | 0.171 | 2.24E-07 | M2 | INTS12      |
| CLDN15.3  | 1.52E-11 | -0.1759  | 0.006 | 0.067 | 2.27E-07 | M2 | CLDN15      |
| RNASEH1.3 | 1.52E-11 | -0.12712 | 0.12  | 0.237 | 2.28E-07 | M2 | RNASEH1     |
| PSTPIP2.3 | 1.54E-11 | 0.149944 | 0.092 | 0.041 | 2.31E-07 | M2 | PSTPIP2     |
| KPNA5.1   | 1.56E-11 | -0.17672 | 0.024 | 0.097 | 2.32E-07 | M2 | KPNA5       |
| BEX5.3    | 1.56E-11 | -0.32624 | 0.028 | 0.101 | 2.33E-07 | M2 | BEX5        |
| ACACA.2   | 1.56E-11 | -0.12043 | 0.024 | 0.098 | 2.34E-07 | M2 | ACACA       |
| TMEM129.2 | 1.57E-11 | -0.17031 | 0.079 | 0.179 | 2.34E-07 | M2 | TMEM129     |
| RASSF8.2  | 1.59E-11 | -0.11129 | 0.02  | 0.092 | 2.37E-07 | M2 | RASSF8      |
| DGCR8.2   | 1.60E-11 | -0.15299 | 0.018 | 0.087 | 2.38E-07 | M2 | DGCR8       |
| RP3-460G2 | 1.61E-11 | 0.174973 | 0.115 | 0.056 | 2.41E-07 | M2 | RP3-460G2.2 |
| FAM64A.5  | 1.61E-11 | -0.24171 | 0.01  | 0.073 | 2.41E-07 | M2 | FAM64A      |
| PMS1.1    | 1.64E-11 | -0.17308 | 0.041 | 0.123 | 2.45E-07 | M2 | PMS1        |
| RBM38.3   | 1.64E-11 | -0.1353  | 0.052 | 0.141 | 2.45E-07 | M2 | RBM38       |
| TSMF.3    | 1.65E-11 | -0.27343 | 0.166 | 0.284 | 2.46E-07 | M2 | TSMF        |
| GPR162.3  | 1.66E-11 | -0.15427 | 0.031 | 0.107 | 2.47E-07 | M2 | GPR162      |
| SLC16A2.2 | 1.66E-11 | -0.1117  | 0.001 | 0.058 | 2.47E-07 | M2 | SLC16A2     |
| MTFP1.1   | 1.69E-11 | 0.311622 | 0.121 | 0.063 | 2.52E-07 | M2 | MTFP1       |
| ABHD14A.3 | 1.70E-11 | -0.13984 | 0.116 | 0.229 | 2.54E-07 | M2 | ABHD14A     |
| LIPE.2    | 1.70E-11 | -0.1604  | 0.005 | 0.065 | 2.54E-07 | M2 | LIPE        |
| PWWP2A.2  | 1.73E-11 | -0.16639 | 0.047 | 0.132 | 2.59E-07 | M2 | PWWP2A      |
| ZNF599.3  | 1.74E-11 | -0.14764 | 0.013 | 0.078 | 2.60E-07 | M2 | ZNF599      |
| ERBB4.4   | 1.75E-11 | -0.19328 | 0.004 | 0.062 | 2.61E-07 | M2 | ERBB4       |
| TRIM33.4  | 1.77E-11 | -0.1475  | 0.087 | 0.19  | 2.65E-07 | M2 | TRIM33      |
| PARD6A.2  | 1.79E-11 | -0.12715 | 0.026 | 0.1   | 2.68E-07 | M2 | PARD6A      |
| FRS2.4    | 1.80E-11 | -0.19157 | 0.037 | 0.117 | 2.69E-07 | M2 | FRS2        |
| ST3GAL3.3 | 1.81E-11 | -0.14301 | 0.02  | 0.091 | 2.71E-07 | M2 | ST3GAL3     |
| RBAK-RBAK | 1.82E-11 | -0.19787 | 0.031 | 0.106 | 2.71E-07 | M2 | RBAK-RBAKDN |
| IL32.3    | 1.83E-11 | -0.41236 | 0.031 | 0.105 | 2.74E-07 | M2 | IL32        |
| HN1L.3    | 1.83E-11 | -0.14972 | 0.065 | 0.159 | 2.74E-07 | M2 | HN1L        |
| RP1-79C4. | 1.83E-11 | -0.11292 | 0     | 0.055 | 2.74E-07 | M2 | RP1-79C4.4  |
| WDR25.2   | 1.84E-11 | -0.1637  | 0.028 | 0.103 | 2.76E-07 | M2 | WDR25       |
| SLC35B4.3 | 1.87E-11 | -0.20491 | 0.096 | 0.198 | 2.80E-07 | M2 | SLC35B4     |
| ZNF830.3  | 1.89E-11 | -0.19374 | 0.093 | 0.198 | 2.82E-07 | M2 | ZNF830      |

|              |           |           |        |        |              |              |
|--------------|-----------|-----------|--------|--------|--------------|--------------|
| MRFAP1. 4    | 1. 96E-11 | -0. 23318 | 0. 552 | 0. 679 | 2. 93E-07 M2 | MRFAP1       |
| FASTK. 3     | 1. 97E-11 | -0. 18611 | 0. 207 | 0. 347 | 2. 94E-07 M2 | FASTK        |
| GNAZ. 3      | 1. 98E-11 | -0. 15338 | 0. 005 | 0. 065 | 2. 96E-07 M2 | GNAZ         |
| CA14. 4      | 1. 99E-11 | -0. 20621 | 0      | 0. 055 | 2. 97E-07 M2 | CA14         |
| GBE1. 3      | 1. 99E-11 | 0. 308317 | 0. 259 | 0. 18  | 2. 98E-07 M2 | GBE1         |
| RANBP3. 2    | 2. 03E-11 | -0. 15172 | 0. 119 | 0. 23  | 3. 03E-07 M2 | RANBP3       |
| FAM76B. 1    | 2. 09E-11 | -0. 14708 | 0. 037 | 0. 117 | 3. 13E-07 M2 | FAM76B       |
| RPRM. 5      | 2. 11E-11 | -0. 24883 | 0. 009 | 0. 071 | 3. 15E-07 M2 | RPRM         |
| IL16. 5      | 2. 12E-11 | 0. 187141 | 0. 128 | 0. 064 | 3. 17E-07 M2 | IL16         |
| NOTCH3. 2    | 2. 13E-11 | -0. 11003 | 0. 005 | 0. 064 | 3. 18E-07 M2 | NOTCH3       |
| ARFGAP2. 2   | 2. 18E-11 | -0. 17673 | 0. 172 | 0. 3   | 3. 26E-07 M2 | ARFGAP2      |
| AC011043. 1  | 2. 19E-11 | -0. 14859 | 0. 006 | 0. 067 | 3. 27E-07 M2 | AC011043. 1  |
| HDGF. 2      | 2. 20E-11 | -0. 15659 | 0. 155 | 0. 282 | 3. 28E-07 M2 | HDGF         |
| CTPS1. 2     | 2. 20E-11 | -0. 15143 | 0. 033 | 0. 111 | 3. 29E-07 M2 | CTPS1        |
| NCAM2. 3     | 2. 21E-11 | -0. 19085 | 0. 009 | 0. 071 | 3. 30E-07 M2 | NCAM2        |
| KIAA1958     | 2. 22E-11 | -0. 11877 | 0. 009 | 0. 071 | 3. 31E-07 M2 | KIAA1958     |
| SCAF1. 4     | 2. 23E-11 | -0. 11233 | 0. 065 | 0. 16  | 3. 33E-07 M2 | SCAF1        |
| SKP1. 4      | 2. 25E-11 | -0. 2398  | 0. 822 | 0. 868 | 3. 36E-07 M2 | SKP1         |
| EML1. 1      | 2. 26E-11 | -0. 151   | 0. 017 | 0. 084 | 3. 38E-07 M2 | EML1         |
| TULP3. 4     | 2. 28E-11 | -0. 1433  | 0. 046 | 0. 131 | 3. 41E-07 M2 | TULP3        |
| KCND3. 4     | 2. 29E-11 | -0. 12633 | 0. 004 | 0. 062 | 3. 42E-07 M2 | KCND3        |
| TRAF3IP2-AS1 | 2. 30E-11 | -0. 15812 | 0. 017 | 0. 084 | 3. 43E-07 M2 | TRAF3IP2-AS1 |
| AK1. 3       | 2. 31E-11 | -0. 15724 | 0. 204 | 0. 345 | 3. 46E-07 M2 | AK1          |
| NHSL1. 1     | 2. 32E-11 | -0. 18665 | 0. 032 | 0. 108 | 3. 47E-07 M2 | NHSL1        |
| SUDS3. 4     | 2. 34E-11 | -0. 10825 | 0. 089 | 0. 195 | 3. 49E-07 M2 | SUDS3        |
| ABCF1. 4     | 2. 36E-11 | -0. 14203 | 0. 162 | 0. 293 | 3. 52E-07 M2 | ABCF1        |
| C1orf122. 2  | 2. 39E-11 | -0. 25086 | 0. 361 | 0. 497 | 3. 57E-07 M2 | C1orf122     |
| TAPT1-AS1    | 2. 39E-11 | -0. 13532 | 0. 005 | 0. 064 | 3. 57E-07 M2 | TAPT1-AS1    |
| RGS12. 5     | 2. 39E-11 | -0. 17871 | 0. 157 | 0. 279 | 3. 57E-07 M2 | RGS12        |
| MOXD1. 3     | 2. 39E-11 | -0. 13256 | 0. 001 | 0. 057 | 3. 58E-07 M2 | MOXD1        |
| SLC39A1. 2   | 2. 41E-11 | 0. 245349 | 0. 446 | 0. 383 | 3. 60E-07 M2 | SLC39A1      |
| TTC17. 2     | 2. 43E-11 | -0. 1744  | 0. 115 | 0. 226 | 3. 63E-07 M2 | TTC17        |
| RAB6B. 4     | 2. 44E-11 | -0. 13612 | 0. 008 | 0. 069 | 3. 64E-07 M2 | RAB6B        |
| TRIM38. 4    | 2. 45E-11 | 0. 220081 | 0. 165 | 0. 093 | 3. 66E-07 M2 | TRIM38       |
| PRKDC. 2     | 2. 45E-11 | -0. 17165 | 0. 172 | 0. 301 | 3. 67E-07 M2 | PRKDC        |
| JPH4. 2      | 2. 50E-11 | -0. 20105 | 0. 005 | 0. 064 | 3. 74E-07 M2 | JPH4         |
| SPHK2. 3     | 2. 50E-11 | -0. 10815 | 0. 049 | 0. 134 | 3. 74E-07 M2 | SPHK2        |
| PDLIM1. 3    | 2. 52E-11 | -0. 14962 | 0. 013 | 0. 078 | 3. 77E-07 M2 | PDLIM1       |
| B3GALT1. 3   | 2. 53E-11 | -0. 10813 | 0      | 0. 054 | 3. 79E-07 M2 | B3GALT1      |
| FGF9. 4      | 2. 53E-11 | -0. 19452 | 0      | 0. 054 | 3. 79E-07 M2 | FGF9         |
| ARL2BP. 2    | 2. 54E-11 | -0. 18293 | 0. 267 | 0. 415 | 3. 79E-07 M2 | ARL2BP       |
| HRSP12. 5    | 2. 54E-11 | -0. 17068 | 0. 1   | 0. 205 | 3. 80E-07 M2 | HRSP12       |
| FDPS. 3      | 2. 54E-11 | -0. 21897 | 0. 276 | 0. 426 | 3. 80E-07 M2 | FDPS         |
| GTF2H3. 2    | 2. 56E-11 | -0. 13334 | 0. 057 | 0. 147 | 3. 82E-07 M2 | GTF2H3       |
| FBXL3. 2     | 2. 56E-11 | -0. 15894 | 0. 083 | 0. 182 | 3. 83E-07 M2 | FBXL3        |
| CBX2. 3      | 2. 60E-11 | -0. 13859 | 0. 009 | 0. 071 | 3. 89E-07 M2 | CBX2         |
| PRDX4. 5     | 2. 69E-11 | 0. 130517 | 0. 596 | 0. 543 | 4. 03E-07 M2 | PRDX4        |
| SCAP. 3      | 2. 71E-11 | -0. 14086 | 0. 069 | 0. 163 | 4. 05E-07 M2 | SCAP         |
| SP3. 4       | 2. 71E-11 | -0. 162   | 0. 107 | 0. 217 | 4. 05E-07 M2 | SP3          |
| STK32A. 4    | 2. 72E-11 | -0. 1176  | 0. 003 | 0. 059 | 4. 06E-07 M2 | STK32A       |
| TPX2. 4      | 2. 73E-11 | -0. 24163 | 0. 019 | 0. 087 | 4. 08E-07 M2 | TPX2         |

|           |          |          |       |       |             |               |
|-----------|----------|----------|-------|-------|-------------|---------------|
| TRMT61A   | 2.77E-11 | -0.13139 | 0.047 | 0.133 | 4.14E-07 M2 | TRMT61A       |
| FAM98B.3  | 2.77E-11 | -0.15872 | 0.027 | 0.1   | 4.14E-07 M2 | FAM98B        |
| CASC3.2   | 2.80E-11 | -0.14974 | 0.089 | 0.192 | 4.19E-07 M2 | CASC3         |
| MKLN1.3   | 2.85E-11 | -0.1555  | 0.123 | 0.237 | 4.26E-07 M2 | MKLN1         |
| EID2B.3   | 2.88E-11 | -0.15574 | 0.023 | 0.094 | 4.30E-07 M2 | EID2B         |
| RNFT2.4   | 2.91E-11 | -0.13212 | 0.01  | 0.073 | 4.35E-07 M2 | RNFT2         |
| LAMA4.3   | 2.92E-11 | -0.14171 | 0.011 | 0.075 | 4.36E-07 M2 | LAMA4         |
| MTMR2.2   | 2.93E-11 | -0.13905 | 0.061 | 0.152 | 4.39E-07 M2 | MTMR2         |
| NF1.3     | 2.94E-11 | -0.13854 | 0.119 | 0.231 | 4.39E-07 M2 | NF1           |
| DBF4.3    | 2.94E-11 | -0.21177 | 0.045 | 0.126 | 4.39E-07 M2 | DBF4          |
| ADCY3.2   | 2.96E-11 | 0.231656 | 0.11  | 0.055 | 4.42E-07 M2 | ADCY3         |
| ZNF148.1  | 2.97E-11 | -0.17243 | 0.139 | 0.257 | 4.43E-07 M2 | ZNF148        |
| NFKB2.5   | 2.97E-11 | 0.266844 | 0.114 | 0.057 | 4.44E-07 M2 | NFKB2         |
| SCAI.2    | 2.97E-11 | -0.1686  | 0.019 | 0.088 | 4.44E-07 M2 | SCAI          |
| HELZ2.4   | 3.01E-11 | -0.12981 | 0.029 | 0.105 | 4.49E-07 M2 | HELZ2         |
| HPCA.3    | 3.01E-11 | -0.18917 | 0.005 | 0.063 | 4.49E-07 M2 | HPCA          |
| IQCG.4    | 3.01E-11 | -0.19724 | 0.045 | 0.128 | 4.49E-07 M2 | IQCG          |
| NOL10.2   | 3.02E-11 | -0.13835 | 0.068 | 0.161 | 4.51E-07 M2 | NOL10         |
| RAB9B.2   | 3.03E-11 | -0.16676 | 0.001 | 0.056 | 4.53E-07 M2 | RAB9B         |
| MPP2.4    | 3.04E-11 | -0.14588 | 0.005 | 0.063 | 4.54E-07 M2 | MPP2          |
| VAMP5.2   | 3.06E-11 | 0.152528 | 0.478 | 0.391 | 4.57E-07 M2 | VAMP5         |
| GAS2L1.4  | 3.07E-11 | -0.12232 | 0.065 | 0.158 | 4.59E-07 M2 | GAS2L1        |
| ASB8.2    | 3.08E-11 | -0.14655 | 0.115 | 0.225 | 4.60E-07 M2 | ASB8          |
| COA1.2    | 3.09E-11 | -0.19981 | 0.262 | 0.407 | 4.62E-07 M2 | COA1          |
| TARSL2.4  | 3.11E-11 | -0.17646 | 0.037 | 0.115 | 4.65E-07 M2 | TARSL2        |
| RAD17.2   | 3.16E-11 | -0.1485  | 0.05  | 0.135 | 4.72E-07 M2 | RAD17         |
| ZNF451.2  | 3.17E-11 | -0.13203 | 0.073 | 0.169 | 4.74E-07 M2 | ZNF451        |
| RP11-126K | 3.20E-11 | -0.13037 | 0.024 | 0.096 | 4.78E-07 M2 | RP11-126K1.6  |
| TMEM255A  | 3.21E-11 | -0.17175 | 0.032 | 0.107 | 4.80E-07 M2 | TMEM255A      |
| RP11-111M | 3.21E-11 | -0.15298 | 0.027 | 0.101 | 4.80E-07 M2 | RP11-111M22.3 |
| CAPN5.2   | 3.24E-11 | -0.11737 | 0.01  | 0.073 | 4.84E-07 M2 | CAPN5         |
| HID1.2    | 3.24E-11 | -0.14978 | 0.001 | 0.056 | 4.85E-07 M2 | HID1          |
| PCM1.4    | 3.25E-11 | -0.17901 | 0.201 | 0.332 | 4.86E-07 M2 | PCM1          |
| TSEN34.2  | 3.26E-11 | -0.16917 | 0.238 | 0.378 | 4.87E-07 M2 | TSEN34        |
| HAS2.2    | 3.29E-11 | -0.16149 | 0.001 | 0.056 | 4.91E-07 M2 | HAS2          |
| UBTD2.2   | 3.29E-11 | -0.13163 | 0.033 | 0.111 | 4.92E-07 M2 | UBTD2         |
| LACC1.2   | 3.32E-11 | 0.152288 | 0.075 | 0.031 | 4.97E-07 M2 | LACC1         |
| GABBR1.4  | 3.33E-11 | -0.15578 | 0.017 | 0.083 | 4.98E-07 M2 | GABBR1        |
| SLC25A36  | 3.34E-11 | -0.10936 | 0.152 | 0.277 | 4.99E-07 M2 | SLC25A36      |
| NOA1.3    | 3.34E-11 | -0.17734 | 0.061 | 0.149 | 5.00E-07 M2 | NOA1          |
| QDPR.4    | 3.35E-11 | -0.26725 | 0.23  | 0.369 | 5.00E-07 M2 | QDPR          |
| DDX19A.1  | 3.40E-11 | -0.15387 | 0.07  | 0.164 | 5.08E-07 M2 | DDX19A        |
| TNPO3.1   | 3.43E-11 | -0.18539 | 0.06  | 0.148 | 5.12E-07 M2 | TNPO3         |
| PDZRN3.3  | 3.45E-11 | -0.1611  | 0.004 | 0.061 | 5.16E-07 M2 | PDZRN3        |
| PYURF.2   | 3.49E-11 | -0.19694 | 0.405 | 0.55  | 5.22E-07 M2 | PYURF         |
| TACC2.2   | 3.51E-11 | -0.12849 | 0.004 | 0.061 | 5.24E-07 M2 | TACC2         |
| PMPCA.3   | 3.53E-11 | -0.16228 | 0.137 | 0.254 | 5.28E-07 M2 | PMPCA         |
| SIVA1.2   | 3.57E-11 | 0.213251 | 0.534 | 0.482 | 5.34E-07 M2 | SIVA1         |
| MOCS2.5   | 3.63E-11 | -0.19708 | 0.152 | 0.271 | 5.42E-07 M2 | MOCS2         |
| MAP4K5.3  | 3.70E-11 | -0.1837  | 0.069 | 0.161 | 5.54E-07 M2 | MAP4K5        |
| RELT.4    | 3.71E-11 | 0.204045 | 0.146 | 0.08  | 5.54E-07 M2 | RELT          |

|            |          |          |       |       |             |              |
|------------|----------|----------|-------|-------|-------------|--------------|
| UBE2V2.4   | 3.72E-11 | -0.19659 | 0.347 | 0.505 | 5.55E-07 M2 | UBE2V2       |
| RP11-11N9  | 3.73E-11 | 0.12547  | 0.106 | 0.05  | 5.57E-07 M2 | RP11-11N9.4  |
| TMEM52B.5  | 3.75E-11 | 0.171262 | 0.096 | 0.044 | 5.61E-07 M2 | TMEM52B      |
| C16orf87.3 | 3.81E-11 | -0.158   | 0.105 | 0.212 | 5.69E-07 M2 | C16orf87     |
| SPEG.3     | 3.84E-11 | -0.14498 | 0.011 | 0.074 | 5.74E-07 M2 | SPEG         |
| SHPRH.2    | 3.87E-11 | -0.17075 | 0.049 | 0.132 | 5.79E-07 M2 | SHPRH        |
| RHOT1.3    | 3.89E-11 | -0.17849 | 0.14  | 0.257 | 5.82E-07 M2 | RHOT1        |
| CADM3.3    | 3.90E-11 | -0.27    | 0.031 | 0.105 | 5.83E-07 M2 | CADM3        |
| PPP1R37.3  | 3.91E-11 | -0.12999 | 0.054 | 0.14  | 5.85E-07 M2 | PPP1R37      |
| CTA-445C9  | 3.94E-11 | -0.12978 | 0.004 | 0.061 | 5.88E-07 M2 | CTA-445C9.14 |
| ZNF582-AS  | 4.03E-11 | -0.20754 | 0.015 | 0.081 | 6.02E-07 M2 | ZNF582-AS1   |
| ARSA.4     | 4.03E-11 | 0.294231 | 0.204 | 0.13  | 6.03E-07 M2 | ARSA         |
| MMP15.4    | 4.06E-11 | -0.12781 | 0.008 | 0.067 | 6.07E-07 M2 | MMP15        |
| SEMA3E.2   | 4.10E-11 | -0.12835 | 0.001 | 0.055 | 6.13E-07 M2 | SEMA3E       |
| MFAP4.3    | 4.12E-11 | -0.20016 | 0.003 | 0.058 | 6.16E-07 M2 | MFAP4        |
| TMEM14B.1  | 4.15E-11 | 0.205433 | 0.567 | 0.523 | 6.20E-07 M2 | TMEM14B      |
| NAA16.3    | 4.21E-11 | -0.15767 | 0.045 | 0.127 | 6.29E-07 M2 | NAA16        |
| SCIN.5     | 4.21E-11 | 0.136335 | 0.24  | 0.144 | 6.29E-07 M2 | SCIN         |
| DUSP2.5    | 4.25E-11 | 0.179322 | 0.184 | 0.105 | 6.35E-07 M2 | DUSP2        |
| PLCB2.5    | 4.25E-11 | 0.164676 | 0.116 | 0.057 | 6.35E-07 M2 | PLCB2        |
| HILPDA.4   | 4.26E-11 | -0.33    | 0.124 | 0.234 | 6.36E-07 M2 | HILPDA       |
| SEPT3.4    | 4.27E-11 | -0.17295 | 0.01  | 0.071 | 6.38E-07 M2 | 3-Sep        |
| CREBZF.4   | 4.27E-11 | -0.14043 | 0.051 | 0.137 | 6.39E-07 M2 | CREBZF       |
| KCNJ10.3   | 4.28E-11 | -0.19915 | 0.001 | 0.055 | 6.40E-07 M2 | KCNJ10       |
| PQLC3.5    | 4.31E-11 | 0.327568 | 0.255 | 0.179 | 6.44E-07 M2 | PQLC3        |
| ZNF568.3   | 4.32E-11 | -0.18853 | 0.029 | 0.103 | 6.46E-07 M2 | ZNF568       |
| SPIN2B.3   | 4.36E-11 | -0.13886 | 0.034 | 0.111 | 6.52E-07 M2 | SPIN2B       |
| PABPC1L    | 4.37E-11 | -0.10024 | 0.01  | 0.072 | 6.54E-07 M2 | PABPC1L      |
| RP11-390F  | 4.41E-11 | -0.14507 | 0.052 | 0.139 | 6.58E-07 M2 | RP11-390P2.4 |
| CAPRIN2.3  | 4.41E-11 | -0.10113 | 0.033 | 0.109 | 6.59E-07 M2 | CAPRIN2      |
| LDOC1L.4   | 4.43E-11 | -0.10298 | 0.022 | 0.091 | 6.62E-07 M2 | LDOC1L       |
| TBCK.2     | 4.49E-11 | -0.12053 | 0.018 | 0.085 | 6.71E-07 M2 | TBCK         |
| VRK3.4     | 4.52E-11 | -0.14525 | 0.115 | 0.226 | 6.75E-07 M2 | VRK3         |
| DCUN1D5.1  | 4.55E-11 | -0.14883 | 0.169 | 0.296 | 6.81E-07 M2 | DCUN1D5      |
| SMO.3      | 4.58E-11 | -0.11118 | 0.001 | 0.055 | 6.85E-07 M2 | SMO          |
| LAYN.4     | 4.60E-11 | -0.11451 | 0.004 | 0.06  | 6.88E-07 M2 | LAYN         |
| WDR48.3    | 4.63E-11 | -0.18549 | 0.057 | 0.144 | 6.92E-07 M2 | WDR48        |
| MYT1L.5    | 4.63E-11 | -0.21145 | 0.005 | 0.063 | 6.92E-07 M2 | MYT1L        |
| C12orf43.4 | 4.64E-11 | -0.16324 | 0.07  | 0.163 | 6.94E-07 M2 | C12orf43     |
| MFI2.1     | 4.68E-11 | 0.21274  | 0.065 | 0.026 | 7.00E-07 M2 | MFI2         |
| TMEM145.3  | 4.80E-11 | -0.16497 | 0.011 | 0.074 | 7.17E-07 M2 | TMEM145      |
| PRSS23.3   | 4.82E-11 | -0.24904 | 0.017 | 0.082 | 7.21E-07 M2 | PRSS23       |
| AKAP11.4   | 4.83E-11 | -0.14742 | 0.065 | 0.156 | 7.22E-07 M2 | AKAP11       |
| SMIM18.4   | 4.83E-11 | -0.1916  | 0.006 | 0.065 | 7.22E-07 M2 | SMIM18       |
| ZMAT1.3    | 4.84E-11 | -0.18712 | 0.027 | 0.099 | 7.23E-07 M2 | ZMAT1        |
| POLR1E.2   | 4.85E-11 | -0.14575 | 0.038 | 0.117 | 7.25E-07 M2 | POLR1E       |
| PWP1.2     | 4.86E-11 | -0.18193 | 0.183 | 0.311 | 7.26E-07 M2 | PWP1         |
| FOXK1.1    | 4.88E-11 | -0.12003 | 0.049 | 0.133 | 7.29E-07 M2 | FOXK1        |
| CBX4.5     | 4.94E-11 | -0.14925 | 0.041 | 0.12  | 7.38E-07 M2 | CBX4         |
| KCNJ16.4   | 4.98E-11 | -0.12459 | 0.003 | 0.058 | 7.44E-07 M2 | KCNJ16       |
| C19orf52.4 | 4.99E-11 | -0.1343  | 0.082 | 0.18  | 7.46E-07 M2 | C19orf52     |



|             |           |           |        |        |              |           |
|-------------|-----------|-----------|--------|--------|--------------|-----------|
| AIM1. 2     | 5. 00E-11 | 0. 107532 | 0. 077 | 0. 032 | 7. 48E-07 M2 | AIM1      |
| ODF2L. 2    | 5. 05E-11 | -0. 17701 | 0. 084 | 0. 181 | 7. 55E-07 M2 | ODF2L     |
| SH3GL1. 2   | 5. 09E-11 | -0. 14949 | 0. 14  | 0. 258 | 7. 60E-07 M2 | SH3GL1    |
| TRIAP1. 3   | 5. 10E-11 | -0. 1741  | 0. 189 | 0. 322 | 7. 62E-07 M2 | TRIAP1    |
| RHBDF1. 2   | 5. 23E-11 | -0. 10988 | 0. 001 | 0. 055 | 7. 81E-07 M2 | RHBDF1    |
| RRP1B. 4    | 5. 26E-11 | -0. 12282 | 0. 069 | 0. 162 | 7. 86E-07 M2 | RRP1B     |
| UBL4A. 4    | 5. 31E-11 | -0. 14417 | 0. 088 | 0. 189 | 7. 94E-07 M2 | UBL4A     |
| C19orf12. 5 | 5. 43E-11 | -0. 15529 | 0. 06  | 0. 148 | 8. 11E-07 M2 | C19orf12  |
| ATP6VOA2. 5 | 5. 49E-11 | -0. 15137 | 0. 028 | 0. 1   | 8. 20E-07 M2 | ATP6VOA2  |
| ASH2L. 2    | 5. 58E-11 | -0. 20515 | 0. 087 | 0. 183 | 8. 33E-07 M2 | ASH2L     |
| DLEU1. 1    | 5. 58E-11 | -0. 1238  | 0. 023 | 0. 093 | 8. 34E-07 M2 | DLEU1     |
| IKZF1. 5    | 5. 63E-11 | 0. 149258 | 0. 121 | 0. 061 | 8. 42E-07 M2 | IKZF1     |
| MVB12B. 4   | 5. 68E-11 | -0. 16925 | 0. 031 | 0. 105 | 8. 50E-07 M2 | MVB12B    |
| CREB1. 3    | 5. 69E-11 | -0. 13603 | 0. 133 | 0. 249 | 8. 51E-07 M2 | CREB1     |
| PLCE1. 3    | 5. 72E-11 | -0. 13776 | 0. 009 | 0. 069 | 8. 55E-07 M2 | PLCE1     |
| DMPK. 2     | 5. 77E-11 | -0. 11213 | 0. 009 | 0. 069 | 8. 62E-07 M2 | DMPK      |
| MED31. 2    | 5. 79E-11 | -0. 1794  | 0. 115 | 0. 224 | 8. 65E-07 M2 | MED31     |
| LYRM9. 4    | 5. 83E-11 | -0. 17768 | 0. 082 | 0. 179 | 8. 71E-07 M2 | LYRM9     |
| INO80E. 3   | 5. 85E-11 | -0. 10624 | 0. 119 | 0. 233 | 8. 75E-07 M2 | INO80E    |
| GPATCH11. 5 | 5. 91E-11 | -0. 17133 | 0. 057 | 0. 144 | 8. 84E-07 M2 | GPATCH11  |
| OPHN1. 3    | 5. 94E-11 | -0. 17209 | 0. 013 | 0. 075 | 8. 88E-07 M2 | OPHN1     |
| TRIM69. 2   | 5. 96E-11 | -0. 1138  | 0. 1   | 0. 205 | 8. 90E-07 M2 | TRIM69    |
| SMC6. 3     | 5. 97E-11 | -0. 18425 | 0. 072 | 0. 163 | 8. 92E-07 M2 | SMC6      |
| HSD17B1. 2  | 5. 98E-11 | -0. 10366 | 0. 004 | 0. 06  | 8. 94E-07 M2 | HSD17B1   |
| EFNA2. 3    | 6. 01E-11 | -0. 12434 | 0. 001 | 0. 055 | 8. 99E-07 M2 | EFNA2     |
| THBS4. 3    | 6. 05E-11 | -0. 12668 | 0. 001 | 0. 054 | 9. 04E-07 M2 | THBS4     |
| HNRNPD. 4   | 6. 09E-11 | -0. 17078 | 0. 28  | 0. 424 | 9. 10E-07 M2 | HNRNPD    |
| FAM184A. 2  | 6. 09E-11 | -0. 1218  | 0. 001 | 0. 055 | 9. 10E-07 M2 | FAM184A   |
| TLE3. 4     | 6. 11E-11 | 0. 30431  | 0. 208 | 0. 132 | 9. 13E-07 M2 | TLE3      |
| METTL21A. 6 | 6. 12E-11 | -0. 14133 | 0. 089 | 0. 19  | 9. 14E-07 M2 | METTL21A  |
| ZNF649. 4   | 6. 23E-11 | -0. 12884 | 0. 024 | 0. 094 | 9. 31E-07 M2 | ZNF649    |
| TMEM169. 3  | 6. 28E-11 | -0. 13921 | 0. 005 | 0. 062 | 9. 39E-07 M2 | TMEM169   |
| ENPP4. 3    | 6. 29E-11 | 0. 17291  | 0. 105 | 0. 051 | 9. 41E-07 M2 | ENPP4     |
| NDUFV2. 3   | 6. 34E-11 | 0. 113911 | 0. 626 | 0. 589 | 9. 48E-07 M2 | NDUFV2    |
| GRWD1. 1    | 6. 40E-11 | -0. 11797 | 0. 068 | 0. 161 | 9. 56E-07 M2 | GRWD1     |
| NDFIP1. 5   | 6. 40E-11 | -0. 20223 | 0. 478 | 0. 61  | 9. 57E-07 M2 | NDFIP1    |
| TAF15. 3    | 6. 49E-11 | -0. 14001 | 0. 156 | 0. 282 | 9. 70E-07 M2 | TAF15     |
| EIF3H. 3    | 6. 49E-11 | 0. 116274 | 0. 693 | 0. 667 | 9. 71E-07 M2 | EIF3H     |
| LGALS1. 3   | 6. 51E-11 | -0. 11854 | 0. 008 | 0. 066 | 9. 74E-07 M2 | LGALS1    |
| LRCH3. 3    | 6. 55E-11 | -0. 11465 | 0. 056 | 0. 144 | 9. 79E-07 M2 | LRCH3     |
| YEATS4. 3   | 6. 62E-11 | -0. 24351 | 0. 148 | 0. 259 | 9. 89E-07 M2 | YEATS4    |
| TET2. 3     | 6. 62E-11 | 0. 264241 | 0. 148 | 0. 084 | 9. 90E-07 M2 | TET2      |
| ZFP37. 2    | 6. 76E-11 | -0. 14161 | 0. 001 | 0. 054 | 1. 01E-06 M2 | ZFP37     |
| RMND5A. 2   | 6. 81E-11 | -0. 18785 | 0. 047 | 0. 128 | 1. 02E-06 M2 | RMND5A    |
| PRKD1. 2    | 6. 82E-11 | -0. 1075  | 0. 001 | 0. 054 | 1. 02E-06 M2 | PRKD1     |
| MTRNR2L1C   | 6. 83E-11 | 0. 28012  | 0. 133 | 0. 07  | 1. 02E-06 M2 | MTRNR2L10 |
| COQ4. 3     | 6. 94E-11 | -0. 16375 | 0. 156 | 0. 275 | 1. 04E-06 M2 | COQ4      |
| LYRM2. 2    | 6. 98E-11 | -0. 11442 | 0. 174 | 0. 303 | 1. 04E-06 M2 | LYRM2     |
| UNC119B. 2  | 7. 02E-11 | -0. 10189 | 0. 008 | 0. 067 | 1. 05E-06 M2 | UNC119B   |
| PLEKHG1. 1  | 7. 03E-11 | -0. 10185 | 0. 004 | 0. 059 | 1. 05E-06 M2 | PLEKHG1   |
| DNAJC19. 5  | 7. 11E-11 | -0. 24475 | 0. 258 | 0. 398 | 1. 06E-06 M2 | DNAJC19   |

|              |           |           |        |        |              |                |
|--------------|-----------|-----------|--------|--------|--------------|----------------|
| YY1. 4       | 7. 14E-11 | -0. 19659 | 0. 216 | 0. 349 | 1. 07E-06 M2 | YY1            |
| AARSD1. 2    | 7. 17E-11 | -0. 14492 | 0. 034 | 0. 11  | 1. 07E-06 M2 | AARSD1         |
| CTNNA2. 3    | 7. 20E-11 | -0. 17811 | 0. 005 | 0. 062 | 1. 08E-06 M2 | CTNNA2         |
| SCO1. 2      | 7. 24E-11 | -0. 12443 | 0. 077 | 0. 172 | 1. 08E-06 M2 | SCO1           |
| RGAG4. 2     | 7. 26E-11 | -0. 1128  | 0. 008 | 0. 066 | 1. 09E-06 M2 | RGAG4          |
| BRF1. 2      | 7. 33E-11 | -0. 16119 | 0. 033 | 0. 108 | 1. 10E-06 M2 | BRF1           |
| MSX1. 3      | 7. 33E-11 | -0. 1087  | 0. 009 | 0. 069 | 1. 10E-06 M2 | MSX1           |
| ZNF585A. 2   | 7. 35E-11 | -0. 12718 | 0. 006 | 0. 064 | 1. 10E-06 M2 | ZNF585A        |
| TMEM231. 3   | 7. 35E-11 | -0. 13432 | 0. 008 | 0. 066 | 1. 10E-06 M2 | TMEM231        |
| ZC3H14. 4    | 7. 37E-11 | -0. 14944 | 0. 105 | 0. 21  | 1. 10E-06 M2 | ZC3H14         |
| UQCRC1. 2    | 7. 44E-11 | 0. 196907 | 0. 526 | 0. 485 | 1. 11E-06 M2 | UQCRC1         |
| EDARADD. 1   | 7. 64E-11 | 0. 263063 | 0. 064 | 0. 025 | 1. 14E-06 M2 | EDARADD        |
| CMC2. 1      | 7. 66E-11 | -0. 18649 | 0. 186 | 0. 313 | 1. 14E-06 M2 | CMC2           |
| ST3GAL5. 2   | 7. 75E-11 | -0. 23709 | 0. 1   | 0. 197 | 1. 16E-06 M2 | ST3GAL5        |
| FRMD5. 2     | 7. 85E-11 | -0. 10724 | 0. 005 | 0. 061 | 1. 17E-06 M2 | FRMD5          |
| KTI12. 3     | 7. 91E-11 | -0. 13726 | 0. 034 | 0. 11  | 1. 18E-06 M2 | KTI12          |
| POLR2I. 4    | 8. 00E-11 | -0. 26269 | 0. 413 | 0. 563 | 1. 20E-06 M2 | POLR2I         |
| RNF26. 2     | 8. 08E-11 | -0. 16128 | 0. 072 | 0. 164 | 1. 21E-06 M2 | RNF26          |
| GART. 2      | 8. 08E-11 | -0. 13997 | 0. 102 | 0. 207 | 1. 21E-06 M2 | GART           |
| NHLRC3. 2    | 8. 08E-11 | -0. 1929  | 0. 16  | 0. 278 | 1. 21E-06 M2 | NHLRC3         |
| VDAC2. 1     | 8. 09E-11 | 0. 147009 | 0. 668 | 0. 637 | 1. 21E-06 M2 | VDAC2          |
| CNOT2. 1     | 8. 24E-11 | -0. 20411 | 0. 183 | 0. 306 | 1. 23E-06 M2 | CNOT2          |
| ZNF273. 4    | 8. 31E-11 | -0. 19274 | 0. 022 | 0. 089 | 1. 24E-06 M2 | ZNF273         |
| HSBP1L1. 3   | 8. 33E-11 | 0. 234582 | 0. 13  | 0. 07  | 1. 24E-06 M2 | HSBP1L1        |
| RRAGB. 2     | 8. 34E-11 | -0. 19775 | 0. 04  | 0. 116 | 1. 25E-06 M2 | RRAGB          |
| NADK2. 2     | 8. 45E-11 | -0. 11227 | 0. 031 | 0. 104 | 1. 26E-06 M2 | NADK2          |
| LRRC37B. 3   | 8. 49E-11 | -0. 11104 | 0. 04  | 0. 118 | 1. 27E-06 M2 | LRRC37B        |
| TMEM181. 5   | 8. 52E-11 | -0. 1124  | 0. 074 | 0. 17  | 1. 27E-06 M2 | TMEM181        |
| ZFHx4-AS1    | 8. 53E-11 | -0. 10117 | 0. 001 | 0. 054 | 1. 27E-06 M2 | ZFHx4-AS1      |
| NUDT8. 1     | 8. 54E-11 | -0. 10841 | 0. 013 | 0. 075 | 1. 28E-06 M2 | NUDT8          |
| SCN3B. 3     | 8. 60E-11 | -0. 21332 | 0. 014 | 0. 076 | 1. 29E-06 M2 | SCN3B          |
| CENPH. 3     | 8. 62E-11 | -0. 14508 | 0. 05  | 0. 132 | 1. 29E-06 M2 | CENPH          |
| TOM1L1. 3    | 8. 77E-11 | -0. 10707 | 0. 005 | 0. 061 | 1. 31E-06 M2 | TOM1L1         |
| HBS1L. 3     | 8. 78E-11 | -0. 16882 | 0. 097 | 0. 198 | 1. 31E-06 M2 | HBS1L          |
| PTAR1. 3     | 8. 83E-11 | -0. 1048  | 0. 056 | 0. 142 | 1. 32E-06 M2 | PTAR1          |
| MKRN1. 4     | 8. 88E-11 | -0. 21167 | 0. 286 | 0. 417 | 1. 33E-06 M2 | MKRN1          |
| EIF2B1. 1    | 8. 94E-11 | -0. 15582 | 0. 166 | 0. 291 | 1. 34E-06 M2 | EIF2B1         |
| SLC25A17. 8. | 9. 99E-11 | -0. 1343  | 0. 07  | 0. 163 | 1. 34E-06 M2 | SLC25A17       |
| FTX. 2       | 9. 00E-11 | -0. 18184 | 0. 032 | 0. 105 | 1. 34E-06 M2 | FTX            |
| ARID4A. 1    | 9. 20E-11 | -0. 19528 | 0. 166 | 0. 283 | 1. 37E-06 M2 | ARID4A         |
| TGS1. 1      | 9. 22E-11 | -0. 17576 | 0. 074 | 0. 166 | 1. 38E-06 M2 | TGS1           |
| POLR3K. 1    | 9. 25E-11 | -0. 20481 | 0. 121 | 0. 228 | 1. 38E-06 M2 | POLR3K         |
| CAP2. 2      | 9. 30E-11 | -0. 16457 | 0. 005 | 0. 061 | 1. 39E-06 M2 | CAP2           |
| ZNF212. 2    | 9. 31E-11 | -0. 15608 | 0. 011 | 0. 072 | 1. 39E-06 M2 | ZNF212         |
| FBXO22. 1    | 9. 34E-11 | -0. 19452 | 0. 057 | 0. 144 | 1. 40E-06 M2 | FBXO22         |
| DNMT1. 4     | 9. 53E-11 | -0. 15933 | 0. 171 | 0. 294 | 1. 42E-06 M2 | DNMT1          |
| RDH14. 2     | 9. 59E-11 | -0. 16755 | 0. 095 | 0. 194 | 1. 43E-06 M2 | RDH14          |
| ORC6. 4      | 9. 68E-11 | -0. 15612 | 0. 026 | 0. 096 | 1. 45E-06 M2 | ORC6           |
| PDE4A. 3     | 9. 73E-11 | 0. 298068 | 0. 148 | 0. 085 | 1. 45E-06 M2 | PDE4A          |
| RP13-1032    | 9. 82E-11 | -0. 10128 | 0. 018 | 0. 084 | 1. 47E-06 M2 | RP13-1032I1. 7 |
| NSUN5. 1     | 9. 84E-11 | -0. 1933  | 0. 123 | 0. 23  | 1. 47E-06 M2 | NSUN5          |

|           |          |          |       |       |          |    |          |
|-----------|----------|----------|-------|-------|----------|----|----------|
| C12orf75. | 9.87E-11 | -0.21061 | 0.1   | 0.2   | 1.47E-06 | M2 | C12orf75 |
| FN3K.1    | 9.88E-11 | -0.13153 | 0.02  | 0.088 | 1.48E-06 | M2 | FN3K     |
| ROBO3     | 9.92E-11 | -0.19863 | 0.043 | 0.122 | 1.48E-06 | M2 | ROBO3    |
| OGG1.1    | 9.99E-11 | -0.12528 | 0.065 | 0.156 | 1.49E-06 | M2 | OGG1     |
| ZNF776.2  | 1.00E-10 | -0.1519  | 0.006 | 0.063 | 1.50E-06 | M2 | ZNF776   |
| ARHGAP23. | 1.01E-10 | -0.14706 | 0.003 | 0.056 | 1.51E-06 | M2 | ARHGAP23 |
| NUDT10.2  | 1.02E-10 | -0.14491 | 0.001 | 0.053 | 1.53E-06 | M2 | NUDT10   |
| SLC16A9.3 | 1.04E-10 | -0.11291 | 0     | 0.051 | 1.55E-06 | M2 | SLC16A9  |
| PLOD1.1   | 1.04E-10 | 0.376122 | 0.258 | 0.186 | 1.55E-06 | M2 | PLOD1    |
| BZW2.2    | 1.04E-10 | -0.2209  | 0.165 | 0.278 | 1.56E-06 | M2 | BZW2     |
| ABTB1.5   | 1.04E-10 | 0.208414 | 0.17  | 0.099 | 1.56E-06 | M2 | ABTB1    |
| STRIP1.2  | 1.04E-10 | -0.14203 | 0.049 | 0.13  | 1.56E-06 | M2 | STRIP1   |
| ALYREF.5  | 1.04E-10 | -0.10644 | 0.063 | 0.152 | 1.56E-06 | M2 | ALYREF   |
| TP53BP1.2 | 1.05E-10 | -0.11691 | 0.029 | 0.102 | 1.56E-06 | M2 | TP53BP1  |
| BLVRA.4   | 1.05E-10 | 0.26145  | 0.41  | 0.334 | 1.57E-06 | M2 | BLVRA    |
| RAB22A.4  | 1.07E-10 | -0.18407 | 0.135 | 0.246 | 1.59E-06 | M2 | RAB22A   |
| OMG.3     | 1.07E-10 | -0.28723 | 0.019 | 0.084 | 1.60E-06 | M2 | OMG      |
| SAP30L.4  | 1.08E-10 | -0.13097 | 0.027 | 0.097 | 1.61E-06 | M2 | SAP30L   |
| UBIAD1.1  | 1.08E-10 | -0.17009 | 0.033 | 0.107 | 1.61E-06 | M2 | UBIAD1   |
| THAP7.3   | 1.09E-10 | -0.14829 | 0.111 | 0.216 | 1.63E-06 | M2 | THAP7    |
| BTBD17.4  | 1.11E-10 | -0.18776 | 0.003 | 0.055 | 1.66E-06 | M2 | BTBD17   |
| DNAJC6.2  | 1.14E-10 | -0.15597 | 0.003 | 0.056 | 1.70E-06 | M2 | DNAJC6   |
| AMH.3     | 1.15E-10 | -0.11613 | 0.005 | 0.061 | 1.71E-06 | M2 | AMH      |
| SNX10.3   | 1.17E-10 | 0.289913 | 0.303 | 0.223 | 1.74E-06 | M2 | SNX10    |
| ZKSCAN5.3 | 1.17E-10 | -0.13527 | 0.01  | 0.07  | 1.74E-06 | M2 | ZKSCAN5  |
| BTBD10.3  | 1.18E-10 | -0.15441 | 0.089 | 0.188 | 1.76E-06 | M2 | BTBD10   |
| LMNB2.5   | 1.18E-10 | -0.12207 | 0.043 | 0.122 | 1.77E-06 | M2 | LMNB2    |
| PTPRO.4   | 1.18E-10 | 0.168546 | 0.138 | 0.074 | 1.77E-06 | M2 | PTPRO    |
| CHAMP1.3  | 1.18E-10 | -0.11111 | 0.051 | 0.134 | 1.77E-06 | M2 | CHAMP1   |
| ANKRD37.3 | 1.18E-10 | 0.348788 | 0.209 | 0.137 | 1.77E-06 | M2 | ANKRD37  |
| USP13.3   | 1.19E-10 | -0.11595 | 0.014 | 0.076 | 1.78E-06 | M2 | USP13    |
| REV1.3    | 1.22E-10 | -0.13346 | 0.079 | 0.174 | 1.82E-06 | M2 | REV1     |
| NLN.3     | 1.22E-10 | -0.13075 | 0.093 | 0.192 | 1.83E-06 | M2 | NLN      |
| DLL1.3    | 1.22E-10 | -0.23274 | 0.014 | 0.075 | 1.83E-06 | M2 | DLL1     |
| CSTF2T.1  | 1.23E-10 | -0.12748 | 0.046 | 0.127 | 1.84E-06 | M2 | CSTF2T   |
| GLI4.3    | 1.24E-10 | -0.14421 | 0.04  | 0.116 | 1.85E-06 | M2 | GLI4     |
| ASIC1.3   | 1.24E-10 | -0.1572  | 0.003 | 0.055 | 1.86E-06 | M2 | ASIC1    |
| LARP1B.3  | 1.25E-10 | -0.1469  | 0.046 | 0.125 | 1.86E-06 | M2 | LARP1B   |
| CCNB1IP1. | 1.25E-10 | -0.14972 | 0.078 | 0.171 | 1.87E-06 | M2 | CCNB1IP1 |
| ANKRD13B. | 1.26E-10 | -0.12746 | 0.001 | 0.053 | 1.88E-06 | M2 | ANKRD13B |
| CSPP1.3   | 1.26E-10 | -0.12642 | 0.036 | 0.111 | 1.89E-06 | M2 | CSPP1    |
| SNHG7.2   | 1.27E-10 | -0.16199 | 0.218 | 0.355 | 1.89E-06 | M2 | SNHG7    |
| GINS2.3   | 1.29E-10 | -0.18312 | 0.032 | 0.104 | 1.93E-06 | M2 | GINS2    |
| CACNG4.2  | 1.29E-10 | -0.13395 | 0.001 | 0.053 | 1.93E-06 | M2 | CACNG4   |
| IQCE.3    | 1.30E-10 | -0.11426 | 0.045 | 0.124 | 1.94E-06 | M2 | IQCE     |
| CASP6.4   | 1.32E-10 | -0.15361 | 0.077 | 0.169 | 1.97E-06 | M2 | CASP6    |
| CARF.3    | 1.33E-10 | -0.10777 | 0.017 | 0.081 | 1.98E-06 | M2 | CARF     |
| C15orf61. | 1.33E-10 | -0.10155 | 0.083 | 0.18  | 1.99E-06 | M2 | C15orf61 |
| RNMTL1.3  | 1.33E-10 | -0.13533 | 0.052 | 0.135 | 1.99E-06 | M2 | RNMTL1   |
| MTURN.2   | 1.34E-10 | -0.19539 | 0.019 | 0.083 | 2.00E-06 | M2 | MTURN    |
| HNRNPL.3  | 1.34E-10 | -0.12084 | 0.152 | 0.272 | 2.01E-06 | M2 | HNRNPL   |

|              |           |           |        |        |              |              |
|--------------|-----------|-----------|--------|--------|--------------|--------------|
| AADAT. 2     | 1. 37E-10 | -0. 11783 | 0. 003 | 0. 055 | 2. 05E-06 M2 | AADAT        |
| OPN3. 4      | 1. 37E-10 | 0. 226889 | 0. 126 | 0. 068 | 2. 05E-06 M2 | OPN3         |
| SHROOM2. 4   | 1. 39E-10 | -0. 11379 | 0. 006 | 0. 063 | 2. 07E-06 M2 | SHROOM2      |
| PATZ1. 2     | 1. 39E-10 | -0. 14038 | 0. 022 | 0. 088 | 2. 08E-06 M2 | PATZ1        |
| CRB1. 2      | 1. 40E-10 | -0. 17896 | 0. 011 | 0. 071 | 2. 10E-06 M2 | CRB1         |
| FEN1. 3      | 1. 41E-10 | -0. 21035 | 0. 059 | 0. 142 | 2. 11E-06 M2 | FEN1         |
| DDX27. 3     | 1. 42E-10 | -0. 17606 | 0. 169 | 0. 29  | 2. 11E-06 M2 | DDX27        |
| RAB11B. 3    | 1. 42E-10 | -0. 19271 | 0. 363 | 0. 514 | 2. 12E-06 M2 | RAB11B       |
| CEBPZ. 3     | 1. 44E-10 | -0. 16088 | 0. 16  | 0. 279 | 2. 16E-06 M2 | CEBPZ        |
| C1QTNF4. 3   | 1. 46E-10 | -0. 16516 | 0. 005 | 0. 06  | 2. 18E-06 M2 | C1QTNF4      |
| CITED2. 4    | 1. 46E-10 | 0. 254129 | 0. 429 | 0. 347 | 2. 18E-06 M2 | CITED2       |
| ODF2. 3      | 1. 46E-10 | -0. 11881 | 0. 054 | 0. 138 | 2. 18E-06 M2 | ODF2         |
| RAB6A. 4     | 1. 46E-10 | -0. 17456 | 0. 261 | 0. 403 | 2. 18E-06 M2 | RAB6A        |
| PRRT1. 2     | 1. 47E-10 | -0. 13878 | 0. 003 | 0. 055 | 2. 20E-06 M2 | PRRT1        |
| ADAM23. 2    | 1. 47E-10 | -0. 11313 | 0. 001 | 0. 052 | 2. 20E-06 M2 | ADAM23       |
| SDSL. 4      | 1. 48E-10 | 0. 329037 | 0. 255 | 0. 182 | 2. 20E-06 M2 | SDSL         |
| HMGCR. 3     | 1. 50E-10 | -0. 11889 | 0. 038 | 0. 114 | 2. 24E-06 M2 | HMGCR        |
| SRP9. 3      | 1. 51E-10 | -0. 22281 | 0. 563 | 0. 689 | 2. 25E-06 M2 | SRP9         |
| MAP2K3. 5    | 1. 52E-10 | 0. 31999  | 0. 258 | 0. 184 | 2. 27E-06 M2 | MAP2K3       |
| NAB2. 1      | 1. 52E-10 | -0. 15527 | 0. 061 | 0. 147 | 2. 27E-06 M2 | NAB2         |
| ELP6. 3      | 1. 53E-10 | -0. 18197 | 0. 116 | 0. 222 | 2. 29E-06 M2 | ELP6         |
| ANKRD26. 1   | 1. 53E-10 | -0. 12347 | 0. 041 | 0. 119 | 2. 29E-06 M2 | ANKRD26      |
| LMBR1L. 4    | 1. 54E-10 | -0. 20518 | 0. 096 | 0. 19  | 2. 30E-06 M2 | LMBR1L       |
| MCAT. 4      | 1. 54E-10 | -0. 12322 | 0. 052 | 0. 134 | 2. 31E-06 M2 | MCAT         |
| BGN. 4       | 1. 55E-10 | -0. 28698 | 0. 01  | 0. 069 | 2. 32E-06 M2 | BGN          |
| TMTC3. 1     | 1. 59E-10 | -0. 1068  | 0. 026 | 0. 094 | 2. 37E-06 M2 | TMTC3        |
| XPOT. 4      | 1. 60E-10 | -0. 13502 | 0. 079 | 0. 174 | 2. 39E-06 M2 | XPOT         |
| ARHGEF10. 1  | 1. 61E-10 | -0. 19249 | 0. 013 | 0. 073 | 2. 40E-06 M2 | ARHGEF10     |
| TRIM28. 3    | 1. 61E-10 | -0. 11738 | 0. 14  | 0. 257 | 2. 40E-06 M2 | TRIM28       |
| SUCO. 2      | 1. 61E-10 | -0. 11024 | 0. 069 | 0. 16  | 2. 40E-06 M2 | SUCO         |
| ATG9A. 3     | 1. 62E-10 | -0. 13698 | 0. 043 | 0. 122 | 2. 41E-06 M2 | ATG9A        |
| PSMG4. 3     | 1. 62E-10 | -0. 12098 | 0. 101 | 0. 205 | 2. 42E-06 M2 | PSMG4        |
| CSK. 5       | 1. 62E-10 | 0. 289333 | 0. 217 | 0. 142 | 2. 43E-06 M2 | CSK          |
| MBNL1. 5     | 1. 63E-10 | 0. 307747 | 0. 295 | 0. 219 | 2. 43E-06 M2 | MBNL1        |
| UPF3B. 3     | 1. 64E-10 | -0. 1684  | 0. 144 | 0. 259 | 2. 44E-06 M2 | UPF3B        |
| GATS. 2      | 1. 64E-10 | -0. 15196 | 0. 009 | 0. 066 | 2. 45E-06 M2 | GATS         |
| BAG5. 3      | 1. 67E-10 | -0. 14713 | 0. 093 | 0. 191 | 2. 50E-06 M2 | BAG5         |
| CEP97. 3     | 1. 68E-10 | -0. 11677 | 0. 017 | 0. 08  | 2. 50E-06 M2 | CEP97        |
| HINT3. 3     | 1. 68E-10 | -0. 15663 | 0. 105 | 0. 205 | 2. 51E-06 M2 | HINT3        |
| CTC-459F4. 1 | 1. 68E-10 | -0. 15401 | 0. 01  | 0. 069 | 2. 52E-06 M2 | CTC-459F4. 3 |
| PIK3R1. 3    | 1. 70E-10 | -0. 23005 | 0. 198 | 0. 315 | 2. 53E-06 M2 | PIK3R1       |
| CEP41. 1     | 1. 71E-10 | -0. 1488  | 0. 068 | 0. 157 | 2. 55E-06 M2 | CEP41        |
| SLC26A11. 1  | 1. 71E-10 | -0. 13375 | 0. 036 | 0. 11  | 2. 56E-06 M2 | SLC26A11     |
| RANBP6. 2    | 1. 73E-10 | -0. 16381 | 0. 013 | 0. 073 | 2. 58E-06 M2 | RANBP6       |
| RNF182. 3    | 1. 75E-10 | -0. 1316  | 0. 001 | 0. 052 | 2. 61E-06 M2 | RNF182       |
| ANP32B. 5    | 1. 78E-10 | 0. 22102  | 0. 498 | 0. 446 | 2. 66E-06 M2 | ANP32B       |
| PDE4D. 2     | 1. 83E-10 | -0. 11924 | 0. 031 | 0. 103 | 2. 73E-06 M2 | PDE4D        |
| RITA1. 3     | 1. 83E-10 | -0. 1506  | 0. 055 | 0. 137 | 2. 74E-06 M2 | RITA1        |
| MRI1. 2      | 1. 84E-10 | -0. 1317  | 0. 04  | 0. 115 | 2. 75E-06 M2 | MRI1         |
| ICAM3. 4     | 1. 86E-10 | -0. 17808 | 0. 033 | 0. 106 | 2. 78E-06 M2 | ICAM3        |
| ZSCAN32. 2   | 1. 86E-10 | -0. 12091 | 0. 011 | 0. 071 | 2. 78E-06 M2 | ZSCAN32      |

|           |          |          |       |       |             |               |
|-----------|----------|----------|-------|-------|-------------|---------------|
| RB1CC1.3  | 1.86E-10 | -0.17819 | 0.167 | 0.284 | 2.79E-06 M2 | RB1CC1        |
| WDR1.3    | 1.87E-10 | 0.229971 | 0.466 | 0.411 | 2.79E-06 M2 | WDR1          |
| THOC2     | 1.87E-10 | -0.18068 | 0.188 | 0.312 | 2.79E-06 M2 | THOC2         |
| ZNF136.3  | 1.87E-10 | -0.16782 | 0.031 | 0.102 | 2.79E-06 M2 | ZNF136        |
| SYNE1.2   | 1.87E-10 | -0.15485 | 0.049 | 0.128 | 2.80E-06 M2 | SYNE1         |
| BLOC1S4.5 | 1.88E-10 | -0.12772 | 0.135 | 0.251 | 2.81E-06 M2 | BLOC1S4       |
| ZNHIT2.2  | 1.90E-10 | -0.143   | 0.023 | 0.089 | 2.83E-06 M2 | ZNHIT2        |
| GEMIN2.1  | 1.90E-10 | -0.14106 | 0.04  | 0.116 | 2.84E-06 M2 | GEMIN2        |
| MIA3.2    | 1.90E-10 | -0.16388 | 0.114 | 0.216 | 2.84E-06 M2 | MIA3          |
| TUBB.3    | 1.92E-10 | -0.2162  | 0.733 | 0.773 | 2.86E-06 M2 | TUBB          |
| ALDH3A2.3 | 1.93E-10 | -0.16459 | 0.13  | 0.239 | 2.89E-06 M2 | ALDH3A2       |
| RP11-119E | 1.93E-10 | -0.12169 | 0.008 | 0.064 | 2.89E-06 M2 | RP11-119B16.2 |
| UCKL1.2   | 1.94E-10 | -0.1495  | 0.074 | 0.164 | 2.90E-06 M2 | UCKL1         |
| NDRG3.4   | 1.94E-10 | -0.1201  | 0.087 | 0.184 | 2.90E-06 M2 | NDRG3         |
| CANX.1    | 1.96E-10 | 0.129794 | 0.607 | 0.571 | 2.93E-06 M2 | CANX          |
| ZNF74.2   | 1.97E-10 | -0.13271 | 0.006 | 0.061 | 2.95E-06 M2 | ZNF74         |
| GALNT6.1  | 1.99E-10 | 0.176884 | 0.066 | 0.027 | 2.98E-06 M2 | GALNT6        |
| SLC38A6.2 | 2.00E-10 | 0.308005 | 0.16  | 0.095 | 2.99E-06 M2 | SLC38A6       |
| NMRK1.3   | 2.00E-10 | 0.235482 | 0.211 | 0.134 | 2.99E-06 M2 | NMRK1         |
| TTI1.2    | 2.00E-10 | -0.13211 | 0.031 | 0.102 | 2.99E-06 M2 | TTI1          |
| APH1B.3   | 2.00E-10 | 0.306252 | 0.193 | 0.123 | 2.99E-06 M2 | APH1B         |
| ZMYND8.4  | 2.01E-10 | -0.14336 | 0.11  | 0.214 | 3.00E-06 M2 | ZMYND8        |
| CPNE5.3   | 2.04E-10 | -0.10695 | 0.003 | 0.054 | 3.05E-06 M2 | CPNE5         |
| RBM27.3   | 2.04E-10 | -0.14592 | 0.125 | 0.233 | 3.05E-06 M2 | RBM27         |
| ANK3.4    | 2.04E-10 | -0.18966 | 0.008 | 0.064 | 3.05E-06 M2 | ANK3          |
| C21orf58. | 2.07E-10 | -0.1356  | 0.004 | 0.057 | 3.09E-06 M2 | C21orf58      |
| C1QBP.3   | 2.08E-10 | -0.19717 | 0.432 | 0.563 | 3.11E-06 M2 | C1QBP         |
| PMPCB.2   | 2.11E-10 | -0.2068  | 0.221 | 0.352 | 3.15E-06 M2 | PMPCB         |
| ZNF71.3   | 2.14E-10 | -0.15451 | 0.023 | 0.089 | 3.20E-06 M2 | ZNF71         |
| DBT.1     | 2.15E-10 | -0.15788 | 0.033 | 0.105 | 3.22E-06 M2 | DBT           |
| ZNF880.1  | 2.16E-10 | -0.12071 | 0.064 | 0.151 | 3.22E-06 M2 | ZNF880        |
| CNOT10.1  | 2.16E-10 | -0.16383 | 0.049 | 0.128 | 3.23E-06 M2 | CNOT10        |
| MED24.4   | 2.21E-10 | -0.1487  | 0.082 | 0.175 | 3.31E-06 M2 | MED24         |
| KANSL1.3  | 2.23E-10 | -0.10205 | 0.078 | 0.172 | 3.34E-06 M2 | KANSL1        |
| BCS1L.3   | 2.24E-10 | -0.13717 | 0.079 | 0.172 | 3.35E-06 M2 | BCS1L         |
| TEFM.1    | 2.25E-10 | -0.17145 | 0.042 | 0.118 | 3.36E-06 M2 | TEFM          |
| ITM2A.4   | 2.25E-10 | -0.2557  | 0.005 | 0.059 | 3.36E-06 M2 | ITM2A         |
| ARIH2.1   | 2.26E-10 | -0.16104 | 0.144 | 0.258 | 3.37E-06 M2 | ARIH2         |
| RBM14.2   | 2.26E-10 | -0.11537 | 0.098 | 0.198 | 3.38E-06 M2 | RBM14         |
| ZMAT3.2   | 2.27E-10 | -0.18902 | 0.109 | 0.209 | 3.40E-06 M2 | ZMAT3         |
| GMCL1.3   | 2.28E-10 | -0.1519  | 0.075 | 0.164 | 3.41E-06 M2 | GMCL1         |
| USP39.2   | 2.28E-10 | -0.11559 | 0.093 | 0.191 | 3.41E-06 M2 | USP39         |
| FILIP1L.5 | 2.29E-10 | 0.277508 | 0.218 | 0.144 | 3.42E-06 M2 | FILIP1L       |
| ARVCF.3   | 2.30E-10 | -0.12309 | 0.005 | 0.059 | 3.44E-06 M2 | ARVCF         |
| PAQR3.3   | 2.34E-10 | -0.12129 | 0.018 | 0.081 | 3.50E-06 M2 | PAQR3         |
| ATXN2.3   | 2.35E-10 | -0.14139 | 0.121 | 0.229 | 3.51E-06 M2 | ATXN2         |
| HSPA4L.3  | 2.38E-10 | -0.15001 | 0.015 | 0.077 | 3.55E-06 M2 | HSPA4L        |
| ADD3.2    | 2.42E-10 | -0.20606 | 0.056 | 0.138 | 3.61E-06 M2 | ADD3          |
| ZCCHC24.3 | 2.42E-10 | -0.19928 | 0.033 | 0.104 | 3.62E-06 M2 | ZCCHC24       |
| RP11-115C | 2.44E-10 | -0.1248  | 0.023 | 0.09  | 3.65E-06 M2 | RP11-115C21.2 |
| ARHGAP32. | 2.46E-10 | -0.14636 | 0.023 | 0.089 | 3.67E-06 M2 | ARHGAP32      |

|            |           |           |        |        |              |           |
|------------|-----------|-----------|--------|--------|--------------|-----------|
| TBRG4. 3   | 2. 47E-10 | -0. 15959 | 0. 135 | 0. 245 | 3. 68E-06 M2 | TBRG4     |
| CTH. 2     | 2. 47E-10 | -0. 11162 | 0. 005 | 0. 059 | 3. 70E-06 M2 | CTH       |
| XPR1. 3    | 2. 48E-10 | -0. 10253 | 0. 05  | 0. 131 | 3. 70E-06 M2 | XPR1      |
| DNAJC30. 3 | 2. 48E-10 | -0. 14783 | 0. 072 | 0. 16  | 3. 71E-06 M2 | DNAJC30   |
| ZNF32. 2   | 2. 51E-10 | -0. 14312 | 0. 123 | 0. 23  | 3. 75E-06 M2 | ZNF32     |
| LGALS8. 3  | 2. 52E-10 | 0. 312565 | 0. 218 | 0. 147 | 3. 76E-06 M2 | LGALS8    |
| VCAM1. 3   | 2. 52E-10 | -0. 25919 | 0. 015 | 0. 076 | 3. 77E-06 M2 | VCAM1     |
| PRKCA. 3   | 2. 55E-10 | -0. 14224 | 0. 105 | 0. 205 | 3. 81E-06 M2 | PRKCA     |
| ACOT8. 1   | 2. 56E-10 | -0. 14186 | 0. 109 | 0. 213 | 3. 82E-06 M2 | ACOT8     |
| ITFG1. 3   | 2. 56E-10 | -0. 16822 | 0. 225 | 0. 357 | 3. 83E-06 M2 | ITFG1     |
| MUT. 4     | 2. 57E-10 | -0. 11863 | 0. 073 | 0. 163 | 3. 83E-06 M2 | MUT       |
| NUB1. 1    | 2. 57E-10 | -0. 16773 | 0. 148 | 0. 261 | 3. 84E-06 M2 | NUB1      |
| SDC1. 2    | 2. 59E-10 | -0. 1079  | 0. 001 | 0. 051 | 3. 86E-06 M2 | SDC1      |
| RNF20. 2   | 2. 64E-10 | -0. 14221 | 0. 068 | 0. 154 | 3. 94E-06 M2 | RNF20     |
| IL12RB1. 4 | 2. 64E-10 | 0. 152958 | 0. 069 | 0. 028 | 3. 95E-06 M2 | IL12RB1   |
| STX2. 4    | 2. 69E-10 | -0. 13008 | 0. 038 | 0. 113 | 4. 02E-06 M2 | STX2      |
| PLBD2. 3   | 2. 69E-10 | 0. 25432  | 0. 106 | 0. 054 | 4. 02E-06 M2 | PLBD2     |
| CCDC8. 2   | 2. 71E-10 | -0. 11014 | 0. 001 | 0. 051 | 4. 05E-06 M2 | CCDC8     |
| FAM169A. 2 | 2. 72E-10 | -0. 12787 | 0. 001 | 0. 051 | 4. 06E-06 M2 | FAM169A   |
| MANSC1. 2  | 2. 74E-10 | -0. 11585 | 0. 006 | 0. 061 | 4. 09E-06 M2 | MANSC1    |
| NPRL2. 3   | 2. 74E-10 | -0. 14505 | 0. 074 | 0. 164 | 4. 10E-06 M2 | NPRL2     |
| EFNB1. 2   | 2. 75E-10 | -0. 15526 | 0. 031 | 0. 1   | 4. 11E-06 M2 | EFNB1     |
| CBWD5. 2   | 2. 77E-10 | -0. 18011 | 0. 049 | 0. 127 | 4. 14E-06 M2 | CBWD5     |
| KIAA1456   | 2. 78E-10 | -0. 10088 | 0. 001 | 0. 051 | 4. 15E-06 M2 | KIAA1456  |
| NDUFAF4. 3 | 2. 81E-10 | -0. 17722 | 0. 121 | 0. 228 | 4. 20E-06 M2 | NDUFAF4   |
| SRRM2. 2   | 2. 84E-10 | -0. 1835  | 0. 396 | 0. 542 | 4. 25E-06 M2 | SRRM2     |
| ZNF669. 2  | 2. 86E-10 | -0. 15862 | 0. 031 | 0. 1   | 4. 28E-06 M2 | ZNF669    |
| ZNF268. 3  | 2. 92E-10 | -0. 13187 | 0. 045 | 0. 122 | 4. 37E-06 M2 | ZNF268    |
| ASB16-AS1  | 2. 94E-10 | -0. 12288 | 0. 028 | 0. 097 | 4. 40E-06 M2 | ASB16-AS1 |
| KLHL9. 3   | 2. 94E-10 | -0. 14015 | 0. 04  | 0. 114 | 4. 40E-06 M2 | KLHL9     |
| TIMP4. 3   | 2. 97E-10 | -0. 31087 | 0. 034 | 0. 105 | 4. 44E-06 M2 | TIMP4     |
| TMOD2. 3   | 2. 99E-10 | -0. 16979 | 0. 041 | 0. 115 | 4. 46E-06 M2 | TMOD2     |
| ZNF853. 3  | 2. 99E-10 | -0. 10723 | 0. 001 | 0. 051 | 4. 47E-06 M2 | ZNF853    |
| CDCA3. 4   | 3. 04E-10 | -0. 18153 | 0. 004 | 0. 056 | 4. 54E-06 M2 | CDCA3     |
| DBI. 5     | 3. 04E-10 | -0. 28256 | 0. 857 | 0. 842 | 4. 55E-06 M2 | DBI       |
| BLMH. 2    | 3. 04E-10 | -0. 14729 | 0. 087 | 0. 182 | 4. 55E-06 M2 | BLMH      |
| ARF6. 5    | 3. 07E-10 | 0. 270821 | 0. 405 | 0. 339 | 4. 59E-06 M2 | ARF6      |
| PI4K2A. 4  | 3. 15E-10 | 0. 253501 | 0. 116 | 0. 061 | 4. 71E-06 M2 | PI4K2A    |
| COG8. 2    | 3. 16E-10 | -0. 14454 | 0. 028 | 0. 096 | 4. 72E-06 M2 | COG8      |
| TRIM23. 2  | 3. 17E-10 | -0. 14396 | 0. 02  | 0. 084 | 4. 74E-06 M2 | TRIM23    |
| PCDH8. 1   | 3. 20E-10 | -0. 12443 | 0. 001 | 0. 051 | 4. 79E-06 M2 | PCDH8     |
| FAM104A. 3 | 3. 24E-10 | -0. 1489  | 0. 137 | 0. 247 | 4. 85E-06 M2 | FAM104A   |
| SMARCB1. 4 | 3. 29E-10 | -0. 16119 | 0. 286 | 0. 423 | 4. 91E-06 M2 | SMARCB1   |
| MRGBP. 3   | 3. 30E-10 | -0. 1056  | 0. 065 | 0. 153 | 4. 93E-06 M2 | MRGBP     |
| URGCP. 2   | 3. 35E-10 | -0. 16851 | 0. 045 | 0. 121 | 5. 00E-06 M2 | URGCP     |
| CCDC126. 2 | 3. 36E-10 | -0. 17294 | 0. 045 | 0. 121 | 5. 02E-06 M2 | CCDC126   |
| DVL3. 3    | 3. 37E-10 | -0. 13993 | 0. 072 | 0. 159 | 5. 04E-06 M2 | DVL3      |
| FGFR2. 3   | 3. 37E-10 | -0. 21087 | 0. 001 | 0. 051 | 5. 04E-06 M2 | FGFR2     |
| MIR22HG. 4 | 3. 48E-10 | 0. 268144 | 0. 176 | 0. 109 | 5. 20E-06 M2 | MIR22HG   |
| FBXL12     | 3. 49E-10 | -0. 15652 | 0. 072 | 0. 16  | 5. 22E-06 M2 | FBXL12    |
| KANK1. 3   | 3. 50E-10 | -0. 15444 | 0. 028 | 0. 097 | 5. 22E-06 M2 | KANK1     |

|            |          |          |       |       |          |    |           |
|------------|----------|----------|-------|-------|----------|----|-----------|
| FAM19A5.2  | 3.51E-10 | -0.13976 | 0.001 | 0.051 | 5.24E-06 | M2 | FAM19A5   |
| UGT8.4     | 3.52E-10 | -0.25532 | 0.003 | 0.053 | 5.26E-06 | M2 | UGT8      |
| HAP1.2     | 3.55E-10 | -0.11197 | 0.013 | 0.072 | 5.30E-06 | M2 | HAP1      |
| RAF1.5     | 3.60E-10 | -0.13506 | 0.165 | 0.285 | 5.38E-06 | M2 | RAF1      |
| DUOX1.5    | 3.61E-10 | -0.14135 | 0.01  | 0.067 | 5.39E-06 | M2 | DUOX1     |
| REC8.3     | 3.67E-10 | -0.1731  | 0.019 | 0.081 | 5.48E-06 | M2 | REC8      |
| CYR61.3    | 3.68E-10 | -0.32515 | 0.086 | 0.174 | 5.50E-06 | M2 | CYR61     |
| FERMT1.3   | 3.69E-10 | -0.18264 | 0.003 | 0.053 | 5.52E-06 | M2 | FERMT1    |
| LPIN1.2    | 3.71E-10 | -0.14637 | 0.06  | 0.142 | 5.54E-06 | M2 | LPIN1     |
| PITHD1.4   | 3.77E-10 | -0.18825 | 0.226 | 0.355 | 5.63E-06 | M2 | PITHD1    |
| GIMAP6.3   | 3.79E-10 | 0.127114 | 0.087 | 0.04  | 5.66E-06 | M2 | GIMAP6    |
| EFCAB7.2   | 3.79E-10 | -0.13665 | 0.014 | 0.073 | 5.67E-06 | M2 | EFCAB7    |
| DPEP2.4    | 3.80E-10 | 0.117402 | 0.073 | 0.031 | 5.67E-06 | M2 | DPEP2     |
| ZFYVE21.4  | 3.80E-10 | -0.19013 | 0.16  | 0.274 | 5.69E-06 | M2 | ZFYVE21   |
| ADAM22.4   | 3.81E-10 | -0.15073 | 0.01  | 0.067 | 5.69E-06 | M2 | ADAM22    |
| ZNF454.3   | 3.83E-10 | -0.11532 | 0.001 | 0.05  | 5.72E-06 | M2 | ZNF454    |
| NCEH1.3    | 3.83E-10 | 0.235629 | 0.12  | 0.064 | 5.73E-06 | M2 | NCEH1     |
| DCAF7.3    | 3.89E-10 | -0.16017 | 0.202 | 0.329 | 5.81E-06 | M2 | DCAF7     |
| ARHGEF4.2  | 3.92E-10 | -0.13126 | 0.005 | 0.058 | 5.86E-06 | M2 | ARHGEF4   |
| BMI1.3     | 3.93E-10 | -0.12686 | 0.061 | 0.145 | 5.88E-06 | M2 | BMI1      |
| ZNF562.3   | 3.99E-10 | -0.15007 | 0.063 | 0.147 | 5.96E-06 | M2 | ZNF562    |
| CCNI.3     | 3.99E-10 | -0.16627 | 0.644 | 0.71  | 5.97E-06 | M2 | CCNI      |
| CDC42EP3.4 | 4.11E-10 | -0.17875 | 0.051 | 0.129 | 6.14E-06 | M2 | CDC42EP3  |
| RGS16.4    | 4.12E-10 | -0.27487 | 0.171 | 0.283 | 6.15E-06 | M2 | RGS16     |
| EXOC5.2    | 4.13E-10 | -0.16624 | 0.092 | 0.186 | 6.17E-06 | M2 | EXOC5     |
| ARHGAP5.2  | 4.13E-10 | -0.13407 | 0.1   | 0.201 | 6.18E-06 | M2 | ARHGAP5   |
| TXNDC17.4  | 4.17E-10 | 0.164673 | 0.581 | 0.521 | 6.23E-06 | M2 | TXNDC17   |
| CERCAM.3   | 4.17E-10 | -0.13385 | 0.054 | 0.135 | 6.23E-06 | M2 | CERCAM    |
| SPRTN.2    | 4.19E-10 | -0.11176 | 0.051 | 0.131 | 6.26E-06 | M2 | SPRTN     |
| DHX57.2    | 4.22E-10 | -0.12272 | 0.031 | 0.1   | 6.31E-06 | M2 | DHX57     |
| STARD7.2   | 4.27E-10 | -0.15887 | 0.198 | 0.325 | 6.38E-06 | M2 | STARD7    |
| SFSWAP.4   | 4.28E-10 | -0.12716 | 0.088 | 0.183 | 6.40E-06 | M2 | SFSWAP    |
| POLDIP2.5  | 4.29E-10 | -0.17405 | 0.231 | 0.355 | 6.40E-06 | M2 | POLDIP2   |
| LSG1.3     | 4.35E-10 | -0.1475  | 0.054 | 0.133 | 6.50E-06 | M2 | LSG1      |
| SPDL1.2    | 4.37E-10 | -0.11499 | 0.011 | 0.069 | 6.52E-06 | M2 | SPDL1     |
| AP3M2.3    | 4.38E-10 | -0.11393 | 0.028 | 0.096 | 6.54E-06 | M2 | AP3M2     |
| MACF1.3    | 4.38E-10 | -0.17722 | 0.208 | 0.33  | 6.55E-06 | M2 | MACF1     |
| PSMD2.2    | 4.40E-10 | -0.16883 | 0.319 | 0.471 | 6.58E-06 | M2 | PSMD2     |
| ARV1.4     | 4.41E-10 | -0.17871 | 0.091 | 0.185 | 6.59E-06 | M2 | ARV1      |
| MMP24-AS1  | 4.43E-10 | 0.281232 | 0.375 | 0.307 | 6.62E-06 | M2 | MMP24-AS1 |
| AAK1.3     | 4.43E-10 | -0.15721 | 0.169 | 0.284 | 6.62E-06 | M2 | AAK1      |
| TMEM168.2  | 4.48E-10 | -0.17822 | 0.042 | 0.116 | 6.70E-06 | M2 | TMEM168   |
| MKRN3.2    | 4.57E-10 | -0.14076 | 0     | 0.047 | 6.83E-06 | M2 | MKRN3     |
| CAST.4     | 4.58E-10 | 0.253305 | 0.381 | 0.314 | 6.84E-06 | M2 | CAST      |
| CES2.3     | 4.59E-10 | -0.13954 | 0.095 | 0.19  | 6.85E-06 | M2 | CES2      |
| RAB23.1    | 4.60E-10 | -0.10179 | 0.003 | 0.053 | 6.87E-06 | M2 | RAB23     |
| MYADM.4    | 4.64E-10 | 0.260316 | 0.262 | 0.188 | 6.94E-06 | M2 | MYADM     |
| DMAP1.3    | 4.67E-10 | -0.15898 | 0.146 | 0.258 | 6.99E-06 | M2 | DMAP1     |
| ISOC1.2    | 4.68E-10 | -0.17539 | 0.08  | 0.17  | 6.99E-06 | M2 | ISOC1     |
| KIAA0355.4 | 4.72E-10 | -0.13767 | 0.07  | 0.158 | 7.05E-06 | M2 | KIAA0355  |
| RNF19B.2   | 4.72E-10 | 0.211932 | 0.098 | 0.049 | 7.05E-06 | M2 | RNF19B    |

|             |           |           |        |        |              |          |
|-------------|-----------|-----------|--------|--------|--------------|----------|
| INTU. 1     | 4. 74E-10 | -0. 13417 | 0. 014 | 0. 073 | 7. 08E-06 M2 | INTU     |
| ARRB1. 4    | 4. 75E-10 | 0. 206199 | 0. 084 | 0. 038 | 7. 10E-06 M2 | ARRB1    |
| GLO1. 3     | 4. 78E-10 | -0. 18426 | 0. 277 | 0. 42  | 7. 15E-06 M2 | GLO1     |
| HSD17B14. 4 | 4. 80E-10 | 0. 213955 | 0. 153 | 0. 088 | 7. 17E-06 M2 | HSD17B14 |
| TAF1A. 1    | 4. 87E-10 | -0. 1522  | 0. 006 | 0. 06  | 7. 28E-06 M2 | TAF1A    |
| HINFP. 1    | 4. 88E-10 | -0. 11475 | 0. 029 | 0. 097 | 7. 29E-06 M2 | HINFP    |
| CCZ1B. 4    | 4. 90E-10 | -0. 12655 | 0. 07  | 0. 157 | 7. 32E-06 M2 | CCZ1B    |
| TUBG2. 4    | 4. 90E-10 | -0. 15331 | 0. 041 | 0. 115 | 7. 32E-06 M2 | TUBG2    |
| FDX1L. 3    | 4. 90E-10 | -0. 14319 | 0. 151 | 0. 267 | 7. 33E-06 M2 | FDX1L    |
| CCBL1       | 4. 91E-10 | -0. 14755 | 0. 005 | 0. 057 | 7. 34E-06 M2 | CCBL1    |
| THAP3. 4    | 4. 95E-10 | -0. 14766 | 0. 057 | 0. 14  | 7. 39E-06 M2 | THAP3    |
| ERBB2. 1    | 4. 99E-10 | -0. 11357 | 0. 008 | 0. 062 | 7. 46E-06 M2 | ERBB2    |
| DENND2D. 2  | 5. 03E-10 | 0. 132419 | 0. 089 | 0. 042 | 7. 52E-06 M2 | DENND2D  |
| SAPCD2. 4   | 5. 06E-10 | -0. 13443 | 0. 006 | 0. 06  | 7. 57E-06 M2 | SAPCD2   |
| SLC25A1. 4  | 5. 09E-10 | -0. 12913 | 0. 102 | 0. 201 | 7. 61E-06 M2 | SLC25A1  |
| TARBP1. 2   | 5. 11E-10 | -0. 13354 | 0. 015 | 0. 075 | 7. 63E-06 M2 | TARBP1   |
| ANKMY2. 2   | 5. 12E-10 | -0. 17608 | 0. 047 | 0. 123 | 7. 66E-06 M2 | ANKMY2   |
| SLC25A42. 5 | 5. 13E-10 | -0. 11805 | 0. 003 | 0. 052 | 7. 66E-06 M2 | SLC25A42 |
| TMEM186. 4  | 5. 23E-10 | -0. 14604 | 0. 032 | 0. 101 | 7. 81E-06 M2 | TMEM186  |
| BAD. 3      | 5. 25E-10 | -0. 1911  | 0. 284 | 0. 427 | 7. 84E-06 M2 | BAD      |
| ALDH5A1. 1  | 5. 28E-10 | -0. 10193 | 0. 006 | 0. 059 | 7. 89E-06 M2 | ALDH5A1  |
| DNPB1. 2    | 5. 29E-10 | 0. 244276 | 0. 434 | 0. 373 | 7. 90E-06 M2 | DNPB1    |
| WDR47. 2    | 5. 31E-10 | -0. 13765 | 0. 037 | 0. 109 | 7. 94E-06 M2 | WDR47    |
| TTLL1. 2    | 5. 32E-10 | -0. 14158 | 0. 028 | 0. 095 | 7. 96E-06 M2 | TTLL1    |
| NME5. 3     | 5. 33E-10 | -0. 1172  | 0. 003 | 0. 052 | 7. 96E-06 M2 | NME5     |
| DACT3. 3    | 5. 33E-10 | -0. 15177 | 0. 019 | 0. 081 | 7. 97E-06 M2 | DACT3    |
| HAUS5. 1    | 5. 43E-10 | -0. 13276 | 0. 011 | 0. 068 | 8. 12E-06 M2 | HAUS5    |
| PDK2. 2     | 5. 46E-10 | -0. 12461 | 0. 079 | 0. 17  | 8. 15E-06 M2 | PDK2     |
| RIC8B. 3    | 5. 48E-10 | -0. 1266  | 0. 029 | 0. 097 | 8. 19E-06 M2 | RIC8B    |
| CRIP1. 1    | 5. 54E-10 | -0. 16475 | 0. 203 | 0. 335 | 8. 28E-06 M2 | CRIP1    |
| ZNF211. 2   | 5. 58E-10 | -0. 17056 | 0. 013 | 0. 07  | 8. 33E-06 M2 | ZNF211   |
| FBXL16. 2   | 5. 58E-10 | -0. 11266 | 0      | 0. 047 | 8. 34E-06 M2 | FBXL16   |
| CHRNA9. 2   | 5. 65E-10 | -0. 115   | 0. 003 | 0. 052 | 8. 44E-06 M2 | CHRNA9   |
| TOPBP1. 3   | 5. 65E-10 | -0. 11632 | 0. 029 | 0. 097 | 8. 45E-06 M2 | TOPBP1   |
| ACTL6A. 3   | 5. 68E-10 | -0. 14145 | 0. 152 | 0. 265 | 8. 49E-06 M2 | ACTL6A   |
| RRP15. 2    | 5. 70E-10 | -0. 15072 | 0. 123 | 0. 227 | 8. 52E-06 M2 | RRP15    |
| ZNF140. 2   | 5. 73E-10 | -0. 15558 | 0. 04  | 0. 112 | 8. 57E-06 M2 | ZNF140   |
| MAGI3. 1    | 5. 83E-10 | -0. 11587 | 0. 006 | 0. 059 | 8. 72E-06 M2 | MAGI3    |
| GPR137C. 2  | 5. 93E-10 | -0. 11371 | 0. 003 | 0. 052 | 8. 86E-06 M2 | GPR137C  |
| GJA1. 2     | 5. 96E-10 | -0. 21311 | 0. 02  | 0. 083 | 8. 90E-06 M2 | GJA1     |
| LSS. 4      | 5. 99E-10 | -0. 12519 | 0. 033 | 0. 103 | 8. 95E-06 M2 | LSS      |
| SCRIB. 2    | 6. 14E-10 | -0. 11449 | 0. 028 | 0. 095 | 9. 18E-06 M2 | SCRIB    |
| SRPK1. 3    | 6. 20E-10 | -0. 14295 | 0. 082 | 0. 172 | 9. 27E-06 M2 | SRPK1    |
| ST7. 1      | 6. 21E-10 | -0. 1294  | 0. 038 | 0. 111 | 9. 28E-06 M2 | ST7      |
| MLF2. 5     | 6. 28E-10 | -0. 21664 | 0. 496 | 0. 617 | 9. 38E-06 M2 | MLF2     |
| TUBA1B. 3   | 6. 33E-10 | -0. 20805 | 0. 875 | 0. 897 | 9. 46E-06 M2 | TUBA1B   |
| BCLAF1. 3   | 6. 34E-10 | -0. 18437 | 0. 259 | 0. 394 | 9. 47E-06 M2 | BCLAF1   |
| GGCT. 4     | 6. 36E-10 | -0. 22653 | 0. 261 | 0. 395 | 9. 51E-06 M2 | GGCT     |
| FAF1. 1     | 6. 55E-10 | -0. 128   | 0. 08  | 0. 171 | 9. 78E-06 M2 | FAF1     |
| CDK17. 3    | 6. 55E-10 | -0. 13483 | 0. 046 | 0. 121 | 9. 79E-06 M2 | CDK17    |
| FNBP4. 2    | 6. 57E-10 | -0. 12795 | 0. 146 | 0. 259 | 9. 82E-06 M2 | FNBP4    |



|             |           |           |        |        |           |    |                |
|-------------|-----------|-----------|--------|--------|-----------|----|----------------|
| RABL2A. 2   | 6. 64E-10 | -0. 15415 | 0. 019 | 0. 08  | 9. 92E-06 | M2 | RABL2A         |
| SORBS2. 3   | 6. 71E-10 | -0. 175   | 0. 004 | 0. 054 | 1. 00E-05 | M2 | SORBS2         |
| SLC25A25. 6 | 8. 9E-10  | -0. 11875 | 0. 08  | 0. 171 | 1. 03E-05 | M2 | SLC25A25       |
| CLDN10. 3   | 6. 91E-10 | -0. 28504 | 0. 006 | 0. 059 | 1. 03E-05 | M2 | CLDN10         |
| CA8. 4      | 6. 93E-10 | -0. 20991 | 0. 006 | 0. 058 | 1. 04E-05 | M2 | CA8            |
| ZNF324. 3   | 6. 97E-10 | -0. 14271 | 0. 023 | 0. 086 | 1. 04E-05 | M2 | ZNF324         |
| CCDC51. 1   | 7. 02E-10 | -0. 13017 | 0. 034 | 0. 105 | 1. 05E-05 | M2 | CCDC51         |
| HRASLS. 3   | 7. 05E-10 | -0. 11291 | 0. 003 | 0. 051 | 1. 05E-05 | M2 | HRASLS         |
| STK17A. 4   | 7. 13E-10 | -0. 19876 | 0. 185 | 0. 301 | 1. 06E-05 | M2 | STK17A         |
| PDCD2. 4    | 7. 14E-10 | -0. 16286 | 0. 184 | 0. 302 | 1. 07E-05 | M2 | PDCD2          |
| RCOR2. 3    | 7. 17E-10 | -0. 14101 | 0. 001 | 0. 049 | 1. 07E-05 | M2 | RCOR2          |
| TECPR1. 3   | 7. 23E-10 | -0. 12917 | 0. 049 | 0. 125 | 1. 08E-05 | M2 | TECPR1         |
| FBXW9. 2    | 7. 24E-10 | -0. 1012  | 0. 042 | 0. 117 | 1. 08E-05 | M2 | FBXW9          |
| ZNF800. 2   | 7. 34E-10 | -0. 13479 | 0. 093 | 0. 188 | 1. 10E-05 | M2 | ZNF800         |
| LTBP1. 3    | 7. 44E-10 | -0. 1055  | 0. 004 | 0. 054 | 1. 11E-05 | M2 | LTBP1          |
| RRP8. 1     | 7. 48E-10 | -0. 12744 | 0. 054 | 0. 132 | 1. 12E-05 | M2 | RRP8           |
| CDIP1. 1    | 7. 54E-10 | -0. 13734 | 0. 098 | 0. 193 | 1. 13E-05 | M2 | CDIP1          |
| CLHC1. 2    | 7. 54E-10 | -0. 13449 | 0. 014 | 0. 072 | 1. 13E-05 | M2 | CLHC1          |
| DHRS7B. 1   | 7. 56E-10 | -0. 14897 | 0. 097 | 0. 193 | 1. 13E-05 | M2 | DHRS7B         |
| TNR. 4      | 7. 82E-10 | -0. 20701 | 0. 006 | 0. 058 | 1. 17E-05 | M2 | TNR            |
| GSK3B. 3    | 7. 90E-10 | -0. 16156 | 0. 109 | 0. 204 | 1. 18E-05 | M2 | GSK3B          |
| SIAE. 3     | 7. 91E-10 | -0. 14495 | 0. 028 | 0. 094 | 1. 18E-05 | M2 | SIAE           |
| IFRD1. 4    | 7. 95E-10 | -0. 19372 | 0. 349 | 0. 497 | 1. 19E-05 | M2 | IFRD1          |
| ADRB2. 3    | 8. 00E-10 | 0. 149573 | 0. 091 | 0. 043 | 1. 20E-05 | M2 | ADRB2          |
| SDF2. 2     | 8. 04E-10 | -0. 14779 | 0. 229 | 0. 366 | 1. 20E-05 | M2 | SDF2           |
| KLHL22. 2   | 8. 07E-10 | -0. 13533 | 0. 027 | 0. 092 | 1. 21E-05 | M2 | KLHL22         |
| TMEM38A. 3  | 8. 18E-10 | -0. 13892 | 0. 004 | 0. 054 | 1. 22E-05 | M2 | TMEM38A        |
| ARPP19. 3   | 8. 18E-10 | -0. 18462 | 0. 291 | 0. 435 | 1. 22E-05 | M2 | ARPP19         |
| HAT1        | 8. 20E-10 | -0. 21044 | 0. 188 | 0. 304 | 1. 23E-05 | M2 | HAT1           |
| TUBE1. 2    | 8. 38E-10 | -0. 14619 | 0. 031 | 0. 098 | 1. 25E-05 | M2 | TUBE1          |
| BOLA1. 3    | 8. 48E-10 | -0. 14877 | 0. 07  | 0. 157 | 1. 27E-05 | M2 | BOLA1          |
| DENND6B. 5  | 8. 48E-10 | 0. 26572  | 0. 162 | 0. 098 | 1. 27E-05 | M2 | DENND6B        |
| SNRNP200. 8 | 4. 9E-10  | -0. 12309 | 0. 172 | 0. 292 | 1. 27E-05 | M2 | SNRNP200       |
| RP11-195F   | 8. 53E-10 | -0. 19472 | 0. 029 | 0. 095 | 1. 27E-05 | M2 | RP11-195F19. 5 |
| MIS12. 3    | 8. 53E-10 | -0. 11972 | 0. 064 | 0. 147 | 1. 27E-05 | M2 | MIS12          |
| PDK3. 3     | 8. 59E-10 | 0. 22164  | 0. 109 | 0. 057 | 1. 28E-05 | M2 | PDK3           |
| DHX30. 3    | 8. 61E-10 | -0. 10238 | 0. 149 | 0. 265 | 1. 29E-05 | M2 | DHX30          |
| NVL. 3      | 8. 67E-10 | -0. 14788 | 0. 041 | 0. 113 | 1. 30E-05 | M2 | NVL            |
| ARPP21. 3   | 8. 88E-10 | -0. 14757 | 0. 004 | 0. 053 | 1. 33E-05 | M2 | ARPP21         |
| HS2ST1. 4   | 8. 90E-10 | -0. 12432 | 0. 088 | 0. 181 | 1. 33E-05 | M2 | HS2ST1         |
| GCDH. 1     | 8. 92E-10 | -0. 14371 | 0. 106 | 0. 204 | 1. 33E-05 | M2 | GCDH           |
| MLKL. 2     | 8. 97E-10 | 0. 144673 | 0. 063 | 0. 025 | 1. 34E-05 | M2 | MLKL           |
| AZGP1. 3    | 9. 02E-10 | -0. 26076 | 0. 008 | 0. 06  | 1. 35E-05 | M2 | AZGP1          |
| SGIP1. 2    | 9. 07E-10 | -0. 17857 | 0. 004 | 0. 053 | 1. 36E-05 | M2 | SGIP1          |
| GTPBP3. 2   | 9. 09E-10 | -0. 13585 | 0. 043 | 0. 117 | 1. 36E-05 | M2 | GTPBP3         |
| AUP1. 3     | 9. 12E-10 | 0. 216194 | 0. 55  | 0. 52  | 1. 36E-05 | M2 | AUP1           |
| CARS2       | 9. 18E-10 | -0. 12493 | 0. 059 | 0. 139 | 1. 37E-05 | M2 | CARS2          |
| ZNF514. 3   | 9. 20E-10 | -0. 13054 | 0. 024 | 0. 088 | 1. 37E-05 | M2 | ZNF514         |
| RAD9A       | 9. 28E-10 | -0. 13608 | 0. 06  | 0. 14  | 1. 39E-05 | M2 | RAD9A          |
| ZNF232. 3   | 9. 34E-10 | -0. 11144 | 0. 022 | 0. 084 | 1. 40E-05 | M2 | ZNF232         |
| RAB2A. 2    | 9. 42E-10 | -0. 21003 | 0. 465 | 0. 6   | 1. 41E-05 | M2 | RAB2A          |

|             |           |           |        |        |              |          |
|-------------|-----------|-----------|--------|--------|--------------|----------|
| VPS37B. 4   | 9. 43E-10 | -0. 12464 | 0. 148 | 0. 262 | 1. 41E-05 M2 | VPS37B   |
| ABHD17A. 4  | 9. 44E-10 | -0. 15531 | 0. 137 | 0. 242 | 1. 41E-05 M2 | ABHD17A  |
| OXNAD1      | 9. 55E-10 | -0. 16463 | 0. 015 | 0. 073 | 1. 43E-05 M2 | OXNAD1   |
| R3HDM1. 2   | 9. 56E-10 | -0. 10695 | 0. 054 | 0. 132 | 1. 43E-05 M2 | R3HDM1   |
| MID1. 2     | 9. 57E-10 | -0. 13493 | 0. 004 | 0. 053 | 1. 43E-05 M2 | MID1     |
| RBBP5       | 9. 70E-10 | -0. 13637 | 0. 054 | 0. 132 | 1. 45E-05 M2 | RBBP5    |
| PLEKHM2     | 9. 73E-10 | 0. 282391 | 0. 16  | 0. 098 | 1. 45E-05 M2 | PLEKHM2  |
| CPM. 4      | 9. 86E-10 | 0. 143719 | 0. 331 | 0. 228 | 1. 47E-05 M2 | CPM      |
| GFPT2. 2    | 9. 97E-10 | -0. 13724 | 0. 005 | 0. 056 | 1. 49E-05 M2 | GFPT2    |
| ATPAF1. 5   | 9. 99E-10 | -0. 16047 | 0. 14  | 0. 247 | 1. 49E-05 M2 | ATPAF1   |
| MAST4. 2    | 1. 00E-09 | -0. 16248 | 0. 005 | 0. 055 | 1. 49E-05 M2 | MAST4    |
| PDE6G. 1    | 1. 00E-09 | 0. 116212 | 0. 036 | 0. 011 | 1. 50E-05 M2 | PDE6G    |
| MBD1. 1     | 1. 01E-09 | -0. 10406 | 0. 072 | 0. 157 | 1. 51E-05 M2 | MBD1     |
| CNOT7. 3    | 1. 01E-09 | -0. 17581 | 0. 245 | 0. 377 | 1. 51E-05 M2 | CNOT7    |
| XXYLT1. 3   | 1. 02E-09 | -0. 11691 | 0. 054 | 0. 131 | 1. 52E-05 M2 | XXYLT1   |
| DDR2. 3     | 1. 02E-09 | -0. 12567 | 0. 008 | 0. 06  | 1. 53E-05 M2 | DDR2     |
| BBS4. 2     | 1. 02E-09 | -0. 15035 | 0. 026 | 0. 09  | 1. 53E-05 M2 | BBS4     |
| STRAP. 3    | 1. 02E-09 | -0. 18958 | 0. 419 | 0. 563 | 1. 53E-05 M2 | STRAP    |
| MED27. 1    | 1. 04E-09 | -0. 11808 | 0. 072 | 0. 157 | 1. 56E-05 M2 | MED27    |
| KRBOX4. 1   | 1. 05E-09 | -0. 14584 | 0. 046 | 0. 12  | 1. 56E-05 M2 | KRBOX4   |
| SSFA2. 3    | 1. 06E-09 | -0. 10889 | 0. 096 | 0. 192 | 1. 59E-05 M2 | SSFA2    |
| B4GALNT4. 1 | 1. 08E-09 | -0. 11537 | 0. 001 | 0. 048 | 1. 61E-05 M2 | B4GALNT4 |
| RMND5B. 2   | 1. 08E-09 | -0. 12439 | 0. 08  | 0. 17  | 1. 61E-05 M2 | RMND5B   |
| CIAPIN1. 2  | 1. 08E-09 | -0. 14278 | 0. 156 | 0. 267 | 1. 62E-05 M2 | CIAPIN1  |
| LMBR1. 3    | 1. 09E-09 | -0. 11836 | 0. 042 | 0. 115 | 1. 62E-05 M2 | LMBR1    |
| STAU2. 3    | 1. 09E-09 | -0. 1542  | 0. 089 | 0. 179 | 1. 63E-05 M2 | STAU2    |
| ZNF569. 2   | 1. 09E-09 | -0. 13592 | 0. 015 | 0. 073 | 1. 63E-05 M2 | ZNF569   |
| GAPT. 5     | 1. 09E-09 | 0. 135256 | 0. 111 | 0. 056 | 1. 63E-05 M2 | GAPT     |
| FKBP15. 4   | 1. 10E-09 | 0. 287576 | 0. 202 | 0. 134 | 1. 64E-05 M2 | FKBP15   |
| PET117. 2   | 1. 13E-09 | -0. 10895 | 0. 092 | 0. 186 | 1. 69E-05 M2 | PET117   |
| NOL12. 1    | 1. 14E-09 | -0. 14778 | 0. 123 | 0. 227 | 1. 70E-05 M2 | NOL12    |
| GCFC2. 1    | 1. 14E-09 | -0. 13475 | 0. 05  | 0. 125 | 1. 70E-05 M2 | GCFC2    |
| MAPK8IP2. 1 | 1. 15E-09 | -0. 13077 | 0      | 0. 045 | 1. 71E-05 M2 | MAPK8IP2 |
| C9orf142. 1 | 1. 15E-09 | -0. 1407  | 0. 249 | 0. 385 | 1. 72E-05 M2 | C9orf142 |
| NR2F2. 3    | 1. 16E-09 | -0. 15445 | 0. 001 | 0. 048 | 1. 74E-05 M2 | NR2F2    |
| CAPS. 2     | 1. 17E-09 | -0. 14182 | 0. 017 | 0. 075 | 1. 74E-05 M2 | CAPS     |
| PPP1R14C. 1 | 1. 17E-09 | -0. 11039 | 0. 01  | 0. 064 | 1. 75E-05 M2 | PPP1R14C |
| GALNT11. 3  | 1. 19E-09 | -0. 11329 | 0. 128 | 0. 233 | 1. 79E-05 M2 | GALNT11  |
| CTU1. 3     | 1. 22E-09 | -0. 1249  | 0. 02  | 0. 081 | 1. 82E-05 M2 | CTU1     |
| ZMYND11. 5  | 1. 22E-09 | -0. 10733 | 0. 068 | 0. 152 | 1. 82E-05 M2 | ZMYND11  |
| PRC1. 4     | 1. 23E-09 | -0. 19333 | 0. 027 | 0. 09  | 1. 83E-05 M2 | PRC1     |
| DNM1L. 3    | 1. 23E-09 | -0. 11524 | 0. 133 | 0. 239 | 1. 83E-05 M2 | DNM1L    |
| CACNB3. 3   | 1. 23E-09 | -0. 11342 | 0. 01  | 0. 064 | 1. 83E-05 M2 | CACNB3   |
| ZNF22. 4    | 1. 23E-09 | -0. 13176 | 0. 166 | 0. 283 | 1. 84E-05 M2 | ZNF22    |
| LIN7B. 3    | 1. 24E-09 | -0. 12566 | 0. 051 | 0. 127 | 1. 86E-05 M2 | LIN7B    |
| NCOA1. 2    | 1. 25E-09 | -0. 13837 | 0. 079 | 0. 167 | 1. 87E-05 M2 | NCOA1    |
| RBM12B. 1   | 1. 26E-09 | -0. 12005 | 0. 018 | 0. 077 | 1. 88E-05 M2 | RBM12B   |
| XIST. 5     | 1. 26E-09 | 0. 191759 | 0. 354 | 0. 26  | 1. 89E-05 M2 | XIST     |
| TRUB2. 3    | 1. 31E-09 | -0. 13839 | 0. 117 | 0. 219 | 1. 96E-05 M2 | TRUB2    |
| CCDC94. 1   | 1. 31E-09 | -0. 1175  | 0. 077 | 0. 164 | 1. 96E-05 M2 | CCDC94   |
| MICAL3. 1   | 1. 33E-09 | -0. 13392 | 0. 019 | 0. 079 | 1. 99E-05 M2 | MICAL3   |

|             |           |           |        |        |           |    |              |
|-------------|-----------|-----------|--------|--------|-----------|----|--------------|
| RALGPS1. 2  | 1. 33E-09 | -0. 1269  | 0. 006 | 0. 057 | 1. 99E-05 | M2 | RALGPS1      |
| RP11-15A1   | 1. 34E-09 | -0. 11778 | 0. 006 | 0. 057 | 2. 00E-05 | M2 | RP11-15A1. 3 |
| ARMC10. 3   | 1. 35E-09 | -0. 12957 | 0. 184 | 0. 304 | 2. 02E-05 | M2 | ARMC10       |
| PLSCR4. 2   | 1. 35E-09 | -0. 12523 | 0. 003 | 0. 05  | 2. 02E-05 | M2 | PLSCR4       |
| RPN2. 1     | 1. 37E-09 | 0. 114028 | 0. 66  | 0. 621 | 2. 04E-05 | M2 | RPN2         |
| TMEM42. 3   | 1. 39E-09 | -0. 15303 | 0. 079 | 0. 167 | 2. 08E-05 | M2 | TMEM42       |
| HEBP1. 1    | 1. 39E-09 | 0. 265858 | 0. 258 | 0. 184 | 2. 08E-05 | M2 | HEBP1        |
| SRM. 4      | 1. 39E-09 | -0. 16721 | 0. 245 | 0. 373 | 2. 08E-05 | M2 | SRM          |
| TGFB2. 4    | 1. 40E-09 | -0. 14271 | 0. 014 | 0. 07  | 2. 09E-05 | M2 | TGFB2        |
| GATAD1. 2   | 1. 40E-09 | -0. 13767 | 0. 11  | 0. 207 | 2. 09E-05 | M2 | GATAD1       |
| ATP5EP2. 3  | 1. 40E-09 | 0. 240406 | 0. 488 | 0. 444 | 2. 09E-05 | M2 | ATP5EP2      |
| TASP1. 2    | 1. 40E-09 | -0. 13948 | 0. 031 | 0. 097 | 2. 09E-05 | M2 | TASP1        |
| SH3PXD2A    | 1. 42E-09 | 0. 181775 | 0. 075 | 0. 034 | 2. 12E-05 | M2 | SH3PXD2A     |
| IGF1R. 3    | 1. 44E-09 | -0. 11549 | 0. 015 | 0. 073 | 2. 16E-05 | M2 | IGF1R        |
| DCBLD1. 1   | 1. 45E-09 | -0. 13731 | 0. 028 | 0. 093 | 2. 17E-05 | M2 | DCBLD1       |
| ATP1A2. 3   | 1. 46E-09 | -0. 26451 | 0. 011 | 0. 065 | 2. 18E-05 | M2 | ATP1A2       |
| MED21. 2    | 1. 46E-09 | -0. 1925  | 0. 119 | 0. 216 | 2. 18E-05 | M2 | MED21        |
| LZTS1. 4    | 1. 46E-09 | -0. 11035 | 0. 01  | 0. 064 | 2. 18E-05 | M2 | LZTS1        |
| ATXN10. 2   | 1. 47E-09 | -0. 15136 | 0. 286 | 0. 431 | 2. 19E-05 | M2 | ATXN10       |
| FAM208B. 1  | 1. 47E-09 | -0. 10947 | 0. 026 | 0. 089 | 2. 20E-05 | M2 | FAM208B      |
| HSPB6. 4    | 1. 48E-09 | -0. 1416  | 0. 01  | 0. 064 | 2. 21E-05 | M2 | HSPB6        |
| SLC30A9. 4  | 1. 48E-09 | -0. 11447 | 0. 148 | 0. 259 | 2. 22E-05 | M2 | SLC30A9      |
| FAM219B. 2  | 1. 49E-09 | -0. 12868 | 0. 072 | 0. 155 | 2. 23E-05 | M2 | FAM219B      |
| PAK7. 4     | 1. 49E-09 | -0. 15839 | 0. 003 | 0. 05  | 2. 23E-05 | M2 | PAK7         |
| SCMH1. 1    | 1. 50E-09 | -0. 13012 | 0. 022 | 0. 083 | 2. 24E-05 | M2 | SCMH1        |
| ZNF652. 2   | 1. 51E-09 | -0. 14423 | 0. 068 | 0. 15  | 2. 26E-05 | M2 | ZNF652       |
| UBE2J2. 4   | 1. 52E-09 | -0. 13343 | 0. 216 | 0. 343 | 2. 27E-05 | M2 | UBE2J2       |
| CDH13. 2    | 1. 53E-09 | -0. 21651 | 0. 006 | 0. 056 | 2. 29E-05 | M2 | CDH13        |
| RABGAP1. 3  | 1. 55E-09 | -0. 1115  | 0. 052 | 0. 13  | 2. 32E-05 | M2 | RABGAP1      |
| GLMN. 2     | 1. 59E-09 | -0. 1213  | 0. 029 | 0. 095 | 2. 37E-05 | M2 | GLMN         |
| RND1. 1     | 1. 60E-09 | -0. 17678 | 0. 013 | 0. 068 | 2. 39E-05 | M2 | RND1         |
| SLC25A33. 1 | 1. 60E-09 | -0. 10752 | 0. 123 | 0. 225 | 2. 39E-05 | M2 | SLC25A33     |
| TARS. 2     | 1. 61E-09 | -0. 1459  | 0. 13  | 0. 233 | 2. 40E-05 | M2 | TARS         |
| MAD2L1BP. 1 | 1. 61E-09 | -0. 10556 | 0. 078 | 0. 166 | 2. 41E-05 | M2 | MAD2L1BP     |
| ARID5B. 4   | 1. 62E-09 | 0. 233253 | 0. 415 | 0. 351 | 2. 42E-05 | M2 | ARID5B       |
| MAK16. 1    | 1. 63E-09 | -0. 10825 | 0. 031 | 0. 097 | 2. 43E-05 | M2 | MAK16        |
| SBN01. 3    | 1. 63E-09 | -0. 11441 | 0. 161 | 0. 273 | 2. 44E-05 | M2 | SBN01        |
| IFT46. 3    | 1. 63E-09 | -0. 11764 | 0. 042 | 0. 114 | 2. 44E-05 | M2 | IFT46        |
| GPHN. 2     | 1. 64E-09 | -0. 11407 | 0. 014 | 0. 07  | 2. 45E-05 | M2 | GPHN         |
| ZCCHC6. 5   | 1. 65E-09 | 0. 237528 | 0. 199 | 0. 131 | 2. 46E-05 | M2 | ZCCHC6       |
| RNF126. 4   | 1. 65E-09 | -0. 12547 | 0. 18  | 0. 298 | 2. 46E-05 | M2 | RNF126       |
| PIBF1. 1    | 1. 65E-09 | -0. 14032 | 0. 029 | 0. 094 | 2. 46E-05 | M2 | PIBF1        |
| BLOC1S2. 3  | 1. 65E-09 | 0. 267097 | 0. 416 | 0. 365 | 2. 47E-05 | M2 | BLOC1S2      |
| TOMM40. 3   | 1. 65E-09 | -0. 14159 | 0. 211 | 0. 336 | 2. 47E-05 | M2 | TOMM40       |
| POLR2K. 2   | 1. 68E-09 | -0. 21351 | 0. 359 | 0. 498 | 2. 50E-05 | M2 | POLR2K       |
| SPC25. 5    | 1. 69E-09 | -0. 17364 | 0. 011 | 0. 065 | 2. 53E-05 | M2 | SPC25        |
| TEX30. 2    | 1. 70E-09 | -0. 18349 | 0. 084 | 0. 171 | 2. 54E-05 | M2 | TEX30        |
| CSRP2BP. 1  | 1. 71E-09 | -0. 1141  | 0. 02  | 0. 08  | 2. 55E-05 | M2 | CSRP2BP      |
| PDHA1. 2    | 1. 71E-09 | -0. 1456  | 0. 19  | 0. 311 | 2. 55E-05 | M2 | PDHA1        |
| COQ5. 3     | 1. 71E-09 | -0. 12472 | 0. 105 | 0. 202 | 2. 56E-05 | M2 | COQ5         |
| NDUFAF3. 1  | 1. 72E-09 | 0. 181821 | 0. 552 | 0. 515 | 2. 56E-05 | M2 | NDUFAF3      |

|            |          |          |       |       |          |    |           |
|------------|----------|----------|-------|-------|----------|----|-----------|
| FRMD3.3    | 1.72E-09 | -0.15828 | 0.008 | 0.059 | 2.57E-05 | M2 | FRMD3     |
| C9orf78.1  | 1.73E-09 | -0.16201 | 0.303 | 0.454 | 2.58E-05 | M2 | C9orf78   |
| TNFSF12.5  | 1.75E-09 | 0.236902 | 0.255 | 0.181 | 2.61E-05 | M2 | TNFSF12   |
| IDI1.4     | 1.76E-09 | -0.16997 | 0.209 | 0.332 | 2.64E-05 | M2 | IDI1      |
| SRPX2.3    | 1.77E-09 | -0.1843  | 0.009 | 0.061 | 2.65E-05 | M2 | SRPX2     |
| GABARAPL2  | 1.80E-09 | -0.23627 | 0.64  | 0.75  | 2.69E-05 | M2 | GABARAPL2 |
| RNF10.3    | 1.82E-09 | -0.12036 | 0.209 | 0.341 | 2.72E-05 | M2 | RNF10     |
| ACSL4.5    | 1.82E-09 | 0.221766 | 0.138 | 0.079 | 2.72E-05 | M2 | ACSL4     |
| SMYD3.2    | 1.83E-09 | -0.15736 | 0.064 | 0.144 | 2.73E-05 | M2 | SMYD3     |
| PRUNE2.3   | 1.83E-09 | -0.22904 | 0.049 | 0.122 | 2.74E-05 | M2 | PRUNE2    |
| ZC3H18.3   | 1.85E-09 | -0.12641 | 0.077 | 0.162 | 2.76E-05 | M2 | ZC3H18    |
| RASSF4.5   | 1.86E-09 | 0.217134 | 0.405 | 0.324 | 2.78E-05 | M2 | RASSF4    |
| CHEK1.1    | 1.87E-09 | -0.13349 | 0.023 | 0.084 | 2.80E-05 | M2 | CHEK1     |
| FAXDC2.2   | 1.88E-09 | -0.14335 | 0.009 | 0.061 | 2.82E-05 | M2 | FAXDC2    |
| ZNF174.3   | 1.89E-09 | -0.10968 | 0.017 | 0.074 | 2.83E-05 | M2 | ZNF174    |
| SPATS2L.3  | 1.92E-09 | -0.12616 | 0.218 | 0.34  | 2.87E-05 | M2 | SPATS2L   |
| DCUN1D4.2  | 1.93E-09 | -0.10342 | 0.036 | 0.104 | 2.88E-05 | M2 | DCUN1D4   |
| PRR3.2     | 1.93E-09 | -0.14071 | 0.038 | 0.107 | 2.89E-05 | M2 | PRR3      |
| HDAC5.1    | 1.94E-09 | -0.15197 | 0.087 | 0.175 | 2.90E-05 | M2 | HDAC5     |
| GTSE1.3    | 1.95E-09 | -0.14229 | 0.009 | 0.061 | 2.91E-05 | M2 | GTSE1     |
| COPS6.3    | 1.96E-09 | -0.20713 | 0.474 | 0.613 | 2.93E-05 | M2 | COPS6     |
| GRID2.2    | 1.96E-09 | -0.13487 | 0.003 | 0.049 | 2.94E-05 | M2 | GRID2     |
| ZNF620.2   | 1.99E-09 | -0.12325 | 0.01  | 0.063 | 2.97E-05 | M2 | ZNF620    |
| SLC05A1.3  | 2.00E-09 | -0.15317 | 0     | 0.044 | 2.99E-05 | M2 | SLC05A1   |
| CYP3A5.2   | 2.01E-09 | -0.12375 | 0.01  | 0.063 | 3.00E-05 | M2 | CYP3A5    |
| GOSR1.4    | 2.01E-09 | -0.14843 | 0.161 | 0.275 | 3.00E-05 | M2 | GOSR1     |
| TCEA1.1    | 2.04E-09 | -0.19692 | 0.359 | 0.493 | 3.04E-05 | M2 | TCEA1     |
| ABLIM1.4   | 2.05E-09 | -0.11581 | 0.006 | 0.056 | 3.07E-05 | M2 | ABLIM1    |
| DLX6.5     | 2.06E-09 | -0.19719 | 0.009 | 0.06  | 3.07E-05 | M2 | DLX6      |
| STK10.5    | 2.06E-09 | 0.266452 | 0.123 | 0.068 | 3.08E-05 | M2 | STK10     |
| SLC6A9.1   | 2.06E-09 | -0.14557 | 0.001 | 0.047 | 3.09E-05 | M2 | SLC6A9    |
| RAE1.3     | 2.07E-09 | -0.13421 | 0.161 | 0.275 | 3.09E-05 | M2 | RAE1      |
| ZNF354A.2  | 2.08E-09 | -0.14457 | 0.051 | 0.125 | 3.10E-05 | M2 | ZNF354A   |
| CEP104.2   | 2.13E-09 | -0.11146 | 0.051 | 0.126 | 3.18E-05 | M2 | CEP104    |
| SYAP1.4    | 2.13E-09 | 0.249919 | 0.436 | 0.384 | 3.18E-05 | M2 | SYAP1     |
| CCDC144A.2 | 2.13E-09 | -0.11045 | 0.024 | 0.086 | 3.19E-05 | M2 | CCDC144A  |
| GOLGA2.1   | 2.13E-09 | -0.1287  | 0.114 | 0.212 | 3.19E-05 | M2 | GOLGA2    |
| TCF7.2     | 2.14E-09 | -0.11853 | 0.064 | 0.145 | 3.20E-05 | M2 | TCF7      |
| DUSP8.3    | 2.16E-09 | -0.12286 | 0.005 | 0.054 | 3.23E-05 | M2 | DUSP8     |
| GPANK1.3   | 2.17E-09 | -0.12362 | 0.105 | 0.2   | 3.24E-05 | M2 | GPANK1    |
| CAPRIN1.4  | 2.18E-09 | -0.12611 | 0.207 | 0.328 | 3.25E-05 | M2 | CAPRIN1   |
| SSBP4.3    | 2.18E-09 | -0.12655 | 0.165 | 0.278 | 3.25E-05 | M2 | SSBP4     |
| SNAPC3.3   | 2.19E-09 | -0.11607 | 0.061 | 0.141 | 3.27E-05 | M2 | SNAPC3    |
| SEPN1.4    | 2.20E-09 | -0.11855 | 0.115 | 0.216 | 3.28E-05 | M2 | SEPN1     |
| SLC31A1.3  | 2.20E-09 | 0.296036 | 0.231 | 0.163 | 3.29E-05 | M2 | SLC31A1   |
| SLC39A14.2 | 2.21E-09 | -0.14396 | 0.033 | 0.099 | 3.30E-05 | M2 | SLC39A14  |
| GLRX3.3    | 2.22E-09 | 0.267048 | 0.361 | 0.3   | 3.32E-05 | M2 | GLRX3     |
| AMN1.1     | 2.25E-09 | -0.14465 | 0.054 | 0.129 | 3.36E-05 | M2 | AMN1      |
| METTL3.2   | 2.25E-09 | -0.14895 | 0.052 | 0.128 | 3.36E-05 | M2 | METTL3    |
| TAGAP.5    | 2.25E-09 | 0.138334 | 0.165 | 0.096 | 3.37E-05 | M2 | TAGAP     |
| SALL3.2    | 2.26E-09 | -0.10732 | 0     | 0.044 | 3.37E-05 | M2 | SALL3     |

|             |           |           |        |        |              |                |
|-------------|-----------|-----------|--------|--------|--------------|----------------|
| PFDN4. 4    | 2. 26E-09 | -0. 165   | 0. 241 | 0. 368 | 3. 37E-05 M2 | PFDN4          |
| GPATCH4     | 2. 26E-09 | -0. 15144 | 0. 103 | 0. 199 | 3. 37E-05 M2 | GPATCH4        |
| TNFAIP6. 3  | 2. 26E-09 | -0. 31008 | 0. 045 | 0. 114 | 3. 38E-05 M2 | TNFAIP6        |
| DHX15. 2    | 2. 29E-09 | -0. 16422 | 0. 146 | 0. 251 | 3. 42E-05 M2 | DHX15          |
| OSBPL2. 3   | 2. 29E-09 | -0. 13423 | 0. 06  | 0. 139 | 3. 43E-05 M2 | OSBPL2         |
| SARS. 4     | 2. 32E-09 | -0. 17117 | 0. 31  | 0. 452 | 3. 47E-05 M2 | SARS           |
| TSPAN33. 4  | 2. 33E-09 | 0. 209378 | 0. 083 | 0. 039 | 3. 48E-05 M2 | TSPAN33        |
| MTUS1. 3    | 2. 33E-09 | -0. 24416 | 0. 073 | 0. 153 | 3. 49E-05 M2 | MTUS1          |
| PPFIA2. 1   | 2. 34E-09 | -0. 16067 | 0. 003 | 0. 049 | 3. 49E-05 M2 | PPFIA2         |
| KIAA1586. 2 | 2. 34E-09 | -0. 13303 | 0. 047 | 0. 12  | 3. 50E-05 M2 | KIAA1586       |
| CLNS1A. 3   | 2. 35E-09 | -0. 20075 | 0. 354 | 0. 501 | 3. 51E-05 M2 | CLNS1A         |
| RP11-294J   | 2. 36E-09 | -0. 15838 | 0. 061 | 0. 139 | 3. 52E-05 M2 | RP11-294J22. 6 |
| ZDHHC22. 3  | 2. 36E-09 | -0. 13259 | 0. 001 | 0. 046 | 3. 53E-05 M2 | ZDHHC22        |
| TMEM106A. 2 | 2. 38E-09 | 0. 153228 | 0. 114 | 0. 06  | 3. 56E-05 M2 | TMEM106A       |
| ZNF227. 2   | 2. 40E-09 | -0. 12062 | 0. 036 | 0. 103 | 3. 59E-05 M2 | ZNF227         |
| CCT7. 3     | 2. 40E-09 | -0. 18909 | 0. 39  | 0. 54  | 3. 59E-05 M2 | CCT7           |
| RRS1. 2     | 2. 40E-09 | -0. 1571  | 0. 068 | 0. 148 | 3. 59E-05 M2 | RRS1           |
| MTF2. 3     | 2. 41E-09 | -0. 13777 | 0. 153 | 0. 261 | 3. 59E-05 M2 | MTF2           |
| PRMT3. 2    | 2. 43E-09 | -0. 11978 | 0. 029 | 0. 094 | 3. 64E-05 M2 | PRMT3          |
| SMYD5. 1    | 2. 45E-09 | -0. 11197 | 0. 014 | 0. 069 | 3. 66E-05 M2 | SMYD5          |
| KIAA1107. 2 | 2. 46E-09 | -0. 15314 | 0. 001 | 0. 046 | 3. 68E-05 M2 | KIAA1107       |
| ZNF567. 2   | 2. 47E-09 | -0. 16874 | 0. 034 | 0. 1   | 3. 70E-05 M2 | ZNF567         |
| RAD54L2. 2  | 2. 48E-09 | -0. 10498 | 0. 041 | 0. 112 | 3. 70E-05 M2 | RAD54L2        |
| DYNC1I2. 4  | 2. 48E-09 | -0. 19322 | 0. 345 | 0. 478 | 3. 70E-05 M2 | DYNC1I2        |
| SIRT2. 5    | 2. 55E-09 | -0. 2103  | 0. 29  | 0. 425 | 3. 80E-05 M2 | SIRT2          |
| TMEM9. 5    | 2. 57E-09 | -0. 14177 | 0. 239 | 0. 376 | 3. 84E-05 M2 | TMEM9          |
| ADCYAP1R1   | 2. 58E-09 | -0. 1251  | 0. 004 | 0. 051 | 3. 86E-05 M2 | ADCYAP1R1      |
| PRIM1. 3    | 2. 59E-09 | -0. 12357 | 0. 024 | 0. 086 | 3. 87E-05 M2 | PRIM1          |
| METTL8. 2   | 2. 60E-09 | -0. 15283 | 0. 051 | 0. 125 | 3. 88E-05 M2 | METTL8         |
| CAPN2. 2    | 2. 60E-09 | -0. 1619  | 0. 152 | 0. 259 | 3. 89E-05 M2 | CAPN2          |
| XRCC5. 4    | 2. 63E-09 | -0. 20096 | 0. 436 | 0. 569 | 3. 93E-05 M2 | XRCC5          |
| DLAT. 2     | 2. 66E-09 | -0. 12676 | 0. 055 | 0. 131 | 3. 97E-05 M2 | DLAT           |
| SPRYD7. 1   | 2. 67E-09 | -0. 12468 | 0. 092 | 0. 182 | 3. 99E-05 M2 | SPRYD7         |
| TPM1. 3     | 2. 69E-09 | -0. 13569 | 0. 151 | 0. 259 | 4. 02E-05 M2 | TPM1           |
| ZNF668. 1   | 2. 75E-09 | -0. 12055 | 0. 026 | 0. 087 | 4. 11E-05 M2 | ZNF668         |
| SCAMP4. 3   | 2. 75E-09 | -0. 11542 | 0. 162 | 0. 276 | 4. 11E-05 M2 | SCAMP4         |
| TTPAL       | 2. 75E-09 | -0. 10469 | 0. 066 | 0. 148 | 4. 12E-05 M2 | TTPAL          |
| ABCE1. 2    | 2. 76E-09 | -0. 12477 | 0. 149 | 0. 257 | 4. 13E-05 M2 | ABCE1          |
| SMAP2. 5    | 2. 77E-09 | 0. 230302 | 0. 314 | 0. 231 | 4. 14E-05 M2 | SMAP2          |
| C17orf97. 2 | 2. 77E-09 | -0. 11057 | 0. 009 | 0. 06  | 4. 14E-05 M2 | C17orf97       |
| EIF4E2. 3   | 2. 78E-09 | 0. 278566 | 0. 384 | 0. 329 | 4. 15E-05 M2 | EIF4E2         |
| CAMKMT. 2   | 2. 79E-09 | -0. 15915 | 0. 02  | 0. 079 | 4. 17E-05 M2 | CAMKMT         |
| METAP2. 3   | 2. 82E-09 | -0. 18023 | 0. 33  | 0. 48  | 4. 22E-05 M2 | METAP2         |
| RALB. 3     | 2. 82E-09 | 0. 232938 | 0. 222 | 0. 152 | 4. 22E-05 M2 | RALB           |
| NFKB1. 5    | 2. 86E-09 | 0. 241575 | 0. 162 | 0. 1   | 4. 28E-05 M2 | NFKB1          |
| ZNF275. 3   | 2. 88E-09 | -0. 13038 | 0. 009 | 0. 06  | 4. 30E-05 M2 | ZNF275         |
| SH2B2. 4    | 2. 88E-09 | -0. 1353  | 0. 043 | 0. 113 | 4. 31E-05 M2 | SH2B2          |
| HK1. 4      | 2. 89E-09 | 0. 333297 | 0. 258 | 0. 191 | 4. 31E-05 M2 | HK1            |
| DLGAP1. 2   | 2. 89E-09 | -0. 11179 | 0. 003 | 0. 048 | 4. 33E-05 M2 | DLGAP1         |
| DCTN2. 1    | 2. 96E-09 | -0. 25018 | 0. 386 | 0. 516 | 4. 42E-05 M2 | DCTN2          |
| RP11-536K   | 2. 96E-09 | 0. 188105 | 0. 075 | 0. 034 | 4. 42E-05 M2 | RP11-536K7. 3  |

|             |          |          |       |       |          |    |               |
|-------------|----------|----------|-------|-------|----------|----|---------------|
| WRAP73.2    | 2.96E-09 | -0.11473 | 0.07  | 0.152 | 4.43E-05 | M2 | WRAP73        |
| THUMPD1.1   | 2.96E-09 | -0.16022 | 0.12  | 0.219 | 4.43E-05 | M2 | THUMPD1       |
| FAM220A.1   | 2.97E-09 | -0.12791 | 0.02  | 0.079 | 4.44E-05 | M2 | FAM220A       |
| MEX3B.3     | 2.98E-09 | -0.13217 | 0.013 | 0.066 | 4.45E-05 | M2 | MEX3B         |
| GNG10.1     | 2.99E-09 | 0.294538 | 0.124 | 0.07  | 4.46E-05 | M2 | GNG10         |
| HSDL1.4     | 3.01E-09 | -0.11521 | 0.059 | 0.136 | 4.49E-05 | M2 | HSDL1         |
| FAM179B.3   | 3.02E-09 | -0.13926 | 0.05  | 0.123 | 4.51E-05 | M2 | FAM179B       |
| HNRNPA1L2.3 | 3.04E-09 | -0.22753 | 0.116 | 0.207 | 4.55E-05 | M2 | HNRNPA1L2     |
| UBE2G1.5    | 3.06E-09 | -0.14875 | 0.158 | 0.265 | 4.57E-05 | M2 | UBE2G1        |
| LRTOMT.3    | 3.06E-09 | -0.11795 | 0.018 | 0.075 | 4.57E-05 | M2 | LRTOMT        |
| TMEM175.1   | 3.08E-09 | -0.16829 | 0.075 | 0.157 | 4.61E-05 | M2 | TMEM175       |
| USP53.5     | 3.09E-09 | 0.233221 | 0.209 | 0.136 | 4.61E-05 | M2 | USP53         |
| FUBP1.4     | 3.09E-09 | -0.15928 | 0.132 | 0.231 | 4.62E-05 | M2 | FUBP1         |
| GPR19.2     | 3.13E-09 | -0.17249 | 0.003 | 0.048 | 4.68E-05 | M2 | GPR19         |
| ZNF558.2    | 3.15E-09 | -0.11797 | 0.022 | 0.081 | 4.71E-05 | M2 | ZNF558        |
| ZNF844.2    | 3.15E-09 | -0.13548 | 0.02  | 0.079 | 4.71E-05 | M2 | ZNF844        |
| NRIP3.2     | 3.17E-09 | 0.186594 | 0.074 | 0.034 | 4.74E-05 | M2 | NRIP3         |
| ZNF536.3    | 3.18E-09 | -0.16709 | 0.001 | 0.046 | 4.75E-05 | M2 | ZNF536        |
| NOL8.2      | 3.20E-09 | -0.14208 | 0.098 | 0.19  | 4.78E-05 | M2 | NOL8          |
| TBL1XR1.3   | 3.21E-09 | -0.13652 | 0.148 | 0.255 | 4.80E-05 | M2 | TBL1XR1       |
| RP5-1177M.3 | 3.26E-09 | -0.19789 | 0.003 | 0.048 | 4.87E-05 | M2 | RP5-1177M21.1 |
| UFC1.4      | 3.28E-09 | 0.146422 | 0.59  | 0.559 | 4.91E-05 | M2 | UFC1          |
| MYOF.2      | 3.29E-09 | 0.139814 | 0.086 | 0.041 | 4.92E-05 | M2 | MYOF          |
| PAFAH1B2.3  | 3.31E-09 | -0.1011  | 0.211 | 0.334 | 4.94E-05 | M2 | PAFAH1B2      |
| CDK14.1     | 3.31E-09 | -0.14432 | 0.023 | 0.082 | 4.95E-05 | M2 | CDK14         |
| RP11-111M.3 | 3.34E-09 | -0.13445 | 0.001 | 0.045 | 4.99E-05 | M2 | RP11-111M22.2 |
| PPOX.1      | 3.34E-09 | -0.10663 | 0.043 | 0.114 | 5.00E-05 | M2 | PPOX          |
| MBIP.4      | 3.34E-09 | -0.15989 | 0.096 | 0.185 | 5.00E-05 | M2 | MBIP          |
| MEMO1.1     | 3.35E-09 | -0.12215 | 0.038 | 0.106 | 5.00E-05 | M2 | MEMO1         |
| TSHZ2.3     | 3.40E-09 | -0.18105 | 0.005 | 0.053 | 5.08E-05 | M2 | TSHZ2         |
| CDKN3.4     | 3.44E-09 | -0.19552 | 0.032 | 0.096 | 5.15E-05 | M2 | CDKN3         |
| NOC3L.1     | 3.45E-09 | -0.13398 | 0.033 | 0.099 | 5.16E-05 | M2 | NOC3L         |
| BACE1.4     | 3.46E-09 | -0.13196 | 0.05  | 0.123 | 5.16E-05 | M2 | BACE1         |
| DOCK4.4     | 3.55E-09 | 0.212321 | 0.232 | 0.157 | 5.31E-05 | M2 | DOCK4         |
| NDE1.2      | 3.55E-09 | -0.12484 | 0.041 | 0.11  | 5.31E-05 | M2 | NDE1          |
| PIGM.1      | 3.58E-09 | -0.10719 | 0.027 | 0.089 | 5.35E-05 | M2 | PIGM          |
| MECR.3      | 3.59E-09 | -0.10501 | 0.08  | 0.166 | 5.37E-05 | M2 | MECR          |
| CEP63.2     | 3.60E-09 | -0.10302 | 0.093 | 0.184 | 5.38E-05 | M2 | CEP63         |
| SH3BP4.1    | 3.61E-09 | -0.12054 | 0.022 | 0.081 | 5.39E-05 | M2 | SH3BP4        |
| GABARAPL1.3 | 3.61E-09 | 0.292879 | 0.361 | 0.293 | 5.40E-05 | M2 | GABARAPL1     |
| C6orf203.3  | 3.63E-09 | -0.13428 | 0.084 | 0.171 | 5.42E-05 | M2 | C6orf203      |
| SORT1.3     | 3.65E-09 | -0.20972 | 0.138 | 0.236 | 5.46E-05 | M2 | SORT1         |
| BACH1.3     | 3.69E-09 | 0.243087 | 0.165 | 0.103 | 5.51E-05 | M2 | BACH1         |
| ACTN2.1     | 3.69E-09 | -0.1249  | 0.001 | 0.045 | 5.52E-05 | M2 | ACTN2         |
| N6AMT2.3    | 3.72E-09 | -0.12243 | 0.06  | 0.138 | 5.55E-05 | M2 | N6AMT2        |
| PIP5K1A.3   | 3.72E-09 | -0.10958 | 0.07  | 0.152 | 5.56E-05 | M2 | PIP5K1A       |
| TUG1.4      | 3.78E-09 | -0.10343 | 0.091 | 0.181 | 5.65E-05 | M2 | TUG1          |
| ARX.4       | 3.78E-09 | -0.15164 | 0     | 0.043 | 5.65E-05 | M2 | ARX           |
| KIAA0895L.3 | 3.78E-09 | -0.12197 | 0.032 | 0.096 | 5.66E-05 | M2 | KIAA0895L     |
| PTPN7.5     | 3.86E-09 | 0.151445 | 0.134 | 0.074 | 5.77E-05 | M2 | PTPN7         |
| ITFG2.1     | 3.90E-09 | -0.1352  | 0.045 | 0.115 | 5.82E-05 | M2 | ITFG2         |

|            |           |           |        |        |              |               |
|------------|-----------|-----------|--------|--------|--------------|---------------|
| CCL8. 1    | 3. 90E-09 | 0. 111468 | 0. 037 | 0. 012 | 5. 83E-05 M2 | CCL8          |
| SC5D. 3    | 3. 90E-09 | -0. 17501 | 0. 092 | 0. 179 | 5. 83E-05 M2 | SC5D          |
| XPC. 1     | 3. 94E-09 | -0. 15263 | 0. 08  | 0. 164 | 5. 88E-05 M2 | XPC           |
| NUDCD1. 3  | 3. 94E-09 | -0. 11328 | 0. 038 | 0. 105 | 5. 89E-05 M2 | NUDCD1        |
| U2AF1L4. 2 | 3. 94E-09 | -0. 19422 | 0. 11  | 0. 203 | 5. 89E-05 M2 | U2AF1L4       |
| PTPRJ. 2   | 3. 95E-09 | 0. 141591 | 0. 064 | 0. 027 | 5. 90E-05 M2 | PTPRJ         |
| MCAM. 2    | 3. 96E-09 | -0. 13059 | 0. 001 | 0. 045 | 5. 91E-05 M2 | MCAM          |
| TRMT11. 3  | 4. 00E-09 | -0. 16538 | 0. 05  | 0. 122 | 5. 98E-05 M2 | TRMT11        |
| SEC22C. 3  | 4. 02E-09 | -0. 10802 | 0. 13  | 0. 234 | 6. 01E-05 M2 | SEC22C        |
| KRCC1      | 4. 07E-09 | -0. 17779 | 0. 137 | 0. 237 | 6. 08E-05 M2 | KRCC1         |
| LINC00909  | 4. 09E-09 | -0. 13804 | 0. 046 | 0. 116 | 6. 11E-05 M2 | LINC00909     |
| SNAI2. 2   | 4. 10E-09 | -0. 1055  | 0      | 0. 042 | 6. 12E-05 M2 | SNAI2         |
| ANKZF1. 3  | 4. 13E-09 | -0. 11309 | 0. 061 | 0. 139 | 6. 17E-05 M2 | ANKZF1        |
| TRADD. 3   | 4. 14E-09 | 0. 268995 | 0. 23  | 0. 163 | 6. 19E-05 M2 | TRADD         |
| CDK5. 3    | 4. 17E-09 | -0. 13485 | 0. 14  | 0. 245 | 6. 23E-05 M2 | CDK5          |
| PPP1R8. 2  | 4. 17E-09 | -0. 123   | 0. 126 | 0. 23  | 6. 24E-05 M2 | PPP1R8        |
| ADCK4. 3   | 4. 18E-09 | -0. 11342 | 0. 056 | 0. 132 | 6. 25E-05 M2 | ADCK4         |
| IFT27. 4   | 4. 20E-09 | -0. 14686 | 0. 157 | 0. 264 | 6. 28E-05 M2 | IFT27         |
| ERCC3. 1   | 4. 21E-09 | -0. 15683 | 0. 07  | 0. 15  | 6. 29E-05 M2 | ERCC3         |
| CPLX1. 2   | 4. 22E-09 | -0. 16005 | 0. 001 | 0. 045 | 6. 31E-05 M2 | CPLX1         |
| CNIH1. 2   | 4. 25E-09 | 0. 223117 | 0. 43  | 0. 368 | 6. 36E-05 M2 | CNIH1         |
| RPP21. 1   | 4. 28E-09 | -0. 1455  | 0. 055 | 0. 129 | 6. 39E-05 M2 | RPP21         |
| PCNXL2. 1  | 4. 31E-09 | -0. 14378 | 0. 027 | 0. 088 | 6. 44E-05 M2 | PCNXL2        |
| ZNF419. 2  | 4. 33E-09 | -0. 14415 | 0. 013 | 0. 066 | 6. 47E-05 M2 | ZNF419        |
| KIAA1841   | 4. 33E-09 | -0. 13541 | 0. 015 | 0. 07  | 6. 48E-05 M2 | KIAA1841      |
| ZNF682. 2  | 4. 38E-09 | -0. 1234  | 0. 022 | 0. 08  | 6. 55E-05 M2 | ZNF682        |
| COL9A2. 2  | 4. 42E-09 | -0. 18743 | 0. 031 | 0. 093 | 6. 60E-05 M2 | COL9A2        |
| AR. 2      | 4. 43E-09 | -0. 11973 | 0. 004 | 0. 05  | 6. 61E-05 M2 | AR            |
| MAL. 4     | 4. 43E-09 | -0. 27988 | 0      | 0. 042 | 6. 63E-05 M2 | MAL           |
| TNK2. 3    | 4. 44E-09 | -0. 13608 | 0. 057 | 0. 132 | 6. 64E-05 M2 | TNK2          |
| IPP. 3     | 4. 50E-09 | -0. 10284 | 0. 011 | 0. 064 | 6. 72E-05 M2 | IPP           |
| SRFBP1. 2  | 4. 53E-09 | -0. 11253 | 0. 097 | 0. 187 | 6. 76E-05 M2 | SRFBP1        |
| INTS10. 2  | 4. 56E-09 | -0. 16341 | 0. 195 | 0. 31  | 6. 82E-05 M2 | INTS10        |
| APIP. 3    | 4. 59E-09 | 0. 292757 | 0. 296 | 0. 229 | 6. 86E-05 M2 | APIP          |
| FAM98A. 3  | 4. 63E-09 | -0. 1315  | 0. 068 | 0. 147 | 6. 92E-05 M2 | FAM98A        |
| CPSF6. 3   | 4. 64E-09 | -0. 15352 | 0. 216 | 0. 338 | 6. 94E-05 M2 | CPSF6         |
| RP5-827C2  | 4. 64E-09 | -0. 13128 | 0. 014 | 0. 068 | 6. 94E-05 M2 | RP5-827C21. 4 |
| BNC2. 1    | 4. 65E-09 | 0. 173039 | 0. 057 | 0. 023 | 6. 95E-05 M2 | BNC2          |
| SAMD4B. 2  | 4. 68E-09 | -0. 1135  | 0. 128 | 0. 23  | 6. 99E-05 M2 | SAMD4B        |
| UBE3A. 4   | 4. 69E-09 | -0. 15654 | 0. 183 | 0. 294 | 7. 00E-05 M2 | UBE3A         |
| C17orf89.  | 4. 82E-09 | -0. 19139 | 0. 31  | 0. 429 | 7. 20E-05 M2 | C17orf89      |
| SLC35E3. 4 | 4. 83E-09 | -0. 21589 | 0. 105 | 0. 193 | 7. 22E-05 M2 | SLC35E3       |
| NIFK-AS1.  | 4. 87E-09 | -0. 13177 | 0. 029 | 0. 092 | 7. 27E-05 M2 | NIFK-AS1      |
| PHC1. 3    | 4. 89E-09 | -0. 11601 | 0. 023 | 0. 082 | 7. 31E-05 M2 | PHC1          |
| DOCK5. 5   | 4. 90E-09 | 0. 128437 | 0. 102 | 0. 052 | 7. 32E-05 M2 | DOCK5         |
| NACC2. 3   | 4. 93E-09 | -0. 11436 | 0. 04  | 0. 107 | 7. 37E-05 M2 | NACC2         |
| FKBP7. 2   | 4. 96E-09 | -0. 1498  | 0. 032 | 0. 096 | 7. 42E-05 M2 | FKBP7         |
| SURF2. 4   | 4. 97E-09 | -0. 10068 | 0. 134 | 0. 239 | 7. 43E-05 M2 | SURF2         |
| PGAP2. 2   | 5. 00E-09 | -0. 13338 | 0. 05  | 0. 122 | 7. 48E-05 M2 | PGAP2         |
| AC018647.  | 5. 03E-09 | -0. 22641 | 0. 001 | 0. 045 | 7. 51E-05 M2 | AC018647. 3   |
| BMPR2. 3   | 5. 04E-09 | -0. 14114 | 0. 096 | 0. 183 | 7. 53E-05 M2 | BMPR2         |

|            |          |          |       |       |          |    |               |
|------------|----------|----------|-------|-------|----------|----|---------------|
| IQSEC1.1   | 5.05E-09 | 0.228479 | 0.115 | 0.064 | 7.55E-05 | M2 | IQSEC1        |
| DPY19L4.2  | 5.14E-09 | -0.10658 | 0.033 | 0.098 | 7.68E-05 | M2 | DPY19L4       |
| TPD52.4    | 5.16E-09 | -0.23943 | 0.143 | 0.243 | 7.71E-05 | M2 | TPD52         |
| RTF1.4     | 5.19E-09 | -0.16406 | 0.304 | 0.439 | 7.76E-05 | M2 | RTF1          |
| ZNF189.1   | 5.21E-09 | -0.13595 | 0.015 | 0.069 | 7.79E-05 | M2 | ZNF189        |
| MESDC2.1   | 5.30E-09 | 0.201703 | 0.452 | 0.401 | 7.92E-05 | M2 | MESDC2        |
| RBP7.2     | 5.36E-09 | 0.165048 | 0.087 | 0.042 | 8.00E-05 | M2 | RBP7          |
| GPR89A.2   | 5.37E-09 | -0.11139 | 0.057 | 0.133 | 8.02E-05 | M2 | GPR89A        |
| FHL2.2     | 5.39E-09 | -0.13625 | 0.004 | 0.049 | 8.06E-05 | M2 | FHL2          |
| EFNA3.2    | 5.41E-09 | -0.13245 | 0.011 | 0.063 | 8.09E-05 | M2 | EFNA3         |
| TSR1.3     | 5.42E-09 | -0.11969 | 0.102 | 0.196 | 8.10E-05 | M2 | TSR1          |
| MMS22L.2   | 5.46E-09 | -0.14992 | 0.014 | 0.067 | 8.16E-05 | M2 | MMS22L        |
| RRN3.1     | 5.48E-09 | -0.1411  | 0.063 | 0.139 | 8.19E-05 | M2 | RRN3          |
| RAB33A.3   | 5.58E-09 | -0.21744 | 0.043 | 0.111 | 8.33E-05 | M2 | RAB33A        |
| FAM63B.2   | 5.61E-09 | -0.11821 | 0.115 | 0.211 | 8.38E-05 | M2 | FAM63B        |
| STIP1.2    | 5.70E-09 | -0.15671 | 0.252 | 0.38  | 8.52E-05 | M2 | STIP1         |
| UNC50.3    | 5.79E-09 | -0.19061 | 0.236 | 0.363 | 8.65E-05 | M2 | UNC50         |
| FKBP14.1   | 5.82E-09 | -0.12639 | 0.034 | 0.099 | 8.69E-05 | M2 | FKBP14        |
| BET1.3     | 5.83E-09 | -0.15735 | 0.129 | 0.228 | 8.72E-05 | M2 | BET1          |
| MARCH7.1   | 5.86E-09 | -0.15214 | 0.157 | 0.262 | 8.76E-05 | M2 | 7-Mar         |
| THEM6.2    | 5.88E-09 | -0.13574 | 0.027 | 0.087 | 8.79E-05 | M2 | THEM6         |
| RPGRIP1L.1 | 5.94E-09 | -0.10377 | 0.01  | 0.061 | 8.88E-05 | M2 | RPGRIP1L      |
| TM9SF4.1   | 5.96E-09 | -0.14017 | 0.102 | 0.194 | 8.91E-05 | M2 | TM9SF4        |
| DIMT1.2    | 6.03E-09 | -0.12475 | 0.101 | 0.192 | 9.02E-05 | M2 | DIMT1         |
| CASP8.4    | 6.10E-09 | 0.161041 | 0.089 | 0.044 | 9.11E-05 | M2 | CASP8         |
| HMGB3.4    | 6.15E-09 | -0.16846 | 0.179 | 0.286 | 9.19E-05 | M2 | HMGB3         |
| FKBP5.5    | 6.18E-09 | 0.210703 | 0.392 | 0.311 | 9.23E-05 | M2 | FKBP5         |
| NAGK.3     | 6.25E-09 | 0.234144 | 0.432 | 0.378 | 9.34E-05 | M2 | NAGK          |
| ZGLP1.1    | 6.28E-09 | 0.202493 | 0.088 | 0.044 | 9.39E-05 | M2 | ZGLP1         |
| BIRC5.5    | 6.29E-09 | -0.27743 | 0.043 | 0.109 | 9.40E-05 | M2 | BIRC5         |
| SYT5.3     | 6.30E-09 | -0.14474 | 0.003 | 0.047 | 9.41E-05 | M2 | SYT5          |
| NUCKS1.3   | 6.31E-09 | -0.20022 | 0.526 | 0.644 | 9.43E-05 | M2 | NUCKS1        |
| SMCHD1.3   | 6.35E-09 | -0.11367 | 0.101 | 0.193 | 9.49E-05 | M2 | SMCHD1        |
| GPC6.2     | 6.35E-09 | -0.1387  | 0.001 | 0.044 | 9.50E-05 | M2 | GPC6          |
| PIGH.2     | 6.36E-09 | -0.15495 | 0.117 | 0.214 | 9.50E-05 | M2 | PIGH          |
| MPST.3     | 6.38E-09 | -0.13719 | 0.194 | 0.314 | 9.53E-05 | M2 | MPST          |
| TBCE.1     | 6.50E-09 | -0.13384 | 0.043 | 0.112 | 9.72E-05 | M2 | TBCE          |
| FAM188A.3  | 6.58E-09 | -0.12755 | 0.032 | 0.095 | 9.83E-05 | M2 | FAM188A       |
| CCDC82.2   | 6.59E-09 | -0.1319  | 0.169 | 0.279 | 9.86E-05 | M2 | CCDC82        |
| NONO.4     | 6.63E-09 | -0.17505 | 0.328 | 0.464 | 9.91E-05 | M2 | NONO          |
| SEPT2.2    | 6.64E-09 | -0.18705 | 0.453 | 0.59  | 9.92E-05 | M2 | 2-Sep         |
| AFF3.3     | 6.71E-09 | -0.14299 | 0.008 | 0.056 | 0.0001   | M2 | AFF3          |
| PDP1.2     | 6.73E-09 | -0.10489 | 0.057 | 0.131 | 0.000101 | M2 | PDP1          |
| RBM48.2    | 6.75E-09 | -0.13322 | 0.032 | 0.094 | 0.000101 | M2 | RBM48         |
| MLST8.3    | 6.78E-09 | -0.10024 | 0.139 | 0.243 | 0.000101 | M2 | MLST8         |
| RP11-486G  | 6.87E-09 | -0.11776 | 0.004 | 0.049 | 0.000103 | M2 | RP11-486G15.2 |
| INF2.3     | 6.89E-09 | 0.277694 | 0.137 | 0.082 | 0.000103 | M2 | INF2          |
| ASNSD1.4   | 6.90E-09 | -0.13255 | 0.167 | 0.278 | 0.000103 | M2 | ASNSD1        |
| ZMYM5      | 6.96E-09 | -0.10872 | 0.072 | 0.153 | 0.000104 | M2 | ZMYM5         |
| KATNB1.3   | 7.04E-09 | -0.10535 | 0.052 | 0.124 | 0.000105 | M2 | KATNB1        |
| SLC43A2.5  | 7.09E-09 | 0.267867 | 0.31  | 0.241 | 0.000106 | M2 | SLC43A2       |



|           |          |          |       |       |          |    |              |
|-----------|----------|----------|-------|-------|----------|----|--------------|
| RALGAPA1. | 7.12E-09 | -0.1272  | 0.06  | 0.135 | 0.000106 | M2 | RALGAPA1     |
| CALU.4    | 7.16E-09 | -0.18962 | 0.284 | 0.412 | 0.000107 | M2 | CALU         |
| DLG2.2    | 7.19E-09 | -0.1468  | 0.005 | 0.051 | 0.000107 | M2 | DLG2         |
| ZC3H7B.1  | 7.23E-09 | -0.10531 | 0.042 | 0.111 | 0.000108 | M2 | ZC3H7B       |
| TSTD1.3   | 7.25E-09 | 0.253798 | 0.266 | 0.192 | 0.000108 | M2 | TSTD1        |
| RNPEP.5   | 7.29E-09 | 0.288666 | 0.286 | 0.219 | 0.000109 | M2 | RNPEP        |
| CALCOCO1. | 7.32E-09 | -0.14378 | 0.073 | 0.153 | 0.000109 | M2 | CALCOCO1     |
| ZFAND5.5  | 7.34E-09 | 0.248895 | 0.492 | 0.461 | 0.00011  | M2 | ZFAND5       |
| BCR.3     | 7.35E-09 | -0.12615 | 0.014 | 0.067 | 0.00011  | M2 | BCR          |
| HIST1H1C. | 7.42E-09 | 0.304839 | 0.252 | 0.184 | 0.000111 | M2 | HIST1H1C     |
| TGOLN2.5  | 7.44E-09 | 0.267229 | 0.419 | 0.369 | 0.000111 | M2 | TGOLN2       |
| SFRP4.1   | 7.46E-09 | -0.19619 | 0.01  | 0.06  | 0.000111 | M2 | SFRP4        |
| TPST2.4   | 7.50E-09 | 0.274031 | 0.23  | 0.163 | 0.000112 | M2 | TPST2        |
| RNF115.3  | 7.53E-09 | -0.12581 | 0.147 | 0.25  | 0.000112 | M2 | RNF115       |
| CPQ.3     | 7.58E-09 | 0.214717 | 0.246 | 0.173 | 0.000113 | M2 | CPQ          |
| ZNF507    | 7.58E-09 | -0.11054 | 0.004 | 0.048 | 0.000113 | M2 | ZNF507       |
| TMEM184B. | 7.59E-09 | -0.12091 | 0.066 | 0.143 | 0.000113 | M2 | TMEM184B     |
| EIF4H.2   | 7.60E-09 | -0.18389 | 0.406 | 0.55  | 0.000114 | M2 | EIF4H        |
| FGF12.2   | 7.61E-09 | -0.1713  | 0.005 | 0.051 | 0.000114 | M2 | FGF12        |
| UBA3      | 7.72E-09 | -0.15904 | 0.151 | 0.252 | 0.000115 | M2 | UBA3         |
| ZFR2.2    | 7.73E-09 | -0.13852 | 0     | 0.041 | 0.000116 | M2 | ZFR2         |
| APOBEC3G. | 7.76E-09 | 0.229841 | 0.179 | 0.114 | 0.000116 | M2 | APOBEC3G     |
| STX16.1   | 7.89E-09 | -0.10692 | 0.117 | 0.215 | 0.000118 | M2 | STX16        |
| BRCA1     | 7.90E-09 | -0.12206 | 0.01  | 0.06  | 0.000118 | M2 | BRCA1        |
| PCNA.3    | 7.94E-09 | -0.20006 | 0.208 | 0.323 | 0.000119 | M2 | PCNA         |
| HAUS4.5   | 8.05E-09 | 0.171467 | 0.109 | 0.058 | 0.00012  | M2 | HAUS4        |
| DIP2A.2   | 8.07E-09 | -0.14211 | 0.049 | 0.118 | 0.000121 | M2 | DIP2A        |
| TOP3A.1   | 8.08E-09 | -0.11191 | 0.032 | 0.094 | 0.000121 | M2 | TOP3A        |
| GOLGA8B.1 | 8.08E-09 | -0.10124 | 0.006 | 0.053 | 0.000121 | M2 | GOLGA8B      |
| CTD-3074C | 8.13E-09 | -0.11675 | 0.011 | 0.062 | 0.000122 | M2 | CTD-307407.5 |
| PDIK1L.1  | 8.15E-09 | -0.13278 | 0.011 | 0.061 | 0.000122 | M2 | PDIK1L       |
| SNRNP40.2 | 8.30E-09 | -0.15766 | 0.215 | 0.337 | 0.000124 | M2 | SNRNP40      |
| C1orf27.3 | 8.31E-09 | -0.13658 | 0.097 | 0.185 | 0.000124 | M2 | C1orf27      |
| ID3.5     | 8.34E-09 | 0.118817 | 0.341 | 0.259 | 0.000125 | M2 | ID3          |
| TCERG1.3  | 8.35E-09 | -0.10012 | 0.115 | 0.211 | 0.000125 | M2 | TCERG1       |
| LTV1.1    | 8.46E-09 | -0.1459  | 0.102 | 0.192 | 0.000126 | M2 | LTV1         |
| WDR11.1   | 8.50E-09 | 0.221328 | 0.163 | 0.103 | 0.000127 | M2 | WDR11        |
| MRPS23.3  | 8.65E-09 | -0.16308 | 0.248 | 0.375 | 0.000129 | M2 | MRPS23       |
| NARF.2    | 8.68E-09 | -0.12569 | 0.215 | 0.337 | 0.00013  | M2 | NARF         |
| GSE1.4    | 8.73E-09 | -0.15869 | 0.033 | 0.095 | 0.00013  | M2 | GSE1         |
| ATP5F1.3  | 8.75E-09 | 0.103827 | 0.655 | 0.643 | 0.000131 | M2 | ATP5F1       |
| CLOCK.4   | 8.76E-09 | -0.15399 | 0.06  | 0.133 | 0.000131 | M2 | CLOCK        |
| NBEA.1    | 8.77E-09 | -0.13648 | 0.006 | 0.053 | 0.000131 | M2 | NBEA         |
| C1orf228. | 8.82E-09 | 0.126641 | 0.066 | 0.029 | 0.000132 | M2 | C1orf228     |
| SECISBP2. | 8.91E-09 | -0.12734 | 0.155 | 0.26  | 0.000133 | M2 | SECISBP2     |
| SREK1.4   | 8.94E-09 | -0.11378 | 0.207 | 0.331 | 0.000134 | M2 | SREK1        |
| C17orf58. | 8.97E-09 | -0.10642 | 0.101 | 0.192 | 0.000134 | M2 | C17orf58     |
| GTF3C4.2  | 8.98E-09 | -0.10283 | 0.017 | 0.07  | 0.000134 | M2 | GTF3C4       |
| RQCD1.1   | 9.04E-09 | -0.15464 | 0.105 | 0.193 | 0.000135 | M2 | RQCD1        |
| MDM1.1    | 9.06E-09 | -0.1204  | 0.02  | 0.076 | 0.000135 | M2 | MDM1         |
| GORAB.5   | 9.08E-09 | -0.10423 | 0.022 | 0.079 | 0.000136 | M2 | GORAB        |

|            |           |           |        |        |              |                |
|------------|-----------|-----------|--------|--------|--------------|----------------|
| GPKOW. 2   | 9. 11E-09 | -0. 15103 | 0. 066 | 0. 143 | 0. 000136 M2 | GPKOW          |
| METTL1. 4  | 9. 32E-09 | -0. 2091  | 0. 075 | 0. 153 | 0. 000139 M2 | METTL1         |
| SIGLEC14.  | 9. 36E-09 | 0. 15347  | 0. 086 | 0. 042 | 0. 00014 M2  | SIGLEC14       |
| PLEKHB2. 4 | 9. 38E-09 | 0. 233673 | 0. 434 | 0. 397 | 0. 00014 M2  | PLEKHB2        |
| RPRD2. 1   | 9. 45E-09 | -0. 11642 | 0. 06  | 0. 135 | 0. 000141 M2 | RPRD2          |
| ATMIN. 4   | 9. 47E-09 | -0. 11716 | 0. 05  | 0. 12  | 0. 000142 M2 | ATMIN          |
| SUPT4H1. 2 | 9. 61E-09 | 0. 217437 | 0. 52  | 0. 493 | 0. 000144 M2 | SUPT4H1        |
| IFT80. 2   | 9. 61E-09 | -0. 10851 | 0. 019 | 0. 074 | 0. 000144 M2 | IFT80          |
| CEP57. 2   | 9. 67E-09 | -0. 10631 | 0. 134 | 0. 237 | 0. 000145 M2 | CEP57          |
| KAT2A. 2   | 9. 74E-09 | -0. 12232 | 0. 083 | 0. 166 | 0. 000145 M2 | KAT2A          |
| NEUROD1. 2 | 9. 81E-09 | -0. 15117 | 0      | 0. 04  | 0. 000147 M2 | NEUROD1        |
| LTBP2      | 9. 86E-09 | 0. 186748 | 0. 056 | 0. 023 | 0. 000147 M2 | LTBP2          |
| CCDC142. 1 | 9. 87E-09 | -0. 12539 | 0. 015 | 0. 068 | 0. 000147 M2 | CCDC142        |
| ST8SIA5. 2 | 9. 87E-09 | -0. 12065 | 0. 003 | 0. 045 | 0. 000148 M2 | ST8SIA5        |
| DPH5. 1    | 9. 93E-09 | -0. 17198 | 0. 087 | 0. 17  | 0. 000148 M2 | DPH5           |
| NUDT9. 2   | 9. 93E-09 | -0. 16726 | 0. 132 | 0. 229 | 0. 000148 M2 | NUDT9          |
| TMCC1. 4   | 9. 95E-09 | -0. 10102 | 0. 049 | 0. 118 | 0. 000149 M2 | TMCC1          |
| WDR70      | 1. 02E-08 | -0. 15988 | 0. 077 | 0. 156 | 0. 000152 M2 | WDR70          |
| PDZD4. 3   | 1. 02E-08 | -0. 1187  | 0. 005 | 0. 05  | 0. 000152 M2 | PDZD4          |
| TADA2A. 1  | 1. 03E-08 | -0. 10701 | 0. 022 | 0. 078 | 0. 000154 M2 | TADA2A         |
| PIFO. 3    | 1. 04E-08 | -0. 21666 | 0. 006 | 0. 052 | 0. 000155 M2 | PIFO           |
| GRIK3. 2   | 1. 04E-08 | -0. 10197 | 0. 004 | 0. 048 | 0. 000156 M2 | GRIK3          |
| GRAMD1A. 3 | 1. 07E-08 | -0. 12206 | 0. 172 | 0. 282 | 0. 00016 M2  | GRAMD1A        |
| MAP2K2. 4  | 1. 07E-08 | -0. 1617  | 0. 202 | 0. 309 | 0. 00016 M2  | MAP2K2         |
| GADD45G. 4 | 1. 08E-08 | -0. 27332 | 0. 17  | 0. 261 | 0. 000161 M2 | GADD45G        |
| TAPBP. 5   | 1. 09E-08 | 0. 25679  | 0. 395 | 0. 339 | 0. 000163 M2 | TAPBP          |
| FOPNL. 2   | 1. 09E-08 | -0. 14793 | 0. 109 | 0. 2   | 0. 000163 M2 | FOPNL          |
| ROGDI. 3   | 1. 09E-08 | -0. 1412  | 0. 137 | 0. 234 | 0. 000163 M2 | ROGDI          |
| CA9. 3     | 1. 11E-08 | -0. 17994 | 0. 001 | 0. 043 | 0. 000165 M2 | CA9            |
| OSGEPL1. 1 | 1. 11E-08 | -0. 12027 | 0. 018 | 0. 072 | 0. 000166 M2 | OSGEPL1        |
| CDCA4. 3   | 1. 11E-08 | -0. 12178 | 0. 031 | 0. 092 | 0. 000166 M2 | CDCA4          |
| IFI35. 3   | 1. 12E-08 | 0. 25046  | 0. 298 | 0. 226 | 0. 000168 M2 | IFI35          |
| SMIM14. 3  | 1. 12E-08 | -0. 16695 | 0. 218 | 0. 338 | 0. 000168 M2 | SMIM14         |
| G6PC3. 2   | 1. 14E-08 | -0. 16291 | 0. 235 | 0. 355 | 0. 00017 M2  | G6PC3          |
| CDKL3. 1   | 1. 14E-08 | -0. 13907 | 0. 046 | 0. 114 | 0. 000171 M2 | CDKL3          |
| TMEM151A.  | 1. 15E-08 | -0. 16031 | 0. 003 | 0. 045 | 0. 000171 M2 | TMEM151A       |
| RIPPLY2. 1 | 1. 15E-08 | -0. 10431 | 0      | 0. 04  | 0. 000172 M2 | RIPPLY2        |
| DAPP1. 4   | 1. 15E-08 | 0. 112403 | 0. 06  | 0. 025 | 0. 000172 M2 | DAPP1          |
| UNC80. 1   | 1. 16E-08 | -0. 10118 | 0. 001 | 0. 043 | 0. 000173 M2 | UNC80          |
| MASP1. 2   | 1. 16E-08 | -0. 15452 | 0. 001 | 0. 043 | 0. 000174 M2 | MASP1          |
| RP4-798A1  | 1. 17E-08 | -0. 11149 | 0. 001 | 0. 043 | 0. 000174 M2 | RP4-798A10. 7  |
| S100BPB    | 1. 17E-08 | -0. 11805 | 0. 05  | 0. 119 | 0. 000175 M2 | S100BPB        |
| RUNX2. 2   | 1. 17E-08 | 0. 13051  | 0. 061 | 0. 026 | 0. 000175 M2 | RUNX2          |
| MFS10. 2   | 1. 18E-08 | 0. 297822 | 0. 351 | 0. 298 | 0. 000177 M2 | MFS10          |
| RP11-544A  | 1. 19E-08 | -0. 16634 | 0. 028 | 0. 087 | 0. 000177 M2 | RP11-544A12. 8 |
| ASPM. 5    | 1. 20E-08 | -0. 1547  | 0. 005 | 0. 05  | 0. 00018 M2  | ASPM           |
| METTL4. 1  | 1. 21E-08 | -0. 11044 | 0. 022 | 0. 078 | 0. 00018 M2  | METTL4         |
| TMEM206. 4 | 1. 21E-08 | -0. 15815 | 0. 14  | 0. 237 | 0. 000181 M2 | TMEM206        |
| TAP1. 1    | 1. 22E-08 | -0. 18588 | 0. 16  | 0. 26  | 0. 000182 M2 | TAP1           |
| CTDSP1. 5  | 1. 22E-08 | 0. 291263 | 0. 282 | 0. 217 | 0. 000182 M2 | CTDSP1         |
| SECISBP2L  | 1. 22E-08 | -0. 14404 | 0. 095 | 0. 18  | 0. 000183 M2 | SECISBP2L      |

|           |          |          |       |       |          |    |              |
|-----------|----------|----------|-------|-------|----------|----|--------------|
| SPC24.5   | 1.23E-08 | -0.13772 | 0.006 | 0.052 | 0.000184 | M2 | SPC24        |
| FGF14-AS2 | 1.26E-08 | -0.10076 | 0.008 | 0.054 | 0.000189 | M2 | FGF14-AS2    |
| C19orf66. | 1.28E-08 | -0.14874 | 0.158 | 0.263 | 0.000192 | M2 | C19orf66     |
| CENPJ.1   | 1.34E-08 | -0.1172  | 0.017 | 0.069 | 0.0002   | M2 | CENPJ        |
| KPNA3.2   | 1.34E-08 | -0.12588 | 0.158 | 0.263 | 0.000201 | M2 | KPNA3        |
| WDR18.3   | 1.36E-08 | -0.10498 | 0.18  | 0.293 | 0.000203 | M2 | WDR18        |
| GFM2.1    | 1.36E-08 | -0.14696 | 0.032 | 0.092 | 0.000203 | M2 | GFM2         |
| BMF.2     | 1.36E-08 | 0.12698  | 0.049 | 0.019 | 0.000204 | M2 | BMF          |
| EVI5L.2   | 1.36E-08 | -0.10463 | 0.013 | 0.063 | 0.000204 | M2 | EVI5L        |
| UBA6-AS1. | 1.39E-08 | -0.11712 | 0.028 | 0.087 | 0.000207 | M2 | UBA6-AS1     |
| ILF2.2    | 1.39E-08 | -0.18416 | 0.442 | 0.583 | 0.000208 | M2 | ILF2         |
| RNF219.2  | 1.40E-08 | -0.16303 | 0.051 | 0.119 | 0.00021  | M2 | RNF219       |
| CDK5RAP2. | 1.41E-08 | -0.13293 | 0.049 | 0.117 | 0.000211 | M2 | CDK5RAP2     |
| NPAT.1    | 1.42E-08 | -0.11593 | 0.027 | 0.085 | 0.000213 | M2 | NPAT         |
| SMARCAD1. | 1.44E-08 | -0.11601 | 0.045 | 0.111 | 0.000215 | M2 | SMARCAD1     |
| CES1.1    | 1.44E-08 | 0.102176 | 0.032 | 0.01  | 0.000215 | M2 | CES1         |
| FAM189B.1 | 1.45E-08 | -0.10385 | 0.04  | 0.105 | 0.000217 | M2 | FAM189B      |
| MKRN2.1   | 1.46E-08 | -0.14741 | 0.078 | 0.157 | 0.000218 | M2 | MKRN2        |
| GPD1.4    | 1.47E-08 | -0.20778 | 0.006 | 0.051 | 0.00022  | M2 | GPD1         |
| MPV17L.1  | 1.47E-08 | -0.1266  | 0.022 | 0.077 | 0.00022  | M2 | MPV17L       |
| CCSAP.2   | 1.49E-08 | -0.13408 | 0.04  | 0.104 | 0.000223 | M2 | CCSAP        |
| MYLK.2    | 1.50E-08 | -0.19563 | 0.013 | 0.062 | 0.000224 | M2 | MYLK         |
| UBL3.5    | 1.50E-08 | -0.178   | 0.241 | 0.362 | 0.000224 | M2 | UBL3         |
| DNAJC2.3  | 1.51E-08 | -0.13916 | 0.193 | 0.305 | 0.000226 | M2 | DNAJC2       |
| KLF15.1   | 1.51E-08 | -0.12162 | 0.001 | 0.042 | 0.000226 | M2 | KLF15        |
| THAP1.1   | 1.52E-08 | -0.12375 | 0.069 | 0.146 | 0.000226 | M2 | THAP1        |
| ZNF85.1   | 1.52E-08 | -0.10589 | 0.029 | 0.089 | 0.000227 | M2 | ZNF85        |
| RP11-412D | 1.52E-08 | -0.11222 | 0.003 | 0.044 | 0.000227 | M2 | RP11-412D9.4 |
| DYNC1LI1. | 1.53E-08 | -0.13054 | 0.169 | 0.274 | 0.000228 | M2 | DYNC1LI1     |
| FARSA.2   | 1.55E-08 | -0.10671 | 0.206 | 0.328 | 0.000232 | M2 | FARSA        |
| TNNI2.4   | 1.56E-08 | 0.10391  | 0.046 | 0.017 | 0.000234 | M2 | TNNI2        |
| ALDH1L1.4 | 1.57E-08 | -0.18982 | 0.015 | 0.067 | 0.000234 | M2 | ALDH1L1      |
| ALCAM.4   | 1.59E-08 | 0.249048 | 0.259 | 0.191 | 0.000237 | M2 | ALCAM        |
| TMEM5.3   | 1.60E-08 | -0.12269 | 0.121 | 0.214 | 0.000239 | M2 | TMEM5        |
| RND3.4    | 1.62E-08 | -0.20908 | 0.153 | 0.249 | 0.000242 | M2 | RND3         |
| AP006621. | 1.62E-08 | -0.10396 | 0.014 | 0.065 | 0.000243 | M2 | AP006621.5   |
| CDC14B.1  | 1.63E-08 | -0.12432 | 0.015 | 0.066 | 0.000243 | M2 | CDC14B       |
| MINA      | 1.65E-08 | -0.11873 | 0.064 | 0.138 | 0.000247 | M2 | MINA         |
| CABIN1.1  | 1.67E-08 | -0.13404 | 0.064 | 0.138 | 0.00025  | M2 | CABIN1       |
| IGFBP4.1  | 1.70E-08 | 0.317166 | 0.111 | 0.063 | 0.000254 | M2 | IGFBP4       |
| GUCY1A2.1 | 1.71E-08 | -0.10795 | 0     | 0.039 | 0.000255 | M2 | GUCY1A2      |
| TFAP2A.2  | 1.71E-08 | -0.13539 | 0     | 0.039 | 0.000255 | M2 | TFAP2A       |
| AP3D1.3   | 1.71E-08 | -0.12518 | 0.203 | 0.316 | 0.000255 | M2 | AP3D1        |
| MSH3.1    | 1.73E-08 | -0.12722 | 0.045 | 0.111 | 0.000258 | M2 | MSH3         |
| TMEM55A.4 | 1.74E-08 | -0.11593 | 0.139 | 0.239 | 0.00026  | M2 | TMEM55A      |
| CNTN1.1   | 1.75E-08 | -0.1481  | 0.001 | 0.042 | 0.000262 | M2 | CNTN1        |
| EDEM1.4   | 1.76E-08 | 0.213937 | 0.129 | 0.076 | 0.000263 | M2 | EDEM1        |
| ANKRD11.3 | 1.81E-08 | -0.13197 | 0.208 | 0.324 | 0.00027  | M2 | ANKRD11      |
| TMEM128.3 | 1.81E-08 | -0.10351 | 0.184 | 0.299 | 0.00027  | M2 | TMEM128      |
| CNTN2.3   | 1.81E-08 | -0.27474 | 0.003 | 0.044 | 0.000271 | M2 | CNTN2        |
| RNPEPL1.3 | 1.84E-08 | 0.317035 | 0.186 | 0.126 | 0.000274 | M2 | RNPEPL1      |

|           |          |          |       |       |          |    |           |
|-----------|----------|----------|-------|-------|----------|----|-----------|
| TMEM246.3 | 1.84E-08 | -0.14398 | 0.006 | 0.051 | 0.000275 | M2 | TMEM246   |
| UQCRC2.2  | 1.84E-08 | 0.148894 | 0.544 | 0.511 | 0.000275 | M2 | UQCRC2    |
| CDK18.2   | 1.85E-08 | -0.22037 | 0.026 | 0.081 | 0.000277 | M2 | CDK18     |
| ZNF529.2  | 1.86E-08 | -0.11626 | 0.013 | 0.062 | 0.000278 | M2 | ZNF529    |
| TSEN54.2  | 1.86E-08 | -0.1213  | 0.051 | 0.12  | 0.000279 | M2 | TSEN54    |
| KIAA0319L | 1.86E-08 | -0.11129 | 0.102 | 0.19  | 0.000279 | M2 | KIAA0319L |
| TIMP2.3   | 1.87E-08 | 0.307073 | 0.375 | 0.322 | 0.00028  | M2 | TIMP2     |
| LRRC42.3  | 1.89E-08 | -0.11782 | 0.072 | 0.149 | 0.000282 | M2 | LRRC42    |
| EPHB1.2   | 1.89E-08 | -0.12947 | 0.005 | 0.049 | 0.000282 | M2 | EPHB1     |
| ILK.2     | 1.90E-08 | 0.224667 | 0.413 | 0.362 | 0.000284 | M2 | ILK       |
| AZI2.3    | 1.91E-08 | 0.287053 | 0.355 | 0.297 | 0.000286 | M2 | AZI2      |
| ZFP1.2    | 1.92E-08 | -0.11449 | 0.018 | 0.07  | 0.000288 | M2 | ZFP1      |
| KRT7.2    | 1.93E-08 | -0.15951 | 0.001 | 0.041 | 0.000288 | M2 | KRT7      |
| PN01.2    | 1.97E-08 | -0.11762 | 0.116 | 0.208 | 0.000294 | M2 | PN01      |
| ZNF720.1  | 1.97E-08 | -0.15042 | 0.061 | 0.133 | 0.000294 | M2 | ZNF720    |
| ZNF25.1   | 2.00E-08 | -0.10727 | 0.024 | 0.081 | 0.000298 | M2 | ZNF25     |
| DCAF10.2  | 2.02E-08 | -0.11927 | 0.097 | 0.183 | 0.000302 | M2 | DCAF10    |
| POLR2C.4  | 2.02E-08 | -0.17431 | 0.239 | 0.358 | 0.000303 | M2 | POLR2C    |
| ONECUT2.2 | 2.03E-08 | -0.13514 | 0.004 | 0.046 | 0.000303 | M2 | ONECUT2   |
| HSPH1.2   | 2.04E-08 | -0.12787 | 0.244 | 0.369 | 0.000305 | M2 | HSPH1     |
| PDZD2     | 2.04E-08 | -0.11391 | 0.004 | 0.046 | 0.000305 | M2 | PDZD2     |
| DTD2.2    | 2.05E-08 | -0.11588 | 0.02  | 0.074 | 0.000306 | M2 | DTD2      |
| JDP2.5    | 2.05E-08 | 0.15185  | 0.12  | 0.067 | 0.000307 | M2 | JDP2      |
| PSD2.2    | 2.06E-08 | -0.13299 | 0.003 | 0.044 | 0.000307 | M2 | PSD2      |
| USE1.5    | 2.06E-08 | -0.15131 | 0.217 | 0.338 | 0.000308 | M2 | USE1      |
| HSP90AA1. | 2.07E-08 | -0.15167 | 0.895 | 0.888 | 0.000309 | M2 | HSP90AA1  |
| FHOD1.5   | 2.11E-08 | 0.200453 | 0.1   | 0.053 | 0.000315 | M2 | FHOD1     |
| N4BP2L2.1 | 2.12E-08 | -0.19625 | 0.387 | 0.525 | 0.000317 | M2 | N4BP2L2   |
| SYNGAP1.3 | 2.13E-08 | -0.10796 | 0.01  | 0.057 | 0.000318 | M2 | SYNGAP1   |
| BNIP2.5   | 2.15E-08 | 0.267723 | 0.321 | 0.26  | 0.000321 | M2 | BNIP2     |
| KCTD15.1  | 2.16E-08 | -0.10043 | 0.005 | 0.048 | 0.000323 | M2 | KCTD15    |
| KLHDC3.3  | 2.17E-08 | -0.14143 | 0.245 | 0.37  | 0.000324 | M2 | KLHDC3    |
| PARP2.2   | 2.17E-08 | -0.1182  | 0.049 | 0.115 | 0.000324 | M2 | PARP2     |
| POLI      | 2.18E-08 | -0.13211 | 0.033 | 0.093 | 0.000326 | M2 | POLI      |
| NAT8L.2   | 2.22E-08 | -0.10859 | 0.008 | 0.053 | 0.000331 | M2 | NAT8L     |
| SGOL2.3   | 2.22E-08 | -0.19436 | 0.034 | 0.094 | 0.000332 | M2 | SGOL2     |
| STAU1.3   | 2.23E-08 | -0.14084 | 0.254 | 0.374 | 0.000333 | M2 | STAU1     |
| CHST11.5  | 2.23E-08 | 0.241967 | 0.278 | 0.208 | 0.000334 | M2 | CHST11    |
| ATP6V1E2  | 2.25E-08 | -0.11577 | 0.014 | 0.063 | 0.000337 | M2 | ATP6V1E2  |
| COX5A.3   | 2.27E-08 | 0.138769 | 0.621 | 0.596 | 0.000339 | M2 | COX5A     |
| HADHB.2   | 2.27E-08 | 0.185193 | 0.49  | 0.459 | 0.00034  | M2 | HADHB     |
| FAM122A.4 | 2.29E-08 | -0.13072 | 0.073 | 0.149 | 0.000342 | M2 | FAM122A   |
| ACD.3     | 2.29E-08 | -0.10786 | 0.089 | 0.173 | 0.000342 | M2 | ACD       |
| CDC7      | 2.34E-08 | -0.10871 | 0.003 | 0.043 | 0.00035  | M2 | CDC7      |
| NIP7.4    | 2.35E-08 | -0.13998 | 0.093 | 0.178 | 0.00035  | M2 | NIP7      |
| SLC27A5.3 | 2.36E-08 | -0.17167 | 0.066 | 0.141 | 0.000353 | M2 | SLC27A5   |
| STX17.1   | 2.38E-08 | -0.10449 | 0.049 | 0.116 | 0.000355 | M2 | STX17     |
| PCBP1.5   | 2.42E-08 | 0.155143 | 0.609 | 0.586 | 0.000362 | M2 | PCBP1     |
| PCCB.1    | 2.46E-08 | -0.15448 | 0.096 | 0.18  | 0.000367 | M2 | PCCB      |
| PPP2R3A.2 | 2.49E-08 | -0.10426 | 0.014 | 0.064 | 0.000372 | M2 | PPP2R3A   |
| TECPR2.1  | 2.49E-08 | -0.13302 | 0.015 | 0.066 | 0.000373 | M2 | TECPR2    |

|           |          |          |       |       |          |    |               |
|-----------|----------|----------|-------|-------|----------|----|---------------|
| IFNAR2.3  | 2.51E-08 | 0.335376 | 0.255 | 0.195 | 0.000375 | M2 | IFNAR2        |
| RGS11.2   | 2.53E-08 | -0.11475 | 0.006 | 0.05  | 0.000378 | M2 | RGS11         |
| RP11-430H | 2.55E-08 | -0.10152 | 0.001 | 0.041 | 0.000381 | M2 | RP11-430H10.1 |
| ZFP30.1   | 2.59E-08 | -0.10417 | 0.008 | 0.052 | 0.000387 | M2 | ZFP30         |
| WBP1L.5   | 2.59E-08 | 0.262041 | 0.165 | 0.105 | 0.000388 | M2 | WBP1L         |
| SENP5.2   | 2.59E-08 | -0.11598 | 0.068 | 0.143 | 0.000388 | M2 | SENP5         |
| PHF20.2   | 2.60E-08 | -0.10751 | 0.208 | 0.328 | 0.000389 | M2 | PHF20         |
| DICER1-AS | 2.62E-08 | -0.12942 | 0.01  | 0.057 | 0.000392 | M2 | DICER1-AS1    |
| CCT3.3    | 2.63E-08 | -0.20673 | 0.447 | 0.587 | 0.000393 | M2 | CCT3          |
| CEBPD.3   | 2.65E-08 | 0.129573 | 0.554 | 0.452 | 0.000396 | M2 | CEBPD         |
| AHSA2.2   | 2.66E-08 | -0.13202 | 0.057 | 0.128 | 0.000398 | M2 | AHSA2         |
| SMIM3.3   | 2.66E-08 | 0.178458 | 0.072 | 0.033 | 0.000398 | M2 | SMIM3         |
| CGRRF1.3  | 2.67E-08 | -0.16151 | 0.088 | 0.169 | 0.000399 | M2 | CGRRF1        |
| GEM.1     | 2.68E-08 | 0.241058 | 0.149 | 0.093 | 0.000401 | M2 | GEM           |
| ABCC3.2   | 2.72E-08 | 0.25191  | 0.152 | 0.095 | 0.000406 | M2 | ABCC3         |
| HENMT1.4  | 2.73E-08 | 0.130853 | 0.066 | 0.03  | 0.000408 | M2 | HENMT1        |
| ARL13B.5  | 2.74E-08 | -0.1347  | 0.072 | 0.148 | 0.000409 | M2 | ARL13B        |
| IL33.3    | 2.75E-08 | -0.12473 | 0.005 | 0.048 | 0.00041  | M2 | IL33          |
| COX17.1   | 2.76E-08 | 0.164101 | 0.557 | 0.515 | 0.000412 | M2 | COX17         |
| WDR73.3   | 2.76E-08 | -0.10575 | 0.07  | 0.147 | 0.000413 | M2 | WDR73         |
| SERPINI1. | 2.76E-08 | -0.18201 | 0.01  | 0.056 | 0.000413 | M2 | SERPINI1      |
| CEP76     | 2.77E-08 | -0.1248  | 0.005 | 0.048 | 0.000414 | M2 | CEP76         |
| DERL2.2   | 2.79E-08 | 0.237286 | 0.401 | 0.349 | 0.000416 | M2 | DERL2         |
| PCED1B.3  | 2.79E-08 | 0.143796 | 0.072 | 0.033 | 0.000417 | M2 | PCED1B        |
| SGOL1.3   | 2.80E-08 | -0.16657 | 0.013 | 0.061 | 0.000418 | M2 | SGOL1         |
| EIF3L.3   | 2.81E-08 | 0.126952 | 0.633 | 0.604 | 0.000419 | M2 | EIF3L         |
| RBM23     | 2.84E-08 | -0.1826  | 0.17  | 0.271 | 0.000424 | M2 | RBM23         |
| CASP2.1   | 2.87E-08 | -0.10807 | 0.041 | 0.104 | 0.000429 | M2 | CASP2         |
| RP11-421L | 2.88E-08 | -0.1248  | 0.028 | 0.085 | 0.00043  | M2 | RP11-421L21.3 |
| CADPS.3   | 2.89E-08 | -0.1876  | 0.004 | 0.045 | 0.000431 | M2 | CADPS         |
| FAM32A.3  | 2.93E-08 | -0.16829 | 0.323 | 0.461 | 0.000438 | M2 | FAM32A        |
| ZNF573.2  | 2.93E-08 | -0.13281 | 0.017 | 0.067 | 0.000438 | M2 | ZNF573        |
| PKMYT1.3  | 2.93E-08 | -0.10234 | 0.004 | 0.045 | 0.000439 | M2 | PKMYT1        |
| RBBP6.2   | 2.94E-08 | -0.11272 | 0.204 | 0.321 | 0.00044  | M2 | RBBP6         |
| PMM1.4    | 2.95E-08 | -0.11985 | 0.14  | 0.24  | 0.000441 | M2 | PMM1          |
| ACO05618. | 2.95E-08 | -0.12516 | 0.004 | 0.045 | 0.000441 | M2 | ACO05618.6    |
| ZCCHC7.3  | 2.98E-08 | -0.12482 | 0.073 | 0.148 | 0.000445 | M2 | ZCCHC7        |
| FOXRED1.1 | 2.98E-08 | -0.11615 | 0.046 | 0.111 | 0.000445 | M2 | FOXRED1       |
| INA.3     | 2.99E-08 | -0.14815 | 0.004 | 0.045 | 0.000448 | M2 | INA           |
| GOLIM4.3  | 3.02E-08 | -0.12898 | 0.217 | 0.334 | 0.000452 | M2 | GOLIM4        |
| RABL2B.1  | 3.06E-08 | -0.11855 | 0.06  | 0.132 | 0.000457 | M2 | RABL2B        |
| NUP54.2   | 3.06E-08 | -0.12135 | 0.098 | 0.183 | 0.000458 | M2 | NUP54         |
| ATAD2.3   | 3.08E-08 | -0.11363 | 0.024 | 0.079 | 0.00046  | M2 | ATAD2         |
| CDC37.1   | 3.08E-08 | 0.165462 | 0.567 | 0.542 | 0.000461 | M2 | CDC37         |
| SH3BP2.4  | 3.10E-08 | 0.247612 | 0.197 | 0.134 | 0.000464 | M2 | SH3BP2        |
| MAP3K7.2  | 3.13E-08 | -0.12277 | 0.119 | 0.211 | 0.000467 | M2 | MAP3K7        |
| EBPL.3    | 3.13E-08 | -0.13478 | 0.197 | 0.31  | 0.000468 | M2 | EBPL          |
| ERBB3.3   | 3.14E-08 | -0.1742  | 0.001 | 0.04  | 0.000469 | M2 | ERBB3         |
| NUP85.2   | 3.14E-08 | -0.11134 | 0.057 | 0.128 | 0.000469 | M2 | NUP85         |
| TRPC4AP.3 | 3.14E-08 | -0.11609 | 0.156 | 0.257 | 0.00047  | M2 | TRPC4AP       |
| NCAPH2.3  | 3.18E-08 | -0.11308 | 0.063 | 0.135 | 0.000475 | M2 | NCAPH2        |

|            |          |          |       |       |          |    |               |
|------------|----------|----------|-------|-------|----------|----|---------------|
| TOR1AIP2.  | 3.19E-08 | -0.14521 | 0.156 | 0.258 | 0.000476 | M2 | TOR1AIP2      |
| DKC1.1     | 3.20E-08 | -0.11661 | 0.167 | 0.273 | 0.000478 | M2 | DKC1          |
| RP11-315A  | 3.21E-08 | -0.11906 | 0     | 0.038 | 0.00048  | M2 | RP11-315A16.1 |
| NSUN6.1    | 3.21E-08 | -0.14415 | 0.024 | 0.079 | 0.00048  | M2 | NSUN6         |
| NRG2.2     | 3.22E-08 | -0.10089 | 0.003 | 0.043 | 0.000481 | M2 | NRG2          |
| SH3YL1.4   | 3.25E-08 | -0.10232 | 0.101 | 0.187 | 0.000485 | M2 | SH3YL1        |
| MCM3.3     | 3.32E-08 | -0.13463 | 0.073 | 0.147 | 0.000496 | M2 | MCM3          |
| GSTM4.3    | 3.32E-08 | -0.1416  | 0.12  | 0.211 | 0.000496 | M2 | GSTM4         |
| POMT2.1    | 3.35E-08 | -0.10042 | 0.022 | 0.075 | 0.000501 | M2 | POMT2         |
| RASAL3.5   | 3.37E-08 | 0.129812 | 0.102 | 0.054 | 0.000503 | M2 | RASAL3        |
| EDNRB.3    | 3.38E-08 | -0.12232 | 0.106 | 0.193 | 0.000505 | M2 | EDNRB         |
| HMMR.2     | 3.40E-08 | -0.12275 | 0.003 | 0.043 | 0.000509 | M2 | HMMR          |
| NFKBIZ.5   | 3.43E-08 | 0.235029 | 0.24  | 0.17  | 0.000512 | M2 | NFKBIZ        |
| FAM13C.2   | 3.44E-08 | -0.1233  | 0.003 | 0.043 | 0.000514 | M2 | FAM13C        |
| LRBA       | 3.44E-08 | -0.10554 | 0.017 | 0.067 | 0.000515 | M2 | LRBA          |
| THUMPD3.2  | 3.45E-08 | -0.12598 | 0.111 | 0.2   | 0.000516 | M2 | THUMPD3       |
| CDC5L.4    | 3.46E-08 | -0.1188  | 0.181 | 0.288 | 0.000517 | M2 | CDC5L         |
| PACRGL.1   | 3.48E-08 | -0.10074 | 0.02  | 0.073 | 0.00052  | M2 | PACRGL        |
| PAK1.5     | 3.48E-08 | 0.230385 | 0.235 | 0.165 | 0.000521 | M2 | PAK1          |
| ORAOV1.2   | 3.50E-08 | -0.10301 | 0.029 | 0.087 | 0.000523 | M2 | ORAOV1        |
| ZYG11B.4   | 3.51E-08 | -0.10513 | 0.077 | 0.154 | 0.000524 | M2 | ZYG11B        |
| ELAVL1.2   | 3.52E-08 | -0.13549 | 0.235 | 0.352 | 0.000527 | M2 | ELAVL1        |
| PLB1.4     | 3.55E-08 | 0.10948  | 0.08  | 0.039 | 0.000531 | M2 | PLB1          |
| SUGP1.2    | 3.57E-08 | -0.11289 | 0.066 | 0.14  | 0.000533 | M2 | SUGP1         |
| ZSCAN9     | 3.57E-08 | -0.13908 | 0.027 | 0.082 | 0.000533 | M2 | ZSCAN9        |
| ZNF721.1   | 3.58E-08 | -0.11187 | 0.077 | 0.154 | 0.000535 | M2 | ZNF721        |
| SLC25A37.3 | 3.64E-08 | 0.239993 | 0.367 | 0.306 | 0.000543 | M2 | SLC25A37      |
| BTN3A2.2   | 3.65E-08 | -0.20341 | 0.077 | 0.152 | 0.000545 | M2 | BTN3A2        |
| NECAB1.4   | 3.65E-08 | -0.17943 | 0.001 | 0.04  | 0.000546 | M2 | NECAB1        |
| TYW5.1     | 3.66E-08 | -0.1514  | 0.036 | 0.096 | 0.000547 | M2 | TYW5          |
| RP11-51J9  | 3.69E-08 | -0.13211 | 0.07  | 0.146 | 0.000551 | M2 | RP11-51J9.5   |
| ATG3.4     | 3.70E-08 | 0.251375 | 0.414 | 0.374 | 0.000553 | M2 | ATG3          |
| MIR4458HG  | 3.71E-08 | -0.26211 | 0.091 | 0.165 | 0.000555 | M2 | MIR4458HG     |
| TBC1D19.1  | 3.73E-08 | -0.12984 | 0.015 | 0.065 | 0.000558 | M2 | TBC1D19       |
| DDX55.3    | 3.75E-08 | -0.15612 | 0.055 | 0.122 | 0.00056  | M2 | DDX55         |
| ZNF7.1     | 3.75E-08 | -0.12289 | 0.086 | 0.166 | 0.00056  | M2 | ZNF7          |
| VWA9.2     | 3.76E-08 | -0.11613 | 0.061 | 0.133 | 0.000561 | M2 | VWA9          |
| PPM1B.2    | 3.78E-08 | -0.11441 | 0.197 | 0.308 | 0.000565 | M2 | PPM1B         |
| MSTO1.1    | 3.80E-08 | -0.11639 | 0.032 | 0.09  | 0.000567 | M2 | MSTO1         |
| DNTTIP1.2  | 3.87E-08 | -0.13418 | 0.222 | 0.338 | 0.000578 | M2 | DNTTIP1       |
| AURKB.4    | 3.87E-08 | -0.14522 | 0.008 | 0.052 | 0.000578 | M2 | AURKB         |
| NOM1.3     | 3.95E-08 | -0.1056  | 0.054 | 0.12  | 0.00059  | M2 | NOM1          |
| DDX60L.2   | 3.96E-08 | 0.176913 | 0.097 | 0.052 | 0.000591 | M2 | DDX60L        |
| METTL21B.3 | 3.98E-08 | -0.13389 | 0.018 | 0.068 | 0.000594 | M2 | METTL21B      |
| MYBPC1.2   | 3.98E-08 | -0.17697 | 0.005 | 0.047 | 0.000594 | M2 | MYBPC1        |
| KIAA0930.4 | 4.04E-08 | 0.212377 | 0.206 | 0.14  | 0.000603 | M2 | KIAA0930      |
| ZNF530.3   | 4.04E-08 | -0.10406 | 0.014 | 0.062 | 0.000604 | M2 | ZNF530        |
| C7orf49.2  | 4.04E-08 | -0.11835 | 0.123 | 0.214 | 0.000604 | M2 | C7orf49       |
| POLR2E.3   | 4.07E-08 | 0.173475 | 0.558 | 0.533 | 0.000608 | M2 | POLR2E        |
| PIAS4.2    | 4.08E-08 | -0.1308  | 0.065 | 0.136 | 0.00061  | M2 | PIAS4         |
| SCAMP1.3   | 4.09E-08 | -0.10327 | 0.126 | 0.22  | 0.000612 | M2 | SCAMP1        |

|           |          |          |       |       |          |    |            |
|-----------|----------|----------|-------|-------|----------|----|------------|
| CDC20.3   | 4.10E-08 | -0.20127 | 0.02  | 0.072 | 0.000613 | M2 | CDC20      |
| PTTG1.4   | 4.11E-08 | -0.22569 | 0.146 | 0.236 | 0.000614 | M2 | PTTG1      |
| TUBD1.1   | 4.12E-08 | -0.11405 | 0.031 | 0.088 | 0.000616 | M2 | TUBD1      |
| DNAJB14.1 | 4.15E-08 | -0.12752 | 0.116 | 0.206 | 0.00062  | M2 | DNAJB14    |
| KIFC1.3   | 4.18E-08 | -0.14235 | 0.014 | 0.062 | 0.000624 | M2 | KIFC1      |
| PPM1D.1   | 4.22E-08 | -0.10727 | 0.038 | 0.099 | 0.000631 | M2 | PPM1D      |
| HAAO.4    | 4.25E-08 | 0.12674  | 0.051 | 0.021 | 0.000635 | M2 | HAAO       |
| NOP58.3   | 4.25E-08 | -0.14687 | 0.192 | 0.299 | 0.000635 | M2 | NOP58      |
| BRSK2.2   | 4.25E-08 | -0.10828 | 0.003 | 0.042 | 0.000636 | M2 | BRSK2      |
| ZNF286A.2 | 4.28E-08 | -0.11401 | 0.014 | 0.062 | 0.000639 | M2 | ZNF286A    |
| BOLA3-AS1 | 4.28E-08 | -0.1027  | 0.003 | 0.042 | 0.00064  | M2 | BOLA3-AS1  |
| KMT2C.3   | 4.29E-08 | -0.11965 | 0.167 | 0.268 | 0.000641 | M2 | KMT2C      |
| LEMD1.2   | 4.30E-08 | -0.12436 | 0.006 | 0.049 | 0.000642 | M2 | LEMD1      |
| PDIA4.3   | 4.35E-08 | 0.203389 | 0.487 | 0.459 | 0.00065  | M2 | PDIA4      |
| RHO.4     | 4.35E-08 | -0.15516 | 0.068 | 0.139 | 0.000651 | M2 | RHO        |
| SDCBP2.2  | 4.42E-08 | -0.10652 | 0.005 | 0.047 | 0.000661 | M2 | SDCBP2     |
| DOK4.3    | 4.47E-08 | -0.10625 | 0.006 | 0.049 | 0.000668 | M2 | DOK4       |
| SCAPER.1  | 4.52E-08 | -0.1269  | 0.051 | 0.117 | 0.000675 | M2 | SCAPER     |
| RPP14.3   | 4.54E-08 | -0.12548 | 0.107 | 0.193 | 0.000678 | M2 | RPP14      |
| ZNF519    | 4.58E-08 | -0.11694 | 0.004 | 0.044 | 0.000685 | M2 | ZNF519     |
| RCAN2.2   | 4.59E-08 | -0.16128 | 0.005 | 0.047 | 0.000686 | M2 | RCAN2      |
| FBXO45.1  | 4.61E-08 | -0.10027 | 0.017 | 0.066 | 0.000688 | M2 | FBXO45     |
| CLDN11.3  | 4.62E-08 | -0.37023 | 0.006 | 0.048 | 0.000691 | M2 | CLDN11     |
| AC002456. | 4.64E-08 | -0.14566 | 0.005 | 0.047 | 0.000694 | M2 | AC002456.2 |
| GNL3L     | 4.69E-08 | -0.10527 | 0.014 | 0.062 | 0.0007   | M2 | GNL3L      |
| ATP6VOA1. | 4.69E-08 | -0.12496 | 0.185 | 0.292 | 0.000701 | M2 | ATP6VOA1   |
| RREB1.5   | 4.74E-08 | 0.217321 | 0.117 | 0.068 | 0.000708 | M2 | RREB1      |
| ZNF248.1  | 4.81E-08 | -0.10192 | 0.009 | 0.053 | 0.000718 | M2 | ZNF248     |
| DDX25.2   | 4.82E-08 | -0.11204 | 0.003 | 0.042 | 0.000721 | M2 | DDX25      |
| SPTSSB.2  | 4.83E-08 | -0.13448 | 0.001 | 0.039 | 0.000721 | M2 | SPTSSB     |
| PPT1.4    | 4.86E-08 | 0.121029 | 0.58  | 0.554 | 0.000726 | M2 | PPT1       |
| GALNT15.2 | 4.89E-08 | -0.20603 | 0.003 | 0.042 | 0.000731 | M2 | GALNT15    |
| DDIT3.2   | 4.96E-08 | -0.24052 | 0.319 | 0.436 | 0.000741 | M2 | DDIT3      |
| DCLRE1C.2 | 5.00E-08 | -0.12791 | 0.064 | 0.135 | 0.000747 | M2 | DCLRE1C    |
| SNX7.1    | 5.01E-08 | -0.12265 | 0.097 | 0.179 | 0.000748 | M2 | SNX7       |
| RBMS1.3   | 5.04E-08 | 0.267842 | 0.304 | 0.246 | 0.000753 | M2 | RBMS1      |
| VSIG10    | 5.04E-08 | -0.12479 | 0.017 | 0.066 | 0.000753 | M2 | VSIG10     |
| CLTB.4    | 5.07E-08 | -0.1403  | 0.318 | 0.45  | 0.000757 | M2 | CLTB       |
| FKBP4.4   | 5.09E-08 | -0.12174 | 0.212 | 0.329 | 0.00076  | M2 | FKBP4      |
| PUS7L.2   | 5.10E-08 | -0.14086 | 0.088 | 0.167 | 0.000762 | M2 | PUS7L      |
| CARD8.4   | 5.10E-08 | 0.214147 | 0.209 | 0.144 | 0.000763 | M2 | CARD8      |
| CASD1.3   | 5.13E-08 | -0.15555 | 0.027 | 0.08  | 0.000767 | M2 | CASD1      |
| HMG20B.2  | 5.14E-08 | -0.1254  | 0.227 | 0.344 | 0.000768 | M2 | HMG20B     |
| CAV2.1    | 5.15E-08 | -0.14137 | 0.005 | 0.046 | 0.00077  | M2 | CAV2       |
| TSTD2.1   | 5.16E-08 | -0.13362 | 0.026 | 0.079 | 0.000771 | M2 | TSTD2      |
| RCCD1.1   | 5.16E-08 | -0.10423 | 0.013 | 0.06  | 0.000771 | M2 | RCCD1      |
| IL17RB.3  | 5.24E-08 | -0.12983 | 0.006 | 0.049 | 0.000783 | M2 | IL17RB     |
| TOMM34.1  | 5.31E-08 | -0.13867 | 0.069 | 0.141 | 0.000793 | M2 | TOMM34     |
| MAP7D1.4  | 5.35E-08 | -0.11625 | 0.232 | 0.354 | 0.000799 | M2 | MAP7D1     |
| CNTNAP3B. | 5.37E-08 | -0.10289 | 0     | 0.037 | 0.000803 | M2 | CNTNAP3B   |
| CIRBP.4   | 5.40E-08 | -0.17302 | 0.835 | 0.868 | 0.000807 | M2 | CIRBP      |

|             |           |           |        |        |              |          |
|-------------|-----------|-----------|--------|--------|--------------|----------|
| CLSTN3. 2   | 5. 40E-08 | -0. 10781 | 0. 014 | 0. 062 | 0. 000808 M2 | CLSTN3   |
| SGPL1. 2    | 5. 42E-08 | 0. 241895 | 0. 186 | 0. 127 | 0. 000811 M2 | SGPL1    |
| BYSL. 2     | 5. 44E-08 | -0. 11331 | 0. 047 | 0. 112 | 0. 000813 M2 | BYSL     |
| CCSER2. 3   | 5. 46E-08 | -0. 13492 | 0. 142 | 0. 235 | 0. 000816 M2 | CCSER2   |
| CGGBP1. 2   | 5. 56E-08 | -0. 12465 | 0. 172 | 0. 276 | 0. 000831 M2 | CGGBP1   |
| GIGYF1      | 5. 57E-08 | -0. 15223 | 0. 047 | 0. 111 | 0. 000833 M2 | GIGYF1   |
| FAM133B. 2  | 5. 59E-08 | -0. 15574 | 0. 341 | 0. 48  | 0. 000835 M2 | FAM133B  |
| RBM22. 2    | 5. 60E-08 | -0. 12938 | 0. 199 | 0. 31  | 0. 000837 M2 | RBM22    |
| STARD8. 1   | 5. 62E-08 | 0. 100684 | 0. 031 | 0. 01  | 0. 00084 M2  | STARD8   |
| SH3BP1. 5   | 5. 66E-08 | 0. 211333 | 0. 167 | 0. 108 | 0. 000845 M2 | SH3BP1   |
| SLC25A12    | 5. 71E-08 | -0. 13112 | 0. 026 | 0. 079 | 0. 000853 M2 | SLC25A12 |
| ELP2. 1     | 5. 72E-08 | -0. 11741 | 0. 12  | 0. 209 | 0. 000855 M2 | ELP2     |
| FBX06. 1    | 5. 75E-08 | 0. 230664 | 0. 121 | 0. 072 | 0. 000859 M2 | FBX06    |
| METTL13. 1  | 5. 76E-08 | -0. 1191  | 0. 059 | 0. 127 | 0. 00086 M2  | METTL13  |
| RDH13. 1    | 5. 78E-08 | -0. 11076 | 0. 024 | 0. 077 | 0. 000864 M2 | RDH13    |
| RWDD4. 1    | 5. 82E-08 | -0. 10996 | 0. 139 | 0. 233 | 0. 00087 M2  | RWDD4    |
| ISG20L2. 3  | 5. 86E-08 | -0. 10963 | 0. 135 | 0. 231 | 0. 000876 M2 | ISG20L2  |
| NAA40       | 5. 91E-08 | -0. 11986 | 0. 029 | 0. 085 | 0. 000883 M2 | NAA40    |
| WDR92. 2    | 5. 94E-08 | -0. 13644 | 0. 028 | 0. 083 | 0. 000888 M2 | WDR92    |
| HECTD4. 2   | 5. 95E-08 | -0. 12506 | 0. 036 | 0. 094 | 0. 000889 M2 | HECTD4   |
| CRLS1. 3    | 6. 10E-08 | -0. 12204 | 0. 184 | 0. 29  | 0. 000911 M2 | CRLS1    |
| PRKAB1. 2   | 6. 14E-08 | -0. 1333  | 0. 086 | 0. 163 | 0. 000918 M2 | PRKAB1   |
| TTC26. 4    | 6. 18E-08 | -0. 11374 | 0. 008 | 0. 051 | 0. 000923 M2 | TTC26    |
| NHSL2. 3    | 6. 18E-08 | 0. 213488 | 0. 093 | 0. 049 | 0. 000924 M2 | NHSL2    |
| ARHGAP10    | 6. 22E-08 | 0. 157806 | 0. 066 | 0. 031 | 0. 00093 M2  | ARHGAP10 |
| SUSD4. 2    | 6. 23E-08 | -0. 12213 | 0. 004 | 0. 044 | 0. 000931 M2 | SUSD4    |
| TBCCD1      | 6. 23E-08 | -0. 10926 | 0. 018 | 0. 067 | 0. 000932 M2 | TBCCD1   |
| YWHAG. 5    | 6. 24E-08 | -0. 14575 | 0. 278 | 0. 398 | 0. 000933 M2 | YWHAG    |
| DUS4L. 2    | 6. 28E-08 | -0. 10932 | 0. 028 | 0. 083 | 0. 000938 M2 | DUS4L    |
| MTG2. 2     | 6. 28E-08 | -0. 11278 | 0. 077 | 0. 152 | 0. 000939 M2 | MTG2     |
| CDK5R2. 2   | 6. 29E-08 | -0. 13053 | 0      | 0. 036 | 0. 00094 M2  | CDK5R2   |
| CRTAP. 5    | 6. 31E-08 | 0. 270901 | 0. 295 | 0. 232 | 0. 000944 M2 | CRTAP    |
| PABPC4. 5   | 6. 41E-08 | 0. 246747 | 0. 381 | 0. 325 | 0. 000958 M2 | PABPC4   |
| DPY19L3. 3  | 6. 43E-08 | -0. 10752 | 0. 034 | 0. 092 | 0. 000961 M2 | DPY19L3  |
| ARNTL. 2    | 6. 51E-08 | -0. 11094 | 0. 04  | 0. 1   | 0. 000973 M2 | ARNTL    |
| MFSD6. 2    | 6. 55E-08 | -0. 11455 | 0. 018 | 0. 067 | 0. 000978 M2 | MFSD6    |
| BBS10. 1    | 6. 58E-08 | -0. 1045  | 0. 011 | 0. 057 | 0. 000983 M2 | BBS10    |
| SART3. 2    | 6. 58E-08 | -0. 1355  | 0. 061 | 0. 13  | 0. 000983 M2 | SART3    |
| ATP6AP1L. 6 | 6. 59E-08 | -0. 12249 | 0. 006 | 0. 048 | 0. 000985 M2 | ATP6AP1L |
| TRA2B. 3    | 6. 68E-08 | -0. 16729 | 0. 407 | 0. 549 | 0. 000998 M2 | TRA2B    |
| NEK11. 3    | 6. 68E-08 | -0. 1202  | 0. 008 | 0. 05  | 0. 000998 M2 | NEK11    |
| NFIC. 2     | 6. 69E-08 | -0. 15175 | 0. 328 | 0. 441 | 0. 001 M2    | NFIC     |
| CDCA5. 3    | 6. 71E-08 | -0. 10724 | 0. 006 | 0. 048 | 0. 001003 M2 | CDCA5    |
| PBRM1. 4    | 6. 83E-08 | -0. 1068  | 0. 151 | 0. 246 | 0. 00102 M2  | PBRM1    |
| ZNF625. 1   | 6. 86E-08 | -0. 10121 | 0. 009 | 0. 052 | 0. 001025 M2 | ZNF625   |
| TRIM32. 1   | 6. 87E-08 | -0. 12816 | 0. 014 | 0. 061 | 0. 001027 M2 | TRIM32   |
| SDHA        | 6. 95E-08 | -0. 15836 | 0. 204 | 0. 313 | 0. 001038 M2 | SDHA     |
| PRCP. 2     | 6. 95E-08 | -0. 15868 | 0. 248 | 0. 363 | 0. 001039 M2 | PRCP     |
| CENPA. 5    | 6. 98E-08 | -0. 15813 | 0. 009 | 0. 052 | 0. 001043 M2 | CENPA    |
| GFM1. 1     | 6. 99E-08 | -0. 15535 | 0. 109 | 0. 192 | 0. 001045 M2 | GFM1     |
| FAM126B. 2  | 7. 01E-08 | -0. 13382 | 0. 072 | 0. 144 | 0. 001048 M2 | FAM126B  |



|                     |           |           |        |           |           |             |           |
|---------------------|-----------|-----------|--------|-----------|-----------|-------------|-----------|
| APOA1BP. 1          | 7. 08E-08 | -0. 12192 | 0. 259 | 0. 383    | 0. 001058 | M2          | APOA1BP   |
| CRYZL1              | 7. 17E-08 | -0. 13163 | 0. 172 | 0. 275    | 0. 001071 | M2          | CRYZL1    |
| FABP6. 4            | 7. 18E-08 | -0. 14726 | 0. 003 | 0. 041    | 0. 001072 | M2          | FABP6     |
| SASH1. 2            | 7. 18E-08 | -0. 10881 | 0. 022 | 0. 073    | 0. 001073 | M2          | SASH1     |
| LRCH4. 5            | 7. 21E-08 | 0. 230275 | 0. 252 | 0. 184    | 0. 001078 | M2          | LRCH4     |
| AC084219. 7. 27E-08 | -0. 10861 | 0. 001    | 0. 038 | 0. 001086 | M2        | AC084219. 4 |           |
| TMEM161A. 7. 27E-08 | -0. 11398 | 0. 095    | 0. 177 | 0. 001086 | M2        | TMEM161A    |           |
| TRAPPC12. 7. 28E-08 | -0. 11014 | 0. 116    | 0. 203 | 0. 001088 | M2        | TRAPPC12    |           |
| CDK11B              | 7. 30E-08 | -0. 10733 | 0. 074 | 0. 148    | 0. 00109  | M2          | CDK11B    |
| NOTCH4. 1           | 7. 34E-08 | -0. 11574 | 0. 017 | 0. 065    | 0. 001097 | M2          | NOTCH4    |
| LINGO1. 2           | 7. 37E-08 | -0. 11837 | 0. 001 | 0. 038    | 0. 001101 | M2          | LINGO1    |
| DDX6. 1             | 7. 44E-08 | -0. 14986 | 0. 116 | 0. 203    | 0. 001112 | M2          | DDX6      |
| PDHB. 3             | 7. 44E-08 | -0. 15308 | 0. 248 | 0. 371    | 0. 001112 | M2          | PDHB      |
| NDUFB1. 2           | 7. 56E-08 | 0. 1492   | 0. 618 | 0. 592    | 0. 00113  | M2          | NDUFB1    |
| U2SURP. 2           | 7. 58E-08 | -0. 12067 | 0. 254 | 0. 378    | 0. 001132 | M2          | U2SURP    |
| GIGYF2. 1           | 7. 64E-08 | -0. 13298 | 0. 1   | 0. 181    | 0. 001141 | M2          | GIGYF2    |
| RINT1. 3            | 7. 68E-08 | -0. 12187 | 0. 04  | 0. 099    | 0. 001147 | M2          | RINT1     |
| HS3ST3B1. 7. 69E-08 | 0. 137851 | 0. 078    | 0. 039 | 0. 001149 | M2        | HS3ST3B1    |           |
| ARMC9. 2            | 7. 73E-08 | -0. 11033 | 0. 022 | 0. 073    | 0. 001155 | M2          | ARMC9     |
| ZNF789. 1           | 7. 74E-08 | -0. 10089 | 0. 028 | 0. 083    | 0. 001156 | M2          | ZNF789    |
| ASL. 3              | 7. 83E-08 | 0. 245309 | 0. 229 | 0. 167    | 0. 00117  | M2          | ASL       |
| PSMG3. 4            | 7. 94E-08 | -0. 1056  | 0. 22  | 0. 335    | 0. 001186 | M2          | PSMG3     |
| TUSC1. 3            | 7. 96E-08 | -0. 12257 | 0. 028 | 0. 082    | 0. 001189 | M2          | TUSC1     |
| CHST9               | 7. 97E-08 | -0. 11258 | 0      | 0. 036    | 0. 001191 | M2          | CHST9     |
| BNIP1. 4            | 8. 00E-08 | -0. 14996 | 0. 057 | 0. 124    | 0. 001195 | M2          | BNIP1     |
| EIF4ENIF1           | 8. 03E-08 | -0. 10624 | 0. 02  | 0. 071    | 0. 0012   | M2          | EIF4ENIF1 |
| KCNN2. 2            | 8. 04E-08 | -0. 10324 | 0. 001 | 0. 038    | 0. 001201 | M2          | KCNN2     |
| UMPS. 3             | 8. 04E-08 | -0. 11146 | 0. 066 | 0. 138    | 0. 001202 | M2          | UMPS      |
| GLUD1. 3            | 8. 09E-08 | 0. 199125 | 0. 313 | 0. 243    | 0. 001208 | M2          | GLUD1     |
| MMAB. 3             | 8. 09E-08 | -0. 10383 | 0. 115 | 0. 203    | 0. 001209 | M2          | MMAB      |
| TWSG1. 1            | 8. 13E-08 | -0. 15239 | 0. 089 | 0. 168    | 0. 001214 | M2          | TWSG1     |
| MCM4. 4             | 8. 17E-08 | -0. 10068 | 0. 04  | 0. 1      | 0. 001221 | M2          | MCM4      |
| SCFD2. 2            | 8. 18E-08 | -0. 11134 | 0. 034 | 0. 092    | 0. 001222 | M2          | SCFD2     |
| MYC. 3              | 8. 21E-08 | -0. 25934 | 0. 098 | 0. 175    | 0. 001226 | M2          | MYC       |
| TTY15. 2            | 8. 21E-08 | -0. 1196  | 0. 013 | 0. 058    | 0. 001227 | M2          | TTY15     |
| CHMP7. 4            | 8. 38E-08 | -0. 11332 | 0. 101 | 0. 182    | 0. 001253 | M2          | CHMP7     |
| YIPF4. 2            | 8. 48E-08 | -0. 15077 | 0. 261 | 0. 382    | 0. 001268 | M2          | YIPF4     |
| WSB2. 5             | 8. 50E-08 | -0. 10923 | 0. 137 | 0. 23     | 0. 001271 | M2          | WSB2      |
| PTMA. 5             | 8. 54E-08 | -0. 17685 | 0. 994 | 0. 965    | 0. 001276 | M2          | PTMA      |
| POMT1. 4            | 8. 54E-08 | -0. 10857 | 0. 07  | 0. 142    | 0. 001276 | M2          | POMT1     |
| DIO2. 1             | 8. 73E-08 | -0. 14316 | 0. 001 | 0. 038    | 0. 001305 | M2          | DIO2      |
| FAM160A2. 8. 83E-08 | -0. 10287 | 0. 052    | 0. 118 | 0. 00132  | M2        | FAM160A2    |           |
| RORB. 2             | 8. 86E-08 | -0. 14239 | 0. 003 | 0. 04     | 0. 001324 | M2          | RORB      |
| RDH11. 3            | 8. 91E-08 | -0. 14559 | 0. 268 | 0. 396    | 0. 001331 | M2          | RDH11     |
| SPOCK3. 3           | 8. 97E-08 | -0. 24882 | 0      | 0. 035    | 0. 00134  | M2          | SPOCK3    |
| CARHSP1. 4          | 9. 02E-08 | -0. 15801 | 0. 307 | 0. 431    | 0. 001348 | M2          | CARHSP1   |
| RTN3. 3             | 9. 04E-08 | -0. 18986 | 0. 556 | 0. 662    | 0. 001351 | M2          | RTN3      |
| PLIN3. 2            | 9. 11E-08 | 0. 201263 | 0. 407 | 0. 355    | 0. 001361 | M2          | PLIN3     |
| FAM127C. 2          | 9. 20E-08 | -0. 12932 | 0. 046 | 0. 108    | 0. 001374 | M2          | FAM127C   |
| SRSF7. 2            | 9. 23E-08 | -0. 17411 | 0. 447 | 0. 601    | 0. 001379 | M2          | SRSF7     |
| NOTCH1. 2           | 9. 24E-08 | -0. 10356 | 0. 051 | 0. 115    | 0. 00138  | M2          | NOTCH1    |

|            |          |          |       |       |          |    |               |
|------------|----------|----------|-------|-------|----------|----|---------------|
| C10orf107  | 9.33E-08 | -0.103   | 0.003 | 0.04  | 0.001394 | M2 | C10orf107     |
| SPEN.2     | 9.38E-08 | -0.11141 | 0.087 | 0.164 | 0.001402 | M2 | SPEN          |
| CASP3.3    | 9.40E-08 | -0.13688 | 0.116 | 0.203 | 0.001405 | M2 | CASP3         |
| R3HDM2.3   | 9.57E-08 | -0.11613 | 0.093 | 0.172 | 0.00143  | M2 | R3HDM2        |
| TTC7A.5    | 9.59E-08 | 0.164929 | 0.123 | 0.071 | 0.001433 | M2 | TTC7A         |
| PXDC1.2    | 9.66E-08 | -0.10308 | 0.082 | 0.157 | 0.001444 | M2 | PXDC1         |
| RNF187.3   | 9.74E-08 | -0.15222 | 0.272 | 0.385 | 0.001455 | M2 | RNF187        |
| RP11-798M  | 9.74E-08 | 0.308728 | 0.202 | 0.145 | 0.001455 | M2 | RP11-798M19.6 |
| TSNAX      | 9.75E-08 | -0.16116 | 0.216 | 0.325 | 0.001457 | M2 | TSNAX         |
| ZFP36L2.5  | 9.76E-08 | 0.116364 | 0.581 | 0.511 | 0.001459 | M2 | ZFP36L2       |
| RARRES3.2  | 9.80E-08 | -0.34279 | 0.162 | 0.249 | 0.001464 | M2 | RARRES3       |
| FAM66C     | 9.80E-08 | -0.12158 | 0.005 | 0.045 | 0.001465 | M2 | FAM66C        |
| TDG.3      | 9.90E-08 | -0.11624 | 0.175 | 0.28  | 0.001479 | M2 | TDG           |
| CLCN4.4    | 9.91E-08 | -0.1285  | 0.013 | 0.058 | 0.001482 | M2 | CLCN4         |
| ZSCAN16.2  | 1.02E-07 | -0.1138  | 0.018 | 0.066 | 0.001521 | M2 | ZSCAN16       |
| METTL18.1  | 1.02E-07 | -0.12425 | 0.022 | 0.072 | 0.001525 | M2 | METTL18       |
| ARPC5L.3   | 1.02E-07 | -0.12432 | 0.257 | 0.378 | 0.001532 | M2 | ARPC5L        |
| TWISTNB.1  | 1.03E-07 | -0.12176 | 0.172 | 0.276 | 0.001542 | M2 | TWISTNB       |
| SCN9A.2    | 1.03E-07 | -0.141   | 0.001 | 0.038 | 0.001546 | M2 | SCN9A         |
| CDKN2AIP.1 | 1.04E-07 | -0.15069 | 0.079 | 0.152 | 0.001549 | M2 | CDKN2AIP      |
| EIF2B4.3   | 1.05E-07 | -0.1034  | 0.109 | 0.193 | 0.001568 | M2 | EIF2B4        |
| FLVCR1.1   | 1.05E-07 | -0.10145 | 0.028 | 0.082 | 0.001576 | M2 | FLVCR1        |
| HAUS3.1    | 1.06E-07 | -0.11454 | 0.032 | 0.088 | 0.001577 | M2 | HAUS3         |
| LRP12.2    | 1.07E-07 | -0.11328 | 0.038 | 0.097 | 0.001595 | M2 | LRP12         |
| CYP2U1.1   | 1.08E-07 | -0.11024 | 0.011 | 0.055 | 0.001608 | M2 | CYP2U1        |
| CCNE2.2    | 1.08E-07 | -0.14481 | 0.015 | 0.062 | 0.001616 | M2 | CCNE2         |
| PRPF4B.3   | 1.10E-07 | -0.10344 | 0.178 | 0.28  | 0.001637 | M2 | PRPF4B        |
| NGDN.3     | 1.10E-07 | -0.13762 | 0.17  | 0.27  | 0.001639 | M2 | NGDN          |
| APOLD1.2   | 1.10E-07 | -0.10865 | 0.009 | 0.051 | 0.00164  | M2 | APOLD1        |
| MAG.3      | 1.10E-07 | -0.37885 | 0.003 | 0.04  | 0.001645 | M2 | MAG           |
| ZNF224.1   | 1.10E-07 | -0.10936 | 0.046 | 0.108 | 0.001645 | M2 | ZNF224        |
| BAG2.1     | 1.11E-07 | -0.10857 | 0.028 | 0.082 | 0.00166  | M2 | BAG2          |
| DPH2.3     | 1.12E-07 | -0.11594 | 0.055 | 0.12  | 0.001678 | M2 | DPH2          |
| ATAD1.1    | 1.13E-07 | -0.13797 | 0.095 | 0.171 | 0.001693 | M2 | ATAD1         |
| RP11-545E  | 1.14E-07 | 0.197079 | 0.088 | 0.047 | 0.001698 | M2 | RP11-545E17.3 |
| BLZF1.1    | 1.15E-07 | -0.14109 | 0.056 | 0.121 | 0.001714 | M2 | BLZF1         |
| HHLA3.5    | 1.17E-07 | -0.15738 | 0.073 | 0.144 | 0.001749 | M2 | HHLA3         |
| PRMT5.4    | 1.17E-07 | -0.13944 | 0.082 | 0.156 | 0.00175  | M2 | PRMT5         |
| CDKN1C.4   | 1.18E-07 | -0.2285  | 0.056 | 0.118 | 0.001757 | M2 | CDKN1C        |
| WBSCR16.3  | 1.18E-07 | -0.1048  | 0.077 | 0.15  | 0.00176  | M2 | WBSCR16       |
| ZNF781.1   | 1.18E-07 | -0.10394 | 0.006 | 0.047 | 0.001767 | M2 | ZNF781        |
| GTF3A.5    | 1.19E-07 | 0.186674 | 0.529 | 0.503 | 0.001773 | M2 | GTF3A         |
| SLC32A1.3  | 1.19E-07 | -0.1451  | 0.003 | 0.04  | 0.001776 | M2 | SLC32A1       |
| RCHY1.2    | 1.19E-07 | -0.14967 | 0.12  | 0.206 | 0.001777 | M2 | RCHY1         |
| PNKD.3     | 1.19E-07 | -0.17057 | 0.34  | 0.465 | 0.001782 | M2 | PNKD          |
| CRB2.3     | 1.20E-07 | -0.14106 | 0.006 | 0.047 | 0.001796 | M2 | CRB2          |
| NUF2.5     | 1.20E-07 | -0.16079 | 0.018 | 0.065 | 0.001797 | M2 | NUF2          |
| ALDH16A1.1 | 1.22E-07 | 0.237014 | 0.172 | 0.116 | 0.001817 | M2 | ALDH16A1      |
| DIP2B.4    | 1.23E-07 | -0.12057 | 0.057 | 0.123 | 0.001838 | M2 | DIP2B         |
| NDUFB3.4   | 1.23E-07 | 0.131459 | 0.57  | 0.552 | 0.001839 | M2 | NDUFB3        |
| CCNA2.4    | 1.23E-07 | -0.14805 | 0.014 | 0.059 | 0.00184  | M2 | CCNA2         |

|             |           |           |        |        |           |    |          |
|-------------|-----------|-----------|--------|--------|-----------|----|----------|
| SLC17A5. 4  | 1. 24E-07 | 0. 232417 | 0. 157 | 0. 102 | 0. 00185  | M2 | SLC17A5  |
| HJURP. 3    | 1. 24E-07 | -0. 12964 | 0. 004 | 0. 042 | 0. 00185  | M2 | HJURP    |
| FOXP1. 3    | 1. 25E-07 | 0. 154148 | 0. 3   | 0. 225 | 0. 001865 | M2 | FOXP1    |
| C5orf28. 2  | 1. 26E-07 | -0. 11833 | 0. 057 | 0. 123 | 0. 00188  | M2 | C5orf28  |
| ERCC4. 3    | 1. 27E-07 | -0. 11182 | 0. 065 | 0. 134 | 0. 001891 | M2 | ERCC4    |
| SLC35A1     | 1. 27E-07 | -0. 11158 | 0. 07  | 0. 141 | 0. 001894 | M2 | SLC35A1  |
| B3GALT2. 1  | 1. 27E-07 | -0. 12397 | 0. 001 | 0. 037 | 0. 001895 | M2 | B3GALT2  |
| PDE1C. 1    | 1. 28E-07 | -0. 12625 | 0. 004 | 0. 042 | 0. 00191  | M2 | PDE1C    |
| CHRNE. 4    | 1. 31E-07 | 0. 122419 | 0. 055 | 0. 024 | 0. 001964 | M2 | CHRNE    |
| MPHOSPH6. 1 | 1. 32E-07 | 0. 274158 | 0. 341 | 0. 287 | 0. 001966 | M2 | MPHOSPH6 |
| MALT1. 5    | 1. 36E-07 | 0. 197678 | 0. 119 | 0. 071 | 0. 002025 | M2 | MALT1    |
| DFNA5. 2    | 1. 36E-07 | -0. 15392 | 0. 119 | 0. 201 | 0. 002026 | M2 | DFNA5    |
| TRIP13      | 1. 36E-07 | -0. 10264 | 0. 008 | 0. 049 | 0. 002029 | M2 | TRIP13   |
| ACHE. 2     | 1. 37E-07 | -0. 1199  | 0. 006 | 0. 046 | 0. 002042 | M2 | ACHE     |
| TBCA. 4     | 1. 37E-07 | -0. 19915 | 0. 635 | 0. 716 | 0. 002048 | M2 | TBCA     |
| C1orf53. 3  | 1. 42E-07 | -0. 10766 | 0. 032 | 0. 087 | 0. 002117 | M2 | C1orf53  |
| IL2RG. 3    | 1. 42E-07 | 0. 125681 | 0. 08  | 0. 04  | 0. 002121 | M2 | IL2RG    |
| FANCG       | 1. 44E-07 | -0. 1064  | 0. 019 | 0. 067 | 0. 002147 | M2 | FANCG    |
| CKAP2L. 4   | 1. 44E-07 | -0. 13223 | 0. 008 | 0. 048 | 0. 002149 | M2 | CKAP2L   |
| PCGF5. 2    | 1. 46E-07 | 0. 245772 | 0. 236 | 0. 175 | 0. 002183 | M2 | PCGF5    |
| C9orf72. 5  | 1. 47E-07 | 0. 22735  | 0. 208 | 0. 146 | 0. 002197 | M2 | C9orf72  |
| MYT1. 3     | 1. 48E-07 | -0. 12781 | 0. 004 | 0. 042 | 0. 002205 | M2 | MYT1     |
| EDIL3. 3    | 1. 50E-07 | -0. 22725 | 0      | 0. 034 | 0. 002237 | M2 | EDIL3    |
| FAM173B. 3  | 1. 50E-07 | -0. 1093  | 0. 019 | 0. 067 | 0. 002241 | M2 | FAM173B  |
| AP5M1. 2    | 1. 52E-07 | -0. 13655 | 0. 087 | 0. 16  | 0. 002264 | M2 | AP5M1    |
| GPCPD1. 3   | 1. 52E-07 | 0. 279594 | 0. 252 | 0. 194 | 0. 002266 | M2 | GPCPD1   |
| ADAT1       | 1. 52E-07 | -0. 11788 | 0. 05  | 0. 112 | 0. 002274 | M2 | ADAT1    |
| C2orf42. 1  | 1. 52E-07 | -0. 10443 | 0. 017 | 0. 063 | 0. 002277 | M2 | C2orf42  |
| JOSD1. 5    | 1. 52E-07 | 0. 310338 | 0. 209 | 0. 154 | 0. 002278 | M2 | JOSD1    |
| FOXM1. 3    | 1. 54E-07 | -0. 10614 | 0. 011 | 0. 055 | 0. 002303 | M2 | FOXM1    |
| SLC04A1. 2  | 1. 55E-07 | 0. 168765 | 0. 068 | 0. 033 | 0. 002313 | M2 | SLC04A1  |
| PACRG. 2    | 1. 55E-07 | -0. 12473 | 0. 003 | 0. 039 | 0. 002321 | M2 | PACRG    |
| OAS1. 3     | 1. 57E-07 | 0. 134372 | 0. 195 | 0. 128 | 0. 002342 | M2 | OAS1     |
| ORC5. 4     | 1. 59E-07 | -0. 11302 | 0. 043 | 0. 103 | 0. 002374 | M2 | ORC5     |
| FAHD2B. 2   | 1. 60E-07 | -0. 12526 | 0. 032 | 0. 086 | 0. 002393 | M2 | FAHD2B   |
| ZNF35. 1    | 1. 60E-07 | -0. 10354 | 0. 015 | 0. 061 | 0. 002396 | M2 | ZNF35    |
| B4GALT3. 2  | 1. 61E-07 | -0. 11463 | 0. 133 | 0. 224 | 0. 0024   | M2 | B4GALT3  |
| RUNX1T1. 2  | 1. 62E-07 | -0. 10133 | 0. 001 | 0. 037 | 0. 002414 | M2 | RUNX1T1  |
| MAPK8IP3. 1 | 1. 65E-07 | -0. 10777 | 0. 036 | 0. 092 | 0. 00247  | M2 | MAPK8IP3 |
| SLITRK2. 2  | 1. 66E-07 | -0. 11032 | 0. 001 | 0. 036 | 0. 002483 | M2 | SLITRK2  |
| ANKRD40. 2  | 1. 68E-07 | -0. 12537 | 0. 101 | 0. 18  | 0. 002511 | M2 | ANKRD40  |
| PPIL6. 4    | 1. 70E-07 | -0. 10534 | 0. 009 | 0. 05  | 0. 002538 | M2 | PPIL6    |
| CEP44. 1    | 1. 71E-07 | -0. 13048 | 0. 02  | 0. 069 | 0. 002553 | M2 | CEP44    |
| COMMD8. 5   | 1. 71E-07 | 0. 227748 | 0. 284 | 0. 22  | 0. 002562 | M2 | COMMD8   |
| TOR1AIP1. 1 | 1. 72E-07 | -0. 13782 | 0. 106 | 0. 187 | 0. 002572 | M2 | TOR1AIP1 |
| COPS3. 1    | 1. 76E-07 | -0. 12597 | 0. 255 | 0. 377 | 0. 00263  | M2 | COPS3    |
| AKT3. 1     | 1. 78E-07 | -0. 11881 | 0. 014 | 0. 059 | 0. 002654 | M2 | AKT3     |
| PHF5A. 1    | 1. 79E-07 | -0. 12793 | 0. 222 | 0. 335 | 0. 002672 | M2 | PHF5A    |
| PINLYP. 3   | 1. 79E-07 | -0. 14816 | 0. 013 | 0. 057 | 0. 002672 | M2 | PINLYP   |
| EPHX2. 2    | 1. 79E-07 | -0. 12598 | 0. 004 | 0. 041 | 0. 002681 | M2 | EPHX2    |
| SLC24A2. 3  | 1. 82E-07 | -0. 17283 | 0      | 0. 034 | 0. 002723 | M2 | SLC24A2  |

|            |           |           |        |        |           |    |                |
|------------|-----------|-----------|--------|--------|-----------|----|----------------|
| MBD6. 3    | 1. 83E-07 | -0. 16211 | 0. 075 | 0. 144 | 0. 002738 | M2 | MBD6           |
| LINC00237  | 1. 84E-07 | -0. 10103 | 0. 001 | 0. 036 | 0. 00275  | M2 | LINC00237      |
| FCAR. 1    | 1. 87E-07 | 0. 100732 | 0. 023 | 0. 006 | 0. 002796 | M2 | FCAR           |
| CRIM1. 4   | 1. 88E-07 | -0. 10941 | 0. 019 | 0. 066 | 0. 002812 | M2 | CRIM1          |
| ING3. 1    | 1. 90E-07 | -0. 14417 | 0. 11  | 0. 19  | 0. 002842 | M2 | ING3           |
| BCDIN3D    | 1. 92E-07 | -0. 10344 | 0. 015 | 0. 061 | 0. 002865 | M2 | BCDIN3D        |
| ZIK1. 2    | 1. 92E-07 | -0. 1068  | 0. 011 | 0. 054 | 0. 002877 | M2 | ZIK1           |
| LUZP1. 1   | 1. 94E-07 | -0. 14221 | 0. 111 | 0. 193 | 0. 002896 | M2 | LUZP1          |
| USP31. 4   | 1. 94E-07 | -0. 10503 | 0. 011 | 0. 054 | 0. 002905 | M2 | USP31          |
| MESDC1. 3  | 1. 95E-07 | 0. 285481 | 0. 174 | 0. 12  | 0. 002907 | M2 | MESDC1         |
| NOP16. 4   | 1. 95E-07 | -0. 11937 | 0. 117 | 0. 205 | 0. 002908 | M2 | NOP16          |
| FAM78A. 4  | 1. 97E-07 | 0. 105927 | 0. 069 | 0. 033 | 0. 002951 | M2 | FAM78A         |
| PDE9A. 2   | 1. 99E-07 | -0. 13229 | 0. 024 | 0. 074 | 0. 00297  | M2 | PDE9A          |
| ZNF783. 1  | 1. 99E-07 | -0. 12288 | 0. 015 | 0. 06  | 0. 002974 | M2 | ZNF783         |
| MEAF6. 4   | 2. 00E-07 | -0. 1377  | 0. 35  | 0. 486 | 0. 002986 | M2 | MEAF6          |
| ARSK       | 2. 00E-07 | -0. 12705 | 0. 013 | 0. 056 | 0. 002995 | M2 | ARSK           |
| YPEL5. 3   | 2. 03E-07 | 0. 201046 | 0. 485 | 0. 45  | 0. 003032 | M2 | YPEL5          |
| DACT1      | 2. 05E-07 | -0. 10762 | 0      | 0. 033 | 0. 003064 | M2 | DACT1          |
| RP11-676J  | 2. 05E-07 | -0. 11942 | 0      | 0. 033 | 0. 003064 | M2 | RP11-676J15. 1 |
| PDZRN4. 3  | 2. 06E-07 | -0. 14137 | 0. 004 | 0. 041 | 0. 003071 | M2 | PDZRN4         |
| PRCD. 2    | 2. 10E-07 | -0. 17919 | 0. 001 | 0. 036 | 0. 003142 | M2 | PRCD           |
| UCK1. 1    | 2. 10E-07 | -0. 13539 | 0. 11  | 0. 19  | 0. 003144 | M2 | UCK1           |
| IRF7. 5    | 2. 11E-07 | 0. 245869 | 0. 216 | 0. 157 | 0. 003152 | M2 | IRF7           |
| EIF1B. 4   | 2. 11E-07 | -0. 192   | 0. 461 | 0. 597 | 0. 003154 | M2 | EIF1B          |
| DUSP4. 4   | 2. 12E-07 | 0. 354633 | 0. 23  | 0. 176 | 0. 003167 | M2 | DUSP4          |
| RPA2. 1    | 2. 13E-07 | -0. 12335 | 0. 216 | 0. 327 | 0. 003181 | M2 | RPA2           |
| PUM1. 3    | 2. 15E-07 | -0. 11755 | 0. 149 | 0. 243 | 0. 003214 | M2 | PUM1           |
| HSPA1B. 4  | 2. 17E-07 | -0. 19796 | 0. 305 | 0. 418 | 0. 003244 | M2 | HSPA1B         |
| GBAS. 2    | 2. 19E-07 | -0. 10352 | 0. 282 | 0. 408 | 0. 003273 | M2 | GBAS           |
| TRNT1. 2   | 2. 19E-07 | -0. 12705 | 0. 068 | 0. 136 | 0. 003274 | M2 | TRNT1          |
| MYLIP. 5   | 2. 20E-07 | 0. 183578 | 0. 188 | 0. 125 | 0. 003284 | M2 | MYLIP          |
| SLC50A1. 4 | 2. 21E-07 | 0. 287605 | 0. 221 | 0. 164 | 0. 003305 | M2 | SLC50A1        |
| AC113189.  | 2. 21E-07 | -0. 11702 | 0. 02  | 0. 069 | 0. 00331  | M2 | AC113189. 5    |
| RAPGEF5. 3 | 2. 24E-07 | -0. 21426 | 0. 006 | 0. 045 | 0. 003342 | M2 | RAPGEF5        |
| PLK1. 3    | 2. 30E-07 | -0. 16006 | 0. 014 | 0. 057 | 0. 003433 | M2 | PLK1           |
| KCND2. 2   | 2. 30E-07 | -0. 10798 | 0. 003 | 0. 038 | 0. 003445 | M2 | KCND2          |
| KLK6. 3    | 2. 31E-07 | -0. 27775 | 0      | 0. 033 | 0. 003448 | M2 | KLK6           |
| RP11-539L  | 2. 31E-07 | -0. 14325 | 0. 042 | 0. 1   | 0. 003452 | M2 | RP11-539L10. 3 |
| STAT1. 3   | 2. 32E-07 | -0. 14477 | 0. 144 | 0. 236 | 0. 003472 | M2 | STAT1          |
| LINC00672  | 2. 35E-07 | -0. 13249 | 0. 011 | 0. 054 | 0. 00351  | M2 | LINC00672      |
| MROH8      | 2. 37E-07 | -0. 1168  | 0. 004 | 0. 041 | 0. 003541 | M2 | MROH8          |
| GYG1. 2    | 2. 43E-07 | 0. 25502  | 0. 308 | 0. 25  | 0. 003632 | M2 | GYG1           |
| FUNDC1. 4  | 2. 43E-07 | -0. 13394 | 0. 157 | 0. 252 | 0. 003634 | M2 | FUNDC1         |
| CDK13      | 2. 44E-07 | -0. 11546 | 0. 059 | 0. 123 | 0. 003649 | M2 | CDK13          |
| TCEAL6. 2  | 2. 45E-07 | -0. 13774 | 0. 003 | 0. 038 | 0. 003657 | M2 | TCEAL6         |
| CEBPA. 4   | 2. 45E-07 | 0. 175852 | 0. 158 | 0. 1   | 0. 003657 | M2 | CEBPA          |
| MYNN. 1    | 2. 47E-07 | -0. 12507 | 0. 047 | 0. 107 | 0. 003693 | M2 | MYNN           |
| CDK2. 2    | 2. 47E-07 | -0. 11006 | 0. 033 | 0. 087 | 0. 003694 | M2 | CDK2           |
| SLC9A9. 4  | 2. 47E-07 | 0. 157759 | 0. 125 | 0. 075 | 0. 003695 | M2 | SLC9A9         |
| TRIP11. 1  | 2. 47E-07 | -0. 106   | 0. 112 | 0. 194 | 0. 003695 | M2 | TRIP11         |
| SIGLEC5. 1 | 2. 51E-07 | 0. 100369 | 0. 036 | 0. 013 | 0. 003753 | M2 | SIGLEC5        |

|           |          |          |       |       |          |    |              |
|-----------|----------|----------|-------|-------|----------|----|--------------|
| PPWD1.1   | 2.52E-07 | -0.13572 | 0.054 | 0.116 | 0.003772 | M2 | PPWD1        |
| ZNF274.2  | 2.54E-07 | -0.11826 | 0.054 | 0.116 | 0.003793 | M2 | ZNF274       |
| PRKAR1B.3 | 2.54E-07 | -0.10187 | 0.065 | 0.132 | 0.003797 | M2 | PRKAR1B      |
| APCDD1    | 2.57E-07 | -0.11273 | 0.003 | 0.038 | 0.003833 | M2 | APCDD1       |
| BCL11B.2  | 2.73E-07 | -0.13601 | 0.001 | 0.035 | 0.00408  | M2 | BCL11B       |
| ATP6V1C1  | 2.73E-07 | 0.253013 | 0.298 | 0.24  | 0.004085 | M2 | ATP6V1C1     |
| LRRC8D.2  | 2.74E-07 | -0.10908 | 0.041 | 0.098 | 0.004098 | M2 | LRRC8D       |
| NSL1.2    | 2.76E-07 | -0.12186 | 0.239 | 0.354 | 0.004128 | M2 | NSL1         |
| FEZ2.4    | 2.81E-07 | -0.15335 | 0.336 | 0.457 | 0.004198 | M2 | FEZ2         |
| SERPINB8  | 2.81E-07 | 0.207807 | 0.123 | 0.075 | 0.004199 | M2 | SERPINB8     |
| SLC1A3.4  | 2.84E-07 | -0.23784 | 0.379 | 0.484 | 0.00425  | M2 | SLC1A3       |
| EXOSC10.1 | 2.88E-07 | -0.1031  | 0.079 | 0.151 | 0.004309 | M2 | EXOSC10      |
| PDE6D.3   | 2.91E-07 | -0.11802 | 0.114 | 0.194 | 0.004346 | M2 | PDE6D        |
| WFDC2.1   | 2.92E-07 | -0.11177 | 0     | 0.033 | 0.004366 | M2 | WFDC2        |
| TRMU.1    | 2.92E-07 | -0.11529 | 0.069 | 0.136 | 0.004367 | M2 | TRMU         |
| BCAS3     | 2.95E-07 | -0.11533 | 0.024 | 0.073 | 0.004402 | M2 | BCAS3        |
| RASSF5.5  | 2.95E-07 | 0.176613 | 0.176 | 0.115 | 0.00441  | M2 | RASSF5       |
| GTSF1     | 2.96E-07 | 0.153539 | 0.029 | 0.01  | 0.004421 | M2 | GTSF1        |
| CAPNS1.4  | 3.00E-07 | 0.282961 | 0.378 | 0.337 | 0.004482 | M2 | CAPNS1       |
| LUZP2.2   | 3.00E-07 | -0.12045 | 0.01  | 0.051 | 0.004482 | M2 | LUZP2        |
| FLYWCH2.2 | 3.00E-07 | -0.10958 | 0.208 | 0.317 | 0.004486 | M2 | FLYWCH2      |
| MBD2.1    | 3.01E-07 | 0.182789 | 0.106 | 0.062 | 0.004495 | M2 | MBD2         |
| SRSF11.2  | 3.01E-07 | -0.16825 | 0.414 | 0.548 | 0.004505 | M2 | SRSF11       |
| RP11-436K | 3.04E-07 | -0.10076 | 0     | 0.032 | 0.004541 | M2 | RP11-436K8.1 |
| EEF1E1.2  | 3.07E-07 | -0.10363 | 0.211 | 0.323 | 0.004583 | M2 | EEF1E1       |
| TMEM160.4 | 3.07E-07 | -0.14094 | 0.354 | 0.474 | 0.004587 | M2 | TMEM160      |
| GALNT13.2 | 3.08E-07 | -0.14474 | 0.008 | 0.046 | 0.0046   | M2 | GALNT13      |
| SUCLG1.3  | 3.13E-07 | -0.13497 | 0.317 | 0.445 | 0.004671 | M2 | SUCLG1       |
| CSGALNACT | 3.14E-07 | -0.19336 | 0.028 | 0.078 | 0.004696 | M2 | CSGALNACT1   |
| ZBED3.3   | 3.18E-07 | -0.10567 | 0.037 | 0.092 | 0.004757 | M2 | ZBED3        |
| LENG1.2   | 3.20E-07 | -0.10715 | 0.121 | 0.207 | 0.004777 | M2 | LENG1        |
| TIMM8B.3  | 3.20E-07 | 0.152116 | 0.571 | 0.542 | 0.004788 | M2 | TIMM8B       |
| CAB39L.3  | 3.23E-07 | -0.10793 | 0.027 | 0.077 | 0.004827 | M2 | CAB39L       |
| HAPLN2.3  | 3.28E-07 | -0.17225 | 0.001 | 0.035 | 0.004901 | M2 | HAPLN2       |
| LINC00599 | 3.28E-07 | -0.13306 | 0.003 | 0.037 | 0.004905 | M2 | LINC00599    |
| ATP5D.4   | 3.29E-07 | -0.15391 | 0.534 | 0.62  | 0.004912 | M2 | ATP5D        |
| LSM2.2    | 3.30E-07 | -0.12131 | 0.327 | 0.456 | 0.004927 | M2 | LSM2         |
| WDR26.2   | 3.32E-07 | 0.272839 | 0.211 | 0.157 | 0.004961 | M2 | WDR26        |
| MAML3.4   | 3.34E-07 | 0.13957  | 0.068 | 0.033 | 0.004989 | M2 | MAML3        |
| DUSP3.2   | 3.38E-07 | 0.293347 | 0.226 | 0.172 | 0.005047 | M2 | DUSP3        |
| LHX1.1    | 3.42E-07 | -0.12563 | 0     | 0.032 | 0.005109 | M2 | LHX1         |
| HOTAIRM1  | 3.47E-07 | -0.19966 | 0.112 | 0.187 | 0.005188 | M2 | HOTAIRM1     |
| NCAPG.3   | 3.49E-07 | -0.10549 | 0.006 | 0.044 | 0.00521  | M2 | NCAPG        |
| PIGF.4    | 3.50E-07 | -0.13487 | 0.192 | 0.294 | 0.005224 | M2 | PIGF         |
| CHCHD3.2  | 3.50E-07 | -0.11495 | 0.259 | 0.377 | 0.005232 | M2 | CHCHD3       |
| NARS.2    | 3.53E-07 | -0.15167 | 0.318 | 0.446 | 0.005273 | M2 | NARS         |
| KANSL2.2  | 3.54E-07 | -0.10421 | 0.083 | 0.154 | 0.005289 | M2 | KANSL2       |
| HSD17B4.2 | 3.55E-07 | 0.259516 | 0.295 | 0.237 | 0.00531  | M2 | HSD17B4      |
| ACTR3.3   | 3.56E-07 | 0.118351 | 0.564 | 0.559 | 0.005315 | M2 | ACTR3        |
| NDUFAF7   | 3.57E-07 | -0.11154 | 0.04  | 0.095 | 0.005329 | M2 | NDUFAF7      |
| HOXA-AS2  | 3.63E-07 | -0.1284  | 0.004 | 0.039 | 0.00542  | M2 | HOXA-AS2     |

|              |           |           |        |        |           |    |             |
|--------------|-----------|-----------|--------|--------|-----------|----|-------------|
| SELM. 3      | 3. 67E-07 | 0. 189208 | 0. 249 | 0. 184 | 0. 005484 | M2 | SELM        |
| KCNMB2. 1    | 3. 67E-07 | -0. 1171  | 0. 001 | 0. 035 | 0. 005487 | M2 | KCNMB2      |
| UNC5B. 4     | 3. 67E-07 | 0. 217411 | 0. 13  | 0. 08  | 0. 00549  | M2 | UNC5B       |
| MICU2. 2     | 3. 72E-07 | -0. 11629 | 0. 149 | 0. 24  | 0. 005563 | M2 | MICU2       |
| AC093818. 1  | 3. 73E-07 | 0. 114172 | 0. 033 | 0. 012 | 0. 005575 | M2 | AC093818. 1 |
| AGAP2. 3     | 3. 75E-07 | -0. 10453 | 0. 015 | 0. 059 | 0. 005608 | M2 | AGAP2       |
| ABHD5. 1     | 3. 75E-07 | 0. 227936 | 0. 161 | 0. 108 | 0. 00561  | M2 | ABHD5       |
| LOH12CR2     | 3. 77E-07 | -0. 10779 | 0. 014 | 0. 057 | 0. 005631 | M2 | LOH12CR2    |
| TJAP1        | 3. 78E-07 | -0. 10143 | 0. 041 | 0. 097 | 0. 005653 | M2 | TJAP1       |
| GLB1. 2      | 3. 91E-07 | 0. 253015 | 0. 299 | 0. 241 | 0. 00584  | M2 | GLB1        |
| NIF3L1. 1    | 3. 92E-07 | -0. 12238 | 0. 061 | 0. 125 | 0. 005851 | M2 | NIF3L1      |
| B3GNT5. 5    | 3. 92E-07 | 0. 248133 | 0. 194 | 0. 138 | 0. 005854 | M2 | B3GNT5      |
| SMIM8. 1     | 3. 94E-07 | -0. 10495 | 0. 05  | 0. 11  | 0. 005888 | M2 | SMIM8       |
| HIBADH. 2    | 3. 98E-07 | -0. 14142 | 0. 144 | 0. 234 | 0. 005947 | M2 | HIBADH      |
| FOLR1. 2     | 3. 99E-07 | -0. 1951  | 0. 003 | 0. 037 | 0. 005967 | M2 | FOLR1       |
| ZNF681       | 4. 05E-07 | -0. 10209 | 0. 006 | 0. 044 | 0. 006059 | M2 | ZNF681      |
| OXA1L. 4     | 4. 09E-07 | 0. 183229 | 0. 356 | 0. 297 | 0. 006111 | M2 | OXA1L       |
| ECT2. 3      | 4. 09E-07 | -0. 10366 | 0. 011 | 0. 052 | 0. 006114 | M2 | ECT2        |
| MGEA5. 2     | 4. 11E-07 | -0. 11513 | 0. 149 | 0. 238 | 0. 00614  | M2 | MGEA5       |
| WIPF3. 5     | 4. 11E-07 | -0. 13337 | 0. 041 | 0. 096 | 0. 006143 | M2 | WIPF3       |
| ADRBK1. 5    | 4. 16E-07 | 0. 232848 | 0. 139 | 0. 089 | 0. 006213 | M2 | ADRBK1      |
| TMBIM4. 4    | 4. 17E-07 | 0. 131933 | 0. 101 | 0. 056 | 0. 006237 | M2 | TMBIM4      |
| NYAP1. 3     | 4. 20E-07 | -0. 11123 | 0. 004 | 0. 039 | 0. 006282 | M2 | NYAP1       |
| KIF2C. 3     | 4. 22E-07 | -0. 11493 | 0. 008 | 0. 046 | 0. 006306 | M2 | KIF2C       |
| TTYH3. 4     | 4. 22E-07 | 0. 370035 | 0. 29  | 0. 244 | 0. 00631  | M2 | TTYH3       |
| IPO13. 3     | 4. 26E-07 | -0. 10771 | 0. 051 | 0. 111 | 0. 006368 | M2 | IPO13       |
| MAP1LC3B. 1  | 4. 27E-07 | 0. 159694 | 0. 572 | 0. 565 | 0. 006387 | M2 | MAP1LC3B    |
| GSAP. 4      | 4. 35E-07 | 0. 143602 | 0. 125 | 0. 076 | 0. 006503 | M2 | GSAP        |
| MOSPD3. 2    | 4. 36E-07 | -0. 10273 | 0. 193 | 0. 294 | 0. 00652  | M2 | MOSPD3      |
| TMED2. 2     | 4. 38E-07 | 0. 103081 | 0. 616 | 0. 611 | 0. 00654  | M2 | TMED2       |
| C15orf41. 1  | 4. 41E-07 | -0. 11325 | 0. 013 | 0. 054 | 0. 006583 | M2 | C15orf41    |
| CENPK. 3     | 4. 42E-07 | -0. 12797 | 0. 046 | 0. 103 | 0. 006607 | M2 | CENPK       |
| PLK2. 3      | 4. 45E-07 | -0. 16316 | 0. 074 | 0. 141 | 0. 006645 | M2 | PLK2        |
| ACO2         | 4. 54E-07 | -0. 1474  | 0. 261 | 0. 372 | 0. 006783 | M2 | ACO2        |
| SLC9A3R1. 1  | 4. 58E-07 | -0. 11373 | 0. 084 | 0. 155 | 0. 006843 | M2 | SLC9A3R1    |
| TMEM50B. 3   | 4. 61E-07 | -0. 10124 | 0. 203 | 0. 31  | 0. 006889 | M2 | TMEM50B     |
| CNPY2. 4     | 4. 62E-07 | -0. 14488 | 0. 443 | 0. 577 | 0. 006907 | M2 | CNPY2       |
| PDE1B. 2     | 4. 67E-07 | 0. 109856 | 0. 045 | 0. 019 | 0. 00698  | M2 | PDE1B       |
| NGFR. 2      | 4. 67E-07 | -0. 12364 | 0. 004 | 0. 039 | 0. 006985 | M2 | NGFR        |
| SF3B1. 3     | 4. 69E-07 | -0. 16464 | 0. 322 | 0. 444 | 0. 00701  | M2 | SF3B1       |
| MEGF9. 2     | 4. 73E-07 | -0. 10956 | 0. 041 | 0. 096 | 0. 007063 | M2 | MEGF9       |
| SEPT9. 3     | 4. 74E-07 | -0. 11386 | 0. 244 | 0. 348 | 0. 007086 | M2 | 9-Sep       |
| SNRPN. 5     | 4. 80E-07 | -0. 34284 | 0. 046 | 0. 102 | 0. 007167 | M2 | SNRPN       |
| CA10. 2      | 4. 82E-07 | -0. 13615 | 0. 001 | 0. 034 | 0. 007208 | M2 | CA10        |
| WDR19. 4     | 4. 83E-07 | -0. 10994 | 0. 01  | 0. 05  | 0. 007214 | M2 | WDR19       |
| CKMT2-AS1. 1 | 4. 84E-07 | -0. 10352 | 0. 006 | 0. 043 | 0. 007232 | M2 | CKMT2-AS1   |
| TBC1D9. 5    | 4. 86E-07 | 0. 147809 | 0. 092 | 0. 051 | 0. 007262 | M2 | TBC1D9      |
| MAGT1. 1     | 4. 86E-07 | 0. 24672  | 0. 254 | 0. 199 | 0. 007265 | M2 | MAGT1       |
| MOSPD1. 3    | 4. 88E-07 | -0. 13132 | 0. 069 | 0. 134 | 0. 00729  | M2 | MOSPD1      |
| EID1. 3      | 4. 90E-07 | -0. 19335 | 0. 617 | 0. 714 | 0. 007323 | M2 | EID1        |
| ABHD14B. 4   | 4. 92E-07 | 0. 253586 | 0. 231 | 0. 175 | 0. 007357 | M2 | ABHD14B     |

|            |           |           |        |        |           |    |               |
|------------|-----------|-----------|--------|--------|-----------|----|---------------|
| PLD3. 3    | 4. 95E-07 | 0. 134312 | 0. 526 | 0. 529 | 0. 007402 | M2 | PLD3          |
| ZCWPW1. 1  | 4. 99E-07 | -0. 12007 | 0. 018 | 0. 062 | 0. 007453 | M2 | ZCWPW1        |
| ATP13A1. 2 | 5. 07E-07 | -0. 11749 | 0. 093 | 0. 166 | 0. 00758  | M2 | ATP13A1       |
| RP11-160C  | 5. 15E-07 | 0. 151588 | 0. 057 | 0. 027 | 0. 007698 | M2 | RP11-16005. 1 |
| DOCK10. 5  | 5. 17E-07 | 0. 205585 | 0. 179 | 0. 122 | 0. 007723 | M2 | DOCK10        |
| IDH3G. 3   | 5. 30E-07 | 0. 204919 | 0. 439 | 0. 4   | 0. 007918 | M2 | IDH3G         |
| GLTP. 3    | 5. 31E-07 | -0. 15558 | 0. 18  | 0. 274 | 0. 00793  | M2 | GLTP          |
| CXCL14. 2  | 5. 31E-07 | -0. 2172  | 0. 078 | 0. 146 | 0. 007934 | M2 | CXCL14        |
| EBI3. 5    | 5. 32E-07 | 0. 107886 | 0. 149 | 0. 092 | 0. 007953 | M2 | EBI3          |
| MON2       | 5. 33E-07 | -0. 10997 | 0. 041 | 0. 096 | 0. 007972 | M2 | MON2          |
| TTC8. 2    | 5. 38E-07 | -0. 10263 | 0. 037 | 0. 091 | 0. 008043 | M2 | TTC8          |
| SP9. 4     | 5. 40E-07 | -0. 13835 | 0. 006 | 0. 043 | 0. 008065 | M2 | SP9           |
| RAB11FIP4  | 5. 40E-07 | -0. 14374 | 0. 006 | 0. 043 | 0. 008069 | M2 | RAB11FIP4     |
| LRRC61. 4  | 5. 50E-07 | -0. 14122 | 0. 022 | 0. 067 | 0. 008219 | M2 | LRRC61        |
| COX7A2L. 2 | 5. 59E-07 | 0. 10289  | 0. 619 | 0. 612 | 0. 008357 | M2 | COX7A2L       |
| CTC-338M1  | 5. 61E-07 | -0. 11844 | 0. 024 | 0. 072 | 0. 008378 | M2 | CTC-338M12. 5 |
| TRAFD1. 1  | 5. 68E-07 | -0. 10141 | 0. 069 | 0. 134 | 0. 008483 | M2 | TRAFD1        |
| INHBB      | 5. 71E-07 | -0. 1031  | 0. 001 | 0. 033 | 0. 008536 | M2 | INHBB         |
| ATG10. 1   | 5. 73E-07 | -0. 11898 | 0. 079 | 0. 147 | 0. 008558 | M2 | ATG10         |
| PRPF39     | 5. 73E-07 | -0. 12444 | 0. 028 | 0. 077 | 0. 00857  | M2 | PRPF39        |
| HOXC8. 1   | 5. 80E-07 | -0. 12379 | 0. 003 | 0. 036 | 0. 008669 | M2 | HOXC8         |
| ZBTB7B. 1  | 5. 84E-07 | 0. 175549 | 0. 075 | 0. 039 | 0. 008723 | M2 | ZBTB7B        |
| PCTP. 2    | 5. 86E-07 | 0. 179251 | 0. 115 | 0. 069 | 0. 008763 | M2 | PCTP          |
| ADRBK2. 5  | 5. 91E-07 | 0. 142369 | 0. 091 | 0. 05  | 0. 008831 | M2 | ADRBK2        |
| HNRNPK. 3  | 5. 93E-07 | -0. 17122 | 0. 728 | 0. 793 | 0. 008867 | M2 | HNRNPK        |
| NIPAL3. 2  | 5. 98E-07 | -0. 14233 | 0. 033 | 0. 084 | 0. 008944 | M2 | NIPAL3        |
| SLC12A5. 5 | 6. 00E-07 | 0. 170951 | 0. 14  | 0. 089 | 0. 008967 | M2 | SLC12A5       |
| CMTR2. 1   | 6. 03E-07 | -0. 10397 | 0. 075 | 0. 143 | 0. 009011 | M2 | CMTR2         |
| E2F1. 2    | 6. 04E-07 | -0. 10415 | 0. 015 | 0. 057 | 0. 009021 | M2 | E2F1          |
| KCNN3. 1   | 6. 15E-07 | -0. 10441 | 0. 001 | 0. 033 | 0. 009194 | M2 | KCNN3         |
| WNT3. 2    | 6. 16E-07 | -0. 10162 | 0      | 0. 031 | 0. 00921  | M2 | WNT3          |
| ETFDH. 2   | 6. 25E-07 | -0. 12212 | 0. 063 | 0. 126 | 0. 009344 | M2 | ETFDH         |
| ACSS1. 2   | 6. 33E-07 | -0. 12993 | 0. 047 | 0. 104 | 0. 009455 | M2 | ACSS1         |
| COL4A5. 1  | 6. 33E-07 | -0. 10692 | 0. 001 | 0. 033 | 0. 009456 | M2 | COL4A5        |
| MIS18A. 3  | 6. 35E-07 | -0. 11106 | 0. 051 | 0. 11  | 0. 009488 | M2 | MIS18A        |
| AC114730.  | 6. 41E-07 | -0. 14098 | 0      | 0. 031 | 0. 009579 | M2 | AC114730. 3   |
| HADHA. 2   | 6. 48E-07 | 0. 200844 | 0. 466 | 0. 44  | 0. 009688 | M2 | HADHA         |
| TXNIP. 2   | 6. 51E-07 | 0. 145081 | 0. 492 | 0. 443 | 0. 009732 | M2 | TXNIP         |
| ZC3H7A. 3  | 6. 59E-07 | -0. 12553 | 0. 084 | 0. 154 | 0. 009843 | M2 | ZC3H7A        |
| CFI. 3     | 6. 63E-07 | -0. 12989 | 0. 019 | 0. 063 | 0. 009907 | M2 | CFI           |
| KIAA2026.  | 6. 65E-07 | -0. 10465 | 0. 079 | 0. 147 | 0. 009934 | M2 | KIAA2026      |
| GNPAT. 4   | 6. 66E-07 | -0. 10881 | 0. 153 | 0. 246 | 0. 009955 | M2 | GNPAT         |
| SRRM4. 2   | 6. 67E-07 | -0. 11998 | 0. 001 | 0. 033 | 0. 00997  | M2 | SRRM4         |
| LPL. 2     | 6. 72E-07 | -0. 16152 | 0. 091 | 0. 163 | 0. 010049 | M2 | LPL           |
| RBM41. 2   | 6. 76E-07 | -0. 10753 | 0. 037 | 0. 09  | 0. 0101   | M2 | RBM41         |
| MB21D2. 4  | 6. 77E-07 | 0. 168458 | 0. 092 | 0. 051 | 0. 010116 | M2 | MB21D2        |
| NFKBIE. 5  | 6. 78E-07 | 0. 221742 | 0. 184 | 0. 13  | 0. 010131 | M2 | NFKBIE        |
| UAP1. 3    | 6. 81E-07 | -0. 12944 | 0. 111 | 0. 19  | 0. 010179 | M2 | UAP1          |
| PRIMPOL    | 6. 84E-07 | -0. 1294  | 0. 036 | 0. 088 | 0. 010229 | M2 | PRIMPOL       |
| CREB3L2. 4 | 6. 85E-07 | 0. 247051 | 0. 174 | 0. 12  | 0. 010232 | M2 | CREB3L2       |
| XAB2. 2    | 6. 85E-07 | -0. 10727 | 0. 105 | 0. 182 | 0. 010234 | M2 | XAB2          |

|           |          |          |       |       |          |    |             |
|-----------|----------|----------|-------|-------|----------|----|-------------|
| PITX2.1   | 6.93E-07 | -0.10121 | 0     | 0.031 | 0.010362 | M2 | PITX2       |
| NXPE3.2   | 6.98E-07 | -0.14571 | 0.038 | 0.091 | 0.010426 | M2 | NXPE3       |
| NEK2.3    | 7.04E-07 | -0.1025  | 0.003 | 0.036 | 0.010515 | M2 | NEK2        |
| DIS3L2    | 7.08E-07 | -0.12862 | 0.049 | 0.106 | 0.010579 | M2 | DIS3L2      |
| CLASRP.1  | 7.12E-07 | -0.10535 | 0.083 | 0.153 | 0.010642 | M2 | CLASRP      |
| ARHGEF3   | 7.13E-07 | -0.1015  | 0.051 | 0.11  | 0.010651 | M2 | ARHGEF3     |
| ELOF1.4   | 7.16E-07 | -0.13097 | 0.309 | 0.432 | 0.010693 | M2 | ELOF1       |
| SRCIN1.3  | 7.16E-07 | -0.14279 | 0.001 | 0.033 | 0.010705 | M2 | SRCIN1      |
| TROAP.4   | 7.39E-07 | -0.10866 | 0.01  | 0.049 | 0.011045 | M2 | TROAP       |
| COPS4.1   | 7.42E-07 | -0.10541 | 0.225 | 0.331 | 0.01109  | M2 | COPS4       |
| CLCC1     | 7.44E-07 | -0.11682 | 0.075 | 0.142 | 0.011111 | M2 | CLCC1       |
| TANGO2.5  | 7.52E-07 | 0.189844 | 0.13  | 0.082 | 0.011244 | M2 | TANGO2      |
| RBL2.1    | 7.77E-07 | -0.10063 | 0.069 | 0.134 | 0.011615 | M2 | RBL2        |
| CLVS1.1   | 7.90E-07 | -0.11313 | 0.001 | 0.033 | 0.0118   | M2 | CLVS1       |
| BDH1.2    | 8.04E-07 | -0.11678 | 0.026 | 0.072 | 0.012014 | M2 | BDH1        |
| DOCK11.5  | 8.25E-07 | 0.149135 | 0.092 | 0.051 | 0.012331 | M2 | DOCK11      |
| DHFRL1.2  | 8.26E-07 | -0.10632 | 0.023 | 0.069 | 0.012346 | M2 | DHFRL1      |
| CEP135.2  | 8.27E-07 | -0.12494 | 0.033 | 0.083 | 0.012363 | M2 | CEP135      |
| MLH1.1    | 8.28E-07 | -0.10747 | 0.087 | 0.157 | 0.012367 | M2 | MLH1        |
| SPR       | 8.28E-07 | 0.163914 | 0.117 | 0.072 | 0.012368 | M2 | SPR         |
| C11orf1.3 | 8.33E-07 | -0.174   | 0.082 | 0.149 | 0.012443 | M2 | C11orf1     |
| SMDT1.2   | 8.46E-07 | 0.124411 | 0.579 | 0.558 | 0.012647 | M2 | SMDT1       |
| NDC80.3   | 8.53E-07 | -0.12675 | 0.011 | 0.05  | 0.012753 | M2 | NDC80       |
| TPMT.3    | 8.54E-07 | 0.233557 | 0.245 | 0.188 | 0.012756 | M2 | TPMT        |
| PYCR2.1   | 8.73E-07 | -0.16358 | 0.158 | 0.247 | 0.013041 | M2 | PYCR2       |
| SPA17.5   | 8.87E-07 | -0.10705 | 0.033 | 0.084 | 0.013251 | M2 | SPA17       |
| HRH2.3    | 8.94E-07 | 0.149179 | 0.073 | 0.037 | 0.013365 | M2 | HRH2        |
| JARID2.2  | 8.99E-07 | 0.268418 | 0.17  | 0.119 | 0.013429 | M2 | JARID2      |
| CDV3.2    | 9.03E-07 | 0.273336 | 0.318 | 0.272 | 0.013501 | M2 | CDV3        |
| TRAPPC13. | 9.06E-07 | -0.12812 | 0.057 | 0.117 | 0.013534 | M2 | TRAPPC13    |
| MXRA8.1   | 9.09E-07 | -0.10026 | 0.004 | 0.037 | 0.01359  | M2 | MXRA8       |
| TMEM140.2 | 9.17E-07 | 0.171115 | 0.083 | 0.045 | 0.013707 | M2 | TMEM140     |
| CDC37L1.3 | 9.21E-07 | -0.12568 | 0.078 | 0.143 | 0.013761 | M2 | CDC37L1     |
| ADAM9.3   | 9.21E-07 | 0.223713 | 0.37  | 0.327 | 0.013769 | M2 | ADAM9       |
| KLC4.1    | 9.39E-07 | -0.10621 | 0.036 | 0.087 | 0.014033 | M2 | KLC4        |
| SZRD1.1   | 9.47E-07 | 0.303492 | 0.308 | 0.261 | 0.014155 | M2 | SZRD1       |
| IFIT5.2   | 9.51E-07 | -0.11453 | 0.036 | 0.087 | 0.014211 | M2 | IFIT5       |
| NDUFA6.3  | 9.53E-07 | 0.104513 | 0.599 | 0.569 | 0.014235 | M2 | NDUFA6      |
| BTG2.3    | 9.55E-07 | -0.21554 | 0.367 | 0.474 | 0.014271 | M2 | BTG2        |
| RICTOR.2  | 9.61E-07 | -0.14322 | 0.115 | 0.191 | 0.014358 | M2 | RICTOR      |
| KPNB1.4   | 9.62E-07 | -0.12131 | 0.332 | 0.456 | 0.014372 | M2 | KPNB1       |
| KLHL28.3  | 9.66E-07 | -0.13049 | 0.063 | 0.123 | 0.014441 | M2 | KLHL28      |
| PGAM2.4   | 9.76E-07 | -0.14195 | 0.011 | 0.051 | 0.014587 | M2 | PGAM2       |
| HOXA9.1   | 9.78E-07 | -0.11667 | 0.004 | 0.037 | 0.014621 | M2 | HOXA9       |
| EIF5B.3   | 9.79E-07 | -0.17496 | 0.398 | 0.531 | 0.01463  | M2 | EIF5B       |
| PIN1.3    | 9.83E-07 | -0.17868 | 0.432 | 0.544 | 0.014696 | M2 | PIN1        |
| KRT8.1    | 9.97E-07 | 0.10838  | 0.034 | 0.013 | 0.014899 | M2 | KRT8        |
| BCYRN1.2  | 1.01E-06 | -0.10973 | 0.014 | 0.054 | 0.015083 | M2 | BCYRN1      |
| TVP23B.3  | 1.02E-06 | -0.1059  | 0.049 | 0.105 | 0.015264 | M2 | TVP23B      |
| CPB2-AS1. | 1.03E-06 | -0.10592 | 0     | 0.03  | 0.015341 | M2 | CPB2-AS1    |
| RP5-940J5 | 1.03E-06 | 0.264959 | 0.215 | 0.158 | 0.015395 | M2 | RP5-940J5.9 |



|             |           |           |        |        |           |    |              |
|-------------|-----------|-----------|--------|--------|-----------|----|--------------|
| IGF1. 4     | 1. 03E-06 | 0. 151296 | 0. 102 | 0. 059 | 0. 015404 | M2 | IGF1         |
| ZBTB37. 1   | 1. 03E-06 | -0. 10445 | 0. 015 | 0. 056 | 0. 015446 | M2 | ZBTB37       |
| LINC00882   | 1. 04E-06 | -0. 12257 | 0. 001 | 0. 032 | 0. 015474 | M2 | LINC00882    |
| GTPBP1. 2   | 1. 04E-06 | -0. 10182 | 0. 049 | 0. 105 | 0. 01551  | M2 | GTPBP1       |
| PNRC1. 5    | 1. 05E-06 | 0. 148789 | 0. 552 | 0. 539 | 0. 015737 | M2 | PNRC1        |
| GAL. 1      | 1. 08E-06 | -0. 15203 | 0. 005 | 0. 039 | 0. 016161 | M2 | GAL          |
| CDK8. 2     | 1. 08E-06 | -0. 11477 | 0. 034 | 0. 084 | 0. 016175 | M2 | CDK8         |
| B3GAT2. 1   | 1. 08E-06 | -0. 11962 | 0. 036 | 0. 086 | 0. 016186 | M2 | B3GAT2       |
| TMEM116. 2  | 1. 09E-06 | -0. 12099 | 0. 022 | 0. 066 | 0. 016218 | M2 | TMEM116      |
| USP54. 2    | 1. 14E-06 | -0. 12555 | 0. 011 | 0. 05  | 0. 017007 | M2 | USP54        |
| COMMD9. 3   | 1. 15E-06 | 0. 281799 | 0. 347 | 0. 307 | 0. 01713  | M2 | COMMD9       |
| G3BP1. 2    | 1. 15E-06 | -0. 10511 | 0. 217 | 0. 321 | 0. 017137 | M2 | G3BP1        |
| ZDHHC4. 5   | 1. 15E-06 | -0. 10671 | 0. 249 | 0. 362 | 0. 017258 | M2 | ZDHHC4       |
| STARD3NL. 1 | 1. 16E-06 | -0. 10789 | 0. 287 | 0. 405 | 0. 017281 | M2 | STARD3NL     |
| QTRTD1      | 1. 16E-06 | -0. 10937 | 0. 041 | 0. 094 | 0. 017389 | M2 | QTRTD1       |
| PRR5. 4     | 1. 17E-06 | 0. 162994 | 0. 082 | 0. 044 | 0. 017474 | M2 | PRR5         |
| GAB3. 3     | 1. 17E-06 | 0. 112718 | 0. 063 | 0. 031 | 0. 017544 | M2 | GAB3         |
| AP1G2. 4    | 1. 18E-06 | 0. 127057 | 0. 088 | 0. 049 | 0. 017673 | M2 | AP1G2        |
| ARID1B. 3   | 1. 19E-06 | -0. 12314 | 0. 069 | 0. 132 | 0. 01776  | M2 | ARID1B       |
| GGNBP2. 1   | 1. 19E-06 | -0. 12593 | 0. 284 | 0. 398 | 0. 01776  | M2 | GGNBP2       |
| RP11-22P6   | 1. 19E-06 | -0. 12045 | 0. 009 | 0. 046 | 0. 017831 | M2 | RP11-22P6. 2 |
| RHNO1. 2    | 1. 19E-06 | -0. 14038 | 0. 123 | 0. 2   | 0. 017857 | M2 | RHNO1        |
| SAP30BP. 1  | 1. 20E-06 | -0. 12136 | 0. 254 | 0. 369 | 0. 017928 | M2 | SAP30BP      |
| SCRN2. 1    | 1. 21E-06 | -0. 13183 | 0. 103 | 0. 177 | 0. 018108 | M2 | SCRN2        |
| NKIRAS1. 1  | 1. 22E-06 | -0. 1147  | 0. 05  | 0. 106 | 0. 018257 | M2 | NKIRAS1      |
| TFAP4       | 1. 22E-06 | -0. 10376 | 0. 015 | 0. 056 | 0. 018305 | M2 | TFAP4        |
| METTL7A. 2  | 1. 23E-06 | -0. 24999 | 0. 152 | 0. 226 | 0. 018336 | M2 | METTL7A      |
| CRYZ. 4     | 1. 23E-06 | -0. 11213 | 0. 065 | 0. 128 | 0. 018354 | M2 | CRYZ         |
| DIAPH2. 2   | 1. 23E-06 | 0. 117557 | 0. 106 | 0. 062 | 0. 018455 | M2 | DIAPH2       |
| CMYA5. 2    | 1. 26E-06 | -0. 10417 | 0. 001 | 0. 032 | 0. 018895 | M2 | CMYA5        |
| RALBP1. 2   | 1. 27E-06 | -0. 10494 | 0. 207 | 0. 31  | 0. 018961 | M2 | RALBP1       |
| EPSTI1. 5   | 1. 27E-06 | 0. 100517 | 0. 181 | 0. 121 | 0. 019001 | M2 | EPSTI1       |
| DNAJB12. 4  | 1. 27E-06 | 0. 234795 | 0. 199 | 0. 144 | 0. 019053 | M2 | DNAJB12      |
| FAM117B     | 1. 32E-06 | -0. 10533 | 0. 008 | 0. 043 | 0. 019704 | M2 | FAM117B      |
| ELL. 2      | 1. 34E-06 | 0. 246458 | 0. 146 | 0. 097 | 0. 020085 | M2 | ELL          |
| DTNBP1. 3   | 1. 35E-06 | -0. 10497 | 0. 132 | 0. 212 | 0. 020136 | M2 | DTNBP1       |
| AIG1. 2     | 1. 35E-06 | -0. 15766 | 0. 236 | 0. 341 | 0. 02014  | M2 | AIG1         |
| PCSK2. 1    | 1. 35E-06 | -0. 11951 | 0      | 0. 029 | 0. 020188 | M2 | PCSK2        |
| QKI. 3      | 1. 36E-06 | -0. 1946  | 0. 374 | 0. 478 | 0. 020283 | M2 | QKI          |
| RBM42. 3    | 1. 36E-06 | -0. 10255 | 0. 277 | 0. 394 | 0. 020376 | M2 | RBM42        |
| YIPF6. 4    | 1. 38E-06 | -0. 10368 | 0. 216 | 0. 32  | 0. 020675 | M2 | YIPF6        |
| S100A1. 1   | 1. 40E-06 | -0. 28918 | 0. 006 | 0. 04  | 0. 020928 | M2 | S100A1       |
| CHGA. 1     | 1. 40E-06 | -0. 10789 | 0      | 0. 029 | 0. 020996 | M2 | CHGA         |
| POLB. 1     | 1. 41E-06 | -0. 10193 | 0. 037 | 0. 088 | 0. 021005 | M2 | POLB         |
| FAM222A. 2  | 1. 42E-06 | -0. 10354 | 0. 001 | 0. 031 | 0. 021232 | M2 | FAM222A      |
| C18orf8. 2  | 1. 43E-06 | -0. 1001  | 0. 059 | 0. 117 | 0. 021332 | M2 | C18orf8      |
| AP1S1. 5    | 1. 46E-06 | -0. 14205 | 0. 351 | 0. 476 | 0. 021827 | M2 | AP1S1        |
| PSORS1C1. 1 | 1. 49E-06 | -0. 10846 | 0. 005 | 0. 039 | 0. 022331 | M2 | PSORS1C1     |
| SRSF2. 4    | 1. 50E-06 | -0. 15181 | 0. 511 | 0. 612 | 0. 022366 | M2 | SRSF2        |
| SON. 2      | 1. 50E-06 | -0. 21322 | 0. 599 | 0. 719 | 0. 022447 | M2 | SON          |
| NMB. 4      | 1. 52E-06 | -0. 14593 | 0. 129 | 0. 207 | 0. 022658 | M2 | NMB          |

|             |           |           |        |        |           |    |                |
|-------------|-----------|-----------|--------|--------|-----------|----|----------------|
| WDR20. 1    | 1. 54E-06 | -0. 10434 | 0. 077 | 0. 142 | 0. 022954 | M2 | WDR20          |
| IGFBP6. 3   | 1. 56E-06 | -0. 16056 | 0. 024 | 0. 069 | 0. 023321 | M2 | IGFBP6         |
| SCN2A. 1    | 1. 57E-06 | -0. 10831 | 0. 001 | 0. 031 | 0. 023449 | M2 | SCN2A          |
| DNAJC7. 2   | 1. 59E-06 | -0. 14088 | 0. 345 | 0. 473 | 0. 023691 | M2 | DNAJC7         |
| NEU1. 3     | 1. 59E-06 | 0. 237883 | 0. 335 | 0. 289 | 0. 023764 | M2 | NEU1           |
| ALG6. 2     | 1. 60E-06 | -0. 12481 | 0. 051 | 0. 107 | 0. 023918 | M2 | ALG6           |
| CCNB1. 3    | 1. 63E-06 | -0. 16902 | 0. 042 | 0. 094 | 0. 024431 | M2 | CCNB1          |
| FASTKD5. 1  | 1. 65E-06 | -0. 10111 | 0. 056 | 0. 114 | 0. 024658 | M2 | FASTKD5        |
| UFD1L. 3    | 1. 68E-06 | 0. 264519 | 0. 368 | 0. 327 | 0. 025155 | M2 | UFD1L          |
| PTGR2. 1    | 1. 70E-06 | -0. 10281 | 0. 031 | 0. 078 | 0. 02541  | M2 | PTGR2          |
| TFAP2B. 1   | 1. 70E-06 | -0. 11036 | 0. 001 | 0. 031 | 0. 025426 | M2 | TFAP2B         |
| PPP1R1C. 2  | 1. 71E-06 | -0. 12162 | 0      | 0. 028 | 0. 025543 | M2 | PPP1R1C        |
| ABCA5. 2    | 1. 72E-06 | -0. 11148 | 0. 04  | 0. 09  | 0. 025766 | M2 | ABCA5          |
| PCL0. 1     | 1. 75E-06 | -0. 10296 | 0. 004 | 0. 036 | 0. 026185 | M2 | PCL0           |
| SOX10. 2    | 1. 76E-06 | -0. 16448 | 0. 001 | 0. 031 | 0. 026355 | M2 | SOX10          |
| KIAA1324L   | 1. 78E-06 | -0. 11148 | 0. 001 | 0. 031 | 0. 026589 | M2 | KIAA1324L      |
| ITGB3BP. 3  | 1. 80E-06 | -0. 11213 | 0. 082 | 0. 147 | 0. 026893 | M2 | ITGB3BP        |
| ACKR3       | 1. 82E-06 | 0. 149736 | 0. 04  | 0. 017 | 0. 027195 | M2 | ACKR3          |
| MOG. 3      | 1. 83E-06 | -0. 2507  | 0. 003 | 0. 033 | 0. 027321 | M2 | MOG            |
| FAM159A. 4  | 1. 87E-06 | 0. 124682 | 0. 079 | 0. 043 | 0. 027872 | M2 | FAM159A        |
| NXN. 2      | 1. 95E-06 | -0. 1122  | 0. 005 | 0. 038 | 0. 029126 | M2 | NXN            |
| HVCN1. 5    | 1. 96E-06 | 0. 13989  | 0. 144 | 0. 093 | 0. 029274 | M2 | HVCN1          |
| NTAN1. 3    | 1. 97E-06 | 0. 278933 | 0. 245 | 0. 196 | 0. 02937  | M2 | NTAN1          |
| CMTM3. 5    | 1. 97E-06 | 0. 242619 | 0. 363 | 0. 321 | 0. 029409 | M2 | CMTM3          |
| PTEN. 5     | 1. 98E-06 | 0. 208593 | 0. 178 | 0. 126 | 0. 029572 | M2 | PTEN           |
| ASTN2       | 1. 98E-06 | -0. 1105  | 0. 005 | 0. 038 | 0. 029641 | M2 | ASTN2          |
| PHF3. 2     | 1. 99E-06 | -0. 10502 | 0. 123 | 0. 2   | 0. 029716 | M2 | PHF3           |
| RP11-445F   | 2. 01E-06 | -0. 12999 | 0. 001 | 0. 031 | 0. 03008  | M2 | RP11-445F12. 1 |
| FAM13A. 1   | 2. 02E-06 | 0. 216963 | 0. 143 | 0. 095 | 0. 030132 | M2 | FAM13A         |
| PPP1R12A. 2 | 2. 02E-06 | -0. 10749 | 0. 257 | 0. 367 | 0. 03014  | M2 | PPP1R12A       |
| ADPRH. 3    | 2. 02E-06 | 0. 102882 | 0. 063 | 0. 031 | 0. 030178 | M2 | ADPRH          |
| DGCR5. 1    | 2. 07E-06 | -0. 10715 | 0. 001 | 0. 031 | 0. 03086  | M2 | DGCR5          |
| YBEY. 2     | 2. 09E-06 | -0. 12845 | 0. 144 | 0. 227 | 0. 031194 | M2 | YBEY           |
| EFCAB2      | 2. 09E-06 | -0. 11956 | 0. 047 | 0. 101 | 0. 03125  | M2 | EFCAB2         |
| MFS12. 4    | 2. 10E-06 | 0. 331663 | 0. 235 | 0. 188 | 0. 031339 | M2 | MFS12          |
| MPC2. 2     | 2. 12E-06 | 0. 106533 | 0. 584 | 0. 581 | 0. 031653 | M2 | MPC2           |
| ERCC1. 5    | 2. 15E-06 | 0. 153569 | 0. 499 | 0. 47  | 0. 032163 | M2 | ERCC1          |
| PPIL4. 2    | 2. 19E-06 | -0. 12409 | 0. 163 | 0. 252 | 0. 03271  | M2 | PPIL4          |
| DLGAP5. 4   | 2. 21E-06 | -0. 10382 | 0. 005 | 0. 037 | 0. 032978 | M2 | DLGAP5         |
| CHIC2. 2    | 2. 22E-06 | -0. 10827 | 0. 163 | 0. 249 | 0. 033215 | M2 | CHIC2          |
| GLDN. 4     | 2. 25E-06 | 0. 107862 | 0. 147 | 0. 093 | 0. 033621 | M2 | GLDN           |
| BTG3. 3     | 2. 25E-06 | -0. 11803 | 0. 267 | 0. 379 | 0. 03364  | M2 | BTG3           |
| CARNS1. 3   | 2. 32E-06 | -0. 22637 | 0. 001 | 0. 03  | 0. 034724 | M2 | CARNS1         |
| APOBEC3C. 2 | 2. 33E-06 | 0. 174455 | 0. 179 | 0. 125 | 0. 034866 | M2 | APOBEC3C       |
| HHIP. 2     | 2. 34E-06 | -0. 15553 | 0      | 0. 028 | 0. 034951 | M2 | HHIP           |
| HOXB3. 1    | 2. 35E-06 | -0. 10612 | 0. 004 | 0. 035 | 0. 035175 | M2 | HOXB3          |
| GSPT1. 4    | 2. 36E-06 | -0. 11364 | 0. 244 | 0. 356 | 0. 035274 | M2 | GSPT1          |
| RP6-91H8. 2 | 2. 37E-06 | 0. 168607 | 0. 093 | 0. 053 | 0. 035429 | M2 | RP6-91H8. 3    |
| FAM135A. 1  | 2. 37E-06 | -0. 13033 | 0. 04  | 0. 089 | 0. 035488 | M2 | FAM135A        |
| RP11-127E   | 2. 39E-06 | -0. 10496 | 0. 013 | 0. 05  | 0. 035706 | M2 | RP11-127B20. 3 |
| NIPA1. 1    | 2. 42E-06 | -0. 10489 | 0. 015 | 0. 054 | 0. 036132 | M2 | NIPA1          |

|            |          |          |       |       |          |    |          |
|------------|----------|----------|-------|-------|----------|----|----------|
| MKI67.4    | 2.42E-06 | -0.14894 | 0.023 | 0.065 | 0.036172 | M2 | MKI67    |
| CENPE.4    | 2.47E-06 | -0.1482  | 0.018 | 0.058 | 0.036953 | M2 | CENPE    |
| HECA.4     | 2.49E-06 | 0.179989 | 0.11  | 0.068 | 0.037175 | M2 | HECA     |
| PTPRM      | 2.49E-06 | 0.121257 | 0.032 | 0.012 | 0.037178 | M2 | PTPRM    |
| JAGN1.4    | 2.50E-06 | -0.1327  | 0.222 | 0.327 | 0.037295 | M2 | JAGN1    |
| FBX08.2    | 2.50E-06 | -0.1064  | 0.083 | 0.149 | 0.037409 | M2 | FBX08    |
| BRD4.4     | 2.58E-06 | -0.10298 | 0.229 | 0.334 | 0.038568 | M2 | BRD4     |
| CENPM.4    | 2.60E-06 | -0.10428 | 0.031 | 0.077 | 0.038884 | M2 | CENPM    |
| MXD3.4     | 2.61E-06 | -0.10452 | 0.023 | 0.066 | 0.038934 | M2 | MXD3     |
| RALYL.1    | 2.68E-06 | -0.10506 | 0.003 | 0.032 | 0.04005  | M2 | RALYL    |
| ENSA.3     | 2.75E-06 | 0.139127 | 0.52  | 0.499 | 0.041077 | M2 | ENSA     |
| WBSCR22.4  | 2.77E-06 | -0.12945 | 0.369 | 0.502 | 0.041361 | M2 | WBSCR22  |
| CCNT2.1    | 2.82E-06 | -0.11514 | 0.052 | 0.107 | 0.042192 | M2 | CCNT2    |
| PEX1.1     | 2.84E-06 | -0.10842 | 0.036 | 0.084 | 0.04241  | M2 | PEX1     |
| ZCCHC17.3  | 2.86E-06 | -0.11712 | 0.249 | 0.359 | 0.042716 | M2 | ZCCHC17  |
| B4GALT4.1  | 2.92E-06 | -0.10259 | 0.078 | 0.142 | 0.043638 | M2 | B4GALT4  |
| C7orf61.1  | 2.97E-06 | -0.10924 | 0.004 | 0.035 | 0.044334 | M2 | C7orf61  |
| PNPLA8.3   | 2.98E-06 | -0.11693 | 0.249 | 0.354 | 0.044495 | M2 | PNPLA8   |
| GOLGA4.2   | 3.00E-06 | -0.1296  | 0.249 | 0.354 | 0.044885 | M2 | GOLGA4   |
| TMEM2.2    | 3.01E-06 | 0.184862 | 0.102 | 0.062 | 0.045003 | M2 | TMEM2    |
| JTB.3      | 3.08E-06 | 0.104889 | 0.617 | 0.609 | 0.046023 | M2 | JTB      |
| L1CAM.2    | 3.08E-06 | -0.11073 | 0.005 | 0.037 | 0.046036 | M2 | L1CAM    |
| ATF7IP2.4  | 3.08E-06 | 0.111182 | 0.074 | 0.039 | 0.04606  | M2 | ATF7IP2  |
| TOPORS.3   | 3.09E-06 | -0.11737 | 0.112 | 0.183 | 0.046148 | M2 | TOPORS   |
| SS18L2.1   | 3.14E-06 | -0.12716 | 0.217 | 0.317 | 0.046917 | M2 | SS18L2   |
| G2E3       | 3.14E-06 | -0.10619 | 0.054 | 0.108 | 0.046946 | M2 | G2E3     |
| ARMCX5.2   | 3.18E-06 | -0.10289 | 0.032 | 0.078 | 0.047567 | M2 | ARMCX5   |
| PLD4.5     | 3.21E-06 | -0.30219 | 0.1   | 0.157 | 0.047961 | M2 | PLD4     |
| SH3GLB1.3  | 3.21E-06 | 0.16242  | 0.455 | 0.428 | 0.048045 | M2 | SH3GLB1  |
| TRIP6.5    | 3.29E-06 | -0.10985 | 0.169 | 0.255 | 0.0492   | M2 | TRIP6    |
| IER3IP1.3  | 3.29E-06 | 0.164774 | 0.069 | 0.036 | 0.049215 | M2 | IER3IP1  |
| HOXA5.2    | 3.33E-06 | -0.12279 | 0.022 | 0.063 | 0.049829 | M2 | HOXA5    |
| CLGN.1     | 3.35E-06 | -0.10869 | 0.006 | 0.039 | 0.050012 | M2 | CLGN     |
| PDCD4.5    | 3.36E-06 | 0.158209 | 0.203 | 0.145 | 0.050174 | M2 | PDCD4    |
| LDLRAD4.5  | 3.38E-06 | 0.176533 | 0.199 | 0.142 | 0.050541 | M2 | LDLRAD4  |
| C6orf141.3 | 3.44E-06 | -0.11308 | 0.003 | 0.032 | 0.051396 | M2 | C6orf141 |
| REEP4.5    | 3.48E-06 | 0.201139 | 0.221 | 0.163 | 0.052056 | M2 | REEP4    |
| IPMK.2     | 3.52E-06 | 0.196575 | 0.075 | 0.042 | 0.052529 | M2 | IPMK     |
| BCAS1.2    | 3.54E-06 | -0.18133 | 0.01  | 0.045 | 0.052848 | M2 | BCAS1    |
| SSH1.2     | 3.56E-06 | 0.227539 | 0.124 | 0.08  | 0.053147 | M2 | SSH1     |
| MEF2C.5    | 3.59E-06 | 0.155828 | 0.346 | 0.278 | 0.053665 | M2 | MEF2C    |
| MED7.2     | 3.60E-06 | -0.12668 | 0.061 | 0.119 | 0.053728 | M2 | MED7     |
| NME1.3     | 3.66E-06 | -0.16841 | 0.456 | 0.576 | 0.054762 | M2 | NME1     |
| BABAM1.1   | 3.68E-06 | -0.13831 | 0.298 | 0.413 | 0.055021 | M2 | BABAM1   |
| CCDC57.5   | 3.69E-06 | 0.187109 | 0.153 | 0.104 | 0.055102 | M2 | CCDC57   |
| C1QTNF3.2  | 3.70E-06 | -0.12148 | 0.008 | 0.041 | 0.055308 | M2 | C1QTNF3  |
| BEND7.2    | 3.74E-06 | -0.10674 | 0.02  | 0.061 | 0.055947 | M2 | BEND7    |
| CCNB2.4    | 3.78E-06 | -0.13721 | 0.024 | 0.066 | 0.056515 | M2 | CCNB2    |
| ERMN.3     | 3.81E-06 | -0.34663 | 0.008 | 0.04  | 0.056962 | M2 | ERMN     |
| PRKCH.4    | 3.82E-06 | 0.123024 | 0.077 | 0.041 | 0.057012 | M2 | PRKCH    |
| NUDCD2.2   | 3.92E-06 | -0.11943 | 0.294 | 0.408 | 0.05865  | M2 | NUDCD2   |

|             |           |           |        |        |              |                |
|-------------|-----------|-----------|--------|--------|--------------|----------------|
| NUDC. 4     | 3. 93E-06 | -0. 1433  | 0. 457 | 0. 588 | 0. 058735 M2 | NUDC           |
| NEUROD2. 1  | 3. 94E-06 | -0. 12656 | 0. 003 | 0. 031 | 0. 058917 M2 | NEUROD2        |
| RANBP1. 4   | 3. 95E-06 | -0. 15965 | 0. 473 | 0. 585 | 0. 059041 M2 | RANBP1         |
| CNDP1. 3    | 4. 01E-06 | -0. 24462 | 0. 005 | 0. 036 | 0. 059941 M2 | CNDP1          |
| RAB3C. 1    | 4. 04E-06 | -0. 10534 | 0. 008 | 0. 04  | 0. 06031 M2  | RAB3C          |
| TUBA4A. 2   | 4. 10E-06 | -0. 20248 | 0. 018 | 0. 056 | 0. 061268 M2 | TUBA4A         |
| SDHB. 1     | 4. 12E-06 | 0. 142916 | 0. 448 | 0. 422 | 0. 061556 M2 | SDHB           |
| ADAMTS4. 2  | 4. 15E-06 | -0. 1568  | 0. 004 | 0. 034 | 0. 062031 M2 | ADAMTS4        |
| ATP6AP1. 5  | 4. 18E-06 | 0. 172611 | 0. 503 | 0. 492 | 0. 062463 M2 | ATP6AP1        |
| STAG3       | 4. 19E-06 | -0. 10789 | 0. 014 | 0. 051 | 0. 062566 M2 | STAG3          |
| MTRNR2L8. 4 | 4. 19E-06 | 0. 228209 | 0. 245 | 0. 187 | 0. 062682 M2 | MTRNR2L8       |
| CCDC134     | 4. 21E-06 | 0. 108936 | 0. 037 | 0. 015 | 0. 062877 M2 | CCDC134        |
| B3GNT2. 4   | 4. 21E-06 | 0. 176545 | 0. 103 | 0. 064 | 0. 062958 M2 | B3GNT2         |
| COPS5. 1    | 4. 31E-06 | -0. 12922 | 0. 307 | 0. 417 | 0. 064386 M2 | COPS5          |
| NUDT19. 1   | 4. 33E-06 | -0. 11615 | 0. 051 | 0. 104 | 0. 064778 M2 | NUDT19         |
| PPARD. 5    | 4. 35E-06 | 0. 249303 | 0. 152 | 0. 105 | 0. 064945 M2 | PPARD          |
| MOBP. 4     | 4. 37E-06 | -0. 30704 | 0. 006 | 0. 038 | 0. 065238 M2 | MOBP           |
| SNRNP48     | 4. 41E-06 | -0. 10865 | 0. 059 | 0. 114 | 0. 065861 M2 | SNRNP48        |
| JAKMIP1. 1  | 4. 43E-06 | -0. 10277 | 0. 004 | 0. 033 | 0. 06627 M2  | JAKMIP1        |
| CENPU. 4    | 4. 54E-06 | -0. 11032 | 0. 055 | 0. 109 | 0. 067857 M2 | CENPU          |
| COPB2. 4    | 4. 59E-06 | -0. 13309 | 0. 217 | 0. 312 | 0. 068568 M2 | COPB2          |
| ECH1. 3     | 4. 62E-06 | 0. 103521 | 0. 567 | 0. 558 | 0. 068981 M2 | ECH1           |
| RCBTB1. 3   | 4. 80E-06 | -0. 11488 | 0. 031 | 0. 075 | 0. 071707 M2 | RCBTB1         |
| RAB5A. 1    | 4. 82E-06 | -0. 11248 | 0. 335 | 0. 456 | 0. 072076 M2 | RAB5A          |
| ARG2. 3     | 4. 89E-06 | 0. 169535 | 0. 144 | 0. 096 | 0. 073027 M2 | ARG2           |
| NKX6-2. 3   | 4. 92E-06 | -0. 18277 | 0      | 0. 026 | 0. 07357 M2  | NKX6-2         |
| PAF1        | 4. 99E-06 | -0. 10693 | 0. 137 | 0. 216 | 0. 074623 M2 | PAF1           |
| HBP1        | 5. 01E-06 | 0. 19148  | 0. 285 | 0. 228 | 0. 07484 M2  | HBP1           |
| ZBTB2. 1    | 5. 04E-06 | -0. 10574 | 0. 031 | 0. 075 | 0. 075333 M2 | ZBTB2          |
| AQP1        | 5. 07E-06 | -0. 14258 | 0. 013 | 0. 048 | 0. 075694 M2 | AQP1           |
| ARID5A. 3   | 5. 07E-06 | 0. 18058  | 0. 34  | 0. 286 | 0. 075771 M2 | ARID5A         |
| RRP7A. 4    | 5. 14E-06 | 0. 264628 | 0. 326 | 0. 284 | 0. 076846 M2 | RRP7A          |
| OASL. 1     | 5. 16E-06 | 0. 161209 | 0. 055 | 0. 027 | 0. 077181 M2 | OASL           |
| ZNF511. 3   | 5. 29E-06 | 0. 25409  | 0. 239 | 0. 192 | 0. 079052 M2 | ZNF511         |
| ATF4. 2     | 5. 33E-06 | 0. 140865 | 0. 539 | 0. 515 | 0. 079593 M2 | ATF4           |
| EIF1AX. 3   | 5. 36E-06 | -0. 1403  | 0. 441 | 0. 568 | 0. 080075 M2 | EIF1AX         |
| SWAP70. 5   | 5. 49E-06 | 0. 178638 | 0. 272 | 0. 218 | 0. 081997 M2 | SWAP70         |
| STK24. 2    | 5. 51E-06 | 0. 238995 | 0. 142 | 0. 098 | 0. 082323 M2 | STK24          |
| TOMM5. 4    | 5. 54E-06 | 0. 319865 | 0. 252 | 0. 206 | 0. 08273 M2  | TOMM5          |
| HLA-DOA. 4  | 5. 54E-06 | 0. 139024 | 0. 14  | 0. 091 | 0. 082737 M2 | HLA-DOA        |
| MYRF. 3     | 5. 72E-06 | -0. 18234 | 0. 004 | 0. 033 | 0. 085484 M2 | MYRF           |
| CCDC84      | 5. 96E-06 | -0. 11255 | 0. 05  | 0. 101 | 0. 089032 M2 | CCDC84         |
| CTD-2090I   | 5. 98E-06 | 0. 134684 | 0. 088 | 0. 05  | 0. 089433 M2 | CTD-2090I13. 1 |
| CHURC1. 2   | 6. 00E-06 | 0. 181674 | 0. 43  | 0. 398 | 0. 089704 M2 | CHURC1         |
| CX3CR1. 4   | 6. 15E-06 | -0. 25354 | 0. 055 | 0. 104 | 0. 091919 M2 | CX3CR1         |
| ANGPT2. 2   | 6. 41E-06 | -0. 11722 | 0. 013 | 0. 048 | 0. 095801 M2 | ANGPT2         |
| SIL1. 4     | 6. 44E-06 | 0. 212212 | 0. 299 | 0. 251 | 0. 09629 M2  | SIL1           |
| MTHFS. 3    | 6. 47E-06 | 0. 226473 | 0. 236 | 0. 186 | 0. 096644 M2 | MTHFS          |
| CXorf40B. 6 | 6. 73E-06 | -0. 10108 | 0. 092 | 0. 157 | 0. 100507 M2 | CXorf40B       |
| ARHGEF37    | 6. 74E-06 | -0. 10827 | 0. 011 | 0. 046 | 0. 100723 M2 | ARHGEF37       |
| EAPP. 4     | 6. 87E-06 | -0. 12668 | 0. 258 | 0. 361 | 0. 102643 M2 | EAPP           |

|              |           |           |        |        |              |               |
|--------------|-----------|-----------|--------|--------|--------------|---------------|
| PCP4. 3      | 6. 94E-06 | -0. 18893 | 0. 009 | 0. 041 | 0. 103759 M2 | PCP4          |
| SF3B2. 2     | 6. 96E-06 | -0. 16425 | 0. 416 | 0. 532 | 0. 103987 M2 | SF3B2         |
| ARL8B. 2     | 6. 98E-06 | 0. 26717  | 0. 249 | 0. 203 | 0. 104332 M2 | ARL8B         |
| FAM212A. 4   | 7. 09E-06 | -0. 17161 | 0. 015 | 0. 051 | 0. 105882 M2 | FAM212A       |
| TMA16. 2     | 7. 13E-06 | -0. 1033  | 0. 129 | 0. 206 | 0. 106567 M2 | TMA16         |
| BACE2. 4     | 7. 19E-06 | -0. 10874 | 0. 019 | 0. 057 | 0. 107397 M2 | BACE2         |
| CPSF3L. 2    | 7. 20E-06 | -0. 1122  | 0. 189 | 0. 28  | 0. 10754 M2  | CPSF3L        |
| PRKCDBP. 1   | 7. 55E-06 | 0. 127801 | 0. 059 | 0. 03  | 0. 112814 M2 | PRKCDBP       |
| PDLIM4. 3    | 7. 56E-06 | -0. 16242 | 0. 032 | 0. 076 | 0. 11296 M2  | PDLIM4        |
| SLC18B1. 3   | 7. 61E-06 | -0. 19308 | 0. 116 | 0. 183 | 0. 113656 M2 | SLC18B1       |
| MSRA. 4      | 7. 62E-06 | -0. 1436  | 0. 181 | 0. 262 | 0. 113885 M2 | MSRA          |
| LSM5. 2      | 7. 69E-06 | -0. 15474 | 0. 401 | 0. 515 | 0. 114881 M2 | LSM5          |
| IVNS1ABP. 7. | 7. 72E-06 | 0. 195821 | 0. 286 | 0. 234 | 0. 11535 M2  | IVNS1ABP      |
| RP11-76E1    | 7. 74E-06 | 0. 141276 | 0. 065 | 0. 034 | 0. 115636 M2 | RP11-76E17. 3 |
| NSMCE4A. 3   | 7. 91E-06 | -0. 1004  | 0. 093 | 0. 157 | 0. 118159 M2 | NSMCE4A       |
| GDF15. 4     | 7. 94E-06 | -0. 21692 | 0. 031 | 0. 073 | 0. 118657 M2 | GDF15         |
| POLE4. 3     | 8. 25E-06 | 0. 2093   | 0. 328 | 0. 282 | 0. 123281 M2 | POLE4         |
| ZNF548       | 8. 27E-06 | -0. 13528 | 0. 029 | 0. 071 | 0. 123607 M2 | ZNF548        |
| IDH1. 3      | 8. 31E-06 | 0. 18149  | 0. 405 | 0. 378 | 0. 12425 M2  | IDH1          |
| FIGNL1. 2    | 8. 38E-06 | -0. 10361 | 0. 014 | 0. 049 | 0. 125212 M2 | FIGNL1        |
| ZDHHHC14. 1  | 8. 45E-06 | -0. 12021 | 0. 036 | 0. 08  | 0. 126208 M2 | ZDHHHC14      |
| ARHGAP26. 8. | 5. 7E-06  | 0. 147441 | 0. 134 | 0. 088 | 0. 12811 M2  | ARHGAP26      |
| CMIP. 3      | 8. 63E-06 | 0. 22166  | 0. 22  | 0. 169 | 0. 128909 M2 | CMIP          |
| CPNE3. 2     | 8. 69E-06 | -0. 13179 | 0. 239 | 0. 337 | 0. 12982 M2  | CPNE3         |
| FKBPL. 2     | 8. 72E-06 | -0. 10914 | 0. 027 | 0. 068 | 0. 130376 M2 | FKBPL         |
| MPC1. 2      | 8. 73E-06 | -0. 17023 | 0. 388 | 0. 495 | 0. 130418 M2 | MPC1          |
| RP11-356C    | 8. 78E-06 | -0. 11844 | 0. 008 | 0. 039 | 0. 131138 M2 | RP11-356C4. 3 |
| THSD4. 1     | 8. 81E-06 | -0. 10222 | 0. 001 | 0. 027 | 0. 131628 M2 | THSD4         |
| CDPF1. 2     | 8. 84E-06 | -0. 12132 | 0. 034 | 0. 079 | 0. 132125 M2 | CDPF1         |
| MAP1LC3B2    | 8. 97E-06 | 0. 224816 | 0. 124 | 0. 081 | 0. 134098 M2 | MAP1LC3B2     |
| ZNRD1. 1     | 8. 99E-06 | -0. 10359 | 0. 139 | 0. 216 | 0. 134392 M2 | ZNRD1         |
| DERL1. 2     | 9. 05E-06 | 0. 238345 | 0. 349 | 0. 31  | 0. 135278 M2 | DERL1         |
| RNF213. 5    | 9. 16E-06 | 0. 259614 | 0. 301 | 0. 258 | 0. 136907 M2 | RNF213        |
| SMOC1. 1     | 9. 17E-06 | -0. 13178 | 0. 006 | 0. 036 | 0. 137063 M2 | SMOC1         |
| KNSTRN. 3    | 9. 24E-06 | -0. 11595 | 0. 037 | 0. 082 | 0. 138108 M2 | KNSTRN        |
| PEA15. 3     | 9. 49E-06 | -0. 11742 | 0. 333 | 0. 451 | 0. 141879 M2 | PEA15         |
| SMAD7. 3     | 9. 55E-06 | 0. 14212  | 0. 061 | 0. 032 | 0. 142683 M2 | SMAD7         |
| VCPKMT. 1    | 9. 64E-06 | -0. 10062 | 0. 031 | 0. 073 | 0. 144081 M2 | VCPKMT        |
| SCFD1. 3     | 9. 85E-06 | -0. 1252  | 0. 174 | 0. 258 | 0. 147187 M2 | SCFD1         |
| OSBPL9. 1    | 9. 89E-06 | -0. 10411 | 0. 12  | 0. 191 | 0. 147851 M2 | OSBPL9        |
| EFR3A. 4     | 9. 92E-06 | 0. 233787 | 0. 184 | 0. 139 | 0. 148216 M2 | EFR3A         |
| ALG13. 4     | 9. 99E-06 | 0. 210942 | 0. 267 | 0. 216 | 0. 149274 M2 | ALG13         |
| MDM2. 2      | 1. 02E-05 | -0. 16039 | 0. 14  | 0. 211 | 0. 152836 M2 | MDM2          |
| REX02. 5     | 1. 03E-05 | -0. 19604 | 0. 234 | 0. 325 | 0. 154107 M2 | REX02         |
| LINC0032C    | 1. 04E-05 | -0. 17147 | 0      | 0. 024 | 0. 154801 M2 | LINC00320     |
| RSU1. 1      | 1. 05E-05 | 0. 237443 | 0. 308 | 0. 266 | 0. 156314 M2 | RSU1          |
| DLD. 3       | 1. 05E-05 | -0. 12464 | 0. 25  | 0. 351 | 0. 156563 M2 | DLD           |
| SRP54. 2     | 1. 06E-05 | -0. 12637 | 0. 192 | 0. 279 | 0. 158782 M2 | SRP54         |
| TNFRSF11E    | 1. 07E-05 | -0. 1281  | 0. 019 | 0. 056 | 0. 159489 M2 | TNFRSF11B     |
| MCEE         | 1. 08E-05 | -0. 10109 | 0. 056 | 0. 108 | 0. 161598 M2 | MCEE          |
| CTNNB1. 5    | 1. 09E-05 | 0. 210961 | 0. 391 | 0. 352 | 0. 16331 M2  | CTNNB1        |

|            |           |           |        |        |           |    |             |
|------------|-----------|-----------|--------|--------|-----------|----|-------------|
| AK5. 2     | 1. 10E-05 | -0. 12915 | 0. 001 | 0. 027 | 0. 163649 | M2 | AK5         |
| PEX5L. 2   | 1. 12E-05 | -0. 13022 | 0      | 0. 024 | 0. 167408 | M2 | PEX5L       |
| ME1        | 1. 13E-05 | 0. 130694 | 0. 051 | 0. 025 | 0. 169202 | M2 | ME1         |
| MIR7-3HG.  | 1. 14E-05 | -0. 15456 | 0. 006 | 0. 036 | 0. 170933 | M2 | MIR7-3HG    |
| CDK5RAP3   | 1. 16E-05 | -0. 1306  | 0. 304 | 0. 413 | 0. 173744 | M2 | CDK5RAP3    |
| FA2H. 3    | 1. 17E-05 | -0. 14526 | 0. 003 | 0. 029 | 0. 174305 | M2 | FA2H        |
| THOC7. 1   | 1. 18E-05 | 0. 19302  | 0. 411 | 0. 387 | 0. 175669 | M2 | THOC7       |
| TAX1BP1. 2 | 1. 18E-05 | -0. 1419  | 0. 4   | 0. 52  | 0. 176945 | M2 | TAX1BP1     |
| PCSK1. 2   | 1. 21E-05 | -0. 12275 | 0. 006 | 0. 036 | 0. 180157 | M2 | PCSK1       |
| AC068535.  | 1. 21E-05 | -0. 1047  | 0      | 0. 024 | 0. 181041 | M2 | AC068535. 2 |
| NQO2. 2    | 1. 21E-05 | 0. 233551 | 0. 294 | 0. 25  | 0. 181199 | M2 | NQO2        |
| SLC2A11    | 1. 22E-05 | -0. 10107 | 0. 028 | 0. 069 | 0. 181687 | M2 | SLC2A11     |
| RIT1. 3    | 1. 22E-05 | 0. 258087 | 0. 255 | 0. 211 | 0. 182338 | M2 | RIT1        |
| TTC13. 2   | 1. 23E-05 | -0. 10905 | 0. 031 | 0. 072 | 0. 184026 | M2 | TTC13       |
| GPR108. 3  | 1. 25E-05 | 0. 237013 | 0. 305 | 0. 263 | 0. 186166 | M2 | GPR108      |
| TSPAN31. 3 | 1. 25E-05 | -0. 16894 | 0. 216 | 0. 301 | 0. 186227 | M2 | TSPAN31     |
| FKBP3. 3   | 1. 26E-05 | -0. 15248 | 0. 364 | 0. 485 | 0. 187761 | M2 | FKBP3       |
| GJB1. 3    | 1. 26E-05 | -0. 18067 | 0. 001 | 0. 026 | 0. 188031 | M2 | GJB1        |
| GRSF1. 2   | 1. 27E-05 | -0. 10041 | 0. 232 | 0. 329 | 0. 189742 | M2 | GRSF1       |
| DNAJC3. 2  | 1. 35E-05 | 0. 22134  | 0. 328 | 0. 289 | 0. 202086 | M2 | DNAJC3      |
| CBX7. 1    | 1. 36E-05 | -0. 13663 | 0. 032 | 0. 074 | 0. 202765 | M2 | CBX7        |
| NDUFS3. 3  | 1. 36E-05 | -0. 16689 | 0. 381 | 0. 497 | 0. 20315  | M2 | NDUFS3      |
| TMEM125. 2 | 1. 36E-05 | -0. 15155 | 0      | 0. 024 | 0. 2036   | M2 | TMEM125     |
| PET100. 2  | 1. 37E-05 | 0. 131502 | 0. 536 | 0. 524 | 0. 205081 | M2 | PET100      |
| SPSB1. 1   | 1. 37E-05 | -0. 12126 | 0. 031 | 0. 072 | 0. 205115 | M2 | SPSB1       |
| ANP32E. 3  | 1. 37E-05 | -0. 10704 | 0. 189 | 0. 273 | 0. 205191 | M2 | ANP32E      |
| PDLIM2. 3  | 1. 38E-05 | -0. 16951 | 0. 167 | 0. 245 | 0. 206735 | M2 | PDLIM2      |
| POT1. 2    | 1. 39E-05 | -0. 1065  | 0. 04  | 0. 084 | 0. 207082 | M2 | POT1        |
| VTI1B. 3   | 1. 40E-05 | 0. 21177  | 0. 374 | 0. 345 | 0. 208564 | M2 | VTI1B       |
| GRPEL1. 1  | 1. 40E-05 | 0. 259298 | 0. 305 | 0. 268 | 0. 209012 | M2 | GRPEL1      |
| GLYCTK. 1  | 1. 41E-05 | 0. 136867 | 0. 054 | 0. 027 | 0. 210083 | M2 | GLYCTK      |
| MAPT-AS1   | 1. 42E-05 | -0. 10475 | 0      | 0. 024 | 0. 211728 | M2 | MAPT-AS1    |
| GRM3. 2    | 1. 42E-05 | -0. 12753 | 0      | 0. 024 | 0. 211728 | M2 | GRM3        |
| DPM1. 4    | 1. 43E-05 | -0. 1329  | 0. 278 | 0. 385 | 0. 213822 | M2 | DPM1        |
| AIFM2      | 1. 44E-05 | 0. 147126 | 0. 069 | 0. 039 | 0. 214585 | M2 | AIFM2       |
| COQ2. 4    | 1. 50E-05 | 0. 206504 | 0. 226 | 0. 176 | 0. 224029 | M2 | COQ2        |
| SAAL1. 1   | 1. 52E-05 | -0. 12067 | 0. 075 | 0. 132 | 0. 227243 | M2 | SAAL1       |
| ZNF330. 1  | 1. 53E-05 | 0. 232833 | 0. 261 | 0. 213 | 0. 22901  | M2 | ZNF330      |
| NRG1       | 1. 57E-05 | 0. 147712 | 0. 049 | 0. 024 | 0. 23483  | M2 | NRG1        |
| TFG. 2     | 1. 58E-05 | -0. 10919 | 0. 303 | 0. 416 | 0. 236513 | M2 | TFG         |
| DUSP22. 5  | 1. 59E-05 | 0. 187941 | 0. 155 | 0. 108 | 0. 236888 | M2 | DUSP22      |
| CLIC2. 3   | 1. 67E-05 | 0. 108336 | 0. 074 | 0. 042 | 0. 248825 | M2 | CLIC2       |
| APOL4. 2   | 1. 69E-05 | -0. 12718 | 0. 013 | 0. 045 | 0. 25283  | M2 | APOL4       |
| KLF10. 3   | 1. 70E-05 | 0. 191469 | 0. 282 | 0. 23  | 0. 253675 | M2 | KLF10       |
| MT1F. 5    | 1. 70E-05 | 0. 197924 | 0. 345 | 0. 302 | 0. 253676 | M2 | MT1F        |
| SUSD1. 4   | 1. 72E-05 | 0. 117697 | 0. 088 | 0. 053 | 0. 256338 | M2 | SUSD1       |
| WDFY4. 4   | 1. 72E-05 | 0. 111296 | 0. 05  | 0. 024 | 0. 25663  | M2 | WDFY4       |
| CCDC88A. 4 | 1. 73E-05 | -0. 11929 | 0. 317 | 0. 423 | 0. 258995 | M2 | CCDC88A     |
| TADA3. 1   | 1. 74E-05 | -0. 11379 | 0. 291 | 0. 397 | 0. 259426 | M2 | TADA3       |
| RFC2. 1    | 1. 74E-05 | -0. 12434 | 0. 17  | 0. 247 | 0. 260649 | M2 | RFC2        |
| MIR210HG.  | 1. 77E-05 | 0. 278693 | 0. 128 | 0. 089 | 0. 26398  | M2 | MIR210HG    |

|            |          |          |       |       |          |    |            |
|------------|----------|----------|-------|-------|----------|----|------------|
| FASTKD2.1  | 1.77E-05 | -0.11361 | 0.057 | 0.107 | 0.26427  | M2 | FASTKD2    |
| TMEM53.3   | 1.78E-05 | -0.12357 | 0.057 | 0.108 | 0.265582 | M2 | TMEM53     |
| PSD4.2     | 1.80E-05 | 0.108425 | 0.056 | 0.029 | 0.26876  | M2 | PSD4       |
| SYT6.2     | 1.81E-05 | -0.1126  | 0.018 | 0.053 | 0.26978  | M2 | SYT6       |
| TINF2.2    | 1.83E-05 | -0.10009 | 0.172 | 0.254 | 0.272901 | M2 | TINF2      |
| ESYT1.4    | 1.84E-05 | 0.212785 | 0.162 | 0.117 | 0.274311 | M2 | ESYT1      |
| IMPA2.2    | 1.91E-05 | 0.156734 | 0.093 | 0.057 | 0.284772 | M2 | IMPA2      |
| YIPF3.4    | 1.92E-05 | -0.13367 | 0.374 | 0.491 | 0.286615 | M2 | YIPF3      |
| PPP1R7.1   | 1.95E-05 | 0.233459 | 0.378 | 0.352 | 0.291975 | M2 | PPP1R7     |
| CYB5R2.1   | 1.97E-05 | -0.12931 | 0.005 | 0.032 | 0.295019 | M2 | CYB5R2     |
| NUS1.1     | 2.01E-05 | 0.248864 | 0.192 | 0.149 | 0.299797 | M2 | NUS1       |
| HSPA9.3    | 2.01E-05 | -0.17066 | 0.384 | 0.495 | 0.300778 | M2 | HSPA9      |
| AC078883.2 | 2.03E-05 | 0.130751 | 0.04  | 0.018 | 0.303817 | M2 | AC078883.3 |
| FAM149A.3  | 2.05E-05 | -0.11722 | 0.006 | 0.034 | 0.305656 | M2 | FAM149A    |
| TMOD3.3    | 2.07E-05 | 0.258732 | 0.184 | 0.141 | 0.30994  | M2 | TMOD3      |
| THOC6.3    | 2.16E-05 | 0.213589 | 0.213 | 0.166 | 0.323401 | M2 | THOC6      |
| LGALS3BP.2 | 2.23E-05 | -0.21398 | 0.358 | 0.456 | 0.333652 | M2 | LGALS3BP   |
| NAV3.1     | 2.27E-05 | -0.11587 | 0.004 | 0.03  | 0.338984 | M2 | NAV3       |
| RSPH1.1    | 2.27E-05 | -0.10252 | 0.003 | 0.027 | 0.339891 | M2 | RSPH1      |
| TAX1BP3.3  | 2.28E-05 | 0.201759 | 0.41  | 0.38  | 0.341037 | M2 | TAX1BP3    |
| ACAP1.4    | 2.29E-05 | 0.205559 | 0.116 | 0.077 | 0.341934 | M2 | ACAP1      |
| PIP4K2C.3  | 2.31E-05 | -0.12776 | 0.063 | 0.112 | 0.344473 | M2 | PIP4K2C    |
| GPR146     | 2.31E-05 | 0.102241 | 0.042 | 0.02  | 0.344695 | M2 | GPR146     |
| CYC1.4     | 2.35E-05 | -0.15045 | 0.433 | 0.547 | 0.351665 | M2 | CYC1       |
| RP2.5      | 2.43E-05 | 0.185051 | 0.114 | 0.075 | 0.362967 | M2 | RP2        |
| EMC7       | 2.44E-05 | 0.165    | 0.465 | 0.453 | 0.364626 | M2 | EMC7       |
| DHRS4.2    | 2.46E-05 | 0.122618 | 0.12  | 0.079 | 0.368216 | M2 | DHRS4      |
| MED10.5    | 2.53E-05 | -0.1391  | 0.369 | 0.492 | 0.377491 | M2 | MED10      |
| HSPA6.3    | 2.53E-05 | 0.104413 | 0.143 | 0.096 | 0.378285 | M2 | HSPA6      |
| LGI3.3     | 2.55E-05 | -0.13274 | 0     | 0.022 | 0.380883 | M2 | LGI3       |
| CCL4L2.4   | 2.57E-05 | 0.156792 | 0.126 | 0.083 | 0.38377  | M2 | CCL4L2     |
| SDHD.3     | 2.60E-05 | 0.155586 | 0.421 | 0.394 | 0.388406 | M2 | SDHD       |
| STX7.5     | 2.63E-05 | 0.199229 | 0.312 | 0.264 | 0.393207 | M2 | STX7       |
| COA3.4     | 2.67E-05 | -0.11226 | 0.364 | 0.485 | 0.398883 | M2 | COA3       |
| ABCC5      | 2.67E-05 | -0.1297  | 0.073 | 0.125 | 0.3992   | M2 | ABCC5      |
| RAB3IL1.3  | 2.74E-05 | 0.12929  | 0.059 | 0.031 | 0.410164 | M2 | RAB3IL1    |
| MYO5A.3    | 2.75E-05 | 0.209777 | 0.151 | 0.109 | 0.410944 | M2 | MYO5A      |
| RASA4      | 2.78E-05 | -0.10284 | 0.024 | 0.061 | 0.415765 | M2 | RASA4      |
| NHP2.3     | 2.81E-05 | -0.14231 | 0.471 | 0.588 | 0.420579 | M2 | NHP2       |
| AGFG1.2    | 2.89E-05 | 0.285348 | 0.169 | 0.129 | 0.43161  | M2 | AGFG1      |
| GLIPR1L2.2 | 2.89E-05 | -0.10586 | 0.01  | 0.04  | 0.432577 | M2 | GLIPR1L2   |
| DDX24      | 2.93E-05 | -0.1249  | 0.367 | 0.49  | 0.438096 | M2 | DDX24      |
| LSM7.2     | 2.95E-05 | -0.14477 | 0.544 | 0.637 | 0.440257 | M2 | LSM7       |
| FLII.4     | 3.04E-05 | 0.229701 | 0.229 | 0.184 | 0.45359  | M2 | FLII       |
| BASP1.5    | 3.04E-05 | 0.166367 | 0.424 | 0.369 | 0.454569 | M2 | BASP1      |
| SNRPE.3    | 3.05E-05 | -0.15834 | 0.476 | 0.587 | 0.455879 | M2 | SNRPE      |
| PSMC6.3    | 3.08E-05 | -0.11239 | 0.286 | 0.394 | 0.460451 | M2 | PSMC6      |
| FLNA.4     | 3.20E-05 | 0.260057 | 0.282 | 0.248 | 0.478293 | M2 | FLNA       |
| TMEM205.4  | 3.24E-05 | -0.21421 | 0.406 | 0.502 | 0.484443 | M2 | TMEM205    |
| RAC1.2     | 3.28E-05 | -0.10121 | 0.699 | 0.746 | 0.49034  | M2 | RAC1       |
| FAM102B.1  | 3.32E-05 | 0.111612 | 0.052 | 0.027 | 0.496717 | M2 | FAM102B    |

|           |    |          |          |       |       |          |    |          |
|-----------|----|----------|----------|-------|-------|----------|----|----------|
| RPS19BP1. | 3. | 3.7E-05  | 0.142042 | 0.501 | 0.49  | 0.504303 | M2 | RPS19BP1 |
| PPP3CA.   | 3. | 3.40E-05 | -0.10216 | 0.174 | 0.251 | 0.508606 | M2 | PPP3CA   |
| AKNA.     | 4. | 3.54E-05 | 0.143857 | 0.109 | 0.07  | 0.529155 | M2 | AKNA     |
| MORF4L2.  | 4. | 3.59E-05 | -0.15123 | 0.527 | 0.632 | 0.53694  | M2 | MORF4L2  |
| C8orf59.  | 3. | 3.69E-05 | -0.12398 | 0.296 | 0.4   | 0.551456 | M2 | C8orf59  |
| RHOQ.     | 4. | 3.70E-05 | 0.228595 | 0.202 | 0.158 | 0.552725 | M2 | RHOQ     |
| ACTR10.   | 3. | 3.73E-05 | -0.12353 | 0.268 | 0.366 | 0.557094 | M2 | ACTR10   |
| RGS18.    | 5. | 3.77E-05 | 0.101573 | 0.084 | 0.05  | 0.563407 | M2 | RGS18    |
| ARAP2.    | 2. | 3.77E-05 | -0.10777 | 0.045 | 0.088 | 0.563613 | M2 | ARAP2    |
| HSD17B7.  | 1. | 3.89E-05 | -0.10623 | 0.069 | 0.121 | 0.581621 | M2 | HSD17B7  |
| MCM5.     | 5. | 4.12E-05 | 0.180433 | 0.194 | 0.147 | 0.614952 | M2 | MCM5     |
| RRM2.     | 4. | 4.28E-05 | -0.13077 | 0.028 | 0.065 | 0.64006  | M2 | RRM2     |
| GIMAP2.   | 4. | 4.29E-05 | 0.103571 | 0.115 | 0.074 | 0.641016 | M2 | GIMAP2   |
| SUMO2.    | 3. | 4.36E-05 | -0.11849 | 0.808 | 0.822 | 0.651418 | M2 | SUMO2    |
| EIF4EBP2. | 4. | 4.39E-05 | 0.230227 | 0.18  | 0.138 | 0.655639 | M2 | EIF4EBP2 |
| CLEC9A.   | 4. | 4.51E-05 | -0.18257 | 0.008 | 0.034 | 0.673411 | M2 | CLEC9A   |
| C20orf27. | 4. | 4.54E-05 | -0.13727 | 0.273 | 0.366 | 0.678708 | M2 | C20orf27 |
| CHMP4B.   | 3. | 4.67E-05 | 0.143952 | 0.483 | 0.452 | 0.697403 | M2 | CHMP4B   |
| SNAP23.   | 5. | 4.67E-05 | 0.152852 | 0.289 | 0.241 | 0.697819 | M2 | SNAP23   |
| VIMP.     | 2. | 4.67E-05 | 0.155145 | 0.467 | 0.455 | 0.698077 | M2 | VIMP     |
| C10orf35. | 4. | 4.72E-05 | -0.12198 | 0.024 | 0.059 | 0.704868 | M2 | C10orf35 |
| ZNF33A.   | 3. | 4.72E-05 | 0.247341 | 0.138 | 0.098 | 0.706072 | M2 | ZNF33A   |
| TBC1D1.   | 5. | 4.76E-05 | 0.20274  | 0.162 | 0.12  | 0.711022 | M2 | TBC1D1   |
| RFX5.     | 3. | 4.76E-05 | -0.10948 | 0.06  | 0.108 | 0.711149 | M2 | RFX5     |
| NUDT22.   | 3. | 4.79E-05 | 0.223524 | 0.304 | 0.267 | 0.715333 | M2 | NUDT22   |
| IRF1.     | 4. | 4.96E-05 | -0.13101 | 0.143 | 0.21  | 0.740481 | M2 | IRF1     |
| TAC3.     | 1. | 4.97E-05 | -0.11169 | 0.003 | 0.026 | 0.74254  | M2 | TAC3     |
| RAB32.    | 5. | 5.10E-05 | 0.212879 | 0.276 | 0.236 | 0.762504 | M2 | RAB32    |
| ACY3.     | 2. | 5.16E-05 | -0.12399 | 0     | 0.021 | 0.770742 | M2 | ACY3     |
| SLC25A39. | 5. | 5.22E-05 | 0.169066 | 0.425 | 0.404 | 0.779618 | M2 | SLC25A39 |
| SPTSSA.   | 4. | 5.26E-05 | -0.17787 | 0.333 | 0.435 | 0.786315 | M2 | SPTSSA   |
| HMOX2.    | 3. | 5.35E-05 | -0.10454 | 0.213 | 0.301 | 0.799809 | M2 | HMOX2    |
| KCNK1.    | 1. | 5.36E-05 | -0.10012 | 0     | 0.02  | 0.801533 | M2 | KCNK1    |
| RAB11A.   | 1. | 5.46E-05 | 0.151819 | 0.481 | 0.465 | 0.815389 | M2 | RAB11A   |
| KDM6B.    | 5. | 5.51E-05 | 0.209828 | 0.267 | 0.219 | 0.82269  | M2 | KDM6B    |
| EIF3M.    | 4. | 5.56E-05 | 0.119726 | 0.534 | 0.525 | 0.830384 | M2 | EIF3M    |
| GRASP.    | 5. | 5.60E-05 | 0.159554 | 0.082 | 0.049 | 0.836343 | M2 | GRASP    |
| SNRPB2.   | 3. | 5.66E-05 | -0.17129 | 0.462 | 0.571 | 0.846174 | M2 | SNRPB2   |
| EMC3.     |    | 5.72E-05 | 0.143248 | 0.458 | 0.449 | 0.854331 | M2 | EMC3     |
| CAPN3.    | 3. | 5.78E-05 | -0.2743  | 0.015 | 0.045 | 0.864127 | M2 | CAPN3    |
| PLEKHH1.  | 3. | 5.83E-05 | -0.13155 | 0.008 | 0.034 | 0.870596 | M2 | PLEKHH1  |
| VEGFB.    | 2. | 5.86E-05 | 0.247996 | 0.183 | 0.142 | 0.875761 | M2 | VEGFB    |
| APLN.     | 2. | 5.97E-05 | -0.10834 | 0.008 | 0.034 | 0.892523 | M2 | APLN     |
| C6orf15.  | 3. | 6.11E-05 | -0.13766 | 0.005 | 0.03  | 0.912436 | M2 | C6orf15  |
| AIDA.     | 2. | 6.25E-05 | -0.12636 | 0.167 | 0.24  | 0.934728 | M2 | AIDA     |
| CHADL.    | 2. | 6.37E-05 | -0.12847 | 0.014 | 0.044 | 0.95228  | M2 | CHADL    |
| FRMD4A.   | 4. | 6.45E-05 | 0.153948 | 0.239 | 0.184 | 0.964062 | M2 | FRMD4A   |
| PICALM.   | 5. | 6.59E-05 | 0.173873 | 0.322 | 0.278 | 0.985185 | M2 | PICALM   |
| GJB2.     | 2. | 6.66E-05 | -0.10422 | 0.019 | 0.051 | 0.995702 | M2 | GJB2     |
| NEU4.     | 3. | 6.76E-05 | -0.12683 | 0.029 | 0.066 | 1        | M2 | NEU4     |
| APOL2.    | 3. | 6.83E-05 | -0.21048 | 0.057 | 0.102 | 1        | M2 | APOL2    |



|            |          |          |       |       |      |             |
|------------|----------|----------|-------|-------|------|-------------|
| FRZB. 1    | 6.84E-05 | -0.17419 | 0.017 | 0.047 | 1 M2 | FRZB        |
| RBPJ. 5    | 6.87E-05 | 0.141304 | 0.487 | 0.468 | 1 M2 | RBPJ        |
| CCT5. 2    | 6.93E-05 | -0.12551 | 0.382 | 0.489 | 1 M2 | CCT5        |
| TRAPPC2L.  | 6.95E-05 | 0.183443 | 0.433 | 0.419 | 1 M2 | TRAPPC2L    |
| POLR1D. 3  | 7.28E-05 | 0.191624 | 0.432 | 0.414 | 1 M2 | POLR1D      |
| HSPB8. 2   | 7.30E-05 | -0.12973 | 0.013 | 0.041 | 1 M2 | HSPB8       |
| CRELD2. 3  | 7.52E-05 | 0.2611   | 0.308 | 0.281 | 1 M2 | CRELD2      |
| GBP1. 2    | 7.52E-05 | -0.27273 | 0.105 | 0.157 | 1 M2 | GBP1        |
| MCOLN1. 3  | 7.67E-05 | 0.244225 | 0.28  | 0.24  | 1 M2 | MCOLN1      |
| SCARB2. 4  | 7.75E-05 | 0.19337  | 0.4   | 0.38  | 1 M2 | SCARB2      |
| YME1L1. 3  | 8.06E-05 | 0.226278 | 0.294 | 0.258 | 1 M2 | YME1L1      |
| LIX1. 1    | 8.10E-05 | -0.10079 | 0.001 | 0.022 | 1 M2 | LIX1        |
| EMC2. 1    | 8.21E-05 | -0.12538 | 0.157 | 0.227 | 1 M2 | EMC2        |
| HTRA1. 5   | 8.22E-05 | 0.14524  | 0.488 | 0.458 | 1 M2 | HTRA1       |
| TSR2       | 8.30E-05 | -0.12073 | 0.18  | 0.252 | 1 M2 | TSR2        |
| OLFML3. 4  | 8.31E-05 | 0.128985 | 0.281 | 0.223 | 1 M2 | OLFML3      |
| FOLH1. 2   | 8.58E-05 | -0.10285 | 0     | 0.019 | 1 M2 | FOLH1       |
| PRKAR2B. 4 | 8.62E-05 | -0.10835 | 0.034 | 0.071 | 1 M2 | PRKAR2B     |
| SFXN3      | 8.76E-05 | 0.220243 | 0.148 | 0.109 | 1 M2 | SFXN3       |
| DNASE2. 4  | 8.81E-05 | 0.117454 | 0.416 | 0.381 | 1 M2 | DNASE2      |
| CREBRF. 2  | 9.22E-05 | 0.186977 | 0.171 | 0.128 | 1 M2 | CREBRF      |
| DUT. 4     | 9.34E-05 | -0.1112  | 0.363 | 0.461 | 1 M2 | DUT         |
| MBD4. 3    | 9.55E-05 | 0.185262 | 0.301 | 0.261 | 1 M2 | MBD4        |
| MYD88. 2   | 0.000102 | 0.211325 | 0.167 | 0.128 | 1 M2 | MYD88       |
| PDE2A      | 0.000104 | 0.111574 | 0.032 | 0.014 | 1 M2 | PDE2A       |
| FAM107B. 4 | 0.000104 | 0.131132 | 0.163 | 0.119 | 1 M2 | FAM107B     |
| PSMD7. 2   | 0.000104 | 0.108559 | 0.489 | 0.49  | 1 M2 | PSMD7       |
| RBM39. 2   | 0.000105 | -0.12276 | 0.575 | 0.66  | 1 M2 | RBM39       |
| GFAP. 3    | 0.000108 | -0.32186 | 0.284 | 0.354 | 1 M2 | GFAP        |
| RASGRP2. 5 | 0.000108 | 0.126998 | 0.08  | 0.05  | 1 M2 | RASGRP2     |
| PCBP2. 3   | 0.00011  | 0.100521 | 0.668 | 0.662 | 1 M2 | PCBP2       |
| AC015936.  | 0.00011  | -0.10289 | 0.001 | 0.021 | 1 M2 | AC015936. 3 |
| EGLN3. 2   | 0.000111 | 0.179084 | 0.093 | 0.061 | 1 M2 | EGLN3       |
| DARS. 4    | 0.000113 | 0.174434 | 0.419 | 0.401 | 1 M2 | DARS        |
| TOMM20. 1  | 0.000114 | 0.114894 | 0.519 | 0.517 | 1 M2 | TOMM20      |
| SRA1. 3    | 0.000115 | 0.20883  | 0.411 | 0.398 | 1 M2 | SRA1        |
| TPTEP1. 1  | 0.000124 | -0.10902 | 0.008 | 0.032 | 1 M2 | TPTEP1      |
| KIF22. 2   | 0.000127 | -0.11262 | 0.137 | 0.201 | 1 M2 | KIF22       |
| RELB. 2    | 0.000131 | 0.21933  | 0.129 | 0.093 | 1 M2 | RELB        |
| IRF9. 1    | 0.000131 | -0.1098  | 0.054 | 0.096 | 1 M2 | IRF9        |
| SLC01A2. 1 | 0.000132 | -0.10092 | 0     | 0.018 | 1 M2 | SLC01A2     |
| PLCL1. 1   | 0.000133 | -0.11233 | 0.009 | 0.034 | 1 M2 | PLCL1       |
| PAQR8. 3   | 0.000135 | -0.16669 | 0.057 | 0.099 | 1 M2 | PAQR8       |
| NPPA. 3    | 0.000135 | -0.11193 | 0.006 | 0.03  | 1 M2 | NPPA        |
| IGFLR1. 2  | 0.000137 | 0.142737 | 0.084 | 0.053 | 1 M2 | IGFLR1      |
| NKAIN2. 1  | 0.000137 | -0.10013 | 0     | 0.018 | 1 M2 | NKAIN2      |
| SH3BP5. 4  | 0.000148 | 0.227112 | 0.238 | 0.198 | 1 M2 | SH3BP5      |
| ULK3. 3    | 0.000152 | -0.10313 | 0.097 | 0.149 | 1 M2 | ULK3        |
| TOMM22. 4  | 0.000155 | 0.133811 | 0.475 | 0.468 | 1 M2 | TOMM22      |
| PTPN18. 5  | 0.000156 | 0.164838 | 0.254 | 0.208 | 1 M2 | PTPN18      |
| ADAM10. 3  | 0.000157 | 0.229472 | 0.221 | 0.181 | 1 M2 | ADAM10      |

|              |          |          |       |       |      |               |
|--------------|----------|----------|-------|-------|------|---------------|
| ARRDC1. 5    | 0.000159 | 0.158028 | 0.174 | 0.131 | 1 M2 | ARRDC1        |
| UPK3A. 1     | 0.00016  | 0.116609 | 0.019 | 0.007 | 1 M2 | UPK3A         |
| TNIP1. 2     | 0.000162 | 0.245205 | 0.241 | 0.206 | 1 M2 | TNIP1         |
| TAGLN. 2     | 0.000165 | -0.28581 | 0.037 | 0.073 | 1 M2 | TAGLN         |
| YWHAH. 5     | 0.000165 | 0.114241 | 0.562 | 0.565 | 1 M2 | YWHAH         |
| CCT4. 2      | 0.000167 | -0.13164 | 0.452 | 0.568 | 1 M2 | CCT4          |
| CREBL2. 4    | 0.000173 | 0.158838 | 0.231 | 0.186 | 1 M2 | CREBL2        |
| HHATL. 1     | 0.000175 | -0.1182  | 0.001 | 0.02  | 1 M2 | HHATL         |
| SIPA1. 5     | 0.000176 | 0.171878 | 0.18  | 0.136 | 1 M2 | SIPA1         |
| MAP7. 3      | 0.000179 | -0.16899 | 0.014 | 0.041 | 1 M2 | MAP7          |
| SH3D21. 2    | 0.00018  | 0.113146 | 0.043 | 0.023 | 1 M2 | SH3D21        |
| RAB1B. 1     | 0.000181 | 0.304108 | 0.264 | 0.234 | 1 M2 | RAB1B         |
| CD3D. 3      | 0.000181 | -0.20925 | 0.001 | 0.02  | 1 M2 | CD3D          |
| SLC38A10. 0  | 0.000184 | 0.232934 | 0.234 | 0.196 | 1 M2 | SLC38A10      |
| LLGL2        | 0.000188 | 0.101003 | 0.029 | 0.013 | 1 M2 | LLGL2         |
| VTI1A. 3     | 0.000189 | 0.142973 | 0.096 | 0.063 | 1 M2 | VTI1A         |
| UBE2D1. 3    | 0.00019  | 0.230221 | 0.295 | 0.265 | 1 M2 | UBE2D1        |
| TPK1. 4      | 0.000195 | 0.139823 | 0.072 | 0.044 | 1 M2 | TPK1          |
| LTF. 3       | 0.000196 | -0.28572 | 0.207 | 0.147 | 1 M2 | LTF           |
| EIF1. 5      | 0.000198 | -0.16242 | 0.999 | 0.972 | 1 M2 | EIF1          |
| ADH5. 3      | 0.000198 | -0.10063 | 0.3   | 0.395 | 1 M2 | ADH5          |
| PTRHD1. 1    | 0.000204 | 0.177942 | 0.347 | 0.317 | 1 M2 | PTRHD1        |
| DNAJB11. 2   | 0.000204 | 0.179794 | 0.436 | 0.433 | 1 M2 | DNAJB11       |
| SUCLG2. 3    | 0.000205 | 0.222218 | 0.278 | 0.243 | 1 M2 | SUCLG2        |
| FLOT1. 5     | 0.000206 | 0.126476 | 0.512 | 0.502 | 1 M2 | FLOT1         |
| ABCC1        | 0.000207 | 0.126367 | 0.052 | 0.029 | 1 M2 | ABCC1         |
| CTGF. 2      | 0.00021  | -0.12137 | 0.008 | 0.031 | 1 M2 | CTGF          |
| IFIT1. 2     | 0.000212 | -0.17055 | 0.04  | 0.076 | 1 M2 | IFIT1         |
| MARCH3. 3    | 0.000212 | -0.10982 | 0.064 | 0.108 | 1 M2 | 3-Mar         |
| ZCRB1. 4     | 0.000232 | -0.12817 | 0.392 | 0.498 | 1 M2 | ZCRB1         |
| AP005530. 0  | 0.000233 | -0.12246 | 0.008 | 0.03  | 1 M2 | AP005530. 2   |
| IGF2R. 2     | 0.000233 | 0.240188 | 0.128 | 0.094 | 1 M2 | IGF2R         |
| DPY30. 3     | 0.000238 | -0.1071  | 0.393 | 0.503 | 1 M2 | DPY30         |
| PPM1N. 1     | 0.000243 | 0.112543 | 0.063 | 0.037 | 1 M2 | PPM1N         |
| ATL3. 2      | 0.000248 | 0.191859 | 0.172 | 0.135 | 1 M2 | ATL3          |
| MEF2A. 5     | 0.000255 | 0.12249  | 0.261 | 0.212 | 1 M2 | MEF2A         |
| RP11-552D. 0 | 0.000262 | -0.27265 | 0.08  | 0.123 | 1 M2 | RP11-552D4. 1 |
| OCIAD1. 3    | 0.000264 | -0.13633 | 0.539 | 0.643 | 1 M2 | OCIAD1        |
| RP11-166C. 0 | 0.000267 | -0.11188 | 0.027 | 0.058 | 1 M2 | RP11-16604. 6 |
| TXNDC11. 2   | 0.000268 | 0.217396 | 0.151 | 0.114 | 1 M2 | TXNDC11       |
| CORO1C. 2    | 0.000277 | 0.172943 | 0.392 | 0.372 | 1 M2 | CORO1C        |
| NDUFA4L2. 0  | 0.000281 | -0.11226 | 0.015 | 0.042 | 1 M2 | NDUFA4L2      |
| MAPKAPK2. 0  | 0.000282 | 0.246013 | 0.166 | 0.13  | 1 M2 | MAPKAPK2      |
| PHB. 3       | 0.000286 | -0.12826 | 0.458 | 0.561 | 1 M2 | PHB           |
| CORO7. 5     | 0.000287 | 0.189094 | 0.198 | 0.155 | 1 M2 | CORO7         |
| PIM1. 2      | 0.000292 | 0.128714 | 0.17  | 0.127 | 1 M2 | PIM1          |
| UBASH3B. 3   | 0.000303 | 0.14956  | 0.105 | 0.073 | 1 M2 | UBASH3B       |
| FAM107A. 1   | 0.000318 | -0.10247 | 0.02  | 0.049 | 1 M2 | FAM107A       |
| P2RY11. 3    | 0.000321 | 0.144758 | 0.12  | 0.084 | 1 M2 | P2RY11        |
| CAPN1. 3     | 0.00033  | 0.204471 | 0.289 | 0.257 | 1 M2 | CAPN1         |
| PTPN1. 4     | 0.000339 | 0.234643 | 0.261 | 0.23  | 1 M2 | PTPN1         |

|                     |          |          |       |       |      |               |
|---------------------|----------|----------|-------|-------|------|---------------|
| TSLP. 3             | 0.000339 | -0.11907 | 0.003 | 0.021 | 1 M2 | TSLP          |
| RAMP3. 2            | 0.00034  | -0.10023 | 0.006 | 0.028 | 1 M2 | RAMP3         |
| TUBB4B. 2           | 0.000373 | 0.10958  | 0.511 | 0.491 | 1 M2 | TUBB4B        |
| HSP90AB1. 0.000378  | -0.10723 | 0.812    | 0.821 | 0.821 | 1 M2 | HSP90AB1      |
| C10orf76. 0.000381  | 0.130846 | 0.083    | 0.054 | 0.054 | 1 M2 | C10orf76      |
| NCOA4. 5            | 0.000383 | 0.172018 | 0.292 | 0.26  | 1 M2 | NCOA4         |
| TPCN1. 4            | 0.000385 | 0.139442 | 0.123 | 0.087 | 1 M2 | TPCN1         |
| P2RY12. 2           | 0.000385 | -0.10681 | 0.003 | 0.021 | 1 M2 | P2RY12        |
| MIS18BP1. 0.000387  | 0.115967 | 0.188    | 0.144 | 0.144 | 1 M2 | MIS18BP1      |
| DDAH2. 3            | 0.000388 | 0.143853 | 0.502 | 0.488 | 1 M2 | DDAH2         |
| PCF11. 4            | 0.000398 | -0.11133 | 0.148 | 0.208 | 1 M2 | PCF11         |
| RP11-862L. 0.000399 | -0.13926 | 0.001    | 0.018 | 0.018 | 1 M2 | RP11-862L9. 3 |
| AAED1. 5            | 0.00042  | 0.180423 | 0.217 | 0.179 | 1 M2 | AAED1         |
| BDH2. 1             | 0.000461 | -0.10446 | 0.096 | 0.145 | 1 M2 | BDH2          |
| MTIF3. 2            | 0.000466 | 0.202946 | 0.365 | 0.344 | 1 M2 | MTIF3         |
| TXNL1. 2            | 0.000466 | 0.12565  | 0.474 | 0.471 | 1 M2 | TXNL1         |
| SFR1. 2             | 0.000479 | 0.143939 | 0.097 | 0.066 | 1 M2 | SFR1          |
| AMDHD2. 3           | 0.00049  | 0.232657 | 0.155 | 0.121 | 1 M2 | AMDHD2        |
| EIF4B. 5            | 0.000506 | 0.159826 | 0.395 | 0.377 | 1 M2 | EIF4B         |
| SNAPC1. 2           | 0.000508 | 0.20351  | 0.22  | 0.186 | 1 M2 | SNAPC1        |
| IFITM1. 1           | 0.00051  | -0.12396 | 0.014 | 0.038 | 1 M2 | IFITM1        |
| DAAM2. 1            | 0.000518 | -0.11727 | 0.004 | 0.022 | 1 M2 | DAAM2         |
| ACER3. 4            | 0.000521 | 0.164809 | 0.221 | 0.182 | 1 M2 | ACER3         |
| NENF. 3             | 0.000527 | -0.12513 | 0.406 | 0.5   | 1 M2 | NENF          |
| SH3PXD2B. 0.000555  | 0.251519 | 0.146    | 0.115 | 0.115 | 1 M2 | SH3PXD2B      |
| HYOU1. 3            | 0.000596 | 0.278493 | 0.169 | 0.137 | 1 M2 | HYOU1         |
| TRIM22. 4           | 0.000608 | 0.129556 | 0.172 | 0.132 | 1 M2 | TRIM22        |
| MAFF. 5             | 0.000608 | 0.165226 | 0.209 | 0.168 | 1 M2 | MAFF          |
| ANP32A. 5           | 0.000621 | 0.108086 | 0.442 | 0.427 | 1 M2 | ANP32A        |
| BSG. 5              | 0.000626 | -0.15512 | 0.709 | 0.744 | 1 M2 | BSG           |
| MYCBP. 2            | 0.000634 | 0.19543  | 0.123 | 0.091 | 1 M2 | MYCBP         |
| SBF2-AS1. 0.000649  | 0.129628 | 0.046    | 0.026 | 0.026 | 1 M2 | SBF2-AS1      |
| DGUOK. 3            | 0.000653 | -0.1121  | 0.429 | 0.522 | 1 M2 | DGUOK         |
| FAM204A. 3          | 0.000668 | 0.192986 | 0.287 | 0.255 | 1 M2 | FAM204A       |
| DOK1. 5             | 0.000684 | 0.159441 | 0.189 | 0.152 | 1 M2 | DOK1          |
| SLC8A1. 4           | 0.000698 | 0.146683 | 0.181 | 0.142 | 1 M2 | SLC8A1        |
| ACTA2. 2            | 0.000704 | -0.11361 | 0.026 | 0.053 | 1 M2 | ACTA2         |
| LMAN1. 3            | 0.000707 | 0.148715 | 0.346 | 0.328 | 1 M2 | LMAN1         |
| GTF3C6. 2           | 0.000713 | 0.100881 | 0.507 | 0.514 | 1 M2 | GTF3C6        |
| TRIM25. 1           | 0.000767 | 0.232904 | 0.115 | 0.086 | 1 M2 | TRIM25        |
| DDX21. 3            | 0.000778 | 0.206814 | 0.323 | 0.298 | 1 M2 | DDX21         |
| MGAT5. 3            | 0.000788 | 0.111084 | 0.096 | 0.066 | 1 M2 | MGAT5         |
| ZCCHC2. 1           | 0.00079  | 0.119397 | 0.066 | 0.042 | 1 M2 | ZCCHC2        |
| UBE2D2. 3           | 0.000796 | -0.10774 | 0.497 | 0.594 | 1 M2 | UBE2D2        |
| NMI. 4              | 0.000809 | 0.122991 | 0.22  | 0.18  | 1 M2 | NMI           |
| GNAS. 5             | 0.000825 | -0.10427 | 0.602 | 0.65  | 1 M2 | GNAS          |
| OSR1. 2             | 0.000841 | -0.12594 | 0     | 0.014 | 1 M2 | OSR1          |
| ITPRIP. 5           | 0.000844 | 0.145255 | 0.103 | 0.073 | 1 M2 | ITPRIP        |
| SND1. 2             | 0.000848 | 0.219218 | 0.281 | 0.254 | 1 M2 | SND1          |
| CALM1. 5            | 0.000863 | -0.12086 | 0.766 | 0.772 | 1 M2 | CALM1         |
| HIST1H4E. 0.000867  | -0.10581 | 0.005    | 0.023 | 0.023 | 1 M2 | HIST1H4E      |

|           |          |          |       |       |      |               |
|-----------|----------|----------|-------|-------|------|---------------|
| VIM-AS1.1 | 0.000878 | 0.242558 | 0.142 | 0.11  | 1 M2 | VIM-AS1       |
| ST3GAL6.5 | 0.00089  | 0.147726 | 0.146 | 0.109 | 1 M2 | ST3GAL6       |
| ATP5L2.1  | 0.000893 | 0.169359 | 0.124 | 0.091 | 1 M2 | ATP5L2        |
| HSPD1.4   | 0.000894 | -0.151   | 0.521 | 0.621 | 1 M2 | HSPD1         |
| CHI3L1.5  | 0.000908 | -0.36388 | 0.631 | 0.517 | 1 M2 | CHI3L1        |
| MDH2.2    | 0.000917 | -0.14785 | 0.572 | 0.667 | 1 M2 | MDH2          |
| NACA2.2   | 0.000928 | 0.243849 | 0.201 | 0.165 | 1 M2 | NACA2         |
| DTX2.2    | 0.000937 | 0.153727 | 0.088 | 0.061 | 1 M2 | DTX2          |
| CDK2AP2.3 | 0.000939 | 0.16252  | 0.35  | 0.327 | 1 M2 | CDK2AP2       |
| EIF4G2.4  | 0.000941 | -0.11998 | 0.598 | 0.664 | 1 M2 | EIF4G2        |
| TDP2.2    | 0.000951 | 0.231261 | 0.212 | 0.181 | 1 M2 | TDP2          |
| TNFRSF12A | 0.000953 | -0.17119 | 0.241 | 0.29  | 1 M2 | TNFRSF12A     |
| NAAA.5    | 0.000953 | 0.115981 | 0.169 | 0.131 | 1 M2 | NAAA          |
| DENND1A.1 | 0.000961 | 0.188778 | 0.077 | 0.051 | 1 M2 | DENND1A       |
| CFL1.4    | 0.000963 | -0.10054 | 0.99  | 0.947 | 1 M2 | CFL1          |
| C15orf57. | 0.000968 | 0.200517 | 0.155 | 0.122 | 1 M2 | C15orf57      |
| BCL2L11.1 | 0.000975 | 0.162679 | 0.072 | 0.047 | 1 M2 | BCL2L11       |
| DDOST.2   | 0.001012 | 0.129578 | 0.46  | 0.465 | 1 M2 | DDOST         |
| PWWP2B.2  | 0.001026 | 0.110536 | 0.054 | 0.032 | 1 M2 | PWWP2B        |
| MYO9B.4   | 0.00107  | 0.250847 | 0.291 | 0.268 | 1 M2 | MYO9B         |
| EAF1.2    | 0.001073 | 0.190044 | 0.153 | 0.122 | 1 M2 | EAF1          |
| MSRB2.4   | 0.001083 | 0.15242  | 0.286 | 0.253 | 1 M2 | MSRB2         |
| PACSIN2.5 | 0.001098 | 0.192313 | 0.206 | 0.172 | 1 M2 | PACSIN2       |
| JUND.4    | 0.001103 | 0.188568 | 0.411 | 0.398 | 1 M2 | JUND          |
| GBA.1     | 0.001115 | 0.191153 | 0.161 | 0.128 | 1 M2 | GBA           |
| SLC12A7.2 | 0.001142 | 0.137616 | 0.063 | 0.04  | 1 M2 | SLC12A7       |
| ZMYND15.3 | 0.001145 | 0.102865 | 0.082 | 0.055 | 1 M2 | ZMYND15       |
| EIF2S3.3  | 0.001157 | 0.159498 | 0.317 | 0.293 | 1 M2 | EIF2S3        |
| CLIP4     | 0.001176 | 0.149742 | 0.08  | 0.055 | 1 M2 | CLIP4         |
| NAA10.3   | 0.001202 | 0.203134 | 0.419 | 0.426 | 1 M2 | NAA10         |
| PSMA6.3   | 0.001252 | 0.207247 | 0.253 | 0.221 | 1 M2 | PSMA6         |
| RP11-295G | 0.001274 | 0.165249 | 0.068 | 0.044 | 1 M2 | RP11-295G20.2 |
| IRF2BP2.4 | 0.001279 | 0.229415 | 0.335 | 0.314 | 1 M2 | IRF2BP2       |
| IKBIP.4   | 0.001286 | 0.197031 | 0.255 | 0.224 | 1 M2 | IKBIP         |
| CCNY.3    | 0.001287 | 0.229077 | 0.137 | 0.107 | 1 M2 | CCNY          |
| DPCD.3    | 0.001308 | 0.256344 | 0.189 | 0.159 | 1 M2 | DPCD          |
| RP11-796E | 0.00136  | 0.122059 | 0.092 | 0.063 | 1 M2 | RP11-796E2.4  |
| NEK6.3    | 0.001377 | 0.124452 | 0.327 | 0.287 | 1 M2 | NEK6          |
| MARVELD1. | 0.001379 | 0.20092  | 0.06  | 0.038 | 1 M2 | MARVELD1      |
| TMEM150A  | 0.001384 | 0.190471 | 0.18  | 0.147 | 1 M2 | TMEM150A      |
| MAP3K3.4  | 0.001396 | 0.1396   | 0.089 | 0.062 | 1 M2 | MAP3K3        |
| DENND4B.3 | 0.00141  | 0.135698 | 0.095 | 0.067 | 1 M2 | DENND4B       |
| AC074289. | 0.001437 | -0.13033 | 0.034 | 0.063 | 1 M2 | AC074289.1    |
| PSMB5.4   | 0.001458 | -0.1421  | 0.498 | 0.602 | 1 M2 | PSMB5         |
| DGUOK-AS1 | 0.001473 | 0.141299 | 0.026 | 0.012 | 1 M2 | DGUOK-AS1     |
| AMPD2.4   | 0.00154  | 0.263043 | 0.18  | 0.15  | 1 M2 | AMPD2         |
| STEAP4    | 0.001577 | 0.121178 | 0.015 | 0.006 | 1 M2 | STEAP4        |
| ITPRIPL2. | 0.001615 | 0.183385 | 0.098 | 0.072 | 1 M2 | ITPRIPL2      |
| ARSG.1    | 0.001623 | 0.179742 | 0.112 | 0.084 | 1 M2 | ARSG          |
| SEL1L.2   | 0.001626 | 0.183161 | 0.202 | 0.171 | 1 M2 | SEL1L         |
| MLX.3     | 0.001628 | 0.233324 | 0.317 | 0.297 | 1 M2 | MLX           |

|           |          |          |       |       |      |               |
|-----------|----------|----------|-------|-------|------|---------------|
| SCNN1A    | 0.001656 | -0.10942 | 0.027 | 0.053 | 1 M2 | SCNN1A        |
| SRRM1.1   | 0.001696 | 0.116413 | 0.512 | 0.518 | 1 M2 | SRRM1         |
| THG1L.1   | 0.001741 | 0.199045 | 0.101 | 0.074 | 1 M2 | THG1L         |
| RP11-841C | 0.001764 | 0.129061 | 0.079 | 0.054 | 1 M2 | RP11-841020.2 |
| ASB1.1    | 0.001779 | 0.172949 | 0.128 | 0.098 | 1 M2 | ASB1          |
| UBAC2.4   | 0.001796 | 0.215539 | 0.291 | 0.27  | 1 M2 | UBAC2         |
| ABI1.5    | 0.001807 | 0.136247 | 0.269 | 0.239 | 1 M2 | ABI1          |
| TBC1D16.2 | 0.001864 | 0.23172  | 0.161 | 0.132 | 1 M2 | TBC1D16       |
| DNAJB1.2  | 0.001927 | -0.17228 | 0.511 | 0.617 | 1 M2 | DNAJB1        |
| VEGFA.3   | 0.002025 | 0.172214 | 0.245 | 0.214 | 1 M2 | VEGFA         |
| PELI1.5   | 0.002036 | 0.164796 | 0.243 | 0.207 | 1 M2 | PELI1         |
| C6orf48.3 | 0.002091 | -0.15896 | 0.554 | 0.653 | 1 M2 | C6orf48       |
| ACADS.1   | 0.002137 | 0.185083 | 0.146 | 0.116 | 1 M2 | ACADS         |
| PTGES3.2  | 0.002206 | -0.15547 | 0.639 | 0.725 | 1 M2 | PTGES3        |
| PTP4A2.4  | 0.002311 | -0.10745 | 0.382 | 0.458 | 1 M2 | PTP4A2        |
| LRRK2.4   | 0.002353 | 0.146613 | 0.084 | 0.059 | 1 M2 | LRRK2         |
| BAG3.3    | 0.002356 | 0.215113 | 0.135 | 0.106 | 1 M2 | BAG3          |
| MEA1.1    | 0.002382 | 0.149633 | 0.433 | 0.433 | 1 M2 | MEA1          |
| NAPA.2    | 0.002394 | 0.174528 | 0.4   | 0.393 | 1 M2 | NAPA          |
| NPTN.2    | 0.002397 | 0.13355  | 0.086 | 0.06  | 1 M2 | NPTN          |
| TMEM243.3 | 0.002468 | 0.1695   | 0.232 | 0.2   | 1 M2 | TMEM243       |
| MAFK.1    | 0.002489 | 0.126378 | 0.059 | 0.038 | 1 M2 | MAFK          |
| RANBP2.5  | 0.002499 | 0.204642 | 0.235 | 0.207 | 1 M2 | RANBP2        |
| TMIGD2.2  | 0.002502 | -0.10355 | 0.005 | 0.021 | 1 M2 | TMIGD2        |
| CDC123.2  | 0.002505 | 0.153085 | 0.347 | 0.336 | 1 M2 | CDC123        |
| MDFIC     | 0.002518 | 0.126045 | 0.064 | 0.043 | 1 M2 | MDFIC         |
| PNPO.2    | 0.002544 | 0.124352 | 0.105 | 0.077 | 1 M2 | PNPO          |
| ETFA.3    | 0.002583 | 0.132676 | 0.379 | 0.372 | 1 M2 | ETFA          |
| TBC1D2B.4 | 0.002601 | 0.116196 | 0.074 | 0.05  | 1 M2 | TBC1D2B       |
| OPALIN.2  | 0.002649 | -0.16709 | 0.001 | 0.014 | 1 M2 | OPALIN        |
| PPP1R15B. | 0.002662 | 0.180879 | 0.146 | 0.116 | 1 M2 | PPP1R15B      |
| LASP1.5   | 0.002668 | 0.186559 | 0.236 | 0.208 | 1 M2 | LASP1         |
| MGP.4     | 0.002805 | -0.59139 | 0.075 | 0.106 | 1 M2 | MGP           |
| SNRPD3.4  | 0.002817 | 0.17486  | 0.415 | 0.414 | 1 M2 | SNRPD3        |
| TECR.3    | 0.002834 | -0.13391 | 0.465 | 0.548 | 1 M2 | TECR          |
| IFIT2.3   | 0.002876 | -0.14389 | 0.054 | 0.084 | 1 M2 | IFIT2         |
| RASSF7.4  | 0.002877 | 0.150028 | 0.095 | 0.069 | 1 M2 | RASSF7        |
| STARD4    | 0.002914 | 0.126532 | 0.05  | 0.031 | 1 M2 | STARD4        |
| ELMO1.4   | 0.003014 | -0.11819 | 0.148 | 0.193 | 1 M2 | ELMO1         |
| UBXN11.2  | 0.003018 | 0.248148 | 0.162 | 0.134 | 1 M2 | UBXN11        |
| STX8.1    | 0.003033 | 0.206527 | 0.367 | 0.36  | 1 M2 | STX8          |
| GNPDA1    | 0.003094 | 0.193592 | 0.259 | 0.238 | 1 M2 | GNPDA1        |
| APH1A.3   | 0.00313  | 0.102237 | 0.473 | 0.485 | 1 M2 | APH1A         |
| CXorf38.1 | 0.003151 | 0.142819 | 0.093 | 0.068 | 1 M2 | CXorf38       |
| UBAP1.2   | 0.003175 | 0.206444 | 0.208 | 0.182 | 1 M2 | UBAP1         |
| PFKFB4    | 0.003217 | 0.107444 | 0.055 | 0.035 | 1 M2 | PFKFB4        |
| CLTC.3    | 0.00323  | 0.180867 | 0.355 | 0.348 | 1 M2 | CLTC          |
| TUBB6.3   | 0.003276 | 0.16401  | 0.209 | 0.182 | 1 M2 | TUBB6         |
| PREX1.5   | 0.003326 | 0.175185 | 0.245 | 0.216 | 1 M2 | PREX1         |
| COPZ1.2   | 0.00341  | 0.110065 | 0.469 | 0.487 | 1 M2 | COPZ1         |
| MT1E.5    | 0.003468 | -0.32795 | 0.335 | 0.383 | 1 M2 | MT1E          |

|           |          |          |       |       |      |               |
|-----------|----------|----------|-------|-------|------|---------------|
| NEK7      | 0.003548 | 0.117925 | 0.101 | 0.074 | 1 M2 | NEK7          |
| GZMA.3    | 0.003619 | -0.145   | 0.003 | 0.015 | 1 M2 | GZMA          |
| NR1H2.5   | 0.003661 | 0.200843 | 0.317 | 0.302 | 1 M2 | NR1H2         |
| UCHL3.2   | 0.003719 | 0.159325 | 0.272 | 0.246 | 1 M2 | UCHL3         |
| ZFYVE16.2 | 0.003751 | 0.208835 | 0.198 | 0.17  | 1 M2 | ZFYVE16       |
| ATG7.3    | 0.00378  | 0.155776 | 0.138 | 0.109 | 1 M2 | ATG7          |
| IGLON5.2  | 0.003828 | 0.141003 | 0.068 | 0.046 | 1 M2 | IGLON5        |
| TMEM87B.3 | 0.004016 | 0.116476 | 0.089 | 0.065 | 1 M2 | TMEM87B       |
| CDC42SE1. | 0.004029 | 0.18811  | 0.323 | 0.303 | 1 M2 | CDC42SE1      |
| FAM35A    | 0.004036 | 0.129212 | 0.084 | 0.06  | 1 M2 | FAM35A        |
| BHLHE41.4 | 0.004434 | -0.12375 | 0.165 | 0.211 | 1 M2 | BHLHE41       |
| NUMB.5    | 0.004512 | 0.143798 | 0.199 | 0.168 | 1 M2 | NUMB          |
| SEC24D.1  | 0.004697 | 0.144934 | 0.116 | 0.09  | 1 M2 | SEC24D        |
| NAGPA.3   | 0.004754 | 0.155774 | 0.134 | 0.107 | 1 M2 | NAGPA         |
| TMEM134.3 | 0.004862 | 0.201468 | 0.319 | 0.309 | 1 M2 | TMEM134       |
| GGA1.5    | 0.004907 | 0.19719  | 0.307 | 0.288 | 1 M2 | GGA1          |
| ARF3.3    | 0.00491  | 0.193368 | 0.374 | 0.378 | 1 M2 | ARF3          |
| EDEM2.2   | 0.004963 | 0.15886  | 0.259 | 0.239 | 1 M2 | EDEM2         |
| UBR4.4    | 0.005023 | 0.278236 | 0.169 | 0.143 | 1 M2 | UBR4          |
| CHMP2B.2  | 0.005093 | 0.179135 | 0.319 | 0.306 | 1 M2 | CHMP2B        |
| FTL.5     | 0.005256 | -0.1864  | 1     | 0.993 | 1 M2 | FTL           |
| EXOSC1    | 0.005511 | 0.18847  | 0.206 | 0.18  | 1 M2 | EXOSC1        |
| WASF2.5   | 0.005627 | 0.100434 | 0.446 | 0.438 | 1 M2 | WASF2         |
| SSNA1.3   | 0.005644 | 0.14463  | 0.436 | 0.446 | 1 M2 | SSNA1         |
| PLAC8.4   | 0.005675 | -0.16247 | 0.045 | 0.07  | 1 M2 | PLAC8         |
| NSMAF.3   | 0.005681 | 0.153273 | 0.142 | 0.114 | 1 M2 | NSMAF         |
| ETV3.5    | 0.005715 | 0.141216 | 0.1   | 0.075 | 1 M2 | ETV3          |
| MAOA.1    | 0.005753 | 0.109638 | 0.047 | 0.03  | 1 M2 | MAOA          |
| PLK3.5    | 0.006033 | 0.149788 | 0.269 | 0.239 | 1 M2 | PLK3          |
| CELF2.5   | 0.006036 | 0.107065 | 0.4   | 0.382 | 1 M2 | CELF2         |
| GALC.2    | 0.006051 | 0.151055 | 0.126 | 0.101 | 1 M2 | GALC          |
| TEX264.1  | 0.006245 | 0.10501  | 0.397 | 0.396 | 1 M2 | TEX264        |
| HNRNPDL.2 | 0.006266 | -0.13411 | 0.739 | 0.802 | 1 M2 | HNRNPDL       |
| IMPDH1.3  | 0.006429 | 0.18214  | 0.181 | 0.156 | 1 M2 | IMPDH1        |
| ASPH.2    | 0.006445 | 0.216435 | 0.285 | 0.276 | 1 M2 | ASPH          |
| ZNF780A   | 0.006687 | 0.156583 | 0.089 | 0.067 | 1 M2 | ZNF780A       |
| CD2.4     | 0.006695 | -0.1416  | 0.006 | 0.02  | 1 M2 | CD2           |
| AP5B1.2   | 0.006701 | 0.112188 | 0.072 | 0.05  | 1 M2 | AP5B1         |
| NUDT16.5  | 0.006811 | 0.157383 | 0.244 | 0.217 | 1 M2 | NUDT16        |
| BEX4.4    | 0.006924 | -0.10888 | 0.406 | 0.482 | 1 M2 | BEX4          |
| GTF2B.4   | 0.006949 | 0.142955 | 0.321 | 0.299 | 1 M2 | GTF2B         |
| DYM.1     | 0.007155 | 0.158118 | 0.114 | 0.089 | 1 M2 | DYM           |
| RP11-1143 | 0.007156 | 0.133002 | 0.072 | 0.05  | 1 M2 | RP11-1143G9.4 |
| PDCD5.5   | 0.007204 | -0.12951 | 0.451 | 0.545 | 1 M2 | PDCD5         |
| SAA2.3    | 0.007272 | -0.5096  | 0.032 | 0.053 | 1 M2 | SAA2          |
| RSL1D1.2  | 0.007288 | 0.103417 | 0.475 | 0.498 | 1 M2 | RSL1D1        |
| GAB2.3    | 0.007341 | 0.151389 | 0.087 | 0.064 | 1 M2 | GAB2          |
| PHLDA2.1  | 0.00736  | 0.160149 | 0.069 | 0.049 | 1 M2 | PHLDA2        |
| HDLBP.2   | 0.007399 | 0.181583 | 0.338 | 0.336 | 1 M2 | HDLBP         |
| OSER1.1   | 0.007423 | 0.195894 | 0.313 | 0.301 | 1 M2 | OSER1         |
| PTPRCAP.3 | 0.007481 | -0.14533 | 0.011 | 0.027 | 1 M2 | PTPRCAP       |

|           |           |           |        |        |           |                |
|-----------|-----------|-----------|--------|--------|-----------|----------------|
| CKS2. 5   | 0. 007619 | 0. 116838 | 0. 388 | 0. 365 | 1 M2      | CKS2           |
| DNAJA4. 4 | 0. 008101 | 0. 116246 | 0. 083 | 0. 06  | 1 M2      | DNAJA4         |
| MBP. 2    | 0. 008345 | -0. 49394 | 0. 213 | 0. 24  | 1 M2      | MBP            |
| FBXW5. 3  | 0. 00839  | 0. 198424 | 0. 298 | 0. 287 | 1 M2      | FBXW5          |
| IMPDH2. 5 | 0. 008504 | -0. 10597 | 0. 338 | 0. 422 | 1 M2      | IMPDH2         |
| ALDOC. 4  | 0. 008547 | 0. 11274  | 0. 184 | 0. 153 | 1 M2      | ALDOC          |
| EPS8. 2   | 0. 008644 | 0. 156572 | 0. 152 | 0. 124 | 1 M2      | EPS8           |
| LINC00998 | 0. 008896 | 0. 127281 | 0. 368 | 0. 372 | 1 M2      | LINC00998      |
| LCK. 2    | 0. 009224 | -0. 10185 | 0. 004 | 0. 015 | 1 M2      | LCK            |
| NDUFC1. 4 | 0. 009566 | -0. 13916 | 0. 474 | 0. 558 | 1 M2      | NDUFC1         |
| KIAA0101. | 0         | 1. 546854 | 0. 835 | 0. 1   | 0 Mcy     | KIAA0101       |
| TK1. 4    | 0         | 1. 529662 | 0. 78  | 0. 054 | 0 Mcy     | TK1            |
| RRM2. 5   | 0         | 1. 431223 | 0. 685 | 0. 048 | 0 Mcy     | RRM2           |
| BIRC5. 6  | 0         | 1. 411762 | 0. 791 | 0. 088 | 0 Mcy     | BIRC5          |
| ZWINT. 4  | 0         | 1. 329789 | 0. 722 | 0. 078 | 0 Mcy     | ZWINT          |
| MKI67. 5  | #####     | 1. 217606 | 0. 579 | 0. 05  | ##### Mcy | MKI67          |
| CDK1. 4   | #####     | 1. 293507 | 0. 711 | 0. 082 | ##### Mcy | CDK1           |
| CENPM. 5  | #####     | 1. 170579 | 0. 615 | 0. 061 | ##### Mcy | CENPM          |
| UBE2C. 6  | #####     | 1. 47167  | 0. 773 | 0. 101 | ##### Mcy | UBE2C          |
| CCNB2. 5  | #####     | 1. 04791  | 0. 535 | 0. 052 | ##### Mcy | CCNB2          |
| AURKB. 5  | #####     | 1. 033209 | 0. 465 | 0. 039 | ##### Mcy | AURKB          |
| NUSAP1. 5 | #####     | 1. 260608 | 0. 685 | 0. 091 | ##### Mcy | NUSAP1         |
| APOBEC3B. | #####     | 0. 74193  | 0. 37  | 0. 025 | ##### Mcy | APOBEC3B       |
| CEP55     | #####     | 0. 712013 | 0. 341 | 0. 022 | ##### Mcy | CEP55          |
| SHCBP1. 3 | #####     | 0. 858183 | 0. 454 | 0. 044 | ##### Mcy | SHCBP1         |
| HMMR. 3   | #####     | 0. 857496 | 0. 385 | 0. 032 | ##### Mcy | HMMR           |
| CCNA2. 5  | #####     | 0. 869803 | 0. 454 | 0. 047 | ##### Mcy | CCNA2          |
| CENPW. 3  | #####     | 1. 08556  | 0. 656 | 0. 105 | ##### Mcy | CENPW          |
| CDKN3. 5  | #####     | 1. 009984 | 0. 575 | 0. 08  | ##### Mcy | CDKN3          |
| TOP2A. 6  | #####     | 0. 930676 | 0. 557 | 0. 075 | ##### Mcy | TOP2A          |
| DERL3     | #####     | 0. 599873 | 0. 264 | 0. 016 | ##### Mcy | DERL3          |
| ASF1B. 3  | #####     | 0. 828861 | 0. 447 | 0. 051 | ##### Mcy | ASF1B          |
| MND1. 2   | #####     | 0. 769474 | 0. 374 | 0. 037 | ##### Mcy | MND1           |
| KIF11     | #####     | 0. 676036 | 0. 3   | 0. 023 | ##### Mcy | KIF11          |
| RNASE2. 6 | #####     | 0. 995577 | 0. 773 | 0. 143 | ##### Mcy | RNASE2         |
| CKS1B. 2  | #####     | 1. 154991 | 0. 864 | 0. 244 | ##### Mcy | CKS1B          |
| PRC1. 5   | #####     | 0. 903266 | 0. 524 | 0. 076 | ##### Mcy | PRC1           |
| CDCA3. 5  | #####     | 0. 851804 | 0. 399 | 0. 044 | ##### Mcy | CDCA3          |
| CDC20. 4  | #####     | 0. 922716 | 0. 458 | 0. 059 | ##### Mcy | CDC20          |
| RAD51AP1. | #####     | 0. 849338 | 0. 44  | 0. 057 | ##### Mcy | RAD51AP1       |
| RP11-742E | #####     | 0. 612213 | 0. 293 | 0. 024 | ##### Mcy | RP11-742B18. 1 |
| CRIP1. 4  | #####     | 0. 766075 | 0. 333 | 0. 032 | ##### Mcy | CRIP1          |
| CENPF. 6  | #####     | 0. 947453 | 0. 546 | 0. 091 | ##### Mcy | CENPF          |
| CENPN. 3  | #####     | 0. 854246 | 0. 498 | 0. 078 | ##### Mcy | CENPN          |
| TCF19. 1  | #####     | 0. 72723  | 0. 359 | 0. 041 | ##### Mcy | TCF19          |
| NUF2. 6   | #####     | 0. 750318 | 0. 418 | 0. 054 | ##### Mcy | NUF2           |
| HIST1H2BH | #####     | 0. 573389 | 0. 245 | 0. 018 | ##### Mcy | HIST1H2BH      |
| TACC3. 3  | #####     | 0. 811039 | 0. 462 | 0. 068 | ##### Mcy | TACC3          |
| CLSPN. 4  | #####     | 0. 80659  | 0. 407 | 0. 054 | ##### Mcy | CLSPN          |
| ST14. 6   | #####     | 0. 691881 | 0. 462 | 0. 063 | ##### Mcy | ST14           |
| KIF2C. 4  | #####     | 0. 724593 | 0. 333 | 0. 036 | ##### Mcy | KIF2C          |

|             |           |           |        |        |           |     |           |
|-------------|-----------|-----------|--------|--------|-----------|-----|-----------|
| PLK1. 4     | #####     | 0. 813069 | 0. 377 | 0. 047 | #####     | Mcy | PLK1      |
| TYMS. 5     | #####     | 1. 045045 | 0. 641 | 0. 149 | #####     | Mcy | TYMS      |
| PLEK2. 4    | #####     | 0. 496568 | 0. 242 | 0. 019 | #####     | Mcy | PLEK2     |
| MELK. 2     | #####     | 0. 623006 | 0. 337 | 0. 039 | #####     | Mcy | MELK      |
| PTTG1. 5    | #####     | 1. 058976 | 0. 766 | 0. 218 | #####     | Mcy | PTTG1     |
| GTSE1. 4    | #####     | 0. 711322 | 0. 381 | 0. 05  | #####     | Mcy | GTSE1     |
| SGOL1. 4    | #####     | 0. 748773 | 0. 381 | 0. 05  | #####     | Mcy | SGOL1     |
| TGFBI. 6    | #####     | 0. 996586 | 0. 777 | 0. 192 | #####     | Mcy | TGFBI     |
| TROAP. 5    | #####     | 0. 719036 | 0. 333 | 0. 04  | #####     | Mcy | TROAP     |
| CENPU. 5    | #####     | 0. 866515 | 0. 516 | 0. 095 | #####     | Mcy | CENPU     |
| TNFRSF11A   | #####     | 0. 496862 | 0. 238 | 0. 019 | #####     | Mcy | TNFRSF11A |
| S100A9. 6   | #####     | 0. 878736 | 0. 813 | 0. 21  | #####     | Mcy | S100A9    |
| PKMYT1. 4   | #####     | 0. 681994 | 0. 315 | 0. 036 | #####     | Mcy | PKMYT1    |
| RAC2. 6     | #####     | 0. 727025 | 0. 579 | 0. 108 | #####     | Mcy | RAC2      |
| KIFC1. 4    | #####     | 0. 635291 | 0. 377 | 0. 051 | #####     | Mcy | KIFC1     |
| ASPM. 6     | #####     | 0. 692865 | 0. 33  | 0. 04  | #####     | Mcy | ASPM      |
| DEPDC1. 2   | #####     | 0. 595183 | 0. 278 | 0. 029 | #####     | Mcy | DEPDC1    |
| NCAPG. 4    | #####     | 0. 587579 | 0. 304 | 0. 035 | #####     | Mcy | NCAPG     |
| DIAPH3      | #####     | 0. 494381 | 0. 264 | 0. 027 | #####     | Mcy | DIAPH3    |
| SPC25. 6    | #####     | 0. 70055  | 0. 374 | 0. 054 | #####     | Mcy | SPC25     |
| TPX2. 5     | #####     | 0. 853223 | 0. 436 | 0. 074 | #####     | Mcy | TPX2      |
| SLFN13      | #####     | 0. 376225 | 0. 143 | 0. 007 | #####     | Mcy | SLFN13    |
| CDCA5. 4    | #####     | 0. 618002 | 0. 311 | 0. 039 | 4. 16E-99 | Mcy | CDCA5     |
| MAD2L1. 5   | #####     | 0. 822949 | 0. 553 | 0. 118 | 7. 21E-99 | Mcy | MAD2L1    |
| SKA3        | #####     | 0. 502923 | 0. 275 | 0. 03  | 1. 06E-98 | Mcy | SKA3      |
| SYK. 6      | #####     | 0. 695716 | 0. 516 | 0. 096 | 8. 19E-98 | Mcy | SYK       |
| S100A8. 6   | #####     | 0. 840691 | 0. 703 | 0. 173 | 1. 36E-97 | Mcy | S100A8    |
| MAPK13. 3   | #####     | 0. 534213 | 0. 253 | 0. 025 | 1. 77E-97 | Mcy | MAPK13    |
| CLEC5A. 6   | #####     | 0. 765104 | 0. 498 | 0. 09  | 4. 79E-96 | Mcy | CLEC5A    |
| POC1A. 3    | 1. 05E-99 | 0. 695069 | 0. 344 | 0. 05  | 1. 56E-95 | Mcy | POC1A     |
| DLGAP5. 5   | 6. 59E-99 | 0. 572376 | 0. 267 | 0. 03  | 9. 85E-95 | Mcy | DLGAP5    |
| S100A4. 6   | 1. 20E-98 | 0. 928093 | 0. 905 | 0. 281 | 1. 79E-94 | Mcy | S100A4    |
| KIF20B. 3   | 1. 94E-98 | 0. 727127 | 0. 44  | 0. 079 | 2. 89E-94 | Mcy | KIF20B    |
| NDC80. 4    | 3. 99E-98 | 0. 692514 | 0. 315 | 0. 042 | 5. 96E-94 | Mcy | NDC80     |
| STAB1. 5    | 5. 96E-97 | 0. 737578 | 0. 652 | 0. 15  | 8. 91E-93 | Mcy | STAB1     |
| CACNA2D4. 4 | 3. 43E-95 | 0. 641189 | 0. 407 | 0. 066 | 5. 13E-91 | Mcy | CACNA2D4  |
| CCNB1. 4    | 6. 81E-95 | 0. 829264 | 0. 44  | 0. 082 | 1. 02E-90 | Mcy | CCNB1     |
| AURKA. 3    | 6. 87E-94 | 0. 731586 | 0. 403 | 0. 07  | 1. 03E-89 | Mcy | AURKA     |
| MNDA. 6     | 1. 28E-91 | 0. 726645 | 0. 678 | 0. 165 | 1. 91E-87 | Mcy | MNDA      |
| CENPA. 6    | 9. 31E-91 | 0. 594158 | 0. 311 | 0. 043 | 1. 39E-86 | Mcy | CENPA     |
| RAD51       | 1. 81E-90 | 0. 398731 | 0. 227 | 0. 023 | 2. 71E-86 | Mcy | RAD51     |
| MALAT1. 6   | 1. 16E-89 | -0. 65891 | 0. 993 | 0. 996 | 1. 74E-85 | Mcy | MALAT1    |
| MYBL2. 4    | 3. 58E-89 | 0. 592319 | 0. 289 | 0. 039 | 5. 35E-85 | Mcy | MYBL2     |
| NEK2. 4     | 2. 65E-87 | 0. 538437 | 0. 245 | 0. 028 | 3. 97E-83 | Mcy | NEK2      |
| MTFR2       | 2. 67E-87 | 0. 435414 | 0. 179 | 0. 015 | 3. 99E-83 | Mcy | MTFR2     |
| RETN. 4     | 8. 84E-86 | 0. 565866 | 0. 183 | 0. 016 | 1. 32E-81 | Mcy | RETN      |
| CDCA8. 3    | 1. 34E-85 | 0. 57513  | 0. 267 | 0. 034 | 2. 01E-81 | Mcy | CDCA8     |
| CENPE. 5    | 2. 45E-85 | 0. 679817 | 0. 322 | 0. 049 | 3. 66E-81 | Mcy | CENPE     |
| MARCO. 3    | 8. 08E-85 | 0. 828949 | 0. 337 | 0. 052 | 1. 21E-80 | Mcy | MARCO     |
| NCAPH. 1    | 1. 30E-83 | 0. 476546 | 0. 249 | 0. 03  | 1. 95E-79 | Mcy | NCAPH     |
| CDC45. 2    | 7. 44E-82 | 0. 530683 | 0. 245 | 0. 03  | 1. 11E-77 | Mcy | CDC45     |



|             |           |           |        |        |           |     |             |
|-------------|-----------|-----------|--------|--------|-----------|-----|-------------|
| TRIP13. 1   | 5. 98E-81 | 0. 496172 | 0. 282 | 0. 04  | 8. 94E-77 | Mcy | TRIP13      |
| KIF23. 3    | 2. 23E-80 | 0. 557182 | 0. 26  | 0. 034 | 3. 33E-76 | Mcy | KIF23       |
| CENPK. 4    | 3. 80E-80 | 0. 763624 | 0. 429 | 0. 091 | 5. 67E-76 | Mcy | CENPK       |
| OIP5. 3     | 9. 72E-80 | 0. 5548   | 0. 264 | 0. 036 | 1. 45E-75 | Mcy | OIP5        |
| LYZ. 6      | 2. 73E-79 | 0. 823123 | 0. 696 | 0. 194 | 4. 08E-75 | Mcy | LYZ         |
| NCKAP1L. 6  | 2. 87E-79 | 0. 621957 | 0. 516 | 0. 112 | 4. 29E-75 | Mcy | NCKAP1L     |
| BUB1. 3     | 9. 62E-79 | 0. 497743 | 0. 26  | 0. 035 | 1. 44E-74 | Mcy | BUB1        |
| PLK4        | 7. 28E-78 | 0. 454513 | 0. 198 | 0. 021 | 1. 09E-73 | Mcy | PLK4        |
| TMEM106C. 2 | 0. 7E-77  | 0. 8647   | 0. 696 | 0. 256 | 3. 10E-73 | Mcy | TMEM106C    |
| DNAJC9. 3   | 7. 15E-77 | 0. 810629 | 0. 546 | 0. 153 | 1. 07E-72 | Mcy | DNAJC9      |
| PRRG4. 4    | 7. 07E-76 | 0. 45432  | 0. 278 | 0. 039 | 1. 06E-71 | Mcy | PRRG4       |
| ZDHHC12. 6  | 1. 51E-75 | 0. 798935 | 0. 703 | 0. 25  | 2. 25E-71 | Mcy | ZDHHC12     |
| FANCI. 3    | 1. 77E-75 | 0. 524917 | 0. 275 | 0. 041 | 2. 65E-71 | Mcy | FANCI       |
| FAM111B     | 7. 15E-75 | 0. 461607 | 0. 205 | 0. 023 | 1. 07E-70 | Mcy | FAM111B     |
| HPRT1. 6    | 8. 96E-75 | 0. 731603 | 0. 681 | 0. 22  | 1. 34E-70 | Mcy | HPRT1       |
| VAMP8. 6    | 1. 12E-74 | 0. 745546 | 0. 927 | 0. 329 | 1. 67E-70 | Mcy | VAMP8       |
| MS4A4A. 6   | 4. 42E-74 | 0. 637089 | 0. 853 | 0. 272 | 6. 61E-70 | Mcy | MS4A4A      |
| SKA1        | 8. 45E-74 | 0. 41758  | 0. 212 | 0. 025 | 1. 26E-69 | Mcy | SKA1        |
| MGMT. 6     | 8. 75E-74 | 0. 675689 | 0. 557 | 0. 142 | 1. 31E-69 | Mcy | MGMT        |
| CASC5       | 1. 04E-73 | 0. 508405 | 0. 216 | 0. 026 | 1. 55E-69 | Mcy | CASC5       |
| FCGBP. 5    | 1. 06E-73 | 0. 74263  | 0. 718 | 0. 217 | 1. 59E-69 | Mcy | FCGBP       |
| FAM26F. 6   | 2. 88E-73 | 0. 726977 | 0. 601 | 0. 156 | 4. 30E-69 | Mcy | FAM26F      |
| GMFG. 6     | 3. 82E-73 | 0. 696668 | 0. 868 | 0. 284 | 5. 71E-69 | Mcy | GMFG        |
| CD93. 6     | 6. 09E-73 | 0. 562175 | 0. 355 | 0. 064 | 9. 10E-69 | Mcy | CD93        |
| GALM. 5     | 1. 00E-72 | 0. 662155 | 0. 48  | 0. 116 | 1. 49E-68 | Mcy | GALM        |
| HMGB2. 6    | 4. 78E-72 | 0. 762418 | 0. 952 | 0. 484 | 7. 14E-68 | Mcy | HMGB2       |
| ENG. 6      | 5. 55E-72 | 0. 642508 | 0. 586 | 0. 155 | 8. 29E-68 | Mcy | ENG         |
| PHF19. 4    | 1. 12E-71 | 0. 694259 | 0. 473 | 0. 121 | 1. 67E-67 | Mcy | PHF19       |
| ANLN. 5     | 5. 30E-71 | 0. 545919 | 0. 322 | 0. 056 | 7. 92E-67 | Mcy | ANLN        |
| UBE2T. 6    | 7. 07E-71 | 0. 747653 | 0. 476 | 0. 119 | 1. 06E-66 | Mcy | UBE2T       |
| FOXM1. 4    | 8. 62E-71 | 0. 655791 | 0. 286 | 0. 046 | 1. 29E-66 | Mcy | FOXM1       |
| STXBP2. 6   | 9. 82E-71 | 0. 630757 | 0. 608 | 0. 162 | 1. 47E-66 | Mcy | STXBP2      |
| GNA15. 6    | 2. 34E-70 | 0. 612337 | 0. 462 | 0. 101 | 3. 49E-66 | Mcy | GNA15       |
| CD163. 6    | 5. 36E-70 | 0. 721554 | 0. 817 | 0. 263 | 8. 01E-66 | Mcy | CD163       |
| CKAP2L. 5   | 4. 10E-69 | 0. 526852 | 0. 264 | 0. 04  | 6. 12E-65 | Mcy | CKAP2L      |
| HJURP. 4    | 1. 06E-67 | 0. 471565 | 0. 242 | 0. 035 | 1. 58E-63 | Mcy | HJURP       |
| SPAG5. 2    | 1. 22E-67 | 0. 488685 | 0. 256 | 0. 039 | 1. 82E-63 | Mcy | SPAG5       |
| CD180. 5    | 1. 56E-67 | 0. 441454 | 0. 234 | 0. 032 | 2. 32E-63 | Mcy | CD180       |
| PARVG. 6    | 1. 85E-67 | 0. 622468 | 0. 579 | 0. 152 | 2. 77E-63 | Mcy | PARVG       |
| KIF22. 3    | 2. 12E-67 | 0. 786065 | 0. 59  | 0. 187 | 3. 17E-63 | Mcy | KIF22       |
| SQRDL. 6    | 2. 34E-67 | 0. 60144  | 0. 56  | 0. 151 | 3. 49E-63 | Mcy | SQRDL       |
| SMC2. 4     | 2. 74E-67 | 0. 746818 | 0. 586 | 0. 191 | 4. 10E-63 | Mcy | SMC2        |
| CD300C. 6   | 4. 57E-67 | 0. 459361 | 0. 337 | 0. 061 | 6. 83E-63 | Mcy | CD300C      |
| ALOX5AP. 6  | 1. 44E-66 | 0. 69542  | 0. 967 | 0. 386 | 2. 16E-62 | Mcy | ALOX5AP     |
| LMNB1. 5    | 3. 01E-65 | 0. 665622 | 0. 505 | 0. 141 | 4. 50E-61 | Mcy | LMNB1       |
| SLC16A10. 3 | 8. 0E-65  | 0. 604956 | 0. 385 | 0. 08  | 5. 69E-61 | Mcy | SLC16A10    |
| ARHGDIB. 6  | 4. 50E-65 | 0. 676241 | 0. 949 | 0. 358 | 6. 73E-61 | Mcy | ARHGDIB     |
| KCNN4. 3    | 7. 36E-65 | 0. 36624  | 0. 216 | 0. 028 | 1. 10E-60 | Mcy | KCNN4       |
| SIGLEC9. 6  | 8. 40E-65 | 0. 491214 | 0. 403 | 0. 085 | 1. 25E-60 | Mcy | SIGLEC9     |
| ACO92484. 2 | 5. 3E-64  | 0. 551646 | 0. 128 | 0. 01  | 3. 78E-60 | Mcy | ACO92484. 1 |
| SERPINA1. 3 | 3. 37E-64 | 0. 684993 | 0. 828 | 0. 287 | 5. 04E-60 | Mcy | SERPINA1    |

|             |           |           |        |        |           |     |               |
|-------------|-----------|-----------|--------|--------|-----------|-----|---------------|
| LCP1. 5     | 5. 54E-64 | 0. 512488 | 0. 527 | 0. 133 | 8. 27E-60 | Mcy | LCP1          |
| TCIRG1. 6   | 7. 72E-64 | 0. 582714 | 0. 48  | 0. 117 | 1. 15E-59 | Mcy | TCIRG1        |
| CYBB. 6     | 1. 31E-63 | 0. 637571 | 0. 637 | 0. 181 | 1. 96E-59 | Mcy | CYBB          |
| FEN1. 4     | 1. 62E-63 | 0. 715701 | 0. 465 | 0. 128 | 2. 42E-59 | Mcy | FEN1          |
| Clorf162. 2 | 4. 9E-63  | 0. 619907 | 0. 883 | 0. 309 | 3. 73E-59 | Mcy | Clorf162      |
| CTSZ. 6     | 3. 22E-63 | 0. 68308  | 0. 736 | 0. 245 | 4. 82E-59 | Mcy | CTSZ          |
| CD4. 6      | 3. 25E-63 | 0. 608154 | 0. 546 | 0. 146 | 4. 86E-59 | Mcy | CD4           |
| HNMT. 5     | 1. 11E-62 | 0. 703888 | 0. 645 | 0. 208 | 1. 66E-58 | Mcy | HNMT          |
| CIDEB. 4    | 1. 34E-62 | 0. 298277 | 0. 183 | 0. 021 | 2. 01E-58 | Mcy | CIDEB         |
| RACGAP1. 3  | 1. 87E-62 | 0. 594031 | 0. 355 | 0. 076 | 2. 80E-58 | Mcy | RACGAP1       |
| SIGLEC7. 6  | 3. 35E-62 | 0. 52488  | 0. 344 | 0. 068 | 5. 01E-58 | Mcy | SIGLEC7       |
| LRR1. 2     | 2. 52E-61 | 0. 526726 | 0. 359 | 0. 08  | 3. 76E-57 | Mcy | LRR1          |
| SMC4. 4     | 2. 95E-61 | 0. 694848 | 0. 59  | 0. 203 | 4. 41E-57 | Mcy | SMC4          |
| ESCO2. 1    | 3. 41E-61 | 0. 400513 | 0. 212 | 0. 03  | 5. 10E-57 | Mcy | ESCO2         |
| KIF15       | 9. 77E-61 | 0. 426537 | 0. 209 | 0. 029 | 1. 46E-56 | Mcy | KIF15         |
| FAM111A. 3  | 5. 37E-60 | 0. 676493 | 0. 407 | 0. 102 | 8. 03E-56 | Mcy | FAM111A       |
| FUOM. 6     | 7. 66E-60 | 0. 600536 | 0. 491 | 0. 132 | 1. 14E-55 | Mcy | FUOM          |
| MCM5. 6     | 3. 53E-59 | 0. 682654 | 0. 491 | 0. 142 | 5. 27E-55 | Mcy | MCM5          |
| LAIR1. 6    | 6. 74E-59 | 0. 58851  | 0. 689 | 0. 22  | 1. 01E-54 | Mcy | LAIR1         |
| CDCA2       | 2. 67E-58 | 0. 37192  | 0. 198 | 0. 027 | 3. 99E-54 | Mcy | CDCA2         |
| DEPDC1B. 1  | 3. 40E-58 | 0. 423189 | 0. 212 | 0. 031 | 5. 09E-54 | Mcy | DEPDC1B       |
| ARHGAP18. 1 | 1. 24E-57 | 0. 587904 | 0. 56  | 0. 163 | 1. 85E-53 | Mcy | ARHGAP18      |
| SLC16A3. 6  | 1. 24E-57 | 0. 678015 | 0. 791 | 0. 309 | 1. 86E-53 | Mcy | SLC16A3       |
| NRGN        | 1. 37E-57 | 0. 445838 | 0. 223 | 0. 035 | 2. 05E-53 | Mcy | NRGN          |
| FERMT3. 6   | 1. 39E-57 | 0. 552435 | 0. 56  | 0. 157 | 2. 07E-53 | Mcy | FERMT3        |
| FXYD5. 6    | 1. 92E-57 | 0. 606733 | 0. 868 | 0. 328 | 2. 87E-53 | Mcy | FXYD5         |
| FANCD2      | 2. 58E-57 | 0. 447523 | 0. 216 | 0. 033 | 3. 86E-53 | Mcy | FANCD2        |
| GSTO1. 5    | 2. 61E-57 | 0. 636341 | 0. 886 | 0. 446 | 3. 90E-53 | Mcy | GSTO1         |
| ARHGAP4. 6  | 2. 83E-57 | 0. 51354  | 0. 44  | 0. 108 | 4. 23E-53 | Mcy | ARHGAP4       |
| CORO1A. 6   | 3. 53E-57 | 0. 614913 | 0. 875 | 0. 361 | 5. 27E-53 | Mcy | CORO1A        |
| SMCO4. 6    | 8. 36E-57 | 0. 506477 | 0. 469 | 0. 125 | 1. 25E-52 | Mcy | SMCO4         |
| FAM64A. 6   | 9. 72E-57 | 0. 554783 | 0. 311 | 0. 063 | 1. 45E-52 | Mcy | FAM64A        |
| NCF4. 6     | 1. 30E-56 | 0. 565684 | 0. 505 | 0. 137 | 1. 95E-52 | Mcy | NCF4          |
| NRM. 2      | 2. 12E-56 | 0. 57812  | 0. 341 | 0. 078 | 3. 17E-52 | Mcy | NRM           |
| LAT2. 6     | 2. 21E-56 | 0. 563986 | 0. 63  | 0. 193 | 3. 31E-52 | Mcy | LAT2          |
| GGH. 4      | 3. 92E-56 | 0. 702623 | 0. 645 | 0. 254 | 5. 86E-52 | Mcy | GGH           |
| RP11-84C1   | 4. 15E-56 | 0. 360492 | 0. 147 | 0. 015 | 6. 20E-52 | Mcy | RP11-84C10. 2 |
| CAPG. 6     | 5. 36E-56 | 0. 638294 | 0. 908 | 0. 403 | 8. 01E-52 | Mcy | CAPG          |
| TTK         | 5. 45E-56 | 0. 398117 | 0. 179 | 0. 023 | 8. 14E-52 | Mcy | TTK           |
| CHEK2. 2    | 5. 67E-56 | 0. 5307   | 0. 249 | 0. 043 | 8. 47E-52 | Mcy | CHEK2         |
| ANPEP. 5    | 1. 02E-55 | 0. 433388 | 0. 198 | 0. 028 | 1. 52E-51 | Mcy | ANPEP         |
| DTYMK. 5    | 1. 67E-55 | 0. 707569 | 0. 711 | 0. 32  | 2. 50E-51 | Mcy | DTYMK         |
| TMEM109. 5  | 2. 30E-55 | 0. 604416 | 0. 579 | 0. 196 | 3. 43E-51 | Mcy | TMEM109       |
| AIF1. 6     | 2. 42E-55 | 0. 587463 | 0. 96  | 0. 398 | 3. 61E-51 | Mcy | AIF1          |
| EAF2. 6     | 4. 96E-55 | 0. 509791 | 0. 37  | 0. 086 | 7. 41E-51 | Mcy | EAF2          |
| HK3. 4      | 8. 57E-55 | 0. 363029 | 0. 172 | 0. 021 | 1. 28E-50 | Mcy | HK3           |
| TMSB4X. 6   | 1. 54E-54 | -0. 42259 | 1      | 0. 997 | 2. 30E-50 | Mcy | TMSB4X        |
| IL1RN. 6    | 1. 97E-54 | 0. 505055 | 0. 33  | 0. 069 | 2. 95E-50 | Mcy | IL1RN         |
| ADAP2. 6    | 4. 12E-54 | 0. 538907 | 0. 59  | 0. 174 | 6. 16E-50 | Mcy | ADAP2         |
| NAGA. 6     | 6. 79E-54 | 0. 602703 | 0. 549 | 0. 176 | 1. 01E-49 | Mcy | NAGA          |
| TUBA1C. 4   | 7. 98E-54 | 0. 69063  | 0. 773 | 0. 37  | 1. 19E-49 | Mcy | TUBA1C        |

|             |           |           |        |        |           |     |             |
|-------------|-----------|-----------|--------|--------|-----------|-----|-------------|
| TES. 6      | 1. 03E-53 | 0. 340897 | 0. 245 | 0. 041 | 1. 53E-49 | Mcy | TES         |
| SPC24. 6    | 1. 51E-53 | 0. 663522 | 0. 245 | 0. 044 | 2. 26E-49 | Mcy | SPC24       |
| PNP. 4      | 1. 94E-53 | 0. 568517 | 0. 388 | 0. 096 | 2. 90E-49 | Mcy | PNP         |
| PYCARD. 6   | 3. 79E-53 | 0. 564026 | 0. 758 | 0. 273 | 5. 67E-49 | Mcy | PYCARD      |
| AC147651. 6 | 6. 82E-53 | 0. 426601 | 0. 209 | 0. 032 | 1. 02E-48 | Mcy | AC147651. 4 |
| FCER1G. 6   | 7. 36E-53 | 0. 600064 | 0. 978 | 0. 429 | 1. 10E-48 | Mcy | FCER1G      |
| HCLS1. 6    | 9. 65E-53 | 0. 551195 | 0. 806 | 0. 278 | 1. 44E-48 | Mcy | HCLS1       |
| CSTA. 6     | 1. 26E-52 | 0. 538331 | 0. 458 | 0. 121 | 1. 89E-48 | Mcy | CSTA        |
| SERPINB1. 1 | 1. 94E-52 | 0. 580518 | 0. 733 | 0. 256 | 2. 91E-48 | Mcy | SERPINB1    |
| FBP1. 6     | 2. 27E-52 | 0. 515153 | 0. 429 | 0. 11  | 3. 40E-48 | Mcy | FBP1        |
| WAS. 6      | 2. 95E-52 | 0. 480881 | 0. 56  | 0. 165 | 4. 41E-48 | Mcy | WAS         |
| FAM159A. 5  | 4. 14E-52 | 0. 375112 | 0. 238 | 0. 04  | 6. 19E-48 | Mcy | FAM159A     |
| SLC25A19. 4 | 6. 3E-52  | 0. 578524 | 0. 513 | 0. 16  | 6. 91E-48 | Mcy | SLC25A19    |
| VSIG4. 6    | 8. 79E-52 | 0. 507622 | 0. 905 | 0. 352 | 1. 31E-47 | Mcy | VSIG4       |
| IMPA2. 3    | 1. 60E-51 | 0. 419964 | 0. 275 | 0. 055 | 2. 39E-47 | Mcy | IMPA2       |
| HELLS. 2    | 1. 82E-51 | 0. 535221 | 0. 282 | 0. 058 | 2. 73E-47 | Mcy | HELLS       |
| GPM6B. 6    | 2. 02E-51 | -1. 3823  | 0. 198 | 0. 629 | 3. 02E-47 | Mcy | GPM6B       |
| GCHFR. 5    | 2. 52E-51 | 0. 557355 | 0. 319 | 0. 071 | 3. 77E-47 | Mcy | GCHFR       |
| AC109826. 3 | 2. 9E-51  | 0. 463335 | 0. 209 | 0. 033 | 4. 92E-47 | Mcy | AC109826. 1 |
| ATAD2. 4    | 3. 40E-51 | 0. 451416 | 0. 311 | 0. 07  | 5. 08E-47 | Mcy | ATAD2       |
| UCP2. 6     | 3. 41E-51 | 0. 538167 | 0. 722 | 0. 261 | 5. 09E-47 | Mcy | UCP2        |
| ACTG1. 6    | 4. 96E-51 | -0. 46886 | 0. 949 | 0. 948 | 7. 42E-47 | Mcy | ACTG1       |
| RPA3. 3     | 6. 87E-51 | 0. 657309 | 0. 718 | 0. 334 | 1. 03E-46 | Mcy | RPA3        |
| LGALS9. 6   | 7. 77E-51 | 0. 501829 | 0. 681 | 0. 23  | 1. 16E-46 | Mcy | LGALS9      |
| ACTB. 6     | 1. 04E-50 | -0. 3763  | 1      | 0. 992 | 1. 56E-46 | Mcy | ACTB        |
| CD300A. 6   | 1. 12E-50 | 0. 547769 | 0. 593 | 0. 182 | 1. 68E-46 | Mcy | CD300A      |
| GNGT2. 6    | 1. 33E-50 | 0. 439831 | 0. 256 | 0. 047 | 1. 98E-46 | Mcy | GNGT2       |
| CCDC134. 1  | 1. 55E-50 | 0. 2998   | 0. 132 | 0. 014 | 2. 31E-46 | Mcy | CCDC134     |
| CDT1. 3     | 2. 96E-50 | 0. 501071 | 0. 271 | 0. 055 | 4. 42E-46 | Mcy | CDT1        |
| RPS6KA1. 6  | 3. 09E-50 | 0. 48126  | 0. 451 | 0. 123 | 4. 62E-46 | Mcy | RPS6KA1     |
| LAPTM5. 6   | 3. 24E-50 | 0. 587767 | 0. 971 | 0. 423 | 4. 84E-46 | Mcy | LAPTM5      |
| TREM2. 6    | 3. 44E-50 | 0. 509645 | 0. 897 | 0. 338 | 5. 13E-46 | Mcy | TREM2       |
| MS4A6A. 6   | 4. 22E-50 | 0. 509346 | 0. 872 | 0. 328 | 6. 31E-46 | Mcy | MS4A6A      |
| SMC1B       | 7. 52E-50 | 0. 167267 | 0. 04  | 0. 001 | 1. 12E-45 | Mcy | SMC1B       |
| ADAM8. 5    | 7. 66E-50 | 0. 433311 | 0. 227 | 0. 039 | 1. 14E-45 | Mcy | ADAM8       |
| KIF4A. 1    | 9. 10E-50 | 0. 421698 | 0. 194 | 0. 03  | 1. 36E-45 | Mcy | KIF4A       |
| ITGB2. 6    | 9. 16E-50 | 0. 605103 | 0. 842 | 0. 312 | 1. 37E-45 | Mcy | ITGB2       |
| PLEK. 6     | 1. 24E-49 | 0. 434037 | 0. 557 | 0. 166 | 1. 85E-45 | Mcy | PLEK        |
| TUBA1A. 5   | 1. 41E-49 | -0. 8601  | 0. 725 | 0. 81  | 2. 10E-45 | Mcy | TUBA1A      |
| VAV1. 6     | 1. 56E-49 | 0. 400274 | 0. 315 | 0. 068 | 2. 33E-45 | Mcy | VAV1        |
| TYROBP. 6   | 2. 51E-49 | 0. 558715 | 0. 989 | 0. 447 | 3. 76E-45 | Mcy | TYROBP      |
| SAMSN1. 6   | 2. 90E-49 | 0. 500224 | 0. 722 | 0. 241 | 4. 34E-45 | Mcy | SAMSN1      |
| ALOX5. 6    | 3. 29E-49 | 0. 508858 | 0. 473 | 0. 131 | 4. 91E-45 | Mcy | ALOX5       |
| ZWILCH. 3   | 3. 59E-49 | 0. 514627 | 0. 304 | 0. 07  | 5. 37E-45 | Mcy | ZWILCH      |
| MICB        | 5. 91E-49 | 0. 321728 | 0. 147 | 0. 018 | 8. 83E-45 | Mcy | MICB        |
| KNSTRN. 4   | 7. 78E-49 | 0. 515672 | 0. 315 | 0. 074 | 1. 16E-44 | Mcy | KNSTRN      |
| MCM10       | 8. 23E-49 | 0. 333762 | 0. 154 | 0. 02  | 1. 23E-44 | Mcy | MCM10       |
| HENMT1. 5   | 8. 83E-49 | 0. 403739 | 0. 19  | 0. 029 | 1. 32E-44 | Mcy | HENMT1      |
| SIGLEC10. 9 | 3. 0E-49  | 0. 472254 | 0. 524 | 0. 153 | 1. 39E-44 | Mcy | SIGLEC10    |
| HCK. 6      | 1. 04E-48 | 0. 52277  | 0. 531 | 0. 159 | 1. 55E-44 | Mcy | HCK         |
| PTPN6. 6    | 1. 55E-48 | 0. 498963 | 0. 524 | 0. 153 | 2. 31E-44 | Mcy | PTPN6       |

|            |           |           |        |        |           |     |           |
|------------|-----------|-----------|--------|--------|-----------|-----|-----------|
| FCGR2B. 6  | 2. 34E-48 | 0. 474247 | 0. 48  | 0. 136 | 3. 50E-44 | Mcy | FCGR2B    |
| IRAK3. 6   | 2. 91E-48 | 0. 439492 | 0. 311 | 0. 068 | 4. 35E-44 | Mcy | IRAK3     |
| KPNA2. 3   | 5. 59E-48 | 0. 678985 | 0. 729 | 0. 346 | 8. 35E-44 | Mcy | KPNA2     |
| KIF20A     | 6. 46E-48 | 0. 374135 | 0. 168 | 0. 024 | 9. 66E-44 | Mcy | KIF20A    |
| FTH1. 5    | 8. 35E-48 | -0. 32354 | 0. 967 | 0. 932 | 1. 25E-43 | Mcy | FTH1      |
| PLAC8. 5   | 8. 73E-48 | 0. 560776 | 0. 293 | 0. 063 | 1. 30E-43 | Mcy | PLAC8     |
| VRK1. 1    | 9. 02E-48 | 0. 520264 | 0. 359 | 0. 095 | 1. 35E-43 | Mcy | VRK1      |
| STAC3. 6   | 1. 22E-47 | 0. 469138 | 0. 319 | 0. 073 | 1. 82E-43 | Mcy | STAC3     |
| RGS10. 6   | 2. 90E-47 | 0. 561772 | 0. 839 | 0. 33  | 4. 33E-43 | Mcy | RGS10     |
| CD33. 6    | 3. 02E-47 | 0. 447273 | 0. 421 | 0. 113 | 4. 52E-43 | Mcy | CD33      |
| ARHGAP11A  | 8. 42E-47 | 0. 425459 | 0. 201 | 0. 034 | 1. 26E-42 | Mcy | ARHGAP11A |
| H2AFJ. 6   | 8. 65E-47 | 0. 666196 | 0. 623 | 0. 25  | 1. 29E-42 | Mcy | H2AFJ     |
| CATSPER1.  | 9. 05E-47 | 0. 417759 | 0. 165 | 0. 023 | 1. 35E-42 | Mcy | CATSPER1  |
| TNFAIP8. 5 | 1. 81E-46 | 0. 467185 | 0. 293 | 0. 064 | 2. 70E-42 | Mcy | TNFAIP8   |
| FAM105A. 6 | 2. 65E-46 | 0. 482658 | 0. 513 | 0. 154 | 3. 96E-42 | Mcy | FAM105A   |
| PRIM1. 4   | 2. 80E-46 | 0. 505418 | 0. 311 | 0. 076 | 4. 18E-42 | Mcy | PRIM1     |
| COQ2. 5    | 3. 00E-46 | 0. 532048 | 0. 498 | 0. 172 | 4. 48E-42 | Mcy | COQ2      |
| MAPKAPK3.  | 3. 21E-46 | 0. 56004  | 0. 491 | 0. 163 | 4. 80E-42 | Mcy | MAPKAPK3  |
| BCL2L12. 2 | 3. 22E-46 | 0. 60314  | 0. 396 | 0. 121 | 4. 81E-42 | Mcy | BCL2L12   |
| PCNA. 4    | 4. 88E-46 | 0. 650916 | 0. 656 | 0. 307 | 7. 30E-42 | Mcy | PCNA      |
| LIG1. 1    | 5. 14E-46 | 0. 483514 | 0. 289 | 0. 066 | 7. 68E-42 | Mcy | LIG1      |
| BUB3. 3    | 8. 69E-46 | 0. 634545 | 0. 659 | 0. 299 | 1. 30E-41 | Mcy | BUB3      |
| PARVB. 6   | 8. 71E-46 | 0. 517097 | 0. 476 | 0. 157 | 1. 30E-41 | Mcy | PARVB     |
| APBB1IP. 6 | 8. 86E-46 | 0. 453516 | 0. 505 | 0. 148 | 1. 32E-41 | Mcy | APBB1IP   |
| CENPP. 1   | 9. 73E-46 | 0. 414786 | 0. 231 | 0. 044 | 1. 45E-41 | Mcy | CENPP     |
| SLC7A7. 6  | 1. 02E-45 | 0. 445685 | 0. 542 | 0. 165 | 1. 53E-41 | Mcy | SLC7A7    |
| DSE. 6     | 1. 34E-45 | 0. 400106 | 0. 454 | 0. 13  | 2. 00E-41 | Mcy | DSE       |
| RNASEH2A.  | 1. 47E-45 | 0. 627852 | 0. 535 | 0. 203 | 2. 20E-41 | Mcy | RNASEH2A  |
| SLC17A9. 5 | 1. 56E-45 | 0. 246416 | 0. 176 | 0. 026 | 2. 33E-41 | Mcy | SLC17A9   |
| SGOL2. 4   | 1. 64E-45 | 0. 549976 | 0. 33  | 0. 084 | 2. 45E-41 | Mcy | SGOL2     |
| FPR1. 6    | 2. 65E-45 | 0. 449047 | 0. 762 | 0. 273 | 3. 96E-41 | Mcy | FPR1      |
| RNASE3. 4  | 3. 60E-45 | 0. 374675 | 0. 187 | 0. 029 | 5. 37E-41 | Mcy | RNASE3    |
| GPSM3. 6   | 3. 87E-45 | 0. 453612 | 0. 714 | 0. 251 | 5. 78E-41 | Mcy | GPSM3     |
| NCAPD2. 3  | 4. 57E-45 | 0. 446785 | 0. 264 | 0. 058 | 6. 83E-41 | Mcy | NCAPD2    |
| LY86. 6    | 5. 06E-45 | 0. 443587 | 0. 78  | 0. 28  | 7. 56E-41 | Mcy | LY86      |
| PTN. 6     | 5. 97E-45 | -1. 29276 | 0. 249 | 0. 625 | 8. 92E-41 | Mcy | PTN       |
| THBD. 6    | 6. 99E-45 | 0. 464158 | 0. 355 | 0. 088 | 1. 04E-40 | Mcy | THBD      |
| CKS2. 6    | 8. 11E-45 | 0. 64224  | 0. 755 | 0. 357 | 1. 21E-40 | Mcy | CKS2      |
| DOCK8. 6   | 1. 10E-44 | 0. 415383 | 0. 418 | 0. 114 | 1. 64E-40 | Mcy | DOCK8     |
| E2F8       | 1. 26E-44 | 0. 255538 | 0. 103 | 0. 01  | 1. 89E-40 | Mcy | E2F8      |
| RNASE6. 6  | 1. 51E-44 | 0. 499769 | 0. 733 | 0. 264 | 2. 25E-40 | Mcy | RNASE6    |
| SPCS3. 6   | 1. 82E-44 | 0. 565617 | 0. 689 | 0. 317 | 2. 72E-40 | Mcy | SPCS3     |
| CSF1R. 6   | 2. 04E-44 | 0. 460551 | 0. 729 | 0. 257 | 3. 05E-40 | Mcy | CSF1R     |
| PLAU. 6    | 2. 43E-44 | 0. 578216 | 0. 469 | 0. 156 | 3. 64E-40 | Mcy | PLAU      |
| RECQL4     | 2. 65E-44 | 0. 386851 | 0. 176 | 0. 028 | 3. 97E-40 | Mcy | RECQL4    |
| POLD1. 1   | 2. 69E-44 | 0. 383213 | 0. 249 | 0. 052 | 4. 02E-40 | Mcy | POLD1     |
| VRK2. 6    | 3. 05E-44 | 0. 310264 | 0. 249 | 0. 05  | 4. 56E-40 | Mcy | VRK2      |
| NOVA1. 6   | 4. 84E-44 | -1. 40948 | 0. 051 | 0. 489 | 7. 23E-40 | Mcy | NOVA1     |
| CD14. 6    | 5. 75E-44 | 0. 487958 | 0. 901 | 0. 397 | 8. 60E-40 | Mcy | CD14      |
| ABI3. 6    | 6. 17E-44 | 0. 465497 | 0. 568 | 0. 181 | 9. 23E-40 | Mcy | ABI3      |
| PRR11. 2   | 6. 64E-44 | 0. 513449 | 0. 264 | 0. 059 | 9. 92E-40 | Mcy | PRR11     |

|             |           |           |        |        |           |     |           |
|-------------|-----------|-----------|--------|--------|-----------|-----|-----------|
| CLN6. 4     | 1. 26E-43 | 0. 52468  | 0. 403 | 0. 123 | 1. 89E-39 | Mcy | CLN6      |
| RNASE1. 4   | 1. 28E-43 | 0. 682305 | 0. 491 | 0. 161 | 1. 91E-39 | Mcy | RNASE1    |
| SYCE2       | 1. 66E-43 | 0. 226746 | 0. 103 | 0. 01  | 2. 48E-39 | Mcy | SYCE2     |
| CXorf21. 6  | 2. 17E-43 | 0. 42722  | 0. 304 | 0. 071 | 3. 25E-39 | Mcy | CXorf21   |
| SLC39A8. 5  | 2. 92E-43 | 0. 405266 | 0. 253 | 0. 054 | 4. 36E-39 | Mcy | SLC39A8   |
| RMI2. 1     | 3. 10E-43 | 0. 400916 | 0. 198 | 0. 035 | 4. 63E-39 | Mcy | RMI2      |
| PARPBP. 1   | 3. 66E-43 | 0. 396902 | 0. 216 | 0. 042 | 5. 47E-39 | Mcy | PARPBP    |
| HMHA1. 6    | 6. 24E-43 | 0. 390444 | 0. 385 | 0. 102 | 9. 32E-39 | Mcy | HMHA1     |
| NCAPG2. 2   | 7. 76E-43 | 0. 506755 | 0. 26  | 0. 058 | 1. 16E-38 | Mcy | NCAPG2    |
| LINC00152   | 8. 50E-43 | 0. 645169 | 0. 601 | 0. 25  | 1. 27E-38 | Mcy | LINC00152 |
| CLEC7A. 6   | 1. 01E-42 | 0. 365803 | 0. 538 | 0. 166 | 1. 51E-38 | Mcy | CLEC7A    |
| GSDMD. 5    | 1. 19E-42 | 0. 490741 | 0. 498 | 0. 177 | 1. 78E-38 | Mcy | GSDMD     |
| SLA. 6      | 1. 31E-42 | 0. 450128 | 0. 582 | 0. 193 | 1. 95E-38 | Mcy | SLA       |
| BRCA2. 1    | 1. 54E-42 | 0. 386086 | 0. 216 | 0. 042 | 2. 30E-38 | Mcy | BRCA2     |
| MASTL. 2    | 1. 55E-42 | 0. 372336 | 0. 19  | 0. 034 | 2. 31E-38 | Mcy | MASTL     |
| ITGAM. 6    | 1. 61E-42 | 0. 423127 | 0. 3   | 0. 07  | 2. 41E-38 | Mcy | ITGAM     |
| C1QC. 6     | 1. 90E-42 | 0. 514822 | 0. 967 | 0. 49  | 2. 84E-38 | Mcy | C1QC      |
| GINS2. 4    | 2. 88E-42 | 0. 571013 | 0. 337 | 0. 094 | 4. 30E-38 | Mcy | GINS2     |
| FCGR1A. 6   | 3. 70E-42 | 0. 447575 | 0. 696 | 0. 248 | 5. 53E-38 | Mcy | FCGR1A    |
| FES. 6      | 4. 26E-42 | 0. 381764 | 0. 308 | 0. 074 | 6. 36E-38 | Mcy | FES       |
| CTSH. 6     | 4. 62E-42 | 0. 464146 | 0. 744 | 0. 285 | 6. 91E-38 | Mcy | CTSH      |
| SLC43A3. 1  | 5. 54E-42 | 0. 505646 | 0. 418 | 0. 13  | 8. 28E-38 | Mcy | SLC43A3   |
| ARHGAP30. 5 | 9. 0E-42  | 0. 356162 | 0. 348 | 0. 088 | 8. 82E-38 | Mcy | ARHGAP30  |
| CD53. 6     | 5. 95E-42 | 0. 458519 | 0. 795 | 0. 304 | 8. 90E-38 | Mcy | CD53      |
| ADORA3. 6   | 8. 20E-42 | 0. 480367 | 0. 689 | 0. 251 | 1. 23E-37 | Mcy | ADORA3    |
| DUSP23. 5   | 8. 35E-42 | 0. 430008 | 0. 542 | 0. 179 | 1. 25E-37 | Mcy | DUSP23    |
| LST1. 6     | 8. 72E-42 | 0. 464722 | 0. 788 | 0. 301 | 1. 30E-37 | Mcy | LST1      |
| KIF14       | 9. 73E-42 | 0. 343491 | 0. 165 | 0. 026 | 1. 45E-37 | Mcy | KIF14     |
| DMC1        | 1. 16E-41 | 0. 160301 | 0. 062 | 0. 004 | 1. 73E-37 | Mcy | DMC1      |
| CTSC. 6     | 1. 38E-41 | 0. 462585 | 0. 842 | 0. 373 | 2. 06E-37 | Mcy | CTSC      |
| RHOH. 6     | 1. 72E-41 | 0. 324048 | 0. 304 | 0. 072 | 2. 58E-37 | Mcy | RHOH      |
| SP100. 5    | 2. 48E-41 | 0. 535245 | 0. 678 | 0. 277 | 3. 71E-37 | Mcy | SP100     |
| TMEM173. 6  | 2. 76E-41 | 0. 412499 | 0. 418 | 0. 119 | 4. 13E-37 | Mcy | TMEM173   |
| ARHGAP9. 6  | 3. 01E-41 | 0. 395841 | 0. 322 | 0. 08  | 4. 49E-37 | Mcy | ARHGAP9   |
| MAP3K8. 6   | 3. 10E-41 | 0. 4819   | 0. 531 | 0. 175 | 4. 64E-37 | Mcy | MAP3K8    |
| DHFR. 4     | 4. 40E-41 | 0. 630293 | 0. 418 | 0. 145 | 6. 57E-37 | Mcy | DHFR      |
| C1QA. 6     | 4. 40E-41 | 0. 502654 | 0. 978 | 0. 527 | 6. 58E-37 | Mcy | C1QA      |
| BATF. 3     | 4. 93E-41 | 0. 393513 | 0. 194 | 0. 035 | 7. 36E-37 | Mcy | BATF      |
| IL7R. 5     | 6. 70E-41 | 0. 399033 | 0. 238 | 0. 049 | 1. 00E-36 | Mcy | IL7R      |
| HAVCR2. 6   | 9. 72E-41 | 0. 450094 | 0. 637 | 0. 222 | 1. 45E-36 | Mcy | HAVCR2    |
| H3F3B. 6    | 1. 18E-40 | -0. 35758 | 0. 971 | 0. 971 | 1. 77E-36 | Mcy | H3F3B     |
| SNX20. 5    | 1. 57E-40 | 0. 337576 | 0. 212 | 0. 041 | 2. 34E-36 | Mcy | SNX20     |
| KIAA1524. 2 | 5. 2E-40  | 0. 43479  | 0. 22  | 0. 045 | 3. 76E-36 | Mcy | KIAA1524  |
| CKB. 6      | 3. 15E-40 | -1. 13468 | 0. 264 | 0. 59  | 4. 70E-36 | Mcy | CKB       |
| SNCA. 6     | 3. 33E-40 | 0. 411205 | 0. 447 | 0. 137 | 4. 98E-36 | Mcy | SNCA      |
| SPI1. 6     | 3. 67E-40 | 0. 530466 | 0. 648 | 0. 229 | 5. 48E-36 | Mcy | SPI1      |
| POLA2. 1    | 4. 81E-40 | 0. 360184 | 0. 227 | 0. 048 | 7. 19E-36 | Mcy | POLA2     |
| CCL20. 5    | 4. 86E-40 | 0. 391522 | 0. 256 | 0. 056 | 7. 26E-36 | Mcy | CCL20     |
| MAP1B. 5    | 6. 29E-40 | -1. 23543 | 0. 158 | 0. 543 | 9. 40E-36 | Mcy | MAP1B     |
| C1QB. 6     | 1. 01E-39 | 0. 509992 | 0. 978 | 0. 56  | 1. 51E-35 | Mcy | C1QB      |
| OSM. 6      | 1. 07E-39 | 0. 435593 | 0. 451 | 0. 138 | 1. 60E-35 | Mcy | OSM       |

|             |           |           |        |        |               |          |
|-------------|-----------|-----------|--------|--------|---------------|----------|
| CASP1. 5    | 1. 76E-39 | 0. 472759 | 0. 575 | 0. 218 | 2. 63E-35 Mcy | CASP1    |
| DDX39A. 3   | 2. 46E-39 | 0. 503448 | 0. 74  | 0. 384 | 3. 67E-35 Mcy | DDX39A   |
| NANS. 6     | 2. 69E-39 | 0. 476291 | 0. 733 | 0. 351 | 4. 02E-35 Mcy | NANS     |
| PPIF. 6     | 3. 07E-39 | 0. 581358 | 0. 538 | 0. 213 | 4. 59E-35 Mcy | PPIF     |
| CARD9. 6    | 4. 32E-39 | 0. 315365 | 0. 275 | 0. 064 | 6. 46E-35 Mcy | CARD9    |
| HCST. 6     | 6. 01E-39 | 0. 425959 | 0. 718 | 0. 274 | 8. 97E-35 Mcy | HCST     |
| PTPN7. 6    | 7. 12E-39 | 0. 368827 | 0. 297 | 0. 073 | 1. 06E-34 Mcy | PTPN7    |
| KYNU. 6     | 8. 60E-39 | 0. 414951 | 0. 311 | 0. 079 | 1. 29E-34 Mcy | KYNU     |
| E2F2        | 1. 09E-38 | 0. 230598 | 0. 092 | 0. 009 | 1. 62E-34 Mcy | E2F2     |
| MLKL. 3     | 1. 13E-38 | 0. 31549  | 0. 158 | 0. 025 | 1. 69E-34 Mcy | MLKL     |
| GLA. 6      | 1. 55E-38 | 0. 51839  | 0. 538 | 0. 208 | 2. 32E-34 Mcy | GLA      |
| FYB. 6      | 1. 76E-38 | 0. 446345 | 0. 608 | 0. 214 | 2. 63E-34 Mcy | FYB      |
| GAPDH. 6    | 2. 32E-38 | -0. 37513 | 0. 993 | 0. 985 | 3. 46E-34 Mcy | GAPDH    |
| CHCHD7. 5   | 2. 93E-38 | 0. 499071 | 0. 637 | 0. 277 | 4. 38E-34 Mcy | CHCHD7   |
| FCGR2A. 6   | 3. 04E-38 | 0. 407029 | 0. 744 | 0. 278 | 4. 54E-34 Mcy | FCGR2A   |
| PGM2. 3     | 3. 35E-38 | 0. 450511 | 0. 425 | 0. 142 | 5. 01E-34 Mcy | PGM2     |
| SRGN. 6     | 3. 42E-38 | 0. 474028 | 0. 978 | 0. 487 | 5. 11E-34 Mcy | SRGN     |
| TUBB2B. 5   | 3. 77E-38 | -1. 29455 | 0. 245 | 0. 562 | 5. 63E-34 Mcy | TUBB2B   |
| LPXN. 6     | 4. 22E-38 | 0. 413616 | 0. 366 | 0. 104 | 6. 31E-34 Mcy | LPXN     |
| PPIH. 1     | 4. 27E-38 | 0. 575316 | 0. 535 | 0. 22  | 6. 38E-34 Mcy | PPIH     |
| TUBB4B. 3   | 4. 33E-38 | 0. 53908  | 0. 828 | 0. 484 | 6. 47E-34 Mcy | TUBB4B   |
| NPM3. 3     | 6. 18E-38 | 0. 560457 | 0. 516 | 0. 21  | 9. 23E-34 Mcy | NPM3     |
| CKAP2. 6    | 8. 96E-38 | 0. 537201 | 0. 447 | 0. 162 | 1. 34E-33 Mcy | CKAP2    |
| EBP. 2      | 9. 16E-38 | 0. 608186 | 0. 557 | 0. 244 | 1. 37E-33 Mcy | EBP      |
| HPGDS. 5    | 1. 06E-37 | 0. 440407 | 0. 319 | 0. 084 | 1. 58E-33 Mcy | HPGDS    |
| ALDH16A1. 2 | 8. 4E-37  | 0. 4761   | 0. 363 | 0. 114 | 4. 24E-33 Mcy | ALDH16A1 |
| GPR84. 6    | 2. 90E-37 | 0. 346732 | 0. 282 | 0. 069 | 4. 33E-33 Mcy | GPR84    |
| F13A1. 3    | 4. 83E-37 | 0. 268179 | 0. 473 | 0. 151 | 7. 22E-33 Mcy | F13A1    |
| PAK1. 6     | 5. 68E-37 | 0. 480134 | 0. 462 | 0. 163 | 8. 48E-33 Mcy | PAK1     |
| IFI30. 6    | 5. 75E-37 | 0. 502977 | 0. 575 | 0. 211 | 8. 59E-33 Mcy | IFI30    |
| SAMHD1. 6   | 7. 46E-37 | 0. 499649 | 0. 538 | 0. 207 | 1. 12E-32 Mcy | SAMHD1   |
| MCM3. 4     | 7. 76E-37 | 0. 561139 | 0. 396 | 0. 136 | 1. 16E-32 Mcy | MCM3     |
| FCGR3A. 6   | 1. 29E-36 | 0. 392575 | 0. 832 | 0. 33  | 1. 93E-32 Mcy | FCGR3A   |
| MDK. 5      | 1. 35E-36 | -1. 24247 | 0. 136 | 0. 499 | 2. 02E-32 Mcy | MDK      |
| ITGA4. 5    | 1. 41E-36 | 0. 302229 | 0. 198 | 0. 039 | 2. 11E-32 Mcy | ITGA4    |
| MFNG. 6     | 1. 43E-36 | 0. 437107 | 0. 396 | 0. 12  | 2. 14E-32 Mcy | MFNG     |
| CNN3. 6     | 1. 56E-36 | -1. 11308 | 0. 099 | 0. 477 | 2. 33E-32 Mcy | CNN3     |
| SLC39A4. 4  | 1. 89E-36 | 0. 458867 | 0. 311 | 0. 085 | 2. 82E-32 Mcy | SLC39A4  |
| IDH2. 5     | 1. 89E-36 | 0. 525864 | 0. 729 | 0. 419 | 2. 83E-32 Mcy | IDH2     |
| RCC1. 1     | 2. 05E-36 | 0. 469748 | 0. 319 | 0. 095 | 3. 06E-32 Mcy | RCC1     |
| CALD1. 5    | 2. 13E-36 | -1. 13292 | 0. 037 | 0. 429 | 3. 19E-32 Mcy | CALD1    |
| PLAUR. 6    | 2. 28E-36 | 0. 428142 | 0. 806 | 0. 356 | 3. 41E-32 Mcy | PLAUR    |
| GPR65. 6    | 2. 47E-36 | 0. 383217 | 0. 414 | 0. 127 | 3. 70E-32 Mcy | GPR65    |
| REEP4. 6    | 2. 99E-36 | 0. 485999 | 0. 454 | 0. 16  | 4. 46E-32 Mcy | REEP4    |
| ORC6. 5     | 3. 09E-36 | 0. 466638 | 0. 308 | 0. 086 | 4. 62E-32 Mcy | ORC6     |
| TUBB6. 4    | 3. 20E-36 | 0. 522941 | 0. 458 | 0. 177 | 4. 79E-32 Mcy | TUBB6    |
| NUDT1. 2    | 5. 06E-36 | 0. 516849 | 0. 7   | 0. 342 | 7. 56E-32 Mcy | NUDT1    |
| TSC22D1. 5  | 5. 55E-36 | -1. 08445 | 0. 154 | 0. 52  | 8. 29E-32 Mcy | TSC22D1  |
| ANP32E. 4   | 5. 61E-36 | 0. 612922 | 0. 564 | 0. 26  | 8. 39E-32 Mcy | ANP32E   |
| RGS1. 6     | 5. 88E-36 | 0. 433976 | 0. 923 | 0. 435 | 8. 78E-32 Mcy | RGS1     |
| PLBD1. 6    | 8. 71E-36 | 0. 382639 | 0. 322 | 0. 089 | 1. 30E-31 Mcy | PLBD1    |

|             |           |           |        |        |           |     |               |
|-------------|-----------|-----------|--------|--------|-----------|-----|---------------|
| CHEK1. 2    | 9. 64E-36 | 0. 470872 | 0. 278 | 0. 075 | 1. 44E-31 | Mcy | CHEK1         |
| SMC1A. 2    | 1. 05E-35 | 0. 554262 | 0. 502 | 0. 21  | 1. 57E-31 | Mcy | SMC1A         |
| SHMT1. 4    | 1. 28E-35 | 0. 490693 | 0. 359 | 0. 112 | 1. 91E-31 | Mcy | SHMT1         |
| RP11-160C   | 1. 41E-35 | 0. 357988 | 0. 154 | 0. 026 | 2. 11E-31 | Mcy | RP11-16005. 1 |
| IFITM2. 6   | 1. 73E-35 | 0. 476127 | 0. 667 | 0. 274 | 2. 59E-31 | Mcy | IFITM2        |
| PRPS2. 2    | 1. 90E-35 | 0. 458649 | 0. 363 | 0. 119 | 2. 84E-31 | Mcy | PRPS2         |
| OSTF1. 6    | 1. 96E-35 | 0. 487497 | 0. 656 | 0. 283 | 2. 93E-31 | Mcy | OSTF1         |
| SLC29A1. 5  | 2. 18E-35 | 0. 464487 | 0. 403 | 0. 131 | 3. 26E-31 | Mcy | SLC29A1       |
| MCM6. 1     | 2. 30E-35 | 0. 542398 | 0. 3   | 0. 087 | 3. 43E-31 | Mcy | MCM6          |
| MARCKSL1. 2 | 5. 4E-35  | -1. 1982  | 0. 242 | 0. 552 | 3. 80E-31 | Mcy | MARCKSL1      |
| MGST2. 6    | 2. 67E-35 | 0. 453948 | 0. 604 | 0. 245 | 3. 99E-31 | Mcy | MGST2         |
| LYN. 6      | 3. 19E-35 | 0. 477362 | 0. 48  | 0. 167 | 4. 76E-31 | Mcy | LYN           |
| CLECL1. 5   | 3. 61E-35 | 0. 325985 | 0. 209 | 0. 044 | 5. 40E-31 | Mcy | CLECL1        |
| NGK7. 4     | 4. 02E-35 | 0. 241516 | 0. 216 | 0. 046 | 6. 01E-31 | Mcy | NGK7          |
| HMGB3. 5    | 4. 04E-35 | 0. 595932 | 0. 597 | 0. 271 | 6. 03E-31 | Mcy | HMGB3         |
| C14orf80. 4 | 4. 14E-35 | 0. 38603  | 0. 245 | 0. 061 | 6. 19E-31 | Mcy | C14orf80      |
| CPNE8. 1    | 4. 91E-35 | 0. 193198 | 0. 128 | 0. 018 | 7. 34E-31 | Mcy | CPNE8         |
| Clorf61. 6  | 5. 21E-35 | -1. 17239 | 0. 205 | 0. 543 | 7. 79E-31 | Mcy | Clorf61       |
| AP1B1. 6    | 5. 71E-35 | 0. 523278 | 0. 586 | 0. 251 | 8. 53E-31 | Mcy | AP1B1         |
| ARPC1B. 6   | 8. 78E-35 | 0. 472396 | 0. 905 | 0. 522 | 1. 31E-30 | Mcy | ARPC1B        |
| GCA. 6      | 9. 61E-35 | 0. 458153 | 0. 656 | 0. 29  | 1. 44E-30 | Mcy | GCA           |
| RIN3. 6     | 1. 03E-34 | 0. 369862 | 0. 366 | 0. 109 | 1. 53E-30 | Mcy | RIN3          |
| LINC01094   | 1. 11E-34 | 0. 394771 | 0. 443 | 0. 147 | 1. 65E-30 | Mcy | LINC01094     |
| HMOX1. 6    | 1. 11E-34 | 0. 430278 | 0. 678 | 0. 285 | 1. 66E-30 | Mcy | HMOX1         |
| H2AFX. 5    | 1. 57E-34 | 0. 543049 | 0. 509 | 0. 212 | 2. 34E-30 | Mcy | H2AFX         |
| SOX2. 6     | 1. 62E-34 | -1. 16467 | 0. 073 | 0. 438 | 2. 42E-30 | Mcy | SOX2          |
| CDC6. 1     | 2. 11E-34 | 0. 360288 | 0. 165 | 0. 031 | 3. 15E-30 | Mcy | CDC6          |
| GPR183. 6   | 2. 20E-34 | 0. 412284 | 0. 707 | 0. 28  | 3. 29E-30 | Mcy | GPR183        |
| MPP1. 6     | 2. 93E-34 | 0. 466243 | 0. 509 | 0. 193 | 4. 38E-30 | Mcy | MPP1          |
| RBP4. 1     | 3. 08E-34 | 0. 228486 | 0. 103 | 0. 013 | 4. 60E-30 | Mcy | RBP4          |
| CCNF. 1     | 3. 37E-34 | 0. 458207 | 0. 172 | 0. 033 | 5. 04E-30 | Mcy | CCNF          |
| SAE1. 3     | 4. 03E-34 | 0. 598096 | 0. 568 | 0. 266 | 6. 02E-30 | Mcy | SAE1          |
| NUP37. 2    | 4. 56E-34 | 0. 490652 | 0. 366 | 0. 125 | 6. 82E-30 | Mcy | NUP37         |
| MYCBP. 3    | 4. 85E-34 | 0. 507114 | 0. 3   | 0. 088 | 7. 24E-30 | Mcy | MYCBP         |
| GAL3ST4. 5  | 5. 29E-34 | 0. 432231 | 0. 462 | 0. 164 | 7. 91E-30 | Mcy | GAL3ST4       |
| CYTIP. 6    | 5. 50E-34 | 0. 35796  | 0. 341 | 0. 098 | 8. 22E-30 | Mcy | CYTIP         |
| HAAO. 5     | 5. 93E-34 | 0. 2986   | 0. 132 | 0. 02  | 8. 86E-30 | Mcy | HAAO          |
| FCGR1B. 5   | 6. 68E-34 | 0. 363229 | 0. 465 | 0. 156 | 9. 99E-30 | Mcy | FCGR1B        |
| ANP32B. 6   | 7. 51E-34 | 0. 504697 | 0. 747 | 0. 442 | 1. 12E-29 | Mcy | ANP32B        |
| FXYD6. 6    | 8. 95E-34 | -1. 1049  | 0. 106 | 0. 469 | 1. 34E-29 | Mcy | FXYD6         |
| TPK1. 5     | 9. 24E-34 | 0. 305937 | 0. 198 | 0. 042 | 1. 38E-29 | Mcy | TPK1          |
| SLC11A1. 6  | 9. 97E-34 | 0. 379081 | 0. 722 | 0. 295 | 1. 49E-29 | Mcy | SLC11A1       |
| EMB. 6      | 1. 62E-33 | 0. 325238 | 0. 275 | 0. 07  | 2. 42E-29 | Mcy | EMB           |
| CASP4. 6    | 1. 95E-33 | 0. 459276 | 0. 546 | 0. 22  | 2. 91E-29 | Mcy | CASP4         |
| EIF1. 6     | 2. 55E-33 | -0. 31798 | 0. 978 | 0. 974 | 3. 82E-29 | Mcy | EIF1          |
| CCR2. 1     | 2. 74E-33 | 0. 130942 | 0. 055 | 0. 004 | 4. 09E-29 | Mcy | CCR2          |
| AP2S1. 5    | 2. 90E-33 | 0. 44418  | 0. 927 | 0. 654 | 4. 34E-29 | Mcy | AP2S1         |
| ARHGAP11E   | 3. 29E-33 | 0. 349139 | 0. 176 | 0. 035 | 4. 91E-29 | Mcy | ARHGAP11B     |
| TREM1. 5    | 3. 71E-33 | 0. 283706 | 0. 465 | 0. 157 | 5. 54E-29 | Mcy | TREM1         |
| SP140. 5    | 4. 42E-33 | 0. 200865 | 0. 158 | 0. 028 | 6. 60E-29 | Mcy | SP140         |
| BCL2A1. 6   | 4. 71E-33 | 0. 357252 | 0. 451 | 0. 15  | 7. 04E-29 | Mcy | BCL2A1        |

|            |           |           |        |        |           |     |         |
|------------|-----------|-----------|--------|--------|-----------|-----|---------|
| PSME2. 4   | 4. 72E-33 | 0. 432857 | 0. 879 | 0. 55  | 7. 05E-29 | Mcy | PSME2   |
| VPS29. 4   | 5. 04E-33 | 0. 464085 | 0. 842 | 0. 547 | 7. 53E-29 | Mcy | VPS29   |
| PEBP1. 6   | 5. 07E-33 | -0. 53959 | 0. 714 | 0. 806 | 7. 57E-29 | Mcy | PEBP1   |
| SASH3. 6   | 5. 86E-33 | 0. 378979 | 0. 278 | 0. 073 | 8. 75E-29 | Mcy | SASH3   |
| GMNN. 5    | 7. 75E-33 | 0. 453942 | 0. 44  | 0. 17  | 1. 16E-28 | Mcy | GMNN    |
| TPM3. 6    | 8. 83E-33 | 0. 432284 | 0. 857 | 0. 551 | 1. 32E-28 | Mcy | TPM3    |
| PMAIP1. 6  | 8. 98E-33 | 0. 325159 | 0. 293 | 0. 078 | 1. 34E-28 | Mcy | PMAIP1  |
| RAB27A. 4  | 9. 06E-33 | 0. 369688 | 0. 271 | 0. 073 | 1. 35E-28 | Mcy | RAB27A  |
| CCR1. 5    | 1. 04E-32 | 0. 383018 | 0. 286 | 0. 077 | 1. 56E-28 | Mcy | CCR1    |
| NUDT5. 3   | 1. 05E-32 | 0. 502901 | 0. 604 | 0. 299 | 1. 57E-28 | Mcy | NUDT5   |
| THBS1. 5   | 1. 20E-32 | 0. 437659 | 0. 282 | 0. 076 | 1. 79E-28 | Mcy | THBS1   |
| H2AFZ. 2   | 1. 24E-32 | 0. 420939 | 0. 985 | 0. 733 | 1. 85E-28 | Mcy | H2AFZ   |
| ACAA2. 4   | 1. 39E-32 | 0. 446155 | 0. 505 | 0. 203 | 2. 08E-28 | Mcy | ACAA2   |
| SCIN. 6    | 1. 56E-32 | 0. 435388 | 0. 429 | 0. 144 | 2. 33E-28 | Mcy | SCIN    |
| FGL2. 6    | 1. 58E-32 | 0. 34013  | 0. 487 | 0. 169 | 2. 36E-28 | Mcy | FGL2    |
| RBP1. 4    | 1. 69E-32 | -1. 11329 | 0. 114 | 0. 468 | 2. 53E-28 | Mcy | RBP1    |
| NMI. 5     | 1. 93E-32 | 0. 460605 | 0. 454 | 0. 176 | 2. 88E-28 | Mcy | NMI     |
| SPTLC2. 6  | 1. 96E-32 | 0. 433573 | 0. 52  | 0. 203 | 2. 92E-28 | Mcy | SPTLC2  |
| CPE. 5     | 2. 29E-32 | -1. 09715 | 0. 044 | 0. 398 | 3. 43E-28 | Mcy | CPE     |
| PRKCD. 5   | 2. 35E-32 | 0. 440889 | 0. 278 | 0. 076 | 3. 51E-28 | Mcy | PRKCD   |
| RRP7A. 5   | 2. 35E-32 | 0. 525091 | 0. 575 | 0. 28  | 3. 52E-28 | Mcy | RRP7A   |
| RFC5. 2    | 2. 46E-32 | 0. 440417 | 0. 289 | 0. 085 | 3. 68E-28 | Mcy | RFC5    |
| CLEC2B. 6  | 2. 64E-32 | 0. 431642 | 0. 531 | 0. 197 | 3. 95E-28 | Mcy | CLEC2B  |
| SDF2L1. 3  | 2. 79E-32 | 0. 491483 | 0. 663 | 0. 353 | 4. 17E-28 | Mcy | SDF2L1  |
| CD48. 6    | 2. 92E-32 | 0. 375041 | 0. 278 | 0. 073 | 4. 36E-28 | Mcy | CD48    |
| TSPAN15. 5 | 2. 93E-32 | 0. 314412 | 0. 275 | 0. 073 | 4. 37E-28 | Mcy | TSPAN15 |
| ACSL5. 5   | 3. 60E-32 | 0. 229458 | 0. 165 | 0. 031 | 5. 38E-28 | Mcy | ACSL5   |
| CARD16. 4  | 4. 10E-32 | 0. 391779 | 0. 564 | 0. 221 | 6. 13E-28 | Mcy | CARD16  |
| ITGB3BP. 4 | 4. 87E-32 | 0. 457169 | 0. 377 | 0. 137 | 7. 27E-28 | Mcy | ITGB3BP |
| DEF6. 6    | 5. 05E-32 | 0. 304018 | 0. 308 | 0. 086 | 7. 55E-28 | Mcy | DEF6    |
| FEZ1. 5    | 7. 62E-32 | -1. 0118  | 0. 084 | 0. 438 | 1. 14E-27 | Mcy | FEZ1    |
| TFDP1. 3   | 9. 29E-32 | 0. 468443 | 0. 447 | 0. 185 | 1. 39E-27 | Mcy | TFDP1   |
| FMNL1. 6   | 1. 04E-31 | 0. 338036 | 0. 374 | 0. 118 | 1. 55E-27 | Mcy | FMNL1   |
| NCAPD3     | 1. 22E-31 | 0. 443347 | 0. 271 | 0. 078 | 1. 82E-27 | Mcy | NCAPD3  |
| CKLF. 6    | 1. 51E-31 | 0. 437522 | 0. 835 | 0. 512 | 2. 25E-27 | Mcy | CKLF    |
| SLC2A5. 6  | 1. 79E-31 | 0. 408809 | 0. 462 | 0. 164 | 2. 67E-27 | Mcy | SLC2A5  |
| TBXAS1. 6  | 1. 89E-31 | 0. 338373 | 0. 612 | 0. 232 | 2. 83E-27 | Mcy | TBXAS1  |
| UCHL1. 4   | 2. 01E-31 | -1. 14198 | 0. 099 | 0. 444 | 3. 00E-27 | Mcy | UCHL1   |
| GIMAP7. 3  | 2. 10E-31 | 0. 375126 | 0. 216 | 0. 05  | 3. 14E-27 | Mcy | GIMAP7  |
| PTPRC. 6   | 2. 12E-31 | 0. 330355 | 0. 546 | 0. 195 | 3. 17E-27 | Mcy | PTPRC   |
| MXD3. 5    | 2. 47E-31 | 0. 424156 | 0. 231 | 0. 059 | 3. 70E-27 | Mcy | MXD3    |
| NDC1       | 2. 63E-31 | 0. 474195 | 0. 223 | 0. 056 | 3. 92E-27 | Mcy | NDC1    |
| PSMB10. 6  | 2. 95E-31 | 0. 421357 | 0. 579 | 0. 247 | 4. 41E-27 | Mcy | PSMB10  |
| BTK. 6     | 3. 06E-31 | 0. 297648 | 0. 293 | 0. 081 | 4. 58E-27 | Mcy | BTK     |
| PTGS1. 6   | 3. 55E-31 | 0. 369865 | 0. 425 | 0. 15  | 5. 31E-27 | Mcy | PTGS1   |
| SIVA1. 3   | 3. 80E-31 | 0. 426914 | 0. 784 | 0. 478 | 5. 68E-27 | Mcy | SIVA1   |
| ETS2. 6    | 4. 09E-31 | 0. 391598 | 0. 527 | 0. 199 | 6. 11E-27 | Mcy | ETS2    |
| DOK2. 5    | 4. 18E-31 | 0. 27126  | 0. 22  | 0. 051 | 6. 25E-27 | Mcy | DOK2    |
| LSP1. 6    | 5. 66E-31 | 0. 364204 | 0. 454 | 0. 159 | 8. 46E-27 | Mcy | LSP1    |
| TIMM10. 3  | 5. 72E-31 | 0. 483345 | 0. 648 | 0. 347 | 8. 55E-27 | Mcy | TIMM10  |
| IL18. 6    | 6. 41E-31 | 0. 30857  | 0. 516 | 0. 185 | 9. 58E-27 | Mcy | IL18    |



|            |           |           |        |        |           |     |                |
|------------|-----------|-----------|--------|--------|-----------|-----|----------------|
| NCF2. 6    | 7. 16E-31 | 0. 290215 | 0. 33  | 0. 096 | 1. 07E-26 | Mcy | NCF2           |
| CYBA. 6    | 8. 39E-31 | 0. 483933 | 0. 832 | 0. 395 | 1. 25E-26 | Mcy | CYBA           |
| GGA2. 6    | 1. 01E-30 | 0. 444344 | 0. 385 | 0. 133 | 1. 51E-26 | Mcy | GGA2           |
| CEP152     | 1. 05E-30 | 0. 252877 | 0. 154 | 0. 029 | 1. 57E-26 | Mcy | CEP152         |
| DEK. 4     | 1. 27E-30 | 0. 491834 | 0. 744 | 0. 457 | 1. 90E-26 | Mcy | DEK            |
| HAUS1      | 1. 31E-30 | 0. 513468 | 0. 502 | 0. 224 | 1. 96E-26 | Mcy | HAUS1          |
| RB1. 6     | 1. 39E-30 | 0. 487296 | 0. 619 | 0. 298 | 2. 08E-26 | Mcy | RB1            |
| GPM6A. 5   | 1. 56E-30 | -0. 9803  | 0. 172 | 0. 512 | 2. 34E-26 | Mcy | GPM6A          |
| CTSS. 6    | 1. 63E-30 | 0. 359146 | 0. 806 | 0. 343 | 2. 43E-26 | Mcy | CTSS           |
| RP11-552E  | 1. 69E-30 | 0. 472504 | 0. 359 | 0. 114 | 2. 52E-26 | Mcy | RP11-552D4. 1  |
| TMSB10. 6  | 1. 88E-30 | -0. 31472 | 1      | 0. 964 | 2. 81E-26 | Mcy | TMSB10         |
| FUCA2. 6   | 1. 89E-30 | 0. 432167 | 0. 531 | 0. 236 | 2. 82E-26 | Mcy | FUCA2          |
| SH3KBP1. 6 | 1. 90E-30 | 0. 458413 | 0. 538 | 0. 234 | 2. 84E-26 | Mcy | SH3KBP1        |
| CD84. 6    | 1. 98E-30 | 0. 354979 | 0. 385 | 0. 123 | 2. 95E-26 | Mcy | CD84           |
| FHOD1. 6   | 2. 51E-30 | 0. 337491 | 0. 216 | 0. 052 | 3. 75E-26 | Mcy | FHOD1          |
| CIB1. 5    | 2. 91E-30 | 0. 405379 | 0. 821 | 0. 484 | 4. 34E-26 | Mcy | CIB1           |
| TYMP. 6    | 4. 47E-30 | 0. 510386 | 0. 681 | 0. 298 | 6. 68E-26 | Mcy | TYMP           |
| RNPEP. 6   | 4. 60E-30 | 0. 492964 | 0. 495 | 0. 217 | 6. 88E-26 | Mcy | RNPEP          |
| GAP43. 6   | 6. 04E-30 | -1. 237   | 0. 15  | 0. 474 | 9. 03E-26 | Mcy | GAP43          |
| ARRB2. 6   | 7. 22E-30 | 0. 410455 | 0. 758 | 0. 392 | 1. 08E-25 | Mcy | ARRB2          |
| PCK2. 4    | 7. 77E-30 | 0. 449232 | 0. 242 | 0. 065 | 1. 16E-25 | Mcy | PCK2           |
| PCSK1N. 5  | 8. 09E-30 | -1. 08509 | 0. 103 | 0. 428 | 1. 21E-25 | Mcy | PCSK1N         |
| ZNF667-AS  | 8. 29E-30 | -0. 82884 | 0. 051 | 0. 396 | 1. 24E-25 | Mcy | ZNF667-AS1     |
| CRYBB1. 4  | 8. 37E-30 | 0. 273142 | 0. 179 | 0. 038 | 1. 25E-25 | Mcy | CRYBB1         |
| MCM4. 5    | 9. 55E-30 | 0. 455583 | 0. 289 | 0. 091 | 1. 43E-25 | Mcy | MCM4           |
| FAH. 5     | 1. 03E-29 | 0. 407917 | 0. 407 | 0. 152 | 1. 54E-25 | Mcy | FAH            |
| RHOG. 6    | 1. 04E-29 | 0. 414413 | 0. 762 | 0. 401 | 1. 55E-25 | Mcy | RHOG           |
| SH2B3. 6   | 1. 29E-29 | 0. 34578  | 0. 326 | 0. 103 | 1. 93E-25 | Mcy | SH2B3          |
| H2AFV. 4   | 1. 82E-29 | 0. 45807  | 0. 791 | 0. 516 | 2. 72E-25 | Mcy | H2AFV          |
| CXCL3. 3   | 2. 29E-29 | 0. 34009  | 0. 253 | 0. 068 | 3. 42E-25 | Mcy | CXCL3          |
| COMMD4     | 2. 35E-29 | 0. 48978  | 0. 59  | 0. 298 | 3. 51E-25 | Mcy | COMMD4         |
| CNPY3. 6   | 2. 83E-29 | 0. 403388 | 0. 758 | 0. 404 | 4. 23E-25 | Mcy | CNPY3          |
| IKBKE. 5   | 3. 06E-29 | 0. 370523 | 0. 212 | 0. 053 | 4. 57E-25 | Mcy | IKBKE          |
| HPSE. 5    | 3. 21E-29 | 0. 332423 | 0. 22  | 0. 054 | 4. 79E-25 | Mcy | HPSE           |
| LCP2. 6    | 3. 34E-29 | 0. 336643 | 0. 344 | 0. 109 | 4. 99E-25 | Mcy | LCP2           |
| RASGEF1B.  | 3. 41E-29 | 0. 35977  | 0. 359 | 0. 115 | 5. 09E-25 | Mcy | RASGEF1B       |
| RGS19. 6   | 3. 57E-29 | 0. 430579 | 0. 586 | 0. 268 | 5. 34E-25 | Mcy | RGS19          |
| SNRNP25. 2 | 3. 58E-29 | 0. 512869 | 0. 63  | 0. 343 | 5. 36E-25 | Mcy | SNRNP25        |
| HLA-DRB5.  | 3. 63E-29 | 0. 35603  | 0. 842 | 0. 389 | 5. 43E-25 | Mcy | HLA-DRB5       |
| RP11-556E  | 3. 91E-29 | 0. 284554 | 0. 212 | 0. 051 | 5. 84E-25 | Mcy | RP11-556E13. 1 |
| PLB1. 5    | 4. 82E-29 | 0. 225952 | 0. 179 | 0. 039 | 7. 20E-25 | Mcy | PLB1           |
| DAB2. 5    | 5. 15E-29 | 0. 378069 | 0. 41  | 0. 144 | 7. 69E-25 | Mcy | DAB2           |
| DCK. 5     | 5. 81E-29 | 0. 456537 | 0. 549 | 0. 259 | 8. 68E-25 | Mcy | DCK            |
| BRCA1. 1   | 5. 87E-29 | 0. 35299  | 0. 209 | 0. 053 | 8. 78E-25 | Mcy | BRCA1          |
| POLE4. 4   | 6. 58E-29 | 0. 421741 | 0. 575 | 0. 278 | 9. 83E-25 | Mcy | POLE4          |
| SNAI1. 5   | 7. 63E-29 | 0. 263363 | 0. 187 | 0. 041 | 1. 14E-24 | Mcy | SNAI1          |
| HRH2. 4    | 7. 84E-29 | 0. 2635   | 0. 172 | 0. 036 | 1. 17E-24 | Mcy | HRH2           |
| ORMDL2. 4  | 8. 45E-29 | 0. 481647 | 0. 568 | 0. 265 | 1. 26E-24 | Mcy | ORMDL2         |
| C1orf228.  | 8. 86E-29 | 0. 253348 | 0. 15  | 0. 029 | 1. 32E-24 | Mcy | C1orf228       |
| FTL. 6     | 9. 70E-29 | -0. 30454 | 1      | 0. 994 | 1. 45E-24 | Mcy | FTL            |
| ANXA11. 6  | 1. 04E-28 | 0. 417202 | 0. 513 | 0. 209 | 1. 55E-24 | Mcy | ANXA11         |

|             |           |           |        |        |           |     |               |
|-------------|-----------|-----------|--------|--------|-----------|-----|---------------|
| MS4A7. 6    | 1. 19E-28 | 0. 330144 | 0. 762 | 0. 322 | 1. 78E-24 | Mcy | MS4A7         |
| PSTPIP1. 5  | 1. 28E-28 | 0. 243767 | 0. 176 | 0. 038 | 1. 91E-24 | Mcy | PSTPIP1       |
| PFN2. 5     | 1. 41E-28 | -0. 95339 | 0. 106 | 0. 442 | 2. 10E-24 | Mcy | PFN2          |
| LMF2. 3     | 1. 45E-28 | 0. 485716 | 0. 454 | 0. 195 | 2. 17E-24 | Mcy | LMF2          |
| CIRBP. 5    | 1. 70E-28 | -0. 35563 | 0. 839 | 0. 866 | 2. 55E-24 | Mcy | CIRBP         |
| MAP4K1. 4   | 1. 74E-28 | 0. 233821 | 0. 143 | 0. 027 | 2. 60E-24 | Mcy | MAP4K1        |
| PLXDC2. 6   | 1. 78E-28 | 0. 321593 | 0. 538 | 0. 201 | 2. 66E-24 | Mcy | PLXDC2        |
| HAMP. 6     | 1. 86E-28 | 0. 458357 | 0. 418 | 0. 155 | 2. 78E-24 | Mcy | HAMP          |
| UPP1. 5     | 2. 18E-28 | 0. 396728 | 0. 538 | 0. 248 | 3. 26E-24 | Mcy | UPP1          |
| NFIB. 6     | 2. 60E-28 | -1. 03796 | 0. 059 | 0. 386 | 3. 88E-24 | Mcy | NFIB          |
| STOM. 5     | 3. 28E-28 | 0. 358794 | 0. 564 | 0. 244 | 4. 90E-24 | Mcy | STOM          |
| SKP1. 5     | 3. 47E-28 | -0. 42631 | 0. 832 | 0. 865 | 5. 18E-24 | Mcy | SKP1          |
| BUB1B       | 3. 59E-28 | 0. 222257 | 0. 128 | 0. 023 | 5. 37E-24 | Mcy | BUB1B         |
| GOS2. 5     | 4. 73E-28 | 0. 400238 | 0. 451 | 0. 178 | 7. 07E-24 | Mcy | GOS2          |
| HERC5. 1    | 4. 75E-28 | 0. 351969 | 0. 242 | 0. 069 | 7. 10E-24 | Mcy | HERC5         |
| HIRIP3. 4   | 5. 94E-28 | 0. 480278 | 0. 403 | 0. 159 | 8. 87E-24 | Mcy | HIRIP3        |
| WDR76. 1    | 6. 07E-28 | 0. 376152 | 0. 201 | 0. 051 | 9. 07E-24 | Mcy | WDR76         |
| TMEM52B. 6  | 6. 37E-28 | 0. 267522 | 0. 19  | 0. 044 | 9. 53E-24 | Mcy | TMEM52B       |
| RAB8A. 3    | 7. 74E-28 | 0. 425843 | 0. 637 | 0. 349 | 1. 16E-23 | Mcy | RAB8A         |
| MYO1F. 6    | 7. 78E-28 | 0. 304171 | 0. 476 | 0. 177 | 1. 16E-23 | Mcy | MYO1F         |
| LILRB4. 6   | 8. 90E-28 | 0. 30866  | 0. 623 | 0. 246 | 1. 33E-23 | Mcy | LILRB4        |
| STRA13. 1   | 1. 00E-27 | 0. 46513  | 0. 733 | 0. 444 | 1. 50E-23 | Mcy | STRA13        |
| RP3-369A1   | 1. 18E-27 | 0. 197808 | 0. 081 | 0. 01  | 1. 76E-23 | Mcy | RP3-369A17. 4 |
| EEF2. 1     | 1. 42E-27 | -0. 34118 | 0. 832 | 0. 829 | 2. 12E-23 | Mcy | EEF2          |
| PIK3AP1. 6  | 1. 59E-27 | 0. 272042 | 0. 231 | 0. 061 | 2. 37E-23 | Mcy | PIK3AP1       |
| RNASEH2C. 1 | 1. 69E-27 | 0. 460795 | 0. 67  | 0. 366 | 2. 53E-23 | Mcy | RNASEH2C      |
| NGFRAP1. 5  | 1. 70E-27 | -0. 74443 | 0. 407 | 0. 65  | 2. 54E-23 | Mcy | NGFRAP1       |
| MCM2. 2     | 1. 88E-27 | 0. 39469  | 0. 223 | 0. 061 | 2. 81E-23 | Mcy | MCM2          |
| CRYAB. 6    | 2. 04E-27 | -1. 30651 | 0. 187 | 0. 507 | 3. 05E-23 | Mcy | CRYAB         |
| PSMB9. 4    | 2. 05E-27 | 0. 401637 | 0. 725 | 0. 397 | 3. 06E-23 | Mcy | PSMB9         |
| IL10RA. 6   | 2. 10E-27 | 0. 317215 | 0. 392 | 0. 132 | 3. 13E-23 | Mcy | IL10RA        |
| RILPL2. 6   | 2. 10E-27 | 0. 35323  | 0. 568 | 0. 251 | 3. 14E-23 | Mcy | RILPL2        |
| ZBTB20. 5   | 2. 40E-27 | -0. 86154 | 0. 073 | 0. 393 | 3. 59E-23 | Mcy | ZBTB20        |
| CAMK2N1. 6  | 2. 54E-27 | -0. 90563 | 0. 011 | 0. 324 | 3. 80E-23 | Mcy | CAMK2N1       |
| OLFML3. 5   | 2. 61E-27 | 0. 40366  | 0. 527 | 0. 219 | 3. 90E-23 | Mcy | OLFML3        |
| HPS1. 5     | 3. 31E-27 | 0. 324656 | 0. 326 | 0. 106 | 4. 95E-23 | Mcy | HPS1          |
| ANKH. 5     | 3. 41E-27 | 0. 356685 | 0. 392 | 0. 143 | 5. 09E-23 | Mcy | ANKH          |
| DOCK2. 6    | 3. 62E-27 | 0. 329885 | 0. 256 | 0. 073 | 5. 41E-23 | Mcy | DOCK2         |
| DTL         | 4. 78E-27 | 0. 264    | 0. 125 | 0. 022 | 7. 14E-23 | Mcy | DTL           |
| FANCG. 1    | 4. 88E-27 | 0. 416058 | 0. 22  | 0. 06  | 7. 29E-23 | Mcy | FANCG         |
| SUMO3. 6    | 5. 44E-27 | 0. 422353 | 0. 729 | 0. 432 | 8. 13E-23 | Mcy | SUMO3         |
| NPL. 5      | 5. 75E-27 | 0. 362046 | 0. 484 | 0. 194 | 8. 60E-23 | Mcy | NPL           |
| CYP19A1. 1  | 5. 80E-27 | 0. 337268 | 0. 125 | 0. 022 | 8. 67E-23 | Mcy | CYP19A1       |
| CD68. 6     | 6. 15E-27 | 0. 348905 | 0. 872 | 0. 431 | 9. 19E-23 | Mcy | CD68          |
| SLC1A5. 5   | 6. 19E-27 | 0. 389803 | 0. 366 | 0. 132 | 9. 25E-23 | Mcy | SLC1A5        |
| VAMP2. 5    | 6. 49E-27 | -0. 71188 | 0. 41  | 0. 628 | 9. 71E-23 | Mcy | VAMP2         |
| CMTM7. 6    | 6. 61E-27 | 0. 398268 | 0. 421 | 0. 158 | 9. 87E-23 | Mcy | CMTM7         |
| TOMM5. 5    | 7. 38E-27 | 0. 499819 | 0. 454 | 0. 203 | 1. 10E-22 | Mcy | TOMM5         |
| FGR. 6      | 7. 97E-27 | 0. 305077 | 0. 271 | 0. 079 | 1. 19E-22 | Mcy | FGR           |
| MGAT4A. 6   | 9. 31E-27 | 0. 304704 | 0. 52  | 0. 213 | 1. 39E-22 | Mcy | MGAT4A        |
| RNF149. 6   | 9. 49E-27 | 0. 381739 | 0. 59  | 0. 263 | 1. 42E-22 | Mcy | RNF149        |

|            |           |           |        |        |           |     |            |
|------------|-----------|-----------|--------|--------|-----------|-----|------------|
| CLU. 6     | 9. 86E-27 | -0. 74764 | 0. 74  | 0. 783 | 1. 47E-22 | Mcy | CLU        |
| CHTF18     | 1. 00E-26 | 0. 292174 | 0. 183 | 0. 045 | 1. 50E-22 | Mcy | CHTF18     |
| RRM1. 4    | 1. 10E-26 | 0. 467036 | 0. 421 | 0. 179 | 1. 65E-22 | Mcy | RRM1       |
| BRI3BP. 3  | 1. 13E-26 | 0. 413109 | 0. 308 | 0. 108 | 1. 68E-22 | Mcy | BRI3BP     |
| FPR2. 4    | 1. 33E-26 | 0. 20909  | 0. 106 | 0. 017 | 1. 99E-22 | Mcy | FPR2       |
| HAUS4. 6   | 1. 35E-26 | 0. 495643 | 0. 216 | 0. 058 | 2. 02E-22 | Mcy | HAUS4      |
| PLSCR1. 6  | 1. 43E-26 | 0. 394618 | 0. 692 | 0. 351 | 2. 13E-22 | Mcy | PLSCR1     |
| GDI2. 6    | 1. 52E-26 | 0. 394337 | 0. 777 | 0. 482 | 2. 27E-22 | Mcy | GDI2       |
| SLC1A4. 5  | 1. 84E-26 | 0. 397766 | 0. 238 | 0. 069 | 2. 75E-22 | Mcy | SLC1A4     |
| PSMB8. 4   | 2. 12E-26 | 0. 411388 | 0. 707 | 0. 408 | 3. 17E-22 | Mcy | PSMB8      |
| FABP7. 5   | 2. 53E-26 | -1. 22017 | 0. 088 | 0. 39  | 3. 78E-22 | Mcy | FABP7      |
| RDM1       | 2. 69E-26 | 0. 147595 | 0. 07  | 0. 008 | 4. 02E-22 | Mcy | RDM1       |
| ATF7IP2. 5 | 2. 76E-26 | 0. 218291 | 0. 172 | 0. 039 | 4. 13E-22 | Mcy | ATF7IP2    |
| IL1ORB. 6  | 3. 29E-26 | 0. 402918 | 0. 516 | 0. 237 | 4. 92E-22 | Mcy | IL1ORB     |
| SAR1A. 5   | 3. 48E-26 | 0. 442209 | 0. 579 | 0. 291 | 5. 20E-22 | Mcy | SAR1A      |
| SLCO2B1. 5 | 3. 68E-26 | 0. 356407 | 0. 535 | 0. 213 | 5. 49E-22 | Mcy | SLCO2B1    |
| KCNMB1. 5  | 3. 95E-26 | 0. 297395 | 0. 308 | 0. 098 | 5. 90E-22 | Mcy | KCNMB1     |
| RAMP1. 5   | 4. 65E-26 | -1. 14945 | 0. 103 | 0. 419 | 6. 95E-22 | Mcy | RAMP1      |
| CYTH4. 6   | 5. 77E-26 | 0. 263271 | 0. 33  | 0. 107 | 8. 62E-22 | Mcy | CYTH4      |
| LXN. 2     | 5. 87E-26 | 0. 245717 | 0. 125 | 0. 023 | 8. 77E-22 | Mcy | LXN        |
| TMPO. 5    | 6. 19E-26 | 0. 460321 | 0. 44  | 0. 188 | 9. 25E-22 | Mcy | TMPO       |
| COMMD8. 6  | 6. 63E-26 | 0. 453822 | 0. 476 | 0. 218 | 9. 90E-22 | Mcy | COMMD8     |
| EFHD2. 6   | 6. 66E-26 | 0. 390415 | 0. 473 | 0. 204 | 9. 95E-22 | Mcy | EFHD2      |
| DENND3. 6  | 7. 99E-26 | 0. 334901 | 0. 3   | 0. 096 | 1. 19E-21 | Mcy | DENND3     |
| CCNE2. 3   | 8. 02E-26 | 0. 32277  | 0. 209 | 0. 055 | 1. 20E-21 | Mcy | CCNE2      |
| PDXK. 6    | 8. 69E-26 | 0. 392557 | 0. 564 | 0. 278 | 1. 30E-21 | Mcy | PDXK       |
| AREG. 6    | 9. 27E-26 | 0. 327722 | 0. 227 | 0. 061 | 1. 39E-21 | Mcy | AREG       |
| CLIC1. 4   | 1. 14E-25 | 0. 373181 | 0. 963 | 0. 615 | 1. 70E-21 | Mcy | CLIC1      |
| ABRACL. 5  | 1. 24E-25 | 0. 483752 | 0. 575 | 0. 298 | 1. 86E-21 | Mcy | ABRACL     |
| ARHGGEF39  | 1. 39E-25 | 0. 189216 | 0. 106 | 0. 018 | 2. 08E-21 | Mcy | ARHGGEF39  |
| IL1ORB-AS  | 1. 49E-25 | 0. 2999   | 0. 176 | 0. 042 | 2. 22E-21 | Mcy | IL1ORB-AS1 |
| MTFP1. 2   | 1. 56E-25 | 0. 43873  | 0. 22  | 0. 063 | 2. 34E-21 | Mcy | MTFP1      |
| HHEX. 6    | 1. 65E-25 | 0. 258047 | 0. 209 | 0. 054 | 2. 47E-21 | Mcy | HHEX       |
| LPCAT2. 6  | 1. 72E-25 | 0. 303578 | 0. 399 | 0. 141 | 2. 56E-21 | Mcy | LPCAT2     |
| MCM7. 5    | 1. 75E-25 | 0. 482188 | 0. 524 | 0. 248 | 2. 62E-21 | Mcy | MCM7       |
| APLP1. 6   | 1. 82E-25 | -0. 94954 | 0. 055 | 0. 359 | 2. 72E-21 | Mcy | APLP1      |
| ELAVL3. 6  | 1. 88E-25 | -0. 83299 | 0. 018 | 0. 318 | 2. 81E-21 | Mcy | ELAVL3     |
| PRDM1. 6   | 1. 90E-25 | 0. 350238 | 0. 297 | 0. 095 | 2. 84E-21 | Mcy | PRDM1      |
| CDC25C     | 1. 91E-25 | 0. 222637 | 0. 114 | 0. 02  | 2. 85E-21 | Mcy | CDC25C     |
| EPB41L3. 6 | 2. 06E-25 | 0. 314788 | 0. 311 | 0. 1   | 3. 08E-21 | Mcy | EPB41L3    |
| LINC00461  | 2. 21E-25 | -0. 8472  | 0. 026 | 0. 327 | 3. 31E-21 | Mcy | LINC00461  |
| VMA21. 5   | 2. 27E-25 | 0. 485068 | 0. 608 | 0. 334 | 3. 39E-21 | Mcy | VMA21      |
| HAUS2. 2   | 2. 32E-25 | 0. 376411 | 0. 282 | 0. 096 | 3. 46E-21 | Mcy | HAUS2      |
| FYN. 5     | 2. 33E-25 | -0. 79435 | 0. 029 | 0. 333 | 3. 48E-21 | Mcy | FYN        |
| WNT5A. 6   | 2. 49E-25 | 0. 256837 | 0. 209 | 0. 055 | 3. 72E-21 | Mcy | WNT5A      |
| ACSL1. 6   | 2. 61E-25 | 0. 40327  | 0. 516 | 0. 22  | 3. 90E-21 | Mcy | ACSL1      |
| NLRP1. 5   | 3. 13E-25 | -0. 78205 | 0. 04  | 0. 346 | 4. 67E-21 | Mcy | NLRP1      |
| ITGA5. 3   | 3. 31E-25 | 0. 359487 | 0. 256 | 0. 08  | 4. 95E-21 | Mcy | ITGA5      |
| IL13RA1. 6 | 3. 80E-25 | 0. 391907 | 0. 542 | 0. 242 | 5. 68E-21 | Mcy | IL13RA1    |
| BEX1. 5    | 4. 03E-25 | -1. 02088 | 0. 059 | 0. 358 | 6. 03E-21 | Mcy | BEX1       |
| FHL1. 6    | 4. 17E-25 | -0. 81742 | 0. 062 | 0. 364 | 6. 23E-21 | Mcy | FHL1       |

|             |           |           |        |        |               |                |
|-------------|-----------|-----------|--------|--------|---------------|----------------|
| BAALC. 5    | 4. 35E-25 | -0. 87175 | 0. 051 | 0. 352 | 6. 50E-21 Mcy | BAALC          |
| PCED1B. 4   | 4. 41E-25 | 0. 16919  | 0. 154 | 0. 033 | 6. 59E-21 Mcy | PCED1B         |
| C16orf45. 4 | 4. 89E-25 | -0. 80469 | 0. 026 | 0. 325 | 7. 31E-21 Mcy | C16orf45       |
| KIF21A. 6   | 5. 11E-25 | -0. 77948 | 0. 015 | 0. 309 | 7. 64E-21 Mcy | KIF21A         |
| EIF4A2. 3   | 5. 27E-25 | -0. 58764 | 0. 538 | 0. 724 | 7. 87E-21 Mcy | EIF4A2         |
| CCDC34. 4   | 5. 78E-25 | 0. 517518 | 0. 385 | 0. 162 | 8. 64E-21 Mcy | CCDC34         |
| PROCR. 5    | 5. 95E-25 | 0. 203524 | 0. 231 | 0. 065 | 8. 89E-21 Mcy | PROCR          |
| CDCP1. 4    | 6. 11E-25 | 0. 243815 | 0. 147 | 0. 031 | 9. 13E-21 Mcy | CDCP1          |
| PTPRZ1. 6   | 6. 23E-25 | -0. 94938 | 0. 092 | 0. 391 | 9. 31E-21 Mcy | PTPRZ1         |
| TPMT. 4     | 6. 31E-25 | 0. 394615 | 0. 432 | 0. 186 | 9. 43E-21 Mcy | TPMT           |
| MIS18BP1. 6 | 6. 52E-25 | 0. 359747 | 0. 374 | 0. 141 | 9. 74E-21 Mcy | MIS18BP1       |
| C10orf11. 7 | 7. 05E-25 | 0. 309952 | 0. 297 | 0. 096 | 1. 05E-20 Mcy | C10orf11       |
| TRPV2. 6    | 7. 05E-25 | 0. 253299 | 0. 209 | 0. 055 | 1. 05E-20 Mcy | TRPV2          |
| DNMT1. 5    | 8. 53E-25 | 0. 487108 | 0. 531 | 0. 28  | 1. 27E-20 Mcy | DNMT1          |
| CD86. 6     | 8. 67E-25 | 0. 300817 | 0. 52  | 0. 206 | 1. 30E-20 Mcy | CD86           |
| PLCG2. 3    | 8. 73E-25 | 0. 224564 | 0. 183 | 0. 044 | 1. 30E-20 Mcy | PLCG2          |
| SHMT2. 3    | 9. 21E-25 | 0. 374234 | 0. 484 | 0. 225 | 1. 38E-20 Mcy | SHMT2          |
| THEMIS2. 6  | 9. 37E-25 | 0. 29436  | 0. 553 | 0. 234 | 1. 40E-20 Mcy | THEMIS2        |
| DOK3. 6     | 9. 59E-25 | 0. 258511 | 0. 223 | 0. 062 | 1. 43E-20 Mcy | DOK3           |
| MYH9. 6     | 1. 08E-24 | 0. 378432 | 0. 432 | 0. 182 | 1. 61E-20 Mcy | MYH9           |
| PGAM1. 4    | 1. 30E-24 | 0. 356508 | 0. 769 | 0. 495 | 1. 94E-20 Mcy | PGAM1          |
| MAP1LC3A. 1 | 5. 3E-24  | -0. 81075 | 0. 084 | 0. 372 | 2. 28E-20 Mcy | MAP1LC3A       |
| NCAM1. 6    | 1. 54E-24 | -0. 80937 | 0. 044 | 0. 342 | 2. 30E-20 Mcy | NCAM1          |
| RGS18. 6    | 1. 71E-24 | 0. 216793 | 0. 194 | 0. 049 | 2. 56E-20 Mcy | RGS18          |
| STMN1. 5    | 1. 72E-24 | 0. 371692 | 0. 978 | 0. 622 | 2. 57E-20 Mcy | STMN1          |
| EXO1        | 1. 83E-24 | 0. 304268 | 0. 095 | 0. 015 | 2. 73E-20 Mcy | EXO1           |
| PMP2. 6     | 1. 93E-24 | -1. 04684 | 0. 059 | 0. 357 | 2. 89E-20 Mcy | PMP2           |
| TWF2. 6     | 2. 05E-24 | 0. 389475 | 0. 623 | 0. 334 | 3. 06E-20 Mcy | TWF2           |
| APITD1. 2   | 2. 16E-24 | 0. 55586  | 0. 242 | 0. 078 | 3. 22E-20 Mcy | APITD1         |
| ECM1. 2     | 2. 16E-24 | 0. 331132 | 0. 161 | 0. 039 | 3. 22E-20 Mcy | ECM1           |
| CEACAM21. 2 | 2. 27E-24 | 0. 244439 | 0. 106 | 0. 018 | 3. 39E-20 Mcy | CEACAM21       |
| RP11-362F   | 2. 38E-24 | 0. 12975  | 0. 092 | 0. 014 | 3. 56E-20 Mcy | RP11-362F19. 1 |
| TLR2. 6     | 2. 69E-24 | 0. 29615  | 0. 319 | 0. 106 | 4. 01E-20 Mcy | TLR2           |
| ANKRD22. 5  | 3. 33E-24 | 0. 207878 | 0. 223 | 0. 061 | 4. 98E-20 Mcy | ANKRD22        |
| LRRC25. 6   | 3. 39E-24 | 0. 245534 | 0. 282 | 0. 088 | 5. 06E-20 Mcy | LRRC25         |
| MTAP. 3     | 3. 39E-24 | 0. 365253 | 0. 227 | 0. 067 | 5. 07E-20 Mcy | MTAP           |
| NUDT21. 1   | 3. 70E-24 | 0. 444754 | 0. 513 | 0. 254 | 5. 54E-20 Mcy | NUDT21         |
| E2F1. 3     | 3. 92E-24 | 0. 3318   | 0. 19  | 0. 051 | 5. 86E-20 Mcy | E2F1           |
| C1orf54. 6  | 3. 93E-24 | 0. 363435 | 0. 498 | 0. 219 | 5. 88E-20 Mcy | C1orf54        |
| PLP2. 5     | 4. 01E-24 | 0. 449377 | 0. 615 | 0. 337 | 6. 00E-20 Mcy | PLP2           |
| CPVL. 6     | 4. 48E-24 | 0. 252426 | 0. 703 | 0. 34  | 6. 69E-20 Mcy | CPVL           |
| RAD54L      | 4. 53E-24 | 0. 198467 | 0. 099 | 0. 016 | 6. 78E-20 Mcy | RAD54L         |
| GK. 6       | 4. 74E-24 | 0. 327182 | 0. 359 | 0. 133 | 7. 08E-20 Mcy | GK             |
| IGFBP2. 5   | 4. 95E-24 | -1        | 0. 092 | 0. 381 | 7. 39E-20 Mcy | IGFBP2         |
| RPP30. 2    | 5. 07E-24 | 0. 383764 | 0. 392 | 0. 163 | 7. 57E-20 Mcy | RPP30          |
| RNASET2. 6  | 5. 08E-24 | 0. 389046 | 0. 835 | 0. 474 | 7. 59E-20 Mcy | RNASET2        |
| MMP14. 4    | 5. 58E-24 | 0. 425965 | 0. 473 | 0. 216 | 8. 33E-20 Mcy | MMP14          |
| RANGAP1. 3  | 5. 90E-24 | 0. 398509 | 0. 282 | 0. 098 | 8. 82E-20 Mcy | RANGAP1        |
| CTSL. 6     | 6. 02E-24 | 0. 404798 | 0. 824 | 0. 517 | 9. 00E-20 Mcy | CTSL           |
| TNS3. 5     | 8. 19E-24 | 0. 293446 | 0. 234 | 0. 07  | 1. 22E-19 Mcy | TNS3           |
| COLGALT1. 8 | 4. 5E-24  | 0. 388697 | 0. 425 | 0. 186 | 1. 26E-19 Mcy | COLGALT1       |

|             |           |           |        |        |               |           |
|-------------|-----------|-----------|--------|--------|---------------|-----------|
| NPC2. 5     | 9. 70E-24 | 0. 326723 | 0. 989 | 0. 684 | 1. 45E-19 Mcy | NPC2      |
| NCF1. 6     | 1. 11E-23 | 0. 299376 | 0. 341 | 0. 118 | 1. 66E-19 Mcy | NCF1      |
| UQCC2. 2    | 1. 11E-23 | 0. 411292 | 0. 7   | 0. 42  | 1. 66E-19 Mcy | UQCC2     |
| NFIX. 5     | 1. 21E-23 | -0. 74923 | 0. 048 | 0. 339 | 1. 80E-19 Mcy | NFIX      |
| CNDP2. 6    | 1. 22E-23 | 0. 357301 | 0. 696 | 0. 425 | 1. 82E-19 Mcy | CNDP2     |
| FRMD4B. 6   | 1. 51E-23 | 0. 333936 | 0. 396 | 0. 154 | 2. 25E-19 Mcy | FRMD4B    |
| ENTPD1. 6   | 1. 57E-23 | 0. 356255 | 0. 407 | 0. 156 | 2. 35E-19 Mcy | ENTPD1    |
| ANXA1. 4    | 1. 81E-23 | 0. 298463 | 0. 806 | 0. 4   | 2. 71E-19 Mcy | ANXA1     |
| CDH2. 5     | 1. 88E-23 | -0. 71748 | 0. 011 | 0. 291 | 2. 80E-19 Mcy | CDH2      |
| GCNT1. 1    | 1. 93E-23 | 0. 19704  | 0. 117 | 0. 022 | 2. 88E-19 Mcy | GCNT1     |
| TRPM2. 6    | 1. 95E-23 | 0. 269633 | 0. 187 | 0. 048 | 2. 91E-19 Mcy | TRPM2     |
| C3AR1. 6    | 2. 08E-23 | 0. 247408 | 0. 56  | 0. 23  | 3. 11E-19 Mcy | C3AR1     |
| PRKCB. 5    | 2. 27E-23 | 0. 211536 | 0. 165 | 0. 039 | 3. 39E-19 Mcy | PRKCB     |
| PTER. 2     | 2. 33E-23 | 0. 232554 | 0. 106 | 0. 019 | 3. 48E-19 Mcy | PTER      |
| EVI2B. 6    | 2. 53E-23 | 0. 28651  | 0. 491 | 0. 196 | 3. 77E-19 Mcy | EVI2B     |
| COTL1. 6    | 3. 25E-23 | 0. 430141 | 0. 777 | 0. 503 | 4. 85E-19 Mcy | COTL1     |
| SKAP2. 5    | 3. 26E-23 | 0. 316009 | 0. 586 | 0. 262 | 4. 88E-19 Mcy | SKAP2     |
| SPHK1. 5    | 3. 87E-23 | 0. 371894 | 0. 286 | 0. 102 | 5. 79E-19 Mcy | SPHK1     |
| JUN. 3      | 4. 07E-23 | -0. 6067  | 0. 535 | 0. 676 | 6. 07E-19 Mcy | JUN       |
| RTN4. 6     | 4. 36E-23 | -0. 42193 | 0. 608 | 0. 702 | 6. 51E-19 Mcy | RTN4      |
| SZRD1. 2    | 4. 39E-23 | 0. 444435 | 0. 509 | 0. 259 | 6. 56E-19 Mcy | SZRD1     |
| HLA-DQB1. 4 | 4. 90E-23 | 0. 305158 | 0. 703 | 0. 316 | 7. 32E-19 Mcy | HLA-DQB1  |
| DDB2. 1     | 4. 91E-23 | 0. 317588 | 0. 267 | 0. 09  | 7. 33E-19 Mcy | DDB2      |
| FANCB       | 4. 91E-23 | 0. 226501 | 0. 11  | 0. 02  | 7. 34E-19 Mcy | FANCB     |
| UCHL3. 3    | 5. 62E-23 | 0. 431239 | 0. 491 | 0. 242 | 8. 40E-19 Mcy | UCHL3     |
| MAP2. 6     | 5. 63E-23 | -0. 77159 | 0. 059 | 0. 344 | 8. 41E-19 Mcy | MAP2      |
| TCEAL7. 4   | 5. 71E-23 | -0. 82947 | 0. 026 | 0. 309 | 8. 54E-19 Mcy | TCEAL7    |
| HAUS8. 1    | 5. 93E-23 | 0. 323021 | 0. 245 | 0. 079 | 8. 86E-19 Mcy | HAUS8     |
| FAM96A. 4   | 6. 10E-23 | 0. 355226 | 0. 63  | 0. 35  | 9. 11E-19 Mcy | FAM96A    |
| SOX4. 5     | 6. 42E-23 | -1. 03675 | 0. 183 | 0. 451 | 9. 60E-19 Mcy | SOX4      |
| METRNL. 6   | 6. 70E-23 | 0. 310493 | 0. 249 | 0. 079 | 1. 00E-18 Mcy | METRNL    |
| MSR1. 6     | 7. 17E-23 | 0. 304197 | 0. 443 | 0. 174 | 1. 07E-18 Mcy | MSR1      |
| WDR34. 4    | 7. 19E-23 | 0. 487226 | 0. 429 | 0. 202 | 1. 07E-18 Mcy | WDR34     |
| GOLM1. 5    | 7. 91E-23 | -0. 72444 | 0. 04  | 0. 322 | 1. 18E-18 Mcy | GOLM1     |
| GAPT. 6     | 8. 42E-23 | 0. 265904 | 0. 205 | 0. 057 | 1. 26E-18 Mcy | GAPT      |
| FOLR2. 6    | 8. 45E-23 | 0. 256845 | 0. 432 | 0. 172 | 1. 26E-18 Mcy | FOLR2     |
| TNFRSF1B. 8 | 6. 69E-23 | 0. 270998 | 0. 462 | 0. 182 | 1. 30E-18 Mcy | TNFRSF1B  |
| MT3. 6      | 8. 98E-23 | -1. 16476 | 0. 249 | 0. 496 | 1. 34E-18 Mcy | MT3       |
| CENPH. 4    | 9. 15E-23 | 0. 381762 | 0. 319 | 0. 122 | 1. 37E-18 Mcy | CENPH     |
| RFC4. 4     | 9. 87E-23 | 0. 513105 | 0. 359 | 0. 152 | 1. 48E-18 Mcy | RFC4      |
| GABARAPL2   | 1. 11E-22 | -0. 4782  | 0. 637 | 0. 745 | 1. 66E-18 Mcy | GABARAPL2 |
| IL6R. 6     | 1. 14E-22 | 0. 334081 | 0. 256 | 0. 082 | 1. 70E-18 Mcy | IL6R      |
| HS3ST3B1. 1 | 1. 14E-22 | 0. 178058 | 0. 161 | 0. 039 | 1. 70E-18 Mcy | HS3ST3B1  |
| HK1. 5      | 1. 16E-22 | 0. 408927 | 0. 421 | 0. 19  | 1. 73E-18 Mcy | HK1       |
| IRF8. 6     | 1. 20E-22 | 0. 295847 | 0. 407 | 0. 152 | 1. 80E-18 Mcy | IRF8      |
| MEG3. 5     | 1. 23E-22 | -1. 02729 | 0. 033 | 0. 311 | 1. 83E-18 Mcy | MEG3      |
| RCCD1. 2    | 1. 24E-22 | 0. 301508 | 0. 19  | 0. 053 | 1. 85E-18 Mcy | RCCD1     |
| NUDT15      | 1. 27E-22 | 0. 34324  | 0. 286 | 0. 103 | 1. 89E-18 Mcy | NUDT15    |
| C10orf54. 1 | 1. 46E-22 | 0. 298829 | 0. 648 | 0. 279 | 2. 18E-18 Mcy | C10orf54  |
| TRAF3IP3. 1 | 1. 57E-22 | 0. 233204 | 0. 187 | 0. 049 | 2. 35E-18 Mcy | TRAF3IP3  |
| SEZ6L2. 5   | 1. 68E-22 | -0. 7054  | 0. 007 | 0. 28  | 2. 52E-18 Mcy | SEZ6L2    |

|             |           |           |        |        |               |                |
|-------------|-----------|-----------|--------|--------|---------------|----------------|
| MTHFD2. 5   | 1. 72E-22 | 0. 351428 | 0. 571 | 0. 282 | 2. 57E-18 Mcy | MTHFD2         |
| TXNDC12. 3  | 1. 85E-22 | 0. 333025 | 0. 703 | 0. 426 | 2. 77E-18 Mcy | TXNDC12        |
| THOC6. 4    | 1. 98E-22 | 0. 339355 | 0. 388 | 0. 164 | 2. 96E-18 Mcy | THOC6          |
| GPR34. 6    | 2. 00E-22 | 0. 256135 | 0. 612 | 0. 259 | 3. 00E-18 Mcy | GPR34          |
| TFEC. 6     | 2. 30E-22 | 0. 259773 | 0. 194 | 0. 053 | 3. 44E-18 Mcy | TFEC           |
| TAGLN2. 6   | 2. 30E-22 | 0. 330031 | 0. 85  | 0. 506 | 3. 44E-18 Mcy | TAGLN2         |
| DSN1. 2     | 2. 31E-22 | 0. 359254 | 0. 271 | 0. 096 | 3. 46E-18 Mcy | DSN1           |
| SIGLEC5. 2  | 2. 50E-22 | 0. 233679 | 0. 084 | 0. 013 | 3. 74E-18 Mcy | SIGLEC5        |
| KCNQ1. 5    | 2. 52E-22 | 0. 185566 | 0. 154 | 0. 036 | 3. 76E-18 Mcy | KCNQ1          |
| PODXL2. 6   | 3. 02E-22 | -0. 74276 | 0. 04  | 0. 314 | 4. 51E-18 Mcy | PODXL2         |
| CDK2. 3     | 3. 11E-22 | 0. 359329 | 0. 242 | 0. 08  | 4. 65E-18 Mcy | CDK2           |
| PTPN22. 4   | 3. 19E-22 | 0. 202371 | 0. 121 | 0. 024 | 4. 77E-18 Mcy | PTPN22         |
| TPT1. 4     | 3. 40E-22 | -0. 28741 | 0. 967 | 0. 953 | 5. 08E-18 Mcy | TPT1           |
| HLA-F. 6    | 3. 43E-22 | 0. 241237 | 0. 374 | 0. 141 | 5. 12E-18 Mcy | HLA-F          |
| HLA-DRB1. 3 | 3. 63E-22 | 0. 328896 | 0. 967 | 0. 522 | 5. 42E-18 Mcy | HLA-DRB1       |
| MAFB. 5     | 3. 81E-22 | 0. 366845 | 0. 641 | 0. 307 | 5. 69E-18 Mcy | MAFB           |
| FAU. 4      | 3. 85E-22 | -0. 2487  | 0. 978 | 0. 957 | 5. 75E-18 Mcy | FAU            |
| MAPT. 6     | 3. 93E-22 | -0. 74609 | 0. 018 | 0. 291 | 5. 88E-18 Mcy | MAPT           |
| FPR3. 6     | 4. 06E-22 | 0. 283385 | 0. 194 | 0. 053 | 6. 07E-18 Mcy | FPR3           |
| APOC1. 5    | 4. 52E-22 | 0. 307696 | 0. 872 | 0. 507 | 6. 76E-18 Mcy | APOC1          |
| TTC3. 5     | 4. 76E-22 | -0. 69781 | 0. 3   | 0. 521 | 7. 12E-18 Mcy | TTC3           |
| SPINT2. 6   | 5. 12E-22 | 0. 324064 | 0. 498 | 0. 21  | 7. 66E-18 Mcy | SPINT2         |
| PPP1CA. 5   | 5. 14E-22 | 0. 381843 | 0. 832 | 0. 565 | 7. 68E-18 Mcy | PPP1CA         |
| TCF4. 6     | 5. 33E-22 | -0. 74664 | 0. 304 | 0. 528 | 7. 96E-18 Mcy | TCF4           |
| IFI35. 4    | 5. 48E-22 | 0. 38696  | 0. 473 | 0. 225 | 8. 19E-18 Mcy | IFI35          |
| B4GALT1. 6  | 5. 61E-22 | 0. 295055 | 0. 319 | 0. 116 | 8. 39E-18 Mcy | B4GALT1        |
| SLC25A24. 5 | 5. 94E-22 | 0. 286346 | 0. 271 | 0. 095 | 8. 88E-18 Mcy | SLC25A24       |
| CD109. 2    | 6. 32E-22 | 0. 216282 | 0. 114 | 0. 022 | 9. 45E-18 Mcy | CD109          |
| TDP1. 1     | 7. 22E-22 | 0. 335798 | 0. 194 | 0. 056 | 1. 08E-17 Mcy | TDP1           |
| LAP3. 4     | 7. 47E-22 | 0. 331392 | 0. 777 | 0. 485 | 1. 12E-17 Mcy | LAP3           |
| DPYSL3. 5   | 7. 51E-22 | -0. 72932 | 0. 051 | 0. 328 | 1. 12E-17 Mcy | DPYSL3         |
| UBC. 4      | 7. 90E-22 | -0. 272   | 0. 967 | 0. 95  | 1. 18E-17 Mcy | UBC            |
| IGSF6. 6    | 8. 17E-22 | 0. 269528 | 0. 396 | 0. 148 | 1. 22E-17 Mcy | IGSF6          |
| SLFN11. 3   | 8. 18E-22 | 0. 223062 | 0. 161 | 0. 04  | 1. 22E-17 Mcy | SLFN11         |
| M6PR. 6     | 8. 75E-22 | 0. 352716 | 0. 652 | 0. 376 | 1. 31E-17 Mcy | M6PR           |
| NDUFA4. 5   | 8. 91E-22 | -0. 27035 | 0. 927 | 0. 894 | 1. 33E-17 Mcy | NDUFA4         |
| HLA-DMA. 6  | 8. 95E-22 | 0. 285919 | 0. 821 | 0. 398 | 1. 34E-17 Mcy | HLA-DMA        |
| ANP32A. 6   | 9. 12E-22 | 0. 333809 | 0. 696 | 0. 422 | 1. 36E-17 Mcy | ANP32A         |
| MOB1A. 6    | 9. 26E-22 | 0. 322076 | 0. 615 | 0. 333 | 1. 38E-17 Mcy | MOB1A          |
| SNX10. 4    | 9. 42E-22 | 0. 370282 | 0. 476 | 0. 223 | 1. 41E-17 Mcy | SNX10          |
| LY96. 6     | 9. 68E-22 | 0. 424693 | 0. 473 | 0. 217 | 1. 45E-17 Mcy | LY96           |
| EHD4. 6     | 9. 68E-22 | 0. 290949 | 0. 26  | 0. 087 | 1. 45E-17 Mcy | EHD4           |
| UFD1L. 4    | 9. 92E-22 | 0. 394806 | 0. 579 | 0. 324 | 1. 48E-17 Mcy | UFD1L          |
| ARHGAP15. 1 | 1. 07E-21 | 0. 26504  | 0. 278 | 0. 093 | 1. 60E-17 Mcy | ARHGAP15       |
| TOPBP1. 4   | 1. 12E-21 | 0. 314856 | 0. 256 | 0. 089 | 1. 68E-17 Mcy | TOPBP1         |
| ANXA2. 5    | 1. 15E-21 | 0. 375605 | 0. 89  | 0. 504 | 1. 72E-17 Mcy | ANXA2          |
| DDR1. 5     | 1. 15E-21 | -0. 72133 | 0. 059 | 0. 338 | 1. 72E-17 Mcy | DDR1           |
| DDX5. 4     | 1. 21E-21 | -0. 27353 | 0. 824 | 0. 817 | 1. 82E-17 Mcy | DDX5           |
| IL12RB1. 5  | 1. 25E-21 | 0. 25709  | 0. 132 | 0. 029 | 1. 87E-17 Mcy | IL12RB1        |
| RP11-545E   | 1. 28E-21 | 0. 347177 | 0. 172 | 0. 047 | 1. 92E-17 Mcy | RP11-545E17. 3 |
| PER1. 5     | 1. 33E-21 | 0. 439408 | 0. 418 | 0. 179 | 1. 99E-17 Mcy | PER1           |

|            |           |           |        |        |               |           |
|------------|-----------|-----------|--------|--------|---------------|-----------|
| IQGAP3     | 1. 50E-21 | 0. 224297 | 0. 081 | 0. 012 | 2. 24E-17 Mcy | IQGAP3    |
| ODF3B. 6   | 1. 57E-21 | 0. 260385 | 0. 267 | 0. 09  | 2. 34E-17 Mcy | ODF3B     |
| ASGR1. 5   | 1. 75E-21 | 0. 405773 | 0. 22  | 0. 069 | 2. 62E-17 Mcy | ASGR1     |
| LTBR. 6    | 1. 82E-21 | 0. 253443 | 0. 271 | 0. 091 | 2. 73E-17 Mcy | LTBR      |
| PRDX3. 4   | 1. 91E-21 | 0. 328852 | 0. 733 | 0. 46  | 2. 85E-17 Mcy | PRDX3     |
| GUSB. 5    | 1. 96E-21 | 0. 342203 | 0. 535 | 0. 266 | 2. 93E-17 Mcy | GUSB      |
| TNFAIP8L2  | 1. 99E-21 | 0. 225704 | 0. 275 | 0. 09  | 2. 98E-17 Mcy | TNFAIP8L2 |
| PA2G4. 1   | 2. 10E-21 | 0. 393204 | 0. 788 | 0. 533 | 3. 14E-17 Mcy | PA2G4     |
| PIK3CG. 3  | 2. 20E-21 | 0. 173992 | 0. 106 | 0. 02  | 3. 29E-17 Mcy | PIK3CG    |
| SEC61G. 6  | 2. 23E-21 | -0. 6071  | 0. 832 | 0. 798 | 3. 34E-17 Mcy | SEC61G    |
| VPS26A. 5  | 2. 43E-21 | 0. 402455 | 0. 484 | 0. 237 | 3. 63E-17 Mcy | VPS26A    |
| BST2. 5    | 2. 63E-21 | 0. 314643 | 0. 872 | 0. 477 | 3. 92E-17 Mcy | BST2      |
| BST1. 2    | 2. 76E-21 | 0. 240435 | 0. 147 | 0. 035 | 4. 13E-17 Mcy | BST1      |
| CHAF1B     | 2. 78E-21 | 0. 266199 | 0. 147 | 0. 036 | 4. 15E-17 Mcy | CHAF1B    |
| STMN3. 4   | 2. 91E-21 | -0. 64774 | 0. 044 | 0. 313 | 4. 35E-17 Mcy | STMN3     |
| INCENP     | 2. 92E-21 | 0. 208797 | 0. 114 | 0. 023 | 4. 37E-17 Mcy | INCENP    |
| MEST. 5    | 2. 93E-21 | -0. 78752 | 0. 121 | 0. 393 | 4. 38E-17 Mcy | MEST      |
| NAIP. 6    | 3. 02E-21 | 0. 39254  | 0. 289 | 0. 104 | 4. 51E-17 Mcy | NAIP      |
| GNB2L1. 4  | 3. 18E-21 | -0. 23739 | 0. 971 | 0. 941 | 4. 76E-17 Mcy | GNB2L1    |
| SERPINE2.  | 3. 95E-21 | -0. 72855 | 0. 029 | 0. 299 | 5. 90E-17 Mcy | SERPINE2  |
| CXCL2. 3   | 4. 07E-21 | 0. 312612 | 0. 253 | 0. 082 | 6. 09E-17 Mcy | CXCL2     |
| SCD5. 5    | 4. 26E-21 | -0. 76154 | 0. 132 | 0. 4   | 6. 37E-17 Mcy | SCD5      |
| SNRPD3. 5  | 4. 37E-21 | 0. 394414 | 0. 667 | 0. 408 | 6. 54E-17 Mcy | SNRPD3    |
| PHACTR1. 6 | 4. 40E-21 | 0. 240092 | 0. 315 | 0. 113 | 6. 58E-17 Mcy | PHACTR1   |
| IER3. 6    | 5. 15E-21 | 0. 359963 | 0. 527 | 0. 235 | 7. 69E-17 Mcy | IER3      |
| EMP3. 5    | 5. 31E-21 | 0. 355037 | 0. 744 | 0. 442 | 7. 93E-17 Mcy | EMP3      |
| EPSTI1. 6  | 5. 45E-21 | 0. 315841 | 0. 319 | 0. 12  | 8. 15E-17 Mcy | EPSTI1    |
| TUBG1. 4   | 5. 47E-21 | 0. 482521 | 0. 447 | 0. 228 | 8. 17E-17 Mcy | TUBG1     |
| HS3ST1. 5  | 5. 58E-21 | 0. 311898 | 0. 253 | 0. 084 | 8. 33E-17 Mcy | HS3ST1    |
| TSPAN7. 4  | 6. 12E-21 | -0. 78705 | 0. 048 | 0. 316 | 9. 15E-17 Mcy | TSPAN7    |
| GIMAP4. 6  | 6. 16E-21 | 0. 224397 | 0. 377 | 0. 144 | 9. 20E-17 Mcy | GIMAP4    |
| APOC2. 5   | 6. 58E-21 | 0. 30255  | 0. 443 | 0. 183 | 9. 83E-17 Mcy | APOC2     |
| IBSP. 4    | 6. 94E-21 | 0. 321822 | 0. 11  | 0. 022 | 1. 04E-16 Mcy | IBSP      |
| DLGAP3. 1  | 7. 01E-21 | 0. 176982 | 0. 095 | 0. 017 | 1. 05E-16 Mcy | DLGAP3    |
| SNX2. 6    | 7. 15E-21 | 0. 368359 | 0. 674 | 0. 404 | 1. 07E-16 Mcy | SNX2      |
| INPP5D. 6  | 7. 38E-21 | 0. 203099 | 0. 253 | 0. 081 | 1. 10E-16 Mcy | INPP5D    |
| BEX2. 5    | 8. 47E-21 | -0. 90275 | 0. 011 | 0. 263 | 1. 27E-16 Mcy | BEX2      |
| ENAH. 5    | 8. 49E-21 | -0. 62796 | 0. 015 | 0. 27  | 1. 27E-16 Mcy | ENAH      |
| NT5DC1. 2  | 8. 94E-21 | 0. 232765 | 0. 179 | 0. 049 | 1. 34E-16 Mcy | NT5DC1    |
| GRN. 6     | 9. 61E-21 | 0. 320441 | 0. 853 | 0. 563 | 1. 44E-16 Mcy | GRN       |
| IL4R. 6    | 9. 83E-21 | 0. 234501 | 0. 22  | 0. 067 | 1. 47E-16 Mcy | IL4R      |
| POMC. 6    | 1. 01E-20 | 0. 250825 | 0. 168 | 0. 044 | 1. 51E-16 Mcy | POMC      |
| PLXND1. 5  | 1. 02E-20 | 0. 408188 | 0. 264 | 0. 094 | 1. 52E-16 Mcy | PLXND1    |
| SCG2. 5    | 1. 02E-20 | -0. 83273 | 0. 015 | 0. 268 | 1. 53E-16 Mcy | SCG2      |
| NCAPH2. 4  | 1. 07E-20 | 0. 442274 | 0. 308 | 0. 126 | 1. 60E-16 Mcy | NCAPH2    |
| GLRX3. 4   | 1. 31E-20 | 0. 319025 | 0. 549 | 0. 299 | 1. 96E-16 Mcy | GLRX3     |
| YDJC. 4    | 1. 31E-20 | 0. 37746  | 0. 33  | 0. 139 | 1. 96E-16 Mcy | YDJC      |
| CHCHD1. 4  | 1. 33E-20 | 0. 349429 | 0. 505 | 0. 265 | 1. 98E-16 Mcy | CHCHD1    |
| KCNAB2. 5  | 1. 38E-20 | 0. 347046 | 0. 227 | 0. 073 | 2. 06E-16 Mcy | KCNAB2    |
| SIRPA. 6   | 1. 44E-20 | 0. 395069 | 0. 484 | 0. 238 | 2. 16E-16 Mcy | SIRPA     |
| LIMS1. 6   | 1. 46E-20 | 0. 363013 | 0. 725 | 0. 433 | 2. 18E-16 Mcy | LIMS1     |

|           |    |          |          |       |       |          |     |               |
|-----------|----|----------|----------|-------|-------|----------|-----|---------------|
| TIMELESS. | 1. | 55E-20   | 0.343102 | 0.194 | 0.059 | 2.32E-16 | Mcy | TIMELESS      |
| DUT.      | 5  | 1.58E-20 | 0.398593 | 0.674 | 0.45  | 2.37E-16 | Mcy | DUT           |
| RASSF4.   | 6  | 1.61E-20 | 0.327168 | 0.615 | 0.322 | 2.41E-16 | Mcy | RASSF4        |
| OGFRL1.   | 6  | 1.62E-20 | 0.339646 | 0.41  | 0.176 | 2.42E-16 | Mcy | OGFRL1        |
| DBN1.     | 6  | 1.65E-20 | -0.71854 | 0.055 | 0.317 | 2.47E-16 | Mcy | DBN1          |
| KLHDC8A.  | 6  | 1.66E-20 | -0.69114 | 0.007 | 0.256 | 2.48E-16 | Mcy | KLHDC8A       |
| MILR1.    | 6  | 1.67E-20 | 0.259829 | 0.275 | 0.094 | 2.49E-16 | Mcy | MILR1         |
| SPINT1.   | 5  | 1.67E-20 | 0.154347 | 0.136 | 0.031 | 2.50E-16 | Mcy | SPINT1        |
| TOR4A.    | 5  | 1.70E-20 | 0.192282 | 0.114 | 0.023 | 2.54E-16 | Mcy | TOR4A         |
| EEF1A1.   | 6  | 1.74E-20 | -0.36048 | 0.868 | 0.825 | 2.60E-16 | Mcy | EEF1A1        |
| RP3-47704 | 1. | 98E-20   | 0.236735 | 0.121 | 0.026 | 2.96E-16 | Mcy | RP3-47704.14  |
| MKNK1.    | 5  | 2.46E-20 | 0.308169 | 0.399 | 0.165 | 3.67E-16 | Mcy | MKNK1         |
| SVIP.     | 3  | 2.57E-20 | 0.383216 | 0.385 | 0.164 | 3.84E-16 | Mcy | SVIP          |
| CRIP2.    | 4  | 3.14E-20 | -0.70933 | 0.055 | 0.32  | 4.69E-16 | Mcy | CRIP2         |
| CDC123.   | 3  | 3.70E-20 | 0.372714 | 0.568 | 0.331 | 5.53E-16 | Mcy | CDC123        |
| ANKRD39.  | 4  | 3.82E-20 | 0.429081 | 0.363 | 0.163 | 5.70E-16 | Mcy | ANKRD39       |
| SSNA1.    | 4  | 4.07E-20 | 0.350732 | 0.703 | 0.44  | 6.08E-16 | Mcy | SSNA1         |
| ETFB.     | 2  | 4.10E-20 | 0.300918 | 0.773 | 0.494 | 6.13E-16 | Mcy | ETFB          |
| NES.      | 6  | 4.11E-20 | -0.83069 | 0.033 | 0.282 | 6.14E-16 | Mcy | NES           |
| SORL1.    | 5  | 4.13E-20 | 0.305705 | 0.484 | 0.221 | 6.17E-16 | Mcy | SORL1         |
| LAPTM4B.  | 6  | 4.25E-20 | -0.69911 | 0.077 | 0.337 | 6.35E-16 | Mcy | LAPTM4B       |
| SDS.      | 6  | 4.31E-20 | 0.348179 | 0.19  | 0.056 | 6.44E-16 | Mcy | SDS           |
| PCDH12.   | 1  | 4.79E-20 | 0.236239 | 0.084 | 0.014 | 7.16E-16 | Mcy | PCDH12        |
| RAP2B.    | 6  | 4.79E-20 | 0.363273 | 0.374 | 0.16  | 7.16E-16 | Mcy | RAP2B         |
| SIRPB1.   | 2  | 4.95E-20 | 0.186052 | 0.07  | 0.01  | 7.40E-16 | Mcy | SIRPB1        |
| SUSD3.    | 5  | 5.03E-20 | 0.267266 | 0.267 | 0.091 | 7.52E-16 | Mcy | SUSD3         |
| ARL11.    | 5  | 5.64E-20 | 0.275924 | 0.147 | 0.036 | 8.43E-16 | Mcy | ARL11         |
| CARHSP1.  | 5  | 6.08E-20 | 0.380976 | 0.674 | 0.417 | 9.08E-16 | Mcy | CARHSP1       |
| CFL1.     | 5  | 6.17E-20 | -0.20373 | 0.978 | 0.949 | 9.22E-16 | Mcy | CFL1          |
| RP2.      | 6  | 6.27E-20 | 0.313947 | 0.223 | 0.074 | 9.37E-16 | Mcy | RP2           |
| IKBIP.    | 5  | 6.89E-20 | 0.321732 | 0.454 | 0.221 | 1.03E-15 | Mcy | IKBIP         |
| TSPAN5.   | 6  | 7.89E-20 | -0.61024 | 0.018 | 0.268 | 1.18E-15 | Mcy | TSPAN5        |
| MYL12A.   | 5  | 8.02E-20 | 0.288275 | 0.853 | 0.536 | 1.20E-15 | Mcy | MYL12A        |
| CXCR2.    | 6  | 8.04E-20 | 0.169508 | 0.048 | 0.005 | 1.20E-15 | Mcy | CXCR2         |
| CSK.      | 6  | 8.21E-20 | 0.49366  | 0.341 | 0.143 | 1.23E-15 | Mcy | CSK           |
| CENPV.    | 6  | 8.56E-20 | -0.66506 | 0.015 | 0.261 | 1.28E-15 | Mcy | CENPV         |
| TRIB2.    | 6  | 9.37E-20 | -0.66723 | 0.022 | 0.268 | 1.40E-15 | Mcy | TRIB2         |
| UBE2L3.   | 5  | 9.50E-20 | 0.3427   | 0.777 | 0.529 | 1.42E-15 | Mcy | UBE2L3        |
| LTC4S.    | 6  | 9.93E-20 | 0.235723 | 0.407 | 0.162 | 1.48E-15 | Mcy | LTC4S         |
| PLIN2.    | 5  | 1.00E-19 | 0.196149 | 0.681 | 0.334 | 1.50E-15 | Mcy | PLIN2         |
| B3GNTL1.  | 2  | 1.04E-19 | 0.405342 | 0.187 | 0.058 | 1.55E-15 | Mcy | B3GNTL1       |
| KIF18B.   | 6  | 1.06E-19 | 0.250729 | 0.103 | 0.021 | 1.58E-15 | Mcy | KIF18B        |
| GIMAP1.   | 5  | 1.07E-19 | 0.277099 | 0.22  | 0.07  | 1.59E-15 | Mcy | GIMAP1        |
| RP11-597D | 1. | 13E-19   | 0.172349 | 0.106 | 0.021 | 1.69E-15 | Mcy | RP11-597D13.8 |
| SCRG1.    | 5  | 1.14E-19 | -0.79489 | 0.095 | 0.352 | 1.70E-15 | Mcy | SCRG1         |
| MLLT11.   | 4  | 1.16E-19 | -0.81589 | 0.209 | 0.46  | 1.73E-15 | Mcy | MLLT11        |
| RNASEH2B. | 6  | 1.17E-19 | 0.399499 | 0.458 | 0.233 | 1.75E-15 | Mcy | RNASEH2B      |
| PPP1R18.  | 6  | 1.18E-19 | 0.403894 | 0.542 | 0.287 | 1.76E-15 | Mcy | PPP1R18       |
| HADH.     | 1  | 1.25E-19 | 0.327675 | 0.418 | 0.202 | 1.86E-15 | Mcy | HADH          |
| SYNGR2.   | 6  | 1.26E-19 | 0.297729 | 0.619 | 0.321 | 1.89E-15 | Mcy | SYNGR2        |
| HIST1H4C. | 6  | 1.28E-19 | 0.43386  | 0.667 | 0.419 | 1.91E-15 | Mcy | HIST1H4C      |



|            |           |           |        |        |               |                 |
|------------|-----------|-----------|--------|--------|---------------|-----------------|
| SRI. 6     | 1. 31E-19 | -0. 48738 | 0. 667 | 0. 73  | 1. 95E-15 Mcy | SRI             |
| CREM. 6    | 1. 42E-19 | 0. 265076 | 0. 689 | 0. 4   | 2. 13E-15 Mcy | CREM            |
| CPPED1. 6  | 1. 51E-19 | 0. 20601  | 0. 209 | 0. 064 | 2. 25E-15 Mcy | CPPED1          |
| WDFY4. 5   | 1. 52E-19 | 0. 210824 | 0. 114 | 0. 024 | 2. 26E-15 Mcy | WDFY4           |
| SGCB. 3    | 1. 53E-19 | -0. 72196 | 0. 073 | 0. 332 | 2. 28E-15 Mcy | SGCB            |
| HLA-DPB1.  | 1. 72E-19 | 0. 272581 | 0. 901 | 0. 485 | 2. 57E-15 Mcy | HLA-DPB1        |
| KIF5C. 6   | 1. 82E-19 | -0. 52595 | 0. 026 | 0. 274 | 2. 72E-15 Mcy | KIF5C           |
| SNRPB. 2   | 1. 93E-19 | 0. 363951 | 0. 85  | 0. 571 | 2. 88E-15 Mcy | SNRPB           |
| PVRL2. 5   | 1. 95E-19 | 0. 379329 | 0. 469 | 0. 238 | 2. 92E-15 Mcy | PVRL2           |
| MS4A14. 5  | 2. 21E-19 | 0. 137235 | 0. 103 | 0. 02  | 3. 30E-15 Mcy | MS4A14          |
| SOX11. 5   | 2. 33E-19 | -0. 80791 | 0. 033 | 0. 278 | 3. 49E-15 Mcy | SOX11           |
| CD81. 5    | 2. 38E-19 | 0. 336709 | 0. 725 | 0. 432 | 3. 55E-15 Mcy | CD81            |
| SLAMF8. 6  | 2. 39E-19 | 0. 3181   | 0. 198 | 0. 06  | 3. 57E-15 Mcy | SLAMF8          |
| MT1H. 1    | 2. 41E-19 | 0. 338635 | 0. 095 | 0. 018 | 3. 61E-15 Mcy | MT1H            |
| FCGRT. 5   | 2. 47E-19 | 0. 293009 | 0. 875 | 0. 542 | 3. 68E-15 Mcy | FCGRT           |
| WDFY2. 1   | 2. 53E-19 | 0. 365282 | 0. 231 | 0. 08  | 3. 78E-15 Mcy | WDFY2           |
| SPDL1. 3   | 2. 59E-19 | 0. 317844 | 0. 194 | 0. 062 | 3. 87E-15 Mcy | SPDL1           |
| NEFH       | 2. 93E-19 | 0. 137504 | 0. 066 | 0. 009 | 4. 37E-15 Mcy | NEFH            |
| EXOSC9. 1  | 3. 01E-19 | 0. 421005 | 0. 337 | 0. 145 | 4. 49E-15 Mcy | EXOSC9          |
| RFC3. 4    | 3. 15E-19 | 0. 287838 | 0. 238 | 0. 084 | 4. 70E-15 Mcy | RFC3            |
| SERPINB9.  | 3. 21E-19 | 0. 2235   | 0. 366 | 0. 141 | 4. 79E-15 Mcy | SERPINB9        |
| TTF2. 1    | 3. 30E-19 | 0. 325793 | 0. 194 | 0. 061 | 4. 93E-15 Mcy | TTF2            |
| ADK. 1     | 3. 71E-19 | 0. 342418 | 0. 363 | 0. 161 | 5. 55E-15 Mcy | ADK             |
| TNFSF15. 1 | 3. 72E-19 | 0. 104235 | 0. 07  | 0. 01  | 5. 56E-15 Mcy | TNFSF15         |
| SCG3. 6    | 3. 83E-19 | -0. 80215 | 0. 029 | 0. 272 | 5. 72E-15 Mcy | SCG3            |
| RAB3IP. 4  | 3. 89E-19 | -0. 75398 | 0. 015 | 0. 252 | 5. 81E-15 Mcy | RAB3IP          |
| THY1. 5    | 4. 42E-19 | -0. 70537 | 0. 022 | 0. 261 | 6. 60E-15 Mcy | THY1            |
| TMEM59L. 5 | 4. 42E-19 | -0. 60422 | 0. 022 | 0. 264 | 6. 61E-15 Mcy | TMEM59L         |
| ARG2. 4    | 4. 63E-19 | 0. 221641 | 0. 267 | 0. 095 | 6. 91E-15 Mcy | ARG2            |
| FN1. 4     | 4. 86E-19 | 0. 4486   | 0. 341 | 0. 15  | 7. 26E-15 Mcy | FN1             |
| CADM4. 5   | 5. 66E-19 | -0. 62677 | 0. 029 | 0. 269 | 8. 45E-15 Mcy | CADM4           |
| SHKBP1. 6  | 5. 66E-19 | 0. 356864 | 0. 454 | 0. 232 | 8. 46E-15 Mcy | SHKBP1          |
| PTPRS. 6   | 5. 81E-19 | -0. 65008 | 0. 022 | 0. 264 | 8. 68E-15 Mcy | PTPRS           |
| ADAM15. 2  | 5. 93E-19 | 0. 36311  | 0. 282 | 0. 112 | 8. 87E-15 Mcy | ADAM15          |
| NRP1. 5    | 6. 78E-19 | 0. 344014 | 0. 363 | 0. 161 | 1. 01E-14 Mcy | NRP1            |
| RP11-1008  | 6. 81E-19 | 0. 143865 | 0. 048 | 0. 005 | 1. 02E-14 Mcy | RP11-1008C21. 1 |
| SOX9. 5    | 7. 09E-19 | -0. 73142 | 0. 037 | 0. 277 | 1. 06E-14 Mcy | SOX9            |
| CDCA4. 4   | 7. 13E-19 | 0. 32799  | 0. 234 | 0. 084 | 1. 07E-14 Mcy | CDCA4           |
| NLRC4. 1   | 7. 13E-19 | 0. 161585 | 0. 073 | 0. 012 | 1. 07E-14 Mcy | NLRC4           |
| SYT11. 6   | 7. 42E-19 | -0. 70427 | 0. 143 | 0. 39  | 1. 11E-14 Mcy | SYT11           |
| TCEA2. 5   | 7. 71E-19 | -0. 66757 | 0. 128 | 0. 374 | 1. 15E-14 Mcy | TCEA2           |
| LILRA2. 6  | 8. 14E-19 | 0. 171074 | 0. 242 | 0. 08  | 1. 22E-14 Mcy | LILRA2          |
| TRABD. 6   | 8. 35E-19 | 0. 335954 | 0. 491 | 0. 253 | 1. 25E-14 Mcy | TRABD           |
| RPA1. 1    | 8. 61E-19 | 0. 377727 | 0. 451 | 0. 235 | 1. 29E-14 Mcy | RPA1            |
| ERLIN1     | 8. 83E-19 | 0. 251254 | 0. 19  | 0. 059 | 1. 32E-14 Mcy | ERLIN1          |
| NR4A2. 6   | 8. 89E-19 | 0. 279658 | 0. 542 | 0. 245 | 1. 33E-14 Mcy | NR4A2           |
| NFIA. 5    | 8. 91E-19 | -0. 67587 | 0. 132 | 0. 385 | 1. 33E-14 Mcy | NFIA            |
| DNAJB12. 5 | 9. 29E-19 | 0. 327835 | 0. 337 | 0. 144 | 1. 39E-14 Mcy | DNAJB12         |
| CD36. 2    | 9. 50E-19 | 0. 179919 | 0. 081 | 0. 014 | 1. 42E-14 Mcy | CD36            |
| SCG5. 5    | 9. 53E-19 | -0. 76346 | 0. 077 | 0. 334 | 1. 42E-14 Mcy | SCG5            |
| APIP. 4    | 9. 61E-19 | 0. 331399 | 0. 458 | 0. 228 | 1. 44E-14 Mcy | APIP            |

|             |           |           |        |        |               |               |
|-------------|-----------|-----------|--------|--------|---------------|---------------|
| CREG1. 6    | 9. 73E-19 | 0. 375468 | 0. 56  | 0. 291 | 1. 45E-14 Mcy | CREG1         |
| DDX21. 4    | 9. 79E-19 | 0. 399246 | 0. 527 | 0. 294 | 1. 46E-14 Mcy | DDX21         |
| FAM20A. 5   | 9. 92E-19 | 0. 187668 | 0. 19  | 0. 056 | 1. 48E-14 Mcy | FAM20A        |
| ME2. 4      | 1. 02E-18 | 0. 32951  | 0. 443 | 0. 219 | 1. 53E-14 Mcy | ME2           |
| S100A16. 5  | 1. 09E-18 | -0. 96754 | 0. 066 | 0. 313 | 1. 63E-14 Mcy | S100A16       |
| PTAFR. 6    | 1. 09E-18 | 0. 25692  | 0. 319 | 0. 121 | 1. 64E-14 Mcy | PTAFR         |
| ARHGAP10. 1 | 1. 17E-18 | 0. 203227 | 0. 128 | 0. 031 | 1. 75E-14 Mcy | ARHGAP10      |
| IFI16. 4    | 1. 24E-18 | 0. 292362 | 0. 685 | 0. 386 | 1. 85E-14 Mcy | IFI16         |
| CFL2. 5     | 1. 31E-18 | -0. 7121  | 0. 084 | 0. 333 | 1. 96E-14 Mcy | CFL2          |
| BAZ1A. 4    | 1. 37E-18 | 0. 341031 | 0. 557 | 0. 314 | 2. 05E-14 Mcy | BAZ1A         |
| CASP8. 5    | 1. 39E-18 | 0. 275888 | 0. 161 | 0. 045 | 2. 07E-14 Mcy | CASP8         |
| MRO. 2      | 1. 46E-18 | 0. 237276 | 0. 095 | 0. 019 | 2. 19E-14 Mcy | MRO           |
| NPDC1. 5    | 1. 48E-18 | -0. 63376 | 0. 081 | 0. 329 | 2. 21E-14 Mcy | NPDC1         |
| FNDC3B. 3   | 1. 52E-18 | 0. 381287 | 0. 359 | 0. 169 | 2. 27E-14 Mcy | FNDC3B        |
| TNFSF13B. 1 | 1. 55E-18 | 0. 230902 | 0. 454 | 0. 197 | 2. 31E-14 Mcy | TNFSF13B      |
| IFNGR1. 6   | 1. 64E-18 | 0. 281865 | 0. 729 | 0. 43  | 2. 45E-14 Mcy | IFNGR1        |
| LYL1. 6     | 1. 67E-18 | 0. 209274 | 0. 234 | 0. 078 | 2. 49E-14 Mcy | LYL1          |
| APOBEC3C. 1 | 1. 74E-18 | 0. 284403 | 0. 308 | 0. 124 | 2. 61E-14 Mcy | APOBEC3C      |
| JDP2. 6     | 1. 75E-18 | 0. 31485  | 0. 209 | 0. 067 | 2. 62E-14 Mcy | JDP2          |
| LILRB1. 6   | 1. 85E-18 | 0. 18225  | 0. 256 | 0. 088 | 2. 76E-14 Mcy | LILRB1        |
| P2RY6. 5    | 1. 90E-18 | 0. 216298 | 0. 128 | 0. 031 | 2. 84E-14 Mcy | P2RY6         |
| LMO7        | 1. 90E-18 | 0. 191346 | 0. 139 | 0. 036 | 2. 85E-14 Mcy | LMO7          |
| PCBP4. 6    | 1. 96E-18 | -0. 59944 | 0. 026 | 0. 261 | 2. 92E-14 Mcy | PCBP4         |
| TRIM38. 5   | 2. 14E-18 | 0. 286957 | 0. 26  | 0. 094 | 3. 20E-14 Mcy | TRIM38        |
| CIT         | 2. 25E-18 | 0. 230977 | 0. 128 | 0. 032 | 3. 37E-14 Mcy | CIT           |
| FZD3. 3     | 2. 31E-18 | -0. 5711  | 0. 037 | 0. 282 | 3. 45E-14 Mcy | FZD3          |
| RP11-108M   | 2. 35E-18 | 0. 323663 | 0. 264 | 0. 098 | 3. 51E-14 Mcy | RP11-108M9. 4 |
| TTYH1. 6    | 2. 38E-18 | -0. 79769 | 0. 037 | 0. 273 | 3. 56E-14 Mcy | TTYH1         |
| CDKN2A. 3   | 2. 44E-18 | 0. 240916 | 0. 275 | 0. 098 | 3. 65E-14 Mcy | CDKN2A        |
| TMEM98. 4   | 2. 50E-18 | -0. 64191 | 0. 011 | 0. 24  | 3. 73E-14 Mcy | TMEM98        |
| NRCAM. 5    | 2. 95E-18 | -0. 5944  | 0. 033 | 0. 275 | 4. 41E-14 Mcy | NRCAM         |
| ACO09005. 3 | 2. 29E-18 | 0. 249303 | 0. 11  | 0. 025 | 4. 91E-14 Mcy | ACO09005. 2   |
| TMEM141. 4  | 3. 40E-18 | 0. 41933  | 0. 465 | 0. 247 | 5. 09E-14 Mcy | TMEM141       |
| DPYD. 4     | 3. 48E-18 | 0. 194918 | 0. 267 | 0. 097 | 5. 20E-14 Mcy | DPYD          |
| DSTN. 6     | 3. 49E-18 | -0. 5274  | 0. 516 | 0. 621 | 5. 22E-14 Mcy | DSTN          |
| SLC22A17. 3 | 3. 86E-18 | -0. 62196 | 0. 048 | 0. 289 | 5. 77E-14 Mcy | SLC22A17      |
| RP11-553L   | 3. 89E-18 | -0. 55859 | 0. 007 | 0. 231 | 5. 82E-14 Mcy | RP11-553L6. 5 |
| KCNK13. 3   | 4. 13E-18 | 0. 157183 | 0. 103 | 0. 021 | 6. 17E-14 Mcy | KCNK13        |
| DNAJC15. 4  | 4. 36E-18 | 0. 349451 | 0. 619 | 0. 384 | 6. 52E-14 Mcy | DNAJC15       |
| KCTD12. 6   | 4. 37E-18 | 0. 284215 | 0. 48  | 0. 23  | 6. 53E-14 Mcy | KCTD12        |
| CCL3. 6     | 4. 75E-18 | 0. 252236 | 0. 729 | 0. 415 | 7. 10E-14 Mcy | CCL3          |
| GPN3. 1     | 4. 86E-18 | 0. 37238  | 0. 469 | 0. 248 | 7. 26E-14 Mcy | GPN3          |
| ATG3. 5     | 5. 16E-18 | 0. 377138 | 0. 604 | 0. 372 | 7. 72E-14 Mcy | ATG3          |
| CX3CR1. 5   | 5. 23E-18 | 0. 264586 | 0. 271 | 0. 097 | 7. 81E-14 Mcy | CX3CR1        |
| TLN1. 6     | 5. 24E-18 | 0. 359528 | 0. 513 | 0. 279 | 7. 82E-14 Mcy | TLN1          |
| EIF4EBP1. 5 | 5. 30E-18 | 0. 349335 | 0. 663 | 0. 421 | 7. 91E-14 Mcy | EIF4EBP1      |
| ATAT1. 6    | 5. 52E-18 | -0. 65168 | 0. 055 | 0. 294 | 8. 25E-14 Mcy | ATAT1         |
| BAX. 6      | 5. 66E-18 | 0. 296925 | 0. 817 | 0. 56  | 8. 47E-14 Mcy | BAX           |
| MRVI1       | 6. 73E-18 | 0. 129123 | 0. 059 | 0. 008 | 1. 01E-13 Mcy | MRVI1         |
| LYVE1. 4    | 6. 79E-18 | 0. 200826 | 0. 139 | 0. 036 | 1. 02E-13 Mcy | LYVE1         |
| CSR2. 4     | 6. 87E-18 | -0. 7463  | 0. 059 | 0. 307 | 1. 03E-13 Mcy | CSR2          |

|             |           |           |        |        |               |          |
|-------------|-----------|-----------|--------|--------|---------------|----------|
| ATL3. 3     | 7. 24E-18 | 0. 321815 | 0. 311 | 0. 134 | 1. 08E-13 Mcy | ATL3     |
| CXXC5. 6    | 7. 62E-18 | -0. 65831 | 0. 147 | 0. 385 | 1. 14E-13 Mcy | CXXC5    |
| CARD6       | 7. 68E-18 | 0. 139275 | 0. 081 | 0. 014 | 1. 15E-13 Mcy | CARD6    |
| METRN. 6    | 7. 81E-18 | -0. 727   | 0. 07  | 0. 299 | 1. 17E-13 Mcy | METRN    |
| CRMP1. 5    | 9. 02E-18 | -0. 71531 | 0. 04  | 0. 271 | 1. 35E-13 Mcy | CRMP1    |
| SLC25A4. 6  | 1. 10E-17 | -0. 62186 | 0. 176 | 0. 432 | 1. 64E-13 Mcy | SLC25A4  |
| UBXN11. 3   | 1. 15E-17 | 0. 292039 | 0. 311 | 0. 132 | 1. 72E-13 Mcy | UBXN11   |
| BIK. 2      | 1. 22E-17 | 0. 116718 | 0. 07  | 0. 011 | 1. 82E-13 Mcy | BIK      |
| POU3F2. 5   | 1. 28E-17 | -0. 59848 | 0. 004 | 0. 221 | 1. 91E-13 Mcy | POU3F2   |
| TEX30. 3    | 1. 31E-17 | 0. 340097 | 0. 348 | 0. 161 | 1. 96E-13 Mcy | TEX30    |
| MBD2. 2     | 1. 32E-17 | 0. 313732 | 0. 19  | 0. 062 | 1. 97E-13 Mcy | MBD2     |
| GNAI2. 6    | 1. 33E-17 | 0. 349111 | 0. 729 | 0. 476 | 1. 99E-13 Mcy | GNAI2    |
| KCNQ2. 5    | 1. 35E-17 | -0. 58654 | 0. 004 | 0. 22  | 2. 01E-13 Mcy | KCNQ2    |
| SLC25A5. 3  | 1. 43E-17 | 0. 28564  | 0. 927 | 0. 716 | 2. 14E-13 Mcy | SLC25A5  |
| ATAD5. 3    | 1. 50E-17 | 0. 29048  | 0. 209 | 0. 072 | 2. 24E-13 Mcy | ATAD5    |
| SGK1. 6     | 1. 71E-17 | 0. 279473 | 0. 751 | 0. 429 | 2. 55E-13 Mcy | SGK1     |
| BLVRB. 4    | 1. 74E-17 | 0. 30941  | 0. 634 | 0. 368 | 2. 61E-13 Mcy | BLVRB    |
| CD58. 6     | 1. 82E-17 | 0. 277293 | 0. 451 | 0. 222 | 2. 72E-13 Mcy | CD58     |
| HSD17B11. 1 | 1. 83E-17 | 0. 276815 | 0. 652 | 0. 37  | 2. 73E-13 Mcy | HSD17B11 |
| C3. 5       | 1. 88E-17 | 0. 22968  | 0. 766 | 0. 393 | 2. 81E-13 Mcy | C3       |
| CCDC18. 3   | 1. 91E-17 | 0. 249081 | 0. 212 | 0. 073 | 2. 85E-13 Mcy | CCDC18   |
| MAP1A. 5    | 2. 04E-17 | -0. 61947 | 0. 015 | 0. 235 | 3. 05E-13 Mcy | MAP1A    |
| GSN. 5      | 2. 07E-17 | 0. 260031 | 0. 824 | 0. 502 | 3. 09E-13 Mcy | GSN      |
| GIMAP5. 4   | 2. 10E-17 | 0. 218249 | 0. 165 | 0. 048 | 3. 14E-13 Mcy | GIMAP5   |
| MTHFD1L. 5  | 2. 10E-17 | 0. 300169 | 0. 308 | 0. 131 | 3. 14E-13 Mcy | MTHFD1L  |
| LACTB. 6    | 2. 11E-17 | 0. 27659  | 0. 359 | 0. 161 | 3. 15E-13 Mcy | LACTB    |
| TMOD3. 4    | 2. 16E-17 | 0. 346462 | 0. 315 | 0. 14  | 3. 23E-13 Mcy | TMOD3    |
| CCDC28A. 5  | 2. 19E-17 | 0. 350589 | 0. 344 | 0. 154 | 3. 27E-13 Mcy | CCDC28A  |
| HMG1A1. 4   | 2. 19E-17 | 0. 368618 | 0. 571 | 0. 34  | 3. 27E-13 Mcy | HMG1A1   |
| ARPC4. 6    | 2. 28E-17 | 0. 313175 | 0. 74  | 0. 508 | 3. 41E-13 Mcy | ARPC4    |
| TMEM167A. 2 | 2. 32E-17 | 0. 33525  | 0. 648 | 0. 415 | 3. 47E-13 Mcy | TMEM167A |
| CTTN. 5     | 2. 33E-17 | -0. 55314 | 0. 015 | 0. 234 | 3. 49E-13 Mcy | CTTN     |
| AKR1A1. 4   | 2. 35E-17 | 0. 325573 | 0. 755 | 0. 491 | 3. 50E-13 Mcy | AKR1A1   |
| CCRL2. 6    | 2. 51E-17 | 0. 2434   | 0. 242 | 0. 085 | 3. 76E-13 Mcy | CCRL2    |
| SPARC. 5    | 2. 59E-17 | -0. 84445 | 0. 15  | 0. 39  | 3. 88E-13 Mcy | SPARC    |
| TLR1. 6     | 2. 63E-17 | 0. 220387 | 0. 201 | 0. 065 | 3. 93E-13 Mcy | TLR1     |
| RASSF5. 6   | 2. 73E-17 | 0. 218656 | 0. 297 | 0. 115 | 4. 08E-13 Mcy | RASSF5   |
| FLI1. 6     | 2. 78E-17 | 0. 18514  | 0. 168 | 0. 049 | 4. 15E-13 Mcy | FLI1     |
| FKBP5. 6    | 2. 80E-17 | 0. 316644 | 0. 586 | 0. 31  | 4. 18E-13 Mcy | FKBP5    |
| LAMTOR2. 4  | 2. 83E-17 | 0. 337171 | 0. 842 | 0. 581 | 4. 23E-13 Mcy | LAMTOR2  |
| IL10. 6     | 2. 85E-17 | 0. 237021 | 0. 275 | 0. 102 | 4. 26E-13 Mcy | IL10     |
| EMC9. 2     | 3. 00E-17 | 0. 392106 | 0. 359 | 0. 173 | 4. 49E-13 Mcy | EMC9     |
| IL17RA. 6   | 3. 12E-17 | 0. 248185 | 0. 289 | 0. 115 | 4. 66E-13 Mcy | IL17RA   |
| TOR2A. 4    | 3. 18E-17 | 0. 328026 | 0. 326 | 0. 143 | 4. 76E-13 Mcy | TOR2A    |
| PCDH9. 4    | 3. 22E-17 | -0. 68819 | 0. 029 | 0. 26  | 4. 81E-13 Mcy | PCDH9    |
| PKIB. 4     | 3. 41E-17 | 0. 352442 | 0. 509 | 0. 278 | 5. 10E-13 Mcy | PKIB     |
| RALB. 4     | 3. 46E-17 | 0. 283122 | 0. 341 | 0. 153 | 5. 17E-13 Mcy | RALB     |
| PSMC3. 3    | 3. 57E-17 | 0. 293057 | 0. 777 | 0. 524 | 5. 33E-13 Mcy | PSMC3    |
| GPAT2       | 3. 59E-17 | 0. 167073 | 0. 066 | 0. 01  | 5. 37E-13 Mcy | GPAT2    |
| ID4. 5      | 3. 59E-17 | -0. 69489 | 0. 007 | 0. 22  | 5. 37E-13 Mcy | ID4      |
| ELL2. 5     | 3. 89E-17 | 0. 268713 | 0. 418 | 0. 187 | 5. 82E-13 Mcy | ELL2     |

|           |          |          |       |       |          |     |          |
|-----------|----------|----------|-------|-------|----------|-----|----------|
| SIGLEC14. | 3.95E-17 | 0.249741 | 0.15  | 0.042 | 5.91E-13 | Mcy | SIGLEC14 |
| CD55.6    | 4.06E-17 | 0.156901 | 0.3   | 0.113 | 6.07E-13 | Mcy | CD55     |
| GPC1.5    | 4.11E-17 | -0.67822 | 0.022 | 0.242 | 6.14E-13 | Mcy | GPC1     |
| PTGER4.6  | 4.29E-17 | 0.196166 | 0.311 | 0.119 | 6.41E-13 | Mcy | PTGER4   |
| MEF2C.6   | 4.59E-17 | 0.271658 | 0.542 | 0.277 | 6.86E-13 | Mcy | MEF2C    |
| LHFP.6    | 4.68E-17 | -0.65443 | 0.018 | 0.237 | 6.99E-13 | Mcy | LHFP     |
| FANCA.1   | 4.70E-17 | 0.253256 | 0.176 | 0.056 | 7.02E-13 | Mcy | FANCA    |
| PTMA.6    | 4.89E-17 | -0.18758 | 1     | 0.966 | 7.31E-13 | Mcy | PTMA     |
| KIFC3.2   | 4.91E-17 | 0.397526 | 0.256 | 0.1   | 7.33E-13 | Mcy | KIFC3    |
| GIMAP6.4  | 5.19E-17 | 0.226888 | 0.147 | 0.04  | 7.75E-13 | Mcy | GIMAP6   |
| POLE3.1   | 5.26E-17 | 0.431734 | 0.454 | 0.242 | 7.86E-13 | Mcy | POLE3    |
| CD52.5    | 5.30E-17 | 0.1063   | 0.168 | 0.049 | 7.92E-13 | Mcy | CD52     |
| SLC7A5.6  | 5.41E-17 | 0.268796 | 0.322 | 0.134 | 8.09E-13 | Mcy | SLC7A5   |
| TMEM255B. | 5.42E-17 | 0.244579 | 0.172 | 0.052 | 8.10E-13 | Mcy | TMEM255B |
| DNER.4    | 5.43E-17 | -0.76406 | 0.062 | 0.285 | 8.11E-13 | Mcy | DNER     |
| LPAR5.4   | 5.73E-17 | 0.212931 | 0.271 | 0.1   | 8.56E-13 | Mcy | LPAR5    |
| CD83.6    | 5.75E-17 | 0.219513 | 0.582 | 0.288 | 8.59E-13 | Mcy | CD83     |
| IQGAP1.6  | 5.86E-17 | 0.34857  | 0.458 | 0.248 | 8.75E-13 | Mcy | IQGAP1   |
| CXorf38.2 | 5.87E-17 | 0.200006 | 0.198 | 0.066 | 8.78E-13 | Mcy | CXorf38  |
| MFSD1.6   | 5.91E-17 | 0.247008 | 0.619 | 0.337 | 8.83E-13 | Mcy | MFSD1    |
| MYO7A.4   | 5.99E-17 | 0.190223 | 0.125 | 0.031 | 8.95E-13 | Mcy | MYO7A    |
| ELF1.6    | 5.99E-17 | 0.222924 | 0.484 | 0.238 | 8.95E-13 | Mcy | ELF1     |
| SPINK6.1  | 6.65E-17 | 0.118469 | 0.033 | 0.003 | 9.94E-13 | Mcy | SPINK6   |
| MAGED2.6  | 6.78E-17 | -0.61979 | 0.293 | 0.514 | 1.01E-12 | Mcy | MAGED2   |
| LMNB2.6   | 6.92E-17 | 0.384701 | 0.271 | 0.113 | 1.03E-12 | Mcy | LMNB2    |
| DARS2     | 7.08E-17 | 0.202322 | 0.128 | 0.034 | 1.06E-12 | Mcy | DARS2    |
| TGFB1.6   | 7.78E-17 | 0.317538 | 0.469 | 0.239 | 1.16E-12 | Mcy | TGFB1    |
| KLF4.6    | 7.89E-17 | 0.238764 | 0.447 | 0.2   | 1.18E-12 | Mcy | KLF4     |
| COL6A1.5  | 8.17E-17 | -0.64187 | 0.018 | 0.234 | 1.22E-12 | Mcy | COL6A1   |
| ARHGAP27. | 8.25E-17 | 0.206195 | 0.172 | 0.052 | 1.23E-12 | Mcy | ARHGAP27 |
| SFR1.3    | 8.44E-17 | 0.289954 | 0.194 | 0.065 | 1.26E-12 | Mcy | SFR1     |
| CCNI.4    | 8.71E-17 | -0.27857 | 0.696 | 0.706 | 1.30E-12 | Mcy | CCNI     |
| GYPC.6    | 9.02E-17 | 0.293843 | 0.564 | 0.303 | 1.35E-12 | Mcy | GYPC     |
| PNMA1.5   | 9.25E-17 | -0.55021 | 0.062 | 0.289 | 1.38E-12 | Mcy | PNMA1    |
| STMN4.5   | 9.36E-17 | -0.99837 | 0.092 | 0.311 | 1.40E-12 | Mcy | STMN4    |
| GINS4     | 9.38E-17 | 0.213082 | 0.147 | 0.042 | 1.40E-12 | Mcy | GINS4    |
| PKIG.6    | 9.42E-17 | -0.59685 | 0.077 | 0.316 | 1.41E-12 | Mcy | PKIG     |
| MSI2.4    | 9.67E-17 | -0.644   | 0.092 | 0.327 | 1.45E-12 | Mcy | MSI2     |
| SNRPD1.2  | 9.72E-17 | 0.308702 | 0.799 | 0.558 | 1.45E-12 | Mcy | SNRPD1   |
| ECT2.4    | 1.00E-16 | 0.23369  | 0.158 | 0.047 | 1.50E-12 | Mcy | ECT2     |
| B2M.4     | 1.03E-16 | -0.26786 | 1     | 0.97  | 1.54E-12 | Mcy | B2M      |
| SLC19A1.2 | 1.08E-16 | 0.303574 | 0.194 | 0.067 | 1.62E-12 | Mcy | SLC19A1  |
| TOR3A.3   | 1.11E-16 | 0.329219 | 0.407 | 0.205 | 1.66E-12 | Mcy | TOR3A    |
| RIC3.4    | 1.14E-16 | -0.6532  | 0.018 | 0.236 | 1.70E-12 | Mcy | RIC3     |
| CHPF.5    | 1.24E-16 | -0.56009 | 0.044 | 0.264 | 1.85E-12 | Mcy | CHPF     |
| IMPDH1.4  | 1.26E-16 | 0.316644 | 0.333 | 0.153 | 1.88E-12 | Mcy | IMPDH1   |
| FIBIN.5   | 1.29E-16 | -0.67177 | 0.018 | 0.232 | 1.93E-12 | Mcy | FIBIN    |
| GLDN.5    | 1.35E-16 | 0.225534 | 0.256 | 0.093 | 2.01E-12 | Mcy | GLDN     |
| PTPRO.5   | 1.37E-16 | 0.206695 | 0.216 | 0.075 | 2.05E-12 | Mcy | PTPRO    |
| NSMCE4A.4 | 1.52E-16 | 0.330778 | 0.326 | 0.149 | 2.27E-12 | Mcy | NSMCE4A  |
| TAGAP.6   | 1.52E-16 | 0.188258 | 0.264 | 0.097 | 2.28E-12 | Mcy | TAGAP    |

|            |           |           |        |        |               |              |
|------------|-----------|-----------|--------|--------|---------------|--------------|
| LRRFIP1. 6 | 1. 53E-16 | 0. 30596  | 0. 59  | 0. 348 | 2. 28E-12 Mcy | LRRFIP1      |
| UBB. 5     | 1. 56E-16 | -0. 18363 | 0. 967 | 0. 909 | 2. 33E-12 Mcy | UBB          |
| CDO1. 6    | 1. 59E-16 | -0. 62199 | 0. 022 | 0. 24  | 2. 38E-12 Mcy | CDO1         |
| CHN1. 5    | 1. 63E-16 | -0. 511   | 0. 011 | 0. 221 | 2. 44E-12 Mcy | CHN1         |
| PLS3. 5    | 1. 65E-16 | -0. 59256 | 0. 015 | 0. 226 | 2. 47E-12 Mcy | PLS3         |
| NACA. 2    | 1. 69E-16 | -0. 17247 | 0. 967 | 0. 924 | 2. 53E-12 Mcy | NACA         |
| KCNJ3      | 1. 71E-16 | 0. 396879 | 0. 147 | 0. 042 | 2. 56E-12 Mcy | KCNJ3        |
| STX11. 6   | 1. 73E-16 | 0. 175673 | 0. 289 | 0. 11  | 2. 58E-12 Mcy | STX11        |
| LPAR6. 6   | 1. 77E-16 | 0. 370319 | 0. 465 | 0. 232 | 2. 64E-12 Mcy | LPAR6        |
| CYSLTR1. 4 | 1. 80E-16 | 0. 221409 | 0. 103 | 0. 023 | 2. 69E-12 Mcy | CYSLTR1      |
| PRAF2. 5   | 1. 85E-16 | -0. 56145 | 0. 077 | 0. 307 | 2. 76E-12 Mcy | PRAF2        |
| RPS6KA4. 5 | 1. 94E-16 | 0. 299304 | 0. 282 | 0. 118 | 2. 90E-12 Mcy | RPS6KA4      |
| RP3-340N1  | 2. 02E-16 | 0. 103118 | 0. 044 | 0. 005 | 3. 02E-12 Mcy | RP3-340N1. 2 |
| MAGED1. 5  | 2. 04E-16 | -0. 59766 | 0. 11  | 0. 35  | 3. 06E-12 Mcy | MAGED1       |
| DHRS3. 4   | 2. 14E-16 | 0. 197611 | 0. 377 | 0. 166 | 3. 20E-12 Mcy | DHRS3        |
| VKORC1. 2  | 2. 19E-16 | 0. 285728 | 0. 729 | 0. 491 | 3. 27E-12 Mcy | VKORC1       |
| EXOSC8. 5  | 2. 20E-16 | 0. 381094 | 0. 505 | 0. 284 | 3. 28E-12 Mcy | EXOSC8       |
| GTSF1. 1   | 2. 25E-16 | 0. 19992  | 0. 062 | 0. 01  | 3. 36E-12 Mcy | GTSF1        |
| QSOX1. 5   | 2. 27E-16 | 0. 301318 | 0. 443 | 0. 231 | 3. 40E-12 Mcy | QSOX1        |
| NRN1. 4    | 2. 47E-16 | -0. 68632 | 0. 037 | 0. 259 | 3. 69E-12 Mcy | NRN1         |
| PLTP. 4    | 2. 51E-16 | 0. 249736 | 0. 725 | 0. 464 | 3. 75E-12 Mcy | PLTP         |
| RNF135. 6  | 2. 77E-16 | 0. 32744  | 0. 267 | 0. 107 | 4. 15E-12 Mcy | RNF135       |
| MX2. 6     | 2. 90E-16 | 0. 281611 | 0. 187 | 0. 061 | 4. 33E-12 Mcy | MX2          |
| RP6-91H8.  | 2. 95E-16 | 0. 231301 | 0. 172 | 0. 053 | 4. 41E-12 Mcy | RP6-91H8. 3  |
| TRIM2. 4   | 2. 97E-16 | -0. 54013 | 0. 018 | 0. 228 | 4. 44E-12 Mcy | TRIM2        |
| APBA2. 6   | 3. 26E-16 | -0. 51301 | 0. 007 | 0. 211 | 4. 87E-12 Mcy | APBA2        |
| CCND2. 6   | 3. 31E-16 | -0. 61174 | 0. 099 | 0. 332 | 4. 95E-12 Mcy | CCND2        |
| RGMA. 5    | 3. 33E-16 | -0. 55703 | 0. 004 | 0. 205 | 4. 98E-12 Mcy | RGMA         |
| PRR13. 4   | 3. 35E-16 | 0. 237934 | 0. 799 | 0. 537 | 5. 01E-12 Mcy | PRR13        |
| CTSV       | 3. 68E-16 | 0. 219128 | 0. 07  | 0. 012 | 5. 50E-12 Mcy | CTSV         |
| SLC25A40.  | 3. 77E-16 | 0. 304702 | 0. 179 | 0. 06  | 5. 63E-12 Mcy | SLC25A40     |
| MCTP1. 1   | 4. 02E-16 | 0. 139939 | 0. 092 | 0. 019 | 6. 00E-12 Mcy | MCTP1        |
| PARP1. 4   | 4. 22E-16 | 0. 322378 | 0. 678 | 0. 467 | 6. 30E-12 Mcy | PARP1        |
| TALDO1. 6  | 4. 23E-16 | 0. 273893 | 0. 813 | 0. 592 | 6. 32E-12 Mcy | TALDO1       |
| ASCL2. 5   | 4. 34E-16 | 0. 141096 | 0. 132 | 0. 035 | 6. 48E-12 Mcy | ASCL2        |
| MBNL1. 6   | 4. 37E-16 | 0. 299767 | 0. 425 | 0. 219 | 6. 54E-12 Mcy | MBNL1        |
| FAM181B. 6 | 4. 92E-16 | -0. 59486 | 0. 007 | 0. 208 | 7. 35E-12 Mcy | FAM181B      |
| ST3GAL6. 6 | 5. 27E-16 | 0. 264356 | 0. 271 | 0. 108 | 7. 88E-12 Mcy | ST3GAL6      |
| NFATC2. 3  | 5. 28E-16 | 0. 198603 | 0. 15  | 0. 044 | 7. 89E-12 Mcy | NFATC2       |
| HEPN1. 5   | 5. 33E-16 | -0. 68253 | 0. 007 | 0. 209 | 7. 97E-12 Mcy | HEPN1        |
| SKA2. 4    | 5. 54E-16 | 0. 386144 | 0. 513 | 0. 302 | 8. 28E-12 Mcy | SKA2         |
| SERPINB8.  | 5. 63E-16 | 0. 243534 | 0. 209 | 0. 075 | 8. 41E-12 Mcy | SERPINB8     |
| MB21D1. 1  | 5. 84E-16 | 0. 16941  | 0. 125 | 0. 033 | 8. 73E-12 Mcy | MB21D1       |
| SCAMP2. 6  | 5. 99E-16 | 0. 242497 | 0. 626 | 0. 368 | 8. 95E-12 Mcy | SCAMP2       |
| HEY1. 5    | 6. 24E-16 | -0. 58901 | 0. 037 | 0. 252 | 9. 33E-12 Mcy | HEY1         |
| NLRP3. 6   | 6. 25E-16 | 0. 219483 | 0. 234 | 0. 084 | 9. 34E-12 Mcy | NLRP3        |
| POLD4. 4   | 6. 39E-16 | 0. 240528 | 0. 692 | 0. 414 | 9. 54E-12 Mcy | POLD4        |
| CYFIP1. 5  | 6. 44E-16 | 0. 283568 | 0. 505 | 0. 278 | 9. 62E-12 Mcy | CYFIP1       |
| TRAF4. 5   | 6. 56E-16 | -0. 57909 | 0. 059 | 0. 274 | 9. 80E-12 Mcy | TRAF4        |
| HIST1H2AE  | 6. 72E-16 | 0. 143581 | 0. 029 | 0. 002 | 1. 00E-11 Mcy | HIST1H2AB    |
| TBC1D22A.  | 6. 75E-16 | 0. 285058 | 0. 282 | 0. 119 | 1. 01E-11 Mcy | TBC1D22A     |

|           |          |          |       |       |          |     |               |
|-----------|----------|----------|-------|-------|----------|-----|---------------|
| SASS6.1   | 7.44E-16 | 0.230036 | 0.176 | 0.058 | 1.11E-11 | Mcy | SASS6         |
| ATG16L2.5 | 7.56E-16 | 0.22831  | 0.227 | 0.084 | 1.13E-11 | Mcy | ATG16L2       |
| C19orf48. | 7.84E-16 | 0.325026 | 0.425 | 0.222 | 1.17E-11 | Mcy | C19orf48      |
| LIMA1.5   | 7.94E-16 | -0.64228 | 0.103 | 0.323 | 1.19E-11 | Mcy | LIMA1         |
| NASP.2    | 8.35E-16 | 0.296465 | 0.637 | 0.404 | 1.25E-11 | Mcy | NASP          |
| PBX1.5    | 8.39E-16 | -0.49676 | 0.015 | 0.219 | 1.25E-11 | Mcy | PBX1          |
| RP11-514C | 8.44E-16 | 0.181394 | 0.106 | 0.025 | 1.26E-11 | Mcy | RP11-514012.4 |
| CCR5.4    | 8.85E-16 | 0.155777 | 0.103 | 0.024 | 1.32E-11 | Mcy | CCR5          |
| EXOSC1.1  | 8.96E-16 | 0.285512 | 0.363 | 0.177 | 1.34E-11 | Mcy | EXOSC1        |
| RPA2.2    | 9.15E-16 | 0.326124 | 0.538 | 0.314 | 1.37E-11 | Mcy | RPA2          |
| DONSON.2  | 9.37E-16 | 0.263953 | 0.209 | 0.078 | 1.40E-11 | Mcy | DONSON        |
| TSPO.5    | 9.38E-16 | 0.271405 | 0.817 | 0.589 | 1.40E-11 | Mcy | TSPO          |
| CISD3.5   | 9.40E-16 | 0.286734 | 0.462 | 0.249 | 1.40E-11 | Mcy | CISD3         |
| EPN2.6    | 9.72E-16 | -0.53223 | 0.033 | 0.242 | 1.45E-11 | Mcy | EPN2          |
| GRIA2.5   | 9.80E-16 | -0.54264 | 0.015 | 0.217 | 1.46E-11 | Mcy | GRIA2         |
| MYO6.4    | 9.84E-16 | -0.53109 | 0.022 | 0.229 | 1.47E-11 | Mcy | MYO6          |
| HTATIP2.6 | 1.01E-15 | 0.261944 | 0.322 | 0.142 | 1.51E-11 | Mcy | HTATIP2       |
| STAT6.6   | 1.02E-15 | 0.243489 | 0.161 | 0.049 | 1.52E-11 | Mcy | STAT6         |
| CTSB.3    | 1.04E-15 | 0.213939 | 0.978 | 0.751 | 1.55E-11 | Mcy | CTSB          |
| TTL7.6    | 1.11E-15 | -0.56719 | 0.029 | 0.242 | 1.65E-11 | Mcy | TTL7          |
| PSMA4.2   | 1.18E-15 | 0.314482 | 0.747 | 0.532 | 1.77E-11 | Mcy | PSMA4         |
| SLC37A4.1 | 1.19E-15 | 0.38522  | 0.271 | 0.117 | 1.78E-11 | Mcy | SLC37A4       |
| RFC2.2    | 1.23E-15 | 0.32213  | 0.443 | 0.237 | 1.83E-11 | Mcy | RFC2          |
| S100A11.6 | 1.23E-15 | 0.233606 | 0.978 | 0.65  | 1.83E-11 | Mcy | S100A11       |
| AIM1.3    | 1.34E-15 | 0.111433 | 0.125 | 0.033 | 2.00E-11 | Mcy | AIM1          |
| PYGL.5    | 1.36E-15 | 0.290375 | 0.388 | 0.187 | 2.03E-11 | Mcy | PYGL          |
| MAGEH1.5  | 1.43E-15 | -0.65764 | 0.103 | 0.323 | 2.13E-11 | Mcy | MAGEH1        |
| POLD3.1   | 1.48E-15 | 0.304633 | 0.234 | 0.093 | 2.21E-11 | Mcy | POLD3         |
| CD37.6    | 1.52E-15 | 0.162109 | 0.623 | 0.293 | 2.27E-11 | Mcy | CD37          |
| HSPB11.3  | 1.60E-15 | 0.359224 | 0.527 | 0.323 | 2.40E-11 | Mcy | HSPB11        |
| SPRY1.5   | 1.75E-15 | -0.66686 | 0.033 | 0.237 | 2.62E-11 | Mcy | SPRY1         |
| TGFBR1.6  | 1.78E-15 | 0.256979 | 0.348 | 0.157 | 2.66E-11 | Mcy | TGFBR1        |
| APP.5     | 1.78E-15 | -0.53027 | 0.344 | 0.529 | 2.67E-11 | Mcy | APP           |
| RP11-452F | 1.81E-15 | 0.299705 | 0.289 | 0.123 | 2.70E-11 | Mcy | RP11-452F19.3 |
| PLA2G15.5 | 1.87E-15 | 0.257501 | 0.308 | 0.134 | 2.80E-11 | Mcy | PLA2G15       |
| ADPGK.6   | 1.98E-15 | 0.265817 | 0.48  | 0.256 | 2.97E-11 | Mcy | ADPGK         |
| DHRS4.3   | 1.99E-15 | 0.275411 | 0.212 | 0.078 | 2.97E-11 | Mcy | DHRS4         |
| EFEMP2.4  | 2.02E-15 | -0.53394 | 0.018 | 0.219 | 3.01E-11 | Mcy | EFEMP2        |
| EPB41L2.4 | 2.04E-15 | 0.286762 | 0.538 | 0.305 | 3.04E-11 | Mcy | EPB41L2       |
| AGPAT2.6  | 2.09E-15 | 0.288161 | 0.359 | 0.175 | 3.12E-11 | Mcy | AGPAT2        |
| NINJ1.6   | 2.11E-15 | 0.325768 | 0.703 | 0.446 | 3.15E-11 | Mcy | NINJ1         |
| LARP6.5   | 2.14E-15 | -0.52629 | 0.004 | 0.197 | 3.20E-11 | Mcy | LARP6         |
| KDELC2    | 2.15E-15 | 0.245591 | 0.198 | 0.071 | 3.22E-11 | Mcy | KDELC2        |
| C17orf53  | 2.16E-15 | 0.141087 | 0.081 | 0.016 | 3.23E-11 | Mcy | C17orf53      |
| DSEL.6    | 2.22E-15 | -0.56665 | 0.026 | 0.23  | 3.32E-11 | Mcy | DSEL          |
| GRB2.6    | 2.23E-15 | 0.301472 | 0.711 | 0.475 | 3.33E-11 | Mcy | GRB2          |
| ETV1.6    | 2.24E-15 | -0.6252  | 0.04  | 0.249 | 3.35E-11 | Mcy | ETV1          |
| MCMBP.4   | 2.48E-15 | 0.301037 | 0.308 | 0.141 | 3.71E-11 | Mcy | MCMBP         |
| RHN01.3   | 2.49E-15 | 0.337344 | 0.374 | 0.191 | 3.72E-11 | Mcy | RHN01         |
| TRIM9.5   | 2.62E-15 | -0.51248 | 0.029 | 0.237 | 3.91E-11 | Mcy | TRIM9         |
| THRA.4    | 2.64E-15 | -0.57395 | 0.037 | 0.244 | 3.95E-11 | Mcy | THRA          |

|             |           |           |        |        |               |          |
|-------------|-----------|-----------|--------|--------|---------------|----------|
| PMVK. 2     | 2. 65E-15 | 0. 278569 | 0. 659 | 0. 432 | 3. 96E-11 Mcy | PMVK     |
| HLA-A. 4    | 2. 77E-15 | -0. 30679 | 0. 945 | 0. 895 | 4. 14E-11 Mcy | HLA-A    |
| ADCY7. 6    | 3. 28E-15 | 0. 212878 | 0. 183 | 0. 06  | 4. 91E-11 Mcy | ADCY7    |
| MVP. 4      | 3. 32E-15 | 0. 352582 | 0. 421 | 0. 221 | 4. 96E-11 Mcy | MVP      |
| EGFR. 5     | 3. 33E-15 | -0. 70058 | 0. 088 | 0. 305 | 4. 98E-11 Mcy | EGFR     |
| ANG. 4      | 3. 35E-15 | 0. 243071 | 0. 22  | 0. 081 | 5. 00E-11 Mcy | ANG      |
| GPRC5B. 4   | 3. 36E-15 | -0. 56202 | 0. 022 | 0. 223 | 5. 02E-11 Mcy | GPRC5B   |
| CAPZA1. 6   | 3. 49E-15 | 0. 342005 | 0. 586 | 0. 388 | 5. 22E-11 Mcy | CAPZA1   |
| GPRIN3. 6   | 3. 66E-15 | 0. 211062 | 0. 172 | 0. 056 | 5. 47E-11 Mcy | GPRIN3   |
| MAPK10. 5   | 3. 81E-15 | -0. 51496 | 0. 007 | 0. 199 | 5. 70E-11 Mcy | MAPK10   |
| FKBP10. 6   | 3. 84E-15 | -0. 51421 | 0. 018 | 0. 217 | 5. 74E-11 Mcy | FKBP10   |
| USB1. 4     | 3. 86E-15 | 0. 315801 | 0. 418 | 0. 225 | 5. 77E-11 Mcy | USB1     |
| LRRC8C. 5   | 3. 87E-15 | 0. 185049 | 0. 172 | 0. 056 | 5. 79E-11 Mcy | LRRC8C   |
| ADAMTSL4. 3 | 3. 96E-15 | 0. 150234 | 0. 092 | 0. 02  | 5. 92E-11 Mcy | ADAMTSL4 |
| RAB32. 6    | 4. 07E-15 | 0. 315369 | 0. 44  | 0. 234 | 6. 09E-11 Mcy | RAB32    |
| CEBPA. 5    | 4. 18E-15 | 0. 245722 | 0. 256 | 0. 1   | 6. 25E-11 Mcy | CEBPA    |
| CNIH4. 4    | 4. 23E-15 | 0. 334574 | 0. 59  | 0. 368 | 6. 32E-11 Mcy | CNIH4    |
| FKBP15. 5   | 4. 43E-15 | 0. 337681 | 0. 3   | 0. 134 | 6. 63E-11 Mcy | FKBP15   |
| TM7SF2. 5   | 4. 49E-15 | -0. 53256 | 0. 033 | 0. 235 | 6. 71E-11 Mcy | TM7SF2   |
| ITM2B. 4    | 4. 58E-15 | -0. 24463 | 0. 788 | 0. 799 | 6. 85E-11 Mcy | ITM2B    |
| HSPA8. 4    | 4. 64E-15 | -0. 26385 | 0. 886 | 0. 865 | 6. 93E-11 Mcy | HSPA8    |
| SBDS. 6     | 4. 71E-15 | -0. 52515 | 0. 462 | 0. 613 | 7. 04E-11 Mcy | SBDS     |
| PBK. 6      | 4. 85E-15 | 0. 353841 | 0. 198 | 0. 07  | 7. 25E-11 Mcy | PBK      |
| CST6. 2     | 4. 94E-15 | 0. 150135 | 0. 073 | 0. 014 | 7. 38E-11 Mcy | CST6     |
| COR07. 6    | 4. 97E-15 | 0. 269645 | 0. 337 | 0. 154 | 7. 43E-11 Mcy | COR07    |
| MESDC2. 2   | 5. 07E-15 | 0. 252987 | 0. 626 | 0. 399 | 7. 58E-11 Mcy | MESDC2   |
| HLA-DPA1. 5 | 5. 26E-15 | 0. 179259 | 0. 919 | 0. 524 | 7. 87E-11 Mcy | HLA-DPA1 |
| NCKAP1. 4   | 5. 65E-15 | -0. 41316 | 0. 004 | 0. 193 | 8. 45E-11 Mcy | NCKAP1   |
| KHDRBS3. 6  | 5. 82E-15 | -0. 51842 | 0. 022 | 0. 219 | 8. 70E-11 Mcy | KHDRBS3  |
| SEMA6A. 5   | 5. 84E-15 | -0. 47137 | 0. 011 | 0. 204 | 8. 73E-11 Mcy | SEMA6A   |
| SLAIN1. 6   | 5. 95E-15 | -0. 5882  | 0. 015 | 0. 207 | 8. 90E-11 Mcy | SLAIN1   |
| ADRB2. 4    | 6. 04E-15 | 0. 198707 | 0. 147 | 0. 043 | 9. 03E-11 Mcy | ADRB2    |
| UBL7-AS1    | 6. 20E-15 | 0. 333894 | 0. 161 | 0. 054 | 9. 27E-11 Mcy | UBL7-AS1 |
| SCO2. 6     | 6. 26E-15 | 0. 380922 | 0. 396 | 0. 207 | 9. 36E-11 Mcy | SCO2     |
| OXA1L. 5    | 6. 76E-15 | 0. 211226 | 0. 531 | 0. 296 | 1. 01E-10 Mcy | OXA1L    |
| PPP2R2B. 5  | 6. 83E-15 | -0. 59012 | 0. 026 | 0. 223 | 1. 02E-10 Mcy | PPP2R2B  |
| TAF7. 5     | 7. 00E-15 | -0. 5251  | 0. 366 | 0. 558 | 1. 05E-10 Mcy | TAF7     |
| CLIP3. 5    | 7. 01E-15 | -0. 50409 | 0. 011 | 0. 202 | 1. 05E-10 Mcy | CLIP3    |
| RBFOX2. 5   | 7. 05E-15 | -0. 52287 | 0. 022 | 0. 221 | 1. 05E-10 Mcy | RBFOX2   |
| SUCLG2. 4   | 7. 33E-15 | 0. 291508 | 0. 443 | 0. 24  | 1. 10E-10 Mcy | SUCLG2   |
| OLR1. 6     | 7. 79E-15 | 0. 167345 | 0. 527 | 0. 244 | 1. 16E-10 Mcy | OLR1     |
| PCDH17. 4   | 8. 14E-15 | -0. 49499 | 0. 007 | 0. 196 | 1. 22E-10 Mcy | PCDH17   |
| ASCL1. 5    | 8. 38E-15 | -0. 60451 | 0. 004 | 0. 19  | 1. 25E-10 Mcy | ASCL1    |
| LYPD1. 4    | 8. 55E-15 | -0. 56632 | 0. 011 | 0. 2   | 1. 28E-10 Mcy | LYPD1    |
| PTGR1. 2    | 9. 25E-15 | 0. 321605 | 0. 355 | 0. 181 | 1. 38E-10 Mcy | PTGR1    |
| CD1D. 4     | 9. 36E-15 | 0. 135414 | 0. 128 | 0. 035 | 1. 40E-10 Mcy | CD1D     |
| PSMD7. 3    | 9. 56E-15 | 0. 308786 | 0. 703 | 0. 485 | 1. 43E-10 Mcy | PSMD7    |
| SMARCD3. 5  | 9. 73E-15 | -0. 48185 | 0. 037 | 0. 236 | 1. 45E-10 Mcy | SMARCD3  |
| SEPT6. 5    | 9. 95E-15 | 0. 249607 | 0. 348 | 0. 162 | 1. 49E-10 Mcy | 6-Sep    |
| UNC93B1. 6  | 1. 02E-14 | 0. 281911 | 0. 399 | 0. 196 | 1. 52E-10 Mcy | UNC93B1  |
| RUFY3. 5    | 1. 04E-14 | -0. 53499 | 0. 095 | 0. 31  | 1. 55E-10 Mcy | RUFY3    |

|             |           |           |        |        |               |            |
|-------------|-----------|-----------|--------|--------|---------------|------------|
| TMEM14B. 2  | 1. 04E-14 | 0. 25562  | 0. 758 | 0. 52  | 1. 55E-10 Mcy | TMEM14B    |
| NUP214. 5   | 1. 05E-14 | 0. 26669  | 0. 381 | 0. 191 | 1. 56E-10 Mcy | NUP214     |
| NREP. 5     | 1. 08E-14 | -0. 5857  | 0. 07  | 0. 277 | 1. 62E-10 Mcy | NREP       |
| ECE2        | 1. 15E-14 | 0. 27634  | 0. 161 | 0. 054 | 1. 72E-10 Mcy | ECE2       |
| IL2RA. 4    | 1. 15E-14 | 0. 292224 | 0. 114 | 0. 03  | 1. 72E-10 Mcy | IL2RA      |
| P2RX4. 5    | 1. 17E-14 | 0. 297022 | 0. 363 | 0. 172 | 1. 75E-10 Mcy | P2RX4      |
| VDR. 2      | 1. 19E-14 | 0. 149963 | 0. 073 | 0. 014 | 1. 77E-10 Mcy | VDR        |
| ERI2        | 1. 19E-14 | 0. 261793 | 0. 154 | 0. 05  | 1. 78E-10 Mcy | ERI2       |
| RCBTB2. 5   | 1. 20E-14 | 0. 263865 | 0. 311 | 0. 138 | 1. 79E-10 Mcy | RCBTB2     |
| PAPSS2. 3   | 1. 20E-14 | 0. 203942 | 0. 092 | 0. 021 | 1. 79E-10 Mcy | PAPSS2     |
| YWHAE. 5    | 1. 20E-14 | -0. 21507 | 0. 78  | 0. 751 | 1. 80E-10 Mcy | YWHAE      |
| HSP90AB1. 1 | 1. 21E-14 | -0. 21364 | 0. 842 | 0. 82  | 1. 81E-10 Mcy | HSP90AB1   |
| MSN. 6      | 1. 22E-14 | 0. 310085 | 0. 59  | 0. 37  | 1. 82E-10 Mcy | MSN        |
| GRK6. 3     | 1. 22E-14 | 0. 344395 | 0. 286 | 0. 132 | 1. 82E-10 Mcy | GRK6       |
| MYL6. 5     | 1. 24E-14 | -0. 17862 | 0. 978 | 0. 941 | 1. 85E-10 Mcy | MYL6       |
| TMEM220. 4  | 1. 30E-14 | 0. 230504 | 0. 187 | 0. 066 | 1. 95E-10 Mcy | TMEM220    |
| SIPA1. 6    | 1. 31E-14 | 0. 260894 | 0. 304 | 0. 135 | 1. 95E-10 Mcy | SIPA1      |
| TGOLN2. 6   | 1. 33E-14 | 0. 301346 | 0. 586 | 0. 367 | 1. 98E-10 Mcy | TGOLN2     |
| PPT1. 5     | 1. 36E-14 | 0. 268092 | 0. 773 | 0. 55  | 2. 03E-10 Mcy | PPT1       |
| SV2A. 4     | 1. 37E-14 | -0. 42747 | 0. 015 | 0. 206 | 2. 04E-10 Mcy | SV2A       |
| ZNF367      | 1. 37E-14 | 0. 150732 | 0. 106 | 0. 027 | 2. 05E-10 Mcy | ZNF367     |
| CTSD. 5     | 1. 43E-14 | 0. 252008 | 0. 872 | 0. 634 | 2. 14E-10 Mcy | CTSD       |
| CLEC12A. 3  | 1. 45E-14 | 0. 161719 | 0. 084 | 0. 018 | 2. 16E-10 Mcy | CLEC12A    |
| PIF1. 2     | 1. 46E-14 | 0. 253801 | 0. 15  | 0. 048 | 2. 18E-10 Mcy | PIF1       |
| ST6GAL1. 4  | 1. 47E-14 | 0. 206021 | 0. 267 | 0. 106 | 2. 20E-10 Mcy | ST6GAL1    |
| EMG1. 2     | 1. 58E-14 | 0. 305242 | 0. 421 | 0. 23  | 2. 36E-10 Mcy | EMG1       |
| CALM2. 5    | 1. 58E-14 | -0. 19688 | 0. 971 | 0. 931 | 2. 36E-10 Mcy | CALM2      |
| CALM1. 6    | 1. 60E-14 | -0. 26042 | 0. 791 | 0. 771 | 2. 38E-10 Mcy | CALM1      |
| CARD8. 5    | 1. 63E-14 | 0. 271334 | 0. 315 | 0. 145 | 2. 43E-10 Mcy | CARD8      |
| MYOF. 3     | 1. 63E-14 | 0. 183026 | 0. 139 | 0. 042 | 2. 44E-10 Mcy | MYOF       |
| GSTA4. 5    | 1. 69E-14 | -0. 60125 | 0. 084 | 0. 295 | 2. 53E-10 Mcy | GSTA4      |
| AGT. 4      | 1. 75E-14 | -0. 73551 | 0. 029 | 0. 224 | 2. 61E-10 Mcy | AGT        |
| PIK3CD. 3   | 1. 79E-14 | 0. 198209 | 0. 11  | 0. 029 | 2. 67E-10 Mcy | PIK3CD     |
| TMEM107. 1  | 1. 81E-14 | 0. 295624 | 0. 407 | 0. 213 | 2. 71E-10 Mcy | TMEM107    |
| RAP1A. 6    | 1. 82E-14 | 0. 257249 | 0. 751 | 0. 51  | 2. 72E-10 Mcy | RAP1A      |
| MYEF2. 5    | 1. 94E-14 | -0. 42321 | 0. 011 | 0. 198 | 2. 91E-10 Mcy | MYEF2      |
| CD40. 6     | 1. 96E-14 | 0. 220537 | 0. 187 | 0. 064 | 2. 93E-10 Mcy | CD40       |
| CNTRL. 5    | 1. 98E-14 | 0. 250063 | 0. 267 | 0. 115 | 2. 96E-10 Mcy | CNTRL      |
| MRE11A. 1   | 1. 99E-14 | 0. 207259 | 0. 158 | 0. 052 | 2. 97E-10 Mcy | MRE11A     |
| CASP10. 2   | 2. 06E-14 | 0. 133964 | 0. 099 | 0. 024 | 3. 08E-10 Mcy | CASP10     |
| BORA        | 2. 09E-14 | 0. 225281 | 0. 11  | 0. 029 | 3. 12E-10 Mcy | BORA       |
| KDELR1. 2   | 2. 11E-14 | 0. 300941 | 0. 729 | 0. 487 | 3. 16E-10 Mcy | KDELR1     |
| NUTM2A-AS   | 2. 47E-14 | 0. 321752 | 0. 278 | 0. 124 | 3. 70E-10 Mcy | NUTM2A-AS1 |
| FNDC4. 4    | 2. 65E-14 | -0. 43678 | 0. 015 | 0. 202 | 3. 96E-10 Mcy | FNDC4      |
| MAGI1. 6    | 2. 66E-14 | -0. 50932 | 0. 015 | 0. 202 | 3. 97E-10 Mcy | MAGI1      |
| BCAN. 6     | 2. 70E-14 | -0. 7874  | 0. 077 | 0. 28  | 4. 04E-10 Mcy | BCAN       |
| ISG15. 4    | 2. 79E-14 | 0. 312744 | 0. 579 | 0. 351 | 4. 16E-10 Mcy | ISG15      |
| VASP. 6     | 2. 80E-14 | 0. 257121 | 0. 436 | 0. 235 | 4. 19E-10 Mcy | VASP       |
| HIST1H2BJ   | 2. 89E-14 | 0. 183893 | 0. 081 | 0. 017 | 4. 33E-10 Mcy | HIST1H2BJ  |
| LHFPL2. 5   | 2. 90E-14 | 0. 261655 | 0. 337 | 0. 156 | 4. 33E-10 Mcy | LHFPL2     |
| BCKDK. 6    | 2. 91E-14 | 0. 28758  | 0. 516 | 0. 309 | 4. 35E-10 Mcy | BCKDK      |



|            |          |          |       |       |              |          |
|------------|----------|----------|-------|-------|--------------|----------|
| TMEM19.4   | 3.01E-14 | 0.275185 | 0.315 | 0.149 | 4.50E-10 Mcy | TMEM19   |
| REEP2.4    | 3.03E-14 | -0.43118 | 0.018 | 0.206 | 4.53E-10 Mcy | REEP2    |
| PRPS1.3    | 3.07E-14 | 0.33762  | 0.366 | 0.186 | 4.59E-10 Mcy | PRPS1    |
| CDK2AP2.4  | 3.10E-14 | 0.376802 | 0.535 | 0.324 | 4.63E-10 Mcy | CDK2AP2  |
| LMO4.6     | 3.11E-14 | -0.59086 | 0.315 | 0.482 | 4.65E-10 Mcy | LMO4     |
| GIMAP2.5   | 3.13E-14 | 0.221815 | 0.201 | 0.074 | 4.67E-10 Mcy | GIMAP2   |
| MEX3A.5    | 3.32E-14 | -0.49041 | 0.004 | 0.182 | 4.96E-10 Mcy | MEX3A    |
| ITGB8.4    | 3.32E-14 | -0.50296 | 0.048 | 0.244 | 4.97E-10 Mcy | ITGB8    |
| ARC.4      | 3.36E-14 | -0.68383 | 0.026 | 0.212 | 5.03E-10 Mcy | ARC      |
| RHBDF2.6   | 3.56E-14 | 0.230512 | 0.377 | 0.173 | 5.32E-10 Mcy | RHBDF2   |
| FAR2.3     | 3.86E-14 | 0.131547 | 0.161 | 0.053 | 5.77E-10 Mcy | FAR2     |
| HSD11B1L.3 | 3.87E-14 | -0.45597 | 0.022 | 0.209 | 5.78E-10 Mcy | HSD11B1L |
| MINOS1.4   | 4.10E-14 | 0.229436 | 0.853 | 0.634 | 6.12E-10 Mcy | MINOS1   |
| CD302.6    | 4.13E-14 | 0.195742 | 0.407 | 0.2   | 6.18E-10 Mcy | CD302    |
| PDK4.5     | 4.16E-14 | 0.179357 | 0.37  | 0.165 | 6.21E-10 Mcy | PDK4     |
| C7orf55.5  | 4.22E-14 | -0.61476 | 0.227 | 0.428 | 6.30E-10 Mcy | C7orf55  |
| KCTD9.1    | 4.32E-14 | 0.253926 | 0.158 | 0.053 | 6.45E-10 Mcy | KCTD9    |
| FJX1.5     | 4.39E-14 | -0.51048 | 0.018 | 0.206 | 6.56E-10 Mcy | FJX1     |
| PRRX1.6    | 4.52E-14 | -0.46563 | 0     | 0.175 | 6.76E-10 Mcy | PRRX1    |
| RAB13.5    | 4.54E-14 | 0.193359 | 0.615 | 0.366 | 6.78E-10 Mcy | RAB13    |
| CALM3.5    | 4.66E-14 | 0.300554 | 0.817 | 0.587 | 6.97E-10 Mcy | CALM3    |
| PCBD1.2    | 4.83E-14 | 0.283704 | 0.535 | 0.326 | 7.22E-10 Mcy | PCBD1    |
| CSE1L.5    | 4.88E-14 | 0.328369 | 0.396 | 0.218 | 7.29E-10 Mcy | CSE1L    |
| SUV39H1.4  | 4.89E-14 | 0.215283 | 0.117 | 0.033 | 7.31E-10 Mcy | SUV39H1  |
| GAS6.5     | 5.27E-14 | 0.278687 | 0.403 | 0.2   | 7.87E-10 Mcy | GAS6     |
| SMC3.4     | 5.38E-14 | 0.352039 | 0.473 | 0.281 | 8.04E-10 Mcy | SMC3     |
| CHD7.6     | 5.38E-14 | -0.54616 | 0.084 | 0.294 | 8.04E-10 Mcy | CHD7     |
| TNFSF10.3  | 5.39E-14 | 0.185584 | 0.198 | 0.071 | 8.06E-10 Mcy | TNFSF10  |
| SRPX.5     | 5.47E-14 | -0.57191 | 0.004 | 0.181 | 8.18E-10 Mcy | SRPX     |
| CHCHD2.4   | 5.49E-14 | -0.18659 | 0.93  | 0.879 | 8.20E-10 Mcy | CHCHD2   |
| BOLA3.3    | 5.72E-14 | 0.335136 | 0.535 | 0.331 | 8.55E-10 Mcy | BOLA3    |
| MTHFS.4    | 5.79E-14 | 0.219291 | 0.366 | 0.185 | 8.66E-10 Mcy | MTHFS    |
| ARL2.3     | 6.09E-14 | 0.245412 | 0.67  | 0.433 | 9.10E-10 Mcy | ARL2     |
| SPTBN1.4   | 6.40E-14 | -0.52008 | 0.073 | 0.279 | 9.56E-10 Mcy | SPTBN1   |
| MYO1G.6    | 6.51E-14 | 0.189258 | 0.172 | 0.058 | 9.72E-10 Mcy | MYO1G    |
| MBD4.4     | 6.68E-14 | 0.325014 | 0.458 | 0.259 | 9.99E-10 Mcy | MBD4     |
| BMP2K.4    | 7.21E-14 | 0.254001 | 0.267 | 0.113 | 1.08E-09 Mcy | BMP2K    |
| OSCAR.6    | 7.49E-14 | 0.209526 | 0.194 | 0.07  | 1.12E-09 Mcy | OSCAR    |
| CHAC2.7    | 7.71E-14 | 0.179892 | 0.139 | 0.044 | 1.15E-09 Mcy | CHAC2    |
| ERP29.3    | 8.08E-14 | 0.215972 | 0.832 | 0.606 | 1.21E-09 Mcy | ERP29    |
| NAT1.1     | 8.15E-14 | 0.113325 | 0.088 | 0.02  | 1.22E-09 Mcy | NAT1     |
| GLIPR2.5   | 8.25E-14 | 0.378859 | 0.465 | 0.264 | 1.23E-09 Mcy | GLIPR2   |
| CUTC.1     | 8.37E-14 | 0.211685 | 0.275 | 0.122 | 1.25E-09 Mcy | CUTC     |
| PHYHIPL.4  | 9.37E-14 | -0.60103 | 0.011 | 0.189 | 1.40E-09 Mcy | PHYHIPL  |
| FDPS.4     | 1.02E-13 | 0.257661 | 0.63  | 0.411 | 1.52E-09 Mcy | FDPS     |
| TGFBR2.5   | 1.02E-13 | 0.267573 | 0.264 | 0.113 | 1.52E-09 Mcy | TGFBR2   |
| CCL5.3     | 1.03E-13 | 0.135739 | 0.161 | 0.053 | 1.54E-09 Mcy | CCL5     |
| UBE2A.2    | 1.04E-13 | 0.248877 | 0.63  | 0.417 | 1.56E-09 Mcy | UBE2A    |
| PSMG2.2    | 1.10E-13 | 0.325587 | 0.612 | 0.407 | 1.64E-09 Mcy | PSMG2    |
| HAT1.1     | 1.10E-13 | 0.330541 | 0.491 | 0.292 | 1.65E-09 Mcy | HAT1     |
| TMEM71.1   | 1.11E-13 | 0.1427   | 0.095 | 0.023 | 1.66E-09 Mcy | TMEM71   |

|              |           |           |        |        |               |               |
|--------------|-----------|-----------|--------|--------|---------------|---------------|
| SSR3. 6      | 1. 31E-13 | 0. 229577 | 0. 762 | 0. 521 | 1. 96E-09 Mcy | SSR3          |
| DBNL. 6      | 1. 34E-13 | 0. 265998 | 0. 634 | 0. 42  | 2. 00E-09 Mcy | DBNL          |
| ANAPC16. 4   | 1. 38E-13 | 0. 211591 | 0. 758 | 0. 52  | 2. 06E-09 Mcy | ANAPC16       |
| PTPN1. 5     | 1. 39E-13 | 0. 323623 | 0. 41  | 0. 228 | 2. 08E-09 Mcy | PTPN1         |
| IP6K2. 5     | 1. 43E-13 | -0. 57525 | 0. 238 | 0. 439 | 2. 14E-09 Mcy | IP6K2         |
| CHST12. 4    | 1. 47E-13 | -0. 45832 | 0. 051 | 0. 25  | 2. 19E-09 Mcy | CHST12        |
| AP000439. 1  | 1. 55E-13 | 0. 184688 | 0. 099 | 0. 025 | 2. 31E-09 Mcy | AP000439. 1   |
| IL1RL2. 1    | 1. 56E-13 | 0. 152147 | 0. 037 | 0. 004 | 2. 33E-09 Mcy | IL1RL2        |
| ATP6VOD1. 1  | 1. 57E-13 | 0. 262781 | 0. 733 | 0. 505 | 2. 34E-09 Mcy | ATP6VOD1      |
| C4orf46. 1   | 1. 59E-13 | 0. 28754  | 0. 19  | 0. 073 | 2. 37E-09 Mcy | C4orf46       |
| ANXA7. 5     | 1. 59E-13 | 0. 249941 | 0. 549 | 0. 334 | 2. 38E-09 Mcy | ANXA7         |
| MTHFD1. 3    | 1. 65E-13 | 0. 286538 | 0. 348 | 0. 183 | 2. 47E-09 Mcy | MTHFD1        |
| C12orf57. 1  | 1. 72E-13 | -0. 59928 | 0. 366 | 0. 541 | 2. 57E-09 Mcy | C12orf57      |
| CADM2. 5     | 1. 77E-13 | -0. 53928 | 0. 015 | 0. 192 | 2. 65E-09 Mcy | CADM2         |
| RHOBTB3. 6   | 1. 78E-13 | -0. 54737 | 0. 212 | 0. 413 | 2. 66E-09 Mcy | RHOBTB3       |
| ZDHHC6. 2    | 1. 81E-13 | 0. 235039 | 0. 33  | 0. 164 | 2. 71E-09 Mcy | ZDHHC6        |
| MEIS2. 5     | 1. 82E-13 | -0. 50388 | 0. 026 | 0. 208 | 2. 72E-09 Mcy | MEIS2         |
| GSTM3. 4     | 1. 86E-13 | -0. 56928 | 0. 073 | 0. 273 | 2. 78E-09 Mcy | GSTM3         |
| RPN1. 3      | 1. 87E-13 | 0. 287665 | 0. 623 | 0. 405 | 2. 80E-09 Mcy | RPN1          |
| SPPL2A. 6    | 1. 89E-13 | 0. 268167 | 0. 355 | 0. 18  | 2. 83E-09 Mcy | SPPL2A        |
| ATP6V1C1. 1  | 1. 90E-13 | 0. 274057 | 0. 429 | 0. 239 | 2. 83E-09 Mcy | ATP6V1C1      |
| CENPQ. 1     | 1. 90E-13 | 0. 264609 | 0. 227 | 0. 096 | 2. 84E-09 Mcy | CENPQ         |
| TNFAIP8L3. 2 | 2. 04E-13 | 0. 124899 | 0. 103 | 0. 027 | 3. 05E-09 Mcy | TNFAIP8L3     |
| RPP25. 1     | 2. 13E-13 | 0. 174696 | 0. 103 | 0. 027 | 3. 18E-09 Mcy | RPP25         |
| SUB1. 4      | 2. 30E-13 | -0. 26903 | 0. 773 | 0. 756 | 3. 44E-09 Mcy | SUB1          |
| IRAK1. 4     | 2. 33E-13 | 0. 326441 | 0. 311 | 0. 154 | 3. 48E-09 Mcy | IRAK1         |
| SNRPC. 2     | 2. 36E-13 | 0. 221763 | 0. 725 | 0. 507 | 3. 52E-09 Mcy | SNRPC         |
| NR4A1. 6     | 2. 38E-13 | 0. 192371 | 0. 52  | 0. 267 | 3. 55E-09 Mcy | NR4A1         |
| DERA. 2      | 2. 44E-13 | 0. 22873  | 0. 443 | 0. 247 | 3. 64E-09 Mcy | DERA          |
| CD63. 5      | 2. 44E-13 | -0. 2867  | 0. 956 | 0. 924 | 3. 65E-09 Mcy | CD63          |
| SNRPA1. 4    | 2. 46E-13 | 0. 318144 | 0. 487 | 0. 29  | 3. 68E-09 Mcy | SNRPA1        |
| ASPH. 3      | 2. 52E-13 | 0. 302106 | 0. 454 | 0. 273 | 3. 77E-09 Mcy | ASPH          |
| CALHM2. 4    | 2. 59E-13 | 0. 214123 | 0. 165 | 0. 057 | 3. 87E-09 Mcy | CALHM2        |
| HLA-E. 6     | 2. 76E-13 | 0. 225308 | 0. 879 | 0. 589 | 4. 12E-09 Mcy | HLA-E         |
| PSMA5. 2     | 2. 86E-13 | 0. 297143 | 0. 641 | 0. 438 | 4. 28E-09 Mcy | PSMA5         |
| LSM2. 3      | 2. 90E-13 | 0. 287525 | 0. 667 | 0. 442 | 4. 33E-09 Mcy | LSM2          |
| F2R. 6       | 2. 90E-13 | -0. 38709 | 0. 004 | 0. 173 | 4. 34E-09 Mcy | F2R           |
| AQP9. 2      | 2. 97E-13 | 0. 148266 | 0. 103 | 0. 027 | 4. 44E-09 Mcy | AQP9          |
| MAPK8IP1. 3  | 3. 11E-13 | -0. 46964 | 0. 018 | 0. 195 | 4. 65E-09 Mcy | MAPK8IP1      |
| OASL. 2      | 3. 38E-13 | 0. 156673 | 0. 103 | 0. 027 | 5. 05E-09 Mcy | OASL          |
| EIF4EBP2. 3  | 3. 43E-13 | 0. 252883 | 0. 293 | 0. 137 | 5. 12E-09 Mcy | EIF4EBP2      |
| PARP9. 1     | 3. 43E-13 | 0. 25802  | 0. 333 | 0. 166 | 5. 13E-09 Mcy | PARP9         |
| RP11-536K. 3 | 3. 45E-13 | 0. 175535 | 0. 121 | 0. 035 | 5. 16E-09 Mcy | RP11-536K7. 3 |
| CTSF. 5      | 3. 47E-13 | -0. 48892 | 0. 077 | 0. 274 | 5. 19E-09 Mcy | CTSF          |
| ITGAE. 1     | 3. 52E-13 | 0. 382378 | 0. 564 | 0. 36  | 5. 27E-09 Mcy | ITGAE         |
| ROB01. 6     | 3. 65E-13 | -0. 42525 | 0. 011 | 0. 182 | 5. 46E-09 Mcy | ROB01         |
| ATP6V1B2. 3  | 3. 78E-13 | 0. 264711 | 0. 626 | 0. 403 | 5. 65E-09 Mcy | ATP6V1B2      |
| CCDC57. 6    | 3. 84E-13 | 0. 329207 | 0. 242 | 0. 104 | 5. 74E-09 Mcy | CCDC57        |
| NUP93. 2     | 3. 86E-13 | 0. 292173 | 0. 344 | 0. 177 | 5. 77E-09 Mcy | NUP93         |
| NR2F1. 3     | 3. 87E-13 | -0. 38799 | 0. 004 | 0. 169 | 5. 78E-09 Mcy | NR2F1         |
| TANGO2. 6    | 3. 92E-13 | 0. 181853 | 0. 209 | 0. 082 | 5. 86E-09 Mcy | TANGO2        |

|           |           |           |        |        |           |     |          |
|-----------|-----------|-----------|--------|--------|-----------|-----|----------|
| FAM72B. 1 | 4. 07E-13 | 0. 102789 | 0. 084 | 0. 02  | 6. 08E-09 | Mcy | FAM72B   |
| NUTF2. 2  | 4. 24E-13 | 0. 262254 | 0. 637 | 0. 445 | 6. 33E-09 | Mcy | NUTF2    |
| CTXN1. 6  | 4. 26E-13 | -0. 3715  | 0      | 0. 163 | 6. 36E-09 | Mcy | CTXN1    |
| DKK3. 4   | 4. 38E-13 | -0. 44195 | 0. 026 | 0. 204 | 6. 54E-09 | Mcy | DKK3     |
| DDX11     | 4. 41E-13 | 0. 25157  | 0. 147 | 0. 049 | 6. 59E-09 | Mcy | DDX11    |
| MTX1. 1   | 4. 42E-13 | 0. 327005 | 0. 418 | 0. 241 | 6. 60E-09 | Mcy | MTX1     |
| SNRPA. 2  | 4. 63E-13 | 0. 29745  | 0. 436 | 0. 248 | 6. 92E-09 | Mcy | SNRPA    |
| DCTPP1. 3 | 4. 69E-13 | 0. 309583 | 0. 513 | 0. 326 | 7. 01E-09 | Mcy | DCTPP1   |
| PHF14. 5  | 4. 71E-13 | -0. 5139  | 0. 234 | 0. 427 | 7. 04E-09 | Mcy | PHF14    |
| PGD. 4    | 4. 76E-13 | 0. 278643 | 0. 491 | 0. 288 | 7. 11E-09 | Mcy | PGD      |
| PGP. 3    | 4. 82E-13 | 0. 356185 | 0. 388 | 0. 215 | 7. 21E-09 | Mcy | PGP      |
| DCX. 6    | 4. 84E-13 | -0. 62986 | 0. 033 | 0. 208 | 7. 24E-09 | Mcy | DCX      |
| LSAMP. 4  | 4. 96E-13 | -0. 52808 | 0. 007 | 0. 176 | 7. 41E-09 | Mcy | LSAMP    |
| DNP1. 3   | 4. 96E-13 | 0. 320346 | 0. 582 | 0. 372 | 7. 42E-09 | Mcy | DNP1     |
| STIL      | 4. 97E-13 | 0. 175034 | 0. 077 | 0. 017 | 7. 42E-09 | Mcy | STIL     |
| PGAP1. 5  | 5. 00E-13 | -0. 4133  | 0. 015 | 0. 187 | 7. 47E-09 | Mcy | PGAP1    |
| NPAS3. 6  | 5. 03E-13 | -0. 40392 | 0      | 0. 162 | 7. 51E-09 | Mcy | NPAS3    |
| BNC2. 2   | 5. 05E-13 | 0. 110846 | 0. 095 | 0. 024 | 7. 55E-09 | Mcy | BNC2     |
| IMPDH2. 6 | 5. 32E-13 | 0. 261654 | 0. 626 | 0. 411 | 7. 95E-09 | Mcy | IMPDH2   |
| APOBR. 5  | 5. 69E-13 | 0. 226236 | 0. 121 | 0. 036 | 8. 51E-09 | Mcy | APOBR    |
| HIST1H3H  | 5. 74E-13 | 0. 107288 | 0. 026 | 0. 002 | 8. 57E-09 | Mcy | HIST1H3H |
| PSMA3. 4  | 5. 78E-13 | 0. 265132 | 0. 637 | 0. 436 | 8. 64E-09 | Mcy | PSMA3    |
| DTX3. 3   | 5. 82E-13 | -0. 57761 | 0. 07  | 0. 26  | 8. 70E-09 | Mcy | DTX3     |
| HOPX. 5   | 5. 89E-13 | -0. 91978 | 0. 106 | 0. 286 | 8. 80E-09 | Mcy | HOPX     |
| SEPHS1. 3 | 5. 99E-13 | 0. 353864 | 0. 242 | 0. 11  | 8. 95E-09 | Mcy | SEPHS1   |
| CD320. 4  | 5. 99E-13 | -0. 5224  | 0. 125 | 0. 322 | 8. 96E-09 | Mcy | CD320    |
| NUDT14. 6 | 6. 06E-13 | 0. 279746 | 0. 37  | 0. 188 | 9. 05E-09 | Mcy | NUDT14   |
| CR1. 1    | 6. 14E-13 | 0. 144608 | 0. 055 | 0. 01  | 9. 18E-09 | Mcy | CR1      |
| TOR1A. 3  | 6. 24E-13 | 0. 33991  | 0. 443 | 0. 257 | 9. 32E-09 | Mcy | TOR1A    |
| FERMT2. 6 | 6. 25E-13 | -0. 44614 | 0. 029 | 0. 206 | 9. 34E-09 | Mcy | FERMT2   |
| FCN1. 2   | 6. 66E-13 | 0. 117418 | 0. 051 | 0. 008 | 9. 95E-09 | Mcy | FCN1     |
| ENSA. 4   | 6. 85E-13 | 0. 18441  | 0. 725 | 0. 495 | 1. 02E-08 | Mcy | ENSA     |
| CYB561A3. | 6. 90E-13 | 0. 217141 | 0. 308 | 0. 147 | 1. 03E-08 | Mcy | CYB561A3 |
| CHMP4A. 5 | 6. 91E-13 | 0. 262539 | 0. 678 | 0. 463 | 1. 03E-08 | Mcy | CHMP4A   |
| SEMA6D. 6 | 7. 25E-13 | -0. 43105 | 0      | 0. 161 | 1. 08E-08 | Mcy | SEMA6D   |
| SPOCD1. 4 | 7. 32E-13 | -0. 79484 | 0. 04  | 0. 222 | 1. 09E-08 | Mcy | SPOCD1   |
| KDM5B. 5  | 7. 68E-13 | -0. 40279 | 0. 004 | 0. 166 | 1. 15E-08 | Mcy | KDM5B    |
| KLC1. 6   | 7. 68E-13 | -0. 55013 | 0. 172 | 0. 364 | 1. 15E-08 | Mcy | KLC1     |
| MAP2K1. 6 | 7. 82E-13 | 0. 271952 | 0. 458 | 0. 264 | 1. 17E-08 | Mcy | MAP2K1   |
| DAPP1. 5  | 7. 90E-13 | 0. 153907 | 0. 099 | 0. 026 | 1. 18E-08 | Mcy | DAPP1    |
| BSG. 6    | 8. 05E-13 | -0. 30776 | 0. 74  | 0. 742 | 1. 20E-08 | Mcy | BSG      |
| NUP210. 1 | 8. 32E-13 | 0. 23215  | 0. 165 | 0. 06  | 1. 24E-08 | Mcy | NUP210   |
| COL9A3. 6 | 8. 47E-13 | -0. 53906 | 0. 018 | 0. 19  | 1. 27E-08 | Mcy | COL9A3   |
| MT1G. 5   | 8. 53E-13 | 0. 46804  | 0. 271 | 0. 124 | 1. 28E-08 | Mcy | MT1G     |
| IL1B. 6   | 9. 09E-13 | 0. 257689 | 0. 425 | 0. 217 | 1. 36E-08 | Mcy | IL1B     |
| PRR7. 6   | 9. 18E-13 | -0. 40413 | 0. 022 | 0. 192 | 1. 37E-08 | Mcy | PRR7     |
| CNIH3. 3  | 1. 02E-12 | -0. 42336 | 0. 007 | 0. 172 | 1. 52E-08 | Mcy | CNIH3    |
| EGR1. 4   | 1. 02E-12 | -0. 59202 | 0. 341 | 0. 5   | 1. 53E-08 | Mcy | EGR1     |
| TIMM8A. 2 | 1. 03E-12 | 0. 272671 | 0. 22  | 0. 095 | 1. 54E-08 | Mcy | TIMM8A   |
| BCHE. 4   | 1. 04E-12 | -0. 44244 | 0. 018 | 0. 19  | 1. 56E-08 | Mcy | BCHE     |
| AGTRAP. 3 | 1. 05E-12 | 0. 278423 | 0. 469 | 0. 277 | 1. 57E-08 | Mcy | AGTRAP   |

|             |           |           |        |        |               |              |
|-------------|-----------|-----------|--------|--------|---------------|--------------|
| FSD1. 5     | 1. 13E-12 | -0. 37483 | 0      | 0. 158 | 1. 69E-08 Mcy | FSD1         |
| NUCB1. 5    | 1. 23E-12 | 0. 208796 | 0. 667 | 0. 44  | 1. 83E-08 Mcy | NUCB1        |
| SNRNP40. 3  | 1. 23E-12 | 0. 300242 | 0. 509 | 0. 325 | 1. 84E-08 Mcy | SNRNP40      |
| HMG5        | 1. 26E-12 | 0. 26034  | 0. 212 | 0. 088 | 1. 88E-08 Mcy | HMG5         |
| BARD1. 5    | 1. 26E-12 | 0. 294958 | 0. 293 | 0. 143 | 1. 89E-08 Mcy | BARD1        |
| TMEM161B-   | 1. 26E-12 | -0. 62681 | 0. 106 | 0. 293 | 1. 89E-08 Mcy | TMEM161B-AS1 |
| CSNK1E. 5   | 1. 29E-12 | -0. 49284 | 0. 114 | 0. 311 | 1. 93E-08 Mcy | CSNK1E       |
| F3. 6       | 1. 30E-12 | -0. 51896 | 0. 026 | 0. 195 | 1. 94E-08 Mcy | F3           |
| SOX8. 6     | 1. 31E-12 | -0. 52343 | 0. 015 | 0. 181 | 1. 96E-08 Mcy | SOX8         |
| PSME1. 5    | 1. 32E-12 | 0. 183269 | 0. 817 | 0. 578 | 1. 97E-08 Mcy | PSME1        |
| MR1. 4      | 1. 36E-12 | 0. 158352 | 0. 212 | 0. 086 | 2. 03E-08 Mcy | MR1          |
| HEPACAM. 5  | 1. 39E-12 | -0. 5649  | 0. 015 | 0. 181 | 2. 08E-08 Mcy | HEPACAM      |
| DNAJC1. 3   | 1. 40E-12 | 0. 27732  | 0. 344 | 0. 181 | 2. 10E-08 Mcy | DNAJC1       |
| FCRLB       | 1. 40E-12 | 0. 11746  | 0. 095 | 0. 025 | 2. 10E-08 Mcy | FCRLB        |
| RAC1. 3     | 1. 43E-12 | -0. 16253 | 0. 769 | 0. 742 | 2. 13E-08 Mcy | RAC1         |
| ASH2L. 3    | 1. 46E-12 | 0. 34772  | 0. 333 | 0. 173 | 2. 18E-08 Mcy | ASH2L        |
| PHF11. 5    | 1. 48E-12 | 0. 210465 | 0. 293 | 0. 138 | 2. 21E-08 Mcy | PHF11        |
| NQO2. 3     | 1. 50E-12 | 0. 306361 | 0. 429 | 0. 249 | 2. 24E-08 Mcy | NQO2         |
| ARRB1. 5    | 1. 55E-12 | 0. 120168 | 0. 128 | 0. 039 | 2. 32E-08 Mcy | ARRB1        |
| FAM229B. 5  | 1. 56E-12 | -0. 49505 | 0. 099 | 0. 297 | 2. 33E-08 Mcy | FAM229B      |
| FBX05. 3    | 1. 58E-12 | 0. 334987 | 0. 216 | 0. 093 | 2. 36E-08 Mcy | FBX05        |
| CHL1. 4     | 1. 60E-12 | -0. 42054 | 0      | 0. 156 | 2. 39E-08 Mcy | CHL1         |
| FURIN. 4    | 1. 61E-12 | 0. 288985 | 0. 179 | 0. 069 | 2. 40E-08 Mcy | FURIN        |
| ZFYVE19. 1  | 1. 63E-12 | 0. 279097 | 0. 234 | 0. 104 | 2. 44E-08 Mcy | ZFYVE19      |
| DRAXIN. 5   | 1. 68E-12 | -0. 40955 | 0      | 0. 156 | 2. 52E-08 Mcy | DRAXIN       |
| CWF19L1     | 1. 81E-12 | 0. 183065 | 0. 139 | 0. 046 | 2. 71E-08 Mcy | CWF19L1      |
| ZSCAN18. 4  | 1. 82E-12 | -0. 47734 | 0. 055 | 0. 236 | 2. 71E-08 Mcy | ZSCAN18      |
| WIPF1. 6    | 1. 85E-12 | 0. 203971 | 0. 407 | 0. 215 | 2. 77E-08 Mcy | WIPF1        |
| ATP6VOE2. 1 | 1. 87E-12 | -0. 51233 | 0. 297 | 0. 456 | 2. 79E-08 Mcy | ATP6VOE2     |
| WDR1. 4     | 1. 88E-12 | 0. 235128 | 0. 626 | 0. 41  | 2. 81E-08 Mcy | WDR1         |
| PTRF. 6     | 1. 88E-12 | -0. 36019 | 0. 018 | 0. 189 | 2. 81E-08 Mcy | PTRF         |
| PNISR. 3    | 1. 89E-12 | -0. 37934 | 0. 502 | 0. 614 | 2. 83E-08 Mcy | PNISR        |
| LRRC45. 4   | 1. 91E-12 | 0. 236022 | 0. 205 | 0. 086 | 2. 86E-08 Mcy | LRRC45       |
| ZFH4. 6     | 1. 92E-12 | -0. 36067 | 0      | 0. 155 | 2. 87E-08 Mcy | ZFH4         |
| PPDPF. 2    | 1. 92E-12 | -0. 24141 | 0. 725 | 0. 711 | 2. 87E-08 Mcy | PPDPF        |
| SULT1A1. 4  | 1. 95E-12 | 0. 16608  | 0. 143 | 0. 047 | 2. 91E-08 Mcy | SULT1A1      |
| PNPLA4. 3   | 1. 98E-12 | 0. 13123  | 0. 168 | 0. 06  | 2. 96E-08 Mcy | PNPLA4       |
| XPNPEP1. 2  | 1. 99E-12 | 0. 296837 | 0. 286 | 0. 14  | 2. 97E-08 Mcy | XPNPEP1      |
| PTGS2. 6    | 2. 01E-12 | 0. 128467 | 0. 168 | 0. 059 | 3. 01E-08 Mcy | PTGS2        |
| SCLT1. 2    | 2. 02E-12 | 0. 368875 | 0. 172 | 0. 066 | 3. 01E-08 Mcy | SCLT1        |
| SLC25A39. 2 | 2. 04E-12 | 0. 253157 | 0. 608 | 0. 4   | 3. 05E-08 Mcy | SLC25A39     |
| TJP1. 4     | 2. 11E-12 | -0. 38974 | 0. 018 | 0. 184 | 3. 15E-08 Mcy | TJP1         |
| PLIN3. 3    | 2. 11E-12 | 0. 230106 | 0. 56  | 0. 353 | 3. 15E-08 Mcy | PLIN3        |
| ATP1B2. 6   | 2. 16E-12 | -0. 51189 | 0. 051 | 0. 237 | 3. 23E-08 Mcy | ATP1B2       |
| DBI. 6      | 2. 18E-12 | -0. 34669 | 0. 927 | 0. 841 | 3. 25E-08 Mcy | DBI          |
| SMTN        | 2. 21E-12 | 0. 228097 | 0. 11  | 0. 032 | 3. 30E-08 Mcy | SMTN         |
| SCIMP. 6    | 2. 21E-12 | 0. 233858 | 0. 205 | 0. 08  | 3. 31E-08 Mcy | SCIMP        |
| RND2. 5     | 2. 25E-12 | -0. 44111 | 0. 007 | 0. 167 | 3. 36E-08 Mcy | RND2         |
| NRG1. 1     | 2. 28E-12 | 0. 179948 | 0. 092 | 0. 024 | 3. 41E-08 Mcy | NRG1         |
| ZNF462. 6   | 2. 31E-12 | -0. 43087 | 0. 015 | 0. 181 | 3. 45E-08 Mcy | ZNF462       |
| CERS4. 5    | 2. 39E-12 | -0. 38811 | 0. 029 | 0. 203 | 3. 56E-08 Mcy | CERS4        |

|             |           |           |        |        |               |          |
|-------------|-----------|-----------|--------|--------|---------------|----------|
| ATP5E. 3    | 2. 42E-12 | -0. 15692 | 0. 971 | 0. 912 | 3. 62E-08 Mcy | ATP5E    |
| CD5L        | 2. 46E-12 | 0. 167456 | 0. 033 | 0. 004 | 3. 67E-08 Mcy | CD5L     |
| BLOC1S1. 3  | 2. 50E-12 | 0. 197853 | 0. 868 | 0. 643 | 3. 74E-08 Mcy | BLOC1S1  |
| SDHB. 2     | 2. 50E-12 | 0. 363705 | 0. 623 | 0. 419 | 3. 74E-08 Mcy | SDHB     |
| CD9. 2      | 2. 52E-12 | -0. 68125 | 0. 443 | 0. 568 | 3. 77E-08 Mcy | CD9      |
| FAM129B. 4  | 2. 55E-12 | 0. 40161  | 0. 179 | 0. 071 | 3. 80E-08 Mcy | FAM129B  |
| PRDX2. 6    | 2. 55E-12 | -0. 40098 | 0. 711 | 0. 701 | 3. 81E-08 Mcy | PRDX2    |
| TUBGCP3. 2  | 2. 57E-12 | 0. 281698 | 0. 231 | 0. 102 | 3. 84E-08 Mcy | TUBGCP3  |
| RNF144B. 5  | 2. 59E-12 | 0. 120109 | 0. 234 | 0. 095 | 3. 87E-08 Mcy | RNF144B  |
| TCEAL2. 4   | 2. 60E-12 | -0. 59953 | 0. 018 | 0. 183 | 3. 89E-08 Mcy | TCEAL2   |
| LZIC. 1     | 2. 63E-12 | 0. 320606 | 0. 337 | 0. 179 | 3. 93E-08 Mcy | LZIC     |
| CCL4. 5     | 2. 70E-12 | 0. 200027 | 0. 553 | 0. 319 | 4. 03E-08 Mcy | CCL4     |
| BCCIP. 1    | 2. 83E-12 | 0. 283187 | 0. 341 | 0. 18  | 4. 23E-08 Mcy | BCCIP    |
| GGCT. 5     | 2. 87E-12 | 0. 274617 | 0. 586 | 0. 382 | 4. 29E-08 Mcy | GGCT     |
| POLR2J3. 5  | 2. 87E-12 | -0. 42716 | 0. 136 | 0. 344 | 4. 29E-08 Mcy | POLR2J3  |
| LILRB2. 6   | 2. 89E-12 | 0. 252682 | 0. 15  | 0. 051 | 4. 32E-08 Mcy | LILRB2   |
| PLXNC1. 6   | 2. 96E-12 | 0. 226223 | 0. 172 | 0. 064 | 4. 43E-08 Mcy | PLXNC1   |
| MAN1A1. 5   | 2. 98E-12 | 0. 152783 | 0. 139 | 0. 046 | 4. 45E-08 Mcy | MAN1A1   |
| ZNF428. 6   | 3. 00E-12 | -0. 44248 | 0. 465 | 0. 547 | 4. 48E-08 Mcy | ZNF428   |
| MRPS25. 1   | 3. 05E-12 | 0. 302516 | 0. 436 | 0. 26  | 4. 56E-08 Mcy | MRPS25   |
| MLH1. 2     | 3. 15E-12 | 0. 26384  | 0. 3   | 0. 149 | 4. 71E-08 Mcy | MLH1     |
| GRIA3. 5    | 3. 20E-12 | -0. 38075 | 0. 011 | 0. 172 | 4. 78E-08 Mcy | GRIA3    |
| JAM3. 3     | 3. 25E-12 | -0. 39134 | 0      | 0. 153 | 4. 85E-08 Mcy | JAM3     |
| TUBB2A. 5   | 3. 31E-12 | -0. 5516  | 0. 337 | 0. 481 | 4. 95E-08 Mcy | TUBB2A   |
| C9orf142. 3 | 3. 42E-12 | 0. 299165 | 0. 568 | 0. 371 | 5. 11E-08 Mcy | C9orf142 |
| LBR. 3      | 3. 51E-12 | 0. 253094 | 0. 407 | 0. 228 | 5. 25E-08 Mcy | LBR      |
| GHITM. 5    | 3. 56E-12 | 0. 171883 | 0. 736 | 0. 518 | 5. 32E-08 Mcy | GHITM    |
| TTC7A. 6    | 3. 61E-12 | 0. 192227 | 0. 187 | 0. 072 | 5. 39E-08 Mcy | TTC7A    |
| PPM1M. 6    | 3. 84E-12 | 0. 15297  | 0. 187 | 0. 072 | 5. 73E-08 Mcy | PPM1M    |
| NDRG4. 6    | 3. 87E-12 | -0. 41157 | 0. 007 | 0. 164 | 5. 78E-08 Mcy | NDRG4    |
| KLF11. 4    | 3. 94E-12 | 0. 156797 | 0. 121 | 0. 037 | 5. 88E-08 Mcy | KLF11    |
| PGM2L1. 5   | 3. 99E-12 | -0. 53561 | 0. 077 | 0. 26  | 5. 96E-08 Mcy | PGM2L1   |
| STAT5A. 5   | 4. 07E-12 | 0. 132843 | 0. 147 | 0. 05  | 6. 08E-08 Mcy | STAT5A   |
| ARPC5. 5    | 4. 12E-12 | 0. 230321 | 0. 875 | 0. 667 | 6. 15E-08 Mcy | ARPC5    |
| SPN. 6      | 4. 18E-12 | 0. 180697 | 0. 154 | 0. 053 | 6. 25E-08 Mcy | SPN      |
| TMC6. 6     | 4. 24E-12 | 0. 134351 | 0. 256 | 0. 108 | 6. 34E-08 Mcy | TMC6     |
| POU3F3. 5   | 4. 25E-12 | -0. 37962 | 0. 004 | 0. 158 | 6. 35E-08 Mcy | POU3F3   |
| MUM1. 6     | 4. 33E-12 | -0. 48772 | 0. 172 | 0. 368 | 6. 48E-08 Mcy | MUM1     |
| FOXG1. 5    | 4. 34E-12 | -0. 34921 | 0. 004 | 0. 157 | 6. 48E-08 Mcy | FOXG1    |
| BCAR1. 4    | 4. 46E-12 | -0. 39052 | 0. 015 | 0. 175 | 6. 66E-08 Mcy | BCAR1    |
| SPARCL1. 5  | 4. 62E-12 | -0. 70855 | 0. 168 | 0. 35  | 6. 90E-08 Mcy | SPARCL1  |
| SF3A3. 2    | 4. 63E-12 | 0. 297212 | 0. 454 | 0. 282 | 6. 92E-08 Mcy | SF3A3    |
| GLYCTK. 2   | 4. 67E-12 | 0. 144428 | 0. 099 | 0. 027 | 6. 98E-08 Mcy | GLYCTK   |
| PCBD2. 1    | 4. 86E-12 | 0. 305627 | 0. 194 | 0. 081 | 7. 27E-08 Mcy | PCBD2    |
| GLIPR1. 5   | 5. 01E-12 | 0. 142974 | 0. 568 | 0. 329 | 7. 48E-08 Mcy | GLIPR1   |
| EZR. 4      | 5. 01E-12 | 0. 274844 | 0. 542 | 0. 337 | 7. 49E-08 Mcy | EZR      |
| TMC8. 4     | 5. 24E-12 | 0. 123382 | 0. 128 | 0. 04  | 7. 83E-08 Mcy | TMC8     |
| HLA-DRA. 5  | 5. 35E-12 | 0. 161713 | 0. 978 | 0. 625 | 7. 99E-08 Mcy | HLA-DRA  |
| ACTL6A. 4   | 5. 37E-12 | 0. 268639 | 0. 429 | 0. 254 | 8. 02E-08 Mcy | ACTL6A   |
| TELO2. 1    | 5. 37E-12 | 0. 233349 | 0. 267 | 0. 127 | 8. 03E-08 Mcy | TELO2    |
| COMMD9. 4   | 5. 38E-12 | 0. 305735 | 0. 491 | 0. 305 | 8. 05E-08 Mcy | COMMD9   |

|             |           |           |        |        |               |           |
|-------------|-----------|-----------|--------|--------|---------------|-----------|
| PSAT1. 5    | 5. 45E-12 | -0. 51759 | 0. 037 | 0. 207 | 8. 14E-08 Mcy | PSAT1     |
| TPRG1-AS1   | 5. 65E-12 | 0. 107614 | 0. 059 | 0. 011 | 8. 45E-08 Mcy | TPRG1-AS1 |
| RBM47. 6    | 5. 77E-12 | 0. 195719 | 0. 256 | 0. 113 | 8. 63E-08 Mcy | RBM47     |
| NUP98       | 5. 93E-12 | 0. 212321 | 0. 22  | 0. 094 | 8. 86E-08 Mcy | NUP98     |
| S100A10. 6  | 6. 11E-12 | 0. 202188 | 0. 813 | 0. 538 | 9. 13E-08 Mcy | S100A10   |
| KIF3A. 4    | 6. 32E-12 | -0. 49519 | 0. 062 | 0. 238 | 9. 45E-08 Mcy | KIF3A     |
| DCLK2. 6    | 6. 40E-12 | -0. 40257 | 0. 033 | 0. 2   | 9. 57E-08 Mcy | DCLK2     |
| NUP50. 3    | 6. 46E-12 | 0. 267766 | 0. 245 | 0. 114 | 9. 65E-08 Mcy | NUP50     |
| MITF. 5     | 6. 51E-12 | 0. 156112 | 0. 22  | 0. 091 | 9. 73E-08 Mcy | MITF      |
| SNX8. 5     | 6. 82E-12 | 0. 234749 | 0. 293 | 0. 143 | 1. 02E-07 Mcy | SNX8      |
| SMAD1. 4    | 7. 25E-12 | -0. 37939 | 0. 018 | 0. 181 | 1. 08E-07 Mcy | SMAD1     |
| HAUS7       | 7. 31E-12 | 0. 28679  | 0. 209 | 0. 088 | 1. 09E-07 Mcy | HAUS7     |
| GLRX. 5     | 7. 45E-12 | 0. 171523 | 0. 634 | 0. 382 | 1. 11E-07 Mcy | GLRX      |
| ZNF302. 5   | 7. 58E-12 | -0. 47835 | 0. 114 | 0. 319 | 1. 13E-07 Mcy | ZNF302    |
| TMEM132A. 7 | 6. 9E-12  | -0. 32799 | 0      | 0. 148 | 1. 15E-07 Mcy | TMEM132A  |
| ACOT9. 6    | 7. 70E-12 | 0. 203409 | 0. 341 | 0. 178 | 1. 15E-07 Mcy | ACOT9     |
| TMEM219. 5  | 7. 81E-12 | 0. 205908 | 0. 795 | 0. 555 | 1. 17E-07 Mcy | TMEM219   |
| ZEB1. 6     | 7. 97E-12 | -0. 40519 | 0. 029 | 0. 196 | 1. 19E-07 Mcy | ZEB1      |
| FMN1. 5     | 8. 07E-12 | 0. 104373 | 0. 106 | 0. 031 | 1. 21E-07 Mcy | FMN1      |
| TNFAIP3. 6  | 8. 17E-12 | 0. 20949  | 0. 33  | 0. 159 | 1. 22E-07 Mcy | TNFAIP3   |
| C2. 4       | 8. 22E-12 | 0. 230452 | 0. 253 | 0. 112 | 1. 23E-07 Mcy | C2        |
| GALNT6. 2   | 8. 23E-12 | 0. 213592 | 0. 099 | 0. 028 | 1. 23E-07 Mcy | GALNT6    |
| LRCH4. 6    | 8. 33E-12 | 0. 24245  | 0. 355 | 0. 184 | 1. 25E-07 Mcy | LRCH4     |
| SFT2D1. 6   | 8. 47E-12 | 0. 228575 | 0. 722 | 0. 496 | 1. 27E-07 Mcy | SFT2D1    |
| FGD4. 6     | 8. 48E-12 | 0. 174607 | 0. 304 | 0. 143 | 1. 27E-07 Mcy | FGD4      |
| FAIM2. 5    | 8. 56E-12 | -0. 5226  | 0. 029 | 0. 195 | 1. 28E-07 Mcy | FAIM2     |
| HADHA. 3    | 8. 56E-12 | 0. 267692 | 0. 641 | 0. 437 | 1. 28E-07 Mcy | HADHA     |
| RAB1B. 2    | 8. 60E-12 | 0. 319969 | 0. 399 | 0. 232 | 1. 29E-07 Mcy | RAB1B     |
| PDCD4. 6    | 8. 71E-12 | 0. 17719  | 0. 304 | 0. 145 | 1. 30E-07 Mcy | PDCD4     |
| HNRNPF. 4   | 9. 10E-12 | 0. 20796  | 0. 7   | 0. 504 | 1. 36E-07 Mcy | HNRNPF    |
| CTNND2. 5   | 9. 19E-12 | -0. 37293 | 0. 007 | 0. 161 | 1. 37E-07 Mcy | CTNND2    |
| DCP2. 4     | 9. 34E-12 | 0. 269466 | 0. 293 | 0. 147 | 1. 40E-07 Mcy | DCP2      |
| OLFM1. 5    | 9. 36E-12 | -0. 40666 | 0. 004 | 0. 154 | 1. 40E-07 Mcy | OLFM1     |
| PPCS. 3     | 9. 37E-12 | 0. 205014 | 0. 52  | 0. 316 | 1. 40E-07 Mcy | PPCS      |
| ARPC3. 4    | 9. 56E-12 | 0. 239663 | 0. 974 | 0. 8   | 1. 43E-07 Mcy | ARPC3     |
| RAB34. 3    | 9. 61E-12 | 0. 288338 | 0. 495 | 0. 278 | 1. 44E-07 Mcy | RAB34     |
| CPED1. 3    | 9. 61E-12 | 0. 112462 | 0. 106 | 0. 031 | 1. 44E-07 Mcy | CPED1     |
| AKAP12. 6   | 9. 75E-12 | -0. 51966 | 0. 029 | 0. 191 | 1. 46E-07 Mcy | AKAP12    |
| SH3BP1. 6   | 1. 00E-11 | 0. 191973 | 0. 245 | 0. 109 | 1. 50E-07 Mcy | SH3BP1    |
| ACTR2. 6    | 1. 01E-11 | 0. 250896 | 0. 645 | 0. 454 | 1. 50E-07 Mcy | ACTR2     |
| GYG1. 3     | 1. 02E-11 | 0. 294796 | 0. 429 | 0. 25  | 1. 52E-07 Mcy | GYG1      |
| KCNQ10T1. 1 | 0. 6E-11  | -0. 55153 | 0. 099 | 0. 282 | 1. 59E-07 Mcy | KCNQ10T1  |
| FAM134B. 4  | 1. 07E-11 | -0. 40599 | 0. 015 | 0. 169 | 1. 60E-07 Mcy | FAM134B   |
| COL15A1     | 1. 07E-11 | 0. 125355 | 0. 048 | 0. 008 | 1. 60E-07 Mcy | COL15A1   |
| ACSL6. 1    | 1. 07E-11 | 0. 126166 | 0. 136 | 0. 045 | 1. 60E-07 Mcy | ACSL6     |
| NIT2. 1     | 1. 11E-11 | 0. 273084 | 0. 396 | 0. 225 | 1. 66E-07 Mcy | NIT2      |
| RNF24. 3    | 1. 12E-11 | -0. 43819 | 0. 073 | 0. 252 | 1. 67E-07 Mcy | RNF24     |
| HCCS        | 1. 12E-11 | 0. 32401  | 0. 315 | 0. 164 | 1. 68E-07 Mcy | HCCS      |
| XIST. 6     | 1. 16E-11 | 0. 179165 | 0. 498 | 0. 26  | 1. 73E-07 Mcy | XIST      |
| IL15RA. 2   | 1. 17E-11 | 0. 234481 | 0. 103 | 0. 03  | 1. 74E-07 Mcy | IL15RA    |
| TLE3. 5     | 1. 19E-11 | 0. 316716 | 0. 286 | 0. 134 | 1. 78E-07 Mcy | TLE3      |

|            |           |           |        |        |               |         |
|------------|-----------|-----------|--------|--------|---------------|---------|
| ICAM2. 5   | 1. 21E-11 | 0. 16949  | 0. 11  | 0. 033 | 1. 81E-07 Mcy | ICAM2   |
| P4HB. 3    | 1. 24E-11 | 0. 263986 | 0. 784 | 0. 567 | 1. 85E-07 Mcy | P4HB    |
| POLR3K. 2  | 1. 24E-11 | 0. 280661 | 0. 377 | 0. 217 | 1. 86E-07 Mcy | POLR3K  |
| IGFBP5. 6  | 1. 26E-11 | -0. 77202 | 0. 095 | 0. 272 | 1. 88E-07 Mcy | IGFBP5  |
| NTAN1. 4   | 1. 29E-11 | 0. 293407 | 0. 355 | 0. 196 | 1. 93E-07 Mcy | NTAN1   |
| NRXN1. 5   | 1. 30E-11 | -0. 57392 | 0. 015 | 0. 166 | 1. 95E-07 Mcy | NRXN1   |
| DPM2. 1    | 1. 30E-11 | 0. 301248 | 0. 531 | 0. 342 | 1. 95E-07 Mcy | DPM2    |
| MZT2A. 3   | 1. 32E-11 | 0. 217761 | 0. 604 | 0. 409 | 1. 97E-07 Mcy | MZT2A   |
| NDFIP1. 6  | 1. 36E-11 | -0. 35127 | 0. 531 | 0. 603 | 2. 03E-07 Mcy | NDFIP1  |
| LRRC59. 3  | 1. 43E-11 | 0. 279517 | 0. 546 | 0. 353 | 2. 14E-07 Mcy | LRRC59  |
| AKAP13. 6  | 1. 44E-11 | 0. 249917 | 0. 527 | 0. 32  | 2. 15E-07 Mcy | AKAP13  |
| FAM136A. 1 | 1. 53E-11 | 0. 29948  | 0. 429 | 0. 258 | 2. 29E-07 Mcy | FAM136A |
| HEXB. 6    | 1. 55E-11 | 0. 280565 | 0. 612 | 0. 4   | 2. 32E-07 Mcy | HEXB    |
| OLIG2. 5   | 1. 58E-11 | -0. 5633  | 0. 026 | 0. 182 | 2. 36E-07 Mcy | OLIG2   |
| SNTG1. 5   | 1. 59E-11 | -0. 48001 | 0. 007 | 0. 157 | 2. 37E-07 Mcy | SNTG1   |
| RFT1. 1    | 1. 60E-11 | 0. 298774 | 0. 271 | 0. 133 | 2. 39E-07 Mcy | RFT1    |
| RTKN. 6    | 1. 61E-11 | -0. 43108 | 0. 018 | 0. 175 | 2. 40E-07 Mcy | RTKN    |
| APRT. 4    | 1. 65E-11 | 0. 291344 | 0. 758 | 0. 526 | 2. 46E-07 Mcy | APRT    |
| EFHC1. 6   | 1. 65E-11 | -0. 44589 | 0. 04  | 0. 209 | 2. 47E-07 Mcy | EFHC1   |
| BTF3. 2    | 1. 66E-11 | -0. 19161 | 0. 927 | 0. 897 | 2. 49E-07 Mcy | BTF3    |
| BMP7. 6    | 1. 67E-11 | -0. 38455 | 0. 015 | 0. 169 | 2. 49E-07 Mcy | BMP7    |
| GTF3C6. 3  | 1. 68E-11 | 0. 303058 | 0. 718 | 0. 509 | 2. 50E-07 Mcy | GTF3C6  |
| ECHS1. 3   | 1. 69E-11 | 0. 262295 | 0. 623 | 0. 43  | 2. 52E-07 Mcy | ECHS1   |
| ITGB5. 4   | 1. 70E-11 | 0. 187903 | 0. 15  | 0. 054 | 2. 54E-07 Mcy | ITGB5   |
| PTMS. 5    | 1. 71E-11 | -0. 41686 | 0. 484 | 0. 555 | 2. 55E-07 Mcy | PTMS    |
| PROX1. 5   | 1. 77E-11 | -0. 41248 | 0. 015 | 0. 168 | 2. 65E-07 Mcy | PROX1   |
| PTBP1. 3   | 1. 77E-11 | 0. 297546 | 0. 502 | 0. 319 | 2. 65E-07 Mcy | PTBP1   |
| OLFM2. 4   | 1. 81E-11 | -0. 4962  | 0. 033 | 0. 195 | 2. 71E-07 Mcy | OLFM2   |
| COX14. 3   | 1. 83E-11 | 0. 212894 | 0. 659 | 0. 455 | 2. 73E-07 Mcy | COX14   |
| BECN1. 3   | 1. 84E-11 | 0. 346723 | 0. 388 | 0. 226 | 2. 75E-07 Mcy | BECN1   |
| TSEN34. 3  | 1. 89E-11 | -0. 4944  | 0. 198 | 0. 372 | 2. 83E-07 Mcy | TSEN34  |
| TREML1. 3  | 1. 93E-11 | 0. 100075 | 0. 081 | 0. 02  | 2. 88E-07 Mcy | TREML1  |
| ST8SIA4. 6 | 1. 96E-11 | 0. 132739 | 0. 26  | 0. 116 | 2. 93E-07 Mcy | ST8SIA4 |
| SGCE. 4    | 2. 00E-11 | -0. 60125 | 0. 004 | 0. 15  | 2. 99E-07 Mcy | SGCE    |
| DCAF12     | 2. 02E-11 | 0. 373158 | 0. 271 | 0. 132 | 3. 02E-07 Mcy | DCAF12  |
| TMSB15A. 6 | 2. 07E-11 | -0. 50816 | 0. 026 | 0. 182 | 3. 09E-07 Mcy | TMSB15A |
| NSMCE2. 1  | 2. 08E-11 | 0. 308719 | 0. 3   | 0. 153 | 3. 11E-07 Mcy | NSMCE2  |
| DPYSL5. 6  | 2. 09E-11 | -0. 39416 | 0. 015 | 0. 166 | 3. 13E-07 Mcy | DPYSL5  |
| ODF2. 4    | 2. 12E-11 | 0. 240334 | 0. 264 | 0. 129 | 3. 16E-07 Mcy | ODF2    |
| RUNX1. 6   | 2. 17E-11 | 0. 256035 | 0. 352 | 0. 186 | 3. 24E-07 Mcy | RUNX1   |
| TPM2. 3    | 2. 23E-11 | -0. 46307 | 0. 015 | 0. 166 | 3. 33E-07 Mcy | TPM2    |
| GMIP. 6    | 2. 32E-11 | 0. 133267 | 0. 183 | 0. 071 | 3. 46E-07 Mcy | GMIP    |
| OLFML2B. 5 | 2. 34E-11 | 0. 255066 | 0. 172 | 0. 066 | 3. 50E-07 Mcy | OLFML2B |
| NSG1. 6    | 2. 34E-11 | -0. 66598 | 0. 026 | 0. 179 | 3. 50E-07 Mcy | NSG1    |
| BTG1. 5    | 2. 34E-11 | -0. 32826 | 0. 648 | 0. 69  | 3. 50E-07 Mcy | BTG1    |
| B4GALT5. 4 | 2. 36E-11 | -0. 38501 | 0. 037 | 0. 2   | 3. 53E-07 Mcy | B4GALT5 |
| ARF6. 6    | 2. 37E-11 | 0. 219476 | 0. 535 | 0. 339 | 3. 55E-07 Mcy | ARF6    |
| CBS. 5     | 2. 38E-11 | -0. 35548 | 0. 011 | 0. 161 | 3. 56E-07 Mcy | CBS     |
| RAD51C. 4  | 2. 40E-11 | 0. 332378 | 0. 432 | 0. 263 | 3. 58E-07 Mcy | RAD51C  |
| MIAT. 5    | 2. 52E-11 | -0. 49233 | 0. 018 | 0. 171 | 3. 76E-07 Mcy | MIAT    |
| CMTM6. 6   | 2. 52E-11 | 0. 279195 | 0. 623 | 0. 421 | 3. 77E-07 Mcy | CMTM6   |

|            |          |          |       |       |          |     |              |
|------------|----------|----------|-------|-------|----------|-----|--------------|
| BLOC1S2.4  | 2.56E-11 | 0.207948 | 0.564 | 0.364 | 3.82E-07 | Mcy | BLOC1S2      |
| ADRBK1.6   | 2.57E-11 | 0.256777 | 0.209 | 0.09  | 3.84E-07 | Mcy | ADRBK1       |
| SUPT16H.4  | 2.65E-11 | 0.31321  | 0.414 | 0.244 | 3.95E-07 | Mcy | SUPT16H      |
| DCPS.2     | 2.65E-11 | 0.372245 | 0.311 | 0.168 | 3.97E-07 | Mcy | DCPS         |
| PARP2.3    | 2.73E-11 | 0.304349 | 0.234 | 0.108 | 4.08E-07 | Mcy | PARP2        |
| JAKMIP2.4  | 2.75E-11 | -0.35696 | 0.007 | 0.154 | 4.11E-07 | Mcy | JAKMIP2      |
| ENO2.6     | 2.78E-11 | -0.49884 | 0.103 | 0.288 | 4.15E-07 | Mcy | ENO2         |
| SOCS2.5    | 2.83E-11 | -0.3887  | 0.011 | 0.16  | 4.24E-07 | Mcy | SOCS2        |
| SPATS2.4   | 2.89E-11 | -0.40415 | 0.084 | 0.263 | 4.32E-07 | Mcy | SPATS2       |
| MESDC1.4   | 2.94E-11 | 0.239415 | 0.253 | 0.121 | 4.39E-07 | Mcy | MESDC1       |
| RHOA.4     | 2.98E-11 | 0.23129  | 0.945 | 0.75  | 4.46E-07 | Mcy | RHOA         |
| CLPB       | 2.99E-11 | 0.201057 | 0.209 | 0.091 | 4.47E-07 | Mcy | CLPB         |
| BBOX1.5    | 3.03E-11 | -0.47829 | 0     | 0.141 | 4.52E-07 | Mcy | BBOX1        |
| WBP5.5     | 3.10E-11 | -0.46958 | 0.326 | 0.507 | 4.63E-07 | Mcy | WBP5         |
| FAM84A.5   | 3.15E-11 | -0.33557 | 0.004 | 0.148 | 4.71E-07 | Mcy | FAM84A       |
| APEX2.2    | 3.17E-11 | 0.220532 | 0.209 | 0.091 | 4.74E-07 | Mcy | APEX2        |
| TERF2IP.6  | 3.54E-11 | -0.49107 | 0.388 | 0.521 | 5.29E-07 | Mcy | TERF2IP      |
| NKX2-2.5   | 3.61E-11 | -0.48268 | 0.007 | 0.151 | 5.39E-07 | Mcy | NKX2-2       |
| GTF2I.5    | 3.61E-11 | -0.42379 | 0.275 | 0.43  | 5.39E-07 | Mcy | GTF2I        |
| TSPAN31.4  | 3.64E-11 | -0.59604 | 0.121 | 0.299 | 5.44E-07 | Mcy | TSPAN31      |
| CTA-384D8  | 3.66E-11 | 0.213788 | 0.084 | 0.022 | 5.46E-07 | Mcy | CTA-384D8.34 |
| IL15.4     | 3.74E-11 | 0.102684 | 0.114 | 0.035 | 5.60E-07 | Mcy | IL15         |
| LRMP.4     | 3.75E-11 | 0.209904 | 0.128 | 0.043 | 5.60E-07 | Mcy | LRMP         |
| ZKSCAN1.5  | 3.77E-11 | -0.47416 | 0.136 | 0.321 | 5.64E-07 | Mcy | ZKSCAN1      |
| DPF3.3     | 3.91E-11 | -0.34092 | 0     | 0.139 | 5.84E-07 | Mcy | DPF3         |
| COMMD1.1   | 3.93E-11 | 0.29035  | 0.542 | 0.352 | 5.87E-07 | Mcy | COMMD1       |
| ERV3-1.5   | 3.96E-11 | -0.52927 | 0.092 | 0.264 | 5.92E-07 | Mcy | ERV3-1       |
| B3GALT4.3  | 4.00E-11 | 0.143909 | 0.125 | 0.041 | 5.98E-07 | Mcy | B3GALT4      |
| PLEC.4     | 4.04E-11 | 0.252182 | 0.341 | 0.183 | 6.04E-07 | Mcy | PLEC         |
| MARCH9.5   | 4.17E-11 | -0.45022 | 0.011 | 0.157 | 6.23E-07 | Mcy | 9-Mar        |
| ATP6V1G2.4 | 4.21E-11 | -0.38727 | 0.007 | 0.152 | 6.29E-07 | Mcy | ATP6V1G2     |
| PPP1R7.2   | 4.34E-11 | 0.196686 | 0.538 | 0.349 | 6.48E-07 | Mcy | PPP1R7       |
| GALK1.4    | 4.37E-11 | 0.232028 | 0.359 | 0.2   | 6.53E-07 | Mcy | GALK1        |
| GLB1.3     | 4.40E-11 | 0.226056 | 0.418 | 0.241 | 6.58E-07 | Mcy | GLB1         |
| ABHD3.4    | 4.44E-11 | 0.234329 | 0.337 | 0.179 | 6.64E-07 | Mcy | ABHD3        |
| SH3BP2.5   | 4.54E-11 | 0.230092 | 0.275 | 0.135 | 6.79E-07 | Mcy | SH3BP2       |
| FGD2.5     | 4.66E-11 | 0.208487 | 0.158 | 0.058 | 6.96E-07 | Mcy | FGD2         |
| SEC11A.5   | 4.68E-11 | 0.204409 | 0.817 | 0.586 | 7.00E-07 | Mcy | SEC11A       |
| LINC01003  | 4.71E-11 | -0.38969 | 0.037 | 0.196 | 7.04E-07 | Mcy | LINC01003    |
| APC2.5     | 4.78E-11 | -0.37432 | 0.007 | 0.151 | 7.14E-07 | Mcy | APC2         |
| TXN2.2     | 4.84E-11 | 0.307614 | 0.619 | 0.429 | 7.24E-07 | Mcy | TXN2         |
| RGS17.4    | 4.91E-11 | -0.35603 | 0.015 | 0.166 | 7.34E-07 | Mcy | RGS17        |
| MANBAL.6   | 5.03E-11 | -0.48597 | 0.15  | 0.339 | 7.52E-07 | Mcy | MANBAL       |
| ACAD9.2    | 5.12E-11 | 0.243492 | 0.238 | 0.112 | 7.65E-07 | Mcy | ACAD9        |
| FAM72D     | 5.17E-11 | 0.164537 | 0.07  | 0.017 | 7.72E-07 | Mcy | FAM72D       |
| LIMCH1.5   | 5.22E-11 | -0.41947 | 0.011 | 0.155 | 7.79E-07 | Mcy | LIMCH1       |
| SPRYD4     | 5.28E-11 | 0.191888 | 0.172 | 0.069 | 7.90E-07 | Mcy | SPRYD4       |
| MPDU1.1    | 5.35E-11 | 0.33473  | 0.491 | 0.313 | 7.99E-07 | Mcy | MPDU1        |
| DMWD.5     | 5.36E-11 | -0.28626 | 0.004 | 0.145 | 8.01E-07 | Mcy | DMWD         |
| SCPEP1.5   | 5.36E-11 | 0.139633 | 0.568 | 0.341 | 8.02E-07 | Mcy | SCPEP1       |
| SUV39H2.1  | 5.45E-11 | 0.213554 | 0.154 | 0.059 | 8.14E-07 | Mcy | SUV39H2      |



|             |           |           |        |        |           |     |             |
|-------------|-----------|-----------|--------|--------|-----------|-----|-------------|
| MAP9. 4     | 5. 47E-11 | -0. 36118 | 0. 033 | 0. 192 | 8. 17E-07 | Mcy | MAP9        |
| IRF5. 6     | 5. 59E-11 | 0. 167993 | 0. 154 | 0. 057 | 8. 35E-07 | Mcy | IRF5        |
| TOMM7. 2    | 5. 86E-11 | -0. 25241 | 0. 879 | 0. 851 | 8. 76E-07 | Mcy | TOMM7       |
| PCDHB16. 4  | 5. 86E-11 | -0. 3411  | 0. 004 | 0. 143 | 8. 76E-07 | Mcy | PCDHB16     |
| TCTEX1D1. 5 | 8. 7E-11  | 0. 11648  | 0. 066 | 0. 015 | 8. 77E-07 | Mcy | TCTEX1D1    |
| LSM4. 3     | 5. 90E-11 | 0. 264137 | 0. 758 | 0. 556 | 8. 81E-07 | Mcy | LSM4        |
| EIF2S1. 2   | 5. 94E-11 | 0. 233761 | 0. 491 | 0. 315 | 8. 88E-07 | Mcy | EIF2S1      |
| SLC25A23. 6 | 1. 0E-11  | -0. 29506 | 0      | 0. 137 | 9. 12E-07 | Mcy | SLC25A23    |
| BIN1. 4     | 6. 16E-11 | 0. 228268 | 0. 579 | 0. 356 | 9. 20E-07 | Mcy | BIN1        |
| CHAF1A. 4   | 6. 22E-11 | 0. 236506 | 0. 198 | 0. 086 | 9. 30E-07 | Mcy | CHAF1A      |
| DEF8. 5     | 6. 26E-11 | 0. 310737 | 0. 432 | 0. 267 | 9. 36E-07 | Mcy | DEF8        |
| HSP90AA1. 6 | 3. 4E-11  | -0. 13064 | 0. 956 | 0. 886 | 9. 48E-07 | Mcy | HSP90AA1    |
| RP11-8L8. 6 | 3. 8E-11  | 0. 1243   | 0. 044 | 0. 007 | 9. 54E-07 | Mcy | RP11-8L8. 2 |
| LSM5. 3     | 6. 50E-11 | 0. 219314 | 0. 692 | 0. 503 | 9. 72E-07 | Mcy | LSM5        |
| NISCH. 4    | 6. 57E-11 | 0. 254348 | 0. 326 | 0. 173 | 9. 81E-07 | Mcy | NISCH       |
| FGFR1. 3    | 6. 72E-11 | -0. 34992 | 0. 022 | 0. 174 | 1. 00E-06 | Mcy | FGFR1       |
| HMGN2. 1    | 6. 72E-11 | 0. 26368  | 0. 821 | 0. 627 | 1. 00E-06 | Mcy | HMGN2       |
| MANF. 5     | 6. 73E-11 | 0. 205972 | 0. 648 | 0. 446 | 1. 01E-06 | Mcy | MANF        |
| BAIAP2. 1   | 7. 01E-11 | -0. 34826 | 0. 04  | 0. 201 | 1. 05E-06 | Mcy | BAIAP2      |
| TEAD1. 4    | 7. 25E-11 | -0. 30149 | 0. 007 | 0. 148 | 1. 08E-06 | Mcy | TEAD1       |
| RUSC1. 3    | 7. 43E-11 | 0. 242774 | 0. 267 | 0. 135 | 1. 11E-06 | Mcy | RUSC1       |
| PACSIN2. 6  | 7. 43E-11 | 0. 223348 | 0. 322 | 0. 171 | 1. 11E-06 | Mcy | PACSIN2     |
| SERPINB6. 7 | 5. 6E-11  | 0. 181413 | 0. 689 | 0. 473 | 1. 13E-06 | Mcy | SERPINB6    |
| ZNF608. 4   | 7. 69E-11 | -0. 33095 | 0. 015 | 0. 161 | 1. 15E-06 | Mcy | ZNF608      |
| DPP6. 4     | 7. 75E-11 | -0. 39923 | 0. 018 | 0. 165 | 1. 16E-06 | Mcy | DPP6        |
| C21orf62. 7 | 8. 6E-11  | -0. 44108 | 0. 015 | 0. 161 | 1. 17E-06 | Mcy | C21orf62    |
| EID1. 4     | 7. 97E-11 | -0. 30291 | 0. 7   | 0. 708 | 1. 19E-06 | Mcy | EID1        |
| MAGEF1. 5   | 8. 16E-11 | -0. 42481 | 0. 187 | 0. 368 | 1. 22E-06 | Mcy | MAGEF1      |
| USMG5. 5    | 8. 16E-11 | 0. 239993 | 0. 824 | 0. 615 | 1. 22E-06 | Mcy | USMG5       |
| COL6A2. 5   | 8. 16E-11 | -0. 44707 | 0. 018 | 0. 166 | 1. 22E-06 | Mcy | COL6A2      |
| TSTA3. 2    | 8. 38E-11 | 0. 234579 | 0. 436 | 0. 265 | 1. 25E-06 | Mcy | TSTA3       |
| SCRN1. 5    | 8. 61E-11 | -0. 36645 | 0. 029 | 0. 183 | 1. 29E-06 | Mcy | SCRN1       |
| ENHO. 5     | 8. 71E-11 | -0. 34016 | 0. 011 | 0. 154 | 1. 30E-06 | Mcy | ENHO        |
| EFCAB11. 1  | 8. 78E-11 | 0. 269682 | 0. 15  | 0. 058 | 1. 31E-06 | Mcy | EFCAB11     |
| MTCH2. 2    | 8. 90E-11 | 0. 243495 | 0. 619 | 0. 424 | 1. 33E-06 | Mcy | MTCH2       |
| PMM1. 5     | 9. 29E-11 | 0. 31419  | 0. 385 | 0. 23  | 1. 39E-06 | Mcy | PMM1        |
| TMBIM1. 3   | 9. 35E-11 | 0. 227082 | 0. 421 | 0. 24  | 1. 40E-06 | Mcy | TMBIM1      |
| RBBP7. 5    | 9. 69E-11 | 0. 225912 | 0. 604 | 0. 42  | 1. 45E-06 | Mcy | RBBP7       |
| EZH2. 5     | 9. 71E-11 | 0. 304054 | 0. 293 | 0. 15  | 1. 45E-06 | Mcy | EZH2        |
| SLC38A10. 9 | 7. 7E-11  | 0. 241171 | 0. 355 | 0. 195 | 1. 46E-06 | Mcy | SLC38A10    |
| RPS6KB2. 3  | 9. 82E-11 | 0. 289689 | 0. 385 | 0. 223 | 1. 47E-06 | Mcy | RPS6KB2     |
| ZNF780A. 1  | 9. 94E-11 | 0. 224859 | 0. 165 | 0. 066 | 1. 49E-06 | Mcy | ZNF780A     |
| RCL1. 1     | 1. 01E-10 | 0. 141875 | 0. 183 | 0. 075 | 1. 50E-06 | Mcy | RCL1        |
| PARP14. 4   | 1. 01E-10 | 0. 23468  | 0. 297 | 0. 153 | 1. 51E-06 | Mcy | PARP14      |
| RNF180. 5   | 1. 02E-10 | -0. 36367 | 0. 022 | 0. 171 | 1. 52E-06 | Mcy | RNF180      |
| RFWD3. 2    | 1. 03E-10 | 0. 211898 | 0. 147 | 0. 056 | 1. 55E-06 | Mcy | RFWD3       |
| PNPO. 3     | 1. 03E-10 | 0. 196834 | 0. 183 | 0. 076 | 1. 55E-06 | Mcy | PNPO        |
| WSCD1. 5    | 1. 05E-10 | -0. 33973 | 0      | 0. 134 | 1. 56E-06 | Mcy | WSCD1       |
| FH. 2       | 1. 05E-10 | 0. 262024 | 0. 381 | 0. 222 | 1. 58E-06 | Mcy | FH          |
| RFX4. 4     | 1. 09E-10 | -0. 41406 | 0. 011 | 0. 154 | 1. 63E-06 | Mcy | RFX4        |
| SWAP70. 6   | 1. 09E-10 | 0. 207568 | 0. 388 | 0. 218 | 1. 63E-06 | Mcy | SWAP70      |

|            |           |           |        |        |               |                |
|------------|-----------|-----------|--------|--------|---------------|----------------|
| COX15. 1   | 1. 10E-10 | 0. 188574 | 0. 168 | 0. 067 | 1. 65E-06 Mcy | COX15          |
| UXT. 4     | 1. 13E-10 | 0. 196089 | 0. 74  | 0. 533 | 1. 69E-06 Mcy | UXT            |
| TNRC6C. 5  | 1. 14E-10 | -0. 36206 | 0. 026 | 0. 175 | 1. 70E-06 Mcy | TNRC6C         |
| MARCKS. 4  | 1. 14E-10 | -0. 30282 | 0. 549 | 0. 599 | 1. 70E-06 Mcy | MARCKS         |
| TPPP3. 6   | 1. 15E-10 | -0. 55529 | 0. 015 | 0. 157 | 1. 72E-06 Mcy | TPPP3          |
| TUBGCP2. 5 | 1. 18E-10 | 0. 269858 | 0. 363 | 0. 209 | 1. 77E-06 Mcy | TUBGCP2        |
| TM6SF1. 6  | 1. 18E-10 | 0. 113283 | 0. 322 | 0. 154 | 1. 77E-06 Mcy | TM6SF1         |
| C1R. 6     | 1. 23E-10 | -0. 80875 | 0. 059 | 0. 219 | 1. 83E-06 Mcy | C1R            |
| COX6C. 5   | 1. 24E-10 | -0. 19895 | 0. 879 | 0. 83  | 1. 85E-06 Mcy | COX6C          |
| KMT2E. 4   | 1. 25E-10 | -0. 41661 | 0. 396 | 0. 541 | 1. 86E-06 Mcy | KMT2E          |
| ERP44. 4   | 1. 26E-10 | 0. 220556 | 0. 593 | 0. 391 | 1. 88E-06 Mcy | ERP44          |
| MYH10. 4   | 1. 27E-10 | -0. 3701  | 0. 015 | 0. 156 | 1. 90E-06 Mcy | MYH10          |
| NXPH1. 6   | 1. 27E-10 | -0. 38151 | 0. 004 | 0. 139 | 1. 90E-06 Mcy | NXPH1          |
| CYB5R4. 6  | 1. 28E-10 | 0. 235765 | 0. 322 | 0. 173 | 1. 92E-06 Mcy | CYB5R4         |
| DLEU7. 5   | 1. 31E-10 | 0. 165015 | 0. 136 | 0. 048 | 1. 96E-06 Mcy | DLEU7          |
| C8orf4. 5  | 1. 31E-10 | -0. 79722 | 0. 066 | 0. 232 | 1. 96E-06 Mcy | C8orf4         |
| DPYSL4. 6  | 1. 32E-10 | -0. 33569 | 0. 015 | 0. 157 | 1. 97E-06 Mcy | DPYSL4         |
| MAGOH. 3   | 1. 32E-10 | 0. 238309 | 0. 597 | 0. 41  | 1. 98E-06 Mcy | MAGOH          |
| TSPAN4. 2  | 1. 33E-10 | 0. 309811 | 0. 322 | 0. 177 | 1. 99E-06 Mcy | TSPAN4         |
| NRSN2. 5   | 1. 42E-10 | -0. 32848 | 0. 022 | 0. 168 | 2. 12E-06 Mcy | NRSN2          |
| FAM207A. 2 | 1. 43E-10 | 0. 304072 | 0. 348 | 0. 201 | 2. 13E-06 Mcy | FAM207A        |
| WWTR1. 6   | 1. 45E-10 | -0. 38241 | 0. 018 | 0. 163 | 2. 17E-06 Mcy | WWTR1          |
| PHKG2. 3   | 1. 45E-10 | 0. 234336 | 0. 293 | 0. 151 | 2. 17E-06 Mcy | PHKG2          |
| ACER3. 5   | 1. 47E-10 | 0. 229614 | 0. 341 | 0. 181 | 2. 20E-06 Mcy | ACER3          |
| MYO10. 5   | 1. 49E-10 | -0. 43607 | 0. 044 | 0. 198 | 2. 22E-06 Mcy | MYO10          |
| HEXA. 5    | 1. 53E-10 | 0. 198502 | 0. 593 | 0. 384 | 2. 28E-06 Mcy | HEXA           |
| PALD1. 5   | 1. 53E-10 | 0. 136918 | 0. 227 | 0. 099 | 2. 29E-06 Mcy | PALD1          |
| NUDT22. 4  | 1. 54E-10 | 0. 247784 | 0. 436 | 0. 266 | 2. 31E-06 Mcy | NUDT22         |
| CCT5. 3    | 1. 55E-10 | 0. 257364 | 0. 667 | 0. 478 | 2. 31E-06 Mcy | CCT5           |
| COL4A2. 3  | 1. 55E-10 | -0. 29469 | 0      | 0. 132 | 2. 32E-06 Mcy | COL4A2         |
| NOP10. 6   | 1. 57E-10 | 0. 268627 | 0. 821 | 0. 601 | 2. 34E-06 Mcy | NOP10          |
| MXRA7. 4   | 1. 60E-10 | -0. 32051 | 0. 022 | 0. 17  | 2. 40E-06 Mcy | MXRA7          |
| SUN2. 3    | 1. 63E-10 | 0. 222569 | 0. 381 | 0. 215 | 2. 44E-06 Mcy | SUN2           |
| OLIG1. 6   | 1. 65E-10 | -0. 57816 | 0. 033 | 0. 183 | 2. 47E-06 Mcy | OLIG1          |
| HBEGF. 6   | 1. 69E-10 | 0. 15534  | 0. 403 | 0. 211 | 2. 52E-06 Mcy | HBEGF          |
| CERS1. 4   | 1. 73E-10 | -0. 31739 | 0      | 0. 131 | 2. 59E-06 Mcy | CERS1          |
| PTPRA. 5   | 1. 79E-10 | -0. 46758 | 0. 198 | 0. 358 | 2. 68E-06 Mcy | PTPRA          |
| PSMG1      | 1. 82E-10 | 0. 229638 | 0. 366 | 0. 213 | 2. 71E-06 Mcy | PSMG1          |
| ELAVL4. 5  | 1. 86E-10 | -0. 63781 | 0. 037 | 0. 182 | 2. 78E-06 Mcy | ELAVL4         |
| ZNF75A. 5  | 1. 89E-10 | -0. 33042 | 0. 055 | 0. 218 | 2. 83E-06 Mcy | ZNF75A         |
| AKAP9. 4   | 1. 96E-10 | -0. 48962 | 0. 289 | 0. 453 | 2. 93E-06 Mcy | AKAP9          |
| NUDT16. 6  | 2. 01E-10 | 0. 228489 | 0. 381 | 0. 215 | 3. 00E-06 Mcy | NUDT16         |
| RP11-295G  | 2. 02E-10 | 0. 200866 | 0. 125 | 0. 044 | 3. 01E-06 Mcy | RP11-295G20. 2 |
| NPTXR. 5   | 2. 03E-10 | -0. 2984  | 0      | 0. 13  | 3. 03E-06 Mcy | NPTXR          |
| HSPA14. 1  | 2. 03E-10 | 0. 299647 | 0. 267 | 0. 139 | 3. 03E-06 Mcy | HSPA14         |
| FAM49B. 6  | 2. 11E-10 | 0. 218404 | 0. 718 | 0. 501 | 3. 16E-06 Mcy | FAM49B         |
| TAF5       | 2. 15E-10 | 0. 111278 | 0. 081 | 0. 022 | 3. 22E-06 Mcy | TAF5           |
| SEZ6. 6    | 2. 17E-10 | -0. 41251 | 0. 007 | 0. 142 | 3. 24E-06 Mcy | SEZ6           |
| GMPPB      | 2. 18E-10 | 0. 1146   | 0. 037 | 0. 006 | 3. 26E-06 Mcy | GMPPB          |
| SPOCK2. 4  | 2. 29E-10 | -0. 39632 | 0. 007 | 0. 142 | 3. 42E-06 Mcy | SPOCK2         |
| SLC31A2. 6 | 2. 29E-10 | 0. 119574 | 0. 366 | 0. 188 | 3. 42E-06 Mcy | SLC31A2        |

|             |           |           |        |        |               |               |
|-------------|-----------|-----------|--------|--------|---------------|---------------|
| ZNF3. 4     | 2. 38E-10 | -0. 39027 | 0. 051 | 0. 209 | 3. 55E-06 Mcy | ZNF3          |
| SRPK2. 4    | 2. 49E-10 | -0. 42134 | 0. 242 | 0. 414 | 3. 72E-06 Mcy | SRPK2         |
| FADS1. 4    | 2. 54E-10 | 0. 341216 | 0. 359 | 0. 215 | 3. 80E-06 Mcy | FADS1         |
| KMT2A. 6    | 2. 58E-10 | -0. 41174 | 0. 077 | 0. 24  | 3. 85E-06 Mcy | KMT2A         |
| NDFIP2. 4   | 2. 59E-10 | -0. 35552 | 0. 04  | 0. 196 | 3. 86E-06 Mcy | NDFIP2        |
| TBCA. 5     | 2. 59E-10 | -0. 29087 | 0. 725 | 0. 71  | 3. 87E-06 Mcy | TBCA          |
| KLHL23. 6   | 2. 66E-10 | -0. 38834 | 0. 022 | 0. 164 | 3. 98E-06 Mcy | KLHL23        |
| RP3-525N1   | 2. 73E-10 | -0. 4212  | 0. 015 | 0. 153 | 4. 08E-06 Mcy | RP3-525N10. 2 |
| PPP2R3C. 1  | 2. 73E-10 | 0. 21232  | 0. 476 | 0. 302 | 4. 09E-06 Mcy | PPP2R3C       |
| APOD. 5     | 2. 76E-10 | -0. 79389 | 0. 022 | 0. 164 | 4. 12E-06 Mcy | APOD          |
| CTC-479C5   | 2. 77E-10 | 0. 218968 | 0. 136 | 0. 049 | 4. 14E-06 Mcy | CTC-479C5. 12 |
| SNX6. 4     | 2. 87E-10 | 0. 229637 | 0. 608 | 0. 425 | 4. 29E-06 Mcy | SNX6          |
| CAPZB. 5    | 2. 92E-10 | 0. 162459 | 0. 879 | 0. 697 | 4. 36E-06 Mcy | CAPZB         |
| TNIK. 4     | 2. 93E-10 | -0. 30685 | 0. 011 | 0. 147 | 4. 38E-06 Mcy | TNIK          |
| CSTF2       | 2. 94E-10 | 0. 179502 | 0. 161 | 0. 065 | 4. 39E-06 Mcy | CSTF2         |
| FBXO17. 6   | 3. 01E-10 | -0. 33543 | 0. 011 | 0. 147 | 4. 50E-06 Mcy | FBXO17        |
| SLC8B1. 6   | 3. 03E-10 | 0. 156885 | 0. 212 | 0. 095 | 4. 53E-06 Mcy | SLC8B1        |
| F11R. 5     | 3. 05E-10 | 0. 218402 | 0. 147 | 0. 055 | 4. 56E-06 Mcy | F11R          |
| ECHDC1. 2   | 3. 13E-10 | 0. 210375 | 0. 498 | 0. 322 | 4. 67E-06 Mcy | ECHDC1        |
| FAM204A. 4  | 3. 15E-10 | 0. 171391 | 0. 421 | 0. 253 | 4. 70E-06 Mcy | FAM204A       |
| ARSJ. 4     | 3. 15E-10 | -0. 30439 | 0      | 0. 128 | 4. 70E-06 Mcy | ARSJ          |
| IGFLR1. 3   | 3. 17E-10 | 0. 175344 | 0. 143 | 0. 053 | 4. 74E-06 Mcy | IGFLR1        |
| CSRP1. 3    | 3. 26E-10 | 0. 123476 | 0. 403 | 0. 234 | 4. 88E-06 Mcy | CSRP1         |
| EIF5A. 2    | 3. 33E-10 | 0. 311993 | 0. 689 | 0. 523 | 4. 97E-06 Mcy | EIF5A         |
| HCFC1R1. 3  | 3. 33E-10 | 0. 242582 | 0. 458 | 0. 278 | 4. 98E-06 Mcy | HCFC1R1       |
| SSRP1. 4    | 3. 35E-10 | 0. 2859   | 0. 52  | 0. 351 | 5. 00E-06 Mcy | SSRP1         |
| ZC2HC1A. 5  | 3. 36E-10 | -0. 44626 | 0. 059 | 0. 214 | 5. 02E-06 Mcy | ZC2HC1A       |
| FBXO32. 6   | 3. 37E-10 | -0. 4936  | 0. 018 | 0. 157 | 5. 03E-06 Mcy | FBXO32        |
| PPP2R5B. 5  | 3. 38E-10 | -0. 34679 | 0. 026 | 0. 17  | 5. 05E-06 Mcy | PPP2R5B       |
| MAGOHB. 3   | 3. 43E-10 | 0. 338285 | 0. 388 | 0. 234 | 5. 12E-06 Mcy | MAGOHB        |
| MEA1. 2     | 3. 47E-10 | 0. 312219 | 0. 619 | 0. 429 | 5. 19E-06 Mcy | MEA1          |
| C12orf76. 3 | 3. 47E-10 | -0. 33362 | 0. 095 | 0. 27  | 5. 19E-06 Mcy | C12orf76      |
| DPAGT1      | 3. 48E-10 | 0. 270097 | 0. 271 | 0. 139 | 5. 20E-06 Mcy | DPAGT1        |
| PPP2R4. 1   | 3. 56E-10 | 0. 279948 | 0. 385 | 0. 233 | 5. 32E-06 Mcy | PPP2R4        |
| LHX2. 6     | 3. 62E-10 | -0. 31472 | 0. 004 | 0. 133 | 5. 41E-06 Mcy | LHX2          |
| SLC44A2. 4  | 3. 64E-10 | -0. 3096  | 0. 048 | 0. 206 | 5. 43E-06 Mcy | SLC44A2       |
| TSPAN6. 5   | 3. 67E-10 | -0. 32788 | 0. 015 | 0. 153 | 5. 48E-06 Mcy | TSPAN6        |
| PDGFRA. 5   | 3. 69E-10 | -0. 41428 | 0. 015 | 0. 151 | 5. 52E-06 Mcy | PDGFRA        |
| ACTR1A. 2   | 3. 75E-10 | 0. 251584 | 0. 451 | 0. 274 | 5. 60E-06 Mcy | ACTR1A        |
| FNBP1L. 6   | 3. 79E-10 | -0. 40774 | 0. 04  | 0. 188 | 5. 66E-06 Mcy | FNBP1L        |
| MEIS3. 4    | 3. 85E-10 | -0. 32229 | 0. 004 | 0. 132 | 5. 76E-06 Mcy | MEIS3         |
| ITM2C. 6    | 3. 96E-10 | -0. 49248 | 0. 256 | 0. 421 | 5. 92E-06 Mcy | ITM2C         |
| SOAT1. 6    | 4. 06E-10 | 0. 149617 | 0. 359 | 0. 194 | 6. 07E-06 Mcy | SOAT1         |
| POSTN. 5    | 4. 12E-10 | -0. 43853 | 0. 004 | 0. 132 | 6. 16E-06 Mcy | POSTN         |
| NDUFB3. 5   | 4. 19E-10 | 0. 195694 | 0. 74  | 0. 549 | 6. 26E-06 Mcy | NDUFB3        |
| TSPAN13. 6  | 4. 46E-10 | -0. 56155 | 0. 143 | 0. 303 | 6. 66E-06 Mcy | TSPAN13       |
| KIF1B. 5    | 4. 49E-10 | -0. 42104 | 0. 128 | 0. 298 | 6. 70E-06 Mcy | KIF1B         |
| CNN2. 4     | 4. 50E-10 | 0. 160256 | 0. 161 | 0. 065 | 6. 72E-06 Mcy | CNN2          |
| RP11-161M   | 4. 56E-10 | -0. 3981  | 0. 026 | 0. 17  | 6. 81E-06 Mcy | RP11-161M6. 2 |
| MKKS. 3     | 4. 56E-10 | 0. 261802 | 0. 59  | 0. 4   | 6. 81E-06 Mcy | MKKS          |
| SEPT7. 6    | 4. 65E-10 | -0. 34662 | 0. 681 | 0. 703 | 6. 95E-06 Mcy | 7-Sep         |

|           |             |           |        |        |           |     |            |
|-----------|-------------|-----------|--------|--------|-----------|-----|------------|
| C16orf59. | 4. 66E-10   | 0. 179647 | 0. 121 | 0. 043 | 6. 97E-06 | Mcy | C16orf59   |
| UROS.     | 3 4. 70E-10 | 0. 252196 | 0. 41  | 0. 248 | 7. 03E-06 | Mcy | UROS       |
| FBXW5.    | 4 4. 71E-10 | 0. 221044 | 0. 454 | 0. 284 | 7. 04E-06 | Mcy | FBXW5      |
| BANF1.    | 3 4. 72E-10 | 0. 248782 | 0. 875 | 0. 656 | 7. 05E-06 | Mcy | BANF1      |
| NUCB2.    | 2 5. 13E-10 | 0. 255462 | 0. 524 | 0. 343 | 7. 67E-06 | Mcy | NUCB2      |
| MSI1.     | 4 5. 18E-10 | -0. 32272 | 0. 007 | 0. 138 | 7. 74E-06 | Mcy | MSI1       |
| CDC42EP1. | 5. 23E-10   | -0. 34218 | 0. 004 | 0. 131 | 7. 81E-06 | Mcy | CDC42EP1   |
| CSRNP1.   | 6 5. 24E-10 | 0. 196182 | 0. 355 | 0. 187 | 7. 83E-06 | Mcy | CSRNP1     |
| POP5.     | 3 5. 27E-10 | 0. 254792 | 0. 458 | 0. 292 | 7. 88E-06 | Mcy | POP5       |
| GOLT1B.   | 3 5. 39E-10 | 0. 212777 | 0. 399 | 0. 234 | 8. 06E-06 | Mcy | GOLT1B     |
| DPF1.     | 5 5. 48E-10 | -0. 37372 | 0. 011 | 0. 143 | 8. 19E-06 | Mcy | DPF1       |
| TFPT.     | 4 5. 49E-10 | 0. 296873 | 0. 484 | 0. 304 | 8. 20E-06 | Mcy | TFPT       |
| CITED1.   | 5 5. 58E-10 | -0. 44425 | 0. 018 | 0. 154 | 8. 34E-06 | Mcy | CITED1     |
| SBF2-AS1. | 5. 66E-10   | 0. 104257 | 0. 088 | 0. 026 | 8. 45E-06 | Mcy | SBF2-AS1   |
| CDC42BPA. | 5. 66E-10   | -0. 34901 | 0. 037 | 0. 182 | 8. 46E-06 | Mcy | CDC42BPA   |
| COMMD6.   | 3 5. 73E-10 | -0. 30376 | 0. 784 | 0. 776 | 8. 56E-06 | Mcy | COMMD6     |
| EIF5AL1.  | 2 5. 80E-10 | 0. 265038 | 0. 242 | 0. 117 | 8. 67E-06 | Mcy | EIF5AL1    |
| ANK2.     | 6 5. 83E-10 | -0. 33269 | 0. 026 | 0. 167 | 8. 71E-06 | Mcy | ANK2       |
| STOML2.   | 2 5. 84E-10 | 0. 235359 | 0. 612 | 0. 416 | 8. 72E-06 | Mcy | STOML2     |
| PLP1.     | 5 5. 98E-10 | -0. 87303 | 0. 033 | 0. 174 | 8. 94E-06 | Mcy | PLP1       |
| HES6.     | 5 5. 99E-10 | -0. 59911 | 0. 128 | 0. 29  | 8. 95E-06 | Mcy | HES6       |
| CBFB.     | 2 6. 10E-10 | 0. 271152 | 0. 388 | 0. 23  | 9. 11E-06 | Mcy | CBFB       |
| C11orf96. | 6. 17E-10   | -0. 39171 | 0. 007 | 0. 137 | 9. 23E-06 | Mcy | C11orf96   |
| STARD4-AS | 6. 43E-10   | -0. 32574 | 0. 004 | 0. 13  | 9. 61E-06 | Mcy | STARD4-AS1 |
| ACAT2.    | 5 6. 64E-10 | 0. 307531 | 0. 451 | 0. 274 | 9. 92E-06 | Mcy | ACAT2      |
| RFTN2.    | 6 6. 66E-10 | -0. 39289 | 0. 004 | 0. 13  | 9. 95E-06 | Mcy | RFTN2      |
| GADD45A.  | 6 6. 67E-10 | -0. 51973 | 0. 117 | 0. 282 | 9. 97E-06 | Mcy | GADD45A    |
| TIPRL.    | 2 6. 72E-10 | 0. 268429 | 0. 418 | 0. 262 | 1. 00E-05 | Mcy | TIPRL      |
| HINT2.    | 2 6. 77E-10 | 0. 237705 | 0. 52  | 0. 342 | 1. 01E-05 | Mcy | HINT2      |
| NTMT1.    | 1 6. 80E-10 | 0. 243105 | 0. 491 | 0. 32  | 1. 02E-05 | Mcy | NTMT1      |
| PAK3.     | 6 6. 81E-10 | -0. 44321 | 0. 015 | 0. 146 | 1. 02E-05 | Mcy | PAK3       |
| BICD1.    | 4 6. 85E-10 | -0. 31815 | 0. 055 | 0. 208 | 1. 02E-05 | Mcy | BICD1      |
| TCEAL5.   | 4 6. 86E-10 | -0. 4541  | 0      | 0. 123 | 1. 02E-05 | Mcy | TCEAL5     |
| TMED5.    | 5 6. 88E-10 | 0. 20844  | 0. 476 | 0. 302 | 1. 03E-05 | Mcy | TMED5      |
| PRTFDC1.  | 3 6. 95E-10 | 0. 303053 | 0. 256 | 0. 132 | 1. 04E-05 | Mcy | PRTFDC1    |
| NIPSNAP3A | 6. 97E-10   | 0. 293097 | 0. 348 | 0. 196 | 1. 04E-05 | Mcy | NIPSNAP3A  |
| POMGNT1.  | 5 7. 07E-10 | -0. 36842 | 0. 099 | 0. 262 | 1. 06E-05 | Mcy | POMGNT1    |
| PRELID2   | 7. 29E-10   | 0. 129846 | 0. 081 | 0. 023 | 1. 09E-05 | Mcy | PRELID2    |
| NRIP3.    | 3 7. 36E-10 | 0. 128698 | 0. 106 | 0. 035 | 1. 10E-05 | Mcy | NRIP3      |
| CCL7.     | 2 7. 44E-10 | 0. 136215 | 0. 055 | 0. 012 | 1. 11E-05 | Mcy | CCL7       |
| COLGALT2. | 7. 50E-10   | -0. 31748 | 0. 011 | 0. 142 | 1. 12E-05 | Mcy | COLGALT2   |
| PIEZO1.   | 3 7. 50E-10 | 0. 216835 | 0. 161 | 0. 067 | 1. 12E-05 | Mcy | PIEZO1     |
| LRRC4B.   | 6 7. 51E-10 | -0. 28182 | 0. 007 | 0. 136 | 1. 12E-05 | Mcy | LRRC4B     |
| AK2.      | 4 7. 57E-10 | 0. 181336 | 0. 582 | 0. 386 | 1. 13E-05 | Mcy | AK2        |
| TMEM158.  | 5 7. 60E-10 | -0. 3292  | 0. 011 | 0. 142 | 1. 14E-05 | Mcy | TMEM158    |
| DCLK1.    | 4 7. 67E-10 | -0. 32827 | 0. 018 | 0. 154 | 1. 15E-05 | Mcy | DCLK1      |
| NET1.     | 4 7. 72E-10 | 0. 130632 | 0. 114 | 0. 039 | 1. 15E-05 | Mcy | NET1       |
| CA2.      | 4 7. 87E-10 | -0. 66858 | 0. 081 | 0. 229 | 1. 18E-05 | Mcy | CA2        |
| B4GALNT1. | 7. 92E-10   | -0. 47519 | 0. 015 | 0. 146 | 1. 18E-05 | Mcy | B4GALNT1   |
| NAAA.     | 6 7. 97E-10 | 0. 107167 | 0. 267 | 0. 13  | 1. 19E-05 | Mcy | NAAA       |
| TAGLN3.   | 5 7. 99E-10 | -0. 54908 | 0. 048 | 0. 191 | 1. 19E-05 | Mcy | TAGLN3     |

|           |          |          |       |       |          |     |              |
|-----------|----------|----------|-------|-------|----------|-----|--------------|
| PLEKH02.6 | 8.18E-10 | 0.155997 | 0.22  | 0.099 | 1.22E-05 | Mcy | PLEKH02      |
| ATAD3B.1  | 8.19E-10 | 0.227135 | 0.147 | 0.058 | 1.22E-05 | Mcy | ATAD3B       |
| MZT1.3    | 8.50E-10 | 0.260081 | 0.41  | 0.252 | 1.27E-05 | Mcy | MZT1         |
| TMEM106B. | 8.53E-10 | -0.46449 | 0.168 | 0.334 | 1.27E-05 | Mcy | TMEM106B     |
| ZNF711.5  | 8.62E-10 | -0.37342 | 0.015 | 0.145 | 1.29E-05 | Mcy | ZNF711       |
| OCIAD2.5  | 8.67E-10 | -0.83289 | 0.249 | 0.391 | 1.30E-05 | Mcy | OCIAD2       |
| THOC3.2   | 8.78E-10 | 0.320326 | 0.304 | 0.167 | 1.31E-05 | Mcy | THOC3        |
| SHISA4.5  | 8.80E-10 | -0.40744 | 0.088 | 0.25  | 1.32E-05 | Mcy | SHISA4       |
| FAM175B.2 | 8.88E-10 | 0.226336 | 0.179 | 0.078 | 1.33E-05 | Mcy | FAM175B      |
| SCARA3.5  | 8.94E-10 | -0.31411 | 0.011 | 0.141 | 1.34E-05 | Mcy | SCARA3       |
| TIMP3.4   | 8.98E-10 | -0.3751  | 0.004 | 0.128 | 1.34E-05 | Mcy | TIMP3        |
| RMDN1.1   | 9.02E-10 | 0.220308 | 0.326 | 0.185 | 1.35E-05 | Mcy | RMDN1        |
| ASPHD1.4  | 9.16E-10 | -0.36583 | 0.011 | 0.14  | 1.37E-05 | Mcy | ASPHD1       |
| ARMCX3.4  | 9.28E-10 | -0.48571 | 0.282 | 0.433 | 1.39E-05 | Mcy | ARMCX3       |
| RP4-665J2 | 9.29E-10 | -0.31491 | 0.004 | 0.128 | 1.39E-05 | Mcy | RP4-665J23.1 |
| NKAIN3.5  | 9.32E-10 | -0.31965 | 0.004 | 0.128 | 1.39E-05 | Mcy | NKAIN3       |
| CDK5RAP2. | 9.39E-10 | 0.237574 | 0.227 | 0.11  | 1.40E-05 | Mcy | CDK5RAP2     |
| TUBB.4    | 9.48E-10 | 0.241197 | 0.993 | 0.765 | 1.42E-05 | Mcy | TUBB         |
| RASSF7.5  | 9.49E-10 | 0.138363 | 0.165 | 0.068 | 1.42E-05 | Mcy | RASSF7       |
| RABL3.1   | 9.67E-10 | 0.229666 | 0.154 | 0.063 | 1.44E-05 | Mcy | RABL3        |
| CBWD1.1   | 9.67E-10 | 0.215424 | 0.37  | 0.21  | 1.44E-05 | Mcy | CBWD1        |
| RCC2.4    | 9.68E-10 | 0.232725 | 0.311 | 0.171 | 1.45E-05 | Mcy | RCC2         |
| DNAJB2.5  | 9.70E-10 | -0.42754 | 0.15  | 0.318 | 1.45E-05 | Mcy | DNAJB2       |
| XRCC3     | 9.83E-10 | 0.219743 | 0.099 | 0.032 | 1.47E-05 | Mcy | XRCC3        |
| ETV5.3    | 9.93E-10 | 0.198886 | 0.425 | 0.255 | 1.48E-05 | Mcy | ETV5         |
| WDR60.3   | 9.99E-10 | -0.38125 | 0.081 | 0.235 | 1.49E-05 | Mcy | WDR60        |
| CYB561D2. | 1.00E-09 | 0.196712 | 0.377 | 0.222 | 1.50E-05 | Mcy | CYB561D2     |
| BEND5.4   | 1.03E-09 | -0.36207 | 0.011 | 0.14  | 1.54E-05 | Mcy | BEND5        |
| IFI44.3   | 1.04E-09 | 0.241694 | 0.333 | 0.181 | 1.56E-05 | Mcy | IFI44        |
| NDUFA9.2  | 1.05E-09 | 0.286877 | 0.557 | 0.38  | 1.56E-05 | Mcy | NDUFA9       |
| DOK1.6    | 1.05E-09 | 0.191909 | 0.289 | 0.151 | 1.57E-05 | Mcy | DOK1         |
| PHLDA1.4  | 1.07E-09 | -0.5442  | 0.275 | 0.398 | 1.60E-05 | Mcy | PHLDA1       |
| RNF181.2  | 1.08E-09 | 0.225151 | 0.751 | 0.55  | 1.61E-05 | Mcy | RNF181       |
| TMEM14C.4 | 1.09E-09 | 0.216397 | 0.784 | 0.586 | 1.62E-05 | Mcy | TMEM14C      |
| NLGN1.5   | 1.09E-09 | -0.28683 | 0.011 | 0.141 | 1.63E-05 | Mcy | NLGN1        |
| DENND6B.6 | 1.09E-09 | 0.239936 | 0.212 | 0.1   | 1.63E-05 | Mcy | DENND6B      |
| RNF213.6  | 1.14E-09 | 0.232367 | 0.425 | 0.257 | 1.71E-05 | Mcy | RNF213       |
| PIM3.6    | 1.15E-09 | 0.188089 | 0.341 | 0.187 | 1.71E-05 | Mcy | PIM3         |
| RBBP8.1   | 1.19E-09 | 0.251001 | 0.179 | 0.081 | 1.78E-05 | Mcy | RBBP8        |
| FAM127A.3 | 1.20E-09 | -0.42812 | 0.308 | 0.463 | 1.80E-05 | Mcy | FAM127A      |
| ABAT.6    | 1.21E-09 | -0.34421 | 0.026 | 0.163 | 1.80E-05 | Mcy | ABAT         |
| NUP62.4   | 1.22E-09 | 0.244037 | 0.392 | 0.233 | 1.83E-05 | Mcy | NUP62        |
| KCNF1.6   | 1.22E-09 | -0.32726 | 0.004 | 0.126 | 1.83E-05 | Mcy | KCNF1        |
| TIFA.1    | 1.23E-09 | 0.196311 | 0.143 | 0.056 | 1.84E-05 | Mcy | TIFA         |
| LGMN.5    | 1.29E-09 | 0.221013 | 0.549 | 0.346 | 1.93E-05 | Mcy | LGMN         |
| ENY2.3    | 1.30E-09 | 0.180042 | 0.773 | 0.6   | 1.94E-05 | Mcy | ENY2         |
| SRP14.2   | 1.32E-09 | -0.16251 | 0.908 | 0.866 | 1.97E-05 | Mcy | SRP14        |
| GPC2.6    | 1.33E-09 | -0.4528  | 0.033 | 0.171 | 1.98E-05 | Mcy | GPC2         |
| NAT14.3   | 1.33E-09 | -0.33546 | 0.04  | 0.183 | 1.99E-05 | Mcy | NAT14        |
| FLOT2.2   | 1.34E-09 | 0.239474 | 0.319 | 0.183 | 2.00E-05 | Mcy | FLOT2        |
| SLC39A6.4 | 1.37E-09 | -0.44961 | 0.172 | 0.332 | 2.04E-05 | Mcy | SLC39A6      |

|           |          |          |       |       |          |     |              |
|-----------|----------|----------|-------|-------|----------|-----|--------------|
| KCNMB4.6  | 1.38E-09 | -0.36222 | 0.004 | 0.126 | 2.06E-05 | Mcy | KCNMB4       |
| AC004158. | 1.38E-09 | -0.34259 | 0.004 | 0.125 | 2.06E-05 | Mcy | AC004158.3   |
| COMTD1.4  | 1.38E-09 | 0.187918 | 0.147 | 0.058 | 2.06E-05 | Mcy | COMTD1       |
| SMIM4.2   | 1.39E-09 | 0.246574 | 0.421 | 0.264 | 2.07E-05 | Mcy | SMIM4        |
| RP11-71N1 | 1.39E-09 | -0.34197 | 0.011 | 0.139 | 2.07E-05 | Mcy | RP11-71N10.1 |
| GPX3.5    | 1.39E-09 | 0.109792 | 0.293 | 0.149 | 2.08E-05 | Mcy | GPX3         |
| SLC15A3.5 | 1.44E-09 | 0.176848 | 0.165 | 0.067 | 2.16E-05 | Mcy | SLC15A3      |
| ARL4C.4   | 1.44E-09 | -0.43424 | 0.22  | 0.382 | 2.16E-05 | Mcy | ARL4C        |
| IMMT.2    | 1.45E-09 | 0.208685 | 0.469 | 0.298 | 2.17E-05 | Mcy | IMMT         |
| SRD5A3.4  | 1.47E-09 | 0.20844  | 0.297 | 0.159 | 2.20E-05 | Mcy | SRD5A3       |
| UNC13D.5  | 1.47E-09 | 0.119603 | 0.128 | 0.047 | 2.20E-05 | Mcy | UNC13D       |
| SENCR.3   | 1.48E-09 | 0.185307 | 0.07  | 0.018 | 2.21E-05 | Mcy | SENCR        |
| CLIP2.5   | 1.49E-09 | -0.34304 | 0.037 | 0.18  | 2.22E-05 | Mcy | CLIP2        |
| CNIH2.6   | 1.51E-09 | -0.26016 | 0.007 | 0.133 | 2.25E-05 | Mcy | CNIH2        |
| CAP1.5    | 1.55E-09 | 0.178769 | 0.762 | 0.588 | 2.32E-05 | Mcy | CAP1         |
| IKBKG.4   | 1.56E-09 | 0.232256 | 0.253 | 0.13  | 2.34E-05 | Mcy | IKBKG        |
| CENPO     | 1.57E-09 | 0.232729 | 0.117 | 0.042 | 2.35E-05 | Mcy | CENPO        |
| NUCKS1.4  | 1.62E-09 | 0.232352 | 0.832 | 0.632 | 2.42E-05 | Mcy | NUCKS1       |
| TMC04     | 1.63E-09 | 0.119551 | 0.103 | 0.034 | 2.43E-05 | Mcy | TMC04        |
| MLC1.5    | 1.66E-09 | -0.28216 | 0.018 | 0.152 | 2.47E-05 | Mcy | MLC1         |
| SRA1.4    | 1.66E-09 | 0.213673 | 0.582 | 0.394 | 2.48E-05 | Mcy | SRA1         |
| GRPEL1.2  | 1.66E-09 | 0.181935 | 0.432 | 0.266 | 2.48E-05 | Mcy | GRPEL1       |
| WDHD1     | 1.67E-09 | 0.108353 | 0.103 | 0.034 | 2.49E-05 | Mcy | WDHD1        |
| C8orf46.4 | 1.67E-09 | -0.40767 | 0.015 | 0.142 | 2.50E-05 | Mcy | C8orf46      |
| DYNLL1.4  | 1.70E-09 | -0.18597 | 0.897 | 0.835 | 2.54E-05 | Mcy | DYNLL1       |
| DPP7.6    | 1.71E-09 | 0.198804 | 0.663 | 0.462 | 2.56E-05 | Mcy | DPP7         |
| POLR2E.4  | 1.73E-09 | 0.190487 | 0.729 | 0.53  | 2.59E-05 | Mcy | POLR2E       |
| CDH11.4   | 1.73E-09 | -0.30377 | 0     | 0.118 | 2.59E-05 | Mcy | CDH11        |
| SYP.6     | 1.74E-09 | -0.40564 | 0.011 | 0.137 | 2.59E-05 | Mcy | SYP          |
| GAS1.6    | 1.75E-09 | -0.36706 | 0.018 | 0.147 | 2.61E-05 | Mcy | GAS1         |
| ANAPC15.3 | 1.78E-09 | 0.286557 | 0.41  | 0.258 | 2.66E-05 | Mcy | ANAPC15      |
| EFNA1.4   | 1.78E-09 | -0.4309  | 0.007 | 0.131 | 2.66E-05 | Mcy | EFNA1        |
| GNL2.2    | 1.84E-09 | 0.16438  | 0.355 | 0.203 | 2.75E-05 | Mcy | GNL2         |
| SAT2.4    | 1.87E-09 | -0.35857 | 0.465 | 0.589 | 2.79E-05 | Mcy | SAT2         |
| SLC1A2.4  | 1.91E-09 | -0.344   | 0.011 | 0.138 | 2.85E-05 | Mcy | SLC1A2       |
| HIST1H1D  | 1.91E-09 | 0.299773 | 0.084 | 0.026 | 2.86E-05 | Mcy | HIST1H1D     |
| COX7C.3   | 1.94E-09 | -0.16383 | 0.927 | 0.885 | 2.90E-05 | Mcy | COX7C        |
| RNF157.5  | 1.95E-09 | -0.30966 | 0.011 | 0.137 | 2.91E-05 | Mcy | RNF157       |
| PSMC3IP.5 | 2.00E-09 | 0.297918 | 0.161 | 0.068 | 3.00E-05 | Mcy | PSMC3IP      |
| TLR10.4   | 2.01E-09 | 0.133249 | 0.081 | 0.023 | 3.01E-05 | Mcy | TLR10        |
| IQSEC2.1  | 2.03E-09 | 0.158257 | 0.136 | 0.052 | 3.03E-05 | Mcy | IQSEC2       |
| APEH      | 2.03E-09 | 0.208429 | 0.333 | 0.193 | 3.03E-05 | Mcy | APEH         |
| QARS.5    | 2.05E-09 | 0.231157 | 0.447 | 0.278 | 3.07E-05 | Mcy | QARS         |
| RAP1B.5   | 2.08E-09 | 0.219219 | 0.608 | 0.43  | 3.11E-05 | Mcy | RAP1B        |
| B3GNT5.6  | 2.08E-09 | 0.145672 | 0.271 | 0.138 | 3.11E-05 | Mcy | B3GNT5       |
| NDUFA6.4  | 2.09E-09 | 0.239924 | 0.773 | 0.567 | 3.12E-05 | Mcy | NDUFA6       |
| SYNE2.6   | 2.11E-09 | -0.35418 | 0.037 | 0.177 | 3.15E-05 | Mcy | SYNE2        |
| TNFRSF1A. | 2.11E-09 | 0.214553 | 0.568 | 0.367 | 3.15E-05 | Mcy | TNFRSF1A     |
| TMEM54.4  | 2.12E-09 | -0.33647 | 0.051 | 0.199 | 3.16E-05 | Mcy | TMEM54       |
| NDUFA2.1  | 2.15E-09 | 0.269217 | 0.806 | 0.599 | 3.21E-05 | Mcy | NDUFA2       |
| NFIL3.6   | 2.19E-09 | 0.125857 | 0.187 | 0.081 | 3.27E-05 | Mcy | NFIL3        |

|            |           |           |        |        |               |                |
|------------|-----------|-----------|--------|--------|---------------|----------------|
| RP11-802E  | 2. 19E-09 | 0. 173623 | 0. 059 | 0. 014 | 3. 27E-05 Mcy | RP11-802E16. 3 |
| CLCN3. 4   | 2. 21E-09 | -0. 36751 | 0. 095 | 0. 252 | 3. 30E-05 Mcy | CLCN3          |
| PPFIBP1. 4 | 2. 22E-09 | -0. 33501 | 0. 026 | 0. 159 | 3. 32E-05 Mcy | PPFIBP1        |
| WDR77. 1   | 2. 23E-09 | 0. 246747 | 0. 352 | 0. 206 | 3. 33E-05 Mcy | WDR77          |
| PLEKHA4. 5 | 2. 25E-09 | -0. 28248 | 0. 007 | 0. 13  | 3. 37E-05 Mcy | PLEKHA4        |
| TACC1. 4   | 2. 27E-09 | 0. 290098 | 0. 473 | 0. 309 | 3. 39E-05 Mcy | TACC1          |
| ZNF511. 4  | 2. 27E-09 | 0. 196557 | 0. 333 | 0. 192 | 3. 40E-05 Mcy | ZNF511         |
| ANKS3. 4   | 2. 31E-09 | -0. 31373 | 0. 033 | 0. 171 | 3. 46E-05 Mcy | ANKS3          |
| RAB3A. 6   | 2. 33E-09 | -0. 44858 | 0. 033 | 0. 167 | 3. 48E-05 Mcy | RAB3A          |
| VWA1. 6    | 2. 34E-09 | -0. 33022 | 0. 018 | 0. 147 | 3. 50E-05 Mcy | VWA1           |
| FSTL1. 4   | 2. 36E-09 | -0. 26041 | 0      | 0. 116 | 3. 52E-05 Mcy | FSTL1          |
| HN1L. 4    | 2. 38E-09 | 0. 259444 | 0. 275 | 0. 149 | 3. 55E-05 Mcy | HN1L           |
| CAMK2B. 5  | 2. 39E-09 | -0. 32274 | 0      | 0. 116 | 3. 58E-05 Mcy | CAMK2B         |
| SAAL1. 2   | 2. 39E-09 | 0. 274229 | 0. 245 | 0. 125 | 3. 58E-05 Mcy | SAAL1          |
| MLLT4. 5   | 2. 42E-09 | -0. 28297 | 0. 029 | 0. 165 | 3. 62E-05 Mcy | MLLT4          |
| CRELD2. 4  | 2. 44E-09 | 0. 260095 | 0. 432 | 0. 279 | 3. 65E-05 Mcy | CRELD2         |
| RP11-849I  | 2. 46E-09 | -0. 36251 | 0. 011 | 0. 135 | 3. 67E-05 Mcy | RP11-849I19. 1 |
| CMC2. 2    | 2. 49E-09 | 0. 267443 | 0. 465 | 0. 301 | 3. 72E-05 Mcy | CMC2           |
| SLC35F1. 4 | 2. 52E-09 | -0. 26459 | 0. 007 | 0. 129 | 3. 76E-05 Mcy | SLC35F1        |
| ZNF91. 3   | 2. 55E-09 | -0. 36923 | 0. 062 | 0. 213 | 3. 81E-05 Mcy | ZNF91          |
| RASSF1. 2  | 2. 59E-09 | 0. 18575  | 0. 293 | 0. 155 | 3. 86E-05 Mcy | RASSF1         |
| PGK1. 3    | 2. 65E-09 | 0. 149534 | 0. 934 | 0. 749 | 3. 95E-05 Mcy | PGK1           |
| OBSL1. 5   | 2. 67E-09 | -0. 29357 | 0. 018 | 0. 149 | 3. 99E-05 Mcy | OBSL1          |
| BCL7A. 6   | 2. 70E-09 | -0. 33854 | 0. 022 | 0. 153 | 4. 03E-05 Mcy | BCL7A          |
| LRPAP1. 4  | 2. 86E-09 | 0. 220566 | 0. 733 | 0. 543 | 4. 28E-05 Mcy | LRPAP1         |
| GPX1. 6    | 2. 91E-09 | 0. 166919 | 0. 96  | 0. 81  | 4. 35E-05 Mcy | GPX1           |
| IFT81. 4   | 2. 94E-09 | -0. 31848 | 0. 029 | 0. 162 | 4. 40E-05 Mcy | IFT81          |
| PIK3R6. 1  | 2. 97E-09 | 0. 136967 | 0. 051 | 0. 011 | 4. 44E-05 Mcy | PIK3R6         |
| COX20. 1   | 3. 05E-09 | 0. 232555 | 0. 648 | 0. 455 | 4. 56E-05 Mcy | COX20          |
| OSTC. 4    | 3. 06E-09 | 0. 164984 | 0. 685 | 0. 499 | 4. 58E-05 Mcy | OSTC           |
| NAGPA. 4   | 3. 08E-09 | 0. 24538  | 0. 216 | 0. 106 | 4. 60E-05 Mcy | NAGPA          |
| ADI1. 2    | 3. 14E-09 | 0. 248444 | 0. 582 | 0. 402 | 4. 70E-05 Mcy | ADI1           |
| MAML2. 5   | 3. 15E-09 | -0. 34661 | 0. 055 | 0. 201 | 4. 70E-05 Mcy | MAML2          |
| COX6A1. 5  | 3. 18E-09 | -0. 17125 | 0. 89  | 0. 844 | 4. 75E-05 Mcy | COX6A1         |
| DNAJC17. 1 | 3. 21E-09 | 0. 207111 | 0. 187 | 0. 085 | 4. 80E-05 Mcy | DNAJC17        |
| NDN. 6     | 3. 23E-09 | -0. 25959 | 0. 055 | 0. 2   | 4. 83E-05 Mcy | NDN            |
| THG1L. 2   | 3. 28E-09 | 0. 176312 | 0. 168 | 0. 073 | 4. 90E-05 Mcy | THG1L          |
| SEPT4. 6   | 3. 28E-09 | -0. 50328 | 0. 011 | 0. 133 | 4. 90E-05 Mcy | 4-Sep          |
| SMIM13. 2  | 3. 35E-09 | 0. 173178 | 0. 183 | 0. 084 | 5. 01E-05 Mcy | SMIM13         |
| RXRA. 3    | 3. 37E-09 | 0. 178898 | 0. 201 | 0. 094 | 5. 04E-05 Mcy | RXRA           |
| CEND1. 4   | 3. 38E-09 | -0. 29222 | 0. 015 | 0. 142 | 5. 05E-05 Mcy | CEND1          |
| TRIM24. 6  | 3. 47E-09 | -0. 32377 | 0. 051 | 0. 195 | 5. 19E-05 Mcy | TRIM24         |
| ACSS3. 4   | 3. 51E-09 | -0. 24469 | 0      | 0. 114 | 5. 24E-05 Mcy | ACSS3          |
| NTM. 4     | 3. 51E-09 | -0. 44882 | 0      | 0. 114 | 5. 24E-05 Mcy | NTM            |
| IRAK4. 1   | 3. 53E-09 | 0. 192496 | 0. 201 | 0. 095 | 5. 28E-05 Mcy | IRAK4          |
| BLNK. 4    | 3. 55E-09 | 0. 105886 | 0. 161 | 0. 065 | 5. 31E-05 Mcy | BLNK           |
| TMX1. 3    | 3. 61E-09 | 0. 20067  | 0. 59  | 0. 398 | 5. 39E-05 Mcy | TMX1           |
| GRIA4. 5   | 3. 64E-09 | -0. 34709 | 0. 011 | 0. 132 | 5. 44E-05 Mcy | GRIA4          |
| CNTFR. 5   | 3. 65E-09 | -0. 31801 | 0. 011 | 0. 133 | 5. 45E-05 Mcy | CNTFR          |
| ZNF821. 6  | 3. 65E-09 | -0. 33635 | 0. 033 | 0. 166 | 5. 46E-05 Mcy | ZNF821         |
| FABP5. 4   | 3. 82E-09 | -0. 1111  | 0. 612 | 0. 387 | 5. 70E-05 Mcy | FABP5          |

|             |           |           |        |        |               |           |
|-------------|-----------|-----------|--------|--------|---------------|-----------|
| DDAH1. 5    | 3. 85E-09 | -0. 28058 | 0. 007 | 0. 127 | 5. 75E-05 Mcy | DDAH1     |
| UBAC2. 5    | 3. 88E-09 | 0. 22113  | 0. 432 | 0. 267 | 5. 81E-05 Mcy | UBAC2     |
| RAMP2. 5    | 3. 89E-09 | -0. 35543 | 0. 015 | 0. 138 | 5. 81E-05 Mcy | RAMP2     |
| COX5B. 5    | 3. 91E-09 | -0. 16262 | 0. 901 | 0. 847 | 5. 84E-05 Mcy | COX5B     |
| FAM3C. 5    | 3. 91E-09 | -0. 43707 | 0. 311 | 0. 44  | 5. 85E-05 Mcy | FAM3C     |
| HTRA1. 6    | 3. 93E-09 | 0. 218825 | 0. 659 | 0. 455 | 5. 87E-05 Mcy | HTRA1     |
| POLE2       | 3. 94E-09 | 0. 122362 | 0. 099 | 0. 033 | 5. 89E-05 Mcy | POLE2     |
| COL4A1. 3   | 4. 03E-09 | -0. 24143 | 0      | 0. 113 | 6. 02E-05 Mcy | COL4A1    |
| TBCB. 4     | 4. 06E-09 | -0. 35395 | 0. 623 | 0. 659 | 6. 06E-05 Mcy | TBCB      |
| POP4. 1     | 4. 09E-09 | 0. 14977  | 0. 421 | 0. 261 | 6. 11E-05 Mcy | POP4      |
| DST. 5      | 4. 20E-09 | -0. 44576 | 0. 234 | 0. 38  | 6. 27E-05 Mcy | DST       |
| CBR3. 3     | 4. 36E-09 | 0. 232729 | 0. 209 | 0. 103 | 6. 51E-05 Mcy | CBR3      |
| GNG4. 5     | 4. 49E-09 | -0. 30766 | 0. 004 | 0. 119 | 6. 71E-05 Mcy | GNG4      |
| STMN2. 6    | 4. 55E-09 | -0. 88315 | 0. 059 | 0. 19  | 6. 80E-05 Mcy | STMN2     |
| GDI1. 5     | 4. 57E-09 | -0. 41553 | 0. 348 | 0. 489 | 6. 83E-05 Mcy | GDI1      |
| NME4. 3     | 4. 57E-09 | 0. 242544 | 0. 557 | 0. 378 | 6. 83E-05 Mcy | NME4      |
| XRCC4       | 4. 65E-09 | 0. 15119  | 0. 209 | 0. 1   | 6. 95E-05 Mcy | XRCC4     |
| CHKB-AS1    | 4. 68E-09 | 0. 113837 | 0. 066 | 0. 018 | 6. 99E-05 Mcy | CHKB-AS1  |
| OSGEP. 2    | 4. 68E-09 | 0. 253508 | 0. 344 | 0. 199 | 6. 99E-05 Mcy | OSGEP     |
| RCN2. 5     | 4. 71E-09 | -0. 40048 | 0. 381 | 0. 469 | 7. 04E-05 Mcy | RCN2      |
| CLIC4. 5    | 4. 80E-09 | -0. 42802 | 0. 176 | 0. 336 | 7. 17E-05 Mcy | CLIC4     |
| STK24. 3    | 4. 90E-09 | 0. 179641 | 0. 205 | 0. 098 | 7. 32E-05 Mcy | STK24     |
| SPG21. 5    | 4. 97E-09 | 0. 204627 | 0. 56  | 0. 381 | 7. 42E-05 Mcy | SPG21     |
| SSSCA1. 1   | 5. 01E-09 | 0. 251179 | 0. 319 | 0. 184 | 7. 49E-05 Mcy | SSSCA1    |
| THSD7A. 5   | 5. 07E-09 | -0. 48571 | 0. 022 | 0. 145 | 7. 58E-05 Mcy | THSD7A    |
| CTDSP1. 6   | 5. 10E-09 | 0. 189299 | 0. 37  | 0. 218 | 7. 62E-05 Mcy | CTDSP1    |
| RBMS1. 4    | 5. 21E-09 | 0. 232608 | 0. 403 | 0. 246 | 7. 78E-05 Mcy | RBMS1     |
| GNG10. 2    | 5. 32E-09 | 0. 192568 | 0. 165 | 0. 071 | 7. 94E-05 Mcy | GNG10     |
| PXMP4. 1    | 5. 37E-09 | 0. 208299 | 0. 147 | 0. 061 | 8. 03E-05 Mcy | PXMP4     |
| RAPGEF1. 4  | 5. 39E-09 | 0. 155663 | 0. 234 | 0. 114 | 8. 05E-05 Mcy | RAPGEF1   |
| TIAL1. 1    | 5. 50E-09 | 0. 209173 | 0. 366 | 0. 222 | 8. 22E-05 Mcy | TIAL1     |
| MDFIC. 1    | 5. 70E-09 | 0. 203095 | 0. 114 | 0. 042 | 8. 51E-05 Mcy | MDFIC     |
| MGAT1. 6    | 5. 76E-09 | 0. 159695 | 0. 553 | 0. 353 | 8. 60E-05 Mcy | MGAT1     |
| MAF. 5      | 5. 92E-09 | 0. 109321 | 0. 267 | 0. 132 | 8. 85E-05 Mcy | MAF       |
| JAG1. 5     | 5. 94E-09 | -0. 33211 | 0. 033 | 0. 162 | 8. 87E-05 Mcy | JAG1      |
| RABAC1. 3   | 5. 98E-09 | -0. 35428 | 0. 619 | 0. 665 | 8. 94E-05 Mcy | RABAC1    |
| SOBP. 5     | 5. 98E-09 | -0. 30327 | 0. 015 | 0. 137 | 8. 94E-05 Mcy | SOBP      |
| CSPG5. 5    | 6. 17E-09 | -0. 37291 | 0      | 0. 111 | 9. 21E-05 Mcy | CSPG5     |
| MAP2K3. 6   | 6. 17E-09 | 0. 222112 | 0. 326 | 0. 186 | 9. 22E-05 Mcy | MAP2K3    |
| CREB5. 5    | 6. 23E-09 | -0. 42875 | 0. 092 | 0. 238 | 9. 30E-05 Mcy | CREB5     |
| IFNGR2. 6   | 6. 29E-09 | 0. 196729 | 0. 571 | 0. 385 | 9. 40E-05 Mcy | IFNGR2    |
| FAM129A. 3  | 6. 31E-09 | 0. 171742 | 0. 26  | 0. 137 | 9. 43E-05 Mcy | FAM129A   |
| TRAPPC2L. 6 | 6. 44E-09 | 0. 255032 | 0. 582 | 0. 416 | 9. 62E-05 Mcy | TRAPPC2L  |
| DAZAP1. 3   | 6. 47E-09 | 0. 216673 | 0. 374 | 0. 228 | 9. 66E-05 Mcy | DAZAP1    |
| SEC14L2. 5  | 6. 53E-09 | -0. 26489 | 0. 004 | 0. 118 | 9. 77E-05 Mcy | SEC14L2   |
| WNK3. 4     | 6. 61E-09 | -0. 28871 | 0. 007 | 0. 123 | 9. 88E-05 Mcy | WNK3      |
| BAK1. 4     | 6. 69E-09 | 0. 213656 | 0. 223 | 0. 113 | 1. 00E-04 Mcy | BAK1      |
| TNC. 5      | 6. 90E-09 | -0. 44684 | 0. 059 | 0. 204 | 0. 000103 Mcy | TNC       |
| ACOT7. 5    | 6. 92E-09 | 0. 276919 | 0. 374 | 0. 224 | 0. 000103 Mcy | ACOT7     |
| MX1. 3      | 6. 93E-09 | 0. 310664 | 0. 234 | 0. 117 | 0. 000104 Mcy | MX1       |
| LINC00662   | 7. 00E-09 | -0. 37147 | 0. 048 | 0. 186 | 0. 000105 Mcy | LINC00662 |



|            |           |           |        |        |           |     |              |
|------------|-----------|-----------|--------|--------|-----------|-----|--------------|
| ELL. 3     | 7. 03E-09 | 0. 171178 | 0. 205 | 0. 097 | 0. 000105 | Mcy | ELL          |
| EPB41L4A-  | 7. 17E-09 | -0. 42321 | 0. 143 | 0. 297 | 0. 000107 | Mcy | EPB41L4A-AS1 |
| PTOV1. 5   | 7. 28E-09 | -0. 356   | 0. 311 | 0. 442 | 0. 000109 | Mcy | PTOV1        |
| ARHGEF12.  | 7. 32E-09 | -0. 30209 | 0. 033 | 0. 163 | 0. 000109 | Mcy | ARHGEF12     |
| ZIC1. 5    | 7. 33E-09 | -0. 28459 | 0. 004 | 0. 117 | 0. 00011  | Mcy | ZIC1         |
| ZNF827. 5  | 7. 37E-09 | -0. 24812 | 0. 004 | 0. 117 | 0. 00011  | Mcy | ZNF827       |
| TMEM126A.  | 7. 44E-09 | 0. 283006 | 0. 487 | 0. 325 | 0. 000111 | Mcy | TMEM126A     |
| PDK3. 4    | 7. 45E-09 | 0. 166857 | 0. 143 | 0. 058 | 0. 000111 | Mcy | PDK3         |
| KLHL4. 4   | 7. 49E-09 | -0. 28918 | 0. 011 | 0. 13  | 0. 000112 | Mcy | KLHL4        |
| FGFR10P. 1 | 7. 50E-09 | 0. 226121 | 0. 172 | 0. 078 | 0. 000112 | Mcy | FGFR10P      |
| TSPAN12. 4 | 7. 54E-09 | -0. 30629 | 0. 007 | 0. 123 | 0. 000113 | Mcy | TSPAN12      |
| TMEM256. 4 | 7. 60E-09 | 0. 185139 | 0. 612 | 0. 426 | 0. 000114 | Mcy | TMEM256      |
| SPTAN1. 4  | 7. 70E-09 | -0. 4133  | 0. 11  | 0. 264 | 0. 000115 | Mcy | SPTAN1       |
| SETD5. 6   | 7. 88E-09 | -0. 41268 | 0. 139 | 0. 292 | 0. 000118 | Mcy | SETD5        |
| MAPRE3. 4  | 7. 88E-09 | -0. 35155 | 0. 048 | 0. 182 | 0. 000118 | Mcy | MAPRE3       |
| PIPOX. 5   | 7. 93E-09 | -0. 29115 | 0. 015 | 0. 135 | 0. 000118 | Mcy | PIPOX        |
| THOC7. 2   | 8. 00E-09 | 0. 191774 | 0. 553 | 0. 385 | 0. 00012  | Mcy | THOC7        |
| ALG3. 1    | 8. 17E-09 | 0. 219079 | 0. 37  | 0. 228 | 0. 000122 | Mcy | ALG3         |
| DHX15. 3   | 8. 21E-09 | 0. 240265 | 0. 388 | 0. 241 | 0. 000123 | Mcy | DHX15        |
| CEBPB. 6   | 8. 24E-09 | 0. 214027 | 0. 645 | 0. 43  | 0. 000123 | Mcy | CEBPB        |
| MNS1. 3    | 8. 38E-09 | 0. 301047 | 0. 161 | 0. 072 | 0. 000125 | Mcy | MNS1         |
| S100A13. 4 | 8. 42E-09 | -0. 6313  | 0. 15  | 0. 299 | 0. 000126 | Mcy | S100A13      |
| EIF3A. 4   | 8. 44E-09 | 0. 274355 | 0. 48  | 0. 329 | 0. 000126 | Mcy | EIF3A        |
| CAMK1D. 5  | 8. 53E-09 | 0. 170823 | 0. 223 | 0. 108 | 0. 000127 | Mcy | CAMK1D       |
| HEBP1. 2   | 8. 59E-09 | 0. 250538 | 0. 326 | 0. 186 | 0. 000128 | Mcy | HEBP1        |
| LINC00511  | 8. 74E-09 | -0. 28904 | 0. 007 | 0. 122 | 0. 000131 | Mcy | LINC00511    |
| PLOD1. 2   | 8. 81E-09 | 0. 270522 | 0. 319 | 0. 188 | 0. 000132 | Mcy | PLOD1        |
| ZNF254. 3  | 8. 89E-09 | -0. 34493 | 0. 022 | 0. 144 | 0. 000133 | Mcy | ZNF254       |
| NOP16. 5   | 9. 03E-09 | 0. 281779 | 0. 33  | 0. 196 | 0. 000135 | Mcy | NOP16        |
| BEND6. 5   | 9. 16E-09 | -0. 23879 | 0. 007 | 0. 121 | 0. 000137 | Mcy | BEND6        |
| DRG1. 2    | 9. 21E-09 | 0. 272539 | 0. 388 | 0. 242 | 0. 000138 | Mcy | DRG1         |
| FLII. 5    | 9. 21E-09 | 0. 188223 | 0. 322 | 0. 184 | 0. 000138 | Mcy | FLII         |
| MEF2A. 6   | 9. 28E-09 | 0. 160316 | 0. 37  | 0. 212 | 0. 000139 | Mcy | MEF2A        |
| UBR7. 2    | 9. 41E-09 | 0. 290342 | 0. 223 | 0. 115 | 0. 000141 | Mcy | UBR7         |
| TMEM97. 4  | 9. 56E-09 | 0. 316095 | 0. 293 | 0. 169 | 0. 000143 | Mcy | TMEM97       |
| SSR1. 5    | 9. 77E-09 | 0. 168978 | 0. 659 | 0. 464 | 0. 000146 | Mcy | SSR1         |
| ARHGAP21.  | 9. 79E-09 | -0. 37443 | 0. 103 | 0. 254 | 0. 000146 | Mcy | ARHGAP21     |
| EHP1L1. 5  | 9. 93E-09 | 0. 254573 | 0. 158 | 0. 069 | 0. 000148 | Mcy | EHP1L1       |
| SLC37A3. 4 | 1. 01E-08 | -0. 3301  | 0. 015 | 0. 132 | 0. 00015  | Mcy | SLC37A3      |
| EIF4E2. 4  | 1. 01E-08 | 0. 245254 | 0. 48  | 0. 329 | 0. 000151 | Mcy | EIF4E2       |
| LBH. 6     | 1. 02E-08 | -0. 4945  | 0. 033 | 0. 156 | 0. 000153 | Mcy | LBH          |
| CD164. 5   | 1. 03E-08 | 0. 202058 | 0. 678 | 0. 486 | 0. 000153 | Mcy | CD164        |
| KLF7. 4    | 1. 03E-08 | -0. 4655  | 0. 073 | 0. 209 | 0. 000154 | Mcy | KLF7         |
| ASIC4. 5   | 1. 04E-08 | -0. 49798 | 0. 022 | 0. 142 | 0. 000156 | Mcy | ASIC4        |
| PJA2. 5    | 1. 05E-08 | -0. 45855 | 0. 201 | 0. 338 | 0. 000156 | Mcy | PJA2         |
| TAX1BP3. 4 | 1. 05E-08 | 0. 157621 | 0. 553 | 0. 378 | 0. 000156 | Mcy | TAX1BP3      |
| AP1G2. 5   | 1. 06E-08 | 0. 131712 | 0. 128 | 0. 049 | 0. 000159 | Mcy | AP1G2        |
| MANBA. 6   | 1. 07E-08 | 0. 197756 | 0. 238 | 0. 118 | 0. 000159 | Mcy | MANBA        |
| TSC22D4. 6 | 1. 10E-08 | -0. 56886 | 0. 352 | 0. 473 | 0. 000164 | Mcy | TSC22D4      |
| AC004540.  | 1. 13E-08 | -0. 41506 | 0. 011 | 0. 125 | 0. 000169 | Mcy | AC004540. 4  |
| CAST. 5    | 1. 13E-08 | 0. 192703 | 0. 484 | 0. 314 | 0. 000169 | Mcy | CAST         |

|            |           |           |        |        |               |         |
|------------|-----------|-----------|--------|--------|---------------|---------|
| KLHDC4. 2  | 1. 16E-08 | 0. 116486 | 0. 161 | 0. 07  | 0. 000174 Mcy | KLHDC4  |
| CD74. 5    | 1. 18E-08 | 0. 122678 | 0. 989 | 0. 746 | 0. 000176 Mcy | CD74    |
| EXOC6. 3   | 1. 18E-08 | 0. 194681 | 0. 147 | 0. 061 | 0. 000177 Mcy | EXOC6   |
| SMUG1. 1   | 1. 19E-08 | 0. 284532 | 0. 344 | 0. 21  | 0. 000177 Mcy | SMUG1   |
| PREP. 3    | 1. 19E-08 | 0. 199331 | 0. 198 | 0. 094 | 0. 000178 Mcy | PREP    |
| NDP. 4     | 1. 21E-08 | -0. 31047 | 0. 004 | 0. 114 | 0. 00018 Mcy  | NDP     |
| NCALD. 5   | 1. 22E-08 | -0. 32874 | 0. 011 | 0. 127 | 0. 000182 Mcy | NCALD   |
| CEP128     | 1. 24E-08 | 0. 115413 | 0. 066 | 0. 018 | 0. 000186 Mcy | CEP128  |
| YEATS4. 4  | 1. 25E-08 | 0. 145906 | 0. 407 | 0. 247 | 0. 000187 Mcy | YEATS4  |
| INSM1. 6   | 1. 27E-08 | -0. 31721 | 0. 007 | 0. 119 | 0. 000189 Mcy | INSM1   |
| MIS18A. 4  | 1. 27E-08 | 0. 221365 | 0. 209 | 0. 104 | 0. 00019 Mcy  | MIS18A  |
| CAT. 5     | 1. 29E-08 | 0. 1793   | 0. 476 | 0. 301 | 0. 000193 Mcy | CAT     |
| FAM192A. 3 | 1. 29E-08 | 0. 232482 | 0. 509 | 0. 354 | 0. 000193 Mcy | FAM192A |
| ARL9. 5    | 1. 31E-08 | -0. 24793 | 0      | 0. 106 | 0. 000196 Mcy | ARL9    |
| ABI2. 4    | 1. 32E-08 | -0. 39851 | 0. 22  | 0. 365 | 0. 000197 Mcy | ABI2    |
| ETF1. 5    | 1. 33E-08 | 0. 215938 | 0. 509 | 0. 341 | 0. 000199 Mcy | ETF1    |
| CLEC4A. 6  | 1. 37E-08 | 0. 11532  | 0. 147 | 0. 059 | 0. 000205 Mcy | CLEC4A  |
| DAAM1. 4   | 1. 38E-08 | -0. 39773 | 0. 099 | 0. 244 | 0. 000206 Mcy | DAAM1   |
| RCSD1. 5   | 1. 38E-08 | 0. 105736 | 0. 245 | 0. 117 | 0. 000207 Mcy | RCSD1   |
| NBPF1. 6   | 1. 41E-08 | -0. 36634 | 0. 095 | 0. 239 | 0. 000211 Mcy | NBPF1   |
| ZNF793. 3  | 1. 43E-08 | -0. 29373 | 0. 004 | 0. 113 | 0. 000213 Mcy | ZNF793  |
| FBL. 4     | 1. 43E-08 | 0. 17074  | 0. 542 | 0. 374 | 0. 000214 Mcy | FBL     |
| SFXN3. 1   | 1. 48E-08 | 0. 236206 | 0. 216 | 0. 109 | 0. 000221 Mcy | SFXN3   |
| HMGN3. 4   | 1. 48E-08 | 0. 17196  | 0. 802 | 0. 604 | 0. 000221 Mcy | HMGN3   |
| OPTN. 4    | 1. 50E-08 | -0. 28078 | 0. 018 | 0. 138 | 0. 000224 Mcy | OPTN    |
| ATP1A3. 5  | 1. 53E-08 | -0. 41526 | 0. 011 | 0. 123 | 0. 000228 Mcy | ATP1A3  |
| TMEM25. 5  | 1. 55E-08 | -0. 28929 | 0. 011 | 0. 125 | 0. 000231 Mcy | TMEM25  |
| LIFR. 3    | 1. 56E-08 | -0. 2803  | 0. 004 | 0. 112 | 0. 000233 Mcy | LIFR    |
| TNFAIP6. 4 | 1. 56E-08 | -0. 48362 | 0. 004 | 0. 112 | 0. 000234 Mcy | TNFAIP6 |
| EIF4A3. 5  | 1. 58E-08 | 0. 265571 | 0. 604 | 0. 446 | 0. 000237 Mcy | EIF4A3  |
| ZNF267. 6  | 1. 59E-08 | 0. 170911 | 0. 249 | 0. 13  | 0. 000238 Mcy | ZNF267  |
| RTCA. 2    | 1. 60E-08 | 0. 21987  | 0. 418 | 0. 266 | 0. 000239 Mcy | RTCA    |
| TTC14. 2   | 1. 61E-08 | -0. 41494 | 0. 121 | 0. 273 | 0. 000241 Mcy | TTC14   |
| LYAR. 2    | 1. 63E-08 | 0. 212203 | 0. 3   | 0. 171 | 0. 000243 Mcy | LYAR    |
| TTC9B. 6   | 1. 64E-08 | -0. 44445 | 0. 011 | 0. 123 | 0. 000245 Mcy | TTC9B   |
| KARS. 2    | 1. 64E-08 | 0. 250264 | 0. 538 | 0. 37  | 0. 000245 Mcy | KARS    |
| SOX6. 5    | 1. 65E-08 | -0. 30518 | 0. 022 | 0. 144 | 0. 000247 Mcy | SOX6    |
| MRT04. 1   | 1. 69E-08 | 0. 252126 | 0. 385 | 0. 242 | 0. 000252 Mcy | MRT04   |
| POLR2H. 3  | 1. 69E-08 | 0. 224953 | 0. 473 | 0. 319 | 0. 000252 Mcy | POLR2H  |
| HOMER1. 5  | 1. 72E-08 | -0. 27707 | 0. 033 | 0. 159 | 0. 000257 Mcy | HOMER1  |
| LRRTM2. 5  | 1. 72E-08 | -0. 26149 | 0      | 0. 105 | 0. 000258 Mcy | LRRTM2  |
| PNMA2. 5   | 1. 74E-08 | -0. 3177  | 0. 022 | 0. 142 | 0. 00026 Mcy  | PNMA2   |
| EFR3A. 5   | 1. 75E-08 | 0. 193559 | 0. 256 | 0. 139 | 0. 000261 Mcy | EFR3A   |
| DZIP1. 5   | 1. 75E-08 | -0. 21754 | 0      | 0. 105 | 0. 000261 Mcy | DZIP1   |
| NOL3. 6    | 1. 76E-08 | -0. 3775  | 0. 04  | 0. 169 | 0. 000263 Mcy | NOL3    |
| SYT17. 4   | 1. 76E-08 | -0. 33649 | 0. 037 | 0. 162 | 0. 000263 Mcy | SYT17   |
| DOK5. 5    | 1. 76E-08 | -0. 3399  | 0. 051 | 0. 186 | 0. 000263 Mcy | DOK5    |
| CCDC167. 3 | 1. 77E-08 | 0. 258162 | 0. 546 | 0. 379 | 0. 000264 Mcy | CCDC167 |
| ISOC2. 5   | 1. 78E-08 | 0. 225159 | 0. 505 | 0. 345 | 0. 000266 Mcy | ISOC2   |
| PYCR1. 3   | 1. 79E-08 | -0. 20174 | 0. 051 | 0. 188 | 0. 000268 Mcy | PYCR1   |
| MED4. 1    | 1. 81E-08 | 0. 202849 | 0. 582 | 0. 412 | 0. 000271 Mcy | MED4    |

|           |          |          |       |       |          |     |            |
|-----------|----------|----------|-------|-------|----------|-----|------------|
| AMER2.5   | 1.81E-08 | -0.44925 | 0.007 | 0.117 | 0.000271 | Mcy | AMER2      |
| LGR4.6    | 1.83E-08 | -0.20857 | 0     | 0.105 | 0.000274 | Mcy | LGR4       |
| PCDHB10.5 | 1.86E-08 | -0.30434 | 0     | 0.104 | 0.000278 | Mcy | PCDHB10    |
| SNX17.1   | 1.87E-08 | 0.163697 | 0.623 | 0.446 | 0.00028  | Mcy | SNX17      |
| BRMS1.3   | 1.89E-08 | 0.238521 | 0.458 | 0.307 | 0.000282 | Mcy | BRMS1      |
| ITPRIP.6  | 1.90E-08 | 0.213202 | 0.165 | 0.073 | 0.000285 | Mcy | ITPRIP     |
| NAA20.2   | 1.92E-08 | 0.14761  | 0.674 | 0.492 | 0.000287 | Mcy | NAA20      |
| ZNF397.4  | 1.93E-08 | -0.31207 | 0.037 | 0.166 | 0.000288 | Mcy | ZNF397     |
| CCDC53.1  | 1.96E-08 | 0.168355 | 0.491 | 0.325 | 0.000293 | Mcy | CCDC53     |
| CLDN12.6  | 1.98E-08 | -0.32572 | 0.022 | 0.141 | 0.000296 | Mcy | CLDN12     |
| C1QL1.5   | 1.99E-08 | -0.30534 | 0.007 | 0.117 | 0.000297 | Mcy | C1QL1      |
| PSMB4.2   | 1.99E-08 | 0.193884 | 0.582 | 0.413 | 0.000297 | Mcy | PSMB4      |
| STARD4.1  | 2.01E-08 | 0.130989 | 0.092 | 0.031 | 0.000301 | Mcy | STARD4     |
| RAB8B.5   | 2.03E-08 | 0.195043 | 0.275 | 0.152 | 0.000304 | Mcy | RAB8B      |
| BOD1.5    | 2.05E-08 | -0.37553 | 0.158 | 0.306 | 0.000306 | Mcy | BOD1       |
| TRAPPC1.2 | 2.05E-08 | 0.15112  | 0.799 | 0.611 | 0.000307 | Mcy | TRAPPC1    |
| THOC5.2   | 2.07E-08 | 0.206352 | 0.179 | 0.084 | 0.00031  | Mcy | THOC5      |
| ZNF579.5  | 2.08E-08 | -0.23921 | 0.007 | 0.117 | 0.00031  | Mcy | ZNF579     |
| COPS3.2   | 2.08E-08 | 0.219437 | 0.52  | 0.365 | 0.000311 | Mcy | COPS3      |
| JMJD8.1   | 2.11E-08 | 0.13551  | 0.183 | 0.084 | 0.000315 | Mcy | JMJD8      |
| HOXA7.4   | 2.13E-08 | -0.36225 | 0     | 0.104 | 0.000318 | Mcy | HOXA7      |
| PPIC.4    | 2.13E-08 | -0.30582 | 0.051 | 0.186 | 0.000319 | Mcy | PPIC       |
| C1orf112  | 2.18E-08 | 0.126308 | 0.106 | 0.039 | 0.000326 | Mcy | C1orf112   |
| CCDC109B  | 2.18E-08 | 0.2335   | 0.531 | 0.345 | 0.000326 | Mcy | CCDC109B   |
| SUMO2.4   | 2.19E-08 | -0.11556 | 0.879 | 0.82  | 0.000327 | Mcy | SUMO2      |
| SPAG16.6  | 2.21E-08 | -0.45749 | 0.15  | 0.3   | 0.00033  | Mcy | SPAG16     |
| IQCK.4    | 2.23E-08 | -0.29341 | 0.015 | 0.129 | 0.000333 | Mcy | IQCK       |
| TMEM198.4 | 2.27E-08 | -0.21505 | 0.007 | 0.118 | 0.00034  | Mcy | TMEM198    |
| SNAP25.5  | 2.28E-08 | -0.44254 | 0.026 | 0.145 | 0.00034  | Mcy | SNAP25     |
| GINS1.2   | 2.31E-08 | 0.269388 | 0.128 | 0.053 | 0.000345 | Mcy | GINS1      |
| NUDT11.4  | 2.32E-08 | -0.30532 | 0.015 | 0.129 | 0.000347 | Mcy | NUDT11     |
| CDKN2C.4  | 2.33E-08 | 0.152702 | 0.451 | 0.278 | 0.000349 | Mcy | CDKN2C     |
| DOCK11.6  | 2.39E-08 | 0.117829 | 0.132 | 0.052 | 0.000357 | Mcy | DOCK11     |
| CORO2B.4  | 2.40E-08 | -0.2424  | 0     | 0.103 | 0.000358 | Mcy | CORO2B     |
| GDAP1L1.5 | 2.40E-08 | -0.37596 | 0     | 0.103 | 0.000358 | Mcy | GDAP1L1    |
| GMPPA.1   | 2.40E-08 | 0.22381  | 0.278 | 0.157 | 0.000359 | Mcy | GMPPA      |
| GAD1.6    | 2.42E-08 | -0.29776 | 0.007 | 0.116 | 0.000362 | Mcy | GAD1       |
| PAXIP1-AS | 2.42E-08 | -0.31619 | 0.037 | 0.161 | 0.000362 | Mcy | PAXIP1-AS1 |
| TMEM51.5  | 2.44E-08 | 0.127567 | 0.231 | 0.116 | 0.000364 | Mcy | TMEM51     |
| LRRN3.5   | 2.45E-08 | -0.35021 | 0.007 | 0.116 | 0.000366 | Mcy | LRRN3      |
| FAM102B.2 | 2.46E-08 | 0.179675 | 0.084 | 0.027 | 0.000367 | Mcy | FAM102B    |
| DTNA.5    | 2.61E-08 | -0.50155 | 0.11  | 0.256 | 0.00039  | Mcy | DTNA       |
| LSM3.1    | 2.72E-08 | 0.168484 | 0.722 | 0.556 | 0.000406 | Mcy | LSM3       |
| UBE2H.5   | 2.76E-08 | -0.3576  | 0.114 | 0.262 | 0.000412 | Mcy | UBE2H      |
| EPM2AIP1  | 2.78E-08 | -0.26559 | 0.066 | 0.201 | 0.000416 | Mcy | EPM2AIP1   |
| RHOJ.4    | 2.79E-08 | -0.22632 | 0     | 0.102 | 0.000416 | Mcy | RHOJ       |
| GGT7.4    | 2.81E-08 | -0.25943 | 0.04  | 0.168 | 0.00042  | Mcy | GGT7       |
| GXYLT1.1  | 2.82E-08 | 0.222831 | 0.147 | 0.063 | 0.000422 | Mcy | GXYLT1     |
| LINC00665 | 2.83E-08 | -0.37838 | 0.059 | 0.189 | 0.000422 | Mcy | LINC00665  |
| APBB2.5   | 2.90E-08 | -0.28906 | 0.007 | 0.115 | 0.000433 | Mcy | APBB2      |
| REEP5.5   | 2.93E-08 | 0.178176 | 0.773 | 0.58  | 0.000437 | Mcy | REEP5      |

|             |           |           |        |        |               |           |
|-------------|-----------|-----------|--------|--------|---------------|-----------|
| DLGAP4. 3   | 2. 95E-08 | -0. 29312 | 0. 147 | 0. 296 | 0. 000441 Mcy | DLGAP4    |
| SAPCD2. 5   | 2. 97E-08 | 0. 199815 | 0. 132 | 0. 054 | 0. 000444 Mcy | SAPCD2    |
| ATP6VOA1.   | 2. 99E-08 | -0. 4136  | 0. 136 | 0. 289 | 0. 000447 Mcy | ATP6VOA1  |
| APBB1. 5    | 3. 00E-08 | -0. 36582 | 0. 059 | 0. 193 | 0. 000448 Mcy | APBB1     |
| NELL2. 4    | 3. 04E-08 | -0. 30255 | 0. 004 | 0. 108 | 0. 000454 Mcy | NELL2     |
| EOGT        | 3. 04E-08 | 0. 116505 | 0. 092 | 0. 032 | 0. 000455 Mcy | EOGT      |
| C1S. 4      | 3. 07E-08 | -0. 64173 | 0. 04  | 0. 165 | 0. 000458 Mcy | C1S       |
| PCMTD2. 5   | 3. 09E-08 | -0. 35982 | 0. 092 | 0. 23  | 0. 000462 Mcy | PCMTD2    |
| PTTG2       | 3. 12E-08 | 0. 114556 | 0. 033 | 0. 006 | 0. 000467 Mcy | PTTG2     |
| PHLDA3. 3   | 3. 14E-08 | -0. 29304 | 0. 044 | 0. 174 | 0. 000469 Mcy | PHLDA3    |
| OSER1-AS1   | 3. 17E-08 | -0. 27667 | 0. 018 | 0. 134 | 0. 000474 Mcy | OSER1-AS1 |
| SH3BGR. 5   | 3. 18E-08 | -0. 4344  | 0. 015 | 0. 126 | 0. 000476 Mcy | SH3BGR    |
| CCNE1       | 3. 19E-08 | 0. 153724 | 0. 084 | 0. 028 | 0. 000477 Mcy | CCNE1     |
| EIF4A1. 3   | 3. 23E-08 | -0. 13878 | 0. 894 | 0. 86  | 0. 000483 Mcy | EIF4A1    |
| EFS. 4      | 3. 30E-08 | -0. 2914  | 0. 004 | 0. 108 | 0. 000494 Mcy | EFS       |
| CDKN1A. 5   | 3. 35E-08 | 0. 144096 | 0. 495 | 0. 303 | 0. 000501 Mcy | CDKN1A    |
| ZNF439. 5   | 3. 38E-08 | -0. 25688 | 0. 029 | 0. 151 | 0. 000505 Mcy | ZNF439    |
| PHGDH. 5    | 3. 40E-08 | -0. 36718 | 0. 066 | 0. 203 | 0. 000508 Mcy | PHGDH     |
| ZNF704. 5   | 3. 42E-08 | -0. 30035 | 0. 015 | 0. 126 | 0. 000512 Mcy | ZNF704    |
| UBA7. 5     | 3. 43E-08 | 0. 141253 | 0. 176 | 0. 079 | 0. 000512 Mcy | UBA7      |
| HABP4. 3    | 3. 49E-08 | -0. 20285 | 0. 011 | 0. 122 | 0. 000522 Mcy | HABP4     |
| PRR5. 5     | 3. 50E-08 | 0. 149131 | 0. 117 | 0. 045 | 0. 000523 Mcy | PRR5      |
| ADSL. 2     | 3. 51E-08 | 0. 2689   | 0. 388 | 0. 254 | 0. 000525 Mcy | ADSL      |
| ASNS. 6     | 3. 53E-08 | -0. 26725 | 0. 051 | 0. 18  | 0. 000527 Mcy | ASNS      |
| YWHAQ. 5    | 3. 56E-08 | -0. 25621 | 0. 663 | 0. 643 | 0. 000532 Mcy | YWHAQ     |
| KNTC1       | 3. 62E-08 | 0. 112877 | 0. 073 | 0. 022 | 0. 000541 Mcy | KNTC1     |
| SKI. 4      | 3. 63E-08 | 0. 170511 | 0. 271 | 0. 148 | 0. 000542 Mcy | SKI       |
| EIF4G1. 2   | 3. 65E-08 | 0. 242502 | 0. 418 | 0. 274 | 0. 000546 Mcy | EIF4G1    |
| RAD21. 5    | 3. 84E-08 | 0. 224895 | 0. 52  | 0. 363 | 0. 000573 Mcy | RAD21     |
| MAZ. 5      | 3. 86E-08 | 0. 288484 | 0. 381 | 0. 247 | 0. 000577 Mcy | MAZ       |
| EDEM1. 5    | 3. 88E-08 | 0. 175971 | 0. 168 | 0. 077 | 0. 00058 Mcy  | EDEM1     |
| SFRP1. 5    | 3. 93E-08 | -0. 22826 | 0      | 0. 1   | 0. 000587 Mcy | SFRP1     |
| LAMA5. 4    | 3. 93E-08 | -0. 22008 | 0. 007 | 0. 114 | 0. 000588 Mcy | LAMA5     |
| ARNT2. 6    | 3. 95E-08 | -0. 23778 | 0. 007 | 0. 114 | 0. 00059 Mcy  | ARNT2     |
| FAM171B. 4  | 3. 95E-08 | -0. 27338 | 0. 007 | 0. 113 | 0. 000591 Mcy | FAM171B   |
| KCNE4. 4    | 3. 96E-08 | -0. 2416  | 0. 004 | 0. 107 | 0. 000592 Mcy | KCNE4     |
| FBXL15. 6   | 3. 98E-08 | 0. 194359 | 0. 33  | 0. 192 | 0. 000594 Mcy | FBXL15    |
| CORO1C. 3   | 4. 03E-08 | 0. 226371 | 0. 538 | 0. 369 | 0. 000603 Mcy | CORO1C    |
| KIF5A. 5    | 4. 05E-08 | -0. 36119 | 0. 015 | 0. 124 | 0. 000605 Mcy | KIF5A     |
| LAS1L. 1    | 4. 05E-08 | 0. 172649 | 0. 249 | 0. 135 | 0. 000605 Mcy | LAS1L     |
| ELOVL2. 6   | 4. 05E-08 | -0. 22807 | 0      | 0. 1   | 0. 000605 Mcy | ELOVL2    |
| IFI27L2. 3  | 4. 08E-08 | 0. 172728 | 0. 659 | 0. 467 | 0. 000609 Mcy | IFI27L2   |
| EXOSC3. 3   | 4. 12E-08 | 0. 189098 | 0. 278 | 0. 157 | 0. 000615 Mcy | EXOSC3    |
| TMEM18. 1   | 4. 12E-08 | 0. 252156 | 0. 337 | 0. 204 | 0. 000616 Mcy | TMEM18    |
| RUNDC3A. 6  | 4. 17E-08 | -0. 3126  | 0      | 0. 1   | 0. 000623 Mcy | RUNDC3A   |
| ALDH3B1. 4  | 4. 18E-08 | 0. 163901 | 0. 158 | 0. 069 | 0. 000624 Mcy | ALDH3B1   |
| CELF2. 6    | 4. 18E-08 | 0. 141152 | 0. 564 | 0. 379 | 0. 000625 Mcy | CELF2     |
| DIRAS3. 5   | 4. 18E-08 | -0. 49514 | 0. 015 | 0. 126 | 0. 000625 Mcy | DIRAS3    |
| MYL6B. 5    | 4. 23E-08 | -0. 41143 | 0. 315 | 0. 445 | 0. 000632 Mcy | MYL6B     |
| FZD7. 3     | 4. 23E-08 | -0. 21563 | 0      | 0. 1   | 0. 000633 Mcy | FZD7      |
| SLC25A29. 4 | 4. 24E-08 | -0. 24417 | 0. 033 | 0. 155 | 0. 000633 Mcy | SLC25A29  |

|             |           |           |        |        |           |     |                |
|-------------|-----------|-----------|--------|--------|-----------|-----|----------------|
| ZNF385D. 4  | 4. 25E-08 | -0. 25608 | 0. 007 | 0. 113 | 0. 000635 | Mcy | ZNF385D        |
| ATP1B3. 6   | 4. 30E-08 | 0. 199213 | 0. 722 | 0. 54  | 0. 000642 | Mcy | ATP1B3         |
| DNAJC18. 3  | 4. 35E-08 | -0. 28643 | 0. 015 | 0. 125 | 0. 00065  | Mcy | DNAJC18        |
| LRRRC8A. 5  | 4. 45E-08 | -0. 365   | 0. 048 | 0. 171 | 0. 000665 | Mcy | LRRRC8A        |
| C21orf58. 4 | 4. 51E-08 | 0. 265616 | 0. 125 | 0. 051 | 0. 000675 | Mcy | C21orf58       |
| SHD. 5      | 4. 61E-08 | -0. 40913 | 0. 018 | 0. 128 | 0. 00069  | Mcy | SHD            |
| CACNA2D3. 4 | 4. 64E-08 | 0. 209079 | 0. 088 | 0. 03  | 0. 000693 | Mcy | CACNA2D3       |
| EXOC7. 5    | 4. 65E-08 | -0. 39615 | 0. 209 | 0. 355 | 0. 000694 | Mcy | EXOC7          |
| PICALM. 6   | 4. 73E-08 | 0. 185491 | 0. 436 | 0. 277 | 0. 000706 | Mcy | PICALM         |
| HNRNPAB. 5  | 4. 74E-08 | 0. 261593 | 0. 549 | 0. 393 | 0. 000708 | Mcy | HNRNPAB        |
| DLX5. 6     | 4. 83E-08 | -0. 67542 | 0. 033 | 0. 146 | 0. 000721 | Mcy | DLX5           |
| SLC10A4. 5  | 4. 84E-08 | -0. 2073  | 0      | 0. 099 | 0. 000724 | Mcy | SLC10A4        |
| NMRK1. 4    | 5. 04E-08 | 0. 151622 | 0. 256 | 0. 136 | 0. 000753 | Mcy | NMRK1          |
| HIST2H2AC   | 5. 07E-08 | 0. 178457 | 0. 132 | 0. 056 | 0. 000758 | Mcy | HIST2H2AC      |
| SNAPC5. 1   | 5. 10E-08 | 0. 32473  | 0. 33  | 0. 209 | 0. 000762 | Mcy | SNAPC5         |
| EFEMP1. 5   | 5. 13E-08 | -0. 74225 | 0. 088 | 0. 224 | 0. 000767 | Mcy | EFEMP1         |
| DLX2. 6     | 5. 16E-08 | -0. 44518 | 0. 007 | 0. 111 | 0. 00077  | Mcy | DLX2           |
| NFASC. 4    | 5. 16E-08 | -0. 36411 | 0. 004 | 0. 105 | 0. 000772 | Mcy | NFASC          |
| AXL. 5      | 5. 17E-08 | 0. 127909 | 0. 326 | 0. 177 | 0. 000773 | Mcy | AXL            |
| CYTL1. 5    | 5. 20E-08 | 0. 133137 | 0. 22  | 0. 108 | 0. 000777 | Mcy | CYTL1          |
| PLA2G5. 5   | 5. 30E-08 | -0. 49474 | 0. 007 | 0. 111 | 0. 000791 | Mcy | PLA2G5         |
| KIF1A. 5    | 5. 37E-08 | -0. 36075 | 0. 018 | 0. 129 | 0. 000803 | Mcy | KIF1A          |
| LAMP5. 5    | 5. 51E-08 | -0. 25447 | 0. 007 | 0. 112 | 0. 000824 | Mcy | LAMP5          |
| SPATC1L. 5  | 5. 57E-08 | -0. 25329 | 0. 066 | 0. 197 | 0. 000832 | Mcy | SPATC1L        |
| RP11-410L   | 5. 66E-08 | -0. 25253 | 0. 018 | 0. 131 | 0. 000846 | Mcy | RP11-410L14. 2 |
| PTRHD1. 2   | 5. 86E-08 | 0. 17066  | 0. 473 | 0. 315 | 0. 000876 | Mcy | PTRHD1         |
| ALCAM. 5    | 5. 91E-08 | 0. 126524 | 0. 337 | 0. 192 | 0. 000883 | Mcy | ALCAM          |
| NAGK. 4     | 6. 02E-08 | 0. 22293  | 0. 549 | 0. 377 | 0. 0009   | Mcy | NAGK           |
| ATP5C1. 5   | 6. 04E-08 | 0. 161465 | 0. 755 | 0. 582 | 0. 000902 | Mcy | ATP5C1         |
| AEBP1. 5    | 6. 05E-08 | -0. 35682 | 0. 015 | 0. 124 | 0. 000903 | Mcy | AEBP1          |
| CAMSAP2. 4  | 6. 06E-08 | -0. 26457 | 0. 033 | 0. 152 | 0. 000906 | Mcy | CAMSAP2        |
| ANKS1B. 5   | 6. 06E-08 | -0. 40944 | 0. 007 | 0. 11  | 0. 000906 | Mcy | ANKS1B         |
| AIF1L. 5    | 6. 10E-08 | -0. 41573 | 0. 011 | 0. 116 | 0. 000911 | Mcy | AIF1L          |
| PTGDS. 3    | 6. 16E-08 | -0. 86122 | 0. 051 | 0. 173 | 0. 00092  | Mcy | PTGDS          |
| RNPEPL1. 4  | 6. 20E-08 | 0. 251047 | 0. 234 | 0. 128 | 0. 000927 | Mcy | RNPEPL1        |
| E2F4. 3     | 6. 23E-08 | 0. 304771 | 0. 344 | 0. 211 | 0. 000931 | Mcy | E2F4           |
| RP11-169D   | 6. 27E-08 | 0. 103936 | 0. 033 | 0. 006 | 0. 000937 | Mcy | RP11-169D4. 2  |
| HOOK2. 4    | 6. 27E-08 | -0. 39652 | 0. 099 | 0. 238 | 0. 000937 | Mcy | HOOK2          |
| HNRNPK. 4   | 6. 32E-08 | -0. 21419 | 0. 824 | 0. 788 | 0. 000944 | Mcy | HNRNPK         |
| CD226. 1    | 6. 39E-08 | 0. 195776 | 0. 051 | 0. 013 | 0. 000955 | Mcy | CD226          |
| TLE1. 4     | 6. 41E-08 | -0. 22262 | 0. 044 | 0. 173 | 0. 000959 | Mcy | TLE1           |
| NAA38. 2    | 6. 42E-08 | 0. 149681 | 0. 634 | 0. 468 | 0. 000959 | Mcy | NAA38          |
| MERTK. 5    | 6. 43E-08 | 0. 114518 | 0. 242 | 0. 122 | 0. 000961 | Mcy | MERTK          |
| SERP2. 4    | 6. 45E-08 | -0. 2905  | 0. 004 | 0. 104 | 0. 000964 | Mcy | SERP2          |
| CTSA. 6     | 6. 49E-08 | 0. 20962  | 0. 579 | 0. 395 | 0. 00097  | Mcy | CTSA           |
| RNF19A. 6   | 6. 57E-08 | -0. 29749 | 0. 07  | 0. 205 | 0. 000983 | Mcy | RNF19A         |
| COX17. 2    | 6. 58E-08 | 0. 145581 | 0. 703 | 0. 514 | 0. 000983 | Mcy | COX17          |
| PDIA4. 4    | 6. 61E-08 | 0. 197465 | 0. 619 | 0. 457 | 0. 000988 | Mcy | PDIA4          |
| LINC00657   | 6. 65E-08 | -0. 3828  | 0. 187 | 0. 335 | 0. 000993 | Mcy | LINC00657      |
| NRBP2. 5    | 6. 66E-08 | -0. 23841 | 0. 015 | 0. 123 | 0. 000995 | Mcy | NRBP2          |
| TMEM132B.   | 6. 69E-08 | -0. 22395 | 0. 004 | 0. 104 | 0. 000999 | Mcy | TMEM132B       |

|             |           |           |        |        |           |     |                |
|-------------|-----------|-----------|--------|--------|-----------|-----|----------------|
| GCSH. 6     | 6. 72E-08 | -0. 42081 | 0. 242 | 0. 349 | 0. 001004 | Mcy | GCSH           |
| LHFPL3. 6   | 6. 79E-08 | -0. 3153  | 0. 015 | 0. 122 | 0. 001014 | Mcy | LHFPL3         |
| HNRNPA3. 2  | 6. 89E-08 | 0. 204007 | 0. 729 | 0. 55  | 0. 00103  | Mcy | HNRNPA3        |
| TGFB1I1. 5  | 6. 93E-08 | -0. 25354 | 0. 018 | 0. 129 | 0. 001036 | Mcy | TGFB1I1        |
| PINK1. 4    | 7. 02E-08 | -0. 3157  | 0. 077 | 0. 21  | 0. 001049 | Mcy | PINK1          |
| HIST1H1B    | 7. 03E-08 | 0. 191825 | 0. 04  | 0. 009 | 0. 001051 | Mcy | HIST1H1B       |
| DBF4. 4     | 7. 07E-08 | 0. 173298 | 0. 227 | 0. 118 | 0. 001057 | Mcy | DBF4           |
| SLC04A1. 3  | 7. 11E-08 | 0. 110355 | 0. 095 | 0. 034 | 0. 001063 | Mcy | SLC04A1        |
| RAN. 4      | 7. 16E-08 | 0. 179047 | 0. 923 | 0. 753 | 0. 001069 | Mcy | RAN            |
| NUP85. 3    | 7. 17E-08 | 0. 183743 | 0. 227 | 0. 121 | 0. 001072 | Mcy | NUP85          |
| TRAIP       | 7. 28E-08 | 0. 154645 | 0. 088 | 0. 031 | 0. 001088 | Mcy | TRAIP          |
| TUBB4A. 6   | 7. 37E-08 | -0. 50435 | 0. 015 | 0. 12  | 0. 001101 | Mcy | TUBB4A         |
| NIPA2. 3    | 7. 49E-08 | 0. 229551 | 0. 399 | 0. 261 | 0. 001119 | Mcy | NIPA2          |
| TRIM47. 6   | 7. 55E-08 | -0. 3138  | 0. 055 | 0. 183 | 0. 001129 | Mcy | TRIM47         |
| PLGRKT. 2   | 7. 57E-08 | 0. 177753 | 0. 41  | 0. 264 | 0. 001132 | Mcy | PLGRKT         |
| RP11-14N7   | 7. 59E-08 | -0. 32446 | 0. 073 | 0. 208 | 0. 001134 | Mcy | RP11-14N7. 2   |
| ZBTB7B. 2   | 7. 60E-08 | 0. 163193 | 0. 106 | 0. 04  | 0. 001136 | Mcy | ZBTB7B         |
| ROBO2. 5    | 7. 63E-08 | -0. 21678 | 0. 007 | 0. 11  | 0. 00114  | Mcy | ROBO2          |
| SLC12A9. 5  | 7. 70E-08 | 0. 226665 | 0. 33  | 0. 198 | 0. 001151 | Mcy | SLC12A9        |
| AGAP1. 4    | 7. 73E-08 | -0. 27035 | 0. 015 | 0. 122 | 0. 001155 | Mcy | AGAP1          |
| RP1-39G22   | 7. 74E-08 | -0. 26364 | 0. 022 | 0. 133 | 0. 001157 | Mcy | RP1-39G22. 7   |
| C2orf80. 5  | 7. 83E-08 | -0. 30981 | 0. 015 | 0. 121 | 0. 00117  | Mcy | C2orf80        |
| RP11-262H   | 7. 84E-08 | -0. 27918 | 0. 015 | 0. 121 | 0. 001172 | Mcy | RP11-262H14. 4 |
| PLEKHB1. 4  | 8. 00E-08 | -0. 51103 | 0. 084 | 0. 216 | 0. 001196 | Mcy | PLEKHB1        |
| CCDC80. 5   | 8. 02E-08 | -0. 35562 | 0. 011 | 0. 115 | 0. 001199 | Mcy | CCDC80         |
| XBP1. 6     | 8. 07E-08 | 0. 155423 | 0. 553 | 0. 367 | 0. 001206 | Mcy | XBP1           |
| PFKL. 5     | 8. 11E-08 | 0. 210116 | 0. 513 | 0. 36  | 0. 001212 | Mcy | PFKL           |
| DNASE1L1. 8 | 8. 12E-08 | 0. 152501 | 0. 158 | 0. 07  | 0. 001213 | Mcy | DNASE1L1       |
| GSTK1. 4    | 8. 17E-08 | 0. 110253 | 0. 707 | 0. 526 | 0. 00122  | Mcy | GSTK1          |
| IFNAR1. 4   | 8. 36E-08 | 0. 2087   | 0. 429 | 0. 286 | 0. 001249 | Mcy | IFNAR1         |
| CMTM5. 5    | 8. 37E-08 | -0. 50171 | 0. 004 | 0. 102 | 0. 001251 | Mcy | CMTM5          |
| SEZ6L. 5    | 8. 39E-08 | -0. 34485 | 0. 026 | 0. 138 | 0. 001254 | Mcy | SEZ6L          |
| TM4SF1. 6   | 8. 47E-08 | -0. 32477 | 0. 011 | 0. 115 | 0. 001266 | Mcy | TM4SF1         |
| FIBP. 3     | 8. 49E-08 | 0. 177942 | 0. 681 | 0. 478 | 0. 001268 | Mcy | FIBP           |
| YES1. 3     | 8. 53E-08 | -0. 24797 | 0. 022 | 0. 133 | 0. 001274 | Mcy | YES1           |
| LINC00685   | 8. 54E-08 | -0. 24838 | 0. 033 | 0. 152 | 0. 001276 | Mcy | LINC00685      |
| PRIM2. 1    | 8. 63E-08 | 0. 176737 | 0. 128 | 0. 054 | 0. 001289 | Mcy | PRIM2          |
| CA12. 6     | 8. 71E-08 | -0. 21794 | 0. 026 | 0. 139 | 0. 001301 | Mcy | CA12           |
| TNFAIP2. 4  | 8. 78E-08 | 0. 180176 | 0. 161 | 0. 073 | 0. 001313 | Mcy | TNFAIP2        |
| MT1M. 4     | 8. 90E-08 | -0. 42658 | 0. 103 | 0. 247 | 0. 001331 | Mcy | MT1M           |
| ETHE1. 2    | 9. 21E-08 | 0. 20044  | 0. 429 | 0. 285 | 0. 001377 | Mcy | ETHE1          |
| EFNB2. 5    | 9. 22E-08 | -0. 19582 | 0. 004 | 0. 102 | 0. 001377 | Mcy | EFNB2          |
| ARHGDI1. 5  | 9. 30E-08 | 0. 223083 | 0. 733 | 0. 56  | 0. 00139  | Mcy | ARHGDI1        |
| DCBLD2. 5   | 9. 37E-08 | -0. 23265 | 0. 029 | 0. 146 | 0. 001401 | Mcy | DCBLD2         |
| CKAP4. 4    | 9. 40E-08 | -0. 25144 | 0. 077 | 0. 213 | 0. 001405 | Mcy | CKAP4          |
| SMIM12. 1   | 9. 41E-08 | 0. 199939 | 0. 443 | 0. 299 | 0. 001406 | Mcy | SMIM12         |
| DNALI1. 5   | 9. 44E-08 | -0. 25581 | 0. 011 | 0. 115 | 0. 001411 | Mcy | DNALI1         |
| PRKCDBP. 2  | 9. 54E-08 | 0. 174069 | 0. 088 | 0. 031 | 0. 001425 | Mcy | PRKCDBP        |
| CPNE4. 4    | 9. 59E-08 | -0. 19721 | 0      | 0. 095 | 0. 001433 | Mcy | CPNE4          |
| CREB3L2. 5  | 9. 60E-08 | 0. 185255 | 0. 231 | 0. 121 | 0. 001435 | Mcy | CREB3L2        |
| ZCCHC10. 1  | 9. 68E-08 | 0. 199963 | 0. 37  | 0. 23  | 0. 001447 | Mcy | ZCCHC10        |

|            |          |          |       |       |          |     |          |
|------------|----------|----------|-------|-------|----------|-----|----------|
| SALL1.5    | 9.75E-08 | -0.24883 | 0.026 | 0.14  | 0.001457 | Mcy | SALL1    |
| ZNF771.5   | 9.80E-08 | -0.24965 | 0.033 | 0.149 | 0.001465 | Mcy | ZNF771   |
| SLC31A1.4  | 9.81E-08 | 0.180763 | 0.289 | 0.165 | 0.001465 | Mcy | SLC31A1  |
| YPEL3.3    | 9.81E-08 | -0.39319 | 0.11  | 0.248 | 0.001466 | Mcy | YPEL3    |
| SSBP2.6    | 9.84E-08 | -0.38514 | 0.125 | 0.273 | 0.00147  | Mcy | SSBP2    |
| INF2.4     | 1.01E-07 | 0.219485 | 0.176 | 0.083 | 0.001507 | Mcy | INF2     |
| HAUS6.2    | 1.01E-07 | 0.159214 | 0.179 | 0.087 | 0.00151  | Mcy | HAUS6    |
| POLR1D.4   | 1.01E-07 | 0.220132 | 0.571 | 0.412 | 0.001513 | Mcy | POLR1D   |
| ALKBH2.6   | 1.02E-07 | -0.24573 | 0.066 | 0.198 | 0.001527 | Mcy | ALKBH2   |
| GABPB1.3   | 1.03E-07 | 0.190723 | 0.205 | 0.105 | 0.001537 | Mcy | GABPB1   |
| OSBPL6.3   | 1.04E-07 | -0.26209 | 0.04  | 0.159 | 0.001552 | Mcy | OSBPL6   |
| PRR4.6     | 1.04E-07 | -0.33212 | 0.084 | 0.219 | 0.001553 | Mcy | PRR4     |
| CLDN7.2    | 1.04E-07 | 0.124586 | 0.062 | 0.018 | 0.00156  | Mcy | CLDN7    |
| CASC15.5   | 1.05E-07 | -0.26948 | 0.004 | 0.102 | 0.001573 | Mcy | CASC15   |
| SLC38A1.3  | 1.05E-07 | -0.39951 | 0.033 | 0.144 | 0.001575 | Mcy | SLC38A1  |
| SDSL.5     | 1.07E-07 | 0.211947 | 0.308 | 0.184 | 0.001598 | Mcy | SDSL     |
| KLHL13.5   | 1.08E-07 | -0.21746 | 0.004 | 0.101 | 0.00162  | Mcy | KLHL13   |
| KLRC2.5    | 1.10E-07 | -0.38022 | 0.011 | 0.112 | 0.00164  | Mcy | KLRC2    |
| SLC8A1.5   | 1.10E-07 | 0.116401 | 0.264 | 0.142 | 0.001645 | Mcy | SLC8A1   |
| IDH3A      | 1.12E-07 | 0.193004 | 0.289 | 0.171 | 0.001675 | Mcy | IDH3A    |
| PSMB2.3    | 1.13E-07 | 0.121945 | 0.758 | 0.569 | 0.001682 | Mcy | PSMB2    |
| RBM38.4    | 1.14E-07 | -0.26036 | 0.026 | 0.138 | 0.001697 | Mcy | RBM38    |
| ST8SIA1.4  | 1.18E-07 | -0.21287 | 0     | 0.094 | 0.001762 | Mcy | ST8SIA1  |
| ZNF106.5   | 1.18E-07 | 0.175895 | 0.399 | 0.254 | 0.001762 | Mcy | ZNF106   |
| C12orf75.1 | 1.18E-07 | 0.238417 | 0.315 | 0.19  | 0.001763 | Mcy | C12orf75 |
| SERPINF2.1 | 1.18E-07 | 0.103823 | 0.077 | 0.025 | 0.001767 | Mcy | SERPINF2 |
| AQP4.5     | 1.19E-07 | -0.46904 | 0.048 | 0.168 | 0.001773 | Mcy | AQP4     |
| GTF2IRD2.1 | 1.19E-07 | -0.29908 | 0.015 | 0.119 | 0.001781 | Mcy | GTF2IRD2 |
| DHCR7.5    | 1.20E-07 | -0.35574 | 0.059 | 0.18  | 0.001789 | Mcy | DHCR7    |
| ZNF493.4   | 1.20E-07 | -0.27741 | 0.04  | 0.161 | 0.001794 | Mcy | ZNF493   |
| RBX1.5     | 1.20E-07 | 0.191971 | 0.839 | 0.661 | 0.001796 | Mcy | RBX1     |
| MAGI2.5    | 1.21E-07 | -0.258   | 0.007 | 0.107 | 0.001805 | Mcy | MAGI2    |
| STXBP1.5   | 1.22E-07 | -0.28292 | 0.018 | 0.123 | 0.001828 | Mcy | STXBP1   |
| ASTN1.3    | 1.23E-07 | -0.20559 | 0     | 0.093 | 0.001842 | Mcy | ASTN1    |
| FXN.2      | 1.24E-07 | 0.248625 | 0.209 | 0.11  | 0.00185  | Mcy | FXN      |
| DLX1.6     | 1.27E-07 | -0.40146 | 0.015 | 0.117 | 0.001891 | Mcy | DLX1     |
| ATL1.3     | 1.27E-07 | -0.31228 | 0.015 | 0.118 | 0.001896 | Mcy | ATL1     |
| CNKSR3.5   | 1.28E-07 | -0.22076 | 0.015 | 0.12  | 0.001911 | Mcy | CNKSR3   |
| GNA13.6    | 1.29E-07 | 0.102066 | 0.315 | 0.177 | 0.001928 | Mcy | GNA13    |
| IFRD2.1    | 1.29E-07 | 0.261732 | 0.326 | 0.206 | 0.00193  | Mcy | IFRD2    |
| DAGLB.5    | 1.29E-07 | 0.139435 | 0.231 | 0.118 | 0.001932 | Mcy | DAGLB    |
| PPA2.2     | 1.29E-07 | 0.167328 | 0.458 | 0.312 | 0.001935 | Mcy | PPA2     |
| CD200.6    | 1.31E-07 | -0.29611 | 0.011 | 0.112 | 0.001952 | Mcy | CD200    |
| GSPT2.4    | 1.31E-07 | -0.29223 | 0.037 | 0.152 | 0.001964 | Mcy | GSPT2    |
| PAICS.5    | 1.34E-07 | 0.195004 | 0.458 | 0.305 | 0.001998 | Mcy | PAICS    |
| FEZ2.5     | 1.35E-07 | -0.39028 | 0.341 | 0.451 | 0.002017 | Mcy | FEZ2     |
| SOCS3.5    | 1.35E-07 | 0.150123 | 0.527 | 0.344 | 0.002018 | Mcy | SOCS3    |
| AKR7A2.2   | 1.36E-07 | 0.202025 | 0.462 | 0.311 | 0.002036 | Mcy | AKR7A2   |
| TP53I11.4  | 1.37E-07 | 0.161183 | 0.158 | 0.071 | 0.002055 | Mcy | TP53I11  |
| SP140L.2   | 1.39E-07 | 0.100723 | 0.165 | 0.076 | 0.002073 | Mcy | SP140L   |
| TMEM70.5   | 1.40E-07 | 0.136021 | 0.564 | 0.391 | 0.002089 | Mcy | TMEM70   |

|             |           |           |        |        |               |                |
|-------------|-----------|-----------|--------|--------|---------------|----------------|
| TFRC. 5     | 1. 40E-07 | 0. 14317  | 0. 348 | 0. 206 | 0. 00209 Mcy  | TFRC           |
| LDLRAD3. 5  | 1. 40E-07 | -0. 27827 | 0. 055 | 0. 179 | 0. 002093 Mcy | LDLRAD3        |
| FBXO4       | 1. 41E-07 | 0. 172002 | 0. 209 | 0. 108 | 0. 002111 Mcy | FBXO4          |
| VAMP3. 4    | 1. 42E-07 | 0. 178483 | 0. 502 | 0. 345 | 0. 002115 Mcy | VAMP3          |
| GLO1. 4     | 1. 42E-07 | 0. 161355 | 0. 579 | 0. 406 | 0. 002122 Mcy | GLO1           |
| ZNF181. 4   | 1. 42E-07 | -0. 24578 | 0. 004 | 0. 099 | 0. 002129 Mcy | ZNF181         |
| MMP16. 4    | 1. 44E-07 | -0. 23551 | 0. 007 | 0. 105 | 0. 002155 Mcy | MMP16          |
| CUEDC2. 3   | 1. 45E-07 | 0. 161904 | 0. 557 | 0. 397 | 0. 002168 Mcy | CUEDC2         |
| PALM. 4     | 1. 46E-07 | -0. 21294 | 0. 007 | 0. 106 | 0. 002181 Mcy | PALM           |
| KPNB1. 5    | 1. 48E-07 | 0. 245534 | 0. 597 | 0. 444 | 0. 002215 Mcy | KPNB1          |
| CARD11. 4   | 1. 49E-07 | 0. 101673 | 0. 081 | 0. 027 | 0. 002222 Mcy | CARD11         |
| RP11-345F   | 1. 50E-07 | -0. 28369 | 0. 048 | 0. 167 | 0. 002238 Mcy | RP11-345P4. 9  |
| DNM2. 4     | 1. 51E-07 | 0. 179091 | 0. 374 | 0. 239 | 0. 002259 Mcy | DNM2           |
| SRGAP3. 4   | 1. 53E-07 | -0. 27859 | 0. 033 | 0. 148 | 0. 002285 Mcy | SRGAP3         |
| PTPRF. 6    | 1. 57E-07 | -0. 27314 | 0. 015 | 0. 118 | 0. 002344 Mcy | PTPRF          |
| PMF1. 2     | 1. 57E-07 | 0. 185691 | 0. 462 | 0. 317 | 0. 002352 Mcy | PMF1           |
| CRISPLD1. 1 | 1. 58E-07 | -0. 24817 | 0      | 0. 092 | 0. 002367 Mcy | CRISPLD1       |
| BCAP29. 2   | 1. 59E-07 | 0. 16861  | 0. 469 | 0. 313 | 0. 002378 Mcy | BCAP29         |
| SOX12. 5    | 1. 60E-07 | -0. 12058 | 0. 015 | 0. 118 | 0. 002395 Mcy | SOX12          |
| ACAP1. 5    | 1. 60E-07 | 0. 116806 | 0. 165 | 0. 078 | 0. 002396 Mcy | ACAP1          |
| CISD2. 3    | 1. 60E-07 | 0. 198518 | 0. 557 | 0. 4   | 0. 002397 Mcy | CISD2          |
| SLC39A1. 3  | 1. 60E-07 | 0. 149851 | 0. 546 | 0. 383 | 0. 002397 Mcy | SLC39A1        |
| B3GAT1. 5   | 1. 61E-07 | -0. 29182 | 0      | 0. 092 | 0. 002402 Mcy | B3GAT1         |
| RHBDD2. 5   | 1. 62E-07 | -0. 33235 | 0. 352 | 0. 462 | 0. 002423 Mcy | RHBDD2         |
| NUBP1. 4    | 1. 62E-07 | 0. 175588 | 0. 348 | 0. 215 | 0. 002425 Mcy | NUBP1          |
| PTX3. 5     | 1. 66E-07 | -0. 30611 | 0. 015 | 0. 117 | 0. 002477 Mcy | PTX3           |
| RAB11A. 2   | 1. 67E-07 | 0. 202922 | 0. 623 | 0. 463 | 0. 002489 Mcy | RAB11A         |
| ASL. 4      | 1. 67E-07 | 0. 104581 | 0. 293 | 0. 168 | 0. 002499 Mcy | ASL            |
| RP11-733C   | 1. 68E-07 | 0. 100561 | 0. 044 | 0. 01  | 0. 00251 Mcy  | RP11-733018. 1 |
| AKT1. 2     | 1. 71E-07 | 0. 315988 | 0. 249 | 0. 144 | 0. 002553 Mcy | AKT1           |
| PLEKHB2. 5  | 1. 74E-07 | 0. 241129 | 0. 538 | 0. 396 | 0. 002604 Mcy | PLEKHB2        |
| EMILIN2. 5  | 1. 76E-07 | 0. 176854 | 0. 165 | 0. 078 | 0. 002627 Mcy | EMILIN2        |
| IFT57. 6    | 1. 76E-07 | -0. 41022 | 0. 114 | 0. 25  | 0. 002629 Mcy | IFT57          |
| SLC4A4. 4   | 1. 77E-07 | -0. 28613 | 0. 011 | 0. 111 | 0. 002641 Mcy | SLC4A4         |
| PPIB. 2     | 1. 79E-07 | 0. 164382 | 0. 905 | 0. 72  | 0. 002668 Mcy | PPIB           |
| PNMAL1. 5   | 1. 80E-07 | -0. 23063 | 0. 004 | 0. 098 | 0. 002684 Mcy | PNMAL1         |
| AVIL. 4     | 1. 81E-07 | -0. 29269 | 0      | 0. 091 | 0. 002702 Mcy | AVIL           |
| FOS. 4      | 1. 85E-07 | -0. 30778 | 0. 89  | 0. 84  | 0. 002762 Mcy | FOS            |
| ZNF680. 4   | 1. 85E-07 | -0. 31273 | 0. 055 | 0. 177 | 0. 002764 Mcy | ZNF680         |
| MARCH1. 6   | 1. 91E-07 | 0. 162417 | 0. 337 | 0. 187 | 0. 002848 Mcy | 1-Mar          |
| PARVA. 5    | 1. 94E-07 | -0. 19642 | 0. 004 | 0. 098 | 0. 002903 Mcy | PARVA          |
| KCNE3. 5    | 1. 95E-07 | 0. 123287 | 0. 077 | 0. 025 | 0. 002907 Mcy | KCNE3          |
| LRRC4C. 4   | 1. 95E-07 | -0. 2913  | 0. 004 | 0. 098 | 0. 002915 Mcy | LRRC4C         |
| BNIP2. 6    | 1. 95E-07 | 0. 179499 | 0. 399 | 0. 261 | 0. 00292 Mcy  | BNIP2          |
| DERL2. 3    | 1. 96E-07 | 0. 196193 | 0. 495 | 0. 349 | 0. 002925 Mcy | DERL2          |
| SDHA. 1     | 2. 01E-07 | 0. 235529 | 0. 447 | 0. 302 | 0. 003003 Mcy | SDHA           |
| PDLIM3. 5   | 2. 02E-07 | -0. 27041 | 0. 015 | 0. 116 | 0. 003022 Mcy | PDLIM3         |
| TMEM255A. 2 | 2. 03E-07 | -0. 21685 | 0. 007 | 0. 105 | 0. 003027 Mcy | TMEM255A       |
| RP11-395G   | 2. 03E-07 | -0. 31082 | 0. 059 | 0. 18  | 0. 00304 Mcy  | RP11-395G23. 3 |
| AKAP6. 5    | 2. 04E-07 | -0. 22845 | 0. 007 | 0. 104 | 0. 003044 Mcy | AKAP6          |
| ZDHHC9. 6   | 2. 06E-07 | -0. 34501 | 0. 051 | 0. 17  | 0. 003078 Mcy | ZDHHC9         |



|           |          |          |       |       |          |     |               |
|-----------|----------|----------|-------|-------|----------|-----|---------------|
| USP36.5   | 2.08E-07 | 0.286282 | 0.245 | 0.136 | 0.003109 | Mcy | USP36         |
| TSR2.1    | 2.08E-07 | 0.226366 | 0.381 | 0.244 | 0.00311  | Mcy | TSR2          |
| RBM17.3   | 2.08E-07 | 0.189912 | 0.513 | 0.365 | 0.003114 | Mcy | RBM17         |
| IGF2BP3.5 | 2.09E-07 | -0.20915 | 0.011 | 0.11  | 0.003124 | Mcy | IGF2BP3       |
| ADD2.4    | 2.09E-07 | -0.2355  | 0     | 0.09  | 0.00313  | Mcy | ADD2          |
| GAN.4     | 2.10E-07 | -0.2869  | 0.033 | 0.144 | 0.003138 | Mcy | GAN           |
| GADD45G.5 | 2.14E-07 | -0.50268 | 0.136 | 0.258 | 0.0032   | Mcy | GADD45G       |
| DUSP22.6  | 2.17E-07 | 0.111042 | 0.212 | 0.109 | 0.003247 | Mcy | DUSP22        |
| LINC01116 | 2.18E-07 | -0.24797 | 0.026 | 0.135 | 0.003256 | Mcy | LINC01116     |
| AHCY.2    | 2.19E-07 | 0.225816 | 0.429 | 0.291 | 0.003276 | Mcy | AHCY          |
| FAM92A1.4 | 2.22E-07 | -0.32938 | 0.077 | 0.204 | 0.003317 | Mcy | FAM92A1       |
| SAC3D1.6  | 2.23E-07 | 0.330828 | 0.275 | 0.167 | 0.00333  | Mcy | SAC3D1        |
| PPP2R5C.2 | 2.26E-07 | 0.16996  | 0.385 | 0.254 | 0.003373 | Mcy | PPP2R5C       |
| TMEM178A  | 2.26E-07 | -0.26721 | 0.018 | 0.121 | 0.003378 | Mcy | TMEM178A      |
| FAM222B.5 | 2.26E-07 | -0.21844 | 0.015 | 0.116 | 0.003383 | Mcy | FAM222B       |
| CACYBP.2  | 2.29E-07 | 0.146029 | 0.67  | 0.502 | 0.003417 | Mcy | CACYBP        |
| ARPC2.5   | 2.30E-07 | 0.193027 | 0.938 | 0.77  | 0.003434 | Mcy | ARPC2         |
| SQLE.4    | 2.36E-07 | -0.36912 | 0.121 | 0.252 | 0.003526 | Mcy | SQLE          |
| RP11-660L | 2.39E-07 | -0.28157 | 0.022 | 0.126 | 0.003572 | Mcy | RP11-660L16.2 |
| PSMC1.3   | 2.40E-07 | 0.200663 | 0.52  | 0.381 | 0.003581 | Mcy | PSMC1         |
| DIRAS1.4  | 2.41E-07 | -0.23327 | 0.015 | 0.115 | 0.003601 | Mcy | DIRAS1        |
| C9orf64   | 2.43E-07 | 0.102822 | 0.147 | 0.066 | 0.003626 | Mcy | C9orf64       |
| MSM01.5   | 2.44E-07 | -0.3099  | 0.077 | 0.204 | 0.003648 | Mcy | MSM01         |
| MBOAT2.5  | 2.44E-07 | -0.30542 | 0.062 | 0.184 | 0.003651 | Mcy | MBOAT2        |
| AUTS2.6   | 2.47E-07 | -0.25505 | 0.018 | 0.121 | 0.003698 | Mcy | AUTS2         |
| GPX4.3    | 2.54E-07 | -0.14656 | 0.908 | 0.841 | 0.003799 | Mcy | GPX4          |
| RP11-25K1 | 2.55E-07 | -0.21981 | 0.007 | 0.103 | 0.003814 | Mcy | RP11-25K19.1  |
| ARMCX1.5  | 2.56E-07 | -0.37366 | 0.088 | 0.216 | 0.003828 | Mcy | ARMCX1        |
| FGFBP3.5  | 2.57E-07 | -0.22263 | 0.007 | 0.102 | 0.003845 | Mcy | FGFBP3        |
| TMSB15B.5 | 2.59E-07 | -0.35355 | 0.066 | 0.184 | 0.003864 | Mcy | TMSB15B       |
| IGFBP7.4  | 2.59E-07 | -0.59795 | 0.154 | 0.272 | 0.003875 | Mcy | IGFBP7        |
| LGALS8.4  | 2.59E-07 | 0.176686 | 0.264 | 0.149 | 0.003878 | Mcy | LGALS8        |
| NLGN3.5   | 2.61E-07 | -0.22374 | 0.015 | 0.116 | 0.003906 | Mcy | NLGN3         |
| STEAP3.3  | 2.61E-07 | 0.131062 | 0.278 | 0.159 | 0.003907 | Mcy | STEAP3        |
| MEIS1.6   | 2.65E-07 | -0.20999 | 0     | 0.089 | 0.003958 | Mcy | MEIS1         |
| USP53.6   | 2.65E-07 | 0.112421 | 0.26  | 0.138 | 0.003961 | Mcy | USP53         |
| AC004951  | 2.67E-07 | -0.24572 | 0.044 | 0.159 | 0.003996 | Mcy | AC004951.6    |
| CDH4.5    | 2.69E-07 | -0.20771 | 0     | 0.089 | 0.004017 | Mcy | CDH4          |
| SYBU.4    | 2.69E-07 | -0.22633 | 0     | 0.089 | 0.004017 | Mcy | SYBU          |
| KIF3B.6   | 2.71E-07 | -0.21016 | 0.026 | 0.132 | 0.004045 | Mcy | KIF3B         |
| DUSP15.5  | 2.73E-07 | -0.19176 | 0.004 | 0.095 | 0.004085 | Mcy | DUSP15        |
| KIAA1549  | 2.74E-07 | -0.23006 | 0.004 | 0.096 | 0.004088 | Mcy | KIAA1549      |
| REL.6     | 2.74E-07 | 0.130705 | 0.473 | 0.294 | 0.004089 | Mcy | REL           |
| VNN1.1    | 2.78E-07 | 0.104515 | 0.044 | 0.011 | 0.004162 | Mcy | VNN1          |
| CDC25B.4  | 2.80E-07 | 0.223167 | 0.311 | 0.191 | 0.004182 | Mcy | CDC25B        |
| PSMB3.3   | 2.83E-07 | 0.197458 | 0.894 | 0.699 | 0.004224 | Mcy | PSMB3         |
| SDHD.4    | 2.84E-07 | 0.104576 | 0.553 | 0.392 | 0.004238 | Mcy | SDHD          |
| FLVCR2.3  | 2.87E-07 | 0.143375 | 0.092 | 0.033 | 0.004283 | Mcy | FLVCR2        |
| NLGN4X.4  | 2.91E-07 | -0.2253  | 0.011 | 0.108 | 0.004352 | Mcy | NLGN4X        |
| UPF2.2    | 2.92E-07 | 0.165716 | 0.344 | 0.214 | 0.004363 | Mcy | UPF2          |
| RAB3IL1.4 | 2.93E-07 | 0.202856 | 0.088 | 0.032 | 0.00438  | Mcy | RAB3IL1       |

|             |           |           |        |        |               |          |
|-------------|-----------|-----------|--------|--------|---------------|----------|
| HMBOX1. 5   | 2. 98E-07 | -0. 35755 | 0. 073 | 0. 196 | 0. 004459 Mcy | HMBOX1   |
| PTPN13. 4   | 3. 01E-07 | -0. 20326 | 0. 004 | 0. 095 | 0. 004497 Mcy | PTPN13   |
| CYB5B. 3    | 3. 04E-07 | 0. 189404 | 0. 484 | 0. 334 | 0. 004544 Mcy | CYB5B    |
| WHSC1. 5    | 3. 05E-07 | 0. 265414 | 0. 26  | 0. 151 | 0. 004559 Mcy | WHSC1    |
| NR2F6. 5    | 3. 05E-07 | -0. 20467 | 0. 033 | 0. 143 | 0. 00456 Mcy  | NR2F6    |
| SAR1B. 2    | 3. 07E-07 | 0. 159469 | 0. 465 | 0. 319 | 0. 004593 Mcy | SAR1B    |
| STOX2. 6    | 3. 09E-07 | -0. 25587 | 0. 004 | 0. 094 | 0. 004617 Mcy | STOX2    |
| LLPH. 2     | 3. 09E-07 | 0. 184036 | 0. 399 | 0. 265 | 0. 004623 Mcy | LLPH     |
| SOX21. 3    | 3. 11E-07 | -0. 18691 | 0. 004 | 0. 095 | 0. 004641 Mcy | SOX21    |
| GTF2A2. 2   | 3. 16E-07 | 0. 130898 | 0. 659 | 0. 495 | 0. 004722 Mcy | GTF2A2   |
| MRAS. 3     | 3. 17E-07 | -0. 3007  | 0. 055 | 0. 17  | 0. 004742 Mcy | MRAS     |
| SAMM50. 3   | 3. 17E-07 | 0. 175253 | 0. 337 | 0. 212 | 0. 004744 Mcy | SAMM50   |
| PTPN2. 5    | 3. 23E-07 | 0. 124769 | 0. 388 | 0. 245 | 0. 004827 Mcy | PTPN2    |
| PTDSS1. 3   | 3. 25E-07 | 0. 188341 | 0. 322 | 0. 199 | 0. 004854 Mcy | PTDSS1   |
| VCP. 2      | 3. 25E-07 | 0. 239983 | 0. 575 | 0. 428 | 0. 004856 Mcy | VCP      |
| FAXC. 5     | 3. 25E-07 | -0. 24254 | 0      | 0. 088 | 0. 004859 Mcy | FAXC     |
| SNRNP48. 1  | 3. 29E-07 | 0. 183589 | 0. 205 | 0. 108 | 0. 004923 Mcy | SNRNP48  |
| RARRES2. 5  | 3. 30E-07 | -0. 69392 | 0. 044 | 0. 152 | 0. 004935 Mcy | RARRES2  |
| TMEM35. 5   | 3. 33E-07 | -0. 28417 | 0. 004 | 0. 094 | 0. 004982 Mcy | TMEM35   |
| VDAC3. 2    | 3. 34E-07 | 0. 119924 | 0. 63  | 0. 46  | 0. 004996 Mcy | VDAC3    |
| SNCAIP. 5   | 3. 35E-07 | -0. 21315 | 0      | 0. 087 | 0. 005003 Mcy | SNCAIP   |
| DYNC1LI2. 3 | 3. 36E-07 | -0. 41432 | 0. 22  | 0. 347 | 0. 005014 Mcy | DYNC1LI2 |
| KIAA1191. 3 | 3. 39E-07 | -0. 35434 | 0. 132 | 0. 267 | 0. 005069 Mcy | KIAA1191 |
| NAV2. 3     | 3. 43E-07 | -0. 23932 | 0. 018 | 0. 12  | 0. 005131 Mcy | NAV2     |
| TPRKB. 3    | 3. 44E-07 | 0. 220238 | 0. 498 | 0. 36  | 0. 005141 Mcy | TPRKB    |
| TPT1-AS1. 3 | 3. 44E-07 | -0. 28242 | 0. 033 | 0. 141 | 0. 005145 Mcy | TPT1-AS1 |
| FBLN1. 5    | 3. 45E-07 | -0. 33186 | 0      | 0. 087 | 0. 005152 Mcy | FBLN1    |
| TMEM121. 5  | 3. 48E-07 | -0. 19349 | 0. 011 | 0. 108 | 0. 005208 Mcy | TMEM121  |
| LDLR. 3     | 3. 49E-07 | -0. 25068 | 0. 007 | 0. 101 | 0. 005215 Mcy | LDLR     |
| TSKU. 4     | 3. 50E-07 | -0. 18181 | 0      | 0. 087 | 0. 005228 Mcy | TSKU     |
| DNAJB9. 3   | 3. 52E-07 | -0. 5145  | 0. 267 | 0. 388 | 0. 005254 Mcy | DNAJB9   |
| SLBP. 4     | 3. 52E-07 | 0. 222522 | 0. 443 | 0. 308 | 0. 005266 Mcy | SLBP     |
| GM2A. 5     | 3. 52E-07 | 0. 148443 | 0. 256 | 0. 141 | 0. 005267 Mcy | GM2A     |
| TYK2        | 3. 54E-07 | 0. 203214 | 0. 216 | 0. 118 | 0. 005286 Mcy | TYK2     |
| LONRF2. 4   | 3. 55E-07 | -0. 22225 | 0. 004 | 0. 094 | 0. 005303 Mcy | LONRF2   |
| SLC9A9. 5   | 3. 56E-07 | 0. 189471 | 0. 161 | 0. 076 | 0. 005316 Mcy | SLC9A9   |
| YWHAH. 6    | 3. 62E-07 | 0. 213517 | 0. 703 | 0. 562 | 0. 005408 Mcy | YWHAH    |
| LUC7L3. 4   | 3. 63E-07 | -0. 32507 | 0. 418 | 0. 513 | 0. 005419 Mcy | LUC7L3   |
| SLC50A1. 5  | 3. 64E-07 | 0. 237549 | 0. 282 | 0. 165 | 0. 00544 Mcy  | SLC50A1  |
| TMA7. 4     | 3. 64E-07 | -0. 13026 | 0. 901 | 0. 85  | 0. 005446 Mcy | TMA7     |
| UBQLN2. 6   | 3. 70E-07 | -0. 33392 | 0. 099 | 0. 223 | 0. 005527 Mcy | UBQLN2   |
| SLN. 3      | 3. 73E-07 | -0. 74683 | 0. 051 | 0. 164 | 0. 005572 Mcy | SLN      |
| MAOB. 4     | 3. 75E-07 | -0. 34854 | 0. 007 | 0. 101 | 0. 005605 Mcy | MAOB     |
| SLC35G2. 6  | 3. 80E-07 | -0. 27738 | 0. 018 | 0. 119 | 0. 005682 Mcy | SLC35G2  |
| ZBTB8A. 5   | 3. 82E-07 | -0. 27971 | 0. 011 | 0. 106 | 0. 005702 Mcy | ZBTB8A   |
| AKAP8L. 4   | 3. 86E-07 | -0. 3241  | 0. 121 | 0. 252 | 0. 00577 Mcy  | AKAP8L   |
| RHOB. 3     | 3. 86E-07 | -0. 33514 | 0. 56  | 0. 61  | 0. 005775 Mcy | RHOB     |
| PITX1. 5    | 3. 87E-07 | -0. 16109 | 0      | 0. 087 | 0. 005791 Mcy | PITX1    |
| TNFRSF19. 3 | 3. 89E-07 | -0. 17874 | 0. 011 | 0. 107 | 0. 005809 Mcy | TNFRSF19 |
| MCC. 4      | 3. 90E-07 | -0. 22091 | 0. 022 | 0. 124 | 0. 005822 Mcy | MCC      |
| GOT1        | 3. 93E-07 | 0. 165544 | 0. 234 | 0. 129 | 0. 005876 Mcy | GOT1     |

|             |           |           |        |        |           |     |           |
|-------------|-----------|-----------|--------|--------|-----------|-----|-----------|
| DLL3. 5     | 3. 94E-07 | -0. 49621 | 0. 04  | 0. 146 | 0. 005892 | Mcy | DLL3      |
| RECQL. 3    | 3. 98E-07 | 0. 190264 | 0. 286 | 0. 17  | 0. 005941 | Mcy | RECQL     |
| ACAT1. 2    | 3. 98E-07 | 0. 148529 | 0. 52  | 0. 362 | 0. 005949 | Mcy | ACAT1     |
| MPC2. 3     | 4. 00E-07 | 0. 10047  | 0. 736 | 0. 578 | 0. 005972 | Mcy | MPC2      |
| WRB. 5      | 4. 03E-07 | -0. 40739 | 0. 282 | 0. 423 | 0. 006021 | Mcy | WRB       |
| GTF2IRD2E   | 4. 04E-07 | -0. 27994 | 0. 033 | 0. 139 | 0. 006044 | Mcy | GTF2IRD2B |
| BCAM. 4     | 4. 05E-07 | -0. 23457 | 0. 015 | 0. 111 | 0. 006049 | Mcy | BCAM      |
| NDUFAF3. 2  | 4. 08E-07 | 0. 182075 | 0. 681 | 0. 513 | 0. 006098 | Mcy | NDUFAF3   |
| TNFRSF10D   | 4. 13E-07 | 0. 124051 | 0. 044 | 0. 011 | 0. 006174 | Mcy | TNFRSF10D |
| NBR1. 1     | 4. 15E-07 | -0. 35207 | 0. 073 | 0. 192 | 0. 006205 | Mcy | NBR1      |
| TLE2. 5     | 4. 16E-07 | -0. 24186 | 0. 004 | 0. 093 | 0. 006215 | Mcy | TLE2      |
| CACNG7. 4   | 4. 23E-07 | -0. 18254 | 0      | 0. 086 | 0. 006321 | Mcy | CACNG7    |
| TULP4. 5    | 4. 23E-07 | -0. 28202 | 0. 037 | 0. 145 | 0. 006326 | Mcy | TULP4     |
| PDCD10. 2   | 4. 25E-07 | 0. 189972 | 0. 41  | 0. 28  | 0. 006349 | Mcy | PDCD10    |
| GPI. 3      | 4. 27E-07 | 0. 17662  | 0. 502 | 0. 353 | 0. 006385 | Mcy | GPI       |
| CDC34. 5    | 4. 27E-07 | -0. 32656 | 0. 11  | 0. 238 | 0. 006387 | Mcy | CDC34     |
| ZC3H6. 4    | 4. 33E-07 | -0. 31557 | 0. 04  | 0. 149 | 0. 006477 | Mcy | ZC3H6     |
| CCND3. 4    | 4. 34E-07 | 0. 102867 | 0. 396 | 0. 256 | 0. 006484 | Mcy | CCND3     |
| N4BP2L2. 2  | 4. 36E-07 | -0. 29086 | 0. 41  | 0. 519 | 0. 006509 | Mcy | N4BP2L2   |
| ILF3-AS1. 4 | 4. 36E-07 | -0. 35945 | 0. 172 | 0. 313 | 0. 006521 | Mcy | ILF3-AS1  |
| ELN. 4      | 4. 39E-07 | -0. 35194 | 0. 015 | 0. 11  | 0. 006562 | Mcy | ELN       |
| HIP1R. 5    | 4. 43E-07 | -0. 27993 | 0. 015 | 0. 111 | 0. 006626 | Mcy | HIP1R     |
| DERL1. 3    | 4. 45E-07 | 0. 165721 | 0. 458 | 0. 309 | 0. 006648 | Mcy | DERL1     |
| P4HA1. 2    | 4. 48E-07 | 0. 145356 | 0. 355 | 0. 221 | 0. 0067   | Mcy | P4HA1     |
| ENC1. 6     | 4. 51E-07 | -0. 3907  | 0. 103 | 0. 227 | 0. 006745 | Mcy | ENC1      |
| ZNF580. 5   | 4. 53E-07 | -0. 37974 | 0. 172 | 0. 294 | 0. 006776 | Mcy | ZNF580    |
| UTP6. 2     | 4. 60E-07 | 0. 215451 | 0. 33  | 0. 206 | 0. 006879 | Mcy | UTP6      |
| ZNF521. 4   | 4. 62E-07 | -0. 19178 | 0      | 0. 086 | 0. 006899 | Mcy | ZNF521    |
| MCM8        | 4. 63E-07 | 0. 111581 | 0. 099 | 0. 039 | 0. 006913 | Mcy | MCM8      |
| GPAA1. 3    | 4. 65E-07 | 0. 230782 | 0. 538 | 0. 39  | 0. 00695  | Mcy | GPAA1     |
| SFXN4. 1    | 4. 66E-07 | 0. 157679 | 0. 209 | 0. 112 | 0. 006957 | Mcy | SFXN4     |
| TRIM59      | 4. 66E-07 | 0. 124683 | 0. 07  | 0. 023 | 0. 006969 | Mcy | TRIM59    |
| SLC2A3. 5   | 4. 74E-07 | 0. 108172 | 0. 41  | 0. 251 | 0. 007087 | Mcy | SLC2A3    |
| OAS2. 2     | 4. 75E-07 | 0. 196489 | 0. 099 | 0. 038 | 0. 007104 | Mcy | OAS2      |
| SCAMP5. 4   | 4. 80E-07 | -0. 23472 | 0. 007 | 0. 098 | 0. 007172 | Mcy | SCAMP5    |
| ZFP82. 4    | 4. 82E-07 | -0. 22759 | 0. 015 | 0. 111 | 0. 007205 | Mcy | ZFP82     |
| JAM2. 6     | 4. 84E-07 | -0. 32705 | 0. 117 | 0. 256 | 0. 007226 | Mcy | JAM2      |
| TEAD2. 5    | 4. 84E-07 | -0. 18655 | 0. 004 | 0. 092 | 0. 00723  | Mcy | TEAD2     |
| MARCH6. 5   | 4. 84E-07 | -0. 30927 | 0. 231 | 0. 36  | 0. 007238 | Mcy | 6-Mar     |
| SLC4A3. 3   | 4. 87E-07 | -0. 20394 | 0. 004 | 0. 092 | 0. 007272 | Mcy | SLC4A3    |
| RGS6. 4     | 4. 91E-07 | -0. 19009 | 0. 004 | 0. 092 | 0. 007332 | Mcy | RGS6      |
| TOMM22. 5   | 4. 99E-07 | 0. 257958 | 0. 623 | 0. 465 | 0. 007462 | Mcy | TOMM22    |
| HRH1. 5     | 5. 03E-07 | -0. 25462 | 0. 007 | 0. 098 | 0. 007523 | Mcy | HRH1      |
| NFKB1. 6    | 5. 04E-07 | 0. 143791 | 0. 198 | 0. 102 | 0. 007531 | Mcy | NFKB1     |
| ETFA. 4     | 5. 08E-07 | 0. 141909 | 0. 524 | 0. 368 | 0. 007597 | Mcy | ETFA      |
| RBL1. 1     | 5. 13E-07 | 0. 135041 | 0. 114 | 0. 048 | 0. 007661 | Mcy | RBL1      |
| PDE4DIP. 3  | 5. 13E-07 | -0. 40602 | 0. 136 | 0. 267 | 0. 007661 | Mcy | PDE4DIP   |
| ZNRF1. 6    | 5. 13E-07 | -0. 16509 | 0. 018 | 0. 118 | 0. 007662 | Mcy | ZNRF1     |
| MPPED2. 4   | 5. 13E-07 | -0. 2358  | 0. 004 | 0. 092 | 0. 007672 | Mcy | MPPED2    |
| GPR162. 4   | 5. 13E-07 | -0. 23884 | 0. 011 | 0. 104 | 0. 007673 | Mcy | GPR162    |
| PAM. 5      | 5. 17E-07 | -0. 25076 | 0. 051 | 0. 167 | 0. 007728 | Mcy | PAM       |

|             |           |           |        |        |               |                |
|-------------|-----------|-----------|--------|--------|---------------|----------------|
| PJA1. 4     | 5. 44E-07 | -0. 35005 | 0. 077 | 0. 195 | 0. 008131 Mcy | PJA1           |
| PBDC1. 1    | 5. 47E-07 | 0. 174598 | 0. 392 | 0. 257 | 0. 008176 Mcy | PBDC1          |
| ITGA7. 4    | 5. 52E-07 | -0. 20872 | 0. 033 | 0. 139 | 0. 008243 Mcy | ITGA7          |
| CACNA1A. 5  | 5. 58E-07 | -0. 32295 | 0. 007 | 0. 098 | 0. 008345 Mcy | CACNA1A        |
| YAE1D1. 4   | 5. 60E-07 | -0. 33117 | 0. 051 | 0. 163 | 0. 008368 Mcy | YAE1D1         |
| TANC1. 4    | 5. 60E-07 | -0. 20309 | 0. 015 | 0. 11  | 0. 008372 Mcy | TANC1          |
| BSDC1. 4    | 5. 67E-07 | -0. 34019 | 0. 161 | 0. 294 | 0. 008477 Mcy | BSDC1          |
| C15orf48. 5 | 5. 68E-07 | 0. 100707 | 0. 15  | 0. 067 | 0. 008482 Mcy | C15orf48       |
| GNAI3. 3    | 5. 76E-07 | 0. 166317 | 0. 542 | 0. 389 | 0. 008604 Mcy | GNAI3          |
| NTN1. 3     | 5. 91E-07 | -0. 17835 | 0      | 0. 084 | 0. 008838 Mcy | NTN1           |
| PI4K2A. 5   | 5. 94E-07 | 0. 146882 | 0. 139 | 0. 063 | 0. 008876 Mcy | PI4K2A         |
| ZHX3. 4     | 5. 95E-07 | -0. 21565 | 0. 022 | 0. 122 | 0. 008893 Mcy | ZHX3           |
| CYFIP2. 5   | 5. 99E-07 | -0. 25869 | 0. 018 | 0. 116 | 0. 008957 Mcy | CYFIP2         |
| PDGFC. 3    | 6. 00E-07 | -0. 21492 | 0. 022 | 0. 122 | 0. 008959 Mcy | PDGFC          |
| TRIOBP. 2   | 6. 02E-07 | 0. 261402 | 0. 168 | 0. 087 | 0. 008997 Mcy | TRIOBP         |
| PIANP. 4    | 6. 09E-07 | -0. 18747 | 0      | 0. 084 | 0. 009099 Mcy | PIANP          |
| UBAC1. 4    | 6. 14E-07 | 0. 227569 | 0. 333 | 0. 215 | 0. 009174 Mcy | UBAC1          |
| KALRN. 4    | 6. 23E-07 | -0. 21468 | 0. 007 | 0. 097 | 0. 009316 Mcy | KALRN          |
| PTP4A3. 3   | 6. 46E-07 | -0. 22136 | 0. 004 | 0. 09  | 0. 009652 Mcy | PTP4A3         |
| CEP76. 1    | 6. 49E-07 | 0. 123725 | 0. 106 | 0. 043 | 0. 0097 Mcy   | CEP76          |
| FAM184B. 2  | 6. 53E-07 | -0. 26078 | 0. 015 | 0. 11  | 0. 009751 Mcy | FAM184B        |
| PDLIM2. 4   | 6. 53E-07 | -0. 34901 | 0. 114 | 0. 243 | 0. 009758 Mcy | PDLIM2         |
| SYNCRIP. 4  | 6. 55E-07 | 0. 193408 | 0. 524 | 0. 38  | 0. 009785 Mcy | SYNCRIP        |
| SLC36A1. 1  | 6. 60E-07 | 0. 171221 | 0. 081 | 0. 029 | 0. 009858 Mcy | SLC36A1        |
| TTC38. 1    | 6. 60E-07 | 0. 185177 | 0. 172 | 0. 087 | 0. 009863 Mcy | TTC38          |
| RP11-390E   | 6. 61E-07 | -0. 31622 | 0. 026 | 0. 127 | 0. 00988 Mcy  | RP11-390E23. 6 |
| RAC3. 5     | 6. 64E-07 | -0. 24206 | 0. 066 | 0. 186 | 0. 009928 Mcy | RAC3           |
| SPR. 1      | 6. 71E-07 | 0. 154157 | 0. 154 | 0. 073 | 0. 010027 Mcy | SPR            |
| CAV1. 6     | 6. 76E-07 | -0. 7718  | 0. 029 | 0. 129 | 0. 010103 Mcy | CAV1           |
| LRWD1. 3    | 6. 78E-07 | -0. 27721 | 0. 059 | 0. 173 | 0. 010126 Mcy | LRWD1          |
| FNIP2. 5    | 6. 83E-07 | 0. 11812  | 0. 326 | 0. 192 | 0. 01021 Mcy  | FNIP2          |
| PRCP. 3     | 6. 93E-07 | -0. 39612 | 0. 231 | 0. 358 | 0. 010354 Mcy | PRCP           |
| TSPAN3. 5   | 6. 97E-07 | -0. 37702 | 0. 377 | 0. 461 | 0. 010418 Mcy | TSPAN3         |
| PLCG1. 4    | 7. 04E-07 | -0. 21085 | 0. 011 | 0. 102 | 0. 010524 Mcy | PLCG1          |
| TRIM16. 4   | 7. 05E-07 | -0. 23972 | 0. 029 | 0. 132 | 0. 010541 Mcy | TRIM16         |
| RRP12       | 7. 13E-07 | 0. 122578 | 0. 103 | 0. 041 | 0. 010658 Mcy | RRP12          |
| WDR61. 1    | 7. 13E-07 | 0. 150685 | 0. 491 | 0. 345 | 0. 01066 Mcy  | WDR61          |
| HSPE1. 6    | 7. 19E-07 | -0. 17379 | 0. 751 | 0. 729 | 0. 010741 Mcy | HSPE1          |
| ARHGEF26. 7 | 7. 24E-07 | -0. 22929 | 0. 026 | 0. 127 | 0. 010819 Mcy | ARHGEF26       |
| TAB2. 2     | 7. 27E-07 | 0. 24695  | 0. 223 | 0. 124 | 0. 010861 Mcy | TAB2           |
| MTMR4. 5    | 7. 30E-07 | -0. 26037 | 0. 051 | 0. 163 | 0. 010914 Mcy | MTMR4          |
| SNX21. 3    | 7. 31E-07 | -0. 20971 | 0. 022 | 0. 12  | 0. 010929 Mcy | SNX21          |
| DYNC1I1. 6  | 7. 35E-07 | -0. 36886 | 0. 015 | 0. 106 | 0. 010982 Mcy | DYNC1I1        |
| TLCD1. 4    | 7. 35E-07 | -0. 16256 | 0      | 0. 083 | 0. 010991 Mcy | TLCD1          |
| TP53. 1     | 7. 41E-07 | 0. 214878 | 0. 209 | 0. 111 | 0. 011069 Mcy | TP53           |
| APPL1. 3    | 7. 47E-07 | 0. 265544 | 0. 421 | 0. 292 | 0. 01117 Mcy  | APPL1          |
| FGF1. 4     | 7. 50E-07 | -0. 28065 | 0. 007 | 0. 096 | 0. 011205 Mcy | FGF1           |
| ANGPTL2. 4  | 7. 58E-07 | -0. 30487 | 0. 011 | 0. 102 | 0. 011324 Mcy | ANGPTL2        |
| PXDN. 3     | 7. 60E-07 | -0. 17776 | 0. 011 | 0. 103 | 0. 011357 Mcy | PXDN           |
| LRRN1. 5    | 7. 64E-07 | -0. 26435 | 0. 015 | 0. 108 | 0. 011415 Mcy | LRRN1          |
| NOL12. 2    | 7. 71E-07 | 0. 264191 | 0. 337 | 0. 217 | 0. 011517 Mcy | NOL12          |

|            |           |           |        |        |               |          |
|------------|-----------|-----------|--------|--------|---------------|----------|
| TNRC6B. 4  | 7. 74E-07 | -0. 34732 | 0. 227 | 0. 355 | 0. 011572 Mcy | TNRC6B   |
| PPARD. 6   | 7. 80E-07 | 0. 125058 | 0. 201 | 0. 106 | 0. 011657 Mcy | PPARD    |
| MDFI. 5    | 7. 81E-07 | -0. 23077 | 0. 004 | 0. 089 | 0. 011673 Mcy | MDFI     |
| UROD. 3    | 7. 82E-07 | 0. 113659 | 0. 509 | 0. 356 | 0. 011682 Mcy | UROD     |
| TMEM45A. 3 | 7. 82E-07 | -0. 30352 | 0. 062 | 0. 179 | 0. 011685 Mcy | TMEM45A  |
| HUS1. 1    | 7. 88E-07 | 0. 17574  | 0. 212 | 0. 115 | 0. 011772 Mcy | HUS1     |
| CSRNP3. 5  | 7. 96E-07 | -0. 29416 | 0. 011 | 0. 101 | 0. 011895 Mcy | CSRNP3   |
| CLASP1. 5  | 8. 07E-07 | -0. 28039 | 0. 037 | 0. 14  | 0. 012066 Mcy | CLASP1   |
| BOC. 4     | 8. 08E-07 | -0. 1857  | 0. 004 | 0. 089 | 0. 01208 Mcy  | BOC      |
| PPP6C. 1   | 8. 20E-07 | 0. 200748 | 0. 381 | 0. 253 | 0. 012251 Mcy | PPP6C    |
| TMEM108. 4 | 8. 26E-07 | -0. 18923 | 0      | 0. 082 | 0. 012345 Mcy | TMEM108  |
| SMAD7. 4   | 8. 38E-07 | 0. 149219 | 0. 088 | 0. 033 | 0. 012529 Mcy | SMAD7    |
| JUNB. 3    | 8. 40E-07 | -0. 25644 | 0. 74  | 0. 723 | 0. 012558 Mcy | JUNB     |
| PDSS1. 1   | 8. 44E-07 | 0. 107832 | 0. 125 | 0. 055 | 0. 01261 Mcy  | PDSS1    |
| ILDR2. 5   | 8. 50E-07 | -0. 15998 | 0      | 0. 082 | 0. 012708 Mcy | ILDR2    |
| TMEM47. 4  | 8. 50E-07 | -0. 18356 | 0      | 0. 082 | 0. 012708 Mcy | TMEM47   |
| ELOVL1. 3  | 8. 51E-07 | 0. 140405 | 0. 355 | 0. 228 | 0. 012715 Mcy | ELOVL1   |
| MTSS1L. 4  | 8. 54E-07 | -0. 19303 | 0. 007 | 0. 096 | 0. 012766 Mcy | MTSS1L   |
| VGLL4. 4   | 8. 59E-07 | -0. 32131 | 0. 194 | 0. 32  | 0. 012835 Mcy | VGLL4    |
| FAM228B. 5 | 8. 86E-07 | -0. 29124 | 0. 095 | 0. 218 | 0. 013244 Mcy | FAM228B  |
| SNX5. 3    | 8. 89E-07 | 0. 219252 | 0. 564 | 0. 39  | 0. 013288 Mcy | SNX5     |
| TBC1D9B. 3 | 8. 96E-07 | 0. 195235 | 0. 267 | 0. 157 | 0. 013391 Mcy | TBC1D9B  |
| VPS25. 2   | 9. 00E-07 | 0. 26424  | 0. 458 | 0. 327 | 0. 013455 Mcy | VPS25    |
| PRPF18. 3  | 9. 05E-07 | 0. 157034 | 0. 238 | 0. 135 | 0. 013529 Mcy | PRPF18   |
| TMEM69. 2  | 9. 05E-07 | 0. 160278 | 0. 278 | 0. 166 | 0. 01353 Mcy  | TMEM69   |
| CLEC11A. 5 | 9. 15E-07 | 0. 201219 | 0. 348 | 0. 229 | 0. 013668 Mcy | CLEC11A  |
| CCDC181. 5 | 9. 28E-07 | -0. 23706 | 0      | 0. 081 | 0. 013863 Mcy | CCDC181  |
| RAB31. 6   | 9. 46E-07 | 0. 159018 | 0. 645 | 0. 456 | 0. 014144 Mcy | RAB31    |
| ELOVL6. 4  | 9. 64E-07 | -0. 20001 | 0. 007 | 0. 095 | 0. 014413 Mcy | ELOVL6   |
| PCDHB2. 4  | 9. 69E-07 | -0. 18424 | 0      | 0. 081 | 0. 014479 Mcy | PCDHB2   |
| NIF3L1. 2  | 9. 72E-07 | 0. 151302 | 0. 216 | 0. 118 | 0. 014522 Mcy | NIF3L1   |
| PRDX5. 4   | 9. 77E-07 | -0. 2471  | 0. 769 | 0. 742 | 0. 014595 Mcy | PRDX5    |
| NOS1AP. 5  | 9. 83E-07 | -0. 19614 | 0      | 0. 081 | 0. 01469 Mcy  | NOS1AP   |
| TMPO-AS1   | 9. 84E-07 | 0. 135699 | 0. 081 | 0. 029 | 0. 014709 Mcy | TMPO-AS1 |
| ICT1. 1    | 9. 89E-07 | 0. 178634 | 0. 355 | 0. 234 | 0. 014775 Mcy | ICT1     |
| NME7. 6    | 1. 00E-06 | -0. 34182 | 0. 055 | 0. 164 | 0. 014998 Mcy | NME7     |
| NECAP2. 3  | 1. 01E-06 | 0. 243003 | 0. 421 | 0. 289 | 0. 015085 Mcy | NECAP2   |
| CBLN4. 6   | 1. 01E-06 | -0. 23789 | 0      | 0. 081 | 0. 015122 Mcy | CBLN4    |
| ATCAY. 5   | 1. 01E-06 | -0. 31314 | 0. 026 | 0. 123 | 0. 015123 Mcy | ATCAY    |
| ZNF559. 5  | 1. 01E-06 | -0. 26871 | 0. 04  | 0. 147 | 0. 015157 Mcy | ZNF559   |
| DID01. 4   | 1. 03E-06 | -0. 24398 | 0. 044 | 0. 151 | 0. 01546 Mcy  | DID01    |
| HECA. 5    | 1. 04E-06 | 0. 126341 | 0. 147 | 0. 069 | 0. 015472 Mcy | HECA     |
| ICMT. 2    | 1. 04E-06 | 0. 251065 | 0. 223 | 0. 131 | 0. 01554 Mcy  | ICMT     |
| TMED3. 4   | 1. 04E-06 | 0. 153126 | 0. 443 | 0. 305 | 0. 015564 Mcy | TMED3    |
| PDGFD. 4   | 1. 04E-06 | -0. 15976 | 0      | 0. 081 | 0. 015566 Mcy | PDGFD    |
| PSD3. 5    | 1. 06E-06 | -0. 2502  | 0. 077 | 0. 197 | 0. 015798 Mcy | PSD3     |
| PCNT       | 1. 07E-06 | 0. 164851 | 0. 147 | 0. 07  | 0. 015942 Mcy | PCNT     |
| BCL3. 3    | 1. 08E-06 | 0. 152023 | 0. 154 | 0. 075 | 0. 016133 Mcy | BCL3     |
| PAX6. 4    | 1. 09E-06 | -0. 18092 | 0      | 0. 08  | 0. 016257 Mcy | PAX6     |
| MEOX2. 4   | 1. 09E-06 | -0. 22401 | 0      | 0. 08  | 0. 016257 Mcy | MEOX2    |
| CELSR2. 5  | 1. 09E-06 | -0. 19689 | 0. 007 | 0. 094 | 0. 016318 Mcy | CELSR2   |

|             |           |           |        |        |           |     |           |
|-------------|-----------|-----------|--------|--------|-----------|-----|-----------|
| CELF5. 6    | 1. 10E-06 | -0. 30777 | 0. 007 | 0. 093 | 0. 016401 | Mcy | CELF5     |
| SEMA5A. 4   | 1. 11E-06 | -0. 24959 | 0. 015 | 0. 106 | 0. 016526 | Mcy | SEMA5A    |
| CMSS1. 3    | 1. 11E-06 | 0. 237692 | 0. 421 | 0. 286 | 0. 016545 | Mcy | CMSS1     |
| NT5DC2. 4   | 1. 11E-06 | 0. 237355 | 0. 264 | 0. 162 | 0. 016661 | Mcy | NT5DC2    |
| NELFE. 1    | 1. 12E-06 | 0. 252102 | 0. 513 | 0. 373 | 0. 016691 | Mcy | NELFE     |
| KBTBD6. 4   | 1. 13E-06 | -0. 26476 | 0. 033 | 0. 134 | 0. 016899 | Mcy | KBTBD6    |
| CXADR. 6    | 1. 15E-06 | -0. 40282 | 0. 183 | 0. 31  | 0. 017153 | Mcy | CXADR     |
| SH3BGRL3. 1 | 1. 17E-06 | 0. 161167 | 0. 952 | 0. 773 | 0. 017477 | Mcy | SH3BGRL3  |
| ATIC        | 1. 18E-06 | 0. 209322 | 0. 348 | 0. 222 | 0. 017577 | Mcy | ATIC      |
| EXTL3. 4    | 1. 18E-06 | -0. 24727 | 0. 033 | 0. 134 | 0. 017599 | Mcy | EXTL3     |
| TUBG2. 5    | 1. 19E-06 | -0. 22992 | 0. 018 | 0. 112 | 0. 017726 | Mcy | TUBG2     |
| TOMM40L. 2  | 1. 19E-06 | 0. 164854 | 0. 132 | 0. 06  | 0. 017736 | Mcy | TOMM40L   |
| ABL2. 6     | 1. 19E-06 | 0. 105253 | 0. 41  | 0. 265 | 0. 017837 | Mcy | ABL2      |
| NLGN2. 4    | 1. 20E-06 | -0. 1737  | 0. 007 | 0. 094 | 0. 017912 | Mcy | NLGN2     |
| RCAN1. 5    | 1. 20E-06 | -0. 52924 | 0. 147 | 0. 271 | 0. 017939 | Mcy | RCAN1     |
| GNAO1. 4    | 1. 20E-06 | -0. 31251 | 0. 007 | 0. 093 | 0. 01795  | Mcy | GNAO1     |
| ZNF436. 4   | 1. 20E-06 | -0. 16305 | 0      | 0. 08  | 0. 017989 | Mcy | ZNF436    |
| CENPJ. 2    | 1. 21E-06 | 0. 116919 | 0. 139 | 0. 064 | 0. 018091 | Mcy | CENPJ     |
| EEPDI. 3    | 1. 21E-06 | 0. 187903 | 0. 147 | 0. 07  | 0. 018146 | Mcy | EEPDI     |
| CXXC4. 5    | 1. 24E-06 | -0. 21569 | 0      | 0. 08  | 0. 018517 | Mcy | CXXC4     |
| RER1. 4     | 1. 24E-06 | 0. 182325 | 0. 656 | 0. 493 | 0. 01858  | Mcy | RER1      |
| NAP1L3. 4   | 1. 25E-06 | -0. 28339 | 0. 015 | 0. 104 | 0. 018607 | Mcy | NAP1L3    |
| TMEM14A. 5  | 1. 25E-06 | -0. 34422 | 0. 19  | 0. 327 | 0. 018614 | Mcy | TMEM14A   |
| AASS. 4     | 1. 25E-06 | -0. 24659 | 0. 022 | 0. 117 | 0. 01866  | Mcy | AASS      |
| ITSN2. 5    | 1. 26E-06 | 0. 125472 | 0. 3   | 0. 179 | 0. 018848 | Mcy | ITSN2     |
| LOXL1. 4    | 1. 28E-06 | -0. 15579 | 0      | 0. 079 | 0. 01906  | Mcy | LOXL1     |
| PHACTR3. 5  | 1. 28E-06 | -0. 27741 | 0      | 0. 079 | 0. 01906  | Mcy | PHACTR3   |
| ZNF358. 5   | 1. 28E-06 | -0. 17758 | 0. 055 | 0. 167 | 0. 019105 | Mcy | ZNF358    |
| NCLN. 2     | 1. 32E-06 | 0. 172318 | 0. 267 | 0. 162 | 0. 019695 | Mcy | NCLN      |
| AIFM1. 3    | 1. 32E-06 | 0. 140377 | 0. 245 | 0. 143 | 0. 019767 | Mcy | AIFM1     |
| CTPS1. 3    | 1. 34E-06 | 0. 167546 | 0. 194 | 0. 104 | 0. 01999  | Mcy | CTPS1     |
| C17orf100   | 1. 35E-06 | -0. 18611 | 0. 007 | 0. 092 | 0. 020102 | Mcy | C17orf100 |
| SETD3. 3    | 1. 35E-06 | 0. 157438 | 0. 26  | 0. 154 | 0. 020104 | Mcy | SETD3     |
| CNPY1. 5    | 1. 35E-06 | -0. 22855 | 0      | 0. 079 | 0. 020194 | Mcy | CNPY1     |
| ZNF791. 3   | 1. 37E-06 | -0. 37655 | 0. 147 | 0. 273 | 0. 020432 | Mcy | ZNF791    |
| ZNF322. 4   | 1. 37E-06 | -0. 19231 | 0. 033 | 0. 136 | 0. 020515 | Mcy | ZNF322    |
| TBC1D1. 6   | 1. 37E-06 | 0. 189243 | 0. 216 | 0. 12  | 0. 020517 | Mcy | TBC1D1    |
| IMP4. 1     | 1. 39E-06 | 0. 160574 | 0. 495 | 0. 355 | 0. 020784 | Mcy | IMP4      |
| CSAD. 4     | 1. 40E-06 | -0. 2617  | 0. 059 | 0. 17  | 0. 02096  | Mcy | CSAD      |
| RANGRF      | 1. 40E-06 | 0. 24059  | 0. 319 | 0. 208 | 0. 020974 | Mcy | RANGRF    |
| KRT10. 3    | 1. 41E-06 | -0. 27317 | 0. 52  | 0. 559 | 0. 021047 | Mcy | KRT10     |
| MAP6. 4     | 1. 42E-06 | -0. 19663 | 0. 011 | 0. 098 | 0. 0212   | Mcy | MAP6      |
| CMC1        | 1. 42E-06 | 0. 163203 | 0. 399 | 0. 272 | 0. 021214 | Mcy | CMC1      |
| SNN. 6      | 1. 42E-06 | -0. 35636 | 0. 11  | 0. 228 | 0. 021227 | Mcy | SNN       |
| FAM69C. 5   | 1. 43E-06 | -0. 16737 | 0      | 0. 079 | 0. 021395 | Mcy | FAM69C    |
| PRPF4       | 1. 43E-06 | 0. 116967 | 0. 282 | 0. 171 | 0. 021406 | Mcy | PRPF4     |
| NNT. 1      | 1. 47E-06 | 0. 198639 | 0. 231 | 0. 135 | 0. 021902 | Mcy | NNT       |
| IGSF8. 4    | 1. 47E-06 | -0. 31109 | 0. 099 | 0. 215 | 0. 021967 | Mcy | IGSF8     |
| C1orf21. 6  | 1. 47E-06 | -0. 2841  | 0. 081 | 0. 203 | 0. 022003 | Mcy | C1orf21   |
| CNTROB. 1   | 1. 47E-06 | 0. 185028 | 0. 147 | 0. 072 | 0. 022018 | Mcy | CNTROB    |
| POLR2D. 2   | 1. 48E-06 | 0. 207869 | 0. 234 | 0. 136 | 0. 022121 | Mcy | POLR2D    |

|             |           |           |        |        |           |     |               |
|-------------|-----------|-----------|--------|--------|-----------|-----|---------------|
| TTC39C. 2   | 1. 49E-06 | 0. 158479 | 0. 158 | 0. 079 | 0. 022201 | Mcy | TTC39C        |
| NFATC2IP. 1 | 1. 52E-06 | 0. 214994 | 0. 267 | 0. 16  | 0. 022699 | Mcy | NFATC2IP      |
| RREB1. 6    | 1. 52E-06 | 0. 12149  | 0. 147 | 0. 07  | 0. 0227   | Mcy | RREB1         |
| GPBP1. 3    | 1. 53E-06 | -0. 35844 | 0. 352 | 0. 451 | 0. 022876 | Mcy | GPBP1         |
| ACTR3. 4    | 1. 53E-06 | 0. 12037  | 0. 707 | 0. 556 | 0. 022933 | Mcy | ACTR3         |
| RP11-76E1   | 1. 54E-06 | 0. 107882 | 0. 092 | 0. 035 | 0. 023037 | Mcy | RP11-76E17. 3 |
| FBXO44. 4   | 1. 55E-06 | -0. 2715  | 0. 04  | 0. 144 | 0. 023225 | Mcy | FBXO44        |
| ATP1A1. 3   | 1. 55E-06 | 0. 189167 | 0. 637 | 0. 469 | 0. 023235 | Mcy | ATP1A1        |
| RUVBL2. 3   | 1. 56E-06 | 0. 196288 | 0. 451 | 0. 315 | 0. 023308 | Mcy | RUVBL2        |
| ZNF420. 4   | 1. 57E-06 | -0. 26799 | 0. 018 | 0. 109 | 0. 023405 | Mcy | ZNF420        |
| AGAP2-AS1   | 1. 57E-06 | -0. 33722 | 0. 011 | 0. 097 | 0. 02343  | Mcy | AGAP2-AS1     |
| RAB35. 3    | 1. 57E-06 | 0. 15113  | 0. 275 | 0. 163 | 0. 023461 | Mcy | RAB35         |
| NKAIN4. 5   | 1. 58E-06 | -0. 37057 | 0. 015 | 0. 103 | 0. 023658 | Mcy | NKAIN4        |
| PSMA6. 4    | 1. 59E-06 | 0. 192447 | 0. 344 | 0. 221 | 0. 023705 | Mcy | PSMA6         |
| CMBL. 4     | 1. 60E-06 | -0. 21373 | 0. 029 | 0. 129 | 0. 023847 | Mcy | CMBL          |
| DMRTA2. 3   | 1. 61E-06 | -0. 16605 | 0      | 0. 078 | 0. 024013 | Mcy | DMRTA2        |
| NCOA4. 6    | 1. 61E-06 | 0. 232974 | 0. 392 | 0. 26  | 0. 024062 | Mcy | NCOA4         |
| IGFBP3. 4   | 1. 61E-06 | -0. 6104  | 0. 092 | 0. 197 | 0. 024093 | Mcy | IGFBP3        |
| SUFU        | 1. 62E-06 | 0. 102255 | 0. 077 | 0. 028 | 0. 024144 | Mcy | SUFU          |
| VIPR2. 5    | 1. 62E-06 | -0. 31229 | 0. 004 | 0. 084 | 0. 024161 | Mcy | VIPR2         |
| PSMC5. 2    | 1. 64E-06 | 0. 135462 | 0. 733 | 0. 55  | 0. 024472 | Mcy | PSMC5         |
| RSF1. 4     | 1. 67E-06 | -0. 37625 | 0. 311 | 0. 42  | 0. 024944 | Mcy | RSF1          |
| OAZ1. 2     | 1. 67E-06 | -0. 10805 | 0. 971 | 0. 925 | 0. 024946 | Mcy | OAZ1          |
| BOK. 6      | 1. 68E-06 | -0. 21829 | 0      | 0. 078 | 0. 025074 | Mcy | BOK           |
| PHLDB1. 6   | 1. 68E-06 | -0. 26381 | 0. 04  | 0. 144 | 0. 025174 | Mcy | PHLDB1        |
| CINP. 1     | 1. 70E-06 | 0. 185233 | 0. 366 | 0. 249 | 0. 025351 | Mcy | CINP          |
| RGMB. 5     | 1. 70E-06 | -0. 36387 | 0. 037 | 0. 134 | 0. 025352 | Mcy | RGMB          |
| WASF3. 4    | 1. 70E-06 | -0. 2059  | 0      | 0. 078 | 0. 025438 | Mcy | WASF3         |
| CSNK1D. 5   | 1. 71E-06 | 0. 158029 | 0. 505 | 0. 356 | 0. 025605 | Mcy | CSNK1D        |
| GPT2. 4     | 1. 74E-06 | -0. 1946  | 0. 044 | 0. 149 | 0. 026018 | Mcy | GPT2          |
| KCTD13. 5   | 1. 76E-06 | -0. 27169 | 0. 04  | 0. 141 | 0. 026255 | Mcy | KCTD13        |
| TMA16. 3    | 1. 76E-06 | 0. 200917 | 0. 311 | 0. 198 | 0. 026312 | Mcy | TMA16         |
| TIMM23. 1   | 1. 79E-06 | 0. 225209 | 0. 249 | 0. 15  | 0. 026798 | Mcy | TIMM23        |
| ATN1. 4     | 1. 80E-06 | -0. 23531 | 0. 07  | 0. 186 | 0. 026866 | Mcy | ATN1          |
| LAMB1. 3    | 1. 82E-06 | -0. 1678  | 0. 015 | 0. 104 | 0. 027257 | Mcy | LAMB1         |
| RASSF8-AS   | 1. 82E-06 | -0. 30596 | 0. 055 | 0. 162 | 0. 027264 | Mcy | RASSF8-AS1    |
| DENND5B. 5  | 1. 83E-06 | -0. 19895 | 0. 011 | 0. 098 | 0. 02732  | Mcy | DENND5B       |
| LDOC1. 5    | 1. 84E-06 | -0. 3254  | 0. 007 | 0. 09  | 0. 027444 | Mcy | LDOC1         |
| S100B. 5    | 1. 85E-06 | -0. 52748 | 0. 462 | 0. 529 | 0. 027708 | Mcy | S100B         |
| WASL. 4     | 1. 87E-06 | -0. 21544 | 0. 07  | 0. 186 | 0. 028008 | Mcy | WASL          |
| EIF1AY. 5   | 1. 88E-06 | -0. 13789 | 0. 062 | 0. 181 | 0. 028025 | Mcy | EIF1AY        |
| RPRD1A. 4   | 1. 89E-06 | -0. 30399 | 0. 092 | 0. 21  | 0. 028225 | Mcy | RPRD1A        |
| C3orf70. 5  | 1. 89E-06 | -0. 22616 | 0. 015 | 0. 102 | 0. 028241 | Mcy | C3orf70       |
| PLAT. 3     | 1. 90E-06 | -0. 23994 | 0. 026 | 0. 122 | 0. 028341 | Mcy | PLAT          |
| XRCC6. 1    | 1. 91E-06 | 0. 142684 | 0. 7   | 0. 554 | 0. 028478 | Mcy | XRCC6         |
| PLCB2. 6    | 1. 91E-06 | 0. 10834  | 0. 132 | 0. 059 | 0. 028529 | Mcy | PLCB2         |
| THOP1. 5    | 1. 92E-06 | 0. 232573 | 0. 308 | 0. 199 | 0. 028628 | Mcy | THOP1         |
| NDUFS5. 5   | 1. 92E-06 | -0. 1427  | 0. 879 | 0. 809 | 0. 02865  | Mcy | NDUFS5        |
| TMEM136. 4  | 1. 94E-06 | -0. 20329 | 0. 007 | 0. 09  | 0. 029023 | Mcy | TMEM136       |
| CNOT4. 3    | 1. 94E-06 | -0. 38193 | 0. 154 | 0. 275 | 0. 029024 | Mcy | CNOT4         |
| RSBN1. 4    | 1. 96E-06 | -0. 3595  | 0. 106 | 0. 22  | 0. 02927  | Mcy | RSBN1         |

|             |           |           |        |        |           |     |           |
|-------------|-----------|-----------|--------|--------|-----------|-----|-----------|
| AAMDC. 4    | 1. 96E-06 | 0. 243797 | 0. 315 | 0. 204 | 0. 029281 | Mcy | AAMDC     |
| LINC00094   | 2. 00E-06 | -0. 21336 | 0. 033 | 0. 131 | 0. 029903 | Mcy | LINC00094 |
| USP22. 6    | 2. 00E-06 | -0. 26411 | 0. 187 | 0. 322 | 0. 029913 | Mcy | USP22     |
| ATP9A. 5    | 2. 01E-06 | -0. 22634 | 0. 022 | 0. 114 | 0. 030092 | Mcy | ATP9A     |
| LITAF. 6    | 2. 02E-06 | 0. 11431  | 0. 659 | 0. 454 | 0. 030131 | Mcy | LITAF     |
| EPB41L1. 4  | 2. 04E-06 | -0. 19556 | 0. 007 | 0. 09  | 0. 030516 | Mcy | EPB41L1   |
| CD2BP2. 1   | 2. 04E-06 | 0. 196828 | 0. 458 | 0. 325 | 0. 030547 | Mcy | CD2BP2    |
| CNFN. 1     | 2. 05E-06 | 0. 12082  | 0. 073 | 0. 026 | 0. 030562 | Mcy | CNFN      |
| PXMP2. 4    | 2. 08E-06 | 0. 217328 | 0. 333 | 0. 22  | 0. 031144 | Mcy | PXMP2     |
| PCGF2. 4    | 2. 09E-06 | -0. 20303 | 0. 055 | 0. 165 | 0. 031192 | Mcy | PCGF2     |
| CYB5D2. 4   | 2. 10E-06 | -0. 33955 | 0. 114 | 0. 236 | 0. 031371 | Mcy | CYB5D2    |
| MPHOSPH6. 2 | 2. 10E-06 | 0. 176462 | 0. 421 | 0. 288 | 0. 031383 | Mcy | MPHOSPH6  |
| RGS3. 4     | 2. 11E-06 | -0. 18796 | 0. 018 | 0. 108 | 0. 031517 | Mcy | RGS3      |
| THSD1. 4    | 2. 12E-06 | -0. 17176 | 0. 011 | 0. 096 | 0. 03163  | Mcy | THSD1     |
| SYNC. 4     | 2. 12E-06 | -0. 29936 | 0. 07  | 0. 178 | 0. 031642 | Mcy | SYNC      |
| UBL7. 1     | 2. 13E-06 | 0. 152629 | 0. 352 | 0. 227 | 0. 031869 | Mcy | UBL7      |
| DAP. 3      | 2. 20E-06 | 0. 253497 | 0. 392 | 0. 274 | 0. 032823 | Mcy | DAP       |
| WASF1. 3    | 2. 20E-06 | -0. 21966 | 0. 011 | 0. 096 | 0. 032858 | Mcy | WASF1     |
| GSS. 2      | 2. 22E-06 | 0. 146379 | 0. 363 | 0. 237 | 0. 033126 | Mcy | GSS       |
| AMOTL2. 3   | 2. 22E-06 | -0. 25547 | 0. 004 | 0. 083 | 0. 033179 | Mcy | AMOTL2    |
| DUSP26. 5   | 2. 22E-06 | -0. 31225 | 0. 007 | 0. 09  | 0. 033246 | Mcy | DUSP26    |
| USP11. 5    | 2. 29E-06 | -0. 38285 | 0. 234 | 0. 355 | 0. 034159 | Mcy | USP11     |
| EHD2. 4     | 2. 31E-06 | -0. 1364  | 0. 004 | 0. 083 | 0. 034539 | Mcy | EHD2      |
| ZNF583. 4   | 2. 33E-06 | -0. 23718 | 0. 018 | 0. 108 | 0. 034857 | Mcy | ZNF583    |
| UBL5. 4     | 2. 36E-06 | -0. 17766 | 0. 901 | 0. 829 | 0. 035268 | Mcy | UBL5      |
| CBX5. 5     | 2. 37E-06 | 0. 249159 | 0. 484 | 0. 341 | 0. 035374 | Mcy | CBX5      |
| COL16A1. 4  | 2. 37E-06 | -0. 19164 | 0      | 0. 076 | 0. 035421 | Mcy | COL16A1   |
| TMEM129. 3  | 2. 38E-06 | -0. 24676 | 0. 066 | 0. 175 | 0. 035496 | Mcy | TMEM129   |
| TCEB2. 5    | 2. 38E-06 | -0. 11342 | 0. 908 | 0. 821 | 0. 035507 | Mcy | TCEB2     |
| ZNF766. 2   | 2. 39E-06 | -0. 2704  | 0. 033 | 0. 128 | 0. 035665 | Mcy | ZNF766    |
| C5orf45. 3  | 2. 39E-06 | -0. 1754  | 0. 059 | 0. 17  | 0. 035776 | Mcy | C5orf45   |
| DENND2A. 4  | 2. 40E-06 | -0. 16782 | 0. 011 | 0. 097 | 0. 03583  | Mcy | DENND2A   |
| LARP4B. 3   | 2. 41E-06 | 0. 172217 | 0. 168 | 0. 088 | 0. 035962 | Mcy | LARP4B    |
| AKIP1. 2    | 2. 41E-06 | 0. 163321 | 0. 414 | 0. 284 | 0. 036061 | Mcy | AKIP1     |
| CCT8. 2     | 2. 42E-06 | 0. 208861 | 0. 696 | 0. 532 | 0. 036145 | Mcy | CCT8      |
| C14orf142   | 2. 43E-06 | 0. 230448 | 0. 245 | 0. 148 | 0. 036321 | Mcy | C14orf142 |
| ACSBG1. 3   | 2. 44E-06 | -0. 18519 | 0      | 0. 076 | 0. 036454 | Mcy | ACSBG1    |
| CDC26. 1    | 2. 44E-06 | 0. 223696 | 0. 385 | 0. 259 | 0. 036467 | Mcy | CDC26     |
| HDAC3. 3    | 2. 44E-06 | 0. 146799 | 0. 388 | 0. 26  | 0. 03649  | Mcy | HDAC3     |
| NAPEPLD. 3  | 2. 45E-06 | -0. 22407 | 0. 015 | 0. 101 | 0. 036684 | Mcy | NAPEPLD   |
| TOX. 6      | 2. 46E-06 | -0. 21525 | 0. 007 | 0. 089 | 0. 036762 | Mcy | TOX       |
| MAGT1. 2    | 2. 49E-06 | 0. 149953 | 0. 315 | 0. 2   | 0. 037162 | Mcy | MAGT1     |
| KATNA1. 1   | 2. 49E-06 | 0. 158313 | 0. 234 | 0. 136 | 0. 037201 | Mcy | KATNA1    |
| RPPH1. 2    | 2. 52E-06 | 0. 112551 | 0. 081 | 0. 03  | 0. 037621 | Mcy | RPPH1     |
| PDIA3. 6    | 2. 52E-06 | 0. 138979 | 0. 729 | 0. 579 | 0. 037674 | Mcy | PDIA3     |
| TAPBP. 6    | 2. 53E-06 | 0. 131442 | 0. 487 | 0. 339 | 0. 037883 | Mcy | TAPBP     |
| KDM4B. 3    | 2. 54E-06 | -0. 23685 | 0. 037 | 0. 134 | 0. 037883 | Mcy | KDM4B     |
| SLC25A18. 2 | 2. 56E-06 | -0. 25106 | 0. 007 | 0. 089 | 0. 03821  | Mcy | SLC25A18  |
| ZNF331. 6   | 2. 58E-06 | 0. 104001 | 0. 476 | 0. 312 | 0. 038511 | Mcy | ZNF331    |
| VTI1B. 4    | 2. 59E-06 | 0. 140968 | 0. 484 | 0. 343 | 0. 03874  | Mcy | VTI1B     |
| ZNF566. 4   | 2. 61E-06 | -0. 28803 | 0. 026 | 0. 117 | 0. 038951 | Mcy | ZNF566    |



|             |           |           |        |        |           |     |              |
|-------------|-----------|-----------|--------|--------|-----------|-----|--------------|
| VAX2. 5     | 2. 61E-06 | -0. 19688 | 0. 004 | 0. 082 | 0. 039037 | Mcy | VAX2         |
| CNR1. 4     | 2. 62E-06 | -0. 16785 | 0      | 0. 075 | 0. 039169 | Mcy | CNR1         |
| NDST2. 2    | 2. 64E-06 | 0. 101025 | 0. 07  | 0. 024 | 0. 03944  | Mcy | NDST2        |
| PCYT1A. 1   | 2. 66E-06 | 0. 191724 | 0. 22  | 0. 127 | 0. 039779 | Mcy | PCYT1A       |
| PLCB1. 4    | 2. 67E-06 | -0. 18606 | 0. 004 | 0. 082 | 0. 039895 | Mcy | PLCB1        |
| CACFD1. 4   | 2. 68E-06 | -0. 1723  | 0. 007 | 0. 089 | 0. 040042 | Mcy | CACFD1       |
| TNFSF12. 6  | 2. 70E-06 | 0. 187039 | 0. 3   | 0. 183 | 0. 040378 | Mcy | TNFSF12      |
| RELT. 5     | 2. 73E-06 | 0. 105268 | 0. 165 | 0. 082 | 0. 040723 | Mcy | RELT         |
| C10orf76. 2 | 2. 73E-06 | 0. 130552 | 0. 121 | 0. 055 | 0. 040743 | Mcy | C10orf76     |
| PIR. 3      | 2. 73E-06 | 0. 124687 | 0. 121 | 0. 055 | 0. 040787 | Mcy | PIR          |
| ZNF677. 4   | 2. 74E-06 | -0. 19209 | 0. 081 | 0. 2   | 0. 0409   | Mcy | ZNF677       |
| HMGCS1. 4   | 2. 75E-06 | -0. 30734 | 0. 077 | 0. 185 | 0. 041059 | Mcy | HMGCS1       |
| IDS         | 2. 75E-06 | -0. 40605 | 0. 256 | 0. 371 | 0. 04108  | Mcy | IDS          |
| MGARP. 3    | 2. 75E-06 | -0. 15992 | 0. 004 | 0. 082 | 0. 041129 | Mcy | MGARP        |
| EPHA3. 5    | 2. 78E-06 | -0. 13526 | 0      | 0. 075 | 0. 041484 | Mcy | EPHA3        |
| HIST2H2BE   | 2. 78E-06 | -0. 30472 | 0. 048 | 0. 149 | 0. 041553 | Mcy | HIST2H2BE    |
| LINC00632   | 2. 80E-06 | -0. 31531 | 0. 011 | 0. 093 | 0. 04184  | Mcy | LINC00632    |
| LONRF1. 3   | 2. 80E-06 | -0. 19335 | 0. 015 | 0. 1   | 0. 041886 | Mcy | LONRF1       |
| HSCB. 2     | 2. 81E-06 | 0. 225566 | 0. 275 | 0. 169 | 0. 042018 | Mcy | HSCB         |
| RNF141. 3   | 2. 82E-06 | 0. 19847  | 0. 326 | 0. 211 | 0. 04213  | Mcy | RNF141       |
| RBM39. 3    | 2. 82E-06 | -0. 23928 | 0. 667 | 0. 654 | 0. 042195 | Mcy | RBM39        |
| ELOVL4. 4   | 2. 82E-06 | -0. 19776 | 0. 004 | 0. 081 | 0. 0422   | Mcy | ELOVL4       |
| LMBR1L. 5   | 2. 83E-06 | -0. 314   | 0. 077 | 0. 187 | 0. 042237 | Mcy | LMBR1L       |
| DAG1. 4     | 2. 84E-06 | -0. 22483 | 0. 066 | 0. 176 | 0. 042511 | Mcy | DAG1         |
| COX4I1. 3   | 2. 88E-06 | -0. 14458 | 0. 945 | 0. 91  | 0. 043072 | Mcy | COX4I1       |
| SATB2. 3    | 2. 90E-06 | -0. 15392 | 0      | 0. 074 | 0. 043309 | Mcy | SATB2        |
| UBN2. 3     | 2. 92E-06 | -0. 25006 | 0. 022 | 0. 111 | 0. 043586 | Mcy | UBN2         |
| DDIT4. 5    | 2. 93E-06 | 0. 116878 | 0. 601 | 0. 404 | 0. 043797 | Mcy | DDIT4        |
| CHRAC1. 4   | 2. 96E-06 | 0. 106922 | 0. 245 | 0. 142 | 0. 044231 | Mcy | CHRAC1       |
| RHO. 5      | 2. 99E-06 | -0. 33114 | 0. 04  | 0. 137 | 0. 044699 | Mcy | RHO          |
| SMARCA1. 4  | 3. 04E-06 | -0. 26718 | 0. 066 | 0. 174 | 0. 045475 | Mcy | SMARCA1      |
| TNKS. 6     | 3. 05E-06 | -0. 21863 | 0. 048 | 0. 151 | 0. 045605 | Mcy | TNKS         |
| CA5A. 1     | 3. 05E-06 | 0. 10911  | 0. 033 | 0. 007 | 0. 045617 | Mcy | CA5A         |
| PTPRJ. 3    | 3. 07E-06 | 0. 124639 | 0. 077 | 0. 028 | 0. 045807 | Mcy | PTPRJ        |
| LYPLA2. 2   | 3. 13E-06 | 0. 214234 | 0. 33  | 0. 218 | 0. 046809 | Mcy | LYPLA2       |
| TIAM2. 5    | 3. 14E-06 | -0. 22771 | 0. 004 | 0. 081 | 0. 046973 | Mcy | TIAM2        |
| EHBP1. 4    | 3. 16E-06 | -0. 22728 | 0. 062 | 0. 17  | 0. 047163 | Mcy | EHBP1        |
| GAA. 5      | 3. 19E-06 | 0. 116679 | 0. 465 | 0. 316 | 0. 047632 | Mcy | GAA          |
| SEC13. 2    | 3. 23E-06 | 0. 132825 | 0. 502 | 0. 365 | 0. 048278 | Mcy | SEC13        |
| TPM4. 4     | 3. 25E-06 | 0. 183682 | 0. 692 | 0. 492 | 0. 048507 | Mcy | TPM4         |
| CLUAP1. 5   | 3. 25E-06 | -0. 26622 | 0. 062 | 0. 17  | 0. 048564 | Mcy | CLUAP1       |
| ENKUR. 4    | 3. 25E-06 | -0. 23462 | 0      | 0. 074 | 0. 048574 | Mcy | ENKUR        |
| COL22A1. 2  | 3. 30E-06 | -0. 15695 | 0      | 0. 074 | 0. 049275 | Mcy | COL22A1      |
| RDH5. 4     | 3. 38E-06 | -0. 24686 | 0. 018 | 0. 104 | 0. 050437 | Mcy | RDH5         |
| SCN3A. 5    | 3. 39E-06 | -0. 22938 | 0      | 0. 074 | 0. 050708 | Mcy | SCN3A        |
| ENOX2. 2    | 3. 40E-06 | 0. 176472 | 0. 147 | 0. 072 | 0. 050753 | Mcy | ENOX2        |
| MTMR14. 5   | 3. 50E-06 | 0. 213922 | 0. 33  | 0. 219 | 0. 052354 | Mcy | MTMR14       |
| FGF14. 5    | 3. 51E-06 | -0. 18601 | 0. 007 | 0. 087 | 0. 052438 | Mcy | FGF14        |
| CTB-3102C   | 3. 53E-06 | -0. 22839 | 0. 026 | 0. 116 | 0. 052721 | Mcy | CTB-31020. 2 |
| PCGF5. 3    | 3. 54E-06 | 0. 157724 | 0. 286 | 0. 176 | 0. 052968 | Mcy | PCGF5        |
| ZNF43. 4    | 3. 56E-06 | -0. 21375 | 0. 04  | 0. 14  | 0. 053188 | Mcy | ZNF43        |

|             |           |           |        |        |           |     |                |
|-------------|-----------|-----------|--------|--------|-----------|-----|----------------|
| SIAH1. 4    | 3. 56E-06 | -0. 3391  | 0. 117 | 0. 231 | 0. 053207 | Mcy | SIAH1          |
| EWSR1. 2    | 3. 59E-06 | 0. 168782 | 0. 604 | 0. 461 | 0. 053633 | Mcy | EWSR1          |
| KAZN. 4     | 3. 59E-06 | -0. 19304 | 0      | 0. 073 | 0. 053699 | Mcy | KAZN           |
| POMGNT2. 4  | 3. 60E-06 | -0. 24016 | 0. 044 | 0. 143 | 0. 053785 | Mcy | POMGNT2        |
| RRAS2. 4    | 3. 64E-06 | -0. 16016 | 0. 004 | 0. 08  | 0. 054329 | Mcy | RRAS2          |
| ZFAS1. 3    | 3. 66E-06 | -0. 2172  | 0. 714 | 0. 697 | 0. 054765 | Mcy | ZFAS1          |
| GNB4. 4     | 3. 68E-06 | 0. 161663 | 0. 352 | 0. 23  | 0. 054937 | Mcy | GNB4           |
| DLG1. 5     | 3. 71E-06 | -0. 26795 | 0. 062 | 0. 168 | 0. 055422 | Mcy | DLG1           |
| STX7. 6     | 3. 72E-06 | 0. 166878 | 0. 407 | 0. 264 | 0. 055568 | Mcy | STX7           |
| GNG12. 4    | 3. 77E-06 | -0. 18399 | 0. 04  | 0. 14  | 0. 05633  | Mcy | GNG12          |
| MMD. 4      | 3. 77E-06 | 0. 135442 | 0. 37  | 0. 242 | 0. 056399 | Mcy | MMD            |
| SNRPG. 3    | 3. 78E-06 | 0. 203935 | 0. 824 | 0. 635 | 0. 056555 | Mcy | SNRPG          |
| RABIF. 2    | 3. 79E-06 | 0. 132686 | 0. 286 | 0. 179 | 0. 056682 | Mcy | RABIF          |
| RANBP1. 5   | 3. 83E-06 | 0. 127797 | 0. 718 | 0. 574 | 0. 057238 | Mcy | RANBP1         |
| MYO1C. 2    | 3. 83E-06 | 0. 21261  | 0. 183 | 0. 1   | 0. 057248 | Mcy | MYO1C          |
| AHSA1. 1    | 3. 83E-06 | 0. 148223 | 0. 535 | 0. 395 | 0. 057286 | Mcy | AHSA1          |
| MICAL1. 5   | 3. 85E-06 | 0. 185695 | 0. 245 | 0. 138 | 0. 057474 | Mcy | MICAL1         |
| ARID4B. 5   | 3. 86E-06 | -0. 37039 | 0. 297 | 0. 408 | 0. 057658 | Mcy | ARID4B         |
| F12. 4      | 3. 88E-06 | -0. 16921 | 0. 004 | 0. 079 | 0. 058038 | Mcy | F12            |
| SARNP. 1    | 3. 90E-06 | 0. 104624 | 0. 216 | 0. 12  | 0. 058228 | Mcy | SARNP          |
| CCDC86      | 3. 96E-06 | 0. 14589  | 0. 187 | 0. 103 | 0. 059251 | Mcy | CCDC86         |
| LAMA4. 4    | 3. 97E-06 | -0. 19094 | 0      | 0. 073 | 0. 059359 | Mcy | LAMA4          |
| PCDHB7. 4   | 3. 97E-06 | -0. 22011 | 0      | 0. 073 | 0. 059359 | Mcy | PCDHB7         |
| TSPYL4. 3   | 3. 98E-06 | -0. 17614 | 0. 018 | 0. 105 | 0. 059404 | Mcy | TSPYL4         |
| TAP2        | 4. 02E-06 | 0. 174524 | 0. 022 | 0. 004 | 0. 060017 | Mcy | TAP2           |
| PFKP. 2     | 4. 03E-06 | 0. 27132  | 0. 242 | 0. 149 | 0. 060246 | Mcy | PFKP           |
| C5orf34     | 4. 06E-06 | 0. 109767 | 0. 066 | 0. 023 | 0. 060647 | Mcy | C5orf34        |
| SCD. 5      | 4. 07E-06 | -0. 43909 | 0. 103 | 0. 215 | 0. 060782 | Mcy | SCD            |
| ZNF385A. 6  | 4. 07E-06 | 0. 112881 | 0. 238 | 0. 134 | 0. 060798 | Mcy | ZNF385A        |
| LRIG1. 5    | 4. 09E-06 | -0. 21977 | 0. 022 | 0. 11  | 0. 061059 | Mcy | LRIG1          |
| BRSK1. 4    | 4. 10E-06 | -0. 20136 | 0. 007 | 0. 085 | 0. 061221 | Mcy | BRSK1          |
| SERPINF1. 4 | 4. 15E-06 | 0. 141416 | 0. 37  | 0. 221 | 0. 061978 | Mcy | SERPINF1       |
| CIAO1. 2    | 4. 15E-06 | 0. 177191 | 0. 359 | 0. 24  | 0. 062023 | Mcy | CIAO1          |
| DGCR6L. 2   | 4. 16E-06 | 0. 181075 | 0. 473 | 0. 332 | 0. 062211 | Mcy | DGCR6L         |
| FAM122B. 1  | 4. 17E-06 | 0. 200349 | 0. 179 | 0. 097 | 0. 062279 | Mcy | FAM122B        |
| SAP30. 4    | 4. 22E-06 | 0. 180256 | 0. 355 | 0. 237 | 0. 063116 | Mcy | SAP30          |
| DPH7. 5     | 4. 23E-06 | -0. 27542 | 0. 066 | 0. 17  | 0. 063261 | Mcy | DPH7           |
| TMEM106A. 4 | 4. 25E-06 | 0. 107491 | 0. 132 | 0. 062 | 0. 06348  | Mcy | TMEM106A       |
| PTPN18. 6   | 4. 26E-06 | 0. 143742 | 0. 33  | 0. 208 | 0. 063716 | Mcy | PTPN18         |
| PSMD13. 1   | 4. 27E-06 | 0. 123623 | 0. 553 | 0. 41  | 0. 063792 | Mcy | PSMD13         |
| NDUFA10. 2  | 4. 29E-06 | 0. 159358 | 0. 575 | 0. 435 | 0. 064062 | Mcy | NDUFA10        |
| DEAF1. 5    | 4. 34E-06 | -0. 2612  | 0. 099 | 0. 215 | 0. 064838 | Mcy | DEAF1          |
| HYI. 2      | 4. 34E-06 | 0. 187951 | 0. 234 | 0. 137 | 0. 064925 | Mcy | HYI            |
| ADAMTS9. 4  | 4. 37E-06 | -0. 16052 | 0. 004 | 0. 079 | 0. 065298 | Mcy | ADAMTS9        |
| APPBP2. 4   | 4. 39E-06 | -0. 21064 | 0. 095 | 0. 212 | 0. 065583 | Mcy | APPBP2         |
| CYP27A1. 3  | 4. 40E-06 | -0. 29925 | 0. 062 | 0. 167 | 0. 065684 | Mcy | CYP27A1        |
| RP11-1114   | 4. 41E-06 | -0. 19292 | 0. 007 | 0. 086 | 0. 065958 | Mcy | RP11-1114A5. 4 |
| TIMM50. 1   | 4. 42E-06 | 0. 195318 | 0. 436 | 0. 307 | 0. 066059 | Mcy | TIMM50         |
| MRPS23. 4   | 4. 47E-06 | 0. 15564  | 0. 505 | 0. 363 | 0. 066837 | Mcy | MRPS23         |
| HDAC1. 2    | 4. 48E-06 | 0. 181394 | 0. 333 | 0. 223 | 0. 067009 | Mcy | HDAC1          |
| C1D. 1      | 4. 50E-06 | 0. 160473 | 0. 44  | 0. 306 | 0. 067233 | Mcy | C1D            |

|             |           |           |        |        |               |               |
|-------------|-----------|-----------|--------|--------|---------------|---------------|
| TIPIN. 2    | 4. 52E-06 | 0. 124518 | 0. 238 | 0. 139 | 0. 067472 Mcy | TIPIN         |
| MDGA1. 4    | 4. 52E-06 | -0. 13049 | 0      | 0. 072 | 0. 067513 Mcy | MDGA1         |
| ALG5. 1     | 4. 53E-06 | 0. 15334  | 0. 491 | 0. 363 | 0. 067677 Mcy | ALG5          |
| RPAIN. 4    | 4. 54E-06 | -0. 31306 | 0. 396 | 0. 487 | 0. 067792 Mcy | RPAIN         |
| PKN3        | 4. 54E-06 | 0. 15368  | 0. 048 | 0. 014 | 0. 067809 Mcy | PKN3          |
| ROM1. 5     | 4. 57E-06 | -0. 28303 | 0. 026 | 0. 115 | 0. 068354 Mcy | ROM1          |
| RP3-428L1   | 4. 58E-06 | -0. 17638 | 0      | 0. 072 | 0. 068485 Mcy | RP3-428L16. 2 |
| PLD3. 4     | 4. 65E-06 | -0. 28668 | 0. 432 | 0. 531 | 0. 06949 Mcy  | PLD3          |
| GEMIN2. 2   | 4. 70E-06 | 0. 214124 | 0. 194 | 0. 109 | 0. 070274 Mcy | GEMIN2        |
| SLC29A4. 3  | 4. 71E-06 | -0. 2087  | 0. 007 | 0. 084 | 0. 070421 Mcy | SLC29A4       |
| UTP11L. 1   | 4. 73E-06 | 0. 206129 | 0. 41  | 0. 288 | 0. 070613 Mcy | UTP11L        |
| CHRN1. 5    | 4. 74E-06 | -0. 29458 | 0. 051 | 0. 151 | 0. 070801 Mcy | CHRN1         |
| FKBP9. 5    | 4. 74E-06 | -0. 26884 | 0. 073 | 0. 179 | 0. 07089 Mcy  | FKBP9         |
| RBM4. 4     | 4. 76E-06 | -0. 32586 | 0. 11  | 0. 222 | 0. 071079 Mcy | RBM4          |
| EBNA1BP2. 4 | 4. 79E-06 | 0. 204646 | 0. 484 | 0. 351 | 0. 071521 Mcy | EBNA1BP2      |
| ILVBL. 2    | 4. 82E-06 | 0. 161675 | 0. 366 | 0. 249 | 0. 072088 Mcy | ILVBL         |
| C15orf40. 4 | 4. 83E-06 | 0. 153202 | 0. 256 | 0. 159 | 0. 072212 Mcy | C15orf40      |
| CERCAM. 4   | 4. 84E-06 | -0. 2257  | 0. 037 | 0. 132 | 0. 072394 Mcy | CERCAM        |
| TCF12. 6    | 4. 85E-06 | -0. 37429 | 0. 176 | 0. 286 | 0. 072431 Mcy | TCF12         |
| PIH1D1. 2   | 4. 88E-06 | 0. 108531 | 0. 527 | 0. 387 | 0. 07294 Mcy  | PIH1D1        |
| FTX. 3      | 4. 95E-06 | -0. 26551 | 0. 018 | 0. 102 | 0. 073978 Mcy | FTX           |
| TROVE2. 5   | 4. 99E-06 | -0. 2832  | 0. 326 | 0. 435 | 0. 074564 Mcy | TROVE2        |
| SYT1. 6     | 5. 00E-06 | -0. 34394 | 0. 018 | 0. 102 | 0. 074707 Mcy | SYT1          |
| PLXNA4. 5   | 5. 02E-06 | -0. 2147  | 0. 004 | 0. 078 | 0. 07501 Mcy  | PLXNA4        |
| NUMBL. 4    | 5. 02E-06 | -0. 13997 | 0. 011 | 0. 091 | 0. 075067 Mcy | NUMBL         |
| KIAA2026. 5 | 5. 06E-06 | -0. 28202 | 0. 048 | 0. 145 | 0. 075603 Mcy | KIAA2026      |
| ABI1. 6     | 5. 07E-06 | 0. 13573  | 0. 359 | 0. 238 | 0. 075725 Mcy | ABI1          |
| TTC1. 3     | 5. 10E-06 | 0. 164773 | 0. 505 | 0. 37  | 0. 076262 Mcy | TTC1          |
| ALPK1. 1    | 5. 11E-06 | 0. 101892 | 0. 088 | 0. 035 | 0. 076332 Mcy | ALPK1         |
| ARL4D. 6    | 5. 13E-06 | -0. 37482 | 0. 07  | 0. 171 | 0. 076598 Mcy | ARL4D         |
| FAM171A1. 5 | 5. 18E-06 | -0. 16928 | 0. 004 | 0. 078 | 0. 077355 Mcy | FAM171A1      |
| NUPR1. 4    | 5. 18E-06 | -0. 48934 | 0. 205 | 0. 327 | 0. 077391 Mcy | NUPR1         |
| TMCC1. 5    | 5. 20E-06 | -0. 18734 | 0. 026 | 0. 115 | 0. 077701 Mcy | TMCC1         |
| HOXD11. 4   | 5. 20E-06 | -0. 14029 | 0. 004 | 0. 078 | 0. 077731 Mcy | HOXD11        |
| ASAP2. 5    | 5. 21E-06 | -0. 16078 | 0. 015 | 0. 097 | 0. 077787 Mcy | ASAP2         |
| TMEM100. 6  | 5. 22E-06 | -0. 30581 | 0. 011 | 0. 091 | 0. 078047 Mcy | TMEM100       |
| TMEM150A. 5 | 5. 28E-06 | -0. 31215 | 0. 051 | 0. 151 | 0. 078887 Mcy | TMEM150A      |
| FAM210B. 6  | 5. 34E-06 | -0. 29144 | 0. 158 | 0. 273 | 0. 079745 Mcy | FAM210B       |
| DPP3. 1     | 5. 35E-06 | 0. 156242 | 0. 293 | 0. 186 | 0. 079941 Mcy | DPP3          |
| MFI2. 2     | 5. 38E-06 | 0. 107995 | 0. 073 | 0. 027 | 0. 080464 Mcy | MFI2          |
| RBM4B. 4    | 5. 40E-06 | -0. 28794 | 0. 084 | 0. 194 | 0. 080713 Mcy | RBM4B         |
| TET1. 5     | 5. 40E-06 | -0. 15546 | 0. 007 | 0. 084 | 0. 080726 Mcy | TET1          |
| VGf. 4      | 5. 44E-06 | -0. 25267 | 0      | 0. 071 | 0. 081288 Mcy | VGf           |
| MAP6D1. 5   | 5. 50E-06 | -0. 21761 | 0. 007 | 0. 084 | 0. 082184 Mcy | MAP6D1        |
| DCXR. 2     | 5. 51E-06 | 0. 212709 | 0. 608 | 0. 449 | 0. 082287 Mcy | DCXR          |
| ELMOD1. 4   | 5. 55E-06 | -0. 1582  | 0. 007 | 0. 084 | 0. 08295 Mcy  | ELMOD1        |
| CDK5R1. 6   | 5. 57E-06 | -0. 25069 | 0. 015 | 0. 095 | 0. 083264 Mcy | CDK5R1        |
| RASGRP1. 5  | 5. 60E-06 | -0. 1495  | 0      | 0. 07  | 0. 083642 Mcy | RASGRP1       |
| MFGE8. 3    | 5. 60E-06 | -0. 21746 | 0. 081 | 0. 193 | 0. 083746 Mcy | MFGE8         |
| ID1. 4      | 5. 63E-06 | -0. 30807 | 0. 033 | 0. 123 | 0. 084074 Mcy | ID1           |
| TTLL12. 2   | 5. 66E-06 | 0. 152447 | 0. 128 | 0. 062 | 0. 08458 Mcy  | TTLL12        |

|             |           |           |        |        |               |           |
|-------------|-----------|-----------|--------|--------|---------------|-----------|
| DNM3. 4     | 5. 67E-06 | -0. 25007 | 0. 011 | 0. 09  | 0. 084776 Mcy | DNM3      |
| COA1. 3     | 5. 69E-06 | 0. 176157 | 0. 535 | 0. 394 | 0. 08506 Mcy  | COA1      |
| ACAP3. 6    | 5. 74E-06 | -0. 32415 | 0. 11  | 0. 218 | 0. 085804 Mcy | ACAP3     |
| TTPAL. 1    | 5. 75E-06 | -0. 26403 | 0. 048 | 0. 145 | 0. 085883 Mcy | TTPAL     |
| BCL2L13. 1  | 5. 78E-06 | 0. 255466 | 0. 242 | 0. 147 | 0. 086405 Mcy | BCL2L13   |
| CELF4. 6    | 5. 82E-06 | -0. 33513 | 0. 015 | 0. 094 | 0. 086944 Mcy | CELF4     |
| CUL2. 1     | 5. 83E-06 | 0. 199724 | 0. 209 | 0. 119 | 0. 087148 Mcy | CUL2      |
| ATP5L2. 2   | 5. 85E-06 | 0. 231759 | 0. 172 | 0. 091 | 0. 087404 Mcy | ATP5L2    |
| MAPK8IP3. 5 | 5. 90E-06 | -0. 20192 | 0. 011 | 0. 09  | 0. 088149 Mcy | MAPK8IP3  |
| MLLT3. 4    | 5. 91E-06 | -0. 20101 | 0. 015 | 0. 096 | 0. 088379 Mcy | MLLT3     |
| CDH6. 4     | 5. 93E-06 | -0. 14973 | 0      | 0. 07  | 0. 088553 Mcy | CDH6      |
| NRXN2. 6    | 6. 04E-06 | -0. 25577 | 0. 029 | 0. 119 | 0. 090196 Mcy | NRXN2     |
| AUP1. 4     | 6. 04E-06 | 0. 144327 | 0. 67  | 0. 519 | 0. 090199 Mcy | AUP1      |
| BEST3. 5    | 6. 13E-06 | -0. 31914 | 0. 011 | 0. 089 | 0. 091634 Mcy | BEST3     |
| LRP6. 5     | 6. 17E-06 | -0. 16397 | 0. 026 | 0. 114 | 0. 09226 Mcy  | LRP6      |
| FAM57B. 5   | 6. 19E-06 | -0. 26869 | 0. 015 | 0. 094 | 0. 092563 Mcy | FAM57B    |
| ZNF506. 4   | 6. 22E-06 | -0. 22636 | 0. 033 | 0. 123 | 0. 092976 Mcy | ZNF506    |
| PMEPA1. 6   | 6. 25E-06 | -0. 34748 | 0. 099 | 0. 203 | 0. 093391 Mcy | PMEPA1    |
| TRIM14. 3   | 6. 26E-06 | 0. 155227 | 0. 168 | 0. 09  | 0. 093544 Mcy | TRIM14    |
| ZNF667. 5   | 6. 26E-06 | -0. 19937 | 0. 007 | 0. 083 | 0. 093605 Mcy | ZNF667    |
| SLC35E2B. 6 | 6. 38E-06 | -0. 20401 | 0. 048 | 0. 147 | 0. 095389 Mcy | SLC35E2B  |
| IGSF10. 3   | 6. 39E-06 | -0. 17805 | 0. 018 | 0. 101 | 0. 095535 Mcy | IGSF10    |
| GNAS. 6     | 6. 40E-06 | -0. 16908 | 0. 685 | 0. 646 | 0. 095577 Mcy | GNAS      |
| PFDN1       | 6. 45E-06 | 0. 175983 | 0. 571 | 0. 444 | 0. 096316 Mcy | PFDN1     |
| HSP90B1. 3  | 6. 50E-06 | 0. 119533 | 0. 832 | 0. 654 | 0. 09707 Mcy  | HSP90B1   |
| FAM172A. 4  | 6. 52E-06 | -0. 2787  | 0. 092 | 0. 199 | 0. 097407 Mcy | FAM172A   |
| PTK7. 3     | 6. 59E-06 | -0. 14455 | 0. 015 | 0. 096 | 0. 098421 Mcy | PTK7      |
| TRIP4. 1    | 6. 59E-06 | 0. 107164 | 0. 198 | 0. 11  | 0. 098503 Mcy | TRIP4     |
| GINS3       | 6. 59E-06 | 0. 108823 | 0. 084 | 0. 034 | 0. 098555 Mcy | GINS3     |
| CHGB. 3     | 6. 60E-06 | -0. 28283 | 0. 011 | 0. 089 | 0. 098574 Mcy | CHGB      |
| GIPC1. 4    | 6. 61E-06 | -0. 29247 | 0. 15  | 0. 271 | 0. 098711 Mcy | GIPC1     |
| CADM1. 4    | 6. 61E-06 | -0. 29947 | 0. 205 | 0. 328 | 0. 098841 Mcy | CADM1     |
| PCDH10. 4   | 6. 64E-06 | -0. 17041 | 0      | 0. 069 | 0. 099251 Mcy | PCDH10    |
| KIDINS220   | 6. 64E-06 | -0. 34725 | 0. 158 | 0. 271 | 0. 099276 Mcy | KIDINS220 |
| DNAJC3. 3   | 6. 67E-06 | 0. 112159 | 0. 425 | 0. 289 | 0. 099709 Mcy | DNAJC3    |
| MOV10       | 6. 69E-06 | 0. 169075 | 0. 128 | 0. 062 | 0. 100044 Mcy | MOV10     |
| NOVA2. 4    | 6. 73E-06 | -0. 19127 | 0. 007 | 0. 082 | 0. 100556 Mcy | NOVA2     |
| NFKBIA. 5   | 6. 73E-06 | 0. 16539  | 0. 678 | 0. 496 | 0. 100601 Mcy | NFKBIA    |
| DMXL2. 4    | 6. 84E-06 | 0. 240376 | 0. 154 | 0. 08  | 0. 102219 Mcy | DMXL2     |
| KIAA0930. 6 | 6. 86E-06 | 0. 157309 | 0. 242 | 0. 142 | 0. 102499 Mcy | KIAA0930  |
| C14orf166   | 6. 86E-06 | 0. 1702   | 0. 747 | 0. 581 | 0. 102562 Mcy | C14orf166 |
| G3BP1. 3    | 6. 89E-06 | 0. 131474 | 0. 44  | 0. 311 | 0. 102971 Mcy | G3BP1     |
| MGLL. 4     | 6. 90E-06 | -0. 30163 | 0. 051 | 0. 147 | 0. 10309 Mcy  | MGLL      |
| USP14. 2    | 6. 91E-06 | 0. 16969  | 0. 374 | 0. 255 | 0. 103241 Mcy | USP14     |
| PTK2B. 4    | 6. 93E-06 | 0. 142008 | 0. 216 | 0. 125 | 0. 103572 Mcy | PTK2B     |
| NPB. 2      | 6. 93E-06 | -0. 18628 | 0      | 0. 069 | 0. 103585 Mcy | NPB       |
| TRMU. 2     | 6. 97E-06 | 0. 15681  | 0. 22  | 0. 13  | 0. 104098 Mcy | TRMU      |
| RAB40B. 6   | 6. 98E-06 | -0. 29361 | 0. 04  | 0. 132 | 0. 104339 Mcy | RAB40B    |
| LYPD5       | 7. 04E-06 | 0. 106689 | 0. 04  | 0. 011 | 0. 105149 Mcy | LYPD5     |
| DPYSL2. 5   | 7. 04E-06 | -0. 35451 | 0. 322 | 0. 426 | 0. 105178 Mcy | DPYSL2    |
| LRRC17. 4   | 7. 06E-06 | -0. 21646 | 0. 004 | 0. 076 | 0. 105531 Mcy | LRRC17    |

|            |           |           |        |        |               |                |
|------------|-----------|-----------|--------|--------|---------------|----------------|
| CDKN1C. 5  | 7. 07E-06 | -0. 32542 | 0. 029 | 0. 116 | 0. 105599 Mcy | CDKN1C         |
| TARSL2. 5  | 7. 07E-06 | -0. 20183 | 0. 026 | 0. 112 | 0. 105694 Mcy | TARSL2         |
| RNF26. 3   | 7. 08E-06 | 0. 2102   | 0. 249 | 0. 155 | 0. 105743 Mcy | RNF26          |
| ZNF599. 4  | 7. 14E-06 | -0. 18441 | 0. 004 | 0. 076 | 0. 106701 Mcy | ZNF599         |
| EFNB3. 4   | 7. 16E-06 | -0. 17212 | 0. 004 | 0. 075 | 0. 106959 Mcy | EFNB3          |
| MESP1. 3   | 7. 20E-06 | -0. 18232 | 0. 04  | 0. 133 | 0. 107525 Mcy | MESP1          |
| CD151. 5   | 7. 24E-06 | 0. 122856 | 0. 67  | 0. 478 | 0. 108251 Mcy | CD151          |
| SEMA4D. 5  | 7. 24E-06 | 0. 142094 | 0. 158 | 0. 079 | 0. 108258 Mcy | SEMA4D         |
| PRKDC. 3   | 7. 25E-06 | 0. 15663  | 0. 418 | 0. 289 | 0. 10841 Mcy  | PRKDC          |
| NAP1L5. 4  | 7. 31E-06 | -0. 25625 | 0. 044 | 0. 136 | 0. 109278 Mcy | NAP1L5         |
| HIST1H2AC  | 7. 32E-06 | -0. 43671 | 0. 07  | 0. 169 | 0. 109445 Mcy | HIST1H2AC      |
| NCAM2. 4   | 7. 34E-06 | -0. 24167 | 0      | 0. 069 | 0. 109656 Mcy | NCAM2          |
| FIGN. 4    | 7. 41E-06 | -0. 15924 | 0. 011 | 0. 089 | 0. 110729 Mcy | FIGN           |
| PIN4. 4    | 7. 46E-06 | 0. 178118 | 0. 557 | 0. 415 | 0. 111538 Mcy | PIN4           |
| PITPNC1. 3 | 7. 52E-06 | -0. 14023 | 0. 033 | 0. 125 | 0. 112348 Mcy | PITPNC1        |
| OBFC1. 2   | 7. 59E-06 | 0. 116219 | 0. 161 | 0. 085 | 0. 11338 Mcy  | OBFC1          |
| RP11-698F  | 7. 68E-06 | 0. 137198 | 0. 004 | 0      | 0. 114799 Mcy | RP11-698F20. 3 |
| PDLIM7. 3  | 7. 72E-06 | 0. 187627 | 0. 348 | 0. 236 | 0. 115424 Mcy | PDLIM7         |
| HKR1. 5    | 7. 73E-06 | -0. 17973 | 0. 029 | 0. 118 | 0. 115528 Mcy | HKR1           |
| DTD1. 6    | 7. 75E-06 | -0. 35922 | 0. 304 | 0. 394 | 0. 115862 Mcy | DTD1           |
| NCOR1. 5   | 7. 86E-06 | -0. 33005 | 0. 41  | 0. 465 | 0. 11743 Mcy  | NCOR1          |
| MAPKAPK2.  | 7. 95E-06 | 0. 249784 | 0. 22  | 0. 131 | 0. 118804 Mcy | MAPKAPK2       |
| UQCRC1. 3  | 7. 98E-06 | 0. 138336 | 0. 637 | 0. 485 | 0. 119306 Mcy | UQCRC1         |
| SIGIRR. 5  | 8. 01E-06 | 0. 138515 | 0. 304 | 0. 193 | 0. 119765 Mcy | SIGIRR         |
| EME1       | 8. 03E-06 | 0. 132102 | 0. 066 | 0. 024 | 0. 119995 Mcy | EME1           |
| LSS. 5     | 8. 08E-06 | -0. 21689 | 0. 018 | 0. 1   | 0. 120757 Mcy | LSS            |
| GJA1. 3    | 8. 31E-06 | -0. 33212 | 0. 007 | 0. 081 | 0. 124181 Mcy | GJA1           |
| HIPK2. 4   | 8. 38E-06 | -0. 3338  | 0. 114 | 0. 223 | 0. 12518 Mcy  | HIPK2          |
| NDUFB8. 2  | 8. 38E-06 | 0. 238436 | 0. 121 | 0. 055 | 0. 125256 Mcy | NDUFB8         |
| HOXC9. 6   | 8. 44E-06 | -0. 26649 | 0. 011 | 0. 087 | 0. 126098 Mcy | HOXC9          |
| ITGA3. 4   | 8. 47E-06 | -0. 13898 | 0. 018 | 0. 101 | 0. 12659 Mcy  | ITGA3          |
| INIP. 2    | 8. 54E-06 | 0. 205064 | 0. 297 | 0. 195 | 0. 12769 Mcy  | INIP           |
| FAT1. 4    | 8. 58E-06 | -0. 13421 | 0      | 0. 068 | 0. 128235 Mcy | FAT1           |
| SRSF12. 4  | 8. 60E-06 | -0. 17753 | 0. 004 | 0. 074 | 0. 128591 Mcy | SRSF12         |
| FAM102A. 3 | 8. 64E-06 | -0. 2377  | 0. 018 | 0. 1   | 0. 129151 Mcy | FAM102A        |
| SCML1. 3   | 8. 65E-06 | 0. 102061 | 0. 176 | 0. 092 | 0. 129267 Mcy | SCML1          |
| ZFP90. 5   | 8. 75E-06 | -0. 19871 | 0. 04  | 0. 133 | 0. 130716 Mcy | ZFP90          |
| PTPRD. 5   | 8. 76E-06 | -0. 25577 | 0. 004 | 0. 074 | 0. 130937 Mcy | PTPRD          |
| MPDZ. 4    | 8. 84E-06 | -0. 13353 | 0. 011 | 0. 088 | 0. 132061 Mcy | MPDZ           |
| SMIM14. 4  | 8. 87E-06 | -0. 36663 | 0. 209 | 0. 333 | 0. 132623 Mcy | SMIM14         |
| ZNF133. 2  | 8. 90E-06 | -0. 18076 | 0. 007 | 0. 081 | 0. 133061 Mcy | ZNF133         |
| ECE1. 4    | 8. 92E-06 | -0. 18602 | 0. 007 | 0. 082 | 0. 133348 Mcy | ECE1           |
| EED. 1     | 8. 93E-06 | 0. 1249   | 0. 176 | 0. 095 | 0. 133466 Mcy | EED            |
| PIK3R3. 4  | 8. 93E-06 | -0. 25096 | 0. 04  | 0. 134 | 0. 133466 Mcy | PIK3R3         |
| C14orf132  | 8. 93E-06 | -0. 27833 | 0. 015 | 0. 093 | 0. 133503 Mcy | C14orf132      |
| CACNG8. 4  | 8. 97E-06 | -0. 16393 | 0. 004 | 0. 075 | 0. 134101 Mcy | CACNG8         |
| TRIM16L. 3 | 8. 98E-06 | -0. 1572  | 0. 004 | 0. 075 | 0. 134192 Mcy | TRIM16L        |
| CENPL. 1   | 9. 01E-06 | 0. 191378 | 0. 11  | 0. 051 | 0. 134602 Mcy | CENPL          |
| GDAP1. 6   | 9. 05E-06 | -0. 32728 | 0. 059 | 0. 154 | 0. 135219 Mcy | GDAP1          |
| RB1CC1. 4  | 9. 07E-06 | -0. 33529 | 0. 168 | 0. 279 | 0. 135494 Mcy | RB1CC1         |
| NDUFV1. 2  | 9. 07E-06 | 0. 143813 | 0. 619 | 0. 476 | 0. 135515 Mcy | NDUFV1         |

|             |           |           |        |        |           |     |          |
|-------------|-----------|-----------|--------|--------|-----------|-----|----------|
| BRINP2. 5   | 9. 10E-06 | -0. 17611 | 0. 004 | 0. 074 | 0. 135917 | Mcy | BRINP2   |
| TCN2. 2     | 9. 13E-06 | 0. 12296  | 0. 179 | 0. 097 | 0. 13646  | Mcy | TCN2     |
| NAA10. 4    | 9. 20E-06 | 0. 223503 | 0. 568 | 0. 422 | 0. 137436 | Mcy | NAA10    |
| PEG10. 4    | 9. 24E-06 | -0. 29524 | 0. 022 | 0. 104 | 0. 138068 | Mcy | PEG10    |
| IER2. 5     | 9. 25E-06 | -0. 30897 | 0. 612 | 0. 615 | 0. 138299 | Mcy | IER2     |
| GPSM1. 5    | 9. 26E-06 | -0. 17654 | 0. 004 | 0. 074 | 0. 138392 | Mcy | GPSM1    |
| FAM181A. 4  | 9. 35E-06 | -0. 24571 | 0      | 0. 067 | 0. 139652 | Mcy | FAM181A  |
| METTL17. 1  | 9. 35E-06 | 0. 103382 | 0. 205 | 0. 116 | 0. 139663 | Mcy | METTL17  |
| TIMM8B. 4   | 9. 35E-06 | 0. 189345 | 0. 718 | 0. 54  | 0. 13973  | Mcy | TIMM8B   |
| RDX. 5      | 9. 38E-06 | -0. 28223 | 0. 432 | 0. 492 | 0. 140219 | Mcy | RDX      |
| SF3B4       | 9. 47E-06 | 0. 189268 | 0. 44  | 0. 319 | 0. 141523 | Mcy | SF3B4    |
| RALY. 3     | 9. 67E-06 | 0. 176608 | 0. 615 | 0. 452 | 0. 144547 | Mcy | RALY     |
| PUS1. 2     | 9. 68E-06 | 0. 122898 | 0. 15  | 0. 077 | 0. 144599 | Mcy | PUS1     |
| SNTA1. 4    | 9. 69E-06 | -0. 14952 | 0. 011 | 0. 087 | 0. 144772 | Mcy | SNTA1    |
| PPP1CB. 3   | 9. 71E-06 | -0. 31759 | 0. 462 | 0. 507 | 0. 145069 | Mcy | PPP1CB   |
| ZNF512. 4   | 9. 75E-06 | -0. 23591 | 0. 037 | 0. 126 | 0. 145635 | Mcy | ZNF512   |
| MICU1. 2    | 9. 77E-06 | 0. 19195  | 0. 223 | 0. 132 | 0. 14599  | Mcy | MICU1    |
| KLF6. 5     | 9. 80E-06 | 0. 109255 | 0. 729 | 0. 527 | 0. 146464 | Mcy | KLF6     |
| ZNF334. 3   | 9. 81E-06 | -0. 16632 | 0. 004 | 0. 074 | 0. 146661 | Mcy | ZNF334   |
| RIMKLB. 4   | 9. 83E-06 | -0. 22214 | 0. 055 | 0. 153 | 0. 146853 | Mcy | RIMKLB   |
| UBALD2. 3   | 9. 84E-06 | 0. 216815 | 0. 374 | 0. 257 | 0. 147004 | Mcy | UBALD2   |
| ESYT1. 5    | 9. 88E-06 | 0. 171784 | 0. 205 | 0. 118 | 0. 147611 | Mcy | ESYT1    |
| FEM1C. 2    | 1. 01E-05 | -0. 22194 | 0. 048 | 0. 142 | 0. 150721 | Mcy | FEM1C    |
| RGN. 5      | 1. 01E-05 | -0. 22405 | 0. 004 | 0. 074 | 0. 151181 | Mcy | RGN      |
| E2F5. 3     | 1. 02E-05 | -0. 12156 | 0      | 0. 067 | 0. 152076 | Mcy | E2F5     |
| SLC35A2. 1  | 1. 02E-05 | 0. 123689 | 0. 264 | 0. 164 | 0. 152401 | Mcy | SLC35A2  |
| CDK6. 5     | 1. 02E-05 | -0. 31524 | 0. 103 | 0. 208 | 0. 152562 | Mcy | CDK6     |
| PWAR6. 3    | 1. 03E-05 | -0. 15864 | 0. 004 | 0. 074 | 0. 153371 | Mcy | PWAR6    |
| THEM4. 2    | 1. 04E-05 | 0. 109889 | 0. 147 | 0. 075 | 0. 155024 | Mcy | THEM4    |
| NUDCD2. 3   | 1. 04E-05 | 0. 169214 | 0. 535 | 0. 397 | 0. 155111 | Mcy | NUDCD2   |
| DMPK. 3     | 1. 05E-05 | -0. 14491 | 0      | 0. 067 | 0. 156457 | Mcy | DMPK     |
| GPATCH4. 1  | 1. 05E-05 | 0. 118717 | 0. 297 | 0. 19  | 0. 157323 | Mcy | GPATCH4  |
| GLCCI1. 5   | 1. 06E-05 | -0. 33235 | 0. 059 | 0. 153 | 0. 158306 | Mcy | GLCCI1   |
| CUL4A. 2    | 1. 06E-05 | 0. 141466 | 0. 238 | 0. 143 | 0. 15832  | Mcy | CUL4A    |
| EEF1B2. 5   | 1. 07E-05 | 0. 106178 | 0. 923 | 0. 773 | 0. 159273 | Mcy | EEF1B2   |
| EVA1C. 5    | 1. 07E-05 | -0. 17406 | 0. 004 | 0. 073 | 0. 160151 | Mcy | EVA1C    |
| SNRPF. 3    | 1. 08E-05 | 0. 12032  | 0. 685 | 0. 543 | 0. 160663 | Mcy | SNRPF    |
| BBS2. 6     | 1. 08E-05 | -0. 28886 | 0. 073 | 0. 175 | 0. 161147 | Mcy | BBS2     |
| TXNDC17. 5  | 1. 08E-05 | 0. 121997 | 0. 703 | 0. 521 | 0. 161472 | Mcy | TXNDC17  |
| ACTR3B. 3   | 1. 08E-05 | -0. 20225 | 0. 026 | 0. 109 | 0. 161771 | Mcy | ACTR3B   |
| TCTEX1D2. 1 | 1. 08E-05 | -0. 31103 | 0. 117 | 0. 23  | 0. 162046 | Mcy | TCTEX1D2 |
| KIFAP3. 5   | 1. 09E-05 | -0. 26268 | 0. 099 | 0. 205 | 0. 162291 | Mcy | KIFAP3   |
| ZNF429. 5   | 1. 10E-05 | -0. 23364 | 0. 04  | 0. 131 | 0. 164239 | Mcy | ZNF429   |
| PRKCZ. 6    | 1. 11E-05 | -0. 22686 | 0. 022 | 0. 102 | 0. 16592  | Mcy | PRKCZ    |
| ALKBH4. 4   | 1. 11E-05 | -0. 2116  | 0. 095 | 0. 2   | 0. 166398 | Mcy | ALKBH4   |
| CEP57. 3    | 1. 12E-05 | 0. 182857 | 0. 341 | 0. 227 | 0. 167961 | Mcy | CEP57    |
| CBFA2T2. 5  | 1. 13E-05 | -0. 22469 | 0. 04  | 0. 13  | 0. 168163 | Mcy | CBFA2T2  |
| LSM6. 3     | 1. 15E-05 | 0. 146078 | 0. 454 | 0. 328 | 0. 171211 | Mcy | LSM6     |
| ATOH8. 3    | 1. 15E-05 | 0. 102108 | 0. 114 | 0. 052 | 0. 171877 | Mcy | ATOH8    |
| MRRF. 1     | 1. 16E-05 | 0. 141    | 0. 172 | 0. 093 | 0. 172787 | Mcy | MRRF     |
| CTHRC1. 5   | 1. 16E-05 | -0. 13649 | 0      | 0. 066 | 0. 172797 | Mcy | CTHRC1   |

|             |           |           |        |        |           |     |                |
|-------------|-----------|-----------|--------|--------|-----------|-----|----------------|
| GBA. 2      | 1. 16E-05 | 0. 181727 | 0. 216 | 0. 128 | 0. 173735 | Mcy | GBA            |
| DIP2C. 3    | 1. 16E-05 | -0. 16183 | 0. 011 | 0. 086 | 0. 173785 | Mcy | DIP2C          |
| FOXRED1. 2  | 1. 17E-05 | 0. 184618 | 0. 187 | 0. 105 | 0. 174171 | Mcy | FOXRED1        |
| SYAP1. 5    | 1. 17E-05 | 0. 222456 | 0. 513 | 0. 384 | 0. 175068 | Mcy | SYAP1          |
| SOX21-AS1   | 1. 17E-05 | -0. 14105 | 0      | 0. 066 | 0. 175266 | Mcy | SOX21-AS1      |
| DAPK1. 3    | 1. 18E-05 | 0. 141624 | 0. 121 | 0. 057 | 0. 175636 | Mcy | DAPK1          |
| CIB2. 4     | 1. 18E-05 | -0. 13733 | 0. 007 | 0. 079 | 0. 176464 | Mcy | CIB2           |
| NOLC1. 1    | 1. 18E-05 | 0. 115854 | 0. 245 | 0. 149 | 0. 176525 | Mcy | NOLC1          |
| ZNF292. 4   | 1. 18E-05 | -0. 25024 | 0. 15  | 0. 266 | 0. 176877 | Mcy | ZNF292         |
| SMARCA4. 5  | 1. 20E-05 | -0. 3464  | 0. 271 | 0. 363 | 0. 178727 | Mcy | SMARCA4        |
| DPP4. 3     | 1. 20E-05 | -0. 1516  | 0. 007 | 0. 079 | 0. 178801 | Mcy | DPP4           |
| TMEM67. 4   | 1. 20E-05 | -0. 21343 | 0. 018 | 0. 097 | 0. 179362 | Mcy | TMEM67         |
| GPN2. 1     | 1. 20E-05 | 0. 130693 | 0. 198 | 0. 113 | 0. 179937 | Mcy | GPN2           |
| REPIN1. 6   | 1. 21E-05 | -0. 25834 | 0. 161 | 0. 277 | 0. 180316 | Mcy | REPIN1         |
| ZNF444. 4   | 1. 21E-05 | -0. 2044  | 0. 062 | 0. 162 | 0. 180539 | Mcy | ZNF444         |
| ZNF117. 4   | 1. 21E-05 | -0. 24491 | 0. 026 | 0. 107 | 0. 181493 | Mcy | ZNF117         |
| ANKRA2. 3   | 1. 23E-05 | -0. 28528 | 0. 055 | 0. 149 | 0. 183182 | Mcy | ANKRA2         |
| DLL1. 4     | 1. 24E-05 | -0. 25249 | 0. 004 | 0. 073 | 0. 184975 | Mcy | DLL1           |
| RUVBL1. 3   | 1. 25E-05 | 0. 269323 | 0. 377 | 0. 263 | 0. 186387 | Mcy | RUVBL1         |
| ZNF83. 2    | 1. 26E-05 | -0. 25757 | 0. 092 | 0. 2   | 0. 187935 | Mcy | ZNF83          |
| SNX1. 2     | 1. 26E-05 | 0. 193892 | 0. 33  | 0. 219 | 0. 188881 | Mcy | SNX1           |
| DCLRE1B. 1  | 1. 27E-05 | 0. 169353 | 0. 114 | 0. 054 | 0. 189806 | Mcy | DCLRE1B        |
| AP2A2. 5    | 1. 27E-05 | 0. 163253 | 0. 366 | 0. 249 | 0. 190168 | Mcy | AP2A2          |
| PLD4. 6     | 1. 27E-05 | 0. 124004 | 0. 267 | 0. 151 | 0. 190479 | Mcy | PLD4           |
| ZNF7. 2     | 1. 28E-05 | -0. 30405 | 0. 066 | 0. 163 | 0. 190663 | Mcy | ZNF7           |
| HEY2. 2     | 1. 28E-05 | -0. 14332 | 0      | 0. 065 | 0. 19083  | Mcy | HEY2           |
| ASUN. 2     | 1. 28E-05 | 0. 140857 | 0. 19  | 0. 109 | 0. 190855 | Mcy | ASUN           |
| LINC01102   | 1. 28E-05 | -0. 24869 | 0. 004 | 0. 072 | 0. 19088  | Mcy | LINC01102      |
| HES4. 6     | 1. 28E-05 | -0. 24104 | 0. 084 | 0. 189 | 0. 191362 | Mcy | HES4           |
| SMAD9. 4    | 1. 28E-05 | -0. 20279 | 0. 004 | 0. 072 | 0. 191771 | Mcy | SMAD9          |
| FRMD4A. 5   | 1. 30E-05 | 0. 155229 | 0. 304 | 0. 185 | 0. 193686 | Mcy | FRMD4A         |
| CCDC102B. 1 | 1. 30E-05 | -0. 22624 | 0. 022 | 0. 103 | 0. 19415  | Mcy | CCDC102B       |
| GJC1. 4     | 1. 31E-05 | -0. 12883 | 0      | 0. 065 | 0. 196316 | Mcy | GJC1           |
| LIN54       | 1. 32E-05 | 0. 134001 | 0. 088 | 0. 037 | 0. 196913 | Mcy | LIN54          |
| NTRK2. 5    | 1. 34E-05 | -0. 39102 | 0. 037 | 0. 123 | 0. 199527 | Mcy | NTRK2          |
| PLEKHH3. 3  | 1. 34E-05 | -0. 16096 | 0. 011 | 0. 085 | 0. 199661 | Mcy | PLEKHH3        |
| CKAP5. 6    | 1. 34E-05 | 0. 245184 | 0. 245 | 0. 154 | 0. 200142 | Mcy | CKAP5          |
| TMOD1. 4    | 1. 34E-05 | -0. 3876  | 0. 066 | 0. 159 | 0. 200286 | Mcy | TMOD1          |
| FMNL2. 5    | 1. 35E-05 | -0. 3094  | 0. 158 | 0. 268 | 0. 201204 | Mcy | FMNL2          |
| OTUD7B. 4   | 1. 37E-05 | -0. 20944 | 0. 022 | 0. 103 | 0. 204412 | Mcy | OTUD7B         |
| MMP19. 3    | 1. 37E-05 | 0. 103373 | 0. 121 | 0. 057 | 0. 204529 | Mcy | MMP19          |
| RP11-332H   | 1. 38E-05 | -0. 25179 | 0. 04  | 0. 129 | 0. 206746 | Mcy | RP11-332H14. 2 |
| SHOX2. 4    | 1. 39E-05 | -0. 13457 | 0      | 0. 065 | 0. 207764 | Mcy | SHOX2          |
| GPN1. 2     | 1. 39E-05 | 0. 125074 | 0. 333 | 0. 221 | 0. 20817  | Mcy | GPN1           |
| DNAJB11. 3  | 1. 40E-05 | 0. 132256 | 0. 557 | 0. 43  | 0. 209569 | Mcy | DNAJB11        |
| CRIM1. 5    | 1. 43E-05 | -0. 14778 | 0      | 0. 065 | 0. 213734 | Mcy | CRIM1          |
| SEC62. 3    | 1. 43E-05 | -0. 2442  | 0. 692 | 0. 691 | 0. 213795 | Mcy | SEC62          |
| NNT-AS1. 5  | 1. 44E-05 | -0. 26576 | 0. 114 | 0. 224 | 0. 214751 | Mcy | NNT-AS1        |
| EXOSC5. 1   | 1. 45E-05 | 0. 170859 | 0. 282 | 0. 178 | 0. 21653  | Mcy | EXOSC5         |
| SYTL2. 4    | 1. 45E-05 | -0. 28889 | 0. 007 | 0. 078 | 0. 21672  | Mcy | SYTL2          |
| PSPH. 5     | 1. 47E-05 | -0. 29407 | 0. 066 | 0. 159 | 0. 219441 | Mcy | PSPH           |

|            |           |           |        |        |               |         |
|------------|-----------|-----------|--------|--------|---------------|---------|
| SOX5. 4    | 1. 47E-05 | -0. 19909 | 0. 015 | 0. 09  | 0. 219528 Mcy | SOX5    |
| ZNF414. 6  | 1. 47E-05 | -0. 21624 | 0. 084 | 0. 188 | 0. 219615 Mcy | ZNF414  |
| ZFP64. 2   | 1. 47E-05 | -0. 14248 | 0. 007 | 0. 078 | 0. 220376 Mcy | ZFP64   |
| DDX17. 3   | 1. 48E-05 | -0. 30396 | 0. 337 | 0. 426 | 0. 221368 Mcy | DDX17   |
| DPY19L3. 4 | 1. 48E-05 | -0. 18953 | 0. 015 | 0. 09  | 0. 221776 Mcy | DPY19L3 |
| PPFIA3. 4  | 1. 49E-05 | -0. 14889 | 0. 015 | 0. 091 | 0. 222054 Mcy | PPFIA3  |
| DIRAS2. 4  | 1. 49E-05 | -0. 16998 | 0      | 0. 064 | 0. 223009 Mcy | DIRAS2  |
| ZCCHC3. 5  | 1. 49E-05 | -0. 15353 | 0. 026 | 0. 108 | 0. 223281 Mcy | ZCCHC3  |
| RTCB. 3    | 1. 51E-05 | 0. 133324 | 0. 454 | 0. 33  | 0. 225923 Mcy | RTCB    |
| MLLT10. 2  | 1. 52E-05 | 0. 265712 | 0. 209 | 0. 124 | 0. 226535 Mcy | MLLT10  |
| DCAKD. 5   | 1. 53E-05 | -0. 18778 | 0. 048 | 0. 141 | 0. 228719 Mcy | DCAKD   |
| RSPRY1. 4  | 1. 53E-05 | -0. 29392 | 0. 143 | 0. 251 | 0. 229028 Mcy | RSPRY1  |
| SF3B5. 2   | 1. 53E-05 | 0. 134279 | 0. 791 | 0. 626 | 0. 22905 Mcy  | SF3B5   |
| SLC2A9. 4  | 1. 54E-05 | 0. 194457 | 0. 066 | 0. 024 | 0. 229687 Mcy | SLC2A9  |
| TRAPPC4. 4 | 1. 55E-05 | 0. 113669 | 0. 586 | 0. 441 | 0. 232087 Mcy | TRAPPC4 |
| SPOCK1. 5  | 1. 56E-05 | -0. 29649 | 0. 011 | 0. 083 | 0. 232445 Mcy | SPOCK1  |
| GPX8. 5    | 1. 56E-05 | -0. 14988 | 0      | 0. 064 | 0. 232683 Mcy | GPX8    |
| PLXNB1. 5  | 1. 57E-05 | -0. 21544 | 0. 007 | 0. 077 | 0. 234543 Mcy | PLXNB1  |
| PKIA. 6    | 1. 57E-05 | -0. 25369 | 0. 018 | 0. 095 | 0. 235281 Mcy | PKIA    |
| KCTD3. 3   | 1. 60E-05 | -0. 19799 | 0. 051 | 0. 145 | 0. 238497 Mcy | KCTD3   |
| FAM84B. 5  | 1. 60E-05 | -0. 23397 | 0. 015 | 0. 089 | 0. 238687 Mcy | FAM84B  |
| TOMM34. 2  | 1. 60E-05 | 0. 162525 | 0. 22  | 0. 134 | 0. 239165 Mcy | TOMM34  |
| HS6ST2. 2  | 1. 60E-05 | -0. 11767 | 0      | 0. 064 | 0. 239363 Mcy | HS6ST2  |
| IGDCC3. 6  | 1. 60E-05 | -0. 1438  | 0      | 0. 064 | 0. 239363 Mcy | IGDCC3  |
| ABCA3. 4   | 1. 62E-05 | -0. 15524 | 0. 007 | 0. 078 | 0. 242182 Mcy | ABCA3   |
| LGALSL. 4  | 1. 62E-05 | -0. 16293 | 0      | 0. 064 | 0. 242774 Mcy | LGALSL  |
| PPP4C. 4   | 1. 63E-05 | 0. 164007 | 0. 685 | 0. 54  | 0. 243834 Mcy | PPP4C   |
| ELP5. 2    | 1. 64E-05 | 0. 144023 | 0. 377 | 0. 264 | 0. 24506 Mcy  | ELP5    |
| CYR61. 4   | 1. 64E-05 | -0. 517   | 0. 077 | 0. 17  | 0. 245236 Mcy | CYR61   |
| CDC7. 1    | 1. 64E-05 | 0. 105264 | 0. 092 | 0. 04  | 0. 24532 Mcy  | CDC7    |
| TRIM37. 4  | 1. 65E-05 | -0. 177   | 0. 055 | 0. 152 | 0. 245933 Mcy | TRIM37  |
| PLEKHH2. 3 | 1. 65E-05 | -0. 17272 | 0. 004 | 0. 07  | 0. 246865 Mcy | PLEKHH2 |
| PLOD2. 4   | 1. 66E-05 | -0. 25405 | 0. 066 | 0. 164 | 0. 247346 Mcy | PLOD2   |
| ZNF146. 4  | 1. 66E-05 | -0. 27981 | 0. 121 | 0. 23  | 0. 248321 Mcy | ZNF146  |
| TBK1. 2    | 1. 67E-05 | 0. 115255 | 0. 242 | 0. 148 | 0. 249024 Mcy | TBK1    |
| ODC1. 5    | 1. 67E-05 | -0. 3171  | 0. 319 | 0. 395 | 0. 249433 Mcy | ODC1    |
| COL5A2. 4  | 1. 67E-05 | -0. 12418 | 0      | 0. 064 | 0. 249741 Mcy | COL5A2  |
| PYGB. 4    | 1. 68E-05 | -0. 25712 | 0. 106 | 0. 213 | 0. 250345 Mcy | PYGB    |
| FAM131B. 4 | 1. 68E-05 | -0. 17388 | 0. 007 | 0. 078 | 0. 250398 Mcy | FAM131B |
| C5orf42. 4 | 1. 68E-05 | -0. 16873 | 0. 018 | 0. 096 | 0. 25082 Mcy  | C5orf42 |
| RGAG4. 3   | 1. 69E-05 | -0. 13024 | 0      | 0. 064 | 0. 253299 Mcy | RGAG4   |
| LY6H. 5    | 1. 70E-05 | -0. 34027 | 0. 015 | 0. 087 | 0. 253841 Mcy | LY6H    |
| SNAP47. 4  | 1. 70E-05 | -0. 28467 | 0. 099 | 0. 205 | 0. 253911 Mcy | SNAP47  |
| LMO1. 5    | 1. 70E-05 | -0. 26081 | 0. 007 | 0. 076 | 0. 254508 Mcy | LMO1    |
| IPO11. 1   | 1. 71E-05 | 0. 100043 | 0. 117 | 0. 056 | 0. 255871 Mcy | IPO11   |
| AGPS. 3    | 1. 72E-05 | 0. 188486 | 0. 205 | 0. 12  | 0. 256765 Mcy | AGPS    |
| PLAA. 2    | 1. 73E-05 | 0. 284632 | 0. 168 | 0. 092 | 0. 257966 Mcy | PLAA    |
| C9orf3. 4  | 1. 73E-05 | -0. 29914 | 0. 026 | 0. 106 | 0. 258509 Mcy | C9orf3  |
| TYRO3. 5   | 1. 73E-05 | -0. 22788 | 0. 029 | 0. 111 | 0. 259014 Mcy | TYRO3   |
| ATP13A3. 3 | 1. 74E-05 | 0. 163891 | 0. 242 | 0. 148 | 0. 260119 Mcy | ATP13A3 |
| MXD1. 5    | 1. 74E-05 | 0. 107399 | 0. 22  | 0. 126 | 0. 260318 Mcy | MXD1    |



|             |           |           |        |        |               |          |
|-------------|-----------|-----------|--------|--------|---------------|----------|
| RUFY1. 2    | 1. 75E-05 | 0. 130014 | 0. 245 | 0. 15  | 0. 26107 Mcy  | RUFY1    |
| TAF15. 4    | 1. 79E-05 | 0. 185326 | 0. 381 | 0. 271 | 0. 268008 Mcy | TAF15    |
| LANCL2. 6   | 1. 79E-05 | -0. 30395 | 0. 062 | 0. 154 | 0. 268213 Mcy | LANCL2   |
| FBXO21. 4   | 1. 80E-05 | -0. 36026 | 0. 209 | 0. 31  | 0. 269339 Mcy | FBXO21   |
| SPRY2. 5    | 1. 81E-05 | -0. 32469 | 0. 121 | 0. 22  | 0. 27028 Mcy  | SPRY2    |
| FMN2. 4     | 1. 83E-05 | -0. 15947 | 0. 004 | 0. 07  | 0. 27285 Mcy  | FMN2     |
| GUCD1. 3    | 1. 83E-05 | 0. 297823 | 0. 205 | 0. 121 | 0. 273618 Mcy | GUCD1    |
| FAM221A. 6  | 1. 84E-05 | -0. 27457 | 0. 081 | 0. 18  | 0. 274694 Mcy | FAM221A  |
| RAB30. 4    | 1. 85E-05 | -0. 15888 | 0. 007 | 0. 077 | 0. 275723 Mcy | RAB30    |
| CNKSR2. 4   | 1. 85E-05 | -0. 13612 | 0      | 0. 063 | 0. 275726 Mcy | CNKSR2   |
| APC. 6      | 1. 85E-05 | -0. 21169 | 0. 11  | 0. 216 | 0. 276264 Mcy | APC      |
| ARAP1. 5    | 1. 85E-05 | 0. 126011 | 0. 19  | 0. 106 | 0. 276754 Mcy | ARAP1    |
| EPHA4. 3    | 1. 85E-05 | -0. 15354 | 0. 011 | 0. 083 | 0. 276766 Mcy | EPHA4    |
| RORA. 3     | 1. 86E-05 | -0. 22021 | 0. 007 | 0. 076 | 0. 278615 Mcy | RORA     |
| LAGE3. 1    | 1. 87E-05 | 0. 198483 | 0. 531 | 0. 395 | 0. 279082 Mcy | LAGE3    |
| MRFAP1. 5   | 1. 87E-05 | -0. 20644 | 0. 685 | 0. 67  | 0. 280033 Mcy | MRFAP1   |
| MSANTD4. 3  | 1. 91E-05 | -0. 22079 | 0. 04  | 0. 127 | 0. 285024 Mcy | MSANTD4  |
| SUGT1. 3    | 1. 91E-05 | 0. 193882 | 0. 465 | 0. 342 | 0. 285418 Mcy | SUGT1    |
| OFD1. 2     | 1. 92E-05 | -0. 25218 | 0. 165 | 0. 277 | 0. 286464 Mcy | OFD1     |
| LTBP2. 1    | 1. 93E-05 | 0. 10515  | 0. 066 | 0. 025 | 0. 288296 Mcy | LTBP2    |
| VPS36. 3    | 1. 93E-05 | 0. 121015 | 0. 304 | 0. 198 | 0. 28868 Mcy  | VPS36    |
| TCTN1. 5    | 1. 93E-05 | -0. 30806 | 0. 106 | 0. 214 | 0. 288806 Mcy | TCTN1    |
| CSF1. 4     | 1. 93E-05 | -0. 11391 | 0. 018 | 0. 096 | 0. 288897 Mcy | CSF1     |
| RAB2A. 3    | 1. 94E-05 | -0. 24803 | 0. 557 | 0. 592 | 0. 290388 Mcy | RAB2A    |
| MCUR1. 4    | 1. 94E-05 | 0. 196306 | 0. 37  | 0. 26  | 0. 290447 Mcy | MCUR1    |
| ZNF532. 4   | 1. 97E-05 | -0. 17043 | 0. 018 | 0. 095 | 0. 29413 Mcy  | ZNF532   |
| ADORA1. 4   | 1. 97E-05 | -0. 20536 | 0. 037 | 0. 124 | 0. 294529 Mcy | ADORA1   |
| METAP1D. 4  | 1. 97E-05 | -0. 27026 | 0. 04  | 0. 126 | 0. 294629 Mcy | METAP1D  |
| KPNA5. 2    | 1. 97E-05 | -0. 1803  | 0. 018 | 0. 094 | 0. 295116 Mcy | KPNA5    |
| LRP12. 3    | 1. 99E-05 | -0. 1671  | 0. 018 | 0. 094 | 0. 297828 Mcy | LRP12    |
| STK33. 5    | 2. 01E-05 | -0. 14677 | 0. 004 | 0. 07  | 0. 300417 Mcy | STK33    |
| ABCA8. 4    | 2. 01E-05 | -0. 282   | 0. 007 | 0. 076 | 0. 30053 Mcy  | ABCA8    |
| CMPK2. 2    | 2. 03E-05 | 0. 103926 | 0. 117 | 0. 055 | 0. 3034 Mcy   | CMPK2    |
| RND3. 5     | 2. 05E-05 | -0. 42739 | 0. 143 | 0. 245 | 0. 307052 Mcy | RND3     |
| PRUNE2. 4   | 2. 09E-05 | -0. 35885 | 0. 037 | 0. 119 | 0. 311752 Mcy | PRUNE2   |
| SMIM18. 5   | 2. 10E-05 | -0. 21449 | 0      | 0. 062 | 0. 313112 Mcy | SMIM18   |
| CRB1. 3     | 2. 10E-05 | -0. 22114 | 0. 004 | 0. 069 | 0. 313677 Mcy | CRB1     |
| COBL. 4     | 2. 10E-05 | -0. 20016 | 0. 004 | 0. 069 | 0. 314068 Mcy | COBL     |
| UGGT1. 1    | 2. 10E-05 | 0. 20613  | 0. 187 | 0. 109 | 0. 314133 Mcy | UGGT1    |
| SFT2D2. 2   | 2. 11E-05 | 0. 202518 | 0. 238 | 0. 145 | 0. 314958 Mcy | SFT2D2   |
| C17orf51. 2 | 2. 11E-05 | -0. 15615 | 0. 004 | 0. 069 | 0. 315074 Mcy | C17orf51 |
| SLC4A8. 1   | 2. 12E-05 | -0. 17689 | 0. 007 | 0. 076 | 0. 316482 Mcy | SLC4A8   |
| CCDC136. 4  | 2. 13E-05 | -0. 23244 | 0. 018 | 0. 093 | 0. 318587 Mcy | CCDC136  |
| RNF165. 5   | 2. 13E-05 | -0. 17761 | 0. 004 | 0. 069 | 0. 318825 Mcy | RNF165   |
| COX5A. 4    | 2. 14E-05 | 0. 143368 | 0. 736 | 0. 595 | 0. 319288 Mcy | COX5A    |
| FLNB. 2     | 2. 14E-05 | 0. 126407 | 0. 106 | 0. 05  | 0. 320052 Mcy | FLNB     |
| ZNF205. 3   | 2. 14E-05 | -0. 19654 | 0. 029 | 0. 11  | 0. 320171 Mcy | ZNF205   |
| RANBP2. 6   | 2. 14E-05 | 0. 133109 | 0. 315 | 0. 207 | 0. 320235 Mcy | RANBP2   |
| CCDC28B. 5  | 2. 15E-05 | -0. 20134 | 0. 11  | 0. 222 | 0. 321558 Mcy | CCDC28B  |
| OXCT1. 3    | 2. 17E-05 | 0. 137345 | 0. 234 | 0. 146 | 0. 324402 Mcy | OXCT1    |
| SORBS1. 4   | 2. 17E-05 | -0. 15163 | 0. 018 | 0. 095 | 0. 324971 Mcy | SORBS1   |

|             |           |           |        |        |               |               |
|-------------|-----------|-----------|--------|--------|---------------|---------------|
| CPT1C. 4    | 2. 18E-05 | -0. 18053 | 0. 026 | 0. 107 | 0. 325361 Mcy | CPT1C         |
| VPS18. 2    | 2. 19E-05 | 0. 196555 | 0. 147 | 0. 077 | 0. 32713 Mcy  | VPS18         |
| TRIB3. 4    | 2. 19E-05 | -0. 21323 | 0. 007 | 0. 076 | 0. 327392 Mcy | TRIB3         |
| UCHL5. 2    | 2. 20E-05 | 0. 139986 | 0. 238 | 0. 147 | 0. 32837 Mcy  | UCHL5         |
| ZNF577. 5   | 2. 20E-05 | -0. 16172 | 0. 018 | 0. 094 | 0. 329248 Mcy | ZNF577        |
| KCNIP1. 5   | 2. 21E-05 | -0. 20927 | 0. 022 | 0. 1   | 0. 330929 Mcy | KCNIP1        |
| DSTYK. 3    | 2. 22E-05 | -0. 20937 | 0. 037 | 0. 123 | 0. 331881 Mcy | DSTYK         |
| MXD4. 3     | 2. 23E-05 | -0. 22538 | 0. 088 | 0. 191 | 0. 332757 Mcy | MXD4          |
| TMEM80. 1   | 2. 23E-05 | -0. 26085 | 0. 073 | 0. 171 | 0. 33314 Mcy  | TMEM80        |
| RIC8B. 4    | 2. 23E-05 | -0. 1684  | 0. 018 | 0. 095 | 0. 333877 Mcy | RIC8B         |
| CHST7. 4    | 2. 25E-05 | -0. 1771  | 0. 029 | 0. 111 | 0. 336035 Mcy | CHST7         |
| ZNF12. 4    | 2. 25E-05 | -0. 20785 | 0. 04  | 0. 126 | 0. 336494 Mcy | ZNF12         |
| EML1. 2     | 2. 25E-05 | -0. 18211 | 0. 011 | 0. 081 | 0. 33684 Mcy  | EML1          |
| ENDOD1. 4   | 2. 27E-05 | -0. 22468 | 0. 055 | 0. 146 | 0. 339672 Mcy | ENDOD1        |
| RP11-66N1   | 2. 28E-05 | -0. 18645 | 0. 015 | 0. 088 | 0. 341344 Mcy | RP11-66N11. 8 |
| PPP2CB. 6   | 2. 29E-05 | -0. 17099 | 0. 19  | 0. 299 | 0. 341815 Mcy | PPP2CB        |
| RNF146. 3   | 2. 29E-05 | -0. 28144 | 0. 147 | 0. 258 | 0. 341875 Mcy | RNF146        |
| SLC12A2. 5  | 2. 29E-05 | -0. 25919 | 0. 044 | 0. 132 | 0. 342261 Mcy | SLC12A2       |
| SPRY4. 3    | 2. 30E-05 | -0. 13159 | 0. 004 | 0. 069 | 0. 344106 Mcy | SPRY4         |
| CNOT1. 4    | 2. 31E-05 | 0. 149267 | 0. 238 | 0. 147 | 0. 345165 Mcy | CNOT1         |
| TF. 6       | 2. 33E-05 | -0. 46273 | 0. 007 | 0. 074 | 0. 34881 Mcy  | TF            |
| TPD52L2. 3  | 2. 34E-05 | 0. 149485 | 0. 44  | 0. 321 | 0. 349411 Mcy | TPD52L2       |
| KLHL7. 4    | 2. 35E-05 | -0. 26428 | 0. 168 | 0. 282 | 0. 351164 Mcy | KLHL7         |
| SMARCA2. 2  | 2. 39E-05 | 0. 106944 | 0. 223 | 0. 132 | 0. 357155 Mcy | SMARCA2       |
| LINC00844   | 2. 40E-05 | -0. 35301 | 0. 029 | 0. 108 | 0. 358241 Mcy | LINC00844     |
| PCDH19. 4   | 2. 41E-05 | -0. 1326  | 0      | 0. 061 | 0. 360577 Mcy | PCDH19        |
| LZTS1. 5    | 2. 41E-05 | -0. 14238 | 0      | 0. 061 | 0. 360577 Mcy | LZTS1         |
| C12orf45. 2 | 2. 44E-05 | 0. 264516 | 0. 271 | 0. 176 | 0. 364243 Mcy | C12orf45      |
| ACTN4. 3    | 2. 46E-05 | 0. 109226 | 0. 469 | 0. 329 | 0. 366878 Mcy | ACTN4         |
| HOXA2. 5    | 2. 46E-05 | -0. 24523 | 0. 007 | 0. 074 | 0. 367947 Mcy | HOXA2         |
| CHD1L. 3    | 2. 49E-05 | 0. 102164 | 0. 227 | 0. 135 | 0. 372039 Mcy | CHD1L         |
| CHST10. 3   | 2. 52E-05 | -0. 20837 | 0. 051 | 0. 141 | 0. 376807 Mcy | CHST10        |
| C5orf24. 5  | 2. 53E-05 | -0. 30003 | 0. 198 | 0. 298 | 0. 378774 Mcy | C5orf24       |
| TNKS1BP1. 2 | 2. 54E-05 | -0. 14706 | 0. 007 | 0. 075 | 0. 380158 Mcy | TNKS1BP1      |
| GRB10. 5    | 2. 55E-05 | -0. 18149 | 0. 007 | 0. 074 | 0. 381641 Mcy | GRB10         |
| NCEH1. 4    | 2. 56E-05 | 0. 107744 | 0. 132 | 0. 067 | 0. 382268 Mcy | NCEH1         |
| VSTM2A. 5   | 2. 58E-05 | -0. 50357 | 0. 029 | 0. 107 | 0. 385407 Mcy | VSTM2A        |
| PREPL. 4    | 2. 58E-05 | -0. 23562 | 0. 088 | 0. 191 | 0. 386029 Mcy | PREPL         |
| TANC2. 2    | 2. 59E-05 | -0. 25327 | 0. 092 | 0. 191 | 0. 386415 Mcy | TANC2         |
| URI1. 3     | 2. 59E-05 | -0. 26013 | 0. 117 | 0. 223 | 0. 387645 Mcy | URI1          |
| SRRM3. 5    | 2. 60E-05 | -0. 2497  | 0. 007 | 0. 074 | 0. 388201 Mcy | SRRM3         |
| GFER. 3     | 2. 61E-05 | 0. 160961 | 0. 308 | 0. 206 | 0. 389966 Mcy | GFER          |
| ATXN2. 4    | 2. 62E-05 | -0. 27778 | 0. 117 | 0. 224 | 0. 392075 Mcy | ATXN2         |
| TIMP4. 4    | 2. 63E-05 | -0. 39008 | 0. 026 | 0. 102 | 0. 392315 Mcy | TIMP4         |
| SCN3B. 4    | 2. 65E-05 | -0. 25266 | 0. 007 | 0. 074 | 0. 395631 Mcy | SCN3B         |
| RAB39B. 5   | 2. 65E-05 | -0. 19318 | 0. 018 | 0. 092 | 0. 396071 Mcy | RAB39B        |
| MPP2. 5     | 2. 66E-05 | -0. 15524 | 0      | 0. 061 | 0. 397986 Mcy | MPP2          |
| MAPRE1. 3   | 2. 68E-05 | 0. 142026 | 0. 608 | 0. 474 | 0. 399987 Mcy | MAPRE1        |
| DPCD. 4     | 2. 68E-05 | 0. 218366 | 0. 249 | 0. 159 | 0. 40088 Mcy  | DPCD          |
| ZYX. 6      | 2. 68E-05 | 0. 144442 | 0. 542 | 0. 398 | 0. 401143 Mcy | ZYX           |
| KIF3C. 6    | 2. 70E-05 | -0. 19813 | 0. 026 | 0. 104 | 0. 403615 Mcy | KIF3C         |

|             |           |           |        |        |           |     |          |
|-------------|-----------|-----------|--------|--------|-----------|-----|----------|
| NT5C3B. 5   | 2. 71E-05 | -0. 32198 | 0. 234 | 0. 334 | 0. 404488 | Mcy | NT5C3B   |
| CCDC25. 4   | 2. 71E-05 | 0. 170785 | 0. 414 | 0. 294 | 0. 405186 | Mcy | CCDC25   |
| NDUFB1. 3   | 2. 72E-05 | 0. 119799 | 0. 762 | 0. 589 | 0. 406628 | Mcy | NDUFB1   |
| HSPA4L. 4   | 2. 74E-05 | -0. 19909 | 0. 007 | 0. 074 | 0. 409604 | Mcy | HSPA4L   |
| TAOK1. 3    | 2. 76E-05 | -0. 17286 | 0. 154 | 0. 262 | 0. 412664 | Mcy | TAOK1    |
| PTPRG. 3    | 2. 76E-05 | -0. 15988 | 0. 007 | 0. 074 | 0. 412849 | Mcy | PTPRG    |
| CTTNBP2. 5  | 2. 79E-05 | -0. 28713 | 0. 051 | 0. 139 | 0. 417233 | Mcy | CTTNBP2  |
| CDC42EP4. 2 | 2. 79E-05 | -0. 29593 | 0. 103 | 0. 203 | 0. 417597 | Mcy | CDC42EP4 |
| C20orf27. 2 | 2. 82E-05 | 0. 11659  | 0. 495 | 0. 357 | 0. 421007 | Mcy | C20orf27 |
| PHACTR2. 4  | 2. 83E-05 | 0. 189309 | 0. 15  | 0. 081 | 0. 422206 | Mcy | PHACTR2  |
| ZNF268. 4   | 2. 83E-05 | -0. 24164 | 0. 037 | 0. 119 | 0. 423301 | Mcy | ZNF268   |
| CHST11. 6   | 2. 83E-05 | 0. 105976 | 0. 33  | 0. 21  | 0. 423382 | Mcy | CHST11   |
| ALG1. 2     | 2. 84E-05 | 0. 176743 | 0. 19  | 0. 111 | 0. 424566 | Mcy | ALG1     |
| ATP5B. 4    | 2. 84E-05 | -0. 1836  | 0. 806 | 0. 775 | 0. 424969 | Mcy | ATP5B    |
| NEO1. 4     | 2. 90E-05 | -0. 16419 | 0. 007 | 0. 074 | 0. 432968 | Mcy | NEO1     |
| GPS1. 3     | 2. 90E-05 | 0. 158254 | 0. 44  | 0. 321 | 0. 433863 | Mcy | GPS1     |
| IGFBP6. 4   | 2. 90E-05 | -0. 24803 | 0. 004 | 0. 067 | 0. 433881 | Mcy | IGFBP6   |
| TYW3        | 2. 91E-05 | 0. 171863 | 0. 223 | 0. 138 | 0. 434597 | Mcy | TYW3     |
| ROCK1. 5    | 2. 91E-05 | 0. 123166 | 0. 425 | 0. 306 | 0. 435594 | Mcy | ROCK1    |
| GRHPR. 3    | 2. 93E-05 | 0. 170655 | 0. 516 | 0. 39  | 0. 437559 | Mcy | GRHPR    |
| PAQR6. 4    | 2. 93E-05 | -0. 19042 | 0. 007 | 0. 074 | 0. 438112 | Mcy | PAQR6    |
| MARC1. 4    | 2. 94E-05 | -0. 13464 | 0      | 0. 06  | 0. 439247 | Mcy | 1-Mar    |
| DRAM1. 3    | 2. 97E-05 | 0. 101671 | 0. 139 | 0. 072 | 0. 443737 | Mcy | DRAM1    |
| SPSB4. 5    | 2. 98E-05 | -0. 1285  | 0      | 0. 06  | 0. 445478 | Mcy | SPSB4    |
| ARHGEF25. 2 | 2. 99E-05 | -0. 18799 | 0. 004 | 0. 067 | 0. 446299 | Mcy | ARHGEF25 |
| ISCA2. 2    | 2. 99E-05 | 0. 160069 | 0. 396 | 0. 279 | 0. 44641  | Mcy | ISCA2    |
| MGME1. 1    | 3. 00E-05 | 0. 118462 | 0. 234 | 0. 145 | 0. 448115 | Mcy | MGME1    |
| ARHGAP12. 3 | 3. 00E-05 | -0. 27649 | 0. 092 | 0. 192 | 0. 448191 | Mcy | ARHGAP12 |
| GPR37L1. 5  | 3. 00E-05 | -0. 33394 | 0. 015 | 0. 086 | 0. 448567 | Mcy | GPR37L1  |
| NUP205. 1   | 3. 01E-05 | 0. 142961 | 0. 121 | 0. 06  | 0. 450123 | Mcy | NUP205   |
| EIF3D. 5    | 3. 02E-05 | 0. 157614 | 0. 619 | 0. 473 | 0. 451672 | Mcy | EIF3D    |
| MCHR1. 4    | 3. 02E-05 | -0. 12352 | 0      | 0. 06  | 0. 451796 | Mcy | MCHR1    |
| LRP4. 3     | 3. 02E-05 | -0. 17342 | 0      | 0. 06  | 0. 451796 | Mcy | LRP4     |
| SBK1. 6     | 3. 03E-05 | -0. 20532 | 0. 007 | 0. 073 | 0. 452118 | Mcy | SBK1     |
| EID2. 5     | 3. 05E-05 | -0. 19578 | 0. 033 | 0. 113 | 0. 456153 | Mcy | EID2     |
| SYNM. 4     | 3. 07E-05 | -0. 14135 | 0. 007 | 0. 073 | 0. 458306 | Mcy | SYNM     |
| TRPM4. 2    | 3. 13E-05 | 0. 164893 | 0. 088 | 0. 039 | 0. 4671   | Mcy | TRPM4    |
| ACTL6B. 5   | 3. 13E-05 | -0. 2822  | 0. 011 | 0. 078 | 0. 467528 | Mcy | ACTL6B   |
| PRSS23. 4   | 3. 16E-05 | -0. 27802 | 0. 011 | 0. 079 | 0. 471627 | Mcy | PRSS23   |
| ADAMTS6. 3  | 3. 18E-05 | -0. 1341  | 0. 004 | 0. 067 | 0. 474656 | Mcy | ADAMTS6  |
| WNK1. 4     | 3. 18E-05 | 0. 120274 | 0. 392 | 0. 276 | 0. 475239 | Mcy | WNK1     |
| DNAJC13. 2  | 3. 19E-05 | 0. 185502 | 0. 136 | 0. 071 | 0. 47628  | Mcy | DNAJC13  |
| PPME1. 4    | 3. 19E-05 | -0. 24702 | 0. 084 | 0. 184 | 0. 476935 | Mcy | PPME1    |
| ATPIF1. 1   | 3. 21E-05 | 0. 120876 | 0. 788 | 0. 619 | 0. 480025 | Mcy | ATPIF1   |
| KLHL35. 5   | 3. 22E-05 | -0. 26667 | 0. 022 | 0. 096 | 0. 480484 | Mcy | KLHL35   |
| GLE1        | 3. 22E-05 | 0. 108043 | 0. 19  | 0. 11  | 0. 481325 | Mcy | GLE1     |
| FAM69B. 4   | 3. 24E-05 | -0. 1144  | 0      | 0. 06  | 0. 484751 | Mcy | FAM69B   |
| TTC28. 4    | 3. 29E-05 | -0. 18416 | 0. 022 | 0. 097 | 0. 492183 | Mcy | TTC28    |
| MSRB1. 2    | 3. 32E-05 | 0. 1929   | 0. 319 | 0. 218 | 0. 495492 | Mcy | MSRB1    |
| MSX1. 4     | 3. 33E-05 | -0. 15394 | 0. 004 | 0. 066 | 0. 496962 | Mcy | MSX1     |
| IFT43. 5    | 3. 33E-05 | -0. 34844 | 0. 154 | 0. 259 | 0. 497411 | Mcy | IFT43    |

|           |          |          |       |       |          |     |               |
|-----------|----------|----------|-------|-------|----------|-----|---------------|
| ZNF253.4  | 3.34E-05 | -0.1887  | 0.015 | 0.085 | 0.498926 | Mcy | ZNF253        |
| WSB1.3    | 3.34E-05 | -0.24516 | 0.63  | 0.652 | 0.49922  | Mcy | WSB1          |
| EFHD1.3   | 3.38E-05 | -0.28818 | 0     | 0.059 | 0.505657 | Mcy | EFHD1         |
| RNF138.1  | 3.40E-05 | 0.12896  | 0.275 | 0.178 | 0.508679 | Mcy | RNF138        |
| HPS3.3    | 3.41E-05 | 0.166242 | 0.227 | 0.14  | 0.509146 | Mcy | HPS3          |
| SIL1.5    | 3.41E-05 | 0.121102 | 0.366 | 0.252 | 0.509222 | Mcy | SIL1          |
| ZNF786.4  | 3.42E-05 | -0.15732 | 0.007 | 0.073 | 0.511552 | Mcy | ZNF786        |
| CSNK2B.2  | 3.43E-05 | 0.11395  | 0.751 | 0.604 | 0.5127   | Mcy | CSNK2B        |
| SLC6A8.3  | 3.44E-05 | -0.23139 | 0.037 | 0.119 | 0.513357 | Mcy | SLC6A8        |
| URGCP.3   | 3.44E-05 | -0.22434 | 0.037 | 0.117 | 0.514663 | Mcy | URGCP         |
| SUMF1.1   | 3.47E-05 | 0.168045 | 0.22  | 0.135 | 0.518129 | Mcy | SUMF1         |
| NKX2-5.4  | 3.47E-05 | -0.22264 | 0.004 | 0.066 | 0.518518 | Mcy | NKX2-5        |
| RPS6KA3.4 | 3.47E-05 | 0.150863 | 0.22  | 0.135 | 0.518537 | Mcy | RPS6KA3       |
| ADSS.2    | 3.47E-05 | 0.153263 | 0.282 | 0.184 | 0.518772 | Mcy | ADSS          |
| KCND3.5   | 3.48E-05 | -0.14017 | 0     | 0.059 | 0.52009  | Mcy | KCND3         |
| ZNF775.5  | 3.49E-05 | -0.1585  | 0.022 | 0.096 | 0.521746 | Mcy | ZNF775        |
| LAMC1.3   | 3.51E-05 | -0.11112 | 0.026 | 0.104 | 0.523942 | Mcy | LAMC1         |
| FLOT1.6   | 3.51E-05 | 0.140045 | 0.656 | 0.499 | 0.524938 | Mcy | FLOT1         |
| NDUFV2.4  | 3.52E-05 | 0.105941 | 0.74  | 0.588 | 0.525858 | Mcy | NDUFV2        |
| CSTB.4    | 3.55E-05 | 0.140114 | 0.85  | 0.686 | 0.530078 | Mcy | CSTB          |
| ARAP3.3   | 3.56E-05 | -0.1453  | 0.004 | 0.066 | 0.532323 | Mcy | ARAP3         |
| C11orf49. | 3.60E-05 | -0.2528  | 0.128 | 0.239 | 0.537373 | Mcy | C11orf49      |
| RP11-563K | 3.60E-05 | -0.16971 | 0.004 | 0.066 | 0.538405 | Mcy | RP11-563K23.1 |
| RAB6A.5   | 3.61E-05 | -0.27031 | 0.289 | 0.396 | 0.538852 | Mcy | RAB6A         |
| HIST1H1E  | 3.61E-05 | 0.183567 | 0.084 | 0.037 | 0.539619 | Mcy | HIST1H1E      |
| HIP1.4    | 3.64E-05 | -0.18408 | 0.07  | 0.17  | 0.544397 | Mcy | HIP1          |
| CAMLG.5   | 3.65E-05 | -0.35366 | 0.414 | 0.496 | 0.545296 | Mcy | CAMLG         |
| B9D1.4    | 3.68E-05 | -0.21359 | 0.026 | 0.102 | 0.549269 | Mcy | B9D1          |
| FAXDC2.3  | 3.68E-05 | -0.18774 | 0     | 0.059 | 0.550194 | Mcy | FAXDC2        |
| DACT3.4   | 3.70E-05 | -0.21313 | 0.011 | 0.078 | 0.553391 | Mcy | DACT3         |
| WIZ.3     | 3.73E-05 | -0.18216 | 0.033 | 0.113 | 0.55759  | Mcy | WIZ           |
| RABL6.4   | 3.74E-05 | 0.211137 | 0.348 | 0.244 | 0.559211 | Mcy | RABL6         |
| ICOSLG.6  | 3.74E-05 | 0.107767 | 0.165 | 0.089 | 0.559603 | Mcy | ICOSLG        |
| GPR161.6  | 3.76E-05 | -0.16424 | 0.015 | 0.085 | 0.561167 | Mcy | GPR161        |
| YME1L1.4  | 3.76E-05 | 0.177396 | 0.366 | 0.258 | 0.561533 | Mcy | YME1L1        |
| ATXN7L3B. | 3.76E-05 | -0.22816 | 0.084 | 0.183 | 0.562101 | Mcy | ATXN7L3B      |
| EMD.1     | 3.77E-05 | 0.173415 | 0.392 | 0.281 | 0.562753 | Mcy | EMD           |
| SAMD14.3  | 3.77E-05 | -0.16457 | 0.004 | 0.066 | 0.563031 | Mcy | SAMD14        |
| DBX2.5    | 3.77E-05 | -0.12713 | 0.004 | 0.066 | 0.563968 | Mcy | DBX2          |
| WDR41.2   | 3.79E-05 | 0.143885 | 0.326 | 0.223 | 0.565668 | Mcy | WDR41         |
| BABAM1.2  | 3.79E-05 | 0.167076 | 0.531 | 0.402 | 0.566377 | Mcy | BABAM1        |
| C21orf59. | 3.80E-05 | -0.32969 | 0.212 | 0.319 | 0.567866 | Mcy | C21orf59      |
| EPDR1.5   | 3.85E-05 | -0.17692 | 0.044 | 0.129 | 0.575885 | Mcy | EPDR1         |
| GMDS.2    | 3.87E-05 | 0.142427 | 0.158 | 0.088 | 0.578794 | Mcy | GMDS          |
| SLC2A10.3 | 3.88E-05 | -0.12517 | 0.004 | 0.065 | 0.580003 | Mcy | SLC2A10       |
| TOE1      | 3.89E-05 | 0.106554 | 0.132 | 0.068 | 0.581519 | Mcy | TOE1          |
| EYA4.4    | 3.89E-05 | -0.104   | 0     | 0.059 | 0.582028 | Mcy | EYA4          |
| SOGA1.5   | 3.91E-05 | -0.14666 | 0.062 | 0.157 | 0.58382  | Mcy | SOGA1         |
| GS1-124K5 | 3.91E-05 | -0.28637 | 0.037 | 0.116 | 0.584335 | Mcy | GS1-124K5.4   |
| METTL10.1 | 3.92E-05 | 0.182334 | 0.183 | 0.107 | 0.586177 | Mcy | METTL10       |
| ATAD3A.2  | 3.93E-05 | 0.123793 | 0.238 | 0.149 | 0.587662 | Mcy | ATAD3A        |

|             |           |           |        |        |               |          |
|-------------|-----------|-----------|--------|--------|---------------|----------|
| VEZT. 4     | 3. 94E-05 | -0. 3238  | 0. 128 | 0. 229 | 0. 588681 Mcy | VEZT     |
| LMO3. 3     | 3. 96E-05 | -0. 26283 | 0. 015 | 0. 084 | 0. 591427 Mcy | LMO3     |
| SPEG. 4     | 3. 96E-05 | -0. 16987 | 0. 007 | 0. 072 | 0. 592094 Mcy | SPEG     |
| LGALS3. 4   | 3. 97E-05 | -0. 59833 | 0. 462 | 0. 481 | 0. 592545 Mcy | LGALS3   |
| PDCL3. 4    | 4. 02E-05 | 0. 156161 | 0. 407 | 0. 291 | 0. 600796 Mcy | PDCL3    |
| BDNF-AS. 5  | 4. 03E-05 | -0. 13475 | 0. 004 | 0. 065 | 0. 602789 Mcy | BDNF-AS  |
| TXN. 4      | 4. 03E-05 | -0. 2788  | 0. 667 | 0. 666 | 0. 602842 Mcy | TXN      |
| CHUK. 1     | 4. 04E-05 | 0. 126162 | 0. 114 | 0. 055 | 0. 604241 Mcy | CHUK     |
| SOX15. 4    | 4. 05E-05 | -0. 22507 | 0. 007 | 0. 072 | 0. 605267 Mcy | SOX15    |
| SIX1. 4     | 4. 06E-05 | -0. 15541 | 0      | 0. 058 | 0. 607098 Mcy | SIX1     |
| PPA1. 4     | 4. 07E-05 | 0. 116057 | 0. 667 | 0. 525 | 0. 608882 Mcy | PPA1     |
| UPK3A. 2    | 4. 09E-05 | 0. 130163 | 0. 029 | 0. 007 | 0. 611356 Mcy | UPK3A    |
| CHST3. 4    | 4. 09E-05 | -0. 10636 | 0. 004 | 0. 065 | 0. 61152 Mcy  | CHST3    |
| POLR2L. 3   | 4. 11E-05 | 0. 132008 | 0. 883 | 0. 683 | 0. 614517 Mcy | POLR2L   |
| XKR4. 4     | 4. 12E-05 | -0. 17286 | 0      | 0. 058 | 0. 61569 Mcy  | XKR4     |
| DLX6. 6     | 4. 12E-05 | -0. 22407 | 0      | 0. 058 | 0. 61569 Mcy  | DLX6     |
| ABHD17C. 3  | 4. 16E-05 | -0. 11349 | 0. 015 | 0. 085 | 0. 621387 Mcy | ABHD17C  |
| RCN1. 6     | 4. 17E-05 | -0. 3524  | 0. 271 | 0. 356 | 0. 62258 Mcy  | RCN1     |
| LYRM9. 5    | 4. 17E-05 | -0. 14495 | 0. 077 | 0. 175 | 0. 622644 Mcy | LYRM9    |
| EN1. 3      | 4. 18E-05 | -0. 16564 | 0. 004 | 0. 065 | 0. 624281 Mcy | EN1      |
| DCAF6. 4    | 4. 20E-05 | 0. 108121 | 0. 26  | 0. 164 | 0. 627546 Mcy | DCAF6    |
| KHSRP. 5    | 4. 22E-05 | 0. 28658  | 0. 333 | 0. 236 | 0. 630031 Mcy | KHSRP    |
| MYO19       | 4. 24E-05 | 0. 115231 | 0. 147 | 0. 079 | 0. 633582 Mcy | MYO19    |
| KLHL42. 5   | 4. 27E-05 | -0. 2284  | 0. 07  | 0. 161 | 0. 638668 Mcy | KLHL42   |
| ZNF605      | 4. 28E-05 | -0. 22004 | 0. 011 | 0. 078 | 0. 639561 Mcy | ZNF605   |
| BTBD3. 5    | 4. 29E-05 | -0. 17577 | 0. 051 | 0. 139 | 0. 641149 Mcy | BTBD3    |
| NHP2. 4     | 4. 30E-05 | 0. 110376 | 0. 74  | 0. 576 | 0. 642018 Mcy | NHP2     |
| SFRP4. 2    | 4. 30E-05 | -0. 25043 | 0      | 0. 058 | 0. 6422 Mcy   | SFRP4    |
| INSR. 4     | 4. 33E-05 | -0. 25584 | 0. 059 | 0. 147 | 0. 647289 Mcy | INSR     |
| ADAM22. 5   | 4. 35E-05 | -0. 18238 | 0. 004 | 0. 064 | 0. 65037 Mcy  | ADAM22   |
| ZNF300. 5   | 4. 37E-05 | -0. 18178 | 0. 007 | 0. 071 | 0. 652718 Mcy | ZNF300   |
| BAMBI. 4    | 4. 38E-05 | -0. 16815 | 0. 007 | 0. 071 | 0. 654067 Mcy | BAMBI    |
| DLG5. 3     | 4. 39E-05 | -0. 16069 | 0. 011 | 0. 078 | 0. 655582 Mcy | DLG5     |
| TMTC4. 5    | 4. 39E-05 | -0. 22413 | 0. 026 | 0. 1   | 0. 656529 Mcy | TMTC4    |
| GMEB1       | 4. 39E-05 | 0. 125554 | 0. 168 | 0. 094 | 0. 656722 Mcy | GMEB1    |
| CDC27. 3    | 4. 40E-05 | 0. 231079 | 0. 245 | 0. 161 | 0. 65765 Mcy  | CDC27    |
| FAT3. 4     | 4. 42E-05 | -0. 12832 | 0      | 0. 058 | 0. 660499 Mcy | FAT3     |
| SYNRG. 4    | 4. 44E-05 | -0. 2489  | 0. 092 | 0. 191 | 0. 662904 Mcy | SYNRG    |
| ELK3. 3     | 4. 45E-05 | 0. 110178 | 0. 158 | 0. 087 | 0. 664757 Mcy | ELK3     |
| PPP1R14A. 4 | 4. 46E-05 | -0. 49096 | 0. 033 | 0. 109 | 0. 665923 Mcy | PPP1R14A |
| YJEFN3. 4   | 4. 47E-05 | -0. 14901 | 0. 004 | 0. 064 | 0. 668284 Mcy | YJEFN3   |
| TMEM178B. 4 | 4. 48E-05 | -0. 14805 | 0      | 0. 058 | 0. 669842 Mcy | TMEM178B |
| PHTF2. 2    | 4. 52E-05 | 0. 175386 | 0. 161 | 0. 09  | 0. 675852 Mcy | PHTF2    |
| DUOX1. 6    | 4. 52E-05 | -0. 16423 | 0. 004 | 0. 065 | 0. 67613 Mcy  | DUOX1    |
| GPR155. 5   | 4. 53E-05 | -0. 25227 | 0. 092 | 0. 189 | 0. 677512 Mcy | GPR155   |
| SPATA20. 3  | 4. 54E-05 | 0. 100052 | 0. 216 | 0. 129 | 0. 679148 Mcy | SPATA20  |
| NDRG3. 5    | 4. 54E-05 | -0. 24216 | 0. 084 | 0. 18  | 0. 679199 Mcy | NDRG3    |
| C1QTNF4. 4  | 4. 55E-05 | -0. 18148 | 0      | 0. 058 | 0. 679317 Mcy | C1QTNF4  |
| GPX7. 2     | 4. 55E-05 | 0. 146966 | 0. 264 | 0. 175 | 0. 680011 Mcy | GPX7     |
| FER. 2      | 4. 56E-05 | -0. 16245 | 0. 022 | 0. 095 | 0. 68192 Mcy  | FER      |
| NXPH4. 4    | 4. 57E-05 | -0. 20567 | 0. 004 | 0. 064 | 0. 68321 Mcy  | NXPH4    |

|            |           |           |        |        |               |                |
|------------|-----------|-----------|--------|--------|---------------|----------------|
| AKTIP. 5   | 4. 62E-05 | -0. 27725 | 0. 077 | 0. 17  | 0. 689748 Mcy | AKTIP          |
| AK4. 5     | 4. 62E-05 | -0. 29565 | 0. 088 | 0. 181 | 0. 690472 Mcy | AK4            |
| CLDND1. 4  | 4. 64E-05 | -0. 45658 | 0. 293 | 0. 396 | 0. 693189 Mcy | CLDND1         |
| ZNF260. 3  | 4. 66E-05 | -0. 17199 | 0. 026 | 0. 101 | 0. 695897 Mcy | ZNF260         |
| HSD17B1. 3 | 4. 74E-05 | -0. 11552 | 0      | 0. 057 | 0. 708545 Mcy | HSD17B1        |
| LRRN2. 1   | 4. 74E-05 | -0. 11639 | 0      | 0. 057 | 0. 708545 Mcy | LRRN2          |
| AMPD2. 5   | 4. 74E-05 | 0. 113858 | 0. 242 | 0. 15  | 0. 708915 Mcy | AMPD2          |
| NNMT. 4    | 4. 77E-05 | -0. 22922 | 0. 07  | 0. 16  | 0. 712549 Mcy | NNMT           |
| FAM110B. 4 | 4. 78E-05 | -0. 25466 | 0. 092 | 0. 189 | 0. 715021 Mcy | FAM110B        |
| ZNF883. 5  | 4. 80E-05 | -0. 19391 | 0. 055 | 0. 143 | 0. 717899 Mcy | ZNF883         |
| GATS. 3    | 4. 85E-05 | -0. 18036 | 0. 004 | 0. 064 | 0. 724199 Mcy | GATS           |
| LIAS. 1    | 4. 85E-05 | 0. 120577 | 0. 176 | 0. 101 | 0. 724699 Mcy | LIAS           |
| ASNA1. 4   | 4. 86E-05 | 0. 12128  | 0. 678 | 0. 516 | 0. 726628 Mcy | ASNA1          |
| PPM1K. 2   | 4. 86E-05 | -0. 28218 | 0. 125 | 0. 227 | 0. 72693 Mcy  | PPM1K          |
| RP11-192H  | 4. 90E-05 | -0. 20271 | 0. 037 | 0. 116 | 0. 73192 Mcy  | RP11-192H23. 6 |
| POLE       | 4. 92E-05 | 0. 16077  | 0. 066 | 0. 026 | 0. 735371 Mcy | POLE           |
| MEX3B. 4   | 4. 93E-05 | -0. 17737 | 0. 004 | 0. 064 | 0. 736315 Mcy | MEX3B          |
| LNX1. 3    | 5. 00E-05 | -0. 20203 | 0. 007 | 0. 07  | 0. 746494 Mcy | LNX1           |
| TOM1L2. 3  | 5. 03E-05 | -0. 21261 | 0. 04  | 0. 122 | 0. 750975 Mcy | TOM1L2         |
| DNASE1. 3  | 5. 03E-05 | -0. 18201 | 0. 015 | 0. 083 | 0. 752187 Mcy | DNASE1         |
| DNAJB6     | 5. 05E-05 | -0. 19757 | 0. 703 | 0. 709 | 0. 754437 Mcy | DNAJB6         |
| TRPM3. 5   | 5. 06E-05 | -0. 14601 | 0. 007 | 0. 071 | 0. 756335 Mcy | TRPM3          |
| IFT122     | 5. 07E-05 | 0. 190082 | 0. 11  | 0. 054 | 0. 757358 Mcy | IFT122         |
| DTX3L. 1   | 5. 09E-05 | 0. 153184 | 0. 143 | 0. 078 | 0. 760667 Mcy | DTX3L          |
| HSDL2      | 5. 10E-05 | 0. 132574 | 0. 245 | 0. 158 | 0. 761529 Mcy | HSDL2          |
| TSPAN33. 5 | 5. 15E-05 | 0. 144224 | 0. 092 | 0. 041 | 0. 769839 Mcy | TSPAN33        |
| PIGP       | 5. 17E-05 | 0. 110615 | 0. 337 | 0. 227 | 0. 771897 Mcy | PIGP           |
| STRADB. 3  | 5. 19E-05 | -0. 27134 | 0. 125 | 0. 222 | 0. 774899 Mcy | STRADB         |
| ING4. 4    | 5. 21E-05 | -0. 28149 | 0. 161 | 0. 269 | 0. 779147 Mcy | ING4           |
| LONP2. 4   | 5. 22E-05 | -0. 30352 | 0. 147 | 0. 25  | 0. 780398 Mcy | LONP2          |
| RP11-448A  | 5. 24E-05 | -0. 2028  | 0. 022 | 0. 094 | 0. 783406 Mcy | RP11-448A19. 1 |
| NCAN. 4    | 5. 25E-05 | -0. 24539 | 0. 015 | 0. 082 | 0. 785057 Mcy | NCAN           |
| SECISBP2L  | 5. 27E-05 | -0. 2243  | 0. 081 | 0. 176 | 0. 788099 Mcy | SECISBP2L      |
| BLCAP. 3   | 5. 33E-05 | -0. 34528 | 0. 194 | 0. 292 | 0. 797212 Mcy | BLCAP          |
| HCG18. 3   | 5. 35E-05 | -0. 18626 | 0. 037 | 0. 114 | 0. 799562 Mcy | HCG18          |
| HINT1. 3   | 5. 40E-05 | -0. 12391 | 0. 908 | 0. 826 | 0. 807524 Mcy | HINT1          |
| PRPSAP2. 3 | 5. 42E-05 | -0. 28452 | 0. 165 | 0. 269 | 0. 80989 Mcy  | PRPSAP2        |
| PQLC1. 4   | 5. 43E-05 | 0. 147904 | 0. 212 | 0. 132 | 0. 811194 Mcy | PQLC1          |
| USP6NL. 2  | 5. 52E-05 | 0. 194843 | 0. 147 | 0. 081 | 0. 825208 Mcy | USP6NL         |
| PSMG3. 5   | 5. 57E-05 | 0. 202454 | 0. 436 | 0. 324 | 0. 833001 Mcy | PSMG3          |
| RAB33A. 4  | 5. 58E-05 | -0. 30936 | 0. 033 | 0. 108 | 0. 833755 Mcy | RAB33A         |
| INTS8      | 5. 63E-05 | 0. 149654 | 0. 161 | 0. 089 | 0. 841065 Mcy | INTS8          |
| ARF3. 4    | 5. 68E-05 | 0. 146301 | 0. 495 | 0. 375 | 0. 849425 Mcy | ARF3           |
| PPP1R35. 6 | 5. 69E-05 | -0. 22068 | 0. 07  | 0. 159 | 0. 850225 Mcy | PPP1R35        |
| CREB3L1. 3 | 5. 74E-05 | -0. 11127 | 0. 004 | 0. 063 | 0. 857815 Mcy | CREB3L1        |
| USP46. 6   | 5. 77E-05 | -0. 22552 | 0. 055 | 0. 139 | 0. 862157 Mcy | USP46          |
| MAPK11. 3  | 5. 77E-05 | -0. 1055  | 0      | 0. 056 | 0. 862341 Mcy | MAPK11         |
| MFAP3L. 4  | 5. 77E-05 | -0. 13452 | 0      | 0. 056 | 0. 862341 Mcy | MFAP3L         |
| SH3YL1. 5  | 5. 79E-05 | -0. 26893 | 0. 088 | 0. 184 | 0. 864814 Mcy | SH3YL1         |
| CTC-444N2  | 5. 79E-05 | -0. 18977 | 0. 051 | 0. 137 | 0. 865665 Mcy | CTC-444N24. 11 |
| DDX41. 2   | 5. 81E-05 | 0. 110347 | 0. 344 | 0. 24  | 0. 868723 Mcy | DDX41          |

|             |           |           |        |        |           |     |                 |
|-------------|-----------|-----------|--------|--------|-----------|-----|-----------------|
| DSCAM. 3    | 5. 87E-05 | -0. 1922  | 0. 011 | 0. 076 | 0. 877888 | Mcy | DSCAM           |
| MDH1. 3     | 5. 88E-05 | 0. 146949 | 0. 689 | 0. 547 | 0. 878036 | Mcy | MDH1            |
| HILPDA. 5   | 5. 90E-05 | -0. 49413 | 0. 132 | 0. 229 | 0. 881065 | Mcy | HILPDA          |
| RIOK1. 1    | 5. 91E-05 | 0. 128158 | 0. 245 | 0. 154 | 0. 88359  | Mcy | RIOK1           |
| TOX3. 5     | 5. 92E-05 | -0. 23751 | 0. 007 | 0. 069 | 0. 884919 | Mcy | TOX3            |
| CHST8. 5    | 5. 98E-05 | -0. 14548 | 0. 007 | 0. 069 | 0. 892921 | Mcy | CHST8           |
| DDX50. 1    | 5. 98E-05 | 0. 131026 | 0. 245 | 0. 157 | 0. 894251 | Mcy | DDX50           |
| PLL. 5      | 6. 01E-05 | -0. 29847 | 0. 007 | 0. 069 | 0. 898237 | Mcy | PLL             |
| FUBP1. 5    | 6. 03E-05 | 0. 105199 | 0. 333 | 0. 222 | 0. 900907 | Mcy | FUBP1           |
| NHSL1. 2    | 6. 05E-05 | -0. 18072 | 0. 029 | 0. 105 | 0. 90375  | Mcy | NHSL1           |
| ZFR. 4      | 6. 07E-05 | -0. 2804  | 0. 205 | 0. 308 | 0. 906835 | Mcy | ZFR             |
| SETBP1. 4   | 6. 07E-05 | -0. 15385 | 0. 011 | 0. 076 | 0. 907433 | Mcy | SETBP1          |
| DBR1. 1     | 6. 07E-05 | 0. 136769 | 0. 143 | 0. 077 | 0. 90766  | Mcy | DBR1            |
| ZNF814. 3   | 6. 08E-05 | -0. 23943 | 0. 044 | 0. 124 | 0. 908818 | Mcy | ZNF814          |
| RNF130. 6   | 6. 09E-05 | 0. 154529 | 0. 619 | 0. 459 | 0. 909909 | Mcy | RNF130          |
| STK39. 4    | 6. 20E-05 | -0. 16677 | 0. 029 | 0. 103 | 0. 925871 | Mcy | STK39           |
| MEGF8. 1    | 6. 25E-05 | -0. 17004 | 0. 018 | 0. 087 | 0. 933934 | Mcy | MEGF8           |
| PES1. 4     | 6. 30E-05 | 0. 206141 | 0. 278 | 0. 19  | 0. 941504 | Mcy | PES1            |
| HNRNPH3. 5  | 6. 32E-05 | 0. 181099 | 0. 571 | 0. 442 | 0. 944369 | Mcy | HNRNPH3         |
| ACO07405. 6 | 6. 32E-05 | -0. 13636 | 0. 007 | 0. 069 | 0. 94445  | Mcy | ACO07405. 6     |
| KAT7. 3     | 6. 37E-05 | -0. 23138 | 0. 062 | 0. 149 | 0. 95199  | Mcy | KAT7            |
| DDX46. 2    | 6. 40E-05 | 0. 180441 | 0. 579 | 0. 443 | 0. 957149 | Mcy | DDX46           |
| DKC1. 2     | 6. 43E-05 | 0. 121286 | 0. 37  | 0. 263 | 0. 961583 | Mcy | DKC1            |
| ARMCX2. 5   | 6. 45E-05 | -0. 28196 | 0. 062 | 0. 148 | 0. 964358 | Mcy | ARMCX2          |
| ABCB8. 2    | 6. 48E-05 | 0. 167732 | 0. 223 | 0. 139 | 0. 96784  | Mcy | ABCB8           |
| NDUFA5. 4   | 6. 49E-05 | -0. 28796 | 0. 535 | 0. 578 | 0. 970108 | Mcy | NDUFA5          |
| IRF2BPL. 5  | 6. 53E-05 | -0. 12148 | 0. 136 | 0. 244 | 0. 976335 | Mcy | IRF2BPL         |
| PTBP2. 4    | 6. 54E-05 | -0. 2397  | 0. 033 | 0. 107 | 0. 97719  | Mcy | PTBP2           |
| RASL11B. 5  | 6. 55E-05 | -0. 23923 | 0      | 0. 055 | 0. 978283 | Mcy | RASL11B         |
| CPQ. 4      | 6. 60E-05 | 0. 131166 | 0. 275 | 0. 175 | 0. 98633  | Mcy | CPQ             |
| FXYP7. 5    | 6. 69E-05 | -0. 30654 | 0. 015 | 0. 079 | 0. 999298 | Mcy | FXYP7           |
| TRAF7. 3    | 6. 69E-05 | 0. 155016 | 0. 278 | 0. 187 | 0. 99944  | Mcy | TRAF7           |
| ST3GAL5. 3  | 6. 71E-05 | -0. 29289 | 0. 099 | 0. 193 | 1         | Mcy | ST3GAL5         |
| SLC16A2. 3  | 6. 73E-05 | -0. 11321 | 0      | 0. 055 | 1         | Mcy | SLC16A2         |
| EIF2B3. 1   | 6. 73E-05 | 0. 111155 | 0. 264 | 0. 171 | 1         | Mcy | EIF2B3          |
| SRRM1. 2    | 6. 73E-05 | 0. 119713 | 0. 641 | 0. 514 | 1         | Mcy | SRRM1           |
| RP11-277F   | 6. 75E-05 | -0. 19444 | 0. 007 | 0. 069 | 1         | Mcy | RP11-277P12. 20 |
| PPP1R16A. 6 | 6. 75E-05 | -0. 23645 | 0. 081 | 0. 171 | 1         | Mcy | PPP1R16A        |
| SOWAHC. 2   | 6. 76E-05 | -0. 12037 | 0. 007 | 0. 069 | 1         | Mcy | SOWAHC          |
| GNAZ. 4     | 6. 81E-05 | -0. 16651 | 0. 004 | 0. 062 | 1         | Mcy | GNAZ            |
| SEH1L. 2    | 6. 84E-05 | 0. 215877 | 0. 194 | 0. 118 | 1         | Mcy | SEH1L           |
| ZNF626. 3   | 6. 84E-05 | -0. 22257 | 0. 059 | 0. 145 | 1         | Mcy | ZNF626          |
| MARK1. 3    | 6. 85E-05 | -0. 10588 | 0. 007 | 0. 069 | 1         | Mcy | MARK1           |
| FAM134A. 6  | 6. 86E-05 | -0. 26404 | 0. 194 | 0. 301 | 1         | Mcy | FAM134A         |
| TMEFF2. 6   | 6. 86E-05 | -0. 2594  | 0. 015 | 0. 079 | 1         | Mcy | TMEFF2          |
| IGSF11. 4   | 6. 86E-05 | -0. 14268 | 0. 007 | 0. 069 | 1         | Mcy | IGSF11          |
| SEPP1. 3    | 6. 86E-05 | -0. 59257 | 0. 242 | 0. 331 | 1         | Mcy | SEPP1           |
| SLC18B1. 4  | 6. 94E-05 | -0. 30848 | 0. 088 | 0. 181 | 1         | Mcy | SLC18B1         |
| KCNH2. 4    | 6. 94E-05 | -0. 20037 | 0. 007 | 0. 068 | 1         | Mcy | KCNH2           |
| YIPF3. 5    | 6. 97E-05 | -0. 31669 | 0. 41  | 0. 485 | 1         | Mcy | YIPF3           |
| ZDHHC15. 4  | 7. 03E-05 | -0. 12485 | 0. 004 | 0. 062 | 1         | Mcy | ZDHHC15         |

|           |          |          |       |       |       |           |
|-----------|----------|----------|-------|-------|-------|-----------|
| PPP1R14C. | 7.04E-05 | -0.12351 | 0.004 | 0.062 | 1 Mcy | PPP1R14C  |
| DHRS11.5  | 7.08E-05 | -0.12916 | 0.029 | 0.104 | 1 Mcy | DHRS11    |
| VPS37D.4  | 7.13E-05 | -0.15602 | 0.004 | 0.061 | 1 Mcy | VPS37D    |
| JMY.3     | 7.16E-05 | -0.17062 | 0.029 | 0.103 | 1 Mcy | JMY       |
| LMNA.2    | 7.17E-05 | 0.173314 | 0.516 | 0.413 | 1 Mcy | LMNA      |
| ZSCAN9.1  | 7.18E-05 | -0.19358 | 0.015 | 0.08  | 1 Mcy | ZSCAN9    |
| NAA50.1   | 7.19E-05 | 0.134669 | 0.374 | 0.269 | 1 Mcy | NAA50     |
| IFT52.3   | 7.24E-05 | -0.27405 | 0.154 | 0.259 | 1 Mcy | IFT52     |
| DIXDC1.5  | 7.25E-05 | -0.20714 | 0.026 | 0.097 | 1 Mcy | DIXDC1    |
| KLHDC9.4  | 7.25E-05 | -0.15533 | 0.011 | 0.075 | 1 Mcy | KLHDC9    |
| RPS6KL1.5 | 7.27E-05 | -0.21542 | 0.029 | 0.102 | 1 Mcy | RPS6KL1   |
| SRRT.3    | 7.28E-05 | 0.147023 | 0.315 | 0.214 | 1 Mcy | SRRT      |
| LRIF1.3   | 7.31E-05 | -0.23123 | 0.103 | 0.199 | 1 Mcy | LRIF1     |
| PSMD14.3  | 7.32E-05 | 0.128664 | 0.59  | 0.464 | 1 Mcy | PSMD14    |
| MPP6.4    | 7.33E-05 | -0.14225 | 0.011 | 0.074 | 1 Mcy | MPP6      |
| GKAP1.5   | 7.39E-05 | -0.18951 | 0.022 | 0.091 | 1 Mcy | GKAP1     |
| GAB1.4    | 7.39E-05 | -0.19042 | 0.029 | 0.103 | 1 Mcy | GAB1      |
| SLC22A23. | 7.40E-05 | -0.1523  | 0.007 | 0.068 | 1 Mcy | SLC22A23  |
| NSMF.2    | 7.41E-05 | -0.16825 | 0.04  | 0.118 | 1 Mcy | NSMF      |
| SAMD4A.1  | 7.42E-05 | -0.13726 | 0.018 | 0.087 | 1 Mcy | SAMD4A    |
| USE1.6    | 7.44E-05 | -0.38256 | 0.231 | 0.332 | 1 Mcy | USE1      |
| EIF3J-AS1 | 7.46E-05 | -0.25295 | 0.048 | 0.129 | 1 Mcy | EIF3J-AS1 |
| NRSN1.4   | 7.46E-05 | -0.16713 | 0.004 | 0.061 | 1 Mcy | NRSN1     |
| ZFP14.4   | 7.46E-05 | -0.23031 | 0.037 | 0.113 | 1 Mcy | ZFP14     |
| PLCD3.2   | 7.52E-05 | -0.10633 | 0.007 | 0.068 | 1 Mcy | PLCD3     |
| NAT9.4    | 7.56E-05 | -0.28728 | 0.11  | 0.205 | 1 Mcy | NAT9      |
| TGFB2.5   | 7.57E-05 | -0.16556 | 0.007 | 0.068 | 1 Mcy | TGFB2     |
| KIF5B.3   | 7.58E-05 | 0.184356 | 0.656 | 0.508 | 1 Mcy | KIF5B     |
| EPOR.3    | 7.58E-05 | 0.128695 | 0.128 | 0.068 | 1 Mcy | EPOR      |
| ZNF426.3  | 7.62E-05 | -0.19013 | 0.037 | 0.114 | 1 Mcy | ZNF426    |
| SP110.4   | 7.63E-05 | 0.155795 | 0.3   | 0.195 | 1 Mcy | SP110     |
| KLHL20.2  | 7.63E-05 | -0.25916 | 0.059 | 0.141 | 1 Mcy | KLHL20    |
| MOXD1.4   | 7.64E-05 | -0.13949 | 0     | 0.054 | 1 Mcy | MOXD1     |
| GFOD2.3   | 7.66E-05 | -0.21474 | 0.051 | 0.134 | 1 Mcy | GFOD2     |
| HPCA.4    | 7.66E-05 | -0.19973 | 0.004 | 0.061 | 1 Mcy | HPCA      |
| PI4K2B.2  | 7.67E-05 | 0.156373 | 0.15  | 0.085 | 1 Mcy | PI4K2B    |
| SERPINI1. | 7.74E-05 | -0.19654 | 0     | 0.054 | 1 Mcy | SERPINI1  |
| ALDOA.4   | 7.77E-05 | -0.14569 | 0.916 | 0.844 | 1 Mcy | ALDOA     |
| CYP3A5.3  | 7.87E-05 | -0.15328 | 0.004 | 0.061 | 1 Mcy | CYP3A5    |
| CREBZF.5  | 7.87E-05 | -0.21686 | 0.051 | 0.133 | 1 Mcy | CREBZF    |
| OSMR.4    | 7.91E-05 | -0.14841 | 0.018 | 0.087 | 1 Mcy | OSMR      |
| NTRK3.3   | 7.93E-05 | -0.17125 | 0.007 | 0.067 | 1 Mcy | NTRK3     |
| ATG5.1    | 7.94E-05 | 0.10431  | 0.304 | 0.206 | 1 Mcy | ATG5      |
| EXOSC2.2  | 7.96E-05 | 0.125538 | 0.161 | 0.092 | 1 Mcy | EXOSC2    |
| HDAC9.4   | 7.97E-05 | -0.2531  | 0.048 | 0.127 | 1 Mcy | HDAC9     |
| MGP.5     | 7.97E-05 | -0.72004 | 0.033 | 0.105 | 1 Mcy | MGP       |
| VAT1.2    | 7.99E-05 | -0.22989 | 0.106 | 0.204 | 1 Mcy | VAT1      |
| TTYH2.5   | 7.99E-05 | -0.26866 | 0.04  | 0.117 | 1 Mcy | TTYH2     |
| AIP.1     | 7.99E-05 | 0.163442 | 0.41  | 0.301 | 1 Mcy | AIP       |
| DZIP3.4   | 8.09E-05 | -0.23787 | 0.051 | 0.133 | 1 Mcy | DZIP3     |
| PCDH1.4   | 8.11E-05 | -0.13285 | 0.004 | 0.061 | 1 Mcy | PCDH1     |



|            |          |          |       |       |       |               |
|------------|----------|----------|-------|-------|-------|---------------|
| CCDC112.5  | 8.17E-05 | -0.25654 | 0.161 | 0.263 | 1 Mcy | CCDC112       |
| CCAR1.2    | 8.18E-05 | 0.132766 | 0.352 | 0.247 | 1 Mcy | CCAR1         |
| IL32.4     | 8.27E-05 | -0.32874 | 0.029 | 0.102 | 1 Mcy | IL32          |
| DHFRL1.3   | 8.28E-05 | -0.16927 | 0.007 | 0.067 | 1 Mcy | DHFRL1        |
| KLHDC2.5   | 8.32E-05 | -0.26342 | 0.205 | 0.304 | 1 Mcy | KLHDC2        |
| ETV4.5     | 8.32E-05 | -0.14588 | 0.015 | 0.08  | 1 Mcy | ETV4          |
| XRCC6BP1.8 | 8.37E-05 | 0.104606 | 0.147 | 0.078 | 1 Mcy | XRCC6BP1      |
| ZBED3.4    | 8.39E-05 | -0.18095 | 0.022 | 0.09  | 1 Mcy | ZBED3         |
| GLRB.4     | 8.41E-05 | -0.13446 | 0.004 | 0.061 | 1 Mcy | GLRB          |
| SLC35D2.2  | 8.44E-05 | -0.15068 | 0.029 | 0.103 | 1 Mcy | SLC35D2       |
| NOL4.4     | 8.50E-05 | -0.17153 | 0.007 | 0.067 | 1 Mcy | NOL4          |
| PPP1R9A.5  | 8.51E-05 | -0.2143  | 0.011 | 0.073 | 1 Mcy | PPP1R9A       |
| CYHR1.5    | 8.52E-05 | -0.28304 | 0.176 | 0.281 | 1 Mcy | CYHR1         |
| HAS2.3     | 8.54E-05 | -0.16484 | 0     | 0.054 | 1 Mcy | HAS2          |
| FAM63B.3   | 8.55E-05 | -0.22859 | 0.11  | 0.207 | 1 Mcy | FAM63B        |
| FILIP1L.6  | 8.58E-05 | 0.110466 | 0.238 | 0.147 | 1 Mcy | FILIP1L       |
| SMIM3.4    | 8.65E-05 | 0.100012 | 0.081 | 0.035 | 1 Mcy | SMIM3         |
| GAL3ST3.4  | 8.66E-05 | -0.12795 | 0.004 | 0.061 | 1 Mcy | GAL3ST3       |
| CALCOCO1.8 | 8.67E-05 | -0.19996 | 0.062 | 0.149 | 1 Mcy | CALCOCO1      |
| NDUFA7.4   | 8.69E-05 | 0.108586 | 0.092 | 0.042 | 1 Mcy | NDUFA7        |
| DCHS1.5    | 8.75E-05 | -0.12896 | 0.018 | 0.086 | 1 Mcy | DCHS1         |
| B3GNT2.5   | 8.79E-05 | 0.114627 | 0.125 | 0.065 | 1 Mcy | B3GNT2        |
| GRAMD3.6   | 8.81E-05 | -0.27289 | 0.059 | 0.142 | 1 Mcy | GRAMD3        |
| DHCR24.3   | 8.86E-05 | -0.14411 | 0.026 | 0.097 | 1 Mcy | DHCR24        |
| TEAD4.3    | 8.91E-05 | -0.10247 | 0     | 0.053 | 1 Mcy | TEAD4         |
| TMED4.5    | 8.94E-05 | -0.19756 | 0.348 | 0.44  | 1 Mcy | TMED4         |
| RP11-379H  | 9.03E-05 | -0.1394  | 0.011 | 0.073 | 1 Mcy | RP11-379H18.1 |
| SERPINH1.9 | 9.04E-05 | -0.28405 | 0.117 | 0.211 | 1 Mcy | SERPINH1      |
| MALT1.6    | 9.06E-05 | 0.121636 | 0.136 | 0.073 | 1 Mcy | MALT1         |
| C4orf48.4  | 9.09E-05 | -0.24759 | 0.524 | 0.526 | 1 Mcy | C4orf48       |
| HDDC3.1    | 9.10E-05 | 0.124725 | 0.231 | 0.147 | 1 Mcy | HDDC3         |
| GSG1L.3    | 9.14E-05 | -0.18691 | 0.004 | 0.06  | 1 Mcy | GSG1L         |
| PRKAA2.5   | 9.16E-05 | -0.12272 | 0     | 0.053 | 1 Mcy | PRKAA2        |
| BTBD17.5   | 9.16E-05 | -0.18672 | 0     | 0.053 | 1 Mcy | BTBD17        |
| SHROOM2.5  | 9.25E-05 | -0.13247 | 0.004 | 0.06  | 1 Mcy | SHROOM2       |
| TENM1.4    | 9.25E-05 | -0.14666 | 0.011 | 0.073 | 1 Mcy | TENM1         |
| RPE        | 9.26E-05 | 0.10934  | 0.242 | 0.156 | 1 Mcy | RPE           |
| ZCCHC24.4  | 9.27E-05 | -0.23395 | 0.029 | 0.101 | 1 Mcy | ZCCHC24       |
| P2RY11.4   | 9.30E-05 | 0.142522 | 0.154 | 0.085 | 1 Mcy | P2RY11        |
| CDK11B.1   | 9.33E-05 | 0.140534 | 0.223 | 0.141 | 1 Mcy | CDK11B        |
| LRRC49.2   | 9.35E-05 | -0.15133 | 0.004 | 0.06  | 1 Mcy | LRRC49        |
| TMEM53.4   | 9.36E-05 | -0.21893 | 0.033 | 0.106 | 1 Mcy | TMEM53        |
| AES.5      | 9.45E-05 | -0.32104 | 0.337 | 0.412 | 1 Mcy | AES           |
| CRTC2.2    | 9.45E-05 | 0.108006 | 0.136 | 0.073 | 1 Mcy | CRTC2         |
| HNRNPD.5   | 9.45E-05 | 0.194479 | 0.531 | 0.412 | 1 Mcy | HNRNPD        |
| USP1.5     | 9.47E-05 | 0.174735 | 0.359 | 0.256 | 1 Mcy | USP1          |
| HIST1H2BK  | 9.49E-05 | -0.25936 | 0.114 | 0.21  | 1 Mcy | HIST1H2BK     |
| MAFG-AS1.9 | 9.50E-05 | -0.10331 | 0.007 | 0.067 | 1 Mcy | MAFG-AS1      |
| CLTA.4     | 9.52E-05 | 0.151914 | 0.744 | 0.625 | 1 Mcy | CLTA          |
| LRRTM3.4   | 9.55E-05 | -0.10507 | 0     | 0.053 | 1 Mcy | LRRTM3        |
| EDARADD.2  | 9.59E-05 | 0.153938 | 0.066 | 0.027 | 1 Mcy | EDARADD       |

|            |           |           |        |        |       |                |
|------------|-----------|-----------|--------|--------|-------|----------------|
| UHMK1. 2   | 9. 64E-05 | 0. 116968 | 0. 297 | 0. 201 | 1 Mcy | UHMK1          |
| ERAP1. 1   | 9. 68E-05 | 0. 101611 | 0. 121 | 0. 062 | 1 Mcy | ERAP1          |
| GNB5. 4    | 9. 71E-05 | -0. 17851 | 0. 037 | 0. 112 | 1 Mcy | GNB5           |
| TSPYL2. 2  | 9. 75E-05 | -0. 27541 | 0. 04  | 0. 115 | 1 Mcy | TSPYL2         |
| IRF7. 6    | 9. 75E-05 | 0. 173847 | 0. 245 | 0. 159 | 1 Mcy | IRF7           |
| NR2C2AP. 5 | 9. 78E-05 | 0. 118471 | 0. 249 | 0. 164 | 1 Mcy | NR2C2AP        |
| RBM8A. 2   | 9. 79E-05 | 0. 110619 | 0. 74  | 0. 61  | 1 Mcy | RBM8A          |
| IFRD1. 5   | 9. 80E-05 | -0. 34277 | 0. 418 | 0. 489 | 1 Mcy | IFRD1          |
| SMO. 4     | 9. 82E-05 | -0. 10814 | 0      | 0. 053 | 1 Mcy | SMO            |
| SF3A1. 2   | 9. 84E-05 | 0. 287488 | 0. 256 | 0. 172 | 1 Mcy | SF3A1          |
| WDR5. 2    | 9. 87E-05 | 0. 150114 | 0. 194 | 0. 117 | 1 Mcy | WDR5           |
| PRPF19. 2  | 9. 89E-05 | 0. 114336 | 0. 352 | 0. 251 | 1 Mcy | PRPF19         |
| GSR. 1     | 9. 93E-05 | 0. 118286 | 0. 095 | 0. 045 | 1 Mcy | GSR            |
| ZNF600     | 9. 94E-05 | 0. 134689 | 0. 048 | 0. 017 | 1 Mcy | ZNF600         |
| EEF1E1. 3  | 9. 96E-05 | 0. 168609 | 0. 421 | 0. 313 | 1 Mcy | EEF1E1         |
| PRRT1. 3   | 9. 96E-05 | -0. 1382  | 0      | 0. 053 | 1 Mcy | PRRT1          |
| TAF1B. 1   | 1. 00E-04 | 0. 123298 | 0. 15  | 0. 084 | 1 Mcy | TAF1B          |
| RAB6B. 5   | 0. 0001   | -0. 14018 | 0. 007 | 0. 066 | 1 Mcy | RAB6B          |
| DDX54. 2   | 0. 0001   | 0. 100554 | 0. 293 | 0. 197 | 1 Mcy | DDX54          |
| FAM131A. 2 | 0. 000101 | -0. 17819 | 0. 048 | 0. 128 | 1 Mcy | FAM131A        |
| FBLIM1. 2  | 0. 000101 | -0. 22438 | 0. 022 | 0. 09  | 1 Mcy | FBLIM1         |
| RHBDF1. 3  | 0. 000101 | -0. 10819 | 0      | 0. 053 | 1 Mcy | RHBDF1         |
| POGZ. 4    | 0. 000102 | -0. 26047 | 0. 117 | 0. 213 | 1 Mcy | POGZ           |
| CENPC. 1   | 0. 000102 | 0. 142174 | 0. 179 | 0. 106 | 1 Mcy | CENPC          |
| DDT. 3     | 0. 000103 | 0. 125108 | 0. 681 | 0. 519 | 1 Mcy | DDT            |
| RP11-698N  | 0. 000103 | -0. 15799 | 0. 004 | 0. 059 | 1 Mcy | RP11-698N11. 2 |
| MICU3. 5   | 0. 000103 | -0. 18333 | 0. 018 | 0. 084 | 1 Mcy | MICU3          |
| EIF5. 1    | 0. 000103 | -0. 21194 | 0. 637 | 0. 65  | 1 Mcy | EIF5           |
| FTSJ3. 1   | 0. 000103 | 0. 171775 | 0. 227 | 0. 146 | 1 Mcy | FTSJ3          |
| PPAT. 4    | 0. 000104 | -0. 18575 | 0. 062 | 0. 146 | 1 Mcy | PPAT           |
| RP1-79C4.  | 0. 000105 | -0. 10816 | 0      | 0. 052 | 1 Mcy | RP1-79C4. 4    |
| GPATCH8. 4 | 0. 000105 | -0. 25547 | 0. 201 | 0. 306 | 1 Mcy | GPATCH8        |
| TPP2. 2    | 0. 000106 | 0. 137246 | 0. 198 | 0. 121 | 1 Mcy | TPP2           |
| NIM1K. 5   | 0. 000106 | -0. 17812 | 0. 007 | 0. 065 | 1 Mcy | NIM1K          |
| SCNM1. 2   | 0. 000106 | 0. 127022 | 0. 458 | 0. 336 | 1 Mcy | SCNM1          |
| NEIL2. 5   | 0. 000106 | -0. 21211 | 0. 103 | 0. 201 | 1 Mcy | NEIL2          |
| NFYC. 3    | 0. 000107 | 0. 215929 | 0. 315 | 0. 219 | 1 Mcy | NFYC           |
| HNRNPM. 4  | 0. 000107 | 0. 185948 | 0. 674 | 0. 54  | 1 Mcy | HNRNPM         |
| TRIM36. 6  | 0. 000107 | -0. 27045 | 0. 095 | 0. 184 | 1 Mcy | TRIM36         |
| DNAJC8. 1  | 0. 000107 | 0. 140263 | 0. 692 | 0. 548 | 1 Mcy | DNAJC8         |
| CDKN1B. 5  | 0. 000107 | -0. 27862 | 0. 165 | 0. 261 | 1 Mcy | CDKN1B         |
| NMT2. 5    | 0. 000108 | -0. 2025  | 0. 029 | 0. 1   | 1 Mcy | NMT2           |
| THBS4. 4   | 0. 000108 | -0. 12302 | 0      | 0. 052 | 1 Mcy | THBS4          |
| ANKIB1. 5  | 0. 000108 | -0. 25478 | 0. 117 | 0. 21  | 1 Mcy | ANKIB1         |
| MARVELD1.  | 0. 000109 | 0. 130239 | 0. 084 | 0. 039 | 1 Mcy | MARVELD1       |
| P4HTM. 4   | 0. 000109 | -0. 27978 | 0. 168 | 0. 264 | 1 Mcy | P4HTM          |
| UQCRB. 4   | 0. 00011  | -0. 14993 | 0. 689 | 0. 678 | 1 Mcy | UQCRB          |
| RND1. 2    | 0. 00011  | -0. 20527 | 0. 007 | 0. 065 | 1 Mcy | RND1           |
| FSCN1. 6   | 0. 00011  | -0. 24547 | 0. 443 | 0. 506 | 1 Mcy | FSCN1          |
| PRKD1. 3   | 0. 00011  | -0. 11161 | 0      | 0. 052 | 1 Mcy | PRKD1          |
| ZFP37. 3   | 0. 00011  | -0. 14216 | 0      | 0. 052 | 1 Mcy | ZFP37          |

|           |          |          |       |       |       |              |
|-----------|----------|----------|-------|-------|-------|--------------|
| EIF4G2.5  | 0.00011  | -0.15882 | 0.7   | 0.658 | 1 Mcy | EIF4G2       |
| PLEKHG2.2 | 0.00011  | 0.12326  | 0.121 | 0.063 | 1 Mcy | PLEKHG2      |
| ZNF74.3   | 0.000111 | -0.1318  | 0.004 | 0.059 | 1 Mcy | ZNF74        |
| CTNNA2.4  | 0.000111 | -0.18095 | 0.004 | 0.059 | 1 Mcy | CTNNA2       |
| TLK1.3    | 0.000112 | -0.23494 | 0.136 | 0.23  | 1 Mcy | TLK1         |
| GDF15.5   | 0.000112 | -0.28507 | 0.011 | 0.071 | 1 Mcy | GDF15        |
| SLC44A1.4 | 0.000112 | -0.31602 | 0.216 | 0.316 | 1 Mcy | SLC44A1      |
| UBE3D.1   | 0.000113 | -0.15312 | 0.004 | 0.059 | 1 Mcy | UBE3D        |
| C4orf27.4 | 0.000113 | 0.16068  | 0.425 | 0.316 | 1 Mcy | C4orf27      |
| FLRT3.5   | 0.000113 | -0.13779 | 0.004 | 0.059 | 1 Mcy | FLRT3        |
| DUSP8.4   | 0.000113 | -0.1527  | 0     | 0.052 | 1 Mcy | DUSP8        |
| KIAA0907. | 0.000113 | -0.26683 | 0.103 | 0.196 | 1 Mcy | KIAA0907     |
| RP11-792A | 0.000113 | -0.29532 | 0.117 | 0.212 | 1 Mcy | RP11-792A8.4 |
| RFFL.6    | 0.000114 | -0.23674 | 0.081 | 0.166 | 1 Mcy | RFFL         |
| RBM15     | 0.000115 | 0.117571 | 0.099 | 0.048 | 1 Mcy | RBM15        |
| CLASP2.5  | 0.000115 | -0.23064 | 0.106 | 0.199 | 1 Mcy | CLASP2       |
| ZNF398.5  | 0.000115 | -0.14446 | 0.004 | 0.059 | 1 Mcy | ZNF398       |
| FRMD5.3   | 0.000116 | -0.1078  | 0.004 | 0.059 | 1 Mcy | FRMD5        |
| OXR1.5    | 0.000116 | -0.30333 | 0.161 | 0.254 | 1 Mcy | OXR1         |
| ZNF708.3  | 0.000117 | -0.18792 | 0.029 | 0.099 | 1 Mcy | ZNF708       |
| SASH1.3   | 0.000117 | -0.16539 | 0.011 | 0.071 | 1 Mcy | SASH1        |
| MIR4458HG | 0.000117 | -0.36674 | 0.081 | 0.162 | 1 Mcy | MIR4458HG    |
| FAM161A.4 | 0.000118 | -0.20719 | 0.037 | 0.11  | 1 Mcy | FAM161A      |
| B3GALT1.4 | 0.000118 | -0.10356 | 0     | 0.052 | 1 Mcy | B3GALT1      |
| LTBP1.4   | 0.000118 | -0.11169 | 0     | 0.052 | 1 Mcy | LTBP1        |
| ICAM1.5   | 0.000118 | 0.113844 | 0.26  | 0.162 | 1 Mcy | ICAM1        |
| ACADVL.3  | 0.00012  | 0.145661 | 0.582 | 0.447 | 1 Mcy | ACADVL       |
| CTA-445C9 | 0.000121 | -0.14508 | 0.004 | 0.058 | 1 Mcy | CTA-445C9.14 |
| GSE1.5    | 0.000121 | -0.23274 | 0.026 | 0.093 | 1 Mcy | GSE1         |
| ETV3.6    | 0.000122 | 0.109672 | 0.139 | 0.075 | 1 Mcy | ETV3         |
| CPXM1.5   | 0.000122 | -0.16456 | 0.048 | 0.126 | 1 Mcy | CPXM1        |
| AMH.4     | 0.000123 | -0.12846 | 0.004 | 0.058 | 1 Mcy | AMH          |
| PHB2.1    | 0.000123 | 0.133559 | 0.568 | 0.44  | 1 Mcy | PHB2         |
| TACC2.3   | 0.000123 | -0.13776 | 0.004 | 0.058 | 1 Mcy | TACC2        |
| FAM57A.3  | 0.000123 | -0.11191 | 0.026 | 0.096 | 1 Mcy | FAM57A       |
| PTPRK.3   | 0.000124 | -0.21562 | 0.004 | 0.058 | 1 Mcy | PTPRK        |
| PDZRN3.4  | 0.000124 | -0.15728 | 0.004 | 0.058 | 1 Mcy | PDZRN3       |
| KLHDC8B.3 | 0.000124 | -0.19421 | 0.033 | 0.105 | 1 Mcy | KLHDC8B      |
| LDOC1L.5  | 0.000124 | -0.14845 | 0.022 | 0.088 | 1 Mcy | LDOC1L       |
| C7orf49.3 | 0.000124 | 0.145233 | 0.297 | 0.205 | 1 Mcy | C7orf49      |
| ZNF710.2  | 0.000124 | 0.113789 | 0.077 | 0.034 | 1 Mcy | ZNF710       |
| GCAT.6    | 0.000125 | -0.17162 | 0.077 | 0.163 | 1 Mcy | GCAT         |
| PDCD11    | 0.000126 | 0.120153 | 0.117 | 0.061 | 1 Mcy | PDCD11       |
| PPIE.2    | 0.000127 | 0.136074 | 0.381 | 0.281 | 1 Mcy | PPIE         |
| OSER1.2   | 0.000127 | 0.122791 | 0.41  | 0.299 | 1 Mcy | OSER1        |
| HIST1H2AG | 0.000127 | 0.122687 | 0.029 | 0.008 | 1 Mcy | HIST1H2AG    |
| CAP2.3    | 0.000127 | -0.15204 | 0.004 | 0.058 | 1 Mcy | CAP2         |
| RASSF8.3  | 0.000128 | -0.13354 | 0.022 | 0.089 | 1 Mcy | RASSF8       |
| FRYL.6    | 0.000128 | -0.28686 | 0.103 | 0.19  | 1 Mcy | FRYL         |
| MXI1.2    | 0.000129 | -0.22625 | 0.055 | 0.135 | 1 Mcy | MXI1         |
| ATPAF2.3  | 0.000129 | 0.150075 | 0.3   | 0.211 | 1 Mcy | ATPAF2       |

|            |          |          |       |       |       |              |
|------------|----------|----------|-------|-------|-------|--------------|
| COA6. 2    | 0.000129 | 0.119612 | 0.377 | 0.274 | 1 Mcy | COA6         |
| SAP30L. 5  | 0.000131 | -0.1509  | 0.026 | 0.094 | 1 Mcy | SAP30L       |
| MMP15. 5   | 0.000131 | -0.1189  | 0.007 | 0.065 | 1 Mcy | MMP15        |
| NAT8L. 3   | 0.000132 | -0.12587 | 0     | 0.051 | 1 Mcy | NAT8L        |
| CTC-524C5  | 0.000133 | 0.119741 | 0.19  | 0.116 | 1 Mcy | CTC-524C5. 2 |
| FERMT1. 4  | 0.000134 | -0.19183 | 0     | 0.051 | 1 Mcy | FERMT1       |
| RDH10. 5   | 0.000134 | -0.21444 | 0.022 | 0.087 | 1 Mcy | RDH10        |
| PCYOX1. 3  | 0.000134 | -0.16533 | 0.092 | 0.183 | 1 Mcy | PCYOX1       |
| FADS3. 2   | 0.000135 | -0.16459 | 0.066 | 0.151 | 1 Mcy | FADS3        |
| ZNF234     | 0.000135 | -0.13121 | 0.004 | 0.058 | 1 Mcy | ZNF234       |
| DOCK5. 6   | 0.000136 | 0.146499 | 0.11  | 0.054 | 1 Mcy | DOCK5        |
| TRIM25. 2  | 0.000136 | 0.311687 | 0.147 | 0.086 | 1 Mcy | TRIM25       |
| DPH6       | 0.000137 | 0.195544 | 0.165 | 0.097 | 1 Mcy | DPH6         |
| CAPRIN2. 4 | 0.000137 | -0.14069 | 0.033 | 0.106 | 1 Mcy | CAPRIN2      |
| CACNG4. 3  | 0.000137 | -0.13606 | 0     | 0.051 | 1 Mcy | CACNG4       |
| PITPNA-AS  | 0.000138 | -0.20976 | 0.103 | 0.198 | 1 Mcy | PITPNA-AS1   |
| NPHP3. 2   | 0.000139 | -0.16749 | 0.037 | 0.111 | 1 Mcy | NPHP3        |
| CDC42BPB.  | 0.000141 | -0.17499 | 0.044 | 0.121 | 1 Mcy | CDC42BPB     |
| SON. 3     | 0.000141 | -0.22012 | 0.714 | 0.711 | 1 Mcy | SON          |
| NANOS3. 4  | 0.000141 | -0.13078 | 0.007 | 0.064 | 1 Mcy | NANOS3       |
| OCIAD1. 4  | 0.000141 | -0.27844 | 0.637 | 0.636 | 1 Mcy | OCIAD1       |
| ANXA2R. 5  | 0.000142 | -0.23178 | 0.07  | 0.154 | 1 Mcy | ANXA2R       |
| ITGB1BP1.  | 0.000142 | 0.106723 | 0.516 | 0.384 | 1 Mcy | ITGB1BP1     |
| GPR180     | 0.000144 | 0.165737 | 0.143 | 0.081 | 1 Mcy | GPR180       |
| SRPRB. 2   | 0.000145 | 0.138458 | 0.352 | 0.253 | 1 Mcy | SRPRB        |
| OMG. 4     | 0.000145 | -0.29762 | 0.018 | 0.081 | 1 Mcy | OMG          |
| DLC1. 4    | 0.000147 | -0.16504 | 0.022 | 0.088 | 1 Mcy | DLC1         |
| SHISA5. 1  | 0.000147 | 0.187653 | 0.432 | 0.322 | 1 Mcy | SHISA5       |
| HNRNPUL2.  | 0.000149 | 0.154942 | 0.242 | 0.161 | 1 Mcy | HNRNPUL2     |
| PSMD9. 2   | 0.000149 | 0.14211  | 0.381 | 0.278 | 1 Mcy | PSMD9        |
| DHRS4L2. 1 | 0.00015  | 0.126695 | 0.363 | 0.259 | 1 Mcy | DHRS4L2      |
| CCNDBP1. 6 | 0.00015  | 0.176053 | 0.3   | 0.202 | 1 Mcy | CCNDBP1      |
| CNTLN      | 0.000151 | 0.12058  | 0.172 | 0.102 | 1 Mcy | CNTLN        |
| PTPN4. 5   | 0.000151 | -0.18291 | 0.033 | 0.104 | 1 Mcy | PTPN4        |
| NME5. 4    | 0.000151 | -0.12227 | 0     | 0.05  | 1 Mcy | NME5         |
| INO80C. 3  | 0.000152 | 0.155686 | 0.245 | 0.164 | 1 Mcy | INO80C       |
| PIGZ. 3    | 0.000152 | -0.12274 | 0.007 | 0.063 | 1 Mcy | PIGZ         |
| CDK9. 2    | 0.000153 | 0.122232 | 0.22  | 0.139 | 1 Mcy | CDK9         |
| FDX1. 3    | 0.000153 | 0.117386 | 0.418 | 0.303 | 1 Mcy | FDX1         |
| CHRNA9. 3  | 0.000154 | -0.12869 | 0     | 0.05  | 1 Mcy | CHRNA9       |
| ZBTB16. 3  | 0.000154 | -0.4323  | 0.081 | 0.157 | 1 Mcy | ZBTB16       |
| NFE2L2. 4  | 0.000155 | -0.31743 | 0.407 | 0.47  | 1 Mcy | NFE2L2       |
| EPS15L1. 2 | 0.000155 | -0.16715 | 0.081 | 0.168 | 1 Mcy | EPS15L1      |
| ZSCAN21. 4 | 0.000155 | -0.18392 | 0.033 | 0.104 | 1 Mcy | ZSCAN21      |
| SPECC1. 6  | 0.000156 | -0.22368 | 0.201 | 0.298 | 1 Mcy | SPECC1       |
| SMPD1. 4   | 0.000156 | -0.24999 | 0.143 | 0.239 | 1 Mcy | SMPD1        |
| SNF8. 3    | 0.000158 | 0.121121 | 0.604 | 0.456 | 1 Mcy | SNF8         |
| ITGA2. 4   | 0.000159 | -0.1147  | 0.007 | 0.064 | 1 Mcy | ITGA2        |
| CAPN5. 3   | 0.000161 | -0.11492 | 0.011 | 0.07  | 1 Mcy | CAPN5        |
| TMUB1. 2   | 0.000161 | 0.145897 | 0.363 | 0.264 | 1 Mcy | TMUB1        |
| THAP5. 4   | 0.000161 | -0.2762  | 0.095 | 0.181 | 1 Mcy | THAP5        |

|             |          |          |       |       |       |              |
|-------------|----------|----------|-------|-------|-------|--------------|
| AP3B1. 2    | 0.000161 | 0.145261 | 0.253 | 0.169 | 1 Mcy | AP3B1        |
| KIAA0895L   | 0.000162 | -0.13607 | 0.026 | 0.093 | 1 Mcy | KIAA0895L    |
| MARK3. 4    | 0.000162 | -0.20921 | 0.19  | 0.289 | 1 Mcy | MARK3        |
| AP2B1. 5    | 0.000163 | -0.24758 | 0.245 | 0.343 | 1 Mcy | AP2B1        |
| MDM2. 3     | 0.000166 | -0.32039 | 0.121 | 0.208 | 1 Mcy | MDM2         |
| CA8. 5      | 0.000166 | -0.21673 | 0.004 | 0.056 | 1 Mcy | CA8          |
| DENND1A. 2  | 0.000166 | 0.131609 | 0.103 | 0.052 | 1 Mcy | DENND1A      |
| TRO. 2      | 0.000166 | -0.15325 | 0.007 | 0.063 | 1 Mcy | TRO          |
| SLC25A11. 0 | 0.000166 | 0.167084 | 0.546 | 0.416 | 1 Mcy | SLC25A11     |
| NR2E1. 2    | 0.000167 | -0.10325 | 0.004 | 0.057 | 1 Mcy | NR2E1        |
| RPRM. 6     | 0.000167 | -0.25404 | 0.011 | 0.068 | 1 Mcy | RPRM         |
| PON2. 6     | 0.000168 | -0.40123 | 0.399 | 0.452 | 1 Mcy | PON2         |
| ARVCF. 4    | 0.000169 | -0.11935 | 0.004 | 0.056 | 1 Mcy | ARVCF        |
| YBEY. 3     | 0.00017  | -0.29336 | 0.128 | 0.223 | 1 Mcy | YBEY         |
| EBF4. 3     | 0.00017  | -0.11016 | 0.004 | 0.056 | 1 Mcy | EBF4         |
| ADD1. 4     | 0.00017  | -0.19105 | 0.201 | 0.31  | 1 Mcy | ADD1         |
| AC091729. 0 | 0.000171 | -0.11084 | 0.018 | 0.082 | 1 Mcy | AC091729. 9  |
| FBX011. 4   | 0.000172 | -0.26306 | 0.117 | 0.208 | 1 Mcy | FBX011       |
| DBNDD1. 4   | 0.000172 | -0.1279  | 0.011 | 0.069 | 1 Mcy | DBNDD1       |
| PRRT3. 1    | 0.000172 | -0.13478 | 0.011 | 0.069 | 1 Mcy | PRRT3        |
| SEPT3. 5    | 0.000173 | -0.1724  | 0.011 | 0.069 | 1 Mcy | 3-Sep        |
| CNRIP1. 4   | 0.000173 | -0.15162 | 0.114 | 0.206 | 1 Mcy | CNRIP1       |
| HIPK3. 2    | 0.000175 | 0.111832 | 0.154 | 0.088 | 1 Mcy | HIPK3        |
| ISY1. 1     | 0.000176 | 0.155521 | 0.26  | 0.172 | 1 Mcy | ISY1         |
| SDC1. 3     | 0.000177 | -0.10648 | 0     | 0.049 | 1 Mcy | SDC1         |
| TRAF2       | 0.000177 | 0.164863 | 0.143 | 0.081 | 1 Mcy | TRAF2        |
| KATNBL1. 4  | 0.000177 | 0.149505 | 0.344 | 0.249 | 1 Mcy | KATNBL1      |
| KAT5. 1     | 0.000177 | 0.124811 | 0.348 | 0.249 | 1 Mcy | KAT5         |
| SESN2. 4    | 0.000177 | 0.124157 | 0.176 | 0.102 | 1 Mcy | SESN2        |
| PTDSS2. 6   | 0.000177 | -0.17699 | 0.07  | 0.154 | 1 Mcy | PTDSS2       |
| CTC-425F1   | 0.000178 | 0.152067 | 0.103 | 0.052 | 1 Mcy | CTC-425F1. 4 |
| GABBR1. 5   | 0.000178 | -0.16958 | 0.018 | 0.08  | 1 Mcy | GABBR1       |
| CYB5A. 4    | 0.00018  | 0.148295 | 0.443 | 0.339 | 1 Mcy | CYB5A        |
| FOXO1. 2    | 0.00018  | -0.164   | 0.015 | 0.075 | 1 Mcy | FOXO1        |
| PURA. 4     | 0.00018  | -0.22907 | 0.121 | 0.21  | 1 Mcy | PURA         |
| CHD6. 5     | 0.00018  | -0.2582  | 0.15  | 0.247 | 1 Mcy | CHD6         |
| GRIA1. 1    | 0.000181 | -0.10466 | 0     | 0.049 | 1 Mcy | GRIA1        |
| ADCYAP1R1   | 0.000181 | -0.13225 | 0     | 0.049 | 1 Mcy | ADCYAP1R1    |
| FGF12. 3    | 0.000181 | -0.19765 | 0     | 0.049 | 1 Mcy | FGF12        |
| ATP5D. 5    | 0.000182 | -0.15697 | 0.634 | 0.613 | 1 Mcy | ATP5D        |
| PCDHB14. 3  | 0.000182 | -0.15509 | 0.004 | 0.056 | 1 Mcy | PCDHB14      |
| RAI1. 1     | 0.000182 | -0.13924 | 0.011 | 0.068 | 1 Mcy | RAI1         |
| C20orf196   | 0.000183 | 0.132614 | 0.139 | 0.079 | 1 Mcy | C20orf196    |
| GAB3. 4     | 0.000184 | 0.102047 | 0.073 | 0.032 | 1 Mcy | GAB3         |
| HNRNPA0. 4  | 0.000184 | -0.1921  | 0.634 | 0.642 | 1 Mcy | HNRNPA0      |
| PDE8B. 2    | 0.000184 | -0.10903 | 0     | 0.049 | 1 Mcy | PDE8B        |
| ATF1. 1     | 0.000185 | 0.126201 | 0.223 | 0.142 | 1 Mcy | ATF1         |
| MKL1. 1     | 0.000187 | 0.137689 | 0.125 | 0.068 | 1 Mcy | MKL1         |
| ZNF853. 4   | 0.000187 | -0.10497 | 0     | 0.049 | 1 Mcy | ZNF853       |
| PSMD1. 2    | 0.000187 | 0.149801 | 0.425 | 0.32  | 1 Mcy | PSMD1        |
| RBM14. 3    | 0.000187 | 0.119508 | 0.278 | 0.19  | 1 Mcy | RBM14        |

|             |          |          |       |       |       |                 |
|-------------|----------|----------|-------|-------|-------|-----------------|
| CBY1. 4     | 0.000188 | -0.20752 | 0.077 | 0.161 | 1 Mcy | CBY1            |
| FAM217B. 6  | 0.000189 | -0.20862 | 0.073 | 0.157 | 1 Mcy | FAM217B         |
| CCNG2. 5    | 0.000191 | -0.26756 | 0.099 | 0.183 | 1 Mcy | CCNG2           |
| SLC16A9. 4  | 0.000192 | -0.10815 | 0     | 0.049 | 1 Mcy | SLC16A9         |
| COMMD3. 2   | 0.000192 | 0.130236 | 0.465 | 0.352 | 1 Mcy | COMMD3          |
| GPSM2. 5    | 0.000193 | 0.159409 | 0.264 | 0.175 | 1 Mcy | GPSM2           |
| ZNF528. 4   | 0.000193 | -0.10385 | 0.037 | 0.11  | 1 Mcy | ZNF528          |
| CELF3. 6    | 0.000194 | -0.20834 | 0.011 | 0.067 | 1 Mcy | CELF3           |
| MPP5. 3     | 0.000194 | -0.17299 | 0.029 | 0.097 | 1 Mcy | MPP5            |
| FAM19A5. 3  | 0.000195 | -0.14174 | 0     | 0.048 | 1 Mcy | FAM19A5         |
| PRRT2. 4    | 0.000195 | -0.13075 | 0.026 | 0.092 | 1 Mcy | PRRT2           |
| KLC4. 2     | 0.000195 | -0.16892 | 0.022 | 0.085 | 1 Mcy | KLC4            |
| HOTAIRM1. 0 | 0.000195 | -0.3834  | 0.106 | 0.184 | 1 Mcy | HOTAIRM1        |
| RP11-1275   | 0.000195 | -0.18162 | 0.007 | 0.061 | 1 Mcy | RP11-1275H24. 1 |
| RP13-1032   | 0.000196 | -0.117   | 0.018 | 0.081 | 1 Mcy | RP13-1032I1. 7  |
| FBX048      | 0.000196 | 0.118963 | 0.066 | 0.028 | 1 Mcy | FBX048          |
| SURF4. 1    | 0.000197 | 0.15526  | 0.462 | 0.348 | 1 Mcy | SURF4           |
| VANGL2. 4   | 0.000197 | -0.14555 | 0.015 | 0.074 | 1 Mcy | VANGL2          |
| FGFR2. 4    | 0.000197 | -0.20411 | 0     | 0.048 | 1 Mcy | FGFR2           |
| DICER1-AS   | 0.000198 | -0.17309 | 0.004 | 0.055 | 1 Mcy | DICER1-AS1      |
| ZNF454. 4   | 0.0002   | -0.12026 | 0     | 0.048 | 1 Mcy | ZNF454          |
| MFAP4. 4    | 0.000201 | -0.18313 | 0.004 | 0.055 | 1 Mcy | MFAP4           |
| CHTF8. 1    | 0.000202 | 0.147805 | 0.26  | 0.177 | 1 Mcy | CHTF8           |
| PABPC4. 6   | 0.000202 | 0.147679 | 0.447 | 0.326 | 1 Mcy | PABPC4          |
| PDZD4. 4    | 0.000203 | -0.13352 | 0     | 0.048 | 1 Mcy | PDZD4           |
| TAPT1-AS1   | 0.000203 | -0.14808 | 0.007 | 0.062 | 1 Mcy | TAPT1-AS1       |
| C16orf52. 0 | 0.000203 | -0.12026 | 0.029 | 0.098 | 1 Mcy | C16orf52        |
| ABHD2. 2    | 0.000204 | 0.100812 | 0.326 | 0.227 | 1 Mcy | ABHD2           |
| MYLIP. 6    | 0.000205 | 0.137407 | 0.212 | 0.127 | 1 Mcy | MYLIP           |
| KCNJ16. 5   | 0.000206 | -0.11916 | 0.004 | 0.055 | 1 Mcy | KCNJ16          |
| CHDH. 1     | 0.000207 | -0.14663 | 0.011 | 0.068 | 1 Mcy | CHDH            |
| PTS. 5      | 0.000207 | -0.34438 | 0.242 | 0.328 | 1 Mcy | PTS             |
| ZBTB10. 2   | 0.000207 | -0.16024 | 0.026 | 0.091 | 1 Mcy | ZBTB10          |
| C17orf58. 0 | 0.000208 | -0.23879 | 0.103 | 0.188 | 1 Mcy | C17orf58        |
| SKP2        | 0.000209 | 0.103365 | 0.106 | 0.055 | 1 Mcy | SKP2            |
| KLC2. 5     | 0.000209 | -0.14566 | 0.048 | 0.123 | 1 Mcy | KLC2            |
| GATAD1. 3   | 0.00021  | -0.24692 | 0.114 | 0.203 | 1 Mcy | GATAD1          |
| HK2. 4      | 0.00021  | 0.21705  | 0.147 | 0.083 | 1 Mcy | HK2             |
| BBS10. 2    | 0.00021  | -0.12907 | 0.004 | 0.055 | 1 Mcy | BBS10           |
| ZNF587. 1   | 0.000211 | -0.16016 | 0.022 | 0.085 | 1 Mcy | ZNF587          |
| C1orf216. 0 | 0.000211 | -0.18701 | 0.055 | 0.13  | 1 Mcy | C1orf216        |
| CPNE3. 3    | 0.000211 | -0.32127 | 0.242 | 0.332 | 1 Mcy | CPNE3           |
| ZNF585A. 3  | 0.000212 | -0.14247 | 0.007 | 0.061 | 1 Mcy | ZNF585A         |
| EFNA3. 3    | 0.000212 | -0.18016 | 0.007 | 0.061 | 1 Mcy | EFNA3           |
| MIIP. 1     | 0.000213 | 0.218078 | 0.278 | 0.195 | 1 Mcy | MIIP            |
| CCDC50. 4   | 0.000213 | 0.115917 | 0.403 | 0.298 | 1 Mcy | CCDC50          |
| ATMIN. 5    | 0.000214 | -0.16614 | 0.044 | 0.117 | 1 Mcy | ATMIN           |
| CHCHD3. 3   | 0.000214 | 0.119475 | 0.473 | 0.366 | 1 Mcy | CHCHD3          |
| EXOSC10. 2  | 0.000214 | 0.135003 | 0.223 | 0.145 | 1 Mcy | EXOSC10         |
| SNX12. 1    | 0.000215 | 0.202335 | 0.201 | 0.128 | 1 Mcy | SNX12           |
| NFKBIL1. 2  | 0.000216 | -0.23452 | 0.114 | 0.206 | 1 Mcy | NFKBIL1         |

|             |          |          |       |       |       |            |
|-------------|----------|----------|-------|-------|-------|------------|
| FN3KRP. 3   | 0.000216 | 0.11003  | 0.308 | 0.219 | 1 Mcy | FN3KRP     |
| LRRC57. 1   | 0.000216 | 0.147807 | 0.117 | 0.063 | 1 Mcy | LRRC57     |
| HOXA10. 6   | 0.000218 | -0.19739 | 0.018 | 0.078 | 1 Mcy | HOXA10     |
| TOP2B. 6    | 0.000218 | -0.24392 | 0.15  | 0.239 | 1 Mcy | TOP2B      |
| IPP. 4      | 0.00022  | -0.11355 | 0.007 | 0.061 | 1 Mcy | IPP        |
| MATN2. 3    | 0.000221 | -0.14968 | 0.011 | 0.067 | 1 Mcy | MATN2      |
| ASB8. 3     | 0.000222 | -0.27132 | 0.128 | 0.219 | 1 Mcy | ASB8       |
| GNG5. 4     | 0.000225 | 0.125015 | 0.872 | 0.639 | 1 Mcy | GNG5       |
| KIAA0355. 0 | 0.000225 | -0.2407  | 0.073 | 0.154 | 1 Mcy | KIAA0355   |
| FAM127B. 5  | 0.000228 | -0.32935 | 0.209 | 0.302 | 1 Mcy | FAM127B    |
| NUDT2. 4    | 0.000229 | 0.156247 | 0.253 | 0.173 | 1 Mcy | NUDT2      |
| FN3K. 2     | 0.000231 | -0.15751 | 0.022 | 0.085 | 1 Mcy | FN3K       |
| FBX07. 3    | 0.000231 | 0.101296 | 0.418 | 0.307 | 1 Mcy | FBX07      |
| NUDT8. 2    | 0.000233 | 0.14395  | 0.125 | 0.07  | 1 Mcy | NUDT8      |
| GMPS. 2     | 0.000233 | 0.184145 | 0.26  | 0.182 | 1 Mcy | GMPS       |
| RIT2. 5     | 0.000233 | -0.28108 | 0.018 | 0.077 | 1 Mcy | RIT2       |
| PCNXL2. 2   | 0.000234 | -0.14506 | 0.022 | 0.085 | 1 Mcy | PCNXL2     |
| SMKR1. 3    | 0.000235 | -0.17792 | 0.015 | 0.072 | 1 Mcy | SMKR1      |
| C21orf33. 0 | 0.000236 | 0.114503 | 0.473 | 0.361 | 1 Mcy | C21orf33   |
| ARL10. 3    | 0.000237 | -0.14171 | 0.026 | 0.09  | 1 Mcy | ARL10      |
| JOSD2. 4    | 0.000237 | 0.119313 | 0.451 | 0.332 | 1 Mcy | JOSD2      |
| RUFY2. 6    | 0.000237 | -0.19419 | 0.07  | 0.151 | 1 Mcy | RUFY2      |
| RAB18. 1    | 0.00024  | 0.114368 | 0.516 | 0.395 | 1 Mcy | RAB18      |
| MAPRE2. 2   | 0.00024  | 0.167177 | 0.271 | 0.184 | 1 Mcy | MAPRE2     |
| ST3GAL2. 2  | 0.000241 | -0.15241 | 0.033 | 0.101 | 1 Mcy | ST3GAL2    |
| RAB11B-AS   | 0.000241 | -0.20412 | 0.059 | 0.134 | 1 Mcy | RAB11B-AS1 |
| AMDHD2. 4   | 0.000241 | 0.130879 | 0.194 | 0.121 | 1 Mcy | AMDHD2     |
| SNX24. 2    | 0.000242 | 0.173665 | 0.194 | 0.124 | 1 Mcy | SNX24      |
| RFX2        | 0.000242 | 0.155593 | 0.158 | 0.094 | 1 Mcy | RFX2       |
| NIP7. 5     | 0.000243 | 0.107053 | 0.253 | 0.17  | 1 Mcy | NIP7       |
| IFI6. 3     | 0.000243 | 0.115218 | 0.538 | 0.403 | 1 Mcy | IFI6       |
| PGRMC1. 4   | 0.000243 | -0.26852 | 0.385 | 0.449 | 1 Mcy | PGRMC1     |
| ABLIM1. 5   | 0.000244 | -0.12285 | 0.004 | 0.054 | 1 Mcy | ABLIM1     |
| CACNB4. 2   | 0.000247 | -0.16715 | 0.026 | 0.09  | 1 Mcy | CACNB4     |
| LMAN2L. 3   | 0.000248 | -0.20207 | 0.044 | 0.115 | 1 Mcy | LMAN2L     |
| HS6ST1. 1   | 0.000248 | -0.18299 | 0.04  | 0.11  | 1 Mcy | HS6ST1     |
| NFKBIZ. 6   | 0.000248 | 0.136303 | 0.267 | 0.173 | 1 Mcy | NFKBIZ     |
| PEG3. 4     | 0.000249 | -0.17173 | 0.011 | 0.066 | 1 Mcy | PEG3       |
| SPIRE1. 2   | 0.000249 | -0.16581 | 0.033 | 0.099 | 1 Mcy | SPIRE1     |
| RAB9B. 3    | 0.000249 | -0.15949 | 0.004 | 0.054 | 1 Mcy | RAB9B      |
| MYD88. 3    | 0.000249 | 0.165438 | 0.201 | 0.129 | 1 Mcy | MYD88      |
| CEP19. 4    | 0.00025  | -0.17468 | 0.018 | 0.078 | 1 Mcy | CEP19      |
| LGALS1. 5   | 0.00025  | 0.139976 | 0.938 | 0.698 | 1 Mcy | LGALS1     |
| STARD10. 2  | 0.000251 | -0.12717 | 0.018 | 0.079 | 1 Mcy | STARD10    |
| SNRPE. 4    | 0.000252 | 0.104254 | 0.722 | 0.576 | 1 Mcy | SNRPE      |
| GPRASP2. 4  | 0.000253 | -0.14996 | 0.011 | 0.066 | 1 Mcy | GPRASP2    |
| ERBB4. 5    | 0.000255 | -0.18683 | 0.007 | 0.06  | 1 Mcy | ERBB4      |
| PSMD5-AS1   | 0.000257 | -0.13772 | 0.092 | 0.184 | 1 Mcy | PSMD5-AS1  |
| TBCC. 6     | 0.000258 | -0.29008 | 0.136 | 0.223 | 1 Mcy | TBCC       |
| MLF2. 6     | 0.000261 | -0.2078  | 0.623 | 0.609 | 1 Mcy | MLF2       |
| FRS2. 5     | 0.000261 | -0.26366 | 0.044 | 0.113 | 1 Mcy | FRS2       |

|           |          |          |       |       |       |               |
|-----------|----------|----------|-------|-------|-------|---------------|
| PPM1F.3   | 0.000264 | 0.106373 | 0.121 | 0.065 | 1 Mcy | PPM1F         |
| GANAB.3   | 0.000264 | 0.161968 | 0.366 | 0.27  | 1 Mcy | GANAB         |
| REEP1.6   | 0.000265 | -0.18709 | 0.022 | 0.082 | 1 Mcy | REEP1         |
| TMEM218.2 | 0.000265 | 0.112281 | 0.311 | 0.219 | 1 Mcy | TMEM218       |
| ARHGAP23. | 0.000266 | -0.13691 | 0.004 | 0.053 | 1 Mcy | ARHGAP23      |
| PAIP1.6   | 0.000267 | -0.22633 | 0.337 | 0.397 | 1 Mcy | PAIP1         |
| LRRC1.4   | 0.000267 | -0.18182 | 0.015 | 0.071 | 1 Mcy | LRRC1         |
| C6orf52.1 | 0.000268 | -0.11812 | 0     | 0.046 | 1 Mcy | C6orf52       |
| KHDC1.5   | 0.000268 | -0.16703 | 0.011 | 0.066 | 1 Mcy | KHDC1         |
| NIFK-AS1. | 0.000269 | -0.1628  | 0.026 | 0.089 | 1 Mcy | NIFK-AS1      |
| RP11-263K | 0.00027  | -0.11047 | 0.011 | 0.067 | 1 Mcy | RP11-263K19.4 |
| UBXN2B.3  | 0.000271 | 0.117029 | 0.231 | 0.149 | 1 Mcy | UBXN2B        |
| FAM46A.2  | 0.000272 | -0.27797 | 0.114 | 0.198 | 1 Mcy | FAM46A        |
| ELAVL2.6  | 0.000273 | -0.2447  | 0.022 | 0.081 | 1 Mcy | ELAVL2        |
| PRPF6.4   | 0.000274 | -0.28652 | 0.267 | 0.355 | 1 Mcy | PRPF6         |
| ELMO2.3   | 0.000274 | -0.18779 | 0.055 | 0.13  | 1 Mcy | ELMO2         |
| MIDN.3    | 0.000275 | -0.26845 | 0.322 | 0.416 | 1 Mcy | MIDN          |
| DEXI.4    | 0.000275 | -0.19852 | 0.117 | 0.209 | 1 Mcy | DEXI          |
| ASIC1.4   | 0.000276 | -0.15338 | 0.004 | 0.053 | 1 Mcy | ASIC1         |
| PDE9A.3   | 0.000276 | -0.14363 | 0.015 | 0.072 | 1 Mcy | PDE9A         |
| ZNF664.4  | 0.000277 | -0.17194 | 0.07  | 0.151 | 1 Mcy | ZNF664        |
| PRADC1.5  | 0.000281 | 0.138115 | 0.3   | 0.214 | 1 Mcy | PRADC1        |
| GLRX2.2   | 0.000281 | 0.109547 | 0.242 | 0.161 | 1 Mcy | GLRX2         |
| CALR.3    | 0.000283 | 0.197279 | 0.868 | 0.688 | 1 Mcy | CALR          |
| CLSTN3.3  | 0.000284 | -0.13322 | 0.007 | 0.06  | 1 Mcy | CLSTN3        |
| SEMA3E.3  | 0.000286 | -0.11754 | 0.004 | 0.053 | 1 Mcy | SEMA3E        |
| KCNJ10.4  | 0.000286 | -0.18529 | 0.004 | 0.053 | 1 Mcy | KCNJ10        |
| PLCE1.4   | 0.000288 | -0.11208 | 0.011 | 0.066 | 1 Mcy | PLCE1         |
| ZNF337.2  | 0.000288 | -0.12139 | 0.015 | 0.072 | 1 Mcy | ZNF337        |
| TAF11.2   | 0.00029  | 0.145794 | 0.366 | 0.274 | 1 Mcy | TAF11         |
| B4GALNT4. | 0.000291 | -0.11342 | 0     | 0.046 | 1 Mcy | B4GALNT4      |
| EXTL2.4   | 0.000292 | -0.2257  | 0.088 | 0.169 | 1 Mcy | EXTL2         |
| SRGAP1.5  | 0.000292 | -0.25732 | 0.139 | 0.227 | 1 Mcy | SRGAP1        |
| QKI.4     | 0.000294 | -0.29439 | 0.44  | 0.472 | 1 Mcy | QKI           |
| CMTM3.6   | 0.000294 | 0.118874 | 0.429 | 0.321 | 1 Mcy | CMTM3         |
| CDC23.4   | 0.000294 | 0.137245 | 0.194 | 0.123 | 1 Mcy | CDC23         |
| TNF.3     | 0.000295 | 0.124722 | 0.088 | 0.042 | 1 Mcy | TNF           |
| ERBB2.2   | 0.000295 | -0.10809 | 0.007 | 0.059 | 1 Mcy | ERBB2         |
| NR2F2.4   | 0.000295 | -0.15733 | 0     | 0.046 | 1 Mcy | NR2F2         |
| PILRB.2   | 0.000299 | -0.2089  | 0.081 | 0.163 | 1 Mcy | PILRB         |
| XRCC2.1   | 0.0003   | 0.103621 | 0.084 | 0.04  | 1 Mcy | XRCC2         |
| ZBTB80S.2 | 0.0003   | 0.153505 | 0.388 | 0.292 | 1 Mcy | ZBTB80S       |
| TRIM32.2  | 0.000301 | -0.149   | 0.007 | 0.059 | 1 Mcy | TRIM32        |
| SLC2A1.4  | 0.000303 | -0.2366  | 0.062 | 0.139 | 1 Mcy | SLC2A1        |
| CTD-2270L | 0.000304 | 0.156332 | 0.103 | 0.054 | 1 Mcy | CTD-2270L9.4  |
| MFAP1.3   | 0.000308 | 0.19333  | 0.249 | 0.171 | 1 Mcy | MFAP1         |
| PIGF.5    | 0.000309 | 0.101747 | 0.385 | 0.285 | 1 Mcy | PIGF          |
| TCEAL4.4  | 0.00031  | -0.27286 | 0.524 | 0.573 | 1 Mcy | TCEAL4        |
| TMEM169.4 | 0.000311 | -0.12493 | 0.007 | 0.059 | 1 Mcy | TMEM169       |
| APLP2.6   | 0.000316 | 0.147284 | 0.755 | 0.589 | 1 Mcy | APLP2         |
| ABCA2.6   | 0.000316 | -0.32064 | 0.033 | 0.097 | 1 Mcy | ABCA2         |



|            |          |          |       |       |       |                |
|------------|----------|----------|-------|-------|-------|----------------|
| ARHGEF2. 5 | 0.000317 | -0.31999 | 0.201 | 0.291 | 1 Mcy | ARHGEF2        |
| TNKS2. 3   | 0.000319 | 0.133308 | 0.176 | 0.108 | 1 Mcy | TNKS2          |
| MF12-AS1.  | 0.00032  | -0.13829 | 0.018 | 0.076 | 1 Mcy | MF12-AS1       |
| EFNA2. 4   | 0.000321 | -0.11492 | 0.004 | 0.052 | 1 Mcy | EFNA2          |
| LRP5. 2    | 0.000322 | -0.10819 | 0.004 | 0.052 | 1 Mcy | LRP5           |
| SLC2A8. 3  | 0.000322 | 0.118952 | 0.212 | 0.138 | 1 Mcy | SLC2A8         |
| CA14. 5    | 0.000323 | -0.18834 | 0.004 | 0.052 | 1 Mcy | CA14           |
| SEPT8. 6   | 0.000326 | -0.26128 | 0.11  | 0.198 | 1 Mcy | 8-Sep          |
| PRMT5. 5   | 0.000329 | 0.174996 | 0.227 | 0.149 | 1 Mcy | PRMT5          |
| TNK2. 4    | 0.00033  | -0.20868 | 0.055 | 0.129 | 1 Mcy | TNK2           |
| ZNF639. 5  | 0.00033  | -0.15665 | 0.062 | 0.138 | 1 Mcy | ZNF639         |
| RSU1. 2    | 0.000331 | 0.125606 | 0.363 | 0.267 | 1 Mcy | RSU1           |
| RASD1. 4   | 0.000332 | -0.33715 | 0.062 | 0.135 | 1 Mcy | RASD1          |
| CCDC130. 4 | 0.000332 | -0.23327 | 0.139 | 0.23  | 1 Mcy | CCDC130        |
| BRD3. 5    | 0.000333 | -0.2903  | 0.19  | 0.277 | 1 Mcy | BRD3           |
| SH3RF1. 4  | 0.000334 | -0.17086 | 0.04  | 0.108 | 1 Mcy | SH3RF1         |
| FGF9. 5    | 0.000337 | -0.18216 | 0.004 | 0.052 | 1 Mcy | FGF9           |
| PDP1. 3    | 0.000338 | -0.18218 | 0.055 | 0.128 | 1 Mcy | PDP1           |
| CRB2. 4    | 0.000339 | -0.16665 | 0     | 0.045 | 1 Mcy | CRB2           |
| HRK. 4     | 0.000341 | -0.18508 | 0.011 | 0.064 | 1 Mcy | HRK            |
| PDGFA. 3   | 0.000341 | -0.2021  | 0.033 | 0.099 | 1 Mcy | PDGFA          |
| DPF2. 3    | 0.000341 | -0.23751 | 0.136 | 0.226 | 1 Mcy | DPF2           |
| RIN2. 4    | 0.000344 | 0.1692   | 0.201 | 0.124 | 1 Mcy | RIN2           |
| SNAP29. 3  | 0.000344 | 0.149192 | 0.308 | 0.223 | 1 Mcy | SNAP29         |
| UBE2F. 2   | 0.000346 | 0.122254 | 0.429 | 0.327 | 1 Mcy | UBE2F          |
| INTU. 2    | 0.000347 | -0.15209 | 0.015 | 0.07  | 1 Mcy | INTU           |
| AC002456.  | 0.000349 | -0.157   | 0     | 0.045 | 1 Mcy | AC002456. 2    |
| CADM3. 4   | 0.00035  | -0.32698 | 0.037 | 0.102 | 1 Mcy | CADM3          |
| C12orf73.  | 0.00035  | -0.21525 | 0.077 | 0.156 | 1 Mcy | C12orf73       |
| RALGAPA2.  | 0.00035  | -0.17343 | 0.044 | 0.112 | 1 Mcy | RALGAPA2       |
| IFI27. 1   | 0.000352 | 0.277424 | 0.179 | 0.111 | 1 Mcy | IFI27          |
| GUK1. 3    | 0.000353 | -0.11035 | 0.755 | 0.702 | 1 Mcy | GUK1           |
| RBM25. 2   | 0.000353 | 0.106095 | 0.553 | 0.438 | 1 Mcy | RBM25          |
| SHC4. 3    | 0.000354 | -0.11163 | 0.007 | 0.058 | 1 Mcy | SHC4           |
| WBP2. 2    | 0.000357 | -0.286   | 0.377 | 0.454 | 1 Mcy | WBP2           |
| TRAF3IP2-  | 0.000359 | -0.1738  | 0.022 | 0.081 | 1 Mcy | TRAF3IP2-AS1   |
| VPS11. 1   | 0.000361 | 0.107792 | 0.158 | 0.094 | 1 Mcy | VPS11          |
| RP11-446N  | 0.000362 | 0.140551 | 0.033 | 0.01  | 1 Mcy | RP11-446N19. 1 |
| PARN. 2    | 0.000363 | 0.2077   | 0.187 | 0.119 | 1 Mcy | PARN           |
| DUSP14. 5  | 0.000363 | -0.21764 | 0.099 | 0.181 | 1 Mcy | DUSP14         |
| ACHE. 3    | 0.000364 | -0.13607 | 0     | 0.045 | 1 Mcy | ACHE           |
| SLC6A9. 2  | 0.000364 | -0.14431 | 0     | 0.045 | 1 Mcy | SLC6A9         |
| ATF7       | 0.000364 | 0.148751 | 0.209 | 0.136 | 1 Mcy | ATF7           |
| DDR2. 4    | 0.000364 | -0.14471 | 0.007 | 0.058 | 1 Mcy | DDR2           |
| DTNBP1. 4  | 0.000365 | 0.142165 | 0.293 | 0.204 | 1 Mcy | DTNBP1         |
| AC011043.  | 0.000366 | -0.15057 | 0.011 | 0.064 | 1 Mcy | AC011043. 1    |
| RP11-539L  | 0.000368 | -0.2086  | 0.033 | 0.097 | 1 Mcy | RP11-539L10. 3 |
| SMCR5. 4   | 0.000369 | -0.13049 | 0.029 | 0.093 | 1 Mcy | SMCR5          |
| ACAP2. 3   | 0.000369 | 0.176936 | 0.26  | 0.176 | 1 Mcy | ACAP2          |
| GOLGA8B. 2 | 0.000369 | -0.11641 | 0.004 | 0.051 | 1 Mcy | GOLGA8B        |
| STIP1. 3   | 0.000371 | 0.189785 | 0.473 | 0.369 | 1 Mcy | STIP1          |

|             |          |          |       |       |       |                |
|-------------|----------|----------|-------|-------|-------|----------------|
| GRWD1. 2    | 0.000372 | 0.123072 | 0.227 | 0.153 | 1 Mcy | GRWD1          |
| AHDC1. 4    | 0.000373 | -0.17914 | 0.037 | 0.103 | 1 Mcy | AHDC1          |
| MVB12B. 5   | 0.000373 | -0.22382 | 0.037 | 0.101 | 1 Mcy | MVB12B         |
| TMEM8B. 2   | 0.000375 | -0.11709 | 0.011 | 0.064 | 1 Mcy | TMEM8B         |
| ARPP21. 4   | 0.000379 | -0.15222 | 0.004 | 0.051 | 1 Mcy | ARPP21         |
| AKR1B1. 4   | 0.00038  | 0.120394 | 0.766 | 0.622 | 1 Mcy | AKR1B1         |
| ZDHHC17. 2  | 0.000381 | -0.19744 | 0.04  | 0.107 | 1 Mcy | ZDHHC17        |
| PSEN2. 2    | 0.000381 | -0.16137 | 0.044 | 0.114 | 1 Mcy | PSEN2          |
| SEC61A2. 2  | 0.000382 | -0.15233 | 0.022 | 0.081 | 1 Mcy | SEC61A2        |
| RNF168. 3   | 0.000384 | 0.109434 | 0.227 | 0.146 | 1 Mcy | RNF168         |
| B3GALNT2. 0 | 0.000384 | -0.15838 | 0.029 | 0.092 | 1 Mcy | B3GALNT2       |
| SORD. 1     | 0.000384 | 0.155986 | 0.15  | 0.09  | 1 Mcy | SORD           |
| PLEKHF1. 2  | 0.000385 | -0.10096 | 0     | 0.044 | 1 Mcy | PLEKHF1        |
| ZDHHC22. 4  | 0.000385 | -0.13    | 0     | 0.044 | 1 Mcy | ZDHHC22        |
| LAYN. 5     | 0.000385 | -0.10707 | 0.007 | 0.058 | 1 Mcy | LAYN           |
| UBL3. 6     | 0.000388 | -0.28395 | 0.271 | 0.356 | 1 Mcy | UBL3           |
| TTLL1. 3    | 0.00039  | -0.15979 | 0.029 | 0.092 | 1 Mcy | TTLL1          |
| SS18L1. 2   | 0.000391 | -0.15386 | 0.029 | 0.091 | 1 Mcy | SS18L1         |
| BRWD1. 5    | 0.000391 | -0.26141 | 0.158 | 0.243 | 1 Mcy | BRWD1          |
| ICA1L. 3    | 0.000393 | -0.19743 | 0.037 | 0.101 | 1 Mcy | ICA1L          |
| MID1. 3     | 0.000393 | -0.13296 | 0.004 | 0.051 | 1 Mcy | MID1           |
| JPX         | 0.000394 | 0.122705 | 0.348 | 0.254 | 1 Mcy | JPX            |
| AMZ2. 2     | 0.000395 | -0.31313 | 0.297 | 0.382 | 1 Mcy | AMZ2           |
| HDGF. 3     | 0.000398 | 0.229587 | 0.366 | 0.271 | 1 Mcy | HDGF           |
| RP11-1143   | 0.000402 | 0.2068   | 0.099 | 0.05  | 1 Mcy | RP11-1143G9. 4 |
| IGF1R. 4    | 0.000404 | -0.11513 | 0.015 | 0.07  | 1 Mcy | IGF1R          |
| ZNF71. 4    | 0.000404 | -0.17072 | 0.026 | 0.086 | 1 Mcy | ZNF71          |
| FAM50A. 3   | 0.000405 | 0.148422 | 0.48  | 0.37  | 1 Mcy | FAM50A         |
| WLS. 4      | 0.00041  | -0.16717 | 0.125 | 0.216 | 1 Mcy | WLS            |
| TNFAIP1. 4  | 0.000412 | -0.19199 | 0.095 | 0.177 | 1 Mcy | TNFAIP1        |
| NOC4L. 2    | 0.000412 | 0.101624 | 0.234 | 0.154 | 1 Mcy | NOC4L          |
| MIR497HG. 0 | 0.000414 | -0.22307 | 0.015 | 0.069 | 1 Mcy | MIR497HG       |
| RARS. 1     | 0.000415 | 0.134763 | 0.337 | 0.242 | 1 Mcy | RARS           |
| DMD. 3      | 0.000416 | -0.16654 | 0.026 | 0.086 | 1 Mcy | DMD            |
| CADPS. 4    | 0.000418 | -0.20908 | 0     | 0.044 | 1 Mcy | CADPS          |
| HSPD1. 5    | 0.000419 | 0.147461 | 0.762 | 0.611 | 1 Mcy | HSPD1          |
| MLLT6. 3    | 0.00042  | -0.12402 | 0.059 | 0.133 | 1 Mcy | MLLT6          |
| ACO07246. 0 | 0.00042  | -0.16228 | 0.04  | 0.108 | 1 Mcy | ACO07246. 3    |
| ANKRD36C. 0 | 0.00042  | -0.25681 | 0.088 | 0.164 | 1 Mcy | ANKRD36C       |
| MTRNR2L1C 0 | 0.00042  | 0.152793 | 0.132 | 0.073 | 1 Mcy | MTRNR2L10      |
| DENND4B. 4  | 0.000423 | 0.157738 | 0.121 | 0.067 | 1 Mcy | DENND4B        |
| PFDN5. 4    | 0.000424 | -0.10485 | 0.945 | 0.882 | 1 Mcy | PFDN5          |
| ZNF536. 4   | 0.000424 | -0.16531 | 0     | 0.044 | 1 Mcy | ZNF536         |
| R3HDM2. 4   | 0.000424 | -0.17015 | 0.088 | 0.169 | 1 Mcy | R3HDM2         |
| MGRN1. 3    | 0.000427 | -0.18196 | 0.121 | 0.21  | 1 Mcy | MGRN1          |
| ANKRD13B. 0 | 0.000429 | -0.1111  | 0.004 | 0.051 | 1 Mcy | ANKRD13B       |
| FRMD3. 4    | 0.000432 | -0.17188 | 0.007 | 0.057 | 1 Mcy | FRMD3          |
| RP11-488C 0 | 0.000432 | -0.16121 | 0.015 | 0.068 | 1 Mcy | RP11-488C13. 5 |
| XRN2. 2     | 0.000432 | 0.120876 | 0.579 | 0.455 | 1 Mcy | XRN2           |
| COL9A2. 3   | 0.000434 | -0.22479 | 0.029 | 0.09  | 1 Mcy | COL9A2         |
| INADL. 5    | 0.000435 | -0.18742 | 0.015 | 0.068 | 1 Mcy | INADL          |

|           |          |          |       |       |       |          |
|-----------|----------|----------|-------|-------|-------|----------|
| ZNF513.2  | 0.000435 | -0.11813 | 0.018 | 0.075 | 1 Mcy | ZNF513   |
| PHLPP1.6  | 0.000435 | -0.17676 | 0.026 | 0.086 | 1 Mcy | PHLPP1   |
| SCAP.4    | 0.000437 | -0.1941  | 0.081 | 0.159 | 1 Mcy | SCAP     |
| RP9.4     | 0.000437 | -0.15254 | 0.095 | 0.181 | 1 Mcy | RP9      |
| BBX.3     | 0.000437 | -0.31081 | 0.341 | 0.408 | 1 Mcy | BBX      |
| RYK.3     | 0.000438 | -0.14348 | 0.029 | 0.092 | 1 Mcy | RYK      |
| SIAE.4    | 0.000439 | -0.17561 | 0.029 | 0.091 | 1 Mcy | SIAE     |
| RUNDC1.2  | 0.000439 | -0.14992 | 0.062 | 0.137 | 1 Mcy | RUNDC1   |
| MAPK8IP2. | 0.000442 | -0.1253  | 0     | 0.043 | 1 Mcy | MAPK8IP2 |
| STK11IP.1 | 0.000446 | 0.122606 | 0.099 | 0.052 | 1 Mcy | STK11IP  |
| RABGAP1.4 | 0.000447 | -0.16079 | 0.055 | 0.126 | 1 Mcy | RABGAP1  |
| TPST1.4   | 0.000448 | -0.2706  | 0.154 | 0.241 | 1 Mcy | TPST1    |
| ACTN2.2   | 0.000448 | -0.12257 | 0     | 0.043 | 1 Mcy | ACTN2    |
| TMEM151A. | 0.000448 | -0.16734 | 0     | 0.043 | 1 Mcy | TMEM151A |
| UNC5B.5   | 0.00045  | 0.141089 | 0.143 | 0.082 | 1 Mcy | UNC5B    |
| DBT.2     | 0.000451 | -0.18293 | 0.037 | 0.102 | 1 Mcy | DBT      |
| CCER2.5   | 0.000451 | -0.19303 | 0.007 | 0.056 | 1 Mcy | CCER2    |
| CAPN2.3   | 0.000452 | -0.18077 | 0.165 | 0.254 | 1 Mcy | CAPN2    |
| RNF182.4  | 0.000452 | -0.12434 | 0.004 | 0.05  | 1 Mcy | RNF182   |
| ZBTB22    | 0.000454 | -0.12727 | 0.026 | 0.086 | 1 Mcy | ZBTB22   |
| XRCC5.5   | 0.000455 | 0.132887 | 0.696 | 0.557 | 1 Mcy | XRCC5    |
| SEC16A.2  | 0.000456 | 0.165875 | 0.179 | 0.114 | 1 Mcy | SEC16A   |
| FAM212B.5 | 0.000459 | -0.18732 | 0.037 | 0.101 | 1 Mcy | FAM212B  |
| TOMM40.4  | 0.00046  | 0.147521 | 0.421 | 0.325 | 1 Mcy | TOMM40   |
| KLHL9.4   | 0.000462 | -0.19076 | 0.044 | 0.111 | 1 Mcy | KLHL9    |
| SELM.4    | 0.000463 | -0.3586  | 0.114 | 0.19  | 1 Mcy | SELM     |
| LSM7.3    | 0.000465 | -0.17472 | 0.674 | 0.63  | 1 Mcy | LSM7     |
| BMPR2.4   | 0.000465 | -0.21249 | 0.099 | 0.179 | 1 Mcy | BMPR2    |
| SPOP.3    | 0.000467 | -0.29552 | 0.223 | 0.311 | 1 Mcy | SPOP     |
| ARL8A.4   | 0.000473 | -0.26066 | 0.187 | 0.274 | 1 Mcy | ARL8A    |
| KANSL1.4  | 0.000473 | -0.20283 | 0.088 | 0.167 | 1 Mcy | KANSL1   |
| FAM8A1.2  | 0.000473 | -0.15449 | 0.026 | 0.085 | 1 Mcy | FAM8A1   |
| DNAJB1.3  | 0.000474 | -0.31051 | 0.571 | 0.611 | 1 Mcy | DNAJB1   |
| UNG.3     | 0.000481 | 0.160282 | 0.187 | 0.12  | 1 Mcy | UNG      |
| SCAMP1.4  | 0.000485 | -0.2233  | 0.128 | 0.216 | 1 Mcy | SCAMP1   |
| GDPD1.4   | 0.000485 | -0.13268 | 0.015 | 0.068 | 1 Mcy | GDPD1    |
| DHX40.5   | 0.000486 | -0.16585 | 0.066 | 0.141 | 1 Mcy | DHX40    |
| MSRB2.5   | 0.000487 | 0.127316 | 0.352 | 0.252 | 1 Mcy | MSRB2    |
| BCL11A.3  | 0.000487 | -0.14072 | 0.004 | 0.049 | 1 Mcy | BCL11A   |
| TNRC6A.2  | 0.000488 | -0.20647 | 0.128 | 0.217 | 1 Mcy | TNRC6A   |
| C6orf89.2 | 0.000495 | 0.117374 | 0.304 | 0.218 | 1 Mcy | C6orf89  |
| PIGK      | 0.000496 | 0.118081 | 0.227 | 0.15  | 1 Mcy | PIGK     |
| NUP88.3   | 0.000498 | 0.179222 | 0.194 | 0.126 | 1 Mcy | NUP88    |
| POMP.2    | 0.000499 | 0.123725 | 0.872 | 0.732 | 1 Mcy | POMP     |
| LIN7A.2   | 0.000501 | -0.10179 | 0     | 0.043 | 1 Mcy | LIN7A    |
| UPF3A.5   | 0.000501 | -0.24914 | 0.26  | 0.347 | 1 Mcy | UPF3A    |
| UBE20.4   | 0.000502 | -0.13156 | 0.048 | 0.118 | 1 Mcy | UBE20    |
| HAX1.1    | 0.000502 | 0.107922 | 0.564 | 0.443 | 1 Mcy | HAX1     |
| MAP2K2.5  | 0.000507 | -0.28828 | 0.231 | 0.303 | 1 Mcy | MAP2K2   |
| TMEM205.5 | 0.000509 | -0.39791 | 0.469 | 0.496 | 1 Mcy | TMEM205  |
| DDA1.1    | 0.000511 | 0.10429  | 0.429 | 0.326 | 1 Mcy | DDA1     |

|           |          |          |       |       |       |          |
|-----------|----------|----------|-------|-------|-------|----------|
| ITPR2.4   | 0.000512 | 0.111324 | 0.201 | 0.13  | 1 Mcy | ITPR2    |
| EXD2.1    | 0.000513 | -0.14659 | 0.033 | 0.096 | 1 Mcy | EXD2     |
| MOAP1.4   | 0.000515 | -0.19093 | 0.136 | 0.219 | 1 Mcy | MOAP1    |
| ADCY3.3   | 0.000517 | 0.146103 | 0.106 | 0.057 | 1 Mcy | ADCY3    |
| TMEM246.4 | 0.000517 | -0.15623 | 0.004 | 0.049 | 1 Mcy | TMEM246  |
| SYNGAP1.4 | 0.000517 | -0.13152 | 0.007 | 0.055 | 1 Mcy | SYNGAP1  |
| FAM98C.1  | 0.000518 | -0.20602 | 0.066 | 0.139 | 1 Mcy | FAM98C   |
| FAM169A.3 | 0.00052  | -0.12335 | 0.004 | 0.049 | 1 Mcy | FAM169A  |
| CXCL14.3  | 0.00052  | -0.30672 | 0.07  | 0.143 | 1 Mcy | CXCL14   |
| ZNF224.2  | 0.000521 | -0.19283 | 0.04  | 0.106 | 1 Mcy | ZNF224   |
| PCAT6     | 0.000522 | -0.11568 | 0     | 0.042 | 1 Mcy | PCAT6    |
| FAM120A.4 | 0.000523 | 0.103175 | 0.293 | 0.208 | 1 Mcy | FAM120A  |
| EID2B.4   | 0.000526 | -0.13295 | 0.029 | 0.091 | 1 Mcy | EID2B    |
| LENG8.2   | 0.000526 | -0.21951 | 0.136 | 0.225 | 1 Mcy | LENG8    |
| SORBS3.4  | 0.000528 | -0.12404 | 0.092 | 0.174 | 1 Mcy | SORBS3   |
| PGAM2.5   | 0.000529 | -0.21685 | 0.004 | 0.049 | 1 Mcy | PGAM2    |
| RNF216.1  | 0.000533 | -0.19289 | 0.147 | 0.232 | 1 Mcy | RNF216   |
| LOH12CR2. | 0.000539 | -0.14532 | 0.007 | 0.055 | 1 Mcy | LOH12CR2 |
| C14orf37. | 0.000543 | -0.21397 | 0.048 | 0.113 | 1 Mcy | C14orf37 |
| MARK4.2   | 0.000545 | -0.11314 | 0.018 | 0.074 | 1 Mcy | MARK4    |
| RAD9A.1   | 0.000546 | 0.161068 | 0.205 | 0.133 | 1 Mcy | RAD9A    |
| RAD1.2    | 0.000547 | 0.129608 | 0.256 | 0.176 | 1 Mcy | RAD1     |
| DYRK1B.1  | 0.000549 | -0.12163 | 0.015 | 0.068 | 1 Mcy | DYRK1B   |
| RILP.6    | 0.000551 | 0.118025 | 0.165 | 0.101 | 1 Mcy | RILP     |
| MEX3C.3   | 0.000554 | -0.12765 | 0.033 | 0.096 | 1 Mcy | MEX3C    |
| TIA1.6    | 0.000556 | -0.27886 | 0.165 | 0.25  | 1 Mcy | TIA1     |
| LPL.3     | 0.000557 | -0.29943 | 0.084 | 0.16  | 1 Mcy | LPL      |
| TBC1D10B. | 0.000557 | 0.198285 | 0.158 | 0.098 | 1 Mcy | TBC1D10B |
| SALL3.3   | 0.000559 | -0.10278 | 0     | 0.042 | 1 Mcy | SALL3    |
| SH3GLB1.4 | 0.00056  | 0.133787 | 0.557 | 0.427 | 1 Mcy | SH3GLB1  |
| FAM89B.5  | 0.000562 | -0.25974 | 0.168 | 0.248 | 1 Mcy | FAM89B   |
| ZNF558.3  | 0.000566 | -0.14146 | 0.022 | 0.078 | 1 Mcy | ZNF558   |
| PSMD2.3   | 0.000568 | 0.142182 | 0.579 | 0.458 | 1 Mcy | PSMD2    |
| PCDH8.2   | 0.00057  | -0.11708 | 0.004 | 0.049 | 1 Mcy | PCDH8    |
| NOP14     | 0.00057  | 0.130418 | 0.136 | 0.08  | 1 Mcy | NOP14    |
| ZNF324.4  | 0.000572 | -0.15947 | 0.026 | 0.083 | 1 Mcy | ZNF324   |
| AFF4.4    | 0.000577 | -0.28252 | 0.26  | 0.342 | 1 Mcy | AFF4     |
| PPIL6.5   | 0.000578 | -0.12434 | 0.004 | 0.049 | 1 Mcy | PPIL6    |
| ZNF682.3  | 0.000579 | -0.16255 | 0.022 | 0.077 | 1 Mcy | ZNF682   |
| IMMP2L.4  | 0.00058  | -0.26801 | 0.073 | 0.146 | 1 Mcy | IMMP2L   |
| RALGAPB.3 | 0.00058  | -0.10489 | 0.044 | 0.112 | 1 Mcy | RALGAPB  |
| CAB39.3   | 0.000582 | 0.125152 | 0.264 | 0.182 | 1 Mcy | CAB39    |
| ZMIZ2.3   | 0.000583 | -0.1366  | 0.037 | 0.1   | 1 Mcy | ZMIZ2    |
| ARHGEF4.3 | 0.000583 | -0.1149  | 0.007 | 0.055 | 1 Mcy | ARHGEF4  |
| CCDC58.3  | 0.000584 | 0.131452 | 0.212 | 0.142 | 1 Mcy | CCDC58   |
| UBP1.1    | 0.000589 | 0.143415 | 0.125 | 0.071 | 1 Mcy | UBP1     |
| KCNK6.4   | 0.000589 | 0.102152 | 0.081 | 0.039 | 1 Mcy | KCNK6    |
| OGT       | 0.000592 | -0.1946  | 0.059 | 0.128 | 1 Mcy | OGT      |
| ENDOV.3   | 0.000606 | -0.14988 | 0.132 | 0.223 | 1 Mcy | ENDOV    |
| TAGLN.3   | 0.000606 | -0.44014 | 0.018 | 0.072 | 1 Mcy | TAGLN    |
| DYNLL2.6  | 0.000606 | -0.22958 | 0.125 | 0.208 | 1 Mcy | DYNLL2   |

|           |          |          |       |       |       |              |
|-----------|----------|----------|-------|-------|-------|--------------|
| TBL1X     | 0.000608 | -0.10678 | 0.015 | 0.067 | 1 Mcy | TBL1X        |
| CTB-113I2 | 0.000625 | -0.10973 | 0.011 | 0.061 | 1 Mcy | CTB-113I20.2 |
| WDR35     | 0.000625 | -0.12029 | 0.004 | 0.048 | 1 Mcy | WDR35        |
| SMOX.5    | 0.000629 | -0.31432 | 0.161 | 0.249 | 1 Mcy | SMOX         |
| CIITA.2   | 0.000631 | 0.113244 | 0.077 | 0.037 | 1 Mcy | CIITA        |
| USP42.4   | 0.000631 | -0.15079 | 0.055 | 0.124 | 1 Mcy | USP42        |
| ZNF286A.3 | 0.000633 | -0.14475 | 0.011 | 0.06  | 1 Mcy | ZNF286A      |
| MYT1L.6   | 0.000635 | -0.20038 | 0.011 | 0.06  | 1 Mcy | MYT1L        |
| MLEC.3    | 0.000637 | 0.119023 | 0.505 | 0.398 | 1 Mcy | MLEC         |
| ZNF138.4  | 0.000639 | -0.18869 | 0.073 | 0.147 | 1 Mcy | ZNF138       |
| ST5.6     | 0.000639 | -0.20415 | 0.077 | 0.153 | 1 Mcy | ST5          |
| B4GALT2.3 | 0.000641 | -0.12777 | 0.022 | 0.078 | 1 Mcy | B4GALT2      |
| RDH14.3   | 0.000642 | -0.23989 | 0.11  | 0.19  | 1 Mcy | RDH14        |
| NRG2.3    | 0.000643 | -0.10621 | 0     | 0.041 | 1 Mcy | NRG2         |
| METTL7B.3 | 0.000644 | -0.41992 | 0.136 | 0.214 | 1 Mcy | METTL7B      |
| CPD.2     | 0.000648 | -0.17643 | 0.084 | 0.162 | 1 Mcy | CPD          |
| FAM13C.3  | 0.000652 | -0.13253 | 0     | 0.041 | 1 Mcy | FAM13C       |
| AR.3      | 0.000656 | -0.11867 | 0.004 | 0.048 | 1 Mcy | AR           |
| NBL1.5    | 0.000658 | 0.280819 | 0.245 | 0.177 | 1 Mcy | NBL1         |
| HMGXB4.2  | 0.000659 | 0.134207 | 0.3   | 0.22  | 1 Mcy | HMGXB4       |
| FAM200A.3 | 0.00066  | -0.1911  | 0.037 | 0.098 | 1 Mcy | FAM200A      |
| GLG1.5    | 0.00066  | -0.22848 | 0.179 | 0.268 | 1 Mcy | GLG1         |
| RP4-798A1 | 0.000661 | -0.11549 | 0     | 0.041 | 1 Mcy | RP4-798A10.7 |
| NME6.1    | 0.000664 | 0.217441 | 0.172 | 0.107 | 1 Mcy | NME6         |
| PSME3.3   | 0.000671 | 0.1174   | 0.308 | 0.225 | 1 Mcy | PSME3        |
| SEC22A.1  | 0.000679 | 0.1647   | 0.161 | 0.1   | 1 Mcy | SEC22A       |
| ZNF776.3  | 0.00068  | -0.13113 | 0.011 | 0.06  | 1 Mcy | ZNF776       |
| TMEM55A.5 | 0.000681 | -0.25908 | 0.15  | 0.235 | 1 Mcy | TMEM55A      |
| TCEAL3.2  | 0.000682 | 0.151773 | 0.429 | 0.34  | 1 Mcy | TCEAL3       |
| SLC2A6.2  | 0.000685 | -0.11664 | 0.018 | 0.072 | 1 Mcy | SLC2A6       |
| TMEM168.3 | 0.000685 | -0.20756 | 0.048 | 0.113 | 1 Mcy | TMEM168      |
| XRR1.4    | 0.000688 | -0.13846 | 0.059 | 0.131 | 1 Mcy | XRR1         |
| SNAI2.3   | 0.000689 | -0.10104 | 0     | 0.041 | 1 Mcy | SNAI2        |
| PAK7.5    | 0.000692 | -0.14388 | 0.004 | 0.047 | 1 Mcy | PAK7         |
| RBM26.4   | 0.000698 | -0.20289 | 0.132 | 0.215 | 1 Mcy | RBM26        |
| HSPB8.3   | 0.000698 | -0.19914 | 0     | 0.04  | 1 Mcy | HSPB8        |
| TRIM23.3  | 0.000702 | -0.1736  | 0.026 | 0.081 | 1 Mcy | TRIM23       |
| KBTBD7.4  | 0.000705 | -0.16516 | 0.029 | 0.088 | 1 Mcy | KBTBD7       |
| TARBP1.3  | 0.000706 | -0.13157 | 0.018 | 0.072 | 1 Mcy | TARBP1       |
| MAP4K4.4  | 0.000707 | -0.2033  | 0.161 | 0.25  | 1 Mcy | MAP4K4       |
| BOLA3-AS1 | 0.000708 | -0.10889 | 0     | 0.04  | 1 Mcy | BOLA3-AS1    |
| PDE1C.2   | 0.000708 | -0.15048 | 0     | 0.04  | 1 Mcy | PDE1C        |
| TMEM143   | 0.00071  | 0.101247 | 0.062 | 0.028 | 1 Mcy | TMEM143      |
| HID1.3    | 0.000715 | -0.13394 | 0.007 | 0.053 | 1 Mcy | HID1         |
| SOD3.3    | 0.000718 | -0.10546 | 0     | 0.04  | 1 Mcy | SOD3         |
| DNAJC30.4 | 0.000723 | -0.19895 | 0.081 | 0.155 | 1 Mcy | DNAJC30      |
| RASA4.1   | 0.000723 | -0.15156 | 0.011 | 0.06  | 1 Mcy | RASA4        |
| TMEM145.4 | 0.000724 | -0.15759 | 0.018 | 0.071 | 1 Mcy | TMEM145      |
| MAN1A2.4  | 0.000724 | -0.20749 | 0.125 | 0.206 | 1 Mcy | MAN1A2       |
| FHL2.3    | 0.000726 | -0.13066 | 0.004 | 0.047 | 1 Mcy | FHL2         |
| SACS.6    | 0.000733 | -0.16609 | 0.081 | 0.156 | 1 Mcy | SACS         |

|           |          |          |       |       |       |               |
|-----------|----------|----------|-------|-------|-------|---------------|
| DDAH2.4   | 0.000738 | -0.21195 | 0.443 | 0.49  | 1 Mcy | DDAH2         |
| EPHB1.3   | 0.000738 | -0.13984 | 0.004 | 0.047 | 1 Mcy | EPHB1         |
| GRID2.3   | 0.00074  | -0.12763 | 0.004 | 0.047 | 1 Mcy | GRID2         |
| OSBPL1A.5 | 0.000742 | -0.18997 | 0.11  | 0.193 | 1 Mcy | OSBPL1A       |
| SLC40A1.4 | 0.000747 | -0.25156 | 0.07  | 0.14  | 1 Mcy | SLC40A1       |
| BLM.1     | 0.000747 | 0.160569 | 0.132 | 0.079 | 1 Mcy | BLM           |
| IL17RB.4  | 0.000751 | -0.14744 | 0.004 | 0.047 | 1 Mcy | IL17RB        |
| PPFIA2.2  | 0.000752 | -0.15815 | 0.004 | 0.047 | 1 Mcy | PPFIA2        |
| ADSSL1.3  | 0.000756 | 0.10678  | 0.136 | 0.079 | 1 Mcy | ADSSL1        |
| RP11-51J9 | 0.000756 | -0.17486 | 0.07  | 0.142 | 1 Mcy | RP11-51J9.5   |
| TIGD1.2   | 0.000758 | -0.13544 | 0.015 | 0.065 | 1 Mcy | TIGD1         |
| MYT1.4    | 0.000759 | -0.14254 | 0     | 0.04  | 1 Mcy | MYT1          |
| GNPDA2.3  | 0.000761 | -0.21881 | 0.059 | 0.126 | 1 Mcy | GNPDA2        |
| KCTD1.4   | 0.000761 | -0.10896 | 0.015 | 0.065 | 1 Mcy | KCTD1         |
| LINC00909 | 0.000761 | -0.17138 | 0.048 | 0.113 | 1 Mcy | LINC00909     |
| MICAL3.2  | 0.000762 | -0.16607 | 0.022 | 0.076 | 1 Mcy | MICAL3        |
| CLDN11.4  | 0.000765 | -0.36522 | 0.004 | 0.047 | 1 Mcy | CLDN11        |
| HERPUD2.2 | 0.000766 | -0.1525  | 0.099 | 0.176 | 1 Mcy | HERPUD2       |
| RP11-486G | 0.000772 | -0.12303 | 0.004 | 0.047 | 1 Mcy | RP11-486G15.2 |
| EIF1B.5   | 0.000773 | -0.27697 | 0.557 | 0.589 | 1 Mcy | EIF1B         |
| DDHD2.3   | 0.000774 | -0.17664 | 0.044 | 0.107 | 1 Mcy | DDHD2         |
| DPY30.4   | 0.000774 | 0.107143 | 0.626 | 0.492 | 1 Mcy | DPY30         |
| TMEM131.5 | 0.000776 | -0.1089  | 0.073 | 0.148 | 1 Mcy | TMEM131       |
| AC004540. | 0.000778 | -0.19697 | 0.026 | 0.081 | 1 Mcy | AC004540.5    |
| DCAF5.2   | 0.000778 | -0.13728 | 0.062 | 0.135 | 1 Mcy | DCAF5         |
| TMEM138.1 | 0.000779 | 0.11772  | 0.245 | 0.171 | 1 Mcy | TMEM138       |
| C20orf24. | 0.000781 | 0.131707 | 0.59  | 0.464 | 1 Mcy | C20orf24      |
| DLGAP1.3  | 0.000788 | -0.12422 | 0.004 | 0.046 | 1 Mcy | DLGAP1        |
| ACSS1.3   | 0.000791 | -0.20281 | 0.04  | 0.101 | 1 Mcy | ACSS1         |
| ADCY2.2   | 0.000791 | -0.1099  | 0     | 0.04  | 1 Mcy | ADCY2         |
| FAM219A.2 | 0.000792 | -0.14395 | 0.033 | 0.092 | 1 Mcy | FAM219A       |
| CDK20.3   | 0.000793 | -0.12116 | 0.011 | 0.059 | 1 Mcy | CDK20         |
| SLC35E3.5 | 0.000795 | -0.33265 | 0.114 | 0.189 | 1 Mcy | SLC35E3       |
| SLC9A3R2. | 0.000796 | -0.13873 | 0.048 | 0.113 | 1 Mcy | SLC9A3R2      |
| HOMER3.4  | 0.000796 | -0.23363 | 0.161 | 0.243 | 1 Mcy | HOMER3        |
| EPC2.2    | 0.000796 | -0.16732 | 0.037 | 0.096 | 1 Mcy | EPC2          |
| SYNJ2.1   | 0.000799 | -0.12488 | 0.004 | 0.046 | 1 Mcy | SYNJ2         |
| ORC4.5    | 0.000802 | -0.25766 | 0.154 | 0.237 | 1 Mcy | ORC4          |
| C20orf96. | 0.000803 | -0.14279 | 0.077 | 0.152 | 1 Mcy | C20orf96      |
| AADAT.3   | 0.000804 | -0.10836 | 0.007 | 0.053 | 1 Mcy | AADAT         |
| ATG9A.4   | 0.000812 | -0.11389 | 0.051 | 0.118 | 1 Mcy | ATG9A         |
| ARHGEF10. | 0.000815 | -0.19106 | 0.018 | 0.07  | 1 Mcy | ARHGEF10      |
| UMPS.4    | 0.000816 | 0.141374 | 0.198 | 0.131 | 1 Mcy | UMPS          |
| IGF2BP2.4 | 0.000819 | -0.12085 | 0.026 | 0.082 | 1 Mcy | IGF2BP2       |
| ZNF92.4   | 0.00082  | -0.20995 | 0.077 | 0.148 | 1 Mcy | ZNF92         |
| FRZB.2    | 0.000824 | -0.23719 | 0.004 | 0.046 | 1 Mcy | FRZB          |
| MLH3.3    | 0.000827 | -0.12871 | 0.044 | 0.107 | 1 Mcy | MLH3          |
| CCDC92.3  | 0.000829 | -0.14883 | 0.04  | 0.103 | 1 Mcy | CCDC92        |
| CPSF3     | 0.000831 | 0.1231   | 0.253 | 0.174 | 1 Mcy | CPSF3         |
| PRKAR1A.3 | 0.000835 | -0.2708  | 0.418 | 0.473 | 1 Mcy | PRKAR1A       |
| CTD-2017E | 0.000839 | -0.13462 | 0.011 | 0.059 | 1 Mcy | CTD-2017D11.1 |

|             |           |           |        |        |       |             |
|-------------|-----------|-----------|--------|--------|-------|-------------|
| ZBED5. 5    | 0. 000842 | -0. 17222 | 0. 103 | 0. 181 | 1 Mcy | ZBED5       |
| ACVR2A. 1   | 0. 000843 | -0. 12991 | 0. 018 | 0. 07  | 1 Mcy | ACVR2A      |
| ABCD4. 4    | 0. 000847 | -0. 22359 | 0. 168 | 0. 258 | 1 Mcy | ABCD4       |
| LTBP3. 3    | 0. 000847 | -0. 19181 | 0. 128 | 0. 211 | 1 Mcy | LTBP3       |
| AP1M1. 2    | 0. 000854 | 0. 157645 | 0. 304 | 0. 221 | 1 Mcy | AP1M1       |
| BEX5. 4     | 0. 000855 | -0. 34814 | 0. 04  | 0. 097 | 1 Mcy | BEX5        |
| METTL9. 5   | 0. 000858 | -0. 22741 | 0. 421 | 0. 469 | 1 Mcy | METTL9      |
| ZFR2. 3     | 0. 00086  | -0. 13275 | 0      | 0. 039 | 1 Mcy | ZFR2        |
| ZNF232. 4   | 0. 000864 | -0. 14705 | 0. 026 | 0. 081 | 1 Mcy | ZNF232      |
| CDR2L. 2    | 0. 000865 | -0. 10414 | 0. 015 | 0. 065 | 1 Mcy | CDR2L       |
| SRPX2. 4    | 0. 000869 | -0. 18316 | 0. 011 | 0. 059 | 1 Mcy | SRPX2       |
| LPCAT3. 1   | 0. 000871 | 0. 109311 | 0. 22  | 0. 147 | 1 Mcy | LPCAT3      |
| SPPL3. 4    | 0. 000873 | -0. 17611 | 0. 117 | 0. 199 | 1 Mcy | SPPL3       |
| MIB2. 5     | 0. 000874 | -0. 15771 | 0. 077 | 0. 151 | 1 Mcy | MIB2        |
| WDR6. 4     | 0. 000877 | -0. 26968 | 0. 154 | 0. 234 | 1 Mcy | WDR6        |
| GRIK3. 3    | 0. 000884 | -0. 10636 | 0. 004 | 0. 046 | 1 Mcy | GRIK3       |
| SGSH. 1     | 0. 000891 | -0. 11725 | 0. 015 | 0. 064 | 1 Mcy | SGSH        |
| AC093323. 0 | 0. 000892 | -0. 11678 | 0. 037 | 0. 097 | 1 Mcy | AC093323. 3 |
| SORBS2. 4   | 0. 000895 | -0. 17101 | 0. 007 | 0. 052 | 1 Mcy | SORBS2      |
| DGKD        | 0. 000895 | 0. 199667 | 0. 106 | 0. 059 | 1 Mcy | DGKD        |
| SMG9. 1     | 0. 000898 | 0. 151643 | 0. 187 | 0. 123 | 1 Mcy | SMG9        |
| GTF2H2. 4   | 0. 000899 | -0. 21938 | 0. 11  | 0. 186 | 1 Mcy | GTF2H2      |
| SLC27A1. 2  | 0. 000901 | -0. 22403 | 0. 088 | 0. 162 | 1 Mcy | SLC27A1     |
| ANKRD13D. 0 | 0. 000904 | -0. 16878 | 0. 092 | 0. 169 | 1 Mcy | ANKRD13D    |
| SLC1A3. 5   | 0. 000904 | -0. 28958 | 0. 443 | 0. 477 | 1 Mcy | SLC1A3      |
| ERMN. 4     | 0. 000909 | -0. 35653 | 0      | 0. 039 | 1 Mcy | ERMN        |
| SAMD10. 2   | 0. 00091  | -0. 10378 | 0. 011 | 0. 058 | 1 Mcy | SAMD10      |
| RAB30-AS1   | 0. 000911 | 0. 32376  | 0. 212 | 0. 147 | 1 Mcy | RAB30-AS1   |
| IL1RAP. 2   | 0. 000914 | 0. 103359 | 0. 234 | 0. 158 | 1 Mcy | IL1RAP      |
| LY6E. 2     | 0. 000916 | 0. 137495 | 0. 48  | 0. 373 | 1 Mcy | LY6E        |
| GPR37. 3    | 0. 00092  | -0. 28092 | 0. 022 | 0. 074 | 1 Mcy | GPR37       |
| RIC8A. 2    | 0. 00092  | 0. 128404 | 0. 377 | 0. 284 | 1 Mcy | RIC8A       |
| SUCO. 3     | 0. 00092  | -0. 16052 | 0. 081 | 0. 155 | 1 Mcy | SUCO        |
| HSPA2. 3    | 0. 000922 | -0. 40044 | 0. 062 | 0. 126 | 1 Mcy | HSPA2       |
| CDC14B. 2   | 0. 000923 | -0. 1357  | 0. 015 | 0. 064 | 1 Mcy | CDC14B      |
| NGRN. 3     | 0. 000924 | -0. 14503 | 0. 026 | 0. 081 | 1 Mcy | NGRN        |
| COQ10A. 3   | 0. 000928 | -0. 15934 | 0. 04  | 0. 102 | 1 Mcy | COQ10A      |
| NEUROD1. 3  | 0. 000934 | -0. 14491 | 0      | 0. 039 | 1 Mcy | NEUROD1     |
| ERBB3. 4    | 0. 000934 | -0. 17943 | 0      | 0. 039 | 1 Mcy | ERBB3       |
| HSDL1. 5    | 0. 000935 | -0. 21225 | 0. 066 | 0. 132 | 1 Mcy | HSDL1       |
| CSGALNACT   | 0. 000938 | 0. 102872 | 0. 15  | 0. 092 | 1 Mcy | CSGALNACT2  |
| MFSD3. 3    | 0. 000942 | -0. 16381 | 0. 055 | 0. 121 | 1 Mcy | MFSD3       |
| TIRAP       | 0. 000942 | 0. 11153  | 0. 059 | 0. 026 | 1 Mcy | TIRAP       |
| AGFG1. 3    | 0. 00095  | 0. 170388 | 0. 194 | 0. 13  | 1 Mcy | AGFG1       |
| SSFA2. 4    | 0. 000952 | -0. 22537 | 0. 11  | 0. 188 | 1 Mcy | SSFA2       |
| HOXA3. 5    | 0. 000954 | -0. 1716  | 0. 011 | 0. 057 | 1 Mcy | HOXA3       |
| VWA3B. 2    | 0. 00096  | -0. 10317 | 0      | 0. 038 | 1 Mcy | VWA3B       |
| ZNF48. 4    | 0. 000966 | -0. 1067  | 0. 037 | 0. 098 | 1 Mcy | ZNF48       |
| GLTSCR2. 5  | 0. 000966 | -0. 24343 | 0. 546 | 0. 564 | 1 Mcy | GLTSCR2     |
| NELFCD. 4   | 0. 000969 | -0. 20225 | 0. 264 | 0. 338 | 1 Mcy | NELFCD      |
| ZNF527      | 0. 000969 | -0. 11941 | 0. 004 | 0. 045 | 1 Mcy | ZNF527      |

|             |          |          |       |       |       |           |
|-------------|----------|----------|-------|-------|-------|-----------|
| PRRC2B. 5   | 0.000973 | -0.23614 | 0.154 | 0.238 | 1 Mcy | PRRC2B    |
| SCHIP1. 1   | 0.000974 | -0.10723 | 0     | 0.038 | 1 Mcy | SCHIP1    |
| IGFBP4. 2   | 0.000982 | 0.170882 | 0.114 | 0.065 | 1 Mcy | IGFBP4    |
| ASH1L. 3    | 0.000984 | -0.20525 | 0.22  | 0.312 | 1 Mcy | ASH1L     |
| C17orf97. 0 | 0.000985 | -0.12666 | 0.011 | 0.058 | 1 Mcy | C17orf97  |
| LANCL1. 5   | 0.00099  | -0.25449 | 0.055 | 0.118 | 1 Mcy | LANCL1    |
| GNS. 4      | 0.000993 | 0.117635 | 0.278 | 0.197 | 1 Mcy | GNS       |
| LCA5. 2     | 0.001003 | -0.11296 | 0.007 | 0.051 | 1 Mcy | LCA5      |
| POU2F1. 5   | 0.001011 | -0.16304 | 0.088 | 0.162 | 1 Mcy | POU2F1    |
| TBC1D25     | 0.001014 | -0.15966 | 0.026 | 0.079 | 1 Mcy | TBC1D25   |
| FAM124A. 2  | 0.001015 | -0.13051 | 0     | 0.038 | 1 Mcy | FAM124A   |
| SLC32A1. 4  | 0.001015 | -0.15349 | 0     | 0.038 | 1 Mcy | SLC32A1   |
| SLC25A36. 0 | 0.001015 | -0.23447 | 0.187 | 0.271 | 1 Mcy | SLC25A36  |
| C9orf9. 5   | 0.001017 | -0.16613 | 0.048 | 0.111 | 1 Mcy | C9orf9    |
| NACAD. 5    | 0.001024 | -0.18217 | 0.033 | 0.09  | 1 Mcy | NACAD     |
| ZNF623      | 0.001025 | -0.1194  | 0.004 | 0.045 | 1 Mcy | ZNF623    |
| MAG. 4      | 0.001029 | -0.36966 | 0     | 0.038 | 1 Mcy | MAG       |
| TMEM38A. 4  | 0.001034 | -0.13364 | 0.007 | 0.051 | 1 Mcy | TMEM38A   |
| STX1A. 3    | 0.001034 | -0.17196 | 0.018 | 0.069 | 1 Mcy | STX1A     |
| INTS10. 3   | 0.001043 | 0.102657 | 0.392 | 0.3   | 1 Mcy | INTS10    |
| CSMD2       | 0.00105  | -0.11757 | 0.004 | 0.045 | 1 Mcy | CSMD2     |
| CTSK. 3     | 0.001055 | -0.13362 | 0.007 | 0.051 | 1 Mcy | CTSK      |
| HNRNPA1L2   | 0.001056 | 0.12638  | 0.286 | 0.199 | 1 Mcy | HNRNPA1L2 |
| SGIP1. 3    | 0.001062 | -0.16417 | 0.007 | 0.051 | 1 Mcy | SGIP1     |
| PHF20. 3    | 0.001065 | -0.2539  | 0.234 | 0.322 | 1 Mcy | PHF20     |
| PLA2G4C. 2  | 0.001066 | -0.12592 | 0.004 | 0.044 | 1 Mcy | PLA2G4C   |
| KRIT1. 5    | 0.001066 | -0.22106 | 0.139 | 0.218 | 1 Mcy | KRIT1     |
| ABHD16A. 1  | 0.001072 | 0.112592 | 0.073 | 0.036 | 1 Mcy | ABHD16A   |
| PLA2G12A. 0 | 0.001074 | -0.21524 | 0.158 | 0.236 | 1 Mcy | PLA2G12A  |
| PEX6. 1     | 0.001074 | -0.14763 | 0.015 | 0.063 | 1 Mcy | PEX6      |
| PLA2G16. 5  | 0.001076 | -0.41035 | 0.337 | 0.406 | 1 Mcy | PLA2G16   |
| RNF103. 1   | 0.001076 | -0.19281 | 0.044 | 0.104 | 1 Mcy | RNF103    |
| PHC2. 4     | 0.001078 | 0.171218 | 0.359 | 0.275 | 1 Mcy | PHC2      |
| ONECUT2. 3  | 0.001078 | -0.14167 | 0.004 | 0.044 | 1 Mcy | ONECUT2   |
| UGT8. 5     | 0.001078 | -0.23567 | 0.007 | 0.05  | 1 Mcy | UGT8      |
| PSMD11. 3   | 0.001079 | 0.105694 | 0.509 | 0.405 | 1 Mcy | PSMD11    |
| EIF2S2. 3   | 0.001082 | 0.122219 | 0.747 | 0.584 | 1 Mcy | EIF2S2    |
| TSHZ2. 4    | 0.001088 | -0.19525 | 0.007 | 0.05  | 1 Mcy | TSHZ2     |
| CEP85L. 2   | 0.001104 | -0.16613 | 0.051 | 0.115 | 1 Mcy | CEP85L    |
| IER3IP1. 4  | 0.001104 | 0.107121 | 0.077 | 0.037 | 1 Mcy | IER3IP1   |
| SBF2. 1     | 0.001105 | -0.28768 | 0.11  | 0.184 | 1 Mcy | SBF2      |
| FOXO3. 4    | 0.00111  | -0.24546 | 0.187 | 0.274 | 1 Mcy | FOXO3     |
| LMBR1. 4    | 0.001112 | -0.13789 | 0.048 | 0.111 | 1 Mcy | LMBR1     |
| CRELD1      | 0.001114 | -0.22868 | 0.099 | 0.174 | 1 Mcy | CRELD1    |
| CAV2. 2     | 0.001121 | -0.13593 | 0.004 | 0.045 | 1 Mcy | CAV2      |
| ZNF768. 3   | 0.001124 | -0.13559 | 0.037 | 0.096 | 1 Mcy | ZNF768    |
| MATR3. 5    | 0.001127 | -0.25823 | 0.458 | 0.487 | 1 Mcy | MATR3     |
| CELF1. 3    | 0.001131 | -0.1919  | 0.223 | 0.31  | 1 Mcy | CELF1     |
| GUCY1A2. 2  | 0.001134 | -0.10339 | 0     | 0.037 | 1 Mcy | GUCY1A2   |
| TFAP2A. 3   | 0.001134 | -0.12974 | 0     | 0.037 | 1 Mcy | TFAP2A    |
| SNRPN. 6    | 0.001137 | -0.39629 | 0.04  | 0.1   | 1 Mcy | SNRPN     |



|            |          |          |       |       |       |             |
|------------|----------|----------|-------|-------|-------|-------------|
| RGS12.6    | 0.001148 | -0.24056 | 0.183 | 0.273 | 1 Mcy | RGS12       |
| NGFR.3     | 0.00115  | -0.13182 | 0     | 0.037 | 1 Mcy | NGFR        |
| GTF2IRD1   | 0.00115  | -0.15778 | 0.026 | 0.079 | 1 Mcy | GTF2IRD1    |
| PDZD2.1    | 0.001152 | -0.11125 | 0.004 | 0.044 | 1 Mcy | PDZD2       |
| JOSD1.6    | 0.001152 | 0.146084 | 0.227 | 0.156 | 1 Mcy | JOSD1       |
| WDR86.1    | 0.001173 | -0.10041 | 0.004 | 0.044 | 1 Mcy | WDR86       |
| OPHN1.4    | 0.001175 | -0.18966 | 0.022 | 0.072 | 1 Mcy | OPHN1       |
| NCOA1.3    | 0.001177 | -0.21356 | 0.092 | 0.163 | 1 Mcy | NCOA1       |
| ZNF625.2   | 0.001178 | -0.10135 | 0.007 | 0.05  | 1 Mcy | ZNF625      |
| PVRL1.5    | 0.001179 | -0.15479 | 0.015 | 0.062 | 1 Mcy | PVRL1       |
| ZNF320     | 0.00118  | -0.11165 | 0.011 | 0.057 | 1 Mcy | ZNF320      |
| VCAM1.4    | 0.001182 | -0.2697  | 0.022 | 0.073 | 1 Mcy | VCAM1       |
| IL6ST.5    | 0.001187 | -0.24852 | 0.172 | 0.256 | 1 Mcy | IL6ST       |
| TRIM26.1   | 0.001194 | 0.126751 | 0.154 | 0.096 | 1 Mcy | TRIM26      |
| EPB41L5.2  | 0.001215 | -0.1254  | 0.007 | 0.05  | 1 Mcy | EPB41L5     |
| PPHLN1.2   | 0.001221 | 0.103331 | 0.465 | 0.364 | 1 Mcy | PPHLN1      |
| ELMOD3.4   | 0.001231 | -0.121   | 0.066 | 0.137 | 1 Mcy | ELMOD3      |
| HELZ2.5    | 0.001233 | -0.13576 | 0.04  | 0.101 | 1 Mcy | HELZ2       |
| ST8SIA5.3  | 0.00124  | -0.12221 | 0.004 | 0.044 | 1 Mcy | ST8SIA5     |
| ACO05618.0 | 0.001243 | -0.1383  | 0.004 | 0.044 | 1 Mcy | ACO05618.6  |
| CBX8.3     | 0.001245 | -0.13654 | 0.022 | 0.073 | 1 Mcy | CBX8        |
| HNRNPDL.3  | 0.001247 | -0.12135 | 0.853 | 0.796 | 1 Mcy | HNRNPDL     |
| CTC-241N9  | 0.00125  | -0.10009 | 0     | 0.037 | 1 Mcy | CTC-241N9.1 |
| C11orf95.0 | 0.001253 | -0.10643 | 0.004 | 0.044 | 1 Mcy | C11orf95    |
| RSBN1L.4   | 0.00126  | -0.25369 | 0.278 | 0.357 | 1 Mcy | RSBN1L      |
| CLDN10.4   | 0.001261 | -0.26234 | 0.011 | 0.056 | 1 Mcy | CLDN10      |
| TNR.5      | 0.001261 | -0.19431 | 0.011 | 0.056 | 1 Mcy | TNR         |
| VTI1A.4    | 0.001264 | 0.128493 | 0.114 | 0.064 | 1 Mcy | VTI1A       |
| DHX36.4    | 0.001265 | -0.25743 | 0.363 | 0.427 | 1 Mcy | DHX36       |
| BHLHB9     | 0.001267 | -0.10071 | 0     | 0.037 | 1 Mcy | BHLHB9      |
| GNPDA1.1   | 0.001281 | 0.112786 | 0.322 | 0.237 | 1 Mcy | GNPDA1      |
| REV3L.3    | 0.001281 | -0.19027 | 0.136 | 0.211 | 1 Mcy | REV3L       |
| CLCN4.5    | 0.001282 | -0.14133 | 0.011 | 0.056 | 1 Mcy | CLCN4       |
| LINGO1.3   | 0.001285 | -0.11564 | 0     | 0.037 | 1 Mcy | LINGO1      |
| GPHN.3     | 0.001285 | -0.13665 | 0.018 | 0.068 | 1 Mcy | GPHN        |
| MBOAT7.4   | 0.001286 | 0.171745 | 0.322 | 0.241 | 1 Mcy | MBOAT7      |
| PDE4D.3    | 0.001291 | -0.16046 | 0.04  | 0.099 | 1 Mcy | PDE4D       |
| FAM126B.3  | 0.001291 | -0.2103  | 0.073 | 0.141 | 1 Mcy | FAM126B     |
| UBTD1.2    | 0.001292 | 0.174346 | 0.168 | 0.111 | 1 Mcy | UBTD1       |
| RNF144A.2  | 0.001301 | -0.12553 | 0.004 | 0.043 | 1 Mcy | RNF144A     |
| CCDC66.5   | 0.001304 | -0.20104 | 0.15  | 0.231 | 1 Mcy | CCDC66      |
| DIAPH1.4   | 0.001308 | 0.130898 | 0.201 | 0.137 | 1 Mcy | DIAPH1      |
| CRTAP.6    | 0.001312 | 0.101481 | 0.319 | 0.234 | 1 Mcy | CRTAP       |
| GADD45GIP1 | 0.001317 | -0.17361 | 0.604 | 0.562 | 1 Mcy | GADD45GIP1  |
| RAPGEF5.4  | 0.001317 | -0.21575 | 0.004 | 0.043 | 1 Mcy | RAPGEF5     |
| KCNN2.3    | 0.001321 | -0.10106 | 0     | 0.036 | 1 Mcy | KCNN2       |
| JPH4.3     | 0.001322 | -0.17978 | 0.015 | 0.061 | 1 Mcy | JPH4        |
| USP49      | 0.001324 | -0.11858 | 0.004 | 0.043 | 1 Mcy | USP49       |
| ATP6V1G1.0 | 0.001336 | -0.14418 | 0.784 | 0.753 | 1 Mcy | ATP6V1G1    |
| ANK3.5     | 0.001339 | -0.18223 | 0.015 | 0.061 | 1 Mcy | ANK3        |
| TMEM126B.0 | 0.001339 | 0.113767 | 0.396 | 0.307 | 1 Mcy | TMEM126B    |

|             |          |          |       |       |       |                |
|-------------|----------|----------|-------|-------|-------|----------------|
| HEXDC. 2    | 0.001343 | -0.12394 | 0.051 | 0.115 | 1 Mcy | HEXDC          |
| RP11-111M   | 0.001343 | -0.11581 | 0.004 | 0.043 | 1 Mcy | RP11-111M2. 2  |
| BAZ2B. 3    | 0.001347 | -0.26439 | 0.249 | 0.322 | 1 Mcy | BAZ2B          |
| GGPS1. 5    | 0.001349 | -0.30092 | 0.242 | 0.319 | 1 Mcy | GGPS1          |
| BEX4. 5     | 0.001352 | -0.32079 | 0.432 | 0.478 | 1 Mcy | BEX4           |
| CARS. 4     | 0.001352 | -0.24954 | 0.143 | 0.221 | 1 Mcy | CARS           |
| FAM66C. 1   | 0.001354 | -0.12487 | 0.004 | 0.043 | 1 Mcy | FAM66C         |
| PHF1. 3     | 0.001364 | -0.20542 | 0.099 | 0.171 | 1 Mcy | PHF1           |
| CRAT. 2     | 0.001365 | 0.163791 | 0.223 | 0.159 | 1 Mcy | CRAT           |
| ZBTB33. 1   | 0.001371 | -0.1128  | 0.015 | 0.062 | 1 Mcy | ZBTB33         |
| TGDS. 1     | 0.001373 | 0.123092 | 0.125 | 0.073 | 1 Mcy | TGDS           |
| C1orf122. 0 | 0.001375 | -0.25046 | 0.48  | 0.489 | 1 Mcy | C1orf122       |
| RPRD2. 2    | 0.001379 | -0.15858 | 0.066 | 0.131 | 1 Mcy | RPRD2          |
| BCL7C. 3    | 0.001379 | 0.149617 | 0.337 | 0.253 | 1 Mcy | BCL7C          |
| GTPBP4      | 0.001379 | 0.102014 | 0.289 | 0.211 | 1 Mcy | GTPBP4         |
| NCSTN. 1    | 0.001381 | 0.101888 | 0.337 | 0.252 | 1 Mcy | NCSTN          |
| MKLN1. 4    | 0.001385 | -0.25227 | 0.154 | 0.231 | 1 Mcy | MKLN1          |
| USP39. 3    | 0.001397 | 0.121005 | 0.256 | 0.183 | 1 Mcy | USP39          |
| FBX06. 2    | 0.001399 | 0.133586 | 0.125 | 0.074 | 1 Mcy | FBX06          |
| COX16. 2    | 0.001411 | 0.112939 | 0.634 | 0.497 | 1 Mcy | COX16          |
| RP11-315A   | 0.001415 | -0.11405 | 0     | 0.036 | 1 Mcy | RP11-315A16. 1 |
| GRK4. 4     | 0.001419 | -0.12328 | 0.04  | 0.099 | 1 Mcy | GRK4           |
| NCL. 3      | 0.001427 | 0.146152 | 0.685 | 0.552 | 1 Mcy | NCL            |
| SCN9A. 3    | 0.001435 | -0.14009 | 0     | 0.036 | 1 Mcy | SCN9A          |
| TMEM63B. 2  | 0.001444 | -0.17364 | 0.07  | 0.137 | 1 Mcy | TMEM63B        |
| AGPAT4. 3   | 0.001449 | -0.15368 | 0.044 | 0.104 | 1 Mcy | AGPAT4         |
| RTN3. 4     | 0.001451 | -0.18092 | 0.685 | 0.654 | 1 Mcy | RTN3           |
| MZF1. 1     | 0.001451 | -0.14605 | 0.037 | 0.093 | 1 Mcy | MZF1           |
| C1orf52. 6  | 0.001457 | -0.29105 | 0.231 | 0.309 | 1 Mcy | C1orf52        |
| CPLX1. 3    | 0.001457 | -0.13797 | 0.004 | 0.043 | 1 Mcy | CPLX1          |
| NFKB2. 6    | 0.001471 | 0.118726 | 0.106 | 0.06  | 1 Mcy | NFKB2          |
| RPF2. 2     | 0.001473 | 0.112399 | 0.304 | 0.225 | 1 Mcy | RPF2           |
| RP11-15A1   | 0.001475 | -0.11799 | 0.011 | 0.055 | 1 Mcy | RP11-15A1. 3   |
| ZNF502. 1   | 0.001478 | -0.10602 | 0.004 | 0.043 | 1 Mcy | ZNF502         |
| DXO. 1      | 0.001485 | -0.16693 | 0.059 | 0.123 | 1 Mcy | DXO            |
| C19orf12. 0 | 0.001486 | -0.20385 | 0.077 | 0.144 | 1 Mcy | C19orf12       |
| UTP14C. 2   | 0.001487 | -0.11922 | 0.029 | 0.083 | 1 Mcy | UTP14C         |
| PDRG1. 4    | 0.001489 | -0.19733 | 0.187 | 0.27  | 1 Mcy | PDRG1          |
| IRF2BP1. 5  | 0.001493 | -0.13699 | 0.048 | 0.107 | 1 Mcy | IRF2BP1        |
| UBE2N. 3    | 0.001494 | 0.1093   | 0.634 | 0.519 | 1 Mcy | UBE2N          |
| LUZP2. 3    | 0.001495 | -0.12827 | 0.007 | 0.049 | 1 Mcy | LUZP2          |
| CMTR2. 2    | 0.0015   | -0.17776 | 0.073 | 0.14  | 1 Mcy | CMTR2          |
| LRRK2. 5    | 0.001503 | 0.119793 | 0.106 | 0.059 | 1 Mcy | LRRK2          |
| ARRDC3. 1   | 0.001508 | -0.22718 | 0.223 | 0.303 | 1 Mcy | ARRDC3         |
| RP11-620J   | 0.001516 | -0.26993 | 0.19  | 0.271 | 1 Mcy | RP11-620J15. 3 |
| HOXA9. 2    | 0.001517 | -0.1228  | 0     | 0.036 | 1 Mcy | HOXA9          |
| ZNF738. 6   | 0.001518 | -0.16057 | 0.077 | 0.145 | 1 Mcy | ZNF738         |
| ARL16. 3    | 0.00152  | -0.17486 | 0.231 | 0.321 | 1 Mcy | ARL16          |
| TMEM160. 5  | 0.001521 | 0.139958 | 0.582 | 0.463 | 1 Mcy | TMEM160        |
| RBM5. 3     | 0.001524 | -0.25022 | 0.201 | 0.28  | 1 Mcy | RBM5           |
| SPRED1. 3   | 0.001529 | 0.144231 | 0.271 | 0.199 | 1 Mcy | SPRED1         |

|           |          |          |       |       |       |                |
|-----------|----------|----------|-------|-------|-------|----------------|
| Clorf35.5 | 0.001536 | 0.177321 | 0.341 | 0.262 | 1 Mcy | Clorf35        |
| STRN4.4   | 0.001536 | -0.10822 | 0.059 | 0.125 | 1 Mcy | STRN4          |
| TRMT112.3 | 0.001536 | 0.106445 | 0.846 | 0.703 | 1 Mcy | TRMT112        |
| CPEB2.2   | 0.001537 | -0.13854 | 0.022 | 0.072 | 1 Mcy | CPEB2          |
| MAP2K4.1  | 0.001539 | -0.1163  | 0.04  | 0.099 | 1 Mcy | MAP2K4         |
| TCEA1.2   | 0.001542 | -0.25952 | 0.462 | 0.485 | 1 Mcy | TCEA1          |
| ATP5EP2.4 | 0.001543 | 0.1558   | 0.52  | 0.445 | 1 Mcy | ATP5EP2        |
| CAHM.5    | 0.001544 | -0.15849 | 0.037 | 0.093 | 1 Mcy | CAHM           |
| ZNF408.3  | 0.001555 | -0.14682 | 0.026 | 0.077 | 1 Mcy | ZNF408         |
| RAB3GAP2. | 0.001557 | -0.10843 | 0.099 | 0.172 | 1 Mcy | RAB3GAP2       |
| CCDC142.2 | 0.001559 | -0.15421 | 0.018 | 0.065 | 1 Mcy | CCDC142        |
| DPP9.1    | 0.001564 | 0.119657 | 0.19  | 0.127 | 1 Mcy | DPP9           |
| MTRNR2L8. | 0.001565 | 0.125481 | 0.267 | 0.189 | 1 Mcy | MTRNR2L8       |
| EML3.2    | 0.001567 | 0.126403 | 0.172 | 0.113 | 1 Mcy | EML3           |
| POLG.3    | 0.001569 | 0.122386 | 0.15  | 0.095 | 1 Mcy | POLG           |
| CNTN2.4   | 0.001573 | -0.26461 | 0.004 | 0.042 | 1 Mcy | CNTN2          |
| USP20     | 0.001573 | -0.12937 | 0.007 | 0.048 | 1 Mcy | USP20          |
| CLNS1A.4  | 0.001576 | 0.117034 | 0.608 | 0.489 | 1 Mcy | CLNS1A         |
| CPNE2.6   | 0.001579 | -0.20244 | 0.106 | 0.179 | 1 Mcy | CPNE2          |
| ARMCX5.3  | 0.00158  | -0.17056 | 0.026 | 0.076 | 1 Mcy | ARMCX5         |
| HOXC10.4  | 0.001582 | -0.1274  | 0.011 | 0.055 | 1 Mcy | HOXC10         |
| ZHX1.5    | 0.001586 | -0.19307 | 0.136 | 0.211 | 1 Mcy | ZHX1           |
| ARL14EP.2 | 0.001595 | -0.19795 | 0.106 | 0.183 | 1 Mcy | ARL14EP        |
| PLXNA3.2  | 0.001596 | -0.12631 | 0.018 | 0.067 | 1 Mcy | PLXNA3         |
| GNG3.4    | 0.001602 | -0.26422 | 0.026 | 0.075 | 1 Mcy | GNG3           |
| ZNF620.3  | 0.001605 | -0.1238  | 0.015 | 0.06  | 1 Mcy | ZNF620         |
| ARID4A.2  | 0.001606 | -0.23167 | 0.198 | 0.277 | 1 Mcy | ARID4A         |
| PHF23.4   | 0.001608 | -0.23645 | 0.136 | 0.209 | 1 Mcy | PHF23          |
| CUEDC1.5  | 0.001609 | -0.15805 | 0.055 | 0.116 | 1 Mcy | CUEDC1         |
| SUSD4.3   | 0.001611 | -0.13237 | 0.004 | 0.042 | 1 Mcy | SUSD4          |
| RP11-398K | 0.001615 | -0.12455 | 0.026 | 0.077 | 1 Mcy | RP11-398K22.12 |
| CDC37L1.4 | 0.001617 | -0.2063  | 0.073 | 0.14  | 1 Mcy | CDC37L1        |
| SPIN2B.4  | 0.001626 | -0.10732 | 0.048 | 0.108 | 1 Mcy | SPIN2B         |
| ILF2.3    | 0.001626 | 0.108564 | 0.7   | 0.571 | 1 Mcy | ILF2           |
| SALL2     | 0.001634 | -0.1168  | 0.004 | 0.042 | 1 Mcy | SALL2          |
| RGS11.3   | 0.001641 | -0.11758 | 0.007 | 0.048 | 1 Mcy | RGS11          |
| PSD2.3    | 0.001647 | -0.12888 | 0.004 | 0.042 | 1 Mcy | PSD2           |
| SMOC1.2   | 0.001648 | -0.15376 | 0     | 0.035 | 1 Mcy | SMOC1          |
| KLHDC3.4  | 0.00165  | 0.169635 | 0.462 | 0.36  | 1 Mcy | KLHDC3         |
| DNAJC27-A | 0.001656 | -0.11115 | 0.004 | 0.042 | 1 Mcy | DNAJC27-AS1    |
| GPC6.3    | 0.00166  | -0.12274 | 0.004 | 0.042 | 1 Mcy | GPC6           |
| CARF.4    | 0.001668 | -0.12826 | 0.026 | 0.078 | 1 Mcy | CARF           |
| TMEM261.1 | 0.001671 | 0.103573 | 0.447 | 0.358 | 1 Mcy | TMEM261        |
| RUNX1T1.3 | 0.001671 | -0.102   | 0     | 0.035 | 1 Mcy | RUNX1T1        |
| NLN.4     | 0.001679 | -0.20827 | 0.114 | 0.187 | 1 Mcy | NLN            |
| RAB11B.4  | 0.001679 | -0.22686 | 0.465 | 0.505 | 1 Mcy | RAB11B         |
| TRIM28.4  | 0.001684 | 0.167573 | 0.33  | 0.248 | 1 Mcy | TRIM28         |
| MYLK.3    | 0.00169  | -0.19983 | 0.015 | 0.06  | 1 Mcy | MYLK           |
| JRKL.2    | 0.0017   | -0.12116 | 0.026 | 0.077 | 1 Mcy | JRKL           |
| IPO7.3    | 0.001702 | 0.114951 | 0.286 | 0.21  | 1 Mcy | IPO7           |
| ZNF471.1  | 0.001706 | -0.10018 | 0.004 | 0.042 | 1 Mcy | ZNF471         |

|           |          |          |       |       |       |               |
|-----------|----------|----------|-------|-------|-------|---------------|
| RP11-195F | 0.001707 | -0.17673 | 0.037 | 0.092 | 1 Mcy | RP11-195F19.5 |
| CTC-459F4 | 0.001707 | -0.11489 | 0.018 | 0.066 | 1 Mcy | CTC-459F4.3   |
| ABCA5.3   | 0.001715 | -0.11665 | 0.033 | 0.088 | 1 Mcy | ABCA5         |
| ZFAND3.2  | 0.001716 | -0.23969 | 0.198 | 0.274 | 1 Mcy | ZFAND3        |
| WDR11.2   | 0.001718 | 0.107969 | 0.165 | 0.105 | 1 Mcy | WDR11         |
| ABT1.1    | 0.001722 | 0.124338 | 0.289 | 0.214 | 1 Mcy | ABT1          |
| FLYWCH1.1 | 0.001727 | -0.14855 | 0.044 | 0.102 | 1 Mcy | FLYWCH1       |
| SREK1.5   | 0.001734 | 0.159031 | 0.407 | 0.321 | 1 Mcy | SREK1         |
| NOP56.2   | 0.001736 | 0.11039  | 0.527 | 0.411 | 1 Mcy | NOP56         |
| GS1-124K5 | 0.001739 | -0.10832 | 0.004 | 0.042 | 1 Mcy | GS1-124K5.11  |
| SP9.5     | 0.00174  | -0.14896 | 0.004 | 0.041 | 1 Mcy | SP9           |
| FANCF.4   | 0.001742 | -0.10455 | 0.037 | 0.093 | 1 Mcy | FANCF         |
| LINC00237 | 0.001742 | -0.10371 | 0     | 0.035 | 1 Mcy | LINC00237     |
| CNDP1.4   | 0.001742 | -0.2693  | 0     | 0.035 | 1 Mcy | CNDP1         |
| PLSCR4.3  | 0.001754 | -0.11792 | 0.007 | 0.048 | 1 Mcy | PLSCR4        |
| ALYREF.6  | 0.001764 | 0.204726 | 0.205 | 0.144 | 1 Mcy | ALYREF        |
| HBA2.4    | 0.001773 | -0.1144  | 0.297 | 0.195 | 1 Mcy | HBA2          |
| ZNF713.1  | 0.001775 | -0.10343 | 0.007 | 0.048 | 1 Mcy | ZNF713        |
| TBC1D17.2 | 0.00178  | -0.1769  | 0.088 | 0.157 | 1 Mcy | TBC1D17       |
| RBMX.4    | 0.001783 | 0.119906 | 0.703 | 0.563 | 1 Mcy | RBMX          |
| PPP1R37.4 | 0.001788 | -0.14053 | 0.07  | 0.136 | 1 Mcy | PPP1R37       |
| CDK5R2.3  | 0.001791 | -0.12508 | 0     | 0.035 | 1 Mcy | CDK5R2        |
| HOXC8.2   | 0.001791 | -0.12886 | 0     | 0.035 | 1 Mcy | HOXC8         |
| MIR7-3HG. | 0.001791 | -0.18025 | 0     | 0.035 | 1 Mcy | MIR7-3HG      |
| ELP6.4    | 0.001798 | 0.11596  | 0.289 | 0.213 | 1 Mcy | ELP6          |
| SRBD1.2   | 0.001799 | 0.110996 | 0.136 | 0.084 | 1 Mcy | SRBD1         |
| FAM219B.3 | 0.001799 | -0.11728 | 0.081 | 0.151 | 1 Mcy | FAM219B       |
| CTD-3074C | 0.001801 | -0.13439 | 0.015 | 0.06  | 1 Mcy | CTD-307407.5  |
| USP3.5    | 0.001801 | 0.121729 | 0.234 | 0.164 | 1 Mcy | USP3          |
| PCED1A.3  | 0.001809 | -0.12157 | 0.066 | 0.132 | 1 Mcy | PCED1A        |
| ZNF30     | 0.001818 | -0.10277 | 0.004 | 0.041 | 1 Mcy | ZNF30         |
| SCAMP4.4  | 0.001823 | -0.18573 | 0.187 | 0.27  | 1 Mcy | SCAMP4        |
| SREBF2.3  | 0.001825 | -0.1377  | 0.059 | 0.121 | 1 Mcy | SREBF2        |
| RNASEK.1  | 0.001829 | 0.118853 | 0.128 | 0.078 | 1 Mcy | RNASEK        |
| ZNF250.3  | 0.00183  | -0.12741 | 0.029 | 0.082 | 1 Mcy | ZNF250        |
| MTA3      | 0.00183  | -0.15606 | 0.029 | 0.081 | 1 Mcy | MTA3          |
| YPEL4.1   | 0.001833 | -0.1393  | 0.004 | 0.041 | 1 Mcy | YPEL4         |
| DMTF1.4   | 0.001847 | -0.15605 | 0.081 | 0.15  | 1 Mcy | DMTF1         |
| ACVR1.1   | 0.00185  | -0.1335  | 0.022 | 0.07  | 1 Mcy | ACVR1         |
| MAPK7.3   | 0.001861 | -0.156   | 0.062 | 0.126 | 1 Mcy | MAPK7         |
| BMI1.4    | 0.001863 | -0.13083 | 0.073 | 0.141 | 1 Mcy | BMI1          |
| GORAB.6   | 0.001881 | -0.1256  | 0.026 | 0.076 | 1 Mcy | GORAB         |
| PRKACB.3  | 0.001892 | -0.28404 | 0.147 | 0.217 | 1 Mcy | PRKACB        |
| ANTXR1.4  | 0.001892 | -0.11002 | 0.037 | 0.092 | 1 Mcy | ANTXR1        |
| ARGLU1.5  | 0.001896 | -0.21991 | 0.44  | 0.469 | 1 Mcy | ARGLU1        |
| ZNF548.1  | 0.001915 | -0.18023 | 0.022 | 0.07  | 1 Mcy | ZNF548        |
| COL18A1.1 | 0.001918 | -0.1019  | 0.011 | 0.054 | 1 Mcy | COL18A1       |
| MAST4.3   | 0.001924 | -0.14342 | 0.011 | 0.053 | 1 Mcy | MAST4         |
| ZMAT3.3   | 0.001926 | -0.2204  | 0.128 | 0.204 | 1 Mcy | ZMAT3         |
| C18orf32  | 0.001928 | -0.20057 | 0.154 | 0.238 | 1 Mcy | C18orf32      |
| THRB      | 0.001929 | -0.10186 | 0.004 | 0.041 | 1 Mcy | THRB          |

|           |          |          |       |       |       |               |
|-----------|----------|----------|-------|-------|-------|---------------|
| LLGL1.5   | 0.00193  | -0.15227 | 0.044 | 0.101 | 1 Mcy | LLGL1         |
| HEXIM2.2  | 0.001945 | -0.12624 | 0.029 | 0.082 | 1 Mcy | HEXIM2        |
| ZNF800.3  | 0.001946 | -0.15951 | 0.11  | 0.184 | 1 Mcy | ZNF800        |
| RP11-115C | 0.001949 | -0.15349 | 0.033 | 0.087 | 1 Mcy | RP11-115C21.2 |
| SPSB1.2   | 0.001949 | -0.15859 | 0.022 | 0.07  | 1 Mcy | SPSB1         |
| TMBIM6.2  | 0.001952 | -0.16831 | 0.879 | 0.837 | 1 Mcy | TMBIM6        |
| RP11-182L | 0.001953 | -0.1286  | 0.022 | 0.07  | 1 Mcy | RP11-182L21.6 |
| PLEKHJ1.3 | 0.001959 | 0.11339  | 0.465 | 0.364 | 1 Mcy | PLEKHJ1       |
| DOK4.4    | 0.001969 | -0.10833 | 0.007 | 0.047 | 1 Mcy | DOK4          |
| DUSP3.3   | 0.001973 | 0.150968 | 0.242 | 0.174 | 1 Mcy | DUSP3         |
| IDH3G.4   | 0.001975 | 0.117132 | 0.509 | 0.4   | 1 Mcy | IDH3G         |
| NDUFA4L2. | 0.001977 | -0.15303 | 0.004 | 0.041 | 1 Mcy | NDUFA4L2      |
| TCF7.3    | 0.00199  | -0.19537 | 0.077 | 0.141 | 1 Mcy | TCF7          |
| COPZ2.1   | 0.001992 | 0.172664 | 0.095 | 0.054 | 1 Mcy | COPZ2         |
| LEMD1.3   | 0.002002 | -0.12589 | 0.007 | 0.047 | 1 Mcy | LEMD1         |
| ADNP.5    | 0.002005 | -0.2066  | 0.121 | 0.195 | 1 Mcy | ADNP          |
| HPS5.4    | 0.002018 | 0.128403 | 0.172 | 0.113 | 1 Mcy | HPS5          |
| MTURN.3   | 0.002024 | -0.15939 | 0.029 | 0.08  | 1 Mcy | MTURN         |
| HOXB3.2   | 0.002029 | -0.11641 | 0     | 0.034 | 1 Mcy | HOXB3         |
| BCL11B.3  | 0.002029 | -0.13438 | 0     | 0.034 | 1 Mcy | BCL11B        |
| SPOCK3.4  | 0.002029 | -0.23898 | 0     | 0.034 | 1 Mcy | SPOCK3        |
| ABHD17A.5 | 0.002038 | -0.23705 | 0.165 | 0.237 | 1 Mcy | ABHD17A       |
| MAL.5     | 0.002047 | -0.2628  | 0.004 | 0.04  | 1 Mcy | MAL           |
| ARID1B.4  | 0.002054 | -0.17445 | 0.066 | 0.129 | 1 Mcy | ARID1B        |
| CAB39L.4  | 0.002054 | -0.14432 | 0.026 | 0.075 | 1 Mcy | CAB39L        |
| DNAJC6.3  | 0.002055 | -0.12057 | 0.011 | 0.053 | 1 Mcy | DNAJC6        |
| ZNF345.1  | 0.002055 | -0.10268 | 0.011 | 0.053 | 1 Mcy | ZNF345        |
| GFPT2.3   | 0.002061 | -0.12769 | 0.011 | 0.053 | 1 Mcy | GFPT2         |
| PACSIN3.4 | 0.002068 | -0.10146 | 0.022 | 0.07  | 1 Mcy | PACSIN3       |
| ATRN.2    | 0.002072 | -0.12934 | 0.062 | 0.126 | 1 Mcy | ATRN          |
| AQP1.1    | 0.002074 | -0.16107 | 0.007 | 0.046 | 1 Mcy | AQP1          |
| ARMC9.3   | 0.002096 | -0.10537 | 0.022 | 0.071 | 1 Mcy | ARMC9         |
| LINC00526 | 0.0021   | -0.14175 | 0.029 | 0.081 | 1 Mcy | LINC00526     |
| SLC25A22. | 0.002102 | -0.13118 | 0.055 | 0.115 | 1 Mcy | SLC25A22      |
| LTV1.2    | 0.002102 | 0.138661 | 0.253 | 0.184 | 1 Mcy | LTV1          |
| RCOR2.4   | 0.002108 | -0.11813 | 0.007 | 0.047 | 1 Mcy | RCOR2         |
| CCDC90B.5 | 0.002111 | -0.26715 | 0.344 | 0.41  | 1 Mcy | CCDC90B       |
| SF1.3     | 0.002117 | -0.22075 | 0.473 | 0.508 | 1 Mcy | SF1           |
| FPGS.2    | 0.002128 | 0.114792 | 0.212 | 0.148 | 1 Mcy | FPGS          |
| TSEN2.5   | 0.002146 | -0.16628 | 0.037 | 0.09  | 1 Mcy | TSEN2         |
| ZNF500.1  | 0.002148 | -0.13199 | 0.022 | 0.07  | 1 Mcy | ZNF500        |
| TMC7.1    | 0.002155 | -0.11481 | 0.007 | 0.046 | 1 Mcy | TMC7          |
| KDELR2.3  | 0.002158 | 0.102369 | 0.703 | 0.565 | 1 Mcy | KDELR2        |
| HAPLN2.4  | 0.002175 | -0.16812 | 0     | 0.033 | 1 Mcy | HAPLN2        |
| ADCK3.2   | 0.00218  | -0.1635  | 0.066 | 0.13  | 1 Mcy | ADCK3         |
| ARRDC4.1  | 0.002185 | -0.13037 | 0.022 | 0.069 | 1 Mcy | ARRDC4        |
| KLF15.2   | 0.002188 | -0.11214 | 0.004 | 0.04  | 1 Mcy | KLF15         |
| SEC22C.4  | 0.002195 | 0.12382  | 0.3   | 0.226 | 1 Mcy | SEC22C        |
| CDK18.3   | 0.002203 | -0.23431 | 0.029 | 0.079 | 1 Mcy | CDK18         |
| LINC01023 | 0.002204 | -0.11576 | 0.018 | 0.064 | 1 Mcy | LINC01023     |
| ZNF415    | 0.002205 | -0.1098  | 0     | 0.033 | 1 Mcy | ZNF415        |

|           |          |          |       |       |       |               |
|-----------|----------|----------|-------|-------|-------|---------------|
| NEK9      | 0.002212 | 0.161853 | 0.103 | 0.059 | 1 Mcy | NEK9          |
| RP11-544A | 0.002213 | -0.18666 | 0.033 | 0.084 | 1 Mcy | RP11-544A12.8 |
| U2AF1L4.3 | 0.002234 | -0.32946 | 0.128 | 0.198 | 1 Mcy | U2AF1L4       |
| LCAT      | 0.002236 | -0.10344 | 0     | 0.033 | 1 Mcy | LCAT          |
| TLE4.3    | 0.002247 | -0.2375  | 0.099 | 0.165 | 1 Mcy | TLE4          |
| DCAF11.3  | 0.002269 | 0.15242  | 0.256 | 0.189 | 1 Mcy | DCAF11        |
| ZFPL1.3   | 0.002271 | -0.2356  | 0.161 | 0.237 | 1 Mcy | ZFPL1         |
| HSD17B10. | 0.002275 | 0.132849 | 0.608 | 0.493 | 1 Mcy | HSD17B10      |
| MTA1.4    | 0.002278 | -0.20129 | 0.121 | 0.192 | 1 Mcy | MTA1          |
| ANKRD46.4 | 0.002278 | -0.20093 | 0.092 | 0.158 | 1 Mcy | ANKRD46       |
| IMPACT.2  | 0.002279 | 0.135675 | 0.227 | 0.161 | 1 Mcy | IMPACT        |
| RAD54L2.3 | 0.00228  | -0.18813 | 0.051 | 0.108 | 1 Mcy | RAD54L2       |
| DDX25.3   | 0.002289 | -0.1029  | 0.004 | 0.04  | 1 Mcy | DDX25         |
| IRF9.2    | 0.00229  | -0.21508 | 0.04  | 0.094 | 1 Mcy | IRF9          |
| BPTF.4    | 0.002292 | -0.22087 | 0.245 | 0.312 | 1 Mcy | BPTF          |
| HSPA13.5  | 0.002297 | -0.23244 | 0.132 | 0.201 | 1 Mcy | HSPA13        |
| AZGP1.4   | 0.002305 | -0.23447 | 0.015 | 0.058 | 1 Mcy | AZGP1         |
| RP5-1177M | 0.002308 | -0.18161 | 0.007 | 0.046 | 1 Mcy | RP5-1177M21.1 |
| KLHL12.2  | 0.002309 | -0.21477 | 0.066 | 0.126 | 1 Mcy | KLHL12        |
| ZNF880.2  | 0.002317 | -0.18058 | 0.081 | 0.146 | 1 Mcy | ZNF880        |
| HSD17B14. | 0.002318 | -0.2437  | 0.04  | 0.093 | 1 Mcy | HSD17B14      |
| CEP68.2   | 0.002338 | -0.2266  | 0.088 | 0.153 | 1 Mcy | CEP68         |
| GAS8.2    | 0.002344 | -0.11028 | 0.022 | 0.07  | 1 Mcy | GAS8          |
| IL33.4    | 0.002345 | -0.12582 | 0.007 | 0.046 | 1 Mcy | IL33          |
| CPT2.2    | 0.002346 | 0.13562  | 0.168 | 0.109 | 1 Mcy | CPT2          |
| NECAP1.3  | 0.002357 | -0.24271 | 0.128 | 0.2   | 1 Mcy | NECAP1        |
| TSC2.3    | 0.002358 | -0.17734 | 0.073 | 0.137 | 1 Mcy | TSC2          |
| EMILIN3.2 | 0.002363 | -0.10248 | 0     | 0.033 | 1 Mcy | EMILIN3       |
| LRFN4.2   | 0.002367 | -0.10289 | 0.026 | 0.074 | 1 Mcy | LRFN4         |
| DLX6-AS1. | 0.002367 | -0.58101 | 0.077 | 0.131 | 1 Mcy | DLX6-AS1      |
| ADAM9.4   | 0.002384 | 0.10119  | 0.432 | 0.327 | 1 Mcy | ADAM9         |
| WDR55.2   | 0.002385 | 0.111197 | 0.176 | 0.116 | 1 Mcy | WDR55         |
| PHRF1.3   | 0.002387 | 0.117874 | 0.132 | 0.082 | 1 Mcy | PHRF1         |
| UBXN6.3   | 0.002391 | -0.17512 | 0.22  | 0.301 | 1 Mcy | UBXN6         |
| FGF14-AS2 | 0.002393 | -0.10382 | 0.011 | 0.052 | 1 Mcy | FGF14-AS2     |
| XXYLT1.4  | 0.002396 | -0.13104 | 0.066 | 0.128 | 1 Mcy | XXYLT1        |
| HDX       | 0.002399 | -0.10863 | 0.004 | 0.039 | 1 Mcy | HDX           |
| AC093673. | 0.002401 | -0.20128 | 0.11  | 0.18  | 1 Mcy | AC093673.5    |
| CDC42EP3. | 0.002415 | -0.21919 | 0.066 | 0.126 | 1 Mcy | CDC42EP3      |
| BLOC1S4.6 | 0.002417 | -0.17803 | 0.172 | 0.245 | 1 Mcy | BLOC1S4       |
| KRT7.3    | 0.002431 | -0.14054 | 0.004 | 0.04  | 1 Mcy | KRT7          |
| KIFC2.2   | 0.002443 | -0.1126  | 0.022 | 0.069 | 1 Mcy | KIFC2         |
| COPE.3    | 0.002444 | -0.12119 | 0.832 | 0.769 | 1 Mcy | COPE          |
| ABHD17B.6 | 0.002448 | -0.20627 | 0.066 | 0.126 | 1 Mcy | ABHD17B       |
| KDM3A     | 0.002457 | -0.15935 | 0.048 | 0.103 | 1 Mcy | KDM3A         |
| HAP1.3    | 0.002466 | -0.12881 | 0.022 | 0.069 | 1 Mcy | HAP1          |
| GEMIN6.2  | 0.002468 | 0.141071 | 0.223 | 0.161 | 1 Mcy | GEMIN6        |
| FABP6.5   | 0.002483 | -0.14768 | 0.004 | 0.039 | 1 Mcy | FABP6         |
| UACA.1    | 0.002484 | 0.105605 | 0.11  | 0.065 | 1 Mcy | UACA          |
| TMEM231.4 | 0.002491 | -0.11249 | 0.018 | 0.063 | 1 Mcy | TMEM231       |
| LMBRD1.3  | 0.002494 | -0.26591 | 0.147 | 0.218 | 1 Mcy | LMBRD1        |

|           |          |          |       |       |       |               |
|-----------|----------|----------|-------|-------|-------|---------------|
| CA10.3    | 0.002498 | -0.13285 | 0     | 0.032 | 1 Mcy | CA10          |
| MIEF2.2   | 0.002508 | -0.1053  | 0.018 | 0.063 | 1 Mcy | MIEF2         |
| STAU2.4   | 0.002508 | -0.22142 | 0.106 | 0.175 | 1 Mcy | STAU2         |
| ANAPC1    | 0.002514 | 0.103289 | 0.11  | 0.065 | 1 Mcy | ANAPC1        |
| PNRC1.6   | 0.002523 | -0.21845 | 0.513 | 0.541 | 1 Mcy | PNRC1         |
| TMEM150C. | 0.002529 | -0.10037 | 0.007 | 0.046 | 1 Mcy | TMEM150C      |
| SLC30A9.5 | 0.00253  | -0.17772 | 0.172 | 0.254 | 1 Mcy | SLC30A9       |
| ADAMTS4.3 | 0.002533 | -0.16417 | 0     | 0.032 | 1 Mcy | ADAMTS4       |
| LIN7B.4   | 0.002533 | -0.14641 | 0.062 | 0.124 | 1 Mcy | LIN7B         |
| FAM213A.4 | 0.002549 | -0.26016 | 0.3   | 0.384 | 1 Mcy | FAM213A       |
| VCL.2     | 0.002567 | -0.12728 | 0.044 | 0.1   | 1 Mcy | VCL           |
| C15orf57. | 0.002571 | 0.122278 | 0.183 | 0.123 | 1 Mcy | C15orf57      |
| NPRL3.3   | 0.002579 | -0.20662 | 0.121 | 0.192 | 1 Mcy | NPRL3         |
| FAM179B.4 | 0.002586 | -0.12652 | 0.059 | 0.12  | 1 Mcy | FAM179B       |
| YPEL1.6   | 0.002592 | -0.1203  | 0.04  | 0.095 | 1 Mcy | YPEL1         |
| KIAA0232. | 0.002599 | -0.12912 | 0.084 | 0.153 | 1 Mcy | KIAA0232      |
| RAB3C.2   | 0.002599 | -0.12397 | 0.004 | 0.039 | 1 Mcy | RAB3C         |
| RP11-480C | 0.002604 | -0.10889 | 0     | 0.032 | 1 Mcy | RP11-480C16.1 |
| SLC24A2.4 | 0.002604 | -0.16574 | 0     | 0.032 | 1 Mcy | SLC24A2       |
| DPY19L4.3 | 0.002619 | -0.12995 | 0.04  | 0.095 | 1 Mcy | DPY19L4       |
| IDE       | 0.002642 | 0.106602 | 0.073 | 0.038 | 1 Mcy | IDE           |
| LYRM1.5   | 0.002643 | -0.23152 | 0.114 | 0.185 | 1 Mcy | LYRM1         |
| TTC21A    | 0.002644 | -0.10349 | 0.004 | 0.039 | 1 Mcy | TTC21A        |
| MAP2K7.2  | 0.002651 | -0.2018  | 0.125 | 0.197 | 1 Mcy | MAP2K7        |
| FAM73A.1  | 0.002658 | -0.15486 | 0.037 | 0.089 | 1 Mcy | FAM73A        |
| PHOSPHO2. | 0.002665 | -0.13518 | 0.007 | 0.045 | 1 Mcy | PHOSPHO2      |
| ZNF354A.3 | 0.002667 | -0.17834 | 0.062 | 0.122 | 1 Mcy | ZNF354A       |
| NECAB3.2  | 0.002694 | -0.10682 | 0.044 | 0.099 | 1 Mcy | NECAB3        |
| LYPLA1.3  | 0.002697 | 0.108724 | 0.502 | 0.405 | 1 Mcy | LYPLA1        |
| C7orf60   | 0.002701 | -0.1558  | 0.026 | 0.073 | 1 Mcy | C7orf60       |
| C5orf51.1 | 0.002702 | -0.1334  | 0.04  | 0.094 | 1 Mcy | C5orf51       |
| MKRN3.3   | 0.002704 | -0.11338 | 0.007 | 0.045 | 1 Mcy | MKRN3         |
| COL4A5.2  | 0.002715 | -0.10652 | 0     | 0.032 | 1 Mcy | COL4A5        |
| RP11-676J | 0.002715 | -0.1144  | 0     | 0.032 | 1 Mcy | RP11-676J15.1 |
| KLHL24.3  | 0.002716 | -0.24678 | 0.114 | 0.18  | 1 Mcy | KLHL24        |
| CASD1.4   | 0.002723 | -0.11666 | 0.029 | 0.078 | 1 Mcy | CASD1         |
| TMEM79.1  | 0.00273  | -0.11975 | 0.015 | 0.057 | 1 Mcy | TMEM79        |
| NUDT10.3  | 0.00274  | -0.11028 | 0.011 | 0.051 | 1 Mcy | NUDT10        |
| COG8.3    | 0.002746 | -0.14869 | 0.04  | 0.093 | 1 Mcy | COG8          |
| MAPKAPK5- | 0.00275  | -0.15094 | 0.147 | 0.225 | 1 Mcy | MAPKAPK5-AS1  |
| MOG.4     | 0.002753 | -0.25136 | 0     | 0.032 | 1 Mcy | MOG           |
| DYRK2.1   | 0.00278  | -0.10675 | 0.015 | 0.057 | 1 Mcy | DYRK2         |
| PRR3.3    | 0.002813 | -0.14205 | 0.048 | 0.104 | 1 Mcy | PRR3          |
| ADCK2.4   | 0.00282  | 0.176646 | 0.198 | 0.138 | 1 Mcy | ADCK2         |
| KLK6.4    | 0.00283  | -0.2669  | 0     | 0.032 | 1 Mcy | KLK6          |
| SYT5.4    | 0.002835 | -0.13682 | 0.007 | 0.044 | 1 Mcy | SYT5          |
| RRAGB.3   | 0.002855 | -0.16854 | 0.055 | 0.112 | 1 Mcy | RRAGB         |
| KLHL28.4  | 0.002862 | -0.20885 | 0.062 | 0.12  | 1 Mcy | KLHL28        |
| LRRC37B.4 | 0.002863 | -0.11968 | 0.055 | 0.114 | 1 Mcy | LRRC37B       |
| ZNF627.3  | 0.002865 | -0.13136 | 0.029 | 0.078 | 1 Mcy | ZNF627        |
| SRCIN1.4  | 0.002869 | -0.13858 | 0     | 0.032 | 1 Mcy | SRCIN1        |

|             |          |          |       |       |       |               |
|-------------|----------|----------|-------|-------|-------|---------------|
| MYRF. 4     | 0.002869 | -0.18483 | 0     | 0.032 | 1 Mcy | MYRF          |
| ACAD8. 3    | 0.002889 | -0.22721 | 0.117 | 0.184 | 1 Mcy | ACAD8         |
| RORB. 3     | 0.00289  | -0.11913 | 0.004 | 0.039 | 1 Mcy | RORB          |
| SNHG7. 3    | 0.00289  | -0.26158 | 0.286 | 0.347 | 1 Mcy | SNHG7         |
| CLVS1. 2    | 0.00291  | -0.11763 | 0     | 0.031 | 1 Mcy | CLVS1         |
| IL13RA2. 5  | 0.00291  | -0.22368 | 0.015 | 0.056 | 1 Mcy | IL13RA2       |
| STRBP. 6    | 0.002921 | -0.12162 | 0.066 | 0.128 | 1 Mcy | STRBP         |
| EMID1. 4    | 0.002928 | -0.10476 | 0.026 | 0.073 | 1 Mcy | EMID1         |
| ZNF582-AS   | 0.002946 | -0.17908 | 0.029 | 0.078 | 1 Mcy | ZNF582-AS1    |
| ABHD15. 5   | 0.002948 | 0.100216 | 0.099 | 0.057 | 1 Mcy | ABHD15        |
| DGCR2. 3    | 0.002951 | -0.12625 | 0.088 | 0.154 | 1 Mcy | DGCR2         |
| PDIA5. 1    | 0.00296  | 0.106667 | 0.114 | 0.069 | 1 Mcy | PDIA5         |
| POLR3D. 4   | 0.002965 | -0.1626  | 0.066 | 0.127 | 1 Mcy | POLR3D        |
| ARIH2OS. 1  | 0.002969 | -0.1046  | 0.022 | 0.068 | 1 Mcy | ARIH2OS       |
| SECISBP2. 0 | 0.002978 | -0.23585 | 0.179 | 0.255 | 1 Mcy | SECISBP2      |
| AARSD1. 3   | 0.002982 | -0.19102 | 0.051 | 0.106 | 1 Mcy | AARSD1        |
| TNP02. 4    | 0.002983 | -0.13839 | 0.106 | 0.181 | 1 Mcy | TNP02         |
| NONO. 5     | 0.002989 | 0.119262 | 0.557 | 0.453 | 1 Mcy | NONO          |
| C19orf43. 0 | 0.003    | -0.1127  | 0.714 | 0.672 | 1 Mcy | C19orf43      |
| ABCD3. 4    | 0.003005 | -0.14631 | 0.128 | 0.197 | 1 Mcy | ABCD3         |
| PIFO. 4     | 0.003027 | -0.20835 | 0.011 | 0.05  | 1 Mcy | PIFO          |
| DNAJB4. 2   | 0.003029 | -0.27182 | 0.07  | 0.127 | 1 Mcy | DNAJB4        |
| CACNA2D1. 0 | 0.003033 | -0.10421 | 0     | 0.031 | 1 Mcy | CACNA2D1      |
| HOXA-AS2. 0 | 0.003037 | -0.13547 | 0.004 | 0.038 | 1 Mcy | HOXA-AS2      |
| GATAD2B. 4  | 0.00304  | -0.21723 | 0.099 | 0.162 | 1 Mcy | GATAD2B       |
| NECAB1. 5   | 0.003049 | -0.15606 | 0.004 | 0.038 | 1 Mcy | NECAB1        |
| NBEA. 2     | 0.003059 | -0.11677 | 0.011 | 0.05  | 1 Mcy | NBEA          |
| GTF2H2C. 3  | 0.003065 | -0.15886 | 0.037 | 0.088 | 1 Mcy | GTF2H2C       |
| ZNF581. 2   | 0.003066 | -0.20366 | 0.106 | 0.175 | 1 Mcy | ZNF581        |
| CSNK1G3. 4  | 0.003066 | -0.18874 | 0.092 | 0.154 | 1 Mcy | CSNK1G3       |
| WFDC2. 2    | 0.003076 | -0.10705 | 0     | 0.031 | 1 Mcy | WFDC2         |
| C8orf82. 4  | 0.003105 | -0.17769 | 0.106 | 0.172 | 1 Mcy | C8orf82       |
| RP11-126K   | 0.003106 | -0.14487 | 0.04  | 0.093 | 1 Mcy | RP11-126K1. 6 |
| IFNAR2. 4   | 0.003115 | 0.106595 | 0.271 | 0.198 | 1 Mcy | IFNAR2        |
| RERE. 5     | 0.003126 | -0.16588 | 0.139 | 0.212 | 1 Mcy | RERE          |
| IP6K1. 3    | 0.00313  | -0.17154 | 0.088 | 0.153 | 1 Mcy | IP6K1         |
| CBX7. 2     | 0.00314  | -0.19382 | 0.026 | 0.072 | 1 Mcy | CBX7          |
| WDR90       | 0.003141 | 0.104222 | 0.062 | 0.031 | 1 Mcy | WDR90         |
| AGO3. 2     | 0.003145 | -0.22425 | 0.125 | 0.194 | 1 Mcy | AGO3          |
| CHPT1. 4    | 0.003159 | -0.2372  | 0.242 | 0.304 | 1 Mcy | CHPT1         |
| SLC44A3. 2  | 0.003162 | -0.11688 | 0     | 0.031 | 1 Mcy | SLC44A3       |
| ST6GAL2. 3  | 0.003163 | -0.10623 | 0.004 | 0.038 | 1 Mcy | ST6GAL2       |
| WARS2. 1    | 0.003167 | 0.143221 | 0.099 | 0.058 | 1 Mcy | WARS2         |
| TNIP2. 2    | 0.003172 | 0.174978 | 0.227 | 0.163 | 1 Mcy | TNIP2         |
| TBC1D2. 1   | 0.003181 | 0.168307 | 0.062 | 0.031 | 1 Mcy | TBC1D2        |
| SGSM2. 2    | 0.003182 | -0.10344 | 0.048 | 0.104 | 1 Mcy | SGSM2         |
| PHB. 4      | 0.003193 | 0.102209 | 0.714 | 0.551 | 1 Mcy | PHB           |
| LINC00882   | 0.003206 | -0.12797 | 0     | 0.031 | 1 Mcy | LINC00882     |
| RAB1A. 2    | 0.003211 | -0.19525 | 0.604 | 0.62  | 1 Mcy | RAB1A         |
| HSPB6. 5    | 0.003215 | -0.14009 | 0.018 | 0.061 | 1 Mcy | HSPB6         |
| NDUFA13. 3  | 0.003217 | -0.1524  | 0.842 | 0.77  | 1 Mcy | NDUFA13       |



|             |           |           |        |        |       |          |
|-------------|-----------|-----------|--------|--------|-------|----------|
| SH2B1. 2    | 0. 00322  | -0. 13103 | 0. 084 | 0. 151 | 1 Mcy | SH2B1    |
| C5orf56. 5  | 0. 003231 | -0. 17341 | 0. 055 | 0. 113 | 1 Mcy | C5orf56  |
| MAP4K5. 4   | 0. 003236 | -0. 19031 | 0. 092 | 0. 156 | 1 Mcy | MAP4K5   |
| LPIN1. 3    | 0. 003242 | -0. 19621 | 0. 077 | 0. 138 | 1 Mcy | LPIN1    |
| LHX1. 2     | 0. 003251 | -0. 12036 | 0      | 0. 031 | 1 Mcy | LHX1     |
| CEP78. 5    | 0. 003254 | 0. 114099 | 0. 168 | 0. 112 | 1 Mcy | CEP78    |
| NBPF10. 2   | 0. 003255 | -0. 17049 | 0. 084 | 0. 147 | 1 Mcy | NBPF10   |
| RNF187. 4   | 0. 003256 | -0. 26121 | 0. 326 | 0. 379 | 1 Mcy | RNF187   |
| SPTSSB. 3   | 0. 003272 | -0. 1322  | 0. 004 | 0. 038 | 1 Mcy | SPTSSB   |
| TMEM5. 4    | 0. 003296 | -0. 1397  | 0. 139 | 0. 21  | 1 Mcy | TMEM5    |
| SERTAD2. 2  | 0. 003308 | -0. 15777 | 0. 062 | 0. 122 | 1 Mcy | SERTAD2  |
| PCOLCE. 5   | 0. 00331  | -0. 19303 | 0. 033 | 0. 082 | 1 Mcy | PCOLCE   |
| MLF1. 3     | 0. 003319 | -0. 25994 | 0. 168 | 0. 243 | 1 Mcy | MLF1     |
| PACRG. 3    | 0. 003321 | -0. 12762 | 0. 004 | 0. 037 | 1 Mcy | PACRG    |
| ALKBH3. 1   | 0. 003341 | 0. 111839 | 0. 209 | 0. 146 | 1 Mcy | ALKBH3   |
| C6orf141. 0 | 0. 003343 | -0. 12313 | 0      | 0. 031 | 1 Mcy | C6orf141 |
| STARD3. 1   | 0. 003355 | 0. 113542 | 0. 33  | 0. 253 | 1 Mcy | STARD3   |
| CAMKMT. 3   | 0. 003397 | -0. 17742 | 0. 029 | 0. 076 | 1 Mcy | CAMKMT   |
| BTG2. 4     | 0. 003398 | -0. 33207 | 0. 432 | 0. 468 | 1 Mcy | BTG2     |
| PRNP. 3     | 0. 003415 | -0. 28543 | 0. 425 | 0. 466 | 1 Mcy | PRNP     |
| DVL2. 4     | 0. 003417 | -0. 17631 | 0. 11  | 0. 178 | 1 Mcy | DVL2     |
| KIAA1143. 0 | 0. 003417 | 0. 165832 | 0. 282 | 0. 209 | 1 Mcy | KIAA1143 |
| MDM4. 3     | 0. 003436 | -0. 2385  | 0. 176 | 0. 248 | 1 Mcy | MDM4     |
| RABL2A. 3   | 0. 00344  | -0. 12077 | 0. 029 | 0. 078 | 1 Mcy | RABL2A   |
| ZNF561. 2   | 0. 003441 | -0. 14975 | 0. 055 | 0. 112 | 1 Mcy | ZNF561   |
| BTBD10. 4   | 0. 003476 | -0. 2108  | 0. 117 | 0. 183 | 1 Mcy | BTBD10   |
| ERGIC3. 3   | 0. 003476 | -0. 15779 | 0. 593 | 0. 575 | 1 Mcy | ERGIC3   |
| CMYA5. 3    | 0. 003485 | -0. 10209 | 0      | 0. 03  | 1 Mcy | CMYA5    |
| BAZ2A. 1    | 0. 003491 | -0. 12414 | 0. 117 | 0. 191 | 1 Mcy | BAZ2A    |
| BACE2. 5    | 0. 003497 | -0. 10702 | 0. 015 | 0. 055 | 1 Mcy | BACE2    |
| GOPC. 4     | 0. 003508 | -0. 20012 | 0. 183 | 0. 26  | 1 Mcy | GOPC     |
| CCDC74A. 3  | 0. 003519 | -0. 1085  | 0. 011 | 0. 049 | 1 Mcy | CCDC74A  |
| INO80B. 1   | 0. 00352  | -0. 12095 | 0. 026 | 0. 071 | 1 Mcy | INO80B   |
| DNAJB5. 1   | 0. 003528 | -0. 13272 | 0. 033 | 0. 081 | 1 Mcy | DNAJB5   |
| QPRT. 2     | 0. 003529 | 0. 13235  | 0. 172 | 0. 114 | 1 Mcy | QPRT     |
| NEUROD2. 2  | 0. 003533 | -0. 13409 | 0      | 0. 03  | 1 Mcy | NEUROD2  |
| TRIM44. 5   | 0. 003536 | -0. 26248 | 0. 223 | 0. 288 | 1 Mcy | TRIM44   |
| ERCC6L2. 2  | 0. 003557 | -0. 1274  | 0. 037 | 0. 087 | 1 Mcy | ERCC6L2  |
| TMEM181. 6  | 0. 003566 | -0. 15383 | 0. 099 | 0. 165 | 1 Mcy | TMEM181  |
| NPEPPS. 2   | 0. 003576 | -0. 2281  | 0. 158 | 0. 226 | 1 Mcy | NPEPPS   |
| PSORS1C1. 0 | 0. 003596 | -0. 12494 | 0. 004 | 0. 037 | 1 Mcy | PSORS1C1 |
| ARHGEF7. 4  | 0. 0036   | -0. 19588 | 0. 095 | 0. 159 | 1 Mcy | ARHGEF7  |
| PEX1. 2     | 0. 003614 | -0. 13611 | 0. 033 | 0. 082 | 1 Mcy | PEX1     |
| PRDM8. 1    | 0. 003633 | -0. 1075  | 0      | 0. 03  | 1 Mcy | PRDM8    |
| HYAL2. 6    | 0. 003656 | -0. 14615 | 0. 154 | 0. 224 | 1 Mcy | HYAL2    |
| PPID. 1     | 0. 003665 | 0. 119763 | 0. 278 | 0. 208 | 1 Mcy | PPID     |
| DHX57. 3    | 0. 003673 | -0. 14974 | 0. 044 | 0. 096 | 1 Mcy | DHX57    |
| PIGA        | 0. 003677 | 0. 115556 | 0. 077 | 0. 041 | 1 Mcy | PIGA     |
| GOLPH3L. 2  | 0. 003677 | 0. 24391  | 0. 125 | 0. 078 | 1 Mcy | GOLPH3L  |
| HS2ST1. 5   | 0. 003692 | -0. 16842 | 0. 106 | 0. 176 | 1 Mcy | HS2ST1   |
| SCOC. 5     | 0. 003695 | -0. 19145 | 0. 359 | 0. 415 | 1 Mcy | SCOC     |

|              |           |           |        |        |       |                |
|--------------|-----------|-----------|--------|--------|-------|----------------|
| DLG2. 3      | 0. 003696 | -0. 14097 | 0. 011 | 0. 049 | 1 Mcy | DLG2           |
| SMG6. 2      | 0. 003711 | -0. 15686 | 0. 066 | 0. 124 | 1 Mcy | SMG6           |
| SCN2A. 2     | 0. 003735 | -0. 10913 | 0      | 0. 03  | 1 Mcy | SCN2A          |
| CHM. 1       | 0. 003743 | -0. 14071 | 0. 037 | 0. 086 | 1 Mcy | CHM            |
| LINC00847    | 0. 003755 | -0. 19636 | 0. 055 | 0. 11  | 1 Mcy | LINC00847      |
| PALLD. 3     | 0. 003757 | -0. 20137 | 0. 132 | 0. 2   | 1 Mcy | PALLD          |
| TRAF3IP2. 0. | 0. 003773 | -0. 12953 | 0. 044 | 0. 097 | 1 Mcy | TRAF3IP2       |
| KCTD20. 2    | 0. 003779 | 0. 146096 | 0. 256 | 0. 186 | 1 Mcy | KCTD20         |
| SAMD4B. 3    | 0. 003784 | -0. 17787 | 0. 15  | 0. 225 | 1 Mcy | SAMD4B         |
| MT2A. 5      | 0. 003789 | -0. 31749 | 0. 934 | 0. 78  | 1 Mcy | MT2A           |
| CBX4. 6      | 0. 003807 | -0. 10679 | 0. 059 | 0. 117 | 1 Mcy | CBX4           |
| ZNF281. 3    | 0. 003815 | -0. 20651 | 0. 121 | 0. 186 | 1 Mcy | ZNF281         |
| DDX3Y. 2     | 0. 003817 | -0. 11088 | 0. 037 | 0. 088 | 1 Mcy | DDX3Y          |
| MOBP. 5      | 0. 003826 | -0. 31    | 0. 004 | 0. 036 | 1 Mcy | MOBP           |
| BMPER. 1     | 0. 003833 | -0. 10056 | 0. 004 | 0. 036 | 1 Mcy | BMPER          |
| POLI. 1      | 0. 00386  | -0. 1551  | 0. 04  | 0. 091 | 1 Mcy | POLI           |
| ZNF544. 3    | 0. 003865 | -0. 19333 | 0. 066 | 0. 124 | 1 Mcy | ZNF544         |
| EXOG. 5      | 0. 003866 | -0. 15763 | 0. 092 | 0. 157 | 1 Mcy | EXOG           |
| RP11-345J    | 0. 003872 | 0. 124165 | 0. 304 | 0. 233 | 1 Mcy | RP11-345J4. 5  |
| DUS4L. 3     | 0. 003892 | -0. 14317 | 0. 033 | 0. 08  | 1 Mcy | DUS4L          |
| TFAP2B. 2    | 0. 003894 | -0. 10808 | 0      | 0. 03  | 1 Mcy | TFAP2B         |
| SOX10. 3     | 0. 003894 | -0. 1655  | 0      | 0. 03  | 1 Mcy | SOX10          |
| AC018647.    | 0. 003915 | -0. 2148  | 0. 007 | 0. 042 | 1 Mcy | AC018647. 3    |
| ZNF530. 4    | 0. 003921 | -0. 10638 | 0. 018 | 0. 06  | 1 Mcy | ZNF530         |
| BGN. 5       | 0. 003925 | -0. 22886 | 0. 022 | 0. 066 | 1 Mcy | BGN            |
| Clorf174.    | 0. 003926 | 0. 109589 | 0. 212 | 0. 153 | 1 Mcy | Clorf174       |
| PID1. 3      | 0. 003927 | -0. 18338 | 0. 062 | 0. 118 | 1 Mcy | PID1           |
| TP53I13. 4   | 0. 00393  | 0. 122321 | 0. 319 | 0. 243 | 1 Mcy | TP53I13        |
| PIK3R1. 4    | 0. 003938 | -0. 2748  | 0. 245 | 0. 309 | 1 Mcy | PIK3R1         |
| ZNF44. 2     | 0. 003943 | -0. 15886 | 0. 051 | 0. 106 | 1 Mcy | ZNF44          |
| WIPF2. 2     | 0. 003943 | -0. 15767 | 0. 132 | 0. 203 | 1 Mcy | WIPF2          |
| KIAA1324L    | 0. 003948 | -0. 10937 | 0      | 0. 03  | 1 Mcy | KIAA1324L      |
| CXXC1. 1     | 0. 003951 | 0. 139004 | 0. 234 | 0. 172 | 1 Mcy | CXXC1          |
| TRIO. 5      | 0. 003963 | -0. 12873 | 0. 103 | 0. 174 | 1 Mcy | TRIO           |
| GAS2L3. 3    | 0. 003973 | 0. 172019 | 0. 11  | 0. 067 | 1 Mcy | GAS2L3         |
| HDAC11. 2    | 0. 003977 | -0. 15057 | 0. 022 | 0. 065 | 1 Mcy | HDAC11         |
| NFAT5. 1     | 0. 004016 | -0. 16708 | 0. 077 | 0. 138 | 1 Mcy | NFAT5          |
| EIF6. 1      | 0. 004018 | 0. 106809 | 0. 634 | 0. 518 | 1 Mcy | EIF6           |
| NXN. 3       | 0. 004062 | -0. 10895 | 0. 004 | 0. 036 | 1 Mcy | NXN            |
| TLK2. 1      | 0. 004071 | -0. 14652 | 0. 066 | 0. 125 | 1 Mcy | TLK2           |
| DGCR5. 2     | 0. 004116 | -0. 10812 | 0      | 0. 029 | 1 Mcy | DGCR5          |
| RP11-445F    | 0. 004116 | -0. 12804 | 0      | 0. 029 | 1 Mcy | RP11-445F12. 1 |
| NCOA6. 6     | 0. 004148 | -0. 14136 | 0. 077 | 0. 137 | 1 Mcy | NCOA6          |
| TTC26. 5     | 0. 004158 | -0. 10816 | 0. 011 | 0. 049 | 1 Mcy | TTC26          |
| SPHK2. 4     | 0. 004168 | -0. 15957 | 0. 07  | 0. 13  | 1 Mcy | SPHK2          |
| KIF2A. 6     | 0. 004179 | -0. 24772 | 0. 172 | 0. 237 | 1 Mcy | KIF2A          |
| CYLD. 4      | 0. 004193 | 0. 104893 | 0. 231 | 0. 163 | 1 Mcy | CYLD           |
| NCBP1. 2     | 0. 004194 | 0. 122872 | 0. 128 | 0. 082 | 1 Mcy | NCBP1          |
| ZNF395. 3    | 0. 004218 | -0. 13114 | 0. 022 | 0. 065 | 1 Mcy | ZNF395         |
| PLEKHM1. 2   | 0. 004218 | 0. 129315 | 0. 117 | 0. 073 | 1 Mcy | PLEKHM1        |
| HERC4. 1     | 0. 004221 | -0. 10694 | 0. 059 | 0. 116 | 1 Mcy | HERC4          |

|            |          |          |       |       |       |            |
|------------|----------|----------|-------|-------|-------|------------|
| IRS2. 2    | 0.004222 | -0.26073 | 0.289 | 0.35  | 1 Mcy | IRS2       |
| ELAVL1. 3  | 0.004225 | 0.138998 | 0.421 | 0.342 | 1 Mcy | ELAVL1     |
| SYNJ2BP. 3 | 0.004243 | 0.111262 | 0.201 | 0.142 | 1 Mcy | SYNJ2BP    |
| MFSD6. 3   | 0.004247 | -0.12115 | 0.022 | 0.065 | 1 Mcy | MFSD6      |
| SLC05A1. 4 | 0.00425  | -0.13039 | 0.007 | 0.042 | 1 Mcy | SLC05A1    |
| ZFPM2. 1   | 0.004291 | -0.11853 | 0     | 0.029 | 1 Mcy | ZFPM2      |
| KCTD7. 2   | 0.004295 | -0.10204 | 0.018 | 0.06  | 1 Mcy | KCTD7      |
| STIM2. 3   | 0.004313 | -0.14092 | 0.095 | 0.163 | 1 Mcy | STIM2      |
| THRAP3. 4  | 0.004319 | 0.102125 | 0.527 | 0.436 | 1 Mcy | THRAP3     |
| NTPCR. 3   | 0.00432  | 0.145049 | 0.344 | 0.272 | 1 Mcy | NTPCR      |
| ESF1. 4    | 0.004335 | -0.26392 | 0.289 | 0.347 | 1 Mcy | ESF1       |
| ZMYM2. 4   | 0.004342 | -0.19114 | 0.136 | 0.206 | 1 Mcy | ZMYM2      |
| NPPA. 4    | 0.004351 | -0.14066 | 0     | 0.029 | 1 Mcy | NPPA       |
| CARNS1. 4  | 0.004351 | -0.21968 | 0     | 0.029 | 1 Mcy | CARNS1     |
| NAPB. 2    | 0.004357 | -0.15893 | 0.033 | 0.079 | 1 Mcy | NAPB       |
| ZNF568. 4  | 0.004369 | -0.17147 | 0.048 | 0.099 | 1 Mcy | ZNF568     |
| RDH13. 2   | 0.004396 | -0.11676 | 0.029 | 0.075 | 1 Mcy | RDH13      |
| ALDH1L1. 5 | 0.004404 | -0.19646 | 0.022 | 0.065 | 1 Mcy | ALDH1L1    |
| PDLIM4. 4  | 0.004427 | -0.25024 | 0.029 | 0.074 | 1 Mcy | PDLIM4     |
| UBE3C. 3   | 0.004449 | 0.188834 | 0.161 | 0.109 | 1 Mcy | UBE3C      |
| RICTOR. 3  | 0.00448  | -0.20101 | 0.121 | 0.188 | 1 Mcy | RICTOR     |
| GNG7. 5    | 0.004496 | -0.22167 | 0.223 | 0.301 | 1 Mcy | GNG7       |
| L1CAM. 3   | 0.004497 | -0.12896 | 0.004 | 0.035 | 1 Mcy | L1CAM      |
| SCAI. 3    | 0.004527 | -0.15472 | 0.037 | 0.084 | 1 Mcy | SCAI       |
| UNK. 1     | 0.004542 | -0.15146 | 0.07  | 0.128 | 1 Mcy | UNK        |
| LRRC24. 4  | 0.004542 | -0.11832 | 0.026 | 0.07  | 1 Mcy | LRRC24     |
| CCNL2. 4   | 0.004556 | -0.21746 | 0.22  | 0.292 | 1 Mcy | CCNL2      |
| BAIAP2-AS  | 0.004566 | -0.10338 | 0.022 | 0.065 | 1 Mcy | BAIAP2-AS1 |
| ZNF595. 3  | 0.004578 | -0.1105  | 0.029 | 0.076 | 1 Mcy | ZNF595     |
| ZC4H2. 3   | 0.004587 | -0.13131 | 0.015 | 0.053 | 1 Mcy | ZC4H2      |
| CLDN15. 4  | 0.004653 | -0.11981 | 0.022 | 0.064 | 1 Mcy | CLDN15     |
| FBX042     | 0.004662 | -0.11914 | 0.048 | 0.1   | 1 Mcy | FBX042     |
| UBA6-AS1.  | 0.004682 | -0.14473 | 0.037 | 0.084 | 1 Mcy | UBA6-AS1   |
| ENOSF1. 4  | 0.00469  | 0.164147 | 0.176 | 0.123 | 1 Mcy | ENOSF1     |
| ZDHHC5. 1  | 0.004691 | 0.129395 | 0.103 | 0.061 | 1 Mcy | ZDHHC5     |
| FOLR1. 3   | 0.004715 | -0.18553 | 0.004 | 0.035 | 1 Mcy | FOLR1      |
| ZNF136. 4  | 0.00472  | -0.17609 | 0.048 | 0.098 | 1 Mcy | ZNF136     |
| SMARCAL1   | 0.004739 | 0.10898  | 0.11  | 0.068 | 1 Mcy | SMARCAL1   |
| CYSTM1. 5  | 0.004742 | -0.29164 | 0.26  | 0.326 | 1 Mcy | CYSTM1     |
| TOP1MT. 2  | 0.004778 | -0.1191  | 0.029 | 0.074 | 1 Mcy | TOP1MT     |
| DNAAF2. 5  | 0.004788 | -0.1673  | 0.11  | 0.174 | 1 Mcy | DNAAF2     |
| HDAC5. 2   | 0.004798 | -0.16059 | 0.106 | 0.171 | 1 Mcy | HDAC5      |
| MPV17      | 0.004819 | 0.113488 | 0.425 | 0.344 | 1 Mcy | MPV17      |
| TMEM9. 6   | 0.004845 | -0.2882  | 0.304 | 0.368 | 1 Mcy | TMEM9      |
| CDK14. 2   | 0.004851 | -0.12402 | 0.033 | 0.079 | 1 Mcy | CDK14      |
| B3GAT2. 2  | 0.004857 | -0.14123 | 0.037 | 0.084 | 1 Mcy | B3GAT2     |
| TBL1XR1. 4 | 0.004886 | 0.138807 | 0.322 | 0.246 | 1 Mcy | TBL1XR1    |
| RAB11FIP4  | 0.004886 | -0.13806 | 0.007 | 0.041 | 1 Mcy | RAB11FIP4  |
| GALE. 1    | 0.004906 | 0.131749 | 0.212 | 0.154 | 1 Mcy | GALE       |
| KDM1A. 4   | 0.004915 | -0.20629 | 0.139 | 0.205 | 1 Mcy | KDM1A      |
| ESRRG      | 0.004931 | -0.10121 | 0     | 0.028 | 1 Mcy | ESRRG      |

|            |          |          |       |       |       |             |
|------------|----------|----------|-------|-------|-------|-------------|
| ARHGEF9.5  | 0.004954 | -0.16348 | 0.066 | 0.121 | 1 Mcy | ARHGEF9     |
| ARHGAP5.3  | 0.004971 | -0.1877  | 0.128 | 0.196 | 1 Mcy | ARHGAP5     |
| CD70       | 0.005015 | 0.117075 | 0.044 | 0.02  | 1 Mcy | CD70        |
| ORMDL3.4   | 0.005053 | -0.16025 | 0.07  | 0.128 | 1 Mcy | ORMDL3      |
| FASN.6     | 0.005094 | -0.1286  | 0.062 | 0.118 | 1 Mcy | FASN        |
| RBM12B.2   | 0.005113 | -0.11466 | 0.029 | 0.074 | 1 Mcy | RBM12B      |
| MTMR9.4    | 0.00514  | -0.17993 | 0.125 | 0.191 | 1 Mcy | MTMR9       |
| NEK1.3     | 0.005143 | -0.12949 | 0.07  | 0.128 | 1 Mcy | NEK1        |
| DFFA.2     | 0.005152 | 0.115799 | 0.286 | 0.218 | 1 Mcy | DFFA        |
| PRPF31.3   | 0.005158 | 0.11127  | 0.48  | 0.39  | 1 Mcy | PRPF31      |
| FAM195B.2  | 0.00516  | 0.117049 | 0.11  | 0.067 | 1 Mcy | FAM195B     |
| ZNF721.2   | 0.0052   | -0.12177 | 0.088 | 0.15  | 1 Mcy | ZNF721      |
| FBX016.1   | 0.005254 | -0.10206 | 0.007 | 0.041 | 1 Mcy | FBX016      |
| ACYP2.5    | 0.005258 | -0.25671 | 0.238 | 0.314 | 1 Mcy | ACYP2       |
| CA3.2      | 0.005279 | -0.25128 | 0.007 | 0.041 | 1 Mcy | CA3         |
| NME1.4     | 0.005282 | 0.123903 | 0.718 | 0.564 | 1 Mcy | NME1        |
| PCSK2.2    | 0.005286 | -0.11449 | 0     | 0.028 | 1 Mcy | PCSK2       |
| ARX.5      | 0.005299 | -0.12807 | 0.007 | 0.041 | 1 Mcy | ARX         |
| SLC9A3R1.0 | 0.005309 | -0.19542 | 0.092 | 0.151 | 1 Mcy | SLC9A3R1    |
| ST6GALNAC  | 0.005324 | -0.1436  | 0.092 | 0.155 | 1 Mcy | ST6GALNAC6  |
| EHMT2.5    | 0.00533  | -0.18372 | 0.136 | 0.202 | 1 Mcy | EHMT2       |
| PHC1.4     | 0.005332 | -0.12036 | 0.033 | 0.079 | 1 Mcy | PHC1        |
| SERINC3.2  | 0.005342 | -0.21286 | 0.3   | 0.367 | 1 Mcy | SERINC3     |
| CH25H.3    | 0.005379 | -0.12935 | 0.223 | 0.145 | 1 Mcy | CH25H       |
| DCUN1D1.2  | 0.00539  | 0.127975 | 0.216 | 0.154 | 1 Mcy | DCUN1D1     |
| NCBP2.4    | 0.005441 | -0.16847 | 0.392 | 0.442 | 1 Mcy | NCBP2       |
| NUDT16L1.0 | 0.005443 | -0.17386 | 0.209 | 0.283 | 1 Mcy | NUDT16L1    |
| PCSK1.3    | 0.005452 | -0.13016 | 0.004 | 0.034 | 1 Mcy | PCSK1       |
| ALS2.1     | 0.005479 | -0.10631 | 0.018 | 0.058 | 1 Mcy | ALS2        |
| SENP7.3    | 0.005493 | -0.14596 | 0.04  | 0.088 | 1 Mcy | SENP7       |
| VPS53.3    | 0.005517 | -0.1269  | 0.095 | 0.161 | 1 Mcy | VPS53       |
| LAMTOR5.3  | 0.00552  | -0.17772 | 0.751 | 0.69  | 1 Mcy | LAMTOR5     |
| SPATA2.2   | 0.005536 | -0.1192  | 0.026 | 0.068 | 1 Mcy | SPATA2      |
| SPIN1.4    | 0.005541 | -0.19545 | 0.106 | 0.168 | 1 Mcy | SPIN1       |
| SDHAF1.4   | 0.005581 | -0.17355 | 0.114 | 0.178 | 1 Mcy | SDHAF1      |
| RNASEH1-A  | 0.005589 | -0.16698 | 0.114 | 0.179 | 1 Mcy | RNASEH1-AS1 |
| LRRC28.1   | 0.005618 | 0.208083 | 0.139 | 0.093 | 1 Mcy | LRRC28      |
| TDRD3.2    | 0.005625 | -0.10381 | 0.044 | 0.094 | 1 Mcy | TDRD3       |
| MGEA5.3    | 0.005658 | -0.17034 | 0.165 | 0.234 | 1 Mcy | MGEA5       |
| CDKN2D.6   | 0.005668 | 0.13952  | 0.22  | 0.158 | 1 Mcy | CDKN2D      |
| PAQR7      | 0.005675 | -0.11356 | 0.011 | 0.046 | 1 Mcy | PAQR7       |
| DYNC2H1.2  | 0.00571  | -0.1042  | 0.015 | 0.052 | 1 Mcy | DYNC2H1     |
| MASP1.3    | 0.005712 | -0.11127 | 0.007 | 0.041 | 1 Mcy | MASP1       |
| SPAST.4    | 0.005732 | -0.11621 | 0.059 | 0.113 | 1 Mcy | SPAST       |
| PPP1R3C.1  | 0.005747 | -0.10144 | 0     | 0.027 | 1 Mcy | PPP1R3C     |
| PPP1R1C.3  | 0.005747 | -0.11651 | 0     | 0.027 | 1 Mcy | PPP1R1C     |
| PRCD.3     | 0.005762 | -0.13947 | 0.004 | 0.034 | 1 Mcy | PRCD        |
| STAP2.1    | 0.005802 | -0.10023 | 0.007 | 0.04  | 1 Mcy | STAP2       |
| TRIM13.4   | 0.005803 | -0.13223 | 0.179 | 0.251 | 1 Mcy | TRIM13      |
| PURB.1     | 0.005807 | -0.16334 | 0.106 | 0.17  | 1 Mcy | PURB        |
| TUT1       | 0.00581  | -0.13285 | 0.026 | 0.068 | 1 Mcy | TUT1        |

|              |          |          |       |       |       |               |
|--------------|----------|----------|-------|-------|-------|---------------|
| MRFAP1L1.    | 0.005832 | -0.19381 | 0.154 | 0.221 | 1 Mcy | MRFAP1L1      |
| PHF21A. 2    | 0.005905 | -0.10395 | 0.059 | 0.114 | 1 Mcy | PHF21A        |
| ASCC1. 1     | 0.005924 | 0.141055 | 0.165 | 0.112 | 1 Mcy | ASCC1         |
| C10orf35. 0. | 0.005972 | -0.1173  | 0.018 | 0.058 | 1 Mcy | C10orf35      |
| TBC1D19. 2   | 0.005978 | -0.11151 | 0.022 | 0.062 | 1 Mcy | TBC1D19       |
| FSD1L. 2     | 0.005995 | -0.10949 | 0.015 | 0.051 | 1 Mcy | FSD1L         |
| AATK. 3      | 0.006004 | -0.16822 | 0.004 | 0.034 | 1 Mcy | AATK          |
| PEX10. 4     | 0.00601  | -0.1572  | 0.128 | 0.194 | 1 Mcy | PEX10         |
| C1orf198. 0. | 0.006029 | -0.18357 | 0.055 | 0.106 | 1 Mcy | C1orf198      |
| TSGA10. 2    | 0.006061 | -0.10949 | 0.022 | 0.063 | 1 Mcy | TSGA10        |
| C1orf123. 0. | 0.006067 | 0.123775 | 0.421 | 0.339 | 1 Mcy | C1orf123      |
| ZNF669. 3    | 0.006075 | -0.12692 | 0.048 | 0.097 | 1 Mcy | ZNF669        |
| LINC01114    | 0.006087 | -0.1059  | 0.004 | 0.034 | 1 Mcy | LINC01114     |
| PEMT. 5      | 0.006087 | -0.17711 | 0.143 | 0.214 | 1 Mcy | PEMT          |
| BATF3. 1     | 0.006106 | -0.11698 | 0.044 | 0.093 | 1 Mcy | BATF3         |
| ATP1B1. 4    | 0.00611  | -0.36246 | 0.183 | 0.236 | 1 Mcy | ATP1B1        |
| MVB12A. 2    | 0.006118 | 0.144066 | 0.381 | 0.3   | 1 Mcy | MVB12A        |
| CHCHD6. 4    | 0.006126 | -0.20549 | 0.168 | 0.237 | 1 Mcy | CHCHD6        |
| DGKB. 1      | 0.006138 | -0.10529 | 0.004 | 0.034 | 1 Mcy | DGKB          |
| BIVM. 4      | 0.006141 | -0.13388 | 0.059 | 0.112 | 1 Mcy | BIVM          |
| CTIF         | 0.006154 | -0.10958 | 0.011 | 0.045 | 1 Mcy | CTIF          |
| CASC3. 3     | 0.006165 | -0.16506 | 0.121 | 0.187 | 1 Mcy | CASC3         |
| UBE2E3. 5    | 0.006177 | -0.19626 | 0.432 | 0.461 | 1 Mcy | UBE2E3        |
| SDAD1. 3     | 0.006177 | 0.104047 | 0.282 | 0.217 | 1 Mcy | SDAD1         |
| BAG5. 4      | 0.006203 | -0.18035 | 0.121 | 0.186 | 1 Mcy | BAG5          |
| RAB2B. 2     | 0.006205 | -0.14391 | 0.037 | 0.082 | 1 Mcy | RAB2B         |
| ZNF836       | 0.006232 | -0.11392 | 0.011 | 0.046 | 1 Mcy | ZNF836        |
| ZNF14. 2     | 0.00626  | -0.10218 | 0.015 | 0.051 | 1 Mcy | ZNF14         |
| NLK. 3       | 0.006298 | -0.1162  | 0.033 | 0.077 | 1 Mcy | NLK           |
| RNF139. 3    | 0.006322 | -0.18458 | 0.19  | 0.257 | 1 Mcy | RNF139        |
| LOX. 3       | 0.006344 | -0.16727 | 0.011 | 0.046 | 1 Mcy | LOX           |
| PCP4. 4      | 0.006347 | -0.18352 | 0.007 | 0.04  | 1 Mcy | PCP4          |
| TBC1D24. 4   | 0.006379 | -0.1119  | 0.029 | 0.072 | 1 Mcy | TBC1D24       |
| HHIP. 3      | 0.006424 | -0.1491  | 0     | 0.027 | 1 Mcy | HHIP          |
| EPHX2. 3     | 0.006456 | -0.12833 | 0.007 | 0.039 | 1 Mcy | EPHX2         |
| ARL2BP. 3    | 0.006465 | -0.26665 | 0.355 | 0.406 | 1 Mcy | ARL2BP        |
| COG1. 3      | 0.006472 | -0.1337  | 0.059 | 0.111 | 1 Mcy | COG1          |
| PPM1G. 5     | 0.006488 | 0.108215 | 0.513 | 0.416 | 1 Mcy | PPM1G         |
| PWWP2A. 3    | 0.006506 | -0.16319 | 0.073 | 0.128 | 1 Mcy | PWWP2A        |
| AKIRIN1. 4   | 0.006513 | -0.22212 | 0.311 | 0.369 | 1 Mcy | AKIRIN1       |
| WDR33. 1     | 0.006519 | 0.102166 | 0.377 | 0.299 | 1 Mcy | WDR33         |
| DSCR3. 1     | 0.006573 | 0.131277 | 0.223 | 0.163 | 1 Mcy | DSCR3         |
| OMA1. 1      | 0.006612 | 0.104354 | 0.114 | 0.071 | 1 Mcy | OMA1          |
| YTHDF2. 4    | 0.006613 | -0.26309 | 0.396 | 0.432 | 1 Mcy | YTHDF2        |
| AP4M1. 4     | 0.006631 | -0.19222 | 0.132 | 0.195 | 1 Mcy | AP4M1         |
| CUTA. 5      | 0.006632 | -0.13023 | 0.736 | 0.681 | 1 Mcy | CUTA          |
| SLC2A11. 1   | 0.006637 | -0.12489 | 0.026 | 0.067 | 1 Mcy | SLC2A11       |
| CAPS. 3      | 0.006646 | -0.13105 | 0.029 | 0.072 | 1 Mcy | CAPS          |
| RP11-212F    | 0.006651 | -0.12851 | 0.044 | 0.092 | 1 Mcy | RP11-212P7. 2 |
| ACVR1B. 2    | 0.006656 | -0.14825 | 0.04  | 0.086 | 1 Mcy | ACVR1B        |
| AKT3. 2      | 0.006665 | -0.11816 | 0.018 | 0.056 | 1 Mcy | AKT3          |

|            |          |          |       |       |       |          |
|------------|----------|----------|-------|-------|-------|----------|
| ZNF562.4   | 0.006694 | -0.20088 | 0.084 | 0.142 | 1 Mcy | ZNF562   |
| ITM2A.5    | 0.006734 | -0.17847 | 0.018 | 0.056 | 1 Mcy | ITM2A    |
| CBX6.4     | 0.006768 | -0.11633 | 0.172 | 0.242 | 1 Mcy | CBX6     |
| UBALD1.4   | 0.006784 | -0.14785 | 0.106 | 0.169 | 1 Mcy | UBALD1   |
| ALKBH5.4   | 0.006786 | -0.22765 | 0.267 | 0.324 | 1 Mcy | ALKBH5   |
| PRDX1.5    | 0.006789 | -0.14051 | 0.886 | 0.806 | 1 Mcy | PRDX1    |
| FXYD1.2    | 0.00682  | -0.13906 | 0.004 | 0.033 | 1 Mcy | FXYD1    |
| SPSB3.3    | 0.006846 | -0.22253 | 0.238 | 0.306 | 1 Mcy | SPSB3    |
| TTY15.3    | 0.006854 | -0.11578 | 0.018 | 0.056 | 1 Mcy | TTY15    |
| ATP5G3     | 0.006918 | 0.107387 | 0.868 | 0.733 | 1 Mcy | ATP5G3   |
| PLOD3.3    | 0.007038 | 0.144122 | 0.282 | 0.216 | 1 Mcy | PLOD3    |
| PRKAB2.1   | 0.007042 | -0.11749 | 0.022 | 0.061 | 1 Mcy | PRKAB2   |
| PLXNB2.3   | 0.007096 | 0.187146 | 0.209 | 0.156 | 1 Mcy | PLXNB2   |
| DUS3L.1    | 0.00713  | 0.10605  | 0.198 | 0.142 | 1 Mcy | DUS3L    |
| ZFAND5.6   | 0.007156 | -0.23055 | 0.429 | 0.464 | 1 Mcy | ZFAND5   |
| STRIP1.3   | 0.007178 | -0.1757  | 0.073 | 0.126 | 1 Mcy | STRIP1   |
| MROH8.1    | 0.007179 | -0.11887 | 0.007 | 0.039 | 1 Mcy | MROH8    |
| DHX29.4    | 0.0072   | -0.23302 | 0.245 | 0.311 | 1 Mcy | DHX29    |
| RCAN2.3    | 0.007202 | -0.14742 | 0.011 | 0.045 | 1 Mcy | RCAN2    |
| SEC11C.4   | 0.007206 | -0.22998 | 0.476 | 0.497 | 1 Mcy | SEC11C   |
| KMT2C.4    | 0.007207 | -0.24183 | 0.201 | 0.263 | 1 Mcy | KMT2C    |
| TMEM11.3   | 0.007208 | 0.134254 | 0.396 | 0.317 | 1 Mcy | TMEM11   |
| RQCD1.2    | 0.007219 | 0.103615 | 0.249 | 0.186 | 1 Mcy | RQCD1    |
| FAM200B.3  | 0.00722  | -0.2502  | 0.315 | 0.367 | 1 Mcy | FAM200B  |
| MAP3K11.3  | 0.007223 | 0.11768  | 0.242 | 0.181 | 1 Mcy | MAP3K11  |
| TNS1.2     | 0.007248 | 0.104518 | 0.084 | 0.049 | 1 Mcy | TNS1     |
| ATP2A2.2   | 0.007288 | 0.181865 | 0.348 | 0.277 | 1 Mcy | ATP2A2   |
| CRYZ.5     | 0.007292 | -0.1728  | 0.07  | 0.125 | 1 Mcy | CRYZ     |
| AASDHPPT.0 | 0.007313 | -0.2175  | 0.22  | 0.29  | 1 Mcy | AASDHPPT |
| DDIT3.3    | 0.007316 | -0.23754 | 0.377 | 0.429 | 1 Mcy | DDIT3    |
| METTL16.3  | 0.007334 | -0.11747 | 0.059 | 0.11  | 1 Mcy | METTL16  |
| LRCH3.4    | 0.007342 | -0.12892 | 0.081 | 0.139 | 1 Mcy | LRCH3    |
| MYBPC1.3   | 0.007354 | -0.11194 | 0.011 | 0.045 | 1 Mcy | MYBPC1   |
| PLEKHH1.4  | 0.007368 | -0.11784 | 0.004 | 0.033 | 1 Mcy | PLEKHH1  |
| ZNF148.2   | 0.007412 | -0.23715 | 0.187 | 0.25  | 1 Mcy | ZNF148   |
| ZNF174.4   | 0.007439 | -0.11263 | 0.029 | 0.071 | 1 Mcy | ZNF174   |
| CXorf23.1  | 0.007445 | -0.10842 | 0.022 | 0.061 | 1 Mcy | CXorf23  |
| CDC73.1    | 0.007463 | 0.139792 | 0.249 | 0.187 | 1 Mcy | CDC73    |
| TCEAL1.5   | 0.007464 | -0.2446  | 0.187 | 0.257 | 1 Mcy | TCEAL1   |
| EDIL3.4    | 0.007474 | -0.1778  | 0.004 | 0.033 | 1 Mcy | EDIL3    |
| KANSL2.3   | 0.007594 | -0.12442 | 0.092 | 0.151 | 1 Mcy | KANSL2   |
| GLIPR1L2.0 | 0.007624 | -0.11734 | 0.007 | 0.039 | 1 Mcy | GLIPR1L2 |
| UBXN2A.4   | 0.007637 | -0.15128 | 0.125 | 0.189 | 1 Mcy | UBXN2A   |
| DIS3.2     | 0.007637 | -0.1919  | 0.095 | 0.152 | 1 Mcy | DIS3     |
| KIAA1107.0 | 0.007676 | -0.12816 | 0.011 | 0.044 | 1 Mcy | KIAA1107 |
| BASP1.6    | 0.007731 | -0.25698 | 0.326 | 0.374 | 1 Mcy | BASP1    |
| MFSD12.5   | 0.00774  | 0.164493 | 0.249 | 0.19  | 1 Mcy | MFSD12   |
| TAF3.3     | 0.007765 | 0.158979 | 0.172 | 0.121 | 1 Mcy | TAF3     |
| IFIT3.4    | 0.007803 | 0.143536 | 0.158 | 0.107 | 1 Mcy | IFIT3    |
| GPR137C.3  | 0.007821 | -0.10958 | 0.015 | 0.05  | 1 Mcy | GPR137C  |
| MKRN1.5    | 0.007831 | -0.19092 | 0.355 | 0.409 | 1 Mcy | MKRN1    |

|             |          |          |       |       |       |               |
|-------------|----------|----------|-------|-------|-------|---------------|
| VCAN. 4     | 0.007898 | 0.176177 | 0.297 | 0.245 | 1 Mcy | VCAN          |
| GJB1. 4     | 0.007919 | -0.17688 | 0     | 0.025 | 1 Mcy | GJB1          |
| ATP8A1. 3   | 0.00795  | -0.14255 | 0.011 | 0.044 | 1 Mcy | ATP8A1        |
| CCZ1. 3     | 0.008003 | -0.17505 | 0.293 | 0.352 | 1 Mcy | CCZ1          |
| TTC19. 4    | 0.008004 | -0.14097 | 0.293 | 0.357 | 1 Mcy | TTC19         |
| SRRM4. 3    | 0.008022 | -0.11548 | 0.004 | 0.032 | 1 Mcy | SRRM4         |
| POLK. 2     | 0.008044 | -0.21338 | 0.121 | 0.181 | 1 Mcy | POLK          |
| ZNF516      | 0.008055 | -0.12935 | 0.048 | 0.095 | 1 Mcy | ZNF516        |
| CDCA7. 5    | 0.008059 | -0.22706 | 0.073 | 0.124 | 1 Mcy | CDCA7         |
| RALGPS1. 3  | 0.008063 | -0.12509 | 0.018 | 0.055 | 1 Mcy | RALGPS1       |
| SP4         | 0.008096 | -0.1092  | 0.018 | 0.055 | 1 Mcy | SP4           |
| GPD1. 5     | 0.008117 | -0.1817  | 0.015 | 0.049 | 1 Mcy | GPD1          |
| AAK1. 4     | 0.008132 | -0.20742 | 0.212 | 0.278 | 1 Mcy | AAK1          |
| CCDC106. 6  | 0.008136 | -0.16031 | 0.165 | 0.234 | 1 Mcy | CCDC106       |
| C6orf226. 0 | 0.008164 | -0.18524 | 0.128 | 0.191 | 1 Mcy | C6orf226      |
| ERF. 4      | 0.00817  | -0.16271 | 0.117 | 0.179 | 1 Mcy | ERF           |
| SERBP1      | 0.008181 | 0.127415 | 0.758 | 0.623 | 1 Mcy | SERBP1        |
| SMYD3. 3    | 0.008195 | -0.18142 | 0.084 | 0.14  | 1 Mcy | SMYD3         |
| SLAIN2. 3   | 0.00822  | 0.109355 | 0.19  | 0.138 | 1 Mcy | SLAIN2        |
| WDR45B. 3   | 0.008307 | -0.22168 | 0.366 | 0.404 | 1 Mcy | WDR45B        |
| RHOT1. 4    | 0.008322 | -0.19154 | 0.187 | 0.25  | 1 Mcy | RHOT1         |
| NKX6-2. 4   | 0.008374 | -0.17532 | 0     | 0.025 | 1 Mcy | NKX6-2        |
| NMB. 5      | 0.008428 | -0.2693  | 0.143 | 0.203 | 1 Mcy | NMB           |
| TAF9B. 3    | 0.008514 | -0.10988 | 0.088 | 0.146 | 1 Mcy | TAF9B         |
| KIAA1429    | 0.008531 | 0.104695 | 0.158 | 0.108 | 1 Mcy | KIAA1429      |
| GAL. 2      | 0.00857  | -0.15175 | 0.007 | 0.037 | 1 Mcy | GAL           |
| TTLL3. 1    | 0.008589 | -0.11281 | 0.026 | 0.065 | 1 Mcy | TTLL3         |
| NUDT12      | 0.008614 | -0.11032 | 0.026 | 0.065 | 1 Mcy | NUDT12        |
| PHF6. 5     | 0.008647 | -0.14439 | 0.11  | 0.171 | 1 Mcy | PHF6          |
| CHMP5. 1    | 0.008659 | 0.103867 | 0.652 | 0.529 | 1 Mcy | CHMP5         |
| ANKRD12. 1  | 0.008662 | -0.27262 | 0.385 | 0.427 | 1 Mcy | ANKRD12       |
| CHMP6. 2    | 0.008674 | 0.122597 | 0.253 | 0.194 | 1 Mcy | CHMP6         |
| FOXK1. 2    | 0.008704 | -0.13164 | 0.073 | 0.128 | 1 Mcy | FOXK1         |
| BCAS1. 3    | 0.00871  | -0.18967 | 0.011 | 0.043 | 1 Mcy | BCAS1         |
| STAT3. 1    | 0.008721 | -0.22373 | 0.421 | 0.459 | 1 Mcy | STAT3         |
| CYB561. 4   | 0.008764 | -0.10665 | 0.037 | 0.081 | 1 Mcy | CYB561        |
| TPM1. 4     | 0.008789 | -0.22521 | 0.194 | 0.254 | 1 Mcy | TPM1          |
| PHF20L1. 5  | 0.008827 | -0.23133 | 0.253 | 0.309 | 1 Mcy | PHF20L1       |
| RP11-473I   | 0.008831 | -0.11208 | 0.011 | 0.043 | 1 Mcy | RP11-473I1. 5 |
| ZNF573. 3   | 0.008832 | -0.13265 | 0.026 | 0.065 | 1 Mcy | ZNF573        |
| ZNF526      | 0.008868 | -0.13237 | 0.022 | 0.059 | 1 Mcy | ZNF526        |
| ZBTB7A. 2   | 0.00887  | -0.17256 | 0.121 | 0.18  | 1 Mcy | ZBTB7A        |
| CLK4. 2     | 0.00887  | -0.19489 | 0.106 | 0.164 | 1 Mcy | CLK4          |
| ZADH2. 1    | 0.008872 | -0.10925 | 0.055 | 0.105 | 1 Mcy | ZADH2         |
| NAB1. 2     | 0.008877 | -0.14532 | 0.073 | 0.127 | 1 Mcy | NAB1          |
| UQCR10. 3   | 0.00889  | 0.106854 | 0.89  | 0.738 | 1 Mcy | UQCR10        |
| ALG12. 3    | 0.008893 | 0.116011 | 0.136 | 0.091 | 1 Mcy | ALG12         |
| CASC4. 4    | 0.008909 | -0.18619 | 0.161 | 0.225 | 1 Mcy | CASC4         |
| RAB3D       | 0.008924 | -0.1158  | 0.033 | 0.075 | 1 Mcy | RAB3D         |
| GRAMD1A. 4  | 0.008954 | -0.17399 | 0.216 | 0.276 | 1 Mcy | GRAMD1A       |
| KSR1        | 0.008956 | -0.10446 | 0.011 | 0.043 | 1 Mcy | KSR1          |

|             |             |           |        |        |         |                 |
|-------------|-------------|-----------|--------|--------|---------|-----------------|
| AHCYL1. 6   | 0. 009054   | -0. 27565 | 0. 267 | 0. 329 | 1 Mcy   | AHCYL1          |
| JUND. 5     | 0. 00906    | -0. 24762 | 0. 348 | 0. 4   | 1 Mcy   | JUND            |
| ZNF550. 3   | 0. 009065   | -0. 11366 | 0. 015 | 0. 049 | 1 Mcy   | ZNF550          |
| USP47. 2    | 0. 00908    | -0. 21595 | 0. 183 | 0. 246 | 1 Mcy   | USP47           |
| FKBP8. 3    | 0. 009144   | -0. 14758 | 0. 67  | 0. 645 | 1 Mcy   | FKBP8           |
| DYNC2LI1. 1 | 0. 00918    | -0. 18873 | 0. 106 | 0. 166 | 1 Mcy   | DYNC2LI1        |
| RNF25. 1    | 0. 00925    | -0. 12526 | 0. 055 | 0. 103 | 1 Mcy   | RNF25           |
| UCK2. 2     | 0. 009342   | 0. 115124 | 0. 128 | 0. 086 | 1 Mcy   | UCK2            |
| DOLK. 4     | 0. 009357   | -0. 10239 | 0. 073 | 0. 127 | 1 Mcy   | DOLK            |
| NT5C3A. 4   | 0. 009434   | -0. 21972 | 0. 234 | 0. 296 | 1 Mcy   | NT5C3A          |
| ACYP1. 3    | 0. 009439   | 0. 11432  | 0. 234 | 0. 175 | 1 Mcy   | ACYP1           |
| SMARCC2. 5  | 0. 009461   | -0. 21151 | 0. 198 | 0. 265 | 1 Mcy   | SMARCC2         |
| GIGYF1. 1   | 0. 009497   | -0. 10559 | 0. 059 | 0. 108 | 1 Mcy   | GIGYF1          |
| SLC5A6      | 0. 009512   | 0. 140939 | 0. 154 | 0. 105 | 1 Mcy   | SLC5A6          |
| STX17. 2    | 0. 009537   | -0. 12832 | 0. 062 | 0. 113 | 1 Mcy   | STX17           |
| HSPA1B. 5   | 0. 009607   | -0. 35559 | 0. 374 | 0. 411 | 1 Mcy   | HSPA1B          |
| METTL13. 2  | 0. 009631   | 0. 101605 | 0. 172 | 0. 122 | 1 Mcy   | METTL13         |
| ZNF24. 4    | 0. 009633   | -0. 24527 | 0. 245 | 0. 302 | 1 Mcy   | ZNF24           |
| ABCC5. 1    | 0. 009634   | -0. 2187  | 0. 073 | 0. 123 | 1 Mcy   | ABCC5           |
| SLTM. 3     | 0. 009643   | 0. 104382 | 0. 429 | 0. 347 | 1 Mcy   | SLTM            |
| CHADL. 3    | 0. 009658   | -0. 17072 | 0. 011 | 0. 042 | 1 Mcy   | CHADL           |
| USP54. 3    | 0. 009725   | -0. 13808 | 0. 015 | 0. 048 | 1 Mcy   | USP54           |
| C17orf80. 1 | 0. 009763   | -0. 10313 | 0. 04  | 0. 085 | 1 Mcy   | C17orf80        |
| C9orf16. 3  | 0. 009777   | -0. 16184 | 0. 623 | 0. 581 | 1 Mcy   | C9orf16         |
| ITPKB       | 0. 009789   | -0. 13935 | 0. 033 | 0. 074 | 1 Mcy   | ITPKB           |
| CDKL3. 2    | 0. 009804   | -0. 18314 | 0. 062 | 0. 111 | 1 Mcy   | CDKL3           |
| ZNF212. 3   | 0. 009814   | -0. 10928 | 0. 029 | 0. 069 | 1 Mcy   | ZNF212          |
| RP11-386G   | 0. 009827   | 0. 176887 | 0. 198 | 0. 142 | 1 Mcy   | RP11-386G11. 10 |
| UNKL        | 0. 009858   | -0. 12746 | 0. 022 | 0. 059 | 1 Mcy   | UNKL            |
| CTB-58E17   | 0. 0099     | -0. 10285 | 0. 022 | 0. 059 | 1 Mcy   | CTB-58E17. 1    |
| RABEPK. 5   | 0. 009905   | -0. 17901 | 0. 136 | 0. 201 | 1 Mcy   | RABEPK          |
| NNAT. 6     | 0. 009913   | -0. 6746  | 0. 161 | 0. 196 | 1 Mcy   | NNAT            |
| SMPD4. 2    | 0. 009916   | 0. 163635 | 0. 15  | 0. 103 | 1 Mcy   | SMPD4           |
| TMEM116. 3  | 0. 009923   | -0. 13887 | 0. 026 | 0. 064 | 1 Mcy   | TMEM116         |
| PCYT2. 5    | 0. 00994    | -0. 12268 | 0. 103 | 0. 161 | 1 Mcy   | PCYT2           |
| RAB5A. 2    | 0. 009997   | -0. 2526  | 0. 407 | 0. 449 | 1 Mcy   | RAB5A           |
| DLX6-AS1.   | 0 2. 034395 |           | 0. 838 | 0. 044 | 0 Neo-G | DLX6-AS1        |
| STMN2. 7    | 0 2. 010482 |           | 0. 984 | 0. 09  | 0 Neo-G | STMN2           |
| DLX5. 7     | 0 1. 840474 |           | 0. 865 | 0. 056 | 0 Neo-G | DLX5            |
| NNAT. 7     | 0 1. 804069 |           | 0. 87  | 0. 113 | 0 Neo-G | NNAT            |
| NSG1. 7     | 0 1. 630233 |           | 0. 879 | 0. 09  | 0 Neo-G | NSG1            |
| ELAVL4. 6   | 0 1. 530401 |           | 0. 869 | 0. 094 | 0 Neo-G | ELAVL4          |
| TAGLN3. 6   | 0 1. 526926 |           | 0. 848 | 0. 107 | 0 Neo-G | TAGLN3          |
| STMN4. 6    | 0 1. 496653 |           | 0. 962 | 0. 226 | 0 Neo-G | STMN4           |
| DCX. 7      | 0 1. 477803 |           | 0. 814 | 0. 13  | 0 Neo-G | DCX             |
| SOX11. 6    | 0 1. 446174 |           | 0. 866 | 0. 2   | 0 Neo-G | SOX11           |
| DLX2. 7     | 0 1. 419108 |           | 0. 634 | 0. 044 | 0 Neo-G | DLX2            |
| NFIB. 7     | 0 1. 401495 |           | 0. 951 | 0. 308 | 0 Neo-G | NFIB            |
| THSD7A. 6   | 0 1. 377568 |           | 0. 671 | 0. 078 | 0 Neo-G | THSD7A          |
| KLHL35. 6   | 0 1. 362883 |           | 0. 632 | 0. 028 | 0 Neo-G | KLHL35          |
| CELF4. 7    | 0 1. 353442 |           | 0. 6   | 0. 031 | 0 Neo-G | CELF4           |



|                     |   |          |       |       |         |              |
|---------------------|---|----------|-------|-------|---------|--------------|
| CRMP1. 6            | 0 | 1.353013 | 0.86  | 0.193 | 0 Neo-G | CRMP1        |
| SYT1. 7             | 0 | 1.346437 | 0.609 | 0.038 | 0 Neo-G | SYT1         |
| SOX4. 6             | 0 | 1.339104 | 0.998 | 0.378 | 0 Neo-G | SOX4         |
| DLX1. 7             | 0 | 1.313385 | 0.61  | 0.054 | 0 Neo-G | DLX1         |
| MEIS2. 6            | 0 | 1.304036 | 0.692 | 0.144 | 0 Neo-G | MEIS2        |
| TTC9B. 7            | 0 | 1.296817 | 0.686 | 0.051 | 0 Neo-G | TTC9B        |
| GPC2. 7             | 0 | 1.283909 | 0.71  | 0.102 | 0 Neo-G | GPC2         |
| RAB3A. 7            | 0 | 1.261723 | 0.697 | 0.099 | 0 Neo-G | RAB3A        |
| MLLT11. 5           | 0 | 1.250345 | 0.987 | 0.389 | 0 Neo-G | MLLT11       |
| TSPAN13. 7          | 0 | 1.246391 | 0.877 | 0.229 | 0 Neo-G | TSPAN13      |
| DBN1. 7             | 0 | 1.214036 | 0.854 | 0.245 | 0 Neo-G | DBN1         |
| LY6H. 6             | 0 | 1.200266 | 0.523 | 0.032 | 0 Neo-G | LY6H         |
| PAK3. 7             | 0 | 1.191326 | 0.638 | 0.083 | 0 Neo-G | PAK3         |
| RBFOX2. 6           | 0 | 1.183827 | 0.706 | 0.156 | 0 Neo-G | RBFOX2       |
| TMEM161B-<br>LBH. 7 | 0 | 1.177367 | 0.761 | 0.231 | 0 Neo-G | TMEM161B-AS1 |
| ATAT1. 7            | 0 | 1.16298  | 0.78  | 0.229 | 0 Neo-G | ATAT1        |
| TMSB15A. 7          | 0 | 1.155395 | 0.657 | 0.12  | 0 Neo-G | TMSB15A      |
| MIAT. 6             | 0 | 1.150339 | 0.647 | 0.109 | 0 Neo-G | MIAT         |
| NRXN1. 6            | 0 | 1.140606 | 0.651 | 0.104 | 0 Neo-G | NRXN1        |
| PCSK1N. 6           | 0 | 1.136494 | 0.976 | 0.353 | 0 Neo-G | PCSK1N       |
| KIF5C. 7            | 0 | 1.134129 | 0.746 | 0.21  | 0 Neo-G | KIF5C        |
| TUBB2A. 6           | 0 | 1.13297  | 0.982 | 0.416 | 0 Neo-G | TUBB2A       |
| ARL4D. 7            | 0 | 1.12599  | 0.595 | 0.117 | 0 Neo-G | ARL4D        |
| DYNC1I1. 7          | 0 | 1.122604 | 0.559 | 0.049 | 0 Neo-G | DYNC1I1      |
| RND3. 6             | 0 | 1.118734 | 0.691 | 0.188 | 0 Neo-G | RND3         |
| PODXL2. 7           | 0 | 1.116321 | 0.801 | 0.248 | 0 Neo-G | PODXL2       |
| CXADR. 7            | 0 | 1.111669 | 0.745 | 0.254 | 0 Neo-G | CXADR        |
| ELAVL3. 7           | 0 | 1.110716 | 0.816 | 0.249 | 0 Neo-G | ELAVL3       |
| ATP1A3. 6           | 0 | 1.105124 | 0.581 | 0.065 | 0 Neo-G | ATP1A3       |
| APLP1. 7            | 0 | 1.098208 | 0.899 | 0.285 | 0 Neo-G | APLP1        |
| ACTL6B. 6           | 0 | 1.091763 | 0.511 | 0.024 | 0 Neo-G | ACTL6B       |
| NREP. 6             | 0 | 1.090908 | 0.742 | 0.216 | 0 Neo-G | NREP         |
| DNER. 5             | 0 | 1.085465 | 0.77  | 0.22  | 0 Neo-G | DNER         |
| SNAP25. 6           | 0 | 1.077007 | 0.626 | 0.084 | 0 Neo-G | SNAP25       |
| GSTA4. 6            | 0 | 1.076904 | 0.791 | 0.229 | 0 Neo-G | GSTA4        |
| SCG3. 7             | 0 | 1.076548 | 0.826 | 0.198 | 0 Neo-G | SCG3         |
| MARCKSL1. 6         | 0 | 1.07352  | 1     | 0.489 | 0 Neo-G | MARCKSL1     |
| CELF5. 7            | 0 | 1.068144 | 0.52  | 0.039 | 0 Neo-G | CELF5        |
| TERF2IP. 7          | 0 | 1.062704 | 0.969 | 0.463 | 0 Neo-G | TERF2IP      |
| ZC2HC1A. 6          | 0 | 1.061316 | 0.678 | 0.154 | 0 Neo-G | ZC2HC1A      |
| FNBP1L. 7           | 0 | 1.058095 | 0.587 | 0.136 | 0 Neo-G | FNBP1L       |
| ASIC4. 6            | 0 | 1.057858 | 0.531 | 0.092 | 0 Neo-G | ASIC4        |
| UCHL1. 5            | 0 | 1.056228 | 0.964 | 0.372 | 0 Neo-G | UCHL1        |
| MYT1L. 7            | 0 | 1.05484  | 0.446 | 0.012 | 0 Neo-G | MYT1L        |
| TCF4. 7             | 0 | 1.011759 | 0.958 | 0.47  | 0 Neo-G | TCF4         |
| TCEAL2. 5           | 0 | 1.011387 | 0.676 | 0.119 | 0 Neo-G | TCEAL2       |
| BEX2. 6             | 0 | 1.007958 | 0.777 | 0.194 | 0 Neo-G | BEX2         |
| MAPT. 7             | 0 | 1.001735 | 0.753 | 0.228 | 0 Neo-G | MAPT         |
| TUBB2B. 6           | 0 | 0.994134 | 0.999 | 0.501 | 0 Neo-G | TUBB2B       |
| GNG3. 5             | 0 | 0.993168 | 0.406 | 0.033 | 0 Neo-G | GNG3         |

|            |            |       |       |         |             |
|------------|------------|-------|-------|---------|-------------|
| MAP1B. 6   | 0 0.987799 | 0.991 | 0.478 | 0 Neo-G | MAP1B       |
| CDCA7. 6   | 0 0.981461 | 0.468 | 0.081 | 0 Neo-G | CDCA7       |
| MAP2. 7    | 0 0.977164 | 0.796 | 0.282 | 0 Neo-G | MAP2        |
| MEX3A. 6   | 0 0.969345 | 0.564 | 0.131 | 0 Neo-G | MEX3A       |
| ELAVL2. 7  | 0 0.966337 | 0.449 | 0.035 | 0 Neo-G | ELAVL2      |
| CD200. 7   | 0 0.964605 | 0.464 | 0.067 | 0 Neo-G | CD200       |
| PKIA. 7    | 0 0.963958 | 0.462 | 0.048 | 0 Neo-G | PKIA        |
| LINC00461  | 0 0.955886 | 0.709 | 0.273 | 0 Neo-G | LINC00461   |
| CELF3. 7   | 0 0.955128 | 0.435 | 0.021 | 0 Neo-G | CELF3       |
| RPRM. 7    | 0 0.952934 | 0.352 | 0.032 | 0 Neo-G | RPRM        |
| CSRNP3. 6  | 0 0.942023 | 0.46  | 0.055 | 0 Neo-G | CSRNP3      |
| HOXC9. 7   | 0 0.937829 | 0.43  | 0.043 | 0 Neo-G | HOXC9       |
| SCN3B. 5   | 0 0.929773 | 0.422 | 0.029 | 0 Neo-G | SCN3B       |
| STMN1. 6   | 0 0.920669 | 0.999 | 0.586 | 0 Neo-G | STMN1       |
| BEX1. 6    | 0 0.919672 | 0.853 | 0.29  | 0 Neo-G | BEX1        |
| DUSP26. 6  | 0 0.91709  | 0.415 | 0.048 | 0 Neo-G | DUSP26      |
| GDAP1L1. 6 | 0 0.916955 | 0.46  | 0.057 | 0 Neo-G | GDAP1L1     |
| TCEAL5. 5  | 0 0.914808 | 0.513 | 0.073 | 0 Neo-G | TCEAL5      |
| TCEAL7. 5  | 0 0.914385 | 0.751 | 0.248 | 0 Neo-G | TCEAL7      |
| TTC3. 6    | 0 0.91213  | 0.935 | 0.465 | 0 Neo-G | TTC3        |
| AC004540.  | 0 0.905642 | 0.471 | 0.08  | 0 Neo-G | AC004540. 4 |
| SYP. 7     | 0 0.900748 | 0.491 | 0.09  | 0 Neo-G | SYP         |
| KLC1. 7    | 0 0.899962 | 0.773 | 0.309 | 0 Neo-G | KLC1        |
| DLX6. 7    | 0 0.891478 | 0.346 | 0.022 | 0 Neo-G | DLX6        |
| RBP1. 5    | 0 0.891274 | 0.925 | 0.403 | 0 Neo-G | RBP1        |
| ATCAY. 6   | 0 0.887895 | 0.475 | 0.077 | 0 Neo-G | ATCAY       |
| GPM6A. 6   | 0 0.885483 | 0.98  | 0.447 | 0 Neo-G | GPM6A       |
| SLC38A1. 4 | 0 0.883808 | 0.519 | 0.095 | 0 Neo-G | SLC38A1     |
| NFIX. 6    | 0 0.882473 | 0.721 | 0.285 | 0 Neo-G | NFIX        |
| CDK5R1. 7  | 0 0.875025 | 0.419 | 0.053 | 0 Neo-G | CDK5R1      |
| LINC01102  | 0 0.873085 | 0.368 | 0.034 | 0 Neo-G | LINC01102   |
| SLC32A1. 5 | 0 0.857344 | 0.316 | 0.003 | 0 Neo-G | SLC32A1     |
| SRRM3. 6   | 0 0.849135 | 0.393 | 0.033 | 0 Neo-G | SRRM3       |
| KLRC2. 6   | 0 0.845073 | 0.433 | 0.07  | 0 Neo-G | KLRC2       |
| FAM57B. 6  | 0 0.828777 | 0.394 | 0.055 | 0 Neo-G | FAM57B      |
| PHF14. 6   | 0 0.822821 | 0.808 | 0.376 | 0 Neo-G | PHF14       |
| CHGB. 4    | 0 0.816568 | 0.41  | 0.048 | 0 Neo-G | CHGB        |
| HOXA7. 5   | 0 0.810155 | 0.412 | 0.064 | 0 Neo-G | HOXA7       |
| TMEM35. 6  | 0 0.808462 | 0.392 | 0.055 | 0 Neo-G | TMEM35      |
| VGf. 5     | 0 0.798426 | 0.361 | 0.034 | 0 Neo-G | VGf         |
| PAFAH1B3.  | 0 0.797186 | 0.813 | 0.376 | 0 Neo-G | PAFAH1B3    |
| UBE2E3. 6  | 0 0.794282 | 0.86  | 0.412 | 0 Neo-G | UBE2E3      |
| RUNDC3A. 7 | 0 0.783761 | 0.408 | 0.06  | 0 Neo-G | RUNDC3A     |
| PDZRN4. 4  | 0 0.780685 | 0.286 | 0.008 | 0 Neo-G | PDZRN4      |
| SP9. 6     | 0 0.77814  | 0.286 | 0.011 | 0 Neo-G | SP9         |
| REEP1. 7   | 0 0.776479 | 0.357 | 0.047 | 0 Neo-G | REEP1       |
| LINC00632  | 0 0.775518 | 0.375 | 0.057 | 0 Neo-G | LINC00632   |
| STX1A. 4   | 0 0.775108 | 0.339 | 0.034 | 0 Neo-G | STX1A       |
| FABP6. 6   | 0 0.773776 | 0.288 | 0.008 | 0 Neo-G | FABP6       |
| FXyD6. 7   | 0 0.771909 | 0.915 | 0.405 | 0 Neo-G | FXyD6       |
| SMIM18. 6  | 0 0.769756 | 0.342 | 0.027 | 0 Neo-G | SMIM18      |

|            |                 |        |        |             |          |
|------------|-----------------|--------|--------|-------------|----------|
| HDAC2. 6   | 0 0. 768957     | 0. 822 | 0. 402 | 0 Neo-G     | HDAC2    |
| PTMS. 6    | 0 0. 759907     | 0. 951 | 0. 505 | 0 Neo-G     | PTMS     |
| SBK1. 7    | 0 0. 756766     | 0. 333 | 0. 04  | 0 Neo-G     | SBK1     |
| INA. 4     | 0 0. 754772     | 0. 306 | 0. 01  | 0 Neo-G     | INA      |
| ARX. 6     | 0 0. 74606      | 0. 266 | 0. 012 | 0 Neo-G     | ARX      |
| SYT5. 5    | 0 0. 727059     | 0. 295 | 0. 013 | 0 Neo-G     | SYT5     |
| HOXA2. 6   | 0 0. 722447     | 0. 328 | 0. 041 | 0 Neo-G     | HOXA2    |
| ERBB4. 6   | 0 0. 706623     | 0. 288 | 0. 03  | 0 Neo-G     | ERBB4    |
| C1QTNF4. 5 | 0 0. 705903     | 0. 298 | 0. 027 | 0 Neo-G     | C1QTNF4  |
| YWHAQ. 6   | 0 0. 698713     | 0. 98  | 0. 603 | 0 Neo-G     | YWHAQ    |
| PAK7. 6    | 0 0. 680977     | 0. 291 | 0. 017 | 0 Neo-G     | PAK7     |
| SORBS2. 5  | 0 0. 674116     | 0. 285 | 0. 022 | 0 Neo-G     | SORBS2   |
| SLCO5A1. 5 | 0 0. 674014     | 0. 258 | 0. 015 | 0 Neo-G     | SLCO5A1  |
| BTG1. 6    | 0 0. 673715     | 0. 987 | 0. 653 | 0 Neo-G     | BTG1     |
| FGF9. 6    | 0 0. 67119      | 0. 276 | 0. 023 | 0 Neo-G     | FGF9     |
| TSC22D1. 6 | 0 0. 668113     | 0. 93  | 0. 461 | 0 Neo-G     | TSC22D1  |
| MARCKS. 5  | 0 0. 66438      | 0. 966 | 0. 553 | 0 Neo-G     | MARCKS   |
| KIAA1107.  | 0 0. 636209     | 0. 248 | 0. 018 | 0 Neo-G     | KIAA1107 |
| SRRM4. 4   | 0 0. 635931     | 0. 227 | 0. 007 | 0 Neo-G     | SRRM4    |
| HN1. 3     | 0 0. 623266     | 0. 984 | 0. 637 | 0 Neo-G     | HN1      |
| RTN4. 7    | 0 0. 599914     | 0. 984 | 0. 666 | 0 Neo-G     | RTN4     |
| CLVS1. 3   | 0 0. 586736     | 0. 219 | 0. 008 | 0 Neo-G     | CLVS1    |
| MIR7-3HG.  | 0 0. 567969     | 0. 215 | 0. 012 | 0 Neo-G     | MIR7-3HG |
| TUBA1A. 6  | 0 0. 541657     | 1      | 0. 784 | 0 Neo-G     | TUBA1A   |
| TUBB. 5    | 0 0. 522787     | 0. 995 | 0. 743 | 0 Neo-G     | TUBB     |
| B2M. 5     | 0 -0. 86986     | 0. 853 | 0. 985 | 0 Neo-G     | B2M      |
| HLA-B. 4   | 0 -1. 20405     | 0. 482 | 0. 897 | 0 Neo-G     | HLA-B    |
| NEAT1. 4   | 0 -1. 25781     | 0. 328 | 0. 816 | 0 Neo-G     | NEAT1    |
| MT2A. 6    | 0 -1. 61166     | 0. 381 | 0. 833 | 0 Neo-G     | MT2A     |
| S100A11. 7 | 0 -1. 65652     | 0. 165 | 0. 717 | 0 Neo-G     | S100A11  |
| BEX5. 5    | ##### 0. 756392 | 0. 389 | 0. 061 | ##### Neo-G | BEX5     |
| CCNI. 5    | ##### 0. 540668 | 0. 959 | 0. 675 | ##### Neo-G | CCNI     |
| EIF4G2. 6  | ##### 0. 573079 | 0. 921 | 0. 627 | ##### Neo-G | EIF4G2   |
| GADD45G. 6 | ##### 0. 842376 | 0. 677 | 0. 204 | ##### Neo-G | GADD45G  |
| SPOCK1. 6  | ##### 0. 735616 | 0. 349 | 0. 048 | ##### Neo-G | SPOCK1   |
| CPE. 6     | ##### 0. 776358 | 0. 815 | 0. 338 | ##### Neo-G | CPE      |
| ONECUT2. 4 | ##### 0. 60324  | 0. 241 | 0. 019 | ##### Neo-G | ONECUT2  |
| HOXA3. 6   | ##### 0. 655746 | 0. 278 | 0. 029 | ##### Neo-G | HOXA3    |
| NCAN. 5    | ##### 0. 716358 | 0. 342 | 0. 048 | ##### Neo-G | NCAN     |
| CBX1. 5    | ##### 0. 802392 | 0. 732 | 0. 323 | ##### Neo-G | CBX1     |
| NKX2-2. 6  | ##### 0. 80851  | 0. 481 | 0. 107 | ##### Neo-G | NKX2-2   |
| INADL. 6   | ##### 0. 73097  | 0. 302 | 0. 039 | ##### Neo-G | INADL    |
| KIF3A. 5   | ##### 0. 8828   | 0. 59  | 0. 191 | ##### Neo-G | KIF3A    |
| EFNA3. 4   | ##### 0. 6748   | 0. 284 | 0. 032 | ##### Neo-G | EFNA3    |
| YWHAG. 6   | ##### 0. 784856 | 0. 749 | 0. 347 | ##### Neo-G | YWHAG    |
| FSCN1. 7   | ##### 0. 704093 | 0. 87  | 0. 46  | ##### Neo-G | FSCN1    |
| GNG5. 5    | ##### -1. 32469 | 0. 174 | 0. 701 | ##### Neo-G | GNG5     |
| ZNF428. 7  | ##### 0. 643495 | 0. 888 | 0. 503 | ##### Neo-G | ZNF428   |
| KMT2E. 5   | ##### 0. 650698 | 0. 889 | 0. 495 | ##### Neo-G | KMT2E    |
| DPYSL3. 6  | ##### 0. 824549 | 0. 7   | 0. 276 | ##### Neo-G | DPYSL3   |
| JAKMIP1. 2 | ##### 0. 500521 | 0. 198 | 0. 011 | ##### Neo-G | JAKMIP1  |

|           |       |          |       |       |       |       |          |
|-----------|-------|----------|-------|-------|-------|-------|----------|
| NAP1L3.5  | ##### | 0.777619 | 0.379 | 0.068 | ##### | Neo-G | NAP1L3   |
| RIT2.6    | ##### | 0.730319 | 0.326 | 0.046 | ##### | Neo-G | RIT2     |
| SNN.7     | ##### | 0.825897 | 0.582 | 0.182 | ##### | Neo-G | SNN      |
| NYAP1.4   | ##### | 0.552135 | 0.213 | 0.015 | ##### | Neo-G | NYAP1    |
| HLA-C.3   | ##### | -1.00744 | 0.497 | 0.84  | ##### | Neo-G | HLA-C    |
| MAPK10.6  | ##### | 0.866336 | 0.529 | 0.154 | ##### | Neo-G | MAPK10   |
| GDAP1.7   | ##### | 0.782559 | 0.47  | 0.113 | ##### | Neo-G | GDAP1    |
| CD63.6    | ##### | -0.76498 | 0.829 | 0.936 | ##### | Neo-G | CD63     |
| PRKAR2B.5 | ##### | 0.66063  | 0.301 | 0.04  | ##### | Neo-G | PRKAR2B  |
| HNRNPA0.5 | ##### | 0.563079 | 0.928 | 0.607 | ##### | Neo-G | HNRNPA0  |
| ZCCHC12   | ##### | 0.492287 | 0.186 | 0.01  | ##### | Neo-G | ZCCHC12  |
| NEUROD2.3 | ##### | 0.585342 | 0.187 | 0.01  | ##### | Neo-G | NEUROD2  |
| CCNG2.6   | ##### | 0.802179 | 0.518 | 0.14  | ##### | Neo-G | CCNG2    |
| VAMP2.6   | ##### | 0.553932 | 0.931 | 0.585 | ##### | Neo-G | VAMP2    |
| KLHDC8A.7 | ##### | 0.834608 | 0.6   | 0.208 | ##### | Neo-G | KLHDC8A  |
| SRPK2.5   | ##### | 0.72024  | 0.771 | 0.367 | ##### | Neo-G | SRPK2    |
| HOTAIRM1  | ##### | 0.801141 | 0.528 | 0.14  | ##### | Neo-G | HOTAIRM1 |
| SYT4      | ##### | 0.468232 | 0.167 | 0.007 | ##### | Neo-G | SYT4     |
| ERV3-1.6  | ##### | 0.787938 | 0.625 | 0.216 | ##### | Neo-G | ERV3-1   |
| SHD.6     | ##### | 0.754332 | 0.43  | 0.089 | ##### | Neo-G | SHD      |
| KIF1A.6   | ##### | 0.712289 | 0.426 | 0.09  | ##### | Neo-G | KIF1A    |
| CBX3.5    | ##### | 0.611986 | 0.876 | 0.514 | ##### | Neo-G | CBX3     |
| SCN2A.3   | ##### | 0.496085 | 0.183 | 0.011 | ##### | Neo-G | SCN2A    |
| NCAM1.7   | ##### | 0.763926 | 0.704 | 0.29  | ##### | Neo-G | NCAM1    |
| SLC25A4.7 | ##### | 0.655175 | 0.791 | 0.382 | ##### | Neo-G | SLC25A4  |
| CAMK2N1.7 | ##### | 0.771853 | 0.695 | 0.27  | ##### | Neo-G | CAMK2N1  |
| RAB2A.4   | ##### | 0.574477 | 0.9   | 0.554 | ##### | Neo-G | RAB2A    |
| KLHL7.5   | ##### | 0.806598 | 0.628 | 0.237 | ##### | Neo-G | KLHL7    |
| HLA-E.7   | ##### | -1.42644 | 0.135 | 0.652 | ##### | Neo-G | HLA-E    |
| MKRN1.6   | ##### | 0.759834 | 0.747 | 0.367 | ##### | Neo-G | MKRN1    |
| ZFP36L1.3 | ##### | -1.41916 | 0.084 | 0.617 | ##### | Neo-G | ZFP36L1  |
| KLHL23.7  | ##### | 0.805276 | 0.47  | 0.123 | ##### | Neo-G | KLHL23   |
| PLXNA4.6  | ##### | 0.777141 | 0.307 | 0.048 | ##### | Neo-G | PLXNA4   |
| RUFY3.6   | ##### | 0.79604  | 0.65  | 0.263 | ##### | Neo-G | RUFY3    |
| WHSC1L1.6 | ##### | 0.790675 | 0.715 | 0.331 | ##### | Neo-G | WHSC1L1  |
| PFN2.6    | ##### | 0.668146 | 0.822 | 0.387 | ##### | Neo-G | PFN2     |
| CHD7.7    | ##### | 0.80105  | 0.645 | 0.245 | ##### | Neo-G | CHD7     |
| RAB3C.3   | ##### | 0.503909 | 0.21  | 0.017 | ##### | Neo-G | RAB3C    |
| PSIP1.6   | ##### | 0.739935 | 0.733 | 0.341 | ##### | Neo-G | PSIP1    |
| LRRC61.5  | ##### | 0.588596 | 0.281 | 0.038 | ##### | Neo-G | LRRC61   |
| HOXA5.3   | ##### | 0.617569 | 0.271 | 0.035 | ##### | Neo-G | HOXA5    |
| LRTM1     | ##### | 0.421152 | 0.132 | 0.003 | ##### | Neo-G | LRTM1    |
| IFITM3.2  | ##### | -1.64049 | 0.029 | 0.561 | ##### | Neo-G | IFITM3   |
| VIM.5     | ##### | -1.27622 | 0.326 | 0.704 | ##### | Neo-G | VIM      |
| KIF21A.7  | ##### | 0.767868 | 0.651 | 0.26  | ##### | Neo-G | KIF21A   |
| NPC2.6    | ##### | -1.30178 | 0.292 | 0.74  | ##### | Neo-G | NPC2     |
| DAAM1.5   | ##### | 0.777364 | 0.577 | 0.2   | ##### | Neo-G | DAAM1    |
| ANXA5.4   | ##### | -1.02888 | 0.343 | 0.773 | ##### | Neo-G | ANXA5    |
| MAP1LC3A  | ##### | 0.729069 | 0.711 | 0.323 | ##### | Neo-G | MAP1LC3A |
| TMSB15B.6 | ##### | 0.823943 | 0.487 | 0.144 | ##### | Neo-G | TMSB15B  |
| CLIC1.5   | ##### | -1.25377 | 0.194 | 0.675 | ##### | Neo-G | CLIC1    |

|           |       |          |       |       |       |       |          |
|-----------|-------|----------|-------|-------|-------|-------|----------|
| ZNF821.7  | ##### | 0.76499  | 0.465 | 0.126 | ##### | Neo-G | ZNF821   |
| MAGEH1.6  | ##### | 0.728606 | 0.676 | 0.274 | ##### | Neo-G | MAGEH1   |
| DNAJB6.1  | ##### | 0.438684 | 0.961 | 0.678 | ##### | Neo-G | DNAJB6   |
| BCL7A.7   | ##### | 0.776974 | 0.439 | 0.114 | ##### | Neo-G | BCL7A    |
| KHDRBS1.5 | ##### | 0.646314 | 0.797 | 0.448 | ##### | Neo-G | KHDRBS1  |
| CDK5R2.4  | ##### | 0.568325 | 0.19  | 0.015 | ##### | Neo-G | CDK5R2   |
| ZNF711.6  | ##### | 0.759615 | 0.426 | 0.107 | ##### | Neo-G | ZNF711   |
| CD9.3     | ##### | -1.50861 | 0.112 | 0.621 | ##### | Neo-G | CD9      |
| AKAP9.5   | ##### | 0.677296 | 0.776 | 0.41  | ##### | Neo-G | AKAP9    |
| SERF2.3   | ##### | -0.677   | 0.767 | 0.911 | ##### | Neo-G | SERF2    |
| NDRG4.7   | ##### | 0.784109 | 0.448 | 0.125 | ##### | Neo-G | NDRG4    |
| RGMB.6    | ##### | 0.838847 | 0.412 | 0.098 | ##### | Neo-G | RGMB     |
| ATRX.4    | ##### | 0.674009 | 0.765 | 0.405 | ##### | Neo-G | ATRX     |
| BST2.6    | ##### | -1.59756 | 0.031 | 0.541 | ##### | Neo-G | BST2     |
| SEPT3.6   | ##### | 0.681895 | 0.278 | 0.042 | ##### | Neo-G | 3-Sep    |
| C3orf14.4 | ##### | 0.73506  | 0.602 | 0.223 | ##### | Neo-G | C3orf14  |
| RAI2      | ##### | 0.420564 | 0.149 | 0.007 | ##### | Neo-G | RAI2     |
| ZFR2.4    | ##### | 0.504419 | 0.203 | 0.018 | ##### | Neo-G | ZFR2     |
| SCG5.6    | ##### | 0.629981 | 0.695 | 0.283 | ##### | Neo-G | SCG5     |
| MAGED2.7  | ##### | 0.576127 | 0.841 | 0.468 | ##### | Neo-G | MAGED2   |
| CCDC112.6 | ##### | 0.782929 | 0.583 | 0.221 | ##### | Neo-G | CCDC112  |
| NHLH1.2   | ##### | 0.601961 | 0.157 | 0.009 | ##### | Neo-G | NHLH1    |
| NFIA.6    | ##### | 0.76016  | 0.716 | 0.338 | ##### | Neo-G | NFIA     |
| RSBN1L.5  | ##### | 0.693878 | 0.7   | 0.313 | ##### | Neo-G | RSBN1L   |
| NLRP1.6   | ##### | 0.712383 | 0.687 | 0.296 | ##### | Neo-G | NLRP1    |
| MYCBP2.4  | ##### | 0.792636 | 0.627 | 0.265 | ##### | Neo-G | MYCBP2   |
| PTOV1.6   | ##### | 0.64892  | 0.769 | 0.398 | ##### | Neo-G | PTOV1    |
| PCDHB10.6 | ##### | 0.720815 | 0.35  | 0.072 | ##### | Neo-G | PCDHB10  |
| NRXN2.7   | ##### | 0.69621  | 0.38  | 0.084 | ##### | Neo-G | NRXN2    |
| TRH       | ##### | 0.369477 | 0.132 | 0.004 | ##### | Neo-G | TRH      |
| RPAIN.5   | ##### | 0.589116 | 0.816 | 0.445 | ##### | Neo-G | RPAIN    |
| FCGRT.6   | ##### | -1.37225 | 0.115 | 0.603 | ##### | Neo-G | FCGRT    |
| CA8.6     | ##### | 0.650902 | 0.246 | 0.032 | ##### | Neo-G | CA8      |
| RCN2.6    | ##### | 0.614105 | 0.806 | 0.426 | ##### | Neo-G | RCN2     |
| CPLX2     | ##### | 0.417119 | 0.152 | 0.008 | ##### | Neo-G | CPLX2    |
| HMGB3.6   | ##### | 0.713035 | 0.616 | 0.238 | ##### | Neo-G | HMGB3    |
| NPDC1.6   | ##### | 0.717709 | 0.653 | 0.283 | ##### | Neo-G | NPDC1    |
| C10orf35  | ##### | 0.551588 | 0.25  | 0.034 | ##### | Neo-G | C10orf35 |
| RAC1.4    | ##### | 0.390606 | 0.987 | 0.713 | ##### | Neo-G | RAC1     |
| CDKN2D.7  | ##### | 0.765252 | 0.442 | 0.125 | ##### | Neo-G | CDKN2D   |
| UBE2V2.5  | ##### | 0.561061 | 0.805 | 0.457 | ##### | Neo-G | UBE2V2   |
| LGALS1.6  | ##### | -1.08992 | 0.408 | 0.74  | ##### | Neo-G | LGALS1   |
| APP.6     | ##### | 0.590881 | 0.872 | 0.482 | ##### | Neo-G | APP      |
| PPP1R9A.6 | ##### | 0.590191 | 0.284 | 0.045 | ##### | Neo-G | PPP1R9A  |
| ASNS.7    | ##### | 0.696528 | 0.476 | 0.141 | ##### | Neo-G | ASNS     |
| THRA.5    | ##### | 0.734788 | 0.557 | 0.2   | ##### | Neo-G | THRA     |
| ZFP36.4   | ##### | -1.41446 | 0.178 | 0.621 | ##### | Neo-G | ZFP36    |
| SEZ6L2.6  | ##### | 0.744536 | 0.591 | 0.235 | ##### | Neo-G | SEZ6L2   |
| TIMP1.5   | ##### | -1.41804 | 0.272 | 0.663 | ##### | Neo-G | TIMP1    |
| PCL0.2    | ##### | 0.451163 | 0.181 | 0.015 | ##### | Neo-G | PCL0     |
| TOX.7     | ##### | 0.708666 | 0.309 | 0.06  | ##### | Neo-G | TOX      |

|            |       |          |       |       |       |       |               |
|------------|-------|----------|-------|-------|-------|-------|---------------|
| JPH4. 4    | ##### | 0.587938 | 0.254 | 0.036 | ##### | Neo-G | JPH4          |
| C4orf48.5  | ##### | 0.599718 | 0.831 | 0.488 | ##### | Neo-G | C4orf48       |
| L1CAM. 4   | ##### | 0.480908 | 0.186 | 0.016 | ##### | Neo-G | L1CAM         |
| EEF1D. 6   | ##### | -0.76034 | 0.64  | 0.87  | ##### | Neo-G | EEF1D         |
| C14orf132  | ##### | 0.628798 | 0.327 | 0.063 | ##### | Neo-G | C14orf132     |
| CD01. 7    | ##### | 0.68528  | 0.555 | 0.196 | ##### | Neo-G | CD01          |
| BHLHE22    | ##### | 0.486201 | 0.108 | 0.002 | ##### | Neo-G | BHLHE22       |
| FAXC. 6    | ##### | 0.649467 | 0.307 | 0.059 | ##### | Neo-G | FAXC          |
| RTN3. 5    | ##### | 0.461064 | 0.913 | 0.623 | ##### | Neo-G | RTN3          |
| GRIA2. 6   | ##### | 0.754258 | 0.513 | 0.175 | ##### | Neo-G | GRIA2         |
| NXP4. 5    | ##### | 0.703154 | 0.256 | 0.039 | ##### | Neo-G | NXP4          |
| IER2. 6    | ##### | 0.575528 | 0.899 | 0.581 | ##### | Neo-G | IER2          |
| GSE1. 6    | ##### | 0.665535 | 0.32  | 0.063 | ##### | Neo-G | GSE1          |
| MAPRE3. 5  | ##### | 0.724642 | 0.463 | 0.144 | ##### | Neo-G | MAPRE3        |
| GAD2       | ##### | 0.527442 | 0.117 | 0.004 | ##### | Neo-G | GAD2          |
| SMPD3      | ##### | 0.431407 | 0.159 | 0.011 | ##### | Neo-G | SMPD3         |
| SLC1A3. 6  | ##### | -1.26542 | 0.056 | 0.528 | ##### | Neo-G | SLC1A3        |
| CENPV. 7   | ##### | 0.777061 | 0.566 | 0.217 | ##### | Neo-G | CENPV         |
| TUBB4A. 7  | ##### | 0.50015  | 0.386 | 0.085 | ##### | Neo-G | TUBB4A        |
| ZBTB20. 6  | ##### | 0.65966  | 0.712 | 0.346 | ##### | Neo-G | ZBTB20        |
| LGALS3. 5  | ##### | -1.6428  | 0.073 | 0.53  | ##### | Neo-G | LGALS3        |
| RAB9B. 4   | ##### | 0.530983 | 0.229 | 0.031 | ##### | Neo-G | RAB9B         |
| CD99. 4    | ##### | -1.10321 | 0.241 | 0.686 | ##### | Neo-G | CD99          |
| CAMKV      | ##### | 0.354819 | 0.126 | 0.005 | ##### | Neo-G | CAMKV         |
| ENC1. 7    | ##### | 0.943584 | 0.504 | 0.19  | ##### | Neo-G | ENC1          |
| ACOT7. 6   | ##### | 0.787015 | 0.519 | 0.191 | ##### | Neo-G | ACOT7         |
| GNAO1. 5   | ##### | 0.596149 | 0.319 | 0.063 | ##### | Neo-G | GNAO1         |
| BLCAP. 4   | ##### | 0.710615 | 0.592 | 0.254 | ##### | Neo-G | BLCAP         |
| MAGI1. 7   | ##### | 0.72437  | 0.489 | 0.162 | ##### | Neo-G | MAGI1         |
| GSN. 6     | ##### | -1.30952 | 0.104 | 0.559 | ##### | Neo-G | GSN           |
| CCDC136. 5 | ##### | 0.636767 | 0.313 | 0.064 | ##### | Neo-G | CCDC136       |
| HSDL1. 6   | ##### | 0.667559 | 0.384 | 0.1   | ##### | Neo-G | HSDL1         |
| MATR3. 6   | ##### | 0.593479 | 0.78  | 0.451 | ##### | Neo-G | MATR3         |
| PKM. 5     | ##### | -0.83891 | 0.571 | 0.795 | ##### | Neo-G | PKM           |
| BCL11B. 4  | ##### | 0.452522 | 0.174 | 0.016 | ##### | Neo-G | BCL11B        |
| NOVA1. 7   | ##### | 0.655657 | 0.876 | 0.431 | ##### | Neo-G | NOVA1         |
| RP3-525N1  | ##### | 0.746863 | 0.414 | 0.118 | ##### | Neo-G | RP3-525N10. 2 |
| LINCO0599  | ##### | 0.514966 | 0.179 | 0.017 | ##### | Neo-G | LINCO0599     |
| KIAA1549.  | ##### | 0.655669 | 0.313 | 0.067 | ##### | Neo-G | KIAA1549      |
| ENO1. 4    | ##### | -0.76787 | 0.599 | 0.818 | ##### | Neo-G | ENO1          |
| TOX3. 6    | ##### | 0.65441  | 0.262 | 0.044 | ##### | Neo-G | TOX3          |
| SCRT1      | ##### | 0.388743 | 0.134 | 0.007 | ##### | Neo-G | SCRT1         |
| ZFP36L2. 6 | ##### | -1.16731 | 0.113 | 0.565 | ##### | Neo-G | ZFP36L2       |
| TCP1. 3    | ##### | 0.52076  | 0.805 | 0.488 | ##### | Neo-G | TCP1          |
| IP6K2. 6   | ##### | 0.546396 | 0.751 | 0.396 | ##### | Neo-G | IP6K2         |
| GPD1. 6    | ##### | 0.534042 | 0.216 | 0.028 | ##### | Neo-G | GPD1          |
| NKX2-1     | ##### | 0.340059 | 0.119 | 0.005 | ##### | Neo-G | NKX2-1        |
| TBCC. 7    | ##### | 0.695119 | 0.513 | 0.186 | ##### | Neo-G | TBCC          |
| NEDD4L. 5  | ##### | 0.623853 | 0.35  | 0.084 | ##### | Neo-G | NEDD4L        |
| ATP1B1. 5  | ##### | 0.645676 | 0.551 | 0.196 | ##### | Neo-G | ATP1B1        |
| PEG10. 5   | ##### | 0.657491 | 0.335 | 0.074 | ##### | Neo-G | PEG10         |

|            |       |          |       |       |       |       |            |
|------------|-------|----------|-------|-------|-------|-------|------------|
| PJA1. 5    | ##### | 0.698652 | 0.467 | 0.159 | ##### | Neo-G | PJA1       |
| INSM1. 7   | ##### | 0.722455 | 0.353 | 0.088 | ##### | Neo-G | INSM1      |
| FAM155A. 1 | ##### | 0.399558 | 0.158 | 0.013 | ##### | Neo-G | FAM155A    |
| POP7. 5    | ##### | 0.601783 | 0.699 | 0.357 | ##### | Neo-G | POP7       |
| CPLX1. 4   | ##### | 0.49613  | 0.197 | 0.023 | ##### | Neo-G | CPLX1      |
| ANXA2. 6   | ##### | -1.32041 | 0.128 | 0.56  | ##### | Neo-G | ANXA2      |
| DBI. 7     | ##### | -0.76908 | 0.696 | 0.861 | ##### | Neo-G | DBI        |
| PTPRN2. 3  | ##### | 0.61905  | 0.516 | 0.175 | ##### | Neo-G | PTPRN2     |
| KLF7. 5    | ##### | 0.698253 | 0.493 | 0.171 | ##### | Neo-G | KLF7       |
| FEZ1. 6    | ##### | 0.544157 | 0.758 | 0.39  | ##### | Neo-G | FEZ1       |
| TCEAL6. 3  | ##### | 0.443259 | 0.179 | 0.018 | ##### | Neo-G | TCEAL6     |
| REM2       | ##### | 0.370046 | 0.122 | 0.006 | ##### | Neo-G | REM2       |
| NDUFA5. 5  | ##### | 0.441857 | 0.864 | 0.542 | ##### | Neo-G | NDUFA5     |
| DCTN3. 1   | ##### | 0.500575 | 0.808 | 0.481 | ##### | Neo-G | DCTN3      |
| PLK2. 4    | ##### | 0.69605  | 0.39  | 0.106 | ##### | Neo-G | PLK2       |
| ATP6VOE2.  | ##### | 0.543853 | 0.767 | 0.414 | ##### | Neo-G | ATP6VOE2   |
| STXBP1. 6  | ##### | 0.667695 | 0.356 | 0.092 | ##### | Neo-G | STXBP1     |
| DDAH2. 5   | ##### | 0.540777 | 0.781 | 0.453 | ##### | Neo-G | DDAH2      |
| HLA-DRB1.  | ##### | -1.46092 | 0.189 | 0.575 | ##### | Neo-G | HLA-DRB1   |
| NDFIP1. 7  | ##### | 0.48893  | 0.853 | 0.571 | ##### | Neo-G | NDFIP1     |
| BZW2. 3    | ##### | 0.623361 | 0.574 | 0.233 | ##### | Neo-G | BZW2       |
| YBX1. 3    | ##### | 0.341545 | 0.971 | 0.738 | ##### | Neo-G | YBX1       |
| DTD1. 7    | ##### | 0.603966 | 0.697 | 0.354 | ##### | Neo-G | DTD1       |
| CALB2      | ##### | 0.411481 | 0.121 | 0.006 | ##### | Neo-G | CALB2      |
| ARC. 5     | ##### | 0.722189 | 0.503 | 0.172 | ##### | Neo-G | ARC        |
| ADCYAP1    | ##### | 0.331149 | 0.099 | 0.002 | ##### | Neo-G | ADCYAP1    |
| KIDINS220  | ##### | 0.686399 | 0.561 | 0.233 | ##### | Neo-G | KIDINS220  |
| DUSP8. 5   | ##### | 0.540113 | 0.214 | 0.031 | ##### | Neo-G | DUSP8      |
| DLL3. 6    | ##### | 0.621727 | 0.416 | 0.11  | ##### | Neo-G | DLL3       |
| A2M. 5     | ##### | -1.36326 | 0.079 | 0.51  | ##### | Neo-G | A2M        |
| ZNF536. 5  | ##### | 0.449735 | 0.196 | 0.024 | ##### | Neo-G | ZNF536     |
| BASP1. 7   | ##### | 0.802255 | 0.621 | 0.342 | ##### | Neo-G | BASP1      |
| SMARCA4. 6 | ##### | 0.636919 | 0.65  | 0.326 | ##### | Neo-G | SMARCA4    |
| ANKRD46. 5 | ##### | 0.638117 | 0.417 | 0.125 | ##### | Neo-G | ANKRD46    |
| TIAM2. 6   | ##### | 0.639097 | 0.276 | 0.055 | ##### | Neo-G | TIAM2      |
| VDAC3. 3   | ##### | 0.51949  | 0.769 | 0.427 | ##### | Neo-G | VDAC3      |
| DYNC1LI2.  | ##### | 0.62479  | 0.639 | 0.309 | ##### | Neo-G | DYNC1LI2   |
| MT3. 7     | ##### | -1.52458 | 0.122 | 0.535 | ##### | Neo-G | MT3        |
| SCN3A. 6   | ##### | 0.550725 | 0.263 | 0.049 | ##### | Neo-G | SCN3A      |
| MT1X. 5    | ##### | -1.43466 | 0.216 | 0.621 | ##### | Neo-G | MT1X       |
| TRIM36. 7  | ##### | 0.701108 | 0.441 | 0.15  | ##### | Neo-G | TRIM36     |
| LRRC26     | ##### | 0.369144 | 0.126 | 0.007 | ##### | Neo-G | LRRC26     |
| SCRT2      | ##### | 0.352381 | 0.116 | 0.006 | ##### | Neo-G | SCRT2      |
| ATP6V1G2.  | ##### | 0.765867 | 0.393 | 0.119 | ##### | Neo-G | ATP6V1G2   |
| SYNPR      | ##### | 0.366481 | 0.091 | 0.002 | ##### | Neo-G | SYNPR      |
| HLA-DPA1.  | ##### | -1.3982  | 0.2   | 0.574 | ##### | Neo-G | HLA-DPA1   |
| H1FX. 6    | ##### | 0.646913 | 0.691 | 0.347 | ##### | Neo-G | H1FX       |
| STARD4-AS  | ##### | 0.698816 | 0.357 | 0.099 | ##### | Neo-G | STARD4-AS1 |
| GOLM1. 6   | ##### | 0.634679 | 0.606 | 0.281 | ##### | Neo-G | GOLM1      |
| LMO4. 7    | ##### | 0.609873 | 0.774 | 0.442 | ##### | Neo-G | LMO4       |
| EMP3. 6    | ##### | -1.24252 | 0.067 | 0.495 | ##### | Neo-G | EMP3       |

|            |       |          |       |       |       |       |          |
|------------|-------|----------|-------|-------|-------|-------|----------|
| SYN1. 1    | ##### | 0.439665 | 0.178 | 0.02  | ##### | Neo-G | SYN1     |
| TMEFF2. 7  | ##### | 0.578988 | 0.276 | 0.054 | ##### | Neo-G | TMEFF2   |
| PMP22. 5   | ##### | -1.28145 | 0.05  | 0.473 | ##### | Neo-G | PMP22    |
| SLC1A6     | ##### | 0.285885 | 0.101 | 0.003 | ##### | Neo-G | SLC1A6   |
| BEND5. 5   | ##### | 0.641448 | 0.376 | 0.108 | ##### | Neo-G | BEND5    |
| HOXA6      | ##### | 0.356527 | 0.134 | 0.01  | ##### | Neo-G | HOXA6    |
| PLTP. 5    | ##### | -1.31949 | 0.092 | 0.516 | ##### | Neo-G | PLTP     |
| NT5C3A. 5  | ##### | 0.651817 | 0.581 | 0.259 | ##### | Neo-G | NT5C3A   |
| MYH10. 5   | ##### | 0.686638 | 0.396 | 0.123 | ##### | Neo-G | MYH10    |
| CLASP2. 6  | ##### | 0.651361 | 0.475 | 0.163 | ##### | Neo-G | CLASP2   |
| SLC17A6    | ##### | 0.291622 | 0.097 | 0.003 | ##### | Neo-G | SLC17A6  |
| CHGA. 2    | ##### | 0.400146 | 0.147 | 0.012 | ##### | Neo-G | CHGA     |
| PRDX6. 3   | ##### | -1.0506  | 0.304 | 0.663 | ##### | Neo-G | PRDX6    |
| HLA-DRA. 6 | ##### | -1.23967 | 0.386 | 0.663 | ##### | Neo-G | HLA-DRA  |
| DPF1. 6    | ##### | 0.621749 | 0.38  | 0.111 | ##### | Neo-G | DPF1     |
| SAT1. 5    | ##### | -0.87053 | 0.622 | 0.825 | ##### | Neo-G | SAT1     |
| TAGLN2. 7  | ##### | -1.16957 | 0.14  | 0.56  | ##### | Neo-G | TAGLN2   |
| MYL6B. 6   | ##### | 0.524225 | 0.745 | 0.405 | ##### | Neo-G | MYL6B    |
| HOXA10. 7  | ##### | 0.582666 | 0.27  | 0.054 | ##### | Neo-G | HOXA10   |
| ANKS1B. 6  | ##### | 0.534545 | 0.337 | 0.08  | ##### | Neo-G | ANKS1B   |
| NBEAL1. 4  | ##### | -1.04111 | 0.324 | 0.706 | ##### | Neo-G | NBEAL1   |
| ARL4C. 5   | ##### | 0.64313  | 0.692 | 0.34  | ##### | Neo-G | ARL4C    |
| NKX2-5. 5  | ##### | 0.609244 | 0.241 | 0.043 | ##### | Neo-G | NKX2-5   |
| DDX5. 5    | ##### | 0.27559  | 0.98  | 0.797 | ##### | Neo-G | DDX5     |
| MDK. 6     | ##### | 0.454049 | 0.874 | 0.444 | ##### | Neo-G | MDK      |
| SRGAP3. 5  | ##### | 0.641535 | 0.39  | 0.116 | ##### | Neo-G | SRGAP3   |
| LUC7L3. 5  | ##### | 0.506754 | 0.786 | 0.477 | ##### | Neo-G | LUC7L3   |
| MYL12A. 6  | ##### | -1.09588 | 0.196 | 0.586 | ##### | Neo-G | MYL12A   |
| SCGN       | ##### | 0.357467 | 0.09  | 0.002 | ##### | Neo-G | SCGN     |
| GRN. 7     | ##### | -1.01633 | 0.211 | 0.614 | ##### | Neo-G | GRN      |
| RHOA. 5    | ##### | -0.75972 | 0.498 | 0.786 | ##### | Neo-G | RHOA     |
| NGFRAP1. 6 | ##### | 0.339628 | 0.963 | 0.605 | ##### | Neo-G | NGFRAP1  |
| CXXC5. 7   | ##### | 0.637719 | 0.665 | 0.345 | ##### | Neo-G | CXXC5    |
| CTSB. 4    | ##### | -0.88925 | 0.532 | 0.784 | ##### | Neo-G | CTSB     |
| CCT6A. 3   | ##### | 0.437073 | 0.841 | 0.542 | ##### | Neo-G | CCT6A    |
| GDI1. 6    | ##### | 0.496626 | 0.761 | 0.452 | ##### | Neo-G | GDI1     |
| AK1. 4     | ##### | 0.574162 | 0.628 | 0.3   | ##### | Neo-G | AK1      |
| KCNMB2. 2  | ##### | 0.433861 | 0.16  | 0.017 | ##### | Neo-G | KCNMB2   |
| KCNQ10T1.  | ##### | 0.652169 | 0.572 | 0.242 | ##### | Neo-G | KCNQ10T1 |
| MTX2. 4    | ##### | 0.600051 | 0.604 | 0.287 | ##### | Neo-G | MTX2     |
| NEUROD1. 4 | ##### | 0.475621 | 0.174 | 0.021 | ##### | Neo-G | NEUROD1  |
| ARMCX1. 6  | ##### | 0.61828  | 0.483 | 0.18  | ##### | Neo-G | ARMCX1   |
| CIB1. 6    | ##### | -1.08607 | 0.129 | 0.536 | ##### | Neo-G | CIB1     |
| STOX2. 7   | ##### | 0.616531 | 0.291 | 0.068 | ##### | Neo-G | STOX2    |
| CD74. 6    | ##### | -0.97582 | 0.596 | 0.77  | ##### | Neo-G | CD74     |
| HLA-DRB5.  | ##### | -1.60892 | 0.049 | 0.442 | ##### | Neo-G | HLA-DRB5 |
| HSP90AB1.  | ##### | 0.262453 | 0.98  | 0.801 | ##### | Neo-G | HSP90AB1 |
| CEBPD. 4   | ##### | -1.10983 | 0.095 | 0.503 | ##### | Neo-G | CEBPD    |
| B4GALNT1.  | ##### | 0.691816 | 0.386 | 0.114 | ##### | Neo-G | B4GALNT1 |
| TMEM196. 1 | ##### | 0.384227 | 0.145 | 0.014 | ##### | Neo-G | TMEM196  |
| ENO2. 7    | ##### | 0.565406 | 0.574 | 0.249 | ##### | Neo-G | ENO2     |



|             |       |          |       |       |       |       |          |
|-------------|-------|----------|-------|-------|-------|-------|----------|
| RALYL. 2    | ##### | 0.430087 | 0.152 | 0.015 | ##### | Neo-G | RALYL    |
| YTHDF2. 5   | ##### | 0.541585 | 0.699 | 0.398 | ##### | Neo-G | YTHDF2   |
| YWHAE. 6    | ##### | 0.299874 | 0.969 | 0.726 | ##### | Neo-G | YWHAE    |
| SERP2. 5    | ##### | 0.596577 | 0.308 | 0.076 | ##### | Neo-G | SERP2    |
| SFPQ. 4     | ##### | 0.482433 | 0.803 | 0.51  | ##### | Neo-G | SFPQ     |
| CSNK1E. 6   | ##### | 0.647099 | 0.582 | 0.273 | ##### | Neo-G | CSNK1E   |
| TMEM246. 5  | ##### | 0.483818 | 0.198 | 0.03  | ##### | Neo-G | TMEM246  |
| HRK. 5      | ##### | 0.631422 | 0.229 | 0.042 | ##### | Neo-G | HRK      |
| CDC42EP3. 6 | ##### | 0.592589 | 0.348 | 0.097 | ##### | Neo-G | CDC42EP3 |
| ZNF3. 5     | ##### | 0.648684 | 0.463 | 0.174 | ##### | Neo-G | ZNF3     |
| TMEM59L. 6  | ##### | 0.676895 | 0.523 | 0.226 | ##### | Neo-G | TMEM59L  |
| PTPRN. 5    | ##### | 0.509347 | 0.258 | 0.051 | ##### | Neo-G | PTPRN    |
| HSF2. 4     | ##### | 0.56256  | 0.336 | 0.091 | ##### | Neo-G | HSF2     |
| XRCC5. 6    | ##### | 0.43411  | 0.822 | 0.529 | ##### | Neo-G | XRCC5    |
| CD68. 7     | ##### | -1.30964 | 0.101 | 0.483 | ##### | Neo-G | CD68     |
| MAP4. 4     | ##### | 0.606605 | 0.605 | 0.302 | ##### | Neo-G | MAP4     |
| OLA1. 2     | ##### | 0.475997 | 0.752 | 0.456 | ##### | Neo-G | OLA1     |
| VAMP5. 3    | ##### | -1.24552 | 0.045 | 0.439 | ##### | Neo-G | VAMP5    |
| KCNH2. 5    | ##### | 0.49324  | 0.238 | 0.045 | ##### | Neo-G | KCNH2    |
| ANXA1. 5    | ##### | -1.43294 | 0.068 | 0.451 | ##### | Neo-G | ANXA1    |
| SPATS2. 5   | ##### | 0.639351 | 0.518 | 0.227 | ##### | Neo-G | SPATS2   |
| AES. 6      | ##### | 0.579019 | 0.686 | 0.377 | ##### | Neo-G | AES      |
| CD44. 4     | ##### | -1.2741  | 0.036 | 0.425 | ##### | Neo-G | CD44     |
| PNMA1. 6    | ##### | 0.658183 | 0.541 | 0.252 | ##### | Neo-G | PNMA1    |
| STRAP. 4    | ##### | 0.415077 | 0.811 | 0.522 | ##### | Neo-G | STRAP    |
| TAC3. 2     | ##### | 0.480459 | 0.13  | 0.011 | ##### | Neo-G | TAC3     |
| EFNB3. 5    | ##### | 0.548011 | 0.247 | 0.053 | ##### | Neo-G | EFNB3    |
| RSBN1. 5    | ##### | 0.642819 | 0.471 | 0.186 | ##### | Neo-G | RSBN1    |
| CXCL16. 6   | ##### | -1.08835 | 0.101 | 0.496 | ##### | Neo-G | CXCL16   |
| S100A6. 6   | ##### | -1.07    | 0.365 | 0.677 | ##### | Neo-G | S100A6   |
| KDM1A. 5    | ##### | 0.656098 | 0.448 | 0.173 | ##### | Neo-G | KDM1A    |
| ZSCAN18. 5  | ##### | 0.663799 | 0.485 | 0.201 | ##### | Neo-G | ZSCAN18  |
| PHACTR3. 6  | ##### | 0.475172 | 0.264 | 0.055 | ##### | Neo-G | PHACTR3  |
| SGK1. 7     | ##### | -1.20171 | 0.094 | 0.478 | ##### | Neo-G | SGK1     |
| BRD3. 6     | ##### | 0.658306 | 0.531 | 0.243 | ##### | Neo-G | BRD3     |
| PDZRN3. 5   | ##### | 0.52666  | 0.213 | 0.038 | ##### | Neo-G | PDZRN3   |
| PRDX2. 7    | ##### | 0.278815 | 0.962 | 0.669 | ##### | Neo-G | PRDX2    |
| SAMD14. 4   | ##### | 0.522825 | 0.229 | 0.044 | ##### | Neo-G | SAMD14   |
| ARPC1B. 7   | ##### | -1.06642 | 0.203 | 0.571 | ##### | Neo-G | ARPC1B   |
| CEP170. 3   | ##### | 0.650061 | 0.518 | 0.23  | ##### | Neo-G | CEP170   |
| PIK3R3. 5   | ##### | 0.543643 | 0.352 | 0.105 | ##### | Neo-G | PIK3R3   |
| IGFBPL1     | ##### | 0.258193 | 0.088 | 0.003 | ##### | Neo-G | IGFBPL1  |
| RAB11B. 5   | ##### | 0.477918 | 0.764 | 0.473 | ##### | Neo-G | RAB11B   |
| USP11. 6    | ##### | 0.560518 | 0.622 | 0.32  | ##### | Neo-G | USP11    |
| ELOVL4. 5   | ##### | 0.543142 | 0.258 | 0.058 | ##### | Neo-G | ELOVL4   |
| RPS6KL1. 6  | ##### | 0.613018 | 0.297 | 0.076 | ##### | Neo-G | RPS6KL1  |
| CEBPB. 7    | ##### | -1.02481 | 0.092 | 0.477 | ##### | Neo-G | CEBPB    |
| ODC1. 6     | ##### | 0.580534 | 0.666 | 0.36  | ##### | Neo-G | ODC1     |
| CTSD. 6     | ##### | -0.89048 | 0.342 | 0.675 | ##### | Neo-G | CTSD     |
| PSMB9. 5    | ##### | -1.05388 | 0.056 | 0.448 | ##### | Neo-G | PSMB9    |
| CAPG. 7     | ##### | -1.21958 | 0.084 | 0.455 | ##### | Neo-G | CAPG     |

|            |       |          |       |       |       |       |           |
|------------|-------|----------|-------|-------|-------|-------|-----------|
| CTSC. 7    | ##### | -1.28059 | 0.053 | 0.424 | ##### | Neo-G | CTSC      |
| CHD3. 3    | ##### | 0.589643 | 0.323 | 0.09  | ##### | Neo-G | CHD3      |
| ARID4B. 6  | ##### | 0.5472   | 0.665 | 0.374 | ##### | Neo-G | ARID4B    |
| DPYSL4. 7  | ##### | 0.660215 | 0.375 | 0.127 | ##### | Neo-G | DPYSL4    |
| DDX25. 4   | ##### | 0.408646 | 0.17  | 0.023 | ##### | Neo-G | DDX25     |
| LEMD1. 4   | ##### | 0.454427 | 0.185 | 0.029 | ##### | Neo-G | LEMD1     |
| CYTH2. 5   | ##### | 0.583552 | 0.596 | 0.31  | ##### | Neo-G | CYTH2     |
| RSF1. 5    | ##### | 0.535217 | 0.672 | 0.386 | ##### | Neo-G | RSF1      |
| CASC15. 6  | ##### | 0.592293 | 0.293 | 0.076 | ##### | Neo-G | CASC15    |
| LSAMP. 5   | ##### | 0.63365  | 0.407 | 0.143 | ##### | Neo-G | LSAMP     |
| KIFAP3. 6  | ##### | 0.606003 | 0.442 | 0.174 | ##### | Neo-G | KIFAP3    |
| SMAD9. 5   | ##### | 0.503987 | 0.237 | 0.05  | ##### | Neo-G | SMAD9     |
| GNG2. 3    | ##### | 0.57875  | 0.421 | 0.15  | ##### | Neo-G | GNG2      |
| RHOG. 7    | ##### | -1.07945 | 0.075 | 0.45  | ##### | Neo-G | RHOG      |
| HMG1. 4    | ##### | 0.370036 | 0.899 | 0.636 | ##### | Neo-G | HMG1      |
| KIF2A. 7   | ##### | 0.656581 | 0.475 | 0.206 | ##### | Neo-G | KIF2A     |
| KIAA0895L  | ##### | 0.547889 | 0.275 | 0.069 | ##### | Neo-G | KIAA0895L |
| LMBR1L. 6  | ##### | 0.589426 | 0.424 | 0.155 | ##### | Neo-G | LMBR1L    |
| MORF4L2. 5 | ##### | 0.36265  | 0.862 | 0.596 | ##### | Neo-G | MORF4L2   |
| TYROBP. 7  | ##### | -1.35763 | 0.161 | 0.496 | ##### | Neo-G | TYROBP    |
| KCNA5      | ##### | 0.250315 | 0.084 | 0.003 | ##### | Neo-G | KCNA5     |
| FEV        | ##### | 0.383052 | 0.08  | 0.003 | ##### | Neo-G | FEV       |
| STMN3. 5   | ##### | 0.57364  | 0.563 | 0.276 | ##### | Neo-G | STMN3     |
| DLGAP1. 4  | ##### | 0.438386 | 0.181 | 0.029 | ##### | Neo-G | DLGAP1    |
| MT1E. 6    | ##### | -1.3144  | 0.055 | 0.42  | ##### | Neo-G | MT1E      |
| HECW1      | ##### | 0.337428 | 0.129 | 0.013 | ##### | Neo-G | HECW1     |
| ARHGDIB. 7 | ##### | -1.34818 | 0.058 | 0.41  | ##### | Neo-G | ARHGDIB   |
| SCG2. 6    | ##### | 0.625386 | 0.526 | 0.23  | ##### | Neo-G | SCG2      |
| CLTB. 5    | ##### | 0.537168 | 0.684 | 0.411 | ##### | Neo-G | CLTB      |
| PPFIA2. 3  | ##### | 0.401933 | 0.183 | 0.029 | ##### | Neo-G | PPFIA2    |
| SVOP       | ##### | 0.253825 | 0.094 | 0.005 | ##### | Neo-G | SVOP      |
| IGSF21. 5  | ##### | 0.532422 | 0.414 | 0.133 | ##### | Neo-G | IGSF21    |
| HLA-DPB1.  | ##### | -1.25474 | 0.214 | 0.528 | ##### | Neo-G | HLA-DPB1  |
| RNF175     | ##### | 0.357143 | 0.152 | 0.019 | ##### | Neo-G | RNF175    |
| C11orf96.  | ##### | 0.650184 | 0.346 | 0.108 | ##### | Neo-G | C11orf96  |
| NMNAT2     | ##### | 0.327899 | 0.131 | 0.014 | ##### | Neo-G | NMNAT2    |
| FBXO21. 5  | ##### | 0.578886 | 0.561 | 0.277 | ##### | Neo-G | FBXO21    |
| MALAT1. 7  | ##### | 0.122991 | 0.998 | 0.995 | ##### | Neo-G | MALAT1    |
| RGS10. 7   | ##### | -1.29379 | 0.028 | 0.38  | ##### | Neo-G | RGS10     |
| DCLK2. 7   | ##### | 0.622313 | 0.426 | 0.168 | ##### | Neo-G | DCLK2     |
| SLAIN1. 7  | ##### | 0.582333 | 0.441 | 0.174 | ##### | Neo-G | SLAIN1    |
| GPR161. 7  | ##### | 0.516748 | 0.255 | 0.062 | ##### | Neo-G | GPR161    |
| SNCB. 1    | ##### | 0.38736  | 0.144 | 0.017 | ##### | Neo-G | SNCB      |
| TXN. 5     | ##### | 0.309136 | 0.888 | 0.639 | ##### | Neo-G | TXN       |
| CST3. 4    | ##### | -0.55937 | 0.705 | 0.797 | ##### | Neo-G | CST3      |
| PGAP1. 6   | ##### | 0.638397 | 0.406 | 0.156 | ##### | Neo-G | PGAP1     |
| DUOX1. 7   | ##### | 0.492878 | 0.219 | 0.044 | ##### | Neo-G | DUOX1     |
| DYNLT1. 3  | ##### | 0.3406   | 0.871 | 0.599 | ##### | Neo-G | DYNLT1    |
| SPARC. 6   | ##### | -1.20863 | 0.068 | 0.422 | ##### | Neo-G | SPARC     |
| STC1. 1    | ##### | 0.38867  | 0.126 | 0.013 | ##### | Neo-G | STC1      |
| CTSS. 7    | ##### | -1.2759  | 0.043 | 0.392 | ##### | Neo-G | CTSS      |

|             |       |           |        |        |       |       |                |
|-------------|-------|-----------|--------|--------|-------|-------|----------------|
| PTBP2. 5    | ##### | 0. 521296 | 0. 299 | 0. 082 | ##### | Neo-G | PTBP2          |
| HTRA1. 7    | ##### | -0. 91197 | 0. 128 | 0. 5   | ##### | Neo-G | HTRA1          |
| YWHAB. 2    | ##### | 0. 323175 | 0. 917 | 0. 677 | ##### | Neo-G | YWHAB          |
| AP1S1. 6    | ##### | 0. 41195  | 0. 731 | 0. 436 | ##### | Neo-G | AP1S1          |
| NT5C3B. 6   | ##### | 0. 565768 | 0. 574 | 0. 302 | ##### | Neo-G | NT5C3B         |
| CITED2. 5   | ##### | 0. 556471 | 0. 636 | 0. 318 | ##### | Neo-G | CITED2         |
| DHPS. 5     | ##### | 0. 460839 | 0. 71  | 0. 415 | ##### | Neo-G | DHPS           |
| PTPN5       | ##### | 0. 257183 | 0. 093 | 0. 005 | ##### | Neo-G | PTPN5          |
| NDN. 7      | ##### | 0. 696209 | 0. 412 | 0. 17  | ##### | Neo-G | NDN            |
| ST7. 2      | ##### | 0. 533115 | 0. 297 | 0. 083 | ##### | Neo-G | ST7            |
| CLK1. 3     | ##### | 0. 491207 | 0. 705 | 0. 388 | ##### | Neo-G | CLK1           |
| GABRG2      | ##### | 0. 223407 | 0. 079 | 0. 003 | ##### | Neo-G | GABRG2         |
| S100A10. 7  | ##### | -1. 05912 | 0. 241 | 0. 582 | ##### | Neo-G | S100A10        |
| GATM. 4     | ##### | -0. 93082 | 0. 037 | 0. 391 | ##### | Neo-G | GATM           |
| ACO04540. 5 | ##### | 0. 568735 | 0. 249 | 0. 059 | ##### | Neo-G | ACO04540. 5    |
| TMEM14A. 6  | ##### | 0. 516494 | 0. 577 | 0. 293 | ##### | Neo-G | TMEM14A        |
| RP11-445F   | ##### | 0. 518618 | 0. 135 | 0. 016 | ##### | Neo-G | RP11-445F12. 1 |
| GPR85       | ##### | 0. 35965  | 0. 137 | 0. 016 | ##### | Neo-G | GPR85          |
| AMER2. 6    | ##### | 0. 422537 | 0. 321 | 0. 089 | ##### | Neo-G | AMER2          |
| PRR13. 5    | ##### | -0. 91876 | 0. 224 | 0. 582 | ##### | Neo-G | PRR13          |
| NUDT11. 5   | ##### | 0. 561946 | 0. 328 | 0. 102 | ##### | Neo-G | NUDT11         |
| GADD45B. 4  | ##### | -1. 17529 | 0. 197 | 0. 526 | ##### | Neo-G | GADD45B        |
| TMEM57. 5   | ##### | 0. 595607 | 0. 396 | 0. 148 | ##### | Neo-G | TMEM57         |
| ING4. 5     | ##### | 0. 558009 | 0. 511 | 0. 237 | ##### | Neo-G | ING4           |
| MYT1. 5     | ##### | 0. 393638 | 0. 163 | 0. 024 | ##### | Neo-G | MYT1           |
| CPVL. 7     | ##### | -1. 18009 | 0. 042 | 0. 386 | ##### | Neo-G | CPVL           |
| TNFRSF1A. 6 | ##### | -0. 8564  | 0. 055 | 0. 41  | ##### | Neo-G | TNFRSF1A       |
| CTSL. 7     | ##### | -0. 99567 | 0. 219 | 0. 561 | ##### | Neo-G | CTSL           |
| TMEM179     | ##### | 0. 331298 | 0. 128 | 0. 014 | ##### | Neo-G | TMEM179        |
| PPP2R5B. 6  | ##### | 0. 608195 | 0. 379 | 0. 14  | ##### | Neo-G | PPP2R5B        |
| PTPRS. 7    | ##### | 0. 652323 | 0. 499 | 0. 229 | ##### | Neo-G | PTPRS          |
| PLSCR1. 7   | ##### | -1. 03135 | 0. 05  | 0. 397 | ##### | Neo-G | PLSCR1         |
| NOL4. 5     | ##### | 0. 455347 | 0. 218 | 0. 047 | ##### | Neo-G | NOL4           |
| MARCH6. 6   | ##### | 0. 549308 | 0. 596 | 0. 328 | ##### | Neo-G | 6-Mar          |
| GLUL. 3     | ##### | -0. 74912 | 0. 62  | 0. 807 | ##### | Neo-G | GLUL           |
| HOXC6. 1    | ##### | 0. 366243 | 0. 134 | 0. 016 | ##### | Neo-G | HOXC6          |
| LAPTM4B. 7  | ##### | 0. 57797  | 0. 581 | 0. 301 | ##### | Neo-G | LAPTM4B        |
| LAMP2. 4    | ##### | -0. 92324 | 0. 152 | 0. 51  | ##### | Neo-G | LAMP2          |
| ATP6VOE1. 5 | ##### | -0. 70669 | 0. 562 | 0. 785 | ##### | Neo-G | ATP6VOE1       |
| LAPTM5. 7   | ##### | -1. 25543 | 0. 159 | 0. 47  | ##### | Neo-G | LAPTM5         |
| TMEM150C. 6 | ##### | 0. 406271 | 0. 174 | 0. 029 | ##### | Neo-G | TMEM150C       |
| HLA-DMA. 7  | ##### | -1. 23305 | 0. 115 | 0. 444 | ##### | Neo-G | HLA-DMA        |
| BOD1. 6     | ##### | 0. 567444 | 0. 539 | 0. 274 | ##### | Neo-G | BOD1           |
| RB1CC1. 5   | ##### | 0. 591448 | 0. 513 | 0. 248 | ##### | Neo-G | RB1CC1         |
| MPPED2. 5   | ##### | 0. 527298 | 0. 262 | 0. 069 | ##### | Neo-G | MPPED2         |
| LRCH2. 1    | ##### | 0. 367096 | 0. 145 | 0. 02  | ##### | Neo-G | LRCH2          |
| HPCA. 5     | ##### | 0. 537772 | 0. 205 | 0. 042 | ##### | Neo-G | HPCA           |
| RAB13. 6    | ##### | -1. 03806 | 0. 061 | 0. 409 | ##### | Neo-G | RAB13          |
| RAB33A. 5   | ##### | 0. 47395  | 0. 298 | 0. 083 | ##### | Neo-G | RAB33A         |
| POLD4. 5    | ##### | -0. 91381 | 0. 102 | 0. 46  | ##### | Neo-G | POLD4          |
| RGS1. 7     | ##### | -1. 28566 | 0. 174 | 0. 48  | ##### | Neo-G | RGS1           |

|           |       |          |       |       |       |       |             |
|-----------|-------|----------|-------|-------|-------|-------|-------------|
| NAP1L5.5  | ##### | 0.54072  | 0.333 | 0.11  | ##### | Neo-G | NAP1L5      |
| FCER1G.7  | ##### | -1.27303 | 0.165 | 0.475 | ##### | Neo-G | FCER1G      |
| PCP4.5    | ##### | 0.471962 | 0.159 | 0.024 | ##### | Neo-G | PCP4        |
| MTSS1.5   | ##### | 0.522729 | 0.46  | 0.183 | ##### | Neo-G | MTSS1       |
| METTL9.6  | ##### | 0.480293 | 0.708 | 0.439 | ##### | Neo-G | METTL9      |
| SEPP1.4   | ##### | -1.35657 | 0.034 | 0.364 | ##### | Neo-G | SEPP1       |
| HLA-A.5   | ##### | -0.54612 | 0.816 | 0.906 | ##### | Neo-G | HLA-A       |
| ENAH.6    | ##### | 0.596446 | 0.493 | 0.236 | ##### | Neo-G | ENAH        |
| ORC4.6    | ##### | 0.565065 | 0.465 | 0.207 | ##### | Neo-G | ORC4        |
| ST8SIA3   | ##### | 0.280932 | 0.105 | 0.009 | ##### | Neo-G | ST8SIA3     |
| SCML4     | ##### | 0.225679 | 0.089 | 0.005 | ##### | Neo-G | SCML4       |
| MS4A7.7   | ##### | -1.28907 | 0.043 | 0.367 | ##### | Neo-G | MS4A7       |
| BCL11A.4  | ##### | 0.439581 | 0.179 | 0.032 | ##### | Neo-G | BCL11A      |
| KB-1980E6 | ##### | 0.368179 | 0.123 | 0.014 | ##### | Neo-G | KB-1980E6.3 |
| CREM.7    | ##### | -1.02062 | 0.101 | 0.444 | ##### | Neo-G | CREM        |
| HLA-DQB1. | ##### | -1.27878 | 0.038 | 0.36  | ##### | Neo-G | HLA-DQB1    |
| MTMR9.5   | ##### | 0.598624 | 0.405 | 0.163 | ##### | Neo-G | MTMR9       |
| AIF1.7    | ##### | -1.26316 | 0.134 | 0.444 | ##### | Neo-G | AIF1        |
| C3.6      | ##### | -1.18874 | 0.122 | 0.435 | ##### | Neo-G | C3          |
| SH2D3C    | ##### | 0.315463 | 0.126 | 0.015 | ##### | Neo-G | SH2D3C      |
| MEX3B.5   | ##### | 0.472574 | 0.208 | 0.045 | ##### | Neo-G | MEX3B       |
| ROBO1.7   | ##### | 0.682735 | 0.382 | 0.153 | ##### | Neo-G | ROBO1       |
| SMKR1.4   | ##### | 0.488935 | 0.223 | 0.052 | ##### | Neo-G | SMKR1       |
| WRB.6     | ##### | 0.398076 | 0.676 | 0.389 | ##### | Neo-G | WRB         |
| GSTO1.6   | ##### | -0.94682 | 0.153 | 0.493 | ##### | Neo-G | GSTO1       |
| TREM2.7   | ##### | -1.32651 | 0.068 | 0.385 | ##### | Neo-G | TREM2       |
| WASF2.6   | ##### | -0.83888 | 0.13  | 0.476 | ##### | Neo-G | WASF2       |
| HLA-DQA1. | ##### | -1.35607 | 0.024 | 0.341 | ##### | Neo-G | HLA-DQA1    |
| MAGEF1.6  | ##### | 0.501054 | 0.605 | 0.334 | ##### | Neo-G | MAGEF1      |
| DNAJA1.2  | ##### | 0.339682 | 0.861 | 0.6   | ##### | Neo-G | DNAJA1      |
| NPM2      | ##### | 0.293816 | 0.097 | 0.008 | ##### | Neo-G | NPM2        |
| GTF2I.6   | ##### | 0.512788 | 0.639 | 0.401 | ##### | Neo-G | GTF2I       |
| GLIPR1.6  | ##### | -1.03885 | 0.042 | 0.37  | ##### | Neo-G | GLIPR1      |
| OLFM3     | ##### | 0.269333 | 0.072 | 0.003 | ##### | Neo-G | OLFM3       |
| CNRIP1.5  | ##### | 0.556527 | 0.427 | 0.177 | ##### | Neo-G | CNRIP1      |
| RNF24.4   | ##### | 0.577397 | 0.469 | 0.221 | ##### | Neo-G | RNF24       |
| NAPB.3    | ##### | 0.483714 | 0.236 | 0.059 | ##### | Neo-G | NAPB        |
| CALM3.6   | ##### | 0.361935 | 0.823 | 0.564 | ##### | Neo-G | CALM3       |
| PLIN3.4   | ##### | -0.86723 | 0.06  | 0.394 | ##### | Neo-G | PLIN3       |
| RAB6A.6   | ##### | 0.487935 | 0.625 | 0.366 | ##### | Neo-G | RAB6A       |
| C4orf27.5 | ##### | 0.486728 | 0.556 | 0.29  | ##### | Neo-G | C4orf27     |
| ACO08060. | ##### | 0.313507 | 0.111 | 0.011 | ##### | Neo-G | ACO08060.7  |
| SCPEP1.6  | ##### | -0.9842  | 0.053 | 0.382 | ##### | Neo-G | SCPEP1      |
| VAMP8.7   | ##### | -1.22627 | 0.062 | 0.377 | ##### | Neo-G | VAMP8       |
| TCEAL4.5  | ##### | 0.333789 | 0.823 | 0.541 | ##### | Neo-G | TCEAL4      |
| FNDC5     | ##### | 0.249503 | 0.085 | 0.005 | ##### | Neo-G | FNDC5       |
| PGM2L1.6  | ##### | 0.507439 | 0.495 | 0.226 | ##### | Neo-G | PGM2L1      |
| FXVD5.7   | ##### | -1.14876 | 0.057 | 0.375 | ##### | Neo-G | FXVD5       |
| MEIS3.5   | ##### | 0.575002 | 0.314 | 0.107 | ##### | Neo-G | MEIS3       |
| CXCR4.5   | ##### | -1.18748 | 0.102 | 0.424 | ##### | Neo-G | CXCR4       |
| LDHA.4    | ##### | -0.70744 | 0.606 | 0.786 | ##### | Neo-G | LDHA        |

|            |       |           |        |        |       |       |                |
|------------|-------|-----------|--------|--------|-------|-------|----------------|
| FXXD7. 6   | ##### | 0. 528719 | 0. 24  | 0. 058 | ##### | Neo-G | FXXD7          |
| MAGED1. 6  | ##### | 0. 482994 | 0. 584 | 0. 316 | ##### | Neo-G | MAGED1         |
| B3GALNT1.  | ##### | 0. 556644 | 0. 391 | 0. 158 | ##### | Neo-G | B3GALNT1       |
| HOXD3      | ##### | 0. 316656 | 0. 123 | 0. 015 | ##### | Neo-G | HOXD3          |
| PROX1. 6   | ##### | 0. 617265 | 0. 363 | 0. 14  | ##### | Neo-G | PROX1          |
| ZNF117. 5  | ##### | 0. 520466 | 0. 28  | 0. 084 | ##### | Neo-G | ZNF117         |
| Clorf162.  | ##### | -1. 25832 | 0. 045 | 0. 356 | ##### | Neo-G | Clorf162       |
| PSME1. 6   | ##### | -0. 82087 | 0. 285 | 0. 619 | ##### | Neo-G | PSME1          |
| VSIG4. 7   | ##### | -1. 30951 | 0. 092 | 0. 398 | ##### | Neo-G | VSIG4          |
| NBEA. 3    | ##### | 0. 412122 | 0. 178 | 0. 034 | ##### | Neo-G | NBEA           |
| ZNF300. 6  | ##### | 0. 474959 | 0. 218 | 0. 051 | ##### | Neo-G | ZNF300         |
| ZNF704. 6  | ##### | 0. 562229 | 0. 307 | 0. 101 | ##### | Neo-G | ZNF704         |
| LY86. 7    | ##### | -1. 23797 | 0. 016 | 0. 326 | ##### | Neo-G | LY86           |
| LST1. 7    | ##### | -1. 20366 | 0. 035 | 0. 347 | ##### | Neo-G | LST1           |
| PEBP1. 7   | ##### | 0. 163986 | 0. 98  | 0. 782 | ##### | Neo-G | PEBP1          |
| NRXN3      | ##### | 0. 294467 | 0. 115 | 0. 013 | ##### | Neo-G | NRXN3          |
| IFRD1. 6   | ##### | 0. 404247 | 0. 736 | 0. 457 | ##### | Neo-G | IFRD1          |
| PON2. 7    | ##### | -0. 90525 | 0. 154 | 0. 486 | ##### | Neo-G | PON2           |
| CD14. 7    | ##### | -1. 22427 | 0. 142 | 0. 441 | ##### | Neo-G | CD14           |
| NAT16      | ##### | 0. 295892 | 0. 113 | 0. 012 | ##### | Neo-G | NAT16          |
| CD53. 7    | ##### | -1. 21712 | 0. 04  | 0. 349 | ##### | Neo-G | CD53           |
| CCER2. 6   | ##### | 0. 446256 | 0. 191 | 0. 039 | ##### | Neo-G | CCER2          |
| MTPN. 3    | ##### | 0. 450554 | 0. 651 | 0. 405 | ##### | Neo-G | MTPN           |
| RP5-1177M  | ##### | 0. 483285 | 0. 168 | 0. 03  | ##### | Neo-G | RP5-1177M21. 1 |
| RND1. 3    | ##### | 0. 40939  | 0. 209 | 0. 046 | ##### | Neo-G | RND1           |
| SET. 4     | ##### | 0. 365179 | 0. 777 | 0. 534 | ##### | Neo-G | SET            |
| CD37. 7    | ##### | -1. 20798 | 0. 028 | 0. 334 | ##### | Neo-G | CD37           |
| PRKCZ. 7   | ##### | 0. 481803 | 0. 272 | 0. 079 | ##### | Neo-G | PRKCZ          |
| PNISR. 4   | ##### | 0. 340625 | 0. 84  | 0. 584 | ##### | Neo-G | PNISR          |
| ALOX5AP. 7 | ##### | -1. 23501 | 0. 134 | 0. 431 | ##### | Neo-G | ALOX5AP        |
| PPP2R1A. 4 | ##### | 0. 374695 | 0. 743 | 0. 487 | ##### | Neo-G | PPP2R1A        |
| C1QA. 7    | ##### | -1. 09534 | 0. 312 | 0. 565 | ##### | Neo-G | C1QA           |
| SEC11A. 6  | ##### | -0. 7982  | 0. 313 | 0. 625 | ##### | Neo-G | SEC11A         |
| APC. 7     | ##### | 0. 577652 | 0. 422 | 0. 188 | ##### | Neo-G | APC            |
| HNRNPK. 5  | ##### | 0. 220633 | 0. 949 | 0. 769 | ##### | Neo-G | HNRNPK         |
| ZNF512. 5  | ##### | 0. 507171 | 0. 307 | 0. 101 | ##### | Neo-G | ZNF512         |
| CHI3L1. 6  | ##### | -1. 5522  | 0. 294 | 0. 552 | ##### | Neo-G | CHI3L1         |
| TFAP2A. 4  | ##### | 0. 412456 | 0. 146 | 0. 023 | ##### | Neo-G | TFAP2A         |
| NRSN1. 5   | ##### | 0. 434961 | 0. 196 | 0. 043 | ##### | Neo-G | NRSN1          |
| RP6-65G23  | ##### | 0. 253526 | 0. 079 | 0. 005 | ##### | Neo-G | RP6-65G23. 3   |
| WASF1. 4   | ##### | 0. 458587 | 0. 26  | 0. 074 | ##### | Neo-G | WASF1          |
| NAP1L4. 5  | ##### | 0. 462089 | 0. 625 | 0. 376 | ##### | Neo-G | NAP1L4         |
| MS4A6A. 7  | ##### | -1. 26158 | 0. 074 | 0. 373 | ##### | Neo-G | MS4A6A         |
| CTSH. 7    | ##### | -1. 08991 | 0. 027 | 0. 328 | ##### | Neo-G | CTSH           |
| CADM2. 6   | ##### | 0. 553818 | 0. 405 | 0. 162 | ##### | Neo-G | CADM2          |
| HLA-DMB. 6 | ##### | -1. 22559 | 0. 052 | 0. 353 | ##### | Neo-G | HLA-DMB        |
| PGRMC1. 5  | ##### | 0. 452791 | 0. 681 | 0. 419 | ##### | Neo-G | PGRMC1         |
| CACNG2     | ##### | 0. 278089 | 0. 086 | 0. 006 | ##### | Neo-G | CACNG2         |
| XKR4. 5    | ##### | 0. 43336  | 0. 189 | 0. 041 | ##### | Neo-G | XKR4           |
| FCGR3A. 7  | ##### | -1. 24002 | 0. 077 | 0. 373 | ##### | Neo-G | FCGR3A         |
| DOK4. 5    | ##### | 0. 390451 | 0. 166 | 0. 032 | ##### | Neo-G | DOK4           |

|            |       |          |       |       |          |       |               |
|------------|-------|----------|-------|-------|----------|-------|---------------|
| KDM5B. 6   | ##### | 0.578708 | 0.353 | 0.139 | #####    | Neo-G | KDM5B         |
| C1QC. 7    | ##### | -1.15516 | 0.276 | 0.529 | #####    | Neo-G | C1QC          |
| NECAP1. 4  | ##### | 0.505125 | 0.412 | 0.172 | #####    | Neo-G | NECAP1        |
| KLF6. 6    | ##### | -0.87161 | 0.258 | 0.564 | #####    | Neo-G | KLF6          |
| SYNGR2. 7  | ##### | -0.89758 | 0.051 | 0.362 | #####    | Neo-G | SYNGR2        |
| CERS6. 4   | ##### | 0.521427 | 0.306 | 0.104 | #####    | Neo-G | CERS6         |
| FCGR2A. 7  | ##### | -1.14448 | 0.025 | 0.321 | #####    | Neo-G | FCGR2A        |
| ATXN10. 3  | ##### | 0.448012 | 0.648 | 0.393 | #####    | Neo-G | ATXN10        |
| GMFG. 7    | ##### | -1.15421 | 0.034 | 0.33  | #####    | Neo-G | GMFG          |
| HCLS1. 7   | ##### | -1.13705 | 0.027 | 0.322 | #####    | Neo-G | HCLS1         |
| VPS37D. 5  | ##### | 0.461925 | 0.193 | 0.044 | #####    | Neo-G | VPS37D        |
| DGUOK. 4   | ##### | 0.347357 | 0.735 | 0.489 | #####    | Neo-G | DGUOK         |
| RP11-161M  | ##### | 0.55414  | 0.371 | 0.142 | #####    | Neo-G | RP11-161M6. 2 |
| TPGS2. 3   | ##### | 0.509674 | 0.554 | 0.312 | #####    | Neo-G | TPGS2         |
| BEX4. 6    | ##### | 0.353419 | 0.738 | 0.445 | #####    | Neo-G | BEX4          |
| RALA. 4    | ##### | 0.506342 | 0.574 | 0.334 | #####    | Neo-G | RALA          |
| FBLN1. 6   | ##### | 0.557079 | 0.244 | 0.066 | #####    | Neo-G | FBLN1         |
| KIF21B. 1  | ##### | 0.297205 | 0.123 | 0.016 | #####    | Neo-G | KIF21B        |
| SOX2. 7    | ##### | 0.455378 | 0.715 | 0.395 | #####    | Neo-G | SOX2          |
| PLAUR. 7   | ##### | -1.14134 | 0.103 | 0.399 | #####    | Neo-G | PLAUR         |
| SIAH1. 5   | ##### | 0.535496 | 0.445 | 0.202 | #####    | Neo-G | SIAH1         |
| RAB34. 4   | ##### | -0.85395 | 0.021 | 0.315 | #####    | Neo-G | RAB34         |
| SP100. 6   | ##### | -0.98837 | 0.023 | 0.319 | #####    | Neo-G | SP100         |
| KMT2A. 7   | ##### | 0.547306 | 0.445 | 0.211 | #####    | Neo-G | KMT2A         |
| DNASE2. 5  | ##### | -0.83288 | 0.1   | 0.418 | #####    | Neo-G | DNASE2        |
| GSPT2. 5   | ##### | 0.569349 | 0.334 | 0.127 | #####    | Neo-G | GSPT2         |
| RNF165. 6  | ##### | 0.436089 | 0.207 | 0.05  | #####    | Neo-G | RNF165        |
| PTS. 6     | ##### | 0.447952 | 0.546 | 0.3   | #####    | Neo-G | PTS           |
| PSMB8. 5   | ##### | -0.80191 | 0.121 | 0.451 | #####    | Neo-G | PSMB8         |
| ADD2. 5    | ##### | 0.477814 | 0.244 | 0.069 | #####    | Neo-G | ADD2          |
| S100A16. 6 | ##### | -1.11843 | 0.041 | 0.339 | #####    | Neo-G | S100A16       |
| ARMCX3. 5  | ##### | 0.415704 | 0.658 | 0.402 | #####    | Neo-G | ARMCX3        |
| PPM1G. 6   | ##### | 0.464356 | 0.633 | 0.392 | #####    | Neo-G | PPM1G         |
| PPP1R1A    | ##### | 0.273479 | 0.078 | 0.005 | #####    | Neo-G | PPP1R1A       |
| SPSB3. 4   | ##### | 0.47581  | 0.537 | 0.276 | #####    | Neo-G | SPSB3         |
| AGTRAP. 4  | ##### | -0.89323 | 0.02  | 0.313 | #####    | Neo-G | AGTRAP        |
| MPLKIP. 3  | ##### | 0.408403 | 0.671 | 0.417 | #####    | Neo-G | MPLKIP        |
| CKLF. 7    | ##### | -0.80816 | 0.236 | 0.554 | #####    | Neo-G | CKLF          |
| GAD1. 7    | ##### | 0.533218 | 0.284 | 0.092 | #####    | Neo-G | GAD1          |
| ZNF91. 4   | ##### | 0.518199 | 0.416 | 0.184 | 1.17E-99 | Neo-G | ZNF91         |
| HCST. 7    | ##### | -1.17779 | 0.027 | 0.316 | 1.44E-99 | Neo-G | HCST          |
| CNTFR. 6   | ##### | 0.545892 | 0.308 | 0.108 | 1.54E-99 | Neo-G | CNTFR         |
| TSPAN5. 7  | ##### | 0.529064 | 0.476 | 0.236 | 3.25E-99 | Neo-G | TSPAN5        |
| TSPO. 6    | ##### | -0.7151  | 0.312 | 0.629 | 3.35E-99 | Neo-G | TSPO          |
| DGCR5. 3   | ##### | 0.350173 | 0.123 | 0.017 | 3.70E-99 | Neo-G | DGCR5         |
| SLC16A3. 7 | ##### | -0.95924 | 0.056 | 0.352 | 5.78E-99 | Neo-G | SLC16A3       |
| CACNA2D3.  | ##### | 0.314992 | 0.13  | 0.019 | 6.12E-99 | Neo-G | CACNA2D3      |
| LIPA. 6    | ##### | -0.91712 | 0.064 | 0.367 | 7.02E-99 | Neo-G | LIPA          |
| ITGB2. 7   | ##### | -1.12487 | 0.068 | 0.355 | 8.43E-99 | Neo-G | ITGB2         |
| ATP8A2     | ##### | 0.161688 | 0.057 | 0.002 | 1.40E-98 | Neo-G | ATP8A2        |
| POU2F1. 6  | ##### | 0.56491  | 0.35  | 0.138 | 1.48E-98 | Neo-G | POU2F1        |

|             |           |           |        |        |           |       |            |
|-------------|-----------|-----------|--------|--------|-----------|-------|------------|
| NXN. 4      | #####     | 0. 366614 | 0. 14  | 0. 023 | 1. 61E-98 | Neo-G | NXN        |
| NAMPT. 6    | #####     | -1. 05394 | 0. 167 | 0. 47  | 1. 84E-98 | Neo-G | NAMPT      |
| HRAS. 6     | #####     | 0. 554291 | 0. 497 | 0. 269 | 2. 31E-98 | Neo-G | HRAS       |
| RNPS1. 2    | #####     | 0. 352785 | 0. 752 | 0. 508 | 3. 10E-98 | Neo-G | RNPS1      |
| SUMO2. 5    | #####     | 0. 148842 | 0. 967 | 0. 804 | 3. 47E-98 | Neo-G | SUMO2      |
| PRKAR1B. 4  | #####     | 0. 498813 | 0. 306 | 0. 106 | 4. 84E-98 | Neo-G | PRKAR1B    |
| PRDM8. 2    | #####     | 0. 343692 | 0. 125 | 0. 018 | 5. 47E-98 | Neo-G | PRDM8      |
| S100A13. 5  | #####     | -1. 01151 | 0. 035 | 0. 328 | 6. 78E-98 | Neo-G | S100A13    |
| NCBP2. 5    | #####     | 0. 403923 | 0. 654 | 0. 414 | 8. 01E-98 | Neo-G | NCBP2      |
| YWHAH. 7    | #####     | 0. 403646 | 0. 809 | 0. 535 | 8. 65E-98 | Neo-G | YWHAH      |
| IFITM2. 7   | #####     | -1. 06046 | 0. 026 | 0. 314 | 1. 03E-97 | Neo-G | IFITM2     |
| ST18. 3     | #####     | 0. 368304 | 0. 15  | 0. 026 | 1. 15E-97 | Neo-G | ST18       |
| SOD2. 4     | #####     | -1. 05444 | 0. 292 | 0. 566 | 1. 67E-97 | Neo-G | SOD2       |
| LIMS1. 7    | #####     | -0. 80832 | 0. 162 | 0. 473 | 1. 71E-97 | Neo-G | LIMS1      |
| RNASE6. 7   | #####     | -1. 14693 | 0. 023 | 0. 306 | 2. 38E-97 | Neo-G | RNASE6     |
| BAZ1B. 6    | #####     | 0. 549957 | 0. 503 | 0. 273 | 3. 62E-97 | Neo-G | BAZ1B      |
| VAX2. 6     | #####     | 0. 49413  | 0. 225 | 0. 062 | 4. 02E-97 | Neo-G | VAX2       |
| RIC3. 5     | #####     | 0. 438548 | 0. 452 | 0. 204 | 5. 70E-97 | Neo-G | RIC3       |
| POU3F3. 6   | #####     | 0. 561443 | 0. 338 | 0. 132 | 6. 70E-97 | Neo-G | POU3F3     |
| SMARCE1. 4  | #####     | 0. 449245 | 0. 594 | 0. 352 | 7. 58E-97 | Neo-G | SMARCE1    |
| RAP1A. 7    | #####     | -0. 78669 | 0. 239 | 0. 549 | 1. 06E-96 | Neo-G | RAP1A      |
| GPR19. 3    | #####     | 0. 373562 | 0. 161 | 0. 031 | 1. 45E-96 | Neo-G | GPR19      |
| SLC37A3. 5  | #####     | 0. 504584 | 0. 307 | 0. 108 | 1. 49E-96 | Neo-G | SLC37A3    |
| MAGEE1      | #####     | 0. 227117 | 0. 096 | 0. 01  | 1. 56E-96 | Neo-G | MAGEE1     |
| SCAMP2. 7   | #####     | -0. 84458 | 0. 097 | 0. 408 | 1. 84E-96 | Neo-G | SCAMP2     |
| TBCB. 5     | #####     | 0. 278342 | 0. 883 | 0. 631 | 2. 46E-96 | Neo-G | TBCB       |
| ATP6V1H. 1  | #####     | 0. 445363 | 0. 55  | 0. 295 | 4. 06E-96 | Neo-G | ATP6V1H    |
| BSDC1. 5    | #####     | 0. 502609 | 0. 501 | 0. 265 | 1. 16E-95 | Neo-G | BSDC1      |
| DLGAP4. 4   | 1. 92E-99 | 0. 497743 | 0. 5   | 0. 268 | 2. 88E-95 | Neo-G | DLGAP4     |
| GNB2. 4     | 2. 38E-99 | 0. 369035 | 0. 789 | 0. 542 | 3. 55E-95 | Neo-G | GNB2       |
| UBE2I. 3    | 3. 06E-99 | 0. 319173 | 0. 788 | 0. 551 | 4. 57E-95 | Neo-G | UBE2I      |
| ARID4A. 3   | 4. 00E-99 | 0. 49678  | 0. 493 | 0. 248 | 5. 98E-95 | Neo-G | ARID4A     |
| SPARCL1. 6  | 5. 70E-99 | -1. 08766 | 0. 084 | 0. 377 | 8. 51E-95 | Neo-G | SPARCL1    |
| VAMP3. 5    | 5. 85E-99 | -0. 76762 | 0. 075 | 0. 381 | 8. 74E-95 | Neo-G | VAMP3      |
| ZNF292. 5   | 6. 75E-99 | 0. 544756 | 0. 468 | 0. 239 | 1. 01E-94 | Neo-G | ZNF292     |
| PRPSAP2. 4  | 8. 30E-99 | 0. 485034 | 0. 478 | 0. 241 | 1. 24E-94 | Neo-G | PRPSAP2    |
| CD164. 6    | 9. 84E-99 | -0. 74201 | 0. 211 | 0. 524 | 1. 47E-94 | Neo-G | CD164      |
| PLA2G16. 6  | 9. 90E-99 | -0. 87341 | 0. 121 | 0. 439 | 1. 48E-94 | Neo-G | PLA2G16    |
| SLC39A6. 5  | 1. 08E-98 | 0. 478711 | 0. 535 | 0. 303 | 1. 61E-94 | Neo-G | SLC39A6    |
| GYPC. 7     | 1. 28E-98 | -0. 9286  | 0. 052 | 0. 341 | 1. 91E-94 | Neo-G | GYPC       |
| GNAI1. 5    | 2. 38E-98 | 0. 441076 | 0. 273 | 0. 085 | 3. 56E-94 | Neo-G | GNAI1      |
| LRRC24. 5   | 3. 08E-98 | 0. 457313 | 0. 203 | 0. 052 | 4. 60E-94 | Neo-G | LRRC24     |
| PDAP1. 4    | 3. 10E-98 | 0. 325372 | 0. 761 | 0. 508 | 4. 63E-94 | Neo-G | PDAP1      |
| VBP1. 5     | 3. 21E-98 | 0. 344622 | 0. 708 | 0. 46  | 4. 79E-94 | Neo-G | VBP1       |
| GRIN2B      | 4. 20E-98 | 0. 243873 | 0. 092 | 0. 009 | 6. 27E-94 | Neo-G | GRIN2B     |
| AFF3. 4     | 4. 29E-98 | 0. 38761  | 0. 175 | 0. 038 | 6. 42E-94 | Neo-G | AFF3       |
| MAP1LC3B. 5 | 6. 64E-98 | 0. 367046 | 0. 78  | 0. 54  | 8. 43E-94 | Neo-G | MAP1LC3B   |
| ZNF667-AS   | 5. 78E-98 | 0. 368447 | 0. 621 | 0. 36  | 8. 64E-94 | Neo-G | ZNF667-AS1 |
| EI24. 4     | 7. 73E-98 | 0. 412533 | 0. 643 | 0. 408 | 1. 16E-93 | Neo-G | EI24       |
| FKBP4. 5    | 8. 47E-98 | 0. 509175 | 0. 528 | 0. 296 | 1. 27E-93 | Neo-G | FKBP4      |
| KCTD13. 6   | 1. 29E-97 | 0. 545004 | 0. 313 | 0. 117 | 1. 93E-93 | Neo-G | KCTD13     |

|            |          |          |       |       |          |       |              |
|------------|----------|----------|-------|-------|----------|-------|--------------|
| CCDC167.4  | 1.35E-97 | 0.428912 | 0.604 | 0.356 | 2.01E-93 | Neo-G | CCDC167      |
| RP11-25K1  | 1.40E-97 | 0.566632 | 0.255 | 0.082 | 2.09E-93 | Neo-G | RP11-25K19.1 |
| FRRS1L     | 1.50E-97 | 0.269004 | 0.112 | 0.015 | 2.24E-93 | Neo-G | FRRS1L       |
| MS4A4A.7   | 1.66E-97 | -1.17349 | 0.039 | 0.316 | 2.48E-93 | Neo-G | MS4A4A       |
| UBQLN2.7   | 1.91E-97 | 0.538798 | 0.421 | 0.196 | 2.86E-93 | Neo-G | UBQLN2       |
| CCDC90B.6  | 2.55E-97 | 0.376065 | 0.632 | 0.382 | 3.80E-93 | Neo-G | CCDC90B      |
| C1QB.7     | 3.42E-97 | -0.99497 | 0.386 | 0.592 | 5.11E-93 | Neo-G | C1QB         |
| MCM7.6     | 4.33E-97 | 0.451204 | 0.485 | 0.226 | 6.47E-93 | Neo-G | MCM7         |
| HOXB2.4    | 4.97E-97 | 0.454873 | 0.236 | 0.066 | 7.42E-93 | Neo-G | HOXB2        |
| AP1S2.5    | 6.85E-97 | 0.443628 | 0.708 | 0.475 | 1.02E-92 | Neo-G | AP1S2        |
| DYNC1LI1.7 | 0.8E-97  | 0.473875 | 0.48  | 0.241 | 1.06E-92 | Neo-G | DYNC1LI1     |
| CSF1R.7    | 8.46E-97 | -1.08152 | 0.024 | 0.297 | 1.26E-92 | Neo-G | CSF1R        |
| LMO3.4     | 1.52E-96 | 0.507892 | 0.231 | 0.065 | 2.28E-92 | Neo-G | LMO3         |
| RNF11.5    | 1.93E-96 | 0.509092 | 0.515 | 0.283 | 2.88E-92 | Neo-G | RNF11        |
| VASH2      | 2.27E-96 | 0.283317 | 0.104 | 0.013 | 3.40E-92 | Neo-G | VASH2        |
| TPT1.5     | 2.31E-96 | -0.41624 | 0.951 | 0.953 | 3.45E-92 | Neo-G | TPT1         |
| SESTD1.4   | 3.77E-96 | 0.524537 | 0.343 | 0.136 | 5.63E-92 | Neo-G | SESTD1       |
| WDR47.3    | 3.87E-96 | 0.462732 | 0.264 | 0.084 | 5.79E-92 | Neo-G | WDR47        |
| NOVA2.5    | 4.46E-96 | 0.445575 | 0.223 | 0.063 | 6.66E-92 | Neo-G | NOVA2        |
| HIST1H4C.7 | 2.8E-96  | 0.402785 | 0.668 | 0.395 | 1.09E-91 | Neo-G | HIST1H4C     |
| C10orf54.9 | 5.7E-96  | -1.08205 | 0.044 | 0.318 | 1.43E-91 | Neo-G | C10orf54     |
| LAP3.5     | 1.81E-95 | -0.82311 | 0.223 | 0.524 | 2.71E-91 | Neo-G | LAP3         |
| SFT2D1.7   | 2.09E-95 | -0.74148 | 0.23  | 0.534 | 3.13E-91 | Neo-G | SFT2D1       |
| HOPX.6     | 2.28E-95 | -1.16942 | 0.039 | 0.312 | 3.41E-91 | Neo-G | HOPX         |
| FUBP1.6    | 2.61E-95 | 0.48746  | 0.43  | 0.199 | 3.90E-91 | Neo-G | FUBP1        |
| RASSF4.7   | 3.63E-95 | -0.865   | 0.07  | 0.361 | 5.43E-91 | Neo-G | RASSF4       |
| PFDN2.3    | 4.13E-95 | 0.259393 | 0.818 | 0.585 | 6.17E-91 | Neo-G | PFDN2        |
| CCDC88A.5  | 4.45E-95 | 0.426329 | 0.627 | 0.391 | 6.65E-91 | Neo-G | CCDC88A      |
| PYCARD.7   | 4.65E-95 | -0.98657 | 0.039 | 0.314 | 6.95E-91 | Neo-G | PYCARD       |
| ARF5.1     | 5.89E-95 | 0.387312 | 0.739 | 0.503 | 8.80E-91 | Neo-G | ARF5         |
| SRGN.7     | 6.21E-95 | -1.06497 | 0.31  | 0.522 | 9.28E-91 | Neo-G | SRGN         |
| PSMD2.4    | 1.00E-94 | 0.388515 | 0.664 | 0.437 | 1.49E-90 | Neo-G | PSMD2        |
| CAMLG.6    | 1.04E-94 | 0.33489  | 0.701 | 0.469 | 1.55E-90 | Neo-G | CAMLG        |
| HNRNPM.5   | 3.49E-94 | 0.374724 | 0.745 | 0.519 | 5.22E-90 | Neo-G | HNRNPM       |
| DNAJB9.4   | 3.70E-94 | 0.322321 | 0.643 | 0.353 | 5.53E-90 | Neo-G | DNAJB9       |
| 4-Mar      | 6.48E-94 | 0.196174 | 0.053 | 0.002 | 9.68E-90 | Neo-G | 4-Mar        |
| HID1.4     | 8.75E-94 | 0.385749 | 0.17  | 0.038 | 1.31E-89 | Neo-G | HID1         |
| KAT6B.4    | 8.97E-94 | 0.46866  | 0.289 | 0.101 | 1.34E-89 | Neo-G | KAT6B        |
| LINC00237  | 1.09E-93 | 0.315762 | 0.131 | 0.022 | 1.63E-89 | Neo-G | LINC00237    |
| SERPINA1.1 | 2.2E-93  | -1.0787  | 0.057 | 0.329 | 1.82E-89 | Neo-G | SERPINA1     |
| MPP3       | 1.27E-93 | 0.308932 | 0.125 | 0.02  | 1.89E-89 | Neo-G | MPP3         |
| SLC22A17.1 | 6.2E-93  | 0.538418 | 0.492 | 0.259 | 2.42E-89 | Neo-G | SLC22A17     |
| PCDHB7.5   | 2.08E-93 | 0.409443 | 0.207 | 0.054 | 3.11E-89 | Neo-G | PCDHB7       |
| ASRGL1.6   | 3.17E-93 | 0.516106 | 0.396 | 0.177 | 4.73E-89 | Neo-G | ASRGL1       |
| PPT1.6     | 8.54E-93 | -0.7154  | 0.306 | 0.586 | 1.28E-88 | Neo-G | PPT1         |
| PRKX.3     | 1.02E-92 | 0.43971  | 0.276 | 0.092 | 1.52E-88 | Neo-G | PRKX         |
| IFI6.4     | 1.07E-92 | -0.81904 | 0.137 | 0.439 | 1.59E-88 | Neo-G | IFI6         |
| SERPINB1.1 | 2.3E-92  | -1.04611 | 0.03  | 0.296 | 1.83E-88 | Neo-G | SERPINB1     |
| FPR1.7     | 1.36E-92 | -1.15309 | 0.046 | 0.313 | 2.03E-88 | Neo-G | FPR1         |
| RBFOX1     | 1.43E-92 | 0.220585 | 0.058 | 0.002 | 2.13E-88 | Neo-G | RBFOX1       |
| CTSA.7     | 1.43E-92 | -0.73821 | 0.131 | 0.432 | 2.14E-88 | Neo-G | CTSA         |



|            |          |          |       |       |          |       |          |
|------------|----------|----------|-------|-------|----------|-------|----------|
| RHOBTB3.7  | 1.47E-92 | 0.4282   | 0.639 | 0.38  | 2.19E-88 | Neo-G | RHOBTB3  |
| DNAJB5.2   | 1.70E-92 | 0.431789 | 0.222 | 0.063 | 2.53E-88 | Neo-G | DNAJB5   |
| GFOD2.4    | 1.97E-92 | 0.495528 | 0.3   | 0.111 | 2.94E-88 | Neo-G | GFOD2    |
| FCGR1A.7   | 2.36E-92 | -1.12229 | 0.024 | 0.287 | 3.53E-88 | Neo-G | FCGR1A   |
| CLGN.2     | 2.97E-92 | 0.325488 | 0.137 | 0.024 | 4.44E-88 | Neo-G | CLGN     |
| NAE1.4     | 3.94E-92 | 0.432219 | 0.551 | 0.315 | 5.90E-88 | Neo-G | NAE1     |
| EIF1B.6    | 5.29E-92 | 0.280869 | 0.799 | 0.562 | 7.91E-88 | Neo-G | EIF1B    |
| DPYSL5.7   | 6.38E-92 | 0.525527 | 0.341 | 0.141 | 9.54E-88 | Neo-G | DPYSL5   |
| PBRM1.5    | 1.08E-91 | 0.496788 | 0.436 | 0.216 | 1.61E-87 | Neo-G | PBRM1    |
| C7orf50.2  | 1.18E-91 | 0.36442  | 0.72  | 0.482 | 1.77E-87 | Neo-G | C7orf50  |
| PSAP.4     | 1.72E-91 | -0.51592 | 0.74  | 0.828 | 2.57E-87 | Neo-G | PSAP     |
| RILPL2.7   | 1.94E-91 | -0.88306 | 0.021 | 0.287 | 2.89E-87 | Neo-G | RILPL2   |
| SRP9.4     | 2.38E-91 | 0.223484 | 0.872 | 0.658 | 3.55E-87 | Neo-G | SRP9     |
| HSD11B1L.2 | 2.53E-91 | 0.545587 | 0.388 | 0.182 | 3.78E-87 | Neo-G | HSD11B1L |
| GPR34.7    | 2.99E-91 | -1.10234 | 0.032 | 0.295 | 4.47E-87 | Neo-G | GPR34    |
| C8orf46.5  | 3.11E-91 | 0.469065 | 0.319 | 0.118 | 4.65E-87 | Neo-G | C8orf46  |
| GPSM3.7    | 4.80E-91 | -1.03507 | 0.028 | 0.291 | 7.17E-87 | Neo-G | GPSM3    |
| HDAC9.5    | 5.98E-91 | 0.475343 | 0.294 | 0.105 | 8.94E-87 | Neo-G | HDAC9    |
| FBXO11.5   | 6.17E-91 | 0.519791 | 0.397 | 0.183 | 9.22E-87 | Neo-G | FBXO11   |
| KIF5A.6    | 6.23E-91 | 0.640874 | 0.285 | 0.102 | 9.31E-87 | Neo-G | KIF5A    |
| HTATSF1.3  | 7.41E-91 | 0.505455 | 0.474 | 0.25  | 1.11E-86 | Neo-G | HTATSF1  |
| STRBP.7    | 7.82E-91 | 0.495451 | 0.289 | 0.107 | 1.17E-86 | Neo-G | STRBP    |
| RIMKLB.5   | 1.27E-90 | 0.520943 | 0.324 | 0.129 | 1.90E-86 | Neo-G | RIMKLB   |
| TGFB1.7    | 1.68E-90 | -0.72722 | 0.013 | 0.273 | 2.50E-86 | Neo-G | TGFB1    |
| RAMP1.6    | 2.09E-90 | -0.97642 | 0.145 | 0.444 | 3.12E-86 | Neo-G | RAMP1    |
| RHBDD2.6   | 2.35E-90 | 0.365434 | 0.67  | 0.433 | 3.52E-86 | Neo-G | RHBDD2   |
| ANK3.6     | 2.38E-90 | 0.350075 | 0.186 | 0.045 | 3.56E-86 | Neo-G | ANK3     |
| CCT2.2     | 2.80E-90 | 0.338441 | 0.754 | 0.52  | 4.19E-86 | Neo-G | CCT2     |
| BUD31.5    | 2.83E-90 | 0.238133 | 0.841 | 0.602 | 4.23E-86 | Neo-G | BUD31    |
| LANCL2.7   | 3.62E-90 | 0.494665 | 0.333 | 0.13  | 5.41E-86 | Neo-G | LANCL2   |
| CCDC28B.6  | 4.22E-90 | 0.510232 | 0.408 | 0.196 | 6.30E-86 | Neo-G | CCDC28B  |
| CD81.6     | 5.31E-90 | -0.72918 | 0.163 | 0.472 | 7.94E-86 | Neo-G | CD81     |
| SLC11A1.7  | 5.51E-90 | -0.98249 | 0.064 | 0.334 | 8.24E-86 | Neo-G | SLC11A1  |
| ZNF804A.1  | 6.01E-90 | 0.335808 | 0.139 | 0.026 | 8.98E-86 | Neo-G | ZNF804A  |
| TMX1.4     | 6.79E-90 | -0.70776 | 0.131 | 0.436 | 1.01E-85 | Neo-G | TMX1     |
| CTNNA2.5   | 7.67E-90 | 0.398201 | 0.181 | 0.043 | 1.15E-85 | Neo-G | CTNNA2   |
| SOBP.6     | 2.13E-89 | 0.522213 | 0.299 | 0.114 | 3.18E-85 | Neo-G | SOBP     |
| LDOC1.6    | 2.55E-89 | 0.382649 | 0.236 | 0.07  | 3.81E-85 | Neo-G | LDOC1    |
| TOP2B.7    | 2.92E-89 | 0.52165  | 0.427 | 0.214 | 4.36E-85 | Neo-G | TOP2B    |
| PSD2.4     | 5.12E-89 | 0.335133 | 0.145 | 0.028 | 7.65E-85 | Neo-G | PSD2     |
| RAMP2.6    | 8.12E-89 | 0.548328 | 0.302 | 0.115 | 1.21E-84 | Neo-G | RAMP2    |
| MED19.3    | 8.18E-89 | 0.461415 | 0.481 | 0.257 | 1.22E-84 | Neo-G | MED19    |
| ILF2.4     | 9.97E-89 | 0.286137 | 0.786 | 0.548 | 1.49E-84 | Neo-G | ILF2     |
| PDPN.3     | 1.01E-88 | -0.83682 | 0.176 | 0.483 | 1.51E-84 | Neo-G | PDPN     |
| IL13RA1.7  | 1.16E-88 | -0.76407 | 0.018 | 0.277 | 1.73E-84 | Neo-G | IL13RA1  |
| PRR4.7     | 1.48E-88 | 0.504499 | 0.406 | 0.193 | 2.21E-84 | Neo-G | PRR4     |
| CAMK4      | 1.91E-88 | 0.242478 | 0.106 | 0.015 | 2.85E-84 | Neo-G | CAMK4    |
| MLLT4.6    | 2.52E-88 | 0.574086 | 0.334 | 0.141 | 3.76E-84 | Neo-G | MLLT4    |
| CACNA1A.6  | 3.63E-88 | 0.516079 | 0.247 | 0.077 | 5.42E-84 | Neo-G | CACNA1A  |
| IFI16.5    | 4.92E-88 | -0.83499 | 0.142 | 0.424 | 7.35E-84 | Neo-G | IFI16    |
| ZC4H2.4    | 5.49E-88 | 0.371435 | 0.167 | 0.038 | 8.21E-84 | Neo-G | ZC4H2    |

|            |          |          |       |       |          |       |           |
|------------|----------|----------|-------|-------|----------|-------|-----------|
| LRRN3.6    | 9.66E-88 | 0.479159 | 0.272 | 0.094 | 1.44E-83 | Neo-G | LRRN3     |
| CHCHD10.5  | 1.14E-87 | -0.67869 | 0.124 | 0.412 | 1.71E-83 | Neo-G | CHCHD10   |
| MAP6.5     | 1.40E-87 | 0.490239 | 0.24  | 0.079 | 2.09E-83 | Neo-G | MAP6      |
| SNX5.4     | 2.46E-87 | -0.6987  | 0.137 | 0.426 | 3.68E-83 | Neo-G | SNX5      |
| ARHGEF7.5  | 3.02E-87 | 0.45972  | 0.338 | 0.136 | 4.52E-83 | Neo-G | ARHGEF7   |
| PLP2.6     | 3.49E-87 | -0.81957 | 0.09  | 0.375 | 5.22E-83 | Neo-G | PLP2      |
| PHIP.4     | 3.80E-87 | 0.462914 | 0.537 | 0.307 | 5.67E-83 | Neo-G | PHIP      |
| KBTBD6.5   | 4.86E-87 | 0.468325 | 0.296 | 0.111 | 7.26E-83 | Neo-G | KBTBD6    |
| BPGM.3     | 6.96E-87 | 0.470979 | 0.427 | 0.21  | 1.04E-82 | Neo-G | BPGM      |
| LGALS3BP.9 | 2.7E-87  | -0.79645 | 0.203 | 0.479 | 1.39E-82 | Neo-G | LGALS3BP  |
| RAB20.6    | 1.12E-86 | -0.87582 | 0.013 | 0.263 | 1.67E-82 | Neo-G | RAB20     |
| SNAP91     | 1.18E-86 | 0.242803 | 0.081 | 0.008 | 1.76E-82 | Neo-G | SNAP91    |
| LILRB4.7   | 1.19E-86 | -1.04752 | 0.03  | 0.283 | 1.78E-82 | Neo-G | LILRB4    |
| ANKMY2.3   | 2.42E-86 | 0.430768 | 0.277 | 0.098 | 3.62E-82 | Neo-G | ANKMY2    |
| COX7A2.2   | 2.94E-86 | 0.154727 | 0.965 | 0.791 | 4.39E-82 | Neo-G | COX7A2    |
| TMEM160.6  | 3.78E-86 | 0.416407 | 0.672 | 0.441 | 5.65E-82 | Neo-G | TMEM160   |
| ANKRD12.2  | 4.69E-86 | 0.367137 | 0.633 | 0.4   | 7.01E-82 | Neo-G | ANKRD12   |
| RARRES3.3  | 5.06E-86 | -0.97737 | 0.018 | 0.271 | 7.56E-82 | Neo-G | RARRES3   |
| CALM1.7    | 5.62E-86 | 0.255592 | 0.963 | 0.748 | 8.40E-82 | Neo-G | CALM1     |
| ACAP3.7    | 7.66E-86 | 0.520268 | 0.405 | 0.193 | 1.14E-81 | Neo-G | ACAP3     |
| SAMSN1.7   | 7.74E-86 | -1.00597 | 0.027 | 0.279 | 1.16E-81 | Neo-G | SAMSN1    |
| LRRC40.3   | 8.01E-86 | 0.448511 | 0.312 | 0.122 | 1.20E-81 | Neo-G | LRRC40    |
| EPB41L2.5  | 1.29E-85 | -0.75568 | 0.068 | 0.34  | 1.93E-81 | Neo-G | EPB41L2   |
| TSN.4      | 1.39E-85 | 0.393853 | 0.58  | 0.352 | 2.08E-81 | Neo-G | TSN       |
| TBXAS1.7   | 1.62E-85 | -0.991   | 0.02  | 0.268 | 2.42E-81 | Neo-G | TBXAS1    |
| GSK3B.4    | 1.63E-85 | 0.522207 | 0.377 | 0.176 | 2.44E-81 | Neo-G | GSK3B     |
| TMBIM1.4   | 2.18E-85 | -0.76212 | 0.019 | 0.272 | 3.26E-81 | Neo-G | TMBIM1    |
| BCAS2.2    | 2.37E-85 | 0.297754 | 0.686 | 0.436 | 3.54E-81 | Neo-G | BCAS2     |
| CKB.7      | 2.46E-85 | 0.341624 | 0.918 | 0.541 | 3.68E-81 | Neo-G | CKB       |
| RRAGA.2    | 2.56E-85 | 0.426129 | 0.589 | 0.365 | 3.82E-81 | Neo-G | RRAGA     |
| CYBA.7     | 3.19E-85 | -0.98715 | 0.194 | 0.43  | 4.76E-81 | Neo-G | CYBA      |
| CARD16.5   | 3.22E-85 | -0.90309 | 0.01  | 0.256 | 4.81E-81 | Neo-G | CARD16    |
| OLFM2.5    | 3.58E-85 | 0.473136 | 0.384 | 0.168 | 5.35E-81 | Neo-G | OLFM2     |
| LINC00152  | 3.81E-85 | -0.77989 | 0.029 | 0.286 | 5.70E-81 | Neo-G | LINC00152 |
| FAIM2.6    | 5.28E-85 | 0.394797 | 0.383 | 0.168 | 7.89E-81 | Neo-G | FAIM2     |
| APOC1.6    | 5.74E-85 | -0.96449 | 0.327 | 0.539 | 8.57E-81 | Neo-G | APOC1     |
| HNRNPH3.6  | 5.89E-85 | 0.375708 | 0.65  | 0.42  | 8.80E-81 | Neo-G | HNRNPH3   |
| ARL6IP1.3  | 9.01E-85 | 0.208423 | 0.91  | 0.721 | 1.35E-80 | Neo-G | ARL6IP1   |
| H2AFJ.7    | 1.32E-84 | -0.74472 | 0.029 | 0.287 | 1.97E-80 | Neo-G | H2AFJ     |
| UBE2S.6    | 2.07E-84 | 0.395936 | 0.554 | 0.319 | 3.09E-80 | Neo-G | UBE2S     |
| PFDN4.5    | 3.09E-84 | 0.448385 | 0.547 | 0.336 | 4.61E-80 | Neo-G | PFDN4     |
| SETBP1.5   | 3.69E-84 | 0.400426 | 0.203 | 0.058 | 5.51E-80 | Neo-G | SETBP1    |
| TRAF4.6    | 3.92E-84 | 0.471607 | 0.467 | 0.245 | 5.85E-80 | Neo-G | TRAF4     |
| LPAR6.7    | 4.08E-84 | -0.85133 | 0.017 | 0.264 | 6.09E-80 | Neo-G | LPAR6     |
| GATS.4     | 5.92E-84 | 0.362437 | 0.185 | 0.048 | 8.85E-80 | Neo-G | GATS      |
| DRAXIN.6   | 7.63E-84 | 0.516362 | 0.319 | 0.132 | 1.14E-79 | Neo-G | DRAXIN    |
| C1QBP.4    | 1.06E-83 | 0.344031 | 0.776 | 0.527 | 1.59E-79 | Neo-G | C1QBP     |
| STOM.6     | 1.49E-83 | -0.84837 | 0.028 | 0.278 | 2.23E-79 | Neo-G | STOM      |
| DMTN       | 2.07E-83 | 0.228503 | 0.091 | 0.011 | 3.09E-79 | Neo-G | DMTN      |
| YPEL4.2    | 2.35E-83 | 0.336991 | 0.141 | 0.028 | 3.52E-79 | Neo-G | YPEL4     |
| LGALS9.7   | 2.42E-83 | -0.95207 | 0.022 | 0.267 | 3.62E-79 | Neo-G | LGALS9    |

|              |          |          |       |       |          |       |                |
|--------------|----------|----------|-------|-------|----------|-------|----------------|
| ATP6VOA1. 2. | 4.3E-83  | 0.421634 | 0.486 | 0.261 | 3.64E-79 | Neo-G | ATP6VOA1       |
| TMED10. 3    | 3.38E-83 | -0.67727 | 0.382 | 0.641 | 5.06E-79 | Neo-G | TMED10         |
| SEMA6C       | 3.54E-83 | 0.314322 | 0.12  | 0.021 | 5.29E-79 | Neo-G | SEMA6C         |
| IGFBP7. 5    | 3.73E-83 | -0.89541 | 0.044 | 0.296 | 5.58E-79 | Neo-G | IGFBP7         |
| OSTF1. 7     | 4.08E-83 | -0.83074 | 0.057 | 0.32  | 6.10E-79 | Neo-G | OSTF1          |
| TMEM106B. 4. | 1.9E-83  | 0.425836 | 0.526 | 0.307 | 6.26E-79 | Neo-G | TMEM106B       |
| SLC35B4. 4   | 7.09E-83 | 0.496167 | 0.369 | 0.169 | 1.06E-78 | Neo-G | SLC35B4        |
| CASP4. 7     | 7.86E-83 | -0.81671 | 0.012 | 0.254 | 1.18E-78 | Neo-G | CASP4          |
| DCTN2. 2     | 8.36E-83 | 0.379211 | 0.708 | 0.483 | 1.25E-78 | Neo-G | DCTN2          |
| MEST. 6      | 1.01E-82 | 0.420606 | 0.614 | 0.359 | 1.52E-78 | Neo-G | MEST           |
| ZDHHC13      | 1.40E-82 | 0.336392 | 0.183 | 0.047 | 2.09E-78 | Neo-G | ZDHHC13        |
| RNASET2. 7   | 1.58E-82 | -0.84484 | 0.266 | 0.509 | 2.36E-78 | Neo-G | RNASET2        |
| GSTM3. 5     | 1.89E-82 | 0.402557 | 0.467 | 0.244 | 2.82E-78 | Neo-G | GSTM3          |
| CASP1. 6     | 1.89E-82 | -0.81843 | 0.012 | 0.252 | 2.82E-78 | Neo-G | CASP1          |
| SERINC1. 1   | 3.03E-82 | 0.364911 | 0.625 | 0.393 | 4.53E-78 | Neo-G | SERINC1        |
| SUCLG2. 5    | 3.47E-82 | -0.68821 | 0.023 | 0.272 | 5.18E-78 | Neo-G | SUCLG2         |
| C3AR1. 7     | 4.44E-82 | -1.00357 | 0.023 | 0.264 | 6.63E-78 | Neo-G | C3AR1          |
| ZNF281. 4    | 5.04E-82 | 0.473527 | 0.364 | 0.163 | 7.53E-78 | Neo-G | ZNF281         |
| C7orf55-L    | 1.15E-81 | 0.441871 | 0.537 | 0.315 | 1.72E-77 | Neo-G | C7orf55-LUC7L2 |
| GRK4. 5      | 1.37E-81 | 0.448983 | 0.24  | 0.08  | 2.05E-77 | Neo-G | GRK4           |
| PCDHB15      | 2.01E-81 | 0.234897 | 0.09  | 0.011 | 3.00E-77 | Neo-G | PCDHB15        |
| CA2. 5       | 2.92E-81 | -0.91719 | 0.013 | 0.251 | 4.36E-77 | Neo-G | CA2            |
| ALDOA. 5     | 2.94E-81 | -0.43968 | 0.816 | 0.849 | 4.39E-77 | Neo-G | ALDOA          |
| ANAPC16. 5   | 3.19E-81 | -0.75365 | 0.275 | 0.556 | 4.76E-77 | Neo-G | ANAPC16        |
| SPOCD1. 5    | 3.38E-81 | -0.999   | 0.008 | 0.243 | 5.06E-77 | Neo-G | SPOCD1         |
| GAP43. 7     | 3.87E-81 | 0.214495 | 0.8   | 0.426 | 5.79E-77 | Neo-G | GAP43          |
| METTL7B. 4   | 4.77E-81 | -0.91483 | 0.004 | 0.237 | 7.12E-77 | Neo-G | METTL7B        |
| CDKN1B. 6    | 6.99E-81 | 0.462441 | 0.452 | 0.235 | 1.05E-76 | Neo-G | CDKN1B         |
| ATP6V1G1. 8. | 8.2E-81  | 0.163227 | 0.927 | 0.733 | 1.32E-76 | Neo-G | ATP6V1G1       |
| IFI35. 5     | 8.92E-81 | -0.75542 | 0.016 | 0.257 | 1.33E-76 | Neo-G | IFI35          |
| AUTS2. 7     | 1.10E-80 | 0.570115 | 0.266 | 0.1   | 1.65E-76 | Neo-G | AUTS2          |
| SEZ6. 7      | 1.46E-80 | 0.481521 | 0.303 | 0.119 | 2.19E-76 | Neo-G | SEZ6           |
| C14orf37. 1. | 6.3E-80  | 0.476801 | 0.26  | 0.094 | 2.44E-76 | Neo-G | C14orf37       |
| WBP5. 6      | 1.68E-80 | 0.278168 | 0.72  | 0.476 | 2.51E-76 | Neo-G | WBP5           |
| C7orf55. 6   | 1.85E-80 | 0.374256 | 0.626 | 0.399 | 2.76E-76 | Neo-G | C7orf55        |
| SV2A. 5      | 1.90E-80 | 0.514538 | 0.371 | 0.181 | 2.83E-76 | Neo-G | SV2A           |
| ZDHHC12. 7   | 1.94E-80 | -0.67878 | 0.037 | 0.288 | 2.91E-76 | Neo-G | ZDHHC12        |
| SCN9A. 4     | 2.06E-80 | 0.29532  | 0.127 | 0.024 | 3.08E-76 | Neo-G | SCN9A          |
| CHCHD2. 5    | 2.26E-80 | 0.104715 | 0.983 | 0.868 | 3.37E-76 | Neo-G | CHCHD2         |
| C1orf54. 7   | 2.46E-80 | -0.82658 | 0.014 | 0.251 | 3.67E-76 | Neo-G | C1orf54        |
| DCLK1. 5     | 2.66E-80 | 0.480014 | 0.314 | 0.131 | 3.97E-76 | Neo-G | DCLK1          |
| MED17. 3     | 2.66E-80 | 0.460486 | 0.366 | 0.168 | 3.98E-76 | Neo-G | MED17          |
| MOSPD3. 3    | 2.75E-80 | 0.464088 | 0.473 | 0.265 | 4.11E-76 | Neo-G | MOSPD3         |
| HNRNPR. 2    | 5.57E-80 | 0.299413 | 0.716 | 0.496 | 8.32E-76 | Neo-G | HNRNPR         |
| BLVRB. 5     | 5.60E-80 | -0.84339 | 0.131 | 0.404 | 8.37E-76 | Neo-G | BLVRB          |
| RGS19. 7     | 6.55E-80 | -0.74046 | 0.051 | 0.303 | 9.79E-76 | Neo-G | RGS19          |
| ESRRG. 1     | 6.58E-80 | 0.268708 | 0.109 | 0.018 | 9.83E-76 | Neo-G | ESRRG          |
| LHX1. 3      | 7.58E-80 | 0.389839 | 0.115 | 0.02  | 1.13E-75 | Neo-G | LHX1           |
| SYNE2. 7     | 9.27E-80 | 0.490615 | 0.345 | 0.153 | 1.38E-75 | Neo-G | SYNE2          |
| ZKSCAN1. 6   | 1.02E-79 | 0.421001 | 0.508 | 0.293 | 1.52E-75 | Neo-G | ZKSCAN1        |
| TRIM2. 5     | 1.08E-79 | 0.456129 | 0.407 | 0.201 | 1.61E-75 | Neo-G | TRIM2          |

|             |           |           |        |        |                 |          |
|-------------|-----------|-----------|--------|--------|-----------------|----------|
| CDH4. 6     | 1. 18E-79 | 0. 478854 | 0. 218 | 0. 071 | 1. 77E-75 Neo-G | CDH4     |
| RNF213. 7   | 1. 42E-79 | -0. 65844 | 0. 037 | 0. 288 | 2. 12E-75 Neo-G | RNF213   |
| TYMP. 7     | 2. 15E-79 | -0. 87043 | 0. 086 | 0. 333 | 3. 21E-75 Neo-G | TYMP     |
| FZD3. 4     | 2. 56E-79 | 0. 4556   | 0. 466 | 0. 253 | 3. 82E-75 Neo-G | FZD3     |
| OLFML3. 6   | 3. 39E-79 | -0. 93054 | 0. 017 | 0. 252 | 5. 06E-75 Neo-G | OLFML3   |
| C16orf45. 3 | 3. 80E-79 | 0. 396363 | 0. 518 | 0. 294 | 5. 67E-75 Neo-G | C16orf45 |
| HOXA-AS2. 4 | 4. 83E-79 | 0. 288459 | 0. 131 | 0. 026 | 7. 21E-75 Neo-G | HOXA-AS2 |
| RIMS1       | 5. 07E-79 | 0. 221266 | 0. 083 | 0. 01  | 7. 58E-75 Neo-G | RIMS1    |
| ASXL3. 1    | 5. 60E-79 | 0. 277986 | 0. 116 | 0. 02  | 8. 36E-75 Neo-G | ASXL3    |
| CAST. 6     | 6. 09E-79 | -0. 64127 | 0. 082 | 0. 347 | 9. 10E-75 Neo-G | CAST     |
| GPX1. 7     | 6. 25E-79 | -0. 50518 | 0. 756 | 0. 821 | 9. 34E-75 Neo-G | GPX1     |
| SUB1. 5     | 6. 60E-79 | 0. 182851 | 0. 936 | 0. 734 | 9. 86E-75 Neo-G | SUB1     |
| TGIF1. 5    | 9. 05E-79 | -0. 73614 | 0. 118 | 0. 387 | 1. 35E-74 Neo-G | TGIF1    |
| RAB32. 7    | 9. 85E-79 | -0. 58959 | 0. 023 | 0. 265 | 1. 47E-74 Neo-G | RAB32    |
| TSPAN7. 5   | 1. 11E-78 | 0. 386428 | 0. 52  | 0. 285 | 1. 66E-74 Neo-G | TSPAN7   |
| RHOC. 4     | 1. 71E-78 | -0. 6867  | 0. 31  | 0. 56  | 2. 55E-74 Neo-G | RHOC     |
| TPP1. 6     | 1. 73E-78 | -0. 71787 | 0. 089 | 0. 351 | 2. 58E-74 Neo-G | TPP1     |
| THEMIS2. 7  | 1. 74E-78 | -0. 84404 | 0. 029 | 0. 268 | 2. 60E-74 Neo-G | THEMIS2  |
| FSD1. 6     | 2. 17E-78 | 0. 499814 | 0. 313 | 0. 135 | 3. 24E-74 Neo-G | FSD1     |
| RTF1. 5     | 2. 21E-78 | 0. 391738 | 0. 621 | 0. 407 | 3. 31E-74 Neo-G | RTF1     |
| FAM171B. 5  | 2. 34E-78 | 0. 44108  | 0. 258 | 0. 093 | 3. 50E-74 Neo-G | FAM171B  |
| HAVCR2. 7   | 2. 92E-78 | -0. 96659 | 0. 024 | 0. 257 | 4. 36E-74 Neo-G | HAVCR2   |
| CDC42. 4    | 3. 14E-78 | 0. 242015 | 0. 804 | 0. 598 | 4. 70E-74 Neo-G | CDC42    |
| RAB1A. 3    | 3. 45E-78 | 0. 23229  | 0. 8   | 0. 598 | 5. 15E-74 Neo-G | RAB1A    |
| IQGAP1. 7   | 3. 85E-78 | -0. 62618 | 0. 034 | 0. 279 | 5. 75E-74 Neo-G | IQGAP1   |
| PRCD. 4     | 4. 91E-78 | 0. 316124 | 0. 123 | 0. 023 | 7. 33E-74 Neo-G | PRCD     |
| STARD3NL. 5 | 5. 79E-78 | 0. 37167  | 0. 59  | 0. 374 | 8. 65E-74 Neo-G | STARD3NL |
| CD58. 7     | 6. 01E-78 | -0. 72072 | 0. 018 | 0. 253 | 8. 98E-74 Neo-G | CD58     |
| LITAF. 7    | 6. 91E-78 | -0. 78464 | 0. 229 | 0. 487 | 1. 03E-73 Neo-G | LITAF    |
| IFI30. 7    | 7. 24E-78 | -0. 94163 | 0. 014 | 0. 244 | 1. 08E-73 Neo-G | IFI30    |
| TPI1. 4     | 7. 79E-78 | -0. 43064 | 0. 854 | 0. 867 | 1. 16E-73 Neo-G | TPI1     |
| ZNF138. 5   | 1. 04E-77 | 0. 456968 | 0. 307 | 0. 126 | 1. 55E-73 Neo-G | ZNF138   |
| ELF1. 7     | 1. 15E-77 | -0. 76833 | 0. 031 | 0. 27  | 1. 71E-73 Neo-G | ELF1     |
| CD163. 7    | 1. 43E-77 | -1. 00648 | 0. 064 | 0. 302 | 2. 14E-73 Neo-G | CD163    |
| RRBP1. 3    | 1. 62E-77 | -0. 61606 | 0. 068 | 0. 325 | 2. 42E-73 Neo-G | RRBP1    |
| SMARCC2. 6  | 1. 70E-77 | 0. 451932 | 0. 448 | 0. 241 | 2. 55E-73 Neo-G | SMARCC2  |
| WNK2        | 1. 87E-77 | 0. 185867 | 0. 069 | 0. 006 | 2. 80E-73 Neo-G | WNK2     |
| BHLHE41. 5  | 1. 89E-77 | -0. 72075 | 0. 006 | 0. 232 | 2. 83E-73 Neo-G | BHLHE41  |
| FAM92A1. 5  | 1. 97E-77 | 0. 507698 | 0. 368 | 0. 181 | 2. 94E-73 Neo-G | FAM92A1  |
| PTPRE. 6    | 2. 02E-77 | -0. 6788  | 0. 047 | 0. 297 | 3. 02E-73 Neo-G | PTPRE    |
| CLIP3. 6    | 2. 08E-77 | 0. 494213 | 0. 368 | 0. 177 | 3. 12E-73 Neo-G | CLIP3    |
| CLU. 7      | 2. 42E-77 | -0. 72474 | 0. 765 | 0. 784 | 3. 62E-73 Neo-G | CLU      |
| TBPL1. 2    | 4. 38E-77 | 0. 430194 | 0. 398 | 0. 195 | 6. 55E-73 Neo-G | TBPL1    |
| SIRPA. 7    | 5. 39E-77 | -0. 62791 | 0. 03  | 0. 269 | 8. 06E-73 Neo-G | SIRPA    |
| ARMC1. 5    | 5. 55E-77 | 0. 471091 | 0. 447 | 0. 242 | 8. 30E-73 Neo-G | ARMC1    |
| FKBP5. 7    | 5. 75E-77 | -0. 73696 | 0. 085 | 0. 345 | 8. 59E-73 Neo-G | FKBP5    |
| NCOR1. 6    | 6. 25E-77 | 0. 360695 | 0. 668 | 0. 439 | 9. 34E-73 Neo-G | NCOR1    |
| SH3GL2      | 6. 30E-77 | 0. 246026 | 0. 1   | 0. 015 | 9. 42E-73 Neo-G | SH3GL2   |
| EIF4A2. 4   | 6. 32E-77 | 0. 200219 | 0. 892 | 0. 698 | 9. 44E-73 Neo-G | EIF4A2   |
| HSBP1. 4    | 6. 37E-77 | 0. 173141 | 0. 892 | 0. 693 | 9. 52E-73 Neo-G | HSBP1    |
| HMOX1. 7    | 6. 37E-77 | -0. 96323 | 0. 079 | 0. 321 | 9. 52E-73 Neo-G | HMOX1    |

|           |          |          |       |       |          |       |          |
|-----------|----------|----------|-------|-------|----------|-------|----------|
| DHX36.5   | 6.60E-77 | 0.382262 | 0.611 | 0.403 | 9.87E-73 | Neo-G | DHX36    |
| PKIB.5    | 7.97E-77 | -0.77035 | 0.063 | 0.31  | 1.19E-72 | Neo-G | PKIB     |
| SH3BGRL3. | 8.20E-77 | -0.53381 | 0.701 | 0.786 | 1.23E-72 | Neo-G | SH3BGRL3 |
| C7orf26.5 | 8.51E-77 | 0.471829 | 0.321 | 0.138 | 1.27E-72 | Neo-G | C7orf26  |
| KIF3C.7   | 9.30E-77 | 0.475743 | 0.241 | 0.085 | 1.39E-72 | Neo-G | KIF3C    |
| ARPC1A.6  | 1.10E-76 | 0.239463 | 0.767 | 0.533 | 1.65E-72 | Neo-G | ARPC1A   |
| LHX9      | 1.28E-76 | 0.235723 | 0.082 | 0.01  | 1.91E-72 | Neo-G | LHX9     |
| FSD1L.3   | 1.30E-76 | 0.349978 | 0.156 | 0.038 | 1.94E-72 | Neo-G | FSD1L    |
| APC2.6    | 1.42E-76 | 0.498379 | 0.306 | 0.128 | 2.13E-72 | Neo-G | APC2     |
| UBE2H.6   | 1.60E-76 | 0.47097  | 0.438 | 0.237 | 2.39E-72 | Neo-G | UBE2H    |
| PSMD3.3   | 1.60E-76 | 0.402488 | 0.586 | 0.383 | 2.39E-72 | Neo-G | PSMD3    |
| SCOC.6    | 1.72E-76 | 0.350443 | 0.605 | 0.391 | 2.58E-72 | Neo-G | SCOC     |
| ZFAND5.7  | 1.75E-76 | 0.363599 | 0.662 | 0.439 | 2.62E-72 | Neo-G | ZFAND5   |
| MICU3.6   | 2.59E-76 | 0.407131 | 0.214 | 0.066 | 3.87E-72 | Neo-G | MICU3    |
| RNF130.7  | 2.91E-76 | -0.61998 | 0.214 | 0.493 | 4.35E-72 | Neo-G | RNF130   |
| MGAT1.7   | 3.83E-76 | -0.703   | 0.126 | 0.386 | 5.73E-72 | Neo-G | MGAT1    |
| CD163L1.1 | 5.42E-76 | 0.359822 | 0.135 | 0.029 | 8.10E-72 | Neo-G | CD163L1  |
| CACNA2D1. | 7.79E-76 | 0.286605 | 0.114 | 0.02  | 1.16E-71 | Neo-G | CACNA2D1 |
| TAF7.6    | 1.08E-75 | 0.247428 | 0.754 | 0.529 | 1.61E-71 | Neo-G | TAF7     |
| ZNF92.5   | 1.10E-75 | 0.450887 | 0.307 | 0.126 | 1.64E-71 | Neo-G | ZNF92    |
| RAPGEF4   | 1.36E-75 | 0.290081 | 0.119 | 0.023 | 2.03E-71 | Neo-G | RAPGEF4  |
| CALD1.6   | 1.49E-75 | 0.291264 | 0.647 | 0.392 | 2.22E-71 | Neo-G | CALD1    |
| S100A4.7  | 2.14E-75 | -1.06657 | 0.089 | 0.321 | 3.20E-71 | Neo-G | S100A4   |
| TLN1.7    | 2.15E-75 | -0.61634 | 0.06  | 0.312 | 3.21E-71 | Neo-G | TLN1     |
| ZNF250.4  | 2.34E-75 | 0.39586  | 0.209 | 0.065 | 3.50E-71 | Neo-G | ZNF250   |
| PPP1R14B. | 2.40E-75 | 0.449054 | 0.54  | 0.321 | 3.58E-71 | Neo-G | PPP1R14B |
| CRIP2.5   | 2.54E-75 | 0.492787 | 0.502 | 0.291 | 3.79E-71 | Neo-G | CRIP2    |
| GABRB1    | 2.55E-75 | 0.177594 | 0.071 | 0.007 | 3.81E-71 | Neo-G | GABRB1   |
| CADM4.6   | 2.83E-75 | 0.454402 | 0.445 | 0.241 | 4.23E-71 | Neo-G | CADM4    |
| CD86.7    | 3.51E-75 | -0.93992 | 0.015 | 0.238 | 5.25E-71 | Neo-G | CD86     |
| YAE1D1.5  | 3.58E-75 | 0.477179 | 0.322 | 0.14  | 5.35E-71 | Neo-G | YAE1D1   |
| C5AR1.6   | 5.30E-75 | -0.94467 | 0.034 | 0.263 | 7.92E-71 | Neo-G | C5AR1    |
| DZIP3.5   | 5.84E-75 | 0.450668 | 0.284 | 0.112 | 8.73E-71 | Neo-G | DZIP3    |
| MTF2.4    | 6.32E-75 | 0.425954 | 0.439 | 0.231 | 9.44E-71 | Neo-G | MTF2     |
| EEF1A1.7  | 6.34E-75 | -0.5698  | 0.682 | 0.843 | 9.47E-71 | Neo-G | EEF1A1   |
| EFNB1.3   | 7.36E-75 | 0.429913 | 0.232 | 0.079 | 1.10E-70 | Neo-G | EFNB1    |
| EVI2A.6   | 8.22E-75 | -0.9285  | 0.022 | 0.247 | 1.23E-70 | Neo-G | EVI2A    |
| CNOT4.4   | 8.83E-75 | 0.438393 | 0.455 | 0.25  | 1.32E-70 | Neo-G | CNOT4    |
| ZNF195.4  | 1.00E-74 | 0.437936 | 0.325 | 0.142 | 1.50E-70 | Neo-G | ZNF195   |
| MVP.5     | 1.23E-74 | -0.64893 | 0.02  | 0.251 | 1.84E-70 | Neo-G | MVP      |
| CCDC126.3 | 1.26E-74 | 0.417533 | 0.264 | 0.098 | 1.88E-70 | Neo-G | CCDC126  |
| BLVRA.5   | 1.50E-74 | 0.335669 | 0.549 | 0.314 | 2.24E-70 | Neo-G | BLVRA    |
| GPR183.7  | 1.58E-74 | -1.04685 | 0.083 | 0.315 | 2.36E-70 | Neo-G | GPR183   |
| PEG3.5    | 2.48E-74 | 0.374481 | 0.181 | 0.051 | 3.70E-70 | Neo-G | PEG3     |
| RBMS1.5   | 2.74E-74 | -0.59199 | 0.04  | 0.276 | 4.09E-70 | Neo-G | RBMS1    |
| GPRASP2.5 | 2.74E-74 | 0.390218 | 0.18  | 0.051 | 4.09E-70 | Neo-G | GPRASP2  |
| SLCO2B1.6 | 3.18E-74 | -0.90287 | 0.021 | 0.245 | 4.76E-70 | Neo-G | SLCO2B1  |
| NKAIN3.6  | 3.40E-74 | 0.473848 | 0.272 | 0.107 | 5.08E-70 | Neo-G | NKAIN3   |
| KRT10.4   | 3.50E-74 | 0.325662 | 0.764 | 0.533 | 5.23E-70 | Neo-G | KRT10    |
| SERTAD1.4 | 4.21E-74 | -0.79416 | 0.09  | 0.343 | 6.29E-70 | Neo-G | SERTAD1  |
| LAIR1.7   | 4.34E-74 | -0.90366 | 0.03  | 0.255 | 6.48E-70 | Neo-G | LAIR1    |

|             |           |           |        |        |           |       |           |
|-------------|-----------|-----------|--------|--------|-----------|-------|-----------|
| NEK6. 4     | 4. 87E-74 | -0. 64463 | 0. 071 | 0. 316 | 7. 27E-70 | Neo-G | NEK6      |
| PNPLA8. 4   | 4. 95E-74 | 0. 368626 | 0. 541 | 0. 323 | 7. 40E-70 | Neo-G | PNPLA8    |
| SPI1. 7     | 5. 54E-74 | -0. 85906 | 0. 037 | 0. 263 | 8. 28E-70 | Neo-G | SPI1      |
| CNOT7. 4    | 5. 90E-74 | 0. 402022 | 0. 548 | 0. 346 | 8. 82E-70 | Neo-G | CNOT7     |
| ANXA11. 7   | 6. 02E-74 | -0. 69392 | 0. 016 | 0. 24  | 8. 99E-70 | Neo-G | ANXA11    |
| SLC39A1. 4  | 7. 57E-74 | -0. 65507 | 0. 15  | 0. 416 | 1. 13E-69 | Neo-G | SLC39A1   |
| MOB4. 4     | 1. 00E-73 | 0. 350524 | 0. 56  | 0. 349 | 1. 50E-69 | Neo-G | MOB4      |
| ITSN1. 2    | 1. 49E-73 | 0. 417011 | 0. 302 | 0. 127 | 2. 22E-69 | Neo-G | ITSN1     |
| CYFIP2. 6   | 1. 58E-73 | 0. 420721 | 0. 257 | 0. 096 | 2. 36E-69 | Neo-G | CYFIP2    |
| H2AFY. 6    | 3. 63E-73 | 0. 286386 | 0. 798 | 0. 584 | 5. 43E-69 | Neo-G | H2AFY     |
| ABHD17B. 7  | 4. 16E-73 | 0. 406063 | 0. 276 | 0. 106 | 6. 22E-69 | Neo-G | ABHD17B   |
| RGS17. 5    | 5. 12E-73 | 0. 458836 | 0. 321 | 0. 143 | 7. 64E-69 | Neo-G | RGS17     |
| PLCB1. 5    | 6. 04E-73 | 0. 439959 | 0. 202 | 0. 065 | 9. 02E-69 | Neo-G | PLCB1     |
| GBP2. 5     | 8. 75E-73 | -0. 77545 | 0. 013 | 0. 232 | 1. 31E-68 | Neo-G | GBP2      |
| SSR3. 7     | 8. 76E-73 | -0. 716   | 0. 299 | 0. 554 | 1. 31E-68 | Neo-G | SSR3      |
| CDKN1A. 6   | 9. 59E-73 | -0. 78516 | 0. 088 | 0. 334 | 1. 43E-68 | Neo-G | CDKN1A    |
| CELSR3. 1   | 1. 06E-72 | 0. 309119 | 0. 12  | 0. 024 | 1. 59E-68 | Neo-G | CELSR3    |
| PREX1. 6    | 1. 15E-72 | -0. 62321 | 0. 019 | 0. 242 | 1. 73E-68 | Neo-G | PREX1     |
| MYO6. 5     | 1. 38E-72 | 0. 450871 | 0. 396 | 0. 204 | 2. 06E-68 | Neo-G | MYO6      |
| ADORA3. 7   | 1. 53E-72 | -0. 93826 | 0. 059 | 0. 285 | 2. 28E-68 | Neo-G | ADORA3    |
| LY96. 7     | 1. 59E-72 | -0. 6829  | 0. 024 | 0. 247 | 2. 37E-68 | Neo-G | LY96      |
| ZC3H15. 2   | 1. 61E-72 | 0. 281129 | 0. 694 | 0. 48  | 2. 40E-68 | Neo-G | ZC3H15    |
| ID3. 6      | 1. 61E-72 | -0. 95445 | 0. 057 | 0. 29  | 2. 41E-68 | Neo-G | ID3       |
| TCTEX1D2. 1 | 1. 69E-72 | 0. 406648 | 0. 401 | 0. 206 | 2. 53E-68 | Neo-G | TCTEX1D2  |
| GARS. 5     | 2. 25E-72 | 0. 428751 | 0. 478 | 0. 271 | 3. 37E-68 | Neo-G | GARS      |
| RBM4B. 5    | 2. 27E-72 | 0. 448502 | 0. 357 | 0. 172 | 3. 39E-68 | Neo-G | RBM4B     |
| JUP         | 2. 49E-72 | 0. 247939 | 0. 107 | 0. 019 | 3. 73E-68 | Neo-G | JUP       |
| LINC00839   | 3. 23E-72 | 0. 204265 | 0. 083 | 0. 011 | 4. 82E-68 | Neo-G | LINC00839 |
| DPP7. 7     | 3. 25E-72 | -0. 58858 | 0. 227 | 0. 496 | 4. 85E-68 | Neo-G | DPP7      |
| MPHOSPH8. 4 | 0. 03E-72 | 0. 33233  | 0. 588 | 0. 376 | 6. 02E-68 | Neo-G | MPHOSPH8  |
| COPS8. 6    | 4. 21E-72 | 0. 281462 | 0. 664 | 0. 446 | 6. 30E-68 | Neo-G | COPS8     |
| COMMD2. 4   | 4. 54E-72 | 0. 397497 | 0. 472 | 0. 267 | 6. 78E-68 | Neo-G | COMMD2    |
| HOXA9. 3    | 5. 63E-72 | 0. 332488 | 0. 121 | 0. 024 | 8. 42E-68 | Neo-G | HOXA9     |
| ARSF        | 5. 69E-72 | 0. 189917 | 0. 057 | 0. 004 | 8. 50E-68 | Neo-G | ARSF      |
| CLSTN3. 4   | 6. 92E-72 | 0. 355339 | 0. 167 | 0. 045 | 1. 03E-67 | Neo-G | CLSTN3    |
| YWHAZ. 2    | 8. 12E-72 | 0. 271846 | 0. 722 | 0. 513 | 1. 21E-67 | Neo-G | YWHAZ     |
| OLR1. 7     | 1. 15E-71 | -0. 94326 | 0. 051 | 0. 274 | 1. 72E-67 | Neo-G | OLR1      |
| SNAP23. 6   | 1. 49E-71 | -0. 67187 | 0. 039 | 0. 269 | 2. 23E-67 | Neo-G | SNAP23    |
| WDR82. 4    | 1. 53E-71 | 0. 433412 | 0. 429 | 0. 233 | 2. 28E-67 | Neo-G | WDR82     |
| PLA2G12A. 1 | 1. 68E-71 | 0. 468596 | 0. 401 | 0. 214 | 2. 51E-67 | Neo-G | PLA2G12A  |
| EVI2B. 7    | 2. 77E-71 | -0. 87999 | 0. 013 | 0. 226 | 4. 14E-67 | Neo-G | EVI2B     |
| SRGAP1. 6   | 3. 21E-71 | 0. 420242 | 0. 404 | 0. 203 | 4. 79E-67 | Neo-G | SRGAP1    |
| MEG3. 6     | 4. 04E-71 | 0. 746784 | 0. 45  | 0. 287 | 6. 04E-67 | Neo-G | MEG3      |
| CCT7. 4     | 5. 02E-71 | 0. 275714 | 0. 718 | 0. 507 | 7. 51E-67 | Neo-G | CCT7      |
| WIPI2. 4    | 5. 21E-71 | 0. 399317 | 0. 572 | 0. 376 | 7. 79E-67 | Neo-G | WIPI2     |
| C1R. 7      | 6. 12E-71 | -1. 02681 | 0. 021 | 0. 239 | 9. 15E-67 | Neo-G | C1R       |
| POLR2B. 5   | 6. 21E-71 | 0. 451453 | 0. 438 | 0. 241 | 9. 28E-67 | Neo-G | POLR2B    |
| ITFG1. 4    | 6. 48E-71 | 0. 405456 | 0. 524 | 0. 327 | 9. 68E-67 | Neo-G | ITFG1     |
| BAZ2B. 4    | 7. 90E-71 | 0. 418077 | 0. 506 | 0. 298 | 1. 18E-66 | Neo-G | BAZ2B     |
| ZNF454. 5   | 9. 22E-71 | 0. 314064 | 0. 145 | 0. 035 | 1. 38E-66 | Neo-G | ZNF454    |
| ZNF131. 5   | 9. 66E-71 | 0. 46489  | 0. 402 | 0. 211 | 1. 44E-66 | Neo-G | ZNF131    |

|           |    |          |          |       |       |          |       |              |
|-----------|----|----------|----------|-------|-------|----------|-------|--------------|
| GABARAPL2 | 9. | 82E-71   | 0.142907 | 0.914 | 0.722 | 1.47E-66 | Neo-G | GABARAPL2    |
| TAX1BP1.  | 3  | 1.23E-70 | 0.290162 | 0.687 | 0.491 | 1.84E-66 | Neo-G | TAX1BP1      |
| GPBP1.    | 4  | 1.26E-70 | 0.332041 | 0.631 | 0.426 | 1.88E-66 | Neo-G | GPBP1        |
| MIDN.     | 4  | 1.34E-70 | 0.379398 | 0.6   | 0.392 | 2.00E-66 | Neo-G | MIDN         |
| UPF3B.    | 4  | 1.55E-70 | 0.405975 | 0.43  | 0.229 | 2.31E-66 | Neo-G | UPF3B        |
| ERC2      |    | 2.19E-70 | 0.240352 | 0.103 | 0.018 | 3.28E-66 | Neo-G | ERC2         |
| C8orf4.   | 6  | 2.27E-70 | -1.06592 | 0.031 | 0.252 | 3.39E-66 | Neo-G | C8orf4       |
| FAM117B.  | 1  | 2.58E-70 | 0.288563 | 0.133 | 0.03  | 3.85E-66 | Neo-G | FAM117B      |
| TNFRSF12A | 3. | 23E-70   | -0.74638 | 0.079 | 0.312 | 4.83E-66 | Neo-G | TNFRSF12A    |
| ADAM9.    | 5  | 3.82E-70 | -0.57401 | 0.102 | 0.358 | 5.71E-66 | Neo-G | ADAM9        |
| UNC93B1.  | 7  | 4.60E-70 | -0.63095 | 0.012 | 0.224 | 6.88E-66 | Neo-G | UNC93B1      |
| CCZ1.     | 4  | 1.10E-69 | 0.4096   | 0.525 | 0.33  | 1.65E-65 | Neo-G | CCZ1         |
| HNRNPAB.  | 6  | 1.17E-69 | 0.394999 | 0.577 | 0.375 | 1.75E-65 | Neo-G | HNRNPAB      |
| DACT1.    | 1  | 1.27E-69 | 0.30553  | 0.112 | 0.021 | 1.90E-65 | Neo-G | DACT1        |
| HEPN1.    | 6  | 1.33E-69 | -0.70533 | 0.015 | 0.227 | 1.99E-65 | Neo-G | HEPN1        |
| CD302.    | 7  | 1.62E-69 | -0.73731 | 0.016 | 0.228 | 2.42E-65 | Neo-G | CD302        |
| VIP       |    | 1.68E-69 | 0.160845 | 0.031 | 0     | 2.52E-65 | Neo-G | VIP          |
| TTYH1.    | 7  | 1.90E-69 | -0.77053 | 0.064 | 0.293 | 2.84E-65 | Neo-G | TTYH1        |
| SUMO1.    | 1  | 2.09E-69 | 0.1747   | 0.844 | 0.634 | 3.12E-65 | Neo-G | SUMO1        |
| ODF2L.    | 3  | 2.35E-69 | 0.397976 | 0.34  | 0.155 | 3.51E-65 | Neo-G | ODF2L        |
| GLCCI1.   | 6  | 3.07E-69 | 0.443667 | 0.313 | 0.132 | 4.59E-65 | Neo-G | GLCCI1       |
| APOC2.    | 6  | 6.48E-69 | -1.04829 | 0.007 | 0.211 | 9.69E-65 | Neo-G | APOC2        |
| ATXN7L3B. | 7. | 76E-69   | 0.439005 | 0.339 | 0.162 | 1.16E-64 | Neo-G | ATXN7L3B     |
| PLXDC2.   | 7  | 1.02E-68 | -0.82408 | 0.022 | 0.232 | 1.52E-64 | Neo-G | PLXDC2       |
| CYFIP1.   | 6  | 1.03E-68 | -0.66148 | 0.072 | 0.309 | 1.54E-64 | Neo-G | CYFIP1       |
| CACNA1E   |    | 1.07E-68 | 0.150325 | 0.057 | 0.004 | 1.60E-64 | Neo-G | CACNA1E      |
| HSP90AA1. | 1. | 21E-68   | 0.121911 | 0.991 | 0.876 | 1.81E-64 | Neo-G | HSP90AA1     |
| TSPAN18   |    | 1.27E-68 | 0.270627 | 0.092 | 0.015 | 1.90E-64 | Neo-G | TSPAN18      |
| EN2       |    | 1.44E-68 | 0.268701 | 0.095 | 0.016 | 2.15E-64 | Neo-G | EN2          |
| TIMP2.    | 4  | 1.63E-68 | -0.59866 | 0.104 | 0.353 | 2.43E-64 | Neo-G | TIMP2        |
| MGST2.    | 7  | 1.72E-68 | -0.77906 | 0.052 | 0.278 | 2.57E-64 | Neo-G | MGST2        |
| GSTK1.    | 5  | 1.81E-68 | -0.67163 | 0.31  | 0.557 | 2.70E-64 | Neo-G | GSTK1        |
| SH2B2.    | 5  | 2.16E-68 | 0.427354 | 0.243 | 0.092 | 3.22E-64 | Neo-G | SH2B2        |
| EXOC7.    | 6  | 2.27E-68 | 0.371819 | 0.527 | 0.331 | 3.39E-64 | Neo-G | EXOC7        |
| CACYBP.   | 3  | 2.31E-68 | 0.298791 | 0.683 | 0.484 | 3.45E-64 | Neo-G | CACYBP       |
| LRP10.    | 3  | 2.48E-68 | -0.56845 | 0.047 | 0.276 | 3.70E-64 | Neo-G | LRP10        |
| EBAG9.    | 3  | 2.85E-68 | 0.437433 | 0.423 | 0.232 | 4.26E-64 | Neo-G | EBAG9        |
| RP11-553L | 2. | 98E-68   | 0.499083 | 0.389 | 0.206 | 4.45E-64 | Neo-G | RP11-553L6.5 |
| LRP12.    | 4  | 3.21E-68 | 0.427786 | 0.218 | 0.077 | 4.80E-64 | Neo-G | LRP12        |
| PPFIBP1.  | 5  | 3.80E-68 | 0.490979 | 0.302 | 0.138 | 5.68E-64 | Neo-G | PPFIBP1      |
| NUPR1.    | 5  | 4.39E-68 | -0.81758 | 0.111 | 0.35  | 6.57E-64 | Neo-G | NUPR1        |
| EBF1      |    | 4.71E-68 | 0.226847 | 0.073 | 0.009 | 7.04E-64 | Neo-G | EBF1         |
| ZNF90.    | 5  | 4.82E-68 | -0.89796 | 0.169 | 0.405 | 7.20E-64 | Neo-G | ZNF90        |
| FAM127A.  | 4  | 5.94E-68 | 0.347493 | 0.65  | 0.436 | 8.87E-64 | Neo-G | FAM127A      |
| GRAMD1A.  | 5  | 5.94E-68 | 0.426311 | 0.446 | 0.254 | 8.87E-64 | Neo-G | GRAMD1A      |
| WDR60.    | 4  | 6.27E-68 | 0.463283 | 0.397 | 0.212 | 9.37E-64 | Neo-G | WDR60        |
| SERPINH1. | 6. | 31E-68   | -0.52852 | 0.018 | 0.232 | 9.43E-64 | Neo-G | SERPINH1     |
| IGLON5.   | 3  | 6.56E-68 | 0.2667   | 0.146 | 0.036 | 9.81E-64 | Neo-G | IGLON5       |
| TNFSF13B. | 8. | 34E-68   | -0.80688 | 0.018 | 0.226 | 1.25E-63 | Neo-G | TNFSF13B     |
| SRPK1.    | 4  | 9.29E-68 | 0.460674 | 0.318 | 0.147 | 1.39E-63 | Neo-G | SRPK1        |
| TCEA2.    | 6  | 1.23E-67 | 0.405438 | 0.564 | 0.344 | 1.83E-63 | Neo-G | TCEA2        |

|            |           |           |        |        |           |       |                |
|------------|-----------|-----------|--------|--------|-----------|-------|----------------|
| STRIP1. 4  | 1. 38E-67 | 0. 406317 | 0. 267 | 0. 107 | 2. 06E-63 | Neo-G | STRIP1         |
| VIPR2. 6   | 1. 40E-67 | 0. 375383 | 0. 21  | 0. 067 | 2. 09E-63 | Neo-G | VIPR2          |
| ANKRD13D.  | 1. 76E-67 | 0. 43972  | 0. 321 | 0. 149 | 2. 64E-63 | Neo-G | ANKRD13D       |
| JUN. 4     | 2. 07E-67 | 0. 288681 | 0. 857 | 0. 65  | 3. 09E-63 | Neo-G | JUN            |
| FHL1. 7    | 2. 35E-67 | 0. 371254 | 0. 554 | 0. 333 | 3. 51E-63 | Neo-G | FHL1           |
| CSF2RA. 6  | 2. 71E-67 | -0. 88266 | 0. 019 | 0. 225 | 4. 04E-63 | Neo-G | CSF2RA         |
| C19orf53.  | 2. 76E-67 | -0. 55396 | 0. 562 | 0. 698 | 4. 13E-63 | Neo-G | C19orf53       |
| BRWD1. 6   | 2. 94E-67 | 0. 453465 | 0. 407 | 0. 221 | 4. 39E-63 | Neo-G | BRWD1          |
| CSDE1. 4   | 2. 97E-67 | 0. 239805 | 0. 763 | 0. 582 | 4. 43E-63 | Neo-G | CSDE1          |
| RBM4. 5    | 3. 11E-67 | 0. 442353 | 0. 383 | 0. 2   | 4. 65E-63 | Neo-G | RBM4           |
| MURC       | 3. 19E-67 | 0. 224962 | 0. 081 | 0. 011 | 4. 76E-63 | Neo-G | MURC           |
| CUTA. 6    | 3. 57E-67 | 0. 177753 | 0. 854 | 0. 661 | 5. 33E-63 | Neo-G | CUTA           |
| RP11-357K  | 5. 42E-67 | 0. 224672 | 0. 064 | 0. 006 | 8. 10E-63 | Neo-G | RP11-357K6. 1  |
| KIF26A     | 5. 61E-67 | 0. 166382 | 0. 05  | 0. 003 | 8. 38E-63 | Neo-G | KIF26A         |
| BHLHE40. 5 | 5. 69E-67 | -0. 61207 | 0. 011 | 0. 216 | 8. 50E-63 | Neo-G | BHLHE40        |
| HEXA. 6    | 6. 93E-67 | -0. 65517 | 0. 162 | 0. 417 | 1. 04E-62 | Neo-G | HEXA           |
| MT1M. 5    | 7. 00E-67 | -0. 81686 | 0. 046 | 0. 268 | 1. 05E-62 | Neo-G | MT1M           |
| SYPL1. 2   | 7. 53E-67 | -0. 659   | 0. 174 | 0. 434 | 1. 13E-62 | Neo-G | SYPL1          |
| HSD17B11.  | 8. 28E-67 | -0. 74438 | 0. 161 | 0. 403 | 1. 24E-62 | Neo-G | HSD17B11       |
| GTF2IRD2E  | 1. 02E-66 | 0. 404945 | 0. 284 | 0. 119 | 1. 53E-62 | Neo-G | GTF2IRD2B      |
| SPTAN1. 5  | 1. 29E-66 | 0. 424496 | 0. 428 | 0. 24  | 1. 93E-62 | Neo-G | SPTAN1         |
| IFNGR1. 7  | 1. 49E-66 | -0. 71939 | 0. 229 | 0. 462 | 2. 22E-62 | Neo-G | IFNGR1         |
| TMED4. 6   | 2. 22E-66 | 0. 292257 | 0. 615 | 0. 416 | 3. 32E-62 | Neo-G | TMED4          |
| U2SURP. 3  | 2. 43E-66 | 0. 356919 | 0. 54  | 0. 349 | 3. 62E-62 | Neo-G | U2SURP         |
| RADIL      | 4. 03E-66 | 0. 201761 | 0. 071 | 0. 009 | 6. 03E-62 | Neo-G | RADIL          |
| BTBD17. 6  | 4. 18E-66 | 0. 354946 | 0. 152 | 0. 04  | 6. 25E-62 | Neo-G | BTBD17         |
| AMN1. 2    | 4. 46E-66 | 0. 401706 | 0. 266 | 0. 107 | 6. 66E-62 | Neo-G | AMN1           |
| RNF219. 3  | 5. 58E-66 | 0. 406966 | 0. 25  | 0. 098 | 8. 33E-62 | Neo-G | RNF219         |
| TRIP6. 6   | 5. 69E-66 | -0. 58674 | 0. 049 | 0. 273 | 8. 50E-62 | Neo-G | TRIP6          |
| HES1. 4    | 5. 73E-66 | -0. 68913 | 0. 016 | 0. 219 | 8. 56E-62 | Neo-G | HES1           |
| CNPY3. 7   | 7. 30E-66 | -0. 67381 | 0. 195 | 0. 439 | 1. 09E-61 | Neo-G | CNPY3          |
| KIAA1324L  | 7. 41E-66 | 0. 283773 | 0. 104 | 0. 02  | 1. 11E-61 | Neo-G | KIAA1324L      |
| SATB1. 3   | 8. 45E-66 | 0. 390073 | 0. 277 | 0. 112 | 1. 26E-61 | Neo-G | SATB1          |
| CPT1C. 5   | 9. 27E-66 | 0. 399714 | 0. 237 | 0. 089 | 1. 39E-61 | Neo-G | CPT1C          |
| GSDMD. 6   | 9. 70E-66 | -0. 61853 | 0. 008 | 0. 206 | 1. 45E-61 | Neo-G | GSDMD          |
| SF3B2. 3   | 1. 02E-65 | 0. 275935 | 0. 699 | 0. 503 | 1. 52E-61 | Neo-G | SF3B2          |
| RP11-127E  | 1. 02E-65 | 0. 317186 | 0. 14  | 0. 035 | 1. 53E-61 | Neo-G | RP11-127B20. 2 |
| PYGL. 6    | 1. 06E-65 | -0. 65214 | 0. 013 | 0. 214 | 1. 58E-61 | Neo-G | PYGL           |
| FAM96A. 5  | 1. 19E-65 | -0. 65797 | 0. 136 | 0. 383 | 1. 78E-61 | Neo-G | FAM96A         |
| PTPRC. 7   | 1. 54E-65 | -0. 80595 | 0. 022 | 0. 225 | 2. 30E-61 | Neo-G | PTPRC          |
| REST. 3    | 1. 84E-65 | -0. 46203 | 0. 016 | 0. 22  | 2. 75E-61 | Neo-G | REST           |
| ABI3. 7    | 2. 08E-65 | -0. 79894 | 0. 013 | 0. 211 | 3. 10E-61 | Neo-G | ABI3           |
| RCOR2. 5   | 2. 20E-65 | 0. 368477 | 0. 138 | 0. 035 | 3. 28E-61 | Neo-G | RCOR2          |
| NUP160. 4  | 2. 81E-65 | 0. 437109 | 0. 313 | 0. 144 | 4. 21E-61 | Neo-G | NUP160         |
| MAGT1. 3   | 2. 89E-65 | -0. 53053 | 0. 02  | 0. 225 | 4. 33E-61 | Neo-G | MAGT1          |
| MAST1      | 2. 97E-65 | 0. 311532 | 0. 138 | 0. 034 | 4. 45E-61 | Neo-G | MAST1          |
| ILF3. 4    | 3. 13E-65 | 0. 33942  | 0. 583 | 0. 391 | 4. 67E-61 | Neo-G | ILF3           |
| TRAPPC4. 5 | 3. 22E-65 | 0. 261259 | 0. 625 | 0. 423 | 4. 80E-61 | Neo-G | TRAPPC4        |
| SP110. 5   | 3. 78E-65 | -0. 62695 | 0. 016 | 0. 22  | 5. 65E-61 | Neo-G | SP110          |
| ALX3       | 3. 78E-65 | 0. 223357 | 0. 09  | 0. 015 | 5. 65E-61 | Neo-G | ALX3           |
| DIRAS1. 5  | 3. 87E-65 | 0. 432754 | 0. 244 | 0. 097 | 5. 79E-61 | Neo-G | DIRAS1         |



|             |           |           |        |        |           |       |          |
|-------------|-----------|-----------|--------|--------|-----------|-------|----------|
| CD83. 7     | 3. 90E-65 | -0. 89566 | 0. 101 | 0. 318 | 5. 82E-61 | Neo-G | CD83     |
| COMT. 6     | 4. 21E-65 | -0. 55383 | 0. 325 | 0. 574 | 6. 29E-61 | Neo-G | COMT     |
| TNRC6C. 6   | 5. 94E-65 | 0. 442624 | 0. 323 | 0. 153 | 8. 88E-61 | Neo-G | TNRC6C   |
| GAPDH. 7    | 6. 26E-65 | -0. 37623 | 0. 995 | 0. 984 | 9. 36E-61 | Neo-G | GAPDH    |
| MAP9. 5     | 6. 51E-65 | 0. 455658 | 0. 34  | 0. 17  | 9. 73E-61 | Neo-G | MAP9     |
| SLC25A36. 6 | 6. 73E-65 | 0. 420948 | 0. 436 | 0. 249 | 1. 01E-60 | Neo-G | SLC25A36 |
| PTRF. 7     | 7. 64E-65 | -0. 51679 | 0. 009 | 0. 207 | 1. 14E-60 | Neo-G | PTRF     |
| EGR1. 5     | 9. 01E-65 | 0. 319091 | 0. 726 | 0. 468 | 1. 35E-60 | Neo-G | EGR1     |
| PLIN2. 6    | 1. 68E-64 | -0. 95854 | 0. 154 | 0. 365 | 2. 52E-60 | Neo-G | PLIN2    |
| PLCB4       | 1. 74E-64 | 0. 198062 | 0. 075 | 0. 01  | 2. 60E-60 | Neo-G | PLCB4    |
| IL18. 7     | 2. 29E-64 | -0. 83735 | 0. 016 | 0. 215 | 3. 42E-60 | Neo-G | IL18     |
| SPRY1. 6    | 2. 99E-64 | -0. 66473 | 0. 045 | 0. 255 | 4. 47E-60 | Neo-G | SPRY1    |
| EDNRB. 4    | 3. 09E-64 | -0. 57751 | 0. 012 | 0. 208 | 4. 61E-60 | Neo-G | EDNRB    |
| CHMP5. 2    | 3. 13E-64 | 0. 234478 | 0. 706 | 0. 511 | 4. 68E-60 | Neo-G | CHMP5    |
| MRC2. 3     | 5. 52E-64 | -0. 47996 | 0. 003 | 0. 194 | 8. 24E-60 | Neo-G | MRC2     |
| MAPK8IP1. 6 | 6. 05E-64 | 0. 392342 | 0. 35  | 0. 172 | 9. 04E-60 | Neo-G | MAPK8IP1 |
| HOXB5       | 6. 57E-64 | 0. 268496 | 0. 07  | 0. 009 | 9. 82E-60 | Neo-G | HOXB5    |
| CLEC2B. 7   | 6. 97E-64 | -0. 81154 | 0. 026 | 0. 227 | 1. 04E-59 | Neo-G | CLEC2B   |
| RAC3. 6     | 7. 06E-64 | 0. 470869 | 0. 33  | 0. 165 | 1. 06E-59 | Neo-G | RAC3     |
| GLOD4. 3    | 8. 54E-64 | 0. 328492 | 0. 558 | 0. 368 | 1. 28E-59 | Neo-G | GLOD4    |
| CMTM3. 7    | 9. 05E-64 | -0. 52429 | 0. 108 | 0. 35  | 1. 35E-59 | Neo-G | CMTM3    |
| MNDA. 7     | 9. 68E-64 | -0. 80541 | 0. 006 | 0. 198 | 1. 45E-59 | Neo-G | MNDA     |
| OLFM1. 6    | 9. 92E-64 | 0. 453879 | 0. 297 | 0. 133 | 1. 48E-59 | Neo-G | OLFM1    |
| RFK. 4      | 1. 01E-63 | 0. 464732 | 0. 391 | 0. 219 | 1. 51E-59 | Neo-G | RFK      |
| C12orf57. 1 | 1. 11E-63 | 0. 194586 | 0. 74  | 0. 512 | 1. 67E-59 | Neo-G | C12orf57 |
| TMEM176B. 1 | 6. 5E-63  | -0. 91831 | 0. 164 | 0. 375 | 2. 47E-59 | Neo-G | TMEM176B |
| HOXC10. 5   | 2. 00E-63 | 0. 306265 | 0. 153 | 0. 042 | 3. 00E-59 | Neo-G | HOXC10   |
| MLLT3. 5    | 2. 10E-63 | 0. 408728 | 0. 216 | 0. 079 | 3. 14E-59 | Neo-G | MLLT3    |
| CACNA2D2    | 2. 19E-63 | 0. 162618 | 0. 044 | 0. 002 | 3. 28E-59 | Neo-G | CACNA2D2 |
| PTP4A1. 3   | 2. 55E-63 | 0. 362877 | 0. 576 | 0. 386 | 3. 81E-59 | Neo-G | PTP4A1   |
| CPM. 5      | 2. 73E-63 | -0. 8062  | 0. 049 | 0. 257 | 4. 08E-59 | Neo-G | CPM      |
| CTDSP1. 7   | 2. 79E-63 | -0. 53518 | 0. 034 | 0. 244 | 4. 16E-59 | Neo-G | CTDSP1   |
| AXL. 6      | 2. 93E-63 | -0. 78836 | 0. 009 | 0. 201 | 4. 38E-59 | Neo-G | AXL      |
| PIK3R1. 5   | 2. 95E-63 | 0. 393663 | 0. 49  | 0. 285 | 4. 42E-59 | Neo-G | PIK3R1   |
| CCZ1B. 5    | 3. 52E-63 | 0. 440881 | 0. 295 | 0. 134 | 5. 27E-59 | Neo-G | CCZ1B    |
| ZNF439. 6   | 3. 56E-63 | 0. 457398 | 0. 288 | 0. 131 | 5. 32E-59 | Neo-G | ZNF439   |
| HLA-DQA2. 3 | 5. 8E-63  | -1. 01865 | 0. 004 | 0. 192 | 5. 34E-59 | Neo-G | HLA-DQA2 |
| TNC. 6      | 4. 36E-63 | -0. 65136 | 0. 021 | 0. 223 | 6. 52E-59 | Neo-G | TNC      |
| DDIT4. 6    | 4. 70E-63 | -0. 75094 | 0. 213 | 0. 433 | 7. 03E-59 | Neo-G | DDIT4    |
| GABRB3      | 4. 73E-63 | 0. 193586 | 0. 067 | 0. 008 | 7. 06E-59 | Neo-G | GABRB3   |
| ZC3H13. 5   | 5. 29E-63 | 0. 381698 | 0. 501 | 0. 314 | 7. 90E-59 | Neo-G | ZC3H13   |
| TMBIM6. 3   | 5. 33E-63 | -0. 42083 | 0. 803 | 0. 843 | 7. 96E-59 | Neo-G | TMBIM6   |
| PDZD4. 5    | 5. 81E-63 | 0. 31904  | 0. 139 | 0. 036 | 8. 68E-59 | Neo-G | PDZD4    |
| TMED5. 6    | 6. 06E-63 | -0. 58653 | 0. 096 | 0. 331 | 9. 06E-59 | Neo-G | TMED5    |
| CCT4. 3     | 6. 45E-63 | 0. 230694 | 0. 737 | 0. 539 | 9. 65E-59 | Neo-G | CCT4     |
| SQSTM1. 4   | 6. 84E-63 | -0. 54605 | 0. 329 | 0. 547 | 1. 02E-58 | Neo-G | SQSTM1   |
| LAT2. 7     | 8. 63E-63 | -0. 80464 | 0. 027 | 0. 224 | 1. 29E-58 | Neo-G | LAT2     |
| SMARCB1. 5  | 9. 00E-63 | 0. 394709 | 0. 577 | 0. 394 | 1. 35E-58 | Neo-G | SMARCB1  |
| BPHL. 4     | 9. 66E-63 | 0. 438444 | 0. 323 | 0. 156 | 1. 44E-58 | Neo-G | BPHL     |
| LGMN. 6     | 1. 13E-62 | -0. 71508 | 0. 143 | 0. 376 | 1. 69E-58 | Neo-G | LGMN     |
| DNP1. 4     | 1. 38E-62 | -0. 53937 | 0. 151 | 0. 404 | 2. 07E-58 | Neo-G | DNP1     |

|             |           |           |        |        |           |       |             |
|-------------|-----------|-----------|--------|--------|-----------|-------|-------------|
| MOAP1. 5    | 1. 49E-62 | 0. 440181 | 0. 375 | 0. 198 | 2. 23E-58 | Neo-G | MOAP1       |
| YTHDC1. 4   | 1. 59E-62 | 0. 415756 | 0. 467 | 0. 282 | 2. 38E-58 | Neo-G | YTHDC1      |
| EIF4A1. 4   | 1. 65E-62 | 0. 126405 | 0. 977 | 0. 847 | 2. 46E-58 | Neo-G | EIF4A1      |
| EN1. 4      | 1. 67E-62 | 0. 356087 | 0. 169 | 0. 051 | 2. 49E-58 | Neo-G | EN1         |
| HOXD8       | 1. 75E-62 | 0. 244661 | 0. 104 | 0. 021 | 2. 62E-58 | Neo-G | HOXD8       |
| PAQR4. 6    | 1. 87E-62 | 0. 401354 | 0. 315 | 0. 146 | 2. 79E-58 | Neo-G | PAQR4       |
| PAIP1. 7    | 2. 61E-62 | 0. 367447 | 0. 562 | 0. 375 | 3. 90E-58 | Neo-G | PAIP1       |
| NUDT10. 4   | 2. 95E-62 | 0. 305287 | 0. 145 | 0. 039 | 4. 42E-58 | Neo-G | NUDT10      |
| VCP. 3      | 3. 38E-62 | 0. 334364 | 0. 606 | 0. 411 | 5. 05E-58 | Neo-G | VCP         |
| SF1. 4      | 3. 51E-62 | 0. 295242 | 0. 675 | 0. 487 | 5. 25E-58 | Neo-G | SF1         |
| CD82. 3     | 3. 72E-62 | -0. 60791 | 0. 049 | 0. 263 | 5. 57E-58 | Neo-G | CD82        |
| TMEM145. 5  | 4. 52E-62 | 0. 337953 | 0. 178 | 0. 056 | 6. 75E-58 | Neo-G | TMEM145     |
| SAMD11      | 4. 69E-62 | 0. 198615 | 0. 07  | 0. 009 | 7. 00E-58 | Neo-G | SAMD11      |
| NXPH1. 7    | 5. 72E-62 | 0. 468285 | 0. 274 | 0. 119 | 8. 55E-58 | Neo-G | NXPH1       |
| CYBB. 7     | 6. 28E-62 | -0. 77712 | 0. 02  | 0. 213 | 9. 38E-58 | Neo-G | CYBB        |
| USP47. 3    | 6. 71E-62 | 0. 422865 | 0. 402 | 0. 226 | 1. 00E-57 | Neo-G | USP47       |
| ABHD14B. 5  | 8. 01E-62 | -0. 55909 | 0. 009 | 0. 2   | 1. 20E-57 | Neo-G | ABHD14B     |
| PUF60. 4    | 8. 15E-62 | 0. 232652 | 0. 726 | 0. 519 | 1. 22E-57 | Neo-G | PUF60       |
| TRIM24. 7   | 9. 95E-62 | 0. 467223 | 0. 339 | 0. 174 | 1. 49E-57 | Neo-G | TRIM24      |
| RNF13. 5    | 1. 04E-61 | -0. 63067 | 0. 265 | 0. 507 | 1. 56E-57 | Neo-G | RNF13       |
| POLR2L. 4   | 1. 27E-61 | -0. 50567 | 0. 571 | 0. 702 | 1. 90E-57 | Neo-G | POLR2L      |
| C19orf43. 1 | 3. 5E-61  | 0. 240668 | 0. 868 | 0. 649 | 2. 02E-57 | Neo-G | C19orf43    |
| ASIC1. 5    | 1. 41E-61 | 0. 329636 | 0. 147 | 0. 04  | 2. 10E-57 | Neo-G | ASIC1       |
| ACTR6. 3    | 1. 56E-61 | 0. 38704  | 0. 393 | 0. 214 | 2. 34E-57 | Neo-G | ACTR6       |
| SEC63. 2    | 1. 61E-61 | 0. 358638 | 0. 551 | 0. 368 | 2. 40E-57 | Neo-G | SEC63       |
| ZBTB8B      | 1. 80E-61 | 0. 238444 | 0. 11  | 0. 023 | 2. 69E-57 | Neo-G | ZBTB8B      |
| RUNX1. 7    | 2. 06E-61 | -0. 53726 | 0. 017 | 0. 211 | 3. 08E-57 | Neo-G | RUNX1       |
| VPS35. 2    | 2. 30E-61 | 0. 331293 | 0. 592 | 0. 411 | 3. 43E-57 | Neo-G | VPS35       |
| CLEC7A. 7   | 2. 40E-61 | -0. 7564  | 0. 009 | 0. 195 | 3. 59E-57 | Neo-G | CLEC7A      |
| ACO05618. 2 | 8. 1E-61  | 0. 27697  | 0. 13  | 0. 032 | 4. 20E-57 | Neo-G | ACO05618. 6 |
| PRMT2. 2    | 2. 86E-61 | 0. 300701 | 0. 617 | 0. 428 | 4. 27E-57 | Neo-G | PRMT2       |
| GPATCH8. 5  | 2. 88E-61 | 0. 405922 | 0. 463 | 0. 284 | 4. 31E-57 | Neo-G | GPATCH8     |
| FYN. 6      | 2. 99E-61 | 0. 346844 | 0. 505 | 0. 304 | 4. 47E-57 | Neo-G | FYN         |
| TUBB6. 5    | 3. 43E-61 | -0. 58534 | 0. 013 | 0. 205 | 5. 12E-57 | Neo-G | TUBB6       |
| HP1BP3. 6   | 3. 58E-61 | 0. 319095 | 0. 614 | 0. 421 | 5. 35E-57 | Neo-G | HP1BP3      |
| TCEB1. 1    | 4. 06E-61 | 0. 198914 | 0. 803 | 0. 6   | 6. 06E-57 | Neo-G | TCEB1       |
| C11orf95. 4 | 3. 0E-61  | 0. 317581 | 0. 129 | 0. 032 | 6. 43E-57 | Neo-G | C11orf95    |
| SLA. 7      | 4. 52E-61 | -0. 78904 | 0. 028 | 0. 223 | 6. 76E-57 | Neo-G | SLA         |
| PTPRK. 4    | 5. 42E-61 | 0. 36758  | 0. 156 | 0. 045 | 8. 10E-57 | Neo-G | PTPRK       |
| DTX3. 4     | 6. 47E-61 | 0. 463902 | 0. 425 | 0. 234 | 9. 67E-57 | Neo-G | DTX3        |
| PMP2. 7     | 6. 93E-61 | -0. 79268 | 0. 162 | 0. 373 | 1. 04E-56 | Neo-G | PMP2        |
| COPS6. 4    | 8. 33E-61 | 0. 175961 | 0. 787 | 0. 582 | 1. 24E-56 | Neo-G | COPS6       |
| NEGR1       | 9. 35E-61 | 0. 230486 | 0. 09  | 0. 016 | 1. 40E-56 | Neo-G | NEGR1       |
| SYT11. 7    | 9. 43E-61 | 0. 331327 | 0. 576 | 0. 36  | 1. 41E-56 | Neo-G | SYT11       |
| EHMT2. 6    | 9. 79E-61 | 0. 453767 | 0. 35  | 0. 182 | 1. 46E-56 | Neo-G | EHMT2       |
| FUS. 3      | 1. 01E-60 | 0. 206235 | 0. 804 | 0. 623 | 1. 51E-56 | Neo-G | FUS         |
| PFN1. 6     | 1. 16E-60 | -0. 27598 | 0. 835 | 0. 805 | 1. 73E-56 | Neo-G | PFN1        |
| CCT5. 4     | 1. 34E-60 | 0. 260588 | 0. 658 | 0. 461 | 2. 00E-56 | Neo-G | CCT5        |
| CD300A. 7   | 1. 36E-60 | -0. 77638 | 0. 021 | 0. 212 | 2. 03E-56 | Neo-G | CD300A      |
| SLC37A1. 2  | 1. 43E-60 | 0. 296388 | 0. 15  | 0. 042 | 2. 14E-56 | Neo-G | SLC37A1     |
| SOCS3. 6    | 1. 50E-60 | -0. 64488 | 0. 147 | 0. 373 | 2. 25E-56 | Neo-G | SOCS3       |

|              |        |          |       |       |          |       |             |
|--------------|--------|----------|-------|-------|----------|-------|-------------|
| AC004158. 1. | 51E-60 | 0.398569 | 0.255 | 0.106 | 2.25E-56 | Neo-G | AC004158. 3 |
| C2orf80. 6   | 59E-60 | 0.374208 | 0.252 | 0.103 | 2.38E-56 | Neo-G | C2orf80     |
| GPNMB. 6     | 67E-60 | -0.83455 | 0.028 | 0.221 | 2.49E-56 | Neo-G | GPNMB       |
| DNASE1. 4    | 72E-60 | 0.360376 | 0.196 | 0.068 | 2.56E-56 | Neo-G | DNASE1      |
| ARF4. 2      | 78E-60 | 0.19434  | 0.797 | 0.6   | 2.65E-56 | Neo-G | ARF4        |
| CDS1         | 10E-60 | 0.173961 | 0.064 | 0.007 | 3.15E-56 | Neo-G | CDS1        |
| MDH2. 3      | 40E-60 | 0.160379 | 0.845 | 0.638 | 3.59E-56 | Neo-G | MDH2        |
| FCGR1B. 6    | 46E-60 | -0.83433 | 0.002 | 0.183 | 3.67E-56 | Neo-G | FCGR1B      |
| CADM3. 5     | 67E-60 | 0.211894 | 0.236 | 0.084 | 3.99E-56 | Neo-G | CADM3       |
| LSM7. 4      | 83E-60 | 0.217897 | 0.833 | 0.606 | 4.23E-56 | Neo-G | LSM7        |
| MSR1. 7      | 69E-60 | -0.78133 | 0.014 | 0.2   | 5.52E-56 | Neo-G | MSR1        |
| CCL2. 2      | 99E-60 | -0.98891 | 0.047 | 0.247 | 5.97E-56 | Neo-G | CCL2        |
| APRT. 5      | 38E-60 | -0.59542 | 0.338 | 0.555 | 6.55E-56 | Neo-G | APRT        |
| JAKMIP2. 5   | 49E-60 | 0.434484 | 0.288 | 0.134 | 6.71E-56 | Neo-G | JAKMIP2     |
| CELF1. 4     | 76E-60 | 0.396006 | 0.464 | 0.289 | 8.61E-56 | Neo-G | CELF1       |
| ANKRD36C. 5  | 85E-60 | 0.397436 | 0.31  | 0.144 | 8.75E-56 | Neo-G | ANKRD36C    |
| SDF2L1. 4    | 11E-60 | -0.56149 | 0.149 | 0.385 | 1.06E-55 | Neo-G | SDF2L1      |
| METTL7A. 3   | 43E-60 | -0.63832 | 0.04  | 0.243 | 1.11E-55 | Neo-G | METTL7A     |
| MFSD1. 7     | 83E-60 | -0.67249 | 0.144 | 0.368 | 1.17E-55 | Neo-G | MFSD1       |
| EFNA5        | 01E-59 | 0.204141 | 0.062 | 0.007 | 1.50E-55 | Neo-G | EFNA5       |
| USP22. 7     | 06E-59 | 0.39006  | 0.481 | 0.3   | 1.59E-55 | Neo-G | USP22       |
| FGL2. 7      | 08E-59 | -0.76953 | 0.013 | 0.197 | 1.62E-55 | Neo-G | FGL2        |
| ITGB1. 5     | 21E-59 | -0.59894 | 0.191 | 0.409 | 1.81E-55 | Neo-G | ITGB1       |
| ATL1. 4      | 32E-59 | 0.393541 | 0.246 | 0.1   | 1.97E-55 | Neo-G | ATL1        |
| RUFY2. 7     | 39E-59 | 0.424298 | 0.287 | 0.132 | 2.08E-55 | Neo-G | RUFY2       |
| PPIB. 3      | 50E-59 | -0.4997  | 0.61  | 0.738 | 2.24E-55 | Neo-G | PPIB        |
| RUNDC1. 3    | 90E-59 | 0.41238  | 0.269 | 0.119 | 2.84E-55 | Neo-G | RUNDC1      |
| SLC25A37. 2  | 03E-59 | -0.63893 | 0.11  | 0.334 | 3.04E-55 | Neo-G | SLC25A37    |
| SEC61G. 7    | 07E-59 | -0.70345 | 0.819 | 0.797 | 3.09E-55 | Neo-G | SEC61G      |
| GPR137C. 4   | 34E-59 | 0.318487 | 0.139 | 0.038 | 3.50E-55 | Neo-G | GPR137C     |
| ANAPC13. 5   | 61E-59 | 0.305341 | 0.529 | 0.332 | 3.91E-55 | Neo-G | ANAPC13     |
| FAM162A. 6   | 69E-59 | -0.63445 | 0.185 | 0.427 | 4.01E-55 | Neo-G | FAM162A     |
| SLC31A2. 7   | 81E-59 | -0.73678 | 0.024 | 0.213 | 4.19E-55 | Neo-G | SLC31A2     |
| DPYSL2. 6    | 91E-59 | 0.313801 | 0.593 | 0.403 | 4.34E-55 | Neo-G | DPYSL2      |
| GNG7. 6      | 31E-59 | -0.66638 | 0.104 | 0.323 | 4.95E-55 | Neo-G | GNG7        |
| SRSF9. 4     | 57E-59 | 0.293433 | 0.767 | 0.536 | 5.34E-55 | Neo-G | SRSF9       |
| ASF1A. 5     | 77E-59 | 0.403411 | 0.39  | 0.215 | 5.63E-55 | Neo-G | ASF1A       |
| SMARCA5. 5   | 84E-59 | 0.409788 | 0.501 | 0.33  | 5.74E-55 | Neo-G | SMARCA5     |
| ELOVL1. 4    | 45E-59 | -0.62722 | 0.049 | 0.253 | 6.64E-55 | Neo-G | ELOVL1      |
| ELL2. 6      | 90E-59 | -0.67548 | 0.024 | 0.213 | 7.32E-55 | Neo-G | ELL2        |
| PCDHB3       | 57E-59 | 0.294499 | 0.114 | 0.027 | 8.33E-55 | Neo-G | PCDHB3      |
| HNRNPD. 6    | 15E-59 | 0.344945 | 0.579 | 0.394 | 9.19E-55 | Neo-G | HNRNPD      |
| EZH2. 6      | 01E-59 | 0.412273 | 0.297 | 0.136 | 1.05E-54 | Neo-G | EZH2        |
| TMEM44       | 94E-59 | 0.315212 | 0.132 | 0.035 | 1.19E-54 | Neo-G | TMEM44      |
| UBE2D2. 4    | 26E-59 | 0.250616 | 0.75  | 0.568 | 1.23E-54 | Neo-G | UBE2D2      |
| MRFAP1. 6    | 71E-59 | 0.160033 | 0.846 | 0.649 | 1.30E-54 | Neo-G | MRFAP1      |
| PARP9. 2     | 75E-59 | -0.48683 | 0.008 | 0.19  | 1.31E-54 | Neo-G | PARP9       |
| RAB31. 7     | 06E-58 | -0.52481 | 0.253 | 0.485 | 1.58E-54 | Neo-G | RAB31       |
| SLC7A7. 7    | 07E-58 | -0.74771 | 0.013 | 0.194 | 1.60E-54 | Neo-G | SLC7A7      |
| MYO1F. 7     | 14E-58 | -0.72391 | 0.019 | 0.204 | 1.70E-54 | Neo-G | MYO1F       |
| EMP1. 3      | 27E-58 | -0.60244 | 0.014 | 0.198 | 1.89E-54 | Neo-G | EMP1        |

|            |          |          |       |       |          |       |          |
|------------|----------|----------|-------|-------|----------|-------|----------|
| HMBOX1.6   | 1.27E-58 | 0.377426 | 0.346 | 0.174 | 1.90E-54 | Neo-G | HMBOX1   |
| PHF20L1.6  | 1.30E-58 | 0.424964 | 0.462 | 0.289 | 1.94E-54 | Neo-G | PHF20L1  |
| CDH2.6     | 1.37E-58 | 0.415433 | 0.446 | 0.265 | 2.04E-54 | Neo-G | CDH2     |
| RNF149.7   | 1.38E-58 | -0.67556 | 0.086 | 0.293 | 2.07E-54 | Neo-G | RNF149   |
| RNF182.5   | 1.56E-58 | 0.300093 | 0.138 | 0.038 | 2.33E-54 | Neo-G | RNF182   |
| HAND2      | 1.78E-58 | 0.178776 | 0.066 | 0.009 | 2.66E-54 | Neo-G | HAND2    |
| ASB8.4     | 1.79E-58 | 0.36237  | 0.374 | 0.198 | 2.67E-54 | Neo-G | ASB8     |
| CTSZ.7     | 2.19E-58 | -0.72767 | 0.075 | 0.278 | 3.27E-54 | Neo-G | CTSZ     |
| PITHD1.5   | 2.27E-58 | 0.390786 | 0.5   | 0.327 | 3.39E-54 | Neo-G | PITHD1   |
| SGCB.4     | 2.36E-58 | 0.336247 | 0.495 | 0.305 | 3.53E-54 | Neo-G | SGCB     |
| NKAIN1     | 2.40E-58 | 0.218453 | 0.083 | 0.014 | 3.58E-54 | Neo-G | NKAIN1   |
| MEAF6.5    | 2.60E-58 | 0.249263 | 0.642 | 0.457 | 3.88E-54 | Neo-G | MEAF6    |
| AP4M1.5    | 3.35E-58 | 0.386042 | 0.344 | 0.175 | 5.00E-54 | Neo-G | AP4M1    |
| M6PR.7     | 3.48E-58 | -0.5797  | 0.172 | 0.408 | 5.20E-54 | Neo-G | M6PR     |
| MMP14.5    | 3.95E-58 | -0.54596 | 0.042 | 0.244 | 5.90E-54 | Neo-G | MMP14    |
| STAU2.5    | 5.34E-58 | 0.398941 | 0.317 | 0.156 | 7.99E-54 | Neo-G | STAU2    |
| AKAP13.7   | 6.70E-58 | -0.62042 | 0.127 | 0.349 | 1.00E-53 | Neo-G | AKAP13   |
| KCNC1      | 7.90E-58 | 0.197342 | 0.079 | 0.013 | 1.18E-53 | Neo-G | KCNC1    |
| LRRTM1     | 8.95E-58 | 0.223891 | 0.09  | 0.016 | 1.34E-53 | Neo-G | LRRTM1   |
| FYB.7      | 8.97E-58 | -0.76493 | 0.049 | 0.244 | 1.34E-53 | Neo-G | FYB      |
| FAM229B.6  | 9.62E-58 | 0.350704 | 0.456 | 0.272 | 1.44E-53 | Neo-G | FAM229B  |
| CHMP7.5    | 1.21E-57 | 0.421975 | 0.318 | 0.16  | 1.81E-53 | Neo-G | CHMP7    |
| SLN.4      | 1.68E-57 | -1.01897 | 0.005 | 0.18  | 2.51E-53 | Neo-G | SLN      |
| RNF187.5   | 1.71E-57 | 0.39551  | 0.543 | 0.357 | 2.55E-53 | Neo-G | RNF187   |
| BTF3L4.1   | 1.88E-57 | 0.24536  | 0.67  | 0.493 | 2.81E-53 | Neo-G | BTF3L4   |
| SGIP1.4    | 2.57E-57 | 0.276017 | 0.141 | 0.039 | 3.84E-53 | Neo-G | SGIP1    |
| DHRS3.5    | 2.73E-57 | -0.65397 | 0.012 | 0.19  | 4.07E-53 | Neo-G | DHRS3    |
| LMNA.3     | 2.75E-57 | -0.57256 | 0.219 | 0.44  | 4.11E-53 | Neo-G | LMNA     |
| PAFAH1B2.2 | 2.76E-57 | 0.380101 | 0.478 | 0.307 | 4.13E-53 | Neo-G | PAFAH1B2 |
| NDUFS2.2   | 2.99E-57 | 0.198997 | 0.716 | 0.531 | 4.46E-53 | Neo-G | NDUFS2   |
| FAM89B.6   | 3.01E-57 | 0.435571 | 0.394 | 0.228 | 4.50E-53 | Neo-G | FAM89B   |
| FAM32A.4   | 3.10E-57 | 0.259927 | 0.618 | 0.432 | 4.63E-53 | Neo-G | FAM32A   |
| REEP3.3    | 3.66E-57 | -0.46342 | 0.058 | 0.267 | 5.47E-53 | Neo-G | REEP3    |
| SPRED1.4   | 5.57E-57 | -0.44093 | 0.03  | 0.222 | 8.33E-53 | Neo-G | SPRED1   |
| MOB1A.7    | 5.83E-57 | -0.58466 | 0.139 | 0.364 | 8.72E-53 | Neo-G | MOB1A    |
| PCBP4.7    | 7.17E-57 | 0.429724 | 0.409 | 0.237 | 1.07E-52 | Neo-G | PCBP4    |
| SP3.5      | 8.50E-57 | 0.434228 | 0.357 | 0.192 | 1.27E-52 | Neo-G | SP3      |
| MSI1.5     | 8.74E-57 | 0.462115 | 0.263 | 0.12  | 1.31E-52 | Neo-G | MSI1     |
| METTL2B.2  | 8.86E-57 | 0.3886   | 0.345 | 0.18  | 1.32E-52 | Neo-G | METTL2B  |
| NDUFB11.2  | 9.06E-57 | 0.13956  | 0.891 | 0.716 | 1.35E-52 | Neo-G | NDUFB11  |
| CARHSP1.6  | 1.01E-56 | 0.287158 | 0.59  | 0.403 | 1.51E-52 | Neo-G | CARHSP1  |
| NINJ1.7    | 1.05E-56 | -0.62451 | 0.258 | 0.475 | 1.56E-52 | Neo-G | NINJ1    |
| UBE2N.4    | 1.06E-56 | 0.234825 | 0.687 | 0.502 | 1.59E-52 | Neo-G | UBE2N    |
| GALNT11.4  | 1.16E-56 | 0.39516  | 0.374 | 0.208 | 1.73E-52 | Neo-G | GALNT11  |
| UBA2.4     | 1.17E-56 | 0.354711 | 0.514 | 0.339 | 1.75E-52 | Neo-G | UBA2     |
| GABRA2     | 1.38E-56 | 0.142639 | 0.049 | 0.004 | 2.06E-52 | Neo-G | GABRA2   |
| PARP14.5   | 1.39E-56 | -0.49318 | 0.003 | 0.175 | 2.08E-52 | Neo-G | PARP14   |
| CACNB3.4   | 1.96E-56 | 0.350012 | 0.156 | 0.049 | 2.93E-52 | Neo-G | CACNB3   |
| SLBP.5     | 2.23E-56 | 0.42733  | 0.463 | 0.292 | 3.34E-52 | Neo-G | SLBP     |
| TGFBI.7    | 2.24E-56 | -0.77558 | 0.04  | 0.225 | 3.35E-52 | Neo-G | TGFBI    |
| PSMB7.3    | 2.28E-56 | 0.159093 | 0.807 | 0.62  | 3.40E-52 | Neo-G | PSMB7    |

|             |           |           |        |        |           |       |             |
|-------------|-----------|-----------|--------|--------|-----------|-------|-------------|
| IER3. 7     | 2. 37E-56 | -0. 82267 | 0. 071 | 0. 262 | 3. 54E-52 | Neo-G | IER3        |
| RHEB. 1     | 2. 43E-56 | 0. 221484 | 0. 821 | 0. 615 | 3. 63E-52 | Neo-G | RHEB        |
| ZNF669. 4   | 2. 44E-56 | 0. 337128 | 0. 214 | 0. 081 | 3. 64E-52 | Neo-G | ZNF669      |
| AGT. 5      | 2. 45E-56 | -0. 71097 | 0. 046 | 0. 241 | 3. 67E-52 | Neo-G | AGT         |
| RBM6. 3     | 3. 01E-56 | 0. 353447 | 0. 474 | 0. 294 | 4. 51E-52 | Neo-G | RBM6        |
| F3. 7       | 3. 54E-56 | -0. 51388 | 0. 026 | 0. 212 | 5. 29E-52 | Neo-G | F3          |
| TUSC1. 4    | 3. 83E-56 | 0. 304875 | 0. 189 | 0. 065 | 5. 72E-52 | Neo-G | TUSC1       |
| GABBR2      | 3. 93E-56 | 0. 159225 | 0. 062 | 0. 008 | 5. 88E-52 | Neo-G | GABBR2      |
| SLC2A3. 6   | 4. 15E-56 | -0. 69174 | 0. 075 | 0. 276 | 6. 20E-52 | Neo-G | SLC2A3      |
| KCTD12. 7   | 4. 65E-56 | -0. 61187 | 0. 06  | 0. 258 | 6. 95E-52 | Neo-G | KCTD12      |
| HIP1R. 6    | 4. 69E-56 | 0. 347505 | 0. 233 | 0. 094 | 7. 01E-52 | Neo-G | HIP1R       |
| HCK. 7      | 5. 05E-56 | -0. 69546 | 0. 012 | 0. 186 | 7. 54E-52 | Neo-G | HCK         |
| KIAA1715. 5 | 5. 37E-56 | 0. 486251 | 0. 397 | 0. 238 | 8. 02E-52 | Neo-G | KIAA1715    |
| MED30. 2    | 5. 74E-56 | 0. 383546 | 0. 412 | 0. 234 | 8. 57E-52 | Neo-G | MED30       |
| ZNF135      | 6. 77E-56 | 0. 234288 | 0. 108 | 0. 025 | 1. 01E-51 | Neo-G | ZNF135      |
| TMEM179B. 7 | 7. 08E-56 | -0. 58287 | 0. 207 | 0. 439 | 1. 06E-51 | Neo-G | TMEM179B    |
| ZFP1. 3     | 8. 39E-56 | 0. 326741 | 0. 167 | 0. 054 | 1. 25E-51 | Neo-G | ZFP1        |
| NMB. 6      | 9. 17E-56 | -0. 59591 | 0. 035 | 0. 222 | 1. 37E-51 | Neo-G | NMB         |
| CRYZL1. 1   | 9. 54E-56 | 0. 325332 | 0. 432 | 0. 248 | 1. 43E-51 | Neo-G | CRYZL1      |
| NFKBIA. 6   | 9. 58E-56 | -0. 60381 | 0. 328 | 0. 521 | 1. 43E-51 | Neo-G | NFKBIA      |
| MAP3K9      | 1. 05E-55 | 0. 149237 | 0. 057 | 0. 006 | 1. 57E-51 | Neo-G | MAP3K9      |
| RHBDF2. 7   | 1. 11E-55 | -0. 68623 | 0. 019 | 0. 197 | 1. 66E-51 | Neo-G | RHBDF2      |
| ZFP69B      | 1. 18E-55 | 0. 214574 | 0. 081 | 0. 014 | 1. 77E-51 | Neo-G | ZFP69B      |
| LTC4S. 7    | 1. 30E-55 | -0. 70898 | 0. 013 | 0. 187 | 1. 94E-51 | Neo-G | LTC4S       |
| RB1. 7      | 1. 31E-55 | -0. 60421 | 0. 114 | 0. 328 | 1. 95E-51 | Neo-G | RB1         |
| LPAR2. 1    | 1. 35E-55 | 0. 238065 | 0. 107 | 0. 024 | 2. 02E-51 | Neo-G | LPAR2       |
| CUL1. 2     | 1. 45E-55 | 0. 376916 | 0. 386 | 0. 216 | 2. 17E-51 | Neo-G | CUL1        |
| DIXDC1. 6   | 1. 47E-55 | 0. 388266 | 0. 21  | 0. 081 | 2. 20E-51 | Neo-G | DIXDC1      |
| FAM133A     | 1. 49E-55 | 0. 198772 | 0. 071 | 0. 011 | 2. 23E-51 | Neo-G | FAM133A     |
| HCFC1R1. 4  | 1. 94E-55 | 0. 32465  | 0. 452 | 0. 262 | 2. 90E-51 | Neo-G | HCFC1R1     |
| CXXC4. 6    | 2. 00E-55 | 0. 399179 | 0. 184 | 0. 065 | 2. 99E-51 | Neo-G | CXXC4       |
| SPRY2. 6    | 2. 87E-55 | -0. 49109 | 0. 045 | 0. 239 | 4. 29E-51 | Neo-G | SPRY2       |
| MGAT4A. 7   | 2. 91E-55 | -0. 69161 | 0. 051 | 0. 241 | 4. 35E-51 | Neo-G | MGAT4A      |
| ICAM1. 6    | 2. 96E-55 | -0. 61467 | 0. 01  | 0. 182 | 4. 42E-51 | Neo-G | ICAM1       |
| NMI. 6      | 2. 97E-55 | -0. 56774 | 0. 021 | 0. 202 | 4. 43E-51 | Neo-G | NMI         |
| SLC25A22. 3 | 3. 02E-55 | 0. 385832 | 0. 233 | 0. 099 | 4. 52E-51 | Neo-G | SLC25A22    |
| PSME2. 5    | 3. 03E-55 | -0. 6002  | 0. 367 | 0. 58  | 4. 53E-51 | Neo-G | PSME2       |
| AGPAT2. 7   | 3. 05E-55 | -0. 45038 | 0. 018 | 0. 199 | 4. 56E-51 | Neo-G | AGPAT2      |
| CFLAR. 5    | 3. 77E-55 | -0. 61054 | 0. 123 | 0. 342 | 5. 63E-51 | Neo-G | CFLAR       |
| AC068535. 3 | 3. 79E-55 | 0. 246788 | 0. 083 | 0. 015 | 5. 67E-51 | Neo-G | AC068535. 2 |
| PAPSS1. 2   | 3. 98E-55 | 0. 370164 | 0. 452 | 0. 275 | 5. 94E-51 | Neo-G | PAPSS1      |
| TSPYL4. 4   | 4. 55E-55 | 0. 395874 | 0. 22  | 0. 089 | 6. 80E-51 | Neo-G | TSPYL4      |
| WNT6        | 5. 05E-55 | 0. 153464 | 0. 044 | 0. 003 | 7. 55E-51 | Neo-G | WNT6        |
| WLS. 5      | 5. 32E-55 | -0. 47993 | 0. 042 | 0. 235 | 7. 95E-51 | Neo-G | WLS         |
| WNK3. 5     | 6. 18E-55 | 0. 44546  | 0. 24  | 0. 105 | 9. 23E-51 | Neo-G | WNK3        |
| KLF4. 7     | 6. 93E-55 | -0. 71024 | 0. 042 | 0. 226 | 1. 03E-50 | Neo-G | KLF4        |
| MRFAP1L1. 7 | 7. 49E-55 | 0. 389775 | 0. 368 | 0. 201 | 1. 12E-50 | Neo-G | MRFAP1L1    |
| DNM3. 5     | 7. 53E-55 | 0. 311305 | 0. 203 | 0. 074 | 1. 13E-50 | Neo-G | DNM3        |
| PRMT1. 3    | 9. 15E-55 | 0. 189151 | 0. 736 | 0. 532 | 1. 37E-50 | Neo-G | PRMT1       |
| LYN. 7      | 1. 28E-54 | -0. 60147 | 0. 018 | 0. 193 | 1. 91E-50 | Neo-G | LYN         |
| MAP3K8. 7   | 1. 50E-54 | -0. 71029 | 0. 025 | 0. 203 | 2. 24E-50 | Neo-G | MAP3K8      |

|             |           |           |        |        |           |       |           |
|-------------|-----------|-----------|--------|--------|-----------|-------|-----------|
| KPNA2. 4    | 1. 61E-54 | 0. 309843 | 0. 526 | 0. 334 | 2. 41E-50 | Neo-G | KPNA2     |
| DUSP12. 3   | 1. 63E-54 | 0. 35238  | 0. 388 | 0. 217 | 2. 44E-50 | Neo-G | DUSP12    |
| LINC01122   | 1. 66E-54 | 0. 208684 | 0. 086 | 0. 016 | 2. 48E-50 | Neo-G | LINC01122 |
| RNASEH2C. 2 | 2. 06E-54 | -0. 55865 | 0. 168 | 0. 398 | 3. 08E-50 | Neo-G | RNASEH2C  |
| DCP1A. 2    | 2. 27E-54 | 0. 379479 | 0. 378 | 0. 208 | 3. 39E-50 | Neo-G | DCP1A     |
| VEGFA. 4    | 2. 43E-54 | -0. 58012 | 0. 046 | 0. 236 | 3. 63E-50 | Neo-G | VEGFA     |
| C1orf216. 2 | 2. 63E-54 | 0. 406773 | 0. 252 | 0. 113 | 3. 93E-50 | Neo-G | C1orf216  |
| ITGAV. 4    | 2. 82E-54 | -0. 47738 | 0. 09  | 0. 301 | 4. 21E-50 | Neo-G | ITGAV     |
| PPP2CA. 2   | 2. 95E-54 | 0. 294763 | 0. 632 | 0. 461 | 4. 41E-50 | Neo-G | PPP2CA    |
| WIPF1. 7    | 3. 17E-54 | -0. 57936 | 0. 049 | 0. 24  | 4. 73E-50 | Neo-G | WIPF1     |
| PPIC. 5     | 3. 20E-54 | -0. 4791  | 0. 023 | 0. 203 | 4. 78E-50 | Neo-G | PPIC      |
| SQRDL. 7    | 3. 20E-54 | -0. 62894 | 0. 009 | 0. 178 | 4. 78E-50 | Neo-G | SQRDL     |
| PHF6. 6     | 3. 50E-54 | 0. 415398 | 0. 305 | 0. 154 | 5. 23E-50 | Neo-G | PHF6      |
| TNFRSF1B. 3 | 3. 88E-54 | -0. 67707 | 0. 03  | 0. 208 | 5. 81E-50 | Neo-G | TNFRSF1B  |
| ANXA7. 6    | 4. 21E-54 | -0. 5615  | 0. 138 | 0. 363 | 6. 29E-50 | Neo-G | ANXA7     |
| SCD. 6      | 4. 31E-54 | -0. 59366 | 0. 043 | 0. 233 | 6. 44E-50 | Neo-G | SCD       |
| LPL. 4      | 5. 23E-54 | -0. 56288 | 0. 008 | 0. 176 | 7. 82E-50 | Neo-G | LPL       |
| CMTM7. 7    | 5. 79E-54 | -0. 58999 | 0. 013 | 0. 183 | 8. 66E-50 | Neo-G | CMTM7     |
| MYH9. 7     | 6. 09E-54 | -0. 52626 | 0. 027 | 0. 208 | 9. 10E-50 | Neo-G | MYH9      |
| PDK4. 6     | 6. 19E-54 | -0. 7373  | 0. 016 | 0. 188 | 9. 25E-50 | Neo-G | PDK4      |
| ZNHIT3. 1   | 6. 41E-54 | 0. 289504 | 0. 543 | 0. 364 | 9. 57E-50 | Neo-G | ZNHIT3    |
| SNX32       | 6. 62E-54 | 0. 18614  | 0. 091 | 0. 018 | 9. 90E-50 | Neo-G | SNX32     |
| TSC22D4. 7  | 7. 41E-54 | -0. 61641 | 0. 263 | 0. 495 | 1. 11E-49 | Neo-G | TSC22D4   |
| MTDH. 4     | 7. 51E-54 | 0. 265419 | 0. 793 | 0. 588 | 1. 12E-49 | Neo-G | MTDH      |
| TSSC1. 2    | 7. 84E-54 | 0. 382642 | 0. 408 | 0. 242 | 1. 17E-49 | Neo-G | TSSC1     |
| XIST. 7     | 1. 07E-53 | 0. 376334 | 0. 434 | 0. 246 | 1. 61E-49 | Neo-G | XIST      |
| DRAM2. 6    | 1. 09E-53 | -0. 64097 | 0. 146 | 0. 359 | 1. 62E-49 | Neo-G | DRAM2     |
| PARP6. 3    | 1. 18E-53 | 0. 352829 | 0. 22  | 0. 089 | 1. 76E-49 | Neo-G | PARP6     |
| SMARCA1. 5  | 1. 18E-53 | 0. 391387 | 0. 306 | 0. 155 | 1. 77E-49 | Neo-G | SMARCA1   |
| CISD3. 6    | 1. 39E-53 | -0. 48526 | 0. 071 | 0. 276 | 2. 08E-49 | Neo-G | CISD3     |
| RERE. 6     | 1. 44E-53 | 0. 40554  | 0. 353 | 0. 193 | 2. 15E-49 | Neo-G | RERE      |
| PLEK. 7     | 1. 57E-53 | -0. 75351 | 0. 021 | 0. 194 | 2. 35E-49 | Neo-G | PLEK      |
| HAPLN4      | 1. 66E-53 | 0. 181405 | 0. 071 | 0. 011 | 2. 48E-49 | Neo-G | HAPLN4    |
| VAT1L       | 1. 82E-53 | 0. 181044 | 0. 064 | 0. 009 | 2. 71E-49 | Neo-G | VAT1L     |
| GFOD1. 1    | 1. 89E-53 | 0. 332121 | 0. 167 | 0. 055 | 2. 82E-49 | Neo-G | GFOD1     |
| SMIM14. 5   | 2. 00E-53 | 0. 300373 | 0. 489 | 0. 311 | 2. 99E-49 | Neo-G | SMIM14    |
| MAPK8. 3    | 2. 09E-53 | 0. 37796  | 0. 213 | 0. 085 | 3. 13E-49 | Neo-G | MAPK8     |
| HNMT. 6     | 2. 11E-53 | -0. 71242 | 0. 053 | 0. 239 | 3. 15E-49 | Neo-G | HNMT      |
| TSG101      | 2. 11E-53 | 0. 246692 | 0. 579 | 0. 398 | 3. 16E-49 | Neo-G | TSG101    |
| HOXC8. 3    | 2. 14E-53 | 0. 260121 | 0. 107 | 0. 025 | 3. 20E-49 | Neo-G | HOXC8     |
| WWTR1. 7    | 2. 38E-53 | -0. 44842 | 0. 01  | 0. 178 | 3. 55E-49 | Neo-G | WWTR1     |
| SBNO1. 4    | 3. 04E-53 | 0. 36017  | 0. 416 | 0. 247 | 4. 55E-49 | Neo-G | SBNO1     |
| HEPACAM. 6  | 3. 65E-53 | -0. 59317 | 0. 022 | 0. 197 | 5. 46E-49 | Neo-G | HEPACAM   |
| ARID5A. 4   | 4. 14E-53 | -0. 54899 | 0. 101 | 0. 313 | 6. 19E-49 | Neo-G | ARID5A    |
| FOXP1. 4    | 4. 14E-53 | -0. 83033 | 0. 062 | 0. 251 | 6. 19E-49 | Neo-G | FOXP1     |
| EMC10. 2    | 4. 77E-53 | 0. 294352 | 0. 607 | 0. 431 | 7. 13E-49 | Neo-G | EMC10     |
| C15orf41. 4 | 4. 93E-53 | 0. 312792 | 0. 139 | 0. 041 | 7. 36E-49 | Neo-G | C15orf41  |
| SCNN1A. 1   | 5. 75E-53 | 0. 419655 | 0. 14  | 0. 04  | 8. 59E-49 | Neo-G | SCNN1A    |
| SERPINI1. 5 | 5. 83E-53 | 0. 243331 | 0. 144 | 0. 042 | 8. 71E-49 | Neo-G | SERPINI1  |
| SERPINB6. 6 | 6. 17E-53 | -0. 55199 | 0. 284 | 0. 501 | 9. 23E-49 | Neo-G | SERPINB6  |
| SNRPB2. 4   | 8. 61E-53 | 0. 199941 | 0. 74  | 0. 543 | 1. 29E-48 | Neo-G | SNRPB2    |

|            |           |           |        |        |           |       |           |
|------------|-----------|-----------|--------|--------|-----------|-------|-----------|
| FAM118A. 4 | 1. 06E-52 | 0. 335846 | 0. 266 | 0. 116 | 1. 58E-48 | Neo-G | FAM118A   |
| PTGS1. 7   | 1. 08E-52 | -0. 58106 | 0. 009 | 0. 174 | 1. 61E-48 | Neo-G | PTGS1     |
| ACTR3B. 4  | 1. 14E-52 | 0. 374252 | 0. 223 | 0. 093 | 1. 71E-48 | Neo-G | ACTR3B    |
| TDG. 4     | 1. 22E-52 | 0. 354953 | 0. 422 | 0. 255 | 1. 82E-48 | Neo-G | TDG       |
| MESDC2. 3  | 1. 37E-52 | -0. 59762 | 0. 203 | 0. 428 | 2. 05E-48 | Neo-G | MESDC2    |
| P4HA1. 3   | 1. 52E-52 | -0. 51785 | 0. 053 | 0. 245 | 2. 28E-48 | Neo-G | P4HA1     |
| NCF4. 7    | 1. 59E-52 | -0. 70478 | 0. 003 | 0. 163 | 2. 38E-48 | Neo-G | NCF4      |
| CADM1. 5   | 1. 77E-52 | 0. 392918 | 0. 47  | 0. 307 | 2. 65E-48 | Neo-G | CADM1     |
| AQP4. 6    | 1. 95E-52 | -0. 64425 | 0. 015 | 0. 184 | 2. 91E-48 | Neo-G | AQP4      |
| GBP1. 3    | 2. 12E-52 | -0. 67009 | 0. 008 | 0. 171 | 3. 17E-48 | Neo-G | GBP1      |
| NPL. 6     | 2. 33E-52 | -0. 70859 | 0. 042 | 0. 22  | 3. 48E-48 | Neo-G | NPL       |
| CFDP1. 4   | 2. 48E-52 | 0. 263978 | 0. 571 | 0. 397 | 3. 71E-48 | Neo-G | CFDP1     |
| NAGA. 7    | 2. 54E-52 | -0. 59929 | 0. 028 | 0. 203 | 3. 79E-48 | Neo-G | NAGA      |
| SEPT7. 7   | 3. 23E-52 | 0. 133055 | 0. 872 | 0. 682 | 4. 82E-48 | Neo-G | 7-Sep     |
| PLAU. 7    | 3. 61E-52 | -0. 53169 | 0. 014 | 0. 181 | 5. 39E-48 | Neo-G | PLAU      |
| IRF8. 7    | 4. 00E-52 | -0. 66493 | 0. 012 | 0. 176 | 5. 97E-48 | Neo-G | IRF8      |
| KIAA0895   | 4. 60E-52 | 0. 239901 | 0. 101 | 0. 023 | 6. 88E-48 | Neo-G | KIAA0895  |
| ENTPD1. 7  | 5. 01E-52 | -0. 67545 | 0. 014 | 0. 18  | 7. 49E-48 | Neo-G | ENTPD1    |
| TAPBP. 7   | 5. 19E-52 | -0. 49456 | 0. 146 | 0. 366 | 7. 76E-48 | Neo-G | TAPBP     |
| TMEM141. 5 | 5. 67E-52 | -0. 5104  | 0. 072 | 0. 274 | 8. 47E-48 | Neo-G | TMEM141   |
| BHLHB9. 1  | 7. 30E-52 | 0. 259483 | 0. 109 | 0. 027 | 1. 09E-47 | Neo-G | BHLHB9    |
| SYNGR3     | 8. 28E-52 | 0. 287685 | 0. 112 | 0. 029 | 1. 24E-47 | Neo-G | SYNGR3    |
| RBM5. 4    | 8. 29E-52 | 0. 356819 | 0. 43  | 0. 26  | 1. 24E-47 | Neo-G | RBM5      |
| PTPN6. 7   | 8. 36E-52 | -0. 65664 | 0. 015 | 0. 18  | 1. 25E-47 | Neo-G | PTPN6     |
| TMTC4. 6   | 8. 45E-52 | 0. 406598 | 0. 211 | 0. 085 | 1. 26E-47 | Neo-G | TMTC4     |
| GOPC. 5    | 1. 00E-51 | 0. 393635 | 0. 403 | 0. 24  | 1. 50E-47 | Neo-G | GOPC      |
| POU2F2. 5  | 1. 03E-51 | 0. 289022 | 0. 276 | 0. 118 | 1. 54E-47 | Neo-G | POU2F2    |
| MSRA. 5    | 1. 17E-51 | 0. 380835 | 0. 408 | 0. 238 | 1. 75E-47 | Neo-G | MSRA      |
| DYNC1I2. 5 | 1. 24E-51 | 0. 271216 | 0. 612 | 0. 452 | 1. 85E-47 | Neo-G | DYNC1I2   |
| ZNF286A. 4 | 1. 25E-51 | 0. 319133 | 0. 15  | 0. 048 | 1. 87E-47 | Neo-G | ZNF286A   |
| STAB1. 6   | 1. 48E-51 | -0. 72172 | 0. 015 | 0. 179 | 2. 21E-47 | Neo-G | STAB1     |
| VPS26B. 5  | 1. 51E-51 | 0. 419354 | 0. 367 | 0. 215 | 2. 25E-47 | Neo-G | VPS26B    |
| TM6SF1. 7  | 1. 54E-51 | -0. 72963 | 0. 013 | 0. 176 | 2. 30E-47 | Neo-G | TM6SF1    |
| SPP1. 4    | 1. 59E-51 | -0. 51689 | 0. 874 | 0. 851 | 2. 37E-47 | Neo-G | SPP1      |
| COPS4. 2   | 1. 64E-51 | 0. 300704 | 0. 482 | 0. 305 | 2. 45E-47 | Neo-G | COPS4     |
| AFAP1. 4   | 2. 19E-51 | 0. 399061 | 0. 189 | 0. 073 | 3. 27E-47 | Neo-G | AFAP1     |
| TTC13. 3   | 2. 59E-51 | 0. 312898 | 0. 168 | 0. 057 | 3. 87E-47 | Neo-G | TTC13     |
| EPHB1. 4   | 2. 69E-51 | 0. 285046 | 0. 128 | 0. 036 | 4. 02E-47 | Neo-G | EPHB1     |
| CD4. 7     | 2. 73E-51 | -0. 65133 | 0. 011 | 0. 173 | 4. 08E-47 | Neo-G | CD4       |
| TROVE2. 6  | 3. 19E-51 | 0. 265946 | 0. 588 | 0. 414 | 4. 76E-47 | Neo-G | TROVE2    |
| UCP2. 7    | 3. 29E-51 | -0. 73977 | 0. 104 | 0. 293 | 4. 91E-47 | Neo-G | UCP2      |
| GAA. 6     | 3. 47E-51 | -0. 5318  | 0. 13  | 0. 343 | 5. 19E-47 | Neo-G | GAA       |
| PBX1. 6    | 3. 89E-51 | 0. 42093  | 0. 351 | 0. 198 | 5. 81E-47 | Neo-G | PBX1      |
| LINC01094  | 4. 06E-51 | -0. 68531 | 0. 01  | 0. 171 | 6. 06E-47 | Neo-G | LINC01094 |
| IFI44L. 3  | 4. 17E-51 | -0. 67057 | 0. 002 | 0. 158 | 6. 24E-47 | Neo-G | IFI44L    |
| FIBIN. 6   | 4. 27E-51 | -0. 52864 | 0. 056 | 0. 247 | 6. 38E-47 | Neo-G | FIBIN     |
| MTRNR2L12  | 4. 57E-51 | -1. 00309 | 0. 041 | 0. 215 | 6. 82E-47 | Neo-G | MTRNR2L12 |
| TTC19. 5   | 5. 08E-51 | 0. 325399 | 0. 506 | 0. 338 | 7. 58E-47 | Neo-G | TTC19     |
| CSTB. 5    | 5. 50E-51 | -0. 49111 | 0. 563 | 0. 705 | 8. 22E-47 | Neo-G | CSTB      |
| APBB1. 6   | 6. 03E-51 | 0. 35704  | 0. 328 | 0. 173 | 9. 01E-47 | Neo-G | APBB1     |
| TPM2. 4    | 6. 24E-51 | -0. 49096 | 0. 016 | 0. 181 | 9. 33E-47 | Neo-G | TPM2      |

|             |           |           |        |        |           |       |          |
|-------------|-----------|-----------|--------|--------|-----------|-------|----------|
| PARVG. 7    | 7. 26E-51 | -0. 67668 | 0. 016 | 0. 179 | 1. 08E-46 | Neo-G | PARVG    |
| COL6A2. 6   | 8. 47E-51 | -0. 52448 | 0. 016 | 0. 18  | 1. 27E-46 | Neo-G | COL6A2   |
| DFNA5. 3    | 8. 83E-51 | 0. 350698 | 0. 339 | 0. 178 | 1. 32E-46 | Neo-G | DFNA5    |
| SRRM2. 3    | 8. 96E-51 | 0. 268796 | 0. 69  | 0. 513 | 1. 34E-46 | Neo-G | SRRM2    |
| RNASE2. 7   | 1. 18E-50 | -0. 76826 | 0. 014 | 0. 175 | 1. 76E-46 | Neo-G | RNASE2   |
| EFEMP1. 6   | 1. 29E-50 | -0. 97643 | 0. 06  | 0. 241 | 1. 93E-46 | Neo-G | EFEMP1   |
| DNM1L. 4    | 1. 96E-50 | 0. 374945 | 0. 371 | 0. 215 | 2. 92E-46 | Neo-G | DNM1L    |
| STX4. 4     | 2. 17E-50 | -0. 59688 | 0. 131 | 0. 336 | 3. 25E-46 | Neo-G | STX4     |
| VWC2L       | 2. 44E-50 | 0. 142275 | 0. 046 | 0. 004 | 3. 65E-46 | Neo-G | VWC2L    |
| FGF12. 4    | 2. 45E-50 | 0. 282146 | 0. 132 | 0. 038 | 3. 66E-46 | Neo-G | FGF12    |
| HIF1A. 5    | 2. 52E-50 | -0. 50644 | 0. 305 | 0. 52  | 3. 77E-46 | Neo-G | HIF1A    |
| ACVR1B. 3   | 2. 82E-50 | 0. 33691  | 0. 191 | 0. 072 | 4. 21E-46 | Neo-G | ACVR1B   |
| CALR. 4     | 2. 83E-50 | -0. 42834 | 0. 617 | 0. 701 | 4. 23E-46 | Neo-G | CALR     |
| STIP1. 4    | 3. 14E-50 | 0. 287351 | 0. 52  | 0. 353 | 4. 69E-46 | Neo-G | STIP1    |
| CAPZA2. 2   | 3. 41E-50 | 0. 166002 | 0. 806 | 0. 636 | 5. 09E-46 | Neo-G | CAPZA2   |
| C8orf33. 3  | 3. 49E-50 | 0. 336168 | 0. 463 | 0. 301 | 5. 21E-46 | Neo-G | C8orf33  |
| FCGBP. 6    | 3. 50E-50 | -0. 8554  | 0. 071 | 0. 248 | 5. 23E-46 | Neo-G | FCGBP    |
| PCMT1. 3    | 3. 53E-50 | 0. 192779 | 0. 699 | 0. 521 | 5. 28E-46 | Neo-G | PCMT1    |
| GIMAP4. 7   | 3. 84E-50 | -0. 71147 | 0. 009 | 0. 167 | 5. 74E-46 | Neo-G | GIMAP4   |
| KRAS. 3     | 4. 34E-50 | 0. 399615 | 0. 395 | 0. 237 | 6. 48E-46 | Neo-G | KRAS     |
| FOLR2. 7    | 4. 49E-50 | -0. 91035 | 0. 03  | 0. 196 | 6. 71E-46 | Neo-G | FOLR2    |
| OSBPL8. 4   | 4. 51E-50 | 0. 375103 | 0. 452 | 0. 294 | 6. 74E-46 | Neo-G | OSBPL8   |
| CSRP2. 5    | 4. 66E-50 | -0. 81419 | 0. 13  | 0. 322 | 6. 96E-46 | Neo-G | CSRP2    |
| WAS. 7      | 4. 78E-50 | -0. 65742 | 0. 026 | 0. 193 | 7. 14E-46 | Neo-G | WAS      |
| SIL1. 6     | 4. 95E-50 | -0. 50813 | 0. 079 | 0. 276 | 7. 40E-46 | Neo-G | SIL1     |
| DYNLL2. 7   | 4. 96E-50 | 0. 391195 | 0. 342 | 0. 189 | 7. 42E-46 | Neo-G | DYNLL2   |
| RPAP2. 4    | 5. 09E-50 | 0. 408738 | 0. 316 | 0. 168 | 7. 61E-46 | Neo-G | RPAP2    |
| ADAP2. 7    | 5. 64E-50 | -0. 68425 | 0. 035 | 0. 202 | 8. 42E-46 | Neo-G | ADAP2    |
| CACNA1C     | 5. 94E-50 | 0. 141259 | 0. 05  | 0. 006 | 8. 88E-46 | Neo-G | CACNA1C  |
| FERMT3. 7   | 6. 14E-50 | -0. 639   | 0. 02  | 0. 184 | 9. 18E-46 | Neo-G | FERMT3   |
| DYNC1H1. 5  | 6. 51E-50 | 0. 36918  | 0. 482 | 0. 32  | 9. 73E-46 | Neo-G | DYNC1H1  |
| KIAA1586. 7 | 7. 00E-50 | 0. 361082 | 0. 232 | 0. 101 | 1. 05E-45 | Neo-G | KIAA1586 |
| MLC1. 6     | 7. 09E-50 | -0. 39466 | 0. 008 | 0. 166 | 1. 06E-45 | Neo-G | MLC1     |
| IGSF6. 7    | 7. 71E-50 | -0. 70838 | 0. 013 | 0. 171 | 1. 15E-45 | Neo-G | IGSF6    |
| PTPN4. 6    | 8. 29E-50 | 0. 380188 | 0. 214 | 0. 089 | 1. 24E-45 | Neo-G | PTPN4    |
| NR3C1. 5    | 8. 65E-50 | -0. 43249 | 0. 072 | 0. 27  | 1. 29E-45 | Neo-G | NR3C1    |
| RAB3B       | 9. 87E-50 | 0. 236963 | 0. 093 | 0. 021 | 1. 48E-45 | Neo-G | RAB3B    |
| SCAMP1. 5   | 1. 01E-49 | 0. 382287 | 0. 354 | 0. 197 | 1. 50E-45 | Neo-G | SCAMP1   |
| ZCCHC18     | 1. 01E-49 | 0. 229399 | 0. 092 | 0. 02  | 1. 51E-45 | Neo-G | ZCCHC18  |
| EGFR. 6     | 1. 07E-49 | -0. 62142 | 0. 126 | 0. 321 | 1. 61E-45 | Neo-G | EGFR     |
| FBXO3. 4    | 1. 14E-49 | 0. 36577  | 0. 302 | 0. 154 | 1. 70E-45 | Neo-G | FBXO3    |
| RGS7        | 1. 20E-49 | 0. 166537 | 0. 056 | 0. 007 | 1. 79E-45 | Neo-G | RGS7     |
| SORL1. 6    | 1. 27E-49 | -0. 64048 | 0. 066 | 0. 247 | 1. 89E-45 | Neo-G | SORL1    |
| IL6ST. 6    | 1. 47E-49 | -0. 43611 | 0. 079 | 0. 275 | 2. 19E-45 | Neo-G | IL6ST    |
| GPR153      | 1. 61E-49 | 0. 323924 | 0. 112 | 0. 03  | 2. 40E-45 | Neo-G | GPR153   |
| RSRC2. 1    | 1. 67E-49 | 0. 246543 | 0. 629 | 0. 457 | 2. 50E-45 | Neo-G | RSRC2    |
| POLB. 2     | 2. 00E-49 | 0. 314533 | 0. 19  | 0. 072 | 2. 99E-45 | Neo-G | POLB     |
| RNF5. 2     | 2. 47E-49 | 0. 255114 | 0. 547 | 0. 371 | 3. 69E-45 | Neo-G | RNF5     |
| CHD9. 3     | 2. 52E-49 | 0. 266709 | 0. 615 | 0. 449 | 3. 77E-45 | Neo-G | CHD9     |
| SPAG9. 5    | 2. 54E-49 | 0. 370416 | 0. 494 | 0. 336 | 3. 79E-45 | Neo-G | SPAG9    |
| MUM1. 7     | 2. 58E-49 | 0. 332296 | 0. 513 | 0. 346 | 3. 85E-45 | Neo-G | MUM1     |



|            |          |          |       |       |          |       |              |
|------------|----------|----------|-------|-------|----------|-------|--------------|
| FKBP10.7   | 2.63E-49 | -0.44189 | 0.049 | 0.232 | 3.93E-45 | Neo-G | FKBP10       |
| WIPI1.5    | 3.23E-49 | -0.5095  | 0.032 | 0.204 | 4.83E-45 | Neo-G | WIPI1        |
| NEFM       | 3.30E-49 | 0.145446 | 0.049 | 0.005 | 4.93E-45 | Neo-G | NEFM         |
| IL1RAP.3   | 3.38E-49 | -0.41837 | 0.016 | 0.177 | 5.05E-45 | Neo-G | IL1RAP       |
| MYH7       | 3.71E-49 | 0.177567 | 0.051 | 0.006 | 5.55E-45 | Neo-G | MYH7         |
| ATP5EP2.5  | 3.93E-49 | -0.62909 | 0.248 | 0.471 | 5.88E-45 | Neo-G | ATP5EP2      |
| SPIRE2     | 3.95E-49 | 0.245765 | 0.11  | 0.028 | 5.90E-45 | Neo-G | SPIRE2       |
| SOAT1.7    | 4.24E-49 | -0.52381 | 0.042 | 0.217 | 6.33E-45 | Neo-G | SOAT1        |
| CSDC2      | 4.32E-49 | 0.196166 | 0.074 | 0.013 | 6.46E-45 | Neo-G | CSDC2        |
| CDC5L.5    | 4.42E-49 | 0.36046  | 0.425 | 0.264 | 6.60E-45 | Neo-G | CDC5L        |
| COX19.2    | 4.67E-49 | 0.348325 | 0.375 | 0.213 | 6.98E-45 | Neo-G | COX19        |
| CDKN2AIP.4 | 4.91E-49 | 0.366297 | 0.275 | 0.131 | 7.33E-45 | Neo-G | CDKN2AIP     |
| AP2M1.1    | 5.25E-49 | 0.112893 | 0.859 | 0.694 | 7.84E-45 | Neo-G | AP2M1        |
| SNCA.7     | 5.58E-49 | -0.6835  | 0.007 | 0.161 | 8.34E-45 | Neo-G | SNCA         |
| DAB2.6     | 5.62E-49 | -0.64163 | 0.011 | 0.167 | 8.40E-45 | Neo-G | DAB2         |
| TMEM198.5  | 5.97E-49 | 0.378988 | 0.228 | 0.101 | 8.92E-45 | Neo-G | TMEM198      |
| USP53.7    | 6.19E-49 | -0.61342 | 0.005 | 0.158 | 9.25E-45 | Neo-G | USP53        |
| YBX3.2     | 6.23E-49 | -0.46076 | 0.207 | 0.429 | 9.31E-45 | Neo-G | YBX3         |
| APBB1IP.7  | 1.04E-48 | -0.61953 | 0.016 | 0.174 | 1.55E-44 | Neo-G | APBB1IP      |
| ASNSD1.5   | 1.14E-48 | 0.320835 | 0.417 | 0.253 | 1.70E-44 | Neo-G | ASNSD1       |
| LRRTM4     | 1.21E-48 | 0.190869 | 0.069 | 0.012 | 1.81E-44 | Neo-G | LRRTM4       |
| CFD.6      | 1.46E-48 | -0.67939 | 0.016 | 0.173 | 2.18E-44 | Neo-G | CFD          |
| FAM71E1    | 1.64E-48 | 0.20654  | 0.097 | 0.022 | 2.44E-44 | Neo-G | FAM71E1      |
| AP3M2.4    | 1.64E-48 | 0.344063 | 0.196 | 0.079 | 2.46E-44 | Neo-G | AP3M2        |
| CBX5.6     | 1.68E-48 | 0.315876 | 0.493 | 0.326 | 2.51E-44 | Neo-G | CBX5         |
| HIGD2A.5   | 1.75E-48 | -0.50933 | 0.46  | 0.638 | 2.61E-44 | Neo-G | HIGD2A       |
| DLD.4      | 2.03E-48 | 0.286858 | 0.496 | 0.325 | 3.04E-44 | Neo-G | DLD          |
| BCLAF1.4   | 2.08E-48 | 0.3123   | 0.525 | 0.368 | 3.10E-44 | Neo-G | BCLAF1       |
| S100A9.7   | 2.09E-48 | -0.92133 | 0.072 | 0.242 | 3.12E-44 | Neo-G | S100A9       |
| BDP1.3     | 2.12E-48 | 0.386669 | 0.383 | 0.228 | 3.17E-44 | Neo-G | BDP1         |
| SIGLEC10.2 | 2.28E-48 | -0.65115 | 0.02  | 0.179 | 3.41E-44 | Neo-G | SIGLEC10     |
| BNIP3L.4   | 2.36E-48 | 0.183179 | 0.761 | 0.579 | 3.52E-44 | Neo-G | BNIP3L       |
| LSP1.7     | 2.44E-48 | -0.72779 | 0.024 | 0.183 | 3.64E-44 | Neo-G | LSP1         |
| POLE4.5    | 2.65E-48 | -0.50959 | 0.107 | 0.306 | 3.97E-44 | Neo-G | POLE4        |
| DUSP23.6   | 3.08E-48 | -0.64448 | 0.039 | 0.206 | 4.60E-44 | Neo-G | DUSP23       |
| RIMS3      | 3.11E-48 | 0.151338 | 0.053 | 0.006 | 4.65E-44 | Neo-G | RIMS3        |
| SLC2A5.7   | 3.20E-48 | -0.77462 | 0.027 | 0.188 | 4.78E-44 | Neo-G | SLC2A5       |
| RP11-436K  | 3.93E-48 | 0.233376 | 0.096 | 0.022 | 5.88E-44 | Neo-G | RP11-436K8.1 |
| ANKRD53    | 4.38E-48 | 0.165039 | 0.057 | 0.008 | 6.55E-44 | Neo-G | ANKRD53      |
| ZNF791.4   | 4.94E-48 | 0.348812 | 0.415 | 0.253 | 7.39E-44 | Neo-G | ZNF791       |
| MAP4K4.5   | 5.70E-48 | 0.356816 | 0.391 | 0.231 | 8.52E-44 | Neo-G | MAP4K4       |
| GNG4.6     | 5.72E-48 | 0.380187 | 0.23  | 0.102 | 8.55E-44 | Neo-G | GNG4         |
| TSHZ1.4    | 5.75E-48 | 0.321411 | 0.17  | 0.062 | 8.60E-44 | Neo-G | TSHZ1        |
| HCN3       | 5.79E-48 | 0.196357 | 0.078 | 0.015 | 8.66E-44 | Neo-G | HCN3         |
| ZC3H6.5    | 5.92E-48 | 0.391307 | 0.272 | 0.132 | 8.84E-44 | Neo-G | ZC3H6        |
| ENHO.6     | 6.03E-48 | 0.429557 | 0.271 | 0.136 | 9.02E-44 | Neo-G | ENHO         |
| AASDHPPT.6 | 6.28E-48 | 0.327224 | 0.428 | 0.271 | 9.39E-44 | Neo-G | AASDHPPT     |
| VEZT.5     | 6.60E-48 | 0.401635 | 0.361 | 0.21  | 9.86E-44 | Neo-G | VEZT         |
| CACFD1.5   | 6.68E-48 | 0.351522 | 0.189 | 0.075 | 9.98E-44 | Neo-G | CACFD1       |
| G3BP2.3    | 6.84E-48 | 0.338601 | 0.418 | 0.259 | 1.02E-43 | Neo-G | G3BP2        |
| TERF1.3    | 7.44E-48 | 0.337738 | 0.466 | 0.306 | 1.11E-43 | Neo-G | TERF1        |

|             |           |           |        |        |                 |                |
|-------------|-----------|-----------|--------|--------|-----------------|----------------|
| LRR4. 1     | 7. 57E-48 | 0. 254899 | 0. 124 | 0. 035 | 1. 13E-43 Neo-G | LRR4           |
| ATP5E. 4    | 8. 13E-48 | -0. 27953 | 0. 937 | 0. 911 | 1. 21E-43 Neo-G | ATP5E          |
| MAP3K13. 4  | 9. 06E-48 | 0. 25962  | 0. 541 | 0. 376 | 1. 35E-43 Neo-G | MAP3K13        |
| TXNDC12. 4  | 9. 48E-48 | -0. 5372  | 0. 241 | 0. 455 | 1. 42E-43 Neo-G | TXNDC12        |
| CHST12. 5   | 9. 69E-48 | 0. 356885 | 0. 386 | 0. 229 | 1. 45E-43 Neo-G | CHST12         |
| OLIG1. 7    | 1. 07E-47 | -0. 6642  | 0. 033 | 0. 198 | 1. 60E-43 Neo-G | OLIG1          |
| TECR. 4     | 1. 16E-47 | -0. 58139 | 0. 396 | 0. 56  | 1. 73E-43 Neo-G | TECR           |
| COQ7. 4     | 1. 18E-47 | 0. 371492 | 0. 321 | 0. 171 | 1. 77E-43 Neo-G | COQ7           |
| TREM1. 6    | 1. 33E-47 | -0. 80784 | 0. 024 | 0. 181 | 1. 99E-43 Neo-G | TREM1          |
| NELL2. 5    | 1. 36E-47 | 0. 405321 | 0. 217 | 0. 092 | 2. 03E-43 Neo-G | NELL2          |
| FUOM. 7     | 1. 42E-47 | -0. 56338 | 0. 007 | 0. 157 | 2. 12E-43 Neo-G | FUOM           |
| MTRNR2L8. 1 | 1. 45E-47 | -0. 91587 | 0. 042 | 0. 209 | 2. 17E-43 Neo-G | MTRNR2L8       |
| BDH2. 2     | 1. 54E-47 | -0. 48029 | 0. 007 | 0. 158 | 2. 30E-43 Neo-G | BDH2           |
| ZFP37. 4    | 1. 58E-47 | 0. 273718 | 0. 133 | 0. 041 | 2. 37E-43 Neo-G | ZFP37          |
| NUDCD3. 4   | 1. 60E-47 | 0. 371458 | 0. 332 | 0. 182 | 2. 39E-43 Neo-G | NUDCD3         |
| PILRA. 6    | 1. 63E-47 | -0. 71973 | 0. 024 | 0. 182 | 2. 43E-43 Neo-G | PILRA          |
| BBOX1. 6    | 1. 65E-47 | -0. 49408 | 0. 005 | 0. 153 | 2. 47E-43 Neo-G | BBOX1          |
| CBX4. 7     | 1. 67E-47 | 0. 401327 | 0. 229 | 0. 101 | 2. 50E-43 Neo-G | CBX4           |
| CSF3R. 6    | 1. 68E-47 | -0. 67964 | 0. 016 | 0. 169 | 2. 51E-43 Neo-G | CSF3R          |
| RCAN2. 4    | 1. 74E-47 | 0. 211786 | 0. 123 | 0. 034 | 2. 60E-43 Neo-G | RCAN2          |
| PRPF40A. 3  | 1. 77E-47 | 0. 289203 | 0. 588 | 0. 433 | 2. 64E-43 Neo-G | PRPF40A        |
| ZFP90. 6    | 1. 80E-47 | 0. 407155 | 0. 247 | 0. 117 | 2. 69E-43 Neo-G | ZFP90          |
| PTCHD2      | 1. 87E-47 | 0. 2152   | 0. 068 | 0. 011 | 2. 79E-43 Neo-G | PTCHD2         |
| KIAA2026. 1 | 1. 93E-47 | 0. 348489 | 0. 268 | 0. 128 | 2. 88E-43 Neo-G | KIAA2026       |
| CPQ. 5      | 2. 03E-47 | -0. 54585 | 0. 031 | 0. 196 | 3. 03E-43 Neo-G | CPQ            |
| MSN. 7      | 2. 45E-47 | -0. 49401 | 0. 185 | 0. 398 | 3. 66E-43 Neo-G | MSN            |
| CYBRD1. 2   | 2. 60E-47 | -0. 46187 | 0. 028 | 0. 194 | 3. 89E-43 Neo-G | CYBRD1         |
| PLD4. 7     | 3. 07E-47 | -0. 68614 | 0. 016 | 0. 17  | 4. 59E-43 Neo-G | PLD4           |
| RP11-713P   | 3. 61E-47 | 0. 24161  | 0. 09  | 0. 02  | 5. 40E-43 Neo-G | RP11-713P17. 3 |
| KLC2. 6     | 3. 80E-47 | 0. 380206 | 0. 234 | 0. 107 | 5. 68E-43 Neo-G | KLC2           |
| MEF2A. 7    | 3. 98E-47 | -0. 55787 | 0. 06  | 0. 234 | 5. 95E-43 Neo-G | MEF2A          |
| ZNF326. 4   | 4. 25E-47 | 0. 367436 | 0. 384 | 0. 231 | 6. 35E-43 Neo-G | ZNF326         |
| MAPKAPK3. 4 | 4. 33E-47 | -0. 44608 | 0. 026 | 0. 188 | 6. 46E-43 Neo-G | MAPKAPK3       |
| MTURN. 4    | 4. 39E-47 | 0. 288392 | 0. 18  | 0. 067 | 6. 56E-43 Neo-G | MTURN          |
| SERPINF1. 4 | 4. 78E-47 | -0. 64401 | 0. 064 | 0. 244 | 7. 14E-43 Neo-G | SERPINF1       |
| FAM129A. 4  | 5. 70E-47 | -0. 39917 | 0. 007 | 0. 156 | 8. 52E-43 Neo-G | FAM129A        |
| ST8SIA5. 4  | 6. 01E-47 | 0. 275952 | 0. 118 | 0. 033 | 8. 97E-43 Neo-G | ST8SIA5        |
| XPR1. 4     | 6. 16E-47 | 0. 366754 | 0. 24  | 0. 111 | 9. 20E-43 Neo-G | XPR1           |
| ZNF667. 6   | 6. 59E-47 | 0. 345867 | 0. 18  | 0. 07  | 9. 85E-43 Neo-G | ZNF667         |
| LRPAP1. 5   | 6. 66E-47 | -0. 51296 | 0. 364 | 0. 569 | 9. 95E-43 Neo-G | LRPAP1         |
| EPM2AIP1. 7 | 0. 9E-47  | 0. 368739 | 0. 332 | 0. 182 | 1. 06E-42 Neo-G | EPM2AIP1       |
| KIAA1211    | 7. 69E-47 | 0. 215211 | 0. 084 | 0. 018 | 1. 15E-42 Neo-G | KIAA1211       |
| ATP6V1A. 3  | 7. 96E-47 | 0. 38948  | 0. 328 | 0. 183 | 1. 19E-42 Neo-G | ATP6V1A        |
| ZNF253. 5   | 8. 46E-47 | 0. 370024 | 0. 182 | 0. 071 | 1. 26E-42 Neo-G | ZNF253         |
| SVEP1       | 8. 81E-47 | 0. 171424 | 0. 059 | 0. 009 | 1. 32E-42 Neo-G | SVEP1          |
| CMTM6. 7    | 9. 08E-47 | -0. 53049 | 0. 24  | 0. 448 | 1. 36E-42 Neo-G | CMTM6          |
| RP1-293L6   | 9. 45E-47 | 0. 156849 | 0. 049 | 0. 006 | 1. 41E-42 Neo-G | RP1-293L6. 1   |
| ARHGEF9. 6  | 9. 88E-47 | 0. 346257 | 0. 235 | 0. 106 | 1. 48E-42 Neo-G | ARHGEF9        |
| PNCK        | 1. 17E-46 | 0. 153072 | 0. 076 | 0. 015 | 1. 74E-42 Neo-G | PNCK           |
| FIS1. 4     | 1. 20E-46 | 0. 164444 | 0. 796 | 0. 619 | 1. 79E-42 Neo-G | FIS1           |
| PTGR1. 3    | 1. 24E-46 | -0. 47582 | 0. 036 | 0. 204 | 1. 85E-42 Neo-G | PTGR1          |

|            |           |           |        |        |           |       |                |
|------------|-----------|-----------|--------|--------|-----------|-------|----------------|
| XBP1. 7    | 1. 29E-46 | -0. 5106  | 0. 189 | 0. 393 | 1. 92E-42 | Neo-G | XBP1           |
| RASSF2. 2  | 1. 52E-46 | -0. 444   | 0. 087 | 0. 279 | 2. 27E-42 | Neo-G | RASSF2         |
| ZNF620. 4  | 1. 54E-46 | 0. 27639  | 0. 146 | 0. 049 | 2. 30E-42 | Neo-G | ZNF620         |
| CWC27. 4   | 1. 65E-46 | 0. 345351 | 0. 4   | 0. 247 | 2. 47E-42 | Neo-G | CWC27          |
| NUCB2. 3   | 1. 67E-46 | 0. 282219 | 0. 496 | 0. 329 | 2. 50E-42 | Neo-G | NUCB2          |
| MTMR4. 6   | 1. 96E-46 | 0. 405858 | 0. 281 | 0. 146 | 2. 94E-42 | Neo-G | MTMR4          |
| NHLH2      | 2. 08E-46 | 0. 190253 | 0. 051 | 0. 006 | 3. 10E-42 | Neo-G | NHLH2          |
| C9orf16. 4 | 2. 13E-46 | 0. 20693  | 0. 75  | 0. 561 | 3. 18E-42 | Neo-G | C9orf16        |
| GABBR1. 6  | 2. 28E-46 | 0. 338995 | 0. 176 | 0. 067 | 3. 41E-42 | Neo-G | GABBR1         |
| ZNF302. 6  | 2. 33E-46 | 0. 224651 | 0. 471 | 0. 296 | 3. 48E-42 | Neo-G | ZNF302         |
| RGCC. 5    | 2. 37E-46 | -0. 67707 | 0. 095 | 0. 269 | 3. 54E-42 | Neo-G | RGCC           |
| NFE2L2. 5  | 2. 47E-46 | -0. 45058 | 0. 277 | 0. 491 | 3. 69E-42 | Neo-G | NFE2L2         |
| PRDX1. 6   | 3. 08E-46 | -0. 39541 | 0. 79  | 0. 81  | 4. 60E-42 | Neo-G | PRDX1          |
| REXO2. 6   | 3. 17E-46 | -0. 60179 | 0. 14  | 0. 34  | 4. 73E-42 | Neo-G | REXO2          |
| VPS28. 2   | 3. 23E-46 | 0. 137779 | 0. 793 | 0. 617 | 4. 82E-42 | Neo-G | VPS28          |
| CLSTN2     | 3. 29E-46 | 0. 206589 | 0. 078 | 0. 016 | 4. 92E-42 | Neo-G | CLSTN2         |
| RNF145. 3  | 3. 34E-46 | 0. 321541 | 0. 521 | 0. 36  | 4. 99E-42 | Neo-G | RNF145         |
| FKBP1B. 2  | 3. 35E-46 | 0. 399194 | 0. 233 | 0. 109 | 5. 00E-42 | Neo-G | FKBP1B         |
| C1S. 5     | 3. 45E-46 | -0. 75899 | 0. 023 | 0. 179 | 5. 15E-42 | Neo-G | C1S            |
| RAMP3. 3   | 3. 66E-46 | 0. 230403 | 0. 086 | 0. 019 | 5. 47E-42 | Neo-G | RAMP3          |
| ARHGEF6. 2 | 3. 78E-46 | -0. 36581 | 0. 009 | 0. 158 | 5. 64E-42 | Neo-G | ARHGEF6        |
| ZNF236. 3  | 4. 41E-46 | 0. 329452 | 0. 165 | 0. 06  | 6. 59E-42 | Neo-G | ZNF236         |
| SLC29A4. 4 | 4. 77E-46 | 0. 341277 | 0. 181 | 0. 07  | 7. 13E-42 | Neo-G | SLC29A4        |
| ALOX5. 7   | 5. 18E-46 | -0. 60112 | 0. 009 | 0. 154 | 7. 74E-42 | Neo-G | ALOX5          |
| ADAM28. 6  | 5. 40E-46 | -0. 65276 | 0. 01  | 0. 157 | 8. 07E-42 | Neo-G | ADAM28         |
| LNX1. 4    | 5. 45E-46 | 0. 282486 | 0. 163 | 0. 057 | 8. 14E-42 | Neo-G | LNX1           |
| FAM228B. 6 | 5. 49E-46 | 0. 354084 | 0. 349 | 0. 199 | 8. 21E-42 | Neo-G | FAM228B        |
| KLHL24. 4  | 5. 78E-46 | 0. 322224 | 0. 315 | 0. 162 | 8. 64E-42 | Neo-G | KLHL24         |
| SWAP70. 7  | 5. 81E-46 | -0. 47799 | 0. 064 | 0. 241 | 8. 69E-42 | Neo-G | SWAP70         |
| RBFOX3     | 6. 01E-46 | 0. 210924 | 0. 082 | 0. 017 | 8. 98E-42 | Neo-G | RBFOX3         |
| CERK. 3    | 6. 02E-46 | 0. 370884 | 0. 216 | 0. 094 | 9. 00E-42 | Neo-G | CERK           |
| GUCY1B3    | 6. 56E-46 | 0. 224957 | 0. 079 | 0. 016 | 9. 80E-42 | Neo-G | GUCY1B3        |
| AKIRIN2. 4 | 7. 21E-46 | 0. 336289 | 0. 526 | 0. 364 | 1. 08E-41 | Neo-G | AKIRIN2        |
| RP11-192H  | 7. 36E-46 | 0. 351319 | 0. 224 | 0. 101 | 1. 10E-41 | Neo-G | RP11-192H23. 6 |
| AMPH       | 7. 49E-46 | 0. 18781  | 0. 079 | 0. 016 | 1. 12E-41 | Neo-G | AMPH           |
| ZNF71. 5   | 7. 67E-46 | 0. 338354 | 0. 184 | 0. 072 | 1. 15E-41 | Neo-G | ZNF71          |
| CMAS. 2    | 9. 23E-46 | 0. 361462 | 0. 401 | 0. 25  | 1. 38E-41 | Neo-G | CMAS           |
| ANKIB1. 6  | 9. 24E-46 | 0. 391728 | 0. 335 | 0. 193 | 1. 38E-41 | Neo-G | ANKIB1         |
| WDR6. 5    | 9. 40E-46 | 0. 363347 | 0. 369 | 0. 215 | 1. 40E-41 | Neo-G | WDR6           |
| DNAJC8. 2  | 9. 75E-46 | 0. 158951 | 0. 698 | 0. 534 | 1. 46E-41 | Neo-G | DNAJC8         |
| LINC00662  | 9. 85E-46 | 0. 378198 | 0. 311 | 0. 167 | 1. 47E-41 | Neo-G | LINC00662      |
| TMEM256. 5 | 9. 92E-46 | -0. 52748 | 0. 237 | 0. 453 | 1. 48E-41 | Neo-G | TMEM256        |
| MYCNOS     | 1. 08E-45 | 0. 185622 | 0. 06  | 0. 009 | 1. 62E-41 | Neo-G | MYCNOS         |
| RFXANK. 2  | 1. 14E-45 | -0. 50194 | 0. 142 | 0. 347 | 1. 70E-41 | Neo-G | RFXANK         |
| CH25H. 4   | 1. 21E-45 | -0. 82152 | 0. 015 | 0. 163 | 1. 80E-41 | Neo-G | CH25H          |
| TIGD3      | 1. 23E-45 | 0. 194178 | 0. 083 | 0. 018 | 1. 84E-41 | Neo-G | TIGD3          |
| CYC1. 5    | 1. 47E-45 | 0. 255079 | 0. 702 | 0. 52  | 2. 20E-41 | Neo-G | CYC1           |
| ZNF524. 3  | 1. 48E-45 | -0. 36593 | 0. 038 | 0. 206 | 2. 21E-41 | Neo-G | ZNF524         |
| CASD1. 5   | 1. 57E-45 | 0. 297287 | 0. 174 | 0. 065 | 2. 35E-41 | Neo-G | CASD1          |
| TRIM46     | 1. 95E-45 | 0. 202571 | 0. 077 | 0. 016 | 2. 91E-41 | Neo-G | TRIM46         |
| OAS1. 4    | 2. 04E-45 | -0. 63199 | 0. 005 | 0. 148 | 3. 04E-41 | Neo-G | OAS1           |

|             |           |           |        |        |           |       |          |
|-------------|-----------|-----------|--------|--------|-----------|-------|----------|
| FNDC3B. 4   | 2. 05E-45 | -0. 38072 | 0. 03  | 0. 191 | 3. 07E-41 | Neo-G | FNDC3B   |
| ERI3. 4     | 2. 13E-45 | 0. 28891  | 0. 505 | 0. 352 | 3. 18E-41 | Neo-G | ERI3     |
| COCH. 2     | 2. 48E-45 | 0. 190777 | 0. 105 | 0. 027 | 3. 71E-41 | Neo-G | COCH     |
| GPSM1. 6    | 2. 52E-45 | 0. 363138 | 0. 165 | 0. 062 | 3. 76E-41 | Neo-G | GPSM1    |
| ARL16. 4    | 2. 85E-45 | 0. 278135 | 0. 461 | 0. 302 | 4. 26E-41 | Neo-G | ARL16    |
| CRCP. 4     | 3. 49E-45 | 0. 353824 | 0. 307 | 0. 166 | 5. 21E-41 | Neo-G | CRCP     |
| HOXB3. 3    | 3. 51E-45 | 0. 267532 | 0. 099 | 0. 025 | 5. 24E-41 | Neo-G | HOXB3    |
| SLPI. 4     | 3. 55E-45 | -1. 31725 | 0. 018 | 0. 166 | 5. 30E-41 | Neo-G | SLPI     |
| CTXN1. 7    | 3. 87E-45 | 0. 429412 | 0. 277 | 0. 145 | 5. 79E-41 | Neo-G | CTXN1    |
| PLEKHB1. 5  | 3. 92E-45 | -0. 58016 | 0. 059 | 0. 232 | 5. 86E-41 | Neo-G | PLEKHB1  |
| TRO. 3      | 4. 15E-45 | 0. 275427 | 0. 149 | 0. 051 | 6. 20E-41 | Neo-G | TRO      |
| PHF11. 6    | 4. 20E-45 | -0. 42166 | 0. 011 | 0. 158 | 6. 28E-41 | Neo-G | PHF11    |
| SCAMP5. 5   | 4. 27E-45 | 0. 341067 | 0. 199 | 0. 083 | 6. 37E-41 | Neo-G | SCAMP5   |
| TNPO3. 2    | 4. 41E-45 | 0. 332506 | 0. 263 | 0. 128 | 6. 59E-41 | Neo-G | TNPO3    |
| SPTLC2. 7   | 5. 00E-45 | -0. 57797 | 0. 06  | 0. 228 | 7. 47E-41 | Neo-G | SPTLC2   |
| PDE4B. 5    | 5. 20E-45 | -0. 51387 | 0. 107 | 0. 297 | 7. 78E-41 | Neo-G | PDE4B    |
| C2orf69. 6  | 6. 10E-45 | 0. 389018 | 0. 322 | 0. 178 | 9. 12E-41 | Neo-G | C2orf69  |
| NOTCH2. 2   | 6. 49E-45 | -0. 33508 | 0. 013 | 0. 163 | 9. 70E-41 | Neo-G | NOTCH2   |
| NKTR. 4     | 6. 68E-45 | 0. 313088 | 0. 497 | 0. 34  | 9. 98E-41 | Neo-G | NKTR     |
| RNF112. 1   | 7. 05E-45 | 0. 245939 | 0. 105 | 0. 028 | 1. 05E-40 | Neo-G | RNF112   |
| RABL2A. 4   | 7. 66E-45 | 0. 335521 | 0. 17  | 0. 065 | 1. 14E-40 | Neo-G | RABL2A   |
| GPR12       | 7. 96E-45 | 0. 108036 | 0. 041 | 0. 004 | 1. 19E-40 | Neo-G | GPR12    |
| NDUFB1. 4   | 8. 97E-45 | -0. 47393 | 0. 422 | 0. 614 | 1. 34E-40 | Neo-G | NDUFB1   |
| AK2. 5      | 1. 03E-44 | -0. 54734 | 0. 2   | 0. 414 | 1. 54E-40 | Neo-G | AK2      |
| NFKBIZ. 7   | 1. 10E-44 | -0. 53022 | 0. 034 | 0. 192 | 1. 64E-40 | Neo-G | NFKBIZ   |
| ATP1B2. 7   | 1. 25E-44 | -0. 51466 | 0. 078 | 0. 252 | 1. 87E-40 | Neo-G | ATP1B2   |
| C11orf58. 1 | 1. 41E-44 | 0. 113623 | 0. 829 | 0. 67  | 2. 11E-40 | Neo-G | C11orf58 |
| LINGO1. 4   | 1. 68E-44 | 0. 253451 | 0. 104 | 0. 028 | 2. 51E-40 | Neo-G | LINGO1   |
| STUB1. 4    | 1. 98E-44 | 0. 286284 | 0. 6   | 0. 444 | 2. 96E-40 | Neo-G | STUB1    |
| STXBP5L     | 2. 11E-44 | 0. 137922 | 0. 053 | 0. 007 | 3. 15E-40 | Neo-G | STXBP5L  |
| DNAJC7. 3   | 2. 44E-44 | 0. 226296 | 0. 606 | 0. 447 | 3. 64E-40 | Neo-G | DNAJC7   |
| MAP7D1. 5   | 2. 46E-44 | 0. 339736 | 0. 479 | 0. 329 | 3. 67E-40 | Neo-G | MAP7D1   |
| RNF146. 4   | 2. 47E-44 | 0. 324164 | 0. 39  | 0. 238 | 3. 70E-40 | Neo-G | RNF146   |
| GPR65. 7    | 2. 53E-44 | -0. 59437 | 0. 008 | 0. 149 | 3. 79E-40 | Neo-G | GPR65    |
| HEXB. 7     | 2. 68E-44 | -0. 48285 | 0. 227 | 0. 427 | 4. 00E-40 | Neo-G | HEXB     |
| HOXA4       | 2. 79E-44 | 0. 140483 | 0. 071 | 0. 014 | 4. 17E-40 | Neo-G | HOXA4    |
| FAH. 6      | 3. 06E-44 | -0. 50751 | 0. 023 | 0. 174 | 4. 57E-40 | Neo-G | FAH      |
| YJEFN3. 5   | 3. 08E-44 | 0. 332438 | 0. 148 | 0. 053 | 4. 61E-40 | Neo-G | YJEFN3   |
| FAM200A. 4  | 3. 23E-44 | 0. 361664 | 0. 198 | 0. 084 | 4. 83E-40 | Neo-G | FAM200A  |
| CCT8. 3     | 3. 46E-44 | 0. 171819 | 0. 684 | 0. 517 | 5. 17E-40 | Neo-G | CCT8     |
| ARSJ. 5     | 3. 69E-44 | -0. 32071 | 0. 002 | 0. 14  | 5. 52E-40 | Neo-G | ARSJ     |
| ATP5G2. 2   | 3. 79E-44 | -0. 33053 | 0. 863 | 0. 87  | 5. 67E-40 | Neo-G | ATP5G2   |
| WSB1. 4     | 3. 87E-44 | 0. 171507 | 0. 803 | 0. 633 | 5. 78E-40 | Neo-G | WSB1     |
| CYGB        | 3. 88E-44 | 0. 133846 | 0. 04  | 0. 004 | 5. 79E-40 | Neo-G | CYGB     |
| CD69. 5     | 3. 96E-44 | -0. 75481 | 0. 022 | 0. 169 | 5. 91E-40 | Neo-G | CD69     |
| IQGAP2. 2   | 4. 02E-44 | -0. 34465 | 0. 016 | 0. 165 | 6. 00E-40 | Neo-G | IQGAP2   |
| SERPINB9. 4 | 4. 02E-44 | -0. 596   | 0. 016 | 0. 162 | 6. 01E-40 | Neo-G | SERPINB9 |
| CEP19. 5    | 4. 03E-44 | 0. 307806 | 0. 17  | 0. 065 | 6. 03E-40 | Neo-G | CEP19    |
| MMP24       | 4. 08E-44 | 0. 150443 | 0. 063 | 0. 011 | 6. 10E-40 | Neo-G | MMP24    |
| PHYHIPL. 5  | 4. 35E-44 | 0. 262975 | 0. 33  | 0. 167 | 6. 50E-40 | Neo-G | PHYHIPL  |
| PARVB. 7    | 4. 46E-44 | -0. 43026 | 0. 027 | 0. 181 | 6. 67E-40 | Neo-G | PARVB    |

|            |           |           |        |        |           |       |               |
|------------|-----------|-----------|--------|--------|-----------|-------|---------------|
| LMO2. 2    | 4. 77E-44 | -0. 39187 | 0. 027 | 0. 181 | 7. 12E-40 | Neo-G | LMO2          |
| MDGA2      | 5. 37E-44 | 0. 146194 | 0. 048 | 0. 006 | 8. 03E-40 | Neo-G | MDGA2         |
| EBPL. 4    | 5. 77E-44 | 0. 414169 | 0. 428 | 0. 287 | 8. 62E-40 | Neo-G | EBPL          |
| C17orf58.  | 6. 15E-44 | 0. 422396 | 0. 305 | 0. 171 | 9. 19E-40 | Neo-G | C17orf58      |
| CHI3L2. 3  | 6. 34E-44 | -1. 27395 | 0. 044 | 0. 197 | 9. 47E-40 | Neo-G | CHI3L2        |
| FCGR2B. 7  | 6. 50E-44 | -0. 71038 | 0. 016 | 0. 16  | 9. 71E-40 | Neo-G | FCGR2B        |
| ICA1L. 4   | 6. 90E-44 | 0. 334635 | 0. 203 | 0. 087 | 1. 03E-39 | Neo-G | ICA1L         |
| PRKRA. 3   | 8. 31E-44 | 0. 30291  | 0. 496 | 0. 344 | 1. 24E-39 | Neo-G | PRKRA         |
| ZNF677. 5  | 8. 59E-44 | 0. 337295 | 0. 325 | 0. 182 | 1. 28E-39 | Neo-G | ZNF677        |
| MIS18BP1.  | 1. 04E-43 | -0. 47825 | 0. 016 | 0. 163 | 1. 55E-39 | Neo-G | MIS18BP1      |
| SH3BP5. 5  | 1. 15E-43 | 0. 35713  | 0. 331 | 0. 185 | 1. 71E-39 | Neo-G | SH3BP5        |
| FUCA2. 7   | 1. 56E-43 | -0. 43363 | 0. 081 | 0. 263 | 2. 34E-39 | Neo-G | FUCA2         |
| RP11-2E11  | 1. 61E-43 | 0. 211935 | 0. 093 | 0. 023 | 2. 40E-39 | Neo-G | RP11-2E11. 9  |
| U2AF1. 2   | 1. 68E-43 | 0. 190827 | 0. 788 | 0. 612 | 2. 51E-39 | Neo-G | U2AF1         |
| CCP110. 5  | 1. 74E-43 | 0. 321504 | 0. 237 | 0. 11  | 2. 60E-39 | Neo-G | CCP110        |
| TRA2A. 2   | 1. 83E-43 | 0. 286879 | 0. 488 | 0. 326 | 2. 73E-39 | Neo-G | TRA2A         |
| ANP32A. 7  | 1. 85E-43 | -0. 51957 | 0. 244 | 0. 451 | 2. 77E-39 | Neo-G | ANP32A        |
| SNX1. 3    | 1. 94E-43 | -0. 43515 | 0. 065 | 0. 241 | 2. 90E-39 | Neo-G | SNX1          |
| NIPSNAP1.  | 1. 97E-43 | 0. 395721 | 0. 286 | 0. 153 | 2. 95E-39 | Neo-G | NIPSNAP1      |
| ZC3HAV1. 4 | 2. 03E-43 | -0. 4156  | 0. 035 | 0. 194 | 3. 03E-39 | Neo-G | ZC3HAV1       |
| GRAMD3. 7  | 2. 16E-43 | -0. 41777 | 0. 013 | 0. 156 | 3. 23E-39 | Neo-G | GRAMD3        |
| CABYR      | 2. 36E-43 | 0. 201156 | 0. 082 | 0. 019 | 3. 53E-39 | Neo-G | CABYR         |
| PPIG       | 2. 58E-43 | 0. 196187 | 0. 678 | 0. 511 | 3. 86E-39 | Neo-G | PPIG          |
| ZNF397. 5  | 2. 68E-43 | 0. 350063 | 0. 282 | 0. 148 | 4. 00E-39 | Neo-G | ZNF397        |
| WDR48. 4   | 2. 79E-43 | 0. 313843 | 0. 255 | 0. 124 | 4. 16E-39 | Neo-G | WDR48         |
| MCM3AP-AS  | 2. 85E-43 | 0. 245383 | 0. 093 | 0. 023 | 4. 26E-39 | Neo-G | MCM3AP-AS1    |
| TTLL7. 7   | 3. 01E-43 | 0. 302824 | 0. 373 | 0. 221 | 4. 49E-39 | Neo-G | TTLL7         |
| PHF19. 5   | 3. 17E-43 | -0. 39252 | 0. 006 | 0. 144 | 4. 73E-39 | Neo-G | PHF19         |
| HLTF. 5    | 3. 36E-43 | 0. 396167 | 0. 291 | 0. 159 | 5. 02E-39 | Neo-G | HLTF          |
| SIM2       | 3. 89E-43 | 0. 193909 | 0. 068 | 0. 013 | 5. 82E-39 | Neo-G | SIM2          |
| TMEM176A.  | 3. 94E-43 | -0. 704   | 0. 082 | 0. 244 | 5. 89E-39 | Neo-G | TMEM176A      |
| ZBED5. 6   | 4. 52E-43 | 0. 362379 | 0. 301 | 0. 164 | 6. 76E-39 | Neo-G | ZBED5         |
| ZNF462. 7  | 4. 84E-43 | 0. 364701 | 0. 3   | 0. 162 | 7. 24E-39 | Neo-G | ZNF462        |
| POSTN. 6   | 5. 00E-43 | -0. 4596  | 0. 007 | 0. 144 | 7. 47E-39 | Neo-G | POSTN         |
| CREB1. 4   | 5. 31E-43 | 0. 323475 | 0. 375 | 0. 225 | 7. 93E-39 | Neo-G | CREB1         |
| C4orf3. 4  | 5. 72E-43 | -0. 49534 | 0. 526 | 0. 661 | 8. 54E-39 | Neo-G | C4orf3        |
| RP11-527D  | 5. 86E-43 | 0. 157906 | 0. 049 | 0. 007 | 8. 76E-39 | Neo-G | RP11-527D7. 1 |
| SIVA1. 4   | 6. 16E-43 | -0. 50516 | 0. 305 | 0. 507 | 9. 20E-39 | Neo-G | SIVA1         |
| SAFB. 3    | 6. 70E-43 | 0. 355211 | 0. 42  | 0. 273 | 1. 00E-38 | Neo-G | SAFB          |
| F13A1. 4   | 6. 97E-43 | -0. 82952 | 0. 028 | 0. 175 | 1. 04E-38 | Neo-G | F13A1         |
| TPST2. 5   | 8. 09E-43 | -0. 41043 | 0. 03  | 0. 184 | 1. 21E-38 | Neo-G | TPST2         |
| ISYNA1. 3  | 8. 27E-43 | 0. 338241 | 0. 247 | 0. 12  | 1. 24E-38 | Neo-G | ISYNA1        |
| RGMA. 6    | 8. 90E-43 | -0. 4222  | 0. 053 | 0. 218 | 1. 33E-38 | Neo-G | RGMA          |
| PSMB10. 7  | 9. 92E-43 | -0. 53551 | 0. 098 | 0. 274 | 1. 48E-38 | Neo-G | PSMB10        |
| NKIRAS2. 2 | 1. 02E-42 | 0. 343253 | 0. 391 | 0. 248 | 1. 53E-38 | Neo-G | NKIRAS2       |
| CORO1A. 7  | 1. 07E-42 | -0. 7178  | 0. 24  | 0. 389 | 1. 60E-38 | Neo-G | CORO1A        |
| FAM26F. 7  | 1. 12E-42 | -0. 58146 | 0. 034 | 0. 183 | 1. 68E-38 | Neo-G | FAM26F        |
| DAB1       | 1. 14E-42 | 0. 103221 | 0. 041 | 0. 004 | 1. 70E-38 | Neo-G | DAB1          |
| SRPX. 6    | 1. 37E-42 | -0. 51115 | 0. 038 | 0. 194 | 2. 04E-38 | Neo-G | SRPX          |
| CHD4. 4    | 1. 46E-42 | 0. 336226 | 0. 452 | 0. 306 | 2. 18E-38 | Neo-G | CHD4          |
| TRADD. 4   | 1. 47E-42 | -0. 35434 | 0. 03  | 0. 184 | 2. 20E-38 | Neo-G | TRADD         |

|              |          |          |       |       |          |       |               |
|--------------|----------|----------|-------|-------|----------|-------|---------------|
| SPTBN1.5     | 1.73E-42 | 0.340028 | 0.407 | 0.258 | 2.59E-38 | Neo-G | SPTBN1        |
| RP11-259K15  | 1.83E-42 | 0.184059 | 0.071 | 0.014 | 2.73E-38 | Neo-G | RP11-259K15.2 |
| CD47         | 2.11E-42 | -0.43882 | 0.204 | 0.406 | 3.15E-38 | Neo-G | CD47          |
| RP11-552D4.1 | 2.11E-42 | -0.68209 | 0.002 | 0.134 | 3.15E-38 | Neo-G | RP11-552D4.1  |
| ZFPM2        | 2.28E-42 | 0.26347  | 0.088 | 0.021 | 3.41E-38 | Neo-G | ZFPM2         |
| ST6GAL2      | 2.30E-42 | 0.228928 | 0.104 | 0.029 | 3.44E-38 | Neo-G | ST6GAL2       |
| IQCE         | 2.37E-42 | 0.353463 | 0.225 | 0.106 | 3.54E-38 | Neo-G | IQCE          |
| MGEA5        | 2.47E-42 | 0.347919 | 0.364 | 0.216 | 3.70E-38 | Neo-G | MGEA5         |
| GNB1         | 3.21E-42 | 0.291554 | 0.547 | 0.399 | 4.80E-38 | Neo-G | GNB1          |
| NME1         | 3.72E-42 | 0.17402  | 0.763 | 0.544 | 5.56E-38 | Neo-G | NME1          |
| SPATA6       | 4.39E-42 | -0.3483  | 0.024 | 0.172 | 6.55E-38 | Neo-G | SPATA6        |
| GRIA4        | 4.65E-42 | 0.350399 | 0.24  | 0.116 | 6.95E-38 | Neo-G | GRIA4         |
| C19orf70     | 4.90E-42 | -0.49728 | 0.437 | 0.596 | 7.32E-38 | Neo-G | C19orf70      |
| MGST1        | 5.03E-42 | -1.01543 | 0.02  | 0.16  | 7.52E-38 | Neo-G | MGST1         |
| CCL3         | 5.17E-42 | -0.7786  | 0.297 | 0.437 | 7.72E-38 | Neo-G | CCL3          |
| ARRB2        | 5.26E-42 | -0.56994 | 0.236 | 0.42  | 7.87E-38 | Neo-G | ARRB2         |
| SIAH2        | 5.65E-42 | 0.353707 | 0.34  | 0.195 | 8.44E-38 | Neo-G | SIAH2         |
| UQCR11       | 6.09E-42 | -1.25911 | 0     | 0.129 | 9.10E-38 | Neo-G | UQCR11        |
| TMEM173      | 6.11E-42 | -0.5722  | 0.007 | 0.141 | 9.14E-38 | Neo-G | TMEM173       |
| CD33         | 6.75E-42 | -0.5843  | 0.003 | 0.134 | 1.01E-37 | Neo-G | CD33          |
| C16orf87     | 6.82E-42 | 0.356285 | 0.329 | 0.189 | 1.02E-37 | Neo-G | C16orf87      |
| SMCO4        | 7.08E-42 | -0.50713 | 0.011 | 0.147 | 1.06E-37 | Neo-G | SMCO4         |
| ZBTB8A       | 7.40E-42 | 0.312488 | 0.207 | 0.091 | 1.11E-37 | Neo-G | ZBTB8A        |
| MTRNR2L1     | 7.74E-42 | 0.390336 | 0.333 | 0.175 | 1.16E-37 | Neo-G | MTRNR2L1      |
| RSU1         | 8.52E-42 | -0.46789 | 0.105 | 0.289 | 1.27E-37 | Neo-G | RSU1          |
| CSTA         | 8.59E-42 | -0.54686 | 0.009 | 0.143 | 1.28E-37 | Neo-G | CSTA          |
| VPS41        | 8.62E-42 | 0.30498  | 0.328 | 0.185 | 1.29E-37 | Neo-G | VPS41         |
| CNIH2        | 8.86E-42 | 0.400989 | 0.236 | 0.117 | 1.32E-37 | Neo-G | CNIH2         |
| KLHL13       | 9.29E-42 | 0.379732 | 0.196 | 0.087 | 1.39E-37 | Neo-G | KLHL13        |
| SYNC         | 1.00E-41 | 0.353933 | 0.296 | 0.161 | 1.50E-37 | Neo-G | SYNC          |
| TRIM13       | 1.02E-41 | 0.314478 | 0.386 | 0.232 | 1.53E-37 | Neo-G | TRIM13        |
| PFKFB3       | 1.12E-41 | -0.4945  | 0.09  | 0.263 | 1.68E-37 | Neo-G | PFKFB3        |
| PAK2         | 1.36E-41 | 0.335448 | 0.476 | 0.337 | 2.03E-37 | Neo-G | PAK2          |
| LPCAT2       | 1.39E-41 | -0.5528  | 0.022 | 0.163 | 2.07E-37 | Neo-G | LPCAT2        |
| ATF3         | 1.42E-41 | -0.56597 | 0.146 | 0.321 | 2.12E-37 | Neo-G | ATF3          |
| PAIP2        | 1.45E-41 | 0.140516 | 0.77  | 0.613 | 2.17E-37 | Neo-G | PAIP2         |
| SDHD         | 1.52E-41 | -0.4969  | 0.218 | 0.417 | 2.27E-37 | Neo-G | SDHD          |
| ADM          | 1.53E-41 | -0.69434 | 0.047 | 0.202 | 2.28E-37 | Neo-G | ADM           |
| ARL8A        | 1.55E-41 | 0.328765 | 0.405 | 0.256 | 2.32E-37 | Neo-G | ARL8A         |
| HYLS1        | 1.63E-41 | 0.190233 | 0.104 | 0.029 | 2.43E-37 | Neo-G | HYLS1         |
| CD84         | 1.64E-41 | -0.55908 | 0.009 | 0.144 | 2.45E-37 | Neo-G | CD84          |
| RBM25        | 1.70E-41 | 0.258275 | 0.576 | 0.424 | 2.54E-37 | Neo-G | RBM25         |
| AMH          | 1.92E-41 | 0.314576 | 0.136 | 0.047 | 2.87E-37 | Neo-G | AMH           |
| PDE4DIP      | 2.42E-41 | 0.2459   | 0.416 | 0.245 | 3.62E-37 | Neo-G | PDE4DIP       |
| KPNA5        | 2.49E-41 | 0.333733 | 0.19  | 0.081 | 3.73E-37 | Neo-G | KPNA5         |
| UPF3A        | 2.69E-41 | 0.28053  | 0.474 | 0.329 | 4.02E-37 | Neo-G | UPF3A         |
| GABARAP      | 2.83E-41 | -0.60789 | 0.289 | 0.482 | 4.24E-37 | Neo-G | GABARAP       |
| SPCS3        | 2.89E-41 | -0.4879  | 0.154 | 0.346 | 4.32E-37 | Neo-G | SPCS3         |
| TMEM169      | 2.91E-41 | 0.291203 | 0.138 | 0.048 | 4.36E-37 | Neo-G | TMEM169       |
| CSTF3        | 3.05E-41 | 0.31316  | 0.394 | 0.252 | 4.55E-37 | Neo-G | CSTF3         |
| SLC30A9      | 3.27E-41 | 0.359743 | 0.375 | 0.237 | 4.88E-37 | Neo-G | SLC30A9       |

|             |           |           |        |        |           |       |               |
|-------------|-----------|-----------|--------|--------|-----------|-------|---------------|
| HAGH. 4     | 3. 31E-41 | 0. 312819 | 0. 483 | 0. 337 | 4. 94E-37 | Neo-G | HAGH          |
| LYRM7. 4    | 3. 60E-41 | 0. 337004 | 0. 324 | 0. 186 | 5. 37E-37 | Neo-G | LYRM7         |
| TIA1. 7     | 3. 73E-41 | 0. 340515 | 0. 374 | 0. 233 | 5. 57E-37 | Neo-G | TIA1          |
| HSF4        | 3. 91E-41 | 0. 230468 | 0. 093 | 0. 024 | 5. 85E-37 | Neo-G | HSF4          |
| BCL2A1. 7   | 4. 04E-41 | -0. 61852 | 0. 03  | 0. 173 | 6. 03E-37 | Neo-G | BCL2A1        |
| SMARCC1. 5  | 4. 32E-41 | 0. 367291 | 0. 378 | 0. 24  | 6. 46E-37 | Neo-G | SMARCC1       |
| PNMA2. 6    | 4. 79E-41 | 0. 368501 | 0. 248 | 0. 126 | 7. 16E-37 | Neo-G | PNMA2         |
| SPPL2A. 7   | 4. 96E-41 | -0. 38815 | 0. 044 | 0. 201 | 7. 41E-37 | Neo-G | SPPL2A        |
| ISG15. 5    | 5. 38E-41 | -0. 59704 | 0. 189 | 0. 377 | 8. 03E-37 | Neo-G | ISG15         |
| ATP5G3. 1   | 5. 71E-41 | 0. 113139 | 0. 893 | 0. 717 | 8. 53E-37 | Neo-G | ATP5G3        |
| LCP1. 6     | 5. 82E-41 | -0. 57711 | 0. 019 | 0. 157 | 8. 69E-37 | Neo-G | LCP1          |
| ZSCAN16. 3  | 6. 98E-41 | 0. 270325 | 0. 148 | 0. 053 | 1. 04E-36 | Neo-G | ZSCAN16       |
| GPR137B. 4  | 7. 20E-41 | -0. 38424 | 0. 076 | 0. 248 | 1. 08E-36 | Neo-G | GPR137B       |
| PRPSAP1. 6  | 7. 94E-41 | 0. 328951 | 0. 434 | 0. 29  | 1. 19E-36 | Neo-G | PRPSAP1       |
| LRRC1. 5    | 9. 30E-41 | 0. 309859 | 0. 157 | 0. 059 | 1. 39E-36 | Neo-G | LRRC1         |
| COL4A2. 4   | 9. 49E-41 | -0. 28775 | 0. 009 | 0. 143 | 1. 42E-36 | Neo-G | COL4A2        |
| SERPING1. 1 | 1. 02E-40 | -0. 94767 | 0. 092 | 0. 251 | 1. 52E-36 | Neo-G | SERPING1      |
| CMIP. 4     | 1. 02E-40 | 0. 337206 | 0. 296 | 0. 158 | 1. 52E-36 | Neo-G | CMIP          |
| SEZ6L. 6    | 1. 13E-40 | 0. 338834 | 0. 251 | 0. 121 | 1. 69E-36 | Neo-G | SEZ6L         |
| PDRG1. 5    | 1. 15E-40 | 0. 311915 | 0. 394 | 0. 253 | 1. 72E-36 | Neo-G | PDRG1         |
| RP11-71N1   | 1. 25E-40 | -0. 36702 | 0. 014 | 0. 151 | 1. 87E-36 | Neo-G | RP11-71N10. 1 |
| ZNF713. 2   | 1. 28E-40 | 0. 244677 | 0. 12  | 0. 038 | 1. 92E-36 | Neo-G | ZNF713        |
| HSPH1. 3    | 1. 32E-40 | 0. 281555 | 0. 5   | 0. 344 | 1. 98E-36 | Neo-G | HSPH1         |
| HIST1H1C. 1 | 1. 36E-40 | -0. 56619 | 0. 049 | 0. 205 | 2. 03E-36 | Neo-G | HIST1H1C      |
| NCKAP1L. 7  | 1. 44E-40 | -0. 54596 | 0. 006 | 0. 136 | 2. 16E-36 | Neo-G | NCKAP1L       |
| NSFL1C. 2   | 1. 52E-40 | 0. 25053  | 0. 537 | 0. 385 | 2. 27E-36 | Neo-G | NSFL1C        |
| NOP10. 7    | 1. 60E-40 | -0. 44223 | 0. 48  | 0. 621 | 2. 40E-36 | Neo-G | NOP10         |
| SAMHD1. 7   | 1. 72E-40 | -0. 53109 | 0. 072 | 0. 232 | 2. 57E-36 | Neo-G | SAMHD1        |
| PPP1R3F     | 1. 76E-40 | 0. 239657 | 0. 098 | 0. 027 | 2. 63E-36 | Neo-G | PPP1R3F       |
| FAM200B. 4  | 1. 79E-40 | 0. 257144 | 0. 5   | 0. 35  | 2. 67E-36 | Neo-G | FAM200B       |
| PPP2R2C     | 1. 94E-40 | 0. 138351 | 0. 056 | 0. 009 | 2. 89E-36 | Neo-G | PPP2R2C       |
| SOX5. 5     | 1. 99E-40 | 0. 337964 | 0. 181 | 0. 077 | 2. 97E-36 | Neo-G | SOX5          |
| CTBS. 4     | 2. 05E-40 | -0. 41062 | 0. 027 | 0. 172 | 3. 06E-36 | Neo-G | CTBS          |
| COPS3. 3    | 2. 07E-40 | 0. 250458 | 0. 505 | 0. 352 | 3. 09E-36 | Neo-G | COPS3         |
| ZNF254. 4   | 2. 15E-40 | 0. 333063 | 0. 253 | 0. 128 | 3. 21E-36 | Neo-G | ZNF254        |
| TBCA. 6     | 2. 21E-40 | 0. 111891 | 0. 877 | 0. 69  | 3. 30E-36 | Neo-G | TBCA          |
| ARHGAP33. 2 | 2. 36E-40 | 0. 316601 | 0. 174 | 0. 071 | 3. 53E-36 | Neo-G | ARHGAP33      |
| NOTCH2NL. 2 | 2. 51E-40 | -0. 3369  | 0. 033 | 0. 183 | 3. 76E-36 | Neo-G | NOTCH2NL      |
| CAB39L. 5   | 2. 53E-40 | 0. 284106 | 0. 162 | 0. 063 | 3. 78E-36 | Neo-G | CAB39L        |
| NXT1. 3     | 2. 54E-40 | 0. 336905 | 0. 444 | 0. 301 | 3. 79E-36 | Neo-G | NXT1          |
| MED10. 6    | 2. 55E-40 | 0. 144555 | 0. 635 | 0. 465 | 3. 80E-36 | Neo-G | MED10         |
| PWP1. 3     | 2. 92E-40 | 0. 307486 | 0. 43  | 0. 287 | 4. 36E-36 | Neo-G | PWP1          |
| AOAH. 6     | 2. 98E-40 | -0. 58089 | 0. 008 | 0. 137 | 4. 46E-36 | Neo-G | AOAH          |
| HSPD1. 6    | 3. 29E-40 | 0. 144092 | 0. 763 | 0. 596 | 4. 91E-36 | Neo-G | HSPD1         |
| TMEM123. 3  | 3. 84E-40 | -0. 41149 | 0. 215 | 0. 418 | 5. 74E-36 | Neo-G | TMEM123       |
| FAM60A. 4   | 4. 24E-40 | 0. 358396 | 0. 291 | 0. 16  | 6. 34E-36 | Neo-G | FAM60A        |
| PQLC3. 6    | 4. 38E-40 | -0. 38122 | 0. 046 | 0. 201 | 6. 55E-36 | Neo-G | PQLC3         |
| CTC-239J1   | 4. 89E-40 | 0. 239129 | 0. 06  | 0. 011 | 7. 31E-36 | Neo-G | CTC-239J10. 1 |
| NPAS3. 7    | 5. 14E-40 | -0. 32308 | 0. 028 | 0. 175 | 7. 69E-36 | Neo-G | NPAS3         |
| TAF11. 3    | 5. 19E-40 | 0. 290821 | 0. 405 | 0. 261 | 7. 76E-36 | Neo-G | TAF11         |
| HOXC-AS1. 5 | 6. 66E-40 | 0. 210566 | 0. 077 | 0. 017 | 8. 47E-36 | Neo-G | HOXC-AS1      |

|            |           |           |        |        |           |       |                |
|------------|-----------|-----------|--------|--------|-----------|-------|----------------|
| ADPGK. 7   | 5. 89E-40 | -0. 43328 | 0. 104 | 0. 281 | 8. 81E-36 | Neo-G | ADPGK          |
| TLE1. 5    | 6. 46E-40 | -0. 31924 | 0. 035 | 0. 186 | 9. 65E-36 | Neo-G | TLE1           |
| RCS1. 6    | 7. 08E-40 | -0. 55276 | 0. 006 | 0. 134 | 1. 06E-35 | Neo-G | RCS1           |
| R3HCC1. 4  | 7. 39E-40 | 0. 303256 | 0. 412 | 0. 271 | 1. 10E-35 | Neo-G | R3HCC1         |
| DDX1. 4    | 8. 66E-40 | 0. 270016 | 0. 487 | 0. 344 | 1. 29E-35 | Neo-G | DDX1           |
| PADI2. 5   | 8. 77E-40 | -0. 55666 | 0. 016 | 0. 149 | 1. 31E-35 | Neo-G | PADI2          |
| LYZ. 7     | 8. 81E-40 | -0. 69003 | 0. 073 | 0. 222 | 1. 32E-35 | Neo-G | LYZ            |
| NACAD. 6   | 8. 94E-40 | 0. 281341 | 0. 185 | 0. 077 | 1. 34E-35 | Neo-G | NACAD          |
| SCD5. 6    | 9. 45E-40 | 0. 241592 | 0. 571 | 0. 373 | 1. 41E-35 | Neo-G | SCD5           |
| PBXIP1. 2  | 9. 88E-40 | -0. 41619 | 0. 015 | 0. 149 | 1. 48E-35 | Neo-G | PBXIP1         |
| APOL4. 3   | 1. 04E-39 | 0. 214871 | 0. 113 | 0. 034 | 1. 56E-35 | Neo-G | APOL4          |
| TMED1. 4   | 1. 22E-39 | -0. 4933  | 0. 126 | 0. 311 | 1. 83E-35 | Neo-G | TMED1          |
| ARFGAP2. 3 | 1. 29E-39 | 0. 310764 | 0. 423 | 0. 276 | 1. 93E-35 | Neo-G | ARFGAP2        |
| RP11-725F  | 1. 37E-39 | 0. 206746 | 0. 078 | 0. 018 | 2. 04E-35 | Neo-G | RP11-725P16. 2 |
| TCIRG1. 7  | 1. 41E-39 | -0. 47511 | 0. 01  | 0. 139 | 2. 11E-35 | Neo-G | TCIRG1         |
| YIPF3. 6   | 1. 45E-39 | 0. 178158 | 0. 617 | 0. 467 | 2. 16E-35 | Neo-G | YIPF3          |
| IL1B. 7    | 1. 48E-39 | -0. 73276 | 0. 086 | 0. 238 | 2. 21E-35 | Neo-G | IL1B           |
| PLA2G5. 6  | 1. 50E-39 | -0. 55275 | 0      | 0. 122 | 2. 23E-35 | Neo-G | PLA2G5         |
| FAM126B. 4 | 1. 61E-39 | 0. 300647 | 0. 252 | 0. 125 | 2. 41E-35 | Neo-G | FAM126B        |
| ACSS3. 5   | 1. 63E-39 | -0. 2612  | 0. 002 | 0. 125 | 2. 44E-35 | Neo-G | ACSS3          |
| BRSK2. 3   | 1. 68E-39 | 0. 234982 | 0. 106 | 0. 031 | 2. 51E-35 | Neo-G | BRSK2          |
| BIN2. 6    | 1. 70E-39 | -0. 51667 | 0. 002 | 0. 126 | 2. 53E-35 | Neo-G | BIN2           |
| STXBP3. 1  | 1. 82E-39 | -0. 41658 | 0. 053 | 0. 211 | 2. 72E-35 | Neo-G | STXBP3         |
| ABLIM2     | 2. 10E-39 | 0. 188721 | 0. 071 | 0. 015 | 3. 14E-35 | Neo-G | ABLIM2         |
| GNG12. 5   | 2. 11E-39 | -0. 29023 | 0. 016 | 0. 153 | 3. 16E-35 | Neo-G | GNG12          |
| GALNT2. 2  | 2. 17E-39 | -0. 41814 | 0. 091 | 0. 262 | 3. 24E-35 | Neo-G | GALNT2         |
| COMMD4. 1  | 2. 64E-39 | -0. 43902 | 0. 138 | 0. 325 | 3. 94E-35 | Neo-G | COMMD4         |
| GABARAPL1  | 2. 70E-39 | 0. 210471 | 0. 45  | 0. 279 | 4. 03E-35 | Neo-G | GABARAPL1      |
| SPOP. 4    | 2. 79E-39 | 0. 324297 | 0. 43  | 0. 294 | 4. 17E-35 | Neo-G | SPOP           |
| KLHDC9. 5  | 2. 87E-39 | 0. 304058 | 0. 159 | 0. 063 | 4. 29E-35 | Neo-G | KLHDC9         |
| SPTSSA. 5  | 2. 96E-39 | -0. 51403 | 0. 253 | 0. 449 | 4. 42E-35 | Neo-G | SPTSSA         |
| DTX1       | 2. 99E-39 | 0. 219837 | 0. 084 | 0. 021 | 4. 47E-35 | Neo-G | DTX1           |
| RNF139. 4  | 3. 00E-39 | 0. 37931  | 0. 379 | 0. 24  | 4. 48E-35 | Neo-G | RNF139         |
| RSPRY1. 5  | 3. 01E-39 | 0. 352763 | 0. 367 | 0. 234 | 4. 51E-35 | Neo-G | RSPRY1         |
| GNB2L1. 5  | 3. 13E-39 | -0. 29137 | 0. 962 | 0. 94  | 4. 68E-35 | Neo-G | GNB2L1         |
| TAP1. 2    | 3. 42E-39 | -0. 41105 | 0. 096 | 0. 273 | 5. 11E-35 | Neo-G | TAP1           |
| CNPY2. 5   | 3. 90E-39 | 0. 139844 | 0. 731 | 0. 549 | 5. 83E-35 | Neo-G | CNPY2          |
| TAF9. 3    | 3. 95E-39 | 0. 174042 | 0. 64  | 0. 483 | 5. 91E-35 | Neo-G | TAF9           |
| SLC29A1. 6 | 4. 24E-39 | -0. 52028 | 0. 019 | 0. 152 | 6. 33E-35 | Neo-G | SLC29A1        |
| TGFBR2. 6  | 4. 32E-39 | -0. 4193  | 0. 005 | 0. 131 | 6. 46E-35 | Neo-G | TGFBR2         |
| OSM. 7     | 4. 37E-39 | -0. 68691 | 0. 025 | 0. 16  | 6. 53E-35 | Neo-G | OSM            |
| CLIP2. 6   | 4. 54E-39 | 0. 356127 | 0. 295 | 0. 162 | 6. 78E-35 | Neo-G | CLIP2          |
| KLHL9. 5   | 4. 78E-39 | 0. 324499 | 0. 21  | 0. 097 | 7. 15E-35 | Neo-G | KLHL9          |
| ARHGAP18.  | 5. 02E-39 | -0. 55129 | 0. 042 | 0. 188 | 7. 50E-35 | Neo-G | ARHGAP18       |
| STXBP2. 7  | 5. 92E-39 | -0. 59743 | 0. 046 | 0. 188 | 8. 85E-35 | Neo-G | STXBP2         |
| SPIN1. 5   | 5. 99E-39 | 0. 342748 | 0. 28  | 0. 153 | 8. 95E-35 | Neo-G | SPIN1          |
| MAF1. 4    | 6. 64E-39 | 0. 284079 | 0. 552 | 0. 413 | 9. 92E-35 | Neo-G | MAF1           |
| LHFPL2. 6  | 6. 70E-39 | -0. 46055 | 0. 033 | 0. 176 | 1. 00E-34 | Neo-G | LHFPL2         |
| RTN2. 4    | 6. 90E-39 | 0. 228922 | 0. 179 | 0. 072 | 1. 03E-34 | Neo-G | RTN2           |
| SNF8. 4    | 7. 03E-39 | 0. 262536 | 0. 588 | 0. 444 | 1. 05E-34 | Neo-G | SNF8           |
| ARG2. 5    | 8. 02E-39 | 0. 217949 | 0. 204 | 0. 086 | 1. 20E-34 | Neo-G | ARG2           |



|            |          |          |       |       |          |       |           |
|------------|----------|----------|-------|-------|----------|-------|-----------|
| OGFRL1.7   | 8.35E-39 | -0.46822 | 0.049 | 0.198 | 1.25E-34 | Neo-G | OGFRL1    |
| THY1.6     | 8.40E-39 | 0.274087 | 0.394 | 0.239 | 1.26E-34 | Neo-G | THY1      |
| TULP4.6    | 8.50E-39 | 0.331219 | 0.251 | 0.129 | 1.27E-34 | Neo-G | TULP4     |
| GPRIN1     | 8.62E-39 | 0.246882 | 0.106 | 0.032 | 1.29E-34 | Neo-G | GPRIN1    |
| NRBF2.3    | 9.28E-39 | -0.41375 | 0.112 | 0.291 | 1.39E-34 | Neo-G | NRBF2     |
| DEDD2.2    | 9.70E-39 | 0.320387 | 0.292 | 0.157 | 1.45E-34 | Neo-G | DEDD2     |
| PRDX3.5    | 1.10E-38 | -0.53835 | 0.295 | 0.487 | 1.64E-34 | Neo-G | PRDX3     |
| DUSP4.5    | 1.13E-38 | -0.43477 | 0.046 | 0.196 | 1.68E-34 | Neo-G | DUSP4     |
| FAM105A.7  | 1.17E-38 | -0.56766 | 0.037 | 0.178 | 1.74E-34 | Neo-G | FAM105A   |
| PTPRD.6    | 1.19E-38 | 0.251554 | 0.162 | 0.062 | 1.78E-34 | Neo-G | PTPRD     |
| CIAPIN1.3  | 1.25E-38 | 0.321717 | 0.381 | 0.245 | 1.86E-34 | Neo-G | CIAPIN1   |
| FAM210B.7  | 1.27E-38 | 0.39643  | 0.394 | 0.255 | 1.89E-34 | Neo-G | FAM210B   |
| PTAFR.7    | 1.31E-38 | -0.54515 | 0.012 | 0.139 | 1.95E-34 | Neo-G | PTAFR     |
| PTTG1.6    | 1.33E-38 | -0.51611 | 0.084 | 0.248 | 1.99E-34 | Neo-G | PTTG1     |
| FOSL2.6    | 1.34E-38 | -0.40188 | 0.049 | 0.203 | 2.00E-34 | Neo-G | FOSL2     |
| TRIM22.5   | 1.36E-38 | -0.46991 | 0.017 | 0.149 | 2.04E-34 | Neo-G | TRIM22    |
| CAPZB.6    | 1.40E-38 | -0.44811 | 0.599 | 0.714 | 2.10E-34 | Neo-G | CAPZB     |
| MERTK.6    | 1.42E-38 | -0.50093 | 0.011 | 0.138 | 2.12E-34 | Neo-G | MERTK     |
| BCL2L12.3  | 1.55E-38 | -0.31051 | 0.012 | 0.141 | 2.32E-34 | Neo-G | BCL2L12   |
| SNHG8.3    | 1.58E-38 | -0.50252 | 0.296 | 0.489 | 2.36E-34 | Neo-G | SNHG8     |
| TSHZ2.5    | 1.64E-38 | 0.225559 | 0.124 | 0.04  | 2.45E-34 | Neo-G | TSHZ2     |
| MAP7D3.1   | 1.72E-38 | -0.32033 | 0.006 | 0.131 | 2.57E-34 | Neo-G | MAP7D3    |
| MPHOSPH10  | 1.75E-38 | 0.312987 | 0.363 | 0.223 | 2.62E-34 | Neo-G | MPHOSPH10 |
| OSTC.5     | 1.81E-38 | -0.51248 | 0.339 | 0.523 | 2.70E-34 | Neo-G | OSTC      |
| RBM47.7    | 1.96E-38 | -0.39595 | 0.006 | 0.13  | 2.93E-34 | Neo-G | RBM47     |
| TOPORS.4   | 2.01E-38 | 0.326317 | 0.297 | 0.164 | 3.00E-34 | Neo-G | TOPORS    |
| DHX29.5    | 2.06E-38 | 0.30207  | 0.434 | 0.295 | 3.08E-34 | Neo-G | DHX29     |
| BCL7B.3    | 2.12E-38 | 0.309817 | 0.452 | 0.306 | 3.17E-34 | Neo-G | BCL7B     |
| FTX.4      | 2.55E-38 | 0.305798 | 0.199 | 0.088 | 3.81E-34 | Neo-G | FTX       |
| NANOS1     | 2.82E-38 | 0.169587 | 0.059 | 0.011 | 4.21E-34 | Neo-G | NANOS1    |
| CPSF6.4    | 2.84E-38 | 0.292712 | 0.458 | 0.314 | 4.25E-34 | Neo-G | CPSF6     |
| CAND1.3    | 2.93E-38 | 0.340843 | 0.357 | 0.22  | 4.38E-34 | Neo-G | CAND1     |
| EVA1B.3    | 3.24E-38 | -0.23558 | 0.009 | 0.137 | 4.84E-34 | Neo-G | EVA1B     |
| LINC00205  | 3.32E-38 | 0.225294 | 0.096 | 0.027 | 4.97E-34 | Neo-G | LINC00205 |
| OXA1L.6    | 3.51E-38 | -0.53199 | 0.145 | 0.32  | 5.24E-34 | Neo-G | OXA1L     |
| DPM3.2     | 3.73E-38 | -0.44454 | 0.181 | 0.373 | 5.58E-34 | Neo-G | DPM3      |
| FAM120A.5  | 4.07E-38 | -0.3528  | 0.068 | 0.228 | 6.08E-34 | Neo-G | FAM120A   |
| SLC1A5.6   | 4.11E-38 | -0.44972 | 0.02  | 0.152 | 6.15E-34 | Neo-G | SLC1A5    |
| RPP25L.1   | 4.21E-38 | -0.3375  | 0.037 | 0.183 | 6.29E-34 | Neo-G | RPP25L    |
| UQCRFS1.3  | 4.37E-38 | 0.211346 | 0.687 | 0.527 | 6.53E-34 | Neo-G | UQCRFS1   |
| CTTNBP2.6  | 4.37E-38 | 0.311064 | 0.25  | 0.123 | 6.53E-34 | Neo-G | CTTNBP2   |
| MPP2.6     | 4.53E-38 | 0.257761 | 0.137 | 0.05  | 6.76E-34 | Neo-G | MPP2      |
| TMEM109.6  | 4.58E-38 | -0.48658 | 0.067 | 0.221 | 6.85E-34 | Neo-G | TMEM109   |
| MIF4GD.5   | 4.63E-38 | -0.44454 | 0.101 | 0.27  | 6.93E-34 | Neo-G | MIF4GD    |
| PTGER4.7   | 4.78E-38 | -0.52966 | 0.012 | 0.137 | 7.14E-34 | Neo-G | PTGER4    |
| RAD21.6    | 5.34E-38 | 0.268179 | 0.5   | 0.35  | 7.98E-34 | Neo-G | RAD21     |
| NNMT.5     | 5.51E-38 | -0.74113 | 0.035 | 0.173 | 8.24E-34 | Neo-G | NNMT      |
| MAPK8IP2.5 | 5.81E-38 | 0.276789 | 0.109 | 0.034 | 8.68E-34 | Neo-G | MAPK8IP2  |
| GNB4.5     | 6.17E-38 | -0.40733 | 0.085 | 0.251 | 9.22E-34 | Neo-G | GNB4      |
| RAB3IP.5   | 6.88E-38 | 0.354465 | 0.379 | 0.23  | 1.03E-33 | Neo-G | RAB3IP    |
| NFKBID.6   | 7.54E-38 | -0.53263 | 0.023 | 0.155 | 1.13E-33 | Neo-G | NFKBID    |

|             |           |           |        |        |                 |               |
|-------------|-----------|-----------|--------|--------|-----------------|---------------|
| MED24. 5    | 7. 81E-38 | 0. 352757 | 0. 279 | 0. 155 | 1. 17E-33 Neo-G | MED24         |
| RP11-390F   | 8. 00E-38 | -0. 29727 | 0. 016 | 0. 147 | 1. 20E-33 Neo-G | RP11-390P2. 4 |
| DOCK8. 7    | 8. 08E-38 | -0. 51274 | 0. 01  | 0. 134 | 1. 21E-33 Neo-G | DOCK8         |
| CDK5. 4     | 8. 85E-38 | 0. 325775 | 0. 357 | 0. 223 | 1. 32E-33 Neo-G | CDK5          |
| IL10RA. 7   | 8. 94E-38 | -0. 54869 | 0. 022 | 0. 152 | 1. 34E-33 Neo-G | IL10RA        |
| HMGB2. 7    | 9. 11E-38 | -0. 54179 | 0. 351 | 0. 512 | 1. 36E-33 Neo-G | HMGB2         |
| SIPA1. 7    | 9. 21E-38 | -0. 40353 | 0. 021 | 0. 154 | 1. 38E-33 Neo-G | SIPA1         |
| AP001347. 1 | 1. 02E-37 | 0. 21423  | 0. 079 | 0. 02  | 1. 52E-33 Neo-G | AP001347. 6   |
| ZCCHC17. 4  | 1. 05E-37 | 0. 27027  | 0. 474 | 0. 336 | 1. 57E-33 Neo-G | ZCCHC17       |
| PRAF2. 6    | 1. 11E-37 | 0. 347471 | 0. 426 | 0. 287 | 1. 66E-33 Neo-G | PRAF2         |
| MMADHC      | 1. 14E-37 | 0. 208067 | 0. 566 | 0. 42  | 1. 71E-33 Neo-G | MMADHC        |
| SELPLG. 5   | 1. 21E-37 | -0. 58681 | 0. 011 | 0. 135 | 1. 81E-33 Neo-G | SELPLG        |
| LPP. 1      | 1. 22E-37 | -0. 35522 | 0. 072 | 0. 235 | 1. 82E-33 Neo-G | LPP           |
| MLF2. 7     | 1. 24E-37 | 0. 14295  | 0. 773 | 0. 589 | 1. 85E-33 Neo-G | MLF2          |
| PPP1CA. 6   | 1. 26E-37 | -0. 4686  | 0. 43  | 0. 588 | 1. 89E-33 Neo-G | PPP1CA        |
| ISG20. 3    | 1. 30E-37 | -0. 54047 | 0. 011 | 0. 135 | 1. 95E-33 Neo-G | ISG20         |
| LIN7B. 5    | 1. 31E-37 | 0. 373634 | 0. 222 | 0. 11  | 1. 95E-33 Neo-G | LIN7B         |
| COL4A1. 4   | 1. 34E-37 | -0. 25117 | 0. 004 | 0. 124 | 2. 00E-33 Neo-G | COL4A1        |
| SRP72. 2    | 1. 37E-37 | 0. 20946  | 0. 585 | 0. 443 | 2. 05E-33 Neo-G | SRP72         |
| TNFAIP3. 7  | 1. 54E-37 | -0. 59708 | 0. 04  | 0. 178 | 2. 30E-33 Neo-G | TNFAIP3       |
| EIF3K. 5    | 1. 58E-37 | -0. 4177  | 0. 669 | 0. 769 | 2. 36E-33 Neo-G | EIF3K         |
| ENOSF1. 5   | 1. 86E-37 | -0. 30044 | 0. 012 | 0. 138 | 2. 77E-33 Neo-G | ENOSF1        |
| SCAI. 4     | 1. 87E-37 | 0. 294527 | 0. 172 | 0. 072 | 2. 79E-33 Neo-G | SCAI          |
| TMEM230. 1  | 1. 87E-37 | -0. 43626 | 0. 49  | 0. 632 | 2. 80E-33 Neo-G | TMEM230       |
| ENDOD1. 5   | 1. 91E-37 | -0. 31156 | 0. 024 | 0. 158 | 2. 86E-33 Neo-G | ENDOD1        |
| KPNA3. 3    | 1. 93E-37 | 0. 329358 | 0. 372 | 0. 241 | 2. 88E-33 Neo-G | KPNA3         |
| BBC3. 2     | 1. 93E-37 | 0. 312256 | 0. 17  | 0. 07  | 2. 89E-33 Neo-G | BBC3          |
| AZIN1. 2    | 2. 14E-37 | 0. 295276 | 0. 46  | 0. 314 | 3. 19E-33 Neo-G | AZIN1         |
| ERC1. 1     | 2. 23E-37 | 0. 350252 | 0. 221 | 0. 109 | 3. 33E-33 Neo-G | ERC1          |
| AAK1. 5     | 2. 34E-37 | 0. 313216 | 0. 402 | 0. 261 | 3. 50E-33 Neo-G | AAK1          |
| STK17B. 6   | 2. 52E-37 | -0. 53942 | 0. 019 | 0. 147 | 3. 77E-33 Neo-G | STK17B        |
| AAMDC. 5    | 2. 56E-37 | -0. 47191 | 0. 067 | 0. 223 | 3. 83E-33 Neo-G | AAMDC         |
| B3GALT2. 2  | 2. 57E-37 | 0. 226624 | 0. 096 | 0. 027 | 3. 84E-33 Neo-G | B3GALT2       |
| USP49. 1    | 2. 62E-37 | 0. 228099 | 0. 109 | 0. 034 | 3. 91E-33 Neo-G | USP49         |
| SMC3. 5     | 2. 71E-37 | 0. 316609 | 0. 407 | 0. 271 | 4. 05E-33 Neo-G | SMC3          |
| PCGF5. 4    | 2. 75E-37 | -0. 41377 | 0. 047 | 0. 195 | 4. 10E-33 Neo-G | PCGF5         |
| GLIPR2. 6   | 2. 76E-37 | -0. 47498 | 0. 116 | 0. 287 | 4. 12E-33 Neo-G | GLIPR2        |
| S100A8. 7   | 2. 79E-37 | -0. 80104 | 0. 06  | 0. 2   | 4. 18E-33 Neo-G | S100A8        |
| ZNF583. 5   | 2. 87E-37 | 0. 30319  | 0. 203 | 0. 094 | 4. 29E-33 Neo-G | ZNF583        |
| GM2A. 6     | 3. 24E-37 | -0. 43186 | 0. 024 | 0. 158 | 4. 85E-33 Neo-G | GM2A          |
| BZW1. 3     | 3. 30E-37 | 0. 148057 | 0. 668 | 0. 522 | 4. 93E-33 Neo-G | BZW1          |
| SF3B1. 4    | 3. 33E-37 | 0. 242567 | 0. 562 | 0. 421 | 4. 97E-33 Neo-G | SF3B1         |
| AP1B1. 7    | 3. 40E-37 | -0. 48077 | 0. 112 | 0. 277 | 5. 09E-33 Neo-G | AP1B1         |
| TNFAIP6. 5  | 3. 42E-37 | -0. 516   | 0. 004 | 0. 122 | 5. 11E-33 Neo-G | TNFAIP6       |
| GPR108. 4   | 3. 49E-37 | -0. 42    | 0. 11  | 0. 284 | 5. 21E-33 Neo-G | GPR108        |
| C7orf60. 1  | 3. 66E-37 | 0. 27909  | 0. 156 | 0. 061 | 5. 46E-33 Neo-G | C7orf60       |
| FBXL2       | 4. 08E-37 | 0. 168191 | 0. 095 | 0. 027 | 6. 10E-33 Neo-G | FBXL2         |
| FAM127B. 6  | 4. 23E-37 | 0. 262148 | 0. 43  | 0. 285 | 6. 32E-33 Neo-G | FAM127B       |
| SCP2. 3     | 4. 25E-37 | -0. 46408 | 0. 445 | 0. 6   | 6. 35E-33 Neo-G | SCP2          |
| ASAH2B      | 4. 67E-37 | 0. 204401 | 0. 09  | 0. 025 | 6. 97E-33 Neo-G | ASAH2B        |
| TMEM178B. 4 | 4. 70E-37 | 0. 275074 | 0. 131 | 0. 047 | 7. 02E-33 Neo-G | TMEM178B      |

|            |          |          |       |       |          |       |             |
|------------|----------|----------|-------|-------|----------|-------|-------------|
| ZNF638.5   | 4.82E-37 | 0.327881 | 0.372 | 0.237 | 7.21E-33 | Neo-G | ZNF638      |
| CA12.7     | 5.06E-37 | -0.36641 | 0.02  | 0.15  | 7.56E-33 | Neo-G | CA12        |
| CRTAP.7    | 5.13E-37 | -0.41518 | 0.091 | 0.254 | 7.67E-33 | Neo-G | CRTAP       |
| RENBP.6    | 5.60E-37 | -0.48729 | 0.02  | 0.149 | 8.37E-33 | Neo-G | RENBP       |
| SLC25A5.4  | 6.10E-37 | -0.41989 | 0.651 | 0.73  | 9.12E-33 | Neo-G | SLC25A5     |
| B4GALT1.7  | 6.30E-37 | -0.48908 | 0.011 | 0.134 | 9.42E-33 | Neo-G | B4GALT1     |
| C2.5       | 7.28E-37 | -0.55215 | 0.008 | 0.128 | 1.09E-32 | Neo-G | C2          |
| XAF1.2     | 7.65E-37 | -0.45234 | 0.004 | 0.121 | 1.14E-32 | Neo-G | XAF1        |
| PLEKHA8.2  | 7.73E-37 | 0.266318 | 0.141 | 0.054 | 1.16E-32 | Neo-G | PLEKHA8     |
| BCAR1.5    | 7.83E-37 | 0.353542 | 0.281 | 0.158 | 1.17E-32 | Neo-G | BCAR1       |
| STX11.7    | 9.53E-37 | -0.51318 | 0.008 | 0.127 | 1.42E-32 | Neo-G | STX11       |
| SMIM4.3    | 9.91E-37 | -0.39475 | 0.112 | 0.286 | 1.48E-32 | Neo-G | SMIM4       |
| ROB02.6    | 1.13E-36 | 0.366353 | 0.2   | 0.096 | 1.69E-32 | Neo-G | ROB02       |
| REEP2.5    | 1.19E-36 | 0.380868 | 0.311 | 0.189 | 1.78E-32 | Neo-G | REEP2       |
| HARS.2     | 1.20E-36 | 0.299793 | 0.401 | 0.267 | 1.79E-32 | Neo-G | HARS        |
| STX12      | 1.24E-36 | 0.212383 | 0.54  | 0.391 | 1.86E-32 | Neo-G | STX12       |
| TRNAU1AP.1 | 1.26E-36 | 0.317297 | 0.32  | 0.188 | 1.88E-32 | Neo-G | TRNAU1AP    |
| BTN3A2.3   | 1.28E-36 | -0.46046 | 0.028 | 0.161 | 1.91E-32 | Neo-G | BTN3A2      |
| SDSL.6     | 1.29E-36 | -0.38896 | 0.053 | 0.203 | 1.92E-32 | Neo-G | SDSL        |
| GAL.3      | 1.44E-36 | 0.39253  | 0.098 | 0.029 | 2.14E-32 | Neo-G | GAL         |
| SMARCD1.6  | 1.47E-36 | 0.366392 | 0.326 | 0.201 | 2.20E-32 | Neo-G | SMARCD1     |
| TMEM219.6  | 1.49E-36 | -0.45873 | 0.405 | 0.579 | 2.23E-32 | Neo-G | TMEM219     |
| RBPJ.6     | 1.52E-36 | 0.228318 | 0.61  | 0.452 | 2.27E-32 | Neo-G | RBPJ        |
| TLE4.4     | 1.53E-36 | -0.33778 | 0.038 | 0.179 | 2.28E-32 | Neo-G | TLE4        |
| RAC2.7     | 1.56E-36 | -0.54002 | 0.011 | 0.132 | 2.34E-32 | Neo-G | RAC2        |
| KALRN.5    | 1.73E-36 | 0.330996 | 0.185 | 0.084 | 2.59E-32 | Neo-G | KALRN       |
| P2RX4.6    | 1.84E-36 | -0.46365 | 0.049 | 0.192 | 2.75E-32 | Neo-G | P2RX4       |
| NR4A1.7    | 1.89E-36 | -0.61297 | 0.137 | 0.289 | 2.82E-32 | Neo-G | NR4A1       |
| C7orf73.4  | 1.96E-36 | 0.117689 | 0.695 | 0.537 | 2.93E-32 | Neo-G | C7orf73     |
| SLC25A19.2 | 2.12E-36 | -0.47511 | 0.044 | 0.184 | 3.16E-32 | Neo-G | SLC25A19    |
| CLCN4.6    | 2.33E-36 | 0.236249 | 0.129 | 0.046 | 3.49E-32 | Neo-G | CLCN4       |
| MBNL1.7    | 2.35E-36 | -0.4117  | 0.083 | 0.241 | 3.52E-32 | Neo-G | MBNL1       |
| FAM212B-A  | 2.37E-36 | 0.205252 | 0.073 | 0.017 | 3.54E-32 | Neo-G | FAM212B-AS1 |
| LRRTM2.6   | 2.39E-36 | 0.298629 | 0.197 | 0.091 | 3.57E-32 | Neo-G | LRRTM2      |
| NCF1.7     | 2.49E-36 | -0.48645 | 0.014 | 0.137 | 3.72E-32 | Neo-G | NCF1        |
| STAT1.4    | 2.49E-36 | -0.39397 | 0.086 | 0.247 | 3.73E-32 | Neo-G | STAT1       |
| VEZF1.6    | 2.69E-36 | 0.324764 | 0.353 | 0.224 | 4.02E-32 | Neo-G | VEZF1       |
| GGH.5      | 2.71E-36 | 0.31008  | 0.389 | 0.247 | 4.05E-32 | Neo-G | GGH         |
| SEPN1.5    | 2.79E-36 | -0.35893 | 0.071 | 0.226 | 4.17E-32 | Neo-G | SEPN1       |
| ARL10.4    | 2.87E-36 | 0.308531 | 0.177 | 0.078 | 4.29E-32 | Neo-G | ARL10       |
| STRA13.2   | 2.94E-36 | 0.191162 | 0.588 | 0.434 | 4.40E-32 | Neo-G | STRA13      |
| RORB.4     | 3.17E-36 | 0.231678 | 0.101 | 0.03  | 4.73E-32 | Neo-G | RORB        |
| PLEKHA4.6  | 3.60E-36 | -0.26933 | 0.015 | 0.14  | 5.39E-32 | Neo-G | PLEKHA4     |
| RRAS.1     | 3.63E-36 | -0.27179 | 0.003 | 0.118 | 5.42E-32 | Neo-G | RRAS        |
| ILK.3      | 3.76E-36 | -0.48422 | 0.202 | 0.385 | 5.62E-32 | Neo-G | ILK         |
| DCTN1.4    | 4.36E-36 | 0.313437 | 0.334 | 0.201 | 6.51E-32 | Neo-G | DCTN1       |
| ZFAS1.4    | 4.90E-36 | -0.39981 | 0.596 | 0.709 | 7.33E-32 | Neo-G | ZFAS1       |
| DDHD2.4    | 5.31E-36 | 0.332847 | 0.2   | 0.094 | 7.94E-32 | Neo-G | DDHD2       |
| HES6.6     | 5.31E-36 | 0.248442 | 0.435 | 0.268 | 7.94E-32 | Neo-G | HES6        |
| KIAA1033.5 | 5.78E-36 | -0.38994 | 0.094 | 0.256 | 8.63E-32 | Neo-G | KIAA1033    |
| DCAF7.4    | 5.94E-36 | 0.281112 | 0.439 | 0.306 | 8.88E-32 | Neo-G | DCAF7       |

|             |           |           |        |        |           |       |                |
|-------------|-----------|-----------|--------|--------|-----------|-------|----------------|
| MAP2K1. 7   | 6. 34E-36 | -0. 38906 | 0. 119 | 0. 287 | 9. 48E-32 | Neo-G | MAP2K1         |
| NR4A2. 7    | 6. 40E-36 | -0. 65837 | 0. 123 | 0. 267 | 9. 57E-32 | Neo-G | NR4A2          |
| JPH3        | 6. 43E-36 | 0. 105272 | 0. 048 | 0. 008 | 9. 61E-32 | Neo-G | JPH3           |
| RMDN3. 3    | 6. 79E-36 | -0. 34948 | 0. 093 | 0. 258 | 1. 01E-31 | Neo-G | RMDN3          |
| PHGDH. 6    | 7. 04E-36 | -0. 48134 | 0. 067 | 0. 216 | 1. 05E-31 | Neo-G | PHGDH          |
| HMHA1. 7    | 7. 27E-36 | -0. 47088 | 0. 005 | 0. 121 | 1. 09E-31 | Neo-G | HMHA1          |
| IPO9. 4     | 7. 46E-36 | 0. 322285 | 0. 346 | 0. 217 | 1. 11E-31 | Neo-G | IPO9           |
| ITPR2. 5    | 7. 60E-36 | -0. 35419 | 0. 019 | 0. 145 | 1. 14E-31 | Neo-G | ITPR2          |
| ENG. 7      | 7. 64E-36 | -0. 53006 | 0. 045 | 0. 18  | 1. 14E-31 | Neo-G | ENG            |
| CCDC64      | 7. 65E-36 | 0. 10289  | 0. 034 | 0. 003 | 1. 14E-31 | Neo-G | CCDC64         |
| NFIC. 3     | 7. 98E-36 | -0. 4348  | 0. 282 | 0. 452 | 1. 19E-31 | Neo-G | NFIC           |
| EEF1B2. 6   | 9. 48E-36 | -0. 39095 | 0. 723 | 0. 783 | 1. 42E-31 | Neo-G | EEF1B2         |
| ZDHHC24. 3  | 1. 03E-35 | -0. 31683 | 0. 055 | 0. 204 | 1. 54E-31 | Neo-G | ZDHHC24        |
| BMPR2. 5    | 1. 17E-35 | 0. 358922 | 0. 285 | 0. 164 | 1. 75E-31 | Neo-G | BMPR2          |
| CERS2. 2    | 1. 18E-35 | -0. 38472 | 0. 087 | 0. 249 | 1. 76E-31 | Neo-G | CERS2          |
| ABI1. 7     | 1. 24E-35 | -0. 44628 | 0. 097 | 0. 258 | 1. 86E-31 | Neo-G | ABI1           |
| UBE2R2. 4   | 1. 28E-35 | 0. 311862 | 0. 405 | 0. 272 | 1. 92E-31 | Neo-G | UBE2R2         |
| PSMD11. 4   | 1. 41E-35 | 0. 205891 | 0. 534 | 0. 392 | 2. 11E-31 | Neo-G | PSMD11         |
| ALKBH4. 5   | 1. 46E-35 | 0. 330523 | 0. 31  | 0. 184 | 2. 19E-31 | Neo-G | ALKBH4         |
| EPSTI1. 7   | 1. 59E-35 | -0. 51267 | 0. 016 | 0. 138 | 2. 37E-31 | Neo-G | EPSTI1         |
| SNRPE. 5    | 1. 72E-35 | 0. 118616 | 0. 723 | 0. 562 | 2. 57E-31 | Neo-G | SNRPE          |
| PDGFC. 4    | 1. 73E-35 | -0. 25972 | 0. 012 | 0. 132 | 2. 58E-31 | Neo-G | PDGFC          |
| RAP1B. 6    | 1. 80E-35 | -0. 46531 | 0. 273 | 0. 454 | 2. 69E-31 | Neo-G | RAP1B          |
| KHDC1. 6    | 2. 09E-35 | 0. 268391 | 0. 143 | 0. 055 | 3. 12E-31 | Neo-G | KHDC1          |
| TRIM33. 5   | 2. 23E-35 | 0. 324146 | 0. 294 | 0. 169 | 3. 33E-31 | Neo-G | TRIM33         |
| REEP4. 7    | 2. 27E-35 | -0. 40386 | 0. 044 | 0. 182 | 3. 40E-31 | Neo-G | REEP4          |
| BIVM. 5     | 2. 28E-35 | 0. 359474 | 0. 203 | 0. 099 | 3. 40E-31 | Neo-G | BIVM           |
| ZNF574. 4   | 2. 28E-35 | 0. 293045 | 0. 174 | 0. 076 | 3. 40E-31 | Neo-G | ZNF574         |
| ANXA2R. 6   | 2. 30E-35 | 0. 377932 | 0. 257 | 0. 139 | 3. 43E-31 | Neo-G | ANXA2R         |
| HIST1H2BK   | 2. 40E-35 | -0. 41941 | 0. 073 | 0. 224 | 3. 59E-31 | Neo-G | HIST1H2BK      |
| SEC11C. 5   | 2. 55E-35 | 0. 148149 | 0. 631 | 0. 481 | 3. 81E-31 | Neo-G | SEC11C         |
| ABCC8       | 2. 57E-35 | 0. 152724 | 0. 053 | 0. 009 | 3. 84E-31 | Neo-G | ABCC8          |
| YPEL1. 7    | 2. 66E-35 | 0. 365636 | 0. 181 | 0. 083 | 3. 98E-31 | Neo-G | YPEL1          |
| HSDL2. 1    | 2. 78E-35 | -0. 36221 | 0. 038 | 0. 175 | 4. 15E-31 | Neo-G | HSDL2          |
| HAMP. 7     | 2. 89E-35 | -0. 75893 | 0. 045 | 0. 175 | 4. 32E-31 | Neo-G | HAMP           |
| LRP1. 3     | 2. 90E-35 | -0. 46402 | 0. 194 | 0. 369 | 4. 34E-31 | Neo-G | LRP1           |
| PWAR6. 4    | 2. 98E-35 | 0. 276361 | 0. 152 | 0. 062 | 4. 45E-31 | Neo-G | PWAR6          |
| DCTPP1. 4   | 3. 11E-35 | 0. 243815 | 0. 455 | 0. 315 | 4. 65E-31 | Neo-G | DCTPP1         |
| PDE6D. 4    | 3. 16E-35 | 0. 316698 | 0. 302 | 0. 175 | 4. 73E-31 | Neo-G | PDE6D          |
| CDC34. 6    | 3. 24E-35 | 0. 382745 | 0. 342 | 0. 222 | 4. 85E-31 | Neo-G | CDC34          |
| KBTBD7. 5   | 3. 28E-35 | 0. 265516 | 0. 175 | 0. 076 | 4. 90E-31 | Neo-G | KBTBD7         |
| SCIN. 7     | 3. 31E-35 | -0. 67239 | 0. 037 | 0. 165 | 4. 95E-31 | Neo-G | SCIN           |
| REV1. 4     | 3. 42E-35 | 0. 328143 | 0. 276 | 0. 154 | 5. 11E-31 | Neo-G | REV1           |
| RP11-472N   | 3. 50E-35 | -0. 35378 | 0. 005 | 0. 12  | 5. 24E-31 | Neo-G | RP11-472N13. 3 |
| CHD6. 6     | 3. 98E-35 | 0. 330933 | 0. 359 | 0. 231 | 5. 95E-31 | Neo-G | CHD6           |
| BPTF. 5     | 4. 01E-35 | 0. 303751 | 0. 428 | 0. 296 | 6. 00E-31 | Neo-G | BPTF           |
| CDC42EP1. 4 | 4. 07E-35 | -0. 29712 | 0. 017 | 0. 141 | 6. 09E-31 | Neo-G | CDC42EP1       |
| LPAR5. 5    | 4. 34E-35 | -0. 46882 | 0. 004 | 0. 116 | 6. 48E-31 | Neo-G | LPAR5          |
| NTN4        | 4. 62E-35 | 0. 163925 | 0. 064 | 0. 014 | 6. 91E-31 | Neo-G | NTN4           |
| USP42. 5    | 4. 71E-35 | 0. 33074  | 0. 221 | 0. 11  | 7. 04E-31 | Neo-G | USP42          |
| ABAT. 7     | 4. 98E-35 | 0. 338377 | 0. 267 | 0. 146 | 7. 45E-31 | Neo-G | ABAT           |

|           |          |          |       |       |          |       |          |
|-----------|----------|----------|-------|-------|----------|-------|----------|
| NYAP2     | 5.12E-35 | 0.127072 | 0.049 | 0.008 | 7.65E-31 | Neo-G | NYAP2    |
| CPNE3.4   | 5.38E-35 | 0.262183 | 0.449 | 0.316 | 8.04E-31 | Neo-G | CPNE3    |
| KPNB1.6   | 5.54E-35 | 0.218392 | 0.576 | 0.432 | 8.28E-31 | Neo-G | KPNB1    |
| KIAA0232. | 5.55E-35 | 0.339445 | 0.254 | 0.139 | 8.30E-31 | Neo-G | KIAA0232 |
| CAT.6     | 6.19E-35 | -0.51552 | 0.155 | 0.323 | 9.25E-31 | Neo-G | CAT      |
| TRABD.7   | 6.50E-35 | -0.38866 | 0.112 | 0.277 | 9.71E-31 | Neo-G | TRABD    |
| TLR2.7    | 6.84E-35 | -0.50615 | 0.009 | 0.124 | 1.02E-30 | Neo-G | TLR2     |
| COMMD3.3  | 7.41E-35 | 0.22768  | 0.478 | 0.339 | 1.11E-30 | Neo-G | COMMD3   |
| SECISBP2. | 7.48E-35 | 0.310549 | 0.372 | 0.238 | 1.12E-30 | Neo-G | SECISBP2 |
| PPP2R5E.5 | 7.78E-35 | 0.347117 | 0.358 | 0.233 | 1.16E-30 | Neo-G | PPP2R5E  |
| DAZAP2.5  | 7.80E-35 | -0.46458 | 0.377 | 0.556 | 1.17E-30 | Neo-G | DAZAP2   |
| SOCS6.4   | 8.00E-35 | -0.39854 | 0.09  | 0.247 | 1.19E-30 | Neo-G | SOCS6    |
| REPIN1.7  | 8.30E-35 | 0.347461 | 0.387 | 0.26  | 1.24E-30 | Neo-G | REPIN1   |
| RAPGEF5.5 | 8.52E-35 | 0.136192 | 0.109 | 0.034 | 1.27E-30 | Neo-G | RAPGEF5  |
| ZNF331.7  | 8.54E-35 | -0.65597 | 0.186 | 0.331 | 1.28E-30 | Neo-G | ZNF331   |
| OST4.3    | 8.63E-35 | -0.34828 | 0.733 | 0.786 | 1.29E-30 | Neo-G | OST4     |
| PPP2R5A.1 | 9.34E-35 | -0.27748 | 0.009 | 0.125 | 1.40E-30 | Neo-G | PPP2R5A  |
| PPME1.5   | 9.65E-35 | 0.328392 | 0.288 | 0.168 | 1.44E-30 | Neo-G | PPME1    |
| GALM.6    | 9.76E-35 | -0.41714 | 0.017 | 0.138 | 1.46E-30 | Neo-G | GALM     |
| RASA4.2   | 1.06E-34 | 0.233168 | 0.133 | 0.049 | 1.58E-30 | Neo-G | RASA4    |
| CRB1.4    | 1.07E-34 | 0.278442 | 0.147 | 0.058 | 1.59E-30 | Neo-G | CRB1     |
| PIPOX.6   | 1.07E-34 | -0.28922 | 0.02  | 0.146 | 1.60E-30 | Neo-G | PIPOX    |
| FKBP2.3   | 1.14E-34 | -0.46702 | 0.463 | 0.605 | 1.70E-30 | Neo-G | FKBP2    |
| GNA15.7   | 1.17E-34 | -0.45724 | 0.008 | 0.121 | 1.75E-30 | Neo-G | GNA15    |
| MCM5.7    | 1.18E-34 | -0.44186 | 0.035 | 0.164 | 1.77E-30 | Neo-G | MCM5     |
| C5orf30.4 | 1.20E-34 | 0.274024 | 0.158 | 0.065 | 1.80E-30 | Neo-G | C5orf30  |
| LMNB1.6   | 1.23E-34 | 0.295788 | 0.259 | 0.136 | 1.83E-30 | Neo-G | LMNB1    |
| FRY       | 1.35E-34 | 0.186016 | 0.089 | 0.025 | 2.02E-30 | Neo-G | FRY      |
| IGSF3     | 1.37E-34 | 0.202099 | 0.095 | 0.029 | 2.05E-30 | Neo-G | IGSF3    |
| CNTNAP5   | 1.41E-34 | 0.118698 | 0.045 | 0.007 | 2.10E-30 | Neo-G | CNTNAP5  |
| EPB41.1   | 1.45E-34 | 0.22178  | 0.136 | 0.05  | 2.17E-30 | Neo-G | EPB41    |
| DEAF1.6   | 1.46E-34 | 0.366215 | 0.318 | 0.199 | 2.18E-30 | Neo-G | DEAF1    |
| USP1.6    | 1.57E-34 | 0.287499 | 0.378 | 0.244 | 2.34E-30 | Neo-G | USP1     |
| PTP4A3.4  | 1.60E-34 | 0.344786 | 0.173 | 0.077 | 2.39E-30 | Neo-G | PTP4A3   |
| SAMD9L.1  | 1.66E-34 | -0.36119 | 0.002 | 0.111 | 2.49E-30 | Neo-G | SAMD9L   |
| FAM111A.4 | 1.71E-34 | -0.35071 | 0.008 | 0.122 | 2.56E-30 | Neo-G | FAM111A  |
| C21orf62. | 1.79E-34 | -0.4095  | 0.039 | 0.172 | 2.68E-30 | Neo-G | C21orf62 |
| ZNF48.5   | 1.85E-34 | 0.330926 | 0.184 | 0.086 | 2.77E-30 | Neo-G | ZNF48    |
| SPHK1.6   | 1.88E-34 | -0.30478 | 0.006 | 0.119 | 2.81E-30 | Neo-G | SPHK1    |
| MFF.2     | 1.92E-34 | 0.182589 | 0.623 | 0.473 | 2.87E-30 | Neo-G | MFF      |
| FANCF.5   | 1.92E-34 | 0.314305 | 0.179 | 0.081 | 2.88E-30 | Neo-G | FANCF    |
| CRABP1    | 1.97E-34 | 0.218323 | 0.043 | 0.006 | 2.95E-30 | Neo-G | CRABP1   |
| JAM2.7    | 1.99E-34 | -0.38618 | 0.104 | 0.271 | 2.97E-30 | Neo-G | JAM2     |
| ATRNL1    | 2.13E-34 | 0.144997 | 0.062 | 0.013 | 3.19E-30 | Neo-G | ATRNL1   |
| ZNF548.2  | 2.35E-34 | 0.251073 | 0.148 | 0.059 | 3.52E-30 | Neo-G | ZNF548   |
| GARNL3    | 2.41E-34 | 0.218009 | 0.088 | 0.025 | 3.60E-30 | Neo-G | GARNL3   |
| RASSF5.7  | 2.45E-34 | -0.43041 | 0.015 | 0.132 | 3.65E-30 | Neo-G | RASSF5   |
| GDPD1.5   | 2.68E-34 | 0.281503 | 0.144 | 0.057 | 4.01E-30 | Neo-G | GDPD1    |
| TP53I13.5 | 2.74E-34 | -0.30394 | 0.098 | 0.262 | 4.09E-30 | Neo-G | TP53I13  |
| PHAX.4    | 2.81E-34 | 0.25163  | 0.42  | 0.291 | 4.19E-30 | Neo-G | PHAX     |
| RANBP1.6  | 2.83E-34 | 0.193221 | 0.745 | 0.557 | 4.23E-30 | Neo-G | RANBP1   |

|             |           |           |        |        |           |       |          |
|-------------|-----------|-----------|--------|--------|-----------|-------|----------|
| NAV1. 4     | 2. 88E-34 | 0. 338647 | 0. 267 | 0. 15  | 4. 30E-30 | Neo-G | NAV1     |
| COMMD7. 3   | 2. 96E-34 | 0. 276654 | 0. 519 | 0. 385 | 4. 42E-30 | Neo-G | COMMD7   |
| DPY30. 5    | 2. 98E-34 | 0. 147678 | 0. 621 | 0. 48  | 4. 45E-30 | Neo-G | DPY30    |
| AK4. 6      | 3. 02E-34 | -0. 36118 | 0. 053 | 0. 195 | 4. 51E-30 | Neo-G | AK4      |
| LUC7L. 4    | 3. 06E-34 | 0. 302968 | 0. 361 | 0. 231 | 4. 57E-30 | Neo-G | LUC7L    |
| RNASE1. 5   | 3. 13E-34 | -0. 87358 | 0. 053 | 0. 183 | 4. 68E-30 | Neo-G | RNASE1   |
| ANXA4. 5    | 3. 14E-34 | -0. 42635 | 0. 064 | 0. 21  | 4. 69E-30 | Neo-G | ANXA4    |
| DENND5B. 6  | 3. 32E-34 | 0. 323401 | 0. 183 | 0. 085 | 4. 96E-30 | Neo-G | DENND5B  |
| PRPF6. 5    | 3. 60E-34 | 0. 253441 | 0. 472 | 0. 338 | 5. 38E-30 | Neo-G | PRPF6    |
| BSN         | 3. 63E-34 | 0. 150789 | 0. 054 | 0. 01  | 5. 42E-30 | Neo-G | BSN      |
| HPCAL1. 5   | 3. 70E-34 | 0. 318249 | 0. 328 | 0. 196 | 5. 54E-30 | Neo-G | HPCAL1   |
| PTK2B. 5    | 3. 83E-34 | -0. 39694 | 0. 02  | 0. 14  | 5. 73E-30 | Neo-G | PTK2B    |
| ZFP14. 5    | 3. 91E-34 | 0. 30721  | 0. 205 | 0. 1   | 5. 85E-30 | Neo-G | ZFP14    |
| FBP1. 7     | 4. 46E-34 | -0. 47803 | 0. 014 | 0. 129 | 6. 66E-30 | Neo-G | FBP1     |
| FLNA. 5     | 5. 02E-34 | -0. 34735 | 0. 106 | 0. 268 | 7. 50E-30 | Neo-G | FLNA     |
| CAMKK2. 1   | 5. 11E-34 | 0. 27616  | 0. 149 | 0. 061 | 7. 63E-30 | Neo-G | CAMKK2   |
| SYK. 7      | 5. 18E-34 | -0. 45197 | 0. 007 | 0. 118 | 7. 74E-30 | Neo-G | SYK      |
| MFGE8. 4    | 5. 40E-34 | -0. 31051 | 0. 06  | 0. 206 | 8. 07E-30 | Neo-G | MFGE8    |
| DNAAF2. 6   | 5. 43E-34 | 0. 359358 | 0. 277 | 0. 16  | 8. 11E-30 | Neo-G | DNAAF2   |
| ACOT9. 7    | 5. 56E-34 | -0. 39257 | 0. 056 | 0. 197 | 8. 30E-30 | Neo-G | ACOT9    |
| CAMK2D. 4   | 5. 97E-34 | -0. 35531 | 0. 101 | 0. 261 | 8. 92E-30 | Neo-G | CAMK2D   |
| SHKBP1. 7   | 6. 00E-34 | -0. 37315 | 0. 097 | 0. 254 | 8. 96E-30 | Neo-G | SHKBP1   |
| CYTH4. 7    | 6. 33E-34 | -0. 48702 | 0. 011 | 0. 124 | 9. 46E-30 | Neo-G | CYTH4    |
| RRN3. 2     | 6. 34E-34 | 0. 289166 | 0. 236 | 0. 121 | 9. 47E-30 | Neo-G | RRN3     |
| L3HYPDH. 2  | 6. 61E-34 | -0. 2576  | 0. 017 | 0. 138 | 9. 87E-30 | Neo-G | L3HYPDH  |
| SHC1. 1     | 6. 61E-34 | -0. 32181 | 0. 02  | 0. 142 | 9. 88E-30 | Neo-G | SHC1     |
| NUDT5. 4    | 6. 65E-34 | -0. 41622 | 0. 15  | 0. 325 | 9. 94E-30 | Neo-G | NUDT5    |
| MAF. 6      | 7. 55E-34 | -0. 47204 | 0. 025 | 0. 148 | 1. 13E-29 | Neo-G | MAF      |
| MAGI2. 6    | 7. 86E-34 | 0. 28407  | 0. 199 | 0. 094 | 1. 17E-29 | Neo-G | MAGI2    |
| LYG2        | 8. 06E-34 | 0. 159037 | 0. 063 | 0. 014 | 1. 21E-29 | Neo-G | LYG2     |
| KIAA1191. 8 | 8. 14E-34 | 0. 290805 | 0. 378 | 0. 25  | 1. 22E-29 | Neo-G | KIAA1191 |
| LACTB2. 2   | 8. 14E-34 | -0. 40934 | 0. 035 | 0. 165 | 1. 22E-29 | Neo-G | LACTB2   |
| ABHD2. 3    | 8. 31E-34 | -0. 36517 | 0. 091 | 0. 246 | 1. 24E-29 | Neo-G | ABHD2    |
| TMC6. 7     | 8. 70E-34 | -0. 43634 | 0. 01  | 0. 123 | 1. 30E-29 | Neo-G | TMC6     |
| GPR155. 6   | 8. 92E-34 | 0. 309233 | 0. 298 | 0. 173 | 1. 33E-29 | Neo-G | GPR155   |
| EBI3. 6     | 9. 57E-34 | -0. 4736  | 0. 002 | 0. 108 | 1. 43E-29 | Neo-G | EBI3     |
| ADAMTS10    | 9. 79E-34 | 0. 201307 | 0. 108 | 0. 036 | 1. 46E-29 | Neo-G | ADAMTS10 |
| DSTN. 7     | 1. 02E-33 | 0. 112157 | 0. 807 | 0. 595 | 1. 52E-29 | Neo-G | DSTN     |
| RNF10. 4    | 1. 04E-33 | 0. 294104 | 0. 441 | 0. 319 | 1. 55E-29 | Neo-G | RNF10    |
| ALG3. 2     | 1. 05E-33 | -0. 37445 | 0. 091 | 0. 249 | 1. 57E-29 | Neo-G | ALG3     |
| YAF2. 4     | 1. 08E-33 | 0. 205301 | 0. 472 | 0. 331 | 1. 62E-29 | Neo-G | YAF2     |
| ZNF429. 6   | 1. 11E-33 | 0. 31242  | 0. 226 | 0. 117 | 1. 65E-29 | Neo-G | ZNF429   |
| NDUFB6. 2   | 1. 19E-33 | 0. 164277 | 0. 624 | 0. 482 | 1. 78E-29 | Neo-G | NDUFB6   |
| GTF2IRD2. 1 | 1. 25E-33 | 0. 287506 | 0. 213 | 0. 104 | 1. 87E-29 | Neo-G | GTF2IRD2 |
| CAMSAP1. 2  | 1. 35E-33 | 0. 309541 | 0. 168 | 0. 074 | 2. 01E-29 | Neo-G | CAMSAP1  |
| WHSC1. 6    | 1. 41E-33 | 0. 341277 | 0. 255 | 0. 141 | 2. 11E-29 | Neo-G | WHSC1    |
| LYPD1. 5    | 1. 43E-33 | -0. 35849 | 0. 064 | 0. 212 | 2. 14E-29 | Neo-G | LYPD1    |
| SMCR5. 5    | 1. 46E-33 | 0. 311462 | 0. 178 | 0. 081 | 2. 18E-29 | Neo-G | SMCR5    |
| HNRNPU. 2   | 1. 61E-33 | 0. 192115 | 0. 66  | 0. 514 | 2. 40E-29 | Neo-G | HNRNPU   |
| SRSF12. 5   | 1. 65E-33 | 0. 302779 | 0. 151 | 0. 063 | 2. 46E-29 | Neo-G | SRSF12   |
| CCDC14. 4   | 1. 69E-33 | 0. 331457 | 0. 336 | 0. 214 | 2. 52E-29 | Neo-G | CCDC14   |

|             |           |           |        |        |           |       |                 |
|-------------|-----------|-----------|--------|--------|-----------|-------|-----------------|
| COPS5. 2    | 1. 70E-33 | 0. 240705 | 0. 526 | 0. 396 | 2. 53E-29 | Neo-G | COPS5           |
| RBBP4. 3    | 1. 74E-33 | 0. 216538 | 0. 551 | 0. 416 | 2. 60E-29 | Neo-G | RBBP4           |
| VASP. 7     | 1. 78E-33 | -0. 40399 | 0. 102 | 0. 257 | 2. 67E-29 | Neo-G | VASP            |
| EGR2. 4     | 1. 82E-33 | -0. 45441 | 0. 066 | 0. 207 | 2. 72E-29 | Neo-G | EGR2            |
| PABPC5      | 1. 89E-33 | 0. 134555 | 0. 053 | 0. 01  | 2. 82E-29 | Neo-G | PABPC5          |
| PPM1B. 3    | 1. 97E-33 | 0. 286046 | 0. 423 | 0. 285 | 2. 95E-29 | Neo-G | PPM1B           |
| FRMD4B. 7   | 1. 99E-33 | -0. 51757 | 0. 044 | 0. 173 | 2. 98E-29 | Neo-G | FRMD4B          |
| CWC15. 4    | 2. 00E-33 | 0. 134841 | 0. 617 | 0. 471 | 2. 99E-29 | Neo-G | CWC15           |
| EIF5. 2     | 2. 04E-33 | 0. 159672 | 0. 789 | 0. 633 | 3. 05E-29 | Neo-G | EIF5            |
| GAL3ST3. 5  | 2. 11E-33 | 0. 30367  | 0. 13  | 0. 051 | 3. 15E-29 | Neo-G | GAL3ST3         |
| RRAGB. 4    | 2. 15E-33 | 0. 295534 | 0. 204 | 0. 1   | 3. 21E-29 | Neo-G | RRAGB           |
| FGF1. 5     | 2. 19E-33 | -0. 33192 | 0. 001 | 0. 105 | 3. 27E-29 | Neo-G | FGF1            |
| LSM5. 4     | 2. 38E-33 | 0. 144294 | 0. 642 | 0. 491 | 3. 56E-29 | Neo-G | LSM5            |
| MT1G. 6     | 2. 40E-33 | -0. 72629 | 0. 022 | 0. 141 | 3. 58E-29 | Neo-G | MT1G            |
| ZMAT2       | 2. 83E-33 | 0. 209675 | 0. 54  | 0. 406 | 4. 23E-29 | Neo-G | ZMAT2           |
| CCSAP. 3    | 2. 89E-33 | 0. 295747 | 0. 189 | 0. 089 | 4. 31E-29 | Neo-G | CCSAP           |
| KIF1B. 6    | 3. 13E-33 | 0. 321131 | 0. 41  | 0. 28  | 4. 68E-29 | Neo-G | KIF1B           |
| ACTR1A. 3   | 3. 37E-33 | 0. 259106 | 0. 399 | 0. 263 | 5. 03E-29 | Neo-G | ACTR1A          |
| HLA-F. 7    | 3. 42E-33 | -0. 50107 | 0. 035 | 0. 16  | 5. 11E-29 | Neo-G | HLA-F           |
| RIN3. 7     | 3. 59E-33 | -0. 441   | 0. 014 | 0. 127 | 5. 37E-29 | Neo-G | RIN3            |
| FGF14. 6    | 3. 66E-33 | 0. 356785 | 0. 167 | 0. 075 | 5. 47E-29 | Neo-G | FGF14           |
| GPR1        | 3. 69E-33 | 0. 220928 | 0. 075 | 0. 019 | 5. 51E-29 | Neo-G | GPR1            |
| RP11-277F   | 3. 70E-33 | 0. 28589  | 0. 145 | 0. 058 | 5. 52E-29 | Neo-G | RP11-277P12. 20 |
| LPIN1. 4    | 3. 82E-33 | 0. 303854 | 0. 238 | 0. 125 | 5. 71E-29 | Neo-G | LPIN1           |
| NCALD. 6    | 3. 86E-33 | 0. 29803  | 0. 223 | 0. 112 | 5. 77E-29 | Neo-G | NCALD           |
| BCAN. 7     | 3. 88E-33 | -0. 61233 | 0. 142 | 0. 292 | 5. 80E-29 | Neo-G | BCAN            |
| ACAT2. 6    | 3. 98E-33 | 0. 280732 | 0. 395 | 0. 263 | 5. 95E-29 | Neo-G | ACAT2           |
| EIF1AX. 4   | 4. 02E-33 | 0. 131077 | 0. 683 | 0. 545 | 6. 00E-29 | Neo-G | EIF1AX          |
| CALCOCO2. 4 | 4. 19E-33 | -0. 36435 | 0. 064 | 0. 209 | 6. 26E-29 | Neo-G | CALCOCO2        |
| UTRN. 4     | 4. 28E-33 | -0. 29807 | 0. 01  | 0. 122 | 6. 40E-29 | Neo-G | UTRN            |
| IFT81. 5    | 4. 50E-33 | 0. 358831 | 0. 257 | 0. 147 | 6. 72E-29 | Neo-G | IFT81           |
| MILR1. 7    | 4. 71E-33 | -0. 49657 | 0. 004 | 0. 11  | 7. 04E-29 | Neo-G | MILR1           |
| ACTN1. 4    | 4. 71E-33 | -0. 36594 | 0. 112 | 0. 272 | 7. 04E-29 | Neo-G | ACTN1           |
| TRMT10C. 4  | 5. 10E-33 | 0. 304192 | 0. 361 | 0. 236 | 7. 62E-29 | Neo-G | TRMT10C         |
| NOL3. 7     | 5. 23E-33 | 0. 36692  | 0. 269 | 0. 153 | 7. 81E-29 | Neo-G | NOL3            |
| UQCRB. 5    | 5. 38E-33 | 0. 12154  | 0. 826 | 0. 66  | 8. 04E-29 | Neo-G | UQCRB           |
| CACNG4. 4   | 5. 67E-33 | 0. 229186 | 0. 116 | 0. 041 | 8. 48E-29 | Neo-G | CACNG4          |
| CLEC5A. 7   | 5. 88E-33 | -0. 50906 | 0. 005 | 0. 111 | 8. 78E-29 | Neo-G | CLEC5A          |
| ALCAM. 6    | 5. 91E-33 | -0. 33913 | 0. 066 | 0. 212 | 8. 83E-29 | Neo-G | ALCAM           |
| EFCAB14. 3  | 6. 18E-33 | -0. 31552 | 0. 071 | 0. 219 | 9. 24E-29 | Neo-G | EFCAB14         |
| PLOD1. 3    | 6. 22E-33 | -0. 32702 | 0. 062 | 0. 207 | 9. 30E-29 | Neo-G | PLOD1           |
| DUSP6. 1    | 6. 57E-33 | -0. 42958 | 0. 108 | 0. 261 | 9. 82E-29 | Neo-G | DUSP6           |
| SUSD3. 6    | 6. 61E-33 | -0. 46921 | 0. 002 | 0. 107 | 9. 88E-29 | Neo-G | SUSD3           |
| SNRNP70. 4  | 6. 91E-33 | 0. 237285 | 0. 595 | 0. 46  | 1. 03E-28 | Neo-G | SNRNP70         |
| NBPF1. 7    | 7. 10E-33 | 0. 361971 | 0. 34  | 0. 223 | 1. 06E-28 | Neo-G | NBPF1           |
| HECTD4. 3   | 7. 12E-33 | 0. 315662 | 0. 175 | 0. 08  | 1. 06E-28 | Neo-G | HECTD4          |
| TAGAP. 7    | 7. 25E-33 | -0. 51034 | 0. 005 | 0. 112 | 1. 08E-28 | Neo-G | TAGAP           |
| IFI27. 2    | 7. 31E-33 | -0. 60758 | 0. 013 | 0. 125 | 1. 09E-28 | Neo-G | IFI27           |
| TPRKB. 4    | 7. 48E-33 | 0. 24834  | 0. 479 | 0. 349 | 1. 12E-28 | Neo-G | TPRKB           |
| TMEM134. 4  | 7. 64E-33 | -0. 37937 | 0. 155 | 0. 328 | 1. 14E-28 | Neo-G | TMEM134         |
| PSMD1. 3    | 7. 98E-33 | 0. 265069 | 0. 436 | 0. 309 | 1. 19E-28 | Neo-G | PSMD1           |

|            |           |           |        |        |           |       |                |
|------------|-----------|-----------|--------|--------|-----------|-------|----------------|
| REC8. 4    | 7. 99E-33 | 0. 243551 | 0. 159 | 0. 067 | 1. 19E-28 | Neo-G | REC8           |
| ARL2BP. 4  | 8. 09E-33 | 0. 228885 | 0. 518 | 0. 391 | 1. 21E-28 | Neo-G | ARL2BP         |
| NUPL2. 3   | 8. 27E-33 | 0. 235708 | 0. 39  | 0. 254 | 1. 24E-28 | Neo-G | NUPL2          |
| ASCL1. 6   | 8. 92E-33 | 0. 404046 | 0. 295 | 0. 172 | 1. 33E-28 | Neo-G | ASCL1          |
| CAV1. 7    | 9. 08E-33 | -0. 84789 | 0. 023 | 0. 139 | 1. 36E-28 | Neo-G | CAV1           |
| NANS. 7    | 9. 36E-33 | -0. 51513 | 0. 214 | 0. 377 | 1. 40E-28 | Neo-G | NANS           |
| RP11-195F  | 9. 46E-33 | 0. 205964 | 0. 18  | 0. 08  | 1. 41E-28 | Neo-G | RP11-195F19. 5 |
| P4HB. 4    | 1. 03E-32 | -0. 34937 | 0. 483 | 0. 583 | 1. 54E-28 | Neo-G | P4HB           |
| CHST7. 5   | 1. 04E-32 | -0. 23038 | 0. 01  | 0. 121 | 1. 56E-28 | Neo-G | CHST7          |
| TMEM119. 5 | 1. 04E-32 | -0. 51956 | 0. 009 | 0. 117 | 1. 56E-28 | Neo-G | TMEM119        |
| ZNF737     | 1. 09E-32 | 0. 177107 | 0. 083 | 0. 024 | 1. 62E-28 | Neo-G | ZNF737         |
| DIRAS3. 6  | 1. 16E-32 | -0. 55134 | 0. 02  | 0. 136 | 1. 73E-28 | Neo-G | DIRAS3         |
| RBM15B. 5  | 1. 19E-32 | 0. 326978 | 0. 272 | 0. 159 | 1. 78E-28 | Neo-G | RBM15B         |
| CARKD. 5   | 1. 37E-32 | 0. 278953 | 0. 228 | 0. 118 | 2. 05E-28 | Neo-G | CARKD          |
| NR4A3. 6   | 1. 39E-32 | -0. 53414 | 0. 04  | 0. 164 | 2. 07E-28 | Neo-G | NR4A3          |
| LCP2. 7    | 1. 60E-32 | -0. 46473 | 0. 015 | 0. 127 | 2. 39E-28 | Neo-G | LCP2           |
| INPPL1. 3  | 1. 62E-32 | -0. 27489 | 0. 016 | 0. 132 | 2. 41E-28 | Neo-G | INPPL1         |
| SNRNP200.  | 1. 71E-32 | 0. 310793 | 0. 397 | 0. 27  | 2. 55E-28 | Neo-G | SNRNP200       |
| TRIM38. 6  | 1. 71E-32 | -0. 40324 | 0. 005 | 0. 11  | 2. 56E-28 | Neo-G | TRIM38         |
| ATL3. 4    | 1. 74E-32 | -0. 30651 | 0. 028 | 0. 151 | 2. 59E-28 | Neo-G | ATL3           |
| FZD7. 4    | 1. 79E-32 | -0. 22143 | 0. 004 | 0. 109 | 2. 68E-28 | Neo-G | FZD7           |
| CDC42BPA.  | 2. 07E-32 | 0. 326987 | 0. 28  | 0. 167 | 3. 10E-28 | Neo-G | CDC42BPA       |
| PCDH11X    | 2. 34E-32 | 0. 19512  | 0. 075 | 0. 02  | 3. 50E-28 | Neo-G | PCDH11X        |
| MVB12B. 6  | 2. 37E-32 | 0. 249123 | 0. 191 | 0. 089 | 3. 55E-28 | Neo-G | MVB12B         |
| SH2B3. 7   | 2. 42E-32 | -0. 39189 | 0. 011 | 0. 12  | 3. 62E-28 | Neo-G | SH2B3          |
| NKRF       | 2. 45E-32 | 0. 254649 | 0. 146 | 0. 06  | 3. 66E-28 | Neo-G | NKRF           |
| SDCBP. 4   | 2. 48E-32 | -0. 39459 | 0. 65  | 0. 738 | 3. 71E-28 | Neo-G | SDCBP          |
| MAPKAPK5-  | 2. 52E-32 | 0. 266689 | 0. 335 | 0. 21  | 3. 77E-28 | Neo-G | MAPKAPK5-AS1   |
| SRSF11. 3  | 2. 78E-32 | 0. 170166 | 0. 661 | 0. 525 | 4. 16E-28 | Neo-G | SRSF11         |
| LRRC49. 3  | 2. 80E-32 | 0. 252533 | 0. 13  | 0. 05  | 4. 18E-28 | Neo-G | LRRC49         |
| RHOJ. 5    | 3. 10E-32 | -0. 22598 | 0. 005 | 0. 111 | 4. 63E-28 | Neo-G | RHOJ           |
| ABCC3. 3   | 3. 12E-32 | -0. 36972 | 0. 005 | 0. 111 | 4. 67E-28 | Neo-G | ABCC3          |
| HLA-DQB2.  | 3. 29E-32 | -0. 66237 | 0. 005 | 0. 108 | 4. 92E-28 | Neo-G | HLA-DQB2       |
| CYR61. 5   | 3. 30E-32 | -0. 58063 | 0. 053 | 0. 182 | 4. 93E-28 | Neo-G | CYR61          |
| LRRN1. 6   | 3. 78E-32 | 0. 270766 | 0. 199 | 0. 095 | 5. 65E-28 | Neo-G | LRRN1          |
| PABPC1. 5  | 3. 85E-32 | -0. 33485 | 0. 683 | 0. 752 | 5. 75E-28 | Neo-G | PABPC1         |
| CADPS. 5   | 4. 05E-32 | 0. 147181 | 0. 106 | 0. 035 | 6. 05E-28 | Neo-G | CADPS          |
| SNTG1. 6   | 4. 50E-32 | 0. 239167 | 0. 258 | 0. 14  | 6. 73E-28 | Neo-G | SNTG1          |
| PLBD1. 7   | 4. 57E-32 | -0. 38344 | 0. 003 | 0. 105 | 6. 83E-28 | Neo-G | PLBD1          |
| LILRB1. 7  | 4. 64E-32 | -0. 42165 | 0. 002 | 0. 103 | 6. 94E-28 | Neo-G | LILRB1         |
| RFFL. 7    | 4. 68E-32 | -0. 3041  | 0. 047 | 0. 179 | 7. 00E-28 | Neo-G | RFFL           |
| PDIA3. 7   | 4. 89E-32 | -0. 34942 | 0. 485 | 0. 595 | 7. 30E-28 | Neo-G | PDIA3          |
| AP3S1. 3   | 5. 30E-32 | 0. 192599 | 0. 543 | 0. 413 | 7. 92E-28 | Neo-G | AP3S1          |
| SDC4. 2    | 5. 69E-32 | -0. 32372 | 0. 004 | 0. 107 | 8. 50E-28 | Neo-G | SDC4           |
| TFRC. 6    | 5. 70E-32 | -0. 44926 | 0. 083 | 0. 225 | 8. 52E-28 | Neo-G | TFRC           |
| TNFRSF14.  | 5. 98E-32 | -0. 43455 | 0. 016 | 0. 127 | 8. 93E-28 | Neo-G | TNFRSF14       |
| CYTL1. 6   | 6. 73E-32 | -0. 54872 | 0. 013 | 0. 122 | 1. 01E-27 | Neo-G | CYTL1          |
| MED21. 3   | 7. 28E-32 | 0. 275756 | 0. 321 | 0. 197 | 1. 09E-27 | Neo-G | MED21          |
| GBE1. 4    | 7. 40E-32 | -0. 40941 | 0. 063 | 0. 2   | 1. 11E-27 | Neo-G | GBE1           |
| CNIH1. 3   | 7. 41E-32 | -0. 43841 | 0. 214 | 0. 392 | 1. 11E-27 | Neo-G | CNIH1          |
| CSRP1. 4   | 7. 47E-32 | -0. 48302 | 0. 104 | 0. 254 | 1. 12E-27 | Neo-G | CSRP1          |



|             |           |           |        |        |           |       |             |
|-------------|-----------|-----------|--------|--------|-----------|-------|-------------|
| POLR2K. 3   | 7. 69E-32 | 0. 153327 | 0. 619 | 0. 473 | 1. 15E-27 | Neo-G | POLR2K      |
| IL10. 7     | 7. 74E-32 | -0. 55735 | 0. 011 | 0. 118 | 1. 16E-27 | Neo-G | IL10        |
| STK25. 6    | 7. 89E-32 | 0. 318738 | 0. 409 | 0. 289 | 1. 18E-27 | Neo-G | STK25       |
| PSMD14. 4   | 8. 03E-32 | 0. 145793 | 0. 588 | 0. 452 | 1. 20E-27 | Neo-G | PSMD14      |
| GLUD1. 4    | 8. 10E-32 | -0. 41202 | 0. 115 | 0. 264 | 1. 21E-27 | Neo-G | GLUD1       |
| AHNAK. 3    | 8. 23E-32 | -0. 34894 | 0. 017 | 0. 13  | 1. 23E-27 | Neo-G | AHNAK       |
| PIGP. 1     | 8. 29E-32 | -0. 4104  | 0. 095 | 0. 246 | 1. 24E-27 | Neo-G | PIGP        |
| ZYX. 7      | 8. 51E-32 | -0. 37795 | 0. 248 | 0. 42  | 1. 27E-27 | Neo-G | ZYX         |
| LRRC25. 7   | 9. 06E-32 | -0. 42766 | 0. 002 | 0. 103 | 1. 35E-27 | Neo-G | LRRC25      |
| CHP1. 5     | 9. 12E-32 | -0. 37204 | 0. 1   | 0. 251 | 1. 36E-27 | Neo-G | CHP1        |
| SLC50A1. 6  | 9. 56E-32 | -0. 41544 | 0. 05  | 0. 182 | 1. 43E-27 | Neo-G | SLC50A1     |
| PRDM1. 7    | 1. 02E-31 | -0. 42977 | 0. 007 | 0. 111 | 1. 52E-27 | Neo-G | PRDM1       |
| ZCCHC24. 5  | 1. 07E-31 | -0. 30818 | 0. 006 | 0. 111 | 1. 61E-27 | Neo-G | ZCCHC24     |
| ORMDL2. 5   | 1. 09E-31 | -0. 47211 | 0. 132 | 0. 289 | 1. 63E-27 | Neo-G | ORMDL2      |
| KLHDC3. 5   | 1. 20E-31 | 0. 232514 | 0. 473 | 0. 349 | 1. 80E-27 | Neo-G | KLHDC3      |
| SPAST. 5    | 1. 39E-31 | 0. 347967 | 0. 2   | 0. 101 | 2. 08E-27 | Neo-G | SPAST       |
| ARHGAP30. 1 | 1. 42E-31 | -0. 41591 | 0. 004 | 0. 105 | 2. 12E-27 | Neo-G | ARHGAP30    |
| RANBP6. 3   | 1. 65E-31 | 0. 247135 | 0. 144 | 0. 059 | 2. 47E-27 | Neo-G | RANBP6      |
| CCT3. 4     | 1. 92E-31 | 0. 118806 | 0. 708 | 0. 562 | 2. 87E-27 | Neo-G | CCT3        |
| GPR162. 5   | 2. 04E-31 | 0. 328724 | 0. 187 | 0. 092 | 3. 05E-27 | Neo-G | GPR162      |
| RBAK-RBAK   | 2. 20E-31 | 0. 286816 | 0. 189 | 0. 09  | 3. 28E-27 | Neo-G | RBAK-RBAKDN |
| GPX3. 6     | 2. 35E-31 | -0. 48067 | 0. 042 | 0. 166 | 3. 51E-27 | Neo-G | GPX3        |
| HADHB. 3    | 2. 37E-31 | -0. 42009 | 0. 304 | 0. 48  | 3. 54E-27 | Neo-G | HADHB       |
| PLEKH02. 7  | 2. 57E-31 | -0. 3579  | 0. 009 | 0. 113 | 3. 84E-27 | Neo-G | PLEKH02     |
| FKBP7. 3    | 2. 60E-31 | 0. 284949 | 0. 176 | 0. 081 | 3. 89E-27 | Neo-G | FKBP7       |
| HINT3. 4    | 2. 79E-31 | 0. 297    | 0. 305 | 0. 186 | 4. 17E-27 | Neo-G | HINT3       |
| GALK1. 5    | 2. 91E-31 | -0. 34467 | 0. 076 | 0. 22  | 4. 35E-27 | Neo-G | GALK1       |
| PRKRIP1. 5  | 2. 93E-31 | 0. 309565 | 0. 346 | 0. 228 | 4. 38E-27 | Neo-G | PRKRIP1     |
| WDR86. 2    | 2. 97E-31 | 0. 295098 | 0. 104 | 0. 036 | 4. 44E-27 | Neo-G | WDR86       |
| GNAI3. 4    | 3. 12E-31 | 0. 22342  | 0. 511 | 0. 379 | 4. 67E-27 | Neo-G | GNAI3       |
| ELMO1. 5    | 3. 14E-31 | 0. 153144 | 0. 321 | 0. 174 | 4. 70E-27 | Neo-G | ELMO1       |
| TBC1D14. 4  | 3. 16E-31 | 0. 270551 | 0. 278 | 0. 158 | 4. 72E-27 | Neo-G | TBC1D14     |
| CCDC12. 3   | 3. 34E-31 | 0. 192699 | 0. 549 | 0. 416 | 5. 00E-27 | Neo-G | CCDC12      |
| LAMB2. 3    | 3. 47E-31 | -0. 25245 | 0. 005 | 0. 106 | 5. 19E-27 | Neo-G | LAMB2       |
| ECHDC2. 3   | 3. 50E-31 | -0. 35062 | 0. 065 | 0. 203 | 5. 23E-27 | Neo-G | ECHDC2      |
| GUK1. 4     | 3. 56E-31 | 0. 145873 | 0. 848 | 0. 686 | 5. 31E-27 | Neo-G | GUK1        |
| ETS2. 7     | 3. 59E-31 | -0. 48913 | 0. 086 | 0. 222 | 5. 36E-27 | Neo-G | ETS2        |
| DACT3. 5    | 4. 31E-31 | 0. 243781 | 0. 156 | 0. 067 | 6. 45E-27 | Neo-G | DACT3       |
| N4BP2. 3    | 4. 51E-31 | 0. 317853 | 0. 207 | 0. 106 | 6. 74E-27 | Neo-G | N4BP2       |
| SCAND1. 4   | 5. 00E-31 | 0. 208147 | 0. 723 | 0. 552 | 7. 48E-27 | Neo-G | SCAND1      |
| ORAI1. 3    | 5. 13E-31 | -0. 23576 | 0. 022 | 0. 137 | 7. 67E-27 | Neo-G | ORAI1       |
| PCDHB16. 5  | 5. 15E-31 | 0. 337357 | 0. 234 | 0. 128 | 7. 70E-27 | Neo-G | PCDHB16     |
| XRN2. 3     | 5. 19E-31 | 0. 202506 | 0. 58  | 0. 443 | 7. 76E-27 | Neo-G | XRN2        |
| DHRS4L2. 2  | 5. 29E-31 | -0. 37483 | 0. 119 | 0. 279 | 7. 90E-27 | Neo-G | DHRS4L2     |
| ICA1. 3     | 5. 42E-31 | 0. 222986 | 0. 207 | 0. 102 | 8. 09E-27 | Neo-G | ICA1        |
| NOC2L. 5    | 5. 61E-31 | 0. 269139 | 0. 424 | 0. 299 | 8. 39E-27 | Neo-G | NOC2L       |
| HLA-DOA. 5  | 5. 63E-31 | -0. 43964 | 0. 005 | 0. 105 | 8. 42E-27 | Neo-G | HLA-DOA     |
| MCF2L. 5    | 5. 79E-31 | 0. 268292 | 0. 183 | 0. 085 | 8. 65E-27 | Neo-G | MCF2L       |
| FBXW7. 4    | 5. 86E-31 | 0. 354029 | 0. 218 | 0. 116 | 8. 76E-27 | Neo-G | FBXW7       |
| SLC2A6. 3   | 6. 11E-31 | 0. 269938 | 0. 145 | 0. 062 | 9. 13E-27 | Neo-G | SLC2A6      |
| STX1B       | 6. 17E-31 | 0. 164308 | 0. 065 | 0. 016 | 9. 22E-27 | Neo-G | STX1B       |

|             |           |           |        |        |           |       |                |
|-------------|-----------|-----------|--------|--------|-----------|-------|----------------|
| ZFP28       | 6. 33E-31 | 0. 215364 | 0. 099 | 0. 033 | 9. 45E-27 | Neo-G | ZFP28          |
| IK          | 6. 47E-31 | 0. 234916 | 0. 499 | 0. 375 | 9. 67E-27 | Neo-G | IK             |
| CX3CR1. 6   | 6. 93E-31 | -0. 50205 | 0. 009 | 0. 112 | 1. 04E-26 | Neo-G | CX3CR1         |
| TSPYL1. 4   | 6. 98E-31 | 0. 292966 | 0. 347 | 0. 224 | 1. 04E-26 | Neo-G | TSPYL1         |
| CHST2. 4    | 7. 77E-31 | -0. 24593 | 0. 03  | 0. 149 | 1. 16E-26 | Neo-G | CHST2          |
| PDE7A. 3    | 8. 77E-31 | 0. 285426 | 0. 163 | 0. 073 | 1. 31E-26 | Neo-G | PDE7A          |
| FAM131B. 5  | 8. 93E-31 | 0. 288919 | 0. 152 | 0. 067 | 1. 33E-26 | Neo-G | FAM131B        |
| PSPC1. 5    | 8. 94E-31 | 0. 318532 | 0. 316 | 0. 198 | 1. 34E-26 | Neo-G | PSPC1          |
| CHPT1. 5    | 9. 06E-31 | -0. 37792 | 0. 163 | 0. 32  | 1. 35E-26 | Neo-G | CHPT1          |
| ZSCAN21. 5  | 9. 23E-31 | 0. 296726 | 0. 187 | 0. 092 | 1. 38E-26 | Neo-G | ZSCAN21        |
| ANKRD36. 4  | 1. 01E-30 | 0. 300013 | 0. 291 | 0. 172 | 1. 51E-26 | Neo-G | ANKRD36        |
| PDIK1L. 2   | 1. 02E-30 | 0. 224606 | 0. 127 | 0. 05  | 1. 52E-26 | Neo-G | PDIK1L         |
| ICAM3. 5    | 1. 11E-30 | -0. 29192 | 0. 009 | 0. 112 | 1. 66E-26 | Neo-G | ICAM3          |
| MAPK1. 3    | 1. 13E-30 | -0. 29592 | 0. 104 | 0. 259 | 1. 69E-26 | Neo-G | MAPK1          |
| MORC2-AS1   | 1. 14E-30 | 0. 254158 | 0. 117 | 0. 044 | 1. 70E-26 | Neo-G | MORC2-AS1      |
| FHOD3. 1    | 1. 14E-30 | 0. 223787 | 0. 091 | 0. 029 | 1. 70E-26 | Neo-G | FHOD3          |
| MITF. 6     | 1. 21E-30 | -0. 35316 | 0. 005 | 0. 105 | 1. 82E-26 | Neo-G | MITF           |
| GKAP1. 6    | 1. 29E-30 | 0. 281688 | 0. 171 | 0. 08  | 1. 93E-26 | Neo-G | GKAP1          |
| RAB30. 5    | 1. 31E-30 | 0. 303999 | 0. 151 | 0. 066 | 1. 96E-26 | Neo-G | RAB30          |
| TNFAIP8L2   | 1. 32E-30 | -0. 42266 | 0. 005 | 0. 105 | 1. 98E-26 | Neo-G | TNFAIP8L2      |
| TM2D3. 3    | 1. 35E-30 | 0. 19631  | 0. 452 | 0. 316 | 2. 02E-26 | Neo-G | TM2D3          |
| CCL4L2. 5   | 1. 36E-30 | -0. 68681 | 0. 001 | 0. 097 | 2. 04E-26 | Neo-G | CCL4L2         |
| TOMM7. 3    | 1. 45E-30 | -0. 34462 | 0. 82  | 0. 856 | 2. 16E-26 | Neo-G | TOMM7          |
| DKK3. 5     | 1. 51E-30 | 0. 348273 | 0. 3   | 0. 187 | 2. 25E-26 | Neo-G | DKK3           |
| HDX. 1      | 1. 69E-30 | 0. 207171 | 0. 096 | 0. 032 | 2. 53E-26 | Neo-G | HDX            |
| CBX8. 4     | 1. 70E-30 | 0. 301204 | 0. 145 | 0. 063 | 2. 54E-26 | Neo-G | CBX8           |
| KCNMA1. 5   | 1. 70E-30 | -0. 39294 | 0. 036 | 0. 156 | 2. 54E-26 | Neo-G | KCNMA1         |
| EPB41L3. 7  | 1. 78E-30 | -0. 44006 | 0. 013 | 0. 116 | 2. 65E-26 | Neo-G | EPB41L3        |
| FBXO16. 2   | 1. 82E-30 | 0. 224431 | 0. 098 | 0. 033 | 2. 72E-26 | Neo-G | FBXO16         |
| SIX6        | 1. 83E-30 | 0. 138056 | 0. 052 | 0. 011 | 2. 73E-26 | Neo-G | SIX6           |
| SS18L2. 2   | 1. 98E-30 | 0. 261201 | 0. 419 | 0. 297 | 2. 95E-26 | Neo-G | SS18L2         |
| TMEM163. 3  | 1. 99E-30 | 0. 188187 | 0. 135 | 0. 053 | 2. 98E-26 | Neo-G | TMEM163        |
| BAG3. 4     | 2. 10E-30 | -0. 32518 | 0. 013 | 0. 119 | 3. 13E-26 | Neo-G | BAG3           |
| DTNA. 6     | 2. 19E-30 | -0. 51879 | 0. 12  | 0. 269 | 3. 28E-26 | Neo-G | DTNA           |
| RP11-563K   | 2. 50E-30 | 0. 287301 | 0. 135 | 0. 056 | 3. 73E-26 | Neo-G | RP11-563K23. 1 |
| TMED9. 3    | 2. 59E-30 | -0. 38571 | 0. 623 | 0. 697 | 3. 86E-26 | Neo-G | TMED9          |
| SLU7. 1     | 3. 09E-30 | 0. 248869 | 0. 43  | 0. 299 | 4. 62E-26 | Neo-G | SLU7           |
| RALGPS1. 4  | 3. 16E-30 | 0. 230709 | 0. 12  | 0. 046 | 4. 73E-26 | Neo-G | RALGPS1        |
| ADA. 4      | 3. 23E-30 | -0. 23039 | 0. 005 | 0. 103 | 4. 83E-26 | Neo-G | ADA            |
| HOOK2. 5    | 3. 29E-30 | 0. 30632  | 0. 339 | 0. 222 | 4. 92E-26 | Neo-G | HOOK2          |
| ACBD6. 3    | 3. 47E-30 | 0. 274201 | 0. 383 | 0. 264 | 5. 18E-26 | Neo-G | ACBD6          |
| ACTN4. 4    | 3. 76E-30 | -0. 36728 | 0. 183 | 0. 351 | 5. 62E-26 | Neo-G | ACTN4          |
| ATP9A. 6    | 3. 79E-30 | 0. 305266 | 0. 199 | 0. 102 | 5. 66E-26 | Neo-G | ATP9A          |
| AMOTL2. 4   | 3. 83E-30 | 0. 244374 | 0. 162 | 0. 071 | 5. 73E-26 | Neo-G | AMOTL2         |
| NBPF10. 3   | 4. 05E-30 | -0. 25536 | 0. 037 | 0. 158 | 6. 05E-26 | Neo-G | NBPF10         |
| DDX56. 4    | 4. 10E-30 | 0. 270316 | 0. 365 | 0. 244 | 6. 12E-26 | Neo-G | DDX56          |
| NOS1AP. 6   | 4. 14E-30 | 0. 291154 | 0. 155 | 0. 07  | 6. 19E-26 | Neo-G | NOS1AP         |
| UBTD1. 3    | 4. 16E-30 | -0. 23087 | 0. 016 | 0. 124 | 6. 22E-26 | Neo-G | UBTD1          |
| FNDC4. 5    | 4. 54E-30 | 0. 373148 | 0. 295 | 0. 186 | 6. 78E-26 | Neo-G | FNDC4          |
| NUDT22. 5   | 4. 78E-30 | -0. 41388 | 0. 131 | 0. 286 | 7. 14E-26 | Neo-G | NUDT22         |
| APOBEC3G. 4 | 4. 83E-30 | -0. 39663 | 0. 02  | 0. 13  | 7. 22E-26 | Neo-G | APOBEC3G       |

|           |              |          |          |       |          |          |               |       |
|-----------|--------------|----------|----------|-------|----------|----------|---------------|-------|
| LINC00969 | 5.16E-30     | 0.253484 | 0.354    | 0.23  | 7.71E-26 | Neo-G    | LINC00969     |       |
| CREG1     | 7.5.65E-30   | -0.43067 | 0.165    | 0.313 | 8.44E-26 | Neo-G    | CREG1         |       |
| DSCAML1   | 5.70E-30     | 0.176686 | 0.077    | 0.022 | 8.52E-26 | Neo-G    | DSCAML1       |       |
| BRSK1     | 1.5.6.55E-30 | 0.277988 | 0.162    | 0.074 | 9.78E-26 | Neo-G    | BRSK1         |       |
| ZNF493    | 1.5.6.58E-30 | 0.315297 | 0.255    | 0.146 | 9.83E-26 | Neo-G    | ZNF493        |       |
| PER1      | 1.6.6.61E-30 | -0.46813 | 0.07     | 0.198 | 9.87E-26 | Neo-G    | PER1          |       |
| RGS6      | 1.5.6.75E-30 | -0.23804 | 0.004    | 0.101 | 1.01E-25 | Neo-G    | RGS6          |       |
| ARHGAP4   | 1.7.7.08E-30 | -0.43911 | 0.02     | 0.127 | 1.06E-25 | Neo-G    | ARHGAP4       |       |
| CYTIP     | 1.7.7.09E-30 | -0.50744 | 0.013    | 0.115 | 1.06E-25 | Neo-G    | CYTIP         |       |
| SEC14L1   | 1.4.7.48E-30 | -0.41876 | 0.152    | 0.309 | 1.12E-25 | Neo-G    | SEC14L1       |       |
|           | 5-Sep        | 7.93E-30 | 0.221861 | 0.083 | 0.026    | 1.19E-25 | Neo-G         | 5-Sep |
| URGCP     | 1.4.8.49E-30 | 0.290561 | 0.204    | 0.105 | 1.27E-25 | Neo-G    | URGCP         |       |
| PPP2R2A   | 1.3.8.70E-30 | 0.253239 | 0.41     | 0.286 | 1.30E-25 | Neo-G    | PPP2R2A       |       |
| RP11-536C | 1.8.8.89E-30 | 0.137897 | 0.042    | 0.007 | 1.33E-25 | Neo-G    | RP11-536018.1 |       |
| DNAJB2    | 1.6.9.80E-30 | 0.266004 | 0.425    | 0.301 | 1.46E-25 | Neo-G    | DNAJB2        |       |
| CXCL14    | 1.4.9.82E-30 | -0.55947 | 0.038    | 0.154 | 1.47E-25 | Neo-G    | CXCL14        |       |
| ITM2A     | 1.6.9.94E-30 | 0.22584  | 0.124    | 0.047 | 1.49E-25 | Neo-G    | ITM2A         |       |
| PRRC2B    | 1.6.1.03E-29 | 0.320484 | 0.338    | 0.224 | 1.54E-25 | Neo-G    | PRRC2B        |       |
| CNIH3     | 1.4.1.06E-29 | -0.31299 | 0.055    | 0.182 | 1.58E-25 | Neo-G    | CNIH3         |       |
| LMO1      | 1.6.1.10E-29 | 0.359647 | 0.15     | 0.065 | 1.65E-25 | Neo-G    | LMO1          |       |
| ZNF682    | 1.4.1.13E-29 | 0.269174 | 0.152    | 0.067 | 1.68E-25 | Neo-G    | ZNF682        |       |
| GNA13     | 1.7.1.25E-29 | -0.37494 | 0.064    | 0.194 | 1.87E-25 | Neo-G    | GNA13         |       |
| CENPJ     | 1.3.1.25E-29 | 0.263737 | 0.137    | 0.057 | 1.87E-25 | Neo-G    | CENPJ         |       |
| ENDOV     | 1.4.1.25E-29 | 0.329366 | 0.319    | 0.208 | 1.87E-25 | Neo-G    | ENDOV         |       |
| LPCAT1    | 1.2.1.31E-29 | 0.293328 | 0.285    | 0.169 | 1.96E-25 | Neo-G    | LPCAT1        |       |
| PYCR2     | 1.2.1.35E-29 | -0.34034 | 0.107    | 0.258 | 2.02E-25 | Neo-G    | PYCR2         |       |
| ICOSLG    | 1.7.1.42E-29 | -0.35246 | 0.005    | 0.101 | 2.12E-25 | Neo-G    | ICOSLG        |       |
| TMEM189   | 1.3.1.50E-29 | -0.26856 | 0.066    | 0.202 | 2.24E-25 | Neo-G    | TMEM189       |       |
| FBXL16    | 1.3.1.53E-29 | 0.234311 | 0.103    | 0.037 | 2.28E-25 | Neo-G    | FBXL16        |       |
| SRRT      | 1.4.1.67E-29 | 0.295652 | 0.322    | 0.204 | 2.50E-25 | Neo-G    | SRRT          |       |
| TRAM1     | 1.6.1.67E-29 | -0.39058 | 0.277    | 0.452 | 2.50E-25 | Neo-G    | TRAM1         |       |
| ITGB8     | 1.5.1.72E-29 | -0.30139 | 0.106    | 0.256 | 2.58E-25 | Neo-G    | ITGB8         |       |
| PSAT1     | 1.6.1.79E-29 | -0.39279 | 0.082    | 0.218 | 2.68E-25 | Neo-G    | PSAT1         |       |
| NUSAP1    | 1.6.1.86E-29 | -0.43016 | 0.013    | 0.116 | 2.77E-25 | Neo-G    | NUSAP1        |       |
| TMX4      | 1.4.1.91E-29 | 0.321493 | 0.345    | 0.234 | 2.85E-25 | Neo-G    | TMX4          |       |
| TSTD1     | 1.4.1.94E-29 | -0.394   | 0.075    | 0.212 | 2.90E-25 | Neo-G    | TSTD1         |       |
| TLE2      | 1.6.2.01E-29 | 0.328836 | 0.17     | 0.081 | 3.00E-25 | Neo-G    | TLE2          |       |
| MTHFS     | 1.5.2.19E-29 | -0.35209 | 0.07     | 0.203 | 3.28E-25 | Neo-G    | MTHFS         |       |
| GATAD2B   | 1.5.2.23E-29 | 0.311178 | 0.257    | 0.149 | 3.33E-25 | Neo-G    | GATAD2B       |       |
| SDC2      | 1.5.2.26E-29 | -0.37951 | 0.072    | 0.207 | 3.38E-25 | Neo-G    | SDC2          |       |
| FJX1      | 1.6.2.38E-29 | 0.315101 | 0.31     | 0.188 | 3.55E-25 | Neo-G    | FJX1          |       |
| HDAC1     | 1.3.2.65E-29 | -0.3271  | 0.095    | 0.242 | 3.96E-25 | Neo-G    | HDAC1         |       |
| PSENN     | 1.4.2.65E-29 | -0.49373 | 0.345    | 0.51  | 3.96E-25 | Neo-G    | PSENN         |       |
| CSRNP1    | 1.7.2.95E-29 | -0.43922 | 0.076    | 0.205 | 4.40E-25 | Neo-G    | CSRNP1        |       |
| SSBP3     | 1.5.3.00E-29 | 0.307011 | 0.218    | 0.117 | 4.49E-25 | Neo-G    | SSBP3         |       |
| METRN     | 1.7.3.01E-29 | -0.38004 | 0.161    | 0.31  | 4.50E-25 | Neo-G    | METRN         |       |
| EXO5      | 1.3.0.9E-29  | 0.119926 | 0.061    | 0.015 | 4.61E-25 | Neo-G    | EXO5          |       |
| DNAJC12   | 1.1.3.17E-29 | 0.25706  | 0.159    | 0.072 | 4.74E-25 | Neo-G    | DNAJC12       |       |
| PAFAH1B1  | 1.3.3.24E-29 | 0.252642 | 0.471    | 0.355 | 4.84E-25 | Neo-G    | PAFAH1B1      |       |
| TSPAN4    | 1.3.3.45E-29 | -0.3451  | 0.064    | 0.195 | 5.15E-25 | Neo-G    | TSPAN4        |       |
| CORO1B    | 1.6.3.58E-29 | -0.40351 | 0.218    | 0.379 | 5.36E-25 | Neo-G    | CORO1B        |       |

|            |          |          |       |       |          |       |          |
|------------|----------|----------|-------|-------|----------|-------|----------|
| WFDC2.3    | 3.59E-29 | 0.174486 | 0.081 | 0.024 | 5.37E-25 | Neo-G | WFDC2    |
| UBE2J2.5   | 3.63E-29 | 0.286822 | 0.434 | 0.322 | 5.42E-25 | Neo-G | UBE2J2   |
| IGSF8.5    | 3.66E-29 | 0.28724  | 0.317 | 0.2   | 5.47E-25 | Neo-G | IGSF8    |
| BCAP31.3   | 3.80E-29 | -0.42276 | 0.51  | 0.632 | 5.68E-25 | Neo-G | BCAP31   |
| CDKAL1.2   | 4.02E-29 | 0.302687 | 0.174 | 0.083 | 6.01E-25 | Neo-G | CDKAL1   |
| RNF144B.6  | 4.21E-29 | -0.45868 | 0.01  | 0.109 | 6.29E-25 | Neo-G | RNF144B  |
| SH3BP1.7   | 4.30E-29 | -0.32145 | 0.018 | 0.123 | 6.43E-25 | Neo-G | SH3BP1   |
| PALD1.6    | 4.34E-29 | -0.4206  | 0.013 | 0.113 | 6.49E-25 | Neo-G | PALD1    |
| RHOQ.5     | 4.47E-29 | -0.2698  | 0.049 | 0.175 | 6.67E-25 | Neo-G | RHOQ     |
| SPOCK2.5   | 4.63E-29 | -0.34135 | 0.036 | 0.152 | 6.92E-25 | Neo-G | SPOCK2   |
| SALL1.6    | 4.74E-29 | -0.23773 | 0.033 | 0.15  | 7.09E-25 | Neo-G | SALL1    |
| TAF1A.2    | 5.02E-29 | 0.204783 | 0.123 | 0.048 | 7.50E-25 | Neo-G | TAF1A    |
| ZNF140.3   | 5.20E-29 | 0.304441 | 0.192 | 0.097 | 7.77E-25 | Neo-G | ZNF140   |
| MAN1C1.1   | 5.48E-29 | -0.22679 | 0.002 | 0.094 | 8.18E-25 | Neo-G | MAN1C1   |
| DNAJC15.5  | 5.61E-29 | -0.47181 | 0.243 | 0.408 | 8.38E-25 | Neo-G | DNAJC15  |
| SIGLEC9.7  | 6.04E-29 | -0.41538 | 0.007 | 0.103 | 9.03E-25 | Neo-G | SIGLEC9  |
| WSCD1.6    | 6.21E-29 | -0.2577  | 0.03  | 0.143 | 9.28E-25 | Neo-G | WSCD1    |
| LPXN.7     | 6.29E-29 | -0.4274  | 0.018 | 0.121 | 9.41E-25 | Neo-G | LPXN     |
| RAF1.6     | 6.45E-29 | 0.29574  | 0.379 | 0.264 | 9.63E-25 | Neo-G | RAF1     |
| APOE.5     | 6.46E-29 | -0.36183 | 0.724 | 0.681 | 9.66E-25 | Neo-G | APOE     |
| ME3        | 6.48E-29 | 0.245887 | 0.101 | 0.036 | 9.68E-25 | Neo-G | ME3      |
| GBP3.1     | 6.56E-29 | -0.34753 | 0.002 | 0.093 | 9.80E-25 | Neo-G | GBP3     |
| FAM131A.3  | 6.61E-29 | 0.3055   | 0.214 | 0.116 | 9.87E-25 | Neo-G | FAM131A  |
| SPATA13.4  | 6.81E-29 | -0.33309 | 0.053 | 0.178 | 1.02E-24 | Neo-G | SPATA13  |
| NINJ2.6    | 7.27E-29 | -0.45001 | 0.004 | 0.097 | 1.09E-24 | Neo-G | NINJ2    |
| NOTCH4.2   | 7.41E-29 | 0.262516 | 0.13  | 0.054 | 1.11E-24 | Neo-G | NOTCH4   |
| CEBPA.6    | 7.52E-29 | -0.39341 | 0.014 | 0.115 | 1.12E-24 | Neo-G | CEBPA    |
| SUN1.6     | 7.52E-29 | 0.277449 | 0.311 | 0.195 | 1.12E-24 | Neo-G | SUN1     |
| NCF2.7     | 7.81E-29 | -0.41568 | 0.013 | 0.112 | 1.17E-24 | Neo-G | NCF2     |
| APOL6.1    | 8.49E-29 | -0.26091 | 0.007 | 0.104 | 1.27E-24 | Neo-G | APOL6    |
| LTF.4      | 8.62E-29 | -1.17336 | 0.051 | 0.163 | 1.29E-24 | Neo-G | LTF      |
| SLC25A18.8 | 8.86E-29 | -0.29649 | 0.004 | 0.097 | 1.32E-24 | Neo-G | SLC25A18 |
| CCDC115    | 9.03E-29 | 0.209536 | 0.45  | 0.317 | 1.35E-24 | Neo-G | CCDC115  |
| DCUN1D5.2  | 9.19E-29 | 0.260973 | 0.389 | 0.275 | 1.37E-24 | Neo-G | DCUN1D5  |
| C1orf52.7  | 9.24E-29 | 0.213736 | 0.416 | 0.293 | 1.38E-24 | Neo-G | C1orf52  |
| FAM221A.7  | 9.34E-29 | 0.199678 | 0.284 | 0.165 | 1.40E-24 | Neo-G | FAM221A  |
| RNF216.2   | 1.00E-28 | 0.244742 | 0.338 | 0.217 | 1.50E-24 | Neo-G | RNF216   |
| APOD.6     | 1.03E-28 | -0.8036  | 0.056 | 0.173 | 1.55E-24 | Neo-G | APOD     |
| AHCY.3     | 1.13E-28 | -0.34569 | 0.152 | 0.312 | 1.68E-24 | Neo-G | AHCY     |
| NDUFAF4.4  | 1.15E-28 | 0.254088 | 0.324 | 0.209 | 1.71E-24 | Neo-G | NDUFAF4  |
| SOX21.4    | 1.18E-28 | -0.1893  | 0.007 | 0.103 | 1.76E-24 | Neo-G | SOX21    |
| ISCA1.3    | 1.20E-28 | 0.247554 | 0.4   | 0.284 | 1.79E-24 | Neo-G | ISCA1    |
| CCDC93.3   | 1.28E-28 | 0.297614 | 0.217 | 0.116 | 1.91E-24 | Neo-G | CCDC93   |
| GPI.4      | 1.29E-28 | -0.39912 | 0.209 | 0.374 | 1.93E-24 | Neo-G | GPI      |
| MXRA7.5    | 1.33E-28 | -0.2685  | 0.054 | 0.181 | 1.99E-24 | Neo-G | MXRA7    |
| CPXM1.6    | 1.34E-28 | 0.317272 | 0.211 | 0.113 | 2.00E-24 | Neo-G | CPXM1    |
| POMZP3.5   | 1.36E-28 | 0.286029 | 0.163 | 0.077 | 2.03E-24 | Neo-G | POMZP3   |
| TLCD1.5    | 1.42E-28 | -0.17582 | 0.001 | 0.091 | 2.13E-24 | Neo-G | TLCD1    |
| JAG1.6     | 1.44E-28 | -0.25326 | 0.049 | 0.172 | 2.15E-24 | Neo-G | JAG1     |
| VIM-AS1.2  | 1.44E-28 | -0.31315 | 0.019 | 0.123 | 2.15E-24 | Neo-G | VIM-AS1  |
| PDE4D.4    | 1.47E-28 | 0.272169 | 0.179 | 0.088 | 2.20E-24 | Neo-G | PDE4D    |

|             |           |           |        |        |                 |               |
|-------------|-----------|-----------|--------|--------|-----------------|---------------|
| ERF. 5      | 1. 51E-28 | -0. 25714 | 0. 06  | 0. 191 | 2. 26E-24 Neo-G | ERF           |
| PLOD2. 5    | 1. 52E-28 | -0. 30009 | 0. 052 | 0. 175 | 2. 27E-24 Neo-G | PLOD2         |
| ATXN80S. 5  | 1. 52E-28 | -0. 75785 | 0      | 0. 089 | 2. 27E-24 Neo-G | ATXN80S       |
| ZNF566. 5   | 1. 52E-28 | 0. 250696 | 0. 203 | 0. 104 | 2. 27E-24 Neo-G | ZNF566        |
| LINC00998   | 1. 65E-28 | -0. 36855 | 0. 223 | 0. 39  | 2. 47E-24 Neo-G | LINC00998     |
| MINOS1. 5   | 1. 68E-28 | -0. 39689 | 0. 56  | 0. 649 | 2. 51E-24 Neo-G | MINOS1        |
| TMED2. 3    | 1. 72E-28 | 0. 118723 | 0. 746 | 0. 595 | 2. 56E-24 Neo-G | TMED2         |
| ZCCHC11. 3  | 1. 76E-28 | 0. 307144 | 0. 338 | 0. 227 | 2. 63E-24 Neo-G | ZCCHC11       |
| C1orf35. 6  | 1. 83E-28 | 0. 2972   | 0. 367 | 0. 251 | 2. 73E-24 Neo-G | C1orf35       |
| C10orf11. 1 | 1. 86E-28 | -0. 3622  | 0. 013 | 0. 112 | 2. 78E-24 Neo-G | C10orf11      |
| EIF4E. 4    | 1. 89E-28 | 0. 135594 | 0. 599 | 0. 475 | 2. 82E-24 Neo-G | EIF4E         |
| KTI12. 4    | 1. 94E-28 | 0. 286463 | 0. 188 | 0. 095 | 2. 91E-24 Neo-G | KTI12         |
| RAB11FIP4   | 2. 01E-28 | 0. 183557 | 0. 098 | 0. 034 | 3. 00E-24 Neo-G | RAB11FIP4     |
| MAD2L2. 5   | 2. 05E-28 | 0. 254696 | 0. 502 | 0. 379 | 3. 06E-24 Neo-G | MAD2L2        |
| PLXND1. 6   | 2. 09E-28 | -0. 3444  | 0. 011 | 0. 109 | 3. 13E-24 Neo-G | PLXND1        |
| HRH1. 6     | 2. 16E-28 | -0. 26816 | 0. 009 | 0. 107 | 3. 23E-24 Neo-G | HRH1          |
| KLF10. 4    | 2. 17E-28 | 0. 25294  | 0. 35  | 0. 219 | 3. 24E-24 Neo-G | KLF10         |
| YRDC. 3     | 2. 41E-28 | 0. 34985  | 0. 252 | 0. 15  | 3. 60E-24 Neo-G | YRDC          |
| CHMP4B. 4   | 2. 41E-28 | -0. 34047 | 0. 318 | 0. 471 | 3. 61E-24 Neo-G | CHMP4B        |
| MYCBP. 4    | 2. 44E-28 | -0. 29401 | 0. 008 | 0. 103 | 3. 65E-24 Neo-G | MYCBP         |
| LSM1. 2     | 2. 46E-28 | 0. 159212 | 0. 57  | 0. 442 | 3. 68E-24 Neo-G | LSM1          |
| TRIM9. 6    | 2. 52E-28 | -0. 32745 | 0. 104 | 0. 248 | 3. 77E-24 Neo-G | TRIM9         |
| CANX. 2     | 2. 56E-28 | -0. 36706 | 0. 456 | 0. 588 | 3. 83E-24 Neo-G | CANX          |
| KCNH8       | 2. 57E-28 | 0. 123551 | 0. 044 | 0. 008 | 3. 84E-24 Neo-G | KCNH8         |
| TTYH2. 6    | 2. 58E-28 | -0. 30979 | 0. 021 | 0. 127 | 3. 86E-24 Neo-G | TTYH2         |
| IKBIP. 6    | 2. 63E-28 | -0. 39427 | 0. 101 | 0. 242 | 3. 93E-24 Neo-G | IKBIP         |
| PIGX. 5     | 2. 70E-28 | 0. 321436 | 0. 35  | 0. 241 | 4. 03E-24 Neo-G | PIGX          |
| ANO6. 1     | 2. 80E-28 | -0. 23623 | 0. 013 | 0. 114 | 4. 19E-24 Neo-G | ANO6          |
| MSH2. 4     | 2. 82E-28 | 0. 278824 | 0. 202 | 0. 105 | 4. 22E-24 Neo-G | MSH2          |
| TMEM51. 6   | 2. 84E-28 | -0. 29893 | 0. 024 | 0. 13  | 4. 25E-24 Neo-G | TMEM51        |
| EFHD2. 7    | 2. 85E-28 | -0. 36481 | 0. 09  | 0. 225 | 4. 26E-24 Neo-G | EFHD2         |
| ACBD5. 3    | 2. 87E-28 | -0. 25222 | 0. 055 | 0. 181 | 4. 28E-24 Neo-G | ACBD5         |
| UBN2. 4     | 2. 87E-28 | 0. 255718 | 0. 194 | 0. 099 | 4. 29E-24 Neo-G | UBN2          |
| TM7SF2. 6   | 2. 93E-28 | 0. 313201 | 0. 334 | 0. 218 | 4. 38E-24 Neo-G | TM7SF2        |
| ZNF789. 2   | 2. 97E-28 | 0. 238912 | 0. 155 | 0. 07  | 4. 44E-24 Neo-G | ZNF789        |
| KLF9. 2     | 3. 12E-28 | -0. 29631 | 0. 031 | 0. 143 | 4. 67E-24 Neo-G | KLF9          |
| DHCR24. 4   | 3. 20E-28 | -0. 2359  | 0. 009 | 0. 106 | 4. 78E-24 Neo-G | DHCR24        |
| CBFA2T2. 6  | 3. 26E-28 | 0. 328946 | 0. 215 | 0. 118 | 4. 87E-24 Neo-G | CBFA2T2       |
| CARD8. 6    | 3. 26E-28 | -0. 3734  | 0. 044 | 0. 161 | 4. 88E-24 Neo-G | CARD8         |
| ZNF184. 1   | 3. 29E-28 | 0. 212969 | 0. 112 | 0. 042 | 4. 92E-24 Neo-G | ZNF184        |
| GLDN. 6     | 3. 39E-28 | -0. 41242 | 0. 011 | 0. 107 | 5. 06E-24 Neo-G | GLDN          |
| RP11-83A2   | 3. 42E-28 | 0. 242601 | 0. 229 | 0. 124 | 5. 12E-24 Neo-G | RP11-83A24. 2 |
| VWA1. 7     | 3. 50E-28 | -0. 2483  | 0. 039 | 0. 157 | 5. 23E-24 Neo-G | VWA1          |
| TMEM243. 4  | 3. 58E-28 | -0. 43624 | 0. 086 | 0. 216 | 5. 34E-24 Neo-G | TMEM243       |
| HPGDS. 6    | 3. 58E-28 | -0. 45658 | 0. 006 | 0. 099 | 5. 35E-24 Neo-G | HPGDS         |
| MZF1. 2     | 3. 63E-28 | 0. 268635 | 0. 17  | 0. 082 | 5. 43E-24 Neo-G | MZF1          |
| KCNMB1. 6   | 3. 79E-28 | -0. 47925 | 0. 015 | 0. 113 | 5. 67E-24 Neo-G | KCNMB1        |
| ELK3. 4     | 3. 93E-28 | -0. 25789 | 0. 005 | 0. 098 | 5. 88E-24 Neo-G | ELK3          |
| CSNK1G3. 5  | 4. 09E-28 | 0. 335924 | 0. 241 | 0. 142 | 6. 11E-24 Neo-G | CSNK1G3       |
| NFU1        | 4. 14E-28 | 0. 22987  | 0. 411 | 0. 287 | 6. 18E-24 Neo-G | NFU1          |
| ITGA7. 5    | 4. 19E-28 | -0. 21871 | 0. 035 | 0. 149 | 6. 26E-24 Neo-G | ITGA7         |

|             |           |           |        |        |           |       |          |
|-------------|-----------|-----------|--------|--------|-----------|-------|----------|
| BMP2K. 5    | 4. 21E-28 | -0. 35305 | 0. 024 | 0. 128 | 6. 29E-24 | Neo-G | BMP2K    |
| CEP57. 4    | 4. 21E-28 | 0. 276722 | 0. 332 | 0. 218 | 6. 29E-24 | Neo-G | CEP57    |
| SPAG16. 7   | 4. 23E-28 | 0. 234141 | 0. 403 | 0. 283 | 6. 32E-24 | Neo-G | SPAG16   |
| MFSD12. 6   | 4. 28E-28 | -0. 30209 | 0. 074 | 0. 206 | 6. 39E-24 | Neo-G | MFSD12   |
| WTAP. 3     | 4. 74E-28 | 0. 198178 | 0. 537 | 0. 407 | 7. 08E-24 | Neo-G | WTAP     |
| PCM1. 5     | 4. 82E-28 | 0. 264543 | 0. 427 | 0. 311 | 7. 21E-24 | Neo-G | PCM1     |
| IVD. 2      | 4. 94E-28 | -0. 30609 | 0. 079 | 0. 214 | 7. 38E-24 | Neo-G | IVD      |
| ABHD12. 4   | 5. 01E-28 | -0. 33126 | 0. 235 | 0. 399 | 7. 48E-24 | Neo-G | ABHD12   |
| TYMS. 6     | 5. 17E-28 | -0. 32704 | 0. 053 | 0. 174 | 7. 73E-24 | Neo-G | TYMS     |
| PLEKHA3. 5  | 5. 28E-28 | 0. 33085  | 0. 328 | 0. 22  | 7. 90E-24 | Neo-G | PLEKHA3  |
| MAB21L1     | 5. 29E-28 | 0. 166332 | 0. 059 | 0. 014 | 7. 90E-24 | Neo-G | MAB21L1  |
| LGR4. 7     | 5. 42E-28 | -0. 17429 | 0. 013 | 0. 113 | 8. 10E-24 | Neo-G | LGR4     |
| CDC25B. 5   | 5. 66E-28 | -0. 30365 | 0. 076 | 0. 208 | 8. 45E-24 | Neo-G | CDC25B   |
| ZNF354A. 4  | 5. 72E-28 | 0. 281661 | 0. 207 | 0. 11  | 8. 55E-24 | Neo-G | ZNF354A  |
| PPA1. 5     | 5. 96E-28 | 0. 110384 | 0. 663 | 0. 512 | 8. 90E-24 | Neo-G | PPA1     |
| QKI. 5      | 6. 01E-28 | -0. 36088 | 0. 334 | 0. 488 | 8. 99E-24 | Neo-G | QKI      |
| SEPT11. 6   | 6. 19E-28 | 0. 278504 | 0. 403 | 0. 291 | 9. 25E-24 | Neo-G | 11-Sep   |
| FLAD1. 3    | 6. 19E-28 | 0. 260527 | 0. 334 | 0. 22  | 9. 25E-24 | Neo-G | FLAD1    |
| DOCK10. 6   | 6. 56E-28 | -0. 32452 | 0. 029 | 0. 138 | 9. 80E-24 | Neo-G | DOCK10   |
| EAF2. 7     | 6. 68E-28 | -0. 39713 | 0. 009 | 0. 103 | 9. 98E-24 | Neo-G | EAF2     |
| P2RY13. 5   | 6. 79E-28 | -0. 47783 | 0. 004 | 0. 094 | 1. 01E-23 | Neo-G | P2RY13   |
| HEXIM1. 2   | 6. 89E-28 | -0. 34724 | 0. 095 | 0. 233 | 1. 03E-23 | Neo-G | HEXIM1   |
| RAB8B. 6    | 7. 12E-28 | -0. 29247 | 0. 048 | 0. 168 | 1. 06E-23 | Neo-G | RAB8B    |
| CASP7. 1    | 7. 12E-28 | -0. 23775 | 0. 005 | 0. 096 | 1. 06E-23 | Neo-G | CASP7    |
| ZNF430. 3   | 7. 25E-28 | 0. 258622 | 0. 291 | 0. 177 | 1. 08E-23 | Neo-G | ZNF430   |
| WEE1. 4     | 7. 26E-28 | -0. 24149 | 0. 044 | 0. 163 | 1. 08E-23 | Neo-G | WEE1     |
| HYDIN       | 7. 34E-28 | 0. 110954 | 0. 047 | 0. 01  | 1. 10E-23 | Neo-G | HYDIN    |
| ITGAX. 6    | 7. 53E-28 | -0. 42839 | 0. 008 | 0. 101 | 1. 13E-23 | Neo-G | ITGAX    |
| GOSR1. 5    | 7. 57E-28 | 0. 258546 | 0. 37  | 0. 255 | 1. 13E-23 | Neo-G | GOSR1    |
| B4GALNT4. 7 | 7. 85E-28 | 0. 237719 | 0. 103 | 0. 038 | 1. 17E-23 | Neo-G | B4GALNT4 |
| ZNF608. 5   | 8. 00E-28 | 0. 337546 | 0. 245 | 0. 146 | 1. 20E-23 | Neo-G | ZNF608   |
| TSHZ3       | 8. 95E-28 | 0. 198674 | 0. 085 | 0. 027 | 1. 34E-23 | Neo-G | TSHZ3    |
| BACH2       | 9. 23E-28 | 0. 184272 | 0. 079 | 0. 025 | 1. 38E-23 | Neo-G | BACH2    |
| CASP6. 5    | 9. 34E-28 | 0. 327582 | 0. 254 | 0. 152 | 1. 40E-23 | Neo-G | CASP6    |
| WSB2. 6     | 9. 42E-28 | 0. 323843 | 0. 318 | 0. 212 | 1. 41E-23 | Neo-G | WSB2     |
| C11orf63    | 9. 79E-28 | 0. 127933 | 0. 058 | 0. 014 | 1. 46E-23 | Neo-G | C11orf63 |
| DMTF1. 5    | 1. 03E-27 | 0. 284867 | 0. 24  | 0. 137 | 1. 54E-23 | Neo-G | DMTF1    |
| PHACTR2. 5  | 1. 12E-27 | -0. 21616 | 0. 003 | 0. 092 | 1. 67E-23 | Neo-G | PHACTR2  |
| LILRA2. 7   | 1. 15E-27 | -0. 42444 | 0. 004 | 0. 094 | 1. 71E-23 | Neo-G | LILRA2   |
| NPEPPS. 3   | 1. 22E-27 | 0. 281123 | 0. 324 | 0. 213 | 1. 82E-23 | Neo-G | NPEPPS   |
| RUSC2       | 1. 23E-27 | 0. 194805 | 0. 093 | 0. 032 | 1. 84E-23 | Neo-G | RUSC2    |
| PRRX1. 7    | 1. 27E-27 | -0. 27117 | 0. 058 | 0. 185 | 1. 89E-23 | Neo-G | PRRX1    |
| ADAM10. 4   | 1. 34E-27 | -0. 34686 | 0. 069 | 0. 198 | 2. 00E-23 | Neo-G | ADAM10   |
| CYSTM1. 6   | 1. 42E-27 | -0. 46686 | 0. 194 | 0. 34  | 2. 12E-23 | Neo-G | CYSTM1   |
| CALCOCO1. 1 | 1. 47E-27 | 0. 264258 | 0. 241 | 0. 136 | 2. 20E-23 | Neo-G | CALCOCO1 |
| RILP. 7     | 1. 49E-27 | -0. 26687 | 0. 015 | 0. 114 | 2. 22E-23 | Neo-G | RILP     |
| APH1B. 4    | 1. 53E-27 | -0. 34349 | 0. 031 | 0. 139 | 2. 29E-23 | Neo-G | APH1B    |
| NSD1. 4     | 1. 59E-27 | 0. 27425  | 0. 332 | 0. 22  | 2. 38E-23 | Neo-G | NSD1     |
| PCYT1B      | 1. 61E-27 | 0. 16807  | 0. 07  | 0. 02  | 2. 41E-23 | Neo-G | PCYT1B   |
| CCRL2. 7    | 1. 65E-27 | -0. 4164  | 0. 007 | 0. 099 | 2. 47E-23 | Neo-G | CCRL2    |
| SERPINE1. 1 | 1. 66E-27 | -0. 51035 | 0. 014 | 0. 111 | 2. 48E-23 | Neo-G | SERPINE1 |

|              |           |           |        |        |                 |                |
|--------------|-----------|-----------|--------|--------|-----------------|----------------|
| PALM. 5      | 1. 66E-27 | 0. 3003   | 0. 183 | 0. 094 | 2. 48E-23 Neo-G | PALM           |
| TRIM44. 6    | 1. 76E-27 | 0. 27289  | 0. 39  | 0. 274 | 2. 64E-23 Neo-G | TRIM44         |
| KIAA1522     | 1. 79E-27 | 0. 171427 | 0. 07  | 0. 02  | 2. 68E-23 Neo-G | KIAA1522       |
| RAB14. 3     | 1. 80E-27 | 0. 196846 | 0. 521 | 0. 404 | 2. 69E-23 Neo-G | RAB14          |
| ZNF274. 3    | 1. 81E-27 | 0. 253061 | 0. 197 | 0. 101 | 2. 70E-23 Neo-G | ZNF274         |
| RASGEF1B. 1. | 1. 82E-27 | -0. 46044 | 0. 028 | 0. 132 | 2. 72E-23 Neo-G | RASGEF1B       |
| DEF6. 7      | 1. 97E-27 | -0. 36572 | 0. 009 | 0. 101 | 2. 95E-23 Neo-G | DEF6           |
| RP11-620J    | 2. 01E-27 | 0. 290252 | 0. 378 | 0. 256 | 3. 01E-23 Neo-G | RP11-620J15. 3 |
| VM01. 6      | 2. 04E-27 | -0. 57548 | 0. 058 | 0. 172 | 3. 05E-23 Neo-G | VM01           |
| ARPC5L. 4    | 2. 18E-27 | 0. 230754 | 0. 474 | 0. 357 | 3. 25E-23 Neo-G | ARPC5L         |
| VSTM2L       | 2. 26E-27 | 0. 102061 | 0. 043 | 0. 008 | 3. 38E-23 Neo-G | VSTM2L         |
| RBM18. 3     | 2. 35E-27 | 0. 259445 | 0. 304 | 0. 194 | 3. 51E-23 Neo-G | RBM18          |
| ZNF793. 4    | 2. 41E-27 | 0. 251354 | 0. 193 | 0. 1   | 3. 60E-23 Neo-G | ZNF793         |
| ODF3B. 7     | 2. 48E-27 | -0. 33086 | 0. 01  | 0. 104 | 3. 70E-23 Neo-G | ODF3B          |
| ULBP2        | 2. 51E-27 | 0. 20172  | 0. 105 | 0. 039 | 3. 74E-23 Neo-G | ULBP2          |
| MR1. 5       | 2. 95E-27 | -0. 32062 | 0. 007 | 0. 099 | 4. 41E-23 Neo-G | MR1            |
| ABI2. 5      | 3. 09E-27 | 0. 221088 | 0. 474 | 0. 348 | 4. 62E-23 Neo-G | ABI2           |
| ZNF420. 5    | 3. 38E-27 | 0. 256008 | 0. 19  | 0. 097 | 5. 05E-23 Neo-G | ZNF420         |
| KDM2B. 3     | 3. 38E-27 | 0. 280944 | 0. 223 | 0. 124 | 5. 05E-23 Neo-G | KDM2B          |
| TPMT. 5      | 3. 46E-27 | -0. 3427  | 0. 076 | 0. 206 | 5. 17E-23 Neo-G | TPMT           |
| SNAP47. 5    | 3. 63E-27 | 0. 276547 | 0. 299 | 0. 191 | 5. 43E-23 Neo-G | SNAP47         |
| PDXK. 7      | 3. 65E-27 | -0. 37355 | 0. 154 | 0. 301 | 5. 45E-23 Neo-G | PDXK           |
| EDEM2. 3     | 3. 67E-27 | -0. 34907 | 0. 112 | 0. 256 | 5. 48E-23 Neo-G | EDEM2          |
| ADNP. 6      | 3. 80E-27 | 0. 319745 | 0. 285 | 0. 182 | 5. 68E-23 Neo-G | ADNP           |
| HNRNPF. 5    | 3. 94E-27 | -0. 37785 | 0. 374 | 0. 525 | 5. 89E-23 Neo-G | HNRNPF         |
| TIMP4. 5     | 3. 99E-27 | -0. 45156 | 0. 015 | 0. 111 | 5. 96E-23 Neo-G | TIMP4          |
| DENND3. 7    | 4. 07E-27 | -0. 40543 | 0. 015 | 0. 111 | 6. 08E-23 Neo-G | DENND3         |
| PPP2R3A. 3   | 4. 14E-27 | 0. 24592  | 0. 126 | 0. 053 | 6. 18E-23 Neo-G | PPP2R3A        |
| NQ01. 4      | 4. 14E-27 | -0. 2638  | 0. 019 | 0. 12  | 6. 18E-23 Neo-G | NQ01           |
| TFAP2B. 3    | 4. 47E-27 | 0. 224705 | 0. 076 | 0. 023 | 6. 68E-23 Neo-G | TFAP2B         |
| COA3. 5      | 4. 56E-27 | 0. 112796 | 0. 596 | 0. 462 | 6. 81E-23 Neo-G | COA3           |
| BAG6. 2      | 4. 59E-27 | 0. 247997 | 0. 43  | 0. 319 | 6. 85E-23 Neo-G | BAG6           |
| CPNE4. 5     | 4. 69E-27 | -0. 18234 | 0. 009 | 0. 103 | 7. 01E-23 Neo-G | CPNE4          |
| AADAT. 4     | 4. 80E-27 | 0. 225415 | 0. 112 | 0. 044 | 7. 18E-23 Neo-G | AADAT          |
| UBE2G1. 6    | 4. 95E-27 | 0. 313878 | 0. 354 | 0. 246 | 7. 40E-23 Neo-G | UBE2G1         |
| CRYAB. 7     | 4. 96E-27 | -0. 80561 | 0. 398 | 0. 512 | 7. 41E-23 Neo-G | CRYAB          |
| PDZD7        | 5. 01E-27 | 0. 116455 | 0. 047 | 0. 01  | 7. 48E-23 Neo-G | PDZD7          |
| TMEM158. 6   | 5. 01E-27 | -0. 25897 | 0. 039 | 0. 152 | 7. 49E-23 Neo-G | TMEM158        |
| EZR. 5       | 5. 08E-27 | 0. 231932 | 0. 452 | 0. 329 | 7. 59E-23 Neo-G | EZR            |
| NDE1. 3      | 5. 32E-27 | -0. 25002 | 0. 017 | 0. 116 | 7. 95E-23 Neo-G | NDE1           |
| ANKS3. 5     | 5. 35E-27 | 0. 324113 | 0. 258 | 0. 157 | 8. 00E-23 Neo-G | ANKS3          |
| BNIP2. 7     | 5. 42E-27 | -0. 33591 | 0. 134 | 0. 28  | 8. 09E-23 Neo-G | BNIP2          |
| PAICS. 6     | 5. 64E-27 | -0. 3664  | 0. 17  | 0. 325 | 8. 43E-23 Neo-G | PAICS          |
| GNS. 5       | 5. 70E-27 | -0. 32139 | 0. 082 | 0. 213 | 8. 51E-23 Neo-G | GNS            |
| BTBD10. 5    | 6. 13E-27 | 0. 262532 | 0. 276 | 0. 17  | 9. 17E-23 Neo-G | BTBD10         |
| ADCY1        | 6. 23E-27 | 0. 118568 | 0. 059 | 0. 015 | 9. 30E-23 Neo-G | ADCY1          |
| GAS7. 1      | 6. 73E-27 | -0. 33044 | 0. 02  | 0. 121 | 1. 01E-22 Neo-G | GAS7           |
| HTATIP2. 7   | 7. 04E-27 | -0. 35152 | 0. 046 | 0. 159 | 1. 05E-22 Neo-G | HTATIP2        |
| AKAP8L. 5    | 7. 19E-27 | 0. 301997 | 0. 346 | 0. 237 | 1. 08E-22 Neo-G | AKAP8L         |
| DLGAP1-AS    | 7. 22E-27 | -0. 30306 | 0. 009 | 0. 101 | 1. 08E-22 Neo-G | DLGAP1-AS1     |
| ZNF540       | 7. 57E-27 | 0. 127424 | 0. 057 | 0. 014 | 1. 13E-22 Neo-G | ZNF540         |

|             |           |           |        |        |           |       |          |
|-------------|-----------|-----------|--------|--------|-----------|-------|----------|
| COQ2. 6     | 8. 38E-27 | -0. 28443 | 0. 068 | 0. 193 | 1. 25E-22 | Neo-G | COQ2     |
| INIP. 3     | 8. 94E-27 | 0. 255714 | 0. 295 | 0. 185 | 1. 34E-22 | Neo-G | INIP     |
| ABHD3. 5    | 8. 96E-27 | -0. 31302 | 0. 071 | 0. 196 | 1. 34E-22 | Neo-G | ABHD3    |
| MAST2. 2    | 9. 74E-27 | 0. 257384 | 0. 138 | 0. 061 | 1. 46E-22 | Neo-G | MAST2    |
| PNMAL1. 6   | 1. 05E-26 | 0. 264731 | 0. 173 | 0. 087 | 1. 57E-22 | Neo-G | PNMAL1   |
| SMARCAD1. 1 | 1. 06E-26 | 0. 278283 | 0. 186 | 0. 097 | 1. 59E-22 | Neo-G | SMARCAD1 |
| SRGAP2. 4   | 1. 07E-26 | -0. 40075 | 0. 112 | 0. 247 | 1. 61E-22 | Neo-G | SRGAP2   |
| KCNF1. 7    | 1. 11E-26 | -0. 26359 | 0. 03  | 0. 135 | 1. 66E-22 | Neo-G | KCNF1    |
| FAM161A. 5  | 1. 18E-26 | 0. 283743 | 0. 189 | 0. 098 | 1. 76E-22 | Neo-G | FAM161A  |
| CDC37L1. 5  | 1. 21E-26 | 0. 245005 | 0. 229 | 0. 128 | 1. 80E-22 | Neo-G | CDC37L1  |
| MYO10. 6    | 1. 27E-26 | -0. 32057 | 0. 079 | 0. 208 | 1. 90E-22 | Neo-G | MYO10    |
| GIMAP2. 6   | 1. 30E-26 | -0. 36278 | 0. 002 | 0. 086 | 1. 94E-22 | Neo-G | GIMAP2   |
| ZNF589      | 1. 31E-26 | 0. 172813 | 0. 09  | 0. 031 | 1. 96E-22 | Neo-G | ZNF589   |
| AFF4. 5     | 1. 46E-26 | 0. 265057 | 0. 441 | 0. 328 | 2. 19E-22 | Neo-G | AFF4     |
| FAM69C. 6   | 1. 49E-26 | -0. 17763 | 0. 002 | 0. 086 | 2. 23E-22 | Neo-G | FAM69C   |
| RPS6KA1. 7  | 1. 50E-26 | -0. 41359 | 0. 037 | 0. 142 | 2. 24E-22 | Neo-G | RPS6KA1  |
| CD48. 7     | 1. 62E-26 | -0. 40097 | 0. 002 | 0. 087 | 2. 42E-22 | Neo-G | CD48     |
| TMEM183A. 1 | 1. 65E-26 | 0. 289304 | 0. 382 | 0. 281 | 2. 47E-22 | Neo-G | TMEM183A |
| BATF3. 2    | 1. 73E-26 | -0. 23803 | 0. 01  | 0. 102 | 2. 58E-22 | Neo-G | BATF3    |
| SARS. 5     | 1. 74E-26 | 0. 139729 | 0. 559 | 0. 428 | 2. 61E-22 | Neo-G | SARS     |
| HOXB8       | 1. 77E-26 | 0. 148205 | 0. 056 | 0. 014 | 2. 64E-22 | Neo-G | HOXB8    |
| ITGA5. 4    | 1. 85E-26 | -0. 29199 | 0. 005 | 0. 093 | 2. 76E-22 | Neo-G | ITGA5    |
| KMT2C. 5    | 1. 93E-26 | 0. 309213 | 0. 358 | 0. 25  | 2. 89E-22 | Neo-G | KMT2C    |
| ACTR10. 4   | 1. 95E-26 | 0. 180927 | 0. 466 | 0. 347 | 2. 91E-22 | Neo-G | ACTR10   |
| PLEC. 5     | 2. 05E-26 | -0. 29311 | 0. 073 | 0. 2   | 3. 06E-22 | Neo-G | PLEC     |
| GNAQ. 4     | 2. 13E-26 | 0. 261339 | 0. 388 | 0. 274 | 3. 18E-22 | Neo-G | GNAQ     |
| NECAP2. 4   | 2. 15E-26 | -0. 34599 | 0. 154 | 0. 308 | 3. 22E-22 | Neo-G | NECAP2   |
| ADD3. 3     | 2. 18E-26 | -0. 32354 | 0. 036 | 0. 144 | 3. 25E-22 | Neo-G | ADD3     |
| ISOC2. 6    | 2. 37E-26 | -0. 4059  | 0. 21  | 0. 366 | 3. 55E-22 | Neo-G | ISOC2    |
| SPATS2L. 4  | 2. 44E-26 | -0. 34214 | 0. 192 | 0. 349 | 3. 65E-22 | Neo-G | SPATS2L  |
| HMGCL       | 2. 55E-26 | -0. 32695 | 0. 096 | 0. 233 | 3. 81E-22 | Neo-G | HMGCL    |
| SAFB2. 3    | 2. 59E-26 | 0. 257661 | 0. 432 | 0. 319 | 3. 88E-22 | Neo-G | SAFB2    |
| COL9A3. 7   | 2. 61E-26 | -0. 37083 | 0. 076 | 0. 199 | 3. 90E-22 | Neo-G | COL9A3   |
| BTK. 7      | 2. 61E-26 | -0. 36074 | 0. 007 | 0. 095 | 3. 90E-22 | Neo-G | BTK      |
| ASPHD1. 5   | 2. 63E-26 | 0. 291837 | 0. 223 | 0. 127 | 3. 92E-22 | Neo-G | ASPHD1   |
| EFNB2. 6    | 2. 75E-26 | -0. 16733 | 0. 015 | 0. 11  | 4. 11E-22 | Neo-G | EFNB2    |
| EML3. 3     | 2. 77E-26 | -0. 21387 | 0. 024 | 0. 125 | 4. 14E-22 | Neo-G | EML3     |
| PRPH        | 2. 86E-26 | 0. 139343 | 0. 045 | 0. 009 | 4. 27E-22 | Neo-G | PRPH     |
| DOK1. 7     | 2. 94E-26 | -0. 31265 | 0. 051 | 0. 167 | 4. 39E-22 | Neo-G | DOK1     |
| CLCN3. 5    | 2. 96E-26 | 0. 28934  | 0. 342 | 0. 237 | 4. 42E-22 | Neo-G | CLCN3    |
| SRSF2. 5    | 2. 99E-26 | 0. 163213 | 0. 745 | 0. 588 | 4. 47E-22 | Neo-G | SRSF2    |
| OLIG2. 6    | 3. 28E-26 | -0. 39435 | 0. 071 | 0. 191 | 4. 90E-22 | Neo-G | OLIG2    |
| ZNF74. 4    | 3. 34E-26 | 0. 253792 | 0. 12  | 0. 05  | 4. 99E-22 | Neo-G | ZNF74    |
| ABCA8. 5    | 3. 40E-26 | -0. 33135 | 0. 001 | 0. 083 | 5. 08E-22 | Neo-G | ABCA8    |
| UPP1. 6     | 3. 43E-26 | -0. 45721 | 0. 133 | 0. 269 | 5. 13E-22 | Neo-G | UPP1     |
| PDPK1. 4    | 3. 57E-26 | 0. 317476 | 0. 278 | 0. 176 | 5. 33E-22 | Neo-G | PDPK1    |
| GNAZ. 5     | 3. 67E-26 | 0. 247703 | 0. 125 | 0. 053 | 5. 48E-22 | Neo-G | GNAZ     |
| ITGAM. 7    | 3. 94E-26 | -0. 35314 | 0. 002 | 0. 085 | 5. 89E-22 | Neo-G | ITGAM    |
| MTCH1. 2    | 4. 20E-26 | 0. 17699  | 0. 651 | 0. 52  | 6. 28E-22 | Neo-G | MTCH1    |
| PSMC2. 3    | 4. 21E-26 | 0. 131959 | 0. 569 | 0. 445 | 6. 29E-22 | Neo-G | PSMC2    |
| LDLR. 4     | 4. 22E-26 | -0. 25534 | 0. 015 | 0. 109 | 6. 31E-22 | Neo-G | LDLR     |



|             |           |           |        |        |           |       |                |
|-------------|-----------|-----------|--------|--------|-----------|-------|----------------|
| TWF2. 7     | 4. 27E-26 | -0. 40165 | 0. 208 | 0. 357 | 6. 38E-22 | Neo-G | TWF2           |
| IL17RA. 7   | 4. 29E-26 | -0. 32433 | 0. 028 | 0. 13  | 6. 41E-22 | Neo-G | IL17RA         |
| KIFC2. 3    | 4. 29E-26 | 0. 271732 | 0. 134 | 0. 06  | 6. 42E-22 | Neo-G | KIFC2          |
| PMAIP1. 7   | 4. 48E-26 | -0. 45789 | 0. 006 | 0. 093 | 6. 69E-22 | Neo-G | PMAIP1         |
| USF1. 2     | 4. 48E-26 | 0. 260621 | 0. 118 | 0. 048 | 6. 70E-22 | Neo-G | USF1           |
| ARID1B. 5   | 4. 48E-26 | 0. 288015 | 0. 212 | 0. 117 | 6. 70E-22 | Neo-G | ARID1B         |
| TMEM192. 1  | 4. 52E-26 | 0. 212005 | 0. 291 | 0. 177 | 6. 75E-22 | Neo-G | TMEM192        |
| NR1H2. 6    | 4. 54E-26 | -0. 33654 | 0. 166 | 0. 32  | 6. 78E-22 | Neo-G | NR1H2          |
| ARHGAP15. 4 | 4. 63E-26 | -0. 42931 | 0. 015 | 0. 107 | 6. 92E-22 | Neo-G | ARHGAP15       |
| RP9. 5      | 4. 71E-26 | 0. 316277 | 0. 271 | 0. 168 | 7. 04E-22 | Neo-G | RP9            |
| INPP5D. 7   | 4. 81E-26 | -0. 39297 | 0. 007 | 0. 094 | 7. 19E-22 | Neo-G | INPP5D         |
| AKNAD1      | 4. 98E-26 | 0. 155519 | 0. 068 | 0. 02  | 7. 45E-22 | Neo-G | AKNAD1         |
| IL17RC. 1   | 5. 04E-26 | -0. 19034 | 0. 025 | 0. 128 | 7. 54E-22 | Neo-G | IL17RC         |
| ARRDC2. 5   | 5. 25E-26 | -0. 33925 | 0. 008 | 0. 096 | 7. 85E-22 | Neo-G | ARRDC2         |
| LAMC1. 4    | 5. 26E-26 | -0. 16392 | 0. 016 | 0. 113 | 7. 86E-22 | Neo-G | LAMC1          |
| SSFA2. 5    | 5. 34E-26 | -0. 26414 | 0. 073 | 0. 2   | 7. 98E-22 | Neo-G | SSFA2          |
| KLHL4. 5    | 5. 37E-26 | -0. 24071 | 0. 032 | 0. 138 | 8. 03E-22 | Neo-G | KLHL4          |
| TRMT1. 4    | 5. 38E-26 | -0. 40816 | 0. 133 | 0. 272 | 8. 04E-22 | Neo-G | TRMT1          |
| EPAS1. 4    | 5. 48E-26 | -0. 30316 | 0. 019 | 0. 115 | 8. 19E-22 | Neo-G | EPAS1          |
| ARHGAP9. 7  | 5. 60E-26 | -0. 35023 | 0. 008 | 0. 095 | 8. 38E-22 | Neo-G | ARHGAP9        |
| BCL6. 2     | 5. 75E-26 | -0. 30943 | 0. 034 | 0. 139 | 8. 59E-22 | Neo-G | BCL6           |
| ADAM22. 6   | 5. 96E-26 | 0. 224622 | 0. 129 | 0. 055 | 8. 90E-22 | Neo-G | ADAM22         |
| IRF2. 1     | 6. 32E-26 | -0. 31748 | 0. 082 | 0. 212 | 9. 44E-22 | Neo-G | IRF2           |
| ZADH2. 2    | 6. 37E-26 | 0. 272856 | 0. 181 | 0. 094 | 9. 53E-22 | Neo-G | ZADH2          |
| BRD8. 4     | 6. 56E-26 | 0. 256222 | 0. 254 | 0. 151 | 9. 80E-22 | Neo-G | BRD8           |
| NEDD9. 4    | 6. 68E-26 | -0. 38711 | 0. 104 | 0. 235 | 9. 98E-22 | Neo-G | NEDD9          |
| MAPK7. 4    | 6. 83E-26 | 0. 282117 | 0. 207 | 0. 115 | 1. 02E-21 | Neo-G | MAPK7          |
| AP2B1. 6    | 6. 88E-26 | 0. 236911 | 0. 44  | 0. 328 | 1. 03E-21 | Neo-G | AP2B1          |
| VIMP. 3     | 7. 02E-26 | -0. 39266 | 0. 319 | 0. 473 | 1. 05E-21 | Neo-G | VIMP           |
| UCN         | 7. 35E-26 | 0. 172173 | 0. 09  | 0. 031 | 1. 10E-21 | Neo-G | UCN            |
| DNAJC1. 4   | 7. 64E-26 | -0. 25081 | 0. 072 | 0. 199 | 1. 14E-21 | Neo-G | DNAJC1         |
| STEAP3. 4   | 7. 73E-26 | -0. 36384 | 0. 058 | 0. 174 | 1. 16E-21 | Neo-G | STEAP3         |
| CCR1. 6     | 7. 78E-26 | -0. 35735 | 0. 005 | 0. 091 | 1. 16E-21 | Neo-G | CCR1           |
| MTHFD2. 6   | 8. 26E-26 | -0. 42631 | 0. 163 | 0. 304 | 1. 23E-21 | Neo-G | MTHFD2         |
| DESI1. 3    | 8. 37E-26 | -0. 26712 | 0. 065 | 0. 189 | 1. 25E-21 | Neo-G | DESI1          |
| FAM3C. 6    | 8. 37E-26 | 0. 178371 | 0. 556 | 0. 422 | 1. 25E-21 | Neo-G | FAM3C          |
| RELB. 3     | 8. 40E-26 | -0. 21708 | 0. 013 | 0. 106 | 1. 26E-21 | Neo-G | RELB           |
| HS2ST1. 6   | 8. 72E-26 | -0. 27558 | 0. 065 | 0. 188 | 1. 30E-21 | Neo-G | HS2ST1         |
| IFITM10. 3  | 9. 05E-26 | 0. 270523 | 0. 215 | 0. 115 | 1. 35E-21 | Neo-G | IFITM10        |
| DDB1. 1     | 9. 08E-26 | 0. 227779 | 0. 393 | 0. 277 | 1. 36E-21 | Neo-G | DDB1           |
| DPP4. 4     | 9. 60E-26 | -0. 17192 | 0. 003 | 0. 087 | 1. 43E-21 | Neo-G | DPP4           |
| SLC16A1. 6  | 1. 04E-25 | -0. 34274 | 0. 112 | 0. 248 | 1. 55E-21 | Neo-G | SLC16A1        |
| ACD. 4      | 1. 07E-25 | 0. 267162 | 0. 258 | 0. 157 | 1. 60E-21 | Neo-G | ACD            |
| FN1. 5      | 1. 14E-25 | -0. 45609 | 0. 056 | 0. 167 | 1. 70E-21 | Neo-G | FN1            |
| PIANP. 5    | 1. 15E-25 | 0. 308245 | 0. 152 | 0. 073 | 1. 72E-21 | Neo-G | PIANP          |
| RP11-118F   | 1. 16E-25 | 0. 171326 | 0. 044 | 0. 009 | 1. 74E-21 | Neo-G | RP11-118F19. 1 |
| TNFSF10. 4  | 1. 17E-25 | -0. 39078 | 0. 002 | 0. 083 | 1. 75E-21 | Neo-G | TNFSF10        |
| NINL        | 1. 18E-25 | 0. 15035  | 0. 076 | 0. 024 | 1. 77E-21 | Neo-G | NINL           |
| TRMT61B. 4  | 1. 20E-25 | 0. 26989  | 0. 254 | 0. 152 | 1. 80E-21 | Neo-G | TRMT61B        |
| ZNF519. 1   | 1. 33E-25 | 0. 170292 | 0. 096 | 0. 035 | 1. 99E-21 | Neo-G | ZNF519         |
| UBQLN1. 3   | 1. 33E-25 | 0. 261634 | 0. 379 | 0. 27  | 1. 99E-21 | Neo-G | UBQLN1         |

|             |           |           |        |        |           |       |           |
|-------------|-----------|-----------|--------|--------|-----------|-------|-----------|
| A1BG. 2     | 1. 38E-25 | -0. 35085 | 0. 167 | 0. 315 | 2. 06E-21 | Neo-G | A1BG      |
| CHCHD6. 5   | 1. 49E-25 | 0. 28569  | 0. 328 | 0. 224 | 2. 23E-21 | Neo-G | CHCHD6    |
| PRCP. 4     | 1. 51E-25 | -0. 39106 | 0. 218 | 0. 372 | 2. 25E-21 | Neo-G | PRCP      |
| ELOVL2. 7   | 1. 51E-25 | -0. 1976  | 0. 015 | 0. 108 | 2. 26E-21 | Neo-G | ELOVL2    |
| FAM207A. 3  | 1. 52E-25 | -0. 2337  | 0. 086 | 0. 219 | 2. 27E-21 | Neo-G | FAM207A   |
| IRF7. 7     | 1. 55E-25 | -0. 30199 | 0. 057 | 0. 173 | 2. 32E-21 | Neo-G | IRF7      |
| LMCD1. 4    | 1. 57E-25 | -0. 20444 | 0. 008 | 0. 095 | 2. 34E-21 | Neo-G | LMCD1     |
| DUSP2. 6    | 1. 59E-25 | -0. 47424 | 0. 025 | 0. 121 | 2. 38E-21 | Neo-G | DUSP2     |
| KLF12. 5    | 1. 67E-25 | 0. 26813  | 0. 157 | 0. 076 | 2. 50E-21 | Neo-G | KLF12     |
| PIP5KL1     | 1. 70E-25 | 0. 141184 | 0. 056 | 0. 014 | 2. 54E-21 | Neo-G | PIP5KL1   |
| IGFBP3. 5   | 1. 81E-25 | -0. 57322 | 0. 092 | 0. 207 | 2. 71E-21 | Neo-G | IGFBP3    |
| TMEM132A. 1 | 1. 84E-25 | 0. 325459 | 0. 226 | 0. 135 | 2. 74E-21 | Neo-G | TMEM132A  |
| IRS2. 3     | 1. 93E-25 | -0. 34032 | 0. 212 | 0. 365 | 2. 88E-21 | Neo-G | IRS2      |
| DLG2. 4     | 1. 96E-25 | 0. 174563 | 0. 106 | 0. 041 | 2. 93E-21 | Neo-G | DLG2      |
| KIAA0101. 2 | 2. 07E-25 | -0. 38351 | 0. 029 | 0. 128 | 3. 09E-21 | Neo-G | KIAA0101  |
| ACSBG1. 4   | 2. 09E-25 | -0. 19563 | 0. 002 | 0. 083 | 3. 13E-21 | Neo-G | ACSBG1    |
| MGAT5B      | 2. 14E-25 | 0. 181245 | 0. 073 | 0. 023 | 3. 19E-21 | Neo-G | MGAT5B    |
| ARGLU1. 6   | 2. 19E-25 | 0. 207735 | 0. 577 | 0. 455 | 3. 28E-21 | Neo-G | ARGLU1    |
| DNM2. 5     | 2. 30E-25 | -0. 32169 | 0. 119 | 0. 257 | 3. 43E-21 | Neo-G | DNM2      |
| SCIMP. 7    | 2. 34E-25 | -0. 37106 | 0. 007 | 0. 092 | 3. 50E-21 | Neo-G | SCIMP     |
| SIGLEC8. 4  | 2. 36E-25 | -0. 38353 | 0. 004 | 0. 086 | 3. 52E-21 | Neo-G | SIGLEC8   |
| SYNCRIP. 5  | 2. 40E-25 | 0. 226683 | 0. 478 | 0. 372 | 3. 58E-21 | Neo-G | SYNCRIP   |
| CDK1. 5     | 2. 47E-25 | -0. 34683 | 0. 015 | 0. 106 | 3. 69E-21 | Neo-G | CDK1      |
| EMILIN2. 6  | 2. 62E-25 | -0. 24909 | 0. 005 | 0. 09  | 3. 91E-21 | Neo-G | EMILIN2   |
| C11orf73. 2 | 2. 62E-25 | 0. 144976 | 0. 52  | 0. 408 | 3. 92E-21 | Neo-G | C11orf73  |
| TJP1. 5     | 2. 78E-25 | -0. 22878 | 0. 07  | 0. 194 | 4. 16E-21 | Neo-G | TJP1      |
| OSMR. 5     | 2. 83E-25 | -0. 18911 | 0. 008 | 0. 094 | 4. 23E-21 | Neo-G | OSMR      |
| C3orf70. 6  | 2. 91E-25 | 0. 288113 | 0. 177 | 0. 091 | 4. 35E-21 | Neo-G | C3orf70   |
| TIMM22. 3   | 3. 24E-25 | 0. 273266 | 0. 333 | 0. 232 | 4. 84E-21 | Neo-G | TIMM22    |
| VMP1. 3     | 3. 36E-25 | -0. 40905 | 0. 347 | 0. 487 | 5. 02E-21 | Neo-G | VMP1      |
| FBL. 5      | 3. 38E-25 | -0. 42523 | 0. 24  | 0. 394 | 5. 05E-21 | Neo-G | FBL       |
| DCXR. 3     | 3. 54E-25 | -0. 35713 | 0. 317 | 0. 469 | 5. 29E-21 | Neo-G | DCXR      |
| ACADM. 2    | 3. 71E-25 | 0. 193161 | 0. 434 | 0. 318 | 5. 55E-21 | Neo-G | ACADM     |
| MTRNR2L1C   | 3. 74E-25 | -0. 63918 | 0. 002 | 0. 083 | 5. 59E-21 | Neo-G | MTRNR2L10 |
| BIRC5. 7    | 3. 95E-25 | -0. 40348 | 0. 021 | 0. 115 | 5. 91E-21 | Neo-G | BIRC5     |
| CRYZ. 6     | 4. 02E-25 | -0. 25125 | 0. 031 | 0. 135 | 6. 01E-21 | Neo-G | CRYZ      |
| NUCB1. 6    | 4. 28E-25 | -0. 38685 | 0. 311 | 0. 461 | 6. 40E-21 | Neo-G | NUCB1     |
| TREX1. 1    | 4. 28E-25 | -0. 24313 | 0. 025 | 0. 124 | 6. 40E-21 | Neo-G | TREX1     |
| EFR3A. 6    | 4. 40E-25 | -0. 24394 | 0. 045 | 0. 154 | 6. 58E-21 | Neo-G | EFR3A     |
| FES. 7      | 4. 50E-25 | -0. 34101 | 0. 005 | 0. 088 | 6. 73E-21 | Neo-G | FES       |
| CAPRIN1. 5  | 4. 54E-25 | 0. 279606 | 0. 409 | 0. 309 | 6. 78E-21 | Neo-G | CAPRIN1   |
| RAD23B. 2   | 4. 57E-25 | 0. 234395 | 0. 474 | 0. 368 | 6. 83E-21 | Neo-G | RAD23B    |
| ZFAND2A. 5  | 4. 69E-25 | 0. 180108 | 0. 391 | 0. 27  | 7. 01E-21 | Neo-G | ZFAND2A   |
| DCTN6. 2    | 4. 95E-25 | 0. 159591 | 0. 544 | 0. 431 | 7. 40E-21 | Neo-G | DCTN6     |
| PPHLN1. 3   | 4. 98E-25 | 0. 168936 | 0. 471 | 0. 354 | 7. 44E-21 | Neo-G | PPHLN1    |
| EIF2AK1. 4  | 5. 14E-25 | 0. 270681 | 0. 423 | 0. 32  | 7. 69E-21 | Neo-G | EIF2AK1   |
| OPCML       | 5. 40E-25 | 0. 137372 | 0. 059 | 0. 016 | 8. 07E-21 | Neo-G | OPCML     |
| IFIT2. 4    | 5. 43E-25 | -0. 34082 | 0. 007 | 0. 091 | 8. 11E-21 | Neo-G | IFIT2     |
| COLGALT1. 5 | 5. 47E-25 | -0. 29582 | 0. 08  | 0. 206 | 8. 18E-21 | Neo-G | COLGALT1  |
| ARMCX5. 4   | 5. 62E-25 | 0. 240383 | 0. 144 | 0. 067 | 8. 40E-21 | Neo-G | ARMCX5    |
| DLC1. 5     | 5. 82E-25 | -0. 2247  | 0. 009 | 0. 096 | 8. 70E-21 | Neo-G | DLC1      |

|            |          |          |       |       |          |       |          |
|------------|----------|----------|-------|-------|----------|-------|----------|
| CPEB4.3    | 5.98E-25 | 0.253164 | 0.35  | 0.234 | 8.93E-21 | Neo-G | CPEB4    |
| DPY19L1.4  | 6.23E-25 | -0.19474 | 0.02  | 0.115 | 9.31E-21 | Neo-G | DPY19L1  |
| USP27X     | 6.26E-25 | 0.166344 | 0.065 | 0.019 | 9.36E-21 | Neo-G | USP27X   |
| EMB.7      | 6.35E-25 | -0.34959 | 0.003 | 0.084 | 9.48E-21 | Neo-G | EMB      |
| ENSA.5     | 6.59E-25 | -0.39893 | 0.378 | 0.515 | 9.85E-21 | Neo-G | ENSA     |
| TGIF2.2    | 6.62E-25 | -0.18596 | 0.008 | 0.093 | 9.89E-21 | Neo-G | TGIF2    |
| POLR2J3.6  | 6.64E-25 | 0.186017 | 0.438 | 0.327 | 9.92E-21 | Neo-G | POLR2J3  |
| GYG1.4     | 6.79E-25 | -0.37558 | 0.13  | 0.269 | 1.01E-20 | Neo-G | GYG1     |
| SP140L.3   | 6.97E-25 | -0.30703 | 0.005 | 0.087 | 1.04E-20 | Neo-G | SP140L   |
| ZWINT.5    | 7.03E-25 | -0.2872  | 0.013 | 0.102 | 1.05E-20 | Neo-G | ZWINT    |
| TRIB1.4    | 7.31E-25 | -0.40383 | 0.059 | 0.169 | 1.09E-20 | Neo-G | TRIB1    |
| ING3.2     | 7.56E-25 | 0.223407 | 0.282 | 0.173 | 1.13E-20 | Neo-G | ING3     |
| NONO.6     | 8.06E-25 | 0.18452  | 0.552 | 0.443 | 1.20E-20 | Neo-G | NONO     |
| FAM134A.7  | 8.12E-25 | 0.281886 | 0.39  | 0.287 | 1.21E-20 | Neo-G | FAM134A  |
| IFIT1.3    | 8.50E-25 | -0.37099 | 0.002 | 0.082 | 1.27E-20 | Neo-G | IFIT1    |
| SNX4.2     | 8.61E-25 | 0.263418 | 0.345 | 0.238 | 1.29E-20 | Neo-G | SNX4     |
| DTX3L.2    | 8.77E-25 | -0.22038 | 0.005 | 0.088 | 1.31E-20 | Neo-G | DTX3L    |
| COL22A1.3  | 9.39E-25 | -0.16486 | 0.002 | 0.081 | 1.40E-20 | Neo-G | COL22A1  |
| F12.5      | 9.52E-25 | 0.287829 | 0.145 | 0.069 | 1.42E-20 | Neo-G | F12      |
| TXNIP.3    | 9.57E-25 | -0.43742 | 0.321 | 0.461 | 1.43E-20 | Neo-G | TXNIP    |
| TEN1.3     | 9.67E-25 | -0.21957 | 0.069 | 0.191 | 1.45E-20 | Neo-G | TEN1     |
| CCDC170.2  | 9.76E-25 | 0.168833 | 0.101 | 0.038 | 1.46E-20 | Neo-G | CCDC170  |
| LTBR.7     | 9.96E-25 | -0.37157 | 0.016 | 0.105 | 1.49E-20 | Neo-G | LTBR     |
| AHDC1.5    | 9.97E-25 | 0.268297 | 0.178 | 0.092 | 1.49E-20 | Neo-G | AHDC1    |
| LHPP.4     | 1.10E-24 | -0.4525  | 0.022 | 0.115 | 1.64E-20 | Neo-G | LHPP     |
| TSPAN12.5  | 1.14E-24 | -0.24153 | 0.031 | 0.131 | 1.71E-20 | Neo-G | TSPAN12  |
| GCC1.2     | 1.16E-24 | 0.227915 | 0.137 | 0.062 | 1.73E-20 | Neo-G | GCC1     |
| CCNL2.5    | 1.22E-24 | 0.283966 | 0.383 | 0.279 | 1.83E-20 | Neo-G | CCNL2    |
| MVB12A.3   | 1.23E-24 | -0.31162 | 0.17  | 0.318 | 1.84E-20 | Neo-G | MVB12A   |
| ZNF692.3   | 1.24E-24 | 0.276938 | 0.186 | 0.1   | 1.86E-20 | Neo-G | ZNF692   |
| CMPK2.3    | 1.31E-24 | 0.186495 | 0.119 | 0.049 | 1.96E-20 | Neo-G | CMPK2    |
| PDGFRA.6   | 1.33E-24 | -0.29271 | 0.05  | 0.16  | 1.98E-20 | Neo-G | PDGFRA   |
| TACC1.5    | 1.34E-24 | -0.32929 | 0.18  | 0.329 | 2.01E-20 | Neo-G | TACC1    |
| SIGLEC7.7  | 1.41E-24 | -0.33864 | 0.003 | 0.083 | 2.11E-20 | Neo-G | SIGLEC7  |
| ZFYVE21.5  | 1.46E-24 | -0.31877 | 0.138 | 0.282 | 2.18E-20 | Neo-G | ZFYVE21  |
| MMP15.6    | 1.46E-24 | 0.263234 | 0.125 | 0.056 | 2.18E-20 | Neo-G | MMP15    |
| USP8.1     | 1.47E-24 | -0.3197  | 0.132 | 0.274 | 2.19E-20 | Neo-G | USP8     |
| PRCC.3     | 1.50E-24 | 0.230639 | 0.397 | 0.292 | 2.24E-20 | Neo-G | PRCC     |
| LRRC4B.7   | 1.51E-24 | 0.326708 | 0.212 | 0.123 | 2.25E-20 | Neo-G | LRRC4B   |
| WBSCR22.5  | 1.58E-24 | 0.107125 | 0.606 | 0.479 | 2.36E-20 | Neo-G | WBSCR22  |
| TANC1.5    | 1.65E-24 | -0.18059 | 0.023 | 0.119 | 2.47E-20 | Neo-G | TANC1    |
| ZNF268.5   | 1.71E-24 | 0.279802 | 0.196 | 0.107 | 2.56E-20 | Neo-G | ZNF268   |
| C20orf24.1 | 1.72E-24 | 0.195007 | 0.586 | 0.453 | 2.57E-20 | Neo-G | C20orf24 |
| KLF2.4     | 1.79E-24 | -0.42589 | 0.041 | 0.143 | 2.67E-20 | Neo-G | KLF2     |
| IL6R.7     | 1.84E-24 | -0.34021 | 0.01  | 0.095 | 2.75E-20 | Neo-G | IL6R     |
| SCRG1.6    | 1.85E-24 | 0.140381 | 0.487 | 0.329 | 2.77E-20 | Neo-G | SCRG1    |
| TAPBP1.4   | 1.86E-24 | -0.34326 | 0.033 | 0.133 | 2.79E-20 | Neo-G | TAPBP1   |
| EHD2.5     | 1.89E-24 | -0.17227 | 0.007 | 0.09  | 2.82E-20 | Neo-G | EHD2     |
| AKR1A1.5   | 1.96E-24 | -0.42872 | 0.374 | 0.513 | 2.93E-20 | Neo-G | AKR1A1   |
| CAMK2B.6   | 1.97E-24 | 0.287302 | 0.191 | 0.104 | 2.95E-20 | Neo-G | CAMK2B   |
| FGR.7      | 2.13E-24 | -0.34492 | 0.009 | 0.092 | 3.19E-20 | Neo-G | FGR      |

|            |           |           |        |        |           |       |                |
|------------|-----------|-----------|--------|--------|-----------|-------|----------------|
| SRCIN1. 5  | 2. 14E-24 | 0. 123573 | 0. 078 | 0. 025 | 3. 20E-20 | Neo-G | SRCIN1         |
| BAD. 4     | 2. 17E-24 | 0. 161511 | 0. 52  | 0. 405 | 3. 24E-20 | Neo-G | BAD            |
| KYNU. 7    | 2. 19E-24 | -0. 37468 | 0. 009 | 0. 093 | 3. 28E-20 | Neo-G | KYNU           |
| DPYD. 5    | 2. 19E-24 | -0. 3443  | 0. 02  | 0. 11  | 3. 28E-20 | Neo-G | DPYD           |
| UBA7. 6    | 2. 26E-24 | -0. 33039 | 0. 008 | 0. 091 | 3. 37E-20 | Neo-G | UBA7           |
| ID4. 6     | 2. 30E-24 | 0. 292106 | 0. 318 | 0. 203 | 3. 44E-20 | Neo-G | ID4            |
| AIF1L. 6   | 2. 30E-24 | -0. 38025 | 0. 028 | 0. 124 | 3. 44E-20 | Neo-G | AIF1L          |
| NLRP3. 7   | 2. 37E-24 | -0. 39079 | 0. 012 | 0. 097 | 3. 54E-20 | Neo-G | NLRP3          |
| PLAT. 4    | 2. 42E-24 | -0. 28657 | 0. 031 | 0. 13  | 3. 61E-20 | Neo-G | PLAT           |
| UBE2E2. 4  | 2. 51E-24 | 0. 211487 | 0. 351 | 0. 227 | 3. 74E-20 | Neo-G | UBE2E2         |
| TRA2B. 4   | 2. 58E-24 | 0. 120696 | 0. 649 | 0. 527 | 3. 86E-20 | Neo-G | TRA2B          |
| MAOB. 5    | 2. 66E-24 | 0. 157781 | 0. 178 | 0. 089 | 3. 98E-20 | Neo-G | MAOB           |
| PEPD. 2    | 2. 72E-24 | -0. 36511 | 0. 286 | 0. 446 | 4. 07E-20 | Neo-G | PEPD           |
| TMEM68. 4  | 2. 73E-24 | 0. 276315 | 0. 255 | 0. 156 | 4. 08E-20 | Neo-G | TMEM68         |
| SH3TC1. 6  | 2. 95E-24 | -0. 36134 | 0. 007 | 0. 089 | 4. 41E-20 | Neo-G | SH3TC1         |
| CXorf21. 7 | 2. 95E-24 | -0. 36947 | 0. 005 | 0. 085 | 4. 41E-20 | Neo-G | CXorf21        |
| RIN1. 4    | 2. 98E-24 | -0. 16893 | 0. 008 | 0. 091 | 4. 46E-20 | Neo-G | RIN1           |
| ARL2. 4    | 3. 01E-24 | -0. 44731 | 0. 307 | 0. 454 | 4. 49E-20 | Neo-G | ARL2           |
| DOCK2. 7   | 3. 05E-24 | -0. 34774 | 0. 005 | 0. 086 | 4. 55E-20 | Neo-G | DOCK2          |
| SYNE1. 3   | 3. 15E-24 | 0. 258863 | 0. 203 | 0. 113 | 4. 71E-20 | Neo-G | SYNE1          |
| LAMTOR1. 4 | 3. 22E-24 | -0. 35622 | 0. 574 | 0. 664 | 4. 81E-20 | Neo-G | LAMTOR1        |
| FSTL1. 5   | 3. 30E-24 | -0. 19307 | 0. 027 | 0. 124 | 4. 94E-20 | Neo-G | FSTL1          |
| CASC3. 4   | 3. 43E-24 | 0. 26462  | 0. 276 | 0. 174 | 5. 13E-20 | Neo-G | CASC3          |
| IGDCC3. 7  | 3. 64E-24 | 0. 281009 | 0. 123 | 0. 055 | 5. 44E-20 | Neo-G | IGDCC3         |
| RP11-262H  | 3. 66E-24 | 0. 295038 | 0. 196 | 0. 109 | 5. 47E-20 | Neo-G | RP11-262H14. 4 |
| AP3B2      | 3. 84E-24 | 0. 165437 | 0. 068 | 0. 021 | 5. 74E-20 | Neo-G | AP3B2          |
| ARHGAP12.  | 3. 85E-24 | -0. 26809 | 0. 079 | 0. 203 | 5. 76E-20 | Neo-G | ARHGAP12       |
| PTPRZ1. 7  | 3. 86E-24 | -0. 45116 | 0. 295 | 0. 395 | 5. 77E-20 | Neo-G | PTPRZ1         |
| SETMAR. 2  | 4. 05E-24 | 0. 219847 | 0. 115 | 0. 048 | 6. 05E-20 | Neo-G | SETMAR         |
| NAA35. 2   | 4. 16E-24 | 0. 266038 | 0. 219 | 0. 127 | 6. 21E-20 | Neo-G | NAA35          |
| ARL6IP6. 2 | 4. 16E-24 | 0. 258729 | 0. 377 | 0. 269 | 6. 22E-20 | Neo-G | ARL6IP6        |
| FOXP2      | 4. 17E-24 | 0. 12896  | 0. 057 | 0. 015 | 6. 24E-20 | Neo-G | FOXP2          |
| HPS1. 6    | 4. 23E-24 | -0. 39314 | 0. 027 | 0. 121 | 6. 32E-20 | Neo-G | HPS1           |
| CCDC82. 3  | 4. 30E-24 | 0. 237948 | 0. 363 | 0. 261 | 6. 42E-20 | Neo-G | CCDC82         |
| PIK3IP1. 5 | 4. 42E-24 | -0. 45728 | 0. 064 | 0. 172 | 6. 60E-20 | Neo-G | PIK3IP1        |
| GALNT13. 3 | 4. 49E-24 | 0. 203699 | 0. 098 | 0. 037 | 6. 70E-20 | Neo-G | GALNT13        |
| PDGFD. 5   | 4. 50E-24 | -0. 15313 | 0. 006 | 0. 088 | 6. 73E-20 | Neo-G | PDGFD          |
| ARL6IP4. 6 | 4. 57E-24 | -0. 2958  | 0. 543 | 0. 634 | 6. 83E-20 | Neo-G | ARL6IP4        |
| NOTCH1. 3  | 4. 63E-24 | -0. 20011 | 0. 025 | 0. 121 | 6. 91E-20 | Neo-G | NOTCH1         |
| ATF2. 1    | 4. 75E-24 | 0. 2798   | 0. 247 | 0. 149 | 7. 09E-20 | Neo-G | ATF2           |
| KANK2. 3   | 5. 01E-24 | -0. 19691 | 0. 013 | 0. 101 | 7. 49E-20 | Neo-G | KANK2          |
| PCMTD2. 6  | 5. 06E-24 | 0. 304481 | 0. 317 | 0. 216 | 7. 56E-20 | Neo-G | PCMTD2         |
| THRAP3. 5  | 5. 09E-24 | 0. 176599 | 0. 533 | 0. 426 | 7. 60E-20 | Neo-G | THRAP3         |
| UBE2C. 7   | 5. 12E-24 | -0. 42178 | 0. 031 | 0. 127 | 7. 65E-20 | Neo-G | UBE2C          |
| THUMPD1. 2 | 5. 20E-24 | 0. 229682 | 0. 306 | 0. 201 | 7. 77E-20 | Neo-G | THUMPD1        |
| FAM217B. 7 | 5. 26E-24 | 0. 292993 | 0. 238 | 0. 145 | 7. 87E-20 | Neo-G | FAM217B        |
| CCND1. 3   | 5. 42E-24 | -0. 29498 | 0. 104 | 0. 233 | 8. 11E-20 | Neo-G | CCND1          |
| CCNE2. 4   | 5. 46E-24 | 0. 217141 | 0. 12  | 0. 051 | 8. 16E-20 | Neo-G | CCNE2          |
| RAB9A. 3   | 5. 47E-24 | -0. 3318  | 0. 171 | 0. 32  | 8. 18E-20 | Neo-G | RAB9A          |
| GALC. 3    | 5. 50E-24 | -0. 22161 | 0. 02  | 0. 112 | 8. 22E-20 | Neo-G | GALC           |
| RUVBL1. 4  | 5. 69E-24 | 0. 221678 | 0. 36  | 0. 255 | 8. 51E-20 | Neo-G | RUVBL1         |

|            |          |          |       |       |          |       |             |
|------------|----------|----------|-------|-------|----------|-------|-------------|
| SPINT2.7   | 5.77E-24 | 0.12609  | 0.346 | 0.201 | 8.62E-20 | Neo-G | SPINT2      |
| IFT52.4    | 5.77E-24 | 0.239989 | 0.347 | 0.245 | 8.63E-20 | Neo-G | IFT52       |
| LAMP5.6    | 6.17E-24 | 0.354862 | 0.182 | 0.1   | 9.21E-20 | Neo-G | LAMP5       |
| UBE3A.5    | 6.23E-24 | 0.305256 | 0.372 | 0.277 | 9.30E-20 | Neo-G | UBE3A       |
| RNFT1.3    | 6.32E-24 | -0.28072 | 0.089 | 0.216 | 9.44E-20 | Neo-G | RNFT1       |
| KCNN1      | 6.35E-24 | 0.110398 | 0.046 | 0.011 | 9.49E-20 | Neo-G | KCNN1       |
| TSC22D2.4  | 6.80E-24 | 0.244183 | 0.248 | 0.145 | 1.02E-19 | Neo-G | TSC22D2     |
| GMPR2.2    | 7.11E-24 | -0.34424 | 0.101 | 0.229 | 1.06E-19 | Neo-G | GMPR2       |
| SOX8.7     | 7.55E-24 | 0.299079 | 0.27  | 0.166 | 1.13E-19 | Neo-G | SOX8        |
| GAL3ST4.6  | 7.59E-24 | -0.47575 | 0.074 | 0.183 | 1.13E-19 | Neo-G | GAL3ST4     |
| TSPAN15.6  | 7.74E-24 | -0.32954 | 0.006 | 0.086 | 1.16E-19 | Neo-G | TSPAN15     |
| EIF3G.2    | 7.78E-24 | -0.34511 | 0.528 | 0.631 | 1.16E-19 | Neo-G | EIF3G       |
| IRAK3.7    | 8.14E-24 | -0.32515 | 0.004 | 0.082 | 1.22E-19 | Neo-G | IRAK3       |
| OPHN1.5    | 8.19E-24 | 0.263715 | 0.137 | 0.063 | 1.22E-19 | Neo-G | OPHN1       |
| LINC00116  | 8.61E-24 | -0.37369 | 0.227 | 0.381 | 1.29E-19 | Neo-G | LINC00116   |
| IRF2BPL.6  | 8.70E-24 | 0.27551  | 0.334 | 0.23  | 1.30E-19 | Neo-G | IRF2BPL     |
| RP5-940J5  | 8.71E-24 | -0.53396 | 0.066 | 0.173 | 1.30E-19 | Neo-G | RP5-940J5.9 |
| LYL1.7     | 8.75E-24 | -0.34088 | 0.009 | 0.09  | 1.31E-19 | Neo-G | LYL1        |
| ERAP2      | 9.10E-24 | -0.25139 | 0.007 | 0.088 | 1.36E-19 | Neo-G | ERAP2       |
| GIMAP1.6   | 9.30E-24 | -0.33182 | 0.004 | 0.081 | 1.39E-19 | Neo-G | GIMAP1      |
| LINC00643  | 9.43E-24 | 0.129554 | 0.049 | 0.012 | 1.41E-19 | Neo-G | LINC00643   |
| RNF135.7   | 9.44E-24 | -0.28908 | 0.027 | 0.121 | 1.41E-19 | Neo-G | RNF135      |
| KCNK12     | 9.54E-24 | 0.165695 | 0.065 | 0.019 | 1.43E-19 | Neo-G | KCNK12      |
| DEPDC7     | 9.62E-24 | 0.139181 | 0.068 | 0.021 | 1.44E-19 | Neo-G | DEPDC7      |
| RABEP1.5   | 9.63E-24 | 0.294515 | 0.338 | 0.242 | 1.44E-19 | Neo-G | RABEP1      |
| CTC-503J8  | 9.66E-24 | 0.153276 | 0.071 | 0.022 | 1.44E-19 | Neo-G | CTC-503J8.4 |
| KIAA1841.9 | 9.71E-24 | 0.249816 | 0.129 | 0.058 | 1.45E-19 | Neo-G | KIAA1841    |
| SNX3.2     | 1.00E-23 | -0.22408 | 0.714 | 0.717 | 1.49E-19 | Neo-G | SNX3        |
| ANAPC5.4   | 1.02E-23 | 0.181029 | 0.492 | 0.384 | 1.52E-19 | Neo-G | ANAPC5      |
| NDUFAF6.5  | 1.02E-23 | 0.299783 | 0.266 | 0.17  | 1.53E-19 | Neo-G | NDUFAF6     |
| ZNF267.7   | 1.05E-23 | -0.32029 | 0.042 | 0.143 | 1.57E-19 | Neo-G | ZNF267      |
| NELFCD.5   | 1.07E-23 | 0.231269 | 0.434 | 0.325 | 1.59E-19 | Neo-G | NELFCD      |
| ASPDH      | 1.08E-23 | 0.100851 | 0.038 | 0.007 | 1.62E-19 | Neo-G | ASPDH       |
| KAT6A.2    | 1.11E-23 | 0.288701 | 0.244 | 0.148 | 1.66E-19 | Neo-G | KAT6A       |
| EFNA2.5    | 1.17E-23 | 0.246949 | 0.107 | 0.044 | 1.74E-19 | Neo-G | EFNA2       |
| MYO1E      | 1.19E-23 | -0.19352 | 0.001 | 0.075 | 1.78E-19 | Neo-G | MYO1E       |
| EPHA3.6    | 1.24E-23 | -0.139   | 0.004 | 0.081 | 1.86E-19 | Neo-G | EPHA3       |
| ITPKB.1    | 1.25E-23 | -0.25401 | 0.004 | 0.081 | 1.87E-19 | Neo-G | ITPKB       |
| NPC1       | 1.27E-23 | -0.26512 | 0.023 | 0.114 | 1.89E-19 | Neo-G | NPC1        |
| PPP1CC.4   | 1.31E-23 | 0.193547 | 0.541 | 0.433 | 1.95E-19 | Neo-G | PPP1CC      |
| TPST1.5    | 1.32E-23 | 0.225098 | 0.342 | 0.227 | 1.97E-19 | Neo-G | TPST1       |
| MAPRE2.3   | 1.40E-23 | 0.178913 | 0.284 | 0.174 | 2.09E-19 | Neo-G | MAPRE2      |
| SASH3.7    | 1.45E-23 | -0.33504 | 0.007 | 0.087 | 2.16E-19 | Neo-G | SASH3       |
| LINC01117  | 1.60E-23 | 0.173474 | 0.06  | 0.017 | 2.39E-19 | Neo-G | LINC01117   |
| ILDR2.6    | 1.61E-23 | -0.14947 | 0.008 | 0.089 | 2.40E-19 | Neo-G | ILDR2       |
| IRAK1.5    | 1.71E-23 | -0.28555 | 0.06  | 0.17  | 2.56E-19 | Neo-G | IRAK1       |
| CECR1.6    | 1.74E-23 | -0.32914 | 0.003 | 0.079 | 2.60E-19 | Neo-G | CECR1       |
| YIPF4.3    | 1.79E-23 | 0.21704  | 0.467 | 0.363 | 2.68E-19 | Neo-G | YIPF4       |
| APOBEC3C   | 1.79E-23 | -0.31958 | 0.038 | 0.139 | 2.68E-19 | Neo-G | APOBEC3C    |
| NDUFA4L2   | 1.80E-23 | 0.157837 | 0.092 | 0.034 | 2.69E-19 | Neo-G | NDUFA4L2    |
| FAM220A.2  | 1.81E-23 | 0.238665 | 0.141 | 0.067 | 2.71E-19 | Neo-G | FAM220A     |

|              |          |          |       |       |          |       |             |
|--------------|----------|----------|-------|-------|----------|-------|-------------|
| AC009501. 1. | 8.6E-23  | -0.7242  | 0.064 | 0.168 | 2.78E-19 | Neo-G | AC009501. 4 |
| HSD3B7. 4    | 1.92E-23 | -0.27353 | 0.005 | 0.084 | 2.86E-19 | Neo-G | HSD3B7      |
| TNFAIP8. 6   | 1.92E-23 | -0.34241 | 0.002 | 0.078 | 2.88E-19 | Neo-G | TNFAIP8     |
| TRIP10. 1    | 1.97E-23 | -0.21089 | 0.019 | 0.108 | 2.94E-19 | Neo-G | TRIP10      |
| Clorf198. 1. | 9.9E-23  | 0.212702 | 0.183 | 0.095 | 2.97E-19 | Neo-G | Clorf198    |
| SHPRH. 3     | 2.00E-23 | 0.274633 | 0.205 | 0.117 | 2.99E-19 | Neo-G | SHPRH       |
| GPR84. 7     | 2.02E-23 | -0.34767 | 0.005 | 0.082 | 3.02E-19 | Neo-G | GPR84       |
| IL4R. 7      | 2.05E-23 | -0.30718 | 0.003 | 0.079 | 3.07E-19 | Neo-G | IL4R        |
| CD151. 6     | 2.17E-23 | -0.46932 | 0.387 | 0.494 | 3.24E-19 | Neo-G | CD151       |
| SS18L1. 3    | 2.23E-23 | 0.272917 | 0.159 | 0.082 | 3.34E-19 | Neo-G | SS18L1      |
| VCAM1. 5     | 2.28E-23 | -0.35968 | 0.004 | 0.081 | 3.40E-19 | Neo-G | VCAM1       |
| CDK8. 3      | 2.28E-23 | 0.252556 | 0.148 | 0.073 | 3.40E-19 | Neo-G | CDK8        |
| PWWP2A. 4    | 2.29E-23 | 0.281905 | 0.206 | 0.117 | 3.43E-19 | Neo-G | PWWP2A      |
| PLXNB2. 4    | 2.32E-23 | -0.26017 | 0.058 | 0.169 | 3.46E-19 | Neo-G | PLXNB2      |
| ARL9. 6      | 2.34E-23 | 0.317752 | 0.176 | 0.095 | 3.49E-19 | Neo-G | ARL9        |
| SLC39A10. 2. | 4.0E-23  | 0.280147 | 0.241 | 0.147 | 3.58E-19 | Neo-G | SLC39A10    |
| TRIM25. 3    | 2.42E-23 | -0.19347 | 0.013 | 0.097 | 3.62E-19 | Neo-G | TRIM25      |
| ZBTB18. 2    | 2.52E-23 | 0.219153 | 0.108 | 0.045 | 3.77E-19 | Neo-G | ZBTB18      |
| YME1L1. 5    | 2.55E-23 | -0.30629 | 0.137 | 0.275 | 3.81E-19 | Neo-G | YME1L1      |
| BAALC. 6     | 2.57E-23 | 0.192224 | 0.471 | 0.33  | 3.84E-19 | Neo-G | BAALC       |
| CITED1. 6    | 2.58E-23 | -0.34398 | 0.057 | 0.163 | 3.86E-19 | Neo-G | CITED1      |
| RGS11. 4     | 2.59E-23 | 0.206315 | 0.101 | 0.041 | 3.88E-19 | Neo-G | RGS11       |
| TM4SF1. 7    | 2.61E-23 | -0.29558 | 0.029 | 0.123 | 3.90E-19 | Neo-G | TM4SF1      |
| TNFRSF19. 2. | 6.2E-23  | -0.16354 | 0.023 | 0.115 | 3.91E-19 | Neo-G | TNFRSF19    |
| MTMR11. 2    | 2.69E-23 | -0.20526 | 0.003 | 0.079 | 4.02E-19 | Neo-G | MTMR11      |
| KLHDC2. 6    | 2.76E-23 | 0.27439  | 0.392 | 0.291 | 4.12E-19 | Neo-G | KLHDC2      |
| ZMAT3. 4     | 2.81E-23 | -0.27231 | 0.092 | 0.216 | 4.19E-19 | Neo-G | ZMAT3       |
| TCF7. 4      | 2.82E-23 | 0.234817 | 0.225 | 0.129 | 4.22E-19 | Neo-G | TCF7        |
| CHMP4A. 6    | 2.89E-23 | -0.37663 | 0.328 | 0.485 | 4.32E-19 | Neo-G | CHMP4A      |
| CCDC80. 6    | 2.89E-23 | -0.31674 | 0.029 | 0.123 | 4.33E-19 | Neo-G | CCDC80      |
| DDX46. 3     | 3.01E-23 | 0.152282 | 0.545 | 0.435 | 4.49E-19 | Neo-G | DDX46       |
| SRSF4. 4     | 3.04E-23 | 0.228154 | 0.448 | 0.349 | 4.54E-19 | Neo-G | SRSF4       |
| TNFAIP2. 5   | 3.18E-23 | -0.29453 | 0.005 | 0.083 | 4.75E-19 | Neo-G | TNFAIP2     |
| MAPT-AS1. 3. | 1.9E-23  | 0.166451 | 0.06  | 0.017 | 4.76E-19 | Neo-G | MAPT-AS1    |
| HOOK3. 3     | 3.26E-23 | 0.280274 | 0.374 | 0.273 | 4.88E-19 | Neo-G | HOOK3       |
| TRPM3. 6     | 3.33E-23 | -0.17393 | 0.002 | 0.077 | 4.98E-19 | Neo-G | TRPM3       |
| SSPN. 3      | 3.34E-23 | -0.26466 | 0.024 | 0.116 | 5.00E-19 | Neo-G | SSPN        |
| ITPK1. 1     | 3.41E-23 | -0.26846 | 0.046 | 0.15  | 5.10E-19 | Neo-G | ITPK1       |
| DCAF10. 3    | 3.43E-23 | 0.295391 | 0.262 | 0.167 | 5.13E-19 | Neo-G | DCAF10      |
| ZHX1. 6      | 3.51E-23 | 0.29772  | 0.295 | 0.199 | 5.25E-19 | Neo-G | ZHX1        |
| ZKSCAN5. 4   | 3.56E-23 | 0.238012 | 0.127 | 0.058 | 5.32E-19 | Neo-G | ZKSCAN5     |
| GLIS3. 2     | 3.64E-23 | -0.17043 | 0.007 | 0.086 | 5.44E-19 | Neo-G | GLIS3       |
| ST14. 7      | 3.65E-23 | -0.31084 | 0.005 | 0.081 | 5.46E-19 | Neo-G | ST14        |
| ZNF511. 5    | 3.67E-23 | -0.21841 | 0.085 | 0.209 | 5.48E-19 | Neo-G | ZNF511      |
| EHD4. 7      | 3.93E-23 | -0.27774 | 0.016 | 0.1   | 5.87E-19 | Neo-G | EHD4        |
| CENPK. 5     | 3.96E-23 | -0.24835 | 0.02  | 0.109 | 5.92E-19 | Neo-G | CENPK       |
| SEN7. 4      | 4.07E-23 | 0.252616 | 0.156 | 0.078 | 6.08E-19 | Neo-G | SEN7        |
| EID2B. 5     | 4.08E-23 | 0.282683 | 0.159 | 0.081 | 6.09E-19 | Neo-G | EID2B       |
| ZSCAN9. 2    | 4.10E-23 | 0.203189 | 0.146 | 0.07  | 6.12E-19 | Neo-G | ZSCAN9      |
| SLC25A14. 4. | 1.1E-23  | 0.227758 | 0.161 | 0.082 | 6.15E-19 | Neo-G | SLC25A14    |
| AKIRIN1. 5   | 4.20E-23 | 0.227394 | 0.456 | 0.358 | 6.28E-19 | Neo-G | AKIRIN1     |

|            |          |          |       |       |          |       |               |
|------------|----------|----------|-------|-------|----------|-------|---------------|
| CRTAC1     | 4.39E-23 | 0.130901 | 0.062 | 0.018 | 6.56E-19 | Neo-G | CRTAC1        |
| EIF4H.3    | 4.46E-23 | 0.105288 | 0.646 | 0.528 | 6.67E-19 | Neo-G | EIF4H         |
| CHN1.6     | 4.54E-23 | 0.335367 | 0.299 | 0.206 | 6.78E-19 | Neo-G | CHN1          |
| RAI14.3    | 4.77E-23 | 0.267613 | 0.132 | 0.062 | 7.12E-19 | Neo-G | RAI14         |
| TMEM25.6   | 4.94E-23 | 0.294132 | 0.198 | 0.113 | 7.39E-19 | Neo-G | TMEM25        |
| GFAP.4     | 5.04E-23 | -0.69865 | 0.255 | 0.361 | 7.53E-19 | Neo-G | GFAP          |
| OAF.1      | 5.17E-23 | -0.13787 | 0.002 | 0.075 | 7.73E-19 | Neo-G | OAF           |
| TAF6.3     | 5.17E-23 | 0.244902 | 0.324 | 0.225 | 7.73E-19 | Neo-G | TAF6          |
| TUB        | 5.27E-23 | 0.134397 | 0.048 | 0.012 | 7.87E-19 | Neo-G | TUB           |
| VAV1.7     | 5.29E-23 | -0.31502 | 0.005 | 0.082 | 7.90E-19 | Neo-G | VAV1          |
| ACSF2.4    | 5.37E-23 | -0.21966 | 0.001 | 0.073 | 8.02E-19 | Neo-G | ACSF2         |
| RHBDL1     | 5.42E-23 | 0.148676 | 0.06  | 0.018 | 8.10E-19 | Neo-G | RHBDL1        |
| IL32.5     | 5.56E-23 | -0.48155 | 0.022 | 0.109 | 8.31E-19 | Neo-G | IL32          |
| FAHD1.3    | 5.76E-23 | 0.290004 | 0.259 | 0.166 | 8.61E-19 | Neo-G | FAHD1         |
| RFTN2.7    | 6.12E-23 | 0.233665 | 0.211 | 0.117 | 9.15E-19 | Neo-G | RFTN2         |
| MX1.4      | 6.13E-23 | -0.40195 | 0.036 | 0.13  | 9.16E-19 | Neo-G | MX1           |
| SHMT2.4    | 6.53E-23 | -0.34873 | 0.118 | 0.245 | 9.76E-19 | Neo-G | SHMT2         |
| RIPPLY2.2  | 6.56E-23 | 0.195663 | 0.086 | 0.032 | 9.80E-19 | Neo-G | RIPPLY2       |
| MGP.6      | 6.60E-23 | -0.92699 | 0.026 | 0.113 | 9.86E-19 | Neo-G | MGP           |
| SLC40A1.5  | 6.63E-23 | -0.2988  | 0.047 | 0.15  | 9.90E-19 | Neo-G | SLC40A1       |
| ANKRD9.3   | 6.68E-23 | -0.19588 | 0.013 | 0.096 | 9.98E-19 | Neo-G | ANKRD9        |
| HGSNAT.4   | 6.92E-23 | 0.293015 | 0.295 | 0.195 | 1.03E-18 | Neo-G | HGSNAT        |
| SST        | 6.95E-23 | 0.116077 | 0.016 | 0.001 | 1.04E-18 | Neo-G | SST           |
| EID2.6     | 7.25E-23 | 0.311015 | 0.183 | 0.102 | 1.08E-18 | Neo-G | EID2          |
| RASL11B.6  | 7.47E-23 | 0.277566 | 0.112 | 0.047 | 1.12E-18 | Neo-G | RASL11B       |
| RARRES2.6  | 7.71E-23 | -0.67128 | 0.06  | 0.16  | 1.15E-18 | Neo-G | RARRES2       |
| NMT1.2     | 7.79E-23 | -0.28913 | 0.146 | 0.283 | 1.16E-18 | Neo-G | NMT1          |
| PIEZO1.4   | 8.08E-23 | -0.21535 | 0.003 | 0.077 | 1.21E-18 | Neo-G | PIEZO1        |
| RP11-452F  | 8.10E-23 | -0.35312 | 0.04  | 0.137 | 1.21E-18 | Neo-G | RP11-452F19.3 |
| ATP6VOD1.8 | 8.14E-23 | 0.122354 | 0.619 | 0.497 | 1.22E-18 | Neo-G | ATP6VOD1      |
| NACA2.3    | 8.17E-23 | -0.55354 | 0.074 | 0.179 | 1.22E-18 | Neo-G | NACA2         |
| GDI2.7     | 8.61E-23 | -0.39422 | 0.365 | 0.503 | 1.29E-18 | Neo-G | GDI2          |
| PPP3CC.3   | 8.68E-23 | 0.261096 | 0.213 | 0.123 | 1.30E-18 | Neo-G | PPP3CC        |
| GNAI2.7    | 9.34E-23 | -0.31384 | 0.357 | 0.498 | 1.40E-18 | Neo-G | GNAI2         |
| SRSF1.2    | 9.76E-23 | 0.17558  | 0.493 | 0.385 | 1.46E-18 | Neo-G | SRSF1         |
| DDX21.5    | 9.89E-23 | -0.3417  | 0.176 | 0.315 | 1.48E-18 | Neo-G | DDX21         |
| PEX5.3     | 9.91E-23 | 0.224525 | 0.162 | 0.082 | 1.48E-18 | Neo-G | PEX5          |
| C9orf78.2  | 1.03E-22 | 0.124586 | 0.539 | 0.432 | 1.54E-18 | Neo-G | C9orf78       |
| DGCR6L.3   | 1.03E-22 | -0.28667 | 0.2   | 0.352 | 1.55E-18 | Neo-G | DGCR6L        |
| SLC39A4.5  | 1.06E-22 | -0.31551 | 0.016 | 0.099 | 1.59E-18 | Neo-G | SLC39A4       |
| PNP.5      | 1.07E-22 | -0.35702 | 0.024 | 0.113 | 1.61E-18 | Neo-G | PNP           |
| POR.2      | 1.11E-22 | 0.211277 | 0.363 | 0.253 | 1.66E-18 | Neo-G | POR           |
| COX20.2    | 1.11E-22 | 0.113778 | 0.57  | 0.446 | 1.66E-18 | Neo-G | COX20         |
| ZNF75A.6   | 1.12E-22 | 0.287919 | 0.301 | 0.204 | 1.67E-18 | Neo-G | ZNF75A        |
| RELL2      | 1.15E-22 | 0.169177 | 0.089 | 0.033 | 1.71E-18 | Neo-G | RELL2         |
| ZNF618.5   | 1.23E-22 | 0.172596 | 0.102 | 0.041 | 1.83E-18 | Neo-G | ZNF618        |
| DDT.4      | 1.23E-22 | -0.35338 | 0.397 | 0.537 | 1.84E-18 | Neo-G | DDT           |
| COL6A1.6   | 1.26E-22 | -0.34802 | 0.119 | 0.242 | 1.88E-18 | Neo-G | COL6A1        |
| DOLPP1.4   | 1.28E-22 | 0.223885 | 0.174 | 0.092 | 1.91E-18 | Neo-G | DOLPP1        |
| MBIP.5     | 1.29E-22 | 0.258302 | 0.266 | 0.169 | 1.92E-18 | Neo-G | MBIP          |
| BLNK.5     | 1.37E-22 | -0.36245 | 0.002 | 0.075 | 2.04E-18 | Neo-G | BLNK          |

|              |           |           |        |        |                 |          |
|--------------|-----------|-----------|--------|--------|-----------------|----------|
| NAIP. 7      | 1. 49E-22 | -0. 33465 | 0. 028 | 0. 118 | 2. 23E-18 Neo-G | NAIP     |
| RAB6B. 6     | 1. 51E-22 | 0. 230422 | 0. 125 | 0. 057 | 2. 25E-18 Neo-G | RAB6B    |
| MSH6. 4      | 1. 56E-22 | 0. 27337  | 0. 204 | 0. 117 | 2. 33E-18 Neo-G | MSH6     |
| FUT9         | 1. 61E-22 | 0. 117336 | 0. 049 | 0. 013 | 2. 41E-18 Neo-G | FUT9     |
| CACNA2D4. 1. | 64E-22    | -0. 34966 | 0. 006 | 0. 082 | 2. 46E-18 Neo-G | CACNA2D4 |
| RRM1. 5      | 1. 68E-22 | 0. 244731 | 0. 273 | 0. 174 | 2. 51E-18 Neo-G | RRM1     |
| CENPM. 6     | 1. 69E-22 | -0. 23854 | 0. 006 | 0. 082 | 2. 53E-18 Neo-G | CENPM    |
| PLAC8. 6     | 1. 70E-22 | -0. 38078 | 0. 003 | 0. 076 | 2. 55E-18 Neo-G | PLAC8    |
| NDUFA13. 4   | 1. 75E-22 | -0. 33677 | 0. 745 | 0. 775 | 2. 62E-18 Neo-G | NDUFA13  |
| CSNK2A1. 4   | 1. 76E-22 | 0. 244379 | 0. 403 | 0. 306 | 2. 63E-18 Neo-G | CSNK2A1  |
| SLC4A2       | 1. 79E-22 | -0. 24155 | 0. 053 | 0. 157 | 2. 67E-18 Neo-G | SLC4A2   |
| DCHS1. 6     | 1. 79E-22 | 0. 278322 | 0. 15  | 0. 076 | 2. 67E-18 Neo-G | DCHS1    |
| IRF3. 1      | 1. 87E-22 | -0. 28381 | 0. 126 | 0. 258 | 2. 80E-18 Neo-G | IRF3     |
| TRIM56. 2    | 1. 92E-22 | -0. 27576 | 0. 006 | 0. 082 | 2. 87E-18 Neo-G | TRIM56   |
| HIPK2. 5     | 1. 92E-22 | 0. 256315 | 0. 314 | 0. 209 | 2. 87E-18 Neo-G | HIPK2    |
| BCAT1. 5     | 2. 02E-22 | -0. 29651 | 0. 118 | 0. 245 | 3. 02E-18 Neo-G | BCAT1    |
| ADORA1. 5    | 2. 10E-22 | -0. 23739 | 0. 036 | 0. 132 | 3. 14E-18 Neo-G | ADORA1   |
| TUSC2. 4     | 2. 15E-22 | 0. 241734 | 0. 422 | 0. 325 | 3. 21E-18 Neo-G | TUSC2    |
| MBOAT7. 5    | 2. 15E-22 | -0. 27147 | 0. 126 | 0. 257 | 3. 22E-18 Neo-G | MBOAT7   |
| ZC3H12A. 5   | 2. 22E-22 | -0. 308   | 0. 008 | 0. 085 | 3. 32E-18 Neo-G | ZC3H12A  |
| CA14. 6      | 2. 25E-22 | 0. 23602  | 0. 106 | 0. 044 | 3. 36E-18 Neo-G | CA14     |
| TFPT. 5      | 2. 29E-22 | -0. 37153 | 0. 189 | 0. 323 | 3. 42E-18 Neo-G | TFPT     |
| NR2F1. 4     | 2. 35E-22 | 0. 313975 | 0. 244 | 0. 156 | 3. 52E-18 Neo-G | NR2F1    |
| SFXN1. 4     | 2. 35E-22 | 0. 250924 | 0. 302 | 0. 207 | 3. 52E-18 Neo-G | SFXN1    |
| CD300C. 7    | 2. 39E-22 | -0. 32233 | 0. 003 | 0. 076 | 3. 57E-18 Neo-G | CD300C   |
| RNPEPL1. 5   | 2. 48E-22 | -0. 26478 | 0. 042 | 0. 141 | 3. 70E-18 Neo-G | RNPEPL1  |
| ATF7IP. 2    | 2. 54E-22 | 0. 236381 | 0. 188 | 0. 103 | 3. 79E-18 Neo-G | ATF7IP   |
| PPP3CB. 3    | 2. 60E-22 | 0. 256956 | 0. 183 | 0. 1   | 3. 88E-18 Neo-G | PPP3CB   |
| RNF150. 2    | 2. 67E-22 | 0. 166261 | 0. 091 | 0. 035 | 3. 99E-18 Neo-G | RNF150   |
| FRS3         | 2. 72E-22 | 0. 132358 | 0. 064 | 0. 02  | 4. 06E-18 Neo-G | FRS3     |
| CDH8         | 2. 88E-22 | 0. 141389 | 0. 049 | 0. 013 | 4. 30E-18 Neo-G | CDH8     |
| HIGD1A. 3    | 2. 92E-22 | -0. 3767  | 0. 297 | 0. 443 | 4. 36E-18 Neo-G | HIGD1A   |
| FARSB. 4     | 2. 97E-22 | 0. 218073 | 0. 323 | 0. 221 | 4. 44E-18 Neo-G | FARSB    |
| TMEM63A. 3   | 3. 11E-22 | -0. 2582  | 0. 005 | 0. 079 | 4. 65E-18 Neo-G | TMEM63A  |
| CEP97. 4     | 3. 24E-22 | 0. 236272 | 0. 14  | 0. 068 | 4. 85E-18 Neo-G | CEP97    |
| CLTA. 5      | 3. 33E-22 | 0. 124241 | 0. 746 | 0. 614 | 4. 97E-18 Neo-G | CLTA     |
| RCAN1. 6     | 3. 49E-22 | -0. 48793 | 0. 156 | 0. 282 | 5. 22E-18 Neo-G | RCAN1    |
| SLC15A3. 6   | 3. 52E-22 | -0. 28603 | 0. 004 | 0. 077 | 5. 26E-18 Neo-G | SLC15A3  |
| CSNK1A1. 4   | 3. 56E-22 | 0. 142521 | 0. 672 | 0. 544 | 5. 32E-18 Neo-G | CSNK1A1  |
| MYO9B. 5     | 3. 62E-22 | -0. 29414 | 0. 148 | 0. 284 | 5. 42E-18 Neo-G | MYO9B    |
| PACSIN3. 5   | 3. 66E-22 | -0. 15024 | 0. 004 | 0. 077 | 5. 46E-18 Neo-G | PACSIN3  |
| BLOC1S4. 7   | 3. 66E-22 | 0. 31089  | 0. 324 | 0. 233 | 5. 47E-18 Neo-G | BLOC1S4  |
| TUFT1        | 3. 67E-22 | 0. 153192 | 0. 071 | 0. 023 | 5. 48E-18 Neo-G | TUFT1    |
| LIFR. 4      | 3. 70E-22 | -0. 20666 | 0. 028 | 0. 12  | 5. 53E-18 Neo-G | LIFR     |
| ASH1L. 4     | 3. 88E-22 | 0. 233702 | 0. 396 | 0. 299 | 5. 80E-18 Neo-G | ASH1L    |
| STK3. 1      | 3. 89E-22 | -0. 24977 | 0. 028 | 0. 119 | 5. 81E-18 Neo-G | STK3     |
| NSUN5. 2     | 3. 95E-22 | 0. 21828  | 0. 313 | 0. 212 | 5. 90E-18 Neo-G | NSUN5    |
| RBM10. 3     | 3. 96E-22 | 0. 282088 | 0. 285 | 0. 192 | 5. 91E-18 Neo-G | RBM10    |
| SORT1. 4     | 4. 07E-22 | -0. 29364 | 0. 117 | 0. 243 | 6. 08E-18 Neo-G | SORT1    |
| ZNF22. 5     | 4. 18E-22 | 0. 204614 | 0. 372 | 0. 264 | 6. 24E-18 Neo-G | ZNF22    |
| CLK4. 3      | 4. 24E-22 | 0. 210079 | 0. 25  | 0. 152 | 6. 33E-18 Neo-G | CLK4     |



|            |          |          |       |       |          |       |               |
|------------|----------|----------|-------|-------|----------|-------|---------------|
| PHF21B     | 4.31E-22 | 0.189877 | 0.072 | 0.025 | 6.45E-18 | Neo-G | PHF21B        |
| AKAP12.7   | 4.35E-22 | -0.33387 | 0.086 | 0.199 | 6.50E-18 | Neo-G | AKAP12        |
| ATP13A2.4  | 4.36E-22 | 0.288997 | 0.218 | 0.131 | 6.52E-18 | Neo-G | ATP13A2       |
| KDM7A.1    | 4.42E-22 | 0.157743 | 0.124 | 0.055 | 6.61E-18 | Neo-G | KDM7A         |
| MTHFD1L.6  | 4.43E-22 | -0.25346 | 0.046 | 0.146 | 6.62E-18 | Neo-G | MTHFD1L       |
| FAU.5      | 4.46E-22 | -0.29515 | 0.969 | 0.956 | 6.67E-18 | Neo-G | FAU           |
| RREB1.7    | 4.52E-22 | -0.24196 | 0.005 | 0.08  | 6.75E-18 | Neo-G | RREB1         |
| KRTCAP2.4  | 4.54E-22 | -0.37613 | 0.438 | 0.571 | 6.78E-18 | Neo-G | KRTCAP2       |
| ETHE1.3    | 4.68E-22 | -0.39559 | 0.17  | 0.303 | 6.99E-18 | Neo-G | ETHE1         |
| IL16.6     | 4.76E-22 | -0.32921 | 0.004 | 0.076 | 7.11E-18 | Neo-G | IL16          |
| C11orf49.4 | 4.92E-22 | 0.251388 | 0.321 | 0.227 | 7.35E-18 | Neo-G | C11orf49      |
| USP33.2    | 4.96E-22 | 0.254249 | 0.264 | 0.169 | 7.41E-18 | Neo-G | USP33         |
| NUP214.6   | 5.05E-22 | -0.41632 | 0.094 | 0.207 | 7.55E-18 | Neo-G | NUP214        |
| PDCD2L.4   | 5.13E-22 | 0.239393 | 0.177 | 0.096 | 7.67E-18 | Neo-G | PDCD2L        |
| CEP41.2    | 5.17E-22 | 0.228831 | 0.234 | 0.141 | 7.73E-18 | Neo-G | CEP41         |
| DNAJC3.4   | 5.27E-22 | -0.32322 | 0.17  | 0.307 | 7.87E-18 | Neo-G | DNAJC3        |
| CD93.7     | 5.28E-22 | -0.32536 | 0.005 | 0.079 | 7.89E-18 | Neo-G | CD93          |
| DSE.7      | 5.28E-22 | -0.37617 | 0.051 | 0.148 | 7.89E-18 | Neo-G | DSE           |
| RGN.6      | 5.34E-22 | 0.202004 | 0.137 | 0.064 | 7.98E-18 | Neo-G | RGN           |
| CAP1.6     | 5.79E-22 | -0.35806 | 0.495 | 0.604 | 8.65E-18 | Neo-G | CAP1          |
| MTFR1L.4   | 5.94E-22 | 0.229064 | 0.376 | 0.28  | 8.88E-18 | Neo-G | MTFR1L        |
| COPS7B.3   | 6.10E-22 | 0.243624 | 0.282 | 0.186 | 9.11E-18 | Neo-G | COPS7B        |
| TM9SF3.4   | 6.11E-22 | -0.24728 | 0.108 | 0.233 | 9.13E-18 | Neo-G | TM9SF3        |
| SYNM.5     | 6.20E-22 | -0.1419  | 0.005 | 0.079 | 9.27E-18 | Neo-G | SYNM          |
| TMEM101.2  | 6.29E-22 | -0.29255 | 0.098 | 0.22  | 9.41E-18 | Neo-G | TMEM101       |
| APOPT1.3   | 6.49E-22 | 0.184001 | 0.474 | 0.37  | 9.70E-18 | Neo-G | APOPT1        |
| SYDE1.3    | 6.50E-22 | -0.12763 | 0.005 | 0.078 | 9.71E-18 | Neo-G | SYDE1         |
| HNRNPH1.2  | 6.60E-22 | 0.174889 | 0.556 | 0.444 | 9.86E-18 | Neo-G | HNRNPH1       |
| NUB1.2     | 6.61E-22 | 0.223944 | 0.345 | 0.242 | 9.88E-18 | Neo-G | NUB1          |
| PRKCD.6    | 6.86E-22 | -0.28331 | 0.011 | 0.089 | 1.03E-17 | Neo-G | PRKCD         |
| SRD5A1.2   | 7.09E-22 | 0.25621  | 0.181 | 0.101 | 1.06E-17 | Neo-G | SRD5A1        |
| RP13-188A  | 7.14E-22 | 0.121919 | 0.051 | 0.014 | 1.07E-17 | Neo-G | RP13-188A5.1  |
| COLGALT2.7 | 7.39E-22 | -0.19591 | 0.048 | 0.15  | 1.10E-17 | Neo-G | COLGALT2      |
| DDX6.2     | 7.81E-22 | 0.171406 | 0.29  | 0.186 | 1.17E-17 | Neo-G | DDX6          |
| EMP2.2     | 7.94E-22 | -0.3521  | 0.029 | 0.118 | 1.19E-17 | Neo-G | EMP2          |
| PCDHB2.5   | 7.95E-22 | 0.247542 | 0.143 | 0.071 | 1.19E-17 | Neo-G | PCDHB2        |
| RHOH.7     | 8.07E-22 | -0.37988 | 0.009 | 0.085 | 1.21E-17 | Neo-G | RHOH          |
| AREG.7     | 8.17E-22 | -0.47719 | 0.002 | 0.072 | 1.22E-17 | Neo-G | AREG          |
| RP11-386I  | 8.20E-22 | -0.31735 | 0.003 | 0.074 | 1.23E-17 | Neo-G | RP11-386I14.4 |
| ANGPTL4.3  | 8.98E-22 | -0.47937 | 0.026 | 0.11  | 1.34E-17 | Neo-G | ANGPTL4       |
| NACC2.4    | 8.99E-22 | -0.17554 | 0.024 | 0.112 | 1.34E-17 | Neo-G | NACC2         |
| HBEGF.7    | 9.03E-22 | -0.48333 | 0.12  | 0.227 | 1.35E-17 | Neo-G | HBEGF         |
| SSRP1.5    | 9.12E-22 | 0.219414 | 0.444 | 0.344 | 1.36E-17 | Neo-G | SSRP1         |
| GEM.2      | 9.20E-22 | -0.36647 | 0.022 | 0.106 | 1.37E-17 | Neo-G | GEM           |
| C1QTNF3.3  | 9.23E-22 | 0.196328 | 0.086 | 0.033 | 1.38E-17 | Neo-G | C1QTNF3       |
| GLB1.4     | 9.76E-22 | -0.33115 | 0.132 | 0.258 | 1.46E-17 | Neo-G | GLB1          |
| RALGDS.4   | 9.80E-22 | 0.231265 | 0.237 | 0.142 | 1.46E-17 | Neo-G | RALGDS        |
| AGA.2      | 9.88E-22 | -0.31517 | 0.06  | 0.165 | 1.48E-17 | Neo-G | AGA           |
| NR2F6.6    | 9.90E-22 | 0.325793 | 0.214 | 0.132 | 1.48E-17 | Neo-G | NR2F6         |
| CNIH4.5    | 1.03E-21 | -0.36882 | 0.242 | 0.39  | 1.54E-17 | Neo-G | CNIH4         |
| CARD9.7    | 1.05E-21 | -0.2782  | 0.005 | 0.077 | 1.57E-17 | Neo-G | CARD9         |

|             |           |           |        |        |                 |                |
|-------------|-----------|-----------|--------|--------|-----------------|----------------|
| ATG10. 2    | 1. 05E-21 | 0. 253729 | 0. 222 | 0. 133 | 1. 57E-17 Neo-G | ATG10          |
| HM13. 2     | 1. 06E-21 | -0. 35521 | 0. 35  | 0. 49  | 1. 59E-17 Neo-G | HM13           |
| EPC2. 3     | 1. 13E-21 | 0. 27076  | 0. 163 | 0. 087 | 1. 69E-17 Neo-G | EPC2           |
| ZSCAN1      | 1. 17E-21 | 0. 101237 | 0. 047 | 0. 012 | 1. 75E-17 Neo-G | ZSCAN1         |
| HSPA13. 6   | 1. 24E-21 | 0. 282167 | 0. 285 | 0. 189 | 1. 85E-17 Neo-G | HSPA13         |
| NCL. 4      | 1. 27E-21 | 0. 122395 | 0. 661 | 0. 542 | 1. 89E-17 Neo-G | NCL            |
| ARHGEF2. 6  | 1. 27E-21 | 0. 226579 | 0. 385 | 0. 277 | 1. 89E-17 Neo-G | ARHGEF2        |
| KXD1. 4     | 1. 30E-21 | -0. 37514 | 0. 322 | 0. 464 | 1. 94E-17 Neo-G | KXD1           |
| RASGRP3. 5  | 1. 32E-21 | -0. 33767 | 0. 005 | 0. 076 | 1. 98E-17 Neo-G | RASGRP3        |
| VPS13C. 2   | 1. 36E-21 | -0. 26057 | 0. 075 | 0. 186 | 2. 03E-17 Neo-G | VPS13C         |
| GPR37L1. 6  | 1. 38E-21 | -0. 37635 | 0. 014 | 0. 093 | 2. 06E-17 Neo-G | GPR37L1        |
| ALDH3B1. 5  | 1. 38E-21 | -0. 26279 | 0. 006 | 0. 079 | 2. 06E-17 Neo-G | ALDH3B1        |
| NFE2L3. 1   | 1. 46E-21 | 0. 138273 | 0. 075 | 0. 026 | 2. 18E-17 Neo-G | NFE2L3         |
| KDELR3. 1   | 1. 47E-21 | -0. 16112 | 0      | 0. 067 | 2. 19E-17 Neo-G | KDELR3         |
| FAM181A. 5  | 1. 56E-21 | -0. 25364 | 0. 003 | 0. 073 | 2. 33E-17 Neo-G | FAM181A        |
| GJA1. 4     | 1. 60E-21 | -0. 33232 | 0. 011 | 0. 087 | 2. 40E-17 Neo-G | GJA1           |
| TMEM37. 3   | 1. 61E-21 | -0. 30603 | 0. 002 | 0. 07  | 2. 40E-17 Neo-G | TMEM37         |
| ACIN1. 4    | 1. 61E-21 | 0. 265181 | 0. 348 | 0. 255 | 2. 41E-17 Neo-G | ACIN1          |
| CCDC88B. 2  | 1. 85E-21 | -0. 29048 | 0. 013 | 0. 09  | 2. 76E-17 Neo-G | CCDC88B        |
| RASSF8. 4   | 1. 93E-21 | -0. 1614  | 0. 016 | 0. 096 | 2. 89E-17 Neo-G | RASSF8         |
| PKNOX1      | 1. 95E-21 | 0. 259268 | 0. 181 | 0. 1   | 2. 91E-17 Neo-G | PKNOX1         |
| PPM1K. 3    | 1. 95E-21 | 0. 183168 | 0. 32  | 0. 213 | 2. 92E-17 Neo-G | PPM1K          |
| TGFB1I1. 6  | 1. 95E-21 | -0. 1722  | 0. 04  | 0. 137 | 2. 92E-17 Neo-G | TGFB1I1        |
| PSMA2. 4    | 1. 97E-21 | -0. 67758 | 0. 001 | 0. 068 | 2. 95E-17 Neo-G | PSMA2          |
| TMEM11. 4   | 2. 21E-21 | 0. 1692   | 0. 408 | 0. 308 | 3. 30E-17 Neo-G | TMEM11         |
| MGME1. 2    | 2. 26E-21 | -0. 24567 | 0. 056 | 0. 159 | 3. 37E-17 Neo-G | MGME1          |
| AGAP3. 4    | 2. 26E-21 | 0. 255562 | 0. 17  | 0. 091 | 3. 38E-17 Neo-G | AGAP3          |
| TBL1XR1. 5  | 2. 29E-21 | 0. 263634 | 0. 333 | 0. 238 | 3. 42E-17 Neo-G | TBL1XR1        |
| UBE2B       | 2. 47E-21 | 0. 134221 | 0. 578 | 0. 474 | 3. 69E-17 Neo-G | UBE2B          |
| GAS1. 7     | 2. 50E-21 | -0. 2464  | 0. 055 | 0. 155 | 3. 74E-17 Neo-G | GAS1           |
| NDRG1. 3    | 2. 56E-21 | -0. 50705 | 0. 08  | 0. 183 | 3. 82E-17 Neo-G | NDRG1          |
| UBTD2. 3    | 2. 76E-21 | 0. 288524 | 0. 174 | 0. 097 | 4. 12E-17 Neo-G | UBTD2          |
| FILIP1L. 7  | 3. 20E-21 | -0. 30342 | 0. 06  | 0. 16  | 4. 78E-17 Neo-G | FILIP1L        |
| GGPS1. 6    | 3. 32E-21 | 0. 192417 | 0. 406 | 0. 307 | 4. 96E-17 Neo-G | GGPS1          |
| TMBIM4. 5   | 3. 37E-21 | -0. 68065 | 0      | 0. 066 | 5. 03E-17 Neo-G | TMBIM4         |
| PCDH10. 5   | 3. 40E-21 | -0. 16705 | 0. 005 | 0. 075 | 5. 09E-17 Neo-G | PCDH10         |
| EPHX1. 3    | 3. 48E-21 | -0. 35064 | 0. 121 | 0. 246 | 5. 20E-17 Neo-G | EPHX1          |
| MOB3B. 4    | 3. 51E-21 | 0. 22789  | 0. 165 | 0. 085 | 5. 24E-17 Neo-G | MOB3B          |
| SLC9A9. 6   | 3. 61E-21 | -0. 31018 | 0. 011 | 0. 086 | 5. 39E-17 Neo-G | SLC9A9         |
| LOXL1. 5    | 3. 67E-21 | -0. 13258 | 0. 01  | 0. 086 | 5. 49E-17 Neo-G | LOXL1          |
| MXD4. 4     | 3. 83E-21 | 0. 296152 | 0. 269 | 0. 178 | 5. 72E-17 Neo-G | MXD4           |
| PFDN1. 1    | 3. 87E-21 | 0. 115185 | 0. 544 | 0. 436 | 5. 79E-17 Neo-G | PFDN1          |
| FAM66C. 2   | 3. 95E-21 | 0. 173886 | 0. 091 | 0. 036 | 5. 91E-17 Neo-G | FAM66C         |
| PROCR. 6    | 3. 98E-21 | -0. 28267 | 0. 005 | 0. 077 | 5. 95E-17 Neo-G | PROCR          |
| GRSF1. 3    | 4. 02E-21 | 0. 242217 | 0. 405 | 0. 312 | 6. 01E-17 Neo-G | GRSF1          |
| ADAMTS9. 5  | 4. 09E-21 | -0. 1581  | 0. 01  | 0. 086 | 6. 11E-17 Neo-G | ADAMTS9        |
| RP11-480C   | 4. 10E-21 | 0. 128446 | 0. 075 | 0. 026 | 6. 13E-17 Neo-G | RP11-480C16. 1 |
| AAED1. 6    | 4. 23E-21 | -0. 2318  | 0. 081 | 0. 193 | 6. 32E-17 Neo-G | AAED1          |
| SLC30A1. 2  | 4. 29E-21 | -0. 18319 | 0. 017 | 0. 098 | 6. 41E-17 Neo-G | SLC30A1        |
| TIPRL. 3    | 4. 32E-21 | 0. 179137 | 0. 353 | 0. 255 | 6. 45E-17 Neo-G | TIPRL          |
| C10orf10. 4 | 4. 38E-21 | -0. 56162 | 0. 02  | 0. 099 | 6. 55E-17 Neo-G | C10orf10       |

|            |           |           |        |        |           |       |              |
|------------|-----------|-----------|--------|--------|-----------|-------|--------------|
| ZNF205. 4  | 4. 53E-21 | 0. 276929 | 0. 178 | 0. 1   | 6. 77E-17 | Neo-G | ZNF205       |
| RDH10. 6   | 4. 56E-21 | -0. 23838 | 0. 016 | 0. 094 | 6. 82E-17 | Neo-G | RDH10        |
| FOXO3. 5   | 4. 77E-21 | 0. 218201 | 0. 364 | 0. 261 | 7. 13E-17 | Neo-G | FOXO3        |
| DBX2. 6    | 4. 86E-21 | -0. 14167 | 0. 003 | 0. 072 | 7. 26E-17 | Neo-G | DBX2         |
| ASH2L. 4   | 4. 87E-21 | 0. 231176 | 0. 26  | 0. 166 | 7. 27E-17 | Neo-G | ASH2L        |
| GK. 7      | 4. 95E-21 | -0. 3658  | 0. 053 | 0. 149 | 7. 39E-17 | Neo-G | GK           |
| LAPTM4A. 3 | 4. 98E-21 | -0. 33465 | 0. 74  | 0. 776 | 7. 45E-17 | Neo-G | LAPTM4A      |
| CXCL2. 4   | 5. 00E-21 | -0. 47232 | 0. 017 | 0. 095 | 7. 47E-17 | Neo-G | CXCL2        |
| CDK2. 4    | 5. 14E-21 | -0. 19325 | 0. 014 | 0. 092 | 7. 68E-17 | Neo-G | CDK2         |
| BTG3. 4    | 5. 52E-21 | 0. 20153  | 0. 464 | 0. 36  | 8. 25E-17 | Neo-G | BTG3         |
| KAT5. 2    | 5. 60E-21 | 0. 21017  | 0. 339 | 0. 24  | 8. 36E-17 | Neo-G | KAT5         |
| MIEN1. 1   | 5. 71E-21 | 0. 108401 | 0. 583 | 0. 472 | 8. 53E-17 | Neo-G | MIEN1        |
| KBTBD4. 3  | 5. 75E-21 | 0. 221392 | 0. 156 | 0. 081 | 8. 59E-17 | Neo-G | KBTBD4       |
| TNFSF12. 7 | 5. 93E-21 | -0. 3136  | 0. 088 | 0. 197 | 8. 86E-17 | Neo-G | TNFSF12      |
| SPTBN2     | 6. 19E-21 | 0. 161478 | 0. 068 | 0. 023 | 9. 26E-17 | Neo-G | SPTBN2       |
| GPX8. 6    | 6. 25E-21 | -0. 15602 | 0. 002 | 0. 07  | 9. 35E-17 | Neo-G | GPX8         |
| NRROS. 4   | 6. 36E-21 | -0. 31736 | 0. 005 | 0. 075 | 9. 50E-17 | Neo-G | NRROS        |
| RGP1. 2    | 6. 54E-21 | 0. 260843 | 0. 156 | 0. 083 | 9. 78E-17 | Neo-G | RGP1         |
| KANK1. 4   | 6. 81E-21 | -0. 22768 | 0. 02  | 0. 101 | 1. 02E-16 | Neo-G | KANK1        |
| TSEN34. 4  | 6. 94E-21 | 0. 192766 | 0. 468 | 0. 356 | 1. 04E-16 | Neo-G | TSEN34       |
| MANBA. 7   | 7. 01E-21 | -0. 33568 | 0. 04  | 0. 13  | 1. 05E-16 | Neo-G | MANBA        |
| AC073283.  | 7. 18E-21 | 0. 138639 | 0. 064 | 0. 02  | 1. 07E-16 | Neo-G | AC073283. 4  |
| PUS7L. 3   | 7. 75E-21 | 0. 261014 | 0. 241 | 0. 152 | 1. 16E-16 | Neo-G | PUS7L        |
| SRC        | 7. 83E-21 | 0. 156548 | 0. 091 | 0. 036 | 1. 17E-16 | Neo-G | SRC          |
| GMNN. 6    | 8. 16E-21 | -0. 27235 | 0. 079 | 0. 188 | 1. 22E-16 | Neo-G | GMNN         |
| CD55. 7    | 8. 32E-21 | -0. 40464 | 0. 039 | 0. 127 | 1. 24E-16 | Neo-G | CD55         |
| TXNDC16. 2 | 8. 37E-21 | 0. 188573 | 0. 111 | 0. 049 | 1. 25E-16 | Neo-G | TXNDC16      |
| ALDH1L1. 6 | 8. 44E-21 | -0. 30729 | 0. 003 | 0. 071 | 1. 26E-16 | Neo-G | ALDH1L1      |
| APOL2. 4   | 8. 49E-21 | -0. 36333 | 0. 025 | 0. 108 | 1. 27E-16 | Neo-G | APOL2        |
| SH3KBP1. 7 | 8. 50E-21 | -0. 34825 | 0. 137 | 0. 254 | 1. 27E-16 | Neo-G | SH3KBP1      |
| NASP. 3    | 8. 70E-21 | 0. 156806 | 0. 508 | 0. 397 | 1. 30E-16 | Neo-G | NASP         |
| NARF. 3    | 8. 75E-21 | 0. 198402 | 0. 418 | 0. 318 | 1. 31E-16 | Neo-G | NARF         |
| SCO2. 7    | 8. 86E-21 | -0. 28942 | 0. 106 | 0. 224 | 1. 32E-16 | Neo-G | SCO2         |
| THBD. 7    | 8. 97E-21 | -0. 3786  | 0. 023 | 0. 103 | 1. 34E-16 | Neo-G | THBD         |
| PREP. 4    | 9. 12E-21 | 0. 245051 | 0. 165 | 0. 088 | 1. 36E-16 | Neo-G | PREP         |
| ARVCF. 5   | 9. 19E-21 | 0. 22642  | 0. 108 | 0. 049 | 1. 37E-16 | Neo-G | ARVCF        |
| PIGT. 2    | 9. 33E-21 | -0. 35792 | 0. 277 | 0. 412 | 1. 39E-16 | Neo-G | PIGT         |
| APO01055.  | 9. 41E-21 | -0. 35609 | 0. 013 | 0. 088 | 1. 41E-16 | Neo-G | APO01055. 6  |
| CLEC4E. 5  | 9. 49E-21 | -0. 36355 | 0      | 0. 065 | 1. 42E-16 | Neo-G | CLEC4E       |
| AFTPH. 2   | 9. 75E-21 | 0. 234033 | 0. 233 | 0. 143 | 1. 46E-16 | Neo-G | AFTPH        |
| SLC27A1. 3 | 9. 92E-21 | -0. 24503 | 0. 068 | 0. 171 | 1. 48E-16 | Neo-G | SLC27A1      |
| KRBOX4. 2  | 1. 01E-20 | 0. 22759  | 0. 189 | 0. 106 | 1. 50E-16 | Neo-G | KRBOX4       |
| DEXI. 5    | 1. 01E-20 | 0. 29198  | 0. 284 | 0. 197 | 1. 51E-16 | Neo-G | DEXI         |
| TMEM144. 3 | 1. 02E-20 | -0. 45614 | 0. 012 | 0. 086 | 1. 52E-16 | Neo-G | TMEM144      |
| ZNF775. 6  | 1. 02E-20 | 0. 285995 | 0. 16  | 0. 086 | 1. 53E-16 | Neo-G | ZNF775       |
| ENKUR. 5   | 1. 03E-20 | -0. 21753 | 0. 008 | 0. 08  | 1. 54E-16 | Neo-G | ENKUR        |
| GINM1. 1   | 1. 04E-20 | -0. 2776  | 0. 175 | 0. 311 | 1. 55E-16 | Neo-G | GINM1        |
| ACAP1. 6   | 1. 07E-20 | -0. 24661 | 0. 013 | 0. 088 | 1. 59E-16 | Neo-G | ACAP1        |
| OSBPL3     | 1. 07E-20 | -0. 20636 | 0. 007 | 0. 078 | 1. 60E-16 | Neo-G | OSBPL3       |
| ATP6VOE2-  | 1. 11E-20 | 0. 155773 | 0. 076 | 0. 028 | 1. 65E-16 | Neo-G | ATP6VOE2-AS1 |
| MARCH1. 7  | 1. 12E-20 | 0. 183894 | 0. 292 | 0. 178 | 1. 67E-16 | Neo-G | 1-Mar        |

|             |           |           |        |        |           |       |           |
|-------------|-----------|-----------|--------|--------|-----------|-------|-----------|
| IKZF1. 6    | 1. 14E-20 | -0. 29323 | 0. 004 | 0. 072 | 1. 70E-16 | Neo-G | IKZF1     |
| PIK3AP1. 7  | 1. 15E-20 | -0. 26011 | 0. 004 | 0. 072 | 1. 72E-16 | Neo-G | PIK3AP1   |
| PABPN1. 4   | 1. 16E-20 | 0. 222006 | 0. 442 | 0. 344 | 1. 73E-16 | Neo-G | PABPN1    |
| UBXN4. 3    | 1. 19E-20 | 0. 101084 | 0. 647 | 0. 532 | 1. 78E-16 | Neo-G | UBXN4     |
| POLR2C. 5   | 1. 22E-20 | 0. 169775 | 0. 441 | 0. 339 | 1. 82E-16 | Neo-G | POLR2C    |
| GDF15. 6    | 1. 22E-20 | -0. 3311  | 0. 007 | 0. 078 | 1. 83E-16 | Neo-G | GDF15     |
| SLC38A10. 1 | 1. 22E-20 | -0. 25649 | 0. 097 | 0. 211 | 1. 83E-16 | Neo-G | SLC38A10  |
| TRAPPC2P1   | 1. 24E-20 | 0. 170939 | 0. 317 | 0. 213 | 1. 85E-16 | Neo-G | TRAPPC2P1 |
| FAS. 1      | 1. 30E-20 | -0. 28523 | 0. 005 | 0. 075 | 1. 94E-16 | Neo-G | FAS       |
| IL10RB. 7   | 1. 34E-20 | -0. 38373 | 0. 137 | 0. 256 | 2. 01E-16 | Neo-G | IL10RB    |
| DUSP22. 7   | 1. 42E-20 | -0. 30116 | 0. 034 | 0. 121 | 2. 12E-16 | Neo-G | DUSP22    |
| FAM110A. 3  | 1. 44E-20 | 0. 216343 | 0. 136 | 0. 066 | 2. 15E-16 | Neo-G | FAM110A   |
| PTGFRN. 2   | 1. 48E-20 | -0. 17335 | 0. 027 | 0. 113 | 2. 22E-16 | Neo-G | PTGFRN    |
| FAM219A. 3  | 1. 53E-20 | 0. 239883 | 0. 156 | 0. 083 | 2. 28E-16 | Neo-G | FAM219A   |
| SNTA1. 5    | 1. 55E-20 | -0. 13949 | 0. 016 | 0. 094 | 2. 31E-16 | Neo-G | SNTA1     |
| MX2. 7      | 1. 62E-20 | -0. 30404 | 0. 004 | 0. 071 | 2. 42E-16 | Neo-G | MX2       |
| BCS1L. 4    | 1. 65E-20 | 0. 270051 | 0. 245 | 0. 156 | 2. 46E-16 | Neo-G | BCS1L     |
| LRP6. 6     | 1. 67E-20 | 0. 297257 | 0. 181 | 0. 104 | 2. 49E-16 | Neo-G | LRP6      |
| FHL3. 3     | 1. 68E-20 | -0. 22562 | 0. 066 | 0. 17  | 2. 51E-16 | Neo-G | FHL3      |
| CASP3. 4    | 1. 68E-20 | 0. 23538  | 0. 279 | 0. 187 | 2. 52E-16 | Neo-G | CASP3     |
| NCAM2. 5    | 1. 69E-20 | 0. 206899 | 0. 127 | 0. 06  | 2. 52E-16 | Neo-G | NCAM2     |
| CALHM2. 5   | 1. 69E-20 | -0. 22821 | 0. 002 | 0. 067 | 2. 52E-16 | Neo-G | CALHM2    |
| SUCLG1. 4   | 1. 71E-20 | 0. 132779 | 0. 528 | 0. 425 | 2. 56E-16 | Neo-G | SUCLG1    |
| ANKRD11. 4  | 1. 73E-20 | 0. 224376 | 0. 404 | 0. 305 | 2. 58E-16 | Neo-G | ANKRD11   |
| BOLA3. 4    | 1. 78E-20 | -0. 3278  | 0. 21  | 0. 351 | 2. 67E-16 | Neo-G | BOLA3     |
| COL16A1. 5  | 1. 82E-20 | -0. 17639 | 0. 009 | 0. 082 | 2. 72E-16 | Neo-G | COL16A1   |
| KITLG. 1    | 1. 94E-20 | 0. 208921 | 0. 09  | 0. 037 | 2. 90E-16 | Neo-G | KITLG     |
| TMEM205. 6  | 2. 12E-20 | -0. 46128 | 0. 405 | 0. 507 | 3. 17E-16 | Neo-G | TMEM205   |
| TLR1. 7     | 2. 15E-20 | -0. 29999 | 0. 006 | 0. 075 | 3. 22E-16 | Neo-G | TLR1      |
| GRB2. 7     | 2. 16E-20 | 0. 151557 | 0. 585 | 0. 468 | 3. 22E-16 | Neo-G | GRB2      |
| C12orf76. 2 | 2. 16E-20 | 0. 165508 | 0. 353 | 0. 255 | 3. 23E-16 | Neo-G | C12orf76  |
| MIR155HG    | 2. 17E-20 | -0. 20701 | 0      | 0. 064 | 3. 24E-16 | Neo-G | MIR155HG  |
| TMEM5. 5    | 2. 19E-20 | 0. 250605 | 0. 288 | 0. 198 | 3. 27E-16 | Neo-G | TMEM5     |
| HS6ST2. 3   | 2. 27E-20 | -0. 12    | 0. 003 | 0. 07  | 3. 39E-16 | Neo-G | HS6ST2    |
| SRRM1. 3    | 2. 31E-20 | 0. 105905 | 0. 609 | 0. 506 | 3. 45E-16 | Neo-G | SRRM1     |
| FUCA1. 5    | 2. 32E-20 | -0. 36507 | 0. 12  | 0. 232 | 3. 47E-16 | Neo-G | FUCA1     |
| SLC9B2. 1   | 2. 33E-20 | 0. 177427 | 0. 094 | 0. 039 | 3. 47E-16 | Neo-G | SLC9B2    |
| ORMDL3. 5   | 2. 33E-20 | 0. 223883 | 0. 201 | 0. 118 | 3. 48E-16 | Neo-G | ORMDL3    |
| CNPY1. 6    | 2. 34E-20 | 0. 264537 | 0. 139 | 0. 07  | 3. 50E-16 | Neo-G | CNPY1     |
| LMF2. 4     | 2. 34E-20 | -0. 25944 | 0. 098 | 0. 214 | 3. 50E-16 | Neo-G | LMF2      |
| TWSG1. 2    | 2. 35E-20 | -0. 27369 | 0. 07  | 0. 174 | 3. 51E-16 | Neo-G | TWSG1     |
| ARRDC1. 6   | 2. 40E-20 | -0. 28113 | 0. 05  | 0. 144 | 3. 59E-16 | Neo-G | ARRDC1    |
| RAD1. 3     | 2. 45E-20 | 0. 232458 | 0. 258 | 0. 168 | 3. 66E-16 | Neo-G | RAD1      |
| NDUFB8. 3   | 2. 49E-20 | -0. 64196 | 0      | 0. 063 | 3. 72E-16 | Neo-G | NDUFB8    |
| CACNB1      | 2. 50E-20 | 0. 127013 | 0. 06  | 0. 019 | 3. 73E-16 | Neo-G | CACNB1    |
| CDV3. 3     | 2. 52E-20 | -0. 28528 | 0. 159 | 0. 289 | 3. 77E-16 | Neo-G | CDV3      |
| UNC5B. 6    | 2. 59E-20 | -0. 27158 | 0. 016 | 0. 092 | 3. 87E-16 | Neo-G | UNC5B     |
| TEX264. 2   | 2. 67E-20 | -0. 37979 | 0. 267 | 0. 411 | 3. 98E-16 | Neo-G | TEX264    |
| LINC00844   | 2. 74E-20 | -0. 36409 | 0. 031 | 0. 116 | 4. 09E-16 | Neo-G | LINC00844 |
| PDCD6. 2    | 2. 80E-20 | 0. 122249 | 0. 631 | 0. 523 | 4. 18E-16 | Neo-G | PDCD6     |
| SLAMF8. 7   | 2. 81E-20 | -0. 28235 | 0. 004 | 0. 071 | 4. 20E-16 | Neo-G | SLAMF8    |

|            |          |          |       |       |          |       |               |
|------------|----------|----------|-------|-------|----------|-------|---------------|
| ANG. 5     | 2.93E-20 | -0.33724 | 0.016 | 0.092 | 4.38E-16 | Neo-G | ANG           |
| NPB. 3     | 3.16E-20 | 0.26067  | 0.125 | 0.061 | 4.71E-16 | Neo-G | NPB           |
| DNAJB11. 4 | 3.27E-20 | 0.150368 | 0.523 | 0.422 | 4.89E-16 | Neo-G | DNAJB11       |
| PINK1. 5   | 3.28E-20 | 0.256108 | 0.288 | 0.197 | 4.90E-16 | Neo-G | PINK1         |
| ZSWIM5     | 3.36E-20 | 0.121506 | 0.041 | 0.01  | 5.03E-16 | Neo-G | ZSWIM5        |
| EFCAB7. 3  | 3.46E-20 | 0.23531  | 0.128 | 0.062 | 5.17E-16 | Neo-G | EFCAB7        |
| SETD6. 4   | 3.52E-20 | 0.246891 | 0.155 | 0.083 | 5.26E-16 | Neo-G | SETD6         |
| FEZ2. 6    | 3.73E-20 | 0.186605 | 0.539 | 0.438 | 5.57E-16 | Neo-G | FEZ2          |
| RP11-108M  | 3.83E-20 | -0.31576 | 0.028 | 0.111 | 5.72E-16 | Neo-G | RP11-108M9. 4 |
| EPB41L4A-  | 3.86E-20 | 0.179149 | 0.39  | 0.282 | 5.77E-16 | Neo-G | EPB41L4A-AS1  |
| TFEC. 7    | 4.03E-20 | -0.26268 | 0     | 0.063 | 6.03E-16 | Neo-G | TFEC          |
| DGKI       | 4.12E-20 | 0.125614 | 0.058 | 0.018 | 6.16E-16 | Neo-G | DGKI          |
| TPX2. 6    | 4.56E-20 | -0.26864 | 0.016 | 0.09  | 6.82E-16 | Neo-G | TPX2          |
| ACVR2A. 2  | 4.57E-20 | 0.218995 | 0.126 | 0.062 | 6.83E-16 | Neo-G | ACVR2A        |
| RAP1GAP    | 4.58E-20 | 0.139945 | 0.069 | 0.024 | 6.84E-16 | Neo-G | RAP1GAP       |
| MB21D2. 5  | 4.58E-20 | 0.139396 | 0.108 | 0.047 | 6.84E-16 | Neo-G | MB21D2        |
| ORAI3. 5   | 4.71E-20 | -0.241   | 0.055 | 0.152 | 7.03E-16 | Neo-G | ORAI3         |
| NOTCH3. 3  | 4.77E-20 | -0.12823 | 0.002 | 0.067 | 7.13E-16 | Neo-G | NOTCH3        |
| ZCCHC9     | 4.89E-20 | -0.23028 | 0.064 | 0.166 | 7.31E-16 | Neo-G | ZCCHC9        |
| OLFML2B. 6 | 4.90E-20 | -0.32474 | 0.007 | 0.075 | 7.32E-16 | Neo-G | OLFML2B       |
| EYA4. 5    | 4.99E-20 | -0.11098 | 0.001 | 0.064 | 7.45E-16 | Neo-G | EYA4          |
| CUL5. 4    | 4.99E-20 | 0.285542 | 0.299 | 0.213 | 7.46E-16 | Neo-G | CUL5          |
| BIRC3. 3   | 5.00E-20 | -0.34076 | 0.005 | 0.071 | 7.47E-16 | Neo-G | BIRC3         |
| FRG1       | 5.51E-20 | 0.146336 | 0.413 | 0.309 | 8.24E-16 | Neo-G | FRG1          |
| MFNG. 7    | 5.63E-20 | -0.3611  | 0.046 | 0.136 | 8.42E-16 | Neo-G | MFNG          |
| ETV6. 3    | 5.66E-20 | -0.25214 | 0.06  | 0.158 | 8.46E-16 | Neo-G | ETV6          |
| ZNF433. 2  | 5.70E-20 | 0.204618 | 0.108 | 0.049 | 8.52E-16 | Neo-G | ZNF433        |
| CCND2. 7   | 5.72E-20 | 0.191357 | 0.427 | 0.314 | 8.55E-16 | Neo-G | CCND2         |
| FIGNL1. 3  | 5.95E-20 | 0.151545 | 0.097 | 0.04  | 8.90E-16 | Neo-G | FIGNL1        |
| ORAI2. 3   | 5.98E-20 | 0.245819 | 0.357 | 0.266 | 8.93E-16 | Neo-G | ORAI2         |
| SNRK. 2    | 6.03E-20 | 0.207719 | 0.149 | 0.077 | 9.01E-16 | Neo-G | SNRK          |
| G6PD. 2    | 6.05E-20 | -0.26636 | 0.121 | 0.241 | 9.04E-16 | Neo-G | G6PD          |
| DOK2. 6    | 6.09E-20 | -0.28014 | 0     | 0.062 | 9.10E-16 | Neo-G | DOK2          |
| BTBD3. 6   | 6.37E-20 | -0.17546 | 0.051 | 0.148 | 9.51E-16 | Neo-G | BTBD3         |
| UNC13A     | 6.57E-20 | 0.161681 | 0.079 | 0.03  | 9.83E-16 | Neo-G | UNC13A        |
| ETV1. 7    | 6.68E-20 | -0.31785 | 0.136 | 0.258 | 9.98E-16 | Neo-G | ETV1          |
| MSANTD3. 4 | 6.69E-20 | 0.24784  | 0.149 | 0.08  | 9.99E-16 | Neo-G | MSANTD3       |
| DNAJC2. 4  | 6.74E-20 | 0.230014 | 0.384 | 0.287 | 1.01E-15 | Neo-G | DNAJC2        |
| CDH6. 5    | 6.87E-20 | -0.13402 | 0.007 | 0.076 | 1.03E-15 | Neo-G | CDH6          |
| SOX15. 5   | 7.02E-20 | 0.185726 | 0.13  | 0.063 | 1.05E-15 | Neo-G | SOX15         |
| CCDC159. 1 | 7.04E-20 | -0.29788 | 0.06  | 0.16  | 1.05E-15 | Neo-G | CCDC159       |
| LCMT1. 1   | 7.55E-20 | 0.235413 | 0.341 | 0.253 | 1.13E-15 | Neo-G | LCMT1         |
| PPP1R16A.  | 7.66E-20 | 0.253777 | 0.246 | 0.16  | 1.14E-15 | Neo-G | PPP1R16A      |
| RINT1. 4   | 7.75E-20 | 0.191404 | 0.163 | 0.087 | 1.16E-15 | Neo-G | RINT1         |
| NUDT16. 7  | 7.79E-20 | -0.31915 | 0.117 | 0.232 | 1.16E-15 | Neo-G | NUDT16        |
| REEP5. 6   | 7.96E-20 | -0.3872  | 0.484 | 0.597 | 1.19E-15 | Neo-G | REEP5         |
| TMEM255A.  | 7.97E-20 | -0.16141 | 0.027 | 0.111 | 1.19E-15 | Neo-G | TMEM255A      |
| FGD2. 6    | 8.16E-20 | -0.32333 | 0.003 | 0.068 | 1.22E-15 | Neo-G | FGD2          |
| ARAF. 1    | 8.21E-20 | -0.22158 | 0.08  | 0.189 | 1.23E-15 | Neo-G | ARAF          |
| LGALS1. 5  | 8.24E-20 | 0.222029 | 0.118 | 0.056 | 1.23E-15 | Neo-G | LGALS1        |
| PLD6       | 8.31E-20 | 0.133467 | 0.064 | 0.022 | 1.24E-15 | Neo-G | PLD6          |

|             |           |           |        |        |           |       |                |
|-------------|-----------|-----------|--------|--------|-----------|-------|----------------|
| IDI1. 5     | 8. 35E-20 | -0. 34379 | 0. 207 | 0. 338 | 1. 25E-15 | Neo-G | IDI1           |
| TGFBR1. 7   | 8. 54E-20 | -0. 31434 | 0. 074 | 0. 173 | 1. 28E-15 | Neo-G | TGFBR1         |
| TPCN1. 5    | 8. 79E-20 | -0. 24613 | 0. 02  | 0. 098 | 1. 31E-15 | Neo-G | TPCN1          |
| BOK. 7      | 8. 84E-20 | -0. 19422 | 0. 012 | 0. 084 | 1. 32E-15 | Neo-G | BOK            |
| TOM1. 6     | 9. 25E-20 | -0. 29781 | 0. 071 | 0. 171 | 1. 38E-15 | Neo-G | TOM1           |
| SNX9. 6     | 9. 29E-20 | -0. 26989 | 0. 092 | 0. 201 | 1. 39E-15 | Neo-G | SNX9           |
| LAMA4. 5    | 9. 47E-20 | -0. 16323 | 0. 009 | 0. 078 | 1. 42E-15 | Neo-G | LAMA4          |
| SPG20. 2    | 9. 93E-20 | -0. 27915 | 0. 13  | 0. 251 | 1. 48E-15 | Neo-G | SPG20          |
| TUBGCP4. 4  | 1. 03E-19 | 0. 253142 | 0. 193 | 0. 114 | 1. 54E-15 | Neo-G | TUBGCP4        |
| ZNF222. 2   | 1. 05E-19 | 0. 172464 | 0. 105 | 0. 047 | 1. 57E-15 | Neo-G | ZNF222         |
| COPZ2. 2    | 1. 06E-19 | -0. 15528 | 0      | 0. 061 | 1. 58E-15 | Neo-G | COPZ2          |
| SLC8B1. 7   | 1. 06E-19 | -0. 24372 | 0. 026 | 0. 106 | 1. 58E-15 | Neo-G | SLC8B1         |
| HSP90B1. 4  | 1. 09E-19 | -0. 31378 | 0. 606 | 0. 664 | 1. 63E-15 | Neo-G | HSP90B1        |
| HERC5. 2    | 1. 11E-19 | -0. 18901 | 0. 01  | 0. 081 | 1. 65E-15 | Neo-G | HERC5          |
| HHEX. 7     | 1. 14E-19 | -0. 28383 | 0. 002 | 0. 064 | 1. 71E-15 | Neo-G | HHEX           |
| SH3BGRL. 4  | 1. 15E-19 | -0. 3661  | 0. 572 | 0. 658 | 1. 71E-15 | Neo-G | SH3BGRL        |
| TCF7L2. 2   | 1. 15E-19 | -0. 17984 | 0. 023 | 0. 102 | 1. 72E-15 | Neo-G | TCF7L2         |
| LAMP1. 5    | 1. 22E-19 | -0. 28938 | 0. 427 | 0. 532 | 1. 82E-15 | Neo-G | LAMP1          |
| ARSA. 5     | 1. 22E-19 | -0. 30096 | 0. 052 | 0. 145 | 1. 83E-15 | Neo-G | ARSA           |
| IMMP1L. 5   | 1. 23E-19 | 0. 217797 | 0. 311 | 0. 222 | 1. 84E-15 | Neo-G | IMMP1L         |
| SEP15. 2    | 1. 30E-19 | -0. 34976 | 0. 582 | 0. 666 | 1. 94E-15 | Neo-G | 15-Sep         |
| LRRFIP1. 7  | 1. 34E-19 | -0. 32582 | 0. 236 | 0. 368 | 2. 00E-15 | Neo-G | LRRFIP1        |
| SQLE. 5     | 1. 37E-19 | 0. 260474 | 0. 33  | 0. 239 | 2. 05E-15 | Neo-G | SQLE           |
| ZNF322. 5   | 1. 39E-19 | 0. 26295  | 0. 203 | 0. 125 | 2. 07E-15 | Neo-G | ZNF322         |
| GAPT. 7     | 1. 39E-19 | -0. 29335 | 0. 003 | 0. 067 | 2. 08E-15 | Neo-G | GAPT           |
| ALDH6A1. 4  | 1. 40E-19 | -0. 23914 | 0. 104 | 0. 219 | 2. 09E-15 | Neo-G | ALDH6A1        |
| ZNF738. 7   | 1. 44E-19 | 0. 264382 | 0. 218 | 0. 135 | 2. 16E-15 | Neo-G | ZNF738         |
| ETV5. 4     | 1. 45E-19 | -0. 21878 | 0. 145 | 0. 272 | 2. 16E-15 | Neo-G | ETV5           |
| TNFRSF10E   | 1. 45E-19 | -0. 28148 | 0. 03  | 0. 111 | 2. 17E-15 | Neo-G | TNFRSF10B      |
| PPDPF. 3    | 1. 49E-19 | 0. 10142  | 0. 884 | 0. 69  | 2. 23E-15 | Neo-G | PPDPF          |
| IL1RN. 7    | 1. 55E-19 | -0. 35441 | 0. 013 | 0. 083 | 2. 31E-15 | Neo-G | IL1RN          |
| TLR7. 4     | 1. 55E-19 | -0. 30083 | 0. 001 | 0. 062 | 2. 32E-15 | Neo-G | TLR7           |
| TMTC2. 2    | 1. 55E-19 | 0. 185717 | 0. 102 | 0. 044 | 2. 32E-15 | Neo-G | TMTC2          |
| OXR1. 6     | 1. 58E-19 | 0. 265784 | 0. 33  | 0. 242 | 2. 36E-15 | Neo-G | OXR1           |
| SMARCD2. 2  | 1. 59E-19 | -0. 17862 | 0. 018 | 0. 094 | 2. 38E-15 | Neo-G | SMARCD2        |
| ARAP2. 3    | 1. 61E-19 | -0. 20961 | 0. 018 | 0. 094 | 2. 40E-15 | Neo-G | ARAP2          |
| GPBP1L1. 4  | 1. 62E-19 | -0. 24648 | 0. 103 | 0. 219 | 2. 42E-15 | Neo-G | GPBP1L1        |
| PPCS. 4     | 1. 65E-19 | -0. 38445 | 0. 21  | 0. 334 | 2. 47E-15 | Neo-G | PPCS           |
| GPRIN3. 7   | 1. 73E-19 | -0. 25617 | 0. 002 | 0. 065 | 2. 58E-15 | Neo-G | GPRIN3         |
| RRM2. 6     | 1. 73E-19 | -0. 26571 | 0. 005 | 0. 07  | 2. 59E-15 | Neo-G | RRM2           |
| SYTL2. 5    | 1. 76E-19 | -0. 28549 | 0. 013 | 0. 084 | 2. 64E-15 | Neo-G | SYTL2          |
| CAP2. 4     | 1. 79E-19 | 0. 180717 | 0. 111 | 0. 05  | 2. 67E-15 | Neo-G | CAP2           |
| ARHGAP22. 1 | 1. 81E-19 | -0. 29173 | 0. 012 | 0. 082 | 2. 70E-15 | Neo-G | ARHGAP22       |
| FAM64A. 7   | 1. 90E-19 | -0. 25619 | 0. 009 | 0. 076 | 2. 84E-15 | Neo-G | FAM64A         |
| CCL3L3. 4   | 1. 96E-19 | -0. 70149 | 0      | 0. 06  | 2. 92E-15 | Neo-G | CCL3L3         |
| PRRC2C. 4   | 2. 03E-19 | 0. 128265 | 0. 566 | 0. 472 | 3. 04E-15 | Neo-G | PRRC2C         |
| TACC3. 4    | 2. 13E-19 | -0. 23626 | 0. 013 | 0. 085 | 3. 18E-15 | Neo-G | TACC3          |
| RP11-263K   | 2. 17E-19 | -0. 17052 | 0. 006 | 0. 073 | 3. 25E-15 | Neo-G | RP11-263K19. 4 |
| SYS1. 1     | 2. 25E-19 | -0. 29723 | 0. 133 | 0. 254 | 3. 37E-15 | Neo-G | SYS1           |
| PARP4. 2    | 2. 39E-19 | -0. 19709 | 0. 017 | 0. 092 | 3. 57E-15 | Neo-G | PARP4          |
| SAA1. 4     | 2. 41E-19 | -1. 16913 | 0. 046 | 0. 128 | 3. 60E-15 | Neo-G | SAA1           |

|            |          |          |       |       |          |       |            |
|------------|----------|----------|-------|-------|----------|-------|------------|
| CCNB2.6    | 2.44E-19 | -0.25862 | 0.005 | 0.07  | 3.65E-15 | Neo-G | CCNB2      |
| PSMD13.2   | 2.45E-19 | 0.131681 | 0.504 | 0.402 | 3.65E-15 | Neo-G | PSMD13     |
| TSPYL2.3   | 2.59E-19 | 0.177185 | 0.187 | 0.104 | 3.87E-15 | Neo-G | TSPYL2     |
| PIBF1.2    | 2.64E-19 | 0.236389 | 0.153 | 0.082 | 3.94E-15 | Neo-G | PIBF1      |
| ZNF263.1   | 2.67E-19 | 0.234599 | 0.2   | 0.119 | 3.99E-15 | Neo-G | ZNF263     |
| RIT1.4     | 2.67E-19 | -0.26732 | 0.111 | 0.226 | 3.99E-15 | Neo-G | RIT1       |
| TSSC4.4    | 2.69E-19 | 0.191563 | 0.393 | 0.302 | 4.03E-15 | Neo-G | TSSC4      |
| C3orf58.1  | 2.72E-19 | -0.20443 | 0.021 | 0.098 | 4.06E-15 | Neo-G | C3orf58    |
| HIST2H2AA  | 2.76E-19 | -0.26487 | 0.005 | 0.07  | 4.12E-15 | Neo-G | HIST2H2AA3 |
| ITGB5.5    | 2.79E-19 | -0.23873 | 0.002 | 0.063 | 4.17E-15 | Neo-G | ITGB5      |
| RAB39B.6   | 2.92E-19 | 0.244134 | 0.152 | 0.083 | 4.36E-15 | Neo-G | RAB39B     |
| PXN.2      | 2.94E-19 | -0.18832 | 0.044 | 0.134 | 4.40E-15 | Neo-G | PXN        |
| SEC14L2.6  | 2.94E-19 | -0.17371 | 0.037 | 0.125 | 4.40E-15 | Neo-G | SEC14L2    |
| ANP32B.7   | 2.98E-19 | -0.28304 | 0.327 | 0.465 | 4.45E-15 | Neo-G | ANP32B     |
| MTMR10.1   | 3.20E-19 | -0.2223  | 0.007 | 0.073 | 4.79E-15 | Neo-G | MTMR10     |
| TKT.4      | 3.21E-19 | -0.34643 | 0.399 | 0.522 | 4.80E-15 | Neo-G | TKT        |
| CYB561D2.3 | 3.22E-19 | -0.33324 | 0.124 | 0.238 | 4.81E-15 | Neo-G | CYB561D2   |
| CENPT.4    | 3.22E-19 | 0.237414 | 0.269 | 0.18  | 4.81E-15 | Neo-G | CENPT      |
| USP46.7    | 3.24E-19 | 0.259237 | 0.211 | 0.128 | 4.84E-15 | Neo-G | USP46      |
| CREB3L2.6  | 3.26E-19 | -0.27019 | 0.045 | 0.133 | 4.88E-15 | Neo-G | CREB3L2    |
| TMEM206.5  | 3.36E-19 | 0.238205 | 0.311 | 0.221 | 5.02E-15 | Neo-G | TMEM206    |
| SIMC1      | 3.39E-19 | 0.195677 | 0.104 | 0.047 | 5.07E-15 | Neo-G | SIMC1      |
| FAM167A    | 3.48E-19 | 0.105995 | 0.05  | 0.015 | 5.20E-15 | Neo-G | FAM167A    |
| PRPS2.3    | 3.52E-19 | -0.24348 | 0.046 | 0.134 | 5.26E-15 | Neo-G | PRPS2      |
| PRAM1.5    | 3.62E-19 | -0.26784 | 0     | 0.06  | 5.42E-15 | Neo-G | PRAM1      |
| SRPX2.5    | 3.64E-19 | -0.22962 | 0.002 | 0.064 | 5.44E-15 | Neo-G | SRPX2      |
| RUNX1T1.4  | 3.80E-19 | 0.184088 | 0.076 | 0.029 | 5.67E-15 | Neo-G | RUNX1T1    |
| ASAP1.3    | 3.89E-19 | 0.286779 | 0.302 | 0.218 | 5.82E-15 | Neo-G | ASAP1      |
| CENPN.4    | 3.91E-19 | -0.23467 | 0.02  | 0.095 | 5.84E-15 | Neo-G | CENPN      |
| PDE8A.2    | 4.01E-19 | -0.19525 | 0.021 | 0.097 | 5.99E-15 | Neo-G | PDE8A      |
| SEL1L.3    | 4.02E-19 | -0.24977 | 0.081 | 0.185 | 6.01E-15 | Neo-G | SEL1L      |
| RFWD2.3    | 4.04E-19 | 0.264683 | 0.239 | 0.156 | 6.04E-15 | Neo-G | RFWD2      |
| KIAA0226L  | 4.15E-19 | -0.29348 | 0.026 | 0.104 | 6.20E-15 | Neo-G | KIAA0226L  |
| SMAP1.3    | 4.16E-19 | 0.220984 | 0.378 | 0.288 | 6.22E-15 | Neo-G | SMAP1      |
| RP6-91H8.  | 4.23E-19 | -0.31738 | 0.002 | 0.062 | 6.32E-15 | Neo-G | RP6-91H8.3 |
| ZNF106.6   | 4.27E-19 | -0.29943 | 0.148 | 0.271 | 6.38E-15 | Neo-G | ZNF106     |
| FRMD4A.6   | 4.29E-19 | 0.118657 | 0.287 | 0.176 | 6.41E-15 | Neo-G | FRMD4A     |
| CAMSAP2.5  | 4.43E-19 | 0.267569 | 0.22  | 0.141 | 6.62E-15 | Neo-G | CAMSAP2    |
| CHST11.7   | 4.48E-19 | -0.29673 | 0.115 | 0.225 | 6.69E-15 | Neo-G | CHST11     |
| EIF2S3.4   | 4.48E-19 | -0.31641 | 0.184 | 0.308 | 6.70E-15 | Neo-G | EIF2S3     |
| B3GAT2.3   | 4.52E-19 | 0.211229 | 0.145 | 0.075 | 6.76E-15 | Neo-G | B3GAT2     |
| ITPRIP.7   | 4.53E-19 | -0.22906 | 0.013 | 0.083 | 6.76E-15 | Neo-G | ITPRIP     |
| RCHY1.3    | 4.59E-19 | 0.182539 | 0.284 | 0.19  | 6.86E-15 | Neo-G | RCHY1      |
| SPEG.5     | 4.62E-19 | 0.201353 | 0.127 | 0.063 | 6.91E-15 | Neo-G | SPEG       |
| SYBU.5     | 4.77E-19 | 0.256924 | 0.148 | 0.079 | 7.12E-15 | Neo-G | SYBU       |
| ZNF883.6   | 4.82E-19 | 0.233941 | 0.212 | 0.132 | 7.20E-15 | Neo-G | ZNF883     |
| IRF1.5     | 4.89E-19 | -0.37286 | 0.111 | 0.218 | 7.31E-15 | Neo-G | IRF1       |
| SORBS3.5   | 5.02E-19 | -0.17342 | 0.079 | 0.184 | 7.50E-15 | Neo-G | SORBS3     |
| TK1.5      | 5.05E-19 | -0.25522 | 0.01  | 0.078 | 7.54E-15 | Neo-G | TK1        |
| ASF1B.4    | 5.08E-19 | -0.1927  | 0.004 | 0.067 | 7.59E-15 | Neo-G | ASF1B      |
| UNC79      | 5.27E-19 | 0.1066   | 0.054 | 0.017 | 7.88E-15 | Neo-G | UNC79      |

|            |           |           |        |        |           |       |                |
|------------|-----------|-----------|--------|--------|-----------|-------|----------------|
| H6PD. 1    | 5. 31E-19 | -0. 21813 | 0. 025 | 0. 103 | 7. 94E-15 | Neo-G | H6PD           |
| NCEH1. 5   | 5. 40E-19 | -0. 19762 | 0. 009 | 0. 075 | 8. 07E-15 | Neo-G | NCEH1          |
| MKNK1. 6   | 5. 45E-19 | -0. 41411 | 0. 085 | 0. 181 | 8. 15E-15 | Neo-G | MKNK1          |
| ANKRD17. 5 | 5. 65E-19 | 0. 280692 | 0. 291 | 0. 208 | 8. 44E-15 | Neo-G | ANKRD17        |
| SMARCD3. 6 | 5. 65E-19 | 0. 286034 | 0. 306 | 0. 222 | 8. 44E-15 | Neo-G | SMARCD3        |
| IL4I1. 5   | 5. 67E-19 | -0. 27836 | 0. 007 | 0. 072 | 8. 47E-15 | Neo-G | IL4I1          |
| HDDC3. 2   | 5. 94E-19 | -0. 25515 | 0. 063 | 0. 16  | 8. 88E-15 | Neo-G | HDDC3          |
| ZYG11B. 5  | 5. 96E-19 | 0. 259153 | 0. 221 | 0. 14  | 8. 91E-15 | Neo-G | ZYG11B         |
| LDLRAP1. 3 | 6. 03E-19 | -0. 18102 | 0. 002 | 0. 064 | 9. 00E-15 | Neo-G | LDLRAP1        |
| MPZL1. 3   | 6. 33E-19 | 0. 218918 | 0. 333 | 0. 238 | 9. 46E-15 | Neo-G | MPZL1          |
| CPSF4. 3   | 6. 39E-19 | 0. 262144 | 0. 273 | 0. 186 | 9. 55E-15 | Neo-G | CPSF4          |
| PGAM2. 6   | 6. 44E-19 | 0. 122256 | 0. 098 | 0. 042 | 9. 62E-15 | Neo-G | PGAM2          |
| CD247      | 6. 46E-19 | 0. 113269 | 0. 046 | 0. 013 | 9. 65E-15 | Neo-G | CD247          |
| CHTOP. 4   | 6. 48E-19 | 0. 137583 | 0. 451 | 0. 356 | 9. 69E-15 | Neo-G | CHTOP          |
| MARCH7. 2  | 6. 51E-19 | 0. 248897 | 0. 334 | 0. 246 | 9. 73E-15 | Neo-G | 7-Mar          |
| PAXIP1-AS  | 6. 60E-19 | 0. 276689 | 0. 232 | 0. 15  | 9. 86E-15 | Neo-G | PAXIP1-AS1     |
| FGFRL1. 1  | 6. 74E-19 | -0. 10723 | 0. 002 | 0. 062 | 1. 01E-14 | Neo-G | FGFRL1         |
| PGAM1. 5   | 6. 89E-19 | -0. 36009 | 0. 407 | 0. 513 | 1. 03E-14 | Neo-G | PGAM1          |
| LINC00936  | 6. 96E-19 | -0. 33902 | 0. 059 | 0. 15  | 1. 04E-14 | Neo-G | LINC00936      |
| CSK. 7     | 7. 02E-19 | -0. 28546 | 0. 064 | 0. 157 | 1. 05E-14 | Neo-G | CSK            |
| EEF1E1. 4  | 7. 05E-19 | 0. 17099  | 0. 4   | 0. 305 | 1. 05E-14 | Neo-G | EEF1E1         |
| CREB5. 6   | 7. 08E-19 | -0. 24201 | 0. 128 | 0. 248 | 1. 06E-14 | Neo-G | CREB5          |
| SFT2D2. 3  | 7. 35E-19 | -0. 26939 | 0. 063 | 0. 158 | 1. 10E-14 | Neo-G | SFT2D2         |
| TMEM9. 7   | 7. 51E-19 | 0. 113079 | 0. 456 | 0. 356 | 1. 12E-14 | Neo-G | TMEM9          |
| OSCAR. 7   | 7. 54E-19 | -0. 26888 | 0. 012 | 0. 08  | 1. 13E-14 | Neo-G | OSCAR          |
| FGD5-AS1.  | 7. 58E-19 | 0. 232425 | 0. 39  | 0. 303 | 1. 13E-14 | Neo-G | FGD5-AS1       |
| PSD        | 7. 62E-19 | 0. 142528 | 0. 061 | 0. 021 | 1. 14E-14 | Neo-G | PSD            |
| OTUD1. 6   | 7. 72E-19 | -0. 3273  | 0. 029 | 0. 107 | 1. 15E-14 | Neo-G | OTUD1          |
| TMED3. 5   | 8. 03E-19 | -0. 28092 | 0. 192 | 0. 322 | 1. 20E-14 | Neo-G | TMED3          |
| RAD50. 3   | 8. 15E-19 | 0. 211333 | 0. 345 | 0. 256 | 1. 22E-14 | Neo-G | RAD50          |
| IKBKE. 6   | 8. 35E-19 | -0. 2275  | 0. 002 | 0. 063 | 1. 25E-14 | Neo-G | IKBKE          |
| SZRD1. 3   | 8. 42E-19 | -0. 2578  | 0. 15  | 0. 278 | 1. 26E-14 | Neo-G | SZRD1          |
| CBLN4. 7   | 8. 55E-19 | -0. 15339 | 0. 015 | 0. 087 | 1. 28E-14 | Neo-G | CBLN4          |
| ATP1A2. 4  | 8. 60E-19 | -0. 31634 | 0. 005 | 0. 069 | 1. 29E-14 | Neo-G | ATP1A2         |
| QARS. 6    | 8. 73E-19 | -0. 29339 | 0. 17  | 0. 296 | 1. 30E-14 | Neo-G | QARS           |
| ITGA2. 5   | 8. 90E-19 | -0. 14217 | 0. 005 | 0. 069 | 1. 33E-14 | Neo-G | ITGA2          |
| CCL4. 6    | 8. 90E-19 | -0. 62982 | 0. 247 | 0. 334 | 1. 33E-14 | Neo-G | CCL4           |
| FAM109A. 1 | 9. 01E-19 | 0. 200375 | 0. 104 | 0. 047 | 1. 35E-14 | Neo-G | FAM109A        |
| COPG2. 3   | 9. 15E-19 | 0. 22929  | 0. 185 | 0. 109 | 1. 37E-14 | Neo-G | COPG2          |
| ANKRD13B.  | 9. 54E-19 | 0. 202083 | 0. 098 | 0. 044 | 1. 43E-14 | Neo-G | ANKRD13B       |
| RP11-556E  | 9. 58E-19 | -0. 28803 | 0. 002 | 0. 061 | 1. 43E-14 | Neo-G | RP11-556E13. 1 |
| GSTM4. 4   | 9. 81E-19 | -0. 28575 | 0. 106 | 0. 217 | 1. 47E-14 | Neo-G | GSTM4          |
| LILRB2. 7  | 9. 83E-19 | -0. 27226 | 0. 001 | 0. 06  | 1. 47E-14 | Neo-G | LILRB2         |
| WNT7A      | 1. 00E-18 | 0. 143165 | 0. 053 | 0. 017 | 1. 50E-14 | Neo-G | WNT7A          |
| FPR3. 7    | 1. 01E-18 | -0. 24293 | 0. 002 | 0. 063 | 1. 50E-14 | Neo-G | FPR3           |
| GADD45A. 7 | 1. 01E-18 | -0. 38603 | 0. 176 | 0. 291 | 1. 51E-14 | Neo-G | GADD45A        |
| DNAJA2. 1  | 1. 02E-18 | 0. 180517 | 0. 411 | 0. 32  | 1. 52E-14 | Neo-G | DNAJA2         |
| ARHGDIG    | 1. 03E-18 | 0. 120725 | 0. 051 | 0. 015 | 1. 53E-14 | Neo-G | ARHGDIG        |
| FAM110B. 5 | 1. 04E-18 | 0. 228555 | 0. 267 | 0. 177 | 1. 55E-14 | Neo-G | FAM110B        |
| CNDP2. 7   | 1. 04E-18 | -0. 34367 | 0. 319 | 0. 445 | 1. 56E-14 | Neo-G | CNDP2          |
| RP11-347F  | 1. 04E-18 | -0. 32706 | 0. 007 | 0. 071 | 1. 56E-14 | Neo-G | RP11-347P5. 1  |



|             |           |           |        |        |                 |                |
|-------------|-----------|-----------|--------|--------|-----------------|----------------|
| ETV4. 6     | 1. 06E-18 | -0. 15936 | 0. 015 | 0. 086 | 1. 59E-14 Neo-G | ETV4           |
| PIP4K2A. 4  | 1. 12E-18 | -0. 32697 | 0. 057 | 0. 147 | 1. 68E-14 Neo-G | PIP4K2A        |
| GPR173. 1   | 1. 13E-18 | 0. 181065 | 0. 078 | 0. 03  | 1. 69E-14 Neo-G | GPR173         |
| CDC20. 5    | 1. 14E-18 | -0. 25902 | 0. 009 | 0. 075 | 1. 71E-14 Neo-G | CDC20          |
| SSTR2       | 1. 19E-18 | 0. 123069 | 0. 047 | 0. 013 | 1. 78E-14 Neo-G | SSTR2          |
| ZNF217. 1   | 1. 20E-18 | -0. 15172 | 0. 02  | 0. 095 | 1. 79E-14 Neo-G | ZNF217         |
| NHSL2. 4    | 1. 24E-18 | -0. 5015  | 0      | 0. 058 | 1. 85E-14 Neo-G | NHSL2          |
| IFNGR2. 7   | 1. 27E-18 | -0. 29765 | 0. 276 | 0. 403 | 1. 89E-14 Neo-G | IFNGR2         |
| BICD1. 5    | 1. 35E-18 | 0. 282593 | 0. 277 | 0. 196 | 2. 02E-14 Neo-G | BICD1          |
| FAM13B. 3   | 1. 37E-18 | 0. 187983 | 0. 148 | 0. 078 | 2. 05E-14 Neo-G | FAM13B         |
| NPPC        | 1. 38E-18 | 0. 112103 | 0. 045 | 0. 012 | 2. 06E-14 Neo-G | NPPC           |
| GOT2. 4     | 1. 47E-18 | 0. 247533 | 0. 273 | 0. 188 | 2. 20E-14 Neo-G | GOT2           |
| DHX57. 4    | 1. 50E-18 | 0. 218368 | 0. 159 | 0. 087 | 2. 24E-14 Neo-G | DHX57          |
| NABP1. 5    | 1. 56E-18 | -0. 3732  | 0. 049 | 0. 133 | 2. 33E-14 Neo-G | NABP1          |
| SSR1. 6     | 1. 57E-18 | -0. 34596 | 0. 35  | 0. 483 | 2. 35E-14 Neo-G | SSR1           |
| FAF2. 4     | 1. 70E-18 | 0. 270328 | 0. 263 | 0. 18  | 2. 54E-14 Neo-G | FAF2           |
| GSTZ1. 3    | 1. 71E-18 | -0. 21174 | 0. 068 | 0. 168 | 2. 56E-14 Neo-G | GSTZ1          |
| HK2. 5      | 1. 73E-18 | -0. 2246  | 0. 02  | 0. 093 | 2. 59E-14 Neo-G | HK2            |
| ANKRD22. 6  | 1. 74E-18 | -0. 3061  | 0. 008 | 0. 072 | 2. 60E-14 Neo-G | ANKRD22        |
| APBA2. 7    | 1. 83E-18 | 0. 257698 | 0. 282 | 0. 198 | 2. 74E-14 Neo-G | APBA2          |
| BCAM. 5     | 1. 84E-18 | -0. 14787 | 0. 035 | 0. 118 | 2. 75E-14 Neo-G | BCAM           |
| WARS. 4     | 1. 95E-18 | -0. 3086  | 0. 106 | 0. 213 | 2. 92E-14 Neo-G | WARS           |
| MBD2. 3     | 2. 05E-18 | -0. 17775 | 0. 008 | 0. 072 | 3. 06E-14 Neo-G | MBD2           |
| KIAA1211L   | 2. 06E-18 | -0. 14358 | 0. 002 | 0. 062 | 3. 09E-14 Neo-G | KIAA1211L      |
| SUGP2. 5    | 2. 11E-18 | 0. 230384 | 0. 322 | 0. 237 | 3. 16E-14 Neo-G | SUGP2          |
| FAM20C. 5   | 2. 20E-18 | -0. 25693 | 0. 12  | 0. 236 | 3. 29E-14 Neo-G | FAM20C         |
| NT5DC3      | 2. 37E-18 | 0. 123016 | 0. 068 | 0. 025 | 3. 54E-14 Neo-G | NT5DC3         |
| ERCC1. 6    | 2. 41E-18 | -0. 34814 | 0. 351 | 0. 487 | 3. 60E-14 Neo-G | ERCC1          |
| PARP10. 3   | 2. 50E-18 | -0. 23055 | 0. 021 | 0. 095 | 3. 73E-14 Neo-G | PARP10         |
| PDCL. 2     | 2. 60E-18 | 0. 217028 | 0. 271 | 0. 184 | 3. 88E-14 Neo-G | PDCL           |
| VANGL2. 5   | 2. 68E-18 | 0. 229424 | 0. 129 | 0. 066 | 4. 00E-14 Neo-G | VANGL2         |
| RP11-166F   | 2. 68E-18 | 0. 13093  | 0. 063 | 0. 022 | 4. 01E-14 Neo-G | RP11-166P13. 4 |
| PBX4        | 2. 70E-18 | 0. 132302 | 0. 053 | 0. 017 | 4. 03E-14 Neo-G | PBX4           |
| MXI1. 3     | 2. 75E-18 | 0. 187157 | 0. 207 | 0. 124 | 4. 11E-14 Neo-G | MXI1           |
| GBAS. 3     | 2. 83E-18 | 0. 189309 | 0. 478 | 0. 39  | 4. 22E-14 Neo-G | GBAS           |
| OBFC1. 3    | 2. 95E-18 | -0. 22623 | 0. 021 | 0. 094 | 4. 40E-14 Neo-G | OBFC1          |
| ACAA2. 5    | 2. 95E-18 | -0. 37963 | 0. 117 | 0. 221 | 4. 41E-14 Neo-G | ACAA2          |
| EIF2B1. 2   | 2. 96E-18 | 0. 214372 | 0. 361 | 0. 273 | 4. 43E-14 Neo-G | EIF2B1         |
| TIMP3. 5    | 2. 96E-18 | -0. 18779 | 0. 046 | 0. 135 | 4. 43E-14 Neo-G | TIMP3          |
| LNX1-AS1    | 2. 98E-18 | 0. 10074  | 0. 037 | 0. 009 | 4. 45E-14 Neo-G | LNX1-AS1       |
| TMPO. 6     | 3. 04E-18 | 0. 22523  | 0. 276 | 0. 184 | 4. 54E-14 Neo-G | TMPO           |
| ILKAP. 4    | 3. 10E-18 | 0. 256542 | 0. 305 | 0. 22  | 4. 63E-14 Neo-G | ILKAP          |
| PFKP. 3     | 3. 11E-18 | -0. 19705 | 0. 065 | 0. 162 | 4. 65E-14 Neo-G | PFKP           |
| CFI. 4      | 3. 15E-18 | -0. 2034  | 0. 005 | 0. 067 | 4. 71E-14 Neo-G | CFI            |
| C14orf166   | 3. 15E-18 | -0. 34438 | 0. 485 | 0. 597 | 4. 71E-14 Neo-G | C14orf166      |
| ARAP1. 6    | 3. 28E-18 | -0. 26545 | 0. 036 | 0. 117 | 4. 90E-14 Neo-G | ARAP1          |
| SGK3. 4     | 3. 39E-18 | -0. 21248 | 0. 009 | 0. 074 | 5. 06E-14 Neo-G | SGK3           |
| FAM114A1. 3 | 3. 39E-18 | -0. 24626 | 0. 038 | 0. 121 | 5. 07E-14 Neo-G | FAM114A1       |
| TRPV2. 7    | 3. 43E-18 | -0. 25274 | 0. 005 | 0. 065 | 5. 12E-14 Neo-G | TRPV2          |
| BAG1. 3     | 3. 61E-18 | 0. 203446 | 0. 437 | 0. 342 | 5. 40E-14 Neo-G | BAG1           |
| RIC8A. 3    | 3. 71E-18 | 0. 196945 | 0. 363 | 0. 276 | 5. 54E-14 Neo-G | RIC8A          |

|            |          |          |       |       |          |       |          |
|------------|----------|----------|-------|-------|----------|-------|----------|
| NHLRC3.3   | 3.72E-18 | 0.146818 | 0.357 | 0.259 | 5.56E-14 | Neo-G | NHLRC3   |
| PTGS2.7    | 3.73E-18 | -0.27487 | 0.006 | 0.068 | 5.57E-14 | Neo-G | PTGS2    |
| MICAL1.6   | 3.73E-18 | 0.183296 | 0.219 | 0.131 | 5.58E-14 | Neo-G | MICAL1   |
| FREM2.5    | 3.78E-18 | -0.10062 | 0.009 | 0.075 | 5.65E-14 | Neo-G | FREM2    |
| METRNL.7   | 3.79E-18 | -0.28702 | 0.02  | 0.09  | 5.66E-14 | Neo-G | METRNL   |
| METTL12.1  | 4.30E-18 | -0.24473 | 0.076 | 0.175 | 6.43E-14 | Neo-G | METTL12  |
| ING2.3     | 4.33E-18 | 0.260839 | 0.28  | 0.197 | 6.46E-14 | Neo-G | ING2     |
| CTTN.6     | 4.34E-18 | 0.233196 | 0.304 | 0.22  | 6.48E-14 | Neo-G | CTTN     |
| MZT2B.3    | 4.34E-18 | 0.153921 | 0.723 | 0.577 | 6.49E-14 | Neo-G | MZT2B    |
| SAMD9      | 4.42E-18 | -0.22121 | 0.016 | 0.085 | 6.60E-14 | Neo-G | SAMD9    |
| PICALM.7   | 4.53E-18 | -0.31844 | 0.177 | 0.294 | 6.78E-14 | Neo-G | PICALM   |
| PDE9A.4    | 4.65E-18 | 0.214744 | 0.127 | 0.064 | 6.94E-14 | Neo-G | PDE9A    |
| IFNAR1.5   | 4.67E-18 | -0.28779 | 0.178 | 0.303 | 6.97E-14 | Neo-G | IFNAR1   |
| FRAT2.1    | 4.84E-18 | 0.173634 | 0.093 | 0.04  | 7.23E-14 | Neo-G | FRAT2    |
| POFUT1.3   | 5.00E-18 | -0.16411 | 0.041 | 0.126 | 7.47E-14 | Neo-G | POFUT1   |
| LACTB.7    | 5.05E-18 | -0.27045 | 0.08  | 0.176 | 7.55E-14 | Neo-G | LACTB    |
| CLUAP1.6   | 5.07E-18 | 0.254412 | 0.239 | 0.159 | 7.58E-14 | Neo-G | CLUAP1   |
| NADSYN1.3  | 5.10E-18 | -0.22049 | 0.044 | 0.129 | 7.62E-14 | Neo-G | NADSYN1  |
| SFMBT2.5   | 5.30E-18 | -0.32502 | 0.016 | 0.085 | 7.92E-14 | Neo-G | SFMBT2   |
| EEF1A2.1   | 5.30E-18 | 0.227714 | 0.08  | 0.033 | 7.92E-14 | Neo-G | EEF1A2   |
| MAEA.3     | 5.40E-18 | 0.228321 | 0.311 | 0.226 | 8.07E-14 | Neo-G | MAEA     |
| CCSER2.4   | 5.41E-18 | 0.216079 | 0.307 | 0.219 | 8.09E-14 | Neo-G | CCSER2   |
| RASAL3.6   | 5.41E-18 | -0.24546 | 0.004 | 0.064 | 8.09E-14 | Neo-G | RASAL3   |
| KIF1C.1    | 5.56E-18 | -0.17885 | 0.02  | 0.091 | 8.31E-14 | Neo-G | KIF1C    |
| DMRTA2.4   | 5.59E-18 | -0.12075 | 0.015 | 0.084 | 8.35E-14 | Neo-G | DMRTA2   |
| MOSPD1.4   | 5.68E-18 | 0.248024 | 0.196 | 0.121 | 8.49E-14 | Neo-G | MOSPD1   |
| ZBTB38.1   | 5.73E-18 | 0.182153 | 0.266 | 0.177 | 8.56E-14 | Neo-G | ZBTB38   |
| TBC1D22A.5 | 5.76E-18 | -0.22294 | 0.046 | 0.132 | 8.60E-14 | Neo-G | TBC1D22A |
| DNAJC18.4  | 5.82E-18 | 0.231835 | 0.19  | 0.114 | 8.70E-14 | Neo-G | DNAJC18  |
| CLIC4.6    | 5.97E-18 | -0.32682 | 0.221 | 0.346 | 8.93E-14 | Neo-G | CLIC4    |
| ITPRIPL2.6 | 6.02E-18 | -0.16196 | 0.013 | 0.081 | 9.00E-14 | Neo-G | ITPRIPL2 |
| IRF2BP2.5  | 6.15E-18 | 0.172211 | 0.404 | 0.305 | 9.19E-14 | Neo-G | IRF2BP2  |
| FAM198B.4  | 6.40E-18 | -0.2549  | 0.006 | 0.067 | 9.57E-14 | Neo-G | FAM198B  |
| BLM.2      | 6.53E-18 | -0.16041 | 0.017 | 0.087 | 9.76E-14 | Neo-G | BLM      |
| UBL5.5     | 6.54E-18 | -0.25932 | 0.871 | 0.826 | 9.78E-14 | Neo-G | UBL5     |
| RPS6KA4.6  | 6.55E-18 | -0.22648 | 0.046 | 0.131 | 9.79E-14 | Neo-G | RPS6KA4  |
| DBNDD1.5   | 6.66E-18 | 0.252607 | 0.121 | 0.061 | 9.96E-14 | Neo-G | DBNDD1   |
| NUMB.6     | 6.67E-18 | -0.28813 | 0.082 | 0.181 | 9.97E-14 | Neo-G | NUMB     |
| JOSD2.5    | 6.99E-18 | -0.255   | 0.214 | 0.349 | 1.05E-13 | Neo-G | JOSD2    |
| KCNE4.5    | 6.99E-18 | -0.14143 | 0.033 | 0.113 | 1.05E-13 | Neo-G | KCNE4    |
| PTPRO.6    | 7.02E-18 | 0.141189 | 0.14  | 0.071 | 1.05E-13 | Neo-G | PTPRO    |
| CLDN10.5   | 7.46E-18 | -0.3254  | 0.003 | 0.061 | 1.11E-13 | Neo-G | CLDN10   |
| SH3PXD2B.7 | 7.48E-18 | -0.15907 | 0.042 | 0.126 | 1.12E-13 | Neo-G | SH3PXD2B |
| HAS2.4     | 7.54E-18 | -0.17329 | 0.002 | 0.059 | 1.13E-13 | Neo-G | HAS2     |
| ADSSL1.4   | 7.73E-18 | -0.2009  | 0.018 | 0.088 | 1.15E-13 | Neo-G | ADSSL1   |
| AIG1.3     | 7.78E-18 | -0.37513 | 0.223 | 0.347 | 1.16E-13 | Neo-G | AIG1     |
| IGFLR1.4   | 8.19E-18 | -0.29924 | 0.003 | 0.061 | 1.22E-13 | Neo-G | IGFLR1   |
| USP10.3    | 8.28E-18 | 0.210956 | 0.32  | 0.234 | 1.24E-13 | Neo-G | USP10    |
| GJB2.3     | 8.35E-18 | -0.20304 | 0     | 0.055 | 1.25E-13 | Neo-G | GJB2     |
| PSMD6.3    | 8.83E-18 | 0.135931 | 0.434 | 0.34  | 1.32E-13 | Neo-G | PSMD6    |
| CD40.7     | 8.96E-18 | -0.2653  | 0.01  | 0.074 | 1.34E-13 | Neo-G | CD40     |

|             |           |           |        |        |           |       |                |
|-------------|-----------|-----------|--------|--------|-----------|-------|----------------|
| HPS3. 4     | 9. 23E-18 | -0. 22478 | 0. 061 | 0. 152 | 1. 38E-13 | Neo-G | HPS3           |
| TNS3. 6     | 9. 51E-18 | -0. 2507  | 0. 014 | 0. 081 | 1. 42E-13 | Neo-G | TNS3           |
| TFEB. 5     | 1. 02E-17 | -0. 20903 | 0. 016 | 0. 085 | 1. 52E-13 | Neo-G | TFEB           |
| SLC2A4RG. 1 | 0. 06E-17 | -0. 17193 | 0. 049 | 0. 135 | 1. 58E-13 | Neo-G | SLC2A4RG       |
| MIR210HG. 1 | 0. 07E-17 | -0. 18219 | 0. 025 | 0. 1   | 1. 60E-13 | Neo-G | MIR210HG       |
| PLLP. 6     | 1. 09E-17 | -0. 33248 | 0. 011 | 0. 075 | 1. 63E-13 | Neo-G | PLLP           |
| TECPR1. 4   | 1. 09E-17 | 0. 20338  | 0. 188 | 0. 112 | 1. 63E-13 | Neo-G | TECPR1         |
| MSANTD4. 4  | 1. 10E-17 | 0. 241276 | 0. 191 | 0. 117 | 1. 65E-13 | Neo-G | MSANTD4        |
| TMEM156. 5  | 1. 11E-17 | -0. 28708 | 0. 004 | 0. 062 | 1. 65E-13 | Neo-G | TMEM156        |
| SNX8. 6     | 1. 11E-17 | -0. 23738 | 0. 064 | 0. 156 | 1. 65E-13 | Neo-G | SNX8           |
| ZNF12. 5    | 1. 12E-17 | 0. 274383 | 0. 189 | 0. 116 | 1. 67E-13 | Neo-G | ZNF12          |
| STK17A. 5   | 1. 16E-17 | -0. 27833 | 0. 185 | 0. 306 | 1. 73E-13 | Neo-G | STK17A         |
| DHCR7. 6    | 1. 16E-17 | -0. 24189 | 0. 088 | 0. 188 | 1. 74E-13 | Neo-G | DHCR7          |
| ZFP69       | 1. 17E-17 | 0. 105418 | 0. 049 | 0. 015 | 1. 75E-13 | Neo-G | ZFP69          |
| ST6GALNAC   | 1. 18E-17 | -0. 2079  | 0. 049 | 0. 135 | 1. 76E-13 | Neo-G | ST6GALNAC4     |
| SLC38A6. 3  | 1. 19E-17 | -0. 21629 | 0. 031 | 0. 108 | 1. 78E-13 | Neo-G | SLC38A6        |
| ZNF573. 4   | 1. 20E-17 | 0. 18313  | 0. 117 | 0. 057 | 1. 79E-13 | Neo-G | ZNF573         |
| ARL1. 3     | 1. 22E-17 | -0. 3238  | 0. 201 | 0. 327 | 1. 82E-13 | Neo-G | ARL1           |
| DIS3. 3     | 1. 27E-17 | 0. 22658  | 0. 222 | 0. 142 | 1. 89E-13 | Neo-G | DIS3           |
| CEP70. 4    | 1. 28E-17 | 0. 242806 | 0. 159 | 0. 09  | 1. 91E-13 | Neo-G | CEP70          |
| CTD-2090I   | 1. 30E-17 | -0. 5024  | 0. 002 | 0. 059 | 1. 95E-13 | Neo-G | CTD-2090I13. 1 |
| COBL. 5     | 1. 31E-17 | 0. 244819 | 0. 121 | 0. 061 | 1. 95E-13 | Neo-G | COBL           |
| RP11-436D   | 1. 31E-17 | 0. 139914 | 0. 043 | 0. 012 | 1. 96E-13 | Neo-G | RP11-436D23. 1 |
| PURA. 5     | 1. 33E-17 | 0. 262921 | 0. 279 | 0. 199 | 1. 98E-13 | Neo-G | PURA           |
| GIMAP7. 4   | 1. 36E-17 | -0. 29199 | 0. 003 | 0. 061 | 2. 03E-13 | Neo-G | GIMAP7         |
| TCERG1. 4   | 1. 37E-17 | 0. 243314 | 0. 279 | 0. 195 | 2. 04E-13 | Neo-G | TCERG1         |
| TANGO2. 7   | 1. 43E-17 | -0. 22528 | 0. 022 | 0. 093 | 2. 14E-13 | Neo-G | TANGO2         |
| KCNN2. 4    | 1. 45E-17 | 0. 191684 | 0. 076 | 0. 031 | 2. 16E-13 | Neo-G | KCNN2          |
| PTPN13. 5   | 1. 50E-17 | -0. 12728 | 0. 026 | 0. 101 | 2. 24E-13 | Neo-G | PTPN13         |
| PTPN7. 7    | 1. 54E-17 | -0. 3137  | 0. 018 | 0. 086 | 2. 30E-13 | Neo-G | PTPN7          |
| HPSE. 6     | 1. 54E-17 | -0. 26899 | 0. 005 | 0. 065 | 2. 31E-13 | Neo-G | HPSE           |
| RAB27A. 5   | 1. 55E-17 | -0. 24128 | 0. 017 | 0. 085 | 2. 32E-13 | Neo-G | RAB27A         |
| TXLNG. 4    | 1. 56E-17 | 0. 213654 | 0. 203 | 0. 125 | 2. 33E-13 | Neo-G | TXLNG          |
| USP18       | 1. 59E-17 | -0. 17566 | 0. 007 | 0. 068 | 2. 38E-13 | Neo-G | USP18          |
| TOM1L1. 4   | 1. 60E-17 | -0. 10951 | 0. 005 | 0. 064 | 2. 39E-13 | Neo-G | TOM1L1         |
| PLGRKT. 3   | 1. 62E-17 | 0. 161913 | 0. 349 | 0. 257 | 2. 42E-13 | Neo-G | PLGRKT         |
| ACER3. 6    | 1. 63E-17 | -0. 29146 | 0. 096 | 0. 196 | 2. 44E-13 | Neo-G | ACER3          |
| DENND1B. 4  | 1. 66E-17 | 0. 217142 | 0. 153 | 0. 084 | 2. 48E-13 | Neo-G | DENND1B        |
| GAS6. 6     | 1. 68E-17 | -0. 33051 | 0. 117 | 0. 215 | 2. 50E-13 | Neo-G | GAS6           |
| PLCD3. 3    | 1. 68E-17 | -0. 11527 | 0. 01  | 0. 074 | 2. 51E-13 | Neo-G | PLCD3          |
| GBA. 3      | 1. 70E-17 | -0. 26591 | 0. 053 | 0. 14  | 2. 54E-13 | Neo-G | GBA            |
| MPI. 1      | 1. 72E-17 | -0. 25236 | 0. 055 | 0. 142 | 2. 57E-13 | Neo-G | MPI            |
| ZNF786. 5   | 1. 72E-17 | 0. 198735 | 0. 126 | 0. 065 | 2. 58E-13 | Neo-G | ZNF786         |
| CHMP1A. 3   | 1. 73E-17 | 0. 239604 | 0. 345 | 0. 265 | 2. 59E-13 | Neo-G | CHMP1A         |
| TMEM38B. 2  | 1. 73E-17 | -0. 28835 | 0. 08  | 0. 176 | 2. 59E-13 | Neo-G | TMEM38B        |
| TPT1-AS1. 1 | 1. 76E-17 | 0. 244359 | 0. 207 | 0. 131 | 2. 63E-13 | Neo-G | TPT1-AS1       |
| HEATR5A. 2  | 1. 80E-17 | -0. 18847 | 0. 019 | 0. 088 | 2. 69E-13 | Neo-G | HEATR5A        |
| MYEF2. 6    | 1. 81E-17 | 0. 30978  | 0. 26  | 0. 185 | 2. 70E-13 | Neo-G | MYEF2          |
| IWS1. 3     | 1. 84E-17 | 0. 243214 | 0. 286 | 0. 204 | 2. 75E-13 | Neo-G | IWS1           |
| DCPS. 3     | 1. 93E-17 | -0. 21323 | 0. 082 | 0. 182 | 2. 89E-13 | Neo-G | DCPS           |
| LRRC73      | 1. 94E-17 | 0. 160359 | 0. 074 | 0. 03  | 2. 90E-13 | Neo-G | LRRC73         |

|            |           |           |        |        |           |       |          |
|------------|-----------|-----------|--------|--------|-----------|-------|----------|
| DOCK5. 7   | 1. 96E-17 | -0. 27471 | 0. 004 | 0. 061 | 2. 92E-13 | Neo-G | DOCK5    |
| PARD6A. 3  | 1. 99E-17 | 0. 246061 | 0. 154 | 0. 087 | 2. 97E-13 | Neo-G | PARD6A   |
| SNAPC1. 3  | 2. 04E-17 | -0. 28593 | 0. 097 | 0. 199 | 3. 05E-13 | Neo-G | SNAPC1   |
| TMOD3. 5   | 2. 06E-17 | -0. 19412 | 0. 062 | 0. 154 | 3. 07E-13 | Neo-G | TMOD3    |
| ZNF346     | 2. 06E-17 | 0. 174214 | 0. 123 | 0. 062 | 3. 08E-13 | Neo-G | ZNF346   |
| REL. 7     | 2. 06E-17 | -0. 39202 | 0. 207 | 0. 309 | 3. 09E-13 | Neo-G | REL      |
| RGS18. 7   | 2. 09E-17 | -0. 25424 | 0. 002 | 0. 058 | 3. 13E-13 | Neo-G | RGS18    |
| NPM3. 4    | 2. 19E-17 | -0. 29073 | 0. 119 | 0. 229 | 3. 27E-13 | Neo-G | NPM3     |
| C15orf48.  | 2. 23E-17 | -0. 33157 | 0. 013 | 0. 076 | 3. 33E-13 | Neo-G | C15orf48 |
| PFKM. 3    | 2. 26E-17 | 0. 231814 | 0. 256 | 0. 175 | 3. 37E-13 | Neo-G | PFKM     |
| MPP5. 4    | 2. 31E-17 | -0. 16855 | 0. 028 | 0. 104 | 3. 45E-13 | Neo-G | MPP5     |
| KIAA0907.  | 2. 35E-17 | 0. 221267 | 0. 27  | 0. 185 | 3. 52E-13 | Neo-G | KIAA0907 |
| PUM1. 4    | 2. 39E-17 | 0. 223143 | 0. 312 | 0. 228 | 3. 57E-13 | Neo-G | PUM1     |
| LRRC8A. 6  | 2. 50E-17 | 0. 21024  | 0. 243 | 0. 159 | 3. 73E-13 | Neo-G | LRRC8A   |
| EVA1C. 6   | 2. 78E-17 | -0. 1416  | 0. 013 | 0. 079 | 4. 15E-13 | Neo-G | EVA1C    |
| KISS1      | 2. 79E-17 | 0. 101836 | 0. 023 | 0. 004 | 4. 17E-13 | Neo-G | KISS1    |
| DCAF13. 4  | 2. 91E-17 | 0. 155392 | 0. 4   | 0. 308 | 4. 35E-13 | Neo-G | DCAF13   |
| NDUFA3. 2  | 2. 99E-17 | -0. 28174 | 0. 603 | 0. 654 | 4. 46E-13 | Neo-G | NDUFA3   |
| PDIA5. 2   | 3. 02E-17 | -0. 17181 | 0. 013 | 0. 077 | 4. 51E-13 | Neo-G | PDIA5    |
| GTSE1. 5   | 3. 06E-17 | -0. 19677 | 0. 005 | 0. 064 | 4. 58E-13 | Neo-G | GTSE1    |
| TEAD4. 4   | 3. 09E-17 | -0. 10326 | 0. 002 | 0. 058 | 4. 62E-13 | Neo-G | TEAD4    |
| PCSK5      | 3. 10E-17 | -0. 14503 | 0. 006 | 0. 066 | 4. 63E-13 | Neo-G | PCSK5    |
| PNPLA2. 4  | 3. 10E-17 | -0. 2104  | 0. 115 | 0. 224 | 4. 63E-13 | Neo-G | PNPLA2   |
| FLI1. 7    | 3. 12E-17 | -0. 24989 | 0. 002 | 0. 058 | 4. 66E-13 | Neo-G | FLI1     |
| RAB10. 2   | 3. 21E-17 | 0. 126812 | 0. 579 | 0. 486 | 4. 79E-13 | Neo-G | RAB10    |
| ANK2. 7    | 3. 22E-17 | 0. 286165 | 0. 231 | 0. 156 | 4. 81E-13 | Neo-G | ANK2     |
| TPM4. 5    | 3. 22E-17 | -0. 2996  | 0. 423 | 0. 506 | 4. 81E-13 | Neo-G | TPM4     |
| CKS1B. 3   | 3. 24E-17 | -0. 33984 | 0. 159 | 0. 271 | 4. 84E-13 | Neo-G | CKS1B    |
| THBS1. 6   | 3. 30E-17 | -0. 39465 | 0. 02  | 0. 088 | 4. 93E-13 | Neo-G | THBS1    |
| RGS16. 5   | 3. 34E-17 | -0. 36209 | 0. 174 | 0. 288 | 4. 99E-13 | Neo-G | RGS16    |
| PTGDS. 4   | 3. 38E-17 | -0. 74745 | 0. 09  | 0. 18  | 5. 05E-13 | Neo-G | PTGDS    |
| DRAM1. 4   | 3. 52E-17 | -0. 18473 | 0. 015 | 0. 08  | 5. 26E-13 | Neo-G | DRAM1    |
| FAM184B. 3 | 3. 57E-17 | -0. 23063 | 0. 038 | 0. 117 | 5. 33E-13 | Neo-G | FAM184B  |
| SLC35D2. 3 | 3. 75E-17 | -0. 14514 | 0. 032 | 0. 109 | 5. 61E-13 | Neo-G | SLC35D2  |
| MKI67. 6   | 3. 79E-17 | -0. 23369 | 0. 009 | 0. 069 | 5. 67E-13 | Neo-G | MKI67    |
| ARSG. 2    | 3. 81E-17 | -0. 21    | 0. 023 | 0. 093 | 5. 70E-13 | Neo-G | ARSG     |
| LPAR1. 2   | 3. 81E-17 | -0. 17299 | 0. 001 | 0. 055 | 5. 70E-13 | Neo-G | LPAR1    |
| COX14. 4   | 3. 90E-17 | -0. 36284 | 0. 342 | 0. 474 | 5. 83E-13 | Neo-G | COX14    |
| GRIK2      | 3. 93E-17 | 0. 136491 | 0. 071 | 0. 027 | 5. 87E-13 | Neo-G | GRIK2    |
| CHRNA9. 4  | 3. 94E-17 | -0. 1377  | 0. 001 | 0. 055 | 5. 88E-13 | Neo-G | CHRNA9   |
| DHX9. 4    | 3. 99E-17 | 0. 212679 | 0. 354 | 0. 269 | 5. 96E-13 | Neo-G | DHX9     |
| SPTBN4     | 4. 30E-17 | 0. 151553 | 0. 058 | 0. 02  | 6. 43E-13 | Neo-G | SPTBN4   |
| EIF3D. 6   | 4. 66E-17 | -0. 2859  | 0. 355 | 0. 491 | 6. 97E-13 | Neo-G | EIF3D    |
| ARHGAP26.  | 4. 68E-17 | -0. 26687 | 0. 027 | 0. 099 | 7. 00E-13 | Neo-G | ARHGAP26 |
| C21orf59.  | 4. 83E-17 | 0. 174817 | 0. 393 | 0. 307 | 7. 22E-13 | Neo-G | C21orf59 |
| TARDBP. 2  | 4. 83E-17 | 0. 202187 | 0. 369 | 0. 285 | 7. 22E-13 | Neo-G | TARDBP   |
| CDIPT. 2   | 4. 84E-17 | 0. 222052 | 0. 361 | 0. 276 | 7. 23E-13 | Neo-G | CDIPT    |
| DDB2. 2    | 4. 86E-17 | -0. 27827 | 0. 029 | 0. 102 | 7. 26E-13 | Neo-G | DDB2     |
| CRYL1. 1   | 4. 86E-17 | -0. 33142 | 0. 2   | 0. 323 | 7. 26E-13 | Neo-G | CRYL1    |
| VKORC1. 3  | 4. 92E-17 | -0. 34863 | 0. 387 | 0. 509 | 7. 35E-13 | Neo-G | VKORC1   |
| SLC39A8. 6 | 4. 93E-17 | -0. 20892 | 0. 006 | 0. 065 | 7. 37E-13 | Neo-G | SLC39A8  |

|           |          |          |       |       |          |       |               |
|-----------|----------|----------|-------|-------|----------|-------|---------------|
| DNTTIP2.2 | 5.33E-17 | 0.165478 | 0.372 | 0.276 | 7.96E-13 | Neo-G | DNTTIP2       |
| CLN6.5    | 5.42E-17 | -0.21299 | 0.053 | 0.139 | 8.10E-13 | Neo-G | CLN6          |
| LRR1.3    | 5.43E-17 | -0.20327 | 0.024 | 0.094 | 8.11E-13 | Neo-G | LRR1          |
| MAML2.6   | 5.50E-17 | -0.20262 | 0.104 | 0.209 | 8.22E-13 | Neo-G | MAML2         |
| SFRP1.6   | 5.52E-17 | -0.14703 | 0.031 | 0.106 | 8.25E-13 | Neo-G | SFRP1         |
| ZNF286B   | 5.55E-17 | 0.169165 | 0.076 | 0.031 | 8.29E-13 | Neo-G | ZNF286B       |
| UBL3.7    | 5.69E-17 | -0.24375 | 0.236 | 0.368 | 8.50E-13 | Neo-G | UBL3          |
| SCAPER.2  | 5.71E-17 | 0.193113 | 0.178 | 0.105 | 8.53E-13 | Neo-G | SCAPER        |
| C12orf73. | 5.73E-17 | 0.240721 | 0.222 | 0.146 | 8.57E-13 | Neo-G | C12orf73      |
| ZNF880.3  | 5.82E-17 | 0.243187 | 0.212 | 0.137 | 8.69E-13 | Neo-G | ZNF880        |
| COL18A1.2 | 5.88E-17 | -0.14548 | 0.003 | 0.059 | 8.79E-13 | Neo-G | COL18A1       |
| SCARA3.6  | 5.89E-17 | -0.14934 | 0.057 | 0.147 | 8.81E-13 | Neo-G | SCARA3        |
| HEY2.3    | 5.93E-17 | -0.12389 | 0.009 | 0.071 | 8.86E-13 | Neo-G | HEY2          |
| C15orf40. | 6.00E-17 | -0.26362 | 0.076 | 0.171 | 8.97E-13 | Neo-G | C15orf40      |
| SLC2A10.4 | 6.00E-17 | -0.10952 | 0.009 | 0.071 | 8.97E-13 | Neo-G | SLC2A10       |
| SNRPD2.4  | 6.06E-17 | -0.31984 | 0.735 | 0.749 | 9.06E-13 | Neo-G | SNRPD2        |
| SNRNP35.2 | 6.10E-17 | 0.19236  | 0.272 | 0.187 | 9.11E-13 | Neo-G | SNRNP35       |
| CCNY.4    | 6.14E-17 | -0.1868  | 0.038 | 0.117 | 9.17E-13 | Neo-G | CCNY          |
| PLA2G7.5  | 6.16E-17 | -0.22256 | 0.002 | 0.057 | 9.20E-13 | Neo-G | PLA2G7        |
| ZMYND15.4 | 6.39E-17 | -0.18128 | 0.005 | 0.063 | 9.55E-13 | Neo-G | ZMYND15       |
| TMEM255B. | 6.49E-17 | -0.29268 | 0.005 | 0.061 | 9.69E-13 | Neo-G | TMEM255B      |
| ISCA2.3   | 6.63E-17 | -0.27458 | 0.171 | 0.295 | 9.90E-13 | Neo-G | ISCA2         |
| RP11-698N | 6.69E-17 | -0.16308 | 0.006 | 0.064 | 1.00E-12 | Neo-G | RP11-698N11.2 |
| BOD1L1.2  | 6.73E-17 | 0.223797 | 0.231 | 0.151 | 1.01E-12 | Neo-G | BOD1L1        |
| GNGT2.7   | 6.91E-17 | -0.24528 | 0.003 | 0.058 | 1.03E-12 | Neo-G | GNGT2         |
| ETF1.6    | 6.99E-17 | -0.3248  | 0.236 | 0.359 | 1.05E-12 | Neo-G | ETF1          |
| TYK2.1    | 7.41E-17 | -0.17662 | 0.046 | 0.129 | 1.11E-12 | Neo-G | TYK2          |
| SNRNP27.3 | 7.54E-17 | 0.163246 | 0.424 | 0.343 | 1.13E-12 | Neo-G | SNRNP27       |
| GMCL1.4   | 7.63E-17 | 0.258534 | 0.227 | 0.15  | 1.14E-12 | Neo-G | GMCL1         |
| LRIG1.6   | 7.63E-17 | -0.15195 | 0.038 | 0.117 | 1.14E-12 | Neo-G | LRIG1         |
| PRR3.4    | 7.65E-17 | 0.230085 | 0.163 | 0.095 | 1.14E-12 | Neo-G | PRR3          |
| COL5A2.5  | 7.67E-17 | -0.10341 | 0.009 | 0.069 | 1.15E-12 | Neo-G | COL5A2        |
| RPP14.4   | 7.68E-17 | 0.249283 | 0.257 | 0.178 | 1.15E-12 | Neo-G | RPP14         |
| SWI5.5    | 7.78E-17 | -0.24016 | 0.14  | 0.258 | 1.16E-12 | Neo-G | SWI5          |
| RP11-834C | 7.84E-17 | 0.143762 | 0.162 | 0.089 | 1.17E-12 | Neo-G | RP11-834C11.4 |
| CHCHD7.6  | 8.02E-17 | -0.34811 | 0.186 | 0.298 | 1.20E-12 | Neo-G | CHCHD7        |
| POM121C.4 | 8.19E-17 | 0.238752 | 0.207 | 0.132 | 1.22E-12 | Neo-G | POM121C       |
| TYRO3.6   | 8.29E-17 | -0.16364 | 0.038 | 0.118 | 1.24E-12 | Neo-G | TYRO3         |
| MGMT.7    | 8.30E-17 | -0.36155 | 0.073 | 0.161 | 1.24E-12 | Neo-G | MGMT          |
| RBM28.4   | 8.37E-17 | 0.222845 | 0.234 | 0.154 | 1.25E-12 | Neo-G | RBM28         |
| ARMC10.4  | 9.22E-17 | 0.245    | 0.366 | 0.288 | 1.38E-12 | Neo-G | ARMC10        |
| BMP7.7    | 9.69E-17 | -0.14985 | 0.079 | 0.176 | 1.45E-12 | Neo-G | BMP7          |
| PTPN14.2  | 9.73E-17 | -0.15411 | 0.013 | 0.075 | 1.45E-12 | Neo-G | PTPN14        |
| BEST1.4   | 1.00E-16 | -0.39781 | 0.18  | 0.286 | 1.50E-12 | Neo-G | BEST1         |
| KIFC1.5   | 1.00E-16 | -0.18743 | 0.007 | 0.065 | 1.50E-12 | Neo-G | KIFC1         |
| PGK1.4    | 1.01E-16 | -0.33795 | 0.727 | 0.757 | 1.51E-12 | Neo-G | PGK1          |
| AP001372. | 1.04E-16 | 0.16814  | 0.092 | 0.041 | 1.55E-12 | Neo-G | AP001372.2    |
| CNN2.5    | 1.06E-16 | -0.2098  | 0.012 | 0.073 | 1.59E-12 | Neo-G | CNN2          |
| SORD.2    | 1.07E-16 | -0.18651 | 0.027 | 0.1   | 1.60E-12 | Neo-G | SORD          |
| FTL.7     | 1.09E-16 | -0.31727 | 1     | 0.993 | 1.63E-12 | Neo-G | FTL           |
| FLVCR1.2  | 1.10E-16 | 0.206309 | 0.134 | 0.071 | 1.64E-12 | Neo-G | FLVCR1        |

|             |           |           |        |        |           |       |           |
|-------------|-----------|-----------|--------|--------|-----------|-------|-----------|
| PURG        | 1. 10E-16 | 0. 144385 | 0. 057 | 0. 02  | 1. 65E-12 | Neo-G | PURG      |
| ATF6B. 2    | 1. 11E-16 | 0. 163788 | 0. 46  | 0. 378 | 1. 65E-12 | Neo-G | ATF6B     |
| C19orf25.   | 1. 15E-16 | 0. 229156 | 0. 369 | 0. 291 | 1. 72E-12 | Neo-G | C19orf25  |
| GAS2L1. 5   | 1. 18E-16 | -0. 13331 | 0. 068 | 0. 162 | 1. 76E-12 | Neo-G | GAS2L1    |
| MAP3K1. 2   | 1. 21E-16 | -0. 16604 | 0. 031 | 0. 105 | 1. 80E-12 | Neo-G | MAP3K1    |
| ZNF527. 1   | 1. 21E-16 | 0. 131366 | 0. 089 | 0. 039 | 1. 81E-12 | Neo-G | ZNF527    |
| CHSY1. 2    | 1. 22E-16 | -0. 17671 | 0. 027 | 0. 099 | 1. 82E-12 | Neo-G | CHSY1     |
| SOX21-AS1   | 1. 22E-16 | -0. 1201  | 0. 01  | 0. 071 | 1. 82E-12 | Neo-G | SOX21-AS1 |
| ABL2. 7     | 1. 22E-16 | -0. 37128 | 0. 174 | 0. 279 | 1. 83E-12 | Neo-G | ABL2      |
| ID1. 5      | 1. 23E-16 | -0. 22199 | 0. 048 | 0. 129 | 1. 83E-12 | Neo-G | ID1       |
| CTIF. 1     | 1. 26E-16 | 0. 150801 | 0. 089 | 0. 039 | 1. 88E-12 | Neo-G | CTIF      |
| TFR2        | 1. 28E-16 | 0. 11297  | 0. 053 | 0. 017 | 1. 91E-12 | Neo-G | TFR2      |
| NDP. 5      | 1. 29E-16 | -0. 20719 | 0. 041 | 0. 12  | 1. 93E-12 | Neo-G | NDP       |
| GRASP. 6    | 1. 29E-16 | -0. 25728 | 0. 003 | 0. 057 | 1. 93E-12 | Neo-G | GRASP     |
| COMMD8. 7   | 1. 32E-16 | -0. 31929 | 0. 13  | 0. 236 | 1. 97E-12 | Neo-G | COMMD8    |
| SEMA5A. 5   | 1. 32E-16 | -0. 19018 | 0. 036 | 0. 112 | 1. 97E-12 | Neo-G | SEMA5A    |
| ARHGAP5. 4  | 1. 33E-16 | -0. 19403 | 0. 101 | 0. 205 | 1. 99E-12 | Neo-G | ARHGAP5   |
| P2RY11. 5   | 1. 33E-16 | -0. 23395 | 0. 025 | 0. 094 | 1. 99E-12 | Neo-G | P2RY11    |
| KATNB1. 4   | 1. 34E-16 | 0. 273285 | 0. 181 | 0. 112 | 2. 01E-12 | Neo-G | KATNB1    |
| TBC1D19. 3  | 1. 35E-16 | 0. 180048 | 0. 112 | 0. 055 | 2. 01E-12 | Neo-G | TBC1D19   |
| IFIH1. 1    | 1. 35E-16 | -0. 14222 | 0. 001 | 0. 053 | 2. 02E-12 | Neo-G | IFIH1     |
| MMP19. 4    | 1. 36E-16 | -0. 25389 | 0. 007 | 0. 064 | 2. 03E-12 | Neo-G | MMP19     |
| LMAN2. 3    | 1. 37E-16 | -0. 3358  | 0. 488 | 0. 584 | 2. 04E-12 | Neo-G | LMAN2     |
| HAP1. 4     | 1. 44E-16 | -0. 15579 | 0. 013 | 0. 075 | 2. 15E-12 | Neo-G | HAP1      |
| MTUS1. 4    | 1. 45E-16 | 0. 101659 | 0. 225 | 0. 138 | 2. 17E-12 | Neo-G | MTUS1     |
| POU4F1      | 1. 54E-16 | 0. 194568 | 0. 058 | 0. 021 | 2. 30E-12 | Neo-G | POU4F1    |
| FAM213A. 5  | 1. 55E-16 | 0. 10752  | 0. 469 | 0. 372 | 2. 31E-12 | Neo-G | FAM213A   |
| HS3ST1. 6   | 1. 57E-16 | -0. 27483 | 0. 026 | 0. 095 | 2. 35E-12 | Neo-G | HS3ST1    |
| PCBD1. 3    | 1. 59E-16 | -0. 28468 | 0. 217 | 0. 344 | 2. 38E-12 | Neo-G | PCBD1     |
| RAD51AP1. 1 | 1. 61E-16 | -0. 18664 | 0. 012 | 0. 073 | 2. 41E-12 | Neo-G | RAD51AP1  |
| DPP6. 5     | 1. 62E-16 | 0. 225535 | 0. 232 | 0. 153 | 2. 42E-12 | Neo-G | DPP6      |
| RAB5A. 3    | 1. 63E-16 | 0. 114164 | 0. 529 | 0. 438 | 2. 44E-12 | Neo-G | RAB5A     |
| HERPUD2. 3  | 1. 65E-16 | 0. 23276  | 0. 245 | 0. 166 | 2. 46E-12 | Neo-G | HERPUD2   |
| NFKB2. 7    | 1. 66E-16 | -0. 20683 | 0. 009 | 0. 067 | 2. 49E-12 | Neo-G | NFKB2     |
| ROGDI. 4    | 1. 66E-16 | 0. 205667 | 0. 302 | 0. 218 | 2. 49E-12 | Neo-G | ROGDI     |
| PROS1. 1    | 1. 85E-16 | -0. 17888 | 0. 028 | 0. 1   | 2. 77E-12 | Neo-G | PROS1     |
| LINC0091C   | 1. 94E-16 | 0. 190209 | 0. 135 | 0. 072 | 2. 89E-12 | Neo-G | LINC00910 |
| HDDC2. 2    | 1. 95E-16 | 0. 129213 | 0. 477 | 0. 391 | 2. 91E-12 | Neo-G | HDDC2     |
| KLHL12. 3   | 1. 99E-16 | 0. 204694 | 0. 189 | 0. 116 | 2. 97E-12 | Neo-G | KLHL12    |
| ZNF408. 4   | 1. 99E-16 | 0. 198948 | 0. 13  | 0. 069 | 2. 98E-12 | Neo-G | ZNF408    |
| GCHFR. 6    | 2. 11E-16 | -0. 28064 | 0. 019 | 0. 083 | 3. 16E-12 | Neo-G | GCHFR     |
| SNX14. 3    | 2. 14E-16 | 0. 230788 | 0. 282 | 0. 202 | 3. 20E-12 | Neo-G | SNX14     |
| MARCH2. 5   | 2. 21E-16 | -0. 19904 | 0. 134 | 0. 245 | 3. 30E-12 | Neo-G | 2-Mar     |
| TMEM178A. 2 | 2. 23E-16 | 0. 239114 | 0. 181 | 0. 111 | 3. 33E-12 | Neo-G | TMEM178A  |
| TRAF3IP3. 3 | 2. 23E-16 | -0. 27013 | 0. 004 | 0. 058 | 3. 33E-12 | Neo-G | TRAF3IP3  |
| LRRK2. 6    | 2. 23E-16 | -0. 21207 | 0. 009 | 0. 067 | 3. 33E-12 | Neo-G | LRRK2     |
| MANBAL. 7   | 2. 25E-16 | 0. 141037 | 0. 414 | 0. 325 | 3. 36E-12 | Neo-G | MANBAL    |
| NSMF. 3     | 2. 25E-16 | 0. 233735 | 0. 178 | 0. 109 | 3. 37E-12 | Neo-G | NSMF      |
| SIK3. 4     | 2. 30E-16 | -0. 17737 | 0. 038 | 0. 114 | 3. 44E-12 | Neo-G | SIK3      |
| EPC1. 5     | 2. 35E-16 | 0. 180465 | 0. 367 | 0. 282 | 3. 51E-12 | Neo-G | EPC1      |
| PIRT        | 2. 37E-16 | 0. 102942 | 0. 031 | 0. 007 | 3. 54E-12 | Neo-G | PIRT      |

|           |          |          |       |       |          |       |               |
|-----------|----------|----------|-------|-------|----------|-------|---------------|
| CEP95.3   | 2.37E-16 | 0.221518 | 0.188 | 0.116 | 3.54E-12 | Neo-G | CEP95         |
| PLRG1.3   | 2.38E-16 | 0.190358 | 0.313 | 0.228 | 3.56E-12 | Neo-G | PLRG1         |
| HDLBP.3   | 2.40E-16 | -0.25484 | 0.222 | 0.35  | 3.59E-12 | Neo-G | HDLBP         |
| LINC00094 | 2.46E-16 | 0.239748 | 0.191 | 0.121 | 3.68E-12 | Neo-G | LINC00094     |
| JDP2.7    | 2.51E-16 | -0.26365 | 0.015 | 0.077 | 3.76E-12 | Neo-G | JDP2          |
| NDUFC1.5  | 2.53E-16 | -0.35172 | 0.467 | 0.563 | 3.78E-12 | Neo-G | NDUFC1        |
| B4GALT3.3 | 2.60E-16 | 0.19445  | 0.29  | 0.209 | 3.88E-12 | Neo-G | B4GALT3       |
| PRSS27    | 2.60E-16 | 0.133978 | 0.068 | 0.026 | 3.88E-12 | Neo-G | PRSS27        |
| ZNF708.4  | 2.62E-16 | 0.223192 | 0.156 | 0.09  | 3.92E-12 | Neo-G | ZNF708        |
| TLK1.4    | 2.63E-16 | -0.20097 | 0.13  | 0.24  | 3.93E-12 | Neo-G | TLK1          |
| CDKN2AIPN | 2.71E-16 | 0.198788 | 0.319 | 0.24  | 4.05E-12 | Neo-G | CDKN2AIPNL    |
| PCK2.5    | 2.73E-16 | -0.19761 | 0.014 | 0.076 | 4.08E-12 | Neo-G | PCK2          |
| AP006222. | 2.76E-16 | -0.29325 | 0.118 | 0.222 | 4.12E-12 | Neo-G | AP006222.2    |
| MAP2K3.7  | 2.77E-16 | -0.24123 | 0.102 | 0.2   | 4.13E-12 | Neo-G | MAP2K3        |
| IGF2R.3   | 2.77E-16 | -0.16737 | 0.031 | 0.104 | 4.13E-12 | Neo-G | IGF2R         |
| LYRM1.6   | 2.78E-16 | 0.214345 | 0.252 | 0.175 | 4.15E-12 | Neo-G | LYRM1         |
| CREBZF.6  | 2.88E-16 | 0.228134 | 0.196 | 0.123 | 4.31E-12 | Neo-G | CREBZF        |
| MAN1A1.6  | 2.89E-16 | -0.2019  | 0.002 | 0.053 | 4.31E-12 | Neo-G | MAN1A1        |
| AMDHD2.5  | 2.89E-16 | -0.17887 | 0.05  | 0.132 | 4.32E-12 | Neo-G | AMDHD2        |
| ACP5.5    | 2.89E-16 | -0.23299 | 0.002 | 0.053 | 4.33E-12 | Neo-G | ACP5          |
| CTD-3138E | 2.92E-16 | -0.16058 | 0.021 | 0.088 | 4.37E-12 | Neo-G | CTD-3138B18.5 |
| RHOT1.5   | 2.95E-16 | 0.23984  | 0.317 | 0.24  | 4.41E-12 | Neo-G | RHOT1         |
| ACHE.4    | 2.99E-16 | 0.204912 | 0.086 | 0.038 | 4.47E-12 | Neo-G | ACHE          |
| ABHD15.6  | 3.07E-16 | -0.19491 | 0.007 | 0.064 | 4.59E-12 | Neo-G | ABHD15        |
| CXorf57   | 3.13E-16 | 0.111844 | 0.049 | 0.016 | 4.68E-12 | Neo-G | CXorf57       |
| NPRL2.4   | 3.15E-16 | 0.217795 | 0.227 | 0.149 | 4.70E-12 | Neo-G | NPRL2         |
| LRRC37A3  | 3.15E-16 | 0.122662 | 0.067 | 0.026 | 4.71E-12 | Neo-G | LRRC37A3      |
| TES.7     | 3.24E-16 | -0.24524 | 0.001 | 0.052 | 4.84E-12 | Neo-G | TES           |
| GCAT.7    | 3.30E-16 | -0.13672 | 0.077 | 0.171 | 4.94E-12 | Neo-G | GCAT          |
| EPS15.3   | 3.34E-16 | -0.23324 | 0.071 | 0.16  | 4.99E-12 | Neo-G | EPS15         |
| REV3L.4   | 3.45E-16 | 0.220089 | 0.283 | 0.2   | 5.15E-12 | Neo-G | REV3L         |
| FAM172A.5 | 3.47E-16 | 0.219675 | 0.266 | 0.188 | 5.19E-12 | Neo-G | FAM172A       |
| MFAP3L.5  | 3.50E-16 | -0.12548 | 0.005 | 0.061 | 5.23E-12 | Neo-G | MFAP3L        |
| PNRC1.7   | 3.59E-16 | 0.145298 | 0.645 | 0.527 | 5.36E-12 | Neo-G | PNRC1         |
| TBX5      | 3.62E-16 | 0.105796 | 0.038 | 0.01  | 5.42E-12 | Neo-G | TBX5          |
| ARL4A     | 3.66E-16 | -0.37424 | 0.273 | 0.386 | 5.47E-12 | Neo-G | ARL4A         |
| GPRC5B.5  | 3.90E-16 | -0.22996 | 0.122 | 0.23  | 5.82E-12 | Neo-G | GPRC5B        |
| FMNL3.5   | 3.91E-16 | -0.23691 | 0.02  | 0.084 | 5.84E-12 | Neo-G | FMNL3         |
| TBC1D24.5 | 3.92E-16 | 0.221005 | 0.123 | 0.065 | 5.86E-12 | Neo-G | TBC1D24       |
| EEF1G.1   | 4.20E-16 | -0.34422 | 0.038 | 0.111 | 6.28E-12 | Neo-G | EEF1G         |
| CHST10.4  | 4.32E-16 | 0.25266  | 0.202 | 0.132 | 6.45E-12 | Neo-G | CHST10        |
| PDGFB.4   | 4.53E-16 | -0.24428 | 0.001 | 0.051 | 6.77E-12 | Neo-G | PDGFB         |
| ZMIZ2.4   | 4.56E-16 | 0.204893 | 0.159 | 0.092 | 6.82E-12 | Neo-G | ZMIZ2         |
| IMPA2.4   | 4.57E-16 | -0.16721 | 0.009 | 0.066 | 6.84E-12 | Neo-G | IMPA2         |
| PHACTR1.7 | 4.67E-16 | -0.4146  | 0.051 | 0.126 | 6.97E-12 | Neo-G | PHACTR1       |
| STAC3.7   | 4.68E-16 | -0.2594  | 0.021 | 0.086 | 6.99E-12 | Neo-G | STAC3         |
| ZNF568.5  | 4.81E-16 | 0.186383 | 0.158 | 0.091 | 7.18E-12 | Neo-G | ZNF568        |
| KRIT1.6   | 4.91E-16 | 0.225632 | 0.286 | 0.208 | 7.34E-12 | Neo-G | KRIT1         |
| WDSUB1.2  | 4.94E-16 | 0.176152 | 0.13  | 0.069 | 7.38E-12 | Neo-G | WDSUB1        |
| IFT27.5   | 4.99E-16 | 0.252263 | 0.324 | 0.248 | 7.46E-12 | Neo-G | IFT27         |
| DOK3.7    | 5.11E-16 | -0.22818 | 0.013 | 0.072 | 7.64E-12 | Neo-G | DOK3          |

|             |           |           |        |        |           |       |                |
|-------------|-----------|-----------|--------|--------|-----------|-------|----------------|
| H2AFV. 5    | 5. 18E-16 | 0. 115274 | 0. 625 | 0. 51  | 7. 74E-12 | Neo-G | H2AFV          |
| GTF2IRD1. 5 | 5. 23E-16 | 0. 189443 | 0. 132 | 0. 071 | 7. 82E-12 | Neo-G | GTF2IRD1       |
| NUF2. 7     | 5. 26E-16 | -0. 204   | 0. 01  | 0. 068 | 7. 86E-12 | Neo-G | NUF2           |
| FIG4. 2     | 5. 27E-16 | 0. 198073 | 0. 166 | 0. 098 | 7. 88E-12 | Neo-G | FIG4           |
| RNF8. 4     | 5. 31E-16 | 0. 224552 | 0. 233 | 0. 159 | 7. 94E-12 | Neo-G | RNF8           |
| HNRNPH2. 3  | 5. 46E-16 | 0. 112328 | 0. 48  | 0. 39  | 8. 15E-12 | Neo-G | HNRNPH2        |
| TMEM154     | 5. 51E-16 | -0. 19296 | 0. 005 | 0. 06  | 8. 24E-12 | Neo-G | TMEM154        |
| SHMT1. 5    | 5. 53E-16 | -0. 24961 | 0. 048 | 0. 126 | 8. 26E-12 | Neo-G | SHMT1          |
| WBP4. 5     | 5. 63E-16 | 0. 161644 | 0. 379 | 0. 296 | 8. 41E-12 | Neo-G | WBP4           |
| ZNF554      | 5. 83E-16 | 0. 129772 | 0. 079 | 0. 033 | 8. 71E-12 | Neo-G | ZNF554         |
| CSF1. 5     | 5. 91E-16 | -0. 15792 | 0. 031 | 0. 102 | 8. 82E-12 | Neo-G | CSF1           |
| CROCC       | 5. 99E-16 | 0. 146482 | 0. 068 | 0. 027 | 8. 95E-12 | Neo-G | CROCC          |
| UBTF. 5     | 6. 01E-16 | 0. 252711 | 0. 294 | 0. 218 | 8. 99E-12 | Neo-G | UBTF           |
| MORC2. 2    | 6. 08E-16 | 0. 19039  | 0. 108 | 0. 054 | 9. 08E-12 | Neo-G | MORC2          |
| LONP2. 5    | 6. 09E-16 | 0. 199774 | 0. 324 | 0. 239 | 9. 10E-12 | Neo-G | LONP2          |
| SERPINB8. 6 | 6. 09E-16 | -0. 21303 | 0. 02  | 0. 085 | 9. 11E-12 | Neo-G | SERPINB8       |
| PCGF2. 5    | 6. 12E-16 | 0. 271213 | 0. 225 | 0. 155 | 9. 15E-12 | Neo-G | PCGF2          |
| MTFP1. 3    | 6. 25E-16 | -0. 18791 | 0. 013 | 0. 074 | 9. 33E-12 | Neo-G | MTFP1          |
| SH3BP5L. 1  | 6. 27E-16 | 0. 191692 | 0. 108 | 0. 054 | 9. 37E-12 | Neo-G | SH3BP5L        |
| EIF3J. 3    | 6. 39E-16 | -0. 27938 | 0. 265 | 0. 391 | 9. 55E-12 | Neo-G | EIF3J          |
| POC1A. 4    | 6. 40E-16 | -0. 14939 | 0. 007 | 0. 063 | 9. 56E-12 | Neo-G | POC1A          |
| SDC3. 3     | 6. 50E-16 | -0. 24136 | 0. 106 | 0. 207 | 9. 72E-12 | Neo-G | SDC3           |
| FIP1L1. 3   | 6. 54E-16 | 0. 193306 | 0. 372 | 0. 288 | 9. 78E-12 | Neo-G | FIP1L1         |
| SUDS3. 5    | 6. 73E-16 | 0. 27392  | 0. 254 | 0. 18  | 1. 01E-11 | Neo-G | SUDS3          |
| PYURF. 3    | 6. 87E-16 | 0. 123021 | 0. 632 | 0. 53  | 1. 03E-11 | Neo-G | PYURF          |
| TNFRSF11E   | 6. 91E-16 | -0. 21031 | 0. 005 | 0. 06  | 1. 03E-11 | Neo-G | TNFRSF11B      |
| SLC35B1. 2  | 7. 05E-16 | 0. 131092 | 0. 469 | 0. 381 | 1. 05E-11 | Neo-G | SLC35B1        |
| PPIF. 7     | 7. 09E-16 | -0. 30359 | 0. 135 | 0. 231 | 1. 06E-11 | Neo-G | PPIF           |
| NEU1. 4     | 7. 11E-16 | -0. 28986 | 0. 19  | 0. 305 | 1. 06E-11 | Neo-G | NEU1           |
| MAP2K7. 3   | 7. 12E-16 | 0. 261024 | 0. 262 | 0. 188 | 1. 06E-11 | Neo-G | MAP2K7         |
| DLG1. 6     | 7. 19E-16 | -0. 19317 | 0. 082 | 0. 176 | 1. 07E-11 | Neo-G | DLG1           |
| APEX2. 3    | 7. 23E-16 | -0. 19291 | 0. 031 | 0. 101 | 1. 08E-11 | Neo-G | APEX2          |
| ZIK1. 3     | 7. 30E-16 | 0. 170145 | 0. 097 | 0. 046 | 1. 09E-11 | Neo-G | ZIK1           |
| RP11-480C   | 7. 33E-16 | -0. 29362 | 0. 002 | 0. 053 | 1. 10E-11 | Neo-G | RP11-480C22. 1 |
| CCDC47. 3   | 7. 60E-16 | -0. 27466 | 0. 291 | 0. 418 | 1. 14E-11 | Neo-G | CCDC47         |
| KLC4. 3     | 7. 72E-16 | 0. 208611 | 0. 138 | 0. 077 | 1. 15E-11 | Neo-G | KLC4           |
| RNASEH1-A   | 7. 82E-16 | 0. 305032 | 0. 241 | 0. 17  | 1. 17E-11 | Neo-G | RNASEH1-AS1    |
| ZNF766. 3   | 8. 00E-16 | 0. 225711 | 0. 189 | 0. 118 | 1. 20E-11 | Neo-G | ZNF766         |
| SSSCA1. 2   | 8. 07E-16 | -0. 25169 | 0. 1   | 0. 198 | 1. 21E-11 | Neo-G | SSSCA1         |
| ANP32E. 5   | 8. 20E-16 | -0. 2583  | 0. 169 | 0. 28  | 1. 23E-11 | Neo-G | ANP32E         |
| HSD17B8. 1  | 8. 21E-16 | -0. 17708 | 0. 033 | 0. 105 | 1. 23E-11 | Neo-G | HSD17B8        |
| PLAA. 3     | 8. 23E-16 | 0. 177355 | 0. 153 | 0. 087 | 1. 23E-11 | Neo-G | PLAA           |
| C1QTNF2     | 8. 28E-16 | 0. 154276 | 0. 051 | 0. 017 | 1. 24E-11 | Neo-G | C1QTNF2        |
| POLDIP2. 6  | 8. 35E-16 | 0. 196927 | 0. 422 | 0. 338 | 1. 25E-11 | Neo-G | POLDIP2        |
| KDM5A. 2    | 8. 40E-16 | 0. 239573 | 0. 316 | 0. 239 | 1. 26E-11 | Neo-G | KDM5A          |
| SEMA6D. 7   | 8. 72E-16 | -0. 21391 | 0. 079 | 0. 166 | 1. 30E-11 | Neo-G | SEMA6D         |
| RHCE        | 8. 72E-16 | 0. 109566 | 0. 044 | 0. 013 | 1. 30E-11 | Neo-G | RHCE           |
| AURKA. 4    | 8. 79E-16 | -0. 21365 | 0. 02  | 0. 084 | 1. 31E-11 | Neo-G | AURKA          |
| PLCG2. 4    | 8. 81E-16 | -0. 24039 | 0. 002 | 0. 053 | 1. 32E-11 | Neo-G | PLCG2          |
| PPARD. 7    | 8. 98E-16 | -0. 2232  | 0. 042 | 0. 116 | 1. 34E-11 | Neo-G | PPARD          |
| PSMG3. 6    | 9. 01E-16 | 0. 168458 | 0. 4   | 0. 318 | 1. 35E-11 | Neo-G | PSMG3          |



|              |           |           |        |        |           |       |                |
|--------------|-----------|-----------|--------|--------|-----------|-------|----------------|
| GIMAP5. 5    | 9. 11E-16 | -0. 23601 | 0. 004 | 0. 056 | 1. 36E-11 | Neo-G | GIMAP5         |
| VPS4A. 3     | 9. 54E-16 | 0. 201265 | 0. 376 | 0. 299 | 1. 43E-11 | Neo-G | VPS4A          |
| NTRK2. 6     | 9. 58E-16 | -0. 38768 | 0. 053 | 0. 129 | 1. 43E-11 | Neo-G | NTRK2          |
| CCDC109B. 9. | 67E-16    | 0. 222957 | 0. 419 | 0. 34  | 1. 45E-11 | Neo-G | CCDC109B       |
| RNF7. 3      | 1. 02E-15 | -0. 34535 | 0. 441 | 0. 543 | 1. 53E-11 | Neo-G | RNF7           |
| RP11-111M    | 1. 03E-15 | 0. 145212 | 0. 084 | 0. 037 | 1. 53E-11 | Neo-G | RP11-111M2. 2  |
| UBAP2. 1     | 1. 04E-15 | 0. 198068 | 0. 148 | 0. 084 | 1. 55E-11 | Neo-G | UBAP2          |
| LRWD1. 4     | 1. 04E-15 | 0. 259717 | 0. 234 | 0. 162 | 1. 56E-11 | Neo-G | LRWD1          |
| FOS. 5       | 1. 07E-15 | -0. 31707 | 0. 844 | 0. 84  | 1. 60E-11 | Neo-G | FOS            |
| CLECL1. 6    | 1. 10E-15 | -0. 20754 | 0. 002 | 0. 053 | 1. 65E-11 | Neo-G | CLECL1         |
| RDX. 6       | 1. 10E-15 | 0. 120923 | 0. 608 | 0. 476 | 1. 65E-11 | Neo-G | RDX            |
| ZNF273. 5    | 1. 11E-15 | 0. 170804 | 0. 141 | 0. 077 | 1. 66E-11 | Neo-G | ZNF273         |
| SNX20. 6     | 1. 11E-15 | -0. 19681 | 0. 001 | 0. 05  | 1. 66E-11 | Neo-G | SNX20          |
| CERCAM. 5    | 1. 14E-15 | -0. 18723 | 0. 056 | 0. 138 | 1. 70E-11 | Neo-G | CERCAM         |
| FAM20A. 6    | 1. 15E-15 | -0. 2249  | 0. 009 | 0. 066 | 1. 72E-11 | Neo-G | FAM20A         |
| GPRASP1      | 1. 16E-15 | 0. 10213  | 0. 057 | 0. 02  | 1. 73E-11 | Neo-G | GPRASP1        |
| DOCK1. 1     | 1. 17E-15 | -0. 12621 | 0. 005 | 0. 058 | 1. 75E-11 | Neo-G | DOCK1          |
| INSIG1. 6    | 1. 18E-15 | -0. 30788 | 0. 138 | 0. 238 | 1. 76E-11 | Neo-G | INSIG1         |
| PDLIM4. 5    | 1. 19E-15 | -0. 29809 | 0. 018 | 0. 079 | 1. 77E-11 | Neo-G | PDLIM4         |
| C6orf203. 1. | 19E-15    | 0. 193705 | 0. 233 | 0. 157 | 1. 78E-11 | Neo-G | C6orf203       |
| VTA1. 2      | 1. 20E-15 | 0. 210802 | 0. 252 | 0. 176 | 1. 79E-11 | Neo-G | VTA1           |
| F11R. 6      | 1. 21E-15 | -0. 22173 | 0. 008 | 0. 063 | 1. 80E-11 | Neo-G | F11R           |
| TMEM170A. 1. | 22E-15    | -0. 24177 | 0. 15  | 0. 263 | 1. 82E-11 | Neo-G | TMEM170A       |
| PIK3R5. 6    | 1. 24E-15 | -0. 21234 | 0. 002 | 0. 053 | 1. 85E-11 | Neo-G | PIK3R5         |
| SIGIRR. 6    | 1. 26E-15 | -0. 28538 | 0. 11  | 0. 206 | 1. 88E-11 | Neo-G | SIGIRR         |
| INTS8. 1     | 1. 27E-15 | 0. 209964 | 0. 148 | 0. 084 | 1. 90E-11 | Neo-G | INTS8          |
| DDX55. 4     | 1. 28E-15 | 0. 201133 | 0. 18  | 0. 11  | 1. 92E-11 | Neo-G | DDX55          |
| BACE2. 6     | 1. 31E-15 | -0. 15493 | 0. 006 | 0. 06  | 1. 96E-11 | Neo-G | BACE2          |
| HBS1L. 4     | 1. 37E-15 | 0. 219202 | 0. 259 | 0. 183 | 2. 04E-11 | Neo-G | HBS1L          |
| RNH1. 4      | 1. 40E-15 | -0. 31587 | 0. 439 | 0. 55  | 2. 10E-11 | Neo-G | RNH1           |
| HTRA2. 2     | 1. 41E-15 | 0. 2194   | 0. 295 | 0. 216 | 2. 11E-11 | Neo-G | HTRA2          |
| RP11-545E    | 1. 42E-15 | -0. 1398  | 0. 004 | 0. 056 | 2. 11E-11 | Neo-G | RP11-545E17. 3 |
| CCDC57. 7    | 1. 42E-15 | -0. 25211 | 0. 042 | 0. 115 | 2. 12E-11 | Neo-G | CCDC57         |
| NDUFA7. 5    | 1. 42E-15 | -0. 4334  | 0      | 0. 048 | 2. 13E-11 | Neo-G | NDUFA7         |
| ZCCHC7. 4    | 1. 42E-15 | 0. 237834 | 0. 207 | 0. 135 | 2. 13E-11 | Neo-G | ZCCHC7         |
| ARPP21. 5    | 1. 43E-15 | 0. 179006 | 0. 095 | 0. 045 | 2. 13E-11 | Neo-G | ARPP21         |
| OSER1-AS1    | 1. 43E-15 | 0. 220846 | 0. 194 | 0. 124 | 2. 14E-11 | Neo-G | OSER1-AS1      |
| WIPF3. 6     | 1. 44E-15 | 0. 16512  | 0. 152 | 0. 085 | 2. 15E-11 | Neo-G | WIPF3          |
| IQSEC1. 2    | 1. 45E-15 | -0. 17438 | 0. 014 | 0. 074 | 2. 16E-11 | Neo-G | IQSEC1         |
| SYT6. 3      | 1. 46E-15 | 0. 142181 | 0. 096 | 0. 045 | 2. 18E-11 | Neo-G | SYT6           |
| CDYL. 5      | 1. 49E-15 | -0. 11987 | 0. 045 | 0. 123 | 2. 23E-11 | Neo-G | CDYL           |
| UBASH3B. 4   | 1. 53E-15 | -0. 14633 | 0. 019 | 0. 082 | 2. 29E-11 | Neo-G | UBASH3B        |
| MYC. 4       | 1. 54E-15 | -0. 38481 | 0. 092 | 0. 179 | 2. 30E-11 | Neo-G | MYC            |
| KIF3B. 7     | 1. 56E-15 | 0. 276826 | 0. 189 | 0. 123 | 2. 33E-11 | Neo-G | KIF3B          |
| MATN2. 4     | 1. 56E-15 | -0. 16372 | 0. 013 | 0. 073 | 2. 34E-11 | Neo-G | MATN2          |
| FOXG1. 6     | 1. 59E-15 | 0. 274954 | 0. 214 | 0. 146 | 2. 38E-11 | Neo-G | FOXG1          |
| USP5. 2      | 1. 60E-15 | 0. 223688 | 0. 292 | 0. 216 | 2. 39E-11 | Neo-G | USP5           |
| DYRK4. 2     | 1. 60E-15 | -0. 26168 | 0. 124 | 0. 228 | 2. 40E-11 | Neo-G | DYRK4          |
| ARPC3. 5     | 1. 64E-15 | -0. 28609 | 0. 812 | 0. 803 | 2. 46E-11 | Neo-G | ARPC3          |
| FIGN. 5      | 1. 71E-15 | -0. 11911 | 0. 027 | 0. 095 | 2. 55E-11 | Neo-G | FIGN           |
| CD300LF. 5   | 1. 72E-15 | -0. 20192 | 0. 002 | 0. 051 | 2. 56E-11 | Neo-G | CD300LF        |

|           |          |          |       |       |          |       |            |
|-----------|----------|----------|-------|-------|----------|-------|------------|
| TRIM5     | 1.77E-15 | -0.13001 | 0.005 | 0.057 | 2.65E-11 | Neo-G | TRIM5      |
| BCL3.4    | 1.77E-15 | -0.14872 | 0.02  | 0.084 | 2.65E-11 | Neo-G | BCL3       |
| NUBP2.3   | 1.79E-15 | 0.159324 | 0.449 | 0.373 | 2.67E-11 | Neo-G | NUBP2      |
| CENPQ.2   | 1.90E-15 | -0.1552  | 0.035 | 0.106 | 2.84E-11 | Neo-G | CENPQ      |
| CMKLR1.5  | 1.91E-15 | -0.22329 | 0.004 | 0.055 | 2.86E-11 | Neo-G | CMKLR1     |
| PLSCR4.4  | 1.92E-15 | -0.13548 | 0.002 | 0.052 | 2.87E-11 | Neo-G | PLSCR4     |
| IRF5.7    | 1.93E-15 | -0.24495 | 0.009 | 0.065 | 2.88E-11 | Neo-G | IRF5       |
| C6orf48.4 | 1.99E-15 | -0.3184  | 0.573 | 0.656 | 2.97E-11 | Neo-G | C6orf48    |
| GPX4.4    | 2.01E-15 | -0.23899 | 0.88  | 0.838 | 3.00E-11 | Neo-G | GPX4       |
| ZNF441.1  | 2.04E-15 | 0.169208 | 0.087 | 0.04  | 3.05E-11 | Neo-G | ZNF441     |
| COIL.4    | 2.12E-15 | 0.249247 | 0.25  | 0.177 | 3.16E-11 | Neo-G | COIL       |
| SAC3D1.7  | 2.12E-15 | 0.259157 | 0.233 | 0.162 | 3.17E-11 | Neo-G | SAC3D1     |
| MGAT4B.2  | 2.15E-15 | -0.10527 | 0.038 | 0.112 | 3.22E-11 | Neo-G | MGAT4B     |
| NT5C.3    | 2.15E-15 | -0.21249 | 0.209 | 0.334 | 3.22E-11 | Neo-G | NT5C       |
| RBM41.3   | 2.22E-15 | 0.184149 | 0.141 | 0.079 | 3.31E-11 | Neo-G | RBM41      |
| KLHDC10.4 | 2.24E-15 | 0.235779 | 0.191 | 0.123 | 3.35E-11 | Neo-G | KLHDC10    |
| ALG8.1    | 2.27E-15 | -0.21756 | 0.093 | 0.189 | 3.39E-11 | Neo-G | ALG8       |
| BROX.4    | 2.28E-15 | -0.21191 | 0.138 | 0.246 | 3.41E-11 | Neo-G | BROX       |
| BNIP3.5   | 2.33E-15 | -0.30307 | 0.124 | 0.226 | 3.49E-11 | Neo-G | BNIP3      |
| PBK.7     | 2.34E-15 | -0.27082 | 0.019 | 0.08  | 3.49E-11 | Neo-G | PBK        |
| PLEKHM2.1 | 2.34E-15 | -0.17632 | 0.037 | 0.11  | 3.49E-11 | Neo-G | PLEKHM2    |
| CD2AP.3   | 2.36E-15 | -0.14582 | 0.024 | 0.089 | 3.53E-11 | Neo-G | CD2AP      |
| GORASP2.3 | 2.37E-15 | 0.19824  | 0.361 | 0.284 | 3.54E-11 | Neo-G | GORASP2    |
| PACSIN2.7 | 2.41E-15 | -0.22926 | 0.092 | 0.184 | 3.61E-11 | Neo-G | PACSIN2    |
| NDRG3.6   | 2.42E-15 | 0.238795 | 0.243 | 0.169 | 3.62E-11 | Neo-G | NDRG3      |
| TMEM140.3 | 2.50E-15 | -0.199   | 0.003 | 0.053 | 3.73E-11 | Neo-G | TMEM140    |
| CBWD1.2   | 2.52E-15 | 0.115955 | 0.297 | 0.203 | 3.76E-11 | Neo-G | CBWD1      |
| IRAK4.2   | 2.53E-15 | -0.19328 | 0.035 | 0.105 | 3.78E-11 | Neo-G | IRAK4      |
| WDR1.5    | 2.54E-15 | -0.31094 | 0.312 | 0.427 | 3.80E-11 | Neo-G | WDR1       |
| RANGRF.1  | 2.55E-15 | -0.2491  | 0.119 | 0.221 | 3.81E-11 | Neo-G | RANGRF     |
| MPEG1.5   | 2.61E-15 | -0.19165 | 0     | 0.047 | 3.90E-11 | Neo-G | MPEG1      |
| RXR.1     | 2.65E-15 | 0.202986 | 0.234 | 0.158 | 3.96E-11 | Neo-G | RXR        |
| CD320.5   | 2.69E-15 | 0.17842  | 0.397 | 0.308 | 4.02E-11 | Neo-G | CD320      |
| CEP85L.3  | 2.69E-15 | 0.208575 | 0.173 | 0.106 | 4.02E-11 | Neo-G | CEP85L     |
| DENND2D.3 | 2.74E-15 | -0.2085  | 0.002 | 0.05  | 4.10E-11 | Neo-G | DENND2D    |
| CD72.5    | 2.77E-15 | -0.21064 | 0.005 | 0.056 | 4.14E-11 | Neo-G | CD72       |
| TBC1D9B.4 | 2.78E-15 | -0.18067 | 0.079 | 0.17  | 4.15E-11 | Neo-G | TBC1D9B    |
| TFPI.2    | 2.83E-15 | -0.15971 | 0.006 | 0.059 | 4.23E-11 | Neo-G | TFPI       |
| SPSB1.3   | 2.90E-15 | -0.17435 | 0.016 | 0.075 | 4.34E-11 | Neo-G | SPSB1      |
| FAM98A.4  | 2.91E-15 | 0.214643 | 0.205 | 0.134 | 4.34E-11 | Neo-G | FAM98A     |
| THAP9-AS1 | 2.93E-15 | 0.197127 | 0.291 | 0.213 | 4.37E-11 | Neo-G | THAP9-AS1  |
| CTCF.4    | 3.00E-15 | 0.245738 | 0.227 | 0.156 | 4.49E-11 | Neo-G | CTCF       |
| CENPA.7   | 3.05E-15 | -0.17568 | 0.004 | 0.055 | 4.55E-11 | Neo-G | CENPA      |
| KLHL6.6   | 3.07E-15 | -0.25558 | 0.005 | 0.056 | 4.59E-11 | Neo-G | KLHL6      |
| RNFT2.5   | 3.08E-15 | 0.204273 | 0.118 | 0.063 | 4.60E-11 | Neo-G | RNFT2      |
| MAT2B     | 3.09E-15 | -0.26966 | 0.112 | 0.209 | 4.62E-11 | Neo-G | MAT2B      |
| RIC8B.5   | 3.12E-15 | 0.216897 | 0.148 | 0.086 | 4.67E-11 | Neo-G | RIC8B      |
| TRPC1     | 3.14E-15 | 0.1308   | 0.054 | 0.019 | 4.69E-11 | Neo-G | TRPC1      |
| PPM1M.7   | 3.14E-15 | -0.19313 | 0.02  | 0.081 | 4.69E-11 | Neo-G | PPM1M      |
| BCAT2.3   | 3.15E-15 | -0.19914 | 0.064 | 0.148 | 4.71E-11 | Neo-G | BCAT2      |
| IL10RB-AS | 3.30E-15 | -0.22953 | 0.002 | 0.05  | 4.94E-11 | Neo-G | IL10RB-AS1 |

|             |           |           |        |        |           |       |                 |
|-------------|-----------|-----------|--------|--------|-----------|-------|-----------------|
| SH3GLB1. 5  | 3. 49E-15 | -0. 29662 | 0. 321 | 0. 443 | 5. 21E-11 | Neo-G | SH3GLB1         |
| SHCBP1. 4   | 3. 49E-15 | -0. 15383 | 0. 006 | 0. 059 | 5. 22E-11 | Neo-G | SHCBP1          |
| STK38L. 4   | 3. 57E-15 | -0. 26126 | 0. 075 | 0. 159 | 5. 34E-11 | Neo-G | STK38L          |
| SCARB1. 2   | 3. 61E-15 | -0. 21746 | 0. 042 | 0. 116 | 5. 40E-11 | Neo-G | SCARB1          |
| RGS2. 5     | 3. 62E-15 | -0. 54427 | 0. 42  | 0. 448 | 5. 41E-11 | Neo-G | RGS2            |
| YEATS4. 5   | 3. 64E-15 | 0. 201572 | 0. 327 | 0. 242 | 5. 43E-11 | Neo-G | YEATS4          |
| AKAP17A. 3  | 3. 73E-15 | 0. 216033 | 0. 235 | 0. 159 | 5. 58E-11 | Neo-G | AKAP17A         |
| MARCO. 4    | 3. 82E-15 | -0. 38311 | 0. 01  | 0. 065 | 5. 71E-11 | Neo-G | MARCO           |
| PIGO. 1     | 3. 82E-15 | -0. 15877 | 0. 019 | 0. 081 | 5. 72E-11 | Neo-G | PIGO            |
| MED27. 2    | 3. 82E-15 | 0. 21736  | 0. 215 | 0. 143 | 5. 72E-11 | Neo-G | MED27           |
| DUS4L. 4    | 3. 86E-15 | 0. 204929 | 0. 132 | 0. 073 | 5. 77E-11 | Neo-G | DUS4L           |
| CALU. 5     | 3. 91E-15 | -0. 31593 | 0. 298 | 0. 416 | 5. 85E-11 | Neo-G | CALU            |
| CACNB4. 3   | 3. 94E-15 | 0. 200446 | 0. 143 | 0. 082 | 5. 89E-11 | Neo-G | CACNB4          |
| UACA. 2     | 4. 06E-15 | -0. 12821 | 0. 014 | 0. 073 | 6. 07E-11 | Neo-G | UACA            |
| DDX52. 4    | 4. 15E-15 | 0. 228185 | 0. 308 | 0. 236 | 6. 20E-11 | Neo-G | DDX52           |
| DUT. 6      | 4. 30E-15 | -0. 24226 | 0. 353 | 0. 467 | 6. 43E-11 | Neo-G | DUT             |
| ARID1A. 4   | 4. 38E-15 | 0. 228096 | 0. 31  | 0. 233 | 6. 55E-11 | Neo-G | ARID1A          |
| ADH5. 4     | 4. 59E-15 | 0. 107134 | 0. 463 | 0. 38  | 6. 85E-11 | Neo-G | ADH5            |
| PLCB3       | 4. 59E-15 | -0. 11984 | 0. 009 | 0. 063 | 6. 87E-11 | Neo-G | PLCB3           |
| SAMD8. 2    | 4. 60E-15 | -0. 19599 | 0. 068 | 0. 153 | 6. 87E-11 | Neo-G | SAMD8           |
| CLEC4A. 7   | 4. 62E-15 | -0. 26443 | 0. 012 | 0. 067 | 6. 90E-11 | Neo-G | CLEC4A          |
| NVL. 4      | 4. 77E-15 | 0. 203749 | 0. 167 | 0. 101 | 7. 13E-11 | Neo-G | NVL             |
| FOXO1. 3    | 4. 81E-15 | -0. 15932 | 0. 019 | 0. 08  | 7. 19E-11 | Neo-G | FOXO1           |
| PCBD2. 2    | 4. 92E-15 | -0. 15753 | 0. 025 | 0. 09  | 7. 36E-11 | Neo-G | PCBD2           |
| CHERP. 3    | 4. 97E-15 | 0. 233491 | 0. 234 | 0. 16  | 7. 43E-11 | Neo-G | CHERP           |
| CCDC151. 4  | 5. 04E-15 | -0. 22109 | 0. 013 | 0. 069 | 7. 53E-11 | Neo-G | CCDC151         |
| SCN1B. 4    | 5. 21E-15 | -0. 20221 | 0. 017 | 0. 077 | 7. 78E-11 | Neo-G | SCN1B           |
| EGLN3. 3    | 5. 26E-15 | -0. 22596 | 0. 013 | 0. 069 | 7. 86E-11 | Neo-G | EGLN3           |
| RSRC1. 2    | 5. 29E-15 | 0. 169367 | 0. 373 | 0. 296 | 7. 90E-11 | Neo-G | RSRC1           |
| SLC16A10. 5 | 5. 32E-15 | -0. 36012 | 0. 03  | 0. 094 | 7. 95E-11 | Neo-G | SLC16A10        |
| GMPR. 1     | 5. 36E-15 | -0. 13822 | 0. 024 | 0. 089 | 8. 01E-11 | Neo-G | GMPR            |
| MAP3K5. 2   | 5. 42E-15 | -0. 15093 | 0. 005 | 0. 055 | 8. 09E-11 | Neo-G | MAP3K5          |
| HAUS4. 7    | 5. 44E-15 | -0. 25743 | 0. 012 | 0. 067 | 8. 14E-11 | Neo-G | HAUS4           |
| LRRC8C. 6   | 5. 45E-15 | -0. 17654 | 0. 01  | 0. 065 | 8. 14E-11 | Neo-G | LRRC8C          |
| ATG16L2. 6  | 5. 51E-15 | -0. 23742 | 0. 029 | 0. 094 | 8. 23E-11 | Neo-G | ATG16L2         |
| ST3GAL6. 7  | 5. 52E-15 | -0. 30855 | 0. 047 | 0. 119 | 8. 24E-11 | Neo-G | ST3GAL6         |
| UQCC2. 3    | 5. 54E-15 | -0. 33535 | 0. 322 | 0. 439 | 8. 28E-11 | Neo-G | UQCC2           |
| GALNT10. 2  | 5. 59E-15 | -0. 18147 | 0. 033 | 0. 102 | 8. 35E-11 | Neo-G | GALNT10         |
| CDH11. 5    | 5. 60E-15 | -0. 13323 | 0. 046 | 0. 124 | 8. 37E-11 | Neo-G | CDH11           |
| SAMD10. 3   | 5. 74E-15 | 0. 194624 | 0. 102 | 0. 052 | 8. 58E-11 | Neo-G | SAMD10          |
| ZNF680. 5   | 5. 75E-15 | 0. 219074 | 0. 242 | 0. 166 | 8. 60E-11 | Neo-G | ZNF680          |
| CLYBL. 2    | 5. 83E-15 | -0. 19087 | 0. 012 | 0. 068 | 8. 71E-11 | Neo-G | CLYBL           |
| MIR22HG. 5  | 5. 84E-15 | -0. 28253 | 0. 047 | 0. 121 | 8. 72E-11 | Neo-G | MIR22HG         |
| TOP2A. 7    | 5. 85E-15 | -0. 28782 | 0. 028 | 0. 093 | 8. 74E-11 | Neo-G | TOP2A           |
| RBP7. 3     | 5. 89E-15 | -0. 24632 | 0. 002 | 0. 051 | 8. 80E-11 | Neo-G | RBP7            |
| MYOF. 4     | 5. 92E-15 | -0. 18072 | 0. 002 | 0. 049 | 8. 85E-11 | Neo-G | MYOF            |
| ARIH2. 2    | 6. 09E-15 | 0. 19702  | 0. 319 | 0. 242 | 9. 11E-11 | Neo-G | ARIH2           |
| GNG10. 3    | 6. 14E-15 | -0. 28824 | 0. 02  | 0. 08  | 9. 17E-11 | Neo-G | GNG10           |
| TMEM220. 5  | 6. 17E-15 | -0. 17442 | 0. 016 | 0. 076 | 9. 22E-11 | Neo-G | TMEM220         |
| CCNA2. 6    | 6. 30E-15 | -0. 17813 | 0. 009 | 0. 062 | 9. 41E-11 | Neo-G | CCNA2           |
| RP11-398K   | 6. 35E-15 | 0. 17792  | 0. 127 | 0. 07  | 9. 49E-11 | Neo-G | RP11-398K22. 12 |

|           |          |          |       |       |          |       |               |
|-----------|----------|----------|-------|-------|----------|-------|---------------|
| C19orf48. | 6.40E-15 | -0.22511 | 0.135 | 0.238 | 9.57E-11 | Neo-G | C19orf48      |
| RP11-22P6 | 6.45E-15 | 0.172692 | 0.084 | 0.038 | 9.64E-11 | Neo-G | RP11-22P6.2   |
| MAML1.5   | 6.52E-15 | -0.24584 | 0.05  | 0.125 | 9.75E-11 | Neo-G | MAML1         |
| SFXN5.5   | 6.73E-15 | -0.23945 | 0.102 | 0.199 | 1.01E-10 | Neo-G | SFXN5         |
| B3GNT5.7  | 6.82E-15 | -0.26615 | 0.069 | 0.15  | 1.02E-10 | Neo-G | B3GNT5        |
| TRAF3IP2. | 6.85E-15 | -0.16645 | 0.034 | 0.103 | 1.02E-10 | Neo-G | TRAF3IP2      |
| TACC2.4   | 7.17E-15 | 0.189146 | 0.102 | 0.051 | 1.07E-10 | Neo-G | TACC2         |
| RRAGD.3   | 7.18E-15 | -0.12758 | 0.057 | 0.138 | 1.07E-10 | Neo-G | RRAGD         |
| SGOL1.5   | 7.38E-15 | -0.18662 | 0.009 | 0.063 | 1.10E-10 | Neo-G | SGOL1         |
| PSRC1.4   | 7.41E-15 | -0.27192 | 0.167 | 0.276 | 1.11E-10 | Neo-G | PSRC1         |
| CCL5.4    | 7.63E-15 | -0.37901 | 0.009 | 0.061 | 1.14E-10 | Neo-G | CCL5          |
| FOSB.5    | 7.67E-15 | -0.38834 | 0.321 | 0.4   | 1.15E-10 | Neo-G | FOSB          |
| SP4.1     | 7.84E-15 | 0.15622  | 0.099 | 0.048 | 1.17E-10 | Neo-G | SP4           |
| ADAM17.4  | 7.90E-15 | -0.22636 | 0.159 | 0.267 | 1.18E-10 | Neo-G | ADAM17        |
| TRPM2.7   | 8.08E-15 | -0.22565 | 0.006 | 0.057 | 1.21E-10 | Neo-G | TRPM2         |
| PRKCB.6   | 8.14E-15 | -0.17723 | 0.001 | 0.047 | 1.22E-10 | Neo-G | PRKCB         |
| CCPG1.3   | 8.26E-15 | -0.22716 | 0.124 | 0.224 | 1.23E-10 | Neo-G | CCPG1         |
| FBXO4.1   | 8.37E-15 | -0.224   | 0.046 | 0.119 | 1.25E-10 | Neo-G | FBXO4         |
| SYTL3.6   | 8.43E-15 | -0.28936 | 0.014 | 0.07  | 1.26E-10 | Neo-G | SYTL3         |
| NAAA.7    | 8.44E-15 | -0.23535 | 0.063 | 0.142 | 1.26E-10 | Neo-G | NAAA          |
| BRD2.3    | 8.52E-15 | 0.109926 | 0.534 | 0.444 | 1.27E-10 | Neo-G | BRD2          |
| FOSL1.2   | 8.55E-15 | -0.11632 | 0.003 | 0.052 | 1.28E-10 | Neo-G | FOSL1         |
| NFATC2.4  | 8.75E-15 | -0.20983 | 0.003 | 0.051 | 1.31E-10 | Neo-G | NFATC2        |
| BLOC1S1.4 | 8.76E-15 | -0.32574 | 0.574 | 0.657 | 1.31E-10 | Neo-G | BLOC1S1       |
| SLC4A4.5  | 9.01E-15 | -0.17903 | 0.043 | 0.116 | 1.35E-10 | Neo-G | SLC4A4        |
| POGZ.5    | 9.05E-15 | 0.239191 | 0.276 | 0.203 | 1.35E-10 | Neo-G | POGZ          |
| MYL5.1    | 9.05E-15 | -0.15347 | 0.034 | 0.103 | 1.35E-10 | Neo-G | MYL5          |
| MOV10.1   | 9.07E-15 | -0.14471 | 0.013 | 0.07  | 1.35E-10 | Neo-G | MOV10         |
| FLOT2.3   | 9.10E-15 | -0.19585 | 0.101 | 0.196 | 1.36E-10 | Neo-G | FLOT2         |
| ARL3.3    | 9.42E-15 | 0.124738 | 0.418 | 0.338 | 1.41E-10 | Neo-G | ARL3          |
| B3GNT2.6  | 1.02E-14 | -0.14131 | 0.015 | 0.073 | 1.53E-10 | Neo-G | B3GNT2        |
| GLI4.4    | 1.03E-14 | 0.238835 | 0.169 | 0.104 | 1.54E-10 | Neo-G | GLI4          |
| PSMD12.2  | 1.04E-14 | 0.142627 | 0.412 | 0.334 | 1.55E-10 | Neo-G | PSMD12        |
| ACTA2.3   | 1.07E-14 | -0.19232 | 0.006 | 0.057 | 1.59E-10 | Neo-G | ACTA2         |
| ATP8B4.5  | 1.07E-14 | -0.20195 | 0.002 | 0.048 | 1.60E-10 | Neo-G | ATP8B4        |
| PSTPIP2.4 | 1.08E-14 | -0.15127 | 0.002 | 0.05  | 1.62E-10 | Neo-G | PSTPIP2       |
| FBXO41    | 1.09E-14 | 0.117674 | 0.049 | 0.017 | 1.63E-10 | Neo-G | FBXO41        |
| ARHGEF26. | 1.10E-14 | -0.13674 | 0.054 | 0.133 | 1.64E-10 | Neo-G | ARHGEF26      |
| KCNJ10.5  | 1.10E-14 | -0.1794  | 0.006 | 0.057 | 1.65E-10 | Neo-G | KCNJ10        |
| FMNL1.7   | 1.11E-14 | -0.3379  | 0.059 | 0.132 | 1.66E-10 | Neo-G | FMNL1         |
| SDS.7     | 1.13E-14 | -0.32569 | 0.011 | 0.064 | 1.69E-10 | Neo-G | SDS           |
| MELK.3    | 1.15E-14 | -0.13406 | 0.003 | 0.051 | 1.72E-10 | Neo-G | MELK          |
| LARS.3    | 1.16E-14 | 0.164725 | 0.408 | 0.333 | 1.73E-10 | Neo-G | LARS          |
| MEF2C.7   | 1.16E-14 | -0.37554 | 0.201 | 0.293 | 1.73E-10 | Neo-G | MEF2C         |
| AURKB.6   | 1.17E-14 | -0.1809  | 0.005 | 0.054 | 1.74E-10 | Neo-G | AURKB         |
| CASP8.6   | 1.17E-14 | -0.19174 | 0.004 | 0.053 | 1.75E-10 | Neo-G | CASP8         |
| CHCHD5.2  | 1.21E-14 | -0.29804 | 0.26  | 0.386 | 1.80E-10 | Neo-G | CHCHD5        |
| TTC38.2   | 1.21E-14 | -0.1878  | 0.03  | 0.096 | 1.81E-10 | Neo-G | TTC38         |
| ERICH1.4  | 1.22E-14 | 0.201173 | 0.345 | 0.264 | 1.82E-10 | Neo-G | ERICH1        |
| MICA      | 1.24E-14 | -0.15451 | 0.002 | 0.05  | 1.85E-10 | Neo-G | MICA          |
| RP11-295G | 1.29E-14 | -0.14528 | 0.003 | 0.051 | 1.92E-10 | Neo-G | RP11-295G20.2 |

|             |           |           |        |        |                 |          |
|-------------|-----------|-----------|--------|--------|-----------------|----------|
| KLHL21      | 1. 29E-14 | -0. 16041 | 0. 011 | 0. 065 | 1. 93E-10 Neo-G | KLHL21   |
| PTAR1. 4    | 1. 30E-14 | -0. 13347 | 0. 063 | 0. 146 | 1. 95E-10 Neo-G | PTAR1    |
| IRF9. 3     | 1. 33E-14 | -0. 22432 | 0. 033 | 0. 1   | 1. 99E-10 Neo-G | IRF9     |
| POMC. 7     | 1. 35E-14 | -0. 22023 | 0. 004 | 0. 052 | 2. 02E-10 Neo-G | POMC     |
| TPR. 3      | 1. 39E-14 | 0. 139314 | 0. 473 | 0. 396 | 2. 08E-10 Neo-G | TPR      |
| PDXDC1. 2   | 1. 40E-14 | 0. 1946   | 0. 238 | 0. 163 | 2. 09E-10 Neo-G | PDXDC1   |
| FAM192A. 4  | 1. 40E-14 | 0. 150293 | 0. 427 | 0. 349 | 2. 10E-10 Neo-G | FAM192A  |
| LMBR1. 5    | 1. 41E-14 | 0. 242509 | 0. 167 | 0. 103 | 2. 11E-10 Neo-G | LMBR1    |
| TNIP2. 3    | 1. 43E-14 | -0. 14988 | 0. 084 | 0. 175 | 2. 14E-10 Neo-G | TNIP2    |
| SIPA1L1     | 1. 43E-14 | -0. 16871 | 0. 084 | 0. 174 | 2. 14E-10 Neo-G | SIPA1L1  |
| CTNS. 1     | 1. 45E-14 | -0. 1633  | 0. 027 | 0. 091 | 2. 17E-10 Neo-G | CTNS     |
| PPP1R3B. 3  | 1. 52E-14 | -0. 18955 | 0. 016 | 0. 073 | 2. 27E-10 Neo-G | PPP1R3B  |
| NADK. 3     | 1. 53E-14 | -0. 17593 | 0. 086 | 0. 177 | 2. 28E-10 Neo-G | NADK     |
| GIMAP6. 5   | 1. 56E-14 | -0. 20998 | 0. 002 | 0. 048 | 2. 34E-10 Neo-G | GIMAP6   |
| ZNF324. 5   | 1. 56E-14 | 0. 203539 | 0. 134 | 0. 076 | 2. 34E-10 Neo-G | ZNF324   |
| DNAJB12. 6  | 1. 58E-14 | -0. 25957 | 0. 075 | 0. 157 | 2. 36E-10 Neo-G | DNAJB12  |
| OAS2. 3     | 1. 59E-14 | -0. 18404 | 0      | 0. 045 | 2. 38E-10 Neo-G | OAS2     |
| SHF. 1      | 1. 61E-14 | 0. 160053 | 0. 082 | 0. 038 | 2. 40E-10 Neo-G | SHF      |
| IL7R. 6     | 1. 61E-14 | -0. 27392 | 0. 008 | 0. 059 | 2. 41E-10 Neo-G | IL7R     |
| ZNF595. 4   | 1. 64E-14 | 0. 164784 | 0. 126 | 0. 068 | 2. 45E-10 Neo-G | ZNF595   |
| DPH6. 1     | 1. 64E-14 | -0. 17734 | 0. 037 | 0. 106 | 2. 46E-10 Neo-G | DPH6     |
| ZNF596      | 1. 65E-14 | 0. 141212 | 0. 075 | 0. 032 | 2. 47E-10 Neo-G | ZNF596   |
| SLC39A7. 2  | 1. 66E-14 | 0. 175362 | 0. 371 | 0. 297 | 2. 48E-10 Neo-G | SLC39A7  |
| RGL3        | 1. 68E-14 | -0. 10596 | 0. 002 | 0. 049 | 2. 51E-10 Neo-G | RGL3     |
| ZNF668. 2   | 1. 68E-14 | 0. 201475 | 0. 134 | 0. 077 | 2. 52E-10 Neo-G | ZNF668   |
| NARS2. 1    | 1. 69E-14 | 0. 218994 | 0. 172 | 0. 107 | 2. 53E-10 Neo-G | NARS2    |
| ATRAID. 2   | 1. 73E-14 | -0. 34268 | 0. 525 | 0. 622 | 2. 58E-10 Neo-G | ATRAID   |
| PDS5B. 4    | 1. 76E-14 | 0. 244865 | 0. 229 | 0. 16  | 2. 63E-10 Neo-G | PDS5B    |
| GGNBP2. 2   | 1. 78E-14 | 0. 153916 | 0. 459 | 0. 382 | 2. 67E-10 Neo-G | GGNBP2   |
| LRRC47. 5   | 1. 79E-14 | 0. 222047 | 0. 283 | 0. 208 | 2. 68E-10 Neo-G | LRRC47   |
| CBFB. 3     | 1. 80E-14 | -0. 22765 | 0. 141 | 0. 244 | 2. 69E-10 Neo-G | CBFB     |
| CRB2. 5     | 1. 81E-14 | -0. 17388 | 0. 002 | 0. 049 | 2. 70E-10 Neo-G | CRB2     |
| PCBP1. 6    | 1. 89E-14 | 0. 113683 | 0. 66  | 0. 579 | 2. 83E-10 Neo-G | PCBP1    |
| AGPAT5. 5   | 1. 91E-14 | -0. 24643 | 0. 123 | 0. 22  | 2. 85E-10 Neo-G | AGPAT5   |
| MDFIC. 2    | 1. 92E-14 | -0. 11355 | 0. 002 | 0. 049 | 2. 86E-10 Neo-G | MDFIC    |
| NOP58. 4    | 1. 92E-14 | 0. 159143 | 0. 365 | 0. 283 | 2. 87E-10 Neo-G | NOP58    |
| FHOD1. 7    | 2. 09E-14 | -0. 17752 | 0. 009 | 0. 062 | 3. 12E-10 Neo-G | FHOD1    |
| SUMF1. 2    | 2. 11E-14 | -0. 1748  | 0. 064 | 0. 146 | 3. 15E-10 Neo-G | SUMF1    |
| ATG4C. 3    | 2. 12E-14 | -0. 23705 | 0. 067 | 0. 147 | 3. 17E-10 Neo-G | ATG4C    |
| GLO1. 5     | 2. 12E-14 | -0. 28376 | 0. 306 | 0. 423 | 3. 17E-10 Neo-G | GLO1     |
| SGPP1. 4    | 2. 16E-14 | -0. 18843 | 0. 024 | 0. 086 | 3. 23E-10 Neo-G | SGPP1    |
| NCOA4. 7    | 2. 18E-14 | -0. 26474 | 0. 17  | 0. 274 | 3. 25E-10 Neo-G | NCOA4    |
| CERS4. 6    | 2. 28E-14 | -0. 1592  | 0. 111 | 0. 21  | 3. 41E-10 Neo-G | CERS4    |
| C19orf38. 2 | 2. 31E-14 | -0. 2357  | 0. 005 | 0. 053 | 3. 45E-10 Neo-G | C19orf38 |
| TMEM64. 1   | 2. 32E-14 | -0. 11787 | 0. 014 | 0. 07  | 3. 46E-10 Neo-G | TMEM64   |
| TTC14. 3    | 2. 33E-14 | 0. 178831 | 0. 337 | 0. 261 | 3. 48E-10 Neo-G | TTC14    |
| KIAA2013. 2 | 2. 42E-14 | -0. 14365 | 0. 074 | 0. 16  | 3. 62E-10 Neo-G | KIAA2013 |
| COPA. 4     | 2. 43E-14 | 0. 19189  | 0. 381 | 0. 304 | 3. 64E-10 Neo-G | COPA     |
| TAB2. 3     | 2. 44E-14 | -0. 17565 | 0. 057 | 0. 135 | 3. 64E-10 Neo-G | TAB2     |
| NXT2. 1     | 2. 46E-14 | -0. 14118 | 0. 027 | 0. 09  | 3. 67E-10 Neo-G | NXT2     |
| NMNAT3      | 2. 49E-14 | 0. 104242 | 0. 082 | 0. 037 | 3. 72E-10 Neo-G | NMNAT3   |

|            |           |           |        |        |           |       |          |
|------------|-----------|-----------|--------|--------|-----------|-------|----------|
| ZNF781. 2  | 2. 52E-14 | 0. 170451 | 0. 084 | 0. 039 | 3. 77E-10 | Neo-G | ZNF781   |
| TPM3. 7    | 2. 57E-14 | -0. 32235 | 0. 472 | 0. 569 | 3. 84E-10 | Neo-G | TPM3     |
| PKNOX2     | 2. 63E-14 | 0. 123284 | 0. 062 | 0. 025 | 3. 93E-10 | Neo-G | PKNOX2   |
| RIF1. 5    | 2. 66E-14 | 0. 219862 | 0. 284 | 0. 212 | 3. 97E-10 | Neo-G | RIF1     |
| EIF1AY. 6  | 2. 71E-14 | -0. 12818 | 0. 093 | 0. 188 | 4. 04E-10 | Neo-G | EIF1AY   |
| WDR33. 2   | 2. 75E-14 | 0. 143523 | 0. 369 | 0. 292 | 4. 11E-10 | Neo-G | WDR33    |
| LHFP. 7    | 2. 80E-14 | -0. 29451 | 0. 145 | 0. 242 | 4. 19E-10 | Neo-G | LHFP     |
| ZNF559. 6  | 2. 85E-14 | 0. 200244 | 0. 207 | 0. 137 | 4. 26E-10 | Neo-G | ZNF559   |
| TMC03. 1   | 2. 87E-14 | 0. 253071 | 0. 264 | 0. 197 | 4. 29E-10 | Neo-G | TMC03    |
| RNF114. 2  | 2. 88E-14 | -0. 28932 | 0. 311 | 0. 427 | 4. 30E-10 | Neo-G | RNF114   |
| HSPB1. 3   | 2. 88E-14 | -0. 24889 | 0. 597 | 0. 661 | 4. 30E-10 | Neo-G | HSPB1    |
| AHR. 6     | 2. 96E-14 | -0. 21604 | 0. 014 | 0. 069 | 4. 42E-10 | Neo-G | AHR      |
| SPRY4. 4   | 3. 04E-14 | -0. 11978 | 0. 016 | 0. 074 | 4. 54E-10 | Neo-G | SPRY4    |
| SUSD4. 4   | 3. 04E-14 | 0. 144169 | 0. 08  | 0. 036 | 4. 55E-10 | Neo-G | SUSD4    |
| KDELR1. 3  | 3. 10E-14 | -0. 29128 | 0. 391 | 0. 505 | 4. 63E-10 | Neo-G | KDELR1   |
| GPLD1      | 3. 16E-14 | 0. 140864 | 0. 055 | 0. 021 | 4. 72E-10 | Neo-G | GPLD1    |
| TMOD1. 5   | 3. 16E-14 | 0. 148211 | 0. 228 | 0. 148 | 4. 73E-10 | Neo-G | TMOD1    |
| EIF2S2. 4  | 3. 17E-14 | -0. 3107  | 0. 533 | 0. 595 | 4. 74E-10 | Neo-G | EIF2S2   |
| SGTA. 4    | 3. 22E-14 | 0. 179892 | 0. 379 | 0. 308 | 4. 81E-10 | Neo-G | SGTA     |
| AP3B1. 3   | 3. 23E-14 | -0. 16739 | 0. 09  | 0. 18  | 4. 83E-10 | Neo-G | AP3B1    |
| KCNJ6      | 3. 24E-14 | 0. 1235   | 0. 04  | 0. 013 | 4. 84E-10 | Neo-G | KCNJ6    |
| ATAD1. 2   | 3. 24E-14 | 0. 177953 | 0. 233 | 0. 158 | 4. 84E-10 | Neo-G | ATAD1    |
| NNT-AS1. 6 | 3. 27E-14 | 0. 216978 | 0. 286 | 0. 213 | 4. 89E-10 | Neo-G | NNT-AS1  |
| HCCS. 1    | 3. 28E-14 | -0. 20832 | 0. 088 | 0. 177 | 4. 90E-10 | Neo-G | HCCS     |
| SIGLEC14.  | 3. 32E-14 | -0. 21814 | 0. 003 | 0. 049 | 4. 96E-10 | Neo-G | SIGLEC14 |
| SMOX. 6    | 3. 33E-14 | -0. 29876 | 0. 155 | 0. 258 | 4. 98E-10 | Neo-G | SMOX     |
| KCNQ3. 2   | 3. 50E-14 | 0. 1225   | 0. 082 | 0. 037 | 5. 23E-10 | Neo-G | KCNQ3    |
| NACC1. 2   | 3. 51E-14 | -0. 13217 | 0. 074 | 0. 16  | 5. 25E-10 | Neo-G | NACC1    |
| ADRB2. 5   | 3. 55E-14 | -0. 24547 | 0. 004 | 0. 051 | 5. 31E-10 | Neo-G | ADRB2    |
| C1RL. 1    | 3. 64E-14 | -0. 22276 | 0. 01  | 0. 062 | 5. 44E-10 | Neo-G | C1RL     |
| RBBP8. 2   | 3. 74E-14 | -0. 12587 | 0. 027 | 0. 09  | 5. 59E-10 | Neo-G | RBBP8    |
| CRYBB1. 5  | 3. 75E-14 | -0. 22586 | 0. 002 | 0. 046 | 5. 61E-10 | Neo-G | CRYBB1   |
| ATG12. 1   | 3. 81E-14 | 0. 120864 | 0. 418 | 0. 336 | 5. 70E-10 | Neo-G | ATG12    |
| RBM38. 5   | 3. 83E-14 | -0. 12319 | 0. 063 | 0. 144 | 5. 72E-10 | Neo-G | RBM38    |
| CHRN1. 6   | 3. 88E-14 | 0. 172626 | 0. 211 | 0. 141 | 5. 80E-10 | Neo-G | CHRN1    |
| ADCY7. 7   | 3. 88E-14 | -0. 24711 | 0. 015 | 0. 069 | 5. 80E-10 | Neo-G | ADCY7    |
| CPSF2      | 3. 93E-14 | -0. 14262 | 0. 056 | 0. 133 | 5. 87E-10 | Neo-G | CPSF2    |
| FAM184A. 3 | 3. 94E-14 | 0. 182785 | 0. 093 | 0. 046 | 5. 89E-10 | Neo-G | FAM184A  |
| PAM. 6     | 3. 96E-14 | -0. 13874 | 0. 085 | 0. 174 | 5. 91E-10 | Neo-G | PAM      |
| RAE1. 4    | 3. 97E-14 | 0. 176199 | 0. 333 | 0. 259 | 5. 93E-10 | Neo-G | RAE1     |
| TMEM52B. 7 | 3. 98E-14 | -0. 22928 | 0. 005 | 0. 052 | 5. 95E-10 | Neo-G | TMEM52B  |
| NEDD8. 3   | 4. 00E-14 | -0. 2752  | 0. 732 | 0. 747 | 5. 97E-10 | Neo-G | NEDD8    |
| STAG2. 1   | 4. 16E-14 | -0. 23391 | 0. 148 | 0. 254 | 6. 21E-10 | Neo-G | STAG2    |
| MAD2L1BP.  | 4. 36E-14 | 0. 230502 | 0. 222 | 0. 153 | 6. 52E-10 | Neo-G | MAD2L1BP |
| SLC22A18.  | 4. 37E-14 | -0. 22939 | 0. 057 | 0. 132 | 6. 53E-10 | Neo-G | SLC22A18 |
| MYBPC1. 4  | 4. 56E-14 | -0. 20034 | 0. 003 | 0. 049 | 6. 81E-10 | Neo-G | MYBPC1   |
| HEBP1. 3   | 4. 57E-14 | -0. 22538 | 0. 108 | 0. 199 | 6. 82E-10 | Neo-G | HEBP1    |
| SLC25A25.  | 4. 57E-14 | 0. 194337 | 0. 23  | 0. 158 | 6. 82E-10 | Neo-G | SLC25A25 |
| PFDN5. 5   | 4. 64E-14 | -0. 247   | 0. 903 | 0. 882 | 6. 93E-10 | Neo-G | PFDN5    |
| HR         | 4. 64E-14 | 0. 114896 | 0. 043 | 0. 014 | 6. 93E-10 | Neo-G | HR       |
| CCDC142. 3 | 4. 65E-14 | 0. 162452 | 0. 112 | 0. 059 | 6. 94E-10 | Neo-G | CCDC142  |

|            |          |          |       |       |                |              |
|------------|----------|----------|-------|-------|----------------|--------------|
| ZNF671     | 4.66E-14 | 0.148151 | 0.082 | 0.038 | 6.96E-10 Neo-G | ZNF671       |
| ZNF681.1   | 4.67E-14 | 0.137811 | 0.08  | 0.037 | 6.98E-10 Neo-G | ZNF681       |
| NRP2.4     | 4.74E-14 | -0.22915 | 0.133 | 0.232 | 7.08E-10 Neo-G | NRP2         |
| ZSCAN16-A  | 4.75E-14 | -0.2254  | 0.162 | 0.269 | 7.10E-10 Neo-G | ZSCAN16-AS1  |
| PEAK1.3    | 4.76E-14 | -0.13209 | 0.018 | 0.075 | 7.11E-10 Neo-G | PEAK1        |
| RARS2.2    | 4.83E-14 | 0.208213 | 0.253 | 0.183 | 7.21E-10 Neo-G | RARS2        |
| PREPL.5    | 4.83E-14 | 0.248858 | 0.25  | 0.181 | 7.22E-10 Neo-G | PREPL        |
| EDEM1.6    | 4.94E-14 | -0.18508 | 0.025 | 0.086 | 7.39E-10 Neo-G | EDEM1        |
| ARPP19.4   | 4.96E-14 | 0.102693 | 0.497 | 0.417 | 7.41E-10 Neo-G | ARPP19       |
| CLCF1.3    | 5.00E-14 | -0.17232 | 0.002 | 0.046 | 7.47E-10 Neo-G | CLCF1        |
| FAXDC2.4   | 5.16E-14 | -0.16302 | 0.011 | 0.063 | 7.71E-10 Neo-G | FAXDC2       |
| CTB-61M7.5 | 5.30E-14 | -0.21973 | 0     | 0.043 | 7.93E-10 Neo-G | CTB-61M7.2   |
| IER3IP1.5  | 5.30E-14 | -0.41584 | 0     | 0.043 | 7.93E-10 Neo-G | IER3IP1      |
| SEC24D.2   | 5.47E-14 | -0.16824 | 0.034 | 0.099 | 8.18E-10 Neo-G | SEC24D       |
| RIN2.5     | 5.62E-14 | -0.26621 | 0.06  | 0.134 | 8.39E-10 Neo-G | RIN2         |
| TLR4.5     | 5.70E-14 | -0.19987 | 0.002 | 0.046 | 8.52E-10 Neo-G | TLR4         |
| AMPD3.4    | 5.79E-14 | -0.19293 | 0.008 | 0.057 | 8.65E-10 Neo-G | AMPD3        |
| ZBTB2.2    | 5.81E-14 | 0.186132 | 0.121 | 0.066 | 8.68E-10 Neo-G | ZBTB2        |
| MYO1G.7    | 5.83E-14 | -0.21519 | 0.013 | 0.066 | 8.71E-10 Neo-G | MYO1G        |
| MCM3.5     | 5.91E-14 | -0.19396 | 0.071 | 0.151 | 8.83E-10 Neo-G | MCM3         |
| ETFDH.3    | 5.97E-14 | 0.153266 | 0.182 | 0.114 | 8.93E-10 Neo-G | ETFDH        |
| TRIM14.4   | 6.06E-14 | -0.15824 | 0.034 | 0.099 | 9.06E-10 Neo-G | TRIM14       |
| FAM84A.6   | 6.19E-14 | -0.14813 | 0.071 | 0.153 | 9.25E-10 Neo-G | FAM84A       |
| ZFAND6.1   | 6.24E-14 | -0.3391  | 0.353 | 0.462 | 9.32E-10 Neo-G | ZFAND6       |
| OXLD1.4    | 6.39E-14 | -0.22322 | 0.159 | 0.264 | 9.55E-10 Neo-G | OXLD1        |
| BAK1.5     | 6.51E-14 | -0.19213 | 0.051 | 0.124 | 9.73E-10 Neo-G | BAK1         |
| ACVR1.2    | 6.59E-14 | 0.214257 | 0.116 | 0.063 | 9.85E-10 Neo-G | ACVR1        |
| PARP12.3   | 6.71E-14 | -0.15809 | 0.022 | 0.081 | 1.00E-09 Neo-G | PARP12       |
| SNRPB.3    | 6.74E-14 | -0.2632  | 0.535 | 0.583 | 1.01E-09 Neo-G | SNRPB        |
| EXOC1.3    | 6.78E-14 | 0.181394 | 0.32  | 0.241 | 1.01E-09 Neo-G | EXOC1        |
| RP11-490M  | 6.82E-14 | 0.186941 | 0.082 | 0.039 | 1.02E-09 Neo-G | RP11-490M8.1 |
| STAU1.4    | 7.04E-14 | 0.157946 | 0.438 | 0.357 | 1.05E-09 Neo-G | STAU1        |
| ABCC5.2    | 7.09E-14 | 0.16258  | 0.182 | 0.114 | 1.06E-09 Neo-G | ABCC5        |
| NDC80.5    | 7.13E-14 | -0.15848 | 0.005 | 0.053 | 1.06E-09 Neo-G | NDC80        |
| TROAP.6    | 7.13E-14 | -0.1469  | 0.005 | 0.051 | 1.07E-09 Neo-G | TROAP        |
| IGF1.5     | 7.16E-14 | -0.27017 | 0.014 | 0.067 | 1.07E-09 Neo-G | IGF1         |
| STX2.5     | 7.28E-14 | 0.251294 | 0.161 | 0.101 | 1.09E-09 Neo-G | STX2         |
| PNPO.4     | 7.30E-14 | -0.19524 | 0.025 | 0.085 | 1.09E-09 Neo-G | PNPO         |
| XPA.2      | 7.30E-14 | 0.20812  | 0.288 | 0.214 | 1.09E-09 Neo-G | XPA          |
| G6PC3.3    | 7.32E-14 | -0.26506 | 0.24  | 0.36  | 1.09E-09 Neo-G | G6PC3        |
| GID8.1     | 7.41E-14 | -0.17637 | 0.15  | 0.259 | 1.11E-09 Neo-G | GID8         |
| CD7.4      | 7.53E-14 | -0.29583 | 0.003 | 0.048 | 1.12E-09 Neo-G | CD7          |
| MPC1.3     | 7.82E-14 | -0.33547 | 0.416 | 0.497 | 1.17E-09 Neo-G | MPC1         |
| PRPF40B    | 7.98E-14 | 0.175068 | 0.108 | 0.057 | 1.19E-09 Neo-G | PRPF40B      |
| CTNNA1.5   | 8.11E-14 | -0.11669 | 0.071 | 0.156 | 1.21E-09 Neo-G | CTNNA1       |
| PDCD4.7    | 8.18E-14 | -0.2878  | 0.079 | 0.157 | 1.22E-09 Neo-G | PDCD4        |
| UXT.5      | 8.19E-14 | -0.33527 | 0.438 | 0.55  | 1.22E-09 Neo-G | UXT          |
| PHLDA2.2   | 8.21E-14 | -0.14734 | 0.007 | 0.056 | 1.23E-09 Neo-G | PHLDA2       |
| C20orf27   | 8.21E-14 | -0.29232 | 0.263 | 0.372 | 1.23E-09 Neo-G | C20orf27     |
| RASAL2.1   | 8.28E-14 | 0.155659 | 0.129 | 0.072 | 1.24E-09 Neo-G | RASAL2       |
| CDC73.2    | 8.57E-14 | -0.18742 | 0.106 | 0.199 | 1.28E-09 Neo-G | CDC73        |

|              |           |           |        |        |           |       |               |
|--------------|-----------|-----------|--------|--------|-----------|-------|---------------|
| TMEM91. 5    | 8. 74E-14 | -0. 20784 | 0. 021 | 0. 079 | 1. 31E-09 | Neo-G | TMEM91        |
| MYBL2. 5     | 8. 74E-14 | -0. 11816 | 0. 004 | 0. 05  | 1. 31E-09 | Neo-G | MYBL2         |
| KIF13B. 1    | 9. 11E-14 | -0. 16972 | 0. 022 | 0. 08  | 1. 36E-09 | Neo-G | KIF13B        |
| CCDC91. 3    | 9. 19E-14 | 0. 138301 | 0. 268 | 0. 188 | 1. 37E-09 | Neo-G | CCDC91        |
| C16orf13. 9  | 9. 20E-14 | 0. 153636 | 0. 526 | 0. 452 | 1. 38E-09 | Neo-G | C16orf13      |
| GALNT7. 3    | 9. 29E-14 | -0. 14103 | 0. 032 | 0. 096 | 1. 39E-09 | Neo-G | GALNT7        |
| UFD1L. 5     | 9. 30E-14 | -0. 28071 | 0. 227 | 0. 343 | 1. 39E-09 | Neo-G | UFD1L         |
| OPTN. 5      | 9. 39E-14 | 0. 217677 | 0. 193 | 0. 128 | 1. 40E-09 | Neo-G | OPTN          |
| NT5E. 2      | 9. 41E-14 | -0. 14498 | 0. 014 | 0. 068 | 1. 41E-09 | Neo-G | NT5E          |
| CTPS1. 4     | 9. 42E-14 | 0. 196097 | 0. 161 | 0. 099 | 1. 41E-09 | Neo-G | CTPS1         |
| PPP2CB. 7    | 9. 49E-14 | 0. 214135 | 0. 359 | 0. 289 | 1. 42E-09 | Neo-G | PPP2CB        |
| RGS12. 7     | 9. 53E-14 | 0. 161834 | 0. 344 | 0. 262 | 1. 42E-09 | Neo-G | RGS12         |
| BCKDK. 7     | 9. 54E-14 | -0. 23725 | 0. 212 | 0. 326 | 1. 42E-09 | Neo-G | BCKDK         |
| DAG1. 5      | 9. 54E-14 | -0. 13837 | 0. 093 | 0. 183 | 1. 43E-09 | Neo-G | DAG1          |
| MAN2C1. 1    | 9. 62E-14 | -0. 22364 | 0. 064 | 0. 142 | 1. 44E-09 | Neo-G | MAN2C1        |
| FGGY. 1      | 9. 74E-14 | -0. 1998  | 0. 031 | 0. 093 | 1. 45E-09 | Neo-G | FGGY          |
| SLC35F5. 1   | 1. 02E-13 | -0. 14738 | 0. 068 | 0. 148 | 1. 53E-09 | Neo-G | SLC35F5       |
| C12orf43. 1  | 1. 02E-13 | 0. 207289 | 0. 217 | 0. 149 | 1. 53E-09 | Neo-G | C12orf43      |
| ALDH16A1. 1  | 1. 04E-13 | -0. 1769  | 0. 054 | 0. 127 | 1. 55E-09 | Neo-G | ALDH16A1      |
| SDHB. 3      | 1. 04E-13 | -0. 30165 | 0. 314 | 0. 437 | 1. 56E-09 | Neo-G | SDHB          |
| AC018647. 1  | 1. 07E-13 | -0. 23964 | 0. 002 | 0. 046 | 1. 60E-09 | Neo-G | AC018647. 3   |
| ARHGAP25. 1  | 1. 07E-13 | -0. 22317 | 0. 017 | 0. 072 | 1. 60E-09 | Neo-G | ARHGAP25      |
| USP6NL. 3    | 1. 11E-13 | -0. 14302 | 0. 027 | 0. 089 | 1. 66E-09 | Neo-G | USP6NL        |
| RAB40B. 7    | 1. 14E-13 | 0. 180772 | 0. 191 | 0. 122 | 1. 70E-09 | Neo-G | RAB40B        |
| LINC01023. 1 | 1. 14E-13 | -0. 12312 | 0. 015 | 0. 069 | 1. 70E-09 | Neo-G | LINC01023     |
| CAPZA1. 7    | 1. 15E-13 | -0. 25547 | 0. 295 | 0. 404 | 1. 72E-09 | Neo-G | CAPZA1        |
| TOPORS-AS. 1 | 1. 17E-13 | -0. 20455 | 0. 075 | 0. 156 | 1. 74E-09 | Neo-G | TOPORS-AS1    |
| XXYLT1. 5    | 1. 19E-13 | 0. 240788 | 0. 181 | 0. 12  | 1. 78E-09 | Neo-G | XXYLT1        |
| TNRC6A. 3    | 1. 20E-13 | 0. 203309 | 0. 278 | 0. 207 | 1. 79E-09 | Neo-G | TNRC6A        |
| EEPDI. 4     | 1. 22E-13 | -0. 19614 | 0. 021 | 0. 078 | 1. 83E-09 | Neo-G | EEPDI         |
| RP11-455F. 1 | 1. 23E-13 | 0. 139862 | 0. 068 | 0. 03  | 1. 84E-09 | Neo-G | RP11-455F5. 3 |
| CDK2AP2. 5   | 1. 23E-13 | -0. 31497 | 0. 235 | 0. 34  | 1. 84E-09 | Neo-G | CDK2AP2       |
| SAA2. 4      | 1. 23E-13 | -0. 69785 | 0. 009 | 0. 057 | 1. 84E-09 | Neo-G | SAA2          |
| ABHD4. 1     | 1. 25E-13 | -0. 15139 | 0. 016 | 0. 071 | 1. 87E-09 | Neo-G | ABHD4         |
| CDKN1C. 6    | 1. 26E-13 | 0. 202647 | 0. 174 | 0. 107 | 1. 88E-09 | Neo-G | CDKN1C        |
| CNOT8. 3     | 1. 26E-13 | 0. 195322 | 0. 246 | 0. 173 | 1. 88E-09 | Neo-G | CNOT8         |
| RP4-798A1. 1 | 1. 27E-13 | 0. 179067 | 0. 077 | 0. 035 | 1. 89E-09 | Neo-G | RP4-798A10. 7 |
| RP11-536K. 1 | 1. 35E-13 | -0. 23296 | 0      | 0. 041 | 2. 02E-09 | Neo-G | RP11-536K7. 3 |
| TMEM106A. 1  | 1. 36E-13 | -0. 23974 | 0. 016 | 0. 069 | 2. 03E-09 | Neo-G | TMEM106A      |
| OSER1. 3     | 1. 37E-13 | 0. 102194 | 0. 375 | 0. 293 | 2. 05E-09 | Neo-G | OSER1         |
| MIEF2. 3     | 1. 39E-13 | 0. 164334 | 0. 107 | 0. 057 | 2. 08E-09 | Neo-G | MIEF2         |
| MMP24-AS1. 1 | 1. 40E-13 | -0. 20069 | 0. 211 | 0. 324 | 2. 10E-09 | Neo-G | MMP24-AS1     |
| PEX1. 3      | 1. 41E-13 | 0. 18207  | 0. 13  | 0. 075 | 2. 10E-09 | Neo-G | PEX1          |
| MBOAT2. 6    | 1. 42E-13 | 0. 230125 | 0. 242 | 0. 174 | 2. 13E-09 | Neo-G | MBOAT2        |
| CRBN. 1      | 1. 43E-13 | 0. 156328 | 0. 355 | 0. 277 | 2. 13E-09 | Neo-G | CRBN          |
| ENDOG. 5     | 1. 44E-13 | 0. 27284  | 0. 203 | 0. 14  | 2. 14E-09 | Neo-G | ENDOG         |
| NDUFA1. 3    | 1. 44E-13 | -0. 27846 | 0. 702 | 0. 726 | 2. 15E-09 | Neo-G | NDUFA1        |
| EVI5. 2      | 1. 45E-13 | -0. 15689 | 0. 102 | 0. 194 | 2. 16E-09 | Neo-G | EVI5          |
| KHNYN. 1     | 1. 52E-13 | -0. 13912 | 0. 016 | 0. 07  | 2. 27E-09 | Neo-G | KHNYN         |
| ARL6IP5. 2   | 1. 53E-13 | -0. 32314 | 0. 59  | 0. 658 | 2. 29E-09 | Neo-G | ARL6IP5       |
| TLR5. 4      | 1. 54E-13 | -0. 23539 | 0. 005 | 0. 05  | 2. 30E-09 | Neo-G | TLR5          |



|           |           |           |        |        |           |       |                  |
|-----------|-----------|-----------|--------|--------|-----------|-------|------------------|
| AC004951. | 1. 54E-13 | 0. 227302 | 0. 215 | 0. 149 | 2. 30E-09 | Neo-G | AC004951. 6      |
| PLK1.     | 1. 54E-13 | -0. 19055 | 0. 01  | 0. 06  | 2. 30E-09 | Neo-G | PLK1             |
| RPN1.     | 1. 56E-13 | -0. 3205  | 0. 307 | 0. 422 | 2. 34E-09 | Neo-G | RPN1             |
| GIGYF1.   | 1. 58E-13 | 0. 169111 | 0. 164 | 0. 1   | 2. 36E-09 | Neo-G | GIGYF1           |
| VOPP1.    | 1. 60E-13 | 0. 175644 | 0. 36  | 0. 282 | 2. 39E-09 | Neo-G | VOPP1            |
| SERINC2.  | 1. 60E-13 | -0. 13734 | 0. 054 | 0. 128 | 2. 39E-09 | Neo-G | SERINC2          |
| AGAP1.    | 1. 60E-13 | 0. 240966 | 0. 175 | 0. 113 | 2. 40E-09 | Neo-G | AGAP1            |
| IFITM1.   | 1. 65E-13 | -0. 23538 | 0      | 0. 041 | 2. 46E-09 | Neo-G | IFITM1           |
| LRP4.     | 1. 69E-13 | -0. 13753 | 0. 013 | 0. 064 | 2. 53E-09 | Neo-G | LRP4             |
| PRKCH.    | 1. 72E-13 | -0. 2172  | 0. 004 | 0. 049 | 2. 56E-09 | Neo-G | PRKCH            |
| RP5-1085F | 1. 75E-13 | 0. 189738 | 0. 147 | 0. 088 | 2. 62E-09 | Neo-G | RP5-1085F17. 3   |
| CTSf.     | 1. 76E-13 | 0. 197489 | 0. 334 | 0. 262 | 2. 63E-09 | Neo-G | CTSf             |
| IGFBP4.   | 1. 79E-13 | -0. 16602 | 0. 017 | 0. 072 | 2. 67E-09 | Neo-G | IGFBP4           |
| RP11-1094 | 1. 79E-13 | 0. 206982 | 0. 296 | 0. 227 | 2. 67E-09 | Neo-G | RP11-1094M14. 11 |
| ZFR.      | 1. 80E-13 | 0. 153566 | 0. 371 | 0. 297 | 2. 68E-09 | Neo-G | ZFR              |
| PPP1R18.  | 1. 82E-13 | -0. 28949 | 0. 202 | 0. 304 | 2. 71E-09 | Neo-G | PPP1R18          |
| ATXN2.    | 1. 85E-13 | 0. 206152 | 0. 284 | 0. 214 | 2. 77E-09 | Neo-G | ATXN2            |
| FAM46A.   | 1. 86E-13 | -0. 14341 | 0. 11  | 0. 206 | 2. 78E-09 | Neo-G | FAM46A           |
| CMC1.     | 1. 87E-13 | -0. 25381 | 0. 179 | 0. 287 | 2. 80E-09 | Neo-G | CMC1             |
| CCDC28A.  | 1. 88E-13 | -0. 23407 | 0. 085 | 0. 167 | 2. 81E-09 | Neo-G | CCDC28A          |
| EPRS.     | 1. 89E-13 | 0. 172394 | 0. 359 | 0. 286 | 2. 82E-09 | Neo-G | EPRS             |
| RP11-138A | 1. 93E-13 | -0. 26161 | 0. 041 | 0. 106 | 2. 88E-09 | Neo-G | RP11-138A9. 2    |
| GAN.      | 1. 95E-13 | 0. 220951 | 0. 199 | 0. 134 | 2. 91E-09 | Neo-G | GAN              |
| TJP2.     | 1. 95E-13 | -0. 14944 | 0. 009 | 0. 059 | 2. 92E-09 | Neo-G | TJP2             |
| UTP11L.   | 1. 95E-13 | 0. 153859 | 0. 357 | 0. 283 | 2. 92E-09 | Neo-G | UTP11L           |
| DNAJC30.  | 1. 96E-13 | 0. 248854 | 0. 212 | 0. 147 | 2. 92E-09 | Neo-G | DNAJC30          |
| C7orf49.  | 1. 97E-13 | -0. 17353 | 0. 121 | 0. 218 | 2. 94E-09 | Neo-G | C7orf49          |
| PML.      | 1. 98E-13 | -0. 13037 | 0. 041 | 0. 109 | 2. 97E-09 | Neo-G | PML              |
| SLC9A3R2. | 2. 05E-13 | 0. 260897 | 0. 163 | 0. 105 | 3. 06E-09 | Neo-G | SLC9A3R2         |
| SLC25A38. | 2. 13E-13 | 0. 16694  | 0. 207 | 0. 138 | 3. 18E-09 | Neo-G | SLC25A38         |
| SAR1B.    | 2. 13E-13 | -0. 27039 | 0. 221 | 0. 334 | 3. 19E-09 | Neo-G | SAR1B            |
| ZNF14.    | 2. 27E-13 | 0. 173435 | 0. 091 | 0. 045 | 3. 39E-09 | Neo-G | ZNF14            |
| SNAI1.    | 2. 33E-13 | -0. 20394 | 0. 005 | 0. 05  | 3. 49E-09 | Neo-G | SNAI1            |
| LRMP.     | 2. 35E-13 | -0. 20592 | 0. 005 | 0. 05  | 3. 52E-09 | Neo-G | LRMP             |
| SLC9A3R1. | 2. 41E-13 | -0. 13176 | 0. 076 | 0. 159 | 3. 61E-09 | Neo-G | SLC9A3R1         |
| IL33.     | 2. 41E-13 | -0. 13459 | 0. 005 | 0. 05  | 3. 61E-09 | Neo-G | IL33             |
| KCTD1.    | 2. 49E-13 | 0. 198236 | 0. 108 | 0. 059 | 3. 72E-09 | Neo-G | KCTD1            |
| CASP2.    | 2. 50E-13 | 0. 199724 | 0. 153 | 0. 094 | 3. 73E-09 | Neo-G | CASP2            |
| ATP13A3.  | 2. 51E-13 | -0. 1799  | 0. 079 | 0. 159 | 3. 75E-09 | Neo-G | ATP13A3          |
| FYT1D1.   | 2. 52E-13 | 0. 174654 | 0. 352 | 0. 281 | 3. 77E-09 | Neo-G | FYT1D1           |
| DIAPH2.   | 2. 56E-13 | -0. 18974 | 0. 017 | 0. 071 | 3. 83E-09 | Neo-G | DIAPH2           |
| TRIOBP.   | 2. 67E-13 | -0. 10683 | 0. 032 | 0. 096 | 3. 99E-09 | Neo-G | TRIOBP           |
| ANLN.     | 2. 76E-13 | -0. 24514 | 0. 016 | 0. 068 | 4. 13E-09 | Neo-G | ANLN             |
| PEX2.     | 2. 77E-13 | -0. 21698 | 0. 17  | 0. 28  | 4. 15E-09 | Neo-G | PEX2             |
| AFF1.     | 2. 85E-13 | -0. 14584 | 0. 016 | 0. 07  | 4. 26E-09 | Neo-G | AFF1             |
| NCAPD2.   | 2. 89E-13 | -0. 11609 | 0. 016 | 0. 069 | 4. 32E-09 | Neo-G | NCAPD2           |
| TNKS1BP1. | 2. 93E-13 | -0. 10339 | 0. 022 | 0. 079 | 4. 38E-09 | Neo-G | TNKS1BP1         |
| TMEM251.  | 2. 96E-13 | -0. 18603 | 0. 148 | 0. 254 | 4. 42E-09 | Neo-G | TMEM251          |
| SNHG9.    | 2. 99E-13 | -0. 24369 | 0. 207 | 0. 317 | 4. 46E-09 | Neo-G | SNHG9            |
| TST.      | 2. 99E-13 | -0. 14474 | 0. 025 | 0. 084 | 4. 47E-09 | Neo-G | TST              |
| ZMYM2.    | 3. 04E-13 | 0. 206625 | 0. 269 | 0. 197 | 4. 54E-09 | Neo-G | ZMYM2            |

|           |          |          |       |       |          |       |            |
|-----------|----------|----------|-------|-------|----------|-------|------------|
| DHX58.1   | 3.05E-13 | -0.14805 | 0.002 | 0.045 | 4.55E-09 | Neo-G | DHX58      |
| TMEM150A. | 3.08E-13 | -0.23603 | 0.079 | 0.158 | 4.60E-09 | Neo-G | TMEM150A   |
| ZNF675    | 3.22E-13 | 0.161055 | 0.112 | 0.06  | 4.81E-09 | Neo-G | ZNF675     |
| ATF7IP2.6 | 3.22E-13 | -0.2069  | 0.003 | 0.046 | 4.82E-09 | Neo-G | ATF7IP2    |
| NPHP1.3   | 3.25E-13 | -0.13125 | 0.02  | 0.075 | 4.85E-09 | Neo-G | NPHP1      |
| CREB3L4   | 3.26E-13 | 0.138188 | 0.091 | 0.045 | 4.87E-09 | Neo-G | CREB3L4    |
| YIPF6.5   | 3.28E-13 | 0.147296 | 0.377 | 0.305 | 4.90E-09 | Neo-G | YIPF6      |
| DERA.3    | 3.30E-13 | -0.25636 | 0.16  | 0.262 | 4.93E-09 | Neo-G | DERA       |
| MAGI3.2   | 3.35E-13 | 0.183047 | 0.097 | 0.05  | 5.00E-09 | Neo-G | MAGI3      |
| AGAP2.4   | 3.47E-13 | 0.208387 | 0.098 | 0.051 | 5.18E-09 | Neo-G | AGAP2      |
| RNASEH2A. | 3.50E-13 | -0.26969 | 0.13  | 0.221 | 5.22E-09 | Neo-G | RNASEH2A   |
| CDKN3.6   | 3.51E-13 | -0.23234 | 0.036 | 0.098 | 5.24E-09 | Neo-G | CDKN3      |
| CTNNBIP1. | 3.53E-13 | 0.266785 | 0.271 | 0.208 | 5.28E-09 | Neo-G | CTNNBIP1   |
| GALNT1.3  | 3.56E-13 | -0.16338 | 0.122 | 0.216 | 5.32E-09 | Neo-G | GALNT1     |
| CCNB1.5   | 3.59E-13 | -0.26248 | 0.035 | 0.097 | 5.37E-09 | Neo-G | CCNB1      |
| EXOSC1.2  | 3.65E-13 | -0.24528 | 0.104 | 0.191 | 5.46E-09 | Neo-G | EXOSC1     |
| JADE2     | 3.67E-13 | -0.1629  | 0.007 | 0.054 | 5.49E-09 | Neo-G | JADE2      |
| C9orf72.6 | 3.68E-13 | 0.10462  | 0.22  | 0.142 | 5.51E-09 | Neo-G | C9orf72    |
| COQ3.3    | 3.70E-13 | 0.166182 | 0.114 | 0.062 | 5.53E-09 | Neo-G | COQ3       |
| NAA40.1   | 3.73E-13 | 0.172535 | 0.131 | 0.076 | 5.57E-09 | Neo-G | NAA40      |
| STAT6.7   | 3.75E-13 | -0.22337 | 0.009 | 0.057 | 5.60E-09 | Neo-G | STAT6      |
| FAM102A.4 | 3.79E-13 | -0.16592 | 0.039 | 0.105 | 5.66E-09 | Neo-G | FAM102A    |
| SLC39A14. | 3.79E-13 | -0.18801 | 0.038 | 0.102 | 5.67E-09 | Neo-G | SLC39A14   |
| RNF38.2   | 3.82E-13 | 0.20793  | 0.146 | 0.088 | 5.71E-09 | Neo-G | RNF38      |
| C16orf91. | 4.00E-13 | 0.238702 | 0.254 | 0.188 | 5.97E-09 | Neo-G | C16orf91   |
| MARCH9.6  | 4.03E-13 | 0.292338 | 0.214 | 0.147 | 6.02E-09 | Neo-G | 9-Mar      |
| EFNA4     | 4.08E-13 | -0.13065 | 0.004 | 0.048 | 6.09E-09 | Neo-G | EFNA4      |
| IRGQ.3    | 4.10E-13 | 0.184622 | 0.137 | 0.081 | 6.12E-09 | Neo-G | IRGQ       |
| PAK1IP1.4 | 4.23E-13 | 0.184937 | 0.28  | 0.208 | 6.32E-09 | Neo-G | PAK1IP1    |
| SPAG5.3   | 4.30E-13 | -0.12875 | 0.005 | 0.049 | 6.42E-09 | Neo-G | SPAG5      |
| DTNBP1.5  | 4.35E-13 | 0.196557 | 0.27  | 0.199 | 6.51E-09 | Neo-G | DTNBP1     |
| FOXM1.5   | 4.37E-13 | -0.13982 | 0.009 | 0.057 | 6.53E-09 | Neo-G | FOXM1      |
| ARHGAP24. | 4.52E-13 | -0.37397 | 0.083 | 0.156 | 6.75E-09 | Neo-G | ARHGAP24   |
| RUNX3.5   | 4.52E-13 | -0.18651 | 0.002 | 0.043 | 6.75E-09 | Neo-G | RUNX3      |
| SLC4A3.4  | 4.58E-13 | 0.241595 | 0.138 | 0.084 | 6.85E-09 | Neo-G | SLC4A3     |
| FBLN5.2   | 4.60E-13 | -0.20742 | 0.002 | 0.044 | 6.88E-09 | Neo-G | FBLN5      |
| CORO1C.4  | 4.68E-13 | 0.13225  | 0.441 | 0.365 | 6.99E-09 | Neo-G | CORO1C     |
| GCA.7     | 4.85E-13 | -0.34558 | 0.215 | 0.309 | 7.25E-09 | Neo-G | GCA        |
| SELL.4    | 4.90E-13 | -0.21496 | 0.001 | 0.041 | 7.33E-09 | Neo-G | SELL       |
| MAP3K7CL. | 4.93E-13 | -0.14697 | 0.004 | 0.047 | 7.37E-09 | Neo-G | MAP3K7CL   |
| PTX3.6    | 4.95E-13 | -0.1977  | 0.053 | 0.123 | 7.40E-09 | Neo-G | PTX3       |
| PCSK7.4   | 4.98E-13 | 0.142242 | 0.349 | 0.274 | 7.45E-09 | Neo-G | PCSK7      |
| FCF1      | 5.02E-13 | -0.15068 | 0.029 | 0.089 | 7.51E-09 | Neo-G | FCF1       |
| RNF20.3   | 5.06E-13 | 0.20032  | 0.207 | 0.141 | 7.56E-09 | Neo-G | RNF20      |
| TMC8.5    | 5.08E-13 | -0.18847 | 0.004 | 0.047 | 7.60E-09 | Neo-G | TMC8       |
| SRR.5     | 5.11E-13 | 0.221503 | 0.211 | 0.147 | 7.63E-09 | Neo-G | SRR        |
| BATF.4    | 5.12E-13 | -0.18029 | 0.002 | 0.043 | 7.66E-09 | Neo-G | BATF       |
| TLN2.4    | 5.41E-13 | -0.20613 | 0.038 | 0.101 | 8.08E-09 | Neo-G | TLN2       |
| TTF1.3    | 5.41E-13 | 0.218293 | 0.263 | 0.196 | 8.08E-09 | Neo-G | TTF1       |
| KAT2B.3   | 5.42E-13 | -0.14747 | 0.022 | 0.078 | 8.10E-09 | Neo-G | KAT2B      |
| RASSF8-AS | 5.43E-13 | 0.229786 | 0.218 | 0.153 | 8.11E-09 | Neo-G | RASSF8-AS1 |

|           |          |          |       |       |          |       |          |
|-----------|----------|----------|-------|-------|----------|-------|----------|
| PSTPIP1.6 | 5.60E-13 | -0.17883 | 0.003 | 0.046 | 8.36E-09 | Neo-G | PSTPIP1  |
| ZNF639.6  | 5.61E-13 | 0.248267 | 0.191 | 0.13  | 8.38E-09 | Neo-G | ZNF639   |
| BCL2.4    | 5.62E-13 | -0.18519 | 0.008 | 0.054 | 8.39E-09 | Neo-G | BCL2     |
| PPM1D.2   | 5.66E-13 | 0.180492 | 0.147 | 0.089 | 8.46E-09 | Neo-G | PPM1D    |
| MYCN      | 5.68E-13 | 0.124432 | 0.049 | 0.018 | 8.49E-09 | Neo-G | MYCN     |
| LYVE1.5   | 5.84E-13 | -0.31912 | 0.002 | 0.042 | 8.73E-09 | Neo-G | LYVE1    |
| CNOT2.2   | 5.85E-13 | 0.153503 | 0.362 | 0.29  | 8.74E-09 | Neo-G | CNOT2    |
| FAM177A1. | 5.91E-13 | 0.131304 | 0.451 | 0.38  | 8.83E-09 | Neo-G | FAM177A1 |
| RHOB.4    | 5.93E-13 | 0.109498 | 0.719 | 0.595 | 8.85E-09 | Neo-G | RHOB     |
| MNS1.4    | 6.01E-13 | -0.10395 | 0.024 | 0.081 | 8.98E-09 | Neo-G | MNS1     |
| RETSAT.2  | 6.08E-13 | -0.14131 | 0.031 | 0.091 | 9.09E-09 | Neo-G | RETSAT   |
| ENPP2.2   | 6.18E-13 | -0.28696 | 0.005 | 0.049 | 9.23E-09 | Neo-G | ENPP2    |
| HAUS3.2   | 6.20E-13 | 0.151366 | 0.134 | 0.078 | 9.26E-09 | Neo-G | HAUS3    |
| RAB1B.3   | 6.33E-13 | -0.2328  | 0.148 | 0.246 | 9.46E-09 | Neo-G | RAB1B    |
| VMA21.6   | 6.38E-13 | -0.25307 | 0.239 | 0.353 | 9.53E-09 | Neo-G | VMA21    |
| PLD2.4    | 6.47E-13 | -0.15253 | 0.031 | 0.092 | 9.67E-09 | Neo-G | PLD2     |
| SH2D4A    | 6.48E-13 | -0.11691 | 0.001 | 0.041 | 9.69E-09 | Neo-G | SH2D4A   |
| GOLGB1.2  | 6.56E-13 | 0.198123 | 0.303 | 0.232 | 9.81E-09 | Neo-G | GOLGB1   |
| PLAGL1.4  | 6.57E-13 | -0.16571 | 0.003 | 0.045 | 9.82E-09 | Neo-G | PLAGL1   |
| TCN2.3    | 6.62E-13 | -0.21791 | 0.042 | 0.106 | 9.90E-09 | Neo-G | TCN2     |
| ARID5B.5  | 6.64E-13 | -0.30398 | 0.257 | 0.367 | 9.93E-09 | Neo-G | ARID5B   |
| TEX2.1    | 6.76E-13 | -0.10244 | 0.024 | 0.082 | 1.01E-08 | Neo-G | TEX2     |
| PRMT7.1   | 6.76E-13 | 0.198172 | 0.152 | 0.094 | 1.01E-08 | Neo-G | PRMT7    |
| HSPA5.3   | 6.78E-13 | -0.314   | 0.618 | 0.662 | 1.01E-08 | Neo-G | HSPA5    |
| PHF20.4   | 6.98E-13 | 0.15309  | 0.382 | 0.313 | 1.04E-08 | Neo-G | PHF20    |
| ATP6V1D.2 | 7.02E-13 | 0.109982 | 0.433 | 0.362 | 1.05E-08 | Neo-G | ATP6V1D  |
| ATP5D.6   | 7.09E-13 | 0.118077 | 0.752 | 0.597 | 1.06E-08 | Neo-G | ATP5D    |
| HARS2     | 7.12E-13 | 0.179318 | 0.132 | 0.077 | 1.06E-08 | Neo-G | HARS2    |
| NKG7.5    | 7.20E-13 | -0.27406 | 0.009 | 0.055 | 1.08E-08 | Neo-G | NKG7     |
| SCRN1.6   | 7.21E-13 | -0.14552 | 0.101 | 0.189 | 1.08E-08 | Neo-G | SCRN1    |
| ARHGAP27. | 7.25E-13 | -0.2086  | 0.012 | 0.06  | 1.08E-08 | Neo-G | ARHGAP27 |
| APOBR.6   | 7.38E-13 | -0.17531 | 0.002 | 0.042 | 1.10E-08 | Neo-G | APOBR    |
| DMAP1.4   | 7.49E-13 | 0.164702 | 0.314 | 0.243 | 1.12E-08 | Neo-G | DMAP1    |
| TTL.3     | 7.63E-13 | 0.175758 | 0.173 | 0.111 | 1.14E-08 | Neo-G | TTL      |
| IRAK2.1   | 7.94E-13 | -0.16515 | 0.009 | 0.055 | 1.19E-08 | Neo-G | IRAK2    |
| FANCI.4   | 8.01E-13 | -0.10971 | 0.006 | 0.051 | 1.20E-08 | Neo-G | FANCI    |
| CD52.6    | 8.06E-13 | -0.36294 | 0.01  | 0.057 | 1.21E-08 | Neo-G | CD52     |
| ITSN2.6   | 8.32E-13 | -0.19863 | 0.105 | 0.191 | 1.24E-08 | Neo-G | ITSN2    |
| PSMD9.3   | 8.38E-13 | -0.27853 | 0.189 | 0.292 | 1.25E-08 | Neo-G | PSMD9    |
| RASA3.2   | 8.42E-13 | -0.16331 | 0.038 | 0.101 | 1.26E-08 | Neo-G | RASA3    |
| FLII.6    | 8.49E-13 | -0.18519 | 0.108 | 0.197 | 1.27E-08 | Neo-G | FLII     |
| CD1D.5    | 8.65E-13 | -0.20708 | 0.002 | 0.042 | 1.29E-08 | Neo-G | CD1D     |
| ITCH.1    | 8.68E-13 | -0.15007 | 0.048 | 0.116 | 1.30E-08 | Neo-G | ITCH     |
| BCAR3     | 8.72E-13 | -0.12558 | 0.009 | 0.055 | 1.30E-08 | Neo-G | BCAR3    |
| METTL2A.4 | 8.87E-13 | 0.227205 | 0.214 | 0.152 | 1.33E-08 | Neo-G | METTL2A  |
| LZTS2.2   | 8.94E-13 | -0.11973 | 0.027 | 0.086 | 1.34E-08 | Neo-G | LZTS2    |
| ARL11.6   | 8.99E-13 | -0.18414 | 0.002 | 0.043 | 1.34E-08 | Neo-G | ARL11    |
| KLHL42.6  | 9.01E-13 | 0.245572 | 0.214 | 0.152 | 1.35E-08 | Neo-G | KLHL42   |
| DLG4.2    | 9.06E-13 | 0.218453 | 0.119 | 0.068 | 1.35E-08 | Neo-G | DLG4     |
| PDLIM1.4  | 9.15E-13 | -0.13886 | 0.024 | 0.08  | 1.37E-08 | Neo-G | PDLIM1   |
| DNASE1L1. | 9.31E-13 | -0.21971 | 0.024 | 0.078 | 1.39E-08 | Neo-G | DNASE1L1 |

|            |          |          |       |       |          |       |               |
|------------|----------|----------|-------|-------|----------|-------|---------------|
| PAQR6.5    | 9.39E-13 | -0.17112 | 0.023 | 0.078 | 1.40E-08 | Neo-G | PAQR6         |
| ZFYVE27.1  | 9.63E-13 | 0.155416 | 0.128 | 0.073 | 1.44E-08 | Neo-G | ZFYVE27       |
| AVPI1.6    | 1.01E-12 | -0.27613 | 0.039 | 0.1   | 1.51E-08 | Neo-G | AVPI1         |
| VEGFB.3    | 1.02E-12 | -0.15726 | 0.075 | 0.153 | 1.52E-08 | Neo-G | VEGFB         |
| BBS9       | 1.03E-12 | 0.136849 | 0.09  | 0.045 | 1.54E-08 | Neo-G | BBS9          |
| TOMM40.5   | 1.03E-12 | 0.168257 | 0.39  | 0.32  | 1.54E-08 | Neo-G | TOMM40        |
| ECT2.5     | 1.03E-12 | -0.13332 | 0.009 | 0.055 | 1.55E-08 | Neo-G | ECT2          |
| PPCDC.1    | 1.04E-12 | -0.13421 | 0.02  | 0.075 | 1.56E-08 | Neo-G | PPCDC         |
| ICMT.3     | 1.04E-12 | -0.12365 | 0.065 | 0.141 | 1.56E-08 | Neo-G | ICMT          |
| SGOL2.5    | 1.07E-12 | -0.18416 | 0.035 | 0.096 | 1.59E-08 | Neo-G | SGOL2         |
| SLC36A4.3  | 1.07E-12 | 0.22605  | 0.251 | 0.186 | 1.59E-08 | Neo-G | SLC36A4       |
| MTAP.4     | 1.07E-12 | -0.19744 | 0.022 | 0.076 | 1.60E-08 | Neo-G | MTAP          |
| SUCLA2.5   | 1.09E-12 | 0.148367 | 0.349 | 0.28  | 1.63E-08 | Neo-G | SUCLA2        |
| FASTK.4    | 1.10E-12 | 0.128609 | 0.4   | 0.33  | 1.64E-08 | Neo-G | FASTK         |
| PXDC1.3    | 1.10E-12 | -0.11547 | 0.079 | 0.161 | 1.64E-08 | Neo-G | PXDC1         |
| ATM.4      | 1.11E-12 | -0.21887 | 0.111 | 0.198 | 1.66E-08 | Neo-G | ATM           |
| GSPT1.5    | 1.11E-12 | 0.187281 | 0.404 | 0.341 | 1.66E-08 | Neo-G | GSPT1         |
| ARHGEF1.5  | 1.14E-12 | -0.21439 | 0.119 | 0.206 | 1.71E-08 | Neo-G | ARHGEF1       |
| PHF23.5    | 1.14E-12 | 0.212874 | 0.265 | 0.2   | 1.71E-08 | Neo-G | PHF23         |
| RP11-783K  | 1.15E-12 | -0.14514 | 0.008 | 0.053 | 1.71E-08 | Neo-G | RP11-783K16.5 |
| SEMA6B.2   | 1.15E-12 | 0.111333 | 0.09  | 0.044 | 1.72E-08 | Neo-G | SEMA6B        |
| ERBB2IP.4  | 1.16E-12 | -0.17086 | 0.135 | 0.232 | 1.74E-08 | Neo-G | ERBB2IP       |
| HS3ST3B1.1 | 1.17E-12 | -0.1521  | 0.004 | 0.046 | 1.75E-08 | Neo-G | HS3ST3B1      |
| ASPM.7     | 1.17E-12 | -0.16146 | 0.007 | 0.052 | 1.75E-08 | Neo-G | ASPM          |
| FURIN.5    | 1.19E-12 | -0.17351 | 0.023 | 0.078 | 1.77E-08 | Neo-G | FURIN         |
| GIGYF2.2   | 1.19E-12 | 0.18749  | 0.235 | 0.168 | 1.78E-08 | Neo-G | GIGYF2        |
| NME2.1     | 1.19E-12 | -0.13336 | 0.032 | 0.092 | 1.79E-08 | Neo-G | NME2          |
| RP11-140K  | 1.20E-12 | -0.1486  | 0.028 | 0.086 | 1.79E-08 | Neo-G | RP11-140K17.3 |
| ADAMDEC1.1 | 1.21E-12 | -0.19612 | 0.002 | 0.041 | 1.81E-08 | Neo-G | ADAMDEC1      |
| SMIM3.5    | 1.21E-12 | -0.44325 | 0.001 | 0.04  | 1.81E-08 | Neo-G | SMIM3         |
| KIAA0040.1 | 1.22E-12 | -0.16777 | 0.006 | 0.05  | 1.83E-08 | Neo-G | KIAA0040      |
| AC109826.1 | 1.23E-12 | -0.18906 | 0.002 | 0.041 | 1.84E-08 | Neo-G | AC109826.1    |
| NME7.7     | 1.25E-12 | 0.206909 | 0.219 | 0.154 | 1.86E-08 | Neo-G | NME7          |
| NKIRAS1.2  | 1.27E-12 | 0.19715  | 0.154 | 0.096 | 1.90E-08 | Neo-G | NKIRAS1       |
| C14orf142  | 1.28E-12 | -0.19405 | 0.079 | 0.158 | 1.91E-08 | Neo-G | C14orf142     |
| TMC04.1    | 1.29E-12 | -0.1266  | 0.001 | 0.04  | 1.93E-08 | Neo-G | TMC04         |
| KIF5B.4    | 1.31E-12 | 0.11275  | 0.607 | 0.5   | 1.96E-08 | Neo-G | KIF5B         |
| PPP1R2.2   | 1.34E-12 | 0.114184 | 0.437 | 0.36  | 2.00E-08 | Neo-G | PPP1R2        |
| HERC4.2    | 1.34E-12 | -0.17213 | 0.053 | 0.122 | 2.00E-08 | Neo-G | HERC4         |
| CHCHD1.5   | 1.34E-12 | -0.25668 | 0.178 | 0.282 | 2.00E-08 | Neo-G | CHCHD1        |
| CCAR2.2    | 1.34E-12 | 0.200002 | 0.203 | 0.139 | 2.00E-08 | Neo-G | CCAR2         |
| FPGT       | 1.34E-12 | -0.15088 | 0.024 | 0.079 | 2.01E-08 | Neo-G | FPGT          |
| ZNF623.1   | 1.35E-12 | 0.152541 | 0.081 | 0.039 | 2.02E-08 | Neo-G | ZNF623        |
| WBP1L.6    | 1.36E-12 | -0.2153  | 0.05  | 0.116 | 2.04E-08 | Neo-G | WBP1L         |
| NIPA2.4    | 1.38E-12 | -0.19105 | 0.173 | 0.276 | 2.06E-08 | Neo-G | NIPA2         |
| ELF2.2     | 1.39E-12 | 0.169409 | 0.244 | 0.173 | 2.08E-08 | Neo-G | ELF2          |
| EBNA1BP2.1 | 1.41E-12 | 0.111214 | 0.415 | 0.346 | 2.10E-08 | Neo-G | EBNA1BP2      |
| FTO.3      | 1.43E-12 | 0.206357 | 0.189 | 0.127 | 2.13E-08 | Neo-G | FTO           |
| RFT1.2     | 1.43E-12 | -0.16604 | 0.068 | 0.144 | 2.13E-08 | Neo-G | RFT1          |
| NOA1.4     | 1.43E-12 | 0.199896 | 0.201 | 0.136 | 2.14E-08 | Neo-G | NOA1          |
| CEP68.3    | 1.45E-12 | 0.184434 | 0.211 | 0.144 | 2.17E-08 | Neo-G | CEP68         |

|           |          |          |       |       |          |       |              |
|-----------|----------|----------|-------|-------|----------|-------|--------------|
| ZNF382    | 1.45E-12 | 0.111469 | 0.049 | 0.019 | 2.17E-08 | Neo-G | ZNF382       |
| SPPL3.5   | 1.49E-12 | 0.209134 | 0.257 | 0.19  | 2.23E-08 | Neo-G | SPPL3        |
| S100A1.2  | 1.52E-12 | -0.317   | 0.002 | 0.043 | 2.27E-08 | Neo-G | S100A1       |
| EMILIN1   | 1.52E-12 | -0.10765 | 0.014 | 0.064 | 2.27E-08 | Neo-G | EMILIN1      |
| C9orf3.5  | 1.52E-12 | 0.172793 | 0.159 | 0.098 | 2.27E-08 | Neo-G | C9orf3       |
| REX04.3   | 1.52E-12 | 0.247562 | 0.246 | 0.184 | 2.27E-08 | Neo-G | REX04        |
| ZKSCAN7   | 1.53E-12 | 0.105496 | 0.046 | 0.017 | 2.29E-08 | Neo-G | ZKSCAN7      |
| WDR61.2   | 1.57E-12 | -0.3272  | 0.253 | 0.36  | 2.34E-08 | Neo-G | WDR61        |
| CLN5.2    | 1.64E-12 | -0.17482 | 0.135 | 0.231 | 2.46E-08 | Neo-G | CLN5         |
| RP11-686C | 1.65E-12 | 0.159299 | 0.064 | 0.028 | 2.47E-08 | Neo-G | RP11-68606.2 |
| STK24.4   | 1.67E-12 | -0.16211 | 0.043 | 0.107 | 2.49E-08 | Neo-G | STK24        |
| CAMK2N2   | 1.82E-12 | 0.130517 | 0.054 | 0.022 | 2.71E-08 | Neo-G | CAMK2N2      |
| NFKB1.7   | 1.83E-12 | -0.2033  | 0.046 | 0.111 | 2.73E-08 | Neo-G | NFKB1        |
| SLC25A17. | 1.90E-12 | 0.206564 | 0.214 | 0.15  | 2.84E-08 | Neo-G | SLC25A17     |
| IFRD2.2   | 1.93E-12 | -0.16373 | 0.126 | 0.218 | 2.88E-08 | Neo-G | IFRD2        |
| SCMH1.2   | 1.94E-12 | 0.187159 | 0.125 | 0.073 | 2.90E-08 | Neo-G | SCMH1        |
| MOXD1.5   | 1.98E-12 | -0.10742 | 0.011 | 0.058 | 2.96E-08 | Neo-G | MOXD1        |
| SPATA2L.1 | 2.01E-12 | 0.181069 | 0.155 | 0.097 | 3.00E-08 | Neo-G | SPATA2L      |
| ATP1A1.4  | 2.07E-12 | -0.25916 | 0.385 | 0.484 | 3.09E-08 | Neo-G | ATP1A1       |
| CABIN1.2  | 2.11E-12 | -0.14388 | 0.067 | 0.141 | 3.16E-08 | Neo-G | CABIN1       |
| HCG18.4   | 2.12E-12 | 0.203133 | 0.165 | 0.106 | 3.17E-08 | Neo-G | HCG18        |
| RP11-76E1 | 2.16E-12 | -0.22432 | 0.002 | 0.041 | 3.23E-08 | Neo-G | RP11-76E17.3 |
| SNCAIP.6  | 2.20E-12 | 0.192809 | 0.133 | 0.08  | 3.29E-08 | Neo-G | SNCAIP       |
| ANKRD40.3 | 2.28E-12 | -0.17069 | 0.1   | 0.184 | 3.40E-08 | Neo-G | ANKRD40      |
| BMPER.2   | 2.29E-12 | 0.14897  | 0.069 | 0.032 | 3.43E-08 | Neo-G | BMPER        |
| NTPCR.4   | 2.31E-12 | -0.27154 | 0.182 | 0.284 | 3.45E-08 | Neo-G | NTPCR        |
| IGFBP5.7  | 2.31E-12 | -0.50127 | 0.194 | 0.277 | 3.45E-08 | Neo-G | IGFBP5       |
| DLEU7.6   | 2.32E-12 | -0.21717 | 0.009 | 0.055 | 3.47E-08 | Neo-G | DLEU7        |
| TMEM128.4 | 2.35E-12 | 0.13901  | 0.355 | 0.284 | 3.51E-08 | Neo-G | TMEM128      |
| LENG1.3   | 2.38E-12 | -0.23407 | 0.121 | 0.211 | 3.56E-08 | Neo-G | LENG1        |
| KIF2C.5   | 2.44E-12 | -0.13134 | 0.005 | 0.048 | 3.65E-08 | Neo-G | KIF2C        |
| DAP.4     | 2.44E-12 | -0.15905 | 0.181 | 0.288 | 3.65E-08 | Neo-G | DAP          |
| ZBTB7B.3  | 2.49E-12 | -0.13811 | 0.005 | 0.046 | 3.72E-08 | Neo-G | ZBTB7B       |
| ACTR1B.1  | 2.50E-12 | 0.206861 | 0.269 | 0.202 | 3.74E-08 | Neo-G | ACTR1B       |
| NME1-NME2 | 2.51E-12 | -0.1725  | 0.039 | 0.1   | 3.74E-08 | Neo-G | NME1-NME2    |
| IL2RG.4   | 2.54E-12 | -0.25125 | 0.005 | 0.048 | 3.80E-08 | Neo-G | IL2RG        |
| ATG7.4    | 2.57E-12 | -0.20021 | 0.052 | 0.118 | 3.83E-08 | Neo-G | ATG7         |
| CTC-534A2 | 2.57E-12 | 0.146582 | 0.086 | 0.043 | 3.84E-08 | Neo-G | CTC-534A2.2  |
| GPATCH1.2 | 2.59E-12 | 0.157827 | 0.12  | 0.069 | 3.88E-08 | Neo-G | GPATCH1      |
| GSG1L.4   | 2.62E-12 | -0.15753 | 0.015 | 0.064 | 3.92E-08 | Neo-G | GSG1L        |
| GFPT1.4   | 2.62E-12 | 0.177021 | 0.146 | 0.089 | 3.92E-08 | Neo-G | GFPT1        |
| ILVBL.3   | 2.70E-12 | -0.19488 | 0.16  | 0.263 | 4.04E-08 | Neo-G | ILVBL        |
| AC147651. | 2.71E-12 | -0.16664 | 0.002 | 0.04  | 4.06E-08 | Neo-G | AC147651.4   |
| TNF.4     | 2.75E-12 | -0.21902 | 0.005 | 0.047 | 4.11E-08 | Neo-G | TNF          |
| PCYT1A.2  | 2.83E-12 | -0.16085 | 0.064 | 0.137 | 4.24E-08 | Neo-G | PCYT1A       |
| CENPF.7   | 2.85E-12 | -0.29292 | 0.046 | 0.108 | 4.27E-08 | Neo-G | CENPF        |
| NOL11.4   | 2.86E-12 | 0.195597 | 0.247 | 0.182 | 4.28E-08 | Neo-G | NOL11        |
| RASSF3.5  | 2.87E-12 | -0.15001 | 0.005 | 0.046 | 4.29E-08 | Neo-G | RASSF3       |
| EPHB6     | 2.87E-12 | 0.123207 | 0.081 | 0.039 | 4.29E-08 | Neo-G | EPHB6        |
| TMEM161A. | 2.94E-12 | -0.17575 | 0.097 | 0.18  | 4.40E-08 | Neo-G | TMEM161A     |
| NRG2.4    | 2.96E-12 | 0.202414 | 0.075 | 0.036 | 4.42E-08 | Neo-G | NRG2         |

|           |          |          |       |       |          |       |             |
|-----------|----------|----------|-------|-------|----------|-------|-------------|
| ZNFX1.1   | 2.96E-12 | -0.16159 | 0.073 | 0.149 | 4.43E-08 | Neo-G | ZNFX1       |
| TAF9B.4   | 3.05E-12 | 0.213547 | 0.199 | 0.138 | 4.55E-08 | Neo-G | TAF9B       |
| DHFR.5    | 3.05E-12 | -0.16062 | 0.082 | 0.159 | 4.56E-08 | Neo-G | DHFR        |
| PTBP1.4   | 3.07E-12 | -0.20312 | 0.224 | 0.335 | 4.59E-08 | Neo-G | PTBP1       |
| RCOR1.1   | 3.08E-12 | -0.10981 | 0.023 | 0.077 | 4.60E-08 | Neo-G | RCOR1       |
| RP1-39G22 | 3.10E-12 | 0.234387 | 0.184 | 0.124 | 4.64E-08 | Neo-G | RP1-39G22.7 |
| RCBTB2.6  | 3.10E-12 | 0.103144 | 0.207 | 0.134 | 4.64E-08 | Neo-G | RCBTB2      |
| TAF8.1    | 3.14E-12 | -0.15522 | 0.037 | 0.098 | 4.70E-08 | Neo-G | TAF8        |
| SH3BP2.6  | 3.23E-12 | -0.18126 | 0.072 | 0.146 | 4.82E-08 | Neo-G | SH3BP2      |
| ETFB.3    | 3.23E-12 | -0.30791 | 0.419 | 0.51  | 4.82E-08 | Neo-G | ETFB        |
| SMC4.5    | 3.24E-12 | -0.21677 | 0.134 | 0.221 | 4.84E-08 | Neo-G | SMC4        |
| TMUB2.1   | 3.28E-12 | 0.176636 | 0.319 | 0.252 | 4.90E-08 | Neo-G | TMUB2       |
| TRMT61A.1 | 3.32E-12 | -0.145   | 0.063 | 0.135 | 4.97E-08 | Neo-G | TRMT61A     |
| SP1       | 3.34E-12 | -0.12676 | 0.028 | 0.085 | 4.99E-08 | Neo-G | SP1         |
| RHOT2.2   | 3.43E-12 | 0.175654 | 0.313 | 0.243 | 5.12E-08 | Neo-G | RHOT2       |
| ASCL2.6   | 3.45E-12 | -0.15968 | 0.002 | 0.041 | 5.15E-08 | Neo-G | ASCL2       |
| CHL1.5    | 3.51E-12 | -0.18452 | 0.084 | 0.161 | 5.24E-08 | Neo-G | CHL1        |
| PCDH9.5   | 3.51E-12 | -0.32261 | 0.173 | 0.265 | 5.24E-08 | Neo-G | PCDH9       |
| COX17.3   | 3.52E-12 | -0.32621 | 0.427 | 0.529 | 5.26E-08 | Neo-G | COX17       |
| ACSL5.6   | 3.57E-12 | -0.15648 | 0.001 | 0.038 | 5.34E-08 | Neo-G | ACSL5       |
| MPHOSPH6. | 3.64E-12 | 0.110021 | 0.357 | 0.283 | 5.43E-08 | Neo-G | MPHOSPH6    |
| MYLK.4    | 3.67E-12 | -0.22425 | 0.016 | 0.064 | 5.49E-08 | Neo-G | MYLK        |
| CKAP4.5   | 3.81E-12 | 0.243993 | 0.262 | 0.203 | 5.69E-08 | Neo-G | CKAP4       |
| OCEL1.2   | 3.82E-12 | -0.18668 | 0.086 | 0.165 | 5.70E-08 | Neo-G | OCEL1       |
| RPH3A.2   | 3.90E-12 | 0.120234 | 0.064 | 0.028 | 5.83E-08 | Neo-G | RPH3A       |
| IDH2.6    | 3.91E-12 | -0.22645 | 0.331 | 0.438 | 5.84E-08 | Neo-G | IDH2        |
| APOO.5    | 3.92E-12 | 0.15881  | 0.288 | 0.222 | 5.86E-08 | Neo-G | APOO        |
| PDGFA.4   | 3.93E-12 | -0.17958 | 0.042 | 0.104 | 5.87E-08 | Neo-G | PDGFA       |
| DGKG.2    | 3.94E-12 | -0.1132  | 0.009 | 0.053 | 5.89E-08 | Neo-G | DGKG        |
| LNP1.1    | 3.96E-12 | 0.134569 | 0.061 | 0.027 | 5.91E-08 | Neo-G | LNP1        |
| SEC61A2.3 | 3.96E-12 | 0.185642 | 0.126 | 0.074 | 5.92E-08 | Neo-G | SEC61A2     |
| CLEC9A.5  | 3.99E-12 | -0.23195 | 0     | 0.037 | 5.96E-08 | Neo-G | CLEC9A      |
| RORA.4    | 4.03E-12 | -0.15051 | 0.026 | 0.081 | 6.02E-08 | Neo-G | RORA        |
| IL15.5    | 4.14E-12 | -0.16791 | 0.002 | 0.041 | 6.18E-08 | Neo-G | IL15        |
| PRPF3.1   | 4.17E-12 | 0.170401 | 0.168 | 0.108 | 6.23E-08 | Neo-G | PRPF3       |
| CTDSP2.3  | 4.24E-12 | -0.14904 | 0.181 | 0.288 | 6.33E-08 | Neo-G | CTDSP2      |
| INF2.5    | 4.25E-12 | -0.17418 | 0.034 | 0.092 | 6.34E-08 | Neo-G | INF2        |
| SLC25A11. | 4.33E-12 | 0.121611 | 0.479 | 0.412 | 6.46E-08 | Neo-G | SLC25A11    |
| HOXB-AS1  | 4.39E-12 | 0.11298  | 0.064 | 0.028 | 6.56E-08 | Neo-G | HOXB-AS1    |
| MARCH5.2  | 4.43E-12 | 0.179812 | 0.252 | 0.184 | 6.62E-08 | Neo-G | 5-Mar       |
| DDR2.5    | 4.47E-12 | -0.12635 | 0.014 | 0.062 | 6.69E-08 | Neo-G | DDR2        |
| SASH1.4   | 4.50E-12 | -0.13428 | 0.023 | 0.076 | 6.72E-08 | Neo-G | SASH1       |
| STAT2.1   | 4.51E-12 | -0.18887 | 0.073 | 0.147 | 6.75E-08 | Neo-G | STAT2       |
| ARHGAP32. | 4.52E-12 | 0.183194 | 0.131 | 0.079 | 6.75E-08 | Neo-G | ARHGAP32    |
| TXNL4A.3  | 4.57E-12 | 0.126171 | 0.474 | 0.403 | 6.83E-08 | Neo-G | TXNL4A      |
| OIP5.4    | 4.58E-12 | -0.10374 | 0.005 | 0.046 | 6.85E-08 | Neo-G | OIP5        |
| ARHGAP11A | 4.61E-12 | -0.10822 | 0.003 | 0.043 | 6.89E-08 | Neo-G | ARHGAP11A   |
| DERL2.4   | 4.62E-12 | -0.29722 | 0.255 | 0.364 | 6.90E-08 | Neo-G | DERL2       |
| SBN02.2   | 4.64E-12 | -0.1017  | 0.013 | 0.061 | 6.94E-08 | Neo-G | SBN02       |
| SYNJ2.2   | 4.67E-12 | -0.11036 | 0.007 | 0.05  | 6.98E-08 | Neo-G | SYNJ2       |
| ENOX2.3   | 4.68E-12 | -0.15476 | 0.026 | 0.08  | 7.00E-08 | Neo-G | ENOX2       |

|             |           |           |        |        |           |       |             |
|-------------|-----------|-----------|--------|--------|-----------|-------|-------------|
| VPS53. 4    | 4. 73E-12 | 0. 197248 | 0. 215 | 0. 152 | 7. 07E-08 | Neo-G | VPS53       |
| S1PR3       | 4. 77E-12 | -0. 2108  | 0. 01  | 0. 055 | 7. 13E-08 | Neo-G | S1PR3       |
| HENMT1. 6   | 4. 87E-12 | -0. 16732 | 0      | 0. 036 | 7. 27E-08 | Neo-G | HENMT1      |
| GPT2. 5     | 4. 87E-12 | 0. 203118 | 0. 202 | 0. 14  | 7. 27E-08 | Neo-G | GPT2        |
| NIPAL3. 3   | 4. 88E-12 | -0. 18135 | 0. 031 | 0. 087 | 7. 29E-08 | Neo-G | NIPAL3      |
| ZNF502. 2   | 4. 89E-12 | 0. 119253 | 0. 078 | 0. 038 | 7. 30E-08 | Neo-G | ZNF502      |
| PRKCSH. 3   | 4. 90E-12 | -0. 28703 | 0. 335 | 0. 442 | 7. 32E-08 | Neo-G | PRKCSH      |
| ZNF10       | 4. 99E-12 | 0. 12374  | 0. 079 | 0. 038 | 7. 46E-08 | Neo-G | ZNF10       |
| RARA. 2     | 5. 20E-12 | 0. 19104  | 0. 145 | 0. 09  | 7. 77E-08 | Neo-G | RARA        |
| RNGTT. 2    | 5. 20E-12 | 0. 157881 | 0. 12  | 0. 07  | 7. 77E-08 | Neo-G | RNGTT       |
| NAB1. 3     | 5. 23E-12 | 0. 240697 | 0. 178 | 0. 119 | 7. 81E-08 | Neo-G | NAB1        |
| PNMAL2      | 5. 25E-12 | 0. 103752 | 0. 041 | 0. 014 | 7. 84E-08 | Neo-G | PNMAL2      |
| USP14. 3    | 5. 32E-12 | 0. 197883 | 0. 315 | 0. 251 | 7. 96E-08 | Neo-G | USP14       |
| TMEM258. 3  | 5. 38E-12 | -0. 28054 | 0. 707 | 0. 731 | 8. 04E-08 | Neo-G | TMEM258     |
| COG4. 4     | 5. 38E-12 | 0. 222598 | 0. 246 | 0. 184 | 8. 04E-08 | Neo-G | COG4        |
| ERLIN2. 1   | 5. 39E-12 | -0. 15127 | 0. 06  | 0. 131 | 8. 05E-08 | Neo-G | ERLIN2      |
| SNX6. 5     | 5. 40E-12 | -0. 29248 | 0. 332 | 0. 442 | 8. 08E-08 | Neo-G | SNX6        |
| MLXIPL. 3   | 5. 43E-12 | -0. 19857 | 0. 004 | 0. 044 | 8. 11E-08 | Neo-G | MLXIPL      |
| TAGLN. 4    | 5. 44E-12 | -0. 45821 | 0. 024 | 0. 076 | 8. 13E-08 | Neo-G | TAGLN       |
| ZNF586      | 5. 45E-12 | 0. 127613 | 0. 078 | 0. 038 | 8. 14E-08 | Neo-G | ZNF586      |
| PLB1. 6     | 5. 55E-12 | -0. 16977 | 0. 005 | 0. 047 | 8. 29E-08 | Neo-G | PLB1        |
| ZFP30. 2    | 5. 63E-12 | 0. 153682 | 0. 087 | 0. 045 | 8. 42E-08 | Neo-G | ZFP30       |
| CINP. 2     | 5. 71E-12 | -0. 22515 | 0. 163 | 0. 262 | 8. 53E-08 | Neo-G | CINP        |
| DEPDC1. 3   | 5. 75E-12 | -0. 10293 | 0. 002 | 0. 039 | 8. 60E-08 | Neo-G | DEPDC1      |
| PTPN2. 6    | 5. 81E-12 | -0. 28097 | 0. 169 | 0. 258 | 8. 68E-08 | Neo-G | PTPN2       |
| LHFPL3. 7   | 5. 81E-12 | -0. 18407 | 0. 06  | 0. 127 | 8. 68E-08 | Neo-G | LHFPL3      |
| CLSTN1. 4   | 5. 82E-12 | 0. 203192 | 0. 338 | 0. 276 | 8. 70E-08 | Neo-G | CLSTN1      |
| ORAOV1. 3   | 5. 84E-12 | 0. 165827 | 0. 13  | 0. 077 | 8. 72E-08 | Neo-G | ORAOV1      |
| HPS5. 5     | 5. 95E-12 | -0. 15243 | 0. 054 | 0. 121 | 8. 89E-08 | Neo-G | HPS5        |
| RFXAP. 3    | 5. 97E-12 | 0. 206143 | 0. 144 | 0. 089 | 8. 92E-08 | Neo-G | RFXAP       |
| DYNLT3. 2   | 5. 99E-12 | -0. 27017 | 0. 204 | 0. 305 | 8. 96E-08 | Neo-G | DYNLT3      |
| JOSD1. 7    | 6. 02E-12 | -0. 17607 | 0. 088 | 0. 166 | 9. 00E-08 | Neo-G | JOSD1       |
| VAT1. 3     | 6. 10E-12 | 0. 188136 | 0. 262 | 0. 194 | 9. 11E-08 | Neo-G | VAT1        |
| COX11. 4    | 6. 27E-12 | 0. 118065 | 0. 378 | 0. 311 | 9. 37E-08 | Neo-G | COX11       |
| NEK1. 4     | 6. 40E-12 | 0. 196704 | 0. 178 | 0. 12  | 9. 57E-08 | Neo-G | NEK1        |
| LRRC27. 2   | 6. 48E-12 | 0. 201406 | 0. 131 | 0. 08  | 9. 68E-08 | Neo-G | LRRC27      |
| C19orf81    | 6. 49E-12 | 0. 167482 | 0. 092 | 0. 048 | 9. 70E-08 | Neo-G | C19orf81    |
| PAOX. 3     | 6. 51E-12 | -0. 11246 | 0. 012 | 0. 058 | 9. 73E-08 | Neo-G | PAOX        |
| CCDC22. 3   | 6. 58E-12 | -0. 16876 | 0. 064 | 0. 134 | 9. 83E-08 | Neo-G | CCDC22      |
| RBM48. 3    | 6. 66E-12 | 0. 17766  | 0. 139 | 0. 084 | 9. 96E-08 | Neo-G | RBM48       |
| CMPK1. 4    | 6. 73E-12 | 0. 146516 | 0. 475 | 0. 409 | 1. 01E-07 | Neo-G | CMPK1       |
| SEPT8. 7    | 6. 74E-12 | -0. 20345 | 0. 118 | 0. 205 | 1. 01E-07 | Neo-G | 8-Sep       |
| EPHB2. 3    | 6. 77E-12 | 0. 184403 | 0. 13  | 0. 078 | 1. 01E-07 | Neo-G | EPHB2       |
| MTHFD1. 4   | 6. 92E-12 | -0. 15262 | 0. 11  | 0. 197 | 1. 03E-07 | Neo-G | MTHFD1      |
| AC084219. 4 | 6. 99E-12 | 0. 114193 | 0. 069 | 0. 032 | 1. 05E-07 | Neo-G | AC084219. 4 |
| NUDT3. 5    | 7. 03E-12 | 0. 101148 | 0. 463 | 0. 392 | 1. 05E-07 | Neo-G | NUDT3       |
| EEF2K       | 7. 10E-12 | -0. 11135 | 0. 008 | 0. 051 | 1. 06E-07 | Neo-G | EEF2K       |
| NAA15. 4    | 7. 22E-12 | 0. 217192 | 0. 271 | 0. 208 | 1. 08E-07 | Neo-G | NAA15       |
| IL15RA. 3   | 7. 24E-12 | -0. 10791 | 0      | 0. 036 | 1. 08E-07 | Neo-G | IL15RA      |
| PSORS1C1. 1 | 7. 35E-12 | -0. 14119 | 0. 002 | 0. 04  | 1. 10E-07 | Neo-G | PSORS1C1    |
| SPRED2. 2   | 7. 43E-12 | -0. 11121 | 0. 053 | 0. 12  | 1. 11E-07 | Neo-G | SPRED2      |

|             |           |           |        |        |           |       |                |
|-------------|-----------|-----------|--------|--------|-----------|-------|----------------|
| TMEM47. 5   | 7. 45E-12 | -0. 10289 | 0. 03  | 0. 086 | 1. 11E-07 | Neo-G | TMEM47         |
| CTBP1. 3    | 7. 49E-12 | 0. 204808 | 0. 279 | 0. 216 | 1. 12E-07 | Neo-G | CTBP1          |
| SLC35A1. 1  | 7. 53E-12 | 0. 148554 | 0. 194 | 0. 13  | 1. 13E-07 | Neo-G | SLC35A1        |
| ZNF585A. 4  | 7. 60E-12 | 0. 163802 | 0. 101 | 0. 055 | 1. 14E-07 | Neo-G | ZNF585A        |
| WDFY2. 2    | 7. 69E-12 | -0. 15656 | 0. 033 | 0. 09  | 1. 15E-07 | Neo-G | WDFY2          |
| SPN. 7      | 7. 72E-12 | -0. 20756 | 0. 014 | 0. 06  | 1. 15E-07 | Neo-G | SPN            |
| FLVCR2. 4   | 8. 02E-12 | -0. 1441  | 0. 002 | 0. 039 | 1. 20E-07 | Neo-G | FLVCR2         |
| HIST1H2AC   | 8. 05E-12 | -0. 28308 | 0. 097 | 0. 175 | 1. 20E-07 | Neo-G | HIST1H2AC      |
| CTD-2270L   | 8. 08E-12 | -0. 14046 | 0. 013 | 0. 06  | 1. 21E-07 | Neo-G | CTD-2270L9. 4  |
| TRUB1       | 8. 10E-12 | 0. 147216 | 0. 093 | 0. 049 | 1. 21E-07 | Neo-G | TRUB1          |
| PCDHB5      | 8. 31E-12 | 0. 108272 | 0. 033 | 0. 01  | 1. 24E-07 | Neo-G | PCDHB5         |
| XKR6        | 8. 50E-12 | 0. 171173 | 0. 065 | 0. 03  | 1. 27E-07 | Neo-G | XKR6           |
| RP11-100C   | 8. 53E-12 | -0. 14536 | 0. 005 | 0. 045 | 1. 27E-07 | Neo-G | RP11-1000B6. 3 |
| RICTOR. 4   | 8. 64E-12 | 0. 15173  | 0. 25  | 0. 178 | 1. 29E-07 | Neo-G | RICTOR         |
| ZP3. 2      | 8. 88E-12 | 0. 154432 | 0. 115 | 0. 066 | 1. 33E-07 | Neo-G | ZP3            |
| MAGOHB. 4   | 8. 88E-12 | 0. 159417 | 0. 296 | 0. 231 | 1. 33E-07 | Neo-G | MAGOHB         |
| STYX. 1     | 9. 00E-12 | -0. 11739 | 0. 026 | 0. 08  | 1. 34E-07 | Neo-G | STYX           |
| TTC7A. 7    | 9. 20E-12 | -0. 20946 | 0. 027 | 0. 08  | 1. 38E-07 | Neo-G | TTC7A          |
| ARF6. 7     | 9. 23E-12 | -0. 19903 | 0. 245 | 0. 355 | 1. 38E-07 | Neo-G | ARF6           |
| TXNRD1. 3   | 9. 33E-12 | 0. 19206  | 0. 294 | 0. 231 | 1. 39E-07 | Neo-G | TXNRD1         |
| PCED1B. 5   | 9. 53E-12 | -0. 17594 | 0. 002 | 0. 04  | 1. 42E-07 | Neo-G | PCED1B         |
| GPR82. 4    | 9. 59E-12 | 0. 157788 | 0. 193 | 0. 128 | 1. 43E-07 | Neo-G | GPR82          |
| SLFN11. 4   | 9. 66E-12 | -0. 15949 | 0. 006 | 0. 047 | 1. 44E-07 | Neo-G | SLFN11         |
| RTP4        | 9. 88E-12 | -0. 15558 | 0. 001 | 0. 037 | 1. 48E-07 | Neo-G | RTP4           |
| NUP37. 3    | 9. 94E-12 | -0. 14404 | 0. 067 | 0. 138 | 1. 49E-07 | Neo-G | NUP37          |
| ANKZF1. 4   | 1. 01E-11 | 0. 202375 | 0. 187 | 0. 127 | 1. 50E-07 | Neo-G | ANKZF1         |
| NOM1. 4     | 1. 01E-11 | 0. 190767 | 0. 167 | 0. 11  | 1. 51E-07 | Neo-G | NOM1           |
| SLC29A3. 3  | 1. 02E-11 | -0. 17415 | 0. 007 | 0. 049 | 1. 52E-07 | Neo-G | SLC29A3        |
| FAM69A. 1   | 1. 03E-11 | -0. 11256 | 0. 016 | 0. 065 | 1. 53E-07 | Neo-G | FAM69A         |
| TBC1D2B. 5  | 1. 03E-11 | -0. 17171 | 0. 012 | 0. 057 | 1. 54E-07 | Neo-G | TBC1D2B        |
| OGFOD3. 4   | 1. 04E-11 | -0. 13173 | 0. 137 | 0. 232 | 1. 56E-07 | Neo-G | OGFOD3         |
| PMPCA. 4    | 1. 06E-11 | 0. 162011 | 0. 305 | 0. 239 | 1. 58E-07 | Neo-G | PMPCA          |
| PPP1R12B. 1 | 1. 06E-11 | 0. 12769  | 0. 101 | 0. 054 | 1. 59E-07 | Neo-G | PPP1R12B       |
| PNPLA6. 3   | 1. 07E-11 | -0. 17773 | 0. 096 | 0. 175 | 1. 61E-07 | Neo-G | PNPLA6         |
| EFS. 5      | 1. 08E-11 | 0. 261133 | 0. 154 | 0. 1   | 1. 61E-07 | Neo-G | EFS            |
| ZEB2. 4     | 1. 08E-11 | 0. 123486 | 0. 382 | 0. 294 | 1. 62E-07 | Neo-G | ZEB2           |
| CCDC69. 5   | 1. 09E-11 | -0. 14967 | 0. 002 | 0. 04  | 1. 63E-07 | Neo-G | CCDC69         |
| SNRNP25. 3  | 1. 13E-11 | 0. 116727 | 0. 408 | 0. 343 | 1. 69E-07 | Neo-G | SNRNP25        |
| PDCD7. 3    | 1. 16E-11 | 0. 248945 | 0. 274 | 0. 214 | 1. 74E-07 | Neo-G | PDCD7          |
| NRCAM. 6    | 1. 16E-11 | 0. 1747   | 0. 332 | 0. 262 | 1. 74E-07 | Neo-G | NRCAM          |
| CPSF7. 1    | 1. 17E-11 | 0. 176507 | 0. 245 | 0. 18  | 1. 74E-07 | Neo-G | CPSF7          |
| ACSM5. 2    | 1. 18E-11 | -0. 18376 | 0. 001 | 0. 037 | 1. 76E-07 | Neo-G | ACSM5          |
| PDCD2. 5    | 1. 18E-11 | 0. 198695 | 0. 347 | 0. 288 | 1. 76E-07 | Neo-G | PDCD2          |
| CDC16. 3    | 1. 18E-11 | 0. 211793 | 0. 251 | 0. 189 | 1. 76E-07 | Neo-G | CDC16          |
| INTS7. 1    | 1. 20E-11 | 0. 138695 | 0. 1   | 0. 054 | 1. 79E-07 | Neo-G | INTS7          |
| ACTR5       | 1. 21E-11 | 0. 155188 | 0. 091 | 0. 048 | 1. 81E-07 | Neo-G | ACTR5          |
| KIF23. 4    | 1. 21E-11 | -0. 11987 | 0. 005 | 0. 044 | 1. 81E-07 | Neo-G | KIF23          |
| OAS3. 1     | 1. 23E-11 | -0. 13611 | 0. 013 | 0. 058 | 1. 84E-07 | Neo-G | OAS3           |
| ALG2. 3     | 1. 24E-11 | -0. 15947 | 0. 093 | 0. 172 | 1. 85E-07 | Neo-G | ALG2           |
| SPAG4. 3    | 1. 24E-11 | -0. 19359 | 0. 009 | 0. 052 | 1. 86E-07 | Neo-G | SPAG4          |
| TFE3. 1     | 1. 24E-11 | -0. 1377  | 0. 057 | 0. 124 | 1. 86E-07 | Neo-G | TFE3           |



|              |          |          |       |       |          |       |                |
|--------------|----------|----------|-------|-------|----------|-------|----------------|
| NUDT16L1. 1. | 2.5E-11  | 0.188661 | 0.335 | 0.275 | 1.87E-07 | Neo-G | NUDT16L1       |
| FAM78A. 5    | 1.25E-11 | -0.16912 | 0.002 | 0.04  | 1.87E-07 | Neo-G | FAM78A         |
| CUTC. 2      | 1.28E-11 | -0.21779 | 0.064 | 0.133 | 1.91E-07 | Neo-G | CUTC           |
| ZNF653       | 1.30E-11 | 0.142571 | 0.075 | 0.037 | 1.94E-07 | Neo-G | ZNF653         |
| GREM1        | 1.32E-11 | -0.30234 | 0.001 | 0.036 | 1.97E-07 | Neo-G | GREM1          |
| KCNJ2        | 1.33E-11 | -0.1342  | 0.009 | 0.052 | 1.98E-07 | Neo-G | KCNJ2          |
| RBM22. 3     | 1.35E-11 | 0.123974 | 0.365 | 0.295 | 2.01E-07 | Neo-G | RBM22          |
| CDH24        | 1.36E-11 | 0.147675 | 0.065 | 0.03  | 2.03E-07 | Neo-G | CDH24          |
| PPFIA3. 5    | 1.39E-11 | 0.225824 | 0.134 | 0.084 | 2.08E-07 | Neo-G | PPFIA3         |
| AIDA. 3      | 1.47E-11 | -0.23623 | 0.155 | 0.245 | 2.20E-07 | Neo-G | AIDA           |
| SLC26A2. 1   | 1.47E-11 | -0.18425 | 0.049 | 0.111 | 2.20E-07 | Neo-G | SLC26A2        |
| RBCK1. 2     | 1.48E-11 | -0.2001  | 0.244 | 0.349 | 2.21E-07 | Neo-G | RBCK1          |
| PVRL1. 6     | 1.49E-11 | 0.157438 | 0.102 | 0.056 | 2.23E-07 | Neo-G | PVRL1          |
| CXCL12. 2    | 1.51E-11 | -0.21334 | 0.006 | 0.046 | 2.26E-07 | Neo-G | CXCL12         |
| CPED1. 4     | 1.53E-11 | -0.1549  | 0.001 | 0.036 | 2.28E-07 | Neo-G | CPED1          |
| ZCCHC10. 2   | 1.54E-11 | 0.153299 | 0.294 | 0.226 | 2.30E-07 | Neo-G | ZCCHC10        |
| MYL9. 1      | 1.56E-11 | -0.14553 | 0.002 | 0.038 | 2.32E-07 | Neo-G | MYL9           |
| MCPH1        | 1.57E-11 | 0.163278 | 0.117 | 0.068 | 2.35E-07 | Neo-G | MCPH1          |
| ERAP1. 2     | 1.57E-11 | -0.1208  | 0.02  | 0.069 | 2.35E-07 | Neo-G | ERAP1          |
| EPHA4. 4     | 1.58E-11 | -0.1099  | 0.031 | 0.087 | 2.36E-07 | Neo-G | EPHA4          |
| ST3GAL1. 6   | 1.61E-11 | -0.23816 | 0.049 | 0.109 | 2.41E-07 | Neo-G | ST3GAL1        |
| SRM. 5       | 1.64E-11 | 0.204559 | 0.419 | 0.358 | 2.44E-07 | Neo-G | SRM            |
| CD180. 6     | 1.65E-11 | -0.15364 | 0.003 | 0.041 | 2.46E-07 | Neo-G | CD180          |
| PPM1A. 3     | 1.67E-11 | 0.245218 | 0.236 | 0.175 | 2.49E-07 | Neo-G | PPM1A          |
| HLX. 3       | 1.68E-11 | -0.1548  | 0.005 | 0.045 | 2.51E-07 | Neo-G | HLX            |
| BCOR. 1      | 1.68E-11 | 0.159071 | 0.093 | 0.049 | 2.51E-07 | Neo-G | BCOR           |
| SOX6. 6      | 1.70E-11 | 0.254494 | 0.193 | 0.135 | 2.54E-07 | Neo-G | SOX6           |
| NPNT         | 1.71E-11 | -0.10004 | 0     | 0.034 | 2.55E-07 | Neo-G | NPNT           |
| BRCA2. 2     | 1.73E-11 | -0.11304 | 0.009 | 0.051 | 2.58E-07 | Neo-G | BRCA2          |
| CERS1. 5     | 1.73E-11 | -0.12238 | 0.065 | 0.136 | 2.59E-07 | Neo-G | CERS1          |
| CCM2. 3      | 1.75E-11 | 0.173385 | 0.341 | 0.277 | 2.61E-07 | Neo-G | CCM2           |
| LFNG         | 1.75E-11 | -0.12023 | 0.008 | 0.049 | 2.61E-07 | Neo-G | LFNG           |
| DENND1C. 5   | 1.77E-11 | -0.17167 | 0.002 | 0.038 | 2.65E-07 | Neo-G | DENND1C        |
| PLOD3. 4     | 1.80E-11 | -0.16048 | 0.137 | 0.228 | 2.68E-07 | Neo-G | PLOD3          |
| PCCB. 2      | 1.81E-11 | -0.1965  | 0.102 | 0.183 | 2.70E-07 | Neo-G | PCCB           |
| TMF1. 2      | 1.82E-11 | 0.171066 | 0.278 | 0.212 | 2.72E-07 | Neo-G | TMF1           |
| HJURP. 5     | 1.84E-11 | -0.12799 | 0.005 | 0.044 | 2.75E-07 | Neo-G | HJURP          |
| PAXIP1-AS    | 1.87E-11 | -0.10054 | 0.002 | 0.038 | 2.80E-07 | Neo-G | PAXIP1-AS2     |
| CCDC107. 4   | 1.89E-11 | 0.132328 | 0.452 | 0.383 | 2.83E-07 | Neo-G | CCDC107        |
| ALPK1. 2     | 1.93E-11 | -0.1428  | 0.003 | 0.041 | 2.88E-07 | Neo-G | ALPK1          |
| UBE2D1. 4    | 1.97E-11 | 0.197588 | 0.324 | 0.26  | 2.95E-07 | Neo-G | UBE2D1         |
| PARK7. 4     | 1.98E-11 | -0.25917 | 0.786 | 0.763 | 2.96E-07 | Neo-G | PARK7          |
| TIMM10. 4    | 2.05E-11 | -0.22475 | 0.256 | 0.366 | 3.06E-07 | Neo-G | TIMM10         |
| TMEM248. 2   | 2.08E-11 | -0.17532 | 0.203 | 0.306 | 3.11E-07 | Neo-G | TMEM248        |
| CSPG5. 6     | 2.08E-11 | -0.22097 | 0.053 | 0.115 | 3.11E-07 | Neo-G | CSPG5          |
| C5orf38. 1   | 2.10E-11 | 0.141221 | 0.062 | 0.028 | 3.14E-07 | Neo-G | C5orf38        |
| RTTN         | 2.12E-11 | -0.10459 | 0.007 | 0.048 | 3.17E-07 | Neo-G | RTTN           |
| TIPIN. 3     | 2.14E-11 | -0.25413 | 0.078 | 0.149 | 3.20E-07 | Neo-G | TIPIN          |
| RP11-977G    | 2.14E-11 | -0.11372 | 0.023 | 0.074 | 3.20E-07 | Neo-G | RP11-977G19.11 |
| PIFO. 5      | 2.15E-11 | -0.22475 | 0.011 | 0.054 | 3.21E-07 | Neo-G | PIFO           |
| ZNF581. 3    | 2.23E-11 | -0.19104 | 0.102 | 0.182 | 3.33E-07 | Neo-G | ZNF581         |

|            |           |           |        |        |           |       |           |
|------------|-----------|-----------|--------|--------|-----------|-------|-----------|
| NGFR. 4    | 2. 26E-11 | 0. 12892  | 0. 069 | 0. 032 | 3. 37E-07 | Neo-G | NGFR      |
| ARHGEF40.  | 2. 28E-11 | -0. 16046 | 0. 067 | 0. 136 | 3. 40E-07 | Neo-G | ARHGEF40  |
| CCNDBP1. 7 | 2. 29E-11 | -0. 24853 | 0. 13  | 0. 214 | 3. 42E-07 | Neo-G | CCNDBP1   |
| ABCA2. 7   | 2. 31E-11 | -0. 26246 | 0. 043 | 0. 102 | 3. 45E-07 | Neo-G | ABCA2     |
| NEK2. 5    | 2. 31E-11 | -0. 11522 | 0. 002 | 0. 037 | 3. 46E-07 | Neo-G | NEK2      |
| MYCL. 1    | 2. 33E-11 | 0. 110938 | 0. 056 | 0. 024 | 3. 48E-07 | Neo-G | MYCL      |
| CHEK2. 3   | 2. 33E-11 | -0. 17194 | 0. 01  | 0. 053 | 3. 48E-07 | Neo-G | CHEK2     |
| TGM2. 3    | 2. 34E-11 | -0. 14438 | 0. 004 | 0. 042 | 3. 50E-07 | Neo-G | TGM2      |
| YY1AP1. 1  | 2. 36E-11 | 0. 165587 | 0. 227 | 0. 163 | 3. 53E-07 | Neo-G | YY1AP1    |
| ELP2. 2    | 2. 37E-11 | 0. 145738 | 0. 263 | 0. 196 | 3. 55E-07 | Neo-G | ELP2      |
| SFR1. 4    | 2. 38E-11 | -0. 21558 | 0. 024 | 0. 073 | 3. 55E-07 | Neo-G | SFR1      |
| AKR7A2. 3  | 2. 39E-11 | -0. 15143 | 0. 218 | 0. 327 | 3. 58E-07 | Neo-G | AKR7A2    |
| SKA2. 5    | 2. 45E-11 | 0. 152259 | 0. 37  | 0. 299 | 3. 66E-07 | Neo-G | SKA2      |
| PPIA. 3    | 2. 45E-11 | -0. 2328  | 0. 914 | 0. 87  | 3. 66E-07 | Neo-G | PPIA      |
| ADIPOR1. 6 | 2. 47E-11 | -0. 24343 | 0. 288 | 0. 391 | 3. 69E-07 | Neo-G | ADIPOR1   |
| RAB42. 4   | 2. 53E-11 | -0. 13723 | 0. 011 | 0. 054 | 3. 77E-07 | Neo-G | RAB42     |
| TRIM16. 5  | 2. 53E-11 | 0. 225292 | 0. 178 | 0. 124 | 3. 79E-07 | Neo-G | TRIM16    |
| ZFYVE19. 2 | 2. 55E-11 | -0. 1498  | 0. 05  | 0. 114 | 3. 81E-07 | Neo-G | ZFYVE19   |
| CKAP2L. 6  | 2. 56E-11 | -0. 13022 | 0. 009 | 0. 05  | 3. 83E-07 | Neo-G | CKAP2L    |
| KIFC3. 3   | 2. 60E-11 | -0. 17554 | 0. 049 | 0. 111 | 3. 88E-07 | Neo-G | KIFC3     |
| POLR2H. 4  | 2. 61E-11 | 0. 125435 | 0. 381 | 0. 316 | 3. 89E-07 | Neo-G | POLR2H    |
| TAF10. 3   | 2. 71E-11 | -0. 14573 | 0. 143 | 0. 236 | 4. 05E-07 | Neo-G | TAF10     |
| FUNDC1. 5  | 2. 71E-11 | 0. 136151 | 0. 304 | 0. 239 | 4. 05E-07 | Neo-G | FUNDC1    |
| PI4K2B. 3  | 2. 73E-11 | -0. 10136 | 0. 035 | 0. 092 | 4. 07E-07 | Neo-G | PI4K2B    |
| TRAF3. 1   | 2. 74E-11 | -0. 10589 | 0. 02  | 0. 068 | 4. 09E-07 | Neo-G | TRAF3     |
| EXOC4. 2   | 2. 74E-11 | 0. 200366 | 0. 218 | 0. 157 | 4. 10E-07 | Neo-G | EXOC4     |
| NCAPG. 5   | 2. 77E-11 | -0. 11134 | 0. 006 | 0. 046 | 4. 15E-07 | Neo-G | NCAPG     |
| SNRPD3. 6  | 2. 78E-11 | -0. 26234 | 0. 313 | 0. 426 | 4. 16E-07 | Neo-G | SNRPD3    |
| P2RY6. 6   | 2. 79E-11 | -0. 14623 | 0. 002 | 0. 037 | 4. 18E-07 | Neo-G | P2RY6     |
| KCTD5. 2   | 2. 80E-11 | 0. 20855  | 0. 262 | 0. 201 | 4. 18E-07 | Neo-G | KCTD5     |
| SFRP4. 3   | 2. 81E-11 | -0. 19622 | 0. 016 | 0. 062 | 4. 20E-07 | Neo-G | SFRP4     |
| CNKSR3. 6  | 2. 83E-11 | -0. 11257 | 0. 058 | 0. 125 | 4. 23E-07 | Neo-G | CNKSR3    |
| C11orf24.  | 2. 89E-11 | -0. 16736 | 0. 078 | 0. 15  | 4. 31E-07 | Neo-G | C11orf24  |
| SLC7A8. 2  | 2. 89E-11 | -0. 17904 | 0. 008 | 0. 048 | 4. 32E-07 | Neo-G | SLC7A8    |
| APOL3. 1   | 2. 92E-11 | -0. 15376 | 0. 003 | 0. 04  | 4. 37E-07 | Neo-G | APOL3     |
| ATPAF2. 4  | 2. 95E-11 | -0. 16887 | 0. 132 | 0. 223 | 4. 41E-07 | Neo-G | ATPAF2    |
| RFX2. 1    | 2. 98E-11 | -0. 15574 | 0. 042 | 0. 102 | 4. 46E-07 | Neo-G | RFX2      |
| SLC39A11.  | 3. 04E-11 | -0. 13054 | 0. 027 | 0. 079 | 4. 54E-07 | Neo-G | SLC39A11  |
| COPG1      | 3. 04E-11 | 0. 154243 | 0. 29  | 0. 223 | 4. 55E-07 | Neo-G | COPG1     |
| MAD1L1. 3  | 3. 05E-11 | 0. 160619 | 0. 214 | 0. 15  | 4. 56E-07 | Neo-G | MAD1L1    |
| SLC12A7. 3 | 3. 06E-11 | -0. 13357 | 0. 006 | 0. 046 | 4. 57E-07 | Neo-G | SLC12A7   |
| HMMR. 4    | 3. 06E-11 | -0. 12652 | 0. 005 | 0. 044 | 4. 58E-07 | Neo-G | HMMR      |
| CCDC6. 1   | 3. 09E-11 | -0. 1059  | 0. 053 | 0. 117 | 4. 62E-07 | Neo-G | CCDC6     |
| ABTB1. 6   | 3. 12E-11 | -0. 23407 | 0. 05  | 0. 111 | 4. 66E-07 | Neo-G | ABTB1     |
| LINC01003  | 3. 12E-11 | 0. 272949 | 0. 243 | 0. 186 | 4. 66E-07 | Neo-G | LINC01003 |
| SLC35A4. 1 | 3. 14E-11 | -0. 16182 | 0. 129 | 0. 218 | 4. 69E-07 | Neo-G | SLC35A4   |
| SLFN5. 1   | 3. 20E-11 | -0. 15187 | 0. 018 | 0. 065 | 4. 78E-07 | Neo-G | SLFN5     |
| RNF126. 5  | 3. 20E-11 | 0. 213003 | 0. 341 | 0. 284 | 4. 78E-07 | Neo-G | RNF126    |
| UBA6-AS1.  | 3. 34E-11 | 0. 177328 | 0. 128 | 0. 078 | 4. 99E-07 | Neo-G | UBA6-AS1  |
| KCNN4. 4   | 3. 43E-11 | -0. 13002 | 0. 002 | 0. 037 | 5. 13E-07 | Neo-G | KCNN4     |
| TLR3. 2    | 3. 55E-11 | -0. 16491 | 0. 002 | 0. 037 | 5. 30E-07 | Neo-G | TLR3      |

|            |          |          |       |       |          |       |          |
|------------|----------|----------|-------|-------|----------|-------|----------|
| SERAC1     | 3.59E-11 | 0.117354 | 0.104 | 0.058 | 5.37E-07 | Neo-G | SERAC1   |
| ROM1.6     | 3.59E-11 | -0.19445 | 0.056 | 0.12  | 5.37E-07 | Neo-G | ROM1     |
| PILRB.3    | 3.62E-11 | 0.174705 | 0.219 | 0.154 | 5.40E-07 | Neo-G | PILRB    |
| HAUS8.2    | 3.66E-11 | -0.14003 | 0.034 | 0.089 | 5.47E-07 | Neo-G | HAUS8    |
| DPAGT1.1   | 3.67E-11 | -0.21822 | 0.079 | 0.15  | 5.49E-07 | Neo-G | DPAGT1   |
| UNC119.3   | 3.70E-11 | 0.197671 | 0.272 | 0.21  | 5.53E-07 | Neo-G | UNC119   |
| COMMD10.2  | 3.74E-11 | -0.2595  | 0.146 | 0.235 | 5.59E-07 | Neo-G | COMMD10  |
| ECHDC3.5   | 3.75E-11 | -0.1475  | 0.002 | 0.036 | 5.60E-07 | Neo-G | ECHDC3   |
| ABCC4.3    | 3.78E-11 | -0.12249 | 0.009 | 0.049 | 5.65E-07 | Neo-G | ABCC4    |
| HIPK3.3    | 3.84E-11 | -0.1334  | 0.038 | 0.095 | 5.73E-07 | Neo-G | HIPK3    |
| KIF9.6     | 3.87E-11 | -0.16164 | 0.102 | 0.183 | 5.78E-07 | Neo-G | KIF9     |
| TTPAL.2    | 3.87E-11 | 0.192211 | 0.194 | 0.136 | 5.79E-07 | Neo-G | TTPAL    |
| KCNAB2.6   | 3.90E-11 | -0.19704 | 0.03  | 0.082 | 5.82E-07 | Neo-G | KCNAB2   |
| INPP1.3    | 3.96E-11 | 0.208806 | 0.203 | 0.145 | 5.92E-07 | Neo-G | INPP1    |
| FBXL20     | 4.19E-11 | 0.126898 | 0.075 | 0.037 | 6.27E-07 | Neo-G | FBXL20   |
| GUCY1A2.3  | 4.25E-11 | 0.155779 | 0.068 | 0.033 | 6.35E-07 | Neo-G | GUCY1A2  |
| ESYT1.6    | 4.28E-11 | -0.14768 | 0.061 | 0.127 | 6.40E-07 | Neo-G | ESYT1    |
| ERMN.5     | 4.29E-11 | -0.36773 | 0.005 | 0.042 | 6.41E-07 | Neo-G | ERMN     |
| RIPK2.6    | 4.30E-11 | -0.22992 | 0.101 | 0.176 | 6.43E-07 | Neo-G | RIPK2    |
| SLC12A4.2  | 4.38E-11 | -0.1066  | 0.022 | 0.071 | 6.55E-07 | Neo-G | SLC12A4  |
| NIPBL.2    | 4.47E-11 | 0.202216 | 0.294 | 0.232 | 6.69E-07 | Neo-G | NIPBL    |
| GON4L.4    | 4.49E-11 | 0.210592 | 0.266 | 0.208 | 6.72E-07 | Neo-G | GON4L    |
| CST7.4     | 4.55E-11 | -0.21616 | 0.003 | 0.039 | 6.81E-07 | Neo-G | CST7     |
| TMEM199.3  | 4.70E-11 | 0.15502  | 0.298 | 0.236 | 7.02E-07 | Neo-G | TMEM199  |
| KLF16.1    | 4.74E-11 | -0.10386 | 0.016 | 0.062 | 7.08E-07 | Neo-G | KLF16    |
| ARL15      | 4.75E-11 | 0.118735 | 0.082 | 0.041 | 7.09E-07 | Neo-G | ARL15    |
| PCOLCE.6   | 4.76E-11 | 0.145614 | 0.126 | 0.076 | 7.11E-07 | Neo-G | PCOLCE   |
| PDZD2.2    | 4.80E-11 | -0.11867 | 0.008 | 0.048 | 7.17E-07 | Neo-G | PDZD2    |
| CES2.4     | 4.89E-11 | 0.204125 | 0.237 | 0.177 | 7.31E-07 | Neo-G | CES2     |
| PCAT6.1    | 4.92E-11 | 0.136869 | 0.075 | 0.037 | 7.36E-07 | Neo-G | PCAT6    |
| STARD4.2   | 4.94E-11 | -0.11406 | 0.002 | 0.036 | 7.38E-07 | Neo-G | STARD4   |
| HVCN1.6    | 4.96E-11 | -0.25323 | 0.046 | 0.102 | 7.41E-07 | Neo-G | HVCN1    |
| FKBP1A.4   | 4.96E-11 | -0.24533 | 0.716 | 0.698 | 7.41E-07 | Neo-G | FKBP1A   |
| THEM4.3    | 5.12E-11 | 0.140985 | 0.12  | 0.071 | 7.65E-07 | Neo-G | THEM4    |
| LYSMD2.4   | 5.16E-11 | -0.15872 | 0.119 | 0.202 | 7.71E-07 | Neo-G | LYSMD2   |
| ZNF846.4   | 5.20E-11 | -0.21824 | 0.026 | 0.076 | 7.77E-07 | Neo-G | ZNF846   |
| NUFIP2.3   | 5.22E-11 | -0.15239 | 0.153 | 0.246 | 7.80E-07 | Neo-G | NUFIP2   |
| VKORC1L1.5 | 5.23E-11 | 0.205807 | 0.181 | 0.125 | 7.81E-07 | Neo-G | VKORC1L1 |
| NTM.5      | 5.25E-11 | 0.119357 | 0.168 | 0.105 | 7.84E-07 | Neo-G | NTM      |
| SLC20A2.2  | 5.43E-11 | -0.14818 | 0.056 | 0.12  | 8.12E-07 | Neo-G | SLC20A2  |
| DCBLD2.6   | 5.46E-11 | -0.11941 | 0.079 | 0.151 | 8.15E-07 | Neo-G | DCBLD2   |
| CDCP1.5    | 5.49E-11 | -0.15289 | 0.002 | 0.037 | 8.21E-07 | Neo-G | CDCP1    |
| DPP9.2     | 5.51E-11 | -0.12853 | 0.068 | 0.136 | 8.23E-07 | Neo-G | DPP9     |
| MEMO1.2    | 5.55E-11 | 0.129681 | 0.151 | 0.096 | 8.30E-07 | Neo-G | MEMO1    |
| RNF41.1    | 5.66E-11 | 0.164867 | 0.222 | 0.16  | 8.46E-07 | Neo-G | RNF41    |
| CIITA.3    | 5.81E-11 | -0.17262 | 0.005 | 0.042 | 8.68E-07 | Neo-G | CIITA    |
| P2RX7.2    | 5.84E-11 | -0.21101 | 0.035 | 0.089 | 8.72E-07 | Neo-G | P2RX7    |
| DPEP2.5    | 5.84E-11 | -0.18398 | 0.002 | 0.037 | 8.73E-07 | Neo-G | DPEP2    |
| ADD1.5     | 5.85E-11 | 0.150279 | 0.362 | 0.301 | 8.74E-07 | Neo-G | ADD1     |
| MED11.1    | 5.87E-11 | -0.1743  | 0.137 | 0.227 | 8.78E-07 | Neo-G | MED11    |
| URM1.1     | 5.98E-11 | -0.25679 | 0.266 | 0.369 | 8.93E-07 | Neo-G | URM1     |

|            |           |           |        |        |           |       |                |
|------------|-----------|-----------|--------|--------|-----------|-------|----------------|
| STK4. 5    | 5. 98E-11 | -0. 25899 | 0. 202 | 0. 297 | 8. 93E-07 | Neo-G | STK4           |
| NCLN. 3    | 5. 99E-11 | -0. 10277 | 0. 094 | 0. 173 | 8. 95E-07 | Neo-G | NCLN           |
| VPS13D. 1  | 5. 99E-11 | -0. 13331 | 0. 026 | 0. 077 | 8. 96E-07 | Neo-G | VPS13D         |
| PRR11. 3   | 6. 11E-11 | -0. 11665 | 0. 021 | 0. 069 | 9. 13E-07 | Neo-G | PRR11          |
| GNPNAT1. 1 | 6. 15E-11 | -0. 11911 | 0. 047 | 0. 108 | 9. 19E-07 | Neo-G | GNPNAT1        |
| MAP7. 4    | 6. 16E-11 | -0. 20834 | 0. 005 | 0. 043 | 9. 21E-07 | Neo-G | MAP7           |
| FBXO6. 3   | 6. 20E-11 | -0. 14376 | 0. 029 | 0. 081 | 9. 26E-07 | Neo-G | FBXO6          |
| PCTP. 3    | 6. 21E-11 | -0. 18044 | 0. 027 | 0. 078 | 9. 28E-07 | Neo-G | PCTP           |
| TRAF7. 4   | 6. 25E-11 | -0. 14335 | 0. 115 | 0. 198 | 9. 34E-07 | Neo-G | TRAF7          |
| ISOC1. 3   | 6. 30E-11 | 0. 17319  | 0. 219 | 0. 158 | 9. 41E-07 | Neo-G | ISOC1          |
| AACS. 1    | 6. 38E-11 | 0. 152703 | 0. 103 | 0. 058 | 9. 53E-07 | Neo-G | AACS           |
| FRMD8. 2   | 6. 57E-11 | -0. 14426 | 0. 059 | 0. 123 | 9. 82E-07 | Neo-G | FRMD8          |
| ALG13. 5   | 6. 63E-11 | -0. 23028 | 0. 144 | 0. 229 | 9. 91E-07 | Neo-G | ALG13          |
| FAM65B     | 6. 63E-11 | 0. 127786 | 0. 068 | 0. 032 | 9. 91E-07 | Neo-G | FAM65B         |
| RP11-742E  | 6. 64E-11 | -0. 16091 | 0. 001 | 0. 034 | 9. 92E-07 | Neo-G | RP11-742B18. 1 |
| TRMT13. 3  | 6. 66E-11 | 0. 16289  | 0. 189 | 0. 13  | 9. 95E-07 | Neo-G | TRMT13         |
| DNPEP. 1   | 6. 72E-11 | -0. 16037 | 0. 158 | 0. 252 | 1. 00E-06 | Neo-G | DNPEP          |
| TAX1BP3. 5 | 6. 72E-11 | -0. 29537 | 0. 291 | 0. 393 | 1. 00E-06 | Neo-G | TAX1BP3        |
| ITGA4. 6   | 6. 88E-11 | -0. 16725 | 0. 008 | 0. 047 | 1. 03E-06 | Neo-G | ITGA4          |
| ACP2. 4    | 7. 06E-11 | -0. 22549 | 0. 163 | 0. 253 | 1. 06E-06 | Neo-G | ACP2           |
| ABHD17A. 6 | 7. 08E-11 | -0. 16458 | 0. 155 | 0. 245 | 1. 06E-06 | Neo-G | ABHD17A        |
| ZXDA       | 7. 16E-11 | 0. 107207 | 0. 046 | 0. 018 | 1. 07E-06 | Neo-G | ZXDA           |
| SIGLEC1. 3 | 7. 29E-11 | -0. 15113 | 0      | 0. 032 | 1. 09E-06 | Neo-G | SIGLEC1        |
| PLXNA3. 3  | 7. 45E-11 | 0. 15387  | 0. 106 | 0. 061 | 1. 11E-06 | Neo-G | PLXNA3         |
| BOLA2B. 1  | 7. 49E-11 | -0. 1734  | 0. 027 | 0. 078 | 1. 12E-06 | Neo-G | BOLA2B         |
| PFKL. 6    | 7. 58E-11 | -0. 19494 | 0. 267 | 0. 375 | 1. 13E-06 | Neo-G | PFKL           |
| MAG. 5     | 7. 59E-11 | -0. 38549 | 0. 005 | 0. 041 | 1. 13E-06 | Neo-G | MAG            |
| FLT3LG     | 7. 64E-11 | -0. 12771 | 0. 005 | 0. 041 | 1. 14E-06 | Neo-G | FLT3LG         |
| MED22. 3   | 7. 68E-11 | 0. 181463 | 0. 153 | 0. 099 | 1. 15E-06 | Neo-G | MED22          |
| CAPNS1. 5  | 7. 75E-11 | -0. 20034 | 0. 247 | 0. 351 | 1. 16E-06 | Neo-G | CAPNS1         |
| AK9        | 7. 75E-11 | 0. 126808 | 0. 095 | 0. 052 | 1. 16E-06 | Neo-G | AK9            |
| DSCC1. 3   | 7. 77E-11 | 0. 157754 | 0. 098 | 0. 055 | 1. 16E-06 | Neo-G | DSCC1          |
| ZNF627. 4  | 7. 85E-11 | 0. 181272 | 0. 119 | 0. 072 | 1. 17E-06 | Neo-G | ZNF627         |
| PCNA. 5    | 7. 86E-11 | -0. 28384 | 0. 231 | 0. 325 | 1. 18E-06 | Neo-G | PCNA           |
| FAM72A. 2  | 7. 89E-11 | -0. 15054 | 0. 007 | 0. 046 | 1. 18E-06 | Neo-G | FAM72A         |
| KANSL2. 4  | 7. 92E-11 | 0. 174205 | 0. 203 | 0. 143 | 1. 18E-06 | Neo-G | KANSL2         |
| KLHL28. 5  | 7. 95E-11 | 0. 183421 | 0. 17  | 0. 113 | 1. 19E-06 | Neo-G | KLHL28         |
| RNASE3. 5  | 8. 01E-11 | -0. 20635 | 0. 002 | 0. 037 | 1. 20E-06 | Neo-G | RNASE3         |
| MCCC2. 2   | 8. 03E-11 | -0. 11989 | 0. 071 | 0. 141 | 1. 20E-06 | Neo-G | MCCC2          |
| MON1A. 4   | 8. 04E-11 | 0. 197003 | 0. 13  | 0. 081 | 1. 20E-06 | Neo-G | MON1A          |
| SLIRP. 2   | 8. 05E-11 | -0. 25959 | 0. 566 | 0. 628 | 1. 20E-06 | Neo-G | SLIRP          |
| CCNJ       | 8. 06E-11 | 0. 112576 | 0. 051 | 0. 021 | 1. 20E-06 | Neo-G | CCNJ           |
| ATP11A. 3  | 8. 11E-11 | -0. 12728 | 0. 045 | 0. 103 | 1. 21E-06 | Neo-G | ATP11A         |
| P4HA2. 2   | 8. 22E-11 | -0. 12633 | 0. 033 | 0. 086 | 1. 23E-06 | Neo-G | P4HA2          |
| SMIM10. 2  | 8. 30E-11 | -0. 10541 | 0. 011 | 0. 053 | 1. 24E-06 | Neo-G | SMIM10         |
| BUB1. 4    | 8. 33E-11 | -0. 1077  | 0. 006 | 0. 044 | 1. 25E-06 | Neo-G | BUB1           |
| ZNF426. 4  | 8. 76E-11 | 0. 177255 | 0. 16  | 0. 107 | 1. 31E-06 | Neo-G | ZNF426         |
| NDUFB5. 1  | 8. 83E-11 | -0. 29293 | 0. 489 | 0. 57  | 1. 32E-06 | Neo-G | NDUFB5         |
| PCDH17. 5  | 8. 90E-11 | -0. 16366 | 0. 119 | 0. 2   | 1. 33E-06 | Neo-G | PCDH17         |
| ARHGAP31   | 8. 97E-11 | -0. 11301 | 0. 009 | 0. 05  | 1. 34E-06 | Neo-G | ARHGAP31       |
| ABCD1. 4   | 9. 11E-11 | -0. 1226  | 0. 01  | 0. 051 | 1. 36E-06 | Neo-G | ABCD1          |

|             |           |           |        |        |           |       |               |
|-------------|-----------|-----------|--------|--------|-----------|-------|---------------|
| THAP5. 5    | 9. 13E-11 | 0. 163907 | 0. 234 | 0. 172 | 1. 36E-06 | Neo-G | THAP5         |
| RNMT. 1     | 9. 24E-11 | 0. 114317 | 0. 364 | 0. 296 | 1. 38E-06 | Neo-G | RNMT          |
| CTA-292E1   | 9. 47E-11 | -0. 10828 | 0. 005 | 0. 043 | 1. 41E-06 | Neo-G | CTA-292E10. 6 |
| RDH14. 4    | 9. 47E-11 | 0. 227275 | 0. 239 | 0. 181 | 1. 42E-06 | Neo-G | RDH14         |
| GNPTAB. 2   | 9. 53E-11 | 0. 164001 | 0. 211 | 0. 149 | 1. 42E-06 | Neo-G | GNPTAB        |
| OTOA. 4     | 9. 56E-11 | -0. 14228 | 0. 002 | 0. 035 | 1. 43E-06 | Neo-G | OTOA          |
| CCNK. 1     | 9. 57E-11 | -0. 1137  | 0. 064 | 0. 131 | 1. 43E-06 | Neo-G | CCNK          |
| PRR7. 7     | 9. 63E-11 | 0. 246466 | 0. 237 | 0. 182 | 1. 44E-06 | Neo-G | PRR7          |
| USP48. 2    | 9. 67E-11 | 0. 181888 | 0. 268 | 0. 208 | 1. 45E-06 | Neo-G | USP48         |
| AEBP1. 6    | 9. 79E-11 | -0. 24108 | 0. 065 | 0. 128 | 1. 46E-06 | Neo-G | AEBP1         |
| DBR1. 2     | 9. 79E-11 | 0. 14156  | 0. 122 | 0. 073 | 1. 46E-06 | Neo-G | DBR1          |
| BACH1. 4    | 9. 83E-11 | -0. 16806 | 0. 053 | 0. 114 | 1. 47E-06 | Neo-G | BACH1         |
| DAD1. 3     | 9. 84E-11 | -0. 27599 | 0. 668 | 0. 727 | 1. 47E-06 | Neo-G | DAD1          |
| PLEKHA2. 3  | 1. 04E-10 | -0. 14214 | 0. 058 | 0. 121 | 1. 55E-06 | Neo-G | PLEKHA2       |
| RBBP6. 3    | 1. 04E-10 | 0. 188318 | 0. 365 | 0. 307 | 1. 55E-06 | Neo-G | RBBP6         |
| BAZ2A. 2    | 1. 05E-10 | 0. 189668 | 0. 243 | 0. 183 | 1. 56E-06 | Neo-G | BAZ2A         |
| CHURC1. 3   | 1. 05E-10 | -0. 24416 | 0. 302 | 0. 412 | 1. 57E-06 | Neo-G | CHURC1        |
| SSH1. 3     | 1. 06E-10 | -0. 15379 | 0. 035 | 0. 089 | 1. 58E-06 | Neo-G | SSH1          |
| MYOM2. 1    | 1. 06E-10 | 0. 14496  | 0. 078 | 0. 04  | 1. 58E-06 | Neo-G | MYOM2         |
| CYP3A5. 4   | 1. 06E-10 | 0. 193584 | 0. 097 | 0. 055 | 1. 58E-06 | Neo-G | CYP3A5        |
| C6orf141. 1 | 1. 06E-10 | -0. 13176 | 0. 001 | 0. 033 | 1. 59E-06 | Neo-G | C6orf141      |
| MYL12B. 5   | 1. 10E-10 | -0. 3     | 0. 711 | 0. 729 | 1. 65E-06 | Neo-G | MYL12B        |
| ERI1. 1     | 1. 10E-10 | -0. 13905 | 0. 057 | 0. 119 | 1. 65E-06 | Neo-G | ERI1          |
| GPATCH4. 2  | 1. 12E-10 | -0. 16264 | 0. 119 | 0. 202 | 1. 67E-06 | Neo-G | GPATCH4       |
| GMPPA. 2    | 1. 12E-10 | -0. 18521 | 0. 093 | 0. 168 | 1. 68E-06 | Neo-G | GMPPA         |
| SMAP2. 6    | 1. 13E-10 | -0. 30642 | 0. 17  | 0. 244 | 1. 69E-06 | Neo-G | SMAP2         |
| PXMP2. 5    | 1. 16E-10 | 0. 220954 | 0. 273 | 0. 217 | 1. 73E-06 | Neo-G | PXMP2         |
| PVRL2. 6    | 1. 17E-10 | -0. 17919 | 0. 163 | 0. 253 | 1. 74E-06 | Neo-G | PVRL2         |
| SDHC. 3     | 1. 17E-10 | -0. 3368  | 0. 489 | 0. 565 | 1. 75E-06 | Neo-G | SDHC          |
| RHOBTB2     | 1. 19E-10 | 0. 137892 | 0. 084 | 0. 044 | 1. 78E-06 | Neo-G | RHOBTB2       |
| EEFSEC. 1   | 1. 19E-10 | 0. 20371  | 0. 152 | 0. 099 | 1. 78E-06 | Neo-G | EEFSEC        |
| FAM107A. 2  | 1. 19E-10 | -0. 18608 | 0. 011 | 0. 051 | 1. 78E-06 | Neo-G | FAM107A       |
| RRAGC. 2    | 1. 21E-10 | 0. 165869 | 0. 305 | 0. 24  | 1. 80E-06 | Neo-G | RRAGC         |
| ZNF334. 4   | 1. 22E-10 | 0. 171007 | 0. 113 | 0. 067 | 1. 82E-06 | Neo-G | ZNF334        |
| TYW3. 1     | 1. 22E-10 | -0. 16123 | 0. 078 | 0. 147 | 1. 83E-06 | Neo-G | TYW3          |
| PLA2G15. 6  | 1. 22E-10 | -0. 22987 | 0. 079 | 0. 146 | 1. 83E-06 | Neo-G | PLA2G15       |
| SPTSSB. 4   | 1. 23E-10 | -0. 13843 | 0. 005 | 0. 041 | 1. 83E-06 | Neo-G | SPTSSB        |
| THOC2. 1    | 1. 24E-10 | 0. 168089 | 0. 353 | 0. 298 | 1. 85E-06 | Neo-G | THOC2         |
| LUCAT1. 2   | 1. 24E-10 | -0. 1526  | 0. 004 | 0. 039 | 1. 85E-06 | Neo-G | LUCAT1        |
| IP6K1. 4    | 1. 25E-10 | 0. 199548 | 0. 202 | 0. 145 | 1. 86E-06 | Neo-G | IP6K1         |
| SELT. 3     | 1. 25E-10 | -0. 30705 | 0. 61  | 0. 665 | 1. 87E-06 | Neo-G | SELT          |
| C11orf71    | 1. 26E-10 | -0. 19082 | 0. 006 | 0. 043 | 1. 88E-06 | Neo-G | C11orf71      |
| ST3GAL3. 4  | 1. 27E-10 | 0. 174202 | 0. 13  | 0. 081 | 1. 89E-06 | Neo-G | ST3GAL3       |
| GCNT2. 1    | 1. 30E-10 | 0. 117514 | 0. 077 | 0. 039 | 1. 94E-06 | Neo-G | GCNT2         |
| INSR. 5     | 1. 30E-10 | 0. 140577 | 0. 201 | 0. 138 | 1. 94E-06 | Neo-G | INSR          |
| EHBP1L1. 6  | 1. 36E-10 | -0. 13536 | 0. 027 | 0. 076 | 2. 03E-06 | Neo-G | EHBP1L1       |
| PLA2G4A. 3  | 1. 36E-10 | -0. 14151 | 0. 002 | 0. 036 | 2. 03E-06 | Neo-G | PLA2G4A       |
| CAPN7. 1    | 1. 36E-10 | 0. 184879 | 0. 162 | 0. 108 | 2. 04E-06 | Neo-G | CAPN7         |
| STC2. 2     | 1. 37E-10 | 0. 179134 | 0. 075 | 0. 037 | 2. 04E-06 | Neo-G | STC2          |
| CMSS1. 4    | 1. 37E-10 | 0. 149019 | 0. 34  | 0. 283 | 2. 05E-06 | Neo-G | CMSS1         |
| ADRBK1. 7   | 1. 40E-10 | -0. 19017 | 0. 043 | 0. 098 | 2. 09E-06 | Neo-G | ADRBK1        |

|            |           |           |        |        |           |       |                |
|------------|-----------|-----------|--------|--------|-----------|-------|----------------|
| EHD1. 4    | 1. 40E-10 | 0. 179532 | 0. 171 | 0. 115 | 2. 09E-06 | Neo-G | EHD1           |
| F2R. 7     | 1. 40E-10 | 0. 214145 | 0. 219 | 0. 163 | 2. 10E-06 | Neo-G | F2R            |
| SUPT20H. 4 | 1. 41E-10 | 0. 208633 | 0. 258 | 0. 201 | 2. 10E-06 | Neo-G | SUPT20H        |
| C6orf15. 4 | 1. 41E-10 | -0. 18943 | 0      | 0. 031 | 2. 10E-06 | Neo-G | C6orf15        |
| FNTB. 3    | 1. 44E-10 | -0. 15252 | 0. 038 | 0. 092 | 2. 16E-06 | Neo-G | FNTB           |
| LYRM5. 4   | 1. 45E-10 | -0. 24377 | 0. 247 | 0. 352 | 2. 16E-06 | Neo-G | LYRM5          |
| TMX3. 1    | 1. 45E-10 | -0. 13589 | 0. 091 | 0. 166 | 2. 16E-06 | Neo-G | TMX3           |
| GPM6B. 7   | 1. 46E-10 | -0. 37443 | 0. 764 | 0. 601 | 2. 19E-06 | Neo-G | GPM6B          |
| TIFA. 2    | 1. 47E-10 | -0. 16566 | 0. 018 | 0. 063 | 2. 19E-06 | Neo-G | TIFA           |
| NRSN2. 6   | 1. 53E-10 | 0. 232023 | 0. 211 | 0. 158 | 2. 29E-06 | Neo-G | NRSN2          |
| GALNT6. 3  | 1. 54E-10 | -0. 13989 | 0. 001 | 0. 033 | 2. 30E-06 | Neo-G | GALNT6         |
| RP3-508I1  | 1. 55E-10 | -0. 10954 | 0. 001 | 0. 033 | 2. 32E-06 | Neo-G | RP3-508I15. 14 |
| NUDT14. 7  | 1. 58E-10 | -0. 22295 | 0. 124 | 0. 2   | 2. 36E-06 | Neo-G | NUDT14         |
| TOMM5. 6   | 1. 60E-10 | -0. 19148 | 0. 134 | 0. 218 | 2. 40E-06 | Neo-G | TOMM5          |
| ADI1. 3    | 1. 61E-10 | 0. 101031 | 0. 469 | 0. 399 | 2. 41E-06 | Neo-G | ADI1           |
| GBGT1. 6   | 1. 62E-10 | -0. 17659 | 0. 013 | 0. 054 | 2. 43E-06 | Neo-G | GBGT1          |
| TRPS1      | 1. 64E-10 | -0. 1036  | 0. 065 | 0. 132 | 2. 45E-06 | Neo-G | TRPS1          |
| MT1A. 4    | 1. 65E-10 | -0. 2089  | 0. 001 | 0. 033 | 2. 46E-06 | Neo-G | MT1A           |
| FAM177B. 3 | 1. 67E-10 | -0. 16902 | 0. 002 | 0. 034 | 2. 49E-06 | Neo-G | FAM177B        |
| ZNF569. 3  | 1. 71E-10 | 0. 167887 | 0. 109 | 0. 064 | 2. 55E-06 | Neo-G | ZNF569         |
| ASL. 5     | 1. 74E-10 | -0. 23544 | 0. 104 | 0. 179 | 2. 60E-06 | Neo-G | ASL            |
| SS18. 2    | 1. 77E-10 | -0. 15173 | 0. 035 | 0. 088 | 2. 64E-06 | Neo-G | SS18           |
| GAB1. 5    | 1. 78E-10 | -0. 11855 | 0. 049 | 0. 108 | 2. 66E-06 | Neo-G | GAB1           |
| ECI1. 4    | 1. 78E-10 | -0. 10613 | 0. 134 | 0. 223 | 2. 66E-06 | Neo-G | ECI1           |
| MAPKAPK2.  | 1. 79E-10 | -0. 15754 | 0. 073 | 0. 14  | 2. 68E-06 | Neo-G | MAPKAPK2       |
| TBC1D1. 7  | 1. 83E-10 | -0. 13479 | 0. 065 | 0. 13  | 2. 73E-06 | Neo-G | TBC1D1         |
| PCSK2. 3   | 1. 86E-10 | 0. 140865 | 0. 054 | 0. 024 | 2. 79E-06 | Neo-G | PCSK2          |
| PNRC2      | 1. 88E-10 | -0. 27474 | 0. 018 | 0. 062 | 2. 81E-06 | Neo-G | PNRC2          |
| BRAT1. 2   | 1. 88E-10 | 0. 178698 | 0. 238 | 0. 177 | 2. 81E-06 | Neo-G | BRAT1          |
| FKBP15. 6  | 1. 88E-10 | -0. 20099 | 0. 079 | 0. 145 | 2. 81E-06 | Neo-G | FKBP15         |
| GATSL3     | 1. 94E-10 | -0. 12337 | 0. 011 | 0. 051 | 2. 90E-06 | Neo-G | GATSL3         |
| SEMA4D. 6  | 1. 94E-10 | -0. 24765 | 0. 035 | 0. 086 | 2. 90E-06 | Neo-G | SEMA4D         |
| DDX60      | 1. 99E-10 | -0. 11729 | 0. 008 | 0. 046 | 2. 98E-06 | Neo-G | DDX60          |
| KCNQ1. 6   | 2. 00E-10 | -0. 16287 | 0. 006 | 0. 043 | 2. 99E-06 | Neo-G | KCNQ1          |
| TAF13. 2   | 2. 01E-10 | -0. 11623 | 0. 075 | 0. 144 | 3. 00E-06 | Neo-G | TAF13          |
| EPOR. 4    | 2. 02E-10 | -0. 13283 | 0. 026 | 0. 074 | 3. 02E-06 | Neo-G | EPOR           |
| HSPA4. 3   | 2. 03E-10 | 0. 159181 | 0. 328 | 0. 27  | 3. 04E-06 | Neo-G | HSPA4          |
| IL2RA. 5   | 2. 04E-10 | -0. 2487  | 0. 002 | 0. 035 | 3. 05E-06 | Neo-G | IL2RA          |
| ATXN1. 2   | 2. 05E-10 | -0. 16227 | 0. 097 | 0. 171 | 3. 06E-06 | Neo-G | ATXN1          |
| TBC1D17. 3 | 2. 06E-10 | 0. 176765 | 0. 208 | 0. 149 | 3. 07E-06 | Neo-G | TBC1D17        |
| CYB5R2. 2  | 2. 06E-10 | -0. 15983 | 0. 002 | 0. 034 | 3. 08E-06 | Neo-G | CYB5R2         |
| DST. 6     | 2. 07E-10 | 0. 103535 | 0. 46  | 0. 366 | 3. 09E-06 | Neo-G | DST            |
| HSBP1L1. 4 | 2. 08E-10 | -0. 16116 | 0. 03  | 0. 079 | 3. 11E-06 | Neo-G | HSBP1L1        |
| CKS2. 7    | 2. 11E-10 | -0. 32282 | 0. 298 | 0. 375 | 3. 15E-06 | Neo-G | CKS2           |
| PTPN18. 7  | 2. 11E-10 | -0. 17584 | 0. 137 | 0. 22  | 3. 16E-06 | Neo-G | PTPN18         |
| DTWD1      | 2. 13E-10 | -0. 12411 | 0. 075 | 0. 144 | 3. 18E-06 | Neo-G | DTWD1          |
| TRIAP1. 4  | 2. 15E-10 | 0. 127058 | 0. 365 | 0. 307 | 3. 22E-06 | Neo-G | TRIAP1         |
| P4HTM. 5   | 2. 16E-10 | 0. 208154 | 0. 308 | 0. 256 | 3. 23E-06 | Neo-G | P4HTM          |
| POLR3F. 4  | 2. 16E-10 | 0. 211934 | 0. 185 | 0. 131 | 3. 23E-06 | Neo-G | POLR3F         |
| IFIT3. 5   | 2. 17E-10 | -0. 29399 | 0. 057 | 0. 114 | 3. 24E-06 | Neo-G | IFIT3          |
| ARHGEF11   | 2. 18E-10 | 0. 156801 | 0. 068 | 0. 034 | 3. 25E-06 | Neo-G | ARHGEF11       |

|             |           |           |        |        |           |       |               |
|-------------|-----------|-----------|--------|--------|-----------|-------|---------------|
| UBN1. 4     | 2. 20E-10 | 0. 227442 | 0. 214 | 0. 161 | 3. 29E-06 | Neo-G | UBN1          |
| GNG11. 2    | 2. 21E-10 | -0. 17746 | 0. 005 | 0. 041 | 3. 30E-06 | Neo-G | GNG11         |
| AQP11       | 2. 24E-10 | 0. 177631 | 0. 069 | 0. 035 | 3. 35E-06 | Neo-G | AQP11         |
| AKNA. 5     | 2. 25E-10 | -0. 22534 | 0. 029 | 0. 077 | 3. 37E-06 | Neo-G | AKNA          |
| INTS12. 4   | 2. 32E-10 | 0. 165249 | 0. 217 | 0. 158 | 3. 46E-06 | Neo-G | INTS12        |
| IL1R2. 4    | 2. 32E-10 | -0. 18598 | 0. 001 | 0. 032 | 3. 47E-06 | Neo-G | IL1R2         |
| KDM6B. 6    | 2. 35E-10 | 0. 112668 | 0. 295 | 0. 214 | 3. 51E-06 | Neo-G | KDM6B         |
| AP005530. 2 | 2. 35E-10 | -0. 15421 | 0. 001 | 0. 032 | 3. 52E-06 | Neo-G | AP005530. 2   |
| RCN1. 7     | 2. 38E-10 | 0. 149502 | 0. 413 | 0. 347 | 3. 56E-06 | Neo-G | RCN1          |
| FAR1. 2     | 2. 46E-10 | -0. 14522 | 0. 076 | 0. 145 | 3. 68E-06 | Neo-G | FAR1          |
| CPNE2. 7    | 2. 47E-10 | -0. 15352 | 0. 108 | 0. 186 | 3. 69E-06 | Neo-G | CPNE2         |
| ANPEP. 6    | 2. 47E-10 | -0. 1471  | 0. 002 | 0. 035 | 3. 70E-06 | Neo-G | ANPEP         |
| EXOSC6      | 2. 52E-10 | -0. 12877 | 0. 022 | 0. 069 | 3. 76E-06 | Neo-G | EXOSC6        |
| TMEM203. 5  | 2. 55E-10 | 0. 206697 | 0. 299 | 0. 246 | 3. 81E-06 | Neo-G | TMEM203       |
| DOLK. 5     | 2. 57E-10 | -0. 12793 | 0. 068 | 0. 133 | 3. 84E-06 | Neo-G | DOLK          |
| ATAD2B. 1   | 2. 57E-10 | 0. 147255 | 0. 097 | 0. 055 | 3. 84E-06 | Neo-G | ATAD2B        |
| ZBED1. 3    | 2. 57E-10 | 0. 190473 | 0. 189 | 0. 133 | 3. 85E-06 | Neo-G | ZBED1         |
| KNOP1. 5    | 2. 58E-10 | 0. 19206  | 0. 308 | 0. 254 | 3. 86E-06 | Neo-G | KNOP1         |
| SSR4. 3     | 2. 59E-10 | -0. 27274 | 0. 756 | 0. 763 | 3. 87E-06 | Neo-G | SSR4          |
| DCTD. 1     | 2. 60E-10 | -0. 16376 | 0. 171 | 0. 266 | 3. 88E-06 | Neo-G | DCTD          |
| RP11-138A   | 2. 62E-10 | -0. 23763 | 0. 07  | 0. 132 | 3. 91E-06 | Neo-G | RP11-138A9. 1 |
| NLGN4X. 5   | 2. 62E-10 | 0. 209318 | 0. 15  | 0. 1   | 3. 91E-06 | Neo-G | NLGN4X        |
| SLC35F6. 4  | 2. 64E-10 | -0. 17266 | 0. 135 | 0. 218 | 3. 95E-06 | Neo-G | SLC35F6       |
| ST5. 7      | 2. 64E-10 | -0. 14802 | 0. 086 | 0. 159 | 3. 95E-06 | Neo-G | ST5           |
| ARHGAP11E   | 2. 72E-10 | -0. 10982 | 0. 006 | 0. 042 | 4. 06E-06 | Neo-G | ARHGAP11B     |
| ZNF398. 6   | 2. 74E-10 | 0. 165778 | 0. 094 | 0. 053 | 4. 10E-06 | Neo-G | ZNF398        |
| HERC6       | 2. 75E-10 | -0. 11657 | 0. 004 | 0. 038 | 4. 11E-06 | Neo-G | HERC6         |
| DPH7. 6     | 2. 79E-10 | 0. 209992 | 0. 217 | 0. 161 | 4. 16E-06 | Neo-G | DPH7          |
| MSANTD2. 1  | 2. 84E-10 | 0. 184057 | 0. 097 | 0. 055 | 4. 25E-06 | Neo-G | MSANTD2       |
| IL18BP      | 2. 87E-10 | -0. 12881 | 0. 007 | 0. 044 | 4. 28E-06 | Neo-G | IL18BP        |
| RPE. 1      | 3. 00E-10 | -0. 15383 | 0. 092 | 0. 166 | 4. 48E-06 | Neo-G | RPE           |
| PI4K2A. 6   | 3. 05E-10 | -0. 14262 | 0. 024 | 0. 07  | 4. 56E-06 | Neo-G | PI4K2A        |
| BOLA3-AS1   | 3. 07E-10 | 0. 145514 | 0. 071 | 0. 036 | 4. 59E-06 | Neo-G | BOLA3-AS1     |
| ELP4. 2     | 3. 13E-10 | -0. 15281 | 0. 042 | 0. 098 | 4. 67E-06 | Neo-G | ELP4          |
| WHAMM. 1    | 3. 13E-10 | -0. 12313 | 0. 053 | 0. 113 | 4. 68E-06 | Neo-G | WHAMM         |
| ZNF780A. 2  | 3. 26E-10 | -0. 16964 | 0. 026 | 0. 073 | 4. 87E-06 | Neo-G | ZNF780A       |
| TRIM47. 7   | 3. 32E-10 | -0. 16657 | 0. 112 | 0. 188 | 4. 96E-06 | Neo-G | TRIM47        |
| SEPHS2. 3   | 3. 50E-10 | 0. 17304  | 0. 364 | 0. 307 | 5. 23E-06 | Neo-G | SEPHS2        |
| PRC1. 6     | 3. 51E-10 | -0. 20309 | 0. 04  | 0. 092 | 5. 24E-06 | Neo-G | PRC1          |
| SNX18. 3    | 3. 51E-10 | -0. 14294 | 0. 059 | 0. 12  | 5. 25E-06 | Neo-G | SNX18         |
| PI3. 3      | 3. 56E-10 | -0. 41479 | 0. 016 | 0. 057 | 5. 32E-06 | Neo-G | PI3           |
| PRR5. 6     | 3. 56E-10 | -0. 15524 | 0. 012 | 0. 051 | 5. 33E-06 | Neo-G | PRR5          |
| ZNF451. 3   | 3. 59E-10 | 0. 167509 | 0. 214 | 0. 156 | 5. 36E-06 | Neo-G | ZNF451        |
| MBNL2. 3    | 3. 60E-10 | -0. 1787  | 0. 046 | 0. 102 | 5. 37E-06 | Neo-G | MBNL2         |
| TRAP1. 4    | 3. 62E-10 | 0. 191916 | 0. 309 | 0. 252 | 5. 41E-06 | Neo-G | TRAP1         |
| CRIP1. 5    | 3. 63E-10 | -0. 23179 | 0. 007 | 0. 043 | 5. 42E-06 | Neo-G | CRIP1         |
| MOG. 5      | 3. 67E-10 | -0. 26357 | 0. 002 | 0. 035 | 5. 48E-06 | Neo-G | MOG           |
| MMP16. 5    | 3. 69E-10 | 0. 202178 | 0. 148 | 0. 098 | 5. 52E-06 | Neo-G | MMP16         |
| DSN1. 3     | 3. 73E-10 | -0. 12746 | 0. 049 | 0. 106 | 5. 57E-06 | Neo-G | DSN1          |
| GPR37. 4    | 3. 77E-10 | -0. 24251 | 0. 03  | 0. 078 | 5. 64E-06 | Neo-G | GPR37         |
| SLC25A12. 3 | 3. 78E-10 | 0. 156333 | 0. 116 | 0. 07  | 5. 66E-06 | Neo-G | SLC25A12      |

|            |           |           |        |        |           |       |                |
|------------|-----------|-----------|--------|--------|-----------|-------|----------------|
| TDP2. 3    | 3. 83E-10 | 0. 139388 | 0. 237 | 0. 176 | 5. 72E-06 | Neo-G | TDP2           |
| C20orf96.  | 3. 89E-10 | 0. 253115 | 0. 196 | 0. 145 | 5. 81E-06 | Neo-G | C20orf96       |
| ZNF443     | 3. 89E-10 | 0. 107007 | 0. 053 | 0. 023 | 5. 82E-06 | Neo-G | ZNF443         |
| TMEM100. 7 | 3. 93E-10 | -0. 25264 | 0. 042 | 0. 094 | 5. 87E-06 | Neo-G | TMEM100        |
| ATP6V1B1   | 4. 02E-10 | 0. 116913 | 0. 05  | 0. 022 | 6. 01E-06 | Neo-G | ATP6V1B1       |
| IL12RB1. 6 | 4. 06E-10 | -0. 15119 | 0. 002 | 0. 035 | 6. 07E-06 | Neo-G | IL12RB1        |
| RP11-489C  | 4. 09E-10 | -0. 16663 | 0. 001 | 0. 031 | 6. 12E-06 | Neo-G | RP11-489018. 1 |
| RAPGEF1. 5 | 4. 11E-10 | -0. 2157  | 0. 064 | 0. 124 | 6. 14E-06 | Neo-G | RAPGEF1        |
| ZUFSP. 1   | 4. 16E-10 | 0. 171984 | 0. 128 | 0. 08  | 6. 22E-06 | Neo-G | ZUFSP          |
| STX3. 2    | 4. 17E-10 | 0. 110172 | 0. 118 | 0. 07  | 6. 24E-06 | Neo-G | STX3           |
| CREBL2. 5  | 4. 20E-10 | -0. 23234 | 0. 122 | 0. 197 | 6. 27E-06 | Neo-G | CREBL2         |
| CCDC66. 6  | 4. 22E-10 | 0. 18017  | 0. 28  | 0. 223 | 6. 31E-06 | Neo-G | CCDC66         |
| OTUD7B. 5  | 4. 22E-10 | -0. 12921 | 0. 049 | 0. 107 | 6. 31E-06 | Neo-G | OTUD7B         |
| RP3-47704  | 4. 25E-10 | -0. 15363 | 0. 001 | 0. 031 | 6. 35E-06 | Neo-G | RP3-47704. 14  |
| TRMT112. 4 | 4. 28E-10 | -0. 30588 | 0. 679 | 0. 71  | 6. 40E-06 | Neo-G | TRMT112        |
| WNT5A. 7   | 4. 32E-10 | -0. 1545  | 0. 02  | 0. 063 | 6. 45E-06 | Neo-G | WNT5A          |
| ATF6. 4    | 4. 33E-10 | -0. 18449 | 0. 168 | 0. 258 | 6. 48E-06 | Neo-G | ATF6           |
| MBLAC1     | 4. 37E-10 | 0. 116875 | 0. 047 | 0. 02  | 6. 54E-06 | Neo-G | MBLAC1         |
| SLC20A1. 1 | 4. 38E-10 | -0. 17879 | 0. 112 | 0. 186 | 6. 55E-06 | Neo-G | SLC20A1        |
| NIFK-AS1.  | 4. 42E-10 | 0. 173678 | 0. 131 | 0. 083 | 6. 60E-06 | Neo-G | NIFK-AS1       |
| UBA6. 2    | 4. 45E-10 | 0. 182696 | 0. 246 | 0. 188 | 6. 65E-06 | Neo-G | UBA6           |
| RP11-127E  | 4. 46E-10 | 0. 150723 | 0. 082 | 0. 043 | 6. 67E-06 | Neo-G | RP11-127B20. 3 |
| RPP38. 1   | 4. 48E-10 | -0. 12692 | 0. 073 | 0. 14  | 6. 70E-06 | Neo-G | RPP38          |
| TRIQK. 1   | 4. 53E-10 | 0. 136315 | 0. 097 | 0. 055 | 6. 78E-06 | Neo-G | TRIQK          |
| NLRC5      | 4. 61E-10 | -0. 11039 | 0. 008 | 0. 044 | 6. 89E-06 | Neo-G | NLRC5          |
| ZCCHC14. 2 | 4. 61E-10 | 0. 147858 | 0. 084 | 0. 045 | 6. 90E-06 | Neo-G | ZCCHC14        |
| DEF8. 6    | 4. 62E-10 | 0. 138522 | 0. 321 | 0. 264 | 6. 91E-06 | Neo-G | DEF8           |
| EIF4B. 6   | 4. 65E-10 | -0. 22733 | 0. 295 | 0. 388 | 6. 95E-06 | Neo-G | EIF4B          |
| UNG. 4     | 4. 68E-10 | 0. 166226 | 0. 17  | 0. 116 | 6. 99E-06 | Neo-G | UNG            |
| APEH. 1    | 4. 75E-10 | -0. 16947 | 0. 124 | 0. 205 | 7. 09E-06 | Neo-G | APEH           |
| MXRA8. 2   | 4. 78E-10 | -0. 10107 | 0. 005 | 0. 039 | 7. 15E-06 | Neo-G | MXRA8          |
| IL6. 2     | 4. 79E-10 | -0. 19194 | 0. 008 | 0. 044 | 7. 17E-06 | Neo-G | IL6            |
| PTPN9. 1   | 4. 80E-10 | -0. 11085 | 0. 067 | 0. 131 | 7. 17E-06 | Neo-G | PTPN9          |
| TGS1. 2    | 4. 87E-10 | 0. 18081  | 0. 21  | 0. 154 | 7. 27E-06 | Neo-G | TGS1           |
| BET1L      | 5. 01E-10 | -0. 13778 | 0. 063 | 0. 125 | 7. 48E-06 | Neo-G | BET1L          |
| TSEN2. 6   | 5. 03E-10 | 0. 180909 | 0. 131 | 0. 083 | 7. 52E-06 | Neo-G | TSEN2          |
| ZC3H8. 4   | 5. 04E-10 | 0. 180688 | 0. 196 | 0. 141 | 7. 53E-06 | Neo-G | ZC3H8          |
| CLPB. 1    | 5. 07E-10 | -0. 14365 | 0. 045 | 0. 1   | 7. 58E-06 | Neo-G | CLPB           |
| MRAS. 4    | 5. 08E-10 | 0. 21871  | 0. 214 | 0. 162 | 7. 59E-06 | Neo-G | MRAS           |
| ZNF24. 5   | 5. 15E-10 | 0. 100696 | 0. 356 | 0. 294 | 7. 70E-06 | Neo-G | ZNF24          |
| MCRS1. 3   | 5. 19E-10 | 0. 150691 | 0. 319 | 0. 264 | 7. 75E-06 | Neo-G | MCRS1          |
| FAM13C. 4  | 5. 31E-10 | 0. 114576 | 0. 071 | 0. 036 | 7. 93E-06 | Neo-G | FAM13C         |
| MMP7. 2    | 5. 41E-10 | -0. 2545  | 0. 002 | 0. 033 | 8. 09E-06 | Neo-G | MMP7           |
| ZNF93. 2   | 5. 42E-10 | 0. 132165 | 0. 093 | 0. 053 | 8. 10E-06 | Neo-G | ZNF93          |
| ATXN7L2    | 5. 53E-10 | 0. 128613 | 0. 058 | 0. 027 | 8. 27E-06 | Neo-G | ATXN7L2        |
| ECM1. 3    | 5. 55E-10 | -0. 11438 | 0. 009 | 0. 045 | 8. 29E-06 | Neo-G | ECM1           |
| CEP63. 3   | 5. 56E-10 | 0. 197759 | 0. 228 | 0. 172 | 8. 31E-06 | Neo-G | CEP63          |
| ZNF146. 5  | 5. 57E-10 | 0. 169234 | 0. 279 | 0. 221 | 8. 33E-06 | Neo-G | ZNF146         |
| ZNRF1. 7   | 5. 62E-10 | 0. 244096 | 0. 159 | 0. 111 | 8. 41E-06 | Neo-G | ZNRF1          |
| GPR132. 4  | 5. 69E-10 | -0. 15062 | 0. 002 | 0. 034 | 8. 50E-06 | Neo-G | GPR132         |
| NFKBIB. 1  | 5. 80E-10 | -0. 16173 | 0. 109 | 0. 184 | 8. 66E-06 | Neo-G | NFKBIB         |



|           |          |          |       |       |          |       |              |
|-----------|----------|----------|-------|-------|----------|-------|--------------|
| CRYBB2    | 5.86E-10 | 0.10272  | 0.034 | 0.012 | 8.76E-06 | Neo-G | CRYBB2       |
| C10orf128 | 5.89E-10 | -0.16038 | 0.002 | 0.034 | 8.80E-06 | Neo-G | C10orf128    |
| MTRF1L.4  | 5.93E-10 | 0.226824 | 0.235 | 0.184 | 8.86E-06 | Neo-G | MTRF1L       |
| ERCC3.2   | 6.05E-10 | 0.173627 | 0.194 | 0.139 | 9.04E-06 | Neo-G | ERCC3        |
| DAPP1.6   | 6.08E-10 | -0.14383 | 0.001 | 0.031 | 9.08E-06 | Neo-G | DAPP1        |
| CCND3.5   | 6.08E-10 | -0.29719 | 0.185 | 0.269 | 9.09E-06 | Neo-G | CCND3        |
| INPP5K.1  | 6.10E-10 | 0.163293 | 0.167 | 0.114 | 9.12E-06 | Neo-G | INPP5K       |
| CTB-58E17 | 6.19E-10 | -0.10657 | 0.02  | 0.063 | 9.25E-06 | Neo-G | CTB-58E17.1  |
| DDOST.3   | 6.22E-10 | -0.29488 | 0.386 | 0.475 | 9.30E-06 | Neo-G | DDOST        |
| MAP4K2    | 6.39E-10 | -0.10001 | 0.011 | 0.049 | 9.54E-06 | Neo-G | MAP4K2       |
| ZMYND8.5  | 6.44E-10 | 0.20317  | 0.258 | 0.201 | 9.62E-06 | Neo-G | ZMYND8       |
| BBS2.7    | 6.46E-10 | -0.1995  | 0.107 | 0.18  | 9.66E-06 | Neo-G | BBS2         |
| CDT1.4    | 6.47E-10 | -0.11589 | 0.021 | 0.065 | 9.67E-06 | Neo-G | CDT1         |
| TMEM216.1 | 6.51E-10 | -0.18182 | 0.035 | 0.086 | 9.73E-06 | Neo-G | TMEM216      |
| TP53TG1.3 | 6.70E-10 | -0.26968 | 0.129 | 0.206 | 1.00E-05 | Neo-G | TP53TG1      |
| RP2.7     | 6.72E-10 | -0.14006 | 0.033 | 0.083 | 1.00E-05 | Neo-G | RP2          |
| MOBP.6    | 6.79E-10 | -0.32631 | 0.005 | 0.039 | 1.01E-05 | Neo-G | MOBP         |
| CPD.3     | 6.79E-10 | -0.14912 | 0.096 | 0.168 | 1.01E-05 | Neo-G | CPD          |
| ASAH1.5   | 6.93E-10 | -0.31039 | 0.61  | 0.656 | 1.04E-05 | Neo-G | ASAH1        |
| OASL.3    | 6.96E-10 | -0.14578 | 0.002 | 0.032 | 1.04E-05 | Neo-G | OASL         |
| CDKL3.3   | 7.00E-10 | 0.147361 | 0.156 | 0.104 | 1.05E-05 | Neo-G | CDKL3        |
| TMEM187.1 | 7.07E-10 | -0.15409 | 0.037 | 0.088 | 1.06E-05 | Neo-G | TMEM187      |
| POLK.3    | 7.08E-10 | 0.152281 | 0.233 | 0.173 | 1.06E-05 | Neo-G | POLK         |
| VPS51.3   | 7.09E-10 | 0.180593 | 0.314 | 0.257 | 1.06E-05 | Neo-G | VPS51        |
| TBC1D22B  | 7.10E-10 | 0.124844 | 0.074 | 0.038 | 1.06E-05 | Neo-G | TBC1D22B     |
| RP11-468E | 7.22E-10 | -0.10998 | 0.011 | 0.049 | 1.08E-05 | Neo-G | RP11-468E2.4 |
| FAM120AOS | 7.29E-10 | -0.14444 | 0.117 | 0.194 | 1.09E-05 | Neo-G | FAM120AOS    |
| ZNF136.5  | 7.44E-10 | 0.145924 | 0.141 | 0.092 | 1.11E-05 | Neo-G | ZNF136       |
| MINK1.3   | 7.46E-10 | -0.13481 | 0.053 | 0.11  | 1.11E-05 | Neo-G | MINK1        |
| ZNF414.7  | 7.50E-10 | 0.265635 | 0.229 | 0.18  | 1.12E-05 | Neo-G | ZNF414       |
| HS6ST1.2  | 7.53E-10 | -0.11614 | 0.056 | 0.115 | 1.13E-05 | Neo-G | HS6ST1       |
| SLC48A1.4 | 7.56E-10 | -0.22278 | 0.076 | 0.139 | 1.13E-05 | Neo-G | SLC48A1      |
| MFSD7.5   | 7.60E-10 | -0.11601 | 0.003 | 0.035 | 1.14E-05 | Neo-G | MFSD7        |
| DISC1.4   | 7.60E-10 | -0.13063 | 0.012 | 0.05  | 1.14E-05 | Neo-G | DISC1        |
| SART3.3   | 7.64E-10 | 0.157575 | 0.174 | 0.119 | 1.14E-05 | Neo-G | SART3        |
| ZMYM5.1   | 7.78E-10 | 0.154684 | 0.197 | 0.141 | 1.16E-05 | Neo-G | ZMYM5        |
| QPRT.3    | 7.84E-10 | -0.21753 | 0.063 | 0.121 | 1.17E-05 | Neo-G | QPRT         |
| TBC1D10C. | 7.84E-10 | -0.15753 | 0.002 | 0.034 | 1.17E-05 | Neo-G | TBC1D10C     |
| CLDN15.5  | 7.93E-10 | 0.135128 | 0.101 | 0.059 | 1.18E-05 | Neo-G | CLDN15       |
| ASGR1.6   | 7.98E-10 | 0.126924 | 0.114 | 0.068 | 1.19E-05 | Neo-G | ASGR1        |
| ZFYVE9.1  | 8.05E-10 | 0.154135 | 0.081 | 0.044 | 1.20E-05 | Neo-G | ZFYVE9       |
| PSMC1.4   | 8.11E-10 | -0.30716 | 0.302 | 0.394 | 1.21E-05 | Neo-G | PSMC1        |
| BTN3A3    | 8.12E-10 | -0.13428 | 0.018 | 0.06  | 1.21E-05 | Neo-G | BTN3A3       |
| SLFN12.3  | 8.30E-10 | -0.11824 | 0     | 0.029 | 1.24E-05 | Neo-G | SLFN12       |
| BNC2.3    | 8.30E-10 | -0.12309 | 0     | 0.029 | 1.24E-05 | Neo-G | BNC2         |
| NDUFS1.4  | 8.41E-10 | 0.186794 | 0.302 | 0.249 | 1.26E-05 | Neo-G | NDUFS1       |
| PTPDC1    | 8.57E-10 | 0.10706  | 0.073 | 0.038 | 1.28E-05 | Neo-G | PTPDC1       |
| CHRAC1.5  | 8.62E-10 | -0.16408 | 0.085 | 0.152 | 1.29E-05 | Neo-G | CHRAC1       |
| PGM2.4    | 8.65E-10 | -0.22354 | 0.09  | 0.156 | 1.29E-05 | Neo-G | PGM2         |
| AATF.2    | 8.71E-10 | 0.152862 | 0.34  | 0.285 | 1.30E-05 | Neo-G | AATF         |
| RNF103.2  | 8.77E-10 | 0.191744 | 0.147 | 0.097 | 1.31E-05 | Neo-G | RNF103       |

|            |           |           |        |        |           |       |             |
|------------|-----------|-----------|--------|--------|-----------|-------|-------------|
| ZRANB2. 2  | 8. 90E-10 | 0. 112897 | 0. 381 | 0. 323 | 1. 33E-05 | Neo-G | ZRANB2      |
| NME4. 4    | 8. 97E-10 | -0. 19244 | 0. 296 | 0. 392 | 1. 34E-05 | Neo-G | NME4        |
| UBA1. 2    | 9. 09E-10 | 0. 1208   | 0. 393 | 0. 335 | 1. 36E-05 | Neo-G | UBA1        |
| ACO69363.  | 9. 11E-10 | -0. 24872 | 0. 016 | 0. 055 | 1. 36E-05 | Neo-G | ACO69363. 1 |
| CNFN. 2    | 9. 29E-10 | -0. 11182 | 0. 001 | 0. 03  | 1. 39E-05 | Neo-G | CNFN        |
| UCK1. 2    | 9. 56E-10 | 0. 181119 | 0. 235 | 0. 179 | 1. 43E-05 | Neo-G | UCK1        |
| HGF. 1     | 9. 66E-10 | -0. 14034 | 0. 002 | 0. 032 | 1. 44E-05 | Neo-G | HGF         |
| CDCA8. 4   | 9. 71E-10 | -0. 12089 | 0. 008 | 0. 043 | 1. 45E-05 | Neo-G | CDCA8       |
| NCS1. 3    | 9. 80E-10 | 0. 166301 | 0. 097 | 0. 056 | 1. 46E-05 | Neo-G | NCS1        |
| CRK. 3     | 9. 81E-10 | 0. 156864 | 0. 366 | 0. 31  | 1. 47E-05 | Neo-G | CRK         |
| IFNAR2. 5  | 9. 83E-10 | -0. 12347 | 0. 127 | 0. 208 | 1. 47E-05 | Neo-G | IFNAR2      |
| ZNF606. 2  | 9. 89E-10 | 0. 163717 | 0. 122 | 0. 076 | 1. 48E-05 | Neo-G | ZNF606      |
| RABGGTA    | 9. 91E-10 | -0. 15897 | 0. 071 | 0. 135 | 1. 48E-05 | Neo-G | RABGGTA     |
| ITGB4. 1   | 9. 96E-10 | -0. 11464 | 0. 004 | 0. 036 | 1. 49E-05 | Neo-G | ITGB4       |
| AKT3. 3    | 9. 98E-10 | 0. 139379 | 0. 091 | 0. 051 | 1. 49E-05 | Neo-G | AKT3        |
| APOL1. 2   | 1. 01E-09 | -0. 13621 | 0. 008 | 0. 043 | 1. 51E-05 | Neo-G | APOL1       |
| NDUFA6. 5  | 1. 02E-09 | -0. 2958  | 0. 506 | 0. 579 | 1. 53E-05 | Neo-G | NDUFA6      |
| TSTD2. 2   | 1. 04E-09 | 0. 16715  | 0. 115 | 0. 071 | 1. 55E-05 | Neo-G | TSTD2       |
| SH3RF1. 5  | 1. 04E-09 | 0. 190152 | 0. 149 | 0. 101 | 1. 55E-05 | Neo-G | SH3RF1      |
| CLDN12. 7  | 1. 05E-09 | 0. 179672 | 0. 185 | 0. 133 | 1. 57E-05 | Neo-G | CLDN12      |
| BTBD1. 3   | 1. 05E-09 | -0. 10957 | 0. 086 | 0. 156 | 1. 57E-05 | Neo-G | BTBD1       |
| GRHPR. 4   | 1. 06E-09 | -0. 23262 | 0. 302 | 0. 404 | 1. 59E-05 | Neo-G | GRHPR       |
| CCBL2. 1   | 1. 09E-09 | -0. 15803 | 0. 07  | 0. 133 | 1. 63E-05 | Neo-G | CCBL2       |
| DSC2. 5    | 1. 13E-09 | -0. 12936 | 0. 004 | 0. 036 | 1. 69E-05 | Neo-G | DSC2        |
| UQCR10. 4  | 1. 13E-09 | -0. 21806 | 0. 742 | 0. 741 | 1. 69E-05 | Neo-G | UQCR10      |
| NOC3L. 2   | 1. 14E-09 | -0. 1249  | 0. 046 | 0. 1   | 1. 70E-05 | Neo-G | NOC3L       |
| MBLAC2     | 1. 17E-09 | 0. 101685 | 0. 047 | 0. 02  | 1. 74E-05 | Neo-G | MBLAC2      |
| BCL2L13. 2 | 1. 17E-09 | -0. 16729 | 0. 089 | 0. 157 | 1. 75E-05 | Neo-G | BCL2L13     |
| PPIP5K2. 2 | 1. 18E-09 | 0. 157931 | 0. 175 | 0. 121 | 1. 76E-05 | Neo-G | PPIP5K2     |
| RELT. 6    | 1. 18E-09 | -0. 15111 | 0. 039 | 0. 09  | 1. 76E-05 | Neo-G | RELT        |
| IDS. 1     | 1. 18E-09 | -0. 2606  | 0. 292 | 0. 378 | 1. 76E-05 | Neo-G | IDS         |
| ITGB2-AS1  | 1. 19E-09 | -0. 1663  | 0. 002 | 0. 031 | 1. 78E-05 | Neo-G | ITGB2-AS1   |
| PLVAP. 3   | 1. 20E-09 | -0. 15384 | 0. 002 | 0. 033 | 1. 79E-05 | Neo-G | PLVAP       |
| FABP5. 5   | 1. 20E-09 | -0. 73356 | 0. 357 | 0. 396 | 1. 80E-05 | Neo-G | FABP5       |
| RGL1. 3    | 1. 20E-09 | -0. 12897 | 0. 04  | 0. 092 | 1. 80E-05 | Neo-G | RGL1        |
| AP000439.  | 1. 22E-09 | -0. 16524 | 0. 001 | 0. 03  | 1. 82E-05 | Neo-G | AP000439. 1 |
| OMA1. 2    | 1. 27E-09 | -0. 12464 | 0. 03  | 0. 077 | 1. 90E-05 | Neo-G | OMA1        |
| TET1. 6    | 1. 28E-09 | 0. 223044 | 0. 121 | 0. 078 | 1. 91E-05 | Neo-G | TET1        |
| FLYWCH1. 2 | 1. 29E-09 | 0. 188608 | 0. 143 | 0. 095 | 1. 92E-05 | Neo-G | FLYWCH1     |
| RAB4A. 3   | 1. 29E-09 | 0. 140534 | 0. 39  | 0. 335 | 1. 93E-05 | Neo-G | RAB4A       |
| FFAR4. 3   | 1. 29E-09 | -0. 14591 | 0. 002 | 0. 033 | 1. 93E-05 | Neo-G | FFAR4       |
| UBE2L3. 6  | 1. 29E-09 | -0. 25912 | 0. 467 | 0. 543 | 1. 93E-05 | Neo-G | UBE2L3      |
| CDCA5. 5   | 1. 30E-09 | -0. 10336 | 0. 012 | 0. 049 | 1. 94E-05 | Neo-G | CDCA5       |
| LXN. 3     | 1. 31E-09 | -0. 12959 | 0      | 0. 028 | 1. 96E-05 | Neo-G | LXN         |
| TOMM70A. 4 | 1. 33E-09 | 0. 200031 | 0. 17  | 0. 12  | 1. 99E-05 | Neo-G | TOMM70A     |
| UHMK1. 3   | 1. 34E-09 | -0. 14288 | 0. 132 | 0. 212 | 2. 00E-05 | Neo-G | UHMK1       |
| CLMN. 1    | 1. 34E-09 | -0. 12323 | 0. 009 | 0. 044 | 2. 01E-05 | Neo-G | CLMN        |
| TLE3. 6    | 1. 35E-09 | 0. 133116 | 0. 191 | 0. 131 | 2. 01E-05 | Neo-G | TLE3        |
| ABCF1. 5   | 1. 35E-09 | 0. 172514 | 0. 329 | 0. 278 | 2. 01E-05 | Neo-G | ABCF1       |
| SP140. 6   | 1. 36E-09 | -0. 14882 | 0. 003 | 0. 034 | 2. 03E-05 | Neo-G | SP140       |
| CUL3. 4    | 1. 37E-09 | 0. 221577 | 0. 247 | 0. 194 | 2. 05E-05 | Neo-G | CUL3        |

|            |          |          |       |       |          |       |             |
|------------|----------|----------|-------|-------|----------|-------|-------------|
| PLA2G2A.2  | 1.38E-09 | -0.4432  | 0.007 | 0.041 | 2.06E-05 | Neo-G | PLA2G2A     |
| NRP1.6     | 1.39E-09 | -0.12296 | 0.101 | 0.173 | 2.08E-05 | Neo-G | NRP1        |
| CDK10.2    | 1.39E-09 | 0.148361 | 0.214 | 0.158 | 2.08E-05 | Neo-G | CDK10       |
| SLC10A3.1  | 1.39E-09 | -0.13789 | 0.038 | 0.088 | 2.08E-05 | Neo-G | SLC10A3     |
| ITGB3BP.5  | 1.41E-09 | -0.14194 | 0.083 | 0.15  | 2.11E-05 | Neo-G | ITGB3BP     |
| E2F1.4     | 1.42E-09 | -0.10417 | 0.018 | 0.059 | 2.13E-05 | Neo-G | E2F1        |
| HNRNPUL2.1 | 1.43E-09 | -0.12753 | 0.099 | 0.171 | 2.13E-05 | Neo-G | HNRNPUL2    |
| GBP4.3     | 1.43E-09 | -0.20999 | 0.027 | 0.072 | 2.14E-05 | Neo-G | GBP4        |
| AP2A2.6    | 1.46E-09 | 0.149163 | 0.307 | 0.245 | 2.19E-05 | Neo-G | AP2A2       |
| SYNRG.5    | 1.49E-09 | 0.16837  | 0.238 | 0.183 | 2.23E-05 | Neo-G | SYNRG       |
| PDHA1.3    | 1.50E-09 | 0.108753 | 0.353 | 0.297 | 2.24E-05 | Neo-G | PDHA1       |
| KCNE3.6    | 1.53E-09 | -0.12258 | 0.001 | 0.03  | 2.28E-05 | Neo-G | KCNE3       |
| AIM1.4     | 1.53E-09 | -0.16021 | 0.005 | 0.038 | 2.29E-05 | Neo-G | AIM1        |
| VHL.2      | 1.54E-09 | 0.171727 | 0.212 | 0.157 | 2.30E-05 | Neo-G | VHL         |
| FAM195B.3  | 1.54E-09 | -0.3868  | 0.028 | 0.073 | 2.30E-05 | Neo-G | FAM195B     |
| LTB4R.5    | 1.55E-09 | -0.1218  | 0.005 | 0.037 | 2.31E-05 | Neo-G | LTB4R       |
| ITPR1.2    | 1.56E-09 | -0.12581 | 0.005 | 0.038 | 2.33E-05 | Neo-G | ITPR1       |
| RAB8A.4    | 1.60E-09 | -0.25234 | 0.272 | 0.366 | 2.38E-05 | Neo-G | RAB8A       |
| ALDH1A1.3  | 1.60E-09 | -0.15333 | 0.002 | 0.032 | 2.39E-05 | Neo-G | ALDH1A1     |
| LMAN2L.4   | 1.61E-09 | 0.17419  | 0.158 | 0.108 | 2.40E-05 | Neo-G | LMAN2L      |
| MTM1.1     | 1.61E-09 | -0.10226 | 0.019 | 0.06  | 2.40E-05 | Neo-G | MTM1        |
| MEOX2.5    | 1.62E-09 | -0.11276 | 0.035 | 0.084 | 2.42E-05 | Neo-G | MEOX2       |
| CEP78.6    | 1.62E-09 | 0.185499 | 0.157 | 0.108 | 2.43E-05 | Neo-G | CEP78       |
| PABPC4.7   | 1.63E-09 | -0.21483 | 0.25  | 0.338 | 2.43E-05 | Neo-G | PABPC4      |
| C7orf43.3  | 1.66E-09 | 0.142699 | 0.108 | 0.064 | 2.48E-05 | Neo-G | C7orf43     |
| ARHGAP21.1 | 1.67E-09 | -0.17015 | 0.173 | 0.259 | 2.49E-05 | Neo-G | ARHGAP21    |
| SH3GL1.3   | 1.67E-09 | -0.1297  | 0.17  | 0.26  | 2.50E-05 | Neo-G | SH3GL1      |
| RNF181.3   | 1.71E-09 | -0.31279 | 0.49  | 0.562 | 2.55E-05 | Neo-G | RNF181      |
| FAM134B.5  | 1.72E-09 | 0.209144 | 0.213 | 0.16  | 2.57E-05 | Neo-G | FAM134B     |
| SRA1.5     | 1.72E-09 | -0.24319 | 0.313 | 0.409 | 2.58E-05 | Neo-G | SRA1        |
| KBTBD11.1  | 1.73E-09 | 0.102279 | 0.052 | 0.023 | 2.58E-05 | Neo-G | KBTBD11     |
| RPA3.4     | 1.74E-09 | -0.30085 | 0.266 | 0.352 | 2.59E-05 | Neo-G | RPA3        |
| ICAM2.6    | 1.76E-09 | -0.17562 | 0.005 | 0.038 | 2.63E-05 | Neo-G | ICAM2       |
| CYTH1.6    | 1.78E-09 | 0.122109 | 0.214 | 0.151 | 2.66E-05 | Neo-G | CYTH1       |
| RBM26.5    | 1.84E-09 | 0.207839 | 0.258 | 0.207 | 2.74E-05 | Neo-G | RBM26       |
| ADPRH.4    | 1.86E-09 | -0.1231  | 0.005 | 0.037 | 2.78E-05 | Neo-G | ADPRH       |
| CTC-425F1  | 1.88E-09 | -0.14637 | 0.017 | 0.057 | 2.81E-05 | Neo-G | CTC-425F1.4 |
| NLGN1.6    | 1.90E-09 | 0.235217 | 0.181 | 0.133 | 2.83E-05 | Neo-G | NLGN1       |
| C6orf62.4  | 1.90E-09 | 0.106231 | 0.5   | 0.446 | 2.84E-05 | Neo-G | C6orf62     |
| MAN1B1.1   | 1.90E-09 | -0.14215 | 0.146 | 0.231 | 2.84E-05 | Neo-G | MAN1B1      |
| KLHL20.3   | 1.90E-09 | 0.188861 | 0.185 | 0.133 | 2.84E-05 | Neo-G | KLHL20      |
| CYB5R4.7   | 1.92E-09 | -0.19722 | 0.112 | 0.184 | 2.87E-05 | Neo-G | CYB5R4      |
| FHL2.4     | 1.93E-09 | -0.10573 | 0.013 | 0.05  | 2.88E-05 | Neo-G | FHL2        |
| EFCAB11.2  | 1.97E-09 | -0.10177 | 0.022 | 0.065 | 2.95E-05 | Neo-G | EFCAB11     |
| RNASEH1.4  | 1.99E-09 | 0.186879 | 0.275 | 0.223 | 2.97E-05 | Neo-G | RNASEH1     |
| NOVA1-AS1  | 2.03E-09 | 0.172927 | 0.062 | 0.031 | 3.03E-05 | Neo-G | NOVA1-AS1   |
| WDYHV1.2   | 2.03E-09 | 0.155436 | 0.167 | 0.116 | 3.03E-05 | Neo-G | WDYHV1      |
| LIMA1.6    | 2.04E-09 | 0.149167 | 0.372 | 0.311 | 3.04E-05 | Neo-G | LIMA1       |
| ATN1.5     | 2.05E-09 | 0.215786 | 0.229 | 0.178 | 3.07E-05 | Neo-G | ATN1        |
| PIF1.3     | 2.06E-09 | -0.1095  | 0.016 | 0.055 | 3.07E-05 | Neo-G | PIF1        |
| APH1A.4    | 2.06E-09 | -0.25933 | 0.407 | 0.494 | 3.08E-05 | Neo-G | APH1A       |

|            |           |           |        |        |           |       |                |
|------------|-----------|-----------|--------|--------|-----------|-------|----------------|
| RWDD4. 2   | 2. 06E-09 | 0. 196051 | 0. 272 | 0. 221 | 3. 08E-05 | Neo-G | RWDD4          |
| XPOT. 5    | 2. 11E-09 | -0. 1124  | 0. 103 | 0. 175 | 3. 16E-05 | Neo-G | XPOT           |
| ANKRD65    | 2. 12E-09 | -0. 11157 | 0. 008 | 0. 042 | 3. 16E-05 | Neo-G | ANKRD65        |
| LINC00685  | 2. 16E-09 | 0. 168878 | 0. 198 | 0. 143 | 3. 22E-05 | Neo-G | LINC00685      |
| AGPAT3. 3  | 2. 16E-09 | -0. 10459 | 0. 073 | 0. 137 | 3. 23E-05 | Neo-G | AGPAT3         |
| BRF2. 3    | 2. 18E-09 | 0. 162368 | 0. 131 | 0. 085 | 3. 25E-05 | Neo-G | BRF2           |
| CEBPZ. 4   | 2. 19E-09 | 0. 138509 | 0. 321 | 0. 265 | 3. 27E-05 | Neo-G | CEBPZ          |
| NPTN. 3    | 2. 19E-09 | -0. 13226 | 0. 024 | 0. 066 | 3. 27E-05 | Neo-G | NPTN           |
| MGRN1. 4   | 2. 20E-09 | 0. 21431  | 0. 255 | 0. 203 | 3. 29E-05 | Neo-G | MGRN1          |
| GLRX5. 5   | 2. 23E-09 | 0. 210187 | 0. 342 | 0. 291 | 3. 34E-05 | Neo-G | GLRX5          |
| CASC4. 5   | 2. 24E-09 | -0. 12187 | 0. 148 | 0. 233 | 3. 35E-05 | Neo-G | CASC4          |
| EMC7. 1    | 2. 24E-09 | -0. 29467 | 0. 372 | 0. 463 | 3. 35E-05 | Neo-G | EMC7           |
| ZNF550. 4  | 2. 27E-09 | 0. 100282 | 0. 081 | 0. 044 | 3. 39E-05 | Neo-G | ZNF550         |
| NCOA1. 4   | 2. 31E-09 | 0. 205488 | 0. 208 | 0. 155 | 3. 45E-05 | Neo-G | NCOA1          |
| ZNF592     | 2. 35E-09 | -0. 10787 | 0. 021 | 0. 063 | 3. 52E-05 | Neo-G | ZNF592         |
| FAM159A. 6 | 2. 39E-09 | -0. 17369 | 0. 013 | 0. 049 | 3. 57E-05 | Neo-G | FAM159A        |
| RPN2. 2    | 2. 40E-09 | -0. 25125 | 0. 59  | 0. 628 | 3. 59E-05 | Neo-G | RPN2           |
| ATP10B     | 2. 48E-09 | -0. 10019 | 0. 001 | 0. 029 | 3. 70E-05 | Neo-G | ATP10B         |
| STYXL1. 3  | 2. 50E-09 | 0. 148344 | 0. 175 | 0. 12  | 3. 74E-05 | Neo-G | STYXL1         |
| B3GALT4. 4 | 2. 51E-09 | -0. 13869 | 0. 011 | 0. 047 | 3. 75E-05 | Neo-G | B3GALT4        |
| TMSB4X. 7  | 2. 61E-09 | -0. 12523 | 1      | 0. 996 | 3. 90E-05 | Neo-G | TMSB4X         |
| MED15. 2   | 2. 63E-09 | -0. 13197 | 0. 084 | 0. 15  | 3. 93E-05 | Neo-G | MED15          |
| GAB3. 5    | 2. 65E-09 | -0. 13447 | 0. 005 | 0. 036 | 3. 96E-05 | Neo-G | GAB3           |
| TMEM87B. 4 | 2. 66E-09 | -0. 10189 | 0. 027 | 0. 071 | 3. 97E-05 | Neo-G | TMEM87B        |
| UAP1L1. 1  | 2. 67E-09 | -0. 10303 | 0. 023 | 0. 065 | 3. 99E-05 | Neo-G | UAP1L1         |
| BAX. 7     | 2. 67E-09 | -0. 26152 | 0. 501 | 0. 573 | 3. 99E-05 | Neo-G | BAX            |
| UBL4A. 5   | 2. 72E-09 | 0. 183826 | 0. 228 | 0. 177 | 4. 06E-05 | Neo-G | UBL4A          |
| GMDS-AS1   | 2. 73E-09 | -0. 10559 | 0. 01  | 0. 046 | 4. 08E-05 | Neo-G | GMDS-AS1       |
| NR1D1. 4   | 2. 74E-09 | -0. 11916 | 0. 015 | 0. 053 | 4. 09E-05 | Neo-G | NR1D1          |
| GALNT15. 3 | 2. 83E-09 | -0. 19244 | 0. 009 | 0. 043 | 4. 23E-05 | Neo-G | GALNT15        |
| RP11-514C  | 2. 84E-09 | -0. 12076 | 0. 002 | 0. 03  | 4. 24E-05 | Neo-G | RP11-514012. 4 |
| FAM229A. 2 | 2. 86E-09 | 0. 144444 | 0. 076 | 0. 041 | 4. 28E-05 | Neo-G | FAM229A        |
| MIA3. 3    | 2. 89E-09 | 0. 16545  | 0. 258 | 0. 203 | 4. 32E-05 | Neo-G | MIA3           |
| SETD5. 7   | 2. 90E-09 | 0. 16647  | 0. 337 | 0. 283 | 4. 34E-05 | Neo-G | SETD5          |
| NFAM1. 5   | 2. 93E-09 | -0. 14328 | 0. 005 | 0. 037 | 4. 39E-05 | Neo-G | NFAM1          |
| SUPT6H. 1  | 2. 94E-09 | -0. 14638 | 0. 107 | 0. 18  | 4. 40E-05 | Neo-G | SUPT6H         |
| PIGB       | 2. 95E-09 | -0. 1051  | 0. 009 | 0. 043 | 4. 41E-05 | Neo-G | PIGB           |
| MARCH3. 4  | 2. 97E-09 | -0. 21958 | 0. 057 | 0. 111 | 4. 44E-05 | Neo-G | 3-Mar          |
| CCR5. 5    | 3. 06E-09 | -0. 11543 | 0. 001 | 0. 029 | 4. 57E-05 | Neo-G | CCR5           |
| SPIN2B. 5  | 3. 10E-09 | 0. 160027 | 0. 148 | 0. 101 | 4. 64E-05 | Neo-G | SPIN2B         |
| TMEM42. 4  | 3. 16E-09 | -0. 1063  | 0. 097 | 0. 169 | 4. 72E-05 | Neo-G | TMEM42         |
| SH2B1. 3   | 3. 18E-09 | 0. 192825 | 0. 195 | 0. 144 | 4. 75E-05 | Neo-G | SH2B1          |
| PGM5. 1    | 3. 28E-09 | -0. 10135 | 0. 002 | 0. 03  | 4. 91E-05 | Neo-G | PGM5           |
| OARD1. 3   | 3. 31E-09 | 0. 119626 | 0. 283 | 0. 226 | 4. 95E-05 | Neo-G | OARD1          |
| FBXO22. 2  | 3. 35E-09 | -0. 16312 | 0. 08  | 0. 145 | 5. 01E-05 | Neo-G | FBXO22         |
| ABCF2. 4   | 3. 38E-09 | 0. 16524  | 0. 264 | 0. 21  | 5. 05E-05 | Neo-G | ABCF2          |
| TSGA10. 3  | 3. 43E-09 | 0. 154982 | 0. 097 | 0. 058 | 5. 13E-05 | Neo-G | TSGA10         |
| CTTNBP2NL  | 3. 48E-09 | 0. 139692 | 0. 203 | 0. 147 | 5. 20E-05 | Neo-G | CTTNBP2NL      |
| RP11-557H  | 3. 50E-09 | -0. 14947 | 0. 002 | 0. 03  | 5. 23E-05 | Neo-G | RP11-557H15. 4 |
| ELOVL6. 5  | 3. 53E-09 | 0. 203613 | 0. 132 | 0. 088 | 5. 28E-05 | Neo-G | ELOVL6         |
| ACADS. 2   | 3. 68E-09 | -0. 12031 | 0. 065 | 0. 124 | 5. 50E-05 | Neo-G | ACADS          |

|             |           |           |        |        |           |       |                 |
|-------------|-----------|-----------|--------|--------|-----------|-------|-----------------|
| SLC6A6. 2   | 3. 69E-09 | -0. 17403 | 0. 025 | 0. 068 | 5. 52E-05 | Neo-G | SLC6A6          |
| MGAT2. 2    | 3. 75E-09 | -0. 10705 | 0. 119 | 0. 195 | 5. 60E-05 | Neo-G | MGAT2           |
| ZDHHC6. 3   | 3. 87E-09 | -0. 18813 | 0. 105 | 0. 175 | 5. 78E-05 | Neo-G | ZDHHC6          |
| ARHGEF4. 4  | 3. 92E-09 | 0. 156499 | 0. 087 | 0. 05  | 5. 86E-05 | Neo-G | ARHGEF4         |
| KIF9-AS1    | 3. 92E-09 | 0. 105126 | 0. 039 | 0. 016 | 5. 86E-05 | Neo-G | KIF9-AS1        |
| ROBO3. 1    | 3. 94E-09 | 0. 180944 | 0. 162 | 0. 111 | 5. 90E-05 | Neo-G | ROBO3           |
| SLC17A9. 6  | 3. 98E-09 | -0. 11921 | 0. 003 | 0. 033 | 5. 94E-05 | Neo-G | SLC17A9         |
| MKRN3. 4    | 4. 01E-09 | 0. 117869 | 0. 075 | 0. 041 | 6. 00E-05 | Neo-G | MKRN3           |
| FH. 3       | 4. 03E-09 | 0. 142483 | 0. 277 | 0. 219 | 6. 02E-05 | Neo-G | FH              |
| YIPF5. 3    | 4. 14E-09 | 0. 115467 | 0. 312 | 0. 256 | 6. 19E-05 | Neo-G | YIPF5           |
| RP11-727F   | 4. 21E-09 | 0. 105641 | 0. 06  | 0. 029 | 6. 29E-05 | Neo-G | RP11-727F15. 11 |
| MAP4K1. 5   | 4. 25E-09 | -0. 14474 | 0. 003 | 0. 033 | 6. 35E-05 | Neo-G | MAP4K1          |
| TBC1D4. 4   | 4. 28E-09 | -0. 1636  | 0. 015 | 0. 052 | 6. 40E-05 | Neo-G | TBC1D4          |
| EPB41L5. 3  | 4. 30E-09 | 0. 137144 | 0. 081 | 0. 045 | 6. 43E-05 | Neo-G | EPB41L5         |
| DOK5. 6     | 4. 40E-09 | -0. 14512 | 0. 116 | 0. 191 | 6. 57E-05 | Neo-G | DOK5            |
| PGBD5       | 4. 40E-09 | 0. 105128 | 0. 057 | 0. 028 | 6. 58E-05 | Neo-G | PGBD5           |
| CTSW. 3     | 4. 42E-09 | -0. 20571 | 0. 003 | 0. 032 | 6. 60E-05 | Neo-G | CTSW            |
| KDM4B. 4    | 4. 42E-09 | 0. 206096 | 0. 176 | 0. 127 | 6. 61E-05 | Neo-G | KDM4B           |
| COX6B1. 3   | 4. 44E-09 | -0. 21157 | 0. 888 | 0. 841 | 6. 63E-05 | Neo-G | COX6B1          |
| ALKBH5. 5   | 4. 46E-09 | 0. 153979 | 0. 373 | 0. 317 | 6. 66E-05 | Neo-G | ALKBH5          |
| TRAPPC2. 1  | 4. 46E-09 | 0. 13901  | 0. 139 | 0. 091 | 6. 66E-05 | Neo-G | TRAPPC2         |
| TK2. 3      | 4. 52E-09 | -0. 12395 | 0. 07  | 0. 13  | 6. 75E-05 | Neo-G | TK2             |
| LMTK3       | 4. 53E-09 | 0. 108556 | 0. 042 | 0. 018 | 6. 77E-05 | Neo-G | LMTK3           |
| UBA5. 2     | 4. 56E-09 | 0. 184048 | 0. 23  | 0. 179 | 6. 81E-05 | Neo-G | UBA5            |
| SKI. 5      | 4. 57E-09 | -0. 13439 | 0. 092 | 0. 158 | 6. 83E-05 | Neo-G | SKI             |
| SETD3. 4    | 4. 62E-09 | -0. 10787 | 0. 095 | 0. 163 | 6. 91E-05 | Neo-G | SETD3           |
| GGA2. 7     | 4. 64E-09 | -0. 20195 | 0. 086 | 0. 146 | 6. 94E-05 | Neo-G | GGA2            |
| PLCB2. 7    | 4. 71E-09 | -0. 20451 | 0. 024 | 0. 065 | 7. 04E-05 | Neo-G | PLCB2           |
| TMCC1. 6    | 4. 74E-09 | 0. 199983 | 0. 156 | 0. 108 | 7. 08E-05 | Neo-G | TMCC1           |
| TAF15. 5    | 4. 78E-09 | 0. 119292 | 0. 323 | 0. 267 | 7. 15E-05 | Neo-G | TAF15           |
| ADAM8. 6    | 4. 79E-09 | -0. 16136 | 0. 012 | 0. 047 | 7. 16E-05 | Neo-G | ADAM8           |
| NUP107. 6   | 4. 80E-09 | 0. 183424 | 0. 277 | 0. 217 | 7. 18E-05 | Neo-G | NUP107          |
| TPPP3. 7    | 4. 82E-09 | -0. 28314 | 0. 097 | 0. 161 | 7. 20E-05 | Neo-G | TPPP3           |
| NAP1L1. 3   | 4. 89E-09 | -0. 24826 | 0. 642 | 0. 678 | 7. 31E-05 | Neo-G | NAP1L1          |
| TUBA4A. 3   | 4. 91E-09 | -0. 21211 | 0. 019 | 0. 058 | 7. 34E-05 | Neo-G | TUBA4A          |
| RP11-345F   | 4. 98E-09 | 0. 223138 | 0. 207 | 0. 159 | 7. 45E-05 | Neo-G | RP11-345P4. 9   |
| HFE         | 5. 00E-09 | -0. 10398 | 0. 002 | 0. 031 | 7. 47E-05 | Neo-G | HFE             |
| AGPAT4. 4   | 5. 13E-09 | 0. 166925 | 0. 145 | 0. 098 | 7. 67E-05 | Neo-G | AGPAT4          |
| PECR        | 5. 14E-09 | -0. 11859 | 0. 036 | 0. 084 | 7. 69E-05 | Neo-G | PECR            |
| CEP89. 4    | 5. 20E-09 | 0. 142991 | 0. 175 | 0. 125 | 7. 78E-05 | Neo-G | CEP89           |
| SPG11. 3    | 5. 25E-09 | -0. 13204 | 0. 064 | 0. 123 | 7. 85E-05 | Neo-G | SPG11           |
| PCMTD1. 3   | 5. 30E-09 | 0. 116757 | 0. 205 | 0. 146 | 7. 92E-05 | Neo-G | PCMTD1          |
| ZNF385A. 7  | 5. 34E-09 | -0. 20682 | 0. 084 | 0. 143 | 7. 98E-05 | Neo-G | ZNF385A         |
| CATSPER1. 5 | 5. 35E-09 | -0. 14762 | 0. 002 | 0. 029 | 8. 00E-05 | Neo-G | CATSPER1        |
| DPP3. 2     | 5. 37E-09 | 0. 157432 | 0. 237 | 0. 183 | 8. 03E-05 | Neo-G | DPP3            |
| ACTR8       | 5. 46E-09 | 0. 152966 | 0. 148 | 0. 1   | 8. 16E-05 | Neo-G | ACTR8           |
| STEAP1. 2   | 5. 59E-09 | -0. 13479 | 0. 002 | 0. 029 | 8. 36E-05 | Neo-G | STEAP1          |
| CLASP1. 6   | 5. 67E-09 | 0. 218704 | 0. 181 | 0. 133 | 8. 47E-05 | Neo-G | CLASP1          |
| KIAA0141. 5 | 5. 88E-09 | -0. 16742 | 0. 07  | 0. 128 | 8. 78E-05 | Neo-G | KIAA0141        |
| IMMP2L. 5   | 5. 93E-09 | 0. 144161 | 0. 193 | 0. 139 | 8. 86E-05 | Neo-G | IMMP2L          |
| GJB1. 5     | 6. 08E-09 | -0. 1897  | 0. 001 | 0. 028 | 9. 09E-05 | Neo-G | GJB1            |

|           |          |          |       |       |          |       |               |
|-----------|----------|----------|-------|-------|----------|-------|---------------|
| C5orf63.2 | 6.10E-09 | 0.132445 | 0.104 | 0.063 | 9.12E-05 | Neo-G | C5orf63       |
| WDFY4.6   | 6.12E-09 | -0.12142 | 0.002 | 0.029 | 9.15E-05 | Neo-G | WDFY4         |
| AKAP1.2   | 6.15E-09 | 0.173288 | 0.166 | 0.116 | 9.19E-05 | Neo-G | AKAP1         |
| NCOA3.4   | 6.18E-09 | -0.11129 | 0.071 | 0.132 | 9.24E-05 | Neo-G | NCOA3         |
| SLK       | 6.19E-09 | -0.10188 | 0.029 | 0.074 | 9.25E-05 | Neo-G | SLK           |
| CYP19A1.2 | 6.27E-09 | -0.1273  | 0.001 | 0.028 | 9.37E-05 | Neo-G | CYP19A1       |
| NR6A1     | 6.28E-09 | 0.102771 | 0.066 | 0.034 | 9.38E-05 | Neo-G | NR6A1         |
| PIM3.7    | 6.29E-09 | -0.17614 | 0.128 | 0.198 | 9.40E-05 | Neo-G | PIM3          |
| ATHL1.1   | 6.39E-09 | -0.11582 | 0.006 | 0.038 | 9.56E-05 | Neo-G | ATHL1         |
| SCAF4.1   | 6.42E-09 | 0.184143 | 0.185 | 0.135 | 9.60E-05 | Neo-G | SCAF4         |
| EHMT1.3   | 6.56E-09 | 0.184104 | 0.191 | 0.141 | 9.81E-05 | Neo-G | EHMT1         |
| PELP1.5   | 6.57E-09 | 0.18572  | 0.195 | 0.145 | 9.81E-05 | Neo-G | PELP1         |
| RMI1.2    | 6.58E-09 | 0.155751 | 0.094 | 0.056 | 9.83E-05 | Neo-G | RMI1          |
| TNFRSF11A | 6.63E-09 | -0.10883 | 0.001 | 0.027 | 9.90E-05 | Neo-G | TNFRSF11A     |
| ASPA      | 6.64E-09 | -0.17187 | 0.002 | 0.029 | 9.93E-05 | Neo-G | ASPA          |
| C3orf18.1 | 6.65E-09 | 0.121058 | 0.066 | 0.034 | 9.94E-05 | Neo-G | C3orf18       |
| CTSK.4    | 6.73E-09 | -0.1236  | 0.016 | 0.054 | 0.000101 | Neo-G | CTSK          |
| FAM53B.4  | 6.77E-09 | -0.14294 | 0.017 | 0.055 | 0.000101 | Neo-G | FAM53B        |
| DSEL.7    | 6.83E-09 | -0.17928 | 0.156 | 0.233 | 0.000102 | Neo-G | DSEL          |
| TRAPPC12. | 6.86E-09 | 0.196247 | 0.244 | 0.192 | 0.000103 | Neo-G | TRAPPC12      |
| FAM175A.1 | 6.87E-09 | -0.11537 | 0.026 | 0.069 | 0.000103 | Neo-G | FAM175A       |
| RP11-571M | 7.02E-09 | 0.106223 | 0.054 | 0.026 | 0.000105 | Neo-G | RP11-571M6.17 |
| RPS6KA3.5 | 7.02E-09 | -0.13779 | 0.082 | 0.144 | 0.000105 | Neo-G | RPS6KA3       |
| ZFP82.5   | 7.06E-09 | 0.173793 | 0.151 | 0.104 | 0.000106 | Neo-G | ZFP82         |
| NUTM2A-AS | 7.14E-09 | -0.17765 | 0.075 | 0.134 | 0.000107 | Neo-G | NUTM2A-AS1    |
| UBALD1.5  | 7.24E-09 | 0.218053 | 0.211 | 0.162 | 0.000108 | Neo-G | UBALD1        |
| ZBTB43.2  | 7.27E-09 | 0.148228 | 0.197 | 0.144 | 0.000109 | Neo-G | ZBTB43        |
| COQ10A.4  | 7.42E-09 | 0.17631  | 0.141 | 0.096 | 0.000111 | Neo-G | COQ10A        |
| CHST15.2  | 7.45E-09 | -0.13629 | 0.009 | 0.043 | 0.000111 | Neo-G | CHST15        |
| TLR10.5   | 7.47E-09 | -0.12338 | 0.001 | 0.027 | 0.000112 | Neo-G | TLR10         |
| PBX3.3    | 7.50E-09 | 0.218663 | 0.159 | 0.113 | 0.000112 | Neo-G | PBX3          |
| MAP1LC3B2 | 7.54E-09 | 0.125422 | 0.126 | 0.079 | 0.000113 | Neo-G | MAP1LC3B2     |
| RNASE4.2  | 7.55E-09 | -0.21587 | 0.007 | 0.039 | 0.000113 | Neo-G | RNASE4        |
| TRIM32.3  | 7.66E-09 | 0.136289 | 0.091 | 0.054 | 0.000115 | Neo-G | TRIM32        |
| DOPEY1    | 7.67E-09 | 0.122682 | 0.075 | 0.041 | 0.000115 | Neo-G | DOPEY1        |
| LZTS1.6   | 7.72E-09 | 0.16969  | 0.093 | 0.056 | 0.000115 | Neo-G | LZTS1         |
| CNR1.5    | 7.73E-09 | 0.170569 | 0.109 | 0.069 | 0.000115 | Neo-G | CNR1          |
| ARHGEF12. | 7.74E-09 | 0.202145 | 0.203 | 0.155 | 0.000116 | Neo-G | ARHGEF12      |
| JAK3.2    | 7.79E-09 | -0.11994 | 0.002 | 0.03  | 0.000116 | Neo-G | JAK3          |
| RUNX2.3   | 7.84E-09 | -0.13315 | 0.003 | 0.032 | 0.000117 | Neo-G | RUNX2         |
| TMEM107.2 | 7.85E-09 | -0.20122 | 0.149 | 0.226 | 0.000117 | Neo-G | TMEM107       |
| ZBTB10.3  | 7.87E-09 | 0.187803 | 0.128 | 0.085 | 0.000118 | Neo-G | ZBTB10        |
| SUPT16H.5 | 7.89E-09 | 0.12235  | 0.299 | 0.242 | 0.000118 | Neo-G | SUPT16H       |
| TNKS.7    | 7.91E-09 | 0.2229   | 0.192 | 0.143 | 0.000118 | Neo-G | TNKS          |
| NKX6-2.5  | 7.94E-09 | -0.18641 | 0.001 | 0.027 | 0.000119 | Neo-G | NKX6-2        |
| DLGAP5.6  | 7.98E-09 | -0.10225 | 0.007 | 0.039 | 0.000119 | Neo-G | DLGAP5        |
| PIGS.3    | 8.25E-09 | -0.13337 | 0.117 | 0.191 | 0.000123 | Neo-G | PIGS          |
| STK10.6   | 8.32E-09 | -0.16216 | 0.032 | 0.077 | 0.000124 | Neo-G | STK10         |
| ACYP1.4   | 8.39E-09 | 0.197303 | 0.222 | 0.171 | 0.000125 | Neo-G | ACYP1         |
| SOCS1.3   | 8.40E-09 | -0.17566 | 0.019 | 0.057 | 0.000126 | Neo-G | SOCS1         |
| HNRNPL.4  | 8.42E-09 | 0.137372 | 0.314 | 0.258 | 0.000126 | Neo-G | HNRNPL        |

|           |          |          |       |       |          |       |              |
|-----------|----------|----------|-------|-------|----------|-------|--------------|
| KHK       | 8.43E-09 | 0.160602 | 0.12  | 0.077 | 0.000126 | Neo-G | KHK          |
| RP3-460G2 | 8.44E-09 | -0.25846 | 0.024 | 0.064 | 0.000126 | Neo-G | RP3-460G2.2  |
| UFM1.1    | 8.52E-09 | 0.105812 | 0.39  | 0.336 | 0.000127 | Neo-G | UFM1         |
| RMND5B.3  | 8.58E-09 | 0.166231 | 0.211 | 0.158 | 0.000128 | Neo-G | RMND5B       |
| NTAN1.5   | 8.67E-09 | -0.11244 | 0.13  | 0.208 | 0.00013  | Neo-G | NTAN1        |
| TNFAIP8L1 | 8.70E-09 | -0.13344 | 0.038 | 0.086 | 0.00013  | Neo-G | TNFAIP8L1    |
| GPC1.6    | 8.71E-09 | -0.23554 | 0.179 | 0.244 | 0.00013  | Neo-G | GPC1         |
| CCNG1.3   | 8.72E-09 | -0.27031 | 0.198 | 0.278 | 0.00013  | Neo-G | CCNG1        |
| USP34.3   | 8.72E-09 | 0.196501 | 0.254 | 0.204 | 0.00013  | Neo-G | USP34        |
| CEP135.3  | 8.73E-09 | -0.10879 | 0.038 | 0.085 | 0.00013  | Neo-G | CEP135       |
| BECN1.4   | 8.79E-09 | -0.16784 | 0.156 | 0.239 | 0.000131 | Neo-G | BECN1        |
| FXN.3     | 8.86E-09 | -0.10603 | 0.062 | 0.119 | 0.000132 | Neo-G | FXN          |
| C17orf51. | 8.88E-09 | 0.168936 | 0.103 | 0.064 | 0.000133 | Neo-G | C17orf51     |
| ELOVL5.2  | 8.92E-09 | -0.20748 | 0.241 | 0.334 | 0.000133 | Neo-G | ELOVL5       |
| TMEM50A.5 | 8.96E-09 | -0.30868 | 0.54  | 0.598 | 0.000134 | Neo-G | TMEM50A      |
| NSL1.3    | 9.28E-09 | -0.24322 | 0.263 | 0.357 | 0.000139 | Neo-G | NSL1         |
| CAPN3.4   | 9.32E-09 | -0.29263 | 0.013 | 0.047 | 0.000139 | Neo-G | CAPN3        |
| ECHS1.4   | 9.34E-09 | -0.25163 | 0.357 | 0.444 | 0.00014  | Neo-G | ECHS1        |
| SPRTN.3   | 9.42E-09 | 0.143152 | 0.17  | 0.12  | 0.000141 | Neo-G | SPRTN        |
| ZNF7.3    | 9.46E-09 | 0.160064 | 0.207 | 0.155 | 0.000141 | Neo-G | ZNF7         |
| IREB2.2   | 9.47E-09 | -0.15267 | 0.096 | 0.162 | 0.000142 | Neo-G | IREB2        |
| PAQR8.4   | 9.56E-09 | -0.21258 | 0.052 | 0.101 | 0.000143 | Neo-G | PAQR8        |
| RNF115.4  | 9.59E-09 | 0.159919 | 0.289 | 0.238 | 0.000143 | Neo-G | RNF115       |
| UFL1.1    | 9.68E-09 | -0.14617 | 0.142 | 0.22  | 0.000145 | Neo-G | UFL1         |
| MIER1.2   | 9.74E-09 | -0.13978 | 0.112 | 0.182 | 0.000146 | Neo-G | MIER1        |
| ARHGEF25. | 9.85E-09 | 0.151734 | 0.101 | 0.061 | 0.000147 | Neo-G | ARHGEF25     |
| ENTPD3-AS | 1.00E-08 | -0.15708 | 0.043 | 0.092 | 0.000149 | Neo-G | ENTPD3-AS1   |
| COLEC12.1 | 1.01E-08 | -0.13826 | 0.006 | 0.037 | 0.000151 | Neo-G | COLEC12      |
| MAP1A.6   | 1.02E-08 | 0.147711 | 0.279 | 0.224 | 0.000153 | Neo-G | MAP1A        |
| TBC1D25.1 | 1.02E-08 | 0.164785 | 0.115 | 0.073 | 0.000153 | Neo-G | TBC1D25      |
| PHLPP1.7  | 1.03E-08 | -0.13761 | 0.042 | 0.09  | 0.000153 | Neo-G | PHLPP1       |
| UTP23.3   | 1.03E-08 | 0.148898 | 0.196 | 0.143 | 0.000153 | Neo-G | UTP23        |
| HMG20B.3  | 1.04E-08 | -0.14603 | 0.251 | 0.347 | 0.000156 | Neo-G | HMG20B       |
| MPST.4    | 1.05E-08 | -0.11207 | 0.22  | 0.317 | 0.000156 | Neo-G | MPST         |
| GREB1     | 1.05E-08 | 0.112593 | 0.048 | 0.022 | 0.000157 | Neo-G | GREB1        |
| BRAF.1    | 1.09E-08 | 0.138589 | 0.104 | 0.064 | 0.000162 | Neo-G | BRAF         |
| RNF14.3   | 1.09E-08 | 0.18845  | 0.238 | 0.19  | 0.000162 | Neo-G | RNF14        |
| TOB2.2    | 1.09E-08 | -0.12749 | 0.13  | 0.205 | 0.000163 | Neo-G | TOB2         |
| PHYH      | 1.09E-08 | -0.15018 | 0.104 | 0.174 | 0.000163 | Neo-G | PHYH         |
| RP11-212F | 1.13E-08 | 0.158969 | 0.13  | 0.087 | 0.000169 | Neo-G | RP11-212P7.2 |
| ITGB7.4   | 1.14E-08 | -0.11131 | 0.002 | 0.028 | 0.00017  | Neo-G | ITGB7        |
| CDS2.2    | 1.15E-08 | -0.15807 | 0.171 | 0.257 | 0.000172 | Neo-G | CDS2         |
| PLEK2.5   | 1.17E-08 | -0.10993 | 0.001 | 0.027 | 0.000175 | Neo-G | PLEK2        |
| CCDC106.7 | 1.18E-08 | -0.13989 | 0.162 | 0.24  | 0.000177 | Neo-G | CCDC106      |
| CENPBD1.1 | 1.19E-08 | 0.126684 | 0.107 | 0.066 | 0.000178 | Neo-G | CENPBD1      |
| LBR.4     | 1.21E-08 | 0.12922  | 0.286 | 0.226 | 0.000181 | Neo-G | LBR          |
| PSMA6.5   | 1.21E-08 | -0.28065 | 0.159 | 0.231 | 0.000181 | Neo-G | PSMA6        |
| CHD1L.4   | 1.21E-08 | -0.13535 | 0.082 | 0.144 | 0.000181 | Neo-G | CHD1L        |
| MYNN.2    | 1.25E-08 | 0.138203 | 0.145 | 0.098 | 0.000187 | Neo-G | MYNN         |
| CDH13.3   | 1.29E-08 | 0.130148 | 0.086 | 0.049 | 0.000192 | Neo-G | CDH13        |
| TCEAL1.6  | 1.30E-08 | 0.113196 | 0.306 | 0.249 | 0.000194 | Neo-G | TCEAL1       |

|            |          |          |       |       |          |       |               |
|------------|----------|----------|-------|-------|----------|-------|---------------|
| ERRFI1.3   | 1.30E-08 | -0.17443 | 0.096 | 0.158 | 0.000195 | Neo-G | ERRFI1        |
| RIOK1.2    | 1.31E-08 | 0.138809 | 0.203 | 0.15  | 0.000195 | Neo-G | RIOK1         |
| TMEM71.2   | 1.33E-08 | -0.11496 | 0.002 | 0.028 | 0.000199 | Neo-G | TMEM71        |
| CARD11.5   | 1.34E-08 | -0.1152  | 0.003 | 0.031 | 0.0002   | Neo-G | CARD11        |
| DEPTOR.3   | 1.34E-08 | -0.18988 | 0.013 | 0.048 | 0.0002   | Neo-G | DEPTOR        |
| SNUPN.3    | 1.36E-08 | -0.1277  | 0.101 | 0.17  | 0.000204 | Neo-G | SNUPN         |
| YIPF2.1    | 1.38E-08 | -0.19294 | 0.068 | 0.125 | 0.000206 | Neo-G | YIPF2         |
| MAN2A1.5   | 1.47E-08 | -0.17953 | 0.063 | 0.116 | 0.00022  | Neo-G | MAN2A1        |
| SKIL.5     | 1.51E-08 | -0.22073 | 0.216 | 0.294 | 0.000225 | Neo-G | SKIL          |
| CENPW.4    | 1.56E-08 | -0.1664  | 0.068 | 0.124 | 0.000234 | Neo-G | CENPW         |
| RANBP2.7   | 1.57E-08 | -0.18211 | 0.145 | 0.217 | 0.000235 | Neo-G | RANBP2        |
| U73166.2   | 1.59E-08 | 0.101905 | 0.053 | 0.025 | 0.000237 | Neo-G | U73166.2      |
| CWC25.1    | 1.61E-08 | 0.116633 | 0.251 | 0.195 | 0.00024  | Neo-G | CWC25         |
| PLEKH01.4  | 1.62E-08 | 0.117193 | 0.328 | 0.269 | 0.000241 | Neo-G | PLEKH01       |
| LOH12CR2.1 | 1.62E-08 | 0.131163 | 0.086 | 0.05  | 0.000242 | Neo-G | LOH12CR2      |
| CRELD2.5   | 1.63E-08 | -0.1253  | 0.203 | 0.293 | 0.000244 | Neo-G | CRELD2        |
| TCF20.2    | 1.69E-08 | 0.150652 | 0.09  | 0.053 | 0.000252 | Neo-G | TCF20         |
| CLIC2.4    | 1.70E-08 | -0.16402 | 0.013 | 0.047 | 0.000255 | Neo-G | CLIC2         |
| FAM129B.5  | 1.71E-08 | -0.10465 | 0.034 | 0.078 | 0.000256 | Neo-G | FAM129B       |
| ACSS1.4    | 1.72E-08 | -0.11112 | 0.053 | 0.106 | 0.000258 | Neo-G | ACSS1         |
| RBMX2.2    | 1.72E-08 | 0.136739 | 0.282 | 0.23  | 0.000258 | Neo-G | RBMX2         |
| FUT11.1    | 1.73E-08 | -0.10601 | 0.033 | 0.077 | 0.000258 | Neo-G | FUT11         |
| NLN.5      | 1.74E-08 | 0.194286 | 0.228 | 0.18  | 0.000261 | Neo-G | NLN           |
| SPRYD4.1   | 1.75E-08 | -0.13823 | 0.032 | 0.076 | 0.000261 | Neo-G | SPRYD4        |
| NEMF.1     | 1.78E-08 | 0.141415 | 0.368 | 0.322 | 0.000265 | Neo-G | NEMF          |
| PPARG.4    | 1.79E-08 | -0.11292 | 0.002 | 0.028 | 0.000268 | Neo-G | PPARG         |
| RP11-69E1  | 1.79E-08 | 0.12546  | 0.101 | 0.061 | 0.000268 | Neo-G | RP11-69E11.4  |
| HMGN5.1    | 1.83E-08 | -0.13976 | 0.047 | 0.096 | 0.000273 | Neo-G | HMGN5         |
| SLC12A9.6  | 1.85E-08 | -0.1563  | 0.137 | 0.209 | 0.000276 | Neo-G | SLC12A9       |
| LILRA4.2   | 1.85E-08 | -0.13832 | 0.001 | 0.026 | 0.000276 | Neo-G | LILRA4        |
| NMNAT1.1   | 1.88E-08 | -0.10531 | 0.036 | 0.082 | 0.000282 | Neo-G | NMNAT1        |
| MAP3K11.4  | 1.89E-08 | -0.15152 | 0.12  | 0.19  | 0.000282 | Neo-G | MAP3K11       |
| RP13-516M  | 1.89E-08 | -0.13203 | 0.005 | 0.035 | 0.000282 | Neo-G | RP13-516M14.4 |
| PTCRA.3    | 1.90E-08 | -0.11952 | 0.001 | 0.026 | 0.000285 | Neo-G | PTCRA         |
| SPNS3.4    | 1.91E-08 | -0.12495 | 0.001 | 0.026 | 0.000286 | Neo-G | SPNS3         |
| SFXN3.2    | 1.93E-08 | -0.12931 | 0.063 | 0.118 | 0.000288 | Neo-G | SFXN3         |
| C9orf114.1 | 1.93E-08 | -0.13351 | 0.086 | 0.149 | 0.000288 | Neo-G | C9orf114      |
| TMCC3.5    | 1.96E-08 | -0.12921 | 0.034 | 0.078 | 0.000292 | Neo-G | TMCC3         |
| SNHG12.5   | 1.96E-08 | -0.22155 | 0.083 | 0.14  | 0.000293 | Neo-G | SNHG12        |
| RNU12.3    | 1.98E-08 | -0.19986 | 0.009 | 0.041 | 0.000296 | Neo-G | RNU12         |
| ZNF445.1   | 2.00E-08 | 0.101079 | 0.099 | 0.059 | 0.000299 | Neo-G | ZNF445        |
| IKBKB.2    | 2.01E-08 | -0.12318 | 0.068 | 0.124 | 0.000301 | Neo-G | IKBKB         |
| ATPAF1.6   | 2.02E-08 | 0.164695 | 0.285 | 0.234 | 0.000301 | Neo-G | ATPAF1        |
| MSL1.2     | 2.03E-08 | 0.181158 | 0.201 | 0.153 | 0.000304 | Neo-G | MSL1          |
| RP11-353N  | 2.06E-08 | -0.11692 | 0     | 0.024 | 0.000307 | Neo-G | RP11-353N4.5  |
| ARNT.2     | 2.08E-08 | -0.11497 | 0.034 | 0.078 | 0.00031  | Neo-G | ARNT          |
| MXD3.6     | 2.10E-08 | -0.12755 | 0.027 | 0.067 | 0.000314 | Neo-G | MXD3          |
| AIMP2.3    | 2.12E-08 | 0.111883 | 0.288 | 0.234 | 0.000316 | Neo-G | AIMP2         |
| RP11-115C  | 2.16E-08 | 0.173121 | 0.123 | 0.081 | 0.000323 | Neo-G | RP11-115C21.2 |
| LYPD6      | 2.16E-08 | 0.103391 | 0.043 | 0.019 | 0.000324 | Neo-G | LYPD6         |
| WDR92.3    | 2.19E-08 | 0.148908 | 0.116 | 0.075 | 0.000327 | Neo-G | WDR92         |



|            |           |           |        |        |           |       |               |
|------------|-----------|-----------|--------|--------|-----------|-------|---------------|
| TREML1. 4  | 2. 20E-08 | -0. 12145 | 0      | 0. 024 | 0. 000328 | Neo-G | TREML1        |
| PAAF1. 4   | 2. 23E-08 | 0. 147268 | 0. 245 | 0. 194 | 0. 000333 | Neo-G | PAAF1         |
| FAM103A1.  | 2. 27E-08 | -0. 22382 | 0. 17  | 0. 252 | 0. 000339 | Neo-G | FAM103A1      |
| ZNF32. 3   | 2. 27E-08 | 0. 18617  | 0. 266 | 0. 217 | 0. 00034  | Neo-G | ZNF32         |
| CSF2RB. 5  | 2. 29E-08 | -0. 10443 | 0. 002 | 0. 027 | 0. 000342 | Neo-G | CSF2RB        |
| SNAP29. 4  | 2. 29E-08 | -0. 11896 | 0. 153 | 0. 234 | 0. 000342 | Neo-G | SNAP29        |
| ZNF232. 5  | 2. 33E-08 | 0. 148026 | 0. 116 | 0. 075 | 0. 000349 | Neo-G | ZNF232        |
| SLC15A2. 1 | 2. 34E-08 | -0. 10732 | 0. 002 | 0. 027 | 0. 00035  | Neo-G | SLC15A2       |
| TRIM21     | 2. 35E-08 | -0. 10936 | 0. 012 | 0. 045 | 0. 000352 | Neo-G | TRIM21        |
| PLXNA2. 1  | 2. 36E-08 | 0. 126495 | 0. 079 | 0. 045 | 0. 000352 | Neo-G | PLXNA2        |
| LRRC20     | 2. 36E-08 | 0. 14634  | 0. 079 | 0. 045 | 0. 000353 | Neo-G | LRRC20        |
| MARK1. 4   | 2. 37E-08 | 0. 1625   | 0. 101 | 0. 063 | 0. 000354 | Neo-G | MARK1         |
| PCSK1. 4   | 2. 39E-08 | -0. 13827 | 0. 007 | 0. 037 | 0. 000358 | Neo-G | PCSK1         |
| GSS. 3     | 2. 41E-08 | -0. 14929 | 0. 167 | 0. 249 | 0. 00036  | Neo-G | GSS           |
| BAG4       | 2. 41E-08 | 0. 144956 | 0. 145 | 0. 099 | 0. 000361 | Neo-G | BAG4          |
| FMN1. 6    | 2. 49E-08 | -0. 12774 | 0. 006 | 0. 035 | 0. 000372 | Neo-G | FMN1          |
| COA6. 3    | 2. 53E-08 | -0. 16931 | 0. 198 | 0. 286 | 0. 000379 | Neo-G | COA6          |
| ST13       | 2. 55E-08 | -0. 22562 | 0. 612 | 0. 655 | 0. 000381 | Neo-G | ST13          |
| CARNS1. 5  | 2. 56E-08 | -0. 22535 | 0. 004 | 0. 031 | 0. 000382 | Neo-G | CARNS1        |
| TRAPPC6A.  | 2. 58E-08 | -0. 20427 | 0. 185 | 0. 268 | 0. 000386 | Neo-G | TRAPPC6A      |
| RP11-46H1  | 2. 59E-08 | -0. 24052 | 0. 003 | 0. 03  | 0. 000387 | Neo-G | RP11-46H1. 3  |
| LINC00493  | 2. 60E-08 | -0. 25728 | 0. 463 | 0. 538 | 0. 000388 | Neo-G | LINC00493     |
| COG8. 4    | 2. 63E-08 | 0. 148163 | 0. 13  | 0. 087 | 0. 000393 | Neo-G | COG8          |
| FOXRED1. 3 | 2. 63E-08 | 0. 158551 | 0. 147 | 0. 102 | 0. 000393 | Neo-G | FOXRED1       |
| LAMTOR4. 1 | 2. 65E-08 | -0. 24761 | 0. 752 | 0. 766 | 0. 000396 | Neo-G | LAMTOR4       |
| MYRF. 5    | 2. 68E-08 | -0. 18575 | 0. 005 | 0. 034 | 0. 0004   | Neo-G | MYRF          |
| PPIL6. 6   | 2. 70E-08 | 0. 122303 | 0. 078 | 0. 044 | 0. 000403 | Neo-G | PPIL6         |
| SLC25A24.  | 2. 73E-08 | -0. 10762 | 0. 053 | 0. 104 | 0. 000408 | Neo-G | SLC25A24      |
| EMG1. 3    | 2. 74E-08 | -0. 20885 | 0. 165 | 0. 243 | 0. 000409 | Neo-G | EMG1          |
| CCDC74A. 4 | 2. 79E-08 | 0. 128506 | 0. 079 | 0. 045 | 0. 000418 | Neo-G | CCDC74A       |
| IL17RB. 5  | 2. 80E-08 | -0. 11841 | 0. 015 | 0. 049 | 0. 000418 | Neo-G | IL17RB        |
| CASP10. 3  | 2. 83E-08 | -0. 12533 | 0. 002 | 0. 028 | 0. 000422 | Neo-G | CASP10        |
| ENPP4. 4   | 2. 84E-08 | -0. 15533 | 0. 021 | 0. 058 | 0. 000425 | Neo-G | ENPP4         |
| EIF2B5. 2  | 2. 85E-08 | 0. 146002 | 0. 229 | 0. 178 | 0. 000426 | Neo-G | EIF2B5        |
| MLF1. 4    | 2. 86E-08 | 0. 107211 | 0. 29  | 0. 236 | 0. 000428 | Neo-G | MLF1          |
| CDCA3. 6   | 2. 86E-08 | -0. 14101 | 0. 02  | 0. 056 | 0. 000428 | Neo-G | CDCA3         |
| SPINT1. 6  | 2. 90E-08 | -0. 11961 | 0. 007 | 0. 037 | 0. 000434 | Neo-G | SPINT1        |
| DENR. 3    | 2. 90E-08 | 0. 133233 | 0. 361 | 0. 315 | 0. 000434 | Neo-G | DENR          |
| PSD4. 3    | 2. 93E-08 | -0. 10279 | 0. 005 | 0. 034 | 0. 000438 | Neo-G | PSD4          |
| SLC33A1. 1 | 2. 94E-08 | -0. 10815 | 0. 075 | 0. 133 | 0. 000439 | Neo-G | SLC33A1       |
| FCER1A. 3  | 2. 96E-08 | -0. 13881 | 0. 002 | 0. 027 | 0. 000442 | Neo-G | FCER1A        |
| RAB11FIP1  | 2. 97E-08 | -0. 11721 | 0. 003 | 0. 03  | 0. 000445 | Neo-G | RAB11FIP1     |
| CASP9. 3   | 2. 99E-08 | -0. 12718 | 0. 042 | 0. 089 | 0. 000446 | Neo-G | CASP9         |
| PPP2R5C. 3 | 2. 99E-08 | -0. 19182 | 0. 183 | 0. 267 | 0. 000447 | Neo-G | PPP2R5C       |
| TMA16. 4   | 3. 04E-08 | -0. 15771 | 0. 134 | 0. 208 | 0. 000454 | Neo-G | TMA16         |
| THSD4. 2   | 3. 05E-08 | -0. 10238 | 0. 002 | 0. 028 | 0. 000455 | Neo-G | THSD4         |
| CTD-2336C  | 3. 06E-08 | -0. 14079 | 0. 155 | 0. 232 | 0. 000458 | Neo-G | CTD-233602. 1 |
| ZBTB44. 2  | 3. 08E-08 | 0. 164058 | 0. 162 | 0. 115 | 0. 00046  | Neo-G | ZBTB44        |
| NMRK1. 5   | 3. 09E-08 | -0. 27221 | 0. 09  | 0. 145 | 0. 000461 | Neo-G | NMRK1         |
| PSMC3IP. 6 | 3. 09E-08 | 0. 148072 | 0. 105 | 0. 066 | 0. 000462 | Neo-G | PSMC3IP       |
| DHRS9. 3   | 3. 13E-08 | -0. 1773  | 0. 001 | 0. 025 | 0. 000467 | Neo-G | DHRS9         |

|            |           |           |        |        |           |       |               |
|------------|-----------|-----------|--------|--------|-----------|-------|---------------|
| SPG21. 6   | 3. 20E-08 | -0. 2034  | 0. 302 | 0. 395 | 0. 000477 | Neo-G | SPG21         |
| CETN3. 4   | 3. 25E-08 | 0. 173763 | 0. 189 | 0. 141 | 0. 000486 | Neo-G | CETN3         |
| CP. 2      | 3. 26E-08 | -0. 13719 | 0. 004 | 0. 031 | 0. 000487 | Neo-G | CP            |
| SVIP. 4    | 3. 27E-08 | -0. 30021 | 0. 118 | 0. 176 | 0. 000489 | Neo-G | SVIP          |
| SLC12A2. 6 | 3. 27E-08 | -0. 16976 | 0. 079 | 0. 136 | 0. 000489 | Neo-G | SLC12A2       |
| HP. 2      | 3. 30E-08 | -0. 329   | 0. 002 | 0. 027 | 0. 000493 | Neo-G | HP            |
| MAPK13. 4  | 3. 45E-08 | -0. 11949 | 0. 005 | 0. 034 | 0. 000515 | Neo-G | MAPK13        |
| FNDC3A. 3  | 3. 46E-08 | -0. 12766 | 0. 145 | 0. 223 | 0. 000518 | Neo-G | FNDC3A        |
| SLC15A4. 1 | 3. 50E-08 | -0. 12754 | 0. 035 | 0. 079 | 0. 000523 | Neo-G | SLC15A4       |
| SF3A1. 3   | 3. 52E-08 | -0. 11638 | 0. 112 | 0. 181 | 0. 000527 | Neo-G | SF3A1         |
| TAL1. 3    | 3. 54E-08 | -0. 1671  | 0. 008 | 0. 037 | 0. 000529 | Neo-G | TAL1          |
| DCAF8. 2   | 3. 56E-08 | -0. 13329 | 0. 14  | 0. 216 | 0. 000532 | Neo-G | DCAF8         |
| VNN2. 4    | 3. 60E-08 | -0. 1078  | 0. 002 | 0. 028 | 0. 000538 | Neo-G | VNN2          |
| NFATC1. 5  | 3. 69E-08 | -0. 12229 | 0. 02  | 0. 056 | 0. 000552 | Neo-G | NFATC1        |
| SETD9. 1   | 3. 71E-08 | -0. 13337 | 0. 079 | 0. 139 | 0. 000554 | Neo-G | SETD9         |
| RAD17. 3   | 3. 72E-08 | 0. 191355 | 0. 17  | 0. 125 | 0. 000555 | Neo-G | RAD17         |
| ARV1. 5    | 3. 77E-08 | 0. 126105 | 0. 224 | 0. 173 | 0. 000563 | Neo-G | ARV1          |
| GRIPAP1. 2 | 3. 78E-08 | 0. 160925 | 0. 237 | 0. 187 | 0. 000564 | Neo-G | GRIPAP1       |
| PPP1R1C. 4 | 3. 80E-08 | -0. 11453 | 0. 003 | 0. 029 | 0. 000567 | Neo-G | PPP1R1C       |
| CTA-384D8  | 3. 81E-08 | -0. 11142 | 0. 002 | 0. 026 | 0. 00057  | Neo-G | CTA-384D8. 34 |
| SUPT7L. 1  | 3. 83E-08 | 0. 139726 | 0. 234 | 0. 184 | 0. 000573 | Neo-G | SUPT7L        |
| CLEC2D. 1  | 3. 86E-08 | -0. 14997 | 0. 003 | 0. 029 | 0. 000576 | Neo-G | CLEC2D        |
| CAPN1. 4   | 3. 87E-08 | 0. 115706 | 0. 308 | 0. 253 | 0. 000578 | Neo-G | CAPN1         |
| ADCK3. 3   | 3. 90E-08 | -0. 13676 | 0. 077 | 0. 134 | 0. 000583 | Neo-G | ADCK3         |
| SEMA4C. 2  | 3. 99E-08 | 0. 122037 | 0. 135 | 0. 09  | 0. 000597 | Neo-G | SEMA4C        |
| FGFR2. 5   | 4. 03E-08 | -0. 15917 | 0. 016 | 0. 051 | 0. 000602 | Neo-G | FGFR2         |
| ASXL2. 3   | 4. 07E-08 | -0. 10036 | 0. 053 | 0. 104 | 0. 000609 | Neo-G | ASXL2         |
| MID1IP1. 3 | 4. 09E-08 | -0. 25032 | 0. 197 | 0. 269 | 0. 000612 | Neo-G | MID1IP1       |
| TCTN3      | 4. 14E-08 | -0. 13161 | 0. 089 | 0. 15  | 0. 000619 | Neo-G | TCTN3         |
| NEK7. 1    | 4. 16E-08 | -0. 11744 | 0. 037 | 0. 081 | 0. 000621 | Neo-G | NEK7          |
| LLPH. 3    | 4. 21E-08 | -0. 19813 | 0. 194 | 0. 277 | 0. 000629 | Neo-G | LLPH          |
| NCOR2. 4   | 4. 22E-08 | -0. 10732 | 0. 157 | 0. 24  | 0. 000631 | Neo-G | NCOR2         |
| TNKS2. 4   | 4. 23E-08 | -0. 11912 | 0. 063 | 0. 116 | 0. 000632 | Neo-G | TNKS2         |
| FHIT. 3    | 4. 34E-08 | -0. 23691 | 0. 07  | 0. 122 | 0. 000649 | Neo-G | FHIT          |
| UPF2. 3    | 4. 36E-08 | -0. 23082 | 0. 154 | 0. 225 | 0. 000652 | Neo-G | UPF2          |
| SAE1. 4    | 4. 37E-08 | 0. 100013 | 0. 322 | 0. 267 | 0. 000653 | Neo-G | SAE1          |
| PSD3. 6    | 4. 38E-08 | 0. 215326 | 0. 234 | 0. 189 | 0. 000654 | Neo-G | PSD3          |
| SEMA4F     | 4. 41E-08 | 0. 103647 | 0. 054 | 0. 027 | 0. 000658 | Neo-G | SEMA4F        |
| HINT2. 3   | 4. 42E-08 | -0. 17589 | 0. 266 | 0. 355 | 0. 000661 | Neo-G | HINT2         |
| LACC1. 3   | 4. 47E-08 | -0. 12223 | 0. 008 | 0. 037 | 0. 000668 | Neo-G | LACC1         |
| TECPR2. 2  | 4. 50E-08 | -0. 10488 | 0. 027 | 0. 067 | 0. 000672 | Neo-G | TECPR2        |
| DNAJC10. 2 | 4. 52E-08 | -0. 12885 | 0. 132 | 0. 205 | 0. 000676 | Neo-G | DNAJC10       |
| RPUSD1. 3  | 4. 54E-08 | 0. 199049 | 0. 174 | 0. 129 | 0. 000678 | Neo-G | RPUSD1        |
| CYSLTR1. 5 | 4. 56E-08 | -0. 11823 | 0. 002 | 0. 028 | 0. 000681 | Neo-G | CYSLTR1       |
| SLC7A5. 7  | 4. 64E-08 | -0. 23973 | 0. 09  | 0. 144 | 0. 000694 | Neo-G | SLC7A5        |
| PIK3CG. 4  | 4. 66E-08 | -0. 10261 | 0. 001 | 0. 025 | 0. 000697 | Neo-G | PIK3CG        |
| ZNF582-AS  | 4. 71E-08 | 0. 110231 | 0. 113 | 0. 072 | 0. 000704 | Neo-G | ZNF582-AS1    |
| UBR7. 3    | 4. 72E-08 | -0. 11686 | 0. 068 | 0. 123 | 0. 000706 | Neo-G | UBR7          |
| ALOX15B. 5 | 4. 75E-08 | -0. 14234 | 0. 003 | 0. 029 | 0. 000709 | Neo-G | ALOX15B       |
| LINC00342  | 4. 77E-08 | 0. 116535 | 0. 057 | 0. 029 | 0. 000713 | Neo-G | LINC00342     |
| PSEN1. 2   | 4. 82E-08 | -0. 15102 | 0. 119 | 0. 186 | 0. 000721 | Neo-G | PSEN1         |

|             |           |           |        |        |           |       |                 |
|-------------|-----------|-----------|--------|--------|-----------|-------|-----------------|
| NRARP. 3    | 4. 86E-08 | -0. 11048 | 0. 009 | 0. 039 | 0. 000727 | Neo-G | NRARP           |
| RP11-160C   | 4. 87E-08 | -0. 13798 | 0. 005 | 0. 032 | 0. 000728 | Neo-G | RP11-16005. 1   |
| FAM118B. 4  | 5. 02E-08 | 0. 168824 | 0. 189 | 0. 141 | 0. 000749 | Neo-G | FAM118B         |
| GPS1. 4     | 5. 04E-08 | 0. 119975 | 0. 366 | 0. 319 | 0. 000753 | Neo-G | GPS1            |
| SLC44A3. 3  | 5. 08E-08 | -0. 107   | 0. 005 | 0. 033 | 0. 000759 | Neo-G | SLC44A3         |
| DIS3L2. 1   | 5. 14E-08 | 0. 136644 | 0. 141 | 0. 097 | 0. 000769 | Neo-G | DIS3L2          |
| SLC25A42. 5 | 5. 17E-08 | 0. 138888 | 0. 079 | 0. 045 | 0. 000773 | Neo-G | SLC25A42        |
| MPP1. 7     | 5. 18E-08 | -0. 28346 | 0. 148 | 0. 207 | 0. 000773 | Neo-G | MPP1            |
| ACSL3. 3    | 5. 19E-08 | 0. 122908 | 0. 391 | 0. 335 | 0. 000776 | Neo-G | ACSL3           |
| ANKRD50. 2  | 5. 24E-08 | 0. 147934 | 0. 079 | 0. 045 | 0. 000783 | Neo-G | ANKRD50         |
| STX10       | 5. 25E-08 | -0. 21026 | 0. 276 | 0. 366 | 0. 000784 | Neo-G | STX10           |
| VRK2. 7     | 5. 31E-08 | -0. 16064 | 0. 022 | 0. 058 | 0. 000793 | Neo-G | VRK2            |
| ABHD5. 2    | 5. 33E-08 | -0. 17851 | 0. 065 | 0. 117 | 0. 000796 | Neo-G | ABHD5           |
| PGBD1. 3    | 5. 39E-08 | 0. 15774  | 0. 104 | 0. 067 | 0. 000806 | Neo-G | PGBD1           |
| IMMT. 3     | 5. 48E-08 | 0. 105331 | 0. 348 | 0. 297 | 0. 000819 | Neo-G | IMMT            |
| CBLB. 1     | 5. 49E-08 | 0. 141253 | 0. 112 | 0. 072 | 0. 000821 | Neo-G | CBLB            |
| CGGBP1. 3   | 5. 58E-08 | 0. 140917 | 0. 313 | 0. 264 | 0. 000835 | Neo-G | CGGBP1          |
| TIMM10B. 2  | 5. 60E-08 | -0. 18491 | 0. 116 | 0. 183 | 0. 000838 | Neo-G | TIMM10B         |
| AQP9. 3     | 5. 65E-08 | -0. 12165 | 0. 005 | 0. 032 | 0. 000845 | Neo-G | AQP9            |
| CAMKMT. 4   | 5. 81E-08 | 0. 183277 | 0. 11  | 0. 071 | 0. 000868 | Neo-G | CAMKMT          |
| RP11-597D   | 5. 83E-08 | -0. 13624 | 0. 002 | 0. 026 | 0. 000871 | Neo-G | RP11-597D13. 8  |
| GNPDA2. 4   | 5. 92E-08 | 0. 155541 | 0. 165 | 0. 12  | 0. 000884 | Neo-G | GNPDA2          |
| WASL. 5     | 5. 94E-08 | 0. 185809 | 0. 225 | 0. 178 | 0. 000888 | Neo-G | WASL            |
| UBE2J1. 3   | 5. 98E-08 | -0. 14481 | 0. 207 | 0. 29  | 0. 000893 | Neo-G | UBE2J1          |
| CLOCK. 5    | 5. 98E-08 | 0. 148239 | 0. 171 | 0. 123 | 0. 000894 | Neo-G | CLOCK           |
| CEACAM21. 6 | 6. 25E-08 | -0. 11053 | 0      | 0. 023 | 0. 000934 | Neo-G | CEACAM21        |
| RP11-386G   | 6. 26E-08 | -0. 26033 | 0. 093 | 0. 15  | 0. 000936 | Neo-G | RP11-386G11. 10 |
| SLC37A4. 2  | 6. 32E-08 | -0. 14392 | 0. 072 | 0. 127 | 0. 000944 | Neo-G | SLC37A4         |
| ATP5L2. 3   | 6. 45E-08 | -0. 30193 | 0. 053 | 0. 098 | 0. 000964 | Neo-G | ATP5L2          |
| TRPT1. 2    | 6. 55E-08 | -0. 14291 | 0. 154 | 0. 232 | 0. 000979 | Neo-G | TRPT1           |
| JMY. 4      | 6. 58E-08 | 0. 142166 | 0. 14  | 0. 096 | 0. 000983 | Neo-G | JMY             |
| FAM122A. 5  | 6. 79E-08 | 0. 166216 | 0. 186 | 0. 138 | 0. 001015 | Neo-G | FAM122A         |
| ADAM15. 3   | 6. 87E-08 | -0. 12013 | 0. 068 | 0. 121 | 0. 001026 | Neo-G | ADAM15          |
| ZCCHC6. 6   | 6. 94E-08 | -0. 17357 | 0. 086 | 0. 141 | 0. 001037 | Neo-G | ZCCHC6          |
| VPS37B. 5   | 6. 98E-08 | 0. 12542  | 0. 302 | 0. 249 | 0. 001044 | Neo-G | VPS37B          |
| ERMAP. 1    | 7. 03E-08 | -0. 10013 | 0. 015 | 0. 048 | 0. 00105  | Neo-G | ERMAP           |
| HHLA3. 6    | 7. 07E-08 | -0. 18359 | 0. 087 | 0. 146 | 0. 001057 | Neo-G | HHLA3           |
| ARMC8. 2    | 7. 09E-08 | 0. 109537 | 0. 247 | 0. 194 | 0. 001059 | Neo-G | ARMC8           |
| THAP2. 1    | 7. 12E-08 | 0. 11723  | 0. 17  | 0. 121 | 0. 001064 | Neo-G | THAP2           |
| CDK13. 1    | 7. 12E-08 | 0. 174527 | 0. 159 | 0. 114 | 0. 001064 | Neo-G | CDK13           |
| DNAAF1. 4   | 7. 18E-08 | -0. 17135 | 0. 004 | 0. 03  | 0. 001073 | Neo-G | DNAAF1          |
| ACSL1. 7    | 7. 36E-08 | -0. 31212 | 0. 18  | 0. 233 | 0. 0011   | Neo-G | ACSL1           |
| PIR. 4      | 7. 47E-08 | -0. 15057 | 0. 024 | 0. 06  | 0. 001117 | Neo-G | PIR             |
| TMEM14C. 5  | 7. 89E-08 | -0. 27952 | 0. 541 | 0. 597 | 0. 001179 | Neo-G | TMEM14C         |
| AC016831. 7 | 7. 89E-08 | -0. 17099 | 0. 035 | 0. 075 | 0. 001179 | Neo-G | AC016831. 7     |
| HAAO. 6     | 8. 09E-08 | -0. 13029 | 0. 002 | 0. 025 | 0. 001209 | Neo-G | HAAO            |
| KIF27       | 8. 30E-08 | 0. 100156 | 0. 053 | 0. 027 | 0. 00124  | Neo-G | KIF27           |
| SNX17. 2    | 8. 36E-08 | -0. 23788 | 0. 376 | 0. 459 | 0. 00125  | Neo-G | SNX17           |
| CXCL3. 4    | 8. 61E-08 | -0. 34851 | 0. 037 | 0. 076 | 0. 001287 | Neo-G | CXCL3           |
| CLEC12A. 4  | 8. 66E-08 | -0. 10312 | 0      | 0. 022 | 0. 001295 | Neo-G | CLEC12A         |
| TRIM37. 5   | 8. 74E-08 | 0. 199169 | 0. 188 | 0. 145 | 0. 001306 | Neo-G | TRIM37          |

|              |           |           |        |        |           |       |               |
|--------------|-----------|-----------|--------|--------|-----------|-------|---------------|
| DNM1. 3      | 8. 80E-08 | 0. 168409 | 0. 105 | 0. 069 | 0. 001315 | Neo-G | DNM1          |
| ADK. 2       | 8. 87E-08 | -0. 145   | 0. 108 | 0. 173 | 0. 001325 | Neo-G | ADK           |
| SLC7A6OS. 8. | 8. 89E-08 | 0. 156448 | 0. 175 | 0. 129 | 0. 001329 | Neo-G | SLC7A6OS      |
| DPCD. 5      | 8. 91E-08 | -0. 19548 | 0. 105 | 0. 168 | 0. 001332 | Neo-G | DPCD          |
| CHORDC1. 2   | 9. 05E-08 | 0. 104277 | 0. 259 | 0. 206 | 0. 001353 | Neo-G | CHORDC1       |
| CLDN11. 5    | 9. 15E-08 | -0. 33797 | 0. 016 | 0. 049 | 0. 001368 | Neo-G | CLDN11        |
| COX8A. 1     | 9. 33E-08 | -0. 18248 | 0. 8   | 0. 767 | 0. 001394 | Neo-G | COX8A         |
| CCAR1. 3     | 9. 49E-08 | 0. 137537 | 0. 294 | 0. 245 | 0. 001418 | Neo-G | CCAR1         |
| RNF125. 3    | 9. 53E-08 | -0. 11917 | 0. 002 | 0. 027 | 0. 001424 | Neo-G | RNF125        |
| NFIL3. 7     | 9. 55E-08 | -0. 1592  | 0. 044 | 0. 088 | 0. 001428 | Neo-G | NFIL3         |
| RNF44. 2     | 9. 58E-08 | 0. 164998 | 0. 154 | 0. 109 | 0. 001432 | Neo-G | RNF44         |
| CEACAM4. 5   | 9. 80E-08 | -0. 1094  | 0. 002 | 0. 026 | 0. 001465 | Neo-G | CEACAM4       |
| NPRL3. 4     | 9. 91E-08 | 0. 194572 | 0. 231 | 0. 185 | 0. 001481 | Neo-G | NPRL3         |
| ZNF660. 1    | 9. 94E-08 | 0. 141061 | 0. 079 | 0. 046 | 0. 001486 | Neo-G | ZNF660        |
| PKN1. 3      | 9. 95E-08 | -0. 10219 | 0. 171 | 0. 252 | 0. 001487 | Neo-G | PKN1          |
| RXRA. 4      | 1. 01E-07 | -0. 13037 | 0. 053 | 0. 102 | 0. 001505 | Neo-G | RXRA          |
| MLKL. 4      | 1. 01E-07 | -0. 12287 | 0. 005 | 0. 031 | 0. 001509 | Neo-G | MLKL          |
| THG1L. 3     | 1. 06E-07 | -0. 11963 | 0. 038 | 0. 08  | 0. 001591 | Neo-G | THG1L         |
| TM9SF4. 2    | 1. 07E-07 | -0. 10305 | 0. 125 | 0. 195 | 0. 001602 | Neo-G | TM9SF4        |
| POM121. 2    | 1. 07E-07 | 0. 148398 | 0. 199 | 0. 152 | 0. 001603 | Neo-G | POM121        |
| SCARF1. 5    | 1. 08E-07 | -0. 11725 | 0. 004 | 0. 029 | 0. 001611 | Neo-G | SCARF1        |
| C17orf10C    | 1. 08E-07 | 0. 200869 | 0. 125 | 0. 086 | 0. 001618 | Neo-G | C17orf100     |
| TRIB2. 7     | 1. 10E-07 | 0. 127783 | 0. 316 | 0. 256 | 0. 001643 | Neo-G | TRIB2         |
| LILRB3. 5    | 1. 12E-07 | -0. 14646 | 0. 013 | 0. 043 | 0. 001669 | Neo-G | LILRB3        |
| ZMAT5. 2     | 1. 12E-07 | -0. 15406 | 0. 165 | 0. 244 | 0. 00168  | Neo-G | ZMAT5         |
| CLEC10A. 3   | 1. 13E-07 | -0. 12065 | 0      | 0. 022 | 0. 001681 | Neo-G | CLEC10A       |
| CIDEB. 5     | 1. 15E-07 | -0. 1017  | 0. 003 | 0. 028 | 0. 001717 | Neo-G | CIDEB         |
| SOX10. 4     | 1. 16E-07 | -0. 15695 | 0. 005 | 0. 032 | 0. 001728 | Neo-G | SOX10         |
| ATP10D       | 1. 21E-07 | -0. 12521 | 0. 034 | 0. 075 | 0. 001803 | Neo-G | ATP10D        |
| LRIF1. 4     | 1. 22E-07 | 0. 14096  | 0. 24  | 0. 192 | 0. 001817 | Neo-G | LRIF1         |
| UBXN11. 4    | 1. 24E-07 | -0. 19246 | 0. 086 | 0. 142 | 0. 00185  | Neo-G | UBXN11        |
| ARPC4. 7     | 1. 24E-07 | -0. 25477 | 0. 453 | 0. 521 | 0. 001859 | Neo-G | ARPC4         |
| UBE2L6. 3    | 1. 26E-07 | -0. 33193 | 0. 411 | 0. 481 | 0. 001886 | Neo-G | UBE2L6        |
| PTEN. 6      | 1. 31E-07 | -0. 13661 | 0. 081 | 0. 135 | 0. 001957 | Neo-G | PTEN          |
| RP1-313I6    | 1. 32E-07 | -0. 13798 | 0. 021 | 0. 056 | 0. 001968 | Neo-G | RP1-313I6. 12 |
| PPP1R21. 1   | 1. 32E-07 | 0. 14907  | 0. 152 | 0. 108 | 0. 001971 | Neo-G | PPP1R21       |
| SETD2. 3     | 1. 33E-07 | 0. 163576 | 0. 184 | 0. 139 | 0. 001993 | Neo-G | SETD2         |
| PTPN12. 3    | 1. 38E-07 | 0. 164707 | 0. 263 | 0. 217 | 0. 002059 | Neo-G | PTPN12        |
| NDUFAF5. 3   | 1. 39E-07 | 0. 166365 | 0. 172 | 0. 129 | 0. 002079 | Neo-G | NDUFAF5       |
| SPATA33. 5   | 1. 43E-07 | 0. 14644  | 0. 186 | 0. 141 | 0. 002131 | Neo-G | SPATA33       |
| SIDT2. 1     | 1. 43E-07 | -0. 12801 | 0. 038 | 0. 08  | 0. 002141 | Neo-G | SIDT2         |
| VPS72. 4     | 1. 44E-07 | 0. 130506 | 0. 315 | 0. 271 | 0. 002159 | Neo-G | VPS72         |
| GMEB1. 1     | 1. 45E-07 | 0. 104895 | 0. 134 | 0. 091 | 0. 002173 | Neo-G | GMEB1         |
| PSPH. 6      | 1. 46E-07 | 0. 152923 | 0. 198 | 0. 152 | 0. 002175 | Neo-G | PSPH          |
| TAF2         | 1. 46E-07 | 0. 168265 | 0. 137 | 0. 096 | 0. 00218  | Neo-G | TAF2          |
| FTSJ2. 4     | 1. 47E-07 | 0. 118534 | 0. 279 | 0. 232 | 0. 00219  | Neo-G | FTSJ2         |
| FAM135A. 2   | 1. 49E-07 | -0. 12391 | 0. 046 | 0. 091 | 0. 002229 | Neo-G | FAM135A       |
| FAM8A1. 3    | 1. 50E-07 | 0. 150614 | 0. 118 | 0. 079 | 0. 002241 | Neo-G | FAM8A1        |
| SULT1A1. 5   | 1. 52E-07 | -0. 18311 | 0. 02  | 0. 053 | 0. 002268 | Neo-G | SULT1A1       |
| H2AFX. 6     | 1. 53E-07 | -0. 16422 | 0. 159 | 0. 227 | 0. 00229  | Neo-G | H2AFX         |
| KCNK6. 5     | 1. 56E-07 | -0. 14093 | 0. 013 | 0. 043 | 0. 002328 | Neo-G | KCNK6         |

|             |           |           |        |        |           |       |                |
|-------------|-----------|-----------|--------|--------|-----------|-------|----------------|
| RWDD2A. 1   | 1. 56E-07 | 0. 137631 | 0. 101 | 0. 064 | 0. 002329 | Neo-G | RWDD2A         |
| HHATL. 2    | 1. 56E-07 | -0. 12529 | 0      | 0. 021 | 0. 00233  | Neo-G | HHATL          |
| PGGT1B. 2   | 1. 58E-07 | -0. 13244 | 0. 057 | 0. 104 | 0. 002363 | Neo-G | PGGT1B         |
| MFSD2A. 3   | 1. 60E-07 | -0. 12754 | 0. 056 | 0. 104 | 0. 002388 | Neo-G | MFSD2A         |
| CD70. 1     | 1. 62E-07 | -0. 13386 | 0. 001 | 0. 023 | 0. 002426 | Neo-G | CD70           |
| NIT2. 2     | 1. 62E-07 | -0. 23408 | 0. 166 | 0. 236 | 0. 002428 | Neo-G | NIT2           |
| PDP1. 4     | 1. 63E-07 | 0. 146957 | 0. 167 | 0. 121 | 0. 002435 | Neo-G | PDP1           |
| RAB26       | 1. 63E-07 | 0. 11156  | 0. 051 | 0. 026 | 0. 002437 | Neo-G | RAB26          |
| CDK18. 4    | 1. 64E-07 | -0. 19298 | 0. 041 | 0. 082 | 0. 002446 | Neo-G | CDK18          |
| LCA5. 3     | 1. 64E-07 | 0. 159183 | 0. 079 | 0. 047 | 0. 002456 | Neo-G | LCA5           |
| STAT5A. 6   | 1. 65E-07 | -0. 13021 | 0. 021 | 0. 056 | 0. 002462 | Neo-G | STAT5A         |
| STARD7. 3   | 1. 68E-07 | -0. 15263 | 0. 24  | 0. 325 | 0. 002512 | Neo-G | STARD7         |
| SIDT1. 4    | 1. 70E-07 | -0. 13306 | 0. 002 | 0. 026 | 0. 002537 | Neo-G | SIDT1          |
| ABRACL. 6   | 1. 70E-07 | 0. 110213 | 0. 351 | 0. 299 | 0. 00254  | Neo-G | ABRACL         |
| C3orf33. 1  | 1. 71E-07 | 0. 108893 | 0. 086 | 0. 052 | 0. 002551 | Neo-G | C3orf33        |
| QRICH1. 3   | 1. 72E-07 | 0. 159979 | 0. 189 | 0. 144 | 0. 002572 | Neo-G | QRICH1         |
| INHBA. 2    | 1. 73E-07 | -0. 11047 | 0. 001 | 0. 023 | 0. 002581 | Neo-G | INHBA          |
| FAM35A. 1   | 1. 76E-07 | -0. 10307 | 0. 028 | 0. 066 | 0. 002635 | Neo-G | FAM35A         |
| LEAP2. 2    | 1. 79E-07 | 0. 106948 | 0. 118 | 0. 077 | 0. 002679 | Neo-G | LEAP2          |
| LYST. 2     | 1. 80E-07 | -0. 11762 | 0. 097 | 0. 157 | 0. 002692 | Neo-G | LYST           |
| PRRG4. 5    | 1. 83E-07 | -0. 15204 | 0. 016 | 0. 048 | 0. 00274  | Neo-G | PRRG4          |
| C14orf119   | 1. 84E-07 | -0. 19295 | 0. 235 | 0. 322 | 0. 002743 | Neo-G | C14orf119      |
| SLC44A2. 5  | 1. 84E-07 | -0. 11419 | 0. 139 | 0. 21  | 0. 002746 | Neo-G | SLC44A2        |
| ARPC5. 6    | 1. 87E-07 | -0. 25512 | 0. 645 | 0. 676 | 0. 002796 | Neo-G | ARPC5          |
| FAM195A. 4  | 1. 95E-07 | -0. 12736 | 0. 185 | 0. 263 | 0. 00291  | Neo-G | FAM195A        |
| CAPN10. 3   | 1. 95E-07 | 0. 178233 | 0. 121 | 0. 082 | 0. 002914 | Neo-G | CAPN10         |
| MORN4. 3    | 1. 95E-07 | 0. 111356 | 0. 079 | 0. 047 | 0. 002919 | Neo-G | MORN4          |
| TIAL1. 2    | 1. 99E-07 | -0. 17305 | 0. 161 | 0. 233 | 0. 002968 | Neo-G | TIAL1          |
| SLC25A29. 1 | 1. 99E-07 | 0. 204107 | 0. 191 | 0. 148 | 0. 002975 | Neo-G | SLC25A29       |
| ERCC6L2. 3  | 2. 01E-07 | 0. 149094 | 0. 12  | 0. 082 | 0. 002999 | Neo-G | ERCC6L2        |
| SNAPC3. 4   | 2. 02E-07 | 0. 168844 | 0. 174 | 0. 131 | 0. 003025 | Neo-G | SNAPC3         |
| ENOPH1. 5   | 2. 03E-07 | 0. 107339 | 0. 43  | 0. 384 | 0. 003033 | Neo-G | ENOPH1         |
| CYP27A1. 4  | 2. 04E-07 | -0. 12444 | 0. 109 | 0. 171 | 0. 003048 | Neo-G | CYP27A1        |
| IFI27L2. 4  | 2. 05E-07 | -0. 24548 | 0. 39  | 0. 481 | 0. 00307  | Neo-G | IFI27L2        |
| TP53BP1. 3  | 2. 09E-07 | 0. 178864 | 0. 132 | 0. 093 | 0. 003124 | Neo-G | TP53BP1        |
| AP5B1. 3    | 2. 09E-07 | -0. 10319 | 0. 021 | 0. 056 | 0. 003128 | Neo-G | AP5B1          |
| NFE2L1. 3   | 2. 11E-07 | -0. 11183 | 0. 127 | 0. 195 | 0. 003149 | Neo-G | NFE2L1         |
| DSCAM. 4    | 2. 12E-07 | 0. 141736 | 0. 108 | 0. 07  | 0. 003167 | Neo-G | DSCAM          |
| LOX. 4      | 2. 12E-07 | -0. 17928 | 0. 016 | 0. 048 | 0. 003169 | Neo-G | LOX            |
| RNF170. 3   | 2. 12E-07 | 0. 15175  | 0. 205 | 0. 16  | 0. 003175 | Neo-G | RNF170         |
| MMP9. 1     | 2. 13E-07 | -0. 10132 | 0. 005 | 0. 031 | 0. 00319  | Neo-G | MMP9           |
| AMFR. 1     | 2. 14E-07 | -0. 10957 | 0. 115 | 0. 18  | 0. 003195 | Neo-G | AMFR           |
| EPB41L1. 5  | 2. 15E-07 | 0. 155794 | 0. 123 | 0. 084 | 0. 003207 | Neo-G | EPB41L1        |
| IMPDH2. 7   | 2. 15E-07 | -0. 28935 | 0. 351 | 0. 424 | 0. 003211 | Neo-G | IMPDH2         |
| HSD11B1. 1  | 2. 17E-07 | -0. 1362  | 0. 003 | 0. 027 | 0. 003237 | Neo-G | HSD11B1        |
| SLC11A2. 2  | 2. 17E-07 | -0. 15469 | 0. 114 | 0. 175 | 0. 00324  | Neo-G | SLC11A2        |
| RP11-212I   | 2. 18E-07 | -0. 11906 | 0. 002 | 0. 025 | 0. 003252 | Neo-G | RP11-212I21. 4 |
| NAA16. 4    | 2. 18E-07 | 0. 170727 | 0. 159 | 0. 117 | 0. 003252 | Neo-G | NAA16          |
| FAM98C. 2   | 2. 19E-07 | -0. 11466 | 0. 087 | 0. 144 | 0. 003265 | Neo-G | FAM98C         |
| TRAPPC9     | 2. 20E-07 | 0. 142282 | 0. 096 | 0. 06  | 0. 003281 | Neo-G | TRAPPC9        |
| ITGAL. 2    | 2. 20E-07 | -0. 12009 | 0. 003 | 0. 027 | 0. 003287 | Neo-G | ITGAL          |

|             |           |           |        |        |           |       |          |
|-------------|-----------|-----------|--------|--------|-----------|-------|----------|
| PMS2. 5     | 2. 21E-07 | 0. 137003 | 0. 167 | 0. 123 | 0. 003304 | Neo-G | PMS2     |
| FBXW2. 3    | 2. 22E-07 | -0. 10942 | 0. 131 | 0. 2   | 0. 003311 | Neo-G | FBXW2    |
| APIP. 5     | 2. 22E-07 | -0. 20291 | 0. 17  | 0. 241 | 0. 003325 | Neo-G | APIP     |
| PRR14. 3    | 2. 25E-07 | 0. 180469 | 0. 239 | 0. 195 | 0. 003336 | Neo-G | PRR14    |
| CES4A       | 2. 25E-07 | -0. 12797 | 0. 001 | 0. 022 | 0. 003361 | Neo-G | CES4A    |
| RCC1. 2     | 2. 29E-07 | -0. 11546 | 0. 057 | 0. 105 | 0. 003419 | Neo-G | RCC1     |
| POC1B. 1    | 2. 30E-07 | -0. 10562 | 0. 044 | 0. 088 | 0. 003443 | Neo-G | POC1B    |
| PLEKHA5. 2  | 2. 32E-07 | 0. 146274 | 0. 095 | 0. 06  | 0. 003466 | Neo-G | PLEKHA5  |
| CDCA4. 5    | 2. 35E-07 | -0. 10301 | 0. 048 | 0. 093 | 0. 003506 | Neo-G | CDCA4    |
| AGK. 2      | 2. 36E-07 | 0. 125625 | 0. 137 | 0. 095 | 0. 003525 | Neo-G | AGK      |
| KANSL1. 5   | 2. 38E-07 | 0. 17836  | 0. 205 | 0. 161 | 0. 003557 | Neo-G | KANSL1   |
| ABC8. 3     | 2. 42E-07 | 0. 153309 | 0. 181 | 0. 136 | 0. 003611 | Neo-G | ABC8     |
| CNDP1. 5    | 2. 44E-07 | -0. 26107 | 0. 009 | 0. 037 | 0. 003648 | Neo-G | CNDP1    |
| NUP50. 4    | 2. 46E-07 | -0. 10051 | 0. 071 | 0. 122 | 0. 003675 | Neo-G | NUP50    |
| ZBTB5       | 2. 48E-07 | 0. 10678  | 0. 06  | 0. 032 | 0. 003711 | Neo-G | ZBTB5    |
| RUFY1. 3    | 2. 48E-07 | -0. 10824 | 0. 099 | 0. 159 | 0. 003712 | Neo-G | RUFY1    |
| DENND4B. 5  | 2. 50E-07 | -0. 10219 | 0. 034 | 0. 073 | 0. 003729 | Neo-G | DENND4B  |
| TMEM18. 2   | 2. 51E-07 | -0. 18912 | 0. 147 | 0. 215 | 0. 003756 | Neo-G | TMEM18   |
| SLC31A1. 5  | 2. 55E-07 | -0. 18224 | 0. 114 | 0. 174 | 0. 003807 | Neo-G | SLC31A1  |
| TNFAIP1. 5  | 2. 56E-07 | 0. 191467 | 0. 212 | 0. 171 | 0. 003829 | Neo-G | TNFAIP1  |
| UBE2A. 3    | 2. 58E-07 | -0. 22149 | 0. 34  | 0. 432 | 0. 003852 | Neo-G | UBE2A    |
| ATP5H. 3    | 2. 59E-07 | -0. 23133 | 0. 629 | 0. 652 | 0. 003876 | Neo-G | ATP5H    |
| RNF141. 4   | 2. 60E-07 | -0. 19211 | 0. 153 | 0. 222 | 0. 003885 | Neo-G | RNF141   |
| PDLIM3. 6   | 2. 61E-07 | -0. 1892  | 0. 07  | 0. 119 | 0. 003898 | Neo-G | PDLIM3   |
| INTS4       | 2. 62E-07 | 0. 130912 | 0. 122 | 0. 082 | 0. 00391  | Neo-G | INTS4    |
| MAVS. 1     | 2. 67E-07 | -0. 10055 | 0. 037 | 0. 078 | 0. 003991 | Neo-G | MAVS     |
| NDRG2. 4    | 2. 67E-07 | -0. 33272 | 0. 312 | 0. 365 | 0. 003995 | Neo-G | NDRG2    |
| MANSC1. 3   | 2. 68E-07 | 0. 138319 | 0. 087 | 0. 054 | 0. 004002 | Neo-G | MANSC1   |
| UPRT. 1     | 2. 71E-07 | 0. 1354   | 0. 122 | 0. 082 | 0. 004043 | Neo-G | UPRT     |
| DIO2. 2     | 2. 72E-07 | -0. 10859 | 0. 01  | 0. 039 | 0. 004059 | Neo-G | DIO2     |
| KIAA1143. 2 | 2. 73E-07 | -0. 13974 | 0. 146 | 0. 218 | 0. 004082 | Neo-G | KIAA1143 |
| C6orf52. 2  | 2. 75E-07 | 0. 131849 | 0. 072 | 0. 042 | 0. 004115 | Neo-G | C6orf52  |
| SNRPN. 7    | 2. 83E-07 | -0. 46824 | 0. 06  | 0. 103 | 0. 004226 | Neo-G | SNRPN    |
| MKNK2. 1    | 2. 85E-07 | -0. 15927 | 0. 129 | 0. 191 | 0. 004261 | Neo-G | MKNK2    |
| IFNLR1. 3   | 2. 86E-07 | -0. 12166 | 0. 003 | 0. 026 | 0. 004269 | Neo-G | IFNLR1   |
| FER. 3      | 2. 89E-07 | 0. 173309 | 0. 127 | 0. 089 | 0. 004325 | Neo-G | FER      |
| OSGEPL1. 2  | 2. 90E-07 | 0. 124054 | 0. 101 | 0. 064 | 0. 004335 | Neo-G | OSGEPL1  |
| NFKBIE. 6   | 2. 92E-07 | -0. 12054 | 0. 086 | 0. 14  | 0. 004368 | Neo-G | NFKBIE   |
| PTPN22. 5   | 2. 96E-07 | -0. 10912 | 0. 005 | 0. 029 | 0. 004425 | Neo-G | PTPN22   |
| RARS. 2     | 2. 97E-07 | 0. 101931 | 0. 288 | 0. 239 | 0. 004431 | Neo-G | RARS     |
| FOLH1. 3    | 3. 00E-07 | -0. 10742 | 0      | 0. 02  | 0. 004477 | Neo-G | FOLH1    |
| PPOX. 2     | 3. 02E-07 | 0. 148742 | 0. 146 | 0. 105 | 0. 004507 | Neo-G | PPOX     |
| SLC2A9. 5   | 3. 03E-07 | -0. 11558 | 0. 004 | 0. 028 | 0. 004533 | Neo-G | SLC2A9   |
| PPP6R3      | 3. 04E-07 | -0. 10394 | 0. 076 | 0. 13  | 0. 004545 | Neo-G | PPP6R3   |
| MAP3K10     | 3. 07E-07 | 0. 135868 | 0. 062 | 0. 034 | 0. 004586 | Neo-G | MAP3K10  |
| VTI1A. 5    | 3. 14E-07 | -0. 12583 | 0. 031 | 0. 069 | 0. 004698 | Neo-G | VTI1A    |
| LMBRD1. 4   | 3. 16E-07 | -0. 23062 | 0. 159 | 0. 223 | 0. 00473  | Neo-G | LMBRD1   |
| PPP1CB. 4   | 3. 24E-07 | -0. 22903 | 0. 468 | 0. 511 | 0. 004835 | Neo-G | PPP1CB   |
| PRRT1. 4    | 3. 24E-07 | 0. 14888  | 0. 079 | 0. 048 | 0. 004846 | Neo-G | PRRT1    |
| AARSD1. 4   | 3. 25E-07 | 0. 166544 | 0. 141 | 0. 101 | 0. 004863 | Neo-G | AARSD1   |
| AGO3. 3     | 3. 26E-07 | 0. 143806 | 0. 233 | 0. 187 | 0. 004869 | Neo-G | AGO3     |

|             |           |           |        |        |           |       |               |
|-------------|-----------|-----------|--------|--------|-----------|-------|---------------|
| SPEN. 3     | 3. 29E-07 | 0. 168055 | 0. 199 | 0. 154 | 0. 004915 | Neo-G | SPEN          |
| CDK20. 4    | 3. 30E-07 | 0. 125522 | 0. 088 | 0. 055 | 0. 004931 | Neo-G | CDK20         |
| ZNF800. 4   | 3. 30E-07 | 0. 171459 | 0. 221 | 0. 177 | 0. 004933 | Neo-G | ZNF800        |
| TRIT1. 2    | 3. 36E-07 | 0. 123874 | 0. 123 | 0. 083 | 0. 005014 | Neo-G | TRIT1         |
| GEMIN7. 1   | 3. 41E-07 | -0. 12076 | 0. 104 | 0. 166 | 0. 005098 | Neo-G | GEMIN7        |
| CSAD. 5     | 3. 42E-07 | 0. 206213 | 0. 203 | 0. 163 | 0. 005113 | Neo-G | CSAD          |
| PDIA6. 3    | 3. 46E-07 | -0. 2298  | 0. 65  | 0. 647 | 0. 005176 | Neo-G | PDIA6         |
| ETNK2       | 3. 52E-07 | 0. 105456 | 0. 059 | 0. 032 | 0. 005257 | Neo-G | ETNK2         |
| PLEKHH3. 4  | 3. 52E-07 | 0. 171534 | 0. 116 | 0. 08  | 0. 005262 | Neo-G | PLEKHH3       |
| TXNDC9. 2   | 3. 56E-07 | 0. 104764 | 0. 302 | 0. 255 | 0. 005325 | Neo-G | TXNDC9        |
| ANKRA2. 4   | 3. 61E-07 | 0. 139738 | 0. 187 | 0. 142 | 0. 005393 | Neo-G | ANKRA2        |
| RRP8. 2     | 3. 67E-07 | -0. 10946 | 0. 079 | 0. 133 | 0. 005481 | Neo-G | RRP8          |
| TMA7. 5     | 3. 69E-07 | -0. 19848 | 0. 896 | 0. 846 | 0. 005521 | Neo-G | TMA7          |
| SETX. 4     | 3. 73E-07 | -0. 12803 | 0. 112 | 0. 173 | 0. 00557  | Neo-G | SETX          |
| TMEM125. 3  | 3. 76E-07 | -0. 15212 | 0. 002 | 0. 024 | 0. 005618 | Neo-G | TMEM125       |
| ZDHHC14. 2  | 3. 76E-07 | -0. 11781 | 0. 041 | 0. 082 | 0. 00562  | Neo-G | ZDHHC14       |
| TTC21B. 1   | 3. 80E-07 | 0. 128083 | 0. 073 | 0. 043 | 0. 005678 | Neo-G | TTC21B        |
| MT1F. 6     | 3. 80E-07 | -0. 22433 | 0. 24  | 0. 313 | 0. 005678 | Neo-G | MT1F          |
| MZT2A. 4    | 3. 80E-07 | 0. 104664 | 0. 45  | 0. 409 | 0. 005678 | Neo-G | MZT2A         |
| C19orf12. 3 | 3. 81E-07 | 0. 152167 | 0. 18  | 0. 138 | 0. 005694 | Neo-G | C19orf12      |
| CFB. 1      | 3. 85E-07 | -0. 10148 | 0. 002 | 0. 025 | 0. 005753 | Neo-G | CFB           |
| PEX6. 2     | 3. 89E-07 | 0. 126562 | 0. 092 | 0. 058 | 0. 005811 | Neo-G | PEX6          |
| KLK6. 5     | 3. 90E-07 | -0. 25594 | 0. 008 | 0. 034 | 0. 00583  | Neo-G | KLK6          |
| NOB1. 2     | 3. 95E-07 | -0. 14383 | 0. 134 | 0. 2   | 0. 0059   | Neo-G | NOB1          |
| MTMR6. 3    | 3. 96E-07 | 0. 121258 | 0. 186 | 0. 14  | 0. 005913 | Neo-G | MTMR6         |
| UBA3. 1     | 3. 98E-07 | 0. 124098 | 0. 288 | 0. 24  | 0. 005951 | Neo-G | UBA3          |
| DHX15. 4    | 3. 98E-07 | 0. 131352 | 0. 285 | 0. 239 | 0. 005952 | Neo-G | DHX15         |
| TNNI2. 5    | 4. 00E-07 | -0. 10966 | 0. 001 | 0. 021 | 0. 005983 | Neo-G | TNNI2         |
| MTA3. 1     | 4. 02E-07 | -0. 10117 | 0. 042 | 0. 084 | 0. 006013 | Neo-G | MTA3          |
| ACY3. 3     | 4. 04E-07 | -0. 12679 | 0. 001 | 0. 021 | 0. 00603  | Neo-G | ACY3          |
| DCUN1D4. 3  | 4. 04E-07 | 0. 167195 | 0. 135 | 0. 095 | 0. 006036 | Neo-G | DCUN1D4       |
| TPSAB1. 2   | 4. 05E-07 | -0. 15689 | 0. 002 | 0. 024 | 0. 006045 | Neo-G | TPSAB1        |
| LIX1. 2     | 4. 11E-07 | -0. 10422 | 0. 002 | 0. 023 | 0. 006141 | Neo-G | LIX1          |
| CDK6. 6     | 4. 16E-07 | 0. 145062 | 0. 251 | 0. 2   | 0. 006223 | Neo-G | CDK6          |
| PPA2. 3     | 4. 19E-07 | -0. 2055  | 0. 243 | 0. 324 | 0. 006268 | Neo-G | PPA2          |
| HERPUD1. 5  | 4. 21E-07 | -0. 28913 | 0. 638 | 0. 642 | 0. 00629  | Neo-G | HERPUD1       |
| SENTP6. 3   | 4. 22E-07 | 0. 160324 | 0. 257 | 0. 214 | 0. 006299 | Neo-G | SENTP6        |
| PSMG2. 3    | 4. 22E-07 | -0. 26101 | 0. 339 | 0. 421 | 0. 006304 | Neo-G | PSMG2         |
| FLCN. 2     | 4. 34E-07 | -0. 12132 | 0. 086 | 0. 142 | 0. 00648  | Neo-G | FLCN          |
| AMD1. 2     | 4. 34E-07 | -0. 25549 | 0. 315 | 0. 392 | 0. 006492 | Neo-G | AMD1          |
| JMJD1C. 5   | 4. 36E-07 | 0. 117643 | 0. 374 | 0. 329 | 0. 006511 | Neo-G | JMJD1C        |
| LRP1B       | 4. 37E-07 | 0. 100026 | 0. 048 | 0. 024 | 0. 006533 | Neo-G | LRP1B         |
| H3F3C. 1    | 4. 38E-07 | -0. 26883 | 0. 024 | 0. 057 | 0. 00654  | Neo-G | H3F3C         |
| TNS1. 3     | 4. 43E-07 | -0. 12079 | 0. 02  | 0. 053 | 0. 006621 | Neo-G | TNS1          |
| PMF1. 3     | 4. 43E-07 | -0. 22348 | 0. 249 | 0. 329 | 0. 006625 | Neo-G | PMF1          |
| RABGGTB. 2  | 4. 46E-07 | -0. 17515 | 0. 223 | 0. 3   | 0. 006666 | Neo-G | RABGGTB       |
| MTHFR. 4    | 4. 61E-07 | -0. 1277  | 0. 042 | 0. 083 | 0. 006884 | Neo-G | MTHFR         |
| GS1-124K5   | 4. 65E-07 | 0. 143839 | 0. 151 | 0. 109 | 0. 006942 | Neo-G | GS1-124K5. 4  |
| INHBB. 1    | 4. 66E-07 | 0. 109531 | 0. 054 | 0. 029 | 0. 006964 | Neo-G | INHBB         |
| RP11-244H   | 4. 73E-07 | -0. 1168  | 0      | 0. 02  | 0. 007071 | Neo-G | RP11-244H3. 4 |
| DHTKD1. 2   | 4. 75E-07 | -0. 11191 | 0. 078 | 0. 131 | 0. 007097 | Neo-G | DHTKD1        |

|              |           |           |        |        |           |       |                |
|--------------|-----------|-----------|--------|--------|-----------|-------|----------------|
| C1orf159. 4. | 4. 78E-07 | 0. 136658 | 0. 079 | 0. 048 | 0. 00715  | Neo-G | C1orf159       |
| C14orf159    | 4. 82E-07 | -0. 11332 | 0. 079 | 0. 131 | 0. 007205 | Neo-G | C14orf159      |
| IPCEF1. 3    | 4. 87E-07 | -0. 10309 | 0. 002 | 0. 024 | 0. 007282 | Neo-G | IPCEF1         |
| RAB33B       | 4. 99E-07 | 0. 118119 | 0. 088 | 0. 055 | 0. 007456 | Neo-G | RAB33B         |
| TRMT2A       | 5. 01E-07 | -0. 11    | 0. 092 | 0. 148 | 0. 007483 | Neo-G | TRMT2A         |
| DDX41. 3     | 5. 07E-07 | 0. 130958 | 0. 283 | 0. 238 | 0. 007579 | Neo-G | DDX41          |
| PCGF3. 2     | 5. 15E-07 | 0. 150539 | 0. 152 | 0. 11  | 0. 007692 | Neo-G | PCGF3          |
| DYNC2LI1.    | 5. 22E-07 | 0. 121991 | 0. 204 | 0. 159 | 0. 007805 | Neo-G | DYNC2LI1       |
| LZIC. 2      | 5. 25E-07 | -0. 10144 | 0. 124 | 0. 189 | 0. 007851 | Neo-G | LZIC           |
| TTC5         | 5. 32E-07 | 0. 13147  | 0. 134 | 0. 092 | 0. 007957 | Neo-G | TTC5           |
| DIRAS2. 5    | 5. 33E-07 | 0. 115722 | 0. 093 | 0. 059 | 0. 007971 | Neo-G | DIRAS2         |
| TTC28. 5     | 5. 40E-07 | 0. 20668  | 0. 128 | 0. 091 | 0. 008068 | Neo-G | TTC28          |
| SNX22        | 5. 41E-07 | -0. 18992 | 0. 033 | 0. 069 | 0. 008089 | Neo-G | SNX22          |
| YKT6. 3      | 5. 45E-07 | 0. 148108 | 0. 277 | 0. 234 | 0. 00814  | Neo-G | YKT6           |
| KAT2A. 3     | 5. 52E-07 | -0. 11115 | 0. 108 | 0. 167 | 0. 008254 | Neo-G | KAT2A          |
| ATG5. 2      | 5. 60E-07 | 0. 104121 | 0. 251 | 0. 203 | 0. 008374 | Neo-G | ATG5           |
| SLC22A5      | 5. 61E-07 | 0. 107227 | 0. 06  | 0. 033 | 0. 008386 | Neo-G | SLC22A5        |
| RP11-156K    | 5. 65E-07 | -0. 10398 | 0. 001 | 0. 021 | 0. 008441 | Neo-G | RP11-156K13. 3 |
| FPR2. 5      | 5. 67E-07 | -0. 1031  | 0. 001 | 0. 021 | 0. 008469 | Neo-G | FPR2           |
| RP4-613B2    | 5. 74E-07 | -0. 11084 | 0. 01  | 0. 037 | 0. 008575 | Neo-G | RP4-613B23. 1  |
| BTF3. 3      | 5. 74E-07 | -0. 24007 | 0. 922 | 0. 895 | 0. 008582 | Neo-G | BTF3           |
| CDR2L. 3     | 5. 77E-07 | 0. 151293 | 0. 093 | 0. 06  | 0. 008625 | Neo-G | CDR2L          |
| DDX10        | 5. 93E-07 | 0. 12442  | 0. 158 | 0. 116 | 0. 008867 | Neo-G | DDX10          |
| CCDC102B.    | 6. 00E-07 | -0. 10355 | 0. 059 | 0. 106 | 0. 008969 | Neo-G | CCDC102B       |
| PDLIM5. 2    | 6. 14E-07 | -0. 13507 | 0. 156 | 0. 227 | 0. 009179 | Neo-G | PDLIM5         |
| ELK4. 2      | 6. 20E-07 | -0. 10112 | 0. 064 | 0. 112 | 0. 009263 | Neo-G | ELK4           |
| DNAJB1. 4    | 6. 25E-07 | -0. 30077 | 0. 56  | 0. 616 | 0. 009336 | Neo-G | DNAJB1         |
| YIF1A. 4     | 6. 29E-07 | -0. 2361  | 0. 351 | 0. 433 | 0. 009396 | Neo-G | YIF1A          |
| NCSTN. 2     | 6. 36E-07 | -0. 16785 | 0. 187 | 0. 262 | 0. 009502 | Neo-G | NCSTN          |
| REPS1. 5     | 6. 43E-07 | 0. 195526 | 0. 162 | 0. 123 | 0. 009603 | Neo-G | REPS1          |
| MYD88. 4     | 6. 50E-07 | -0. 12041 | 0. 083 | 0. 136 | 0. 009709 | Neo-G | MYD88          |
| AGTPBP1. 3   | 6. 52E-07 | 0. 121664 | 0. 079 | 0. 047 | 0. 009748 | Neo-G | AGTPBP1        |
| EPS8L1       | 6. 54E-07 | 0. 135118 | 0. 071 | 0. 043 | 0. 00977  | Neo-G | EPS8L1         |
| FDFT1. 4     | 6. 57E-07 | -0. 20664 | 0. 237 | 0. 314 | 0. 009813 | Neo-G | FDFT1          |
| RAI1. 2      | 6. 58E-07 | 0. 186749 | 0. 097 | 0. 063 | 0. 009832 | Neo-G | RAI1           |
| PRRT2. 5     | 6. 59E-07 | 0. 216453 | 0. 123 | 0. 087 | 0. 009841 | Neo-G | PRRT2          |
| TBC1D12. 5   | 6. 59E-07 | -0. 13211 | 0. 066 | 0. 112 | 0. 009848 | Neo-G | TBC1D12        |
| CDK14. 3     | 6. 70E-07 | 0. 162776 | 0. 11  | 0. 074 | 0. 010016 | Neo-G | CDK14          |
| MAPK3. 2     | 6. 76E-07 | -0. 1658  | 0. 148 | 0. 214 | 0. 010101 | Neo-G | MAPK3          |
| RP11-84C1    | 6. 89E-07 | -0. 1148  | 0. 001 | 0. 021 | 0. 010298 | Neo-G | RP11-84C10. 2  |
| LTA4H. 5     | 6. 91E-07 | -0. 23151 | 0. 174 | 0. 236 | 0. 010321 | Neo-G | LTA4H          |
| ZFP62        | 6. 95E-07 | 0. 12502  | 0. 119 | 0. 082 | 0. 010388 | Neo-G | ZFP62          |
| THOC1. 2     | 6. 96E-07 | 0. 106782 | 0. 187 | 0. 141 | 0. 010406 | Neo-G | THOC1          |
| PCSK6. 1     | 7. 00E-07 | -0. 10974 | 0      | 0. 019 | 0. 010461 | Neo-G | PCSK6          |
| MAN2B2       | 7. 03E-07 | -0. 11973 | 0. 042 | 0. 082 | 0. 010509 | Neo-G | MAN2B2         |
| LMAN1. 4     | 7. 04E-07 | -0. 21867 | 0. 258 | 0. 338 | 0. 010523 | Neo-G | LMAN1          |
| LINC0032C    | 7. 04E-07 | -0. 16378 | 0. 003 | 0. 025 | 0. 010525 | Neo-G | LINC00320      |
| ACBD3. 2     | 7. 07E-07 | 0. 185378 | 0. 211 | 0. 17  | 0. 010563 | Neo-G | ACBD3          |
| WDR18. 4     | 7. 10E-07 | 0. 155629 | 0. 321 | 0. 282 | 0. 010605 | Neo-G | WDR18          |
| KDM4A. 1     | 7. 23E-07 | 0. 174611 | 0. 148 | 0. 108 | 0. 010806 | Neo-G | KDM4A          |
| ZNF830. 4    | 7. 44E-07 | 0. 110384 | 0. 231 | 0. 186 | 0. 011119 | Neo-G | ZNF830         |



|            |           |           |        |        |           |       |           |
|------------|-----------|-----------|--------|--------|-----------|-------|-----------|
| MYLIP. 7   | 7. 60E-07 | -0. 21424 | 0. 086 | 0. 134 | 0. 01135  | Neo-G | MYLIP     |
| GUSB. 6    | 7. 63E-07 | -0. 21764 | 0. 213 | 0. 279 | 0. 011399 | Neo-G | GUSB      |
| DDX60L. 3  | 7. 70E-07 | -0. 10607 | 0. 025 | 0. 059 | 0. 011504 | Neo-G | DDX60L    |
| TSLP. 4    | 7. 95E-07 | -0. 12478 | 0. 002 | 0. 022 | 0. 011874 | Neo-G | TSLP      |
| ZDHHC2. 1  | 7. 96E-07 | -0. 10753 | 0. 031 | 0. 068 | 0. 011892 | Neo-G | ZDHHC2    |
| RECQL. 4   | 7. 97E-07 | -0. 11953 | 0. 118 | 0. 179 | 0. 011909 | Neo-G | RECQL     |
| CHADL. 4   | 8. 02E-07 | -0. 15222 | 0. 016 | 0. 045 | 0. 011991 | Neo-G | CHADL     |
| FASTKD2. 2 | 8. 12E-07 | 0. 121394 | 0. 14  | 0. 1   | 0. 012136 | Neo-G | FASTKD2   |
| MIS12. 4   | 8. 25E-07 | -0. 10326 | 0. 092 | 0. 148 | 0. 012331 | Neo-G | MIS12     |
| MAP3K7. 3  | 8. 28E-07 | 0. 140397 | 0. 243 | 0. 2   | 0. 012377 | Neo-G | MAP3K7    |
| MANEAL     | 8. 29E-07 | 0. 131485 | 0. 064 | 0. 036 | 0. 012395 | Neo-G | MANEAL    |
| SPG7. 2    | 8. 32E-07 | 0. 148692 | 0. 279 | 0. 236 | 0. 01244  | Neo-G | SPG7      |
| DSTYK. 4   | 8. 49E-07 | 0. 152428 | 0. 157 | 0. 116 | 0. 012684 | Neo-G | DSTYK     |
| LINC00869  | 8. 51E-07 | -0. 18943 | 0      | 0. 019 | 0. 012724 | Neo-G | LINC00869 |
| UBE2D3. 5  | 8. 52E-07 | -0. 23472 | 0. 726 | 0. 728 | 0. 01273  | Neo-G | UBE2D3    |
| C14orf2. 3 | 8. 52E-07 | -0. 21274 | 0. 658 | 0. 654 | 0. 012737 | Neo-G | C14orf2   |
| KIAA1614   | 8. 62E-07 | 0. 127998 | 0. 061 | 0. 035 | 0. 012878 | Neo-G | KIAA1614  |
| CDC26. 2   | 8. 64E-07 | -0. 21269 | 0. 195 | 0. 27  | 0. 012908 | Neo-G | CDC26     |
| PIK3CA. 1  | 8. 73E-07 | 0. 147153 | 0. 123 | 0. 085 | 0. 013048 | Neo-G | PIK3CA    |
| YBEY. 4    | 8. 86E-07 | 0. 133001 | 0. 26  | 0. 216 | 0. 013239 | Neo-G | YBEY      |
| LRFN1      | 8. 87E-07 | 0. 103835 | 0. 058 | 0. 032 | 0. 013256 | Neo-G | LRFN1     |
| C21orf91   | 9. 01E-07 | -0. 11332 | 0. 006 | 0. 03  | 0. 013469 | Neo-G | C21orf91  |
| RAP1GDS1.  | 9. 08E-07 | 0. 136979 | 0. 214 | 0. 169 | 0. 013568 | Neo-G | RAP1GDS1  |
| FANCL. 4   | 9. 08E-07 | 0. 109022 | 0. 183 | 0. 138 | 0. 013576 | Neo-G | FANCL     |
| TPM1. 5    | 9. 10E-07 | -0. 14145 | 0. 187 | 0. 26  | 0. 013602 | Neo-G | TPM1      |
| ARAP3. 4   | 9. 12E-07 | 0. 17632  | 0. 093 | 0. 061 | 0. 013626 | Neo-G | ARAP3     |
| C19orf24.  | 9. 17E-07 | -0. 16313 | 0. 296 | 0. 373 | 0. 013709 | Neo-G | C19orf24  |
| ARFIP2. 4  | 9. 18E-07 | 0. 117119 | 0. 284 | 0. 239 | 0. 013719 | Neo-G | ARFIP2    |
| ZBTB11. 1  | 9. 33E-07 | 0. 132233 | 0. 104 | 0. 069 | 0. 013939 | Neo-G | ZBTB11    |
| UBAC2. 6   | 9. 35E-07 | -0. 18746 | 0. 206 | 0. 279 | 0. 013966 | Neo-G | UBAC2     |
| ORC5. 5    | 9. 50E-07 | 0. 112135 | 0. 135 | 0. 095 | 0. 014201 | Neo-G | ORC5      |
| ADSL. 3    | 9. 61E-07 | -0. 11568 | 0. 186 | 0. 266 | 0. 014367 | Neo-G | ADSL      |
| GCLC. 4    | 9. 64E-07 | -0. 12949 | 0. 058 | 0. 102 | 0. 014408 | Neo-G | GCLC      |
| UBXN7. 1   | 9. 70E-07 | 0. 152355 | 0. 152 | 0. 112 | 0. 014501 | Neo-G | UBXN7     |
| DOCK4. 5   | 9. 72E-07 | -0. 21787 | 0. 116 | 0. 167 | 0. 014519 | Neo-G | DOCK4     |
| CD46. 1    | 9. 75E-07 | -0. 16156 | 0. 173 | 0. 241 | 0. 014571 | Neo-G | CD46      |
| ASB16-AS1  | 9. 80E-07 | 0. 157669 | 0. 126 | 0. 088 | 0. 014638 | Neo-G | ASB16-AS1 |
| METTL15. 2 | 9. 92E-07 | -0. 13537 | 0. 082 | 0. 133 | 0. 014828 | Neo-G | METTL15   |
| BAIAP2. 2  | 9. 93E-07 | -0. 11076 | 0. 138 | 0. 204 | 0. 014837 | Neo-G | BAIAP2    |
| SLC35E3. 6 | 1. 01E-06 | 0. 167215 | 0. 23  | 0. 182 | 0. 01505  | Neo-G | SLC35E3   |
| CA3. 3     | 1. 03E-06 | -0. 26078 | 0. 015 | 0. 043 | 0. 015418 | Neo-G | CA3       |
| ISG20L2. 4 | 1. 04E-06 | 0. 111351 | 0. 269 | 0. 219 | 0. 015477 | Neo-G | ISG20L2   |
| ANKRD39. 5 | 1. 04E-06 | 0. 158129 | 0. 205 | 0. 163 | 0. 015578 | Neo-G | ANKRD39   |
| MS4A14. 6  | 1. 06E-06 | -0. 10575 | 0. 003 | 0. 024 | 0. 015834 | Neo-G | MS4A14    |
| ZNF879     | 1. 07E-06 | 0. 102568 | 0. 069 | 0. 041 | 0. 015937 | Neo-G | ZNF879    |
| NFASC. 5   | 1. 07E-06 | -0. 18175 | 0. 063 | 0. 108 | 0. 016007 | Neo-G | NFASC     |
| TCF12. 7   | 1. 07E-06 | -0. 12516 | 0. 214 | 0. 292 | 0. 016061 | Neo-G | TCF12     |
| HIBCH. 4   | 1. 09E-06 | 0. 103862 | 0. 283 | 0. 239 | 0. 016216 | Neo-G | HIBCH     |
| MYO7A. 5   | 1. 09E-06 | -0. 1458  | 0. 01  | 0. 036 | 0. 016222 | Neo-G | MYO7A     |
| DNAJC17. 2 | 1. 10E-06 | -0. 10053 | 0. 049 | 0. 092 | 0. 01645  | Neo-G | DNAJC17   |
| MAP3K3. 5  | 1. 11E-06 | -0. 11986 | 0. 032 | 0. 068 | 0. 016596 | Neo-G | MAP3K3    |

|           |    |          |          |       |       |          |       |           |
|-----------|----|----------|----------|-------|-------|----------|-------|-----------|
| LINC00526 | 1. | 1.1E-06  | 0.136139 | 0.111 | 0.076 | 0.01665  | Neo-G | LINC00526 |
| FNBP4     | 3  | 1.13E-06 | 0.15826  | 0.288 | 0.247 | 0.016895 | Neo-G | FNBP4     |
| HOMER1    | 6  | 1.13E-06 | 0.17705  | 0.192 | 0.152 | 0.016955 | Neo-G | HOMER1    |
| MIF       | 4  | 1.15E-06 | -0.15555 | 0.668 | 0.671 | 0.017115 | Neo-G | MIF       |
| GHITM     | 6  | 1.16E-06 | -0.27903 | 0.464 | 0.53  | 0.017265 | Neo-G | GHITM     |
| RPPH1     | 3  | 1.18E-06 | -0.12149 | 0.009 | 0.034 | 0.017579 | Neo-G | RPPH1     |
| MAN2B1    | 5  | 1.18E-06 | -0.10846 | 0.035 | 0.071 | 0.017581 | Neo-G | MAN2B1    |
| C5AR2     | 2  | 1.18E-06 | -0.11932 | 0     | 0.018 | 0.017636 | Neo-G | C5AR2     |
| MACF1     | 4  | 1.18E-06 | 0.108041 | 0.364 | 0.317 | 0.017647 | Neo-G | MACF1     |
| CAMK2G    | 1  | 1.20E-06 | 0.130443 | 0.135 | 0.096 | 0.017881 | Neo-G | CAMK2G    |
| MCL1      | 6  | 1.20E-06 | -0.21711 | 0.57  | 0.602 | 0.017947 | Neo-G | MCL1      |
| KCTD15    | 2  | 1.21E-06 | 0.149416 | 0.071 | 0.042 | 0.018035 | Neo-G | KCTD15    |
| CSE1L     | 6  | 1.22E-06 | 0.140735 | 0.259 | 0.218 | 0.018212 | Neo-G | CSE1L     |
| SLAMF9    | 3  | 1.22E-06 | -0.12262 | 0.002 | 0.021 | 0.018255 | Neo-G | SLAMF9    |
| MRPS25    | 2  | 1.22E-06 | -0.16982 | 0.196 | 0.272 | 0.018302 | Neo-G | MRPS25    |
| CYB5R1    | 1  | 1.23E-06 | -0.22568 | 0.196 | 0.265 | 0.01835  | Neo-G | CYB5R1    |
| GAS2L3    | 4  | 1.24E-06 | 0.125453 | 0.098 | 0.065 | 0.018564 | Neo-G | GAS2L3    |
| CDK19     | 3  | 1.27E-06 | 0.121946 | 0.164 | 0.121 | 0.019049 | Neo-G | CDK19     |
| ICK       | 3  | 1.28E-06 | 0.157979 | 0.117 | 0.081 | 0.019097 | Neo-G | ICK       |
| CENPE     | 6  | 1.28E-06 | -0.13771 | 0.026 | 0.059 | 0.019169 | Neo-G | CENPE     |
| TMEM86A   | 5  | 1.28E-06 | -0.14135 | 0.02  | 0.05  | 0.019174 | Neo-G | TMEM86A   |
| PPP1R15B  | 1  | 1.30E-06 | -0.143   | 0.075 | 0.123 | 0.019419 | Neo-G | PPP1R15B  |
| TRPC4AP   | 4  | 1.31E-06 | 0.154808 | 0.285 | 0.246 | 0.019561 | Neo-G | TRPC4AP   |
| MRO       | 3  | 1.31E-06 | -0.1162  | 0.002 | 0.023 | 0.019638 | Neo-G | MRO       |
| NT5M      | 1  | 1.34E-06 | 0.120845 | 0.069 | 0.041 | 0.020029 | Neo-G | NT5M      |
| CCDC18    | 4  | 1.39E-06 | -0.13109 | 0.042 | 0.081 | 0.020796 | Neo-G | CCDC18    |
| UNC13D    | 6  | 1.42E-06 | -0.12664 | 0.021 | 0.052 | 0.021155 | Neo-G | UNC13D    |
| TMEM138   | 2  | 1.42E-06 | -0.15888 | 0.12  | 0.179 | 0.021187 | Neo-G | TMEM138   |
| GSAP      | 5  | 1.43E-06 | -0.15752 | 0.045 | 0.083 | 0.021302 | Neo-G | GSAP      |
| PPIE      | 3  | 1.46E-06 | -0.15169 | 0.213 | 0.292 | 0.021859 | Neo-G | PPIE      |
| GLRX      | 6  | 1.47E-06 | -0.39735 | 0.357 | 0.392 | 0.021943 | Neo-G | GLRX      |
| TMEM181   | 7  | 1.48E-06 | 0.203537 | 0.196 | 0.159 | 0.022097 | Neo-G | TMEM181   |
| NPAT      | 2  | 1.50E-06 | 0.105107 | 0.114 | 0.077 | 0.022349 | Neo-G | NPAT      |
| SLC35A5   | 2  | 1.50E-06 | 0.152801 | 0.224 | 0.182 | 0.022472 | Neo-G | SLC35A5   |
| C17orf75  | 1  | 1.51E-06 | 0.127453 | 0.128 | 0.091 | 0.022496 | Neo-G | C17orf75  |
| TMEM39A   | 3  | 1.53E-06 | -0.13495 | 0.054 | 0.096 | 0.022916 | Neo-G | TMEM39A   |
| PIK3CD    | 4  | 1.54E-06 | -0.10542 | 0.009 | 0.033 | 0.023002 | Neo-G | PIK3CD    |
| MBTD1     | 1  | 1.54E-06 | 0.118495 | 0.084 | 0.053 | 0.023012 | Neo-G | MBTD1     |
| RIMKLA    | 2  | 1.59E-06 | 0.134994 | 0.079 | 0.049 | 0.02379  | Neo-G | RIMKLA    |
| PPP4R1    | 1  | 1.64E-06 | 0.14363  | 0.147 | 0.108 | 0.024486 | Neo-G | PPP4R1    |
| CAMTA1    | 3  | 1.68E-06 | -0.20904 | 0.382 | 0.457 | 0.025147 | Neo-G | CAMTA1    |
| KIF20B    | 4  | 1.69E-06 | -0.1393  | 0.051 | 0.092 | 0.025276 | Neo-G | KIF20B    |
| TBCK      | 3  | 1.71E-06 | 0.150865 | 0.112 | 0.077 | 0.025507 | Neo-G | TBCK      |
| ETFFA     | 5  | 1.72E-06 | -0.22145 | 0.301 | 0.381 | 0.025703 | Neo-G | ETFFA     |
| FADS3     | 3  | 1.72E-06 | -0.11416 | 0.101 | 0.155 | 0.025769 | Neo-G | FADS3     |
| SCAP      | 5  | 1.73E-06 | 0.163754 | 0.192 | 0.153 | 0.025793 | Neo-G | SCAP      |
| TUBGCP2   | 6  | 1.74E-06 | -0.13892 | 0.154 | 0.22  | 0.026024 | Neo-G | TUBGCP2   |
| COG1      | 4  | 1.74E-06 | 0.161925 | 0.143 | 0.105 | 0.026076 | Neo-G | COG1      |
| DENND6B   | 7  | 1.76E-06 | -0.14004 | 0.063 | 0.107 | 0.026246 | Neo-G | DENND6B   |
| FBXL3     | 3  | 1.77E-06 | 0.178743 | 0.213 | 0.171 | 0.02644  | Neo-G | FBXL3     |
| TRIM8     | 3  | 1.78E-06 | -0.10055 | 0.06  | 0.103 | 0.02667  | Neo-G | TRIM8     |

|            |           |           |        |        |           |       |                |
|------------|-----------|-----------|--------|--------|-----------|-------|----------------|
| LTB. 3     | 1. 83E-06 | -0. 16829 | 0. 01  | 0. 035 | 0. 027417 | Neo-G | LTB            |
| HSPB8. 4   | 1. 84E-06 | -0. 14685 | 0. 015 | 0. 043 | 0. 027485 | Neo-G | HSPB8          |
| PUS3. 4    | 1. 85E-06 | 0. 126537 | 0. 148 | 0. 11  | 0. 027688 | Neo-G | PUS3           |
| RTN1. 4    | 1. 86E-06 | -0. 23358 | 0. 097 | 0. 149 | 0. 027753 | Neo-G | RTN1           |
| RNF214. 1  | 1. 86E-06 | 0. 159799 | 0. 139 | 0. 102 | 0. 027775 | Neo-G | RNF214         |
| PHOSPHO2.  | 1. 87E-06 | 0. 107019 | 0. 069 | 0. 041 | 0. 027872 | Neo-G | PHOSPHO2       |
| AZGP1. 5   | 1. 90E-06 | -0. 18377 | 0. 027 | 0. 06  | 0. 028363 | Neo-G | AZGP1          |
| HADHA. 4   | 1. 92E-06 | -0. 18919 | 0. 368 | 0. 45  | 0. 028705 | Neo-G | HADHA          |
| FBXO32. 7  | 1. 95E-06 | -0. 18803 | 0. 107 | 0. 159 | 0. 029072 | Neo-G | FBXO32         |
| ZNF197. 1  | 1. 96E-06 | 0. 104302 | 0. 096 | 0. 063 | 0. 029308 | Neo-G | ZNF197         |
| MBD4. 5    | 2. 01E-06 | -0. 21271 | 0. 204 | 0. 271 | 0. 030009 | Neo-G | MBD4           |
| IMPACT. 3  | 2. 02E-06 | -0. 1143  | 0. 111 | 0. 168 | 0. 030168 | Neo-G | IMPACT         |
| LRRC2. 1   | 2. 05E-06 | -0. 11265 | 0. 002 | 0. 021 | 0. 030706 | Neo-G | LRRC2          |
| NKAIN2. 2  | 2. 06E-06 | -0. 10192 | 0. 001 | 0. 019 | 0. 030742 | Neo-G | NKAIN2         |
| SMYD3. 4   | 2. 07E-06 | 0. 125116 | 0. 174 | 0. 134 | 0. 030891 | Neo-G | SMYD3          |
| TGDS. 2    | 2. 07E-06 | -0. 10909 | 0. 041 | 0. 079 | 0. 030948 | Neo-G | TGDS           |
| VWA9. 3    | 2. 09E-06 | -0. 12403 | 0. 083 | 0. 134 | 0. 031192 | Neo-G | VWA9           |
| THUMPD3. 3 | 2. 10E-06 | -0. 11253 | 0. 135 | 0. 201 | 0. 031391 | Neo-G | THUMPD3        |
| ZNF678     | 2. 11E-06 | 0. 115224 | 0. 065 | 0. 038 | 0. 031509 | Neo-G | ZNF678         |
| TIGD1. 3   | 2. 11E-06 | 0. 11578  | 0. 093 | 0. 061 | 0. 031515 | Neo-G | TIGD1          |
| ZNF471. 2  | 2. 12E-06 | 0. 100479 | 0. 064 | 0. 038 | 0. 031661 | Neo-G | ZNF471         |
| ZNF628. 1  | 2. 14E-06 | 0. 128896 | 0. 077 | 0. 048 | 0. 031975 | Neo-G | ZNF628         |
| CNBP. 3    | 2. 16E-06 | -0. 25765 | 0. 75  | 0. 748 | 0. 032342 | Neo-G | CNBP           |
| CPSF3. 1   | 2. 18E-06 | 0. 132336 | 0. 214 | 0. 171 | 0. 032547 | Neo-G | CPSF3          |
| SDF4. 3    | 2. 18E-06 | -0. 14412 | 0. 341 | 0. 411 | 0. 032648 | Neo-G | SDF4           |
| INO80E. 4  | 2. 21E-06 | 0. 172211 | 0. 258 | 0. 221 | 0. 033028 | Neo-G | INO80E         |
| S100BPB. 1 | 2. 26E-06 | -0. 10993 | 0. 072 | 0. 12  | 0. 033699 | Neo-G | S100BPB        |
| TPGS1. 2   | 2. 27E-06 | 0. 147444 | 0. 341 | 0. 306 | 0. 033919 | Neo-G | TPGS1          |
| RUSC1. 4   | 2. 27E-06 | 0. 15099  | 0. 172 | 0. 134 | 0. 03392  | Neo-G | RUSC1          |
| DUSP16     | 2. 30E-06 | 0. 106585 | 0. 06  | 0. 035 | 0. 034443 | Neo-G | DUSP16         |
| MAN2A2. 2  | 2. 32E-06 | -0. 10401 | 0. 042 | 0. 08  | 0. 034696 | Neo-G | MAN2A2         |
| AC011043.  | 2. 34E-06 | 0. 113853 | 0. 091 | 0. 059 | 0. 034983 | Neo-G | AC011043. 1    |
| PTK2. 4    | 2. 35E-06 | 0. 144734 | 0. 214 | 0. 173 | 0. 035161 | Neo-G | PTK2           |
| LTN1       | 2. 36E-06 | 0. 120749 | 0. 165 | 0. 125 | 0. 035338 | Neo-G | LTN1           |
| IKZF4. 1   | 2. 41E-06 | 0. 136215 | 0. 072 | 0. 044 | 0. 035976 | Neo-G | IKZF4          |
| MLXIP. 3   | 2. 47E-06 | 0. 10299  | 0. 224 | 0. 178 | 0. 036938 | Neo-G | MLXIP          |
| PRKAA2. 6  | 2. 51E-06 | 0. 110787 | 0. 078 | 0. 049 | 0. 037467 | Neo-G | PRKAA2         |
| ACOT13. 2  | 2. 55E-06 | -0. 17225 | 0. 159 | 0. 225 | 0. 038067 | Neo-G | ACOT13         |
| C1orf56. 3 | 2. 57E-06 | -0. 18087 | 0. 15  | 0. 208 | 0. 038446 | Neo-G | C1orf56        |
| RFX4. 5    | 2. 60E-06 | -0. 14407 | 0. 102 | 0. 156 | 0. 038846 | Neo-G | RFX4           |
| KANSL1-AS  | 2. 62E-06 | -0. 11368 | 0. 137 | 0. 2   | 0. 039123 | Neo-G | KANSL1-AS1     |
| EP400. 2   | 2. 63E-06 | 0. 152495 | 0. 15  | 0. 113 | 0. 039243 | Neo-G | EP400          |
| TFSM. 4    | 2. 63E-06 | 0. 117286 | 0. 318 | 0. 271 | 0. 039331 | Neo-G | TFSM           |
| RP11-332H  | 2. 64E-06 | 0. 200471 | 0. 159 | 0. 123 | 0. 039442 | Neo-G | RP11-332H14. 2 |
| APLN. 3    | 2. 65E-06 | -0. 10746 | 0. 01  | 0. 035 | 0. 039546 | Neo-G | APLN           |
| TMEM33. 3  | 2. 65E-06 | 0. 102252 | 0. 323 | 0. 281 | 0. 039634 | Neo-G | TMEM33         |
| CSPP1. 4   | 2. 66E-06 | 0. 139631 | 0. 14  | 0. 102 | 0. 039809 | Neo-G | CSPP1          |
| PISD. 3    | 2. 70E-06 | -0. 10649 | 0. 065 | 0. 11  | 0. 04033  | Neo-G | PISD           |
| BCL9L      | 2. 76E-06 | 0. 109261 | 0. 063 | 0. 037 | 0. 041314 | Neo-G | BCL9L          |
| EREG. 2    | 2. 77E-06 | -0. 13365 | 0. 005 | 0. 027 | 0. 041398 | Neo-G | EREG           |
| PRMT5. 6   | 2. 80E-06 | -0. 14536 | 0. 103 | 0. 157 | 0. 041812 | Neo-G | PRMT5          |

|            |          |          |       |       |          |       |            |
|------------|----------|----------|-------|-------|----------|-------|------------|
| RPUSD4     | 2.85E-06 | 0.10749  | 0.132 | 0.094 | 0.04262  | Neo-G | RPUSD4     |
| SHROOM2.6  | 2.90E-06 | 0.158472 | 0.086 | 0.056 | 0.043385 | Neo-G | SHROOM2    |
| DNMT3A.3   | 2.92E-06 | 0.126318 | 0.134 | 0.096 | 0.043604 | Neo-G | DNMT3A     |
| FA2H.4     | 2.97E-06 | -0.13112 | 0.007 | 0.03  | 0.04435  | Neo-G | FA2H       |
| SLC35E2B.2 | 2.98E-06 | 0.14676  | 0.178 | 0.14  | 0.044532 | Neo-G | SLC35E2B   |
| TRNT1.3    | 3.02E-06 | -0.14089 | 0.086 | 0.137 | 0.045092 | Neo-G | TRNT1      |
| C19orf66.3 | 3.02E-06 | -0.14583 | 0.192 | 0.264 | 0.045157 | Neo-G | C19orf66   |
| RAD51B.3   | 3.06E-06 | -0.10305 | 0.011 | 0.036 | 0.045787 | Neo-G | RAD51B     |
| SYNGR1.4   | 3.08E-06 | -0.12101 | 0.071 | 0.116 | 0.045954 | Neo-G | SYNGR1     |
| DND1.3     | 3.08E-06 | 0.108049 | 0.056 | 0.032 | 0.045968 | Neo-G | DND1       |
| TLL1.4     | 3.10E-06 | 0.172823 | 0.121 | 0.087 | 0.046263 | Neo-G | TLL1       |
| SELENBP1.3 | 3.12E-06 | -0.11374 | 0.002 | 0.021 | 0.046579 | Neo-G | SELENBP1   |
| PTCD3.4    | 3.12E-06 | 0.150159 | 0.263 | 0.226 | 0.046592 | Neo-G | PTCD3      |
| UBL7.2     | 3.15E-06 | -0.1866  | 0.173 | 0.237 | 0.047099 | Neo-G | UBL7       |
| GHDC.3     | 3.16E-06 | -0.13574 | 0.057 | 0.098 | 0.047191 | Neo-G | GHDC       |
| TAOK1.4    | 3.18E-06 | 0.134653 | 0.295 | 0.255 | 0.047489 | Neo-G | TAOK1      |
| CCNT2.2    | 3.19E-06 | 0.140379 | 0.137 | 0.099 | 0.047648 | Neo-G | CCNT2      |
| FAM210A.2  | 3.20E-06 | -0.11792 | 0.095 | 0.147 | 0.047756 | Neo-G | FAM210A    |
| FAM65A.1   | 3.29E-06 | 0.114901 | 0.134 | 0.096 | 0.049162 | Neo-G | FAM65A     |
| SIK1.6     | 3.32E-06 | -0.19239 | 0.064 | 0.105 | 0.04954  | Neo-G | SIK1       |
| DDX23.3    | 3.33E-06 | 0.134372 | 0.194 | 0.154 | 0.049834 | Neo-G | DDX23      |
| MYADM.5    | 3.36E-06 | -0.20887 | 0.143 | 0.199 | 0.050212 | Neo-G | MYADM      |
| PSMA3.5    | 3.37E-06 | -0.26079 | 0.372 | 0.449 | 0.050428 | Neo-G | PSMA3      |
| TEX10.2    | 3.38E-06 | 0.108312 | 0.107 | 0.073 | 0.050481 | Neo-G | TEX10      |
| CTNNB1.6   | 3.40E-06 | -0.19043 | 0.293 | 0.362 | 0.050743 | Neo-G | CTNNB1     |
| EIF3B.2    | 3.40E-06 | 0.152793 | 0.279 | 0.243 | 0.050823 | Neo-G | EIF3B      |
| ATG4B.1    | 3.42E-06 | 0.109483 | 0.313 | 0.272 | 0.051172 | Neo-G | ATG4B      |
| CD2.5      | 3.47E-06 | -0.17548 | 0.002 | 0.021 | 0.051849 | Neo-G | CD2        |
| CAMK1.4    | 3.57E-06 | -0.11389 | 0.167 | 0.233 | 0.053411 | Neo-G | CAMK1      |
| TMOD2.4    | 3.68E-06 | 0.142736 | 0.143 | 0.106 | 0.05499  | Neo-G | TMOD2      |
| PAPD5.3    | 3.69E-06 | 0.119687 | 0.111 | 0.076 | 0.055204 | Neo-G | PAPD5      |
| SLC35A2.2  | 3.73E-06 | -0.15555 | 0.117 | 0.173 | 0.055678 | Neo-G | SLC35A2    |
| S100B.6    | 3.77E-06 | -0.35463 | 0.511 | 0.53  | 0.056362 | Neo-G | S100B      |
| USP54.4    | 3.81E-06 | -0.10414 | 0.021 | 0.051 | 0.056958 | Neo-G | USP54      |
| TTC17.3    | 3.84E-06 | 0.122388 | 0.255 | 0.214 | 0.057449 | Neo-G | TTC17      |
| CLPTM1.1   | 3.86E-06 | -0.16725 | 0.279 | 0.353 | 0.057756 | Neo-G | CLPTM1     |
| NPTXR.6    | 3.88E-06 | 0.240804 | 0.157 | 0.123 | 0.058024 | Neo-G | NPTXR      |
| DIMT1.3    | 3.91E-06 | -0.1339  | 0.132 | 0.193 | 0.058445 | Neo-G | DIMT1      |
| EIF2B4.4   | 3.95E-06 | 0.129554 | 0.225 | 0.183 | 0.05909  | Neo-G | EIF2B4     |
| RYBP.3     | 3.96E-06 | 0.122849 | 0.15  | 0.111 | 0.059153 | Neo-G | RYBP       |
| NCDN.3     | 3.96E-06 | 0.128409 | 0.121 | 0.086 | 0.059247 | Neo-G | NCDN       |
| RPS6KA2.1  | 3.98E-06 | 0.134038 | 0.146 | 0.107 | 0.059491 | Neo-G | RPS6KA2    |
| RQCD1.3    | 4.01E-06 | 0.133484 | 0.224 | 0.183 | 0.059921 | Neo-G | RQCD1      |
| C5orf28.3  | 4.05E-06 | -0.14867 | 0.078 | 0.124 | 0.06052  | Neo-G | C5orf28    |
| KCNQ2.6    | 4.09E-06 | 0.184547 | 0.251 | 0.211 | 0.061151 | Neo-G | KCNQ2      |
| EXOG.6     | 4.10E-06 | 0.16426  | 0.189 | 0.152 | 0.061196 | Neo-G | EXOG       |
| AC113189.4 | 4.18E-06 | 0.13289  | 0.093 | 0.062 | 0.062433 | Neo-G | AC113189.5 |
| NT5DC1.3   | 4.18E-06 | -0.1556  | 0.025 | 0.055 | 0.062458 | Neo-G | NT5DC1     |
| MAPKAPK5.4 | 4.23E-06 | 0.172196 | 0.216 | 0.179 | 0.063156 | Neo-G | MAPKAPK5   |
| SCRN3.3    | 4.36E-06 | 0.150947 | 0.133 | 0.097 | 0.065201 | Neo-G | SCRN3      |
| NET1.5     | 4.64E-06 | -0.10309 | 0.016 | 0.043 | 0.069284 | Neo-G | NET1       |

|           |          |          |       |       |          |       |             |
|-----------|----------|----------|-------|-------|----------|-------|-------------|
| RPIA.3    | 4.65E-06 | 0.12793  | 0.225 | 0.183 | 0.069535 | Neo-G | RPIA        |
| ABCA1.4   | 4.68E-06 | -0.13402 | 0.183 | 0.246 | 0.069925 | Neo-G | ABCA1       |
| HSPA2.4   | 4.74E-06 | -0.28799 | 0.086 | 0.129 | 0.070844 | Neo-G | HSPA2       |
| SFXN4.2   | 4.81E-06 | -0.11444 | 0.073 | 0.119 | 0.071885 | Neo-G | SFXN4       |
| TIPARP.4  | 5.00E-06 | -0.16796 | 0.122 | 0.174 | 0.07469  | Neo-G | TIPARP      |
| SKIV2L2.4 | 5.09E-06 | 0.120382 | 0.192 | 0.152 | 0.076054 | Neo-G | SKIV2L2     |
| CBR1.5    | 5.18E-06 | -0.23454 | 0.422 | 0.482 | 0.077407 | Neo-G | CBR1        |
| MAN1A2.5  | 5.19E-06 | 0.18047  | 0.235 | 0.2   | 0.077633 | Neo-G | MAN1A2      |
| IDH3A.1   | 5.20E-06 | -0.10755 | 0.122 | 0.18  | 0.077659 | Neo-G | IDH3A       |
| TRMT11.4  | 5.28E-06 | 0.114908 | 0.151 | 0.113 | 0.078885 | Neo-G | TRMT11      |
| DHRS1.1   | 5.54E-06 | -0.16403 | 0.108 | 0.16  | 0.082828 | Neo-G | DHRS1       |
| AATK.4    | 5.56E-06 | -0.16641 | 0.012 | 0.036 | 0.083055 | Neo-G | AATK        |
| ZNF345.2  | 5.57E-06 | 0.109706 | 0.078 | 0.049 | 0.083285 | Neo-G | ZNF345      |
| PTPRCAP.4 | 5.62E-06 | -0.19495 | 0.007 | 0.028 | 0.084048 | Neo-G | PTPRCAP     |
| B4GALT2.4 | 5.67E-06 | 0.177151 | 0.104 | 0.073 | 0.08474  | Neo-G | B4GALT2     |
| MAPKAP1.1 | 5.68E-06 | -0.11052 | 0.188 | 0.258 | 0.084809 | Neo-G | MAPKAP1     |
| PET100.3  | 5.69E-06 | -0.23534 | 0.46  | 0.532 | 0.085057 | Neo-G | PET100      |
| MAPK6.3   | 5.73E-06 | 0.136784 | 0.207 | 0.168 | 0.085638 | Neo-G | MAPK6       |
| LINC01116 | 5.75E-06 | 0.16726  | 0.166 | 0.129 | 0.085933 | Neo-G | LINC01116   |
| GNB5.5    | 5.90E-06 | 0.140882 | 0.141 | 0.106 | 0.08818  | Neo-G | GNB5        |
| ANAPC7.4  | 6.03E-06 | 0.15309  | 0.204 | 0.168 | 0.090077 | Neo-G | ANAPC7      |
| C16orf89. | 6.05E-06 | -0.10225 | 0.002 | 0.02  | 0.090438 | Neo-G | C16orf89    |
| KBTBD3.1  | 6.12E-06 | -0.10654 | 0.067 | 0.11  | 0.091396 | Neo-G | KBTBD3      |
| GPX7.3    | 6.16E-06 | -0.13624 | 0.125 | 0.183 | 0.092047 | Neo-G | GPX7        |
| KIAA1549L | 6.17E-06 | 0.114286 | 0.06  | 0.036 | 0.092275 | Neo-G | KIAA1549L   |
| ZNF555    | 6.19E-06 | 0.121964 | 0.064 | 0.039 | 0.092576 | Neo-G | ZNF555      |
| PHLDA3.4  | 6.20E-06 | -0.10509 | 0.121 | 0.177 | 0.092618 | Neo-G | PHLDA3      |
| HIBADH.3  | 6.22E-06 | -0.12165 | 0.167 | 0.235 | 0.093007 | Neo-G | HIBADH      |
| PDE4A.4   | 6.33E-06 | -0.10114 | 0.054 | 0.093 | 0.094622 | Neo-G | PDE4A       |
| HKR1.6    | 6.38E-06 | 0.1497   | 0.148 | 0.112 | 0.095357 | Neo-G | HKR1        |
| C11orf57. | 6.43E-06 | 0.14591  | 0.187 | 0.15  | 0.096129 | Neo-G | C11orf57    |
| E4F1.2    | 6.50E-06 | 0.148408 | 0.147 | 0.111 | 0.097143 | Neo-G | E4F1        |
| DAAM2.2   | 6.51E-06 | -0.12732 | 0.004 | 0.023 | 0.097218 | Neo-G | DAAM2       |
| RAD23A.3  | 6.52E-06 | -0.21535 | 0.54  | 0.57  | 0.097433 | Neo-G | RAD23A      |
| HNRNPLL.3 | 6.53E-06 | 0.174994 | 0.224 | 0.186 | 0.097607 | Neo-G | HNRNPLL     |
| ZNF16.3   | 6.55E-06 | 0.105759 | 0.094 | 0.063 | 0.097881 | Neo-G | ZNF16       |
| SOGA1.6   | 6.56E-06 | 0.184928 | 0.187 | 0.151 | 0.098072 | Neo-G | SOGA1       |
| UCHL5.3   | 6.60E-06 | 0.115856 | 0.185 | 0.144 | 0.098634 | Neo-G | UCHL5       |
| RRAS2.5   | 6.64E-06 | 0.15242  | 0.106 | 0.075 | 0.099178 | Neo-G | RRAS2       |
| CLP1.2    | 6.74E-06 | 0.110693 | 0.104 | 0.071 | 0.100762 | Neo-G | CLP1        |
| CHRNE.5   | 6.79E-06 | -0.10779 | 0.007 | 0.028 | 0.10141  | Neo-G | CHRNE       |
| TBC1D7.2  | 6.91E-06 | 0.154587 | 0.196 | 0.158 | 0.103299 | Neo-G | TBC1D7      |
| GTPBP3.3  | 6.98E-06 | 0.147361 | 0.145 | 0.109 | 0.104266 | Neo-G | GTPBP3      |
| CTC-524C5 | 7.00E-06 | 0.148345 | 0.149 | 0.114 | 0.104644 | Neo-G | CTC-524C5.2 |
| SIP1L2.2  | 7.01E-06 | -0.10549 | 0.08  | 0.127 | 0.104823 | Neo-G | SIP1L2      |
| FAM76B.2  | 7.12E-06 | 0.158206 | 0.143 | 0.108 | 0.106399 | Neo-G | FAM76B      |
| C5orf42.5 | 7.26E-06 | 0.165664 | 0.123 | 0.09  | 0.108558 | Neo-G | C5orf42     |
| LRRC28.2  | 7.35E-06 | -0.1084  | 0.058 | 0.098 | 0.109874 | Neo-G | LRRC28      |
| P2RY12.3  | 7.48E-06 | -0.11468 | 0.003 | 0.021 | 0.111853 | Neo-G | P2RY12      |
| MARC1.5   | 7.57E-06 | 0.160337 | 0.084 | 0.056 | 0.113139 | Neo-G | 1-Mar       |
| TNRC18.2  | 7.63E-06 | 0.11746  | 0.104 | 0.071 | 0.114029 | Neo-G | TNRC18      |

|             |           |           |        |        |           |       |               |
|-------------|-----------|-----------|--------|--------|-----------|-------|---------------|
| AHI1. 2     | 7. 70E-06 | 0. 129029 | 0. 241 | 0. 201 | 0. 115113 | Neo-G | AHI1          |
| KCMF1. 3    | 7. 72E-06 | 0. 186147 | 0. 222 | 0. 187 | 0. 115438 | Neo-G | KCMF1         |
| TFDP2. 2    | 8. 00E-06 | 0. 111475 | 0. 251 | 0. 208 | 0. 119561 | Neo-G | TFDP2         |
| EPS15L1. 3  | 8. 12E-06 | 0. 151826 | 0. 198 | 0. 162 | 0. 121385 | Neo-G | EPS15L1       |
| C4orf46. 2  | 8. 17E-06 | 0. 114634 | 0. 104 | 0. 072 | 0. 122084 | Neo-G | C4orf46       |
| PTPN1. 6    | 8. 21E-06 | -0. 131   | 0. 174 | 0. 239 | 0. 122655 | Neo-G | PTPN1         |
| RASSF1. 3   | 8. 32E-06 | 0. 118602 | 0. 196 | 0. 154 | 0. 124271 | Neo-G | RASSF1        |
| RPF1. 2     | 8. 32E-06 | -0. 15445 | 0. 185 | 0. 252 | 0. 124297 | Neo-G | RPF1          |
| GOSR2. 3    | 8. 33E-06 | 0. 114963 | 0. 22  | 0. 181 | 0. 124532 | Neo-G | GOSR2         |
| SLC27A5. 4  | 8. 39E-06 | -0. 15895 | 0. 093 | 0. 141 | 0. 125408 | Neo-G | SLC27A5       |
| SMIM12. 2   | 8. 53E-06 | -0. 12869 | 0. 232 | 0. 311 | 0. 127504 | Neo-G | SMIM12        |
| CDADC1. 2   | 8. 57E-06 | 0. 114242 | 0. 138 | 0. 103 | 0. 12808  | Neo-G | CDADC1        |
| RP4-665J2   | 8. 59E-06 | 0. 311247 | 0. 153 | 0. 122 | 0. 128321 | Neo-G | RP4-665J23. 1 |
| C2orf68. 1  | 8. 60E-06 | 0. 138675 | 0. 174 | 0. 136 | 0. 12853  | Neo-G | C2orf68       |
| WDR11. 3    | 8. 66E-06 | -0. 10077 | 0. 068 | 0. 111 | 0. 129377 | Neo-G | WDR11         |
| SLC25A39. 8 | 8. 70E-06 | -0. 16677 | 0. 344 | 0. 413 | 0. 129941 | Neo-G | SLC25A39      |
| ELMO2. 4    | 8. 74E-06 | 0. 15406  | 0. 159 | 0. 124 | 0. 130625 | Neo-G | ELMO2         |
| LARP1B. 4   | 8. 79E-06 | 0. 140777 | 0. 152 | 0. 116 | 0. 131399 | Neo-G | LARP1B        |
| RMDN1. 2    | 8. 92E-06 | -0. 10883 | 0. 135 | 0. 194 | 0. 133275 | Neo-G | RMDN1         |
| CPPED1. 7   | 9. 14E-06 | -0. 15456 | 0. 038 | 0. 071 | 0. 136565 | Neo-G | CPPED1        |
| CCDC24      | 9. 18E-06 | 0. 113897 | 0. 08  | 0. 052 | 0. 137158 | Neo-G | CCDC24        |
| ALDH9A1. 2  | 9. 27E-06 | -0. 20454 | 0. 275 | 0. 346 | 0. 138555 | Neo-G | ALDH9A1       |
| ATG3. 6     | 9. 55E-06 | -0. 16496 | 0. 307 | 0. 385 | 0. 14269  | Neo-G | ATG3          |
| DTX2. 3     | 9. 69E-06 | -0. 10626 | 0. 034 | 0. 066 | 0. 144821 | Neo-G | DTX2          |
| ZNF664. 5   | 9. 70E-06 | 0. 181047 | 0. 18  | 0. 145 | 0. 145007 | Neo-G | ZNF664        |
| HRSP12. 6   | 1. 00E-05 | -0. 13496 | 0. 145 | 0. 205 | 0. 149663 | Neo-G | HRSP12        |
| PCDH8. 3    | 1. 01E-05 | 0. 127258 | 0. 071 | 0. 045 | 0. 150353 | Neo-G | PCDH8         |
| NUP88. 4    | 1. 01E-05 | 0. 14414  | 0. 159 | 0. 124 | 0. 150986 | Neo-G | NUP88         |
| MDP1. 1     | 1. 02E-05 | -0. 11347 | 0. 075 | 0. 119 | 0. 15208  | Neo-G | MDP1          |
| MED9. 3     | 1. 04E-05 | 0. 110526 | 0. 123 | 0. 089 | 0. 154826 | Neo-G | MED9          |
| AIMP1. 3    | 1. 04E-05 | -0. 19975 | 0. 302 | 0. 379 | 0. 154923 | Neo-G | AIMP1         |
| SMCHD1. 4   | 1. 04E-05 | 0. 142693 | 0. 22  | 0. 183 | 0. 156063 | Neo-G | SMCHD1        |
| NFKBIL1. 3  | 1. 05E-05 | 0. 142347 | 0. 236 | 0. 2   | 0. 156919 | Neo-G | NFKBIL1       |
| RTKN. 7     | 1. 06E-05 | -0. 11263 | 0. 121 | 0. 177 | 0. 158755 | Neo-G | RTKN          |
| CD276. 2    | 1. 07E-05 | -0. 11308 | 0. 166 | 0. 229 | 0. 159959 | Neo-G | CD276         |
| AEN. 1      | 1. 08E-05 | -0. 13344 | 0. 053 | 0. 09  | 0. 161841 | Neo-G | AEN           |
| MAFG. 4     | 1. 10E-05 | 0. 190767 | 0. 215 | 0. 181 | 0. 164121 | Neo-G | MAFG          |
| MOSPD2. 2   | 1. 11E-05 | -0. 10464 | 0. 071 | 0. 114 | 0. 1666   | Neo-G | MOSPD2        |
| CEP290. 4   | 1. 12E-05 | 0. 168692 | 0. 189 | 0. 154 | 0. 167754 | Neo-G | CEP290        |
| BRD9. 2     | 1. 13E-05 | 0. 14748  | 0. 226 | 0. 189 | 0. 16868  | Neo-G | BRD9          |
| ERP44. 5    | 1. 13E-05 | -0. 22502 | 0. 342 | 0. 402 | 0. 168746 | Neo-G | ERP44         |
| SLC25A13. 1 | 1. 17E-05 | 0. 161889 | 0. 159 | 0. 123 | 0. 175066 | Neo-G | SLC25A13      |
| DALRD3. 3   | 1. 21E-05 | 0. 146594 | 0. 197 | 0. 161 | 0. 181349 | Neo-G | DALRD3        |
| PTRHD1. 3   | 1. 23E-05 | -0. 17255 | 0. 249 | 0. 327 | 0. 184028 | Neo-G | PTRHD1        |
| ZNF529. 3   | 1. 27E-05 | 0. 107636 | 0. 085 | 0. 056 | 0. 1893   | Neo-G | ZNF529        |
| TRIM52. 1   | 1. 27E-05 | 0. 13238  | 0. 104 | 0. 073 | 0. 190415 | Neo-G | TRIM52        |
| TUBG1. 5    | 1. 28E-05 | 0. 129325 | 0. 265 | 0. 23  | 0. 191929 | Neo-G | TUBG1         |
| CENPU. 6    | 1. 31E-05 | -0. 13457 | 0. 069 | 0. 109 | 0. 195274 | Neo-G | CENPU         |
| AC006129. 1 | 1. 32E-05 | -0. 10554 | 0      | 0. 015 | 0. 197863 | Neo-G | AC006129. 2   |
| SETD7. 2    | 1. 34E-05 | -0. 1093  | 0. 066 | 0. 108 | 0. 199871 | Neo-G | SETD7         |
| AVIL. 5     | 1. 34E-05 | 0. 169494 | 0. 119 | 0. 085 | 0. 200446 | Neo-G | AVIL          |

|            |           |           |        |        |           |       |                 |
|------------|-----------|-----------|--------|--------|-----------|-------|-----------------|
| QSER1. 5   | 1. 36E-05 | 0. 161558 | 0. 148 | 0. 115 | 0. 203311 | Neo-G | QSER1           |
| MPV17. 1   | 1. 37E-05 | -0. 16672 | 0. 275 | 0. 354 | 0. 205359 | Neo-G | MPV17           |
| NUFIP1. 4  | 1. 37E-05 | 0. 133202 | 0. 146 | 0. 111 | 0. 205399 | Neo-G | NUFIP1          |
| ZNF212. 4  | 1. 43E-05 | 0. 100534 | 0. 095 | 0. 065 | 0. 213061 | Neo-G | ZNF212          |
| RP11-345J  | 1. 44E-05 | 0. 133455 | 0. 262 | 0. 231 | 0. 214462 | Neo-G | RP11-345J4. 5   |
| RRP1. 4    | 1. 44E-05 | 0. 11964  | 0. 24  | 0. 206 | 0. 214874 | Neo-G | RRP1            |
| FAM188A. 4 | 1. 45E-05 | 0. 137311 | 0. 119 | 0. 087 | 0. 216679 | Neo-G | FAM188A         |
| MARK4. 3   | 1. 45E-05 | 0. 150849 | 0. 099 | 0. 069 | 0. 217058 | Neo-G | MARK4           |
| FAM19A5. 4 | 1. 45E-05 | 0. 109692 | 0. 071 | 0. 045 | 0. 217207 | Neo-G | FAM19A5         |
| TOR2A. 5   | 1. 47E-05 | -0. 11067 | 0. 104 | 0. 152 | 0. 219662 | Neo-G | TOR2A           |
| SIX1. 5    | 1. 49E-05 | 0. 137234 | 0. 082 | 0. 054 | 0. 222735 | Neo-G | SIX1            |
| DDX49. 4   | 1. 50E-05 | 0. 13943  | 0. 302 | 0. 271 | 0. 224412 | Neo-G | DDX49           |
| MTX1. 2    | 1. 52E-05 | -0. 17365 | 0. 187 | 0. 253 | 0. 226809 | Neo-G | MTX1            |
| EXTL2. 5   | 1. 52E-05 | 0. 162023 | 0. 197 | 0. 164 | 0. 227331 | Neo-G | EXTL2           |
| USMG5. 6   | 1. 52E-05 | -0. 21176 | 0. 589 | 0. 624 | 0. 227743 | Neo-G | USMG5           |
| ADSS. 3    | 1. 53E-05 | -0. 10878 | 0. 136 | 0. 193 | 0. 228313 | Neo-G | ADSS            |
| DHRS7B. 2  | 1. 54E-05 | -0. 11048 | 0. 134 | 0. 193 | 0. 230664 | Neo-G | DHRS7B          |
| MARK3. 5   | 1. 58E-05 | 0. 137189 | 0. 314 | 0. 284 | 0. 235677 | Neo-G | MARK3           |
| ACOX3. 2   | 1. 59E-05 | 0. 122017 | 0. 122 | 0. 089 | 0. 238238 | Neo-G | ACOX3           |
| SYAP1. 6   | 1. 61E-05 | -0. 19817 | 0. 323 | 0. 395 | 0. 241301 | Neo-G | SYAP1           |
| VPS36. 4   | 1. 63E-05 | 0. 102737 | 0. 237 | 0. 196 | 0. 242929 | Neo-G | VPS36           |
| MARS. 2    | 1. 66E-05 | 0. 104651 | 0. 24  | 0. 202 | 0. 247483 | Neo-G | MARS            |
| ZNF143     | 1. 66E-05 | 0. 126818 | 0. 109 | 0. 077 | 0. 248603 | Neo-G | ZNF143          |
| SUMF2. 1   | 1. 67E-05 | -0. 15641 | 0. 277 | 0. 351 | 0. 249318 | Neo-G | SUMF2           |
| HHIP. 4    | 1. 67E-05 | -0. 12534 | 0. 008 | 0. 028 | 0. 250068 | Neo-G | HHIP            |
| COX5A. 5   | 1. 67E-05 | -0. 15856 | 0. 575 | 0. 601 | 0. 250231 | Neo-G | COX5A           |
| HECTD1. 2  | 1. 68E-05 | 0. 139972 | 0. 259 | 0. 224 | 0. 251313 | Neo-G | HECTD1          |
| RNF157. 6  | 1. 69E-05 | 0. 144618 | 0. 164 | 0. 13  | 0. 252438 | Neo-G | RNF157          |
| DDI2       | 1. 69E-05 | -0. 10725 | 0. 032 | 0. 063 | 0. 252553 | Neo-G | DDI2            |
| SURF2. 5   | 1. 70E-05 | 0. 13292  | 0. 262 | 0. 228 | 0. 253938 | Neo-G | SURF2           |
| TCOF1. 5   | 1. 71E-05 | -0. 1822  | 0. 149 | 0. 201 | 0. 255277 | Neo-G | TCOF1           |
| CLIP1      | 1. 73E-05 | 0. 109643 | 0. 246 | 0. 21  | 0. 257872 | Neo-G | CLIP1           |
| PRKAB2. 2  | 1. 75E-05 | 0. 120036 | 0. 086 | 0. 057 | 0. 261137 | Neo-G | PRKAB2          |
| NAV2. 4    | 1. 80E-05 | 0. 141989 | 0. 149 | 0. 114 | 0. 268907 | Neo-G | NAV2            |
| HAPLN2. 5  | 1. 84E-05 | -0. 13142 | 0. 013 | 0. 035 | 0. 274535 | Neo-G | HAPLN2          |
| COPE. 4    | 1. 85E-05 | -0. 18373 | 0. 819 | 0. 765 | 0. 277071 | Neo-G | COPE            |
| RALGAPA2.  | 1. 88E-05 | 0. 179479 | 0. 139 | 0. 107 | 0. 280277 | Neo-G | RALGAPA2        |
| TTC27      | 1. 88E-05 | 0. 116935 | 0. 105 | 0. 074 | 0. 280875 | Neo-G | TTC27           |
| RP11-14N7  | 1. 91E-05 | 0. 125386 | 0. 235 | 0. 201 | 0. 285817 | Neo-G | RP11-14N7. 2    |
| BNIP1. 5   | 1. 92E-05 | 0. 102998 | 0. 152 | 0. 116 | 0. 28752  | Neo-G | BNIP1           |
| EMC8. 3    | 1. 94E-05 | 0. 156492 | 0. 298 | 0. 269 | 0. 289548 | Neo-G | EMC8            |
| MOB2. 1    | 1. 95E-05 | 0. 108897 | 0. 221 | 0. 183 | 0. 291047 | Neo-G | MOB2            |
| NME3. 3    | 2. 02E-05 | -0. 17996 | 0. 358 | 0. 424 | 0. 301516 | Neo-G | NME3            |
| CDK11A. 2  | 2. 04E-05 | 0. 111628 | 0. 231 | 0. 192 | 0. 30507  | Neo-G | CDK11A          |
| USP30. 1   | 2. 04E-05 | 0. 104693 | 0. 087 | 0. 059 | 0. 305103 | Neo-G | USP30           |
| ZDHHC9. 7  | 2. 06E-05 | -0. 15143 | 0. 121 | 0. 173 | 0. 307357 | Neo-G | ZDHHC9          |
| EIF4EBP2.  | 2. 07E-05 | -0. 10689 | 0. 099 | 0. 146 | 0. 309983 | Neo-G | EIF4EBP2        |
| RP11-1275  | 2. 08E-05 | 0. 116741 | 0. 086 | 0. 057 | 0. 310559 | Neo-G | RP11-1275H24. 1 |
| POLR3D. 5  | 2. 09E-05 | 0. 171885 | 0. 156 | 0. 122 | 0. 312464 | Neo-G | POLR3D          |
| RP11-437L  | 2. 09E-05 | -0. 10113 | 0      | 0. 014 | 0. 312868 | Neo-G | RP11-437L7. 1   |
| TMEM168. 4 | 2. 12E-05 | 0. 112704 | 0. 142 | 0. 107 | 0. 316425 | Neo-G | TMEM168         |

|            |          |          |       |       |          |       |               |
|------------|----------|----------|-------|-------|----------|-------|---------------|
| TMEM261.2  | 2.13E-05 | -0.21472 | 0.297 | 0.368 | 0.317612 | Neo-G | TMEM261       |
| ADPRHL2.4  | 2.13E-05 | 0.11215  | 0.293 | 0.257 | 0.318046 | Neo-G | ADPRHL2       |
| SPATA20.4  | 2.13E-05 | -0.11966 | 0.091 | 0.136 | 0.318109 | Neo-G | SPATA20       |
| RPRD2.3    | 2.16E-05 | 0.121893 | 0.162 | 0.126 | 0.323388 | Neo-G | RPRD2         |
| PRKCI.1    | 2.18E-05 | 0.165956 | 0.131 | 0.1   | 0.325794 | Neo-G | PRKCI         |
| SPATC1L.6  | 2.20E-05 | 0.180774 | 0.221 | 0.191 | 0.328228 | Neo-G | SPATC1L       |
| HMGCR.4    | 2.21E-05 | 0.144648 | 0.138 | 0.105 | 0.330212 | Neo-G | HMGCR         |
| SENP5.3    | 2.24E-05 | 0.152388 | 0.168 | 0.134 | 0.33448  | Neo-G | SENP5         |
| PDIA4.5    | 2.25E-05 | -0.22348 | 0.403 | 0.468 | 0.335589 | Neo-G | PDIA4         |
| BRAP.1     | 2.30E-05 | 0.127311 | 0.137 | 0.103 | 0.343716 | Neo-G | BRAP          |
| HSCB.3     | 2.31E-05 | -0.11067 | 0.123 | 0.178 | 0.345268 | Neo-G | HSCB          |
| ZNF25.2    | 2.33E-05 | 0.129096 | 0.104 | 0.074 | 0.348092 | Neo-G | ZNF25         |
| KEAP1.4    | 2.33E-05 | -0.11302 | 0.211 | 0.279 | 0.348275 | Neo-G | KEAP1         |
| CCL20.6    | 2.37E-05 | -0.23383 | 0.035 | 0.064 | 0.354171 | Neo-G | CCL20         |
| PRKAR2A.2  | 2.39E-05 | 0.126944 | 0.277 | 0.245 | 0.357645 | Neo-G | PRKAR2A       |
| UIMC1.1    | 2.42E-05 | 0.102541 | 0.14  | 0.105 | 0.362343 | Neo-G | UIMC1         |
| FKBPL.3    | 2.43E-05 | 0.134739 | 0.09  | 0.062 | 0.363726 | Neo-G | FKBPL         |
| Clorf50.3  | 2.44E-05 | 0.109495 | 0.212 | 0.176 | 0.364924 | Neo-G | Clorf50       |
| AP5Z1.1    | 2.48E-05 | 0.137978 | 0.16  | 0.125 | 0.371177 | Neo-G | AP5Z1         |
| NUAK1.4    | 2.49E-05 | 0.106961 | 0.098 | 0.068 | 0.372228 | Neo-G | NUAK1         |
| RP11-294J  | 2.50E-05 | -0.10058 | 0.093 | 0.139 | 0.373817 | Neo-G | RP11-294J22.6 |
| FRZB.3     | 2.50E-05 | -0.15722 | 0.022 | 0.048 | 0.374122 | Neo-G | FRZB          |
| THAP1.2    | 2.55E-05 | 0.11482  | 0.172 | 0.137 | 0.380513 | Neo-G | THAP1         |
| KBTBD8.3   | 2.61E-05 | -0.10357 | 0.011 | 0.032 | 0.39039  | Neo-G | KBTBD8        |
| WDR41.3    | 2.63E-05 | -0.11317 | 0.168 | 0.232 | 0.392572 | Neo-G | WDR41         |
| MAL.6      | 2.63E-05 | -0.2036  | 0.018 | 0.042 | 0.393637 | Neo-G | MAL           |
| CSRNP2.2   | 2.66E-05 | 0.117752 | 0.114 | 0.083 | 0.397402 | Neo-G | CSRNP2        |
| PDHX.4     | 2.67E-05 | 0.1382   | 0.201 | 0.168 | 0.399131 | Neo-G | PDHX          |
| USP36.6    | 2.67E-05 | -0.14363 | 0.099 | 0.143 | 0.399547 | Neo-G | USP36         |
| PARP2.4    | 2.70E-05 | 0.122573 | 0.142 | 0.107 | 0.404055 | Neo-G | PARP2         |
| EFHD1.4    | 2.71E-05 | -0.15612 | 0.032 | 0.061 | 0.40536  | Neo-G | EFHD1         |
| ING1.2     | 2.72E-05 | 0.107226 | 0.168 | 0.132 | 0.406233 | Neo-G | ING1          |
| COPS2.2    | 2.75E-05 | -0.10486 | 0.156 | 0.216 | 0.410461 | Neo-G | COPS2         |
| DNMT1.6    | 2.77E-05 | 0.117472 | 0.315 | 0.283 | 0.41373  | Neo-G | DNMT1         |
| ZNF35.2    | 2.78E-05 | 0.121269 | 0.082 | 0.055 | 0.41474  | Neo-G | ZNF35         |
| GLTSCR2.6  | 2.78E-05 | -0.13831 | 0.513 | 0.57  | 0.41521  | Neo-G | GLTSCR2       |
| PRDM4.3    | 2.79E-05 | 0.148749 | 0.112 | 0.082 | 0.416289 | Neo-G | PRDM4         |
| ATP6V1E2.2 | 2.80E-05 | 0.118026 | 0.085 | 0.057 | 0.418872 | Neo-G | ATP6V1E2      |
| ZNF670     | 2.81E-05 | 0.10334  | 0.07  | 0.045 | 0.42048  | Neo-G | ZNF670        |
| YY1.5      | 2.83E-05 | 0.103135 | 0.368 | 0.337 | 0.422639 | Neo-G | YY1           |
| LYPLAL1.1  | 2.85E-05 | -0.15073 | 0.181 | 0.244 | 0.425311 | Neo-G | LYPLAL1       |
| RBX1.6     | 2.91E-05 | -0.20439 | 0.648 | 0.667 | 0.434487 | Neo-G | RBX1          |
| ZNF649.5   | 2.93E-05 | 0.159184 | 0.116 | 0.086 | 0.437229 | Neo-G | ZNF649        |
| TUBA1C.5   | 2.97E-05 | -0.24497 | 0.326 | 0.386 | 0.443455 | Neo-G | TUBA1C        |
| PPM1N.2    | 2.97E-05 | -0.13827 | 0.017 | 0.041 | 0.443759 | Neo-G | PPM1N         |
| PRPS1.4    | 2.98E-05 | -0.18333 | 0.144 | 0.195 | 0.445454 | Neo-G | PRPS1         |
| TPD52.5    | 2.98E-05 | -0.15905 | 0.181 | 0.243 | 0.445873 | Neo-G | TPD52         |
| SNAPC5.2   | 3.02E-05 | -0.13351 | 0.158 | 0.218 | 0.451116 | Neo-G | SNAPC5        |
| C12orf75.3 | 3.07E-05 | -0.14596 | 0.146 | 0.199 | 0.459103 | Neo-G | C12orf75      |
| CDIP1.2    | 3.08E-05 | 0.132774 | 0.218 | 0.183 | 0.459931 | Neo-G | CDIP1         |
| TSC22D3.5  | 3.13E-05 | -0.32233 | 0.443 | 0.458 | 0.468124 | Neo-G | TSC22D3       |



|             |           |           |        |        |           |       |               |
|-------------|-----------|-----------|--------|--------|-----------|-------|---------------|
| BANP. 2     | 3. 17E-05 | 0. 102314 | 0. 108 | 0. 077 | 0. 4741   | Neo-G | BANP          |
| NLGN2. 5    | 3. 19E-05 | 0. 170195 | 0. 119 | 0. 089 | 0. 476315 | Neo-G | NLGN2         |
| PTPRG. 4    | 3. 26E-05 | 0. 122003 | 0. 098 | 0. 069 | 0. 487843 | Neo-G | PTPRG         |
| PEX5L. 3    | 3. 28E-05 | -0. 11721 | 0. 006 | 0. 024 | 0. 489986 | Neo-G | PEX5L         |
| MBTPS1. 1   | 3. 30E-05 | 0. 121913 | 0. 205 | 0. 169 | 0. 493051 | Neo-G | MBTPS1        |
| DXO. 2      | 3. 34E-05 | 0. 123304 | 0. 152 | 0. 118 | 0. 499181 | Neo-G | DXO           |
| SOWAHC. 3   | 3. 35E-05 | 0. 10886  | 0. 093 | 0. 064 | 0. 500941 | Neo-G | SOWAHC        |
| TYW1. 1     | 3. 36E-05 | 0. 127861 | 0. 149 | 0. 115 | 0. 502501 | Neo-G | TYW1          |
| KLHL8. 2    | 3. 38E-05 | 0. 143974 | 0. 163 | 0. 129 | 0. 505184 | Neo-G | KLHL8         |
| GNPDA1. 2   | 3. 39E-05 | -0. 14621 | 0. 184 | 0. 246 | 0. 506507 | Neo-G | GNPDA1        |
| RER1. 5     | 3. 39E-05 | -0. 1883  | 0. 453 | 0. 502 | 0. 506614 | Neo-G | RER1          |
| WDR70. 1    | 3. 41E-05 | 0. 112382 | 0. 183 | 0. 146 | 0. 50975  | Neo-G | WDR70         |
| RFX5. 4     | 3. 42E-05 | -0. 10072 | 0. 069 | 0. 109 | 0. 510636 | Neo-G | RFX5          |
| NPAS1       | 3. 43E-05 | 0. 149603 | 0. 056 | 0. 034 | 0. 512471 | Neo-G | NPAS1         |
| ERGIC3. 4   | 3. 43E-05 | -0. 22384 | 0. 565 | 0. 577 | 0. 512888 | Neo-G | ERGIC3        |
| PLS3. 6     | 3. 45E-05 | 0. 174592 | 0. 244 | 0. 218 | 0. 516044 | Neo-G | PLS3          |
| RGAG4. 4    | 3. 45E-05 | 0. 142834 | 0. 086 | 0. 059 | 0. 516312 | Neo-G | RGAG4         |
| ITGB1BP1. 3 | 3. 51E-05 | -0. 1788  | 0. 317 | 0. 395 | 0. 524708 | Neo-G | ITGB1BP1      |
| RBM14. 4    | 3. 61E-05 | 0. 134997 | 0. 223 | 0. 188 | 0. 540112 | Neo-G | RBM14         |
| NDUFA2. 2   | 3. 64E-05 | -0. 22294 | 0. 581 | 0. 606 | 0. 544506 | Neo-G | NDUFA2        |
| TTI1. 3     | 3. 68E-05 | 0. 142083 | 0. 124 | 0. 094 | 0. 550441 | Neo-G | TTI1          |
| CDC42SE2. 3 | 3. 70E-05 | -0. 15151 | 0. 168 | 0. 225 | 0. 552392 | Neo-G | CDC42SE2      |
| LINC00339   | 3. 70E-05 | -0. 11966 | 0. 035 | 0. 065 | 0. 552456 | Neo-G | LINC00339     |
| TPTEP1. 2   | 3. 72E-05 | -0. 11524 | 0. 012 | 0. 033 | 0. 555805 | Neo-G | TPTEP1        |
| SNHG15. 3   | 3. 79E-05 | -0. 17197 | 0. 171 | 0. 228 | 0. 565976 | Neo-G | SNHG15        |
| C18orf8. 3  | 3. 82E-05 | 0. 110614 | 0. 144 | 0. 11  | 0. 571028 | Neo-G | C18orf8       |
| PPM1L. 2    | 3. 85E-05 | 0. 105108 | 0. 069 | 0. 045 | 0. 575809 | Neo-G | PPM1L         |
| PPP1R35. 7  | 3. 87E-05 | 0. 19263  | 0. 185 | 0. 154 | 0. 578298 | Neo-G | PPP1R35       |
| TIMMDC1. 3  | 3. 89E-05 | -0. 19885 | 0. 321 | 0. 395 | 0. 581358 | Neo-G | TIMMDC1       |
| RP11-796E   | 3. 91E-05 | -0. 1519  | 0. 038 | 0. 069 | 0. 58484  | Neo-G | RP11-796E2. 4 |
| NES. 7      | 4. 01E-05 | -0. 23137 | 0. 249 | 0. 279 | 0. 599685 | Neo-G | NES           |
| SLC1A2. 5   | 4. 04E-05 | -0. 12171 | 0. 096 | 0. 14  | 0. 603881 | Neo-G | SLC1A2        |
| LCK. 3      | 4. 07E-05 | -0. 11749 | 0. 002 | 0. 016 | 0. 608805 | Neo-G | LCK           |
| ZNF318. 1   | 4. 13E-05 | 0. 128185 | 0. 082 | 0. 056 | 0. 617206 | Neo-G | ZNF318        |
| NUBP1. 5    | 4. 13E-05 | -0. 1648  | 0. 167 | 0. 224 | 0. 617261 | Neo-G | NUBP1         |
| N6AMT2. 4   | 4. 15E-05 | 0. 14629  | 0. 161 | 0. 129 | 0. 620354 | Neo-G | N6AMT2        |
| SLC2A1. 5   | 4. 22E-05 | -0. 13336 | 0. 098 | 0. 142 | 0. 630532 | Neo-G | SLC2A1        |
| RALB. 5     | 4. 23E-05 | -0. 11666 | 0. 114 | 0. 162 | 0. 631959 | Neo-G | RALB          |
| KIAA1456. 4 | 4. 27E-05 | 0. 113145 | 0. 069 | 0. 045 | 0. 638306 | Neo-G | KIAA1456      |
| ELP5. 3     | 4. 28E-05 | 0. 10981  | 0. 294 | 0. 264 | 0. 638874 | Neo-G | ELP5          |
| GSTP1. 4    | 4. 30E-05 | -0. 22097 | 0. 866 | 0. 816 | 0. 642992 | Neo-G | GSTP1         |
| PHACTR4. 3  | 4. 31E-05 | 0. 125895 | 0. 233 | 0. 198 | 0. 64464  | Neo-G | PHACTR4       |
| FBXW5. 5    | 4. 37E-05 | -0. 102   | 0. 226 | 0. 296 | 0. 652433 | Neo-G | FBXW5         |
| CLHC1. 3    | 4. 44E-05 | 0. 124727 | 0. 093 | 0. 065 | 0. 663935 | Neo-G | CLHC1         |
| TOR1AIP1. 4 | 4. 50E-05 | -0. 11238 | 0. 135 | 0. 188 | 0. 672079 | Neo-G | TOR1AIP1      |
| RETN. 5     | 4. 70E-05 | -0. 10302 | 0. 005 | 0. 021 | 0. 702165 | Neo-G | RETN          |
| HSPBP1. 3   | 4. 71E-05 | 0. 102605 | 0. 315 | 0. 284 | 0. 703216 | Neo-G | HSPBP1        |
| TMIGD2. 3   | 4. 71E-05 | -0. 12741 | 0. 005 | 0. 021 | 0. 703265 | Neo-G | TMIGD2        |
| TMEM39B. 1  | 4. 85E-05 | 0. 104596 | 0. 158 | 0. 124 | 0. 724743 | Neo-G | TMEM39B       |
| RAD54L2. 4  | 4. 85E-05 | 0. 139837 | 0. 135 | 0. 103 | 0. 724892 | Neo-G | RAD54L2       |
| TCEB3. 3    | 4. 87E-05 | 0. 140851 | 0. 205 | 0. 173 | 0. 728349 | Neo-G | TCEB3         |

|             |           |           |        |        |           |       |                |
|-------------|-----------|-----------|--------|--------|-----------|-------|----------------|
| RCE1. 2     | 4. 96E-05 | 0. 123792 | 0. 159 | 0. 125 | 0. 741117 | Neo-G | RCE1           |
| CTC-479C5   | 5. 03E-05 | -0. 11759 | 0. 027 | 0. 054 | 0. 752061 | Neo-G | CTC-479C5. 12  |
| WDR83. 4    | 5. 18E-05 | 0. 145607 | 0. 2   | 0. 167 | 0. 774148 | Neo-G | WDR83          |
| FAM193B. 2  | 5. 20E-05 | 0. 116656 | 0. 083 | 0. 057 | 0. 777094 | Neo-G | FAM193B        |
| PPIH. 2     | 5. 21E-05 | -0. 17779 | 0. 177 | 0. 234 | 0. 778954 | Neo-G | PPIH           |
| FAM174A. 3  | 5. 25E-05 | 0. 150493 | 0. 25  | 0. 219 | 0. 784153 | Neo-G | FAM174A        |
| NCBP2-AS2   | 5. 28E-05 | 0. 156151 | 0. 299 | 0. 274 | 0. 788725 | Neo-G | NCBP2-AS2      |
| GGCT. 6     | 5. 28E-05 | -0. 26197 | 0. 329 | 0. 393 | 0. 789068 | Neo-G | GGCT           |
| CYB561A3. 5 | 5. 36E-05 | -0. 12668 | 0. 11  | 0. 155 | 0. 80028  | Neo-G | CYB561A3       |
| RABGAP1. 5  | 5. 40E-05 | 0. 147738 | 0. 152 | 0. 121 | 0. 80712  | Neo-G | RABGAP1        |
| MICU2. 3    | 5. 41E-05 | 0. 124924 | 0. 264 | 0. 231 | 0. 8081   | Neo-G | MICU2          |
| WDR91. 4    | 5. 53E-05 | -0. 13315 | 0. 056 | 0. 09  | 0. 826018 | Neo-G | WDR91          |
| SPHK2. 5    | 5. 63E-05 | 0. 144287 | 0. 157 | 0. 125 | 0. 841848 | Neo-G | SPHK2          |
| GFM2. 2     | 5. 66E-05 | 0. 109653 | 0. 115 | 0. 085 | 0. 846251 | Neo-G | GFM2           |
| ZFHX2       | 5. 69E-05 | 0. 110096 | 0. 049 | 0. 029 | 0. 84958  | Neo-G | ZFHX2          |
| TANK        | 5. 86E-05 | -0. 16395 | 0. 269 | 0. 338 | 0. 876066 | Neo-G | TANK           |
| GSK3A. 5    | 5. 88E-05 | 0. 166022 | 0. 216 | 0. 187 | 0. 878889 | Neo-G | GSK3A          |
| PPP2R4. 2   | 5. 90E-05 | -0. 10534 | 0. 181 | 0. 243 | 0. 881658 | Neo-G | PPP2R4         |
| ANKRD6. 1   | 5. 95E-05 | 0. 102377 | 0. 069 | 0. 045 | 0. 888679 | Neo-G | ANKRD6         |
| ST8SIA4. 7  | 5. 98E-05 | -0. 1946  | 0. 086 | 0. 123 | 0. 893694 | Neo-G | ST8SIA4        |
| TANC2. 3    | 6. 00E-05 | 0. 141776 | 0. 218 | 0. 185 | 0. 897381 | Neo-G | TANC2          |
| SLC52A2. 3  | 6. 02E-05 | 0. 147954 | 0. 302 | 0. 277 | 0. 900174 | Neo-G | SLC52A2        |
| RMND1. 2    | 6. 03E-05 | 0. 128505 | 0. 128 | 0. 098 | 0. 90149  | Neo-G | RMND1          |
| PLXNC1. 7   | 6. 13E-05 | -0. 12137 | 0. 04  | 0. 069 | 0. 916739 | Neo-G | PLXNC1         |
| FAM173A. 3  | 6. 16E-05 | 0. 135359 | 0. 312 | 0. 284 | 0. 920924 | Neo-G | FAM173A        |
| RNF34. 4    | 6. 18E-05 | 0. 123088 | 0. 223 | 0. 192 | 0. 923004 | Neo-G | RNF34          |
| ARID2. 2    | 6. 21E-05 | 0. 140055 | 0. 13  | 0. 099 | 0. 927897 | Neo-G | ARID2          |
| NUP54. 3    | 6. 22E-05 | 0. 109234 | 0. 209 | 0. 174 | 0. 929114 | Neo-G | NUP54          |
| VAMP7. 3    | 6. 22E-05 | -0. 11406 | 0. 122 | 0. 171 | 0. 9292   | Neo-G | VAMP7          |
| RP11-538F   | 6. 28E-05 | 0. 113423 | 0. 109 | 0. 08  | 0. 938944 | Neo-G | RP11-538P18. 2 |
| ZC3HC1. 4   | 6. 46E-05 | 0. 132245 | 0. 152 | 0. 121 | 0. 966005 | Neo-G | ZC3HC1         |
| ITM2C. 7    | 6. 53E-05 | -0. 26623 | 0. 374 | 0. 422 | 0. 975957 | Neo-G | ITM2C          |
| CALB1. 1    | 6. 55E-05 | -0. 10273 | 0. 002 | 0. 015 | 0. 978593 | Neo-G | CALB1          |
| SERTAD3     | 6. 58E-05 | -0. 16736 | 0. 13  | 0. 179 | 0. 982851 | Neo-G | SERTAD3        |
| NAA60. 2    | 6. 61E-05 | -0. 12218 | 0. 001 | 0. 014 | 0. 988284 | Neo-G | NAA60          |
| GTF2H2. 5   | 6. 62E-05 | 0. 107483 | 0. 212 | 0. 181 | 0. 989338 | Neo-G | GTF2H2         |
| ERP29. 4    | 6. 74E-05 | -0. 24814 | 0. 579 | 0. 615 | 1         | Neo-G | ERP29          |
| C5orf15. 1  | 6. 76E-05 | -0. 1656  | 0. 262 | 0. 331 | 1         | Neo-G | C5orf15        |
| BIN1. 5     | 6. 77E-05 | -0. 2636  | 0. 337 | 0. 364 | 1         | Neo-G | BIN1           |
| SMC6. 4     | 6. 78E-05 | 0. 142993 | 0. 185 | 0. 153 | 1         | Neo-G | SMC6           |
| NCKAP1. 5   | 6. 85E-05 | 0. 193604 | 0. 211 | 0. 186 | 1         | Neo-G | NCKAP1         |
| CMBL. 5     | 6. 91E-05 | 0. 139401 | 0. 154 | 0. 123 | 1         | Neo-G | CMBL           |
| PID1. 4     | 6. 92E-05 | 0. 123003 | 0. 146 | 0. 113 | 1         | Neo-G | PID1           |
| IBSP. 5     | 6. 95E-05 | -0. 16268 | 0. 008 | 0. 026 | 1         | Neo-G | IBSP           |
| DDX42. 4    | 7. 03E-05 | 0. 13662  | 0. 244 | 0. 215 | 1         | Neo-G | DDX42          |
| ZDHHC22. 5  | 7. 15E-05 | 0. 115965 | 0. 064 | 0. 041 | 1         | Neo-G | ZDHHC22        |
| C1orf43. 1  | 7. 16E-05 | -0. 20516 | 0. 563 | 0. 601 | 1         | Neo-G | C1orf43        |
| ZNF776. 4   | 7. 16E-05 | 0. 129863 | 0. 082 | 0. 056 | 1         | Neo-G | ZNF776         |
| IFIT5. 3    | 7. 19E-05 | 0. 105951 | 0. 11  | 0. 08  | 1         | Neo-G | IFIT5          |
| BAP1. 2     | 7. 22E-05 | 0. 13661  | 0. 167 | 0. 136 | 1         | Neo-G | BAP1           |
| APOA1BP. 2  | 7. 29E-05 | -0. 13869 | 0. 308 | 0. 383 | 1         | Neo-G | APOA1BP        |

|             |           |           |        |        |         |                |
|-------------|-----------|-----------|--------|--------|---------|----------------|
| CD3E. 3     | 7. 30E-05 | -0. 16395 | 0. 004 | 0. 019 | 1 Neo-G | CD3E           |
| C2orf44     | 7. 40E-05 | 0. 108536 | 0. 057 | 0. 036 | 1 Neo-G | C2orf44        |
| DNAJC4. 4   | 7. 51E-05 | -0. 11867 | 0. 178 | 0. 234 | 1 Neo-G | DNAJC4         |
| CRY1. 3     | 7. 59E-05 | 0. 107931 | 0. 165 | 0. 133 | 1 Neo-G | CRY1           |
| SIRT6. 2    | 7. 87E-05 | 0. 125878 | 0. 223 | 0. 192 | 1 Neo-G | SIRT6          |
| FGF20. 3    | 8. 01E-05 | -0. 10229 | 0. 004 | 0. 019 | 1 Neo-G | FGF20          |
| FAM104B. 3  | 8. 01E-05 | -0. 11675 | 0. 142 | 0. 197 | 1 Neo-G | FAM104B        |
| RBFA. 1     | 8. 08E-05 | 0. 130231 | 0. 196 | 0. 164 | 1 Neo-G | RBFA           |
| PLK3. 6     | 8. 21E-05 | -0. 20018 | 0. 2   | 0. 246 | 1 Neo-G | PLK3           |
| CBR4. 6     | 8. 30E-05 | 0. 144712 | 0. 216 | 0. 185 | 1 Neo-G | CBR4           |
| CEND1. 5    | 8. 31E-05 | 0. 118551 | 0. 167 | 0. 135 | 1 Neo-G | CEND1          |
| GOLIM4. 4   | 8. 32E-05 | -0. 13233 | 0. 27  | 0. 333 | 1 Neo-G | GOLIM4         |
| LRRC69. 2   | 8. 35E-05 | -0. 20272 | 0. 014 | 0. 035 | 1 Neo-G | LRRC69         |
| PRIM1. 5    | 8. 51E-05 | 0. 111099 | 0. 108 | 0. 078 | 1 Neo-G | PRIM1          |
| POMGNT2. 5  | 8. 52E-05 | 0. 143666 | 0. 168 | 0. 137 | 1 Neo-G | POMGNT2        |
| FAM193A. 1  | 8. 62E-05 | 0. 147608 | 0. 108 | 0. 079 | 1 Neo-G | FAM193A        |
| PRKCG. 3    | 8. 82E-05 | -0. 14517 | 0. 005 | 0. 022 | 1 Neo-G | PRKCG          |
| GFM1. 2     | 8. 93E-05 | 0. 122699 | 0. 215 | 0. 183 | 1 Neo-G | GFM1           |
| FOXK1. 3    | 8. 94E-05 | 0. 122368 | 0. 156 | 0. 123 | 1 Neo-G | FOXK1          |
| ZNF330. 2   | 8. 99E-05 | -0. 19332 | 0. 17  | 0. 221 | 1 Neo-G | ZNF330         |
| RNPEP. 7    | 9. 01E-05 | -0. 12445 | 0. 176 | 0. 23  | 1 Neo-G | RNPEP          |
| ANKRD13A. 9 | 9. 38E-05 | 0. 112705 | 0. 124 | 0. 093 | 1 Neo-G | ANKRD13A       |
| ERBB3. 5    | 9. 68E-05 | -0. 11074 | 0. 018 | 0. 04  | 1 Neo-G | ERBB3          |
| PALLD. 4    | 9. 72E-05 | 0. 13164  | 0. 226 | 0. 195 | 1 Neo-G | PALLD          |
| BID. 6      | 9. 73E-05 | -0. 13483 | 0. 291 | 0. 365 | 1 Neo-G | BID            |
| PDK1. 2     | 9. 74E-05 | 0. 126546 | 0. 111 | 0. 081 | 1 Neo-G | PDK1           |
| AAR2. 2     | 9. 79E-05 | 0. 115668 | 0. 165 | 0. 133 | 1 Neo-G | AAR2           |
| COPS7A. 1   | 9. 90E-05 | -0. 10891 | 0. 215 | 0. 284 | 1 Neo-G | COPS7A         |
| C12orf54    | 0. 000101 | -0. 10138 | 0      | 0. 012 | 1 Neo-G | C12orf54       |
| METTL23. 2  | 0. 000102 | -0. 13749 | 0. 261 | 0. 326 | 1 Neo-G | METTL23        |
| AGO1. 3     | 0. 000105 | 0. 127711 | 0. 115 | 0. 086 | 1 Neo-G | AGO1           |
| HIC2        | 0. 000105 | 0. 127993 | 0. 059 | 0. 038 | 1 Neo-G | HIC2           |
| RP11-390E   | 0. 000111 | 0. 102413 | 0. 153 | 0. 121 | 1 Neo-G | RP11-390E23. 6 |
| AC159540. 0 | 0. 000112 | 0. 117339 | 0. 109 | 0. 081 | 1 Neo-G | AC159540. 1    |
| BRMS1L. 3   | 0. 000113 | 0. 148099 | 0. 123 | 0. 094 | 1 Neo-G | BRMS1L         |
| TF. 7       | 0. 000115 | -0. 35811 | 0. 048 | 0. 076 | 1 Neo-G | TF             |
| PHF13. 1    | 0. 000117 | 0. 138816 | 0. 087 | 0. 062 | 1 Neo-G | PHF13          |
| PIP4K2C. 4  | 0. 00012  | 0. 160344 | 0. 137 | 0. 106 | 1 Neo-G | PIP4K2C        |
| RPP30. 3    | 0. 000121 | -0. 16822 | 0. 128 | 0. 173 | 1 Neo-G | RPP30          |
| DHRS4. 4    | 0. 000125 | -0. 13231 | 0. 053 | 0. 085 | 1 Neo-G | DHRS4          |
| BGN. 6      | 0. 000125 | -0. 19552 | 0. 04  | 0. 068 | 1 Neo-G | BGN            |
| ADAM23. 3   | 0. 000126 | 0. 137819 | 0. 069 | 0. 047 | 1 Neo-G | ADAM23         |
| OPALIN. 3   | 0. 000131 | -0. 17326 | 0. 002 | 0. 014 | 1 Neo-G | OPALIN         |
| KLHL22. 3   | 0. 000131 | 0. 114814 | 0. 113 | 0. 085 | 1 Neo-G | KLHL22         |
| KMT2E-AS1   | 0. 000131 | -0. 11154 | 0. 058 | 0. 091 | 1 Neo-G | KMT2E-AS1      |
| CCS. 2      | 0. 000132 | -0. 14901 | 0. 206 | 0. 266 | 1 Neo-G | CCS            |
| BIRC6. 2    | 0. 000134 | 0. 118058 | 0. 212 | 0. 18  | 1 Neo-G | BIRC6          |
| UBE2E1. 3   | 0. 000135 | -0. 20775 | 0. 394 | 0. 458 | 1 Neo-G | UBE2E1         |
| FNIP1. 1    | 0. 000135 | -0. 104   | 0. 071 | 0. 108 | 1 Neo-G | FNIP1          |
| SOS1. 1     | 0. 000136 | 0. 120416 | 0. 108 | 0. 081 | 1 Neo-G | SOS1           |
| CARM1       | 0. 000138 | 0. 146042 | 0. 102 | 0. 076 | 1 Neo-G | CARM1          |

|           |          |          |       |       |         |          |
|-----------|----------|----------|-------|-------|---------|----------|
| TMLHE     | 0.000138 | -0.12562 | 0.049 | 0.079 | 1 Neo-G | TMLHE    |
| PREB.3    | 0.00014  | 0.108914 | 0.238 | 0.206 | 1 Neo-G | PREB     |
| UGP2.2    | 0.00014  | -0.22289 | 0.411 | 0.467 | 1 Neo-G | UGP2     |
| PICK1.3   | 0.00014  | 0.104732 | 0.115 | 0.085 | 1 Neo-G | PICK1    |
| DUSP28.2  | 0.00014  | 0.123602 | 0.112 | 0.084 | 1 Neo-G | DUSP28   |
| C8orf82.5 | 0.000143 | 0.173004 | 0.196 | 0.168 | 1 Neo-G | C8orf82  |
| TXNDC15.1 | 0.000143 | -0.17179 | 0.237 | 0.3   | 1 Neo-G | TXNDC15  |
| CDK5RAP1. | 0.000144 | 0.12861  | 0.185 | 0.155 | 1 Neo-G | CDK5RAP1 |
| RCC2.5    | 0.000147 | -0.11724 | 0.133 | 0.18  | 1 Neo-G | RCC2     |
| AFMID.3   | 0.000147 | -0.11893 | 0.073 | 0.109 | 1 Neo-G | AFMID    |
| PNPLA4.4  | 0.00015  | -0.15547 | 0.038 | 0.066 | 1 Neo-G | PNPLA4   |
| ETV3.7    | 0.000152 | -0.10905 | 0.049 | 0.08  | 1 Neo-G | ETV3     |
| NSA2.4    | 0.000154 | -0.14712 | 0.334 | 0.406 | 1 Neo-G | NSA2     |
| TDRD3.3   | 0.000157 | 0.133462 | 0.117 | 0.089 | 1 Neo-G | TDRD3    |
| CELF2.7   | 0.000162 | -0.20942 | 0.332 | 0.389 | 1 Neo-G | CELF2    |
| NCOA5.2   | 0.000163 | 0.1324   | 0.106 | 0.079 | 1 Neo-G | NCOA5    |
| QDPR.5    | 0.000167 | -0.23283 | 0.301 | 0.367 | 1 Neo-G | QDPR     |
| SLC8A1.6  | 0.000169 | -0.12285 | 0.108 | 0.149 | 1 Neo-G | SLC8A1   |
| CRLF3.5   | 0.000172 | -0.1048  | 0.08  | 0.117 | 1 Neo-G | CRLF3    |
| HSD17B14. | 0.000172 | -0.14334 | 0.063 | 0.096 | 1 Neo-G | HSD17B14 |
| MFI2-AS1. | 0.000172 | 0.164775 | 0.097 | 0.072 | 1 Neo-G | MFI2-AS1 |
| KIAA1429. | 0.000174 | 0.131909 | 0.135 | 0.106 | 1 Neo-G | KIAA1429 |
| TRIM3     | 0.000177 | 0.10046  | 0.071 | 0.048 | 1 Neo-G | TRIM3    |
| STX6.5    | 0.000177 | 0.118304 | 0.228 | 0.193 | 1 Neo-G | STX6     |
| ADAT1.1   | 0.000178 | 0.14445  | 0.133 | 0.104 | 1 Neo-G | ADAT1    |
| SF3B3.3   | 0.000178 | 0.107803 | 0.218 | 0.186 | 1 Neo-G | SF3B3    |
| HN1L.5    | 0.00018  | 0.156372 | 0.178 | 0.149 | 1 Neo-G | HN1L     |
| RNF168.4  | 0.000187 | 0.11024  | 0.178 | 0.145 | 1 Neo-G | RNF168   |
| SOX12.6   | 0.000189 | 0.184623 | 0.139 | 0.113 | 1 Neo-G | SOX12    |
| PGD.5     | 0.000191 | -0.1479  | 0.239 | 0.3   | 1 Neo-G | PGD      |
| ADIPOR2.2 | 0.000192 | -0.13869 | 0.112 | 0.155 | 1 Neo-G | ADIPOR2  |
| TIMM50.2  | 0.000193 | -0.15161 | 0.252 | 0.318 | 1 Neo-G | TIMM50   |
| CD3D.4    | 0.000196 | -0.19084 | 0.005 | 0.02  | 1 Neo-G | CD3D     |
| WBSCR16.4 | 0.000197 | 0.130661 | 0.171 | 0.142 | 1 Neo-G | WBSCR16  |
| CNP.5     | 0.000199 | -0.2947  | 0.329 | 0.383 | 1 Neo-G | CNP      |
| ZNF652.3  | 0.000203 | 0.105514 | 0.172 | 0.141 | 1 Neo-G | ZNF652   |
| UBQLN4.2  | 0.000203 | 0.14687  | 0.127 | 0.099 | 1 Neo-G | UBQLN4   |
| SNX2.7    | 0.000203 | -0.21844 | 0.363 | 0.416 | 1 Neo-G | SNX2     |
| CLEC11A.6 | 0.000205 | 0.178755 | 0.256 | 0.229 | 1 Neo-G | CLEC11A  |
| ZNF625.3  | 0.00021  | 0.116563 | 0.069 | 0.047 | 1 Neo-G | ZNF625   |
| SCAF11.4  | 0.000214 | -0.15564 | 0.332 | 0.404 | 1 Neo-G | SCAF11   |
| HAT1.2    | 0.000214 | -0.16861 | 0.244 | 0.303 | 1 Neo-G | HAT1     |
| GBA2.2    | 0.000216 | 0.102455 | 0.11  | 0.083 | 1 Neo-G | GBA2     |
| PPP3R1.3  | 0.000217 | 0.136863 | 0.139 | 0.11  | 1 Neo-G | PPP3R1   |
| GPALPP1.3 | 0.000218 | 0.137253 | 0.145 | 0.117 | 1 Neo-G | GPALPP1  |
| POGK.3    | 0.00022  | 0.127361 | 0.156 | 0.126 | 1 Neo-G | POGK     |
| ROMO1.4   | 0.000221 | -0.19536 | 0.592 | 0.595 | 1 Neo-G | ROMO1    |
| ZFYVE16.3 | 0.000229 | -0.10764 | 0.131 | 0.177 | 1 Neo-G | ZFYVE16  |
| SESN1.5   | 0.000248 | -0.15818 | 0.073 | 0.105 | 1 Neo-G | SESN1    |
| DECR1.3   | 0.00025  | -0.17937 | 0.342 | 0.42  | 1 Neo-G | DECR1    |
| PINX1.1   | 0.000258 | 0.114039 | 0.124 | 0.096 | 1 Neo-G | PINX1    |

|           |          |          |       |       |         |               |
|-----------|----------|----------|-------|-------|---------|---------------|
| DHX38.2   | 0.000263 | 0.128889 | 0.141 | 0.112 | 1 Neo-G | DHX38         |
| WDR13.2   | 0.000263 | -0.11788 | 0.229 | 0.292 | 1 Neo-G | WDR13         |
| SRF       | 0.000264 | 0.131636 | 0.101 | 0.076 | 1 Neo-G | SRF           |
| SMYD2.1   | 0.000266 | 0.120443 | 0.167 | 0.138 | 1 Neo-G | SMYD2         |
| GNLY.2    | 0.000267 | -0.16762 | 0.013 | 0.032 | 1 Neo-G | GNLY          |
| EIF3M.5   | 0.000272 | -0.22848 | 0.478 | 0.532 | 1 Neo-G | EIF3M         |
| THEM6.3   | 0.000276 | 0.132431 | 0.106 | 0.08  | 1 Neo-G | THEM6         |
| SDCCAG8.4 | 0.000277 | -0.1896  | 0.275 | 0.336 | 1 Neo-G | SDCCAG8       |
| IFT88.4   | 0.000278 | 0.101442 | 0.134 | 0.105 | 1 Neo-G | IFT88         |
| HIST1H2BC | 0.000285 | -0.10395 | 0.008 | 0.024 | 1 Neo-G | HIST1H2BC     |
| OAZ1.3    | 0.000292 | -0.19247 | 0.962 | 0.922 | 1 Neo-G | OAZ1          |
| PDCD10.3  | 0.000293 | -0.1376  | 0.226 | 0.29  | 1 Neo-G | PDCD10        |
| EGLN1.2   | 0.000298 | 0.120765 | 0.214 | 0.184 | 1 Neo-G | EGLN1         |
| GZMA.4    | 0.000301 | -0.15286 | 0.003 | 0.016 | 1 Neo-G | GZMA          |
| ZNF528.5  | 0.000302 | 0.135015 | 0.132 | 0.105 | 1 Neo-G | ZNF528        |
| YIF1B.2   | 0.000302 | -0.15099 | 0.276 | 0.34  | 1 Neo-G | YIF1B         |
| ZNF629.2  | 0.000305 | 0.12721  | 0.09  | 0.066 | 1 Neo-G | ZNF629        |
| GTF3C5.4  | 0.000305 | 0.112222 | 0.212 | 0.183 | 1 Neo-G | GTF3C5        |
| CDK12.1   | 0.000311 | 0.123285 | 0.192 | 0.162 | 1 Neo-G | CDK12         |
| EXT2.4    | 0.000311 | 0.150208 | 0.195 | 0.168 | 1 Neo-G | EXT2          |
| KPNA4.3   | 0.000313 | 0.14107  | 0.204 | 0.177 | 1 Neo-G | KPNA4         |
| TSR3.4    | 0.000314 | 0.140811 | 0.294 | 0.274 | 1 Neo-G | TSR3          |
| ZNF44.3   | 0.000318 | 0.111581 | 0.129 | 0.101 | 1 Neo-G | ZNF44         |
| ZC3H7A.4  | 0.000322 | 0.122807 | 0.175 | 0.146 | 1 Neo-G | ZC3H7A        |
| ATMIN.6   | 0.000324 | 0.158329 | 0.138 | 0.112 | 1 Neo-G | ATMIN         |
| PKD1.4    | 0.000324 | 0.139039 | 0.142 | 0.115 | 1 Neo-G | PKD1          |
| MMP2.4    | 0.000325 | -0.13245 | 0.184 | 0.232 | 1 Neo-G | MMP2          |
| FABP3.3   | 0.000334 | -0.13929 | 0.028 | 0.051 | 1 Neo-G | FABP3         |
| TNIP1.3   | 0.000336 | -0.10647 | 0.164 | 0.214 | 1 Neo-G | TNIP1         |
| MORC3.2   | 0.000336 | 0.104336 | 0.128 | 0.1   | 1 Neo-G | MORC3         |
| NELFA.4   | 0.000344 | 0.124283 | 0.165 | 0.137 | 1 Neo-G | NELFA         |
| SELM.5    | 0.000344 | -0.18377 | 0.152 | 0.193 | 1 Neo-G | SELM          |
| NACA.3    | 0.00035  | -0.18576 | 0.965 | 0.92  | 1 Neo-G | NACA          |
| AC074289. | 0.000363 | -0.14255 | 0.038 | 0.064 | 1 Neo-G | AC074289.1    |
| DDRKG1.2  | 0.000366 | -0.13109 | 0.357 | 0.425 | 1 Neo-G | DDRKG1        |
| TADA1     | 0.000371 | 0.113612 | 0.077 | 0.055 | 1 Neo-G | TADA1         |
| SNX13     | 0.000379 | -0.12496 | 0.128 | 0.171 | 1 Neo-G | SNX13         |
| TBRG4.4   | 0.000392 | 0.103376 | 0.262 | 0.235 | 1 Neo-G | TBRG4         |
| QSOX1.6   | 0.000392 | -0.10464 | 0.189 | 0.242 | 1 Neo-G | QSOX1         |
| SMPDL3A.5 | 0.000392 | -0.1328  | 0.093 | 0.129 | 1 Neo-G | SMPDL3A       |
| GOS2.6    | 0.000396 | -0.43113 | 0.162 | 0.187 | 1 Neo-G | GOS2          |
| LINC00665 | 0.000399 | 0.105929 | 0.21  | 0.183 | 1 Neo-G | LINC00665     |
| DHX33.4   | 0.0004   | 0.130832 | 0.145 | 0.118 | 1 Neo-G | DHX33         |
| SRPRB.3   | 0.000404 | -0.11279 | 0.203 | 0.262 | 1 Neo-G | SRPRB         |
| PRUNE2.5  | 0.000411 | -0.16602 | 0.086 | 0.121 | 1 Neo-G | PRUNE2        |
| RP11-191L | 0.000414 | 0.100938 | 0.036 | 0.021 | 1 Neo-G | RP11-191L17.1 |
| SMC2.5    | 0.000415 | -0.10075 | 0.158 | 0.205 | 1 Neo-G | SMC2          |
| RP11-110G | 0.000416 | 0.109304 | 0.057 | 0.037 | 1 Neo-G | RP11-110G21.1 |
| BCCIP.2   | 0.000418 | -0.12656 | 0.142 | 0.189 | 1 Neo-G | BCCIP         |
| OCIAD2.6  | 0.00042  | -0.29081 | 0.474 | 0.377 | 1 Neo-G | OCIAD2        |
| SLC43A3.2 | 0.000426 | -0.14221 | 0.104 | 0.141 | 1 Neo-G | SLC43A3       |

|           |          |          |       |       |         |               |
|-----------|----------|----------|-------|-------|---------|---------------|
| TMEM126B. | 0.000428 | -0.14279 | 0.251 | 0.316 | 1 Neo-G | TMEM126B      |
| TRAFD1.2  | 0.00043  | 0.111515 | 0.156 | 0.127 | 1 Neo-G | TRAFD1        |
| SLC4A8.2  | 0.000431 | 0.108158 | 0.096 | 0.071 | 1 Neo-G | SLC4A8        |
| CLN3.2    | 0.000444 | -0.1189  | 0.001 | 0.011 | 1 Neo-G | CLN3          |
| COA4.2    | 0.00046  | -0.19307 | 0.329 | 0.393 | 1 Neo-G | COA4          |
| SLC25A46. | 0.000461 | 0.117664 | 0.178 | 0.15  | 1 Neo-G | SLC25A46      |
| LEMD3.1   | 0.000461 | 0.106119 | 0.082 | 0.06  | 1 Neo-G | LEMD3         |
| MESP1.4   | 0.000467 | 0.191108 | 0.152 | 0.129 | 1 Neo-G | MESP1         |
| ZDHHC15.5 | 0.000467 | 0.130949 | 0.08  | 0.058 | 1 Neo-G | ZDHHC15       |
| SUGP1.3   | 0.000469 | 0.126644 | 0.16  | 0.133 | 1 Neo-G | SUGP1         |
| PAXBP1.5  | 0.000472 | 0.163954 | 0.181 | 0.157 | 1 Neo-G | PAXBP1        |
| SSH2.5    | 0.000481 | -0.13475 | 0.138 | 0.181 | 1 Neo-G | SSH2          |
| CTD-2017D | 0.000493 | 0.121409 | 0.077 | 0.055 | 1 Neo-G | CTD-2017D11.1 |
| SEMA3A.1  | 0.000499 | 0.116661 | 0.068 | 0.047 | 1 Neo-G | SEMA3A        |
| TNPO2.5   | 0.000502 | 0.121083 | 0.203 | 0.176 | 1 Neo-G | TNPO2         |
| MAP4K5.5  | 0.000508 | 0.144444 | 0.179 | 0.152 | 1 Neo-G | MAP4K5        |
| ZNF746.1  | 0.000531 | 0.110392 | 0.088 | 0.065 | 1 Neo-G | ZNF746        |
| LRCH4.7   | 0.000532 | -0.13125 | 0.152 | 0.193 | 1 Neo-G | LRCH4         |
| ST6GAL1.5 | 0.000545 | -0.15786 | 0.082 | 0.114 | 1 Neo-G | ST6GAL1       |
| LDLRAD4.6 | 0.000546 | -0.20417 | 0.116 | 0.149 | 1 Neo-G | LDLRAD4       |
| MITD1.2   | 0.000555 | -0.11717 | 0.186 | 0.24  | 1 Neo-G | MITD1         |
| RBM33.1   | 0.000556 | 0.109985 | 0.174 | 0.146 | 1 Neo-G | RBM33         |
| NANOS3.5  | 0.000558 | 0.14907  | 0.082 | 0.06  | 1 Neo-G | NANOS3        |
| ZNF654.1  | 0.000561 | 0.106718 | 0.073 | 0.052 | 1 Neo-G | ZNF654        |
| RBBP5.1   | 0.000569 | 0.104304 | 0.152 | 0.124 | 1 Neo-G | RBBP5         |
| CDC37.2   | 0.000578 | -0.19242 | 0.505 | 0.548 | 1 Neo-G | CDC37         |
| ATG4D.3   | 0.000593 | 0.169289 | 0.181 | 0.158 | 1 Neo-G | ATG4D         |
| ABHD10.1  | 0.000593 | 0.100289 | 0.097 | 0.073 | 1 Neo-G | ABHD10        |
| JUNB.4    | 0.000596 | -0.13367 | 0.773 | 0.718 | 1 Neo-G | JUNB          |
| TPD52L2.4 | 0.000613 | -0.10842 | 0.267 | 0.331 | 1 Neo-G | TPD52L2       |
| FADS2.4   | 0.000639 | 0.145452 | 0.159 | 0.134 | 1 Neo-G | FADS2         |
| NARFL.2   | 0.000651 | 0.118784 | 0.168 | 0.142 | 1 Neo-G | NARFL         |
| GIT2.5    | 0.000655 | -0.10322 | 0.117 | 0.157 | 1 Neo-G | GIT2          |
| XPO7      | 0.000666 | 0.130681 | 0.12  | 0.095 | 1 Neo-G | XPO7          |
| SOX9.6    | 0.00067  | -0.15512 | 0.243 | 0.275 | 1 Neo-G | SOX9          |
| TRIM11.2  | 0.000683 | 0.1154   | 0.12  | 0.094 | 1 Neo-G | TRIM11        |
| CCDC43.3  | 0.000686 | 0.114398 | 0.22  | 0.196 | 1 Neo-G | CCDC43        |
| CHD8      | 0.000687 | 0.100735 | 0.129 | 0.103 | 1 Neo-G | CHD8          |
| ELL.4     | 0.000689 | -0.10188 | 0.072 | 0.103 | 1 Neo-G | ELL           |
| AC093323. | 0.000704 | 0.126071 | 0.117 | 0.093 | 1 Neo-G | AC093323.3    |
| ANTXR2.1  | 0.00071  | 0.108084 | 0.075 | 0.053 | 1 Neo-G | ANTXR2        |
| AUP1.5    | 0.000712 | -0.19397 | 0.474 | 0.528 | 1 Neo-G | AUP1          |
| TUG1.5    | 0.000721 | 0.132355 | 0.198 | 0.173 | 1 Neo-G | TUG1          |
| UBR5      | 0.000731 | 0.124361 | 0.156 | 0.13  | 1 Neo-G | UBR5          |
| MSRB1.3   | 0.000745 | -0.10999 | 0.173 | 0.226 | 1 Neo-G | MSRB1         |
| GAS8.3    | 0.000759 | 0.144925 | 0.088 | 0.066 | 1 Neo-G | GAS8          |
| RMND5A.3  | 0.00077  | 0.123207 | 0.147 | 0.12  | 1 Neo-G | RMND5A        |
| SPNS1.4   | 0.000781 | 0.104228 | 0.309 | 0.288 | 1 Neo-G | SPNS1         |
| ZNF500.2  | 0.000784 | 0.10616  | 0.089 | 0.066 | 1 Neo-G | ZNF500        |
| FASTKD5.2 | 0.000785 | 0.118731 | 0.133 | 0.107 | 1 Neo-G | FASTKD5       |
| PACS2.2   | 0.000801 | -0.10133 | 0.102 | 0.139 | 1 Neo-G | PACS2         |

|            |          |          |       |       |         |          |
|------------|----------|----------|-------|-------|---------|----------|
| SLX4IP.1   | 0.000806 | 0.102777 | 0.076 | 0.055 | 1 Neo-G | SLX4IP   |
| ZNF444.5   | 0.000809 | 0.150522 | 0.182 | 0.157 | 1 Neo-G | ZNF444   |
| PGRMC2.4   | 0.000815 | 0.112759 | 0.248 | 0.223 | 1 Neo-G | PGRMC2   |
| FAM212A.5  | 0.000829 | -0.14365 | 0.03  | 0.051 | 1 Neo-G | FAM212A  |
| NUDCD2.4   | 0.000837 | -0.17318 | 0.345 | 0.407 | 1 Neo-G | NUDCD2   |
| C16orf52.0 | 0.000837 | 0.164831 | 0.116 | 0.094 | 1 Neo-G | C16orf52 |
| BET1.4     | 0.000838 | -0.15169 | 0.178 | 0.226 | 1 Neo-G | BET1     |
| PRNP.4     | 0.000842 | -0.20036 | 0.419 | 0.471 | 1 Neo-G | PRNP     |
| RNF180.6   | 0.000891 | 0.153003 | 0.189 | 0.165 | 1 Neo-G | RNF180   |
| SLC30A5.3  | 0.000894 | 0.135519 | 0.224 | 0.202 | 1 Neo-G | SLC30A5  |
| RRP7A.6    | 0.000896 | -0.16555 | 0.24  | 0.293 | 1 Neo-G | RRP7A    |
| MCAT.5     | 0.000909 | 0.18155  | 0.149 | 0.126 | 1 Neo-G | MCAT     |
| CNKSR2.5   | 0.00093  | 0.129486 | 0.08  | 0.059 | 1 Neo-G | CNKSR2   |
| HDAC6.1    | 0.000938 | 0.12069  | 0.136 | 0.111 | 1 Neo-G | HDAC6    |
| CLTC.4     | 0.000954 | -0.10355 | 0.291 | 0.356 | 1 Neo-G | CLTC     |
| FGFR10P2.0 | 0.000956 | -0.17776 | 0.267 | 0.324 | 1 Neo-G | FGFR10P2 |
| SLC10A4.6  | 0.000961 | 0.201525 | 0.115 | 0.094 | 1 Neo-G | SLC10A4  |
| MUS81.3    | 0.000974 | 0.144188 | 0.194 | 0.171 | 1 Neo-G | MUS81    |
| URI1.4     | 0.000981 | 0.153693 | 0.238 | 0.219 | 1 Neo-G | URI1     |
| CNOT6.2    | 0.000982 | 0.125083 | 0.093 | 0.071 | 1 Neo-G | CNOT6    |
| ZC3H18.4   | 0.001012 | 0.146355 | 0.178 | 0.154 | 1 Neo-G | ZC3H18   |
| ANAPC2.1   | 0.001014 | 0.124844 | 0.155 | 0.129 | 1 Neo-G | ANAPC2   |
| EHBP1.5    | 0.00102  | 0.137698 | 0.189 | 0.164 | 1 Neo-G | EHBP1    |
| DVL2.5     | 0.001026 | 0.153578 | 0.196 | 0.174 | 1 Neo-G | DVL2     |
| NDUFV2.5   | 0.001054 | -0.24669 | 0.57  | 0.594 | 1 Neo-G | NDUFV2   |
| CHMP2B.3   | 0.001056 | -0.14337 | 0.256 | 0.313 | 1 Neo-G | CHMP2B   |
| NEU4.4     | 0.001064 | -0.12661 | 0.042 | 0.066 | 1 Neo-G | NEU4     |
| MFSD6.4    | 0.00108  | 0.118763 | 0.083 | 0.062 | 1 Neo-G | MFSD6    |
| TOM1L2.4   | 0.001104 | 0.13182  | 0.141 | 0.117 | 1 Neo-G | TOM1L2   |
| PHC2.5     | 0.001109 | -0.1275  | 0.228 | 0.283 | 1 Neo-G | PHC2     |
| FBXO44.5   | 0.001118 | 0.140482 | 0.163 | 0.139 | 1 Neo-G | FBXO44   |
| EIF5AL1.3  | 0.001136 | -0.11409 | 0.091 | 0.124 | 1 Neo-G | EIF5AL1  |
| SMIM20.1   | 0.001146 | -0.17393 | 0.289 | 0.346 | 1 Neo-G | SMIM20   |
| EPB41L4A.0 | 0.001166 | 0.109509 | 0.057 | 0.039 | 1 Neo-G | EPB41L4A |
| TRAPPC3.1  | 0.001171 | -0.21437 | 0.386 | 0.444 | 1 Neo-G | TRAPPC3  |
| DYRK1B.2   | 0.001171 | 0.141668 | 0.085 | 0.064 | 1 Neo-G | DYRK1B   |
| DBF4.5     | 0.001206 | -0.10056 | 0.091 | 0.125 | 1 Neo-G | DBF4     |
| TMEM8B.3   | 0.001235 | 0.112667 | 0.081 | 0.06  | 1 Neo-G | TMEM8B   |
| VPS37A.1   | 0.001246 | 0.101772 | 0.227 | 0.203 | 1 Neo-G | VPS37A   |
| IQCB1.1    | 0.001255 | 0.122964 | 0.144 | 0.119 | 1 Neo-G | IQCB1    |
| NAF1.4     | 0.001255 | -0.10943 | 0.082 | 0.113 | 1 Neo-G | NAF1     |
| ZBTB22.1   | 0.001278 | 0.126788 | 0.104 | 0.082 | 1 Neo-G | ZBTB22   |
| GGT7.5     | 0.001279 | 0.153962 | 0.184 | 0.163 | 1 Neo-G | GGT7     |
| TEX261.3   | 0.001283 | 0.113689 | 0.188 | 0.163 | 1 Neo-G | TEX261   |
| TCHP.3     | 0.001285 | 0.133601 | 0.132 | 0.109 | 1 Neo-G | TCHP     |
| RPF2.3     | 0.001348 | -0.12947 | 0.182 | 0.232 | 1 Neo-G | RPF2     |
| TMEM87A.2  | 0.001352 | -0.12575 | 0.225 | 0.279 | 1 Neo-G | TMEM87A  |
| SMURF2.2   | 0.001373 | 0.122005 | 0.148 | 0.123 | 1 Neo-G | SMURF2   |
| IMPDH1.5   | 0.001391 | 0.101499 | 0.181 | 0.154 | 1 Neo-G | IMPDH1   |
| COG6.1     | 0.001416 | 0.10203  | 0.115 | 0.092 | 1 Neo-G | COG6     |
| LYRM4.0    | 0.001428 | -0.10764 | 0.212 | 0.267 | 1 Neo-G | LYRM4    |

|            |          |          |       |       |         |          |
|------------|----------|----------|-------|-------|---------|----------|
| NCOA7.3    | 0.001463 | -0.12656 | 0.088 | 0.118 | 1 Neo-G | NCOA7    |
| TRAPPC6B   | 0.001518 | 0.112573 | 0.156 | 0.132 | 1 Neo-G | TRAPPC6B |
| ZBTB80S.3  | 0.001524 | -0.14223 | 0.244 | 0.3   | 1 Neo-G | ZBTB80S  |
| PRDX4.6    | 0.001534 | -0.23264 | 0.517 | 0.55  | 1 Neo-G | PRDX4    |
| NR2C1.2    | 0.001582 | 0.104984 | 0.118 | 0.095 | 1 Neo-G | NR2C1    |
| OSGEP.3    | 0.001639 | -0.14126 | 0.164 | 0.207 | 1 Neo-G | OSGEP    |
| ZZZ3.2     | 0.001639 | 0.124828 | 0.13  | 0.107 | 1 Neo-G | ZZZ3     |
| PHKG2.4    | 0.0017   | -0.14085 | 0.123 | 0.158 | 1 Neo-G | PHKG2    |
| CCDC92.4   | 0.00171  | 0.142842 | 0.122 | 0.099 | 1 Neo-G | CCDC92   |
| PNPT1.4    | 0.00176  | 0.111264 | 0.217 | 0.194 | 1 Neo-G | PNPT1    |
| HYAL2.7    | 0.001857 | 0.133333 | 0.241 | 0.221 | 1 Neo-G | HYAL2    |
| MAT2A.4    | 0.001864 | -0.12955 | 0.334 | 0.39  | 1 Neo-G | MAT2A    |
| ZCCHC3.6   | 0.001949 | 0.172127 | 0.124 | 0.104 | 1 Neo-G | ZCCHC3   |
| KIAA1109.0 | 0.001958 | 0.111499 | 0.141 | 0.117 | 1 Neo-G | KIAA1109 |
| TMEM237.4  | 0.00197  | 0.119259 | 0.207 | 0.184 | 1 Neo-G | TMEM237  |
| FBRSL1.2   | 0.002129 | 0.132904 | 0.071 | 0.053 | 1 Neo-G | FBRSL1   |
| LRRFIP2.3  | 0.002166 | 0.125222 | 0.206 | 0.185 | 1 Neo-G | LRRFIP2  |
| TSPAN17.2  | 0.00217  | 0.134559 | 0.167 | 0.146 | 1 Neo-G | TSPAN17  |
| LSG1.4     | 0.002181 | 0.116156 | 0.148 | 0.125 | 1 Neo-G | LSG1     |
| TRAK1.2    | 0.0022   | 0.100541 | 0.117 | 0.094 | 1 Neo-G | TRAK1    |
| OSR1.3     | 0.002212 | -0.11843 | 0.004 | 0.014 | 1 Neo-G | OSR1     |
| CDK17.4    | 0.002277 | 0.114741 | 0.137 | 0.114 | 1 Neo-G | CDK17    |
| MINPP1.1   | 0.002312 | 0.113318 | 0.127 | 0.104 | 1 Neo-G | MINPP1   |
| PGP.4      | 0.002327 | 0.134259 | 0.236 | 0.217 | 1 Neo-G | PGP      |
| ZBTB17.2   | 0.002348 | 0.129565 | 0.131 | 0.109 | 1 Neo-G | ZBTB17   |
| CGREF1.1   | 0.002366 | 0.109001 | 0.056 | 0.039 | 1 Neo-G | CGREF1   |
| ABHD8.3    | 0.002402 | 0.124137 | 0.165 | 0.142 | 1 Neo-G | ABHD8    |
| CSRP2BP.2  | 0.002406 | 0.127037 | 0.094 | 0.074 | 1 Neo-G | CSRP2BP  |
| C17orf97.0 | 0.002469 | 0.121932 | 0.073 | 0.055 | 1 Neo-G | C17orf97 |
| FMN2.5     | 0.002477 | 0.104421 | 0.086 | 0.067 | 1 Neo-G | FMN2     |
| BAG5.5     | 0.002533 | 0.115241 | 0.203 | 0.183 | 1 Neo-G | BAG5     |
| GIT1.3     | 0.002559 | 0.131869 | 0.124 | 0.103 | 1 Neo-G | GIT1     |
| TMEM50B.4  | 0.002571 | -0.14192 | 0.253 | 0.309 | 1 Neo-G | TMEM50B  |
| CREBBP.1   | 0.002601 | 0.119245 | 0.171 | 0.149 | 1 Neo-G | CREBBP   |
| CDK9.3     | 0.002622 | 0.116163 | 0.162 | 0.138 | 1 Neo-G | CDK9     |
| CEP57L1.5  | 0.002637 | 0.112493 | 0.13  | 0.108 | 1 Neo-G | CEP57L1  |
| H3F3A.2    | 0.002688 | -0.13619 | 0.681 | 0.755 | 1 Neo-G | H3F3A    |
| MED28.3    | 0.002785 | -0.1864  | 0.291 | 0.345 | 1 Neo-G | MED28    |
| MEN1.2     | 0.002878 | 0.137304 | 0.135 | 0.114 | 1 Neo-G | MEN1     |
| ANKLE2.1   | 0.00295  | 0.110849 | 0.199 | 0.177 | 1 Neo-G | ANKLE2   |
| ANAPC10.1  | 0.002977 | -0.10708 | 0.141 | 0.181 | 1 Neo-G | ANAPC10  |
| DUS3L.2    | 0.003015 | 0.129508 | 0.163 | 0.141 | 1 Neo-G | DUS3L    |
| SAR1A.6    | 0.003121 | -0.15713 | 0.256 | 0.303 | 1 Neo-G | SAR1A    |
| RNMTL1.4   | 0.003136 | 0.11841  | 0.148 | 0.127 | 1 Neo-G | RNMTL1   |
| DAPK3.4    | 0.003166 | 0.120612 | 0.253 | 0.237 | 1 Neo-G | DAPK3    |
| PLP1.6     | 0.003261 | -0.53615 | 0.147 | 0.174 | 1 Neo-G | PLP1     |
| SHARPIN.3  | 0.003318 | 0.107888 | 0.316 | 0.3   | 1 Neo-G | SHARPIN  |
| TP53INP2.0 | 0.003447 | 0.109954 | 0.114 | 0.092 | 1 Neo-G | TP53INP2 |
| DTYMK.6    | 0.003496 | -0.11978 | 0.284 | 0.335 | 1 Neo-G | DTYMK    |
| BRF1.3     | 0.003511 | 0.115239 | 0.122 | 0.101 | 1 Neo-G | BRF1     |
| CXorf23.2  | 0.003625 | 0.109786 | 0.076 | 0.058 | 1 Neo-G | CXorf23  |



|            |          |          |       |       |         |                |
|------------|----------|----------|-------|-------|---------|----------------|
| OMG. 5     | 0.003658 | -0.14181 | 0.059 | 0.082 | 1 Neo-G | OMG            |
| RP11-1143  | 0.00367  | -0.18189 | 0.035 | 0.054 | 1 Neo-G | RP11-1143G9. 4 |
| AGAP2-AS1  | 0.003732 | 0.201131 | 0.114 | 0.093 | 1 Neo-G | AGAP2-AS1      |
| PAPOLA. 2  | 0.003857 | -0.16369 | 0.434 | 0.49  | 1 Neo-G | PAPOLA         |
| CDK16. 3   | 0.0041   | 0.108073 | 0.249 | 0.233 | 1 Neo-G | CDK16          |
| OTUD6B. 4  | 0.004126 | 0.143464 | 0.137 | 0.117 | 1 Neo-G | OTUD6B         |
| ZMYM4. 3   | 0.004191 | 0.126401 | 0.143 | 0.123 | 1 Neo-G | ZMYM4          |
| ATF1. 2    | 0.004214 | -0.10923 | 0.115 | 0.147 | 1 Neo-G | ATF1           |
| LEPROT. 1  | 0.004336 | -0.1795  | 0.344 | 0.396 | 1 Neo-G | LEPROT         |
| HILPDA. 6  | 0.004348 | -0.18744 | 0.261 | 0.223 | 1 Neo-G | HILPDA         |
| R3HDM1. 3  | 0.004468 | 0.137935 | 0.144 | 0.125 | 1 Neo-G | R3HDM1         |
| RAB35. 4   | 0.004614 | 0.109401 | 0.185 | 0.163 | 1 Neo-G | RAB35          |
| SDHAF1. 5  | 0.004729 | 0.151762 | 0.192 | 0.175 | 1 Neo-G | SDHAF1         |
| ZNF43. 5   | 0.004779 | 0.131321 | 0.155 | 0.135 | 1 Neo-G | ZNF43          |
| LONRF1. 4  | 0.004824 | 0.144027 | 0.115 | 0.096 | 1 Neo-G | LONRF1         |
| ZNF260. 4  | 0.004939 | 0.130151 | 0.116 | 0.097 | 1 Neo-G | ZNF260         |
| CRADD. 3   | 0.00499  | 0.106364 | 0.123 | 0.103 | 1 Neo-G | CRADD          |
| CKAP5. 7   | 0.005197 | 0.109171 | 0.174 | 0.154 | 1 Neo-G | CKAP5          |
| NAA30. 3   | 0.00523  | 0.120554 | 0.104 | 0.084 | 1 Neo-G | NAA30          |
| ECI2. 4    | 0.005238 | -0.16301 | 0.285 | 0.328 | 1 Neo-G | ECI2           |
| LAMTOR2. 5 | 0.005255 | -0.21315 | 0.579 | 0.588 | 1 Neo-G | LAMTOR2        |
| BYSL. 3    | 0.005491 | 0.109757 | 0.125 | 0.105 | 1 Neo-G | BYSL           |
| MAX. 3     | 0.00555  | -0.14056 | 0.252 | 0.299 | 1 Neo-G | MAX            |
| SLC24A2. 5 | 0.005593 | -0.10877 | 0.019 | 0.033 | 1 Neo-G | SLC24A2        |
| AMOTL1. 3  | 0.00563  | 0.106937 | 0.082 | 0.064 | 1 Neo-G | AMOTL1         |
| FLOT1. 7   | 0.005728 | -0.15787 | 0.481 | 0.505 | 1 Neo-G | FLOT1          |
| SLC18B1. 5 | 0.005771 | -0.14108 | 0.148 | 0.182 | 1 Neo-G | SLC18B1        |
| HADH. 2    | 0.00583  | -0.11705 | 0.17  | 0.212 | 1 Neo-G | HADH           |
| UBE20. 5   | 0.005939 | 0.163564 | 0.133 | 0.115 | 1 Neo-G | UBE20          |
| FARP1. 2   | 0.005962 | 0.103811 | 0.202 | 0.184 | 1 Neo-G | FARP1          |
| FBXO17. 7  | 0.006061 | 0.134217 | 0.16  | 0.142 | 1 Neo-G | FBXO17         |
| NOC4L. 3   | 0.006143 | 0.116917 | 0.174 | 0.154 | 1 Neo-G | NOC4L          |
| SPCS1. 2   | 0.006231 | -0.22709 | 0.76  | 0.734 | 1 Neo-G | SPCS1          |
| LPGAT1. 4  | 0.006364 | 0.100978 | 0.146 | 0.126 | 1 Neo-G | LPGAT1         |
| VPS26A. 6  | 0.006491 | -0.17737 | 0.212 | 0.246 | 1 Neo-G | VPS26A         |
| CTD-2020K  | 0.006559 | -0.12    | 0.013 | 0.026 | 1 Neo-G | CTD-2020K17. 1 |
| ZNF174. 5  | 0.006788 | 0.107594 | 0.086 | 0.068 | 1 Neo-G | ZNF174         |
| TTYH3. 5   | 0.007017 | 0.102988 | 0.262 | 0.245 | 1 Neo-G | TTYH3          |
| ACTR2. 7   | 0.007044 | -0.14159 | 0.419 | 0.464 | 1 Neo-G | ACTR2          |
| RBM27. 4   | 0.007047 | 0.127665 | 0.237 | 0.225 | 1 Neo-G | RBM27          |
| SLC43A2. 6 | 0.007292 | -0.13973 | 0.214 | 0.249 | 1 Neo-G | SLC43A2        |
| TNIK. 5    | 0.007625 | 0.140396 | 0.159 | 0.142 | 1 Neo-G | TNIK           |
| UBR3       | 0.007656 | 0.105457 | 0.098 | 0.08  | 1 Neo-G | UBR3           |
| POLR2E. 5  | 0.007872 | -0.18398 | 0.504 | 0.539 | 1 Neo-G | POLR2E         |
| POMT1. 5   | 0.008021 | 0.108905 | 0.154 | 0.135 | 1 Neo-G | POMT1          |
| PRSS23. 5  | 0.008057 | -0.11759 | 0.059 | 0.08  | 1 Neo-G | PRSS23         |
| CYB5B. 4   | 0.008193 | -0.1457  | 0.291 | 0.343 | 1 Neo-G | CYB5B          |
| ATF5. 5    | 0.008209 | -0.14241 | 0.165 | 0.197 | 1 Neo-G | ATF5           |
| RP11-119E  | 0.008214 | 0.129257 | 0.075 | 0.058 | 1 Neo-G | RP11-119B16. 2 |
| LRFN3      | 0.008263 | 0.104794 | 0.05  | 0.036 | 1 Neo-G | LRFN3          |
| GOLT1B. 4  | 0.008275 | -0.12331 | 0.201 | 0.242 | 1 Neo-G | GOLT1B         |

|           |          |          |       |       |                |              |
|-----------|----------|----------|-------|-------|----------------|--------------|
| FNBP1.4   | 0.008431 | -0.11122 | 0.225 | 0.268 | 1 Neo-G        | FNBP1        |
| BEND6.6   | 0.008592 | 0.150913 | 0.133 | 0.117 | 1 Neo-G        | BEND6        |
| METAP1D.5 | 0.008672 | 0.121692 | 0.141 | 0.122 | 1 Neo-G        | METAP1D      |
| TXN2.3    | 0.009029 | -0.11965 | 0.38  | 0.44  | 1 Neo-G        | TXN2         |
| MTIF3.3   | 0.009099 | -0.17843 | 0.302 | 0.351 | 1 Neo-G        | MTIF3        |
| DCLRE1C.3 | 0.009317 | 0.10038  | 0.147 | 0.128 | 1 Neo-G        | DCLRE1C      |
| TRMT6.2   | 0.009429 | 0.105904 | 0.192 | 0.176 | 1 Neo-G        | TRMT6        |
| PIAS4.3   | 0.009493 | 0.127173 | 0.147 | 0.129 | 1 Neo-G        | PIAS4        |
| UBFD1.2   | 0.009571 | 0.126382 | 0.119 | 0.102 | 1 Neo-G        | UBFD1        |
| RP11-412E | 0.009652 | 0.104246 | 0.054 | 0.04  | 1 Neo-G        | RP11-412D9.4 |
| DCAF16.3  | 0.009788 | 0.117023 | 0.135 | 0.117 | 1 Neo-G        | DCAF16       |
| IRF2BP1.6 | 0.00988  | 0.126045 | 0.121 | 0.104 | 1 Neo-G        | IRF2BP1      |
| TRAPPC1.3 | 0.009905 | -0.21106 | 0.606 | 0.616 | 1 Neo-G        | TRAPPC1      |
| TOPBP1.5  | 0.009991 | 0.119678 | 0.108 | 0.091 | 1 Neo-G        | TOPBP1       |
| AIF1.8    | 0        | 1.262294 | 0.933 | 0.364 | 0 monocyte     | AIF1         |
| C1QC.8    | 0        | 1.25091  | 0.994 | 0.457 | 0 monocyte     | C1QC         |
| TYROBP.8  | 0        | 1.236088 | 0.978 | 0.414 | 0 monocyte     | TYROBP       |
| FCER1G.8  | 0        | 1.224659 | 0.945 | 0.397 | 0 monocyte     | FCER1G       |
| C1QA.8    | 0        | 1.209766 | 0.991 | 0.497 | 0 monocyte     | C1QA         |
| C1QB.8    | 0        | 1.178539 | 0.996 | 0.532 | 0 monocyte     | C1QB         |
| APOC1.7   | #####    | 1.166415 | 0.949 | 0.477 | ##### monocyte | APOC1        |
| VSIG4.8   | #####    | 1.257125 | 0.864 | 0.321 | ##### monocyte | VSIG4        |
| MS4A6A.8  | #####    | 1.237191 | 0.837 | 0.297 | ##### monocyte | MS4A6A       |
| HLA-DMB.7 | #####    | 1.198676 | 0.807 | 0.277 | ##### monocyte | HLA-DMB      |
| TREM2.8   | #####    | 1.181671 | 0.843 | 0.307 | ##### monocyte | TREM2        |
| LAPTM5.8  | #####    | 1.130432 | 0.921 | 0.393 | ##### monocyte | LAPTM5       |
| GPR34.8   | #####    | 1.190031 | 0.734 | 0.225 | ##### monocyte | GPR34        |
| HLA-DPB1. | #####    | 1.093098 | 0.934 | 0.455 | ##### monocyte | HLA-DPB1     |
| FCGR3A.8  | #####    | 1.183056 | 0.807 | 0.3   | ##### monocyte | FCGR3A       |
| HLA-DRB1. | #####    | 1.019266 | 0.973 | 0.494 | ##### monocyte | HLA-DRB1     |
| HLA-DPA1. | #####    | 1.02102  | 0.965 | 0.495 | ##### monocyte | HLA-DPA1     |
| SRGN.8    | #####    | 1.09124  | 0.955 | 0.458 | ##### monocyte | SRGN         |
| CD14.8    | #####    | 1.138657 | 0.857 | 0.368 | ##### monocyte | CD14         |
| CD53.8    | #####    | 1.10113  | 0.767 | 0.275 | ##### monocyte | CD53         |
| CD68.8    | #####    | 1.097938 | 0.857 | 0.404 | ##### monocyte | CD68         |
| HLA-DMA.8 | #####    | 1.070912 | 0.85  | 0.369 | ##### monocyte | HLA-DMA      |
| LY86.8    | #####    | 1.053347 | 0.737 | 0.253 | ##### monocyte | LY86         |
| RGS10.8   | #####    | 1.0765   | 0.779 | 0.303 | ##### monocyte | RGS10        |
| ALOX5AP.8 | #####    | 1.062944 | 0.833 | 0.361 | ##### monocyte | ALOX5AP      |
| ADORA3.8  | #####    | 1.00852  | 0.668 | 0.225 | ##### monocyte | ADORA3       |
| LILRB4.8  | #####    | 1.084855 | 0.659 | 0.219 | ##### monocyte | LILRB4       |
| FCGR1A.8  | #####    | 1.062454 | 0.672 | 0.222 | ##### monocyte | FCGR1A       |
| HLA-DQB1. | #####    | 1.031857 | 0.746 | 0.288 | ##### monocyte | HLA-DQB1     |
| ARHGDIB.8 | #####    | 0.971838 | 0.805 | 0.333 | ##### monocyte | ARHGDIB      |
| CTSS.8    | #####    | 1.03624  | 0.765 | 0.317 | ##### monocyte | CTSS         |
| HLA-DRA.7 | #####    | 0.858526 | 0.986 | 0.602 | ##### monocyte | HLA-DRA      |
| VAMP8.8   | #####    | 1.04638  | 0.766 | 0.306 | ##### monocyte | VAMP8        |
| LST1.8    | #####    | 1.016445 | 0.725 | 0.276 | ##### monocyte | LST1         |
| CSF1R.8   | #####    | 1.009061 | 0.669 | 0.232 | ##### monocyte | CSF1R        |
| MS4A4A.8  | #####    | 1.133506 | 0.694 | 0.25  | ##### monocyte | MS4A4A       |
| RGS1.8    | #####    | 1.046924 | 0.855 | 0.41  | ##### monocyte | RGS1         |

|            |       |           |        |        |       |          |          |
|------------|-------|-----------|--------|--------|-------|----------|----------|
| NPC2. 7    | ##### | 0. 849952 | 0. 958 | 0. 668 | ##### | monocyte | NPC2     |
| SLCO2B1. 7 | ##### | 0. 986197 | 0. 589 | 0. 188 | ##### | monocyte | SLCO2B1  |
| CYBA. 8    | ##### | 0. 894721 | 0. 791 | 0. 37  | ##### | monocyte | CYBA     |
| CD74. 7    | ##### | 0. 784207 | 0. 999 | 0. 729 | ##### | monocyte | CD74     |
| CD37. 8    | ##### | 0. 97872  | 0. 701 | 0. 265 | ##### | monocyte | CD37     |
| GIMAP4. 8  | ##### | 1. 04898  | 0. 468 | 0. 121 | ##### | monocyte | GIMAP4   |
| ITGB2. 8   | ##### | 0. 969537 | 0. 72  | 0. 289 | ##### | monocyte | ITGB2    |
| RNASE6. 8  | ##### | 0. 965932 | 0. 657 | 0. 241 | ##### | monocyte | RNASE6   |
| HLA-DQA1.  | ##### | 0. 989965 | 0. 698 | 0. 271 | ##### | monocyte | HLA-DQA1 |
| FOLR2. 8   | ##### | 1. 264312 | 0. 502 | 0. 149 | ##### | monocyte | FOLR2    |
| PTN. 7     | ##### | -1. 37361 | 0. 173 | 0. 656 | ##### | monocyte | PTN      |
| MS4A7. 8   | ##### | 0. 99028  | 0. 724 | 0. 297 | ##### | monocyte | MS4A7    |
| GPX1. 8    | ##### | 0. 705607 | 0. 945 | 0. 802 | ##### | monocyte | GPX1     |
| ABI3. 8    | ##### | 0. 950931 | 0. 521 | 0. 16  | ##### | monocyte | ABI3     |
| C10orf54.  | ##### | 0. 940104 | 0. 659 | 0. 255 | ##### | monocyte | C10orf54 |
| HCLS1. 8   | ##### | 0. 956535 | 0. 667 | 0. 257 | ##### | monocyte | HCLS1    |
| CTSC. 8    | ##### | 0. 991797 | 0. 742 | 0. 352 | ##### | monocyte | CTSC     |
| RNASET2. 8 | ##### | 0. 861222 | 0. 794 | 0. 455 | ##### | monocyte | RNASET2  |
| TUBA1A. 7  | ##### | -0. 82766 | 0. 505 | 0. 834 | ##### | monocyte | TUBA1A   |
| CTSB. 5    | ##### | 0. 74917  | 0. 934 | 0. 741 | ##### | monocyte | CTSB     |
| C1orf162.  | ##### | 0. 957483 | 0. 708 | 0. 288 | ##### | monocyte | C1orf162 |
| CPVL. 8    | ##### | 1. 030586 | 0. 696 | 0. 318 | ##### | monocyte | CPVL     |
| NGFRAP1. 7 | ##### | -1. 02085 | 0. 212 | 0. 683 | ##### | monocyte | NGFRAP1  |
| HLA-DRB5.  | ##### | 1. 004527 | 0. 778 | 0. 366 | ##### | monocyte | HLA-DRB5 |
| MAP1B. 7   | ##### | -1. 29555 | 0. 09  | 0. 573 | ##### | monocyte | MAP1B    |
| PSAP. 5    | ##### | 0. 674053 | 0. 931 | 0. 809 | ##### | monocyte | PSAP     |
| C3AR1. 8   | ##### | 0. 979371 | 0. 587 | 0. 207 | ##### | monocyte | C3AR1    |
| GPM6B. 8   | ##### | -1. 20457 | 0. 194 | 0. 656 | ##### | monocyte | GPM6B    |
| SPI1. 8    | ##### | 0. 859863 | 0. 575 | 0. 209 | ##### | monocyte | SPI1     |
| FCGRT. 7   | ##### | 0. 883229 | 0. 832 | 0. 525 | ##### | monocyte | FCGRT    |
| NOVA1. 8   | ##### | -1. 4217  | 0. 053 | 0. 517 | ##### | monocyte | NOVA1    |
| IGSF6. 8   | ##### | 0. 904478 | 0. 441 | 0. 128 | ##### | monocyte | IGSF6    |
| TUBB2B. 7  | ##### | -1. 32768 | 0. 17  | 0. 589 | ##### | monocyte | TUBB2B   |
| HLA-E. 8   | ##### | 0. 821591 | 0. 855 | 0. 573 | ##### | monocyte | HLA-E    |
| APOC2. 7   | ##### | 1. 062797 | 0. 492 | 0. 162 | ##### | monocyte | APOC2    |
| SAT1. 6    | ##### | 0. 687331 | 0. 966 | 0. 788 | ##### | monocyte | SAT1     |
| FCGR2A. 8  | ##### | 0. 853249 | 0. 643 | 0. 258 | ##### | monocyte | FCGR2A   |
| FCGR1B. 7  | ##### | 0. 949615 | 0. 455 | 0. 137 | ##### | monocyte | FCGR1B   |
| ARPC1B. 8  | ##### | 0. 870067 | 0. 797 | 0. 507 | ##### | monocyte | ARPC1B   |
| GRN. 8     | ##### | 0. 860123 | 0. 787 | 0. 551 | ##### | monocyte | GRN      |
| HAVCR2. 8  | ##### | 0. 906846 | 0. 557 | 0. 203 | ##### | monocyte | HAVCR2   |
| CYBB. 8    | ##### | 0. 839586 | 0. 495 | 0. 165 | ##### | monocyte | CYBB     |
| OLFML3. 7  | ##### | 1. 011117 | 0. 528 | 0. 2   | ##### | monocyte | OLFML3   |
| HAMP. 8    | ##### | 1. 05596  | 0. 435 | 0. 136 | ##### | monocyte | HAMP     |
| ADAP2. 8   | ##### | 0. 815405 | 0. 472 | 0. 158 | ##### | monocyte | ADAP2    |
| CSF2RA. 7  | ##### | 0. 902152 | 0. 508 | 0. 175 | ##### | monocyte | CSF2RA   |
| MARCKSL1.  | ##### | -1. 19966 | 0. 188 | 0. 576 | ##### | monocyte | MARCKSL1 |
| TMEM176B.  | ##### | 1. 01211  | 0. 666 | 0. 324 | ##### | monocyte | TMEM176B |
| LGALS9. 8  | ##### | 0. 901424 | 0. 549 | 0. 213 | ##### | monocyte | LGALS9   |
| PLD4. 8    | ##### | 0. 870743 | 0. 414 | 0. 13  | ##### | monocyte | PLD4     |
| C3. 7      | ##### | 0. 754849 | 0. 736 | 0. 372 | ##### | monocyte | C3       |

|              |       |          |       |       |       |          |              |
|--------------|-------|----------|-------|-------|-------|----------|--------------|
| S100A11.8    | ##### | 0.645851 | 0.915 | 0.634 | ##### | monocyte | S100A11      |
| MNDA.8       | ##### | 0.819779 | 0.456 | 0.152 | ##### | monocyte | MNDA         |
| PRDX2.8      | ##### | -0.74513 | 0.338 | 0.733 | ##### | monocyte | PRDX2        |
| TSC22D1.7    | ##### | -1.05353 | 0.141 | 0.545 | ##### | monocyte | TSC22D1      |
| UCP2.8       | ##### | 0.960786 | 0.565 | 0.246 | ##### | monocyte | UCP2         |
| PYCARD.8     | ##### | 0.824459 | 0.597 | 0.257 | ##### | monocyte | PYCARD       |
| CAPG.8       | ##### | 0.854282 | 0.707 | 0.389 | ##### | monocyte | CAPG         |
| UCHL1.6      | ##### | -1.14566 | 0.055 | 0.47  | ##### | monocyte | UCHL1        |
| RBP1.6       | ##### | -1.19364 | 0.09  | 0.493 | ##### | monocyte | RBP1         |
| SCIN.8       | ##### | 0.986454 | 0.402 | 0.128 | ##### | monocyte | SCIN         |
| CD163.8      | ##### | 0.908826 | 0.592 | 0.248 | ##### | monocyte | CD163        |
| C1orf61.7    | ##### | -1.09746 | 0.178 | 0.567 | ##### | monocyte | C1orf61      |
| MDK.7        | ##### | -1.09905 | 0.118 | 0.524 | ##### | monocyte | MDK          |
| LAIR1.8      | ##### | 0.871268 | 0.528 | 0.204 | ##### | monocyte | LAIR1        |
| SERPINF1.    | ##### | 0.894739 | 0.51  | 0.199 | ##### | monocyte | SERPINF1     |
| ENTPD1.8     | ##### | 0.768646 | 0.427 | 0.139 | ##### | monocyte | ENTPD1       |
| GMFG.8       | ##### | 0.803159 | 0.627 | 0.269 | ##### | monocyte | GMFG         |
| TBXAS1.8     | ##### | 0.849352 | 0.546 | 0.214 | ##### | monocyte | TBXAS1       |
| CALD1.7      | ##### | -0.98722 | 0.039 | 0.453 | ##### | monocyte | CALD1        |
| FEZ1.7       | ##### | -1.01486 | 0.053 | 0.463 | ##### | monocyte | FEZ1         |
| IL18.8       | ##### | 0.876462 | 0.475 | 0.168 | ##### | monocyte | IL18         |
| GPM6A.7      | ##### | -0.91721 | 0.121 | 0.538 | ##### | monocyte | GPM6A        |
| MSR1.8       | ##### | 0.868534 | 0.453 | 0.156 | ##### | monocyte | MSR1         |
| SIGLEC8.5    | ##### | 0.719684 | 0.27  | 0.06  | ##### | monocyte | SIGLEC8      |
| AXL.7        | ##### | 0.912585 | 0.446 | 0.157 | ##### | monocyte | AXL          |
| CD86.8       | ##### | 0.853657 | 0.506 | 0.187 | ##### | monocyte | CD86         |
| LPAR5.6      | ##### | 0.757948 | 0.319 | 0.084 | ##### | monocyte | LPAR5        |
| FAM105A.8    | ##### | 0.79053  | 0.421 | 0.139 | ##### | monocyte | FAM105A      |
| LAT2.8       | ##### | 0.830942 | 0.483 | 0.178 | ##### | monocyte | LAT2         |
| CTSH.8       | ##### | 0.819061 | 0.597 | 0.269 | ##### | monocyte | CTSH         |
| SOX2.8       | ##### | -1.1151  | 0.074 | 0.461 | ##### | monocyte | SOX2         |
| CORO1A.8     | ##### | 0.830181 | 0.673 | 0.346 | ##### | monocyte | CORO1A       |
| PFN2.7       | ##### | -0.97219 | 0.07  | 0.466 | ##### | monocyte | PFN2         |
| CNN3.7       | ##### | -1.03944 | 0.116 | 0.499 | ##### | monocyte | CNN3         |
| FPR1.8       | ##### | 0.927092 | 0.587 | 0.258 | ##### | monocyte | FPR1         |
| P2RY13.6     | ##### | 0.808237 | 0.278 | 0.067 | ##### | monocyte | P2RY13       |
| ADAMDEC1.    | ##### | 0.538144 | 0.169 | 0.025 | ##### | monocyte | ADAMDEC1     |
| PTAFR.8      | ##### | 0.724968 | 0.355 | 0.105 | ##### | monocyte | PTAFR        |
| HCST.8       | ##### | 0.818656 | 0.59  | 0.257 | ##### | monocyte | HCST         |
| FXYD6.8      | ##### | -1.03854 | 0.111 | 0.492 | ##### | monocyte | FXYD6        |
| SLC7A7.8     | ##### | 0.802134 | 0.433 | 0.151 | ##### | monocyte | SLC7A7       |
| RP11-552D4.1 | ##### | 0.892687 | 0.337 | 0.1   | ##### | monocyte | RP11-552D4.1 |
| PCSK1N.7     | ##### | -1.09001 | 0.077 | 0.451 | ##### | monocyte | PCSK1N       |
| MLLT11.6     | ##### | -0.99763 | 0.095 | 0.486 | ##### | monocyte | MLLT11       |
| GAP43.8      | ##### | -1.18959 | 0.12  | 0.497 | ##### | monocyte | GAP43        |
| TNFAIP8L2    | ##### | 0.705191 | 0.295 | 0.077 | ##### | monocyte | TNFAIP8L2    |
| PLXDC2.8     | ##### | 0.748301 | 0.483 | 0.185 | ##### | monocyte | PLXDC2       |
| HCK.8        | ##### | 0.762055 | 0.416 | 0.145 | ##### | monocyte | HCK          |
| GIMAP1.7     | ##### | 0.592198 | 0.252 | 0.057 | ##### | monocyte | GIMAP1       |
| OTOA.5       | ##### | 0.438212 | 0.151 | 0.021 | ##### | monocyte | OTOA         |
| NFIB.8       | ##### | -1.06229 | 0.037 | 0.408 | ##### | monocyte | NFIB         |

|            |          |          |       |       |          |          |            |
|------------|----------|----------|-------|-------|----------|----------|------------|
| CTSD. 7    | #####    | 0.736062 | 0.778 | 0.627 | #####    | monocyte | CTSD       |
| GPSM3. 8   | #####    | 0.795653 | 0.552 | 0.236 | #####    | monocyte | GPSM3      |
| SOX4. 7    | #####    | -1.16243 | 0.109 | 0.475 | #####    | monocyte | SOX4       |
| LPAR6. 8   | #####    | 0.833597 | 0.496 | 0.215 | #####    | monocyte | LPAR6      |
| CD84. 8    | #####    | 0.679079 | 0.355 | 0.109 | #####    | monocyte | CD84       |
| ZNF667-AS  | #####    | -0.88981 | 0.043 | 0.419 | #####    | monocyte | ZNF667-AS1 |
| APP. 7     | #####    | -0.7712  | 0.18  | 0.555 | #####    | monocyte | APP        |
| PILRA. 7   | #####    | 0.804411 | 0.409 | 0.143 | #####    | monocyte | PILRA      |
| TUBB2A. 7  | #####    | -0.93036 | 0.141 | 0.507 | #####    | monocyte | TUBB2A     |
| SIGLEC10.  | #####    | 0.73616  | 0.407 | 0.14  | #####    | monocyte | SIGLEC10   |
| TM6SF1. 8  | #####    | 0.795586 | 0.402 | 0.137 | #####    | monocyte | TM6SF1     |
| APOE. 6    | #####    | 0.585064 | 0.807 | 0.675 | #####    | monocyte | APOE       |
| LTC4S. 8   | #####    | 0.801721 | 0.405 | 0.147 | #####    | monocyte | LTC4S      |
| NPL. 7     | #####    | 0.932756 | 0.447 | 0.179 | 5.94E-99 | monocyte | NPL        |
| TMEM119. 6 | #####    | 0.758098 | 0.306 | 0.087 | 9.49E-99 | monocyte | TMEM119    |
| FXDY5. 8   | #####    | 0.727616 | 0.64  | 0.314 | 9.85E-99 | monocyte | FXDY5      |
| GYPC. 8    | #####    | 0.853801 | 0.569 | 0.286 | 1.18E-98 | monocyte | GYPC       |
| CTSZ. 8    | #####    | 0.744483 | 0.514 | 0.233 | 6.56E-98 | monocyte | CTSZ       |
| PLA2G7. 6  | #####    | 0.565308 | 0.195 | 0.038 | 7.88E-98 | monocyte | PLA2G7     |
| FYB. 8     | #####    | 0.737862 | 0.495 | 0.199 | 1.02E-97 | monocyte | FYB        |
| AOAH. 7    | #####    | 0.754966 | 0.339 | 0.104 | 3.29E-97 | monocyte | AOAH       |
| LRRC25. 8  | #####    | 0.645737 | 0.282 | 0.075 | 1.61E-96 | monocyte | LRRC25     |
| WBP5. 7    | #####    | -0.76384 | 0.156 | 0.533 | 2.48E-96 | monocyte | WBP5       |
| MT3. 8     | 1.80E-99 | -1.20282 | 0.169 | 0.519 | 2.69E-95 | monocyte | MT3        |
| FHL1. 8    | 2.34E-99 | -0.85442 | 0.038 | 0.385 | 3.49E-95 | monocyte | FHL1       |
| SERPINA1.  | 4.06E-99 | 0.755959 | 0.593 | 0.273 | 6.07E-95 | monocyte | SERPINA1   |
| SEC61G. 8  | 3.37E-98 | -0.73479 | 0.543 | 0.822 | 5.04E-94 | monocyte | SEC61G     |
| MPEG1. 6   | 1.79E-97 | 0.440859 | 0.172 | 0.03  | 2.67E-93 | monocyte | MPEG1      |
| CKB. 8     | 1.86E-96 | -0.80501 | 0.294 | 0.608 | 2.78E-92 | monocyte | CKB        |
| SLA. 8     | 3.59E-96 | 0.725657 | 0.459 | 0.179 | 5.36E-92 | monocyte | SLA        |
| CPE. 7     | 3.68E-96 | -0.92001 | 0.069 | 0.418 | 5.50E-92 | monocyte | CPE        |
| EVI2B. 8   | 4.27E-96 | 0.759038 | 0.46  | 0.18  | 6.38E-92 | monocyte | EVI2B      |
| BEX1. 7    | 6.62E-96 | -1.03745 | 0.035 | 0.379 | 9.89E-92 | monocyte | BEX1       |
| SCD5. 7    | 7.01E-96 | -0.87171 | 0.073 | 0.423 | 1.05E-91 | monocyte | SCD5       |
| ADAM28. 7  | 2.02E-95 | 0.736688 | 0.362 | 0.122 | 3.01E-91 | monocyte | ADAM28     |
| APLP1. 8   | 3.02E-95 | -0.96988 | 0.039 | 0.379 | 4.52E-91 | monocyte | APLP1      |
| LIPA. 7    | 1.26E-94 | 0.829379 | 0.57  | 0.313 | 1.88E-90 | monocyte | LIPA       |
| PKD2L1. 1  | 4.87E-94 | 0.317243 | 0.1   | 0.01  | 7.28E-90 | monocyte | PKD2L1     |
| GIMAP7. 5  | 2.04E-93 | 0.584358 | 0.198 | 0.042 | 3.04E-89 | monocyte | GIMAP7     |
| A2M. 6     | 2.10E-93 | 0.630614 | 0.722 | 0.441 | 3.13E-89 | monocyte | A2M        |
| LYL1. 8    | 2.69E-93 | 0.617824 | 0.254 | 0.066 | 4.02E-89 | monocyte | LYL1       |
| NFIX. 7    | 3.10E-93 | -0.80937 | 0.026 | 0.36  | 4.63E-89 | monocyte | NFIX       |
| TNFSF13B.  | 6.77E-93 | 0.769643 | 0.449 | 0.182 | 1.01E-88 | monocyte | TNFSF13B   |
| CMKLR1. 6  | 1.62E-92 | 0.448503 | 0.187 | 0.037 | 2.43E-88 | monocyte | CMKLR1     |
| LINC00461  | 2.01E-92 | -0.89972 | 0.022 | 0.347 | 3.01E-88 | monocyte | LINC00461  |
| ELAVL3. 8  | 2.33E-92 | -0.86708 | 0.013 | 0.337 | 3.49E-88 | monocyte | ELAVL3     |
| YWHAQ. 7   | 3.42E-92 | -0.58068 | 0.333 | 0.671 | 5.11E-88 | monocyte | YWHAQ      |
| IGFBP2. 6  | 6.14E-92 | -1.13101 | 0.078 | 0.4   | 9.17E-88 | monocyte | IGFBP2     |
| RCSD1. 7   | 8.23E-92 | 0.661843 | 0.323 | 0.102 | 1.23E-87 | monocyte | RCSD1      |
| NCF4. 8    | 8.49E-92 | 0.748888 | 0.365 | 0.126 | 1.27E-87 | monocyte | NCF4       |
| PTPRC. 8   | 2.42E-91 | 0.646933 | 0.456 | 0.181 | 3.62E-87 | monocyte | PTPRC      |

|             |           |           |        |        |           |          |          |
|-------------|-----------|-----------|--------|--------|-----------|----------|----------|
| CFD. 7      | 5. 74E-91 | 0. 703711 | 0. 379 | 0. 136 | 8. 58E-87 | monocyte | CFD      |
| SCPEP1. 7   | 6. 74E-91 | 0. 81679  | 0. 585 | 0. 325 | 1. 01E-86 | monocyte | SCPEP1   |
| CREG1. 8    | 2. 15E-90 | 0. 783917 | 0. 52  | 0. 277 | 3. 21E-86 | monocyte | CREG1    |
| ASAH1. 6    | 2. 61E-90 | 0. 757436 | 0. 761 | 0. 642 | 3. 90E-86 | monocyte | ASAH1    |
| DAB2. 7     | 6. 31E-90 | 0. 709245 | 0. 368 | 0. 131 | 9. 43E-86 | monocyte | DAB2     |
| CXCL16. 7   | 6. 42E-90 | 0. 742515 | 0. 67  | 0. 434 | 9. 60E-86 | monocyte | CXCL16   |
| SCG5. 7     | 8. 84E-90 | -0. 93996 | 0. 029 | 0. 355 | 1. 32E-85 | monocyte | SCG5     |
| CAMK2N1. 8  | 1. 69E-89 | -0. 88819 | 0. 024 | 0. 343 | 2. 52E-85 | monocyte | CAMK2N1  |
| CX3CR1. 7   | 2. 35E-89 | 0. 817354 | 0. 281 | 0. 085 | 3. 52E-85 | monocyte | CX3CR1   |
| BAALC. 7    | 2. 82E-89 | -0. 87544 | 0. 044 | 0. 372 | 4. 22E-85 | monocyte | BAALC    |
| IFNGR1. 8   | 4. 69E-89 | 0. 756734 | 0. 653 | 0. 418 | 7. 01E-85 | monocyte | IFNGR1   |
| CD300LF. 6  | 4. 82E-89 | 0. 439967 | 0. 175 | 0. 034 | 7. 21E-85 | monocyte | CD300LF  |
| FYN. 7      | 1. 01E-88 | -0. 79963 | 0. 03  | 0. 352 | 1. 52E-84 | monocyte | FYN      |
| TYMP. 8     | 4. 03E-88 | 0. 719731 | 0. 561 | 0. 284 | 6. 03E-84 | monocyte | TYMP     |
| HLA-B. 5    | 4. 83E-88 | 0. 478556 | 0. 975 | 0. 841 | 7. 21E-84 | monocyte | HLA-B    |
| NCAM1. 8    | 1. 04E-87 | -0. 79194 | 0. 035 | 0. 362 | 1. 55E-83 | monocyte | NCAM1    |
| SELPLG. 6   | 1. 36E-87 | 0. 699409 | 0. 32  | 0. 104 | 2. 03E-83 | monocyte | SELPLG   |
| GOLM1. 7    | 4. 35E-87 | -0. 76638 | 0. 025 | 0. 342 | 6. 49E-83 | monocyte | GOLM1    |
| KIF21A. 8   | 5. 14E-87 | -0. 74966 | 0. 015 | 0. 328 | 7. 68E-83 | monocyte | KIF21A   |
| HMOX1. 8    | 1. 29E-86 | 0. 835879 | 0. 553 | 0. 272 | 1. 93E-82 | monocyte | HMOX1    |
| MEF2C. 8    | 1. 76E-86 | 0. 804216 | 0. 511 | 0. 263 | 2. 63E-82 | monocyte | MEF2C    |
| NPDC1. 7    | 2. 34E-86 | -0. 79656 | 0. 038 | 0. 349 | 3. 50E-82 | monocyte | NPDC1    |
| CD4. 8      | 3. 78E-86 | 0. 682119 | 0. 375 | 0. 136 | 5. 65E-82 | monocyte | CD4      |
| GIMAP5. 6   | 5. 70E-86 | 0. 521951 | 0. 184 | 0. 039 | 8. 52E-82 | monocyte | GIMAP5   |
| S100A8. 8   | 1. 01E-85 | 1. 114349 | 0. 405 | 0. 165 | 1. 50E-81 | monocyte | S100A8   |
| NINJ1. 8    | 1. 08E-85 | 0. 789579 | 0. 647 | 0. 434 | 1. 62E-81 | monocyte | NINJ1    |
| SLC25A4. 8  | 1. 08E-85 | -0. 63426 | 0. 113 | 0. 454 | 1. 62E-81 | monocyte | SLC25A4  |
| MAP2. 8     | 1. 34E-85 | -0. 77783 | 0. 041 | 0. 364 | 2. 01E-81 | monocyte | MAP2     |
| APBB1IP. 8  | 6. 65E-85 | 0. 647132 | 0. 371 | 0. 138 | 9. 94E-81 | monocyte | APBB1IP  |
| ZBTB20. 7   | 7. 32E-85 | -0. 68652 | 0. 077 | 0. 413 | 1. 09E-80 | monocyte | ZBTB20   |
| DPYSL3. 7   | 9. 44E-85 | -0. 8098  | 0. 034 | 0. 348 | 1. 41E-80 | monocyte | DPYSL3   |
| WAS. 8      | 9. 48E-85 | 0. 690212 | 0. 401 | 0. 154 | 1. 42E-80 | monocyte | WAS      |
| CECR1. 7    | 1. 71E-84 | 0. 611078 | 0. 225 | 0. 057 | 2. 55E-80 | monocyte | CECR1    |
| MYO1F. 8    | 1. 98E-84 | 0. 638132 | 0. 413 | 0. 163 | 2. 95E-80 | monocyte | MYO1F    |
| TCEAL7. 6   | 2. 07E-84 | -0. 82646 | 0. 019 | 0. 327 | 3. 10E-80 | monocyte | TCEAL7   |
| C16orf45. 2 | 1. 10E-84 | -0. 78901 | 0. 032 | 0. 344 | 3. 15E-80 | monocyte | C16orf45 |
| ARHGAP24. 6 | 3. 36E-84 | 0. 748649 | 0. 356 | 0. 13  | 9. 50E-80 | monocyte | ARHGAP24 |
| CXXC5. 8    | 1. 97E-83 | -0. 77603 | 0. 088 | 0. 406 | 2. 95E-79 | monocyte | CXXC5    |
| MAPT. 8     | 2. 61E-83 | -0. 77144 | 0. 009 | 0. 309 | 3. 89E-79 | monocyte | MAPT     |
| FGL2. 8     | 4. 70E-83 | 0. 664821 | 0. 404 | 0. 156 | 7. 03E-79 | monocyte | FGL2     |
| ACP5. 6     | 5. 04E-83 | 0. 510192 | 0. 174 | 0. 036 | 7. 53E-79 | monocyte | ACP5     |
| NCKAP1L. 8  | 1. 66E-82 | 0. 691323 | 0. 315 | 0. 105 | 2. 48E-78 | monocyte | NCKAP1L  |
| BST2. 7     | 2. 90E-82 | 0. 616779 | 0. 738 | 0. 463 | 4. 34E-78 | monocyte | BST2     |
| DBN1. 8     | 5. 34E-82 | -0. 74885 | 0. 029 | 0. 336 | 7. 99E-78 | monocyte | DBN1     |
| PTPN6. 8    | 2. 12E-81 | 0. 654362 | 0. 376 | 0. 143 | 3. 17E-77 | monocyte | PTPN6    |
| FERMT3. 8   | 3. 68E-81 | 0. 707966 | 0. 381 | 0. 147 | 5. 50E-77 | monocyte | FERMT3   |
| PODXL2. 8   | 5. 05E-81 | -0. 76563 | 0. 031 | 0. 332 | 7. 55E-77 | monocyte | PODXL2   |
| CEBPA. 7    | 5. 75E-81 | 0. 565097 | 0. 283 | 0. 088 | 8. 59E-77 | monocyte | CEBPA    |
| STMN1. 7    | 1. 46E-80 | -0. 57112 | 0. 338 | 0. 657 | 2. 18E-76 | monocyte | STMN1    |
| FABP7. 6    | 3. 13E-80 | -1. 13861 | 0. 117 | 0. 407 | 4. 68E-76 | monocyte | FABP7    |
| BIN2. 7     | 7. 20E-80 | 0. 642415 | 0. 296 | 0. 096 | 1. 08E-75 | monocyte | BIN2     |

|              |           |           |        |        |           |          |          |
|--------------|-----------|-----------|--------|--------|-----------|----------|----------|
| LAPTM4B. 8   | 1. 09E-79 | -0. 68224 | 0. 05  | 0. 356 | 1. 63E-75 | monocyte | LAPTM4B  |
| SYT11. 8     | 2. 11E-79 | -0. 68142 | 0. 092 | 0. 41  | 3. 15E-75 | monocyte | SYT11    |
| PTPRZ1. 8    | 2. 16E-79 | -0. 88332 | 0. 102 | 0. 409 | 3. 22E-75 | monocyte | PTPRZ1   |
| HPGDS. 7     | 3. 01E-79 | 0. 80629  | 0. 251 | 0. 075 | 4. 50E-75 | monocyte | HPGDS    |
| SGCB. 5      | 3. 69E-79 | -0. 58289 | 0. 042 | 0. 351 | 5. 52E-75 | monocyte | SGCB     |
| ATP6VOE2. 3. | 8. 6E-79  | -0. 59592 | 0. 159 | 0. 479 | 5. 77E-75 | monocyte | ATP6VOE2 |
| PAFAH1B3. 6. | 4. 2E-79  | -0. 68382 | 0. 122 | 0. 45  | 9. 60E-75 | monocyte | PAFAH1B3 |
| IGF1. 6      | 9. 45E-79 | 0. 551005 | 0. 201 | 0. 049 | 1. 41E-74 | monocyte | IGF1     |
| CDH2. 7      | 1. 00E-78 | -0. 72323 | 0. 019 | 0. 308 | 1. 50E-74 | monocyte | CDH2     |
| SEPT7. 8     | 1. 00E-78 | -0. 43984 | 0. 406 | 0. 729 | 1. 50E-74 | monocyte | 7-Sep    |
| STMN3. 6     | 1. 22E-78 | -0. 70415 | 0. 033 | 0. 331 | 1. 82E-74 | monocyte | STMN3    |
| PLTP. 6      | 1. 93E-78 | 1. 016767 | 0. 641 | 0. 455 | 2. 88E-74 | monocyte | PLTP     |
| POLD2. 5     | 5. 35E-78 | -0. 6556  | 0. 126 | 0. 447 | 7. 99E-74 | monocyte | POLD2    |
| CSF3R. 7     | 8. 00E-78 | 0. 669591 | 0. 358 | 0. 134 | 1. 20E-73 | monocyte | CSF3R    |
| SERPINB1. 1. | 6E-77     | 0. 709243 | 0. 517 | 0. 244 | 1. 73E-73 | monocyte | SERPINB1 |
| OCIAD2. 7    | 1. 91E-77 | -0. 95734 | 0. 103 | 0. 412 | 2. 85E-73 | monocyte | OCIAD2   |
| SRI. 7       | 2. 11E-77 | -0. 45715 | 0. 454 | 0. 753 | 3. 16E-73 | monocyte | SRI      |
| MGST2. 8     | 2. 46E-77 | 0. 747831 | 0. 48  | 0. 233 | 3. 68E-73 | monocyte | MGST2    |
| KCTD12. 8    | 6. 98E-77 | 0. 725788 | 0. 45  | 0. 217 | 1. 04E-72 | monocyte | KCTD12   |
| C1orf54. 8   | 1. 08E-76 | 0. 842218 | 0. 438 | 0. 207 | 1. 62E-72 | monocyte | C1orf54  |
| SYNGR2. 8    | 1. 64E-76 | 0. 756054 | 0. 541 | 0. 309 | 2. 46E-72 | monocyte | SYNGR2   |
| NFIA. 7      | 1. 86E-76 | -0. 71239 | 0. 09  | 0. 405 | 2. 78E-72 | monocyte | NFIA     |
| VAMP2. 7     | 1. 94E-76 | -0. 52847 | 0. 322 | 0. 649 | 2. 89E-72 | monocyte | VAMP2    |
| SPP1. 5      | 3. 25E-76 | 0. 530355 | 0. 923 | 0. 848 | 4. 85E-72 | monocyte | SPP1     |
| NCF1. 8      | 4. 32E-76 | 0. 598939 | 0. 309 | 0. 107 | 6. 45E-72 | monocyte | NCF1     |
| RHOBTB3. 8   | 9. 91E-76 | -0. 63896 | 0. 117 | 0. 434 | 1. 48E-71 | monocyte | RHOBTB3  |
| DSTN. 8      | 1. 57E-75 | -0. 48158 | 0. 338 | 0. 643 | 2. 35E-71 | monocyte | DSTN     |
| CYTL1. 7     | 1. 85E-75 | 0. 713048 | 0. 285 | 0. 095 | 2. 76E-71 | monocyte | CYTL1    |
| PARVG. 8     | 2. 13E-75 | 0. 638723 | 0. 372 | 0. 143 | 3. 18E-71 | monocyte | PARVG    |
| DDR1. 6      | 2. 36E-75 | -0. 71475 | 0. 061 | 0. 355 | 3. 53E-71 | monocyte | DDR1     |
| TSPAN7. 6    | 2. 94E-75 | -0. 67855 | 0. 04  | 0. 334 | 4. 39E-71 | monocyte | TSPAN7   |
| PHLDA1. 5    | 4. 76E-75 | -0. 77045 | 0. 123 | 0. 42  | 7. 12E-71 | monocyte | PHLDA1   |
| PMP2. 8      | 7. 17E-75 | -0. 96857 | 0. 082 | 0. 374 | 1. 07E-70 | monocyte | PMP2     |
| CD320. 6     | 7. 81E-75 | -0. 54185 | 0. 047 | 0. 342 | 1. 17E-70 | monocyte | CD320    |
| IP6K2. 7     | 1. 04E-74 | -0. 55675 | 0. 138 | 0. 461 | 1. 55E-70 | monocyte | IP6K2    |
| ARRB2. 8     | 3. 26E-74 | 0. 763406 | 0. 605 | 0. 382 | 4. 87E-70 | monocyte | ARRB2    |
| STMN4. 7     | 3. 39E-74 | -1. 0111  | 0. 042 | 0. 329 | 5. 07E-70 | monocyte | STMN4    |
| GSN. 7       | 3. 76E-74 | 0. 6067   | 0. 715 | 0. 491 | 5. 62E-70 | monocyte | GSN      |
| CCR1. 7      | 8. 21E-74 | 0. 514642 | 0. 237 | 0. 068 | 1. 23E-69 | monocyte | CCR1     |
| LPCAT2. 8    | 1. 48E-73 | 0. 629078 | 0. 34  | 0. 13  | 2. 22E-69 | monocyte | LPCAT2   |
| CRMP1. 7     | 1. 56E-73 | -0. 78769 | 0. 014 | 0. 288 | 2. 33E-69 | monocyte | CRMP1    |
| PIK3AP1. 8   | 2. 16E-73 | 0. 429636 | 0. 204 | 0. 052 | 3. 23E-69 | monocyte | PIK3AP1  |
| S100A9. 8    | 5. 43E-73 | 0. 988552 | 0. 437 | 0. 205 | 8. 11E-69 | monocyte | S100A9   |
| ENO2. 8      | 5. 85E-73 | -0. 72812 | 0. 026 | 0. 307 | 8. 75E-69 | monocyte | ENO2     |
| FZD3. 5      | 7. 63E-73 | -0. 66643 | 0. 022 | 0. 299 | 1. 14E-68 | monocyte | FZD3     |
| MILR1. 8     | 8. 32E-73 | 0. 707001 | 0. 263 | 0. 084 | 1. 24E-68 | monocyte | MILR1    |
| MORF4L2. 6   | 1. 18E-72 | -0. 42484 | 0. 316 | 0. 652 | 1. 77E-68 | monocyte | MORF4L2  |
| C12orf57. 1. | 29E-72    | -0. 55316 | 0. 24  | 0. 563 | 1. 93E-68 | monocyte | C12orf57 |
| S100A16. 7   | 1. 70E-72 | -1. 05056 | 0. 053 | 0. 329 | 2. 54E-68 | monocyte | S100A16  |
| MAGED1. 7    | 1. 90E-72 | -0. 59772 | 0. 071 | 0. 369 | 2. 83E-68 | monocyte | MAGED1   |
| CRIP2. 6     | 4. 09E-72 | -0. 69425 | 0. 048 | 0. 337 | 6. 11E-68 | monocyte | CRIP2    |

|             |           |           |        |        |           |          |           |
|-------------|-----------|-----------|--------|--------|-----------|----------|-----------|
| PPDPF. 4    | 5. 05E-72 | -0. 44059 | 0. 46  | 0. 733 | 7. 54E-68 | monocyte | PPDPF     |
| MEST. 7     | 6. 21E-72 | -0. 69127 | 0. 11  | 0. 411 | 9. 28E-68 | monocyte | MEST      |
| UBE2S. 7    | 8. 00E-72 | -0. 70765 | 0. 08  | 0. 367 | 1. 20E-67 | monocyte | UBE2S     |
| SLC2A5. 8   | 1. 06E-71 | 0. 840596 | 0. 366 | 0. 153 | 1. 59E-67 | monocyte | SLC2A5    |
| STAB1. 7    | 1. 27E-71 | 0. 681519 | 0. 365 | 0. 143 | 1. 90E-67 | monocyte | STAB1     |
| SOX11. 7    | 1. 68E-71 | -0. 84449 | 0. 023 | 0. 295 | 2. 51E-67 | monocyte | SOX11     |
| PTOV1. 7    | 2. 09E-71 | -0. 60268 | 0. 16  | 0. 463 | 3. 13E-67 | monocyte | PTOV1     |
| GSTA4. 7    | 2. 49E-71 | -0. 73809 | 0. 034 | 0. 312 | 3. 72E-67 | monocyte | GSTA4     |
| BLNK. 6     | 3. 86E-71 | 0. 60332  | 0. 205 | 0. 055 | 5. 77E-67 | monocyte | BLNK      |
| SCG3. 8     | 4. 34E-71 | -0. 85425 | 0. 02  | 0. 288 | 6. 49E-67 | monocyte | SCG3      |
| KIF5C. 8    | 6. 77E-71 | -0. 68824 | 0. 02  | 0. 29  | 1. 01E-66 | monocyte | KIF5C     |
| TFEC. 8     | 2. 93E-70 | 0. 424133 | 0. 183 | 0. 045 | 4. 38E-66 | monocyte | TFEC      |
| ATP8B4. 6   | 3. 49E-70 | 0. 433369 | 0. 154 | 0. 033 | 5. 22E-66 | monocyte | ATP8B4    |
| LILRB1. 8   | 4. 80E-70 | 0. 55696  | 0. 248 | 0. 078 | 7. 18E-66 | monocyte | LILRB1    |
| SERPINE2. 5 | 5. 51E-70 | -0. 69807 | 0. 038 | 0. 316 | 8. 23E-66 | monocyte | SERPINE2  |
| GPNMB. 7    | 6. 36E-70 | 0. 8173   | 0. 403 | 0. 182 | 9. 50E-66 | monocyte | GPNMB     |
| DNER. 6     | 6. 60E-70 | -0. 78383 | 0. 028 | 0. 302 | 9. 86E-66 | monocyte | DNER      |
| CSRP2. 6    | 1. 22E-69 | -0. 87374 | 0. 047 | 0. 324 | 1. 82E-65 | monocyte | CSRP2     |
| SUSD3. 7    | 1. 58E-69 | 0. 617368 | 0. 254 | 0. 081 | 2. 35E-65 | monocyte | SUSD3     |
| CAPZB. 7    | 2. 17E-69 | 0. 582263 | 0. 775 | 0. 695 | 3. 25E-65 | monocyte | CAPZB     |
| ZNF428. 8   | 3. 51E-69 | -0. 52855 | 0. 275 | 0. 569 | 5. 25E-65 | monocyte | ZNF428    |
| MEG3. 7     | 4. 14E-69 | -0. 92785 | 0. 05  | 0. 327 | 6. 18E-65 | monocyte | MEG3      |
| SCG2. 7     | 6. 52E-69 | -0. 85591 | 0. 024 | 0. 283 | 9. 74E-65 | monocyte | SCG2      |
| NREP. 7     | 7. 93E-69 | -0. 68228 | 0. 027 | 0. 294 | 1. 19E-64 | monocyte | NREP      |
| EBI3. 7     | 1. 46E-68 | 0. 539997 | 0. 257 | 0. 082 | 2. 18E-64 | monocyte | EBI3      |
| NME1. 6     | 1. 60E-68 | -0. 47091 | 0. 276 | 0. 594 | 2. 38E-64 | monocyte | NME1      |
| AP1S1. 7    | 2. 65E-68 | -0. 55385 | 0. 183 | 0. 493 | 3. 96E-64 | monocyte | AP1S1     |
| TMEM176A. 2 | 7. 0E-68  | 0. 757094 | 0. 432 | 0. 208 | 4. 03E-64 | monocyte | TMEM176A  |
| SNCA. 8     | 3. 19E-68 | 0. 730705 | 0. 333 | 0. 127 | 4. 77E-64 | monocyte | SNCA      |
| LGMN. 7     | 4. 23E-68 | 0. 886722 | 0. 532 | 0. 335 | 6. 32E-64 | monocyte | LGMN      |
| SYK. 8      | 6. 63E-68 | 0. 561071 | 0. 272 | 0. 091 | 9. 90E-64 | monocyte | SYK       |
| LMNA. 4     | 7. 89E-68 | -0. 60953 | 0. 144 | 0. 44  | 1. 18E-63 | monocyte | LMNA      |
| TMEM59L. 7  | 8. 05E-68 | -0. 62845 | 0. 018 | 0. 28  | 1. 20E-63 | monocyte | TMEM59L   |
| FAM229B. 7  | 1. 21E-67 | -0. 64324 | 0. 043 | 0. 314 | 1. 81E-63 | monocyte | FAM229B   |
| PCBP4. 8    | 1. 63E-67 | -0. 64007 | 0. 018 | 0. 277 | 2. 44E-63 | monocyte | PCBP4     |
| MYL6B. 7    | 1. 94E-67 | -0. 50282 | 0. 158 | 0. 467 | 2. 89E-63 | monocyte | MYL6B     |
| LINC01094   | 2. 27E-67 | 0. 645725 | 0. 346 | 0. 137 | 3. 40E-63 | monocyte | LINC01094 |
| CADM4. 7    | 2. 57E-67 | -0. 62496 | 0. 023 | 0. 285 | 3. 84E-63 | monocyte | CADM4     |
| SCRG1. 7    | 2. 59E-67 | -0. 74343 | 0. 088 | 0. 369 | 3. 87E-63 | monocyte | SCRG1     |
| PRAM1. 6    | 4. 30E-67 | 0. 499429 | 0. 173 | 0. 042 | 6. 43E-63 | monocyte | PRAM1     |
| CD302. 8    | 4. 42E-67 | 0. 737331 | 0. 403 | 0. 187 | 6. 61E-63 | monocyte | CD302     |
| CD300A. 8   | 4. 79E-67 | 0. 644534 | 0. 402 | 0. 173 | 7. 16E-63 | monocyte | CD300A    |
| C7orf55. 7  | 5. 68E-67 | -0. 56768 | 0. 141 | 0. 448 | 8. 48E-63 | monocyte | C7orf55   |
| CLU. 8      | 1. 11E-66 | -0. 52812 | 0. 546 | 0. 803 | 1. 67E-62 | monocyte | CLU       |
| LYZ. 8      | 1. 24E-66 | 0. 659953 | 0. 419 | 0. 187 | 1. 85E-62 | monocyte | LYZ       |
| CPM. 6      | 1. 48E-66 | 0. 730054 | 0. 443 | 0. 216 | 2. 22E-62 | monocyte | CPM       |
| UNC93B1. 8  | 1. 49E-66 | 0. 662524 | 0. 389 | 0. 184 | 2. 23E-62 | monocyte | UNC93B1   |
| MSI2. 5     | 2. 60E-66 | -0. 64385 | 0. 069 | 0. 344 | 3. 88E-62 | monocyte | MSI2      |
| NES. 8      | 3. 94E-66 | -0. 81528 | 0. 041 | 0. 297 | 5. 88E-62 | monocyte | NES       |
| MAF. 7      | 5. 80E-66 | 0. 608808 | 0. 311 | 0. 119 | 8. 67E-62 | monocyte | MAF       |
| PCDH9. 6    | 6. 35E-66 | -0. 76585 | 0. 02  | 0. 276 | 9. 50E-62 | monocyte | PCDH9     |



|             |           |           |        |        |           |          |          |
|-------------|-----------|-----------|--------|--------|-----------|----------|----------|
| PKIG. 7     | 6. 67E-66 | -0. 7078  | 0. 064 | 0. 332 | 9. 96E-62 | monocyte | PKIG     |
| TSPAN5. 8   | 6. 75E-66 | -0. 6011  | 0. 025 | 0. 283 | 1. 01E-61 | monocyte | TSPAN5   |
| SEZ6L2. 7   | 8. 61E-66 | -0. 68031 | 0. 037 | 0. 294 | 1. 29E-61 | monocyte | SEZ6L2   |
| PSIP1. 7    | 8. 66E-66 | -0. 50427 | 0. 112 | 0. 408 | 1. 29E-61 | monocyte | PSIP1    |
| CRYAB. 8    | 1. 30E-65 | -0. 87264 | 0. 222 | 0. 524 | 1. 95E-61 | monocyte | CRYAB    |
| KLHDC8A. 8  | 2. 55E-65 | -0. 6745  | 0. 02  | 0. 271 | 3. 81E-61 | monocyte | KLHDC8A  |
| CENPV. 8    | 3. 15E-65 | -0. 63986 | 0. 021 | 0. 276 | 4. 70E-61 | monocyte | CENPV    |
| LIMA1. 7    | 4. 38E-65 | -0. 6742  | 0. 072 | 0. 34  | 6. 55E-61 | monocyte | LIMA1    |
| AES. 7      | 4. 83E-65 | -0. 53613 | 0. 135 | 0. 435 | 7. 22E-61 | monocyte | AES      |
| LMO4. 8     | 4. 85E-65 | -0. 57133 | 0. 214 | 0. 501 | 7. 25E-61 | monocyte | LMO4     |
| ATAT1. 8    | 6. 71E-65 | -0. 56208 | 0. 044 | 0. 31  | 1. 00E-60 | monocyte | ATAT1    |
| THY1. 7     | 7. 81E-65 | -0. 65359 | 0. 022 | 0. 276 | 1. 17E-60 | monocyte | THY1     |
| IFITM2. 8   | 9. 72E-65 | 0. 772572 | 0. 494 | 0. 264 | 1. 45E-60 | monocyte | IFITM2   |
| DYNC1LI2. 1 | 1. 12E-64 | -0. 59833 | 0. 087 | 0. 367 | 1. 67E-60 | monocyte | DYNC1LI2 |
| SAMSN1. 8   | 1. 12E-64 | 0. 683773 | 0. 484 | 0. 231 | 1. 68E-60 | monocyte | SAMSN1   |
| NRN1. 5     | 1. 14E-64 | -0. 75664 | 0. 022 | 0. 274 | 1. 71E-60 | monocyte | NRN1     |
| ENAH. 7     | 1. 17E-64 | -0. 58593 | 0. 028 | 0. 285 | 1. 74E-60 | monocyte | ENAH     |
| FAM26F. 8   | 1. 17E-64 | 0. 562449 | 0. 361 | 0. 149 | 1. 75E-60 | monocyte | FAM26F   |
| IGFBP5. 8   | 1. 22E-64 | -1. 04755 | 0. 033 | 0. 289 | 1. 82E-60 | monocyte | IGFBP5   |
| TAF7. 7     | 6. 67E-64 | -0. 49357 | 0. 272 | 0. 578 | 9. 96E-60 | monocyte | TAF7     |
| TUBB4B. 4   | 8. 55E-64 | -0. 42788 | 0. 216 | 0. 517 | 1. 28E-59 | monocyte | TUBB4B   |
| PRAF2. 7    | 9. 37E-64 | -0. 56822 | 0. 056 | 0. 324 | 1. 40E-59 | monocyte | PRAF2    |
| STXBP2. 8   | 1. 06E-63 | 0. 618308 | 0. 367 | 0. 155 | 1. 58E-59 | monocyte | STXBP2   |
| ARPC3. 6    | 1. 84E-63 | 0. 477198 | 0. 839 | 0. 801 | 2. 74E-59 | monocyte | ARPC3    |
| CNPY3. 8    | 2. 03E-63 | 0. 678947 | 0. 599 | 0. 396 | 3. 03E-59 | monocyte | CNPY3    |
| CARHSP1. 7  | 2. 09E-63 | -0. 54971 | 0. 159 | 0. 446 | 3. 12E-59 | monocyte | CARHSP1  |
| THEMIS2. 8  | 2. 10E-63 | 0. 680966 | 0. 451 | 0. 223 | 3. 15E-59 | monocyte | THEMIS2  |
| NLRP1. 7    | 3. 04E-63 | -0. 60165 | 0. 085 | 0. 361 | 4. 55E-59 | monocyte | NLRP1    |
| SPTBN1. 6   | 4. 63E-63 | -0. 54296 | 0. 038 | 0. 295 | 6. 91E-59 | monocyte | SPTBN1   |
| RHBDF2. 8   | 5. 37E-63 | 0. 630652 | 0. 367 | 0. 161 | 8. 03E-59 | monocyte | RHBDF2   |
| SLC22A17. 5 | 5. 67E-63 | -0. 56282 | 0. 043 | 0. 305 | 8. 47E-59 | monocyte | SLC22A17 |
| SIGLEC9. 8  | 8. 51E-63 | 0. 58714  | 0. 242 | 0. 079 | 1. 27E-58 | monocyte | SIGLEC9  |
| SFMBT2. 6   | 9. 52E-63 | 0. 582105 | 0. 214 | 0. 065 | 1. 42E-58 | monocyte | SFMBT2   |
| LY96. 8     | 9. 71E-63 | 0. 70606  | 0. 408 | 0. 206 | 1. 45E-58 | monocyte | LY96     |
| TBCB. 6     | 1. 61E-62 | -0. 41248 | 0. 38  | 0. 683 | 2. 40E-58 | monocyte | TBCB     |
| CD33. 8     | 2. 74E-62 | 0. 596549 | 0. 289 | 0. 105 | 4. 09E-58 | monocyte | CD33     |
| RUFY3. 7    | 2. 87E-62 | -0. 54829 | 0. 062 | 0. 327 | 4. 29E-58 | monocyte | RUFY3    |
| SMARCA4. 7  | 5. 24E-62 | -0. 56377 | 0. 108 | 0. 383 | 7. 83E-58 | monocyte | SMARCA4  |
| TRIB2. 8    | 8. 41E-62 | -0. 64478 | 0. 035 | 0. 283 | 1. 26E-57 | monocyte | TRIB2    |
| RPAIN. 6    | 1. 27E-61 | -0. 41832 | 0. 211 | 0. 51  | 1. 90E-57 | monocyte | RPAIN    |
| TRAF4. 7    | 1. 29E-61 | -0. 59333 | 0. 039 | 0. 289 | 1. 92E-57 | monocyte | TRAF4    |
| STRAP. 5    | 2. 55E-61 | -0. 40707 | 0. 276 | 0. 578 | 3. 81E-57 | monocyte | STRAP    |
| IL10RA. 8   | 4. 08E-61 | 0. 57124  | 0. 315 | 0. 123 | 6. 10E-57 | monocyte | IL10RA   |
| COPS8. 7    | 4. 32E-61 | -0. 4518  | 0. 192 | 0. 494 | 6. 46E-57 | monocyte | COPS8    |
| VCAN. 5     | 4. 72E-61 | -0. 64477 | 0. 022 | 0. 266 | 7. 05E-57 | monocyte | VCAN     |
| RB1. 8      | 5. 24E-61 | 0. 729625 | 0. 486 | 0. 289 | 7. 83E-57 | monocyte | RB1      |
| TMEM98. 5   | 5. 34E-61 | -0. 65376 | 0. 017 | 0. 254 | 7. 97E-57 | monocyte | TMEM98   |
| P2RY6. 7    | 9. 62E-61 | 0. 362898 | 0. 124 | 0. 025 | 1. 44E-56 | monocyte | P2RY6    |
| RIC3. 6     | 1. 03E-60 | -0. 66472 | 0. 014 | 0. 25  | 1. 53E-56 | monocyte | RIC3     |
| TLL7. 8     | 1. 38E-60 | -0. 56991 | 0. 017 | 0. 257 | 2. 06E-56 | monocyte | TLL7     |
| SPINT2. 8   | 1. 56E-60 | 0. 641245 | 0. 412 | 0. 199 | 2. 33E-56 | monocyte | SPINT2   |

|             |           |           |        |        |           |          |               |
|-------------|-----------|-----------|--------|--------|-----------|----------|---------------|
| CYTH4. 8    | 1. 90E-60 | 0. 560641 | 0. 271 | 0. 098 | 2. 84E-56 | monocyte | CYTH4         |
| GAL3ST4. 7  | 2. 07E-60 | 0. 671555 | 0. 353 | 0. 155 | 3. 09E-56 | monocyte | GAL3ST4       |
| NRCAM. 7    | 5. 37E-60 | -0. 5331  | 0. 04  | 0. 29  | 8. 03E-56 | monocyte | NRCAM         |
| LILRA4. 3   | 5. 42E-60 | 0. 356043 | 0. 099 | 0. 016 | 8. 10E-56 | monocyte | LILRA4        |
| OLR1. 8     | 7. 16E-60 | 0. 651663 | 0. 474 | 0. 23  | 1. 07E-55 | monocyte | OLR1          |
| MAP1LC3A. 7 | 7. 71E-60 | -0. 56692 | 0. 121 | 0. 387 | 1. 15E-55 | monocyte | MAP1LC3A      |
| BEX2. 7     | 9. 23E-60 | -0. 74912 | 0. 031 | 0. 277 | 1. 38E-55 | monocyte | BEX2          |
| CFL2. 6     | 9. 57E-60 | -0. 60102 | 0. 084 | 0. 349 | 1. 43E-55 | monocyte | CFL2          |
| IL16. 7     | 9. 76E-60 | 0. 499902 | 0. 196 | 0. 057 | 1. 46E-55 | monocyte | IL16          |
| HEY1. 6     | 1. 12E-59 | -0. 64905 | 0. 028 | 0. 266 | 1. 68E-55 | monocyte | HEY1          |
| TTC3. 7     | 1. 22E-59 | -0. 52266 | 0. 265 | 0. 538 | 1. 82E-55 | monocyte | TTC3          |
| ALOX5. 8    | 1. 40E-59 | 0. 626071 | 0. 312 | 0. 123 | 2. 10E-55 | monocyte | ALOX5         |
| TMEM86A. 6  | 3. 48E-59 | 0. 463691 | 0. 151 | 0. 037 | 5. 20E-55 | monocyte | TMEM86A       |
| FGD2. 7     | 4. 00E-59 | 0. 512592 | 0. 181 | 0. 05  | 5. 98E-55 | monocyte | FGD2          |
| MLF2. 8     | 4. 98E-59 | -0. 37527 | 0. 34  | 0. 633 | 7. 44E-55 | monocyte | MLF2          |
| RAMP1. 7    | 5. 42E-59 | -0. 73099 | 0. 154 | 0. 435 | 8. 10E-55 | monocyte | RAMP1         |
| LHFP. 8     | 7. 32E-59 | -0. 66856 | 0. 019 | 0. 251 | 1. 09E-54 | monocyte | LHFP          |
| CLEC7A. 8   | 9. 03E-59 | 0. 594636 | 0. 368 | 0. 158 | 1. 35E-54 | monocyte | CLEC7A        |
| CTTN. 7     | 9. 77E-59 | -0. 56738 | 0. 017 | 0. 248 | 1. 46E-54 | monocyte | CTTN          |
| CCDC167. 5  | 9. 82E-59 | -0. 47303 | 0. 126 | 0. 405 | 1. 47E-54 | monocyte | CCDC167       |
| SPARC. 7    | 1. 17E-58 | -0. 85315 | 0. 15  | 0. 405 | 1. 74E-54 | monocyte | SPARC         |
| RNASE2. 8   | 1. 32E-58 | 0. 693939 | 0. 335 | 0. 142 | 1. 97E-54 | monocyte | RNASE2        |
| PPT1. 7     | 1. 74E-58 | 0. 614059 | 0. 669 | 0. 546 | 2. 60E-54 | monocyte | PPT1          |
| MGAT4A. 8   | 1. 76E-58 | 0. 641497 | 0. 415 | 0. 203 | 2. 63E-54 | monocyte | MGAT4A        |
| NAE1. 5     | 1. 77E-58 | -0. 50444 | 0. 095 | 0. 362 | 2. 64E-54 | monocyte | NAE1          |
| METRN. 8    | 1. 89E-58 | -0. 64736 | 0. 068 | 0. 314 | 2. 82E-54 | monocyte | METRN         |
| SIGLEC1. 4  | 1. 93E-58 | 0. 388643 | 0. 113 | 0. 021 | 2. 89E-54 | monocyte | SIGLEC1       |
| RCN2. 7     | 2. 25E-58 | -0. 50802 | 0. 216 | 0. 489 | 3. 37E-54 | monocyte | RCN2          |
| SIGLEC7. 8  | 2. 80E-58 | 0. 457425 | 0. 206 | 0. 062 | 4. 19E-54 | monocyte | SIGLEC7       |
| RAB3IP. 6   | 3. 96E-58 | -0. 66881 | 0. 029 | 0. 266 | 5. 91E-54 | monocyte | RAB3IP        |
| SOWAHD. 1   | 5. 10E-58 | 0. 222959 | 0. 079 | 0. 011 | 7. 62E-54 | monocyte | SOWAHD        |
| FCGBP. 7    | 5. 24E-58 | 0. 776361 | 0. 413 | 0. 213 | 7. 83E-54 | monocyte | FCGBP         |
| VBP1. 6     | 5. 61E-58 | -0. 38012 | 0. 209 | 0. 512 | 8. 38E-54 | monocyte | VBP1          |
| TCEA2. 7    | 5. 70E-58 | -0. 5472  | 0. 124 | 0. 39  | 8. 51E-54 | monocyte | TCEA2         |
| RP11-553L   | 1. 00E-57 | -0. 53524 | 0. 016 | 0. 245 | 1. 50E-53 | monocyte | RP11-553L6. 5 |
| SBDS. 7     | 1. 05E-57 | -0. 30497 | 0. 326 | 0. 635 | 1. 57E-53 | monocyte | SBDS          |
| RCN1. 8     | 1. 12E-57 | -0. 51065 | 0. 11  | 0. 376 | 1. 68E-53 | monocyte | RCN1          |
| IFRD1. 7    | 1. 14E-57 | -0. 38019 | 0. 205 | 0. 512 | 1. 70E-53 | monocyte | IFRD1         |
| RHOG. 8     | 1. 44E-57 | 0. 66258  | 0. 587 | 0. 393 | 2. 15E-53 | monocyte | RHOG          |
| ODC1. 7     | 1. 54E-57 | -0. 58004 | 0. 152 | 0. 415 | 2. 30E-53 | monocyte | ODC1          |
| TMEM161B-   | 1. 84E-57 | -0. 62214 | 0. 059 | 0. 309 | 2. 75E-53 | monocyte | TMEM161B-AS1  |
| NDUFA5. 6   | 2. 81E-57 | -0. 39256 | 0. 297 | 0. 602 | 4. 20E-53 | monocyte | NDUFA5        |
| FAM3C. 7    | 4. 12E-57 | -0. 53504 | 0. 187 | 0. 459 | 6. 16E-53 | monocyte | FAM3C         |
| DHPS. 6     | 6. 92E-57 | -0. 4782  | 0. 182 | 0. 47  | 1. 03E-52 | monocyte | DHPS          |
| BSG. 7      | 7. 04E-57 | -0. 32288 | 0. 49  | 0. 764 | 1. 05E-52 | monocyte | BSG           |
| PTPRS. 8    | 7. 24E-57 | -0. 61327 | 0. 04  | 0. 277 | 1. 08E-52 | monocyte | PTPRS         |
| SPAG9. 6    | 9. 41E-57 | -0. 51025 | 0. 111 | 0. 375 | 1. 41E-52 | monocyte | SPAG9         |
| PBX1. 7     | 1. 17E-56 | -0. 53505 | 0. 01  | 0. 232 | 1. 75E-52 | monocyte | PBX1          |
| RBFOX2. 7   | 1. 23E-56 | -0. 5762  | 0. 011 | 0. 234 | 1. 84E-52 | monocyte | RBFOX2        |
| MT1M. 6     | 1. 37E-56 | -0. 77288 | 0. 029 | 0. 263 | 2. 04E-52 | monocyte | MT1M          |
| HEPN1. 7    | 1. 86E-56 | -0. 72562 | 0. 005 | 0. 222 | 2. 78E-52 | monocyte | HEPN1         |

|             |           |           |        |        |           |          |          |
|-------------|-----------|-----------|--------|--------|-----------|----------|----------|
| SORL1. 7    | 3. 14E-56 | 0. 65272  | 0. 411 | 0. 211 | 4. 69E-52 | monocyte | SORL1    |
| HHEX. 8     | 3. 41E-56 | 0. 467593 | 0. 171 | 0. 047 | 5. 09E-52 | monocyte | HHEX     |
| TERF2IP. 8  | 4. 77E-56 | -0. 47626 | 0. 259 | 0. 541 | 7. 13E-52 | monocyte | TERF2IP  |
| CD01. 8     | 5. 76E-56 | -0. 61264 | 0. 024 | 0. 253 | 8. 60E-52 | monocyte | CD01     |
| BUD31. 6    | 5. 90E-56 | -0. 40103 | 0. 356 | 0. 652 | 8. 82E-52 | monocyte | BUD31    |
| MAFB. 6     | 8. 25E-56 | 0. 551871 | 0. 51  | 0. 297 | 1. 23E-51 | monocyte | MAFB     |
| FKBP10. 8   | 1. 07E-55 | -0. 55326 | 0. 011 | 0. 23  | 1. 60E-51 | monocyte | FKBP10   |
| SLC15A3. 7  | 1. 13E-55 | 0. 38303  | 0. 193 | 0. 058 | 1. 69E-51 | monocyte | SLC15A3  |
| TCF4. 8     | 1. 21E-55 | -0. 48995 | 0. 278 | 0. 545 | 1. 80E-51 | monocyte | TCF4     |
| MEIS2. 7    | 1. 38E-55 | -0. 67966 | 0. 006 | 0. 221 | 2. 06E-51 | monocyte | MEIS2    |
| CLEC4A. 8   | 1. 63E-55 | 0. 420589 | 0. 178 | 0. 051 | 2. 43E-51 | monocyte | CLEC4A   |
| CSTA. 8     | 1. 65E-55 | 0. 523348 | 0. 293 | 0. 114 | 2. 46E-51 | monocyte | CSTA     |
| HLA-C. 4    | 1. 92E-55 | 0. 39999  | 0. 894 | 0. 795 | 2. 86E-51 | monocyte | HLA-C    |
| NT5C3B. 7   | 3. 13E-55 | -0. 45001 | 0. 095 | 0. 353 | 4. 68E-51 | monocyte | NT5C3B   |
| POU3F2. 6   | 3. 57E-55 | -0. 57973 | 0. 016 | 0. 234 | 5. 33E-51 | monocyte | POU3F2   |
| TRIM2. 6    | 4. 00E-55 | -0. 51185 | 0. 019 | 0. 242 | 5. 97E-51 | monocyte | TRIM2    |
| MFSD1. 8    | 4. 31E-55 | 0. 734743 | 0. 519 | 0. 328 | 6. 44E-51 | monocyte | MFSD1    |
| MALAT1. 8   | 4. 67E-55 | -0. 18483 | 0. 979 | 0. 997 | 6. 99E-51 | monocyte | MALAT1   |
| DTD1. 8     | 4. 89E-55 | -0. 45185 | 0. 146 | 0. 413 | 7. 31E-51 | monocyte | DTD1     |
| TLR7. 5     | 5. 05E-55 | 0. 496415 | 0. 166 | 0. 046 | 7. 54E-51 | monocyte | TLR7     |
| PHF14. 7    | 5. 06E-55 | -0. 45882 | 0. 165 | 0. 445 | 7. 57E-51 | monocyte | PHF14    |
| FAM212A. 6  | 5. 29E-55 | 0. 64887  | 0. 15  | 0. 04  | 7. 90E-51 | monocyte | FAM212A  |
| SRPK2. 6    | 5. 99E-55 | -0. 48882 | 0. 162 | 0. 432 | 8. 96E-51 | monocyte | SRPK2    |
| DSEL. 8     | 6. 48E-55 | -0. 56698 | 0. 02  | 0. 243 | 9. 68E-51 | monocyte | DSEL     |
| SCIMP. 8    | 7. 41E-55 | 0. 462633 | 0. 216 | 0. 071 | 1. 11E-50 | monocyte | SCIMP    |
| WRB. 7      | 8. 36E-55 | -0. 36719 | 0. 161 | 0. 443 | 1. 25E-50 | monocyte | WRB      |
| CSNK1E. 7   | 8. 69E-55 | -0. 50304 | 0. 076 | 0. 327 | 1. 30E-50 | monocyte | CSNK1E   |
| HLA-DOA. 6  | 1. 50E-54 | 0. 571268 | 0. 235 | 0. 082 | 2. 25E-50 | monocyte | HLA-DOA  |
| DCX. 8      | 1. 72E-54 | -0. 67634 | 0. 008 | 0. 222 | 2. 58E-50 | monocyte | DCX      |
| DLEU7. 7    | 1. 90E-54 | 0. 458721 | 0. 154 | 0. 04  | 2. 84E-50 | monocyte | DLEU7    |
| POP7. 6     | 2. 23E-54 | -0. 44615 | 0. 149 | 0. 416 | 3. 34E-50 | monocyte | POP7     |
| RHBDD2. 7   | 2. 29E-54 | -0. 44059 | 0. 204 | 0. 482 | 3. 42E-50 | monocyte | RHBDD2   |
| COL6A1. 7   | 2. 38E-54 | -0. 61168 | 0. 027 | 0. 247 | 3. 55E-50 | monocyte | COL6A1   |
| CHN1. 7     | 2. 89E-54 | -0. 51915 | 0. 017 | 0. 234 | 4. 31E-50 | monocyte | CHN1     |
| SPARCL1. 7  | 3. 82E-54 | -0. 91016 | 0. 127 | 0. 365 | 5. 71E-50 | monocyte | SPARCL1  |
| SV2A. 6     | 4. 07E-54 | -0. 48635 | 0. 008 | 0. 219 | 6. 09E-50 | monocyte | SV2A     |
| PLS3. 7     | 4. 31E-54 | -0. 56563 | 0. 02  | 0. 239 | 6. 44E-50 | monocyte | PLS3     |
| TSPO. 7     | 6. 59E-54 | 0. 530619 | 0. 699 | 0. 585 | 9. 84E-50 | monocyte | TSPO     |
| MAP1A. 7    | 7. 13E-54 | -0. 54542 | 0. 025 | 0. 248 | 1. 07E-49 | monocyte | MAP1A    |
| FAM127A. 5  | 7. 16E-54 | -0. 42771 | 0. 198 | 0. 482 | 1. 07E-49 | monocyte | FAM127A  |
| RND3. 7     | 7. 31E-54 | -0. 71856 | 0. 038 | 0. 261 | 1. 09E-49 | monocyte | RND3     |
| LYN. 8      | 7. 53E-54 | 0. 534995 | 0. 343 | 0. 159 | 1. 13E-49 | monocyte | LYN      |
| SFPQ. 5     | 8. 11E-54 | -0. 36093 | 0. 287 | 0. 565 | 1. 21E-49 | monocyte | SFPQ     |
| HLA-DQA2. 8 | 8. 77E-54 | 0. 776201 | 0. 344 | 0. 157 | 1. 31E-49 | monocyte | HLA-DQA2 |
| RGS19. 8    | 9. 29E-54 | 0. 673684 | 0. 451 | 0. 26  | 1. 39E-49 | monocyte | RGS19    |
| PIK3IP1. 6  | 9. 40E-54 | 0. 633326 | 0. 33  | 0. 146 | 1. 40E-49 | monocyte | PIK3IP1  |
| PPP2R2B. 6  | 1. 01E-53 | -0. 57617 | 0. 019 | 0. 237 | 1. 51E-49 | monocyte | PPP2R2B  |
| FERMT2. 7   | 1. 43E-53 | -0. 49318 | 0. 008 | 0. 22  | 2. 14E-49 | monocyte | FERMT2   |
| GPC1. 7     | 1. 82E-53 | -0. 68972 | 0. 038 | 0. 255 | 2. 71E-49 | monocyte | GPC1     |
| TPST1. 6    | 2. 03E-53 | -0. 52534 | 0. 031 | 0. 258 | 3. 04E-49 | monocyte | TPST1    |
| CBX5. 7     | 2. 49E-53 | -0. 45845 | 0. 104 | 0. 365 | 3. 72E-49 | monocyte | CBX5     |

|            |           |           |        |        |           |          |                |
|------------|-----------|-----------|--------|--------|-----------|----------|----------------|
| REEP2. 6   | 2. 58E-53 | -0. 46945 | 0. 009 | 0. 219 | 3. 85E-49 | monocyte | REEP2          |
| CYCS. 2    | 2. 67E-53 | -0. 2418  | 0. 467 | 0. 758 | 3. 99E-49 | monocyte | CYCS           |
| YWHAE. 7   | 3. 08E-53 | -0. 26461 | 0. 548 | 0. 77  | 4. 61E-49 | monocyte | YWHAE          |
| HMGB3. 7   | 3. 15E-53 | -0. 56247 | 0. 065 | 0. 298 | 4. 70E-49 | monocyte | HMGB3          |
| CCL3. 8    | 3. 27E-53 | 0. 839553 | 0. 606 | 0. 406 | 4. 89E-49 | monocyte | CCL3           |
| GAS6. 7    | 3. 34E-53 | 0. 583211 | 0. 379 | 0. 189 | 4. 99E-49 | monocyte | GAS6           |
| FIBIN. 7   | 4. 38E-53 | -0. 62521 | 0. 027 | 0. 244 | 6. 54E-49 | monocyte | FIBIN          |
| PNMA1. 7   | 4. 76E-53 | -0. 51153 | 0. 068 | 0. 303 | 7. 12E-49 | monocyte | PNMA1          |
| LILRA2. 8  | 4. 91E-53 | 0. 62513  | 0. 213 | 0. 072 | 7. 34E-49 | monocyte | LILRA2         |
| SOX9. 7    | 5. 04E-53 | -0. 6995  | 0. 069 | 0. 29  | 7. 54E-49 | monocyte | SOX9           |
| SPATS2. 6  | 5. 75E-53 | -0. 4851  | 0. 046 | 0. 277 | 8. 60E-49 | monocyte | SPATS2         |
| NAGA. 8    | 6. 41E-53 | 0. 668341 | 0. 353 | 0. 17  | 9. 58E-49 | monocyte | NAGA           |
| KIF1B. 7   | 7. 09E-53 | -0. 55542 | 0. 075 | 0. 313 | 1. 06E-48 | monocyte | KIF1B          |
| ID4. 7     | 7. 14E-53 | -0. 69376 | 0. 022 | 0. 232 | 1. 07E-48 | monocyte | ID4            |
| PTMS. 7    | 7. 31E-53 | -0. 46354 | 0. 337 | 0. 572 | 1. 09E-48 | monocyte | PTMS           |
| TMEM106A.  | 7. 71E-53 | 0. 508465 | 0. 177 | 0. 053 | 1. 15E-48 | monocyte | TMEM106A       |
| TTYH1. 8   | 8. 06E-53 | -0. 73735 | 0. 059 | 0. 286 | 1. 20E-48 | monocyte | TTYH1          |
| DYNLL1. 5  | 8. 12E-53 | -0. 26191 | 0. 62  | 0. 855 | 1. 21E-48 | monocyte | DYNLL1         |
| EVI2A. 7   | 8. 55E-53 | 0. 576866 | 0. 421 | 0. 205 | 1. 28E-48 | monocyte | EVI2A          |
| ARL4A. 1   | 1. 16E-52 | -0. 4812  | 0. 138 | 0. 395 | 1. 73E-48 | monocyte | ARL4A          |
| CREB5. 7   | 1. 34E-52 | -0. 5567  | 0. 031 | 0. 253 | 2. 01E-48 | monocyte | CREB5          |
| ALDH1A1. 4 | 1. 46E-52 | 0. 366718 | 0. 109 | 0. 022 | 2. 18E-48 | monocyte | ALDH1A1        |
| ACTG1. 7   | 1. 58E-52 | -0. 21455 | 0. 832 | 0. 959 | 2. 36E-48 | monocyte | ACTG1          |
| LILRB5. 1  | 1. 71E-52 | 0. 179679 | 0. 059 | 0. 006 | 2. 55E-48 | monocyte | LILRB5         |
| RP11-480C  | 2. 23E-52 | 0. 637455 | 0. 147 | 0. 039 | 3. 33E-48 | monocyte | RP11-480C22. 1 |
| GRIA2. 7   | 2. 46E-52 | -0. 54462 | 0. 017 | 0. 229 | 3. 67E-48 | monocyte | GRIA2          |
| UBE2E3. 7  | 3. 66E-52 | -0. 44214 | 0. 209 | 0. 483 | 5. 47E-48 | monocyte | UBE2E3         |
| WDR54. 5   | 4. 42E-52 | -0. 54857 | 0. 032 | 0. 251 | 6. 61E-48 | monocyte | WDR54          |
| GGH. 6     | 5. 15E-52 | -0. 54546 | 0. 054 | 0. 281 | 7. 69E-48 | monocyte | GGH            |
| PGM2L1. 7  | 1. 07E-51 | -0. 58238 | 0. 05  | 0. 274 | 1. 60E-47 | monocyte | PGM2L1         |
| TRIM9. 7   | 1. 08E-51 | -0. 48294 | 0. 031 | 0. 251 | 1. 62E-47 | monocyte | TRIM9          |
| S100A4. 8  | 1. 46E-51 | 0. 570871 | 0. 514 | 0. 276 | 2. 18E-47 | monocyte | S100A4         |
| FABP3. 4   | 1. 62E-51 | 0. 34133  | 0. 149 | 0. 04  | 2. 42E-47 | monocyte | FABP3          |
| ARPC1A. 7  | 1. 90E-51 | -0. 33244 | 0. 293 | 0. 582 | 2. 85E-47 | monocyte | ARPC1A         |
| IRF8. 8    | 2. 78E-51 | 0. 508428 | 0. 333 | 0. 143 | 4. 15E-47 | monocyte | IRF8           |
| EPSTI1. 8  | 4. 48E-51 | 0. 58765  | 0. 275 | 0. 112 | 6. 70E-47 | monocyte | EPSTI1         |
| LSM7. 5    | 6. 69E-51 | -0. 32908 | 0. 375 | 0. 653 | 1. 00E-46 | monocyte | LSM7           |
| S100B. 7   | 7. 69E-51 | -0. 51607 | 0. 285 | 0. 549 | 1. 15E-46 | monocyte | S100B          |
| USP11. 7   | 8. 56E-51 | -0. 42427 | 0. 115 | 0. 373 | 1. 28E-46 | monocyte | USP11          |
| HES6. 7    | 8. 80E-51 | -0. 67062 | 0. 073 | 0. 305 | 1. 32E-46 | monocyte | HES6           |
| LILRB2. 8  | 9. 50E-51 | 0. 371233 | 0. 159 | 0. 044 | 1. 42E-46 | monocyte | LILRB2         |
| THRA. 6    | 9. 68E-51 | -0. 50187 | 0. 037 | 0. 257 | 1. 45E-46 | monocyte | THRA           |
| EGFR. 7    | 1. 06E-50 | -0. 68679 | 0. 09  | 0. 319 | 1. 58E-46 | monocyte | EGFR           |
| CBX3. 6    | 1. 07E-50 | -0. 3423  | 0. 302 | 0. 576 | 1. 61E-46 | monocyte | CBX3           |
| CD209. 1   | 1. 09E-50 | 0. 147519 | 0. 056 | 0. 006 | 1. 62E-46 | monocyte | CD209          |
| FBXO21. 6  | 1. 10E-50 | -0. 49816 | 0. 087 | 0. 328 | 1. 64E-46 | monocyte | FBXO21         |
| MIDN. 5    | 1. 22E-50 | -0. 46968 | 0. 178 | 0. 435 | 1. 83E-46 | monocyte | MIDN           |
| ILF2. 5    | 1. 96E-50 | -0. 26471 | 0. 304 | 0. 598 | 2. 92E-46 | monocyte | ILF2           |
| FAM181B. 7 | 1. 97E-50 | -0. 58856 | 0. 017 | 0. 22  | 2. 95E-46 | monocyte | FAM181B        |
| MAGEH1. 7  | 2. 67E-50 | -0. 4528  | 0. 092 | 0. 338 | 4. 00E-46 | monocyte | MAGEH1         |
| FNDC4. 6   | 2. 98E-50 | -0. 46523 | 0. 013 | 0. 215 | 4. 46E-46 | monocyte | FNDC4          |

|            |          |          |       |       |          |          |          |
|------------|----------|----------|-------|-------|----------|----------|----------|
| ARL11.7    | 3.11E-50 | 0.358097 | 0.128 | 0.031 | 4.65E-46 | monocyte | ARL11    |
| PAICS.7    | 3.23E-50 | -0.42197 | 0.084 | 0.328 | 4.82E-46 | monocyte | PAICS    |
| SLC29A3.4  | 3.43E-50 | 0.348758 | 0.139 | 0.036 | 5.13E-46 | monocyte | SLC29A3  |
| TMEM173.8  | 3.54E-50 | 0.517326 | 0.279 | 0.113 | 5.28E-46 | monocyte | TMEM173  |
| MAPK10.7   | 3.73E-50 | -0.51949 | 0.01  | 0.211 | 5.58E-46 | monocyte | MAPK10   |
| SEMA6A.6   | 3.86E-50 | -0.4896  | 0.015 | 0.216 | 5.77E-46 | monocyte | SEMA6A   |
| KCNQ2.7    | 3.87E-50 | -0.53301 | 0.024 | 0.232 | 5.78E-46 | monocyte | KCNQ2    |
| GPR65.8    | 4.86E-50 | 0.541251 | 0.292 | 0.119 | 7.26E-46 | monocyte | GPR65    |
| C8orf4.7   | 5.45E-50 | -0.79246 | 0.03  | 0.245 | 8.15E-46 | monocyte | C8orf4   |
| CCND2.8    | 5.66E-50 | -0.51587 | 0.101 | 0.347 | 8.45E-46 | monocyte | CCND2    |
| POLR2I.5   | 7.85E-50 | -0.38257 | 0.3   | 0.575 | 1.17E-45 | monocyte | POLR2I   |
| CALM1.8    | 7.94E-50 | -0.30565 | 0.554 | 0.791 | 1.19E-45 | monocyte | CALM1    |
| UBE2V2.6   | 8.86E-50 | -0.3177  | 0.235 | 0.518 | 1.32E-45 | monocyte | UBE2V2   |
| MRFAP1.7   | 9.36E-50 | -0.30731 | 0.412 | 0.694 | 1.40E-45 | monocyte | MRFAP1   |
| KLHL7.6    | 1.10E-49 | -0.49861 | 0.069 | 0.298 | 1.64E-45 | monocyte | KLHL7    |
| GIMAP6.6   | 1.25E-49 | 0.352776 | 0.136 | 0.034 | 1.87E-45 | monocyte | GIMAP6   |
| TAGLN3.7   | 1.31E-49 | -0.66226 | 0.007 | 0.204 | 1.96E-45 | monocyte | TAGLN3   |
| FUOM.8     | 1.45E-49 | 0.540857 | 0.295 | 0.127 | 2.16E-45 | monocyte | FUOM     |
| NAP1L4.6   | 1.60E-49 | -0.34931 | 0.158 | 0.425 | 2.39E-45 | monocyte | NAP1L4   |
| APBA2.8    | 1.62E-49 | -0.46726 | 0.019 | 0.223 | 2.43E-45 | monocyte | APBA2    |
| IL13RA1.8  | 1.93E-49 | 0.574011 | 0.423 | 0.234 | 2.89E-45 | monocyte | IL13RA1  |
| SLC11A1.8  | 2.00E-49 | 0.548477 | 0.516 | 0.286 | 2.99E-45 | monocyte | SLC11A1  |
| ANXA11.8   | 2.10E-49 | 0.581723 | 0.382 | 0.201 | 3.14E-45 | monocyte | ANXA11   |
| CYFIP1.7   | 2.26E-49 | 0.703988 | 0.445 | 0.269 | 3.37E-45 | monocyte | CYFIP1   |
| MKNK1.7    | 2.51E-49 | 0.615478 | 0.332 | 0.156 | 3.76E-45 | monocyte | MKNK1    |
| ABI2.6     | 2.54E-49 | -0.41109 | 0.127 | 0.382 | 3.79E-45 | monocyte | ABI2     |
| PSMB7.4    | 2.98E-49 | -0.29294 | 0.375 | 0.664 | 4.45E-45 | monocyte | PSMB7    |
| HPS1.7     | 3.02E-49 | 0.473709 | 0.253 | 0.098 | 4.51E-45 | monocyte | HPS1     |
| MYO6.6     | 3.32E-49 | -0.4801  | 0.03  | 0.242 | 4.96E-45 | monocyte | MYO6     |
| OSTF1.8    | 5.48E-49 | 0.621323 | 0.473 | 0.275 | 8.20E-45 | monocyte | OSTF1    |
| MPLKIP.4   | 6.27E-49 | -0.39055 | 0.194 | 0.467 | 9.36E-45 | monocyte | MPLKIP   |
| CLIC4.7    | 1.06E-48 | -0.51814 | 0.117 | 0.351 | 1.58E-44 | monocyte | CLIC4    |
| SRP9.5     | 1.06E-48 | -0.29122 | 0.438 | 0.702 | 1.59E-44 | monocyte | SRP9     |
| ETV1.8     | 1.18E-48 | -0.58654 | 0.047 | 0.262 | 1.77E-44 | monocyte | ETV1     |
| CDC42EP4.1 | 1.56E-48 | -0.53625 | 0.018 | 0.217 | 2.33E-44 | monocyte | CDC42EP4 |
| NCKAP1.6   | 1.57E-48 | -0.42446 | 0.009 | 0.204 | 2.35E-44 | monocyte | NCKAP1   |
| GDI1.7     | 1.66E-48 | -0.36737 | 0.234 | 0.508 | 2.49E-44 | monocyte | GDI1     |
| SMCO4.8    | 1.80E-48 | 0.569917 | 0.282 | 0.119 | 2.69E-44 | monocyte | SMCO4    |
| SCAMP2.8   | 1.91E-48 | 0.666631 | 0.529 | 0.361 | 2.85E-44 | monocyte | SCAMP2   |
| IFI44L.4   | 2.58E-48 | 0.615699 | 0.293 | 0.128 | 3.85E-44 | monocyte | IFI44L   |
| ARC.6      | 2.73E-48 | -0.64913 | 0.023 | 0.224 | 4.09E-44 | monocyte | ARC      |
| GPR35.1    | 3.05E-48 | 0.146721 | 0.074 | 0.011 | 4.57E-44 | monocyte | GPR35    |
| TLR1.8     | 3.16E-48 | 0.412594 | 0.182 | 0.058 | 4.72E-44 | monocyte | TLR1     |
| KCNQ10T1.3 | 3.72E-48 | -0.55021 | 0.072 | 0.296 | 5.56E-44 | monocyte | KCNQ10T1 |
| FJX1.7     | 5.18E-48 | -0.53627 | 0.02  | 0.218 | 7.73E-44 | monocyte | FJX1     |
| KCNE3.7    | 5.42E-48 | 0.228504 | 0.099 | 0.02  | 8.10E-44 | monocyte | KCNE3    |
| SLC16A3.8  | 5.69E-48 | 0.543503 | 0.507 | 0.304 | 8.50E-44 | monocyte | SLC16A3  |
| FAM92A1.6  | 6.33E-48 | -0.47096 | 0.019 | 0.217 | 9.46E-44 | monocyte | FAM92A1  |
| RHOB.5     | 6.79E-48 | -0.35723 | 0.34  | 0.633 | 1.01E-43 | monocyte | RHOB     |
| LARP6.6    | 7.52E-48 | -0.5112  | 0.014 | 0.209 | 1.12E-43 | monocyte | LARP6    |
| PCDH17.6   | 7.86E-48 | -0.46423 | 0.013 | 0.207 | 1.17E-43 | monocyte | PCDH17   |

|             |           |           |        |        |           |          |             |
|-------------|-----------|-----------|--------|--------|-----------|----------|-------------|
| KIF3A. 6    | 8. 26E-48 | -0. 49403 | 0. 04  | 0. 251 | 1. 23E-43 | monocyte | KIF3A       |
| C1R. 8      | 8. 36E-48 | -0. 75066 | 0. 027 | 0. 232 | 1. 25E-43 | monocyte | C1R         |
| RMRP        | 9. 41E-48 | 0. 403588 | 0. 076 | 0. 012 | 1. 41E-43 | monocyte | RMRP        |
| NCF2. 8     | 9. 67E-48 | 0. 481928 | 0. 238 | 0. 089 | 1. 44E-43 | monocyte | NCF2        |
| ASCL1. 7    | 9. 68E-48 | -0. 60207 | 0. 009 | 0. 201 | 1. 45E-43 | monocyte | ASCL1       |
| DHRS9. 4    | 1. 10E-47 | 0. 525291 | 0. 089 | 0. 017 | 1. 64E-43 | monocyte | DHRS9       |
| BCHE. 5     | 1. 33E-47 | -0. 51042 | 0. 01  | 0. 202 | 1. 99E-43 | monocyte | BCHE        |
| TBCA. 7     | 1. 37E-47 | -0. 26429 | 0. 477 | 0. 731 | 2. 05E-43 | monocyte | TBCA        |
| DENND3. 8   | 1. 43E-47 | 0. 529966 | 0. 233 | 0. 089 | 2. 14E-43 | monocyte | DENND3      |
| SELK. 5     | 1. 47E-47 | -0. 2141  | 0. 429 | 0. 725 | 2. 20E-43 | monocyte | SELK        |
| CADM2. 7    | 1. 49E-47 | -0. 57712 | 0. 011 | 0. 204 | 2. 23E-43 | monocyte | CADM2       |
| SLAIN1. 8   | 1. 51E-47 | -0. 50788 | 0. 02  | 0. 219 | 2. 25E-43 | monocyte | SLAIN1      |
| EPN2. 7     | 1. 57E-47 | -0. 42109 | 0. 041 | 0. 254 | 2. 35E-43 | monocyte | EPN2        |
| MEX3A. 7    | 1. 71E-47 | -0. 49573 | 0. 005 | 0. 193 | 2. 56E-43 | monocyte | MEX3A       |
| F3. 8       | 1. 92E-47 | -0. 57175 | 0. 016 | 0. 207 | 2. 87E-43 | monocyte | F3          |
| MAD2L2. 6   | 2. 09E-47 | -0. 46045 | 0. 164 | 0. 413 | 3. 12E-43 | monocyte | MAD2L2      |
| MAGI1. 8    | 3. 11E-47 | -0. 50657 | 0. 018 | 0. 213 | 4. 64E-43 | monocyte | MAGI1       |
| CCDC28B. 7  | 4. 12E-47 | -0. 49087 | 0. 033 | 0. 235 | 6. 16E-43 | monocyte | CCDC28B     |
| KMT2E. 6    | 5. 02E-47 | -0. 31973 | 0. 284 | 0. 56  | 7. 51E-43 | monocyte | KMT2E       |
| TCTEX1D2. 5 | 5. 35E-47 | -0. 50702 | 0. 039 | 0. 244 | 8. 00E-43 | monocyte | TCTEX1D2    |
| CHD7. 8     | 6. 05E-47 | -0. 44729 | 0. 079 | 0. 307 | 9. 04E-43 | monocyte | CHD7        |
| BIN1. 6     | 6. 15E-47 | 0. 62198  | 0. 517 | 0. 347 | 9. 19E-43 | monocyte | BIN1        |
| CLIP3. 7    | 6. 47E-47 | -0. 44536 | 0. 017 | 0. 213 | 9. 67E-43 | monocyte | CLIP3       |
| MAPK8IP1. 9 | 9. 39E-47 | -0. 43908 | 0. 014 | 0. 207 | 1. 40E-42 | monocyte | MAPK8IP1    |
| HERPUD1. 6  | 9. 65E-47 | 0. 56589  | 0. 743 | 0. 633 | 1. 44E-42 | monocyte | HERPUD1     |
| DKK3. 6     | 1. 33E-46 | -0. 43662 | 0. 02  | 0. 215 | 1. 99E-42 | monocyte | DKK3        |
| HIST1H4C. 1 | 4. 1E-46  | -0. 406   | 0. 197 | 0. 445 | 2. 11E-42 | monocyte | HIST1H4C    |
| MYL12A. 7   | 1. 57E-46 | 0. 53548  | 0. 672 | 0. 532 | 2. 34E-42 | monocyte | MYL12A      |
| PABPC1. 6   | 2. 06E-46 | 0. 443347 | 0. 775 | 0. 742 | 3. 08E-42 | monocyte | PABPC1      |
| RPS6KA1. 8  | 2. 45E-46 | 0. 598876 | 0. 275 | 0. 118 | 3. 67E-42 | monocyte | RPS6KA1     |
| EFEMP2. 5   | 3. 06E-46 | -0. 47482 | 0. 031 | 0. 23  | 4. 57E-42 | monocyte | EFEMP2      |
| SLAMF8. 8   | 3. 33E-46 | 0. 394086 | 0. 172 | 0. 054 | 4. 98E-42 | monocyte | SLAMF8      |
| BTK. 8      | 4. 12E-46 | 0. 488608 | 0. 21  | 0. 075 | 6. 15E-42 | monocyte | BTK         |
| NDUFS5. 6   | 4. 69E-46 | -0. 2254  | 0. 595 | 0. 83  | 7. 02E-42 | monocyte | NDUFS5      |
| ADCY7. 8    | 5. 03E-46 | 0. 436335 | 0. 17  | 0. 054 | 7. 51E-42 | monocyte | ADCY7       |
| SAMHD1. 8   | 5. 74E-46 | 0. 581287 | 0. 377 | 0. 2   | 8. 58E-42 | monocyte | SAMHD1      |
| CLECL1. 7   | 5. 88E-46 | 0. 394594 | 0. 141 | 0. 039 | 8. 79E-42 | monocyte | CLECL1      |
| SUB1. 6     | 6. 57E-46 | -0. 23772 | 0. 548 | 0. 775 | 9. 82E-42 | monocyte | SUB1        |
| MERTK. 7    | 6. 72E-46 | 0. 604788 | 0. 265 | 0. 112 | 1. 00E-41 | monocyte | MERTK       |
| TLR2. 8     | 7. 50E-46 | 0. 555696 | 0. 248 | 0. 099 | 1. 12E-41 | monocyte | TLR2        |
| GPRC5B. 6   | 7. 79E-46 | -0. 49956 | 0. 034 | 0. 235 | 1. 16E-41 | monocyte | GPRC5B      |
| NHP2. 5     | 8. 55E-46 | -0. 29772 | 0. 327 | 0. 602 | 1. 28E-41 | monocyte | NHP2        |
| TSPAN13. 8  | 8. 70E-46 | -0. 50143 | 0. 088 | 0. 318 | 1. 30E-41 | monocyte | TSPAN13     |
| MARCH1. 8   | 9. 98E-46 | 0. 524991 | 0. 352 | 0. 176 | 1. 49E-41 | monocyte | 1-Mar       |
| DCLK2. 8    | 1. 07E-45 | -0. 44845 | 0. 02  | 0. 212 | 1. 60E-41 | monocyte | DCLK2       |
| SQLE. 6     | 1. 59E-45 | -0. 44704 | 0. 055 | 0. 266 | 2. 38E-41 | monocyte | SQLE        |
| PSAT1. 7    | 1. 68E-45 | -0. 53633 | 0. 024 | 0. 219 | 2. 51E-41 | monocyte | PSAT1       |
| AP000439. 1 | 1. 70E-45 | 0. 455096 | 0. 097 | 0. 02  | 2. 54E-41 | monocyte | AP000439. 1 |
| OAS1. 5     | 1. 82E-45 | 0. 619393 | 0. 277 | 0. 119 | 2. 72E-41 | monocyte | OAS1        |
| MBOAT2. 7   | 2. 00E-45 | -0. 44007 | 0. 011 | 0. 197 | 2. 98E-41 | monocyte | MBOAT2      |
| ACOT7. 7    | 2. 24E-45 | -0. 46076 | 0. 042 | 0. 243 | 3. 34E-41 | monocyte | ACOT7       |

|             |           |           |        |        |           |          |           |
|-------------|-----------|-----------|--------|--------|-----------|----------|-----------|
| PYCR1. 4    | 2. 25E-45 | -0. 4405  | 0. 014 | 0. 2   | 3. 37E-41 | monocyte | PYCR1     |
| CAMLG. 7    | 2. 52E-45 | -0. 28898 | 0. 248 | 0. 516 | 3. 77E-41 | monocyte | CAMLG     |
| PRR7. 8     | 2. 73E-45 | -0. 39177 | 0. 016 | 0. 203 | 4. 08E-41 | monocyte | PRR7      |
| GM2A. 7     | 3. 29E-45 | 0. 595795 | 0. 284 | 0. 131 | 4. 91E-41 | monocyte | GM2A      |
| LINC00665   | 3. 54E-45 | -0. 4675  | 0. 015 | 0. 201 | 5. 28E-41 | monocyte | LINC00665 |
| HINT1. 4    | 3. 87E-45 | -0. 23676 | 0. 612 | 0. 847 | 5. 79E-41 | monocyte | HINT1     |
| POLR2J. 4   | 3. 88E-45 | -0. 35239 | 0. 392 | 0. 666 | 5. 80E-41 | monocyte | POLR2J    |
| ACAP3. 8    | 4. 32E-45 | -0. 45435 | 0. 032 | 0. 232 | 6. 46E-41 | monocyte | ACAP3     |
| DLGAP4. 5   | 4. 34E-45 | -0. 43875 | 0. 09  | 0. 311 | 6. 49E-41 | monocyte | DLGAP4    |
| TMEM45A. 4  | 4. 48E-45 | -0. 55244 | 0. 008 | 0. 191 | 6. 70E-41 | monocyte | TMEM45A   |
| CHPF. 6     | 4. 51E-45 | -0. 4569  | 0. 067 | 0. 276 | 6. 74E-41 | monocyte | CHPF      |
| RDX. 7      | 4. 65E-45 | -0. 40284 | 0. 262 | 0. 511 | 6. 95E-41 | monocyte | RDX       |
| FAIM2. 7    | 4. 99E-45 | -0. 49974 | 0. 018 | 0. 206 | 7. 45E-41 | monocyte | FAIM2     |
| GTF2I. 7    | 5. 76E-45 | -0. 46427 | 0. 208 | 0. 446 | 8. 60E-41 | monocyte | GTF2I     |
| ZNF462. 8   | 5. 88E-45 | -0. 48308 | 0. 009 | 0. 192 | 8. 79E-41 | monocyte | ZNF462    |
| WDR34. 5    | 6. 15E-45 | -0. 40233 | 0. 027 | 0. 223 | 9. 19E-41 | monocyte | WDR34     |
| CTSL. 8     | 6. 33E-45 | 0. 643274 | 0. 643 | 0. 513 | 9. 47E-41 | monocyte | CTSL      |
| PALD1. 7    | 6. 51E-45 | 0. 545075 | 0. 23  | 0. 09  | 9. 72E-41 | monocyte | PALD1     |
| KLC1. 8     | 6. 58E-45 | -0. 37925 | 0. 139 | 0. 379 | 9. 84E-41 | monocyte | KLC1      |
| DNAJB2. 7   | 1. 08E-44 | -0. 45252 | 0. 105 | 0. 333 | 1. 61E-40 | monocyte | DNAJB2    |
| ATP1B2. 8   | 1. 10E-44 | -0. 51636 | 0. 048 | 0. 249 | 1. 64E-40 | monocyte | ATP1B2    |
| ENC1. 8     | 1. 26E-44 | -0. 54199 | 0. 043 | 0. 24  | 1. 88E-40 | monocyte | ENC1      |
| BCAS2. 3    | 1. 48E-44 | -0. 24368 | 0. 214 | 0. 485 | 2. 21E-40 | monocyte | BCAS2     |
| PHGDH. 7    | 1. 55E-44 | -0. 56749 | 0. 024 | 0. 215 | 2. 31E-40 | monocyte | PHGDH     |
| TNC. 7      | 1. 57E-44 | -0. 59495 | 0. 026 | 0. 216 | 2. 34E-40 | monocyte | TNC       |
| CMTM7. 8    | 2. 16E-44 | 0. 520201 | 0. 317 | 0. 151 | 3. 24E-40 | monocyte | CMTM7     |
| NCBP2. 6    | 2. 47E-44 | -0. 36343 | 0. 203 | 0. 462 | 3. 69E-40 | monocyte | NCBP2     |
| FLI1. 8     | 2. 49E-44 | 0. 400137 | 0. 148 | 0. 043 | 3. 73E-40 | monocyte | FLI1      |
| SLC39A6. 6  | 2. 54E-44 | -0. 32384 | 0. 118 | 0. 347 | 3. 80E-40 | monocyte | SLC39A6   |
| AGT. 6      | 2. 85E-44 | -0. 65768 | 0. 04  | 0. 236 | 4. 25E-40 | monocyte | AGT       |
| PPP1R14B. 3 | 2. 21E-44 | -0. 49312 | 0. 142 | 0. 363 | 4. 80E-40 | monocyte | PPP1R14B  |
| RENBP. 7    | 3. 33E-44 | 0. 505617 | 0. 282 | 0. 122 | 4. 98E-40 | monocyte | RENBP     |
| CD81. 7     | 3. 37E-44 | 0. 589021 | 0. 571 | 0. 427 | 5. 03E-40 | monocyte | CD81      |
| CXADR. 8    | 3. 37E-44 | -0. 46436 | 0. 102 | 0. 325 | 5. 04E-40 | monocyte | CXADR     |
| MAGEF1. 7   | 3. 65E-44 | -0. 38606 | 0. 139 | 0. 383 | 5. 46E-40 | monocyte | MAGEF1    |
| RCAN1. 7    | 3. 99E-44 | -0. 57659 | 0. 075 | 0. 285 | 5. 96E-40 | monocyte | RCAN1     |
| MX1. 5      | 4. 49E-44 | 0. 586822 | 0. 255 | 0. 108 | 6. 71E-40 | monocyte | MX1       |
| MAP9. 6     | 4. 70E-44 | -0. 44771 | 0. 019 | 0. 204 | 7. 02E-40 | monocyte | MAP9      |
| WHSC1L1. 7  | 4. 75E-44 | -0. 41734 | 0. 151 | 0. 392 | 7. 10E-40 | monocyte | WHSC1L1   |
| DPEP2. 6    | 4. 78E-44 | 0. 29669  | 0. 112 | 0. 027 | 7. 15E-40 | monocyte | DPEP2     |
| PTRF. 8     | 5. 14E-44 | -0. 4689  | 0. 017 | 0. 2   | 7. 68E-40 | monocyte | PTRF      |
| ZNHIT1. 2   | 5. 57E-44 | -0. 22679 | 0. 399 | 0. 674 | 8. 32E-40 | monocyte | ZNHIT1    |
| STOM. 7     | 5. 78E-44 | 0. 655255 | 0. 413 | 0. 237 | 8. 64E-40 | monocyte | STOM      |
| EIF4G2. 7   | 5. 92E-44 | -0. 26731 | 0. 433 | 0. 679 | 8. 85E-40 | monocyte | EIF4G2    |
| TMSB15A. 8  | 6. 32E-44 | -0. 5391  | 0. 013 | 0. 193 | 9. 44E-40 | monocyte | TMSB15A   |
| DNASE2. 6   | 6. 32E-44 | 0. 613222 | 0. 515 | 0. 372 | 9. 44E-40 | monocyte | DNASE2    |
| CD180. 7    | 6. 43E-44 | 0. 2851   | 0. 118 | 0. 029 | 9. 61E-40 | monocyte | CD180     |
| GIMAP8. 2   | 6. 81E-44 | 0. 218906 | 0. 077 | 0. 014 | 1. 02E-39 | monocyte | GIMAP8    |
| LSAMP. 6    | 7. 96E-44 | -0. 53834 | 0. 008 | 0. 187 | 1. 19E-39 | monocyte | LSAMP     |
| RAB2A. 5    | 7. 97E-44 | -0. 35126 | 0. 341 | 0. 613 | 1. 19E-39 | monocyte | RAB2A     |
| SPAG16. 8   | 9. 10E-44 | -0. 42434 | 0. 093 | 0. 314 | 1. 36E-39 | monocyte | SPAG16    |

|             |           |           |        |        |           |          |                  |
|-------------|-----------|-----------|--------|--------|-----------|----------|------------------|
| MIAT. 7     | 1. 03E-43 | -0. 55313 | 0. 006 | 0. 182 | 1. 54E-39 | monocyte | MIAT             |
| SH3BGRL. 5  | 1. 04E-43 | 0. 527769 | 0. 706 | 0. 643 | 1. 55E-39 | monocyte | SH3BGRL          |
| SASH3. 8    | 1. 09E-43 | 0. 431817 | 0. 194 | 0. 068 | 1. 63E-39 | monocyte | SASH3            |
| BCAR1. 6    | 1. 12E-43 | -0. 39569 | 0. 008 | 0. 186 | 1. 67E-39 | monocyte | BCAR1            |
| PGAP1. 7    | 1. 14E-43 | -0. 39759 | 0. 016 | 0. 198 | 1. 70E-39 | monocyte | PGAP1            |
| TMEM9. 8    | 1. 18E-43 | -0. 35695 | 0. 145 | 0. 387 | 1. 77E-39 | monocyte | TMEM9            |
| H1FX. 7     | 1. 24E-43 | -0. 40606 | 0. 163 | 0. 404 | 1. 86E-39 | monocyte | H1FX             |
| SSBP2. 7    | 1. 26E-43 | -0. 33818 | 0. 069 | 0. 288 | 1. 88E-39 | monocyte | SSBP2            |
| GRIA3. 6    | 1. 67E-43 | -0. 41648 | 0. 007 | 0. 183 | 2. 50E-39 | monocyte | GRIA3            |
| NDN. 8      | 1. 67E-43 | -0. 42872 | 0. 024 | 0. 212 | 2. 50E-39 | monocyte | NDN              |
| ARHGAP15. 1 | 1. 86E-43 | 0. 463828 | 0. 223 | 0. 086 | 2. 78E-39 | monocyte | ARHGAP15         |
| VMO1. 7     | 2. 05E-43 | 0. 565136 | 0. 314 | 0. 146 | 3. 07E-39 | monocyte | VMO1             |
| NR2F1. 5    | 2. 11E-43 | -0. 39228 | 0. 005 | 0. 18  | 3. 16E-39 | monocyte | NR2F1            |
| AKAP12. 8   | 2. 58E-43 | -0. 54241 | 0. 02  | 0. 202 | 3. 85E-39 | monocyte | AKAP12           |
| VGLL4. 5    | 2. 68E-43 | -0. 33302 | 0. 11  | 0. 336 | 4. 01E-39 | monocyte | VGLL4            |
| ACTN4. 5    | 2. 80E-43 | -0. 43173 | 0. 123 | 0. 351 | 4. 18E-39 | monocyte | ACTN4            |
| PGRMC1. 6   | 2. 88E-43 | -0. 3789  | 0. 215 | 0. 468 | 4. 30E-39 | monocyte | PGRMC1           |
| PHYHIPL. 6  | 2. 94E-43 | -0. 57418 | 0. 018 | 0. 2   | 4. 39E-39 | monocyte | PHYHIPL          |
| NSG1. 8     | 3. 18E-43 | -0. 69918 | 0. 013 | 0. 19  | 4. 75E-39 | monocyte | NSG1             |
| CA2. 6      | 3. 31E-43 | -0. 71231 | 0. 048 | 0. 241 | 4. 95E-39 | monocyte | CA2              |
| IFI30. 8    | 3. 46E-43 | 0. 481896 | 0. 403 | 0. 203 | 5. 17E-39 | monocyte | IFI30            |
| AK4. 7      | 3. 50E-43 | -0. 45961 | 0. 015 | 0. 194 | 5. 23E-39 | monocyte | AK4              |
| COL9A3. 8   | 3. 64E-43 | -0. 5535  | 0. 02  | 0. 201 | 5. 44E-39 | monocyte | COL9A3           |
| SOX8. 8     | 3. 75E-43 | -0. 51074 | 0. 013 | 0. 192 | 5. 60E-39 | monocyte | SOX8             |
| KCNMB1. 7   | 3. 90E-43 | 0. 567409 | 0. 229 | 0. 091 | 5. 84E-39 | monocyte | KCNMB1           |
| CD40. 8     | 4. 12E-43 | 0. 432241 | 0. 173 | 0. 058 | 6. 15E-39 | monocyte | CD40             |
| MANBAL. 8   | 4. 68E-43 | -0. 41339 | 0. 126 | 0. 353 | 6. 99E-39 | monocyte | MANBAL           |
| ZEB1. 7     | 4. 87E-43 | -0. 41204 | 0. 022 | 0. 208 | 7. 28E-39 | monocyte | ZEB1             |
| BNIP3. 6    | 4. 89E-43 | -0. 5548  | 0. 039 | 0. 231 | 7. 31E-39 | monocyte | BNIP3            |
| PRKCD. 7    | 5. 23E-43 | 0. 440096 | 0. 194 | 0. 07  | 7. 81E-39 | monocyte | PRKCD            |
| LTBR. 8     | 6. 19E-43 | 0. 462531 | 0. 219 | 0. 084 | 9. 24E-39 | monocyte | LTBR             |
| CCL13. 1    | 6. 70E-43 | 0. 105091 | 0. 046 | 0. 005 | 1. 00E-38 | monocyte | CCL13            |
| RP11-1094   | 7. 52E-43 | -0. 34863 | 0. 049 | 0. 251 | 1. 12E-38 | monocyte | RP11-1094M14. 11 |
| TAGLN2. 8   | 8. 44E-43 | -0. 39945 | 0. 302 | 0. 533 | 1. 26E-38 | monocyte | TAGLN2           |
| DCTN3. 2    | 8. 91E-43 | -0. 32181 | 0. 28  | 0. 537 | 1. 33E-38 | monocyte | DCTN3            |
| HMHA1. 8    | 1. 03E-42 | 0. 423803 | 0. 241 | 0. 097 | 1. 54E-38 | monocyte | HMHA1            |
| FUCA1. 6    | 1. 04E-42 | 0. 646737 | 0. 358 | 0. 208 | 1. 55E-38 | monocyte | FUCA1            |
| HRAS. 7     | 1. 06E-42 | -0. 40134 | 0. 096 | 0. 311 | 1. 59E-38 | monocyte | HRAS             |
| OLA1. 3     | 1. 09E-42 | -0. 36892 | 0. 256 | 0. 509 | 1. 63E-38 | monocyte | OLA1             |
| TMSB15B. 7  | 1. 21E-42 | -0. 44284 | 0. 017 | 0. 196 | 1. 81E-38 | monocyte | TMSB15B          |
| SPOCD1. 6   | 1. 51E-42 | -0. 66032 | 0. 042 | 0. 233 | 2. 25E-38 | monocyte | SPOCD1           |
| HILPDA. 7   | 1. 51E-42 | -0. 56119 | 0. 045 | 0. 243 | 2. 26E-38 | monocyte | HILPDA           |
| JUND. 6     | 1. 70E-42 | -0. 36605 | 0. 173 | 0. 419 | 2. 54E-38 | monocyte | JUND             |
| PTS. 7      | 1. 70E-42 | -0. 32892 | 0. 119 | 0. 345 | 2. 54E-38 | monocyte | PTS              |
| BOD1. 7     | 1. 92E-42 | -0. 35261 | 0. 1   | 0. 321 | 2. 87E-38 | monocyte | BOD1             |
| COPS6. 5    | 2. 13E-42 | -0. 28448 | 0. 355 | 0. 626 | 3. 18E-38 | monocyte | COPS6            |
| ASCL2. 7    | 2. 29E-42 | 0. 34473  | 0. 117 | 0. 03  | 3. 43E-38 | monocyte | ASCL2            |
| COTL1. 7    | 2. 48E-42 | 0. 50369  | 0. 614 | 0. 5   | 3. 71E-38 | monocyte | COTL1            |
| LACC1. 4    | 2. 49E-42 | 0. 237846 | 0. 111 | 0. 027 | 3. 72E-38 | monocyte | LACC1            |
| FAM134B. 6  | 2. 53E-42 | -0. 4191  | 0. 007 | 0. 179 | 3. 77E-38 | monocyte | FAM134B          |
| SCOC. 7     | 2. 74E-42 | -0. 32283 | 0. 189 | 0. 434 | 4. 09E-38 | monocyte | SCOC             |



|             |           |           |        |        |           |          |                |
|-------------|-----------|-----------|--------|--------|-----------|----------|----------------|
| VAV1. 8     | 2. 91E-42 | 0. 404839 | 0. 185 | 0. 064 | 4. 35E-38 | monocyte | VAV1           |
| FAM200B. 5  | 3. 05E-42 | -0. 35561 | 0. 153 | 0. 385 | 4. 55E-38 | monocyte | FAM200B        |
| NRXN1. 7    | 3. 26E-42 | -0. 59167 | 0. 006 | 0. 177 | 4. 87E-38 | monocyte | NRXN1          |
| SMAD1. 5    | 3. 29E-42 | -0. 41395 | 0. 016 | 0. 192 | 4. 91E-38 | monocyte | SMAD1          |
| CD48. 8     | 3. 59E-42 | 0. 337529 | 0. 193 | 0. 068 | 5. 36E-38 | monocyte | CD48           |
| MED10. 7    | 4. 82E-42 | -0. 27041 | 0. 245 | 0. 505 | 7. 20E-38 | monocyte | MED10          |
| SLC29A1. 7  | 4. 90E-42 | 0. 537403 | 0. 278 | 0. 125 | 7. 32E-38 | monocyte | SLC29A1        |
| CCT2. 3     | 5. 55E-42 | -0. 36809 | 0. 31  | 0. 566 | 8. 30E-38 | monocyte | CCT2           |
| EI24. 5     | 5. 97E-42 | -0. 33251 | 0. 211 | 0. 453 | 8. 92E-38 | monocyte | EI24           |
| ARL4C. 6    | 6. 23E-42 | -0. 4608  | 0. 171 | 0. 397 | 9. 32E-38 | monocyte | ARL4C          |
| NT5C3A. 6   | 6. 60E-42 | -0. 41796 | 0. 096 | 0. 312 | 9. 87E-38 | monocyte | NT5C3A         |
| BCAN. 8     | 6. 74E-42 | -0. 69372 | 0. 09  | 0. 292 | 1. 01E-37 | monocyte | BCAN           |
| PUF60. 5    | 6. 82E-42 | -0. 26727 | 0. 295 | 0. 563 | 1. 02E-37 | monocyte | PUF60          |
| DHRS7. 6    | 6. 87E-42 | 0. 605057 | 0. 654 | 0. 548 | 1. 03E-37 | monocyte | DHRS7          |
| BMP2K. 6    | 7. 65E-42 | 0. 440947 | 0. 247 | 0. 105 | 1. 14E-37 | monocyte | BMP2K          |
| ROBO1. 8    | 7. 87E-42 | -0. 42709 | 0. 017 | 0. 192 | 1. 18E-37 | monocyte | ROBO1          |
| CRNDE. 3    | 9. 10E-42 | -0. 41591 | 0. 017 | 0. 193 | 1. 36E-37 | monocyte | CRNDE          |
| TCEAL2. 6   | 9. 19E-42 | -0. 58148 | 0. 017 | 0. 194 | 1. 37E-37 | monocyte | TCEAL2         |
| STRA13. 3   | 9. 36E-42 | -0. 23406 | 0. 216 | 0. 472 | 1. 40E-37 | monocyte | STRA13         |
| UPF3A. 7    | 1. 01E-41 | -0. 35233 | 0. 133 | 0. 364 | 1. 51E-37 | monocyte | UPF3A          |
| PRRX1. 8    | 1. 15E-41 | -0. 43729 | 0. 013 | 0. 185 | 1. 72E-37 | monocyte | PRRX1          |
| YWHAG. 7    | 1. 16E-41 | -0. 4174  | 0. 174 | 0. 41  | 1. 74E-37 | monocyte | YWHAG          |
| ITGB8. 6    | 1. 17E-41 | -0. 41469 | 0. 057 | 0. 256 | 1. 74E-37 | monocyte | ITGB8          |
| RGMA. 7     | 1. 23E-41 | -0. 48831 | 0. 032 | 0. 215 | 1. 83E-37 | monocyte | RGMA           |
| MATR3. 7    | 1. 32E-41 | -0. 34266 | 0. 248 | 0. 508 | 1. 97E-37 | monocyte | MATR3          |
| EID1. 5     | 1. 74E-41 | -0. 25614 | 0. 474 | 0. 728 | 2. 60E-37 | monocyte | EID1           |
| F2R. 8      | 1. 77E-41 | -0. 37919 | 0. 01  | 0. 183 | 2. 64E-37 | monocyte | F2R            |
| TMEM14A. 7  | 2. 96E-41 | -0. 37898 | 0. 12  | 0. 342 | 4. 43E-37 | monocyte | TMEM14A        |
| AKR1A1. 6   | 3. 63E-41 | 0. 60312  | 0. 594 | 0. 489 | 5. 43E-37 | monocyte | AKR1A1         |
| AP1B1. 8    | 4. 05E-41 | 0. 561429 | 0. 41  | 0. 245 | 6. 06E-37 | monocyte | AP1B1          |
| DPYSL4. 8   | 4. 17E-41 | -0. 38462 | 0. 003 | 0. 168 | 6. 23E-37 | monocyte | DPYSL4         |
| SNTG1. 7    | 5. 64E-41 | -0. 53813 | 0. 003 | 0. 167 | 8. 43E-37 | monocyte | SNTG1          |
| IGFBP7. 6   | 5. 67E-41 | -0. 69381 | 0. 091 | 0. 285 | 8. 48E-37 | monocyte | IGFBP7         |
| MAP4. 5     | 5. 83E-41 | -0. 37859 | 0. 126 | 0. 353 | 8. 72E-37 | monocyte | MAP4           |
| HSD11B1L. 6 | 6. 17E-41 | -0. 37061 | 0. 035 | 0. 22  | 9. 22E-37 | monocyte | HSD11B1L       |
| BAD. 5      | 7. 31E-41 | -0. 30655 | 0. 195 | 0. 437 | 1. 09E-36 | monocyte | BAD            |
| RP11-557H   | 7. 32E-41 | 0. 298498 | 0. 094 | 0. 021 | 1. 09E-36 | monocyte | RP11-557H15. 4 |
| MT1F. 7     | 7. 91E-41 | -0. 52571 | 0. 111 | 0. 322 | 1. 18E-36 | monocyte | MT1F           |
| RGS17. 6    | 8. 47E-41 | -0. 42547 | 0. 008 | 0. 176 | 1. 27E-36 | monocyte | RGS17          |
| PTCRA. 4    | 9. 42E-41 | 0. 30274  | 0. 086 | 0. 018 | 1. 41E-36 | monocyte | PTCRA          |
| ARHGAP30. 1 | 0. 9E-40  | 0. 425921 | 0. 216 | 0. 083 | 1. 63E-36 | monocyte | ARHGAP30       |
| DOCK8. 8    | 1. 22E-40 | 0. 427183 | 0. 257 | 0. 109 | 1. 83E-36 | monocyte | DOCK8          |
| OLIG2. 7    | 1. 43E-40 | -0. 56032 | 0. 02  | 0. 192 | 2. 14E-36 | monocyte | OLIG2          |
| RP11-489C   | 1. 49E-40 | 0. 425928 | 0. 096 | 0. 022 | 2. 22E-36 | monocyte | RP11-489018. 1 |
| MCM7. 7     | 1. 56E-40 | -0. 44121 | 0. 07  | 0. 271 | 2. 34E-36 | monocyte | MCM7           |
| HVCN1. 7    | 1. 62E-40 | 0. 436724 | 0. 216 | 0. 086 | 2. 42E-36 | monocyte | HVCN1          |
| ATP6VOE1. 1 | 1. 69E-40 | 0. 440477 | 0. 787 | 0. 758 | 2. 52E-36 | monocyte | ATP6VOE1       |
| BTG3. 5     | 1. 94E-40 | -0. 30144 | 0. 16  | 0. 39  | 2. 90E-36 | monocyte | BTG3           |
| PLBD1. 8    | 2. 19E-40 | 0. 421674 | 0. 214 | 0. 084 | 3. 27E-36 | monocyte | PLBD1          |
| VIM. 6      | 2. 28E-40 | -0. 40097 | 0. 526 | 0. 676 | 3. 41E-36 | monocyte | VIM            |
| IRF5. 8     | 2. 46E-40 | 0. 399918 | 0. 156 | 0. 05  | 3. 68E-36 | monocyte | IRF5           |

|             |           |           |        |        |           |          |                |
|-------------|-----------|-----------|--------|--------|-----------|----------|----------------|
| ELOF1. 5    | 2. 51E-40 | -0. 4013  | 0. 21  | 0. 442 | 3. 75E-36 | monocyte | ELOF1          |
| RP11-161M   | 2. 61E-40 | -0. 48588 | 0. 011 | 0. 18  | 3. 90E-36 | monocyte | RP11-161M6. 2  |
| PSMB5. 5    | 2. 66E-40 | -0. 23528 | 0. 352 | 0. 616 | 3. 97E-36 | monocyte | PSMB5          |
| GAA. 7      | 2. 90E-40 | 0. 56871  | 0. 46  | 0. 307 | 4. 34E-36 | monocyte | GAA            |
| C4orf27. 6  | 2. 98E-40 | -0. 37636 | 0. 117 | 0. 336 | 4. 45E-36 | monocyte | C4orf27        |
| ARHGAP4. 8  | 3. 23E-40 | 0. 490703 | 0. 245 | 0. 104 | 4. 83E-36 | monocyte | ARHGAP4        |
| HLA-DQB2. 3 | 3. 58E-40 | 0. 711609 | 0. 216 | 0. 087 | 5. 35E-36 | monocyte | HLA-DQB2       |
| MYEF2. 7    | 3. 61E-40 | -0. 33388 | 0. 028 | 0. 208 | 5. 40E-36 | monocyte | MYEF2          |
| CTXN1. 8    | 3. 73E-40 | -0. 36099 | 0. 008 | 0. 173 | 5. 58E-36 | monocyte | CTXN1          |
| VEGFA. 5    | 4. 58E-40 | -0. 56715 | 0. 046 | 0. 231 | 6. 84E-36 | monocyte | VEGFA          |
| TGFBI. 8    | 5. 45E-40 | 0. 452612 | 0. 375 | 0. 19  | 8. 15E-36 | monocyte | TGFBI          |
| TRPM2. 8    | 5. 90E-40 | 0. 335807 | 0. 143 | 0. 044 | 8. 81E-36 | monocyte | TRPM2          |
| NPAS3. 8    | 6. 45E-40 | -0. 40103 | 0. 008 | 0. 172 | 9. 64E-36 | monocyte | NPAS3          |
| MAP3K13. 5  | 6. 45E-40 | -0. 33284 | 0. 178 | 0. 413 | 9. 64E-36 | monocyte | MAP3K13        |
| KLHL23. 8   | 6. 64E-40 | -0. 41295 | 0. 009 | 0. 174 | 9. 92E-36 | monocyte | KLHL23         |
| CHCHD2. 6   | 7. 03E-40 | -0. 17655 | 0. 707 | 0. 895 | 1. 05E-35 | monocyte | CHCHD2         |
| HES4. 7     | 9. 01E-40 | -0. 44052 | 0. 027 | 0. 201 | 1. 35E-35 | monocyte | HES4           |
| ERI3. 5     | 1. 02E-39 | -0. 27513 | 0. 154 | 0. 388 | 1. 52E-35 | monocyte | ERI3           |
| ENG. 8      | 1. 18E-39 | 0. 526213 | 0. 313 | 0. 152 | 1. 76E-35 | monocyte | ENG            |
| PLOD2. 6    | 1. 20E-39 | -0. 3983  | 0. 01  | 0. 175 | 1. 80E-35 | monocyte | PLOD2          |
| POU3F3. 7   | 1. 29E-39 | -0. 39533 | 0. 006 | 0. 167 | 1. 93E-35 | monocyte | POU3F3         |
| APBB1. 7    | 1. 32E-39 | -0. 46949 | 0. 029 | 0. 204 | 1. 97E-35 | monocyte | APBB1          |
| LYPD1. 6    | 1. 61E-39 | -0. 44027 | 0. 032 | 0. 21  | 2. 40E-35 | monocyte | LYPD1          |
| ALDH7A1. 3  | 1. 65E-39 | -0. 40516 | 0. 086 | 0. 292 | 2. 46E-35 | monocyte | ALDH7A1        |
| SEPT9. 4    | 1. 66E-39 | -0. 45279 | 0. 151 | 0. 358 | 2. 48E-35 | monocyte | 9-Sep          |
| BMP7. 8     | 2. 13E-39 | -0. 4036  | 0. 014 | 0. 179 | 3. 19E-35 | monocyte | BMP7           |
| DPYSL5. 8   | 2. 15E-39 | -0. 35581 | 0. 011 | 0. 176 | 3. 21E-35 | monocyte | DPYSL5         |
| UBA2. 5     | 2. 77E-39 | -0. 33334 | 0. 147 | 0. 377 | 4. 14E-35 | monocyte | UBA2           |
| OLIG1. 8    | 2. 86E-39 | -0. 6761  | 0. 024 | 0. 194 | 4. 28E-35 | monocyte | OLIG1          |
| RNF180. 7   | 3. 02E-39 | -0. 38467 | 0. 015 | 0. 181 | 4. 52E-35 | monocyte | RNF180         |
| NDRG4. 8    | 3. 29E-39 | -0. 40762 | 0. 01  | 0. 173 | 4. 92E-35 | monocyte | NDRG4          |
| HSD17B10. 3 | 3. 55E-39 | -0. 35164 | 0. 265 | 0. 516 | 5. 30E-35 | monocyte | HSD17B10       |
| CDC42BPA. 3 | 3. 55E-39 | -0. 38591 | 0. 022 | 0. 193 | 5. 31E-35 | monocyte | CDC42BPA       |
| MFF. 3      | 3. 56E-39 | -0. 31017 | 0. 261 | 0. 509 | 5. 32E-35 | monocyte | MFF            |
| HOPX. 7     | 3. 67E-39 | -0. 85381 | 0. 115 | 0. 297 | 5. 48E-35 | monocyte | HOPX           |
| CASP1. 7    | 3. 68E-39 | 0. 560633 | 0. 379 | 0. 212 | 5. 50E-35 | monocyte | CASP1          |
| C7orf55-L   | 4. 00E-39 | -0. 36493 | 0. 136 | 0. 357 | 5. 98E-35 | monocyte | C7orf55-LUC7L2 |
| RP11-14N7   | 4. 10E-39 | -0. 4145  | 0. 039 | 0. 219 | 6. 13E-35 | monocyte | RP11-14N7. 2   |
| TTC19. 6    | 4. 27E-39 | -0. 31222 | 0. 146 | 0. 374 | 6. 39E-35 | monocyte | TTC19          |
| RGS18. 8    | 4. 31E-39 | 0. 435626 | 0. 142 | 0. 044 | 6. 44E-35 | monocyte | RGS18          |
| SEPT11. 7   | 4. 41E-39 | -0. 36398 | 0. 11  | 0. 32  | 6. 59E-35 | monocyte | 11-Sep         |
| PDCD5. 6    | 4. 72E-39 | -0. 33514 | 0. 31  | 0. 56  | 7. 05E-35 | monocyte | PDCD5          |
| UBE2H. 7    | 4. 90E-39 | -0. 36807 | 0. 076 | 0. 275 | 7. 32E-35 | monocyte | UBE2H          |
| CKS2. 8     | 4. 96E-39 | -0. 26007 | 0. 164 | 0. 384 | 7. 41E-35 | monocyte | CKS2           |
| FSD1. 7     | 5. 32E-39 | -0. 36734 | 0. 007 | 0. 168 | 7. 94E-35 | monocyte | FSD1           |
| OLFM2. 6    | 5. 45E-39 | -0. 47012 | 0. 03  | 0. 206 | 8. 14E-35 | monocyte | OLFM2          |
| JUN. 5      | 5. 96E-39 | -0. 3667  | 0. 47  | 0. 69  | 8. 90E-35 | monocyte | JUN            |
| MOB4. 5     | 5. 98E-39 | -0. 25635 | 0. 156 | 0. 391 | 8. 94E-35 | monocyte | MOB4           |
| SHISA4. 6   | 7. 04E-39 | -0. 43014 | 0. 069 | 0. 262 | 1. 05E-34 | monocyte | SHISA4         |
| CHTOP. 5    | 7. 39E-39 | -0. 36598 | 0. 156 | 0. 385 | 1. 11E-34 | monocyte | CHTOP          |
| C8orf33. 4  | 8. 53E-39 | -0. 33289 | 0. 119 | 0. 336 | 1. 27E-34 | monocyte | C8orf33        |

|            |          |          |       |       |          |          |              |
|------------|----------|----------|-------|-------|----------|----------|--------------|
| ARL16.5    | 8.97E-39 | -0.3334  | 0.118 | 0.337 | 1.34E-34 | monocyte | ARL16        |
| PHAX.5     | 9.16E-39 | -0.36595 | 0.109 | 0.323 | 1.37E-34 | monocyte | PHAX         |
| GPR160.3   | 9.22E-39 | 0.198981 | 0.088 | 0.019 | 1.38E-34 | monocyte | GPR160       |
| DCAF13.5   | 9.29E-39 | -0.35157 | 0.119 | 0.335 | 1.39E-34 | monocyte | DCAF13       |
| CDC34.7    | 9.71E-39 | -0.39598 | 0.062 | 0.25  | 1.45E-34 | monocyte | CDC34        |
| NNAT.8     | 1.03E-38 | -0.84247 | 0.038 | 0.21  | 1.54E-34 | monocyte | NNAT         |
| CMSS1.5    | 1.18E-38 | -0.29186 | 0.096 | 0.307 | 1.77E-34 | monocyte | CMSS1        |
| TXN.6      | 1.20E-38 | -0.27332 | 0.436 | 0.687 | 1.79E-34 | monocyte | TXN          |
| FLNA.6     | 1.36E-38 | -0.46027 | 0.077 | 0.266 | 2.03E-34 | monocyte | FLNA         |
| ASNS.8     | 1.57E-38 | -0.44543 | 0.022 | 0.191 | 2.35E-34 | monocyte | ASNS         |
| FAM49B.7   | 1.63E-38 | 0.518998 | 0.597 | 0.498 | 2.43E-34 | monocyte | FAM49B       |
| OLFM1.7    | 1.65E-38 | -0.43159 | 0.006 | 0.163 | 2.47E-34 | monocyte | OLFM1        |
| CSTF3.5    | 1.71E-38 | -0.33485 | 0.079 | 0.284 | 2.55E-34 | monocyte | CSTF3        |
| NELFCD.6   | 1.71E-38 | -0.26545 | 0.135 | 0.355 | 2.56E-34 | monocyte | NELFCD       |
| PRMT1.4    | 1.91E-38 | -0.26564 | 0.311 | 0.576 | 2.86E-34 | monocyte | PRMT1        |
| LDLRAD3.6  | 1.92E-38 | -0.3643  | 0.021 | 0.189 | 2.88E-34 | monocyte | LDLRAD3      |
| PTPRA.6    | 2.01E-38 | -0.3982  | 0.156 | 0.372 | 3.00E-34 | monocyte | PTPRA        |
| PPFIBP1.6  | 2.23E-38 | -0.36549 | 0.009 | 0.169 | 3.33E-34 | monocyte | PPFIBP1      |
| ENHO.7     | 2.27E-38 | -0.36587 | 0.006 | 0.163 | 3.39E-34 | monocyte | ENHO         |
| ZFHX4.7    | 2.36E-38 | -0.36139 | 0.007 | 0.165 | 3.53E-34 | monocyte | ZFHX4        |
| AK1.5      | 2.50E-38 | -0.31645 | 0.135 | 0.353 | 3.74E-34 | monocyte | AK1          |
| RP3-525N1  | 3.30E-38 | -0.46518 | 0.006 | 0.163 | 4.93E-34 | monocyte | RP3-525N10.2 |
| TMEM132A.3 | 3.66E-38 | -0.33122 | 0.003 | 0.157 | 5.47E-34 | monocyte | TMEM132A     |
| DRAXIN.7   | 4.06E-38 | -0.36481 | 0.008 | 0.165 | 6.06E-34 | monocyte | DRAXIN       |
| TPGS2.4    | 4.12E-38 | -0.41615 | 0.143 | 0.356 | 6.15E-34 | monocyte | TPGS2        |
| PSD3.7     | 4.16E-38 | -0.33831 | 0.033 | 0.209 | 6.22E-34 | monocyte | PSD3         |
| STMN2.8    | 4.34E-38 | -0.89165 | 0.033 | 0.2   | 6.48E-34 | monocyte | STMN2        |
| CRYBB1.6   | 4.89E-38 | 0.437937 | 0.121 | 0.034 | 7.30E-34 | monocyte | CRYBB1       |
| MYO10.7    | 5.01E-38 | -0.41298 | 0.034 | 0.208 | 7.49E-34 | monocyte | MYO10        |
| TLE1.6     | 5.12E-38 | -0.33322 | 0.018 | 0.183 | 7.65E-34 | monocyte | TLE1         |
| TSC22D4.8  | 5.12E-38 | -0.50552 | 0.268 | 0.488 | 7.65E-34 | monocyte | TSC22D4      |
| HPSE.7     | 5.22E-38 | 0.451008 | 0.151 | 0.05  | 7.79E-34 | monocyte | HPSE         |
| NAIP.8     | 5.58E-38 | 0.473101 | 0.23  | 0.098 | 8.35E-34 | monocyte | NAIP         |
| ILF3-AS1.6 | 3.8E-38  | -0.34539 | 0.112 | 0.327 | 9.53E-34 | monocyte | ILF3-AS1     |
| PEBP1.8    | 6.81E-38 | -0.1585  | 0.614 | 0.821 | 1.02E-33 | monocyte | PEBP1        |
| NOC2L.6    | 7.15E-38 | -0.35227 | 0.116 | 0.33  | 1.07E-33 | monocyte | NOC2L        |
| CARD9.8    | 7.71E-38 | 0.403295 | 0.169 | 0.06  | 1.15E-33 | monocyte | CARD9        |
| RAB42.5    | 7.73E-38 | 0.289507 | 0.135 | 0.042 | 1.15E-33 | monocyte | RAB42        |
| ARHGAP25.7 | 7.94E-38 | 0.388117 | 0.164 | 0.057 | 1.19E-33 | monocyte | ARHGAP25     |
| SMARCD3.7  | 8.20E-38 | -0.39471 | 0.062 | 0.247 | 1.23E-33 | monocyte | SMARCD3      |
| TRIM24.8   | 8.49E-38 | -0.3714  | 0.033 | 0.206 | 1.27E-33 | monocyte | TRIM24       |
| SPTAN1.6   | 8.51E-38 | -0.38032 | 0.08  | 0.276 | 1.27E-33 | monocyte | SPTAN1       |
| DNAJA1.3   | 8.81E-38 | -0.20623 | 0.396 | 0.649 | 1.32E-33 | monocyte | DNAJA1       |
| MEF2A.8    | 9.11E-38 | 0.576381 | 0.355 | 0.203 | 1.36E-33 | monocyte | MEF2A        |
| TGFBR1.8   | 9.15E-38 | 0.526784 | 0.294 | 0.15  | 1.37E-33 | monocyte | TGFBR1       |
| HSD17B11.1 | 1.01E-37 | 0.620748 | 0.524 | 0.364 | 1.50E-33 | monocyte | HSD17B11     |
| INPP5D.8   | 1.12E-37 | 0.456428 | 0.195 | 0.075 | 1.67E-33 | monocyte | INPP5D       |
| HEPACAM.7  | 1.19E-37 | -0.50353 | 0.024 | 0.191 | 1.78E-33 | monocyte | HEPACAM      |
| KRT10.5    | 1.20E-37 | -0.30582 | 0.334 | 0.578 | 1.80E-33 | monocyte | KRT10        |
| CAPN2.4    | 1.23E-37 | -0.39766 | 0.077 | 0.268 | 1.83E-33 | monocyte | CAPN2        |
| C11orf49.1 | 1.25E-37 | -0.30168 | 0.062 | 0.252 | 1.87E-33 | monocyte | C11orf49     |

|            |          |          |       |       |          |          |              |
|------------|----------|----------|-------|-------|----------|----------|--------------|
| NBEAL1.5   | 1.40E-37 | 0.546889 | 0.735 | 0.659 | 2.09E-33 | monocyte | NBEAL1       |
| WDR60.5    | 1.41E-37 | -0.33945 | 0.058 | 0.247 | 2.11E-33 | monocyte | WDR60        |
| GADD45A.8  | 1.41E-37 | -0.48759 | 0.097 | 0.295 | 2.11E-33 | monocyte | GADD45A      |
| TIMP1.6    | 1.67E-37 | -0.4614  | 0.427 | 0.638 | 2.50E-33 | monocyte | TIMP1        |
| JAM3.4     | 1.73E-37 | -0.3866  | 0.007 | 0.162 | 2.59E-33 | monocyte | JAM3         |
| PXMP2.6    | 1.84E-37 | -0.33581 | 0.054 | 0.238 | 2.75E-33 | monocyte | PXMP2        |
| SKA2.6     | 1.90E-37 | -0.38709 | 0.118 | 0.323 | 2.83E-33 | monocyte | SKA2         |
| DEF6.8     | 1.98E-37 | 0.401053 | 0.205 | 0.081 | 2.96E-33 | monocyte | DEF6         |
| MYH10.6    | 2.05E-37 | -0.37881 | 0.009 | 0.166 | 3.06E-33 | monocyte | MYH10        |
| WDR45B.4   | 2.14E-37 | -0.3049  | 0.195 | 0.421 | 3.19E-33 | monocyte | WDR45B       |
| DPM1.5     | 2.17E-37 | -0.34013 | 0.168 | 0.397 | 3.25E-33 | monocyte | DPM1         |
| ATP6V1G2.2 | 2.18E-37 | -0.41784 | 0.007 | 0.162 | 3.26E-33 | monocyte | ATP6V1G2     |
| SFXN1.5    | 2.37E-37 | -0.39769 | 0.051 | 0.232 | 3.55E-33 | monocyte | SFXN1        |
| CSF2RB.6   | 2.72E-37 | 0.196122 | 0.086 | 0.019 | 4.07E-33 | monocyte | CSF2RB       |
| GPSM2.6    | 2.88E-37 | -0.4032  | 0.024 | 0.19  | 4.30E-33 | monocyte | GPSM2        |
| PPP1CC.5   | 2.88E-37 | -0.32315 | 0.225 | 0.464 | 4.31E-33 | monocyte | PPP1CC       |
| GAPT.8     | 3.23E-37 | 0.431154 | 0.153 | 0.052 | 4.83E-33 | monocyte | GAPT         |
| HNRNPR.3   | 3.50E-37 | -0.32638 | 0.303 | 0.539 | 5.22E-33 | monocyte | HNRNPR       |
| C3orf14.5  | 3.68E-37 | -0.39115 | 0.089 | 0.28  | 5.49E-33 | monocyte | C3orf14      |
| C2.6       | 3.93E-37 | 0.618885 | 0.237 | 0.104 | 5.87E-33 | monocyte | C2           |
| BZW1.4     | 4.09E-37 | -0.20094 | 0.309 | 0.558 | 6.11E-33 | monocyte | BZW1         |
| CLEC2B.8   | 4.09E-37 | 0.488944 | 0.366 | 0.19  | 6.12E-33 | monocyte | CLEC2B       |
| THSD7A.7   | 4.18E-37 | -0.5349  | 0.004 | 0.155 | 6.25E-33 | monocyte | THSD7A       |
| LHFPL2.7   | 4.26E-37 | 0.535088 | 0.294 | 0.149 | 6.37E-33 | monocyte | LHFPL2       |
| CYTH2.6    | 4.41E-37 | -0.29784 | 0.142 | 0.359 | 6.60E-33 | monocyte | CYTH2        |
| RFX4.6     | 4.70E-37 | -0.43247 | 0.008 | 0.163 | 7.02E-33 | monocyte | RFX4         |
| ILF3.5     | 4.84E-37 | -0.29669 | 0.205 | 0.43  | 7.24E-33 | monocyte | ILF3         |
| RHEB.2     | 5.17E-37 | -0.27902 | 0.408 | 0.658 | 7.73E-33 | monocyte | RHEB         |
| SGCE.5     | 5.24E-37 | -0.60356 | 0.006 | 0.159 | 7.83E-33 | monocyte | SGCE         |
| PAK3.8     | 5.56E-37 | -0.48386 | 0.005 | 0.155 | 8.31E-33 | monocyte | PAK3         |
| ARHGAP18.5 | 5.96E-37 | 0.507548 | 0.318 | 0.159 | 8.90E-33 | monocyte | ARHGAP18     |
| TFG.3      | 6.21E-37 | -0.36274 | 0.205 | 0.426 | 9.28E-33 | monocyte | TFG          |
| FPR3.8     | 6.39E-37 | 0.360794 | 0.146 | 0.048 | 9.54E-33 | monocyte | FPR3         |
| GPRIN3.8   | 7.38E-37 | 0.313215 | 0.151 | 0.05  | 1.10E-32 | monocyte | GPRIN3       |
| RP11-345F  | 7.81E-37 | -0.3382  | 0.017 | 0.177 | 1.17E-32 | monocyte | RP11-345P4.9 |
| RSPRY1.6   | 7.95E-37 | -0.36036 | 0.073 | 0.264 | 1.19E-32 | monocyte | RSPRY1       |
| LRMP.6     | 9.02E-37 | 0.332531 | 0.126 | 0.037 | 1.35E-32 | monocyte | LRMP         |
| GPC2.8     | 9.26E-37 | -0.50861 | 0.021 | 0.181 | 1.38E-32 | monocyte | GPC2         |
| ARHGAP9.8  | 9.62E-37 | 0.355185 | 0.197 | 0.076 | 1.44E-32 | monocyte | ARHGAP9      |
| CCT6A.4    | 9.84E-37 | -0.21817 | 0.348 | 0.595 | 1.47E-32 | monocyte | CCT6A        |
| CLDND1.5   | 1.12E-36 | -0.37968 | 0.182 | 0.412 | 1.68E-32 | monocyte | CLDND1       |
| LRRC8A.7   | 1.23E-36 | -0.33404 | 0.02  | 0.181 | 1.84E-32 | monocyte | LRRC8A       |
| MTX2.5     | 1.27E-36 | -0.33603 | 0.133 | 0.338 | 1.90E-32 | monocyte | MTX2         |
| CKAP4.6    | 1.27E-36 | -0.32002 | 0.047 | 0.224 | 1.90E-32 | monocyte | CKAP4        |
| FOXG1.7    | 1.30E-36 | -0.32371 | 0.011 | 0.166 | 1.94E-32 | monocyte | FOXG1        |
| ARID5B.6   | 1.30E-36 | -0.31851 | 0.16  | 0.373 | 1.94E-32 | monocyte | ARID5B       |
| PROX1.7    | 1.57E-36 | -0.36341 | 0.018 | 0.177 | 2.34E-32 | monocyte | PROX1        |
| GCSH.7     | 1.65E-36 | -0.41989 | 0.16  | 0.364 | 2.46E-32 | monocyte | GCSH         |
| MAGED2.8   | 1.69E-36 | -0.20891 | 0.285 | 0.529 | 2.52E-32 | monocyte | MAGED2       |
| SQRDL.8    | 2.09E-36 | 0.459144 | 0.301 | 0.148 | 3.12E-32 | monocyte | SQRDL        |
| RNF24.5    | 2.13E-36 | -0.40894 | 0.077 | 0.263 | 3.19E-32 | monocyte | RNF24        |

|             |           |           |        |        |           |          |                |
|-------------|-----------|-----------|--------|--------|-----------|----------|----------------|
| DPF1. 7     | 2. 25E-36 | -0. 40423 | 0. 004 | 0. 152 | 3. 36E-32 | monocyte | DPF1           |
| ITGAM. 8    | 2. 33E-36 | 0. 421638 | 0. 178 | 0. 066 | 3. 48E-32 | monocyte | ITGAM          |
| FMNL1. 8    | 2. 56E-36 | 0. 434869 | 0. 253 | 0. 113 | 3. 83E-32 | monocyte | FMNL1          |
| DMWD. 6     | 2. 63E-36 | -0. 30317 | 0. 005 | 0. 153 | 3. 93E-32 | monocyte | DMWD           |
| JAKMIP2. 6  | 2. 65E-36 | -0. 34595 | 0. 01  | 0. 163 | 3. 96E-32 | monocyte | JAKMIP2        |
| SLC46A3. 5  | 2. 76E-36 | 0. 373199 | 0. 147 | 0. 05  | 4. 12E-32 | monocyte | SLC46A3        |
| S100A10. 8  | 2. 82E-36 | -0. 45781 | 0. 349 | 0. 562 | 4. 22E-32 | monocyte | S100A10        |
| HSPBP1. 4   | 2. 84E-36 | -0. 35113 | 0. 104 | 0. 304 | 4. 25E-32 | monocyte | HSPBP1         |
| RAC3. 7     | 3. 08E-36 | -0. 3542  | 0. 031 | 0. 196 | 4. 61E-32 | monocyte | RAC3           |
| NOP56. 3    | 3. 18E-36 | -0. 34342 | 0. 21  | 0. 432 | 4. 74E-32 | monocyte | NOP56          |
| IFT57. 7    | 3. 18E-36 | -0. 30286 | 0. 073 | 0. 263 | 4. 76E-32 | monocyte | IFT57          |
| COX20. 3    | 3. 21E-36 | -0. 34235 | 0. 239 | 0. 479 | 4. 80E-32 | monocyte | COX20          |
| PDAP1. 5    | 3. 28E-36 | -0. 24074 | 0. 315 | 0. 555 | 4. 90E-32 | monocyte | PDAP1          |
| SNAP25. 7   | 3. 33E-36 | -0. 54393 | 0. 006 | 0. 155 | 4. 98E-32 | monocyte | SNAP25         |
| RP11-620J   | 3. 46E-36 | -0. 4927  | 0. 094 | 0. 285 | 5. 17E-32 | monocyte | RP11-620J15. 3 |
| PTGS1. 8    | 3. 66E-36 | 0. 549292 | 0. 288 | 0. 145 | 5. 47E-32 | monocyte | PTGS1          |
| PLEK. 8     | 3. 82E-36 | 0. 624956 | 0. 329 | 0. 161 | 5. 71E-32 | monocyte | PLEK           |
| C8orf46. 6  | 3. 84E-36 | -0. 45105 | 0. 004 | 0. 151 | 5. 73E-32 | monocyte | C8orf46        |
| DTNA. 7     | 4. 07E-36 | -0. 47804 | 0. 078 | 0. 268 | 6. 09E-32 | monocyte | DTNA           |
| ZNF608. 6   | 4. 13E-36 | -0. 33295 | 0. 015 | 0. 17  | 6. 17E-32 | monocyte | ZNF608         |
| ELAVL4. 7   | 4. 19E-36 | -0. 64397 | 0. 031 | 0. 192 | 6. 26E-32 | monocyte | ELAVL4         |
| BCL7A. 8    | 4. 22E-36 | -0. 39534 | 0. 01  | 0. 162 | 6. 31E-32 | monocyte | BCL7A          |
| NLGN1. 7    | 4. 24E-36 | -0. 32669 | 0. 003 | 0. 15  | 6. 34E-32 | monocyte | NLGN1          |
| RAB11B. 6   | 4. 28E-36 | -0. 2546  | 0. 277 | 0. 524 | 6. 39E-32 | monocyte | RAB11B         |
| RP11-108M   | 4. 51E-36 | 0. 508014 | 0. 215 | 0. 092 | 6. 74E-32 | monocyte | RP11-108M9. 4  |
| DRAM2. 7    | 4. 60E-36 | 0. 612935 | 0. 473 | 0. 324 | 6. 87E-32 | monocyte | DRAM2          |
| DAG1. 6     | 4. 88E-36 | -0. 31469 | 0. 025 | 0. 186 | 7. 29E-32 | monocyte | DAG1           |
| LCP1. 7     | 5. 08E-36 | 0. 457459 | 0. 282 | 0. 13  | 7. 59E-32 | monocyte | LCP1           |
| SKP1. 6     | 5. 42E-36 | -0. 1555  | 0. 667 | 0. 882 | 8. 09E-32 | monocyte | SKP1           |
| S100A6. 7   | 5. 53E-36 | -0. 47441 | 0. 445 | 0. 661 | 8. 26E-32 | monocyte | S100A6         |
| PRKRA. 4    | 5. 66E-36 | -0. 26593 | 0. 162 | 0. 379 | 8. 45E-32 | monocyte | PRKRA          |
| AC109826. 5 | 5. 70E-36 | 0. 370579 | 0. 111 | 0. 031 | 8. 51E-32 | monocyte | AC109826. 1    |
| DPP6. 6     | 5. 76E-36 | -0. 38226 | 0. 018 | 0. 174 | 8. 61E-32 | monocyte | DPP6           |
| EMP1. 4     | 5. 92E-36 | -0. 49005 | 0. 029 | 0. 192 | 8. 85E-32 | monocyte | EMP1           |
| APC2. 7     | 5. 93E-36 | -0. 38197 | 0. 009 | 0. 16  | 8. 86E-32 | monocyte | APC2           |
| POLR2H. 5   | 6. 12E-36 | -0. 27847 | 0. 126 | 0. 34  | 9. 15E-32 | monocyte | POLR2H         |
| TEAD1. 5    | 6. 17E-36 | -0. 30622 | 0. 007 | 0. 157 | 9. 21E-32 | monocyte | TEAD1          |
| TRAF3IP3. 7 | 5. 58E-36 | 0. 34459  | 0. 139 | 0. 045 | 1. 13E-31 | monocyte | TRAF3IP3       |
| CNIH3. 5    | 8. 81E-36 | -0. 34635 | 0. 023 | 0. 181 | 1. 32E-31 | monocyte | CNIH3          |
| NKX2-2. 7   | 8. 93E-36 | -0. 4677  | 0. 009 | 0. 16  | 1. 33E-31 | monocyte | NKX2-2         |
| DCLK1. 6    | 9. 09E-36 | -0. 3985  | 0. 013 | 0. 164 | 1. 36E-31 | monocyte | DCLK1          |
| PDRG1. 6    | 9. 29E-36 | -0. 37822 | 0. 091 | 0. 284 | 1. 39E-31 | monocyte | PDRG1          |
| BRD2. 4     | 1. 01E-35 | -0. 23955 | 0. 236 | 0. 473 | 1. 51E-31 | monocyte | BRD2           |
| DHRS3. 6    | 1. 02E-35 | 0. 518264 | 0. 309 | 0. 159 | 1. 52E-31 | monocyte | DHRS3          |
| HSPD1. 7    | 1. 05E-35 | -0. 21195 | 0. 384 | 0. 635 | 1. 57E-31 | monocyte | HSPD1          |
| PCDHB16. 6  | 1. 27E-35 | -0. 34326 | 0. 005 | 0. 152 | 1. 89E-31 | monocyte | PCDHB16        |
| HSPE1. 7    | 1. 31E-35 | -0. 2092  | 0. 52  | 0. 748 | 1. 95E-31 | monocyte | HSPE1          |
| ARL4D. 8    | 1. 36E-35 | -0. 37686 | 0. 022 | 0. 182 | 2. 03E-31 | monocyte | ARL4D          |
| FGFR1. 4    | 1. 45E-35 | -0. 31642 | 0. 023 | 0. 183 | 2. 17E-31 | monocyte | FGFR1          |
| GADD45GIP1  | 1. 50E-35 | -0. 32367 | 0. 362 | 0. 581 | 2. 25E-31 | monocyte | GADD45GIP1     |
| TNFRSF1B. 1 | 1. 52E-35 | 0. 447657 | 0. 34  | 0. 175 | 2. 27E-31 | monocyte | TNFRSF1B       |

|             |           |           |        |        |           |          |          |
|-------------|-----------|-----------|--------|--------|-----------|----------|----------|
| CHD6. 7     | 1. 53E-35 | -0. 28878 | 0. 071 | 0. 26  | 2. 29E-31 | monocyte | CHD6     |
| PIGX. 6     | 1. 53E-35 | -0. 34671 | 0. 08  | 0. 268 | 2. 29E-31 | monocyte | PIGX     |
| CNIH2. 8    | 1. 62E-35 | -0. 32434 | 0      | 0. 141 | 2. 42E-31 | monocyte | CNIH2    |
| PLCG2. 5    | 1. 77E-35 | 0. 400068 | 0. 129 | 0. 04  | 2. 64E-31 | monocyte | PLCG2    |
| C19orf38. 1 | 1. 77E-35 | 0. 362358 | 0. 13  | 0. 04  | 2. 64E-31 | monocyte | C19orf38 |
| KHDRBS3. 7  | 2. 19E-35 | -0. 33338 | 0. 051 | 0. 229 | 3. 27E-31 | monocyte | KHDRBS3  |
| RND2. 6     | 2. 27E-35 | -0. 32868 | 0. 019 | 0. 176 | 3. 39E-31 | monocyte | RND2     |
| TJP1. 6     | 2. 33E-35 | -0. 29815 | 0. 03  | 0. 194 | 3. 48E-31 | monocyte | TJP1     |
| SYNE2. 8    | 2. 36E-35 | -0. 39534 | 0. 026 | 0. 187 | 3. 53E-31 | monocyte | SYNE2    |
| CDKN2D. 8   | 2. 68E-35 | -0. 41891 | 0. 019 | 0. 172 | 4. 01E-31 | monocyte | CDKN2D   |
| ANK2. 8     | 3. 15E-35 | -0. 26923 | 0. 021 | 0. 177 | 4. 71E-31 | monocyte | ANK2     |
| SHFM1. 4    | 3. 23E-35 | -0. 28207 | 0. 498 | 0. 743 | 4. 82E-31 | monocyte | SHFM1    |
| BICD1. 6    | 3. 25E-35 | -0. 33356 | 0. 046 | 0. 219 | 4. 86E-31 | monocyte | BICD1    |
| NDFIP2. 5   | 3. 28E-35 | -0. 31196 | 0. 039 | 0. 206 | 4. 91E-31 | monocyte | NDFIP2   |
| KIFAP3. 7   | 3. 87E-35 | -0. 3757  | 0. 046 | 0. 217 | 5. 78E-31 | monocyte | KIFAP3   |
| EEF1B2. 7   | 4. 11E-35 | 0. 406169 | 0. 789 | 0. 775 | 6. 14E-31 | monocyte | EEF1B2   |
| ZNF711. 7   | 4. 68E-35 | -0. 34853 | 0. 007 | 0. 154 | 6. 99E-31 | monocyte | ZNF711   |
| HDAC2. 7    | 4. 68E-35 | -0. 24104 | 0. 241 | 0. 466 | 6. 99E-31 | monocyte | HDAC2    |
| TMEM54. 5   | 4. 70E-35 | -0. 31453 | 0. 041 | 0. 209 | 7. 03E-31 | monocyte | TMEM54   |
| FAM84A. 7   | 4. 74E-35 | -0. 35142 | 0. 009 | 0. 156 | 7. 08E-31 | monocyte | FAM84A   |
| DENND2D. 4  | 5. 23E-35 | 0. 238423 | 0. 124 | 0. 038 | 7. 81E-31 | monocyte | DENND2D  |
| BBOX1. 7    | 5. 27E-35 | -0. 48316 | 0. 005 | 0. 149 | 7. 87E-31 | monocyte | BBOX1    |
| PPP2CB. 8   | 5. 76E-35 | -0. 37417 | 0. 12  | 0. 312 | 8. 61E-31 | monocyte | PPP2CB   |
| CALU. 6     | 5. 89E-35 | -0. 33674 | 0. 2   | 0. 421 | 8. 80E-31 | monocyte | CALU     |
| CETN2. 6    | 5. 97E-35 | -0. 39432 | 0. 133 | 0. 339 | 8. 92E-31 | monocyte | CETN2    |
| TCP1. 4     | 7. 07E-35 | -0. 24284 | 0. 301 | 0. 543 | 1. 06E-30 | monocyte | TCP1     |
| ZSCAN18. 6  | 7. 30E-35 | -0. 31508 | 0. 065 | 0. 246 | 1. 09E-30 | monocyte | ZSCAN18  |
| RTN3. 6     | 7. 30E-35 | -0. 20879 | 0. 432 | 0. 674 | 1. 09E-30 | monocyte | RTN3     |
| EFEMP1. 7   | 7. 44E-35 | -0. 66599 | 0. 061 | 0. 235 | 1. 11E-30 | monocyte | EFEMP1   |
| CDKN2C. 5   | 8. 39E-35 | -0. 43423 | 0. 104 | 0. 298 | 1. 25E-30 | monocyte | CDKN2C   |
| EPB41L2. 6  | 8. 47E-35 | 0. 616404 | 0. 441 | 0. 299 | 1. 27E-30 | monocyte | EPB41L2  |
| DOK5. 7     | 8. 93E-35 | -0. 37479 | 0. 033 | 0. 196 | 1. 33E-30 | monocyte | DOK5     |
| ITM2B. 5    | 9. 08E-35 | 0. 282401 | 0. 789 | 0. 8   | 1. 36E-30 | monocyte | ITM2B    |
| PFDN2. 4    | 9. 12E-35 | -0. 22937 | 0. 376 | 0. 631 | 1. 36E-30 | monocyte | PFDN2    |
| PNPLA8. 5   | 9. 34E-35 | -0. 28715 | 0. 151 | 0. 364 | 1. 40E-30 | monocyte | PNPLA8   |
| LRRC4B. 8   | 9. 85E-35 | -0. 30067 | 0. 003 | 0. 145 | 1. 47E-30 | monocyte | LRRC4B   |
| OSCAR. 8    | 9. 90E-35 | 0. 332308 | 0. 172 | 0. 064 | 1. 48E-30 | monocyte | OSCAR    |
| ZC2HC1A. 7  | 1. 01E-34 | -0. 39002 | 0. 053 | 0. 225 | 1. 50E-30 | monocyte | ZC2HC1A  |
| PSMC3. 4    | 1. 02E-34 | -0. 23984 | 0. 305 | 0. 55  | 1. 52E-30 | monocyte | PSMC3    |
| ZKSCAN1. 7  | 1. 03E-34 | -0. 31218 | 0. 13  | 0. 333 | 1. 54E-30 | monocyte | ZKSCAN1  |
| Clorf122. 1 | 1. 10E-34 | -0. 32374 | 0. 283 | 0. 507 | 1. 64E-30 | monocyte | Clorf122 |
| EIF4E. 5    | 1. 12E-34 | -0. 20726 | 0. 263 | 0. 508 | 1. 68E-30 | monocyte | EIF4E    |
| NAT14. 4    | 1. 14E-34 | -0. 30668 | 0. 031 | 0. 193 | 1. 70E-30 | monocyte | NAT14    |
| MT1E. 7     | 1. 17E-34 | -0. 24441 | 0. 188 | 0. 397 | 1. 75E-30 | monocyte | MT1E     |
| FBXO17. 8   | 1. 36E-34 | -0. 3169  | 0. 009 | 0. 156 | 2. 04E-30 | monocyte | FBXO17   |
| TSPAN6. 6   | 1. 44E-34 | -0. 37127 | 0. 013 | 0. 162 | 2. 16E-30 | monocyte | TSPAN6   |
| SOX6. 7     | 1. 62E-34 | -0. 3865  | 0. 008 | 0. 153 | 2. 41E-30 | monocyte | SOX6     |
| ERV3-1. 7   | 1. 68E-34 | -0. 32239 | 0. 086 | 0. 276 | 2. 51E-30 | monocyte | ERV3-1   |
| Clorf52. 8  | 1. 70E-34 | -0. 274   | 0. 119 | 0. 323 | 2. 54E-30 | monocyte | Clorf52  |
| CHL1. 6     | 1. 71E-34 | -0. 40748 | 0. 017 | 0. 165 | 2. 55E-30 | monocyte | CHL1     |
| HSD17B14. 1 | 1. 78E-34 | 0. 405828 | 0. 201 | 0. 082 | 2. 67E-30 | monocyte | HSD17B14 |

|            |          |          |       |       |          |          |              |
|------------|----------|----------|-------|-------|----------|----------|--------------|
| C7orf73.5  | 1.86E-34 | -0.33188 | 0.336 | 0.574 | 2.78E-30 | monocyte | C7orf73      |
| RALA.5     | 1.87E-34 | -0.32499 | 0.164 | 0.377 | 2.79E-30 | monocyte | RALA         |
| BATF.5     | 2.08E-34 | 0.268158 | 0.112 | 0.032 | 3.11E-30 | monocyte | BATF         |
| VPS37B.6   | 2.29E-34 | -0.30488 | 0.084 | 0.27  | 3.42E-30 | monocyte | VPS37B       |
| AKAP8L.6   | 2.32E-34 | -0.27797 | 0.078 | 0.264 | 3.47E-30 | monocyte | AKAP8L       |
| DDX49.5    | 2.42E-34 | -0.32961 | 0.096 | 0.29  | 3.62E-30 | monocyte | DDX49        |
| MED19.4    | 2.58E-34 | -0.33867 | 0.102 | 0.297 | 3.86E-30 | monocyte | MED19        |
| MARCH6.7   | 2.71E-34 | -0.28608 | 0.158 | 0.375 | 4.05E-30 | monocyte | 6-Mar        |
| IL4I1.6    | 2.81E-34 | 0.312604 | 0.159 | 0.057 | 4.21E-30 | monocyte | IL4I1        |
| SOD1.4     | 2.86E-34 | -0.27859 | 0.541 | 0.776 | 4.28E-30 | monocyte | SOD1         |
| AASDHPPT.2 | 2.89E-34 | -0.28374 | 0.109 | 0.304 | 4.31E-30 | monocyte | AASDHPPT     |
| BLVRA.6    | 2.98E-34 | -0.42105 | 0.151 | 0.356 | 4.46E-30 | monocyte | BLVRA        |
| DYNC1H1.6  | 3.21E-34 | -0.27087 | 0.143 | 0.355 | 4.80E-30 | monocyte | DYNC1H1      |
| RNPS1.3    | 3.26E-34 | -0.20135 | 0.307 | 0.554 | 4.87E-30 | monocyte | RNPS1        |
| TMEM205.7  | 3.42E-34 | -0.36119 | 0.294 | 0.514 | 5.11E-30 | monocyte | TMEM205      |
| TNFSF12.8  | 3.64E-34 | 0.573822 | 0.312 | 0.174 | 5.44E-30 | monocyte | TNFSF12      |
| DAAM1.6    | 3.86E-34 | -0.35638 | 0.074 | 0.256 | 5.77E-30 | monocyte | DAAM1        |
| WEE1.5     | 3.86E-34 | -0.34029 | 0.015 | 0.162 | 5.77E-30 | monocyte | WEE1         |
| ECSIT.4    | 3.87E-34 | -0.30499 | 0.091 | 0.283 | 5.78E-30 | monocyte | ECSIT        |
| C10orf11.4 | 4.13E-34 | 0.397324 | 0.214 | 0.091 | 6.16E-30 | monocyte | C10orf11     |
| P4HTM.6    | 4.30E-34 | -0.30652 | 0.091 | 0.276 | 6.43E-30 | monocyte | P4HTM        |
| CTA-384D8  | 4.63E-34 | 0.170643 | 0.081 | 0.019 | 6.92E-30 | monocyte | CTA-384D8.34 |
| TMX4.5     | 4.68E-34 | -0.30517 | 0.076 | 0.261 | 7.00E-30 | monocyte | TMX4         |
| TERF1.4    | 4.74E-34 | -0.28417 | 0.133 | 0.34  | 7.08E-30 | monocyte | TERF1        |
| BRD3.7     | 4.75E-34 | -0.29051 | 0.096 | 0.29  | 7.09E-30 | monocyte | BRD3         |
| SGK1.8     | 5.16E-34 | 0.593838 | 0.578 | 0.424 | 7.72E-30 | monocyte | SGK1         |
| PPIC.6     | 5.56E-34 | -0.44581 | 0.038 | 0.196 | 8.31E-30 | monocyte | PPIC         |
| AHCYL1.7   | 5.71E-34 | -0.39949 | 0.142 | 0.344 | 8.53E-30 | monocyte | AHCYL1       |
| SUGP2.6    | 6.01E-34 | -0.31017 | 0.077 | 0.261 | 8.98E-30 | monocyte | SUGP2        |
| SCARA3.7   | 6.03E-34 | -0.32039 | 0.007 | 0.149 | 9.02E-30 | monocyte | SCARA3       |
| BAZ1B.7    | 6.52E-34 | -0.33049 | 0.119 | 0.314 | 9.74E-30 | monocyte | BAZ1B        |
| VWA1.8     | 6.67E-34 | -0.35259 | 0.011 | 0.156 | 9.97E-30 | monocyte | VWA1         |
| AKR1B1.5   | 7.59E-34 | 0.492919 | 0.661 | 0.622 | 1.13E-29 | monocyte | AKR1B1       |
| CERS1.6    | 8.17E-34 | -0.31655 | 0.002 | 0.139 | 1.22E-29 | monocyte | CERS1        |
| SAFB2.4    | 8.40E-34 | -0.23308 | 0.136 | 0.349 | 1.26E-29 | monocyte | SAFB2        |
| TMEM158.7  | 8.55E-34 | -0.3625  | 0.009 | 0.151 | 1.28E-29 | monocyte | TMEM158      |
| SLC38A1.5  | 8.87E-34 | -0.40163 | 0.009 | 0.153 | 1.33E-29 | monocyte | SLC38A1      |
| WTAP.4     | 8.90E-34 | -0.3088  | 0.223 | 0.438 | 1.33E-29 | monocyte | WTAP         |
| NARF.4     | 9.02E-34 | -0.25004 | 0.14  | 0.346 | 1.35E-29 | monocyte | NARF         |
| CSNK2A1.5  | 9.16E-34 | -0.33751 | 0.133 | 0.333 | 1.37E-29 | monocyte | CSNK2A1      |
| USP1.7     | 9.21E-34 | -0.29306 | 0.087 | 0.274 | 1.38E-29 | monocyte | USP1         |
| TROVE2.7   | 9.43E-34 | -0.25217 | 0.222 | 0.451 | 1.41E-29 | monocyte | TROVE2       |
| CEND1.6    | 9.51E-34 | -0.35675 | 0.008 | 0.15  | 1.42E-29 | monocyte | CEND1        |
| FNBP1L.8   | 1.01E-33 | -0.37194 | 0.038 | 0.198 | 1.50E-29 | monocyte | FNBP1L       |
| TNFSF10.5  | 1.05E-33 | 0.516094 | 0.17  | 0.066 | 1.57E-29 | monocyte | TNFSF10      |
| CCDC34.5   | 1.07E-33 | -0.38675 | 0.027 | 0.18  | 1.60E-29 | monocyte | CCDC34       |
| TCIRG1.8   | 1.21E-33 | 0.411625 | 0.249 | 0.114 | 1.82E-29 | monocyte | TCIRG1       |
| DOCK2.8    | 1.22E-33 | 0.397896 | 0.178 | 0.068 | 1.83E-29 | monocyte | DOCK2        |
| SPECC1.7   | 1.24E-33 | -0.26694 | 0.114 | 0.312 | 1.85E-29 | monocyte | SPECC1       |
| DPF3.4     | 1.37E-33 | -0.33954 | 0.007 | 0.147 | 2.05E-29 | monocyte | DPF3         |
| ZNF302.7   | 1.39E-33 | -0.20475 | 0.124 | 0.331 | 2.08E-29 | monocyte | ZNF302       |

|           |          |          |       |       |          |          |               |
|-----------|----------|----------|-------|-------|----------|----------|---------------|
| RBM47.8   | 1.51E-33 | 0.367341 | 0.234 | 0.106 | 2.26E-29 | monocyte | RBM47         |
| CA12.8    | 1.51E-33 | -0.39003 | 0.007 | 0.148 | 2.26E-29 | monocyte | CA12          |
| SEMA6D.8  | 1.73E-33 | -0.37923 | 0.021 | 0.169 | 2.58E-29 | monocyte | SEMA6D        |
| CTNND2.6  | 1.81E-33 | -0.3409  | 0.02  | 0.17  | 2.70E-29 | monocyte | CTNND2        |
| ITGAX.7   | 1.86E-33 | 0.405055 | 0.2   | 0.081 | 2.77E-29 | monocyte | ITGAX         |
| RIN3.8    | 1.93E-33 | 0.445851 | 0.233 | 0.105 | 2.88E-29 | monocyte | RIN3          |
| HNMT.7    | 2.07E-33 | 0.542708 | 0.363 | 0.206 | 3.10E-29 | monocyte | HNMT          |
| EVL.4     | 2.18E-33 | 0.585509 | 0.485 | 0.34  | 3.26E-29 | monocyte | EVL           |
| EEF1E1.5  | 2.30E-33 | -0.28143 | 0.126 | 0.332 | 3.44E-29 | monocyte | EEF1E1        |
| RP11-792A | 2.31E-33 | -0.35386 | 0.053 | 0.224 | 3.45E-29 | monocyte | RP11-792A8.4  |
| DTX3.5    | 2.31E-33 | -0.45966 | 0.089 | 0.27  | 3.45E-29 | monocyte | DTX3          |
| PCMT1.4   | 2.45E-33 | -0.25773 | 0.316 | 0.561 | 3.66E-29 | monocyte | PCMT1         |
| KIF9.7    | 2.50E-33 | -0.34979 | 0.03  | 0.187 | 3.73E-29 | monocyte | KIF9          |
| DLX5.8    | 2.75E-33 | -0.71045 | 0.014 | 0.155 | 4.11E-29 | monocyte | DLX5          |
| PIN1.4    | 2.86E-33 | -0.25574 | 0.326 | 0.555 | 4.28E-29 | monocyte | PIN1          |
| LINC01003 | 3.01E-33 | -0.32856 | 0.042 | 0.205 | 4.50E-29 | monocyte | LINC01003     |
| PADI2.6   | 3.17E-33 | 0.406512 | 0.262 | 0.124 | 4.73E-29 | monocyte | PADI2         |
| RAB3A.8   | 3.66E-33 | -0.41639 | 0.025 | 0.176 | 5.47E-29 | monocyte | RAB3A         |
| DAPK3.5   | 3.87E-33 | -0.32122 | 0.075 | 0.253 | 5.79E-29 | monocyte | DAPK3         |
| SIGLEC14. | 4.21E-33 | 0.339994 | 0.121 | 0.038 | 6.29E-29 | monocyte | SIGLEC14      |
| WSCD1.7   | 4.26E-33 | -0.34215 | 0.005 | 0.142 | 6.36E-29 | monocyte | WSCD1         |
| PPME1.6   | 4.43E-33 | -0.3094  | 0.035 | 0.194 | 6.62E-29 | monocyte | PPME1         |
| C12orf76. | 4.64E-33 | -0.27809 | 0.091 | 0.282 | 6.93E-29 | monocyte | C12orf76      |
| NXPH1.8   | 4.67E-33 | -0.38248 | 0.008 | 0.147 | 6.98E-29 | monocyte | NXPH1         |
| CDK4.4    | 5.25E-33 | -0.39305 | 0.283 | 0.502 | 7.84E-29 | monocyte | CDK4          |
| ASIC4.7   | 5.41E-33 | -0.51798 | 0.01  | 0.151 | 8.09E-29 | monocyte | ASIC4         |
| DDIT3.4   | 5.61E-33 | -0.31348 | 0.231 | 0.445 | 8.38E-29 | monocyte | DDIT3         |
| SRPX.7    | 5.75E-33 | -0.4617  | 0.034 | 0.189 | 8.60E-29 | monocyte | SRPX          |
| GNL1.3    | 6.05E-33 | -0.26134 | 0.078 | 0.257 | 9.04E-29 | monocyte | GNL1          |
| METTL7B.5 | 6.51E-33 | -0.55391 | 0.061 | 0.225 | 9.73E-29 | monocyte | METTL7B       |
| ANKRD22.7 | 6.94E-33 | 0.447276 | 0.154 | 0.057 | 1.04E-28 | monocyte | ANKRD22       |
| TIA1.8    | 6.96E-33 | -0.2363  | 0.079 | 0.263 | 1.04E-28 | monocyte | TIA1          |
| ALKBH2.7  | 7.92E-33 | -0.33697 | 0.046 | 0.208 | 1.18E-28 | monocyte | ALKBH2        |
| EFNA1.5   | 8.17E-33 | -0.41954 | 0.004 | 0.139 | 1.22E-28 | monocyte | EFNA1         |
| ATF3.7    | 8.38E-33 | -0.46496 | 0.126 | 0.318 | 1.25E-28 | monocyte | ATF3          |
| KHDRBS1.6 | 8.68E-33 | -0.32133 | 0.281 | 0.504 | 1.30E-28 | monocyte | KHDRBS1       |
| RP11-849I | 8.79E-33 | -0.38683 | 0.006 | 0.143 | 1.31E-28 | monocyte | RP11-849I19.1 |
| IFT81.6   | 8.80E-33 | -0.25893 | 0.022 | 0.171 | 1.32E-28 | monocyte | IFT81         |
| TPM2.5    | 8.95E-33 | -0.45161 | 0.027 | 0.175 | 1.34E-28 | monocyte | TPM2          |
| C1orf21.7 | 8.96E-33 | -0.42212 | 0.051 | 0.213 | 1.34E-28 | monocyte | C1orf21       |
| NDUFB7.5  | 9.54E-33 | -0.19123 | 0.507 | 0.739 | 1.43E-28 | monocyte | NDUFB7        |
| MEAF6.6   | 9.58E-33 | -0.24827 | 0.26  | 0.496 | 1.43E-28 | monocyte | MEAF6         |
| KIAA1715. | 9.98E-33 | -0.32185 | 0.088 | 0.27  | 1.49E-28 | monocyte | KIAA1715      |
| OCIAD1.5  | 1.02E-32 | -0.23813 | 0.41  | 0.656 | 1.52E-28 | monocyte | OCIAD1        |
| COLGALT2. | 1.05E-32 | -0.31411 | 0.01  | 0.15  | 1.56E-28 | monocyte | COLGALT2      |
| LRWD1.5   | 1.08E-32 | -0.31033 | 0.029 | 0.183 | 1.62E-28 | monocyte | LRWD1         |
| ARHGAP27. | 1.11E-32 | 0.358371 | 0.139 | 0.048 | 1.66E-28 | monocyte | ARHGAP27      |
| EXOC7.7   | 1.12E-32 | -0.28283 | 0.163 | 0.369 | 1.67E-28 | monocyte | EXOC7         |
| WBP4.6    | 1.16E-32 | -0.31472 | 0.125 | 0.321 | 1.73E-28 | monocyte | WBP4          |
| PNMA2.7   | 1.19E-32 | -0.32136 | 0.01  | 0.15  | 1.78E-28 | monocyte | PNMA2         |
| MSI1.6    | 1.20E-32 | -0.31354 | 0.008 | 0.146 | 1.79E-28 | monocyte | MSI1          |



|             |           |           |        |        |           |          |            |
|-------------|-----------|-----------|--------|--------|-----------|----------|------------|
| SLC37A3. 6  | 1. 25E-32 | -0. 35302 | 0. 005 | 0. 14  | 1. 87E-28 | monocyte | SLC37A3    |
| CLIC1. 6    | 1. 29E-32 | 0. 4177   | 0. 731 | 0. 613 | 1. 93E-28 | monocyte | CLIC1      |
| LBH. 8      | 1. 34E-32 | -0. 44825 | 0. 02  | 0. 165 | 2. 01E-28 | monocyte | LBH        |
| NR2F6. 7    | 1. 37E-32 | -0. 29968 | 0. 013 | 0. 152 | 2. 04E-28 | monocyte | NR2F6      |
| PITPNA-AS   | 1. 42E-32 | -0. 31624 | 0. 046 | 0. 209 | 2. 12E-28 | monocyte | PITPNA-AS1 |
| GIMAP2. 7   | 1. 43E-32 | 0. 445306 | 0. 173 | 0. 068 | 2. 13E-28 | monocyte | GIMAP2     |
| DBI. 8      | 1. 43E-32 | -0. 24384 | 0. 675 | 0. 858 | 2. 14E-28 | monocyte | DBI        |
| ZNF3. 6     | 1. 49E-32 | -0. 36739 | 0. 053 | 0. 219 | 2. 22E-28 | monocyte | ZNF3       |
| CITED1. 7   | 1. 54E-32 | -0. 46856 | 0. 02  | 0. 163 | 2. 30E-28 | monocyte | CITED1     |
| NRSN2. 7    | 1. 55E-32 | -0. 22664 | 0. 026 | 0. 176 | 2. 32E-28 | monocyte | NRSN2      |
| CBX1. 6     | 1. 68E-32 | -0. 29753 | 0. 176 | 0. 384 | 2. 51E-28 | monocyte | CBX1       |
| MFNG. 8     | 1. 70E-32 | 0. 49838  | 0. 246 | 0. 116 | 2. 55E-28 | monocyte | MFNG       |
| EIF5. 3     | 1. 73E-32 | -0. 21989 | 0. 419 | 0. 671 | 2. 58E-28 | monocyte | EIF5       |
| SNRPE. 6    | 1. 73E-32 | -0. 25993 | 0. 362 | 0. 599 | 2. 59E-28 | monocyte | SNRPE      |
| LIMCH1. 6   | 1. 75E-32 | -0. 37957 | 0. 019 | 0. 164 | 2. 62E-28 | monocyte | LIMCH1     |
| RSF1. 6     | 1. 76E-32 | -0. 22639 | 0. 213 | 0. 435 | 2. 63E-28 | monocyte | RSF1       |
| LHX2. 7     | 1. 80E-32 | -0. 32491 | 0. 006 | 0. 141 | 2. 69E-28 | monocyte | LHX2       |
| SLC16A1. 7  | 1. 96E-32 | -0. 28731 | 0. 071 | 0. 248 | 2. 93E-28 | monocyte | SLC16A1    |
| SUN1. 7     | 2. 00E-32 | -0. 33015 | 0. 054 | 0. 221 | 2. 98E-28 | monocyte | SUN1       |
| SLC40A1. 6  | 2. 01E-32 | 0. 568279 | 0. 252 | 0. 129 | 3. 00E-28 | monocyte | SLC40A1    |
| QTRT1. 6    | 2. 02E-32 | -0. 35929 | 0. 143 | 0. 347 | 3. 02E-28 | monocyte | QTRT1      |
| DGUOK. 5    | 2. 03E-32 | -0. 21972 | 0. 293 | 0. 535 | 3. 04E-28 | monocyte | DGUOK      |
| OSBPL6. 4   | 2. 08E-32 | -0. 30495 | 0. 022 | 0. 168 | 3. 11E-28 | monocyte | OSBPL6     |
| AMPD3. 5    | 2. 13E-32 | 0. 256374 | 0. 134 | 0. 045 | 3. 19E-28 | monocyte | AMPD3      |
| PCMTD2. 7   | 2. 18E-32 | -0. 3118  | 0. 068 | 0. 241 | 3. 26E-28 | monocyte | PCMTD2     |
| C11orf96. 2 | 2. 30E-32 | -0. 41553 | 0. 008 | 0. 145 | 3. 43E-28 | monocyte | C11orf96   |
| SGTA. 5     | 2. 32E-32 | -0. 25982 | 0. 132 | 0. 332 | 3. 46E-28 | monocyte | SGTA       |
| TCEB1. 2    | 2. 39E-32 | -0. 18999 | 0. 394 | 0. 643 | 3. 58E-28 | monocyte | TCEB1      |
| IMMP1L. 6   | 2. 51E-32 | -0. 25101 | 0. 071 | 0. 246 | 3. 75E-28 | monocyte | IMMP1L     |
| PHPT1. 3    | 2. 51E-32 | -0. 21681 | 0. 437 | 0. 671 | 3. 75E-28 | monocyte | PHPT1      |
| RNF187. 6   | 2. 55E-32 | -0. 32742 | 0. 185 | 0. 395 | 3. 81E-28 | monocyte | RNF187     |
| COL6A2. 7   | 2. 64E-32 | -0. 48382 | 0. 029 | 0. 174 | 3. 95E-28 | monocyte | COL6A2     |
| CD151. 7    | 2. 75E-32 | -0. 23208 | 0. 282 | 0. 5   | 4. 11E-28 | monocyte | CD151      |
| ISCA1. 4    | 2. 77E-32 | -0. 31545 | 0. 121 | 0. 312 | 4. 14E-28 | monocyte | ISCA1      |
| GNGT2. 8    | 2. 90E-32 | 0. 272595 | 0. 135 | 0. 045 | 4. 34E-28 | monocyte | GNGT2      |
| POLR2C. 6   | 2. 93E-32 | -0. 30686 | 0. 16  | 0. 367 | 4. 38E-28 | monocyte | POLR2C     |
| GPBP1. 5    | 2. 97E-32 | -0. 24844 | 0. 237 | 0. 467 | 4. 44E-28 | monocyte | GPBP1      |
| SNHG9. 4    | 3. 00E-32 | -0. 23755 | 0. 12  | 0. 321 | 4. 48E-28 | monocyte | SNHG9      |
| TWISTNB. 2  | 3. 03E-32 | -0. 30429 | 0. 096 | 0. 284 | 4. 52E-28 | monocyte | TWISTNB    |
| MEIS3. 6    | 3. 09E-32 | -0. 3258  | 0. 006 | 0. 14  | 4. 62E-28 | monocyte | MEIS3      |
| RNF130. 8   | 3. 16E-32 | 0. 482555 | 0. 552 | 0. 455 | 4. 73E-28 | monocyte | RNF130     |
| CNTFR. 7    | 3. 34E-32 | -0. 33873 | 0. 006 | 0. 141 | 5. 00E-28 | monocyte | CNTFR      |
| SERF2. 4    | 3. 45E-32 | 0. 341551 | 0. 913 | 0. 894 | 5. 15E-28 | monocyte | SERF2      |
| TIMM22. 4   | 3. 62E-32 | -0. 20621 | 0. 078 | 0. 257 | 5. 40E-28 | monocyte | TIMM22     |
| WWTR1. 8    | 3. 65E-32 | -0. 3715  | 0. 026 | 0. 172 | 5. 45E-28 | monocyte | WWTR1      |
| SSRP1. 6    | 3. 87E-32 | -0. 27194 | 0. 165 | 0. 371 | 5. 78E-28 | monocyte | SSRP1      |
| ASPH. 4     | 3. 87E-32 | -0. 31375 | 0. 104 | 0. 292 | 5. 78E-28 | monocyte | ASPH       |
| SLC37A2. 3  | 4. 23E-32 | 0. 204354 | 0. 072 | 0. 016 | 6. 32E-28 | monocyte | SLC37A2    |
| RFTN2. 8    | 4. 34E-32 | -0. 40872 | 0. 005 | 0. 138 | 6. 49E-28 | monocyte | RFTN2      |
| MPP1. 8     | 4. 48E-32 | 0. 488148 | 0. 335 | 0. 189 | 6. 69E-28 | monocyte | MPP1       |
| PGM1. 4     | 4. 51E-32 | -0. 34436 | 0. 088 | 0. 265 | 6. 74E-28 | monocyte | PGM1       |

|            |          |          |       |       |          |          |          |
|------------|----------|----------|-------|-------|----------|----------|----------|
| SLC35F1.5  | 4.51E-32 | -0.23734 | 0.004 | 0.137 | 6.74E-28 | monocyte | SLC35F1  |
| BBX.4      | 4.57E-32 | -0.29956 | 0.209 | 0.424 | 6.83E-28 | monocyte | BBX      |
| ENOPH1.6   | 4.66E-32 | -0.26863 | 0.189 | 0.407 | 6.97E-28 | monocyte | ENOPH1   |
| GRIA4.7    | 4.85E-32 | -0.36537 | 0.006 | 0.14  | 7.24E-28 | monocyte | GRIA4    |
| SF3B2.4    | 4.93E-32 | -0.2435  | 0.312 | 0.543 | 7.37E-28 | monocyte | SF3B2    |
| PRPF6.6    | 5.42E-32 | -0.24451 | 0.159 | 0.37  | 8.10E-28 | monocyte | PRPF6    |
| JAG1.7     | 5.50E-32 | -0.32231 | 0.025 | 0.171 | 8.22E-28 | monocyte | JAG1     |
| TYMS.7     | 5.72E-32 | -0.34246 | 0.025 | 0.173 | 8.55E-28 | monocyte | TYMS     |
| BEND5.6    | 6.11E-32 | -0.32937 | 0.01  | 0.148 | 9.13E-28 | monocyte | BEND5    |
| NUDCD2.5   | 6.24E-32 | -0.21487 | 0.199 | 0.418 | 9.32E-28 | monocyte | NUDCD2   |
| RANBP1.7   | 6.75E-32 | -0.30195 | 0.374 | 0.596 | 1.01E-27 | monocyte | RANBP1   |
| TCEA1.3    | 6.84E-32 | -0.24569 | 0.278 | 0.503 | 1.02E-27 | monocyte | TCEA1    |
| SMARCD1.7  | 7.15E-32 | -0.3138  | 0.062 | 0.228 | 1.07E-27 | monocyte | SMARCD1  |
| TUBA1C.6   | 7.35E-32 | -0.35025 | 0.196 | 0.396 | 1.10E-27 | monocyte | TUBA1C   |
| TGFB1.8    | 7.88E-32 | 0.537028 | 0.372 | 0.233 | 1.18E-27 | monocyte | TGFB1    |
| WDR18.5    | 7.91E-32 | -0.24091 | 0.109 | 0.302 | 1.18E-27 | monocyte | WDR18    |
| C1S.6      | 8.02E-32 | -0.67878 | 0.028 | 0.174 | 1.20E-27 | monocyte | C1S      |
| ZDHHC9.8   | 8.13E-32 | -0.3631  | 0.029 | 0.18  | 1.22E-27 | monocyte | ZDHHC9   |
| TMEM156.6  | 9.71E-32 | 0.413788 | 0.139 | 0.049 | 1.45E-27 | monocyte | TMEM156  |
| DHX36.6    | 1.01E-31 | -0.29304 | 0.224 | 0.444 | 1.51E-27 | monocyte | DHX36    |
| RNF19A.7   | 1.10E-31 | -0.33344 | 0.053 | 0.215 | 1.64E-27 | monocyte | RNF19A   |
| TCEAL4.6   | 1.11E-31 | -0.21378 | 0.347 | 0.591 | 1.65E-27 | monocyte | TCEAL4   |
| ACAT2.7    | 1.11E-31 | -0.29651 | 0.11  | 0.293 | 1.66E-27 | monocyte | ACAT2    |
| PHF20L1.7  | 1.12E-31 | -0.27918 | 0.13  | 0.324 | 1.67E-27 | monocyte | PHF20L1  |
| ATP6VOB.6  | 1.13E-31 | 0.391827 | 0.787 | 0.799 | 1.69E-27 | monocyte | ATP6VOB  |
| GAS1.8     | 1.18E-31 | -0.37708 | 0.017 | 0.156 | 1.77E-27 | monocyte | GAS1     |
| MDH2.4     | 1.22E-31 | -0.22754 | 0.444 | 0.68  | 1.82E-27 | monocyte | MDH2     |
| KIF2A.8    | 1.22E-31 | -0.29121 | 0.077 | 0.249 | 1.82E-27 | monocyte | KIF2A    |
| PCGF2.6    | 1.26E-31 | -0.30881 | 0.027 | 0.175 | 1.89E-27 | monocyte | PCGF2    |
| IFT43.6    | 1.27E-31 | -0.28827 | 0.092 | 0.271 | 1.91E-27 | monocyte | IFT43    |
| C21orf59.1 | 1.35E-31 | -0.24958 | 0.136 | 0.332 | 2.01E-27 | monocyte | C21orf59 |
| NOL3.8     | 1.38E-31 | -0.42684 | 0.031 | 0.178 | 2.07E-27 | monocyte | NOL3     |
| ZNF146.6   | 1.41E-31 | -0.31683 | 0.072 | 0.241 | 2.11E-27 | monocyte | ZNF146   |
| CBS.6      | 1.46E-31 | -0.33416 | 0.025 | 0.169 | 2.18E-27 | monocyte | CBS      |
| SLC7A8.3   | 1.47E-31 | 0.236744 | 0.119 | 0.037 | 2.20E-27 | monocyte | SLC7A8   |
| HLA-F.8    | 1.52E-31 | 0.420778 | 0.272 | 0.135 | 2.27E-27 | monocyte | HLA-F    |
| SMARCC1.6  | 1.54E-31 | -0.24178 | 0.087 | 0.27  | 2.30E-27 | monocyte | SMARCC1  |
| RARRES2.7  | 1.78E-31 | -0.71809 | 0.02  | 0.161 | 2.66E-27 | monocyte | RARRES2  |
| CTNNA1.6   | 2.08E-31 | -0.33795 | 0.019 | 0.158 | 3.11E-27 | monocyte | CTNNA1   |
| LUC7L3.6   | 2.19E-31 | -0.21359 | 0.292 | 0.53  | 3.27E-27 | monocyte | LUC7L3   |
| PRCC.4     | 2.19E-31 | -0.30621 | 0.124 | 0.319 | 3.27E-27 | monocyte | PRCC     |
| NEDD9.5    | 2.24E-31 | -0.26383 | 0.065 | 0.234 | 3.34E-27 | monocyte | NEDD9    |
| ARL3.4     | 2.34E-31 | -0.22928 | 0.162 | 0.363 | 3.49E-27 | monocyte | ARL3     |
| PLXNC1.8   | 2.40E-31 | 0.295908 | 0.156 | 0.058 | 3.58E-27 | monocyte | PLXNC1   |
| CFDP1.5    | 2.43E-31 | -0.22625 | 0.215 | 0.434 | 3.63E-27 | monocyte | CFDP1    |
| EMC6.3     | 2.45E-31 | -0.27171 | 0.241 | 0.451 | 3.65E-27 | monocyte | EMC6     |
| TMEM237.5  | 2.48E-31 | -0.32088 | 0.044 | 0.199 | 3.71E-27 | monocyte | TMEM237  |
| SPOCK2.6   | 2.54E-31 | -0.3746  | 0.014 | 0.15  | 3.80E-27 | monocyte | SPOCK2   |
| CCL18.1    | 2.64E-31 | 0.188656 | 0.044 | 0.006 | 3.94E-27 | monocyte | CCL18    |
| HNRNPA0.6  | 2.69E-31 | -0.24853 | 0.437 | 0.66  | 4.02E-27 | monocyte | HNRNPA0  |
| EZH2.7     | 2.82E-31 | -0.36867 | 0.023 | 0.165 | 4.22E-27 | monocyte | EZH2     |

|             |           |           |        |        |           |          |               |
|-------------|-----------|-----------|--------|--------|-----------|----------|---------------|
| EIF3B. 3    | 2. 85E-31 | -0. 28592 | 0. 086 | 0. 261 | 4. 26E-27 | monocyte | EIF3B         |
| TIMM13. 2   | 3. 16E-31 | -0. 21699 | 0. 385 | 0. 609 | 4. 72E-27 | monocyte | TIMM13        |
| RSBN1L. 6   | 3. 20E-31 | -0. 30929 | 0. 17  | 0. 371 | 4. 78E-27 | monocyte | RSBN1L        |
| HP1BP3. 7   | 3. 27E-31 | -0. 22223 | 0. 239 | 0. 46  | 4. 89E-27 | monocyte | HP1BP3        |
| CCDC82. 4   | 3. 48E-31 | -0. 28737 | 0. 104 | 0. 287 | 5. 20E-27 | monocyte | CCDC82        |
| LINC00662   | 3. 55E-31 | -0. 32578 | 0. 041 | 0. 196 | 5. 31E-27 | monocyte | LINC00662     |
| RAMP2. 7    | 3. 57E-31 | -0. 33737 | 0. 011 | 0. 147 | 5. 33E-27 | monocyte | RAMP2         |
| EBNA1BP2. 3 | 5. 59E-31 | -0. 27941 | 0. 165 | 0. 37  | 5. 37E-27 | monocyte | EBNA1BP2      |
| PSMD2. 5    | 3. 63E-31 | -0. 20441 | 0. 255 | 0. 48  | 5. 42E-27 | monocyte | PSMD2         |
| MFGES. 5    | 4. 23E-31 | -0. 2938  | 0. 046 | 0. 203 | 6. 32E-27 | monocyte | MFGES         |
| NUDT11. 6   | 4. 34E-31 | -0. 35722 | 0. 006 | 0. 137 | 6. 49E-27 | monocyte | NUDT11        |
| POLR2F. 5   | 4. 38E-31 | -0. 24447 | 0. 332 | 0. 561 | 6. 55E-27 | monocyte | POLR2F        |
| RBBP6. 4    | 5. 01E-31 | -0. 28865 | 0. 134 | 0. 329 | 7. 49E-27 | monocyte | RBBP6         |
| SKAP2. 6    | 5. 39E-31 | 0. 493493 | 0. 413 | 0. 257 | 8. 06E-27 | monocyte | SKAP2         |
| NNT-AS1. 7  | 5. 43E-31 | -0. 32669 | 0. 068 | 0. 235 | 8. 11E-27 | monocyte | NNT-AS1       |
| RNF157. 7   | 5. 65E-31 | -0. 32811 | 0. 011 | 0. 145 | 8. 44E-27 | monocyte | RNF157        |
| RBM39. 4    | 5. 76E-31 | -0. 18143 | 0. 437 | 0. 673 | 8. 61E-27 | monocyte | RBM39         |
| GTF2F2. 3   | 6. 05E-31 | -0. 28533 | 0. 127 | 0. 314 | 9. 03E-27 | monocyte | GTF2F2        |
| EIF3I. 3    | 6. 10E-31 | -0. 18414 | 0. 381 | 0. 621 | 9. 11E-27 | monocyte | EIF3I         |
| CCT7. 5     | 6. 35E-31 | -0. 18591 | 0. 315 | 0. 549 | 9. 49E-27 | monocyte | CCT7          |
| NNMT. 6     | 6. 46E-31 | -0. 66544 | 0. 027 | 0. 169 | 9. 66E-27 | monocyte | NNMT          |
| RP11-71N1   | 6. 58E-31 | -0. 34617 | 0. 013 | 0. 147 | 9. 83E-27 | monocyte | RP11-71N10. 1 |
| PSRC1. 5    | 6. 62E-31 | -0. 30282 | 0. 096 | 0. 279 | 9. 89E-27 | monocyte | PSRC1         |
| SOBP. 7     | 7. 25E-31 | -0. 32092 | 0. 011 | 0. 145 | 1. 08E-26 | monocyte | SOBP          |
| DDX1. 5     | 7. 44E-31 | -0. 28566 | 0. 172 | 0. 377 | 1. 11E-26 | monocyte | DDX1          |
| PPP1R16A. 7 | 4. 48E-31 | -0. 323   | 0. 033 | 0. 181 | 1. 12E-26 | monocyte | PPP1R16A      |
| YES1. 4     | 7. 58E-31 | -0. 26984 | 0. 009 | 0. 141 | 1. 13E-26 | monocyte | YES1          |
| TNRC6C. 7   | 7. 69E-31 | -0. 31982 | 0. 034 | 0. 184 | 1. 15E-26 | monocyte | TNRC6C        |
| ALKBH5. 6   | 8. 45E-31 | -0. 31033 | 0. 146 | 0. 339 | 1. 26E-26 | monocyte | ALKBH5        |
| CYR61. 6    | 8. 65E-31 | -0. 51547 | 0. 032 | 0. 18  | 1. 29E-26 | monocyte | CYR61         |
| HIP1. 5     | 8. 67E-31 | -0. 37713 | 0. 033 | 0. 18  | 1. 30E-26 | monocyte | HIP1          |
| NDUFS4. 2   | 8. 68E-31 | -0. 22528 | 0. 288 | 0. 524 | 1. 30E-26 | monocyte | NDUFS4        |
| TNFRSF12A   | 8. 93E-31 | -0. 49643 | 0. 132 | 0. 301 | 1. 33E-26 | monocyte | TNFRSF12A     |
| WASL. 6     | 9. 03E-31 | -0. 29482 | 0. 043 | 0. 196 | 1. 35E-26 | monocyte | WASL          |
| EIF1B. 7    | 9. 68E-31 | -0. 24771 | 0. 372 | 0. 607 | 1. 45E-26 | monocyte | EIF1B         |
| TPPP3. 8    | 1. 05E-30 | -0. 52217 | 0. 024 | 0. 165 | 1. 57E-26 | monocyte | TPPP3         |
| CHCHD10. 6  | 1. 06E-30 | 0. 492081 | 0. 483 | 0. 372 | 1. 59E-26 | monocyte | CHCHD10       |
| TOMM40. 6   | 1. 07E-30 | -0. 29497 | 0. 15  | 0. 343 | 1. 60E-26 | monocyte | TOMM40        |
| WDR6. 6     | 1. 08E-30 | -0. 24082 | 0. 074 | 0. 246 | 1. 62E-26 | monocyte | WDR6          |
| SPATC1L. 7  | 1. 11E-30 | -0. 21435 | 0. 049 | 0. 207 | 1. 67E-26 | monocyte | SPATC1L       |
| ACO04540. 1 | 1. 19E-30 | -0. 43107 | 0. 005 | 0. 133 | 1. 78E-26 | monocyte | ACO04540. 4   |
| APPBP2. 5   | 1. 29E-30 | -0. 32113 | 0. 061 | 0. 222 | 1. 92E-26 | monocyte | APPBP2        |
| SAMD4B. 4   | 1. 31E-30 | -0. 29923 | 0. 069 | 0. 237 | 1. 95E-26 | monocyte | SAMD4B        |
| PRPSAP1. 7  | 1. 36E-30 | -0. 25987 | 0. 133 | 0. 321 | 2. 03E-26 | monocyte | PRPSAP1       |
| SLC1A2. 6   | 1. 42E-30 | -0. 35125 | 0. 013 | 0. 146 | 2. 12E-26 | monocyte | SLC1A2        |
| NIFK. 4     | 1. 46E-30 | -0. 268   | 0. 16  | 0. 365 | 2. 18E-26 | monocyte | NIFK          |
| NUCB2. 4    | 1. 47E-30 | -0. 34854 | 0. 167 | 0. 363 | 2. 19E-26 | monocyte | NUCB2         |
| NUDC. 5     | 1. 47E-30 | -0. 22955 | 0. 367 | 0. 598 | 2. 20E-26 | monocyte | NUDC          |
| MORN2. 6    | 1. 49E-30 | -0. 28132 | 0. 1   | 0. 276 | 2. 23E-26 | monocyte | MORN2         |
| TLR4. 6     | 1. 53E-30 | 0. 265651 | 0. 112 | 0. 035 | 2. 29E-26 | monocyte | TLR4          |
| PTK2. 5     | 1. 59E-30 | -0. 29451 | 0. 039 | 0. 19  | 2. 38E-26 | monocyte | PTK2          |

|             |           |           |        |        |           |          |               |
|-------------|-----------|-----------|--------|--------|-----------|----------|---------------|
| SACS. 7     | 1. 66E-30 | -0. 28056 | 0. 025 | 0. 166 | 2. 48E-26 | monocyte | SACS          |
| AHI1. 3     | 1. 69E-30 | -0. 27141 | 0. 055 | 0. 219 | 2. 52E-26 | monocyte | AHI1          |
| RNASEH1-A   | 1. 80E-30 | -0. 31251 | 0. 04  | 0. 19  | 2. 69E-26 | monocyte | RNASEH1-AS1   |
| BPGM. 4     | 1. 86E-30 | -0. 31845 | 0. 078 | 0. 248 | 2. 78E-26 | monocyte | BPGM          |
| METTL2B. 3  | 1. 95E-30 | -0. 32078 | 0. 053 | 0. 211 | 2. 91E-26 | monocyte | METTL2B       |
| FKBP3. 4    | 2. 00E-30 | -0. 24656 | 0. 269 | 0. 495 | 2. 99E-26 | monocyte | FKBP3         |
| TGFBR2. 7   | 2. 04E-30 | 0. 403821 | 0. 227 | 0. 107 | 3. 05E-26 | monocyte | TGFBR2        |
| PPM1G. 7    | 2. 06E-30 | -0. 28212 | 0. 223 | 0. 436 | 3. 08E-26 | monocyte | PPM1G         |
| SUMO1. 2    | 2. 10E-30 | -0. 17089 | 0. 432 | 0. 677 | 3. 14E-26 | monocyte | SUMO1         |
| AQP4. 7     | 2. 11E-30 | -0. 53672 | 0. 033 | 0. 177 | 3. 16E-26 | monocyte | AQP4          |
| ANXA6. 1    | 2. 15E-30 | -0. 34145 | 0. 045 | 0. 197 | 3. 21E-26 | monocyte | ANXA6         |
| DPY30. 6    | 2. 57E-30 | -0. 24613 | 0. 284 | 0. 514 | 3. 84E-26 | monocyte | DPY30         |
| SLC2A1. 6   | 2. 58E-30 | -0. 37024 | 0. 015 | 0. 148 | 3. 85E-26 | monocyte | SLC2A1        |
| STIP1. 5    | 2. 61E-30 | -0. 25535 | 0. 188 | 0. 388 | 3. 89E-26 | monocyte | STIP1         |
| SEPT8. 8    | 2. 66E-30 | -0. 35524 | 0. 052 | 0. 208 | 3. 98E-26 | monocyte | 8-Sep         |
| OAS2. 4     | 2. 69E-30 | 0. 321231 | 0. 109 | 0. 034 | 4. 03E-26 | monocyte | OAS2          |
| GPT2. 6     | 2. 74E-30 | -0. 25527 | 0. 02  | 0. 158 | 4. 09E-26 | monocyte | GPT2          |
| ANAPC11. 5  | 2. 76E-30 | -0. 14538 | 0. 528 | 0. 744 | 4. 13E-26 | monocyte | ANAPC11       |
| SLC35B1. 3  | 2. 77E-30 | -0. 28685 | 0. 203 | 0. 408 | 4. 13E-26 | monocyte | SLC35B1       |
| RUVBL1. 5   | 2. 80E-30 | -0. 2191  | 0. 1   | 0. 281 | 4. 19E-26 | monocyte | RUVBL1        |
| COPS5. 3    | 2. 92E-30 | -0. 28274 | 0. 212 | 0. 428 | 4. 36E-26 | monocyte | COPS5         |
| ATF4. 3     | 2. 94E-30 | -0. 23973 | 0. 31  | 0. 535 | 4. 40E-26 | monocyte | ATF4          |
| ING4. 6     | 3. 07E-30 | -0. 31802 | 0. 1   | 0. 281 | 4. 58E-26 | monocyte | ING4          |
| CHD4. 5     | 3. 09E-30 | -0. 2454  | 0. 147 | 0. 338 | 4. 61E-26 | monocyte | CHD4          |
| TMEM106C. 3 | 3. 12E-30 | -0. 30437 | 0. 104 | 0. 281 | 4. 66E-26 | monocyte | TMEM106C      |
| KLHL4. 6    | 3. 13E-30 | -0. 30746 | 0. 008 | 0. 137 | 4. 67E-26 | monocyte | KLHL4         |
| BPTF. 6     | 3. 29E-30 | -0. 28215 | 0. 138 | 0. 326 | 4. 91E-26 | monocyte | BPTF          |
| DUSP23. 7   | 3. 38E-30 | 0. 377254 | 0. 327 | 0. 176 | 5. 05E-26 | monocyte | DUSP23        |
| BEND6. 7    | 3. 42E-30 | -0. 25981 | 0. 004 | 0. 129 | 5. 11E-26 | monocyte | BEND6         |
| RNF126. 6   | 3. 69E-30 | -0. 28584 | 0. 121 | 0. 306 | 5. 51E-26 | monocyte | RNF126        |
| TCTN1. 6    | 3. 86E-30 | -0. 34686 | 0. 064 | 0. 225 | 5. 76E-26 | monocyte | TCTN1         |
| KIF1A. 7    | 3. 97E-30 | -0. 41163 | 0. 008 | 0. 137 | 5. 93E-26 | monocyte | KIF1A         |
| MXRA7. 6    | 4. 00E-30 | -0. 32308 | 0. 034 | 0. 179 | 5. 98E-26 | monocyte | MXRA7         |
| HOOK2. 6    | 4. 11E-30 | -0. 26202 | 0. 076 | 0. 248 | 6. 15E-26 | monocyte | HOOK2         |
| CCDC12. 4   | 4. 24E-30 | -0. 25927 | 0. 23  | 0. 448 | 6. 33E-26 | monocyte | CCDC12        |
| ASPHD1. 6   | 4. 46E-30 | -0. 32302 | 0. 016 | 0. 148 | 6. 66E-26 | monocyte | ASPHD1        |
| ADH5. 5     | 4. 50E-30 | -0. 28176 | 0. 199 | 0. 405 | 6. 73E-26 | monocyte | ADH5          |
| AP2B1. 7    | 4. 69E-30 | -0. 26793 | 0. 162 | 0. 356 | 7. 01E-26 | monocyte | AP2B1         |
| DDAH1. 6    | 4. 75E-30 | -0. 2983  | 0. 007 | 0. 135 | 7. 10E-26 | monocyte | DDAH1         |
| TTC9B. 8    | 5. 15E-30 | -0. 46837 | 0. 005 | 0. 13  | 7. 69E-26 | monocyte | TTC9B         |
| FAM177A1. 5 | 5. 32E-30 | -0. 24519 | 0. 196 | 0. 405 | 7. 96E-26 | monocyte | FAM177A1      |
| NCALD. 7    | 5. 89E-30 | -0. 33729 | 0. 007 | 0. 135 | 8. 80E-26 | monocyte | NCALD         |
| CCDC124. 2  | 6. 03E-30 | -0. 22064 | 0. 269 | 0. 489 | 9. 02E-26 | monocyte | CCDC124       |
| DEXI. 6     | 6. 20E-30 | -0. 28866 | 0. 059 | 0. 22  | 9. 26E-26 | monocyte | DEXI          |
| WNK3. 6     | 6. 56E-30 | -0. 29803 | 0. 005 | 0. 13  | 9. 80E-26 | monocyte | WNK3          |
| NDUFA4. 6   | 6. 63E-30 | -0. 12974 | 0. 748 | 0. 908 | 9. 91E-26 | monocyte | NDUFA4        |
| NETO2. 4    | 6. 78E-30 | -0. 28042 | 0. 03  | 0. 173 | 1. 01E-25 | monocyte | NETO2         |
| DOK3. 8     | 6. 86E-30 | 0. 266859 | 0. 153 | 0. 058 | 1. 02E-25 | monocyte | DOK3          |
| P2RX4. 7    | 7. 21E-30 | 0. 549132 | 0. 296 | 0. 166 | 1. 08E-25 | monocyte | P2RX4         |
| FIP1L1. 4   | 7. 24E-30 | -0. 32926 | 0. 13  | 0. 311 | 1. 08E-25 | monocyte | FIP1L1        |
| RP4-665J2   | 7. 56E-30 | -0. 29993 | 0. 008 | 0. 136 | 1. 13E-25 | monocyte | RP4-665J23. 1 |

|             |           |           |        |        |           |          |              |
|-------------|-----------|-----------|--------|--------|-----------|----------|--------------|
| PALLD. 5    | 7. 68E-30 | -0. 28779 | 0. 053 | 0. 211 | 1. 15E-25 | monocyte | PALLD        |
| PPP1R15A. 7 | 8. 86E-30 | -0. 3184  | 0. 285 | 0. 483 | 1. 18E-25 | monocyte | PPP1R15A     |
| CDK16. 4    | 7. 93E-30 | -0. 29191 | 0. 081 | 0. 249 | 1. 18E-25 | monocyte | CDK16        |
| ZNF91. 5    | 8. 15E-30 | -0. 26259 | 0. 059 | 0. 223 | 1. 22E-25 | monocyte | ZNF91        |
| EHBP1. 6    | 8. 25E-30 | -0. 28314 | 0. 033 | 0. 179 | 1. 23E-25 | monocyte | EHBP1        |
| PPP1CB. 5   | 8. 36E-30 | -0. 25489 | 0. 32  | 0. 522 | 1. 25E-25 | monocyte | PPP1CB       |
| GNAS. 7     | 8. 90E-30 | -0. 21445 | 0. 465 | 0. 663 | 1. 33E-25 | monocyte | GNAS         |
| KCNJ5. 1    | 8. 97E-30 | 0. 169903 | 0. 072 | 0. 017 | 1. 34E-25 | monocyte | KCNJ5        |
| BMF. 3      | 9. 30E-30 | 0. 152334 | 0. 071 | 0. 016 | 1. 39E-25 | monocyte | BMF          |
| BRD4. 5     | 9. 31E-30 | -0. 24229 | 0. 153 | 0. 343 | 1. 39E-25 | monocyte | BRD4         |
| LPXN. 8     | 9. 32E-30 | 0. 431799 | 0. 22  | 0. 1   | 1. 39E-25 | monocyte | LPXN         |
| ATP1A3. 7   | 9. 52E-30 | -0. 43988 | 0. 006 | 0. 131 | 1. 42E-25 | monocyte | ATP1A3       |
| FIBP. 4     | 9. 56E-30 | -0. 25797 | 0. 283 | 0. 5   | 1. 43E-25 | monocyte | FIBP         |
| RP5-899E9   | 9. 57E-30 | 0. 12788  | 0. 054 | 0. 01  | 1. 43E-25 | monocyte | RP5-899E9. 1 |
| HTATSF1. 4  | 9. 70E-30 | -0. 32649 | 0. 111 | 0. 289 | 1. 45E-25 | monocyte | HTATSF1      |
| LARS. 4     | 9. 81E-30 | -0. 23464 | 0. 158 | 0. 358 | 1. 47E-25 | monocyte | LARS         |
| C1QBP. 5    | 9. 88E-30 | -0. 24655 | 0. 36  | 0. 572 | 1. 48E-25 | monocyte | C1QBP        |
| RAD51C. 5   | 1. 02E-29 | -0. 21068 | 0. 101 | 0. 281 | 1. 53E-25 | monocyte | RAD51C       |
| DNAJC2. 5   | 1. 04E-29 | -0. 29482 | 0. 129 | 0. 313 | 1. 55E-25 | monocyte | DNAJC2       |
| CCT3. 5     | 1. 06E-29 | -0. 20428 | 0. 365 | 0. 596 | 1. 58E-25 | monocyte | CCT3         |
| RNF10. 5    | 1. 10E-29 | -0. 31044 | 0. 156 | 0. 348 | 1. 64E-25 | monocyte | RNF10        |
| CBR1. 6     | 1. 13E-29 | -0. 27558 | 0. 28  | 0. 493 | 1. 69E-25 | monocyte | CBR1         |
| FIS1. 5     | 1. 14E-29 | -0. 23565 | 0. 422 | 0. 657 | 1. 71E-25 | monocyte | FIS1         |
| NAP1L5. 6   | 1. 14E-29 | -0. 28409 | 0. 014 | 0. 145 | 1. 71E-25 | monocyte | NAP1L5       |
| NTM. 6      | 1. 23E-29 | -0. 46749 | 0. 001 | 0. 121 | 1. 85E-25 | monocyte | NTM          |
| NECAP1. 5   | 1. 27E-29 | -0. 32178 | 0. 054 | 0. 211 | 1. 89E-25 | monocyte | NECAP1       |
| CYFIP2. 7   | 1. 27E-29 | -0. 31483 | 0. 002 | 0. 123 | 1. 90E-25 | monocyte | CYFIP2       |
| C21orf62. 1 | 1. 28E-29 | -0. 41675 | 0. 03  | 0. 169 | 1. 91E-25 | monocyte | C21orf62     |
| CAMK2B. 7   | 1. 28E-29 | -0. 32478 | 0. 002 | 0. 123 | 1. 92E-25 | monocyte | CAMK2B       |
| DNASE1L1. 1 | 1. 46E-29 | 0. 352983 | 0. 162 | 0. 064 | 2. 18E-25 | monocyte | DNASE1L1     |
| AP005530. 1 | 1. 46E-29 | 0. 390074 | 0. 087 | 0. 024 | 2. 18E-25 | monocyte | AP005530. 2  |
| CDC25B. 6   | 1. 48E-29 | -0. 3424  | 0. 054 | 0. 206 | 2. 21E-25 | monocyte | CDC25B       |
| ZNF439. 7   | 1. 50E-29 | -0. 28229 | 0. 022 | 0. 159 | 2. 24E-25 | monocyte | ZNF439       |
| MLLT4. 7    | 1. 58E-29 | -0. 3364  | 0. 032 | 0. 173 | 2. 35E-25 | monocyte | MLLT4        |
| TCEAL5. 6   | 1. 59E-29 | -0. 43934 | 0. 006 | 0. 131 | 2. 38E-25 | monocyte | TCEAL5       |
| CLK1. 4     | 1. 60E-29 | -0. 23806 | 0. 228 | 0. 44  | 2. 39E-25 | monocyte | CLK1         |
| INSM1. 8    | 1. 62E-29 | -0. 33613 | 0. 004 | 0. 127 | 2. 42E-25 | monocyte | INSM1        |
| IPO9. 5     | 1. 63E-29 | -0. 23917 | 0. 077 | 0. 245 | 2. 43E-25 | monocyte | IPO9         |
| DDX39A. 4   | 1. 66E-29 | -0. 27692 | 0. 2   | 0. 409 | 2. 48E-25 | monocyte | DDX39A       |
| USP22. 8    | 1. 67E-29 | -0. 29492 | 0. 145 | 0. 335 | 2. 49E-25 | monocyte | USP22        |
| MTPN. 4     | 1. 69E-29 | -0. 29141 | 0. 243 | 0. 449 | 2. 52E-25 | monocyte | MTPN         |
| AKIRIN1. 6  | 1. 81E-29 | -0. 28952 | 0. 184 | 0. 385 | 2. 70E-25 | monocyte | AKIRIN1      |
| YAF2. 5     | 1. 83E-29 | -0. 21536 | 0. 162 | 0. 363 | 2. 74E-25 | monocyte | YAF2         |
| RNF11. 6    | 1. 87E-29 | -0. 26241 | 0. 135 | 0. 323 | 2. 79E-25 | monocyte | RNF11        |
| AMER2. 7    | 1. 93E-29 | -0. 48067 | 0. 003 | 0. 124 | 2. 89E-25 | monocyte | AMER2        |
| TAF9. 4     | 1. 94E-29 | -0. 15685 | 0. 293 | 0. 518 | 2. 90E-25 | monocyte | TAF9         |
| UBXN2A. 5   | 1. 95E-29 | -0. 26908 | 0. 047 | 0. 2   | 2. 92E-25 | monocyte | UBXN2A       |
| CHCHD3. 4   | 2. 01E-29 | -0. 25855 | 0. 185 | 0. 385 | 3. 01E-25 | monocyte | CHCHD3       |
| PLEKHB1. 6  | 2. 03E-29 | -0. 34561 | 0. 065 | 0. 226 | 3. 04E-25 | monocyte | PLEKHB1      |
| MAPRE3. 6   | 2. 23E-29 | -0. 32419 | 0. 044 | 0. 191 | 3. 34E-25 | monocyte | MAPRE3       |
| OBSL1. 6    | 2. 30E-29 | -0. 32219 | 0. 022 | 0. 157 | 3. 43E-25 | monocyte | OBSL1        |

|           |          |          |       |       |          |          |               |
|-----------|----------|----------|-------|-------|----------|----------|---------------|
| LANCL2.8  | 2.30E-29 | -0.36115 | 0.026 | 0.163 | 3.44E-25 | monocyte | LANCL2        |
| CAP1.7    | 2.30E-29 | 0.471618 | 0.63  | 0.589 | 3.44E-25 | monocyte | CAP1          |
| ABAT.8    | 2.34E-29 | -0.32966 | 0.03  | 0.171 | 3.49E-25 | monocyte | ABAT          |
| OLFML2B.7 | 2.37E-29 | 0.418318 | 0.156 | 0.06  | 3.54E-25 | monocyte | OLFML2B       |
| GNG12.6   | 2.49E-29 | -0.26682 | 0.017 | 0.149 | 3.72E-25 | monocyte | GNG12         |
| STARD4-AS | 2.50E-29 | -0.31418 | 0.01  | 0.137 | 3.73E-25 | monocyte | STARD4-AS1    |
| PSPH.7    | 2.56E-29 | -0.27702 | 0.028 | 0.169 | 3.83E-25 | monocyte | PSPH          |
| C2orf69.7 | 2.64E-29 | -0.30923 | 0.053 | 0.207 | 3.95E-25 | monocyte | C2orf69       |
| YWHAH.8   | 2.65E-29 | 0.41753  | 0.605 | 0.561 | 3.96E-25 | monocyte | YWHAH         |
| EPRS.5    | 2.69E-29 | -0.29608 | 0.125 | 0.309 | 4.02E-25 | monocyte | EPRS          |
| GSDMA.2   | 2.71E-29 | 0.164501 | 0.061 | 0.012 | 4.05E-25 | monocyte | GSDMA         |
| RIPK3.3   | 2.72E-29 | 0.214381 | 0.067 | 0.015 | 4.06E-25 | monocyte | RIPK3         |
| AGAP1.6   | 2.80E-29 | -0.31558 | 0.006 | 0.13  | 4.19E-25 | monocyte | AGAP1         |
| PSMC5.3   | 2.96E-29 | -0.21138 | 0.346 | 0.573 | 4.42E-25 | monocyte | PSMC5         |
| IGSF8.6   | 3.26E-29 | -0.31454 | 0.066 | 0.226 | 4.86E-25 | monocyte | IGSF8         |
| SEZ6L.7   | 3.50E-29 | -0.37338 | 0.016 | 0.146 | 5.23E-25 | monocyte | SEZ6L         |
| IER2.7    | 3.76E-29 | -0.27627 | 0.42  | 0.632 | 5.63E-25 | monocyte | IER2          |
| RP11-332H | 3.84E-29 | -0.31195 | 0.01  | 0.137 | 5.74E-25 | monocyte | RP11-332H14.2 |
| TMEM97.5  | 3.98E-29 | -0.28445 | 0.039 | 0.184 | 5.95E-25 | monocyte | TMEM97        |
| SFXN5.6   | 4.00E-29 | -0.28407 | 0.049 | 0.201 | 5.97E-25 | monocyte | SFXN5         |
| ARL2BP.5  | 4.14E-29 | -0.27914 | 0.216 | 0.422 | 6.18E-25 | monocyte | ARL2BP        |
| RUVBL2.4  | 4.27E-29 | -0.24993 | 0.143 | 0.333 | 6.37E-25 | monocyte | RUVBL2        |
| ZNF292.6  | 4.34E-29 | -0.29095 | 0.1   | 0.278 | 6.49E-25 | monocyte | ZNF292        |
| CDH11.6   | 4.60E-29 | -0.28488 | 0.004 | 0.125 | 6.87E-25 | monocyte | CDH11         |
| SOCS2.6   | 4.76E-29 | -0.36843 | 0.031 | 0.168 | 7.11E-25 | monocyte | SOCS2         |
| COL4A2.5  | 4.79E-29 | -0.28327 | 0.013 | 0.139 | 7.15E-25 | monocyte | COL4A2        |
| AC004158. | 5.15E-29 | -0.33104 | 0.008 | 0.133 | 7.70E-25 | monocyte | AC004158.3    |
| APOD.7    | 5.44E-29 | -0.80842 | 0.034 | 0.172 | 8.12E-25 | monocyte | APOD          |
| TNKS.8    | 6.15E-29 | -0.27251 | 0.024 | 0.16  | 9.19E-25 | monocyte | TNKS          |
| C11orf73. | 6.22E-29 | -0.18486 | 0.23  | 0.437 | 9.30E-25 | monocyte | C11orf73      |
| CDC42EP1. | 6.50E-29 | -0.29945 | 0.011 | 0.138 | 9.72E-25 | monocyte | CDC42EP1      |
| C14orf1.5 | 7.20E-29 | -0.2806  | 0.126 | 0.307 | 1.08E-24 | monocyte | C14orf1       |
| BCLAF1.5  | 7.52E-29 | -0.22281 | 0.194 | 0.402 | 1.12E-24 | monocyte | BCLAF1        |
| KCTD3.4   | 7.55E-29 | -0.25507 | 0.02  | 0.153 | 1.13E-24 | monocyte | KCTD3         |
| AC093673. | 8.02E-29 | -0.27596 | 0.043 | 0.19  | 1.20E-24 | monocyte | AC093673.5    |
| TMEM222.6 | 8.13E-29 | -0.25845 | 0.113 | 0.294 | 1.21E-24 | monocyte | TMEM222       |
| CAV1.8    | 8.27E-29 | -0.79753 | 0.011 | 0.137 | 1.24E-24 | monocyte | CAV1          |
| ST6GAL1.6 | 8.29E-29 | 0.465027 | 0.215 | 0.101 | 1.24E-24 | monocyte | ST6GAL1       |
| ARMCX3.6  | 8.38E-29 | -0.23577 | 0.231 | 0.447 | 1.25E-24 | monocyte | ARMCX3        |
| ASNSD1.6  | 8.96E-29 | -0.26621 | 0.11  | 0.285 | 1.34E-24 | monocyte | ASNSD1        |
| SLC44A1.5 | 9.39E-29 | -0.38149 | 0.147 | 0.328 | 1.40E-24 | monocyte | SLC44A1       |
| FUS.4     | 9.75E-29 | -0.22866 | 0.43  | 0.662 | 1.46E-24 | monocyte | FUS           |
| DNAJB9.5  | 9.90E-29 | -0.30014 | 0.211 | 0.4   | 1.48E-24 | monocyte | DNAJB9        |
| DST.7     | 9.93E-29 | -0.28911 | 0.203 | 0.392 | 1.48E-24 | monocyte | DST           |
| TGFB1I1.7 | 1.04E-28 | -0.29179 | 0.011 | 0.137 | 1.55E-24 | monocyte | TGFB1I1       |
| TIMP3.6   | 1.09E-28 | -0.32811 | 0.01  | 0.136 | 1.63E-24 | monocyte | TIMP3         |
| LDHB.4    | 1.09E-28 | -0.20739 | 0.586 | 0.796 | 1.63E-24 | monocyte | LDHB          |
| NLGN3.6   | 1.10E-28 | -0.31948 | 0.004 | 0.123 | 1.64E-24 | monocyte | NLGN3         |
| TRAP1.5   | 1.14E-28 | -0.21432 | 0.099 | 0.272 | 1.70E-24 | monocyte | TRAP1         |
| TMEM106B. | 1.14E-28 | -0.23419 | 0.157 | 0.346 | 1.71E-24 | monocyte | TMEM106B      |
| EPDR1.6   | 1.14E-28 | -0.2779  | 0.011 | 0.137 | 1.71E-24 | monocyte | EPDR1         |

|             |           |           |        |        |           |          |          |
|-------------|-----------|-----------|--------|--------|-----------|----------|----------|
| GNA15. 8    | 1. 18E-28 | 0. 333592 | 0. 219 | 0. 099 | 1. 76E-24 | monocyte | GNA15    |
| FARSB. 5    | 1. 21E-28 | -0. 26547 | 0. 081 | 0. 246 | 1. 80E-24 | monocyte | FARSB    |
| CD200. 8    | 1. 23E-28 | -0. 34327 | 0. 002 | 0. 119 | 1. 83E-24 | monocyte | CD200    |
| LILRA5. 2   | 1. 26E-28 | 0. 171449 | 0. 051 | 0. 009 | 1. 88E-24 | monocyte | LILRA5   |
| C2orf80. 7  | 1. 28E-28 | -0. 30237 | 0. 007 | 0. 129 | 1. 91E-24 | monocyte | C2orf80  |
| ZNF677. 6   | 1. 31E-28 | -0. 21993 | 0. 055 | 0. 21  | 1. 96E-24 | monocyte | ZNF677   |
| SEC14L2. 7  | 1. 34E-28 | -0. 29092 | 0. 005 | 0. 125 | 2. 00E-24 | monocyte | SEC14L2  |
| KNOP1. 6    | 1. 36E-28 | -0. 22765 | 0. 1   | 0. 274 | 2. 03E-24 | monocyte | KNOP1    |
| GNL3. 4     | 1. 36E-28 | -0. 20431 | 0. 163 | 0. 362 | 2. 03E-24 | monocyte | GNL3     |
| RTKN. 8     | 1. 37E-28 | -0. 31395 | 0. 039 | 0. 183 | 2. 04E-24 | monocyte | RTKN     |
| SETD5. 8    | 1. 41E-28 | -0. 2305  | 0. 123 | 0. 303 | 2. 10E-24 | monocyte | SETD5    |
| ITGA7. 6    | 1. 41E-28 | -0. 22706 | 0. 018 | 0. 147 | 2. 11E-24 | monocyte | ITGA7    |
| CNP. 6      | 1. 41E-28 | -0. 39029 | 0. 2   | 0. 393 | 2. 11E-24 | monocyte | CNP      |
| PTX3. 7     | 1. 51E-28 | -0. 34192 | 0. 005 | 0. 125 | 2. 26E-24 | monocyte | PTX3     |
| RASSF4. 8   | 1. 54E-28 | 0. 584969 | 0. 45  | 0. 318 | 2. 31E-24 | monocyte | RASSF4   |
| ARF4. 3     | 1. 57E-28 | -0. 14128 | 0. 398 | 0. 642 | 2. 34E-24 | monocyte | ARF4     |
| CDCA7L. 5   | 1. 58E-28 | -0. 34023 | 0. 025 | 0. 16  | 2. 36E-24 | monocyte | CDCA7L   |
| THYN1. 5    | 1. 59E-28 | -0. 15249 | 0. 217 | 0. 423 | 2. 38E-24 | monocyte | THYN1    |
| PJA1. 6     | 1. 60E-28 | -0. 26516 | 0. 053 | 0. 205 | 2. 38E-24 | monocyte | PJA1     |
| CLEC9A. 6   | 1. 63E-28 | 0. 452312 | 0. 093 | 0. 027 | 2. 44E-24 | monocyte | CLEC9A   |
| NPTXR. 7    | 1. 69E-28 | -0. 27736 | 0. 013 | 0. 137 | 2. 52E-24 | monocyte | NPTXR    |
| TSEN34. 5   | 1. 71E-28 | -0. 25073 | 0. 191 | 0. 384 | 2. 56E-24 | monocyte | TSEN34   |
| SPRY1. 7    | 1. 72E-28 | -0. 35609 | 0. 086 | 0. 246 | 2. 57E-24 | monocyte | SPRY1    |
| FDPS. 5     | 1. 87E-28 | -0. 17096 | 0. 221 | 0. 433 | 2. 80E-24 | monocyte | FDPS     |
| CCDC90B. 7  | 1. 88E-28 | -0. 14872 | 0. 218 | 0. 426 | 2. 80E-24 | monocyte | CCDC90B  |
| JAM2. 8     | 1. 90E-28 | -0. 2171  | 0. 092 | 0. 267 | 2. 84E-24 | monocyte | JAM2     |
| LSM14A. 3   | 1. 90E-28 | -0. 24031 | 0. 194 | 0. 398 | 2. 84E-24 | monocyte | LSM14A   |
| RBBP4. 4    | 1. 92E-28 | -0. 20723 | 0. 234 | 0. 448 | 2. 87E-24 | monocyte | RBBP4    |
| CLCN3. 6    | 1. 92E-28 | -0. 22878 | 0. 094 | 0. 262 | 2. 87E-24 | monocyte | CLCN3    |
| ZCRB1. 5    | 1. 96E-28 | -0. 26797 | 0. 291 | 0. 508 | 2. 93E-24 | monocyte | ZCRB1    |
| CDK6. 7     | 1. 97E-28 | -0. 28904 | 0. 062 | 0. 218 | 2. 95E-24 | monocyte | CDK6     |
| SLC25A23. 2 | 2. 09E-28 | -0. 25929 | 0. 017 | 0. 144 | 3. 13E-24 | monocyte | SLC25A23 |
| AUTS2. 8    | 2. 11E-28 | -0. 29729 | 0. 007 | 0. 128 | 3. 15E-24 | monocyte | AUTS2    |
| DHX30. 4    | 2. 24E-28 | -0. 27323 | 0. 1   | 0. 271 | 3. 35E-24 | monocyte | DHX30    |
| CCNL2. 6    | 2. 29E-28 | -0. 26033 | 0. 122 | 0. 305 | 3. 43E-24 | monocyte | CCNL2    |
| GDAP1. 8    | 2. 35E-28 | -0. 37193 | 0. 028 | 0. 163 | 3. 51E-24 | monocyte | GDAP1    |
| HNRNPH3. 7  | 2. 47E-28 | -0. 18239 | 0. 248 | 0. 463 | 3. 70E-24 | monocyte | HNRNPH3  |
| ARSJ. 6     | 2. 49E-28 | -0. 28057 | 0. 011 | 0. 135 | 3. 73E-24 | monocyte | ARSJ     |
| NRROS. 5    | 2. 50E-28 | 0. 321175 | 0. 156 | 0. 06  | 3. 74E-24 | monocyte | NRROS    |
| CCZ1. 5     | 2. 54E-28 | -0. 24379 | 0. 172 | 0. 367 | 3. 79E-24 | monocyte | CCZ1     |
| ATP9A. 7    | 2. 67E-28 | -0. 29477 | 0. 004 | 0. 122 | 3. 99E-24 | monocyte | ATP9A    |
| MED31. 3    | 2. 68E-28 | -0. 24284 | 0. 07  | 0. 229 | 4. 01E-24 | monocyte | MED31    |
| ZNF771. 6   | 2. 73E-28 | -0. 23722 | 0. 024 | 0. 157 | 4. 08E-24 | monocyte | ZNF771   |
| THOP1. 6    | 2. 76E-28 | -0. 30001 | 0. 062 | 0. 214 | 4. 12E-24 | monocyte | THOP1    |
| PPP2R2A. 4  | 2. 76E-28 | -0. 29581 | 0. 136 | 0. 314 | 4. 13E-24 | monocyte | PPP2R2A  |
| ERGIC3. 5   | 2. 83E-28 | -0. 20925 | 0. 378 | 0. 593 | 4. 23E-24 | monocyte | ERGIC3   |
| SPN. 8      | 2. 87E-28 | 0. 224121 | 0. 135 | 0. 048 | 4. 29E-24 | monocyte | SPN      |
| NKAIN3. 7   | 2. 95E-28 | -0. 26972 | 0. 011 | 0. 135 | 4. 41E-24 | monocyte | NKAIN3   |
| VDAC3. 4    | 3. 00E-28 | -0. 14398 | 0. 268 | 0. 482 | 4. 48E-24 | monocyte | VDAC3    |
| GOPC. 6     | 3. 01E-28 | -0. 27352 | 0. 099 | 0. 272 | 4. 50E-24 | monocyte | GOPC     |
| ZNF326. 5   | 3. 07E-28 | -0. 26732 | 0. 093 | 0. 261 | 4. 59E-24 | monocyte | ZNF326   |

|            |           |           |        |        |           |          |                |
|------------|-----------|-----------|--------|--------|-----------|----------|----------------|
| GOLGA7. 2  | 3. 12E-28 | -0. 18405 | 0. 264 | 0. 482 | 4. 66E-24 | monocyte | GOLGA7         |
| DTYMK. 7   | 3. 18E-28 | -0. 2524  | 0. 158 | 0. 345 | 4. 75E-24 | monocyte | DTYMK          |
| LUC7L. 5   | 3. 24E-28 | -0. 21682 | 0. 089 | 0. 259 | 4. 84E-24 | monocyte | LUC7L          |
| ZNF827. 6  | 3. 31E-28 | -0. 24396 | 0. 005 | 0. 124 | 4. 95E-24 | monocyte | ZNF827         |
| PAQR4. 7   | 3. 51E-28 | -0. 3058  | 0. 037 | 0. 175 | 5. 25E-24 | monocyte | PAQR4          |
| TAF6. 4    | 3. 74E-28 | -0. 19352 | 0. 085 | 0. 249 | 5. 59E-24 | monocyte | TAF6           |
| DCTN6. 3   | 3. 88E-28 | -0. 19606 | 0. 245 | 0. 461 | 5. 80E-24 | monocyte | DCTN6          |
| LAMTOR5. 4 | 4. 03E-28 | -0. 21705 | 0. 491 | 0. 71  | 6. 02E-24 | monocyte | LAMTOR5        |
| LCP2. 8    | 4. 21E-28 | 0. 314382 | 0. 227 | 0. 105 | 6. 29E-24 | monocyte | LCP2           |
| TPM1. 6    | 4. 26E-28 | -0. 25861 | 0. 097 | 0. 266 | 6. 36E-24 | monocyte | TPM1           |
| TIMM44. 4  | 4. 41E-28 | -0. 24679 | 0. 103 | 0. 276 | 6. 59E-24 | monocyte | TIMM44         |
| AP4M1. 6   | 4. 66E-28 | -0. 25771 | 0. 054 | 0. 206 | 6. 96E-24 | monocyte | AP4M1          |
| RBM8A. 3   | 4. 72E-28 | -0. 15938 | 0. 391 | 0. 633 | 7. 06E-24 | monocyte | RBM8A          |
| PRKDC. 4   | 4. 78E-28 | -0. 27904 | 0. 126 | 0. 307 | 7. 15E-24 | monocyte | PRKDC          |
| HNRNPDL. 4 | 5. 02E-28 | -0. 14325 | 0. 58  | 0. 817 | 7. 50E-24 | monocyte | HNRNPDL        |
| ABCF1. 6   | 5. 02E-28 | -0. 24541 | 0. 121 | 0. 298 | 7. 51E-24 | monocyte | ABCF1          |
| APOBR. 7   | 5. 17E-28 | 0. 188864 | 0. 103 | 0. 032 | 7. 72E-24 | monocyte | APOBR          |
| YIPF3. 7   | 5. 24E-28 | -0. 2097  | 0. 282 | 0. 501 | 7. 84E-24 | monocyte | YIPF3          |
| TM7SF2. 7  | 5. 25E-28 | -0. 29221 | 0. 087 | 0. 243 | 7. 85E-24 | monocyte | TM7SF2         |
| FAM32A. 5  | 5. 27E-28 | -0. 12966 | 0. 253 | 0. 47  | 7. 88E-24 | monocyte | FAM32A         |
| ARAP1. 7   | 5. 66E-28 | 0. 31855  | 0. 212 | 0. 099 | 8. 45E-24 | monocyte | ARAP1          |
| SPTSSA. 6  | 6. 08E-28 | -0. 23392 | 0. 237 | 0. 445 | 9. 09E-24 | monocyte | SPTSSA         |
| PSMD3. 4   | 6. 77E-28 | -0. 26313 | 0. 22  | 0. 421 | 1. 01E-23 | monocyte | PSMD3          |
| CHST10. 5  | 6. 98E-28 | -0. 22441 | 0. 02  | 0. 15  | 1. 04E-23 | monocyte | CHST10         |
| IL21R. 1   | 7. 09E-28 | 0. 163713 | 0. 062 | 0. 013 | 1. 06E-23 | monocyte | IL21R          |
| EPB41L3. 8 | 7. 21E-28 | 0. 333388 | 0. 211 | 0. 096 | 1. 08E-23 | monocyte | EPB41L3        |
| LONP1. 3   | 7. 42E-28 | -0. 26854 | 0. 064 | 0. 217 | 1. 11E-23 | monocyte | LONP1          |
| CYB5D2. 5  | 7. 42E-28 | -0. 22883 | 0. 084 | 0. 246 | 1. 11E-23 | monocyte | CYB5D2         |
| HDGF. 4    | 7. 59E-28 | -0. 29497 | 0. 116 | 0. 287 | 1. 13E-23 | monocyte | HDGF           |
| BTG1. 7    | 7. 62E-28 | -0. 2612  | 0. 525 | 0. 703 | 1. 14E-23 | monocyte | BTG1           |
| FKBP9. 6   | 7. 70E-28 | -0. 26776 | 0. 046 | 0. 188 | 1. 15E-23 | monocyte | FKBP9          |
| MTHFD2L. 4 | 7. 90E-28 | -0. 27706 | 0. 064 | 0. 219 | 1. 18E-23 | monocyte | MTHFD2L        |
| LINC00094  | 8. 16E-28 | -0. 26322 | 0. 015 | 0. 139 | 1. 22E-23 | monocyte | LINC00094      |
| ZNF92. 6   | 8. 99E-28 | -0. 2547  | 0. 025 | 0. 157 | 1. 34E-23 | monocyte | ZNF92          |
| PHLDB1. 7  | 9. 12E-28 | -0. 3474  | 0. 023 | 0. 152 | 1. 36E-23 | monocyte | PHLDB1         |
| TMED4. 7   | 9. 23E-28 | -0. 17308 | 0. 241 | 0. 455 | 1. 38E-23 | monocyte | TMED4          |
| DSC2. 6    | 9. 35E-28 | 0. 204099 | 0. 093 | 0. 027 | 1. 40E-23 | monocyte | DSC2           |
| ARFIP2. 5  | 9. 40E-28 | -0. 29298 | 0. 092 | 0. 257 | 1. 40E-23 | monocyte | ARFIP2         |
| NRXN2. 8   | 9. 42E-28 | -0. 32358 | 0. 007 | 0. 126 | 1. 41E-23 | monocyte | NRXN2          |
| NAGK. 5    | 9. 86E-28 | 0. 624334 | 0. 474 | 0. 373 | 1. 47E-23 | monocyte | NAGK           |
| NUCKS1. 5  | 1. 01E-27 | -0. 19564 | 0. 443 | 0. 653 | 1. 51E-23 | monocyte | NUCKS1         |
| GNG4. 7    | 1. 03E-27 | -0. 30089 | 0. 007 | 0. 126 | 1. 54E-23 | monocyte | GNG4           |
| DYNLT1. 4  | 1. 05E-27 | -0. 13985 | 0. 424 | 0. 646 | 1. 57E-23 | monocyte | DYNLT1         |
| NDUF2. 4   | 1. 07E-27 | -0. 21893 | 0. 112 | 0. 287 | 1. 61E-23 | monocyte | NDUF2          |
| KCNE4. 6   | 1. 11E-27 | -0. 26437 | 0. 001 | 0. 114 | 1. 66E-23 | monocyte | KCNE4          |
| NT5DC2. 5  | 1. 16E-27 | -0. 27462 | 0. 038 | 0. 175 | 1. 74E-23 | monocyte | NT5DC2         |
| KEAP1. 5   | 1. 17E-27 | -0. 28164 | 0. 117 | 0. 285 | 1. 75E-23 | monocyte | KEAP1          |
| RP11-212I  | 1. 17E-27 | 0. 263494 | 0. 073 | 0. 018 | 1. 75E-23 | monocyte | RP11-212I21. 4 |
| AFF4. 6    | 1. 20E-27 | -0. 26966 | 0. 168 | 0. 356 | 1. 80E-23 | monocyte | AFF4           |
| FAM104A. 4 | 1. 20E-27 | -0. 23916 | 0. 091 | 0. 253 | 1. 80E-23 | monocyte | FAM104A        |
| PDLIM3. 7  | 1. 21E-27 | -0. 4047  | 0. 006 | 0. 124 | 1. 81E-23 | monocyte | PDLIM3         |



|             |           |           |        |        |           |          |            |
|-------------|-----------|-----------|--------|--------|-----------|----------|------------|
| ADD1. 6     | 1. 21E-27 | -0. 2673  | 0. 141 | 0. 322 | 1. 81E-23 | monocyte | ADD1       |
| PRPSAP2. 5  | 1. 24E-27 | -0. 26489 | 0. 109 | 0. 281 | 1. 86E-23 | monocyte | PRPSAP2    |
| MX2. 8      | 1. 25E-27 | 0. 371354 | 0. 146 | 0. 057 | 1. 86E-23 | monocyte | MX2        |
| REV3L. 5    | 1. 25E-27 | -0. 26709 | 0. 067 | 0. 222 | 1. 87E-23 | monocyte | REV3L      |
| DUSP4. 6    | 1. 28E-27 | -0. 38227 | 0. 049 | 0. 191 | 1. 92E-23 | monocyte | DUSP4      |
| SLC25A25. 1 | 1. 29E-27 | -0. 27201 | 0. 038 | 0. 177 | 1. 93E-23 | monocyte | SLC25A25   |
| ZNF75A. 7   | 1. 31E-27 | -0. 28225 | 0. 07  | 0. 227 | 1. 96E-23 | monocyte | ZNF75A     |
| AP3D1. 4    | 1. 38E-27 | -0. 27144 | 0. 144 | 0. 323 | 2. 06E-23 | monocyte | AP3D1      |
| SOCS3. 7    | 1. 43E-27 | -0. 33624 | 0. 184 | 0. 363 | 2. 14E-23 | monocyte | SOCS3      |
| RFK. 5      | 1. 44E-27 | -0. 28359 | 0. 089 | 0. 251 | 2. 15E-23 | monocyte | RFK        |
| SLC30A9. 7  | 1. 48E-27 | -0. 26055 | 0. 099 | 0. 265 | 2. 22E-23 | monocyte | SLC30A9    |
| OAZ1. 4     | 1. 49E-27 | 0. 321987 | 0. 924 | 0. 926 | 2. 23E-23 | monocyte | OAZ1       |
| TMOD1. 6    | 1. 51E-27 | -0. 31495 | 0. 031 | 0. 168 | 2. 26E-23 | monocyte | TMOD1      |
| PPP2R5B. 7  | 1. 71E-27 | -0. 27583 | 0. 039 | 0. 178 | 2. 55E-23 | monocyte | PPP2R5B    |
| PSMD8. 3    | 1. 71E-27 | -0. 14607 | 0. 459 | 0. 692 | 2. 56E-23 | monocyte | PSMD8      |
| KLRC2. 7    | 1. 84E-27 | -0. 37744 | 0. 004 | 0. 119 | 2. 75E-23 | monocyte | KLRC2      |
| NUDT16L1. 1 | 1. 89E-27 | -0. 26718 | 0. 12  | 0. 296 | 2. 82E-23 | monocyte | NUDT16L1   |
| PAXIP1-AS   | 2. 02E-27 | -0. 28191 | 0. 033 | 0. 17  | 3. 01E-23 | monocyte | PAXIP1-AS1 |
| BTBD3. 7    | 2. 05E-27 | -0. 2675  | 0. 021 | 0. 147 | 3. 06E-23 | monocyte | BTBD3      |
| TMEM198. 6  | 2. 22E-27 | -0. 25109 | 0. 007 | 0. 125 | 3. 32E-23 | monocyte | TMEM198    |
| EFS. 6      | 2. 25E-27 | -0. 29612 | 0. 002 | 0. 115 | 3. 36E-23 | monocyte | EFS        |
| TIMM17A. 3  | 2. 25E-27 | -0. 2258  | 0. 192 | 0. 392 | 3. 36E-23 | monocyte | TIMM17A    |
| DNALI1. 6   | 2. 29E-27 | -0. 29473 | 0. 006 | 0. 122 | 3. 42E-23 | monocyte | DNALI1     |
| MOSPD3. 4   | 2. 31E-27 | -0. 26399 | 0. 129 | 0. 301 | 3. 45E-23 | monocyte | MOSPD3     |
| ARPC2. 6    | 2. 36E-27 | 0. 369709 | 0. 763 | 0. 775 | 3. 52E-23 | monocyte | ARPC2      |
| PDLIM7. 4   | 2. 53E-27 | -0. 32366 | 0. 094 | 0. 251 | 3. 78E-23 | monocyte | PDLIM7     |
| TPM4. 6     | 2. 57E-27 | -0. 24181 | 0. 309 | 0. 514 | 3. 84E-23 | monocyte | TPM4       |
| CLSTN1. 5   | 2. 65E-27 | -0. 29375 | 0. 123 | 0. 297 | 3. 95E-23 | monocyte | CLSTN1     |
| TNFRSF14. 2 | 2. 73E-27 | 0. 419137 | 0. 22  | 0. 106 | 4. 09E-23 | monocyte | TNFRSF14   |
| IFT52. 5    | 2. 76E-27 | -0. 21327 | 0. 1   | 0. 27  | 4. 12E-23 | monocyte | IFT52      |
| CDCA7. 7    | 2. 85E-27 | -0. 37115 | 0. 013 | 0. 133 | 4. 25E-23 | monocyte | CDCA7      |
| PSMD11. 5   | 3. 05E-27 | -0. 16807 | 0. 219 | 0. 424 | 4. 55E-23 | monocyte | PSMD11     |
| SNRPB2. 5   | 3. 08E-27 | -0. 19176 | 0. 361 | 0. 582 | 4. 61E-23 | monocyte | SNRPB2     |
| CCDC80. 7   | 3. 13E-27 | -0. 33147 | 0. 006 | 0. 122 | 4. 68E-23 | monocyte | CCDC80     |
| BCAT1. 6    | 3. 16E-27 | -0. 29355 | 0. 087 | 0. 244 | 4. 72E-23 | monocyte | BCAT1      |
| PTTG1. 7    | 3. 17E-27 | -0. 38735 | 0. 088 | 0. 243 | 4. 73E-23 | monocyte | PTTG1      |
| SLC35B2. 5  | 3. 22E-27 | -0. 25568 | 0. 14  | 0. 315 | 4. 81E-23 | monocyte | SLC35B2    |
| PJA2. 6     | 3. 26E-27 | -0. 29714 | 0. 173 | 0. 349 | 4. 88E-23 | monocyte | PJA2       |
| FLVCR2. 5   | 3. 49E-27 | 0. 214559 | 0. 096 | 0. 029 | 5. 22E-23 | monocyte | FLVCR2     |
| DEAF1. 7    | 3. 49E-27 | -0. 20435 | 0. 07  | 0. 224 | 5. 22E-23 | monocyte | DEAF1      |
| RAP1A. 8    | 3. 54E-27 | 0. 519497 | 0. 581 | 0. 51  | 5. 30E-23 | monocyte | RAP1A      |
| HLTF. 6     | 3. 59E-27 | -0. 24814 | 0. 044 | 0. 185 | 5. 37E-23 | monocyte | HLTF       |
| PYGB. 5     | 3. 71E-27 | -0. 25664 | 0. 07  | 0. 223 | 5. 55E-23 | monocyte | PYGB       |
| TRA2B. 5    | 3. 77E-27 | -0. 13777 | 0. 326 | 0. 559 | 5. 63E-23 | monocyte | TRA2B      |
| PPP2CA. 3   | 3. 77E-27 | -0. 2409  | 0. 283 | 0. 497 | 5. 64E-23 | monocyte | PPP2CA     |
| PPP1R10. 4  | 3. 78E-27 | -0. 18864 | 0. 126 | 0. 302 | 5. 64E-23 | monocyte | PPP1R10    |
| ARL6IP6. 3  | 3. 80E-27 | -0. 23634 | 0. 121 | 0. 295 | 5. 68E-23 | monocyte | ARL6IP6    |
| ZIC1. 6     | 3. 84E-27 | -0. 28168 | 0. 007 | 0. 123 | 5. 74E-23 | monocyte | ZIC1       |
| GAD1. 8     | 3. 90E-27 | -0. 31569 | 0. 007 | 0. 122 | 5. 82E-23 | monocyte | GAD1       |
| NXT1. 4     | 4. 39E-27 | -0. 27785 | 0. 149 | 0. 332 | 6. 56E-23 | monocyte | NXT1       |
| ACP1. 3     | 4. 42E-27 | -0. 1794  | 0. 293 | 0. 517 | 6. 61E-23 | monocyte | ACP1       |

|             |           |           |        |        |           |          |                |
|-------------|-----------|-----------|--------|--------|-----------|----------|----------------|
| ACSS3. 6    | 4. 45E-27 | -0. 24682 | 0. 006 | 0. 121 | 6. 65E-23 | monocyte | ACSS3          |
| SARS. 6     | 4. 54E-27 | -0. 263   | 0. 254 | 0. 459 | 6. 78E-23 | monocyte | SARS           |
| GLRX. 7     | 4. 59E-27 | 0. 483931 | 0. 517 | 0. 377 | 6. 86E-23 | monocyte | GLRX           |
| NDP. 6      | 4. 75E-27 | -0. 32055 | 0. 006 | 0. 121 | 7. 10E-23 | monocyte | NDP            |
| PLEKHJ1. 4  | 4. 86E-27 | -0. 18129 | 0. 185 | 0. 383 | 7. 27E-23 | monocyte | PLEKHJ1        |
| SOX12. 7    | 5. 07E-27 | -0. 23067 | 0. 008 | 0. 125 | 7. 57E-23 | monocyte | SOX12          |
| TMEM25. 7   | 5. 17E-27 | -0. 28736 | 0. 013 | 0. 132 | 7. 73E-23 | monocyte | TMEM25         |
| COQ4. 4     | 5. 33E-27 | -0. 27134 | 0. 111 | 0. 281 | 7. 97E-23 | monocyte | COQ4           |
| EIF1AX. 5   | 5. 34E-27 | -0. 14667 | 0. 352 | 0. 578 | 7. 98E-23 | monocyte | EIF1AX         |
| SMOX. 7     | 5. 42E-27 | -0. 24585 | 0. 098 | 0. 26  | 8. 10E-23 | monocyte | SMOX           |
| HSBP1. 5    | 5. 44E-27 | -0. 1818  | 0. 508 | 0. 733 | 8. 13E-23 | monocyte | HSBP1          |
| NKTR. 5     | 5. 48E-27 | -0. 20039 | 0. 177 | 0. 373 | 8. 19E-23 | monocyte | NKTR           |
| C1QL1. 6    | 5. 61E-27 | -0. 3105  | 0. 008 | 0. 124 | 8. 39E-23 | monocyte | C1QL1          |
| GBGT1. 7    | 5. 62E-27 | 0. 253506 | 0. 123 | 0. 043 | 8. 41E-23 | monocyte | GBGT1          |
| ARNT2. 7    | 5. 73E-27 | -0. 25979 | 0. 006 | 0. 12  | 8. 57E-23 | monocyte | ARNT2          |
| DLX6-AS1. 6 | 6. 12E-27 | -0. 69123 | 0. 019 | 0. 14  | 9. 15E-23 | monocyte | DLX6-AS1       |
| PCDHB10. 7  | 6. 14E-27 | -0. 31488 | 0. 001 | 0. 111 | 9. 18E-23 | monocyte | PCDHB10        |
| CRIPT. 2    | 6. 49E-27 | -0. 27417 | 0. 157 | 0. 341 | 9. 70E-23 | monocyte | CRIPT          |
| MESP1. 5    | 6. 51E-27 | -0. 23865 | 0. 018 | 0. 141 | 9. 73E-23 | monocyte | MESP1          |
| GCAT. 8     | 6. 52E-27 | -0. 25004 | 0. 037 | 0. 172 | 9. 74E-23 | monocyte | GCAT           |
| ZNF821. 8   | 6. 83E-27 | -0. 2882  | 0. 038 | 0. 174 | 1. 02E-22 | monocyte | ZNF821         |
| LSM1. 3     | 6. 91E-27 | -0. 20551 | 0. 262 | 0. 473 | 1. 03E-22 | monocyte | LSM1           |
| PAM. 7      | 7. 07E-27 | -0. 26734 | 0. 039 | 0. 176 | 1. 06E-22 | monocyte | PAM            |
| LRIF1. 5    | 7. 08E-27 | -0. 31618 | 0. 062 | 0. 209 | 1. 06E-22 | monocyte | LRIF1          |
| CMAS. 3     | 7. 24E-27 | -0. 23007 | 0. 112 | 0. 28  | 1. 08E-22 | monocyte | CMAS           |
| TLK1. 5     | 7. 26E-27 | -0. 27646 | 0. 084 | 0. 241 | 1. 08E-22 | monocyte | TLK1           |
| NUBP2. 4    | 7. 28E-27 | -0. 2513  | 0. 201 | 0. 398 | 1. 09E-22 | monocyte | NUBP2          |
| YIF1A. 5    | 7. 37E-27 | -0. 25869 | 0. 241 | 0. 441 | 1. 10E-22 | monocyte | YIF1A          |
| COL4A1. 5   | 7. 52E-27 | -0. 24176 | 0. 006 | 0. 12  | 1. 12E-22 | monocyte | COL4A1         |
| DHCR7. 7    | 7. 92E-27 | -0. 24901 | 0. 049 | 0. 189 | 1. 18E-22 | monocyte | DHCR7          |
| NTHL1. 3    | 7. 98E-27 | -0. 29079 | 0. 054 | 0. 199 | 1. 19E-22 | monocyte | NTHL1          |
| RP11-346C   | 8. 32E-27 | 0. 152996 | 0. 028 | 0. 003 | 1. 24E-22 | monocyte | RP11-346C20. 3 |
| POLDIP2. 7  | 8. 44E-27 | -0. 20721 | 0. 173 | 0. 362 | 1. 26E-22 | monocyte | POLDIP2        |
| CNPY2. 6    | 8. 48E-27 | -0. 16708 | 0. 364 | 0. 587 | 1. 27E-22 | monocyte | CNPY2          |
| CHST12. 6   | 8. 78E-27 | -0. 292   | 0. 099 | 0. 259 | 1. 31E-22 | monocyte | CHST12         |
| RSRC2. 2    | 9. 01E-27 | -0. 15183 | 0. 272 | 0. 493 | 1. 35E-22 | monocyte | RSRC2          |
| MSM01. 6    | 9. 02E-27 | -0. 31254 | 0. 066 | 0. 213 | 1. 35E-22 | monocyte | MSM01          |
| ANXA2R. 7   | 9. 08E-27 | -0. 27    | 0. 031 | 0. 163 | 1. 36E-22 | monocyte | ANXA2R         |
| RNF149. 8   | 9. 22E-27 | 0. 476531 | 0. 397 | 0. 26  | 1. 38E-22 | monocyte | RNF149         |
| ZNF704. 7   | 9. 27E-27 | -0. 28938 | 0. 014 | 0. 133 | 1. 39E-22 | monocyte | ZNF704         |
| MLC1. 7     | 9. 29E-27 | -0. 21136 | 0. 029 | 0. 159 | 1. 39E-22 | monocyte | MLC1           |
| GLDN. 7     | 9. 89E-27 | 0. 420449 | 0. 192 | 0. 088 | 1. 48E-22 | monocyte | GLDN           |
| BRIX1. 6    | 9. 93E-27 | -0. 27428 | 0. 101 | 0. 267 | 1. 48E-22 | monocyte | BRIX1          |
| EFHC1. 7    | 1. 02E-26 | -0. 27383 | 0. 066 | 0. 218 | 1. 52E-22 | monocyte | EFHC1          |
| WSB2. 7     | 1. 05E-26 | -0. 26348 | 0. 081 | 0. 236 | 1. 57E-22 | monocyte | WSB2           |
| PABPN1. 5   | 1. 07E-26 | -0. 21483 | 0. 183 | 0. 37  | 1. 60E-22 | monocyte | PABPN1         |
| APOPT1. 4   | 1. 08E-26 | -0. 18983 | 0. 204 | 0. 397 | 1. 61E-22 | monocyte | APOPT1         |
| ACYP1. 5    | 1. 09E-26 | -0. 2918  | 0. 048 | 0. 188 | 1. 62E-22 | monocyte | ACYP1          |
| METTL2A. 5  | 1. 09E-26 | -0. 23744 | 0. 035 | 0. 169 | 1. 63E-22 | monocyte | METTL2A        |
| TUBB. 6     | 1. 10E-26 | -0. 14116 | 0. 612 | 0. 785 | 1. 64E-22 | monocyte | TUBB           |
| H2AFX. 7    | 1. 10E-26 | -0. 31762 | 0. 079 | 0. 232 | 1. 64E-22 | monocyte | H2AFX          |

|             |           |           |        |        |           |          |                |
|-------------|-----------|-----------|--------|--------|-----------|----------|----------------|
| NASP. 4     | 1. 10E-26 | -0. 14706 | 0. 221 | 0. 426 | 1. 65E-22 | monocyte | NASP           |
| TRUB2. 4    | 1. 13E-26 | -0. 24447 | 0. 071 | 0. 225 | 1. 69E-22 | monocyte | TRUB2          |
| SEPT4. 7    | 1. 13E-26 | -0. 4469  | 0. 018 | 0. 14  | 1. 69E-22 | monocyte | 4-Sep          |
| HMGCS1. 5   | 1. 13E-26 | -0. 24636 | 0. 052 | 0. 195 | 1. 69E-22 | monocyte | HMGCS1         |
| GGCT. 7     | 1. 13E-26 | -0. 20797 | 0. 199 | 0. 403 | 1. 69E-22 | monocyte | GGCT           |
| CWC27. 5    | 1. 18E-26 | -0. 25827 | 0. 11  | 0. 277 | 1. 77E-22 | monocyte | CWC27          |
| PHB. 5      | 1. 18E-26 | -0. 21205 | 0. 358 | 0. 572 | 1. 77E-22 | monocyte | PHB            |
| BARD1. 6    | 1. 21E-26 | -0. 27957 | 0. 028 | 0. 157 | 1. 81E-22 | monocyte | BARD1          |
| GTF3C6. 4   | 1. 23E-26 | -0. 13045 | 0. 306 | 0. 532 | 1. 84E-22 | monocyte | GTF3C6         |
| ZNF883. 7   | 1. 26E-26 | -0. 25948 | 0. 024 | 0. 151 | 1. 88E-22 | monocyte | ZNF883         |
| SNHG7. 4    | 1. 31E-26 | -0. 24561 | 0. 171 | 0. 362 | 1. 96E-22 | monocyte | SNHG7          |
| HBS1L. 5    | 1. 31E-26 | -0. 21178 | 0. 056 | 0. 203 | 1. 96E-22 | monocyte | HBS1L          |
| IGFBP3. 6   | 1. 32E-26 | -0. 6879  | 0. 072 | 0. 205 | 1. 97E-22 | monocyte | IGFBP3         |
| ISCU. 4     | 1. 33E-26 | 0. 463288 | 0. 6   | 0. 563 | 1. 99E-22 | monocyte | ISCU           |
| SEZ6. 8     | 1. 33E-26 | -0. 32523 | 0. 024 | 0. 149 | 1. 99E-22 | monocyte | SEZ6           |
| RBBP7. 6    | 1. 36E-26 | -0. 16236 | 0. 233 | 0. 441 | 2. 04E-22 | monocyte | RBBP7          |
| PON2. 8     | 1. 36E-26 | -0. 30292 | 0. 271 | 0. 466 | 2. 04E-22 | monocyte | PON2           |
| HNRNPAB. 7  | 1. 40E-26 | -0. 2627  | 0. 216 | 0. 413 | 2. 10E-22 | monocyte | HNRNPAB        |
| TCEB2. 6    | 1. 44E-26 | -0. 14206 | 0. 646 | 0. 839 | 2. 15E-22 | monocyte | TCEB2          |
| FADS1. 5    | 1. 45E-26 | -0. 24724 | 0. 075 | 0. 231 | 2. 17E-22 | monocyte | FADS1          |
| ENDOV. 5    | 1. 46E-26 | -0. 2766  | 0. 078 | 0. 233 | 2. 18E-22 | monocyte | ENDOV          |
| TSPAN12. 6  | 1. 50E-26 | -0. 30711 | 0. 013 | 0. 13  | 2. 24E-22 | monocyte | TSPAN12        |
| BZW2. 4     | 1. 51E-26 | -0. 27763 | 0. 115 | 0. 284 | 2. 26E-22 | monocyte | BZW2           |
| KLHL42. 7   | 1. 60E-26 | -0. 25937 | 0. 037 | 0. 17  | 2. 39E-22 | monocyte | KLHL42         |
| SP100. 7    | 1. 61E-26 | 0. 507372 | 0. 421 | 0. 275 | 2. 41E-22 | monocyte | SP100          |
| PPAT. 5     | 1. 65E-26 | -0. 27426 | 0. 027 | 0. 154 | 2. 46E-22 | monocyte | PPAT           |
| CPED1. 5    | 1. 65E-26 | 0. 262914 | 0. 091 | 0. 027 | 2. 46E-22 | monocyte | CPED1          |
| NELL2. 6    | 1. 67E-26 | -0. 31872 | 0. 004 | 0. 115 | 2. 50E-22 | monocyte | NELL2          |
| SH3BP5. 6   | 1. 73E-26 | -0. 30587 | 0. 067 | 0. 213 | 2. 58E-22 | monocyte | SH3BP5         |
| SPRY2. 7    | 1. 79E-26 | -0. 34341 | 0. 079 | 0. 23  | 2. 67E-22 | monocyte | SPRY2          |
| PEMT. 6     | 1. 81E-26 | -0. 27549 | 0. 073 | 0. 225 | 2. 70E-22 | monocyte | PEMT           |
| CPXM1. 7    | 1. 81E-26 | -0. 2674  | 0. 015 | 0. 134 | 2. 71E-22 | monocyte | CPXM1          |
| FAM53C. 4   | 1. 85E-26 | -0. 22065 | 0. 095 | 0. 254 | 2. 77E-22 | monocyte | FAM53C         |
| ENDOD1. 6   | 1. 86E-26 | -0. 26593 | 0. 026 | 0. 154 | 2. 78E-22 | monocyte | ENDOD1         |
| KCNF1. 8    | 1. 88E-26 | -0. 32019 | 0. 016 | 0. 133 | 2. 80E-22 | monocyte | KCNF1          |
| C19orf25. 1 | 1. 88E-26 | -0. 27517 | 0. 139 | 0. 313 | 2. 81E-22 | monocyte | C19orf25       |
| TRAPPC4. 6  | 1. 93E-26 | -0. 13631 | 0. 246 | 0. 462 | 2. 88E-22 | monocyte | TRAPPC4        |
| KCNMA1. 6   | 1. 95E-26 | 0. 51257  | 0. 245 | 0. 134 | 2. 91E-22 | monocyte | KCNMA1         |
| DUSP14. 6   | 1. 96E-26 | -0. 27678 | 0. 05  | 0. 191 | 2. 93E-22 | monocyte | DUSP14         |
| TCF12. 8    | 1. 97E-26 | -0. 26545 | 0. 124 | 0. 298 | 2. 95E-22 | monocyte | TCF12          |
| SYP. 8      | 2. 02E-26 | -0. 31329 | 0. 02  | 0. 144 | 3. 01E-22 | monocyte | SYP            |
| NCBP2-AS2   | 2. 11E-26 | -0. 20701 | 0. 117 | 0. 291 | 3. 15E-22 | monocyte | NCBP2-AS2      |
| SEC11C. 6   | 2. 26E-26 | -0. 1802  | 0. 302 | 0. 514 | 3. 38E-22 | monocyte | SEC11C         |
| TOB1. 2     | 2. 32E-26 | -0. 25999 | 0. 106 | 0. 268 | 3. 47E-22 | monocyte | TOB1           |
| RP11-556E   | 2. 33E-26 | 0. 471694 | 0. 129 | 0. 048 | 3. 48E-22 | monocyte | RP11-556E13. 1 |
| RRM1. 6     | 2. 33E-26 | -0. 2661  | 0. 054 | 0. 197 | 3. 48E-22 | monocyte | RRM1           |
| LRRN3. 7    | 2. 57E-26 | -0. 32511 | 0. 008 | 0. 123 | 3. 84E-22 | monocyte | LRRN3          |
| PTPRF. 7    | 2. 74E-26 | -0. 26004 | 0. 009 | 0. 125 | 4. 10E-22 | monocyte | PTPRF          |
| C5orf24. 6  | 2. 77E-26 | -0. 22433 | 0. 136 | 0. 31  | 4. 13E-22 | monocyte | C5orf24        |
| FAM171B. 6  | 2. 77E-26 | -0. 28118 | 0. 007 | 0. 12  | 4. 14E-22 | monocyte | FAM171B        |
| PRR4. 8     | 2. 92E-26 | -0. 22371 | 0. 074 | 0. 229 | 4. 36E-22 | monocyte | PRR4           |

|            |          |          |       |       |          |          |              |
|------------|----------|----------|-------|-------|----------|----------|--------------|
| TNPO2.6    | 2.97E-26 | -0.24432 | 0.05  | 0.191 | 4.44E-22 | monocyte | TNPO2        |
| SLC4A4.6   | 3.10E-26 | -0.31087 | 0.006 | 0.118 | 4.63E-22 | monocyte | SLC4A4       |
| NME7.8     | 3.17E-26 | -0.2825  | 0.039 | 0.172 | 4.73E-22 | monocyte | NME7         |
| MAN1A2.6   | 3.28E-26 | -0.26805 | 0.068 | 0.216 | 4.91E-22 | monocyte | MAN1A2       |
| TNFAIP2.6  | 3.38E-26 | 0.278633 | 0.162 | 0.067 | 5.06E-22 | monocyte | TNFAIP2      |
| SPOP.5     | 3.43E-26 | -0.16044 | 0.141 | 0.324 | 5.12E-22 | monocyte | SPOP         |
| DLX2.8     | 3.72E-26 | -0.45529 | 0.006 | 0.117 | 5.56E-22 | monocyte | DLX2         |
| AEBP1.7    | 3.72E-26 | -0.33881 | 0.014 | 0.131 | 5.56E-22 | monocyte | AEBP1        |
| KIAA1191.3 | 3.75E-26 | -0.24616 | 0.113 | 0.278 | 5.61E-22 | monocyte | KIAA1191     |
| CSPG5.7    | 3.93E-26 | -0.36666 | 0.006 | 0.117 | 5.88E-22 | monocyte | CSPG5        |
| TRPV2.8    | 4.02E-26 | 0.262513 | 0.137 | 0.052 | 6.00E-22 | monocyte | TRPV2        |
| TNFRSF19.4 | 4.05E-26 | -0.22481 | 0.004 | 0.114 | 6.05E-22 | monocyte | TNFRSF19     |
| MAPK6.4    | 4.06E-26 | -0.2789  | 0.047 | 0.183 | 6.06E-22 | monocyte | MAPK6        |
| CHST13.2   | 4.28E-26 | 0.122669 | 0.059 | 0.013 | 6.40E-22 | monocyte | CHST13       |
| TRIM37.6   | 4.29E-26 | -0.20265 | 0.03  | 0.16  | 6.42E-22 | monocyte | TRIM37       |
| DLD.5      | 4.57E-26 | -0.18001 | 0.171 | 0.359 | 6.83E-22 | monocyte | DLD          |
| POLR2J3.7  | 4.73E-26 | -0.23699 | 0.169 | 0.354 | 7.07E-22 | monocyte | POLR2J3      |
| CCDC14.5   | 4.80E-26 | -0.278   | 0.084 | 0.24  | 7.17E-22 | monocyte | CCDC14       |
| STAC3.8    | 5.14E-26 | 0.346866 | 0.167 | 0.071 | 7.68E-22 | monocyte | STAC3        |
| SRSF6.4    | 5.41E-26 | -0.19817 | 0.184 | 0.375 | 8.08E-22 | monocyte | SRSF6        |
| DLX1.8     | 5.53E-26 | -0.40613 | 0.01  | 0.124 | 8.26E-22 | monocyte | DLX1         |
| CCDC130.5  | 5.57E-26 | -0.1711  | 0.084 | 0.241 | 8.33E-22 | monocyte | CCDC130      |
| COA3.6     | 5.74E-26 | -0.15373 | 0.284 | 0.494 | 8.57E-22 | monocyte | COA3         |
| ITGB1BP1.5 | 5.79E-26 | -0.17434 | 0.214 | 0.402 | 8.65E-22 | monocyte | ITGB1BP1     |
| CLIP2.7    | 6.05E-26 | -0.27378 | 0.049 | 0.188 | 9.05E-22 | monocyte | CLIP2        |
| SYAP1.7    | 6.08E-26 | -0.18012 | 0.205 | 0.403 | 9.09E-22 | monocyte | SYAP1        |
| RP11-25K1  | 6.40E-26 | -0.25048 | 0.002 | 0.109 | 9.56E-22 | monocyte | RP11-25K19.1 |
| ARL9.7     | 6.40E-26 | -0.24511 | 0.004 | 0.113 | 9.57E-22 | monocyte | ARL9         |
| TMEM132B.6 | 6.48E-26 | -0.24723 | 0.003 | 0.111 | 9.69E-22 | monocyte | TMEM132B     |
| PALM.6     | 6.54E-26 | -0.2056  | 0.004 | 0.113 | 9.78E-22 | monocyte | PALM         |
| SIPA1.8    | 6.64E-26 | 0.441011 | 0.243 | 0.13  | 9.92E-22 | monocyte | SIPA1        |
| IL10RB-AS  | 6.87E-26 | 0.257282 | 0.113 | 0.039 | 1.03E-21 | monocyte | IL10RB-AS1   |
| SNRPD1.3   | 6.95E-26 | -0.16212 | 0.359 | 0.582 | 1.04E-21 | monocyte | SNRPD1       |
| ADORA1.6   | 7.09E-26 | -0.26252 | 0.015 | 0.131 | 1.06E-21 | monocyte | ADORA1       |
| ZNHIT3.2   | 7.50E-26 | -0.21806 | 0.206 | 0.4   | 1.12E-21 | monocyte | ZNHIT3       |
| SH3BGR.6   | 7.55E-26 | -0.38128 | 0.016 | 0.133 | 1.13E-21 | monocyte | SH3BGR       |
| ERRFI1.4   | 7.61E-26 | -0.32256 | 0.033 | 0.162 | 1.14E-21 | monocyte | ERRFI1       |
| TRIM44.7   | 7.86E-26 | -0.2665  | 0.132 | 0.301 | 1.17E-21 | monocyte | TRIM44       |
| ASNA1.5    | 8.18E-26 | -0.19782 | 0.323 | 0.537 | 1.22E-21 | monocyte | ASNA1        |
| ZFR.6      | 8.22E-26 | -0.23339 | 0.144 | 0.32  | 1.23E-21 | monocyte | ZFR          |
| HIP1R.7    | 8.25E-26 | -0.31123 | 0.007 | 0.118 | 1.23E-21 | monocyte | HIP1R        |
| B3GALT4.5  | 8.29E-26 | 0.202265 | 0.11  | 0.037 | 1.24E-21 | monocyte | B3GALT4      |
| TMEM181.8  | 8.41E-26 | -0.24498 | 0.041 | 0.174 | 1.26E-21 | monocyte | TMEM181      |
| UBE3A.6    | 8.46E-26 | -0.2405  | 0.132 | 0.301 | 1.26E-21 | monocyte | UBE3A        |
| VEZF1.7    | 8.61E-26 | -0.23122 | 0.093 | 0.251 | 1.29E-21 | monocyte | VEZF1        |
| MMP9.2     | 8.77E-26 | 0.226784 | 0.081 | 0.023 | 1.31E-21 | monocyte | MMP9         |
| NSFL1C.3   | 8.79E-26 | -0.21583 | 0.218 | 0.418 | 1.31E-21 | monocyte | NSFL1C       |
| HSP90AA1.8 | 8.86E-26 | -0.11203 | 0.728 | 0.902 | 1.32E-21 | monocyte | HSP90AA1     |
| NTRK2.7    | 8.92E-26 | -0.49378 | 0.015 | 0.13  | 1.33E-21 | monocyte | NTRK2        |
| SHD.7      | 9.47E-26 | -0.39861 | 0.018 | 0.136 | 1.42E-21 | monocyte | SHD          |
| TMEM121.6  | 9.93E-26 | -0.24698 | 0.005 | 0.114 | 1.48E-21 | monocyte | TMEM121      |

|             |          |          |       |       |          |          |                |
|-------------|----------|----------|-------|-------|----------|----------|----------------|
| OXCT1. 4    | 9.94E-26 | -0.24642 | 0.031 | 0.158 | 1.49E-21 | monocyte | OXCT1          |
| SERP2. 6    | 1.01E-25 | -0.29589 | 0.003 | 0.11  | 1.51E-21 | monocyte | SERP2          |
| ZNF131. 6   | 1.03E-25 | -0.2205  | 0.088 | 0.245 | 1.53E-21 | monocyte | ZNF131         |
| CLDN12. 8   | 1.03E-25 | -0.27143 | 0.025 | 0.148 | 1.53E-21 | monocyte | CLDN12         |
| NLGN4X. 6   | 1.05E-25 | -0.23376 | 0.005 | 0.114 | 1.56E-21 | monocyte | NLGN4X         |
| USP47. 4    | 1.08E-25 | -0.2332  | 0.098 | 0.258 | 1.62E-21 | monocyte | USP47          |
| CEBPZ. 5    | 1.09E-25 | -0.23013 | 0.117 | 0.285 | 1.63E-21 | monocyte | CEBPZ          |
| MGST1. 5    | 1.09E-25 | -0.72607 | 0.03  | 0.155 | 1.64E-21 | monocyte | MGST1          |
| C12orf10. 1 | 1.12E-25 | -0.19958 | 0.153 | 0.332 | 1.67E-21 | monocyte | C12orf10       |
| MAGI2. 7    | 1.18E-25 | -0.28765 | 0.005 | 0.114 | 1.76E-21 | monocyte | MAGI2          |
| EIF4H. 4    | 1.25E-25 | -0.16941 | 0.34  | 0.558 | 1.86E-21 | monocyte | EIF4H          |
| ZNF385D. 5  | 1.26E-25 | -0.24334 | 0.008 | 0.12  | 1.89E-21 | monocyte | ZNF385D        |
| YTHDC1. 5   | 1.29E-25 | -0.21842 | 0.142 | 0.316 | 1.93E-21 | monocyte | YTHDC1         |
| CCT5. 5     | 1.33E-25 | -0.15305 | 0.286 | 0.5   | 1.98E-21 | monocyte | CCT5           |
| ARPP19. 5   | 1.34E-25 | -0.17718 | 0.243 | 0.442 | 2.01E-21 | monocyte | ARPP19         |
| COPS7B. 4   | 1.40E-25 | -0.19741 | 0.063 | 0.209 | 2.10E-21 | monocyte | COPS7B         |
| RP11-410L 1 | 1.41E-25 | -0.2585  | 0.019 | 0.138 | 2.10E-21 | monocyte | RP11-410L14. 2 |
| NAV2. 5     | 1.43E-25 | -0.27575 | 0.013 | 0.127 | 2.14E-21 | monocyte | NAV2           |
| SNX20. 7    | 1.46E-25 | 0.250211 | 0.112 | 0.039 | 2.19E-21 | monocyte | SNX20          |
| GPS1. 5     | 1.54E-25 | -0.24877 | 0.162 | 0.339 | 2.30E-21 | monocyte | GPS1           |
| ACTN1. 5    | 1.54E-25 | -0.35394 | 0.113 | 0.268 | 2.31E-21 | monocyte | ACTN1          |
| SLC6A8. 4   | 1.55E-25 | -0.30467 | 0.013 | 0.127 | 2.31E-21 | monocyte | SLC6A8         |
| DSE. 8      | 1.56E-25 | 0.396488 | 0.248 | 0.128 | 2.34E-21 | monocyte | DSE            |
| SRP72. 3    | 1.57E-25 | -0.17927 | 0.275 | 0.474 | 2.35E-21 | monocyte | SRP72          |
| COX7A2. 3   | 1.64E-25 | -0.10801 | 0.63  | 0.826 | 2.45E-21 | monocyte | COX7A2         |
| DDX52. 5    | 1.68E-25 | -0.1822  | 0.097 | 0.257 | 2.51E-21 | monocyte | DDX52          |
| SAFB. 4     | 1.68E-25 | -0.23899 | 0.132 | 0.303 | 2.51E-21 | monocyte | SAFB           |
| GGPS1. 7    | 1.71E-25 | -0.15941 | 0.15  | 0.332 | 2.56E-21 | monocyte | GGPS1          |
| RIMKLB. 6   | 1.73E-25 | -0.22042 | 0.032 | 0.161 | 2.58E-21 | monocyte | RIMKLB         |
| ATCAY. 7    | 1.75E-25 | -0.33927 | 0.015 | 0.13  | 2.62E-21 | monocyte | ATCAY          |
| RHOA. 6     | 1.84E-25 | 0.355312 | 0.751 | 0.755 | 2.75E-21 | monocyte | RHOA           |
| PMP22. 6    | 1.85E-25 | -0.25383 | 0.259 | 0.442 | 2.76E-21 | monocyte | PMP22          |
| LCMT1. 2    | 1.98E-25 | -0.26837 | 0.113 | 0.276 | 2.97E-21 | monocyte | LCMT1          |
| FSTL1. 6    | 2.01E-25 | -0.21449 | 0.01  | 0.123 | 3.01E-21 | monocyte | FSTL1          |
| TMEM203. 6  | 2.02E-25 | -0.21603 | 0.103 | 0.265 | 3.02E-21 | monocyte | TMEM203        |
| PSMD12. 3   | 2.03E-25 | -0.18351 | 0.176 | 0.358 | 3.04E-21 | monocyte | PSMD12         |
| PFKM. 4     | 2.07E-25 | -0.20855 | 0.055 | 0.195 | 3.09E-21 | monocyte | PFKM           |
| HDDC2. 3    | 2.08E-25 | -0.1941  | 0.219 | 0.417 | 3.10E-21 | monocyte | HDDC2          |
| DYNLRB1. 4  | 2.08E-25 | -0.15992 | 0.463 | 0.683 | 3.11E-21 | monocyte | DYNLRB1        |
| SNRPF. 4    | 2.09E-25 | -0.14295 | 0.338 | 0.565 | 3.12E-21 | monocyte | SNRPF          |
| SESTD1. 5   | 2.12E-25 | -0.30372 | 0.04  | 0.169 | 3.16E-21 | monocyte | SESTD1         |
| PID1. 5     | 2.12E-25 | -0.29407 | 0.013 | 0.126 | 3.18E-21 | monocyte | PID1           |
| RAD21. 7    | 2.16E-25 | -0.22764 | 0.193 | 0.382 | 3.23E-21 | monocyte | RAD21          |
| FAM210B. 8  | 2.18E-25 | -0.30897 | 0.124 | 0.283 | 3.26E-21 | monocyte | FAM210B        |
| UBXN4. 4    | 2.22E-25 | -0.16817 | 0.341 | 0.562 | 3.32E-21 | monocyte | UBXN4          |
| FAM161A. 6  | 2.31E-25 | -0.24947 | 0.007 | 0.117 | 3.45E-21 | monocyte | FAM161A        |
| KYNU. 8     | 2.32E-25 | 0.313254 | 0.176 | 0.076 | 3.46E-21 | monocyte | KYNU           |
| ASRGL1. 7   | 2.34E-25 | -0.28171 | 0.07  | 0.212 | 3.50E-21 | monocyte | ASRGL1         |
| PDCD7. 4    | 2.36E-25 | -0.26142 | 0.081 | 0.233 | 3.53E-21 | monocyte | PDCD7          |
| CLUAP1. 7   | 2.43E-25 | -0.30052 | 0.045 | 0.179 | 3.63E-21 | monocyte | CLUAP1         |
| LIFR. 5     | 2.46E-25 | -0.25843 | 0.008 | 0.119 | 3.68E-21 | monocyte | LIFR           |

|             |           |           |        |        |           |          |                |
|-------------|-----------|-----------|--------|--------|-----------|----------|----------------|
| SYT1. 8     | 2. 49E-25 | -0. 41811 | 0. 003 | 0. 108 | 3. 73E-21 | monocyte | SYT1           |
| SRM. 6      | 2. 49E-25 | -0. 28028 | 0. 194 | 0. 38  | 3. 73E-21 | monocyte | SRM            |
| RP11-660L   | 2. 51E-25 | -0. 28315 | 0. 017 | 0. 133 | 3. 74E-21 | monocyte | RP11-660L16. 2 |
| HNRNPM. 6   | 2. 52E-25 | -0. 19752 | 0. 342 | 0. 561 | 3. 76E-21 | monocyte | HNRNPM         |
| FEM1C. 3    | 2. 55E-25 | -0. 22327 | 0. 026 | 0. 15  | 3. 80E-21 | monocyte | FEM1C          |
| PSPC1. 6    | 2. 56E-25 | -0. 22483 | 0. 073 | 0. 223 | 3. 82E-21 | monocyte | PSPC1          |
| SMARCA5. 6  | 2. 59E-25 | -0. 22347 | 0. 18  | 0. 363 | 3. 87E-21 | monocyte | SMARCA5        |
| ST3GAL6. 8  | 2. 59E-25 | 0. 422362 | 0. 209 | 0. 103 | 3. 87E-21 | monocyte | ST3GAL6        |
| NFIC. 4     | 2. 65E-25 | -0. 20768 | 0. 265 | 0. 449 | 3. 96E-21 | monocyte | NFIC           |
| ITGB7. 5    | 2. 80E-25 | 0. 18215  | 0. 076 | 0. 021 | 4. 19E-21 | monocyte | ITGB7          |
| NABP2. 5    | 2. 82E-25 | -0. 22255 | 0. 122 | 0. 289 | 4. 21E-21 | monocyte | NABP2          |
| KCNMB4. 7   | 2. 84E-25 | -0. 27486 | 0. 017 | 0. 133 | 4. 25E-21 | monocyte | KCNMB4         |
| KDM5B. 7    | 2. 96E-25 | -0. 23317 | 0. 042 | 0. 173 | 4. 42E-21 | monocyte | KDM5B          |
| PNN. 5      | 3. 08E-25 | -0. 16251 | 0. 215 | 0. 418 | 4. 60E-21 | monocyte | PNN            |
| GPATCH8. 6  | 3. 13E-25 | -0. 18446 | 0. 143 | 0. 318 | 4. 67E-21 | monocyte | GPATCH8        |
| ILKAP. 5    | 3. 19E-25 | -0. 21322 | 0. 088 | 0. 241 | 4. 76E-21 | monocyte | ILKAP          |
| IRS2. 4     | 3. 35E-25 | -0. 25638 | 0. 175 | 0. 363 | 5. 01E-21 | monocyte | IRS2           |
| DLL3. 7     | 3. 41E-25 | -0. 45916 | 0. 03  | 0. 154 | 5. 09E-21 | monocyte | DLL3           |
| FRMD4A. 7   | 3. 41E-25 | 0. 448355 | 0. 305 | 0. 177 | 5. 09E-21 | monocyte | FRMD4A         |
| DAPP1. 7    | 3. 47E-25 | 0. 231765 | 0. 08  | 0. 023 | 5. 19E-21 | monocyte | DAPP1          |
| KBTBD6. 6   | 3. 50E-25 | -0. 28425 | 0. 022 | 0. 141 | 5. 24E-21 | monocyte | KBTBD6         |
| RABEPK. 6   | 3. 55E-25 | -0. 23275 | 0. 067 | 0. 211 | 5. 30E-21 | monocyte | RABEPK         |
| RBM4B. 6    | 3. 57E-25 | -0. 22896 | 0. 061 | 0. 203 | 5. 34E-21 | monocyte | RBM4B          |
| YAE1D1. 6   | 3. 57E-25 | -0. 28635 | 0. 04  | 0. 171 | 5. 34E-21 | monocyte | YAE1D1         |
| TYRO3. 7    | 3. 78E-25 | -0. 19554 | 0. 008 | 0. 118 | 5. 65E-21 | monocyte | TYRO3          |
| LINC00511   | 3. 90E-25 | -0. 26563 | 0. 015 | 0. 128 | 5. 83E-21 | monocyte | LINC00511      |
| RP1-39G22   | 4. 00E-25 | -0. 22838 | 0. 021 | 0. 141 | 5. 98E-21 | monocyte | RP1-39G22. 7   |
| FN1. 6      | 4. 07E-25 | -0. 41005 | 0. 038 | 0. 165 | 6. 08E-21 | monocyte | FN1            |
| ARHGEF26. 4 | 4. 12E-25 | -0. 23737 | 0. 018 | 0. 134 | 6. 16E-21 | monocyte | ARHGEF26       |
| PXDN. 4     | 4. 18E-25 | -0. 22802 | 0. 004 | 0. 11  | 6. 25E-21 | monocyte | PXDN           |
| CIAPIN1. 4  | 4. 23E-25 | -0. 21715 | 0. 112 | 0. 273 | 6. 33E-21 | monocyte | CIAPIN1        |
| MTMR4. 7    | 4. 32E-25 | -0. 23012 | 0. 04  | 0. 171 | 6. 46E-21 | monocyte | MTMR4          |
| PSMD14. 5   | 4. 39E-25 | -0. 16935 | 0. 275 | 0. 484 | 6. 57E-21 | monocyte | PSMD14         |
| EXOSC8. 6   | 4. 63E-25 | -0. 15064 | 0. 13  | 0. 303 | 6. 92E-21 | monocyte | EXOSC8         |
| RP11-395G   | 4. 70E-25 | -0. 25667 | 0. 052 | 0. 188 | 7. 03E-21 | monocyte | RP11-395G23. 3 |
| CCL3L3. 5   | 4. 81E-25 | 1. 132722 | 0. 122 | 0. 048 | 7. 19E-21 | monocyte | CCL3L3         |
| SMARCA1. 6  | 4. 85E-25 | -0. 16829 | 0. 047 | 0. 182 | 7. 24E-21 | monocyte | SMARCA1        |
| PCM1. 6     | 4. 86E-25 | -0. 17161 | 0. 157 | 0. 339 | 7. 26E-21 | monocyte | PCM1           |
| KMT2A. 8    | 4. 88E-25 | -0. 25086 | 0. 094 | 0. 249 | 7. 29E-21 | monocyte | KMT2A          |
| ANKS1B. 7   | 4. 92E-25 | -0. 4194  | 0. 008 | 0. 117 | 7. 35E-21 | monocyte | ANKS1B         |
| TULP3. 5    | 5. 72E-25 | -0. 22695 | 0. 019 | 0. 135 | 8. 55E-21 | monocyte | TULP3          |
| PRDX5. 5    | 5. 86E-25 | -0. 20713 | 0. 545 | 0. 76  | 8. 76E-21 | monocyte | PRDX5          |
| STK25. 7    | 6. 07E-25 | -0. 17187 | 0. 142 | 0. 316 | 9. 07E-21 | monocyte | STK25          |
| MOB1A. 8    | 6. 18E-25 | 0. 525655 | 0. 442 | 0. 331 | 9. 23E-21 | monocyte | MOB1A          |
| MAPK1IP1L   | 6. 23E-25 | -0. 19598 | 0. 207 | 0. 391 | 9. 30E-21 | monocyte | MAPK1IP1L      |
| STAU1. 5    | 6. 29E-25 | -0. 23458 | 0. 198 | 0. 381 | 9. 39E-21 | monocyte | STAU1          |
| YTHDF1. 3   | 6. 34E-25 | -0. 26332 | 0. 056 | 0. 194 | 9. 48E-21 | monocyte | YTHDF1         |
| KLHDC2. 7   | 6. 61E-25 | -0. 18165 | 0. 14  | 0. 316 | 9. 88E-21 | monocyte | KLHDC2         |
| USP16. 2    | 6. 69E-25 | -0. 18543 | 0. 194 | 0. 378 | 1. 00E-20 | monocyte | USP16          |
| HNRNPD. 7   | 6. 69E-25 | -0. 23167 | 0. 236 | 0. 43  | 1. 00E-20 | monocyte | HNRNPD         |
| AKT1S1. 4   | 6. 73E-25 | -0. 22866 | 0. 097 | 0. 253 | 1. 01E-20 | monocyte | AKT1S1         |

|            |           |           |        |        |           |          |           |
|------------|-----------|-----------|--------|--------|-----------|----------|-----------|
| HSPA2. 5   | 6. 90E-25 | -0. 50885 | 0. 019 | 0. 134 | 1. 03E-20 | monocyte | HSPA2     |
| CEBPD. 5   | 6. 94E-25 | 0. 411483 | 0. 571 | 0. 449 | 1. 04E-20 | monocyte | CEBPD     |
| OSER1-AS1  | 7. 00E-25 | -0. 24395 | 0. 022 | 0. 141 | 1. 05E-20 | monocyte | OSER1-AS1 |
| VSTM2A. 6  | 7. 02E-25 | -0. 60003 | 0. 007 | 0. 114 | 1. 05E-20 | monocyte | VSTM2A    |
| APC. 8     | 7. 04E-25 | -0. 23662 | 0. 078 | 0. 225 | 1. 05E-20 | monocyte | APC       |
| KDM1A. 6   | 7. 53E-25 | -0. 25559 | 0. 071 | 0. 215 | 1. 13E-20 | monocyte | KDM1A     |
| CKS1B. 4   | 7. 55E-25 | -0. 23465 | 0. 111 | 0. 272 | 1. 13E-20 | monocyte | CKS1B     |
| FUNDC2. 2  | 8. 02E-25 | -0. 1684  | 0. 219 | 0. 419 | 1. 20E-20 | monocyte | FUNDC2    |
| SMARCE1. 5 | 8. 24E-25 | -0. 19414 | 0. 199 | 0. 394 | 1. 23E-20 | monocyte | SMARCE1   |
| B2M. 6     | 8. 35E-25 | 0. 266543 | 1      | 0. 968 | 1. 25E-20 | monocyte | B2M       |
| PLRG1. 4   | 8. 41E-25 | -0. 25032 | 0. 095 | 0. 25  | 1. 26E-20 | monocyte | PLRG1     |
| YWHAZ. 3   | 8. 41E-25 | -0. 21915 | 0. 343 | 0. 552 | 1. 26E-20 | monocyte | YWHAZ     |
| SRSF11. 4  | 8. 57E-25 | -0. 20311 | 0. 341 | 0. 557 | 1. 28E-20 | monocyte | SRSF11    |
| NABP1. 6   | 8. 73E-25 | 0. 375126 | 0. 23  | 0. 115 | 1. 30E-20 | monocyte | NABP1     |
| ETS2. 8    | 8. 76E-25 | 0. 39778  | 0. 333 | 0. 196 | 1. 31E-20 | monocyte | ETS2      |
| R3HCC1. 5  | 8. 80E-25 | -0. 26559 | 0. 136 | 0. 299 | 1. 32E-20 | monocyte | R3HCC1    |
| PTP4A2. 5  | 8. 85E-25 | -0. 24442 | 0. 277 | 0. 469 | 1. 32E-20 | monocyte | PTP4A2    |
| MLF1. 5    | 8. 86E-25 | -0. 27554 | 0. 102 | 0. 254 | 1. 32E-20 | monocyte | MLF1      |
| SEMA5A. 6  | 8. 89E-25 | -0. 26008 | 0. 006 | 0. 113 | 1. 33E-20 | monocyte | SEMA5A    |
| TRIM28. 5  | 9. 20E-25 | -0. 22034 | 0. 104 | 0. 263 | 1. 37E-20 | monocyte | TRIM28    |
| RSBN1. 6   | 9. 76E-25 | -0. 2452  | 0. 08  | 0. 229 | 1. 46E-20 | monocyte | RSBN1     |
| ITGAE. 2   | 9. 89E-25 | -0. 16752 | 0. 187 | 0. 381 | 1. 48E-20 | monocyte | ITGAE     |
| TDG. 5     | 9. 92E-25 | -0. 12372 | 0. 12  | 0. 287 | 1. 48E-20 | monocyte | TDG       |
| FAM127B. 7 | 9. 98E-25 | -0. 26543 | 0. 145 | 0. 314 | 1. 49E-20 | monocyte | FAM127B   |
| ZNF680. 6  | 1. 02E-24 | -0. 27233 | 0. 05  | 0. 185 | 1. 52E-20 | monocyte | ZNF680    |
| SUDS3. 6   | 1. 02E-24 | -0. 22316 | 0. 061 | 0. 199 | 1. 53E-20 | monocyte | SUDS3     |
| RB1CC1. 6  | 1. 09E-24 | -0. 23498 | 0. 126 | 0. 29  | 1. 62E-20 | monocyte | RB1CC1    |
| ZRANB2. 3  | 1. 10E-24 | -0. 24565 | 0. 163 | 0. 344 | 1. 65E-20 | monocyte | ZRANB2    |
| FBP1. 8    | 1. 10E-24 | 0. 339345 | 0. 22  | 0. 108 | 1. 65E-20 | monocyte | FBP1      |
| ANKIB1. 7  | 1. 11E-24 | -0. 23909 | 0. 075 | 0. 22  | 1. 65E-20 | monocyte | ANKIB1    |
| PREPL. 6   | 1. 13E-24 | -0. 245   | 0. 062 | 0. 2   | 1. 68E-20 | monocyte | PREPL     |
| PMM1. 6    | 1. 13E-24 | -0. 25331 | 0. 093 | 0. 246 | 1. 69E-20 | monocyte | PMM1      |
| CARD16. 6  | 1. 14E-24 | 0. 409527 | 0. 36  | 0. 218 | 1. 70E-20 | monocyte | CARD16    |
| ZNF626. 4  | 1. 17E-24 | -0. 23161 | 0. 03  | 0. 152 | 1. 76E-20 | monocyte | ZNF626    |
| TMC6. 8    | 1. 20E-24 | 0. 34269  | 0. 213 | 0. 102 | 1. 80E-20 | monocyte | TMC6      |
| PDGFRA. 7  | 1. 21E-24 | -0. 36843 | 0. 035 | 0. 158 | 1. 81E-20 | monocyte | PDGFRA    |
| NAMPT. 7   | 1. 22E-24 | -0. 29784 | 0. 275 | 0. 452 | 1. 82E-20 | monocyte | NAMPT     |
| SRSF1. 3   | 1. 29E-24 | -0. 14776 | 0. 218 | 0. 413 | 1. 93E-20 | monocyte | SRSF1     |
| DOK1. 8    | 1. 29E-24 | 0. 488794 | 0. 256 | 0. 145 | 1. 93E-20 | monocyte | DOK1      |
| PLP2. 7    | 1. 36E-24 | -0. 36786 | 0. 19  | 0. 358 | 2. 04E-20 | monocyte | PLP2      |
| FASTK. 5   | 1. 39E-24 | -0. 21134 | 0. 173 | 0. 352 | 2. 07E-20 | monocyte | FASTK     |
| CRK. 4     | 1. 41E-24 | -0. 221   | 0. 157 | 0. 331 | 2. 10E-20 | monocyte | CRK       |
| ERLEC1. 3  | 1. 44E-24 | -0. 15489 | 0. 192 | 0. 377 | 2. 16E-20 | monocyte | ERLEC1    |
| CNKSR3. 7  | 1. 49E-24 | -0. 21148 | 0. 015 | 0. 127 | 2. 22E-20 | monocyte | CNKSR3    |
| IL4R. 8    | 1. 50E-24 | 0. 287087 | 0. 152 | 0. 064 | 2. 24E-20 | monocyte | IL4R      |
| TPR. 4     | 1. 51E-24 | -0. 16964 | 0. 232 | 0. 42  | 2. 25E-20 | monocyte | TPR       |
| ALDOC. 5   | 1. 53E-24 | -0. 42165 | 0. 04  | 0. 166 | 2. 29E-20 | monocyte | ALDOC     |
| B4GALT5. 5 | 1. 56E-24 | -0. 31213 | 0. 07  | 0. 208 | 2. 33E-20 | monocyte | B4GALT5   |
| PLA2G5. 7  | 1. 59E-24 | -0. 45186 | 0. 009 | 0. 117 | 2. 38E-20 | monocyte | PLA2G5    |
| NFASC. 6   | 1. 61E-24 | -0. 35135 | 0. 006 | 0. 111 | 2. 40E-20 | monocyte | NFASC     |
| ROM1. 7    | 1. 61E-24 | -0. 33115 | 0. 013 | 0. 122 | 2. 40E-20 | monocyte | ROM1      |

|              |           |           |        |        |           |          |                |
|--------------|-----------|-----------|--------|--------|-----------|----------|----------------|
| BSDC1. 6     | 1. 61E-24 | -0. 14166 | 0. 134 | 0. 304 | 2. 40E-20 | monocyte | BSDC1          |
| LRRN1. 7     | 1. 64E-24 | -0. 29898 | 0. 008 | 0. 115 | 2. 45E-20 | monocyte | LRRN1          |
| DZIP1. 6     | 1. 66E-24 | -0. 2159  | 0. 006 | 0. 111 | 2. 49E-20 | monocyte | DZIP1          |
| PSMB4. 3     | 1. 67E-24 | -0. 14689 | 0. 236 | 0. 433 | 2. 49E-20 | monocyte | PSMB4          |
| RAD23B. 3    | 1. 70E-24 | -0. 21993 | 0. 207 | 0. 395 | 2. 54E-20 | monocyte | RAD23B         |
| SNRNP200. 1. | 1. 71E-24 | -0. 27068 | 0. 13  | 0. 298 | 2. 56E-20 | monocyte | SNRNP200       |
| ABCD3. 5     | 1. 74E-24 | -0. 21887 | 0. 066 | 0. 207 | 2. 61E-20 | monocyte | ABCD3          |
| DHFR. 6      | 1. 77E-24 | -0. 20564 | 0. 035 | 0. 161 | 2. 64E-20 | monocyte | DHFR           |
| ST3GAL4. 4   | 1. 79E-24 | -0. 25985 | 0. 018 | 0. 132 | 2. 68E-20 | monocyte | ST3GAL4        |
| HNRNPU. 3    | 1. 80E-24 | -0. 18798 | 0. 337 | 0. 547 | 2. 69E-20 | monocyte | HNRNPU         |
| ACBD6. 4     | 1. 86E-24 | -0. 23978 | 0. 126 | 0. 29  | 2. 78E-20 | monocyte | ACBD6          |
| MACF1. 5     | 1. 93E-24 | -0. 24834 | 0. 166 | 0. 336 | 2. 89E-20 | monocyte | MACF1          |
| CSRNP3. 7    | 1. 93E-24 | -0. 31432 | 0. 004 | 0. 107 | 2. 89E-20 | monocyte | CSRNP3         |
| DNAJC18. 5   | 1. 94E-24 | -0. 24118 | 0. 018 | 0. 132 | 2. 90E-20 | monocyte | DNAJC18        |
| PLK2. 5      | 1. 95E-24 | -0. 22896 | 0. 026 | 0. 147 | 2. 92E-20 | monocyte | PLK2           |
| ODF3B. 8     | 1. 99E-24 | 0. 351575 | 0. 185 | 0. 086 | 2. 98E-20 | monocyte | ODF3B          |
| GAMT. 6      | 2. 00E-24 | -0. 21482 | 0. 145 | 0. 313 | 2. 99E-20 | monocyte | GAMT           |
| CHID1. 3     | 2. 09E-24 | -0. 20436 | 0. 259 | 0. 452 | 3. 13E-20 | monocyte | CHID1          |
| QDPR. 6      | 2. 17E-24 | -0. 28234 | 0. 192 | 0. 375 | 3. 24E-20 | monocyte | QDPR           |
| SIGLEC11. 2. | 2. 17E-24 | 0. 190272 | 0. 046 | 0. 009 | 3. 25E-20 | monocyte | SIGLEC11       |
| CTNNA1. 2    | 2. 20E-24 | -0. 16046 | 0. 238 | 0. 438 | 3. 28E-20 | monocyte | CTNNA1         |
| DYNC1I1. 8   | 2. 24E-24 | -0. 37619 | 0. 007 | 0. 113 | 3. 34E-20 | monocyte | DYNC1I1        |
| STXBP1. 7    | 2. 24E-24 | -0. 26661 | 0. 018 | 0. 13  | 3. 35E-20 | monocyte | STXBP1         |
| POMGNT2. 6   | 2. 24E-24 | -0. 2557  | 0. 03  | 0. 15  | 3. 35E-20 | monocyte | POMGNT2        |
| MAP2K2. 6    | 2. 27E-24 | -0. 28737 | 0. 153 | 0. 315 | 3. 40E-20 | monocyte | MAP2K2         |
| SMIM7. 4     | 2. 28E-24 | -0. 18755 | 0. 309 | 0. 523 | 3. 41E-20 | monocyte | SMIM7          |
| ACSL3. 4     | 2. 29E-24 | -0. 24732 | 0. 182 | 0. 355 | 3. 42E-20 | monocyte | ACSL3          |
| RP11-798M    | 2. 29E-24 | -0. 25459 | 0. 033 | 0. 159 | 3. 42E-20 | monocyte | RP11-798M19. 6 |
| CELF4. 8     | 2. 47E-24 | -0. 38775 | 0. 001 | 0. 101 | 3. 69E-20 | monocyte | CELF4          |
| EZR. 6       | 2. 62E-24 | -0. 19348 | 0. 18  | 0. 357 | 3. 92E-20 | monocyte | EZR            |
| ECI2. 5      | 2. 63E-24 | -0. 24794 | 0. 167 | 0. 337 | 3. 93E-20 | monocyte | ECI2           |
| PRPF31. 4    | 2. 65E-24 | -0. 1091  | 0. 215 | 0. 408 | 3. 96E-20 | monocyte | PRPF31         |
| TRMT6. 3     | 2. 75E-24 | -0. 21828 | 0. 054 | 0. 189 | 4. 11E-20 | monocyte | TRMT6          |
| ZHX3. 5      | 2. 83E-24 | -0. 24699 | 0. 017 | 0. 129 | 4. 22E-20 | monocyte | ZHX3           |
| CCT4. 4      | 2. 87E-24 | -0. 14762 | 0. 356 | 0. 578 | 4. 30E-20 | monocyte | CCT4           |
| RHOJ. 6      | 2. 93E-24 | -0. 21973 | 0. 005 | 0. 108 | 4. 37E-20 | monocyte | RHOJ           |
| RP11-390E    | 2. 99E-24 | -0. 32498 | 0. 02  | 0. 134 | 4. 47E-20 | monocyte | RP11-390E23. 6 |
| MED17. 4     | 3. 06E-24 | -0. 24854 | 0. 064 | 0. 201 | 4. 57E-20 | monocyte | MED17          |
| CHST2. 5     | 3. 07E-24 | -0. 26676 | 0. 028 | 0. 146 | 4. 59E-20 | monocyte | CHST2          |
| ZCCHC17. 5   | 3. 22E-24 | -0. 20799 | 0. 184 | 0. 366 | 4. 82E-20 | monocyte | ZCCHC17        |
| SMARCC2. 7   | 3. 24E-24 | -0. 25101 | 0. 117 | 0. 276 | 4. 83E-20 | monocyte | SMARCC2        |
| NFYB. 4      | 3. 25E-24 | -0. 22704 | 0. 058 | 0. 195 | 4. 85E-20 | monocyte | NFYB           |
| P2RY12. 4    | 3. 26E-24 | 0. 34722  | 0. 063 | 0. 016 | 4. 87E-20 | monocyte | P2RY12         |
| SMARCB1. 6   | 3. 39E-24 | -0. 20614 | 0. 238 | 0. 43  | 5. 06E-20 | monocyte | SMARCB1        |
| DIRAS3. 7    | 3. 43E-24 | -0. 393   | 0. 019 | 0. 133 | 5. 13E-20 | monocyte | DIRAS3         |
| KRR1         | 3. 51E-24 | -0. 20464 | 0. 091 | 0. 244 | 5. 24E-20 | monocyte | KRR1           |
| CSNK1G3. 6   | 3. 51E-24 | -0. 21633 | 0. 038 | 0. 163 | 5. 25E-20 | monocyte | CSNK1G3        |
| FES. 8       | 3. 68E-24 | 0. 338007 | 0. 165 | 0. 072 | 5. 51E-20 | monocyte | FES            |
| ANGPTL2. 5   | 3. 75E-24 | -0. 32475 | 0. 005 | 0. 108 | 5. 60E-20 | monocyte | ANGPTL2        |
| PARVA. 6     | 3. 84E-24 | -0. 21285 | 0. 003 | 0. 104 | 5. 73E-20 | monocyte | PARVA          |
| ZNF493. 6    | 3. 85E-24 | -0. 19724 | 0. 04  | 0. 168 | 5. 75E-20 | monocyte | ZNF493         |



|           |          |          |       |       |          |          |            |
|-----------|----------|----------|-------|-------|----------|----------|------------|
| KCTD13.7  | 4.07E-24 | -0.23986 | 0.028 | 0.148 | 6.08E-20 | monocyte | KCTD13     |
| ERH.4     | 4.07E-24 | -0.14579 | 0.515 | 0.731 | 6.08E-20 | monocyte | ERH        |
| DCAKD.6   | 4.09E-24 | -0.23165 | 0.028 | 0.148 | 6.11E-20 | monocyte | DCAKD      |
| FARSA.3   | 4.22E-24 | -0.23653 | 0.159 | 0.334 | 6.30E-20 | monocyte | FARSA      |
| CDKN2AIPN | 4.22E-24 | -0.16483 | 0.104 | 0.262 | 6.31E-20 | monocyte | CDKN2AIPNL |
| AIF1L.7   | 4.26E-24 | -0.39326 | 0.014 | 0.122 | 6.37E-20 | monocyte | AIF1L      |
| ATXN7L3B  | 4.30E-24 | -0.2495  | 0.056 | 0.192 | 6.42E-20 | monocyte | ATXN7L3B   |
| ARMC1.6   | 4.37E-24 | -0.17978 | 0.117 | 0.277 | 6.53E-20 | monocyte | ARMC1      |
| PDZD11.4  | 4.39E-24 | -0.2205  | 0.191 | 0.373 | 6.56E-20 | monocyte | PDZD11     |
| ABCF2.5   | 4.45E-24 | -0.27831 | 0.082 | 0.227 | 6.66E-20 | monocyte | ABCF2      |
| FAF2.5    | 4.50E-24 | -0.23553 | 0.063 | 0.2   | 6.72E-20 | monocyte | FAF2       |
| NDUFB10.2 | 4.51E-24 | -0.14612 | 0.426 | 0.659 | 6.75E-20 | monocyte | NDUFB10    |
| SECTM1.2  | 4.64E-24 | 0.121298 | 0.064 | 0.016 | 6.93E-20 | monocyte | SECTM1     |
| ANKRD46.6 | 4.83E-24 | -0.26149 | 0.041 | 0.167 | 7.22E-20 | monocyte | ANKRD46    |
| BHLHE41.6 | 4.86E-24 | 0.544347 | 0.316 | 0.198 | 7.27E-20 | monocyte | BHLHE41    |
| LGALS3.6  | 4.94E-24 | -0.47222 | 0.332 | 0.494 | 7.39E-20 | monocyte | LGALS3     |
| TUBB6.6   | 5.45E-24 | -0.34395 | 0.062 | 0.195 | 8.15E-20 | monocyte | TUBB6      |
| TNFAIP1.6 | 5.50E-24 | -0.2093  | 0.053 | 0.186 | 8.22E-20 | monocyte | TNFAIP1    |
| CNOT4.5   | 5.57E-24 | -0.22862 | 0.124 | 0.285 | 8.33E-20 | monocyte | CNOT4      |
| B9D1.5    | 5.81E-24 | -0.28876 | 0.006 | 0.109 | 8.68E-20 | monocyte | B9D1       |
| TXNL4A.4  | 5.84E-24 | -0.26493 | 0.238 | 0.426 | 8.73E-20 | monocyte | TXNL4A     |
| PAFAH1B2  | 5.87E-24 | -0.23627 | 0.167 | 0.34  | 8.78E-20 | monocyte | PAFAH1B2   |
| AKTIP.6   | 5.99E-24 | -0.23597 | 0.049 | 0.179 | 8.94E-20 | monocyte | AKTIP      |
| ALDH3A2.4 | 6.01E-24 | -0.26127 | 0.095 | 0.244 | 8.97E-20 | monocyte | ALDH3A2    |
| TNFAIP8.7 | 6.13E-24 | 0.346671 | 0.149 | 0.062 | 9.17E-20 | monocyte | TNFAIP8    |
| TMEM183A  | 6.26E-24 | -0.21367 | 0.141 | 0.305 | 9.36E-20 | monocyte | TMEM183A   |
| SYNC.6    | 6.29E-24 | -0.20025 | 0.052 | 0.187 | 9.41E-20 | monocyte | SYNC       |
| HSPA9.4   | 6.30E-24 | -0.21297 | 0.296 | 0.504 | 9.41E-20 | monocyte | HSPA9      |
| TM4SF1.8  | 6.40E-24 | -0.33516 | 0.014 | 0.121 | 9.56E-20 | monocyte | TM4SF1     |
| DOCK4.6   | 6.48E-24 | 0.41011  | 0.268 | 0.152 | 9.68E-20 | monocyte | DOCK4      |
| ASF1A.6   | 6.57E-24 | -0.19901 | 0.095 | 0.247 | 9.81E-20 | monocyte | ASF1A      |
| ZNF580.6  | 6.73E-24 | -0.22899 | 0.14  | 0.305 | 1.01E-19 | monocyte | ZNF580     |
| AKAP7.6   | 6.80E-24 | -0.28113 | 0.068 | 0.206 | 1.02E-19 | monocyte | AKAP7      |
| ZNF254.5  | 7.03E-24 | -0.25594 | 0.03  | 0.151 | 1.05E-19 | monocyte | ZNF254     |
| LRRTM2.7  | 7.09E-24 | -0.23859 | 0.007 | 0.111 | 1.06E-19 | monocyte | LRRTM2     |
| ADNP.7    | 7.42E-24 | -0.22102 | 0.066 | 0.204 | 1.11E-19 | monocyte | ADNP       |
| SERPINH1  | 7.58E-24 | -0.27825 | 0.079 | 0.22  | 1.13E-19 | monocyte | SERPINH1   |
| PFDN4.6   | 7.63E-24 | -0.15223 | 0.188 | 0.374 | 1.14E-19 | monocyte | PFDN4      |
| REPIN1.8  | 7.69E-24 | -0.24183 | 0.126 | 0.287 | 1.15E-19 | monocyte | REPIN1     |
| TRIAP1.5  | 7.70E-24 | -0.15944 | 0.151 | 0.328 | 1.15E-19 | monocyte | TRIAP1     |
| APBB2.6   | 8.06E-24 | -0.27533 | 0.014 | 0.121 | 1.21E-19 | monocyte | APBB2      |
| RRAGA.3   | 8.16E-24 | -0.21913 | 0.215 | 0.404 | 1.22E-19 | monocyte | RRAGA      |
| IQCK.5    | 8.57E-24 | -0.24353 | 0.022 | 0.136 | 1.28E-19 | monocyte | IQCK       |
| MAP6.6    | 8.60E-24 | -0.22068 | 0.004 | 0.104 | 1.29E-19 | monocyte | MAP6       |
| DCAF16.4  | 8.91E-24 | -0.2674  | 0.018 | 0.128 | 1.33E-19 | monocyte | DCAF16     |
| RGS6.6    | 9.32E-24 | -0.24745 | 0.001 | 0.098 | 1.39E-19 | monocyte | RGS6       |
| CRY1.4    | 9.34E-24 | -0.24795 | 0.028 | 0.146 | 1.40E-19 | monocyte | CRY1       |
| NDUFS1.5  | 9.34E-24 | -0.15146 | 0.11  | 0.268 | 1.40E-19 | monocyte | NDUFS1     |
| TLE2.7    | 9.69E-24 | -0.2558  | 0.001 | 0.098 | 1.45E-19 | monocyte | TLE2       |
| C17orf58  | 9.86E-24 | -0.24539 | 0.062 | 0.197 | 1.47E-19 | monocyte | C17orf58   |
| RIN2.6    | 9.88E-24 | 0.544687 | 0.22  | 0.117 | 1.48E-19 | monocyte | RIN2       |

|             |           |           |        |        |           |          |           |
|-------------|-----------|-----------|--------|--------|-----------|----------|-----------|
| CLTB. 6     | 1. 00E-23 | -0. 22413 | 0. 26  | 0. 457 | 1. 50E-19 | monocyte | CLTB      |
| NAP1L3. 6   | 1. 02E-23 | -0. 27554 | 0. 007 | 0. 11  | 1. 52E-19 | monocyte | NAP1L3    |
| ID1. 6      | 1. 03E-23 | -0. 30822 | 0. 019 | 0. 13  | 1. 54E-19 | monocyte | ID1       |
| CSAD. 6     | 1. 05E-23 | -0. 17899 | 0. 047 | 0. 179 | 1. 56E-19 | monocyte | CSAD      |
| KPNA2. 5    | 1. 09E-23 | -0. 25896 | 0. 197 | 0. 369 | 1. 63E-19 | monocyte | KPNA2     |
| DNM1L. 5    | 1. 11E-23 | -0. 24857 | 0. 096 | 0. 244 | 1. 66E-19 | monocyte | DNM1L     |
| ELN. 5      | 1. 13E-23 | -0. 35531 | 0. 011 | 0. 117 | 1. 69E-19 | monocyte | ELN       |
| FAM221A. 8  | 1. 14E-23 | -0. 21508 | 0. 055 | 0. 189 | 1. 70E-19 | monocyte | FAM221A   |
| RAD23A. 4   | 1. 17E-23 | -0. 17825 | 0. 372 | 0. 584 | 1. 74E-19 | monocyte | RAD23A    |
| HOXA7. 6    | 1. 18E-23 | -0. 34634 | 0. 007 | 0. 11  | 1. 77E-19 | monocyte | HOXA7     |
| GABARAPL2   | 1. 19E-23 | -0. 14388 | 0. 537 | 0. 761 | 1. 78E-19 | monocyte | GABARAPL2 |
| B4GALNT1. 1 | 1. 21E-23 | -0. 4086  | 0. 034 | 0. 153 | 1. 81E-19 | monocyte | B4GALNT1  |
| DCUN1D5. 3  | 1. 24E-23 | -0. 18789 | 0. 138 | 0. 301 | 1. 85E-19 | monocyte | DCUN1D5   |
| EFNB2. 7    | 1. 24E-23 | -0. 19223 | 0. 006 | 0. 108 | 1. 86E-19 | monocyte | EFNB2     |
| DDX56. 5    | 1. 25E-23 | -0. 17913 | 0. 113 | 0. 27  | 1. 87E-19 | monocyte | DDX56     |
| GLCCI1. 7   | 1. 31E-23 | -0. 36872 | 0. 04  | 0. 161 | 1. 96E-19 | monocyte | GLCCI1    |
| SEC63. 3    | 1. 32E-23 | -0. 16873 | 0. 216 | 0. 403 | 1. 98E-19 | monocyte | SEC63     |
| BLCAP. 5    | 1. 34E-23 | -0. 19254 | 0. 14  | 0. 304 | 2. 00E-19 | monocyte | BLCAP     |
| POLR2B. 6   | 1. 34E-23 | -0. 27523 | 0. 119 | 0. 275 | 2. 00E-19 | monocyte | POLR2B    |
| DCBLD2. 7   | 1. 34E-23 | -0. 26487 | 0. 034 | 0. 153 | 2. 01E-19 | monocyte | DCBLD2    |
| PPP5C. 5    | 1. 35E-23 | -0. 23964 | 0. 054 | 0. 187 | 2. 02E-19 | monocyte | PPP5C     |
| CKLF. 8     | 1. 37E-23 | 0. 482039 | 0. 584 | 0. 514 | 2. 05E-19 | monocyte | CKLF      |
| GTF2H2. 6   | 1. 42E-23 | -0. 21443 | 0. 058 | 0. 196 | 2. 12E-19 | monocyte | GTF2H2    |
| TMC8. 6     | 1. 42E-23 | 0. 246405 | 0. 105 | 0. 037 | 2. 12E-19 | monocyte | TMC8      |
| CPT1C. 6    | 1. 44E-23 | -0. 23321 | 0. 009 | 0. 114 | 2. 15E-19 | monocyte | CPT1C     |
| PPP2R1A. 5  | 1. 53E-23 | -0. 13776 | 0. 32  | 0. 532 | 2. 29E-19 | monocyte | PPP2R1A   |
| TLR6. 1     | 1. 56E-23 | 0. 148146 | 0. 061 | 0. 015 | 2. 33E-19 | monocyte | TLR6      |
| WHSC1. 7    | 1. 61E-23 | -0. 24358 | 0. 04  | 0. 163 | 2. 41E-19 | monocyte | WHSC1     |
| SRPK1. 5    | 1. 64E-23 | -0. 22056 | 0. 048 | 0. 176 | 2. 45E-19 | monocyte | SRPK1     |
| FAIM. 4     | 1. 68E-23 | -0. 23705 | 0. 035 | 0. 156 | 2. 52E-19 | monocyte | FAIM      |
| SNRPG. 4    | 1. 73E-23 | -0. 17812 | 0. 45  | 0. 656 | 2. 58E-19 | monocyte | SNRPG     |
| LSM5. 5     | 1. 73E-23 | -0. 13759 | 0. 318 | 0. 524 | 2. 59E-19 | monocyte | LSM5      |
| PLA2G15. 7  | 1. 74E-23 | 0. 483978 | 0. 238 | 0. 129 | 2. 59E-19 | monocyte | PLA2G15   |
| ASAP2. 6    | 1. 75E-23 | -0. 20016 | 0. 004 | 0. 103 | 2. 62E-19 | monocyte | ASAP2     |
| LRRC4C. 5   | 1. 76E-23 | -0. 2875  | 0. 004 | 0. 104 | 2. 63E-19 | monocyte | LRRC4C    |
| MAP4K4. 6   | 1. 79E-23 | -0. 17396 | 0. 106 | 0. 261 | 2. 67E-19 | monocyte | MAP4K4    |
| UBE2N. 5    | 1. 81E-23 | -0. 13124 | 0. 328 | 0. 539 | 2. 70E-19 | monocyte | UBE2N     |
| PLCB2. 8    | 1. 89E-23 | 0. 331638 | 0. 135 | 0. 054 | 2. 83E-19 | monocyte | PLCB2     |
| ARHGAP22. 1 | 1. 91E-23 | 0. 345009 | 0. 154 | 0. 067 | 2. 85E-19 | monocyte | ARHGAP22  |
| COPRS. 5    | 1. 98E-23 | -0. 21825 | 0. 177 | 0. 348 | 2. 96E-19 | monocyte | COPRS     |
| HSPA13. 7   | 2. 01E-23 | -0. 26954 | 0. 072 | 0. 211 | 3. 00E-19 | monocyte | HSPA13    |
| GDAP1L1. 7  | 2. 02E-23 | -0. 35298 | 0. 007 | 0. 109 | 3. 02E-19 | monocyte | GDAP1L1   |
| CCNI. 6     | 2. 03E-23 | -0. 19176 | 0. 541 | 0. 72  | 3. 03E-19 | monocyte | CCNI      |
| ROB2. 7     | 2. 03E-23 | -0. 22727 | 0. 011 | 0. 116 | 3. 03E-19 | monocyte | ROB2      |
| SUCLG1. 5   | 2. 22E-23 | -0. 21057 | 0. 257 | 0. 452 | 3. 31E-19 | monocyte | SUCLG1    |
| MYO1G. 8    | 2. 25E-23 | 0. 169549 | 0. 137 | 0. 054 | 3. 36E-19 | monocyte | MYO1G     |
| POMGNT1. 6  | 2. 38E-23 | -0. 18813 | 0. 113 | 0. 271 | 3. 56E-19 | monocyte | POMGNT1   |
| SWI5. 6     | 2. 62E-23 | -0. 24318 | 0. 103 | 0. 258 | 3. 92E-19 | monocyte | SWI5      |
| MRT04. 2    | 2. 73E-23 | -0. 16479 | 0. 102 | 0. 258 | 4. 08E-19 | monocyte | MRT04     |
| POU2F2. 6   | 2. 74E-23 | 0. 40739  | 0. 239 | 0. 126 | 4. 10E-19 | monocyte | POU2F2    |
| TSSC4. 5    | 2. 81E-23 | -0. 24331 | 0. 157 | 0. 326 | 4. 20E-19 | monocyte | TSSC4     |

|           |          |          |       |       |          |          |             |
|-----------|----------|----------|-------|-------|----------|----------|-------------|
| TMEM100.8 | 2.85E-23 | -0.38228 | 0.001 | 0.096 | 4.26E-19 | monocyte | TMEM100     |
| ALKBH4.6  | 2.96E-23 | -0.21938 | 0.071 | 0.209 | 4.42E-19 | monocyte | ALKBH4      |
| C19orf43. | 3.02E-23 | -0.19693 | 0.489 | 0.689 | 4.52E-19 | monocyte | C19orf43    |
| RP11-51J9 | 3.06E-23 | -0.34952 | 0.032 | 0.15  | 4.58E-19 | monocyte | RP11-51J9.5 |
| CLASP1.7  | 3.12E-23 | -0.19855 | 0.03  | 0.147 | 4.66E-19 | monocyte | CLASP1      |
| RASD1.5   | 3.20E-23 | -0.36236 | 0.027 | 0.143 | 4.78E-19 | monocyte | RASD1       |
| SFRP1.7   | 3.55E-23 | -0.21331 | 0.006 | 0.106 | 5.30E-19 | monocyte | SFRP1       |
| DLG1.7    | 3.61E-23 | -0.16824 | 0.048 | 0.176 | 5.39E-19 | monocyte | DLG1        |
| MZT2A.5   | 3.68E-23 | -0.2512  | 0.242 | 0.429 | 5.49E-19 | monocyte | MZT2A       |
| TMC03.2   | 3.68E-23 | -0.23933 | 0.077 | 0.215 | 5.49E-19 | monocyte | TMC03       |
| E2F6.4    | 3.73E-23 | -0.1275  | 0.033 | 0.154 | 5.57E-19 | monocyte | E2F6        |
| ELP5.4    | 3.75E-23 | -0.15002 | 0.118 | 0.28  | 5.60E-19 | monocyte | ELP5        |
| INPP1.4   | 3.81E-23 | -0.23589 | 0.039 | 0.161 | 5.69E-19 | monocyte | INPP1       |
| PRKRIP1.6 | 3.82E-23 | -0.18038 | 0.101 | 0.254 | 5.71E-19 | monocyte | PRKRIP1     |
| TSFM.5    | 3.89E-23 | -0.31483 | 0.133 | 0.289 | 5.82E-19 | monocyte | TSFM        |
| BAZ2B.5   | 3.93E-23 | -0.18703 | 0.163 | 0.334 | 5.87E-19 | monocyte | BAZ2B       |
| MARK3.6   | 3.96E-23 | -0.17692 | 0.136 | 0.301 | 5.91E-19 | monocyte | MARK3       |
| ADD2.6    | 4.06E-23 | -0.24394 | 0.001 | 0.096 | 6.07E-19 | monocyte | ADD2        |
| BRD8.5    | 4.09E-23 | -0.25874 | 0.046 | 0.172 | 6.11E-19 | monocyte | BRD8        |
| C16orf91. | 4.25E-23 | -0.18886 | 0.069 | 0.207 | 6.34E-19 | monocyte | C16orf91    |
| PCNP.4    | 4.38E-23 | -0.17818 | 0.336 | 0.555 | 6.55E-19 | monocyte | PCNP        |
| FUBP1.7   | 4.44E-23 | -0.26188 | 0.092 | 0.236 | 6.63E-19 | monocyte | FUBP1       |
| KIAA1549. | 4.45E-23 | -0.25441 | 0.004 | 0.102 | 6.65E-19 | monocyte | KIAA1549    |
| GSAP.6    | 4.49E-23 | 0.320016 | 0.16  | 0.072 | 6.71E-19 | monocyte | GSAP        |
| LAMP5.7   | 4.49E-23 | -0.21641 | 0.014 | 0.118 | 6.71E-19 | monocyte | LAMP5       |
| THAP5.6   | 4.64E-23 | -0.2091  | 0.057 | 0.19  | 6.93E-19 | monocyte | THAP5       |
| SNAP47.6  | 4.84E-23 | -0.23827 | 0.075 | 0.214 | 7.24E-19 | monocyte | SNAP47      |
| USE1.7    | 4.88E-23 | -0.24889 | 0.169 | 0.344 | 7.29E-19 | monocyte | USE1        |
| TEAD2.6   | 4.90E-23 | -0.18762 | 0.002 | 0.098 | 7.33E-19 | monocyte | TEAD2       |
| NMB.7     | 4.93E-23 | -0.3387  | 0.077 | 0.213 | 7.36E-19 | monocyte | NMB         |
| SIGLEC5.3 | 4.93E-23 | 0.152861 | 0.051 | 0.011 | 7.37E-19 | monocyte | SIGLEC5     |
| YTHDF2.6  | 4.94E-23 | -0.12039 | 0.254 | 0.447 | 7.38E-19 | monocyte | YTHDF2      |
| PSMC6.4   | 5.03E-23 | -0.17043 | 0.214 | 0.403 | 7.52E-19 | monocyte | PSMC6       |
| CREB3.1   | 5.20E-23 | -0.18611 | 0.13  | 0.29  | 7.76E-19 | monocyte | CREB3       |
| RBM10.4   | 5.27E-23 | -0.21846 | 0.074 | 0.214 | 7.87E-19 | monocyte | RBM10       |
| SRSF2.6   | 5.52E-23 | -0.19927 | 0.418 | 0.622 | 8.25E-19 | monocyte | SRSF2       |
| FCGR2B.8  | 5.55E-23 | 0.405974 | 0.256 | 0.134 | 8.29E-19 | monocyte | FCGR2B      |
| PEF1.3    | 5.65E-23 | -0.16431 | 0.163 | 0.333 | 8.44E-19 | monocyte | PEF1        |
| CXCL12.3  | 5.91E-23 | 0.326511 | 0.103 | 0.037 | 8.83E-19 | monocyte | CXCL12      |
| C1orf35.7 | 6.37E-23 | -0.17698 | 0.118 | 0.276 | 9.51E-19 | monocyte | C1orf35     |
| GNB5.6    | 6.41E-23 | -0.20907 | 0.014 | 0.118 | 9.58E-19 | monocyte | GNB5        |
| SOX21.5   | 6.43E-23 | -0.2025  | 0.004 | 0.101 | 9.61E-19 | monocyte | SOX21       |
| TIMM8B.5  | 6.54E-23 | -0.17141 | 0.356 | 0.56  | 9.78E-19 | monocyte | TIMM8B      |
| SUPT5H.1  | 6.56E-23 | -0.16143 | 0.111 | 0.262 | 9.80E-19 | monocyte | SUPT5H      |
| ZFPL1.4   | 6.80E-23 | -0.21795 | 0.099 | 0.247 | 1.02E-18 | monocyte | ZFPL1       |
| TEX30.4   | 6.93E-23 | -0.25735 | 0.05  | 0.175 | 1.04E-18 | monocyte | TEX30       |
| LINC00632 | 6.96E-23 | -0.32602 | 0.003 | 0.099 | 1.04E-18 | monocyte | LINC00632   |
| RHOC.5    | 7.03E-23 | -0.25993 | 0.374 | 0.547 | 1.05E-18 | monocyte | RHOC        |
| SNX21.4   | 7.03E-23 | -0.21143 | 0.019 | 0.127 | 1.05E-18 | monocyte | SNX21       |
| PLAUR.8   | 7.06E-23 | 0.578227 | 0.508 | 0.354 | 1.06E-18 | monocyte | PLAUR       |
| FLYWCH2.3 | 7.06E-23 | -0.15199 | 0.157 | 0.323 | 1.06E-18 | monocyte | FLYWCH2     |

|             |           |           |        |        |           |          |          |
|-------------|-----------|-----------|--------|--------|-----------|----------|----------|
| DGCR6. 3    | 7. 09E-23 | -0. 27098 | 0. 042 | 0. 164 | 1. 06E-18 | monocyte | DGCR6    |
| GTF2A2. 3   | 7. 15E-23 | -0. 10502 | 0. 309 | 0. 516 | 1. 07E-18 | monocyte | GTF2A2   |
| MED21. 4    | 7. 26E-23 | -0. 16018 | 0. 079 | 0. 222 | 1. 09E-18 | monocyte | MED21    |
| FADS2. 5    | 7. 54E-23 | -0. 22058 | 0. 03  | 0. 146 | 1. 13E-18 | monocyte | FADS2    |
| VAPB. 5     | 7. 57E-23 | -0. 23307 | 0. 071 | 0. 208 | 1. 13E-18 | monocyte | VAPB     |
| EHMT2. 7    | 7. 78E-23 | -0. 20397 | 0. 073 | 0. 212 | 1. 16E-18 | monocyte | EHMT2    |
| ECH1. 4     | 7. 93E-23 | -0. 16277 | 0. 357 | 0. 576 | 1. 18E-18 | monocyte | ECH1     |
| APOO. 6     | 7. 95E-23 | -0. 18369 | 0. 094 | 0. 241 | 1. 19E-18 | monocyte | APOO     |
| TCF7. 5     | 7. 96E-23 | -0. 30141 | 0. 033 | 0. 149 | 1. 19E-18 | monocyte | TCF7     |
| CMBL. 6     | 8. 22E-23 | -0. 21945 | 0. 024 | 0. 135 | 1. 23E-18 | monocyte | CMBL     |
| PAXBP1. 6   | 8. 29E-23 | -0. 19946 | 0. 045 | 0. 17  | 1. 24E-18 | monocyte | PAXBP1   |
| GIPC1. 5    | 8. 43E-23 | -0. 27241 | 0. 128 | 0. 28  | 1. 26E-18 | monocyte | GIPC1    |
| GAN. 6      | 8. 49E-23 | -0. 24923 | 0. 033 | 0. 151 | 1. 27E-18 | monocyte | GAN      |
| PWP1. 4     | 8. 51E-23 | -0. 23258 | 0. 15  | 0. 316 | 1. 27E-18 | monocyte | PWP1     |
| HNRNPUL1. 8 | 8. 61E-23 | -0. 20871 | 0. 217 | 0. 398 | 1. 29E-18 | monocyte | HNRNPUL1 |
| ORC4. 7     | 8. 74E-23 | -0. 20818 | 0. 1   | 0. 247 | 1. 31E-18 | monocyte | ORC4     |
| NCOR1. 7    | 8. 78E-23 | -0. 16698 | 0. 291 | 0. 48  | 1. 31E-18 | monocyte | NCOR1    |
| PDCD1LG2. 9 | 9. 21E-23 | 0. 178432 | 0. 073 | 0. 021 | 1. 38E-18 | monocyte | PDCD1LG2 |
| CDH4. 7     | 9. 40E-23 | -0. 2173  | 0. 001 | 0. 094 | 1. 40E-18 | monocyte | CDH4     |
| RRP1. 5     | 9. 97E-23 | -0. 19264 | 0. 081 | 0. 221 | 1. 49E-18 | monocyte | RRP1     |
| PRPF38A. 3  | 1. 01E-22 | -0. 18515 | 0. 138 | 0. 304 | 1. 51E-18 | monocyte | PRPF38A  |
| CSNK1A1. 5  | 1. 01E-22 | -0. 16794 | 0. 374 | 0. 574 | 1. 51E-18 | monocyte | CSNK1A1  |
| DENND2A. 5  | 1. 03E-22 | -0. 22315 | 0. 005 | 0. 102 | 1. 53E-18 | monocyte | DENND2A  |
| ATRX. 5     | 1. 05E-22 | -0. 17689 | 0. 266 | 0. 46  | 1. 57E-18 | monocyte | ATRX     |
| SF3A2. 4    | 1. 07E-22 | -0. 17466 | 0. 117 | 0. 272 | 1. 60E-18 | monocyte | SF3A2    |
| AKAP6. 6    | 1. 08E-22 | -0. 21876 | 0. 009 | 0. 11  | 1. 61E-18 | monocyte | AKAP6    |
| CMC2. 3     | 1. 09E-22 | -0. 18801 | 0. 153 | 0. 318 | 1. 63E-18 | monocyte | CMC2     |
| HARS. 3     | 1. 11E-22 | -0. 17813 | 0. 133 | 0. 294 | 1. 66E-18 | monocyte | HARS     |
| GMNN. 7     | 1. 12E-22 | -0. 22565 | 0. 058 | 0. 187 | 1. 67E-18 | monocyte | GMNN     |
| RAB5A. 4    | 1. 13E-22 | -0. 13186 | 0. 261 | 0. 465 | 1. 69E-18 | monocyte | RAB5A    |
| PLSCR1. 8   | 1. 15E-22 | 0. 488337 | 0. 469 | 0. 349 | 1. 72E-18 | monocyte | PLSCR1   |
| NPEPPS. 4   | 1. 16E-22 | -0. 26907 | 0. 093 | 0. 236 | 1. 73E-18 | monocyte | NPEPPS   |
| MAN1A1. 7   | 1. 16E-22 | 0. 205556 | 0. 113 | 0. 042 | 1. 73E-18 | monocyte | MAN1A1   |
| STOML2. 3   | 1. 20E-22 | -0. 16087 | 0. 247 | 0. 436 | 1. 79E-18 | monocyte | STOML2   |
| PSMD1. 4    | 1. 22E-22 | -0. 1561  | 0. 164 | 0. 337 | 1. 82E-18 | monocyte | PSMD1    |
| ELOVL2. 8   | 1. 22E-22 | -0. 21464 | 0. 007 | 0. 106 | 1. 83E-18 | monocyte | ELOVL2   |
| DYNLL2. 8   | 1. 24E-22 | -0. 23383 | 0. 078 | 0. 217 | 1. 86E-18 | monocyte | DYNLL2   |
| ZNF544. 4   | 1. 26E-22 | -0. 21111 | 0. 022 | 0. 131 | 1. 88E-18 | monocyte | ZNF544   |
| EIF2B1. 3   | 1. 26E-22 | -0. 19547 | 0. 133 | 0. 296 | 1. 88E-18 | monocyte | EIF2B1   |
| COIL. 5     | 1. 31E-22 | -0. 23151 | 0. 063 | 0. 196 | 1. 96E-18 | monocyte | COIL     |
| PEG10. 6    | 1. 40E-22 | -0. 35269 | 0. 01  | 0. 11  | 2. 08E-18 | monocyte | PEG10    |
| LONRF2. 5   | 1. 40E-22 | -0. 19768 | 0. 004 | 0. 1   | 2. 09E-18 | monocyte | LONRF2   |
| GSPT1. 6    | 1. 41E-22 | -0. 19695 | 0. 189 | 0. 362 | 2. 11E-18 | monocyte | GSPT1    |
| CBX6. 5     | 1. 43E-22 | -0. 23245 | 0. 104 | 0. 252 | 2. 13E-18 | monocyte | CBX6     |
| HLA-A. 6    | 1. 43E-22 | 0. 277749 | 0. 933 | 0. 893 | 2. 13E-18 | monocyte | HLA-A    |
| VEZT. 6     | 1. 46E-22 | -0. 25684 | 0. 095 | 0. 238 | 2. 18E-18 | monocyte | VEZT     |
| SLC4A3. 5   | 1. 53E-22 | -0. 20976 | 0. 003 | 0. 098 | 2. 28E-18 | monocyte | SLC4A3   |
| DHX9. 5     | 1. 54E-22 | -0. 18043 | 0. 129 | 0. 292 | 2. 31E-18 | monocyte | DHX9     |
| LHFPL3. 8   | 1. 55E-22 | -0. 30023 | 0. 021 | 0. 128 | 2. 32E-18 | monocyte | LHFPL3   |
| IARS. 4     | 1. 60E-22 | -0. 21306 | 0. 081 | 0. 222 | 2. 39E-18 | monocyte | IARS     |
| EXTL2. 6    | 1. 63E-22 | -0. 18375 | 0. 051 | 0. 178 | 2. 44E-18 | monocyte | EXTL2    |

|             |           |           |        |        |           |          |          |
|-------------|-----------|-----------|--------|--------|-----------|----------|----------|
| PKIA. 8     | 1. 67E-22 | -0. 30944 | 0. 005 | 0. 101 | 2. 50E-18 | monocyte | PKIA     |
| TNFAIP6. 6  | 1. 72E-22 | -0. 40202 | 0. 015 | 0. 118 | 2. 57E-18 | monocyte | TNFAIP6  |
| PNKD. 4     | 1. 75E-22 | -0. 20431 | 0. 281 | 0. 473 | 2. 61E-18 | monocyte | PNKD     |
| PDDC1. 5    | 1. 75E-22 | -0. 2149  | 0. 037 | 0. 156 | 2. 61E-18 | monocyte | PDDC1    |
| IL18BP. 1   | 1. 79E-22 | 0. 155785 | 0. 099 | 0. 035 | 2. 68E-18 | monocyte | IL18BP   |
| SRSF10. 5   | 1. 81E-22 | -0. 18528 | 0. 103 | 0. 252 | 2. 71E-18 | monocyte | SRSF10   |
| SCAMP4. 5   | 1. 96E-22 | -0. 14402 | 0. 123 | 0. 281 | 2. 93E-18 | monocyte | SCAMP4   |
| FASN. 7     | 2. 04E-22 | -0. 20766 | 0. 019 | 0. 125 | 3. 04E-18 | monocyte | FASN     |
| MED27. 3    | 2. 10E-22 | -0. 22938 | 0. 041 | 0. 161 | 3. 13E-18 | monocyte | MED27    |
| CMTM5. 6    | 2. 13E-22 | -0. 49348 | 0. 009 | 0. 108 | 3. 19E-18 | monocyte | CMTM5    |
| CAMK2D. 5   | 2. 14E-22 | -0. 25695 | 0. 11  | 0. 255 | 3. 19E-18 | monocyte | CAMK2D   |
| PGM3. 4     | 2. 17E-22 | -0. 17145 | 0. 056 | 0. 185 | 3. 25E-18 | monocyte | PGM3     |
| ZNF207. 1   | 2. 20E-22 | -0. 17307 | 0. 276 | 0. 471 | 3. 29E-18 | monocyte | ZNF207   |
| SYMPK. 5    | 2. 22E-22 | -0. 25233 | 0. 091 | 0. 235 | 3. 32E-18 | monocyte | SYMPK    |
| C16orf13. 2 | 2. 23E-22 | -0. 19937 | 0. 285 | 0. 475 | 3. 34E-18 | monocyte | C16orf13 |
| EDNRB. 5    | 2. 24E-22 | -0. 23182 | 0. 068 | 0. 198 | 3. 34E-18 | monocyte | EDNRB    |
| DYNC1LI1. 2 | 2. 24E-22 | -0. 22843 | 0. 126 | 0. 279 | 3. 35E-18 | monocyte | DYNC1LI1 |
| NR2C2AP. 6  | 2. 29E-22 | -0. 16513 | 0. 049 | 0. 176 | 3. 41E-18 | monocyte | NR2C2AP  |
| CISD1. 6    | 2. 32E-22 | -0. 18763 | 0. 18  | 0. 351 | 3. 47E-18 | monocyte | CISD1    |
| TXNDC17. 6  | 2. 33E-22 | -0. 15482 | 0. 353 | 0. 54  | 3. 49E-18 | monocyte | TXNDC17  |
| TOX. 8      | 2. 33E-22 | -0. 25031 | 0. 002 | 0. 095 | 3. 49E-18 | monocyte | TOX      |
| SLC25A22. 2 | 2. 34E-22 | -0. 20929 | 0. 017 | 0. 122 | 3. 50E-18 | monocyte | SLC25A22 |
| ATN1. 6     | 2. 37E-22 | -0. 22018 | 0. 064 | 0. 194 | 3. 54E-18 | monocyte | ATN1     |
| SMC4. 6     | 2. 38E-22 | -0. 31743 | 0. 087 | 0. 223 | 3. 55E-18 | monocyte | SMC4     |
| CXCL14. 5   | 2. 38E-22 | -0. 25688 | 0. 033 | 0. 151 | 3. 55E-18 | monocyte | CXCL14   |
| HOXC9. 8    | 2. 41E-22 | -0. 31298 | 0. 001 | 0. 093 | 3. 60E-18 | monocyte | HOXC9    |
| TLR5. 5     | 2. 44E-22 | 0. 368331 | 0. 108 | 0. 04  | 3. 65E-18 | monocyte | TLR5     |
| MTFR1L. 5   | 2. 51E-22 | -0. 15662 | 0. 142 | 0. 304 | 3. 74E-18 | monocyte | MTFR1L   |
| TTC32. 3    | 2. 52E-22 | -0. 29063 | 0. 04  | 0. 159 | 3. 77E-18 | monocyte | TTC32    |
| SELL. 5     | 2. 53E-22 | 0. 354489 | 0. 093 | 0. 032 | 3. 78E-18 | monocyte | SELL     |
| LYRM5. 5    | 2. 58E-22 | -0. 21471 | 0. 185 | 0. 355 | 3. 85E-18 | monocyte | LYRM5    |
| FKBP4. 6    | 2. 60E-22 | -0. 22985 | 0. 171 | 0. 334 | 3. 89E-18 | monocyte | FKBP4    |
| MNAT1. 5    | 2. 65E-22 | -0. 22317 | 0. 069 | 0. 204 | 3. 95E-18 | monocyte | MNAT1    |
| VPS72. 5    | 2. 70E-22 | -0. 186   | 0. 133 | 0. 289 | 4. 03E-18 | monocyte | VPS72    |
| TNIK. 6     | 2. 77E-22 | -0. 24192 | 0. 038 | 0. 153 | 4. 14E-18 | monocyte | TNIK     |
| PHF5A. 2    | 2. 80E-22 | -0. 12141 | 0. 166 | 0. 342 | 4. 18E-18 | monocyte | PHF5A    |
| HEXA. 7     | 2. 81E-22 | 0. 464861 | 0. 472 | 0. 382 | 4. 19E-18 | monocyte | HEXA     |
| MEIS1. 7    | 2. 84E-22 | -0. 21751 | 0. 002 | 0. 094 | 4. 25E-18 | monocyte | MEIS1    |
| AKAP9. 6    | 2. 92E-22 | -0. 18564 | 0. 273 | 0. 465 | 4. 37E-18 | monocyte | AKAP9    |
| ARGLU1. 7   | 2. 97E-22 | -0. 17783 | 0. 29  | 0. 484 | 4. 44E-18 | monocyte | ARGLU1   |
| PLEKH02. 8  | 3. 02E-22 | 0. 324734 | 0. 191 | 0. 094 | 4. 52E-18 | monocyte | PLEKH02  |
| SAP30. 5    | 3. 05E-22 | -0. 22356 | 0. 103 | 0. 252 | 4. 56E-18 | monocyte | SAP30    |
| TBCC. 8     | 3. 05E-22 | -0. 24592 | 0. 091 | 0. 233 | 4. 56E-18 | monocyte | TBCC     |
| NOP58. 5    | 3. 14E-22 | -0. 15132 | 0. 144 | 0. 305 | 4. 69E-18 | monocyte | NOP58    |
| TOP2B. 8    | 3. 16E-22 | -0. 24325 | 0. 103 | 0. 249 | 4. 72E-18 | monocyte | TOP2B    |
| FFAR4. 4    | 3. 19E-22 | 0. 228851 | 0. 08  | 0. 025 | 4. 77E-18 | monocyte | FFAR4    |
| SAT2. 5     | 3. 22E-22 | -0. 14028 | 0. 394 | 0. 603 | 4. 81E-18 | monocyte | SAT2     |
| CBY1. 5     | 3. 28E-22 | -0. 20149 | 0. 047 | 0. 169 | 4. 91E-18 | monocyte | CBY1     |
| FBX032. 8   | 3. 30E-22 | -0. 3295  | 0. 044 | 0. 164 | 4. 92E-18 | monocyte | FBX032   |
| TRIM36. 8   | 3. 36E-22 | -0. 12809 | 0. 063 | 0. 193 | 5. 02E-18 | monocyte | TRIM36   |
| SCAND1. 5   | 3. 39E-22 | -0. 19416 | 0. 397 | 0. 586 | 5. 07E-18 | monocyte | SCAND1   |

|            |           |           |        |        |           |          |           |
|------------|-----------|-----------|--------|--------|-----------|----------|-----------|
| LAMC1. 5   | 3. 52E-22 | -0. 20185 | 0. 011 | 0. 111 | 5. 26E-18 | monocyte | LAMC1     |
| ROCK2. 3   | 3. 74E-22 | -0. 20624 | 0. 042 | 0. 161 | 5. 59E-18 | monocyte | ROCK2     |
| FGF1. 6    | 3. 79E-22 | -0. 30283 | 0. 006 | 0. 102 | 5. 67E-18 | monocyte | FGF1      |
| TSEN15. 4  | 3. 87E-22 | -0. 1997  | 0. 099 | 0. 245 | 5. 79E-18 | monocyte | TSEN15    |
| OTUD7B. 6  | 3. 89E-22 | -0. 25286 | 0. 01  | 0. 109 | 5. 81E-18 | monocyte | OTUD7B    |
| YKT6. 4    | 3. 94E-22 | -0. 22025 | 0. 103 | 0. 251 | 5. 89E-18 | monocyte | YKT6      |
| PEX10. 5   | 4. 07E-22 | -0. 20711 | 0. 07  | 0. 203 | 6. 08E-18 | monocyte | PEX10     |
| ARID4B. 7  | 4. 11E-22 | -0. 20323 | 0. 235 | 0. 421 | 6. 13E-18 | monocyte | ARID4B    |
| COQ10B. 3  | 4. 16E-22 | -0. 21332 | 0. 121 | 0. 275 | 6. 22E-18 | monocyte | COQ10B    |
| BRD7. 5    | 4. 17E-22 | -0. 18241 | 0. 115 | 0. 266 | 6. 23E-18 | monocyte | BRD7      |
| IKZF1. 7   | 4. 17E-22 | 0. 249402 | 0. 139 | 0. 058 | 6. 24E-18 | monocyte | IKZF1     |
| METTL5. 2  | 4. 28E-22 | -0. 21169 | 0. 203 | 0. 374 | 6. 39E-18 | monocyte | METTL5    |
| LINC01116  | 4. 37E-22 | -0. 16124 | 0. 029 | 0. 142 | 6. 52E-18 | monocyte | LINC01116 |
| HIBCH. 5   | 4. 40E-22 | -0. 23406 | 0. 108 | 0. 256 | 6. 58E-18 | monocyte | HIBCH     |
| NRBP2. 6   | 4. 45E-22 | -0. 20812 | 0. 022 | 0. 13  | 6. 64E-18 | monocyte | NRBP2     |
| TSN. 5     | 4. 80E-22 | -0. 13732 | 0. 208 | 0. 392 | 7. 17E-18 | monocyte | TSN       |
| TRIM38. 7  | 4. 83E-22 | 0. 381293 | 0. 185 | 0. 091 | 7. 22E-18 | monocyte | TRIM38    |
| KIF5A. 7   | 4. 90E-22 | -0. 34068 | 0. 024 | 0. 13  | 7. 32E-18 | monocyte | KIF5A     |
| SOAT1. 8   | 5. 11E-22 | 0. 482187 | 0. 3   | 0. 189 | 7. 64E-18 | monocyte | SOAT1     |
| LRRCC1. 5  | 5. 22E-22 | -0. 23671 | 0. 032 | 0. 145 | 7. 80E-18 | monocyte | LRRCC1    |
| PPP1R8. 3  | 5. 22E-22 | -0. 18972 | 0. 093 | 0. 234 | 7. 81E-18 | monocyte | PPP1R8    |
| IGSF10. 4  | 5. 24E-22 | -0. 18041 | 0. 009 | 0. 107 | 7. 82E-18 | monocyte | IGSF10    |
| CAMSAP2. 6 | 5. 25E-22 | -0. 16355 | 0. 041 | 0. 159 | 7. 84E-18 | monocyte | CAMSAP2   |
| LRP6. 7    | 5. 29E-22 | -0. 21614 | 0. 017 | 0. 12  | 7. 90E-18 | monocyte | LRP6      |
| KALRN. 6   | 5. 34E-22 | -0. 1768  | 0. 007 | 0. 103 | 7. 98E-18 | monocyte | KALRN     |
| DIXDC1. 7  | 5. 42E-22 | -0. 25581 | 0. 007 | 0. 103 | 8. 10E-18 | monocyte | DIXDC1    |
| FAM172A. 6 | 5. 58E-22 | -0. 20554 | 0. 072 | 0. 207 | 8. 33E-18 | monocyte | FAM172A   |
| CCDC25. 5  | 5. 64E-22 | -0. 19269 | 0. 149 | 0. 31  | 8. 43E-18 | monocyte | CCDC25    |
| ST8SIA1. 5 | 5. 64E-22 | -0. 20786 | 0. 005 | 0. 099 | 8. 43E-18 | monocyte | ST8SIA1   |
| DUSP12. 4  | 5. 68E-22 | -0. 21584 | 0. 1   | 0. 247 | 8. 48E-18 | monocyte | DUSP12    |
| CLPP. 2    | 5. 70E-22 | -0. 1673  | 0. 232 | 0. 413 | 8. 51E-18 | monocyte | CLPP      |
| TMEM35. 7  | 6. 03E-22 | -0. 27948 | 0. 005 | 0. 099 | 9. 01E-18 | monocyte | TMEM35    |
| ZNF644. 3  | 6. 06E-22 | -0. 15728 | 0. 113 | 0. 265 | 9. 06E-18 | monocyte | ZNF644    |
| B3GAT1. 6  | 6. 09E-22 | -0. 27424 | 0. 004 | 0. 097 | 9. 10E-18 | monocyte | B3GAT1    |
| UBA7. 7    | 6. 32E-22 | 0. 432596 | 0. 16  | 0. 075 | 9. 45E-18 | monocyte | UBA7      |
| FAM20A. 7  | 6. 34E-22 | 0. 242506 | 0. 13  | 0. 053 | 9. 47E-18 | monocyte | FAM20A    |
| DPYSL2. 7  | 6. 36E-22 | -0. 24191 | 0. 256 | 0. 438 | 9. 50E-18 | monocyte | DPYSL2    |
| CCL8. 2    | 6. 66E-22 | 0. 175847 | 0. 048 | 0. 01  | 9. 95E-18 | monocyte | CCL8      |
| HIRIP3. 5  | 6. 76E-22 | -0. 21364 | 0. 051 | 0. 175 | 1. 01E-17 | monocyte | HIRIP3    |
| KLHL13. 7  | 6. 77E-22 | -0. 19452 | 0. 009 | 0. 107 | 1. 01E-17 | monocyte | KLHL13    |
| CPNE4. 6   | 7. 13E-22 | -0. 195   | 0. 006 | 0. 1   | 1. 07E-17 | monocyte | CPNE4     |
| CORO2B. 5  | 7. 43E-22 | -0. 20013 | 0. 01  | 0. 109 | 1. 11E-17 | monocyte | CORO2B    |
| CD44. 5    | 7. 45E-22 | -0. 44033 | 0. 243 | 0. 395 | 1. 11E-17 | monocyte | CD44      |
| NCL. 5     | 7. 70E-22 | -0. 16384 | 0. 376 | 0. 571 | 1. 15E-17 | monocyte | NCL       |
| NKIRAS2. 3 | 7. 80E-22 | -0. 18644 | 0. 123 | 0. 276 | 1. 17E-17 | monocyte | NKIRAS2   |
| REEP4. 8   | 7. 82E-22 | 0. 393684 | 0. 268 | 0. 158 | 1. 17E-17 | monocyte | REEP4     |
| ACSM5. 3   | 7. 96E-22 | 0. 254763 | 0. 086 | 0. 028 | 1. 19E-17 | monocyte | ACSM5     |
| FGF14. 7   | 8. 01E-22 | -0. 21069 | 0. 002 | 0. 093 | 1. 20E-17 | monocyte | FGF14     |
| GSK3A. 6   | 8. 20E-22 | -0. 21032 | 0. 07  | 0. 201 | 1. 23E-17 | monocyte | GSK3A     |
| SNCAIP. 7  | 8. 27E-22 | -0. 18908 | 0. 002 | 0. 093 | 1. 24E-17 | monocyte | SNCAIP    |
| TRA2A. 3   | 8. 33E-22 | -0. 1526  | 0. 184 | 0. 357 | 1. 24E-17 | monocyte | TRA2A     |

|             |          |          |       |       |          |          |             |
|-------------|----------|----------|-------|-------|----------|----------|-------------|
| MAOB. 6     | 8.69E-22 | -0.31503 | 0.009 | 0.106 | 1.30E-17 | monocyte | MAOB        |
| ZHX1. 7     | 9.57E-22 | -0.14963 | 0.081 | 0.22  | 1.43E-17 | monocyte | ZHX1        |
| STK39. 5    | 9.85E-22 | -0.2051  | 0.011 | 0.11  | 1.47E-17 | monocyte | STK39       |
| MTMR9. 6    | 1.00E-21 | -0.23604 | 0.069 | 0.2   | 1.50E-17 | monocyte | MTMR9       |
| RAB32. 8    | 1.02E-21 | 0.456158 | 0.329 | 0.23  | 1.52E-17 | monocyte | RAB32       |
| KCNQ1. 7    | 1.02E-21 | 0.241302 | 0.096 | 0.034 | 1.53E-17 | monocyte | KCNQ1       |
| SAP30BP. 2  | 1.05E-21 | -0.10345 | 0.197 | 0.376 | 1.57E-17 | monocyte | SAP30BP     |
| SP110. 6    | 1.05E-21 | 0.514854 | 0.299 | 0.189 | 1.57E-17 | monocyte | SP110       |
| DLC1. 6     | 1.06E-21 | -0.24092 | 0.003 | 0.094 | 1.59E-17 | monocyte | DLC1        |
| THSD1. 5    | 1.07E-21 | -0.1959  | 0.007 | 0.102 | 1.60E-17 | monocyte | THSD1       |
| RABAC1. 4   | 1.09E-21 | -0.19532 | 0.471 | 0.682 | 1.63E-17 | monocyte | RABAC1      |
| WLS. 6      | 1.09E-21 | -0.21742 | 0.089 | 0.225 | 1.63E-17 | monocyte | WLS         |
| C7orf50. 3  | 1.09E-21 | -0.15952 | 0.325 | 0.524 | 1.63E-17 | monocyte | C7orf50     |
| PHLDA3. 5   | 1.09E-21 | -0.24154 | 0.056 | 0.181 | 1.63E-17 | monocyte | PHLDA3      |
| RTF1. 6     | 1.09E-21 | -0.1585  | 0.256 | 0.446 | 1.64E-17 | monocyte | RTF1        |
| MMP16. 6    | 1.11E-21 | -0.21914 | 0.013 | 0.111 | 1.65E-17 | monocyte | MMP16       |
| WBSCR22. 6  | 1.11E-21 | -0.10981 | 0.303 | 0.51  | 1.66E-17 | monocyte | WBSCR22     |
| LAMA5. 5    | 1.12E-21 | -0.19924 | 0.018 | 0.12  | 1.67E-17 | monocyte | LAMA5       |
| EAPP. 5     | 1.12E-21 | -0.13084 | 0.189 | 0.369 | 1.68E-17 | monocyte | EAPP        |
| ZNRF1. 8    | 1.19E-21 | -0.21783 | 0.021 | 0.124 | 1.78E-17 | monocyte | ZNRF1       |
| STOX2. 8    | 1.20E-21 | -0.24938 | 0.006 | 0.1   | 1.79E-17 | monocyte | STOX2       |
| FAM212B. 6  | 1.21E-21 | -0.26433 | 0.01  | 0.107 | 1.81E-17 | monocyte | FAM212B     |
| DHCR24. 5   | 1.22E-21 | -0.23572 | 0.008 | 0.103 | 1.83E-17 | monocyte | DHCR24      |
| DCAF7. 5    | 1.23E-21 | -0.23136 | 0.169 | 0.334 | 1.84E-17 | monocyte | DCAF7       |
| GLTP. 4     | 1.24E-21 | -0.23551 | 0.129 | 0.28  | 1.85E-17 | monocyte | GLTP        |
| TTPAL. 3    | 1.26E-21 | -0.19132 | 0.037 | 0.152 | 1.88E-17 | monocyte | TTPAL       |
| LINC00657   | 1.28E-21 | -0.16649 | 0.178 | 0.345 | 1.91E-17 | monocyte | LINC00657   |
| COX11. 5    | 1.28E-21 | -0.1116  | 0.164 | 0.332 | 1.92E-17 | monocyte | COX11       |
| FAM57B. 7   | 1.29E-21 | -0.26538 | 0.006 | 0.1   | 1.92E-17 | monocyte | FAM57B      |
| DAXX. 2     | 1.29E-21 | -0.23365 | 0.079 | 0.214 | 1.92E-17 | monocyte | DAXX        |
| ACTL6A. 5   | 1.30E-21 | -0.15084 | 0.117 | 0.27  | 1.95E-17 | monocyte | ACTL6A      |
| CSRNP1. 8   | 1.31E-21 | -0.33226 | 0.073 | 0.201 | 1.96E-17 | monocyte | CSRNP1      |
| GARS. 6     | 1.32E-21 | -0.22349 | 0.15  | 0.306 | 1.98E-17 | monocyte | GARS        |
| CDKN1B. 7   | 1.36E-21 | -0.18377 | 0.121 | 0.271 | 2.04E-17 | monocyte | CDKN1B      |
| SOGA1. 7    | 1.38E-21 | -0.22093 | 0.046 | 0.165 | 2.06E-17 | monocyte | SOGA1       |
| SDR39U1. 4  | 1.39E-21 | -0.15017 | 0.129 | 0.287 | 2.08E-17 | monocyte | SDR39U1     |
| TMEM109. 7  | 1.42E-21 | 0.538212 | 0.305 | 0.196 | 2.12E-17 | monocyte | TMEM109     |
| CC2D1A. 5   | 1.45E-21 | -0.2052  | 0.067 | 0.197 | 2.17E-17 | monocyte | CC2D1A      |
| ECHDC3. 6   | 1.47E-21 | 0.210767 | 0.086 | 0.028 | 2.20E-17 | monocyte | ECHDC3      |
| YRDC. 4     | 1.51E-21 | -0.23593 | 0.05  | 0.171 | 2.25E-17 | monocyte | YRDC        |
| WDR13. 3    | 1.60E-21 | -0.21732 | 0.142 | 0.298 | 2.39E-17 | monocyte | WDR13       |
| CDK5R1. 8   | 1.63E-21 | -0.26785 | 0.007 | 0.101 | 2.44E-17 | monocyte | CDK5R1      |
| UBA1. 3     | 1.67E-21 | -0.20604 | 0.184 | 0.356 | 2.49E-17 | monocyte | UBA1        |
| AP001055. 6 | 1.69E-21 | 0.32563  | 0.16  | 0.073 | 2.53E-17 | monocyte | AP001055. 6 |
| TMEM108. 5  | 1.69E-21 | -0.20013 | 0     | 0.087 | 2.53E-17 | monocyte | TMEM108     |
| PPM1B. 4    | 1.71E-21 | -0.20013 | 0.154 | 0.313 | 2.56E-17 | monocyte | PPM1B       |
| LMNB1. 7    | 1.71E-21 | -0.26071 | 0.042 | 0.159 | 2.56E-17 | monocyte | LMNB1       |
| CRCP. 5     | 1.74E-21 | -0.22031 | 0.064 | 0.192 | 2.59E-17 | monocyte | CRCP        |
| MLLT3. 6    | 1.74E-21 | -0.21772 | 0.007 | 0.101 | 2.60E-17 | monocyte | MLLT3       |
| PTP4A3. 5   | 1.80E-21 | -0.21643 | 0.004 | 0.095 | 2.68E-17 | monocyte | PTP4A3      |
| PFDN6. 4    | 1.80E-21 | -0.19021 | 0.191 | 0.367 | 2.69E-17 | monocyte | PFDN6       |

|           |          |          |       |       |          |          |           |
|-----------|----------|----------|-------|-------|----------|----------|-----------|
| SAE1.5    | 1.81E-21 | -0.18232 | 0.133 | 0.286 | 2.71E-17 | monocyte | SAE1      |
| NDUFB9.3  | 1.82E-21 | -0.12682 | 0.499 | 0.706 | 2.72E-17 | monocyte | NDUFB9    |
| COA4.3    | 1.90E-21 | -0.15154 | 0.222 | 0.401 | 2.84E-17 | monocyte | COA4      |
| ATL1.5    | 1.92E-21 | -0.26888 | 0.021 | 0.124 | 2.87E-17 | monocyte | ATL1      |
| UQCC1.4   | 1.93E-21 | -0.2     | 0.052 | 0.175 | 2.88E-17 | monocyte | UQCC1     |
| PIK3R5.7  | 1.94E-21 | 0.205188 | 0.111 | 0.042 | 2.89E-17 | monocyte | PIK3R5    |
| GLG1.6    | 1.96E-21 | -0.17819 | 0.125 | 0.279 | 2.93E-17 | monocyte | GLG1      |
| C14orf132 | 1.98E-21 | -0.3157  | 0.006 | 0.099 | 2.95E-17 | monocyte | C14orf132 |
| CRISPLD1  | 1.98E-21 | -0.23166 | 0.005 | 0.097 | 2.95E-17 | monocyte | CRISPLD1  |
| CPNE3.5   | 2.07E-21 | -0.20618 | 0.18  | 0.344 | 3.10E-17 | monocyte | CPNE3     |
| USP5.3    | 2.10E-21 | -0.20561 | 0.095 | 0.236 | 3.14E-17 | monocyte | USP5      |
| ENDOG.6   | 2.13E-21 | -0.18595 | 0.041 | 0.157 | 3.18E-17 | monocyte | ENDOG     |
| ERAL1.3   | 2.14E-21 | -0.17489 | 0.106 | 0.252 | 3.20E-17 | monocyte | ERAL1     |
| ZNF521.5  | 2.16E-21 | -0.19889 | 0.002 | 0.091 | 3.22E-17 | monocyte | ZNF521    |
| SLC10A4.7 | 2.19E-21 | -0.19181 | 0.009 | 0.104 | 3.27E-17 | monocyte | SLC10A4   |
| CARS.5    | 2.23E-21 | -0.23217 | 0.091 | 0.231 | 3.33E-17 | monocyte | CARS      |
| MDFI.6    | 2.38E-21 | -0.22832 | 0.004 | 0.095 | 3.56E-17 | monocyte | MDFI      |
| PAIP1.8   | 2.43E-21 | -0.16137 | 0.23  | 0.41  | 3.63E-17 | monocyte | PAIP1     |
| SLC35F2.4 | 2.45E-21 | -0.17462 | 0.016 | 0.116 | 3.67E-17 | monocyte | SLC35F2   |
| RAN.5     | 2.50E-21 | -0.11435 | 0.572 | 0.773 | 3.73E-17 | monocyte | RAN       |
| SUCLA2.6  | 2.51E-21 | -0.10665 | 0.139 | 0.3   | 3.75E-17 | monocyte | SUCLA2    |
| DCTN2.3   | 2.57E-21 | -0.20519 | 0.327 | 0.523 | 3.84E-17 | monocyte | DCTN2     |
| PSMB2.4   | 2.58E-21 | -0.17777 | 0.383 | 0.591 | 3.85E-17 | monocyte | PSMB2     |
| CPSF6.5   | 2.58E-21 | -0.16828 | 0.177 | 0.343 | 3.86E-17 | monocyte | CPSF6     |
| KCNIP1.6  | 2.65E-21 | -0.26085 | 0.01  | 0.106 | 3.95E-17 | monocyte | KCNIP1    |
| SLC12A5.6 | 2.65E-21 | 0.365803 | 0.175 | 0.085 | 3.96E-17 | monocyte | SLC12A5   |
| PTPN13.6  | 2.66E-21 | -0.20281 | 0.007 | 0.101 | 3.98E-17 | monocyte | PTPN13    |
| XRCC5.7   | 2.69E-21 | -0.1313  | 0.367 | 0.578 | 4.01E-17 | monocyte | XRCC5     |
| WASF1.5   | 2.85E-21 | -0.24391 | 0.008 | 0.102 | 4.27E-17 | monocyte | WASF1     |
| RUNX3.6   | 2.89E-21 | 0.114269 | 0.096 | 0.033 | 4.32E-17 | monocyte | RUNX3     |
| DIRAS1.6  | 2.89E-21 | -0.23651 | 0.02  | 0.121 | 4.33E-17 | monocyte | DIRAS1    |
| SLC25A36  | 2.91E-21 | -0.15768 | 0.123 | 0.282 | 4.34E-17 | monocyte | SLC25A36  |
| KIDINS220 | 2.93E-21 | -0.26225 | 0.135 | 0.281 | 4.38E-17 | monocyte | KIDINS220 |
| STIM2.4   | 2.98E-21 | -0.13486 | 0.049 | 0.172 | 4.45E-17 | monocyte | STIM2     |
| RAC2.8    | 3.10E-21 | 0.271682 | 0.218 | 0.11  | 4.63E-17 | monocyte | RAC2      |
| KCNK6.6   | 3.18E-21 | 0.202658 | 0.097 | 0.035 | 4.76E-17 | monocyte | KCNK6     |
| CASC15.7  | 3.19E-21 | -0.25509 | 0.011 | 0.107 | 4.76E-17 | monocyte | CASC15    |
| ARIH2.3   | 3.23E-21 | -0.1941  | 0.112 | 0.262 | 4.82E-17 | monocyte | ARIH2     |
| POSTN.7   | 3.28E-21 | -0.40007 | 0.033 | 0.138 | 4.90E-17 | monocyte | POSTN     |
| PRRT2.6   | 3.31E-21 | -0.20023 | 0.006 | 0.098 | 4.94E-17 | monocyte | PRRT2     |
| TAOK1.5   | 3.32E-21 | -0.23968 | 0.123 | 0.271 | 4.96E-17 | monocyte | TAOK1     |
| FRMD4B.8  | 3.33E-21 | 0.38459  | 0.263 | 0.15  | 4.97E-17 | monocyte | FRMD4B    |
| C12orf29  | 3.37E-21 | -0.15115 | 0.044 | 0.163 | 5.03E-17 | monocyte | C12orf29  |
| HABP4.4   | 3.39E-21 | -0.17602 | 0.023 | 0.128 | 5.07E-17 | monocyte | HABP4     |
| JMJD6.4   | 3.40E-21 | -0.18827 | 0.139 | 0.295 | 5.08E-17 | monocyte | JMJD6     |
| ARHGEF2.7 | 3.41E-21 | -0.19353 | 0.147 | 0.301 | 5.09E-17 | monocyte | ARHGEF2   |
| ANAPC5.5  | 3.46E-21 | -0.12998 | 0.224 | 0.411 | 5.17E-17 | monocyte | ANAPC5    |
| TRIM16.6  | 3.46E-21 | -0.14359 | 0.029 | 0.138 | 5.17E-17 | monocyte | TRIM16    |
| IGF2BP3.6 | 3.47E-21 | -0.19819 | 0.017 | 0.116 | 5.19E-17 | monocyte | IGF2BP3   |
| GRAMD3.8  | 3.62E-21 | -0.22041 | 0.037 | 0.149 | 5.41E-17 | monocyte | GRAMD3    |
| EBPL.5    | 3.75E-21 | -0.16443 | 0.15  | 0.316 | 5.61E-17 | monocyte | EBPL      |



|           |             |           |        |        |           |          |             |
|-----------|-------------|-----------|--------|--------|-----------|----------|-------------|
| HSP90AB1. | 3. 77E-21   | -0. 1146  | 0. 665 | 0. 834 | 5. 63E-17 | monocyte | HSP90AB1    |
| TCF3.     | 5 3. 83E-21 | -0. 14201 | 0. 029 | 0. 138 | 5. 72E-17 | monocyte | TCF3        |
| ZNF444.   | 6 3. 90E-21 | -0. 25029 | 0. 051 | 0. 17  | 5. 82E-17 | monocyte | ZNF444      |
| H2AFV.    | 6 3. 90E-21 | -0. 19311 | 0. 341 | 0. 538 | 5. 83E-17 | monocyte | H2AFV       |
| PSMD13.   | 3 3. 90E-21 | -0. 13423 | 0. 241 | 0. 428 | 5. 83E-17 | monocyte | PSMD13      |
| CYHR1.    | 6 3. 94E-21 | -0. 21998 | 0. 137 | 0. 291 | 5. 88E-17 | monocyte | CYHR1       |
| MBP.      | 3 3. 96E-21 | 0. 27355  | 0. 36  | 0. 227 | 5. 92E-17 | monocyte | MBP         |
| AP000476. | 4. 07E-21   | 0. 196791 | 0. 041 | 0. 008 | 6. 08E-17 | monocyte | AP000476. 1 |
| LSM2.     | 4 4. 08E-21 | -0. 16754 | 0. 279 | 0. 462 | 6. 10E-17 | monocyte | LSM2        |
| ZFAND2A.  | 6 4. 25E-21 | -0. 23708 | 0. 141 | 0. 296 | 6. 36E-17 | monocyte | ZFAND2A     |
| COMMD2.   | 5 4. 26E-21 | -0. 15581 | 0. 141 | 0. 302 | 6. 37E-17 | monocyte | COMMD2      |
| MTG2.     | 3 4. 32E-21 | -0. 1607  | 0. 04  | 0. 157 | 6. 45E-17 | monocyte | MTG2        |
| LGR4.     | 8 4. 40E-21 | -0. 18738 | 0. 014 | 0. 11  | 6. 57E-17 | monocyte | LGR4        |
| CEP57.    | 5 4. 43E-21 | -0. 22681 | 0. 101 | 0. 241 | 6. 62E-17 | monocyte | CEP57       |
| THAP2.    | 2 4. 74E-21 | -0. 12599 | 0. 028 | 0. 135 | 7. 08E-17 | monocyte | THAP2       |
| PPHLN1.   | 4 4. 74E-21 | -0. 18254 | 0. 204 | 0. 381 | 7. 08E-17 | monocyte | PPHLN1      |
| PAK4.     | 4 4. 80E-21 | -0. 18798 | 0. 021 | 0. 124 | 7. 17E-17 | monocyte | PAK4        |
| PIGU.     | 5 4. 99E-21 | -0. 20775 | 0. 056 | 0. 181 | 7. 46E-17 | monocyte | PIGU        |
| BCAM.     | 6 5. 00E-21 | -0. 22438 | 0. 018 | 0. 117 | 7. 48E-17 | monocyte | BCAM        |
| EXTL3.    | 5 5. 07E-21 | -0. 17728 | 0. 031 | 0. 14  | 7. 58E-17 | monocyte | EXTL3       |
| ZNF738.   | 8 5. 08E-21 | -0. 2193  | 0. 04  | 0. 153 | 7. 60E-17 | monocyte | ZNF738      |
| PLAC8.    | 7 5. 34E-21 | 0. 449661 | 0. 139 | 0. 062 | 7. 98E-17 | monocyte | PLAC8       |
| NLGN2.    | 6 5. 38E-21 | -0. 19304 | 0. 007 | 0. 099 | 8. 05E-17 | monocyte | NLGN2       |
| PIPOX.    | 7 5. 44E-21 | -0. 25037 | 0. 033 | 0. 141 | 8. 12E-17 | monocyte | PIPOX       |
| IPO5.     | 4 5. 62E-21 | -0. 19458 | 0. 09  | 0. 227 | 8. 40E-17 | monocyte | IPO5        |
| DOHH.     | 4 5. 64E-21 | -0. 23561 | 0. 075 | 0. 204 | 8. 43E-17 | monocyte | DOHH        |
| NME4.     | 5 5. 64E-21 | -0. 17573 | 0. 222 | 0. 396 | 8. 43E-17 | monocyte | NME4        |
| ZFAND5.   | 8 5. 74E-21 | -0. 16268 | 0. 289 | 0. 478 | 8. 58E-17 | monocyte | ZFAND5      |
| TSR1.     | 4 5. 79E-21 | -0. 17199 | 0. 07  | 0. 2   | 8. 66E-17 | monocyte | TSR1        |
| TSR3.     | 5 5. 81E-21 | -0. 21556 | 0. 136 | 0. 288 | 8. 68E-17 | monocyte | TSR3        |
| RARS2.    | 3 5. 94E-21 | -0. 17479 | 0. 07  | 0. 201 | 8. 87E-17 | monocyte | RARS2       |
| ATXN10.   | 4 6. 04E-21 | -0. 13389 | 0. 252 | 0. 436 | 9. 03E-17 | monocyte | ATXN10      |
| C11orf58. | 6. 25E-21   | -0. 11304 | 0. 497 | 0. 704 | 9. 34E-17 | monocyte | C11orf58    |
| WDR41.    | 4 6. 44E-21 | -0. 18174 | 0. 096 | 0. 237 | 9. 63E-17 | monocyte | WDR41       |
| VPS26B.   | 6 6. 48E-21 | -0. 2156  | 0. 103 | 0. 243 | 9. 69E-17 | monocyte | VPS26B      |
| PCID2.    | 3 6. 72E-21 | -0. 20693 | 0. 064 | 0. 19  | 1. 00E-16 | monocyte | PCID2       |
| ACAD8.    | 4 6. 86E-21 | -0. 17171 | 0. 066 | 0. 193 | 1. 03E-16 | monocyte | ACAD8       |
| FAXC.     | 7 7. 02E-21 | -0. 23766 | 0. 004 | 0. 093 | 1. 05E-16 | monocyte | FAXC        |
| RTN4.     | 8 7. 03E-21 | -0. 17197 | 0. 55  | 0. 713 | 1. 05E-16 | monocyte | RTN4        |
| C3orf70.  | 7 7. 11E-21 | -0. 23229 | 0. 013 | 0. 108 | 1. 06E-16 | monocyte | C3orf70     |
| TBRG4.    | 5 7. 16E-21 | -0. 22238 | 0. 106 | 0. 249 | 1. 07E-16 | monocyte | TBRG4       |
| ITM2C.    | 8 7. 36E-21 | -0. 16601 | 0. 242 | 0. 433 | 1. 10E-16 | monocyte | ITM2C       |
| LY6H.     | 7 7. 46E-21 | -0. 35558 | 0. 004 | 0. 093 | 1. 12E-16 | monocyte | LY6H        |
| SPATA33.  | 6 7. 65E-21 | -0. 21456 | 0. 042 | 0. 155 | 1. 14E-16 | monocyte | SPATA33     |
| ACTR6.    | 4 7. 66E-21 | -0. 13769 | 0. 102 | 0. 246 | 1. 14E-16 | monocyte | ACTR6       |
| TIMP4.    | 6 7. 88E-21 | -0. 36764 | 0. 013 | 0. 109 | 1. 18E-16 | monocyte | TIMP4       |
| PCED1B.   | 6 7. 88E-21 | 0. 246112 | 0. 09  | 0. 031 | 1. 18E-16 | monocyte | PCED1B      |
| PPP4R2.   | 2 7. 90E-21 | -0. 16609 | 0. 124 | 0. 274 | 1. 18E-16 | monocyte | PPP4R2      |
| PMPCA.    | 5 7. 93E-21 | -0. 18746 | 0. 111 | 0. 258 | 1. 18E-16 | monocyte | PMPCA       |
| CADM3.    | 6 8. 15E-21 | -0. 37778 | 0. 013 | 0. 108 | 1. 22E-16 | monocyte | CADM3       |
| PAPSS1.   | 3 8. 82E-21 | -0. 24567 | 0. 153 | 0. 307 | 1. 32E-16 | monocyte | PAPSS1      |

|           |          |          |       |       |          |          |           |
|-----------|----------|----------|-------|-------|----------|----------|-----------|
| KRIT1.7   | 8.92E-21 | -0.22452 | 0.092 | 0.228 | 1.33E-16 | monocyte | KRIT1     |
| MOAP1.6   | 9.03E-21 | -0.17537 | 0.092 | 0.228 | 1.35E-16 | monocyte | MOAP1     |
| COX19.3   | 9.05E-21 | -0.21691 | 0.104 | 0.242 | 1.35E-16 | monocyte | COX19     |
| SRRM2.4   | 9.11E-21 | -0.13767 | 0.35  | 0.548 | 1.36E-16 | monocyte | SRRM2     |
| NCOA6.7   | 9.22E-21 | -0.17239 | 0.034 | 0.145 | 1.38E-16 | monocyte | NCOA6     |
| SYBU.6    | 9.44E-21 | -0.22035 | 0.005 | 0.094 | 1.41E-16 | monocyte | SYBU      |
| TBC1D20.4 | 9.48E-21 | -0.16824 | 0.067 | 0.193 | 1.42E-16 | monocyte | TBC1D20   |
| SF1.5     | 9.51E-21 | -0.1345  | 0.324 | 0.523 | 1.42E-16 | monocyte | SF1       |
| SMC3.6    | 9.55E-21 | -0.18613 | 0.145 | 0.298 | 1.43E-16 | monocyte | SMC3      |
| LINC00844 | 9.58E-21 | -0.37249 | 0.017 | 0.114 | 1.43E-16 | monocyte | LINC00844 |
| CHMP2A.4  | 9.76E-21 | -0.13086 | 0.46  | 0.672 | 1.46E-16 | monocyte | CHMP2A    |
| U2SURP.4  | 9.81E-21 | -0.15314 | 0.21  | 0.384 | 1.47E-16 | monocyte | U2SURP    |
| C17orf100 | 1.02E-20 | -0.19517 | 0.007 | 0.098 | 1.53E-16 | monocyte | C17orf100 |
| TMEM37.4  | 1.10E-20 | 0.31162  | 0.133 | 0.057 | 1.64E-16 | monocyte | TMEM37    |
| SLC39A7.3 | 1.14E-20 | -0.13454 | 0.157 | 0.318 | 1.71E-16 | monocyte | SLC39A7   |
| KXD1.5    | 1.16E-20 | -0.18599 | 0.278 | 0.464 | 1.73E-16 | monocyte | KXD1      |
| AMOTL2.5  | 1.17E-20 | -0.2584  | 0.002 | 0.088 | 1.75E-16 | monocyte | AMOTL2    |
| PPP2R5E.6 | 1.21E-20 | -0.20158 | 0.113 | 0.259 | 1.81E-16 | monocyte | PPP2R5E   |
| DESI2.3   | 1.21E-20 | -0.22085 | 0.076 | 0.205 | 1.81E-16 | monocyte | DESI2     |
| PLEKHA4.7 | 1.22E-20 | -0.20085 | 0.029 | 0.135 | 1.82E-16 | monocyte | PLEKHA4   |
| LRRC59.4  | 1.23E-20 | -0.16816 | 0.198 | 0.372 | 1.84E-16 | monocyte | LRRC59    |
| BDP1.4    | 1.24E-20 | -0.16278 | 0.11  | 0.257 | 1.86E-16 | monocyte | BDP1      |
| ARRDC3.2  | 1.26E-20 | -0.23201 | 0.158 | 0.314 | 1.88E-16 | monocyte | ARRDC3    |
| THOC2.2   | 1.27E-20 | -0.16004 | 0.159 | 0.317 | 1.90E-16 | monocyte | THOC2     |
| ITGA3.5   | 1.27E-20 | -0.22622 | 0.013 | 0.106 | 1.90E-16 | monocyte | ITGA3     |
| SNRNP25.4 | 1.36E-20 | -0.14929 | 0.198 | 0.363 | 2.03E-16 | monocyte | SNRNP25   |
| CCDC58.4  | 1.41E-20 | -0.12719 | 0.04  | 0.153 | 2.10E-16 | monocyte | CCDC58    |
| ZFP36.5   | 1.41E-20 | 0.385991 | 0.699 | 0.562 | 2.11E-16 | monocyte | ZFP36     |
| ANP32E.6  | 1.42E-20 | -0.26595 | 0.135 | 0.279 | 2.12E-16 | monocyte | ANP32E    |
| EWSR1.3   | 1.42E-20 | -0.13552 | 0.283 | 0.481 | 2.13E-16 | monocyte | EWSR1     |
| TRAPPC2P1 | 1.43E-20 | -0.22924 | 0.097 | 0.235 | 2.14E-16 | monocyte | TRAPPC2P1 |
| ISG20L2.5 | 1.44E-20 | -0.21422 | 0.098 | 0.236 | 2.15E-16 | monocyte | ISG20L2   |
| LINC00152 | 1.46E-20 | -0.31542 | 0.13  | 0.27  | 2.19E-16 | monocyte | LINC00152 |
| ZNF358.6  | 1.47E-20 | -0.21307 | 0.055 | 0.174 | 2.20E-16 | monocyte | ZNF358    |
| PAX6.5    | 1.48E-20 | -0.18962 | 0.001 | 0.085 | 2.21E-16 | monocyte | PAX6      |
| STX2.6    | 1.51E-20 | -0.19173 | 0.018 | 0.116 | 2.26E-16 | monocyte | STX2      |
| SCRN1.7   | 1.53E-20 | -0.19535 | 0.065 | 0.19  | 2.28E-16 | monocyte | SCRN1     |
| TUBG1.6   | 1.54E-20 | -0.21697 | 0.106 | 0.245 | 2.30E-16 | monocyte | TUBG1     |
| VIPR2.7   | 1.56E-20 | -0.31869 | 0.003 | 0.09  | 2.33E-16 | monocyte | VIPR2     |
| ZNF138.6  | 1.60E-20 | -0.26371 | 0.043 | 0.155 | 2.40E-16 | monocyte | ZNF138    |
| OXR1.7    | 1.64E-20 | -0.16796 | 0.116 | 0.264 | 2.46E-16 | monocyte | OXR1      |
| RPAP2.5   | 1.68E-20 | -0.19792 | 0.069 | 0.195 | 2.51E-16 | monocyte | RPAP2     |
| MPPED2.6  | 1.68E-20 | -0.23626 | 0.007 | 0.097 | 2.51E-16 | monocyte | MPPED2    |
| NOVA2.6   | 1.68E-20 | -0.20362 | 0.002 | 0.087 | 2.52E-16 | monocyte | NOVA2     |
| PHF19.6   | 1.76E-20 | -0.22805 | 0.031 | 0.138 | 2.64E-16 | monocyte | PHF19     |
| POLR3H.4  | 1.78E-20 | -0.10938 | 0.092 | 0.226 | 2.66E-16 | monocyte | POLR3H    |
| N6AMT2.5  | 1.80E-20 | -0.19794 | 0.033 | 0.141 | 2.69E-16 | monocyte | N6AMT2    |
| DNAAF2.7  | 1.82E-20 | -0.15843 | 0.059 | 0.183 | 2.72E-16 | monocyte | DNAAF2    |
| MTSS1L.5  | 1.82E-20 | -0.19381 | 0.009 | 0.101 | 2.73E-16 | monocyte | MTSS1L    |
| UBTF.6    | 1.85E-20 | -0.19837 | 0.099 | 0.238 | 2.76E-16 | monocyte | UBTF      |
| RPRD1A.5  | 1.87E-20 | -0.15536 | 0.082 | 0.219 | 2.79E-16 | monocyte | RPRD1A    |

|            |          |          |       |       |          |          |             |
|------------|----------|----------|-------|-------|----------|----------|-------------|
| CACNG7.5   | 1.87E-20 | -0.18111 | 0.004 | 0.091 | 2.80E-16 | monocyte | CACNG7      |
| CACYBP.4   | 1.89E-20 | -0.16974 | 0.326 | 0.522 | 2.82E-16 | monocyte | CACYBP      |
| KPNB1.7    | 1.89E-20 | -0.16406 | 0.278 | 0.463 | 2.83E-16 | monocyte | KPNB1       |
| PIANP.6    | 1.99E-20 | -0.19021 | 0.003 | 0.089 | 2.97E-16 | monocyte | PIANP       |
| ZNF593.3   | 2.00E-20 | -0.18334 | 0.16  | 0.314 | 2.99E-16 | monocyte | ZNF593      |
| CAPRIN1.6  | 2.06E-20 | -0.16307 | 0.17  | 0.333 | 3.07E-16 | monocyte | CAPRIN1     |
| FGFBP3.6   | 2.17E-20 | -0.19902 | 0.014 | 0.108 | 3.24E-16 | monocyte | FGFBP3      |
| TMEM5.6    | 2.18E-20 | -0.16601 | 0.086 | 0.219 | 3.26E-16 | monocyte | TMEM5       |
| GSTO1.7    | 2.20E-20 | 0.436297 | 0.541 | 0.448 | 3.29E-16 | monocyte | GSTO1       |
| ECI1.5     | 2.27E-20 | -0.15128 | 0.089 | 0.224 | 3.39E-16 | monocyte | ECI1        |
| STRADB.4   | 2.31E-20 | -0.22094 | 0.097 | 0.231 | 3.46E-16 | monocyte | STRADB      |
| CXXC4.7    | 2.31E-20 | -0.22604 | 0.001 | 0.085 | 3.46E-16 | monocyte | CXXC4       |
| FBLN1.7    | 2.36E-20 | -0.32717 | 0.005 | 0.092 | 3.53E-16 | monocyte | FBLN1       |
| GGT7.6     | 2.36E-20 | -0.11756 | 0.054 | 0.175 | 3.53E-16 | monocyte | GGT7        |
| ERF.6      | 2.37E-20 | -0.19856 | 0.063 | 0.187 | 3.54E-16 | monocyte | ERF         |
| CSE1L.7    | 2.37E-20 | -0.16667 | 0.095 | 0.234 | 3.54E-16 | monocyte | CSE1L       |
| PLAT.5     | 2.39E-20 | -0.22743 | 0.025 | 0.128 | 3.58E-16 | monocyte | PLAT        |
| ZNF814.4   | 2.41E-20 | -0.21879 | 0.027 | 0.131 | 3.61E-16 | monocyte | ZNF814      |
| TRIM47.8   | 2.43E-20 | -0.30632 | 0.069 | 0.189 | 3.63E-16 | monocyte | TRIM47      |
| SRR.6      | 2.43E-20 | -0.2228  | 0.049 | 0.163 | 3.64E-16 | monocyte | SRR         |
| FIGN.6     | 2.54E-20 | -0.18562 | 0.006 | 0.095 | 3.79E-16 | monocyte | FIGN        |
| MKKS.4     | 2.54E-20 | -0.12149 | 0.245 | 0.418 | 3.80E-16 | monocyte | MKKS        |
| ATP5J.3    | 2.57E-20 | -0.13259 | 0.559 | 0.768 | 3.84E-16 | monocyte | ATP5J       |
| EGR1.6     | 2.57E-20 | -0.24871 | 0.333 | 0.51  | 3.84E-16 | monocyte | EGR1        |
| NUMBL.5    | 2.60E-20 | -0.18232 | 0.007 | 0.097 | 3.89E-16 | monocyte | NUMBL       |
| RGMB.7     | 2.64E-20 | -0.29242 | 0.033 | 0.141 | 3.94E-16 | monocyte | RGMB        |
| CCDC181.6  | 2.69E-20 | -0.245   | 0.002 | 0.086 | 4.02E-16 | monocyte | CCDC181     |
| ACTR10.5   | 2.72E-20 | -0.18542 | 0.2   | 0.374 | 4.07E-16 | monocyte | ACTR10      |
| EID2B.6    | 2.73E-20 | -0.17082 | 0.007 | 0.097 | 4.08E-16 | monocyte | EID2B       |
| EIF2AK1.5  | 2.74E-20 | -0.18983 | 0.183 | 0.345 | 4.09E-16 | monocyte | EIF2AK1     |
| HKR1.7     | 2.79E-20 | -0.14051 | 0.023 | 0.125 | 4.17E-16 | monocyte | HKR1        |
| GS1-124K5  | 2.82E-20 | -0.25779 | 0.022 | 0.122 | 4.21E-16 | monocyte | GS1-124K5.4 |
| PHACTR3.7  | 2.88E-20 | -0.28587 | 0.001 | 0.084 | 4.30E-16 | monocyte | PHACTR3     |
| C19orf12.2 | 2.92E-20 | -0.18316 | 0.041 | 0.152 | 4.37E-16 | monocyte | C19orf12    |
| SREK1.6    | 2.94E-20 | -0.21036 | 0.172 | 0.336 | 4.40E-16 | monocyte | SREK1       |
| THRAP3.6   | 2.95E-20 | -0.16233 | 0.268 | 0.453 | 4.41E-16 | monocyte | THRAP3      |
| LRRC47.6   | 3.01E-20 | -0.18973 | 0.093 | 0.227 | 4.50E-16 | monocyte | LRRC47      |
| SRSF4.5    | 3.03E-20 | -0.19889 | 0.203 | 0.374 | 4.53E-16 | monocyte | SRSF4       |
| RFXANK.3   | 3.07E-20 | -0.24477 | 0.18  | 0.337 | 4.59E-16 | monocyte | RFXANK      |
| CCDC66.7   | 3.19E-20 | -0.14497 | 0.099 | 0.241 | 4.77E-16 | monocyte | CCDC66      |
| ZFP82.6    | 3.28E-20 | -0.19776 | 0.019 | 0.117 | 4.90E-16 | monocyte | ZFP82       |
| ZNF793.5   | 3.29E-20 | -0.22264 | 0.02  | 0.118 | 4.92E-16 | monocyte | ZNF793      |
| DOLPP1.5   | 3.32E-20 | -0.19351 | 0.015 | 0.109 | 4.96E-16 | monocyte | DOLPP1      |
| NGDN.4     | 3.34E-20 | -0.19742 | 0.126 | 0.275 | 4.99E-16 | monocyte | NGDN        |
| PDS5B.5    | 3.35E-20 | -0.18826 | 0.057 | 0.177 | 5.00E-16 | monocyte | PDS5B       |
| CUTA.7     | 3.36E-20 | -0.10564 | 0.487 | 0.699 | 5.02E-16 | monocyte | CUTA        |
| CYSTM1.7   | 3.36E-20 | -0.27797 | 0.187 | 0.337 | 5.03E-16 | monocyte | CYSTM1      |
| CELF5.8    | 3.39E-20 | -0.27984 | 0.008 | 0.098 | 5.07E-16 | monocyte | CELF5       |
| TMEM11.5   | 3.52E-20 | -0.19802 | 0.17  | 0.332 | 5.26E-16 | monocyte | TMEM11      |
| ABHD17C.4  | 3.54E-20 | -0.1632  | 0.004 | 0.09  | 5.29E-16 | monocyte | ABHD17C     |
| SLC25A33.3 | 3.58E-20 | -0.22062 | 0.096 | 0.229 | 5.35E-16 | monocyte | SLC25A33    |

|             |           |           |        |        |           |          |           |
|-------------|-----------|-----------|--------|--------|-----------|----------|-----------|
| RNF167. 2   | 3. 62E-20 | -0. 13257 | 0. 245 | 0. 422 | 5. 40E-16 | monocyte | RNF167    |
| PITX1. 6    | 3. 68E-20 | -0. 16001 | 0. 005 | 0. 092 | 5. 50E-16 | monocyte | PITX1     |
| DHRS13. 4   | 3. 72E-20 | -0. 17111 | 0. 013 | 0. 105 | 5. 56E-16 | monocyte | DHRS13    |
| LXN. 4      | 3. 80E-20 | 0. 234974 | 0. 07  | 0. 021 | 5. 68E-16 | monocyte | LXN       |
| DDX24. 1    | 3. 82E-20 | -0. 14322 | 0. 302 | 0. 498 | 5. 71E-16 | monocyte | DDX24     |
| UBE2J2. 6   | 3. 89E-20 | -0. 18701 | 0. 185 | 0. 348 | 5. 82E-16 | monocyte | UBE2J2    |
| PTK7. 4     | 3. 99E-20 | -0. 16039 | 0. 01  | 0. 101 | 5. 96E-16 | monocyte | PTK7      |
| FAM89B. 7   | 4. 04E-20 | -0. 22059 | 0. 119 | 0. 258 | 6. 03E-16 | monocyte | FAM89B    |
| ASH1L. 5    | 4. 05E-20 | -0. 14087 | 0. 164 | 0. 323 | 6. 05E-16 | monocyte | ASH1L     |
| MLST8. 4    | 4. 05E-20 | -0. 16741 | 0. 109 | 0. 248 | 6. 05E-16 | monocyte | MLST8     |
| MPDZ. 5     | 4. 12E-20 | -0. 19848 | 0. 006 | 0. 093 | 6. 16E-16 | monocyte | MPDZ      |
| TLCD1. 6    | 4. 15E-20 | -0. 161   | 0. 003 | 0. 088 | 6. 20E-16 | monocyte | TLCD1     |
| POR. 3      | 4. 20E-20 | -0. 12177 | 0. 129 | 0. 277 | 6. 28E-16 | monocyte | POR       |
| DKC1. 3     | 4. 46E-20 | -0. 23806 | 0. 132 | 0. 277 | 6. 67E-16 | monocyte | DKC1      |
| SLN. 5      | 4. 77E-20 | -0. 55122 | 0. 056 | 0. 171 | 7. 12E-16 | monocyte | SLN       |
| PIK3R3. 6   | 4. 78E-20 | -0. 12052 | 0. 033 | 0. 141 | 7. 14E-16 | monocyte | PIK3R3    |
| NDUFS6. 3   | 4. 81E-20 | -0. 15005 | 0. 449 | 0. 643 | 7. 19E-16 | monocyte | NDUFS6    |
| FUBP3. 4    | 4. 82E-20 | -0. 17236 | 0. 111 | 0. 251 | 7. 21E-16 | monocyte | FUBP3     |
| UAP1. 4     | 4. 84E-20 | -0. 20054 | 0. 072 | 0. 195 | 7. 23E-16 | monocyte | UAP1      |
| CCDC109B. 4 | 4. 94E-20 | -0. 20024 | 0. 204 | 0. 362 | 7. 38E-16 | monocyte | CCDC109B  |
| MAGOHB. 5   | 4. 95E-20 | -0. 17487 | 0. 108 | 0. 249 | 7. 40E-16 | monocyte | MAGOHB    |
| PTCD3. 5    | 4. 97E-20 | -0. 18459 | 0. 101 | 0. 241 | 7. 43E-16 | monocyte | PTCD3     |
| ACTL6B. 7   | 4. 98E-20 | -0. 31382 | 0. 001 | 0. 083 | 7. 44E-16 | monocyte | ACTL6B    |
| UBE2I. 4    | 5. 05E-20 | -0. 1098  | 0. 386 | 0. 594 | 7. 54E-16 | monocyte | UBE2I     |
| MEOX2. 6    | 5. 09E-20 | -0. 21877 | 0. 002 | 0. 085 | 7. 61E-16 | monocyte | MEOX2     |
| RAD1. 4     | 5. 09E-20 | -0. 1844  | 0. 066 | 0. 188 | 7. 61E-16 | monocyte | RAD1      |
| IFI27L1. 4  | 5. 29E-20 | -0. 17692 | 0. 071 | 0. 196 | 7. 91E-16 | monocyte | IFI27L1   |
| MIB2. 6     | 5. 40E-20 | -0. 20468 | 0. 046 | 0. 158 | 8. 07E-16 | monocyte | MIB2      |
| ZC3H15. 3   | 5. 46E-20 | -0. 10348 | 0. 325 | 0. 52  | 8. 16E-16 | monocyte | ZC3H15    |
| HOXD11. 5   | 5. 49E-20 | -0. 1701  | 0. 001 | 0. 083 | 8. 20E-16 | monocyte | HOXD11    |
| FAM78A. 6   | 5. 55E-20 | 0. 300681 | 0. 088 | 0. 031 | 8. 30E-16 | monocyte | FAM78A    |
| MT1X. 6     | 5. 63E-20 | -0. 17188 | 0. 407 | 0. 593 | 8. 41E-16 | monocyte | MT1X      |
| SIRPA. 8    | 5. 65E-20 | 0. 427727 | 0. 337 | 0. 235 | 8. 45E-16 | monocyte | SIRPA     |
| GSPT2. 6    | 5. 66E-20 | -0. 19137 | 0. 045 | 0. 158 | 8. 46E-16 | monocyte | GSPT2     |
| GLRX5. 6    | 5. 70E-20 | -0. 20132 | 0. 156 | 0. 309 | 8. 52E-16 | monocyte | GLRX5     |
| TPP1. 7     | 5. 74E-20 | 0. 467696 | 0. 413 | 0. 315 | 8. 58E-16 | monocyte | TPP1      |
| RPS6KL1. 7  | 5. 77E-20 | -0. 22899 | 0. 015 | 0. 108 | 8. 62E-16 | monocyte | RPS6KL1   |
| PLVAP. 4    | 5. 84E-20 | 0. 325228 | 0. 077 | 0. 025 | 8. 73E-16 | monocyte | PLVAP     |
| PSTPIP2. 5  | 5. 97E-20 | 0. 221729 | 0. 102 | 0. 039 | 8. 92E-16 | monocyte | PSTPIP2   |
| GUK1. 5     | 6. 21E-20 | -0. 15378 | 0. 524 | 0. 719 | 9. 27E-16 | monocyte | GUK1      |
| TNRC6A. 4   | 6. 53E-20 | -0. 19686 | 0. 091 | 0. 225 | 9. 75E-16 | monocyte | TNRC6A    |
| TUBB4A. 8   | 6. 53E-20 | -0. 39846 | 0. 026 | 0. 126 | 9. 76E-16 | monocyte | TUBB4A    |
| TMEM43. 3   | 6. 60E-20 | -0. 11491 | 0. 074 | 0. 202 | 9. 86E-16 | monocyte | TMEM43    |
| ATG12. 2    | 6. 66E-20 | -0. 13746 | 0. 193 | 0. 359 | 9. 95E-16 | monocyte | ATG12     |
| PLCB1. 6    | 6. 70E-20 | -0. 19291 | 0. 003 | 0. 087 | 1. 00E-15 | monocyte | PLCB1     |
| ANKRD36. 5  | 6. 82E-20 | -0. 18251 | 0. 07  | 0. 195 | 1. 02E-15 | monocyte | ANKRD36   |
| PSMB6. 2    | 6. 83E-20 | -0. 11103 | 0. 511 | 0. 712 | 1. 02E-15 | monocyte | PSMB6     |
| ZNF43. 6    | 6. 84E-20 | -0. 13773 | 0. 038 | 0. 146 | 1. 02E-15 | monocyte | ZNF43     |
| ZNF429. 7   | 6. 89E-20 | -0. 21679 | 0. 032 | 0. 138 | 1. 03E-15 | monocyte | ZNF429    |
| MPHOSPH10   | 7. 00E-20 | -0. 11467 | 0. 106 | 0. 249 | 1. 05E-15 | monocyte | MPHOSPH10 |
| ST7. 3      | 7. 09E-20 | -0. 26597 | 0. 019 | 0. 114 | 1. 06E-15 | monocyte | ST7       |

|            |           |           |        |        |           |          |           |
|------------|-----------|-----------|--------|--------|-----------|----------|-----------|
| SENCR. 4   | 7. 15E-20 | 0. 136034 | 0. 058 | 0. 016 | 1. 07E-15 | monocyte | SENCR     |
| ACTR3B. 5  | 7. 55E-20 | -0. 19076 | 0. 019 | 0. 115 | 1. 13E-15 | monocyte | ACTR3B    |
| MMAB. 4    | 7. 66E-20 | -0. 1963  | 0. 08  | 0. 207 | 1. 14E-15 | monocyte | MMAB      |
| PSMG3. 7   | 7. 79E-20 | -0. 18718 | 0. 182 | 0. 34  | 1. 16E-15 | monocyte | PSMG3     |
| LMCD1. 5   | 7. 90E-20 | -0. 1895  | 0. 006 | 0. 092 | 1. 18E-15 | monocyte | LMCD1     |
| DCTN1. 5   | 8. 14E-20 | -0. 16591 | 0. 093 | 0. 227 | 1. 22E-15 | monocyte | DCTN1     |
| ADAM19. 4  | 8. 21E-20 | -0. 20589 | 0. 003 | 0. 086 | 1. 23E-15 | monocyte | ADAM19    |
| C9orf3. 6  | 8. 23E-20 | -0. 28708 | 0. 018 | 0. 112 | 1. 23E-15 | monocyte | C9orf3    |
| HNRNPH1. 3 | 8. 23E-20 | -0. 14793 | 0. 283 | 0. 472 | 1. 23E-15 | monocyte | HNRNPH1   |
| FXYD7. 7   | 8. 41E-20 | -0. 34414 | 0. 002 | 0. 085 | 1. 26E-15 | monocyte | FXYD7     |
| FLAD1. 4   | 8. 56E-20 | -0. 14317 | 0. 105 | 0. 243 | 1. 28E-15 | monocyte | FLAD1     |
| KANK2. 4   | 8. 64E-20 | -0. 17347 | 0. 009 | 0. 098 | 1. 29E-15 | monocyte | KANK2     |
| KLF10. 5   | 8. 82E-20 | -0. 28938 | 0. 11  | 0. 244 | 1. 32E-15 | monocyte | KLF10     |
| PRKCZ. 8   | 9. 12E-20 | -0. 23648 | 0. 016 | 0. 108 | 1. 36E-15 | monocyte | PRKCZ     |
| LAP3. 6    | 9. 15E-20 | 0. 510108 | 0. 555 | 0. 486 | 1. 37E-15 | monocyte | LAP3      |
| GLO1. 6    | 9. 20E-20 | -0. 11645 | 0. 247 | 0. 425 | 1. 38E-15 | monocyte | GLO1      |
| ANKRD17. 6 | 9. 28E-20 | -0. 21847 | 0. 095 | 0. 228 | 1. 39E-15 | monocyte | ANKRD17   |
| SDF2. 3    | 9. 49E-20 | -0. 14466 | 0. 205 | 0. 37  | 1. 42E-15 | monocyte | SDF2      |
| MRGBP. 4   | 9. 60E-20 | -0. 17468 | 0. 045 | 0. 156 | 1. 44E-15 | monocyte | MRGBP     |
| MOCS2. 6   | 9. 64E-20 | -0. 20883 | 0. 132 | 0. 275 | 1. 44E-15 | monocyte | MOCS2     |
| ZNF667. 7  | 9. 83E-20 | -0. 20035 | 0. 004 | 0. 088 | 1. 47E-15 | monocyte | ZNF667    |
| BOC. 5     | 9. 89E-20 | -0. 18393 | 0. 007 | 0. 094 | 1. 48E-15 | monocyte | BOC       |
| TMEM57. 6  | 9. 92E-20 | -0. 20806 | 0. 066 | 0. 184 | 1. 48E-15 | monocyte | TMEM57    |
| SRRT. 5    | 9. 98E-20 | -0. 12888 | 0. 094 | 0. 228 | 1. 49E-15 | monocyte | SRRT      |
| THAP9-AS1  | 1. 00E-19 | -0. 10811 | 0. 096 | 0. 233 | 1. 50E-15 | monocyte | THAP9-AS1 |
| DHX33. 5   | 1. 01E-19 | -0. 22041 | 0. 028 | 0. 129 | 1. 50E-15 | monocyte | DHX33     |
| LONRF1. 5  | 1. 01E-19 | -0. 17945 | 0. 014 | 0. 105 | 1. 50E-15 | monocyte | LONRF1    |
| PCNA. 6    | 1. 04E-19 | -0. 137   | 0. 17  | 0. 328 | 1. 55E-15 | monocyte | PCNA      |
| ARMC10. 5  | 1. 04E-19 | -0. 19454 | 0. 156 | 0. 309 | 1. 55E-15 | monocyte | ARMC10    |
| ELAVL2. 8  | 1. 05E-19 | -0. 2765  | 0. 003 | 0. 086 | 1. 57E-15 | monocyte | ELAVL2    |
| PNO1. 3    | 1. 05E-19 | -0. 19901 | 0. 085 | 0. 213 | 1. 57E-15 | monocyte | PNO1      |
| AKIRIN2. 5 | 1. 06E-19 | -0. 18669 | 0. 224 | 0. 395 | 1. 59E-15 | monocyte | AKIRIN2   |
| FBXW9. 3   | 1. 07E-19 | -0. 17216 | 0. 022 | 0. 12  | 1. 59E-15 | monocyte | FBXW9     |
| AMZ2. 3    | 1. 07E-19 | -0. 19467 | 0. 224 | 0. 394 | 1. 60E-15 | monocyte | AMZ2      |
| MUM1. 8    | 1. 07E-19 | -0. 15642 | 0. 206 | 0. 378 | 1. 61E-15 | monocyte | MUM1      |
| NTMT1. 2   | 1. 08E-19 | -0. 13946 | 0. 178 | 0. 337 | 1. 61E-15 | monocyte | NTMT1     |
| FAM84B. 6  | 1. 08E-19 | -0. 23804 | 0. 007 | 0. 094 | 1. 62E-15 | monocyte | FAM84B    |
| CD300C. 8  | 1. 09E-19 | 0. 237628 | 0. 14  | 0. 061 | 1. 63E-15 | monocyte | CD300C    |
| PPIL1. 4   | 1. 10E-19 | -0. 15061 | 0. 076 | 0. 205 | 1. 64E-15 | monocyte | PPIL1     |
| EPHA4. 5   | 1. 11E-19 | -0. 16971 | 0. 004 | 0. 088 | 1. 67E-15 | monocyte | EPHA4     |
| SIK3. 5    | 1. 12E-19 | -0. 21927 | 0. 019 | 0. 114 | 1. 67E-15 | monocyte | SIK3      |
| TP53RK. 3  | 1. 17E-19 | -0. 151   | 0. 075 | 0. 201 | 1. 75E-15 | monocyte | TP53RK    |
| ACD. 5     | 1. 18E-19 | -0. 13581 | 0. 059 | 0. 178 | 1. 76E-15 | monocyte | ACD       |
| CTNNBIP1.  | 1. 18E-19 | -0. 21294 | 0. 094 | 0. 225 | 1. 77E-15 | monocyte | CTNNBIP1  |
| USP48. 3   | 1. 19E-19 | -0. 2148  | 0. 093 | 0. 226 | 1. 78E-15 | monocyte | USP48     |
| USP10. 4   | 1. 19E-19 | -0. 13709 | 0. 112 | 0. 255 | 1. 78E-15 | monocyte | USP10     |
| OSMR. 6    | 1. 21E-19 | -0. 16591 | 0. 006 | 0. 092 | 1. 81E-15 | monocyte | OSMR      |
| DNAJB1. 5  | 1. 22E-19 | -0. 10552 | 0. 416 | 0. 627 | 1. 83E-15 | monocyte | DNAJB1    |
| PCDHB2. 6  | 1. 22E-19 | -0. 17158 | 0. 003 | 0. 086 | 1. 83E-15 | monocyte | PCDHB2    |
| HOXA10. 8  | 1. 23E-19 | -0. 27212 | 0. 002 | 0. 084 | 1. 84E-15 | monocyte | HOXA10    |
| KLHL35. 7  | 1. 25E-19 | -0. 38485 | 0. 013 | 0. 101 | 1. 87E-15 | monocyte | KLHL35    |

|            |          |          |       |       |          |          |          |
|------------|----------|----------|-------|-------|----------|----------|----------|
| ZNF506.5   | 1.26E-19 | -0.19898 | 0.028 | 0.129 | 1.89E-15 | monocyte | ZNF506   |
| AASS.5     | 1.26E-19 | -0.18508 | 0.024 | 0.123 | 1.89E-15 | monocyte | AASS     |
| FAM69C.7   | 1.27E-19 | -0.17365 | 0.002 | 0.084 | 1.89E-15 | monocyte | FAM69C   |
| SURF2.6    | 1.28E-19 | -0.14073 | 0.104 | 0.243 | 1.91E-15 | monocyte | SURF2    |
| CARD11.6   | 1.28E-19 | 0.177574 | 0.074 | 0.024 | 1.91E-15 | monocyte | CARD11   |
| PRDX4.7    | 1.29E-19 | -0.12774 | 0.367 | 0.562 | 1.93E-15 | monocyte | PRDX4    |
| REEP1.8    | 1.30E-19 | -0.22204 | 0.004 | 0.088 | 1.94E-15 | monocyte | REEP1    |
| TMEM136.5  | 1.37E-19 | -0.2091  | 0.008 | 0.095 | 2.05E-15 | monocyte | TMEM136  |
| GNAO1.6    | 1.39E-19 | -0.23439 | 0.009 | 0.098 | 2.07E-15 | monocyte | GNAO1    |
| TIMM17B.1  | 1.41E-19 | -0.12612 | 0.189 | 0.356 | 2.10E-15 | monocyte | TIMM17B  |
| ZNF281.5   | 1.41E-19 | -0.23464 | 0.072 | 0.195 | 2.11E-15 | monocyte | ZNF281   |
| PLA2G12A.1 | 1.41E-19 | -0.21743 | 0.111 | 0.245 | 2.11E-15 | monocyte | PLA2G12A |
| GFOD2.5    | 1.42E-19 | -0.1944  | 0.035 | 0.14  | 2.12E-15 | monocyte | GFOD2    |
| UBE2C.8    | 1.42E-19 | -0.41505 | 0.027 | 0.124 | 2.13E-15 | monocyte | UBE2C    |
| DCHS1.7    | 1.42E-19 | -0.17766 | 0.006 | 0.091 | 2.13E-15 | monocyte | DCHS1    |
| SOX5.6     | 1.43E-19 | -0.19084 | 0.008 | 0.096 | 2.13E-15 | monocyte | SOX5     |
| LYRM7.5    | 1.45E-19 | -0.14164 | 0.084 | 0.212 | 2.16E-15 | monocyte | LYRM7    |
| PTBP2.6    | 1.47E-19 | -0.24647 | 0.019 | 0.113 | 2.20E-15 | monocyte | PTBP2    |
| FAM228B.7  | 1.48E-19 | -0.17068 | 0.092 | 0.226 | 2.20E-15 | monocyte | FAM228B  |
| TRIO.6     | 1.50E-19 | -0.22423 | 0.063 | 0.182 | 2.24E-15 | monocyte | TRIO     |
| MAZ.6      | 1.52E-19 | -0.16305 | 0.119 | 0.262 | 2.27E-15 | monocyte | MAZ      |
| SBNO1.5    | 1.56E-19 | -0.22547 | 0.134 | 0.277 | 2.33E-15 | monocyte | SBNO1    |
| KCMF1.4    | 1.57E-19 | -0.22196 | 0.077 | 0.201 | 2.34E-15 | monocyte | KCMF1    |
| CCDC88A.6  | 1.63E-19 | -0.13365 | 0.248 | 0.431 | 2.43E-15 | monocyte | CCDC88A  |
| DPY19L1.5  | 1.70E-19 | -0.17593 | 0.018 | 0.112 | 2.53E-15 | monocyte | DPY19L1  |
| FAM96A.6   | 1.71E-19 | 0.46908  | 0.437 | 0.349 | 2.55E-15 | monocyte | FAM96A   |
| USP46.8    | 1.71E-19 | -0.20036 | 0.04  | 0.146 | 2.56E-15 | monocyte | USP46    |
| SNRPA1.5   | 1.77E-19 | -0.19373 | 0.156 | 0.307 | 2.64E-15 | monocyte | SNRPA1   |
| MSANTD4.5  | 1.82E-19 | -0.1966  | 0.031 | 0.134 | 2.73E-15 | monocyte | MSANTD4  |
| KIF3B.8    | 1.85E-19 | -0.15816 | 0.034 | 0.138 | 2.76E-15 | monocyte | KIF3B    |
| CD93.8     | 1.88E-19 | 0.275347 | 0.143 | 0.064 | 2.80E-15 | monocyte | CD93     |
| TRIM22.6   | 1.88E-19 | 0.41478  | 0.224 | 0.127 | 2.81E-15 | monocyte | TRIM22   |
| NDUFA9.3   | 1.91E-19 | -0.12864 | 0.222 | 0.398 | 2.85E-15 | monocyte | NDUFA9   |
| MAP6D1.6   | 1.93E-19 | -0.21886 | 0.005 | 0.089 | 2.88E-15 | monocyte | MAP6D1   |
| PCOLCE2.3  | 1.94E-19 | -0.25105 | 0.005 | 0.089 | 2.90E-15 | monocyte | PCOLCE2  |
| RP9.6      | 1.97E-19 | -0.20459 | 0.069 | 0.189 | 2.94E-15 | monocyte | RP9      |
| IDI1.6     | 1.99E-19 | -0.20298 | 0.178 | 0.337 | 2.97E-15 | monocyte | IDI1     |
| PKD1.5     | 2.01E-19 | -0.23494 | 0.027 | 0.126 | 3.00E-15 | monocyte | PKD1     |
| PTER.3     | 2.04E-19 | 0.194339 | 0.061 | 0.017 | 3.05E-15 | monocyte | PTER     |
| ZNF512.6   | 2.05E-19 | -0.1989  | 0.03  | 0.132 | 3.07E-15 | monocyte | ZNF512   |
| PRUNE2.6   | 2.06E-19 | -0.2883  | 0.026 | 0.125 | 3.08E-15 | monocyte | PRUNE2   |
| CEACAM4.6  | 2.09E-19 | 0.132406 | 0.067 | 0.02  | 3.13E-15 | monocyte | CEACAM4  |
| MED24.6    | 2.09E-19 | -0.18131 | 0.061 | 0.178 | 3.13E-15 | monocyte | MED24    |
| TMEM47.6   | 2.09E-19 | -0.18359 | 0.004 | 0.087 | 3.13E-15 | monocyte | TMEM47   |
| CENPT.5    | 2.09E-19 | -0.16149 | 0.074 | 0.2   | 3.13E-15 | monocyte | CENPT    |
| RIT2.7     | 2.10E-19 | -0.34079 | 0.002 | 0.083 | 3.13E-15 | monocyte | RIT2     |
| ELOVL6.6   | 2.12E-19 | -0.18881 | 0.011 | 0.1   | 3.17E-15 | monocyte | ELOVL6   |
| POU2F1.7   | 2.23E-19 | -0.21343 | 0.055 | 0.17  | 3.33E-15 | monocyte | POU2F1   |
| MGARP.4    | 2.23E-19 | -0.16628 | 0.004 | 0.087 | 3.34E-15 | monocyte | MGARP    |
| TMEM99.5   | 2.26E-19 | -0.21551 | 0.033 | 0.136 | 3.38E-15 | monocyte | TMEM99   |
| FGF20.4    | 2.26E-19 | 0.246458 | 0.054 | 0.014 | 3.38E-15 | monocyte | FGF20    |

|             |           |           |        |        |           |          |              |
|-------------|-----------|-----------|--------|--------|-----------|----------|--------------|
| ABHD17B. 8  | 2. 27E-19 | -0. 23322 | 0. 031 | 0. 133 | 3. 40E-15 | monocyte | ABHD17B      |
| RBM42. 4    | 2. 33E-19 | -0. 17242 | 0. 227 | 0. 4   | 3. 48E-15 | monocyte | RBM42        |
| FAM110B. 6  | 2. 35E-19 | -0. 19763 | 0. 072 | 0. 197 | 3. 52E-15 | monocyte | FAM110B      |
| MCC. 5      | 2. 37E-19 | -0. 11218 | 0. 028 | 0. 13  | 3. 54E-15 | monocyte | MCC          |
| ZMYND8. 6   | 2. 46E-19 | -0. 21233 | 0. 089 | 0. 218 | 3. 67E-15 | monocyte | ZMYND8       |
| TMED2. 4    | 2. 47E-19 | -0. 13505 | 0. 419 | 0. 629 | 3. 70E-15 | monocyte | TMED2        |
| WASF3. 5    | 2. 50E-19 | -0. 19529 | 0. 002 | 0. 082 | 3. 73E-15 | monocyte | WASF3        |
| SNRPB. 4    | 2. 54E-19 | -0. 12103 | 0. 416 | 0. 592 | 3. 80E-15 | monocyte | SNRPB        |
| NDUFV1. 3   | 2. 56E-19 | -0. 12259 | 0. 305 | 0. 495 | 3. 83E-15 | monocyte | NDUFV1       |
| ICA1L. 5    | 2. 61E-19 | -0. 22029 | 0. 016 | 0. 107 | 3. 90E-15 | monocyte | ICA1L        |
| SLC25A18. 2 | 2. 62E-19 | -0. 25743 | 0. 008 | 0. 094 | 3. 91E-15 | monocyte | SLC25A18     |
| PDE4B. 6    | 2. 62E-19 | -0. 17254 | 0. 142 | 0. 288 | 3. 92E-15 | monocyte | PDE4B        |
| Clorf109. 2 | 2. 65E-19 | -0. 17765 | 0. 035 | 0. 141 | 3. 96E-15 | monocyte | Clorf109     |
| TSSC1. 3    | 2. 71E-19 | -0. 12418 | 0. 126 | 0. 272 | 4. 06E-15 | monocyte | TSSC1        |
| ELOVL4. 6   | 2. 72E-19 | -0. 2013  | 0. 004 | 0. 086 | 4. 07E-15 | monocyte | ELOVL4       |
| NUPL2. 4    | 2. 81E-19 | -0. 14228 | 0. 133 | 0. 28  | 4. 21E-15 | monocyte | NUPL2        |
| RNF216. 3   | 2. 85E-19 | -0. 18578 | 0. 106 | 0. 241 | 4. 25E-15 | monocyte | RNF216       |
| ARFGAP2. 4  | 2. 85E-19 | -0. 18528 | 0. 149 | 0. 304 | 4. 26E-15 | monocyte | ARFGAP2      |
| CALM3. 7    | 2. 88E-19 | -0. 1258  | 0. 4   | 0. 61  | 4. 31E-15 | monocyte | CALM3        |
| NOP16. 6    | 2. 89E-19 | -0. 17216 | 0. 081 | 0. 209 | 4. 32E-15 | monocyte | NOP16        |
| HMGCR. 5    | 2. 96E-19 | -0. 17467 | 0. 021 | 0. 116 | 4. 42E-15 | monocyte | HMGCR        |
| TRMT11. 5   | 3. 00E-19 | -0. 19811 | 0. 026 | 0. 125 | 4. 49E-15 | monocyte | TRMT11       |
| HMCES. 2    | 3. 01E-19 | -0. 19566 | 0. 062 | 0. 178 | 4. 50E-15 | monocyte | HMCES        |
| RAB6A. 7    | 3. 04E-19 | -0. 13735 | 0. 234 | 0. 408 | 4. 54E-15 | monocyte | RAB6A        |
| CHGB. 5     | 3. 06E-19 | -0. 25828 | 0. 008 | 0. 094 | 4. 58E-15 | monocyte | CHGB         |
| CBLN4. 8    | 3. 09E-19 | -0. 24343 | 0. 004 | 0. 086 | 4. 62E-15 | monocyte | CBLN4        |
| VPS25. 3    | 3. 12E-19 | -0. 11101 | 0. 181 | 0. 343 | 4. 67E-15 | monocyte | VPS25        |
| TAL1. 4     | 3. 12E-19 | 0. 270871 | 0. 085 | 0. 03  | 4. 67E-15 | monocyte | TAL1         |
| FAM57A. 4   | 3. 16E-19 | -0. 15295 | 0. 013 | 0. 101 | 4. 73E-15 | monocyte | FAM57A       |
| TADA3. 2    | 3. 18E-19 | -0. 17521 | 0. 233 | 0. 404 | 4. 75E-15 | monocyte | TADA3        |
| ID2. 5      | 3. 22E-19 | 0. 452939 | 0. 704 | 0. 65  | 4. 81E-15 | monocyte | ID2          |
| SBK1. 8     | 3. 33E-19 | -0. 23577 | 0      | 0. 078 | 4. 97E-15 | monocyte | SBK1         |
| SH3GL1. 4   | 3. 39E-19 | -0. 12613 | 0. 123 | 0. 261 | 5. 07E-15 | monocyte | SH3GL1       |
| ATAD3A. 3   | 3. 53E-19 | -0. 18298 | 0. 05  | 0. 161 | 5. 28E-15 | monocyte | ATAD3A       |
| GNA11. 3    | 3. 53E-19 | -0. 17589 | 0. 02  | 0. 114 | 5. 28E-15 | monocyte | GNA11        |
| CTB-3102C   | 3. 57E-19 | -0. 14878 | 0. 024 | 0. 122 | 5. 34E-15 | monocyte | CTB-31020. 2 |
| MGP. 7      | 3. 58E-19 | -0. 72411 | 0. 019 | 0. 111 | 5. 35E-15 | monocyte | MGP          |
| ZNF830. 5   | 3. 63E-19 | -0. 19232 | 0. 076 | 0. 201 | 5. 42E-15 | monocyte | ZNF830       |
| GNPDA2. 5   | 3. 65E-19 | -0. 18922 | 0. 031 | 0. 133 | 5. 46E-15 | monocyte | GNPDA2       |
| Clorf198. 3 | 3. 69E-19 | -0. 29937 | 0. 02  | 0. 112 | 5. 52E-15 | monocyte | Clorf198     |
| UBE2T. 7    | 3. 80E-19 | -0. 29127 | 0. 034 | 0. 135 | 5. 67E-15 | monocyte | UBE2T        |
| IRF2BP2. 6  | 3. 85E-19 | -0. 19309 | 0. 176 | 0. 328 | 5. 76E-15 | monocyte | IRF2BP2      |
| ITGB2-AS1   | 3. 90E-19 | 0. 267156 | 0. 074 | 0. 024 | 5. 83E-15 | monocyte | ITGB2-AS1    |
| CPD. 4      | 3. 92E-19 | -0. 21123 | 0. 056 | 0. 169 | 5. 85E-15 | monocyte | CPD          |
| FDX1L. 4    | 3. 92E-19 | -0. 15135 | 0. 125 | 0. 271 | 5. 87E-15 | monocyte | FDX1L        |
| RERE. 7     | 3. 96E-19 | -0. 13493 | 0. 091 | 0. 221 | 5. 91E-15 | monocyte | RERE         |
| SIAH1. 6    | 4. 02E-19 | -0. 17312 | 0. 104 | 0. 24  | 6. 01E-15 | monocyte | SIAH1        |
| CPSF3L. 3   | 4. 14E-19 | -0. 19162 | 0. 14  | 0. 286 | 6. 19E-15 | monocyte | CPSF3L       |
| DYNC1I2. 6  | 4. 16E-19 | -0. 13628 | 0. 3   | 0. 484 | 6. 21E-15 | monocyte | DYNC1I2      |
| JPX. 1      | 4. 23E-19 | -0. 13424 | 0. 124 | 0. 268 | 6. 33E-15 | monocyte | JPX          |
| RBM7. 2     | 4. 29E-19 | -0. 22124 | 0. 117 | 0. 254 | 6. 41E-15 | monocyte | RBM7         |

|             |           |           |        |        |           |          |                |
|-------------|-----------|-----------|--------|--------|-----------|----------|----------------|
| RSAD1. 4    | 4. 33E-19 | -0. 16131 | 0. 047 | 0. 157 | 6. 46E-15 | monocyte | RSAD1          |
| COQ7. 5     | 4. 45E-19 | -0. 12033 | 0. 073 | 0. 197 | 6. 64E-15 | monocyte | COQ7           |
| ZNF83. 3    | 4. 48E-19 | -0. 16656 | 0. 081 | 0. 208 | 6. 69E-15 | monocyte | ZNF83          |
| TET1. 7     | 4. 56E-19 | -0. 16747 | 0. 006 | 0. 089 | 6. 82E-15 | monocyte | TET1           |
| LDOC1. 7    | 4. 62E-19 | -0. 3114  | 0. 009 | 0. 095 | 6. 91E-15 | monocyte | LDOC1          |
| LPIN1. 5    | 4. 71E-19 | -0. 25939 | 0. 041 | 0. 145 | 7. 04E-15 | monocyte | LPIN1          |
| SNAP23. 7   | 4. 76E-19 | 0. 504522 | 0. 334 | 0. 236 | 7. 11E-15 | monocyte | SNAP23         |
| VPS4A. 4    | 4. 83E-19 | -0. 13642 | 0. 165 | 0. 32  | 7. 22E-15 | monocyte | VPS4A          |
| ISYNA1. 4   | 4. 85E-19 | -0. 17899 | 0. 038 | 0. 142 | 7. 25E-15 | monocyte | ISYNA1         |
| STAMPB. 4   | 4. 87E-19 | -0. 16824 | 0. 133 | 0. 278 | 7. 27E-15 | monocyte | STAMPB         |
| TSG101. 1   | 4. 90E-19 | -0. 10138 | 0. 252 | 0. 432 | 7. 32E-15 | monocyte | TSG101         |
| DNAJC19. 6  | 4. 93E-19 | -0. 12274 | 0. 229 | 0. 403 | 7. 36E-15 | monocyte | DNAJC19        |
| SLC25A17. 4 | 4. 96E-19 | -0. 20384 | 0. 053 | 0. 166 | 7. 41E-15 | monocyte | SLC25A17       |
| IER3. 8     | 5. 00E-19 | 0. 370385 | 0. 364 | 0. 23  | 7. 47E-15 | monocyte | IER3           |
| POLR3F. 5   | 5. 02E-19 | -0. 12296 | 0. 04  | 0. 146 | 7. 50E-15 | monocyte | POLR3F         |
| RFC4. 5     | 5. 05E-19 | -0. 15084 | 0. 053 | 0. 166 | 7. 55E-15 | monocyte | RFC4           |
| ANGPTL4. 4  | 5. 06E-19 | -0. 42945 | 0. 018 | 0. 109 | 7. 56E-15 | monocyte | ANGPTL4        |
| NAAA. 8     | 5. 14E-19 | 0. 361404 | 0. 22  | 0. 126 | 7. 69E-15 | monocyte | NAAA           |
| LYRM2. 3    | 5. 15E-19 | -0. 18341 | 0. 158 | 0. 306 | 7. 70E-15 | monocyte | LYRM2          |
| FBX05. 4    | 5. 23E-19 | -0. 22473 | 0. 015 | 0. 104 | 7. 82E-15 | monocyte | FBX05          |
| SLC2A4RG. 5 | 5. 31E-19 | -0. 15244 | 0. 032 | 0. 134 | 7. 94E-15 | monocyte | SLC2A4RG       |
| DHX15. 5    | 5. 36E-19 | -0. 12904 | 0. 115 | 0. 256 | 8. 02E-15 | monocyte | DHX15          |
| SURF4. 2    | 5. 39E-19 | -0. 15209 | 0. 199 | 0. 364 | 8. 05E-15 | monocyte | SURF4          |
| HRH1. 7     | 5. 43E-19 | -0. 24105 | 0. 015 | 0. 103 | 8. 12E-15 | monocyte | HRH1           |
| CSF1. 6     | 5. 51E-19 | -0. 22092 | 0. 014 | 0. 102 | 8. 23E-15 | monocyte | CSF1           |
| FAM171A1. 5 | 5. 51E-19 | -0. 19695 | 0. 003 | 0. 083 | 8. 24E-15 | monocyte | FAM171A1       |
| NTN1. 4     | 5. 52E-19 | -0. 17204 | 0. 006 | 0. 089 | 8. 25E-15 | monocyte | NTN1           |
| C12orf43. 5 | 5. 67E-19 | -0. 19704 | 0. 053 | 0. 166 | 8. 48E-15 | monocyte | C12orf43       |
| SAC3D1. 8   | 5. 67E-19 | -0. 20552 | 0. 064 | 0. 179 | 8. 48E-15 | monocyte | SAC3D1         |
| POLD4. 6    | 5. 87E-19 | 0. 421946 | 0. 499 | 0. 414 | 8. 77E-15 | monocyte | POLD4          |
| CHD1. 5     | 5. 88E-19 | -0. 16531 | 0. 154 | 0. 305 | 8. 79E-15 | monocyte | CHD1           |
| LEO1. 3     | 5. 88E-19 | -0. 16138 | 0. 045 | 0. 153 | 8. 79E-15 | monocyte | LEO1           |
| AATF. 3     | 6. 14E-19 | -0. 13766 | 0. 153 | 0. 303 | 9. 18E-15 | monocyte | AATF           |
| CTC-444N2   | 6. 16E-19 | -0. 17754 | 0. 039 | 0. 143 | 9. 20E-15 | monocyte | CTC-444N24. 11 |
| NUCD3. 5    | 6. 37E-19 | -0. 11618 | 0. 081 | 0. 208 | 9. 51E-15 | monocyte | NUCD3          |
| SRP54. 3    | 6. 52E-19 | -0. 19525 | 0. 14  | 0. 285 | 9. 74E-15 | monocyte | SRP54          |
| WIPF2. 3    | 6. 75E-19 | -0. 19605 | 0. 086 | 0. 212 | 1. 01E-14 | monocyte | WIPF2          |
| ZBTB8A. 7   | 6. 87E-19 | -0. 16009 | 0. 019 | 0. 111 | 1. 03E-14 | monocyte | ZBTB8A         |
| HMBOX1. 7   | 6. 91E-19 | -0. 17481 | 0. 079 | 0. 203 | 1. 03E-14 | monocyte | HMBOX1         |
| GATAD2B. 6  | 7. 00E-19 | -0. 18151 | 0. 056 | 0. 17  | 1. 05E-14 | monocyte | GATAD2B        |
| MT2A. 7     | 7. 06E-19 | -0. 18026 | 0. 652 | 0. 796 | 1. 06E-14 | monocyte | MT2A           |
| CCDC136. 6  | 7. 20E-19 | -0. 21672 | 0. 011 | 0. 098 | 1. 08E-14 | monocyte | CCDC136        |
| NACAD. 7    | 7. 27E-19 | -0. 2354  | 0. 01  | 0. 096 | 1. 09E-14 | monocyte | NACAD          |
| PSMD7. 4    | 7. 29E-19 | -0. 1326  | 0. 322 | 0. 505 | 1. 09E-14 | monocyte | PSMD7          |
| BOK. 8      | 7. 33E-19 | -0. 22394 | 0. 003 | 0. 082 | 1. 09E-14 | monocyte | BOK            |
| DUSP26. 7   | 7. 37E-19 | -0. 29486 | 0. 009 | 0. 095 | 1. 10E-14 | monocyte | DUSP26         |
| ORAI2. 4    | 7. 44E-19 | -0. 20053 | 0. 145 | 0. 288 | 1. 11E-14 | monocyte | ORAI2          |
| VAX2. 7     | 7. 45E-19 | -0. 19739 | 0. 005 | 0. 086 | 1. 11E-14 | monocyte | VAX2           |
| LTBP3. 4    | 7. 52E-19 | -0. 14938 | 0. 091 | 0. 22  | 1. 12E-14 | monocyte | LTBP3          |
| TANC1. 6    | 7. 57E-19 | -0. 12929 | 0. 022 | 0. 116 | 1. 13E-14 | monocyte | TANC1          |
| ZC3H8. 5    | 7. 60E-19 | -0. 24557 | 0. 048 | 0. 156 | 1. 14E-14 | monocyte | ZC3H8          |



|            |          |          |       |       |          |          |               |
|------------|----------|----------|-------|-------|----------|----------|---------------|
| MFSD7.6    | 7.65E-19 | 0.134561 | 0.08  | 0.027 | 1.14E-14 | monocyte | MFSD7         |
| TOMM34.3   | 7.65E-19 | -0.1414  | 0.04  | 0.145 | 1.14E-14 | monocyte | TOMM34        |
| PSMB1.2    | 7.70E-19 | -0.12065 | 0.53  | 0.742 | 1.15E-14 | monocyte | PSMB1         |
| STAT3.2    | 7.81E-19 | -0.15463 | 0.29  | 0.473 | 1.17E-14 | monocyte | STAT3         |
| ARHGAP5.5  | 7.88E-19 | -0.18951 | 0.08  | 0.204 | 1.18E-14 | monocyte | ARHGAP5       |
| MTMR2.3    | 8.04E-19 | -0.18905 | 0.047 | 0.155 | 1.20E-14 | monocyte | MTMR2         |
| FAM131B.6  | 8.12E-19 | -0.20436 | 0.003 | 0.082 | 1.21E-14 | monocyte | FAM131B       |
| CYP2S1.2   | 8.24E-19 | 0.100248 | 0.05  | 0.013 | 1.23E-14 | monocyte | CYP2S1        |
| IL32.6     | 8.30E-19 | -0.44397 | 0.018 | 0.107 | 1.24E-14 | monocyte | IL32          |
| LOXL1.6    | 8.38E-19 | -0.15705 | 0.004 | 0.084 | 1.25E-14 | monocyte | LOXL1         |
| NUP107.7   | 8.44E-19 | -0.32956 | 0.105 | 0.234 | 1.26E-14 | monocyte | NUP107        |
| TARDBP.3   | 8.48E-19 | -0.11317 | 0.151 | 0.307 | 1.27E-14 | monocyte | TARDBP        |
| HYAL2.8    | 8.56E-19 | -0.15982 | 0.102 | 0.233 | 1.28E-14 | monocyte | HYAL2         |
| B3GALNT1.8 | 8.76E-19 | -0.21826 | 0.073 | 0.193 | 1.31E-14 | monocyte | B3GALNT1      |
| STAT5A.7   | 8.79E-19 | 0.247653 | 0.112 | 0.046 | 1.31E-14 | monocyte | STAT5A        |
| KIAA0907.8 | 8.86E-19 | -0.19446 | 0.079 | 0.204 | 1.32E-14 | monocyte | KIAA0907      |
| DENND5B.7  | 9.04E-19 | -0.19024 | 0.015 | 0.103 | 1.35E-14 | monocyte | DENND5B       |
| ARL8A.6    | 9.20E-19 | -0.22515 | 0.142 | 0.284 | 1.38E-14 | monocyte | ARL8A         |
| MXI1.4     | 9.51E-19 | -0.23143 | 0.039 | 0.141 | 1.42E-14 | monocyte | MXI1          |
| PDE4D.5    | 9.55E-19 | -0.20367 | 0.016 | 0.105 | 1.43E-14 | monocyte | PDE4D         |
| ZMYND15.5  | 9.61E-19 | 0.26193  | 0.119 | 0.051 | 1.44E-14 | monocyte | ZMYND15       |
| RP11-262H  | 9.86E-19 | -0.15674 | 0.028 | 0.127 | 1.47E-14 | monocyte | RP11-262H14.4 |
| UQCRFS1.4  | 9.94E-19 | -0.18485 | 0.367 | 0.56  | 1.49E-14 | monocyte | UQCRFS1       |
| RIC8A.4    | 1.02E-18 | -0.12675 | 0.149 | 0.298 | 1.52E-14 | monocyte | RIC8A         |
| DDX46.4    | 1.04E-18 | -0.12921 | 0.283 | 0.461 | 1.55E-14 | monocyte | DDX46         |
| SECISBP2.1 | 1.05E-18 | -0.14417 | 0.123 | 0.264 | 1.58E-14 | monocyte | SECISBP2      |
| ZFAND3.3   | 1.07E-18 | -0.14579 | 0.14  | 0.284 | 1.59E-14 | monocyte | ZFAND3        |
| DHX40.6    | 1.09E-18 | -0.11835 | 0.042 | 0.148 | 1.63E-14 | monocyte | DHX40         |
| CASK.2     | 1.10E-18 | -0.21171 | 0.032 | 0.132 | 1.65E-14 | monocyte | CASK          |
| GCA.8      | 1.11E-18 | 0.496051 | 0.398 | 0.29  | 1.66E-14 | monocyte | GCA           |
| KCNK13.4   | 1.13E-18 | 0.169095 | 0.065 | 0.02  | 1.69E-14 | monocyte | KCNK13        |
| RAB39B.7   | 1.14E-18 | -0.19571 | 0.011 | 0.097 | 1.71E-14 | monocyte | RAB39B        |
| EMC8.4     | 1.15E-18 | -0.17525 | 0.137 | 0.284 | 1.72E-14 | monocyte | EMC8          |
| FAM174A.4  | 1.19E-18 | -0.14085 | 0.101 | 0.233 | 1.78E-14 | monocyte | FAM174A       |
| AIMP1.4    | 1.20E-18 | -0.11731 | 0.215 | 0.385 | 1.80E-14 | monocyte | AIMP1         |
| KLHDC9.6   | 1.24E-18 | -0.20661 | 0.002 | 0.079 | 1.85E-14 | monocyte | KLHDC9        |
| MAD2L1BP.1 | 1.27E-18 | -0.12906 | 0.056 | 0.169 | 1.90E-14 | monocyte | MAD2L1BP      |
| KAT6B.5    | 1.27E-18 | -0.20268 | 0.031 | 0.13  | 1.90E-14 | monocyte | KAT6B         |
| PRKAR1B.5  | 1.28E-18 | -0.21588 | 0.035 | 0.136 | 1.91E-14 | monocyte | PRKAR1B       |
| RDH5.5     | 1.29E-18 | -0.19176 | 0.019 | 0.11  | 1.93E-14 | monocyte | RDH5          |
| ZNF24.6    | 1.30E-18 | -0.14393 | 0.162 | 0.313 | 1.94E-14 | monocyte | ZNF24         |
| SPOCK1.7   | 1.31E-18 | -0.29289 | 0.006 | 0.088 | 1.95E-14 | monocyte | SPOCK1        |
| GLIPR1.7   | 1.31E-18 | 0.502511 | 0.43  | 0.326 | 1.96E-14 | monocyte | GLIPR1        |
| TRMT61B.5  | 1.33E-18 | -0.18114 | 0.058 | 0.172 | 1.98E-14 | monocyte | TRMT61B       |
| RNASE3.6   | 1.33E-18 | 0.36241  | 0.081 | 0.029 | 1.99E-14 | monocyte | RNASE3        |
| ING2.4     | 1.36E-18 | -0.20857 | 0.092 | 0.216 | 2.03E-14 | monocyte | ING2          |
| AAMP.3     | 1.36E-18 | -0.10665 | 0.26  | 0.442 | 2.03E-14 | monocyte | AAMP          |
| OGG1.2     | 1.38E-18 | -0.17153 | 0.049 | 0.159 | 2.06E-14 | monocyte | OGG1          |
| KIAA0895L  | 1.43E-18 | -0.20802 | 0.013 | 0.098 | 2.13E-14 | monocyte | KIAA0895L     |
| GIT1.4     | 1.47E-18 | -0.16645 | 0.021 | 0.113 | 2.20E-14 | monocyte | GIT1          |
| KANSL1.6   | 1.47E-18 | -0.22203 | 0.062 | 0.175 | 2.20E-14 | monocyte | KANSL1        |

|             |           |           |        |        |           |          |          |
|-------------|-----------|-----------|--------|--------|-----------|----------|----------|
| FZD7. 5     | 1. 49E-18 | -0. 19263 | 0. 017 | 0. 105 | 2. 23E-14 | monocyte | FZD7     |
| FAM177B. 4  | 1. 51E-18 | 0. 271695 | 0. 077 | 0. 027 | 2. 25E-14 | monocyte | FAM177B  |
| SH3RF1. 6   | 1. 52E-18 | -0. 18464 | 0. 022 | 0. 114 | 2. 27E-14 | monocyte | SH3RF1   |
| RUFY2. 8    | 1. 57E-18 | -0. 16161 | 0. 049 | 0. 158 | 2. 34E-14 | monocyte | RUFY2    |
| MKRN1. 7    | 1. 58E-18 | -0. 1791  | 0. 252 | 0. 422 | 2. 36E-14 | monocyte | MKRN1    |
| CACNG8. 5   | 1. 62E-18 | -0. 17728 | 0. 002 | 0. 079 | 2. 42E-14 | monocyte | CACNG8   |
| CHERP. 4    | 1. 63E-18 | -0. 15095 | 0. 062 | 0. 178 | 2. 43E-14 | monocyte | CHERP    |
| PTBP1. 5    | 1. 65E-18 | -0. 15181 | 0. 177 | 0. 336 | 2. 47E-14 | monocyte | PTBP1    |
| STUB1. 5    | 1. 66E-18 | -0. 18026 | 0. 295 | 0. 476 | 2. 49E-14 | monocyte | STUB1    |
| CLASP2. 7   | 1. 67E-18 | -0. 26217 | 0. 086 | 0. 207 | 2. 49E-14 | monocyte | CLASP2   |
| SLC12A2. 7  | 1. 68E-18 | -0. 15974 | 0. 037 | 0. 138 | 2. 51E-14 | monocyte | SLC12A2  |
| PDGFD. 6    | 1. 68E-18 | -0. 14442 | 0. 005 | 0. 085 | 2. 51E-14 | monocyte | PDGFD    |
| CAND1. 4    | 1. 68E-18 | -0. 12471 | 0. 113 | 0. 246 | 2. 52E-14 | monocyte | CAND1    |
| MBD3. 3     | 1. 70E-18 | -0. 14601 | 0. 058 | 0. 173 | 2. 54E-14 | monocyte | MBD3     |
| RORA. 5     | 1. 70E-18 | -0. 23891 | 0. 003 | 0. 081 | 2. 54E-14 | monocyte | RORA     |
| SRSF12. 6   | 1. 71E-18 | -0. 14493 | 0. 002 | 0. 079 | 2. 55E-14 | monocyte | SRSF12   |
| FOSB. 6     | 1. 74E-18 | -0. 22486 | 0. 253 | 0. 404 | 2. 61E-14 | monocyte | FOSB     |
| IK. 1       | 1. 77E-18 | -0. 12165 | 0. 23  | 0. 403 | 2. 64E-14 | monocyte | IK       |
| HN1L. 6     | 1. 77E-18 | -0. 1543  | 0. 051 | 0. 161 | 2. 65E-14 | monocyte | HN1L     |
| TMEM255B. 1 | 1. 79E-18 | 0. 312919 | 0. 117 | 0. 05  | 2. 68E-14 | monocyte | TMEM255B |
| COG4. 5     | 1. 87E-18 | -0. 16741 | 0. 08  | 0. 201 | 2. 80E-14 | monocyte | COG4     |
| JMY. 5      | 1. 90E-18 | -0. 18782 | 0. 019 | 0. 108 | 2. 84E-14 | monocyte | JMY      |
| SF3B4. 1    | 1. 91E-18 | -0. 15016 | 0. 176 | 0. 334 | 2. 86E-14 | monocyte | SF3B4    |
| GSK3B. 5    | 1. 91E-18 | -0. 178   | 0. 085 | 0. 207 | 2. 86E-14 | monocyte | GSK3B    |
| PSMB10. 8   | 1. 93E-18 | 0. 443432 | 0. 35  | 0. 247 | 2. 89E-14 | monocyte | PSMB10   |
| NAA35. 3    | 1. 93E-18 | -0. 19175 | 0. 042 | 0. 145 | 2. 89E-14 | monocyte | NAA35    |
| GPR37. 5    | 1. 93E-18 | -0. 33747 | 0. 002 | 0. 079 | 2. 89E-14 | monocyte | GPR37    |
| ELMOD1. 5   | 1. 95E-18 | -0. 12044 | 0. 007 | 0. 089 | 2. 92E-14 | monocyte | ELMOD1   |
| NONO. 7     | 1. 99E-18 | -0. 12102 | 0. 286 | 0. 47  | 2. 97E-14 | monocyte | NONO     |
| METTL9. 7   | 2. 03E-18 | -0. 15381 | 0. 302 | 0. 483 | 3. 04E-14 | monocyte | METTL9   |
| SEPN1. 6    | 2. 03E-18 | -0. 20849 | 0. 095 | 0. 22  | 3. 04E-14 | monocyte | SEPN1    |
| BEST3. 6    | 2. 05E-18 | -0. 32029 | 0. 01  | 0. 094 | 3. 06E-14 | monocyte | BEST3    |
| SORBS1. 5   | 2. 07E-18 | -0. 16294 | 0. 014 | 0. 1   | 3. 09E-14 | monocyte | SORBS1   |
| PYURF. 4    | 2. 10E-18 | -0. 15035 | 0. 364 | 0. 556 | 3. 14E-14 | monocyte | PYURF    |
| PIGF. 6     | 2. 12E-18 | -0. 10165 | 0. 152 | 0. 3   | 3. 17E-14 | monocyte | PIGF     |
| FNBP4. 4    | 2. 17E-18 | -0. 10409 | 0. 121 | 0. 263 | 3. 24E-14 | monocyte | FNBP4    |
| SH3TC1. 7   | 2. 20E-18 | 0. 331063 | 0. 152 | 0. 073 | 3. 29E-14 | monocyte | SH3TC1   |
| METTL1. 5   | 2. 33E-18 | -0. 26141 | 0. 05  | 0. 156 | 3. 47E-14 | monocyte | METTL1   |
| PLXNA4. 7   | 2. 36E-18 | -0. 21302 | 0. 004 | 0. 083 | 3. 53E-14 | monocyte | PLXNA4   |
| SEC61A1. 3  | 2. 36E-18 | -0. 12815 | 0. 215 | 0. 379 | 3. 53E-14 | monocyte | SEC61A1  |
| BIRC5. 8    | 2. 37E-18 | -0. 33183 | 0. 022 | 0. 112 | 3. 54E-14 | monocyte | BIRC5    |
| YEATS4. 6   | 2. 44E-18 | -0. 22135 | 0. 129 | 0. 262 | 3. 65E-14 | monocyte | YEATS4   |
| ATP2A2. 3   | 2. 47E-18 | -0. 11021 | 0. 146 | 0. 291 | 3. 69E-14 | monocyte | ATP2A2   |
| CEP89. 5    | 2. 50E-18 | -0. 17144 | 0. 037 | 0. 139 | 3. 74E-14 | monocyte | CEP89    |
| COL16A1. 6  | 2. 53E-18 | -0. 19582 | 0. 003 | 0. 08  | 3. 78E-14 | monocyte | COL16A1  |
| RFC1. 4     | 2. 55E-18 | -0. 11578 | 0. 144 | 0. 288 | 3. 81E-14 | monocyte | RFC1     |
| MAD2L1. 6   | 2. 58E-18 | -0. 26717 | 0. 037 | 0. 136 | 3. 85E-14 | monocyte | MAD2L1   |
| ARMCX1. 7   | 2. 60E-18 | -0. 17567 | 0. 101 | 0. 223 | 3. 88E-14 | monocyte | ARMCX1   |
| TMTC4. 7    | 2. 61E-18 | -0. 23344 | 0. 018 | 0. 106 | 3. 90E-14 | monocyte | TMTC4    |
| SDC3. 4     | 2. 65E-18 | -0. 27265 | 0. 085 | 0. 206 | 3. 96E-14 | monocyte | SDC3     |
| RBM4. 6     | 2. 66E-18 | -0. 16564 | 0. 098 | 0. 231 | 3. 98E-14 | monocyte | RBM4     |

|            |          |          |       |       |          |          |          |
|------------|----------|----------|-------|-------|----------|----------|----------|
| LRRC17.5   | 2.67E-18 | -0.21425 | 0.003 | 0.08  | 4.00E-14 | monocyte | LRRC17   |
| SYTL2.6    | 2.70E-18 | -0.2939  | 0.004 | 0.082 | 4.04E-14 | monocyte | SYTL2    |
| GOSR1.6    | 2.71E-18 | -0.12061 | 0.136 | 0.279 | 4.05E-14 | monocyte | GOSR1    |
| ECE1.5     | 2.73E-18 | -0.18986 | 0.006 | 0.086 | 4.08E-14 | monocyte | ECE1     |
| ZNF205.5   | 2.76E-18 | -0.20603 | 0.024 | 0.116 | 4.12E-14 | monocyte | ZNF205   |
| SCN3B.6    | 2.76E-18 | -0.27355 | 0.002 | 0.078 | 4.12E-14 | monocyte | SCN3B    |
| NIP7.6     | 2.86E-18 | -0.18417 | 0.066 | 0.182 | 4.28E-14 | monocyte | NIP7     |
| SRRM3.7    | 2.93E-18 | -0.26101 | 0.002 | 0.078 | 4.37E-14 | monocyte | SRRM3    |
| WIZ.4      | 2.93E-18 | -0.17908 | 0.025 | 0.118 | 4.38E-14 | monocyte | WIZ      |
| EFNB3.6    | 2.97E-18 | -0.17744 | 0.003 | 0.08  | 4.44E-14 | monocyte | EFNB3    |
| CEBPB.8    | 3.03E-18 | 0.341267 | 0.523 | 0.427 | 4.53E-14 | monocyte | CEBPB    |
| NOL11.5    | 3.13E-18 | -0.13583 | 0.077 | 0.199 | 4.67E-14 | monocyte | NOL11    |
| ANKS3.6    | 3.15E-18 | -0.12647 | 0.062 | 0.178 | 4.71E-14 | monocyte | ANKS3    |
| YIPF5.4    | 3.16E-18 | -0.17544 | 0.133 | 0.273 | 4.72E-14 | monocyte | YIPF5    |
| ARPC5L.5   | 3.21E-18 | -0.12505 | 0.219 | 0.383 | 4.79E-14 | monocyte | ARPC5L   |
| MAPKAP1.2  | 3.28E-18 | -0.2061  | 0.127 | 0.261 | 4.90E-14 | monocyte | MAPKAP1  |
| GABARAP.5  | 3.31E-18 | 0.543767 | 0.528 | 0.455 | 4.94E-14 | monocyte | GABARAP  |
| PAAF1.5    | 3.33E-18 | -0.15149 | 0.086 | 0.209 | 4.97E-14 | monocyte | PAAF1    |
| HGF.2      | 3.38E-18 | 0.205706 | 0.073 | 0.024 | 5.05E-14 | monocyte | HGF      |
| STK17A.6   | 3.48E-18 | -0.2059  | 0.163 | 0.305 | 5.20E-14 | monocyte | STK17A   |
| SSBP3.6    | 3.53E-18 | -0.20269 | 0.038 | 0.136 | 5.28E-14 | monocyte | SSBP3    |
| PAFAH1B1.3 | 3.58E-18 | -0.16083 | 0.217 | 0.381 | 5.35E-14 | monocyte | PAFAH1B1 |
| RHOU.6     | 3.59E-18 | -0.30609 | 0.043 | 0.142 | 5.36E-14 | monocyte | RHOU     |
| C19orf48.3 | 3.61E-18 | -0.1441  | 0.105 | 0.238 | 5.39E-14 | monocyte | C19orf48 |
| DMAP1.5    | 3.64E-18 | -0.1325  | 0.124 | 0.262 | 5.44E-14 | monocyte | DMAP1    |
| UBTD2.4    | 3.68E-18 | -0.19588 | 0.022 | 0.113 | 5.50E-14 | monocyte | UBTD2    |
| DHX29.6    | 3.79E-18 | -0.16112 | 0.17  | 0.322 | 5.67E-14 | monocyte | DHX29    |
| FBXO3.5    | 3.87E-18 | -0.16272 | 0.065 | 0.18  | 5.78E-14 | monocyte | FBXO3    |
| SNHG10.3   | 3.89E-18 | -0.17388 | 0.015 | 0.101 | 5.82E-14 | monocyte | SNHG10   |
| SIRT2.6    | 3.90E-18 | -0.1426  | 0.261 | 0.43  | 5.83E-14 | monocyte | SIRT2    |
| ZDHHC4.6   | 3.97E-18 | -0.22003 | 0.21  | 0.368 | 5.93E-14 | monocyte | ZDHHC4   |
| CNPY4.5    | 4.07E-18 | -0.16439 | 0.026 | 0.12  | 6.08E-14 | monocyte | CNPY4    |
| U2AF2.3    | 4.16E-18 | -0.12777 | 0.127 | 0.268 | 6.22E-14 | monocyte | U2AF2    |
| KATNB1.5   | 4.16E-18 | -0.18068 | 0.031 | 0.128 | 6.22E-14 | monocyte | KATNB1   |
| PRRC2A.4   | 4.19E-18 | -0.20803 | 0.12  | 0.254 | 6.26E-14 | monocyte | PRRC2A   |
| NSRP1.1    | 4.24E-18 | -0.11541 | 0.204 | 0.37  | 6.34E-14 | monocyte | NSRP1    |
| TWF1.3     | 4.28E-18 | -0.18405 | 0.136 | 0.275 | 6.40E-14 | monocyte | TWF1     |
| NOS1AP.7   | 4.35E-18 | -0.17647 | 0.006 | 0.086 | 6.50E-14 | monocyte | NOS1AP   |
| EPM2AIP1.4 | 4.36E-18 | -0.13343 | 0.084 | 0.208 | 6.51E-14 | monocyte | EPM2AIP1 |
| SLC9A9.7   | 4.44E-18 | 0.398941 | 0.149 | 0.072 | 6.64E-14 | monocyte | SLC9A9   |
| PRTFDC1.4  | 4.44E-18 | -0.17293 | 0.041 | 0.143 | 6.64E-14 | monocyte | PRTFDC1  |
| GABBR1.7   | 4.49E-18 | -0.20005 | 0.006 | 0.085 | 6.72E-14 | monocyte | GABBR1   |
| DDX18.1    | 4.61E-18 | -0.1045  | 0.322 | 0.517 | 6.88E-14 | monocyte | DDX18    |
| MIR210HG.4 | 4.61E-18 | -0.22224 | 0.014 | 0.098 | 6.89E-14 | monocyte | MIR210HG |
| NFKBIL1.4  | 4.62E-18 | -0.18407 | 0.092 | 0.214 | 6.91E-14 | monocyte | NFKBIL1  |
| WDR47.4    | 4.64E-18 | -0.22149 | 0.022 | 0.111 | 6.93E-14 | monocyte | WDR47    |
| C19orf53.4 | 4.64E-18 | -0.1886  | 0.524 | 0.697 | 6.93E-14 | monocyte | C19orf53 |
| SH3BGRL3.4 | 4.67E-18 | 0.292121 | 0.781 | 0.777 | 6.98E-14 | monocyte | SH3BGRL3 |
| TMEM128.5  | 4.70E-18 | -0.14178 | 0.156 | 0.303 | 7.02E-14 | monocyte | TMEM128  |
| ISOC1.4    | 4.90E-18 | -0.14877 | 0.062 | 0.173 | 7.33E-14 | monocyte | ISOC1    |
| ING1.3     | 4.91E-18 | -0.11866 | 0.042 | 0.144 | 7.34E-14 | monocyte | ING1     |

|           |          |          |       |       |          |          |            |
|-----------|----------|----------|-------|-------|----------|----------|------------|
| DYNC2LI1. | 5.01E-18 | -0.21414 | 0.062 | 0.173 | 7.48E-14 | monocyte | DYNC2LI1   |
| GART.3    | 5.01E-18 | -0.15142 | 0.087 | 0.21  | 7.48E-14 | monocyte | GART       |
| PPFIA3.6  | 5.06E-18 | -0.15694 | 0.013 | 0.096 | 7.56E-14 | monocyte | PPFIA3     |
| RAB11B-AS | 5.11E-18 | -0.18869 | 0.04  | 0.14  | 7.63E-14 | monocyte | RAB11B-AS1 |
| TMEM178A. | 5.14E-18 | -0.22105 | 0.031 | 0.126 | 7.69E-14 | monocyte | TMEM178A   |
| BRWD1.7   | 5.23E-18 | -0.19133 | 0.119 | 0.252 | 7.81E-14 | monocyte | BRWD1      |
| PTPRD.7   | 5.31E-18 | -0.26972 | 0.003 | 0.079 | 7.93E-14 | monocyte | PTPRD      |
| C12orf73. | 5.48E-18 | -0.19009 | 0.055 | 0.163 | 8.19E-14 | monocyte | C12orf73   |
| RBM18.4   | 5.50E-18 | -0.14835 | 0.091 | 0.216 | 8.22E-14 | monocyte | RBM18      |
| MLXIPL.4  | 5.52E-18 | 0.303043 | 0.091 | 0.035 | 8.25E-14 | monocyte | MLXIPL     |
| DDA1.2    | 5.58E-18 | -0.14216 | 0.185 | 0.341 | 8.33E-14 | monocyte | DDA1       |
| NCAN.6    | 5.69E-18 | -0.26268 | 0.007 | 0.086 | 8.51E-14 | monocyte | NCAN       |
| ZFP90.7   | 5.72E-18 | -0.20823 | 0.04  | 0.139 | 8.54E-14 | monocyte | ZFP90      |
| VANGL2.6  | 5.76E-18 | -0.19004 | 0.003 | 0.079 | 8.61E-14 | monocyte | VANGL2     |
| CASP6.6   | 5.86E-18 | -0.14352 | 0.059 | 0.172 | 8.76E-14 | monocyte | CASP6      |
| ING3.3    | 5.94E-18 | -0.15779 | 0.077 | 0.194 | 8.87E-14 | monocyte | ING3       |
| LRIG1.7   | 5.97E-18 | -0.18633 | 0.024 | 0.116 | 8.92E-14 | monocyte | LRIG1      |
| IL3RA.2   | 6.05E-18 | 0.105393 | 0.044 | 0.01  | 9.04E-14 | monocyte | IL3RA      |
| XXYLT1.6  | 6.06E-18 | -0.17017 | 0.035 | 0.134 | 9.06E-14 | monocyte | XXYLT1     |
| ZNF426.5  | 6.12E-18 | -0.20663 | 0.027 | 0.12  | 9.14E-14 | monocyte | ZNF426     |
| WBP11.2   | 6.21E-18 | -0.18255 | 0.158 | 0.303 | 9.29E-14 | monocyte | WBP11      |
| DMRTA2.5  | 6.35E-18 | -0.15958 | 0.005 | 0.083 | 9.49E-14 | monocyte | DMRTA2     |
| ZNF397.6  | 6.38E-18 | -0.16329 | 0.059 | 0.172 | 9.53E-14 | monocyte | ZNF397     |
| FBXO44.6  | 6.45E-18 | -0.21358 | 0.046 | 0.15  | 9.64E-14 | monocyte | FBXO44     |
| ADRB2.6   | 6.59E-18 | 0.306176 | 0.101 | 0.041 | 9.85E-14 | monocyte | ADRB2      |
| GRK4.6    | 6.59E-18 | -0.19849 | 0.018 | 0.105 | 9.85E-14 | monocyte | GRK4       |
| AIMP2.4   | 6.63E-18 | -0.14635 | 0.116 | 0.251 | 9.91E-14 | monocyte | AIMP2      |
| AC004540. | 6.64E-18 | -0.25141 | 0.007 | 0.086 | 9.92E-14 | monocyte | AC004540.5 |
| RRAS2.6   | 6.88E-18 | -0.15218 | 0.006 | 0.084 | 1.03E-13 | monocyte | RRAS2      |
| MCFD2.1   | 6.90E-18 | -0.1163  | 0.15  | 0.298 | 1.03E-13 | monocyte | MCFD2      |
| CEACAM21. | 6.92E-18 | 0.267483 | 0.057 | 0.017 | 1.03E-13 | monocyte | CEACAM21   |
| KHSRP.6   | 7.01E-18 | -0.14795 | 0.115 | 0.249 | 1.05E-13 | monocyte | KHSRP      |
| UFSP2.2   | 7.02E-18 | -0.13374 | 0.1   | 0.227 | 1.05E-13 | monocyte | UFSP2      |
| CELSR2.6  | 7.14E-18 | -0.17521 | 0.015 | 0.099 | 1.07E-13 | monocyte | CELSR2     |
| MPRIP.2   | 7.24E-18 | -0.1607  | 0.056 | 0.166 | 1.08E-13 | monocyte | MPRIP      |
| MECR.4    | 7.27E-18 | -0.12237 | 0.059 | 0.17  | 1.09E-13 | monocyte | MECR       |
| ILDR2.7   | 7.35E-18 | -0.10794 | 0.007 | 0.086 | 1.10E-13 | monocyte | ILDR2      |
| AGPAT1.2  | 7.47E-18 | -0.15504 | 0.109 | 0.238 | 1.12E-13 | monocyte | AGPAT1     |
| ALDH2.5   | 7.59E-18 | 0.405309 | 0.451 | 0.364 | 1.13E-13 | monocyte | ALDH2      |
| EIF5B.4   | 8.02E-18 | -0.13312 | 0.342 | 0.538 | 1.20E-13 | monocyte | EIF5B      |
| KCNH2.6   | 8.17E-18 | -0.2254  | 0     | 0.072 | 1.22E-13 | monocyte | KCNH2      |
| TBPL1.3   | 8.27E-18 | -0.15042 | 0.101 | 0.228 | 1.24E-13 | monocyte | TBPL1      |
| NDUFA13.5 | 8.62E-18 | -0.12437 | 0.593 | 0.788 | 1.29E-13 | monocyte | NDUFA13    |
| LPCAT1.3  | 8.65E-18 | -0.16832 | 0.075 | 0.191 | 1.29E-13 | monocyte | LPCAT1     |
| AHDC1.6   | 8.68E-18 | -0.16349 | 0.02  | 0.109 | 1.30E-13 | monocyte | AHDC1      |
| PTPN4.7   | 8.70E-18 | -0.20637 | 0.021 | 0.11  | 1.30E-13 | monocyte | PTPN4      |
| NIPSNAP1. | 8.75E-18 | -0.16828 | 0.065 | 0.176 | 1.31E-13 | monocyte | NIPSNAP1   |
| HOXA2.7   | 8.81E-18 | -0.24935 | 0.003 | 0.078 | 1.32E-13 | monocyte | HOXA2      |
| NARFL.3   | 8.84E-18 | -0.1758  | 0.048 | 0.154 | 1.32E-13 | monocyte | NARFL      |
| PAK1IP1.5 | 8.86E-18 | -0.14769 | 0.098 | 0.226 | 1.32E-13 | monocyte | PAK1IP1    |
| ZBTB43.3  | 8.89E-18 | -0.20166 | 0.053 | 0.159 | 1.33E-13 | monocyte | ZBTB43     |

|           |          |          |       |       |          |          |               |
|-----------|----------|----------|-------|-------|----------|----------|---------------|
| ZNF566.6  | 8.92E-18 | -0.21717 | 0.029 | 0.123 | 1.33E-13 | monocyte | ZNF566        |
| ACSBG1.5  | 9.02E-18 | -0.17683 | 0.004 | 0.08  | 1.35E-13 | monocyte | ACSBG1        |
| QPRT.4    | 9.14E-18 | 0.343446 | 0.196 | 0.108 | 1.37E-13 | monocyte | QPRT          |
| SUPT6H.2  | 9.21E-18 | -0.16369 | 0.068 | 0.181 | 1.38E-13 | monocyte | SUPT6H        |
| POMC.8    | 9.27E-18 | 0.259566 | 0.103 | 0.042 | 1.39E-13 | monocyte | POMC          |
| ENKUR.6   | 9.32E-18 | -0.2223  | 0.003 | 0.078 | 1.39E-13 | monocyte | ENKUR         |
| LRRC42.4  | 9.70E-18 | -0.18985 | 0.049 | 0.153 | 1.45E-13 | monocyte | LRRC42        |
| LILRB3.6  | 9.72E-18 | 0.171344 | 0.093 | 0.035 | 1.45E-13 | monocyte | LILRB3        |
| FDFT1.5   | 1.00E-17 | -0.1086  | 0.169 | 0.318 | 1.50E-13 | monocyte | FDFT1         |
| SCAF4.2   | 1.01E-17 | -0.18605 | 0.046 | 0.149 | 1.50E-13 | monocyte | SCAF4         |
| HGS.4     | 1.01E-17 | -0.16736 | 0.101 | 0.226 | 1.51E-13 | monocyte | HGS           |
| PHLPP1.8  | 1.01E-17 | -0.21633 | 0.01  | 0.091 | 1.52E-13 | monocyte | PHLPP1        |
| C9orf9.6  | 1.01E-17 | -0.17998 | 0.026 | 0.117 | 1.52E-13 | monocyte | C9orf9        |
| TMED1.5   | 1.02E-17 | -0.21216 | 0.16  | 0.303 | 1.52E-13 | monocyte | TMED1         |
| NDUFA12.3 | 1.05E-17 | -0.13051 | 0.382 | 0.574 | 1.56E-13 | monocyte | NDUFA12       |
| ZCCHC10.3 | 1.05E-17 | -0.17863 | 0.114 | 0.244 | 1.57E-13 | monocyte | ZCCHC10       |
| F12.6     | 1.07E-17 | -0.14476 | 0.006 | 0.084 | 1.60E-13 | monocyte | F12           |
| PDHX.5    | 1.10E-17 | -0.20966 | 0.069 | 0.18  | 1.65E-13 | monocyte | PDHX          |
| MPC1.4    | 1.10E-17 | -0.14562 | 0.325 | 0.502 | 1.65E-13 | monocyte | MPC1          |
| TXLNG.5   | 1.11E-17 | -0.20419 | 0.042 | 0.142 | 1.65E-13 | monocyte | TXLNG         |
| BOLA3.5   | 1.11E-17 | -0.18342 | 0.197 | 0.348 | 1.65E-13 | monocyte | BOLA3         |
| CNPY1.7   | 1.12E-17 | -0.21062 | 0.006 | 0.084 | 1.67E-13 | monocyte | CNPY1         |
| SLC29A4.5 | 1.12E-17 | -0.20569 | 0.009 | 0.089 | 1.68E-13 | monocyte | SLC29A4       |
| TMEM67.5  | 1.14E-17 | -0.18205 | 0.017 | 0.102 | 1.70E-13 | monocyte | TMEM67        |
| IL12RB1.7 | 1.15E-17 | 0.243654 | 0.077 | 0.027 | 1.72E-13 | monocyte | IL12RB1       |
| GEM.3     | 1.16E-17 | -0.26555 | 0.018 | 0.104 | 1.74E-13 | monocyte | GEM           |
| UBQLN2.8  | 1.16E-17 | -0.18453 | 0.104 | 0.231 | 1.74E-13 | monocyte | UBQLN2        |
| MTRF1L.5  | 1.17E-17 | -0.12482 | 0.081 | 0.199 | 1.74E-13 | monocyte | MTRF1L        |
| RAB33A.6  | 1.17E-17 | -0.30184 | 0.024 | 0.113 | 1.75E-13 | monocyte | RAB33A        |
| DALRD3.4  | 1.17E-17 | -0.16271 | 0.064 | 0.174 | 1.75E-13 | monocyte | DALRD3        |
| LAMB1.4   | 1.19E-17 | -0.17447 | 0.021 | 0.109 | 1.78E-13 | monocyte | LAMB1         |
| EID2.7    | 1.21E-17 | -0.19417 | 0.027 | 0.118 | 1.81E-13 | monocyte | EID2          |
| URM1.2    | 1.23E-17 | -0.13581 | 0.211 | 0.371 | 1.83E-13 | monocyte | URM1          |
| FANCL.5   | 1.27E-17 | -0.14629 | 0.048 | 0.151 | 1.90E-13 | monocyte | FANCL         |
| AP1S2.6   | 1.27E-17 | -0.21774 | 0.358 | 0.513 | 1.90E-13 | monocyte | AP1S2         |
| PLCG1.5   | 1.28E-17 | -0.15969 | 0.02  | 0.107 | 1.92E-13 | monocyte | PLCG1         |
| TENM1.5   | 1.32E-17 | -0.1674  | 0.003 | 0.077 | 1.97E-13 | monocyte | TENM1         |
| SRP68.2   | 1.34E-17 | -0.15845 | 0.111 | 0.24  | 2.00E-13 | monocyte | SRP68         |
| C7orf26.6 | 1.35E-17 | -0.22155 | 0.059 | 0.166 | 2.01E-13 | monocyte | C7orf26       |
| CLEC12A.5 | 1.36E-17 | 0.177959 | 0.056 | 0.016 | 2.04E-13 | monocyte | CLEC12A       |
| COQ9.5    | 1.36E-17 | -0.12733 | 0.119 | 0.253 | 2.04E-13 | monocyte | COQ9          |
| CNOT7.5   | 1.38E-17 | -0.12371 | 0.22  | 0.381 | 2.06E-13 | monocyte | CNOT7         |
| GOLGA2.2  | 1.38E-17 | -0.13568 | 0.092 | 0.215 | 2.07E-13 | monocyte | GOLGA2        |
| EMD.2     | 1.40E-17 | -0.17393 | 0.156 | 0.295 | 2.09E-13 | monocyte | EMD           |
| KLC2.7    | 1.40E-17 | -0.1535  | 0.033 | 0.129 | 2.09E-13 | monocyte | KLC2          |
| RP13-1032 | 1.40E-17 | -0.146   | 0.007 | 0.086 | 2.10E-13 | monocyte | RP13-1032I1.7 |
| IWS1.4    | 1.41E-17 | -0.17462 | 0.097 | 0.223 | 2.10E-13 | monocyte | IWS1          |
| ASTN1.4   | 1.41E-17 | -0.16969 | 0.015 | 0.098 | 2.10E-13 | monocyte | ASTN1         |
| LMAN2L.5  | 1.42E-17 | -0.17926 | 0.028 | 0.121 | 2.12E-13 | monocyte | LMAN2L        |
| ZNF414.8  | 1.42E-17 | -0.166   | 0.078 | 0.195 | 2.12E-13 | monocyte | ZNF414        |
| RIF1.6    | 1.43E-17 | -0.17019 | 0.103 | 0.23  | 2.13E-13 | monocyte | RIF1          |

|              |           |           |        |        |           |          |          |
|--------------|-----------|-----------|--------|--------|-----------|----------|----------|
| TM2D3. 4     | 1. 43E-17 | -0. 11759 | 0. 189 | 0. 343 | 2. 13E-13 | monocyte | TM2D3    |
| VAPA. 4      | 1. 43E-17 | -0. 13652 | 0. 446 | 0. 65  | 2. 14E-13 | monocyte | VAPA     |
| EHD1. 5      | 1. 48E-17 | -0. 22267 | 0. 034 | 0. 129 | 2. 21E-13 | monocyte | EHD1     |
| B4GALT3. 4   | 1. 51E-17 | -0. 11351 | 0. 102 | 0. 228 | 2. 26E-13 | monocyte | B4GALT3  |
| SLC1A3. 7    | 1. 51E-17 | 0. 361578 | 0. 544 | 0. 471 | 2. 26E-13 | monocyte | SLC1A3   |
| ALYREF. 7    | 1. 57E-17 | -0. 17003 | 0. 05  | 0. 154 | 2. 34E-13 | monocyte | ALYREF   |
| P2RY11. 6    | 1. 61E-17 | 0. 313941 | 0. 159 | 0. 08  | 2. 41E-13 | monocyte | P2RY11   |
| M6PR. 8      | 1. 61E-17 | 0. 50063  | 0. 443 | 0. 377 | 2. 41E-13 | monocyte | M6PR     |
| ZNF12. 6     | 1. 62E-17 | -0. 16113 | 0. 035 | 0. 132 | 2. 42E-13 | monocyte | ZNF12    |
| PPP1R12A. 1. | 63E-17    | -0. 17263 | 0. 214 | 0. 372 | 2. 43E-13 | monocyte | PPP1R12A |
| XPOT. 6      | 1. 63E-17 | -0. 14906 | 0. 065 | 0. 177 | 2. 44E-13 | monocyte | XPOT     |
| SMKR1. 5     | 1. 64E-17 | -0. 20945 | 0. 003 | 0. 077 | 2. 45E-13 | monocyte | SMKR1    |
| METAP1D. 6   | 1. 64E-17 | -0. 15371 | 0. 034 | 0. 132 | 2. 45E-13 | monocyte | METAP1D  |
| RRP9. 2      | 1. 65E-17 | -0. 12814 | 0. 056 | 0. 165 | 2. 47E-13 | monocyte | RRP9     |
| PEA15. 4     | 1. 68E-17 | -0. 16173 | 0. 281 | 0. 458 | 2. 50E-13 | monocyte | PEA15    |
| SUPT16H. 6   | 1. 70E-17 | -0. 19583 | 0. 125 | 0. 259 | 2. 55E-13 | monocyte | SUPT16H  |
| RNF139. 5    | 1. 71E-17 | -0. 25612 | 0. 136 | 0. 266 | 2. 56E-13 | monocyte | RNF139   |
| PPP1R14A. 1. | 71E-17    | -0. 49992 | 0. 026 | 0. 114 | 2. 56E-13 | monocyte | PPP1R14A |
| NBPF1. 8     | 1. 72E-17 | -0. 19477 | 0. 117 | 0. 246 | 2. 57E-13 | monocyte | NBPF1    |
| SCAMP5. 6    | 1. 74E-17 | -0. 16122 | 0. 018 | 0. 103 | 2. 59E-13 | monocyte | SCAMP5   |
| PLEKHH3. 5   | 1. 80E-17 | -0. 1475  | 0. 01  | 0. 09  | 2. 68E-13 | monocyte | PLEKHH3  |
| EPS15L1. 4   | 1. 81E-17 | -0. 12336 | 0. 064 | 0. 175 | 2. 71E-13 | monocyte | EPS15L1  |
| PDCL3. 5     | 1. 83E-17 | -0. 12833 | 0. 16  | 0. 305 | 2. 73E-13 | monocyte | PDCL3    |
| HOMER1. 7    | 1. 85E-17 | -0. 22728 | 0. 059 | 0. 165 | 2. 77E-13 | monocyte | HOMER1   |
| DLG5. 4      | 1. 92E-17 | -0. 16725 | 0. 006 | 0. 082 | 2. 87E-13 | monocyte | DLG5     |
| SUSD1. 5     | 1. 93E-17 | 0. 261421 | 0. 114 | 0. 05  | 2. 88E-13 | monocyte | SUSD1    |
| IGF2BP2. 5   | 1. 94E-17 | -0. 16982 | 0. 008 | 0. 087 | 2. 89E-13 | monocyte | IGF2BP2  |
| IL17RA. 8    | 1. 97E-17 | 0. 351346 | 0. 199 | 0. 112 | 2. 94E-13 | monocyte | IL17RA   |
| LYRM1. 7     | 1. 98E-17 | -0. 24161 | 0. 078 | 0. 193 | 2. 96E-13 | monocyte | LYRM1    |
| ATG4D. 4     | 2. 05E-17 | -0. 16177 | 0. 061 | 0. 169 | 3. 07E-13 | monocyte | ATG4D    |
| PCOLCE. 7    | 2. 07E-17 | -0. 26706 | 0. 009 | 0. 088 | 3. 10E-13 | monocyte | PCOLCE   |
| MRPS23. 5    | 2. 09E-17 | -0. 15098 | 0. 221 | 0. 379 | 3. 13E-13 | monocyte | MRPS23   |
| FUZ. 3       | 2. 10E-17 | -0. 2301  | 0. 063 | 0. 17  | 3. 13E-13 | monocyte | FUZ      |
| SCN1B. 5     | 2. 12E-17 | 0. 382724 | 0. 135 | 0. 065 | 3. 16E-13 | monocyte | SCN1B    |
| COPB2. 5     | 2. 12E-17 | -0. 12766 | 0. 169 | 0. 318 | 3. 17E-13 | monocyte | COPB2    |
| C16orf52. 2. | 12E-17    | -0. 14138 | 0. 018 | 0. 103 | 3. 17E-13 | monocyte | C16orf52 |
| CIITA. 4     | 2. 15E-17 | 0. 253237 | 0. 088 | 0. 033 | 3. 21E-13 | monocyte | CIITA    |
| NPRL3. 5     | 2. 19E-17 | -0. 15372 | 0. 081 | 0. 2   | 3. 27E-13 | monocyte | NPRL3    |
| CENPH. 5     | 2. 20E-17 | -0. 18108 | 0. 038 | 0. 134 | 3. 28E-13 | monocyte | CENPH    |
| FBXW11. 2    | 2. 23E-17 | -0. 12216 | 0. 073 | 0. 19  | 3. 33E-13 | monocyte | FBXW11   |
| UCKL1. 3     | 2. 23E-17 | -0. 13473 | 0. 058 | 0. 167 | 3. 33E-13 | monocyte | UCKL1    |
| EMB. 8       | 2. 24E-17 | 0. 301165 | 0. 144 | 0. 069 | 3. 35E-13 | monocyte | EMB      |
| SMAD9. 6     | 2. 26E-17 | -0. 21141 | 0. 003 | 0. 076 | 3. 37E-13 | monocyte | SMAD9    |
| DDX42. 5     | 2. 29E-17 | -0. 17444 | 0. 104 | 0. 229 | 3. 42E-13 | monocyte | DDX42    |
| LTB4R. 6     | 2. 31E-17 | 0. 196664 | 0. 08  | 0. 029 | 3. 45E-13 | monocyte | LTB4R    |
| ZNF467. 5    | 2. 33E-17 | 0. 169578 | 0. 081 | 0. 03  | 3. 47E-13 | monocyte | ZNF467   |
| RAF1. 7      | 2. 33E-17 | -0. 11632 | 0. 147 | 0. 288 | 3. 48E-13 | monocyte | RAF1     |
| CHIC2. 3     | 2. 38E-17 | -0. 21083 | 0. 125 | 0. 254 | 3. 56E-13 | monocyte | CHIC2    |
| SLC39A14. 2. | 42E-17    | -0. 26088 | 0. 018 | 0. 102 | 3. 62E-13 | monocyte | SLC39A14 |
| MAFF. 6      | 2. 45E-17 | -0. 2475  | 0. 072 | 0. 18  | 3. 66E-13 | monocyte | MAFF     |
| RGS3. 5      | 2. 46E-17 | -0. 17273 | 0. 024 | 0. 114 | 3. 67E-13 | monocyte | RGS3     |

|             |           |           |        |        |           |          |               |
|-------------|-----------|-----------|--------|--------|-----------|----------|---------------|
| SPRYD7. 2   | 2. 48E-17 | -0. 20748 | 0. 073 | 0. 185 | 3. 70E-13 | monocyte | SPRYD7        |
| SUCO. 4     | 2. 48E-17 | -0. 12588 | 0. 054 | 0. 162 | 3. 71E-13 | monocyte | SUCO          |
| KDM6B. 7    | 2. 54E-17 | -0. 26467 | 0. 11  | 0. 233 | 3. 79E-13 | monocyte | KDM6B         |
| RAB40B. 8   | 2. 63E-17 | -0. 18416 | 0. 04  | 0. 138 | 3. 92E-13 | monocyte | RAB40B        |
| ANKRD35. 3  | 2. 63E-17 | -0. 18703 | 0. 045 | 0. 145 | 3. 93E-13 | monocyte | ANKRD35       |
| ALG14. 3    | 2. 63E-17 | -0. 13287 | 0. 054 | 0. 16  | 3. 93E-13 | monocyte | ALG14         |
| RFFL. 8     | 2. 71E-17 | -0. 21886 | 0. 066 | 0. 173 | 4. 06E-13 | monocyte | RFFL          |
| RP11-505K   | 2. 77E-17 | -0. 14434 | 0. 008 | 0. 086 | 4. 13E-13 | monocyte | RP11-505K9. 1 |
| LINC00526   | 2. 77E-17 | -0. 17652 | 0. 008 | 0. 086 | 4. 14E-13 | monocyte | LINC00526     |
| FZR1. 4     | 2. 80E-17 | -0. 13887 | 0. 056 | 0. 164 | 4. 19E-13 | monocyte | FZR1          |
| PRDX6. 4    | 2. 83E-17 | -0. 20087 | 0. 481 | 0. 637 | 4. 24E-13 | monocyte | PRDX6         |
| AFAP1. 5    | 2. 84E-17 | -0. 15512 | 0. 011 | 0. 092 | 4. 25E-13 | monocyte | AFAP1         |
| PPM1N. 3    | 2. 87E-17 | 0. 211338 | 0. 089 | 0. 034 | 4. 29E-13 | monocyte | PPM1N         |
| SLC4A1AP. 2 | 2. 88E-17 | -0. 16921 | 0. 071 | 0. 185 | 4. 31E-13 | monocyte | SLC4A1AP      |
| ZNF436. 5   | 2. 89E-17 | -0. 13963 | 0. 007 | 0. 084 | 4. 31E-13 | monocyte | ZNF436        |
| KIF3C. 8    | 2. 89E-17 | -0. 18552 | 0. 022 | 0. 109 | 4. 32E-13 | monocyte | KIF3C         |
| EXOG. 7     | 2. 90E-17 | -0. 16976 | 0. 057 | 0. 165 | 4. 33E-13 | monocyte | EXOG          |
| PRC1. 7     | 2. 91E-17 | -0. 23807 | 0. 013 | 0. 093 | 4. 35E-13 | monocyte | PRC1          |
| ALDH3B1. 6  | 2. 98E-17 | 0. 203803 | 0. 139 | 0. 065 | 4. 45E-13 | monocyte | ALDH3B1       |
| KANK1. 5    | 3. 00E-17 | -0. 18449 | 0. 016 | 0. 099 | 4. 48E-13 | monocyte | KANK1         |
| SLC36A4. 4  | 3. 02E-17 | -0. 19084 | 0. 086 | 0. 203 | 4. 51E-13 | monocyte | SLC36A4       |
| SDS. 8      | 3. 05E-17 | 0. 338287 | 0. 121 | 0. 053 | 4. 55E-13 | monocyte | SDS           |
| SOX15. 6    | 3. 05E-17 | -0. 22505 | 0. 003 | 0. 076 | 4. 56E-13 | monocyte | SOX15         |
| MRAS. 5     | 3. 06E-17 | -0. 16504 | 0. 067 | 0. 177 | 4. 57E-13 | monocyte | MRAS          |
| NIM1K. 6    | 3. 10E-17 | -0. 20343 | 0      | 0. 07  | 4. 63E-13 | monocyte | NIM1K         |
| DPH7. 7     | 3. 14E-17 | -0. 17844 | 0. 066 | 0. 176 | 4. 70E-13 | monocyte | DPH7          |
| DUSP15. 6   | 3. 19E-17 | -0. 12079 | 0. 017 | 0. 1   | 4. 77E-13 | monocyte | DUSP15        |
| EIF4A2. 5   | 3. 20E-17 | -0. 11086 | 0. 54  | 0. 735 | 4. 79E-13 | monocyte | EIF4A2        |
| ZNF692. 4   | 3. 23E-17 | -0. 16439 | 0. 026 | 0. 116 | 4. 83E-13 | monocyte | ZNF692        |
| KARS. 3     | 3. 24E-17 | -0. 11779 | 0. 227 | 0. 387 | 4. 84E-13 | monocyte | KARS          |
| YPEL1. 8    | 3. 26E-17 | -0. 1677  | 0. 017 | 0. 1   | 4. 87E-13 | monocyte | YPEL1         |
| RNASEH2A. 3 | 2. 8E-17  | -0. 138   | 0. 098 | 0. 221 | 4. 91E-13 | monocyte | RNASEH2A      |
| ALOX15B. 6  | 3. 29E-17 | 0. 23637  | 0. 068 | 0. 022 | 4. 91E-13 | monocyte | ALOX15B       |
| U2AF1. 3    | 3. 32E-17 | -0. 11304 | 0. 452 | 0. 647 | 4. 96E-13 | monocyte | U2AF1         |
| CERCAM. 6   | 3. 33E-17 | -0. 2322  | 0. 041 | 0. 137 | 4. 98E-13 | monocyte | CERCAM        |
| PPIG. 1     | 3. 38E-17 | -0. 11287 | 0. 35  | 0. 545 | 5. 06E-13 | monocyte | PPIG          |
| GPR141      | 3. 45E-17 | 0. 117705 | 0. 03  | 0. 006 | 5. 16E-13 | monocyte | GPR141        |
| EHD2. 6     | 3. 48E-17 | -0. 13829 | 0. 009 | 0. 088 | 5. 21E-13 | monocyte | EHD2          |
| GNG3. 6     | 3. 52E-17 | -0. 29693 | 0. 005 | 0. 079 | 5. 26E-13 | monocyte | GNG3          |
| FUNDC1. 6   | 3. 54E-17 | -0. 14836 | 0. 123 | 0. 257 | 5. 29E-13 | monocyte | FUNDC1        |
| AKT2. 2     | 3. 56E-17 | -0. 13486 | 0. 079 | 0. 195 | 5. 33E-13 | monocyte | AKT2          |
| ACACA. 3    | 3. 71E-17 | -0. 15661 | 0. 017 | 0. 1   | 5. 54E-13 | monocyte | ACACA         |
| KANSL2. 5   | 3. 71E-17 | -0. 13565 | 0. 053 | 0. 158 | 5. 54E-13 | monocyte | KANSL2        |
| ZC3HC1. 5   | 3. 78E-17 | -0. 19277 | 0. 037 | 0. 132 | 5. 64E-13 | monocyte | ZC3HC1        |
| SDCBP. 5    | 3. 79E-17 | 0. 410704 | 0. 712 | 0. 73  | 5. 66E-13 | monocyte | SDCBP         |
| UBE20. 6    | 3. 86E-17 | -0. 17079 | 0. 031 | 0. 124 | 5. 77E-13 | monocyte | UBE20         |
| LSM4. 4     | 3. 92E-17 | -0. 14194 | 0. 394 | 0. 575 | 5. 86E-13 | monocyte | LSM4          |
| LLGL1. 6    | 3. 99E-17 | -0. 17984 | 0. 021 | 0. 107 | 5. 97E-13 | monocyte | LLGL1         |
| YBX1. 4     | 4. 04E-17 | -0. 12868 | 0. 647 | 0. 774 | 6. 04E-13 | monocyte | YBX1          |
| SLC25A29. 4 | 1. 0E-17  | -0. 14192 | 0. 055 | 0. 161 | 6. 12E-13 | monocyte | SLC25A29      |
| C6orf203. 4 | 2. 2E-17  | -0. 19537 | 0. 065 | 0. 174 | 6. 30E-13 | monocyte | C6orf203      |

|            |          |          |       |       |          |          |          |
|------------|----------|----------|-------|-------|----------|----------|----------|
| SYNM.6     | 4.23E-17 | -0.13344 | 0.004 | 0.077 | 6.33E-13 | monocyte | SYNM     |
| RBM5.5     | 4.40E-17 | -0.13401 | 0.148 | 0.29  | 6.58E-13 | monocyte | RBM5     |
| RNF165.7   | 4.41E-17 | -0.18857 | 0.002 | 0.073 | 6.59E-13 | monocyte | RNF165   |
| TPT1-AS1.4 | 4.42E-17 | -0.10591 | 0.046 | 0.147 | 6.61E-13 | monocyte | TPT1-AS1 |
| DOCK7.1    | 4.53E-17 | -0.15732 | 0.038 | 0.134 | 6.77E-13 | monocyte | DOCK7    |
| EIF2S1.3   | 4.60E-17 | -0.14932 | 0.183 | 0.332 | 6.87E-13 | monocyte | EIF2S1   |
| BBS2.8     | 4.63E-17 | -0.25935 | 0.071 | 0.181 | 6.92E-13 | monocyte | BBS2     |
| INTS12.5   | 4.66E-17 | -0.1208  | 0.064 | 0.173 | 6.97E-13 | monocyte | INTS12   |
| CANT1.3    | 4.67E-17 | -0.1565  | 0.072 | 0.184 | 6.98E-13 | monocyte | CANT1    |
| FAM46A.4   | 4.71E-17 | -0.22241 | 0.089 | 0.206 | 7.04E-13 | monocyte | FAM46A   |
| B4GALT2.5  | 4.78E-17 | -0.16471 | 0.007 | 0.083 | 7.15E-13 | monocyte | B4GALT2  |
| MTF2.5     | 4.87E-17 | -0.11142 | 0.132 | 0.265 | 7.28E-13 | monocyte | MTF2     |
| TSPYL4.5   | 4.90E-17 | -0.16587 | 0.023 | 0.11  | 7.33E-13 | monocyte | TSPYL4   |
| ZNF300.7   | 4.96E-17 | -0.18828 | 0.003 | 0.075 | 7.41E-13 | monocyte | ZNF300   |
| GNB1.5     | 4.99E-17 | -0.16034 | 0.262 | 0.429 | 7.46E-13 | monocyte | GNB1     |
| HIPK2.6    | 5.04E-17 | -0.1803  | 0.11  | 0.231 | 7.53E-13 | monocyte | HIPK2    |
| DENR.4     | 5.13E-17 | -0.10675 | 0.182 | 0.333 | 7.67E-13 | monocyte | DENR     |
| FBXW7.5    | 5.21E-17 | -0.18965 | 0.04  | 0.135 | 7.79E-13 | monocyte | FBXW7    |
| CEP290.5   | 5.24E-17 | -0.14182 | 0.059 | 0.166 | 7.84E-13 | monocyte | CEP290   |
| MPP6.5     | 5.39E-17 | -0.16235 | 0.005 | 0.079 | 8.05E-13 | monocyte | MPP6     |
| CCDC106.8  | 5.49E-17 | -0.15684 | 0.116 | 0.242 | 8.20E-13 | monocyte | CCDC106  |
| LENG8.3    | 5.58E-17 | -0.11441 | 0.105 | 0.233 | 8.34E-13 | monocyte | LENG8    |
| XIST.8     | 5.68E-17 | -0.23158 | 0.139 | 0.277 | 8.49E-13 | monocyte | XIST     |
| MAP1LC3B.5 | 5.69E-17 | -0.11601 | 0.383 | 0.582 | 8.50E-13 | monocyte | MAP1LC3B |
| C5orf45.4  | 5.71E-17 | -0.17531 | 0.066 | 0.177 | 8.53E-13 | monocyte | C5orf45  |
| LMO1.7     | 5.72E-17 | -0.24616 | 0.006 | 0.081 | 8.55E-13 | monocyte | LMO1     |
| GALNT11.5  | 5.76E-17 | -0.12574 | 0.11  | 0.237 | 8.60E-13 | monocyte | GALNT11  |
| UBL4A.6    | 5.81E-17 | -0.13968 | 0.077 | 0.192 | 8.69E-13 | monocyte | UBL4A    |
| TPCN1.6    | 5.93E-17 | 0.349341 | 0.161 | 0.083 | 8.86E-13 | monocyte | TPCN1    |
| LITAF.8    | 6.13E-17 | 0.467081 | 0.532 | 0.452 | 9.16E-13 | monocyte | LITAF    |
| ETV4.7     | 6.45E-17 | -0.15902 | 0.008 | 0.084 | 9.65E-13 | monocyte | ETV4     |
| KIAA0101.6 | 6.59E-17 | -0.25692 | 0.033 | 0.125 | 9.84E-13 | monocyte | KIAA0101 |
| DNAL1.2    | 6.60E-17 | -0.19869 | 0.024 | 0.111 | 9.86E-13 | monocyte | DNAL1    |
| TNS3.7     | 6.62E-17 | 0.265737 | 0.141 | 0.067 | 9.89E-13 | monocyte | TNS3     |
| ING5.3     | 6.64E-17 | -0.1265  | 0.031 | 0.124 | 9.93E-13 | monocyte | ING5     |
| BCL7B.4    | 6.68E-17 | -0.17238 | 0.185 | 0.334 | 9.99E-13 | monocyte | BCL7B    |
| TARSL2.6   | 6.72E-17 | -0.19042 | 0.028 | 0.117 | 1.00E-12 | monocyte | TARSL2   |
| UBE2M.5    | 6.81E-17 | -0.16346 | 0.116 | 0.24  | 1.02E-12 | monocyte | UBE2M    |
| EFHD2.8    | 6.88E-17 | 0.408452 | 0.3   | 0.202 | 1.03E-12 | monocyte | EFHD2    |
| SLC2A9.6   | 7.02E-17 | 0.19025  | 0.066 | 0.022 | 1.05E-12 | monocyte | SLC2A9   |
| AGPAT5.6   | 7.10E-17 | -0.10497 | 0.095 | 0.22  | 1.06E-12 | monocyte | AGPAT5   |
| THAP4.2    | 7.13E-17 | -0.18892 | 0.062 | 0.168 | 1.07E-12 | monocyte | THAP4    |
| ZNF583.6   | 7.15E-17 | -0.15005 | 0.025 | 0.113 | 1.07E-12 | monocyte | ZNF583   |
| DCAF10.4   | 7.21E-17 | -0.17911 | 0.075 | 0.187 | 1.08E-12 | monocyte | DCAF10   |
| CRLS1.4    | 7.24E-17 | -0.12221 | 0.156 | 0.295 | 1.08E-12 | monocyte | CRLS1    |
| ACLY.5     | 7.32E-17 | -0.15091 | 0.102 | 0.226 | 1.09E-12 | monocyte | ACLY     |
| ZNF226.5   | 7.37E-17 | -0.12687 | 0.092 | 0.214 | 1.10E-12 | monocyte | ZNF226   |
| LSM14B.3   | 7.41E-17 | -0.16752 | 0.022 | 0.107 | 1.11E-12 | monocyte | LSM14B   |
| CITED2.6   | 7.43E-17 | -0.20834 | 0.223 | 0.364 | 1.11E-12 | monocyte | CITED2   |
| TMEFF2.8   | 7.46E-17 | -0.25376 | 0.008 | 0.084 | 1.11E-12 | monocyte | TMEFF2   |
| SCCPDH.3   | 7.57E-17 | -0.10724 | 0.23  | 0.39  | 1.13E-12 | monocyte | SCCPDH   |



|           |          |          |       |       |          |          |               |
|-----------|----------|----------|-------|-------|----------|----------|---------------|
| TMEM219.7 | 7.92E-17 | 0.40414  | 0.585 | 0.558 | 1.18E-12 | monocyte | TMEM219       |
| PTP4A1.4  | 7.93E-17 | -0.13274 | 0.252 | 0.421 | 1.18E-12 | monocyte | PTP4A1        |
| PGRMC2.5  | 8.02E-17 | -0.13002 | 0.109 | 0.236 | 1.20E-12 | monocyte | PGRMC2        |
| ZNF579.6  | 8.09E-17 | -0.17986 | 0.031 | 0.121 | 1.21E-12 | monocyte | ZNF579        |
| NANOS3.6  | 8.19E-17 | -0.15102 | 0     | 0.068 | 1.22E-12 | monocyte | NANOS3        |
| TLR3.3    | 8.20E-17 | 0.32214  | 0.078 | 0.029 | 1.23E-12 | monocyte | TLR3          |
| DBX2.7    | 8.29E-17 | -0.14621 | 0.001 | 0.07  | 1.24E-12 | monocyte | DBX2          |
| PLXND1.7  | 8.33E-17 | 0.313845 | 0.173 | 0.092 | 1.25E-12 | monocyte | PLXND1        |
| RP11-111M | 8.39E-17 | -0.16453 | 0.019 | 0.102 | 1.25E-12 | monocyte | RP11-111M22.3 |
| HSF2.5    | 8.43E-17 | -0.22675 | 0.033 | 0.125 | 1.26E-12 | monocyte | HSF2          |
| CASC3.5   | 8.64E-17 | -0.14096 | 0.079 | 0.195 | 1.29E-12 | monocyte | CASC3         |
| SOX21-AS1 | 8.67E-17 | -0.14428 | 0.001 | 0.07  | 1.29E-12 | monocyte | SOX21-AS1     |
| COL22A1.4 | 8.80E-17 | -0.15175 | 0.005 | 0.078 | 1.31E-12 | monocyte | COL22A1       |
| PRSS23.6  | 8.82E-17 | -0.26679 | 0.008 | 0.084 | 1.32E-12 | monocyte | PRSS23        |
| ZNF576.4  | 9.19E-17 | -0.14939 | 0.046 | 0.145 | 1.37E-12 | monocyte | ZNF576        |
| RP11-563K | 9.20E-17 | -0.18272 | 0.001 | 0.07  | 1.38E-12 | monocyte | RP11-563K23.1 |
| PDLIM2.5  | 9.26E-17 | -0.19847 | 0.123 | 0.251 | 1.38E-12 | monocyte | PDLIM2        |
| AGAP2-AS1 | 9.41E-17 | -0.31916 | 0.02  | 0.102 | 1.41E-12 | monocyte | AGAP2-AS1     |
| ZNF599.5  | 9.44E-17 | -0.12686 | 0.006 | 0.08  | 1.41E-12 | monocyte | ZNF599        |
| SLC35E2B. | 9.67E-17 | -0.19924 | 0.051 | 0.153 | 1.44E-12 | monocyte | SLC35E2B      |
| FAM126A.3 | 9.72E-17 | -0.1863  | 0.046 | 0.144 | 1.45E-12 | monocyte | FAM126A       |
| PODXL.4   | 9.83E-17 | -0.15887 | 0.004 | 0.076 | 1.47E-12 | monocyte | PODXL         |
| SNRNP70.5 | 9.94E-17 | -0.12265 | 0.311 | 0.49  | 1.49E-12 | monocyte | SNRNP70       |
| PURB.2    | 1.01E-16 | -0.16473 | 0.069 | 0.178 | 1.50E-12 | monocyte | PURB          |
| DBNDD1.6  | 1.02E-16 | -0.16006 | 0.003 | 0.074 | 1.52E-12 | monocyte | DBNDD1        |
| ANAPC7.5  | 1.04E-16 | -0.16772 | 0.07  | 0.181 | 1.56E-12 | monocyte | ANAPC7        |
| RPP40.4   | 1.05E-16 | -0.18802 | 0.033 | 0.126 | 1.56E-12 | monocyte | RPP40         |
| GNG2.4    | 1.06E-16 | -0.20305 | 0.077 | 0.188 | 1.58E-12 | monocyte | GNG2          |
| CCZ1B.6   | 1.07E-16 | -0.16202 | 0.056 | 0.16  | 1.59E-12 | monocyte | CCZ1B         |
| WDR12.3   | 1.09E-16 | -0.15734 | 0.049 | 0.151 | 1.63E-12 | monocyte | WDR12         |
| CNIH4.6   | 1.09E-16 | -0.16078 | 0.229 | 0.386 | 1.63E-12 | monocyte | CNIH4         |
| NDUFA11.2 | 1.10E-16 | -0.10518 | 0.576 | 0.756 | 1.64E-12 | monocyte | NDUFA11       |
| CIB2.5    | 1.10E-16 | -0.12336 | 0.008 | 0.084 | 1.65E-12 | monocyte | CIB2          |
| MAP4K5.6  | 1.11E-16 | -0.16541 | 0.058 | 0.163 | 1.66E-12 | monocyte | MAP4K5        |
| PDLIM1.5  | 1.11E-16 | -0.18863 | 0.006 | 0.079 | 1.66E-12 | monocyte | PDLIM1        |
| CELF3.8   | 1.14E-16 | -0.23578 | 0.002 | 0.072 | 1.70E-12 | monocyte | CELF3         |
| GPR37L1.7 | 1.14E-16 | -0.32081 | 0.013 | 0.091 | 1.71E-12 | monocyte | GPR37L1       |
| HEY2.4    | 1.15E-16 | -0.14878 | 0.001 | 0.069 | 1.71E-12 | monocyte | HEY2          |
| RP11-66N1 | 1.15E-16 | -0.14084 | 0.014 | 0.093 | 1.72E-12 | monocyte | RP11-66N11.8  |
| CHCHD7.7  | 1.17E-16 | 0.519363 | 0.371 | 0.278 | 1.75E-12 | monocyte | CHCHD7        |
| EN1.5     | 1.17E-16 | -0.19368 | 0.001 | 0.069 | 1.75E-12 | monocyte | EN1           |
| MRI1.3    | 1.17E-16 | -0.13998 | 0.028 | 0.118 | 1.75E-12 | monocyte | MRI1          |
| SLC9A3R2. | 1.18E-16 | -0.14765 | 0.029 | 0.119 | 1.76E-12 | monocyte | SLC9A3R2      |
| PCDH10.6  | 1.18E-16 | -0.16426 | 0.003 | 0.074 | 1.76E-12 | monocyte | PCDH10        |
| AZIN1.3   | 1.19E-16 | -0.11272 | 0.192 | 0.342 | 1.77E-12 | monocyte | AZIN1         |
| ESF1.5    | 1.19E-16 | -0.14847 | 0.206 | 0.358 | 1.78E-12 | monocyte | ESF1          |
| RNF8.5    | 1.20E-16 | -0.13551 | 0.068 | 0.176 | 1.79E-12 | monocyte | RNF8          |
| AC007405. | 1.21E-16 | -0.14868 | 0.003 | 0.074 | 1.81E-12 | monocyte | AC007405.6    |
| PET117.3  | 1.21E-16 | -0.14495 | 0.076 | 0.189 | 1.81E-12 | monocyte | PET117        |
| MZT2B.4   | 1.22E-16 | -0.1521  | 0.438 | 0.607 | 1.82E-12 | monocyte | MZT2B         |
| GJC1.5    | 1.24E-16 | -0.13448 | 0.001 | 0.069 | 1.85E-12 | monocyte | GJC1          |

|             |           |           |        |        |           |          |                 |
|-------------|-----------|-----------|--------|--------|-----------|----------|-----------------|
| GOT2. 5     | 1. 24E-16 | -0. 11915 | 0. 088 | 0. 207 | 1. 85E-12 | monocyte | GOT2            |
| IP6K1. 5    | 1. 24E-16 | -0. 13553 | 0. 056 | 0. 16  | 1. 86E-12 | monocyte | IP6K1           |
| CMTM6. 8    | 1. 25E-16 | 0. 500507 | 0. 485 | 0. 42  | 1. 87E-12 | monocyte | CMTM6           |
| GLIPR2. 7   | 1. 25E-16 | -0. 16633 | 0. 146 | 0. 279 | 1. 87E-12 | monocyte | GLIPR2          |
| REPS1. 6    | 1. 27E-16 | -0. 18753 | 0. 041 | 0. 135 | 1. 90E-12 | monocyte | REPS1           |
| SH3BP4. 2   | 1. 28E-16 | -0. 18847 | 0. 008 | 0. 083 | 1. 92E-12 | monocyte | SH3BP4          |
| COBL. 6     | 1. 28E-16 | -0. 20814 | 0. 003 | 0. 073 | 1. 92E-12 | monocyte | COBL            |
| NEIL2. 6    | 1. 28E-16 | -0. 14994 | 0. 09  | 0. 208 | 1. 92E-12 | monocyte | NEIL2           |
| TIPARP. 5   | 1. 29E-16 | -0. 23155 | 0. 071 | 0. 177 | 1. 93E-12 | monocyte | TIPARP          |
| AAAS. 3     | 1. 30E-16 | -0. 14956 | 0. 079 | 0. 195 | 1. 94E-12 | monocyte | AAAS            |
| ASPSCR1. 3  | 1. 30E-16 | -0. 11417 | 0. 117 | 0. 247 | 1. 94E-12 | monocyte | ASPSCR1         |
| ZCCHC3. 7   | 1. 31E-16 | -0. 14845 | 0. 026 | 0. 113 | 1. 95E-12 | monocyte | ZCCHC3          |
| HS2ST1. 7   | 1. 32E-16 | -0. 16551 | 0. 073 | 0. 183 | 1. 97E-12 | monocyte | HS2ST1          |
| SF3B1. 5    | 1. 33E-16 | -0. 10411 | 0. 273 | 0. 451 | 1. 99E-12 | monocyte | SF3B1           |
| GALNT6. 4   | 1. 33E-16 | 0. 138223 | 0. 073 | 0. 026 | 1. 99E-12 | monocyte | GALNT6          |
| REXO2. 7    | 1. 36E-16 | -0. 18938 | 0. 187 | 0. 33  | 2. 03E-12 | monocyte | REXO2           |
| RP11-277F   | 1. 37E-16 | -0. 23036 | 0. 003 | 0. 073 | 2. 05E-12 | monocyte | RP11-277P12. 20 |
| VGF. 6      | 1. 39E-16 | -0. 25435 | 0. 004 | 0. 075 | 2. 08E-12 | monocyte | VGF             |
| ZNF649. 6   | 1. 41E-16 | -0. 13636 | 0. 016 | 0. 096 | 2. 11E-12 | monocyte | ZNF649          |
| MFI2-AS1. 1 | 1. 43E-16 | -0. 15062 | 0. 007 | 0. 081 | 2. 13E-12 | monocyte | MFI2-AS1        |
| DNAJA3. 3   | 1. 43E-16 | -0. 11291 | 0. 071 | 0. 182 | 2. 14E-12 | monocyte | DNAJA3          |
| DGCR2. 4    | 1. 45E-16 | -0. 15527 | 0. 056 | 0. 161 | 2. 17E-12 | monocyte | DGCR2           |
| PPP1R9A. 7  | 1. 47E-16 | -0. 22417 | 0. 005 | 0. 077 | 2. 19E-12 | monocyte | PPP1R9A         |
| CTC-524C5   | 1. 49E-16 | -0. 1091  | 0. 033 | 0. 125 | 2. 22E-12 | monocyte | CTC-524C5. 2    |
| PNMAL1. 7   | 1. 51E-16 | -0. 17845 | 0. 02  | 0. 103 | 2. 26E-12 | monocyte | PNMAL1          |
| TNNI2. 6    | 1. 53E-16 | 0. 19875  | 0. 054 | 0. 016 | 2. 29E-12 | monocyte | TNNI2           |
| TSPYL2. 4   | 1. 54E-16 | -0. 26705 | 0. 031 | 0. 12  | 2. 31E-12 | monocyte | TSPYL2          |
| SIAH2. 4    | 1. 56E-16 | -0. 17204 | 0. 1   | 0. 22  | 2. 34E-12 | monocyte | SIAH2           |
| POLR2D. 3   | 1. 59E-16 | -0. 17533 | 0. 048 | 0. 147 | 2. 38E-12 | monocyte | POLR2D          |
| CTNBL1. 1   | 1. 61E-16 | -0. 16103 | 0. 168 | 0. 308 | 2. 41E-12 | monocyte | CTNBL1          |
| FOSL2. 7    | 1. 62E-16 | -0. 23579 | 0. 086 | 0. 195 | 2. 42E-12 | monocyte | FOSL2           |
| WDR82. 5    | 1. 62E-16 | -0. 17405 | 0. 134 | 0. 265 | 2. 42E-12 | monocyte | WDR82           |
| Clorf131. 1 | 1. 64E-16 | -0. 10207 | 0. 091 | 0. 21  | 2. 45E-12 | monocyte | Clorf131        |
| SLC35E1. 1  | 1. 67E-16 | -0. 17033 | 0. 064 | 0. 171 | 2. 50E-12 | monocyte | SLC35E1         |
| CYC1. 6     | 1. 68E-16 | -0. 1436  | 0. 372 | 0. 554 | 2. 51E-12 | monocyte | CYC1            |
| DCP1A. 3    | 1. 70E-16 | -0. 15352 | 0. 113 | 0. 237 | 2. 55E-12 | monocyte | DCP1A           |
| GAR1. 6     | 1. 71E-16 | -0. 13294 | 0. 085 | 0. 2   | 2. 56E-12 | monocyte | GAR1            |
| GTF2F1. 1   | 1. 72E-16 | -0. 10599 | 0. 156 | 0. 294 | 2. 56E-12 | monocyte | GTF2F1          |
| SLC35A5. 3  | 1. 72E-16 | -0. 13884 | 0. 082 | 0. 196 | 2. 56E-12 | monocyte | SLC35A5         |
| TMEM41B. 3  | 1. 72E-16 | -0. 12082 | 0. 074 | 0. 185 | 2. 57E-12 | monocyte | TMEM41B         |
| IL6R. 8     | 1. 73E-16 | 0. 250693 | 0. 158 | 0. 079 | 2. 59E-12 | monocyte | IL6R            |
| TOX3. 7     | 1. 73E-16 | -0. 23791 | 0. 003 | 0. 073 | 2. 59E-12 | monocyte | TOX3            |
| USP53. 8    | 1. 76E-16 | 0. 496237 | 0. 22  | 0. 134 | 2. 64E-12 | monocyte | USP53           |
| NOL4. 6     | 1. 77E-16 | -0. 18216 | 0. 002 | 0. 071 | 2. 64E-12 | monocyte | NOL4            |
| PTGFRN. 3   | 1. 79E-16 | -0. 17358 | 0. 025 | 0. 111 | 2. 67E-12 | monocyte | PTGFRN          |
| GPSM1. 7    | 1. 87E-16 | -0. 15441 | 0. 006 | 0. 079 | 2. 79E-12 | monocyte | GPSM1           |
| SFSWAP. 5   | 1. 89E-16 | -0. 19149 | 0. 075 | 0. 185 | 2. 82E-12 | monocyte | SFSWAP          |
| RP11-156K   | 1. 92E-16 | 0. 193804 | 0. 053 | 0. 016 | 2. 87E-12 | monocyte | RP11-156K13. 3  |
| VCAM1. 6    | 1. 94E-16 | -0. 33743 | 0. 006 | 0. 078 | 2. 90E-12 | monocyte | VCAM1           |
| KCTD6. 2    | 1. 95E-16 | -0. 13293 | 0. 033 | 0. 125 | 2. 91E-12 | monocyte | KCTD6           |
| TP53BP2. 1  | 1. 95E-16 | -0. 14086 | 0. 025 | 0. 111 | 2. 91E-12 | monocyte | TP53BP2         |

|             |           |           |        |        |                    |                |
|-------------|-----------|-----------|--------|--------|--------------------|----------------|
| HMGXB4. 3   | 1. 96E-16 | -0. 13262 | 0. 109 | 0. 232 | 2. 92E-12 monocyte | HMGXB4         |
| RGN. 7      | 1. 97E-16 | -0. 20995 | 0. 006 | 0. 078 | 2. 94E-12 monocyte | RGN            |
| NDUFAF6. 6  | 1. 98E-16 | -0. 16577 | 0. 077 | 0. 19  | 2. 95E-12 monocyte | NDUFAF6        |
| CCDC102B. 2 | 2. 04E-16 | -0. 16862 | 0. 023 | 0. 108 | 3. 06E-12 monocyte | CCDC102B       |
| PLEKHH2. 4  | 2. 06E-16 | -0. 16027 | 0. 004 | 0. 075 | 3. 07E-12 monocyte | PLEKHH2        |
| FMN2. 6     | 2. 07E-16 | -0. 12031 | 0. 004 | 0. 074 | 3. 09E-12 monocyte | FMN2           |
| ARL10. 5    | 2. 09E-16 | -0. 1618  | 0. 016 | 0. 095 | 3. 12E-12 monocyte | ARL10          |
| PAF1. 1     | 2. 13E-16 | -0. 18053 | 0. 101 | 0. 22  | 3. 19E-12 monocyte | PAF1           |
| JMJD1C. 6   | 2. 14E-16 | -0. 13377 | 0. 195 | 0. 347 | 3. 20E-12 monocyte | JMJD1C         |
| KDM4B. 5    | 2. 17E-16 | -0. 17054 | 0. 044 | 0. 14  | 3. 24E-12 monocyte | KDM4B          |
| RAB9A. 4    | 2. 19E-16 | -0. 16676 | 0. 175 | 0. 315 | 3. 27E-12 monocyte | RAB9A          |
| UPF3B. 5    | 2. 26E-16 | -0. 19539 | 0. 133 | 0. 262 | 3. 38E-12 monocyte | UPF3B          |
| RP3-428L1   | 2. 28E-16 | -0. 17721 | 0. 005 | 0. 076 | 3. 41E-12 monocyte | RP3-428L16. 2  |
| MDGA1. 5    | 2. 34E-16 | -0. 12954 | 0. 005 | 0. 076 | 3. 50E-12 monocyte | MDGA1          |
| VCP. 4      | 2. 37E-16 | -0. 12947 | 0. 277 | 0. 446 | 3. 54E-12 monocyte | VCP            |
| PTDSS2. 7   | 2. 39E-16 | -0. 16158 | 0. 058 | 0. 16  | 3. 57E-12 monocyte | PTDSS2         |
| RPRM. 8     | 2. 40E-16 | -0. 26868 | 0. 003 | 0. 072 | 3. 58E-12 monocyte | RPRM           |
| PIAS4. 4    | 2. 44E-16 | -0. 17894 | 0. 044 | 0. 139 | 3. 64E-12 monocyte | PIAS4          |
| GLDC. 4     | 2. 44E-16 | -0. 15011 | 0. 004 | 0. 074 | 3. 65E-12 monocyte | GLDC           |
| DEK. 5      | 2. 46E-16 | -0. 17314 | 0. 312 | 0. 477 | 3. 68E-12 monocyte | DEK            |
| AC093323. 2 | 2. 47E-16 | -0. 11626 | 0. 02  | 0. 102 | 3. 69E-12 monocyte | AC093323. 3    |
| RARS. 3     | 2. 49E-16 | -0. 11323 | 0. 126 | 0. 255 | 3. 72E-12 monocyte | RARS           |
| CTHRC1. 6   | 2. 51E-16 | -0. 13917 | 0. 002 | 0. 07  | 3. 76E-12 monocyte | CTHRC1         |
| IGDCC3. 8   | 2. 55E-16 | -0. 14934 | 0. 001 | 0. 068 | 3. 82E-12 monocyte | IGDCC3         |
| ADAMTS9. 6  | 2. 57E-16 | -0. 16348 | 0. 009 | 0. 083 | 3. 83E-12 monocyte | ADAMTS9        |
| ALDOA. 6    | 2. 61E-16 | -0. 11934 | 0. 706 | 0. 858 | 3. 90E-12 monocyte | ALDOA          |
| CDKN3. 7    | 2. 62E-16 | -0. 2844  | 0. 019 | 0. 098 | 3. 91E-12 monocyte | CDKN3          |
| INO80E. 5   | 2. 62E-16 | -0. 14963 | 0. 111 | 0. 236 | 3. 92E-12 monocyte | INO80E         |
| PRKCSH. 4   | 2. 65E-16 | -0. 18174 | 0. 28  | 0. 444 | 3. 95E-12 monocyte | PRKCSH         |
| STK33. 6    | 2. 68E-16 | -0. 14848 | 0. 004 | 0. 074 | 4. 00E-12 monocyte | STK33          |
| TOP1. 3     | 2. 68E-16 | -0. 13122 | 0. 244 | 0. 402 | 4. 01E-12 monocyte | TOP1           |
| PRR13. 6    | 2. 74E-16 | 0. 435019 | 0. 577 | 0. 54  | 4. 09E-12 monocyte | PRR13          |
| SLC26A11. 2 | 2. 85E-16 | -0. 1399  | 0. 026 | 0. 112 | 4. 26E-12 monocyte | SLC26A11       |
| ARMC6. 3    | 2. 87E-16 | -0. 14664 | 0. 064 | 0. 169 | 4. 29E-12 monocyte | ARMC6          |
| EIF2B5. 3   | 2. 91E-16 | -0. 11657 | 0. 078 | 0. 193 | 4. 34E-12 monocyte | EIF2B5         |
| SRSF9. 5    | 2. 91E-16 | -0. 12276 | 0. 402 | 0. 575 | 4. 36E-12 monocyte | SRSF9          |
| FAT1. 5     | 2. 92E-16 | -0. 12348 | 0. 003 | 0. 072 | 4. 36E-12 monocyte | FAT1           |
| LRRC40. 4   | 2. 92E-16 | -0. 14689 | 0. 051 | 0. 151 | 4. 36E-12 monocyte | LRRC40         |
| ITPA. 1     | 2. 93E-16 | -0. 10736 | 0. 257 | 0. 417 | 4. 38E-12 monocyte | ITPA           |
| CEP70. 5    | 2. 93E-16 | -0. 18089 | 0. 022 | 0. 104 | 4. 38E-12 monocyte | CEP70          |
| RP11-733C   | 2. 95E-16 | 0. 139435 | 0. 038 | 0. 009 | 4. 41E-12 monocyte | RP11-733018. 1 |
| PMPCB. 3    | 3. 10E-16 | -0. 12397 | 0. 2   | 0. 356 | 4. 64E-12 monocyte | PMPCB          |
| EPB41L1. 6  | 3. 12E-16 | -0. 15285 | 0. 016 | 0. 094 | 4. 67E-12 monocyte | EPB41L1        |
| SREBF2. 4   | 3. 18E-16 | -0. 16596 | 0. 037 | 0. 127 | 4. 75E-12 monocyte | SREBF2         |
| CRTAP. 8    | 3. 23E-16 | 0. 447654 | 0. 315 | 0. 229 | 4. 83E-12 monocyte | CRTAP          |
| SMG6. 3     | 3. 27E-16 | -0. 12794 | 0. 038 | 0. 13  | 4. 89E-12 monocyte | SMG6           |
| AGRN. 3     | 3. 29E-16 | -0. 158   | 0. 02  | 0. 101 | 4. 92E-12 monocyte | AGRN           |
| ATXN2. 6    | 3. 33E-16 | -0. 15859 | 0. 108 | 0. 232 | 4. 97E-12 monocyte | ATXN2          |
| CPSF4. 4    | 3. 34E-16 | -0. 17466 | 0. 092 | 0. 205 | 4. 99E-12 monocyte | CPSF4          |
| TIAM2. 7    | 3. 37E-16 | -0. 19831 | 0. 01  | 0. 085 | 5. 04E-12 monocyte | TIAM2          |
| KAZN. 5     | 3. 49E-16 | -0. 17646 | 0. 006 | 0. 077 | 5. 21E-12 monocyte | KAZN           |

|           |          |          |       |       |          |          |               |
|-----------|----------|----------|-------|-------|----------|----------|---------------|
| ISOC2.7   | 3.57E-16 | -0.14692 | 0.211 | 0.361 | 5.34E-12 | monocyte | ISOC2         |
| BLMH.3    | 3.59E-16 | -0.14856 | 0.074 | 0.184 | 5.37E-12 | monocyte | BLMH          |
| IKBKE.7   | 3.59E-16 | 0.280558 | 0.114 | 0.051 | 5.37E-12 | monocyte | IKBKE         |
| SMC6.5    | 3.63E-16 | -0.12533 | 0.062 | 0.165 | 5.42E-12 | monocyte | SMC6          |
| PDE6D.5   | 3.68E-16 | -0.18502 | 0.086 | 0.198 | 5.50E-12 | monocyte | PDE6D         |
| TAF9B.5   | 3.69E-16 | -0.10589 | 0.052 | 0.153 | 5.51E-12 | monocyte | TAF9B         |
| FAM181A.6 | 3.71E-16 | -0.24214 | 0.003 | 0.071 | 5.55E-12 | monocyte | FAM181A       |
| RASSF8-AS | 3.74E-16 | -0.10448 | 0.064 | 0.168 | 5.58E-12 | monocyte | RASSF8-AS1    |
| PITPNC1.4 | 3.77E-16 | -0.16755 | 0.039 | 0.131 | 5.64E-12 | monocyte | PITPNC1       |
| IFI16.6   | 3.78E-16 | 0.383712 | 0.478 | 0.386 | 5.65E-12 | monocyte | IFI16         |
| URI1.5    | 3.87E-16 | -0.11593 | 0.108 | 0.231 | 5.78E-12 | monocyte | URI1          |
| SNF8.5    | 3.87E-16 | -0.12539 | 0.297 | 0.474 | 5.79E-12 | monocyte | SNF8          |
| RP11-195F | 3.88E-16 | -0.23046 | 0.018 | 0.097 | 5.80E-12 | monocyte | RP11-195F19.5 |
| MOB2.2    | 3.90E-16 | -0.16809 | 0.084 | 0.196 | 5.83E-12 | monocyte | MOB2          |
| BAMBI.5   | 3.92E-16 | -0.15703 | 0.005 | 0.075 | 5.85E-12 | monocyte | BAMBI         |
| ACIN1.5   | 3.93E-16 | -0.16288 | 0.143 | 0.276 | 5.87E-12 | monocyte | ACIN1         |
| TMEM206.6 | 3.93E-16 | -0.16971 | 0.118 | 0.241 | 5.87E-12 | monocyte | TMEM206       |
| ARHGEF12. | 3.95E-16 | -0.17227 | 0.065 | 0.169 | 5.90E-12 | monocyte | ARHGEF12      |
| FYTDD1.3  | 4.03E-16 | -0.13926 | 0.163 | 0.3   | 6.03E-12 | monocyte | FYTDD1        |
| TMEM170A. | 4.04E-16 | -0.11996 | 0.133 | 0.262 | 6.04E-12 | monocyte | TMEM170A      |
| FKBP7.4   | 4.05E-16 | -0.14306 | 0.018 | 0.098 | 6.05E-12 | monocyte | FKBP7         |
| ATP6V1B2. | 4.05E-16 | 0.440131 | 0.47  | 0.403 | 6.06E-12 | monocyte | ATP6V1B2      |
| PHACTR4.4 | 4.06E-16 | -0.14167 | 0.094 | 0.212 | 6.06E-12 | monocyte | PHACTR4       |
| CSK.8     | 4.12E-16 | 0.31509  | 0.23  | 0.14  | 6.16E-12 | monocyte | CSK           |
| DNM3.6    | 4.16E-16 | -0.22466 | 0.017 | 0.094 | 6.22E-12 | monocyte | DNM3          |
| HNRNPL.5  | 4.18E-16 | -0.14324 | 0.14  | 0.275 | 6.25E-12 | monocyte | HNRNPL        |
| SEMA4A.6  | 4.23E-16 | 0.180035 | 0.104 | 0.044 | 6.32E-12 | monocyte | SEMA4A        |
| ANKRD36C. | 4.27E-16 | -0.13817 | 0.065 | 0.171 | 6.39E-12 | monocyte | ANKRD36C      |
| ATP2B1.3  | 4.29E-16 | -0.17255 | 0.222 | 0.366 | 6.40E-12 | monocyte | ATP2B1        |
| SESN1.6   | 4.32E-16 | 0.372371 | 0.173 | 0.095 | 6.46E-12 | monocyte | SESN1         |
| GNB2.5    | 4.34E-16 | -0.14541 | 0.397 | 0.585 | 6.49E-12 | monocyte | GNB2          |
| BRSK1.6   | 4.37E-16 | -0.17352 | 0.014 | 0.09  | 6.53E-12 | monocyte | BRSK1         |
| SMIM14.6  | 4.42E-16 | -0.11179 | 0.194 | 0.343 | 6.60E-12 | monocyte | SMIM14        |
| STX1A.5   | 4.43E-16 | -0.20002 | 0.004 | 0.073 | 6.62E-12 | monocyte | STX1A         |
| GRB10.6   | 4.43E-16 | -0.18722 | 0.007 | 0.079 | 6.62E-12 | monocyte | GRB10         |
| TMEM145.6 | 4.55E-16 | -0.17281 | 0.005 | 0.075 | 6.81E-12 | monocyte | TMEM145       |
| STAT6.8   | 4.65E-16 | 0.209895 | 0.109 | 0.047 | 6.95E-12 | monocyte | STAT6         |
| ANKRD11.5 | 4.66E-16 | -0.15071 | 0.184 | 0.328 | 6.97E-12 | monocyte | ANKRD11       |
| RABL6.5   | 4.67E-16 | -0.16175 | 0.128 | 0.257 | 6.98E-12 | monocyte | RABL6         |
| SHOX2.5   | 4.75E-16 | -0.13879 | 0.002 | 0.069 | 7.10E-12 | monocyte | SHOX2         |
| ZNF117.6  | 4.78E-16 | -0.19195 | 0.027 | 0.112 | 7.14E-12 | monocyte | ZNF117        |
| CNOT2.3   | 4.81E-16 | -0.15516 | 0.171 | 0.309 | 7.18E-12 | monocyte | CNOT2         |
| TSPAN3.6  | 4.84E-16 | -0.12775 | 0.313 | 0.473 | 7.23E-12 | monocyte | TSPAN3        |
| ZBED5.7   | 4.86E-16 | -0.156   | 0.078 | 0.188 | 7.27E-12 | monocyte | ZBED5         |
| LAMA4.6   | 4.87E-16 | -0.17752 | 0.006 | 0.077 | 7.28E-12 | monocyte | LAMA4         |
| FLYWCH1.3 | 4.97E-16 | -0.15727 | 0.024 | 0.107 | 7.43E-12 | monocyte | FLYWCH1       |
| UBALD2.4  | 5.02E-16 | -0.15789 | 0.145 | 0.27  | 7.51E-12 | monocyte | UBALD2        |
| PCDHB7.6  | 5.06E-16 | -0.18841 | 0.006 | 0.077 | 7.56E-12 | monocyte | PCDHB7        |
| SMCHD1.5  | 5.09E-16 | -0.11393 | 0.082 | 0.197 | 7.61E-12 | monocyte | SMCHD1        |
| OTUB1     | 5.12E-16 | -0.14302 | 0.234 | 0.393 | 7.65E-12 | monocyte | OTUB1         |
| TRMT10C.5 | 5.15E-16 | -0.101   | 0.129 | 0.26  | 7.70E-12 | monocyte | TRMT10C       |

|            |          |          |       |       |          |          |           |
|------------|----------|----------|-------|-------|----------|----------|-----------|
| KMT2C.6    | 5.23E-16 | -0.11562 | 0.14  | 0.272 | 7.81E-12 | monocyte | KMT2C     |
| HSPA4L.5   | 5.32E-16 | -0.18922 | 0.007 | 0.079 | 7.95E-12 | monocyte | HSPA4L    |
| CLEC11A.7  | 5.33E-16 | -0.17593 | 0.117 | 0.242 | 7.96E-12 | monocyte | CLEC11A   |
| RAI14.4    | 5.34E-16 | -0.16658 | 0.005 | 0.075 | 7.97E-12 | monocyte | RAI14     |
| CD164.7    | 5.34E-16 | 0.376719 | 0.531 | 0.487 | 7.98E-12 | monocyte | CD164     |
| PARD3.4    | 5.38E-16 | -0.11999 | 0     | 0.065 | 8.05E-12 | monocyte | PARD3     |
| ADD3.4     | 5.41E-16 | -0.20038 | 0.045 | 0.14  | 8.08E-12 | monocyte | ADD3      |
| CDC5L.6    | 5.45E-16 | -0.12884 | 0.156 | 0.292 | 8.15E-12 | monocyte | CDC5L     |
| GBE1.5     | 5.47E-16 | -0.23265 | 0.085 | 0.194 | 8.17E-12 | monocyte | GBE1      |
| RASGRP1.6  | 5.51E-16 | -0.14294 | 0.005 | 0.074 | 8.23E-12 | monocyte | RASGRP1   |
| EBAG9.4    | 5.53E-16 | -0.15884 | 0.135 | 0.263 | 8.26E-12 | monocyte | EBAG9     |
| BAG6.3     | 5.53E-16 | -0.14016 | 0.195 | 0.343 | 8.27E-12 | monocyte | BAG6      |
| NGLY1.2    | 5.55E-16 | -0.16072 | 0.105 | 0.224 | 8.30E-12 | monocyte | NGLY1     |
| INADL.7    | 5.56E-16 | -0.17922 | 0.004 | 0.073 | 8.31E-12 | monocyte | INADL     |
| RAB3GAP2.5 | 5.81E-16 | -0.14581 | 0.072 | 0.179 | 8.68E-12 | monocyte | RAB3GAP2  |
| HAX1.2     | 5.83E-16 | -0.10123 | 0.293 | 0.46  | 8.72E-12 | monocyte | HAX1      |
| ARHGEF7.6  | 5.86E-16 | -0.17982 | 0.064 | 0.166 | 8.75E-12 | monocyte | ARHGEF7   |
| DID01.5    | 5.91E-16 | -0.11397 | 0.055 | 0.156 | 8.83E-12 | monocyte | DID01     |
| LANCL1.6   | 5.94E-16 | -0.23883 | 0.035 | 0.124 | 8.88E-12 | monocyte | LANCL1    |
| MGRN1.5    | 6.09E-16 | -0.17526 | 0.101 | 0.218 | 9.11E-12 | monocyte | MGRN1     |
| DMPK.4     | 6.15E-16 | -0.12951 | 0.003 | 0.071 | 9.19E-12 | monocyte | DMPK      |
| C9orf116.6 | 6.16E-16 | -0.14985 | 0.009 | 0.082 | 9.21E-12 | monocyte | C9orf116  |
| SMCR5.6    | 6.18E-16 | -0.13699 | 0.019 | 0.098 | 9.23E-12 | monocyte | SMCR5     |
| LINC01102  | 6.38E-16 | -0.24384 | 0.006 | 0.076 | 9.53E-12 | monocyte | LINC01102 |
| GAS2L1.6   | 6.54E-16 | -0.15846 | 0.059 | 0.16  | 9.78E-12 | monocyte | GAS2L1    |
| CPEB4.4    | 6.58E-16 | -0.17801 | 0.132 | 0.257 | 9.84E-12 | monocyte | CPEB4     |
| PEG3.6     | 6.62E-16 | -0.19413 | 0.003 | 0.07  | 9.89E-12 | monocyte | PEG3      |
| INIP.4     | 6.72E-16 | -0.13979 | 0.092 | 0.207 | 1.00E-11 | monocyte | INIP      |
| NLN.6      | 6.75E-16 | -0.13392 | 0.082 | 0.194 | 1.01E-11 | monocyte | NLN       |
| DVL2.6     | 6.79E-16 | -0.11792 | 0.076 | 0.185 | 1.01E-11 | monocyte | DVL2      |
| MED29      | 6.88E-16 | -0.13294 | 0.147 | 0.281 | 1.03E-11 | monocyte | MED29     |
| LDLR.5     | 6.90E-16 | -0.11478 | 0.023 | 0.106 | 1.03E-11 | monocyte | LDLR      |
| ANKRD12.3  | 6.91E-16 | -0.12022 | 0.276 | 0.439 | 1.03E-11 | monocyte | ANKRD12   |
| MSX1.5     | 6.95E-16 | -0.15837 | 0.003 | 0.07  | 1.04E-11 | monocyte | MSX1      |
| NDUFV3.2   | 6.99E-16 | -0.10605 | 0.26  | 0.423 | 1.04E-11 | monocyte | NDUFV3    |
| CNOT3.3    | 7.01E-16 | -0.11694 | 0.066 | 0.171 | 1.05E-11 | monocyte | CNOT3     |
| NXPH4.6    | 7.06E-16 | -0.21254 | 0.002 | 0.068 | 1.05E-11 | monocyte | NXPH4     |
| FOXN3.5    | 7.09E-16 | 0.413908 | 0.342 | 0.247 | 1.06E-11 | monocyte | FOXN3     |
| SPEG.6     | 7.12E-16 | -0.17163 | 0.006 | 0.076 | 1.06E-11 | monocyte | SPEG      |
| SS18L1.4   | 7.15E-16 | -0.15063 | 0.018 | 0.096 | 1.07E-11 | monocyte | SS18L1    |
| LRRC24.6   | 7.24E-16 | -0.16219 | 0.005 | 0.074 | 1.08E-11 | monocyte | LRRC24    |
| ASXL1.5    | 7.38E-16 | -0.18704 | 0.077 | 0.186 | 1.10E-11 | monocyte | ASXL1     |
| MGAT1.8    | 7.47E-16 | 0.416116 | 0.432 | 0.351 | 1.12E-11 | monocyte | MGAT1     |
| CREBZF.7   | 7.57E-16 | -0.15477 | 0.044 | 0.139 | 1.13E-11 | monocyte | CREBZF    |
| HSDL1.7    | 7.74E-16 | -0.17658 | 0.045 | 0.138 | 1.16E-11 | monocyte | HSDL1     |
| CENPK.6    | 7.85E-16 | -0.16999 | 0.024 | 0.106 | 1.17E-11 | monocyte | CENPK     |
| CKAP2.7    | 7.99E-16 | -0.18029 | 0.073 | 0.177 | 1.19E-11 | monocyte | CKAP2     |
| RIC8B.6    | 8.00E-16 | -0.13476 | 0.02  | 0.099 | 1.20E-11 | monocyte | RIC8B     |
| KHDC1.7    | 8.09E-16 | -0.19473 | 0.003 | 0.07  | 1.21E-11 | monocyte | KHDC1     |
| ASAP1.4    | 8.11E-16 | -0.17439 | 0.117 | 0.237 | 1.21E-11 | monocyte | ASAP1     |
| PARP12.4   | 8.17E-16 | 0.243536 | 0.138 | 0.069 | 1.22E-11 | monocyte | PARP12    |

|               |           |           |        |        |           |          |               |
|---------------|-----------|-----------|--------|--------|-----------|----------|---------------|
| PTPRN. 6      | 8. 23E-16 | -0. 22777 | 0. 008 | 0. 08  | 1. 23E-11 | monocyte | PTPRN         |
| GNAZ. 6       | 8. 27E-16 | -0. 18273 | 0. 001 | 0. 066 | 1. 24E-11 | monocyte | GNAZ          |
| COA5. 3       | 8. 42E-16 | -0. 13586 | 0. 176 | 0. 317 | 1. 26E-11 | monocyte | COA5          |
| RAB30. 6      | 8. 45E-16 | -0. 15725 | 0. 009 | 0. 081 | 1. 26E-11 | monocyte | RAB30         |
| CUL5. 5       | 8. 61E-16 | -0. 13496 | 0. 112 | 0. 232 | 1. 29E-11 | monocyte | CUL5          |
| PLLP. 7       | 8. 79E-16 | -0. 34161 | 0. 005 | 0. 074 | 1. 31E-11 | monocyte | PLLP          |
| GTF2IRD2. 8   | 8. 93E-16 | -0. 14647 | 0. 034 | 0. 123 | 1. 34E-11 | monocyte | GTF2IRD2      |
| FAM179B. 5    | 9. 05E-16 | -0. 14275 | 0. 037 | 0. 126 | 1. 35E-11 | monocyte | FAM179B       |
| RP11-536K7. 3 | 9. 20E-16 | 0. 378635 | 0. 084 | 0. 033 | 1. 38E-11 | monocyte | RP11-536K7. 3 |
| RGS16. 6      | 9. 25E-16 | -0. 14864 | 0. 153 | 0. 286 | 1. 38E-11 | monocyte | RGS16         |
| TUG1. 6       | 9. 26E-16 | -0. 10978 | 0. 075 | 0. 184 | 1. 38E-11 | monocyte | TUG1          |
| FBXO11. 6     | 9. 26E-16 | -0. 14498 | 0. 099 | 0. 215 | 1. 38E-11 | monocyte | FBXO11        |
| LARP1B. 5     | 9. 36E-16 | -0. 163   | 0. 038 | 0. 127 | 1. 40E-11 | monocyte | LARP1B        |
| UQCRC1. 4     | 9. 38E-16 | -0. 10591 | 0. 326 | 0. 503 | 1. 40E-11 | monocyte | UQCRC1        |
| SYDE1. 4      | 9. 39E-16 | -0. 12598 | 0. 006 | 0. 076 | 1. 40E-11 | monocyte | SYDE1         |
| DMD. 4        | 9. 42E-16 | -0. 1638  | 0. 015 | 0. 091 | 1. 41E-11 | monocyte | DMD           |
| CENPU. 7      | 9. 79E-16 | -0. 17385 | 0. 028 | 0. 112 | 1. 46E-11 | monocyte | CENPU         |
| KLHL20. 4     | 9. 83E-16 | -0. 15691 | 0. 05  | 0. 147 | 1. 47E-11 | monocyte | KLHL20        |
| BLOC1S4. 8    | 9. 84E-16 | -0. 12487 | 0. 126 | 0. 253 | 1. 47E-11 | monocyte | BLOC1S4       |
| BBIP1. 3      | 1. 00E-15 | -0. 19246 | 0. 079 | 0. 187 | 1. 49E-11 | monocyte | BBIP1         |
| SCN3A. 7      | 1. 00E-15 | -0. 19417 | 0. 007 | 0. 078 | 1. 50E-11 | monocyte | SCN3A         |
| MAU2. 2       | 1. 01E-15 | -0. 1816  | 0. 04  | 0. 13  | 1. 52E-11 | monocyte | MAU2          |
| ARL5A. 4      | 1. 03E-15 | 0. 396234 | 0. 538 | 0. 515 | 1. 54E-11 | monocyte | ARL5A         |
| MEX3C. 4      | 1. 03E-15 | -0. 15469 | 0. 021 | 0. 101 | 1. 55E-11 | monocyte | MEX3C         |
| CRAT. 3       | 1. 04E-15 | -0. 14705 | 0. 066 | 0. 169 | 1. 55E-11 | monocyte | CRAT          |
| S100A13. 6    | 1. 05E-15 | -0. 34632 | 0. 178 | 0. 306 | 1. 57E-11 | monocyte | S100A13       |
| TBC1D4. 5     | 1. 06E-15 | 0. 293269 | 0. 1   | 0. 043 | 1. 58E-11 | monocyte | TBC1D4        |
| BAIAP2. 3     | 1. 07E-15 | -0. 19359 | 0. 094 | 0. 206 | 1. 60E-11 | monocyte | BAIAP2        |
| CHST8. 6      | 1. 07E-15 | -0. 1571  | 0. 005 | 0. 073 | 1. 60E-11 | monocyte | CHST8         |
| PIK3R1. 6     | 1. 08E-15 | -0. 18133 | 0. 183 | 0. 318 | 1. 61E-11 | monocyte | PIK3R1        |
| SLC27A3. 3    | 1. 08E-15 | -0. 14439 | 0. 039 | 0. 13  | 1. 62E-11 | monocyte | SLC27A3       |
| NELFA. 5      | 1. 09E-15 | -0. 14044 | 0. 051 | 0. 148 | 1. 63E-11 | monocyte | NELFA         |
| SENP2. 4      | 1. 10E-15 | -0. 14744 | 0. 046 | 0. 14  | 1. 64E-11 | monocyte | SENP2         |
| PARVB. 8      | 1. 10E-15 | 0. 360804 | 0. 244 | 0. 157 | 1. 64E-11 | monocyte | PARVB         |
| R3HDM4. 4     | 1. 10E-15 | -0. 14077 | 0. 094 | 0. 21  | 1. 64E-11 | monocyte | R3HDM4        |
| EVA1C. 7      | 1. 11E-15 | -0. 15466 | 0. 007 | 0. 077 | 1. 66E-11 | monocyte | EVA1C         |
| RRP1B. 5      | 1. 11E-15 | -0. 13258 | 0. 063 | 0. 164 | 1. 66E-11 | monocyte | RRP1B         |
| LSM12. 3      | 1. 12E-15 | -0. 12976 | 0. 141 | 0. 27  | 1. 67E-11 | monocyte | LSM12         |
| FAM216A. 4    | 1. 13E-15 | -0. 13751 | 0. 039 | 0. 129 | 1. 69E-11 | monocyte | FAM216A       |
| TNKS1BP1. 1   | 1. 14E-15 | -0. 14836 | 0. 008 | 0. 079 | 1. 70E-11 | monocyte | TNKS1BP1      |
| CXCL2. 5      | 1. 14E-15 | -0. 40438 | 0. 017 | 0. 093 | 1. 70E-11 | monocyte | CXCL2         |
| MATN2. 5      | 1. 15E-15 | -0. 15903 | 0. 004 | 0. 072 | 1. 71E-11 | monocyte | MATN2         |
| PCDH19. 5     | 1. 16E-15 | -0. 13425 | 0. 001 | 0. 065 | 1. 74E-11 | monocyte | PCDH19        |
| AP2A1. 3      | 1. 18E-15 | -0. 11766 | 0. 122 | 0. 246 | 1. 76E-11 | monocyte | AP2A1         |
| UNG. 5        | 1. 18E-15 | -0. 10222 | 0. 039 | 0. 129 | 1. 77E-11 | monocyte | UNG           |
| CCDC137. 4    | 1. 19E-15 | -0. 11568 | 0. 095 | 0. 211 | 1. 77E-11 | monocyte | CCDC137       |
| RBM26. 6      | 1. 20E-15 | -0. 17638 | 0. 104 | 0. 222 | 1. 79E-11 | monocyte | RBM26         |
| UBE2D2. 5     | 1. 20E-15 | -0. 11752 | 0. 416 | 0. 603 | 1. 80E-11 | monocyte | UBE2D2        |
| EPHA3. 7      | 1. 21E-15 | -0. 12483 | 0. 008 | 0. 079 | 1. 80E-11 | monocyte | EPHA3         |
| SCMH1. 3      | 1. 21E-15 | -0. 16132 | 0. 011 | 0. 084 | 1. 82E-11 | monocyte | SCMH1         |
| TUBG2. 6      | 1. 22E-15 | -0. 13138 | 0. 031 | 0. 117 | 1. 82E-11 | monocyte | TUBG2         |

|             |           |           |        |        |           |          |                |
|-------------|-----------|-----------|--------|--------|-----------|----------|----------------|
| ITGB3BP. 6  | 1. 22E-15 | -0. 15128 | 0. 053 | 0. 151 | 1. 83E-11 | monocyte | ITGB3BP        |
| LINC0090C   | 1. 25E-15 | 0. 117673 | 0. 044 | 0. 012 | 1. 87E-11 | monocyte | LINC00900      |
| MSANTD3. 5  | 1. 26E-15 | -0. 16169 | 0. 017 | 0. 093 | 1. 89E-11 | monocyte | MSANTD3        |
| GTF2IRD2E   | 1. 27E-15 | -0. 16643 | 0. 049 | 0. 145 | 1. 90E-11 | monocyte | GTF2IRD2B      |
| UNK. 2      | 1. 28E-15 | -0. 15385 | 0. 042 | 0. 134 | 1. 92E-11 | monocyte | UNK            |
| IFT27. 6    | 1. 28E-15 | -0. 11022 | 0. 139 | 0. 267 | 1. 92E-11 | monocyte | IFT27          |
| GPX7. 4     | 1. 29E-15 | -0. 11338 | 0. 076 | 0. 186 | 1. 93E-11 | monocyte | GPX7           |
| IMP3. 1     | 1. 30E-15 | -0. 13823 | 0. 223 | 0. 372 | 1. 94E-11 | monocyte | IMP3           |
| SLFN12. 4   | 1. 31E-15 | 0. 206719 | 0. 065 | 0. 022 | 1. 95E-11 | monocyte | SLFN12         |
| INSR. 6     | 1. 31E-15 | -0. 15269 | 0. 054 | 0. 153 | 1. 95E-11 | monocyte | INSR           |
| RNF34. 5    | 1. 31E-15 | -0. 13365 | 0. 091 | 0. 204 | 1. 96E-11 | monocyte | RNF34          |
| MKLN1. 5    | 1. 33E-15 | -0. 15919 | 0. 118 | 0. 239 | 1. 99E-11 | monocyte | MKLN1          |
| TTC28. 6    | 1. 36E-15 | -0. 15446 | 0. 022 | 0. 102 | 2. 04E-11 | monocyte | TTC28          |
| TMEM199. 4  | 1. 38E-15 | -0. 11841 | 0. 127 | 0. 252 | 2. 06E-11 | monocyte | TMEM199        |
| MSH6. 5     | 1. 38E-15 | -0. 14548 | 0. 042 | 0. 134 | 2. 07E-11 | monocyte | MSH6           |
| ARHGEF25. 1 | 1. 39E-15 | -0. 19228 | 0. 004 | 0. 071 | 2. 07E-11 | monocyte | ARHGEF25       |
| ZNF567. 3   | 1. 40E-15 | -0. 10528 | 0. 022 | 0. 102 | 2. 09E-11 | monocyte | ZNF567         |
| NCOA1. 5    | 1. 41E-15 | -0. 16216 | 0. 067 | 0. 169 | 2. 10E-11 | monocyte | NCOA1          |
| DNAJA2. 2   | 1. 43E-15 | -0. 11252 | 0. 197 | 0. 342 | 2. 14E-11 | monocyte | DNAJA2         |
| CHEK1. 3    | 1. 44E-15 | -0. 14009 | 0. 013 | 0. 086 | 2. 16E-11 | monocyte | CHEK1          |
| NFATC2. 5   | 1. 44E-15 | 0. 234123 | 0. 098 | 0. 042 | 2. 16E-11 | monocyte | NFATC2         |
| SLC25A14. 1 | 1. 46E-15 | -0. 14309 | 0. 019 | 0. 097 | 2. 18E-11 | monocyte | SLC25A14       |
| PSMC2. 4    | 1. 46E-15 | -0. 11976 | 0. 301 | 0. 473 | 2. 18E-11 | monocyte | PSMC2          |
| GAB1. 6     | 1. 48E-15 | -0. 18608 | 0. 026 | 0. 108 | 2. 21E-11 | monocyte | GAB1           |
| FADS3. 4    | 1. 50E-15 | -0. 15959 | 0. 058 | 0. 157 | 2. 24E-11 | monocyte | FADS3          |
| PACSN3. 6   | 1. 52E-15 | -0. 13287 | 0. 006 | 0. 075 | 2. 26E-11 | monocyte | PACSN3         |
| PROCR. 7    | 1. 52E-15 | 0. 268446 | 0. 132 | 0. 063 | 2. 27E-11 | monocyte | PROCR          |
| RP11-263K   | 1. 52E-15 | -0. 1615  | 0. 004 | 0. 071 | 2. 27E-11 | monocyte | RP11-263K19. 4 |
| SNTB2. 3    | 1. 52E-15 | -0. 15733 | 0. 022 | 0. 101 | 2. 27E-11 | monocyte | SNTB2          |
| SULF2. 3    | 1. 53E-15 | -0. 19497 | 0. 068 | 0. 167 | 2. 28E-11 | monocyte | SULF2          |
| ZNF430. 4   | 1. 53E-15 | -0. 11857 | 0. 087 | 0. 198 | 2. 29E-11 | monocyte | ZNF430         |
| PMEPA1. 7   | 1. 53E-15 | -0. 13954 | 0. 098 | 0. 21  | 2. 29E-11 | monocyte | PMEPA1         |
| BRINP2. 6   | 1. 55E-15 | -0. 17064 | 0. 008 | 0. 078 | 2. 32E-11 | monocyte | BRINP2         |
| GPRASP2. 6  | 1. 56E-15 | -0. 17942 | 0. 004 | 0. 07  | 2. 33E-11 | monocyte | GPRASP2        |
| ABCA8. 6    | 1. 57E-15 | -0. 24915 | 0. 009 | 0. 08  | 2. 34E-11 | monocyte | ABCA8          |
| RP11-212F   | 1. 59E-15 | -0. 10115 | 0. 02  | 0. 098 | 2. 38E-11 | monocyte | RP11-212P7. 2  |
| PGAP2. 3    | 1. 59E-15 | -0. 11365 | 0. 035 | 0. 124 | 2. 38E-11 | monocyte | PGAP2          |
| TASP1. 3    | 1. 60E-15 | -0. 12959 | 0. 02  | 0. 099 | 2. 39E-11 | monocyte | TASP1          |
| DNM1. 4     | 1. 60E-15 | -0. 11983 | 0. 008 | 0. 079 | 2. 39E-11 | monocyte | DNM1           |
| CRB1. 5     | 1. 60E-15 | -0. 20417 | 0. 005 | 0. 073 | 2. 39E-11 | monocyte | CRB1           |
| IGSF11. 5   | 1. 61E-15 | -0. 16567 | 0. 005 | 0. 073 | 2. 40E-11 | monocyte | IGSF11         |
| CDK14. 4    | 1. 65E-15 | -0. 16133 | 0. 011 | 0. 084 | 2. 47E-11 | monocyte | CDK14          |
| HAT1. 3     | 1. 66E-15 | -0. 11001 | 0. 172 | 0. 307 | 2. 47E-11 | monocyte | HAT1           |
| ADAMTS6. 4  | 1. 67E-15 | -0. 13152 | 0. 004 | 0. 071 | 2. 50E-11 | monocyte | ADAMTS6        |
| ZNF638. 6   | 1. 67E-15 | -0. 10186 | 0. 134 | 0. 262 | 2. 50E-11 | monocyte | ZNF638         |
| WDR48. 5    | 1. 68E-15 | -0. 13796 | 0. 05  | 0. 146 | 2. 52E-11 | monocyte | WDR48          |
| TECR. 5     | 1. 70E-15 | -0. 13333 | 0. 387 | 0. 556 | 2. 54E-11 | monocyte | TECR           |
| CTU2. 3     | 1. 71E-15 | -0. 11035 | 0. 046 | 0. 141 | 2. 55E-11 | monocyte | CTU2           |
| KDM4A. 2    | 1. 71E-15 | -0. 14086 | 0. 033 | 0. 12  | 2. 56E-11 | monocyte | KDM4A          |
| CCP110. 6   | 1. 71E-15 | -0. 12606 | 0. 041 | 0. 131 | 2. 56E-11 | monocyte | CCP110         |
| PMS2. 6     | 1. 72E-15 | -0. 1726  | 0. 043 | 0. 135 | 2. 57E-11 | monocyte | PMS2           |

|             |           |           |        |        |                    |             |
|-------------|-----------|-----------|--------|--------|--------------------|-------------|
| SNTA1. 6    | 1. 73E-15 | -0. 12061 | 0. 016 | 0. 091 | 2. 59E-11 monocyte | SNTA1       |
| CBR3. 4     | 1. 74E-15 | -0. 19471 | 0. 029 | 0. 112 | 2. 59E-11 monocyte | CBR3        |
| PNISR. 5    | 1. 75E-15 | -0. 12766 | 0. 436 | 0. 627 | 2. 62E-11 monocyte | PNISR       |
| MICU2. 4    | 1. 76E-15 | -0. 13699 | 0. 121 | 0. 244 | 2. 63E-11 monocyte | MICU2       |
| BCL7C. 4    | 1. 78E-15 | -0. 17892 | 0. 14  | 0. 265 | 2. 67E-11 monocyte | BCL7C       |
| GATAD2A     | 1. 79E-15 | -0. 16483 | 0. 044 | 0. 136 | 2. 67E-11 monocyte | GATAD2A     |
| MEN1. 3     | 1. 79E-15 | -0. 15923 | 0. 037 | 0. 124 | 2. 68E-11 monocyte | MEN1        |
| TCERG1. 5   | 1. 81E-15 | -0. 16476 | 0. 099 | 0. 214 | 2. 71E-11 monocyte | TCERG1      |
| GCLM. 3     | 1. 82E-15 | -0. 20488 | 0. 067 | 0. 166 | 2. 71E-11 monocyte | GCLM        |
| JAGN1. 5    | 1. 83E-15 | -0. 13752 | 0. 188 | 0. 332 | 2. 73E-11 monocyte | JAGN1       |
| PPP1R18. 8  | 1. 85E-15 | 0. 415276 | 0. 372 | 0. 286 | 2. 76E-11 monocyte | PPP1R18     |
| PRKCA. 4    | 1. 86E-15 | -0. 12276 | 0. 095 | 0. 208 | 2. 78E-11 monocyte | PRKCA       |
| WDR43. 2    | 1. 88E-15 | -0. 17787 | 0. 092 | 0. 203 | 2. 81E-11 monocyte | WDR43       |
| NOL10. 3    | 1. 91E-15 | -0. 13469 | 0. 063 | 0. 163 | 2. 85E-11 monocyte | NOL10       |
| EMC10. 3    | 1. 91E-15 | -0. 13137 | 0. 295 | 0. 464 | 2. 85E-11 monocyte | EMC10       |
| YARS. 2     | 1. 93E-15 | -0. 13684 | 0. 11  | 0. 227 | 2. 89E-11 monocyte | YARS        |
| ZFAND2B. 2  | 1. 95E-15 | -0. 14592 | 0. 101 | 0. 216 | 2. 92E-11 monocyte | ZFAND2B     |
| DIRAS2. 6   | 1. 97E-15 | -0. 17063 | 0. 003 | 0. 068 | 2. 94E-11 monocyte | DIRAS2      |
| EGLN3. 4    | 1. 99E-15 | -0. 25776 | 0. 003 | 0. 068 | 2. 97E-11 monocyte | EGLN3       |
| SUZ12. 4    | 2. 00E-15 | -0. 10347 | 0. 091 | 0. 204 | 2. 99E-11 monocyte | SUZ12       |
| MRC1. 1     | 2. 02E-15 | 0. 165617 | 0. 032 | 0. 007 | 3. 02E-11 monocyte | MRC1        |
| LMO3. 5     | 2. 04E-15 | -0. 2144  | 0. 015 | 0. 089 | 3. 04E-11 monocyte | LMO3        |
| ACO74289. 2 | 2. 05E-15 | 0. 38026  | 0. 118 | 0. 056 | 3. 07E-11 monocyte | ACO74289. 1 |
| UBE2E1. 4   | 2. 10E-15 | -0. 14148 | 0. 293 | 0. 465 | 3. 14E-11 monocyte | UBE2E1      |
| GGA2. 8     | 2. 12E-15 | 0. 31258  | 0. 22  | 0. 132 | 3. 17E-11 monocyte | GGA2        |
| NPRL2. 5    | 2. 20E-15 | -0. 15356 | 0. 065 | 0. 166 | 3. 29E-11 monocyte | NPRL2       |
| MAPK7. 5    | 2. 21E-15 | -0. 14554 | 0. 042 | 0. 132 | 3. 31E-11 monocyte | MAPK7       |
| POLR1C. 5   | 2. 22E-15 | -0. 18133 | 0. 04  | 0. 129 | 3. 32E-11 monocyte | POLR1C      |
| ARFGAP1. 2  | 2. 25E-15 | -0. 12395 | 0. 056 | 0. 156 | 3. 36E-11 monocyte | ARFGAP1     |
| PLAGL1. 5   | 2. 27E-15 | 0. 257841 | 0. 089 | 0. 037 | 3. 40E-11 monocyte | PLAGL1      |
| BRMS1L. 4   | 2. 27E-15 | -0. 18552 | 0. 024 | 0. 104 | 3. 40E-11 monocyte | BRMS1L      |
| HRK. 6      | 2. 27E-15 | -0. 20466 | 0. 003 | 0. 068 | 3. 40E-11 monocyte | HRK         |
| GPR161. 8   | 2. 28E-15 | -0. 11716 | 0. 015 | 0. 089 | 3. 40E-11 monocyte | GPR161      |
| LMNB2. 7    | 2. 32E-15 | -0. 1601  | 0. 037 | 0. 124 | 3. 47E-11 monocyte | LMNB2       |
| HTRA1. 8    | 2. 36E-15 | 0. 381638 | 0. 514 | 0. 455 | 3. 53E-11 monocyte | HTRA1       |
| ABCA2. 8    | 2. 37E-15 | -0. 28545 | 0. 023 | 0. 102 | 3. 55E-11 monocyte | ABCA2       |
| ICT1. 2     | 2. 38E-15 | -0. 1104  | 0. 123 | 0. 247 | 3. 55E-11 monocyte | ICT1        |
| GATS. 5     | 2. 46E-15 | -0. 19048 | 0. 003 | 0. 068 | 3. 68E-11 monocyte | GATS        |
| CEP95. 4    | 2. 51E-15 | -0. 12173 | 0. 041 | 0. 131 | 3. 75E-11 monocyte | CEP95       |
| CNR1. 6     | 2. 56E-15 | -0. 13269 | 0. 009 | 0. 079 | 3. 82E-11 monocyte | CNR1        |
| CACNA2D4. 2 | 2. 56E-15 | 0. 256241 | 0. 139 | 0. 068 | 3. 82E-11 monocyte | CACNA2D4    |
| C5AR1. 7    | 2. 57E-15 | 0. 401291 | 0. 351 | 0. 228 | 3. 84E-11 monocyte | C5AR1       |
| ANKMY2. 4   | 2. 59E-15 | -0. 20625 | 0. 038 | 0. 125 | 3. 87E-11 monocyte | ANKMY2      |
| FAM98A. 5   | 2. 59E-15 | -0. 12657 | 0. 053 | 0. 149 | 3. 87E-11 monocyte | FAM98A      |
| BCS1L. 5    | 2. 63E-15 | -0. 1316  | 0. 07  | 0. 174 | 3. 93E-11 monocyte | BCS1L       |
| ST3GAL3. 5  | 2. 64E-15 | -0. 11559 | 0. 017 | 0. 093 | 3. 94E-11 monocyte | ST3GAL3     |
| UTP11L. 3   | 2. 64E-15 | -0. 13934 | 0. 167 | 0. 302 | 3. 95E-11 monocyte | UTP11L      |
| ARHGAP32. 2 | 2. 68E-15 | -0. 15758 | 0. 016 | 0. 091 | 4. 00E-11 monocyte | ARHGAP32    |
| CLEC4E. 6   | 2. 81E-15 | 0. 34688  | 0. 114 | 0. 053 | 4. 20E-11 monocyte | CLEC4E      |
| ORC6. 6     | 2. 82E-15 | -0. 17688 | 0. 02  | 0. 097 | 4. 21E-11 monocyte | ORC6        |
| GMCL1. 5    | 2. 83E-15 | -0. 12339 | 0. 067 | 0. 167 | 4. 23E-11 monocyte | GMCL1       |



|            |          |          |       |       |          |          |               |
|------------|----------|----------|-------|-------|----------|----------|---------------|
| DENND1C.6  | 2.86E-15 | 0.18523  | 0.078 | 0.03  | 4.27E-11 | monocyte | DENND1C       |
| HERC2.3    | 2.86E-15 | -0.1018  | 0.087 | 0.197 | 4.28E-11 | monocyte | HERC2         |
| MGMT.8     | 2.89E-15 | 0.33135  | 0.237 | 0.144 | 4.31E-11 | monocyte | MGMT          |
| SAMD14.5   | 2.92E-15 | -0.16348 | 0.004 | 0.07  | 4.36E-11 | monocyte | SAMD14        |
| CCDC112.7  | 2.99E-15 | -0.18583 | 0.146 | 0.271 | 4.47E-11 | monocyte | CCDC112       |
| LMBR1.6    | 3.09E-15 | -0.15153 | 0.032 | 0.117 | 4.61E-11 | monocyte | LMBR1         |
| COL5A2.6   | 3.10E-15 | -0.12252 | 0.003 | 0.068 | 4.63E-11 | monocyte | COL5A2        |
| HAP1.5     | 3.13E-15 | -0.16609 | 0.006 | 0.074 | 4.67E-11 | monocyte | HAP1          |
| VNN2.5     | 3.17E-15 | 0.145925 | 0.064 | 0.022 | 4.73E-11 | monocyte | VNN2          |
| MED9.4     | 3.17E-15 | -0.15162 | 0.021 | 0.099 | 4.74E-11 | monocyte | MED9          |
| BDNF-AS.6  | 3.21E-15 | -0.1534  | 0.004 | 0.069 | 4.79E-11 | monocyte | BDNF-AS       |
| BNIP1.6    | 3.25E-15 | -0.18104 | 0.04  | 0.127 | 4.85E-11 | monocyte | BNIP1         |
| CCDC43.4   | 3.30E-15 | -0.19119 | 0.097 | 0.208 | 4.93E-11 | monocyte | CCDC43        |
| ACO04951.3 | 3.30E-15 | -0.18454 | 0.065 | 0.164 | 4.94E-11 | monocyte | ACO04951.6    |
| RBM27.5    | 3.33E-15 | -0.13066 | 0.116 | 0.236 | 4.97E-11 | monocyte | RBM27         |
| TOB2.3     | 3.36E-15 | -0.13307 | 0.095 | 0.206 | 5.01E-11 | monocyte | TOB2          |
| NUDT4      | 3.38E-15 | -0.18471 | 0.101 | 0.212 | 5.06E-11 | monocyte | NUDT4         |
| AGPAT4.5   | 3.47E-15 | -0.14652 | 0.028 | 0.109 | 5.19E-11 | monocyte | AGPAT4        |
| PFKP.4     | 3.52E-15 | -0.10061 | 0.062 | 0.159 | 5.26E-11 | monocyte | PFKP          |
| EEA1.4     | 3.54E-15 | -0.16693 | 0.133 | 0.255 | 5.28E-11 | monocyte | EEA1          |
| AHCY.4     | 3.54E-15 | -0.10535 | 0.174 | 0.305 | 5.29E-11 | monocyte | AHCY          |
| RP11-115C  | 3.58E-15 | -0.19387 | 0.017 | 0.091 | 5.34E-11 | monocyte | RP11-115C21.2 |
| PNPT1.5    | 3.61E-15 | -0.11806 | 0.094 | 0.206 | 5.40E-11 | monocyte | PNPT1         |
| PDPK1.5    | 3.68E-15 | -0.1806  | 0.089 | 0.196 | 5.50E-11 | monocyte | PDPK1         |
| NAA15.5    | 3.72E-15 | -0.14227 | 0.108 | 0.225 | 5.57E-11 | monocyte | NAA15         |
| CHI3L2.4   | 3.73E-15 | -0.58699 | 0.087 | 0.189 | 5.58E-11 | monocyte | CHI3L2        |
| ANK3.7     | 3.79E-15 | -0.22053 | 0.002 | 0.065 | 5.66E-11 | monocyte | ANK3          |
| CYSLTR1.6  | 3.80E-15 | 0.219565 | 0.063 | 0.022 | 5.67E-11 | monocyte | CYSLTR1       |
| RNF144B.7  | 3.84E-15 | 0.33558  | 0.172 | 0.092 | 5.73E-11 | monocyte | RNF144B       |
| HTRA2.3    | 3.86E-15 | -0.11355 | 0.114 | 0.234 | 5.77E-11 | monocyte | HTRA2         |
| EFNA3.5    | 3.88E-15 | -0.20427 | 0.002 | 0.065 | 5.79E-11 | monocyte | EFNA3         |
| OSBPL2.4   | 4.04E-15 | -0.12661 | 0.048 | 0.141 | 6.04E-11 | monocyte | OSBPL2        |
| ZNF584.4   | 4.09E-15 | -0.15806 | 0.018 | 0.092 | 6.12E-11 | monocyte | ZNF584        |
| CENPJ.4    | 4.11E-15 | -0.17458 | 0.005 | 0.071 | 6.14E-11 | monocyte | CENPJ         |
| CREB3L1.4  | 4.14E-15 | -0.11847 | 0.003 | 0.067 | 6.19E-11 | monocyte | CREB3L1       |
| TP53INP2.4 | 4.18E-15 | -0.16701 | 0.023 | 0.101 | 6.24E-11 | monocyte | TP53INP2      |
| BIVM.6     | 4.20E-15 | -0.13406 | 0.032 | 0.117 | 6.27E-11 | monocyte | BIVM          |
| ALDH1L1.7  | 4.20E-15 | -0.28679 | 0.004 | 0.069 | 6.28E-11 | monocyte | ALDH1L1       |
| ZNF775.7   | 4.23E-15 | -0.17847 | 0.023 | 0.101 | 6.32E-11 | monocyte | ZNF775        |
| CTNNA2.6   | 4.30E-15 | -0.2087  | 0.001 | 0.063 | 6.43E-11 | monocyte | CTNNA2        |
| ZNF582-AS  | 4.35E-15 | -0.22311 | 0.011 | 0.082 | 6.50E-11 | monocyte | ZNF582-AS1    |
| ANKRD37.4  | 4.41E-15 | -0.14714 | 0.054 | 0.149 | 6.59E-11 | monocyte | ANKRD37       |
| TYW1.2     | 4.44E-15 | -0.12621 | 0.039 | 0.126 | 6.64E-11 | monocyte | TYW1          |
| GPI.5      | 4.46E-15 | -0.14308 | 0.224 | 0.368 | 6.66E-11 | monocyte | GPI           |
| FLRT3.6    | 4.49E-15 | -0.15567 | 0.001 | 0.063 | 6.71E-11 | monocyte | FLRT3         |
| TFDP2.3    | 4.61E-15 | -0.14616 | 0.105 | 0.222 | 6.88E-11 | monocyte | TFDP2         |
| GNAI1.6    | 4.71E-15 | -0.2182  | 0.03  | 0.112 | 7.03E-11 | monocyte | GNAI1         |
| CSRP1.5    | 4.72E-15 | -0.24158 | 0.129 | 0.248 | 7.06E-11 | monocyte | CSRP1         |
| TMEM68.5   | 4.75E-15 | -0.10635 | 0.072 | 0.175 | 7.10E-11 | monocyte | TMEM68        |
| PEX13      | 4.75E-15 | -0.19717 | 0.075 | 0.178 | 7.10E-11 | monocyte | PEX13         |
| VPS16.2    | 4.75E-15 | -0.14987 | 0.079 | 0.183 | 7.10E-11 | monocyte | VPS16         |

|                |           |           |        |        |           |          |                |
|----------------|-----------|-----------|--------|--------|-----------|----------|----------------|
| ABI1. 8        | 4. 76E-15 | 0. 559681 | 0. 316 | 0. 234 | 7. 11E-11 | monocyte | ABI1           |
| IGF1R. 5       | 4. 76E-15 | -0. 17929 | 0. 007 | 0. 075 | 7. 11E-11 | monocyte | IGF1R          |
| DCUN1D4. 4     | 4. 83E-15 | -0. 13263 | 0. 026 | 0. 106 | 7. 22E-11 | monocyte | DCUN1D4        |
| RFX2. 2        | 4. 85E-15 | -0. 12523 | 0. 023 | 0. 102 | 7. 25E-11 | monocyte | RFX2           |
| GON4L. 5       | 4. 88E-15 | -0. 11103 | 0. 108 | 0. 224 | 7. 30E-11 | monocyte | GON4L          |
| TTF1. 4        | 4. 89E-15 | -0. 10046 | 0. 098 | 0. 212 | 7. 31E-11 | monocyte | TTF1           |
| ZBTB22. 2      | 4. 90E-15 | -0. 1202  | 0. 017 | 0. 091 | 7. 33E-11 | monocyte | ZBTB22         |
| SIPA1L1. 1     | 4. 91E-15 | -0. 18133 | 0. 071 | 0. 173 | 7. 34E-11 | monocyte | SIPA1L1        |
| ALDH6A1. 5     | 4. 94E-15 | -0. 16384 | 0. 103 | 0. 216 | 7. 39E-11 | monocyte | ALDH6A1        |
| DPP4. 5        | 4. 96E-15 | -0. 10817 | 0. 013 | 0. 083 | 7. 41E-11 | monocyte | DPP4           |
| NCOA4. 8       | 5. 04E-15 | 0. 420148 | 0. 335 | 0. 256 | 7. 53E-11 | monocyte | NCOA4          |
| MPP2. 7        | 5. 09E-15 | -0. 14333 | 0. 002 | 0. 065 | 7. 60E-11 | monocyte | MPP2           |
| MIS18BP1. 5    | 5. 13E-15 | 0. 374682 | 0. 223 | 0. 14  | 7. 67E-11 | monocyte | MIS18BP1       |
| PITHD1. 6      | 5. 18E-15 | -0. 12449 | 0. 211 | 0. 358 | 7. 74E-11 | monocyte | PITHD1         |
| PIP5K1A. 1     | 5. 18E-15 | -0. 12777 | 0. 057 | 0. 154 | 7. 74E-11 | monocyte | PIP5K1A        |
| FAM102A. 5     | 5. 21E-15 | -0. 1963  | 0. 025 | 0. 104 | 7. 78E-11 | monocyte | FAM102A        |
| IMPAD1. 3      | 5. 22E-15 | -0. 19356 | 0. 089 | 0. 195 | 7. 80E-11 | monocyte | IMPAD1         |
| COPG2. 4       | 5. 27E-15 | -0. 13429 | 0. 038 | 0. 124 | 7. 88E-11 | monocyte | COPG2          |
| MARCH9. 7      | 5. 33E-15 | -0. 26647 | 0. 067 | 0. 162 | 7. 96E-11 | monocyte | 9-Mar          |
| MZF1. 3        | 5. 38E-15 | -0. 12357 | 0. 021 | 0. 098 | 8. 04E-11 | monocyte | MZF1           |
| DHX38. 3       | 5. 38E-15 | -0. 17517 | 0. 037 | 0. 122 | 8. 05E-11 | monocyte | DHX38          |
| EFTUD2. 3      | 5. 42E-15 | -0. 12214 | 0. 108 | 0. 224 | 8. 09E-11 | monocyte | EFTUD2         |
| ZNF263. 2      | 5. 43E-15 | -0. 1576  | 0. 045 | 0. 135 | 8. 11E-11 | monocyte | ZNF263         |
| MTA1. 5        | 5. 43E-15 | -0. 14669 | 0. 09  | 0. 199 | 8. 11E-11 | monocyte | MTA1           |
| TEX261. 4      | 5. 47E-15 | -0. 14503 | 0. 072 | 0. 174 | 8. 17E-11 | monocyte | TEX261         |
| MMP15. 7       | 5. 47E-15 | -0. 12901 | 0. 004 | 0. 068 | 8. 18E-11 | monocyte | MMP15          |
| SAA1. 5        | 5. 49E-15 | -0. 83354 | 0. 041 | 0. 126 | 8. 20E-11 | monocyte | SAA1           |
| CENPF. 8       | 5. 56E-15 | -0. 30451 | 0. 028 | 0. 108 | 8. 31E-11 | monocyte | CENPF          |
| DENND5A. 3     | 5. 64E-15 | -0. 16378 | 0. 081 | 0. 187 | 8. 43E-11 | monocyte | DENND5A        |
| IRAK3. 8       | 5. 65E-15 | 0. 234267 | 0. 138 | 0. 068 | 8. 44E-11 | monocyte | IRAK3          |
| CDH6. 6        | 5. 72E-15 | -0. 14184 | 0. 007 | 0. 074 | 8. 55E-11 | monocyte | CDH6           |
| GLRB. 5        | 5. 80E-15 | -0. 14165 | 0. 002 | 0. 064 | 8. 67E-11 | monocyte | GLRB           |
| RP11-597D13. 8 | 5. 81E-15 | 0. 250711 | 0. 059 | 0. 02  | 8. 68E-11 | monocyte | RP11-597D13. 8 |
| YJEFN3. 6      | 5. 89E-15 | -0. 15266 | 0. 004 | 0. 068 | 8. 80E-11 | monocyte | YJEFN3         |
| CIZ1. 3        | 6. 13E-15 | -0. 10776 | 0. 081 | 0. 188 | 9. 16E-11 | monocyte | CIZ1           |
| SETBP1. 6      | 6. 17E-15 | -0. 15315 | 0. 01  | 0. 08  | 9. 22E-11 | monocyte | SETBP1         |
| MYLK. 5        | 6. 20E-15 | -0. 26174 | 0. 002 | 0. 064 | 9. 26E-11 | monocyte | MYLK           |
| DXO. 3         | 6. 33E-15 | -0. 12066 | 0. 041 | 0. 129 | 9. 46E-11 | monocyte | DXO            |
| ZFP36L1. 4     | 6. 35E-15 | 0. 342861 | 0. 603 | 0. 556 | 9. 49E-11 | monocyte | ZFP36L1        |
| METTL3. 3      | 6. 37E-15 | -0. 1857  | 0. 042 | 0. 13  | 9. 51E-11 | monocyte | METTL3         |
| EFNB1. 4       | 6. 46E-15 | -0. 17889 | 0. 024 | 0. 102 | 9. 66E-11 | monocyte | EFNB1          |
| DFFA. 3        | 6. 47E-15 | -0. 10918 | 0. 112 | 0. 229 | 9. 68E-11 | monocyte | DFFA           |
| SLC36A1. 2     | 6. 67E-15 | 0. 159958 | 0. 071 | 0. 026 | 9. 96E-11 | monocyte | SLC36A1        |
| LRRC1. 6       | 6. 96E-15 | -0. 16303 | 0. 008 | 0. 075 | 1. 04E-10 | monocyte | LRRC1          |
| BYSL. 4        | 6. 97E-15 | -0. 12149 | 0. 031 | 0. 114 | 1. 04E-10 | monocyte | BYSL           |
| ARID1A. 5      | 7. 00E-15 | -0. 13522 | 0. 129 | 0. 252 | 1. 05E-10 | monocyte | ARID1A         |
| ZNF322. 6      | 7. 01E-15 | -0. 15667 | 0. 049 | 0. 141 | 1. 05E-10 | monocyte | ZNF322         |
| CD5L. 1        | 7. 11E-15 | 0. 168104 | 0. 021 | 0. 003 | 1. 06E-10 | monocyte | CD5L           |
| HMOX2. 4       | 7. 16E-15 | -0. 15442 | 0. 17  | 0. 306 | 1. 07E-10 | monocyte | HMOX2          |
| ZMYM5. 2       | 7. 27E-15 | -0. 17044 | 0. 058 | 0. 155 | 1. 09E-10 | monocyte | ZMYM5          |
| TMEM131. 6     | 7. 34E-15 | -0. 15183 | 0. 058 | 0. 154 | 1. 10E-10 | monocyte | TMEM131        |

|           |             |           |        |        |           |          |                  |
|-----------|-------------|-----------|--------|--------|-----------|----------|------------------|
| SLC25A38. | 7. 34E-15   | -0. 1671  | 0. 058 | 0. 153 | 1. 10E-10 | monocyte | SLC25A38         |
| PDZRN3.   | 6 7. 38E-15 | -0. 17207 | 0. 001 | 0. 062 | 1. 10E-10 | monocyte | PDZRN3           |
| XXbac-B13 | 7. 40E-15   | 0. 132499 | 0. 052 | 0. 016 | 1. 11E-10 | monocyte | XXbac-B135H6. 15 |
| ARFGAP3.  | 1 7. 41E-15 | -0. 1761  | 0. 12  | 0. 238 | 1. 11E-10 | monocyte | ARFGAP3          |
| SPSB4.    | 6 7. 77E-15 | -0. 12871 | 0. 002 | 0. 064 | 1. 16E-10 | monocyte | SPSB4            |
| CTPS1.    | 5 7. 81E-15 | -0. 12259 | 0. 03  | 0. 113 | 1. 17E-10 | monocyte | CTPS1            |
| HS6ST2.   | 4 7. 88E-15 | -0. 10823 | 0. 004 | 0. 068 | 1. 18E-10 | monocyte | HS6ST2           |
| AC011043. | 7. 91E-15   | -0. 1501  | 0. 004 | 0. 068 | 1. 18E-10 | monocyte | AC011043. 1      |
| AKAP1.    | 3 8. 00E-15 | -0. 12467 | 0. 041 | 0. 129 | 1. 20E-10 | monocyte | AKAP1            |
| GORASP2.  | 4 8. 00E-15 | -0. 14242 | 0. 169 | 0. 304 | 1. 20E-10 | monocyte | GORASP2          |
| RAB22A.   | 5 8. 07E-15 | -0. 12137 | 0. 128 | 0. 248 | 1. 21E-10 | monocyte | RAB22A           |
| KCTD1.    | 6 8. 08E-15 | -0. 14915 | 0. 005 | 0. 07  | 1. 21E-10 | monocyte | KCTD1            |
| LRRC49.   | 4 8. 10E-15 | -0. 1584  | 0. 002 | 0. 064 | 1. 21E-10 | monocyte | LRRC49           |
| SULT1A1.  | 6 8. 12E-15 | 0. 309793 | 0. 101 | 0. 045 | 1. 21E-10 | monocyte | SULT1A1          |
| RUNDC1.   | 4 8. 13E-15 | -0. 16129 | 0. 051 | 0. 143 | 1. 22E-10 | monocyte | RUNDC1           |
| DLL1.     | 5 8. 19E-15 | -0. 2182  | 0. 009 | 0. 077 | 1. 22E-10 | monocyte | DLL1             |
| CTCF.     | 5 8. 40E-15 | -0. 13579 | 0. 071 | 0. 172 | 1. 25E-10 | monocyte | CTCF             |
| PRKAR2A.  | 3 8. 52E-15 | -0. 13817 | 0. 136 | 0. 259 | 1. 27E-10 | monocyte | PRKAR2A          |
| CEP78.    | 7 8. 55E-15 | -0. 12134 | 0. 035 | 0. 121 | 1. 28E-10 | monocyte | CEP78            |
| NKX2-5.   | 6 8. 74E-15 | -0. 19781 | 0. 005 | 0. 07  | 1. 31E-10 | monocyte | NKX2-5           |
| KPNA6.    | 2 8. 81E-15 | -0. 15276 | 0. 125 | 0. 244 | 1. 32E-10 | monocyte | KPNA6            |
| C5orf30.  | 5 9. 02E-15 | -0. 15705 | 0. 011 | 0. 081 | 1. 35E-10 | monocyte | C5orf30          |
| CCNE2.    | 5 9. 09E-15 | -0. 20874 | 0. 002 | 0. 063 | 1. 36E-10 | monocyte | CCNE2            |
| ITGA2.    | 6 9. 20E-15 | -0. 13708 | 0. 004 | 0. 067 | 1. 37E-10 | monocyte | ITGA2            |
| MAML2.    | 7 9. 28E-15 | -0. 10619 | 0. 095 | 0. 207 | 1. 39E-10 | monocyte | MAML2            |
| RNF135.   | 8 9. 32E-15 | 0. 332647 | 0. 183 | 0. 104 | 1. 39E-10 | monocyte | RNF135           |
| UBE2G1.   | 7 9. 44E-15 | -0. 13659 | 0. 143 | 0. 268 | 1. 41E-10 | monocyte | UBE2G1           |
| CSNK1G2.  | 3 9. 48E-15 | -0. 10953 | 0. 055 | 0. 151 | 1. 42E-10 | monocyte | CSNK1G2          |
| CHMP7.    | 6 9. 57E-15 | -0. 13838 | 0. 081 | 0. 185 | 1. 43E-10 | monocyte | CHMP7            |
| FRYL.     | 7 9. 57E-15 | -0. 11315 | 0. 089 | 0. 196 | 1. 43E-10 | monocyte | FRYL             |
| MVB12A.   | 4 9. 92E-15 | -0. 11611 | 0. 18  | 0. 313 | 1. 48E-10 | monocyte | MVB12A           |
| RP11-448A | 1. 00E-14   | -0. 14419 | 0. 022 | 0. 098 | 1. 50E-10 | monocyte | RP11-448A19. 1   |
| ANP32A.   | 8 1. 00E-14 | 0. 443352 | 0. 477 | 0. 424 | 1. 50E-10 | monocyte | ANP32A           |
| WDR25.    | 3 1. 00E-14 | -0. 17462 | 0. 026 | 0. 104 | 1. 50E-10 | monocyte | WDR25            |
| AARSD1.   | 5 1. 02E-14 | -0. 1363  | 0. 03  | 0. 112 | 1. 53E-10 | monocyte | AARSD1           |
| ERBB4.    | 7 1. 04E-14 | -0. 19961 | 0. 002 | 0. 063 | 1. 55E-10 | monocyte | ERBB4            |
| C20orf96. | 1. 05E-14   | -0. 11119 | 0. 061 | 0. 158 | 1. 56E-10 | monocyte | C20orf96         |
| CAPRIN2.  | 5 1. 06E-14 | -0. 10446 | 0. 029 | 0. 111 | 1. 59E-10 | monocyte | CAPRIN2          |
| LZTS1.    | 7 1. 08E-14 | -0. 14357 | 0. 003 | 0. 065 | 1. 62E-10 | monocyte | LZTS1            |
| CDIP1.    | 3 1. 09E-14 | -0. 15386 | 0. 089 | 0. 195 | 1. 63E-10 | monocyte | CDIP1            |
| RPP25.    | 2 1. 09E-14 | 0. 106893 | 0. 069 | 0. 025 | 1. 63E-10 | monocyte | RPP25            |
| TCTA.     | 2 1. 12E-14 | -0. 16706 | 0. 071 | 0. 169 | 1. 68E-10 | monocyte | TCTA             |
| ABCE1.    | 3 1. 13E-14 | -0. 10183 | 0. 135 | 0. 26  | 1. 69E-10 | monocyte | ABCE1            |
| SAPCD2.   | 6 1. 15E-14 | -0. 16674 | 0. 001 | 0. 061 | 1. 72E-10 | monocyte | SAPCD2           |
| CHST3.    | 5 1. 16E-14 | -0. 11571 | 0. 005 | 0. 069 | 1. 73E-10 | monocyte | CHST3            |
| RP11-698N | 1. 20E-14   | -0. 16525 | 0. 002 | 0. 063 | 1. 80E-10 | monocyte | RP11-698N11. 2   |
| SIKE1.    | 2 1. 23E-14 | -0. 14331 | 0. 089 | 0. 197 | 1. 83E-10 | monocyte | SIKE1            |
| RUNDC3A.  | 8 1. 23E-14 | -0. 24859 | 0. 027 | 0. 104 | 1. 84E-10 | monocyte | RUNDC3A          |
| DPH2.     | 4 1. 28E-14 | -0. 13496 | 0. 038 | 0. 123 | 1. 92E-10 | monocyte | DPH2             |
| KCNJ16.   | 6 1. 30E-14 | -0. 1372  | 0      | 0. 059 | 1. 94E-10 | monocyte | KCNJ16           |
| RBFA.     | 2 1. 30E-14 | -0. 11856 | 0. 073 | 0. 176 | 1. 94E-10 | monocyte | RBFA             |

|            |          |          |       |       |          |          |                |
|------------|----------|----------|-------|-------|----------|----------|----------------|
| ARL6IP5.3  | 1.32E-14 | 0.321088 | 0.649 | 0.65  | 1.97E-10 | monocyte | ARL6IP5        |
| MARK1.5    | 1.32E-14 | -0.13091 | 0.007 | 0.072 | 1.97E-10 | monocyte | MARK1          |
| MIEF1.2    | 1.33E-14 | -0.14864 | 0.058 | 0.153 | 1.99E-10 | monocyte | MIEF1          |
| CCDC69.6   | 1.36E-14 | 0.142755 | 0.08  | 0.032 | 2.03E-10 | monocyte | CCDC69         |
| TREM1.7    | 1.37E-14 | -0.30895 | 0.076 | 0.172 | 2.04E-10 | monocyte | TREM1          |
| CNKSR2.6   | 1.37E-14 | -0.12312 | 0.004 | 0.067 | 2.05E-10 | monocyte | CNKSR2         |
| MFSD10.3   | 1.40E-14 | -0.17765 | 0.18  | 0.312 | 2.09E-10 | monocyte | MFSD10         |
| HSPA6.4    | 1.40E-14 | 0.312493 | 0.17  | 0.093 | 2.09E-10 | monocyte | HSPA6          |
| SCARF1.6   | 1.44E-14 | 0.21278  | 0.065 | 0.023 | 2.14E-10 | monocyte | SCARF1         |
| NAV1.5     | 1.44E-14 | -0.15813 | 0.071 | 0.171 | 2.15E-10 | monocyte | NAV1           |
| ZNF260.5   | 1.44E-14 | -0.15251 | 0.027 | 0.106 | 2.15E-10 | monocyte | ZNF260         |
| NEO1.5     | 1.47E-14 | -0.1503  | 0.01  | 0.078 | 2.19E-10 | monocyte | NEO1           |
| VRK3.5     | 1.47E-14 | -0.10109 | 0.112 | 0.228 | 2.20E-10 | monocyte | VRK3           |
| YY1AP1.2   | 1.50E-14 | -0.13209 | 0.076 | 0.179 | 2.24E-10 | monocyte | YY1AP1         |
| NRSN1.6    | 1.53E-14 | -0.15661 | 0.003 | 0.065 | 2.28E-10 | monocyte | NRSN1          |
| DNMT1.7    | 1.54E-14 | -0.19971 | 0.167 | 0.297 | 2.31E-10 | monocyte | DNMT1          |
| TNFRSF21.1 | 1.54E-14 | -0.13788 | 0.072 | 0.171 | 2.31E-10 | monocyte | TNFRSF21       |
| ACO05082.1 | 1.55E-14 | 0.122885 | 0.033 | 0.008 | 2.31E-10 | monocyte | ACO05082.12    |
| PWWP2A.5   | 1.57E-14 | -0.13221 | 0.045 | 0.134 | 2.34E-10 | monocyte | PWWP2A         |
| NCAM2.6    | 1.59E-14 | -0.19407 | 0.007 | 0.073 | 2.37E-10 | monocyte | NCAM2          |
| ZNF273.6   | 1.59E-14 | -0.16426 | 0.018 | 0.09  | 2.38E-10 | monocyte | ZNF273         |
| MNS1.5     | 1.60E-14 | -0.13093 | 0.011 | 0.08  | 2.39E-10 | monocyte | MNS1           |
| C10orf10.1 | 1.61E-14 | -0.38379 | 0.022 | 0.097 | 2.41E-10 | monocyte | C10orf10       |
| HENMT1.7   | 1.61E-14 | 0.241086 | 0.074 | 0.029 | 2.41E-10 | monocyte | HENMT1         |
| RP11-398K  | 1.62E-14 | -0.16285 | 0.013 | 0.082 | 2.42E-10 | monocyte | RP11-398K22.12 |
| NKAIN4.6   | 1.62E-14 | -0.29549 | 0.029 | 0.107 | 2.42E-10 | monocyte | NKAIN4         |
| E2F5.4     | 1.63E-14 | -0.10649 | 0.006 | 0.07  | 2.43E-10 | monocyte | E2F5           |
| PRPF40A.4  | 1.64E-14 | -0.10764 | 0.301 | 0.463 | 2.46E-10 | monocyte | PRPF40A        |
| HPCA.6     | 1.68E-14 | -0.19057 | 0.003 | 0.065 | 2.51E-10 | monocyte | HPCA           |
| PTPRG.5    | 1.70E-14 | -0.14495 | 0.01  | 0.078 | 2.53E-10 | monocyte | PTPRG          |
| RFC3.5     | 1.75E-14 | -0.13104 | 0.02  | 0.094 | 2.61E-10 | monocyte | RFC3           |
| RGCC.6     | 1.76E-14 | -0.17704 | 0.147 | 0.259 | 2.63E-10 | monocyte | RGCC           |
| FRMD5.4    | 1.78E-14 | -0.1132  | 0.002 | 0.062 | 2.66E-10 | monocyte | FRMD5          |
| IRF2BP1.7  | 1.83E-14 | -0.10884 | 0.031 | 0.113 | 2.73E-10 | monocyte | IRF2BP1        |
| ADM.6      | 1.83E-14 | -0.26929 | 0.094 | 0.193 | 2.74E-10 | monocyte | ADM            |
| NSMF.4     | 1.84E-14 | -0.13064 | 0.039 | 0.123 | 2.75E-10 | monocyte | NSMF           |
| ABCG1.6    | 1.87E-14 | 0.245486 | 0.211 | 0.124 | 2.79E-10 | monocyte | ABCG1          |
| CBX2.4     | 1.87E-14 | -0.14924 | 0.007 | 0.072 | 2.80E-10 | monocyte | CBX2           |
| SMIM18.7   | 1.88E-14 | -0.21174 | 0.004 | 0.066 | 2.81E-10 | monocyte | SMIM18         |
| TOM1L1.5   | 1.90E-14 | -0.10716 | 0.002 | 0.062 | 2.84E-10 | monocyte | TOM1L1         |
| GAL3ST3.6  | 1.91E-14 | -0.13205 | 0.003 | 0.064 | 2.85E-10 | monocyte | GAL3ST3        |
| VHL.3      | 1.92E-14 | -0.12446 | 0.072 | 0.171 | 2.86E-10 | monocyte | VHL            |
| MUT.5      | 1.96E-14 | -0.17317 | 0.068 | 0.165 | 2.93E-10 | monocyte | MUT            |
| PLCD3.4    | 1.99E-14 | -0.11744 | 0.007 | 0.072 | 2.98E-10 | monocyte | PLCD3          |
| SHC4.4     | 2.02E-14 | -0.12635 | 0.002 | 0.062 | 3.01E-10 | monocyte | SHC4           |
| TAF13.3    | 2.02E-14 | -0.15168 | 0.053 | 0.144 | 3.02E-10 | monocyte | TAF13          |
| PDP1.5     | 2.03E-14 | -0.14843 | 0.046 | 0.133 | 3.03E-10 | monocyte | PDP1           |
| BGN.7      | 2.05E-14 | -0.27519 | 0.006 | 0.07  | 3.06E-10 | monocyte | BGN            |
| PLXNB1.6   | 2.06E-14 | -0.17533 | 0.013 | 0.081 | 3.08E-10 | monocyte | PLXNB1         |
| C16orf87.2 | 2.12E-14 | -0.12101 | 0.103 | 0.214 | 3.17E-10 | monocyte | C16orf87       |
| STK19.1    | 2.14E-14 | -0.12055 | 0.046 | 0.133 | 3.20E-10 | monocyte | STK19          |

|           |          |          |       |       |          |          |          |
|-----------|----------|----------|-------|-------|----------|----------|----------|
| CCER2.7   | 2.18E-14 | -0.22074 | 0.001 | 0.06  | 3.26E-10 | monocyte | CCER2    |
| SPPL3.6   | 2.19E-14 | -0.1049  | 0.096 | 0.206 | 3.27E-10 | monocyte | SPPL3    |
| UNC119B.3 | 2.21E-14 | -0.1381  | 0.005 | 0.068 | 3.30E-10 | monocyte | UNC119B  |
| PRADC1.6  | 2.27E-14 | -0.12503 | 0.112 | 0.226 | 3.39E-10 | monocyte | PRADC1   |
| SEPT3.7   | 2.29E-14 | -0.206   | 0.008 | 0.073 | 3.43E-10 | monocyte | 3-Sep    |
| JADE1.3   | 2.31E-14 | -0.13878 | 0.044 | 0.131 | 3.46E-10 | monocyte | JADE1    |
| IZUM04.4  | 2.32E-14 | -0.14654 | 0.007 | 0.072 | 3.47E-10 | monocyte | IZUM04   |
| CHRN1.7   | 2.35E-14 | -0.15884 | 0.062 | 0.156 | 3.51E-10 | monocyte | CHRN1    |
| CPSF7.2   | 2.37E-14 | -0.11363 | 0.09  | 0.195 | 3.53E-10 | monocyte | CPSF7    |
| CDC42EP3. | 2.37E-14 | -0.19494 | 0.045 | 0.131 | 3.54E-10 | monocyte | CDC42EP3 |
| SIX1.6    | 2.39E-14 | -0.15511 | 0.002 | 0.062 | 3.58E-10 | monocyte | SIX1     |
| RAB6B.7   | 2.44E-14 | -0.13596 | 0.006 | 0.07  | 3.64E-10 | monocyte | RAB6B    |
| GMIP.7    | 2.45E-14 | 0.26144  | 0.135 | 0.069 | 3.66E-10 | monocyte | GMIP     |
| MYT1L.8   | 2.46E-14 | -0.22578 | 0.003 | 0.064 | 3.67E-10 | monocyte | MYT1L    |
| LIN7B.6   | 2.50E-14 | -0.10493 | 0.043 | 0.129 | 3.73E-10 | monocyte | LIN7B    |
| RASAL3.7  | 2.50E-14 | 0.173005 | 0.113 | 0.052 | 3.74E-10 | monocyte | RASAL3   |
| TMUB2.2   | 2.51E-14 | -0.13279 | 0.144 | 0.27  | 3.75E-10 | monocyte | TMUB2    |
| FGD3.4    | 2.52E-14 | 0.182797 | 0.086 | 0.035 | 3.76E-10 | monocyte | FGD3     |
| IL13RA2.6 | 2.54E-14 | -0.27107 | 0.001 | 0.06  | 3.79E-10 | monocyte | IL13RA2  |
| PPP2R3A.4 | 2.58E-14 | -0.15682 | 0.004 | 0.065 | 3.86E-10 | monocyte | PPP2R3A  |
| TRAF3IP2. | 2.60E-14 | -0.19604 | 0.026 | 0.102 | 3.89E-10 | monocyte | TRAF3IP2 |
| RAB3IL1.5 | 2.61E-14 | 0.202788 | 0.075 | 0.029 | 3.90E-10 | monocyte | RAB3IL1  |
| CACFD1.6  | 2.61E-14 | -0.14657 | 0.02  | 0.093 | 3.90E-10 | monocyte | CACFD1   |
| TTI1.4    | 2.61E-14 | -0.13278 | 0.026 | 0.103 | 3.90E-10 | monocyte | TTI1     |
| TLR10.6   | 2.62E-14 | 0.194882 | 0.061 | 0.021 | 3.91E-10 | monocyte | TLR10    |
| ZDHHC15.6 | 2.64E-14 | -0.11299 | 0.004 | 0.066 | 3.94E-10 | monocyte | ZDHHC15  |
| B4GALT1.8 | 2.64E-14 | 0.380448 | 0.195 | 0.114 | 3.95E-10 | monocyte | B4GALT1  |
| DLEU1.2   | 2.67E-14 | -0.12074 | 0.021 | 0.095 | 3.99E-10 | monocyte | DLEU1    |
| PARP10.4  | 2.69E-14 | 0.309267 | 0.15  | 0.081 | 4.02E-10 | monocyte | PARP10   |
| RALBP1.3  | 2.71E-14 | -0.13405 | 0.178 | 0.314 | 4.04E-10 | monocyte | RALBP1   |
| CDADC1.3  | 2.73E-14 | -0.16961 | 0.032 | 0.113 | 4.08E-10 | monocyte | CDADC1   |
| CD63.7    | 2.74E-14 | 0.22985  | 0.943 | 0.923 | 4.09E-10 | monocyte | CD63     |
| CDK5RAP1. | 2.75E-14 | -0.11966 | 0.068 | 0.166 | 4.10E-10 | monocyte | CDK5RAP1 |
| GTF3C5.5  | 2.80E-14 | -0.10217 | 0.089 | 0.195 | 4.18E-10 | monocyte | GTF3C5   |
| TPX2.7    | 2.83E-14 | -0.24382 | 0.018 | 0.088 | 4.23E-10 | monocyte | TPX2     |
| ETFDH.4   | 2.84E-14 | -0.23131 | 0.044 | 0.129 | 4.24E-10 | monocyte | ETFDH    |
| MZT1.4    | 2.84E-14 | -0.12433 | 0.144 | 0.265 | 4.25E-10 | monocyte | MZT1     |
| POGZ.6    | 2.89E-14 | -0.10355 | 0.105 | 0.22  | 4.31E-10 | monocyte | POGZ     |
| LAYN.6    | 2.89E-14 | -0.1286  | 0.002 | 0.061 | 4.32E-10 | monocyte | LAYN     |
| PPP1R11.2 | 2.90E-14 | -0.11394 | 0.225 | 0.372 | 4.33E-10 | monocyte | PPP1R11  |
| ARL13B.6  | 2.95E-14 | -0.16807 | 0.057 | 0.15  | 4.40E-10 | monocyte | ARL13B   |
| PHF23.6   | 2.96E-14 | -0.13696 | 0.105 | 0.216 | 4.42E-10 | monocyte | PHF23    |
| HOXA5.4   | 2.97E-14 | -0.20614 | 0.004 | 0.065 | 4.44E-10 | monocyte | HOXA5    |
| STX7.7    | 2.99E-14 | 0.430709 | 0.348 | 0.261 | 4.48E-10 | monocyte | STX7     |
| ABCB8.4   | 3.00E-14 | -0.14762 | 0.056 | 0.149 | 4.49E-10 | monocyte | ABCB8    |
| ARHGAP33. | 3.01E-14 | -0.14129 | 0.017 | 0.088 | 4.49E-10 | monocyte | ARHGAP33 |
| HTATIP2.8 | 3.01E-14 | 0.391281 | 0.222 | 0.14  | 4.50E-10 | monocyte | HTATIP2  |
| SLBP.6    | 3.02E-14 | -0.14808 | 0.189 | 0.322 | 4.51E-10 | monocyte | SLBP     |
| BCAP31.4  | 3.03E-14 | 0.343059 | 0.614 | 0.619 | 4.53E-10 | monocyte | BCAP31   |
| SLC30A5.4 | 3.07E-14 | -0.10046 | 0.103 | 0.214 | 4.58E-10 | monocyte | SLC30A5  |
| GFOD1.2   | 3.07E-14 | -0.17754 | 0.008 | 0.073 | 4.59E-10 | monocyte | GFOD1    |

|            |          |          |       |       |          |          |           |
|------------|----------|----------|-------|-------|----------|----------|-----------|
| FAM69B.5   | 3.11E-14 | -0.11498 | 0.003 | 0.063 | 4.65E-10 | monocyte | FAM69B    |
| GTPBP6.3   | 3.17E-14 | -0.10712 | 0.109 | 0.221 | 4.73E-10 | monocyte | GTPBP6    |
| SSBP4.4    | 3.17E-14 | -0.14626 | 0.158 | 0.28  | 4.74E-10 | monocyte | SSBP4     |
| PCDHB14.4  | 3.19E-14 | -0.1671  | 0.001 | 0.059 | 4.76E-10 | monocyte | PCDHB14   |
| FAM200A.5  | 3.22E-14 | -0.17869 | 0.026 | 0.102 | 4.81E-10 | monocyte | FAM200A   |
| DPP7.8     | 3.25E-14 | 0.366055 | 0.495 | 0.464 | 4.86E-10 | monocyte | DPP7      |
| ZBED3.5    | 3.26E-14 | -0.1556  | 0.021 | 0.094 | 4.87E-10 | monocyte | ZBED3     |
| SH3BP1.8   | 3.29E-14 | 0.317195 | 0.182 | 0.106 | 4.92E-10 | monocyte | SH3BP1    |
| CENPN.5    | 3.30E-14 | -0.21548 | 0.021 | 0.093 | 4.93E-10 | monocyte | CENPN     |
| CEP85L.4   | 3.31E-14 | -0.171   | 0.038 | 0.12  | 4.94E-10 | monocyte | CEP85L    |
| NDRG1.4    | 3.40E-14 | -0.35743 | 0.085 | 0.179 | 5.08E-10 | monocyte | NDRG1     |
| NT5E.3     | 3.44E-14 | -0.16677 | 0.005 | 0.067 | 5.15E-10 | monocyte | NT5E      |
| KLF12.6    | 3.55E-14 | -0.14596 | 0.019 | 0.091 | 5.31E-10 | monocyte | KLF12     |
| NDUFB4.3   | 3.61E-14 | -0.11324 | 0.511 | 0.695 | 5.39E-10 | monocyte | NDUFB4    |
| RNF219.4   | 3.62E-14 | -0.14916 | 0.039 | 0.121 | 5.41E-10 | monocyte | RNF219    |
| C1QTNF4.6  | 3.62E-14 | -0.1779  | 0.002 | 0.061 | 5.42E-10 | monocyte | C1QTNF4   |
| PDLIM4.6   | 3.63E-14 | -0.25866 | 0.011 | 0.078 | 5.42E-10 | monocyte | PDLIM4    |
| NEK1.5     | 3.67E-14 | -0.10654 | 0.046 | 0.133 | 5.48E-10 | monocyte | NEK1      |
| VPS37D.6   | 3.67E-14 | -0.14658 | 0.004 | 0.065 | 5.49E-10 | monocyte | VPS37D    |
| ZNF268.6   | 3.72E-14 | -0.17649 | 0.041 | 0.124 | 5.56E-10 | monocyte | ZNF268    |
| OTUD6B.5   | 3.88E-14 | -0.13995 | 0.042 | 0.126 | 5.79E-10 | monocyte | OTUD6B    |
| CACNA1A.7  | 3.90E-14 | -0.23728 | 0.026 | 0.102 | 5.82E-10 | monocyte | CACNA1A   |
| MAFG-AS1.3 | 3.90E-14 | -0.11215 | 0.007 | 0.071 | 5.82E-10 | monocyte | MAFG-AS1  |
| PSMC3IP.7  | 3.93E-14 | -0.18388 | 0.01  | 0.076 | 5.87E-10 | monocyte | PSMC3IP   |
| ARHGEF4.5  | 3.97E-14 | -0.13129 | 0.001 | 0.059 | 5.93E-10 | monocyte | ARHGEF4   |
| OGFRL1.8   | 4.00E-14 | 0.339402 | 0.263 | 0.174 | 5.97E-10 | monocyte | OGFRL1    |
| MSH2.5     | 4.03E-14 | -0.11239 | 0.04  | 0.123 | 6.02E-10 | monocyte | MSH2      |
| PHIP.5     | 4.04E-14 | -0.14439 | 0.207 | 0.343 | 6.04E-10 | monocyte | PHIP      |
| BLM.3      | 4.05E-14 | -0.12787 | 0.016 | 0.086 | 6.05E-10 | monocyte | BLM       |
| NF1.4      | 4.06E-14 | -0.10108 | 0.117 | 0.233 | 6.07E-10 | monocyte | NF1       |
| PCDH1.5    | 4.14E-14 | -0.14251 | 0.004 | 0.064 | 6.18E-10 | monocyte | PCDH1     |
| MTMR11.3   | 4.21E-14 | -0.1531  | 0.01  | 0.076 | 6.30E-10 | monocyte | MTMR11    |
| STRBP.8    | 4.23E-14 | -0.15414 | 0.047 | 0.133 | 6.32E-10 | monocyte | STRBP     |
| PPM1M.8    | 4.24E-14 | 0.274465 | 0.135 | 0.069 | 6.33E-10 | monocyte | PPM1M     |
| LINC00685  | 4.28E-14 | -0.15384 | 0.063 | 0.157 | 6.40E-10 | monocyte | LINC00685 |
| CBX4.8     | 4.31E-14 | -0.13987 | 0.039 | 0.122 | 6.43E-10 | monocyte | CBX4      |
| HOXA3.7    | 4.37E-14 | -0.18873 | 0.002 | 0.061 | 6.52E-10 | monocyte | HOXA3     |
| PIK3CG.5   | 4.38E-14 | 0.132714 | 0.056 | 0.019 | 6.55E-10 | monocyte | PIK3CG    |
| AASDH.4    | 4.41E-14 | -0.10569 | 0.074 | 0.172 | 6.59E-10 | monocyte | AASDH     |
| MIS12.5    | 4.49E-14 | -0.11124 | 0.057 | 0.149 | 6.71E-10 | monocyte | MIS12     |
| SPC25.7    | 4.53E-14 | -0.18705 | 0.005 | 0.067 | 6.77E-10 | monocyte | SPC25     |
| GTPBP4.1   | 4.54E-14 | -0.12424 | 0.109 | 0.222 | 6.79E-10 | monocyte | GTPBP4    |
| CROT.5     | 4.55E-14 | -0.17316 | 0.051 | 0.139 | 6.80E-10 | monocyte | CROT      |
| SPA17.6    | 4.66E-14 | -0.18838 | 0.017 | 0.086 | 6.96E-10 | monocyte | SPA17     |
| NUP35.3    | 4.66E-14 | -0.14378 | 0.037 | 0.119 | 6.97E-10 | monocyte | NUP35     |
| UBE2Q2.3   | 4.77E-14 | -0.10386 | 0.104 | 0.214 | 7.13E-10 | monocyte | UBE2Q2    |
| NFAM1.6    | 4.78E-14 | 0.199519 | 0.076 | 0.03  | 7.14E-10 | monocyte | NFAM1     |
| AADAT.5    | 4.79E-14 | -0.12824 | 0     | 0.056 | 7.15E-10 | monocyte | AADAT     |
| SRPX2.6    | 4.80E-14 | -0.21357 | 0.003 | 0.063 | 7.17E-10 | monocyte | SRPX2     |
| RNF13.6    | 4.85E-14 | 0.433294 | 0.514 | 0.478 | 7.25E-10 | monocyte | RNF13     |
| EIF4G1.3   | 4.87E-14 | -0.11484 | 0.16  | 0.288 | 7.28E-10 | monocyte | EIF4G1    |

|           |          |          |       |       |          |          |               |
|-----------|----------|----------|-------|-------|----------|----------|---------------|
| ZNF568.6  | 5.01E-14 | -0.12304 | 0.027 | 0.104 | 7.49E-10 | monocyte | ZNF568        |
| PWAR6.5   | 5.02E-14 | -0.14394 | 0.011 | 0.078 | 7.50E-10 | monocyte | PWAR6         |
| NUP160.5  | 5.04E-14 | -0.13918 | 0.072 | 0.17  | 7.53E-10 | monocyte | NUP160        |
| NDUF4F4.5 | 5.11E-14 | -0.12565 | 0.116 | 0.231 | 7.64E-10 | monocyte | NDUF4F4       |
| ZNF639.7  | 5.16E-14 | -0.16276 | 0.054 | 0.144 | 7.71E-10 | monocyte | ZNF639        |
| HES1.5    | 5.38E-14 | -0.19041 | 0.099 | 0.205 | 8.05E-10 | monocyte | HES1          |
| GDPD1.6   | 5.41E-14 | -0.14038 | 0.008 | 0.072 | 8.09E-10 | monocyte | GDPD1         |
| MBIP.6    | 5.59E-14 | -0.17621 | 0.087 | 0.188 | 8.36E-10 | monocyte | MBIP          |
| IFT46.4   | 5.63E-14 | -0.14815 | 0.035 | 0.116 | 8.42E-10 | monocyte | IFT46         |
| DNAJB5.3  | 5.67E-14 | -0.15657 | 0.017 | 0.086 | 8.48E-10 | monocyte | DNAJB5        |
| FAF1.2    | 5.68E-14 | -0.12501 | 0.074 | 0.173 | 8.49E-10 | monocyte | FAF1          |
| FXR1.1    | 5.78E-14 | -0.12054 | 0.199 | 0.338 | 8.63E-10 | monocyte | FXR1          |
| AGBL5.2   | 5.79E-14 | -0.13574 | 0.019 | 0.089 | 8.65E-10 | monocyte | AGBL5         |
| FBXL3.4   | 5.95E-14 | -0.1551  | 0.082 | 0.184 | 8.89E-10 | monocyte | FBXL3         |
| MKS1.1    | 6.22E-14 | -0.15985 | 0.023 | 0.096 | 9.29E-10 | monocyte | MKS1          |
| SAMD10.4  | 6.24E-14 | -0.12536 | 0.003 | 0.062 | 9.32E-10 | monocyte | SAMD10        |
| RRM2.7    | 6.26E-14 | -0.24584 | 0.006 | 0.068 | 9.36E-10 | monocyte | RRM2          |
| CCL4.7    | 6.39E-14 | 0.576064 | 0.416 | 0.316 | 9.55E-10 | monocyte | CCL4          |
| ZNF577.6  | 6.46E-14 | -0.12872 | 0.024 | 0.098 | 9.65E-10 | monocyte | ZNF577        |
| RILP.8    | 6.57E-14 | 0.293549 | 0.169 | 0.097 | 9.82E-10 | monocyte | RILP          |
| SHROOM1.1 | 6.83E-14 | -0.14919 | 0.006 | 0.068 | 1.02E-09 | monocyte | SHROOM1       |
| TACC2.5   | 6.83E-14 | -0.1465  | 0.003 | 0.062 | 1.02E-09 | monocyte | TACC2         |
| KLF7.6    | 6.84E-14 | -0.10897 | 0.104 | 0.215 | 1.02E-09 | monocyte | KLF7          |
| GSG1L.5   | 6.85E-14 | -0.19296 | 0.004 | 0.064 | 1.02E-09 | monocyte | GSG1L         |
| MLH1.3    | 6.93E-14 | -0.17571 | 0.066 | 0.16  | 1.04E-09 | monocyte | MLH1          |
| ANLN.7    | 7.00E-14 | -0.26101 | 0.006 | 0.067 | 1.05E-09 | monocyte | ANLN          |
| CHMP6.3   | 7.02E-14 | -0.13769 | 0.098 | 0.204 | 1.05E-09 | monocyte | CHMP6         |
| ITGB5.6   | 7.06E-14 | 0.254457 | 0.11  | 0.052 | 1.05E-09 | monocyte | ITGB5         |
| METTL6.1  | 7.16E-14 | -0.17227 | 0.032 | 0.11  | 1.07E-09 | monocyte | METTL6        |
| CACNB3.5  | 7.17E-14 | -0.14697 | 0.005 | 0.065 | 1.07E-09 | monocyte | CACNB3        |
| AMH.6     | 7.22E-14 | -0.13251 | 0.003 | 0.062 | 1.08E-09 | monocyte | AMH           |
| RP11-1114 | 7.29E-14 | -0.13942 | 0.019 | 0.09  | 1.09E-09 | monocyte | RP11-1114A5.4 |
| CREBL2.6  | 7.43E-14 | 0.439432 | 0.265 | 0.182 | 1.11E-09 | monocyte | CREBL2        |
| PTGDS.5   | 7.43E-14 | -0.56989 | 0.084 | 0.178 | 1.11E-09 | monocyte | PTGDS         |
| CEP170.4  | 7.56E-14 | -0.15653 | 0.151 | 0.271 | 1.13E-09 | monocyte | CEP170        |
| GFAP.5    | 7.56E-14 | -0.20939 | 0.222 | 0.361 | 1.13E-09 | monocyte | GFAP          |
| MARC1.6   | 7.58E-14 | -0.12256 | 0.004 | 0.064 | 1.13E-09 | monocyte | 1-Mar         |
| BRAT1.3   | 7.60E-14 | -0.1273  | 0.088 | 0.192 | 1.14E-09 | monocyte | BRAT1         |
| TSKU.5    | 7.62E-14 | -0.13602 | 0.02  | 0.091 | 1.14E-09 | monocyte | TSKU          |
| DLX6.8    | 7.67E-14 | -0.21908 | 0.003 | 0.062 | 1.15E-09 | monocyte | DLX6          |
| LILRA1.1  | 7.74E-14 | 0.165963 | 0.045 | 0.013 | 1.16E-09 | monocyte | LILRA1        |
| UBA5.3    | 7.91E-14 | -0.13629 | 0.091 | 0.193 | 1.18E-09 | monocyte | UBA5          |
| PHTF1.3   | 7.93E-14 | -0.11436 | 0.043 | 0.128 | 1.18E-09 | monocyte | PHTF1         |
| NCDN.4    | 8.54E-14 | -0.11458 | 0.023 | 0.096 | 1.28E-09 | monocyte | NCDN          |
| JOSD2.6   | 8.69E-14 | -0.14907 | 0.21  | 0.346 | 1.30E-09 | monocyte | JOSD2         |
| ANKLE2.2  | 8.75E-14 | -0.12003 | 0.086 | 0.188 | 1.31E-09 | monocyte | ANKLE2        |
| LARP1.3   | 8.81E-14 | -0.14096 | 0.144 | 0.262 | 1.32E-09 | monocyte | LARP1         |
| KLF4.8    | 8.81E-14 | -0.23568 | 0.112 | 0.215 | 1.32E-09 | monocyte | KLF4          |
| ANKZF1.5  | 8.82E-14 | -0.19145 | 0.053 | 0.141 | 1.32E-09 | monocyte | ANKZF1        |
| KIF22.4   | 8.85E-14 | -0.12841 | 0.099 | 0.205 | 1.32E-09 | monocyte | KIF22         |
| CHMP1A.4  | 8.93E-14 | -0.13281 | 0.158 | 0.284 | 1.33E-09 | monocyte | CHMP1A        |

|            |           |           |        |        |           |          |           |
|------------|-----------|-----------|--------|--------|-----------|----------|-----------|
| NFS1. 3    | 8. 97E-14 | -0. 12388 | 0. 052 | 0. 141 | 1. 34E-09 | monocyte | NFS1      |
| HEBP2. 4   | 8. 98E-14 | -0. 13162 | 0. 118 | 0. 228 | 1. 34E-09 | monocyte | HEBP2     |
| MPG. 2     | 9. 02E-14 | -0. 11086 | 0. 217 | 0. 356 | 1. 35E-09 | monocyte | MPG       |
| LDOC1L. 6  | 9. 48E-14 | -0. 11826 | 0. 021 | 0. 092 | 1. 42E-09 | monocyte | LDOC1L    |
| LTF. 5     | 9. 50E-14 | -0. 61065 | 0. 068 | 0. 158 | 1. 42E-09 | monocyte | LTF       |
| AZGP1. 6   | 9. 54E-14 | -0. 26287 | 0. 003 | 0. 061 | 1. 43E-09 | monocyte | AZGP1     |
| FUT8. 4    | 9. 77E-14 | -0. 1868  | 0. 047 | 0. 131 | 1. 46E-09 | monocyte | FUT8      |
| RAB9B. 5   | 9. 77E-14 | -0. 16375 | 0. 001 | 0. 057 | 1. 46E-09 | monocyte | RAB9B     |
| UCK1. 3    | 1. 00E-13 | -0. 11925 | 0. 089 | 0. 193 | 1. 50E-09 | monocyte | UCK1      |
| COG6. 2    | 1. 01E-13 | -0. 12135 | 0. 026 | 0. 101 | 1. 50E-09 | monocyte | COG6      |
| FOPNL. 3   | 1. 01E-13 | -0. 12647 | 0. 097 | 0. 202 | 1. 51E-09 | monocyte | FOPNL     |
| RBM15B. 6  | 1. 01E-13 | -0. 13553 | 0. 08  | 0. 179 | 1. 51E-09 | monocyte | RBM15B    |
| FGF9. 7    | 1. 01E-13 | -0. 19738 | 0      | 0. 055 | 1. 52E-09 | monocyte | FGF9      |
| GMPS. 3    | 1. 02E-13 | -0. 11242 | 0. 091 | 0. 193 | 1. 52E-09 | monocyte | GMPS      |
| MIR4458HG  | 1. 03E-13 | -0. 25126 | 0. 075 | 0. 168 | 1. 54E-09 | monocyte | MIR4458HG |
| RAB13. 7   | 1. 03E-13 | -0. 25669 | 0. 248 | 0. 382 | 1. 54E-09 | monocyte | RAB13     |
| CSRNP2. 3  | 1. 07E-13 | -0. 11877 | 0. 021 | 0. 092 | 1. 60E-09 | monocyte | CSRNP2    |
| AAR2. 3    | 1. 07E-13 | -0. 12472 | 0. 054 | 0. 144 | 1. 60E-09 | monocyte | AAR2      |
| ZNF181. 5  | 1. 09E-13 | -0. 17848 | 0. 028 | 0. 103 | 1. 62E-09 | monocyte | ZNF181    |
| ABCA3. 5   | 1. 11E-13 | -0. 12814 | 0. 015 | 0. 082 | 1. 65E-09 | monocyte | ABCA3     |
| EGR2. 5    | 1. 11E-13 | -0. 11597 | 0. 097 | 0. 2   | 1. 66E-09 | monocyte | EGR2      |
| TOP2A. 8   | 1. 12E-13 | -0. 31286 | 0. 022 | 0. 092 | 1. 68E-09 | monocyte | TOP2A     |
| FKBP1B. 3  | 1. 13E-13 | -0. 15365 | 0. 046 | 0. 129 | 1. 69E-09 | monocyte | FKBP1B    |
| NUP54. 4   | 1. 13E-13 | -0. 13407 | 0. 085 | 0. 186 | 1. 69E-09 | monocyte | NUP54     |
| PURA. 6    | 1. 15E-13 | -0. 13189 | 0. 109 | 0. 217 | 1. 72E-09 | monocyte | PURA      |
| IPP. 5     | 1. 15E-13 | -0. 12107 | 0. 005 | 0. 065 | 1. 72E-09 | monocyte | IPP       |
| ZNF420. 6  | 1. 17E-13 | -0. 1652  | 0. 034 | 0. 113 | 1. 75E-09 | monocyte | ZNF420    |
| SERP1. 6   | 1. 18E-13 | 0. 307421 | 0. 593 | 0. 605 | 1. 76E-09 | monocyte | SERP1     |
| TANC2. 4   | 1. 18E-13 | -0. 1169  | 0. 092 | 0. 197 | 1. 77E-09 | monocyte | TANC2     |
| CDC20. 6   | 1. 20E-13 | -0. 25092 | 0. 01  | 0. 073 | 1. 79E-09 | monocyte | CDC20     |
| FAM219A. 4 | 1. 20E-13 | -0. 11609 | 0. 024 | 0. 097 | 1. 79E-09 | monocyte | FAM219A   |
| IL2RA. 6   | 1. 21E-13 | 0. 451156 | 0. 072 | 0. 028 | 1. 81E-09 | monocyte | IL2RA     |
| ZNF227. 3  | 1. 22E-13 | -0. 15141 | 0. 029 | 0. 105 | 1. 82E-09 | monocyte | ZNF227    |
| MAP3K7. 4  | 1. 22E-13 | -0. 11509 | 0. 105 | 0. 214 | 1. 83E-09 | monocyte | MAP3K7    |
| SHMT2. 5   | 1. 23E-13 | -0. 17534 | 0. 126 | 0. 24  | 1. 84E-09 | monocyte | SHMT2     |
| SLC16A4. 2 | 1. 23E-13 | -0. 12158 | 0. 006 | 0. 067 | 1. 84E-09 | monocyte | SLC16A4   |
| UBQLN1. 4  | 1. 23E-13 | -0. 15039 | 0. 167 | 0. 292 | 1. 84E-09 | monocyte | UBQLN1    |
| NFAT5. 2   | 1. 24E-13 | -0. 10028 | 0. 054 | 0. 143 | 1. 85E-09 | monocyte | NFAT5     |
| TMEM259. 3 | 1. 26E-13 | -0. 11789 | 0. 206 | 0. 347 | 1. 88E-09 | monocyte | TMEM259   |
| CLIC2. 5   | 1. 26E-13 | 0. 245358 | 0. 091 | 0. 04  | 1. 89E-09 | monocyte | CLIC2     |
| KAT5. 3    | 1. 27E-13 | -0. 10965 | 0. 141 | 0. 261 | 1. 89E-09 | monocyte | KAT5      |
| TRPC4AP. 5 | 1. 29E-13 | -0. 11908 | 0. 139 | 0. 26  | 1. 93E-09 | monocyte | TRPC4AP   |
| RAD54L2. 5 | 1. 29E-13 | -0. 13041 | 0. 034 | 0. 113 | 1. 93E-09 | monocyte | RAD54L2   |
| DNAJC6. 4  | 1. 32E-13 | -0. 15808 | 0. 001 | 0. 057 | 1. 97E-09 | monocyte | DNAJC6    |
| PRKAA2. 7  | 1. 32E-13 | -0. 12785 | 0. 001 | 0. 056 | 1. 97E-09 | monocyte | PRKAA2    |
| HDLBP. 4   | 1. 33E-13 | -0. 12058 | 0. 208 | 0. 347 | 1. 98E-09 | monocyte | HDLBP     |
| KCND3. 6   | 1. 34E-13 | -0. 12746 | 0. 004 | 0. 063 | 2. 00E-09 | monocyte | KCND3     |
| DPF2. 4    | 1. 34E-13 | -0. 13342 | 0. 119 | 0. 233 | 2. 00E-09 | monocyte | DPF2      |
| ERC1. 2    | 1. 35E-13 | -0. 125   | 0. 045 | 0. 128 | 2. 02E-09 | monocyte | ERC1      |
| ASIC1. 6   | 1. 36E-13 | -0. 16744 | 0. 001 | 0. 056 | 2. 03E-09 | monocyte | ASIC1     |
| ATRN. 3    | 1. 37E-13 | -0. 11309 | 0. 046 | 0. 131 | 2. 04E-09 | monocyte | ATRN      |



|            |          |          |       |       |          |          |               |
|------------|----------|----------|-------|-------|----------|----------|---------------|
| CLK4.4     | 1.38E-13 | -0.15184 | 0.074 | 0.17  | 2.06E-09 | monocyte | CLK4          |
| SCAMP1.6   | 1.40E-13 | -0.14832 | 0.114 | 0.223 | 2.09E-09 | monocyte | SCAMP1        |
| ASB8.5     | 1.40E-13 | -0.15713 | 0.117 | 0.226 | 2.09E-09 | monocyte | ASB8          |
| FTSJ1.1    | 1.41E-13 | -0.13224 | 0.055 | 0.144 | 2.10E-09 | monocyte | FTSJ1         |
| ZNF708.5   | 1.42E-13 | -0.1205  | 0.028 | 0.104 | 2.12E-09 | monocyte | ZNF708        |
| WDR92.4    | 1.44E-13 | -0.14858 | 0.017 | 0.085 | 2.15E-09 | monocyte | WDR92         |
| LRCH3.5    | 1.44E-13 | -0.13634 | 0.056 | 0.145 | 2.15E-09 | monocyte | LRCH3         |
| GTSE1.6    | 1.46E-13 | -0.19138 | 0.004 | 0.062 | 2.18E-09 | monocyte | GTSE1         |
| ZC3H14.5   | 1.46E-13 | -0.12248 | 0.103 | 0.212 | 2.18E-09 | monocyte | ZC3H14        |
| SEMA3E.4   | 1.51E-13 | -0.12791 | 0.001 | 0.056 | 2.26E-09 | monocyte | SEMA3E        |
| PLCE1.5    | 1.53E-13 | -0.12304 | 0.008 | 0.07  | 2.28E-09 | monocyte | PLCE1         |
| SERPINB9.1 | 1.53E-13 | 0.322426 | 0.228 | 0.139 | 2.29E-09 | monocyte | SERPINB9      |
| SLC35E3.7  | 1.54E-13 | -0.22284 | 0.096 | 0.195 | 2.30E-09 | monocyte | SLC35E3       |
| PPP1R37.5  | 1.57E-13 | -0.16945 | 0.054 | 0.141 | 2.34E-09 | monocyte | PPP1R37       |
| KCNJ10.6   | 1.57E-13 | -0.19989 | 0.001 | 0.056 | 2.35E-09 | monocyte | KCNJ10        |
| SEMA3A.2   | 1.59E-13 | -0.10015 | 0     | 0.054 | 2.38E-09 | monocyte | SEMA3A        |
| FOXO1.4    | 1.59E-13 | -0.1566  | 0.014 | 0.079 | 2.38E-09 | monocyte | FOXO1         |
| DACT3.6    | 1.60E-13 | -0.16051 | 0.016 | 0.082 | 2.39E-09 | monocyte | DACT3         |
| PFDN5.6    | 1.65E-13 | 0.253085 | 0.841 | 0.888 | 2.46E-09 | monocyte | PFDN5         |
| PTPN18.8   | 1.65E-13 | 0.400934 | 0.285 | 0.204 | 2.47E-09 | monocyte | PTPN18        |
| REV1.5     | 1.67E-13 | -0.13738 | 0.078 | 0.175 | 2.49E-09 | monocyte | REV1          |
| RP11-379H  | 1.67E-13 | -0.13862 | 0.013 | 0.077 | 2.49E-09 | monocyte | RP11-379H18.1 |
| TUBE1.3    | 1.67E-13 | -0.15266 | 0.026 | 0.1   | 2.50E-09 | monocyte | TUBE1         |
| RNF40.2    | 1.69E-13 | -0.12296 | 0.084 | 0.184 | 2.53E-09 | monocyte | RNF40         |
| RMND5B.4   | 1.71E-13 | -0.14932 | 0.076 | 0.172 | 2.55E-09 | monocyte | RMND5B        |
| DDHD2.5    | 1.71E-13 | -0.15577 | 0.034 | 0.112 | 2.55E-09 | monocyte | DDHD2         |
| CLIP1.1    | 1.73E-13 | -0.16494 | 0.115 | 0.223 | 2.58E-09 | monocyte | CLIP1         |
| GOLT1B.5   | 1.73E-13 | -0.10407 | 0.132 | 0.247 | 2.58E-09 | monocyte | GOLT1B        |
| SLC9A3R1.1 | 1.74E-13 | -0.19763 | 0.067 | 0.157 | 2.59E-09 | monocyte | SLC9A3R1      |
| POM121C.5  | 1.75E-13 | -0.10796 | 0.058 | 0.148 | 2.61E-09 | monocyte | POM121C       |
| TMEM52B.8  | 1.76E-13 | 0.286004 | 0.095 | 0.043 | 2.63E-09 | monocyte | TMEM52B       |
| HECTD4.4   | 1.76E-13 | -0.15192 | 0.024 | 0.096 | 2.63E-09 | monocyte | HECTD4        |
| PIP4K2B.3  | 1.76E-13 | -0.10477 | 0.032 | 0.109 | 2.63E-09 | monocyte | PIP4K2B       |
| ADAM22.7   | 1.78E-13 | -0.16137 | 0.007 | 0.068 | 2.66E-09 | monocyte | ADAM22        |
| FHOD1.8    | 1.78E-13 | 0.238501 | 0.108 | 0.052 | 2.66E-09 | monocyte | FHOD1         |
| DNASE1.5   | 1.78E-13 | -0.173   | 0.019 | 0.087 | 2.67E-09 | monocyte | DNASE1        |
| UROD.4     | 1.79E-13 | -0.10917 | 0.225 | 0.371 | 2.67E-09 | monocyte | UROD          |
| CASP2.3    | 1.79E-13 | -0.13677 | 0.03  | 0.106 | 2.67E-09 | monocyte | CASP2         |
| MCAT.6     | 1.79E-13 | -0.14554 | 0.05  | 0.136 | 2.67E-09 | monocyte | MCAT          |
| MANSC1.4   | 1.80E-13 | -0.13406 | 0.004 | 0.062 | 2.69E-09 | monocyte | MANSC1        |
| TP53BP1.4  | 1.81E-13 | -0.12239 | 0.028 | 0.103 | 2.71E-09 | monocyte | TP53BP1       |
| GPX8.7     | 1.84E-13 | -0.13708 | 0.007 | 0.068 | 2.75E-09 | monocyte | GPX8          |
| C1orf216.1 | 1.85E-13 | -0.12061 | 0.05  | 0.135 | 2.76E-09 | monocyte | C1orf216      |
| NACC2.5    | 1.87E-13 | -0.14167 | 0.032 | 0.109 | 2.79E-09 | monocyte | NACC2         |
| ITM2A.7    | 1.93E-13 | -0.26848 | 0.003 | 0.06  | 2.88E-09 | monocyte | ITM2A         |
| MCHR1.5    | 1.97E-13 | -0.12242 | 0.005 | 0.063 | 2.95E-09 | monocyte | MCHR1         |
| FAM222B.6  | 1.98E-13 | -0.13135 | 0.04  | 0.12  | 2.96E-09 | monocyte | FAM222B       |
| ACBD3.3    | 2.03E-13 | -0.17135 | 0.085 | 0.182 | 3.04E-09 | monocyte | ACBD3         |
| DLG4.3     | 2.03E-13 | -0.14204 | 0.014 | 0.079 | 3.04E-09 | monocyte | DLG4          |
| CCNB1.6    | 2.05E-13 | -0.2388  | 0.025 | 0.096 | 3.06E-09 | monocyte | CCNB1         |
| YY1.6      | 2.06E-13 | -0.11592 | 0.213 | 0.351 | 3.08E-09 | monocyte | YY1           |

|             |          |          |       |       |          |          |             |
|-------------|----------|----------|-------|-------|----------|----------|-------------|
| PTPRK. 5    | 2.09E-13 | -0.22485 | 0.004 | 0.061 | 3.12E-09 | monocyte | PTPRK       |
| ZC3H6. 6    | 2.10E-13 | -0.10463 | 0.063 | 0.154 | 3.14E-09 | monocyte | ZC3H6       |
| ZNF253. 6   | 2.10E-13 | -0.13099 | 0.02  | 0.089 | 3.14E-09 | monocyte | ZNF253      |
| PDGFB. 5    | 2.12E-13 | 0.192242 | 0.094 | 0.041 | 3.16E-09 | monocyte | PDGFB       |
| RP1-79C4. 2 | 2.12E-13 | -0.11316 | 0.001 | 0.056 | 3.17E-09 | monocyte | RP1-79C4. 4 |
| CA8. 7      | 2.14E-13 | -0.21889 | 0.003 | 0.06  | 3.20E-09 | monocyte | CA8         |
| MED16. 4    | 2.18E-13 | -0.12096 | 0.072 | 0.167 | 3.26E-09 | monocyte | MED16       |
| ELMO2. 5    | 2.18E-13 | -0.10117 | 0.049 | 0.135 | 3.26E-09 | monocyte | ELMO2       |
| STK32A. 5   | 2.20E-13 | -0.10736 | 0.003 | 0.06  | 3.28E-09 | monocyte | STK32A      |
| TPD52. 6    | 2.26E-13 | -0.22804 | 0.134 | 0.245 | 3.38E-09 | monocyte | TPD52       |
| FH. 4       | 2.27E-13 | -0.12955 | 0.121 | 0.235 | 3.39E-09 | monocyte | FH          |
| ID3. 7      | 2.27E-13 | -0.27348 | 0.165 | 0.273 | 3.39E-09 | monocyte | ID3         |
| MOXD1. 6    | 2.27E-13 | -0.13677 | 0.002 | 0.058 | 3.40E-09 | monocyte | MOXD1       |
| TMEM160. 7  | 2.32E-13 | -0.1281  | 0.323 | 0.478 | 3.46E-09 | monocyte | TMEM160     |
| MIF. 5      | 2.32E-13 | -0.16281 | 0.518 | 0.684 | 3.47E-09 | monocyte | MIF         |
| XKR4. 6     | 2.34E-13 | -0.16306 | 0.004 | 0.061 | 3.50E-09 | monocyte | XKR4        |
| SCAF1. 5    | 2.34E-13 | -0.11316 | 0.068 | 0.161 | 3.50E-09 | monocyte | SCAF1       |
| CCAR2. 3    | 2.36E-13 | -0.1207  | 0.063 | 0.154 | 3.53E-09 | monocyte | CCAR2       |
| SENP5. 4    | 2.37E-13 | -0.13291 | 0.057 | 0.145 | 3.54E-09 | monocyte | SENP5       |
| FAM184A. 4  | 2.37E-13 | -0.12237 | 0.001 | 0.055 | 3.54E-09 | monocyte | FAM184A     |
| GTF2H3. 3   | 2.38E-13 | -0.1293  | 0.058 | 0.149 | 3.55E-09 | monocyte | GTF2H3      |
| SMPD1. 5    | 2.39E-13 | -0.14157 | 0.133 | 0.246 | 3.58E-09 | monocyte | SMPD1       |
| SHROOM2. 7  | 2.40E-13 | -0.12485 | 0.005 | 0.064 | 3.58E-09 | monocyte | SHROOM2     |
| MSL1. 3     | 2.41E-13 | -0.12277 | 0.072 | 0.166 | 3.61E-09 | monocyte | MSL1        |
| NEDD4L. 6   | 2.49E-13 | -0.14498 | 0.041 | 0.119 | 3.72E-09 | monocyte | NEDD4L      |
| PDK2. 3     | 2.49E-13 | -0.16652 | 0.077 | 0.172 | 3.72E-09 | monocyte | PDK2        |
| TMEM184B. 2 | 2.51E-13 | -0.15449 | 0.057 | 0.145 | 3.76E-09 | monocyte | TMEM184B    |
| EIF2S2. 5   | 2.54E-13 | -0.10179 | 0.435 | 0.601 | 3.80E-09 | monocyte | EIF2S2      |
| SWAP70. 8   | 2.59E-13 | 0.429751 | 0.295 | 0.216 | 3.87E-09 | monocyte | SWAP70      |
| ATP1A2. 5   | 2.59E-13 | -0.2943  | 0.007 | 0.067 | 3.87E-09 | monocyte | ATP1A2      |
| DDR2. 6     | 2.60E-13 | -0.1444  | 0.004 | 0.061 | 3.88E-09 | monocyte | DDR2        |
| RDH10. 7    | 2.60E-13 | -0.15036 | 0.022 | 0.091 | 3.89E-09 | monocyte | RDH10       |
| IGFBP6. 5   | 2.65E-13 | -0.22641 | 0.009 | 0.071 | 3.97E-09 | monocyte | IGFBP6      |
| SMAD5. 5    | 2.68E-13 | -0.12944 | 0.08  | 0.179 | 4.00E-09 | monocyte | SMAD5       |
| TBC1D2B. 6  | 2.70E-13 | 0.233732 | 0.101 | 0.047 | 4.04E-09 | monocyte | TBC1D2B     |
| ZNF334. 5   | 2.71E-13 | -0.14086 | 0.014 | 0.078 | 4.04E-09 | monocyte | ZNF334      |
| LRRK1. 2    | 2.72E-13 | 0.178899 | 0.044 | 0.013 | 4.06E-09 | monocyte | LRRK1       |
| DUSP8. 6    | 2.74E-13 | -0.159   | 0.001 | 0.055 | 4.10E-09 | monocyte | DUSP8       |
| RND1. 4     | 2.84E-13 | -0.15891 | 0.008 | 0.069 | 4.24E-09 | monocyte | RND1        |
| FAT3. 5     | 2.85E-13 | -0.1238  | 0.004 | 0.061 | 4.25E-09 | monocyte | FAT3        |
| BPNT1. 3    | 2.90E-13 | -0.16821 | 0.035 | 0.113 | 4.33E-09 | monocyte | BPNT1       |
| KATNAL1. 3  | 2.91E-13 | -0.10929 | 0.019 | 0.087 | 4.34E-09 | monocyte | KATNAL1     |
| DSCAM. 5    | 2.92E-13 | -0.1763  | 0.015 | 0.08  | 4.37E-09 | monocyte | DSCAM       |
| DDX6. 3     | 3.00E-13 | -0.10735 | 0.1   | 0.206 | 4.49E-09 | monocyte | DDX6        |
| ELK1. 2     | 3.01E-13 | -0.13361 | 0.031 | 0.106 | 4.49E-09 | monocyte | ELK1        |
| AMN1. 3     | 3.13E-13 | -0.12534 | 0.047 | 0.131 | 4.68E-09 | monocyte | AMN1        |
| RFXAP. 4    | 3.20E-13 | -0.15074 | 0.028 | 0.101 | 4.78E-09 | monocyte | RFXAP       |
| TMEM178B. 3 | 2.26E-13 | -0.13848 | 0.004 | 0.061 | 4.87E-09 | monocyte | TMEM178B    |
| TOX4        | 3.29E-13 | -0.12097 | 0.152 | 0.272 | 4.92E-09 | monocyte | TOX4        |
| RAB21. 3    | 3.29E-13 | -0.15142 | 0.108 | 0.212 | 4.92E-09 | monocyte | RAB21       |
| SYNE1. 4    | 3.29E-13 | -0.16927 | 0.047 | 0.129 | 4.92E-09 | monocyte | SYNE1       |

|            |          |          |       |       |          |          |          |
|------------|----------|----------|-------|-------|----------|----------|----------|
| ZNF136.6   | 3.41E-13 | -0.15303 | 0.029 | 0.103 | 5.09E-09 | monocyte | ZNF136   |
| ZNF48.6    | 3.41E-13 | -0.11891 | 0.029 | 0.102 | 5.09E-09 | monocyte | ZNF48    |
| PBK.8      | 3.47E-13 | -0.25888 | 0.015 | 0.079 | 5.19E-09 | monocyte | PBK      |
| CPNE1.1    | 3.57E-13 | -0.10629 | 0.212 | 0.35  | 5.34E-09 | monocyte | CPNE1    |
| OARD1.4    | 3.58E-13 | -0.13331 | 0.127 | 0.241 | 5.35E-09 | monocyte | OARD1    |
| MICALL2.3  | 3.59E-13 | -0.11712 | 0.011 | 0.074 | 5.36E-09 | monocyte | MICALL2  |
| PAK1.7     | 3.59E-13 | 0.464505 | 0.246 | 0.163 | 5.37E-09 | monocyte | PAK1     |
| PRPF3.2    | 3.64E-13 | -0.13936 | 0.041 | 0.121 | 5.43E-09 | monocyte | PRPF3    |
| NFU1.1     | 3.69E-13 | -0.10694 | 0.182 | 0.311 | 5.51E-09 | monocyte | NFU1     |
| MPHOSPH9.3 | 3.71E-13 | -0.13742 | 0.043 | 0.124 | 5.54E-09 | monocyte | MPHOSPH9 |
| FRS2.6     | 3.86E-13 | -0.16618 | 0.04  | 0.118 | 5.77E-09 | monocyte | FRS2     |
| TMPO.7     | 3.86E-13 | -0.16725 | 0.1   | 0.202 | 5.77E-09 | monocyte | TMPO     |
| MCCC2.3    | 3.89E-13 | -0.1373  | 0.054 | 0.14  | 5.82E-09 | monocyte | MCCC2    |
| MVB12B.7   | 3.94E-13 | -0.17973 | 0.031 | 0.106 | 5.89E-09 | monocyte | MVB12B   |
| PDCD2.6    | 3.98E-13 | -0.10627 | 0.176 | 0.305 | 5.94E-09 | monocyte | PDCD2    |
| KIAA1958.4 | 4.06E-13 | -0.11114 | 0.01  | 0.072 | 6.07E-09 | monocyte | KIAA1958 |
| DBF4.6     | 4.06E-13 | -0.1964  | 0.047 | 0.128 | 6.07E-09 | monocyte | DBF4     |
| LRRN2.2    | 4.08E-13 | -0.10126 | 0.004 | 0.061 | 6.10E-09 | monocyte | LRRN2    |
| XPO1.2     | 4.11E-13 | -0.11383 | 0.148 | 0.268 | 6.14E-09 | monocyte | XPO1     |
| SPAST.6    | 4.12E-13 | -0.14041 | 0.04  | 0.118 | 6.15E-09 | monocyte | SPAST    |
| SERTAD2.3  | 4.17E-13 | -0.10545 | 0.045 | 0.127 | 6.23E-09 | monocyte | SERTAD2  |
| CLASRP.2   | 4.26E-13 | -0.11765 | 0.066 | 0.156 | 6.36E-09 | monocyte | CLASRP   |
| PVRL1.7    | 4.26E-13 | -0.17621 | 0.007 | 0.066 | 6.37E-09 | monocyte | PVRL1    |
| PUS3.5     | 4.34E-13 | -0.13895 | 0.041 | 0.12  | 6.49E-09 | monocyte | PUS3     |
| MEX3B.6    | 4.37E-13 | -0.17868 | 0.008 | 0.067 | 6.53E-09 | monocyte | MEX3B    |
| KRBOX4.3   | 4.39E-13 | -0.11407 | 0.042 | 0.122 | 6.56E-09 | monocyte | KRBOX4   |
| SCAP.6     | 4.42E-13 | -0.11192 | 0.071 | 0.165 | 6.60E-09 | monocyte | SCAP     |
| ZNF385A.8  | 4.44E-13 | 0.269668 | 0.211 | 0.13  | 6.63E-09 | monocyte | ZNF385A  |
| MKI67.7    | 4.52E-13 | -0.22683 | 0.008 | 0.067 | 6.75E-09 | monocyte | MKI67    |
| SLC16A2.4  | 4.55E-13 | -0.10864 | 0.003 | 0.058 | 6.81E-09 | monocyte | SLC16A2  |
| SGOL1.6    | 4.73E-13 | -0.18632 | 0.005 | 0.062 | 7.07E-09 | monocyte | SGOL1    |
| ZFP1.4     | 4.76E-13 | -0.13422 | 0.01  | 0.072 | 7.11E-09 | monocyte | ZFP1     |
| CSPP1.5    | 4.90E-13 | -0.14147 | 0.035 | 0.112 | 7.32E-09 | monocyte | CSPP1    |
| TOR4A.6    | 4.93E-13 | 0.131073 | 0.061 | 0.022 | 7.37E-09 | monocyte | TOR4A    |
| SEMA6B.3   | 4.94E-13 | 0.131582 | 0.098 | 0.045 | 7.39E-09 | monocyte | SEMA6B   |
| LSG1.5     | 4.97E-13 | -0.17114 | 0.051 | 0.135 | 7.42E-09 | monocyte | LSG1     |
| TRAPPC2L.5 | 5.05E-13 | -0.12828 | 0.283 | 0.432 | 7.55E-09 | monocyte | TRAPPC2L |
| TLK2.2     | 5.08E-13 | -0.14905 | 0.048 | 0.13  | 7.59E-09 | monocyte | TLK2     |
| TCF7L2.3   | 5.08E-13 | -0.14128 | 0.027 | 0.1   | 7.60E-09 | monocyte | TCF7L2   |
| MED6       | 5.09E-13 | -0.12655 | 0.085 | 0.183 | 7.60E-09 | monocyte | MED6     |
| FAM3A.1    | 5.09E-13 | -0.10707 | 0.119 | 0.23  | 7.61E-09 | monocyte | FAM3A    |
| NRAS.1     | 5.13E-13 | -0.16118 | 0.094 | 0.193 | 7.67E-09 | monocyte | NRAS     |
| MLH3.4     | 5.13E-13 | -0.15353 | 0.035 | 0.112 | 7.67E-09 | monocyte | MLH3     |
| EXOC1.4    | 5.15E-13 | -0.14892 | 0.144 | 0.258 | 7.70E-09 | monocyte | EXOC1    |
| LSS.6      | 5.16E-13 | -0.1881  | 0.031 | 0.104 | 7.70E-09 | monocyte | LSS      |
| FGFRL1.2   | 5.28E-13 | -0.10438 | 0.004 | 0.06  | 7.89E-09 | monocyte | FGFRL1   |
| UBAP2L.1   | 5.31E-13 | -0.15619 | 0.118 | 0.226 | 7.94E-09 | monocyte | UBAP2L   |
| NDRG2.5    | 5.32E-13 | -0.2717  | 0.251 | 0.369 | 7.95E-09 | monocyte | NDRG2    |
| TMEM63B.3  | 5.34E-13 | -0.10831 | 0.056 | 0.143 | 7.98E-09 | monocyte | TMEM63B  |
| N4BP2.4    | 5.34E-13 | -0.1353  | 0.044 | 0.123 | 7.98E-09 | monocyte | N4BP2    |
| ARRB1.6    | 5.45E-13 | 0.245197 | 0.086 | 0.037 | 8.14E-09 | monocyte | ARRB1    |

|              |           |           |        |        |           |          |               |
|--------------|-----------|-----------|--------|--------|-----------|----------|---------------|
| APMAP. 4     | 5. 45E-13 | 0. 447187 | 0. 528 | 0. 517 | 8. 14E-09 | monocyte | APMAP         |
| ATG4B. 2     | 5. 52E-13 | -0. 10542 | 0. 162 | 0. 286 | 8. 26E-09 | monocyte | ATG4B         |
| IQCE. 5      | 5. 54E-13 | -0. 1391  | 0. 045 | 0. 125 | 8. 28E-09 | monocyte | IQCE          |
| TSHZ2. 6     | 5. 57E-13 | -0. 21848 | 0. 001 | 0. 054 | 8. 33E-09 | monocyte | TSHZ2         |
| ABHD14A. 4   | 5. 63E-13 | -0. 10588 | 0. 12  | 0. 231 | 8. 42E-09 | monocyte | ABHD14A       |
| TMTC3. 2     | 5. 72E-13 | -0. 1187  | 0. 025 | 0. 096 | 8. 54E-09 | monocyte | TMTC3         |
| LRRC8C. 7    | 5. 72E-13 | 0. 226606 | 0. 111 | 0. 054 | 8. 55E-09 | monocyte | LRRC8C        |
| DUS3L. 3     | 5. 84E-13 | -0. 12859 | 0. 062 | 0. 15  | 8. 73E-09 | monocyte | DUS3L         |
| RHBDF1. 4    | 5. 93E-13 | -0. 11072 | 0. 002 | 0. 056 | 8. 86E-09 | monocyte | RHBDF1        |
| PBRM1. 6     | 6. 04E-13 | -0. 11828 | 0. 136 | 0. 249 | 9. 03E-09 | monocyte | PBRM1         |
| ABHD17A. 7   | 6. 14E-13 | -0. 11827 | 0. 135 | 0. 244 | 9. 17E-09 | monocyte | ABHD17A       |
| CASP10. 4    | 6. 14E-13 | 0. 209064 | 0. 061 | 0. 022 | 9. 18E-09 | monocyte | CASP10        |
| ANKRD28. 4   | 6. 14E-13 | -0. 22902 | 0. 043 | 0. 119 | 9. 18E-09 | monocyte | ANKRD28       |
| ZDHHC19. 1   | 6. 26E-13 | 0. 120938 | 0. 027 | 0. 006 | 9. 36E-09 | monocyte | ZDHHC19       |
| ARVCF. 6     | 6. 27E-13 | -0. 12495 | 0. 004 | 0. 06  | 9. 38E-09 | monocyte | ARVCF         |
| IGFLR1. 5    | 6. 27E-13 | 0. 332892 | 0. 105 | 0. 05  | 9. 38E-09 | monocyte | IGFLR1        |
| EPB41L4A. 6  | 6. 28E-13 | -0. 10119 | 0. 18  | 0. 303 | 9. 38E-09 | monocyte | EPB41L4A-AS1  |
| TMEM38B. 3   | 6. 32E-13 | -0. 19384 | 0. 081 | 0. 174 | 9. 45E-09 | monocyte | TMEM38B       |
| PLOD3. 5     | 6. 34E-13 | -0. 19721 | 0. 121 | 0. 226 | 9. 48E-09 | monocyte | PLOD3         |
| EBF4. 4      | 6. 41E-13 | -0. 11316 | 0. 004 | 0. 06  | 9. 58E-09 | monocyte | EBF4          |
| NTRK3. 4     | 6. 46E-13 | -0. 14582 | 0. 01  | 0. 071 | 9. 65E-09 | monocyte | NTRK3         |
| NUF2. 8      | 6. 53E-13 | -0. 20749 | 0. 008 | 0. 067 | 9. 76E-09 | monocyte | NUF2          |
| GTPBP10. 2   | 6. 53E-13 | -0. 18425 | 0. 029 | 0. 102 | 9. 76E-09 | monocyte | GTPBP10       |
| LRTOMT. 4    | 6. 60E-13 | -0. 14818 | 0. 014 | 0. 076 | 9. 86E-09 | monocyte | LRTOMT        |
| DUSP2. 7     | 6. 62E-13 | -0. 34645 | 0. 042 | 0. 116 | 9. 89E-09 | monocyte | DUSP2         |
| RBBP8. 3     | 6. 66E-13 | -0. 13879 | 0. 021 | 0. 088 | 9. 95E-09 | monocyte | RBBP8         |
| ADPGK. 8     | 6. 71E-13 | 0. 401544 | 0. 332 | 0. 255 | 1. 00E-08 | monocyte | ADPGK         |
| TMEM8B. 4    | 6. 79E-13 | -0. 10686 | 0. 008 | 0. 067 | 1. 02E-08 | monocyte | TMEM8B        |
| MAPK11. 4    | 6. 86E-13 | -0. 10557 | 0. 004 | 0. 059 | 1. 02E-08 | monocyte | MAPK11        |
| TPGS1. 3     | 6. 87E-13 | -0. 12308 | 0. 19  | 0. 321 | 1. 03E-08 | monocyte | TPGS1         |
| SLC39A3. 5   | 6. 97E-13 | -0. 11231 | 0. 216 | 0. 349 | 1. 04E-08 | monocyte | SLC39A3       |
| TMBIM1. 5    | 7. 04E-13 | 0. 452382 | 0. 318 | 0. 238 | 1. 05E-08 | monocyte | TMBIM1        |
| ARMC8. 3     | 7. 06E-13 | -0. 13695 | 0. 104 | 0. 209 | 1. 05E-08 | monocyte | ARMC8         |
| EFNA2. 6     | 7. 26E-13 | -0. 12337 | 0. 002 | 0. 055 | 1. 08E-08 | monocyte | EFNA2         |
| GTPBP3. 4    | 7. 26E-13 | -0. 14769 | 0. 041 | 0. 119 | 1. 09E-08 | monocyte | GTPBP3        |
| MFAP3L. 6    | 7. 27E-13 | -0. 13344 | 0. 004 | 0. 059 | 1. 09E-08 | monocyte | MFAP3L        |
| CTA-445C9. 7 | 7. 30E-13 | -0. 11558 | 0. 005 | 0. 061 | 1. 09E-08 | monocyte | CTA-445C9. 14 |
| RBAK-RBAK. 7 | 7. 52E-13 | -0. 19806 | 0. 033 | 0. 107 | 1. 12E-08 | monocyte | RBAK-RBAKDN   |
| LRP4. 5      | 7. 58E-13 | -0. 14815 | 0. 006 | 0. 063 | 1. 13E-08 | monocyte | LRP4          |
| TMEM17. 2    | 7. 65E-13 | -0. 13021 | 0. 004 | 0. 059 | 1. 14E-08 | monocyte | TMEM17        |
| TMEM231. 5   | 7. 77E-13 | -0. 13958 | 0. 008 | 0. 067 | 1. 16E-08 | monocyte | TMEM231       |
| ZFP37. 5     | 7. 97E-13 | -0. 14421 | 0. 002 | 0. 055 | 1. 19E-08 | monocyte | ZFP37         |
| SMC2. 6      | 8. 04E-13 | -0. 15594 | 0. 108 | 0. 208 | 1. 20E-08 | monocyte | SMC2          |
| IDS. 2       | 8. 20E-13 | -0. 12797 | 0. 244 | 0. 38  | 1. 23E-08 | monocyte | IDS           |
| PGBD1. 4     | 8. 30E-13 | -0. 12651 | 0. 014 | 0. 076 | 1. 24E-08 | monocyte | PGBD1         |
| EFCAB7. 4    | 8. 38E-13 | -0. 13139 | 0. 013 | 0. 074 | 1. 25E-08 | monocyte | EFCAB7        |
| CAB39L. 6    | 8. 44E-13 | -0. 15797 | 0. 016 | 0. 079 | 1. 26E-08 | monocyte | CAB39L        |
| CLOCK. 6     | 8. 46E-13 | -0. 14347 | 0. 052 | 0. 135 | 1. 26E-08 | monocyte | CLOCK         |
| GRSF1. 4     | 8. 56E-13 | -0. 12085 | 0. 2   | 0. 333 | 1. 28E-08 | monocyte | GRSF1         |
| KCTD5. 3     | 8. 74E-13 | -0. 10616 | 0. 111 | 0. 216 | 1. 31E-08 | monocyte | KCTD5         |
| ATF2. 2      | 8. 76E-13 | -0. 14703 | 0. 076 | 0. 167 | 1. 31E-08 | monocyte | ATF2          |

|           |          |          |       |       |          |          |              |
|-----------|----------|----------|-------|-------|----------|----------|--------------|
| CHI3L1.7  | 8.85E-13 | -0.30554 | 0.385 | 0.537 | 1.32E-08 | monocyte | CHI3L1       |
| RNF182.6  | 9.05E-13 | -0.13136 | 0.001 | 0.053 | 1.35E-08 | monocyte | RNF182       |
| RLF.2     | 9.18E-13 | -0.13086 | 0.035 | 0.111 | 1.37E-08 | monocyte | RLF          |
| RALGAPA2. | 9.21E-13 | -0.12132 | 0.04  | 0.117 | 1.38E-08 | monocyte | RALGAPA2     |
| FTO.4     | 9.30E-13 | -0.11461 | 0.055 | 0.141 | 1.39E-08 | monocyte | FTO          |
| CDK5.5    | 9.43E-13 | -0.10105 | 0.135 | 0.247 | 1.41E-08 | monocyte | CDK5         |
| USP34.4   | 9.45E-13 | -0.10967 | 0.112 | 0.219 | 1.41E-08 | monocyte | USP34        |
| CALCOCO1. | 9.46E-13 | -0.12811 | 0.066 | 0.155 | 1.41E-08 | monocyte | CALCOCO1     |
| AP3M2.5   | 9.53E-13 | -0.14033 | 0.027 | 0.097 | 1.42E-08 | monocyte | AP3M2        |
| ACTR1B.2  | 9.66E-13 | -0.11853 | 0.113 | 0.218 | 1.44E-08 | monocyte | ACTR1B       |
| SSFA2.6   | 9.78E-13 | -0.10967 | 0.094 | 0.194 | 1.46E-08 | monocyte | SSFA2        |
| MED30.3   | 9.79E-13 | -0.156   | 0.151 | 0.263 | 1.46E-08 | monocyte | MED30        |
| CSTB.6    | 9.80E-13 | 0.295776 | 0.656 | 0.693 | 1.46E-08 | monocyte | CSTB         |
| TMEM169.6 | 9.85E-13 | -0.13745 | 0.006 | 0.063 | 1.47E-08 | monocyte | TMEM169      |
| CST3.5    | 9.96E-13 | 0.155603 | 0.789 | 0.786 | 1.49E-08 | monocyte | CST3         |
| SPINT1.7  | 1.03E-12 | 0.164307 | 0.073 | 0.03  | 1.54E-08 | monocyte | SPINT1       |
| DIAPH1.5  | 1.04E-12 | -0.14419 | 0.059 | 0.146 | 1.56E-08 | monocyte | DIAPH1       |
| POLR3D.6  | 1.06E-12 | -0.13311 | 0.05  | 0.132 | 1.58E-08 | monocyte | POLR3D       |
| ACY3.4    | 1.06E-12 | 0.270816 | 0.049 | 0.017 | 1.59E-08 | monocyte | ACY3         |
| CCDC74A.5 | 1.07E-12 | -0.13648 | 0.001 | 0.053 | 1.60E-08 | monocyte | CCDC74A      |
| MFAP4.5   | 1.08E-12 | -0.19548 | 0.004 | 0.058 | 1.61E-08 | monocyte | MFAP4        |
| B3GALT1.5 | 1.08E-12 | -0.10259 | 0.002 | 0.055 | 1.61E-08 | monocyte | B3GALT1      |
| LUZP2.4   | 1.09E-12 | -0.17713 | 0.001 | 0.053 | 1.63E-08 | monocyte | LUZP2        |
| COQ5.4    | 1.09E-12 | -0.1285  | 0.101 | 0.204 | 1.63E-08 | monocyte | COQ5         |
| POM121.3  | 1.10E-12 | -0.14657 | 0.073 | 0.164 | 1.64E-08 | monocyte | POM121       |
| JOSD1.8   | 1.10E-12 | -0.14248 | 0.074 | 0.165 | 1.64E-08 | monocyte | JOSD1        |
| PSMC1.5   | 1.10E-12 | -0.10544 | 0.256 | 0.396 | 1.65E-08 | monocyte | PSMC1        |
| ZNF446.3  | 1.11E-12 | -0.13882 | 0.017 | 0.081 | 1.66E-08 | monocyte | ZNF446       |
| HECTD1.3  | 1.13E-12 | -0.10658 | 0.126 | 0.237 | 1.68E-08 | monocyte | HECTD1       |
| UBN1.5    | 1.14E-12 | -0.12247 | 0.08  | 0.174 | 1.70E-08 | monocyte | UBN1         |
| DNPEP.2   | 1.15E-12 | -0.11354 | 0.138 | 0.251 | 1.73E-08 | monocyte | DNPEP        |
| HID1.5    | 1.16E-12 | -0.1336  | 0.003 | 0.057 | 1.73E-08 | monocyte | HID1         |
| RAD50.4   | 1.16E-12 | -0.10053 | 0.156 | 0.275 | 1.74E-08 | monocyte | RAD50        |
| PPOX.3    | 1.20E-12 | -0.13086 | 0.039 | 0.115 | 1.79E-08 | monocyte | PPOX         |
| PRRC2C.5  | 1.20E-12 | -0.10144 | 0.333 | 0.495 | 1.80E-08 | monocyte | PRRC2C       |
| CTB-113I2 | 1.22E-12 | -0.11143 | 0.007 | 0.064 | 1.82E-08 | monocyte | CTB-113I20.2 |
| DOK2.7    | 1.24E-12 | 0.109662 | 0.108 | 0.051 | 1.85E-08 | monocyte | DOK2         |
| NMT2.6    | 1.24E-12 | -0.13911 | 0.031 | 0.104 | 1.85E-08 | monocyte | NMT2         |
| ZNF121.2  | 1.29E-12 | -0.13874 | 0.04  | 0.117 | 1.93E-08 | monocyte | ZNF121       |
| ADCK4.4   | 1.30E-12 | -0.11943 | 0.051 | 0.133 | 1.95E-08 | monocyte | ADCK4        |
| FKBP11.3  | 1.32E-12 | -0.1193  | 0.044 | 0.123 | 1.97E-08 | monocyte | FKBP11       |
| PGAM2.7   | 1.33E-12 | -0.239   | 0.001 | 0.052 | 1.99E-08 | monocyte | PGAM2        |
| TARS.3    | 1.35E-12 | -0.11246 | 0.126 | 0.235 | 2.02E-08 | monocyte | TARS         |
| SGIP1.5   | 1.37E-12 | -0.18752 | 0.002 | 0.054 | 2.04E-08 | monocyte | SGIP1        |
| RNF26.4   | 1.38E-12 | -0.1074  | 0.073 | 0.165 | 2.06E-08 | monocyte | RNF26        |
| OPHN1.6   | 1.38E-12 | -0.18147 | 0.015 | 0.076 | 2.06E-08 | monocyte | OPHN1        |
| GPC4.2    | 1.38E-12 | -0.1241  | 0.003 | 0.056 | 2.06E-08 | monocyte | GPC4         |
| NAPB.4    | 1.38E-12 | -0.13743 | 0.019 | 0.084 | 2.07E-08 | monocyte | NAPB         |
| UBE2R2.5  | 1.39E-12 | -0.13146 | 0.173 | 0.296 | 2.08E-08 | monocyte | UBE2R2       |
| APITD1.3  | 1.40E-12 | -0.12051 | 0.021 | 0.087 | 2.09E-08 | monocyte | APITD1       |
| RWDD4.3   | 1.40E-12 | -0.16041 | 0.129 | 0.236 | 2.09E-08 | monocyte | RWDD4        |

|           |          |          |       |       |          |          |             |
|-----------|----------|----------|-------|-------|----------|----------|-------------|
| GTPBP1.3  | 1.40E-12 | -0.11928 | 0.033 | 0.107 | 2.10E-08 | monocyte | GTPBP1      |
| DDIT4.7   | 1.41E-12 | 0.397193 | 0.473 | 0.403 | 2.11E-08 | monocyte | DDIT4       |
| FAM210A.3 | 1.42E-12 | -0.13527 | 0.062 | 0.148 | 2.12E-08 | monocyte | FAM210A     |
| ZNF532.5  | 1.48E-12 | -0.12061 | 0.028 | 0.098 | 2.21E-08 | monocyte | ZNF532      |
| CCDC8.3   | 1.51E-12 | -0.10706 | 0.001 | 0.052 | 2.25E-08 | monocyte | CCDC8       |
| CTC-459F4 | 1.51E-12 | -0.14103 | 0.01  | 0.07  | 2.26E-08 | monocyte | CTC-459F4.3 |
| DVL3.4    | 1.52E-12 | -0.10524 | 0.071 | 0.161 | 2.27E-08 | monocyte | DVL3        |
| LRRTM3.5  | 1.54E-12 | -0.10388 | 0.003 | 0.056 | 2.29E-08 | monocyte | LRRTM3      |
| GTF3C1.2  | 1.54E-12 | -0.11647 | 0.038 | 0.113 | 2.31E-08 | monocyte | GTF3C1      |
| EIF2B2.3  | 1.55E-12 | -0.12486 | 0.086 | 0.181 | 2.31E-08 | monocyte | EIF2B2      |
| MED25.1   | 1.55E-12 | -0.14345 | 0.049 | 0.13  | 2.32E-08 | monocyte | MED25       |
| LRFN4.3   | 1.56E-12 | -0.10541 | 0.016 | 0.078 | 2.34E-08 | monocyte | LRFN4       |
| RYR1.2    | 1.61E-12 | 0.15689  | 0.043 | 0.013 | 2.40E-08 | monocyte | RYR1        |
| PPIL6.7   | 1.61E-12 | -0.14608 | 0.001 | 0.052 | 2.41E-08 | monocyte | PPIL6       |
| SETD2.4   | 1.62E-12 | -0.1161  | 0.064 | 0.151 | 2.42E-08 | monocyte | SETD2       |
| ARHGAP21. | 1.64E-12 | -0.10952 | 0.143 | 0.26  | 2.45E-08 | monocyte | ARHGAP21    |
| SEPHS1.4  | 1.65E-12 | -0.10904 | 0.042 | 0.119 | 2.46E-08 | monocyte | SEPHS1      |
| CELF1.5   | 1.65E-12 | -0.12194 | 0.192 | 0.318 | 2.46E-08 | monocyte | CELF1       |
| CPQ.6     | 1.67E-12 | 0.340778 | 0.254 | 0.171 | 2.50E-08 | monocyte | CPQ         |
| KIF5B.5   | 1.67E-12 | -0.10063 | 0.359 | 0.525 | 2.50E-08 | monocyte | KIF5B       |
| GCFC2.2   | 1.68E-12 | -0.10566 | 0.047 | 0.127 | 2.51E-08 | monocyte | GCFC2       |
| CARD8.7   | 1.70E-12 | 0.43787  | 0.216 | 0.143 | 2.54E-08 | monocyte | CARD8       |
| GJA1.5    | 1.70E-12 | -0.27417 | 0.02  | 0.084 | 2.54E-08 | monocyte | GJA1        |
| ZNF232.6  | 1.72E-12 | -0.11173 | 0.02  | 0.085 | 2.57E-08 | monocyte | ZNF232      |
| SPRY4.5   | 1.80E-12 | -0.13197 | 0.013 | 0.072 | 2.69E-08 | monocyte | SPRY4       |
| CACNG4.5  | 1.84E-12 | -0.12859 | 0.002 | 0.054 | 2.75E-08 | monocyte | CACNG4      |
| NCS1.4    | 1.85E-12 | -0.12434 | 0.008 | 0.065 | 2.76E-08 | monocyte | NCS1        |
| ANKRD13B. | 1.86E-12 | -0.12437 | 0.002 | 0.054 | 2.77E-08 | monocyte | ANKRD13B    |
| TOM1L2.5  | 1.89E-12 | -0.12005 | 0.047 | 0.126 | 2.83E-08 | monocyte | TOM1L2      |
| ZBTB16.4  | 1.91E-12 | -0.11019 | 0.072 | 0.163 | 2.85E-08 | monocyte | ZBTB16      |
| TRIP10.2  | 1.99E-12 | -0.15158 | 0.032 | 0.104 | 2.97E-08 | monocyte | TRIP10      |
| KLHL25.2  | 2.00E-12 | -0.12173 | 0.004 | 0.057 | 2.99E-08 | monocyte | KLHL25      |
| DNAJC9.4  | 2.05E-12 | -0.11873 | 0.078 | 0.169 | 3.06E-08 | monocyte | DNAJC9      |
| CDR2L.4   | 2.06E-12 | -0.10133 | 0.01  | 0.069 | 3.08E-08 | monocyte | CDR2L       |
| JAK3.3    | 2.07E-12 | 0.170382 | 0.063 | 0.024 | 3.09E-08 | monocyte | JAK3        |
| ELAVL1.4  | 2.07E-12 | -0.11796 | 0.219 | 0.355 | 3.10E-08 | monocyte | ELAVL1      |
| TCTN3.1   | 2.10E-12 | -0.17215 | 0.065 | 0.151 | 3.14E-08 | monocyte | TCTN3       |
| C17orf89. | 2.12E-12 | -0.10634 | 0.289 | 0.433 | 3.16E-08 | monocyte | C17orf89    |
| ZKSCAN5.5 | 2.15E-12 | -0.13018 | 0.011 | 0.07  | 3.21E-08 | monocyte | ZKSCAN5     |
| RGAG4.5   | 2.16E-12 | -0.10783 | 0.009 | 0.067 | 3.23E-08 | monocyte | RGAG4       |
| PDPN.4    | 2.17E-12 | -0.16269 | 0.315 | 0.461 | 3.24E-08 | monocyte | PDPN        |
| FGR.8     | 2.22E-12 | 0.206139 | 0.145 | 0.078 | 3.32E-08 | monocyte | FGR         |
| ABLIM1.6  | 2.25E-12 | -0.13129 | 0.004 | 0.057 | 3.36E-08 | monocyte | ABLIM1      |
| AKAP8.2   | 2.29E-12 | -0.16072 | 0.058 | 0.142 | 3.42E-08 | monocyte | AKAP8       |
| CCNB2.7   | 2.30E-12 | -0.22171 | 0.01  | 0.068 | 3.44E-08 | monocyte | CCNB2       |
| FMNL3.6   | 2.32E-12 | 0.301663 | 0.133 | 0.072 | 3.47E-08 | monocyte | FMNL3       |
| MIR497HG. | 2.35E-12 | -0.16925 | 0.013 | 0.072 | 3.51E-08 | monocyte | MIR497HG    |
| GADD45G.7 | 2.36E-12 | -0.20755 | 0.161 | 0.264 | 3.52E-08 | monocyte | GADD45G     |
| MEX3D.4   | 2.38E-12 | -0.11378 | 0.009 | 0.067 | 3.56E-08 | monocyte | MEX3D       |
| ADO.5     | 2.41E-12 | -0.10742 | 0.051 | 0.133 | 3.61E-08 | monocyte | ADO         |
| ATAD2.5   | 2.42E-12 | -0.11651 | 0.018 | 0.081 | 3.62E-08 | monocyte | ATAD2       |

|           |          |          |       |       |          |          |               |
|-----------|----------|----------|-------|-------|----------|----------|---------------|
| SCRN3.4   | 2.44E-12 | -0.12312 | 0.034 | 0.107 | 3.65E-08 | monocyte | SCRN3         |
| RP11-66B2 | 2.44E-12 | 0.162229 | 0.035 | 0.01  | 3.65E-08 | monocyte | RP11-66B24.2  |
| SETD4.4   | 2.49E-12 | -0.11175 | 0.051 | 0.132 | 3.73E-08 | monocyte | SETD4         |
| DIS3.4    | 2.52E-12 | -0.1242  | 0.069 | 0.157 | 3.77E-08 | monocyte | DIS3          |
| PRKD1.4   | 2.61E-12 | -0.10379 | 0.003 | 0.055 | 3.90E-08 | monocyte | PRKD1         |
| SGPP1.5   | 2.62E-12 | 0.272731 | 0.135 | 0.074 | 3.92E-08 | monocyte | SGPP1         |
| HSPB6.6   | 2.63E-12 | -0.13856 | 0.008 | 0.065 | 3.93E-08 | monocyte | HSPB6         |
| CLSTN3.5  | 2.65E-12 | -0.11923 | 0.007 | 0.063 | 3.96E-08 | monocyte | CLSTN3        |
| NME5.5    | 2.69E-12 | -0.11137 | 0.002 | 0.053 | 4.02E-08 | monocyte | NME5          |
| ZNF275.4  | 2.71E-12 | -0.13787 | 0.006 | 0.061 | 4.05E-08 | monocyte | ZNF275        |
| STRIP1.5  | 2.74E-12 | -0.13583 | 0.051 | 0.131 | 4.09E-08 | monocyte | STRIP1        |
| DZIP3.6   | 2.79E-12 | -0.12331 | 0.055 | 0.137 | 4.16E-08 | monocyte | DZIP3         |
| HIST2H2BE | 2.79E-12 | -0.1211  | 0.067 | 0.154 | 4.17E-08 | monocyte | HIST2H2BE     |
| SRD5A1.3  | 2.81E-12 | -0.10488 | 0.041 | 0.116 | 4.19E-08 | monocyte | SRD5A1        |
| TF.8      | 2.81E-12 | -0.36418 | 0.017 | 0.078 | 4.20E-08 | monocyte | TF            |
| CUL3.5    | 2.84E-12 | -0.12851 | 0.108 | 0.208 | 4.24E-08 | monocyte | CUL3          |
| RP3-47704 | 2.86E-12 | 0.228481 | 0.064 | 0.025 | 4.27E-08 | monocyte | RP3-47704.14  |
| SLPI.5    | 2.86E-12 | -0.78318 | 0.075 | 0.156 | 4.27E-08 | monocyte | SLPI          |
| MR1.6     | 2.89E-12 | 0.300137 | 0.148 | 0.083 | 4.31E-08 | monocyte | MR1           |
| STK32B.2  | 2.90E-12 | -0.11186 | 0.009 | 0.066 | 4.33E-08 | monocyte | STK32B        |
| TMTC2.3   | 2.91E-12 | -0.167   | 0.003 | 0.055 | 4.35E-08 | monocyte | TMTC2         |
| IFT88.5   | 2.92E-12 | -0.14492 | 0.04  | 0.114 | 4.36E-08 | monocyte | IFT88         |
| KIAA0232. | 2.92E-12 | -0.10227 | 0.071 | 0.159 | 4.37E-08 | monocyte | KIAA0232      |
| ZNF587.2  | 2.93E-12 | -0.12071 | 0.023 | 0.089 | 4.38E-08 | monocyte | ZNF587        |
| AC113189. | 2.93E-12 | -0.10769 | 0.011 | 0.07  | 4.38E-08 | monocyte | AC113189.5    |
| SORBS2.6  | 2.94E-12 | -0.17844 | 0.003 | 0.055 | 4.39E-08 | monocyte | SORBS2        |
| SLC44A2.6 | 2.94E-12 | -0.1038  | 0.106 | 0.211 | 4.40E-08 | monocyte | SLC44A2       |
| NACC1.3   | 2.95E-12 | -0.13737 | 0.07  | 0.158 | 4.41E-08 | monocyte | NACC1         |
| DHRS11.6  | 2.95E-12 | -0.10652 | 0.035 | 0.108 | 4.41E-08 | monocyte | DHRS11        |
| ZNF558.4  | 2.95E-12 | -0.12033 | 0.019 | 0.082 | 4.41E-08 | monocyte | ZNF558        |
| NAPEPLD.4 | 3.04E-12 | -0.13779 | 0.033 | 0.105 | 4.54E-08 | monocyte | NAPEPLD       |
| YME1L1.6  | 3.06E-12 | -0.14268 | 0.156 | 0.27  | 4.58E-08 | monocyte | YME1L1        |
| SEMA4B.1  | 3.07E-12 | -0.11077 | 0.004 | 0.057 | 4.59E-08 | monocyte | SEMA4B        |
| ACOX2.2   | 3.09E-12 | -0.10533 | 0.004 | 0.057 | 4.62E-08 | monocyte | ACOX2         |
| LTBP1.5   | 3.11E-12 | -0.11216 | 0.003 | 0.055 | 4.65E-08 | monocyte | LTBP1         |
| ST3GAL2.3 | 3.18E-12 | -0.10392 | 0.033 | 0.105 | 4.75E-08 | monocyte | ST3GAL2       |
| MAP7D1.6  | 3.20E-12 | -0.12224 | 0.222 | 0.357 | 4.77E-08 | monocyte | MAP7D1        |
| TMEM51.7  | 3.21E-12 | 0.298315 | 0.183 | 0.113 | 4.80E-08 | monocyte | TMEM51        |
| CENPM.7   | 3.22E-12 | -0.13247 | 0.017 | 0.079 | 4.81E-08 | monocyte | CENPM         |
| GOLGA5.1  | 3.26E-12 | -0.141   | 0.069 | 0.155 | 4.87E-08 | monocyte | GOLGA5        |
| RBMXL1.2  | 3.27E-12 | -0.13269 | 0.072 | 0.16  | 4.89E-08 | monocyte | RBMXL1        |
| DHX58.2   | 3.28E-12 | 0.171391 | 0.082 | 0.037 | 4.90E-08 | monocyte | DHX58         |
| RP11-783K | 3.28E-12 | -0.16333 | 0.002 | 0.053 | 4.91E-08 | monocyte | RP11-783K16.5 |
| DUOX1.8   | 3.34E-12 | -0.14822 | 0.01  | 0.068 | 4.99E-08 | monocyte | DUOX1         |
| PTCH1.2   | 3.35E-12 | -0.12044 | 0.003 | 0.055 | 5.00E-08 | monocyte | PTCH1         |
| BTBD17.7  | 3.45E-12 | -0.18488 | 0.004 | 0.056 | 5.16E-08 | monocyte | BTBD17        |
| EPC2.4    | 3.46E-12 | -0.12082 | 0.03  | 0.101 | 5.17E-08 | monocyte | EPC2          |
| PIGL      | 3.49E-12 | -0.10511 | 0.024 | 0.091 | 5.22E-08 | monocyte | PIGL          |
| SLC22A23. | 3.49E-12 | -0.11464 | 0.013 | 0.072 | 5.22E-08 | monocyte | SLC22A23      |
| PAK7.7    | 3.51E-12 | -0.15652 | 0.001 | 0.05  | 5.25E-08 | monocyte | PAK7          |
| RITA1.4   | 3.57E-12 | -0.13222 | 0.056 | 0.139 | 5.34E-08 | monocyte | RITA1         |

|                |           |           |        |        |           |          |                |
|----------------|-----------|-----------|--------|--------|-----------|----------|----------------|
| TMF1. 3        | 3. 58E-12 | -0. 12649 | 0. 122 | 0. 227 | 5. 35E-08 | monocyte | TMF1           |
| TEAD4. 5       | 3. 60E-12 | -0. 10056 | 0. 004 | 0. 056 | 5. 37E-08 | monocyte | TEAD4          |
| ZCCHC7. 5      | 3. 87E-12 | -0. 1093  | 0. 065 | 0. 15  | 5. 79E-08 | monocyte | ZCCHC7         |
| PLP1. 7        | 3. 88E-12 | -0. 45735 | 0. 089 | 0. 178 | 5. 79E-08 | monocyte | PLP1           |
| ARPP21. 6      | 3. 89E-12 | -0. 15645 | 0. 003 | 0. 054 | 5. 81E-08 | monocyte | ARPP21         |
| UBN2. 5        | 3. 99E-12 | -0. 15022 | 0. 041 | 0. 115 | 5. 96E-08 | monocyte | UBN2           |
| NUDT10. 5      | 4. 01E-12 | -0. 15346 | 0. 003 | 0. 054 | 5. 99E-08 | monocyte | NUDT10         |
| ZNF682. 5      | 4. 03E-12 | -0. 14305 | 0. 019 | 0. 081 | 6. 02E-08 | monocyte | ZNF682         |
| ZNF211. 3      | 4. 05E-12 | -0. 16034 | 0. 013 | 0. 071 | 6. 05E-08 | monocyte | ZNF211         |
| HSPH1. 4       | 4. 12E-12 | -0. 11342 | 0. 234 | 0. 372 | 6. 16E-08 | monocyte | HSPH1          |
| ZNF789. 3      | 4. 13E-12 | -0. 12045 | 0. 021 | 0. 085 | 6. 16E-08 | monocyte | ZNF789         |
| TMEM246. 6     | 4. 20E-12 | -0. 16569 | 0. 002 | 0. 052 | 6. 28E-08 | monocyte | TMEM246        |
| LEMD1. 5       | 4. 23E-12 | -0. 14693 | 0. 001 | 0. 05  | 6. 33E-08 | monocyte | LEMD1          |
| HOXC10. 6      | 4. 25E-12 | -0. 16946 | 0. 005 | 0. 058 | 6. 35E-08 | monocyte | HOXC10         |
| BACE1. 5       | 4. 25E-12 | -0. 14834 | 0. 047 | 0. 124 | 6. 35E-08 | monocyte | BACE1          |
| SH2B2. 6       | 4. 25E-12 | -0. 13141 | 0. 041 | 0. 115 | 6. 35E-08 | monocyte | SH2B2          |
| SDC1. 4        | 4. 30E-12 | -0. 10809 | 0. 002 | 0. 052 | 6. 42E-08 | monocyte | SDC1           |
| ARAP3. 5       | 4. 33E-12 | -0. 10706 | 0. 011 | 0. 069 | 6. 47E-08 | monocyte | ARAP3          |
| FRMD3. 5       | 4. 34E-12 | -0. 16674 | 0. 006 | 0. 06  | 6. 49E-08 | monocyte | FRMD3          |
| ACOT11         | 4. 34E-12 | 0. 146227 | 0. 072 | 0. 03  | 6. 49E-08 | monocyte | ACOT11         |
| BOLA1. 4       | 4. 37E-12 | -0. 13255 | 0. 071 | 0. 158 | 6. 53E-08 | monocyte | BOLA1          |
| ACOT8. 2       | 4. 44E-12 | -0. 10815 | 0. 113 | 0. 214 | 6. 63E-08 | monocyte | ACOT8          |
| CCDC93. 4      | 4. 44E-12 | -0. 1185  | 0. 054 | 0. 134 | 6. 63E-08 | monocyte | CCDC93         |
| MON1A. 5       | 4. 49E-12 | -0. 10711 | 0. 025 | 0. 091 | 6. 70E-08 | monocyte | MON1A          |
| HUWE1. 2       | 4. 49E-12 | -0. 11071 | 0. 087 | 0. 18  | 6. 71E-08 | monocyte | HUWE1          |
| TRIB3. 5       | 4. 54E-12 | -0. 18329 | 0. 018 | 0. 079 | 6. 78E-08 | monocyte | TRIB3          |
| ISG20. 4       | 4. 59E-12 | -0. 27766 | 0. 051 | 0. 128 | 6. 86E-08 | monocyte | ISG20          |
| RAD17. 4       | 4. 63E-12 | -0. 11929 | 0. 055 | 0. 136 | 6. 92E-08 | monocyte | RAD17          |
| LIPE. 3        | 4. 63E-12 | -0. 14188 | 0. 009 | 0. 065 | 6. 92E-08 | monocyte | LIPE           |
| FBXL16. 4      | 4. 67E-12 | -0. 11439 | 0      | 0. 048 | 6. 98E-08 | monocyte | FBXL16         |
| SART3. 4       | 4. 77E-12 | -0. 12819 | 0. 052 | 0. 132 | 7. 12E-08 | monocyte | SART3          |
| TFPI. 3        | 4. 84E-12 | -0. 16518 | 0. 005 | 0. 058 | 7. 23E-08 | monocyte | TFPI           |
| ALPK1. 3       | 4. 85E-12 | 0. 194886 | 0. 076 | 0. 033 | 7. 25E-08 | monocyte | ALPK1          |
| CCDC126. 4     | 4. 86E-12 | -0. 14518 | 0. 046 | 0. 122 | 7. 27E-08 | monocyte | CCDC126        |
| FERMT1. 5      | 4. 87E-12 | -0. 18665 | 0. 003 | 0. 054 | 7. 28E-08 | monocyte | FERMT1         |
| LYAR. 3        | 4. 89E-12 | -0. 14513 | 0. 089 | 0. 182 | 7. 31E-08 | monocyte | LYAR           |
| LGALS1. 6      | 4. 90E-12 | -0. 12842 | 0. 01  | 0. 067 | 7. 32E-08 | monocyte | LGALS1         |
| AK3. 1         | 4. 90E-12 | -0. 12256 | 0. 138 | 0. 246 | 7. 33E-08 | monocyte | AK3            |
| ATG9A. 5       | 4. 97E-12 | -0. 10495 | 0. 046 | 0. 123 | 7. 43E-08 | monocyte | ATG9A          |
| GRIA1. 2       | 5. 01E-12 | -0. 1007  | 0. 002 | 0. 052 | 7. 49E-08 | monocyte | GRIA1          |
| PPP1R14C. 5    | 5. 06E-12 | -0. 11619 | 0. 009 | 0. 065 | 7. 56E-08 | monocyte | PPP1R14C       |
| PUS7. 2        | 5. 08E-12 | -0. 1072  | 0. 009 | 0. 066 | 7. 59E-08 | monocyte | PUS7           |
| ZNF286A. 5     | 5. 13E-12 | -0. 13246 | 0. 008 | 0. 063 | 7. 67E-08 | monocyte | ZNF286A        |
| RP11-802E16. 3 | 5. 20E-12 | 0. 178608 | 0. 041 | 0. 013 | 7. 77E-08 | monocyte | RP11-802E16. 3 |
| CLHC1. 4       | 5. 21E-12 | -0. 10995 | 0. 014 | 0. 073 | 7. 78E-08 | monocyte | CLHC1          |
| COG8. 5        | 5. 23E-12 | -0. 12314 | 0. 029 | 0. 097 | 7. 81E-08 | monocyte | COG8           |
| PDE8B. 3       | 5. 26E-12 | -0. 10806 | 0. 002 | 0. 052 | 7. 85E-08 | monocyte | PDE8B          |
| GSE1. 7        | 5. 32E-12 | -0. 15048 | 0. 029 | 0. 097 | 7. 96E-08 | monocyte | GSE1           |
| IRGQ. 4        | 5. 41E-12 | -0. 12054 | 0. 026 | 0. 092 | 8. 08E-08 | monocyte | IRGQ           |
| RP11-486G15. 2 | 5. 43E-12 | -0. 13049 | 0. 001 | 0. 05  | 8. 11E-08 | monocyte | RP11-486G15. 2 |
| EEF1D. 7       | 5. 44E-12 | 0. 239485 | 0. 81  | 0. 848 | 8. 13E-08 | monocyte | EEF1D          |



|            |           |           |        |        |           |          |                |
|------------|-----------|-----------|--------|--------|-----------|----------|----------------|
| HEXB. 8    | 5. 52E-12 | 0. 336861 | 0. 444 | 0. 402 | 8. 25E-08 | monocyte | HEXB           |
| ATP5D. 7   | 5. 61E-12 | -0. 10815 | 0. 479 | 0. 626 | 8. 38E-08 | monocyte | ATP5D          |
| PARP2. 5   | 5. 61E-12 | -0. 17154 | 0. 043 | 0. 117 | 8. 39E-08 | monocyte | PARP2          |
| CLDN10. 6  | 5. 67E-12 | -0. 19292 | 0. 006 | 0. 059 | 8. 48E-08 | monocyte | CLDN10         |
| KIAA0319L  | 5. 70E-12 | -0. 14624 | 0. 096 | 0. 192 | 8. 52E-08 | monocyte | KIAA0319L      |
| CDT1. 5    | 5. 70E-12 | -0. 13042 | 0. 009 | 0. 065 | 8. 52E-08 | monocyte | CDT1           |
| LRRC39     | 5. 73E-12 | 0. 239486 | 0. 025 | 0. 006 | 8. 56E-08 | monocyte | LRRC39         |
| CTDNEP1. 4 | 5. 76E-12 | -0. 12721 | 0. 201 | 0. 323 | 8. 61E-08 | monocyte | CTDNEP1        |
| CEP97. 5   | 5. 96E-12 | -0. 12379 | 0. 019 | 0. 081 | 8. 91E-08 | monocyte | CEP97          |
| TSC2. 4    | 6. 02E-12 | -0. 12896 | 0. 059 | 0. 142 | 8. 99E-08 | monocyte | TSC2           |
| SLC41A3. 1 | 6. 02E-12 | -0. 13888 | 0. 068 | 0. 153 | 9. 00E-08 | monocyte | SLC41A3        |
| SNN. 8     | 6. 15E-12 | -0. 13998 | 0. 134 | 0. 234 | 9. 19E-08 | monocyte | SNN            |
| LSP1. 8    | 6. 15E-12 | 0. 32675  | 0. 247 | 0. 159 | 9. 19E-08 | monocyte | LSP1           |
| TBC1D22A.  | 6. 15E-12 | 0. 296321 | 0. 187 | 0. 117 | 9. 19E-08 | monocyte | TBC1D22A       |
| SPG20. 3   | 6. 16E-12 | -0. 12498 | 0. 14  | 0. 246 | 9. 20E-08 | monocyte | SPG20          |
| MAPKAPK3.  | 6. 31E-12 | 0. 326925 | 0. 241 | 0. 164 | 9. 44E-08 | monocyte | MAPKAPK3       |
| NADK2. 3   | 6. 42E-12 | -0. 11589 | 0. 034 | 0. 105 | 9. 60E-08 | monocyte | NADK2          |
| RGS11. 5   | 6. 47E-12 | -0. 13322 | 0. 002 | 0. 051 | 9. 67E-08 | monocyte | RGS11          |
| RP11-192H  | 6. 50E-12 | -0. 13093 | 0. 045 | 0. 12  | 9. 71E-08 | monocyte | RP11-192H23. 6 |
| RAI1. 3    | 6. 50E-12 | -0. 13278 | 0. 014 | 0. 072 | 9. 71E-08 | monocyte | RAI1           |
| CDK20. 5   | 6. 51E-12 | -0. 12422 | 0. 008 | 0. 063 | 9. 73E-08 | monocyte | CDK20          |
| CDCA5. 6   | 6. 52E-12 | -0. 13652 | 0. 001 | 0. 049 | 9. 74E-08 | monocyte | CDCA5          |
| FAM19A5. 5 | 6. 54E-12 | -0. 12984 | 0. 002 | 0. 051 | 9. 77E-08 | monocyte | FAM19A5        |
| MCM4. 6    | 6. 56E-12 | -0. 11989 | 0. 032 | 0. 101 | 9. 80E-08 | monocyte | MCM4           |
| ACSL5. 7   | 6. 83E-12 | 0. 199538 | 0. 073 | 0. 031 | 1. 02E-07 | monocyte | ACSL5          |
| ZNF454. 6  | 6. 84E-12 | -0. 11773 | 0. 002 | 0. 051 | 1. 02E-07 | monocyte | ZNF454         |
| PSMG1. 1   | 6. 87E-12 | -0. 13778 | 0. 122 | 0. 224 | 1. 03E-07 | monocyte | PSMG1          |
| SNAI3. 2   | 6. 91E-12 | 0. 144218 | 0. 042 | 0. 013 | 1. 03E-07 | monocyte | SNAI3          |
| RINT1. 5   | 6. 92E-12 | -0. 10856 | 0. 031 | 0. 101 | 1. 03E-07 | monocyte | RINT1          |
| CPNE5. 4   | 6. 96E-12 | -0. 10667 | 0. 004 | 0. 055 | 1. 04E-07 | monocyte | CPNE5          |
| ZNF7. 4    | 6. 97E-12 | -0. 10123 | 0. 079 | 0. 168 | 1. 04E-07 | monocyte | ZNF7           |
| TOP1MT. 3  | 6. 99E-12 | -0. 1233  | 0. 018 | 0. 078 | 1. 04E-07 | monocyte | TOP1MT         |
| ADAM23. 4  | 7. 36E-12 | -0. 10261 | 0. 003 | 0. 053 | 1. 10E-07 | monocyte | ADAM23         |
| CHRNA9. 5  | 7. 37E-12 | -0. 13166 | 0. 003 | 0. 053 | 1. 10E-07 | monocyte | CHRNA9         |
| E2F1. 5    | 7. 42E-12 | -0. 10824 | 0. 006 | 0. 059 | 1. 11E-07 | monocyte | E2F1           |
| TRO. 4     | 7. 46E-12 | -0. 13857 | 0. 01  | 0. 066 | 1. 12E-07 | monocyte | TRO            |
| MKL2. 4    | 7. 47E-12 | -0. 12558 | 0. 02  | 0. 082 | 1. 12E-07 | monocyte | MKL2           |
| CAPN7. 2   | 7. 49E-12 | -0. 12819 | 0. 045 | 0. 12  | 1. 12E-07 | monocyte | CAPN7          |
| PDZD4. 6   | 7. 50E-12 | -0. 12957 | 0. 002 | 0. 051 | 1. 12E-07 | monocyte | PDZD4          |
| SEC11A. 7  | 7. 51E-12 | 0. 35938  | 0. 595 | 0. 591 | 1. 12E-07 | monocyte | SEC11A         |
| PIGH. 3    | 8. 06E-12 | -0. 11698 | 0. 115 | 0. 216 | 1. 20E-07 | monocyte | PIGH           |
| MANBA. 8   | 8. 14E-12 | 0. 325664 | 0. 186 | 0. 115 | 1. 22E-07 | monocyte | MANBA          |
| B4GALNT4.  | 8. 17E-12 | -0. 11763 | 0. 001 | 0. 049 | 1. 22E-07 | monocyte | B4GALNT4       |
| KATNA1. 2  | 8. 45E-12 | -0. 10499 | 0. 063 | 0. 145 | 1. 26E-07 | monocyte | KATNA1         |
| NUSAP1. 7  | 8. 66E-12 | -0. 22056 | 0. 04  | 0. 11  | 1. 29E-07 | monocyte | NUSAP1         |
| MORN4. 4   | 8. 80E-12 | -0. 11143 | 0. 004 | 0. 055 | 1. 31E-07 | monocyte | MORN4          |
| PDGFA. 5   | 8. 99E-12 | -0. 10479 | 0. 033 | 0. 103 | 1. 34E-07 | monocyte | PDGFA          |
| OMG. 6     | 9. 02E-12 | -0. 19592 | 0. 022 | 0. 085 | 1. 35E-07 | monocyte | OMG            |
| DSCC1. 4   | 9. 13E-12 | -0. 12015 | 0. 009 | 0. 064 | 1. 36E-07 | monocyte | DSCC1          |
| ABCB4. 1   | 9. 18E-12 | 0. 123637 | 0. 031 | 0. 008 | 1. 37E-07 | monocyte | ABCB4          |
| COG1. 5    | 9. 22E-12 | -0. 11501 | 0. 042 | 0. 116 | 1. 38E-07 | monocyte | COG1           |

|             |           |           |        |        |           |          |          |
|-------------|-----------|-----------|--------|--------|-----------|----------|----------|
| TBCE. 2     | 9. 34E-12 | -0. 15976 | 0. 041 | 0. 113 | 1. 40E-07 | monocyte | TBCE     |
| NDFIP1. 8   | 9. 41E-12 | -0. 10884 | 0. 448 | 0. 615 | 1. 41E-07 | monocyte | NDFIP1   |
| MAST2. 3    | 9. 43E-12 | -0. 13613 | 0. 016 | 0. 074 | 1. 41E-07 | monocyte | MAST2    |
| GKAP1. 7    | 9. 45E-12 | -0. 10476 | 0. 028 | 0. 095 | 1. 41E-07 | monocyte | GKAP1    |
| C5orf42. 6  | 9. 49E-12 | -0. 1143  | 0. 031 | 0. 1   | 1. 42E-07 | monocyte | C5orf42  |
| HAS2. 5     | 9. 51E-12 | -0. 10516 | 0. 005 | 0. 057 | 1. 42E-07 | monocyte | HAS2     |
| ARHGAP23. 9 | 9. 56E-12 | -0. 11636 | 0. 005 | 0. 056 | 1. 43E-07 | monocyte | ARHGAP23 |
| AR. 4       | 9. 61E-12 | -0. 10838 | 0. 002 | 0. 051 | 1. 44E-07 | monocyte | AR       |
| PPP4R1. 2   | 9. 68E-12 | -0. 11282 | 0. 044 | 0. 118 | 1. 45E-07 | monocyte | PPP4R1   |
| NELFB. 4    | 9. 69E-12 | -0. 11606 | 0. 07  | 0. 156 | 1. 45E-07 | monocyte | NELFB    |
| ST8SIA5. 5  | 9. 80E-12 | -0. 1347  | 0      | 0. 046 | 1. 46E-07 | monocyte | ST8SIA5  |
| CSNK2A2     | 9. 96E-12 | -0. 13795 | 0. 046 | 0. 121 | 1. 49E-07 | monocyte | CSNK2A2  |
| KPNA5. 4    | 1. 00E-11 | -0. 12339 | 0. 03  | 0. 098 | 1. 50E-07 | monocyte | KPNA5    |
| FOXM1. 6    | 1. 02E-11 | -0. 15494 | 0. 005 | 0. 056 | 1. 53E-07 | monocyte | FOXM1    |
| PARP6. 4    | 1. 03E-11 | -0. 11418 | 0. 038 | 0. 109 | 1. 53E-07 | monocyte | PARP6    |
| FAXDC2. 5   | 1. 03E-11 | -0. 1589  | 0. 008 | 0. 062 | 1. 54E-07 | monocyte | FAXDC2   |
| MARK4. 4    | 1. 04E-11 | -0. 12478 | 0. 018 | 0. 077 | 1. 55E-07 | monocyte | MARK4    |
| NOM1. 5     | 1. 04E-11 | -0. 13336 | 0. 047 | 0. 122 | 1. 56E-07 | monocyte | NOM1     |
| WNT5A. 8    | 1. 05E-11 | 0. 260007 | 0. 106 | 0. 054 | 1. 57E-07 | monocyte | WNT5A    |
| BCL11A. 5   | 1. 07E-11 | -0. 14418 | 0. 003 | 0. 052 | 1. 60E-07 | monocyte | BCL11A   |
| C8orf82. 6  | 1. 07E-11 | -0. 10224 | 0. 088 | 0. 178 | 1. 60E-07 | monocyte | C8orf82  |
| ZNF620. 5   | 1. 07E-11 | -0. 12273 | 0. 009 | 0. 064 | 1. 61E-07 | monocyte | ZNF620   |
| GPD1. 7     | 1. 08E-11 | -0. 22087 | 0. 003 | 0. 052 | 1. 61E-07 | monocyte | GPD1     |
| METTL16. 4  | 1. 10E-11 | -0. 10445 | 0. 042 | 0. 115 | 1. 64E-07 | monocyte | METTL16  |
| FOSL1. 3    | 1. 12E-11 | -0. 10863 | 0. 002 | 0. 05  | 1. 68E-07 | monocyte | FOSL1    |
| PSMD5. 1    | 1. 12E-11 | -0. 11558 | 0. 044 | 0. 118 | 1. 68E-07 | monocyte | PSMD5    |
| ZBTB17. 3   | 1. 13E-11 | -0. 1208  | 0. 044 | 0. 117 | 1. 69E-07 | monocyte | ZBTB17   |
| CEP41. 3    | 1. 14E-11 | -0. 10542 | 0. 071 | 0. 158 | 1. 71E-07 | monocyte | CEP41    |
| SLC35A1. 2  | 1. 15E-11 | -0. 10757 | 0. 061 | 0. 143 | 1. 71E-07 | monocyte | SLC35A1  |
| ZNF408. 5   | 1. 18E-11 | -0. 15409 | 0. 02  | 0. 08  | 1. 76E-07 | monocyte | ZNF408   |
| VLDLR. 1    | 1. 18E-11 | -0. 10178 | 0. 003 | 0. 052 | 1. 77E-07 | monocyte | VLDLR    |
| HRASLS. 4   | 1. 20E-11 | -0. 10825 | 0. 003 | 0. 052 | 1. 79E-07 | monocyte | HRASLS   |
| MFN1        | 1. 22E-11 | -0. 10491 | 0. 031 | 0. 099 | 1. 82E-07 | monocyte | MFN1     |
| SLC20A2. 3  | 1. 22E-11 | -0. 11242 | 0. 045 | 0. 119 | 1. 83E-07 | monocyte | SLC20A2  |
| ZNF714. 3   | 1. 23E-11 | -0. 11653 | 0. 038 | 0. 109 | 1. 83E-07 | monocyte | ZNF714   |
| PANK4       | 1. 24E-11 | -0. 12807 | 0. 017 | 0. 076 | 1. 86E-07 | monocyte | PANK4    |
| CHST7. 6    | 1. 25E-11 | -0. 10149 | 0. 042 | 0. 115 | 1. 87E-07 | monocyte | CHST7    |
| PRMT3. 3    | 1. 25E-11 | -0. 12484 | 0. 028 | 0. 095 | 1. 87E-07 | monocyte | PRMT3    |
| C17orf96. 1 | 1. 26E-11 | -0. 11442 | 0. 007 | 0. 06  | 1. 89E-07 | monocyte | C17orf96 |
| C5orf28. 4  | 1. 28E-11 | -0. 10845 | 0. 049 | 0. 125 | 1. 91E-07 | monocyte | C5orf28  |
| RNF214. 2   | 1. 28E-11 | -0. 11353 | 0. 04  | 0. 112 | 1. 92E-07 | monocyte | RNF214   |
| B3GALNT2. 1 | 1. 28E-11 | -0. 10772 | 0. 029 | 0. 096 | 1. 92E-07 | monocyte | B3GALNT2 |
| NFE2L2. 6   | 1. 33E-11 | -0. 11273 | 0. 324 | 0. 481 | 1. 99E-07 | monocyte | NFE2L2   |
| TXLNA. 3    | 1. 35E-11 | -0. 10485 | 0. 064 | 0. 146 | 2. 01E-07 | monocyte | TXLNA    |
| LRP12. 5    | 1. 35E-11 | -0. 12999 | 0. 031 | 0. 098 | 2. 02E-07 | monocyte | LRP12    |
| UGDH. 3     | 1. 37E-11 | -0. 12029 | 0. 078 | 0. 165 | 2. 04E-07 | monocyte | UGDH     |
| ITGAL. 3    | 1. 38E-11 | 0. 186594 | 0. 056 | 0. 021 | 2. 06E-07 | monocyte | ITGAL    |
| RAB20. 7    | 1. 40E-11 | 0. 382765 | 0. 318 | 0. 229 | 2. 10E-07 | monocyte | RAB20    |
| CHPT1. 6    | 1. 40E-11 | -0. 11745 | 0. 196 | 0. 312 | 2. 10E-07 | monocyte | CHPT1    |
| CDK1. 6     | 1. 41E-11 | -0. 2388  | 0. 034 | 0. 102 | 2. 10E-07 | monocyte | CDK1     |
| ATG16L2. 7  | 1. 41E-11 | 0. 322496 | 0. 143 | 0. 082 | 2. 11E-07 | monocyte | ATG16L2  |

|             |           |           |        |        |           |          |           |
|-------------|-----------|-----------|--------|--------|-----------|----------|-----------|
| CTSA. 8     | 1. 42E-11 | 0. 339561 | 0. 436 | 0. 396 | 2. 12E-07 | monocyte | CTSA      |
| RPUSD1. 4   | 1. 43E-11 | -0. 10682 | 0. 059 | 0. 141 | 2. 14E-07 | monocyte | RPUSD1    |
| RCOR2. 6    | 1. 44E-11 | -0. 14465 | 0. 002 | 0. 05  | 2. 15E-07 | monocyte | RCOR2     |
| ADCYAP1R1   | 1. 45E-11 | -0. 1302  | 0. 003 | 0. 052 | 2. 16E-07 | monocyte | ADCYAP1R1 |
| NPB. 4      | 1. 46E-11 | -0. 12138 | 0. 015 | 0. 072 | 2. 19E-07 | monocyte | NPB       |
| MCUR1. 5    | 1. 47E-11 | -0. 10187 | 0. 158 | 0. 271 | 2. 19E-07 | monocyte | MCUR1     |
| TATDN1. 2   | 1. 48E-11 | -0. 12426 | 0. 137 | 0. 245 | 2. 22E-07 | monocyte | TATDN1    |
| ZNF668. 3   | 1. 52E-11 | -0. 14608 | 0. 025 | 0. 088 | 2. 27E-07 | monocyte | ZNF668    |
| FAM159A. 7  | 1. 53E-11 | 0. 247895 | 0. 088 | 0. 041 | 2. 29E-07 | monocyte | FAM159A   |
| FGF12. 5    | 1. 54E-11 | -0. 18451 | 0. 003 | 0. 052 | 2. 31E-07 | monocyte | FGF12     |
| ZNF395. 4   | 1. 55E-11 | -0. 1446  | 0. 013 | 0. 069 | 2. 32E-07 | monocyte | ZNF395    |
| USP42. 6    | 1. 55E-11 | -0. 11952 | 0. 052 | 0. 129 | 2. 32E-07 | monocyte | USP42     |
| OAF. 2      | 1. 57E-11 | -0. 11027 | 0. 015 | 0. 072 | 2. 35E-07 | monocyte | OAF       |
| CAP2. 5     | 1. 59E-11 | -0. 1281  | 0. 008 | 0. 061 | 2. 37E-07 | monocyte | CAP2      |
| IL17RB. 6   | 1. 59E-11 | -0. 15373 | 0. 002 | 0. 05  | 2. 38E-07 | monocyte | IL17RB    |
| CXXC1. 2    | 1. 60E-11 | -0. 11256 | 0. 09  | 0. 181 | 2. 38E-07 | monocyte | CXXC1     |
| OPTN. 6     | 1. 61E-11 | -0. 18938 | 0. 063 | 0. 142 | 2. 41E-07 | monocyte | OPTN      |
| VKORC1L1. 1 | 1. 65E-11 | -0. 11029 | 0. 058 | 0. 138 | 2. 47E-07 | monocyte | VKORC1L1  |
| WDR75       | 1. 67E-11 | -0. 12137 | 0. 037 | 0. 107 | 2. 49E-07 | monocyte | WDR75     |
| NARS2. 2    | 1. 68E-11 | -0. 12071 | 0. 047 | 0. 12  | 2. 51E-07 | monocyte | NARS2     |
| ZNF853. 5   | 1. 69E-11 | -0. 10102 | 0. 003 | 0. 052 | 2. 53E-07 | monocyte | ZNF853    |
| SP140. 7    | 1. 70E-11 | 0. 224203 | 0. 067 | 0. 028 | 2. 54E-07 | monocyte | SP140     |
| NAB1. 4     | 1. 75E-11 | -0. 10822 | 0. 054 | 0. 132 | 2. 62E-07 | monocyte | NAB1      |
| ARRDC2. 6   | 1. 76E-11 | 0. 296405 | 0. 142 | 0. 081 | 2. 63E-07 | monocyte | ARRDC2    |
| NVL. 5      | 1. 77E-11 | -0. 11516 | 0. 042 | 0. 114 | 2. 65E-07 | monocyte | NVL       |
| JPH4. 5     | 1. 83E-11 | -0. 16209 | 0. 01  | 0. 064 | 2. 73E-07 | monocyte | JPH4      |
| NUDT16. 8   | 1. 84E-11 | 0. 403596 | 0. 288 | 0. 213 | 2. 75E-07 | monocyte | NUDT16    |
| PAQR6. 6    | 1. 87E-11 | -0. 14191 | 0. 018 | 0. 077 | 2. 79E-07 | monocyte | PAQR6     |
| PIFO. 6     | 1. 87E-11 | -0. 22388 | 0. 004 | 0. 053 | 2. 79E-07 | monocyte | PIFO      |
| RNFT2. 6    | 1. 94E-11 | -0. 11074 | 0. 016 | 0. 073 | 2. 90E-07 | monocyte | RNFT2     |
| CLSPN. 5    | 1. 96E-11 | -0. 12288 | 0. 011 | 0. 066 | 2. 94E-07 | monocyte | CLSPN     |
| NBAS. 1     | 1. 97E-11 | -0. 10031 | 0. 04  | 0. 111 | 2. 95E-07 | monocyte | NBAS      |
| RPS6KA2. 2  | 2. 00E-11 | -0. 16652 | 0. 045 | 0. 118 | 2. 99E-07 | monocyte | RPS6KA2   |
| POC1A. 5    | 2. 02E-11 | -0. 12495 | 0. 008 | 0. 061 | 3. 01E-07 | monocyte | POC1A     |
| TMEM177. 5  | 2. 02E-11 | -0. 13259 | 0. 022 | 0. 083 | 3. 02E-07 | monocyte | TMEM177   |
| FAM64A. 8   | 2. 03E-11 | -0. 22874 | 0. 017 | 0. 074 | 3. 03E-07 | monocyte | FAM64A    |
| TLE4. 5     | 2. 04E-11 | -0. 16992 | 0. 085 | 0. 17  | 3. 04E-07 | monocyte | TLE4      |
| PLB1. 7     | 2. 04E-11 | 0. 189596 | 0. 084 | 0. 038 | 3. 06E-07 | monocyte | PLB1      |
| IFNLR1. 4   | 2. 08E-11 | 0. 239595 | 0. 055 | 0. 021 | 3. 10E-07 | monocyte | IFNLR1    |
| SCD. 7      | 2. 08E-11 | -0. 2684  | 0. 125 | 0. 22  | 3. 11E-07 | monocyte | SCD       |
| CA14. 7     | 2. 09E-11 | -0. 1403  | 0. 005 | 0. 055 | 3. 12E-07 | monocyte | CA14      |
| MCM2. 3     | 2. 13E-11 | -0. 12612 | 0. 014 | 0. 07  | 3. 19E-07 | monocyte | MCM2      |
| MVK. 1      | 2. 20E-11 | -0. 11116 | 0. 022 | 0. 083 | 3. 29E-07 | monocyte | MVK       |
| ASMTL. 1    | 2. 21E-11 | -0. 10145 | 0. 084 | 0. 172 | 3. 31E-07 | monocyte | ASMTL     |
| SERINC5. 2  | 2. 22E-11 | -0. 12858 | 0. 015 | 0. 071 | 3. 31E-07 | monocyte | SERINC5   |
| ZC3H18. 5   | 2. 26E-11 | -0. 10396 | 0. 077 | 0. 164 | 3. 38E-07 | monocyte | ZC3H18    |
| GPHN. 4     | 2. 29E-11 | -0. 1292  | 0. 015 | 0. 071 | 3. 42E-07 | monocyte | GPHN      |
| GINS1. 3    | 2. 30E-11 | -0. 10462 | 0. 007 | 0. 059 | 3. 43E-07 | monocyte | GINS1     |
| ERCC6L2. 4  | 2. 31E-11 | -0. 14153 | 0. 027 | 0. 091 | 3. 46E-07 | monocyte | ERCC6L2   |
| FMN1. 7     | 2. 32E-11 | 0. 157198 | 0. 069 | 0. 029 | 3. 47E-07 | monocyte | FMN1      |
| CORO1B. 7   | 2. 36E-11 | 0. 411483 | 0. 401 | 0. 358 | 3. 53E-07 | monocyte | CORO1B    |

|           |          |          |       |       |          |          |               |
|-----------|----------|----------|-------|-------|----------|----------|---------------|
| PSD2.5    | 2.38E-11 | -0.15012 | 0     | 0.045 | 3.56E-07 | monocyte | PSD2          |
| CYB561A3. | 2.39E-11 | 0.373252 | 0.212 | 0.145 | 3.57E-07 | monocyte | CYB561A3      |
| RP11-24F1 | 2.40E-11 | 0.136669 | 0.041 | 0.013 | 3.59E-07 | monocyte | RP11-24F11.2  |
| ZFP64.3   | 2.43E-11 | -0.10539 | 0.021 | 0.082 | 3.63E-07 | monocyte | ZFP64         |
| SMIM1.1   | 2.44E-11 | 0.128832 | 0.044 | 0.015 | 3.64E-07 | monocyte | SMIM1         |
| SMAP2.7   | 2.44E-11 | 0.354532 | 0.309 | 0.23  | 3.65E-07 | monocyte | SMAP2         |
| SPEN.4    | 2.55E-11 | -0.11953 | 0.08  | 0.166 | 3.82E-07 | monocyte | SPEN          |
| BRF1.4    | 2.57E-11 | -0.10633 | 0.039 | 0.109 | 3.85E-07 | monocyte | BRF1          |
| CHDH.2    | 2.58E-11 | -0.12197 | 0.015 | 0.071 | 3.85E-07 | monocyte | CHDH          |
| PARD6A.4  | 2.59E-11 | -0.1247  | 0.033 | 0.1   | 3.87E-07 | monocyte | PARD6A        |
| TSPAN15.7 | 2.60E-11 | 0.2289   | 0.134 | 0.073 | 3.88E-07 | monocyte | TSPAN15       |
| RNF168.5  | 2.67E-11 | -0.12529 | 0.072 | 0.155 | 3.99E-07 | monocyte | RNF168        |
| RAB11FIP1 | 2.69E-11 | 0.118887 | 0.061 | 0.024 | 4.02E-07 | monocyte | RAB11FIP1     |
| GPR137C.5 | 2.73E-11 | -0.11017 | 0.004 | 0.053 | 4.08E-07 | monocyte | GPR137C       |
| MAP4K3.1  | 2.74E-11 | -0.10476 | 0.023 | 0.085 | 4.09E-07 | monocyte | MAP4K3        |
| GRIK3.4   | 2.77E-11 | -0.11252 | 0.002 | 0.049 | 4.13E-07 | monocyte | GRIK3         |
| SH2B3.8   | 2.85E-11 | 0.232787 | 0.171 | 0.103 | 4.25E-07 | monocyte | SH2B3         |
| CAPS.4    | 2.86E-11 | -0.12455 | 0.018 | 0.076 | 4.28E-07 | monocyte | CAPS          |
| FLCN.3    | 2.91E-11 | -0.11239 | 0.063 | 0.142 | 4.35E-07 | monocyte | FLCN          |
| ZNF574.5  | 2.93E-11 | -0.11971 | 0.028 | 0.092 | 4.37E-07 | monocyte | ZNF574        |
| GFPT2.4   | 2.95E-11 | -0.13646 | 0.006 | 0.056 | 4.40E-07 | monocyte | GFPT2         |
| ZNRD1.2   | 2.97E-11 | -0.10995 | 0.12  | 0.219 | 4.43E-07 | monocyte | ZNRD1         |
| FAH.7     | 3.00E-11 | 0.312524 | 0.225 | 0.152 | 4.49E-07 | monocyte | FAH           |
| LNX1.5    | 3.17E-11 | -0.17989 | 0.017 | 0.073 | 4.74E-07 | monocyte | LNX1          |
| TRIP6.7   | 3.18E-11 | -0.11587 | 0.15  | 0.258 | 4.75E-07 | monocyte | TRIP6         |
| ICK.4     | 3.18E-11 | -0.11673 | 0.027 | 0.09  | 4.76E-07 | monocyte | ICK           |
| TROAP.7   | 3.21E-11 | -0.14342 | 0.003 | 0.05  | 4.80E-07 | monocyte | TROAP         |
| RP11-1398 | 3.31E-11 | 0.108783 | 0.042 | 0.014 | 4.95E-07 | monocyte | RP11-1398P2.1 |
| NECAB3.3  | 3.31E-11 | -0.10274 | 0.035 | 0.103 | 4.95E-07 | monocyte | NECAB3        |
| PILRB.4   | 3.32E-11 | -0.10088 | 0.08  | 0.168 | 4.96E-07 | monocyte | PILRB         |
| SP9.7     | 3.36E-11 | -0.16492 | 0     | 0.044 | 5.02E-07 | monocyte | SP9           |
| CDC16.4   | 3.39E-11 | -0.10302 | 0.109 | 0.204 | 5.07E-07 | monocyte | CDC16         |
| MND1.3    | 3.40E-11 | -0.13457 | 0.002 | 0.048 | 5.09E-07 | monocyte | MND1          |
| RALGAPA1. | 3.43E-11 | -0.1193  | 0.058 | 0.136 | 5.13E-07 | monocyte | RALGAPA1      |
| SLC35C2.2 | 3.53E-11 | -0.10599 | 0.154 | 0.262 | 5.28E-07 | monocyte | SLC35C2       |
| SAAL1.3   | 3.59E-11 | -0.12163 | 0.057 | 0.134 | 5.36E-07 | monocyte | SAAL1         |
| GPR82.5   | 3.65E-11 | 0.34519  | 0.197 | 0.129 | 5.45E-07 | monocyte | GPR82         |
| PRRT3.2   | 3.70E-11 | -0.10774 | 0.016 | 0.072 | 5.52E-07 | monocyte | PRRT3         |
| RP11-353N | 3.72E-11 | 0.192777 | 0.051 | 0.019 | 5.55E-07 | monocyte | RP11-353N4.5  |
| RNF25.2   | 3.75E-11 | -0.10059 | 0.039 | 0.108 | 5.60E-07 | monocyte | RNF25         |
| ERP44.6   | 3.78E-11 | 0.405368 | 0.443 | 0.391 | 5.66E-07 | monocyte | ERP44         |
| SPIN2B.6  | 3.80E-11 | -0.14271 | 0.042 | 0.112 | 5.68E-07 | monocyte | SPIN2B        |
| SPATA2L.2 | 3.82E-11 | -0.12801 | 0.04  | 0.109 | 5.70E-07 | monocyte | SPATA2L       |
| SMIM10.3  | 3.91E-11 | -0.11765 | 0.004 | 0.052 | 5.84E-07 | monocyte | SMIM10        |
| CTD-2015H | 3.92E-11 | -0.12139 | 0.001 | 0.046 | 5.86E-07 | monocyte | CTD-2015H6.3  |
| RXR2.2    | 4.05E-11 | -0.14677 | 0.087 | 0.174 | 6.05E-07 | monocyte | RXR2          |
| THAP3.5   | 4.06E-11 | -0.10587 | 0.062 | 0.141 | 6.07E-07 | monocyte | THAP3         |
| SLC41A1.1 | 4.19E-11 | -0.11145 | 0.016 | 0.072 | 6.26E-07 | monocyte | SLC41A1       |
| MID1.4    | 4.24E-11 | -0.10041 | 0.005 | 0.054 | 6.33E-07 | monocyte | MID1          |
| SDC4.3    | 4.36E-11 | -0.1852  | 0.035 | 0.101 | 6.52E-07 | monocyte | SDC4          |
| ACVR2A.3  | 4.38E-11 | -0.10464 | 0.017 | 0.073 | 6.55E-07 | monocyte | ACVR2A        |

|            |           |           |        |        |           |          |                |
|------------|-----------|-----------|--------|--------|-----------|----------|----------------|
| CRB2. 6    | 4. 40E-11 | -0. 16964 | 0. 002 | 0. 048 | 6. 58E-07 | monocyte | CRB2           |
| RP11-539L  | 4. 41E-11 | -0. 11842 | 0. 034 | 0. 101 | 6. 59E-07 | monocyte | RP11-539L10. 3 |
| ARSA. 6    | 4. 46E-11 | 0. 423417 | 0. 197 | 0. 129 | 6. 67E-07 | monocyte | ARSA           |
| NINJ2. 7   | 4. 46E-11 | 0. 175867 | 0. 146 | 0. 082 | 6. 67E-07 | monocyte | NINJ2          |
| EPHB1. 5   | 4. 49E-11 | -0. 14432 | 0. 003 | 0. 05  | 6. 71E-07 | monocyte | EPHB1          |
| ADNP2. 1   | 4. 49E-11 | -0. 10177 | 0. 022 | 0. 082 | 6. 71E-07 | monocyte | ADNP2          |
| DHODH. 3   | 4. 50E-11 | -0. 10891 | 0. 025 | 0. 087 | 6. 72E-07 | monocyte | DHODH          |
| FAM169A. 4 | 4. 51E-11 | -0. 11165 | 0. 004 | 0. 052 | 6. 74E-07 | monocyte | FAM169A        |
| GTF3C3     | 4. 52E-11 | -0. 12692 | 0. 037 | 0. 104 | 6. 75E-07 | monocyte | GTF3C3         |
| MICAL3. 3  | 4. 52E-11 | -0. 14031 | 0. 021 | 0. 08  | 6. 75E-07 | monocyte | MICAL3         |
| ARHGAP1. 2 | 4. 52E-11 | -0. 10616 | 0. 08  | 0. 167 | 6. 75E-07 | monocyte | ARHGAP1        |
| CSMD2. 1   | 4. 54E-11 | -0. 11943 | 0. 002 | 0. 048 | 6. 78E-07 | monocyte | CSMD2          |
| SHC1. 2    | 4. 60E-11 | -0. 14334 | 0. 058 | 0. 136 | 6. 87E-07 | monocyte | SHC1           |
| EXD2. 2    | 4. 64E-11 | -0. 12123 | 0. 033 | 0. 1   | 6. 93E-07 | monocyte | EXD2           |
| RP11-182L  | 4. 67E-11 | -0. 11475 | 0. 017 | 0. 074 | 6. 98E-07 | monocyte | RP11-182L21. 6 |
| IFT80. 3   | 4. 71E-11 | -0. 10488 | 0. 018 | 0. 075 | 7. 05E-07 | monocyte | IFT80          |
| CARKD. 6   | 4. 72E-11 | -0. 10543 | 0. 058 | 0. 136 | 7. 05E-07 | monocyte | CARKD          |
| URGCP. 5   | 4. 79E-11 | -0. 10124 | 0. 048 | 0. 122 | 7. 16E-07 | monocyte | URGCP          |
| PTPRO. 7   | 4. 93E-11 | 0. 315686 | 0. 132 | 0. 074 | 7. 37E-07 | monocyte | PTPRO          |
| IL17RC. 2  | 4. 96E-11 | -0. 10525 | 0. 049 | 0. 122 | 7. 41E-07 | monocyte | IL17RC         |
| GPR162. 6  | 5. 02E-11 | -0. 15696 | 0. 04  | 0. 107 | 7. 49E-07 | monocyte | GPR162         |
| MAN2B1. 6  | 5. 02E-11 | 0. 284845 | 0. 116 | 0. 063 | 7. 50E-07 | monocyte | MAN2B1         |
| SPRED2. 3  | 5. 10E-11 | -0. 12658 | 0. 047 | 0. 119 | 7. 62E-07 | monocyte | SPRED2         |
| RP3-522D1  | 5. 13E-11 | 0. 204078 | 0. 075 | 0. 034 | 7. 66E-07 | monocyte | RP3-522D1. 1   |
| SYT5. 6    | 5. 26E-11 | -0. 15357 | 0. 002 | 0. 047 | 7. 86E-07 | monocyte | SYT5           |
| BCKDHB. 2  | 5. 27E-11 | -0. 1171  | 0. 029 | 0. 093 | 7. 88E-07 | monocyte | BCKDHB         |
| CCNA2. 7   | 5. 28E-11 | -0. 15926 | 0. 009 | 0. 06  | 7. 89E-07 | monocyte | CCNA2          |
| DUS4L. 5   | 5. 42E-11 | -0. 12475 | 0. 024 | 0. 084 | 8. 09E-07 | monocyte | DUS4L          |
| FTL. 8     | 5. 50E-11 | 0. 204021 | 1      | 0. 993 | 8. 21E-07 | monocyte | FTL            |
| AC018647.  | 5. 51E-11 | -0. 22509 | 0. 001 | 0. 045 | 8. 23E-07 | monocyte | AC018647. 3    |
| AURKA. 5   | 5. 55E-11 | -0. 18624 | 0. 023 | 0. 082 | 8. 29E-07 | monocyte | AURKA          |
| DISC1. 5   | 5. 62E-11 | 0. 211322 | 0. 088 | 0. 042 | 8. 40E-07 | monocyte | DISC1          |
| WDYHV1. 3  | 5. 64E-11 | -0. 15038 | 0. 053 | 0. 127 | 8. 43E-07 | monocyte | WDYHV1         |
| CAV2. 3    | 5. 70E-11 | -0. 14282 | 0. 002 | 0. 047 | 8. 51E-07 | monocyte | CAV2           |
| UBXN6. 4   | 5. 77E-11 | -0. 10824 | 0. 191 | 0. 309 | 8. 62E-07 | monocyte | UBXN6          |
| SENP7. 5   | 5. 87E-11 | -0. 1049  | 0. 028 | 0. 092 | 8. 78E-07 | monocyte | SENP7          |
| FGFR2. 6   | 5. 98E-11 | -0. 19018 | 0. 004 | 0. 051 | 8. 93E-07 | monocyte | FGFR2          |
| RGS2. 6    | 5. 98E-11 | 0. 523723 | 0. 501 | 0. 44  | 8. 93E-07 | monocyte | RGS2           |
| ARCN1. 1   | 5. 99E-11 | -0. 11247 | 0. 093 | 0. 183 | 8. 95E-07 | monocyte | ARCN1          |
| GPR137. 5  | 6. 08E-11 | -0. 1103  | 0. 12  | 0. 216 | 9. 09E-07 | monocyte | GPR137         |
| ONECUT2. 5 | 6. 18E-11 | -0. 13453 | 0. 002 | 0. 047 | 9. 24E-07 | monocyte | ONECUT2        |
| THBS4. 5   | 6. 26E-11 | -0. 10777 | 0. 006 | 0. 055 | 9. 35E-07 | monocyte | THBS4          |
| SYNJ2. 3   | 6. 27E-11 | -0. 1165  | 0. 003 | 0. 049 | 9. 38E-07 | monocyte | SYNJ2          |
| BBS7. 3    | 6. 43E-11 | -0. 12576 | 0. 035 | 0. 102 | 9. 61E-07 | monocyte | BBS7           |
| NCAPG2. 3  | 6. 44E-11 | -0. 11081 | 0. 014 | 0. 067 | 9. 62E-07 | monocyte | NCAPG2         |
| PRKAR2B. 6 | 6. 49E-11 | -0. 17426 | 0. 018 | 0. 073 | 9. 69E-07 | monocyte | PRKAR2B        |
| UPP1. 7    | 6. 52E-11 | -0. 19159 | 0. 163 | 0. 263 | 9. 74E-07 | monocyte | UPP1           |
| SLU7. 2    | 6. 58E-11 | -0. 11056 | 0. 203 | 0. 323 | 9. 84E-07 | monocyte | SLU7           |
| PHF13. 2   | 6. 96E-11 | -0. 11685 | 0. 015 | 0. 069 | 1. 04E-06 | monocyte | PHF13          |
| DDX25. 5   | 7. 02E-11 | -0. 12985 | 0      | 0. 043 | 1. 05E-06 | monocyte | DDX25          |
| PCK2. 6    | 7. 03E-11 | 0. 22027  | 0. 119 | 0. 065 | 1. 05E-06 | monocyte | PCK2           |

|             |          |          |       |       |          |          |               |
|-------------|----------|----------|-------|-------|----------|----------|---------------|
| ZNF516.1    | 7.04E-11 | -0.13981 | 0.034 | 0.099 | 1.05E-06 | monocyte | ZNF516        |
| AP1G1.3     | 7.12E-11 | -0.1188  | 0.055 | 0.13  | 1.06E-06 | monocyte | AP1G1         |
| CDK7.2      | 7.18E-11 | -0.1507  | 0.033 | 0.098 | 1.07E-06 | monocyte | CDK7          |
| BAX.8       | 7.22E-11 | 0.352148 | 0.563 | 0.566 | 1.08E-06 | monocyte | BAX           |
| SLC4A8.3    | 7.25E-11 | -0.14292 | 0.021 | 0.079 | 1.08E-06 | monocyte | SLC4A8        |
| RNF213.8    | 7.34E-11 | 0.431733 | 0.322 | 0.256 | 1.10E-06 | monocyte | RNF213        |
| WDFY4.7     | 7.36E-11 | 0.143083 | 0.058 | 0.023 | 1.10E-06 | monocyte | WDFY4         |
| SLC05A1.6   | 7.42E-11 | -0.1478  | 0.001 | 0.045 | 1.11E-06 | monocyte | SLC05A1       |
| SLC9B2.2    | 7.49E-11 | -0.1356  | 0.003 | 0.049 | 1.12E-06 | monocyte | SLC9B2        |
| WWOX.2      | 7.72E-11 | -0.16148 | 0.038 | 0.104 | 1.15E-06 | monocyte | WWOX          |
| MEPCE.1     | 7.80E-11 | -0.14549 | 0.058 | 0.134 | 1.17E-06 | monocyte | MEPCE         |
| CPPED1.8    | 7.84E-11 | 0.248867 | 0.118 | 0.063 | 1.17E-06 | monocyte | CPPED1        |
| GLI4.5      | 7.95E-11 | -0.11684 | 0.046 | 0.117 | 1.19E-06 | monocyte | GLI4          |
| ZC4H2.5     | 8.00E-11 | -0.12657 | 0.007 | 0.056 | 1.19E-06 | monocyte | ZC4H2         |
| TTC39C.3    | 8.13E-11 | -0.1205  | 0.025 | 0.085 | 1.22E-06 | monocyte | TTC39C        |
| RP11-127E   | 8.24E-11 | -0.11026 | 0.004 | 0.05  | 1.23E-06 | monocyte | RP11-127B20.2 |
| NUDT14.8    | 8.33E-11 | 0.355762 | 0.261 | 0.186 | 1.24E-06 | monocyte | NUDT14        |
| FAM20C.6    | 8.34E-11 | -0.14736 | 0.134 | 0.231 | 1.25E-06 | monocyte | FAM20C        |
| PKP4.4      | 8.46E-11 | -0.11988 | 0.008 | 0.058 | 1.26E-06 | monocyte | PKP4          |
| SALL2.1     | 8.57E-11 | -0.12153 | 0.001 | 0.044 | 1.28E-06 | monocyte | SALL2         |
| F11R.7      | 8.61E-11 | 0.223761 | 0.103 | 0.053 | 1.29E-06 | monocyte | F11R          |
| DIP2C.4     | 9.20E-11 | -0.12154 | 0.028 | 0.09  | 1.38E-06 | monocyte | DIP2C         |
| HCG18.5     | 9.35E-11 | -0.10335 | 0.047 | 0.118 | 1.40E-06 | monocyte | HCG18         |
| AGO2.1      | 9.42E-11 | -0.12678 | 0.019 | 0.075 | 1.41E-06 | monocyte | AGO2          |
| FBLIM1.3    | 9.88E-11 | -0.10243 | 0.03  | 0.094 | 1.48E-06 | monocyte | FBLIM1        |
| ATP6AP2.4   | 9.89E-11 | 0.357728 | 0.621 | 0.659 | 1.48E-06 | monocyte | ATP6AP2       |
| DCBLD1.2    | 9.94E-11 | -0.10871 | 0.03  | 0.093 | 1.49E-06 | monocyte | DCBLD1        |
| ZNF470      | 1.02E-10 | -0.10174 | 0.005 | 0.052 | 1.52E-06 | monocyte | ZNF470        |
| KHK.1       | 1.05E-10 | -0.12248 | 0.026 | 0.087 | 1.57E-06 | monocyte | KHK           |
| GNPNAT1.2   | 1.06E-10 | -0.1248  | 0.04  | 0.107 | 1.58E-06 | monocyte | GNPNAT1       |
| DIAPH2.4    | 1.06E-10 | 0.228257 | 0.114 | 0.061 | 1.59E-06 | monocyte | DIAPH2        |
| NMRK1.6     | 1.06E-10 | 0.414483 | 0.204 | 0.134 | 1.59E-06 | monocyte | NMRK1         |
| CAHM.6      | 1.07E-10 | -0.10262 | 0.032 | 0.097 | 1.59E-06 | monocyte | CAHM          |
| KITLG.2     | 1.07E-10 | -0.10143 | 0.002 | 0.046 | 1.60E-06 | monocyte | KITLG         |
| DUSP5.1     | 1.08E-10 | -0.14388 | 0.021 | 0.078 | 1.61E-06 | monocyte | DUSP5         |
| EMP3.7      | 1.09E-10 | -0.15086 | 0.333 | 0.459 | 1.62E-06 | monocyte | EMP3          |
| ZNF71.6     | 1.09E-10 | -0.12178 | 0.028 | 0.09  | 1.63E-06 | monocyte | ZNF71         |
| GOLGA8B.3   | 1.09E-10 | -0.10739 | 0.006 | 0.054 | 1.63E-06 | monocyte | GOLGA8B       |
| MAPK8IP2.1  | 1.10E-10 | -0.12673 | 0.002 | 0.046 | 1.64E-06 | monocyte | MAPK8IP2      |
| KAT6A.3     | 1.13E-10 | -0.10247 | 0.081 | 0.165 | 1.68E-06 | monocyte | KAT6A         |
| SERPINI1.1  | 1.13E-10 | -0.18303 | 0.008 | 0.057 | 1.69E-06 | monocyte | SERPINI1      |
| MKRN3.5     | 1.15E-10 | -0.12537 | 0.003 | 0.048 | 1.72E-06 | monocyte | MKRN3         |
| CTH.3       | 1.16E-10 | -0.11236 | 0.009 | 0.059 | 1.73E-06 | monocyte | CTH           |
| DOK4.6      | 1.16E-10 | -0.10845 | 0.004 | 0.05  | 1.74E-06 | monocyte | DOK4          |
| DUSP10.1    | 1.17E-10 | -0.18017 | 0.102 | 0.186 | 1.75E-06 | monocyte | DUSP10        |
| AKNA.6      | 1.18E-10 | 0.219924 | 0.123 | 0.068 | 1.77E-06 | monocyte | AKNA          |
| SASH1.5     | 1.18E-10 | -0.14684 | 0.019 | 0.074 | 1.77E-06 | monocyte | SASH1         |
| SECISBP2L.1 | 1.20E-10 | -0.13388 | 0.094 | 0.181 | 1.79E-06 | monocyte | SECISBP2L     |
| FABP6.7     | 1.21E-10 | -0.16128 | 0     | 0.042 | 1.80E-06 | monocyte | FABP6         |
| ATF7IP2.7   | 1.21E-10 | 0.214413 | 0.081 | 0.038 | 1.81E-06 | monocyte | ATF7IP2       |
| IMMP2L.6    | 1.23E-10 | -0.15078 | 0.072 | 0.151 | 1.84E-06 | monocyte | IMMP2L        |

|            |           |           |        |        |           |          |                 |
|------------|-----------|-----------|--------|--------|-----------|----------|-----------------|
| MELK. 4    | 1. 25E-10 | -0. 11958 | 0. 004 | 0. 05  | 1. 87E-06 | monocyte | MELK            |
| KLHL28. 6  | 1. 26E-10 | -0. 12016 | 0. 053 | 0. 125 | 1. 88E-06 | monocyte | KLHL28          |
| CTC-338M1  | 1. 26E-10 | -0. 1496  | 0. 018 | 0. 073 | 1. 88E-06 | monocyte | CTC-338M12. 5   |
| BMP1. 2    | 1. 27E-10 | -0. 11066 | 0. 015 | 0. 068 | 1. 90E-06 | monocyte | BMP1            |
| CLCN4. 7   | 1. 29E-10 | -0. 1446  | 0. 009 | 0. 059 | 1. 93E-06 | monocyte | CLCN4           |
| CDKN2AIP.  | 1. 33E-10 | -0. 17783 | 0. 075 | 0. 153 | 1. 99E-06 | monocyte | CDKN2AIP        |
| MFSD2A. 4  | 1. 37E-10 | -0. 14579 | 0. 039 | 0. 104 | 2. 04E-06 | monocyte | MFSD2A          |
| ASF1B. 5   | 1. 38E-10 | -0. 12758 | 0. 013 | 0. 064 | 2. 06E-06 | monocyte | ASF1B           |
| PHF10. 1   | 1. 39E-10 | -0. 10079 | 0. 027 | 0. 088 | 2. 07E-06 | monocyte | PHF10           |
| BAG5. 6    | 1. 39E-10 | -0. 15431 | 0. 104 | 0. 192 | 2. 08E-06 | monocyte | BAG5            |
| PPM1D. 3   | 1. 41E-10 | -0. 10506 | 0. 035 | 0. 1   | 2. 11E-06 | monocyte | PPM1D           |
| POMT2. 2   | 1. 42E-10 | -0. 11834 | 0. 02  | 0. 076 | 2. 12E-06 | monocyte | POMT2           |
| UBR7. 4    | 1. 43E-10 | -0. 10545 | 0. 051 | 0. 123 | 2. 14E-06 | monocyte | UBR7            |
| CNOT10. 2  | 1. 45E-10 | -0. 10466 | 0. 055 | 0. 128 | 2. 16E-06 | monocyte | CNOT10          |
| CA9. 4     | 1. 46E-10 | -0. 18405 | 0. 001 | 0. 043 | 2. 18E-06 | monocyte | CA9             |
| SMYD2. 2   | 1. 46E-10 | -0. 1208  | 0. 069 | 0. 147 | 2. 18E-06 | monocyte | SMYD2           |
| MSANTD2. 2 | 1. 51E-10 | -0. 10698 | 0. 013 | 0. 064 | 2. 25E-06 | monocyte | MSANTD2         |
| ARX. 7     | 1. 51E-10 | -0. 15233 | 0. 001 | 0. 043 | 2. 25E-06 | monocyte | ARX             |
| CPLX1. 5   | 1. 51E-10 | -0. 14805 | 0. 002 | 0. 045 | 2. 26E-06 | monocyte | CPLX1           |
| BIRC3. 4   | 1. 52E-10 | -0. 24094 | 0. 016 | 0. 068 | 2. 27E-06 | monocyte | BIRC3           |
| RP11-1275  | 1. 53E-10 | -0. 11246 | 0. 013 | 0. 064 | 2. 28E-06 | monocyte | RP11-1275H24. 1 |
| SPTLC2. 8  | 1. 53E-10 | 0. 374018 | 0. 277 | 0. 204 | 2. 29E-06 | monocyte | SPTLC2          |
| PPFIA2. 4  | 1. 54E-10 | -0. 15475 | 0. 004 | 0. 049 | 2. 30E-06 | monocyte | PPFIA2          |
| CXCL3. 5   | 1. 56E-10 | -0. 26977 | 0. 021 | 0. 077 | 2. 33E-06 | monocyte | CXCL3           |
| AURKB. 7   | 1. 60E-10 | -0. 18836 | 0. 006 | 0. 052 | 2. 39E-06 | monocyte | AURKB           |
| KCTD15. 3  | 1. 60E-10 | -0. 11527 | 0. 004 | 0. 049 | 2. 40E-06 | monocyte | KCTD15          |
| IQCG. 5    | 1. 64E-10 | -0. 1191  | 0. 055 | 0. 128 | 2. 45E-06 | monocyte | IQCG            |
| ADRBK2. 6  | 1. 68E-10 | 0. 189458 | 0. 097 | 0. 049 | 2. 51E-06 | monocyte | ADRBK2          |
| CMTM3. 8   | 1. 72E-10 | 0. 345787 | 0. 37  | 0. 32  | 2. 57E-06 | monocyte | CMTM3           |
| LIN7A. 3   | 1. 75E-10 | -0. 10258 | 0. 002 | 0. 045 | 2. 61E-06 | monocyte | LIN7A           |
| PDZD2. 3   | 1. 77E-10 | -0. 13183 | 0. 003 | 0. 047 | 2. 64E-06 | monocyte | PDZD2           |
| RACGAP1. 4 | 1. 79E-10 | -0. 14655 | 0. 028 | 0. 088 | 2. 68E-06 | monocyte | RACGAP1         |
| TXNL4B. 2  | 1. 80E-10 | -0. 11757 | 0. 037 | 0. 101 | 2. 69E-06 | monocyte | TXNL4B          |
| LOH12CR2.  | 1. 85E-10 | -0. 13444 | 0. 009 | 0. 058 | 2. 76E-06 | monocyte | LOH12CR2        |
| ACO91729.  | 1. 85E-10 | -0. 1017  | 0. 026 | 0. 085 | 2. 77E-06 | monocyte | ACO91729. 9     |
| INSIG1. 7  | 1. 87E-10 | -0. 19379 | 0. 141 | 0. 234 | 2. 79E-06 | monocyte | INSIG1          |
| HYOU1. 4   | 1. 91E-10 | -0. 12046 | 0. 068 | 0. 145 | 2. 86E-06 | monocyte | HYOU1           |
| DTD2. 3    | 1. 96E-10 | -0. 12443 | 0. 02  | 0. 075 | 2. 93E-06 | monocyte | DTD2            |
| RIPPLY2. 3 | 1. 97E-10 | -0. 10591 | 0      | 0. 041 | 2. 94E-06 | monocyte | RIPPLY2         |
| STRN3. 2   | 2. 01E-10 | -0. 10477 | 0. 061 | 0. 136 | 3. 00E-06 | monocyte | STRN3           |
| EXOC4. 3   | 2. 02E-10 | -0. 12323 | 0. 088 | 0. 171 | 3. 03E-06 | monocyte | EXOC4           |
| WDR86. 3   | 2. 04E-10 | -0. 10876 | 0. 003 | 0. 047 | 3. 04E-06 | monocyte | WDR86           |
| TPT1. 6    | 2. 05E-10 | 0. 207119 | 0. 937 | 0. 954 | 3. 06E-06 | monocyte | TPT1            |
| ATG16L1. 1 | 2. 06E-10 | -0. 13749 | 0. 018 | 0. 072 | 3. 08E-06 | monocyte | ATG16L1         |
| RSAD2. 1   | 2. 08E-10 | 0. 254694 | 0. 068 | 0. 03  | 3. 10E-06 | monocyte | RSAD2           |
| ZNF22. 6   | 2. 10E-10 | -0. 10069 | 0. 175 | 0. 284 | 3. 14E-06 | monocyte | ZNF22           |
| SLC32A1. 6 | 2. 17E-10 | -0. 16249 | 0      | 0. 041 | 3. 24E-06 | monocyte | SLC32A1         |
| ZNF569. 4  | 2. 18E-10 | -0. 12618 | 0. 019 | 0. 073 | 3. 26E-06 | monocyte | ZNF569          |
| AFF3. 5    | 2. 18E-10 | -0. 12188 | 0. 008 | 0. 056 | 3. 26E-06 | monocyte | AFF3            |
| SLC31A2. 8 | 2. 24E-10 | 0. 279158 | 0. 269 | 0. 185 | 3. 34E-06 | monocyte | SLC31A2         |
| TUBA4A. 4  | 2. 24E-10 | -0. 22168 | 0. 009 | 0. 058 | 3. 34E-06 | monocyte | TUBA4A          |

|              |           |           |        |        |           |          |                |
|--------------|-----------|-----------|--------|--------|-----------|----------|----------------|
| NRP2. 5      | 2. 27E-10 | -0. 14094 | 0. 137 | 0. 229 | 3. 40E-06 | monocyte | NRP2           |
| TMEM150C. 2. | 2. 29E-10 | -0. 13261 | 0. 004 | 0. 048 | 3. 42E-06 | monocyte | TMEM150C       |
| RP5-1177M 2. | 2. 36E-10 | -0. 18577 | 0. 004 | 0. 049 | 3. 53E-06 | monocyte | RP5-1177M21. 1 |
| POLI. 2      | 2. 38E-10 | -0. 12291 | 0. 032 | 0. 095 | 3. 55E-06 | monocyte | POLI           |
| VSIG10. 1    | 2. 41E-10 | -0. 13078 | 0. 015 | 0. 067 | 3. 59E-06 | monocyte | VSIG10         |
| ZNF419. 3    | 2. 44E-10 | -0. 14376 | 0. 015 | 0. 066 | 3. 65E-06 | monocyte | ZNF419         |
| CASKIN2. 2   | 2. 44E-10 | -0. 10957 | 0. 004 | 0. 048 | 3. 65E-06 | monocyte | CASKIN2        |
| NR2F2. 5     | 2. 50E-10 | -0. 14025 | 0. 004 | 0. 048 | 3. 74E-06 | monocyte | NR2F2          |
| UBALD1. 6    | 2. 53E-10 | -0. 10158 | 0. 089 | 0. 174 | 3. 78E-06 | monocyte | UBALD1         |
| LRRC20. 1    | 2. 55E-10 | -0. 10718 | 0. 006 | 0. 052 | 3. 82E-06 | monocyte | LRRC20         |
| SALL3. 4     | 2. 56E-10 | -0. 10312 | 0. 002 | 0. 044 | 3. 83E-06 | monocyte | SALL3          |
| SUSD4. 5     | 2. 58E-10 | -0. 12861 | 0. 002 | 0. 044 | 3. 85E-06 | monocyte | SUSD4          |
| COQ10A. 5    | 2. 69E-10 | -0. 12037 | 0. 041 | 0. 106 | 4. 02E-06 | monocyte | COQ10A         |
| PHF11. 7     | 2. 72E-10 | 0. 329204 | 0. 201 | 0. 136 | 4. 07E-06 | monocyte | PHF11          |
| RNF112. 2    | 2. 77E-10 | -0. 10395 | 0      | 0. 04  | 4. 14E-06 | monocyte | RNF112         |
| RRAGB. 5     | 2. 79E-10 | -0. 10146 | 0. 048 | 0. 117 | 4. 16E-06 | monocyte | RRAGB          |
| RCHY1. 4     | 2. 90E-10 | -0. 10355 | 0. 117 | 0. 207 | 4. 33E-06 | monocyte | RCHY1          |
| FKBPL. 4     | 3. 01E-10 | -0. 11494 | 0. 017 | 0. 069 | 4. 49E-06 | monocyte | FKBPL          |
| MUC12. 3     | 3. 03E-10 | -0. 18042 | 0. 003 | 0. 046 | 4. 53E-06 | monocyte | MUC12          |
| NYAP1. 5     | 3. 06E-10 | -0. 12407 | 0      | 0. 04  | 4. 57E-06 | monocyte | NYAP1          |
| SLC1A5. 7    | 3. 15E-10 | 0. 352036 | 0. 197 | 0. 133 | 4. 70E-06 | monocyte | SLC1A5         |
| SNRNP35. 3   | 3. 16E-10 | -0. 11813 | 0. 112 | 0. 203 | 4. 72E-06 | monocyte | SNRNP35        |
| RABL2A. 5    | 3. 24E-10 | -0. 1217  | 0. 024 | 0. 081 | 4. 84E-06 | monocyte | RABL2A         |
| EFHD1. 5     | 3. 25E-10 | -0. 24245 | 0. 013 | 0. 062 | 4. 85E-06 | monocyte | EFHD1          |
| TMEM151A. 3. | 2. 8E-10  | -0. 16892 | 0. 003 | 0. 046 | 4. 90E-06 | monocyte | TMEM151A       |
| VRK2. 8      | 3. 30E-10 | 0. 197327 | 0. 099 | 0. 051 | 4. 94E-06 | monocyte | VRK2           |
| PDK4. 7      | 3. 31E-10 | 0. 398746 | 0. 234 | 0. 164 | 4. 95E-06 | monocyte | PDK4           |
| NDC80. 6     | 3. 32E-10 | -0. 14031 | 0. 006 | 0. 052 | 4. 96E-06 | monocyte | NDC80          |
| SPRTN. 4     | 3. 34E-10 | -0. 11851 | 0. 059 | 0. 132 | 4. 99E-06 | monocyte | SPRTN          |
| TTC8. 3      | 3. 35E-10 | -0. 11443 | 0. 031 | 0. 092 | 5. 01E-06 | monocyte | TTC8           |
| ZNF550. 5    | 3. 37E-10 | -0. 13526 | 0. 006 | 0. 052 | 5. 04E-06 | monocyte | ZNF550         |
| ANAPC16. 6   | 3. 44E-10 | 0. 415434 | 0. 548 | 0. 523 | 5. 13E-06 | monocyte | ANAPC16        |
| HOOK3. 4     | 3. 52E-10 | -0. 10348 | 0. 181 | 0. 293 | 5. 26E-06 | monocyte | HOOK3          |
| SPAG5. 4     | 3. 55E-10 | -0. 11465 | 0. 004 | 0. 048 | 5. 30E-06 | monocyte | SPAG5          |
| CXorf21. 8   | 3. 61E-10 | 0. 2138   | 0. 129 | 0. 071 | 5. 39E-06 | monocyte | CXorf21        |
| DDX19A. 2    | 3. 62E-10 | -0. 10221 | 0. 081 | 0. 165 | 5. 42E-06 | monocyte | DDX19A         |
| PCNXL4       | 3. 64E-10 | -0. 11535 | 0. 057 | 0. 129 | 5. 44E-06 | monocyte | PCNXL4         |
| ASUN. 3      | 3. 64E-10 | -0. 11093 | 0. 048 | 0. 116 | 5. 44E-06 | monocyte | ASUN           |
| FKBP5. 8     | 3. 71E-10 | 0. 398304 | 0. 374 | 0. 312 | 5. 55E-06 | monocyte | FKBP5          |
| ADRBK1. 8    | 3. 74E-10 | 0. 247851 | 0. 146 | 0. 088 | 5. 59E-06 | monocyte | ADRBK1         |
| FBXO31. 1    | 3. 79E-10 | -0. 11594 | 0. 01  | 0. 059 | 5. 67E-06 | monocyte | FBXO31         |
| ABTB1. 7     | 3. 80E-10 | 0. 268094 | 0. 162 | 0. 099 | 5. 67E-06 | monocyte | ABTB1          |
| PCF11. 5     | 3. 86E-10 | -0. 11097 | 0. 119 | 0. 211 | 5. 77E-06 | monocyte | PCF11          |
| C21orf58. 3. | 3. 90E-10 | -0. 1089  | 0. 009 | 0. 057 | 5. 82E-06 | monocyte | C21orf58       |
| ATF7IP. 3    | 3. 95E-10 | -0. 11381 | 0. 049 | 0. 118 | 5. 91E-06 | monocyte | ATF7IP         |
| FBXO16. 3    | 3. 98E-10 | -0. 11952 | 0. 002 | 0. 043 | 5. 95E-06 | monocyte | FBXO16         |
| RP11-430H 4. | 4. 09E-10 | -0. 10356 | 0. 001 | 0. 041 | 6. 11E-06 | monocyte | RP11-430H10. 1 |
| FO XK1. 4    | 4. 09E-10 | -0. 13252 | 0. 061 | 0. 133 | 6. 12E-06 | monocyte | FO XK1         |
| RAB3C. 4     | 4. 11E-10 | -0. 13622 | 0. 001 | 0. 041 | 6. 15E-06 | monocyte | RAB3C          |
| NDUFA4L2. 4. | 4. 13E-10 | -0. 17607 | 0. 002 | 0. 043 | 6. 16E-06 | monocyte | NDUFA4L2       |
| TSEN2. 7     | 4. 16E-10 | -0. 12747 | 0. 032 | 0. 093 | 6. 21E-06 | monocyte | TSEN2          |



|             |          |          |       |       |          |          |            |
|-------------|----------|----------|-------|-------|----------|----------|------------|
| FCH02.5     | 4.16E-10 | 0.190694 | 0.123 | 0.07  | 6.22E-06 | monocyte | FCH02      |
| ABL1.1      | 4.19E-10 | -0.12228 | 0.035 | 0.098 | 6.27E-06 | monocyte | ABL1       |
| CDCA3.7     | 4.28E-10 | -0.17696 | 0.009 | 0.056 | 6.40E-06 | monocyte | CDCA3      |
| PCDH8.4     | 4.28E-10 | -0.10926 | 0.006 | 0.051 | 6.40E-06 | monocyte | PCDH8      |
| NRG2.5      | 4.30E-10 | -0.10408 | 0.002 | 0.043 | 6.43E-06 | monocyte | NRG2       |
| ACO02456.4  | 4.38E-10 | -0.14779 | 0.004 | 0.047 | 6.55E-06 | monocyte | ACO02456.2 |
| TFEB.6      | 4.39E-10 | 0.210177 | 0.127 | 0.073 | 6.57E-06 | monocyte | TFEB       |
| CKAP2L.7    | 4.43E-10 | -0.13821 | 0.005 | 0.049 | 6.62E-06 | monocyte | CKAP2L     |
| ST8SIA4.8   | 4.44E-10 | 0.219451 | 0.181 | 0.114 | 6.63E-06 | monocyte | ST8SIA4    |
| STOML1.4    | 4.47E-10 | -0.15831 | 0.042 | 0.106 | 6.67E-06 | monocyte | STOML1     |
| ARMC9.4     | 4.51E-10 | -0.10485 | 0.02  | 0.074 | 6.75E-06 | monocyte | ARMC9      |
| MASP1.4     | 4.53E-10 | -0.15933 | 0.002 | 0.043 | 6.76E-06 | monocyte | MASP1      |
| COPA.5      | 4.55E-10 | -0.10118 | 0.208 | 0.322 | 6.80E-06 | monocyte | COPA       |
| LDHD.1      | 4.63E-10 | 0.145516 | 0.049 | 0.019 | 6.92E-06 | monocyte | LDHD       |
| HBEGF.8     | 4.68E-10 | -0.1828  | 0.137 | 0.222 | 6.99E-06 | monocyte | HBEGF      |
| TCN2.4      | 4.71E-10 | 0.359808 | 0.153 | 0.094 | 7.03E-06 | monocyte | TCN2       |
| POMZP3.6    | 4.83E-10 | -0.10679 | 0.031 | 0.091 | 7.21E-06 | monocyte | POMZP3     |
| LINC00672.4 | 4.89E-10 | -0.12912 | 0.008 | 0.055 | 7.30E-06 | monocyte | LINC00672  |
| TOPORS.5    | 4.89E-10 | -0.10594 | 0.101 | 0.185 | 7.31E-06 | monocyte | TOPORS     |
| DLGAP1.5    | 4.97E-10 | -0.10756 | 0.005 | 0.049 | 7.42E-06 | monocyte | DLGAP1     |
| C6orf52.3   | 5.11E-10 | -0.10734 | 0.005 | 0.049 | 7.64E-06 | monocyte | C6orf52    |
| RORB.5      | 5.15E-10 | -0.14679 | 0.001 | 0.041 | 7.70E-06 | monocyte | RORB       |
| ZCCHC24.6   | 5.26E-10 | -0.15707 | 0.041 | 0.105 | 7.86E-06 | monocyte | ZCCHC24    |
| NSUN2.2     | 5.26E-10 | -0.1253  | 0.066 | 0.14  | 7.87E-06 | monocyte | NSUN2      |
| NCAPG.6     | 5.30E-10 | -0.12081 | 0.003 | 0.045 | 7.92E-06 | monocyte | NCAPG      |
| SMAD4.3     | 5.34E-10 | -0.10452 | 0.056 | 0.128 | 7.98E-06 | monocyte | SMAD4      |
| VWA3B.3     | 5.54E-10 | -0.10751 | 0.001 | 0.041 | 8.28E-06 | monocyte | VWA3B      |
| RPUSD2.2    | 5.62E-10 | -0.10124 | 0.019 | 0.072 | 8.40E-06 | monocyte | RPUSD2     |
| TNFRSF1A.5  | 5.75E-10 | 0.328123 | 0.414 | 0.368 | 8.59E-06 | monocyte | TNFRSF1A   |
| LIMS1.8     | 5.81E-10 | 0.371894 | 0.475 | 0.436 | 8.68E-06 | monocyte | LIMS1      |
| PDE1C.3     | 5.86E-10 | -0.13488 | 0.002 | 0.043 | 8.76E-06 | monocyte | PDE1C      |
| NCAPH.2     | 6.07E-10 | -0.1104  | 0     | 0.039 | 9.06E-06 | monocyte | NCAPH      |
| CLCF1.4     | 6.08E-10 | -0.16427 | 0.003 | 0.045 | 9.09E-06 | monocyte | CLCF1      |
| NECAB1.6    | 6.35E-10 | -0.18438 | 0.001 | 0.041 | 9.48E-06 | monocyte | NECAB1     |
| ASPM.8      | 6.41E-10 | -0.14015 | 0.006 | 0.05  | 9.58E-06 | monocyte | ASPM       |
| FARP2.8     | 6.44E-10 | -0.1337  | 0.019 | 0.071 | 9.62E-06 | monocyte | FARP2      |
| DHRS4.5     | 6.53E-10 | 0.23363  | 0.133 | 0.077 | 9.75E-06 | monocyte | DHRS4      |
| SPDL1.4     | 6.77E-10 | -0.11101 | 0.018 | 0.069 | 1.01E-05 | monocyte | SPDL1      |
| DIS3L2.2    | 6.88E-10 | -0.15521 | 0.043 | 0.107 | 1.03E-05 | monocyte | DIS3L2     |
| CERS6.5     | 7.11E-10 | -0.11765 | 0.062 | 0.132 | 1.06E-05 | monocyte | CERS6      |
| RAP1GDS1.7  | 7.36E-10 | -0.102   | 0.097 | 0.18  | 1.10E-05 | monocyte | RAP1GDS1   |
| NLRC4.2     | 7.45E-10 | 0.156337 | 0.034 | 0.011 | 1.11E-05 | monocyte | NLRC4      |
| TMIGD2.4    | 7.46E-10 | 0.260188 | 0.046 | 0.017 | 1.12E-05 | monocyte | TMIGD2     |
| PFN1.7      | 7.47E-10 | 0.163131 | 0.783 | 0.811 | 1.12E-05 | monocyte | PFN1       |
| CADM1.6     | 7.47E-10 | -0.16753 | 0.224 | 0.334 | 1.12E-05 | monocyte | CADM1      |
| EFCAB2.1    | 7.62E-10 | -0.13374 | 0.04  | 0.102 | 1.14E-05 | monocyte | EFCAB2     |
| CADPS.6     | 7.81E-10 | -0.20339 | 0.004 | 0.046 | 1.17E-05 | monocyte | CADPS      |
| UBXN7.2     | 8.01E-10 | -0.10414 | 0.053 | 0.122 | 1.20E-05 | monocyte | UBXN7      |
| PKMYT1.5    | 8.10E-10 | -0.11908 | 0.004 | 0.046 | 1.21E-05 | monocyte | PKMYT1     |
| LINC00599.8 | 8.13E-10 | -0.14485 | 0     | 0.038 | 1.22E-05 | monocyte | LINC00599  |
| APOBEC3G.8  | 8.41E-10 | 0.27285  | 0.176 | 0.113 | 1.26E-05 | monocyte | APOBEC3G   |

|             |           |           |        |        |           |          |           |
|-------------|-----------|-----------|--------|--------|-----------|----------|-----------|
| CTBS. 5     | 8. 49E-10 | 0. 335174 | 0. 215 | 0. 151 | 1. 27E-05 | monocyte | CTBS      |
| PDCD2L. 5   | 8. 65E-10 | -0. 11668 | 0. 045 | 0. 11  | 1. 29E-05 | monocyte | PDCD2L    |
| GINS4. 1    | 8. 65E-10 | -0. 10337 | 0. 005 | 0. 048 | 1. 29E-05 | monocyte | GINS4     |
| FMNL2. 6    | 8. 68E-10 | -0. 1136  | 0. 169 | 0. 274 | 1. 30E-05 | monocyte | FMNL2     |
| PLK1. 6     | 8. 73E-10 | -0. 17972 | 0. 011 | 0. 058 | 1. 30E-05 | monocyte | PLK1      |
| ERBB2. 3    | 8. 88E-10 | -0. 10204 | 0. 014 | 0. 062 | 1. 33E-05 | monocyte | ERBB2     |
| UGT8. 6     | 8. 90E-10 | -0. 21524 | 0. 008 | 0. 053 | 1. 33E-05 | monocyte | UGT8      |
| LYVE1. 6    | 8. 94E-10 | 0. 55928  | 0. 073 | 0. 035 | 1. 34E-05 | monocyte | LYVE1     |
| IRF1. 6     | 9. 00E-10 | -0. 18191 | 0. 125 | 0. 213 | 1. 35E-05 | monocyte | IRF1      |
| SIN3B. 1    | 9. 02E-10 | -0. 12235 | 0. 039 | 0. 101 | 1. 35E-05 | monocyte | SIN3B     |
| CNFN. 3     | 9. 13E-10 | 0. 196108 | 0. 057 | 0. 024 | 1. 37E-05 | monocyte | CNFN      |
| TSTD2. 3    | 9. 43E-10 | -0. 12092 | 0. 025 | 0. 08  | 1. 41E-05 | monocyte | TSTD2     |
| FHL2. 5     | 9. 49E-10 | -0. 1185  | 0. 006 | 0. 05  | 1. 42E-05 | monocyte | FHL2      |
| MYADM. 6    | 9. 75E-10 | -0. 13535 | 0. 114 | 0. 2   | 1. 46E-05 | monocyte | MYADM     |
| CCNF. 2     | 9. 89E-10 | -0. 10392 | 0. 001 | 0. 04  | 1. 48E-05 | monocyte | CCNF      |
| ACTN2. 3    | 9. 95E-10 | -0. 11968 | 0. 004 | 0. 046 | 1. 49E-05 | monocyte | ACTN2     |
| NQO1. 5     | 1. 00E-09 | -0. 17212 | 0. 049 | 0. 114 | 1. 49E-05 | monocyte | NQO1      |
| MXD3. 7     | 1. 01E-09 | -0. 12552 | 0. 017 | 0. 067 | 1. 50E-05 | monocyte | MXD3      |
| ABHD5. 3    | 1. 02E-09 | -0. 14499 | 0. 051 | 0. 116 | 1. 53E-05 | monocyte | ABHD5     |
| ATP5E. 5    | 1. 02E-09 | 0. 255384 | 0. 902 | 0. 915 | 1. 53E-05 | monocyte | ATP5E     |
| UBA6-AS1. 1 | 1. 04E-09 | -0. 14041 | 0. 03  | 0. 088 | 1. 56E-05 | monocyte | UBA6-AS1  |
| GJB2. 4     | 1. 05E-09 | -0. 16138 | 0. 008 | 0. 053 | 1. 57E-05 | monocyte | GJB2      |
| SLC35G2. 7  | 1. 07E-09 | -0. 13296 | 0. 054 | 0. 123 | 1. 60E-05 | monocyte | SLC35G2   |
| INA. 5      | 1. 07E-09 | -0. 13894 | 0. 004 | 0. 046 | 1. 60E-05 | monocyte | INA       |
| ZNF781. 3   | 1. 07E-09 | -0. 11584 | 0. 005 | 0. 047 | 1. 60E-05 | monocyte | ZNF781    |
| FGF14-AS2   | 1. 07E-09 | -0. 10819 | 0. 009 | 0. 055 | 1. 61E-05 | monocyte | FGF14-AS2 |
| MYOZ2       | 1. 08E-09 | 0. 146293 | 0. 018 | 0. 004 | 1. 62E-05 | monocyte | MYOZ2     |
| SAMD9L. 2   | 1. 09E-09 | 0. 284451 | 0. 152 | 0. 095 | 1. 63E-05 | monocyte | SAMD9L    |
| ATMIN. 7    | 1. 09E-09 | -0. 11537 | 0. 053 | 0. 121 | 1. 63E-05 | monocyte | ATMIN     |
| SNAPC2. 1   | 1. 10E-09 | -0. 10072 | 0. 12  | 0. 211 | 1. 64E-05 | monocyte | SNAPC2    |
| IGSF21. 6   | 1. 13E-09 | 0. 310717 | 0. 228 | 0. 158 | 1. 69E-05 | monocyte | IGSF21    |
| SUN2. 4     | 1. 16E-09 | -0. 12746 | 0. 136 | 0. 226 | 1. 73E-05 | monocyte | SUN2      |
| USP54. 5    | 1. 18E-09 | -0. 15829 | 0. 007 | 0. 051 | 1. 76E-05 | monocyte | USP54     |
| TPD52L2. 5  | 1. 18E-09 | -0. 11597 | 0. 218 | 0. 333 | 1. 76E-05 | monocyte | TPD52L2   |
| PDZRN4. 5   | 1. 20E-09 | -0. 14775 | 0. 002 | 0. 041 | 1. 80E-05 | monocyte | PDZRN4    |
| CYP3A5. 5   | 1. 21E-09 | -0. 10175 | 0. 015 | 0. 063 | 1. 82E-05 | monocyte | CYP3A5    |
| AKAP17A. 4  | 1. 22E-09 | -0. 11086 | 0. 093 | 0. 174 | 1. 83E-05 | monocyte | AKAP17A   |
| NEK11. 4    | 1. 23E-09 | -0. 12151 | 0. 007 | 0. 051 | 1. 84E-05 | monocyte | NEK11     |
| RCAN2. 5    | 1. 25E-09 | -0. 15063 | 0. 005 | 0. 047 | 1. 87E-05 | monocyte | RCAN2     |
| NR1D1. 5    | 1. 25E-09 | -0. 10628 | 0. 008 | 0. 053 | 1. 87E-05 | monocyte | NR1D1     |
| ZDHHC17. 3  | 1. 25E-09 | -0. 11794 | 0. 046 | 0. 11  | 1. 88E-05 | monocyte | ZDHHC17   |
| HSPA1A. 4   | 1. 29E-09 | 0. 426601 | 0. 527 | 0. 489 | 1. 93E-05 | monocyte | HSPA1A    |
| CNTNAP3B. 1 | 1. 32E-09 | -0. 10448 | 0      | 0. 037 | 1. 98E-05 | monocyte | CNTNAP3B  |
| SLITRK2. 3  | 1. 32E-09 | -0. 1164  | 0      | 0. 037 | 1. 98E-05 | monocyte | SLITRK2   |
| FAM13C. 5   | 1. 33E-09 | -0. 12802 | 0. 003 | 0. 043 | 1. 99E-05 | monocyte | FAM13C    |
| SAA2. 5     | 1. 37E-09 | -0. 64677 | 0. 01  | 0. 055 | 2. 04E-05 | monocyte | SAA2      |
| C16orf54. 1 | 1. 37E-09 | 0. 138985 | 0. 04  | 0. 014 | 2. 05E-05 | monocyte | C16orf54  |
| PKNOX1. 1   | 1. 38E-09 | -0. 11458 | 0. 049 | 0. 114 | 2. 06E-05 | monocyte | PKNOX1    |
| DNAJC30. 6  | 1. 42E-09 | -0. 10437 | 0. 082 | 0. 16  | 2. 13E-05 | monocyte | DNAJC30   |
| FEM1A. 1    | 1. 42E-09 | -0. 1071  | 0. 062 | 0. 131 | 2. 13E-05 | monocyte | FEM1A     |
| AP5Z1. 2    | 1. 43E-09 | -0. 14136 | 0. 065 | 0. 134 | 2. 14E-05 | monocyte | AP5Z1     |

|           |    |          |          |       |       |          |          |           |       |
|-----------|----|----------|----------|-------|-------|----------|----------|-----------|-------|
| AC006129. | 1. | 4.4E-09  | 0.133484 | 0.034 | 0.011 | 2.15E-05 | monocyte | AC006129. | 2     |
| DPYD.     | 6  | 1.46E-09 | 0.213414 | 0.156 | 0.096 | 2.17E-05 | monocyte | DPYD      |       |
| NKIRAS1.  | 3  | 1.47E-09 | -0.10228 | 0.044 | 0.107 | 2.19E-05 | monocyte | NKIRAS1   |       |
| MAST4.    | 4  | 1.48E-09 | -0.15082 | 0.01  | 0.056 | 2.21E-05 | monocyte | MAST4     |       |
| SERPINF2. | 1. | 5.6E-09  | 0.172785 | 0.055 | 0.023 | 2.33E-05 | monocyte | SERPINF2  |       |
| MCCC1.    | 2  | 1.56E-09 | -0.1001  | 0.077 | 0.153 | 2.34E-05 | monocyte | MCCC1     |       |
| KBTBD2.   | 2  | 1.57E-09 | -0.10068 | 0.053 | 0.12  | 2.35E-05 | monocyte | KBTBD2    |       |
| P4HA2.    | 3  | 1.59E-09 | -0.11712 | 0.029 | 0.085 | 2.38E-05 | monocyte | P4HA2     |       |
| LINGO1.   | 5  | 1.60E-09 | -0.11663 | 0.001 | 0.039 | 2.40E-05 | monocyte | LINGO1    |       |
| CDK5R2.   | 5  | 1.61E-09 | -0.13252 | 0     | 0.037 | 2.41E-05 | monocyte | CDK5R2    |       |
| HOXC8.    | 4  | 1.61E-09 | -0.13651 | 0     | 0.037 | 2.41E-05 | monocyte | HOXC8     |       |
| MIR7-3HG. | 1. | 6.1E-09  | -0.19068 | 0     | 0.037 | 2.41E-05 | monocyte | MIR7-3HG  |       |
| CTD-3138E | 1. | 6.4E-09  | -0.11058 | 0.029 | 0.086 | 2.45E-05 | monocyte | CTD-3138B | 18. 5 |
| GNB4.     | 6  | 1.65E-09 | 0.408696 | 0.287 | 0.228 | 2.46E-05 | monocyte | GNB4      |       |
| CERK.     | 4  | 1.65E-09 | -0.11029 | 0.048 | 0.113 | 2.47E-05 | monocyte | CERK      |       |
| ZDHHC22.  | 6  | 1.66E-09 | -0.1215  | 0.005 | 0.047 | 2.48E-05 | monocyte | ZDHHC22   |       |
| NIPBL.    | 3  | 1.66E-09 | -0.11436 | 0.15  | 0.247 | 2.48E-05 | monocyte | NIPBL     |       |
| ERBB3.    | 6  | 1.67E-09 | -0.1289  | 0.002 | 0.041 | 2.50E-05 | monocyte | ERBB3     |       |
| DOCK11.   | 7  | 1.67E-09 | 0.18522  | 0.096 | 0.05  | 2.50E-05 | monocyte | DOCK11    |       |
| BMPER.    | 3  | 1.69E-09 | -0.10553 | 0.001 | 0.039 | 2.53E-05 | monocyte | BMPER     |       |
| CDCA8.    | 5  | 1.69E-09 | -0.13858 | 0.003 | 0.043 | 2.53E-05 | monocyte | CDCA8     |       |
| KCNN2.    | 5  | 1.72E-09 | -0.10481 | 0.001 | 0.039 | 2.57E-05 | monocyte | KCNN2     |       |
| TYW5.     | 2  | 1.72E-09 | -0.11598 | 0.037 | 0.096 | 2.57E-05 | monocyte | TYW5      |       |
| RP11-635N | 1. | 7.2E-09  | -0.10908 | 0.014 | 0.061 | 2.57E-05 | monocyte | RP11-635N | 19. 1 |
| DEPDC1B.  | 2  | 1.76E-09 | -0.1002  | 0.001 | 0.039 | 2.64E-05 | monocyte | DEPDC1B   |       |
| ZNF140.   | 4  | 1.77E-09 | -0.1127  | 0.048 | 0.112 | 2.64E-05 | monocyte | ZNF140    |       |
| BOLA3-AS1 | 1. | 7.7E-09  | -0.1049  | 0.003 | 0.043 | 2.65E-05 | monocyte | BOLA3-AS1 |       |
| GPR19.    | 4  | 1.80E-09 | -0.14608 | 0.006 | 0.048 | 2.68E-05 | monocyte | GPR19     |       |
| EAF2.     | 8  | 1.83E-09 | 0.281052 | 0.145 | 0.088 | 2.74E-05 | monocyte | EAF2      |       |
| PRCD.     | 5  | 1.86E-09 | -0.18334 | 0     | 0.036 | 2.79E-05 | monocyte | PRCD      |       |
| MLKL.     | 5  | 1.89E-09 | 0.147013 | 0.058 | 0.025 | 2.83E-05 | monocyte | MLKL      |       |
| SGOL2.    | 6  | 1.90E-09 | -0.17402 | 0.037 | 0.095 | 2.84E-05 | monocyte | SGOL2     |       |
| GLUL.     | 4  | 1.90E-09 | 0.247576 | 0.749 | 0.79  | 2.84E-05 | monocyte | GLUL      |       |
| SYN1.     | 2  | 1.90E-09 | -0.11986 | 0.002 | 0.04  | 2.85E-05 | monocyte | SYN1      |       |
| TMEM115.  | 3  | 1.94E-09 | -0.12071 | 0.125 | 0.215 | 2.90E-05 | monocyte | TMEM115   |       |
| MAML1.    | 6  | 1.98E-09 | 0.41171  | 0.168 | 0.113 | 2.96E-05 | monocyte | MAML1     |       |
| ZBED1.    | 4  | 2.00E-09 | -0.15957 | 0.074 | 0.145 | 3.00E-05 | monocyte | ZBED1     |       |
| TSHZ1.    | 5  | 2.01E-09 | -0.13218 | 0.025 | 0.078 | 3.00E-05 | monocyte | TSHZ1     |       |
| FAM124A.  | 3  | 2.04E-09 | -0.13193 | 0.002 | 0.04  | 3.06E-05 | monocyte | FAM124A   |       |
| CHST15.   | 3  | 2.10E-09 | 0.13217  | 0.075 | 0.036 | 3.14E-05 | monocyte | CHST15    |       |
| FHIT.     | 4  | 2.14E-09 | 0.348738 | 0.173 | 0.111 | 3.20E-05 | monocyte | FHIT      |       |
| GPC6.     | 4  | 2.16E-09 | -0.11295 | 0.004 | 0.044 | 3.22E-05 | monocyte | GPC6      |       |
| SERPINB6. | 2. | 2.1E-09  | 0.353883 | 0.495 | 0.476 | 3.31E-05 | monocyte | SERPINB6  |       |
| BET1.     | 5  | 2.22E-09 | -0.10216 | 0.137 | 0.229 | 3.32E-05 | monocyte | BET1      |       |
| ARRDC1.   | 7  | 2.23E-09 | 0.325682 | 0.19  | 0.129 | 3.34E-05 | monocyte | ARRDC1    |       |
| IL1ORB.   | 8  | 2.25E-09 | 0.403614 | 0.301 | 0.238 | 3.36E-05 | monocyte | IL1ORB    |       |
| RP11-403I | 2. | 2.6E-09  | 0.301525 | 0.067 | 0.031 | 3.38E-05 | monocyte | RP11-403I | 13. 5 |
| C11orf95. | 2. | 3.2E-09  | -0.10038 | 0.005 | 0.046 | 3.47E-05 | monocyte | C11orf95  |       |
| ZNF274.   | 4  | 2.33E-09 | -0.14048 | 0.052 | 0.117 | 3.48E-05 | monocyte | ZNF274    |       |
| ZSCAN30   | 2. | 3.4E-09  | -0.10089 | 0.014 | 0.06  | 3.50E-05 | monocyte | ZSCAN30   |       |
| ZNF585A.  | 5  | 2.38E-09 | -0.10392 | 0.016 | 0.064 | 3.55E-05 | monocyte | ZNF585A   |       |

|             |          |          |       |       |          |          |               |
|-------------|----------|----------|-------|-------|----------|----------|---------------|
| SCN9A.5     | 2.39E-09 | -0.13936 | 0.001 | 0.038 | 3.57E-05 | monocyte | SCN9A         |
| RNF220.4    | 2.44E-09 | -0.11019 | 0.079 | 0.154 | 3.65E-05 | monocyte | RNF220        |
| EGLN1.3     | 2.45E-09 | -0.11074 | 0.111 | 0.194 | 3.66E-05 | monocyte | EGLN1         |
| LINC01114   | 2.50E-09 | -0.12296 | 0     | 0.036 | 3.73E-05 | monocyte | LINC01114     |
| BCL11B.5    | 2.50E-09 | -0.14233 | 0     | 0.036 | 3.73E-05 | monocyte | BCL11B        |
| CRYZ.7      | 2.55E-09 | -0.13047 | 0.061 | 0.129 | 3.81E-05 | monocyte | CRYZ          |
| AC005618.2  | 2.55E-09 | -0.1272  | 0.005 | 0.046 | 3.81E-05 | monocyte | AC005618.6    |
| KRT7.4      | 2.56E-09 | -0.14847 | 0.003 | 0.042 | 3.83E-05 | monocyte | KRT7          |
| SCARB1.3    | 2.60E-09 | 0.276023 | 0.16  | 0.103 | 3.88E-05 | monocyte | SCARB1        |
| PIP4K2C.5   | 2.70E-09 | -0.16901 | 0.051 | 0.114 | 4.03E-05 | monocyte | PIP4K2C       |
| LINC00910   | 2.73E-09 | -0.10527 | 0.028 | 0.083 | 4.07E-05 | monocyte | LINC00910     |
| RAPGEF5.6   | 2.74E-09 | -0.21454 | 0.005 | 0.045 | 4.09E-05 | monocyte | RAPGEF5       |
| TNR.6       | 2.83E-09 | -0.16006 | 0.013 | 0.059 | 4.23E-05 | monocyte | TNR           |
| PPP1R12B.2  | 2.86E-09 | -0.12237 | 0.016 | 0.063 | 4.27E-05 | monocyte | PPP1R12B      |
| PLXNA3.4    | 2.86E-09 | -0.14459 | 0.02  | 0.07  | 4.28E-05 | monocyte | PLXNA3        |
| SMAGP.1     | 2.86E-09 | -0.139   | 0.033 | 0.09  | 4.28E-05 | monocyte | SMAGP         |
| TNFRSF10C.2 | 2.89E-09 | 0.10211  | 0.022 | 0.005 | 4.32E-05 | monocyte | TNFRSF10C     |
| OXNAD1.1    | 2.90E-09 | -0.12041 | 0.022 | 0.073 | 4.33E-05 | monocyte | OXNAD1        |
| L1CAM.5     | 2.91E-09 | -0.13757 | 0.001 | 0.038 | 4.34E-05 | monocyte | L1CAM         |
| SRGAP3.6    | 2.92E-09 | -0.14211 | 0.078 | 0.151 | 4.36E-05 | monocyte | SRGAP3        |
| PTPN11.2    | 3.01E-09 | -0.10395 | 0.08  | 0.154 | 4.49E-05 | monocyte | PTPN11        |
| PACRG.4     | 3.09E-09 | -0.12619 | 0.002 | 0.04  | 4.61E-05 | monocyte | PACRG         |
| IGLON5.4    | 3.10E-09 | -0.12561 | 0.008 | 0.051 | 4.63E-05 | monocyte | IGLON5        |
| NGRN.4      | 3.14E-09 | -0.10266 | 0.029 | 0.084 | 4.69E-05 | monocyte | NGRN          |
| B3GALT2.3   | 3.15E-09 | -0.1232  | 0.001 | 0.038 | 4.71E-05 | monocyte | B3GALT2       |
| NGFR.5      | 3.18E-09 | -0.13278 | 0.002 | 0.04  | 4.75E-05 | monocyte | NGFR          |
| PRRG4.6     | 3.19E-09 | 0.210084 | 0.082 | 0.042 | 4.76E-05 | monocyte | PRRG4         |
| FOLR1.4     | 3.23E-09 | -0.20484 | 0.001 | 0.037 | 4.83E-05 | monocyte | FOLR1         |
| ZFR2.5      | 3.25E-09 | -0.13191 | 0.003 | 0.041 | 4.86E-05 | monocyte | ZFR2          |
| RHPN2.2     | 3.28E-09 | -0.11103 | 0.003 | 0.042 | 4.89E-05 | monocyte | RHPN2         |
| STARD10.3   | 3.29E-09 | -0.12428 | 0.028 | 0.082 | 4.91E-05 | monocyte | STARD10       |
| CAMKMT.5    | 3.43E-09 | -0.10413 | 0.026 | 0.079 | 5.12E-05 | monocyte | CAMKMT        |
| TIMELESS.3  | 3.47E-09 | -0.10598 | 0.018 | 0.066 | 5.18E-05 | monocyte | TIMELESS      |
| CLGN.3      | 3.54E-09 | -0.11705 | 0.002 | 0.039 | 5.30E-05 | monocyte | CLGN          |
| HAAO.7      | 3.64E-09 | 0.115874 | 0.05  | 0.02  | 5.44E-05 | monocyte | HAAO          |
| NEU4.5      | 3.68E-09 | -0.18192 | 0.019 | 0.067 | 5.50E-05 | monocyte | NEU4          |
| PINX1.2     | 3.74E-09 | -0.10963 | 0.043 | 0.104 | 5.58E-05 | monocyte | PINX1         |
| SLC45A4.3   | 3.76E-09 | 0.124019 | 0.039 | 0.014 | 5.61E-05 | monocyte | SLC45A4       |
| COL8A2.2    | 3.79E-09 | 0.150201 | 0.05  | 0.021 | 5.67E-05 | monocyte | COL8A2        |
| UNC80.2     | 3.80E-09 | -0.10074 | 0.004 | 0.043 | 5.69E-05 | monocyte | UNC80         |
| PLBD2.4     | 3.82E-09 | 0.124403 | 0.099 | 0.053 | 5.70E-05 | monocyte | PLBD2         |
| GPR84.8     | 3.86E-09 | 0.198593 | 0.122 | 0.069 | 5.77E-05 | monocyte | GPR84         |
| HELLS.3     | 3.88E-09 | -0.13421 | 0.019 | 0.068 | 5.80E-05 | monocyte | HELLS         |
| APLN.4      | 4.06E-09 | -0.14241 | 0     | 0.035 | 6.07E-05 | monocyte | APLN          |
| SBF2.2      | 4.11E-09 | -0.13169 | 0.108 | 0.189 | 6.15E-05 | monocyte | SBF2          |
| RP11-930P   | 4.23E-09 | 0.129375 | 0.017 | 0.003 | 6.32E-05 | monocyte | RP11-930P14.1 |
| EMILIN3.3   | 4.27E-09 | -0.10865 | 0     | 0.035 | 6.38E-05 | monocyte | EMILIN3       |
| NEUROD1.5   | 4.33E-09 | -0.14514 | 0.003 | 0.041 | 6.47E-05 | monocyte | NEUROD1       |
| TSGA10.4    | 4.33E-09 | -0.12308 | 0.018 | 0.066 | 6.47E-05 | monocyte | TSGA10        |
| HSBP1L1.5   | 4.52E-09 | 0.213375 | 0.12  | 0.07  | 6.76E-05 | monocyte | HSBP1L1       |
| AC084219.4  | 4.57E-09 | -0.1061  | 0.002 | 0.039 | 6.83E-05 | monocyte | AC084219.4    |

|            |          |          |       |       |          |          |               |
|------------|----------|----------|-------|-------|----------|----------|---------------|
| PLEKHA8.3  | 4.69E-09 | -0.11055 | 0.019 | 0.067 | 7.01E-05 | monocyte | PLEKHA8       |
| MYBL2.6    | 4.71E-09 | -0.10476 | 0.007 | 0.048 | 7.03E-05 | monocyte | MYBL2         |
| COCH.3     | 4.73E-09 | -0.13545 | 0.002 | 0.039 | 7.06E-05 | monocyte | COCH          |
| HOTAIRM1.4 | 4.83E-09 | -0.22233 | 0.113 | 0.188 | 7.22E-05 | monocyte | HOTAIRM1      |
| TCEAL6.4   | 4.90E-09 | -0.15815 | 0.002 | 0.039 | 7.33E-05 | monocyte | TCEAL6        |
| WIPI1.6    | 4.91E-09 | 0.420952 | 0.244 | 0.18  | 7.34E-05 | monocyte | WIPI1         |
| RP11-455F  | 4.96E-09 | -0.1072  | 0.001 | 0.037 | 7.41E-05 | monocyte | RP11-455F5.3  |
| CXCR4.6    | 5.08E-09 | 0.411927 | 0.442 | 0.384 | 7.59E-05 | monocyte | CXCR4         |
| CAAP1.1    | 5.09E-09 | -0.10037 | 0.037 | 0.094 | 7.60E-05 | monocyte | CAAP1         |
| EEPDI.5    | 5.09E-09 | 0.175137 | 0.118 | 0.068 | 7.61E-05 | monocyte | EEPDI         |
| STC2.3     | 5.17E-09 | -0.15942 | 0.005 | 0.045 | 7.72E-05 | monocyte | STC2          |
| RARA.3     | 5.20E-09 | -0.12229 | 0.042 | 0.101 | 7.78E-05 | monocyte | RARA          |
| TAP1.3     | 5.24E-09 | -0.11642 | 0.165 | 0.261 | 7.83E-05 | monocyte | TAP1          |
| HAUS6.3    | 5.24E-09 | -0.11958 | 0.037 | 0.094 | 7.83E-05 | monocyte | HAUS6         |
| IFIT1.4    | 5.36E-09 | 0.452855 | 0.117 | 0.069 | 8.01E-05 | monocyte | IFIT1         |
| HJURP.6    | 5.41E-09 | -0.12928 | 0.004 | 0.042 | 8.08E-05 | monocyte | HJURP         |
| C5orf38.2  | 5.44E-09 | -0.11431 | 0     | 0.034 | 8.13E-05 | monocyte | C5orf38       |
| DIO2.3     | 5.52E-09 | -0.14911 | 0.002 | 0.038 | 8.25E-05 | monocyte | DIO2          |
| KLF15.3    | 5.54E-09 | -0.10842 | 0.004 | 0.042 | 8.28E-05 | monocyte | KLF15         |
| SLC35F5.2  | 5.58E-09 | -0.10712 | 0.074 | 0.145 | 8.33E-05 | monocyte | SLC35F5       |
| SOWAHC.4   | 5.60E-09 | -0.11207 | 0.022 | 0.072 | 8.37E-05 | monocyte | SOWAHC        |
| EHD4.8     | 5.61E-09 | 0.204803 | 0.142 | 0.087 | 8.38E-05 | monocyte | EHD4          |
| JAKMIP1.3  | 5.71E-09 | -0.12105 | 0     | 0.034 | 8.54E-05 | monocyte | JAKMIP1       |
| ARHGAP26.5 | 5.71E-09 | 0.223225 | 0.143 | 0.087 | 8.54E-05 | monocyte | ARHGAP26      |
| INHBB.2    | 6.30E-09 | -0.10706 | 0     | 0.034 | 9.41E-05 | monocyte | INHBB         |
| DLGAP5.7   | 6.33E-09 | -0.11696 | 0.002 | 0.038 | 9.45E-05 | monocyte | DLGAP5        |
| CHD3.4     | 6.50E-09 | -0.12296 | 0.056 | 0.121 | 9.72E-05 | monocyte | CHD3          |
| BCAS1.4    | 6.54E-09 | -0.20494 | 0.006 | 0.046 | 9.77E-05 | monocyte | BCAS1         |
| SLC04A1.4  | 6.56E-09 | -0.12823 | 0.002 | 0.038 | 9.80E-05 | monocyte | SLC04A1       |
| KIFC1.6    | 6.62E-09 | -0.11296 | 0.017 | 0.063 | 9.89E-05 | monocyte | KIFC1         |
| PHF1.4     | 6.64E-09 | -0.11968 | 0.098 | 0.176 | 9.93E-05 | monocyte | PHF1          |
| APOBEC3C.6 | 6.72E-09 | 0.288046 | 0.184 | 0.123 | 0.0001   | monocyte | APOBEC3C      |
| RP11-315A  | 6.76E-09 | -0.10218 | 0.002 | 0.038 | 0.000101 | monocyte | RP11-315A16.1 |
| ORC5.6     | 6.87E-09 | -0.14316 | 0.045 | 0.104 | 0.000103 | monocyte | ORC5          |
| UIMC1.2    | 6.89E-09 | -0.1014  | 0.051 | 0.114 | 0.000103 | monocyte | UIMC1         |
| SNRPN.8    | 6.94E-09 | -0.10631 | 0.044 | 0.103 | 0.000104 | monocyte | SNRPN         |
| PCP4.6     | 6.94E-09 | -0.19503 | 0.004 | 0.042 | 0.000104 | monocyte | PCP4          |
| RRAGC.3    | 6.95E-09 | -0.11279 | 0.16  | 0.254 | 0.000104 | monocyte | RRAGC         |
| MYT1.6     | 7.06E-09 | -0.12356 | 0.004 | 0.042 | 0.000106 | monocyte | MYT1          |
| ZBTB7A.3   | 7.14E-09 | -0.113   | 0.104 | 0.185 | 0.000107 | monocyte | ZBTB7A        |
| ST6GAL2.5  | 7.14E-09 | -0.10986 | 0.003 | 0.04  | 0.000107 | monocyte | ST6GAL2       |
| CNTN1.2    | 7.16E-09 | -0.12861 | 0.004 | 0.042 | 0.000107 | monocyte | CNTN1         |
| C10orf35.7 | 7.25E-09 | -0.12357 | 0.016 | 0.061 | 0.000108 | monocyte | C10orf35      |
| GPR153.1   | 7.29E-09 | -0.10027 | 0.004 | 0.042 | 0.000109 | monocyte | GPR153        |
| AGPAT2.8   | 7.35E-09 | 0.324009 | 0.234 | 0.174 | 0.00011  | monocyte | AGPAT2        |
| WASF2.7    | 7.39E-09 | 0.393112 | 0.465 | 0.436 | 0.00011  | monocyte | WASF2         |
| TSPAN14.4  | 7.51E-09 | 0.322801 | 0.271 | 0.207 | 0.000112 | monocyte | TSPAN14       |
| WDR81.2    | 7.56E-09 | 0.149416 | 0.084 | 0.043 | 0.000113 | monocyte | WDR81         |
| CEP57L1.6  | 7.56E-09 | 0.11378  | 0.051 | 0.116 | 0.000113 | monocyte | CEP57L1       |
| SDCBP2.3   | 7.64E-09 | -0.12087 | 0.007 | 0.047 | 0.000114 | monocyte | SDCBP2        |
| TMEM64.2   | 7.71E-09 | -0.10408 | 0.02  | 0.068 | 0.000115 | monocyte | TMEM64        |

|           |          |          |       |       |          |          |            |
|-----------|----------|----------|-------|-------|----------|----------|------------|
| RFWD2.4   | 7.99E-09 | -0.10425 | 0.095 | 0.171 | 0.000119 | monocyte | RFWD2      |
| ZNF573.5  | 8.09E-09 | -0.10658 | 0.02  | 0.068 | 0.000121 | monocyte | ZNF573     |
| ECHDC2.4  | 8.16E-09 | -0.12005 | 0.113 | 0.195 | 0.000122 | monocyte | ECHDC2     |
| DICER1-AS | 8.27E-09 | -0.14623 | 0.014 | 0.057 | 0.000124 | monocyte | DICER1-AS1 |
| CCHCR1.1  | 8.55E-09 | -0.11983 | 0.028 | 0.08  | 0.000128 | monocyte | CCHCR1     |
| TRNAU1AP. | 8.69E-09 | -0.10765 | 0.124 | 0.209 | 0.00013  | monocyte | TRNAU1AP   |
| CLVS1.4   | 8.85E-09 | -0.12465 | 0     | 0.033 | 0.000132 | monocyte | CLVS1      |
| ANGPTL6.1 | 8.90E-09 | 0.117154 | 0.033 | 0.011 | 0.000133 | monocyte | ANGPTL6    |
| SETMAR.3  | 8.94E-09 | -0.12917 | 0.015 | 0.059 | 0.000134 | monocyte | SETMAR     |
| ZFP14.6   | 8.97E-09 | -0.1018  | 0.053 | 0.117 | 0.000134 | monocyte | ZFP14      |
| TFAP2A.5  | 9.04E-09 | -0.12529 | 0.003 | 0.04  | 0.000135 | monocyte | TFAP2A     |
| NENF.4    | 9.06E-09 | -0.13519 | 0.365 | 0.505 | 0.000135 | monocyte | NENF       |
| ZHX2      | 9.21E-09 | -0.13145 | 0.011 | 0.054 | 0.000138 | monocyte | ZHX2       |
| ADAMTS1.1 | 9.75E-09 | -0.1045  | 0     | 0.033 | 0.000146 | monocyte | ADAMTS1    |
| GALNT13.4 | 9.82E-09 | -0.11599 | 0.007 | 0.047 | 0.000147 | monocyte | GALNT13    |
| PRKAB2.3  | 1.00E-08 | -0.10439 | 0.018 | 0.064 | 0.00015  | monocyte | PRKAB2     |
| METTL7A.4 | 1.01E-08 | 0.311867 | 0.281 | 0.215 | 0.00015  | monocyte | METTL7A    |
| ZNF212.5  | 1.01E-08 | -0.10186 | 0.023 | 0.072 | 0.000151 | monocyte | ZNF212     |
| METTL21B. | 1.01E-08 | -0.1173  | 0.021 | 0.069 | 0.000151 | monocyte | METTL21B   |
| PTCD1     | 1.02E-08 | -0.12476 | 0.032 | 0.086 | 0.000152 | monocyte | PTCD1      |
| MGA.1     | 1.03E-08 | -0.10696 | 0.046 | 0.106 | 0.000153 | monocyte | MGA        |
| UBQLN4.3  | 1.03E-08 | -0.10817 | 0.047 | 0.107 | 0.000154 | monocyte | UBQLN4     |
| SPC24.7   | 1.04E-08 | -0.10762 | 0.01  | 0.052 | 0.000155 | monocyte | SPC24      |
| SLC22A18. | 1.05E-08 | 0.264659 | 0.176 | 0.119 | 0.000156 | monocyte | SLC22A18   |
| ZNF415.1  | 1.05E-08 | -0.11304 | 0.001 | 0.035 | 0.000157 | monocyte | ZNF415     |
| COQ2.7    | 1.06E-08 | 0.347758 | 0.233 | 0.175 | 0.000158 | monocyte | COQ2       |
| LINC-PINT | 1.11E-08 | -0.10499 | 0.05  | 0.111 | 0.000166 | monocyte | LINC-PINT  |
| SPIRE1.3  | 1.11E-08 | -0.10106 | 0.044 | 0.103 | 0.000167 | monocyte | SPIRE1     |
| MAP2K5.1  | 1.12E-08 | -0.10343 | 0.042 | 0.099 | 0.000167 | monocyte | MAP2K5     |
| LINC00882 | 1.24E-08 | -0.13558 | 0     | 0.033 | 0.000186 | monocyte | LINC00882  |
| APOLD1.3  | 1.28E-08 | -0.10146 | 0.01  | 0.052 | 0.000191 | monocyte | APOLD1     |
| SLC25A19. | 1.29E-08 | 0.349766 | 0.229 | 0.163 | 0.000193 | monocyte | SLC25A19   |
| BST1.3    | 1.30E-08 | 0.116596 | 0.071 | 0.035 | 0.000194 | monocyte | BST1       |
| MAL.7     | 1.30E-08 | -0.25551 | 0.005 | 0.042 | 0.000195 | monocyte | MAL        |
| MSRA.6    | 1.31E-08 | -0.114   | 0.171 | 0.264 | 0.000195 | monocyte | MSRA       |
| S1PR3.1   | 1.31E-08 | -0.14153 | 0.011 | 0.054 | 0.000196 | monocyte | S1PR3      |
| ECT2.6    | 1.32E-08 | -0.12738 | 0.011 | 0.053 | 0.000197 | monocyte | ECT2       |
| CNTN2.5   | 1.34E-08 | -0.2611  | 0.006 | 0.044 | 0.0002   | monocyte | CNTN2      |
| LOX.5     | 1.37E-08 | -0.15825 | 0.008 | 0.048 | 0.000205 | monocyte | LOX        |
| IL33.6    | 1.41E-08 | -0.10981 | 0.008 | 0.048 | 0.000211 | monocyte | IL33       |
| CRTC3.2   | 1.44E-08 | -0.10948 | 0.058 | 0.121 | 0.000215 | monocyte | CRTC3      |
| ORAI3.6   | 1.46E-08 | 0.282626 | 0.194 | 0.137 | 0.000218 | monocyte | ORAI3      |
| CMPK2.4   | 1.47E-08 | 0.229876 | 0.096 | 0.053 | 0.000219 | monocyte | CMPK2      |
| MYH9.8    | 1.47E-08 | 0.276539 | 0.246 | 0.183 | 0.000219 | monocyte | MYH9       |
| CDC37L1.6 | 1.51E-08 | -0.11321 | 0.076 | 0.144 | 0.000225 | monocyte | CDC37L1    |
| MIR22HG.6 | 1.53E-08 | -0.11064 | 0.056 | 0.118 | 0.000229 | monocyte | MIR22HG    |
| C10orf128 | 1.60E-08 | 0.176523 | 0.061 | 0.028 | 0.000239 | monocyte | C10orf128  |
| GCC1.3    | 1.65E-08 | -0.10397 | 0.025 | 0.074 | 0.000246 | monocyte | GCC1       |
| G2E3.1    | 1.66E-08 | -0.11544 | 0.049 | 0.109 | 0.000247 | monocyte | G2E3       |
| APCDD1.1  | 1.67E-08 | -0.11144 | 0.003 | 0.038 | 0.00025  | monocyte | APCDD1     |
| NR4A2.8   | 1.67E-08 | -0.1105  | 0.178 | 0.258 | 0.00025  | monocyte | NR4A2      |

|           |          |          |       |       |          |          |               |
|-----------|----------|----------|-------|-------|----------|----------|---------------|
| NEAT1.5   | 1.69E-08 | 0.233248 | 0.797 | 0.76  | 0.000253 | monocyte | NEAT1         |
| ZNF536.6  | 1.71E-08 | -0.1352  | 0.007 | 0.046 | 0.000256 | monocyte | ZNF536        |
| YARS2.1   | 1.74E-08 | -0.11492 | 0.05  | 0.11  | 0.00026  | monocyte | YARS2         |
| SPAG4.4   | 1.78E-08 | -0.18009 | 0.01  | 0.051 | 0.000266 | monocyte | SPAG4         |
| RNF166.5  | 1.84E-08 | 0.336537 | 0.239 | 0.18  | 0.000275 | monocyte | RNF166        |
| RP11-84C1 | 1.89E-08 | 0.232966 | 0.042 | 0.016 | 0.000283 | monocyte | RP11-84C10.2  |
| MKNK2.2   | 1.92E-08 | -0.1042  | 0.114 | 0.191 | 0.000286 | monocyte | MKNK2         |
| GALNT15.4 | 1.94E-08 | -0.15154 | 0.005 | 0.042 | 0.00029  | monocyte | GALNT15       |
| CLDN11.6  | 2.02E-08 | -0.27744 | 0.009 | 0.049 | 0.000302 | monocyte | CLDN11        |
| TULP4.7   | 2.03E-08 | -0.11165 | 0.079 | 0.148 | 0.000303 | monocyte | TULP4         |
| ABCA5.4   | 2.08E-08 | -0.11766 | 0.038 | 0.091 | 0.000311 | monocyte | ABCA5         |
| SCN2A.4   | 2.12E-08 | -0.11568 | 0     | 0.032 | 0.000317 | monocyte | SCN2A         |
| RP11-111M | 2.14E-08 | -0.10232 | 0.007 | 0.046 | 0.000319 | monocyte | RP11-111M22.2 |
| FBXL15.7  | 2.14E-08 | 0.303371 | 0.251 | 0.19  | 0.00032  | monocyte | FBXL15        |
| COL4A5.3  | 2.18E-08 | -0.10885 | 0.001 | 0.034 | 0.000327 | monocyte | COL4A5        |
| RP11-676J | 2.19E-08 | -0.11633 | 0.001 | 0.034 | 0.000328 | monocyte | RP11-676J15.1 |
| TAGLN.5   | 2.25E-08 | -0.29935 | 0.026 | 0.074 | 0.000336 | monocyte | TAGLN         |
| ZNF529.4  | 2.25E-08 | -0.10297 | 0.018 | 0.063 | 0.000337 | monocyte | ZNF529        |
| SRRM4.5   | 2.29E-08 | -0.12381 | 0.001 | 0.034 | 0.000343 | monocyte | SRRM4         |
| CEP19.6   | 2.35E-08 | -0.11796 | 0.03  | 0.081 | 0.000352 | monocyte | CEP19         |
| ACSL6.2   | 2.36E-08 | -0.12144 | 0.01  | 0.051 | 0.000353 | monocyte | ACSL6         |
| MAST1.1   | 2.40E-08 | -0.10418 | 0.009 | 0.049 | 0.000359 | monocyte | MAST1         |
| GPR132.5  | 2.43E-08 | 0.114872 | 0.061 | 0.028 | 0.000363 | monocyte | GPR132        |
| KLK6.6    | 2.46E-08 | -0.27551 | 0.001 | 0.034 | 0.000368 | monocyte | KLK6          |
| UNC13D.7  | 2.60E-08 | 0.152075 | 0.086 | 0.045 | 0.000388 | monocyte | UNC13D        |
| PLXNA2.2  | 2.66E-08 | -0.10651 | 0.011 | 0.052 | 0.000398 | monocyte | PLXNA2        |
| SRCIN1.6  | 2.69E-08 | -0.13924 | 0.001 | 0.033 | 0.000402 | monocyte | SRCIN1        |
| BEX5.6    | 2.73E-08 | -0.20871 | 0.046 | 0.101 | 0.000408 | monocyte | BEX5          |
| ATG2A.2   | 2.76E-08 | -0.12774 | 0.029 | 0.079 | 0.000413 | monocyte | ATG2A         |
| PYGL.7    | 2.78E-08 | 0.332857 | 0.251 | 0.187 | 0.000415 | monocyte | PYGL          |
| C4orf47.2 | 2.80E-08 | -0.11124 | 0.001 | 0.033 | 0.000419 | monocyte | C4orf47       |
| DOCK1.2   | 2.81E-08 | -0.10551 | 0.014 | 0.055 | 0.00042  | monocyte | DOCK1         |
| MROH8.2   | 2.89E-08 | -0.12838 | 0.005 | 0.041 | 0.000431 | monocyte | MROH8         |
| KIAA0930. | 3.02E-08 | 0.240225 | 0.199 | 0.14  | 0.000451 | monocyte | KIAA0930      |
| KIF23.5   | 3.10E-08 | -0.10326 | 0.006 | 0.043 | 0.000463 | monocyte | KIF23         |
| SLC17A9.7 | 3.26E-08 | 0.128628 | 0.058 | 0.027 | 0.000487 | monocyte | SLC17A9       |
| WFDC2.4   | 3.41E-08 | -0.10821 | 0.001 | 0.033 | 0.00051  | monocyte | WFDC2         |
| KCNMB2.3  | 3.46E-08 | -0.10858 | 0.002 | 0.035 | 0.000517 | monocyte | KCNMB2        |
| HOXB2.5   | 3.62E-08 | -0.13324 | 0.037 | 0.088 | 0.000541 | monocyte | HOXB2         |
| ITPR1.3   | 3.63E-08 | 0.131174 | 0.066 | 0.032 | 0.000543 | monocyte | ITPR1         |
| RASL11B.7 | 3.68E-08 | -0.18865 | 0.016 | 0.057 | 0.00055  | monocyte | RASL11B       |
| NSUN6.2   | 3.73E-08 | -0.10133 | 0.029 | 0.079 | 0.000557 | monocyte | NSUN6         |
| DMXL2.5   | 3.82E-08 | 0.141087 | 0.126 | 0.077 | 0.000571 | monocyte | DMXL2         |
| DRAM1.5   | 3.88E-08 | 0.172294 | 0.116 | 0.07  | 0.00058  | monocyte | DRAM1         |
| CREB3L2.7 | 3.88E-08 | 0.236681 | 0.175 | 0.119 | 0.00058  | monocyte | CREB3L2       |
| NBEA.4    | 3.96E-08 | -0.10315 | 0.013 | 0.053 | 0.000592 | monocyte | NBEA          |
| MITF.7    | 3.98E-08 | 0.285954 | 0.142 | 0.089 | 0.000595 | monocyte | MITF          |
| SLC5A6.1  | 4.16E-08 | -0.10237 | 0.052 | 0.111 | 0.000622 | monocyte | SLC5A6        |
| LHX1.4    | 4.20E-08 | -0.1158  | 0.001 | 0.033 | 0.000627 | monocyte | LHX1          |
| SIK1.7    | 4.29E-08 | -0.16447 | 0.049 | 0.105 | 0.000641 | monocyte | SIK1          |
| CDK18.5   | 4.32E-08 | -0.19135 | 0.032 | 0.082 | 0.000646 | monocyte | CDK18         |

|            |          |          |       |       |          |          |               |
|------------|----------|----------|-------|-------|----------|----------|---------------|
| ABHD12.5   | 4.36E-08 | 0.33933  | 0.392 | 0.38  | 0.000652 | monocyte | ABHD12        |
| ADAT1.2    | 4.49E-08 | -0.10388 | 0.053 | 0.112 | 0.00067  | monocyte | ADAT1         |
| PCSK1.5    | 4.52E-08 | -0.1418  | 0.003 | 0.036 | 0.000676 | monocyte | PCSK1         |
| CTDSP2.4   | 4.52E-08 | -0.11547 | 0.193 | 0.284 | 0.000676 | monocyte | CTDSP2        |
| SLC25A45.4 | 4.56E-08 | 0.226315 | 0.08  | 0.043 | 0.000682 | monocyte | SLC25A45      |
| ANTXR2.2   | 4.94E-08 | -0.10837 | 0.017 | 0.059 | 0.000739 | monocyte | ANTXR2        |
| RP11-483F  | 5.07E-08 | 0.103711 | 0.021 | 0.006 | 0.000758 | monocyte | RP11-483P21.2 |
| ACSL1.8    | 5.08E-08 | 0.345526 | 0.29  | 0.222 | 0.000759 | monocyte | ACSL1         |
| HOXA-AS2.5 | 5.35E-08 | -0.12891 | 0.005 | 0.04  | 0.000799 | monocyte | HOXA-AS2      |
| SESN2.5    | 5.40E-08 | -0.13658 | 0.052 | 0.109 | 0.000806 | monocyte | SESN2         |
| SLC8B1.8   | 5.50E-08 | 0.19326  | 0.145 | 0.093 | 0.000823 | monocyte | SLC8B1        |
| SERGEF.3   | 5.56E-08 | -0.11626 | 0.1   | 0.174 | 0.000831 | monocyte | SERGEF        |
| FAM222A.3  | 5.89E-08 | -0.10243 | 0.001 | 0.032 | 0.00088  | monocyte | FAM222A       |
| RP3-508I1  | 6.08E-08 | -0.10374 | 0.001 | 0.032 | 0.000909 | monocyte | RP3-508I15.14 |
| PRDM8.3    | 6.17E-08 | -0.10581 | 0.001 | 0.032 | 0.000923 | monocyte | PRDM8         |
| HOXA9.4    | 6.40E-08 | -0.12087 | 0.004 | 0.037 | 0.000956 | monocyte | HOXA9         |
| IFIT2.5    | 6.53E-08 | 0.363491 | 0.124 | 0.078 | 0.000976 | monocyte | IFIT2         |
| ZCCHC12.1  | 6.64E-08 | -0.11621 | 0.001 | 0.032 | 0.000992 | monocyte | ZCCHC12       |
| WBP1L.7    | 6.80E-08 | 0.236163 | 0.159 | 0.105 | 0.001016 | monocyte | WBP1L         |
| HAUS4.8    | 6.81E-08 | 0.168788 | 0.101 | 0.058 | 0.001017 | monocyte | HAUS4         |
| LACTB.8    | 6.86E-08 | 0.280067 | 0.22  | 0.161 | 0.001025 | monocyte | LACTB         |
| SPOCK3.5   | 6.92E-08 | -0.21735 | 0.003 | 0.036 | 0.001034 | monocyte | SPOCK3        |
| SNCB.2     | 7.03E-08 | -0.10972 | 0.002 | 0.034 | 0.00105  | monocyte | SNCB          |
| ATP6AP1L.7 | 7.12E-08 | -0.11116 | 0.01  | 0.048 | 0.001064 | monocyte | ATP6AP1L      |
| PICALM.8   | 7.39E-08 | 0.315862 | 0.33  | 0.277 | 0.001104 | monocyte | PICALM        |
| SLFN11.5   | 7.56E-08 | 0.183727 | 0.076 | 0.04  | 0.00113  | monocyte | SLFN11        |
| CAMKK2.2   | 7.69E-08 | -0.10665 | 0.027 | 0.074 | 0.001149 | monocyte | CAMKK2        |
| ATP6V1F.4  | 7.79E-08 | 0.269736 | 0.725 | 0.808 | 0.001165 | monocyte | ATP6V1F       |
| CDK5RAP2.7 | 7.88E-08 | -0.11147 | 0.058 | 0.118 | 0.001177 | monocyte | CDK5RAP2      |
| KIF2C.6    | 7.89E-08 | -0.11105 | 0.009 | 0.046 | 0.00118  | monocyte | KIF2C         |
| SPNS3.5    | 7.91E-08 | 0.157742 | 0.048 | 0.021 | 0.001182 | monocyte | SPNS3         |
| TSEN54.3   | 8.42E-08 | -0.11894 | 0.061 | 0.12  | 0.001259 | monocyte | TSEN54        |
| WNT3.3     | 8.45E-08 | -0.10027 | 0.001 | 0.031 | 0.001262 | monocyte | WNT3          |
| AC114730.8 | 8.74E-08 | -0.13987 | 0.001 | 0.031 | 0.001306 | monocyte | AC114730.3    |
| SFRP4.4    | 9.15E-08 | -0.11598 | 0.018 | 0.06  | 0.001367 | monocyte | SFRP4         |
| RP11-445F  | 9.53E-08 | -0.12498 | 0.001 | 0.031 | 0.001424 | monocyte | RP11-445F12.1 |
| AGAP2.5    | 9.79E-08 | -0.12409 | 0.018 | 0.059 | 0.001463 | monocyte | AGAP2         |
| FKBP15.7   | 9.91E-08 | 0.347233 | 0.187 | 0.134 | 0.001481 | monocyte | FKBP15        |
| FBXL2.1    | 9.98E-08 | -0.10619 | 0.004 | 0.037 | 0.001491 | monocyte | FBXL2         |
| SRGAP2.5   | 1.01E-07 | 0.386921 | 0.278 | 0.229 | 0.001514 | monocyte | SRGAP2        |
| OSGEPL1.3  | 1.03E-07 | -0.10409 | 0.026 | 0.072 | 0.001535 | monocyte | OSGEPL1       |
| RPH3A.3    | 1.03E-07 | -0.10928 | 0.003 | 0.035 | 0.001545 | monocyte | RPH3A         |
| AC016700.1 | 1.04E-07 | -0.10937 | 0.003 | 0.035 | 0.001562 | monocyte | AC016700.5    |
| NAF1.5     | 1.06E-07 | -0.1332  | 0.057 | 0.114 | 0.001586 | monocyte | NAF1          |
| CRIP1.6    | 1.08E-07 | -0.22092 | 0.007 | 0.042 | 0.001614 | monocyte | CRIP1         |
| GDF15.7    | 1.08E-07 | -0.21931 | 0.028 | 0.074 | 0.00162  | monocyte | GDF15         |
| RALYL.3    | 1.09E-07 | -0.10182 | 0.002 | 0.033 | 0.001632 | monocyte | RALYL         |
| ZFPM2.3    | 1.11E-07 | -0.11336 | 0.001 | 0.031 | 0.001652 | monocyte | ZFPM2         |
| CAMK2G.2   | 1.11E-07 | -0.14145 | 0.05  | 0.105 | 0.001653 | monocyte | CAMK2G        |
| ST14.8     | 1.11E-07 | 0.183835 | 0.115 | 0.069 | 0.001666 | monocyte | ST14          |
| UNC5B.7    | 1.15E-07 | 0.207372 | 0.128 | 0.08  | 0.001723 | monocyte | UNC5B         |



|             |           |           |        |        |           |          |                |
|-------------|-----------|-----------|--------|--------|-----------|----------|----------------|
| FSD1L. 4    | 1. 15E-07 | -0. 11128 | 0. 015 | 0. 054 | 0. 001724 | monocyte | FSD1L          |
| PIK3CD. 5   | 1. 16E-07 | 0. 197687 | 0. 058 | 0. 028 | 0. 001729 | monocyte | PIK3CD         |
| TXNIP. 4    | 1. 18E-07 | 0. 273855 | 0. 482 | 0. 443 | 0. 00176  | monocyte | TXNIP          |
| VASH1. 5    | 1. 21E-07 | 0. 29312  | 0. 178 | 0. 125 | 0. 001812 | monocyte | VASH1          |
| KLHL6. 7    | 1. 23E-07 | 0. 193521 | 0. 087 | 0. 047 | 0. 001835 | monocyte | KLHL6          |
| IL15. 6     | 1. 24E-07 | 0. 189098 | 0. 068 | 0. 034 | 0. 001847 | monocyte | IL15           |
| NDUFA7. 6   | 1. 27E-07 | -0. 18787 | 0. 009 | 0. 046 | 0. 001891 | monocyte | NDUFA7         |
| AHR. 7      | 1. 27E-07 | 0. 135115 | 0. 102 | 0. 059 | 0. 001905 | monocyte | AHR            |
| MYBPC1. 5   | 1. 31E-07 | -0. 1458  | 0. 01  | 0. 047 | 0. 001955 | monocyte | MYBPC1         |
| INSIG2. 1   | 1. 31E-07 | -0. 1021  | 0. 132 | 0. 209 | 0. 001962 | monocyte | INSIG2         |
| MOB3B. 5    | 1. 32E-07 | -0. 1788  | 0. 047 | 0. 098 | 0. 001965 | monocyte | MOB3B          |
| NUPR1. 6    | 1. 33E-07 | 0. 35441  | 0. 371 | 0. 32  | 0. 001986 | monocyte | NUPR1          |
| NOP10. 8    | 1. 34E-07 | 0. 310035 | 0. 585 | 0. 608 | 0. 002    | monocyte | NOP10          |
| C6orf141. 1 | 1. 35E-07 | -0. 1178  | 0. 002 | 0. 032 | 0. 002018 | monocyte | C6orf141       |
| WIPF1. 8    | 1. 40E-07 | 0. 356287 | 0. 273 | 0. 215 | 0. 002099 | monocyte | WIPF1          |
| CA10. 4     | 1. 41E-07 | -0. 1224  | 0. 003 | 0. 034 | 0. 002102 | monocyte | CA10           |
| C1orf53. 4  | 1. 41E-07 | -0. 11636 | 0. 038 | 0. 087 | 0. 002104 | monocyte | C1orf53        |
| RNU12. 4    | 1. 48E-07 | 0. 332695 | 0. 068 | 0. 035 | 0. 002205 | monocyte | RNU12          |
| GALM. 7     | 1. 48E-07 | 0. 286536 | 0. 174 | 0. 12  | 0. 002211 | monocyte | GALM           |
| SASS6. 2    | 1. 51E-07 | -0. 10867 | 0. 022 | 0. 065 | 0. 002256 | monocyte | SASS6          |
| CTD-2035E   | 1. 51E-07 | -0. 10059 | 0. 006 | 0. 04  | 0. 002257 | monocyte | CTD-2035E11. 3 |
| ITPR2. 6    | 1. 54E-07 | 0. 317445 | 0. 178 | 0. 127 | 0. 002304 | monocyte | ITPR2          |
| RSPH1. 2    | 1. 54E-07 | -0. 11317 | 0      | 0. 028 | 0. 002308 | monocyte | RSPH1          |
| PIM1. 3     | 1. 59E-07 | 0. 245877 | 0. 183 | 0. 125 | 0. 002371 | monocyte | PIM1           |
| AVIL. 6     | 1. 61E-07 | -0. 16195 | 0. 043 | 0. 093 | 0. 002404 | monocyte | AVIL           |
| ATXN1. 3    | 1. 62E-07 | -0. 11774 | 0. 099 | 0. 169 | 0. 002427 | monocyte | ATXN1          |
| ZNF548. 3   | 1. 63E-07 | -0. 11123 | 0. 027 | 0. 072 | 0. 002432 | monocyte | ZNF548         |
| SEMA4D. 7   | 1. 67E-07 | 0. 214275 | 0. 123 | 0. 077 | 0. 002496 | monocyte | SEMA4D         |
| NDST1. 3    | 1. 69E-07 | -0. 11874 | 0. 041 | 0. 091 | 0. 002519 | monocyte | NDST1          |
| NEUROD2. 4  | 1. 73E-07 | -0. 1144  | 0. 002 | 0. 032 | 0. 002584 | monocyte | NEUROD2        |
| ICAM2. 7    | 1. 74E-07 | 0. 20572  | 0. 064 | 0. 032 | 0. 002602 | monocyte | ICAM2          |
| ACHE. 5     | 1. 74E-07 | -0. 10536 | 0. 01  | 0. 046 | 0. 002607 | monocyte | ACHE           |
| ELF1. 8     | 1. 76E-07 | 0. 351941 | 0. 302 | 0. 239 | 0. 002631 | monocyte | ELF1           |
| ZNF134. 1   | 1. 76E-07 | -0. 11028 | 0. 033 | 0. 081 | 0. 002634 | monocyte | ZNF134         |
| THSD4. 3    | 1. 79E-07 | -0. 10972 | 0      | 0. 028 | 0. 002668 | monocyte | THSD4          |
| TANGO2. 8   | 1. 82E-07 | 0. 269758 | 0. 127 | 0. 082 | 0. 002716 | monocyte | TANGO2         |
| KIAA1107. 1 | 1. 83E-07 | -0. 12933 | 0. 01  | 0. 046 | 0. 00274  | monocyte | KIAA1107       |
| RNF19B. 3   | 1. 86E-07 | 0. 113942 | 0. 088 | 0. 049 | 0. 002777 | monocyte | RNF19B         |
| FGD4. 7     | 1. 86E-07 | 0. 288591 | 0. 198 | 0. 142 | 0. 002784 | monocyte | FGD4           |
| ERMN. 6     | 1. 89E-07 | -0. 34629 | 0. 007 | 0. 041 | 0. 002826 | monocyte | ERMN           |
| ARPC4. 8    | 1. 90E-07 | 0. 3398   | 0. 502 | 0. 515 | 0. 002832 | monocyte | ARPC4          |
| ATP6AP1. 6  | 1. 90E-07 | 0. 269609 | 0. 486 | 0. 493 | 0. 002847 | monocyte | ATP6AP1        |
| ZMIZ2. 5    | 1. 92E-07 | -0. 12229 | 0. 05  | 0. 103 | 0. 002868 | monocyte | ZMIZ2          |
| PI3. 4      | 1. 97E-07 | -0. 35982 | 0. 017 | 0. 056 | 0. 002938 | monocyte | PI3            |
| FBR1. 1     | 1. 98E-07 | -0. 10808 | 0. 061 | 0. 118 | 0. 002956 | monocyte | FBR1           |
| CA3. 4      | 1. 98E-07 | -0. 22736 | 0. 008 | 0. 043 | 0. 002965 | monocyte | CA3            |
| PLAU. 8     | 2. 07E-07 | 0. 257289 | 0. 214 | 0. 159 | 0. 003091 | monocyte | PLAU           |
| DGKB. 2     | 2. 09E-07 | -0. 10061 | 0. 004 | 0. 036 | 0. 003124 | monocyte | DGKB           |
| PAXIP1      | 2. 10E-07 | -0. 1063  | 0. 017 | 0. 056 | 0. 003145 | monocyte | PAXIP1         |
| IPO13. 4    | 2. 13E-07 | -0. 12746 | 0. 056 | 0. 112 | 0. 003183 | monocyte | IPO13          |
| OXA1L. 7    | 2. 14E-07 | 0. 398802 | 0. 347 | 0. 297 | 0. 003201 | monocyte | OXA1L          |

|            |          |          |       |       |          |          |            |
|------------|----------|----------|-------|-------|----------|----------|------------|
| SETD7.3    | 2.16E-07 | -0.12094 | 0.053 | 0.107 | 0.003225 | monocyte | SETD7      |
| FBLN5.3    | 2.17E-07 | -0.17135 | 0.008 | 0.043 | 0.00324  | monocyte | FBLN5      |
| ZDHHC2.2   | 2.18E-07 | 0.143348 | 0.102 | 0.06  | 0.003256 | monocyte | ZDHHC2     |
| TFAP2B.4   | 2.19E-07 | -0.1095  | 0.002 | 0.031 | 0.003273 | monocyte | TFAP2B     |
| PCSK2.4    | 2.22E-07 | -0.11642 | 0.001 | 0.029 | 0.003322 | monocyte | PCSK2      |
| FA2H.5     | 2.23E-07 | -0.14944 | 0.001 | 0.029 | 0.003334 | monocyte | FA2H       |
| HNRNPU-AS  | 2.24E-07 | -0.10214 | 0.049 | 0.103 | 0.003346 | monocyte | HNRNPU-AS1 |
| MMP14.6    | 2.33E-07 | 0.307671 | 0.269 | 0.218 | 0.003477 | monocyte | MMP14      |
| EHBP1L1.7  | 2.34E-07 | 0.194306 | 0.11  | 0.067 | 0.003493 | monocyte | EHBP1L1    |
| IFI27.3    | 2.47E-07 | 0.416648 | 0.158 | 0.109 | 0.003684 | monocyte | IFI27      |
| SLC2A3.7   | 2.53E-07 | -0.11737 | 0.183 | 0.261 | 0.003777 | monocyte | SLC2A3     |
| ATP1B1.6   | 2.56E-07 | -0.16985 | 0.168 | 0.24  | 0.003826 | monocyte | ATP1B1     |
| ZNF431     | 2.56E-07 | -0.10178 | 0.039 | 0.088 | 0.003829 | monocyte | ZNF431     |
| ANGEL2.1   | 2.56E-07 | -0.1008  | 0.061 | 0.118 | 0.003833 | monocyte | ANGEL2     |
| SCNN1A.2   | 2.61E-07 | -0.18101 | 0.016 | 0.054 | 0.003898 | monocyte | SCNN1A     |
| MAP4K1.6   | 2.71E-07 | 0.131762 | 0.056 | 0.027 | 0.00405  | monocyte | MAP4K1     |
| PPP2R1B    | 2.76E-07 | -0.10143 | 0.028 | 0.073 | 0.004121 | monocyte | PPP2R1B    |
| ZNF219     | 2.84E-07 | -0.1043  | 0.026 | 0.069 | 0.004239 | monocyte | ZNF219     |
| MIF4GD.6   | 2.85E-07 | 0.376311 | 0.295 | 0.248 | 0.004263 | monocyte | MIF4GD     |
| NCEH1.6    | 2.89E-07 | 0.185083 | 0.106 | 0.065 | 0.004317 | monocyte | NCEH1      |
| CALHM2.6   | 3.03E-07 | 0.172109 | 0.097 | 0.057 | 0.004523 | monocyte | CALHM2     |
| ZNRF2.1    | 3.05E-07 | 0.146655 | 0.055 | 0.027 | 0.004553 | monocyte | ZNRF2      |
| SLC43A2.7  | 3.06E-07 | 0.378953 | 0.292 | 0.241 | 0.004574 | monocyte | SLC43A2    |
| ARPC5.7    | 3.18E-07 | 0.24569  | 0.621 | 0.677 | 0.004759 | monocyte | ARPC5      |
| TJP2.3     | 3.25E-07 | -0.11576 | 0.018 | 0.056 | 0.004864 | monocyte | TJP2       |
| IFIT3.6    | 3.33E-07 | 0.396622 | 0.152 | 0.104 | 0.004976 | monocyte | IFIT3      |
| JDP2.8     | 3.42E-07 | 0.215197 | 0.111 | 0.067 | 0.005116 | monocyte | JDP2       |
| ORMDL2.6   | 3.67E-07 | 0.356576 | 0.322 | 0.268 | 0.005483 | monocyte | ORMDL2     |
| ANGPT2.3   | 3.69E-07 | -0.13059 | 0.013 | 0.048 | 0.005511 | monocyte | ANGPT2     |
| IFI6.5     | 3.86E-07 | 0.36877  | 0.427 | 0.405 | 0.005773 | monocyte | IFI6       |
| RREB1.8    | 4.00E-07 | 0.216393 | 0.111 | 0.068 | 0.00598  | monocyte | RREB1      |
| SERINC2.4  | 4.12E-07 | -0.11531 | 0.068 | 0.125 | 0.006158 | monocyte | SERINC2    |
| S100Z.2    | 4.12E-07 | 0.162137 | 0.029 | 0.011 | 0.006161 | monocyte | S100Z      |
| GNG10.4    | 4.15E-07 | 0.391378 | 0.113 | 0.07  | 0.006199 | monocyte | GNG10      |
| ATG7.5     | 4.27E-07 | 0.299731 | 0.156 | 0.107 | 0.006377 | monocyte | ATG7       |
| CCDC151.5  | 4.47E-07 | 0.161114 | 0.1   | 0.059 | 0.006683 | monocyte | CCDC151    |
| SLC24A2.6  | 4.49E-07 | -0.11769 | 0.004 | 0.034 | 0.006711 | monocyte | SLC24A2    |
| C12orf75.4 | 4.60E-07 | 0.470862 | 0.233 | 0.189 | 0.006868 | monocyte | C12orf75   |
| TRIM14.5   | 4.72E-07 | 0.262949 | 0.133 | 0.089 | 0.007056 | monocyte | TRIM14     |
| MTF1.1     | 4.80E-07 | -0.10626 | 0.058 | 0.113 | 0.007167 | monocyte | MTF1       |
| TTC7A.8    | 4.89E-07 | 0.194977 | 0.115 | 0.071 | 0.007302 | monocyte | TTC7A      |
| SERAC1.1   | 5.02E-07 | -0.10718 | 0.025 | 0.067 | 0.007503 | monocyte | SERAC1     |
| RELT.7     | 5.29E-07 | 0.167395 | 0.126 | 0.081 | 0.007905 | monocyte | RELT       |
| SYNDIG1.6  | 5.35E-07 | 0.36302  | 0.128 | 0.086 | 0.007991 | monocyte | SYNDIG1    |
| TMEM220.6  | 5.51E-07 | 0.24052  | 0.106 | 0.066 | 0.008239 | monocyte | TMEM220    |
| FABP5.6    | 5.86E-07 | -0.25932 | 0.323 | 0.398 | 0.008761 | monocyte | FABP5      |
| ZNF277.2   | 5.94E-07 | 0.419058 | 0.215 | 0.169 | 0.008883 | monocyte | ZNF277     |
| PERP.2     | 6.04E-07 | -0.10235 | 0.007 | 0.039 | 0.009021 | monocyte | PERP       |
| HAPLN2.6   | 6.09E-07 | -0.16289 | 0.005 | 0.035 | 0.009097 | monocyte | HAPLN2     |
| APOL4.4    | 6.49E-07 | -0.12214 | 0.011 | 0.046 | 0.009692 | monocyte | APOL4      |
| KCNQ3.3    | 6.58E-07 | 0.163491 | 0.072 | 0.039 | 0.00984  | monocyte | KCNQ3      |

|            |          |          |       |       |          |          |               |
|------------|----------|----------|-------|-------|----------|----------|---------------|
| C7orf61.2  | 6.95E-07 | -0.10728 | 0.005 | 0.035 | 0.010392 | monocyte | C7orf61       |
| CCL20.7    | 7.16E-07 | -0.1747  | 0.024 | 0.064 | 0.010703 | monocyte | CCL20         |
| TWF2.8     | 7.30E-07 | 0.342596 | 0.375 | 0.338 | 0.01091  | monocyte | TWF2          |
| RP11-452F  | 7.42E-07 | 0.328012 | 0.173 | 0.123 | 0.011085 | monocyte | RP11-452F19.3 |
| AK5.3      | 7.50E-07 | -0.12963 | 0.001 | 0.027 | 0.011211 | monocyte | AK5           |
| DGCR5.4    | 7.73E-07 | -0.10592 | 0.003 | 0.031 | 0.011551 | monocyte | DGCR5         |
| CYB5R2.3   | 7.82E-07 | -0.11283 | 0.004 | 0.033 | 0.011683 | monocyte | CYB5R2        |
| CASP8.7    | 8.03E-07 | 0.161962 | 0.079 | 0.045 | 0.012002 | monocyte | CASP8         |
| DTX2.4     | 8.37E-07 | 0.178134 | 0.098 | 0.059 | 0.012508 | monocyte | DTX2          |
| NUDT18.1   | 8.62E-07 | 0.157532 | 0.067 | 0.036 | 0.012877 | monocyte | NUDT18        |
| FAM107A.3  | 8.66E-07 | -0.14314 | 0.015 | 0.05  | 0.012944 | monocyte | FAM107A       |
| CARNS1.6   | 8.91E-07 | -0.22481 | 0.003 | 0.031 | 0.013318 | monocyte | CARNS1        |
| STAT5B.1   | 8.94E-07 | -0.10082 | 0.035 | 0.08  | 0.013358 | monocyte | STAT5B        |
| PPP1R1C.5  | 8.96E-07 | -0.11525 | 0.002 | 0.029 | 0.013392 | monocyte | PPP1R1C       |
| MTRNR2L12  | 8.98E-07 | 0.637914 | 0.241 | 0.192 | 0.013419 | monocyte | MTRNR2L12     |
| IPCEF1.4   | 9.18E-07 | 0.17051  | 0.044 | 0.02  | 0.013712 | monocyte | IPCEF1        |
| DSCR3.2    | 9.21E-07 | -0.12788 | 0.105 | 0.17  | 0.013765 | monocyte | DSCR3         |
| CELF2.8    | 9.36E-07 | 0.370503 | 0.41  | 0.381 | 0.013982 | monocyte | CELF2         |
| PNPLA4.5   | 9.56E-07 | 0.260244 | 0.099 | 0.059 | 0.014282 | monocyte | PNPLA4        |
| CLMN.2     | 9.80E-07 | -0.11643 | 0.01  | 0.043 | 0.014642 | monocyte | CLMN          |
| DEDD2.3    | 1.02E-06 | -0.11602 | 0.113 | 0.177 | 0.015238 | monocyte | DEDD2         |
| ACTR2.8    | 1.08E-06 | 0.36049  | 0.458 | 0.459 | 0.016143 | monocyte | ACTR2         |
| PRR5.7     | 1.09E-06 | 0.202375 | 0.078 | 0.044 | 0.016252 | monocyte | PRR5          |
| C16orf86.  | 1.09E-06 | 0.175739 | 0.067 | 0.036 | 0.016341 | monocyte | C16orf86      |
| RAMP3.4    | 1.11E-06 | -0.12764 | 0.002 | 0.028 | 0.016584 | monocyte | RAMP3         |
| NUP214.7   | 1.11E-06 | 0.49503  | 0.24  | 0.191 | 0.016585 | monocyte | NUP214        |
| CSGALNACT1 | 1.14E-06 | 0.240273 | 0.112 | 0.071 | 0.017078 | monocyte | CSGALNACT1    |
| C6orf15.5  | 1.15E-06 | -0.15078 | 0.003 | 0.03  | 0.017193 | monocyte | C6orf15       |
| CLN6.6     | 1.19E-06 | 0.243487 | 0.173 | 0.126 | 0.017832 | monocyte | CLN6          |
| APIG2.6    | 1.21E-06 | 0.219795 | 0.084 | 0.048 | 0.018022 | monocyte | APIG2         |
| F13A1.5    | 1.27E-06 | 0.269737 | 0.213 | 0.154 | 0.018997 | monocyte | F13A1         |
| MAPT-AS1.  | 1.29E-06 | -0.10636 | 0     | 0.024 | 0.019331 | monocyte | MAPT-AS1      |
| ST3GAL1.7  | 1.38E-06 | 0.147178 | 0.148 | 0.098 | 0.020655 | monocyte | ST3GAL1       |
| IFITM3.3   | 1.39E-06 | 0.196211 | 0.552 | 0.499 | 0.020822 | monocyte | IFITM3        |
| RP11-701F  | 1.43E-06 | 0.134277 | 0.031 | 0.012 | 0.0213   | monocyte | RP11-701F16.2 |
| MAP3K7CL.  | 1.53E-06 | -0.1151  | 0.013 | 0.045 | 0.022874 | monocyte | MAP3K7CL      |
| SH3KBP1.8  | 1.54E-06 | 0.293678 | 0.286 | 0.237 | 0.022973 | monocyte | SH3KBP1       |
| CTGF.3     | 1.55E-06 | -0.14082 | 0.004 | 0.031 | 0.023236 | monocyte | CTGF          |
| FAM198B.5  | 1.57E-06 | 0.200059 | 0.096 | 0.058 | 0.023398 | monocyte | FAM198B       |
| USF2.4     | 1.57E-06 | 0.32732  | 0.354 | 0.323 | 0.02345  | monocyte | USF2          |
| RUNX2.4    | 1.58E-06 | 0.104312 | 0.053 | 0.026 | 0.023571 | monocyte | RUNX2         |
| PDE7A.4    | 1.61E-06 | -0.10553 | 0.041 | 0.086 | 0.023986 | monocyte | PDE7A         |
| PHOSPHO2.  | 1.74E-06 | -0.10483 | 0.014 | 0.047 | 0.026057 | monocyte | PHOSPHO2      |
| BCL2A1.8   | 1.75E-06 | 0.273635 | 0.216 | 0.152 | 0.02615  | monocyte | BCL2A1        |
| PRKCB.7    | 1.75E-06 | 0.109264 | 0.072 | 0.039 | 0.026188 | monocyte | PRKCB         |
| GIT2.6     | 1.77E-06 | 0.299735 | 0.197 | 0.149 | 0.026431 | monocyte | GIT2          |
| FICD.2     | 1.77E-06 | -0.10525 | 0.038 | 0.082 | 0.026484 | monocyte | FICD          |
| TEP1       | 1.79E-06 | 0.133745 | 0.041 | 0.018 | 0.026692 | monocyte | TEP1          |
| PI4K2A.7   | 1.84E-06 | 0.194824 | 0.1   | 0.062 | 0.027447 | monocyte | PI4K2A        |
| CCL4L2.6   | 1.94E-06 | 0.666243 | 0.125 | 0.083 | 0.028958 | monocyte | CCL4L2        |
| LAPTM4A.4  | 1.99E-06 | 0.262284 | 0.729 | 0.776 | 0.029729 | monocyte | LAPTM4A       |

|             |           |           |        |        |           |          |             |
|-------------|-----------|-----------|--------|--------|-----------|----------|-------------|
| LAMTOR1. 5  | 2. 02E-06 | 0. 246226 | 0. 616 | 0. 658 | 0. 030137 | monocyte | LAMTOR1     |
| GLA. 7      | 2. 12E-06 | 0. 403515 | 0. 264 | 0. 211 | 0. 031623 | monocyte | GLA         |
| TBC1D9. 6   | 2. 17E-06 | 0. 114951 | 0. 087 | 0. 051 | 0. 032426 | monocyte | TBC1D9      |
| NR4A3. 7    | 2. 26E-06 | -0. 11731 | 0. 098 | 0. 155 | 0. 033803 | monocyte | NR4A3       |
| ETV5. 5     | 2. 31E-06 | 0. 308227 | 0. 293 | 0. 255 | 0. 034519 | monocyte | ETV5        |
| GSTK1. 6    | 2. 36E-06 | 0. 335765 | 0. 524 | 0. 53  | 0. 035231 | monocyte | GSTK1       |
| ATP5L. 2    | 2. 40E-06 | 0. 234489 | 0. 797 | 0. 865 | 0. 035913 | monocyte | ATP5L       |
| ITGA4. 7    | 2. 46E-06 | 0. 115617 | 0. 072 | 0. 04  | 0. 036732 | monocyte | ITGA4       |
| CENPE. 7    | 2. 65E-06 | -0. 12778 | 0. 022 | 0. 058 | 0. 039618 | monocyte | CENPE       |
| ABHD6. 1    | 2. 67E-06 | -0. 10368 | 0. 057 | 0. 106 | 0. 03989  | monocyte | ABHD6       |
| LAMP1. 6    | 2. 87E-06 | 0. 257933 | 0. 496 | 0. 523 | 0. 042936 | monocyte | LAMP1       |
| HS3ST1. 7   | 2. 91E-06 | 0. 160028 | 0. 129 | 0. 084 | 0. 043452 | monocyte | HS3ST1      |
| BHLHE40. 6  | 2. 93E-06 | -0. 12461 | 0. 133 | 0. 199 | 0. 043793 | monocyte | BHLHE40     |
| PEX5L. 4    | 2. 93E-06 | -0. 13055 | 0. 001 | 0. 024 | 0. 043853 | monocyte | PEX5L       |
| EPAS1. 5    | 2. 96E-06 | -0. 17073 | 0. 061 | 0. 109 | 0. 044306 | monocyte | EPAS1       |
| AATK. 5     | 3. 04E-06 | -0. 1645  | 0. 007 | 0. 035 | 0. 045424 | monocyte | AATK        |
| ADAMTS4. 4  | 3. 07E-06 | -0. 11407 | 0. 006 | 0. 034 | 0. 045874 | monocyte | ADAMTS4     |
| STEAP1. 3   | 3. 12E-06 | -0. 12008 | 0. 003 | 0. 028 | 0. 046681 | monocyte | STEAP1      |
| CP. 3       | 3. 13E-06 | -0. 11195 | 0. 004 | 0. 03  | 0. 046837 | monocyte | CP          |
| ASS1. 2     | 3. 14E-06 | -0. 1063  | 0. 004 | 0. 03  | 0. 046859 | monocyte | ASS1        |
| CCDC57. 8   | 3. 16E-06 | 0. 296206 | 0. 147 | 0. 104 | 0. 047235 | monocyte | CCDC57      |
| SEPT6. 6    | 3. 16E-06 | 0. 26949  | 0. 212 | 0. 162 | 0. 047295 | monocyte | 6-Sep       |
| XRCC6BP1. 3 | 3. 21E-06 | -0. 10743 | 0. 041 | 0. 083 | 0. 047939 | monocyte | XRCC6BP1    |
| ACER3. 7    | 3. 22E-06 | 0. 277985 | 0. 231 | 0. 181 | 0. 048194 | monocyte | ACER3       |
| RNF144A. 3  | 3. 29E-06 | -0. 11022 | 0. 014 | 0. 045 | 0. 049208 | monocyte | RNF144A     |
| AMDHD2. 6   | 3. 31E-06 | 0. 24133  | 0. 164 | 0. 119 | 0. 049473 | monocyte | AMDHD2      |
| ACO68535. 3 | 3. 35E-06 | -0. 10016 | 0. 001 | 0. 024 | 0. 050103 | monocyte | ACO68535. 2 |
| SAMD9. 1    | 3. 38E-06 | 0. 203109 | 0. 114 | 0. 074 | 0. 050469 | monocyte | SAMD9       |
| CRABP2. 1   | 3. 39E-06 | -0. 10713 | 0. 003 | 0. 028 | 0. 050728 | monocyte | CRABP2      |
| LRRC61. 6   | 3. 44E-06 | -0. 10786 | 0. 029 | 0. 067 | 0. 051446 | monocyte | LRRC61      |
| TPMT. 6     | 3. 51E-06 | 0. 246761 | 0. 237 | 0. 188 | 0. 052423 | monocyte | TPMT        |
| MYO15B. 1   | 3. 60E-06 | 0. 164611 | 0. 049 | 0. 024 | 0. 053819 | monocyte | MYO15B      |
| LY6E. 3     | 3. 63E-06 | 0. 335102 | 0. 398 | 0. 374 | 0. 054177 | monocyte | LY6E        |
| TLN1. 8     | 3. 70E-06 | 0. 339823 | 0. 318 | 0. 282 | 0. 055356 | monocyte | TLN1        |
| HHIP. 5     | 3. 71E-06 | -0. 13603 | 0. 003 | 0. 028 | 0. 05537  | monocyte | HHIP        |
| TPSAB1. 3   | 3. 79E-06 | 0. 176599 | 0. 043 | 0. 02  | 0. 056657 | monocyte | TPSAB1      |
| JAK2. 2     | 3. 84E-06 | 0. 175694 | 0. 058 | 0. 031 | 0. 057366 | monocyte | JAK2        |
| PPARG. 5    | 3. 86E-06 | 0. 153847 | 0. 047 | 0. 023 | 0. 057758 | monocyte | PPARG       |
| ATP5G2. 3   | 3. 90E-06 | 0. 188687 | 0. 813 | 0. 874 | 0. 058349 | monocyte | ATP5G2      |
| GRM3. 3     | 3. 92E-06 | -0. 12782 | 0. 001 | 0. 024 | 0. 058571 | monocyte | GRM3        |
| MYRF. 6     | 4. 08E-06 | -0. 17506 | 0. 006 | 0. 033 | 0. 060916 | monocyte | MYRF        |
| PRKCG. 4    | 4. 12E-06 | -0. 16004 | 0      | 0. 022 | 0. 061534 | monocyte | PRKCG       |
| RAB5C. 4    | 4. 16E-06 | 0. 349139 | 0. 594 | 0. 658 | 0. 062139 | monocyte | RAB5C       |
| MT1A. 5     | 4. 28E-06 | -0. 10297 | 0. 005 | 0. 031 | 0. 063902 | monocyte | MT1A        |
| MMD. 5      | 4. 36E-06 | 0. 290044 | 0. 284 | 0. 241 | 0. 065124 | monocyte | MMD         |
| GCHFR. 7    | 4. 38E-06 | 0. 176675 | 0. 114 | 0. 073 | 0. 065415 | monocyte | GCHFR       |
| MAG. 6      | 4. 38E-06 | -0. 31497 | 0. 01  | 0. 04  | 0. 065438 | monocyte | MAG         |
| SPPL2A. 8   | 4. 49E-06 | 0. 265631 | 0. 225 | 0. 18  | 0. 067053 | monocyte | SPPL2A      |
| GPX3. 7     | 4. 54E-06 | 0. 316378 | 0. 198 | 0. 149 | 0. 067862 | monocyte | GPX3        |
| SOX10. 5    | 4. 68E-06 | -0. 15177 | 0. 005 | 0. 031 | 0. 069885 | monocyte | SOX10       |
| RASSF3. 6   | 4. 82E-06 | 0. 109067 | 0. 07  | 0. 039 | 0. 072034 | monocyte | RASSF3      |

|            |          |          |       |       |          |          |               |
|------------|----------|----------|-------|-------|----------|----------|---------------|
| MAP3K5.3   | 5.15E-06 | 0.145456 | 0.079 | 0.047 | 0.07695  | monocyte | MAP3K5        |
| MYO7A.6    | 5.18E-06 | 0.178206 | 0.058 | 0.031 | 0.077395 | monocyte | MYO7A         |
| BNC2.4     | 5.42E-06 | 0.111943 | 0.048 | 0.024 | 0.08101  | monocyte | BNC2          |
| PACS2.3    | 5.50E-06 | -0.13276 | 0.086 | 0.139 | 0.082145 | monocyte | PACS2         |
| SLC8A1.7   | 5.53E-06 | 0.27517  | 0.187 | 0.141 | 0.082655 | monocyte | SLC8A1        |
| TREML1.5   | 5.62E-06 | 0.129512 | 0.042 | 0.02  | 0.083971 | monocyte | TREML1        |
| GBP1.4     | 5.88E-06 | -0.17734 | 0.102 | 0.158 | 0.087906 | monocyte | GBP1          |
| PLEKHH1.5  | 5.96E-06 | -0.12126 | 0.007 | 0.034 | 0.089045 | monocyte | PLEKHH1       |
| CR1.2      | 6.02E-06 | 0.108858 | 0.025 | 0.009 | 0.089917 | monocyte | CR1           |
| FRZB.4     | 6.04E-06 | -0.11977 | 0.016 | 0.048 | 0.090212 | monocyte | FRZB          |
| FAM107B.5  | 6.40E-06 | -0.15266 | 0.077 | 0.126 | 0.095623 | monocyte | FAM107B       |
| NFKBIZ.8   | 6.40E-06 | -0.16804 | 0.123 | 0.18  | 0.095638 | monocyte | NFKBIZ        |
| C9orf66    | 6.50E-06 | 0.106231 | 0.023 | 0.008 | 0.097111 | monocyte | C9orf66       |
| KCNK1.2    | 6.67E-06 | -0.10166 | 0     | 0.021 | 0.099682 | monocyte | KCNK1         |
| PDIA3.8    | 6.73E-06 | 0.242309 | 0.556 | 0.585 | 0.100587 | monocyte | PDIA3         |
| RNPEP.8    | 6.95E-06 | 0.342472 | 0.262 | 0.22  | 0.103811 | monocyte | RNPEP         |
| NPPA.5     | 7.13E-06 | -0.11581 | 0.005 | 0.03  | 0.106581 | monocyte | NPPA          |
| NAV3.2     | 7.19E-06 | 0.211351 | 0.05  | 0.026 | 0.10743  | monocyte | NAV3          |
| ATM.5      | 7.23E-06 | 0.362054 | 0.229 | 0.185 | 0.108007 | monocyte | ATM           |
| HHATL.3    | 7.35E-06 | -0.12184 | 0     | 0.021 | 0.10978  | monocyte | HHATL         |
| MTHFD1L.7  | 7.60E-06 | 0.292776 | 0.174 | 0.132 | 0.113569 | monocyte | MTHFD1L       |
| EIF3J.4    | 7.69E-06 | 0.116427 | 0.279 | 0.386 | 0.114944 | monocyte | EIF3J         |
| PPCS.5     | 7.78E-06 | 0.340126 | 0.352 | 0.318 | 0.116212 | monocyte | PPCS          |
| LINC0032C  | 7.99E-06 | -0.16256 | 0.002 | 0.024 | 0.119428 | monocyte | LINC00320     |
| DAPK1.4    | 8.38E-06 | 0.108294 | 0.091 | 0.056 | 0.125171 | monocyte | DAPK1         |
| TP53I11.5  | 8.40E-06 | 0.217655 | 0.106 | 0.07  | 0.125514 | monocyte | TP53I11       |
| ERMAP.2    | 8.43E-06 | 0.210906 | 0.072 | 0.042 | 0.12591  | monocyte | ERMAP         |
| LGI3.4     | 8.43E-06 | -0.11984 | 0.001 | 0.022 | 0.125948 | monocyte | LGI3          |
| PARP14.6   | 8.47E-06 | 0.317989 | 0.195 | 0.153 | 0.126518 | monocyte | PARP14        |
| SH3D19.1   | 8.58E-06 | 0.100755 | 0.028 | 0.066 | 0.128232 | monocyte | SH3D19        |
| UQCR10.5   | 9.08E-06 | 0.252012 | 0.694 | 0.746 | 0.135626 | monocyte | UQCR10        |
| RP11-386I  | 9.38E-06 | 0.230341 | 0.099 | 0.063 | 0.14016  | monocyte | RP11-386I14.4 |
| TPM3.8     | 9.40E-06 | 0.326571 | 0.533 | 0.56  | 0.140544 | monocyte | TPM3          |
| ESYT1.7    | 9.56E-06 | 0.261271 | 0.16  | 0.117 | 0.142931 | monocyte | ESYT1         |
| SLC31A1.6  | 9.85E-06 | 0.439058 | 0.207 | 0.164 | 0.147205 | monocyte | SLC31A1       |
| SMOC1.3    | 1.02E-05 | -0.11971 | 0.009 | 0.036 | 0.152735 | monocyte | SMOC1         |
| AC147651.1 | 1.04E-05 | 0.11392  | 0.062 | 0.034 | 0.156114 | monocyte | AC147651.4    |
| RAP2B.7    | 1.04E-05 | 0.210597 | 0.208 | 0.161 | 0.156153 | monocyte | RAP2B         |
| TAC3.3     | 1.08E-05 | -0.10667 | 0.003 | 0.026 | 0.161717 | monocyte | TAC3          |
| TMEM125.4  | 1.10E-05 | -0.14416 | 0.002 | 0.024 | 0.164079 | monocyte | TMEM125       |
| FOLH1.4    | 1.19E-05 | -0.10444 | 0     | 0.02  | 0.177853 | monocyte | FOLH1         |
| SFT2D1.8   | 1.23E-05 | 0.325905 | 0.495 | 0.502 | 0.183392 | monocyte | SFT2D1        |
| FXYD1.3    | 1.24E-05 | -0.12757 | 0.008 | 0.034 | 0.185224 | monocyte | FXYD1         |
| RP11-11N9  | 1.25E-05 | 0.135779 | 0.085 | 0.051 | 0.18731  | monocyte | RP11-11N9.4   |
| EDIL3.5    | 1.35E-05 | -0.19861 | 0.008 | 0.034 | 0.201432 | monocyte | EDIL3         |
| CISD3.7    | 1.36E-05 | 0.304592 | 0.288 | 0.251 | 0.203718 | monocyte | CISD3         |
| GNS.6      | 1.42E-05 | 0.298075 | 0.237 | 0.196 | 0.21157  | monocyte | GNS           |
| GDI2.8     | 1.42E-05 | 0.345498 | 0.481 | 0.489 | 0.212394 | monocyte | GDI2          |
| MAP3K8.8   | 1.56E-05 | 0.211025 | 0.237 | 0.179 | 0.233003 | monocyte | MAP3K8        |
| ZDHHC13.1  | 1.57E-05 | -0.11121 | 0.029 | 0.064 | 0.234241 | monocyte | ZDHHC13       |
| PTCH2.1    | 1.69E-05 | 0.15898  | 0.05  | 0.027 | 0.252846 | monocyte | PTCH2         |

|            |           |           |        |        |           |          |                |
|------------|-----------|-----------|--------|--------|-----------|----------|----------------|
| RP11-100C  | 1. 71E-05 | 0. 172691 | 0. 066 | 0. 038 | 0. 255438 | monocyte | RP11-1000B6. 3 |
| KBTBD12    | 1. 76E-05 | 0. 107308 | 0. 014 | 0. 004 | 0. 263429 | monocyte | KBTBD12        |
| CCND1. 4   | 1. 85E-05 | 0. 253566 | 0. 26  | 0. 215 | 0. 276616 | monocyte | CCND1          |
| ACAA2. 6   | 1. 85E-05 | 0. 349258 | 0. 252 | 0. 206 | 0. 277041 | monocyte | ACAA2          |
| SNX18. 4   | 1. 89E-05 | 0. 242529 | 0. 15  | 0. 11  | 0. 282701 | monocyte | SNX18          |
| CD2. 6     | 1. 94E-05 | -0. 17601 | 0. 001 | 0. 021 | 0. 289292 | monocyte | CD2            |
| DAAM2. 3   | 1. 94E-05 | -0. 13537 | 0. 002 | 0. 023 | 0. 290356 | monocyte | DAAM2          |
| PAQR8. 5   | 1. 96E-05 | 0. 186339 | 0. 134 | 0. 093 | 0. 293171 | monocyte | PAQR8          |
| COR07. 7   | 2. 06E-05 | 0. 230501 | 0. 2   | 0. 154 | 0. 307883 | monocyte | COR07          |
| ICOSLG. 8  | 2. 13E-05 | 0. 145533 | 0. 128 | 0. 088 | 0. 317782 | monocyte | ICOSLG         |
| SH3D21. 3  | 2. 14E-05 | 0. 141492 | 0. 044 | 0. 022 | 0. 319829 | monocyte | SH3D21         |
| NANS. 8    | 2. 25E-05 | 0. 466037 | 0. 387 | 0. 357 | 0. 335932 | monocyte | NANS           |
| NPTN. 4    | 2. 27E-05 | 0. 166451 | 0. 092 | 0. 059 | 0. 339336 | monocyte | NPTN           |
| NKX6-2. 6  | 2. 30E-05 | -0. 16694 | 0. 004 | 0. 026 | 0. 344087 | monocyte | NKX6-2         |
| NUDT3. 6   | 2. 43E-05 | 0. 376885 | 0. 406 | 0. 399 | 0. 363674 | monocyte | NUDT3          |
| SIRPB1. 3  | 2. 56E-05 | 0. 10381  | 0. 025 | 0. 01  | 0. 383102 | monocyte | SIRPB1         |
| PLA2G2A. 3 | 2. 57E-05 | -0. 29792 | 0. 013 | 0. 04  | 0. 383473 | monocyte | PLA2G2A        |
| PSME1. 7   | 2. 59E-05 | 0. 254537 | 0. 579 | 0. 584 | 0. 387325 | monocyte | PSME1          |
| COX4I1. 4  | 2. 62E-05 | 0. 179475 | 0. 854 | 0. 916 | 0. 391193 | monocyte | COX4I1         |
| CDC26. 3   | 2. 63E-05 | 0. 13862  | 0. 191 | 0. 269 | 0. 392319 | monocyte | CDC26          |
| ARSB. 2    | 2. 64E-05 | 0. 137699 | 0. 076 | 0. 047 | 0. 394515 | monocyte | ARSB           |
| CNDP1. 6   | 2. 65E-05 | -0. 19973 | 0. 01  | 0. 036 | 0. 395388 | monocyte | CNDP1          |
| RP11-254F  | 2. 67E-05 | 0. 139208 | 0. 043 | 0. 022 | 0. 399384 | monocyte | RP11-254F7. 2  |
| HSPBAP1. 3 | 2. 71E-05 | 0. 252984 | 0. 103 | 0. 069 | 0. 404322 | monocyte | HSPBAP1        |
| GAL. 4     | 2. 81E-05 | -0. 14687 | 0. 013 | 0. 039 | 0. 420571 | monocyte | GAL            |
| KLHDC8B. 4 | 2. 97E-05 | 0. 208789 | 0. 138 | 0. 1   | 0. 444388 | monocyte | KLHDC8B        |
| CD247. 1   | 3. 13E-05 | -0. 1017  | 0      | 0. 018 | 0. 467072 | monocyte | CD247          |
| PFKFB2. 1  | 3. 34E-05 | 0. 104594 | 0. 059 | 0. 034 | 0. 498776 | monocyte | PFKFB2         |
| HPS6       | 3. 35E-05 | 0. 12264  | 0. 061 | 0. 035 | 0. 500316 | monocyte | HPS6           |
| ZFP36L2. 7 | 3. 61E-05 | 0. 192904 | 0. 528 | 0. 514 | 0. 538966 | monocyte | ZFP36L2        |
| XAF1. 3    | 3. 77E-05 | 0. 252709 | 0. 145 | 0. 105 | 0. 563607 | monocyte | XAF1           |
| DEPTOR. 4  | 3. 83E-05 | 0. 169936 | 0. 07  | 0. 042 | 0. 572278 | monocyte | DEPTOR         |
| DENND6B. 8 | 3. 86E-05 | 0. 242359 | 0. 138 | 0. 099 | 0. 577412 | monocyte | DENND6B        |
| LRRK2. 7   | 3. 90E-05 | 0. 166827 | 0. 09  | 0. 058 | 0. 582707 | monocyte | LRRK2          |
| GNG7. 7    | 3. 96E-05 | 0. 394127 | 0. 329 | 0. 296 | 0. 591291 | monocyte | GNG7           |
| SMPDL3A. 6 | 4. 29E-05 | 0. 305152 | 0. 162 | 0. 122 | 0. 641332 | monocyte | SMPDL3A        |
| MED28. 4   | 4. 31E-05 | 0. 106228 | 0. 253 | 0. 346 | 0. 644516 | monocyte | MED28          |
| STK10. 7   | 4. 66E-05 | 0. 155082 | 0. 103 | 0. 069 | 0. 69605  | monocyte | STK10          |
| BEST1. 5   | 4. 73E-05 | 0. 317179 | 0. 309 | 0. 272 | 0. 707519 | monocyte | BEST1          |
| PCDH12. 2  | 4. 79E-05 | 0. 134594 | 0. 031 | 0. 014 | 0. 71516  | monocyte | PCDH12         |
| RILPL2. 8  | 4. 83E-05 | 0. 351671 | 0. 305 | 0. 254 | 0. 722499 | monocyte | RILPL2         |
| NHLH1. 3   | 4. 84E-05 | -0. 11013 | 0. 005 | 0. 026 | 0. 723383 | monocyte | NHLH1          |
| MOBP. 7    | 4. 91E-05 | -0. 2616  | 0. 013 | 0. 038 | 0. 733302 | monocyte | MOBP           |
| GJB1. 6    | 5. 09E-05 | -0. 15926 | 0. 005 | 0. 026 | 0. 759927 | monocyte | GJB1           |
| AREG. 8    | 5. 19E-05 | 0. 127818 | 0. 033 | 0. 068 | 0. 775508 | monocyte | AREG           |
| DUSP22. 8  | 5. 44E-05 | 0. 24562  | 0. 146 | 0. 108 | 0. 812356 | monocyte | DUSP22         |
| LAMP2. 5   | 5. 57E-05 | 0. 350551 | 0. 471 | 0. 471 | 0. 832147 | monocyte | LAMP2          |
| GDE1. 4    | 5. 70E-05 | 0. 145354 | 0. 217 | 0. 306 | 0. 851915 | monocyte | GDE1           |
| FPR2. 6    | 5. 91E-05 | 0. 138434 | 0. 035 | 0. 017 | 0. 883191 | monocyte | FPR2           |
| GSDMD. 7   | 5. 93E-05 | 0. 372525 | 0. 222 | 0. 181 | 0. 886735 | monocyte | GSDMD          |
| IFI35. 6   | 6. 02E-05 | 0. 285624 | 0. 269 | 0. 228 | 0. 899106 | monocyte | IFI35          |

|             |           |           |        |        |           |            |                |
|-------------|-----------|-----------|--------|--------|-----------|------------|----------------|
| SNX2. 8     | 6. 08E-05 | 0. 378247 | 0. 418 | 0. 409 | 0. 909208 | monocyte   | SNX2           |
| MMP7. 3     | 6. 35E-05 | -0. 17858 | 0. 008 | 0. 031 | 0. 948817 | monocyte   | MMP7           |
| CD58. 8     | 6. 45E-05 | 0. 345056 | 0. 263 | 0. 224 | 0. 964422 | monocyte   | CD58           |
| SLC46A1. 3  | 6. 57E-05 | 0. 146    | 0. 089 | 0. 058 | 0. 98177  | monocyte   | SLC46A1        |
| CTC-479C5   | 6. 91E-05 | 0. 204418 | 0. 077 | 0. 049 |           | 1 monocyte | CTC-479C5. 12  |
| FAM213A. 6  | 7. 04E-05 | 0. 110688 | 0. 295 | 0. 39  |           | 1 monocyte | FAM213A        |
| TAGAP. 8    | 7. 12E-05 | 0. 203193 | 0. 141 | 0. 097 |           | 1 monocyte | TAGAP          |
| ST18. 4     | 7. 32E-05 | -0. 11878 | 0. 016 | 0. 041 |           | 1 monocyte | ST18           |
| NSL1. 4     | 7. 39E-05 | 0. 150414 | 0. 258 | 0. 354 |           | 1 monocyte | NSL1           |
| LIMD2. 5    | 7. 76E-05 | 0. 368313 | 0. 277 | 0. 246 |           | 1 monocyte | LIMD2          |
| APOL1. 3    | 7. 80E-05 | 0. 139948 | 0. 063 | 0. 037 |           | 1 monocyte | APOL1          |
| OAS3. 2     | 7. 85E-05 | 0. 143553 | 0. 079 | 0. 051 |           | 1 monocyte | OAS3           |
| FOXP1. 5    | 8. 09E-05 | 0. 100789 | 0. 171 | 0. 236 |           | 1 monocyte | FOXP1          |
| FAM72B. 2   | 8. 46E-05 | 0. 11986  | 0. 039 | 0. 02  |           | 1 monocyte | FAM72B         |
| CD1D. 6     | 8. 50E-05 | 0. 211203 | 0. 061 | 0. 036 |           | 1 monocyte | CD1D           |
| SDSL. 7     | 8. 79E-05 | 0. 237081 | 0. 221 | 0. 184 |           | 1 monocyte | SDSL           |
| SGK3. 5     | 8. 83E-05 | 0. 138371 | 0. 097 | 0. 065 |           | 1 monocyte | SGK3           |
| COMMD10. 3  | 9. 04E-05 | 0. 15525  | 0. 162 | 0. 231 |           | 1 monocyte | COMMD10        |
| CD7. 5      | 9. 11E-05 | 0. 188577 | 0. 068 | 0. 041 |           | 1 monocyte | CD7            |
| MYOF. 5     | 9. 31E-05 | 0. 171068 | 0. 068 | 0. 042 |           | 1 monocyte | MYOF           |
| FGFR10P2. 9 | 9. 49E-05 | 0. 115112 | 0. 239 | 0. 325 |           | 1 monocyte | FGFR10P2       |
| SLC17A5. 5  | 9. 53E-05 | 0. 223873 | 0. 141 | 0. 103 |           | 1 monocyte | SLC17A5        |
| GPR183. 8   | 9. 62E-05 | 0. 409226 | 0. 354 | 0. 284 |           | 1 monocyte | GPR183         |
| UQCRB. 6    | 9. 62E-05 | 0. 180964 | 0. 616 | 0. 684 |           | 1 monocyte | UQCRB          |
| RP11-46H1   | 9. 69E-05 | -0. 15558 | 0. 007 | 0. 029 |           | 1 monocyte | RP11-46H11. 3  |
| FUCA2. 8    | 0. 000102 | 0. 272503 | 0. 273 | 0. 24  |           | 1 monocyte | FUCA2          |
| PFKFB3. 7   | 0. 000109 | 0. 257378 | 0. 28  | 0. 241 |           | 1 monocyte | PFKFB3         |
| NDUFAF1. 1  | 0. 00011  | 0. 107946 | 0. 12  | 0. 18  |           | 1 monocyte | NDUFAF1        |
| HRH2. 5     | 0. 000112 | 0. 140761 | 0. 063 | 0. 038 |           | 1 monocyte | HRH2           |
| ABCC4. 4    | 0. 000112 | 0. 152072 | 0. 069 | 0. 043 |           | 1 monocyte | ABCC4          |
| ZDHHC12. 8  | 0. 000113 | 0. 339143 | 0. 287 | 0. 258 |           | 1 monocyte | ZDHHC12        |
| RTN2. 5     | 0. 000118 | 0. 313987 | 0. 115 | 0. 081 |           | 1 monocyte | RTN2           |
| PDCD4. 8    | 0. 000119 | 0. 229204 | 0. 187 | 0. 145 |           | 1 monocyte | PDCD4          |
| LAMTOR2. 6  | 0. 000119 | 0. 283361 | 0. 552 | 0. 59  |           | 1 monocyte | LAMTOR2        |
| CITED4. 1   | 0. 000124 | 0. 163413 | 0. 042 | 0. 022 |           | 1 monocyte | CITED4         |
| ANAPC10. 2  | 0. 000124 | 0. 119522 | 0. 123 | 0. 182 |           | 1 monocyte | ANAPC10        |
| NUMB. 7     | 0. 000125 | 0. 352491 | 0. 204 | 0. 168 |           | 1 monocyte | NUMB           |
| H2AFJ. 8    | 0. 00013  | 0. 298268 | 0. 292 | 0. 256 |           | 1 monocyte | H2AFJ          |
| CD3E. 4     | 0. 000131 | -0. 14956 | 0. 002 | 0. 019 |           | 1 monocyte | CD3E           |
| ATF6B. 3    | 0. 000142 | 0. 115488 | 0. 295 | 0. 395 |           | 1 monocyte | ATF6B          |
| RP11-1143   | 0. 000143 | 0. 216204 | 0. 077 | 0. 049 |           | 1 monocyte | RP11-1143G9. 4 |
| SNX29. 4    | 0. 00015  | 0. 243789 | 0. 139 | 0. 103 |           | 1 monocyte | SNX29          |
| SLAMF9. 4   | 0. 000156 | -0. 11033 | 0. 003 | 0. 021 |           | 1 monocyte | SLAMF9         |
| FAM102B. 3  | 0. 000156 | 0. 124969 | 0. 048 | 0. 027 |           | 1 monocyte | FAM102B        |
| CYP19A1. 3  | 0. 000159 | 0. 132468 | 0. 043 | 0. 023 |           | 1 monocyte | CYP19A1        |
| ANXA4. 6    | 0. 000159 | 0. 30898  | 0. 23  | 0. 191 |           | 1 monocyte | ANXA4          |
| PIP5K1B. 1  | 0. 000165 | 0. 153163 | 0. 043 | 0. 023 |           | 1 monocyte | PIP5K1B        |
| ZEB2-AS1. 0 | 0. 000179 | 0. 117947 | 0. 055 | 0. 032 |           | 1 monocyte | ZEB2-AS1       |
| PPP1R7. 3   | 0. 000182 | 0. 181158 | 0. 27  | 0. 361 |           | 1 monocyte | PPP1R7         |
| SLC38A6. 4  | 0. 000182 | 0. 153412 | 0. 132 | 0. 097 |           | 1 monocyte | SLC38A6        |
| TMEM14C. 6  | 0. 000191 | 0. 307307 | 0. 549 | 0. 595 |           | 1 monocyte | TMEM14C        |

|           |          |          |       |       |            |            |
|-----------|----------|----------|-------|-------|------------|------------|
| HIGD2A.6  | 0.000192 | 0.24     | 0.578 | 0.622 | 1 monocyte | HIGD2A     |
| MED15.3   | 0.000196 | 0.100267 | 0.097 | 0.147 | 1 monocyte | MED15      |
| KIAA1033. | 0.000196 | 0.337566 | 0.264 | 0.236 | 1 monocyte | KIAA1033   |
| GAB3.6    | 0.000207 | 0.144514 | 0.053 | 0.031 | 1 monocyte | GAB3       |
| FAM72A.3  | 0.000215 | 0.173834 | 0.064 | 0.039 | 1 monocyte | FAM72A     |
| DAGLB.6   | 0.00022  | 0.294429 | 0.152 | 0.118 | 1 monocyte | DAGLB      |
| MBD6.4    | 0.00022  | -0.12661 | 0.099 | 0.143 | 1 monocyte | MBD6       |
| APEX2.4   | 0.00022  | 0.283129 | 0.123 | 0.091 | 1 monocyte | APEX2      |
| ATP5EP2.6 | 0.000239 | 0.40131  | 0.453 | 0.446 | 1 monocyte | ATP5EP2    |
| TSPAN33.6 | 0.000245 | 0.127583 | 0.065 | 0.04  | 1 monocyte | TSPAN33    |
| ACSL4.6   | 0.000245 | 0.125927 | 0.114 | 0.081 | 1 monocyte | ACSL4      |
| NMI.7     | 0.000245 | 0.305434 | 0.216 | 0.179 | 1 monocyte | NMI        |
| GNG5.6    | 0.000247 | 0.201941 | 0.641 | 0.644 | 1 monocyte | GNG5       |
| GLB1.5    | 0.000249 | 0.294638 | 0.272 | 0.242 | 1 monocyte | GLB1       |
| MSRB2.6   | 0.000256 | 0.271715 | 0.283 | 0.252 | 1 monocyte | MSRB2      |
| SMIM20.2  | 0.000258 | 0.100482 | 0.26  | 0.347 | 1 monocyte | SMIM20     |
| GZMA.5    | 0.000264 | -0.15493 | 0.001 | 0.016 | 1 monocyte | GZMA       |
| ADCK2.5   | 0.000265 | 0.268013 | 0.17  | 0.137 | 1 monocyte | ADCK2      |
| CIB1.7    | 0.000269 | 0.267562 | 0.491 | 0.492 | 1 monocyte | CIB1       |
| DYRK4.3   | 0.000271 | 0.154192 | 0.158 | 0.222 | 1 monocyte | DYRK4      |
| IFI44.4   | 0.000278 | 0.320817 | 0.216 | 0.182 | 1 monocyte | IFI44      |
| IFIH1.2   | 0.000284 | 0.171742 | 0.07  | 0.045 | 1 monocyte | IFIH1      |
| SP140L.4  | 0.000284 | 0.172732 | 0.106 | 0.075 | 1 monocyte | SP140L     |
| CASP4.8   | 0.000288 | 0.239114 | 0.267 | 0.224 | 1 monocyte | CASP4      |
| DISP1.1   | 0.000289 | 0.166678 | 0.055 | 0.033 | 1 monocyte | DISP1      |
| WIPF3.7   | 0.0003   | 0.243678 | 0.121 | 0.09  | 1 monocyte | WIPF3      |
| ISG15.6   | 0.000305 | 0.374804 | 0.37  | 0.356 | 1 monocyte | ISG15      |
| CHN2.4    | 0.000314 | 0.290218 | 0.127 | 0.095 | 1 monocyte | CHN2       |
| TRIM21.1  | 0.000333 | 0.189387 | 0.063 | 0.039 | 1 monocyte | TRIM21     |
| LTA4H.6   | 0.000348 | 0.339916 | 0.26  | 0.227 | 1 monocyte | LTA4H      |
| HIST2H2AA | 0.000359 | 0.22023  | 0.089 | 0.061 | 1 monocyte | HIST2H2AA3 |
| ARL6IP4.7 | 0.00036  | 0.2192   | 0.579 | 0.628 | 1 monocyte | ARL6IP4    |
| TSPAN4.4  | 0.00036  | 0.314363 | 0.207 | 0.178 | 1 monocyte | TSPAN4     |
| ITPRIPL2. | 0.000372 | 0.192269 | 0.099 | 0.071 | 1 monocyte | ITPRIPL2   |
| IRF2.2    | 0.000377 | 0.316946 | 0.225 | 0.196 | 1 monocyte | IRF2       |
| PTEN.7    | 0.000382 | 0.170661 | 0.162 | 0.126 | 1 monocyte | PTEN       |
| CAMK1D.6  | 0.000383 | 0.176849 | 0.142 | 0.108 | 1 monocyte | CAMK1D     |
| SLC39A4.6 | 0.000391 | 0.190892 | 0.12  | 0.087 | 1 monocyte | SLC39A4    |
| C2orf47.1 | 0.000394 | 0.102712 | 0.084 | 0.127 | 1 monocyte | C2orf47    |
| SLC25A6.3 | 0.000398 | 0.211658 | 0.799 | 0.863 | 1 monocyte | SLC25A6    |
| TUBA1B.4  | 0.000409 | 0.199275 | 0.877 | 0.897 | 1 monocyte | TUBA1B     |
| EEF1G.2   | 0.000409 | 0.339243 | 0.133 | 0.1   | 1 monocyte | EEF1G      |
| MICAL1.7  | 0.000417 | 0.16636  | 0.176 | 0.138 | 1 monocyte | MICAL1     |
| ZNF846.5  | 0.000436 | 0.271677 | 0.096 | 0.068 | 1 monocyte | ZNF846     |
| THNSL2    | 0.000437 | 0.102097 | 0.038 | 0.02  | 1 monocyte | THNSL2     |
| MOG.6     | 0.000468 | -0.19521 | 0.013 | 0.033 | 1 monocyte | MOG        |
| MTHFR.5   | 0.00047  | 0.208949 | 0.105 | 0.076 | 1 monocyte | MTHFR      |
| CD3D.5    | 0.000475 | -0.19677 | 0.004 | 0.02  | 1 monocyte | CD3D       |
| SH3BP2.7  | 0.000481 | 0.157125 | 0.171 | 0.135 | 1 monocyte | SH3BP2     |
| GNAI2.8   | 0.000492 | 0.202293 | 0.458 | 0.485 | 1 monocyte | GNAI2      |
| APOL2.5   | 0.000495 | -0.1401  | 0.066 | 0.102 | 1 monocyte | APOL2      |



|              |          |          |       |       |            |               |
|--------------|----------|----------|-------|-------|------------|---------------|
| RABGAP1L. 0. | 0.000506 | 0.276781 | 0.139 | 0.107 | 1 monocyte | RABGAP1L      |
| TNFAIP3. 8   | 0.000522 | -0.18121 | 0.128 | 0.166 | 1 monocyte | TNFAIP3       |
| MSN. 8       | 0.000528 | 0.249389 | 0.385 | 0.375 | 1 monocyte | MSN           |
| MRO. 4       | 0.000545 | 0.122173 | 0.035 | 0.019 | 1 monocyte | MRO           |
| COLGALT1.    | 0.00055  | 0.294101 | 0.221 | 0.189 | 1 monocyte | COLGALT1      |
| LINC00324    | 0.000556 | 0.103313 | 0.043 | 0.025 | 1 monocyte | LINC00324     |
| B3GNT7. 1    | 0.000568 | 0.110301 | 0.045 | 0.026 | 1 monocyte | B3GNT7        |
| JKAMP. 3     | 0.000582 | 0.155195 | 0.225 | 0.306 | 1 monocyte | JKAMP         |
| NR1H2. 7     | 0.000605 | 0.155532 | 0.23  | 0.31  | 1 monocyte | NR1H2         |
| TMEM2. 3     | 0.00061  | -0.10967 | 0.039 | 0.067 | 1 monocyte | TMEM2         |
| CAPN3. 5     | 0.000612 | -0.20029 | 0.022 | 0.045 | 1 monocyte | CAPN3         |
| RP3-475N1    | 0.000622 | 0.136848 | 0.025 | 0.012 | 1 monocyte | RP3-475N16. 1 |
| LOXL3. 2     | 0.000622 | 0.176773 | 0.099 | 0.071 | 1 monocyte | LOXL3         |
| VPS4B. 3     | 0.000635 | 0.112833 | 0.187 | 0.254 | 1 monocyte | VPS4B         |
| PTBP3. 4     | 0.000643 | 0.250803 | 0.141 | 0.108 | 1 monocyte | PTBP3         |
| SUFU. 1      | 0.000646 | 0.127418 | 0.046 | 0.027 | 1 monocyte | SUFU          |
| RAB4B. 3     | 0.00066  | 0.105024 | 0.199 | 0.268 | 1 monocyte | RAB4B         |
| APOL3. 2     | 0.000683 | 0.115391 | 0.055 | 0.034 | 1 monocyte | APOL3         |
| PTPRCAP. 5   | 0.000684 | -0.1425  | 0.009 | 0.028 | 1 monocyte | PTPRCAP       |
| POLR3GL. 1   | 0.000686 | 0.11452  | 0.273 | 0.357 | 1 monocyte | POLR3GL       |
| KIAA0226L    | 0.000755 | 0.25554  | 0.123 | 0.093 | 1 monocyte | KIAA0226L     |
| HNRNPA3. 3   | 0.000757 | 0.101868 | 0.446 | 0.564 | 1 monocyte | HNRNPA3       |
| FAM118A. 5   | 0.000811 | 0.101188 | 0.092 | 0.136 | 1 monocyte | FAM118A       |
| EMILIN2. 7   | 0.000854 | 0.119693 | 0.108 | 0.078 | 1 monocyte | EMILIN2       |
| FMO4         | 0.000863 | 0.150492 | 0.022 | 0.01  | 1 monocyte | FMO4          |
| APRT. 6      | 0.000888 | 0.264251 | 0.519 | 0.532 | 1 monocyte | APRT          |
| XPNPEP1. 3   | 0.000911 | 0.122195 | 0.101 | 0.147 | 1 monocyte | XPNPEP1       |
| TPST2. 6     | 0.000928 | 0.214953 | 0.196 | 0.165 | 1 monocyte | TPST2         |
| MYSM1. 2     | 0.000938 | 0.103958 | 0.05  | 0.083 | 1 monocyte | MYSM1         |
| TMCC3. 6     | 0.00098  | 0.163713 | 0.098 | 0.071 | 1 monocyte | TMCC3         |
| DBNL. 7      | 0.001008 | 0.34858  | 0.415 | 0.426 | 1 monocyte | DBNL          |
| HP. 3        | 0.001093 | -0.1327  | 0.008 | 0.025 | 1 monocyte | HP            |
| GRINA. 5     | 0.001105 | 0.263833 | 0.411 | 0.439 | 1 monocyte | GRINA         |
| C11orf31.    | 0.001109 | 0.239234 | 0.606 | 0.673 | 1 monocyte | C11orf31      |
| TSC22D3. 6   | 0.001112 | 0.288703 | 0.447 | 0.457 | 1 monocyte | TSC22D3       |
| REL. 8       | 0.001118 | 0.24525  | 0.331 | 0.295 | 1 monocyte | REL           |
| PDE1B. 3     | 0.001118 | 0.127535 | 0.034 | 0.019 | 1 monocyte | PDE1B         |
| MARCH2. 6    | 0.001137 | 0.254192 | 0.253 | 0.231 | 1 monocyte | 2-Mar         |
| PABPC4. 8    | 0.001213 | 0.232156 | 0.342 | 0.327 | 1 monocyte | PABPC4        |
| SELM. 6      | 0.001234 | 0.238271 | 0.219 | 0.186 | 1 monocyte | SELM          |
| CD55. 8      | 0.001244 | 0.205907 | 0.149 | 0.115 | 1 monocyte | CD55          |
| IBSP. 6      | 0.001244 | 0.316536 | 0.039 | 0.022 | 1 monocyte | IBSP          |
| ITSN2. 7     | 0.001262 | 0.261104 | 0.209 | 0.179 | 1 monocyte | ITSN2         |
| HEBP1. 4     | 0.001281 | 0.177752 | 0.219 | 0.187 | 1 monocyte | HEBP1         |
| STXBP3. 2    | 0.00131  | 0.122279 | 0.145 | 0.198 | 1 monocyte | STXBP3        |
| VASP. 8      | 0.001341 | 0.250171 | 0.263 | 0.238 | 1 monocyte | VASP          |
| ABHD15. 7    | 0.001358 | 0.2017   | 0.079 | 0.056 | 1 monocyte | ABHD15        |
| C3orf38      | 0.001409 | 0.117673 | 0.136 | 0.186 | 1 monocyte | C3orf38       |
| CIR1. 2      | 0.00141  | 0.11948  | 0.257 | 0.335 | 1 monocyte | CIR1          |
| CCDC28A. 7   | 0.00148  | 0.256994 | 0.188 | 0.156 | 1 monocyte | CCDC28A       |
| UCHL3. 4     | 0.001492 | 0.12655  | 0.193 | 0.252 | 1 monocyte | UCHL3         |

|              |          |          |       |       |                            |
|--------------|----------|----------|-------|-------|----------------------------|
| RFC2. 3      | 0.001526 | 0.125059 | 0.187 | 0.247 | 1 monocyte RFC2            |
| SYNGR1. 5    | 0.001528 | 0.239241 | 0.138 | 0.109 | 1 monocyte SYNGR1          |
| TIFA. 3      | 0.001584 | 0.169199 | 0.079 | 0.056 | 1 monocyte TIFA            |
| MBNL1. 8     | 0.00164  | 0.254197 | 0.248 | 0.222 | 1 monocyte MBNL1           |
| PLA2G4A. 4   | 0.001759 | 0.172015 | 0.049 | 0.031 | 1 monocyte PLA2G4A         |
| OSGEP. 4     | 0.001761 | 0.248177 | 0.229 | 0.2   | 1 monocyte OSGEP           |
| OPALIN. 4    | 0.001799 | -0.16206 | 0.002 | 0.014 | 1 monocyte OPALIN          |
| OASL. 4      | 0.001827 | 0.126874 | 0.045 | 0.027 | 1 monocyte OASL            |
| UBAC2. 7     | 0.001833 | 0.105581 | 0.213 | 0.276 | 1 monocyte UBAC2           |
| MYL12B. 6    | 0.001901 | 0.223371 | 0.664 | 0.733 | 1 monocyte MYL12B          |
| GPR137B. 5   | 0.001909 | 0.24963  | 0.248 | 0.228 | 1 monocyte GPR137B         |
| GPR155. 7    | 0.001913 | 0.139505 | 0.14  | 0.191 | 1 monocyte GPR155          |
| C16orf89. 0  | 0.001939 | 0.105783 | 0.031 | 0.017 | 1 monocyte C16orf89        |
| MTHFD2. 7    | 0.001959 | 0.325659 | 0.315 | 0.286 | 1 monocyte MTHFD2          |
| CYB5R1. 2    | 0.002013 | 0.325618 | 0.277 | 0.256 | 1 monocyte CYB5R1          |
| PTPN7. 8     | 0.002079 | 0.162635 | 0.103 | 0.076 | 1 monocyte PTPN7           |
| UQCC2. 4     | 0.002087 | 0.101338 | 0.34  | 0.434 | 1 monocyte UQCC2           |
| ZC3H12A. 6   | 0.002111 | -0.13856 | 0.052 | 0.078 | 1 monocyte ZC3H12A         |
| LRP10. 4     | 0.002208 | 0.251887 | 0.267 | 0.25  | 1 monocyte LRP10           |
| NIPSNAP3E. 0 | 0.002212 | 0.123963 | 0.027 | 0.015 | 1 monocyte NIPSNAP3B       |
| CAT. 7       | 0.002249 | 0.366182 | 0.32  | 0.303 | 1 monocyte CAT             |
| RP11-386G. 0 | 0.002271 | 0.111773 | 0.106 | 0.147 | 1 monocyte RP11-386G11. 10 |
| GALC. 4      | 0.002366 | 0.156772 | 0.127 | 0.1   | 1 monocyte GALC            |
| ALDH9A1. 3   | 0.002375 | 0.121444 | 0.265 | 0.345 | 1 monocyte ALDH9A1         |
| TRABD. 8     | 0.002406 | 0.282577 | 0.279 | 0.257 | 1 monocyte TRABD           |
| PREX1. 7     | 0.00245  | 0.258885 | 0.242 | 0.216 | 1 monocyte PREX1           |
| TIPIN. 4     | 0.002519 | 0.105035 | 0.103 | 0.144 | 1 monocyte TIPIN           |
| NAT1. 2      | 0.002556 | 0.102093 | 0.035 | 0.021 | 1 monocyte NAT1            |
| MINOS1. 6    | 0.002566 | 0.244352 | 0.586 | 0.644 | 1 monocyte MINOS1          |
| RCBTB2. 7    | 0.002608 | 0.183637 | 0.17  | 0.139 | 1 monocyte RCBTB2          |
| FNTA. 2      | 0.002615 | 0.112277 | 0.301 | 0.393 | 1 monocyte FNTA            |
| ZNF641. 0    | 0.002616 | 0.18236  | 0.072 | 0.051 | 1 monocyte ZNF641          |
| DAZAP2. 6    | 0.002653 | 0.315856 | 0.501 | 0.539 | 1 monocyte DAZAP2          |
| UTP6. 3      | 0.002662 | 0.119918 | 0.158 | 0.214 | 1 monocyte UTP6            |
| GCLC. 5      | 0.002723 | 0.154498 | 0.122 | 0.095 | 1 monocyte GCLC            |
| NBL1. 6      | 0.002856 | 0.261451 | 0.201 | 0.176 | 1 monocyte NBL1            |
| RP11-488L. 0 | 0.002886 | 0.168999 | 0.072 | 0.051 | 1 monocyte RP11-488L18. 10 |
| LLGL2. 1     | 0.002895 | 0.119349 | 0.025 | 0.013 | 1 monocyte LLGL2           |
| CD59. 4      | 0.002919 | 0.281718 | 0.509 | 0.557 | 1 monocyte CD59            |
| GLTSCR2. 7   | 0.002941 | 0.20125  | 0.522 | 0.568 | 1 monocyte GLTSCR2         |
| IL6ST. 7     | 0.002969 | 0.147917 | 0.193 | 0.259 | 1 monocyte IL6ST           |
| ANKRD44. 4   | 0.003019 | 0.168449 | 0.121 | 0.093 | 1 monocyte ANKRD44         |
| ELMO1. 6     | 0.003152 | 0.25485  | 0.219 | 0.187 | 1 monocyte ELMO1           |
| ATXN3. 2     | 0.003232 | 0.105456 | 0.116 | 0.16  | 1 monocyte ATXN3           |
| PTPRJ. 4     | 0.003306 | 0.11398  | 0.045 | 0.028 | 1 monocyte PTPRJ           |
| KIAA0141. 0  | 0.003334 | 0.325025 | 0.144 | 0.119 | 1 monocyte KIAA0141        |
| IDUA. 1      | 0.00336  | 0.150689 | 0.067 | 0.047 | 1 monocyte IDUA            |
| HADHB. 4     | 0.003399 | 0.113664 | 0.371 | 0.469 | 1 monocyte HADHB           |
| FAU. 6       | 0.00341  | 0.150919 | 0.929 | 0.96  | 1 monocyte FAU             |
| LRCH1. 2     | 0.003414 | 0.164288 | 0.078 | 0.057 | 1 monocyte LRCH1           |
| NFKBIA. 7    | 0.00345  | 0.172405 | 0.509 | 0.499 | 1 monocyte NFKBIA          |

|            |          |          |       |       |            |          |
|------------|----------|----------|-------|-------|------------|----------|
| CDC123.4   | 0.003508 | 0.147863 | 0.263 | 0.343 | 1 monocyte | CDC123   |
| DOPEY2.4   | 0.003514 | 0.142848 | 0.089 | 0.066 | 1 monocyte | DOPEY2   |
| FOS.6      | 0.003696 | 0.219399 | 0.803 | 0.844 | 1 monocyte | FOS      |
| ZFHx3.4    | 0.003702 | 0.243729 | 0.218 | 0.193 | 1 monocyte | ZFHx3    |
| C21orf33.0 | 0.003707 | 0.108784 | 0.285 | 0.37  | 1 monocyte | C21orf33 |
| ABR.4      | 0.003754 | 0.234842 | 0.17  | 0.143 | 1 monocyte | ABR      |
| ZMAT5.3    | 0.003771 | 0.174383 | 0.182 | 0.24  | 1 monocyte | ZMAT5    |
| AP2S1.6    | 0.003833 | 0.223434 | 0.584 | 0.668 | 1 monocyte | AP2S1    |
| IL10.8     | 0.003914 | 0.11606  | 0.138 | 0.103 | 1 monocyte | IL10     |
| AIP.2      | 0.003971 | 0.101457 | 0.241 | 0.309 | 1 monocyte | AIP      |
| RNPEPL1.6  | 0.004167 | 0.169491 | 0.154 | 0.128 | 1 monocyte | RNPEPL1  |
| PTDSS1.4   | 0.004197 | 0.101446 | 0.158 | 0.206 | 1 monocyte | PTDSS1   |
| MAP7.5     | 0.004256 | -0.12638 | 0.022 | 0.04  | 1 monocyte | MAP7     |
| RPS6KA4.7  | 0.004315 | 0.219062 | 0.144 | 0.12  | 1 monocyte | RPS6KA4  |
| OPLAH      | 0.004438 | 0.100612 | 0.037 | 0.022 | 1 monocyte | OPLAH    |
| TES.8      | 0.004517 | 0.120279 | 0.065 | 0.044 | 1 monocyte | TES      |
| PLEC.6     | 0.00455  | 0.223902 | 0.209 | 0.185 | 1 monocyte | PLEC     |
| TMEM33.4   | 0.004563 | 0.126214 | 0.222 | 0.291 | 1 monocyte | TMEM33   |
| SETDB2     | 0.004572 | 0.129399 | 0.076 | 0.055 | 1 monocyte | SETDB2   |
| EIF3E.5    | 0.00473  | 0.271103 | 0.581 | 0.653 | 1 monocyte | EIF3E    |
| GNPTG.3    | 0.004786 | 0.262356 | 0.273 | 0.256 | 1 monocyte | GNPTG    |
| GHDC.4     | 0.005317 | 0.148661 | 0.116 | 0.091 | 1 monocyte | GHDC     |
| SEC24D.3   | 0.005371 | 0.141496 | 0.115 | 0.09  | 1 monocyte | SEC24D   |
| TBC1D12.6  | 0.005437 | 0.172844 | 0.13  | 0.105 | 1 monocyte | TBC1D12  |
| PSME2.6    | 0.005565 | 0.224361 | 0.528 | 0.56  | 1 monocyte | PSME2    |
| ZNF330.3   | 0.005578 | 0.342257 | 0.238 | 0.214 | 1 monocyte | ZNF330   |
| PQLC3.7    | 0.005589 | 0.236152 | 0.206 | 0.183 | 1 monocyte | PQLC3    |
| UBL7.3     | 0.005821 | 0.11707  | 0.182 | 0.235 | 1 monocyte | UBL7     |
| PWP2.4     | 0.005884 | 0.279842 | 0.145 | 0.122 | 1 monocyte | PWP2     |
| LEPROTL1.0 | 0.006065 | 0.152079 | 0.309 | 0.395 | 1 monocyte | LEPROTL1 |
| RASGRP3.6  | 0.006103 | 0.146339 | 0.091 | 0.066 | 1 monocyte | RASGRP3  |
| SKIL.6     | 0.006124 | 0.264613 | 0.303 | 0.284 | 1 monocyte | SKIL     |
| ADAM17.5   | 0.006135 | 0.101064 | 0.2   | 0.26  | 1 monocyte | ADAM17   |
| MTRNR2L6.0 | 0.006211 | 0.174833 | 0.021 | 0.011 | 1 monocyte | MTRNR2L6 |
| PRDX3.6    | 0.00625  | 0.31639  | 0.448 | 0.468 | 1 monocyte | PRDX3    |
| NUCB1.7    | 0.006406 | 0.34486  | 0.425 | 0.447 | 1 monocyte | NUCB1    |
| PTPMT1.2   | 0.006424 | 0.105663 | 0.279 | 0.359 | 1 monocyte | PTPMT1   |
| PSMB9.6    | 0.006451 | 0.25863  | 0.407 | 0.405 | 1 monocyte | PSMB9    |
| UGP2.3     | 0.006575 | 0.150848 | 0.37  | 0.469 | 1 monocyte | UGP2     |
| FAM204A.5  | 0.006763 | 0.191717 | 0.203 | 0.262 | 1 monocyte | FAM204A  |
| PPP2R5C.4  | 0.006802 | 0.154465 | 0.203 | 0.262 | 1 monocyte | PPP2R5C  |
| ERP29.5    | 0.006966 | 0.225698 | 0.558 | 0.616 | 1 monocyte | ERP29    |
| EIF3K.6    | 0.006974 | 0.190415 | 0.686 | 0.765 | 1 monocyte | EIF3K    |
| APH1B.5    | 0.00702  | 0.222229 | 0.151 | 0.125 | 1 monocyte | APH1B    |
| DPAGT1.2   | 0.007155 | 0.165001 | 0.106 | 0.146 | 1 monocyte | DPAGT1   |
| GRB2.8     | 0.007201 | 0.217094 | 0.441 | 0.484 | 1 monocyte | GRB2     |
| BRE.1      | 0.007439 | 0.11012  | 0.178 | 0.23  | 1 monocyte | BRE      |
| CMTM2      | 0.007735 | 0.106821 | 0.011 | 0.005 | 1 monocyte | CMTM2    |
| ISY1.2     | 0.007881 | 0.121033 | 0.137 | 0.177 | 1 monocyte | ISY1     |
| TRMT1.5    | 0.007883 | 0.408519 | 0.267 | 0.256 | 1 monocyte | TRMT1    |
| PARP9.3    | 0.007941 | 0.274261 | 0.19  | 0.168 | 1 monocyte | PARP9    |

|              |           |           |        |        |            |             |
|--------------|-----------|-----------|--------|--------|------------|-------------|
| TMEM59. 2    | 0. 008065 | 0. 217101 | 0. 703 | 0. 793 | 1 monocyte | TMEM59      |
| GZMK. 2      | 0. 008084 | -0. 11146 | 0. 002 | 0. 011 | 1 monocyte | GZMK        |
| MTAP. 5      | 0. 008108 | 0. 138933 | 0. 091 | 0. 069 | 1 monocyte | MTAP        |
| TNF. 5       | 0. 008149 | 0. 107719 | 0. 059 | 0. 041 | 1 monocyte | TNF         |
| MAML3. 5     | 0. 008754 | 0. 125875 | 0. 05  | 0. 034 | 1 monocyte | MAML3       |
| CCDC115. 1   | 0. 008799 | 0. 166789 | 0. 267 | 0. 338 | 1 monocyte | CCDC115     |
| C19orf66. 0. | 0. 008864 | 0. 118425 | 0. 203 | 0. 261 | 1 monocyte | C19orf66    |
| RTP4. 1      | 0. 008942 | 0. 131131 | 0. 047 | 0. 032 | 1 monocyte | RTP4        |
| ETV6. 4      | 0. 009127 | 0. 278664 | 0. 167 | 0. 146 | 1 monocyte | ETV6        |
| MICA. 1      | 0. 009165 | 0. 12793  | 0. 061 | 0. 043 | 1 monocyte | MICA        |
| SMS. 3       | 0. 009193 | 0. 115035 | 0. 466 | 0. 582 | 1 monocyte | SMS         |
| TALDO1. 7    | 0. 009213 | 0. 230866 | 0. 531 | 0. 603 | 1 monocyte | TALDO1      |
| FCH01. 3     | 0. 009673 | 0. 141323 | 0. 054 | 0. 038 | 1 monocyte | FCH01       |
| TCEAL8. 1    | 0. 009716 | 0. 107584 | 0. 354 | 0. 45  | 1 monocyte | TCEAL8      |
| CCDC91. 4    | 0. 00976  | 0. 127555 | 0. 158 | 0. 2   | 1 monocyte | CCDC91      |
| PRKAG2-AS    | 0. 009963 | 0. 278437 | 0. 146 | 0. 123 | 1 monocyte | PRKAG2-AS1  |
| PLP1. 8      | 0         | 2. 692355 | 0. 991 | 0. 14  | 0 Oligo    | PLP1        |
| MAG. 7       | 0         | 2. 493666 | 0. 887 | 0. 005 | 0 Oligo    | MAG         |
| ERMN. 7      | 0         | 2. 411022 | 0. 84  | 0. 008 | 0 Oligo    | ERMN        |
| PTGDS. 6     | 0         | 2. 374976 | 0. 981 | 0. 139 | 0 Oligo    | PTGDS       |
| TF. 9        | 0         | 2. 373353 | 0. 899 | 0. 042 | 0 Oligo    | TF          |
| PPP1R14A.    | 0         | 2. 304921 | 0. 894 | 0. 077 | 0 Oligo    | PPP1R14A    |
| MOBP. 8      | 0         | 2. 284968 | 0. 781 | 0. 008 | 0 Oligo    | MOBP        |
| MBP. 4       | 0         | 2. 265916 | 0. 969 | 0. 21  | 0 Oligo    | MBP         |
| CLDN11. 7    | 0         | 2. 205274 | 0. 774 | 0. 018 | 0 Oligo    | CLDN11      |
| SEPT4. 8     | 0         | 2. 202802 | 0. 871 | 0. 102 | 0 Oligo    | 4-Sep       |
| APOD. 8      | 0         | 2. 186383 | 0. 972 | 0. 13  | 0 Oligo    | APOD        |
| KLK6. 7      | 0         | 2. 17025  | 0. 753 | 0. 004 | 0 Oligo    | KLK6        |
| TMEM144. 4   | 0         | 2. 1679   | 0. 807 | 0. 05  | 0 Oligo    | TMEM144     |
| LHPP. 5      | 0         | 2. 16246  | 0. 833 | 0. 078 | 0 Oligo    | LHPP        |
| CAPN3. 6     | 0         | 2. 103345 | 0. 732 | 0. 017 | 0 Oligo    | CAPN3       |
| CNDP1. 7     | 0         | 2. 096899 | 0. 76  | 0. 007 | 0 Oligo    | CNDP1       |
| MOG. 7       | 0         | 2. 046184 | 0. 739 | 0. 005 | 0 Oligo    | MOG         |
| ABCA2. 9     | 0         | 2. 038166 | 0. 781 | 0. 07  | 0 Oligo    | ABCA2       |
| TUBB4A. 9    | 0         | 2. 035814 | 0. 819 | 0. 092 | 0 Oligo    | TUBB4A      |
| CNTN2. 6     | 0         | 2. 020448 | 0. 711 | 0. 016 | 0 Oligo    | CNTN2       |
| MAL. 8       | 0         | 2. 009081 | 0. 739 | 0. 013 | 0 Oligo    | MAL         |
| CNP. 7       | 0         | 2. 002554 | 0. 981 | 0. 354 | 0 Oligo    | CNP         |
| RNASE1. 6    | 0         | 1. 996828 | 0. 927 | 0. 141 | 0 Oligo    | RNASE1      |
| CARNS1. 7    | 0         | 1. 969271 | 0. 692 | 0. 003 | 0 Oligo    | CARNS1      |
| ENPP2. 3     | 0         | 1. 959504 | 0. 706 | 0. 02  | 0 Oligo    | ENPP2       |
| CMTM5. 7     | 0         | 1. 937523 | 0. 788 | 0. 074 | 0 Oligo    | CMTM5       |
| SPOCK3. 6    | 0         | 1. 909305 | 0. 699 | 0. 008 | 0 Oligo    | SPOCK3      |
| HSPA2. 6     | 0         | 1. 887203 | 0. 802 | 0. 099 | 0 Oligo    | HSPA2       |
| S100A1. 3    | 0         | 1. 871414 | 0. 551 | 0. 019 | 0 Oligo    | S100A1      |
| EDIL3. 6     | 0         | 1. 866857 | 0. 649 | 0. 009 | 0 Oligo    | EDIL3       |
| PLL. 8       | 0         | 1. 866743 | 0. 72  | 0. 043 | 0 Oligo    | PLL         |
| PLEKHB1. 7   | 0         | 1. 81831  | 0. 859 | 0. 189 | 0 Oligo    | PLEKHB1     |
| AMER2. 8     | 0         | 1. 815185 | 0. 732 | 0. 091 | 0 Oligo    | AMER2       |
| AC018647.    | 0         | 1. 798101 | 0. 612 | 0. 02  | 0 Oligo    | AC018647. 3 |
| NKX6-2. 7    | 0         | 1. 776817 | 0. 631 | 0. 002 | 0 Oligo    | NKX6-2      |

|            |   |          |       |       |         |                |
|------------|---|----------|-------|-------|---------|----------------|
| GJB1. 7    | 0 | 1.776712 | 0.605 | 0.003 | 0 Oligo | GJB1           |
| MYRF. 7    | 0 | 1.74865  | 0.631 | 0.008 | 0 Oligo | MYRF           |
| ANLN. 8    | 0 | 1.732384 | 0.659 | 0.04  | 0 Oligo | ANLN           |
| OPALIN. 5  | 0 | 1.715486 | 0.332 | 0.001 | 0 Oligo | OPALIN         |
| UGT8. 7    | 0 | 1.71395  | 0.661 | 0.027 | 0 Oligo | UGT8           |
| AATK. 6    | 0 | 1.701408 | 0.614 | 0.011 | 0 Oligo | AATK           |
| EFHD1. 6   | 0 | 1.688193 | 0.64  | 0.036 | 0 Oligo | EFHD1          |
| MAP7. 6    | 0 | 1.66902  | 0.565 | 0.019 | 0 Oligo | MAP7           |
| GPR37. 6   | 0 | 1.667582 | 0.649 | 0.051 | 0 Oligo | GPR37          |
| RAPGEF5. 7 | 0 | 1.627971 | 0.555 | 0.023 | 0 Oligo | RAPGEF5        |
| MYLK. 6    | 0 | 1.614365 | 0.548 | 0.041 | 0 Oligo | MYLK           |
| TMEM125. 5 | 0 | 1.589985 | 0.553 | 0.002 | 0 Oligo | TMEM125        |
| HAPLN2. 7  | 0 | 1.57413  | 0.56  | 0.013 | 0 Oligo | HAPLN2         |
| FGFR2. 7   | 0 | 1.545498 | 0.536 | 0.029 | 0 Oligo | FGFR2          |
| ANKS1B. 8  | 0 | 1.516097 | 0.64  | 0.088 | 0 Oligo | ANKS1B         |
| SLC24A2. 7 | 0 | 1.505362 | 0.548 | 0.012 | 0 Oligo | SLC24A2        |
| NECAB1. 7  | 0 | 1.497165 | 0.546 | 0.018 | 0 Oligo | NECAB1         |
| BOK. 9     | 0 | 1.495493 | 0.576 | 0.057 | 0 Oligo | BOK            |
| FA2H. 6    | 0 | 1.483972 | 0.539 | 0.008 | 0 Oligo | FA2H           |
| CDK18. 6   | 0 | 1.483304 | 0.614 | 0.057 | 0 Oligo | CDK18          |
| SOX10. 6   | 0 | 1.476572 | 0.541 | 0.01  | 0 Oligo | SOX10          |
| LGI3. 5    | 0 | 1.453747 | 0.487 | 0.003 | 0 Oligo | LGI3           |
| HHIP. 6    | 0 | 1.453457 | 0.508 | 0.008 | 0 Oligo | HHIP           |
| CHADL. 5   | 0 | 1.44177  | 0.541 | 0.023 | 0 Oligo | CHADL          |
| ERBB3. 7   | 0 | 1.431634 | 0.539 | 0.019 | 0 Oligo | ERBB3          |
| BCAS1. 5   | 0 | 1.424145 | 0.529 | 0.024 | 0 Oligo | BCAS1          |
| LINC0032C  | 0 | 1.414375 | 0.414 | 0.008 | 0 Oligo | LINC00320      |
| B3GAT1. 7  | 0 | 1.405356 | 0.595 | 0.071 | 0 Oligo | B3GAT1         |
| PEX5L. 5   | 0 | 1.404763 | 0.485 | 0.005 | 0 Oligo | PEX5L          |
| TMEM151A.  | 0 | 1.399619 | 0.527 | 0.024 | 0 Oligo | TMEM151A       |
| DAAM2. 4   | 0 | 1.381555 | 0.428 | 0.006 | 0 Oligo | DAAM2          |
| ADAMTS4. 5 | 0 | 1.363212 | 0.485 | 0.015 | 0 Oligo | ADAMTS4        |
| GRM3. 4    | 0 | 1.357564 | 0.452 | 0.006 | 0 Oligo | GRM3           |
| PLEKHH1. 6 | 0 | 1.332904 | 0.489 | 0.015 | 0 Oligo | PLEKHH1        |
| HHATL. 4   | 0 | 1.332311 | 0.412 | 0.004 | 0 Oligo | HHATL          |
| KCNJ10. 7  | 0 | 1.328091 | 0.466 | 0.036 | 0 Oligo | KCNJ10         |
| ASPA. 1    | 0 | 1.309518 | 0.419 | 0.011 | 0 Oligo | ASPA           |
| FOLH1. 5   | 0 | 1.293621 | 0.452 | 0.002 | 0 Oligo | FOLH1          |
| AK5. 4     | 0 | 1.28146  | 0.424 | 0.01  | 0 Oligo | AK5            |
| PCSK6. 2   | 0 | 1.26499  | 0.416 | 0.002 | 0 Oligo | PCSK6          |
| NKAIN2. 3  | 0 | 1.252584 | 0.438 | 0.001 | 0 Oligo | NKAIN2         |
| SRCIN1. 7  | 0 | 1.23367  | 0.402 | 0.017 | 0 Oligo | SRCIN1         |
| SLC01A2. 2 | 0 | 1.191881 | 0.379 | 0.004 | 0 Oligo | SLC01A2        |
| DOCK5. 8   | 0 | 1.163608 | 0.48  | 0.039 | 0 Oligo | DOCK5          |
| PDE1C. 4   | 0 | 1.13461  | 0.4   | 0.026 | 0 Oligo | PDE1C          |
| KCNK1. 3   | 0 | 1.116547 | 0.379 | 0.006 | 0 Oligo | KCNK1          |
| SLC03A1. 2 | 0 | 1.105771 | 0.393 | 0.018 | 0 Oligo | SLC03A1        |
| RP11-809C  | 0 | 1.096491 | 0.235 | 0.001 | 0 Oligo | RP11-809C18. 3 |
| ATP8A1. 4  | 0 | 1.076216 | 0.407 | 0.029 | 0 Oligo | ATP8A1         |
| CNTNAP4    | 0 | 1.055515 | 0.341 | 0.005 | 0 Oligo | CNTNAP4        |
| HCN2. 1    | 0 | 1.012361 | 0.365 | 0.016 | 0 Oligo | HCN2           |

|            |       |          |       |       |       |       |                |
|------------|-------|----------|-------|-------|-------|-------|----------------|
| PRRG1. 1   | 0     | 1.011341 | 0.339 | 0.014 | 0     | Oligo | PRRG1          |
| GPIHBP1    | 0     | 1.011108 | 0.249 | 0     | 0     | Oligo | GPIHBP1        |
| GJC2       | 0     | 0.984297 | 0.32  | 0.003 | 0     | Oligo | GJC2           |
| FAM53B-AS  | 0     | 0.979117 | 0.158 | 0.001 | 0     | Oligo | FAM53B-AS1     |
| GREM1. 1   | 0     | 0.977568 | 0.365 | 0.02  | 0     | Oligo | GREM1          |
| PPP1R16B   | 0     | 0.974146 | 0.315 | 0.004 | 0     | Oligo | PPP1R16B       |
| SLC45A3    | 0     | 0.934153 | 0.32  | 0.006 | 0     | Oligo | SLC45A3        |
| SH3GL3     | 0     | 0.933752 | 0.318 | 0.009 | 0     | Oligo | SH3GL3         |
| GPR62      | 0     | 0.932405 | 0.296 | 0.001 | 0     | Oligo | GPR62          |
| LDB3       | 0     | 0.921673 | 0.296 | 0.004 | 0     | Oligo | LDB3           |
| GAL3ST1    | 0     | 0.916764 | 0.329 | 0.007 | 0     | Oligo | GAL3ST1        |
| SLC5A11    | 0     | 0.872978 | 0.273 | 0.001 | 0     | Oligo | SLC5A11        |
| TMEM235    | 0     | 0.863597 | 0.242 | 0.001 | 0     | Oligo | TMEM235        |
| SEC14L5    | 0     | 0.86349  | 0.273 | 0.001 | 0     | Oligo | SEC14L5        |
| CD22       | 0     | 0.852824 | 0.259 | 0.007 | 0     | Oligo | CD22           |
| ADARB2     | 0     | 0.808795 | 0.193 | 0.001 | 0     | Oligo | ADARB2         |
| MYO1D      | 0     | 0.807963 | 0.256 | 0.009 | 0     | Oligo | MYO1D          |
| LRP2       | 0     | 0.752335 | 0.249 | 0.002 | 0     | Oligo | LRP2           |
| TPPP       | 0     | 0.732988 | 0.186 | 0.003 | 0     | Oligo | TPPP           |
| ZNF488     | 0     | 0.710853 | 0.224 | 0.005 | 0     | Oligo | ZNF488         |
| PIEZO2     | 0     | 0.668256 | 0.219 | 0.002 | 0     | Oligo | PIEZO2         |
| RP11-298C  | 0     | 0.667609 | 0.205 | 0     | 0     | Oligo | RP11-298D21. 1 |
| AC007163.  | 0     | 0.593709 | 0.141 | 0.001 | 0     | Oligo | AC007163. 3    |
| TMEM63A. 4 | ##### | 1.317165 | 0.511 | 0.054 | ##### | Oligo | TMEM63A        |
| NINJ2. 8   | ##### | 1.54991  | 0.574 | 0.069 | ##### | Oligo | NINJ2          |
| OMG. 7     | ##### | 1.36059  | 0.548 | 0.062 | ##### | Oligo | OMG            |
| PRR18      | ##### | 0.852452 | 0.169 | 0.002 | ##### | Oligo | PRR18          |
| ST18. 5    | ##### | 1.00911  | 0.381 | 0.027 | ##### | Oligo | ST18           |
| PLCL1. 2   | ##### | 0.987993 | 0.341 | 0.02  | ##### | Oligo | PLCL1          |
| PTPRD. 8   | ##### | 1.255814 | 0.513 | 0.056 | ##### | Oligo | PTPRD          |
| NFASC. 7   | ##### | 1.453622 | 0.607 | 0.084 | ##### | Oligo | NFASC          |
| RP4-613B2  | ##### | 1.030885 | 0.351 | 0.022 | ##### | Oligo | RP4-613B23. 1  |
| UNC5C      | ##### | 0.713668 | 0.186 | 0.004 | ##### | Oligo | UNC5C          |
| RP11-286E  | ##### | 0.764417 | 0.219 | 0.006 | ##### | Oligo | RP11-286E11. 1 |
| CLDND1. 6  | ##### | 1.807552 | 0.972 | 0.372 | ##### | Oligo | CLDND1         |
| SLAIN1. 9  | ##### | 1.715457 | 0.786 | 0.181 | ##### | Oligo | SLAIN1         |
| RBP7. 4    | ##### | 1.292789 | 0.402 | 0.032 | ##### | Oligo | RBP7           |
| SCD. 8     | ##### | 1.822638 | 0.795 | 0.19  | ##### | Oligo | SCD            |
| CLMN. 3    | ##### | 1.032794 | 0.372 | 0.028 | ##### | Oligo | CLMN           |
| FAM222A. 4 | ##### | 0.857899 | 0.315 | 0.019 | ##### | Oligo | FAM222A        |
| TMCC2. 1   | ##### | 0.858351 | 0.308 | 0.018 | ##### | Oligo | TMCC2          |
| PLEKHG3. 2 | ##### | 0.941901 | 0.308 | 0.018 | ##### | Oligo | PLEKHG3        |
| CA2. 7     | ##### | 1.681768 | 0.826 | 0.203 | ##### | Oligo | CA2            |
| SLC48A1. 5 | ##### | 1.535529 | 0.649 | 0.113 | ##### | Oligo | SLC48A1        |
| CLCA4      | ##### | 0.416151 | 0.115 | 0     | ##### | Oligo | CLCA4          |
| COL4A5. 4  | ##### | 0.884936 | 0.32  | 0.02  | ##### | Oligo | COL4A5         |
| DNAJC6. 5  | ##### | 1.070786 | 0.414 | 0.038 | ##### | Oligo | DNAJC6         |
| LINC00323  | ##### | 0.501886 | 0.169 | 0.003 | ##### | Oligo | LINC00323      |
| ADAP1. 3   | ##### | 0.930827 | 0.369 | 0.028 | ##### | Oligo | ADAP1          |
| FAM107B. 6 | ##### | 1.459942 | 0.628 | 0.103 | ##### | Oligo | FAM107B        |
| OLIG1. 9   | ##### | 1.516881 | 0.751 | 0.158 | ##### | Oligo | OLIG1          |

|            |       |          |       |       |       |       |                |
|------------|-------|----------|-------|-------|-------|-------|----------------|
| PIP4K2A. 5 | ##### | 1.463409 | 0.652 | 0.118 | ##### | Oligo | PIP4K2A        |
| STXBP6     | ##### | 0.733996 | 0.233 | 0.009 | ##### | Oligo | STXBP6         |
| KCNMB4. 8  | ##### | 1.520691 | 0.616 | 0.105 | ##### | Oligo | KCNMB4         |
| KLHL32     | ##### | 0.807417 | 0.247 | 0.011 | ##### | Oligo | KLHL32         |
| PLCH2      | ##### | 0.496897 | 0.174 | 0.004 | ##### | Oligo | PLCH2          |
| NTM. 7     | ##### | 1.3166   | 0.593 | 0.093 | ##### | Oligo | NTM            |
| VSTM2B     | ##### | 0.700227 | 0.24  | 0.011 | ##### | Oligo | VSTM2B         |
| ARHGAP23.  | ##### | 1.069874 | 0.4   | 0.039 | ##### | Oligo | ARHGAP23       |
| USH1C      | ##### | 0.544738 | 0.129 | 0.001 | ##### | Oligo | USH1C          |
| SMIM6      | ##### | 0.513242 | 0.122 | 0.001 | ##### | Oligo | SMIM6          |
| AIF1L. 8   | ##### | 1.349196 | 0.593 | 0.095 | ##### | Oligo | AIF1L          |
| TTYH2. 7   | ##### | 1.535046 | 0.586 | 0.098 | ##### | Oligo | TTYH2          |
| LPAR1. 3   | ##### | 1.05662  | 0.386 | 0.036 | ##### | Oligo | LPAR1          |
| MAP6D1. 7  | ##### | 1.262854 | 0.496 | 0.067 | ##### | Oligo | MAP6D1         |
| TP53TG5    | ##### | 0.60429  | 0.136 | 0.002 | ##### | Oligo | TP53TG5        |
| QDPR. 7    | ##### | 1.633294 | 0.901 | 0.34  | ##### | Oligo | QDPR           |
| SLC12A2. 8 | ##### | 1.44718  | 0.612 | 0.112 | ##### | Oligo | SLC12A2        |
| PDIA2      | ##### | 0.747393 | 0.174 | 0.005 | ##### | Oligo | PDIA2          |
| MEGF10     | ##### | 0.673564 | 0.226 | 0.01  | ##### | Oligo | MEGF10         |
| LINC00844  | ##### | 1.480552 | 0.565 | 0.089 | ##### | Oligo | LINC00844      |
| ABCA8. 7   | ##### | 1.335266 | 0.473 | 0.059 | ##### | Oligo | ABCA8          |
| JAKMIP3    | ##### | 0.41458  | 0.12  | 0.001 | ##### | Oligo | JAKMIP3        |
| TPPP3. 9   | ##### | 1.624793 | 0.673 | 0.134 | ##### | Oligo | TPPP3          |
| FAM131C    | ##### | 0.557714 | 0.16  | 0.004 | ##### | Oligo | FAM131C        |
| EVI2A. 8   | ##### | 1.427044 | 0.819 | 0.201 | ##### | Oligo | EVI2A          |
| SERPINI1.  | ##### | 1.175201 | 0.393 | 0.04  | ##### | Oligo | SERPINI1       |
| LARP6. 7   | ##### | 1.555053 | 0.706 | 0.173 | ##### | Oligo | LARP6          |
| C10orf90   | ##### | 0.709981 | 0.214 | 0.009 | ##### | Oligo | C10orf90       |
| APLP1. 9   | ##### | 1.625266 | 0.864 | 0.332 | ##### | Oligo | APLP1          |
| NIPAL4     | ##### | 0.523917 | 0.125 | 0.001 | ##### | Oligo | NIPAL4         |
| ANK3. 8    | ##### | 1.106957 | 0.416 | 0.047 | ##### | Oligo | ANK3           |
| SMIM5      | ##### | 0.783423 | 0.212 | 0.009 | ##### | Oligo | SMIM5          |
| IP6K3      | ##### | 0.564116 | 0.134 | 0.002 | ##### | Oligo | IP6K3          |
| ATP10B. 1  | ##### | 0.738391 | 0.268 | 0.017 | ##### | Oligo | ATP10B         |
| LANCL1. 7  | ##### | 1.364539 | 0.569 | 0.1   | ##### | Oligo | LANCL1         |
| RP11-953E  | ##### | 0.544602 | 0.092 | 0     | ##### | Oligo | RP11-953B20. 1 |
| ENPP6      | ##### | 0.685447 | 0.205 | 0.008 | ##### | Oligo | ENPP6          |
| S1PR5      | ##### | 0.763277 | 0.209 | 0.009 | ##### | Oligo | S1PR5          |
| CDH19      | ##### | 0.515141 | 0.146 | 0.003 | ##### | Oligo | CDH19          |
| FEZ1. 8    | ##### | 1.385636 | 0.913 | 0.411 | ##### | Oligo | FEZ1           |
| FGF1. 7    | ##### | 1.214672 | 0.508 | 0.078 | ##### | Oligo | FGF1           |
| ST6GALNAC  | ##### | 0.630985 | 0.219 | 0.011 | ##### | Oligo | ST6GALNAC3     |
| TTLL7. 9   | ##### | 1.49177  | 0.751 | 0.218 | ##### | Oligo | TTLL7          |
| PDE1A      | ##### | 0.566408 | 0.198 | 0.008 | ##### | Oligo | PDE1A          |
| TSC22D4. 9 | ##### | 1.308929 | 0.946 | 0.452 | ##### | Oligo | TSC22D4        |
| SEPP1. 5   | ##### | 1.346623 | 0.896 | 0.307 | ##### | Oligo | SEPP1          |
| C21orf91.  | ##### | 0.701889 | 0.271 | 0.018 | ##### | Oligo | C21orf91       |
| DNAH17     | ##### | 0.627447 | 0.172 | 0.006 | ##### | Oligo | DNAH17         |
| HOXD1      | ##### | 0.580552 | 0.205 | 0.009 | ##### | Oligo | HOXD1          |
| GPRC5B. 7  | ##### | 1.499748 | 0.72  | 0.2   | ##### | Oligo | GPRC5B         |
| RAB40B. 9  | ##### | 1.297497 | 0.581 | 0.113 | ##### | Oligo | RAB40B         |

|           |       |          |       |       |       |       |               |
|-----------|-------|----------|-------|-------|-------|-------|---------------|
| PAQR8.6   | ##### | 1.226147 | 0.506 | 0.081 | ##### | Oligo | PAQR8         |
| SVIP.5    | ##### | 1.463741 | 0.654 | 0.151 | ##### | Oligo | SVIP          |
| SEPT8.9   | ##### | 1.489431 | 0.685 | 0.177 | ##### | Oligo | 8-Sep         |
| CERCAM.7  | ##### | 1.369081 | 0.572 | 0.113 | ##### | Oligo | CERCAM        |
| RHOU.7    | ##### | 1.293117 | 0.588 | 0.117 | ##### | Oligo | RHOU          |
| PLA2G16.7 | ##### | 1.47806  | 0.901 | 0.385 | ##### | Oligo | PLA2G16       |
| CRYAB.9   | ##### | 1.36417  | 0.981 | 0.481 | ##### | Oligo | CRYAB         |
| RP3-406A7 | ##### | 0.512524 | 0.122 | 0.002 | ##### | Oligo | RP3-406A7.7   |
| CSRP1.6   | ##### | 1.488659 | 0.746 | 0.219 | ##### | Oligo | CSRP1         |
| TPRN      | ##### | 0.91523  | 0.301 | 0.026 | ##### | Oligo | TPRN          |
| MBNL2.4   | ##### | 1.103756 | 0.501 | 0.08  | ##### | Oligo | MBNL2         |
| C1orf198. | ##### | 1.255592 | 0.518 | 0.089 | ##### | Oligo | C1orf198      |
| HDAC11.3  | ##### | 1.119235 | 0.407 | 0.052 | ##### | Oligo | HDAC11        |
| ATP1B1.7  | ##### | 1.425863 | 0.734 | 0.216 | ##### | Oligo | ATP1B1        |
| FAM102A.6 | ##### | 1.236829 | 0.494 | 0.083 | ##### | Oligo | FAM102A       |
| PTPRK.6   | ##### | 0.96738  | 0.384 | 0.045 | ##### | Oligo | PTPRK         |
| CES4A.1   | ##### | 0.979894 | 0.219 | 0.012 | ##### | Oligo | CES4A         |
| SGCD      | ##### | 0.392583 | 0.111 | 0.002 | ##### | Oligo | SGCD          |
| RNF144A.4 | ##### | 0.821062 | 0.32  | 0.032 | ##### | Oligo | RNF144A       |
| SYNJ2.4   | ##### | 0.998705 | 0.327 | 0.035 | ##### | Oligo | SYNJ2         |
| ERMP1     | ##### | 0.554362 | 0.216 | 0.013 | ##### | Oligo | ERMP1         |
| SLC44A1.6 | ##### | 1.444977 | 0.776 | 0.296 | ##### | Oligo | SLC44A1       |
| VWA1.9    | ##### | 1.309887 | 0.574 | 0.128 | ##### | Oligo | VWA1          |
| CDC42EP1. | ##### | 1.287774 | 0.544 | 0.112 | ##### | Oligo | CDC42EP1      |
| NDRG1.5   | ##### | 1.257129 | 0.661 | 0.153 | ##### | Oligo | NDRG1         |
| SEMA4D.8  | ##### | 1.050273 | 0.447 | 0.067 | ##### | Oligo | SEMA4D        |
| ADCY5     | ##### | 0.640342 | 0.176 | 0.008 | ##### | Oligo | ADCY5         |
| RAPGEF3   | ##### | 0.594859 | 0.188 | 0.01  | ##### | Oligo | RAPGEF3       |
| TJP2.4    | ##### | 0.997308 | 0.348 | 0.042 | ##### | Oligo | TJP2          |
| PRCD.6    | ##### | 1.042345 | 0.275 | 0.024 | ##### | Oligo | PRCD          |
| TMSB10.7  | ##### | -1.19614 | 0.466 | 0.983 | ##### | Oligo | TMSB10        |
| ZNF536.7  | ##### | 0.860864 | 0.311 | 0.033 | ##### | Oligo | ZNF536        |
| RP11-496D | ##### | 0.352962 | 0.085 | 0.001 | ##### | Oligo | RP11-496D24.2 |
| HMSD      | ##### | 0.47619  | 0.115 | 0.003 | ##### | Oligo | HMSD          |
| NACAD.8   | ##### | 1.119594 | 0.449 | 0.076 | ##### | Oligo | NACAD         |
| SIRT2.7   | ##### | 1.348048 | 0.84  | 0.4   | ##### | Oligo | SIRT2         |
| ZCCHC24.7 | ##### | 1.274471 | 0.471 | 0.086 | ##### | Oligo | ZCCHC24       |
| PCDH9.7   | ##### | 1.328238 | 0.729 | 0.237 | ##### | Oligo | PCDH9         |
| PAQR6.7   | ##### | 1.072986 | 0.405 | 0.06  | ##### | Oligo | PAQR6         |
| FAXDC2.6  | ##### | 0.988846 | 0.358 | 0.046 | ##### | Oligo | FAXDC2        |
| CTNNA3    | ##### | 0.496061 | 0.153 | 0.006 | ##### | Oligo | CTNNA3        |
| GPM6B.9   | ##### | 0.960952 | 0.984 | 0.605 | ##### | Oligo | GPM6B         |
| TMTC2.4   | ##### | 0.902876 | 0.334 | 0.04  | ##### | Oligo | TMTC2         |
| SLC7A14   | ##### | 0.555612 | 0.136 | 0.005 | ##### | Oligo | SLC7A14       |
| KCTD4     | ##### | 0.562165 | 0.111 | 0.002 | ##### | Oligo | KCTD4         |
| CPEB1     | ##### | 0.662625 | 0.205 | 0.013 | ##### | Oligo | CPEB1         |
| SGK2      | ##### | 0.357515 | 0.092 | 0.001 | ##### | Oligo | SGK2          |
| GNAO1.7   | ##### | 1.046675 | 0.454 | 0.077 | ##### | Oligo | GNAO1         |
| USP54.6   | ##### | 0.945855 | 0.32  | 0.037 | ##### | Oligo | USP54         |
| FAAH      | ##### | 0.740114 | 0.245 | 0.021 | ##### | Oligo | FAAH          |
| PACS2.4   | ##### | 1.257878 | 0.539 | 0.12  | ##### | Oligo | PACS2         |



|           |       |          |       |       |       |       |              |
|-----------|-------|----------|-------|-------|-------|-------|--------------|
| DTX4      | ##### | 0.623967 | 0.191 | 0.011 | ##### | Oligo | DTX4         |
| CBR1.7    | ##### | 1.139333 | 0.882 | 0.461 | ##### | Oligo | CBR1         |
| S100B.8   | ##### | 1.121191 | 0.901 | 0.514 | ##### | Oligo | S100B        |
| MAPK8IP1. | ##### | 1.311008 | 0.619 | 0.175 | ##### | Oligo | MAPK8IP1     |
| SEMA3B-AS | ##### | 0.483435 | 0.12  | 0.003 | ##### | Oligo | SEMA3B-AS1   |
| DOCK9     | ##### | 0.632673 | 0.209 | 0.015 | ##### | Oligo | DOCK9        |
| NIPAL3.4  | ##### | 1.043597 | 0.416 | 0.068 | ##### | Oligo | NIPAL3       |
| HPN       | ##### | 0.395379 | 0.092 | 0.001 | ##### | Oligo | HPN          |
| SLC31A2.9 | ##### | 1.24251  | 0.659 | 0.175 | ##### | Oligo | SLC31A2      |
| GPD1.8    | ##### | 0.957855 | 0.32  | 0.038 | ##### | Oligo | GPD1         |
| PMP22.7   | ##### | 1.151311 | 0.885 | 0.41  | ##### | Oligo | PMP22        |
| PHLDB1.8  | ##### | 1.251213 | 0.541 | 0.126 | ##### | Oligo | PHLDB1       |
| FAIM2.8   | ##### | 1.315717 | 0.624 | 0.175 | ##### | Oligo | FAIM2        |
| CYB5R2.4  | ##### | 0.84021  | 0.247 | 0.022 | ##### | Oligo | CYB5R2       |
| GNAI1.7   | ##### | 1.036564 | 0.473 | 0.091 | ##### | Oligo | GNAI1        |
| SPOCK1.8  | ##### | 1.01854  | 0.419 | 0.068 | ##### | Oligo | SPOCK1       |
| RASGRP3.7 | ##### | 0.880738 | 0.386 | 0.057 | ##### | Oligo | RASGRP3      |
| CDKN1C.7  | ##### | 1.075386 | 0.494 | 0.1   | ##### | Oligo | CDKN1C       |
| PPP2R2C.1 | ##### | 0.445246 | 0.162 | 0.009 | ##### | Oligo | PPP2R2C      |
| FAM171A1. | ##### | 0.980088 | 0.391 | 0.065 | ##### | Oligo | FAM171A1     |
| PRUNE2.7  | ##### | 1.089464 | 0.496 | 0.103 | ##### | Oligo | PRUNE2       |
| MOB3B.6   | ##### | 0.938489 | 0.445 | 0.081 | ##### | Oligo | MOB3B        |
| LIMCH1.7  | ##### | 1.189831 | 0.546 | 0.137 | ##### | Oligo | LIMCH1       |
| SUN2.5    | ##### | 1.281887 | 0.656 | 0.202 | ##### | Oligo | SUN2         |
| TSPAN15.8 | ##### | 0.952272 | 0.402 | 0.065 | ##### | Oligo | TSPAN15      |
| LIPE.4    | ##### | 0.847029 | 0.341 | 0.05  | ##### | Oligo | LIPE         |
| DNM3.7    | ##### | 0.972619 | 0.416 | 0.076 | ##### | Oligo | DNM3         |
| GAS7.2    | ##### | 1.102912 | 0.466 | 0.097 | ##### | Oligo | GAS7         |
| FAM124A.4 | ##### | 0.775768 | 0.264 | 0.029 | ##### | Oligo | FAM124A      |
| TRIM59.1  | ##### | 0.597359 | 0.207 | 0.017 | ##### | Oligo | TRIM59       |
| MTMR10.2  | ##### | 1.001702 | 0.358 | 0.055 | ##### | Oligo | MTMR10       |
| NIPA1.2   | ##### | 0.836648 | 0.311 | 0.042 | ##### | Oligo | NIPA1        |
| FAM13C.6  | ##### | 0.737538 | 0.273 | 0.031 | ##### | Oligo | FAM13C       |
| TSPAN8    | ##### | 0.318646 | 0.073 | 0.001 | ##### | Oligo | TSPAN8       |
| SECISBP2L | ##### | 1.248437 | 0.567 | 0.159 | ##### | Oligo | SECISBP2L    |
| C2orf82   | ##### | 0.623618 | 0.179 | 0.012 | ##### | Oligo | C2orf82      |
| APBB1.8   | ##### | 1.260164 | 0.591 | 0.175 | ##### | Oligo | APBB1        |
| CALN1     | ##### | 0.318221 | 0.101 | 0.003 | ##### | Oligo | CALN1        |
| CTD-2049C | ##### | 0.394848 | 0.096 | 0.002 | ##### | Oligo | CTD-204904.1 |
| ELOVL1.5  | ##### | 1.26249  | 0.649 | 0.215 | ##### | Oligo | ELOVL1       |
| SH3TC2    | ##### | 0.356254 | 0.108 | 0.003 | ##### | Oligo | SH3TC2       |
| AFMID.4   | ##### | 1.031951 | 0.452 | 0.092 | ##### | Oligo | AFMID        |
| KIAA1755  | ##### | 0.536934 | 0.167 | 0.011 | ##### | Oligo | KIAA1755     |
| BACE1.6   | ##### | 1.15751  | 0.466 | 0.105 | ##### | Oligo | BACE1        |
| KIF1A.8   | ##### | 1.118946 | 0.487 | 0.113 | ##### | Oligo | KIF1A        |
| EPB41L3.9 | ##### | 1.012966 | 0.459 | 0.092 | ##### | Oligo | EPB41L3      |
| CLCN4.8   | ##### | 0.821141 | 0.315 | 0.045 | ##### | Oligo | CLCN4        |
| STMN1.8   | ##### | 1.011845 | 0.967 | 0.618 | ##### | Oligo | STMN1        |
| THBS2.1   | ##### | 0.665522 | 0.259 | 0.029 | ##### | Oligo | THBS2        |
| SERTAD4-A | ##### | 0.505553 | 0.141 | 0.007 | ##### | Oligo | SERTAD4-AS1  |
| SHROOM4   | ##### | 0.680546 | 0.228 | 0.023 | ##### | Oligo | SHROOM4      |

|           |       |          |       |       |       |       |               |
|-----------|-------|----------|-------|-------|-------|-------|---------------|
| MID1IP1.4 | ##### | 1.122876 | 0.692 | 0.245 | ##### | Oligo | MID1IP1       |
| ZDHC9.9   | ##### | 1.161182 | 0.551 | 0.153 | ##### | Oligo | ZDHC9         |
| PLXNB1.7  | ##### | 0.982386 | 0.367 | 0.064 | ##### | Oligo | PLXNB1        |
| TBCB.7    | ##### | 0.766742 | 0.934 | 0.648 | ##### | Oligo | TBCB          |
| RP11-236E | ##### | 0.366316 | 0.096 | 0.003 | ##### | Oligo | RP11-236B18.5 |
| FAM19A4   | ##### | 0.241689 | 0.059 | 0     | ##### | Oligo | FAM19A4       |
| DLG2.5    | ##### | 0.783869 | 0.289 | 0.039 | ##### | Oligo | DLG2          |
| TRIM2.7   | ##### | 1.188183 | 0.614 | 0.209 | ##### | Oligo | TRIM2         |
| MTUS1.5   | ##### | 1.071145 | 0.52  | 0.133 | ##### | Oligo | MTUS1         |
| MVB12B.8  | ##### | 1.038627 | 0.424 | 0.088 | ##### | Oligo | MVB12B        |
| CYP2J2    | ##### | 0.472319 | 0.155 | 0.01  | ##### | Oligo | CYP2J2        |
| TMEFF2.9  | ##### | 0.836634 | 0.379 | 0.066 | ##### | Oligo | TMEFF2        |
| C9orf3.7  | ##### | 0.954468 | 0.442 | 0.092 | ##### | Oligo | C9orf3        |
| NEO1.6    | ##### | 0.926689 | 0.353 | 0.062 | ##### | Oligo | NEO1          |
| PVRL1.8   | ##### | 0.885847 | 0.322 | 0.051 | ##### | Oligo | PVRL1         |
| COBL.7    | ##### | 0.84928  | 0.341 | 0.057 | ##### | Oligo | COBL          |
| SLC22A15  | ##### | 0.480248 | 0.136 | 0.008 | ##### | Oligo | SLC22A15      |
| SORT1.5   | ##### | 1.197539 | 0.605 | 0.215 | ##### | Oligo | SORT1         |
| GSN.8     | ##### | 1.007167 | 0.854 | 0.497 | ##### | Oligo | GSN           |
| PRIMA1    | ##### | 0.384506 | 0.136 | 0.008 | ##### | Oligo | PRIMA1        |
| SEPW1.3   | ##### | 0.914587 | 0.899 | 0.664 | ##### | Oligo | SEPW1         |
| LGI4      | ##### | 0.493668 | 0.139 | 0.008 | ##### | Oligo | LGI4          |
| CST3.6    | ##### | -1.21455 | 0.32  | 0.804 | ##### | Oligo | CST3          |
| CADM2.8   | ##### | 1.033007 | 0.572 | 0.174 | ##### | Oligo | CADM2         |
| GLTP.5    | ##### | 1.190524 | 0.645 | 0.254 | ##### | Oligo | GLTP          |
| CFL2.7    | ##### | 1.189083 | 0.722 | 0.313 | ##### | Oligo | CFL2          |
| KIRREL3.1 | ##### | 0.589601 | 0.205 | 0.02  | ##### | Oligo | KIRREL3       |
| ALB       | ##### | 0.289988 | 0.078 | 0.002 | ##### | Oligo | ALB           |
| INF2.6    | ##### | 0.928664 | 0.379 | 0.074 | ##### | Oligo | INF2          |
| QKI.6     | ##### | 1.034139 | 0.769 | 0.46  | ##### | Oligo | QKI           |
| TMC7.2    | ##### | 0.741425 | 0.268 | 0.037 | ##### | Oligo | TMC7          |
| SIK3.6    | ##### | 1.039053 | 0.416 | 0.094 | ##### | Oligo | SIK3          |
| EML2.3    | ##### | 0.941332 | 0.372 | 0.072 | ##### | Oligo | EML2          |
| KIAA0930. | ##### | 1.098238 | 0.496 | 0.132 | ##### | Oligo | KIAA0930      |
| PPM1H     | ##### | 0.331015 | 0.118 | 0.006 | ##### | Oligo | PPM1H         |
| LDHA.5    | ##### | -1.28828 | 0.181 | 0.788 | ##### | Oligo | LDHA          |
| MFAP3L.7  | ##### | 0.793438 | 0.292 | 0.046 | ##### | Oligo | MFAP3L        |
| FIS1.6    | ##### | 0.864178 | 0.873 | 0.629 | ##### | Oligo | FIS1          |
| ROGDI.5   | ##### | 1.159959 | 0.595 | 0.213 | ##### | Oligo | ROGDI         |
| SASH1.6   | ##### | 0.850978 | 0.334 | 0.06  | ##### | Oligo | SASH1         |
| MAN2A1.6  | ##### | 0.994239 | 0.428 | 0.098 | ##### | Oligo | MAN2A1        |
| PXK.3     | ##### | 0.999221 | 0.485 | 0.127 | ##### | Oligo | PXK           |
| KIAA1324L | ##### | 0.570552 | 0.209 | 0.022 | ##### | Oligo | KIAA1324L     |
| CDC42EP2. | ##### | 0.876114 | 0.235 | 0.029 | ##### | Oligo | CDC42EP2      |
| SLC6A8.5  | ##### | 1.018171 | 0.438 | 0.106 | ##### | Oligo | SLC6A8        |
| HEPACAM.8 | ##### | 0.998424 | 0.551 | 0.164 | ##### | Oligo | HEPACAM       |
| GPX1.9    | ##### | -1.15581 | 0.304 | 0.833 | ##### | Oligo | GPX1          |
| PI16      | ##### | 0.432597 | 0.115 | 0.006 | ##### | Oligo | PI16          |
| CTD-2380F | ##### | 0.385485 | 0.073 | 0.002 | ##### | Oligo | CTD-2380F24.1 |
| NALCN     | ##### | 0.478541 | 0.155 | 0.012 | ##### | Oligo | NALCN         |
| CLIC1.7   | ##### | -1.6547  | 0.04  | 0.645 | ##### | Oligo | CLIC1         |

|           |          |          |       |       |          |       |           |
|-----------|----------|----------|-------|-------|----------|-------|-----------|
| SFTPC     | #####    | 0.312478 | 0.08  | 0.002 | #####    | Oligo | SFTPC     |
| CAMK2N1.9 | #####    | 1.025976 | 0.678 | 0.303 | #####    | Oligo | CAMK2N1   |
| SEMA3C    | #####    | 0.404998 | 0.134 | 0.009 | #####    | Oligo | SEMA3C    |
| OTUD7A    | #####    | 0.559035 | 0.092 | 0.003 | #####    | Oligo | OTUD7A    |
| RAB11FIP4 | #####    | 0.69173  | 0.247 | 0.033 | #####    | Oligo | RAB11FIP4 |
| IP013.5   | #####    | 1.005376 | 0.412 | 0.096 | #####    | Oligo | IP013     |
| C8orf46.7 | #####    | 0.977214 | 0.478 | 0.127 | #####    | Oligo | C8orf46   |
| PEBP1.9   | #####    | 0.707579 | 0.965 | 0.798 | #####    | Oligo | PEBP1     |
| PHLPP1.9  | #####    | 1.05979  | 0.36  | 0.074 | #####    | Oligo | PHLPP1    |
| S100A11.9 | #####    | -1.60682 | 0.099 | 0.678 | #####    | Oligo | S100A11   |
| TIMP1.7   | #####    | -1.77758 | 0.047 | 0.642 | #####    | Oligo | TIMP1     |
| RCAN2.6   | #####    | 0.684584 | 0.256 | 0.036 | #####    | Oligo | RCAN2     |
| CLASP2.8  | #####    | 0.956257 | 0.562 | 0.183 | #####    | Oligo | CLASP2    |
| LDLRAP1.4 | #####    | 0.799333 | 0.292 | 0.048 | #####    | Oligo | LDLRAP1   |
| ITPKB.2   | #####    | 0.846517 | 0.334 | 0.063 | #####    | Oligo | ITPKB     |
| CD99.5    | #####    | -1.55852 | 0.078 | 0.659 | #####    | Oligo | CD99      |
| NXPE3.3   | #####    | 0.842964 | 0.367 | 0.077 | #####    | Oligo | NXPE3     |
| CRHBP     | #####    | 0.467918 | 0.094 | 0.004 | #####    | Oligo | CRHBP     |
| CNTNAP2   | #####    | 0.349366 | 0.113 | 0.006 | #####    | Oligo | CNTNAP2   |
| JAM3.5    | #####    | 1.028729 | 0.473 | 0.137 | 1.05E-99 | Oligo | JAM3      |
| TMTC4.8   | #####    | 0.951111 | 0.386 | 0.088 | 1.83E-98 | Oligo | TMTC4     |
| LAPTM4A.5 | #####    | -1.01636 | 0.261 | 0.792 | 2.40E-98 | Oligo | LAPTM4A   |
| PAIP2B    | #####    | 0.676154 | 0.179 | 0.018 | 4.28E-98 | Oligo | PAIP2B    |
| PSAT1.8   | #####    | 1.087055 | 0.56  | 0.19  | 5.11E-98 | Oligo | PSAT1     |
| VIM.7     | #####    | -1.51798 | 0.151 | 0.683 | 1.97E-97 | Oligo | VIM       |
| DLG1.8    | #####    | 1.002264 | 0.489 | 0.154 | 1.25E-96 | Oligo | DLG1      |
| USP31.5   | #####    | 0.709833 | 0.268 | 0.043 | 2.25E-96 | Oligo | USP31     |
| SPP1.6    | #####    | 0.630248 | 0.974 | 0.849 | 1.25E-95 | Oligo | SPP1      |
| LLGL1.7   | #####    | 0.893032 | 0.379 | 0.089 | 1.43E-95 | Oligo | LLGL1     |
| SPNS2.1   | 1.09E-99 | 0.668885 | 0.205 | 0.024 | 1.63E-95 | Oligo | SPNS2     |
| ID2.6     | 1.52E-99 | -1.41129 | 0.113 | 0.674 | 2.27E-95 | Oligo | ID2       |
| AMOTL2.6  | 2.06E-99 | 0.774178 | 0.346 | 0.071 | 3.08E-95 | Oligo | AMOTL2    |
| TYRO3.8   | 3.18E-99 | 1.039171 | 0.395 | 0.098 | 4.75E-95 | Oligo | TYRO3     |
| TMC6.9    | 1.25E-98 | 0.805115 | 0.421 | 0.1   | 1.87E-94 | Oligo | TMC6      |
| DACT3.7   | 4.03E-98 | 0.792604 | 0.334 | 0.067 | 6.02E-94 | Oligo | DACT3     |
| RNF220.5  | 1.97E-97 | 0.962741 | 0.466 | 0.136 | 2.94E-93 | Oligo | RNF220    |
| AJAP1     | 2.82E-97 | 0.279744 | 0.087 | 0.004 | 4.21E-93 | Oligo | AJAP1     |
| ADD3.5    | 4.42E-97 | 0.886175 | 0.445 | 0.121 | 6.61E-93 | Oligo | ADD3      |
| DYNLL1.6  | 8.35E-97 | 0.637047 | 0.974 | 0.831 | 1.25E-92 | Oligo | DYNLL1    |
| PKM.6     | 2.30E-96 | -1.08509 | 0.336 | 0.787 | 3.44E-92 | Oligo | PKM       |
| PTMA.7    | 6.13E-96 | 0.598536 | 0.995 | 0.966 | 9.16E-92 | Oligo | PTMA      |
| ADIPOR2.3 | 5.49E-95 | 1.086322 | 0.464 | 0.139 | 8.21E-91 | Oligo | ADIPOR2   |
| PHYHIPL.7 | 5.81E-95 | 0.966605 | 0.534 | 0.172 | 8.68E-91 | Oligo | PHYHIPL   |
| RGN.8     | 6.35E-95 | 0.85617  | 0.318 | 0.063 | 9.48E-91 | Oligo | RGN       |
| FAM53B.5  | 7.05E-95 | 0.612805 | 0.266 | 0.043 | 1.05E-90 | Oligo | FAM53B    |
| KIF19     | 1.21E-94 | 0.563532 | 0.108 | 0.006 | 1.80E-90 | Oligo | KIF19     |
| YPEL2.3   | 2.98E-94 | 0.795168 | 0.313 | 0.06  | 4.46E-90 | Oligo | YPEL2     |
| HN1.4     | 3.05E-94 | -1.14631 | 0.169 | 0.694 | 4.56E-90 | Oligo | HN1       |
| CALM2.6   | 3.43E-94 | 0.602128 | 0.991 | 0.93  | 5.12E-90 | Oligo | CALM2     |
| BIN1.7    | 2.11E-93 | 0.917781 | 0.72  | 0.348 | 3.16E-89 | Oligo | BIN1      |
| ENPP4.5   | 4.52E-93 | 0.627814 | 0.273 | 0.046 | 6.76E-89 | Oligo | ENPP4     |

|            |          |          |       |       |          |       |               |
|------------|----------|----------|-------|-------|----------|-------|---------------|
| ENDOD1.7   | 2.25E-92 | 1.014042 | 0.442 | 0.132 | 3.36E-88 | Oligo | ENDOD1        |
| SLC6A1     | 2.36E-92 | 0.546679 | 0.186 | 0.022 | 3.52E-88 | Oligo | SLC6A1        |
| PHGDH.8    | 4.85E-92 | 1.042737 | 0.546 | 0.187 | 7.24E-88 | Oligo | PHGDH         |
| CELSR2.7   | 8.08E-92 | 0.851248 | 0.353 | 0.083 | 1.21E-87 | Oligo | CELSR2        |
| PAQR4.8    | 4.23E-91 | 0.99768  | 0.478 | 0.152 | 6.32E-87 | Oligo | PAQR4         |
| UNC5B.8    | 4.29E-91 | 0.818294 | 0.344 | 0.074 | 6.41E-87 | Oligo | UNC5B         |
| DPYSL2.8   | 1.03E-90 | 1.00895  | 0.694 | 0.413 | 1.54E-86 | Oligo | DPYSL2        |
| SLC6A9.3   | 2.20E-90 | 0.655884 | 0.235 | 0.036 | 3.29E-86 | Oligo | SLC6A9        |
| SMS.4      | 5.12E-90 | -1.28988 | 0.049 | 0.592 | 7.66E-86 | Oligo | SMS           |
| RALGDS.5   | 3.73E-89 | 0.954626 | 0.461 | 0.14  | 5.57E-85 | Oligo | RALGDS        |
| CTSB.6     | 5.02E-89 | -1.07968 | 0.296 | 0.774 | 7.51E-85 | Oligo | CTSB          |
| HSPB1.4    | 5.17E-89 | -1.22463 | 0.176 | 0.672 | 7.73E-85 | Oligo | HSPB1         |
| ARHGEF37.7 | 7.56E-89 | 0.679829 | 0.235 | 0.036 | 1.13E-84 | Oligo | ARHGEF37      |
| TPTEP1.3   | 9.56E-89 | 0.568319 | 0.193 | 0.024 | 1.43E-84 | Oligo | TPTEP1        |
| ARHGAP21.2 | 2.45E-88 | 1.029244 | 0.574 | 0.238 | 3.66E-84 | Oligo | ARHGAP21      |
| AGAP1.7    | 5.64E-88 | 0.92844  | 0.4   | 0.109 | 8.43E-84 | Oligo | AGAP1         |
| KIF6       | 5.88E-88 | 0.414283 | 0.092 | 0.005 | 8.79E-84 | Oligo | KIF6          |
| RAB33A.7   | 5.75E-87 | 1.013174 | 0.386 | 0.096 | 8.59E-83 | Oligo | RAB33A        |
| TFEB.7     | 1.02E-86 | 0.749051 | 0.322 | 0.068 | 1.52E-82 | Oligo | TFEB          |
| UBB.6      | 1.39E-86 | 0.56857  | 0.984 | 0.908 | 2.07E-82 | Oligo | UBB           |
| PKP4.5     | 2.16E-86 | 0.685208 | 0.259 | 0.046 | 3.22E-82 | Oligo | PKP4          |
| PHLDA3.6   | 3.04E-86 | 0.979273 | 0.475 | 0.159 | 4.54E-82 | Oligo | PHLDA3        |
| GLDN.8     | 3.48E-86 | 0.732233 | 0.372 | 0.086 | 5.20E-82 | Oligo | GLDN          |
| DIXDC1.8   | 4.74E-86 | 0.828147 | 0.353 | 0.085 | 7.09E-82 | Oligo | DIXDC1        |
| MXI1.5     | 1.91E-85 | 0.982143 | 0.426 | 0.122 | 2.86E-81 | Oligo | MXI1          |
| GAB1.7     | 2.65E-85 | 0.846444 | 0.362 | 0.092 | 3.96E-81 | Oligo | GAB1          |
| NUAK1.5    | 2.67E-85 | 0.763463 | 0.301 | 0.062 | 3.99E-81 | Oligo | NUAK1         |
| TARSL2.7   | 4.54E-85 | 0.854567 | 0.381 | 0.1   | 6.78E-81 | Oligo | TARSL2        |
| SHROOM1.2  | 7.62E-85 | 0.76421  | 0.278 | 0.055 | 1.14E-80 | Oligo | SHROOM1       |
| FXYD4      | 1.04E-84 | 0.356567 | 0.04  | 0     | 1.55E-80 | Oligo | FXYD4         |
| DIP2B.5    | 1.13E-84 | 0.817447 | 0.395 | 0.109 | 1.69E-80 | Oligo | DIP2B         |
| LAMP2.6    | 1.17E-84 | 0.821515 | 0.753 | 0.46  | 1.75E-80 | Oligo | LAMP2         |
| ARL8A.7    | 2.45E-84 | 0.956406 | 0.591 | 0.26  | 3.65E-80 | Oligo | ARL8A         |
| NCAM1.9    | 2.89E-84 | 0.958908 | 0.661 | 0.323 | 4.32E-80 | Oligo | NCAM1         |
| CTC-529P8  | 3.59E-84 | 0.32706  | 0.059 | 0.002 | 5.36E-80 | Oligo | CTC-529P8.1   |
| CXorf36    | 6.06E-84 | 0.1857   | 0.052 | 0.001 | 9.05E-80 | Oligo | CXorf36       |
| S100A10.9  | 1.43E-83 | -1.51977 | 0.045 | 0.563 | 2.14E-79 | Oligo | S100A10       |
| SNHG18.1   | 1.55E-83 | 0.473136 | 0.158 | 0.017 | 2.31E-79 | Oligo | SNHG18        |
| PRR5L      | 2.70E-83 | 0.635816 | 0.193 | 0.027 | 4.04E-79 | Oligo | PRR5L         |
| APP.8      | 4.25E-83 | 0.815166 | 0.786 | 0.515 | 6.36E-79 | Oligo | APP           |
| SDCBP.6    | 5.86E-83 | -0.98318 | 0.264 | 0.746 | 8.76E-79 | Oligo | SDCBP         |
| RTKN.9     | 6.51E-83 | 0.9937   | 0.473 | 0.16  | 9.73E-79 | Oligo | RTKN          |
| CHI3L1.8   | 9.25E-83 | -2.01949 | 0.031 | 0.543 | 1.38E-78 | Oligo | CHI3L1        |
| CCP110.7   | 2.13E-82 | 0.924206 | 0.4   | 0.113 | 3.18E-78 | Oligo | CCP110        |
| FNTB.4     | 5.19E-82 | 0.780903 | 0.329 | 0.077 | 7.76E-78 | Oligo | FNTB          |
| PIK3C2B    | 9.05E-82 | 0.584461 | 0.179 | 0.023 | 1.35E-77 | Oligo | PIK3C2B       |
| RP11-134L  | 1.19E-81 | 0.235411 | 0.082 | 0.004 | 1.78E-77 | Oligo | RP11-134L10.1 |
| IGSF8.7    | 2.88E-81 | 0.977198 | 0.525 | 0.201 | 4.31E-77 | Oligo | IGSF8         |
| SAT1.7     | 5.75E-81 | -0.96278 | 0.386 | 0.818 | 8.59E-77 | Oligo | SAT1          |
| TUBA1A.8   | 7.69E-81 | 0.566545 | 0.981 | 0.801 | 1.15E-76 | Oligo | TUBA1A        |
| HMG1.5     | 9.59E-81 | -0.97763 | 0.224 | 0.681 | 1.43E-76 | Oligo | HMG1          |

|             |           |           |        |        |           |       |          |
|-------------|-----------|-----------|--------|--------|-----------|-------|----------|
| BTG1. 8     | 2. 16E-80 | -1. 02727 | 0. 256 | 0. 705 | 3. 22E-76 | Oligo | BTG1     |
| VAMP2. 8    | 4. 73E-80 | 0. 714203 | 0. 849 | 0. 614 | 7. 07E-76 | Oligo | VAMP2    |
| MFSD6. 5    | 9. 51E-80 | 0. 725795 | 0. 275 | 0. 056 | 1. 42E-75 | Oligo | MFSD6    |
| PHACTR3. 8  | 1. 24E-79 | 0. 704613 | 0. 313 | 0. 069 | 1. 86E-75 | Oligo | PHACTR3  |
| NENF. 5     | 4. 28E-79 | 0. 789646 | 0. 718 | 0. 486 | 6. 40E-75 | Oligo | NENF     |
| NPC1. 1     | 5. 82E-79 | 0. 868733 | 0. 36  | 0. 095 | 8. 70E-75 | Oligo | NPC1     |
| TMEM98. 6   | 1. 10E-78 | 1. 139962 | 0. 539 | 0. 224 | 1. 65E-74 | Oligo | TMEM98   |
| MAN2A2. 3   | 1. 21E-78 | 0. 811894 | 0. 301 | 0. 067 | 1. 80E-74 | Oligo | MAN2A2   |
| DAPK2       | 1. 39E-78 | 0. 413423 | 0. 127 | 0. 012 | 2. 08E-74 | Oligo | DAPK2    |
| POLR2F. 6   | 4. 89E-78 | 0. 868542 | 0. 8   | 0. 532 | 7. 31E-74 | Oligo | POLR2F   |
| CD9. 4      | 6. 42E-78 | 0. 823107 | 0. 906 | 0. 553 | 9. 59E-74 | Oligo | CD9      |
| DENND5A. 4  | 1. 19E-77 | 0. 966429 | 0. 473 | 0. 168 | 1. 77E-73 | Oligo | DENND5A  |
| OSBPL1A. 6  | 1. 20E-77 | 0. 900573 | 0. 487 | 0. 18  | 1. 79E-73 | Oligo | OSBPL1A  |
| NT5DC1. 4   | 3. 47E-77 | 0. 688434 | 0. 247 | 0. 045 | 5. 19E-73 | Oligo | NT5DC1   |
| BST2. 8     | 4. 16E-77 | -1. 59065 | 0. 016 | 0. 503 | 6. 22E-73 | Oligo | BST2     |
| MOSPD2. 3   | 4. 87E-77 | 0. 77611  | 0. 367 | 0. 1   | 7. 28E-73 | Oligo | MOSPD2   |
| RGCC. 7     | 1. 50E-76 | 0. 807713 | 0. 607 | 0. 237 | 2. 25E-72 | Oligo | RGCC     |
| ARPC1B. 9   | 2. 56E-76 | -1. 35371 | 0. 059 | 0. 549 | 3. 83E-72 | Oligo | ARPC1B   |
| PRKACB. 4   | 2. 67E-76 | 0. 912228 | 0. 52  | 0. 204 | 3. 99E-72 | Oligo | PRKACB   |
| MYOT        | 4. 88E-76 | 0. 414192 | 0. 101 | 0. 007 | 7. 29E-72 | Oligo | MYOT     |
| ARPC2. 7    | 1. 01E-75 | -0. 78788 | 0. 365 | 0. 789 | 1. 52E-71 | Oligo | ARPC2    |
| KLF13. 3    | 1. 05E-75 | 0. 824292 | 0. 393 | 0. 115 | 1. 58E-71 | Oligo | KLF13    |
| DYNC1I2. 7  | 1. 18E-75 | 0. 835258 | 0. 706 | 0. 46  | 1. 76E-71 | Oligo | DYNC1I2  |
| CDK19. 4    | 3. 11E-75 | 0. 891775 | 0. 391 | 0. 116 | 4. 64E-71 | Oligo | CDK19    |
| IFITM3. 4   | 3. 15E-75 | -1. 51605 | 0. 038 | 0. 52  | 4. 71E-71 | Oligo | IFITM3   |
| SAMD12      | 4. 11E-75 | 0. 279162 | 0. 082 | 0. 005 | 6. 14E-71 | Oligo | SAMD12   |
| OTUD7B. 7   | 6. 39E-75 | 0. 822246 | 0. 346 | 0. 092 | 9. 55E-71 | Oligo | OTUD7B   |
| PTK2. 6     | 7. 84E-75 | 0. 944444 | 0. 468 | 0. 167 | 1. 17E-70 | Oligo | PTK2     |
| MARCKS. 6   | 1. 51E-74 | -1. 07013 | 0. 141 | 0. 615 | 2. 26E-70 | Oligo | MARCKS   |
| ZNF365      | 1. 92E-74 | 0. 586489 | 0. 16  | 0. 021 | 2. 87E-70 | Oligo | ZNF365   |
| PTMS. 8     | 2. 69E-74 | -1. 14824 | 0. 092 | 0. 57  | 4. 03E-70 | Oligo | PTMS     |
| LGR5        | 3. 08E-74 | 0. 295386 | 0. 078 | 0. 004 | 4. 60E-70 | Oligo | LGR5     |
| TLE4. 6     | 7. 09E-74 | 0. 889689 | 0. 442 | 0. 153 | 1. 06E-69 | Oligo | TLE4     |
| FRMD4B. 9   | 1. 02E-73 | 0. 776887 | 0. 464 | 0. 148 | 1. 52E-69 | Oligo | FRMD4B   |
| SNX22. 1    | 1. 98E-73 | 0. 75403  | 0. 275 | 0. 058 | 2. 96E-69 | Oligo | SNX22    |
| TRAM1L1     | 2. 25E-73 | 0. 455023 | 0. 113 | 0. 01  | 3. 36E-69 | Oligo | TRAM1L1  |
| ANXA2. 7    | 4. 61E-73 | -1. 38385 | 0. 054 | 0. 531 | 6. 89E-69 | Oligo | ANXA2    |
| FAM134B. 7  | 4. 64E-73 | 0. 84003  | 0. 445 | 0. 155 | 6. 93E-69 | Oligo | FAM134B  |
| IL1RAPL1    | 1. 04E-72 | 0. 373414 | 0. 096 | 0. 007 | 1. 56E-68 | Oligo | IL1RAPL1 |
| FCGRT. 8    | 1. 13E-72 | -1. 29967 | 0. 094 | 0. 567 | 1. 69E-68 | Oligo | FCGRT    |
| HLA-DPA1. 1 | 2. 2E-72  | -1. 48071 | 0. 089 | 0. 55  | 1. 83E-68 | Oligo | HLA-DPA1 |
| BTBD16      | 1. 30E-72 | 0. 350583 | 0. 059 | 0. 002 | 1. 95E-68 | Oligo | BTBD16   |
| PTPRH       | 2. 28E-72 | 0. 287205 | 0. 094 | 0. 007 | 3. 41E-68 | Oligo | PTPRH    |
| LZTS2. 3    | 2. 41E-72 | 0. 713746 | 0. 299 | 0. 071 | 3. 60E-68 | Oligo | LZTS2    |
| FMNL2. 7    | 4. 73E-72 | 0. 923919 | 0. 551 | 0. 254 | 7. 07E-68 | Oligo | FMNL2    |
| MAP1A. 8    | 7. 76E-72 | 0. 961518 | 0. 522 | 0. 219 | 1. 16E-67 | Oligo | MAP1A    |
| MEGF9. 3    | 2. 89E-71 | 0. 740525 | 0. 325 | 0. 084 | 4. 31E-67 | Oligo | MEGF9    |
| SREBF1. 2   | 1. 86E-70 | 0. 792209 | 0. 369 | 0. 107 | 2. 78E-66 | Oligo | SREBF1   |
| DOCK10. 7   | 3. 01E-70 | 0. 786793 | 0. 388 | 0. 116 | 4. 51E-66 | Oligo | DOCK10   |
| COTL1. 8    | 3. 58E-70 | -1. 17435 | 0. 066 | 0. 526 | 5. 35E-66 | Oligo | COTL1    |
| PCDH10. 7   | 4. 63E-70 | 0. 745826 | 0. 268 | 0. 06  | 6. 92E-66 | Oligo | PCDH10   |

|            |          |          |       |       |          |       |               |
|------------|----------|----------|-------|-------|----------|-------|---------------|
| ITPK1.2    | 5.56E-70 | 0.761358 | 0.405 | 0.128 | 8.31E-66 | Oligo | ITPK1         |
| GAP43.9    | 6.15E-70 | -1.63231 | 0.024 | 0.483 | 9.20E-66 | Oligo | GAP43         |
| SH3PXD2A.6 | 6.61E-70 | 0.493212 | 0.193 | 0.031 | 9.88E-66 | Oligo | SH3PXD2A      |
| DPYSL5.9   | 9.38E-70 | 0.914849 | 0.426 | 0.153 | 1.40E-65 | Oligo | DPYSL5        |
| ZFYVE16.4  | 1.06E-69 | 0.839967 | 0.449 | 0.161 | 1.58E-65 | Oligo | ZFYVE16       |
| LDLRAD4.7  | 1.08E-69 | 0.891339 | 0.426 | 0.135 | 1.61E-65 | Oligo | LDLRAD4       |
| SYT11.9    | 1.35E-69 | 0.811957 | 0.654 | 0.374 | 2.02E-65 | Oligo | SYT11         |
| MAPRE2.4   | 1.62E-69 | 0.82033  | 0.473 | 0.176 | 2.42E-65 | Oligo | MAPRE2        |
| MT1X.7     | 1.66E-69 | -1.18095 | 0.12  | 0.595 | 2.48E-65 | Oligo | MT1X          |
| SBF1.2     | 3.16E-69 | 0.651138 | 0.268 | 0.059 | 4.73E-65 | Oligo | SBF1          |
| ANO4       | 5.15E-69 | 0.281167 | 0.08  | 0.005 | 7.69E-65 | Oligo | ANO4          |
| FTH1.6     | 5.15E-69 | 0.297429 | 0.965 | 0.931 | 7.70E-65 | Oligo | FTH1          |
| CTD-2325F  | 3.98E-68 | 0.448349 | 0.132 | 0.015 | 5.94E-64 | Oligo | CTD-2325P2.4  |
| CPOX.2     | 1.05E-67 | 0.666572 | 0.273 | 0.063 | 1.57E-63 | Oligo | CPOX          |
| CD151.8    | 1.16E-67 | -1.21323 | 0.045 | 0.498 | 1.74E-63 | Oligo | CD151         |
| ZFP36L1.5  | 1.24E-67 | -1.1543  | 0.122 | 0.576 | 1.86E-63 | Oligo | ZFP36L1       |
| FUT8.5     | 1.37E-67 | 0.812294 | 0.374 | 0.115 | 2.05E-63 | Oligo | FUT8          |
| HR.1       | 1.42E-67 | 0.451967 | 0.125 | 0.013 | 2.13E-63 | Oligo | HR            |
| STRN.1     | 2.58E-67 | 0.643458 | 0.256 | 0.056 | 3.85E-63 | Oligo | STRN          |
| DNAJB2.8   | 2.97E-67 | 0.911718 | 0.593 | 0.304 | 4.44E-63 | Oligo | DNAJB2        |
| ATP5I.2    | 4.39E-67 | 0.551321 | 0.849 | 0.748 | 6.57E-63 | Oligo | ATP5I         |
| DOHH.5     | 7.13E-67 | 0.863113 | 0.464 | 0.184 | 1.07E-62 | Oligo | DOHH          |
| HLA-DRA.8  | 9.50E-67 | -1.19233 | 0.245 | 0.648 | 1.42E-62 | Oligo | HLA-DRA       |
| NRIP2      | 1.22E-66 | 0.276296 | 0.056 | 0.002 | 1.82E-62 | Oligo | NRIP2         |
| PLTP.7     | 1.29E-66 | -1.40259 | 0.04  | 0.486 | 1.92E-62 | Oligo | PLTP          |
| MYH14      | 2.17E-66 | 0.337307 | 0.104 | 0.009 | 3.24E-62 | Oligo | MYH14         |
| SOX8.9     | 3.81E-66 | 0.883573 | 0.459 | 0.167 | 5.70E-62 | Oligo | SOX8          |
| GNAZ.7     | 4.94E-66 | 0.66492  | 0.249 | 0.053 | 7.38E-62 | Oligo | GNAZ          |
| SRGN.9     | 5.61E-66 | -1.50985 | 0.082 | 0.515 | 8.39E-62 | Oligo | SRGN          |
| GALNT6.5   | 5.87E-66 | 0.45944  | 0.167 | 0.024 | 8.78E-62 | Oligo | GALNT6        |
| MPP2.8     | 1.17E-65 | 0.649629 | 0.245 | 0.052 | 1.74E-61 | Oligo | MPP2          |
| RP11-267C  | 1.18E-65 | 0.455466 | 0.071 | 0.004 | 1.76E-61 | Oligo | RP11-267C16.1 |
| LGALS3.7   | 1.31E-65 | -1.48024 | 0.047 | 0.497 | 1.95E-61 | Oligo | LGALS3        |
| HS3ST5     | 1.55E-65 | 0.39455  | 0.099 | 0.008 | 2.32E-61 | Oligo | HS3ST5        |
| SCD5.8     | 4.20E-65 | 0.766192 | 0.673 | 0.384 | 6.27E-61 | Oligo | SCD5          |
| CERS2.3    | 5.53E-65 | 0.916614 | 0.511 | 0.221 | 8.27E-61 | Oligo | CERS2         |
| PADI2.7    | 6.45E-65 | 0.689337 | 0.412 | 0.124 | 9.64E-61 | Oligo | PADI2         |
| NDRG2.6    | 9.69E-65 | 0.896102 | 0.671 | 0.347 | 1.45E-60 | Oligo | NDRG2         |
| REPS2.1    | 1.14E-64 | 0.358137 | 0.118 | 0.012 | 1.70E-60 | Oligo | REPS2         |
| HLA-DRB1.1 | 1.63E-64 | -1.3897  | 0.12  | 0.548 | 2.43E-60 | Oligo | HLA-DRB1      |
| HIPK2.7    | 7.28E-64 | 0.857588 | 0.501 | 0.21  | 1.09E-59 | Oligo | HIPK2         |
| TMED9.4    | 1.27E-63 | -0.74982 | 0.254 | 0.706 | 1.89E-59 | Oligo | TMED9         |
| PALM2      | 1.93E-63 | 0.649668 | 0.165 | 0.025 | 2.89E-59 | Oligo | PALM2         |
| SLC3A2.2   | 3.32E-63 | -0.99465 | 0.172 | 0.603 | 4.97E-59 | Oligo | SLC3A2        |
| SNX30.2    | 6.43E-63 | 0.572256 | 0.249 | 0.055 | 9.62E-59 | Oligo | SNX30         |
| JOSD2.7    | 6.80E-63 | 0.789105 | 0.612 | 0.324 | 1.02E-58 | Oligo | JOSD2         |
| PLA2G4C.3  | 1.05E-62 | 0.552574 | 0.202 | 0.038 | 1.57E-58 | Oligo | PLA2G4C       |
| RP11-862L  | 1.56E-62 | 0.638626 | 0.12  | 0.013 | 2.34E-58 | Oligo | RP11-862L9.3  |
| TTYH1.9    | 2.56E-62 | 0.72137  | 0.584 | 0.256 | 3.83E-58 | Oligo | TTYH1         |
| C2orf88    | 3.82E-62 | 0.348683 | 0.146 | 0.02  | 5.71E-58 | Oligo | C2orf88       |
| RPN2.3     | 4.71E-62 | -0.89    | 0.226 | 0.639 | 7.04E-58 | Oligo | RPN2          |

|             |           |           |        |        |           |       |             |
|-------------|-----------|-----------|--------|--------|-----------|-------|-------------|
| CDH8. 1     | 4. 79E-62 | 0. 382567 | 0. 118 | 0. 013 | 7. 16E-58 | Oligo | CDH8        |
| ART3        | 5. 15E-62 | 0. 479715 | 0. 082 | 0. 006 | 7. 70E-58 | Oligo | ART3        |
| RNF13. 7    | 5. 15E-62 | 0. 80054  | 0. 734 | 0. 471 | 7. 70E-58 | Oligo | RNF13       |
| PDPN. 5     | 5. 45E-62 | -1. 2716  | 0. 04  | 0. 465 | 8. 14E-58 | Oligo | PDPN        |
| TPI1. 5     | 1. 39E-61 | -0. 53411 | 0. 565 | 0. 877 | 2. 08E-57 | Oligo | TPI1        |
| SEPT7. 9    | 1. 99E-61 | 0. 607287 | 0. 856 | 0. 697 | 2. 97E-57 | Oligo | 7-Sep       |
| SOWAHA      | 2. 09E-61 | 0. 227977 | 0. 061 | 0. 003 | 3. 12E-57 | Oligo | SOWAHA      |
| DUSP7       | 7. 56E-61 | 0. 4835   | 0. 165 | 0. 026 | 1. 13E-56 | Oligo | DUSP7       |
| PPDPF. 5    | 1. 41E-60 | 0. 439533 | 0. 88  | 0. 705 | 2. 11E-56 | Oligo | PPDPF       |
| GNG5. 7     | 2. 27E-60 | -0. 86146 | 0. 264 | 0. 658 | 3. 39E-56 | Oligo | GNG5        |
| MCL1. 7     | 3. 82E-60 | -0. 89315 | 0. 195 | 0. 614 | 5. 70E-56 | Oligo | MCL1        |
| RYBP. 4     | 4. 16E-60 | 0. 733152 | 0. 344 | 0. 106 | 6. 22E-56 | Oligo | RYBP        |
| CREB5. 8    | 7. 40E-60 | 0. 888177 | 0. 506 | 0. 225 | 1. 11E-55 | Oligo | CREB5       |
| C4orf48. 6  | 7. 90E-60 | 0. 704224 | 0. 671 | 0. 52  | 1. 18E-55 | Oligo | C4orf48     |
| APLP2. 7    | 9. 61E-60 | -0. 88046 | 0. 198 | 0. 608 | 1. 44E-55 | Oligo | APLP2       |
| ZEB2. 5     | 1. 25E-59 | 0. 786886 | 0. 584 | 0. 293 | 1. 86E-55 | Oligo | ZEB2        |
| CEBPB. 9    | 1. 98E-59 | -1. 16083 | 0. 038 | 0. 45  | 2. 96E-55 | Oligo | CEBPB       |
| ZDHHC14. 3  | 2. 13E-59 | 0. 635045 | 0. 275 | 0. 07  | 3. 18E-55 | Oligo | ZDHHC14     |
| CORO2B. 6   | 3. 34E-59 | 0. 800252 | 0. 313 | 0. 093 | 4. 99E-55 | Oligo | CORO2B      |
| LURAP1L     | 5. 27E-59 | 0. 37108  | 0. 108 | 0. 011 | 7. 88E-55 | Oligo | LURAP1L     |
| FAM178B     | 6. 31E-59 | 0. 342418 | 0. 075 | 0. 005 | 9. 43E-55 | Oligo | FAM178B     |
| RDX. 8      | 8. 02E-59 | 0. 674203 | 0. 687 | 0. 483 | 1. 20E-54 | Oligo | RDX         |
| MDK. 8      | 8. 18E-59 | -1. 22886 | 0. 101 | 0. 505 | 1. 22E-54 | Oligo | MDK         |
| RHOC. 6     | 8. 53E-59 | -1. 03129 | 0. 125 | 0. 548 | 1. 28E-54 | Oligo | RHOC        |
| MGAT3       | 8. 58E-59 | 0. 472516 | 0. 158 | 0. 025 | 1. 28E-54 | Oligo | MGAT3       |
| ANKRD65. 1  | 1. 47E-58 | 0. 630358 | 0. 184 | 0. 033 | 2. 20E-54 | Oligo | ANKRD65     |
| FAM63A      | 1. 53E-58 | 0. 522545 | 0. 184 | 0. 033 | 2. 29E-54 | Oligo | FAM63A      |
| SLC13A3     | 2. 11E-58 | 0. 372186 | 0. 115 | 0. 013 | 3. 16E-54 | Oligo | SLC13A3     |
| CBX7. 3     | 4. 38E-58 | 0. 700337 | 0. 261 | 0. 064 | 6. 55E-54 | Oligo | CBX7        |
| RP11-9G1. 4 | 9. 7E-58  | 0. 324376 | 0. 082 | 0. 007 | 7. 43E-54 | Oligo | RP11-9G1. 3 |
| ANXA1. 6    | 6. 16E-58 | -1. 44613 | 0. 021 | 0. 424 | 9. 21E-54 | Oligo | ANXA1       |
| PRKCQ       | 7. 20E-58 | 0. 237621 | 0. 073 | 0. 005 | 1. 08E-53 | Oligo | PRKCQ       |
| CHN2. 5     | 7. 24E-58 | 0. 670601 | 0. 315 | 0. 089 | 1. 08E-53 | Oligo | CHN2        |
| EMP3. 8     | 7. 50E-58 | -1. 11906 | 0. 047 | 0. 464 | 1. 12E-53 | Oligo | EMP3        |
| ELAVL3. 9   | 7. 71E-58 | 0. 761481 | 0. 586 | 0. 3   | 1. 15E-53 | Oligo | ELAVL3      |
| NRBP2. 7    | 1. 75E-57 | 0. 722572 | 0. 346 | 0. 113 | 2. 61E-53 | Oligo | NRBP2       |
| TSPYL5. 1   | 2. 68E-57 | 0. 301489 | 0. 087 | 0. 007 | 4. 00E-53 | Oligo | TSPYL5      |
| SOD2. 5     | 3. 46E-57 | -1. 21061 | 0. 148 | 0. 551 | 5. 18E-53 | Oligo | SOD2        |
| RNASET2. 9  | 3. 63E-57 | -1. 17683 | 0. 094 | 0. 497 | 5. 43E-53 | Oligo | RNASET2     |
| MARCKSL1. 7 | 5. 6E-57  | 0. 654498 | 0. 798 | 0. 535 | 1. 13E-52 | Oligo | MARCKSL1    |
| HLA-DPB1. 8 | 5. 4E-57  | -1. 30958 | 0. 12  | 0. 508 | 1. 28E-52 | Oligo | HLA-DPB1    |
| RPS6KA5     | 1. 37E-56 | 0. 638309 | 0. 226 | 0. 049 | 2. 05E-52 | Oligo | RPS6KA5     |
| MYLIP. 8    | 1. 41E-56 | 0. 6759   | 0. 376 | 0. 12  | 2. 11E-52 | Oligo | MYLIP       |
| RGS2. 7     | 1. 43E-56 | -1. 33954 | 0. 061 | 0. 46  | 2. 13E-52 | Oligo | RGS2        |
| FRYL. 8     | 1. 80E-56 | 0. 805377 | 0. 435 | 0. 178 | 2. 68E-52 | Oligo | FRYL        |
| CAV2. 4     | 2. 30E-56 | 0. 550465 | 0. 195 | 0. 038 | 3. 43E-52 | Oligo | CAV2        |
| CXCL16. 8   | 4. 01E-56 | -1. 14377 | 0. 068 | 0. 468 | 6. 00E-52 | Oligo | CXCL16      |
| LRRC8D. 3   | 4. 46E-56 | 0. 735875 | 0. 299 | 0. 086 | 6. 67E-52 | Oligo | LRRC8D      |
| BRSK1. 7    | 8. 97E-56 | 0. 688509 | 0. 278 | 0. 076 | 1. 34E-51 | Oligo | BRSK1       |
| EIF4EBP1. 1 | 2. 3E-55  | -0. 99927 | 0. 04  | 0. 441 | 1. 84E-51 | Oligo | EIF4EBP1    |
| MCF2L. 6    | 1. 80E-55 | 0. 620511 | 0. 306 | 0. 088 | 2. 69E-51 | Oligo | MCF2L       |

|            |          |          |       |       |          |       |           |
|------------|----------|----------|-------|-------|----------|-------|-----------|
| REEP3.4    | 2.31E-55 | 0.742626 | 0.494 | 0.235 | 3.45E-51 | Oligo | REEP3     |
| SH3GLB2.3  | 2.31E-55 | 0.762021 | 0.339 | 0.11  | 3.45E-51 | Oligo | SH3GLB2   |
| RASSF2.3   | 4.95E-55 | 0.865899 | 0.511 | 0.249 | 7.39E-51 | Oligo | RASSF2    |
| CADM4.8    | 6.72E-55 | 0.841436 | 0.522 | 0.254 | 1.00E-50 | Oligo | CADM4     |
| HLA-E.9    | 9.84E-55 | -0.91607 | 0.224 | 0.61  | 1.47E-50 | Oligo | HLA-E     |
| ACER3.8    | 1.01E-54 | 0.769911 | 0.442 | 0.175 | 1.50E-50 | Oligo | ACER3     |
| CD68.9     | 1.30E-54 | -1.2807  | 0.064 | 0.456 | 1.94E-50 | Oligo | CD68      |
| EEF1A1.8   | 1.35E-54 | 0.307288 | 0.946 | 0.821 | 2.01E-50 | Oligo | EEF1A1    |
| TCEAL7.7   | 2.23E-54 | 0.891202 | 0.581 | 0.292 | 3.34E-50 | Oligo | TCEAL7    |
| CPEB2.3    | 2.61E-54 | 0.607055 | 0.252 | 0.064 | 3.91E-50 | Oligo | CPEB2     |
| EIF4A1.5   | 3.41E-54 | -0.44725 | 0.612 | 0.871 | 5.09E-50 | Oligo | EIF4A1    |
| C1QB.9     | 3.99E-54 | -1.12722 | 0.216 | 0.583 | 5.97E-50 | Oligo | C1QB      |
| PREX1.8    | 4.19E-54 | 0.812123 | 0.475 | 0.208 | 6.27E-50 | Oligo | PREX1     |
| ARL2.5     | 6.47E-54 | 0.818781 | 0.678 | 0.429 | 9.67E-50 | Oligo | ARL2      |
| TBC1D12.7  | 7.19E-54 | 0.633262 | 0.322 | 0.099 | 1.07E-49 | Oligo | TBC1D12   |
| ARAP2.4    | 1.25E-53 | 0.68831  | 0.28  | 0.078 | 1.87E-49 | Oligo | ARAP2     |
| SEC61G.9   | 1.38E-53 | -0.85185 | 0.586 | 0.807 | 2.06E-49 | Oligo | SEC61G    |
| LYNX1      | 1.72E-53 | 0.521142 | 0.155 | 0.026 | 2.57E-49 | Oligo | LYNX1     |
| PABPC1.7   | 2.13E-53 | -0.70184 | 0.416 | 0.757 | 3.18E-49 | Oligo | PABPC1    |
| SGK3.6     | 2.69E-53 | 0.574372 | 0.247 | 0.06  | 4.02E-49 | Oligo | SGK3      |
| ALCAM.7    | 2.77E-53 | 0.747891 | 0.454 | 0.186 | 4.14E-49 | Oligo | ALCAM     |
| LAMTOR2.7  | 3.60E-53 | -0.77141 | 0.191 | 0.602 | 5.37E-49 | Oligo | LAMTOR2   |
| H2AFY.7    | 4.76E-53 | -0.73991 | 0.233 | 0.621 | 7.11E-49 | Oligo | H2AFY     |
| LGALS1.7   | 1.04E-52 | -0.72526 | 0.334 | 0.718 | 1.56E-48 | Oligo | LGALS1    |
| ALOX5AP.9  | 1.72E-52 | -1.45271 | 0.038 | 0.413 | 2.58E-48 | Oligo | ALOX5AP   |
| FCER1G.9   | 1.92E-52 | -1.40237 | 0.085 | 0.455 | 2.87E-48 | Oligo | FCER1G    |
| GABARAPL2  | 2.58E-52 | 0.58849  | 0.878 | 0.738 | 3.85E-48 | Oligo | GABARAPL2 |
| HEXB.9     | 2.72E-52 | -0.91072 | 0.035 | 0.419 | 4.06E-48 | Oligo | HEXB      |
| PSEN1.3    | 2.99E-52 | 0.813526 | 0.421 | 0.17  | 4.46E-48 | Oligo | PSEN1     |
| NKD1.1     | 3.26E-52 | 0.473663 | 0.165 | 0.03  | 4.87E-48 | Oligo | NKD1      |
| NCAM2.7    | 5.13E-52 | 0.552312 | 0.245 | 0.061 | 7.66E-48 | Oligo | NCAM2     |
| GLRX.8     | 6.55E-52 | -1.2148  | 0.026 | 0.402 | 9.79E-48 | Oligo | GLRX      |
| GLUL.5     | 6.58E-52 | 0.455048 | 0.873 | 0.783 | 9.83E-48 | Oligo | GLUL      |
| PSME2.7    | 7.72E-52 | -0.8983  | 0.186 | 0.571 | 1.15E-47 | Oligo | PSME2     |
| S100A6.8   | 7.90E-52 | -0.82742 | 0.242 | 0.659 | 1.18E-47 | Oligo | S100A6    |
| EEF1B2.8   | 8.17E-52 | -0.53206 | 0.433 | 0.789 | 1.22E-47 | Oligo | EEF1B2    |
| A2M.7      | 9.18E-52 | -1.15796 | 0.094 | 0.477 | 1.37E-47 | Oligo | A2M       |
| LAPTM5.9   | 1.20E-51 | -1.33175 | 0.078 | 0.449 | 1.79E-47 | Oligo | LAPTM5    |
| ATP1B3.7   | 1.30E-51 | -0.84431 | 0.172 | 0.559 | 1.95E-47 | Oligo | ATP1B3    |
| TNFRSF1A.1 | 1.33E-51 | -0.96348 | 0.012 | 0.385 | 1.98E-47 | Oligo | TNFRSF1A  |
| TAGLN2.9   | 1.81E-51 | -0.95278 | 0.134 | 0.529 | 2.71E-47 | Oligo | TAGLN2    |
| HLA-DRB5.2 | 2.41E-51 | -1.45613 | 0.038 | 0.413 | 3.61E-47 | Oligo | HLA-DRB5  |
| FXYD6.9    | 2.45E-51 | -0.99597 | 0.082 | 0.475 | 3.66E-47 | Oligo | FXYD6     |
| PCDH9-AS1  | 2.51E-51 | 0.401792 | 0.129 | 0.019 | 3.75E-47 | Oligo | PCDH9-AS1 |
| TYROBP.9   | 3.00E-51 | -1.30433 | 0.111 | 0.473 | 4.48E-47 | Oligo | TYROBP    |
| EFNA1.6    | 3.15E-51 | 0.827162 | 0.351 | 0.12  | 4.71E-47 | Oligo | EFNA1     |
| KIF13B.2   | 3.20E-51 | 0.620605 | 0.254 | 0.067 | 4.78E-47 | Oligo | KIF13B    |
| DOCK1.3    | 3.53E-51 | 0.570907 | 0.205 | 0.046 | 5.27E-47 | Oligo | DOCK1     |
| DDAH2.6    | 3.87E-51 | -0.83952 | 0.115 | 0.503 | 5.79E-47 | Oligo | DDAH2     |
| HLA-DMA.9  | 3.98E-51 | -1.32862 | 0.052 | 0.422 | 5.95E-47 | Oligo | HLA-DMA   |
| DFNB31     | 6.82E-51 | 0.507283 | 0.151 | 0.026 | 1.02E-46 | Oligo | DFNB31    |



|            |          |          |       |       |          |       |              |
|------------|----------|----------|-------|-------|----------|-------|--------------|
| CELF2.9    | 7.77E-51 | -1.00361 | 0.026 | 0.396 | 1.16E-46 | Oligo | CELF2        |
| MCAM.3     | 8.55E-51 | 0.556346 | 0.181 | 0.037 | 1.28E-46 | Oligo | MCAM         |
| PRDX1.7    | 9.31E-51 | 0.477736 | 0.882 | 0.805 | 1.39E-46 | Oligo | PRDX1        |
| IGFBP2.7   | 1.69E-50 | -1.2644  | 0.024 | 0.387 | 2.52E-46 | Oligo | IGFBP2       |
| EVI5L.3    | 2.41E-50 | 0.565759 | 0.221 | 0.054 | 3.60E-46 | Oligo | EVI5L        |
| BASP1.8    | 3.49E-50 | -1.012   | 0.019 | 0.386 | 5.22E-46 | Oligo | BASP1        |
| MAST3.3    | 4.74E-50 | 0.598967 | 0.261 | 0.071 | 7.09E-46 | Oligo | MAST3        |
| UBE2L6.4   | 5.03E-50 | -0.92573 | 0.099 | 0.487 | 7.52E-46 | Oligo | UBE2L6       |
| HLA-A.7    | 5.27E-50 | -0.53852 | 0.664 | 0.905 | 7.87E-46 | Oligo | HLA-A        |
| HERPUD1.7  | 5.88E-50 | -0.78009 | 0.282 | 0.656 | 8.79E-46 | Oligo | HERPUD1      |
| RNH1.5     | 6.67E-50 | 0.690431 | 0.736 | 0.53  | 9.97E-46 | Oligo | RNH1         |
| TESK2      | 7.12E-50 | 0.222022 | 0.089 | 0.009 | 1.06E-45 | Oligo | TESK2        |
| RP11-285F  | 7.34E-50 | 0.299285 | 0.099 | 0.011 | 1.10E-45 | Oligo | RP11-285F7.2 |
| CD14.9     | 7.58E-50 | -1.29801 | 0.056 | 0.422 | 1.13E-45 | Oligo | CD14         |
| CAPG.9     | 1.37E-49 | -1.17434 | 0.064 | 0.428 | 2.05E-45 | Oligo | CAPG         |
| C1QA.9     | 1.50E-49 | -1.09956 | 0.193 | 0.55  | 2.24E-45 | Oligo | C1QA         |
| LINC00672  | 1.68E-49 | 0.61205  | 0.202 | 0.045 | 2.51E-45 | Oligo | LINC00672    |
| RAB13.8    | 1.68E-49 | -1.13775 | 0.021 | 0.385 | 2.51E-45 | Oligo | RAB13        |
| SMOC1.4    | 2.11E-49 | 0.403186 | 0.162 | 0.029 | 3.16E-45 | Oligo | SMOC1        |
| MTURN.5    | 2.28E-49 | 0.640549 | 0.261 | 0.072 | 3.40E-45 | Oligo | MTURN        |
| C9orf16.5  | 2.58E-49 | -0.70618 | 0.219 | 0.595 | 3.85E-45 | Oligo | C9orf16      |
| RTN4.9     | 2.79E-49 | 0.437301 | 0.762 | 0.698 | 4.17E-45 | Oligo | RTN4         |
| FAM131B.7  | 2.98E-49 | 0.595616 | 0.254 | 0.069 | 4.46E-45 | Oligo | FAM131B      |
| MICAL3.4   | 3.38E-49 | 0.60368  | 0.252 | 0.068 | 5.05E-45 | Oligo | MICAL3       |
| ABHD17B.9  | 4.30E-49 | 0.754603 | 0.339 | 0.117 | 6.42E-45 | Oligo | ABHD17B      |
| PLEKHA1.2  | 5.08E-49 | 0.642446 | 0.296 | 0.091 | 7.60E-45 | Oligo | PLEKHA1      |
| HEPN1.8    | 5.35E-49 | 0.821433 | 0.454 | 0.195 | 7.99E-45 | Oligo | HEPN1        |
| LMBRD1.5   | 5.63E-49 | 0.771366 | 0.466 | 0.207 | 8.41E-45 | Oligo | LMBRD1       |
| CD74.8     | 6.27E-49 | -0.84504 | 0.492 | 0.761 | 9.38E-45 | Oligo | CD74         |
| PCBP4.9    | 7.16E-49 | 0.884974 | 0.496 | 0.247 | 1.07E-44 | Oligo | PCBP4        |
| H2AFZ.3    | 1.28E-48 | -0.55214 | 0.409 | 0.751 | 1.91E-44 | Oligo | H2AFZ        |
| CTSC.9     | 1.91E-48 | -1.25471 | 0.04  | 0.397 | 2.86E-44 | Oligo | CTSC         |
| CEBPD.6    | 2.03E-48 | -0.98694 | 0.101 | 0.472 | 3.03E-44 | Oligo | CEBPD        |
| PDIA6.4    | 2.45E-48 | -0.69159 | 0.308 | 0.661 | 3.66E-44 | Oligo | PDIA6        |
| BAX.9      | 2.63E-48 | -0.75535 | 0.2   | 0.579 | 3.93E-44 | Oligo | BAX          |
| FAR1.3     | 4.49E-48 | 0.711826 | 0.353 | 0.129 | 6.72E-44 | Oligo | FAR1         |
| ARHGEF10.5 | 5.52E-48 | 0.539314 | 0.24  | 0.063 | 8.25E-44 | Oligo | ARHGEF10     |
| YBX3.3     | 5.85E-48 | -0.89449 | 0.049 | 0.418 | 8.75E-44 | Oligo | YBX3         |
| ATP5A1.2   | 6.69E-48 | -0.64418 | 0.32  | 0.687 | 1.00E-43 | Oligo | ATP5A1       |
| OCIAD2.8   | 7.16E-48 | -1.32252 | 0.042 | 0.4   | 1.07E-43 | Oligo | OCIAD2       |
| PHLDA1.6   | 7.43E-48 | -1.0049  | 0.049 | 0.408 | 1.11E-43 | Oligo | PHLDA1       |
| CAPZA2.3   | 8.46E-48 | -0.65827 | 0.306 | 0.667 | 1.26E-43 | Oligo | CAPZA2       |
| POLR2I.6   | 8.92E-48 | 0.625117 | 0.744 | 0.545 | 1.33E-43 | Oligo | POLR2I       |
| ARL4C.7    | 1.05E-47 | -0.97497 | 0.035 | 0.391 | 1.57E-43 | Oligo | ARL4C        |
| FASN.8     | 1.68E-47 | 0.633886 | 0.315 | 0.109 | 2.51E-43 | Oligo | FASN         |
| KDELR2.4   | 2.81E-47 | -0.76317 | 0.212 | 0.582 | 4.19E-43 | Oligo | KDELR2       |
| TALDO1.8   | 3.05E-47 | 0.749135 | 0.765 | 0.591 | 4.55E-43 | Oligo | TALDO1       |
| RP11-161M  | 3.19E-47 | 0.635479 | 0.407 | 0.157 | 4.77E-43 | Oligo | RP11-161M6.2 |
| CYP27A1.5  | 3.35E-47 | 0.771003 | 0.388 | 0.156 | 5.01E-43 | Oligo | CYP27A1      |
| VSIG4.9    | 4.60E-47 | -1.34147 | 0.024 | 0.378 | 6.87E-43 | Oligo | VSIG4        |
| COX5B.6    | 5.84E-47 | 0.421171 | 0.892 | 0.846 | 8.73E-43 | Oligo | COX5B        |

|             |           |           |        |        |           |       |                |
|-------------|-----------|-----------|--------|--------|-----------|-------|----------------|
| NACC2. 6    | 6. 32E-47 | 0. 698899 | 0. 292 | 0. 095 | 9. 44E-43 | Oligo | NACC2          |
| FTL. 9      | 1. 20E-46 | 0. 31564  | 0. 998 | 0. 994 | 1. 80E-42 | Oligo | FTL            |
| CREG2       | 1. 41E-46 | 0. 286947 | 0. 073 | 0. 007 | 2. 10E-42 | Oligo | CREG2          |
| CMTM6. 9    | 1. 83E-46 | -0. 8682  | 0. 078 | 0. 439 | 2. 73E-42 | Oligo | CMTM6          |
| MAPK8IP3. 2 | 1. 0E-46  | 0. 61591  | 0. 271 | 0. 081 | 3. 14E-42 | Oligo | MAPK8IP3       |
| TUBB2B. 8   | 2. 82E-46 | -0. 91323 | 0. 235 | 0. 567 | 4. 21E-42 | Oligo | TUBB2B         |
| SEMA7A. 1   | 3. 64E-46 | 0. 430137 | 0. 172 | 0. 036 | 5. 44E-42 | Oligo | SEMA7A         |
| PLSCR1. 9   | 4. 93E-46 | -1. 03886 | 0. 024 | 0. 372 | 7. 36E-42 | Oligo | PLSCR1         |
| SSR2. 3     | 5. 26E-46 | -0. 5234  | 0. 379 | 0. 726 | 7. 85E-42 | Oligo | SSR2           |
| NDST1. 4    | 5. 32E-46 | 0. 612207 | 0. 266 | 0. 08  | 7. 96E-42 | Oligo | NDST1          |
| TUBA1C. 7   | 5. 35E-46 | -0. 96858 | 0. 04  | 0. 392 | 7. 99E-42 | Oligo | TUBA1C         |
| NAMPT. 8    | 6. 01E-46 | -1. 16257 | 0. 099 | 0. 45  | 8. 98E-42 | Oligo | NAMPT          |
| DOCK3       | 8. 66E-46 | 0. 284985 | 0. 099 | 0. 012 | 1. 29E-41 | Oligo | DOCK3          |
| CPVL. 9     | 1. 26E-45 | -1. 18583 | 0. 019 | 0. 361 | 1. 88E-41 | Oligo | CPVL           |
| RP11-286E   | 1. 35E-45 | 0. 125858 | 0. 035 | 0. 001 | 2. 02E-41 | Oligo | RP11-286E11. 2 |
| FABP7. 7    | 1. 38E-45 | -1. 31457 | 0. 061 | 0. 395 | 2. 07E-41 | Oligo | FABP7          |
| RP11-802C   | 1. 41E-45 | 0. 147259 | 0. 054 | 0. 003 | 2. 10E-41 | Oligo | RP11-802023. 3 |
| TMEM184B. 1 | 5. 6E-45  | 0. 798404 | 0. 341 | 0. 13  | 2. 33E-41 | Oligo | TMEM184B       |
| CD44. 6     | 1. 59E-45 | -1. 15579 | 0. 047 | 0. 395 | 2. 37E-41 | Oligo | CD44           |
| TGIF1. 6    | 1. 79E-45 | -0. 96815 | 0. 026 | 0. 37  | 2. 68E-41 | Oligo | TGIF1          |
| C1QC. 9     | 1. 93E-45 | -1. 14569 | 0. 179 | 0. 513 | 2. 88E-41 | Oligo | C1QC           |
| NPM1. 3     | 2. 02E-45 | -0. 46587 | 0. 602 | 0. 879 | 3. 01E-41 | Oligo | NPM1           |
| TJAP1. 1    | 2. 55E-45 | 0. 640711 | 0. 278 | 0. 087 | 3. 81E-41 | Oligo | TJAP1          |
| MGAT5. 4    | 2. 63E-45 | 0. 508729 | 0. 233 | 0. 062 | 3. 93E-41 | Oligo | MGAT5          |
| TUBB. 7     | 3. 26E-45 | -0. 56645 | 0. 52  | 0. 78  | 4. 87E-41 | Oligo | TUBB           |
| RGS1. 9     | 5. 00E-45 | -1. 19575 | 0. 12  | 0. 459 | 7. 47E-41 | Oligo | RGS1           |
| HIP1. 6     | 5. 97E-45 | 0. 81027  | 0. 388 | 0. 16  | 8. 92E-41 | Oligo | HIP1           |
| AIF1. 9     | 6. 65E-45 | -1. 29192 | 0. 087 | 0. 423 | 9. 94E-41 | Oligo | AIF1           |
| KAZN. 6     | 6. 96E-45 | 0. 588331 | 0. 235 | 0. 065 | 1. 04E-40 | Oligo | KAZN           |
| RHEB. 3     | 7. 07E-45 | -0. 66973 | 0. 306 | 0. 65  | 1. 06E-40 | Oligo | RHEB           |
| LMAN2. 4    | 9. 51E-45 | -0. 63517 | 0. 209 | 0. 588 | 1. 42E-40 | Oligo | LMAN2          |
| DIP2C. 5    | 1. 04E-44 | 0. 563327 | 0. 261 | 0. 078 | 1. 55E-40 | Oligo | DIP2C          |
| BCYRN1. 3   | 1. 39E-44 | 0. 542793 | 0. 195 | 0. 046 | 2. 08E-40 | Oligo | BCYRN1         |
| PPT1. 8     | 1. 47E-44 | -0. 75169 | 0. 207 | 0. 569 | 2. 19E-40 | Oligo | PPT1           |
| RAB31. 8    | 1. 51E-44 | -0. 79279 | 0. 113 | 0. 473 | 2. 26E-40 | Oligo | RAB31          |
| ARRDC2. 7   | 1. 71E-44 | 0. 599368 | 0. 271 | 0. 079 | 2. 56E-40 | Oligo | ARRDC2         |
| HNRNPA0. 7  | 1. 82E-44 | -0. 67872 | 0. 322 | 0. 653 | 2. 72E-40 | Oligo | HNRNPA0        |
| KCNH8. 1    | 2. 12E-44 | 0. 261909 | 0. 085 | 0. 009 | 3. 17E-40 | Oligo | KCNH8          |
| ARHGDI1. 9  | 3. 77E-44 | -1. 23888 | 0. 049 | 0. 384 | 5. 63E-40 | Oligo | ARHGDI1        |
| ATP11A. 4   | 3. 80E-44 | 0. 577389 | 0. 28  | 0. 09  | 5. 68E-40 | Oligo | ATP11A         |
| DST. 8      | 3. 80E-44 | 0. 654457 | 0. 593 | 0. 368 | 5. 68E-40 | Oligo | DST            |
| DNER. 7     | 5. 09E-44 | 0. 654976 | 0. 551 | 0. 269 | 7. 60E-40 | Oligo | DNER           |
| CXCR4. 7    | 5. 32E-44 | -1. 22548 | 0. 064 | 0. 401 | 7. 95E-40 | Oligo | CXCR4          |
| ELMO1. 7    | 5. 70E-44 | 0. 588661 | 0. 442 | 0. 18  | 8. 52E-40 | Oligo | ELMO1          |
| TPD52. 7    | 6. 13E-44 | 0. 877439 | 0. 466 | 0. 227 | 9. 15E-40 | Oligo | TPD52          |
| DHCR24. 6   | 6. 19E-44 | 0. 724342 | 0. 273 | 0. 089 | 9. 25E-40 | Oligo | DHCR24         |
| ASPHD1. 7   | 7. 36E-44 | 0. 812178 | 0. 341 | 0. 13  | 1. 10E-39 | Oligo | ASPHD1         |
| MPDZ. 6     | 7. 57E-44 | 0. 586231 | 0. 259 | 0. 08  | 1. 13E-39 | Oligo | MPDZ           |
| SLC22A23. 8 | 8. 30E-44 | 0. 64852  | 0. 224 | 0. 061 | 1. 24E-39 | Oligo | SLC22A23       |
| SELM. 7     | 8. 99E-44 | 0. 815846 | 0. 421 | 0. 18  | 1. 34E-39 | Oligo | SELM           |
| PLP2. 8     | 9. 37E-44 | -0. 93222 | 0. 021 | 0. 356 | 1. 40E-39 | Oligo | PLP2           |

|            |          |          |       |       |          |       |          |
|------------|----------|----------|-------|-------|----------|-------|----------|
| TIMP2.5    | 1.00E-43 | 0.73381  | 0.539 | 0.318 | 1.50E-39 | Oligo | TIMP2    |
| TMPRSS5    | 1.06E-43 | 0.39128  | 0.125 | 0.021 | 1.58E-39 | Oligo | TMPRSS5  |
| EPS15.4    | 1.24E-43 | 0.64105  | 0.365 | 0.142 | 1.86E-39 | Oligo | EPS15    |
| LYPLA1.4   | 1.50E-43 | -0.79786 | 0.073 | 0.419 | 2.24E-39 | Oligo | LYPLA1   |
| CYP7B1     | 1.56E-43 | 0.205714 | 0.042 | 0.002 | 2.33E-39 | Oligo | CYP7B1   |
| RAB1A.4    | 1.57E-43 | -0.60716 | 0.261 | 0.633 | 2.35E-39 | Oligo | RAB1A    |
| C3.8       | 1.59E-43 | -1.18403 | 0.085 | 0.413 | 2.37E-39 | Oligo | C3       |
| SOX4.8     | 1.59E-43 | -1.07763 | 0.115 | 0.458 | 2.38E-39 | Oligo | SOX4     |
| MALAT1.9   | 1.68E-43 | 0.286932 | 1     | 0.995 | 2.51E-39 | Oligo | MALAT1   |
| HIF1A.6    | 1.82E-43 | -0.83604 | 0.167 | 0.509 | 2.73E-39 | Oligo | HIF1A    |
| LACC1.5    | 1.85E-43 | 0.443556 | 0.153 | 0.03  | 2.77E-39 | Oligo | LACC1    |
| LRP1.4     | 1.91E-43 | -0.88887 | 0.028 | 0.362 | 2.85E-39 | Oligo | LRP1     |
| ENO1.5     | 2.03E-43 | -0.5079  | 0.515 | 0.805 | 3.04E-39 | Oligo | ENO1     |
| CTSS.9     | 2.15E-43 | -1.21519 | 0.038 | 0.366 | 3.21E-39 | Oligo | CTSS     |
| ARRB2.9    | 2.73E-43 | -0.97614 | 0.073 | 0.412 | 4.07E-39 | Oligo | ARRB2    |
| CITED2.7   | 3.09E-43 | -0.93959 | 0.033 | 0.364 | 4.62E-39 | Oligo | CITED2   |
| FKBP1A.5   | 3.21E-43 | -0.61215 | 0.391 | 0.711 | 4.80E-39 | Oligo | FKBP1A   |
| CORO1A.9   | 5.88E-43 | -1.10958 | 0.052 | 0.385 | 8.79E-39 | Oligo | CORO1A   |
| DSCAML1.1  | 6.28E-43 | 0.41864  | 0.134 | 0.024 | 9.38E-39 | Oligo | DSCAML1  |
| NDUFS7.1   | 7.21E-43 | 0.662389 | 0.781 | 0.611 | 1.08E-38 | Oligo | NDUFS7   |
| STMN4.8    | 8.15E-43 | 0.992774 | 0.574 | 0.296 | 1.22E-38 | Oligo | STMN4    |
| PRKCSH.5   | 1.01E-42 | 0.701358 | 0.635 | 0.423 | 1.51E-38 | Oligo | PRKCSH   |
| RCN1.9     | 1.09E-42 | -0.8346  | 0.035 | 0.366 | 1.63E-38 | Oligo | RCN1     |
| ARL5A.5    | 1.15E-42 | -0.73499 | 0.172 | 0.53  | 1.72E-38 | Oligo | ARL5A    |
| TUBB2A.8   | 1.16E-42 | -0.88964 | 0.167 | 0.489 | 1.74E-38 | Oligo | TUBB2A   |
| SCARB2.5   | 1.62E-42 | 0.712347 | 0.579 | 0.374 | 2.43E-38 | Oligo | SCARB2   |
| LY6E.4     | 1.95E-42 | -0.89651 | 0.049 | 0.388 | 2.92E-38 | Oligo | LY6E     |
| IFNGR2.8   | 2.07E-42 | -0.75715 | 0.064 | 0.402 | 3.10E-38 | Oligo | IFNGR2   |
| HLA-DQB1.2 | 3.35E-42 | -1.2821  | 0.016 | 0.337 | 3.51E-38 | Oligo | HLA-DQB1 |
| DNASE2.7   | 2.48E-42 | -0.86126 | 0.054 | 0.396 | 3.70E-38 | Oligo | DNASE2   |
| RGS10.9    | 2.52E-42 | -1.2366  | 0.033 | 0.354 | 3.77E-38 | Oligo | RGS10    |
| GLIPR1.8   | 2.83E-42 | -1.05404 | 0.021 | 0.346 | 4.23E-38 | Oligo | GLIPR1   |
| FCGR3A.9   | 3.29E-42 | -1.19273 | 0.028 | 0.353 | 4.92E-38 | Oligo | FCGR3A   |
| YBX1.5     | 3.41E-42 | -0.42652 | 0.567 | 0.771 | 5.09E-38 | Oligo | YBX1     |
| RPS6KA2.3  | 3.75E-42 | 0.650658 | 0.301 | 0.104 | 5.60E-38 | Oligo | RPS6KA2  |
| ATOX1.5    | 3.81E-42 | 0.594422 | 0.772 | 0.598 | 5.70E-38 | Oligo | ATOX1    |
| C1orf162.4 | 4.09E-42 | -1.30404 | 0.016 | 0.334 | 6.11E-38 | Oligo | C1orf162 |
| NAPEPLD.5  | 4.14E-42 | 0.588919 | 0.28  | 0.092 | 6.18E-38 | Oligo | NAPEPLD  |
| ZFP36.6    | 5.20E-42 | -0.82495 | 0.242 | 0.585 | 7.77E-38 | Oligo | ZFP36    |
| SORCS2.8   | 8.23E-42 | 0.275021 | 0.089 | 0.011 | 1.23E-37 | Oligo | SORCS2   |
| FN3K.3     | 8.41E-42 | 0.567026 | 0.252 | 0.077 | 1.26E-37 | Oligo | FN3K     |
| KCNJ2.1    | 8.59E-42 | 0.599278 | 0.181 | 0.043 | 1.28E-37 | Oligo | KCNJ2    |
| C1orf122.1 | 1.02E-41 | 0.596604 | 0.649 | 0.482 | 1.53E-37 | Oligo | C1orf122 |
| RHBDL2.1   | 1.07E-41 | 0.541464 | 0.108 | 0.016 | 1.60E-37 | Oligo | RHBDL2   |
| GNG7.8     | 1.16E-41 | 0.704427 | 0.532 | 0.29  | 1.73E-37 | Oligo | GNG7     |
| FXYD5.9    | 1.49E-41 | -1.18609 | 0.035 | 0.352 | 2.22E-37 | Oligo | FXYD5    |
| GALNT15.5  | 1.51E-41 | 0.325197 | 0.165 | 0.034 | 2.26E-37 | Oligo | GALNT15  |
| DDOST.4    | 1.53E-41 | -0.73793 | 0.122 | 0.478 | 2.28E-37 | Oligo | DDOST    |
| TXNDC12.5  | 1.69E-41 | -0.80963 | 0.099 | 0.445 | 2.53E-37 | Oligo | TXNDC12  |
| HIP1R.8    | 1.74E-41 | 0.729803 | 0.294 | 0.102 | 2.60E-37 | Oligo | HIP1R    |
| EPB41L1.7  | 2.29E-41 | 0.597173 | 0.256 | 0.082 | 3.42E-37 | Oligo | EPB41L1  |

|             |           |           |        |        |           |       |                |
|-------------|-----------|-----------|--------|--------|-----------|-------|----------------|
| AMD1. 3     | 2. 47E-41 | 0. 758809 | 0. 605 | 0. 375 | 3. 69E-37 | Oligo | AMD1           |
| FDFT1. 6    | 3. 90E-41 | 0. 730121 | 0. 527 | 0. 297 | 5. 83E-37 | Oligo | FDFT1          |
| XRN2. 4     | 4. 44E-41 | -0. 7273  | 0. 12  | 0. 47  | 6. 64E-37 | Oligo | XRN2           |
| BID. 7      | 4. 67E-41 | -0. 82718 | 0. 04  | 0. 369 | 6. 98E-37 | Oligo | BID            |
| SNRPB. 5    | 6. 01E-41 | -0. 61174 | 0. 254 | 0. 59  | 8. 98E-37 | Oligo | SNRPB          |
| CECR7       | 6. 35E-41 | 0. 26126  | 0. 059 | 0. 005 | 9. 49E-37 | Oligo | CECR7          |
| PLAUR. 9    | 7. 95E-41 | -1. 17253 | 0. 059 | 0. 378 | 1. 19E-36 | Oligo | PLAUR          |
| KLF6. 7     | 1. 09E-40 | -0. 78587 | 0. 207 | 0. 543 | 1. 63E-36 | Oligo | KLF6           |
| NINJ1. 9    | 1. 14E-40 | -0. 85188 | 0. 125 | 0. 464 | 1. 71E-36 | Oligo | NINJ1          |
| AKAP13. 8   | 1. 30E-40 | -0. 88547 | 0. 021 | 0. 337 | 1. 94E-36 | Oligo | AKAP13         |
| ASPDH. 1    | 1. 45E-40 | 0. 377075 | 0. 075 | 0. 008 | 2. 17E-36 | Oligo | ASPDH          |
| KAT2B. 4    | 1. 47E-40 | 0. 548693 | 0. 228 | 0. 066 | 2. 20E-36 | Oligo | KAT2B          |
| TMEM176B. 1 | 5. 7E-40  | -1. 16433 | 0. 047 | 0. 363 | 2. 34E-36 | Oligo | TMEM176B       |
| TMEM140. 4  | 1. 99E-40 | 0. 601799 | 0. 181 | 0. 043 | 2. 97E-36 | Oligo | TMEM140        |
| NKAIN1. 1   | 2. 35E-40 | 0. 329998 | 0. 113 | 0. 018 | 3. 51E-36 | Oligo | NKAIN1         |
| CCDC109B. 2 | 3. 8E-40  | -0. 76484 | 0. 04  | 0. 36  | 3. 56E-36 | Oligo | CCDC109B       |
| CD53. 9     | 2. 43E-40 | -1. 21805 | 0. 016 | 0. 326 | 3. 63E-36 | Oligo | CD53           |
| TECPR2. 3   | 2. 68E-40 | 0. 515304 | 0. 209 | 0. 057 | 4. 00E-36 | Oligo | TECPR2         |
| JUND. 7     | 2. 69E-40 | 0. 649168 | 0. 6   | 0. 391 | 4. 01E-36 | Oligo | JUND           |
| CSRP2. 7    | 3. 79E-40 | -1. 12593 | 0. 005 | 0. 313 | 5. 66E-36 | Oligo | CSRP2          |
| MAP4K4. 7   | 4. 85E-40 | 0. 760252 | 0. 468 | 0. 24  | 7. 24E-36 | Oligo | MAP4K4         |
| SLITRK1     | 4. 89E-40 | 0. 368424 | 0. 113 | 0. 018 | 7. 31E-36 | Oligo | SLITRK1        |
| VAMP5. 4    | 5. 24E-40 | -1. 00957 | 0. 085 | 0. 408 | 7. 84E-36 | Oligo | VAMP5          |
| ITGB2. 9    | 7. 91E-40 | -1. 21005 | 0. 031 | 0. 335 | 1. 18E-35 | Oligo | ITGB2          |
| MYO6. 7     | 7. 97E-40 | 0. 782278 | 0. 44  | 0. 217 | 1. 19E-35 | Oligo | MYO6           |
| VDAC1. 5    | 8. 04E-40 | -0. 59869 | 0. 313 | 0. 643 | 1. 20E-35 | Oligo | VDAC1          |
| ACYP2. 6    | 8. 27E-40 | 0. 772717 | 0. 536 | 0. 304 | 1. 24E-35 | Oligo | ACYP2          |
| RP11-983F   | 8. 73E-40 | 0. 426092 | 0. 094 | 0. 013 | 1. 30E-35 | Oligo | RP11-983P16. 4 |
| ATP5J2. 5   | 9. 90E-40 | -0. 43459 | 0. 525 | 0. 818 | 1. 48E-35 | Oligo | ATP5J2         |
| MYL12B. 7   | 1. 01E-39 | -0. 53529 | 0. 402 | 0. 739 | 1. 52E-35 | Oligo | MYL12B         |
| AGTPBP1. 4  | 1. 29E-39 | 0. 423472 | 0. 186 | 0. 045 | 1. 92E-35 | Oligo | AGTPBP1        |
| FHL1. 9     | 1. 32E-39 | -0. 79469 | 0. 047 | 0. 368 | 1. 97E-35 | Oligo | FHL1           |
| TJP1. 7     | 1. 41E-39 | 0. 701015 | 0. 381 | 0. 173 | 2. 10E-35 | Oligo | TJP1           |
| MAP7D1. 7   | 1. 47E-39 | 0. 707444 | 0. 539 | 0. 338 | 2. 20E-35 | Oligo | MAP7D1         |
| NCOA7. 4    | 1. 65E-39 | 0. 594498 | 0. 304 | 0. 108 | 2. 46E-35 | Oligo | NCOA7          |
| ISCU. 5     | 2. 16E-39 | -0. 67448 | 0. 224 | 0. 579 | 3. 22E-35 | Oligo | ISCU           |
| PGK1. 5     | 3. 42E-39 | -0. 53192 | 0. 442 | 0. 765 | 5. 12E-35 | Oligo | PGK1           |
| EZR. 7      | 3. 57E-39 | -0. 79977 | 0. 038 | 0. 354 | 5. 33E-35 | Oligo | EZR            |
| LIMS1. 9    | 3. 76E-39 | -0. 83441 | 0. 125 | 0. 451 | 5. 62E-35 | Oligo | LIMS1          |
| TMEM236     | 5. 72E-39 | 0. 382307 | 0. 045 | 0. 003 | 8. 55E-35 | Oligo | TMEM236        |
| BRK1. 1     | 5. 92E-39 | -0. 37627 | 0. 499 | 0. 791 | 8. 85E-35 | Oligo | BRK1           |
| IFIT2. 6    | 7. 57E-39 | 0. 583149 | 0. 249 | 0. 076 | 1. 13E-34 | Oligo | IFIT2          |
| RTN3. 7     | 8. 01E-39 | 0. 530546 | 0. 798 | 0. 649 | 1. 20E-34 | Oligo | RTN3           |
| MPC1. 5     | 8. 10E-39 | 0. 680244 | 0. 666 | 0. 481 | 1. 21E-34 | Oligo | MPC1           |
| PPP4C. 5    | 9. 17E-39 | -0. 67612 | 0. 224 | 0. 555 | 1. 37E-34 | Oligo | PPP4C          |
| AGPAT4. 6   | 9. 39E-39 | 0. 619228 | 0. 278 | 0. 096 | 1. 40E-34 | Oligo | AGPAT4         |
| SERP1. 7    | 9. 75E-39 | -0. 61604 | 0. 289 | 0. 615 | 1. 46E-34 | Oligo | SERP1          |
| SUB1. 7     | 1. 33E-38 | -0. 40033 | 0. 522 | 0. 765 | 1. 98E-34 | Oligo | SUB1           |
| LST1. 9     | 1. 36E-38 | -1. 19176 | 0. 024 | 0. 324 | 2. 03E-34 | Oligo | LST1           |
| MS4A6A. 9   | 1. 72E-38 | -1. 25814 | 0. 052 | 0. 352 | 2. 57E-34 | Oligo | MS4A6A         |
| INSR. 7     | 1. 82E-38 | 0. 62938  | 0. 346 | 0. 137 | 2. 72E-34 | Oligo | INSR           |

|              |           |           |        |        |                 |           |
|--------------|-----------|-----------|--------|--------|-----------------|-----------|
| CCT8. 4      | 1. 82E-38 | -0. 6277  | 0. 209 | 0. 548 | 2. 72E-34 Oligo | CCT8      |
| HLA-DQA1. 1. | 96E-38    | -1. 25581 | 0. 019 | 0. 317 | 2. 92E-34 Oligo | HLA-DQA1  |
| ATP9A. 8     | 2. 11E-38 | 0. 669695 | 0. 289 | 0. 105 | 3. 15E-34 Oligo | ATP9A     |
| RAB34. 5     | 2. 21E-38 | -0. 87917 | 0      | 0. 294 | 3. 30E-34 Oligo | RAB34     |
| GMFG. 9      | 2. 21E-38 | -1. 16839 | 0. 012 | 0. 309 | 3. 31E-34 Oligo | GMFG      |
| HECW2        | 2. 24E-38 | 0. 218642 | 0. 068 | 0. 007 | 3. 35E-34 Oligo | HECW2     |
| CPE. 8       | 2. 50E-38 | -0. 89889 | 0. 089 | 0. 401 | 3. 74E-34 Oligo | CPE       |
| KBTBD11. 2   | 2. 81E-38 | 0. 395525 | 0. 125 | 0. 023 | 4. 21E-34 Oligo | KBTBD11   |
| GNB2L1. 6    | 2. 92E-38 | -0. 33688 | 0. 76  | 0. 949 | 4. 37E-34 Oligo | GNB2L1    |
| RGL1. 4      | 3. 00E-38 | 0. 558107 | 0. 249 | 0. 08  | 4. 49E-34 Oligo | RGL1      |
| ABHD6. 2     | 3. 18E-38 | 0. 570713 | 0. 278 | 0. 096 | 4. 75E-34 Oligo | ABHD6     |
| CDR2L. 5     | 3. 77E-38 | 0. 531147 | 0. 207 | 0. 058 | 5. 64E-34 Oligo | CDR2L     |
| ZYX. 8       | 3. 85E-38 | -0. 77439 | 0. 101 | 0. 413 | 5. 76E-34 Oligo | ZYX       |
| HMGB2. 8     | 3. 86E-38 | -0. 79802 | 0. 186 | 0. 506 | 5. 76E-34 Oligo | HMGB2     |
| FAM3C. 8     | 4. 42E-38 | -0. 71366 | 0. 125 | 0. 448 | 6. 61E-34 Oligo | FAM3C     |
| MLLT11. 7    | 5. 85E-38 | -0. 8666  | 0. 148 | 0. 465 | 8. 74E-34 Oligo | MLLT11    |
| ABRACL. 7    | 6. 38E-38 | -0. 79139 | 0. 016 | 0. 315 | 9. 54E-34 Oligo | ABRACL    |
| PPP1R14B. 9. | 97E-38    | -0. 70436 | 0. 047 | 0. 356 | 1. 49E-33 Oligo | PPP1R14B  |
| GALNT7. 4    | 9. 97E-38 | 0. 589421 | 0. 252 | 0. 083 | 1. 49E-33 Oligo | GALNT7    |
| GPM6A. 8     | 1. 00E-37 | -0. 68492 | 0. 169 | 0. 517 | 1. 50E-33 Oligo | GPM6A     |
| DYNLT1. 5    | 1. 06E-37 | -0. 52295 | 0. 315 | 0. 64  | 1. 59E-33 Oligo | DYNLT1    |
| CA14. 8      | 1. 35E-37 | 0. 498183 | 0. 184 | 0. 046 | 2. 01E-33 Oligo | CA14      |
| TMCC3. 7     | 1. 47E-37 | 0. 534618 | 0. 228 | 0. 067 | 2. 19E-33 Oligo | TMCC3     |
| NDUFA6. 6    | 1. 88E-37 | -0. 62778 | 0. 259 | 0. 583 | 2. 82E-33 Oligo | NDUFA6    |
| ANKH. 6      | 2. 10E-37 | 0. 567196 | 0. 355 | 0. 141 | 3. 14E-33 Oligo | ANKH      |
| LPGAT1. 5    | 2. 11E-37 | 0. 622663 | 0. 311 | 0. 121 | 3. 15E-33 Oligo | LPGAT1    |
| CDH20        | 2. 79E-37 | 0. 294775 | 0. 104 | 0. 016 | 4. 18E-33 Oligo | CDH20     |
| HLA-DMB. 8   | 2. 85E-37 | -1. 18037 | 0. 035 | 0. 331 | 4. 26E-33 Oligo | HLA-DMB   |
| ABHD17A. 8   | 3. 64E-37 | 0. 666187 | 0. 426 | 0. 228 | 5. 44E-33 Oligo | ABHD17A   |
| FAHD2B. 3    | 4. 45E-37 | 0. 586374 | 0. 24  | 0. 076 | 6. 65E-33 Oligo | FAHD2B    |
| PPFIA2. 5    | 7. 35E-37 | 0. 496498 | 0. 169 | 0. 041 | 1. 10E-32 Oligo | PPFIA2    |
| NAT8L. 4     | 8. 71E-37 | 0. 429032 | 0. 176 | 0. 045 | 1. 30E-32 Oligo | NAT8L     |
| INPP1. 5     | 9. 60E-37 | 0. 800173 | 0. 341 | 0. 144 | 1. 43E-32 Oligo | INPP1     |
| GYPC. 9      | 9. 89E-37 | -0. 93171 | 0. 026 | 0. 32  | 1. 48E-32 Oligo | GYPC      |
| CMTM3. 9     | 1. 07E-36 | -0. 73166 | 0. 035 | 0. 334 | 1. 59E-32 Oligo | CMTM3     |
| NLRP1. 8     | 1. 21E-36 | -0. 78107 | 0. 052 | 0. 349 | 1. 80E-32 Oligo | NLRP1     |
| ENSA. 6      | 1. 59E-36 | -0. 68822 | 0. 184 | 0. 512 | 2. 37E-32 Oligo | ENSA      |
| AKAP6. 7     | 1. 83E-36 | 0. 595237 | 0. 271 | 0. 095 | 2. 73E-32 Oligo | AKAP6     |
| HOPX. 8      | 1. 98E-36 | -1. 20923 | 0. 009 | 0. 293 | 2. 96E-32 Oligo | HOPX      |
| NFKBIA. 8    | 2. 15E-36 | -0. 73793 | 0. 193 | 0. 511 | 3. 21E-32 Oligo | NFKBIA    |
| SEPT11. 8    | 2. 43E-36 | -0. 69717 | 0. 021 | 0. 313 | 3. 64E-32 Oligo | 11-Sep    |
| RAN. 6       | 3. 54E-36 | -0. 39911 | 0. 473 | 0. 767 | 5. 29E-32 Oligo | RAN       |
| CTSH. 9      | 3. 71E-36 | -1. 02248 | 0. 019 | 0. 306 | 5. 54E-32 Oligo | CTSH      |
| NME4. 6      | 3. 73E-36 | -0. 70563 | 0. 08  | 0. 393 | 5. 57E-32 Oligo | NME4      |
| C10orf128    | 4. 15E-36 | 0. 26656  | 0. 134 | 0. 027 | 6. 20E-32 Oligo | C10orf128 |
| HSPD1. 8     | 4. 63E-36 | -0. 51211 | 0. 301 | 0. 626 | 6. 92E-32 Oligo | HSPD1     |
| SERPINA1. 4. | 85E-36    | -1. 11089 | 0. 024 | 0. 31  | 7. 25E-32 Oligo | SERPINA1  |
| RNF125. 4    | 6. 47E-36 | 0. 313027 | 0. 115 | 0. 021 | 9. 67E-32 Oligo | RNF125    |
| UGP2. 4      | 6. 72E-36 | -0. 71609 | 0. 148 | 0. 472 | 1. 00E-31 Oligo | UGP2      |
| NCBP2. 7     | 7. 95E-36 | -0. 681   | 0. 136 | 0. 452 | 1. 19E-31 Oligo | NCBP2     |
| SLC16A3. 9   | 9. 36E-36 | -0. 92731 | 0. 04  | 0. 331 | 1. 40E-31 Oligo | SLC16A3   |

|             |           |           |        |        |           |       |               |
|-------------|-----------|-----------|--------|--------|-----------|-------|---------------|
| RP11-46H1   | 9. 67E-36 | 0. 645807 | 0. 122 | 0. 023 | 1. 45E-31 | Oligo | RP11-46H11. 3 |
| IFITM2. 9   | 9. 69E-36 | -1. 05933 | 0. 012 | 0. 293 | 1. 45E-31 | Oligo | IFITM2        |
| MS4A7. 9    | 9. 90E-36 | -1. 15215 | 0. 054 | 0. 342 | 1. 48E-31 | Oligo | MS4A7         |
| HHIP-AS1    | 1. 18E-35 | 0. 41093  | 0. 101 | 0. 017 | 1. 77E-31 | Oligo | HHIP-AS1      |
| ARHGAP1. 3  | 1. 30E-35 | 0. 711863 | 0. 353 | 0. 153 | 1. 95E-31 | Oligo | ARHGAP1       |
| TYMP. 9     | 1. 40E-35 | -0. 99428 | 0. 033 | 0. 317 | 2. 09E-31 | Oligo | TYMP          |
| ODC1. 8     | 1. 40E-35 | -0. 72816 | 0. 094 | 0. 405 | 2. 09E-31 | Oligo | ODC1          |
| LRRFIP1. 8  | 1. 59E-35 | -0. 68192 | 0. 059 | 0. 365 | 2. 38E-31 | Oligo | LRRFIP1       |
| SLC16A8     | 1. 67E-35 | 0. 189507 | 0. 042 | 0. 003 | 2. 49E-31 | Oligo | SLC16A8       |
| RSL1D1. 3   | 1. 71E-35 | -0. 62656 | 0. 188 | 0. 508 | 2. 56E-31 | Oligo | RSL1D1        |
| VAMP8. 9    | 2. 07E-35 | -1. 06374 | 0. 066 | 0. 354 | 3. 10E-31 | Oligo | VAMP8         |
| FNBP1. 5    | 2. 09E-35 | 0. 723342 | 0. 468 | 0. 255 | 3. 13E-31 | Oligo | FNBP1         |
| MEST. 8     | 2. 21E-35 | -0. 77247 | 0. 094 | 0. 397 | 3. 30E-31 | Oligo | MEST          |
| PRDX6. 5    | 2. 27E-35 | -0. 64899 | 0. 344 | 0. 635 | 3. 39E-31 | Oligo | PRDX6         |
| YWHAH. 9    | 2. 35E-35 | -0. 62452 | 0. 278 | 0. 576 | 3. 51E-31 | Oligo | YWHAH         |
| HCST. 9     | 2. 59E-35 | -1. 16564 | 0. 016 | 0. 294 | 3. 87E-31 | Oligo | HCST          |
| TREM2. 9    | 2. 68E-35 | -1. 17683 | 0. 078 | 0. 361 | 4. 01E-31 | Oligo | TREM2         |
| LSS. 7      | 2. 71E-35 | 0. 588006 | 0. 261 | 0. 092 | 4. 06E-31 | Oligo | LSS           |
| HCLS1. 9    | 4. 53E-35 | -1. 09706 | 0. 021 | 0. 3   | 6. 77E-31 | Oligo | HCLS1         |
| CDC37. 3    | 4. 62E-35 | -0. 56058 | 0. 233 | 0. 555 | 6. 90E-31 | Oligo | CDC37         |
| NANS. 9     | 5. 35E-35 | -0. 74371 | 0. 071 | 0. 371 | 8. 00E-31 | Oligo | NANS          |
| CIPC. 1     | 6. 12E-35 | 0. 511802 | 0. 228 | 0. 073 | 9. 15E-31 | Oligo | CIPC          |
| LAYN. 7     | 6. 24E-35 | 0. 452698 | 0. 186 | 0. 052 | 9. 33E-31 | Oligo | LAYN          |
| LINC0117C   | 7. 17E-35 | 0. 260867 | 0. 026 | 0. 001 | 1. 07E-30 | Oligo | LINC01170     |
| LSM7. 6     | 1. 00E-34 | -0. 48143 | 0. 36  | 0. 641 | 1. 50E-30 | Oligo | LSM7          |
| ARHGEF2. 8  | 1. 03E-34 | 0. 740638 | 0. 494 | 0. 281 | 1. 54E-30 | Oligo | ARHGEF2       |
| LY86. 9     | 1. 39E-34 | -1. 12325 | 0. 026 | 0. 302 | 2. 08E-30 | Oligo | LY86          |
| EGFR. 8     | 1. 39E-34 | -0. 93645 | 0. 033 | 0. 31  | 2. 08E-30 | Oligo | EGFR          |
| DPYSL3. 8   | 1. 65E-34 | -0. 75144 | 0. 042 | 0. 332 | 2. 46E-30 | Oligo | DPYSL3        |
| RNF130. 9   | 2. 25E-34 | 0. 602716 | 0. 647 | 0. 456 | 3. 36E-30 | Oligo | RNF130        |
| PPP1R18. 9  | 2. 61E-34 | -0. 76574 | 0. 024 | 0. 303 | 3. 90E-30 | Oligo | PPP1R18       |
| STRAP. 6    | 3. 05E-34 | -0. 60665 | 0. 252 | 0. 565 | 4. 56E-30 | Oligo | STRAP         |
| MAP2. 9     | 3. 43E-34 | -0. 7578  | 0. 059 | 0. 348 | 5. 13E-30 | Oligo | MAP2          |
| C20orf27. 3 | 6. 3E-34  | -0. 65177 | 0. 075 | 0. 371 | 5. 43E-30 | Oligo | C20orf27      |
| MT3. 9      | 4. 21E-34 | 0. 484626 | 0. 722 | 0. 481 | 6. 29E-30 | Oligo | MT3           |
| SRSF9. 6    | 4. 44E-34 | -0. 5678  | 0. 268 | 0. 572 | 6. 64E-30 | Oligo | SRSF9         |
| MEF2C. 9    | 4. 79E-34 | -0. 87388 | 0. 019 | 0. 293 | 7. 15E-30 | Oligo | MEF2C         |
| GPSM3. 9    | 5. 13E-34 | -1. 06823 | 0. 005 | 0. 272 | 7. 67E-30 | Oligo | GPSM3         |
| RGS19. 9    | 5. 30E-34 | -0. 81996 | 0. 014 | 0. 285 | 7. 92E-30 | Oligo | RGS19         |
| PYCARD. 9   | 5. 88E-34 | -1. 00946 | 0. 024 | 0. 294 | 8. 78E-30 | Oligo | PYCARD        |
| CD37. 9     | 6. 31E-34 | -1. 07668 | 0. 035 | 0. 311 | 9. 43E-30 | Oligo | CD37          |
| COX20. 4    | 6. 52E-34 | -0. 6422  | 0. 165 | 0. 471 | 9. 74E-30 | Oligo | COX20         |
| FPR1. 9     | 7. 51E-34 | -1. 15929 | 0. 024 | 0. 294 | 1. 12E-29 | Oligo | FPR1          |
| NEK6. 5     | 8. 99E-34 | -0. 76614 | 0. 026 | 0. 3   | 1. 34E-29 | Oligo | NEK6          |
| ACTN1. 6    | 9. 55E-34 | -0. 71547 | 0      | 0. 265 | 1. 43E-29 | Oligo | ACTN1         |
| CYBA. 9     | 1. 02E-33 | -1. 01485 | 0. 146 | 0. 414 | 1. 53E-29 | Oligo | CYBA          |
| PKIB. 6     | 1. 31E-33 | -0. 76636 | 0. 019 | 0. 294 | 1. 96E-29 | Oligo | PKIB          |
| ADD1. 7     | 1. 42E-33 | 0. 733406 | 0. 496 | 0. 3   | 2. 13E-29 | Oligo | ADD1          |
| FAM73A. 2   | 1. 58E-33 | 0. 521325 | 0. 242 | 0. 082 | 2. 36E-29 | Oligo | FAM73A        |
| CYFIP1. 8   | 1. 83E-33 | -0. 79442 | 0. 021 | 0. 293 | 2. 73E-29 | Oligo | CYFIP1        |
| ARID5A. 5   | 2. 25E-33 | -0. 7845  | 0. 026 | 0. 3   | 3. 37E-29 | Oligo | ARID5A        |

|             |           |           |        |        |           |       |           |
|-------------|-----------|-----------|--------|--------|-----------|-------|-----------|
| VLDLR. 2    | 2. 32E-33 | 0. 396657 | 0. 167 | 0. 044 | 3. 46E-29 | Oligo | VLDLR     |
| LINC00152   | 2. 57E-33 | -0. 82876 | 0. 005 | 0. 268 | 3. 84E-29 | Oligo | LINC00152 |
| SCG2. 8     | 2. 66E-33 | -0. 8594  | 0. 007 | 0. 271 | 3. 97E-29 | Oligo | SCG2      |
| APMAP. 5    | 2. 84E-33 | -0. 54829 | 0. 212 | 0. 529 | 4. 25E-29 | Oligo | APMAP     |
| HSD17B4. 3  | 2. 90E-33 | 0. 660992 | 0. 445 | 0. 233 | 4. 33E-29 | Oligo | HSD17B4   |
| DUSP1. 6    | 2. 90E-33 | -0. 67893 | 0. 32  | 0. 584 | 4. 34E-29 | Oligo | DUSP1     |
| PTP4A2. 6   | 3. 04E-33 | 0. 567897 | 0. 616 | 0. 447 | 4. 54E-29 | Oligo | PTP4A2    |
| SLC38A2. 2  | 3. 11E-33 | 0. 568808 | 0. 494 | 0. 271 | 4. 65E-29 | Oligo | SLC38A2   |
| MS4A4A. 9   | 3. 15E-33 | -1. 06416 | 0. 026 | 0. 296 | 4. 71E-29 | Oligo | MS4A4A    |
| STK17A. 7   | 3. 28E-33 | -0. 70375 | 0. 028 | 0. 303 | 4. 91E-29 | Oligo | STK17A    |
| TWF2. 9     | 3. 38E-33 | -0. 77458 | 0. 068 | 0. 351 | 5. 05E-29 | Oligo | TWF2      |
| FAM69C. 8   | 4. 22E-33 | 0. 654396 | 0. 216 | 0. 072 | 6. 30E-29 | Oligo | FAM69C    |
| FCGR2A. 9   | 4. 29E-33 | -1. 07088 | 0. 031 | 0. 299 | 6. 41E-29 | Oligo | FCGR2A    |
| ARL2BP. 6   | 4. 34E-33 | -0. 60366 | 0. 111 | 0. 416 | 6. 49E-29 | Oligo | ARL2BP    |
| PRNP. 5     | 4. 70E-33 | 0. 598281 | 0. 619 | 0. 46  | 7. 03E-29 | Oligo | PRNP      |
| BHLHE41. 7  | 4. 75E-33 | 0. 573734 | 0. 412 | 0. 2   | 7. 10E-29 | Oligo | BHLHE41   |
| YPEL3. 4    | 4. 87E-33 | 0. 603189 | 0. 452 | 0. 237 | 7. 28E-29 | Oligo | YPEL3     |
| GGCT. 8     | 5. 26E-33 | -0. 72757 | 0. 099 | 0. 397 | 7. 86E-29 | Oligo | GGCT      |
| HLA-B. 6    | 5. 41E-33 | -0. 57494 | 0. 607 | 0. 861 | 8. 08E-29 | Oligo | HLA-B     |
| MAPT. 9     | 7. 16E-33 | 0. 675927 | 0. 494 | 0. 277 | 1. 07E-28 | Oligo | MAPT      |
| ULK2. 2     | 8. 78E-33 | 0. 519615 | 0. 195 | 0. 058 | 1. 31E-28 | Oligo | ULK2      |
| CKS2. 9     | 8. 96E-33 | -0. 809   | 0. 089 | 0. 377 | 1. 34E-28 | Oligo | CKS2      |
| CD163. 9    | 9. 62E-33 | -1. 08366 | 0. 021 | 0. 285 | 1. 44E-28 | Oligo | CD163     |
| GRID1       | 9. 67E-33 | 0. 349595 | 0. 085 | 0. 013 | 1. 45E-28 | Oligo | GRID1     |
| APBB2. 7    | 1. 34E-32 | 0. 556411 | 0. 278 | 0. 106 | 2. 01E-28 | Oligo | APBB2     |
| UFC1. 5     | 1. 85E-32 | -0. 44533 | 0. 259 | 0. 573 | 2. 77E-28 | Oligo | UFC1      |
| C11orf31. 1 | 1. 93E-32 | -0. 50657 | 0. 391 | 0. 678 | 2. 88E-28 | Oligo | C11orf31  |
| ATP6V1G1. 2 | 1. 12E-32 | -0. 37373 | 0. 475 | 0. 765 | 3. 17E-28 | Oligo | ATP6V1G1  |
| SRI. 8      | 2. 21E-32 | -0. 47718 | 0. 494 | 0. 738 | 3. 30E-28 | Oligo | SRI       |
| MOB1A. 9    | 2. 27E-32 | -0. 72266 | 0. 066 | 0. 35  | 3. 39E-28 | Oligo | MOB1A     |
| S100A4. 9   | 2. 56E-32 | -1. 11411 | 0. 04  | 0. 305 | 3. 83E-28 | Oligo | S100A4    |
| PRCP. 5     | 2. 57E-32 | -0. 66072 | 0. 078 | 0. 365 | 3. 83E-28 | Oligo | PRCP      |
| RNASE6. 9   | 2. 70E-32 | -1. 05914 | 0. 021 | 0. 285 | 4. 03E-28 | Oligo | RNASE6    |
| PLIN2. 7    | 3. 23E-32 | -1. 01667 | 0. 078 | 0. 352 | 4. 83E-28 | Oligo | PLIN2     |
| PREPL. 7    | 3. 71E-32 | 0. 575033 | 0. 376 | 0. 182 | 5. 55E-28 | Oligo | PREPL     |
| GPR183. 9   | 4. 09E-32 | -1. 12163 | 0. 035 | 0. 299 | 6. 11E-28 | Oligo | GPR183    |
| DBN1. 9     | 4. 46E-32 | -0. 70787 | 0. 047 | 0. 321 | 6. 67E-28 | Oligo | DBN1      |
| TMEM56      | 4. 55E-32 | 0. 274972 | 0. 085 | 0. 013 | 6. 79E-28 | Oligo | TMEM56    |
| RHOG. 9     | 4. 63E-32 | 0. 623419 | 0. 631 | 0. 401 | 6. 92E-28 | Oligo | RHOG      |
| TMEM178A. 6 | 6. 71E-32 | 0. 591992 | 0. 28  | 0. 112 | 1. 00E-27 | Oligo | TMEM178A  |
| UCP2. 9     | 6. 92E-32 | -0. 91445 | 0. 021 | 0. 282 | 1. 03E-27 | Oligo | UCP2      |
| KLHDC8A. 9  | 7. 30E-32 | -0. 6964  | 0. 005 | 0. 26  | 1. 09E-27 | Oligo | KLHDC8A   |
| GRN. 9      | 9. 61E-32 | -0. 6043  | 0. 289 | 0. 581 | 1. 44E-27 | Oligo | GRN       |
| PLEKH01. 5  | 1. 08E-31 | -0. 65227 | 0. 021 | 0. 285 | 1. 62E-27 | Oligo | PLEKH01   |
| BLVRA. 7    | 1. 11E-31 | -0. 77014 | 0. 071 | 0. 35  | 1. 66E-27 | Oligo | BLVRA     |
| MGST2. 9    | 1. 11E-31 | -0. 88618 | 0. 007 | 0. 263 | 1. 66E-27 | Oligo | MGST2     |
| OSTC. 6     | 1. 17E-31 | -0. 56937 | 0. 209 | 0. 514 | 1. 75E-27 | Oligo | OSTC      |
| TMX1. 5     | 1. 21E-31 | -0. 69942 | 0. 122 | 0. 413 | 1. 81E-27 | Oligo | TMX1      |
| PSMA1. 5    | 1. 21E-31 | -0. 49345 | 0. 308 | 0. 622 | 1. 81E-27 | Oligo | PSMA1     |
| COLGALT2. 1 | 1. 27E-31 | 0. 722721 | 0. 306 | 0. 132 | 1. 90E-27 | Oligo | COLGALT2  |
| RUFY3. 8    | 1. 39E-31 | 0. 624621 | 0. 496 | 0. 298 | 2. 08E-27 | Oligo | RUFY3     |

|           |          |          |       |       |          |       |               |
|-----------|----------|----------|-------|-------|----------|-------|---------------|
| BBX.5     | 1.57E-31 | 0.699741 | 0.572 | 0.4   | 2.35E-27 | Oligo | BBX           |
| PDE8A.3   | 1.63E-31 | 0.507027 | 0.238 | 0.084 | 2.43E-27 | Oligo | PDE8A         |
| BCAP31.5  | 1.81E-31 | -0.54108 | 0.32  | 0.63  | 2.70E-27 | Oligo | BCAP31        |
| RP11-285F | 1.85E-31 | 0.190666 | 0.031 | 0.002 | 2.77E-27 | Oligo | RP11-285F16.1 |
| CCND2.9   | 1.99E-31 | -0.75525 | 0.064 | 0.337 | 2.97E-27 | Oligo | CCND2         |
| MT1F.8    | 2.08E-31 | -0.63991 | 0.04  | 0.315 | 3.11E-27 | Oligo | MT1F          |
| GTF2I.8   | 2.10E-31 | 0.601221 | 0.595 | 0.42  | 3.14E-27 | Oligo | GTF2I         |
| DICER1.2  | 2.40E-31 | 0.66472  | 0.355 | 0.168 | 3.58E-27 | Oligo | DICER1        |
| ATP6V1E1. | 2.46E-31 | 0.697684 | 0.605 | 0.426 | 3.68E-27 | Oligo | ATP6V1E1      |
| SNCA.9    | 2.47E-31 | 0.510432 | 0.344 | 0.137 | 3.69E-27 | Oligo | SNCA          |
| SAMSN1.9  | 2.50E-31 | -1.02353 | 0.009 | 0.261 | 3.73E-27 | Oligo | SAMSN1        |
| CHCHD10.7 | 2.76E-31 | -0.65856 | 0.111 | 0.391 | 4.12E-27 | Oligo | CHCHD10       |
| STARD9    | 3.24E-31 | 0.358895 | 0.141 | 0.034 | 4.84E-27 | Oligo | STARD9        |
| TRIB2.9   | 3.32E-31 | -0.64639 | 0.016 | 0.272 | 4.96E-27 | Oligo | TRIB2         |
| RAP1GDS1. | 3.97E-31 | 0.582329 | 0.355 | 0.167 | 5.93E-27 | Oligo | RAP1GDS1      |
| PRDX4.8   | 4.10E-31 | -0.59109 | 0.252 | 0.557 | 6.12E-27 | Oligo | PRDX4         |
| TMEM246.7 | 4.43E-31 | 0.413059 | 0.165 | 0.044 | 6.61E-27 | Oligo | TMEM246       |
| IFI16.7   | 4.65E-31 | -0.7393  | 0.12  | 0.403 | 6.95E-27 | Oligo | IFI16         |
| HLA-C.5   | 4.84E-31 | -0.44851 | 0.574 | 0.812 | 7.23E-27 | Oligo | HLA-C         |
| GPR34.9   | 5.40E-31 | -1.05844 | 0.021 | 0.276 | 8.07E-27 | Oligo | GPR34         |
| SLC20A2.4 | 5.83E-31 | 0.522719 | 0.275 | 0.106 | 8.72E-27 | Oligo | SLC20A2       |
| TMEM14C.7 | 6.20E-31 | -0.45519 | 0.292 | 0.602 | 9.26E-27 | Oligo | TMEM14C       |
| MDH2.5    | 6.24E-31 | -0.46194 | 0.367 | 0.671 | 9.32E-27 | Oligo | MDH2          |
| MEG3.8    | 7.03E-31 | -0.96746 | 0.052 | 0.314 | 1.05E-26 | Oligo | MEG3          |
| DDR1.7    | 7.19E-31 | 0.720817 | 0.511 | 0.324 | 1.07E-26 | Oligo | DDR1          |
| FRMD5.5   | 7.43E-31 | 0.459858 | 0.179 | 0.053 | 1.11E-26 | Oligo | FRMD5         |
| ME1.1     | 7.57E-31 | 0.311028 | 0.115 | 0.024 | 1.13E-26 | Oligo | ME1           |
| DGUOK.6   | 7.67E-31 | -0.5445  | 0.214 | 0.527 | 1.15E-26 | Oligo | DGUOK         |
| PPP1R15A. | 8.38E-31 | -0.70255 | 0.2   | 0.477 | 1.25E-26 | Oligo | PPP1R15A      |
| TNFRSF12A | 8.58E-31 | -0.76263 | 0.035 | 0.296 | 1.28E-26 | Oligo | TNFRSF12A     |
| ARHGAP22. | 8.89E-31 | 0.39489  | 0.219 | 0.069 | 1.33E-26 | Oligo | ARHGAP22      |
| TGFB1.9   | 9.14E-31 | -0.69156 | 0.005 | 0.253 | 1.37E-26 | Oligo | TGFB1         |
| MTHFD2.8  | 1.07E-30 | -0.7687  | 0.038 | 0.298 | 1.60E-26 | Oligo | MTHFD2        |
| PCBP3     | 1.44E-30 | 0.171482 | 0.056 | 0.006 | 2.15E-26 | Oligo | PCBP3         |
| FCGR1A.9  | 1.62E-30 | -1.06862 | 0.019 | 0.268 | 2.43E-26 | Oligo | FCGR1A        |
| LINC00461 | 1.88E-30 | -0.67892 | 0.059 | 0.33  | 2.81E-26 | Oligo | LINC00461     |
| GSTK1.7   | 1.93E-30 | -0.53328 | 0.238 | 0.541 | 2.89E-26 | Oligo | GSTK1         |
| SOX11.8   | 1.97E-30 | -0.82587 | 0.028 | 0.282 | 2.94E-26 | Oligo | SOX11         |
| AKR1B1.6  | 1.98E-30 | -0.38407 | 0.325 | 0.636 | 2.96E-26 | Oligo | AKR1B1        |
| PEG3.7    | 2.16E-30 | 0.416978 | 0.195 | 0.06  | 3.23E-26 | Oligo | PEG3          |
| HSPA5.4   | 2.22E-30 | -0.56611 | 0.391 | 0.667 | 3.32E-26 | Oligo | HSPA5         |
| MYL12A.8  | 2.26E-30 | -0.61906 | 0.282 | 0.553 | 3.38E-26 | Oligo | MYL12A        |
| ARPC3.7   | 2.37E-30 | -0.31948 | 0.553 | 0.814 | 3.54E-26 | Oligo | ARPC3         |
| SPTLC2.9  | 2.81E-30 | 0.520002 | 0.426 | 0.202 | 4.20E-26 | Oligo | SPTLC2        |
| NAA20.3   | 4.08E-30 | -0.54327 | 0.209 | 0.507 | 6.09E-26 | Oligo | NAA20         |
| PAFAH1B3. | 4.42E-30 | -0.56784 | 0.139 | 0.434 | 6.60E-26 | Oligo | PAFAH1B3      |
| OLIG2.8   | 5.09E-30 | 0.575933 | 0.372 | 0.171 | 7.60E-26 | Oligo | OLIG2         |
| TPM3.9    | 5.76E-30 | -0.55666 | 0.28  | 0.569 | 8.61E-26 | Oligo | TPM3          |
| IGFBP5.9  | 6.39E-30 | -1.09191 | 0.028 | 0.277 | 9.55E-26 | Oligo | IGFBP5        |
| MICALL1   | 6.89E-30 | 0.376116 | 0.125 | 0.028 | 1.03E-25 | Oligo | MICALL1       |
| ACTN4.6   | 7.91E-30 | 0.580681 | 0.513 | 0.326 | 1.18E-25 | Oligo | ACTN4         |



|           |          |          |       |       |          |       |             |
|-----------|----------|----------|-------|-------|----------|-------|-------------|
| NRN1.6    | 8.67E-30 | -0.78996 | 0.016 | 0.263 | 1.29E-25 | Oligo | NRN1        |
| SSB.4     | 8.85E-30 | -0.47909 | 0.299 | 0.603 | 1.32E-25 | Oligo | SSB         |
| SLC22A17. | 9.58E-30 | 0.588301 | 0.468 | 0.277 | 1.43E-25 | Oligo | SLC22A17    |
| HMGB3.8   | 9.58E-30 | -0.67198 | 0.033 | 0.288 | 1.43E-25 | Oligo | HMGB3       |
| ARPP19.6  | 1.02E-29 | 0.665672 | 0.576 | 0.42  | 1.52E-25 | Oligo | ARPP19      |
| SNX2.9    | 1.07E-29 | -0.66289 | 0.139 | 0.42  | 1.60E-25 | Oligo | SNX2        |
| TMEM189.4 | 1.09E-29 | 0.697775 | 0.358 | 0.181 | 1.63E-25 | Oligo | TMEM189     |
| CDKN1A.7  | 1.80E-29 | -0.81983 | 0.056 | 0.317 | 2.68E-25 | Oligo | CDKN1A      |
| HMOX1.9   | 2.18E-29 | -0.93967 | 0.052 | 0.304 | 3.26E-25 | Oligo | HMOX1       |
| ILF2.6    | 2.70E-29 | -0.37313 | 0.28  | 0.585 | 4.03E-25 | Oligo | ILF2        |
| SGIP1.6   | 2.72E-29 | 0.436868 | 0.165 | 0.046 | 4.07E-25 | Oligo | SGIP1       |
| LIPA.8    | 2.97E-29 | 0.573331 | 0.553 | 0.326 | 4.43E-25 | Oligo | LIPA        |
| LIMD2.6   | 3.13E-29 | -0.67872 | 0.016 | 0.258 | 4.68E-25 | Oligo | LIMD2       |
| DYNC1I1.9 | 3.49E-29 | 0.465271 | 0.271 | 0.098 | 5.22E-25 | Oligo | DYNC1I1     |
| EFCAB14.4 | 3.86E-29 | 0.630201 | 0.381 | 0.196 | 5.77E-25 | Oligo | EFCAB14     |
| SPRY1.8   | 4.02E-29 | -0.74547 | 0.005 | 0.241 | 6.00E-25 | Oligo | SPRY1       |
| AMPD3.6   | 4.30E-29 | 0.444995 | 0.169 | 0.047 | 6.42E-25 | Oligo | AMPD3       |
| CSF1R.9   | 4.40E-29 | -0.9758  | 0.033 | 0.277 | 6.57E-25 | Oligo | CSF1R       |
| CLIC4.8   | 4.41E-29 | 0.515503 | 0.525 | 0.325 | 6.58E-25 | Oligo | CLIC4       |
| TSPAN13.9 | 4.57E-29 | -0.7889  | 0.059 | 0.308 | 6.82E-25 | Oligo | TSPAN13     |
| FAM229B.8 | 5.13E-29 | 0.729904 | 0.468 | 0.285 | 7.67E-25 | Oligo | FAM229B     |
| LPAR6.9   | 5.39E-29 | -0.8413  | 0.009 | 0.246 | 8.06E-25 | Oligo | LPAR6       |
| TMEM165.3 | 5.53E-29 | 0.537213 | 0.6   | 0.451 | 8.27E-25 | Oligo | TMEM165     |
| AP000688. | 5.83E-29 | 0.258734 | 0.035 | 0.002 | 8.71E-25 | Oligo | AP000688.29 |
| FCH01.4   | 6.95E-29 | 0.378026 | 0.141 | 0.035 | 1.04E-24 | Oligo | FCH01       |
| PLD1      | 8.92E-29 | 0.372789 | 0.111 | 0.023 | 1.33E-24 | Oligo | PLD1        |
| TSPO.8    | 9.45E-29 | -0.57084 | 0.332 | 0.604 | 1.41E-24 | Oligo | TSPO        |
| TMEM106C. | 9.51E-29 | -0.64666 | 0.028 | 0.275 | 1.42E-24 | Oligo | TMEM106C    |
| CREM.8    | 1.04E-28 | -0.79456 | 0.146 | 0.416 | 1.55E-24 | Oligo | CREM        |
| RILPL2.9  | 1.09E-28 | -0.80891 | 0.024 | 0.267 | 1.63E-24 | Oligo | RILPL2      |
| ACTN2.4   | 1.17E-28 | 0.441548 | 0.146 | 0.038 | 1.75E-24 | Oligo | ACTN2       |
| RND3.8    | 1.22E-28 | -0.78141 | 0.014 | 0.251 | 1.82E-24 | Oligo | RND3        |
| EIF4E.6   | 1.23E-28 | -0.54609 | 0.214 | 0.499 | 1.84E-24 | Oligo | EIF4E       |
| LILRB4.9  | 1.24E-28 | -0.97878 | 0.024 | 0.264 | 1.85E-24 | Oligo | LILRB4      |
| CPB2-AS1. | 1.25E-28 | 0.550852 | 0.113 | 0.024 | 1.87E-24 | Oligo | CPB2-AS1    |
| CD59.5    | 1.43E-28 | -0.5911  | 0.282 | 0.563 | 2.14E-24 | Oligo | CD59        |
| OLR1.9    | 1.46E-28 | -0.97745 | 0.021 | 0.259 | 2.18E-24 | Oligo | OLR1        |
| RBM11     | 1.53E-28 | 0.193113 | 0.049 | 0.005 | 2.28E-24 | Oligo | RBM11       |
| SOD1.5    | 1.84E-28 | 0.380261 | 0.821 | 0.754 | 2.74E-24 | Oligo | SOD1        |
| NRCAM.8   | 1.86E-28 | -0.61997 | 0.031 | 0.279 | 2.78E-24 | Oligo | NRCAM       |
| GBAS.4    | 1.90E-28 | -0.56839 | 0.132 | 0.41  | 2.85E-24 | Oligo | GBAS        |
| ABCA6     | 2.03E-28 | 0.347742 | 0.066 | 0.009 | 3.03E-24 | Oligo | ABCA6       |
| NUCB2.5   | 2.03E-28 | -0.67731 | 0.092 | 0.356 | 3.04E-24 | Oligo | NUCB2       |
| EIF3H.4   | 2.13E-28 | -0.44534 | 0.376 | 0.68  | 3.18E-24 | Oligo | EIF3H       |
| PACSIN3.7 | 2.46E-28 | 0.598345 | 0.193 | 0.065 | 3.68E-24 | Oligo | PACSIN3     |
| NREP.8    | 2.50E-28 | -0.6489  | 0.035 | 0.282 | 3.73E-24 | Oligo | NREP        |
| FAM32A.6  | 2.65E-28 | -0.5088  | 0.169 | 0.462 | 3.97E-24 | Oligo | FAM32A      |
| CPM.7     | 2.80E-28 | 0.523518 | 0.461 | 0.226 | 4.18E-24 | Oligo | CPM         |
| BAZ1A.5   | 2.93E-28 | -0.59767 | 0.066 | 0.329 | 4.38E-24 | Oligo | BAZ1A       |
| HIGD2A.7  | 3.13E-28 | -0.41246 | 0.346 | 0.629 | 4.68E-24 | Oligo | HIGD2A      |
| CARD16.7  | 3.20E-28 | -0.87023 | 0.007 | 0.238 | 4.79E-24 | Oligo | CARD16      |

|            |          |          |       |       |          |       |          |
|------------|----------|----------|-------|-------|----------|-------|----------|
| CALM1.9    | 3.23E-28 | 0.258002 | 0.835 | 0.769 | 4.82E-24 | Oligo | CALM1    |
| DVL1.1     | 3.31E-28 | 0.45241  | 0.162 | 0.047 | 4.95E-24 | Oligo | DVL1     |
| ST3GAL4.5  | 3.46E-28 | 0.615798 | 0.275 | 0.117 | 5.18E-24 | Oligo | ST3GAL4  |
| CYCS.3     | 3.64E-28 | -0.36596 | 0.471 | 0.744 | 5.44E-24 | Oligo | CYCS     |
| SPARCL1.8  | 3.75E-28 | -0.95445 | 0.104 | 0.355 | 5.60E-24 | Oligo | SPARCL1  |
| GADD45A.9  | 3.96E-28 | -0.75128 | 0.04  | 0.288 | 5.91E-24 | Oligo | GADD45A  |
| MOB4.6     | 4.05E-28 | -0.47972 | 0.104 | 0.382 | 6.05E-24 | Oligo | MOB4     |
| CEP97.6    | 4.50E-28 | 0.48337  | 0.207 | 0.071 | 6.72E-24 | Oligo | CEP97    |
| ATP1B2.9   | 4.52E-28 | -0.68589 | 0.009 | 0.241 | 6.75E-24 | Oligo | ATP1B2   |
| RGS16.7    | 5.07E-28 | -0.73045 | 0.035 | 0.284 | 7.58E-24 | Oligo | RGS16    |
| GOLGA7.3   | 5.13E-28 | 0.600109 | 0.616 | 0.458 | 7.67E-24 | Oligo | GOLGA7   |
| FBXO2      | 5.64E-28 | 0.266061 | 0.078 | 0.012 | 8.43E-24 | Oligo | FBXO2    |
| CD83.8     | 5.67E-28 | -0.89896 | 0.059 | 0.304 | 8.48E-24 | Oligo | CD83     |
| SERPING1.6 | 6.16E-28 | -1.18194 | 0.012 | 0.242 | 9.20E-24 | Oligo | SERPING1 |
| METTL9.8   | 6.43E-28 | -0.56895 | 0.205 | 0.478 | 9.60E-24 | Oligo | METTL9   |
| CAPZB.8    | 6.54E-28 | -0.42773 | 0.428 | 0.712 | 9.77E-24 | Oligo | CAPZB    |
| PCBD1.4    | 6.99E-28 | -0.59141 | 0.08  | 0.34  | 1.04E-23 | Oligo | PCBD1    |
| PPP1R12B.7 | 7.20E-28 | 0.511865 | 0.179 | 0.055 | 1.08E-23 | Oligo | PPP1R12B |
| ATP2B1.4   | 7.94E-28 | -0.63815 | 0.099 | 0.364 | 1.19E-23 | Oligo | ATP2B1   |
| DLGAP4.6   | 8.13E-28 | -0.5344  | 0.049 | 0.302 | 1.21E-23 | Oligo | DLGAP4   |
| SSBP4.5    | 9.02E-28 | -0.57305 | 0.035 | 0.279 | 1.35E-23 | Oligo | SSBP4    |
| FLNA.7     | 9.19E-28 | -0.58934 | 0.021 | 0.259 | 1.37E-23 | Oligo | FLNA     |
| GNAI3.5    | 9.35E-28 | -0.5262  | 0.125 | 0.403 | 1.40E-23 | Oligo | GNAI3    |
| SUMO3.7    | 9.42E-28 | -0.58477 | 0.169 | 0.449 | 1.41E-23 | Oligo | SUMO3    |
| SPI1.9     | 9.47E-28 | -0.87804 | 0.016 | 0.247 | 1.42E-23 | Oligo | SPI1     |
| TECR.6     | 9.54E-28 | 0.59532  | 0.678 | 0.537 | 1.43E-23 | Oligo | TECR     |
| FOXP1.6    | 9.56E-28 | 0.458438 | 0.44  | 0.223 | 1.43E-23 | Oligo | FOXP1    |
| C1orf54.9  | 1.10E-27 | -0.81644 | 0.007 | 0.234 | 1.64E-23 | Oligo | C1orf54  |
| RILPL1     | 1.11E-27 | 0.370423 | 0.134 | 0.034 | 1.66E-23 | Oligo | RILPL1   |
| IER2.8     | 1.33E-27 | -0.48918 | 0.358 | 0.625 | 1.99E-23 | Oligo | IER2     |
| UPP1.8     | 1.34E-27 | -0.74113 | 0.026 | 0.263 | 2.00E-23 | Oligo | UPP1     |
| CCT6A.5    | 1.45E-27 | -0.47925 | 0.313 | 0.584 | 2.16E-23 | Oligo | CCT6A    |
| CASP1.8    | 1.50E-27 | -0.78264 | 0.007 | 0.234 | 2.24E-23 | Oligo | CASP1    |
| TMEM70.6   | 1.51E-27 | -0.5661  | 0.129 | 0.405 | 2.25E-23 | Oligo | TMEM70   |
| KCTD12.9   | 1.53E-27 | -0.71997 | 0.014 | 0.244 | 2.29E-23 | Oligo | KCTD12   |
| LRRC8B.2   | 1.59E-27 | 0.494163 | 0.224 | 0.081 | 2.37E-23 | Oligo | LRRC8B   |
| FBXO32.9   | 1.74E-27 | 0.460242 | 0.329 | 0.147 | 2.60E-23 | Oligo | FBXO32   |
| EFEMP1.8   | 1.76E-27 | -1.12373 | 0.005 | 0.229 | 2.63E-23 | Oligo | EFEMP1   |
| RFTN2.9    | 1.89E-27 | 0.566895 | 0.289 | 0.121 | 2.82E-23 | Oligo | RFTN2    |
| ADORA3.9   | 1.94E-27 | -0.94715 | 0.035 | 0.269 | 2.90E-23 | Oligo | ADORA3   |
| ERP44.7    | 2.00E-27 | -0.58333 | 0.136 | 0.405 | 2.99E-23 | Oligo | ERP44    |
| TNRC6C.8   | 2.06E-27 | 0.65546  | 0.339 | 0.165 | 3.07E-23 | Oligo | TNRC6C   |
| LAMP1.7    | 2.09E-27 | 0.456959 | 0.647 | 0.516 | 3.13E-23 | Oligo | LAMP1    |
| WDFY3.2    | 2.58E-27 | 0.408729 | 0.226 | 0.082 | 3.85E-23 | Oligo | WDFY3    |
| POLR3GL.2  | 2.70E-27 | -0.62239 | 0.099 | 0.36  | 4.04E-23 | Oligo | POLR3GL  |
| ARL4A.2    | 3.23E-27 | -0.60591 | 0.115 | 0.383 | 4.83E-23 | Oligo | ARL4A    |
| METTL7B.6  | 3.85E-27 | -0.88673 | 0     | 0.22  | 5.75E-23 | Oligo | METTL7B  |
| PGM2L1.8   | 3.97E-27 | -0.64162 | 0.028 | 0.264 | 5.94E-23 | Oligo | PGM2L1   |
| S100A9.9   | 4.57E-27 | -1.07136 | 0.009 | 0.232 | 6.83E-23 | Oligo | S100A9   |
| IFI30.9    | 4.75E-27 | -0.92165 | 0.005 | 0.227 | 7.10E-23 | Oligo | IFI30    |
| C10orf54.5 | 5.28E-27 | -0.8868  | 0.056 | 0.297 | 7.89E-23 | Oligo | C10orf54 |

|           |          |          |       |       |          |       |          |
|-----------|----------|----------|-------|-------|----------|-------|----------|
| NXT1.5    | 5.91E-27 | -0.55264 | 0.068 | 0.326 | 8.83E-23 | Oligo | NXT1     |
| AP1S2.7   | 6.18E-27 | -0.58293 | 0.259 | 0.509 | 9.23E-23 | Oligo | AP1S2    |
| NFIX.8    | 6.23E-27 | 0.520578 | 0.511 | 0.326 | 9.31E-23 | Oligo | NFIX     |
| SCG3.9    | 6.24E-27 | -0.74625 | 0.04  | 0.275 | 9.32E-23 | Oligo | SCG3     |
| CLCN6.1   | 6.44E-27 | 0.434981 | 0.188 | 0.061 | 9.63E-23 | Oligo | CLCN6    |
| MMP14.7   | 6.93E-27 | -0.65208 | 0.007 | 0.23  | 1.04E-22 | Oligo | MMP14    |
| ERP29.6   | 7.18E-27 | -0.43509 | 0.329 | 0.621 | 1.07E-22 | Oligo | ERP29    |
| CMTM4     | 7.27E-27 | 0.367473 | 0.132 | 0.034 | 1.09E-22 | Oligo | CMTM4    |
| TOM1L2.6  | 7.48E-27 | 0.651455 | 0.271 | 0.114 | 1.12E-22 | Oligo | TOM1L2   |
| LRRC1.7   | 8.05E-27 | 0.430889 | 0.195 | 0.065 | 1.20E-22 | Oligo | LRRC1    |
| TSEN34.6  | 8.22E-27 | -0.55873 | 0.111 | 0.378 | 1.23E-22 | Oligo | TSEN34   |
| C5AR1.8   | 8.27E-27 | -0.90859 | 0.019 | 0.246 | 1.24E-22 | Oligo | C5AR1    |
| HEY1.7    | 8.42E-27 | -0.62497 | 0.024 | 0.255 | 1.26E-22 | Oligo | HEY1     |
| BLVRB.6   | 8.50E-27 | -0.64177 | 0.118 | 0.384 | 1.27E-22 | Oligo | BLVRB    |
| PDLIM7.5  | 9.10E-27 | -0.57603 | 0.019 | 0.247 | 1.36E-22 | Oligo | PDLIM7   |
| IFRD1.8   | 9.38E-27 | -0.5554  | 0.226 | 0.497 | 1.40E-22 | Oligo | IFRD1    |
| OAZ1.5    | 9.43E-27 | -0.24741 | 0.755 | 0.933 | 1.41E-22 | Oligo | OAZ1     |
| GOLM1.8   | 1.06E-26 | -0.58125 | 0.073 | 0.325 | 1.58E-22 | Oligo | GOLM1    |
| ZNF331.8  | 1.07E-26 | -0.76614 | 0.08  | 0.325 | 1.60E-22 | Oligo | ZNF331   |
| CD58.9    | 1.13E-26 | -0.69969 | 0.012 | 0.235 | 1.69E-22 | Oligo | CD58     |
| OLA1.4    | 1.14E-26 | -0.54655 | 0.224 | 0.498 | 1.71E-22 | Oligo | OLA1     |
| SUMO1.3   | 1.18E-26 | -0.27651 | 0.384 | 0.667 | 1.77E-22 | Oligo | SUMO1    |
| ACTB.7    | 1.19E-26 | 0.153597 | 1     | 0.992 | 1.78E-22 | Oligo | ACTB     |
| EID1.6    | 1.25E-26 | 0.51047  | 0.802 | 0.704 | 1.87E-22 | Oligo | EID1     |
| ORAI2.5   | 1.41E-26 | -0.49443 | 0.042 | 0.285 | 2.11E-22 | Oligo | ORAI2    |
| CNIH4.7   | 1.70E-26 | -0.52513 | 0.118 | 0.383 | 2.54E-22 | Oligo | CNIH4    |
| ADAM15.4  | 1.72E-26 | 0.490019 | 0.266 | 0.11  | 2.56E-22 | Oligo | ADAM15   |
| DCTN1.6   | 1.74E-26 | 0.643803 | 0.391 | 0.209 | 2.60E-22 | Oligo | DCTN1    |
| DUSP6.2   | 1.78E-26 | -0.6098  | 0.021 | 0.253 | 2.66E-22 | Oligo | DUSP6    |
| PVRL2.7   | 1.81E-26 | -0.57949 | 0.024 | 0.251 | 2.70E-22 | Oligo | PVRL2    |
| ZNF652.4  | 1.99E-26 | 0.663849 | 0.301 | 0.138 | 2.98E-22 | Oligo | ZNF652   |
| CASP4.9   | 2.21E-26 | -0.77495 | 0.014 | 0.236 | 3.31E-22 | Oligo | CASP4    |
| CYTH1.7   | 2.44E-26 | 0.497914 | 0.332 | 0.152 | 3.65E-22 | Oligo | CYTH1    |
| NRBP1.1   | 2.49E-26 | -0.57288 | 0.092 | 0.35  | 3.73E-22 | Oligo | NRBP1    |
| PRDX2.9   | 2.59E-26 | -0.31372 | 0.489 | 0.709 | 3.88E-22 | Oligo | PRDX2    |
| C20orf24. | 2.74E-26 | -0.52028 | 0.207 | 0.477 | 4.10E-22 | Oligo | C20orf24 |
| PXMP2.7   | 2.87E-26 | -0.49438 | 0.009 | 0.231 | 4.29E-22 | Oligo | PXMP2    |
| NME1.7    | 2.88E-26 | -0.45433 | 0.313 | 0.577 | 4.31E-22 | Oligo | NME1     |
| CTNNA1.3  | 2.99E-26 | 0.574034 | 0.56  | 0.416 | 4.47E-22 | Oligo | CTNNA1   |
| HSPA1A.5  | 3.10E-26 | 0.563628 | 0.654 | 0.486 | 4.64E-22 | Oligo | HSPA1A   |
| SBDS.8    | 3.15E-26 | 0.403024 | 0.72  | 0.606 | 4.70E-22 | Oligo | SBDS     |
| IDH1.4    | 3.21E-26 | -0.59881 | 0.129 | 0.39  | 4.79E-22 | Oligo | IDH1     |
| FAM69A.2  | 3.25E-26 | 0.464533 | 0.174 | 0.055 | 4.85E-22 | Oligo | FAM69A   |
| PCYT1B.1  | 3.29E-26 | 0.35094  | 0.104 | 0.022 | 4.91E-22 | Oligo | PCYT1B   |
| ZNF532.6  | 3.34E-26 | 0.499641 | 0.228 | 0.088 | 4.99E-22 | Oligo | ZNF532   |
| DRAM2.8   | 3.49E-26 | -0.71204 | 0.096 | 0.345 | 5.22E-22 | Oligo | DRAM2    |
| C3AR1.9   | 3.68E-26 | -0.93967 | 0.024 | 0.246 | 5.50E-22 | Oligo | C3AR1    |
| FCGBP.8   | 3.96E-26 | -1.02716 | 0.019 | 0.237 | 5.92E-22 | Oligo | FCGBP    |
| MAFB.7    | 3.97E-26 | -0.77491 | 0.087 | 0.323 | 5.93E-22 | Oligo | MAFB     |
| COL9A2.4  | 4.22E-26 | 0.457191 | 0.228 | 0.084 | 6.30E-22 | Oligo | COL9A2   |
| KLF10.6   | 4.65E-26 | -0.6983  | 0.019 | 0.241 | 6.95E-22 | Oligo | KLF10    |

|              |           |           |        |        |                 |                |
|--------------|-----------|-----------|--------|--------|-----------------|----------------|
| CAMK1. 5     | 5. 00E-26 | -0. 58051 | 0. 014 | 0. 234 | 7. 47E-22 Oligo | CAMK1          |
| DDX5. 6      | 5. 04E-26 | -0. 3514  | 0. 624 | 0. 824 | 7. 53E-22 Oligo | DDX5           |
| XBP1. 8      | 5. 38E-26 | -0. 66072 | 0. 129 | 0. 38  | 8. 03E-22 Oligo | XBP1           |
| MANF. 6      | 5. 77E-26 | -0. 58039 | 0. 186 | 0. 461 | 8. 63E-22 Oligo | MANF           |
| TMEM176A. 6. | 43E-26    | -0. 8784  | 0. 016 | 0. 235 | 9. 61E-22 Oligo | TMEM176A       |
| RBM8A. 4     | 6. 56E-26 | -0. 43348 | 0. 344 | 0. 623 | 9. 81E-22 Oligo | RBM8A          |
| PTBP2. 7     | 6. 66E-26 | 0. 478264 | 0. 252 | 0. 1   | 9. 96E-22 Oligo | PTBP2          |
| ZFAND6. 2    | 6. 77E-26 | -0. 43107 | 0. 186 | 0. 46  | 1. 01E-21 Oligo | ZFAND6         |
| TOP1. 4      | 6. 91E-26 | -0. 55402 | 0. 139 | 0. 398 | 1. 03E-21 Oligo | TOP1           |
| CDKL2        | 8. 27E-26 | 0. 219713 | 0. 054 | 0. 007 | 1. 24E-21 Oligo | CDKL2          |
| IGFBP7. 7    | 8. 47E-26 | -0. 80853 | 0. 047 | 0. 277 | 1. 27E-21 Oligo | IGFBP7         |
| RAB20. 8     | 9. 55E-26 | -0. 80125 | 0. 024 | 0. 244 | 1. 43E-21 Oligo | RAB20          |
| TBXAS1. 9    | 1. 02E-25 | -0. 85721 | 0. 026 | 0. 249 | 1. 53E-21 Oligo | TBXAS1         |
| STK39. 6     | 1. 17E-25 | 0. 50207  | 0. 238 | 0. 096 | 1. 75E-21 Oligo | STK39          |
| RICTOR. 5    | 1. 18E-25 | 0. 564427 | 0. 36  | 0. 179 | 1. 77E-21 Oligo | RICTOR         |
| MT2A. 8      | 1. 23E-25 | -0. 52152 | 0. 598 | 0. 791 | 1. 83E-21 Oligo | MT2A           |
| RCBTB1. 4    | 1. 26E-25 | 0. 490211 | 0. 195 | 0. 067 | 1. 88E-21 Oligo | RCBTB1         |
| MGAT1. 9     | 1. 28E-25 | -0. 68995 | 0. 122 | 0. 367 | 1. 91E-21 Oligo | MGAT1          |
| ITPA. 2      | 1. 30E-25 | -0. 48906 | 0. 146 | 0. 414 | 1. 94E-21 Oligo | ITPA           |
| B2M. 7       | 1. 56E-25 | 0. 174706 | 0. 974 | 0. 97  | 2. 33E-21 Oligo | B2M            |
| EIF1. 7      | 1. 90E-25 | 0. 220762 | 0. 969 | 0. 974 | 2. 84E-21 Oligo | EIF1           |
| ENOX1        | 1. 90E-25 | 0. 266087 | 0. 094 | 0. 019 | 2. 84E-21 Oligo | ENOX1          |
| REL. 9       | 1. 96E-25 | -0. 65245 | 0. 066 | 0. 307 | 2. 93E-21 Oligo | REL            |
| FAM136A. 2   | 2. 00E-25 | -0. 55175 | 0. 04  | 0. 271 | 2. 98E-21 Oligo | FAM136A        |
| COL6A1. 8    | 2. 08E-25 | -0. 64141 | 0. 019 | 0. 237 | 3. 11E-21 Oligo | COL6A1         |
| FXYD7. 8     | 2. 10E-25 | 0. 461394 | 0. 212 | 0. 073 | 3. 14E-21 Oligo | FXYD7          |
| GGH. 7       | 2. 18E-25 | -0. 57348 | 0. 042 | 0. 271 | 3. 26E-21 Oligo | GGH            |
| C1QBP. 6     | 2. 19E-25 | -0. 49689 | 0. 32  | 0. 563 | 3. 27E-21 Oligo | C1QBP          |
| RFFL. 9      | 2. 21E-25 | 0. 63815  | 0. 32  | 0. 159 | 3. 30E-21 Oligo | RFFL           |
| THNSL2. 1    | 2. 57E-25 | 0. 232727 | 0. 094 | 0. 019 | 3. 84E-21 Oligo | THNSL2         |
| JAM2. 9      | 3. 07E-25 | -0. 59978 | 0. 033 | 0. 261 | 4. 58E-21 Oligo | JAM2           |
| GAMT. 7      | 3. 30E-25 | 0. 580175 | 0. 464 | 0. 293 | 4. 93E-21 Oligo | GAMT           |
| P4HB. 5      | 3. 63E-25 | -0. 45104 | 0. 334 | 0. 581 | 5. 42E-21 Oligo | P4HB           |
| CDKN1B. 8    | 4. 05E-25 | 0. 557405 | 0. 435 | 0. 252 | 6. 05E-21 Oligo | CDKN1B         |
| SEC11A. 8    | 4. 08E-25 | -0. 52305 | 0. 332 | 0. 601 | 6. 10E-21 Oligo | SEC11A         |
| COL9A3. 9    | 4. 16E-25 | 0. 479476 | 0. 367 | 0. 179 | 6. 22E-21 Oligo | COL9A3         |
| CD86. 9      | 4. 24E-25 | -0. 90868 | 0. 012 | 0. 221 | 6. 34E-21 Oligo | CD86           |
| HAVCR2. 9    | 4. 29E-25 | -0. 89145 | 0. 024 | 0. 239 | 6. 41E-21 Oligo | HAVCR2         |
| BSG. 8       | 4. 30E-25 | -0. 33955 | 0. 513 | 0. 75  | 6. 42E-21 Oligo | BSG            |
| CIB1. 8      | 4. 30E-25 | -0. 44475 | 0. 224 | 0. 502 | 6. 43E-21 Oligo | CIB1           |
| TGFBI. 9     | 4. 41E-25 | -0. 83947 | 0. 005 | 0. 213 | 6. 59E-21 Oligo | TGFBI          |
| PSD3. 8      | 5. 37E-25 | 0. 689626 | 0. 353 | 0. 188 | 8. 02E-21 Oligo | PSD3           |
| RGS12. 8     | 5. 38E-25 | -0. 57709 | 0. 049 | 0. 279 | 8. 04E-21 Oligo | RGS12          |
| PRKCZ. 9     | 5. 70E-25 | 0. 461562 | 0. 24  | 0. 095 | 8. 51E-21 Oligo | PRKCZ          |
| MTPN. 5      | 5. 89E-25 | -0. 53527 | 0. 191 | 0. 441 | 8. 80E-21 Oligo | MTPN           |
| CKLF. 9      | 5. 93E-25 | -0. 39767 | 0. 245 | 0. 53  | 8. 86E-21 Oligo | CKLF           |
| NAP1L1. 4    | 6. 28E-25 | -0. 39218 | 0. 44  | 0. 683 | 9. 38E-21 Oligo | NAP1L1         |
| PPM1G. 8     | 6. 28E-25 | -0. 47126 | 0. 165 | 0. 428 | 9. 39E-21 Oligo | PPM1G          |
| CD320. 7     | 7. 88E-25 | -0. 55628 | 0. 08  | 0. 327 | 1. 18E-20 Oligo | CD320          |
| PRR13. 7     | 8. 24E-25 | -0. 469   | 0. 282 | 0. 553 | 1. 23E-20 Oligo | PRR13          |
| RP11-557H    | 8. 33E-25 | 0. 382841 | 0. 106 | 0. 024 | 1. 25E-20 Oligo | RP11-557H15. 4 |

|             |           |           |        |        |           |       |          |
|-------------|-----------|-----------|--------|--------|-----------|-------|----------|
| TULP4. 8    | 8. 38E-25 | 0. 643316 | 0. 292 | 0. 137 | 1. 25E-20 | Oligo | TULP4    |
| AP2M1. 2    | 8. 67E-25 | -0. 31009 | 0. 468 | 0. 721 | 1. 30E-20 | Oligo | AP2M1    |
| GDE1. 5     | 8. 98E-25 | 0. 544328 | 0. 468 | 0. 293 | 1. 34E-20 | Oligo | GDE1     |
| CNPY3. 9    | 9. 19E-25 | -0. 61482 | 0. 165 | 0. 422 | 1. 37E-20 | Oligo | CNPY3    |
| APOE. 7     | 9. 85E-25 | -0. 50315 | 0. 513 | 0. 692 | 1. 47E-20 | Oligo | APOE     |
| TMEM261. 3  | 1. 02E-24 | 0. 633232 | 0. 532 | 0. 354 | 1. 52E-20 | Oligo | TMEM261  |
| CD276. 3    | 1. 02E-24 | -0. 52162 | 0. 016 | 0. 23  | 1. 53E-20 | Oligo | CD276    |
| NUCKS1. 6   | 1. 15E-24 | 0. 447069 | 0. 713 | 0. 633 | 1. 72E-20 | Oligo | NUCKS1   |
| ANXA11. 9   | 1. 18E-24 | -0. 66301 | 0. 014 | 0. 223 | 1. 76E-20 | Oligo | ANXA11   |
| SLC11A1. 9  | 1. 23E-24 | -0. 73927 | 0. 078 | 0. 314 | 1. 84E-20 | Oligo | SLC11A1  |
| FBL. 6      | 1. 27E-24 | -0. 46815 | 0. 127 | 0. 387 | 1. 90E-20 | Oligo | FBL      |
| ERGIC3. 6   | 1. 35E-24 | -0. 41362 | 0. 334 | 0. 585 | 2. 01E-20 | Oligo | ERGIC3   |
| TMEM206. 7  | 1. 39E-24 | 0. 670077 | 0. 391 | 0. 225 | 2. 07E-20 | Oligo | TMEM206  |
| IL13RA1. 9  | 1. 51E-24 | -0. 65888 | 0. 038 | 0. 257 | 2. 26E-20 | Oligo | IL13RA1  |
| LGALS3BP. 1 | 1. 52E-24 | 0. 47195  | 0. 602 | 0. 443 | 2. 27E-20 | Oligo | LGALS3BP |
| PTPRZ1. 9   | 1. 64E-24 | -0. 72334 | 0. 165 | 0. 392 | 2. 44E-20 | Oligo | PTPRZ1   |
| EIF4A3. 6   | 1. 90E-24 | -0. 52582 | 0. 193 | 0. 459 | 2. 85E-20 | Oligo | EIF4A3   |
| TNC. 8      | 2. 27E-24 | -0. 67738 | 0. 005 | 0. 208 | 3. 39E-20 | Oligo | TNC      |
| LDOC1. 8    | 2. 30E-24 | 0. 559761 | 0. 221 | 0. 083 | 3. 43E-20 | Oligo | LDOC1    |
| S100A16. 8  | 2. 32E-24 | -0. 79936 | 0. 082 | 0. 315 | 3. 47E-20 | Oligo | S100A16  |
| SEMA6A. 7   | 2. 34E-24 | 0. 581578 | 0. 358 | 0. 194 | 3. 49E-20 | Oligo | SEMA6A   |
| NUCB1. 8    | 2. 51E-24 | -0. 52916 | 0. 193 | 0. 454 | 3. 75E-20 | Oligo | NUCB1    |
| BAMBI. 6    | 2. 65E-24 | 0. 494725 | 0. 186 | 0. 065 | 3. 96E-20 | Oligo | BAMBI    |
| SLA. 9      | 2. 76E-24 | -0. 83236 | 0. 007 | 0. 209 | 4. 13E-20 | Oligo | SLA      |
| VEGFA. 6    | 2. 88E-24 | -0. 63184 | 0. 014 | 0. 223 | 4. 30E-20 | Oligo | VEGFA    |
| C8orf4. 8   | 3. 12E-24 | -1. 00537 | 0. 024 | 0. 235 | 4. 66E-20 | Oligo | C8orf4   |
| ID4. 8      | 3. 23E-24 | -0. 6453  | 0. 014 | 0. 223 | 4. 82E-20 | Oligo | ID4      |
| H3F3A. 3    | 3. 31E-24 | 0. 410611 | 0. 88  | 0. 742 | 4. 95E-20 | Oligo | H3F3A    |
| SGPP1. 6    | 3. 45E-24 | 0. 419496 | 0. 205 | 0. 074 | 5. 15E-20 | Oligo | SGPP1    |
| KPNA2. 6    | 3. 48E-24 | -0. 59082 | 0. 122 | 0. 364 | 5. 21E-20 | Oligo | KPNA2    |
| ACTR3. 5    | 3. 52E-24 | -0. 40397 | 0. 289 | 0. 57  | 5. 25E-20 | Oligo | ACTR3    |
| GNL3. 5     | 3. 71E-24 | -0. 48951 | 0. 104 | 0. 355 | 5. 54E-20 | Oligo | GNL3     |
| COPS4. 3    | 3. 96E-24 | -0. 52346 | 0. 089 | 0. 333 | 5. 92E-20 | Oligo | COPS4    |
| ZFAS1. 5    | 4. 11E-24 | -0. 41102 | 0. 487 | 0. 705 | 6. 14E-20 | Oligo | ZFAS1    |
| GCLC. 6     | 4. 20E-24 | 0. 417056 | 0. 233 | 0. 092 | 6. 27E-20 | Oligo | GCLC     |
| RAB8A. 5    | 4. 25E-24 | -0. 55544 | 0. 115 | 0. 365 | 6. 35E-20 | Oligo | RAB8A    |
| ENC1. 9     | 4. 59E-24 | -0. 6037  | 0. 021 | 0. 232 | 6. 86E-20 | Oligo | ENC1     |
| ETS2. 9     | 4. 79E-24 | -0. 7324  | 0. 012 | 0. 214 | 7. 16E-20 | Oligo | ETS2     |
| PRPF40A. 5  | 4. 85E-24 | -0. 49223 | 0. 193 | 0. 46  | 7. 26E-20 | Oligo | PRPF40A  |
| CCND1. 5    | 4. 87E-24 | -0. 63897 | 0. 019 | 0. 226 | 7. 28E-20 | Oligo | CCND1    |
| APH1A. 5    | 4. 94E-24 | -0. 47106 | 0. 221 | 0. 494 | 7. 38E-20 | Oligo | APH1A    |
| ATG4C. 4    | 5. 24E-24 | 0. 636106 | 0. 289 | 0. 133 | 7. 83E-20 | Oligo | ATG4C    |
| SH3BGRL. 6  | 5. 73E-24 | -0. 38769 | 0. 381 | 0. 658 | 8. 56E-20 | Oligo | SH3BGRL  |
| TMEM87A. 3  | 6. 05E-24 | 0. 614517 | 0. 438 | 0. 267 | 9. 04E-20 | Oligo | TMEM87A  |
| MAGED2. 9   | 6. 07E-24 | -0. 36592 | 0. 238 | 0. 519 | 9. 07E-20 | Oligo | MAGED2   |
| TXNDC17. 7  | 6. 13E-24 | -0. 42442 | 0. 285 | 0. 534 | 9. 16E-20 | Oligo | TXNDC17  |
| DCTPP1. 5   | 6. 15E-24 | -0. 47672 | 0. 094 | 0. 339 | 9. 18E-20 | Oligo | DCTPP1   |
| STAT2. 2    | 6. 16E-24 | 0. 499563 | 0. 292 | 0. 133 | 9. 20E-20 | Oligo | STAT2    |
| CAPN1. 5    | 6. 19E-24 | -0. 52223 | 0. 042 | 0. 267 | 9. 25E-20 | Oligo | CAPN1    |
| LAP3. 7     | 6. 61E-24 | -0. 51847 | 0. 242 | 0. 501 | 9. 88E-20 | Oligo | LAP3     |
| C1R. 9      | 6. 99E-24 | -0. 93252 | 0. 016 | 0. 223 | 1. 04E-19 | Oligo | C1R      |

|            |          |          |       |       |          |       |          |
|------------|----------|----------|-------|-------|----------|-------|----------|
| SLC25A6.4  | 7.35E-24 | -0.24362 | 0.656 | 0.865 | 1.10E-19 | Oligo | SLC25A6  |
| CRMP1.8    | 7.84E-24 | -0.62902 | 0.052 | 0.273 | 1.17E-19 | Oligo | CRMP1    |
| LGALS9.9   | 8.13E-24 | -0.76682 | 0.035 | 0.248 | 1.21E-19 | Oligo | LGALS9   |
| VCAN.6     | 8.25E-24 | -0.58166 | 0.035 | 0.254 | 1.23E-19 | Oligo | VCAN     |
| PPP2R2B.7  | 9.16E-24 | 0.594207 | 0.386 | 0.213 | 1.37E-19 | Oligo | PPP2R2B  |
| MSN.9      | 9.48E-24 | -0.51604 | 0.134 | 0.384 | 1.42E-19 | Oligo | MSN      |
| EFEMP2.6   | 9.97E-24 | -0.51879 | 0.016 | 0.222 | 1.49E-19 | Oligo | EFEMP2   |
| IL1B.8     | 1.18E-23 | -0.86679 | 0.024 | 0.229 | 1.76E-19 | Oligo | IL1B     |
| GAA.8      | 1.24E-23 | -0.52188 | 0.092 | 0.328 | 1.85E-19 | Oligo | GAA      |
| CHST11.8   | 1.46E-23 | -0.57831 | 0.016 | 0.22  | 2.18E-19 | Oligo | CHST11   |
| TNFSF13B.1 | 1.60E-23 | -0.79434 | 0.012 | 0.211 | 2.40E-19 | Oligo | TNFSF13B |
| MMP2.5     | 1.65E-23 | -0.57752 | 0.026 | 0.234 | 2.46E-19 | Oligo | MMP2     |
| SSNA1.5    | 1.74E-23 | 0.557853 | 0.579 | 0.441 | 2.60E-19 | Oligo | SSNA1    |
| SMARCB1.7  | 1.80E-23 | -0.49721 | 0.172 | 0.423 | 2.69E-19 | Oligo | SMARCB1  |
| SERPINF1.1 | 1.94E-23 | -0.79529 | 0.026 | 0.232 | 2.90E-19 | Oligo | SERPINF1 |
| STMN3.7    | 1.96E-23 | -0.54937 | 0.087 | 0.315 | 2.93E-19 | Oligo | STMN3    |
| PTPRF.8    | 2.00E-23 | 0.533667 | 0.254 | 0.11  | 2.99E-19 | Oligo | PTPRF    |
| SLC2A3.8   | 2.04E-23 | -0.70352 | 0.045 | 0.262 | 3.05E-19 | Oligo | SLC2A3   |
| LY96.9     | 2.06E-23 | -0.59916 | 0.024 | 0.23  | 3.08E-19 | Oligo | LY96     |
| EIF3E.6    | 2.19E-23 | -0.37531 | 0.391 | 0.656 | 3.28E-19 | Oligo | EIF3E    |
| HDAC3.4    | 2.26E-23 | -0.44023 | 0.047 | 0.271 | 3.38E-19 | Oligo | HDAC3    |
| CCL2.3     | 2.60E-23 | -1.00046 | 0.028 | 0.233 | 3.89E-19 | Oligo | CCL2     |
| CD300A.9   | 2.77E-23 | -0.80576 | 0.005 | 0.199 | 4.14E-19 | Oligo | CD300A   |
| YTHDF2.7   | 2.86E-23 | -0.5184  | 0.186 | 0.44  | 4.27E-19 | Oligo | YTHDF2   |
| IKBIP.7    | 2.92E-23 | -0.59372 | 0.026 | 0.234 | 4.36E-19 | Oligo | IKBIP    |
| GLB1.6     | 3.53E-23 | -0.55723 | 0.038 | 0.252 | 5.27E-19 | Oligo | GLB1     |
| CLEC2B.9   | 3.63E-23 | -0.79564 | 0.014 | 0.212 | 5.43E-19 | Oligo | CLEC2B   |
| MYL6B.8    | 3.67E-23 | -0.5132  | 0.2   | 0.451 | 5.49E-19 | Oligo | MYL6B    |
| GSTM3.6    | 3.78E-23 | -0.5865  | 0.054 | 0.276 | 5.65E-19 | Oligo | GSTM3    |
| OLFML3.8   | 4.37E-23 | -0.78769 | 0.028 | 0.234 | 6.53E-19 | Oligo | OLFML3   |
| NPL.8      | 4.50E-23 | -0.76835 | 0.012 | 0.208 | 6.72E-19 | Oligo | NPL      |
| NDUFA3.3   | 4.95E-23 | 0.36468  | 0.725 | 0.646 | 7.40E-19 | Oligo | NDUFA3   |
| DLD.6      | 5.01E-23 | -0.53849 | 0.113 | 0.353 | 7.48E-19 | Oligo | DLD      |
| LURAP1     | 5.43E-23 | 0.33072  | 0.104 | 0.025 | 8.12E-19 | Oligo | LURAP1   |
| HM13.3     | 5.52E-23 | -0.46588 | 0.228 | 0.484 | 8.24E-19 | Oligo | HM13     |
| FDX1.4     | 5.98E-23 | -0.48817 | 0.08  | 0.314 | 8.93E-19 | Oligo | FDX1     |
| APOC1.8    | 6.07E-23 | -0.82519 | 0.348 | 0.522 | 9.07E-19 | Oligo | APOC1    |
| SLCO2B1.8  | 6.12E-23 | -0.81884 | 0.026 | 0.228 | 9.15E-19 | Oligo | SLCO2B1  |
| DDIT4.8    | 6.28E-23 | -0.60525 | 0.174 | 0.417 | 9.38E-19 | Oligo | DDIT4    |
| APOC2.8    | 6.36E-23 | -1.00726 | 0.005 | 0.196 | 9.51E-19 | Oligo | APOC2    |
| ADORA1.7   | 6.38E-23 | 0.587737 | 0.259 | 0.117 | 9.53E-19 | Oligo | ADORA1   |
| PTPRC.9    | 6.60E-23 | -0.79119 | 0.014 | 0.21  | 9.87E-19 | Oligo | PTPRC    |
| IER3.9     | 6.67E-23 | -0.84948 | 0.045 | 0.249 | 9.97E-19 | Oligo | IER3     |
| RAB32.9    | 6.89E-23 | -0.52646 | 0.035 | 0.246 | 1.03E-18 | Oligo | RAB32    |
| MT1E.8     | 7.00E-23 | -0.67581 | 0.148 | 0.389 | 1.05E-18 | Oligo | MT1E     |
| C1orf21.8  | 7.20E-23 | -0.53328 | 0.012 | 0.207 | 1.08E-18 | Oligo | C1orf21  |
| NMB.8      | 7.39E-23 | -0.59507 | 0.012 | 0.209 | 1.10E-18 | Oligo | NMB      |
| PRDM8.4    | 7.66E-23 | 0.270501 | 0.108 | 0.026 | 1.14E-18 | Oligo | PRDM8    |
| LAT2.9     | 7.83E-23 | -0.79388 | 0.014 | 0.21  | 1.17E-18 | Oligo | LAT2     |
| TRPV3      | 7.95E-23 | 0.303408 | 0.054 | 0.008 | 1.19E-18 | Oligo | TRPV3    |
| TAF9.5     | 8.09E-23 | -0.47435 | 0.252 | 0.509 | 1.21E-18 | Oligo | TAF9     |

|             |           |           |        |        |                 |             |
|-------------|-----------|-----------|--------|--------|-----------------|-------------|
| KIF1B. 8    | 8. 11E-23 | 0. 595009 | 0. 445 | 0. 288 | 1. 21E-18 Oligo | KIF1B       |
| SLC27A4. 2  | 8. 39E-23 | 0. 45507  | 0. 165 | 0. 055 | 1. 25E-18 Oligo | SLC27A4     |
| MAP4K5. 7   | 8. 40E-23 | 0. 503826 | 0. 304 | 0. 149 | 1. 25E-18 Oligo | MAP4K5      |
| ZC3H15. 4   | 8. 53E-23 | -0. 38839 | 0. 247 | 0. 513 | 1. 27E-18 Oligo | ZC3H15      |
| ETHE1. 4    | 8. 62E-23 | -0. 55281 | 0. 071 | 0. 297 | 1. 29E-18 Oligo | ETHE1       |
| MT1M. 7     | 9. 12E-23 | -0. 70031 | 0. 04  | 0. 251 | 1. 36E-18 Oligo | MT1M        |
| BTBD3. 8    | 9. 25E-23 | 0. 6      | 0. 275 | 0. 132 | 1. 38E-18 Oligo | BTBD3       |
| ATP50. 1    | 9. 65E-23 | -0. 26982 | 0. 515 | 0. 758 | 1. 44E-18 Oligo | ATP50       |
| PDZD11. 5   | 9. 69E-23 | -0. 53574 | 0. 127 | 0. 367 | 1. 45E-18 Oligo | PDZD11      |
| SLITRK2. 4  | 9. 80E-23 | 0. 346001 | 0. 118 | 0. 031 | 1. 46E-18 Oligo | SLITRK2     |
| SEPT9. 5    | 9. 96E-23 | -0. 54091 | 0. 118 | 0. 349 | 1. 49E-18 Oligo | 9-Sep       |
| LSM4. 5     | 1. 17E-22 | -0. 43946 | 0. 325 | 0. 569 | 1. 75E-18 Oligo | LSM4        |
| SERTAD1. 5  | 1. 18E-22 | -0. 5769  | 0. 092 | 0. 324 | 1. 76E-18 Oligo | SERTAD1     |
| PRELID1. 4  | 1. 22E-22 | -0. 45877 | 0. 327 | 0. 568 | 1. 83E-18 Oligo | PRELID1     |
| VASP. 9     | 1. 24E-22 | -0. 54175 | 0. 038 | 0. 247 | 1. 85E-18 Oligo | VASP        |
| FJX1. 8     | 1. 27E-22 | -0. 54316 | 0. 014 | 0. 208 | 1. 90E-18 Oligo | FJX1        |
| EFS. 7      | 1. 30E-22 | 0. 601831 | 0. 238 | 0. 101 | 1. 94E-18 Oligo | EFS         |
| IKZF5       | 1. 34E-22 | 0. 296857 | 0. 127 | 0. 035 | 2. 00E-18 Oligo | IKZF5       |
| APBA2. 9    | 1. 42E-22 | 0. 608863 | 0. 36  | 0. 201 | 2. 12E-18 Oligo | APBA2       |
| LAIR1. 9    | 1. 42E-22 | -0. 81241 | 0. 035 | 0. 238 | 2. 13E-18 Oligo | LAIR1       |
| CLCN3. 7    | 1. 53E-22 | 0. 610863 | 0. 4   | 0. 243 | 2. 28E-18 Oligo | CLCN3       |
| KIDINS22C   | 1. 63E-22 | 0. 536127 | 0. 426 | 0. 263 | 2. 43E-18 Oligo | KIDINS220   |
| FAM46A. 5   | 1. 67E-22 | -0. 53464 | 0. 009 | 0. 203 | 2. 50E-18 Oligo | FAM46A      |
| CD302. 9    | 1. 69E-22 | -0. 69614 | 0. 016 | 0. 212 | 2. 52E-18 Oligo | CD302       |
| NPM3. 5     | 1. 71E-22 | -0. 58137 | 0. 024 | 0. 224 | 2. 56E-18 Oligo | NPM3        |
| PKIG. 8     | 1. 75E-22 | -0. 58373 | 0. 089 | 0. 319 | 2. 61E-18 Oligo | PKIG        |
| EFHD2. 9    | 1. 87E-22 | -0. 60527 | 0. 021 | 0. 217 | 2. 79E-18 Oligo | EFHD2       |
| CNN3. 8     | 1. 97E-22 | -0. 60156 | 0. 282 | 0. 475 | 2. 95E-18 Oligo | CNN3        |
| IQCJ-SCHI   | 1. 99E-22 | 0. 343696 | 0. 08  | 0. 016 | 2. 97E-18 Oligo | IQCJ-SCHIP1 |
| GLOD4. 4    | 1. 99E-22 | -0. 34686 | 0. 144 | 0. 398 | 2. 98E-18 Oligo | GLOD4       |
| UNC93B1. 9  | 2. 01E-22 | -0. 5973  | 0. 014 | 0. 208 | 3. 00E-18 Oligo | UNC93B1     |
| SLC4A7. 4   | 2. 17E-22 | -0. 50846 | 0. 021 | 0. 221 | 3. 24E-18 Oligo | SLC4A7      |
| JUN. 6      | 2. 30E-22 | -0. 43937 | 0. 456 | 0. 68  | 3. 43E-18 Oligo | JUN         |
| IGFBP3. 7   | 2. 42E-22 | -0. 72045 | 0. 009 | 0. 201 | 3. 62E-18 Oligo | IGFBP3      |
| LSM1. 4     | 2. 55E-22 | -0. 38783 | 0. 207 | 0. 465 | 3. 82E-18 Oligo | LSM1        |
| DNTTIP1. 3  | 2. 60E-22 | -0. 54362 | 0. 108 | 0. 338 | 3. 88E-18 Oligo | DNTTIP1     |
| EIF3F. 5    | 2. 88E-22 | -0. 44677 | 0. 358 | 0. 615 | 4. 31E-18 Oligo | EIF3F       |
| GCSH. 8     | 2. 90E-22 | 0. 468929 | 0. 492 | 0. 341 | 4. 33E-18 Oligo | GCSH        |
| LGMN. 8     | 3. 14E-22 | -0. 60748 | 0. 129 | 0. 359 | 4. 69E-18 Oligo | LGMN        |
| FAM92A1. 7  | 3. 24E-22 | -0. 47463 | 0. 014 | 0. 208 | 4. 84E-18 Oligo | FAM92A1     |
| ADAM9. 6    | 3. 39E-22 | -0. 52044 | 0. 108 | 0. 338 | 5. 06E-18 Oligo | ADAM9       |
| LSM5. 6     | 3. 40E-22 | -0. 36036 | 0. 256 | 0. 516 | 5. 08E-18 Oligo | LSM5        |
| FKBP10. 9   | 3. 52E-22 | -0. 4568  | 0. 021 | 0. 219 | 5. 27E-18 Oligo | FKBP10      |
| NACA. 4     | 3. 62E-22 | -0. 24599 | 0. 755 | 0. 931 | 5. 41E-18 Oligo | NACA        |
| PYGL. 8     | 3. 70E-22 | -0. 62705 | 0. 009 | 0. 199 | 5. 53E-18 Oligo | PYGL        |
| GPAT2. 1    | 3. 85E-22 | 0. 21755  | 0. 061 | 0. 01  | 5. 75E-18 Oligo | GPAT2       |
| RUNX1. 8    | 3. 87E-22 | -0. 4913  | 0. 007 | 0. 197 | 5. 79E-18 Oligo | RUNX1       |
| C18orf32. 3 | 3. 97E-22 | 0. 486309 | 0. 398 | 0. 23  | 5. 93E-18 Oligo | C18orf32    |
| ZEB1. 8     | 4. 08E-22 | -0. 46911 | 0. 009 | 0. 199 | 6. 10E-18 Oligo | ZEB1        |
| GSDMD. 8    | 4. 20E-22 | -0. 59033 | 0. 005 | 0. 192 | 6. 27E-18 Oligo | GSDMD       |
| SEC61B. 3   | 4. 56E-22 | -0. 34411 | 0. 508 | 0. 745 | 6. 81E-18 Oligo | SEC61B      |

|             |          |          |       |       |          |       |           |
|-------------|----------|----------|-------|-------|----------|-------|-----------|
| KLHL2.3     | 4.58E-22 | 0.383457 | 0.207 | 0.081 | 6.84E-18 | Oligo | KLHL2     |
| EIF3I.4     | 4.66E-22 | -0.39849 | 0.346 | 0.611 | 6.97E-18 | Oligo | EIF3I     |
| TUBB6.7     | 4.83E-22 | -0.58266 | 0.005 | 0.191 | 7.22E-18 | Oligo | TUBB6     |
| MAP3K11.5   | 4.94E-22 | 0.514291 | 0.336 | 0.176 | 7.39E-18 | Oligo | MAP3K11   |
| RAMP1.8     | 4.97E-22 | -0.84694 | 0.202 | 0.42  | 7.43E-18 | Oligo | RAMP1     |
| CHD1.6      | 5.00E-22 | -0.48639 | 0.075 | 0.301 | 7.47E-18 | Oligo | CHD1      |
| SPOCD1.7    | 5.18E-22 | -0.81905 | 0.026 | 0.225 | 7.74E-18 | Oligo | SPOCD1    |
| SERINC1.2   | 5.19E-22 | 0.524907 | 0.553 | 0.413 | 7.76E-18 | Oligo | SERINC1   |
| RBX1.7      | 5.24E-22 | 0.42555  | 0.744 | 0.662 | 7.83E-18 | Oligo | RBX1      |
| FZD3.6      | 5.37E-22 | -0.46605 | 0.064 | 0.284 | 8.03E-18 | Oligo | FZD3      |
| SLC25A5.5   | 5.43E-22 | -0.27917 | 0.471 | 0.731 | 8.11E-18 | Oligo | SLC25A5   |
| HES1.6      | 5.51E-22 | -0.66406 | 0.014 | 0.204 | 8.23E-18 | Oligo | HES1      |
| PPA2.4      | 5.56E-22 | -0.51464 | 0.096 | 0.324 | 8.31E-18 | Oligo | PPA2      |
| ATL1.6      | 5.64E-22 | 0.596384 | 0.252 | 0.111 | 8.43E-18 | Oligo | ATL1      |
| SERPINH1.5  | 5.78E-22 | -0.48278 | 0.019 | 0.216 | 8.63E-18 | Oligo | SERPINH1  |
| DAAM1.7     | 5.89E-22 | -0.51252 | 0.042 | 0.248 | 8.81E-18 | Oligo | DAAM1     |
| CD01.9      | 6.51E-22 | -0.54499 | 0.038 | 0.242 | 9.73E-18 | Oligo | CD01      |
| C5orf30.6   | 6.65E-22 | 0.453966 | 0.191 | 0.071 | 9.93E-18 | Oligo | C5orf30   |
| ANKIB1.8    | 6.79E-22 | 0.541618 | 0.358 | 0.203 | 1.02E-17 | Oligo | ANKIB1    |
| FKBP5.9     | 6.91E-22 | -0.48835 | 0.094 | 0.325 | 1.03E-17 | Oligo | FKBP5     |
| PSMA7.4     | 7.04E-22 | -0.29736 | 0.607 | 0.808 | 1.05E-17 | Oligo | PSMA7     |
| USP6        | 7.13E-22 | 0.201317 | 0.089 | 0.02  | 1.06E-17 | Oligo | USP6      |
| CCNY.5      | 7.25E-22 | 0.460185 | 0.24  | 0.104 | 1.08E-17 | Oligo | CCNY      |
| KDR         | 7.29E-22 | 0.164713 | 0.042 | 0.005 | 1.09E-17 | Oligo | KDR       |
| HES4.8      | 7.62E-22 | -0.47696 | 0.007 | 0.194 | 1.14E-17 | Oligo | HES4      |
| ARL6IP1.4   | 7.68E-22 | -0.32477 | 0.527 | 0.75  | 1.15E-17 | Oligo | ARL6IP1   |
| RBMS1.6     | 8.20E-22 | -0.51305 | 0.049 | 0.258 | 1.23E-17 | Oligo | RBMS1     |
| HOGA1       | 8.22E-22 | 0.199541 | 0.052 | 0.007 | 1.23E-17 | Oligo | HOGA1     |
| CRIP2.7     | 8.45E-22 | -0.54015 | 0.094 | 0.322 | 1.26E-17 | Oligo | CRIP2     |
| CYBB.9      | 8.46E-22 | -0.76296 | 0.012 | 0.199 | 1.26E-17 | Oligo | CYBB      |
| ARF4.4      | 9.45E-22 | -0.34987 | 0.367 | 0.631 | 1.41E-17 | Oligo | ARF4      |
| FYB.9       | 9.63E-22 | -0.76972 | 0.033 | 0.23  | 1.44E-17 | Oligo | FYB       |
| FARP1.3     | 1.08E-21 | -0.44481 | 0.007 | 0.192 | 1.61E-17 | Oligo | FARP1     |
| ADAP2.9     | 1.13E-21 | -0.72917 | 0.007 | 0.191 | 1.68E-17 | Oligo | ADAP2     |
| RUFY2.9     | 1.17E-21 | 0.648117 | 0.287 | 0.144 | 1.75E-17 | Oligo | RUFY2     |
| CHMP1B.6    | 1.26E-21 | -0.41142 | 0.191 | 0.447 | 1.88E-17 | Oligo | CHMP1B    |
| UQCRH.4     | 1.32E-21 | -0.26996 | 0.562 | 0.789 | 1.98E-17 | Oligo | UQCRH     |
| FAM195A.5   | 1.42E-21 | -0.48946 | 0.052 | 0.262 | 2.12E-17 | Oligo | FAM195A   |
| OSBP2       | 1.44E-21 | 0.317565 | 0.118 | 0.033 | 2.15E-17 | Oligo | OSBP2     |
| POLR2H.6    | 1.44E-21 | -0.48774 | 0.104 | 0.331 | 2.16E-17 | Oligo | POLR2H    |
| GTF3A.6     | 1.47E-21 | -0.47039 | 0.273 | 0.513 | 2.19E-17 | Oligo | GTF3A     |
| ASAH1.7     | 1.47E-21 | -0.36964 | 0.402 | 0.661 | 2.20E-17 | Oligo | ASAH1     |
| GDI1.8      | 1.85E-21 | 0.480766 | 0.609 | 0.481 | 2.76E-17 | Oligo | GDI1      |
| EIF6.2      | 1.86E-21 | -0.30476 | 0.256 | 0.531 | 2.77E-17 | Oligo | EIF6      |
| BZW2.5      | 1.94E-21 | -0.52283 | 0.066 | 0.278 | 2.90E-17 | Oligo | BZW2      |
| TP53I13.6   | 1.97E-21 | -0.45543 | 0.045 | 0.252 | 2.95E-17 | Oligo | TP53I13   |
| ELAVL4.8    | 2.10E-21 | -0.7283  | 0.005 | 0.185 | 3.14E-17 | Oligo | ELAVL4    |
| SLC25A13.2  | 2.14E-21 | 0.473254 | 0.266 | 0.122 | 3.20E-17 | Oligo | SLC25A13  |
| PTPRN2.4    | 2.24E-21 | -0.6427  | 0.028 | 0.219 | 3.35E-17 | Oligo | PTPRN2    |
| MAPK1IP1L.2 | 2.25E-21 | -0.40496 | 0.144 | 0.384 | 3.36E-17 | Oligo | MAPK1IP1L |
| CCNH.5      | 2.33E-21 | -0.433   | 0.176 | 0.42  | 3.48E-17 | Oligo | CCNH      |



|           |          |          |       |       |          |       |           |
|-----------|----------|----------|-------|-------|----------|-------|-----------|
| CD99L2.4  | 2.38E-21 | 0.601039 | 0.266 | 0.125 | 3.56E-17 | Oligo | CD99L2    |
| GADD45B.5 | 2.43E-21 | -0.52975 | 0.256 | 0.499 | 3.63E-17 | Oligo | GADD45B   |
| PGBD5.1   | 2.44E-21 | 0.366113 | 0.108 | 0.028 | 3.65E-17 | Oligo | PGBD5     |
| ORMDL1.1  | 2.46E-21 | -0.33787 | 0.235 | 0.492 | 3.68E-17 | Oligo | ORMDL1    |
| TAPT1     | 2.53E-21 | 0.359383 | 0.162 | 0.055 | 3.79E-17 | Oligo | TAPT1     |
| EIF4E2.5  | 2.61E-21 | -0.45933 | 0.111 | 0.341 | 3.90E-17 | Oligo | EIF4E2    |
| DEPTOR.5  | 2.64E-21 | 0.413134 | 0.136 | 0.041 | 3.94E-17 | Oligo | DEPTOR    |
| TRIM8.4   | 2.72E-21 | 0.426438 | 0.226 | 0.094 | 4.06E-17 | Oligo | TRIM8     |
| BCAS2.4   | 2.93E-21 | -0.42425 | 0.231 | 0.471 | 4.38E-17 | Oligo | BCAS2     |
| ZBTB44.3  | 2.96E-21 | 0.439835 | 0.254 | 0.115 | 4.42E-17 | Oligo | ZBTB44    |
| IFNGR1.9  | 3.07E-21 | -0.51934 | 0.207 | 0.446 | 4.59E-17 | Oligo | IFNGR1    |
| SLIRP.3   | 3.10E-21 | 0.418637 | 0.699 | 0.618 | 4.63E-17 | Oligo | SLIRP     |
| ATP6AP2.5 | 3.18E-21 | -0.35355 | 0.412 | 0.665 | 4.75E-17 | Oligo | ATP6AP2   |
| BHLHE40.7 | 3.20E-21 | -0.56947 | 0.014 | 0.2   | 4.79E-17 | Oligo | BHLHE40   |
| CUEDC1.6  | 3.33E-21 | 0.491285 | 0.242 | 0.11  | 4.98E-17 | Oligo | CUEDC1    |
| COMMD10.4 | 3.46E-21 | -0.506   | 0.033 | 0.232 | 5.17E-17 | Oligo | COMMD10   |
| ITM2C.9   | 3.70E-21 | -0.4955  | 0.184 | 0.426 | 5.52E-17 | Oligo | ITM2C     |
| YPEL5.4   | 3.87E-21 | -0.40125 | 0.207 | 0.461 | 5.79E-17 | Oligo | YPEL5     |
| CEBPG.2   | 3.90E-21 | -0.50563 | 0.049 | 0.256 | 5.84E-17 | Oligo | CEBPG     |
| CTTN.8    | 3.95E-21 | 0.555428 | 0.379 | 0.224 | 5.91E-17 | Oligo | CTTN      |
| OS9.2     | 4.08E-21 | -0.51048 | 0.315 | 0.544 | 6.09E-17 | Oligo | OS9       |
| MRC2.4    | 4.11E-21 | -0.45384 | 0.002 | 0.18  | 6.14E-17 | Oligo | MRC2      |
| FSCN1.8   | 4.42E-21 | 0.414547 | 0.614 | 0.5   | 6.61E-17 | Oligo | FSCN1     |
| TMEM147.1 | 4.46E-21 | -0.44917 | 0.362 | 0.604 | 6.66E-17 | Oligo | TMEM147   |
| TNS1.4    | 4.59E-21 | 0.310739 | 0.146 | 0.046 | 6.86E-17 | Oligo | TNS1      |
| SLBP.7    | 4.83E-21 | -0.43641 | 0.094 | 0.319 | 7.22E-17 | Oligo | SLBP      |
| LYPD1.7   | 5.04E-21 | -0.53968 | 0.016 | 0.202 | 7.54E-17 | Oligo | LYPD1     |
| EPN2.8    | 5.23E-21 | 0.490942 | 0.388 | 0.231 | 7.82E-17 | Oligo | EPN2      |
| DPM1.6    | 5.39E-21 | -0.47477 | 0.151 | 0.387 | 8.05E-17 | Oligo | DPM1      |
| DNP1.5    | 5.45E-21 | -0.47714 | 0.144 | 0.386 | 8.15E-17 | Oligo | DNP1      |
| ZKSCAN1.8 | 6.33E-21 | 0.564929 | 0.466 | 0.311 | 9.46E-17 | Oligo | ZKSCAN1   |
| ETV5.6    | 6.36E-21 | -0.47502 | 0.056 | 0.266 | 9.51E-17 | Oligo | ETV5      |
| WBP2.3    | 6.59E-21 | 0.510387 | 0.586 | 0.447 | 9.84E-17 | Oligo | WBP2      |
| NBL1.7    | 6.83E-21 | -0.49532 | 0.007 | 0.185 | 1.02E-16 | Oligo | NBL1      |
| SFT2D1.9  | 6.88E-21 | 0.563195 | 0.624 | 0.497 | 1.03E-16 | Oligo | SFT2D1    |
| APLN.5    | 7.00E-21 | 0.299027 | 0.111 | 0.029 | 1.05E-16 | Oligo | APLN      |
| BEX4.7    | 7.21E-21 | 0.61906  | 0.638 | 0.47  | 1.08E-16 | Oligo | BEX4      |
| CBX3.7    | 7.24E-21 | -0.45396 | 0.32  | 0.562 | 1.08E-16 | Oligo | CBX3      |
| HK1.6     | 7.52E-21 | -0.46346 | 0.016 | 0.202 | 1.12E-16 | Oligo | HK1       |
| AGAP3.5   | 7.60E-21 | 0.414882 | 0.226 | 0.095 | 1.14E-16 | Oligo | AGAP3     |
| AGPAT2.9  | 7.71E-21 | -0.48015 | 0.007 | 0.186 | 1.15E-16 | Oligo | AGPAT2    |
| LINC00632 | 7.97E-21 | 0.425233 | 0.219 | 0.087 | 1.19E-16 | Oligo | LINC00632 |
| LYZ.9     | 7.98E-21 | -0.8067  | 0.028 | 0.213 | 1.19E-16 | Oligo | LYZ       |
| PLAC8L1   | 8.06E-21 | 0.128532 | 0.031 | 0.003 | 1.21E-16 | Oligo | PLAC8L1   |
| EGLN3.5   | 8.46E-21 | 0.336876 | 0.169 | 0.059 | 1.26E-16 | Oligo | EGLN3     |
| ETFA.6    | 8.47E-21 | -0.47504 | 0.146 | 0.381 | 1.27E-16 | Oligo | ETFA      |
| DUSP4.7   | 8.53E-21 | -0.51961 | 0.007 | 0.186 | 1.27E-16 | Oligo | DUSP4     |
| UBE2D3.6  | 8.68E-21 | -0.33026 | 0.499 | 0.736 | 1.30E-16 | Oligo | UBE2D3    |
| PALLD.6   | 8.81E-21 | -0.43395 | 0.019 | 0.205 | 1.32E-16 | Oligo | PALLD     |
| SERBP1.1  | 8.89E-21 | -0.35195 | 0.419 | 0.634 | 1.33E-16 | Oligo | SERBP1    |
| P4HA1.4   | 9.28E-21 | -0.52809 | 0.035 | 0.231 | 1.39E-16 | Oligo | P4HA1     |

|             |           |           |        |        |                 |                |
|-------------|-----------|-----------|--------|--------|-----------------|----------------|
| NEDD9. 6    | 9. 65E-21 | -0. 53426 | 0. 033 | 0. 228 | 1. 44E-16 Oligo | NEDD9          |
| HPRT1. 7    | 9. 87E-21 | -0. 56181 | 0. 042 | 0. 237 | 1. 47E-16 Oligo | HPRT1          |
| CHPT1. 7    | 1. 05E-20 | -0. 49669 | 0. 094 | 0. 311 | 1. 57E-16 Oligo | CHPT1          |
| NMI. 8      | 1. 06E-20 | -0. 57235 | 0. 009 | 0. 189 | 1. 58E-16 Oligo | NMI            |
| DCTD. 2     | 1. 06E-20 | -0. 4934  | 0. 059 | 0. 263 | 1. 58E-16 Oligo | DCTD           |
| DHR SX. 2   | 1. 10E-20 | -0. 45907 | 0. 042 | 0. 24  | 1. 64E-16 Oligo | DHR SX         |
| PTTG1. 8    | 1. 12E-20 | -0. 63119 | 0. 042 | 0. 237 | 1. 68E-16 Oligo | PTTG1          |
| PFDN5. 7    | 1. 19E-20 | -0. 22233 | 0. 692 | 0. 891 | 1. 77E-16 Oligo | PFDN5          |
| RGMA. 8     | 1. 19E-20 | -0. 43737 | 0. 021 | 0. 207 | 1. 78E-16 Oligo | RGMA           |
| UNC119. 4   | 1. 20E-20 | -0. 44103 | 0. 031 | 0. 224 | 1. 80E-16 Oligo | UNC119         |
| ERV3-1. 8   | 1. 21E-20 | -0. 46303 | 0. 061 | 0. 268 | 1. 81E-16 Oligo | ERV3-1         |
| RP11-395G   | 1. 22E-20 | -0. 48095 | 0. 007 | 0. 184 | 1. 83E-16 Oligo | RP11-395G23. 3 |
| ABI3. 9     | 1. 23E-20 | -0. 74672 | 0. 016 | 0. 196 | 1. 83E-16 Oligo | ABI3           |
| SH3BP5. 7   | 1. 39E-20 | 0. 507861 | 0. 348 | 0. 195 | 2. 08E-16 Oligo | SH3BP5         |
| CLIP4. 1    | 1. 57E-20 | 0. 343761 | 0. 155 | 0. 053 | 2. 35E-16 Oligo | CLIP4          |
| IL18. 9     | 1. 59E-20 | -0. 77983 | 0. 019 | 0. 2   | 2. 38E-16 Oligo | IL18           |
| FUCA1. 7    | 1. 60E-20 | -0. 55171 | 0. 035 | 0. 227 | 2. 39E-16 Oligo | FUCA1          |
| SFR1. 5     | 1. 63E-20 | 0. 587399 | 0. 176 | 0. 064 | 2. 44E-16 Oligo | SFR1           |
| PDIA3. 9    | 1. 69E-20 | -0. 43151 | 0. 355 | 0. 591 | 2. 52E-16 Oligo | PDIA3          |
| ARF5. 2     | 1. 71E-20 | -0. 42815 | 0. 292 | 0. 538 | 2. 56E-16 Oligo | ARF5           |
| CHI3L2. 5   | 1. 82E-20 | -1. 16242 | 0. 009 | 0. 187 | 2. 72E-16 Oligo | CHI3L2         |
| LMO2. 3     | 1. 87E-20 | -0. 45401 | 0      | 0. 171 | 2. 79E-16 Oligo | LMO2           |
| SPAG7. 1    | 1. 90E-20 | -0. 36051 | 0. 233 | 0. 488 | 2. 83E-16 Oligo | SPAG7          |
| SPG20. 4    | 1. 90E-20 | 0. 585373 | 0. 384 | 0. 232 | 2. 85E-16 Oligo | SPG20          |
| CRTC3. 3    | 1. 95E-20 | 0. 506559 | 0. 245 | 0. 111 | 2. 92E-16 Oligo | CRTC3          |
| SLC25A3. 3  | 2. 00E-20 | -0. 38697 | 0. 52  | 0. 755 | 2. 99E-16 Oligo | SLC25A3        |
| HLA-DQA2. 2 | 2. 16E-20 | -0. 90656 | 0. 005 | 0. 178 | 3. 23E-16 Oligo | HLA-DQA2       |
| ISG15. 7    | 2. 26E-20 | -0. 4668  | 0. 129 | 0. 365 | 3. 37E-16 Oligo | ISG15          |
| DARS. 5     | 2. 26E-20 | -0. 38645 | 0. 174 | 0. 411 | 3. 38E-16 Oligo | DARS           |
| NUDT4. 1    | 2. 33E-20 | -0. 42953 | 0. 024 | 0. 21  | 3. 48E-16 Oligo | NUDT4          |
| WDR54. 6    | 2. 35E-20 | -0. 36266 | 0. 04  | 0. 241 | 3. 51E-16 Oligo | WDR54          |
| WAS. 9      | 2. 42E-20 | -0. 68991 | 0. 007 | 0. 181 | 3. 62E-16 Oligo | WAS            |
| DYNLT3. 3   | 2. 50E-20 | -0. 43147 | 0. 087 | 0. 302 | 3. 74E-16 Oligo | DYNLT3         |
| FNBP1L. 9   | 2. 55E-20 | -0. 44172 | 0. 012 | 0. 191 | 3. 81E-16 Oligo | FNBP1L         |
| LYRM5. 6    | 2. 60E-20 | 0. 618973 | 0. 485 | 0. 335 | 3. 88E-16 Oligo | LYRM5          |
| UQCRC2. 3   | 2. 70E-20 | -0. 40692 | 0. 273 | 0. 522 | 4. 03E-16 Oligo | UQCRC2         |
| GRHPR. 5    | 2. 80E-20 | 0. 637086 | 0. 527 | 0. 388 | 4. 19E-16 Oligo | GRHPR          |
| SNRPB2. 6   | 2. 81E-20 | -0. 35676 | 0. 334 | 0. 573 | 4. 19E-16 Oligo | SNRPB2         |
| ARC. 7      | 2. 81E-20 | -0. 62163 | 0. 028 | 0. 215 | 4. 20E-16 Oligo | ARC            |
| GRAMD3. 9   | 2. 87E-20 | 0. 535642 | 0. 278 | 0. 135 | 4. 29E-16 Oligo | GRAMD3         |
| DCX. 9      | 2. 98E-20 | -0. 62017 | 0. 028 | 0. 211 | 4. 45E-16 Oligo | DCX            |
| ERCC1. 7    | 3. 05E-20 | -0. 45959 | 0. 235 | 0. 481 | 4. 56E-16 Oligo | ERCC1          |
| TMEM258. 4  | 3. 05E-20 | 0. 430585 | 0. 786 | 0. 727 | 4. 56E-16 Oligo | TMEM258        |
| MNDA. 9     | 3. 16E-20 | -0. 75331 | 0. 009 | 0. 183 | 4. 72E-16 Oligo | MNDA           |
| MED28. 5    | 3. 18E-20 | -0. 39499 | 0. 12  | 0. 347 | 4. 75E-16 Oligo | MED28          |
| F3. 9       | 3. 18E-20 | -0. 53389 | 0. 019 | 0. 198 | 4. 75E-16 Oligo | F3             |
| SERPINE2. 3 | 3. 20E-20 | -0. 49735 | 0. 092 | 0. 301 | 4. 79E-16 Oligo | SERPINE2       |
| GNB2. 6     | 3. 33E-20 | -0. 36032 | 0. 341 | 0. 578 | 4. 98E-16 Oligo | GNB2           |
| TIMM22. 5   | 3. 33E-20 | -0. 40745 | 0. 049 | 0. 25  | 4. 98E-16 Oligo | TIMM22         |
| COL6A2. 8   | 3. 52E-20 | -0. 54576 | 0      | 0. 169 | 5. 25E-16 Oligo | COL6A2         |
| SLC18B1. 6  | 3. 68E-20 | -0. 53678 | 0. 009 | 0. 185 | 5. 50E-16 Oligo | SLC18B1        |

|            |           |           |        |        |           |       |               |
|------------|-----------|-----------|--------|--------|-----------|-------|---------------|
| C1GALT1. 2 | 3. 72E-20 | 0. 474646 | 0. 304 | 0. 157 | 5. 56E-16 | Oligo | C1GALT1       |
| ALDH2. 6   | 3. 76E-20 | -0. 48989 | 0. 151 | 0. 379 | 5. 62E-16 | Oligo | ALDH2         |
| FNDC4. 7   | 3. 95E-20 | -0. 41769 | 0. 021 | 0. 205 | 5. 90E-16 | Oligo | FNDC4         |
| FGL2. 9    | 3. 96E-20 | -0. 72416 | 0. 009 | 0. 183 | 5. 91E-16 | Oligo | FGL2          |
| MSRA. 7    | 4. 01E-20 | -0. 5038  | 0. 061 | 0. 264 | 6. 00E-16 | Oligo | MSRA          |
| XIST. 9    | 4. 11E-20 | -0. 31932 | 0. 059 | 0. 274 | 6. 14E-16 | Oligo | XIST          |
| C7orf73. 6 | 4. 21E-20 | -0. 34641 | 0. 313 | 0. 564 | 6. 29E-16 | Oligo | C7orf73       |
| STXBP2. 9  | 4. 30E-20 | -0. 67828 | 0. 007 | 0. 179 | 6. 43E-16 | Oligo | STXBP2        |
| TSPAN4. 5  | 4. 48E-20 | -0. 50476 | 0. 012 | 0. 187 | 6. 70E-16 | Oligo | TSPAN4        |
| MKRN1. 8   | 4. 50E-20 | -0. 40291 | 0. 179 | 0. 417 | 6. 73E-16 | Oligo | MKRN1         |
| SNHG8. 4   | 4. 66E-20 | -0. 49475 | 0. 235 | 0. 477 | 6. 96E-16 | Oligo | SNHG8         |
| CCNE2. 6   | 4. 68E-20 | 0. 385281 | 0. 16  | 0. 055 | 6. 99E-16 | Oligo | CCNE2         |
| EIF3M. 6   | 4. 68E-20 | -0. 33752 | 0. 282 | 0. 535 | 6. 99E-16 | Oligo | EIF3M         |
| DNAJC2. 6  | 4. 69E-20 | -0. 40448 | 0. 087 | 0. 306 | 7. 00E-16 | Oligo | DNAJC2        |
| SLN. 6     | 4. 82E-20 | -0. 98657 | 0      | 0. 168 | 7. 20E-16 | Oligo | SLN           |
| MSR1. 9    | 4. 82E-20 | -0. 72943 | 0. 012 | 0. 186 | 7. 21E-16 | Oligo | MSR1          |
| PGM1. 5    | 5. 17E-20 | -0. 39965 | 0. 054 | 0. 258 | 7. 73E-16 | Oligo | PGM1          |
| PPIC. 7    | 5. 66E-20 | -0. 49506 | 0. 014 | 0. 189 | 8. 46E-16 | Oligo | PPIC          |
| MFSD1. 9   | 5. 87E-20 | -0. 5237  | 0. 134 | 0. 352 | 8. 77E-16 | Oligo | MFSD1         |
| CASKIN2. 3 | 5. 88E-20 | 0. 399869 | 0. 132 | 0. 041 | 8. 79E-16 | Oligo | CASKIN2       |
| TGFA       | 5. 98E-20 | 0. 314686 | 0. 106 | 0. 028 | 8. 94E-16 | Oligo | TGFA          |
| RP11-21A7  | 5. 99E-20 | 0. 133544 | 0. 042 | 0. 005 | 8. 95E-16 | Oligo | RP11-21A7A. 4 |
| RAE1. 5    | 6. 32E-20 | -0. 35099 | 0. 066 | 0. 275 | 9. 45E-16 | Oligo | RAE1          |
| ADAMTS18   | 6. 37E-20 | 0. 183607 | 0. 064 | 0. 012 | 9. 53E-16 | Oligo | ADAMTS18      |
| HCK. 9     | 6. 64E-20 | -0. 68427 | 0. 005 | 0. 173 | 9. 93E-16 | Oligo | HCK           |
| PLEK. 9    | 6. 80E-20 | -0. 74814 | 0. 009 | 0. 181 | 1. 02E-15 | Oligo | PLEK          |
| KDELR1. 4  | 6. 98E-20 | -0. 3091  | 0. 252 | 0. 502 | 1. 04E-15 | Oligo | KDELR1        |
| SLC39A1. 5 | 6. 99E-20 | -0. 44269 | 0. 158 | 0. 396 | 1. 04E-15 | Oligo | SLC39A1       |
| FOSL2. 8   | 7. 42E-20 | -0. 52487 | 0. 016 | 0. 192 | 1. 11E-15 | Oligo | FOSL2         |
| CECR5. 4   | 8. 10E-20 | -0. 41034 | 0. 056 | 0. 259 | 1. 21E-15 | Oligo | CECR5         |
| DERL2. 5   | 8. 29E-20 | -0. 40971 | 0. 129 | 0. 36  | 1. 24E-15 | Oligo | DERL2         |
| TMEM107. 3 | 8. 67E-20 | -0. 47635 | 0. 035 | 0. 224 | 1. 30E-15 | Oligo | TMEM107       |
| DFNA5. 4   | 8. 83E-20 | -0. 5326  | 0. 024 | 0. 202 | 1. 32E-15 | Oligo | DFNA5         |
| SLC11A2. 3 | 9. 14E-20 | 0. 477288 | 0. 313 | 0. 163 | 1. 37E-15 | Oligo | SLC11A2       |
| WLS. 7     | 9. 28E-20 | -0. 4965  | 0. 035 | 0. 221 | 1. 39E-15 | Oligo | WLS           |
| CSF2RA. 8  | 9. 42E-20 | -0. 76908 | 0. 028 | 0. 209 | 1. 41E-15 | Oligo | CSF2RA        |
| ALDH6A1. 6 | 9. 57E-20 | 0. 54426  | 0. 351 | 0. 201 | 1. 43E-15 | Oligo | ALDH6A1       |
| COPZ1. 3   | 1. 04E-19 | -0. 33203 | 0. 247 | 0. 494 | 1. 56E-15 | Oligo | COPZ1         |
| EVI2B. 9   | 1. 17E-19 | -0. 76459 | 0. 031 | 0. 209 | 1. 75E-15 | Oligo | EVI2B         |
| NQO2. 4    | 1. 18E-19 | -0. 44142 | 0. 059 | 0. 26  | 1. 76E-15 | Oligo | NQO2          |
| BVES       | 1. 21E-19 | 0. 226219 | 0. 082 | 0. 019 | 1. 81E-15 | Oligo | BVES          |
| SLC52A2. 4 | 1. 23E-19 | -0. 40555 | 0. 078 | 0. 288 | 1. 83E-15 | Oligo | SLC52A2       |
| NR4A2. 9   | 1. 23E-19 | -0. 70257 | 0. 066 | 0. 258 | 1. 84E-15 | Oligo | NR4A2         |
| SLC4A2. 1  | 1. 24E-19 | 0. 531318 | 0. 278 | 0. 141 | 1. 86E-15 | Oligo | SLC4A2        |
| CMC2. 4    | 1. 24E-19 | 0. 47754  | 0. 454 | 0. 299 | 1. 86E-15 | Oligo | CMC2          |
| DENR. 5    | 1. 27E-19 | -0. 41668 | 0. 111 | 0. 328 | 1. 90E-15 | Oligo | DENR          |
| PRPF31. 5  | 1. 34E-19 | -0. 36821 | 0. 169 | 0. 4   | 2. 00E-15 | Oligo | PRPF31        |
| MEX3A. 8   | 1. 35E-19 | -0. 46187 | 0. 012 | 0. 184 | 2. 02E-15 | Oligo | MEX3A         |
| MZT1. 5    | 1. 49E-19 | -0. 47385 | 0. 064 | 0. 263 | 2. 23E-15 | Oligo | MZT1          |
| MAGOH. 4   | 1. 55E-19 | -0. 43492 | 0. 188 | 0. 422 | 2. 32E-15 | Oligo | MAGOH         |
| EBPL. 6    | 1. 57E-19 | -0. 35991 | 0. 094 | 0. 31  | 2. 34E-15 | Oligo | EBPL          |

|             |           |           |        |        |                 |          |
|-------------|-----------|-----------|--------|--------|-----------------|----------|
| GLA. 8      | 1. 58E-19 | -0. 55814 | 0. 038 | 0. 222 | 2. 36E-15 Oligo | GLA      |
| SMC4. 7     | 1. 59E-19 | -0. 49547 | 0. 033 | 0. 218 | 2. 38E-15 Oligo | SMC4     |
| TXNL1. 3    | 1. 63E-19 | -0. 39389 | 0. 235 | 0. 48  | 2. 44E-15 Oligo | TXNL1    |
| TRIM23. 4   | 1. 64E-19 | 0. 437732 | 0. 191 | 0. 076 | 2. 45E-15 Oligo | TRIM23   |
| RNF24. 6    | 1. 65E-19 | -0. 44832 | 0. 059 | 0. 255 | 2. 46E-15 Oligo | RNF24    |
| SOS2. 3     | 1. 69E-19 | 0. 457943 | 0. 193 | 0. 079 | 2. 53E-15 Oligo | SOS2     |
| EPCAM       | 1. 71E-19 | 0. 23055  | 0. 052 | 0. 008 | 2. 56E-15 Oligo | EPCAM    |
| CRLS1. 5    | 1. 74E-19 | -0. 40936 | 0. 085 | 0. 291 | 2. 60E-15 Oligo | CRLS1    |
| CMPK1. 5    | 1. 86E-19 | -0. 42572 | 0. 188 | 0. 425 | 2. 77E-15 Oligo | CMPK1    |
| NOP10. 9    | 1. 90E-19 | -0. 28878 | 0. 379 | 0. 615 | 2. 84E-15 Oligo | NOP10    |
| LUZP1. 2    | 1. 98E-19 | -0. 45582 | 0. 019 | 0. 194 | 2. 96E-15 Oligo | LUZP1    |
| SNX1. 4     | 1. 99E-19 | 0. 572688 | 0. 367 | 0. 216 | 2. 97E-15 Oligo | SNX1     |
| SERTAD4     | 2. 27E-19 | 0. 181071 | 0. 047 | 0. 007 | 3. 39E-15 Oligo | SERTAD4  |
| BBIP1. 4    | 2. 32E-19 | 0. 570268 | 0. 318 | 0. 173 | 3. 47E-15 Oligo | BBIP1    |
| SDC2. 6     | 2. 43E-19 | -0. 57838 | 0. 024 | 0. 198 | 3. 64E-15 Oligo | SDC2     |
| VMO1. 8     | 2. 59E-19 | -0. 73672 | 0. 002 | 0. 165 | 3. 87E-15 Oligo | VMO1     |
| ABL1. 2     | 2. 61E-19 | 0. 409028 | 0. 209 | 0. 088 | 3. 91E-15 Oligo | ABL1     |
| DHRS3. 7    | 2. 63E-19 | -0. 62232 | 0. 009 | 0. 177 | 3. 92E-15 Oligo | DHRS3    |
| KCNQ2. 8    | 2. 94E-19 | -0. 43583 | 0. 035 | 0. 222 | 4. 40E-15 Oligo | KCNQ2    |
| AXL. 8      | 2. 98E-19 | -0. 71736 | 0. 016 | 0. 187 | 4. 45E-15 Oligo | AXL      |
| RUVBL1. 6   | 3. 01E-19 | -0. 38962 | 0. 071 | 0. 273 | 4. 50E-15 Oligo | RUVBL1   |
| MRFAP1. 8   | 3. 10E-19 | 0. 375117 | 0. 744 | 0. 668 | 4. 64E-15 Oligo | MRFAP1   |
| FAM105A. 9  | 3. 15E-19 | -0. 66061 | 0. 005 | 0. 168 | 4. 71E-15 Oligo | FAM105A  |
| F13A1. 6    | 3. 20E-19 | -0. 87414 | 0. 002 | 0. 165 | 4. 79E-15 Oligo | F13A1    |
| FAM213A. 7  | 3. 29E-19 | -0. 43436 | 0. 169 | 0. 391 | 4. 92E-15 Oligo | FAM213A  |
| GTF2B. 5    | 3. 63E-19 | -0. 49072 | 0. 101 | 0. 307 | 5. 43E-15 Oligo | GTF2B    |
| GPCPD1. 4   | 3. 82E-19 | -0. 43914 | 0. 026 | 0. 204 | 5. 70E-15 Oligo | GPCPD1   |
| KDM6B. 8    | 3. 86E-19 | -0. 54383 | 0. 045 | 0. 229 | 5. 77E-15 Oligo | KDM6B    |
| GNB4. 7     | 3. 86E-19 | -0. 45018 | 0. 049 | 0. 24  | 5. 77E-15 Oligo | GNB4     |
| EIF3D. 7    | 4. 27E-19 | -0. 39056 | 0. 245 | 0. 485 | 6. 38E-15 Oligo | EIF3D    |
| NCK1. 2     | 4. 38E-19 | -0. 42236 | 0. 056 | 0. 251 | 6. 54E-15 Oligo | NCK1     |
| NCKAP5. 1   | 4. 53E-19 | 0. 373222 | 0. 167 | 0. 061 | 6. 77E-15 Oligo | NCKAP5   |
| STEAP3. 5   | 4. 64E-19 | -0. 50911 | 0. 005 | 0. 167 | 6. 93E-15 Oligo | STEAP3   |
| TPM2. 6     | 4. 64E-19 | -0. 48979 | 0. 005 | 0. 169 | 6. 93E-15 Oligo | TPM2     |
| S100A8. 9   | 4. 68E-19 | -0. 88802 | 0. 021 | 0. 191 | 7. 00E-15 Oligo | S100A8   |
| C1S. 7      | 4. 83E-19 | -0. 77856 | 0. 005 | 0. 168 | 7. 22E-15 Oligo | C1S      |
| C7orf50. 4  | 4. 88E-19 | -0. 40965 | 0. 287 | 0. 516 | 7. 29E-15 Oligo | C7orf50  |
| ATG13. 1    | 4. 97E-19 | 0. 491422 | 0. 259 | 0. 125 | 7. 43E-15 Oligo | ATG13    |
| SAMHD1. 9   | 5. 03E-19 | -0. 44436 | 0. 038 | 0. 221 | 7. 52E-15 Oligo | SAMHD1   |
| MPC2. 4     | 5. 04E-19 | -0. 33761 | 0. 339 | 0. 591 | 7. 54E-15 Oligo | MPC2     |
| TREM1. 8    | 5. 26E-19 | -0. 8273  | 0. 007 | 0. 17  | 7. 87E-15 Oligo | TREM1    |
| TCTEX1D2. 5 | 5. 49E-19 | -0. 44971 | 0. 047 | 0. 234 | 8. 21E-15 Oligo | TCTEX1D2 |
| NDUFA12. 4  | 5. 49E-19 | -0. 26677 | 0. 301 | 0. 568 | 8. 21E-15 Oligo | NDUFA12  |
| POLR1D. 5   | 5. 51E-19 | -0. 45543 | 0. 195 | 0. 424 | 8. 23E-15 Oligo | POLR1D   |
| TAPBP. 8    | 5. 53E-19 | -0. 41708 | 0. 129 | 0. 351 | 8. 26E-15 Oligo | TAPBP    |
| SOAT1. 9    | 5. 57E-19 | -0. 54169 | 0. 028 | 0. 204 | 8. 32E-15 Oligo | SOAT1    |
| FOLR2. 9    | 5. 86E-19 | -0. 90511 | 0. 016 | 0. 184 | 8. 75E-15 Oligo | FOLR2    |
| MIDN. 6     | 5. 90E-19 | -0. 3787  | 0. 188 | 0. 423 | 8. 82E-15 Oligo | MIDN     |
| NAGA. 9     | 5. 90E-19 | -0. 6102  | 0. 021 | 0. 191 | 8. 82E-15 Oligo | NAGA     |
| MAP3K8. 9   | 5. 90E-19 | -0. 70718 | 0. 021 | 0. 189 | 8. 82E-15 Oligo | MAP3K8   |
| PDXK. 8     | 6. 00E-19 | -0. 4722  | 0. 087 | 0. 292 | 8. 96E-15 Oligo | PDXK     |

|            |          |          |       |       |          |       |          |
|------------|----------|----------|-------|-------|----------|-------|----------|
| NKX2-2.8   | 6.49E-19 | 0.445189 | 0.292 | 0.142 | 9.70E-15 | Oligo | NKX2-2   |
| SQRDL.9    | 6.75E-19 | -0.61114 | 0.005 | 0.166 | 1.01E-14 | Oligo | SQRDL    |
| PBDC1.2    | 7.09E-19 | -0.50446 | 0.071 | 0.268 | 1.06E-14 | Oligo | PBDC1    |
| TMED2.5    | 7.25E-19 | -0.3771  | 0.395 | 0.62  | 1.08E-14 | Oligo | TMED2    |
| GAL3ST4.8  | 7.48E-19 | -0.65637 | 0.012 | 0.177 | 1.12E-14 | Oligo | GAL3ST4  |
| SYNCRIP.6  | 7.55E-19 | -0.36576 | 0.165 | 0.392 | 1.13E-14 | Oligo | SYNCRIP  |
| ANP32E.7   | 7.79E-19 | -0.42745 | 0.078 | 0.275 | 1.16E-14 | Oligo | ANP32E   |
| APEX1.1    | 8.13E-19 | -0.38437 | 0.301 | 0.546 | 1.21E-14 | Oligo | APEX1    |
| MYO1E.1    | 8.34E-19 | 0.453432 | 0.167 | 0.064 | 1.25E-14 | Oligo | MYO1E    |
| LSM10      | 8.45E-19 | -0.47121 | 0.195 | 0.421 | 1.26E-14 | Oligo | LSM10    |
| SLC7A7.9   | 8.51E-19 | -0.68692 | 0.014 | 0.18  | 1.27E-14 | Oligo | SLC7A7   |
| NDUFAF3.3  | 8.95E-19 | 0.508875 | 0.626 | 0.513 | 1.34E-14 | Oligo | NDUFAF3  |
| AP1S1.8    | 9.03E-19 | -0.34882 | 0.235 | 0.476 | 1.35E-14 | Oligo | AP1S1    |
| EPB41L2.7  | 9.39E-19 | 0.430782 | 0.473 | 0.305 | 1.40E-14 | Oligo | EPB41L2  |
| C12orf75.9 | 9.58E-19 | -0.50806 | 0.026 | 0.199 | 1.43E-14 | Oligo | C12orf75 |
| CLEC7A.9   | 9.87E-19 | -0.70653 | 0.016 | 0.181 | 1.47E-14 | Oligo | CLEC7A   |
| NKAPL      | 1.07E-18 | 0.204002 | 0.052 | 0.008 | 1.60E-14 | Oligo | NKAPL    |
| OLFM2.7    | 1.10E-18 | -0.53036 | 0.026 | 0.198 | 1.65E-14 | Oligo | OLFM2    |
| PLAU.9     | 1.20E-18 | -0.51443 | 0.007 | 0.169 | 1.80E-14 | Oligo | PLAU     |
| ADH5.6     | 1.22E-18 | -0.31177 | 0.167 | 0.397 | 1.82E-14 | Oligo | ADH5     |
| AP2S1.7    | 1.33E-18 | -0.23918 | 0.438 | 0.669 | 1.98E-14 | Oligo | AP2S1    |
| ENG.9      | 1.35E-18 | -0.60955 | 0.009 | 0.171 | 2.02E-14 | Oligo | ENG      |
| VPS25.4    | 1.35E-18 | -0.3388  | 0.12  | 0.338 | 2.02E-14 | Oligo | VPS25    |
| KANK1.6    | 1.39E-18 | 0.727239 | 0.202 | 0.088 | 2.07E-14 | Oligo | KANK1    |
| PPIB.4     | 1.40E-18 | -0.26343 | 0.508 | 0.732 | 2.09E-14 | Oligo | PPIB     |
| RAB30.7    | 1.45E-18 | 0.398953 | 0.179 | 0.071 | 2.16E-14 | Oligo | RAB30    |
| LYN.9      | 1.52E-18 | -0.56355 | 0.014 | 0.18  | 2.27E-14 | Oligo | LYN      |
| TM6SF1.9   | 1.55E-18 | -0.71022 | 0.005 | 0.164 | 2.31E-14 | Oligo | TM6SF1   |
| PPP1R12A.1 | 1.60E-18 | -0.44587 | 0.146 | 0.367 | 2.39E-14 | Oligo | PPP1R12A |
| NNMT.7     | 1.61E-18 | -0.7906  | 0.005 | 0.163 | 2.40E-14 | Oligo | NNMT     |
| PARVG.9    | 1.67E-18 | -0.66453 | 0.007 | 0.167 | 2.49E-14 | Oligo | PARVG    |
| IDH3B.2    | 1.67E-18 | -0.25832 | 0.191 | 0.432 | 2.50E-14 | Oligo | IDH3B    |
| SYF2.1     | 1.70E-18 | -0.34646 | 0.287 | 0.526 | 2.54E-14 | Oligo | SYF2     |
| LTC4S.9    | 1.76E-18 | -0.66144 | 0.012 | 0.174 | 2.63E-14 | Oligo | LTC4S    |
| BTG2.5     | 1.78E-18 | -0.35257 | 0.238 | 0.476 | 2.66E-14 | Oligo | BTG2     |
| RNASEH2B.1 | 1.81E-18 | -0.40759 | 0.056 | 0.245 | 2.71E-14 | Oligo | RNASEH2B |
| GOLIM4.5   | 1.81E-18 | -0.43545 | 0.122 | 0.334 | 2.71E-14 | Oligo | GOLIM4   |
| LASP1.6    | 1.85E-18 | -0.46475 | 0.038 | 0.216 | 2.76E-14 | Oligo | LASP1    |
| INTS10.4   | 1.89E-18 | -0.39189 | 0.101 | 0.31  | 2.82E-14 | Oligo | INTS10   |
| NRP1.7     | 1.89E-18 | -0.42219 | 0.009 | 0.171 | 2.83E-14 | Oligo | NRP1     |
| ABCG1.7    | 1.90E-18 | 0.399712 | 0.273 | 0.126 | 2.84E-14 | Oligo | ABCG1    |
| PSMG2.4    | 1.92E-18 | -0.41834 | 0.186 | 0.421 | 2.86E-14 | Oligo | PSMG2    |
| TNFRSF1B.2 | 2.00E-18 | -0.63571 | 0.026 | 0.194 | 2.99E-14 | Oligo | TNFRSF1B |
| GBP2.6     | 2.03E-18 | -0.53114 | 0.035 | 0.215 | 3.04E-14 | Oligo | GBP2     |
| DNPEP.3    | 2.09E-18 | -0.36371 | 0.056 | 0.248 | 3.12E-14 | Oligo | DNPEP    |
| FERMT3.9   | 2.10E-18 | -0.64771 | 0.012 | 0.172 | 3.14E-14 | Oligo | FERMT3   |
| SNTG1.8    | 2.12E-18 | -0.51718 | 0.002 | 0.159 | 3.17E-14 | Oligo | SNTG1    |
| POR.4      | 2.13E-18 | -0.45513 | 0.075 | 0.272 | 3.18E-14 | Oligo | POR      |
| IER5.5     | 2.14E-18 | -0.4379  | 0.031 | 0.209 | 3.19E-14 | Oligo | IER5     |
| GPX3.8     | 2.14E-18 | -0.58858 | 0.002 | 0.158 | 3.20E-14 | Oligo | GPX3     |
| ANKRD40.4  | 2.14E-18 | 0.466086 | 0.306 | 0.17  | 3.20E-14 | Oligo | ANKRD40  |

|            |          |          |       |       |          |       |            |
|------------|----------|----------|-------|-------|----------|-------|------------|
| HMGA1.5    | 2.16E-18 | -0.36726 | 0.134 | 0.353 | 3.23E-14 | Oligo | HMGA1      |
| NETO2.5    | 2.17E-18 | -0.36541 | 0.007 | 0.167 | 3.25E-14 | Oligo | NETO2      |
| SYNE2.9    | 2.20E-18 | -0.42082 | 0.014 | 0.18  | 3.29E-14 | Oligo | SYNE2      |
| VPS29.5    | 2.26E-18 | -0.27457 | 0.315 | 0.562 | 3.38E-14 | Oligo | VPS29      |
| VAMP3.6    | 2.27E-18 | 0.517157 | 0.482 | 0.343 | 3.39E-14 | Oligo | VAMP3      |
| VMA21.7    | 2.28E-18 | -0.47177 | 0.136 | 0.348 | 3.41E-14 | Oligo | VMA21      |
| SSBP1.4    | 2.42E-18 | -0.29165 | 0.421 | 0.647 | 3.62E-14 | Oligo | SSBP1      |
| OSBPL6.5   | 2.45E-18 | -0.34786 | 0.005 | 0.162 | 3.66E-14 | Oligo | OSBPL6     |
| CETN2.7    | 2.53E-18 | -0.43282 | 0.118 | 0.33  | 3.78E-14 | Oligo | CETN2      |
| AC007228.2 | 2.53E-18 | 0.278093 | 0.096 | 0.026 | 3.79E-14 | Oligo | AC007228.9 |
| TUBG1.7    | 2.58E-18 | -0.39548 | 0.052 | 0.24  | 3.86E-14 | Oligo | TUBG1      |
| WBSCR22.7  | 2.72E-18 | -0.34541 | 0.256 | 0.502 | 4.06E-14 | Oligo | WBSCR22    |
| IGSF21.7   | 2.76E-18 | -0.59829 | 0.009 | 0.169 | 4.12E-14 | Oligo | IGSF21     |
| MYEOV2.3   | 2.85E-18 | 0.36565  | 0.706 | 0.672 | 4.25E-14 | Oligo | MYEOV2     |
| THYN1.6    | 3.09E-18 | -0.39661 | 0.188 | 0.414 | 4.62E-14 | Oligo | THYN1      |
| SULF2.4    | 3.19E-18 | -0.38706 | 0.007 | 0.165 | 4.76E-14 | Oligo | SULF2      |
| PRMT1.5    | 3.19E-18 | -0.23235 | 0.329 | 0.562 | 4.76E-14 | Oligo | PRMT1      |
| NNAT.9     | 3.22E-18 | -0.85035 | 0.033 | 0.202 | 4.81E-14 | Oligo | NNAT       |
| FCGR1B.8   | 3.26E-18 | -0.7423  | 0.009 | 0.169 | 4.87E-14 | Oligo | FCGR1B     |
| CHID1.4    | 3.26E-18 | -0.40326 | 0.221 | 0.445 | 4.88E-14 | Oligo | CHID1      |
| EIF3K.7    | 3.35E-18 | -0.27845 | 0.532 | 0.767 | 5.01E-14 | Oligo | EIF3K      |
| CTXN1.9    | 3.46E-18 | -0.35669 | 0.007 | 0.165 | 5.17E-14 | Oligo | CTXN1      |
| PCDH17.7   | 3.56E-18 | 0.565685 | 0.325 | 0.186 | 5.32E-14 | Oligo | PCDH17     |
| ATAD3C     | 3.71E-18 | 0.276068 | 0.096 | 0.026 | 5.55E-14 | Oligo | ATAD3C     |
| RELN       | 3.92E-18 | 0.19669  | 0.021 | 0.001 | 5.85E-14 | Oligo | RELN       |
| TPST2.7    | 3.97E-18 | -0.4392  | 0.012 | 0.173 | 5.93E-14 | Oligo | TPST2      |
| JAG1.8     | 4.07E-18 | -0.38509 | 0.007 | 0.164 | 6.08E-14 | Oligo | JAG1       |
| GPN1.3     | 4.20E-18 | -0.43016 | 0.049 | 0.23  | 6.28E-14 | Oligo | GPN1       |
| PTPN6.9    | 4.23E-18 | -0.62954 | 0.009 | 0.168 | 6.32E-14 | Oligo | PTPN6      |
| RNASE2.9   | 4.25E-18 | -0.74865 | 0.007 | 0.163 | 6.36E-14 | Oligo | RNASE2     |
| RPA2.3     | 4.30E-18 | -0.39753 | 0.118 | 0.327 | 6.43E-14 | Oligo | RPA2       |
| ARHGAP18.4 | 4.46E-18 | -0.58062 | 0.016 | 0.178 | 6.66E-14 | Oligo | ARHGAP18   |
| ATF5.6     | 4.59E-18 | -0.54472 | 0.031 | 0.2   | 6.85E-14 | Oligo | ATF5       |
| NSG1.9     | 4.65E-18 | -0.6611  | 0.019 | 0.182 | 6.95E-14 | Oligo | NSG1       |
| IL10RB.9   | 4.66E-18 | -0.49754 | 0.061 | 0.25  | 6.96E-14 | Oligo | IL10RB     |
| BLOC1S4.9  | 4.97E-18 | -0.37976 | 0.061 | 0.25  | 7.43E-14 | Oligo | BLOC1S4    |
| RARS.4     | 5.10E-18 | -0.46319 | 0.064 | 0.251 | 7.62E-14 | Oligo | RARS       |
| GIMAP4.9   | 5.12E-18 | -0.69447 | 0.002 | 0.155 | 7.65E-14 | Oligo | GIMAP4     |
| SRPX.8     | 5.18E-18 | -0.52706 | 0.019 | 0.183 | 7.75E-14 | Oligo | SRPX       |
| RFX4.7     | 5.42E-18 | -0.4548  | 0.002 | 0.156 | 8.10E-14 | Oligo | RFX4       |
| FIBIN.8    | 5.42E-18 | -0.47036 | 0.047 | 0.233 | 8.10E-14 | Oligo | FIBIN      |
| NCF4.9     | 5.60E-18 | -0.67484 | 0     | 0.151 | 8.37E-14 | Oligo | NCF4       |
| RAB5B.4    | 5.65E-18 | 0.520706 | 0.351 | 0.209 | 8.44E-14 | Oligo | RAB5B      |
| ARF1.5     | 5.99E-18 | -0.27009 | 0.456 | 0.703 | 8.95E-14 | Oligo | ARF1       |
| TMEM54.6   | 6.13E-18 | -0.30613 | 0.028 | 0.202 | 9.16E-14 | Oligo | TMEM54     |
| PSMD2.6    | 6.16E-18 | -0.37858 | 0.231 | 0.47  | 9.20E-14 | Oligo | PSMD2      |
| ETV1.9     | 6.23E-18 | -0.53005 | 0.066 | 0.251 | 9.30E-14 | Oligo | ETV1       |
| TIMM17A.4  | 6.25E-18 | -0.33397 | 0.158 | 0.384 | 9.33E-14 | Oligo | TIMM17A    |
| FOXG1.8    | 6.26E-18 | -0.34888 | 0.005 | 0.159 | 9.35E-14 | Oligo | FOXG1      |
| FILIP1L.8  | 6.26E-18 | -0.47574 | 0.002 | 0.155 | 9.36E-14 | Oligo | FILIP1L    |
| IMPDH2.8   | 6.28E-18 | -0.26896 | 0.191 | 0.425 | 9.39E-14 | Oligo | IMPDH2     |

|            |          |          |       |       |          |       |           |
|------------|----------|----------|-------|-------|----------|-------|-----------|
| FAM26F.9   | 6.30E-18 | -0.61654 | 0.014 | 0.172 | 9.41E-14 | Oligo | FAM26F    |
| NUPR1.7    | 6.49E-18 | -0.62641 | 0.132 | 0.331 | 9.70E-14 | Oligo | NUPR1     |
| NR2F1.6    | 6.95E-18 | -0.36109 | 0.012 | 0.171 | 1.04E-13 | Oligo | NR2F1     |
| HYAL2.9    | 7.28E-18 | -0.35955 | 0.049 | 0.229 | 1.09E-13 | Oligo | HYAL2     |
| PROX1.8    | 7.49E-18 | 0.453501 | 0.296 | 0.159 | 1.12E-13 | Oligo | PROX1     |
| CHCHD3.5   | 7.51E-18 | -0.30408 | 0.153 | 0.377 | 1.12E-13 | Oligo | CHCHD3    |
| EMP1.5     | 7.53E-18 | -0.48764 | 0.019 | 0.184 | 1.13E-13 | Oligo | EMP1      |
| TMSB15A.9  | 7.74E-18 | -0.51255 | 0.021 | 0.184 | 1.16E-13 | Oligo | TMSB15A   |
| PPP1CA.7   | 7.93E-18 | -0.33864 | 0.346 | 0.58  | 1.19E-13 | Oligo | PPP1CA    |
| MIAT.8     | 8.13E-18 | -0.50772 | 0.014 | 0.173 | 1.21E-13 | Oligo | MIAT      |
| ASPH.5     | 8.23E-18 | -0.41061 | 0.087 | 0.284 | 1.23E-13 | Oligo | ASPH      |
| PLXNB2.5   | 8.60E-18 | -0.40827 | 0.007 | 0.163 | 1.29E-13 | Oligo | PLXNB2    |
| ATP6V1F.5  | 9.18E-18 | -0.22329 | 0.6   | 0.809 | 1.37E-13 | Oligo | ATP6V1F   |
| F2R.9      | 9.20E-18 | -0.36263 | 0.014 | 0.174 | 1.38E-13 | Oligo | F2R       |
| HOMER1.8   | 9.22E-18 | -0.36372 | 0.007 | 0.162 | 1.38E-13 | Oligo | HOMER1    |
| RNF149.9   | 9.76E-18 | -0.56028 | 0.089 | 0.278 | 1.46E-13 | Oligo | RNF149    |
| PPA1.6     | 9.96E-18 | 0.439286 | 0.633 | 0.525 | 1.49E-13 | Oligo | PPA1      |
| SHISA4.7   | 1.00E-17 | 0.601445 | 0.376 | 0.241 | 1.50E-13 | Oligo | SHISA4    |
| CBWD1.3    | 1.00E-17 | -0.44925 | 0.042 | 0.22  | 1.50E-13 | Oligo | CBWD1     |
| SYT17.5    | 1.05E-17 | -0.3927  | 0.009 | 0.165 | 1.57E-13 | Oligo | SYT17     |
| HSPH1.5    | 1.09E-17 | -0.4446  | 0.153 | 0.369 | 1.63E-13 | Oligo | HSPH1     |
| LTF.6      | 1.11E-17 | -1.25152 | 0.005 | 0.157 | 1.65E-13 | Oligo | LTF       |
| ANXA2R.8   | 1.16E-17 | -0.43489 | 0.005 | 0.157 | 1.73E-13 | Oligo | ANXA2R    |
| ECI2.6     | 1.22E-17 | -0.431   | 0.132 | 0.33  | 1.82E-13 | Oligo | ECI2      |
| IRF8.9     | 1.26E-17 | -0.62546 | 0.009 | 0.164 | 1.89E-13 | Oligo | IRF8      |
| GNAS.8     | 1.28E-17 | -0.31975 | 0.494 | 0.653 | 1.91E-13 | Oligo | GNAS      |
| DAB2.8     | 1.36E-17 | -0.63736 | 0.005 | 0.156 | 2.03E-13 | Oligo | DAB2      |
| CDC42EP4.1 | 1.38E-17 | -0.45579 | 0.035 | 0.207 | 2.07E-13 | Oligo | CDC42EP4  |
| TM2D2.2    | 1.44E-17 | -0.34901 | 0.136 | 0.348 | 2.16E-13 | Oligo | TM2D2     |
| WTAP.5     | 1.44E-17 | -0.39338 | 0.207 | 0.429 | 2.16E-13 | Oligo | WTAP      |
| DKC1.4     | 1.51E-17 | -0.39673 | 0.08  | 0.272 | 2.26E-13 | Oligo | DKC1      |
| RAC3.8     | 1.52E-17 | -0.36901 | 0.024 | 0.189 | 2.26E-13 | Oligo | RAC3      |
| DCLK2.9    | 1.61E-17 | -0.40269 | 0.033 | 0.202 | 2.41E-13 | Oligo | DCLK2     |
| PRRX1.9    | 1.62E-17 | -0.4069  | 0.016 | 0.177 | 2.42E-13 | Oligo | PRRX1     |
| STAB1.8    | 1.62E-17 | -0.67597 | 0.012 | 0.167 | 2.42E-13 | Oligo | STAB1     |
| ZFH3.5     | 1.63E-17 | -0.46353 | 0.033 | 0.201 | 2.44E-13 | Oligo | ZFH3      |
| LSP1.9     | 1.63E-17 | -0.68161 | 0.014 | 0.172 | 2.44E-13 | Oligo | LSP1      |
| PILRA.8    | 1.67E-17 | -0.69662 | 0.014 | 0.171 | 2.49E-13 | Oligo | PILRA     |
| HAUS1.1    | 1.68E-17 | -0.43298 | 0.056 | 0.237 | 2.51E-13 | Oligo | HAUS1     |
| PLEKHJ1.5  | 1.69E-17 | -0.45889 | 0.16  | 0.374 | 2.53E-13 | Oligo | PLEKHJ1   |
| ICAM1.7    | 1.71E-17 | -0.57396 | 0.014 | 0.169 | 2.56E-13 | Oligo | ICAM1     |
| CMTM7.9    | 1.78E-17 | -0.54896 | 0.014 | 0.17  | 2.66E-13 | Oligo | CMTM7     |
| GNPMB.8    | 1.78E-17 | -0.72007 | 0.04  | 0.206 | 2.67E-13 | Oligo | GNPMB     |
| SNX5.5     | 1.86E-17 | -0.3427  | 0.184 | 0.402 | 2.78E-13 | Oligo | SNX5      |
| FAM60A.5   | 1.87E-17 | -0.40405 | 0.019 | 0.18  | 2.80E-13 | Oligo | FAM60A    |
| HOTAIRM1.1 | 1.89E-17 | -0.56765 | 0.026 | 0.188 | 2.83E-13 | Oligo | HOTAIRM1  |
| IFT20.1    | 1.90E-17 | -0.34989 | 0.136 | 0.352 | 2.83E-13 | Oligo | IFT20     |
| ATP5C1.6   | 1.90E-17 | -0.254   | 0.353 | 0.595 | 2.84E-13 | Oligo | ATP5C1    |
| WEE1.6     | 1.92E-17 | -0.35063 | 0.005 | 0.155 | 2.88E-13 | Oligo | WEE1      |
| LMCD1-AS1  | 1.95E-17 | 0.308102 | 0.073 | 0.017 | 2.92E-13 | Oligo | LMCD1-AS1 |
| IGSF6.9    | 1.98E-17 | -0.67399 | 0.007 | 0.159 | 2.96E-13 | Oligo | IGSF6     |

|           |          |          |       |       |          |       |           |
|-----------|----------|----------|-------|-------|----------|-------|-----------|
| PDZD7.1   | 2.01E-17 | 0.140518 | 0.061 | 0.012 | 3.01E-13 | Oligo | PDZD7     |
| IQSEC1.3  | 2.04E-17 | 0.400736 | 0.165 | 0.064 | 3.04E-13 | Oligo | IQSEC1    |
| PAPOLA.3  | 2.16E-17 | -0.33343 | 0.252 | 0.493 | 3.23E-13 | Oligo | PAPOLA    |
| CBX6.6    | 2.17E-17 | 0.503487 | 0.374 | 0.235 | 3.24E-13 | Oligo | CBX6      |
| WNK1.5    | 2.20E-17 | 0.51195  | 0.405 | 0.274 | 3.28E-13 | Oligo | WNK1      |
| LEPROTL1. | 2.27E-17 | -0.34989 | 0.181 | 0.396 | 3.39E-13 | Oligo | LEPROTL1  |
| OAT.2     | 2.31E-17 | 0.478777 | 0.381 | 0.232 | 3.45E-13 | Oligo | OAT       |
| AKIRIN2.6 | 2.38E-17 | -0.34901 | 0.169 | 0.389 | 3.55E-13 | Oligo | AKIRIN2   |
| CYC1.7    | 2.39E-17 | -0.37774 | 0.32  | 0.548 | 3.58E-13 | Oligo | CYC1      |
| IQGAP2.3  | 2.53E-17 | -0.38727 | 0.005 | 0.154 | 3.77E-13 | Oligo | IQGAP2    |
| IFT57.8   | 2.59E-17 | -0.41909 | 0.066 | 0.254 | 3.88E-13 | Oligo | IFT57     |
| TCP11L2   | 2.62E-17 | 0.214426 | 0.066 | 0.014 | 3.92E-13 | Oligo | TCP11L2   |
| DDX17.4   | 2.63E-17 | 0.432822 | 0.529 | 0.42  | 3.93E-13 | Oligo | DDX17     |
| NES.9     | 2.67E-17 | -0.56901 | 0.101 | 0.282 | 3.99E-13 | Oligo | NES       |
| DHRS7.7   | 2.73E-17 | -0.26623 | 0.332 | 0.565 | 4.08E-13 | Oligo | DHRS7     |
| TSR1.5    | 2.74E-17 | -0.33705 | 0.028 | 0.195 | 4.09E-13 | Oligo | TSR1      |
| TRABD.9   | 2.75E-17 | -0.4317  | 0.075 | 0.266 | 4.10E-13 | Oligo | TRABD     |
| DDX27.4   | 2.85E-17 | -0.2693  | 0.092 | 0.289 | 4.25E-13 | Oligo | DDX27     |
| APRT.7    | 2.92E-17 | -0.35968 | 0.322 | 0.539 | 4.37E-13 | Oligo | APRT      |
| CNIH3.6   | 2.97E-17 | -0.33656 | 0.016 | 0.174 | 4.43E-13 | Oligo | CNIH3     |
| LIFR.6    | 2.97E-17 | 0.406601 | 0.224 | 0.105 | 4.44E-13 | Oligo | LIFR      |
| DAP.5     | 2.98E-17 | -0.40784 | 0.092 | 0.283 | 4.46E-13 | Oligo | DAP       |
| MAGED1.8  | 3.01E-17 | -0.44343 | 0.146 | 0.352 | 4.50E-13 | Oligo | MAGED1    |
| PDRG1.7   | 3.06E-17 | -0.31585 | 0.082 | 0.275 | 4.57E-13 | Oligo | PDRG1     |
| SLC8A1.8  | 3.07E-17 | -0.43138 | 0.002 | 0.15  | 4.58E-13 | Oligo | SLC8A1    |
| PLEC.7    | 3.41E-17 | -0.42414 | 0.028 | 0.192 | 5.09E-13 | Oligo | PLEC      |
| SAV1.1    | 3.48E-17 | 0.572044 | 0.212 | 0.097 | 5.20E-13 | Oligo | SAV1      |
| LSM6.4    | 3.52E-17 | -0.32427 | 0.129 | 0.338 | 5.26E-13 | Oligo | LSM6      |
| LINC01094 | 3.55E-17 | -0.66135 | 0.009 | 0.159 | 5.30E-13 | Oligo | LINC01094 |
| PAM.8     | 3.57E-17 | -0.35204 | 0.014 | 0.17  | 5.33E-13 | Oligo | PAM       |
| UBE2I.5   | 3.59E-17 | -0.33986 | 0.376 | 0.584 | 5.37E-13 | Oligo | UBE2I     |
| HEXA.8    | 3.63E-17 | -0.47284 | 0.191 | 0.397 | 5.42E-13 | Oligo | HEXA      |
| COPS8.8   | 3.66E-17 | -0.34405 | 0.249 | 0.478 | 5.47E-13 | Oligo | COPS8     |
| SRSF3.1   | 3.66E-17 | -0.23985 | 0.52  | 0.737 | 5.47E-13 | Oligo | SRSF3     |
| MPP5.5    | 3.98E-17 | 0.419121 | 0.205 | 0.092 | 5.95E-13 | Oligo | MPP5      |
| SDC3.5    | 4.01E-17 | -0.43798 | 0.035 | 0.202 | 6.00E-13 | Oligo | SDC3      |
| SEC11C.7  | 4.03E-17 | 0.453313 | 0.598 | 0.493 | 6.02E-13 | Oligo | SEC11C    |
| MMD.6     | 4.04E-17 | -0.44944 | 0.071 | 0.251 | 6.04E-13 | Oligo | MMD       |
| TSPAN7.7  | 4.08E-17 | -0.57608 | 0.127 | 0.317 | 6.10E-13 | Oligo | TSPAN7    |
| ELP5.5    | 4.13E-17 | -0.33881 | 0.08  | 0.274 | 6.17E-13 | Oligo | ELP5      |
| PIR.5     | 4.40E-17 | 0.511001 | 0.146 | 0.053 | 6.58E-13 | Oligo | PIR       |
| SOCS3.8   | 4.44E-17 | -0.39844 | 0.146 | 0.356 | 6.63E-13 | Oligo | SOCS3     |
| SIGLEC10. | 4.48E-17 | -0.61863 | 0.014 | 0.167 | 6.70E-13 | Oligo | SIGLEC10  |
| SP100.8   | 4.50E-17 | -0.40519 | 0.089 | 0.294 | 6.73E-13 | Oligo | SP100     |
| UTP18.2   | 4.56E-17 | -0.41862 | 0.082 | 0.271 | 6.81E-13 | Oligo | UTP18     |
| LBH.9     | 4.57E-17 | -0.54017 | 0.009 | 0.159 | 6.83E-13 | Oligo | LBH       |
| TOR1A.4   | 4.94E-17 | -0.41347 | 0.08  | 0.268 | 7.38E-13 | Oligo | TOR1A     |
| SOX9.8    | 4.96E-17 | -0.46958 | 0.094 | 0.278 | 7.41E-13 | Oligo | SOX9      |
| TNFSF12.9 | 4.99E-17 | -0.47113 | 0.028 | 0.191 | 7.46E-13 | Oligo | TNFSF12   |
| HSPA12A   | 5.03E-17 | 0.25581  | 0.092 | 0.025 | 7.52E-13 | Oligo | HSPA12A   |
| PDCD2.7   | 5.10E-17 | -0.38702 | 0.104 | 0.301 | 7.62E-13 | Oligo | PDCD2     |



|            |           |           |        |        |           |       |          |
|------------|-----------|-----------|--------|--------|-----------|-------|----------|
| MAGEF1. 8  | 5. 12E-17 | -0. 31602 | 0. 16  | 0. 371 | 7. 66E-13 | Oligo | MAGEF1   |
| RBMX. 5    | 5. 18E-17 | -0. 37108 | 0. 344 | 0. 575 | 7. 74E-13 | Oligo | RBMX     |
| HEPH       | 5. 31E-17 | 0. 102657 | 0. 033 | 0. 004 | 7. 94E-13 | Oligo | HEPH     |
| REEP2. 7   | 5. 39E-17 | -0. 3388  | 0. 038 | 0. 208 | 8. 05E-13 | Oligo | REEP2    |
| THOC2. 3   | 5. 40E-17 | -0. 37233 | 0. 111 | 0. 311 | 8. 06E-13 | Oligo | THOC2    |
| NUPL2. 5   | 5. 45E-17 | -0. 4192  | 0. 085 | 0. 275 | 8. 14E-13 | Oligo | NUPL2    |
| COP3. 4    | 5. 48E-17 | -0. 35295 | 0. 162 | 0. 376 | 8. 18E-13 | Oligo | COP3     |
| ADAMTS14   | 5. 53E-17 | 0. 214095 | 0. 064 | 0. 013 | 8. 27E-13 | Oligo | ADAMTS14 |
| OXA1L. 8   | 5. 61E-17 | -0. 48283 | 0. 115 | 0. 308 | 8. 39E-13 | Oligo | OXA1L    |
| KIAA1147.  | 5. 81E-17 | 0. 392358 | 0. 169 | 0. 068 | 8. 68E-13 | Oligo | KIAA1147 |
| RUSC2. 1   | 5. 97E-17 | 0. 299049 | 0. 113 | 0. 036 | 8. 93E-13 | Oligo | RUSC2    |
| TAGLN3. 8  | 6. 06E-17 | -0. 56496 | 0. 033 | 0. 194 | 9. 05E-13 | Oligo | TAGLN3   |
| CLU. 9     | 6. 10E-17 | -0. 45234 | 0. 68  | 0. 786 | 9. 12E-13 | Oligo | CLU      |
| SDAD1. 4   | 6. 31E-17 | -0. 35689 | 0. 049 | 0. 225 | 9. 43E-13 | Oligo | SDAD1    |
| BTBD8      | 6. 32E-17 | 0. 18704  | 0. 066 | 0. 014 | 9. 44E-13 | Oligo | BTBD8    |
| GPX7. 5    | 6. 58E-17 | -0. 42736 | 0. 024 | 0. 183 | 9. 84E-13 | Oligo | GPX7     |
| ATP6V1B2.  | 6. 70E-17 | -0. 44317 | 0. 207 | 0. 416 | 1. 00E-12 | Oligo | ATP6V1B2 |
| CCDC107. 5 | 6. 79E-17 | -0. 40022 | 0. 184 | 0. 398 | 1. 01E-12 | Oligo | CCDC107  |
| B3GNT5. 8  | 6. 94E-17 | -0. 46061 | 0. 002 | 0. 147 | 1. 04E-12 | Oligo | B3GNT5   |
| BBOX1. 8   | 7. 01E-17 | -0. 48339 | 0      | 0. 142 | 1. 05E-12 | Oligo | BBOX1    |
| PTTG1IP. 3 | 7. 33E-17 | -0. 40177 | 0. 245 | 0. 464 | 1. 10E-12 | Oligo | PTTG1IP  |
| SYNGR2. 9  | 7. 57E-17 | 0. 468566 | 0. 487 | 0. 322 | 1. 13E-12 | Oligo | SYNGR2   |
| GOS2. 7    | 7. 60E-17 | -0. 72251 | 0. 031 | 0. 19  | 1. 14E-12 | Oligo | GOS2     |
| PTGS1. 9   | 7. 64E-17 | -0. 52982 | 0. 012 | 0. 162 | 1. 14E-12 | Oligo | PTGS1    |
| TRIB1. 5   | 7. 70E-17 | -0. 51458 | 0. 012 | 0. 162 | 1. 15E-12 | Oligo | TRIB1    |
| FCGR2B. 9  | 7. 84E-17 | -0. 71957 | 0. 005 | 0. 149 | 1. 17E-12 | Oligo | FCGR2B   |
| SOCS2. 7   | 7. 94E-17 | -0. 39387 | 0. 012 | 0. 162 | 1. 19E-12 | Oligo | SOCS2    |
| FNDC3B. 5  | 8. 06E-17 | -0. 37967 | 0. 021 | 0. 179 | 1. 21E-12 | Oligo | FNDC3B   |
| PSMB3. 4   | 8. 08E-17 | -0. 21011 | 0. 489 | 0. 712 | 1. 21E-12 | Oligo | PSMB3    |
| RNF103. 3  | 8. 80E-17 | 0. 408804 | 0. 214 | 0. 098 | 1. 32E-12 | Oligo | RNF103   |
| HILPDA. 8  | 8. 89E-17 | -0. 54786 | 0. 056 | 0. 233 | 1. 33E-12 | Oligo | HILPDA   |
| SLC43A2. 8 | 9. 14E-17 | -0. 46939 | 0. 073 | 0. 252 | 1. 37E-12 | Oligo | SLC43A2  |
| EIF3L. 4   | 9. 73E-17 | -0. 28144 | 0. 388 | 0. 614 | 1. 45E-12 | Oligo | EIF3L    |
| ZNRD1. 3   | 9. 80E-17 | -0. 37443 | 0. 045 | 0. 217 | 1. 46E-12 | Oligo | ZNRD1    |
| ARNT2. 8   | 9. 87E-17 | 0. 459952 | 0. 221 | 0. 107 | 1. 47E-12 | Oligo | ARNT2    |
| TRMT10C. 6 | 9. 93E-17 | -0. 32704 | 0. 073 | 0. 256 | 1. 48E-12 | Oligo | TRMT10C  |
| THOC7. 3   | 1. 01E-16 | -0. 32482 | 0. 176 | 0. 397 | 1. 51E-12 | Oligo | THOC7    |
| UAP1. 5    | 1. 04E-16 | -0. 41554 | 0. 031 | 0. 191 | 1. 55E-12 | Oligo | UAP1     |
| ENTPD1. 9  | 1. 04E-16 | -0. 62841 | 0. 016 | 0. 168 | 1. 56E-12 | Oligo | ENTPD1   |
| CHL1. 7    | 1. 05E-16 | -0. 38881 | 0. 009 | 0. 158 | 1. 57E-12 | Oligo | CHL1     |
| PFKFB3. 8  | 1. 06E-16 | -0. 53217 | 0. 075 | 0. 25  | 1. 58E-12 | Oligo | PFKFB3   |
| METTL23. 3 | 1. 09E-16 | -0. 39372 | 0. 125 | 0. 326 | 1. 63E-12 | Oligo | METTL23  |
| TMEM243. 5 | 1. 11E-16 | -0. 48921 | 0. 042 | 0. 208 | 1. 65E-12 | Oligo | TMEM243  |
| KARS. 4    | 1. 11E-16 | -0. 33241 | 0. 167 | 0. 381 | 1. 66E-12 | Oligo | KARS     |
| JUNB. 5    | 1. 12E-16 | -0. 28621 | 0. 499 | 0. 732 | 1. 67E-12 | Oligo | JUNB     |
| CTSV. 1    | 1. 12E-16 | 0. 177589 | 0. 059 | 0. 012 | 1. 68E-12 | Oligo | CTSV     |
| MAPKAP1. 3 | 1. 13E-16 | -0. 36925 | 0. 071 | 0. 257 | 1. 69E-12 | Oligo | MAPKAP1  |
| ETF1. 7    | 1. 14E-16 | -0. 46099 | 0. 148 | 0. 353 | 1. 71E-12 | Oligo | ETF1     |
| FOXN2. 3   | 1. 18E-16 | 0. 502768 | 0. 252 | 0. 126 | 1. 76E-12 | Oligo | FOXN2    |
| PTGR1. 4   | 1. 18E-16 | -0. 4586  | 0. 031 | 0. 191 | 1. 76E-12 | Oligo | PTGR1    |
| TANK. 1    | 1. 23E-16 | -0. 39789 | 0. 136 | 0. 338 | 1. 84E-12 | Oligo | TANK     |

|            |          |          |       |       |          |       |          |
|------------|----------|----------|-------|-------|----------|-------|----------|
| CTNNBL1.2  | 1.27E-16 | -0.37201 | 0.106 | 0.304 | 1.90E-12 | Oligo | CTNNBL1  |
| SAT2.6     | 1.27E-16 | -0.31879 | 0.379 | 0.594 | 1.90E-12 | Oligo | SAT2     |
| TPM4.7     | 1.31E-16 | -0.42076 | 0.304 | 0.504 | 1.96E-12 | Oligo | TPM4     |
| STEAP1B    | 1.34E-16 | 0.288027 | 0.049 | 0.009 | 2.00E-12 | Oligo | STEAP1B  |
| ICK.5      | 1.35E-16 | 0.36983  | 0.188 | 0.081 | 2.01E-12 | Oligo | ICK      |
| APBB1IP.9  | 1.36E-16 | -0.60076 | 0.014 | 0.162 | 2.03E-12 | Oligo | APBB1IP  |
| RPIA.4     | 1.40E-16 | -0.38948 | 0.033 | 0.194 | 2.09E-12 | Oligo | RPIA     |
| IFI35.7    | 1.41E-16 | -0.43723 | 0.061 | 0.237 | 2.11E-12 | Oligo | IFI35    |
| COMMD6.4   | 1.47E-16 | -0.24536 | 0.576 | 0.784 | 2.19E-12 | Oligo | COMMD6   |
| DOK5.8     | 1.48E-16 | -0.41985 | 0.028 | 0.188 | 2.22E-12 | Oligo | DOK5     |
| CD4.9      | 1.52E-16 | -0.56893 | 0.012 | 0.16  | 2.27E-12 | Oligo | CD4      |
| DOK1.9     | 1.55E-16 | -0.44009 | 0.012 | 0.159 | 2.32E-12 | Oligo | DOK1     |
| COMMD7.4   | 1.57E-16 | -0.34314 | 0.191 | 0.408 | 2.34E-12 | Oligo | COMMD7   |
| ECHDC2.5   | 1.62E-16 | -0.40718 | 0.033 | 0.194 | 2.42E-12 | Oligo | ECHDC2   |
| SPATA2.3   | 1.62E-16 | 0.397753 | 0.16  | 0.064 | 2.42E-12 | Oligo | SPATA2   |
| LYPLA2.3   | 1.65E-16 | -0.38262 | 0.054 | 0.227 | 2.47E-12 | Oligo | LYPLA2   |
| SLC2A5.9   | 1.70E-16 | -0.72014 | 0.024 | 0.176 | 2.54E-12 | Oligo | SLC2A5   |
| SLC1A5.8   | 1.76E-16 | -0.4764  | 0.002 | 0.143 | 2.63E-12 | Oligo | SLC1A5   |
| SEPT6.7    | 1.78E-16 | -0.44652 | 0.019 | 0.171 | 2.66E-12 | Oligo | 6-Sep    |
| IFI27L1.5  | 1.81E-16 | -0.40257 | 0.031 | 0.191 | 2.71E-12 | Oligo | IFI27L1  |
| TRIM47.9   | 1.82E-16 | -0.35368 | 0.026 | 0.185 | 2.72E-12 | Oligo | TRIM47   |
| FAM210B.9  | 1.85E-16 | -0.37169 | 0.089 | 0.277 | 2.77E-12 | Oligo | FAM210B  |
| LPL.5      | 1.93E-16 | -0.50202 | 0.014 | 0.163 | 2.89E-12 | Oligo | LPL      |
| MGST1.6    | 1.95E-16 | -1.00971 | 0.007 | 0.15  | 2.91E-12 | Oligo | MGST1    |
| LAMTOR3.2  | 1.95E-16 | -0.44987 | 0.085 | 0.267 | 2.92E-12 | Oligo | LAMTOR3  |
| COA6.4     | 1.95E-16 | -0.44816 | 0.094 | 0.283 | 2.92E-12 | Oligo | COA6     |
| CCS.3      | 1.96E-16 | -0.36874 | 0.082 | 0.267 | 2.92E-12 | Oligo | CCS      |
| KLF4.9     | 1.98E-16 | -0.6095  | 0.049 | 0.212 | 2.96E-12 | Oligo | KLF4     |
| OGFRL1.9   | 1.99E-16 | -0.50757 | 0.031 | 0.187 | 2.98E-12 | Oligo | OGFRL1   |
| KBTBD3.2   | 2.00E-16 | 0.465853 | 0.216 | 0.101 | 3.00E-12 | Oligo | KBTBD3   |
| PFKP.5     | 2.07E-16 | -0.3579  | 0.009 | 0.156 | 3.09E-12 | Oligo | PFKP     |
| FAM221A.9  | 2.14E-16 | 0.498245 | 0.311 | 0.173 | 3.20E-12 | Oligo | FAM221A  |
| KCTD7.3    | 2.16E-16 | 0.291809 | 0.148 | 0.055 | 3.22E-12 | Oligo | KCTD7    |
| LMNB1.8    | 2.16E-16 | -0.40989 | 0.009 | 0.155 | 3.23E-12 | Oligo | LMNB1    |
| TSTD1.5    | 2.25E-16 | -0.47112 | 0.038 | 0.203 | 3.37E-12 | Oligo | TSTD1    |
| GPC1.8     | 2.28E-16 | -0.4986  | 0.071 | 0.243 | 3.41E-12 | Oligo | GPC1     |
| SLC43A3.3  | 2.35E-16 | -0.45584 | 0.002 | 0.142 | 3.51E-12 | Oligo | SLC43A3  |
| CASP6.7    | 2.41E-16 | -0.341   | 0.016 | 0.168 | 3.59E-12 | Oligo | CASP6    |
| B3GALNT1.2 | 2.45E-16 | -0.38542 | 0.031 | 0.189 | 3.66E-12 | Oligo | B3GALNT1 |
| SLC23A2.2  | 2.46E-16 | 0.44316  | 0.216 | 0.103 | 3.68E-12 | Oligo | SLC23A2  |
| SSBP3.7    | 2.47E-16 | 0.522361 | 0.245 | 0.124 | 3.68E-12 | Oligo | SSBP3    |
| ATP6V1C1.2 | 2.54E-16 | -0.41239 | 0.071 | 0.25  | 3.80E-12 | Oligo | ATP6V1C1 |
| OGFR.3     | 2.59E-16 | -0.37088 | 0.101 | 0.294 | 3.87E-12 | Oligo | OGFR     |
| TMEM245.2  | 2.63E-16 | 0.350263 | 0.254 | 0.129 | 3.93E-12 | Oligo | TMEM245  |
| APOPT1.5   | 2.64E-16 | -0.34907 | 0.179 | 0.389 | 3.95E-12 | Oligo | APOPT1   |
| PGD.6      | 2.68E-16 | -0.36129 | 0.106 | 0.3   | 4.01E-12 | Oligo | PGD      |
| SRP72.4    | 2.71E-16 | -0.40906 | 0.259 | 0.466 | 4.05E-12 | Oligo | SRP72    |
| AQP1.2     | 2.84E-16 | 0.195823 | 0.127 | 0.043 | 4.24E-12 | Oligo | AQP1     |
| GRAMD1A.6  | 2.90E-16 | -0.33798 | 0.094 | 0.281 | 4.33E-12 | Oligo | GRAMD1A  |
| PDHA1.4    | 2.95E-16 | -0.35188 | 0.115 | 0.31  | 4.41E-12 | Oligo | PDHA1    |
| NAA10.5    | 3.08E-16 | -0.3777  | 0.216 | 0.433 | 4.60E-12 | Oligo | NAA10    |

|             |           |           |        |        |                 |          |
|-------------|-----------|-----------|--------|--------|-----------------|----------|
| ABHD8. 4    | 3. 09E-16 | -0. 32802 | 0. 007 | 0. 15  | 4. 62E-12 Oligo | ABHD8    |
| LYSMD2. 5   | 3. 12E-16 | -0. 34919 | 0. 038 | 0. 199 | 4. 66E-12 Oligo | LYSMD2   |
| CA12. 9     | 3. 30E-16 | -0. 40523 | 0. 002 | 0. 141 | 4. 94E-12 Oligo | CA12     |
| UBAC2. 8    | 3. 32E-16 | -0. 33195 | 0. 092 | 0. 278 | 4. 95E-12 Oligo | UBAC2    |
| MTCH2. 3    | 3. 36E-16 | -0. 40951 | 0. 219 | 0. 436 | 5. 03E-12 Oligo | MTCH2    |
| DECR1. 4    | 3. 47E-16 | -0. 42261 | 0. 205 | 0. 42  | 5. 19E-12 Oligo | DECR1    |
| SCIN. 9     | 3. 51E-16 | -0. 69579 | 0. 012 | 0. 156 | 5. 24E-12 Oligo | SCIN     |
| OSER1. 4    | 3. 72E-16 | -0. 37965 | 0. 118 | 0. 309 | 5. 55E-12 Oligo | OSER1    |
| PLK3. 7     | 3. 75E-16 | -0. 41701 | 0. 071 | 0. 247 | 5. 60E-12 Oligo | PLK3     |
| ARF6. 8     | 3. 88E-16 | -0. 38048 | 0. 148 | 0. 351 | 5. 80E-12 Oligo | ARF6     |
| SH3BGRL3. 3 | 3. 91E-16 | -0. 29445 | 0. 593 | 0. 784 | 5. 85E-12 Oligo | SH3BGRL3 |
| HSP90AB1. 3 | 3. 93E-16 | -0. 21991 | 0. 675 | 0. 826 | 5. 87E-12 Oligo | HSP90AB1 |
| MAPRE1. 4   | 4. 01E-16 | -0. 34259 | 0. 271 | 0. 485 | 5. 99E-12 Oligo | MAPRE1   |
| TCP1. 5     | 4. 07E-16 | -0. 30641 | 0. 308 | 0. 531 | 6. 08E-12 Oligo | TCP1     |
| LRIG1. 8    | 4. 09E-16 | 0. 485624 | 0. 216 | 0. 104 | 6. 11E-12 Oligo | LRIG1    |
| SLPI. 6     | 4. 11E-16 | -1. 18414 | 0. 012 | 0. 155 | 6. 14E-12 Oligo | SLPI     |
| PICK1. 4    | 4. 17E-16 | 0. 357523 | 0. 193 | 0. 084 | 6. 23E-12 Oligo | PICK1    |
| FHL3. 4     | 4. 20E-16 | -0. 37866 | 0. 016 | 0. 164 | 6. 28E-12 Oligo | FHL3     |
| CYR61. 7    | 4. 25E-16 | -0. 64391 | 0. 024 | 0. 173 | 6. 35E-12 Oligo | CYR61    |
| ID3. 8      | 4. 29E-16 | -0. 66683 | 0. 094 | 0. 271 | 6. 41E-12 Oligo | ID3      |
| MYC. 5      | 4. 47E-16 | -0. 5639  | 0. 024 | 0. 175 | 6. 69E-12 Oligo | MYC      |
| BUD31. 7    | 4. 52E-16 | -0. 23337 | 0. 416 | 0. 636 | 6. 76E-12 Oligo | BUD31    |
| SHMT2. 6    | 4. 60E-16 | -0. 39462 | 0. 064 | 0. 237 | 6. 87E-12 Oligo | SHMT2    |
| SKIL. 7     | 4. 60E-16 | -0. 46656 | 0. 108 | 0. 293 | 6. 87E-12 Oligo | SKIL     |
| PLD4. 9     | 4. 63E-16 | -0. 64697 | 0. 014 | 0. 159 | 6. 92E-12 Oligo | PLD4     |
| DNTTIP2. 3  | 4. 63E-16 | -0. 3931  | 0. 106 | 0. 294 | 6. 93E-12 Oligo | DNTTIP2  |
| DDX19B. 1   | 5. 00E-16 | -0. 34357 | 0. 045 | 0. 208 | 7. 48E-12 Oligo | DDX19B   |
| RAP2B. 8    | 5. 01E-16 | -0. 42045 | 0. 021 | 0. 17  | 7. 48E-12 Oligo | RAP2B    |
| UBE2V2. 7   | 5. 17E-16 | -0. 27962 | 0. 278 | 0. 503 | 7. 73E-12 Oligo | UBE2V2   |
| SHFM1. 5    | 5. 47E-16 | -0. 281   | 0. 515 | 0. 731 | 8. 18E-12 Oligo | SHFM1    |
| AK4. 8      | 5. 59E-16 | -0. 42534 | 0. 031 | 0. 185 | 8. 36E-12 Oligo | AK4      |
| EXOSC7. 1   | 5. 61E-16 | -0. 3554  | 0. 064 | 0. 235 | 8. 39E-12 Oligo | EXOSC7   |
| SNAP25. 8   | 5. 66E-16 | -0. 51153 | 0. 007 | 0. 148 | 8. 46E-12 Oligo | SNAP25   |
| CITED1. 8   | 5. 84E-16 | -0. 42806 | 0. 012 | 0. 156 | 8. 73E-12 Oligo | CITED1   |
| BAALC. 8    | 6. 04E-16 | -0. 40265 | 0. 155 | 0. 353 | 9. 03E-12 Oligo | BAALC    |
| RIMKLB. 7   | 6. 37E-16 | -0. 36448 | 0. 012 | 0. 156 | 9. 51E-12 Oligo | RIMKLB   |
| SUCLG2. 6   | 6. 37E-16 | -0. 49518 | 0. 078 | 0. 251 | 9. 52E-12 Oligo | SUCLG2   |
| ENTPD6. 3   | 6. 50E-16 | -0. 37009 | 0. 042 | 0. 204 | 9. 71E-12 Oligo | ENTPD6   |
| BCL7B. 5    | 6. 60E-16 | -0. 37323 | 0. 134 | 0. 329 | 9. 86E-12 Oligo | BCL7B    |
| SALL1. 7    | 7. 42E-16 | 0. 55539  | 0. 249 | 0. 133 | 1. 11E-11 Oligo | SALL1    |
| CIAPIN1. 5  | 7. 78E-16 | -0. 32247 | 0. 082 | 0. 267 | 1. 16E-11 Oligo | CIAPIN1  |
| NT5DC2. 6   | 8. 15E-16 | -0. 34627 | 0. 021 | 0. 169 | 1. 22E-11 Oligo | NT5DC2   |
| FLYWCH2. 4  | 8. 22E-16 | -0. 35285 | 0. 125 | 0. 316 | 1. 23E-11 Oligo | FLYWCH2  |
| ARL6IP6. 4  | 8. 24E-16 | -0. 32712 | 0. 099 | 0. 288 | 1. 23E-11 Oligo | ARL6IP6  |
| TOMM40. 7   | 8. 27E-16 | -0. 3001  | 0. 136 | 0. 335 | 1. 24E-11 Oligo | TOMM40   |
| POU3F3. 8   | 8. 28E-16 | 0. 434153 | 0. 273 | 0. 15  | 1. 24E-11 Oligo | POU3F3   |
| WDR34. 6    | 8. 39E-16 | -0. 35568 | 0. 047 | 0. 213 | 1. 25E-11 Oligo | WDR34    |
| SCO2. 8     | 8. 62E-16 | -0. 43684 | 0. 054 | 0. 217 | 1. 29E-11 Oligo | SCO2     |
| ADM. 7      | 8. 73E-16 | -0. 56549 | 0. 033 | 0. 191 | 1. 30E-11 Oligo | ADM      |
| SMAD1. 6    | 8. 84E-16 | -0. 35562 | 0. 028 | 0. 183 | 1. 32E-11 Oligo | SMAD1    |
| COL4A2. 6   | 9. 06E-16 | -0. 29812 | 0      | 0. 133 | 1. 35E-11 Oligo | COL4A2   |

|             |          |          |       |       |          |       |          |
|-------------|----------|----------|-------|-------|----------|-------|----------|
| CCNC. 1     | 9.13E-16 | -0.41158 | 0.115 | 0.303 | 1.36E-11 | Oligo | CCNC     |
| NOL7. 2     | 9.14E-16 | -0.40435 | 0.228 | 0.447 | 1.37E-11 | Oligo | NOL7     |
| PTPDC1. 1   | 9.27E-16 | 0.389115 | 0.115 | 0.039 | 1.38E-11 | Oligo | PTPDC1   |
| SEPHS2. 4   | 9.46E-16 | -0.37476 | 0.125 | 0.32  | 1.41E-11 | Oligo | SEPHS2   |
| H2AFV. 7    | 9.48E-16 | -0.4122  | 0.322 | 0.53  | 1.42E-11 | Oligo | H2AFV    |
| TUBB4B. 5   | 9.68E-16 | -0.44668 | 0.301 | 0.499 | 1.45E-11 | Oligo | TUBB4B   |
| APOBEC3C. 1 | 1.00E-15 | -0.4625  | 0     | 0.133 | 1.49E-11 | Oligo | APOBEC3C |
| IL1RAP. 4   | 1.00E-15 | -0.38427 | 0.019 | 0.165 | 1.50E-11 | Oligo | IL1RAP   |
| PAPSS1. 4   | 1.00E-15 | 0.502984 | 0.416 | 0.29  | 1.50E-11 | Oligo | PAPSS1   |
| MEAF6. 7    | 1.02E-15 | -0.28153 | 0.256 | 0.485 | 1.52E-11 | Oligo | MEAF6    |
| BCL2A1. 9   | 1.03E-15 | -0.6148  | 0.019 | 0.162 | 1.54E-11 | Oligo | BCL2A1   |
| RETSAT. 3   | 1.04E-15 | 0.52272  | 0.184 | 0.081 | 1.56E-11 | Oligo | RETSAT   |
| CD69. 6     | 1.06E-15 | -0.72835 | 0.016 | 0.158 | 1.58E-11 | Oligo | CD69     |
| NT5C3A. 7   | 1.09E-15 | -0.33135 | 0.111 | 0.301 | 1.64E-11 | Oligo | NT5C3A   |
| NDE1. 4     | 1.10E-15 | 0.469818 | 0.212 | 0.101 | 1.64E-11 | Oligo | NDE1     |
| TMEM31      | 1.11E-15 | 0.171073 | 0.035 | 0.005 | 1.65E-11 | Oligo | TMEM31   |
| LPCAT1. 4   | 1.17E-15 | -0.39438 | 0.033 | 0.187 | 1.74E-11 | Oligo | LPCAT1   |
| ABHD2. 4    | 1.17E-15 | -0.32299 | 0.064 | 0.235 | 1.75E-11 | Oligo | ABHD2    |
| GALNT13. 5  | 1.18E-15 | 0.235755 | 0.122 | 0.041 | 1.77E-11 | Oligo | GALNT13  |
| PTBP1. 6    | 1.20E-15 | -0.34192 | 0.132 | 0.33  | 1.79E-11 | Oligo | PTBP1    |
| PIPOX. 8    | 1.22E-15 | -0.31694 | 0.002 | 0.137 | 1.83E-11 | Oligo | PIPOX    |
| TRIP6. 8    | 1.23E-15 | -0.46079 | 0.08  | 0.255 | 1.84E-11 | Oligo | TRIP6    |
| IMMT. 4     | 1.23E-15 | -0.38552 | 0.118 | 0.309 | 1.84E-11 | Oligo | IMMT     |
| TMEM132A. 1 | 1.24E-15 | -0.30066 | 0.009 | 0.15  | 1.85E-11 | Oligo | TMEM132A |
| SRP19. 1    | 1.24E-15 | -0.34192 | 0.2   | 0.412 | 1.85E-11 | Oligo | SRP19    |
| DESI2. 4    | 1.26E-15 | -0.32436 | 0.04  | 0.2   | 1.89E-11 | Oligo | DESI2    |
| CFD. 8      | 1.26E-15 | -0.62773 | 0.019 | 0.161 | 1.89E-11 | Oligo | CFD      |
| TUSC2. 5    | 1.29E-15 | -0.38534 | 0.146 | 0.342 | 1.92E-11 | Oligo | TUSC2    |
| IFIT1. 5    | 1.31E-15 | 0.346388 | 0.172 | 0.07  | 1.95E-11 | Oligo | IFIT1    |
| GAS6. 8     | 1.32E-15 | -0.49598 | 0.052 | 0.21  | 1.97E-11 | Oligo | GAS6     |
| KCNMA1. 7   | 1.33E-15 | -0.45887 | 0.009 | 0.148 | 1.99E-11 | Oligo | KCNMA1   |
| DPM2. 2     | 1.34E-15 | -0.35911 | 0.148 | 0.354 | 2.00E-11 | Oligo | DPM2     |
| RFC2. 4     | 1.36E-15 | -0.45208 | 0.075 | 0.248 | 2.04E-11 | Oligo | RFC2     |
| PRTFDC1. 5  | 1.39E-15 | 0.57467  | 0.252 | 0.131 | 2.07E-11 | Oligo | PRTFDC1  |
| TMEM158. 8  | 1.40E-15 | -0.34717 | 0.007 | 0.144 | 2.08E-11 | Oligo | TMEM158  |
| RHBDF2. 9   | 1.44E-15 | -0.47698 | 0.028 | 0.183 | 2.15E-11 | Oligo | RHBDF2   |
| PGLS. 5     | 1.46E-15 | -0.3768  | 0.315 | 0.518 | 2.18E-11 | Oligo | PGLS     |
| UQCRFS1. 5  | 1.46E-15 | -0.34174 | 0.341 | 0.552 | 2.19E-11 | Oligo | UQCRFS1  |
| SLC40A1. 7  | 1.53E-15 | -0.43237 | 0.007 | 0.144 | 2.29E-11 | Oligo | SLC40A1  |
| TPD52L2. 6  | 1.55E-15 | -0.31365 | 0.136 | 0.331 | 2.32E-11 | Oligo | TPD52L2  |
| ERGIC1. 2   | 1.55E-15 | -0.37728 | 0.108 | 0.296 | 2.32E-11 | Oligo | ERGIC1   |
| VOPPI. 4    | 1.57E-15 | -0.40868 | 0.115 | 0.297 | 2.35E-11 | Oligo | VOPPI    |
| CSF3R. 8    | 1.59E-15 | -0.61591 | 0.016 | 0.158 | 2.37E-11 | Oligo | CSF3R    |
| MBOAT7. 6   | 1.60E-15 | -0.34139 | 0.075 | 0.249 | 2.40E-11 | Oligo | MBOAT7   |
| FLNB. 3     | 1.73E-15 | 0.27868  | 0.132 | 0.048 | 2.58E-11 | Oligo | FLNB     |
| CCDC34. 6   | 1.73E-15 | -0.28827 | 0.024 | 0.173 | 2.59E-11 | Oligo | CCDC34   |
| FAM49A. 5   | 1.79E-15 | -0.40874 | 0.026 | 0.176 | 2.67E-11 | Oligo | FAM49A   |
| MLF1. 6     | 1.80E-15 | -0.40479 | 0.073 | 0.248 | 2.69E-11 | Oligo | MLF1     |
| PRKCB. 8    | 1.83E-15 | 0.263554 | 0.118 | 0.039 | 2.73E-11 | Oligo | PRKCB    |
| STOM. 8     | 1.84E-15 | -0.54697 | 0.089 | 0.257 | 2.75E-11 | Oligo | STOM     |
| CDH2. 8     | 1.87E-15 | -0.40635 | 0.111 | 0.291 | 2.80E-11 | Oligo | CDH2     |

|             |           |           |        |        |           |       |          |
|-------------|-----------|-----------|--------|--------|-----------|-------|----------|
| TRAPPC2L.   | 1. 91E-15 | 0. 488942 | 0. 529 | 0. 415 | 2. 86E-11 | Oligo | TRAPPC2L |
| LHX2. 8     | 1. 93E-15 | -0. 31938 | 0. 002 | 0. 135 | 2. 89E-11 | Oligo | LHX2     |
| ING2. 5     | 1. 96E-15 | -0. 33736 | 0. 049 | 0. 212 | 2. 92E-11 | Oligo | ING2     |
| TTC3. 8     | 1. 98E-15 | -0. 36886 | 0. 339 | 0. 523 | 2. 95E-11 | Oligo | TTC3     |
| RB1. 9      | 2. 00E-15 | -0. 4951  | 0. 134 | 0. 311 | 2. 99E-11 | Oligo | RB1      |
| LRRC4C. 6   | 2. 00E-15 | 0. 502568 | 0. 2   | 0. 091 | 2. 99E-11 | Oligo | LRRC4C   |
| TPR. 5      | 2. 05E-15 | -0. 28661 | 0. 198 | 0. 412 | 3. 07E-11 | Oligo | TPR      |
| MEX3D. 5    | 2. 08E-15 | 0. 320057 | 0. 148 | 0. 059 | 3. 12E-11 | Oligo | MEX3D    |
| COX17. 4    | 2. 13E-15 | 0. 419887 | 0. 609 | 0. 515 | 3. 18E-11 | Oligo | COX17    |
| NDUFA9. 4   | 2. 15E-15 | -0. 33195 | 0. 186 | 0. 391 | 3. 22E-11 | Oligo | NDUFA9   |
| NOP16. 7    | 2. 16E-15 | -0. 39496 | 0. 045 | 0. 205 | 3. 22E-11 | Oligo | NOP16    |
| POSTN. 8    | 2. 17E-15 | -0. 44855 | 0. 002 | 0. 134 | 3. 25E-11 | Oligo | POSTN    |
| DNAJC4. 5   | 2. 17E-15 | -0. 39484 | 0. 066 | 0. 234 | 3. 25E-11 | Oligo | DNAJC4   |
| TPM1. 7     | 2. 18E-15 | -0. 38551 | 0. 082 | 0. 259 | 3. 26E-11 | Oligo | TPM1     |
| CEP57. 6    | 2. 24E-15 | -0. 40953 | 0. 068 | 0. 236 | 3. 35E-11 | Oligo | CEP57    |
| MAGI2. 8    | 2. 28E-15 | 0. 383659 | 0. 214 | 0. 101 | 3. 41E-11 | Oligo | MAGI2    |
| SRA1. 6     | 2. 33E-15 | -0. 41607 | 0. 205 | 0. 406 | 3. 48E-11 | Oligo | SRA1     |
| MAP2K3. 8   | 2. 39E-15 | -0. 33726 | 0. 038 | 0. 195 | 3. 57E-11 | Oligo | MAP2K3   |
| RABAC1. 5   | 2. 41E-15 | 0. 403837 | 0. 734 | 0. 662 | 3. 60E-11 | Oligo | RABAC1   |
| AKAP12. 9   | 2. 46E-15 | -0. 2987  | 0. 035 | 0. 193 | 3. 68E-11 | Oligo | AKAP12   |
| MYH10. 7    | 2. 51E-15 | -0. 34968 | 0. 016 | 0. 158 | 3. 75E-11 | Oligo | MYH10    |
| SYNDIG1. 7  | 2. 56E-15 | 0. 435497 | 0. 193 | 0. 085 | 3. 82E-11 | Oligo | SYNDIG1  |
| SF3A3. 3    | 2. 68E-15 | -0. 32299 | 0. 106 | 0. 292 | 4. 00E-11 | Oligo | SF3A3    |
| LTA4H. 7    | 2. 71E-15 | -0. 39338 | 0. 066 | 0. 236 | 4. 05E-11 | Oligo | LTA4H    |
| ARSJ. 7     | 2. 74E-15 | -0. 30791 | 0      | 0. 129 | 4. 09E-11 | Oligo | ARSJ     |
| WDR46. 2    | 2. 80E-15 | -0. 35862 | 0. 071 | 0. 241 | 4. 18E-11 | Oligo | WDR46    |
| FUOM. 9     | 2. 81E-15 | -0. 51643 | 0. 009 | 0. 146 | 4. 20E-11 | Oligo | FUOM     |
| SMIM7. 5    | 2. 81E-15 | -0. 29078 | 0. 296 | 0. 513 | 4. 20E-11 | Oligo | SMIM7    |
| LRRC59. 5   | 2. 85E-15 | -0. 31102 | 0. 165 | 0. 365 | 4. 25E-11 | Oligo | LRRC59   |
| UBE2J2. 7   | 2. 93E-15 | -0. 34949 | 0. 146 | 0. 341 | 4. 38E-11 | Oligo | UBE2J2   |
| NDFIP1. 9   | 2. 94E-15 | -0. 33158 | 0. 419 | 0. 608 | 4. 39E-11 | Oligo | NDFIP1   |
| FAM84A. 8   | 2. 97E-15 | -0. 34172 | 0. 012 | 0. 149 | 4. 44E-11 | Oligo | FAM84A   |
| RFK. 6      | 3. 03E-15 | -0. 33516 | 0. 071 | 0. 244 | 4. 53E-11 | Oligo | RFK      |
| COQ10B. 4   | 3. 05E-15 | -0. 38912 | 0. 092 | 0. 269 | 4. 55E-11 | Oligo | COQ10B   |
| GPI. 6      | 3. 11E-15 | -0. 44363 | 0. 169 | 0. 363 | 4. 65E-11 | Oligo | GPI      |
| PEA15. 5    | 3. 13E-15 | 0. 467293 | 0. 532 | 0. 44  | 4. 67E-11 | Oligo | PEA15    |
| CCL3. 9     | 3. 14E-15 | -0. 68134 | 0. 268 | 0. 428 | 4. 70E-11 | Oligo | CCL3     |
| PHF14. 8    | 3. 16E-15 | -0. 37594 | 0. 228 | 0. 43  | 4. 72E-11 | Oligo | PHF14    |
| WDR1. 6     | 3. 19E-15 | -0. 33638 | 0. 216 | 0. 422 | 4. 76E-11 | Oligo | WDR1     |
| SPATA13. 5  | 3. 42E-15 | 0. 4442   | 0. 287 | 0. 16  | 5. 11E-11 | Oligo | SPATA13  |
| RNF7. 4     | 3. 43E-15 | -0. 24873 | 0. 329 | 0. 54  | 5. 12E-11 | Oligo | RNF7     |
| DCAF13. 6   | 3. 43E-15 | -0. 32768 | 0. 129 | 0. 325 | 5. 13E-11 | Oligo | DCAF13   |
| EDNRB. 6    | 3. 46E-15 | -0. 44404 | 0. 04  | 0. 193 | 5. 17E-11 | Oligo | EDNRB    |
| SLC25A25. 3 | 3. 51E-15 | -0. 37128 | 0. 026 | 0. 171 | 5. 25E-11 | Oligo | SLC25A25 |
| DLC1. 7     | 3. 54E-15 | 0. 374694 | 0. 184 | 0. 083 | 5. 29E-11 | Oligo | DLC1     |
| SMOX. 8     | 3. 54E-15 | -0. 42249 | 0. 082 | 0. 253 | 5. 29E-11 | Oligo | SMOX     |
| ASB4        | 3. 62E-15 | 0. 132805 | 0. 014 | 0. 001 | 5. 40E-11 | Oligo | ASB4     |
| DTYMK. 8    | 3. 62E-15 | -0. 33492 | 0. 144 | 0. 336 | 5. 41E-11 | Oligo | DTYMK    |
| WARS. 5     | 3. 64E-15 | -0. 38245 | 0. 049 | 0. 207 | 5. 44E-11 | Oligo | WARS     |
| FLNC. 1     | 3. 83E-15 | 0. 20357  | 0. 085 | 0. 024 | 5. 73E-11 | Oligo | FLNC     |
| DCUN1D5. 4  | 4. 17E-15 | -0. 32535 | 0. 106 | 0. 294 | 6. 23E-11 | Oligo | DCUN1D5  |

|           |          |          |       |       |          |       |            |
|-----------|----------|----------|-------|-------|----------|-------|------------|
| NEU1.5    | 4.31E-15 | -0.3583  | 0.113 | 0.299 | 6.45E-11 | Oligo | NEU1       |
| SEZ6L.8   | 4.32E-15 | -0.40246 | 0.007 | 0.14  | 6.45E-11 | Oligo | SEZ6L      |
| MKKS.5    | 4.40E-15 | -0.40122 | 0.212 | 0.411 | 6.57E-11 | Oligo | MKKS       |
| TIPRL.4   | 4.68E-15 | -0.2187  | 0.092 | 0.272 | 6.99E-11 | Oligo | TIPRL      |
| NRP2.6    | 4.70E-15 | -0.3794  | 0.061 | 0.227 | 7.03E-11 | Oligo | NRP2       |
| DCLK1.7   | 4.75E-15 | -0.35026 | 0.016 | 0.156 | 7.11E-11 | Oligo | DCLK1      |
| GALNT11.6 | 4.77E-15 | -0.38519 | 0.068 | 0.232 | 7.13E-11 | Oligo | GALNT11    |
| COQ9.6    | 4.81E-15 | -0.32889 | 0.075 | 0.248 | 7.19E-11 | Oligo | COQ9       |
| BICD1.7   | 4.83E-15 | -0.31521 | 0.052 | 0.21  | 7.21E-11 | Oligo | BICD1      |
| SNRPD2.5  | 4.85E-15 | -0.23635 | 0.553 | 0.755 | 7.25E-11 | Oligo | SNRPD2     |
| JMJD6.5   | 4.91E-15 | -0.33834 | 0.111 | 0.289 | 7.34E-11 | Oligo | JMJD6      |
| GBP1.5    | 5.13E-15 | -0.57256 | 0.019 | 0.159 | 7.67E-11 | Oligo | GBP1       |
| NDUFA5.7  | 5.19E-15 | -0.1805  | 0.36  | 0.585 | 7.76E-11 | Oligo | NDUFA5     |
| COQ2.8    | 5.22E-15 | -0.39093 | 0.035 | 0.185 | 7.79E-11 | Oligo | COQ2       |
| BABAM1.3  | 5.23E-15 | -0.22261 | 0.202 | 0.413 | 7.81E-11 | Oligo | BABAM1     |
| GGA2.9    | 5.26E-15 | -0.41197 | 0.009 | 0.144 | 7.87E-11 | Oligo | GGA2       |
| DDX41.4   | 5.35E-15 | -0.32434 | 0.075 | 0.249 | 8.00E-11 | Oligo | DDX41      |
| NEIL2.7   | 5.41E-15 | -0.38002 | 0.047 | 0.204 | 8.09E-11 | Oligo | NEIL2      |
| VAMP1     | 5.49E-15 | 0.330301 | 0.096 | 0.03  | 8.20E-11 | Oligo | VAMP1      |
| MGAT2.3   | 5.58E-15 | -0.30828 | 0.038 | 0.192 | 8.34E-11 | Oligo | MGAT2      |
| TGFB11.8  | 5.74E-15 | -0.31228 | 0.002 | 0.131 | 8.58E-11 | Oligo | TGFB11     |
| C20orf96. | 5.77E-15 | -0.32823 | 0.016 | 0.155 | 8.62E-11 | Oligo | C20orf96   |
| PSMD12.4  | 5.94E-15 | -0.3003  | 0.155 | 0.35  | 8.88E-11 | Oligo | PSMD12     |
| PIGM.2    | 5.97E-15 | 0.433249 | 0.184 | 0.081 | 8.92E-11 | Oligo | PIGM       |
| STXBP3.3  | 6.02E-15 | 0.472536 | 0.315 | 0.189 | 9.00E-11 | Oligo | STXBP3     |
| EIF4E3    | 6.16E-15 | 0.178501 | 0.075 | 0.02  | 9.21E-11 | Oligo | EIF4E3     |
| SSRP1.7   | 6.20E-15 | -0.31606 | 0.169 | 0.362 | 9.26E-11 | Oligo | SSRP1      |
| RSRC2.3   | 6.32E-15 | -0.29188 | 0.261 | 0.483 | 9.45E-11 | Oligo | RSRC2      |
| SPTAN1.7  | 6.37E-15 | -0.31873 | 0.089 | 0.266 | 9.53E-11 | Oligo | SPTAN1     |
| ANGPTL2.6 | 6.55E-15 | 0.462778 | 0.205 | 0.096 | 9.79E-11 | Oligo | ANGPTL2    |
| LHFP.9    | 6.56E-15 | -0.41745 | 0.071 | 0.238 | 9.81E-11 | Oligo | LHFP       |
| HID1.6    | 6.73E-15 | 0.356129 | 0.132 | 0.049 | 1.01E-10 | Oligo | HID1       |
| ACP2.5    | 6.75E-15 | -0.40596 | 0.08  | 0.25  | 1.01E-10 | Oligo | ACP2       |
| GSN-AS1.1 | 6.84E-15 | 0.131435 | 0.042 | 0.007 | 1.02E-10 | Oligo | GSN-AS1    |
| STK4.6    | 6.91E-15 | -0.40744 | 0.115 | 0.293 | 1.03E-10 | Oligo | STK4       |
| MAP1B.8   | 6.93E-15 | 0.303998 | 0.694 | 0.528 | 1.04E-10 | Oligo | MAP1B      |
| TAF6.5    | 6.97E-15 | -0.30552 | 0.073 | 0.242 | 1.04E-10 | Oligo | TAF6       |
| RNFT1.4   | 7.08E-15 | -0.3665  | 0.049 | 0.208 | 1.06E-10 | Oligo | RNFT1      |
| GARS.7    | 7.15E-15 | -0.38303 | 0.12  | 0.3   | 1.07E-10 | Oligo | GARS       |
| AC093673. | 7.22E-15 | -0.36051 | 0.035 | 0.184 | 1.08E-10 | Oligo | AC093673.5 |
| TMEM97.6  | 7.25E-15 | -0.29282 | 0.031 | 0.177 | 1.08E-10 | Oligo | TMEM97     |
| ISYNA1.5  | 7.27E-15 | -0.33873 | 0.007 | 0.139 | 1.09E-10 | Oligo | ISYNA1     |
| AP3S1.4   | 7.46E-15 | -0.31514 | 0.224 | 0.434 | 1.12E-10 | Oligo | AP3S1      |
| SLC35F1.6 | 7.47E-15 | -0.26812 | 0.002 | 0.13  | 1.12E-10 | Oligo | SLC35F1    |
| MYO10.8   | 7.48E-15 | 0.471732 | 0.315 | 0.19  | 1.12E-10 | Oligo | MYO10      |
| CHPF.7    | 7.51E-15 | -0.35542 | 0.092 | 0.265 | 1.12E-10 | Oligo | CHPF       |
| PSMD6.4   | 7.70E-15 | -0.25026 | 0.16  | 0.357 | 1.15E-10 | Oligo | PSMD6      |
| DNAJB9.6  | 8.02E-15 | -0.43133 | 0.2   | 0.392 | 1.20E-10 | Oligo | DNAJB9     |
| TSC22D1.8 | 8.06E-15 | -0.22984 | 0.332 | 0.519 | 1.20E-10 | Oligo | TSC22D1    |
| FBXO7.4   | 8.15E-15 | 0.496015 | 0.431 | 0.305 | 1.22E-10 | Oligo | FBXO7      |
| STK17B.7  | 8.19E-15 | -0.53743 | 0.007 | 0.138 | 1.22E-10 | Oligo | STK17B     |

|            |           |           |        |        |           |       |            |
|------------|-----------|-----------|--------|--------|-----------|-------|------------|
| CRNDE. 4   | 8. 21E-15 | -0. 34469 | 0. 035 | 0. 184 | 1. 23E-10 | Oligo | CRNDE      |
| ADO. 6     | 8. 25E-15 | 0. 417248 | 0. 233 | 0. 122 | 1. 23E-10 | Oligo | ADO        |
| C14orf119  | 8. 26E-15 | -0. 31352 | 0. 132 | 0. 32  | 1. 23E-10 | Oligo | C14orf119  |
| PSMG1. 2   | 8. 50E-15 | -0. 37211 | 0. 059 | 0. 222 | 1. 27E-10 | Oligo | PSMG1      |
| EIF2S3. 5  | 8. 52E-15 | -0. 44245 | 0. 122 | 0. 301 | 1. 27E-10 | Oligo | EIF2S3     |
| NUDT22. 6  | 8. 59E-15 | -0. 27638 | 0. 096 | 0. 276 | 1. 28E-10 | Oligo | NUDT22     |
| PSMB8. 6   | 9. 10E-15 | -0. 46995 | 0. 224 | 0. 422 | 1. 36E-10 | Oligo | PSMB8      |
| C12orf76.  | 9. 33E-15 | 0. 64381  | 0. 386 | 0. 262 | 1. 39E-10 | Oligo | C12orf76   |
| SLC1A3. 8  | 9. 39E-15 | -0. 44927 | 0. 313 | 0. 483 | 1. 40E-10 | Oligo | SLC1A3     |
| RGS17. 7   | 9. 49E-15 | -0. 32033 | 0. 024 | 0. 167 | 1. 42E-10 | Oligo | RGS17      |
| MMADHC. 1  | 9. 59E-15 | -0. 24489 | 0. 231 | 0. 443 | 1. 43E-10 | Oligo | MMADHC     |
| TPRKB. 5   | 9. 92E-15 | -0. 30288 | 0. 167 | 0. 371 | 1. 48E-10 | Oligo | TPRKB      |
| HNRNPAB. 8 | 1. 00E-14 | -0. 37312 | 0. 209 | 0. 404 | 1. 50E-10 | Oligo | HNRNPAB    |
| PFN1. 8    | 1. 00E-14 | -0. 24745 | 0. 668 | 0. 814 | 1. 50E-10 | Oligo | PFN1       |
| KLF2. 5    | 1. 03E-14 | -0. 54925 | 0. 007 | 0. 136 | 1. 55E-10 | Oligo | KLF2       |
| POU2F2. 7  | 1. 07E-14 | -0. 48508 | 0. 009 | 0. 14  | 1. 59E-10 | Oligo | POU2F2     |
| IL10RA. 9  | 1. 07E-14 | -0. 55256 | 0. 012 | 0. 143 | 1. 60E-10 | Oligo | IL10RA     |
| CCDC28B. 8 | 1. 10E-14 | -0. 28267 | 0. 061 | 0. 225 | 1. 65E-10 | Oligo | CCDC28B    |
| MAPKAPK3.  | 1. 11E-14 | -0. 39048 | 0. 031 | 0. 176 | 1. 66E-10 | Oligo | MAPKAPK3   |
| CH25H. 5   | 1. 17E-14 | -0. 72673 | 0. 016 | 0. 152 | 1. 75E-10 | Oligo | CH25H      |
| COL18A1. 3 | 1. 20E-14 | 0. 297983 | 0. 132 | 0. 05  | 1. 79E-10 | Oligo | COL18A1    |
| PYCR1. 5   | 1. 20E-14 | -0. 32644 | 0. 04  | 0. 19  | 1. 80E-10 | Oligo | PYCR1      |
| CCDC85B. 3 | 1. 21E-14 | -0. 39659 | 0. 228 | 0. 421 | 1. 81E-10 | Oligo | CCDC85B    |
| ASCL1. 8   | 1. 23E-14 | -0. 47265 | 0. 042 | 0. 191 | 1. 84E-10 | Oligo | ASCL1      |
| COLGALT1.  | 1. 23E-14 | -0. 36961 | 0. 045 | 0. 197 | 1. 85E-10 | Oligo | COLGALT1   |
| FAM129A. 5 | 1. 29E-14 | -0. 34326 | 0. 012 | 0. 145 | 1. 93E-10 | Oligo | FAM129A    |
| SLC1A2. 7  | 1. 32E-14 | -0. 38345 | 0. 009 | 0. 14  | 1. 97E-10 | Oligo | SLC1A2     |
| SMARCD3. 8 | 1. 32E-14 | -0. 34851 | 0. 073 | 0. 237 | 1. 97E-10 | Oligo | SMARCD3    |
| FAM89B. 8  | 1. 32E-14 | -0. 3226  | 0. 082 | 0. 253 | 1. 98E-10 | Oligo | FAM89B     |
| CTSZ. 9    | 1. 33E-14 | -0. 63196 | 0. 108 | 0. 262 | 1. 99E-10 | Oligo | CTSZ       |
| NONO. 8    | 1. 34E-14 | -0. 36579 | 0. 261 | 0. 462 | 2. 01E-10 | Oligo | NONO       |
| ADAM28. 8  | 1. 34E-14 | -0. 60694 | 0. 014 | 0. 146 | 2. 01E-10 | Oligo | ADAM28     |
| TLE1. 7    | 1. 35E-14 | -0. 33098 | 0. 031 | 0. 175 | 2. 01E-10 | Oligo | TLE1       |
| KANSL1-AS  | 1. 38E-14 | -0. 3666  | 0. 045 | 0. 199 | 2. 07E-10 | Oligo | KANSL1-AS1 |
| SLC25A39.  | 1. 39E-14 | -0. 39682 | 0. 216 | 0. 412 | 2. 07E-10 | Oligo | SLC25A39   |
| OSM. 8     | 1. 39E-14 | -0. 62285 | 0. 016 | 0. 15  | 2. 08E-10 | Oligo | OSM        |
| GNPDA1. 3  | 1. 42E-14 | -0. 30574 | 0. 075 | 0. 246 | 2. 13E-10 | Oligo | GNPDA1     |
| KCNF1. 9   | 1. 44E-14 | -0. 32845 | 0. 002 | 0. 128 | 2. 15E-10 | Oligo | KCNF1      |
| GNG2. 5    | 1. 45E-14 | -0. 43162 | 0. 038 | 0. 184 | 2. 17E-10 | Oligo | GNG2       |
| UBL3. 8    | 1. 45E-14 | 0. 39282  | 0. 461 | 0. 35  | 2. 17E-10 | Oligo | UBL3       |
| TRIM22. 7  | 1. 46E-14 | -0. 46594 | 0. 009 | 0. 139 | 2. 18E-10 | Oligo | TRIM22     |
| TTC19. 7   | 1. 48E-14 | -0. 2771  | 0. 162 | 0. 363 | 2. 21E-10 | Oligo | TTC19      |
| CKAP2. 8   | 1. 54E-14 | -0. 38175 | 0. 031 | 0. 174 | 2. 31E-10 | Oligo | CKAP2      |
| ALG3. 3    | 1. 55E-14 | -0. 37709 | 0. 073 | 0. 238 | 2. 31E-10 | Oligo | ALG3       |
| IFI44L. 5  | 1. 58E-14 | -0. 58705 | 0. 014 | 0. 146 | 2. 37E-10 | Oligo | IFI44L     |
| S100A13. 7 | 1. 59E-14 | 0. 515899 | 0. 424 | 0. 291 | 2. 37E-10 | Oligo | S100A13    |
| AQP4. 8    | 1. 61E-14 | -0. 57892 | 0. 031 | 0. 171 | 2. 41E-10 | Oligo | AQP4       |
| TBC1D10B.  | 1. 63E-14 | 0. 401794 | 0. 2   | 0. 096 | 2. 43E-10 | Oligo | TBC1D10B   |
| TMEM173. 9 | 1. 69E-14 | -0. 5438  | 0. 005 | 0. 131 | 2. 52E-10 | Oligo | TMEM173    |
| ISCA2. 4   | 1. 72E-14 | -0. 31352 | 0. 108 | 0. 288 | 2. 57E-10 | Oligo | ISCA2      |
| KRR1. 1    | 1. 72E-14 | -0. 27203 | 0. 071 | 0. 238 | 2. 57E-10 | Oligo | KRR1       |

|             |           |           |        |        |                 |               |
|-------------|-----------|-----------|--------|--------|-----------------|---------------|
| XRCC5. 8    | 1. 74E-14 | -0. 23067 | 0. 353 | 0. 568 | 2. 60E-10 Oligo | XRCC5         |
| FRRS1L. 1   | 1. 76E-14 | 0. 233989 | 0. 082 | 0. 023 | 2. 63E-10 Oligo | FRRS1L        |
| STARD4-AS   | 1. 77E-14 | -0. 31125 | 0. 005 | 0. 132 | 2. 65E-10 Oligo | STARD4-AS1    |
| DUSP11. 1   | 1. 79E-14 | -0. 3196  | 0. 04  | 0. 188 | 2. 67E-10 Oligo | DUSP11        |
| CHCHD7. 8   | 1. 81E-14 | -0. 47116 | 0. 122 | 0. 292 | 2. 70E-10 Oligo | CHCHD7        |
| CCNL1. 3    | 1. 82E-14 | -0. 30099 | 0. 32  | 0. 532 | 2. 72E-10 Oligo | CCNL1         |
| ARL4D. 9    | 1. 83E-14 | -0. 38821 | 0. 031 | 0. 174 | 2. 74E-10 Oligo | ARL4D         |
| CDC26. 4    | 1. 87E-14 | -0. 31118 | 0. 092 | 0. 269 | 2. 79E-10 Oligo | CDC26         |
| ZBED3. 6    | 1. 93E-14 | 0. 393271 | 0. 184 | 0. 085 | 2. 88E-10 Oligo | ZBED3         |
| TFRC. 7     | 1. 94E-14 | -0. 44715 | 0. 059 | 0. 215 | 2. 90E-10 Oligo | TFRC          |
| HS2ST1. 8   | 1. 97E-14 | -0. 27538 | 0. 033 | 0. 18  | 2. 95E-10 Oligo | HS2ST1        |
| PPP2R1B. 1  | 2. 02E-14 | 0. 327078 | 0. 158 | 0. 066 | 3. 02E-10 Oligo | PPP2R1B       |
| SEC61A1. 4  | 2. 03E-14 | -0. 35538 | 0. 181 | 0. 372 | 3. 03E-10 Oligo | SEC61A1       |
| APCDD1. 2   | 2. 05E-14 | 0. 359959 | 0. 101 | 0. 033 | 3. 06E-10 Oligo | APCDD1        |
| LRRC4B. 9   | 2. 08E-14 | 0. 412311 | 0. 24  | 0. 129 | 3. 10E-10 Oligo | LRRC4B        |
| ENOSF1. 6   | 2. 09E-14 | 0. 519072 | 0. 228 | 0. 121 | 3. 13E-10 Oligo | ENOSF1        |
| NIFK. 5     | 2. 19E-14 | -0. 31178 | 0. 162 | 0. 355 | 3. 27E-10 Oligo | NIFK          |
| EDEM2. 4    | 2. 23E-14 | -0. 3274  | 0. 078 | 0. 246 | 3. 33E-10 Oligo | EDEM2         |
| SCRG1. 8    | 2. 24E-14 | 0. 369298 | 0. 489 | 0. 341 | 3. 35E-10 Oligo | SCRG1         |
| BLOC1S1. 5  | 2. 25E-14 | 0. 388074 | 0. 694 | 0. 646 | 3. 37E-10 Oligo | BLOC1S1       |
| DNAJC12. 2  | 2. 27E-14 | 0. 48084  | 0. 176 | 0. 078 | 3. 40E-10 Oligo | DNAJC12       |
| DUSP14. 7   | 2. 29E-14 | -0. 36615 | 0. 038 | 0. 185 | 3. 42E-10 Oligo | DUSP14        |
| NOP58. 6    | 2. 36E-14 | -0. 38399 | 0. 122 | 0. 298 | 3. 52E-10 Oligo | NOP58         |
| TOB2. 4     | 2. 36E-14 | 0. 501651 | 0. 318 | 0. 193 | 3. 53E-10 Oligo | TOB2          |
| MCFD2. 2    | 2. 36E-14 | -0. 31363 | 0. 111 | 0. 293 | 3. 53E-10 Oligo | MCFD2         |
| NGFRAP1. 8  | 2. 44E-14 | 0. 289037 | 0. 786 | 0. 639 | 3. 64E-10 Oligo | NGFRAP1       |
| NAB2. 2     | 2. 50E-14 | -0. 31954 | 0. 014 | 0. 146 | 3. 73E-10 Oligo | NAB2          |
| RALGAPA1. 2 | 2. 59E-14 | 0. 412251 | 0. 24  | 0. 126 | 3. 88E-10 Oligo | RALGAPA1      |
| ABHD14B. 6  | 2. 62E-14 | -0. 38697 | 0. 038 | 0. 184 | 3. 91E-10 Oligo | ABHD14B       |
| KLHL23. 9   | 2. 63E-14 | -0. 31949 | 0. 026 | 0. 166 | 3. 93E-10 Oligo | KLHL23        |
| SMYD2. 3    | 2. 68E-14 | -0. 33079 | 0. 014 | 0. 146 | 4. 01E-10 Oligo | SMYD2         |
| SIRT6. 3    | 2. 72E-14 | -0. 26796 | 0. 047 | 0. 201 | 4. 06E-10 Oligo | SIRT6         |
| SDHD. 6     | 2. 84E-14 | -0. 33321 | 0. 202 | 0. 403 | 4. 25E-10 Oligo | SDHD          |
| ATRAID. 3   | 2. 92E-14 | -0. 22702 | 0. 412 | 0. 619 | 4. 37E-10 Oligo | ATRAID        |
| BRE. 2      | 2. 97E-14 | -0. 35073 | 0. 071 | 0. 232 | 4. 43E-10 Oligo | BRE           |
| ACP1. 4     | 3. 07E-14 | -0. 20098 | 0. 287 | 0. 506 | 4. 59E-10 Oligo | ACP1          |
| SAP18. 2    | 3. 12E-14 | -0. 16579 | 0. 56  | 0. 774 | 4. 67E-10 Oligo | SAP18         |
| APOO. 7     | 3. 15E-14 | -0. 34646 | 0. 073 | 0. 235 | 4. 71E-10 Oligo | APOO          |
| HOOK2. 7    | 3. 25E-14 | -0. 29633 | 0. 073 | 0. 24  | 4. 86E-10 Oligo | HOOK2         |
| CD63. 8     | 3. 31E-14 | -0. 19157 | 0. 812 | 0. 929 | 4. 95E-10 Oligo | CD63          |
| RP11-390F   | 3. 33E-14 | -0. 31551 | 0. 009 | 0. 137 | 4. 97E-10 Oligo | RP11-390P2. 4 |
| RAB5C. 5    | 3. 40E-14 | -0. 18772 | 0. 44  | 0. 661 | 5. 08E-10 Oligo | RAB5C         |
| SLC30A5. 5  | 3. 41E-14 | -0. 31548 | 0. 054 | 0. 21  | 5. 10E-10 Oligo | SLC30A5       |
| SNX10. 5    | 3. 42E-14 | -0. 35784 | 0. 075 | 0. 234 | 5. 11E-10 Oligo | SNX10         |
| KLHL7. 7    | 3. 47E-14 | -0. 30609 | 0. 108 | 0. 286 | 5. 18E-10 Oligo | KLHL7         |
| ITGA7. 7    | 3. 57E-14 | -0. 27711 | 0. 012 | 0. 141 | 5. 33E-10 Oligo | ITGA7         |
| ARMCX1. 8   | 3. 61E-14 | -0. 43045 | 0. 064 | 0. 219 | 5. 39E-10 Oligo | ARMCX1        |
| CDC123. 5   | 3. 61E-14 | -0. 27218 | 0. 153 | 0. 343 | 5. 39E-10 Oligo | CDC123        |
| OAS1. 6     | 3. 63E-14 | -0. 55061 | 0. 009 | 0. 137 | 5. 42E-10 Oligo | OAS1          |
| NR4A3. 8    | 3. 73E-14 | -0. 59051 | 0. 024 | 0. 156 | 5. 57E-10 Oligo | NR4A3         |
| SP3. 6      | 3. 73E-14 | -0. 36848 | 0. 061 | 0. 216 | 5. 58E-10 Oligo | SP3           |



|            |          |          |       |       |          |       |            |
|------------|----------|----------|-------|-------|----------|-------|------------|
| GADD45GIF  | 3.75E-14 | -0.33133 | 0.402 | 0.569 | 5.61E-10 | Oligo | GADD45GIP1 |
| TRIM36.9   | 3.77E-14 | -0.37353 | 0.042 | 0.187 | 5.63E-10 | Oligo | TRIM36     |
| TSPAN6.7   | 3.80E-14 | -0.24834 | 0.019 | 0.154 | 5.67E-10 | Oligo | TSPAN6     |
| SSR3.8     | 3.85E-14 | -0.39286 | 0.336 | 0.533 | 5.75E-10 | Oligo | SSR3       |
| SHISA5.2   | 3.86E-14 | -0.33745 | 0.146 | 0.331 | 5.76E-10 | Oligo | SHISA5     |
| ERH.5      | 3.88E-14 | -0.14137 | 0.518 | 0.721 | 5.80E-10 | Oligo | ERH        |
| CPSF6.6    | 3.90E-14 | -0.37489 | 0.155 | 0.336 | 5.83E-10 | Oligo | CPSF6      |
| RBMX2.3    | 3.92E-14 | -0.26924 | 0.078 | 0.241 | 5.86E-10 | Oligo | RBMX2      |
| ITPR2.7    | 3.95E-14 | -0.36681 | 0.009 | 0.136 | 5.91E-10 | Oligo | ITPR2      |
| GUSB.7     | 3.98E-14 | -0.39551 | 0.106 | 0.278 | 5.94E-10 | Oligo | GUSB       |
| ALOX5.9    | 4.02E-14 | -0.53314 | 0.014 | 0.143 | 6.01E-10 | Oligo | ALOX5      |
| CTSL.9     | 4.11E-14 | -0.36001 | 0.334 | 0.531 | 6.15E-10 | Oligo | CTSL       |
| AKR1A1.7   | 4.19E-14 | -0.32818 | 0.301 | 0.505 | 6.26E-10 | Oligo | AKR1A1     |
| TRAF7.5    | 4.28E-14 | -0.24107 | 0.045 | 0.195 | 6.40E-10 | Oligo | TRAF7      |
| TMEM51.8   | 4.28E-14 | -0.36684 | 0.002 | 0.123 | 6.40E-10 | Oligo | TMEM51     |
| SAA1.6     | 4.30E-14 | -1.25418 | 0.002 | 0.123 | 6.42E-10 | Oligo | SAA1       |
| DIRAS3.8   | 4.39E-14 | -0.56816 | 0.005 | 0.128 | 6.56E-10 | Oligo | DIRAS3     |
| SRRM1.4    | 4.44E-14 | -0.31452 | 0.315 | 0.525 | 6.64E-10 | Oligo | SRRM1      |
| DSE.9      | 4.44E-14 | -0.48366 | 0.014 | 0.142 | 6.64E-10 | Oligo | DSE        |
| SSR4.4     | 4.51E-14 | -0.25734 | 0.591 | 0.769 | 6.74E-10 | Oligo | SSR4       |
| TACC1.6    | 4.54E-14 | 0.505363 | 0.428 | 0.309 | 6.79E-10 | Oligo | TACC1      |
| SPOCK2.7   | 4.56E-14 | -0.37425 | 0.014 | 0.144 | 6.81E-10 | Oligo | SPOCK2     |
| RNF166.6   | 4.67E-14 | -0.41118 | 0.045 | 0.19  | 6.98E-10 | Oligo | RNF166     |
| UBE2N.6    | 4.74E-14 | -0.2392  | 0.318 | 0.529 | 7.08E-10 | Oligo | UBE2N      |
| CHIC2.4    | 4.75E-14 | -0.36955 | 0.085 | 0.25  | 7.10E-10 | Oligo | CHIC2      |
| UBA2.6     | 4.77E-14 | -0.28516 | 0.172 | 0.365 | 7.13E-10 | Oligo | UBA2       |
| AIMP2.5    | 4.80E-14 | -0.33814 | 0.082 | 0.246 | 7.17E-10 | Oligo | AIMP2      |
| HAMP.9     | 4.84E-14 | -0.72257 | 0.031 | 0.166 | 7.23E-10 | Oligo | HAMP       |
| ZNF24.7    | 5.02E-14 | 0.479615 | 0.414 | 0.296 | 7.51E-10 | Oligo | ZNF24      |
| SEPT10.3   | 5.05E-14 | 0.377812 | 0.221 | 0.113 | 7.54E-10 | Oligo | 10-Sep     |
| C16orf87.5 | 5.05E-14 | -0.28664 | 0.054 | 0.21  | 7.54E-10 | Oligo | C16orf87   |
| PHB2.2     | 5.06E-14 | -0.32221 | 0.24  | 0.45  | 7.56E-10 | Oligo | PHB2       |
| MIS18BP1.5 | 5.06E-14 | -0.42134 | 0.019 | 0.151 | 7.56E-10 | Oligo | MIS18BP1   |
| ALG5.2     | 5.10E-14 | -0.29537 | 0.176 | 0.373 | 7.62E-10 | Oligo | ALG5       |
| SNRPE.7    | 5.16E-14 | -0.27594 | 0.386 | 0.587 | 7.71E-10 | Oligo | SNRPE      |
| IFT52.6    | 5.16E-14 | -0.26576 | 0.092 | 0.262 | 7.71E-10 | Oligo | IFT52      |
| CALR.5     | 5.19E-14 | -0.26238 | 0.525 | 0.698 | 7.75E-10 | Oligo | CALR       |
| NAE1.6     | 5.20E-14 | -0.27066 | 0.155 | 0.347 | 7.77E-10 | Oligo | NAE1       |
| HEBP2.5    | 5.22E-14 | -0.31408 | 0.066 | 0.224 | 7.80E-10 | Oligo | HEBP2      |
| TAF7.8     | 5.26E-14 | -0.31869 | 0.353 | 0.561 | 7.87E-10 | Oligo | TAF7       |
| NRBF2.4    | 5.34E-14 | -0.31692 | 0.106 | 0.278 | 7.98E-10 | Oligo | NRBF2      |
| SUPT4H1.3  | 5.38E-14 | -0.2522  | 0.292 | 0.502 | 8.04E-10 | Oligo | SUPT4H1    |
| SCPEP1.8   | 5.44E-14 | -0.48547 | 0.179 | 0.353 | 8.12E-10 | Oligo | SCPEP1     |
| ANK2.9     | 5.52E-14 | 0.454552 | 0.273 | 0.16  | 8.25E-10 | Oligo | ANK2       |
| CALU.7     | 5.53E-14 | -0.41506 | 0.221 | 0.41  | 8.26E-10 | Oligo | CALU       |
| ABI1.9     | 5.72E-14 | -0.43427 | 0.085 | 0.246 | 8.55E-10 | Oligo | ABI1       |
| CSTF3.6    | 5.72E-14 | -0.31799 | 0.101 | 0.273 | 8.55E-10 | Oligo | CSTF3      |
| ZC3H7B.2   | 5.74E-14 | 0.350418 | 0.207 | 0.102 | 8.58E-10 | Oligo | ZC3H7B     |
| SMAP1.4    | 5.88E-14 | -0.34607 | 0.125 | 0.304 | 8.78E-10 | Oligo | SMAP1      |
| RAB11B-AS  | 5.89E-14 | 0.498032 | 0.235 | 0.128 | 8.81E-10 | Oligo | RAB11B-AS1 |
| DIAPH1.6   | 5.90E-14 | -0.30187 | 0.014 | 0.143 | 8.82E-10 | Oligo | DIAPH1     |

|             |           |           |        |        |           |       |          |
|-------------|-----------|-----------|--------|--------|-----------|-------|----------|
| GSTA4. 8    | 5. 92E-14 | -0. 34884 | 0. 12  | 0. 296 | 8. 85E-10 | Oligo | GSTA4    |
| RSPRY1. 7   | 5. 94E-14 | -0. 32275 | 0. 087 | 0. 254 | 8. 88E-10 | Oligo | RSPRY1   |
| H1FX. 8     | 5. 98E-14 | -0. 34623 | 0. 2   | 0. 392 | 8. 94E-10 | Oligo | H1FX     |
| SERPINB9. 6 | 6. 04E-14 | -0. 55378 | 0. 021 | 0. 151 | 9. 03E-10 | Oligo | SERPINB9 |
| NTAN1. 6    | 6. 07E-14 | -0. 35848 | 0. 054 | 0. 205 | 9. 07E-10 | Oligo | NTAN1    |
| SNN. 9      | 6. 17E-14 | -0. 35454 | 0. 075 | 0. 231 | 9. 22E-10 | Oligo | SNN      |
| GABARAP. 6  | 6. 31E-14 | 0. 304888 | 0. 595 | 0. 456 | 9. 43E-10 | Oligo | GABARAP  |
| ABCF2. 6    | 6. 37E-14 | -0. 32487 | 0. 066 | 0. 221 | 9. 51E-10 | Oligo | ABCF2    |
| BEST1. 6    | 6. 47E-14 | 0. 376748 | 0. 416 | 0. 27  | 9. 66E-10 | Oligo | BEST1    |
| PLEKHA4. 8  | 6. 49E-14 | -0. 2615  | 0. 007 | 0. 131 | 9. 70E-10 | Oligo | PLEKHA4  |
| CAMK2B. 8   | 6. 53E-14 | -0. 32644 | 0      | 0. 118 | 9. 76E-10 | Oligo | CAMK2B   |
| RANBP1. 8   | 6. 57E-14 | -0. 3394  | 0. 4   | 0. 584 | 9. 82E-10 | Oligo | RANBP1   |
| PGM2. 5     | 6. 62E-14 | -0. 41778 | 0. 021 | 0. 153 | 9. 90E-10 | Oligo | PGM2     |
| DRAXIN. 8   | 6. 75E-14 | -0. 26252 | 0. 021 | 0. 157 | 1. 01E-09 | Oligo | DRAXIN   |
| C21orf62. 6 | 6. 78E-14 | -0. 37282 | 0. 026 | 0. 163 | 1. 01E-09 | Oligo | C21orf62 |
| ZBTB47      | 6. 80E-14 | 0. 228234 | 0. 101 | 0. 034 | 1. 02E-09 | Oligo | ZBTB47   |
| EMC2. 2     | 6. 82E-14 | 0. 485708 | 0. 344 | 0. 218 | 1. 02E-09 | Oligo | EMC2     |
| ABR. 5      | 7. 03E-14 | -0. 36855 | 0. 019 | 0. 15  | 1. 05E-09 | Oligo | ABR      |
| BMI1. 5     | 7. 15E-14 | 0. 444283 | 0. 245 | 0. 135 | 1. 07E-09 | Oligo | BMI1     |
| NBR1. 2     | 7. 15E-14 | 0. 416075 | 0. 306 | 0. 185 | 1. 07E-09 | Oligo | NBR1     |
| CSTA. 9     | 7. 27E-14 | -0. 51352 | 0. 009 | 0. 133 | 1. 09E-09 | Oligo | CSTA     |
| MPG. 3      | 7. 48E-14 | -0. 32021 | 0. 16  | 0. 352 | 1. 12E-09 | Oligo | MPG      |
| PFKM. 5     | 7. 61E-14 | -0. 33232 | 0. 042 | 0. 189 | 1. 14E-09 | Oligo | PFKM     |
| PNMA2. 8    | 7. 65E-14 | -0. 31015 | 0. 014 | 0. 144 | 1. 14E-09 | Oligo | PNMA2    |
| CCSER2. 5   | 7. 67E-14 | 0. 436368 | 0. 346 | 0. 224 | 1. 15E-09 | Oligo | CCSER2   |
| PTAFR. 9    | 7. 76E-14 | -0. 514   | 0. 007 | 0. 13  | 1. 16E-09 | Oligo | PTAFR    |
| SERGEF. 4   | 7. 87E-14 | -0. 31094 | 0. 033 | 0. 173 | 1. 18E-09 | Oligo | SERGEF   |
| MTFR1L. 6   | 7. 99E-14 | -0. 33762 | 0. 122 | 0. 297 | 1. 19E-09 | Oligo | MTFR1L   |
| MZT2B. 5    | 8. 15E-14 | -0. 31857 | 0. 421 | 0. 599 | 1. 22E-09 | Oligo | MZT2B    |
| UBE2Q2. 4   | 8. 23E-14 | -0. 27522 | 0. 056 | 0. 211 | 1. 23E-09 | Oligo | UBE2Q2   |
| CNOT7. 6    | 8. 23E-14 | -0. 30484 | 0. 181 | 0. 375 | 1. 23E-09 | Oligo | CNOT7    |
| TIMP3. 7    | 8. 40E-14 | -0. 35756 | 0. 007 | 0. 13  | 1. 26E-09 | Oligo | TIMP3    |
| MERTK. 8    | 8. 72E-14 | -0. 48467 | 0. 007 | 0. 129 | 1. 30E-09 | Oligo | MERTK    |
| SLC25A19. 8 | 8. 88E-14 | -0. 46701 | 0. 035 | 0. 174 | 1. 33E-09 | Oligo | SLC25A19 |
| SLC39A10. 8 | 8. 97E-14 | -0. 31325 | 0. 026 | 0. 162 | 1. 34E-09 | Oligo | SLC39A10 |
| PPP1R3E. 1  | 9. 08E-14 | 0. 472651 | 0. 155 | 0. 065 | 1. 36E-09 | Oligo | PPP1R3E  |
| PSMD13. 4   | 9. 33E-14 | -0. 23534 | 0. 214 | 0. 421 | 1. 39E-09 | Oligo | PSMD13   |
| NKAIN3. 8   | 9. 34E-14 | -0. 30853 | 0. 007 | 0. 129 | 1. 40E-09 | Oligo | NKAIN3   |
| NBPF10. 4   | 9. 45E-14 | -0. 2806  | 0. 019 | 0. 15  | 1. 41E-09 | Oligo | NBPF10   |
| ATP5B. 5    | 9. 53E-14 | -0. 21921 | 0. 614 | 0. 782 | 1. 42E-09 | Oligo | ATP5B    |
| GPC2. 9     | 9. 58E-14 | -0. 48331 | 0. 038 | 0. 173 | 1. 43E-09 | Oligo | GPC2     |
| TCTN1. 7    | 9. 71E-14 | -0. 33803 | 0. 064 | 0. 217 | 1. 45E-09 | Oligo | TCTN1    |
| FAM63B. 4   | 9. 75E-14 | 0. 498224 | 0. 315 | 0. 2   | 1. 46E-09 | Oligo | FAM63B   |
| POLDIP2. 8  | 9. 76E-14 | -0. 30675 | 0. 165 | 0. 354 | 1. 46E-09 | Oligo | POLDIP2  |
| ANAPC16. 7  | 1. 04E-13 | -0. 23051 | 0. 315 | 0. 533 | 1. 55E-09 | Oligo | ANAPC16  |
| NIPA2. 5    | 1. 05E-13 | -0. 2965  | 0. 099 | 0. 271 | 1. 56E-09 | Oligo | NIPA2    |
| TCEA1. 4    | 1. 08E-13 | -0. 3354  | 0. 294 | 0. 491 | 1. 61E-09 | Oligo | TCEA1    |
| CDC42EP3. 1 | 1. 12E-13 | -0. 36071 | 0. 007 | 0. 129 | 1. 68E-09 | Oligo | CDC42EP3 |
| SQSTM1. 5   | 1. 13E-13 | 0. 318609 | 0. 6   | 0. 521 | 1. 68E-09 | Oligo | SQSTM1   |
| CHD9. 4     | 1. 14E-13 | -0. 32963 | 0. 275 | 0. 474 | 1. 70E-09 | Oligo | CHD9     |
| SYNM. 7     | 1. 18E-13 | 0. 38612  | 0. 155 | 0. 068 | 1. 77E-09 | Oligo | SYNM     |

|            |          |          |       |       |          |       |           |
|------------|----------|----------|-------|-------|----------|-------|-----------|
| CHMP3.2    | 1.20E-13 | -0.30366 | 0.188 | 0.386 | 1.79E-09 | Oligo | CHMP3     |
| NXPH1.9    | 1.20E-13 | -0.3412  | 0.014 | 0.14  | 1.80E-09 | Oligo | NXPH1     |
| DCK.6      | 1.21E-13 | -0.37409 | 0.106 | 0.272 | 1.80E-09 | Oligo | DCK       |
| PAICS.8    | 1.22E-13 | -0.36741 | 0.136 | 0.315 | 1.82E-09 | Oligo | PAICS     |
| SRPRB.4    | 1.26E-13 | -0.33508 | 0.094 | 0.261 | 1.88E-09 | Oligo | SRPRB     |
| PXDC1.4    | 1.28E-13 | -0.29828 | 0.024 | 0.157 | 1.91E-09 | Oligo | PXDC1     |
| KIAA0368   | 1.28E-13 | 0.348628 | 0.169 | 0.076 | 1.91E-09 | Oligo | KIAA0368  |
| OSTM1.4    | 1.31E-13 | -0.30816 | 0.075 | 0.234 | 1.96E-09 | Oligo | OSTM1     |
| PMEPA1.8   | 1.32E-13 | -0.33002 | 0.059 | 0.206 | 1.97E-09 | Oligo | PMEPA1    |
| OPTN.7     | 1.32E-13 | 0.375719 | 0.242 | 0.131 | 1.98E-09 | Oligo | OPTN      |
| GK.8       | 1.33E-13 | -0.44932 | 0.016 | 0.143 | 1.98E-09 | Oligo | GK        |
| ZFP36L2.8  | 1.33E-13 | -0.41486 | 0.353 | 0.522 | 1.98E-09 | Oligo | ZFP36L2   |
| PDGFC.5    | 1.34E-13 | -0.26268 | 0.005 | 0.124 | 2.01E-09 | Oligo | PDGFC     |
| MLC1.8     | 1.35E-13 | -0.30322 | 0.021 | 0.153 | 2.01E-09 | Oligo | MLC1      |
| ST3GAL5.4  | 1.36E-13 | 0.45182  | 0.311 | 0.186 | 2.04E-09 | Oligo | ST3GAL5   |
| RNPEP.9    | 1.39E-13 | -0.34289 | 0.073 | 0.23  | 2.08E-09 | Oligo | RNPEP     |
| EVA1B.4    | 1.40E-13 | -0.24952 | 0.007 | 0.127 | 2.09E-09 | Oligo | EVA1B     |
| TNFRSF14.1 | 1.45E-13 | -0.44994 | 0.002 | 0.119 | 2.17E-09 | Oligo | TNFRSF14  |
| TMEM203.7  | 1.45E-13 | -0.30131 | 0.092 | 0.258 | 2.17E-09 | Oligo | TMEM203   |
| PTX3.8     | 1.47E-13 | -0.34494 | 0.002 | 0.119 | 2.19E-09 | Oligo | PTX3      |
| COL4A1.6   | 1.47E-13 | -0.2443  | 0     | 0.115 | 2.20E-09 | Oligo | COL4A1    |
| PSMG3.8    | 1.49E-13 | -0.30513 | 0.151 | 0.334 | 2.23E-09 | Oligo | PSMG3     |
| EFHC1.8    | 1.49E-13 | -0.35098 | 0.059 | 0.211 | 2.23E-09 | Oligo | EFHC1     |
| ZNF385D.6  | 1.51E-13 | -0.28213 | 0     | 0.115 | 2.25E-09 | Oligo | ZNF385D   |
| CHN1.8     | 1.56E-13 | -0.25661 | 0.064 | 0.222 | 2.34E-09 | Oligo | CHN1      |
| KCMF1.5    | 1.62E-13 | -0.29069 | 0.049 | 0.196 | 2.41E-09 | Oligo | KCMF1     |
| CDCA7.8    | 1.62E-13 | -0.38089 | 0.007 | 0.127 | 2.43E-09 | Oligo | CDCA7     |
| FABP5.7    | 1.63E-13 | -0.7818  | 0.24  | 0.398 | 2.44E-09 | Oligo | FABP5     |
| CERS6.6    | 1.64E-13 | -0.31075 | 0.009 | 0.131 | 2.45E-09 | Oligo | CERS6     |
| NUDT3.7    | 1.66E-13 | -0.24781 | 0.205 | 0.407 | 2.48E-09 | Oligo | NUDT3     |
| NUDT11.7   | 1.66E-13 | -0.35083 | 0.009 | 0.131 | 2.49E-09 | Oligo | NUDT11    |
| PMPCB.4    | 1.68E-13 | -0.33986 | 0.167 | 0.35  | 2.51E-09 | Oligo | PMPCB     |
| ADPGK.9    | 1.74E-13 | -0.34547 | 0.101 | 0.267 | 2.60E-09 | Oligo | ADPGK     |
| CCDC59     | 1.75E-13 | -0.12521 | 0.132 | 0.32  | 2.62E-09 | Oligo | CCDC59    |
| NCKAP1L.9  | 1.78E-13 | -0.48015 | 0.007 | 0.126 | 2.66E-09 | Oligo | NCKAP1L   |
| CLDN12.9   | 1.79E-13 | -0.33237 | 0.016 | 0.143 | 2.68E-09 | Oligo | CLDN12    |
| AKAP7.7    | 1.81E-13 | -0.3163  | 0.052 | 0.2   | 2.70E-09 | Oligo | AKAP7     |
| DALRD3.5   | 1.83E-13 | -0.30005 | 0.033 | 0.17  | 2.74E-09 | Oligo | DALRD3    |
| WASF1.6    | 1.84E-13 | 0.351184 | 0.191 | 0.091 | 2.74E-09 | Oligo | WASF1     |
| AP1B1.9    | 1.86E-13 | -0.48654 | 0.108 | 0.264 | 2.78E-09 | Oligo | AP1B1     |
| GPR65.9    | 1.86E-13 | -0.51959 | 0.014 | 0.138 | 2.78E-09 | Oligo | GPR65     |
| TRMT1.6    | 1.88E-13 | -0.3307  | 0.099 | 0.263 | 2.80E-09 | Oligo | TRMT1     |
| STOML2.4   | 1.90E-13 | -0.20801 | 0.226 | 0.428 | 2.85E-09 | Oligo | STOML2    |
| AGPAT3.4   | 1.91E-13 | 0.526284 | 0.233 | 0.126 | 2.86E-09 | Oligo | AGPAT3    |
| LINC00685  | 1.98E-13 | 0.476784 | 0.256 | 0.145 | 2.96E-09 | Oligo | LINC00685 |
| BRSK2.4    | 2.00E-13 | 0.246176 | 0.106 | 0.037 | 2.99E-09 | Oligo | BRSK2     |
| DOCK8.9    | 2.02E-13 | -0.49975 | 0.007 | 0.125 | 3.01E-09 | Oligo | DOCK8     |
| ZDHHC2.3   | 2.02E-13 | 0.349556 | 0.146 | 0.061 | 3.02E-09 | Oligo | ZDHHC2    |
| SPRY2.8    | 2.04E-13 | -0.29747 | 0.068 | 0.224 | 3.04E-09 | Oligo | SPRY2     |
| PDK4.8     | 2.05E-13 | 0.231    | 0.313 | 0.164 | 3.06E-09 | Oligo | PDK4      |
| TMX4.6     | 2.07E-13 | -0.30859 | 0.087 | 0.252 | 3.09E-09 | Oligo | TMX4      |

|            |          |          |       |       |          |       |          |
|------------|----------|----------|-------|-------|----------|-------|----------|
| HSPA8.5    | 2.08E-13 | -0.17061 | 0.72  | 0.871 | 3.11E-09 | Oligo | HSPA8    |
| UTP11L.4   | 2.09E-13 | -0.27622 | 0.122 | 0.297 | 3.12E-09 | Oligo | UTP11L   |
| MEIS3.7    | 2.09E-13 | -0.29915 | 0.012 | 0.134 | 3.12E-09 | Oligo | MEIS3    |
| LCP1.8     | 2.09E-13 | -0.54582 | 0.021 | 0.147 | 3.13E-09 | Oligo | LCP1     |
| SCAND1.6   | 2.10E-13 | -0.32449 | 0.393 | 0.577 | 3.14E-09 | Oligo | SCAND1   |
| CAMK2D.6   | 2.11E-13 | -0.27921 | 0.087 | 0.249 | 3.15E-09 | Oligo | CAMK2D   |
| AHNAK.4    | 2.13E-13 | -0.36348 | 0.005 | 0.122 | 3.18E-09 | Oligo | AHNAK    |
| KCTD2.1    | 2.15E-13 | 0.288391 | 0.146 | 0.061 | 3.21E-09 | Oligo | KCTD2    |
| PRKAG2.6   | 2.17E-13 | -0.45017 | 0.016 | 0.142 | 3.24E-09 | Oligo | PRKAG2   |
| GAD1.9     | 2.19E-13 | -0.31574 | 0.002 | 0.117 | 3.28E-09 | Oligo | GAD1     |
| CENPH.6    | 2.21E-13 | -0.31305 | 0.009 | 0.131 | 3.30E-09 | Oligo | CENPH    |
| SMCO4.9    | 2.21E-13 | -0.46068 | 0.014 | 0.137 | 3.31E-09 | Oligo | SMCO4    |
| ENY2.4     | 2.22E-13 | -0.24735 | 0.395 | 0.612 | 3.32E-09 | Oligo | ENY2     |
| FIP1L1.5   | 2.23E-13 | -0.32881 | 0.127 | 0.303 | 3.33E-09 | Oligo | FIP1L1   |
| OBSL1.7    | 2.24E-13 | -0.3045  | 0.021 | 0.151 | 3.35E-09 | Oligo | OBSL1    |
| DCAF6.5    | 2.25E-13 | -0.35446 | 0.035 | 0.171 | 3.36E-09 | Oligo | DCAF6    |
| IMPDH1.6   | 2.25E-13 | -0.30824 | 0.028 | 0.162 | 3.36E-09 | Oligo | IMPDH1   |
| UBE4B.2    | 2.28E-13 | 0.377056 | 0.193 | 0.093 | 3.41E-09 | Oligo | UBE4B    |
| NUP62.5    | 2.29E-13 | -0.36938 | 0.085 | 0.243 | 3.42E-09 | Oligo | NUP62    |
| ORAI3.7    | 2.36E-13 | -0.33857 | 0.019 | 0.146 | 3.52E-09 | Oligo | ORAI3    |
| USB1.5     | 2.37E-13 | -0.33763 | 0.078 | 0.235 | 3.54E-09 | Oligo | USB1     |
| RBM47.9    | 2.46E-13 | -0.38236 | 0.005 | 0.121 | 3.68E-09 | Oligo | RBM47    |
| CCDC80.8   | 2.52E-13 | -0.38767 | 0.002 | 0.117 | 3.76E-09 | Oligo | CCDC80   |
| NCF1.9     | 2.54E-13 | -0.48862 | 0.009 | 0.128 | 3.79E-09 | Oligo | NCF1     |
| TUBA1B.5   | 2.55E-13 | -0.24765 | 0.739 | 0.901 | 3.81E-09 | Oligo | TUBA1B   |
| MOSPD3.5   | 2.56E-13 | -0.29278 | 0.12  | 0.294 | 3.83E-09 | Oligo | MOSPD3   |
| ZSWIM6.3   | 2.56E-13 | 0.415625 | 0.233 | 0.125 | 3.83E-09 | Oligo | ZSWIM6   |
| PLA2G5.8   | 2.61E-13 | -0.52041 | 0     | 0.113 | 3.90E-09 | Oligo | PLA2G5   |
| METRN.9    | 2.63E-13 | 0.352219 | 0.426 | 0.289 | 3.93E-09 | Oligo | METRN    |
| SLC4A4.7   | 2.67E-13 | -0.32326 | 0     | 0.113 | 3.99E-09 | Oligo | SLC4A4   |
| PDAP1.6    | 2.72E-13 | -0.22882 | 0.336 | 0.543 | 4.06E-09 | Oligo | PDAP1    |
| NT5C3B.8   | 2.79E-13 | -0.27578 | 0.151 | 0.338 | 4.16E-09 | Oligo | NT5C3B   |
| PAK3.9     | 2.79E-13 | -0.38186 | 0.021 | 0.148 | 4.17E-09 | Oligo | PAK3     |
| ZNF385A.9  | 2.80E-13 | -0.38985 | 0.016 | 0.141 | 4.19E-09 | Oligo | ZNF385A  |
| RPAIN.7    | 2.86E-13 | -0.21813 | 0.294 | 0.492 | 4.28E-09 | Oligo | RPAIN    |
| PPP1R16A.2 | 2.95E-13 | -0.27537 | 0.035 | 0.174 | 4.41E-09 | Oligo | PPP1R16A |
| NAV1.6     | 2.97E-13 | 0.416757 | 0.273 | 0.158 | 4.43E-09 | Oligo | NAV1     |
| RASSF5.8   | 2.98E-13 | -0.43586 | 0.007 | 0.124 | 4.45E-09 | Oligo | RASSF5   |
| SERINC2.5  | 3.03E-13 | -0.28894 | 0.007 | 0.124 | 4.53E-09 | Oligo | SERINC2  |
| SUDS3.7    | 3.07E-13 | -0.30228 | 0.049 | 0.193 | 4.59E-09 | Oligo | SUDS3    |
| TFPT.6     | 3.22E-13 | -0.24965 | 0.139 | 0.315 | 4.81E-09 | Oligo | TFPT     |
| TSTA3.3    | 3.31E-13 | -0.369   | 0.108 | 0.275 | 4.94E-09 | Oligo | TSTA3    |
| MTHFD1L.8  | 3.33E-13 | -0.34421 | 0.016 | 0.14  | 4.97E-09 | Oligo | MTHFD1L  |
| SLC35F2.5  | 3.38E-13 | -0.25222 | 0     | 0.112 | 5.06E-09 | Oligo | SLC35F2  |
| DDAH1.7    | 3.49E-13 | -0.2824  | 0.009 | 0.129 | 5.22E-09 | Oligo | DDAH1    |
| NRSN2.8    | 3.50E-13 | -0.24375 | 0.033 | 0.169 | 5.23E-09 | Oligo | NRSN2    |
| ANKRD35.4  | 3.51E-13 | -0.27152 | 0.016 | 0.141 | 5.24E-09 | Oligo | ANKRD35  |
| DNAJC15.6  | 3.51E-13 | -0.33035 | 0.209 | 0.397 | 5.25E-09 | Oligo | DNAJC15  |
| HNRNPA1.2  | 3.63E-13 | -0.15295 | 0.755 | 0.882 | 5.42E-09 | Oligo | HNRNPA1  |
| CKAP4.7    | 3.64E-13 | -0.25238 | 0.064 | 0.215 | 5.44E-09 | Oligo | CKAP4    |
| RHBDD2.8   | 3.71E-13 | -0.32973 | 0.275 | 0.466 | 5.55E-09 | Oligo | RHBDD2   |

|             |           |           |        |        |           |       |           |
|-------------|-----------|-----------|--------|--------|-----------|-------|-----------|
| NFKBID. 7   | 3. 75E-13 | -0. 51743 | 0. 021 | 0. 145 | 5. 60E-09 | Oligo | NFKBID    |
| CPS1        | 3. 77E-13 | 0. 1879   | 0. 047 | 0. 01  | 5. 63E-09 | Oligo | CPS1      |
| ETV6. 5     | 3. 84E-13 | -0. 34148 | 0. 024 | 0. 152 | 5. 74E-09 | Oligo | ETV6      |
| CREG1. 9    | 3. 88E-13 | -0. 482   | 0. 146 | 0. 303 | 5. 79E-09 | Oligo | CREG1     |
| SRD5A3. 5   | 3. 98E-13 | 0. 398547 | 0. 275 | 0. 158 | 5. 96E-09 | Oligo | SRD5A3    |
| AOAH. 8     | 3. 99E-13 | -0. 5131  | 0. 009 | 0. 127 | 5. 96E-09 | Oligo | AOAH      |
| DERL1. 4    | 4. 08E-13 | -0. 36831 | 0. 146 | 0. 319 | 6. 10E-09 | Oligo | DERL1     |
| BCKDK. 8    | 4. 13E-13 | -0. 3117  | 0. 141 | 0. 321 | 6. 18E-09 | Oligo | BCKDK     |
| DPCD. 6     | 4. 16E-13 | -0. 39759 | 0. 033 | 0. 166 | 6. 22E-09 | Oligo | DPCD      |
| TRAPPC10. 4 | 4. 18E-13 | 0. 318378 | 0. 186 | 0. 089 | 6. 25E-09 | Oligo | TRAPPC10  |
| VGLL4. 6    | 4. 19E-13 | -0. 30489 | 0. 151 | 0. 324 | 6. 26E-09 | Oligo | VGLL4     |
| PTRF. 9     | 4. 24E-13 | 0. 422315 | 0. 294 | 0. 181 | 6. 34E-09 | Oligo | PTRF      |
| LAMA5. 6    | 4. 31E-13 | -0. 23134 | 0. 002 | 0. 116 | 6. 44E-09 | Oligo | LAMA5     |
| ACSS3. 7    | 4. 35E-13 | -0. 20526 | 0. 002 | 0. 116 | 6. 50E-09 | Oligo | ACSS3     |
| CTNNAL1. 7  | 4. 35E-13 | -0. 30365 | 0. 024 | 0. 151 | 6. 50E-09 | Oligo | CTNNAL1   |
| NDUFS4. 3   | 4. 36E-13 | -0. 24715 | 0. 308 | 0. 512 | 6. 52E-09 | Oligo | NDUFS4    |
| MLX. 4      | 4. 39E-13 | -0. 32409 | 0. 132 | 0. 305 | 6. 56E-09 | Oligo | MLX       |
| MORN2. 7    | 4. 58E-13 | -0. 292   | 0. 104 | 0. 268 | 6. 85E-09 | Oligo | MORN2     |
| C2. 7       | 4. 59E-13 | -0. 51972 | 0. 005 | 0. 119 | 6. 86E-09 | Oligo | C2        |
| C3orf58. 2  | 4. 68E-13 | 0. 365563 | 0. 181 | 0. 086 | 7. 00E-09 | Oligo | C3orf58   |
| PITPNC1. 5  | 4. 74E-13 | -0. 26212 | 0. 009 | 0. 127 | 7. 08E-09 | Oligo | PITPNC1   |
| PSMA4. 3    | 4. 76E-13 | -0. 22891 | 0. 346 | 0. 545 | 7. 11E-09 | Oligo | PSMA4     |
| MAGEH1. 8   | 4. 80E-13 | 0. 549677 | 0. 442 | 0. 313 | 7. 17E-09 | Oligo | MAGEH1    |
| KLHL24. 5   | 4. 80E-13 | 0. 353538 | 0. 299 | 0. 174 | 7. 17E-09 | Oligo | KLHL24    |
| PPIG. 2     | 4. 93E-13 | -0. 23184 | 0. 332 | 0. 536 | 7. 37E-09 | Oligo | PPIG      |
| SEC14L1. 5  | 5. 01E-13 | -0. 37704 | 0. 129 | 0. 298 | 7. 49E-09 | Oligo | SEC14L1   |
| PMPCA. 6    | 5. 19E-13 | -0. 23085 | 0. 089 | 0. 252 | 7. 76E-09 | Oligo | PMPCA     |
| CBX1. 7     | 5. 21E-13 | -0. 33506 | 0. 191 | 0. 374 | 7. 78E-09 | Oligo | CBX1      |
| PANK2. 3    | 5. 27E-13 | -0. 29616 | 0. 064 | 0. 214 | 7. 87E-09 | Oligo | PANK2     |
| RGS11. 6    | 5. 38E-13 | 0. 295052 | 0. 118 | 0. 045 | 8. 04E-09 | Oligo | RGS11     |
| TNFAIP3. 9  | 5. 44E-13 | -0. 5583  | 0. 038 | 0. 168 | 8. 13E-09 | Oligo | TNFAIP3   |
| IP6K2. 8    | 5. 53E-13 | -0. 22036 | 0. 24  | 0. 442 | 8. 26E-09 | Oligo | IP6K2     |
| TRAM1. 7    | 5. 55E-13 | -0. 35725 | 0. 249 | 0. 44  | 8. 30E-09 | Oligo | TRAM1     |
| FAM177A1. 5 | 5. 65E-13 | 0. 425877 | 0. 485 | 0. 384 | 8. 44E-09 | Oligo | FAM177A1  |
| RNF141. 5   | 5. 81E-13 | 0. 482338 | 0. 329 | 0. 21  | 8. 68E-09 | Oligo | RNF141    |
| ANXA6. 2    | 5. 83E-13 | -0. 36077 | 0. 049 | 0. 19  | 8. 72E-09 | Oligo | ANXA6     |
| MEA1. 3     | 5. 91E-13 | -0. 18947 | 0. 24  | 0. 441 | 8. 83E-09 | Oligo | MEA1      |
| ARHGAP24. 5 | 5. 94E-13 | -0. 57735 | 0. 028 | 0. 153 | 8. 87E-09 | Oligo | ARHGAP24  |
| TTLL11      | 6. 02E-13 | 0. 18734  | 0. 061 | 0. 015 | 8. 99E-09 | Oligo | TTLL11    |
| TCEB2. 7    | 6. 08E-13 | 0. 232142 | 0. 831 | 0. 823 | 9. 09E-09 | Oligo | TCEB2     |
| TCIRG1. 9   | 6. 15E-13 | -0. 42976 | 0. 012 | 0. 13  | 9. 19E-09 | Oligo | TCIRG1    |
| SMARCA1. 7  | 6. 18E-13 | -0. 28045 | 0. 04  | 0. 176 | 9. 24E-09 | Oligo | SMARCA1   |
| SPECC1. 8   | 6. 22E-13 | 0. 395874 | 0. 407 | 0. 292 | 9. 29E-09 | Oligo | SPECC1    |
| RIC8A. 5    | 6. 34E-13 | -0. 25206 | 0. 12  | 0. 292 | 9. 47E-09 | Oligo | RIC8A     |
| PLK2. 6     | 6. 47E-13 | -0. 42926 | 0. 019 | 0. 141 | 9. 67E-09 | Oligo | PLK2      |
| CTSA. 9     | 6. 63E-13 | -0. 35109 | 0. 226 | 0. 406 | 9. 91E-09 | Oligo | CTSA      |
| CCT5. 6     | 6. 66E-13 | -0. 23762 | 0. 289 | 0. 489 | 9. 95E-09 | Oligo | CCT5      |
| STMN2. 9    | 7. 02E-13 | -0. 76188 | 0. 059 | 0. 191 | 1. 05E-08 | Oligo | STMN2     |
| GAB2. 4     | 7. 06E-13 | 0. 290872 | 0. 148 | 0. 063 | 1. 05E-08 | Oligo | GAB2      |
| FAM110B. 7  | 7. 42E-13 | -0. 3479  | 0. 052 | 0. 192 | 1. 11E-08 | Oligo | FAM110B   |
| C14orf132   | 7. 46E-13 | 0. 41666  | 0. 188 | 0. 088 | 1. 12E-08 | Oligo | C14orf132 |

|              |          |          |       |       |          |       |              |
|--------------|----------|----------|-------|-------|----------|-------|--------------|
| MYO1F.9      | 7.51E-13 | -0.54401 | 0.054 | 0.189 | 1.12E-08 | Oligo | MYO1F        |
| CPNE1.2      | 7.58E-13 | -0.32545 | 0.165 | 0.346 | 1.13E-08 | Oligo | CPNE1        |
| TMUB1.3      | 7.73E-13 | -0.31073 | 0.108 | 0.272 | 1.16E-08 | Oligo | TMUB1        |
| ERBB2IP.5    | 7.74E-13 | 0.435329 | 0.329 | 0.217 | 1.16E-08 | Oligo | ERBB2IP      |
| WWTR1.9      | 7.74E-13 | -0.2958  | 0.033 | 0.165 | 1.16E-08 | Oligo | WWTR1        |
| FLOT2.4      | 7.75E-13 | -0.36291 | 0.052 | 0.191 | 1.16E-08 | Oligo | FLOT2        |
| OFD1.3       | 7.78E-13 | -0.26396 | 0.111 | 0.281 | 1.16E-08 | Oligo | OFD1         |
| DCPS.4       | 7.85E-13 | -0.32779 | 0.04  | 0.176 | 1.17E-08 | Oligo | DCPS         |
| LMO4.9       | 7.87E-13 | -0.36431 | 0.32  | 0.484 | 1.18E-08 | Oligo | LMO4         |
| C16orf91.    | 7.88E-13 | -0.31143 | 0.056 | 0.201 | 1.18E-08 | Oligo | C16orf91     |
| KCNE4.7      | 7.93E-13 | -0.25606 | 0     | 0.109 | 1.19E-08 | Oligo | KCNE4        |
| SAMD8.3      | 8.03E-13 | 0.400558 | 0.247 | 0.14  | 1.20E-08 | Oligo | SAMD8        |
| B4GALT1.9    | 8.08E-13 | -0.46775 | 0.009 | 0.124 | 1.21E-08 | Oligo | B4GALT1      |
| PARP14.7     | 8.19E-13 | -0.35696 | 0.031 | 0.161 | 1.22E-08 | Oligo | PARP14       |
| HMOX2.5      | 8.25E-13 | 0.507986 | 0.409 | 0.29  | 1.23E-08 | Oligo | HMOX2        |
| SRSF7.3      | 8.31E-13 | -0.26163 | 0.4   | 0.598 | 1.24E-08 | Oligo | SRSF7        |
| GGNBP2.3     | 8.31E-13 | -0.27348 | 0.209 | 0.397 | 1.24E-08 | Oligo | GGNBP2       |
| PTGER4.8     | 8.45E-13 | -0.49248 | 0.012 | 0.128 | 1.26E-08 | Oligo | PTGER4       |
| RP11-552D4.1 | 8.67E-13 | -0.61403 | 0.009 | 0.124 | 1.30E-08 | Oligo | RP11-552D4.1 |
| NFKBIE.7     | 8.70E-13 | -0.29995 | 0.016 | 0.138 | 1.30E-08 | Oligo | NFKBIE       |
| MRT04.3      | 8.75E-13 | -0.27107 | 0.092 | 0.251 | 1.31E-08 | Oligo | MRT04        |
| ITFG1.5      | 8.95E-13 | -0.31887 | 0.174 | 0.355 | 1.34E-08 | Oligo | ITFG1        |
| MAPK7.6      | 8.98E-13 | -0.26041 | 0.012 | 0.129 | 1.34E-08 | Oligo | MAPK7        |
| TMEM251.3    | 9.50E-13 | -0.29586 | 0.089 | 0.248 | 1.42E-08 | Oligo | TMEM251      |
| DBF4.7       | 9.54E-13 | -0.33784 | 0.009 | 0.125 | 1.43E-08 | Oligo | DBF4         |
| CWC27.6      | 9.57E-13 | -0.2356  | 0.104 | 0.27  | 1.43E-08 | Oligo | CWC27        |
| CCDC28A.8    | 9.61E-13 | -0.3752  | 0.033 | 0.163 | 1.44E-08 | Oligo | CCDC28A      |
| SEMA4C.3     | 9.69E-13 | 0.387761 | 0.188 | 0.092 | 1.45E-08 | Oligo | SEMA4C       |
| XAF1.4       | 9.71E-13 | -0.41597 | 0.002 | 0.112 | 1.45E-08 | Oligo | XAF1         |
| SNAPC1.4     | 9.83E-13 | -0.29372 | 0.052 | 0.193 | 1.47E-08 | Oligo | SNAPC1       |
| TSSC1.4      | 9.86E-13 | -0.22582 | 0.104 | 0.266 | 1.47E-08 | Oligo | TSSC1        |
| TP53I3.3     | 9.87E-13 | -0.28337 | 0.024 | 0.15  | 1.47E-08 | Oligo | TP53I3       |
| GLRX3.5      | 1.02E-12 | -0.24524 | 0.134 | 0.311 | 1.52E-08 | Oligo | GLRX3        |
| MBD4.6       | 1.02E-12 | -0.38601 | 0.111 | 0.269 | 1.52E-08 | Oligo | MBD4         |
| TRIO.7       | 1.02E-12 | -0.35044 | 0.042 | 0.177 | 1.52E-08 | Oligo | TRIO         |
| ST6GALNAC4   | 1.04E-12 | -0.28652 | 0.012 | 0.13  | 1.55E-08 | Oligo | ST6GALNAC4   |
| RAC2.9       | 1.04E-12 | -0.51565 | 0.009 | 0.123 | 1.55E-08 | Oligo | RAC2         |
| TLE3.7       | 1.04E-12 | -0.40502 | 0.021 | 0.141 | 1.55E-08 | Oligo | TLE3         |
| GAS1.9       | 1.06E-12 | -0.31833 | 0.024 | 0.149 | 1.58E-08 | Oligo | GAS1         |
| DLX6-AS1.1   | 1.06E-12 | -0.67852 | 0.016 | 0.134 | 1.59E-08 | Oligo | DLX6-AS1     |
| SRSF2.7      | 1.06E-12 | -0.27844 | 0.428 | 0.612 | 1.59E-08 | Oligo | SRSF2        |
| GLT8D1.3     | 1.07E-12 | -0.30667 | 0.118 | 0.282 | 1.59E-08 | Oligo | GLT8D1       |
| N4BP2.5      | 1.07E-12 | -0.23128 | 0.007 | 0.121 | 1.59E-08 | Oligo | N4BP2        |
| DLX5.9       | 1.08E-12 | -0.62657 | 0.026 | 0.148 | 1.61E-08 | Oligo | DLX5         |
| DYNC1H1.7    | 1.08E-12 | 0.493379 | 0.438 | 0.334 | 1.62E-08 | Oligo | DYNC1H1      |
| CD82.4       | 1.09E-12 | 0.586891 | 0.353 | 0.235 | 1.62E-08 | Oligo | CD82         |
| FBXL7        | 1.09E-12 | 0.250136 | 0.089 | 0.03  | 1.63E-08 | Oligo | FBXL7        |
| RBM27.6      | 1.10E-12 | -0.29241 | 0.078 | 0.231 | 1.64E-08 | Oligo | RBM27        |
| NDUFB8.4     | 1.13E-12 | 0.709468 | 0.132 | 0.054 | 1.69E-08 | Oligo | NDUFB8       |
| HNRNPA3.4    | 1.14E-12 | -0.27926 | 0.358 | 0.562 | 1.70E-08 | Oligo | HNRNPA3      |
| CBX4.9       | 1.15E-12 | 0.322574 | 0.216 | 0.111 | 1.72E-08 | Oligo | CBX4         |

|           |          |          |       |       |          |       |              |
|-----------|----------|----------|-------|-------|----------|-------|--------------|
| PIH1D1.3  | 1.16E-12 | -0.16641 | 0.205 | 0.397 | 1.73E-08 | Oligo | PIH1D1       |
| SMARCA4.8 | 1.17E-12 | -0.2816  | 0.191 | 0.367 | 1.75E-08 | Oligo | SMARCA4      |
| KIAA1161  | 1.18E-12 | 0.197039 | 0.071 | 0.02  | 1.76E-08 | Oligo | KIAA1161     |
| ST8SIA4.9 | 1.19E-12 | -0.41075 | 0.009 | 0.123 | 1.78E-08 | Oligo | ST8SIA4      |
| TRAPPC2P1 | 1.21E-12 | -0.22328 | 0.078 | 0.229 | 1.81E-08 | Oligo | TRAPPC2P1    |
| STK38L.5  | 1.22E-12 | -0.36197 | 0.028 | 0.155 | 1.83E-08 | Oligo | STK38L       |
| KTN1.3    | 1.27E-12 | 0.282143 | 0.588 | 0.525 | 1.90E-08 | Oligo | KTN1         |
| RIN3.9    | 1.28E-12 | -0.42735 | 0.007 | 0.119 | 1.92E-08 | Oligo | RIN3         |
| ZDHHC4.7  | 1.28E-12 | -0.29809 | 0.174 | 0.362 | 1.92E-08 | Oligo | ZDHHC4       |
| LYRM4.1   | 1.29E-12 | -0.23102 | 0.101 | 0.267 | 1.92E-08 | Oligo | LYRM4        |
| ATPAF2.5  | 1.30E-12 | -0.25823 | 0.071 | 0.218 | 1.94E-08 | Oligo | ATPAF2       |
| FARSB.6   | 1.31E-12 | -0.35764 | 0.085 | 0.238 | 1.95E-08 | Oligo | FARSB        |
| STPG1     | 1.34E-12 | 0.22076  | 0.078 | 0.023 | 2.00E-08 | Oligo | STPG1        |
| DTNBP1.6  | 1.35E-12 | -0.2916  | 0.066 | 0.212 | 2.02E-08 | Oligo | DTNBP1       |
| ATP5G3.2  | 1.35E-12 | -0.12678 | 0.551 | 0.743 | 2.02E-08 | Oligo | ATP5G3       |
| CDKN2C.6  | 1.38E-12 | -0.37674 | 0.12  | 0.288 | 2.06E-08 | Oligo | CDKN2C       |
| EPT1      | 1.39E-12 | 0.286218 | 0.129 | 0.053 | 2.08E-08 | Oligo | EPT1         |
| MKNK1.8   | 1.41E-12 | -0.42362 | 0.042 | 0.175 | 2.11E-08 | Oligo | MKNK1        |
| IMPAD1.4  | 1.41E-12 | 0.464617 | 0.289 | 0.182 | 2.11E-08 | Oligo | IMPAD1       |
| TADA3.3   | 1.45E-12 | -0.31464 | 0.214 | 0.396 | 2.17E-08 | Oligo | TADA3        |
| GRINA.6   | 1.47E-12 | -0.30269 | 0.254 | 0.443 | 2.19E-08 | Oligo | GRINA        |
| PRKAG2-AS | 1.48E-12 | -0.48303 | 0.014 | 0.129 | 2.21E-08 | Oligo | PRKAG2-AS1   |
| CRELD1.1  | 1.49E-12 | -0.23153 | 0.042 | 0.177 | 2.23E-08 | Oligo | CRELD1       |
| NTNG2     | 1.52E-12 | 0.166513 | 0.061 | 0.016 | 2.27E-08 | Oligo | NTNG2        |
| MSI1.7    | 1.58E-12 | -0.28154 | 0.019 | 0.139 | 2.37E-08 | Oligo | MSI1         |
| MFNG.9    | 1.59E-12 | -0.45175 | 0.014 | 0.131 | 2.37E-08 | Oligo | MFNG         |
| DNMT1.8   | 1.59E-12 | -0.24915 | 0.122 | 0.292 | 2.37E-08 | Oligo | DNMT1        |
| PTPN2.7   | 1.60E-12 | -0.37072 | 0.099 | 0.254 | 2.40E-08 | Oligo | PTPN2        |
| NOTCH2.3  | 1.61E-12 | -0.26859 | 0.026 | 0.151 | 2.41E-08 | Oligo | NOTCH2       |
| EZH2.8    | 1.62E-12 | -0.3213  | 0.031 | 0.158 | 2.43E-08 | Oligo | EZH2         |
| KLHL3     | 1.64E-12 | 0.135055 | 0.042 | 0.008 | 2.45E-08 | Oligo | KLHL3        |
| WDR77.2   | 1.64E-12 | -0.25254 | 0.068 | 0.214 | 2.45E-08 | Oligo | WDR77        |
| C1QL1.7   | 1.66E-12 | -0.30689 | 0.007 | 0.119 | 2.48E-08 | Oligo | C1QL1        |
| PREX2     | 1.67E-12 | 0.225405 | 0.082 | 0.026 | 2.50E-08 | Oligo | PREX2        |
| RP11-401F | 1.68E-12 | 0.158234 | 0.049 | 0.011 | 2.51E-08 | Oligo | RP11-401P9.4 |
| VPS45.3   | 1.69E-12 | -0.33145 | 0.04  | 0.173 | 2.53E-08 | Oligo | VPS45        |
| ARHGEF6.3 | 1.71E-12 | -0.29323 | 0.024 | 0.147 | 2.55E-08 | Oligo | ARHGEF6      |
| SCOC.8    | 1.71E-12 | 0.466441 | 0.504 | 0.411 | 2.56E-08 | Oligo | SCOC         |
| FAM104A.5 | 1.71E-12 | -0.22955 | 0.089 | 0.245 | 2.56E-08 | Oligo | FAM104A      |
| FBP1.9    | 1.72E-12 | -0.46635 | 0.009 | 0.121 | 2.57E-08 | Oligo | FBP1         |
| RPF2.4    | 1.74E-12 | -0.21327 | 0.08  | 0.232 | 2.60E-08 | Oligo | RPF2         |
| KDM1A.7   | 1.76E-12 | -0.33596 | 0.066 | 0.208 | 2.64E-08 | Oligo | KDM1A        |
| ASIC4.8   | 1.80E-12 | -0.4774  | 0.024 | 0.144 | 2.70E-08 | Oligo | ASIC4        |
| ADAMTS1.2 | 1.81E-12 | 0.365509 | 0.087 | 0.028 | 2.71E-08 | Oligo | ADAMTS1      |
| C8orf76.2 | 1.81E-12 | -0.31965 | 0.033 | 0.162 | 2.71E-08 | Oligo | C8orf76      |
| IGSF11.6  | 1.82E-12 | 0.39261  | 0.146 | 0.064 | 2.73E-08 | Oligo | IGSF11       |
| C11orf73. | 1.84E-12 | -0.18498 | 0.233 | 0.427 | 2.75E-08 | Oligo | C11orf73     |
| DNAJB6.2  | 1.86E-12 | -0.16525 | 0.511 | 0.716 | 2.78E-08 | Oligo | DNAJB6       |
| C17orf62. | 1.86E-12 | -0.24663 | 0.195 | 0.375 | 2.78E-08 | Oligo | C17orf62     |
| NCF2.9    | 1.89E-12 | -0.4373  | 0     | 0.105 | 2.83E-08 | Oligo | NCF2         |
| FAH.8     | 1.96E-12 | -0.42774 | 0.035 | 0.162 | 2.92E-08 | Oligo | FAH          |

|             |           |           |        |        |           |       |                   |
|-------------|-----------|-----------|--------|--------|-----------|-------|-------------------|
| TMSB15B. 8  | 2. 02E-12 | -0. 28976 | 0. 049 | 0. 186 | 3. 02E-08 | Oligo | TMSB15B           |
| RP11-14N7   | 2. 04E-12 | -0. 33439 | 0. 066 | 0. 21  | 3. 05E-08 | Oligo | RP11-14N7. 2      |
| UTRN. 5     | 2. 07E-12 | -0. 29234 | 0. 005 | 0. 114 | 3. 10E-08 | Oligo | UTRN              |
| RP11-715J   | 2. 08E-12 | 0. 146497 | 0. 024 | 0. 003 | 3. 11E-08 | Oligo | RP11-715J22. 2    |
| SPINT2. 9   | 2. 08E-12 | -0. 47069 | 0. 082 | 0. 221 | 3. 11E-08 | Oligo | SPINT2            |
| SDSL. 8     | 2. 09E-12 | -0. 41033 | 0. 056 | 0. 192 | 3. 13E-08 | Oligo | SDSL              |
| SRR. 7      | 2. 12E-12 | -0. 21998 | 0. 031 | 0. 158 | 3. 17E-08 | Oligo | SRR               |
| GADD45G. 8  | 2. 18E-12 | -0. 49873 | 0. 115 | 0. 261 | 3. 26E-08 | Oligo | GADD45G           |
| MAD2L1BP. 2 | 2. 21E-12 | -0. 27844 | 0. 035 | 0. 165 | 3. 30E-08 | Oligo | MAD2L1BP          |
| ICAM3. 6    | 2. 23E-12 | -0. 30608 | 0      | 0. 105 | 3. 33E-08 | Oligo | ICAM3             |
| SCRN1. 8    | 2. 24E-12 | 0. 422436 | 0. 285 | 0. 176 | 3. 35E-08 | Oligo | SCRN1             |
| C19orf24. 2 | 2. 25E-12 | -0. 30132 | 0. 191 | 0. 371 | 3. 36E-08 | Oligo | C19orf24          |
| HMHA1. 9    | 2. 25E-12 | -0. 45541 | 0. 005 | 0. 112 | 3. 36E-08 | Oligo | HMHA1             |
| NOTCH2NL. 2 | 2. 25E-12 | -0. 30145 | 0. 04  | 0. 171 | 3. 36E-08 | Oligo | NOTCH2NL          |
| MICU1. 3    | 2. 26E-12 | 0. 471559 | 0. 235 | 0. 13  | 3. 38E-08 | Oligo | MICU1             |
| PLGRKT. 4   | 2. 29E-12 | -0. 25075 | 0. 113 | 0. 273 | 3. 42E-08 | Oligo | PLGRKT            |
| BIN2. 8     | 2. 29E-12 | -0. 47232 | 0. 007 | 0. 116 | 3. 42E-08 | Oligo | BIN2              |
| TMEM64. 3   | 2. 29E-12 | 0. 311633 | 0. 141 | 0. 061 | 3. 43E-08 | Oligo | TMEM64            |
| CCDC137. 5  | 2. 29E-12 | -0. 26403 | 0. 064 | 0. 207 | 3. 43E-08 | Oligo | CCDC137           |
| SCG5. 8     | 2. 35E-12 | 0. 464488 | 0. 456 | 0. 323 | 3. 51E-08 | Oligo | SCG5              |
| ACADVL. 4   | 2. 37E-12 | -0. 29113 | 0. 266 | 0. 457 | 3. 54E-08 | Oligo | ACADVL            |
| EEPDI. 6    | 2. 38E-12 | 0. 392301 | 0. 155 | 0. 068 | 3. 56E-08 | Oligo | EEPDI             |
| SYT15       | 2. 40E-12 | 0. 153323 | 0. 042 | 0. 008 | 3. 59E-08 | Oligo | SYT15             |
| RP11-442N   | 2. 42E-12 | 0. 159995 | 0. 038 | 0. 007 | 3. 61E-08 | Oligo | RP11-442N24--B. 1 |
| GALK1. 6    | 2. 42E-12 | -0. 29688 | 0. 064 | 0. 209 | 3. 62E-08 | Oligo | GALK1             |
| DKK3. 7     | 2. 44E-12 | -0. 31255 | 0. 064 | 0. 205 | 3. 64E-08 | Oligo | DKK3              |
| TMEM11. 6   | 2. 44E-12 | -0. 20042 | 0. 144 | 0. 325 | 3. 65E-08 | Oligo | TMEM11            |
| RBFOX2. 8   | 2. 46E-12 | -0. 30952 | 0. 078 | 0. 221 | 3. 67E-08 | Oligo | RBFOX2            |
| RIPK2. 7    | 2. 53E-12 | -0. 38753 | 0. 042 | 0. 173 | 3. 78E-08 | Oligo | RIPK2             |
| DYNC2LI1. 2 | 2. 56E-12 | -0. 33596 | 0. 04  | 0. 169 | 3. 82E-08 | Oligo | DYNC2LI1          |
| GBE1. 6     | 2. 58E-12 | -0. 38478 | 0. 054 | 0. 19  | 3. 86E-08 | Oligo | GBE1              |
| USP15. 5    | 2. 66E-12 | -0. 33982 | 0. 096 | 0. 248 | 3. 98E-08 | Oligo | USP15             |
| SLC7A5. 8   | 2. 68E-12 | -0. 44024 | 0. 024 | 0. 143 | 4. 00E-08 | Oligo | SLC7A5            |
| TXNDC15. 2  | 2. 73E-12 | -0. 19239 | 0. 129 | 0. 3   | 4. 08E-08 | Oligo | TXNDC15           |
| EBP. 3      | 2. 75E-12 | -0. 26218 | 0. 099 | 0. 257 | 4. 11E-08 | Oligo | EBP               |
| BFAR. 2     | 2. 81E-12 | -0. 33033 | 0. 085 | 0. 234 | 4. 20E-08 | Oligo | BFAR              |
| SNX7. 2     | 2. 92E-12 | -0. 27205 | 0. 045 | 0. 178 | 4. 36E-08 | Oligo | SNX7              |
| RIT1. 5     | 2. 95E-12 | -0. 32417 | 0. 073 | 0. 219 | 4. 40E-08 | Oligo | RIT1              |
| NRXN1. 8    | 2. 95E-12 | -0. 47158 | 0. 042 | 0. 167 | 4. 40E-08 | Oligo | NRXN1             |
| EIF5A. 3    | 2. 95E-12 | -0. 34989 | 0. 36  | 0. 533 | 4. 40E-08 | Oligo | EIF5A             |
| NPFFR1      | 3. 00E-12 | 0. 150537 | 0. 028 | 0. 004 | 4. 49E-08 | Oligo | NPFFR1            |
| TOR2A. 6    | 3. 00E-12 | -0. 30461 | 0. 028 | 0. 152 | 4. 49E-08 | Oligo | TOR2A             |
| CIAO1. 3    | 3. 01E-12 | -0. 30084 | 0. 092 | 0. 248 | 4. 50E-08 | Oligo | CIAO1             |
| ADSL. 4     | 3. 04E-12 | -0. 28882 | 0. 104 | 0. 263 | 4. 54E-08 | Oligo | ADSL              |
| PSMA3. 6    | 3. 06E-12 | -0. 22991 | 0. 249 | 0. 448 | 4. 57E-08 | Oligo | PSMA3             |
| HSPB11. 4   | 3. 06E-12 | -0. 19974 | 0. 155 | 0. 335 | 4. 58E-08 | Oligo | HSPB11            |
| AMZ2. 4     | 3. 13E-12 | -0. 31461 | 0. 202 | 0. 387 | 4. 67E-08 | Oligo | AMZ2              |
| MICAL1. 8   | 3. 15E-12 | -0. 3887  | 0. 026 | 0. 145 | 4. 70E-08 | Oligo | MICAL1            |
| RAMP2. 8    | 3. 16E-12 | -0. 32749 | 0. 021 | 0. 14  | 4. 72E-08 | Oligo | RAMP2             |
| CPSF4. 5    | 3. 23E-12 | -0. 30474 | 0. 061 | 0. 201 | 4. 83E-08 | Oligo | CPSF4             |
| MTMR14. 6   | 3. 26E-12 | -0. 29275 | 0. 08  | 0. 227 | 4. 87E-08 | Oligo | MTMR14            |



|           |          |          |       |       |          |       |               |
|-----------|----------|----------|-------|-------|----------|-------|---------------|
| RNF19A.8  | 3.29E-12 | -0.32382 | 0.066 | 0.207 | 4.92E-08 | Oligo | RNF19A        |
| IGSF10.5  | 3.32E-12 | -0.22126 | 0     | 0.103 | 4.96E-08 | Oligo | IGSF10        |
| GRB10.7   | 3.33E-12 | 0.267623 | 0.155 | 0.07  | 4.98E-08 | Oligo | GRB10         |
| EXOSC8.7  | 3.40E-12 | -0.28339 | 0.129 | 0.295 | 5.08E-08 | Oligo | EXOSC8        |
| HCCS.2    | 3.43E-12 | -0.31694 | 0.042 | 0.172 | 5.13E-08 | Oligo | HCCS          |
| LIMA1.8   | 3.47E-12 | -0.3375  | 0.162 | 0.324 | 5.19E-08 | Oligo | LIMA1         |
| PPIH.3    | 3.48E-12 | -0.30413 | 0.082 | 0.233 | 5.20E-08 | Oligo | PPIH          |
| RANGAP1.4 | 3.49E-12 | 0.369945 | 0.195 | 0.099 | 5.21E-08 | Oligo | RANGAP1       |
| RP11-680F | 3.49E-12 | 0.161668 | 0.033 | 0.005 | 5.21E-08 | Oligo | RP11-680F8.3  |
| WNK3.7    | 3.50E-12 | -0.25416 | 0.012 | 0.124 | 5.23E-08 | Oligo | WNK3          |
| PPP1R9A.8 | 3.54E-12 | 0.27535  | 0.155 | 0.068 | 5.30E-08 | Oligo | PPP1R9A       |
| RAPGEF2.2 | 3.55E-12 | 0.326481 | 0.148 | 0.066 | 5.30E-08 | Oligo | RAPGEF2       |
| SMARCE1.6 | 3.56E-12 | -0.27024 | 0.195 | 0.385 | 5.31E-08 | Oligo | SMARCE1       |
| PLD3.5    | 3.59E-12 | -0.3136  | 0.346 | 0.536 | 5.36E-08 | Oligo | PLD3          |
| RP11-472N | 3.60E-12 | -0.3442  | 0.005 | 0.111 | 5.38E-08 | Oligo | RP11-472N13.3 |
| RHOB.6    | 3.66E-12 | 0.305382 | 0.687 | 0.606 | 5.46E-08 | Oligo | RHOB          |
| CD33.9    | 3.68E-12 | -0.47865 | 0.012 | 0.124 | 5.50E-08 | Oligo | CD33          |
| TGFBR1.9  | 3.68E-12 | -0.38636 | 0.04  | 0.166 | 5.50E-08 | Oligo | TGFBR1        |
| PLEKHF1.3 | 3.75E-12 | 0.227672 | 0.108 | 0.041 | 5.61E-08 | Oligo | PLEKHF1       |
| SLC38A1.6 | 3.77E-12 | -0.38294 | 0.026 | 0.146 | 5.63E-08 | Oligo | SLC38A1       |
| MAF.8     | 3.83E-12 | -0.4881  | 0.024 | 0.139 | 5.72E-08 | Oligo | MAF           |
| PGRMC1.7  | 3.85E-12 | 0.3588   | 0.529 | 0.444 | 5.75E-08 | Oligo | PGRMC1        |
| PPP1R7.4  | 3.90E-12 | -0.2969  | 0.181 | 0.36  | 5.82E-08 | Oligo | PPP1R7        |
| EIF2S1.4  | 3.95E-12 | -0.21697 | 0.153 | 0.326 | 5.90E-08 | Oligo | EIF2S1        |
| MPHOSPH6. | 3.95E-12 | -0.28152 | 0.132 | 0.297 | 5.91E-08 | Oligo | MPHOSPH6      |
| CNRIP1.6  | 3.98E-12 | -0.29401 | 0.066 | 0.209 | 5.94E-08 | Oligo | CNRIP1        |
| SMAD7.5   | 4.03E-12 | 0.145913 | 0.094 | 0.032 | 6.02E-08 | Oligo | SMAD7         |
| SNRPG.5   | 4.04E-12 | -0.20342 | 0.475 | 0.646 | 6.03E-08 | Oligo | SNRPG         |
| TMEM183A. | 4.06E-12 | -0.24994 | 0.129 | 0.298 | 6.07E-08 | Oligo | TMEM183A      |
| STOX2.9   | 4.07E-12 | 0.394423 | 0.181 | 0.089 | 6.08E-08 | Oligo | STOX2         |
| STX11.8   | 4.20E-12 | -0.47521 | 0.009 | 0.118 | 6.27E-08 | Oligo | STX11         |
| FOXO4     | 4.24E-12 | 0.171881 | 0.049 | 0.011 | 6.34E-08 | Oligo | FOXO4         |
| UBE2T.8   | 4.27E-12 | -0.36617 | 0.016 | 0.131 | 6.38E-08 | Oligo | UBE2T         |
| THRAP3.7  | 4.28E-12 | -0.25935 | 0.259 | 0.444 | 6.40E-08 | Oligo | THRAP3        |
| NPTX2     | 4.34E-12 | 0.259382 | 0.052 | 0.012 | 6.49E-08 | Oligo | NPTX2         |
| ARPC5L.6  | 4.35E-12 | -0.29968 | 0.195 | 0.376 | 6.50E-08 | Oligo | ARPC5L        |
| CD47.4    | 4.40E-12 | 0.376187 | 0.478 | 0.38  | 6.58E-08 | Oligo | CD47          |
| SNRPA1.6  | 4.42E-12 | -0.26593 | 0.129 | 0.301 | 6.60E-08 | Oligo | SNRPA1        |
| SPHK1.7   | 4.44E-12 | -0.29348 | 0.005 | 0.11  | 6.63E-08 | Oligo | SPHK1         |
| OLFM1.8   | 4.49E-12 | -0.28766 | 0.031 | 0.155 | 6.71E-08 | Oligo | OLFM1         |
| SNRPD1.4  | 4.58E-12 | -0.14835 | 0.376 | 0.571 | 6.85E-08 | Oligo | SNRPD1        |
| CHPF2.3   | 4.62E-12 | -0.2995  | 0.033 | 0.157 | 6.90E-08 | Oligo | CHPF2         |
| CPNE3.6   | 4.65E-12 | -0.29146 | 0.165 | 0.337 | 6.94E-08 | Oligo | CPNE3         |
| SCFD1.4   | 4.70E-12 | -0.21024 | 0.101 | 0.258 | 7.02E-08 | Oligo | SCFD1         |
| POP5.4    | 4.89E-12 | -0.21604 | 0.134 | 0.302 | 7.31E-08 | Oligo | POP5          |
| WDR33.3   | 4.89E-12 | -0.35111 | 0.141 | 0.306 | 7.31E-08 | Oligo | WDR33         |
| WDR41.5   | 4.92E-12 | -0.30521 | 0.082 | 0.231 | 7.36E-08 | Oligo | WDR41         |
| C2orf80.8 | 4.93E-12 | -0.31304 | 0.012 | 0.123 | 7.37E-08 | Oligo | C2orf80       |
| CHCHD6.6  | 4.99E-12 | -0.26156 | 0.092 | 0.241 | 7.45E-08 | Oligo | CHCHD6        |
| PRPF38B.5 | 4.99E-12 | -0.18655 | 0.247 | 0.442 | 7.46E-08 | Oligo | PRPF38B       |
| C12orf10. | 5.08E-12 | -0.24645 | 0.148 | 0.324 | 7.60E-08 | Oligo | C12orf10      |

|             |           |           |        |        |           |       |                |
|-------------|-----------|-----------|--------|--------|-----------|-------|----------------|
| E2F4. 4     | 5. 13E-12 | -0. 30173 | 0. 075 | 0. 219 | 7. 67E-08 | Oligo | E2F4           |
| RWDD4. 4    | 5. 31E-12 | -0. 27045 | 0. 085 | 0. 232 | 7. 94E-08 | Oligo | RWDD4          |
| CSRNP1. 9   | 5. 32E-12 | -0. 44874 | 0. 064 | 0. 195 | 7. 95E-08 | Oligo | CSRNP1         |
| MGAT4A. 9   | 5. 35E-12 | -0. 46566 | 0. 085 | 0. 226 | 7. 99E-08 | Oligo | MGAT4A         |
| SRSF4. 6    | 5. 36E-12 | -0. 24722 | 0. 179 | 0. 367 | 8. 00E-08 | Oligo | SRSF4          |
| CSNK1D. 6   | 5. 55E-12 | -0. 28231 | 0. 184 | 0. 366 | 8. 29E-08 | Oligo | CSNK1D         |
| EHBP1. 7    | 5. 78E-12 | -0. 27118 | 0. 042 | 0. 172 | 8. 63E-08 | Oligo | EHBP1          |
| FZD7. 6     | 5. 81E-12 | -0. 21823 | 0      | 0. 101 | 8. 68E-08 | Oligo | FZD7           |
| ST6GALNAC   | 5. 83E-12 | -0. 25446 | 0. 033 | 0. 158 | 8. 71E-08 | Oligo | ST6GALNAC6     |
| GNG12. 7    | 5. 84E-12 | -0. 25369 | 0. 024 | 0. 142 | 8. 73E-08 | Oligo | GNG12          |
| PDP1. 6     | 5. 92E-12 | -0. 28441 | 0. 016 | 0. 13  | 8. 85E-08 | Oligo | PDP1           |
| RCN2. 8     | 6. 03E-12 | -0. 29816 | 0. 304 | 0. 473 | 9. 01E-08 | Oligo | RCN2           |
| GPATCH4. 3  | 6. 49E-12 | -0. 31904 | 0. 061 | 0. 198 | 9. 69E-08 | Oligo | GPATCH4        |
| TRIAP1. 6   | 6. 52E-12 | -0. 2788  | 0. 148 | 0. 319 | 9. 74E-08 | Oligo | TRIAP1         |
| TTC9B. 9    | 6. 54E-12 | -0. 42546 | 0. 014 | 0. 124 | 9. 77E-08 | Oligo | TTC9B          |
| CASP3. 5    | 6. 57E-12 | -0. 28393 | 0. 064 | 0. 202 | 9. 81E-08 | Oligo | CASP3          |
| CSF1. 7     | 6. 62E-12 | 0. 275184 | 0. 184 | 0. 091 | 9. 89E-08 | Oligo | CSF1           |
| RP11-381K   | 6. 87E-12 | 0. 18563  | 0. 031 | 0. 005 | 1. 03E-07 | Oligo | RP11-381K20. 2 |
| TAGAP. 9    | 6. 94E-12 | -0. 4991  | 0. 002 | 0. 104 | 1. 04E-07 | Oligo | TAGAP          |
| RFTN1. 2    | 6. 99E-12 | -0. 25168 | 0. 007 | 0. 113 | 1. 04E-07 | Oligo | RFTN1          |
| USP39. 4    | 7. 00E-12 | -0. 24903 | 0. 054 | 0. 19  | 1. 05E-07 | Oligo | USP39          |
| SLC27A3. 4  | 7. 01E-12 | -0. 27983 | 0. 014 | 0. 127 | 1. 05E-07 | Oligo | SLC27A3        |
| AEBP1. 8    | 7. 03E-12 | -0. 37432 | 0. 014 | 0. 125 | 1. 05E-07 | Oligo | AEBP1          |
| PHB. 6      | 7. 10E-12 | -0. 21093 | 0. 376 | 0. 561 | 1. 06E-07 | Oligo | PHB            |
| LAMP5. 8    | 7. 18E-12 | -0. 26467 | 0. 007 | 0. 113 | 1. 07E-07 | Oligo | LAMP5          |
| SPTBN1. 7   | 7. 39E-12 | 0. 488392 | 0. 376 | 0. 271 | 1. 11E-07 | Oligo | SPTBN1         |
| LRPAP1. 6   | 7. 41E-12 | -0. 27206 | 0. 36  | 0. 554 | 1. 11E-07 | Oligo | LRPAP1         |
| DLX2. 9     | 7. 45E-12 | -0. 44675 | 0. 007 | 0. 112 | 1. 11E-07 | Oligo | DLX2           |
| RHN01. 4    | 7. 56E-12 | -0. 30215 | 0. 061 | 0. 2   | 1. 13E-07 | Oligo | RHN01          |
| SNRNP25. 5  | 7. 72E-12 | -0. 23556 | 0. 181 | 0. 356 | 1. 15E-07 | Oligo | SNRNP25        |
| TRIM27. 2   | 7. 94E-12 | -0. 2945  | 0. 073 | 0. 215 | 1. 19E-07 | Oligo | TRIM27         |
| SMARCC1. 7  | 7. 99E-12 | -0. 29777 | 0. 106 | 0. 26  | 1. 19E-07 | Oligo | SMARCC1        |
| SH2B2. 7    | 8. 14E-12 | -0. 25138 | 0. 007 | 0. 112 | 1. 22E-07 | Oligo | SH2B2          |
| CEBPA. 8    | 8. 24E-12 | -0. 40674 | 0. 005 | 0. 108 | 1. 23E-07 | Oligo | CEBPA          |
| SH3BP1. 9   | 8. 29E-12 | -0. 34904 | 0. 009 | 0. 116 | 1. 24E-07 | Oligo | SH3BP1         |
| CYTIP. 8    | 8. 44E-12 | -0. 50729 | 0. 005 | 0. 108 | 1. 26E-07 | Oligo | CYTIP          |
| GPR108. 5   | 8. 45E-12 | -0. 18991 | 0. 111 | 0. 271 | 1. 26E-07 | Oligo | GPR108         |
| AC004540. 4 | 8. 49E-12 | -0. 40095 | 0. 016 | 0. 127 | 1. 27E-07 | Oligo | AC004540. 4    |
| LPAR5. 7    | 8. 57E-12 | -0. 44275 | 0. 005 | 0. 107 | 1. 28E-07 | Oligo | LPAR5          |
| CENPU. 8    | 8. 72E-12 | -0. 28322 | 0. 005 | 0. 109 | 1. 30E-07 | Oligo | CENPU          |
| RANGRF. 2   | 8. 72E-12 | -0. 26138 | 0. 073 | 0. 215 | 1. 30E-07 | Oligo | RANGRF         |
| ABHD3. 6    | 8. 78E-12 | -0. 32879 | 0. 054 | 0. 187 | 1. 31E-07 | Oligo | ABHD3          |
| RNPS1. 4    | 8. 80E-12 | -0. 21759 | 0. 344 | 0. 541 | 1. 31E-07 | Oligo | RNPS1          |
| SYT1. 9     | 8. 85E-12 | -0. 40889 | 0. 002 | 0. 103 | 1. 32E-07 | Oligo | SYT1           |
| CSNK2A1. 6  | 8. 86E-12 | -0. 25459 | 0. 155 | 0. 322 | 1. 32E-07 | Oligo | CSNK2A1        |
| ORAI1. 4    | 8. 86E-12 | -0. 23316 | 0. 016 | 0. 129 | 1. 32E-07 | Oligo | ORAI1          |
| RARRES2. 8  | 9. 01E-12 | -0. 70566 | 0. 035 | 0. 154 | 1. 35E-07 | Oligo | RARRES2        |
| PNRC1. 8    | 9. 07E-12 | -0. 31952 | 0. 379 | 0. 546 | 1. 36E-07 | Oligo | PNRC1          |
| IL32. 7     | 9. 12E-12 | -0. 51325 | 0. 002 | 0. 104 | 1. 36E-07 | Oligo | IL32           |
| CHST7. 7    | 9. 22E-12 | -0. 213   | 0. 007 | 0. 113 | 1. 38E-07 | Oligo | CHST7          |
| TMOD3. 6    | 9. 33E-12 | -0. 26334 | 0. 028 | 0. 148 | 1. 39E-07 | Oligo | TMOD3          |

|              |           |           |        |        |           |       |                |
|--------------|-----------|-----------|--------|--------|-----------|-------|----------------|
| PRDM1. 8     | 9. 39E-12 | -0. 41253 | 0. 002 | 0. 104 | 1. 40E-07 | Oligo | PRDM1          |
| STAM. 2      | 9. 39E-12 | 0. 358685 | 0. 188 | 0. 096 | 1. 40E-07 | Oligo | STAM           |
| FMNL1. 9     | 9. 58E-12 | -0. 39936 | 0. 016 | 0. 128 | 1. 43E-07 | Oligo | FMNL1          |
| EFTUD2. 4    | 9. 65E-12 | -0. 24096 | 0. 075 | 0. 22  | 1. 44E-07 | Oligo | EFTUD2         |
| PRPF38A. 4   | 9. 75E-12 | -0. 1422  | 0. 127 | 0. 296 | 1. 46E-07 | Oligo | PRPF38A        |
| SLC25A37. 9  | 9. 79E-12 | -0. 25387 | 0. 144 | 0. 316 | 1. 46E-07 | Oligo | SLC25A37       |
| COMT. 7      | 9. 82E-12 | 0. 354803 | 0. 631 | 0. 544 | 1. 47E-07 | Oligo | COMT           |
| IGF2BP3. 7   | 9. 83E-12 | -0. 22453 | 0. 007 | 0. 112 | 1. 47E-07 | Oligo | IGF2BP3        |
| PAGR1. 1     | 9. 85E-12 | 0. 265164 | 0. 04  | 0. 008 | 1. 47E-07 | Oligo | PAGR1          |
| PABPC4. 9    | 1. 00E-11 | -0. 34545 | 0. 172 | 0. 335 | 1. 50E-07 | Oligo | PABPC4         |
| CD164. 8     | 1. 01E-11 | -0. 25038 | 0. 301 | 0. 497 | 1. 50E-07 | Oligo | CD164          |
| SAMD9L. 3    | 1. 01E-11 | -0. 33651 | 0. 002 | 0. 103 | 1. 52E-07 | Oligo | SAMD9L         |
| GALNT2. 3    | 1. 04E-11 | -0. 33095 | 0. 099 | 0. 249 | 1. 55E-07 | Oligo | GALNT2         |
| TRAP1. 6     | 1. 06E-11 | -0. 23417 | 0. 106 | 0. 264 | 1. 58E-07 | Oligo | TRAP1          |
| INSM1. 9     | 1. 06E-11 | -0. 2818  | 0. 012 | 0. 121 | 1. 59E-07 | Oligo | INSM1          |
| RHOJ. 7      | 1. 07E-11 | -0. 21571 | 0. 002 | 0. 103 | 1. 59E-07 | Oligo | RHOJ           |
| ZNF581. 4    | 1. 07E-11 | -0. 27703 | 0. 047 | 0. 178 | 1. 60E-07 | Oligo | ZNF581         |
| ARHGFEF26. 1 | 1. 10E-11 | -0. 23596 | 0. 016 | 0. 129 | 1. 64E-07 | Oligo | ARHGFEF26      |
| WIPI1. 7     | 1. 15E-11 | -0. 37067 | 0. 059 | 0. 19  | 1. 72E-07 | Oligo | WIPI1          |
| GSTM4. 5     | 1. 17E-11 | -0. 3083  | 0. 071 | 0. 21  | 1. 75E-07 | Oligo | GSTM4          |
| CAP1. 8      | 1. 17E-11 | -0. 24856 | 0. 414 | 0. 599 | 1. 75E-07 | Oligo | CAP1           |
| NUBP1. 6     | 1. 17E-11 | -0. 26514 | 0. 08  | 0. 223 | 1. 75E-07 | Oligo | NUBP1          |
| DYSF. 1      | 1. 17E-11 | 0. 235991 | 0. 038 | 0. 007 | 1. 75E-07 | Oligo | DYSF           |
| DYNLL2. 9    | 1. 19E-11 | 0. 460583 | 0. 308 | 0. 202 | 1. 78E-07 | Oligo | DYNLL2         |
| YWHAE. 8     | 1. 20E-11 | 0. 220156 | 0. 781 | 0. 751 | 1. 80E-07 | Oligo | YWHAE          |
| GIPC1. 6     | 1. 22E-11 | 0. 42231  | 0. 365 | 0. 264 | 1. 82E-07 | Oligo | GIPC1          |
| TWISTNB. 3   | 1. 22E-11 | -0. 30227 | 0. 118 | 0. 274 | 1. 83E-07 | Oligo | TWISTNB        |
| KLHDC8B. 5   | 1. 23E-11 | -0. 26696 | 0. 005 | 0. 107 | 1. 84E-07 | Oligo | KLHDC8B        |
| IFI44. 5     | 1. 25E-11 | -0. 40581 | 0. 059 | 0. 189 | 1. 87E-07 | Oligo | IFI44          |
| MCM3. 6      | 1. 27E-11 | -0. 31312 | 0. 028 | 0. 147 | 1. 90E-07 | Oligo | MCM3           |
| RALY. 4      | 1. 30E-11 | -0. 28668 | 0. 289 | 0. 462 | 1. 94E-07 | Oligo | RALY           |
| ALDH9A1. 4   | 1. 30E-11 | -0. 2585  | 0. 172 | 0. 345 | 1. 95E-07 | Oligo | ALDH9A1        |
| KCNIP1. 7    | 1. 30E-11 | -0. 29913 | 0. 002 | 0. 102 | 1. 95E-07 | Oligo | KCNIP1         |
| TMEM167A. 1  | 1. 31E-11 | -0. 29166 | 0. 249 | 0. 427 | 1. 96E-07 | Oligo | TMEM167A       |
| PLBD1. 9     | 1. 34E-11 | -0. 36746 | 0      | 0. 098 | 2. 00E-07 | Oligo | PLBD1          |
| SH3BP2. 8    | 1. 35E-11 | -0. 3168  | 0. 026 | 0. 142 | 2. 01E-07 | Oligo | SH3BP2         |
| SSBP2. 8     | 1. 36E-11 | -0. 35226 | 0. 12  | 0. 275 | 2. 03E-07 | Oligo | SSBP2          |
| TBC1D1. 8    | 1. 36E-11 | -0. 28003 | 0. 016 | 0. 127 | 2. 03E-07 | Oligo | TBC1D1         |
| ACOT9. 8     | 1. 37E-11 | -0. 28461 | 0. 054 | 0. 187 | 2. 05E-07 | Oligo | ACOT9          |
| FARSA. 4     | 1. 37E-11 | -0. 18808 | 0. 155 | 0. 326 | 2. 05E-07 | Oligo | FARSA          |
| PTGES2. 3    | 1. 37E-11 | -0. 21368 | 0. 115 | 0. 273 | 2. 05E-07 | Oligo | PTGES2         |
| PIGF. 7      | 1. 40E-11 | -0. 24646 | 0. 132 | 0. 293 | 2. 09E-07 | Oligo | PIGF           |
| CCZ1B. 7     | 1. 43E-11 | -0. 30182 | 0. 035 | 0. 156 | 2. 13E-07 | Oligo | CCZ1B          |
| PGAP1. 8     | 1. 44E-11 | -0. 30203 | 0. 056 | 0. 188 | 2. 15E-07 | Oligo | PGAP1          |
| TMSB4X. 8    | 1. 46E-11 | 0. 144371 | 0. 993 | 0. 997 | 2. 19E-07 | Oligo | TMSB4X         |
| ZC2HC1A. 8   | 1. 47E-11 | -0. 29403 | 0. 078 | 0. 216 | 2. 19E-07 | Oligo | ZC2HC1A        |
| SLC35B1. 4   | 1. 47E-11 | -0. 18815 | 0. 212 | 0. 398 | 2. 20E-07 | Oligo | SLC35B1        |
| LHFPL2. 8    | 1. 48E-11 | -0. 39551 | 0. 042 | 0. 165 | 2. 22E-07 | Oligo | LHFPL2         |
| RAD51C. 6    | 1. 50E-11 | -0. 25021 | 0. 113 | 0. 272 | 2. 24E-07 | Oligo | RAD51C         |
| RP11-259K    | 1. 50E-11 | 0. 298556 | 0. 066 | 0. 019 | 2. 25E-07 | Oligo | RP11-259K15. 2 |
| LMBR1L. 7    | 1. 51E-11 | -0. 32339 | 0. 056 | 0. 189 | 2. 26E-07 | Oligo | LMBR1L         |

|           |          |          |       |       |          |       |               |
|-----------|----------|----------|-------|-------|----------|-------|---------------|
| GNA15.9   | 1.52E-11 | -0.43467 | 0.009 | 0.113 | 2.27E-07 | Oligo | GNA15         |
| UTP6.4    | 1.54E-11 | -0.31427 | 0.075 | 0.214 | 2.30E-07 | Oligo | UTP6          |
| RBM15B.7  | 1.55E-11 | -0.23917 | 0.047 | 0.176 | 2.32E-07 | Oligo | RBM15B        |
| LRIF1.6   | 1.56E-11 | -0.27473 | 0.066 | 0.202 | 2.34E-07 | Oligo | LRIF1         |
| ZNF267.8  | 1.57E-11 | -0.37099 | 0.024 | 0.136 | 2.35E-07 | Oligo | ZNF267        |
| RP11-165A | 1.58E-11 | 0.229005 | 0.045 | 0.01  | 2.36E-07 | Oligo | RP11-165A20.3 |
| LRRN3.8   | 1.59E-11 | -0.35075 | 0.012 | 0.117 | 2.38E-07 | Oligo | LRRN3         |
| ATP1A3.8  | 1.60E-11 | -0.38944 | 0.016 | 0.125 | 2.38E-07 | Oligo | ATP1A3        |
| SEC63.4   | 1.62E-11 | -0.26805 | 0.216 | 0.394 | 2.43E-07 | Oligo | SEC63         |
| PCGF2.7   | 1.62E-11 | -0.2625  | 0.042 | 0.167 | 2.43E-07 | Oligo | PCGF2         |
| TNFRSF10E | 1.65E-11 | -0.33232 | 0.005 | 0.106 | 2.47E-07 | Oligo | TNFRSF10B     |
| RAB21.4   | 1.71E-11 | 0.417153 | 0.306 | 0.2   | 2.55E-07 | Oligo | RAB21         |
| LAMC1.6   | 1.72E-11 | -0.1926  | 0.005 | 0.106 | 2.57E-07 | Oligo | LAMC1         |
| FKBP1B.4  | 1.75E-11 | -0.25175 | 0.016 | 0.126 | 2.61E-07 | Oligo | FKBP1B        |
| FBXW2.4   | 1.77E-11 | -0.27332 | 0.061 | 0.197 | 2.64E-07 | Oligo | FBXW2         |
| POLD2.6   | 1.80E-11 | -0.21342 | 0.245 | 0.428 | 2.70E-07 | Oligo | POLD2         |
| TMEM223.2 | 1.83E-11 | -0.18767 | 0.085 | 0.23  | 2.74E-07 | Oligo | TMEM223       |
| HNRNPR.4  | 1.86E-11 | -0.22528 | 0.346 | 0.526 | 2.78E-07 | Oligo | HNRNPR        |
| ZMAT2.1   | 1.86E-11 | -0.19018 | 0.24  | 0.427 | 2.78E-07 | Oligo | ZMAT2         |
| CENPF.9   | 1.91E-11 | -0.40827 | 0.005 | 0.105 | 2.86E-07 | Oligo | CENPF         |
| DDX56.6   | 1.93E-11 | -0.29344 | 0.111 | 0.262 | 2.89E-07 | Oligo | DDX56         |
| SOX21.6   | 1.94E-11 | -0.20255 | 0     | 0.096 | 2.90E-07 | Oligo | SOX21         |
| CNTFR.8   | 1.95E-11 | -0.27107 | 0.021 | 0.134 | 2.92E-07 | Oligo | CNTFR         |
| DUSP12.5  | 1.98E-11 | -0.2669  | 0.094 | 0.241 | 2.95E-07 | Oligo | DUSP12        |
| DIP2A.3   | 1.99E-11 | 0.347816 | 0.207 | 0.11  | 2.97E-07 | Oligo | DIP2A         |
| NOB1.3    | 1.99E-11 | -0.25515 | 0.064 | 0.197 | 2.98E-07 | Oligo | NOB1          |
| BAIAP2.4  | 2.00E-11 | -0.30581 | 0.066 | 0.202 | 2.99E-07 | Oligo | BAIAP2        |
| WRB.8     | 2.00E-11 | 0.56448  | 0.506 | 0.417 | 2.99E-07 | Oligo | WRB           |
| TMEM80.2  | 2.01E-11 | -0.19696 | 0.045 | 0.173 | 3.01E-07 | Oligo | TMEM80        |
| DNAJA2.3  | 2.02E-11 | -0.33004 | 0.169 | 0.336 | 3.02E-07 | Oligo | DNAJA2        |
| PLXNB3    | 2.04E-11 | 0.124224 | 0.024 | 0.003 | 3.04E-07 | Oligo | PLXNB3        |
| TRAPPC1.4 | 2.04E-11 | -0.18983 | 0.435 | 0.622 | 3.04E-07 | Oligo | TRAPPC1       |
| APOBEC3G. | 2.07E-11 | -0.35532 | 0.014 | 0.122 | 3.10E-07 | Oligo | APOBEC3G      |
| CPNE4.7   | 2.08E-11 | -0.19961 | 0     | 0.096 | 3.11E-07 | Oligo | CPNE4         |
| SIGLEC9.9 | 2.08E-11 | -0.41398 | 0     | 0.096 | 3.11E-07 | Oligo | SIGLEC9       |
| SLC10A4.8 | 2.10E-11 | -0.20717 | 0.002 | 0.1   | 3.13E-07 | Oligo | SLC10A4       |
| ARHGAP4.9 | 2.10E-11 | -0.43141 | 0.014 | 0.119 | 3.14E-07 | Oligo | ARHGAP4       |
| BRAT1.4   | 2.11E-11 | -0.2936  | 0.056 | 0.189 | 3.15E-07 | Oligo | BRAT1         |
| UQCR10.6  | 2.11E-11 | -0.12316 | 0.593 | 0.747 | 3.15E-07 | Oligo | UQCR10        |
| PTPN18.9  | 2.12E-11 | -0.33742 | 0.078 | 0.216 | 3.17E-07 | Oligo | PTPN18        |
| NCOR1.8   | 2.12E-11 | -0.25195 | 0.285 | 0.471 | 3.17E-07 | Oligo | NCOR1         |
| MFSD11.1  | 2.13E-11 | -0.29877 | 0.064 | 0.199 | 3.18E-07 | Oligo | MFSD11        |
| ATP6V1H.2 | 2.15E-11 | -0.3377  | 0.162 | 0.328 | 3.21E-07 | Oligo | ATP6V1H       |
| GEM.4     | 2.15E-11 | -0.41326 | 0.002 | 0.1   | 3.21E-07 | Oligo | GEM           |
| PPAT.6    | 2.19E-11 | -0.2628  | 0.031 | 0.148 | 3.27E-07 | Oligo | PPAT          |
| ADAM17.6  | 2.20E-11 | -0.28807 | 0.108 | 0.261 | 3.29E-07 | Oligo | ADAM17        |
| KIF13A.1  | 2.20E-11 | 0.362878 | 0.129 | 0.056 | 3.29E-07 | Oligo | KIF13A        |
| MARCH3.5  | 2.20E-11 | -0.36881 | 0.007 | 0.108 | 3.29E-07 | Oligo | 3-Mar         |
| APEH.2    | 2.26E-11 | -0.29693 | 0.066 | 0.201 | 3.37E-07 | Oligo | APEH          |
| PXDN.5    | 2.26E-11 | -0.22839 | 0.005 | 0.105 | 3.38E-07 | Oligo | PXDN          |
| TTYH3.6   | 2.26E-11 | -0.27479 | 0.104 | 0.252 | 3.38E-07 | Oligo | TTYH3         |

|             |           |           |        |        |                 |               |
|-------------|-----------|-----------|--------|--------|-----------------|---------------|
| BTG3. 6     | 2. 29E-11 | -0. 32703 | 0. 209 | 0. 377 | 3. 42E-07 Oligo | BTG3          |
| SMYD3. 5    | 2. 29E-11 | -0. 34394 | 0. 028 | 0. 143 | 3. 42E-07 Oligo | SMYD3         |
| EBI3. 8     | 2. 29E-11 | -0. 44851 | 0. 002 | 0. 1   | 3. 43E-07 Oligo | EBI3          |
| HDAC2. 8    | 2. 30E-11 | -0. 28016 | 0. 275 | 0. 454 | 3. 43E-07 Oligo | HDAC2         |
| ALAD. 2     | 2. 33E-11 | 0. 34942  | 0. 2   | 0. 104 | 3. 48E-07 Oligo | ALAD          |
| PLOD2. 7    | 2. 36E-11 | -0. 28075 | 0. 042 | 0. 166 | 3. 53E-07 Oligo | PLOD2         |
| PNN. 6      | 2. 37E-11 | -0. 25867 | 0. 228 | 0. 408 | 3. 54E-07 Oligo | PNN           |
| BCAT1. 7    | 2. 38E-11 | -0. 30524 | 0. 092 | 0. 236 | 3. 56E-07 Oligo | BCAT1         |
| BATF3. 3    | 2. 44E-11 | -0. 25125 | 0      | 0. 096 | 3. 65E-07 Oligo | BATF3         |
| HIST1H2AC   | 2. 49E-11 | 0. 348477 | 0. 275 | 0. 163 | 3. 71E-07 Oligo | HIST1H2AC     |
| TPST1. 7    | 2. 50E-11 | -0. 31623 | 0. 101 | 0. 245 | 3. 74E-07 Oligo | TPST1         |
| MVB12A. 5   | 2. 50E-11 | -0. 16159 | 0. 139 | 0. 308 | 3. 74E-07 Oligo | MVB12A        |
| ZDHHC3. 3   | 2. 51E-11 | -0. 2501  | 0. 068 | 0. 204 | 3. 75E-07 Oligo | ZDHHC3        |
| SNW1. 1     | 2. 53E-11 | -0. 32459 | 0. 193 | 0. 359 | 3. 79E-07 Oligo | SNW1          |
| CD84. 9     | 2. 54E-11 | -0. 39464 | 0. 021 | 0. 133 | 3. 80E-07 Oligo | CD84          |
| LDHB. 5     | 2. 55E-11 | -0. 14152 | 0. 607 | 0. 785 | 3. 81E-07 Oligo | LDHB          |
| AKR7A2. 4   | 2. 57E-11 | -0. 29728 | 0. 155 | 0. 321 | 3. 83E-07 Oligo | AKR7A2        |
| MAP7D3. 2   | 2. 58E-11 | -0. 26757 | 0. 014 | 0. 121 | 3. 86E-07 Oligo | MAP7D3        |
| MYD88. 5    | 2. 58E-11 | -0. 32143 | 0. 024 | 0. 134 | 3. 86E-07 Oligo | MYD88         |
| CLEC5A. 8   | 2. 61E-11 | -0. 48926 | 0. 005 | 0. 103 | 3. 90E-07 Oligo | CLEC5A        |
| RASD1. 6    | 2. 62E-11 | -0. 44445 | 0. 026 | 0. 138 | 3. 91E-07 Oligo | RASD1         |
| PLIN3. 5    | 2. 66E-11 | 0. 420783 | 0. 452 | 0. 355 | 3. 98E-07 Oligo | PLIN3         |
| POLD4. 7    | 2. 69E-11 | -0. 34986 | 0. 259 | 0. 427 | 4. 03E-07 Oligo | POLD4         |
| TNFRSF19. 2 | 2. 73E-11 | -0. 18125 | 0. 007 | 0. 109 | 4. 07E-07 Oligo | TNFRSF19      |
| SCP2. 4     | 2. 74E-11 | -0. 27757 | 0. 395 | 0. 591 | 4. 09E-07 Oligo | SCP2          |
| STARD7. 4   | 2. 74E-11 | 0. 430427 | 0. 412 | 0. 313 | 4. 09E-07 Oligo | STARD7        |
| ERICH1. 5   | 2. 75E-11 | -0. 23535 | 0. 122 | 0. 278 | 4. 11E-07 Oligo | ERICH1        |
| GATS. 6     | 2. 75E-11 | 0. 385471 | 0. 136 | 0. 06  | 4. 11E-07 Oligo | GATS          |
| RP11-16E1   | 2. 77E-11 | 0. 212729 | 0. 064 | 0. 018 | 4. 15E-07 Oligo | RP11-16E12. 1 |
| MX1. 6      | 2. 78E-11 | -0. 41538 | 0. 016 | 0. 124 | 4. 15E-07 Oligo | MX1           |
| PARL. 3     | 2. 82E-11 | -0. 26412 | 0. 174 | 0. 344 | 4. 21E-07 Oligo | PARL          |
| EPAS1. 6    | 2. 85E-11 | -0. 31436 | 0. 007 | 0. 108 | 4. 26E-07 Oligo | EPAS1         |
| GSTO2       | 2. 86E-11 | 0. 217747 | 0. 056 | 0. 015 | 4. 27E-07 Oligo | GSTO2         |
| HRH1. 8     | 2. 86E-11 | -0. 2625  | 0. 002 | 0. 1   | 4. 28E-07 Oligo | HRH1          |
| TLR2. 9     | 2. 87E-11 | -0. 46741 | 0. 012 | 0. 115 | 4. 29E-07 Oligo | TLR2          |
| ZNF131. 7   | 2. 89E-11 | -0. 26718 | 0. 092 | 0. 237 | 4. 32E-07 Oligo | ZNF131        |
| LCP2. 9     | 2. 92E-11 | -0. 43673 | 0. 014 | 0. 119 | 4. 36E-07 Oligo | LCP2          |
| GNPTAB. 3   | 2. 93E-11 | -0. 32359 | 0. 04  | 0. 16  | 4. 38E-07 Oligo | GNPTAB        |
| DUSP2. 8    | 2. 95E-11 | -0. 49514 | 0. 012 | 0. 114 | 4. 41E-07 Oligo | DUSP2         |
| SUSD3. 8    | 2. 95E-11 | -0. 4466  | 0. 002 | 0. 099 | 4. 41E-07 Oligo | SUSD3         |
| MTRR. 3     | 2. 96E-11 | 0. 430603 | 0. 165 | 0. 08  | 4. 42E-07 Oligo | MTRR          |
| MINOS1. 7   | 3. 03E-11 | -0. 28282 | 0. 471 | 0. 646 | 4. 53E-07 Oligo | MINOS1        |
| MARCH7. 3   | 3. 05E-11 | -0. 29571 | 0. 111 | 0. 261 | 4. 56E-07 Oligo | 7-Mar         |
| CNIH2. 9    | 3. 08E-11 | -0. 16929 | 0. 021 | 0. 134 | 4. 61E-07 Oligo | CNIH2         |
| CRTAP. 9    | 3. 10E-11 | -0. 24824 | 0. 096 | 0. 242 | 4. 63E-07 Oligo | CRTAP         |
| KCNK12. 1   | 3. 10E-11 | 0. 165822 | 0. 073 | 0. 023 | 4. 64E-07 Oligo | KCNK12        |
| TM4SF1. 9   | 3. 12E-11 | -0. 31199 | 0. 012 | 0. 116 | 4. 67E-07 Oligo | TM4SF1        |
| STIP1. 6    | 3. 16E-11 | -0. 26311 | 0. 2   | 0. 378 | 4. 72E-07 Oligo | STIP1         |
| UXS1. 2     | 3. 17E-11 | -0. 24528 | 0. 071 | 0. 208 | 4. 74E-07 Oligo | UXS1          |
| FN1. 7      | 3. 19E-11 | -0. 4435  | 0. 04  | 0. 159 | 4. 77E-07 Oligo | FN1           |
| SEC62. 4    | 3. 22E-11 | 0. 38591  | 0. 704 | 0. 691 | 4. 81E-07 Oligo | SEC62         |

|            |          |          |       |       |          |       |               |
|------------|----------|----------|-------|-------|----------|-------|---------------|
| SMIM20.3   | 3.23E-11 | -0.25609 | 0.176 | 0.346 | 4.83E-07 | Oligo | SMIM20        |
| ANKRD37.5  | 3.30E-11 | -0.36552 | 0.031 | 0.146 | 4.94E-07 | Oligo | ANKRD37       |
| ITGB8.7    | 3.43E-11 | 0.362476 | 0.339 | 0.236 | 5.12E-07 | Oligo | ITGB8         |
| GNE        | 3.47E-11 | 0.206003 | 0.101 | 0.038 | 5.18E-07 | Oligo | GNE           |
| L3MBTL4    | 3.48E-11 | 0.257045 | 0.089 | 0.031 | 5.19E-07 | Oligo | L3MBTL4       |
| ITGA2.7    | 3.49E-11 | 0.305983 | 0.134 | 0.06  | 5.21E-07 | Oligo | ITGA2         |
| SPATA20.5  | 3.51E-11 | -0.26594 | 0.024 | 0.135 | 5.25E-07 | Oligo | SPATA20       |
| C22orf39.3 | 3.52E-11 | -0.30343 | 0.113 | 0.265 | 5.26E-07 | Oligo | C22orf39      |
| TSFM.6     | 3.53E-11 | -0.32758 | 0.129 | 0.281 | 5.27E-07 | Oligo | TSFM          |
| SNAP47.7   | 3.53E-11 | -0.19074 | 0.071 | 0.207 | 5.28E-07 | Oligo | SNAP47        |
| ARL6IP5.4  | 3.54E-11 | 0.416521 | 0.696 | 0.649 | 5.28E-07 | Oligo | ARL6IP5       |
| CSNK1A1.6  | 3.54E-11 | -0.26496 | 0.398 | 0.564 | 5.29E-07 | Oligo | CSNK1A1       |
| TSNAX.1    | 3.58E-11 | -0.2205  | 0.16  | 0.324 | 5.35E-07 | Oligo | TSNAX         |
| RNF180.8   | 3.59E-11 | -0.30673 | 0.049 | 0.172 | 5.37E-07 | Oligo | RNF180        |
| FAM174B    | 3.62E-11 | 0.127197 | 0.052 | 0.013 | 5.41E-07 | Oligo | FAM174B       |
| TMEM45A.5  | 3.68E-11 | -0.32817 | 0.054 | 0.181 | 5.50E-07 | Oligo | TMEM45A       |
| TTL4.2     | 3.79E-11 | 0.459635 | 0.146 | 0.068 | 5.67E-07 | Oligo | TTL4          |
| PTGFRN.4   | 3.81E-11 | -0.22176 | 0.007 | 0.107 | 5.69E-07 | Oligo | PTGFRN        |
| ZNF800.5   | 3.84E-11 | -0.24805 | 0.056 | 0.187 | 5.73E-07 | Oligo | ZNF800        |
| RGS6.7     | 3.87E-11 | -0.23897 | 0     | 0.094 | 5.79E-07 | Oligo | RGS6          |
| PYCR2.3    | 3.90E-11 | 0.437251 | 0.344 | 0.237 | 5.83E-07 | Oligo | PYCR2         |
| TRIM37.7   | 3.91E-11 | -0.21569 | 0.035 | 0.154 | 5.84E-07 | Oligo | TRIM37        |
| PER3       | 3.91E-11 | 0.254381 | 0.099 | 0.037 | 5.85E-07 | Oligo | PER3          |
| NAT9.5     | 3.92E-11 | -0.19708 | 0.071 | 0.208 | 5.86E-07 | Oligo | NAT9          |
| ACBD6.5    | 3.97E-11 | -0.25373 | 0.127 | 0.283 | 5.94E-07 | Oligo | ACBD6         |
| OCEL1.3    | 4.00E-11 | -0.30405 | 0.04  | 0.161 | 5.98E-07 | Oligo | OCEL1         |
| RAB5A.5    | 4.01E-11 | -0.2521  | 0.266 | 0.455 | 5.99E-07 | Oligo | RAB5A         |
| GID8.2     | 4.11E-11 | -0.26015 | 0.104 | 0.252 | 6.14E-07 | Oligo | GID8          |
| PALD1.8    | 4.17E-11 | -0.41899 | 0.007 | 0.105 | 6.23E-07 | Oligo | PALD1         |
| WDR18.6    | 4.22E-11 | -0.27744 | 0.132 | 0.292 | 6.31E-07 | Oligo | WDR18         |
| TM9SF3.5   | 4.36E-11 | 0.390578 | 0.32  | 0.216 | 6.51E-07 | Oligo | TM9SF3        |
| RILP.9     | 4.36E-11 | -0.27359 | 0.007 | 0.106 | 6.51E-07 | Oligo | RILP          |
| ZDHHC12.9  | 4.38E-11 | -0.29375 | 0.118 | 0.266 | 6.55E-07 | Oligo | ZDHHC12       |
| ZNF791.5   | 4.40E-11 | -0.24962 | 0.12  | 0.276 | 6.57E-07 | Oligo | ZNF791        |
| PPP2R3A.5  | 4.40E-11 | 0.285818 | 0.132 | 0.058 | 6.57E-07 | Oligo | PPP2R3A       |
| ROBO2.8    | 4.44E-11 | -0.19685 | 0.009 | 0.111 | 6.63E-07 | Oligo | ROBO2         |
| ODF3B.9    | 4.48E-11 | -0.34185 | 0.002 | 0.097 | 6.69E-07 | Oligo | ODF3B         |
| OSBPL8.5   | 4.48E-11 | -0.30502 | 0.158 | 0.317 | 6.70E-07 | Oligo | OSBPL8        |
| RP11-100C  | 4.72E-11 | 0.21366  | 0.101 | 0.038 | 7.06E-07 | Oligo | RP11-1000B6.3 |
| SH3GL1.5   | 4.78E-11 | -0.21312 | 0.111 | 0.255 | 7.14E-07 | Oligo | SH3GL1        |
| P2RX7.3    | 4.80E-11 | 0.280943 | 0.167 | 0.08  | 7.17E-07 | Oligo | P2RX7         |
| ZIC1.7     | 4.87E-11 | -0.2559  | 0.014 | 0.118 | 7.27E-07 | Oligo | ZIC1          |
| TRIP10.3   | 4.89E-11 | -0.23958 | 0.005 | 0.102 | 7.31E-07 | Oligo | TRIP10        |
| COA1.4     | 4.93E-11 | -0.28417 | 0.231 | 0.403 | 7.37E-07 | Oligo | COA1          |
| PEX13.1    | 5.06E-11 | -0.28421 | 0.049 | 0.174 | 7.56E-07 | Oligo | PEX13         |
| VSTM2A.7   | 5.06E-11 | -0.57368 | 0.009 | 0.109 | 7.56E-07 | Oligo | VSTM2A        |
| HSD11B1L.5 | 5.07E-11 | -0.26392 | 0.073 | 0.21  | 7.58E-07 | Oligo | HSD11B1L      |
| KLF9.3     | 5.09E-11 | 0.308684 | 0.228 | 0.127 | 7.60E-07 | Oligo | KLF9          |
| HLA-DQB2.5 | 5.10E-11 | -0.62682 | 0.005 | 0.101 | 7.62E-07 | Oligo | HLA-DQB2      |
| PHF23.7    | 5.11E-11 | -0.18821 | 0.075 | 0.212 | 7.64E-07 | Oligo | PHF23         |
| IL10.9     | 5.12E-11 | -0.48949 | 0.009 | 0.11  | 7.65E-07 | Oligo | IL10          |

|             |          |          |       |       |                |               |
|-------------|----------|----------|-------|-------|----------------|---------------|
| SPOPL. 2    | 5.16E-11 | 0.24798  | 0.122 | 0.051 | 7.72E-07 Oligo | SPOPL         |
| NR4A1. 8    | 5.17E-11 | -0.38305 | 0.139 | 0.278 | 7.73E-07 Oligo | NR4A1         |
| INO80C. 4   | 5.24E-11 | -0.28952 | 0.047 | 0.17  | 7.83E-07 Oligo | INO80C        |
| GPR162. 7   | 5.27E-11 | -0.24816 | 0.007 | 0.105 | 7.87E-07 Oligo | GPR162        |
| DZIP1. 7    | 5.31E-11 | -0.17693 | 0.007 | 0.106 | 7.94E-07 Oligo | DZIP1         |
| PAK1IP1. 6  | 5.34E-11 | -0.20575 | 0.08  | 0.221 | 7.98E-07 Oligo | PAK1IP1       |
| SUPT7L. 2   | 5.36E-11 | -0.31312 | 0.064 | 0.194 | 8.00E-07 Oligo | SUPT7L        |
| IER5L. 2    | 5.42E-11 | -0.23625 | 0.005 | 0.101 | 8.10E-07 Oligo | IER5L         |
| MPLKIP. 5   | 5.44E-11 | -0.26526 | 0.259 | 0.452 | 8.12E-07 Oligo | MPLKIP        |
| CROT. 6     | 5.45E-11 | -0.32999 | 0.026 | 0.136 | 8.15E-07 Oligo | CROT          |
| RP11-849I   | 5.50E-11 | -0.31679 | 0.026 | 0.136 | 8.23E-07 Oligo | RP11-849I19.1 |
| C12orf57. 5 | 5.54E-11 | -0.27565 | 0.365 | 0.543 | 8.28E-07 Oligo | C12orf57      |
| ICA1. 4     | 5.56E-11 | -0.3222  | 0.014 | 0.117 | 8.32E-07 Oligo | ICA1          |
| FGFR1. 5    | 5.75E-11 | -0.21236 | 0.049 | 0.175 | 8.59E-07 Oligo | FGFR1         |
| C19orf48. 5 | 5.79E-11 | -0.23497 | 0.092 | 0.232 | 8.65E-07 Oligo | C19orf48      |
| MZT2A. 6    | 5.80E-11 | -0.21323 | 0.238 | 0.42  | 8.67E-07 Oligo | MZT2A         |
| TSPAN12. 7  | 5.81E-11 | -0.28908 | 0.019 | 0.124 | 8.68E-07 Oligo | TSPAN12       |
| RP11-834C   | 5.88E-11 | -0.38074 | 0.005 | 0.1   | 8.79E-07 Oligo | RP11-834C11.4 |
| CLPP. 3     | 5.89E-11 | -0.26072 | 0.235 | 0.404 | 8.80E-07 Oligo | CLPP          |
| DENND3. 9   | 5.92E-11 | -0.41647 | 0.007 | 0.104 | 8.84E-07 Oligo | DENND3        |
| MPZL1. 4    | 5.99E-11 | -0.2758  | 0.104 | 0.254 | 8.95E-07 Oligo | MPZL1         |
| TMED5. 7    | 6.11E-11 | -0.36279 | 0.155 | 0.312 | 9.13E-07 Oligo | TMED5         |
| SNRPA. 3    | 6.20E-11 | -0.28879 | 0.111 | 0.258 | 9.26E-07 Oligo | SNRPA         |
| CPNE2. 8    | 6.30E-11 | 0.429233 | 0.278 | 0.174 | 9.41E-07 Oligo | CPNE2         |
| BEND5. 7    | 6.30E-11 | -0.26366 | 0.028 | 0.141 | 9.41E-07 Oligo | BEND5         |
| EVL. 5      | 6.38E-11 | -0.40969 | 0.205 | 0.357 | 9.53E-07 Oligo | EVL           |
| SLC35E1. 2  | 6.38E-11 | -0.24954 | 0.045 | 0.166 | 9.53E-07 Oligo | SLC35E1       |
| IFI27. 4    | 6.42E-11 | -0.52659 | 0.014 | 0.117 | 9.59E-07 Oligo | IFI27         |
| PIK3R3. 7   | 6.42E-11 | -0.33808 | 0.026 | 0.136 | 9.60E-07 Oligo | PIK3R3        |
| NUSAP1. 8   | 6.43E-11 | -0.42046 | 0.009 | 0.108 | 9.60E-07 Oligo | NUSAP1        |
| UQCRC1. 5   | 6.52E-11 | -0.25946 | 0.311 | 0.495 | 9.74E-07 Oligo | UQCRC1        |
| TMEM119. 7  | 6.52E-11 | -0.46631 | 0.009 | 0.109 | 9.75E-07 Oligo | TMEM119       |
| FAM168A. 4  | 6.57E-11 | 0.406294 | 0.216 | 0.124 | 9.82E-07 Oligo | FAM168A       |
| CERS1. 7    | 6.66E-11 | 0.458188 | 0.216 | 0.125 | 9.95E-07 Oligo | CERS1         |
| MDH1. 4     | 6.66E-11 | -0.12935 | 0.358 | 0.558 | 9.95E-07 Oligo | MDH1          |
| SLC31A1. 7  | 6.86E-11 | -0.32021 | 0.049 | 0.172 | 1.03E-06 Oligo | SLC31A1       |
| SPPL2A. 9   | 6.86E-11 | -0.24652 | 0.059 | 0.189 | 1.03E-06 Oligo | SPPL2A        |
| B4GALT3. 5  | 7.03E-11 | -0.24155 | 0.085 | 0.223 | 1.05E-06 Oligo | B4GALT3       |
| MCC. 6      | 7.19E-11 | -0.21667 | 0.019 | 0.125 | 1.07E-06 Oligo | MCC           |
| LRP11. 1    | 7.28E-11 | 0.28531  | 0.111 | 0.045 | 1.09E-06 Oligo | LRP11         |
| PLOD1. 4    | 7.29E-11 | -0.27475 | 0.064 | 0.196 | 1.09E-06 Oligo | PLOD1         |
| HLCS        | 7.34E-11 | 0.315274 | 0.12  | 0.051 | 1.10E-06 Oligo | HLCS          |
| THAP9-AS1   | 7.34E-11 | -0.28459 | 0.087 | 0.226 | 1.10E-06 Oligo | THAP9-AS1     |
| GMPS. 4     | 7.38E-11 | -0.2575  | 0.059 | 0.189 | 1.10E-06 Oligo | GMPS          |
| HVCN1. 8    | 7.48E-11 | -0.36465 | 0.005 | 0.1   | 1.12E-06 Oligo | HVCN1         |
| DEAF1. 8    | 7.54E-11 | -0.25902 | 0.08  | 0.217 | 1.13E-06 Oligo | DEAF1         |
| FKBP9. 7    | 7.55E-11 | -0.26479 | 0.056 | 0.181 | 1.13E-06 Oligo | FKBP9         |
| ORC4. 8     | 7.67E-11 | -0.25137 | 0.099 | 0.24  | 1.15E-06 Oligo | ORC4          |
| POLR3K. 3   | 7.68E-11 | -0.32949 | 0.089 | 0.226 | 1.15E-06 Oligo | POLR3K        |
| HS3ST1. 8   | 7.71E-11 | -0.38029 | 0     | 0.091 | 1.15E-06 Oligo | HS3ST1        |
| TEX30. 5    | 7.71E-11 | -0.19021 | 0.047 | 0.17  | 1.15E-06 Oligo | TEX30         |

|           |          |          |       |       |          |       |               |
|-----------|----------|----------|-------|-------|----------|-------|---------------|
| ASNA1.6   | 7.90E-11 | -0.18113 | 0.344 | 0.526 | 1.18E-06 | Oligo | ASNA1         |
| PRPF4.1   | 7.93E-11 | -0.25343 | 0.052 | 0.178 | 1.18E-06 | Oligo | PRPF4         |
| KIF5C.9   | 7.94E-11 | 0.362568 | 0.374 | 0.264 | 1.19E-06 | Oligo | KIF5C         |
| GALM.8    | 8.09E-11 | -0.33184 | 0.021 | 0.129 | 1.21E-06 | Oligo | GALM          |
| CERS4.7   | 8.22E-11 | 0.493638 | 0.292 | 0.196 | 1.23E-06 | Oligo | CERS4         |
| TMEM208.4 | 8.30E-11 | -0.15408 | 0.285 | 0.474 | 1.24E-06 | Oligo | TMEM208       |
| RP11-544D | 8.48E-11 | 0.149133 | 0.019 | 0.002 | 1.27E-06 | Oligo | RP11-544D21.2 |
| ARL9.8    | 8.50E-11 | -0.22872 | 0.009 | 0.108 | 1.27E-06 | Oligo | ARL9          |
| NFIB.9    | 8.56E-11 | -0.42646 | 0.233 | 0.383 | 1.28E-06 | Oligo | NFIB          |
| C4orf32.1 | 8.60E-11 | 0.126828 | 0.056 | 0.015 | 1.29E-06 | Oligo | C4orf32       |
| SERF2.5   | 8.65E-11 | 0.201782 | 0.904 | 0.895 | 1.29E-06 | Oligo | SERF2         |
| EMC9.3    | 8.69E-11 | -0.23873 | 0.056 | 0.182 | 1.30E-06 | Oligo | EMC9          |
| SPRED2.4  | 8.72E-11 | -0.20583 | 0.014 | 0.117 | 1.30E-06 | Oligo | SPRED2        |
| SLC25A27  | 8.78E-11 | 0.276543 | 0.049 | 0.012 | 1.31E-06 | Oligo | SLC25A27      |
| SKAP2.7   | 8.79E-11 | -0.45937 | 0.141 | 0.275 | 1.31E-06 | Oligo | SKAP2         |
| ZNF503.2  | 8.94E-11 | -0.30038 | 0.009 | 0.107 | 1.34E-06 | Oligo | ZNF503        |
| BCAM.7    | 8.94E-11 | -0.20132 | 0.012 | 0.113 | 1.34E-06 | Oligo | BCAM          |
| GNL2.3    | 9.01E-11 | -0.24281 | 0.078 | 0.211 | 1.35E-06 | Oligo | GNL2          |
| THSD7A.8  | 9.16E-11 | -0.4082  | 0.035 | 0.147 | 1.37E-06 | Oligo | THSD7A        |
| DEF6.9    | 9.22E-11 | -0.36547 | 0.002 | 0.094 | 1.38E-06 | Oligo | DEF6          |
| KIAA0226L | 9.31E-11 | -0.3409  | 0.005 | 0.099 | 1.39E-06 | Oligo | KIAA0226L     |
| SERPINB6  | 9.36E-11 | -0.32209 | 0.311 | 0.484 | 1.40E-06 | Oligo | SERPINB6      |
| ALDH7A1.4 | 9.39E-11 | -0.24424 | 0.127 | 0.281 | 1.40E-06 | Oligo | ALDH7A1       |
| RMND5A.4  | 9.41E-11 | 0.463481 | 0.214 | 0.119 | 1.41E-06 | Oligo | RMND5A        |
| PAFAH1B2  | 9.41E-11 | 0.44869  | 0.414 | 0.322 | 1.41E-06 | Oligo | PAFAH1B2      |
| SBNO1.6   | 9.46E-11 | -0.19781 | 0.118 | 0.271 | 1.41E-06 | Oligo | SBNO1         |
| SRP68.3   | 9.52E-11 | -0.23769 | 0.092 | 0.235 | 1.42E-06 | Oligo | SRP68         |
| MAGOHB.6  | 9.65E-11 | -0.22414 | 0.099 | 0.243 | 1.44E-06 | Oligo | MAGOHB        |
| AES.8     | 9.70E-11 | -0.23754 | 0.238 | 0.417 | 1.45E-06 | Oligo | AES           |
| EML4.3    | 9.75E-11 | -0.26999 | 0.066 | 0.195 | 1.46E-06 | Oligo | EML4          |
| ATP5E.6   | 9.80E-11 | 0.179783 | 0.892 | 0.915 | 1.47E-06 | Oligo | ATP5E         |
| FKBP11.4  | 9.82E-11 | -0.28081 | 0.016 | 0.12  | 1.47E-06 | Oligo | FKBP11        |
| PARVB.9   | 9.86E-11 | -0.31734 | 0.049 | 0.168 | 1.47E-06 | Oligo | PARVB         |
| EIF2AK1.6 | 9.88E-11 | -0.23321 | 0.169 | 0.338 | 1.48E-06 | Oligo | EIF2AK1       |
| SETD5.9   | 1.00E-10 | -0.23267 | 0.139 | 0.294 | 1.49E-06 | Oligo | SETD5         |
| KLHL21.1  | 1.00E-10 | 0.247021 | 0.129 | 0.057 | 1.50E-06 | Oligo | KLHL21        |
| SNRPD3.7  | 1.02E-10 | -0.27516 | 0.245 | 0.42  | 1.52E-06 | Oligo | SNRPD3        |
| TMEM9.9   | 1.02E-10 | -0.20294 | 0.2   | 0.373 | 1.53E-06 | Oligo | TMEM9         |
| DLX1.9    | 1.04E-10 | -0.37199 | 0.016 | 0.118 | 1.55E-06 | Oligo | DLX1          |
| PPCS.6    | 1.05E-10 | -0.29097 | 0.169 | 0.326 | 1.57E-06 | Oligo | PPCS          |
| GMNN.8    | 1.06E-10 | -0.31767 | 0.056 | 0.181 | 1.58E-06 | Oligo | GMNN          |
| TAOK3.3   | 1.06E-10 | -0.14141 | 0.209 | 0.393 | 1.59E-06 | Oligo | TAOK3         |
| RNF145.4  | 1.07E-10 | -0.23295 | 0.212 | 0.383 | 1.59E-06 | Oligo | RNF145        |
| MAOB.7    | 1.08E-10 | -0.38877 | 0.007 | 0.102 | 1.62E-06 | Oligo | MAOB          |
| NHSL1.3   | 1.09E-10 | -0.27429 | 0.009 | 0.107 | 1.63E-06 | Oligo | NHSL1         |
| TEX2.2    | 1.10E-10 | 0.313615 | 0.151 | 0.073 | 1.65E-06 | Oligo | TEX2          |
| EMP2.3    | 1.11E-10 | -0.34519 | 0.012 | 0.112 | 1.65E-06 | Oligo | EMP2          |
| PARP9.4   | 1.11E-10 | -0.31208 | 0.052 | 0.174 | 1.65E-06 | Oligo | PARP9         |
| ARMCX6.1  | 1.14E-10 | -0.27111 | 0.104 | 0.247 | 1.70E-06 | Oligo | ARMCX6        |
| GALE.2    | 1.14E-10 | -0.23589 | 0.042 | 0.16  | 1.71E-06 | Oligo | GALE          |
| THBD.8    | 1.16E-10 | -0.42255 | 0.005 | 0.098 | 1.74E-06 | Oligo | THBD          |



|            |           |           |        |        |                 |              |
|------------|-----------|-----------|--------|--------|-----------------|--------------|
| RBCK1. 3   | 1. 16E-10 | -0. 23164 | 0. 179 | 0. 343 | 1. 74E-06 Oligo | RBCK1        |
| HSPA14. 2  | 1. 17E-10 | -0. 26051 | 0. 033 | 0. 146 | 1. 75E-06 Oligo | HSPA14       |
| CAMK1D. 7  | 1. 17E-10 | -0. 2799  | 0. 014 | 0. 115 | 1. 75E-06 Oligo | CAMK1D       |
| COR01B. 8  | 1. 17E-10 | -0. 31161 | 0. 2   | 0. 367 | 1. 75E-06 Oligo | COR01B       |
| CENPK. 7   | 1. 18E-10 | -0. 25404 | 0. 007 | 0. 103 | 1. 76E-06 Oligo | CENPK        |
| WWC3. 2    | 1. 21E-10 | 0. 269053 | 0. 111 | 0. 045 | 1. 80E-06 Oligo | WWC3         |
| KMT2E. 7   | 1. 21E-10 | -0. 26123 | 0. 374 | 0. 543 | 1. 81E-06 Oligo | KMT2E        |
| PRRT2. 7   | 1. 22E-10 | -0. 21018 | 0. 002 | 0. 094 | 1. 83E-06 Oligo | PRRT2        |
| DSN1. 4    | 1. 24E-10 | -0. 20819 | 0. 007 | 0. 103 | 1. 85E-06 Oligo | DSN1         |
| KLRC2. 8   | 1. 25E-10 | -0. 36203 | 0. 014 | 0. 113 | 1. 86E-06 Oligo | KLRC2        |
| PSMC4. 2   | 1. 25E-10 | -0. 21097 | 0. 32  | 0. 501 | 1. 87E-06 Oligo | PSMC4        |
| BCL2L12. 4 | 1. 28E-10 | -0. 20458 | 0. 024 | 0. 131 | 1. 91E-06 Oligo | BCL2L12      |
| HLA-DOA. 7 | 1. 29E-10 | -0. 41067 | 0. 005 | 0. 097 | 1. 93E-06 Oligo | HLA-DOA      |
| ANO6. 2    | 1. 30E-10 | -0. 23787 | 0. 009 | 0. 106 | 1. 95E-06 Oligo | ANO6         |
| STX10. 1   | 1. 31E-10 | -0. 14639 | 0. 191 | 0. 362 | 1. 95E-06 Oligo | STX10        |
| SYK. 9     | 1. 33E-10 | -0. 37694 | 0. 012 | 0. 109 | 1. 98E-06 Oligo | SYK          |
| HDAC5. 3   | 1. 33E-10 | 0. 3819   | 0. 266 | 0. 166 | 1. 98E-06 Oligo | HDAC5        |
| MAP2K1. 8  | 1. 34E-10 | -0. 27869 | 0. 127 | 0. 274 | 2. 01E-06 Oligo | MAP2K1       |
| SRD5A1. 4  | 1. 35E-10 | -0. 24507 | 0. 014 | 0. 114 | 2. 01E-06 Oligo | SRD5A1       |
| CARD8. 8   | 1. 35E-10 | -0. 38398 | 0. 04  | 0. 153 | 2. 02E-06 Oligo | CARD8        |
| MARS. 3    | 1. 36E-10 | -0. 16892 | 0. 078 | 0. 211 | 2. 04E-06 Oligo | MARS         |
| ZNF330. 4  | 1. 37E-10 | -0. 32814 | 0. 087 | 0. 221 | 2. 05E-06 Oligo | ZNF330       |
| UPF3A. 8   | 1. 38E-10 | -0. 25473 | 0. 184 | 0. 351 | 2. 06E-06 Oligo | UPF3A        |
| TLK1. 6    | 1. 39E-10 | -0. 25899 | 0. 094 | 0. 233 | 2. 07E-06 Oligo | TLK1         |
| NSA2. 5    | 1. 39E-10 | -0. 292   | 0. 231 | 0. 405 | 2. 07E-06 Oligo | NSA2         |
| SLC4A3. 6  | 1. 40E-10 | -0. 20891 | 0. 002 | 0. 093 | 2. 09E-06 Oligo | SLC4A3       |
| INPP5F. 1  | 1. 40E-10 | 0. 284879 | 0. 111 | 0. 045 | 2. 10E-06 Oligo | INPP5F       |
| SNX18. 5   | 1. 42E-10 | 0. 25303  | 0. 205 | 0. 11  | 2. 12E-06 Oligo | SNX18        |
| NPTXR. 8   | 1. 44E-10 | -0. 17096 | 0. 024 | 0. 131 | 2. 15E-06 Oligo | NPTXR        |
| AHCY. 5    | 1. 44E-10 | -0. 31034 | 0. 144 | 0. 3   | 2. 15E-06 Oligo | AHCY         |
| DPF1. 8    | 1. 44E-10 | -0. 276   | 0. 033 | 0. 144 | 2. 16E-06 Oligo | DPF1         |
| EGR2. 6    | 1. 45E-10 | -0. 38586 | 0. 071 | 0. 196 | 2. 16E-06 Oligo | EGR2         |
| SLC37A4. 3 | 1. 45E-10 | -0. 30372 | 0. 021 | 0. 125 | 2. 17E-06 Oligo | SLC37A4      |
| FADS2. 6   | 1. 46E-10 | -0. 26729 | 0. 031 | 0. 14  | 2. 18E-06 Oligo | FADS2        |
| ARID4A. 4  | 1. 47E-10 | -0. 29348 | 0. 132 | 0. 28  | 2. 19E-06 Oligo | ARID4A       |
| CX3CR1. 8  | 1. 48E-10 | -0. 46426 | 0. 009 | 0. 105 | 2. 21E-06 Oligo | CX3CR1       |
| GSPT2. 7   | 1. 49E-10 | -0. 24818 | 0. 038 | 0. 153 | 2. 23E-06 Oligo | GSPT2        |
| AZI2. 4    | 1. 50E-10 | -0. 29069 | 0. 153 | 0. 306 | 2. 25E-06 Oligo | AZI2         |
| RPP40. 5   | 1. 51E-10 | -0. 28316 | 0. 019 | 0. 122 | 2. 25E-06 Oligo | RPP40        |
| FAM57A. 5  | 1. 55E-10 | -0. 18299 | 0. 005 | 0. 098 | 2. 32E-06 Oligo | FAM57A       |
| NAA50. 2   | 1. 56E-10 | -0. 22482 | 0. 127 | 0. 277 | 2. 32E-06 Oligo | NAA50        |
| VSTM4      | 1. 57E-10 | 0. 246141 | 0. 08  | 0. 028 | 2. 34E-06 Oligo | VSTM4        |
| UBE2C. 9   | 1. 57E-10 | -0. 44299 | 0. 019 | 0. 12  | 2. 35E-06 Oligo | UBE2C        |
| APC2. 8    | 1. 58E-10 | 0. 384532 | 0. 242 | 0. 144 | 2. 36E-06 Oligo | APC2         |
| NLK. 4     | 1. 58E-10 | 0. 295376 | 0. 151 | 0. 073 | 2. 36E-06 Oligo | NLK          |
| UGCG. 3    | 1. 60E-10 | -0. 30012 | 0. 045 | 0. 162 | 2. 39E-06 Oligo | UGCG         |
| CTB-3102C  | 1. 61E-10 | -0. 22453 | 0. 016 | 0. 118 | 2. 40E-06 Oligo | CTB-31020. 2 |
| PSME1. 8   | 1. 64E-10 | -0. 19426 | 0. 398 | 0. 59  | 2. 45E-06 Oligo | PSME1        |
| TGFBR2. 8  | 1. 64E-10 | -0. 34218 | 0. 019 | 0. 121 | 2. 45E-06 Oligo | TGFBR2       |
| UNG. 6     | 1. 65E-10 | -0. 27438 | 0. 021 | 0. 126 | 2. 46E-06 Oligo | UNG          |
| TSPAN17. 3 | 1. 65E-10 | -0. 22805 | 0. 038 | 0. 152 | 2. 46E-06 Oligo | TSPAN17      |

|              |           |           |        |        |           |       |              |
|--------------|-----------|-----------|--------|--------|-----------|-------|--------------|
| HPGDS. 8     | 1. 67E-10 | -0. 44104 | 0. 002 | 0. 092 | 2. 49E-06 | Oligo | HPGDS        |
| SLC29A1. 8   | 1. 70E-10 | -0. 41763 | 0. 033 | 0. 141 | 2. 55E-06 | Oligo | SLC29A1      |
| SPATS2. 7    | 1. 70E-10 | -0. 20608 | 0. 113 | 0. 264 | 2. 55E-06 | Oligo | SPATS2       |
| ANXA5. 5     | 1. 72E-10 | -0. 16758 | 0. 588 | 0. 732 | 2. 56E-06 | Oligo | ANXA5        |
| ZNF43. 7     | 1. 72E-10 | -0. 21487 | 0. 031 | 0. 141 | 2. 56E-06 | Oligo | ZNF43        |
| PLA2G15. 8   | 1. 72E-10 | -0. 27898 | 0. 033 | 0. 142 | 2. 57E-06 | Oligo | PLA2G15      |
| XRCC6. 2     | 1. 72E-10 | -0. 12828 | 0. 367 | 0. 564 | 2. 57E-06 | Oligo | XRCC6        |
| CTA-29F11    | 1. 73E-10 | -0. 31023 | 0. 075 | 0. 205 | 2. 58E-06 | Oligo | CTA-29F11. 1 |
| BRI3. 4      | 1. 73E-10 | -0. 30372 | 0. 308 | 0. 474 | 2. 58E-06 | Oligo | BRI3         |
| REV3L. 6     | 1. 73E-10 | -0. 19149 | 0. 078 | 0. 214 | 2. 59E-06 | Oligo | REV3L        |
| ARFGAP3. 2   | 1. 78E-10 | -0. 27275 | 0. 094 | 0. 234 | 2. 66E-06 | Oligo | ARFGAP3      |
| NUMA1. 2     | 1. 79E-10 | 0. 50804  | 0. 266 | 0. 166 | 2. 67E-06 | Oligo | NUMA1        |
| SHC1. 3      | 1. 79E-10 | -0. 24172 | 0. 026 | 0. 133 | 2. 68E-06 | Oligo | SHC1         |
| PSMD8. 4     | 1. 80E-10 | -0. 21152 | 0. 501 | 0. 68  | 2. 68E-06 | Oligo | PSMD8        |
| RALGPS1. 5   | 1. 82E-10 | 0. 321441 | 0. 12  | 0. 051 | 2. 72E-06 | Oligo | RALGPS1      |
| CYTH4. 9     | 1. 82E-10 | -0. 43141 | 0. 016 | 0. 116 | 2. 72E-06 | Oligo | CYTH4        |
| PSRC1. 6     | 1. 87E-10 | 0. 52882  | 0. 367 | 0. 26  | 2. 79E-06 | Oligo | PSRC1        |
| STARD3NL. 1. | 1. 87E-10 | -0. 23019 | 0. 228 | 0. 404 | 2. 80E-06 | Oligo | STARD3NL     |
| ATXN1. 4     | 1. 93E-10 | 0. 419809 | 0. 259 | 0. 159 | 2. 89E-06 | Oligo | ATXN1        |
| CDK1. 7      | 1. 94E-10 | -0. 36886 | 0. 007 | 0. 1   | 2. 90E-06 | Oligo | CDK1         |
| KIF9. 8      | 1. 95E-10 | -0. 28847 | 0. 056 | 0. 179 | 2. 91E-06 | Oligo | KIF9         |
| SP110. 7     | 1. 95E-10 | -0. 34911 | 0. 075 | 0. 202 | 2. 92E-06 | Oligo | SP110        |
| NUDT1. 3     | 1. 97E-10 | -0. 29567 | 0. 198 | 0. 356 | 2. 94E-06 | Oligo | NUDT1        |
| FBXO17. 9    | 1. 97E-10 | -0. 25151 | 0. 035 | 0. 148 | 2. 95E-06 | Oligo | FBXO17       |
| TIPARP. 6    | 1. 99E-10 | -0. 35503 | 0. 054 | 0. 173 | 2. 97E-06 | Oligo | TIPARP       |
| PRDX3. 7     | 2. 00E-10 | -0. 2291  | 0. 292 | 0. 473 | 2. 98E-06 | Oligo | PRDX3        |
| WIPF3. 8     | 2. 00E-10 | -0. 27595 | 0. 005 | 0. 096 | 2. 99E-06 | Oligo | WIPF3        |
| ANXA4. 7     | 2. 00E-10 | -0. 25445 | 0. 071 | 0. 199 | 2. 99E-06 | Oligo | ANXA4        |
| APPBP2. 6    | 2. 02E-10 | 0. 491664 | 0. 299 | 0. 206 | 3. 03E-06 | Oligo | APPBP2       |
| NDUFB1. 5    | 2. 03E-10 | 0. 233631 | 0. 64  | 0. 592 | 3. 03E-06 | Oligo | NDUFB1       |
| PPP1R2. 3    | 2. 04E-10 | -0. 25438 | 0. 205 | 0. 374 | 3. 05E-06 | Oligo | PPP1R2       |
| TIMP4. 7     | 2. 05E-10 | -0. 43188 | 0. 009 | 0. 104 | 3. 06E-06 | Oligo | TIMP4        |
| KYNU. 9      | 2. 06E-10 | -0. 38578 | 0      | 0. 087 | 3. 07E-06 | Oligo | KYNU         |
| SRM. 7       | 2. 08E-10 | -0. 20602 | 0. 202 | 0. 371 | 3. 10E-06 | Oligo | SRM          |
| SLC25A22. 2. | 2. 08E-10 | -0. 22654 | 0. 016 | 0. 117 | 3. 11E-06 | Oligo | SLC25A22     |
| PTRH1. 3     | 2. 08E-10 | -0. 22967 | 0. 064 | 0. 191 | 3. 12E-06 | Oligo | PTRH1        |
| ANAPC10. 3   | 2. 12E-10 | -0. 20256 | 0. 056 | 0. 181 | 3. 17E-06 | Oligo | ANAPC10      |
| ANG. 6       | 2. 15E-10 | -0. 37517 | 0      | 0. 087 | 3. 22E-06 | Oligo | ANG          |
| CPPED1. 9    | 2. 16E-10 | 0. 27806  | 0. 144 | 0. 065 | 3. 22E-06 | Oligo | CPPED1       |
| PPP2R1A. 6   | 2. 16E-10 | -0. 2133  | 0. 339 | 0. 522 | 3. 24E-06 | Oligo | PPP2R1A      |
| USMG5. 7     | 2. 19E-10 | 0. 320626 | 0. 656 | 0. 619 | 3. 27E-06 | Oligo | USMG5        |
| ELK3. 5      | 2. 21E-10 | -0. 24914 | 0. 002 | 0. 092 | 3. 31E-06 | Oligo | ELK3         |
| PRDX5. 6     | 2. 26E-10 | -0. 16629 | 0. 581 | 0. 748 | 3. 38E-06 | Oligo | PRDX5        |
| C4orf3. 5    | 2. 30E-10 | -0. 17838 | 0. 471 | 0. 653 | 3. 44E-06 | Oligo | C4orf3       |
| PTPN9. 2     | 2. 34E-10 | -0. 23795 | 0. 024 | 0. 128 | 3. 50E-06 | Oligo | PTPN9        |
| NAAA. 9      | 2. 37E-10 | -0. 22631 | 0. 028 | 0. 138 | 3. 54E-06 | Oligo | NAAA         |
| RSAD1. 5     | 2. 37E-10 | -0. 21172 | 0. 038 | 0. 152 | 3. 54E-06 | Oligo | RSAD1        |
| INTS12. 6    | 2. 39E-10 | -0. 32676 | 0. 052 | 0. 169 | 3. 57E-06 | Oligo | INTS12       |
| ZRSR2. 2     | 2. 40E-10 | -0. 29812 | 0. 024 | 0. 128 | 3. 58E-06 | Oligo | ZRSR2        |
| POLE3. 2     | 2. 43E-10 | -0. 15401 | 0. 108 | 0. 252 | 3. 63E-06 | Oligo | POLE3        |
| MIF. 6       | 2. 45E-10 | 0. 183879 | 0. 656 | 0. 671 | 3. 66E-06 | Oligo | MIF          |

|             |          |          |       |       |          |       |           |
|-------------|----------|----------|-------|-------|----------|-------|-----------|
| CEBPZ. 6    | 2.48E-10 | -0.26007 | 0.129 | 0.277 | 3.71E-06 | Oligo | CEBPZ     |
| ATG2B       | 2.49E-10 | 0.225887 | 0.094 | 0.036 | 3.72E-06 | Oligo | ATG2B     |
| DENND1B. 5  | 2.49E-10 | -0.26396 | 0.005 | 0.095 | 3.73E-06 | Oligo | DENND1B   |
| RUFY1. 4    | 2.58E-10 | -0.26438 | 0.042 | 0.157 | 3.85E-06 | Oligo | RUFY1     |
| TBPL1. 4    | 2.59E-10 | -0.27797 | 0.087 | 0.222 | 3.88E-06 | Oligo | TBPL1     |
| SLC35A5. 4  | 2.63E-10 | 0.355706 | 0.285 | 0.183 | 3.93E-06 | Oligo | SLC35A5   |
| POPDC3      | 2.64E-10 | 0.324803 | 0.071 | 0.023 | 3.94E-06 | Oligo | POPDC3    |
| CDKN3. 8    | 2.64E-10 | -0.32322 | 0.005 | 0.095 | 3.95E-06 | Oligo | CDKN3     |
| IMMP2L. 7   | 2.66E-10 | -0.26214 | 0.038 | 0.148 | 3.98E-06 | Oligo | IMMP2L    |
| SYS1. 2     | 2.67E-10 | -0.29962 | 0.106 | 0.246 | 3.99E-06 | Oligo | SYS1      |
| GNG4. 8     | 2.70E-10 | -0.25451 | 0.019 | 0.12  | 4.04E-06 | Oligo | GNG4      |
| JUP. 1      | 2.71E-10 | 0.16104  | 0.078 | 0.026 | 4.06E-06 | Oligo | JUP       |
| NDUFB2. 4   | 2.73E-10 | 0.238554 | 0.802 | 0.809 | 4.08E-06 | Oligo | NDUFB2    |
| RIOK1. 3    | 2.77E-10 | -0.20379 | 0.045 | 0.16  | 4.13E-06 | Oligo | RIOK1     |
| TP53RK. 4   | 2.77E-10 | -0.24811 | 0.068 | 0.195 | 4.14E-06 | Oligo | TP53RK    |
| SDC4. 4     | 2.81E-10 | -0.2914  | 0.007 | 0.099 | 4.20E-06 | Oligo | SDC4      |
| FIBP. 5     | 2.83E-10 | -0.20571 | 0.308 | 0.489 | 4.23E-06 | Oligo | FIBP      |
| PNP. 6      | 2.83E-10 | -0.37283 | 0.012 | 0.106 | 4.23E-06 | Oligo | PNP       |
| PPIL3. 2    | 2.85E-10 | -0.25824 | 0.087 | 0.218 | 4.25E-06 | Oligo | PPIL3     |
| METTL5. 3   | 2.85E-10 | -0.25251 | 0.202 | 0.366 | 4.26E-06 | Oligo | METTL5    |
| USP3. 6     | 2.86E-10 | -0.2913  | 0.052 | 0.17  | 4.28E-06 | Oligo | USP3      |
| KCTD19      | 2.88E-10 | 0.191162 | 0.021 | 0.003 | 4.30E-06 | Oligo | KCTD19    |
| PHTF1. 4    | 2.90E-10 | -0.21471 | 0.021 | 0.124 | 4.33E-06 | Oligo | PHTF1     |
| TMEM59. 3   | 2.93E-10 | 0.274967 | 0.765 | 0.786 | 4.37E-06 | Oligo | TMEM59    |
| SERPINE1. 2 | 2.93E-10 | -0.44377 | 0.009 | 0.104 | 4.38E-06 | Oligo | SERPINE1  |
| C11orf71. 2 | 2.93E-10 | 0.415569 | 0.096 | 0.037 | 4.38E-06 | Oligo | C11orf71  |
| C17orf89. 2 | 2.94E-10 | -0.30816 | 0.273 | 0.427 | 4.39E-06 | Oligo | C17orf89  |
| FRMD4A. 8   | 2.94E-10 | -0.40945 | 0.071 | 0.192 | 4.40E-06 | Oligo | FRMD4A    |
| THOC3. 3    | 2.97E-10 | -0.27964 | 0.056 | 0.174 | 4.44E-06 | Oligo | THOC3     |
| SLC30A4     | 2.98E-10 | 0.193451 | 0.085 | 0.031 | 4.46E-06 | Oligo | SLC30A4   |
| FBXW7. 6    | 3.06E-10 | -0.19785 | 0.026 | 0.131 | 4.58E-06 | Oligo | FBXW7     |
| ST6GAL1. 7  | 3.06E-10 | -0.38692 | 0.016 | 0.114 | 4.58E-06 | Oligo | ST6GAL1   |
| NARF. 5     | 3.15E-10 | -0.17243 | 0.169 | 0.335 | 4.70E-06 | Oligo | NARF      |
| ST8SIA1. 6  | 3.16E-10 | -0.19855 | 0.005 | 0.095 | 4.72E-06 | Oligo | ST8SIA1   |
| RCS1. 8     | 3.18E-10 | -0.37008 | 0.021 | 0.123 | 4.75E-06 | Oligo | RCS1      |
| ANGEL1      | 3.21E-10 | 0.205425 | 0.104 | 0.041 | 4.80E-06 | Oligo | ANGEL1    |
| MAN1B1. 2   | 3.24E-10 | -0.2252  | 0.089 | 0.227 | 4.84E-06 | Oligo | MAN1B1    |
| GATM. 5     | 3.26E-10 | 0.353791 | 0.461 | 0.348 | 4.88E-06 | Oligo | GATM      |
| PDE6B. 1    | 3.27E-10 | 0.322077 | 0.115 | 0.049 | 4.88E-06 | Oligo | PDE6B     |
| RNF135. 9   | 3.28E-10 | -0.31009 | 0.016 | 0.114 | 4.90E-06 | Oligo | RNF135    |
| ZNF217. 2   | 3.31E-10 | -0.19693 | 0.002 | 0.09  | 4.94E-06 | Oligo | ZNF217    |
| MED10. 8    | 3.35E-10 | -0.20322 | 0.306 | 0.49  | 5.00E-06 | Oligo | MED10     |
| TMEM248. 3  | 3.39E-10 | -0.26768 | 0.146 | 0.301 | 5.06E-06 | Oligo | TMEM248   |
| WDR43. 3    | 3.41E-10 | -0.24071 | 0.071 | 0.199 | 5.09E-06 | Oligo | WDR43     |
| ZCCHC9. 1   | 3.45E-10 | -0.24343 | 0.045 | 0.159 | 5.16E-06 | Oligo | ZCCHC9    |
| LAMB2. 4    | 3.46E-10 | -0.22861 | 0.007 | 0.099 | 5.17E-06 | Oligo | LAMB2     |
| CENPW. 5    | 3.47E-10 | -0.32334 | 0.021 | 0.121 | 5.19E-06 | Oligo | CENPW     |
| MFS10. 4    | 3.47E-10 | -0.26418 | 0.153 | 0.307 | 5.19E-06 | Oligo | MFS10     |
| PLAT. 6     | 3.48E-10 | -0.26866 | 0.021 | 0.123 | 5.21E-06 | Oligo | PLAT      |
| SEZ6. 9     | 3.49E-10 | -0.32366 | 0.035 | 0.143 | 5.22E-06 | Oligo | SEZ6      |
| C14orf142   | 3.55E-10 | -0.22746 | 0.04  | 0.154 | 5.31E-06 | Oligo | C14orf142 |

|           |          |          |       |       |          |       |           |
|-----------|----------|----------|-------|-------|----------|-------|-----------|
| TNFAIP8L2 | 3.57E-10 | -0.37768 | 0.007 | 0.098 | 5.34E-06 | Oligo | TNFAIP8L2 |
| SNAPC2    | 3.60E-10 | -0.24275 | 0.078 | 0.208 | 5.39E-06 | Oligo | SNAPC2    |
| IL17RC    | 3.61E-10 | -0.13988 | 0.019 | 0.12  | 5.39E-06 | Oligo | IL17RC    |
| MOAP1     | 3.63E-10 | -0.27773 | 0.092 | 0.222 | 5.42E-06 | Oligo | MOAP1     |
| MFSD2A    | 3.63E-10 | -0.27137 | 0.009 | 0.102 | 5.43E-06 | Oligo | MFSD2A    |
| HSPBP1    | 3.65E-10 | -0.19398 | 0.136 | 0.293 | 5.45E-06 | Oligo | HSPBP1    |
| NFKBIZ    | 3.76E-10 | -0.31154 | 0.059 | 0.179 | 5.62E-06 | Oligo | NFKBIZ    |
| USP4      | 3.77E-10 | -0.25961 | 0.059 | 0.179 | 5.64E-06 | Oligo | USP4      |
| ARPC4     | 3.79E-10 | -0.19285 | 0.346 | 0.52  | 5.67E-06 | Oligo | ARPC4     |
| CCR1      | 3.80E-10 | -0.36298 | 0     | 0.085 | 5.67E-06 | Oligo | CCR1      |
| SLC39A14  | 3.80E-10 | -0.23384 | 0.007 | 0.098 | 5.68E-06 | Oligo | SLC39A14  |
| BTK       | 3.80E-10 | -0.36412 | 0.002 | 0.089 | 5.68E-06 | Oligo | BTK       |
| VCL       | 3.83E-10 | -0.21498 | 0.009 | 0.102 | 5.73E-06 | Oligo | VCL       |
| GHITM     | 3.84E-10 | -0.15899 | 0.341 | 0.53  | 5.73E-06 | Oligo | GHITM     |
| RNF144B   | 3.84E-10 | -0.42228 | 0.009 | 0.102 | 5.73E-06 | Oligo | RNF144B   |
| CDC14B    | 3.87E-10 | 0.28561  | 0.132 | 0.06  | 5.79E-06 | Oligo | CDC14B    |
| ARHGEF3   | 4.00E-10 | -0.26141 | 0.014 | 0.11  | 5.97E-06 | Oligo | ARHGEF3   |
| RDH10     | 4.04E-10 | -0.27021 | 0.002 | 0.089 | 6.04E-06 | Oligo | RDH10     |
| SMG5      | 4.09E-10 | 0.341961 | 0.165 | 0.084 | 6.11E-06 | Oligo | SMG5      |
| ZDHHC17   | 4.13E-10 | 0.369799 | 0.188 | 0.102 | 6.18E-06 | Oligo | ZDHHC17   |
| LPIN2     | 4.19E-10 | -0.27759 | 0.042 | 0.153 | 6.26E-06 | Oligo | LPIN2     |
| UBXN11    | 4.19E-10 | -0.30791 | 0.033 | 0.14  | 6.26E-06 | Oligo | UBXN11    |
| NMD3      | 4.23E-10 | -0.23901 | 0.089 | 0.22  | 6.32E-06 | Oligo | NMD3      |
| DCP1A     | 4.24E-10 | -0.27136 | 0.096 | 0.232 | 6.33E-06 | Oligo | DCP1A     |
| NABP1     | 4.24E-10 | -0.40685 | 0.026 | 0.128 | 6.33E-06 | Oligo | NABP1     |
| SNHG9     | 4.32E-10 | 0.446274 | 0.398 | 0.301 | 6.46E-06 | Oligo | SNHG9     |
| IMP4      | 4.35E-10 | -0.17474 | 0.195 | 0.365 | 6.50E-06 | Oligo | IMP4      |
| FBLN1     | 4.48E-10 | -0.3314  | 0.002 | 0.088 | 6.69E-06 | Oligo | FBLN1     |
| RANBP3    | 4.49E-10 | -0.20246 | 0.092 | 0.227 | 6.71E-06 | Oligo | RANBP3    |
| POLR2J    | 4.50E-10 | -0.19235 | 0.487 | 0.649 | 6.72E-06 | Oligo | POLR2J    |
| FSTL1     | 4.52E-10 | -0.21509 | 0.019 | 0.117 | 6.75E-06 | Oligo | FSTL1     |
| BEX2      | 4.54E-10 | 0.367692 | 0.386 | 0.252 | 6.79E-06 | Oligo | BEX2      |
| MGP       | 4.56E-10 | -0.92505 | 0.014 | 0.107 | 6.81E-06 | Oligo | MGP       |
| HNRNPC    | 4.62E-10 | -0.20069 | 0.534 | 0.699 | 6.90E-06 | Oligo | HNRNPC    |
| RP9       | 4.65E-10 | -0.26938 | 0.064 | 0.183 | 6.94E-06 | Oligo | RP9       |
| ELF1      | 4.66E-10 | -0.39241 | 0.118 | 0.249 | 6.97E-06 | Oligo | ELF1      |
| C14orf166 | 4.71E-10 | -0.20351 | 0.414 | 0.591 | 7.04E-06 | Oligo | C14orf166 |
| ST3GAL1   | 4.76E-10 | -0.28016 | 0.012 | 0.106 | 7.11E-06 | Oligo | ST3GAL1   |
| VMP1      | 4.80E-10 | -0.2015  | 0.299 | 0.478 | 7.17E-06 | Oligo | VMP1      |
| GNA11     | 4.80E-10 | 0.286465 | 0.188 | 0.103 | 7.18E-06 | Oligo | GNA11     |
| ROCK1     | 4.85E-10 | -0.26103 | 0.16  | 0.314 | 7.25E-06 | Oligo | ROCK1     |
| RAD50     | 4.85E-10 | -0.2448  | 0.125 | 0.271 | 7.25E-06 | Oligo | RAD50     |
| GSS       | 4.88E-10 | -0.24217 | 0.106 | 0.245 | 7.29E-06 | Oligo | GSS       |
| GEMIN7    | 4.88E-10 | -0.17608 | 0.047 | 0.164 | 7.29E-06 | Oligo | GEMIN7    |
| C10orf11  | 4.90E-10 | -0.34269 | 0.012 | 0.104 | 7.32E-06 | Oligo | C10orf11  |
| TEAD2     | 4.95E-10 | -0.17378 | 0.005 | 0.093 | 7.39E-06 | Oligo | TEAD2     |
| BMPR2     | 4.97E-10 | -0.25029 | 0.061 | 0.182 | 7.42E-06 | Oligo | BMPR2     |
| HOXA7     | 5.08E-10 | -0.31858 | 0.012 | 0.105 | 7.59E-06 | Oligo | HOXA7     |
| TSKU      | 5.14E-10 | -0.17801 | 0.002 | 0.088 | 7.69E-06 | Oligo | TSKU      |
| MARCH5    | 5.18E-10 | -0.29419 | 0.073 | 0.196 | 7.74E-06 | Oligo | 5-Mar     |
| CELF4     | 5.20E-10 | -0.35849 | 0.007 | 0.096 | 7.76E-06 | Oligo | CELF4     |

|            |           |           |        |        |           |       |             |
|------------|-----------|-----------|--------|--------|-----------|-------|-------------|
| NHP2. 6    | 5. 22E-10 | -0. 13157 | 0. 405 | 0. 586 | 7. 80E-06 | Oligo | NHP2        |
| ATP6VOE1.  | 5. 23E-10 | -0. 1374  | 0. 609 | 0. 766 | 7. 81E-06 | Oligo | ATP6VOE1    |
| TAF15. 6   | 5. 24E-10 | -0. 23688 | 0. 132 | 0. 279 | 7. 84E-06 | Oligo | TAF15       |
| LIMK1. 2   | 5. 25E-10 | -0. 18255 | 0. 033 | 0. 142 | 7. 84E-06 | Oligo | LIMK1       |
| TOR3A. 4   | 5. 26E-10 | -0. 22054 | 0. 085 | 0. 215 | 7. 86E-06 | Oligo | TOR3A       |
| AC144652.  | 5. 27E-10 | 0. 199442 | 0. 047 | 0. 012 | 7. 87E-06 | Oligo | AC144652. 1 |
| LAMB1. 5   | 5. 42E-10 | -0. 21042 | 0. 012 | 0. 105 | 8. 10E-06 | Oligo | LAMB1       |
| SLC30A1. 3 | 5. 54E-10 | -0. 21623 | 0. 005 | 0. 092 | 8. 29E-06 | Oligo | SLC30A1     |
| ATP6AP1. 7 | 5. 68E-10 | -0. 20209 | 0. 325 | 0. 499 | 8. 49E-06 | Oligo | ATP6AP1     |
| CADM3. 7   | 5. 73E-10 | -0. 42459 | 0. 012 | 0. 104 | 8. 56E-06 | Oligo | CADM3       |
| XPR1. 5    | 5. 79E-10 | -0. 18183 | 0. 026 | 0. 129 | 8. 65E-06 | Oligo | XPR1        |
| HK2. 6     | 5. 79E-10 | -0. 27434 | 0. 002 | 0. 088 | 8. 66E-06 | Oligo | HK2         |
| FBX09. 4   | 5. 82E-10 | -0. 19283 | 0. 08  | 0. 211 | 8. 69E-06 | Oligo | FBX09       |
| MUS81. 4   | 5. 98E-10 | -0. 24513 | 0. 059 | 0. 178 | 8. 93E-06 | Oligo | MUS81       |
| AKIP1. 3   | 6. 03E-10 | -0. 24844 | 0. 146 | 0. 292 | 9. 01E-06 | Oligo | AKIP1       |
| UPF3B. 6   | 6. 12E-10 | -0. 17549 | 0. 113 | 0. 256 | 9. 15E-06 | Oligo | UPF3B       |
| SLC35F5. 3 | 6. 14E-10 | -0. 23357 | 0. 035 | 0. 143 | 9. 18E-06 | Oligo | SLC35F5     |
| CACNB4. 4  | 6. 18E-10 | -0. 2293  | 0. 005 | 0. 092 | 9. 23E-06 | Oligo | CACNB4      |
| MYCBP. 5   | 6. 31E-10 | -0. 26277 | 0. 007 | 0. 096 | 9. 43E-06 | Oligo | MYCBP       |
| FAM57B. 8  | 6. 32E-10 | -0. 27836 | 0. 007 | 0. 095 | 9. 44E-06 | Oligo | FAM57B      |
| SOX5. 7    | 6. 40E-10 | -0. 22621 | 0. 005 | 0. 092 | 9. 56E-06 | Oligo | SOX5        |
| LRRC25. 9  | 6. 46E-10 | -0. 37335 | 0. 007 | 0. 095 | 9. 66E-06 | Oligo | LRRC25      |
| DNM2. 6    | 6. 47E-10 | 0. 403704 | 0. 341 | 0. 239 | 9. 67E-06 | Oligo | DNM2        |
| GPSM2. 7   | 6. 55E-10 | 0. 370268 | 0. 273 | 0. 173 | 9. 79E-06 | Oligo | GPSM2       |
| COL16A1. 7 | 6. 60E-10 | 0. 341449 | 0. 146 | 0. 071 | 9. 86E-06 | Oligo | COL16A1     |
| LETMD1     | 6. 74E-10 | -0. 31117 | 0. 052 | 0. 165 | 1. 01E-05 | Oligo | LETMD1      |
| ELAC2. 1   | 6. 81E-10 | -0. 23488 | 0. 045 | 0. 157 | 1. 02E-05 | Oligo | ELAC2       |
| PCSK1N. 8  | 6. 86E-10 | -0. 36674 | 0. 301 | 0. 425 | 1. 02E-05 | Oligo | PCSK1N      |
| CCNG1. 4   | 7. 12E-10 | -0. 3047  | 0. 134 | 0. 275 | 1. 06E-05 | Oligo | CCNG1       |
| NOL11. 6   | 7. 33E-10 | -0. 27928 | 0. 071 | 0. 193 | 1. 09E-05 | Oligo | NOL11       |
| C17orf58.  | 7. 44E-10 | -0. 21022 | 0. 066 | 0. 19  | 1. 11E-05 | Oligo | C17orf58    |
| LEPROT. 2  | 7. 48E-10 | -0. 20868 | 0. 228 | 0. 397 | 1. 12E-05 | Oligo | LEPROT      |
| ZNF880. 4  | 7. 58E-10 | -0. 17982 | 0. 04  | 0. 149 | 1. 13E-05 | Oligo | ZNF880      |
| ICT1. 3    | 7. 65E-10 | -0. 19211 | 0. 104 | 0. 241 | 1. 14E-05 | Oligo | ICT1        |
| SLC35G2. 8 | 7. 71E-10 | -0. 23399 | 0. 021 | 0. 121 | 1. 15E-05 | Oligo | SLC35G2     |
| ITGAX. 8   | 7. 86E-10 | -0. 41086 | 0. 007 | 0. 094 | 1. 17E-05 | Oligo | ITGAX       |
| SRP14. 3   | 7. 87E-10 | 0. 262492 | 0. 849 | 0. 867 | 1. 18E-05 | Oligo | SRP14       |
| SSU72      | 7. 95E-10 | -0. 2162  | 0. 339 | 0. 515 | 1. 19E-05 | Oligo | SSU72       |
| BZW1. 5    | 8. 15E-10 | -0. 25764 | 0. 372 | 0. 544 | 1. 22E-05 | Oligo | BZW1        |
| CBLN4. 9   | 8. 19E-10 | -0. 24073 | 0      | 0. 082 | 1. 22E-05 | Oligo | CBLN4       |
| MRAS. 6    | 8. 20E-10 | -0. 17295 | 0. 054 | 0. 172 | 1. 23E-05 | Oligo | MRAS        |
| SIVA1. 5   | 8. 22E-10 | -0. 1943  | 0. 318 | 0. 492 | 1. 23E-05 | Oligo | SIVA1       |
| TEX264. 3  | 8. 39E-10 | -0. 10626 | 0. 226 | 0. 402 | 1. 25E-05 | Oligo | TEX264      |
| SUPT20H. 5 | 8. 39E-10 | -0. 23604 | 0. 082 | 0. 212 | 1. 25E-05 | Oligo | SUPT20H     |
| FAM212B. 7 | 8. 49E-10 | -0. 25681 | 0. 012 | 0. 102 | 1. 27E-05 | Oligo | FAM212B     |
| KCTD5. 4   | 8. 50E-10 | -0. 25992 | 0. 085 | 0. 212 | 1. 27E-05 | Oligo | KCTD5       |
| PDGFD. 7   | 8. 56E-10 | -0. 16174 | 0      | 0. 082 | 1. 28E-05 | Oligo | PDGFD       |
| TNIP1. 4   | 8. 62E-10 | -0. 27299 | 0. 085 | 0. 213 | 1. 29E-05 | Oligo | TNIP1       |
| VIM-AS1. 3 | 8. 76E-10 | -0. 25635 | 0. 019 | 0. 115 | 1. 31E-05 | Oligo | VIM-AS1     |
| COMMD8. 8  | 8. 86E-10 | -0. 30308 | 0. 101 | 0. 229 | 1. 32E-05 | Oligo | COMMD8      |
| FTCDNL1    | 8. 90E-10 | 0. 160046 | 0. 073 | 0. 025 | 1. 33E-05 | Oligo | FTCDNL1     |

|             |           |           |        |        |           |       |                |
|-------------|-----------|-----------|--------|--------|-----------|-------|----------------|
| ABT1. 2     | 8. 91E-10 | -0. 1004  | 0. 087 | 0. 221 | 1. 33E-05 | Oligo | ABT1           |
| HDAC10. 4   | 8. 93E-10 | -0. 25095 | 0. 016 | 0. 111 | 1. 33E-05 | Oligo | HDAC10         |
| PRKD3. 3    | 8. 94E-10 | -0. 18394 | 0. 04  | 0. 151 | 1. 34E-05 | Oligo | PRKD3          |
| SEC13. 3    | 9. 14E-10 | -0. 21618 | 0. 207 | 0. 374 | 1. 37E-05 | Oligo | SEC13          |
| FNIP1. 2    | 9. 43E-10 | 0. 340717 | 0. 186 | 0. 101 | 1. 41E-05 | Oligo | FNIP1          |
| SLC35C2. 3  | 9. 56E-10 | -0. 11857 | 0. 115 | 0. 258 | 1. 43E-05 | Oligo | SLC35C2        |
| TMEM67. 6   | 9. 58E-10 | -0. 22601 | 0. 009 | 0. 098 | 1. 43E-05 | Oligo | TMEM67         |
| TMEM161A. 9 | 9. 65E-10 | -0. 22676 | 0. 056 | 0. 175 | 1. 44E-05 | Oligo | TMEM161A       |
| FAM96A. 7   | 9. 81E-10 | -0. 15906 | 0. 2   | 0. 362 | 1. 47E-05 | Oligo | FAM96A         |
| FTSJ2. 5    | 9. 83E-10 | -0. 29642 | 0. 106 | 0. 242 | 1. 47E-05 | Oligo | FTSJ2          |
| CCDC122     | 9. 85E-10 | 0. 166145 | 0. 064 | 0. 02  | 1. 47E-05 | Oligo | CCDC122        |
| MGME1. 3    | 9. 89E-10 | -0. 22642 | 0. 042 | 0. 151 | 1. 48E-05 | Oligo | MGME1          |
| NOC2L. 7    | 9. 93E-10 | -0. 20055 | 0. 16  | 0. 318 | 1. 48E-05 | Oligo | NOC2L          |
| ARHGAP30. 9 | 9. 98E-10 | -0. 36748 | 0. 009 | 0. 097 | 1. 49E-05 | Oligo | ARHGAP30       |
| ARHGAP9. 9  | 1. 01E-09 | -0. 35037 | 0. 005 | 0. 089 | 1. 51E-05 | Oligo | ARHGAP9        |
| SMAP2. 8    | 1. 01E-09 | -0. 35238 | 0. 113 | 0. 241 | 1. 51E-05 | Oligo | SMAP2          |
| NSRP1. 2    | 1. 02E-09 | -0. 29096 | 0. 205 | 0. 362 | 1. 52E-05 | Oligo | NSRP1          |
| PNPLA8. 6   | 1. 02E-09 | -0. 30856 | 0. 2   | 0. 353 | 1. 53E-05 | Oligo | PNPLA8         |
| CTD-2008L   | 1. 02E-09 | 0. 106887 | 0. 019 | 0. 002 | 1. 53E-05 | Oligo | CTD-2008L17. 2 |
| ETV4. 8     | 1. 03E-09 | -0. 19297 | 0      | 0. 081 | 1. 53E-05 | Oligo | ETV4           |
| ZNF254. 6   | 1. 03E-09 | -0. 23957 | 0. 038 | 0. 145 | 1. 54E-05 | Oligo | ZNF254         |
| HNMT. 8     | 1. 04E-09 | -0. 49392 | 0. 106 | 0. 223 | 1. 55E-05 | Oligo | HNMT           |
| SUMF2. 2    | 1. 04E-09 | -0. 18176 | 0. 191 | 0. 349 | 1. 56E-05 | Oligo | SUMF2          |
| MAFF. 7     | 1. 07E-09 | -0. 28423 | 0. 059 | 0. 175 | 1. 59E-05 | Oligo | MAFF           |
| CCT7. 6     | 1. 07E-09 | -0. 1476  | 0. 353 | 0. 536 | 1. 60E-05 | Oligo | CCT7           |
| H2AFY2. 3   | 1. 08E-09 | -0. 18077 | 0. 014 | 0. 107 | 1. 61E-05 | Oligo | H2AFY2         |
| SULT1C2     | 1. 08E-09 | 0. 250091 | 0. 035 | 0. 008 | 1. 61E-05 | Oligo | SULT1C2        |
| ZER1        | 1. 08E-09 | 0. 234839 | 0. 089 | 0. 034 | 1. 62E-05 | Oligo | ZER1           |
| RPF1. 3     | 1. 09E-09 | -0. 18944 | 0. 111 | 0. 25  | 1. 63E-05 | Oligo | RPF1           |
| MITF. 8     | 1. 09E-09 | 0. 298875 | 0. 176 | 0. 091 | 1. 63E-05 | Oligo | MITF           |
| XXYLT1. 7   | 1. 09E-09 | -0. 20543 | 0. 028 | 0. 13  | 1. 63E-05 | Oligo | XXYLT1         |
| CCDC106. 9  | 1. 10E-09 | -0. 25918 | 0. 104 | 0. 237 | 1. 65E-05 | Oligo | CCDC106        |
| PSMD4       | 1. 10E-09 | -0. 21271 | 0. 374 | 0. 563 | 1. 65E-05 | Oligo | PSMD4          |
| MAD2L1. 7   | 1. 11E-09 | -0. 31542 | 0. 031 | 0. 132 | 1. 67E-05 | Oligo | MAD2L1         |
| ABCC3. 4    | 1. 12E-09 | -0. 27971 | 0. 012 | 0. 102 | 1. 67E-05 | Oligo | ABCC3          |
| CDK17. 5    | 1. 13E-09 | 0. 311863 | 0. 2   | 0. 113 | 1. 69E-05 | Oligo | CDK17          |
| BOC. 6      | 1. 14E-09 | -0. 1745  | 0. 005 | 0. 09  | 1. 71E-05 | Oligo | BOC            |
| RNMTL1. 5   | 1. 14E-09 | -0. 18596 | 0. 031 | 0. 133 | 1. 71E-05 | Oligo | RNMTL1         |
| DPP4. 6     | 1. 15E-09 | -0. 17047 | 0      | 0. 081 | 1. 71E-05 | Oligo | DPP4           |
| SESTD1. 6   | 1. 15E-09 | 0. 322218 | 0. 252 | 0. 155 | 1. 72E-05 | Oligo | SESTD1         |
| CSNK1E. 8   | 1. 20E-09 | 0. 411105 | 0. 402 | 0. 303 | 1. 79E-05 | Oligo | CSNK1E         |
| F12. 7      | 1. 20E-09 | -0. 17666 | 0      | 0. 08  | 1. 79E-05 | Oligo | F12            |
| KLHL13. 8   | 1. 21E-09 | -0. 19298 | 0. 012 | 0. 102 | 1. 81E-05 | Oligo | KLHL13         |
| HSCB. 4     | 1. 21E-09 | -0. 18195 | 0. 059 | 0. 176 | 1. 81E-05 | Oligo | HSCB           |
| MAPK3. 3    | 1. 21E-09 | 0. 327005 | 0. 304 | 0. 203 | 1. 81E-05 | Oligo | MAPK3          |
| FBXL12. 1   | 1. 22E-09 | -0. 22951 | 0. 047 | 0. 158 | 1. 83E-05 | Oligo | FBXL12         |
| CORO1C. 5   | 1. 23E-09 | -0. 25928 | 0. 219 | 0. 379 | 1. 84E-05 | Oligo | CORO1C         |
| ITSN1. 3    | 1. 24E-09 | -0. 27593 | 0. 042 | 0. 15  | 1. 85E-05 | Oligo | ITSN1          |
| SAMD4B. 5   | 1. 24E-09 | 0. 425415 | 0. 313 | 0. 219 | 1. 85E-05 | Oligo | SAMD4B         |
| ZSCAN16-A   | 1. 25E-09 | 0. 49917  | 0. 346 | 0. 254 | 1. 86E-05 | Oligo | ZSCAN16-AS1    |
| HMG20B. 4   | 1. 26E-09 | -0. 25115 | 0. 188 | 0. 342 | 1. 88E-05 | Oligo | HMG20B         |

|              |          |          |       |       |          |       |          |
|--------------|----------|----------|-------|-------|----------|-------|----------|
| TMEM150A. 1. | 2.6E-09  | -0.27963 | 0.045 | 0.153 | 1.88E-05 | Oligo | TMEM150A |
| ELMOD1. 6    | 1.27E-09 | -0.15594 | 0.002 | 0.085 | 1.89E-05 | Oligo | ELMOD1   |
| KIF5B. 6     | 1.27E-09 | -0.25145 | 0.351 | 0.518 | 1.90E-05 | Oligo | KIF5B    |
| AUP1. 6      | 1.29E-09 | -0.13202 | 0.344 | 0.529 | 1.93E-05 | Oligo | AUP1     |
| TKT. 5       | 1.30E-09 | -0.24529 | 0.341 | 0.515 | 1.95E-05 | Oligo | TKT      |
| KIAA1549. 1. | 3.1E-09  | -0.23534 | 0.009 | 0.097 | 1.96E-05 | Oligo | KIAA1549 |
| SAE1. 6      | 1.32E-09 | -0.22279 | 0.134 | 0.278 | 1.98E-05 | Oligo | SAE1     |
| MYCBP2. 5    | 1.33E-09 | -0.30487 | 0.167 | 0.31  | 1.99E-05 | Oligo | MYCBP2   |
| NUMB. 8      | 1.34E-09 | -0.28126 | 0.059 | 0.175 | 2.01E-05 | Oligo | NUMB     |
| ZDHHC6. 4    | 1.35E-09 | -0.17055 | 0.056 | 0.172 | 2.02E-05 | Oligo | ZDHHC6   |
| MYO1C. 3     | 1.35E-09 | -0.20492 | 0.014 | 0.105 | 2.02E-05 | Oligo | MYO1C    |
| RFXANK. 4    | 1.38E-09 | -0.17492 | 0.176 | 0.33  | 2.06E-05 | Oligo | RFXANK   |
| PAK1. 8      | 1.39E-09 | -0.34801 | 0.061 | 0.174 | 2.08E-05 | Oligo | PAK1     |
| RNF2. 2      | 1.40E-09 | -0.23309 | 0.042 | 0.151 | 2.09E-05 | Oligo | RNF2     |
| SEC61A2. 4   | 1.41E-09 | 0.274853 | 0.153 | 0.077 | 2.11E-05 | Oligo | SEC61A2  |
| MINK1. 4     | 1.42E-09 | 0.296378 | 0.186 | 0.101 | 2.12E-05 | Oligo | MINK1    |
| CHD3. 5      | 1.42E-09 | -0.29161 | 0.024 | 0.119 | 2.12E-05 | Oligo | CHD3     |
| NDRG4. 9     | 1.42E-09 | -0.2601  | 0.052 | 0.164 | 2.13E-05 | Oligo | NDRG4    |
| PRPSAP1. 8   | 1.43E-09 | -0.17859 | 0.155 | 0.312 | 2.14E-05 | Oligo | PRPSAP1  |
| CPXM1. 8     | 1.43E-09 | -0.23744 | 0.028 | 0.128 | 2.14E-05 | Oligo | CPXM1    |
| PSMB9. 7     | 1.47E-09 | -0.36002 | 0.254 | 0.411 | 2.20E-05 | Oligo | PSMB9    |
| FAM162A. 7   | 1.49E-09 | -0.32678 | 0.252 | 0.406 | 2.22E-05 | Oligo | FAM162A  |
| ESD. 3       | 1.49E-09 | -0.22244 | 0.322 | 0.496 | 2.22E-05 | Oligo | ESD      |
| HDAC1. 4     | 1.49E-09 | -0.11196 | 0.096 | 0.23  | 2.22E-05 | Oligo | HDAC1    |
| ZBTB38. 2    | 1.49E-09 | 0.388972 | 0.28  | 0.183 | 2.22E-05 | Oligo | ZBTB38   |
| SRSF1. 4     | 1.50E-09 | -0.23129 | 0.231 | 0.403 | 2.24E-05 | Oligo | SRSF1    |
| RBM6. 4      | 1.51E-09 | -0.26104 | 0.165 | 0.319 | 2.25E-05 | Oligo | RBM6     |
| ZNF703. 5    | 1.51E-09 | -0.25318 | 0.012 | 0.101 | 2.26E-05 | Oligo | ZNF703   |
| UBXN4. 5     | 1.52E-09 | -0.29617 | 0.379 | 0.551 | 2.27E-05 | Oligo | UBXN4    |
| RTN1. 5      | 1.52E-09 | 0.28441  | 0.235 | 0.14  | 2.27E-05 | Oligo | RTN1     |
| CLNS1A. 5    | 1.53E-09 | -0.12637 | 0.311 | 0.498 | 2.29E-05 | Oligo | CLNS1A   |
| NDUF6. 7     | 1.55E-09 | -0.23675 | 0.066 | 0.185 | 2.32E-05 | Oligo | NDUF6    |
| ELOF1. 6     | 1.56E-09 | -0.25324 | 0.266 | 0.429 | 2.33E-05 | Oligo | ELOF1    |
| TMEM255A. 1. | 5.7E-09  | -0.18072 | 0.014 | 0.106 | 2.34E-05 | Oligo | TMEM255A |
| HOXD11. 6    | 1.61E-09 | -0.16428 | 0     | 0.079 | 2.40E-05 | Oligo | HOXD11   |
| MCM7. 8      | 1.61E-09 | -0.19495 | 0.125 | 0.259 | 2.41E-05 | Oligo | MCM7     |
| ANKRD10. 1   | 1.63E-09 | -0.27448 | 0.162 | 0.311 | 2.43E-05 | Oligo | ANKRD10  |
| THBS1. 7     | 1.63E-09 | -0.44314 | 0.002 | 0.083 | 2.43E-05 | Oligo | THBS1    |
| ANAPC11. 6   | 1.63E-09 | -0.11278 | 0.607 | 0.731 | 2.44E-05 | Oligo | ANAPC11  |
| CYTL1. 8     | 1.65E-09 | -0.47307 | 0.021 | 0.114 | 2.47E-05 | Oligo | CYTL1    |
| ST13. 1      | 1.66E-09 | 0.311439 | 0.668 | 0.65  | 2.48E-05 | Oligo | ST13     |
| ANKRD12. 4   | 1.67E-09 | 0.37005  | 0.504 | 0.423 | 2.49E-05 | Oligo | ANKRD12  |
| NR2C2AP. 7   | 1.67E-09 | -0.10338 | 0.054 | 0.17  | 2.50E-05 | Oligo | NR2C2AP  |
| PACSIN2. 8   | 1.67E-09 | -0.17291 | 0.061 | 0.178 | 2.50E-05 | Oligo | PACSIN2  |
| TLCD1. 7     | 1.68E-09 | -0.1563  | 0.002 | 0.084 | 2.50E-05 | Oligo | TLCD1    |
| DAXX. 3      | 1.69E-09 | -0.20157 | 0.082 | 0.208 | 2.53E-05 | Oligo | DAXX     |
| NSMAF. 4     | 1.70E-09 | -0.25816 | 0.024 | 0.12  | 2.54E-05 | Oligo | NSMAF    |
| EIF2AK4. 4   | 1.71E-09 | -0.19832 | 0.066 | 0.186 | 2.55E-05 | Oligo | EIF2AK4  |
| PODXL2. 9    | 1.71E-09 | -0.29538 | 0.172 | 0.313 | 2.56E-05 | Oligo | PODXL2   |
| CXorf21. 9   | 1.72E-09 | -0.3703  | 0     | 0.079 | 2.57E-05 | Oligo | CXorf21  |
| SOCS6. 5     | 1.75E-09 | -0.25451 | 0.106 | 0.234 | 2.62E-05 | Oligo | SOCS6    |

|           |             |           |        |        |           |       |               |
|-----------|-------------|-----------|--------|--------|-----------|-------|---------------|
| KIAA1958. | 1. 75E-09   | 0. 304857 | 0. 134 | 0. 065 | 2. 62E-05 | Oligo | KIAA1958      |
| C9orf116. | 1. 76E-09   | -0. 17419 | 0      | 0. 079 | 2. 63E-05 | Oligo | C9orf116      |
| PDGFRA.   | 8 1. 77E-09 | -0. 2971  | 0. 045 | 0. 152 | 2. 65E-05 | Oligo | PDGFRA        |
| TMOD1.    | 7 1. 79E-09 | -0. 35607 | 0. 052 | 0. 161 | 2. 68E-05 | Oligo | TMOD1         |
| NDUFAF4.  | 6 1. 80E-09 | -0. 20891 | 0. 096 | 0. 226 | 2. 69E-05 | Oligo | NDUFAF4       |
| AKAP11.   | 5 1. 81E-09 | 0. 409733 | 0. 235 | 0. 147 | 2. 71E-05 | Oligo | AKAP11        |
| P2RY13.   | 7 1. 83E-09 | -0. 43267 | 0. 005 | 0. 087 | 2. 73E-05 | Oligo | P2RY13        |
| C19orf66. | 1. 83E-09   | -0. 21722 | 0. 122 | 0. 261 | 2. 73E-05 | Oligo | C19orf66      |
| COMMD9.   | 5 1. 84E-09 | -0. 16298 | 0. 162 | 0. 315 | 2. 76E-05 | Oligo | COMMD9        |
| SESN2.    | 6 1. 85E-09 | -0. 28849 | 0. 016 | 0. 107 | 2. 77E-05 | Oligo | SESN2         |
| RP11-25K1 | 1. 88E-09   | -0. 21493 | 0. 014 | 0. 104 | 2. 81E-05 | Oligo | RP11-25K19. 1 |
| TAF12.    | 3 1. 89E-09 | -0. 28384 | 0. 167 | 0. 314 | 2. 83E-05 | Oligo | TAF12         |
| YIPF1.    | 1 1. 89E-09 | -0. 27732 | 0. 066 | 0. 184 | 2. 83E-05 | Oligo | YIPF1         |
| SLC9A3R1. | 1. 93E-09   | 0. 338135 | 0. 24  | 0. 147 | 2. 89E-05 | Oligo | SLC9A3R1      |
| P2RX4.    | 8 1. 98E-09 | -0. 24769 | 0. 064 | 0. 181 | 2. 96E-05 | Oligo | P2RX4         |
| SYAP1.    | 8 1. 99E-09 | -0. 23095 | 0. 233 | 0. 393 | 2. 98E-05 | Oligo | SYAP1         |
| PMAIP1.   | 8 2. 02E-09 | -0. 44399 | 0. 005 | 0. 086 | 3. 02E-05 | Oligo | PMAIP1        |
| SERP2.    | 7 2. 03E-09 | 0. 307556 | 0. 184 | 0. 098 | 3. 04E-05 | Oligo | SERP2         |
| CCNG2.    | 7 2. 04E-09 | -0. 29108 | 0. 071 | 0. 185 | 3. 04E-05 | Oligo | CCNG2         |
| PITX1.    | 7 2. 05E-09 | -0. 14302 | 0. 005 | 0. 088 | 3. 07E-05 | Oligo | PITX1         |
| MR1.      | 7 2. 06E-09 | -0. 26817 | 0. 007 | 0. 092 | 3. 08E-05 | Oligo | MR1           |
| PDIA4.    | 6 2. 06E-09 | -0. 27111 | 0. 301 | 0. 467 | 3. 08E-05 | Oligo | PDIA4         |
| ABHD13.   | 1 2. 08E-09 | -0. 22853 | 0. 038 | 0. 142 | 3. 10E-05 | Oligo | ABHD13        |
| ZNF593.   | 4 2. 09E-09 | -0. 26385 | 0. 158 | 0. 307 | 3. 12E-05 | Oligo | ZNF593        |
| NME7.     | 9 2. 09E-09 | -0. 28713 | 0. 054 | 0. 165 | 3. 13E-05 | Oligo | NME7          |
| SORBS1.   | 6 2. 10E-09 | -0. 17207 | 0. 009 | 0. 096 | 3. 14E-05 | Oligo | SORBS1        |
| IAH1.     | 1 2. 11E-09 | -0. 24944 | 0. 259 | 0. 427 | 3. 16E-05 | Oligo | IAH1          |
| MIOS.     | 3 2. 15E-09 | -0. 26319 | 0. 028 | 0. 125 | 3. 22E-05 | Oligo | MIOS          |
| RNASEH1-A | 2. 19E-09   | -0. 20671 | 0. 064 | 0. 182 | 3. 27E-05 | Oligo | RNASEH1-AS1   |
| FES.      | 9 2. 20E-09 | -0. 32786 | 0. 002 | 0. 082 | 3. 29E-05 | Oligo | FES           |
| REEP5.    | 7 2. 23E-09 | -0. 2135  | 0. 412 | 0. 591 | 3. 33E-05 | Oligo | REEP5         |
| MESP1.    | 6 2. 23E-09 | -0. 18862 | 0. 033 | 0. 135 | 3. 34E-05 | Oligo | MESP1         |
| CYB561.   | 5 2. 24E-09 | -0. 19949 | 0. 002 | 0. 083 | 3. 34E-05 | Oligo | CYB561        |
| SPTY2D1.  | 2 2. 29E-09 | -0. 25732 | 0. 026 | 0. 122 | 3. 42E-05 | Oligo | SPTY2D1       |
| CDK5.     | 6 2. 29E-09 | -0. 17649 | 0. 111 | 0. 243 | 3. 42E-05 | Oligo | CDK5          |
| APBA1     | 2. 30E-09   | 0. 15133  | 0. 054 | 0. 016 | 3. 43E-05 | Oligo | APBA1         |
| TAPBPL.   | 5 2. 38E-09 | -0. 32209 | 0. 028 | 0. 126 | 3. 56E-05 | Oligo | TAPBPL        |
| POP7.     | 7 2. 39E-09 | -0. 11847 | 0. 233 | 0. 4   | 3. 56E-05 | Oligo | POP7          |
| CHGB.     | 6 2. 41E-09 | -0. 29988 | 0. 007 | 0. 09  | 3. 60E-05 | Oligo | CHGB          |
| EFR3A.    | 7 2. 41E-09 | -0. 18643 | 0. 04  | 0. 146 | 3. 60E-05 | Oligo | EFR3A         |
| FNTA.     | 3 2. 42E-09 | 0. 349136 | 0. 459 | 0. 383 | 3. 62E-05 | Oligo | FNTA          |
| FBXW9.    | 4 2. 45E-09 | -0. 19603 | 0. 021 | 0. 115 | 3. 66E-05 | Oligo | FBXW9         |
| GBP3.     | 2 2. 45E-09 | -0. 31497 | 0. 005 | 0. 086 | 3. 66E-05 | Oligo | GBP3          |
| GLCCI1.   | 8 2. 46E-09 | -0. 34551 | 0. 049 | 0. 155 | 3. 68E-05 | Oligo | GLCCI1        |
| DNAJB11.  | 5 2. 46E-09 | -0. 21679 | 0. 266 | 0. 44  | 3. 68E-05 | Oligo | DNAJB11       |
| TCN2.     | 5 2. 47E-09 | -0. 31311 | 0. 014 | 0. 102 | 3. 69E-05 | Oligo | TCN2          |
| CYB5R4.   | 8 2. 48E-09 | -0. 29852 | 0. 066 | 0. 18  | 3. 71E-05 | Oligo | CYB5R4        |
| RNASEH1.  | 5 2. 49E-09 | -0. 16566 | 0. 104 | 0. 234 | 3. 71E-05 | Oligo | RNASEH1       |
| GRB2.     | 9 2. 50E-09 | -0. 22033 | 0. 315 | 0. 487 | 3. 74E-05 | Oligo | GRB2          |
| AHR.      | 8 2. 52E-09 | 0. 17121  | 0. 132 | 0. 06  | 3. 76E-05 | Oligo | AHR           |
| SLC39A3.  | 6 2. 52E-09 | -0. 27884 | 0. 193 | 0. 344 | 3. 77E-05 | Oligo | SLC39A3       |



|             |           |           |        |        |           |       |          |
|-------------|-----------|-----------|--------|--------|-----------|-------|----------|
| G6PD. 3     | 2. 52E-09 | -0. 27749 | 0. 104 | 0. 233 | 3. 77E-05 | Oligo | G6PD     |
| MTHFD1. 5   | 2. 54E-09 | -0. 26087 | 0. 073 | 0. 192 | 3. 79E-05 | Oligo | MTHFD1   |
| DDX21. 6    | 2. 54E-09 | -0. 18739 | 0. 16  | 0. 305 | 3. 79E-05 | Oligo | DDX21    |
| EFNB1. 5    | 2. 57E-09 | -0. 22604 | 0. 012 | 0. 099 | 3. 83E-05 | Oligo | EFNB1    |
| SLU7. 3     | 2. 58E-09 | -0. 30693 | 0. 172 | 0. 318 | 3. 86E-05 | Oligo | SLU7     |
| TMEM237. 6  | 2. 59E-09 | -0. 22537 | 0. 073 | 0. 191 | 3. 87E-05 | Oligo | TMEM237  |
| ST5. 8      | 2. 59E-09 | -0. 25181 | 0. 047 | 0. 155 | 3. 87E-05 | Oligo | ST5      |
| SLC16A10. 2 | 2. 62E-09 | -0. 39844 | 0. 007 | 0. 09  | 3. 91E-05 | Oligo | SLC16A10 |
| VPS16. 3    | 2. 63E-09 | -0. 24238 | 0. 064 | 0. 179 | 3. 93E-05 | Oligo | VPS16    |
| MMP16. 7    | 2. 64E-09 | -0. 20706 | 0. 016 | 0. 106 | 3. 95E-05 | Oligo | MMP16    |
| METRNL. 8   | 2. 65E-09 | -0. 3191  | 0. 005 | 0. 086 | 3. 96E-05 | Oligo | METRNL   |
| KALRN. 7    | 2. 69E-09 | -0. 20573 | 0. 012 | 0. 099 | 4. 02E-05 | Oligo | KALRN    |
| DNAAF2. 8   | 2. 69E-09 | -0. 22942 | 0. 061 | 0. 177 | 4. 02E-05 | Oligo | DNAAF2   |
| HSP90B1. 5  | 2. 69E-09 | -0. 24401 | 0. 513 | 0. 663 | 4. 02E-05 | Oligo | HSP90B1  |
| CLEC11A. 8  | 2. 69E-09 | -0. 25578 | 0. 106 | 0. 236 | 4. 03E-05 | Oligo | CLEC11A  |
| ZNF90. 6    | 2. 70E-09 | -0. 4533  | 0. 249 | 0. 385 | 4. 04E-05 | Oligo | ZNF90    |
| ALYREF. 8   | 2. 70E-09 | -0. 16976 | 0. 042 | 0. 15  | 4. 04E-05 | Oligo | ALYREF   |
| LUC7L2. 1   | 2. 71E-09 | 0. 307759 | 0. 033 | 0. 007 | 4. 04E-05 | Oligo | LUC7L2   |
| BPHL. 5     | 2. 73E-09 | -0. 26807 | 0. 064 | 0. 178 | 4. 08E-05 | Oligo | BPHL     |
| AAMDC. 6    | 2. 74E-09 | 0. 57336  | 0. 299 | 0. 203 | 4. 10E-05 | Oligo | AAMDC    |
| SNF8. 6     | 2. 78E-09 | -0. 26362 | 0. 296 | 0. 466 | 4. 16E-05 | Oligo | SNF8     |
| TMEM60. 4   | 2. 79E-09 | -0. 21751 | 0. 118 | 0. 252 | 4. 17E-05 | Oligo | TMEM60   |
| PUS3. 6     | 2. 84E-09 | -0. 24362 | 0. 024 | 0. 117 | 4. 25E-05 | Oligo | PUS3     |
| CYB5B. 5    | 2. 90E-09 | -0. 26544 | 0. 188 | 0. 343 | 4. 33E-05 | Oligo | CYB5B    |
| UBE3A. 7    | 2. 96E-09 | -0. 19637 | 0. 148 | 0. 292 | 4. 42E-05 | Oligo | UBE3A    |
| IQCE. 6     | 2. 96E-09 | -0. 20812 | 0. 026 | 0. 122 | 4. 42E-05 | Oligo | IQCE     |
| FAM13A. 2   | 2. 97E-09 | -0. 30145 | 0. 014 | 0. 102 | 4. 44E-05 | Oligo | FAM13A   |
| MEOX2. 7    | 3. 02E-09 | -0. 21574 | 0. 002 | 0. 081 | 4. 52E-05 | Oligo | MEOX2    |
| CCNB1. 7    | 3. 05E-09 | -0. 33189 | 0. 009 | 0. 094 | 4. 56E-05 | Oligo | CCNB1    |
| NIPSNAP1. 3 | 3. 07E-09 | -0. 20549 | 0. 059 | 0. 171 | 4. 58E-05 | Oligo | NIPSNAP1 |
| MCAT. 7     | 3. 08E-09 | -0. 20761 | 0. 033 | 0. 132 | 4. 60E-05 | Oligo | MCAT     |
| RGL2. 3     | 3. 10E-09 | -0. 21756 | 0. 085 | 0. 209 | 4. 64E-05 | Oligo | RGL2     |
| GON4L. 6    | 3. 13E-09 | -0. 14748 | 0. 092 | 0. 219 | 4. 67E-05 | Oligo | GON4L    |
| POP4. 2     | 3. 14E-09 | -0. 30239 | 0. 129 | 0. 27  | 4. 69E-05 | Oligo | POP4     |
| TMUB2. 3    | 3. 15E-09 | -0. 16061 | 0. 127 | 0. 265 | 4. 71E-05 | Oligo | TMUB2    |
| RNASEH2A. 3 | 3. 17E-09 | -0. 18206 | 0. 089 | 0. 215 | 4. 73E-05 | Oligo | RNASEH2A |
| CDK10. 3    | 3. 18E-09 | -0. 25771 | 0. 056 | 0. 168 | 4. 75E-05 | Oligo | CDK10    |
| B9D2. 1     | 3. 22E-09 | -0. 21047 | 0. 005 | 0. 086 | 4. 80E-05 | Oligo | B9D2     |
| RARS2. 4    | 3. 22E-09 | -0. 21371 | 0. 075 | 0. 195 | 4. 81E-05 | Oligo | RARS2    |
| RNF114. 3   | 3. 22E-09 | -0. 27782 | 0. 254 | 0. 421 | 4. 82E-05 | Oligo | RNF114   |
| TMBIM6. 4   | 3. 24E-09 | -0. 23814 | 0. 675 | 0. 844 | 4. 84E-05 | Oligo | TMBIM6   |
| BLCAP. 6    | 3. 24E-09 | -0. 1857  | 0. 151 | 0. 295 | 4. 85E-05 | Oligo | BLCAP    |
| PCOLCE2. 4  | 3. 25E-09 | -0. 25615 | 0. 005 | 0. 085 | 4. 86E-05 | Oligo | PCOLCE2  |
| ZNF326. 6   | 3. 25E-09 | -0. 19813 | 0. 12  | 0. 252 | 4. 86E-05 | Oligo | ZNF326   |
| CHST14. 2   | 3. 34E-09 | -0. 17151 | 0. 002 | 0. 081 | 4. 99E-05 | Oligo | CHST14   |
| ISG20L2. 6  | 3. 35E-09 | -0. 21115 | 0. 104 | 0. 229 | 5. 01E-05 | Oligo | ISG20L2  |
| ERAL1. 4    | 3. 37E-09 | -0. 19672 | 0. 111 | 0. 245 | 5. 03E-05 | Oligo | ERAL1    |
| TMED1. 6    | 3. 37E-09 | -0. 2485  | 0. 153 | 0. 296 | 5. 04E-05 | Oligo | TMED1    |
| RBM39. 5    | 3. 38E-09 | -0. 15825 | 0. 513 | 0. 659 | 5. 06E-05 | Oligo | RBM39    |
| CDH4. 8     | 3. 39E-09 | -0. 18047 | 0. 007 | 0. 09  | 5. 07E-05 | Oligo | CDH4     |
| GYG1. 5     | 3. 43E-09 | -0. 3268  | 0. 127 | 0. 259 | 5. 13E-05 | Oligo | GYG1     |

|           |          |          |       |       |          |       |          |
|-----------|----------|----------|-------|-------|----------|-------|----------|
| FAM110A.4 | 3.44E-09 | -0.23068 | 0     | 0.076 | 5.15E-05 | Oligo | FAM110A  |
| CDK5RAP1. | 3.46E-09 | -0.17123 | 0.052 | 0.162 | 5.18E-05 | Oligo | CDK5RAP1 |
| NELL2.7   | 3.48E-09 | -0.25376 | 0.019 | 0.109 | 5.20E-05 | Oligo | NELL2    |
| DENND6B.9 | 3.51E-09 | -0.29168 | 0.016 | 0.105 | 5.25E-05 | Oligo | DENND6B  |
| ZC3HC1.6  | 3.51E-09 | -0.2473  | 0.031 | 0.128 | 5.25E-05 | Oligo | ZC3HC1   |
| TMED3.6   | 3.53E-09 | -0.2208  | 0.169 | 0.313 | 5.28E-05 | Oligo | TMED3    |
| CCDC88A.7 | 3.59E-09 | 0.403286 | 0.485 | 0.414 | 5.36E-05 | Oligo | CCDC88A  |
| DRAM1.6   | 3.60E-09 | -0.22674 | 0     | 0.076 | 5.38E-05 | Oligo | DRAM1    |
| TRIM38.8  | 3.63E-09 | -0.30471 | 0.014 | 0.101 | 5.42E-05 | Oligo | TRIM38   |
| SIGMAR1.2 | 3.69E-09 | -0.18869 | 0.061 | 0.176 | 5.51E-05 | Oligo | SIGMAR1  |
| DCBLD2.8  | 3.69E-09 | -0.19176 | 0.042 | 0.147 | 5.51E-05 | Oligo | DCBLD2   |
| RIN1.5    | 3.69E-09 | -0.16533 | 0.005 | 0.085 | 5.52E-05 | Oligo | RIN1     |
| EYA2.2    | 3.71E-09 | -0.18044 | 0.002 | 0.081 | 5.55E-05 | Oligo | EYA2     |
| SLC2A4RG. | 3.73E-09 | -0.1863  | 0.031 | 0.129 | 5.57E-05 | Oligo | SLC2A4RG |
| COPB2.6   | 3.75E-09 | -0.22686 | 0.165 | 0.311 | 5.61E-05 | Oligo | COPB2    |
| BCL3.5    | 3.77E-09 | -0.21104 | 0.002 | 0.08  | 5.63E-05 | Oligo | BCL3     |
| DDB2.3    | 3.77E-09 | -0.31061 | 0.012 | 0.097 | 5.63E-05 | Oligo | DDB2     |
| CCRL2.8   | 3.78E-09 | -0.39285 | 0.009 | 0.092 | 5.65E-05 | Oligo | CCRL2    |
| ABHD11.2  | 3.79E-09 | -0.28462 | 0.061 | 0.173 | 5.67E-05 | Oligo | ABHD11   |
| PTPN12.4  | 3.83E-09 | -0.21358 | 0.099 | 0.227 | 5.72E-05 | Oligo | PTPN12   |
| TAF1D.2   | 3.87E-09 | -0.30053 | 0.198 | 0.348 | 5.79E-05 | Oligo | TAF1D    |
| CNPY1.8   | 3.88E-09 | -0.22655 | 0.002 | 0.08  | 5.79E-05 | Oligo | CNPY1    |
| ZNF516.2  | 3.89E-09 | -0.2078  | 0.012 | 0.097 | 5.82E-05 | Oligo | ZNF516   |
| PRC1.8    | 3.92E-09 | -0.26871 | 0.007 | 0.089 | 5.85E-05 | Oligo | PRC1     |
| EPHA3.8   | 3.94E-09 | -0.13696 | 0     | 0.076 | 5.88E-05 | Oligo | EPHA3    |
| LYL1.9    | 4.04E-09 | -0.33313 | 0.005 | 0.084 | 6.04E-05 | Oligo | LYL1     |
| SMIM15.2  | 4.11E-09 | -0.16251 | 0.181 | 0.338 | 6.14E-05 | Oligo | SMIM15   |
| ADAMTS9.7 | 4.12E-09 | -0.17095 | 0.002 | 0.08  | 6.16E-05 | Oligo | ADAMTS9  |
| DDX39A.5  | 4.22E-09 | -0.21695 | 0.238 | 0.398 | 6.31E-05 | Oligo | DDX39A   |
| SMPD1.6   | 4.29E-09 | 0.431709 | 0.32  | 0.233 | 6.41E-05 | Oligo | SMPD1    |
| RSBN1.7   | 4.36E-09 | -0.24137 | 0.096 | 0.222 | 6.51E-05 | Oligo | RSBN1    |
| PPIL4.3   | 4.37E-09 | -0.20968 | 0.118 | 0.251 | 6.52E-05 | Oligo | PPIL4    |
| DBNL.8    | 4.38E-09 | -0.25105 | 0.275 | 0.431 | 6.55E-05 | Oligo | DBNL     |
| CEP63.4   | 4.40E-09 | -0.20069 | 0.068 | 0.182 | 6.58E-05 | Oligo | CEP63    |
| SNCAIP.8  | 4.41E-09 | -0.1937  | 0.007 | 0.088 | 6.59E-05 | Oligo | SNCAIP   |
| GDAP1L1.8 | 4.43E-09 | -0.31574 | 0.016 | 0.104 | 6.61E-05 | Oligo | GDAP1L1  |
| DYNC1LI1. | 4.46E-09 | -0.18296 | 0.134 | 0.272 | 6.66E-05 | Oligo | DYNC1LI1 |
| BARD1.7   | 4.46E-09 | -0.19797 | 0.045 | 0.15  | 6.67E-05 | Oligo | BARD1    |
| PDE4A.5   | 4.49E-09 | -0.24857 | 0.009 | 0.092 | 6.71E-05 | Oligo | PDE4A    |
| OSCAR.9   | 4.50E-09 | -0.29317 | 0     | 0.075 | 6.73E-05 | Oligo | OSCAR    |
| ACTL6B.8  | 4.52E-09 | -0.2997  | 0.002 | 0.079 | 6.75E-05 | Oligo | ACTL6B   |
| ELN.6     | 4.53E-09 | -0.3134  | 0.021 | 0.111 | 6.77E-05 | Oligo | ELN      |
| SHKBP1.8  | 4.55E-09 | -0.20368 | 0.108 | 0.242 | 6.80E-05 | Oligo | SHKBP1   |
| SPCS1.3   | 4.55E-09 | -0.10515 | 0.572 | 0.743 | 6.80E-05 | Oligo | SPCS1    |
| DLL3.8    | 4.62E-09 | -0.4251  | 0.047 | 0.147 | 6.90E-05 | Oligo | DLL3     |
| ITGA3.6   | 4.65E-09 | -0.14618 | 0.014 | 0.102 | 6.94E-05 | Oligo | ITGA3    |
| ZNF22.7   | 4.65E-09 | -0.1591  | 0.141 | 0.28  | 6.95E-05 | Oligo | ZNF22    |
| TDG.6     | 4.72E-09 | -0.13226 | 0.136 | 0.278 | 7.05E-05 | Oligo | TDG      |
| VCAM1.7   | 4.81E-09 | -0.35052 | 0     | 0.075 | 7.19E-05 | Oligo | VCAM1    |
| NUP37.4   | 4.84E-09 | -0.23574 | 0.035 | 0.134 | 7.23E-05 | Oligo | NUP37    |
| TPMT.7    | 4.87E-09 | -0.22199 | 0.078 | 0.196 | 7.27E-05 | Oligo | TPMT     |

|            |          |          |       |       |          |       |              |
|------------|----------|----------|-------|-------|----------|-------|--------------|
| MOSPD1.5   | 4.95E-09 | -0.26022 | 0.035 | 0.133 | 7.40E-05 | Oligo | MOSPD1       |
| DNAJA1.4   | 4.97E-09 | -0.18374 | 0.468 | 0.634 | 7.43E-05 | Oligo | DNAJA1       |
| REXO2.8    | 4.98E-09 | 0.38669  | 0.419 | 0.315 | 7.44E-05 | Oligo | REXO2        |
| ENKUR.7    | 5.03E-09 | -0.23743 | 0     | 0.075 | 7.52E-05 | Oligo | ENKUR        |
| CELF1.6    | 5.04E-09 | -0.16825 | 0.169 | 0.313 | 7.53E-05 | Oligo | CELF1        |
| CCDC58.5   | 5.14E-09 | -0.21159 | 0.045 | 0.148 | 7.67E-05 | Oligo | CCDC58       |
| ANAPC13.6  | 5.22E-09 | -0.14783 | 0.207 | 0.359 | 7.80E-05 | Oligo | ANAPC13      |
| IFITM10.4  | 5.23E-09 | -0.31666 | 0.033 | 0.129 | 7.82E-05 | Oligo | IFITM10      |
| ZWINT.6    | 5.23E-09 | -0.27581 | 0.012 | 0.096 | 7.82E-05 | Oligo | ZWINT        |
| IGF2BP2.6  | 5.29E-09 | -0.18352 | 0.005 | 0.083 | 7.90E-05 | Oligo | IGF2BP2      |
| CLINT1.2   | 5.29E-09 | -0.22782 | 0.085 | 0.205 | 7.90E-05 | Oligo | CLINT1       |
| MGST3.4    | 5.31E-09 | 0.289714 | 0.727 | 0.692 | 7.93E-05 | Oligo | MGST3        |
| PID1.6     | 5.43E-09 | -0.21381 | 0.026 | 0.12  | 8.12E-05 | Oligo | PID1         |
| MT1G.7     | 5.48E-09 | -0.54278 | 0.035 | 0.131 | 8.18E-05 | Oligo | MT1G         |
| SPA17.7    | 5.50E-09 | -0.22701 | 0.005 | 0.083 | 8.23E-05 | Oligo | SPA17        |
| TP53INP2.5 | 5.51E-09 | 0.282331 | 0.169 | 0.092 | 8.24E-05 | Oligo | TP53INP2     |
| SMC2.7     | 5.54E-09 | -0.23516 | 0.085 | 0.204 | 8.28E-05 | Oligo | SMC2         |
| EIF2B1.4   | 5.54E-09 | -0.16207 | 0.146 | 0.288 | 8.28E-05 | Oligo | EIF2B1       |
| RIT2.8     | 5.70E-09 | -0.32022 | 0.002 | 0.079 | 8.51E-05 | Oligo | RIT2         |
| SDF2.4     | 5.71E-09 | -0.15294 | 0.205 | 0.362 | 8.54E-05 | Oligo | SDF2         |
| C16orf62.5 | 5.73E-09 | 0.399968 | 0.233 | 0.145 | 8.57E-05 | Oligo | C16orf62     |
| ITGA5.5    | 5.75E-09 | -0.28234 | 0.007 | 0.087 | 8.59E-05 | Oligo | ITGA5        |
| NGLY1.3    | 5.81E-09 | -0.2292  | 0.094 | 0.219 | 8.68E-05 | Oligo | NGLY1        |
| BRD4.6     | 5.90E-09 | -0.20553 | 0.184 | 0.332 | 8.82E-05 | Oligo | BRD4         |
| BAG3.5     | 5.97E-09 | -0.26613 | 0.021 | 0.111 | 8.92E-05 | Oligo | BAG3         |
| NAT14.5    | 5.99E-09 | -0.20042 | 0.068 | 0.184 | 8.95E-05 | Oligo | NAT14        |
| TBC1D17.4  | 6.12E-09 | 0.288054 | 0.245 | 0.152 | 9.15E-05 | Oligo | TBC1D17      |
| AC004540.6 | 6.15E-09 | -0.25315 | 0.005 | 0.082 | 9.19E-05 | Oligo | AC004540.5   |
| ARNTL.3    | 6.20E-09 | -0.21626 | 0.014 | 0.099 | 9.26E-05 | Oligo | ARNTL        |
| NLRP3.8    | 6.21E-09 | -0.36637 | 0.009 | 0.09  | 9.28E-05 | Oligo | NLRP3        |
| RFWD2.5    | 6.23E-09 | -0.17404 | 0.059 | 0.169 | 9.32E-05 | Oligo | RFWD2        |
| ALG8.2     | 6.23E-09 | -0.23806 | 0.068 | 0.183 | 9.32E-05 | Oligo | ALG8         |
| CLIP1.2    | 6.25E-09 | -0.16683 | 0.092 | 0.218 | 9.34E-05 | Oligo | CLIP1        |
| ITGAM.9    | 6.25E-09 | -0.32568 | 0.002 | 0.078 | 9.35E-05 | Oligo | ITGAM        |
| FGR.9      | 6.25E-09 | -0.34265 | 0.007 | 0.086 | 9.35E-05 | Oligo | FGR          |
| GAR1.7     | 6.27E-09 | -0.24121 | 0.078 | 0.195 | 9.37E-05 | Oligo | GAR1         |
| DUS3L.4    | 6.27E-09 | -0.22766 | 0.045 | 0.147 | 9.37E-05 | Oligo | DUS3L        |
| RAPGEF1.6  | 6.32E-09 | -0.32008 | 0.028 | 0.12  | 9.45E-05 | Oligo | RAPGEF1      |
| CDK2.5     | 6.33E-09 | -0.21971 | 0.007 | 0.087 | 9.47E-05 | Oligo | CDK2         |
| LRRC42.5   | 6.46E-09 | -0.1493  | 0.045 | 0.148 | 9.66E-05 | Oligo | LRRC42       |
| NKIRAS2.4  | 6.51E-09 | -0.18407 | 0.132 | 0.268 | 9.72E-05 | Oligo | NKIRAS2      |
| LYAR.4     | 6.60E-09 | -0.15463 | 0.066 | 0.178 | 9.87E-05 | Oligo | LYAR         |
| CCZ1.6     | 6.62E-09 | -0.24872 | 0.202 | 0.356 | 9.89E-05 | Oligo | CCZ1         |
| CKB.9      | 6.63E-09 | 0.21923  | 0.711 | 0.577 | 9.91E-05 | Oligo | CKB          |
| EXOC6B.2   | 6.64E-09 | 0.382574 | 0.125 | 0.06  | 9.92E-05 | Oligo | EXOC6B       |
| PQLC3.8    | 6.67E-09 | -0.27803 | 0.075 | 0.189 | 9.97E-05 | Oligo | PQLC3        |
| SAP30.6    | 6.70E-09 | -0.25468 | 0.115 | 0.245 | 0.0001   | Oligo | SAP30        |
| TMEM161B-6 | 6.77E-09 | -0.33752 | 0.162 | 0.294 | 0.000101 | Oligo | TMEM161B-AS1 |
| ATF1.3     | 6.96E-09 | -0.23622 | 0.045 | 0.148 | 0.000104 | Oligo | ATF1         |
| ATIC.1     | 6.99E-09 | -0.20136 | 0.106 | 0.229 | 0.000104 | Oligo | ATIC         |
| RUSC1.5    | 7.08E-09 | -0.18717 | 0.04  | 0.141 | 0.000106 | Oligo | RUSC1        |

|           |          |          |       |       |          |       |          |
|-----------|----------|----------|-------|-------|----------|-------|----------|
| HDCC2.4   | 7.09E-09 | -0.10432 | 0.24  | 0.406 | 0.000106 | Oligo | HDCC2    |
| CCL4.8    | 7.13E-09 | -0.62924 | 0.224 | 0.328 | 0.000107 | Oligo | CCL4     |
| CD93.9    | 7.18E-09 | -0.31813 | 0     | 0.073 | 0.000107 | Oligo | CD93     |
| SMIM19.2  | 7.20E-09 | -0.16522 | 0.176 | 0.329 | 0.000108 | Oligo | SMIM19   |
| SMIM13.3  | 7.22E-09 | 0.245543 | 0.158 | 0.083 | 0.000108 | Oligo | SMIM13   |
| EIF2AK2.2 | 7.23E-09 | -0.2028  | 0.158 | 0.307 | 0.000108 | Oligo | EIF2AK2  |
| LSAMP.7   | 7.23E-09 | 0.300834 | 0.271 | 0.168 | 0.000108 | Oligo | LSAMP    |
| RCC1.3    | 7.23E-09 | -0.15063 | 0.016 | 0.103 | 0.000108 | Oligo | RCC1     |
| BOD1.8    | 7.23E-09 | -0.24656 | 0.165 | 0.308 | 0.000108 | Oligo | BOD1     |
| AP4M1.7   | 7.29E-09 | -0.21741 | 0.08  | 0.198 | 0.000109 | Oligo | AP4M1    |
| VPS26B.7  | 7.42E-09 | -0.17626 | 0.106 | 0.236 | 0.000111 | Oligo | VPS26B   |
| DYX1C1    | 7.53E-09 | -0.22152 | 0.002 | 0.078 | 0.000113 | Oligo | DYX1C1   |
| GPATCH2.3 | 7.54E-09 | -0.22365 | 0.056 | 0.165 | 0.000113 | Oligo | GPATCH2  |
| RELB.4    | 7.67E-09 | -0.19505 | 0.014 | 0.099 | 0.000115 | Oligo | RELB     |
| TNFAIP2.7 | 7.69E-09 | -0.29271 | 0.002 | 0.077 | 0.000115 | Oligo | TNFAIP2  |
| ARRDC1.8  | 7.71E-09 | -0.28962 | 0.04  | 0.138 | 0.000115 | Oligo | ARRDC1   |
| UCHL3.5   | 7.74E-09 | -0.24736 | 0.125 | 0.252 | 0.000116 | Oligo | UCHL3    |
| POLR2E.6  | 7.76E-09 | -0.17566 | 0.369 | 0.541 | 0.000116 | Oligo | POLR2E   |
| SPATA2L.3 | 7.82E-09 | -0.18321 | 0.019 | 0.106 | 0.000117 | Oligo | SPATA2L  |
| NDUFS2.3  | 7.90E-09 | -0.13099 | 0.365 | 0.558 | 0.000118 | Oligo | NDUFS2   |
| HAUS8.3   | 8.02E-09 | -0.23024 | 0.007 | 0.086 | 0.00012  | Oligo | HAUS8    |
| SCIMP.9   | 8.26E-09 | -0.31177 | 0.007 | 0.086 | 0.000123 | Oligo | SCIMP    |
| JADE2.1   | 8.28E-09 | 0.310201 | 0.106 | 0.046 | 0.000124 | Oligo | JADE2    |
| HSPA9.5   | 8.32E-09 | -0.27479 | 0.336 | 0.493 | 0.000124 | Oligo | HSPA9    |
| PBXIP1.3  | 8.41E-09 | -0.30345 | 0.04  | 0.138 | 0.000126 | Oligo | PBXIP1   |
| CMBL.7    | 8.47E-09 | -0.1703  | 0.033 | 0.13  | 0.000127 | Oligo | CMBL     |
| SASH3.9   | 8.49E-09 | -0.32918 | 0.005 | 0.081 | 0.000127 | Oligo | SASH3    |
| ARL14EP.3 | 8.49E-09 | -0.13398 | 0.071 | 0.185 | 0.000127 | Oligo | ARL14EP  |
| ELL2.7    | 8.58E-09 | 0.238604 | 0.304 | 0.188 | 0.000128 | Oligo | ELL2     |
| GPR82.6   | 8.69E-09 | -0.17299 | 0.038 | 0.138 | 0.00013  | Oligo | GPR82    |
| CXCL2.6   | 8.69E-09 | -0.44609 | 0.009 | 0.089 | 0.00013  | Oligo | CXCL2    |
| CNOT4.6   | 8.72E-09 | -0.14492 | 0.136 | 0.277 | 0.00013  | Oligo | CNOT4    |
| HELZ2.6   | 8.84E-09 | -0.17124 | 0.016 | 0.103 | 0.000132 | Oligo | HELZ2    |
| PPAN.1    | 8.89E-09 | -0.17525 | 0.059 | 0.169 | 0.000133 | Oligo | PPAN     |
| SIGLEC7.9 | 8.89E-09 | -0.32127 | 0.002 | 0.077 | 0.000133 | Oligo | SIGLEC7  |
| SBF2.3    | 8.94E-09 | 0.544952 | 0.266 | 0.179 | 0.000134 | Oligo | SBF2     |
| MIR210HG. | 9.05E-09 | -0.20196 | 0.012 | 0.094 | 0.000135 | Oligo | MIR210HG |
| DOCK7.2   | 9.06E-09 | -0.16796 | 0.033 | 0.129 | 0.000135 | Oligo | DOCK7    |
| YAF2.6    | 9.20E-09 | -0.20184 | 0.2   | 0.352 | 0.000138 | Oligo | YAF2     |
| PLEKHF2.3 | 9.29E-09 | -0.22875 | 0.035 | 0.131 | 0.000139 | Oligo | PLEKHF2  |
| TRAF3IP2. | 9.36E-09 | -0.14861 | 0.014 | 0.099 | 0.00014  | Oligo | TRAF3IP2 |
| TFDP2.4   | 9.42E-09 | -0.25782 | 0.096 | 0.217 | 0.000141 | Oligo | TFDP2    |
| LY6H.8    | 9.48E-09 | -0.34022 | 0.009 | 0.088 | 0.000142 | Oligo | LY6H     |
| FOPNL.4   | 9.53E-09 | -0.1695  | 0.08  | 0.198 | 0.000142 | Oligo | FOPNL    |
| GPR161.9  | 9.54E-09 | -0.16552 | 0.007 | 0.086 | 0.000143 | Oligo | GPR161   |
| NNT.2     | 9.58E-09 | -0.20009 | 0.04  | 0.14  | 0.000143 | Oligo | NNT      |
| AKAP8L.7  | 9.60E-09 | -0.18027 | 0.122 | 0.254 | 0.000143 | Oligo | AKAP8L   |
| MON2.1    | 9.66E-09 | 0.243376 | 0.167 | 0.089 | 0.000144 | Oligo | MON2     |
| TMEM109.8 | 9.72E-09 | -0.24164 | 0.092 | 0.209 | 0.000145 | Oligo | TMEM109  |
| FLAD1.5   | 9.74E-09 | -0.16554 | 0.108 | 0.237 | 0.000146 | Oligo | FLAD1    |
| IMP3.2    | 9.81E-09 | -0.28305 | 0.209 | 0.365 | 0.000147 | Oligo | IMP3     |

|           |          |          |       |       |          |       |           |
|-----------|----------|----------|-------|-------|----------|-------|-----------|
| ING1.4    | 9.95E-09 | -0.24096 | 0.04  | 0.139 | 0.000149 | Oligo | ING1      |
| CACNA2D4. | 1.00E-08 | -0.34035 | 0.002 | 0.076 | 0.000149 | Oligo | CACNA2D4  |
| LPP.2     | 1.00E-08 | -0.18419 | 0.096 | 0.222 | 0.00015  | Oligo | LPP       |
| PER1.7    | 1.01E-08 | -0.31816 | 0.078 | 0.188 | 0.00015  | Oligo | PER1      |
| CD81.8    | 1.01E-08 | 0.316364 | 0.529 | 0.435 | 0.000151 | Oligo | CD81      |
| C9orf114. | 1.01E-08 | -0.22433 | 0.045 | 0.146 | 0.000151 | Oligo | C9orf114  |
| ZNF711.8  | 1.02E-08 | -0.20679 | 0.045 | 0.146 | 0.000153 | Oligo | ZNF711    |
| NOP56.4   | 1.03E-08 | -0.1706  | 0.254 | 0.42  | 0.000153 | Oligo | NOP56     |
| RNF6.1    | 1.03E-08 | -0.22886 | 0.04  | 0.139 | 0.000153 | Oligo | RNF6      |
| ATP5SL.3  | 1.03E-08 | -0.16483 | 0.108 | 0.235 | 0.000154 | Oligo | ATP5SL    |
| IRAK3.9   | 1.04E-08 | -0.31527 | 0.002 | 0.076 | 0.000155 | Oligo | IRAK3     |
| ZNF189.2  | 1.04E-08 | 0.310462 | 0.129 | 0.063 | 0.000156 | Oligo | ZNF189    |
| IGBP1.2   | 1.05E-08 | -0.25287 | 0.205 | 0.351 | 0.000156 | Oligo | IGBP1     |
| HNRNPH3.8 | 1.05E-08 | -0.1799  | 0.282 | 0.451 | 0.000157 | Oligo | HNRNPH3   |
| LRRC16A.2 | 1.06E-08 | -0.14823 | 0.002 | 0.077 | 0.000158 | Oligo | LRRC16A   |
| GNG3.7    | 1.06E-08 | -0.30724 | 0.002 | 0.076 | 0.000158 | Oligo | GNG3      |
| LINC00998 | 1.06E-08 | -0.2475  | 0.231 | 0.377 | 0.000159 | Oligo | LINC00998 |
| FAM129B.6 | 1.07E-08 | -0.20104 | 0.002 | 0.076 | 0.000159 | Oligo | FAM129B   |
| PDCL3.6   | 1.07E-08 | -0.15421 | 0.158 | 0.298 | 0.000159 | Oligo | PDCL3     |
| SLC29A4.6 | 1.07E-08 | -0.19184 | 0.007 | 0.085 | 0.00016  | Oligo | SLC29A4   |
| PCNP.5    | 1.07E-08 | -0.14433 | 0.367 | 0.543 | 0.00016  | Oligo | PCNP      |
| HBS1L.6   | 1.08E-08 | 0.472743 | 0.275 | 0.188 | 0.000161 | Oligo | HBS1L     |
| CASP7.2   | 1.08E-08 | -0.20254 | 0.009 | 0.089 | 0.000161 | Oligo | CASP7     |
| LINC00936 | 1.08E-08 | -0.31656 | 0.045 | 0.144 | 0.000162 | Oligo | LINC00936 |
| NLGN3.7   | 1.09E-08 | 0.440185 | 0.191 | 0.111 | 0.000163 | Oligo | NLGN3     |
| PDLIM1.6  | 1.09E-08 | -0.19342 | 0.002 | 0.076 | 0.000163 | Oligo | PDLIM1    |
| NARS.3    | 1.10E-08 | -0.21826 | 0.285 | 0.443 | 0.000164 | Oligo | NARS      |
| TBL2.2    | 1.11E-08 | -0.24044 | 0.08  | 0.193 | 0.000166 | Oligo | TBL2      |
| HOXC9.9   | 1.11E-08 | -0.27682 | 0.009 | 0.088 | 0.000166 | Oligo | HOXC9     |
| PPP1R35.8 | 1.11E-08 | -0.1593  | 0.054 | 0.161 | 0.000166 | Oligo | PPP1R35   |
| MLST8.5   | 1.12E-08 | -0.18131 | 0.111 | 0.241 | 0.000168 | Oligo | MLST8     |
| CDC40     | 1.13E-08 | -0.23123 | 0.089 | 0.212 | 0.000169 | Oligo | CDC40     |
| RBM4.7    | 1.13E-08 | -0.15943 | 0.099 | 0.224 | 0.000169 | Oligo | RBM4      |
| SNAPC5.3  | 1.13E-08 | -0.16489 | 0.094 | 0.216 | 0.000169 | Oligo | SNAPC5    |
| SIGLEC8.6 | 1.14E-08 | -0.34494 | 0.005 | 0.08  | 0.00017  | Oligo | SIGLEC8   |
| DDX54.3   | 1.14E-08 | -0.19259 | 0.085 | 0.203 | 0.000171 | Oligo | DDX54     |
| PBK.9     | 1.15E-08 | -0.30566 | 0.002 | 0.076 | 0.000172 | Oligo | PBK       |
| PRKAG1.1  | 1.16E-08 | -0.21243 | 0.16  | 0.299 | 0.000173 | Oligo | PRKAG1    |
| EHD2.7    | 1.16E-08 | -0.17611 | 0.007 | 0.084 | 0.000173 | Oligo | EHD2      |
| UGDH.4    | 1.16E-08 | -0.24249 | 0.056 | 0.162 | 0.000173 | Oligo | UGDH      |
| LRR1.4    | 1.16E-08 | -0.21552 | 0.009 | 0.089 | 0.000174 | Oligo | LRR1      |
| RASGRP1.7 | 1.17E-08 | -0.15136 | 0     | 0.071 | 0.000175 | Oligo | RASGRP1   |
| CCDC174.1 | 1.18E-08 | -0.2924  | 0.082 | 0.198 | 0.000176 | Oligo | CCDC174   |
| ATCAY.8   | 1.18E-08 | -0.22392 | 0.031 | 0.124 | 0.000176 | Oligo | ATCAY     |
| UBA7.8    | 1.18E-08 | -0.29515 | 0.007 | 0.084 | 0.000176 | Oligo | UBA7      |
| SLC27A1.4 | 1.18E-08 | 0.361689 | 0.242 | 0.157 | 0.000176 | Oligo | SLC27A1   |
| NTN1.5    | 1.19E-08 | -0.15349 | 0.007 | 0.085 | 0.000178 | Oligo | NTN1      |
| TAS2R4    | 1.19E-08 | 0.136038 | 0.012 | 0.001 | 0.000178 | Oligo | TAS2R4    |
| HSDL1.8   | 1.20E-08 | -0.22837 | 0.038 | 0.134 | 0.000179 | Oligo | HSDL1     |
| GMDS.3    | 1.20E-08 | -0.19994 | 0.012 | 0.092 | 0.00018  | Oligo | GMDS      |
| DOCK2.9   | 1.20E-08 | -0.32174 | 0.005 | 0.08  | 0.00018  | Oligo | DOCK2     |

|             |           |           |        |        |           |       |              |
|-------------|-----------|-----------|--------|--------|-----------|-------|--------------|
| CHMP4B. 5   | 1. 21E-08 | -0. 23367 | 0. 311 | 0. 459 | 0. 000181 | Oligo | CHMP4B       |
| TMEM104. 1  | 1. 21E-08 | 0. 286224 | 0. 122 | 0. 059 | 0. 000181 | Oligo | TMEM104      |
| HEG1. 2     | 1. 21E-08 | 0. 264088 | 0. 136 | 0. 069 | 0. 000181 | Oligo | HEG1         |
| DUSP5. 2    | 1. 22E-08 | -0. 21787 | 0. 002 | 0. 076 | 0. 000182 | Oligo | DUSP5        |
| RPA3. 5     | 1. 22E-08 | -0. 26813 | 0. 205 | 0. 348 | 0. 000182 | Oligo | RPA3         |
| RRAS. 2     | 1. 22E-08 | -0. 15189 | 0. 021 | 0. 109 | 0. 000182 | Oligo | RRAS         |
| ZMYND11. 6  | 1. 22E-08 | 0. 320348 | 0. 226 | 0. 143 | 0. 000183 | Oligo | ZMYND11      |
| ST14. 9     | 1. 23E-08 | -0. 2989  | 0. 002 | 0. 075 | 0. 000184 | Oligo | ST14         |
| COMMD5      | 1. 23E-08 | -0. 19757 | 0. 129 | 0. 264 | 0. 000184 | Oligo | COMMD5       |
| PCOLCE. 8   | 1. 23E-08 | -0. 278   | 0. 007 | 0. 084 | 0. 000184 | Oligo | PCOLCE       |
| CKS1B. 5    | 1. 24E-08 | -0. 2238  | 0. 132 | 0. 264 | 0. 000186 | Oligo | CKS1B        |
| C14orf37. 1 | 1. 24E-08 | -0. 24031 | 0. 026 | 0. 115 | 0. 000186 | Oligo | C14orf37     |
| BRF1. 5     | 1. 25E-08 | 0. 387554 | 0. 176 | 0. 1   | 0. 000186 | Oligo | BRF1         |
| SCO1. 3     | 1. 25E-08 | -0. 17741 | 0. 061 | 0. 17  | 0. 000186 | Oligo | SCO1         |
| NDUFA8. 1   | 1. 26E-08 | -0. 14645 | 0. 332 | 0. 497 | 0. 000188 | Oligo | NDUFA8       |
| DAGLB. 7    | 1. 26E-08 | -0. 34322 | 0. 033 | 0. 124 | 0. 000188 | Oligo | DAGLB        |
| LMOD3       | 1. 27E-08 | 0. 186764 | 0. 061 | 0. 02  | 0. 00019  | Oligo | LMOD3        |
| RER1. 6     | 1. 28E-08 | -0. 23438 | 0. 336 | 0. 503 | 0. 000192 | Oligo | RER1         |
| IFT81. 7    | 1. 30E-08 | -0. 17676 | 0. 056 | 0. 163 | 0. 000195 | Oligo | IFT81        |
| PDLIM5. 3   | 1. 31E-08 | -0. 16724 | 0. 096 | 0. 224 | 0. 000195 | Oligo | PDLIM5       |
| SRPK1. 6    | 1. 32E-08 | -0. 22621 | 0. 061 | 0. 17  | 0. 000198 | Oligo | SRPK1        |
| HNRNPM. 7   | 1. 33E-08 | -0. 22221 | 0. 388 | 0. 549 | 0. 000199 | Oligo | HNRNPM       |
| SCHIP1. 2   | 1. 35E-08 | 0. 258831 | 0. 087 | 0. 036 | 0. 000202 | Oligo | SCHIP1       |
| DIRAS1. 7   | 1. 36E-08 | -0. 1698  | 0. 026 | 0. 116 | 0. 000203 | Oligo | DIRAS1       |
| CBS. 7      | 1. 36E-08 | -0. 17359 | 0. 054 | 0. 161 | 0. 000203 | Oligo | CBS          |
| RCE1. 3     | 1. 36E-08 | -0. 15267 | 0. 035 | 0. 132 | 0. 000203 | Oligo | RCE1         |
| SNRPF. 5    | 1. 36E-08 | -0. 15104 | 0. 381 | 0. 553 | 0. 000204 | Oligo | SNRPF        |
| MIF4GD. 7   | 1. 37E-08 | -0. 26101 | 0. 127 | 0. 257 | 0. 000205 | Oligo | MIF4GD       |
| PTK2B. 6    | 1. 40E-08 | -0. 19632 | 0. 035 | 0. 13  | 0. 000209 | Oligo | PTK2B        |
| SELPLG. 7   | 1. 40E-08 | -0. 38245 | 0. 033 | 0. 125 | 0. 00021  | Oligo | SELPLG       |
| SF3B2. 5    | 1. 42E-08 | -0. 18035 | 0. 369 | 0. 53  | 0. 000211 | Oligo | SF3B2        |
| SH3TC1. 8   | 1. 43E-08 | -0. 3491  | 0. 007 | 0. 083 | 0. 000214 | Oligo | SH3TC1       |
| CHD2. 4     | 1. 45E-08 | -0. 19744 | 0. 158 | 0. 297 | 0. 000217 | Oligo | CHD2         |
| CNTRL. 6    | 1. 46E-08 | -0. 26584 | 0. 031 | 0. 122 | 0. 000218 | Oligo | CNTRL        |
| ADD2. 7     | 1. 46E-08 | -0. 21061 | 0. 012 | 0. 091 | 0. 000219 | Oligo | ADD2         |
| MDM4. 4     | 1. 47E-08 | 0. 393205 | 0. 334 | 0. 243 | 0. 00022  | Oligo | MDM4         |
| RAD21. 8    | 1. 48E-08 | 0. 385129 | 0. 442 | 0. 363 | 0. 000222 | Oligo | RAD21        |
| OSMR. 7     | 1. 49E-08 | -0. 16482 | 0. 009 | 0. 088 | 0. 000222 | Oligo | OSMR         |
| 8-Mar       | 1. 49E-08 | 0. 219888 | 0. 099 | 0. 043 | 0. 000223 | Oligo | 8-Mar        |
| EMC8. 5     | 1. 50E-08 | -0. 22822 | 0. 139 | 0. 277 | 0. 000224 | Oligo | EMC8         |
| TGS1. 3     | 1. 50E-08 | -0. 21723 | 0. 059 | 0. 164 | 0. 000225 | Oligo | TGS1         |
| CCDC18. 5   | 1. 51E-08 | -0. 22005 | 0. 005 | 0. 079 | 0. 000226 | Oligo | CCDC18       |
| PNMA1. 8    | 1. 52E-08 | -0. 2371  | 0. 153 | 0. 288 | 0. 000227 | Oligo | PNMA1        |
| CTA-204B4   | 1. 52E-08 | 0. 246416 | 0. 078 | 0. 03  | 0. 000228 | Oligo | CTA-204B4. 2 |
| CD300C. 9   | 1. 53E-08 | -0. 31081 | 0      | 0. 07  | 0. 000228 | Oligo | CD300C       |
| PLXNA4. 8   | 1. 54E-08 | -0. 21906 | 0. 005 | 0. 079 | 0. 00023  | Oligo | PLXNA4       |
| COL22A1. 5  | 1. 55E-08 | -0. 15535 | 0. 002 | 0. 075 | 0. 000232 | Oligo | COL22A1      |
| LILRB1. 9   | 1. 56E-08 | -0. 34653 | 0. 014 | 0. 095 | 0. 000232 | Oligo | LILRB1       |
| CSTB. 7     | 1. 57E-08 | -0. 13899 | 0. 529 | 0. 696 | 0. 000234 | Oligo | CSTB         |
| MCM6. 2     | 1. 57E-08 | -0. 22522 | 0. 014 | 0. 095 | 0. 000234 | Oligo | MCM6         |
| JTB. 4      | 1. 57E-08 | -0. 23425 | 0. 464 | 0. 615 | 0. 000235 | Oligo | JTB          |

|           |          |          |       |       |          |       |           |
|-----------|----------|----------|-------|-------|----------|-------|-----------|
| CCDC71.2  | 1.57E-08 | -0.17297 | 0.016 | 0.1   | 0.000235 | Oligo | CCDC71    |
| RAB3A.9   | 1.58E-08 | -0.27747 | 0.064 | 0.168 | 0.000236 | Oligo | RAB3A     |
| TRIM14.6  | 1.59E-08 | -0.22278 | 0.014 | 0.095 | 0.000238 | Oligo | TRIM14    |
| TNPO3.3   | 1.60E-08 | -0.25305 | 0.047 | 0.146 | 0.000239 | Oligo | TNPO3     |
| EXOSC9.2  | 1.60E-08 | -0.24193 | 0.052 | 0.153 | 0.00024  | Oligo | EXOSC9    |
| TMEM218.3 | 1.62E-08 | -0.19122 | 0.104 | 0.226 | 0.000241 | Oligo | TMEM218   |
| PSMD7.5   | 1.63E-08 | -0.18825 | 0.329 | 0.496 | 0.000243 | Oligo | PSMD7     |
| ARMCX3.7  | 1.63E-08 | -0.23776 | 0.287 | 0.435 | 0.000244 | Oligo | ARMCX3    |
| CYSTM1.8  | 1.64E-08 | -0.2864  | 0.188 | 0.33  | 0.000245 | Oligo | CYSTM1    |
| Clorf123. | 1.67E-08 | -0.22955 | 0.198 | 0.346 | 0.000249 | Oligo | Clorf123  |
| RNF165.8  | 1.67E-08 | -0.18887 | 0     | 0.07  | 0.000249 | Oligo | RNF165    |
| ARHGAP15. | 1.68E-08 | -0.40881 | 0.019 | 0.1   | 0.000251 | Oligo | ARHGAP15  |
| PPHLN1.5  | 1.69E-08 | -0.17069 | 0.219 | 0.372 | 0.000253 | Oligo | PPHLN1    |
| ZCCHC10.4 | 1.70E-08 | -0.14905 | 0.111 | 0.238 | 0.000254 | Oligo | ZCCHC10   |
| NUP107.8  | 1.70E-08 | -0.32773 | 0.108 | 0.228 | 0.000254 | Oligo | NUP107    |
| FBXO5.5   | 1.70E-08 | -0.19613 | 0.016 | 0.099 | 0.000254 | Oligo | FBXO5     |
| TTC39C.4  | 1.71E-08 | -0.18545 | 0.007 | 0.083 | 0.000256 | Oligo | TTC39C    |
| NCBP2-AS2 | 1.72E-08 | -0.15413 | 0.141 | 0.282 | 0.000258 | Oligo | NCBP2-AS2 |
| ATP13A3.5 | 1.73E-08 | -0.22203 | 0.052 | 0.154 | 0.000258 | Oligo | ATP13A3   |
| MSL3      | 1.73E-08 | -0.16704 | 0.049 | 0.151 | 0.000258 | Oligo | MSL3      |
| UBAP1L    | 1.74E-08 | 0.105194 | 0.033 | 0.008 | 0.00026  | Oligo | UBAP1L    |
| POU3F2.7  | 1.76E-08 | -0.22856 | 0.104 | 0.22  | 0.000263 | Oligo | POU3F2    |
| PWP1.5    | 1.79E-08 | -0.17229 | 0.165 | 0.308 | 0.000267 | Oligo | PWP1      |
| BEND6.8   | 1.79E-08 | -0.1223  | 0.031 | 0.122 | 0.000268 | Oligo | BEND6     |
| ELAVL2.9  | 1.81E-08 | -0.2541  | 0.007 | 0.082 | 0.00027  | Oligo | ELAVL2    |
| ILK.4     | 1.85E-08 | -0.3187  | 0.224 | 0.37  | 0.000276 | Oligo | ILK       |
| BYSL.5    | 1.89E-08 | -0.18085 | 0.024 | 0.111 | 0.000283 | Oligo | BYSL      |
| PTP4A3.6  | 1.89E-08 | -0.17964 | 0.012 | 0.091 | 0.000283 | Oligo | PTP4A3    |
| NIT2.3    | 1.90E-08 | -0.26487 | 0.108 | 0.233 | 0.000284 | Oligo | NIT2      |
| ATAD2.6   | 1.90E-08 | -0.19347 | 0.005 | 0.078 | 0.000284 | Oligo | ATAD2     |
| CD40.9    | 1.91E-08 | -0.2854  | 0     | 0.069 | 0.000285 | Oligo | CD40      |
| TRIM4.2   | 1.92E-08 | -0.22065 | 0.049 | 0.15  | 0.000286 | Oligo | TRIM4     |
| PDGFA.6   | 1.92E-08 | 0.276262 | 0.172 | 0.094 | 0.000287 | Oligo | PDGFA     |
| ATF3.8    | 1.93E-08 | -0.35071 | 0.181 | 0.307 | 0.000289 | Oligo | ATF3      |
| CHMP7.7   | 1.94E-08 | -0.20648 | 0.071 | 0.181 | 0.000289 | Oligo | CHMP7     |
| CLN8.6    | 1.94E-08 | 0.344522 | 0.372 | 0.265 | 0.000291 | Oligo | CLN8      |
| SEL1L3.2  | 1.95E-08 | -0.20063 | 0.002 | 0.074 | 0.000291 | Oligo | SEL1L3    |
| ZNF91.6   | 1.95E-08 | -0.20186 | 0.096 | 0.214 | 0.000291 | Oligo | ZNF91     |
| IFT43.7   | 1.96E-08 | -0.15148 | 0.129 | 0.262 | 0.000293 | Oligo | IFT43     |
| HINT1.5   | 1.96E-08 | 0.220827 | 0.833 | 0.827 | 0.000293 | Oligo | HINT1     |
| EMB.9     | 1.97E-08 | -0.32538 | 0.005 | 0.078 | 0.000294 | Oligo | EMB       |
| RFX2.3    | 1.97E-08 | -0.23691 | 0.016 | 0.098 | 0.000295 | Oligo | RFX2      |
| ST20.1    | 1.99E-08 | -0.2274  | 0.026 | 0.114 | 0.000298 | Oligo | ST20      |
| TGIF2.3   | 1.99E-08 | -0.17633 | 0.009 | 0.087 | 0.000298 | Oligo | TGIF2     |
| PARVA.7   | 2.00E-08 | -0.16455 | 0.016 | 0.099 | 0.000299 | Oligo | PARVA     |
| AZGP1.7   | 2.01E-08 | 0.286333 | 0.118 | 0.054 | 0.000301 | Oligo | AZGP1     |
| STAC3.9   | 2.02E-08 | -0.29907 | 0.007 | 0.082 | 0.000301 | Oligo | STAC3     |
| ATP5EP2.7 | 2.02E-08 | 0.261931 | 0.536 | 0.444 | 0.000302 | Oligo | ATP5EP2   |
| IL1RN.8   | 2.03E-08 | -0.34791 | 0.005 | 0.078 | 0.000303 | Oligo | IL1RN     |
| NELFCD.7  | 2.04E-08 | -0.11742 | 0.193 | 0.342 | 0.000304 | Oligo | NELFCD    |
| MGARP.5   | 2.05E-08 | -0.13575 | 0.007 | 0.083 | 0.000306 | Oligo | MGARP     |

|            |          |          |       |       |          |       |              |
|------------|----------|----------|-------|-------|----------|-------|--------------|
| LM03.6     | 2.05E-08 | -0.30838 | 0.009 | 0.085 | 0.000307 | Oligo | LM03         |
| PCDHB16.7  | 2.09E-08 | -0.20309 | 0.045 | 0.143 | 0.000312 | Oligo | PCDHB16      |
| PIAS1.4    | 2.10E-08 | -0.25425 | 0.059 | 0.162 | 0.000313 | Oligo | PIAS1        |
| SLC38A6.5  | 2.10E-08 | -0.24866 | 0.019 | 0.103 | 0.000314 | Oligo | SLC38A6      |
| P2RY11.7   | 2.12E-08 | -0.2659  | 0.012 | 0.09  | 0.000317 | Oligo | P2RY11       |
| HSF1.2     | 2.13E-08 | -0.17098 | 0.146 | 0.283 | 0.000319 | Oligo | HSF1         |
| CXXC5.9    | 2.16E-08 | 0.290834 | 0.48  | 0.376 | 0.000322 | Oligo | CXXC5        |
| UMPS.5     | 2.17E-08 | -0.194   | 0.04  | 0.136 | 0.000325 | Oligo | UMPS         |
| MILR1.9    | 2.17E-08 | -0.36947 | 0.019 | 0.102 | 0.000325 | Oligo | MILR1        |
| CCND3.6    | 2.18E-08 | -0.36168 | 0.139 | 0.264 | 0.000326 | Oligo | CCND3        |
| MESDC2.4   | 2.20E-08 | -0.30273 | 0.261 | 0.409 | 0.000329 | Oligo | MESDC2       |
| M6PR.9     | 2.21E-08 | -0.28841 | 0.238 | 0.388 | 0.00033  | Oligo | M6PR         |
| AAED1.7    | 2.23E-08 | -0.28006 | 0.078 | 0.185 | 0.000334 | Oligo | AAED1        |
| CD48.9     | 2.24E-08 | -0.37117 | 0.007 | 0.081 | 0.000334 | Oligo | CD48         |
| QARS.7     | 2.27E-08 | -0.27866 | 0.153 | 0.287 | 0.000339 | Oligo | QARS         |
| TCTN3.2    | 2.34E-08 | -0.16298 | 0.047 | 0.147 | 0.00035  | Oligo | TCTN3        |
| ORC6.7     | 2.34E-08 | -0.20743 | 0.014 | 0.094 | 0.00035  | Oligo | ORC6         |
| LM01.8     | 2.35E-08 | -0.25934 | 0.005 | 0.077 | 0.000351 | Oligo | LM01         |
| SLC35D2.4  | 2.36E-08 | 0.285145 | 0.172 | 0.098 | 0.000353 | Oligo | SLC35D2      |
| BTF3L4.2   | 2.37E-08 | -0.15866 | 0.348 | 0.518 | 0.000353 | Oligo | BTF3L4       |
| CCNB1IP1.2 | 2.37E-08 | -0.22299 | 0.064 | 0.169 | 0.000354 | Oligo | CCNB1IP1     |
| IL6R.9     | 2.40E-08 | -0.32465 | 0.012 | 0.089 | 0.000358 | Oligo | IL6R         |
| SYNE3      | 2.41E-08 | 0.138742 | 0.031 | 0.007 | 0.00036  | Oligo | SYNE3        |
| AP1M1.3    | 2.43E-08 | -0.15944 | 0.104 | 0.227 | 0.000362 | Oligo | AP1M1        |
| CCNL2.7    | 2.43E-08 | -0.18546 | 0.158 | 0.295 | 0.000364 | Oligo | CCNL2        |
| UROD.5     | 2.44E-08 | -0.17697 | 0.216 | 0.365 | 0.000364 | Oligo | UROD         |
| IMMP1L.7   | 2.45E-08 | -0.12005 | 0.108 | 0.236 | 0.000367 | Oligo | IMMP1L       |
| MAPKAPK5.2 | 2.46E-08 | -0.17804 | 0.075 | 0.187 | 0.000367 | Oligo | MAPKAPK5     |
| RTCA.3     | 2.49E-08 | -0.17415 | 0.144 | 0.274 | 0.000372 | Oligo | RTCA         |
| KSR1.1     | 2.53E-08 | 0.321289 | 0.094 | 0.04  | 0.000378 | Oligo | KSR1         |
| OSBPL3.1   | 2.54E-08 | -0.20301 | 0.002 | 0.073 | 0.000379 | Oligo | OSBPL3       |
| RP11-126K  | 2.56E-08 | -0.19192 | 0.014 | 0.094 | 0.000383 | Oligo | RP11-126K1.6 |
| USE1.8     | 2.59E-08 | -0.13118 | 0.188 | 0.335 | 0.000386 | Oligo | USE1         |
| OXCT1.5    | 2.59E-08 | -0.21744 | 0.052 | 0.152 | 0.000387 | Oligo | OXCT1        |
| FAM53C.5   | 2.59E-08 | -0.16372 | 0.122 | 0.246 | 0.000387 | Oligo | FAM53C       |
| KANK2.5    | 2.61E-08 | -0.18499 | 0.014 | 0.094 | 0.00039  | Oligo | KANK2        |
| UBE2D1.5   | 2.63E-08 | -0.22237 | 0.141 | 0.271 | 0.000393 | Oligo | UBE2D1       |
| CNNM2      | 2.66E-08 | 0.129084 | 0.056 | 0.018 | 0.000398 | Oligo | CNNM2        |
| CDC42BPB.2 | 2.67E-08 | 0.371311 | 0.193 | 0.116 | 0.000399 | Oligo | CDC42BPB     |
| NR3C2      | 2.67E-08 | 0.150407 | 0.033 | 0.008 | 0.0004   | Oligo | NR3C2        |
| GINS2.5    | 2.69E-08 | -0.15532 | 0.019 | 0.102 | 0.000402 | Oligo | GINS2        |
| PIM1.4     | 2.70E-08 | -0.27671 | 0.04  | 0.133 | 0.000404 | Oligo | PIM1         |
| GDF15.8    | 2.72E-08 | -0.32701 | 0.002 | 0.072 | 0.000407 | Oligo | GDF15        |
| PPP2CA.4   | 2.73E-08 | -0.24466 | 0.32  | 0.485 | 0.000408 | Oligo | PPP2CA       |
| PPP2CB.9   | 2.75E-08 | 0.360912 | 0.379 | 0.294 | 0.00041  | Oligo | PPP2CB       |
| OXLD1.5    | 2.75E-08 | -0.13424 | 0.127 | 0.257 | 0.00041  | Oligo | OXLD1        |
| RSF1.7     | 2.75E-08 | -0.23944 | 0.271 | 0.423 | 0.00041  | Oligo | RSF1         |
| POLR2C.7   | 2.77E-08 | -0.1273  | 0.205 | 0.355 | 0.000413 | Oligo | POLR2C       |
| SYBU.7     | 2.77E-08 | -0.18526 | 0.012 | 0.09  | 0.000415 | Oligo | SYBU         |
| PRRC2C.6   | 2.79E-08 | -0.20093 | 0.327 | 0.488 | 0.000418 | Oligo | PRRC2C       |
| GRPEL1.3   | 2.80E-08 | -0.15203 | 0.144 | 0.275 | 0.000418 | Oligo | GRPEL1       |



|            |          |          |       |       |          |       |          |
|------------|----------|----------|-------|-------|----------|-------|----------|
| KAT2A.4    | 2.80E-08 | -0.17673 | 0.059 | 0.164 | 0.000418 | Oligo | KAT2A    |
| GPR84.9    | 2.81E-08 | -0.32992 | 0.005 | 0.076 | 0.00042  | Oligo | GPR84    |
| CENPM.8    | 2.83E-08 | -0.22835 | 0.005 | 0.076 | 0.000422 | Oligo | CENPM    |
| ZBTB7B.4   | 2.84E-08 | 0.141951 | 0.094 | 0.04  | 0.000424 | Oligo | ZBTB7B   |
| PTPRN.7    | 2.84E-08 | -0.25766 | 0.005 | 0.076 | 0.000424 | Oligo | PTPRN    |
| ADAMTS6.5  | 2.84E-08 | -0.14931 | 0     | 0.068 | 0.000424 | Oligo | ADAMTS6  |
| DOK3.9     | 2.84E-08 | -0.25055 | 0     | 0.068 | 0.000424 | Oligo | DOK3     |
| SFXN5.7    | 2.84E-08 | -0.27859 | 0.08  | 0.192 | 0.000424 | Oligo | SFXN5    |
| PAX6.6     | 2.85E-08 | -0.15543 | 0.007 | 0.081 | 0.000426 | Oligo | PAX6     |
| CELF5.9    | 2.86E-08 | -0.18323 | 0.014 | 0.094 | 0.000427 | Oligo | CELF5    |
| C19orf52.2 | 2.87E-08 | -0.16838 | 0.068 | 0.178 | 0.000429 | Oligo | C19orf52 |
| CYB5A.5    | 2.87E-08 | 0.491028 | 0.416 | 0.339 | 0.000429 | Oligo | CYB5A    |
| EAF2.9     | 2.88E-08 | -0.33662 | 0.016 | 0.096 | 0.00043  | Oligo | EAF2     |
| PLA2G6     | 2.91E-08 | 0.206631 | 0.082 | 0.033 | 0.000434 | Oligo | PLA2G6   |
| VAV1.9     | 2.92E-08 | -0.29569 | 0.005 | 0.076 | 0.000436 | Oligo | VAV1     |
| BCL7C.5    | 2.92E-08 | -0.2051  | 0.129 | 0.259 | 0.000436 | Oligo | BCL7C    |
| ARL3.5     | 2.98E-08 | -0.2014  | 0.209 | 0.351 | 0.000445 | Oligo | ARL3     |
| FAM49B.8   | 2.98E-08 | -0.24493 | 0.376 | 0.511 | 0.000445 | Oligo | FAM49B   |
| SNHG15.4   | 2.99E-08 | -0.10907 | 0.104 | 0.226 | 0.000446 | Oligo | SNHG15   |
| PRSS23.7   | 3.00E-08 | -0.29675 | 0.007 | 0.08  | 0.000448 | Oligo | PRSS23   |
| RB1CC1.7   | 3.00E-08 | -0.22565 | 0.148 | 0.281 | 0.000448 | Oligo | RB1CC1   |
| PLRG1.5    | 3.00E-08 | -0.20283 | 0.118 | 0.242 | 0.000448 | Oligo | PLRG1    |
| PTPN1.7    | 3.01E-08 | -0.12047 | 0.111 | 0.236 | 0.00045  | Oligo | PTPN1    |
| VAV3.2     | 3.03E-08 | -0.16703 | 0     | 0.068 | 0.000453 | Oligo | VAV3     |
| TRIB3.6    | 3.03E-08 | -0.20244 | 0.005 | 0.077 | 0.000453 | Oligo | TRIB3    |
| KDSR.1     | 3.05E-08 | 0.363617 | 0.334 | 0.251 | 0.000456 | Oligo | KDSR     |
| RBP1.7     | 3.06E-08 | -0.22051 | 0.344 | 0.464 | 0.000457 | Oligo | RBP1     |
| TNFAIP8.8  | 3.10E-08 | -0.316   | 0.002 | 0.072 | 0.000463 | Oligo | TNFAIP8  |
| MECP2.1    | 3.11E-08 | 0.375545 | 0.287 | 0.199 | 0.000465 | Oligo | MECP2    |
| C9orf72.7  | 3.11E-08 | -0.33223 | 0.056 | 0.154 | 0.000465 | Oligo | C9orf72  |
| GLIS3.3    | 3.13E-08 | -0.16363 | 0.007 | 0.08  | 0.000467 | Oligo | GLIS3    |
| E2F3.3     | 3.18E-08 | -0.19202 | 0.012 | 0.089 | 0.000476 | Oligo | E2F3     |
| PCK2.7     | 3.19E-08 | -0.22582 | 0.002 | 0.072 | 0.000476 | Oligo | PCK2     |
| MKNK2.3    | 3.19E-08 | -0.23246 | 0.078 | 0.188 | 0.000476 | Oligo | MKNK2    |
| ARMC7      | 3.19E-08 | -0.20825 | 0.014 | 0.092 | 0.000476 | Oligo | ARMC7    |
| CBR3.5     | 3.21E-08 | -0.19561 | 0.024 | 0.108 | 0.00048  | Oligo | CBR3     |
| ANKRD22.8  | 3.24E-08 | -0.31541 | 0     | 0.067 | 0.000484 | Oligo | ANKRD22  |
| KIAA1109.3 | 3.26E-08 | 0.313279 | 0.195 | 0.117 | 0.000487 | Oligo | KIAA1109 |
| IFNAR2.6   | 3.26E-08 | -0.17242 | 0.089 | 0.203 | 0.000487 | Oligo | IFNAR2   |
| GPRC5C.2   | 3.26E-08 | -0.22096 | 0.002 | 0.072 | 0.000488 | Oligo | GPRC5C   |
| RNF219.5   | 3.27E-08 | -0.18035 | 0.031 | 0.118 | 0.000488 | Oligo | RNF219   |
| SF3B4.2    | 3.29E-08 | -0.19495 | 0.186 | 0.326 | 0.000491 | Oligo | SF3B4    |
| AREG.9     | 3.31E-08 | -0.45658 | 0     | 0.067 | 0.000495 | Oligo | AREG     |
| TPRA1.2    | 3.34E-08 | -0.11587 | 0.059 | 0.166 | 0.0005   | Oligo | TPRA1    |
| REEP1.9    | 3.36E-08 | -0.2159  | 0.009 | 0.084 | 0.000502 | Oligo | REEP1    |
| SRGAP2.6   | 3.37E-08 | -0.2602  | 0.118 | 0.237 | 0.000504 | Oligo | SRGAP2   |
| PSME3.4    | 3.40E-08 | -0.16972 | 0.111 | 0.231 | 0.000508 | Oligo | PSME3    |
| MANBAL.9   | 3.42E-08 | -0.19371 | 0.198 | 0.34  | 0.000511 | Oligo | MANBAL   |
| POLR1E.3   | 3.46E-08 | -0.21633 | 0.028 | 0.115 | 0.000517 | Oligo | POLR1E   |
| SFPQ.6     | 3.49E-08 | -0.19339 | 0.4   | 0.548 | 0.000521 | Oligo | SFPQ     |
| ITCH.2     | 3.49E-08 | 0.298712 | 0.181 | 0.106 | 0.000522 | Oligo | ITCH     |

|             |           |           |        |        |           |       |               |
|-------------|-----------|-----------|--------|--------|-----------|-------|---------------|
| SIDT2. 2    | 3. 49E-08 | 0. 215421 | 0. 141 | 0. 073 | 0. 000522 | Oligo | SIDT2         |
| FGF14. 8    | 3. 50E-08 | -0. 18729 | 0. 012 | 0. 088 | 0. 000523 | Oligo | FGF14         |
| PRKCD. 8    | 3. 51E-08 | -0. 29569 | 0. 009 | 0. 083 | 0. 000524 | Oligo | PRKCD         |
| TINF2. 3    | 3. 52E-08 | -0. 22898 | 0. 127 | 0. 253 | 0. 000526 | Oligo | TINF2         |
| BCAN. 9     | 3. 53E-08 | -0. 42779 | 0. 162 | 0. 28  | 0. 000528 | Oligo | BCAN          |
| ACADM. 3    | 3. 53E-08 | -0. 16491 | 0. 188 | 0. 336 | 0. 000528 | Oligo | ACADM         |
| PIK3AP1. 9  | 3. 54E-08 | -0. 25696 | 0      | 0. 067 | 0. 000529 | Oligo | PIK3AP1       |
| LOXL1. 7    | 3. 56E-08 | -0. 13402 | 0. 007 | 0. 08  | 0. 000532 | Oligo | LOXL1         |
| MRPS23. 6   | 3. 58E-08 | -0. 13422 | 0. 224 | 0. 372 | 0. 000535 | Oligo | MRPS23        |
| RP3-399L1   | 3. 58E-08 | 0. 17842  | 0. 045 | 0. 013 | 0. 000536 | Oligo | RP3-399L15. 3 |
| ELOVL2. 9   | 3. 61E-08 | -0. 13839 | 0. 019 | 0. 101 | 0. 00054  | Oligo | ELOVL2        |
| EHD1. 6     | 3. 61E-08 | 0. 290021 | 0. 2   | 0. 119 | 0. 00054  | Oligo | EHD1          |
| FAM64A. 9   | 3. 62E-08 | -0. 24094 | 0. 002 | 0. 072 | 0. 000542 | Oligo | FAM64A        |
| DHRS11. 7   | 3. 63E-08 | -0. 12975 | 0. 021 | 0. 106 | 0. 000542 | Oligo | DHRS11        |
| OST4. 4     | 3. 64E-08 | -0. 16764 | 0. 628 | 0. 786 | 0. 000544 | Oligo | OST4          |
| NUP85. 4    | 3. 64E-08 | -0. 19835 | 0. 035 | 0. 126 | 0. 000544 | Oligo | NUP85         |
| RMND1. 3    | 3. 66E-08 | -0. 20653 | 0. 021 | 0. 104 | 0. 000548 | Oligo | RMND1         |
| COX7A2. 4   | 3. 67E-08 | 0. 236429 | 0. 812 | 0. 81  | 0. 000548 | Oligo | COX7A2        |
| PMS2. 7     | 3. 68E-08 | -0. 15646 | 0. 038 | 0. 131 | 0. 000551 | Oligo | PMS2          |
| DBX2. 8     | 3. 70E-08 | -0. 1421  | 0      | 0. 067 | 0. 000552 | Oligo | DBX2          |
| CIB2. 6     | 3. 74E-08 | -0. 1353  | 0. 007 | 0. 08  | 0. 000559 | Oligo | CIB2          |
| SYTL3. 7    | 3. 78E-08 | -0. 32579 | 0      | 0. 067 | 0. 000565 | Oligo | SYTL3         |
| NUP93. 3    | 3. 79E-08 | -0. 16636 | 0. 075 | 0. 185 | 0. 000566 | Oligo | NUP93         |
| ITPRIPL2. 3 | 3. 82E-08 | -0. 16876 | 0. 005 | 0. 076 | 0. 00057  | Oligo | ITPRIPL2      |
| HSD17B11. 3 | 3. 84E-08 | -0. 34638 | 0. 254 | 0. 381 | 0. 000573 | Oligo | HSD17B11      |
| RP11-356C   | 3. 84E-08 | 0. 238879 | 0. 085 | 0. 035 | 0. 000573 | Oligo | RP11-356C4. 3 |
| NECAP1. 6   | 3. 85E-08 | -0. 17988 | 0. 089 | 0. 202 | 0. 000576 | Oligo | NECAP1        |
| GART. 4     | 3. 86E-08 | -0. 19022 | 0. 089 | 0. 204 | 0. 000577 | Oligo | GART          |
| HSD17B14. 3 | 3. 86E-08 | -0. 32564 | 0. 016 | 0. 095 | 0. 000578 | Oligo | HSD17B14      |
| KIF3B. 9    | 3. 87E-08 | -0. 12879 | 0. 04  | 0. 133 | 0. 000578 | Oligo | KIF3B         |
| PDLIM4. 7   | 3. 87E-08 | -0. 31359 | 0. 005 | 0. 075 | 0. 000579 | Oligo | PDLIM4        |
| RRP15. 3    | 3. 88E-08 | -0. 17847 | 0. 104 | 0. 224 | 0. 000579 | Oligo | RRP15         |
| DCP2. 5     | 3. 89E-08 | -0. 24532 | 0. 054 | 0. 154 | 0. 000581 | Oligo | DCP2          |
| NUFIP1. 5   | 3. 89E-08 | -0. 22768 | 0. 031 | 0. 118 | 0. 000581 | Oligo | NUFIP1        |
| UBN1. 6     | 3. 90E-08 | -0. 20565 | 0. 066 | 0. 17  | 0. 000582 | Oligo | UBN1          |
| CRIPT. 3    | 3. 94E-08 | 0. 515219 | 0. 4   | 0. 324 | 0. 000588 | Oligo | CRIPT         |
| ZNF451. 4   | 3. 98E-08 | 0. 425046 | 0. 242 | 0. 159 | 0. 000595 | Oligo | ZNF451        |
| SRRD. 5     | 3. 98E-08 | -0. 15822 | 0. 031 | 0. 119 | 0. 000595 | Oligo | SRRD          |
| SLC2A10. 5  | 4. 04E-08 | -0. 13453 | 0      | 0. 066 | 0. 000603 | Oligo | SLC2A10       |
| UBE2E3. 8   | 4. 06E-08 | -0. 2089  | 0. 325 | 0. 465 | 0. 000606 | Oligo | UBE2E3        |
| POMP. 3     | 4. 07E-08 | -0. 12485 | 0. 591 | 0. 74  | 0. 000607 | Oligo | POMP          |
| CXCL3. 6    | 4. 08E-08 | -0. 44159 | 0. 005 | 0. 075 | 0. 00061  | Oligo | CXCL3         |
| ITGB3BP. 7  | 4. 16E-08 | -0. 22559 | 0. 049 | 0. 147 | 0. 000621 | Oligo | ITGB3BP       |
| TPRG1L. 1   | 4. 17E-08 | 0. 320582 | 0. 115 | 0. 055 | 0. 000623 | Oligo | TPRG1L        |
| ASGR1. 7    | 4. 25E-08 | -0. 21972 | 0. 005 | 0. 075 | 0. 000636 | Oligo | ASGR1         |
| CAMK2G. 3   | 4. 28E-08 | -0. 21368 | 0. 021 | 0. 103 | 0. 00064  | Oligo | CAMK2G        |
| ZNF511. 6   | 4. 31E-08 | -0. 21889 | 0. 087 | 0. 2   | 0. 000644 | Oligo | ZNF511        |
| ZBTB80S. 4  | 4. 32E-08 | -0. 17595 | 0. 16  | 0. 299 | 0. 000645 | Oligo | ZBTB80S       |
| SRRM3. 8    | 4. 33E-08 | -0. 25457 | 0. 005 | 0. 075 | 0. 000647 | Oligo | SRRM3         |
| ARFIP1. 1   | 4. 37E-08 | -0. 22304 | 0. 064 | 0. 166 | 0. 000654 | Oligo | ARFIP1        |
| ABL2. 8     | 4. 42E-08 | -0. 2764  | 0. 151 | 0. 272 | 0. 00066  | Oligo | ABL2          |

|             |           |           |        |        |           |       |                |
|-------------|-----------|-----------|--------|--------|-----------|-------|----------------|
| CACNA1A. 8  | 4. 50E-08 | -0. 28955 | 0. 019 | 0. 098 | 0. 000673 | Oligo | CACNA1A        |
| TLR1. 9     | 4. 52E-08 | -0. 29629 | 0. 002 | 0. 07  | 0. 000675 | Oligo | TLR1           |
| TRPT1. 3    | 4. 53E-08 | -0. 25703 | 0. 111 | 0. 227 | 0. 000678 | Oligo | TRPT1          |
| NOL10. 4    | 4. 64E-08 | -0. 14211 | 0. 056 | 0. 159 | 0. 000693 | Oligo | NOL10          |
| SIAH1. 7    | 4. 65E-08 | -0. 2275  | 0. 113 | 0. 233 | 0. 000696 | Oligo | SIAH1          |
| ATE1. 2     | 4. 72E-08 | 0. 214933 | 0. 106 | 0. 048 | 0. 000705 | Oligo | ATE1           |
| UBR3. 1     | 4. 79E-08 | 0. 239738 | 0. 148 | 0. 079 | 0. 000715 | Oligo | UBR3           |
| EIF3G. 3    | 4. 79E-08 | -0. 14206 | 0. 447 | 0. 626 | 0. 000715 | Oligo | EIF3G          |
| RP11-539L   | 4. 82E-08 | -0. 23973 | 0. 019 | 0. 099 | 0. 00072  | Oligo | RP11-539L10. 3 |
| RP5-940J5   | 4. 84E-08 | -0. 42315 | 0. 066 | 0. 165 | 0. 000724 | Oligo | RP5-940J5. 9   |
| FH. 5       | 4. 85E-08 | -0. 15507 | 0. 111 | 0. 23  | 0. 000725 | Oligo | FH             |
| SKA2. 7     | 4. 89E-08 | -0. 22631 | 0. 176 | 0. 312 | 0. 000731 | Oligo | SKA2           |
| LYRM1. 8    | 4. 92E-08 | -0. 15173 | 0. 078 | 0. 187 | 0. 000736 | Oligo | LYRM1          |
| ASF1A. 7    | 4. 94E-08 | -0. 2098  | 0. 118 | 0. 239 | 0. 000739 | Oligo | ASF1A          |
| TM9SF4. 3   | 4. 98E-08 | -0. 1014  | 0. 08  | 0. 192 | 0. 000744 | Oligo | TM9SF4         |
| STX1A. 6    | 5. 00E-08 | -0. 22691 | 0. 002 | 0. 07  | 0. 000747 | Oligo | STX1A          |
| WBSCR16. 5  | 5. 03E-08 | -0. 19721 | 0. 052 | 0. 148 | 0. 000752 | Oligo | WBSCR16        |
| TIA1. 9     | 5. 08E-08 | -0. 15337 | 0. 125 | 0. 253 | 0. 000759 | Oligo | TIA1           |
| LAPTM4B. 9  | 5. 22E-08 | -0. 21013 | 0. 198 | 0. 336 | 0. 000781 | Oligo | LAPTM4B        |
| RREB1. 9    | 5. 24E-08 | -0. 2319  | 0. 005 | 0. 074 | 0. 000783 | Oligo | RREB1          |
| SHARPIN. 4  | 5. 30E-08 | -0. 20926 | 0. 169 | 0. 307 | 0. 000792 | Oligo | SHARPIN        |
| TRA2B. 6    | 5. 36E-08 | -0. 1334  | 0. 381 | 0. 546 | 0. 000801 | Oligo | TRA2B          |
| MECR. 5     | 5. 37E-08 | -0. 15396 | 0. 061 | 0. 164 | 0. 000802 | Oligo | MECR           |
| TASP1. 4    | 5. 43E-08 | -0. 18    | 0. 016 | 0. 095 | 0. 000811 | Oligo | TASP1          |
| SLC36A4. 5  | 5. 46E-08 | -0. 18141 | 0. 085 | 0. 197 | 0. 000817 | Oligo | SLC36A4        |
| NUDT19. 2   | 5. 48E-08 | -0. 1781  | 0. 021 | 0. 103 | 0. 000819 | Oligo | NUDT19         |
| BLNK. 7     | 5. 50E-08 | -0. 33882 | 0. 002 | 0. 07  | 0. 000822 | Oligo | BLNK           |
| C19orf43. 5 | 5. 62E-08 | -0. 23438 | 0. 534 | 0. 678 | 0. 00084  | Oligo | C19orf43       |
| ATG16L2. 8  | 5. 63E-08 | -0. 2192  | 0. 014 | 0. 09  | 0. 000841 | Oligo | ATG16L2        |
| LRP4. 6     | 5. 66E-08 | 0. 36499  | 0. 115 | 0. 057 | 0. 000847 | Oligo | LRP4           |
| DPAGT1. 3   | 5. 71E-08 | -0. 16322 | 0. 049 | 0. 146 | 0. 000854 | Oligo | DPAGT1         |
| ILDR2. 8    | 5. 74E-08 | -0. 12978 | 0. 009 | 0. 083 | 0. 000857 | Oligo | ILDR2          |
| GPX8. 8     | 5. 74E-08 | -0. 15175 | 0      | 0. 065 | 0. 000858 | Oligo | GPX8           |
| MED4. 2     | 5. 76E-08 | -0. 13317 | 0. 266 | 0. 422 | 0. 00086  | Oligo | MED4           |
| DPH3. 3     | 5. 78E-08 | -0. 20367 | 0. 101 | 0. 218 | 0. 000864 | Oligo | DPH3           |
| NUDT16. 9   | 5. 79E-08 | -0. 2373  | 0. 106 | 0. 224 | 0. 000866 | Oligo | NUDT16         |
| RITA1. 5    | 5. 80E-08 | -0. 19029 | 0. 042 | 0. 135 | 0. 000867 | Oligo | RITA1          |
| CCDC43. 5   | 5. 84E-08 | -0. 13663 | 0. 089 | 0. 203 | 0. 000872 | Oligo | CCDC43         |
| MTF1. 2     | 5. 85E-08 | 0. 483661 | 0. 179 | 0. 106 | 0. 000875 | Oligo | MTF1           |
| MAPK10. 8   | 5. 86E-08 | -0. 2283  | 0. 089 | 0. 199 | 0. 000876 | Oligo | MAPK10         |
| TMEM35. 8   | 5. 87E-08 | -0. 20809 | 0. 016 | 0. 094 | 0. 000877 | Oligo | TMEM35         |
| ARHGAP26. 5 | 5. 94E-08 | -0. 23825 | 0. 016 | 0. 094 | 0. 000888 | Oligo | ARHGAP26       |
| TOX. 9      | 5. 96E-08 | -0. 20339 | 0. 014 | 0. 09  | 0. 000891 | Oligo | TOX            |
| UBE2Z. 2    | 5. 99E-08 | 0. 335573 | 0. 256 | 0. 173 | 0. 000895 | Oligo | UBE2Z          |
| HS6ST2. 5   | 6. 00E-08 | -0. 11916 | 0      | 0. 065 | 0. 000896 | Oligo | HS6ST2         |
| SYCE1L. 2   | 6. 02E-08 | -0. 13851 | 0. 005 | 0. 074 | 0. 000899 | Oligo | SYCE1L         |
| BIRC5. 9    | 6. 13E-08 | -0. 34521 | 0. 026 | 0. 107 | 0. 000915 | Oligo | BIRC5          |
| NANOS3. 7   | 6. 13E-08 | -0. 14439 | 0      | 0. 065 | 0. 000916 | Oligo | NANOS3         |
| UNC45A. 2   | 6. 14E-08 | -0. 24819 | 0. 064 | 0. 164 | 0. 000918 | Oligo | UNC45A         |
| EGR3. 4     | 6. 15E-08 | -0. 33331 | 0. 026 | 0. 107 | 0. 00092  | Oligo | EGR3           |
| CDK11A. 3   | 6. 20E-08 | -0. 19112 | 0. 089 | 0. 2   | 0. 000927 | Oligo | CDK11A         |

|             |           |           |        |        |           |       |             |
|-------------|-----------|-----------|--------|--------|-----------|-------|-------------|
| PN01. 4     | 6. 21E-08 | -0. 1156  | 0. 092 | 0. 206 | 0. 000928 | Oligo | PN01        |
| BLM. 4      | 6. 21E-08 | -0. 13141 | 0. 009 | 0. 082 | 0. 000928 | Oligo | BLM         |
| TOP2A. 9    | 6. 25E-08 | -0. 33893 | 0. 014 | 0. 089 | 0. 000934 | Oligo | TOP2A       |
| MF12-AS1. 6 | 6. 26E-08 | -0. 16556 | 0. 007 | 0. 078 | 0. 000935 | Oligo | MF12-AS1    |
| PA2G4. 2    | 6. 28E-08 | -0. 18026 | 0. 381 | 0. 545 | 0. 000938 | Oligo | PA2G4       |
| TGFB2. 6    | 6. 30E-08 | -0. 19056 | 0. 002 | 0. 069 | 0. 000941 | Oligo | TGFB2       |
| SHD. 8      | 6. 30E-08 | -0. 29464 | 0. 04  | 0. 129 | 0. 000942 | Oligo | SHD         |
| ATAD5. 4    | 6. 32E-08 | -0. 18225 | 0. 007 | 0. 078 | 0. 000944 | Oligo | ATAD5       |
| TOR1B       | 6. 32E-08 | -0. 18217 | 0. 021 | 0. 102 | 0. 000944 | Oligo | TOR1B       |
| DCAKD. 7    | 6. 33E-08 | -0. 19249 | 0. 047 | 0. 142 | 0. 000946 | Oligo | DCAKD       |
| SCRN2. 2    | 6. 36E-08 | -0. 14489 | 0. 071 | 0. 176 | 0. 00095  | Oligo | SCRN2       |
| SMIM12. 3   | 6. 43E-08 | -0. 16243 | 0. 172 | 0. 307 | 0. 000962 | Oligo | SMIM12      |
| ING3. 4     | 6. 44E-08 | -0. 24286 | 0. 082 | 0. 189 | 0. 000963 | Oligo | ING3        |
| CCL4L2. 7   | 6. 46E-08 | -0. 5581  | 0. 014 | 0. 089 | 0. 000966 | Oligo | CCL4L2      |
| RENBP. 8    | 6. 52E-08 | 0. 168009 | 0. 228 | 0. 132 | 0. 000974 | Oligo | RENBP       |
| CCDC112. 8  | 6. 53E-08 | -0. 19149 | 0. 136 | 0. 265 | 0. 000975 | Oligo | CCDC112     |
| MED19. 5    | 6. 53E-08 | -0. 21634 | 0. 158 | 0. 286 | 0. 000975 | Oligo | MED19       |
| BTN2A2. 1   | 6. 54E-08 | -0. 19143 | 0. 005 | 0. 074 | 0. 000977 | Oligo | BTN2A2      |
| CDK5RAP3. 6 | 6. 59E-08 | -0. 20753 | 0. 259 | 0. 412 | 0. 000984 | Oligo | CDK5RAP3    |
| UBASH3B. 5  | 6. 67E-08 | -0. 17017 | 0. 007 | 0. 078 | 0. 000996 | Oligo | UBASH3B     |
| SAAL1. 4    | 6. 71E-08 | -0. 16488 | 0. 04  | 0. 131 | 0. 001003 | Oligo | SAAL1       |
| SWAP70. 9   | 6. 78E-08 | -0. 22081 | 0. 108 | 0. 226 | 0. 001013 | Oligo | SWAP70      |
| PPM1M. 9    | 6. 84E-08 | -0. 225   | 0. 007 | 0. 077 | 0. 001023 | Oligo | PPM1M       |
| LINC00662   | 6. 95E-08 | -0. 16159 | 0. 08  | 0. 187 | 0. 001038 | Oligo | LINC00662   |
| THOC6. 5    | 6. 95E-08 | -0. 23247 | 0. 071 | 0. 173 | 0. 001039 | Oligo | THOC6       |
| ARID3A. 3   | 6. 99E-08 | -0. 15472 | 0. 031 | 0. 118 | 0. 001045 | Oligo | ARID3A      |
| LACTB. 9    | 7. 01E-08 | -0. 26225 | 0. 068 | 0. 17  | 0. 001048 | Oligo | LACTB       |
| IK. 2       | 7. 05E-08 | -0. 12559 | 0. 24  | 0. 394 | 0. 001053 | Oligo | IK          |
| SIAH2. 5    | 7. 06E-08 | -0. 22775 | 0. 101 | 0. 214 | 0. 001055 | Oligo | SIAH2       |
| LAMA4. 7    | 7. 06E-08 | -0. 17136 | 0. 005 | 0. 073 | 0. 001056 | Oligo | LAMA4       |
| MTRNR2L10   | 7. 12E-08 | 0. 461596 | 0. 139 | 0. 072 | 0. 001064 | Oligo | MTRNR2L10   |
| CREB3L1. 5  | 7. 15E-08 | -0. 12465 | 0      | 0. 064 | 0. 001068 | Oligo | CREB3L1     |
| EHBP1L1. 8  | 7. 19E-08 | -0. 1954  | 0. 005 | 0. 073 | 0. 001074 | Oligo | EHBP1L1     |
| MAF1. 5     | 7. 19E-08 | -0. 20869 | 0. 282 | 0. 434 | 0. 001075 | Oligo | MAF1        |
| COQ7. 6     | 7. 27E-08 | -0. 15097 | 0. 082 | 0. 191 | 0. 001086 | Oligo | COQ7        |
| TIAM2. 8    | 7. 28E-08 | -0. 20032 | 0. 009 | 0. 082 | 0. 001088 | Oligo | TIAM2       |
| STK32B. 3   | 7. 31E-08 | -0. 15204 | 0      | 0. 064 | 0. 001092 | Oligo | STK32B      |
| REEP4. 9    | 7. 32E-08 | -0. 2706  | 0. 071 | 0. 171 | 0. 001094 | Oligo | REEP4       |
| PTDSS1. 5   | 7. 37E-08 | -0. 20108 | 0. 094 | 0. 206 | 0. 001101 | Oligo | PTDSS1      |
| ABHD17C. 5  | 7. 37E-08 | -0. 12266 | 0. 012 | 0. 086 | 0. 001102 | Oligo | ABHD17C     |
| TNFSF10. 6  | 7. 39E-08 | -0. 34113 | 0. 007 | 0. 077 | 0. 001104 | Oligo | TNFSF10     |
| TMEM138. 3  | 7. 43E-08 | -0. 12136 | 0. 071 | 0. 176 | 0. 001111 | Oligo | TMEM138     |
| ARHGAP25. 7 | 7. 44E-08 | -0. 25614 | 0. 002 | 0. 068 | 0. 001112 | Oligo | ARHGAP25    |
| AC010642. 1 | 7. 51E-08 | -0. 19686 | 0. 108 | 0. 227 | 0. 001122 | Oligo | AC010642. 1 |
| ABCA3. 6    | 7. 61E-08 | 0. 285627 | 0. 139 | 0. 074 | 0. 001138 | Oligo | ABCA3       |
| MCCC1. 3    | 7. 63E-08 | -0. 19102 | 0. 054 | 0. 15  | 0. 00114  | Oligo | MCCC1       |
| IGFBP4. 4   | 7. 64E-08 | -0. 21108 | 0. 002 | 0. 068 | 0. 001142 | Oligo | IGFBP4      |
| ATXN10. 5   | 7. 67E-08 | -0. 22704 | 0. 273 | 0. 427 | 0. 001145 | Oligo | ATXN10      |
| SUPT16H. 7  | 7. 68E-08 | -0. 20771 | 0. 132 | 0. 253 | 0. 001147 | Oligo | SUPT16H     |
| EDF1. 1     | 7. 70E-08 | 0. 267878 | 0. 774 | 0. 786 | 0. 001151 | Oligo | EDF1        |
| SGCE. 6     | 7. 70E-08 | 0. 270402 | 0. 238 | 0. 143 | 0. 001151 | Oligo | SGCE        |

|            |           |           |        |        |           |       |              |
|------------|-----------|-----------|--------|--------|-----------|-------|--------------|
| CLPB. 2    | 7. 72E-08 | -0. 21657 | 0. 019 | 0. 097 | 0. 001154 | Oligo | CLPB         |
| SCNM1. 3   | 7. 78E-08 | -0. 18703 | 0. 202 | 0. 344 | 0. 001163 | Oligo | SCNM1        |
| IGF1. 7    | 7. 80E-08 | -0. 30642 | 0      | 0. 064 | 0. 001166 | Oligo | IGF1         |
| ESF1. 6    | 7. 81E-08 | -0. 14278 | 0. 202 | 0. 351 | 0. 001167 | Oligo | ESF1         |
| TEF        | 7. 84E-08 | 0. 23388  | 0. 073 | 0. 029 | 0. 001171 | Oligo | TEF          |
| NUDCD2. 6  | 7. 84E-08 | 0. 394929 | 0. 473 | 0. 398 | 0. 001171 | Oligo | NUDCD2       |
| SMIM4. 4   | 7. 85E-08 | -0. 24288 | 0. 146 | 0. 272 | 0. 001173 | Oligo | SMIM4        |
| GNS. 7     | 7. 86E-08 | -0. 25936 | 0. 094 | 0. 203 | 0. 001174 | Oligo | GNS          |
| CRLF3. 6   | 7. 86E-08 | -0. 19564 | 0. 031 | 0. 116 | 0. 001174 | Oligo | CRLF3        |
| GNAQ. 5    | 7. 91E-08 | 0. 351732 | 0. 36  | 0. 284 | 0. 001183 | Oligo | GNAQ         |
| SMC5. 1    | 7. 94E-08 | -0. 17946 | 0. 078 | 0. 184 | 0. 001186 | Oligo | SMC5         |
| B4GALT5. 6 | 7. 96E-08 | -0. 15124 | 0. 087 | 0. 201 | 0. 001189 | Oligo | B4GALT5      |
| KDM5B. 8   | 7. 98E-08 | -0. 21557 | 0. 066 | 0. 166 | 0. 001193 | Oligo | KDM5B        |
| RECQL. 5   | 7. 98E-08 | -0. 21661 | 0. 073 | 0. 176 | 0. 001193 | Oligo | RECQL        |
| COPB1. 1   | 7. 98E-08 | -0. 25368 | 0. 16  | 0. 29  | 0. 001193 | Oligo | COPB1        |
| PRKCA. 5   | 8. 03E-08 | -0. 16377 | 0. 092 | 0. 203 | 0. 0012   | Oligo | PRKCA        |
| RBM38. 6   | 8. 04E-08 | -0. 10903 | 0. 045 | 0. 139 | 0. 001201 | Oligo | RBM38        |
| IGFBP6. 6  | 8. 04E-08 | -0. 25795 | 0. 002 | 0. 068 | 0. 001202 | Oligo | IGFBP6       |
| RP11-624M  | 8. 07E-08 | 0. 101526 | 0. 019 | 0. 003 | 0. 001206 | Oligo | RP11-624M. 1 |
| CLIP3. 8   | 8. 22E-08 | 0. 366717 | 0. 28  | 0. 194 | 0. 001229 | Oligo | CLIP3        |
| DRAP1      | 8. 27E-08 | -0. 16587 | 0. 515 | 0. 681 | 0. 001235 | Oligo | DRAP1        |
| PFDN2. 5   | 8. 28E-08 | 0. 388319 | 0. 635 | 0. 609 | 0. 001237 | Oligo | PFDN2        |
| FAM181A. 7 | 8. 35E-08 | -0. 23531 | 0. 002 | 0. 068 | 0. 001247 | Oligo | FAM181A      |
| RAB3D. 1   | 8. 40E-08 | -0. 17651 | 0. 007 | 0. 077 | 0. 001255 | Oligo | RAB3D        |
| ZMIZ2. 6   | 8. 40E-08 | 0. 276315 | 0. 169 | 0. 096 | 0. 001255 | Oligo | ZMIZ2        |
| FGF7. 1    | 8. 48E-08 | 0. 382113 | 0. 066 | 0. 024 | 0. 001267 | Oligo | FGF7         |
| TOPORS-AS  | 8. 48E-08 | 0. 431653 | 0. 224 | 0. 144 | 0. 001268 | Oligo | TOPORS-AS1   |
| REST. 4    | 8. 62E-08 | -0. 18287 | 0. 089 | 0. 202 | 0. 001288 | Oligo | REST         |
| TCEAL2. 7  | 8. 62E-08 | -0. 27335 | 0. 08  | 0. 183 | 0. 001288 | Oligo | TCEAL2       |
| ACSF2. 5   | 8. 70E-08 | -0. 19906 | 0. 002 | 0. 068 | 0. 001301 | Oligo | ACSF2        |
| GIMAP2. 8  | 8. 74E-08 | -0. 32573 | 0. 009 | 0. 079 | 0. 001306 | Oligo | GIMAP2       |
| EFNB3. 7   | 8. 77E-08 | -0. 15983 | 0. 007 | 0. 076 | 0. 001311 | Oligo | EFNB3        |
| LSM12. 4   | 8. 86E-08 | -0. 19308 | 0. 136 | 0. 264 | 0. 001323 | Oligo | LSM12        |
| NECAP2. 5  | 8. 86E-08 | -0. 17688 | 0. 162 | 0. 297 | 0. 001323 | Oligo | NECAP2       |
| NDUFB6. 3  | 8. 93E-08 | 0. 381533 | 0. 541 | 0. 495 | 0. 001335 | Oligo | NDUFB6       |
| NDUFB5. 2  | 8. 95E-08 | -0. 2028  | 0. 402 | 0. 567 | 0. 001337 | Oligo | NDUFB5       |
| PIGX. 7    | 8. 96E-08 | -0. 1024  | 0. 127 | 0. 258 | 0. 00134  | Oligo | PIGX         |
| TET1. 8    | 9. 08E-08 | -0. 13179 | 0. 012 | 0. 085 | 0. 001357 | Oligo | TET1         |
| SLC30A9. 8 | 9. 09E-08 | -0. 21665 | 0. 134 | 0. 256 | 0. 001359 | Oligo | SLC30A9      |
| CCL20. 8   | 9. 10E-08 | -0. 327   | 0      | 0. 063 | 0. 001359 | Oligo | CCL20        |
| CHERP. 5   | 9. 10E-08 | -0. 19119 | 0. 068 | 0. 172 | 0. 00136  | Oligo | CHERP        |
| CDK2AP2. 6 | 9. 13E-08 | 0. 332723 | 0. 412 | 0. 326 | 0. 001365 | Oligo | CDK2AP2      |
| UIMC1. 3   | 9. 19E-08 | -0. 188   | 0. 028 | 0. 112 | 0. 001373 | Oligo | UIMC1        |
| HOXB2. 6   | 9. 22E-08 | -0. 26885 | 0. 014 | 0. 087 | 0. 001378 | Oligo | HOXB2        |
| PTBP3. 5   | 9. 26E-08 | -0. 24172 | 0. 031 | 0. 114 | 0. 001384 | Oligo | PTBP3        |
| C15orf48.  | 9. 27E-08 | -0. 3397  | 0. 005 | 0. 072 | 0. 001386 | Oligo | C15orf48     |
| IL4I1. 7   | 9. 31E-08 | -0. 27971 | 0. 002 | 0. 067 | 0. 001391 | Oligo | IL4I1        |
| GEMIN6. 3  | 9. 37E-08 | -0. 14955 | 0. 064 | 0. 166 | 0. 001401 | Oligo | GEMIN6       |
| THUMPD3. 4 | 9. 39E-08 | -0. 14483 | 0. 085 | 0. 198 | 0. 001403 | Oligo | THUMPD3      |
| RHOH. 8    | 9. 40E-08 | -0. 35057 | 0. 009 | 0. 079 | 0. 001405 | Oligo | RHOH         |
| MYO1G. 9   | 9. 50E-08 | -0. 25127 | 0      | 0. 063 | 0. 00142  | Oligo | MYO1G        |

|            |           |           |        |        |           |       |                |
|------------|-----------|-----------|--------|--------|-----------|-------|----------------|
| BBC3. 3    | 9. 51E-08 | -0. 22106 | 0. 012 | 0. 084 | 0. 001421 | Oligo | BBC3           |
| RPP30. 4   | 9. 57E-08 | -0. 12373 | 0. 071 | 0. 172 | 0. 00143  | Oligo | RPP30          |
| ALDH16A1.  | 9. 61E-08 | -0. 18758 | 0. 035 | 0. 123 | 0. 001436 | Oligo | ALDH16A1       |
| ABI2. 7    | 9. 66E-08 | -0. 19651 | 0. 226 | 0. 367 | 0. 001444 | Oligo | ABI2           |
| RFC4. 6    | 9. 80E-08 | -0. 14082 | 0. 061 | 0. 16  | 0. 001465 | Oligo | RFC4           |
| MAPK12. 4  | 9. 87E-08 | -0. 12346 | 0. 005 | 0. 072 | 0. 001475 | Oligo | MAPK12         |
| PPP1R14C.  | 9. 93E-08 | -0. 13811 | 0      | 0. 063 | 0. 001484 | Oligo | PPP1R14C       |
| IARS. 5    | 9. 99E-08 | -0. 18775 | 0. 101 | 0. 214 | 0. 001493 | Oligo | IARS           |
| SPOP. 6    | 1. 01E-07 | -0. 14218 | 0. 174 | 0. 314 | 0. 001504 | Oligo | SPOP           |
| BGN. 8     | 1. 01E-07 | -0. 34292 | 0. 002 | 0. 067 | 0. 001514 | Oligo | BGN            |
| CFI. 5     | 1. 01E-07 | -0. 20634 | 0      | 0. 063 | 0. 001517 | Oligo | CFI            |
| SOX2. 9    | 1. 02E-07 | -0. 28804 | 0. 346 | 0. 432 | 0. 001517 | Oligo | SOX2           |
| IKZF1. 8   | 1. 02E-07 | -0. 2859  | 0. 002 | 0. 067 | 0. 001518 | Oligo | IKZF1          |
| EXT2. 5    | 1. 02E-07 | -0. 18988 | 0. 073 | 0. 175 | 0. 001525 | Oligo | EXT2           |
| PCGF5. 5   | 1. 03E-07 | 0. 297667 | 0. 264 | 0. 176 | 0. 001546 | Oligo | PCGF5          |
| MTIF2. 1   | 1. 04E-07 | -0. 21517 | 0. 049 | 0. 143 | 0. 001548 | Oligo | MTIF2          |
| CTTNBP2. 7 | 1. 04E-07 | 0. 221566 | 0. 221 | 0. 133 | 0. 001549 | Oligo | CTTNBP2        |
| RALB. 6    | 1. 04E-07 | -0. 26595 | 0. 064 | 0. 161 | 0. 001561 | Oligo | RALB           |
| C19orf81.  | 1. 06E-07 | 0. 194505 | 0. 108 | 0. 05  | 0. 001582 | Oligo | C19orf81       |
| FLII. 7    | 1. 06E-07 | -0. 17651 | 0. 085 | 0. 191 | 0. 001588 | Oligo | FLII           |
| NFU1. 2    | 1. 06E-07 | -0. 18028 | 0. 174 | 0. 305 | 0. 001591 | Oligo | NFU1           |
| PTRHD1. 4  | 1. 07E-07 | -0. 13559 | 0. 186 | 0. 324 | 0. 001599 | Oligo | PTRHD1         |
| CAHM. 7    | 1. 08E-07 | 0. 306557 | 0. 158 | 0. 089 | 0. 001608 | Oligo | CAHM           |
| YME1L1. 7  | 1. 08E-07 | -0. 21305 | 0. 139 | 0. 265 | 0. 001617 | Oligo | YME1L1         |
| SLC12A5. 7 | 1. 10E-07 | -0. 26636 | 0. 019 | 0. 095 | 0. 001637 | Oligo | SLC12A5        |
| CLIP2. 8   | 1. 10E-07 | 0. 382702 | 0. 256 | 0. 173 | 0. 001649 | Oligo | CLIP2          |
| ACAA2. 7   | 1. 11E-07 | -0. 32761 | 0. 108 | 0. 214 | 0. 001664 | Oligo | ACAA2          |
| C1orf109.  | 1. 12E-07 | -0. 16689 | 0. 045 | 0. 135 | 0. 001673 | Oligo | C1orf109       |
| IDNK. 2    | 1. 13E-07 | -0. 28547 | 0. 021 | 0. 098 | 0. 001687 | Oligo | IDNK           |
| CTD-3138E  | 1. 13E-07 | -0. 17891 | 0. 012 | 0. 084 | 0. 001689 | Oligo | CTD-3138B18. 5 |
| PCDH19. 6  | 1. 13E-07 | -0. 13427 | 0      | 0. 062 | 0. 001692 | Oligo | PCDH19         |
| LZTS1. 8   | 1. 13E-07 | -0. 14416 | 0      | 0. 062 | 0. 001692 | Oligo | LZTS1          |
| ASF1B. 6   | 1. 13E-07 | -0. 19408 | 0      | 0. 062 | 0. 001692 | Oligo | ASF1B          |
| GIMAP1. 8  | 1. 13E-07 | -0. 26971 | 0. 007 | 0. 076 | 0. 001693 | Oligo | GIMAP1         |
| CEP89. 6   | 1. 14E-07 | -0. 16467 | 0. 042 | 0. 134 | 0. 001697 | Oligo | CEP89          |
| YIF1A. 6   | 1. 14E-07 | -0. 16369 | 0. 282 | 0. 43  | 0. 001697 | Oligo | YIF1A          |
| OLFML2B. 8 | 1. 14E-07 | -0. 32445 | 0. 005 | 0. 07  | 0. 001703 | Oligo | OLFML2B        |
| CCDC25. 6  | 1. 15E-07 | -0. 18108 | 0. 169 | 0. 302 | 0. 001716 | Oligo | CCDC25         |
| KDEL3. 2   | 1. 16E-07 | -0. 14991 | 0      | 0. 062 | 0. 001729 | Oligo | KDEL3          |
| GAPT. 9    | 1. 16E-07 | -0. 28388 | 0      | 0. 062 | 0. 001729 | Oligo | GAPT           |
| STAU1. 6   | 1. 16E-07 | -0. 18209 | 0. 231 | 0. 371 | 0. 001737 | Oligo | STAU1          |
| TMEM100. 9 | 1. 16E-07 | -0. 28764 | 0. 016 | 0. 091 | 0. 001737 | Oligo | TMEM100        |
| IL16. 8    | 1. 17E-07 | -0. 30302 | 0. 005 | 0. 071 | 0. 001749 | Oligo | IL16           |
| AAMP. 4    | 1. 18E-07 | -0. 12365 | 0. 275 | 0. 433 | 0. 001771 | Oligo | AAMP           |
| DNASE1L1.  | 1. 19E-07 | -0. 25607 | 0. 007 | 0. 075 | 0. 001782 | Oligo | DNASE1L1       |
| GAS2L3. 5  | 1. 22E-07 | -0. 16372 | 0. 005 | 0. 071 | 0. 001819 | Oligo | GAS2L3         |
| PAXIP1-AS  | 1. 23E-07 | -0. 20599 | 0. 064 | 0. 162 | 0. 001834 | Oligo | PAXIP1-AS1     |
| RNF138. 2  | 1. 23E-07 | -0. 2184  | 0. 08  | 0. 184 | 0. 001845 | Oligo | RNF138         |
| PPP1R11. 3 | 1. 24E-07 | -0. 17467 | 0. 219 | 0. 365 | 0. 00186  | Oligo | PPP1R11        |
| TMEM91. 6  | 1. 25E-07 | -0. 23638 | 0. 007 | 0. 075 | 0. 001864 | Oligo | TMEM91         |
| GLDC. 5    | 1. 25E-07 | -0. 15545 | 0. 005 | 0. 071 | 0. 00187  | Oligo | GLDC           |

|             |          |          |       |       |          |       |               |
|-------------|----------|----------|-------|-------|----------|-------|---------------|
| KATNBL1.5   | 1.25E-07 | -0.1742  | 0.132 | 0.256 | 0.001874 | Oligo | KATNBL1       |
| TARS.4      | 1.25E-07 | -0.2242  | 0.115 | 0.231 | 0.001874 | Oligo | TARS          |
| NIP7.7      | 1.25E-07 | -0.22541 | 0.073 | 0.176 | 0.001875 | Oligo | NIP7          |
| KHDRBS3.8   | 1.26E-07 | -0.20875 | 0.106 | 0.219 | 0.001879 | Oligo | KHDRBS3       |
| FASTKD2.3   | 1.26E-07 | -0.11165 | 0.026 | 0.107 | 0.001884 | Oligo | FASTKD2       |
| ARHGAP20.1  | 1.26E-07 | -0.13758 | 0     | 0.062 | 0.001888 | Oligo | ARHGAP20      |
| VPS35.3     | 1.27E-07 | -0.20132 | 0.287 | 0.436 | 0.001899 | Oligo | VPS35         |
| PTPRG.6     | 1.28E-07 | -0.1688  | 0.007 | 0.075 | 0.001909 | Oligo | PTPRG         |
| AC008060.1  | 1.28E-07 | 0.158124 | 0.059 | 0.021 | 0.00191  | Oligo | AC008060.7    |
| FBX04.2     | 1.28E-07 | -0.18333 | 0.031 | 0.114 | 0.001919 | Oligo | FBX04         |
| ZNF85.2     | 1.29E-07 | -0.17499 | 0.014 | 0.087 | 0.001928 | Oligo | ZNF85         |
| RP3-460G2.1 | 1.29E-07 | -0.36663 | 0     | 0.062 | 0.001929 | Oligo | RP3-460G2.2   |
| GCHFR.8     | 1.31E-07 | -0.26157 | 0.009 | 0.079 | 0.001957 | Oligo | GCHFR         |
| APO01055.1  | 1.31E-07 | -0.30963 | 0.012 | 0.083 | 0.001965 | Oligo | APO01055.6    |
| WDTC1.2     | 1.32E-07 | 0.298829 | 0.167 | 0.096 | 0.001978 | Oligo | WDTC1         |
| RP11-805I1  | 1.33E-07 | 0.103448 | 0.019 | 0.003 | 0.001995 | Oligo | RP11-805I24.1 |
| LCOR.3      | 1.34E-07 | 0.235978 | 0.146 | 0.078 | 0.002005 | Oligo | LCOR          |
| HSPB2.1     | 1.36E-07 | 0.14347  | 0.049 | 0.016 | 0.002025 | Oligo | HSPB2         |
| ASB16-AS1.1 | 1.36E-07 | -0.1673  | 0.019 | 0.095 | 0.002027 | Oligo | ASB16-AS1     |
| FUNDC1.7    | 1.36E-07 | -0.1933  | 0.132 | 0.25  | 0.002031 | Oligo | FUNDC1        |
| RAB9A.5     | 1.37E-07 | 0.411406 | 0.379 | 0.301 | 0.00205  | Oligo | RAB9A         |
| LILRA2.9    | 1.37E-07 | -0.32266 | 0.014 | 0.087 | 0.002054 | Oligo | LILRA2        |
| PARP8.3     | 1.38E-07 | -0.21417 | 0.005 | 0.07  | 0.002055 | Oligo | PARP8         |
| CAPRIN2.6   | 1.38E-07 | -0.13058 | 0.026 | 0.107 | 0.002058 | Oligo | CAPRIN2       |
| AKAP8.3     | 1.38E-07 | -0.1825  | 0.047 | 0.138 | 0.002059 | Oligo | AKAP8         |
| CARD14.1    | 1.41E-07 | 0.104237 | 0.026 | 0.005 | 0.002109 | Oligo | CARD14        |
| CERK.5      | 1.42E-07 | -0.18199 | 0.028 | 0.11  | 0.002119 | Oligo | CERK          |
| CDV3.4      | 1.42E-07 | -0.23664 | 0.155 | 0.28  | 0.00212  | Oligo | CDV3          |
| TRAPPC3.2   | 1.42E-07 | -0.13847 | 0.292 | 0.443 | 0.002129 | Oligo | TRAPPC3       |
| DSTYK.5     | 1.43E-07 | 0.315276 | 0.193 | 0.118 | 0.00213  | Oligo | DSTYK         |
| KIAA0355.1  | 1.43E-07 | 0.315593 | 0.231 | 0.149 | 0.002139 | Oligo | KIAA0355      |
| C8orf82.7   | 1.44E-07 | -0.14448 | 0.071 | 0.175 | 0.002146 | Oligo | C8orf82       |
| FAM111A.5   | 1.44E-07 | -0.2454  | 0.031 | 0.112 | 0.002149 | Oligo | FAM111A       |
| BNIP1.7     | 1.44E-07 | -0.22713 | 0.038 | 0.123 | 0.002156 | Oligo | BNIP1         |
| DDX46.5     | 1.45E-07 | -0.1384  | 0.299 | 0.452 | 0.002172 | Oligo | DDX46         |
| C20orf196.1 | 1.46E-07 | -0.1506  | 0.012 | 0.083 | 0.00218  | Oligo | C20orf196     |
| TEN1.4      | 1.47E-07 | -0.18989 | 0.078 | 0.182 | 0.002197 | Oligo | TEN1          |
| RNF5.3      | 1.48E-07 | 0.384133 | 0.461 | 0.388 | 0.002214 | Oligo | RNF5          |
| PHYH.1      | 1.48E-07 | -0.21011 | 0.068 | 0.17  | 0.002217 | Oligo | PHYH          |
| TIMM44.5    | 1.49E-07 | -0.16553 | 0.141 | 0.267 | 0.002227 | Oligo | TIMM44        |
| AIFM1.4     | 1.49E-07 | -0.2033  | 0.054 | 0.148 | 0.00223  | Oligo | AIFM1         |
| RFT1.3      | 1.50E-07 | -0.17935 | 0.047 | 0.139 | 0.00224  | Oligo | RFT1          |
| AZIN1.4     | 1.50E-07 | -0.20405 | 0.198 | 0.335 | 0.002244 | Oligo | AZIN1         |
| TRIM62.1    | 1.50E-07 | 0.239416 | 0.071 | 0.028 | 0.002248 | Oligo | TRIM62        |
| GSG1L.6     | 1.50E-07 | -0.20763 | 0     | 0.061 | 0.002248 | Oligo | GSG1L         |
| DBNDD1.7    | 1.52E-07 | -0.14245 | 0.005 | 0.07  | 0.002279 | Oligo | DBNDD1        |
| NRM.3       | 1.56E-07 | -0.18038 | 0.014 | 0.087 | 0.002338 | Oligo | NRM           |
| VIPR2.8     | 1.57E-07 | -0.27785 | 0.014 | 0.085 | 0.002342 | Oligo | VIPR2         |
| MARCO.5     | 1.57E-07 | -0.39302 | 0     | 0.061 | 0.002349 | Oligo | MARCO         |
| TRPV2.9     | 1.61E-07 | -0.24811 | 0     | 0.061 | 0.002401 | Oligo | TRPV2         |
| USP53.9     | 1.61E-07 | -0.3591  | 0.056 | 0.144 | 0.002403 | Oligo | USP53         |

|             |           |           |        |        |           |       |              |
|-------------|-----------|-----------|--------|--------|-----------|-------|--------------|
| TXNIP. 5    | 1. 61E-07 | -0. 27054 | 0. 313 | 0. 451 | 0. 002413 | Oligo | TXNIP        |
| UBE2K. 2    | 1. 64E-07 | -0. 21436 | 0. 172 | 0. 303 | 0. 002446 | Oligo | UBE2K        |
| KIF20B. 5   | 1. 65E-07 | -0. 22388 | 0. 016 | 0. 09  | 0. 002462 | Oligo | KIF20B       |
| BET1. 6     | 1. 67E-07 | -0. 20865 | 0. 113 | 0. 225 | 0. 002489 | Oligo | BET1         |
| EFNB2. 8    | 1. 67E-07 | -0. 12817 | 0. 024 | 0. 102 | 0. 002496 | Oligo | EFNB2        |
| ENOPH1. 7   | 1. 67E-07 | 0. 321802 | 0. 447 | 0. 387 | 0. 002503 | Oligo | ENOPH1       |
| SGSM2. 3    | 1. 68E-07 | -0. 14708 | 0. 026 | 0. 106 | 0. 002509 | Oligo | SGSM2        |
| SLC2A13. 1  | 1. 69E-07 | -0. 16596 | 0. 016 | 0. 09  | 0. 002527 | Oligo | SLC2A13      |
| RNF168. 6   | 1. 70E-07 | -0. 17552 | 0. 056 | 0. 152 | 0. 002541 | Oligo | RNF168       |
| NSMF. 5     | 1. 71E-07 | -0. 17298 | 0. 035 | 0. 12  | 0. 002554 | Oligo | NSMF         |
| WNT5A. 9    | 1. 72E-07 | -0. 21907 | 0      | 0. 061 | 0. 002563 | Oligo | WNT5A        |
| CTC-524C5   | 1. 72E-07 | -0. 15255 | 0. 035 | 0. 121 | 0. 002564 | Oligo | CTC-524C5. 2 |
| MKI67. 8    | 1. 73E-07 | -0. 24377 | 0. 002 | 0. 065 | 0. 002593 | Oligo | MKI67        |
| CC2D1B      | 1. 77E-07 | 0. 187104 | 0. 092 | 0. 041 | 0. 002638 | Oligo | CC2D1B       |
| VRK3. 6     | 1. 77E-07 | -0. 15187 | 0. 106 | 0. 223 | 0. 00264  | Oligo | VRK3         |
| NXPH4. 7    | 1. 79E-07 | -0. 20331 | 0. 002 | 0. 065 | 0. 002669 | Oligo | NXPH4        |
| TFDP1. 4    | 1. 79E-07 | -0. 20725 | 0. 089 | 0. 195 | 0. 00267  | Oligo | TFDP1        |
| ITPRIP. 8   | 1. 79E-07 | -0. 22662 | 0. 009 | 0. 077 | 0. 002672 | Oligo | ITPRIP       |
| ANTXR1. 5   | 1. 79E-07 | -0. 18338 | 0. 019 | 0. 093 | 0. 002681 | Oligo | ANTXR1       |
| PKIA. 9     | 1. 79E-07 | -0. 2488  | 0. 021 | 0. 096 | 0. 002682 | Oligo | PKIA         |
| ALAS1. 1    | 1. 80E-07 | -0. 19885 | 0. 075 | 0. 175 | 0. 002685 | Oligo | ALAS1        |
| MAML2. 8    | 1. 81E-07 | -0. 11851 | 0. 089 | 0. 202 | 0. 002698 | Oligo | MAML2        |
| TENM1. 6    | 1. 81E-07 | -0. 14905 | 0. 007 | 0. 074 | 0. 002701 | Oligo | TENM1        |
| HRK. 7      | 1. 81E-07 | -0. 19673 | 0. 002 | 0. 065 | 0. 002704 | Oligo | HRK          |
| PGGT1B. 3   | 1. 81E-07 | -0. 16732 | 0. 024 | 0. 102 | 0. 002712 | Oligo | PGGT1B       |
| CCBL2. 2    | 1. 83E-07 | -0. 21764 | 0. 042 | 0. 129 | 0. 002727 | Oligo | CCBL2        |
| RSU1. 4     | 1. 83E-07 | -0. 24585 | 0. 148 | 0. 273 | 0. 002741 | Oligo | RSU1         |
| ENTPD3-AS   | 1. 84E-07 | 0. 387507 | 0. 153 | 0. 084 | 0. 002751 | Oligo | ENTPD3-AS1   |
| RPS6KA3. 6  | 1. 88E-07 | -0. 17889 | 0. 049 | 0. 14  | 0. 002802 | Oligo | RPS6KA3      |
| SPAG9. 7    | 1. 88E-07 | 0. 337518 | 0. 419 | 0. 351 | 0. 002806 | Oligo | SPAG9        |
| C1orf174. 1 | 1. 88E-07 | -0. 21067 | 0. 061 | 0. 158 | 0. 002809 | Oligo | C1orf174     |
| ATMIN. 8    | 1. 90E-07 | 0. 338168 | 0. 184 | 0. 113 | 0. 002834 | Oligo | ATMIN        |
| CDC42SE2. 1 | 1. 90E-07 | 0. 37189  | 0. 296 | 0. 216 | 0. 002844 | Oligo | CDC42SE2     |
| CCDC126. 5  | 1. 91E-07 | -0. 2366  | 0. 035 | 0. 119 | 0. 002853 | Oligo | CCDC126      |
| ICOSLG. 9   | 1. 91E-07 | 0. 303048 | 0. 16  | 0. 088 | 0. 002855 | Oligo | ICOSLG       |
| C1orf53. 5  | 1. 92E-07 | -0. 18435 | 0. 014 | 0. 086 | 0. 002874 | Oligo | C1orf53      |
| ZNF92. 7    | 1. 93E-07 | -0. 21674 | 0. 056 | 0. 149 | 0. 002889 | Oligo | ZNF92        |
| MAEA. 4     | 1. 94E-07 | -0. 20018 | 0. 122 | 0. 239 | 0. 002896 | Oligo | MAEA         |
| MTHFS. 6    | 1. 95E-07 | -0. 27548 | 0. 089 | 0. 193 | 0. 002909 | Oligo | MTHFS        |
| YEATS4. 7   | 1. 95E-07 | -0. 1747  | 0. 139 | 0. 255 | 0. 002911 | Oligo | YEATS4       |
| AHCYL1. 8   | 1. 97E-07 | -0. 18876 | 0. 198 | 0. 332 | 0. 002941 | Oligo | AHCYL1       |
| IRF2BP2. 7  | 1. 97E-07 | 0. 36115  | 0. 391 | 0. 313 | 0. 00295  | Oligo | IRF2BP2      |
| POLR3F. 6   | 1. 98E-07 | -0. 14493 | 0. 049 | 0. 14  | 0. 002961 | Oligo | POLR3F       |
| TPX2. 8     | 1. 99E-07 | -0. 23221 | 0. 014 | 0. 085 | 0. 002967 | Oligo | TPX2         |
| IRF3. 2     | 2. 03E-07 | -0. 12192 | 0. 127 | 0. 248 | 0. 003037 | Oligo | IRF3         |
| SMPDL3A. 7  | 2. 03E-07 | -0. 25139 | 0. 042 | 0. 128 | 0. 003038 | Oligo | SMPDL3A      |
| TIFA. 4     | 2. 04E-07 | -0. 21102 | 0      | 0. 06  | 0. 003052 | Oligo | TIFA         |
| COX5A. 6    | 2. 06E-07 | -0. 22467 | 0. 452 | 0. 603 | 0. 003076 | Oligo | COX5A        |
| AKAP9. 7    | 2. 07E-07 | -0. 19551 | 0. 315 | 0. 455 | 0. 00309  | Oligo | AKAP9        |
| ARSD. 1     | 2. 07E-07 | -0. 17144 | 0. 019 | 0. 093 | 0. 003092 | Oligo | ARSD         |
| BAZ1B. 8    | 2. 07E-07 | -0. 18535 | 0. 174 | 0. 303 | 0. 003094 | Oligo | BAZ1B        |



|            |           |           |        |        |           |       |            |
|------------|-----------|-----------|--------|--------|-----------|-------|------------|
| GSK3B. 6   | 2. 07E-07 | -0. 21661 | 0. 094 | 0. 201 | 0. 003097 | Oligo | GSK3B      |
| LSM14A. 4  | 2. 07E-07 | -0. 1737  | 0. 233 | 0. 387 | 0. 003099 | Oligo | LSM14A     |
| CDKN2AIPN  | 2. 08E-07 | -0. 12479 | 0. 132 | 0. 253 | 0. 003105 | Oligo | CDKN2AIPNL |
| ZNF426. 6  | 2. 09E-07 | -0. 17993 | 0. 033 | 0. 115 | 0. 003116 | Oligo | ZNF426     |
| SRPX2. 7   | 2. 09E-07 | -0. 22769 | 0      | 0. 06  | 0. 003119 | Oligo | SRPX2      |
| CLEC4E. 7  | 2. 09E-07 | -0. 34044 | 0      | 0. 06  | 0. 003119 | Oligo | CLEC4E     |
| NSMCE1. 3  | 2. 10E-07 | -0. 14138 | 0. 259 | 0. 41  | 0. 003134 | Oligo | NSMCE1     |
| PPP3CC. 4  | 2. 14E-07 | -0. 20501 | 0. 047 | 0. 136 | 0. 003205 | Oligo | PPP3CC     |
| UPRT. 2    | 2. 15E-07 | -0. 17198 | 0. 016 | 0. 089 | 0. 003218 | Oligo | UPRT       |
| KLHL8. 3   | 2. 18E-07 | -0. 13074 | 0. 047 | 0. 136 | 0. 003255 | Oligo | KLHL8      |
| HHEX. 9    | 2. 18E-07 | -0. 27195 | 0      | 0. 06  | 0. 003258 | Oligo | HHEX       |
| FARP2. 1   | 2. 20E-07 | 0. 371101 | 0. 125 | 0. 065 | 0. 003288 | Oligo | FARP2      |
| NBN. 1     | 2. 21E-07 | -0. 14111 | 0. 056 | 0. 151 | 0. 003301 | Oligo | NBN        |
| CELF3. 9   | 2. 22E-07 | -0. 22095 | 0. 005 | 0. 068 | 0. 003322 | Oligo | CELF3      |
| SERPINB8.  | 2. 25E-07 | -0. 22874 | 0. 012 | 0. 081 | 0. 003366 | Oligo | SERPINB8   |
| NAGK. 6    | 2. 27E-07 | -0. 20031 | 0. 252 | 0. 386 | 0. 003392 | Oligo | NAGK       |
| CPEB4. 5   | 2. 28E-07 | 0. 273433 | 0. 332 | 0. 243 | 0. 003407 | Oligo | CPEB4      |
| TMEM39B. 2 | 2. 28E-07 | -0. 11001 | 0. 042 | 0. 131 | 0. 003408 | Oligo | TMEM39B    |
| PLXDC2. 9  | 2. 28E-07 | -0. 33794 | 0. 113 | 0. 213 | 0. 003409 | Oligo | PLXDC2     |
| STX4. 5    | 2. 31E-07 | 0. 372696 | 0. 393 | 0. 311 | 0. 003452 | Oligo | STX4       |
| TMEM43. 4  | 2. 32E-07 | -0. 1456  | 0. 089 | 0. 195 | 0. 00346  | Oligo | TMEM43     |
| MALT1. 7   | 2. 35E-07 | -0. 18647 | 0. 009 | 0. 076 | 0. 003515 | Oligo | MALT1      |
| PSEN2. 3   | 2. 36E-07 | -0. 15288 | 0. 033 | 0. 115 | 0. 00352  | Oligo | PSEN2      |
| ZDHHC7. 4  | 2. 36E-07 | -0. 18792 | 0. 056 | 0. 15  | 0. 003523 | Oligo | ZDHHC7     |
| DNALI1. 7  | 2. 37E-07 | -0. 15494 | 0. 033 | 0. 116 | 0. 003543 | Oligo | DNALI1     |
| ZNF766. 4  | 2. 38E-07 | -0. 15674 | 0. 042 | 0. 129 | 0. 00356  | Oligo | ZNF766     |
| VEZF1. 8   | 2. 38E-07 | 0. 423848 | 0. 313 | 0. 235 | 0. 003562 | Oligo | VEZF1      |
| HSPA6. 5   | 2. 39E-07 | -0. 37697 | 0. 026 | 0. 102 | 0. 003572 | Oligo | HSPA6      |
| GMIP. 8    | 2. 42E-07 | -0. 22351 | 0. 009 | 0. 076 | 0. 003609 | Oligo | GMIP       |
| NBEAL1. 6  | 2. 42E-07 | -0. 31978 | 0. 534 | 0. 67  | 0. 003619 | Oligo | NBEAL1     |
| RASAL3. 8  | 2. 43E-07 | -0. 24835 | 0      | 0. 059 | 0. 003633 | Oligo | RASAL3     |
| CXCL14. 6  | 2. 45E-07 | -0. 25323 | 0. 052 | 0. 145 | 0. 003657 | Oligo | CXCL14     |
| USP6NL. 4  | 2. 45E-07 | -0. 1247  | 0. 014 | 0. 085 | 0. 003659 | Oligo | USP6NL     |
| PIANP. 7   | 2. 46E-07 | -0. 15006 | 0. 014 | 0. 084 | 0. 003674 | Oligo | PIANP      |
| DAPK3. 6   | 2. 47E-07 | -0. 1218  | 0. 125 | 0. 243 | 0. 003689 | Oligo | DAPK3      |
| BNIP2. 8   | 2. 48E-07 | -0. 23601 | 0. 151 | 0. 268 | 0. 003703 | Oligo | BNIP2      |
| JMJD1C. 7  | 2. 51E-07 | -0. 18804 | 0. 205 | 0. 339 | 0. 00375  | Oligo | JMJD1C     |
| BACH1. 5   | 2. 52E-07 | -0. 22365 | 0. 031 | 0. 11  | 0. 003772 | Oligo | BACH1      |
| C17orf49.  | 2. 53E-07 | -0. 15427 | 0. 049 | 0. 141 | 0. 003781 | Oligo | C17orf49   |
| NOL4. 7    | 2. 54E-07 | -0. 17938 | 0. 005 | 0. 068 | 0. 003796 | Oligo | NOL4       |
| ADPRHL2. 5 | 2. 55E-07 | -0. 15028 | 0. 141 | 0. 266 | 0. 003813 | Oligo | ADPRHL2    |
| STAG2. 2   | 2. 55E-07 | 0. 427455 | 0. 318 | 0. 24  | 0. 003817 | Oligo | STAG2      |
| TFG. 4     | 2. 57E-07 | -0. 20638 | 0. 266 | 0. 413 | 0. 003836 | Oligo | TFG        |
| LARP1. 4   | 2. 58E-07 | 0. 324465 | 0. 325 | 0. 249 | 0. 003857 | Oligo | LARP1      |
| PRIM1. 6   | 2. 59E-07 | -0. 19846 | 0. 014 | 0. 084 | 0. 003864 | Oligo | PRIM1      |
| GIT1. 5    | 2. 59E-07 | 0. 354294 | 0. 172 | 0. 103 | 0. 003866 | Oligo | GIT1       |
| APITD1. 4  | 2. 59E-07 | -0. 14156 | 0. 014 | 0. 084 | 0. 003876 | Oligo | APITD1     |
| ZMYND15. 6 | 2. 60E-07 | -0. 19085 | 0      | 0. 059 | 0. 003879 | Oligo | ZMYND15    |
| CCDC57. 9  | 2. 63E-07 | -0. 21555 | 0. 031 | 0. 11  | 0. 003931 | Oligo | CCDC57     |
| LIPE-AS1.  | 2. 70E-07 | -0. 14569 | 0. 035 | 0. 119 | 0. 004042 | Oligo | LIPE-AS1   |
| MIR155HG.  | 2. 71E-07 | -0. 19289 | 0      | 0. 059 | 0. 004051 | Oligo | MIR155HG   |

|           |          |          |       |       |          |       |               |
|-----------|----------|----------|-------|-------|----------|-------|---------------|
| LOXL3.3   | 2.74E-07 | -0.21693 | 0.009 | 0.076 | 0.004094 | Oligo | LOXL3         |
| GTF2E2.3  | 2.75E-07 | -0.19095 | 0.087 | 0.192 | 0.004105 | Oligo | GTF2E2        |
| RP11-263K | 2.76E-07 | -0.16236 | 0.005 | 0.068 | 0.004124 | Oligo | RP11-263K19.4 |
| FLOT1.8   | 2.79E-07 | -0.17423 | 0.367 | 0.508 | 0.004171 | Oligo | FLOT1         |
| NUMBL.6   | 2.86E-07 | -0.11992 | 0.019 | 0.092 | 0.004277 | Oligo | NUMBL         |
| SCAF11.5  | 2.90E-07 | -0.11317 | 0.256 | 0.402 | 0.004335 | Oligo | SCAF11        |
| TMEM220.7 | 2.91E-07 | -0.19577 | 0.007 | 0.071 | 0.004346 | Oligo | TMEM220       |
| SOX12.8   | 2.93E-07 | -0.14621 | 0.035 | 0.119 | 0.004373 | Oligo | SOX12         |
| SKP1.7    | 2.96E-07 | 0.181769 | 0.864 | 0.865 | 0.004417 | Oligo | SKP1          |
| THAP2.3   | 2.98E-07 | -0.23622 | 0.045 | 0.13  | 0.004459 | Oligo | THAP2         |
| TP53I11.6 | 3.02E-07 | -0.2292  | 0.009 | 0.075 | 0.004515 | Oligo | TP53I11       |
| FPR3.9    | 3.02E-07 | -0.2355  | 0     | 0.058 | 0.004517 | Oligo | FPR3          |
| METTL1.6  | 3.04E-07 | -0.25405 | 0.059 | 0.151 | 0.004542 | Oligo | METTL1        |
| MGLL.5    | 3.05E-07 | 0.287909 | 0.221 | 0.142 | 0.004563 | Oligo | MGLL          |
| RP11-71N1 | 3.06E-07 | 0.334226 | 0.207 | 0.133 | 0.004579 | Oligo | RP11-71N10.1  |
| HIST2H2BE | 3.06E-07 | 0.410874 | 0.221 | 0.144 | 0.00458  | Oligo | HIST2H2BE     |
| CRNKL1.3  | 3.07E-07 | -0.14397 | 0.059 | 0.154 | 0.004587 | Oligo | CRNKL1        |
| FKBP7.5   | 3.08E-07 | -0.25115 | 0.021 | 0.094 | 0.004596 | Oligo | FKBP7         |
| DPH2.5    | 3.09E-07 | -0.14983 | 0.035 | 0.119 | 0.00461  | Oligo | DPH2          |
| LRRK2.8   | 3.09E-07 | -0.22148 | 0.002 | 0.063 | 0.004619 | Oligo | LRRK2         |
| ATG5.3    | 3.09E-07 | -0.11126 | 0.101 | 0.212 | 0.004624 | Oligo | ATG5          |
| FAM210A.4 | 3.11E-07 | -0.2005  | 0.054 | 0.145 | 0.004648 | Oligo | FAM210A       |
| NDFIP2.6  | 3.12E-07 | 0.393934 | 0.266 | 0.189 | 0.004657 | Oligo | NDFIP2        |
| MTFMT.2   | 3.13E-07 | -0.152   | 0.026 | 0.103 | 0.004675 | Oligo | MTFMT         |
| UTY       | 3.15E-07 | 0.164853 | 0.068 | 0.027 | 0.004702 | Oligo | UTY           |
| PQBP1.3   | 3.17E-07 | -0.2129  | 0.214 | 0.349 | 0.004734 | Oligo | PQBP1         |
| AIDA.4    | 3.20E-07 | -0.20171 | 0.122 | 0.24  | 0.004777 | Oligo | AIDA          |
| ANP32A.9  | 3.22E-07 | -0.137   | 0.282 | 0.434 | 0.004812 | Oligo | ANP32A        |
| NOP2.1    | 3.22E-07 | -0.19026 | 0.031 | 0.109 | 0.004815 | Oligo | NOP2          |
| ARAP3.6   | 3.25E-07 | -0.14727 | 0.005 | 0.067 | 0.004853 | Oligo | ARAP3         |
| ELL.5     | 3.25E-07 | -0.20206 | 0.026 | 0.103 | 0.004859 | Oligo | ELL           |
| HOXA2.8   | 3.26E-07 | -0.22908 | 0.009 | 0.075 | 0.00487  | Oligo | HOXA2         |
| ANP32B.8  | 3.26E-07 | -0.2374  | 0.311 | 0.455 | 0.004876 | Oligo | ANP32B        |
| RARA.4    | 3.32E-07 | -0.19568 | 0.024 | 0.098 | 0.004963 | Oligo | RARA          |
| PLAC8.8   | 3.32E-07 | -0.33957 | 0.007 | 0.07  | 0.004965 | Oligo | PLAC8         |
| RAB11A.3  | 3.33E-07 | -0.21044 | 0.32  | 0.472 | 0.004975 | Oligo | RAB11A        |
| RAP2C.2   | 3.34E-07 | -0.17202 | 0.042 | 0.128 | 0.004985 | Oligo | RAP2C         |
| YAE1D1.7  | 3.37E-07 | -0.13414 | 0.068 | 0.163 | 0.00503  | Oligo | YAE1D1        |
| RNF187.7  | 3.40E-07 | -0.12345 | 0.242 | 0.383 | 0.00508  | Oligo | RNF187        |
| FPGS.3    | 3.41E-07 | -0.15632 | 0.059 | 0.153 | 0.0051   | Oligo | FPGS          |
| SAMD14.6  | 3.43E-07 | -0.1687  | 0.005 | 0.066 | 0.005129 | Oligo | SAMD14        |
| NOTCH3.4  | 3.47E-07 | -0.11978 | 0.002 | 0.062 | 0.005179 | Oligo | NOTCH3        |
| CAMLG.8   | 3.48E-07 | -0.15227 | 0.351 | 0.499 | 0.005205 | Oligo | CAMLG         |
| CDCA4.6   | 3.50E-07 | -0.19872 | 0.019 | 0.09  | 0.005238 | Oligo | CDCA4         |
| NCEH1.7   | 3.51E-07 | -0.19359 | 0.007 | 0.07  | 0.00524  | Oligo | NCEH1         |
| AP3D1.5   | 3.51E-07 | -0.20443 | 0.186 | 0.313 | 0.00525  | Oligo | AP3D1         |
| FTSJ3.2   | 3.53E-07 | -0.15702 | 0.059 | 0.152 | 0.005273 | Oligo | FTSJ3         |
| DNM1.5    | 3.53E-07 | -0.11717 | 0.009 | 0.075 | 0.005275 | Oligo | DNM1          |
| NEDD8.4   | 3.56E-07 | -0.14197 | 0.593 | 0.751 | 0.005313 | Oligo | NEDD8         |
| FRMD3.6   | 3.60E-07 | -0.19223 | 0     | 0.058 | 0.005376 | Oligo | FRMD3         |
| NLGN4Y    | 3.60E-07 | 0.16134  | 0.073 | 0.03  | 0.005376 | Oligo | NLGN4Y        |

|            |          |          |       |       |          |       |          |
|------------|----------|----------|-------|-------|----------|-------|----------|
| PLEKHG2.3  | 3.61E-07 | -0.18994 | 0.005 | 0.067 | 0.005399 | Oligo | PLEKHG2  |
| TMX3.2     | 3.63E-07 | -0.15763 | 0.066 | 0.161 | 0.005431 | Oligo | TMX3     |
| HARS.4     | 3.65E-07 | -0.19735 | 0.16  | 0.286 | 0.005448 | Oligo | HARS     |
| DHRS4L2.3  | 3.65E-07 | -0.13152 | 0.146 | 0.266 | 0.005452 | Oligo | DHRS4L2  |
| SORBS3.6   | 3.65E-07 | -0.166   | 0.078 | 0.176 | 0.005456 | Oligo | SORBS3   |
| ST7.4      | 3.67E-07 | -0.20745 | 0.031 | 0.109 | 0.005482 | Oligo | ST7      |
| NFRKB.2    | 3.69E-07 | -0.20051 | 0.026 | 0.101 | 0.005512 | Oligo | NFRKB    |
| WDR60.6    | 3.70E-07 | -0.1677  | 0.12  | 0.236 | 0.005531 | Oligo | WDR60    |
| USP30.2    | 3.71E-07 | 0.252138 | 0.118 | 0.06  | 0.005549 | Oligo | USP30    |
| BCHE.6     | 3.73E-07 | -0.1781  | 0.087 | 0.19  | 0.005577 | Oligo | BCHE     |
| CLN5.3     | 3.75E-07 | -0.17822 | 0.113 | 0.225 | 0.005606 | Oligo | CLN5     |
| SIPA1.9    | 3.77E-07 | -0.23621 | 0.054 | 0.142 | 0.00564  | Oligo | SIPA1    |
| AMFR.2     | 3.80E-07 | 0.375484 | 0.245 | 0.17  | 0.00568  | Oligo | AMFR     |
| GTF2H2.7   | 3.82E-07 | -0.17226 | 0.085 | 0.188 | 0.005713 | Oligo | GTF2H2   |
| ZC3HAV1.5  | 3.85E-07 | -0.24503 | 0.082 | 0.18  | 0.005759 | Oligo | ZC3HAV1  |
| TMEM216.2  | 3.88E-07 | -0.21606 | 0.014 | 0.083 | 0.005793 | Oligo | TMEM216  |
| ZNF121.3   | 3.88E-07 | -0.1626  | 0.033 | 0.113 | 0.005802 | Oligo | ZNF121   |
| ZC3H12A.7  | 3.91E-07 | -0.24065 | 0.012 | 0.079 | 0.005844 | Oligo | ZC3H12A  |
| SLFN5.2    | 3.93E-07 | 0.210578 | 0.115 | 0.058 | 0.005873 | Oligo | SLFN5    |
| ZBTB1.3    | 3.93E-07 | -0.23479 | 0.073 | 0.168 | 0.005876 | Oligo | ZBTB1    |
| DEDD2.4    | 3.99E-07 | -0.21565 | 0.078 | 0.176 | 0.005959 | Oligo | DEDD2    |
| ACAP1.7    | 4.01E-07 | -0.20331 | 0.014 | 0.082 | 0.005988 | Oligo | ACAP1    |
| CLDN10.7   | 4.01E-07 | -0.31269 | 0     | 0.057 | 0.005993 | Oligo | CLDN10   |
| EIF4A2.6   | 4.03E-07 | -0.11    | 0.579 | 0.725 | 0.006019 | Oligo | EIF4A2   |
| HPCA.7     | 4.09E-07 | -0.19487 | 0.002 | 0.062 | 0.006111 | Oligo | HPCA     |
| RINT1.6    | 4.09E-07 | -0.18294 | 0.024 | 0.098 | 0.006113 | Oligo | RINT1    |
| GOSR1.7    | 4.11E-07 | -0.13213 | 0.148 | 0.272 | 0.00614  | Oligo | GOSR1    |
| GMPPA.3    | 4.14E-07 | -0.18554 | 0.068 | 0.163 | 0.006185 | Oligo | GMPPA    |
| ANAPC15.4  | 4.16E-07 | -0.18642 | 0.148 | 0.266 | 0.006221 | Oligo | ANAPC15  |
| SREK1.7    | 4.17E-07 | -0.11414 | 0.193 | 0.327 | 0.006239 | Oligo | SREK1    |
| SLC25A38.4 | 4.19E-07 | -0.18683 | 0.059 | 0.149 | 0.006267 | Oligo | SLC25A38 |
| TM7SF3.3   | 4.22E-07 | -0.15892 | 0.134 | 0.255 | 0.006299 | Oligo | TM7SF3   |
| ADK.3      | 4.22E-07 | -0.17967 | 0.073 | 0.169 | 0.006301 | Oligo | ADK      |
| PYURF.5    | 4.29E-07 | -0.21649 | 0.405 | 0.546 | 0.006413 | Oligo | PYURF    |
| POFUT1.4   | 4.31E-07 | -0.17241 | 0.038 | 0.12  | 0.006444 | Oligo | POFUT1   |
| PABPC1L.1  | 4.34E-07 | -0.11469 | 0.007 | 0.07  | 0.006483 | Oligo | PABPC1L  |
| SOX6.8     | 4.34E-07 | -0.16321 | 0.054 | 0.144 | 0.006488 | Oligo | SOX6     |
| ZNF354A.5  | 4.34E-07 | -0.1743  | 0.04  | 0.123 | 0.00649  | Oligo | ZNF354A  |
| MAPK11.5   | 4.37E-07 | -0.10684 | 0     | 0.057 | 0.006537 | Oligo | MAPK11   |
| UQCC2.5    | 4.38E-07 | -0.2082  | 0.294 | 0.432 | 0.006548 | Oligo | UQCC2    |
| AMPD2.6    | 4.39E-07 | -0.13793 | 0.064 | 0.155 | 0.006556 | Oligo | AMPD2    |
| KLHL42.8   | 4.42E-07 | 0.30532  | 0.231 | 0.156 | 0.006604 | Oligo | KLHL42   |
| PCSK5.1    | 4.45E-07 | -0.14735 | 0.002 | 0.061 | 0.006654 | Oligo | PCSK5    |
| ALDH1L1.8  | 4.47E-07 | -0.26784 | 0.005 | 0.066 | 0.006686 | Oligo | ALDH1L1  |
| EPS15L1.5  | 4.49E-07 | -0.11506 | 0.071 | 0.169 | 0.006713 | Oligo | EPS15L1  |
| B4GALNT1.4 | 4.51E-07 | -0.29546 | 0.059 | 0.146 | 0.006745 | Oligo | B4GALNT1 |
| HPS3.5     | 4.52E-07 | -0.19284 | 0.056 | 0.145 | 0.006755 | Oligo | HPS3     |
| ATL2.1     | 4.52E-07 | -0.17491 | 0.007 | 0.07  | 0.006755 | Oligo | ATL2     |
| CCNB2.8    | 4.53E-07 | -0.23242 | 0.005 | 0.065 | 0.006767 | Oligo | CCNB2    |
| ZCCHC7.6   | 4.55E-07 | -0.12618 | 0.056 | 0.146 | 0.006796 | Oligo | ZCCHC7   |
| BRIX1.7    | 4.56E-07 | -0.14758 | 0.139 | 0.258 | 0.00682  | Oligo | BRIX1    |

|            |          |          |       |       |          |       |               |
|------------|----------|----------|-------|-------|----------|-------|---------------|
| SCAMP4.6   | 4.58E-07 | 0.318739 | 0.339 | 0.266 | 0.006843 | Oligo | SCAMP4        |
| PRKAB1.3   | 4.62E-07 | -0.24202 | 0.068 | 0.161 | 0.006898 | Oligo | PRKAB1        |
| SPSB4.7    | 4.62E-07 | -0.12747 | 0.002 | 0.061 | 0.006909 | Oligo | SPSB4         |
| LSG1.6     | 4.63E-07 | -0.11026 | 0.045 | 0.131 | 0.006913 | Oligo | LSG1          |
| PSMD11.6   | 4.66E-07 | -0.16602 | 0.259 | 0.413 | 0.006969 | Oligo | PSMD11        |
| SDS.9      | 4.68E-07 | -0.33409 | 0.002 | 0.061 | 0.006989 | Oligo | SDS           |
| SERINC3.3  | 4.68E-07 | 0.355761 | 0.426 | 0.363 | 0.006998 | Oligo | SERINC3       |
| CSGALNACT1 | 4.71E-07 | -0.27649 | 0.012 | 0.077 | 0.007032 | Oligo | CSGALNACT1    |
| FUT9.1     | 4.71E-07 | 0.198218 | 0.047 | 0.015 | 0.007038 | Oligo | FUT9          |
| SHOX2.6    | 4.73E-07 | -0.12052 | 0.005 | 0.066 | 0.007065 | Oligo | SHOX2         |
| KDM2B.4    | 4.74E-07 | -0.174   | 0.049 | 0.138 | 0.007084 | Oligo | KDM2B         |
| CCT2.4     | 4.76E-07 | -0.29009 | 0.414 | 0.55  | 0.007107 | Oligo | CCT2          |
| NLGN4X.7   | 4.76E-07 | -0.16705 | 0.031 | 0.108 | 0.007112 | Oligo | NLGN4X        |
| C19orf60.  | 4.80E-07 | -0.25004 | 0.367 | 0.507 | 0.007174 | Oligo | C19orf60      |
| NOSIP      | 4.80E-07 | -0.11556 | 0.282 | 0.442 | 0.007177 | Oligo | NOSIP         |
| ABTB2      | 4.81E-07 | 0.117133 | 0.049 | 0.017 | 0.007189 | Oligo | ABTB2         |
| RP11-620J  | 4.83E-07 | -0.28358 | 0.158 | 0.274 | 0.007225 | Oligo | RP11-620J15.3 |
| HDHD3.1    | 4.84E-07 | -0.16822 | 0.033 | 0.112 | 0.007227 | Oligo | HDHD3         |
| TRIM25.4   | 4.84E-07 | -0.11811 | 0.019 | 0.09  | 0.007233 | Oligo | TRIM25        |
| VPS36.5    | 4.87E-07 | -0.20696 | 0.099 | 0.205 | 0.007282 | Oligo | VPS36         |
| FREM2.6    | 4.88E-07 | -0.10111 | 0.007 | 0.07  | 0.007286 | Oligo | FREM2         |
| FAS.2      | 4.91E-07 | -0.25137 | 0.007 | 0.069 | 0.007334 | Oligo | FAS           |
| CWC25.2    | 4.95E-07 | -0.13402 | 0.099 | 0.205 | 0.007403 | Oligo | CWC25         |
| ZWILCH.4   | 4.95E-07 | -0.17352 | 0.012 | 0.078 | 0.007404 | Oligo | ZWILCH        |
| CENPT.6    | 4.96E-07 | -0.17809 | 0.092 | 0.193 | 0.007407 | Oligo | CENPT         |
| RRM2.8     | 4.97E-07 | -0.25511 | 0.005 | 0.065 | 0.007426 | Oligo | RRM2          |
| USP10.5    | 4.99E-07 | -0.14667 | 0.129 | 0.247 | 0.007459 | Oligo | USP10         |
| ATP5H.4    | 5.02E-07 | -0.17438 | 0.513 | 0.654 | 0.007499 | Oligo | ATP5H         |
| TVP23B.4   | 5.02E-07 | -0.18064 | 0.028 | 0.104 | 0.007506 | Oligo | TVP23B        |
| CXXC1.3    | 5.06E-07 | -0.15686 | 0.078 | 0.177 | 0.007557 | Oligo | CXXC1         |
| MCHR1.6    | 5.11E-07 | -0.11797 | 0.002 | 0.061 | 0.007633 | Oligo | MCHR1         |
| MTMR11.4   | 5.14E-07 | -0.18414 | 0.009 | 0.073 | 0.007674 | Oligo | MTMR11        |
| LRCH1.3    | 5.14E-07 | -0.18209 | 0.002 | 0.06  | 0.007685 | Oligo | LRCH1         |
| CCDC151.6  | 5.14E-07 | -0.2328  | 0.005 | 0.065 | 0.007686 | Oligo | CCDC151       |
| TMEM141.6  | 5.15E-07 | 0.497568 | 0.327 | 0.25  | 0.007693 | Oligo | TMEM141       |
| YDJC.5     | 5.16E-07 | -0.11055 | 0.056 | 0.147 | 0.007708 | Oligo | YDJC          |
| DRG2.3     | 5.19E-07 | -0.16269 | 0.099 | 0.204 | 0.00775  | Oligo | DRG2          |
| CCDC152    | 5.22E-07 | 0.195462 | 0.122 | 0.062 | 0.007804 | Oligo | CCDC152       |
| EIF4EBP2.  | 5.24E-07 | -0.22689 | 0.056 | 0.144 | 0.007834 | Oligo | EIF4EBP2      |
| RCBTB2.8   | 5.25E-07 | -0.28258 | 0.059 | 0.145 | 0.00785  | Oligo | RCBTB2        |
| PSMA5.3    | 5.27E-07 | -0.14811 | 0.299 | 0.448 | 0.007879 | Oligo | PSMA5         |
| ANKS6      | 5.28E-07 | 0.234761 | 0.075 | 0.032 | 0.007896 | Oligo | ANKS6         |
| SLC39A8.7  | 5.30E-07 | -0.20943 | 0.002 | 0.06  | 0.007922 | Oligo | SLC39A8       |
| SLC7A60S.  | 5.33E-07 | -0.23472 | 0.052 | 0.137 | 0.00796  | Oligo | SLC7A60S      |
| NDUFA11.3  | 5.34E-07 | 0.259883 | 0.758 | 0.74  | 0.007973 | Oligo | NDUFA11       |
| CLSTN3.6   | 5.37E-07 | -0.15974 | 0.002 | 0.06  | 0.008027 | Oligo | CLSTN3        |
| KCNJ16.7   | 5.43E-07 | -0.13115 | 0     | 0.056 | 0.008122 | Oligo | KCNJ16        |
| CCDC14.6   | 5.44E-07 | -0.18241 | 0.118 | 0.231 | 0.008123 | Oligo | CCDC14        |
| SCMH1.4    | 5.44E-07 | -0.16315 | 0.014 | 0.081 | 0.008135 | Oligo | SCMH1         |
| PRPF6.7    | 5.50E-07 | -0.13702 | 0.224 | 0.358 | 0.008212 | Oligo | PRPF6         |
| MMP19.5    | 5.52E-07 | -0.25    | 0.002 | 0.06  | 0.008251 | Oligo | MMP19         |

|              |          |          |       |       |          |       |               |
|--------------|----------|----------|-------|-------|----------|-------|---------------|
| CRISPLD1. 5. | 5.53E-07 | -0.19023 | 0.021 | 0.092 | 0.008261 | Oligo | CRISPLD1      |
| FAM198B. 6   | 5.55E-07 | 0.213221 | 0.118 | 0.059 | 0.0083   | Oligo | FAM198B       |
| PRKAR1B. 6   | 5.59E-07 | -0.2034  | 0.047 | 0.131 | 0.008349 | Oligo | PRKAR1B       |
| ARHGEF7. 7   | 5.59E-07 | 0.305499 | 0.235 | 0.155 | 0.008359 | Oligo | ARHGEF7       |
| DDX55. 5     | 5.60E-07 | -0.21925 | 0.04  | 0.121 | 0.008367 | Oligo | DDX55         |
| RP11-698N    | 5.68E-07 | -0.16475 | 0.002 | 0.06  | 0.008495 | Oligo | RP11-698N11.2 |
| FADD. 3      | 5.71E-07 | -0.13722 | 0.052 | 0.139 | 0.008531 | Oligo | FADD          |
| RBM23. 1     | 5.74E-07 | -0.18056 | 0.148 | 0.269 | 0.008579 | Oligo | RBM23         |
| PPIL1. 5     | 5.77E-07 | -0.15038 | 0.094 | 0.198 | 0.008625 | Oligo | PPIL1         |
| UXT. 6       | 5.78E-07 | -0.17242 | 0.388 | 0.543 | 0.008639 | Oligo | UXT           |
| TNFRSF11E    | 5.80E-07 | -0.21776 | 0     | 0.056 | 0.008668 | Oligo | TNFRSF11B     |
| SLC22A18. 5  | 5.80E-07 | -0.11033 | 0.042 | 0.127 | 0.008668 | Oligo | SLC22A18      |
| TNFAIP1. 7   | 5.80E-07 | -0.11301 | 0.078 | 0.179 | 0.008672 | Oligo | TNFAIP1       |
| EMILIN1. 1   | 5.85E-07 | -0.12662 | 0.002 | 0.06  | 0.008738 | Oligo | EMILIN1       |
| ABCB7        | 5.87E-07 | -0.20354 | 0.035 | 0.114 | 0.008777 | Oligo | ABCB7         |
| MPPED2. 7    | 5.92E-07 | -0.17745 | 0.021 | 0.092 | 0.008839 | Oligo | MPPED2        |
| FUCA2. 9     | 5.93E-07 | -0.18227 | 0.134 | 0.247 | 0.008863 | Oligo | FUCA2         |
| PTPN7. 9     | 5.93E-07 | -0.27429 | 0.014 | 0.081 | 0.008867 | Oligo | PTPN7         |
| DNAJC3. 5    | 5.97E-07 | -0.23331 | 0.172 | 0.297 | 0.008915 | Oligo | DNAJC3        |
| DHRS13. 5    | 5.97E-07 | -0.11657 | 0.026 | 0.1   | 0.008916 | Oligo | DHRS13        |
| MBIP. 7      | 6.03E-07 | -0.14535 | 0.085 | 0.183 | 0.009014 | Oligo | MBIP          |
| RRBP1. 4     | 6.06E-07 | 0.362122 | 0.374 | 0.294 | 0.009054 | Oligo | RRBP1         |
| ARG2. 6      | 6.07E-07 | -0.29629 | 0.028 | 0.102 | 0.009068 | Oligo | ARG2          |
| STIM1. 1     | 6.08E-07 | -0.15033 | 0.007 | 0.069 | 0.009087 | Oligo | STIM1         |
| SCAMP2. 9    | 6.09E-07 | -0.18515 | 0.247 | 0.379 | 0.009101 | Oligo | SCAMP2        |
| HERPUD2. 4   | 6.09E-07 | -0.12322 | 0.08  | 0.178 | 0.009107 | Oligo | HERPUD2       |
| CLP1. 3      | 6.13E-07 | -0.18846 | 0.012 | 0.077 | 0.009157 | Oligo | CLP1          |
| MTMR6. 4     | 6.14E-07 | 0.247278 | 0.219 | 0.142 | 0.009178 | Oligo | MTMR6         |
| ACADSB       | 6.15E-07 | 0.191327 | 0.085 | 0.038 | 0.009196 | Oligo | ACADSB        |
| RRAGB. 6     | 6.16E-07 | -0.18154 | 0.035 | 0.114 | 0.0092   | Oligo | RRAGB         |
| SNX3. 3      | 6.19E-07 | -0.18156 | 0.593 | 0.721 | 0.009243 | Oligo | SNX3          |
| LILRB2. 9    | 6.19E-07 | -0.25811 | 0     | 0.055 | 0.009251 | Oligo | LILRB2        |
| CSNK1G3. 7   | 6.23E-07 | -0.14668 | 0.064 | 0.156 | 0.009315 | Oligo | CSNK1G3       |
| CREB1. 5     | 6.27E-07 | -0.15878 | 0.132 | 0.245 | 0.009363 | Oligo | CREB1         |
| KDELC2. 1    | 6.27E-07 | -0.16001 | 0.012 | 0.077 | 0.009367 | Oligo | KDELC2        |
| LINC00957    | 6.28E-07 | 0.107773 | 0.033 | 0.009 | 0.00938  | Oligo | LINC00957     |
| CPD. 5       | 6.29E-07 | 0.275797 | 0.233 | 0.157 | 0.009395 | Oligo | CPD           |
| ARHGAP12. 6  | 6.29E-07 | -0.17744 | 0.092 | 0.193 | 0.0094   | Oligo | ARHGAP12      |
| TFPI. 4      | 6.33E-07 | -0.17372 | 0     | 0.055 | 0.009453 | Oligo | TFPI          |
| SPPL3. 7     | 6.34E-07 | 0.414439 | 0.271 | 0.195 | 0.009476 | Oligo | SPPL3         |
| ATRX. 6      | 6.37E-07 | -0.11848 | 0.301 | 0.449 | 0.009519 | Oligo | ATRX          |
| SP140L. 5    | 6.43E-07 | -0.23708 | 0.014 | 0.08  | 0.009616 | Oligo | SP140L        |
| CTTNBP2NL    | 6.44E-07 | -0.16911 | 0.066 | 0.157 | 0.00962  | Oligo | CTTNBP2NL     |
| CDK14. 5     | 6.45E-07 | -0.15329 | 0.014 | 0.081 | 0.009635 | Oligo | CDK14         |
| CLEC4A. 9    | 6.45E-07 | -0.27959 | 0.005 | 0.064 | 0.009643 | Oligo | CLEC4A        |
| OSBPL11. 1   | 6.46E-07 | -0.15658 | 0.024 | 0.096 | 0.009658 | Oligo | OSBPL11       |
| PTGS2. 8     | 6.53E-07 | -0.26984 | 0.005 | 0.063 | 0.009755 | Oligo | PTGS2         |
| PDCD6. 3     | 6.56E-07 | -0.19181 | 0.386 | 0.54  | 0.009799 | Oligo | PDCD6         |
| IFRD2. 3     | 6.56E-07 | -0.17004 | 0.104 | 0.212 | 0.0098   | Oligo | IFRD2         |
| HOXA10. 9    | 6.58E-07 | -0.22639 | 0.014 | 0.079 | 0.009829 | Oligo | HOXA10        |
| ELMOD2. 1    | 6.58E-07 | -0.14399 | 0.031 | 0.107 | 0.009837 | Oligo | ELMOD2        |

|            |          |          |       |       |          |       |              |
|------------|----------|----------|-------|-------|----------|-------|--------------|
| ATAT1.9    | 6.58E-07 | -0.21883 | 0.176 | 0.293 | 0.00984  | Oligo | ATAT1        |
| PRAM1.7    | 6.61E-07 | -0.25007 | 0     | 0.055 | 0.009872 | Oligo | PRAM1        |
| MOB3A.4    | 6.62E-07 | -0.21081 | 0.073 | 0.166 | 0.009893 | Oligo | MOB3A        |
| NUDCD1.4   | 6.65E-07 | -0.16767 | 0.028 | 0.103 | 0.009934 | Oligo | NUDCD1       |
| CMSS1.6    | 6.68E-07 | -0.14111 | 0.169 | 0.294 | 0.009989 | Oligo | CMSS1        |
| MOXD1.7    | 6.75E-07 | -0.14124 | 0     | 0.055 | 0.010089 | Oligo | MOXD1        |
| TCF7.6     | 6.76E-07 | -0.14349 | 0.054 | 0.143 | 0.010098 | Oligo | TCF7         |
| DPH5.2     | 6.76E-07 | -0.11467 | 0.073 | 0.168 | 0.010109 | Oligo | DPH5         |
| RASA3.3    | 6.77E-07 | 0.309121 | 0.158 | 0.091 | 0.010117 | Oligo | RASA3        |
| PLXNC1.9   | 6.81E-07 | -0.20129 | 0.007 | 0.068 | 0.010179 | Oligo | PLXNC1       |
| TNIP2.4    | 6.82E-07 | -0.19062 | 0.073 | 0.168 | 0.010194 | Oligo | TNIP2        |
| BCOR.2     | 6.84E-07 | 0.182267 | 0.106 | 0.052 | 0.010229 | Oligo | BCOR         |
| TMED10.4   | 6.86E-07 | 0.244407 | 0.659 | 0.611 | 0.010248 | Oligo | TMED10       |
| SLC35B3.1  | 6.88E-07 | -0.15921 | 0.045 | 0.128 | 0.010276 | Oligo | SLC35B3      |
| MTA1.6     | 6.89E-07 | -0.16663 | 0.092 | 0.194 | 0.010296 | Oligo | MTA1         |
| RP11-345J  | 6.89E-07 | -0.16566 | 0.125 | 0.239 | 0.010299 | Oligo | RP11-345J4.5 |
| CNKSR2.7   | 6.91E-07 | -0.12739 | 0.005 | 0.064 | 0.010325 | Oligo | CNKSR2       |
| CCDC88B.3  | 6.95E-07 | -0.23859 | 0.016 | 0.084 | 0.010391 | Oligo | CCDC88B      |
| ISY1.3     | 7.04E-07 | -0.19241 | 0.08  | 0.178 | 0.010518 | Oligo | ISY1         |
| KIAA0101.7 | 7.04E-07 | -0.22319 | 0.04  | 0.12  | 0.010527 | Oligo | KIAA0101     |
| ZNF302.8   | 7.05E-07 | 0.387599 | 0.379 | 0.312 | 0.010531 | Oligo | ZNF302       |
| SLC15A3.8  | 7.10E-07 | -0.25945 | 0.009 | 0.071 | 0.010607 | Oligo | SLC15A3      |
| TXNRD2.3   | 7.10E-07 | -0.12804 | 0.04  | 0.121 | 0.010607 | Oligo | TXNRD2       |
| GMPR2.3    | 7.11E-07 | -0.18095 | 0.111 | 0.219 | 0.010622 | Oligo | GMPR2        |
| FOXN3.6    | 7.11E-07 | -0.19875 | 0.151 | 0.259 | 0.010628 | Oligo | FOXN3        |
| SPC25.8    | 7.14E-07 | -0.20465 | 0.005 | 0.064 | 0.010668 | Oligo | SPC25        |
| ZNF44.4    | 7.15E-07 | -0.15246 | 0.031 | 0.107 | 0.010678 | Oligo | ZNF44        |
| ASNSD1.7   | 7.16E-07 | -0.12486 | 0.158 | 0.275 | 0.010699 | Oligo | ASNSD1       |
| PDCD5.7    | 7.20E-07 | -0.15529 | 0.4   | 0.544 | 0.010762 | Oligo | PDCD5        |
| GRSF1.5    | 7.28E-07 | -0.15925 | 0.2   | 0.327 | 0.010882 | Oligo | GRSF1        |
| SAFB2.5    | 7.31E-07 | -0.14429 | 0.202 | 0.336 | 0.010927 | Oligo | SAFB2        |
| DIAPH2.5   | 7.36E-07 | -0.21232 | 0.007 | 0.067 | 0.010992 | Oligo | DIAPH2       |
| SRFBP1.3   | 7.41E-07 | -0.15248 | 0.085 | 0.184 | 0.01108  | Oligo | SRFBP1       |
| SAMD10.5   | 7.42E-07 | -0.12177 | 0.002 | 0.059 | 0.011093 | Oligo | SAMD10       |
| PHF20L1.8  | 7.50E-07 | -0.15038 | 0.191 | 0.312 | 0.011211 | Oligo | PHF20L1      |
| TACC3.5    | 7.50E-07 | -0.21453 | 0.014 | 0.079 | 0.011212 | Oligo | TACC3        |
| CNR1.7     | 7.54E-07 | -0.14217 | 0.012 | 0.076 | 0.011264 | Oligo | CNR1         |
| SYDE1.5    | 7.54E-07 | -0.11279 | 0.009 | 0.072 | 0.011269 | Oligo | SYDE1        |
| F11R.8     | 7.56E-07 | -0.22682 | 0.002 | 0.059 | 0.011303 | Oligo | F11R         |
| ZNF428.9   | 7.57E-07 | -0.22783 | 0.447 | 0.548 | 0.011315 | Oligo | ZNF428       |
| PSENE1.5   | 7.59E-07 | -0.16449 | 0.344 | 0.498 | 0.011339 | Oligo | PSENE1       |
| FN3KRP.4   | 7.60E-07 | 0.491871 | 0.292 | 0.218 | 0.011359 | Oligo | FN3KRP       |
| FASTKD5.3  | 7.62E-07 | -0.14231 | 0.035 | 0.113 | 0.011391 | Oligo | FASTKD5      |
| ZHX1.8     | 7.66E-07 | -0.10252 | 0.106 | 0.213 | 0.011452 | Oligo | ZHX1         |
| SIK1.8     | 7.66E-07 | -0.31337 | 0.031 | 0.103 | 0.011454 | Oligo | SIK1         |
| PLXNA1.2   | 7.67E-07 | -0.14856 | 0.019 | 0.088 | 0.011457 | Oligo | PLXNA1       |
| PI3.5      | 7.69E-07 | -0.44038 | 0     | 0.055 | 0.011489 | Oligo | PI3          |
| METTL22.3  | 7.71E-07 | -0.13842 | 0.021 | 0.092 | 0.011516 | Oligo | METTL22      |
| DNAJC7.4   | 7.75E-07 | -0.16544 | 0.315 | 0.47  | 0.011577 | Oligo | DNAJC7       |
| GHRL.5     | 7.76E-07 | -0.20466 | 0.002 | 0.059 | 0.011598 | Oligo | GHRL         |
| MAFG-AS1.7 | 7.78E-07 | -0.10706 | 0.007 | 0.068 | 0.011631 | Oligo | MAFG-AS1     |

|            |          |          |       |       |          |       |          |
|------------|----------|----------|-------|-------|----------|-------|----------|
| KHDRBS1.7  | 7.79E-07 | -0.11724 | 0.351 | 0.491 | 0.011643 | Oligo | KHDRBS1  |
| GCA.9      | 7.81E-07 | 0.465073 | 0.386 | 0.296 | 0.011665 | Oligo | GCA      |
| DDX50.2    | 7.84E-07 | -0.17226 | 0.071 | 0.163 | 0.011716 | Oligo | DDX50    |
| CTDSP2.5   | 7.85E-07 | 0.251557 | 0.358 | 0.274 | 0.011727 | Oligo | CTDSP2   |
| ARL1.4     | 7.93E-07 | -0.18667 | 0.193 | 0.318 | 0.011847 | Oligo | ARL1     |
| CCDC50.5   | 7.93E-07 | -0.23247 | 0.184 | 0.304 | 0.011855 | Oligo | CCDC50   |
| UBE2G1.8   | 8.03E-07 | 0.276255 | 0.329 | 0.255 | 0.011996 | Oligo | UBE2G1   |
| RGS18.9    | 8.03E-07 | -0.24522 | 0     | 0.054 | 0.011997 | Oligo | RGS18    |
| LPXN.9     | 8.17E-07 | -0.3223  | 0.038 | 0.113 | 0.012207 | Oligo | LPXN     |
| IKBKE.8    | 8.17E-07 | -0.21846 | 0.002 | 0.059 | 0.012215 | Oligo | IKBKE    |
| GNGT2.9    | 8.20E-07 | -0.239   | 0     | 0.054 | 0.01226  | Oligo | GNGT2    |
| RPE.2      | 8.22E-07 | -0.20699 | 0.068 | 0.161 | 0.01228  | Oligo | RPE      |
| SLC5A6.2   | 8.22E-07 | -0.17364 | 0.033 | 0.109 | 0.012281 | Oligo | SLC5A6   |
| NSUN2.3    | 8.23E-07 | -0.14126 | 0.052 | 0.137 | 0.012305 | Oligo | NSUN2    |
| EPHA4.6    | 8.29E-07 | -0.14399 | 0.016 | 0.084 | 0.012392 | Oligo | EPHA4    |
| FANCF.6    | 8.34E-07 | -0.1894  | 0.024 | 0.094 | 0.012461 | Oligo | FANCF    |
| CTIF.2     | 8.46E-07 | 0.240398 | 0.092 | 0.043 | 0.012635 | Oligo | CTIF     |
| NCAN.7     | 8.50E-07 | -0.23283 | 0.016 | 0.082 | 0.012704 | Oligo | NCAN     |
| LNX1.6     | 8.52E-07 | -0.19955 | 0.009 | 0.071 | 0.012739 | Oligo | LNX1     |
| MFF.4      | 8.56E-07 | -0.13691 | 0.332 | 0.495 | 0.012788 | Oligo | MFF      |
| DDA1.3     | 8.60E-07 | -0.10816 | 0.198 | 0.333 | 0.012847 | Oligo | DDA1     |
| PROCR.8    | 8.62E-07 | -0.24367 | 0.009 | 0.071 | 0.012875 | Oligo | PROCR    |
| PCTP.4     | 8.62E-07 | -0.22085 | 0.012 | 0.075 | 0.012887 | Oligo | PCTP     |
| ALKBH2.8   | 8.71E-07 | -0.1118  | 0.094 | 0.199 | 0.013016 | Oligo | ALKBH2   |
| FAT3.6     | 8.72E-07 | -0.12623 | 0.002 | 0.058 | 0.013038 | Oligo | FAT3     |
| UBE2W.2    | 8.79E-07 | -0.10383 | 0.111 | 0.217 | 0.013132 | Oligo | UBE2W    |
| CACNB3.6   | 8.81E-07 | -0.14464 | 0.005 | 0.063 | 0.01317  | Oligo | CACNB3   |
| POC1A.6    | 8.83E-07 | -0.14709 | 0.002 | 0.059 | 0.013198 | Oligo | POC1A    |
| RNF40.3    | 8.84E-07 | -0.16031 | 0.082 | 0.179 | 0.013218 | Oligo | RNF40    |
| CCDC51.2   | 8.85E-07 | -0.12303 | 0.028 | 0.103 | 0.013224 | Oligo | CCDC51   |
| RTF1.7     | 8.88E-07 | -0.19252 | 0.294 | 0.435 | 0.013266 | Oligo | RTF1     |
| PGPEP1.2   | 8.88E-07 | -0.18687 | 0.052 | 0.137 | 0.013268 | Oligo | PGPEP1   |
| BEX1.8     | 8.88E-07 | 0.45427  | 0.44  | 0.348 | 0.013269 | Oligo | BEX1     |
| CHST12.7   | 8.88E-07 | -0.13469 | 0.136 | 0.25  | 0.013275 | Oligo | CHST12   |
| VGf.7      | 8.90E-07 | -0.19431 | 0.009 | 0.071 | 0.013298 | Oligo | VGf      |
| HOXA5.5    | 8.92E-07 | -0.20575 | 0.005 | 0.062 | 0.013336 | Oligo | HOXA5    |
| ATG9A.6    | 9.02E-07 | 0.317047 | 0.184 | 0.114 | 0.013487 | Oligo | ATG9A    |
| STARD10.4  | 9.04E-07 | 0.413576 | 0.134 | 0.075 | 0.013508 | Oligo | STARD10  |
| FBXO11.7   | 9.11E-07 | -0.12897 | 0.104 | 0.21  | 0.013607 | Oligo | FBXO11   |
| CARD9.9    | 9.15E-07 | -0.22838 | 0.009 | 0.071 | 0.013678 | Oligo | CARD9    |
| ENHO.8     | 9.16E-07 | -0.12299 | 0.064 | 0.154 | 0.01369  | Oligo | ENHO     |
| JAZF1.5    | 9.20E-07 | -0.27131 | 0.04  | 0.117 | 0.013756 | Oligo | JAZF1    |
| GEMIN2.3   | 9.29E-07 | -0.13868 | 0.035 | 0.113 | 0.013885 | Oligo | GEMIN2   |
| SAA2.6     | 9.34E-07 | -0.6866  | 0     | 0.054 | 0.01396  | Oligo | SAA2     |
| IZUMO4.5   | 9.40E-07 | 0.38116  | 0.12  | 0.064 | 0.014042 | Oligo | IZUMO4   |
| NOA1.5     | 9.46E-07 | -0.16359 | 0.059 | 0.146 | 0.014132 | Oligo | NOA1     |
| DCAF12.1   | 9.55E-07 | -0.19537 | 0.054 | 0.139 | 0.014264 | Oligo | DCAF12   |
| HAT1.4     | 9.57E-07 | -0.21522 | 0.176 | 0.301 | 0.014302 | Oligo | HAT1     |
| ARHGAP32.9 | 9.63E-07 | -0.14955 | 0.019 | 0.087 | 0.014389 | Oligo | ARHGAP32 |
| ZNF558.5   | 9.66E-07 | -0.13191 | 0.014 | 0.08  | 0.014429 | Oligo | ZNF558   |
| PITPNM1.2  | 9.73E-07 | -0.13088 | 0.002 | 0.058 | 0.014546 | Oligo | PITPNM1  |

|            |           |           |        |        |           |       |                 |
|------------|-----------|-----------|--------|--------|-----------|-------|-----------------|
| NKX2-5. 7  | 9. 75E-07 | -0. 20218 | 0. 007 | 0. 067 | 0. 014575 | Oligo | NKX2-5          |
| CAPN5. 4   | 9. 83E-07 | -0. 12741 | 0. 009 | 0. 071 | 0. 014687 | Oligo | CAPN5           |
| MEF2A. 9   | 9. 88E-07 | -0. 27525 | 0. 118 | 0. 219 | 0. 014758 | Oligo | MEF2A           |
| SMO. 5     | 9. 97E-07 | -0. 10951 | 0      | 0. 053 | 0. 014896 | Oligo | SMO             |
| ACTA2. 4   | 9. 97E-07 | -0. 19839 | 0      | 0. 053 | 0. 014896 | Oligo | ACTA2           |
| WDR7       | 1. 00E-06 | 0. 137992 | 0. 087 | 0. 04  | 0. 015015 | Oligo | WDR7            |
| SDHC. 4    | 1. 01E-06 | -0. 12388 | 0. 398 | 0. 563 | 0. 01504  | Oligo | SDHC            |
| SIK2. 1    | 1. 01E-06 | 0. 253167 | 0. 108 | 0. 055 | 0. 01514  | Oligo | SIK2            |
| LRRN2. 3   | 1. 01E-06 | -0. 11182 | 0. 002 | 0. 058 | 0. 015143 | Oligo | LRRN2           |
| COASY. 1   | 1. 04E-06 | -0. 13045 | 0. 096 | 0. 198 | 0. 015612 | Oligo | COASY           |
| ZCCHC6. 7  | 1. 06E-06 | -0. 22474 | 0. 054 | 0. 138 | 0. 015789 | Oligo | ZCCHC6          |
| EMID1. 5   | 1. 06E-06 | -0. 13631 | 0. 012 | 0. 075 | 0. 015844 | Oligo | EMID1           |
| RP11-347F  | 1. 06E-06 | -0. 27262 | 0. 007 | 0. 066 | 0. 015886 | Oligo | RP11-347P5. 1   |
| FASTK. 6   | 1. 07E-06 | -0. 15133 | 0. 209 | 0. 342 | 0. 015963 | Oligo | FASTK           |
| STK40. 1   | 1. 07E-06 | -0. 11235 | 0. 045 | 0. 127 | 0. 016013 | Oligo | STK40           |
| SLC39A4. 7 | 1. 08E-06 | -0. 24662 | 0. 024 | 0. 093 | 0. 016072 | Oligo | SLC39A4         |
| RIPK1      | 1. 08E-06 | -0. 14818 | 0. 009 | 0. 07  | 0. 016135 | Oligo | RIPK1           |
| MTRF1L. 6  | 1. 08E-06 | -0. 12973 | 0. 092 | 0. 194 | 0. 016156 | Oligo | MTRF1L          |
| CMAS. 4    | 1. 08E-06 | -0. 20563 | 0. 155 | 0. 271 | 0. 016169 | Oligo | CMAS            |
| NAP1L6     | 1. 09E-06 | 0. 181976 | 0. 033 | 0. 009 | 0. 016303 | Oligo | NAP1L6          |
| DHX36. 7   | 1. 09E-06 | -0. 13405 | 0. 292 | 0. 431 | 0. 016339 | Oligo | DHX36           |
| PARD6A. 5  | 1. 10E-06 | -0. 15427 | 0. 026 | 0. 097 | 0. 016387 | Oligo | PARD6A          |
| VAX2. 8    | 1. 10E-06 | -0. 15496 | 0. 016 | 0. 082 | 0. 016457 | Oligo | VAX2            |
| RP11-977G  | 1. 11E-06 | -0. 1436  | 0. 009 | 0. 07  | 0. 016542 | Oligo | RP11-977G19. 11 |
| AFTPH. 3   | 1. 11E-06 | -0. 17788 | 0. 066 | 0. 156 | 0. 016601 | Oligo | AFTPH           |
| SMC6. 6    | 1. 11E-06 | -0. 16663 | 0. 068 | 0. 16  | 0. 016637 | Oligo | SMC6            |
| SBK1. 9    | 1. 12E-06 | -0. 18749 | 0. 012 | 0. 074 | 0. 016731 | Oligo | SBK1            |
| SOX21-AS1  | 1. 12E-06 | -0. 11161 | 0. 007 | 0. 067 | 0. 016738 | Oligo | SOX21-AS1       |
| RANBP9. 2  | 1. 12E-06 | -0. 21731 | 0. 066 | 0. 154 | 0. 016744 | Oligo | RANBP9          |
| EN1. 6     | 1. 13E-06 | -0. 16627 | 0. 007 | 0. 066 | 0. 016921 | Oligo | EN1             |
| ELP2. 3    | 1. 14E-06 | -0. 11619 | 0. 104 | 0. 207 | 0. 017039 | Oligo | ELP2            |
| MFAP1. 4   | 1. 14E-06 | -0. 13123 | 0. 08  | 0. 176 | 0. 017101 | Oligo | MFAP1           |
| HELLS. 4   | 1. 15E-06 | -0. 17864 | 0. 007 | 0. 066 | 0. 017231 | Oligo | HELLS           |
| SLAMF8. 9  | 1. 16E-06 | -0. 25157 | 0. 007 | 0. 065 | 0. 017261 | Oligo | SLAMF8          |
| CPNE5. 5   | 1. 16E-06 | -0. 11291 | 0      | 0. 053 | 0. 017329 | Oligo | CPNE5           |
| FAM20A. 8  | 1. 16E-06 | -0. 22329 | 0. 005 | 0. 062 | 0. 017353 | Oligo | FAM20A          |
| ADAM19. 5  | 1. 17E-06 | -0. 15167 | 0. 016 | 0. 082 | 0. 01745  | Oligo | ADAM19          |
| DSCC1. 5   | 1. 17E-06 | -0. 13932 | 0. 005 | 0. 062 | 0. 017492 | Oligo | DSCC1           |
| TMEM255B.  | 1. 17E-06 | -0. 28461 | 0. 002 | 0. 057 | 0. 017494 | Oligo | TMEM255B        |
| CCT3. 6    | 1. 17E-06 | -0. 13046 | 0. 44  | 0. 583 | 0. 0175   | Oligo | CCT3            |
| CAPN2. 5   | 1. 17E-06 | -0. 15597 | 0. 141 | 0. 256 | 0. 017529 | Oligo | CAPN2           |
| YWHAB. 3   | 1. 17E-06 | -0. 13752 | 0. 595 | 0. 707 | 0. 017557 | Oligo | YWHAB           |
| TCEA2. 8   | 1. 18E-06 | -0. 20042 | 0. 247 | 0. 373 | 0. 017598 | Oligo | TCEA2           |
| IL27RA. 3  | 1. 18E-06 | -0. 15409 | 0. 002 | 0. 057 | 0. 017632 | Oligo | IL27RA          |
| PELI3      | 1. 18E-06 | 0. 262114 | 0. 049 | 0. 017 | 0. 017651 | Oligo | PELI3           |
| COIL. 6    | 1. 19E-06 | -0. 12568 | 0. 089 | 0. 189 | 0. 017711 | Oligo | COIL            |
| BCLAF1. 6  | 1. 19E-06 | -0. 17848 | 0. 247 | 0. 39  | 0. 017733 | Oligo | BCLAF1          |
| HADH. 3    | 1. 19E-06 | -0. 15361 | 0. 108 | 0. 211 | 0. 017835 | Oligo | HADH            |
| WSB2. 8    | 1. 20E-06 | 0. 349075 | 0. 287 | 0. 221 | 0. 017866 | Oligo | WSB2            |
| RAB35. 5   | 1. 22E-06 | -0. 18301 | 0. 075 | 0. 169 | 0. 018218 | Oligo | RAB35           |
| FBXL3. 5   | 1. 22E-06 | 0. 26404  | 0. 249 | 0. 173 | 0. 018226 | Oligo | FBXL3           |



|             |           |           |        |        |           |       |                |
|-------------|-----------|-----------|--------|--------|-----------|-------|----------------|
| RP11-452F   | 1. 23E-06 | -0. 22989 | 0. 049 | 0. 13  | 0. 018363 | Oligo | RP11-452F19. 3 |
| RP11-556E   | 1. 23E-06 | -0. 27235 | 0. 002 | 0. 057 | 0. 018363 | Oligo | RP11-556E13. 1 |
| ZNF136. 7   | 1. 23E-06 | -0. 18914 | 0. 028 | 0. 1   | 0. 018378 | Oligo | ZNF136         |
| PARD3. 5    | 1. 24E-06 | -0. 10726 | 0. 005 | 0. 061 | 0. 018472 | Oligo | PARD3          |
| KCNQ10T1. 1 | 1. 25E-06 | 0. 338507 | 0. 36  | 0. 275 | 0. 018695 | Oligo | KCNQ10T1       |
| SUSD1. 6    | 1. 25E-06 | -0. 16128 | 0. 002 | 0. 057 | 0. 018698 | Oligo | SUSD1          |
| CNOT3. 4    | 1. 25E-06 | -0. 15874 | 0. 073 | 0. 166 | 0. 018728 | Oligo | CNOT3          |
| ZSCAN21. 6  | 1. 26E-06 | -0. 12218 | 0. 031 | 0. 105 | 0. 018762 | Oligo | ZSCAN21        |
| CISD3. 8    | 1. 26E-06 | -0. 23136 | 0. 146 | 0. 258 | 0. 018871 | Oligo | CISD3          |
| PLEKHA3. 6  | 1. 26E-06 | -0. 18527 | 0. 127 | 0. 235 | 0. 018896 | Oligo | PLEKHA3        |
| IL13RA2. 7  | 1. 27E-06 | -0. 26081 | 0. 002 | 0. 057 | 0. 018907 | Oligo | IL13RA2        |
| CCDC24. 1   | 1. 27E-06 | -0. 15137 | 0. 002 | 0. 057 | 0. 018958 | Oligo | CCDC24         |
| RP11-88I1   | 1. 27E-06 | 0. 145361 | 0. 049 | 0. 017 | 0. 018974 | Oligo | RP11-88I18. 2  |
| OAZ2. 1     | 1. 28E-06 | 0. 35257  | 0. 544 | 0. 505 | 0. 019173 | Oligo | OAZ2           |
| ZNF226. 6   | 1. 28E-06 | -0. 10946 | 0. 104 | 0. 207 | 0. 019178 | Oligo | ZNF226         |
| TOMM34. 4   | 1. 29E-06 | -0. 17378 | 0. 054 | 0. 139 | 0. 019329 | Oligo | TOMM34         |
| MYT1L. 9    | 1. 30E-06 | -0. 22408 | 0. 005 | 0. 061 | 0. 019471 | Oligo | MYT1L          |
| ZDHHC24. 4  | 1. 31E-06 | -0. 17272 | 0. 092 | 0. 191 | 0. 019562 | Oligo | ZDHHC24        |
| UBL5. 6     | 1. 31E-06 | 0. 147323 | 0. 809 | 0. 832 | 0. 01958  | Oligo | UBL5           |
| HMGXB3. 1   | 1. 31E-06 | -0. 14872 | 0. 047 | 0. 129 | 0. 019586 | Oligo | HMGXB3         |
| ANKMY2. 5   | 1. 31E-06 | -0. 19325 | 0. 042 | 0. 121 | 0. 019629 | Oligo | ANKMY2         |
| PHLDA2. 3   | 1. 32E-06 | -0. 16207 | 0      | 0. 052 | 0. 019727 | Oligo | PHLDA2         |
| FGF9. 8     | 1. 32E-06 | -0. 18891 | 0      | 0. 052 | 0. 019727 | Oligo | FGF9           |
| CYB5R1. 3   | 1. 32E-06 | -0. 27781 | 0. 153 | 0. 262 | 0. 019735 | Oligo | CYB5R1         |
| TMEM50B. 5  | 1. 33E-06 | -0. 20703 | 0. 188 | 0. 307 | 0. 01994  | Oligo | TMEM50B        |
| ZNF561. 3   | 1. 34E-06 | -0. 17951 | 0. 038 | 0. 114 | 0. 019997 | Oligo | ZNF561         |
| F8A1. 3     | 1. 35E-06 | -0. 12588 | 0. 056 | 0. 143 | 0. 020134 | Oligo | F8A1           |
| MIR497HG. 1 | 1. 35E-06 | -0. 21152 | 0. 009 | 0. 069 | 0. 020218 | Oligo | MIR497HG       |
| CCHCR1. 2   | 1. 36E-06 | -0. 11628 | 0. 014 | 0. 078 | 0. 02032  | Oligo | CCHCR1         |
| C14orf1. 6  | 1. 36E-06 | -0. 17146 | 0. 179 | 0. 297 | 0. 020346 | Oligo | C14orf1        |
| CTD-2270L   | 1. 38E-06 | -0. 15358 | 0. 002 | 0. 057 | 0. 020599 | Oligo | CTD-2270L9. 4  |
| RNF41. 2    | 1. 39E-06 | -0. 17723 | 0. 078 | 0. 17  | 0. 020748 | Oligo | RNF41          |
| SLAIN2. 4   | 1. 39E-06 | -0. 15704 | 0. 056 | 0. 142 | 0. 020782 | Oligo | SLAIN2         |
| GINS1. 4    | 1. 40E-06 | -0. 12823 | 0. 002 | 0. 056 | 0. 020939 | Oligo | GINS1          |
| KTI12. 5    | 1. 40E-06 | -0. 13128 | 0. 033 | 0. 108 | 0. 020992 | Oligo | KTI12          |
| PCDHB2. 7   | 1. 41E-06 | -0. 11993 | 0. 016 | 0. 082 | 0. 021014 | Oligo | PCDHB2         |
| MTFP1. 4    | 1. 42E-06 | -0. 18535 | 0. 009 | 0. 069 | 0. 02125  | Oligo | MTFP1          |
| GIMAP7. 6   | 1. 43E-06 | -0. 27852 | 0. 002 | 0. 056 | 0. 0213   | Oligo | GIMAP7         |
| PCDHB7. 7   | 1. 43E-06 | -0. 18055 | 0. 012 | 0. 073 | 0. 021328 | Oligo | PCDHB7         |
| LITAF. 9    | 1. 44E-06 | 0. 340572 | 0. 544 | 0. 456 | 0. 021521 | Oligo | LITAF          |
| ZNF626. 5   | 1. 45E-06 | -0. 1591  | 0. 059 | 0. 146 | 0. 021634 | Oligo | ZNF626         |
| NME2. 2     | 1. 45E-06 | -0. 15613 | 0. 021 | 0. 088 | 0. 021731 | Oligo | NME2           |
| IL4R. 9     | 1. 46E-06 | -0. 23776 | 0. 012 | 0. 073 | 0. 02181  | Oligo | IL4R           |
| NRXN3. 1    | 1. 47E-06 | 0. 155411 | 0. 059 | 0. 023 | 0. 022018 | Oligo | NRXN3          |
| FAM216A. 5  | 1. 48E-06 | -0. 1322  | 0. 045 | 0. 125 | 0. 022044 | Oligo | FAM216A        |
| ZNF528. 6   | 1. 48E-06 | -0. 1388  | 0. 035 | 0. 111 | 0. 022048 | Oligo | ZNF528         |
| BLOC1S6. 3  | 1. 48E-06 | -0. 12171 | 0. 146 | 0. 264 | 0. 022146 | Oligo | BLOC1S6        |
| COQ10A. 6   | 1. 49E-06 | -0. 15623 | 0. 031 | 0. 103 | 0. 022207 | Oligo | COQ10A         |
| PDCD2L. 6   | 1. 49E-06 | -0. 1538  | 0. 033 | 0. 107 | 0. 022218 | Oligo | PDCD2L         |
| POLR1C. 6   | 1. 50E-06 | -0. 2079  | 0. 045 | 0. 124 | 0. 02247  | Oligo | POLR1C         |
| RFX5. 5     | 1. 51E-06 | -0. 17971 | 0. 033 | 0. 107 | 0. 022605 | Oligo | RFX5           |

|            |          |          |       |       |          |       |          |
|------------|----------|----------|-------|-------|----------|-------|----------|
| HTRA2.4    | 1.51E-06 | -0.17614 | 0.122 | 0.228 | 0.022614 | Oligo | HTRA2    |
| PITPNA.3   | 1.52E-06 | -0.13796 | 0.087 | 0.185 | 0.02273  | Oligo | PITPNA   |
| PPP5C.6    | 1.55E-06 | -0.15688 | 0.085 | 0.18  | 0.023176 | Oligo | PPP5C    |
| DXO.4      | 1.56E-06 | -0.10728 | 0.045 | 0.124 | 0.023287 | Oligo | DXO      |
| YTHDC2.3   | 1.56E-06 | -0.14854 | 0.042 | 0.121 | 0.023331 | Oligo | YTHDC2   |
| NXT2.2     | 1.57E-06 | -0.12018 | 0.019 | 0.085 | 0.023522 | Oligo | NXT2     |
| ELK1.3     | 1.58E-06 | -0.1564  | 0.031 | 0.103 | 0.023591 | Oligo | ELK1     |
| FANCA.2    | 1.59E-06 | -0.1435  | 0.005 | 0.061 | 0.023807 | Oligo | FANCA    |
| NUDT15.1   | 1.60E-06 | -0.15327 | 0.035 | 0.11  | 0.023874 | Oligo | NUDT15   |
| DLEU7.8    | 1.60E-06 | -0.23741 | 0     | 0.052 | 0.023957 | Oligo | DLEU7    |
| RBM22.4    | 1.61E-06 | -0.17285 | 0.184 | 0.307 | 0.024007 | Oligo | RBM22    |
| TP53.2     | 1.61E-06 | -0.20782 | 0.04  | 0.116 | 0.024012 | Oligo | TP53     |
| KLF12.7    | 1.61E-06 | -0.17711 | 0.021 | 0.087 | 0.024025 | Oligo | KLF12    |
| SGK1.9     | 1.62E-06 | 0.277995 | 0.539 | 0.433 | 0.024188 | Oligo | SGK1     |
| C5orf24.7  | 1.62E-06 | 0.333872 | 0.358 | 0.294 | 0.024208 | Oligo | C5orf24  |
| HPSE.8     | 1.62E-06 | -0.23951 | 0.005 | 0.06  | 0.024251 | Oligo | HPSE     |
| RBM18.5    | 1.63E-06 | -0.16853 | 0.108 | 0.21  | 0.024398 | Oligo | RBM18    |
| LAGE3.2    | 1.65E-06 | -0.22846 | 0.266 | 0.404 | 0.02465  | Oligo | LAGE3    |
| PLCD3.5    | 1.65E-06 | -0.10988 | 0.009 | 0.069 | 0.024667 | Oligo | PLCD3    |
| PICALM.9   | 1.65E-06 | 0.356843 | 0.351 | 0.279 | 0.024709 | Oligo | PICALM   |
| NUF2.9     | 1.66E-06 | -0.20926 | 0.007 | 0.064 | 0.024782 | Oligo | NUF2     |
| C6orf62.5  | 1.66E-06 | -0.17409 | 0.32  | 0.457 | 0.024853 | Oligo | C6orf62  |
| CACNG4.6   | 1.67E-06 | -0.13777 | 0     | 0.051 | 0.025014 | Oligo | CACNG4   |
| TSHZ2.7    | 1.67E-06 | -0.21343 | 0     | 0.051 | 0.025014 | Oligo | TSHZ2    |
| GLO1.7     | 1.67E-06 | -0.14858 | 0.273 | 0.415 | 0.025016 | Oligo | GLO1     |
| BIN3.2     | 1.68E-06 | -0.14928 | 0.068 | 0.158 | 0.025113 | Oligo | BIN3     |
| SMDT1.3    | 1.70E-06 | -0.10539 | 0.416 | 0.564 | 0.02543  | Oligo | SMDT1    |
| CYLD.5     | 1.73E-06 | 0.289677 | 0.238 | 0.162 | 0.025812 | Oligo | CYLD     |
| ANKRD13D.1 | 1.73E-06 | -0.13734 | 0.078 | 0.171 | 0.025825 | Oligo | ANKRD13D |
| HOXC10.7   | 1.76E-06 | -0.17703 | 0.002 | 0.056 | 0.026375 | Oligo | HOXC10   |
| SEC23A.2   | 1.77E-06 | -0.14636 | 0.096 | 0.197 | 0.026415 | Oligo | SEC23A   |
| INPP5D.9   | 1.78E-06 | -0.25442 | 0.021 | 0.087 | 0.026558 | Oligo | INPP5D   |
| C12orf45.1 | 1.78E-06 | -0.25839 | 0.087 | 0.182 | 0.02658  | Oligo | C12orf45 |
| PINLYP.4   | 1.78E-06 | -0.19551 | 0.002 | 0.056 | 0.026651 | Oligo | PINLYP   |
| AMOTL1.4   | 1.80E-06 | -0.12226 | 0.009 | 0.068 | 0.026904 | Oligo | AMOTL1   |
| NEGR1.1    | 1.81E-06 | 0.109666 | 0.059 | 0.023 | 0.027031 | Oligo | NEGR1    |
| ACTR2.9    | 1.81E-06 | -0.16853 | 0.32  | 0.464 | 0.027077 | Oligo | ACTR2    |
| CRK.5      | 1.82E-06 | -0.13105 | 0.193 | 0.321 | 0.02716  | Oligo | CRK      |
| C5orf28.5  | 1.82E-06 | -0.11082 | 0.042 | 0.122 | 0.027272 | Oligo | C5orf28  |
| PDK1.3     | 1.84E-06 | -0.18608 | 0.021 | 0.087 | 0.027435 | Oligo | PDK1     |
| EI24.6     | 1.85E-06 | -0.15089 | 0.301 | 0.438 | 0.027586 | Oligo | EI24     |
| DERA.4     | 1.87E-06 | -0.15816 | 0.141 | 0.255 | 0.027872 | Oligo | DERA     |
| FAM213B.2  | 1.87E-06 | -0.14378 | 0.024 | 0.091 | 0.027942 | Oligo | FAM213B  |
| COL5A2.7   | 1.88E-06 | -0.10152 | 0.007 | 0.064 | 0.028099 | Oligo | COL5A2   |
| NT5E.4     | 1.88E-06 | -0.16201 | 0.007 | 0.064 | 0.028131 | Oligo | NT5E     |
| CLYBL.3    | 1.89E-06 | -0.20233 | 0.007 | 0.064 | 0.028315 | Oligo | CLYBL    |
| ARV1.6     | 1.90E-06 | -0.17908 | 0.087 | 0.182 | 0.028452 | Oligo | ARV1     |
| LRRC17.6   | 1.91E-06 | -0.16962 | 0.014 | 0.076 | 0.028521 | Oligo | LRRC17   |
| TCEB1.3    | 1.93E-06 | -0.15771 | 0.475 | 0.628 | 0.028834 | Oligo | TCEB1    |
| PSPH.8     | 1.95E-06 | -0.14144 | 0.071 | 0.16  | 0.029161 | Oligo | PSPH     |
| GGA1.6     | 1.96E-06 | -0.19423 | 0.174 | 0.294 | 0.029326 | Oligo | GGA1     |

|            |          |          |       |       |          |       |               |
|------------|----------|----------|-------|-------|----------|-------|---------------|
| FMNL3.7    | 1.96E-06 | -0.22576 | 0.016 | 0.079 | 0.029343 | Oligo | FMNL3         |
| FTO.5      | 1.97E-06 | 0.338114 | 0.2   | 0.132 | 0.029371 | Oligo | FTO           |
| PPFIA3.7   | 1.97E-06 | -0.11677 | 0.024 | 0.092 | 0.029454 | Oligo | PPFIA3        |
| ZFYVE19.3  | 1.99E-06 | 0.31135  | 0.169 | 0.104 | 0.029706 | Oligo | ZFYVE19       |
| CHRNA9.6   | 1.99E-06 | -0.13031 | 0     | 0.051 | 0.029723 | Oligo | CHRNA9        |
| SERPINB1.1 | 1.99E-06 | -0.33707 | 0.181 | 0.27  | 0.029732 | Oligo | SERPINB1      |
| GRIA2.8    | 2.00E-06 | -0.19841 | 0.115 | 0.215 | 0.029865 | Oligo | GRIA2         |
| IRF7.8     | 2.01E-06 | -0.15411 | 0.075 | 0.164 | 0.03005  | Oligo | IRF7          |
| HIVEP3.5   | 2.02E-06 | -0.15366 | 0.068 | 0.156 | 0.030119 | Oligo | HIVEP3        |
| CACUL1.5   | 2.02E-06 | -0.19066 | 0.111 | 0.209 | 0.030206 | Oligo | CACUL1        |
| ABLIM1.7   | 2.02E-06 | -0.14024 | 0.002 | 0.055 | 0.03021  | Oligo | ABLIM1        |
| C3orf38.1  | 2.03E-06 | -0.10398 | 0.089 | 0.186 | 0.030336 | Oligo | C3orf38       |
| DVL2.7     | 2.04E-06 | -0.12571 | 0.085 | 0.18  | 0.030552 | Oligo | DVL2          |
| KCNA7      | 2.06E-06 | 0.173866 | 0.021 | 0.005 | 0.030809 | Oligo | KCNA7         |
| CXorf38.3  | 2.06E-06 | -0.17184 | 0.012 | 0.071 | 0.030826 | Oligo | CXorf38       |
| SHB.2      | 2.09E-06 | 0.309948 | 0.106 | 0.056 | 0.0313   | Oligo | SHB           |
| HP1BP3.8   | 2.10E-06 | 0.249859 | 0.496 | 0.44  | 0.031394 | Oligo | HP1BP3        |
| FAM169A.5  | 2.11E-06 | 0.187831 | 0.094 | 0.046 | 0.031484 | Oligo | FAM169A       |
| PPFIBP2.1  | 2.13E-06 | 0.123266 | 0.099 | 0.048 | 0.031806 | Oligo | PPFIBP2       |
| CRYBG3     | 2.13E-06 | 0.171698 | 0.059 | 0.023 | 0.031892 | Oligo | CRYBG3        |
| CHAF1A.5   | 2.14E-06 | -0.12051 | 0.024 | 0.091 | 0.031909 | Oligo | CHAF1A        |
| TXNDC16.3  | 2.15E-06 | 0.160499 | 0.106 | 0.054 | 0.032101 | Oligo | TXNDC16       |
| SHC4.5     | 2.16E-06 | 0.371385 | 0.106 | 0.055 | 0.032205 | Oligo | SHC4          |
| RP11-783K  | 2.17E-06 | -0.16457 | 0     | 0.05  | 0.032399 | Oligo | RP11-783K16.5 |
| PPP1R3F.1  | 2.17E-06 | 0.13393  | 0.075 | 0.033 | 0.032401 | Oligo | PPP1R3F       |
| PSMG4.4    | 2.17E-06 | -0.10671 | 0.101 | 0.201 | 0.032451 | Oligo | PSMG4         |
| SOCS1.4    | 2.17E-06 | -0.22141 | 0.002 | 0.055 | 0.032488 | Oligo | SOCS1         |
| CNDP2.8    | 2.18E-06 | 0.328124 | 0.48  | 0.429 | 0.032519 | Oligo | CNDP2         |
| SNX29.5    | 2.18E-06 | 0.243971 | 0.172 | 0.103 | 0.032543 | Oligo | SNX29         |
| NAP1L5.7   | 2.18E-06 | -0.18682 | 0.056 | 0.137 | 0.032625 | Oligo | NAP1L5        |
| LIX1L.2    | 2.18E-06 | -0.12616 | 0.056 | 0.143 | 0.032645 | Oligo | LIX1L         |
| TSPAN14.5  | 2.20E-06 | -0.1956  | 0.115 | 0.216 | 0.032919 | Oligo | TSPAN14       |
| BPGM.5     | 2.20E-06 | -0.14707 | 0.129 | 0.238 | 0.032925 | Oligo | BPGM          |
| ABAT.9     | 2.21E-06 | -0.20187 | 0.075 | 0.163 | 0.032971 | Oligo | ABAT          |
| CCDC74A.6  | 2.22E-06 | -0.13315 | 0     | 0.05  | 0.033104 | Oligo | CCDC74A       |
| CDKL5      | 2.23E-06 | 0.236162 | 0.045 | 0.015 | 0.033337 | Oligo | CDKL5         |
| WDR3.2     | 2.24E-06 | -0.10707 | 0.031 | 0.102 | 0.03341  | Oligo | WDR3          |
| NEK1.6     | 2.29E-06 | -0.16737 | 0.049 | 0.129 | 0.034197 | Oligo | NEK1          |
| DLAT.3     | 2.29E-06 | -0.16526 | 0.049 | 0.129 | 0.034238 | Oligo | DLAT          |
| PHYKPL.3   | 2.30E-06 | -0.16647 | 0.106 | 0.205 | 0.034343 | Oligo | PHYKPL        |
| BEX5.7     | 2.33E-06 | -0.30943 | 0.031 | 0.099 | 0.034757 | Oligo | BEX5          |
| NDEL1.3    | 2.33E-06 | -0.19671 | 0.071 | 0.157 | 0.034879 | Oligo | NDEL1         |
| SH2B3.9    | 2.34E-06 | -0.29284 | 0.04  | 0.111 | 0.035041 | Oligo | SH2B3         |
| CYTH2.7    | 2.35E-06 | -0.13147 | 0.219 | 0.346 | 0.035044 | Oligo | CYTH2         |
| PSMD14.6   | 2.35E-06 | -0.17406 | 0.325 | 0.472 | 0.035061 | Oligo | PSMD14        |
| MPP1.9     | 2.37E-06 | -0.31362 | 0.113 | 0.204 | 0.035353 | Oligo | MPP1          |
| ME2.5      | 2.37E-06 | -0.16387 | 0.127 | 0.228 | 0.035423 | Oligo | ME2           |
| TOR1AIP1.1 | 2.37E-06 | -0.16783 | 0.089 | 0.185 | 0.035452 | Oligo | TOR1AIP1      |
| SGOL2.7    | 2.39E-06 | -0.23199 | 0.026 | 0.092 | 0.035706 | Oligo | SGOL2         |
| FGFBP3.7   | 2.41E-06 | -0.11129 | 0.031 | 0.103 | 0.035969 | Oligo | FGFBP3        |
| CEP104.3   | 2.42E-06 | 0.335575 | 0.184 | 0.119 | 0.036125 | Oligo | CEP104        |

|           |          |          |       |       |          |       |               |
|-----------|----------|----------|-------|-------|----------|-------|---------------|
| LRRC61.7  | 2.42E-06 | -0.20676 | 0.009 | 0.066 | 0.036159 | Oligo | LRRC61        |
| NFKB2.8   | 2.44E-06 | -0.17523 | 0.007 | 0.063 | 0.036428 | Oligo | NFKB2         |
| PLOD3.6   | 2.44E-06 | 0.452229 | 0.282 | 0.215 | 0.036435 | Oligo | PLOD3         |
| TTL5.1    | 2.45E-06 | 0.157679 | 0.104 | 0.053 | 0.036656 | Oligo | TTL5          |
| ACOX2.3   | 2.46E-06 | -0.1161  | 0.002 | 0.054 | 0.036777 | Oligo | ACOX2         |
| TBC1D4.6  | 2.47E-06 | -0.19519 | 0     | 0.05  | 0.036868 | Oligo | TBC1D4        |
| PJA1.7    | 2.48E-06 | -0.15267 | 0.099 | 0.196 | 0.036997 | Oligo | PJA1          |
| KLHDC9.7  | 2.48E-06 | -0.11332 | 0.014 | 0.075 | 0.037055 | Oligo | KLHDC9        |
| POLG2.1   | 2.48E-06 | -0.16989 | 0.021 | 0.086 | 0.03707  | Oligo | POLG2         |
| PARK7.5   | 2.51E-06 | -0.11158 | 0.645 | 0.77  | 0.037455 | Oligo | PARK7         |
| DNAJC27   | 2.52E-06 | 0.190463 | 0.087 | 0.041 | 0.037631 | Oligo | DNAJC27       |
| CCDC8.4   | 2.52E-06 | -0.11025 | 0     | 0.05  | 0.03767  | Oligo | CCDC8         |
| RP11-480C | 2.52E-06 | -0.28127 | 0     | 0.05  | 0.03767  | Oligo | RP11-480C22.1 |
| RGS3.6    | 2.52E-06 | 0.241152 | 0.169 | 0.104 | 0.037676 | Oligo | RGS3          |
| LRP3.1    | 2.53E-06 | -0.14936 | 0.007 | 0.062 | 0.037767 | Oligo | LRP3          |
| SRSF12.7  | 2.53E-06 | -0.1269  | 0.014 | 0.075 | 0.037782 | Oligo | SRSF12        |
| ACTL6A.6  | 2.53E-06 | -0.13527 | 0.151 | 0.262 | 0.03785  | Oligo | ACTL6A        |
| LINC00657 | 2.55E-06 | 0.263291 | 0.388 | 0.33  | 0.038072 | Oligo | LINC00657     |
| PLCE1.6   | 2.57E-06 | -0.10017 | 0.009 | 0.067 | 0.038396 | Oligo | PLCE1         |
| VRK1.2    | 2.57E-06 | -0.18401 | 0.033 | 0.104 | 0.038419 | Oligo | VRK1          |
| C19orf38. | 2.58E-06 | -0.23822 | 0     | 0.05  | 0.03849  | Oligo | C19orf38      |
| FAM50B.1  | 2.59E-06 | 0.208447 | 0.087 | 0.041 | 0.03873  | Oligo | FAM50B        |
| ATPAF1.7  | 2.60E-06 | -0.1684  | 0.136 | 0.244 | 0.038874 | Oligo | ATPAF1        |
| ST3GAL6.9 | 2.60E-06 | -0.25245 | 0.04  | 0.114 | 0.038907 | Oligo | ST3GAL6       |
| TMEM126A. | 2.61E-06 | -0.15971 | 0.212 | 0.333 | 0.038931 | Oligo | TMEM126A      |
| PCID2.4   | 2.61E-06 | -0.152   | 0.089 | 0.183 | 0.038932 | Oligo | PCID2         |
| STK16.2   | 2.64E-06 | -0.11266 | 0.094 | 0.192 | 0.039425 | Oligo | STK16         |
| TCEAL5.7  | 2.65E-06 | -0.17221 | 0.047 | 0.123 | 0.039554 | Oligo | TCEAL5        |
| TBC1D14.5 | 2.65E-06 | -0.12884 | 0.082 | 0.175 | 0.03958  | Oligo | TBC1D14       |
| MPDU1.2   | 2.67E-06 | -0.10858 | 0.195 | 0.322 | 0.039828 | Oligo | MPDU1         |
| KIAA1191. | 2.67E-06 | -0.18977 | 0.155 | 0.268 | 0.039836 | Oligo | KIAA1191      |
| CGRRF1.4  | 2.67E-06 | -0.19684 | 0.078 | 0.167 | 0.039861 | Oligo | CGRRF1        |
| NCK2.4    | 2.68E-06 | -0.17993 | 0.066 | 0.151 | 0.040056 | Oligo | NCK2          |
| ABTB1.8   | 2.68E-06 | 0.334067 | 0.169 | 0.102 | 0.04007  | Oligo | ABTB1         |
| PPME1.7   | 2.70E-06 | -0.18141 | 0.089 | 0.185 | 0.0403   | Oligo | PPME1         |
| BTBD17.8  | 2.71E-06 | -0.18105 | 0.002 | 0.054 | 0.04057  | Oligo | BTBD17        |
| SGK223.2  | 2.73E-06 | -0.14053 | 0.014 | 0.075 | 0.040759 | Oligo | SGK223        |
| GRK6.4    | 2.73E-06 | -0.17389 | 0.056 | 0.138 | 0.040794 | Oligo | GRK6          |
| CALHM2.7  | 2.73E-06 | -0.2048  | 0.007 | 0.062 | 0.040816 | Oligo | CALHM2        |
| SPAG4.5   | 2.75E-06 | -0.21088 | 0     | 0.049 | 0.041057 | Oligo | SPAG4         |
| GTPBP3.5  | 2.75E-06 | -0.12838 | 0.04  | 0.115 | 0.041155 | Oligo | GTPBP3        |
| SMCHD1.6  | 2.76E-06 | -0.15976 | 0.094 | 0.191 | 0.041245 | Oligo | SMCHD1        |
| PSTK.1    | 2.76E-06 | 0.306947 | 0.122 | 0.067 | 0.041249 | Oligo | PSTK          |
| INPPL1.4  | 2.79E-06 | -0.16351 | 0.045 | 0.123 | 0.041631 | Oligo | INPPL1        |
| IFNAR1.6  | 2.81E-06 | -0.149   | 0.181 | 0.294 | 0.041953 | Oligo | IFNAR1        |
| TFEC.9    | 2.83E-06 | -0.22983 | 0.005 | 0.058 | 0.042293 | Oligo | TFEC          |
| TMEM156.7 | 2.83E-06 | -0.26107 | 0.005 | 0.058 | 0.042311 | Oligo | TMEM156       |
| ZNF790.2  | 2.84E-06 | -0.16528 | 0.028 | 0.097 | 0.042506 | Oligo | ZNF790        |
| MSX1.6    | 2.85E-06 | -0.10938 | 0.009 | 0.067 | 0.042553 | Oligo | MSX1          |
| UQCR11.4  | 2.85E-06 | 0.431988 | 0.181 | 0.112 | 0.042655 | Oligo | UQCR11        |
| MLEC.4    | 2.86E-06 | -0.14374 | 0.28  | 0.405 | 0.042711 | Oligo | MLEC          |

|           |          |          |       |       |          |       |              |
|-----------|----------|----------|-------|-------|----------|-------|--------------|
| EIF2B5.4  | 2.86E-06 | -0.1579  | 0.092 | 0.187 | 0.042743 | Oligo | EIF2B5       |
| CASP8.8   | 2.87E-06 | -0.1945  | 0     | 0.049 | 0.042863 | Oligo | CASP8        |
| CLECL1.8  | 2.87E-06 | -0.19932 | 0     | 0.049 | 0.042863 | Oligo | CLECL1       |
| PLCB1.7   | 2.88E-06 | -0.12855 | 0.019 | 0.082 | 0.043035 | Oligo | PLCB1        |
| IRAK1.6   | 2.88E-06 | -0.22876 | 0.075 | 0.161 | 0.043048 | Oligo | IRAK1        |
| C7orf26.7 | 2.90E-06 | -0.16279 | 0.073 | 0.161 | 0.043273 | Oligo | C7orf26      |
| GPC4.3    | 2.90E-06 | -0.12101 | 0.002 | 0.054 | 0.043367 | Oligo | GPC4         |
| JPH4.6    | 2.91E-06 | -0.19647 | 0.007 | 0.062 | 0.043416 | Oligo | JPH4         |
| TRAF5.1   | 2.92E-06 | -0.14265 | 0.005 | 0.058 | 0.043694 | Oligo | TRAF5        |
| NRROS.6   | 2.93E-06 | -0.25816 | 0.012 | 0.07  | 0.04385  | Oligo | NRROS        |
| B3GAT2.4  | 2.95E-06 | -0.16448 | 0.021 | 0.085 | 0.044148 | Oligo | B3GAT2       |
| N6AMT2.6  | 2.97E-06 | -0.16077 | 0.054 | 0.135 | 0.044311 | Oligo | N6AMT2       |
| PTPN14.3  | 2.97E-06 | -0.10727 | 0.012 | 0.071 | 0.044372 | Oligo | PTPN14       |
| EFNA3.6   | 2.97E-06 | -0.18117 | 0.007 | 0.062 | 0.044394 | Oligo | EFNA3        |
| MTF2.6    | 2.98E-06 | -0.10871 | 0.146 | 0.258 | 0.044586 | Oligo | MTF2         |
| RABGAP1.6 | 3.00E-06 | 0.312066 | 0.188 | 0.122 | 0.044803 | Oligo | RABGAP1      |
| HOXA3.8   | 3.03E-06 | -0.17181 | 0.005 | 0.058 | 0.045293 | Oligo | HOXA3        |
| TMEM47.7  | 3.04E-06 | -0.11753 | 0.019 | 0.082 | 0.045473 | Oligo | TMEM47       |
| ODF2.5    | 3.05E-06 | -0.15574 | 0.054 | 0.135 | 0.045516 | Oligo | ODF2         |
| UBE2D4.2  | 3.05E-06 | -0.13975 | 0.096 | 0.193 | 0.045607 | Oligo | UBE2D4       |
| TMEM52B.9 | 3.06E-06 | -0.23524 | 0     | 0.049 | 0.04572  | Oligo | TMEM52B      |
| SLC39A7.4 | 3.07E-06 | -0.19541 | 0.188 | 0.31  | 0.045824 | Oligo | SLC39A7      |
| RLF.3     | 3.07E-06 | -0.16816 | 0.035 | 0.107 | 0.045929 | Oligo | RLF          |
| FAM65A.2  | 3.08E-06 | -0.19456 | 0.033 | 0.103 | 0.046047 | Oligo | FAM65A       |
| GFAP.6    | 3.08E-06 | -0.5069  | 0.256 | 0.353 | 0.046063 | Oligo | GFAP         |
| DIS3L2.3  | 3.09E-06 | 0.348477 | 0.162 | 0.1   | 0.046186 | Oligo | DIS3L2       |
| RASGRP2.6 | 3.09E-06 | -0.18279 | 0.002 | 0.053 | 0.046217 | Oligo | RASGRP2      |
| ALDOA.7   | 3.11E-06 | -0.13972 | 0.748 | 0.849 | 0.046452 | Oligo | ALDOA        |
| NOL8.3    | 3.12E-06 | -0.11847 | 0.092 | 0.188 | 0.046629 | Oligo | NOL8         |
| ARID5B.7  | 3.12E-06 | -0.12559 | 0.235 | 0.36  | 0.046697 | Oligo | ARID5B       |
| LRRN1.8   | 3.13E-06 | -0.18199 | 0.038 | 0.109 | 0.046707 | Oligo | LRRN1        |
| CPSF3.2   | 3.13E-06 | -0.13609 | 0.087 | 0.179 | 0.046734 | Oligo | CPSF3        |
| TDP2.4    | 3.14E-06 | -0.20596 | 0.094 | 0.186 | 0.04699  | Oligo | TDP2         |
| PRR14.4   | 3.14E-06 | -0.19339 | 0.106 | 0.204 | 0.046995 | Oligo | PRR14        |
| RP11-505K | 3.15E-06 | -0.10861 | 0.019 | 0.082 | 0.047049 | Oligo | RP11-505K9.1 |
| ZBTB37.2  | 3.16E-06 | 0.339506 | 0.101 | 0.052 | 0.047217 | Oligo | ZBTB37       |
| ZNF559.7  | 3.18E-06 | -0.16481 | 0.064 | 0.148 | 0.047454 | Oligo | ZNF559       |
| HSD17B8.2 | 3.18E-06 | -0.15856 | 0.031 | 0.1   | 0.047572 | Oligo | HSD17B8      |
| ENKD1.2   | 3.22E-06 | -0.11975 | 0.009 | 0.066 | 0.048054 | Oligo | ENKD1        |
| SNX14.4   | 3.23E-06 | -0.11184 | 0.113 | 0.214 | 0.048303 | Oligo | SNX14        |
| GLE1.1    | 3.26E-06 | -0.16275 | 0.04  | 0.114 | 0.048752 | Oligo | GLE1         |
| ZNF195.5  | 3.29E-06 | -0.15676 | 0.078 | 0.165 | 0.049112 | Oligo | ZNF195       |
| C7orf60.2 | 3.29E-06 | -0.15863 | 0.014 | 0.074 | 0.049223 | Oligo | C7orf60      |
| CIRBP.6   | 3.31E-06 | 0.251756 | 0.859 | 0.866 | 0.049399 | Oligo | CIRBP        |
| A1BG.3    | 3.31E-06 | 0.28133  | 0.367 | 0.296 | 0.049478 | Oligo | A1BG         |
| ST3GAL3.6 | 3.31E-06 | -0.15059 | 0.024 | 0.089 | 0.049487 | Oligo | ST3GAL3      |
| PSPC1.7   | 3.33E-06 | -0.12205 | 0.113 | 0.215 | 0.049762 | Oligo | PSPC1        |
| ANTXR2.3  | 3.34E-06 | -0.14395 | 0.005 | 0.058 | 0.049944 | Oligo | ANTXR2       |
| TSGA10.5  | 3.35E-06 | 0.222683 | 0.113 | 0.06  | 0.050117 | Oligo | TSGA10       |
| CDK7.3    | 3.39E-06 | -0.19511 | 0.028 | 0.095 | 0.050639 | Oligo | CDK7         |
| NR2E1.3   | 3.40E-06 | -0.10624 | 0.005 | 0.057 | 0.050856 | Oligo | NR2E1        |

|              |          |          |       |       |          |       |             |
|--------------|----------|----------|-------|-------|----------|-------|-------------|
| RP1-79C4. 3. | 3.42E-06 | -0.10503 | 0.002 | 0.053 | 0.051083 | Oligo | RP1-79C4. 4 |
| TRMT61B. 6   | 3.44E-06 | -0.14989 | 0.078 | 0.166 | 0.051426 | Oligo | TRMT61B     |
| FARS2. 1     | 3.46E-06 | -0.11288 | 0.042 | 0.118 | 0.051633 | Oligo | FARS2       |
| KCNMB1. 8    | 3.46E-06 | -0.2983  | 0.035 | 0.105 | 0.051764 | Oligo | KCNMB1      |
| C17orf96. 3. | 3.48E-06 | -0.1164  | 0.005 | 0.057 | 0.051992 | Oligo | C17orf96    |
| KIFC2. 4     | 3.48E-06 | -0.12736 | 0.012 | 0.07  | 0.052079 | Oligo | KIFC2       |
| EEF2. 2      | 3.51E-06 | -0.10407 | 0.715 | 0.834 | 0.052426 | Oligo | EEF2        |
| GATAD2B. 7   | 3.52E-06 | 0.334717 | 0.228 | 0.158 | 0.052593 | Oligo | GATAD2B     |
| TMED4. 8     | 3.56E-06 | -0.18543 | 0.306 | 0.443 | 0.053135 | Oligo | TMED4       |
| LONRF1. 6    | 3.56E-06 | -0.11706 | 0.031 | 0.1   | 0.053145 | Oligo | LONRF1      |
| C6orf226. 3. | 3.56E-06 | -0.12031 | 0.096 | 0.193 | 0.05321  | Oligo | C6orf226    |
| PDLIM2. 6    | 3.57E-06 | -0.24536 | 0.139 | 0.244 | 0.053357 | Oligo | PDLIM2      |
| CUL1. 3      | 3.57E-06 | -0.23608 | 0.136 | 0.238 | 0.053369 | Oligo | CUL1        |
| IMPA2. 5     | 3.58E-06 | -0.1346  | 0.007 | 0.062 | 0.053475 | Oligo | IMPA2       |
| USP11. 8     | 3.58E-06 | -0.16613 | 0.233 | 0.357 | 0.053523 | Oligo | USP11       |
| MED30. 4     | 3.59E-06 | -0.11918 | 0.148 | 0.257 | 0.053676 | Oligo | MED30       |
| PTPRE. 7     | 3.67E-06 | -0.26818 | 0.167 | 0.274 | 0.054823 | Oligo | PTPRE       |
| SEMA6D. 9    | 3.70E-06 | -0.11991 | 0.073 | 0.16  | 0.055335 | Oligo | SEMA6D      |
| CHST10. 6    | 3.72E-06 | -0.12471 | 0.059 | 0.142 | 0.055614 | Oligo | CHST10      |
| YKT6. 5      | 3.74E-06 | -0.13959 | 0.136 | 0.242 | 0.055913 | Oligo | YKT6        |
| THOP1. 7     | 3.74E-06 | -0.10796 | 0.104 | 0.205 | 0.055961 | Oligo | THOP1       |
| ATL3. 5      | 3.78E-06 | 0.210039 | 0.205 | 0.135 | 0.056485 | Oligo | ATL3        |
| MLH3. 5      | 3.78E-06 | 0.448601 | 0.165 | 0.104 | 0.056518 | Oligo | MLH3        |
| MCUR1. 6     | 3.80E-06 | -0.11258 | 0.153 | 0.266 | 0.056729 | Oligo | MCUR1       |
| INTS5. 1     | 3.80E-06 | -0.12714 | 0.021 | 0.085 | 0.056862 | Oligo | INTS5       |
| GIMAP5. 7    | 3.81E-06 | -0.22878 | 0.002 | 0.052 | 0.056874 | Oligo | GIMAP5      |
| ADPRM        | 3.83E-06 | -0.15746 | 0.009 | 0.065 | 0.05725  | Oligo | ADPRM       |
| THTPA        | 3.84E-06 | 0.324578 | 0.031 | 0.009 | 0.05732  | Oligo | THTPA       |
| RRM1. 7      | 3.85E-06 | -0.13733 | 0.096 | 0.188 | 0.057469 | Oligo | RRM1        |
| GAL3ST3. 7   | 3.86E-06 | -0.11762 | 0.007 | 0.061 | 0.057635 | Oligo | GAL3ST3     |
| NFYC. 4      | 3.86E-06 | -0.12244 | 0.122 | 0.225 | 0.057683 | Oligo | NFYC        |
| B3GALT1. 6   | 3.87E-06 | -0.10241 | 0.002 | 0.052 | 0.057796 | Oligo | B3GALT1     |
| RCN3         | 3.87E-06 | -0.17325 | 0.007 | 0.061 | 0.0579   | Oligo | RCN3        |
| LEAP2. 3     | 3.88E-06 | -0.11998 | 0.021 | 0.084 | 0.058016 | Oligo | LEAP2       |
| LINC00094    | 3.91E-06 | -0.11841 | 0.052 | 0.132 | 0.058462 | Oligo | LINC00094   |
| ZNF135. 1    | 3.94E-06 | 0.157774 | 0.073 | 0.032 | 0.058918 | Oligo | ZNF135      |
| OXSRI. 1     | 3.95E-06 | -0.18301 | 0.04  | 0.112 | 0.059055 | Oligo | OXSRI       |
| DOK4. 7      | 3.96E-06 | -0.12244 | 0     | 0.048 | 0.059175 | Oligo | DOK4        |
| LEMD1. 6     | 3.96E-06 | -0.14666 | 0     | 0.048 | 0.059175 | Oligo | LEMD1       |
| TK1. 6       | 3.99E-06 | -0.21053 | 0.014 | 0.073 | 0.059687 | Oligo | TK1         |
| WDR12. 4     | 4.00E-06 | -0.13767 | 0.064 | 0.146 | 0.059799 | Oligo | WDR12       |
| FNIP2. 6     | 4.00E-06 | 0.250612 | 0.275 | 0.193 | 0.059837 | Oligo | FNIP2       |
| AC011043. 4. | 4.04E-06 | -0.15504 | 0.009 | 0.065 | 0.060342 | Oligo | AC011043. 1 |
| MELK. 5      | 4.05E-06 | -0.13473 | 0     | 0.048 | 0.06046  | Oligo | MELK        |
| ZBTB48. 1    | 4.06E-06 | -0.15649 | 0.024 | 0.088 | 0.060653 | Oligo | ZBTB48      |
| IL17RA. 9    | 4.09E-06 | -0.17428 | 0.047 | 0.122 | 0.061124 | Oligo | IL17RA      |
| AKTIP. 7     | 4.10E-06 | 0.445381 | 0.233 | 0.166 | 0.061254 | Oligo | AKTIP       |
| FAM114A2. 4. | 4.11E-06 | -0.15676 | 0.052 | 0.13  | 0.061421 | Oligo | FAM114A2    |
| HDAC9. 6     | 4.11E-06 | -0.14336 | 0.052 | 0.128 | 0.061493 | Oligo | HDAC9       |
| OGFOD3. 5    | 4.15E-06 | -0.15437 | 0.122 | 0.225 | 0.062087 | Oligo | OGFOD3      |
| ACOX1. 2     | 4.16E-06 | -0.13668 | 0.08  | 0.17  | 0.062131 | Oligo | ACOX1       |

|            |          |          |       |       |          |       |            |
|------------|----------|----------|-------|-------|----------|-------|------------|
| ZNF846.6   | 4.16E-06 | -0.19678 | 0.014 | 0.072 | 0.062136 | Oligo | ZNF846     |
| SDF2L1.5   | 4.17E-06 | -0.27098 | 0.249 | 0.364 | 0.062376 | Oligo | SDF2L1     |
| RTFDC1.2   | 4.19E-06 | 0.341536 | 0.546 | 0.538 | 0.062655 | Oligo | RTFDC1     |
| SYT6.4     | 4.20E-06 | -0.1644  | 0.002 | 0.052 | 0.062718 | Oligo | SYT6       |
| ACTR3B.6   | 4.20E-06 | -0.12681 | 0.038 | 0.11  | 0.062837 | Oligo | ACTR3B     |
| ZBTB7A.4   | 4.22E-06 | 0.362386 | 0.245 | 0.176 | 0.063103 | Oligo | ZBTB7A     |
| ADRB2.7    | 4.22E-06 | -0.2455  | 0     | 0.048 | 0.063114 | Oligo | ADRB2      |
| DAPL1.1    | 4.23E-06 | 0.16501  | 0.104 | 0.052 | 0.063168 | Oligo | DAPL1      |
| USP37.2    | 4.28E-06 | 0.312034 | 0.118 | 0.064 | 0.063938 | Oligo | USP37      |
| ZHX2.1     | 4.28E-06 | 0.227284 | 0.096 | 0.049 | 0.064016 | Oligo | ZHX2       |
| QSER1.6    | 4.29E-06 | -0.1188  | 0.045 | 0.121 | 0.064158 | Oligo | QSER1      |
| CAPZA1.8   | 4.30E-06 | -0.186   | 0.271 | 0.397 | 0.064293 | Oligo | CAPZA1     |
| NPHP3.3    | 4.31E-06 | 0.301904 | 0.169 | 0.107 | 0.064384 | Oligo | NPHP3      |
| CDC42BPA.4 | 4.31E-06 | 0.363563 | 0.242 | 0.176 | 0.064384 | Oligo | CDC42BPA   |
| PNKD.5     | 4.33E-06 | 0.389341 | 0.511 | 0.455 | 0.06478  | Oligo | PNKD       |
| LRRC40.5   | 4.34E-06 | -0.15974 | 0.064 | 0.145 | 0.064862 | Oligo | LRRC40     |
| ZCCHC11.4  | 4.35E-06 | -0.11617 | 0.134 | 0.243 | 0.065075 | Oligo | ZCCHC11    |
| PDGFB.6    | 4.41E-06 | -0.23004 | 0     | 0.047 | 0.065884 | Oligo | PDGFB      |
| AURKA.6    | 4.41E-06 | -0.20278 | 0.019 | 0.08  | 0.065956 | Oligo | AURKA      |
| TMEM37.5   | 4.42E-06 | -0.18658 | 0.009 | 0.065 | 0.066017 | Oligo | TMEM37     |
| TCEAL4.7   | 4.44E-06 | 0.317605 | 0.605 | 0.57  | 0.066381 | Oligo | TCEAL4     |
| POMT1.6    | 4.49E-06 | -0.20273 | 0.061 | 0.14  | 0.067137 | Oligo | POMT1      |
| NKG7.6     | 4.53E-06 | -0.27944 | 0.002 | 0.052 | 0.067753 | Oligo | NKG7       |
| CBX2.5     | 4.54E-06 | -0.12258 | 0.012 | 0.069 | 0.067867 | Oligo | CBX2       |
| AC009506.4 | 4.57E-06 | -0.194   | 0.021 | 0.083 | 0.068223 | Oligo | AC009506.1 |
| CD300LF.7  | 4.60E-06 | -0.19487 | 0     | 0.047 | 0.068775 | Oligo | CD300LF    |
| TTC38.3    | 4.61E-06 | -0.18728 | 0.026 | 0.091 | 0.068959 | Oligo | TTC38      |
| CMIP.5     | 4.62E-06 | -0.13397 | 0.087 | 0.176 | 0.06908  | Oligo | CMIP       |
| CDKN2AIP.4 | 4.62E-06 | -0.20812 | 0.068 | 0.15  | 0.06911  | Oligo | CDKN2AIP   |
| UBL4A.7    | 4.63E-06 | -0.11554 | 0.092 | 0.186 | 0.069253 | Oligo | UBL4A      |
| TXNRD1.4   | 4.63E-06 | -0.124   | 0.136 | 0.241 | 0.069259 | Oligo | TXNRD1     |
| GANAB.4    | 4.64E-06 | -0.15144 | 0.162 | 0.277 | 0.069287 | Oligo | GANAB      |
| GLIPR2.8   | 4.67E-06 | 0.354637 | 0.344 | 0.266 | 0.069768 | Oligo | GLIPR2     |
| KRAS.4     | 4.68E-06 | -0.12368 | 0.146 | 0.258 | 0.069928 | Oligo | KRAS       |
| SNAP29.5   | 4.71E-06 | -0.12919 | 0.125 | 0.229 | 0.070411 | Oligo | SNAP29     |
| IGDCC3.9   | 4.74E-06 | -0.11098 | 0.009 | 0.065 | 0.070767 | Oligo | IGDCC3     |
| SPIDR      | 4.79E-06 | -0.19176 | 0.047 | 0.122 | 0.071576 | Oligo | SPIDR      |
| MED9.5     | 4.80E-06 | -0.11716 | 0.028 | 0.095 | 0.071718 | Oligo | MED9       |
| NTRK3.5    | 4.83E-06 | -0.14631 | 0.012 | 0.068 | 0.072169 | Oligo | NTRK3      |
| RELA.2     | 4.83E-06 | -0.10669 | 0.108 | 0.207 | 0.072206 | Oligo | RELA       |
| TMEM163.4  | 4.83E-06 | -0.18218 | 0.009 | 0.064 | 0.07223  | Oligo | TMEM163    |
| CTSF.7     | 4.84E-06 | 0.405863 | 0.332 | 0.267 | 0.072332 | Oligo | CTSF       |
| PCNA.7     | 4.88E-06 | -0.13124 | 0.202 | 0.319 | 0.072924 | Oligo | PCNA       |
| KLHL35.8   | 5.06E-06 | -0.24952 | 0.031 | 0.096 | 0.075553 | Oligo | KLHL35     |
| C20orf194  | 5.09E-06 | 0.341294 | 0.198 | 0.132 | 0.076074 | Oligo | C20orf194  |
| LUC7L.6    | 5.12E-06 | -0.10612 | 0.144 | 0.249 | 0.076452 | Oligo | LUC7L      |
| PIGL.1     | 5.18E-06 | -0.1083  | 0.024 | 0.088 | 0.077369 | Oligo | PIGL       |
| AL592183.5 | 5.18E-06 | 0.257467 | 0.238 | 0.162 | 0.07738  | Oligo | AL592183.1 |
| NPC2.8     | 5.19E-06 | -0.22526 | 0.626 | 0.694 | 0.077495 | Oligo | NPC2       |
| FGF22      | 5.20E-06 | 0.163052 | 0.033 | 0.01  | 0.077706 | Oligo | FGF22      |
| LYST.3     | 5.20E-06 | -0.11825 | 0.068 | 0.153 | 0.077736 | Oligo | LYST       |

|            |           |           |        |        |           |       |           |
|------------|-----------|-----------|--------|--------|-----------|-------|-----------|
| HMG5. 2    | 5. 21E-06 | -0. 22385 | 0. 028 | 0. 093 | 0. 077843 | Oligo | HMG5      |
| SLC41A2. 2 | 5. 23E-06 | -0. 12792 | 0      | 0. 047 | 0. 078228 | Oligo | SLC41A2   |
| ABCC4. 5   | 5. 23E-06 | -0. 14214 | 0      | 0. 047 | 0. 078228 | Oligo | ABCC4     |
| PIFO. 7    | 5. 26E-06 | -0. 23896 | 0. 002 | 0. 051 | 0. 078579 | Oligo | PIFO      |
| UTP14A     | 5. 26E-06 | -0. 12702 | 0. 024 | 0. 088 | 0. 078605 | Oligo | UTP14A    |
| GLS. 4     | 5. 29E-06 | -0. 15113 | 0. 054 | 0. 132 | 0. 078991 | Oligo | GLS       |
| GJB2. 5    | 5. 29E-06 | -0. 18516 | 0. 002 | 0. 051 | 0. 079119 | Oligo | GJB2      |
| KLHL18. 2  | 5. 30E-06 | -0. 18162 | 0. 047 | 0. 122 | 0. 07914  | Oligo | KLHL18    |
| SOX15. 7   | 5. 31E-06 | -0. 16816 | 0. 014 | 0. 072 | 0. 079315 | Oligo | SOX15     |
| C16orf52.  | 5. 33E-06 | 0. 285675 | 0. 153 | 0. 094 | 0. 079642 | Oligo | C16orf52  |
| IL33. 7    | 5. 35E-06 | -0. 13861 | 0      | 0. 047 | 0. 079925 | Oligo | IL33      |
| NARS2. 3   | 5. 36E-06 | -0. 1787  | 0. 045 | 0. 117 | 0. 080049 | Oligo | NARS2     |
| LINC00987  | 5. 38E-06 | 0. 114285 | 0. 038 | 0. 012 | 0. 080451 | Oligo | LINC00987 |
| COPG2. 5   | 5. 42E-06 | -0. 17878 | 0. 047 | 0. 12  | 0. 080992 | Oligo | COPG2     |
| FAM214A. 1 | 5. 42E-06 | 0. 17223  | 0. 104 | 0. 054 | 0. 081024 | Oligo | FAM214A   |
| SGOL1. 7   | 5. 45E-06 | -0. 18153 | 0. 007 | 0. 059 | 0. 081371 | Oligo | SGOL1     |
| PAQR3. 4   | 5. 45E-06 | 0. 276256 | 0. 129 | 0. 075 | 0. 081453 | Oligo | PAQR3     |
| SLC37A1. 3 | 5. 49E-06 | -0. 16018 | 0. 005 | 0. 055 | 0. 081984 | Oligo | SLC37A1   |
| AP2A2. 7   | 5. 50E-06 | -0. 14784 | 0. 151 | 0. 255 | 0. 082179 | Oligo | AP2A2     |
| SEMA4A. 7  | 5. 51E-06 | -0. 17959 | 0. 002 | 0. 051 | 0. 08237  | Oligo | SEMA4A    |
| PIM2. 3    | 5. 53E-06 | -0. 17207 | 0. 005 | 0. 055 | 0. 082582 | Oligo | PIM2      |
| TAP1. 4    | 5. 54E-06 | -0. 22461 | 0. 151 | 0. 257 | 0. 082859 | Oligo | TAP1      |
| FAM127A. 6 | 5. 58E-06 | 0. 246349 | 0. 504 | 0. 457 | 0. 083339 | Oligo | FAM127A   |
| LRMP. 7    | 5. 58E-06 | -0. 20624 | 0      | 0. 046 | 0. 083429 | Oligo | LRMP      |
| PRR7. 9    | 5. 59E-06 | -0. 11837 | 0. 096 | 0. 191 | 0. 083511 | Oligo | PRR7      |
| CTBS. 6    | 5. 60E-06 | -0. 20788 | 0. 075 | 0. 159 | 0. 083692 | Oligo | CTBS      |
| TBC1D10A.  | 5. 65E-06 | -0. 13    | 0. 016 | 0. 076 | 0. 084387 | Oligo | TBC1D10A  |
| ZDHHC20    | 5. 65E-06 | 0. 101548 | 0. 035 | 0. 011 | 0. 084412 | Oligo | ZDHHC20   |
| HOXB7. 2   | 5. 67E-06 | -0. 22667 | 0. 009 | 0. 063 | 0. 084734 | Oligo | HOXB7     |
| SPC24. 8   | 5. 75E-06 | -0. 15161 | 0. 002 | 0. 051 | 0. 085858 | Oligo | SPC24     |
| AHDC1. 7   | 5. 80E-06 | -0. 16128 | 0. 035 | 0. 104 | 0. 08671  | Oligo | AHDC1     |
| DRG1. 3    | 5. 80E-06 | -0. 1653  | 0. 144 | 0. 249 | 0. 086716 | Oligo | DRG1      |
| SNX20. 8   | 5. 83E-06 | -0. 186   | 0      | 0. 046 | 0. 087086 | Oligo | SNX20     |
| MPHOSPH10  | 5. 85E-06 | -0. 13284 | 0. 136 | 0. 242 | 0. 087488 | Oligo | MPHOSPH10 |
| MKL2. 5    | 5. 88E-06 | -0. 13787 | 0. 019 | 0. 079 | 0. 087816 | Oligo | MKL2      |
| ITGA6. 3   | 5. 89E-06 | -0. 12038 | 0. 019 | 0. 079 | 0. 088042 | Oligo | ITGA6     |
| ZNF232. 7  | 5. 90E-06 | -0. 15618 | 0. 021 | 0. 082 | 0. 08812  | Oligo | ZNF232    |
| NPRL2. 6   | 5. 96E-06 | -0. 14723 | 0. 075 | 0. 161 | 0. 089108 | Oligo | NPRL2     |
| UBE2D2. 6  | 5. 97E-06 | -0. 15658 | 0. 459 | 0. 593 | 0. 089179 | Oligo | UBE2D2    |
| MIR22HG. 7 | 6. 03E-06 | -0. 28408 | 0. 045 | 0. 116 | 0. 090076 | Oligo | MIR22HG   |
| PLAA. 4    | 6. 06E-06 | -0. 16337 | 0. 031 | 0. 096 | 0. 090631 | Oligo | PLAA      |
| DLX6. 9    | 6. 07E-06 | -0. 20391 | 0. 007 | 0. 059 | 0. 090716 | Oligo | DLX6      |
| PCBP2. 4   | 6. 09E-06 | -0. 15441 | 0. 527 | 0. 668 | 0. 09108  | Oligo | PCBP2     |
| DPP3. 3    | 6. 10E-06 | -0. 17391 | 0. 099 | 0. 192 | 0. 091169 | Oligo | DPP3      |
| VASH1. 6   | 6. 10E-06 | -0. 162   | 0. 056 | 0. 132 | 0. 091179 | Oligo | VASH1     |
| LINC00909  | 6. 15E-06 | -0. 13434 | 0. 042 | 0. 114 | 0. 091896 | Oligo | LINC00909 |
| MED12L. 2  | 6. 15E-06 | -0. 10792 | 0. 009 | 0. 063 | 0. 091966 | Oligo | MED12L    |
| ZDHHC16. 2 | 6. 18E-06 | -0. 11133 | 0. 038 | 0. 108 | 0. 092391 | Oligo | ZDHHC16   |
| IQCG. 6    | 6. 22E-06 | -0. 1603  | 0. 049 | 0. 125 | 0. 092886 | Oligo | IQCG      |
| NEAT1. 6   | 6. 24E-06 | 0. 112804 | 0. 76  | 0. 763 | 0. 093223 | Oligo | NEAT1     |
| NDUFS8. 4  | 6. 25E-06 | -0. 10123 | 0. 487 | 0. 613 | 0. 093466 | Oligo | NDUFS8    |



|            |          |          |       |       |          |       |           |
|------------|----------|----------|-------|-------|----------|-------|-----------|
| FBXW11.3   | 6.26E-06 | 0.271248 | 0.245 | 0.178 | 0.093536 | Oligo | FBXW11    |
| GSAP.7     | 6.28E-06 | -0.22155 | 0.021 | 0.081 | 0.093905 | Oligo | GSAP      |
| FMN2.7     | 6.33E-06 | -0.13994 | 0.014 | 0.071 | 0.094571 | Oligo | FMN2      |
| HADHA.5    | 6.40E-06 | -0.17127 | 0.315 | 0.446 | 0.095716 | Oligo | HADHA     |
| RNF182.7   | 6.44E-06 | -0.11753 | 0.002 | 0.05  | 0.096211 | Oligo | RNF182    |
| RHOBTB2.1  | 6.46E-06 | -0.11749 | 0.002 | 0.05  | 0.096513 | Oligo | RHOBTB2   |
| RGL3.1     | 6.49E-06 | -0.10638 | 0     | 0.046 | 0.096942 | Oligo | RGL3      |
| MYBPC1.6   | 6.49E-06 | -0.19549 | 0     | 0.046 | 0.096942 | Oligo | MYBPC1    |
| PRR3.5     | 6.51E-06 | -0.11305 | 0.035 | 0.105 | 0.097296 | Oligo | PRR3      |
| EMC1.2     | 6.54E-06 | -0.13355 | 0.056 | 0.134 | 0.097715 | Oligo | EMC1      |
| MED15.4    | 6.56E-06 | -0.17102 | 0.066 | 0.145 | 0.097965 | Oligo | MED15     |
| MX2.9      | 6.57E-06 | -0.26105 | 0.012 | 0.066 | 0.098211 | Oligo | MX2       |
| RBFA.3     | 6.68E-06 | -0.11074 | 0.082 | 0.171 | 0.099769 | Oligo | RBFA      |
| TIMM8A.3   | 6.76E-06 | -0.13028 | 0.033 | 0.1   | 0.101084 | Oligo | TIMM8A    |
| GFOD2.6    | 6.77E-06 | -0.13413 | 0.056 | 0.135 | 0.101145 | Oligo | GFOD2     |
| SDCCAG8.5  | 6.79E-06 | -0.1131  | 0.214 | 0.334 | 0.101537 | Oligo | SDCCAG8   |
| PIGC       | 6.79E-06 | -0.12905 | 0.125 | 0.224 | 0.10154  | Oligo | PIGC      |
| ARHGEF40.6 | 6.80E-06 | -0.15805 | 0.054 | 0.131 | 0.101665 | Oligo | ARHGEF40  |
| AMH.7      | 6.85E-06 | -0.11085 | 0.007 | 0.059 | 0.102318 | Oligo | AMH       |
| SPNS1.5    | 6.87E-06 | -0.14779 | 0.181 | 0.294 | 0.102711 | Oligo | SPNS1     |
| TNKS.9     | 6.91E-06 | 0.275089 | 0.212 | 0.146 | 0.103298 | Oligo | TNKS      |
| VAPA.5     | 6.96E-06 | 0.137425 | 0.607 | 0.634 | 0.104037 | Oligo | VAPA      |
| BOLA2B.2   | 6.97E-06 | 0.278559 | 0.125 | 0.071 | 0.104228 | Oligo | BOLA2B    |
| GLMN.3     | 6.99E-06 | -0.15125 | 0.028 | 0.093 | 0.104464 | Oligo | GLMN      |
| LINC01116  | 7.05E-06 | -0.11814 | 0.056 | 0.135 | 0.105366 | Oligo | LINC01116 |
| ELOVL4.7   | 7.09E-06 | -0.11599 | 0.021 | 0.082 | 0.105975 | Oligo | ELOVL4    |
| SCLT1.3    | 7.12E-06 | -0.16276 | 0.014 | 0.07  | 0.106338 | Oligo | SCLT1     |
| NBPF11     | 7.12E-06 | 0.114273 | 0.031 | 0.009 | 0.106414 | Oligo | NBPF11    |
| XKR4.7     | 7.14E-06 | -0.1288  | 0.007 | 0.059 | 0.106773 | Oligo | XKR4      |
| ZNF334.6   | 7.16E-06 | -0.11217 | 0.016 | 0.075 | 0.107071 | Oligo | ZNF334    |
| NAA38.3    | 7.19E-06 | 0.136429 | 0.32  | 0.477 | 0.107374 | Oligo | NAA38     |
| FHOD1.9    | 7.26E-06 | -0.18773 | 0.007 | 0.058 | 0.108481 | Oligo | FHOD1     |
| LARS.5     | 7.29E-06 | -0.12389 | 0.216 | 0.346 | 0.108872 | Oligo | LARS      |
| CCDC93.5   | 7.33E-06 | -0.12983 | 0.054 | 0.13  | 0.109476 | Oligo | CCDC93    |
| C1RL.2     | 7.35E-06 | -0.18742 | 0.007 | 0.058 | 0.109805 | Oligo | C1RL      |
| GPD2.1     | 7.36E-06 | -0.13707 | 0.028 | 0.093 | 0.110045 | Oligo | GPD2      |
| ZNF394.2   | 7.39E-06 | -0.2004  | 0.066 | 0.145 | 0.110464 | Oligo | ZNF394    |
| PRPS2.4    | 7.47E-06 | -0.16592 | 0.052 | 0.127 | 0.111642 | Oligo | PRPS2     |
| RFC5.3     | 7.48E-06 | -0.17917 | 0.028 | 0.092 | 0.111734 | Oligo | RFC5      |
| LMAN1.5    | 7.51E-06 | -0.1781  | 0.214 | 0.333 | 0.112284 | Oligo | LMAN1     |
| ADAMTS10.7 | 7.54E-06 | -0.14917 | 0     | 0.045 | 0.112633 | Oligo | ADAMTS10  |
| PTPRO.8    | 7.60E-06 | -0.21252 | 0.021 | 0.08  | 0.113586 | Oligo | PTPRO     |
| SLC12A6    | 7.61E-06 | 0.25796  | 0.04  | 0.014 | 0.113703 | Oligo | SLC12A6   |
| L3HYPDH.3  | 7.62E-06 | -0.1366  | 0.052 | 0.127 | 0.113925 | Oligo | L3HYPDH   |
| ZNF821.9   | 7.67E-06 | -0.17462 | 0.082 | 0.166 | 0.114557 | Oligo | ZNF821    |
| FLI1.9     | 7.70E-06 | -0.22566 | 0.005 | 0.054 | 0.115031 | Oligo | FLI1      |
| NADK.4     | 7.72E-06 | -0.13394 | 0.082 | 0.17  | 0.115396 | Oligo | NADK      |
| RPS6KB2.4  | 7.74E-06 | -0.20122 | 0.132 | 0.23  | 0.115736 | Oligo | RPS6KB2   |
| PIBF1.3    | 7.78E-06 | -0.15539 | 0.028 | 0.092 | 0.116208 | Oligo | PIBF1     |
| GNPNAT1.3  | 7.82E-06 | -0.13208 | 0.035 | 0.104 | 0.116925 | Oligo | GNPNAT1   |
| RALA.6     | 7.86E-06 | -0.16092 | 0.245 | 0.364 | 0.117521 | Oligo | RALA      |

|             |           |           |        |        |           |       |               |
|-------------|-----------|-----------|--------|--------|-----------|-------|---------------|
| STAT6. 9    | 7. 87E-06 | -0. 18048 | 0. 005 | 0. 054 | 0. 117629 | Oligo | STAT6         |
| ERC1. 3     | 7. 90E-06 | -0. 11258 | 0. 049 | 0. 124 | 0. 118011 | Oligo | ERC1          |
| FANCG. 2    | 7. 93E-06 | -0. 13567 | 0. 012 | 0. 066 | 0. 118564 | Oligo | FANCG         |
| RRP1B. 6    | 7. 98E-06 | -0. 11815 | 0. 075 | 0. 159 | 0. 119218 | Oligo | RRP1B         |
| EPB41. 2    | 7. 99E-06 | -0. 17351 | 0. 009 | 0. 062 | 0. 119406 | Oligo | EPB41         |
| AP5S1. 2    | 8. 00E-06 | -0. 11236 | 0. 033 | 0. 1   | 0. 119482 | Oligo | AP5S1         |
| WDR73. 4    | 8. 01E-06 | -0. 10012 | 0. 064 | 0. 144 | 0. 119649 | Oligo | WDR73         |
| NDC80. 7    | 8. 02E-06 | -0. 14135 | 0. 002 | 0. 05  | 0. 119786 | Oligo | NDC80         |
| MKS1. 2     | 8. 03E-06 | -0. 11561 | 0. 028 | 0. 093 | 0. 119974 | Oligo | MKS1          |
| CIZ1. 4     | 8. 04E-06 | -0. 15736 | 0. 092 | 0. 183 | 0. 120171 | Oligo | CIZ1          |
| PDE8B. 4    | 8. 10E-06 | -0. 10546 | 0. 002 | 0. 049 | 0. 121007 | Oligo | PDE8B         |
| ECE2. 1     | 8. 14E-06 | -0. 15997 | 0. 007 | 0. 058 | 0. 121601 | Oligo | ECE2          |
| SWI5. 7     | 8. 16E-06 | -0. 18745 | 0. 146 | 0. 249 | 0. 121997 | Oligo | SWI5          |
| ADCY7. 9    | 8. 19E-06 | -0. 23501 | 0. 012 | 0. 065 | 0. 122414 | Oligo | ADCY7         |
| TMEM19. 5   | 8. 21E-06 | -0. 14538 | 0. 073 | 0. 155 | 0. 122664 | Oligo | TMEM19        |
| ACP5. 7     | 8. 24E-06 | -0. 2088  | 0. 002 | 0. 049 | 0. 123165 | Oligo | ACP5          |
| PPFIA1. 1   | 8. 24E-06 | -0. 14585 | 0. 082 | 0. 17  | 0. 123199 | Oligo | PPFIA1        |
| SLC16A9. 5  | 8. 25E-06 | -0. 10688 | 0. 002 | 0. 049 | 0. 12334  | Oligo | SLC16A9       |
| NDUFAF2. 5  | 8. 28E-06 | -0. 13698 | 0. 167 | 0. 276 | 0. 123783 | Oligo | NDUFAF2       |
| LRCH3. 6    | 8. 29E-06 | 0. 281264 | 0. 2   | 0. 135 | 0. 123847 | Oligo | LRCH3         |
| DOK2. 8     | 8. 34E-06 | -0. 24332 | 0. 007 | 0. 057 | 0. 124691 | Oligo | DOK2          |
| TSPAN3. 7   | 8. 37E-06 | -0. 18554 | 0. 339 | 0. 464 | 0. 125057 | Oligo | TSPAN3        |
| DIS3. 5     | 8. 39E-06 | -0. 12506 | 0. 071 | 0. 153 | 0. 125359 | Oligo | DIS3          |
| RNF113A     | 8. 41E-06 | -0. 1016  | 0. 061 | 0. 139 | 0. 125723 | Oligo | RNF113A       |
| FAXC. 8     | 8. 42E-06 | -0. 15367 | 0. 026 | 0. 088 | 0. 125767 | Oligo | FAXC          |
| DDX1. 6     | 8. 45E-06 | -0. 15853 | 0. 242 | 0. 364 | 0. 126312 | Oligo | DDX1          |
| RBBP8. 4    | 8. 46E-06 | -0. 11636 | 0. 024 | 0. 085 | 0. 126452 | Oligo | RBBP8         |
| FOXM1. 7    | 8. 46E-06 | -0. 13073 | 0. 005 | 0. 054 | 0. 12647  | Oligo | FOXM1         |
| FAM149B1    | 8. 48E-06 | 0. 10171  | 0. 054 | 0. 022 | 0. 126777 | Oligo | FAM149B1      |
| DLST        | 8. 51E-06 | -0. 14447 | 0. 071 | 0. 153 | 0. 127199 | Oligo | DLST          |
| GCNT2. 2    | 8. 57E-06 | -0. 14896 | 0      | 0. 045 | 0. 12808  | Oligo | GCNT2         |
| NT5C. 4     | 8. 61E-06 | -0. 11715 | 0. 2   | 0. 325 | 0. 128634 | Oligo | NT5C          |
| KIF21A. 9   | 8. 61E-06 | -0. 1877  | 0. 2   | 0. 306 | 0. 128738 | Oligo | KIF21A        |
| PELO. 4     | 8. 62E-06 | -0. 16342 | 0. 04  | 0. 109 | 0. 12877  | Oligo | PELO          |
| SEPT3. 8    | 8. 69E-06 | -0. 16378 | 0. 014 | 0. 069 | 0. 12983  | Oligo | 3-Sep         |
| IRF5. 9     | 8. 71E-06 | -0. 24745 | 0. 009 | 0. 061 | 0. 130119 | Oligo | IRF5          |
| RPRM. 9     | 8. 76E-06 | -0. 23332 | 0. 014 | 0. 068 | 0. 130952 | Oligo | RPRM          |
| NEK11. 5    | 9. 03E-06 | -0. 12804 | 0. 002 | 0. 049 | 0. 134996 | Oligo | NEK11         |
| RASSF7. 6   | 9. 23E-06 | -0. 1594  | 0. 016 | 0. 073 | 0. 137994 | Oligo | RASSF7        |
| CTB-113I2   | 9. 29E-06 | -0. 10767 | 0. 009 | 0. 062 | 0. 138853 | Oligo | CTB-113I20. 2 |
| ESYT1. 8    | 9. 30E-06 | -0. 13519 | 0. 049 | 0. 123 | 0. 138912 | Oligo | ESYT1         |
| BCAS4. 3    | 9. 37E-06 | -0. 11436 | 0. 026 | 0. 088 | 0. 139992 | Oligo | BCAS4         |
| CHRAC1. 6   | 9. 38E-06 | 0. 339014 | 0. 209 | 0. 142 | 0. 140177 | Oligo | CHRAC1        |
| C5orf15. 2  | 9. 42E-06 | -0. 11013 | 0. 207 | 0. 328 | 0. 140725 | Oligo | C5orf15       |
| RP6-91H8. 3 | 9. 42E-06 | -0. 221   | 0. 007 | 0. 058 | 0. 14084  | Oligo | RP6-91H8. 3   |
| MUC12. 4    | 9. 54E-06 | -0. 1972  | 0      | 0. 044 | 0. 142552 | Oligo | MUC12         |
| SRRT. 6     | 9. 55E-06 | -0. 17694 | 0. 125 | 0. 22  | 0. 142683 | Oligo | SRRT          |
| ZNF592. 1   | 9. 57E-06 | 0. 162492 | 0. 106 | 0. 057 | 0. 142947 | Oligo | ZNF592        |
| ZNF595. 5   | 9. 67E-06 | -0. 16483 | 0. 019 | 0. 077 | 0. 144486 | Oligo | ZNF595        |
| QPCT. 5     | 9. 70E-06 | -0. 19257 | 0. 002 | 0. 049 | 0. 144934 | Oligo | QPCT          |
| ZNF433. 3   | 9. 73E-06 | -0. 12432 | 0. 007 | 0. 057 | 0. 145474 | Oligo | ZNF433        |

|            |          |          |       |       |          |       |               |
|------------|----------|----------|-------|-------|----------|-------|---------------|
| SCYL2.3    | 9.79E-06 | -0.10909 | 0.059 | 0.138 | 0.146249 | Oligo | SCYL2         |
| BTN2A1.1   | 9.91E-06 | -0.11131 | 0.049 | 0.122 | 0.148082 | Oligo | BTN2A1        |
| DSCAM.6    | 9.94E-06 | -0.18096 | 0.019 | 0.076 | 0.148584 | Oligo | DSCAM         |
| TRIM5.1    | 9.96E-06 | -0.11679 | 0.005 | 0.053 | 0.148818 | Oligo | TRIM5         |
| FBXW4      | 9.97E-06 | 0.170628 | 0.085 | 0.041 | 0.148999 | Oligo | FBXW4         |
| IGFLR1.6   | 1.01E-05 | -0.235   | 0.007 | 0.057 | 0.150392 | Oligo | IGFLR1        |
| RP11-386I  | 1.01E-05 | -0.24992 | 0.014 | 0.068 | 0.150802 | Oligo | RP11-386I14.4 |
| SLC25A4.9  | 1.01E-05 | 0.385225 | 0.482 | 0.424 | 0.151618 | Oligo | SLC25A4       |
| FAR2.4     | 1.02E-05 | -0.16284 | 0.007 | 0.057 | 0.152798 | Oligo | FAR2          |
| NSMCE2.2   | 1.03E-05 | -0.18482 | 0.078 | 0.16  | 0.15386  | Oligo | NSMCE2        |
| ASNS.9     | 1.03E-05 | -0.23274 | 0.096 | 0.18  | 0.154356 | Oligo | ASNS          |
| TMC01.4    | 1.05E-05 | -0.11845 | 0.44  | 0.58  | 0.156184 | Oligo | TMC01         |
| VHL.4      | 1.05E-05 | -0.16891 | 0.082 | 0.166 | 0.156529 | Oligo | VHL           |
| ACOT2      | 1.05E-05 | -0.1764  | 0.014 | 0.068 | 0.157426 | Oligo | ACOT2         |
| GMPR.2     | 1.06E-05 | -0.12718 | 0.024 | 0.084 | 0.158    | Oligo | GMPR          |
| ULBP2.1    | 1.06E-05 | -0.1432  | 0.002 | 0.048 | 0.158226 | Oligo | ULBP2         |
| RSBN1L.7   | 1.06E-05 | -0.15785 | 0.24  | 0.359 | 0.158633 | Oligo | RSBN1L        |
| TAOK1.6    | 1.07E-05 | 0.322312 | 0.318 | 0.257 | 0.159879 | Oligo | TAOK1         |
| C5orf63.3  | 1.08E-05 | -0.13095 | 0.014 | 0.069 | 0.161072 | Oligo | C5orf63       |
| B4GALT4.2  | 1.08E-05 | -0.14294 | 0.064 | 0.141 | 0.161694 | Oligo | B4GALT4       |
| ZNF567.4   | 1.08E-05 | -0.14502 | 0.033 | 0.098 | 0.161885 | Oligo | ZNF567        |
| CYP2R1     | 1.08E-05 | -0.15824 | 0.016 | 0.072 | 0.162085 | Oligo | CYP2R1        |
| DHX16.1    | 1.09E-05 | -0.10629 | 0.04  | 0.109 | 0.163262 | Oligo | DHX16         |
| SFT2D2.4   | 1.10E-05 | 0.272343 | 0.212 | 0.145 | 0.16373  | Oligo | SFT2D2        |
| CASD1.6    | 1.10E-05 | 0.238056 | 0.129 | 0.075 | 0.164043 | Oligo | CASD1         |
| TTBK2.1    | 1.10E-05 | 0.251053 | 0.125 | 0.072 | 0.164238 | Oligo | TTBK2         |
| PIF1.4     | 1.10E-05 | -0.13737 | 0.005 | 0.052 | 0.164845 | Oligo | PIF1          |
| FOSL1.4    | 1.10E-05 | -0.11332 | 0.002 | 0.048 | 0.165047 | Oligo | FOSL1         |
| HTATSF1.5  | 1.11E-05 | -0.13632 | 0.172 | 0.278 | 0.165157 | Oligo | HTATSF1       |
| MPEG1.7    | 1.11E-05 | -0.17849 | 0     | 0.044 | 0.165587 | Oligo | MPEG1         |
| C19orf12.1 | 1.11E-05 | -0.10299 | 0.066 | 0.145 | 0.16597  | Oligo | C19orf12      |
| GOT1.1     | 1.12E-05 | 0.426106 | 0.193 | 0.129 | 0.167718 | Oligo | GOT1          |
| PLEKHA2.4  | 1.13E-05 | -0.1718  | 0.047 | 0.117 | 0.16823  | Oligo | PLEKHA2       |
| MAK16.2    | 1.13E-05 | -0.10665 | 0.031 | 0.094 | 0.168542 | Oligo | MAK16         |
| C8orf33.5  | 1.13E-05 | -0.15514 | 0.207 | 0.322 | 0.169028 | Oligo | C8orf33       |
| GAS2L1.7   | 1.13E-05 | -0.12678 | 0.073 | 0.155 | 0.169113 | Oligo | GAS2L1        |
| GOPC.7     | 1.14E-05 | -0.14724 | 0.155 | 0.262 | 0.169798 | Oligo | GOPC          |
| MARC1.7    | 1.15E-05 | -0.10488 | 0.009 | 0.061 | 0.171319 | Oligo | 1-Mar         |
| TMEM135    | 1.15E-05 | 0.108257 | 0.066 | 0.029 | 0.172003 | Oligo | TMEM135       |
| MYL5.2     | 1.17E-05 | -0.13845 | 0.033 | 0.098 | 0.174828 | Oligo | MYL5          |
| APAF1.5    | 1.18E-05 | -0.15611 | 0.014 | 0.068 | 0.17633  | Oligo | APAF1         |
| PSAP.6     | 1.18E-05 | 0.124747 | 0.793 | 0.82  | 0.176524 | Oligo | PSAP          |
| GBGT1.8    | 1.19E-05 | -0.19435 | 0.005 | 0.052 | 0.177829 | Oligo | GBGT1         |
| ANKRD42    | 1.19E-05 | -0.14727 | 0.009 | 0.061 | 0.178324 | Oligo | ANKRD42       |
| MANBA.9    | 1.20E-05 | -0.18486 | 0.052 | 0.123 | 0.179639 | Oligo | MANBA         |
| ALG2.4     | 1.20E-05 | -0.20587 | 0.085 | 0.166 | 0.179995 | Oligo | ALG2          |
| VPS37B.7   | 1.21E-05 | -0.19312 | 0.158 | 0.258 | 0.180269 | Oligo | VPS37B        |
| CCDC85C    | 1.21E-05 | 0.167483 | 0.061 | 0.027 | 0.180302 | Oligo | CCDC85C       |
| MED17.5    | 1.21E-05 | -0.17616 | 0.104 | 0.193 | 0.180728 | Oligo | MED17         |
| DPF3.5     | 1.22E-05 | -0.12365 | 0.061 | 0.139 | 0.183025 | Oligo | DPF3          |
| FBLIM1.4   | 1.23E-05 | -0.16689 | 0.028 | 0.091 | 0.183156 | Oligo | FBLIM1        |

|             |           |           |        |        |           |       |                |
|-------------|-----------|-----------|--------|--------|-----------|-------|----------------|
| IQSEC2. 2   | 1. 23E-05 | -0. 1722  | 0. 007 | 0. 056 | 0. 183792 | Oligo | IQSEC2         |
| NCDN. 5     | 1. 23E-05 | 0. 241277 | 0. 144 | 0. 088 | 0. 183944 | Oligo | NCDN           |
| LIN7A. 4    | 1. 23E-05 | -0. 10309 | 0      | 0. 043 | 0. 184277 | Oligo | LIN7A          |
| EIF4G2. 8   | 1. 24E-05 | -0. 17897 | 0. 527 | 0. 664 | 0. 185115 | Oligo | EIF4G2         |
| BMP8B       | 1. 24E-05 | 0. 165007 | 0. 042 | 0. 015 | 0. 185244 | Oligo | BMP8B          |
| CCL3L3. 6   | 1. 24E-05 | -0. 59939 | 0. 007 | 0. 056 | 0. 185744 | Oligo | CCL3L3         |
| JAK1. 4     | 1. 26E-05 | -0. 17485 | 0. 155 | 0. 256 | 0. 187628 | Oligo | JAK1           |
| CRYBB1. 7   | 1. 26E-05 | -0. 2141  | 0      | 0. 043 | 0. 18826  | Oligo | CRYBB1         |
| MPRIP. 3    | 1. 26E-05 | 0. 304903 | 0. 219 | 0. 154 | 0. 188295 | Oligo | MPRIP          |
| EEF2K. 1    | 1. 26E-05 | -0. 11938 | 0. 002 | 0. 048 | 0. 188521 | Oligo | EEF2K          |
| RP3-428L1   | 1. 27E-05 | -0. 11672 | 0. 016 | 0. 072 | 0. 189261 | Oligo | RP3-428L16. 2  |
| FAM188A. 5  | 1. 27E-05 | 0. 22602  | 0. 146 | 0. 089 | 0. 19018  | Oligo | FAM188A        |
| TMEM117     | 1. 27E-05 | 0. 168442 | 0. 085 | 0. 042 | 0. 190233 | Oligo | TMEM117        |
| SMUG1. 2    | 1. 28E-05 | -0. 16219 | 0. 122 | 0. 216 | 0. 191146 | Oligo | SMUG1          |
| CRYL1. 2    | 1. 29E-05 | 0. 443059 | 0. 365 | 0. 308 | 0. 192044 | Oligo | CRYL1          |
| CTB-58E17   | 1. 29E-05 | -0. 12446 | 0. 009 | 0. 06  | 0. 192812 | Oligo | CTB-58E17. 1   |
| WDR36. 1    | 1. 30E-05 | -0. 12753 | 0. 021 | 0. 08  | 0. 194017 | Oligo | WDR36          |
| RP11-545E   | 1. 31E-05 | -0. 12625 | 0. 005 | 0. 052 | 0. 195075 | Oligo | RP11-545E17. 3 |
| SLC12A7. 4  | 1. 31E-05 | -0. 1455  | 0      | 0. 043 | 0. 196485 | Oligo | SLC12A7        |
| PIGZ. 4     | 1. 32E-05 | -0. 11031 | 0. 012 | 0. 064 | 0. 197092 | Oligo | PIGZ           |
| KLHL12. 4   | 1. 32E-05 | -0. 14131 | 0. 054 | 0. 127 | 0. 197192 | Oligo | KLHL12         |
| MACROD1. 3  | 1. 32E-05 | -0. 10412 | 0. 052 | 0. 125 | 0. 197707 | Oligo | MACROD1        |
| UBE4A. 3    | 1. 32E-05 | 0. 273788 | 0. 214 | 0. 15  | 0. 19789  | Oligo | UBE4A          |
| P4HA2. 4    | 1. 33E-05 | -0. 1439  | 0. 024 | 0. 083 | 0. 198741 | Oligo | P4HA2          |
| SFRP1. 8    | 1. 33E-05 | 0. 482608 | 0. 148 | 0. 096 | 0. 19913  | Oligo | SFRP1          |
| CREB3L4. 1  | 1. 33E-05 | -0. 15916 | 0. 005 | 0. 052 | 0. 199232 | Oligo | CREB3L4        |
| RAD1. 5     | 1. 33E-05 | -0. 11031 | 0. 094 | 0. 181 | 0. 199406 | Oligo | RAD1           |
| SLC19A1. 3  | 1. 34E-05 | -0. 13217 | 0. 016 | 0. 072 | 0. 200262 | Oligo | SLC19A1        |
| ANKHD1. 2   | 1. 34E-05 | -0. 16973 | 0. 021 | 0. 078 | 0. 200356 | Oligo | ANKHD1         |
| LRP6. 8     | 1. 35E-05 | 0. 290888 | 0. 169 | 0. 11  | 0. 201892 | Oligo | LRP6           |
| CHSY1. 3    | 1. 36E-05 | -0. 13688 | 0. 031 | 0. 094 | 0. 20362  | Oligo | CHSY1          |
| TANC1. 7    | 1. 37E-05 | 0. 246462 | 0. 165 | 0. 106 | 0. 204126 | Oligo | TANC1          |
| MIS18A. 5   | 1. 37E-05 | -0. 10217 | 0. 04  | 0. 108 | 0. 204544 | Oligo | MIS18A         |
| COQ4. 5     | 1. 37E-05 | -0. 11995 | 0. 16  | 0. 271 | 0. 205395 | Oligo | COQ4           |
| STRIP1. 6   | 1. 38E-05 | -0. 15308 | 0. 054 | 0. 127 | 0. 205813 | Oligo | STRIP1         |
| CTR9. 2     | 1. 38E-05 | -0. 16733 | 0. 089 | 0. 175 | 0. 206115 | Oligo | CTR9           |
| LHFPL3. 9   | 1. 38E-05 | -0. 20048 | 0. 052 | 0. 122 | 0. 206465 | Oligo | LHFPL3         |
| OTUD1. 7    | 1. 38E-05 | -0. 28203 | 0. 038 | 0. 1   | 0. 206505 | Oligo | OTUD1          |
| TLR5. 6     | 1. 38E-05 | -0. 23506 | 0. 002 | 0. 047 | 0. 206917 | Oligo | TLR5           |
| TXLNG. 6    | 1. 39E-05 | -0. 14328 | 0. 061 | 0. 136 | 0. 207578 | Oligo | TXLNG          |
| ESCO1. 1    | 1. 39E-05 | -0. 13436 | 0. 054 | 0. 126 | 0. 207924 | Oligo | ESCO1          |
| DOCK11. 8   | 1. 41E-05 | -0. 16641 | 0. 007 | 0. 056 | 0. 21087  | Oligo | DOCK11         |
| CTDSPL2. 2  | 1. 41E-05 | -0. 10197 | 0. 042 | 0. 112 | 0. 211033 | Oligo | CTDSPL2        |
| SLC25A17. 1 | 1. 41E-05 | -0. 12102 | 0. 078 | 0. 16  | 0. 211294 | Oligo | SLC25A17       |
| HIST2H2AC   | 1. 42E-05 | -0. 12816 | 0. 009 | 0. 06  | 0. 21204  | Oligo | HIST2H2AC      |
| IRF9. 4     | 1. 42E-05 | 0. 296059 | 0. 148 | 0. 091 | 0. 212202 | Oligo | IRF9           |
| C18orf21. 1 | 1. 42E-05 | -0. 17303 | 0. 085 | 0. 168 | 0. 212274 | Oligo | C18orf21       |
| C10orf35. 1 | 1. 43E-05 | -0. 19762 | 0. 009 | 0. 059 | 0. 212961 | Oligo | C10orf35       |
| FAM20C. 7   | 1. 43E-05 | -0. 15433 | 0. 132 | 0. 227 | 0. 213013 | Oligo | FAM20C         |
| SLC25A36. 1 | 1. 43E-05 | -0. 16096 | 0. 165 | 0. 273 | 0. 214049 | Oligo | SLC25A36       |
| FLCN. 4     | 1. 43E-05 | 0. 334871 | 0. 195 | 0. 133 | 0. 214415 | Oligo | FLCN           |

|             |           |           |        |        |           |       |               |
|-------------|-----------|-----------|--------|--------|-----------|-------|---------------|
| CLSPN. 6    | 1. 44E-05 | -0. 12868 | 0. 012 | 0. 064 | 0. 214975 | Oligo | CLSPN         |
| ATG4B. 3    | 1. 44E-05 | -0. 13923 | 0. 172 | 0. 28  | 0. 215253 | Oligo | ATG4B         |
| PRKRIR. 3   | 1. 44E-05 | -0. 1072  | 0. 042 | 0. 111 | 0. 215436 | Oligo | PRKRIR        |
| TMEM44. 1   | 1. 45E-05 | -0. 10965 | 0. 002 | 0. 047 | 0. 216111 | Oligo | TMEM44        |
| TYW1. 3     | 1. 45E-05 | -0. 16074 | 0. 052 | 0. 122 | 0. 217082 | Oligo | TYW1          |
| DLGAP1. 6   | 1. 46E-05 | -0. 12323 | 0. 002 | 0. 047 | 0. 217864 | Oligo | DLGAP1        |
| ITM2A. 8    | 1. 46E-05 | 0. 314148 | 0. 101 | 0. 053 | 0. 217964 | Oligo | ITM2A         |
| SMIM18. 8   | 1. 46E-05 | -0. 18147 | 0. 012 | 0. 063 | 0. 218375 | Oligo | SMIM18        |
| SLC2A8. 4   | 1. 48E-05 | -0. 18804 | 0. 066 | 0. 142 | 0. 221315 | Oligo | SLC2A8        |
| ARHGAP31. 1 | 1. 49E-05 | -0. 13388 | 0. 002 | 0. 047 | 0. 222069 | Oligo | ARHGAP31      |
| GTF2H1. 2   | 1. 49E-05 | -0. 16664 | 0. 094 | 0. 18  | 0. 222498 | Oligo | GTF2H1        |
| ZNF219. 1   | 1. 49E-05 | -0. 14571 | 0. 014 | 0. 067 | 0. 22288  | Oligo | ZNF219        |
| ARHGEF10L   | 1. 49E-05 | -0. 15507 | 0. 012 | 0. 063 | 0. 223185 | Oligo | ARHGEF10L     |
| EZH1. 2     | 1. 52E-05 | 0. 30413  | 0. 132 | 0. 078 | 0. 226528 | Oligo | EZH1          |
| LMAN2L. 6   | 1. 52E-05 | -0. 1299  | 0. 047 | 0. 116 | 0. 227232 | Oligo | LMAN2L        |
| TRMT11. 6   | 1. 53E-05 | -0. 18337 | 0. 049 | 0. 119 | 0. 229327 | Oligo | TRMT11        |
| QTRT1. 7    | 1. 54E-05 | -0. 13322 | 0. 216 | 0. 335 | 0. 229393 | Oligo | QTRT1         |
| TMEM68. 6   | 1. 54E-05 | -0. 10882 | 0. 085 | 0. 17  | 0. 230615 | Oligo | TMEM68        |
| RP11-108M   | 1. 54E-05 | -0. 26341 | 0. 04  | 0. 104 | 0. 230767 | Oligo | RP11-108M9. 4 |
| MYPOP. 1    | 1. 55E-05 | -0. 11337 | 0. 024 | 0. 083 | 0. 231096 | Oligo | MYPOP         |
| ZNF556      | 1. 55E-05 | 0. 162606 | 0. 028 | 0. 008 | 0. 23165  | Oligo | ZNF556        |
| TMEM164     | 1. 56E-05 | -0. 1075  | 0      | 0. 042 | 0. 233123 | Oligo | TMEM164       |
| CSDE1. 5    | 1. 57E-05 | -0. 14587 | 0. 461 | 0. 607 | 0. 233896 | Oligo | CSDE1         |
| MPP6. 6     | 1. 57E-05 | -0. 10322 | 0. 019 | 0. 075 | 0. 234238 | Oligo | MPP6          |
| SAR1B. 4    | 1. 57E-05 | 0. 365044 | 0. 379 | 0. 32  | 0. 234349 | Oligo | SAR1B         |
| ZNF441. 2   | 1. 57E-05 | -0. 10663 | 0. 002 | 0. 047 | 0. 235169 | Oligo | ZNF441        |
| NR2F2. 6    | 1. 59E-05 | -0. 15617 | 0. 002 | 0. 046 | 0. 236886 | Oligo | NR2F2         |
| CAPN7. 3    | 1. 59E-05 | -0. 10974 | 0. 047 | 0. 116 | 0. 237053 | Oligo | CAPN7         |
| DTD2. 4     | 1. 61E-05 | 0. 239217 | 0. 12  | 0. 069 | 0. 240186 | Oligo | DTD2          |
| ZNF439. 8   | 1. 61E-05 | -0. 10022 | 0. 071 | 0. 151 | 0. 240303 | Oligo | ZNF439        |
| DDX28. 1    | 1. 61E-05 | -0. 14149 | 0. 024 | 0. 082 | 0. 240377 | Oligo | DDX28         |
| TMEM214. 1  | 1. 61E-05 | -0. 14913 | 0. 049 | 0. 12  | 0. 240914 | Oligo | TMEM214       |
| TRAF3IP2-   | 1. 62E-05 | -0. 14849 | 0. 024 | 0. 082 | 0. 241955 | Oligo | TRAF3IP2-AS1  |
| KLHL36. 3   | 1. 62E-05 | -0. 10592 | 0. 033 | 0. 096 | 0. 242809 | Oligo | KLHL36        |
| CEP19. 7    | 1. 63E-05 | -0. 10186 | 0. 021 | 0. 079 | 0. 242882 | Oligo | CEP19         |
| DNAJC30. 7  | 1. 63E-05 | -0. 10373 | 0. 075 | 0. 157 | 0. 242974 | Oligo | DNAJC30       |
| SP9. 8      | 1. 63E-05 | -0. 15773 | 0      | 0. 042 | 0. 2433   | Oligo | SP9           |
| CTPS1. 6    | 1. 63E-05 | -0. 18094 | 0. 042 | 0. 108 | 0. 243455 | Oligo | CTPS1         |
| SYVN1. 1    | 1. 64E-05 | 0. 281709 | 0. 16  | 0. 101 | 0. 24519  | Oligo | SYVN1         |
| EPOR. 5     | 1. 64E-05 | -0. 1384  | 0. 016 | 0. 071 | 0. 245286 | Oligo | EPOR          |
| MAML1. 7    | 1. 67E-05 | -0. 14912 | 0. 049 | 0. 12  | 0. 248951 | Oligo | MAML1         |
| MYBL2. 7    | 1. 67E-05 | -0. 11294 | 0. 002 | 0. 046 | 0. 249453 | Oligo | MYBL2         |
| PTPMT1. 3   | 1. 67E-05 | -0. 18233 | 0. 235 | 0. 357 | 0. 24996  | Oligo | PTPMT1        |
| GTSE1. 7    | 1. 68E-05 | -0. 12116 | 0. 009 | 0. 059 | 0. 250447 | Oligo | GTSE1         |
| UBE2R2. 6   | 1. 68E-05 | 0. 363458 | 0. 344 | 0. 284 | 0. 250523 | Oligo | UBE2R2        |
| ZBTB41. 1   | 1. 68E-05 | 0. 199722 | 0. 082 | 0. 041 | 0. 250595 | Oligo | ZBTB41        |
| C8orf58     | 1. 70E-05 | -0. 11368 | 0. 009 | 0. 059 | 0. 253448 | Oligo | C8orf58       |
| PDZRN3. 7   | 1. 70E-05 | -0. 14376 | 0. 009 | 0. 059 | 0. 253619 | Oligo | PDZRN3        |
| SIGLEC14. 1 | 1. 72E-05 | -0. 20969 | 0. 002 | 0. 046 | 0. 256397 | Oligo | SIGLEC14      |
| PMS1. 2     | 1. 73E-05 | -0. 14479 | 0. 049 | 0. 12  | 0. 258778 | Oligo | PMS1          |
| PSTPIP2. 6  | 1. 75E-05 | -0. 13985 | 0. 002 | 0. 046 | 0. 262083 | Oligo | PSTPIP2       |

|           |          |          |       |       |          |       |             |
|-----------|----------|----------|-------|-------|----------|-------|-------------|
| EPSTI1.9  | 1.76E-05 | -0.24761 | 0.056 | 0.128 | 0.262447 | Oligo | EPSTI1      |
| SNX19.1   | 1.76E-05 | 0.283739 | 0.148 | 0.093 | 0.262718 | Oligo | SNX19       |
| PLCB3.1   | 1.76E-05 | -0.11496 | 0.009 | 0.059 | 0.262916 | Oligo | PLCB3       |
| SHCBP1.5  | 1.76E-05 | -0.12099 | 0.007 | 0.055 | 0.263093 | Oligo | SHCBP1      |
| MATN2.6   | 1.77E-05 | 0.236736 | 0.113 | 0.064 | 0.264609 | Oligo | MATN2       |
| COG2.1    | 1.77E-05 | -0.13565 | 0.049 | 0.12  | 0.26495  | Oligo | COG2        |
| BUB1.5    | 1.77E-05 | -0.12332 | 0     | 0.042 | 0.265001 | Oligo | BUB1        |
| IL6.3     | 1.77E-05 | -0.20466 | 0     | 0.042 | 0.265001 | Oligo | IL6         |
| CAP2.6    | 1.78E-05 | -0.13768 | 0.009 | 0.059 | 0.266072 | Oligo | CAP2        |
| RP1-92014 | 1.78E-05 | 0.103234 | 0.019 | 0.004 | 0.266731 | Oligo | RP1-92014.3 |
| TGFB3     | 1.79E-05 | 0.203385 | 0.052 | 0.021 | 0.266764 | Oligo | TGFB3       |
| USP18.1   | 1.79E-05 | -0.13443 | 0.012 | 0.063 | 0.267828 | Oligo | USP18       |
| ZNF346.1  | 1.79E-05 | -0.1342  | 0.016 | 0.07  | 0.268097 | Oligo | ZNF346      |
| ARMC6.4   | 1.80E-05 | -0.16402 | 0.082 | 0.163 | 0.26825  | Oligo | ARMC6       |
| SFRP4.5   | 1.80E-05 | -0.2246  | 0.009 | 0.058 | 0.268984 | Oligo | SFRP4       |
| MICA.2    | 1.80E-05 | -0.14566 | 0.002 | 0.046 | 0.269057 | Oligo | MICA        |
| FZD2      | 1.81E-05 | -0.1018  | 0     | 0.042 | 0.270721 | Oligo | FZD2        |
| THG1L.4   | 1.83E-05 | -0.16236 | 0.021 | 0.078 | 0.273563 | Oligo | THG1L       |
| PREB.4    | 1.83E-05 | -0.14402 | 0.12  | 0.213 | 0.273795 | Oligo | PREB        |
| METTL21B. | 1.85E-05 | -0.12779 | 0.014 | 0.067 | 0.276487 | Oligo | METTL21B    |
| CA9.5     | 1.85E-05 | -0.18308 | 0     | 0.041 | 0.276564 | Oligo | CA9         |
| HLTF.7    | 1.85E-05 | -0.13294 | 0.092 | 0.176 | 0.27667  | Oligo | HLTF        |
| PLXNA2.3  | 1.86E-05 | -0.13494 | 0.005 | 0.05  | 0.278223 | Oligo | PLXNA2      |
| TRAF3IP3. | 1.86E-05 | -0.24738 | 0.007 | 0.054 | 0.278402 | Oligo | TRAF3IP3    |
| OGG1.3    | 1.86E-05 | -0.13433 | 0.073 | 0.153 | 0.278496 | Oligo | OGG1        |
| HNRNPU.4  | 1.87E-05 | -0.13254 | 0.398 | 0.535 | 0.278958 | Oligo | HNRNPU      |
| AKNA.7    | 1.87E-05 | -0.1671  | 0.019 | 0.074 | 0.279271 | Oligo | AKNA        |
| BACE2.7   | 1.87E-05 | 0.206949 | 0.099 | 0.053 | 0.279361 | Oligo | BACE2       |
| FDXR.2    | 1.87E-05 | -0.11164 | 0.047 | 0.116 | 0.27962  | Oligo | FDXR        |
| SIMC1.1   | 1.88E-05 | -0.10716 | 0.007 | 0.055 | 0.280371 | Oligo | SIMC1       |
| TESC.2    | 1.89E-05 | -0.1269  | 0     | 0.041 | 0.282532 | Oligo | TESC        |
| MASP1.5   | 1.89E-05 | -0.16008 | 0     | 0.041 | 0.282532 | Oligo | MASP1       |
| HABP4.5   | 1.90E-05 | 0.309531 | 0.174 | 0.117 | 0.28422  | Oligo | HABP4       |
| FGD2.8    | 1.91E-05 | -0.24111 | 0.012 | 0.062 | 0.285747 | Oligo | FGD2        |
| ZNF786.6  | 1.93E-05 | -0.13386 | 0.019 | 0.073 | 0.288776 | Oligo | ZNF786      |
| FAHD2A.3  | 1.94E-05 | 0.335439 | 0.233 | 0.17  | 0.289746 | Oligo | FAHD2A      |
| STK10.8   | 1.95E-05 | -0.14912 | 0.019 | 0.074 | 0.291028 | Oligo | STK10       |
| LRCH4.8   | 1.95E-05 | -0.19849 | 0.106 | 0.192 | 0.291999 | Oligo | LRCH4       |
| KIF23.6   | 1.97E-05 | -0.12161 | 0     | 0.041 | 0.294858 | Oligo | KIF23       |
| HNRNPUL2. | 1.98E-05 | 0.295144 | 0.224 | 0.161 | 0.29519  | Oligo | HNRNPUL2    |
| TSPAN5.9  | 2.00E-05 | 0.325484 | 0.32  | 0.26  | 0.298504 | Oligo | TSPAN5      |
| AGK.3     | 2.02E-05 | -0.1592  | 0.038 | 0.102 | 0.301198 | Oligo | AGK         |
| SNAI2.4   | 2.02E-05 | -0.10233 | 0     | 0.041 | 0.30122  | Oligo | SNAI2       |
| HRH2.6    | 2.02E-05 | -0.17555 | 0     | 0.041 | 0.30122  | Oligo | HRH2        |
| TMEM159   | 2.02E-05 | -0.12284 | 0.005 | 0.05  | 0.301362 | Oligo | TMEM159     |
| OPN3.5    | 2.02E-05 | -0.1162  | 0.019 | 0.074 | 0.302251 | Oligo | OPN3        |
| DMXL1.1   | 2.03E-05 | 0.218302 | 0.141 | 0.086 | 0.302676 | Oligo | DMXL1       |
| NIT1.1    | 2.03E-05 | -0.15625 | 0.089 | 0.173 | 0.303197 | Oligo | NIT1        |
| CEP170.5  | 2.03E-05 | 0.267661 | 0.327 | 0.259 | 0.303734 | Oligo | CEP170      |
| UQCC1.5   | 2.04E-05 | -0.1536  | 0.085 | 0.168 | 0.304777 | Oligo | UQCC1       |
| FBXL16.5  | 2.05E-05 | -0.10616 | 0.002 | 0.045 | 0.306899 | Oligo | FBXL16      |

|             |           |           |        |        |           |       |               |
|-------------|-----------|-----------|--------|--------|-----------|-------|---------------|
| MYOF. 6     | 2. 06E-05 | -0. 16582 | 0. 002 | 0. 045 | 0. 307689 | Oligo | MYOF          |
| CHST8. 7    | 2. 09E-05 | -0. 12152 | 0. 016 | 0. 069 | 0. 311895 | Oligo | CHST8         |
| NRXN2. 9    | 2. 09E-05 | 0. 262926 | 0. 179 | 0. 114 | 0. 312198 | Oligo | NRXN2         |
| WRAP53      | 2. 09E-05 | -0. 14647 | 0. 028 | 0. 088 | 0. 312479 | Oligo | WRAP53        |
| S1PR3. 2    | 2. 10E-05 | 0. 397509 | 0. 092 | 0. 049 | 0. 313443 | Oligo | S1PR3         |
| MOGS. 2     | 2. 10E-05 | -0. 13139 | 0. 054 | 0. 126 | 0. 31372  | Oligo | MOGS          |
| TMEM136. 6  | 2. 10E-05 | 0. 298712 | 0. 139 | 0. 086 | 0. 31456  | Oligo | TMEM136       |
| DHRS4. 6    | 2. 12E-05 | -0. 20073 | 0. 026 | 0. 084 | 0. 316685 | Oligo | DHRS4         |
| DTNA. 8     | 2. 13E-05 | -0. 28339 | 0. 158 | 0. 256 | 0. 317709 | Oligo | DTNA          |
| SAFB. 5     | 2. 14E-05 | -0. 13933 | 0. 184 | 0. 293 | 0. 320038 | Oligo | SAFB          |
| TBCD. 3     | 2. 14E-05 | -0. 13091 | 0. 071 | 0. 148 | 0. 320254 | Oligo | TBCD          |
| IDH2. 7     | 2. 18E-05 | -0. 15758 | 0. 311 | 0. 431 | 0. 325054 | Oligo | IDH2          |
| PCGF1. 1    | 2. 19E-05 | -0. 20199 | 0. 035 | 0. 097 | 0. 327503 | Oligo | PCGF1         |
| IGLON5. 5   | 2. 20E-05 | -0. 1619  | 0. 005 | 0. 049 | 0. 328893 | Oligo | IGLON5        |
| AGTRAP. 5   | 2. 22E-05 | -0. 2231  | 0. 184 | 0. 285 | 0. 331274 | Oligo | AGTRAP        |
| MEN1. 4     | 2. 23E-05 | -0. 12093 | 0. 049 | 0. 119 | 0. 333307 | Oligo | MEN1          |
| ARHGEF1. 6  | 2. 24E-05 | -0. 12441 | 0. 108 | 0. 2   | 0. 334343 | Oligo | ARHGEF1       |
| SMKR1. 6    | 2. 25E-05 | -0. 15142 | 0. 019 | 0. 073 | 0. 336224 | Oligo | SMKR1         |
| PNPO. 5     | 2. 27E-05 | -0. 12347 | 0. 024 | 0. 081 | 0. 3386   | Oligo | PNPO          |
| CLUAP1. 8   | 2. 27E-05 | -0. 13446 | 0. 087 | 0. 171 | 0. 339102 | Oligo | CLUAP1        |
| FAM175A. 2  | 2. 27E-05 | -0. 10415 | 0. 014 | 0. 066 | 0. 339931 | Oligo | FAM175A       |
| SSPN. 4     | 2. 28E-05 | -0. 16249 | 0. 042 | 0. 108 | 0. 340533 | Oligo | SSPN          |
| NRSN1. 7    | 2. 29E-05 | -0. 13512 | 0. 012 | 0. 062 | 0. 341684 | Oligo | NRSN1         |
| CRIP1. 7    | 2. 29E-05 | -0. 23984 | 0      | 0. 041 | 0. 342371 | Oligo | CRIP1         |
| MAN1A1. 8   | 2. 29E-05 | -0. 17493 | 0. 005 | 0. 049 | 0. 342699 | Oligo | MAN1A1        |
| POLR3H. 5   | 2. 30E-05 | -0. 11158 | 0. 122 | 0. 218 | 0. 342972 | Oligo | POLR3H        |
| BRCC3. 1    | 2. 31E-05 | -0. 13149 | 0. 042 | 0. 109 | 0. 344564 | Oligo | BRCC3         |
| MAPRE3. 7   | 2. 31E-05 | 0. 205383 | 0. 245 | 0. 176 | 0. 344654 | Oligo | MAPRE3        |
| ACTR8. 1    | 2. 31E-05 | -0. 17018 | 0. 042 | 0. 107 | 0. 34538  | Oligo | ACTR8         |
| CD7. 6      | 2. 32E-05 | -0. 27561 | 0. 002 | 0. 045 | 0. 346784 | Oligo | CD7           |
| SYT5. 7     | 2. 32E-05 | -0. 1391  | 0. 002 | 0. 045 | 0. 347106 | Oligo | SYT5          |
| ARHGAP33. 2 | 2. 34E-05 | 0. 24248  | 0. 134 | 0. 08  | 0. 349254 | Oligo | ARHGAP33      |
| PDE9A. 5    | 2. 34E-05 | -0. 15443 | 0. 019 | 0. 073 | 0. 349529 | Oligo | PDE9A         |
| RP11-400N   | 2. 37E-05 | 0. 128503 | 0. 019 | 0. 004 | 0. 354103 | Oligo | RP11-400N9. 1 |
| COMTD1. 5   | 2. 38E-05 | -0. 11674 | 0. 012 | 0. 062 | 0. 355178 | Oligo | COMTD1        |
| TTC17. 4    | 2. 38E-05 | -0. 1542  | 0. 127 | 0. 222 | 0. 355682 | Oligo | TTC17         |
| TLE2. 8     | 2. 40E-05 | -0. 17095 | 0. 033 | 0. 093 | 0. 35893  | Oligo | TLE2          |
| ANAPC5. 6   | 2. 41E-05 | 0. 309856 | 0. 438 | 0. 394 | 0. 360366 | Oligo | ANAPC5        |
| CHD6. 8     | 2. 42E-05 | -0. 11106 | 0. 148 | 0. 248 | 0. 361018 | Oligo | CHD6          |
| HNRNPA1L2   | 2. 42E-05 | -0. 15919 | 0. 115 | 0. 204 | 0. 361238 | Oligo | HNRNPA1L2     |
| PPIA. 4     | 2. 42E-05 | 0. 111384 | 0. 831 | 0. 877 | 0. 361395 | Oligo | PPIA          |
| N4BP2L1. 3  | 2. 42E-05 | -0. 20046 | 0. 082 | 0. 16  | 0. 361868 | Oligo | N4BP2L1       |
| CD2AP. 4    | 2. 43E-05 | -0. 13395 | 0. 026 | 0. 084 | 0. 363225 | Oligo | CD2AP         |
| ASL. 6      | 2. 46E-05 | -0. 14113 | 0. 092 | 0. 174 | 0. 366985 | Oligo | ASL           |
| GALC. 5     | 2. 48E-05 | 0. 231613 | 0. 158 | 0. 1   | 0. 370767 | Oligo | GALC          |
| KRT7. 5     | 2. 50E-05 | -0. 16237 | 0      | 0. 04  | 0. 372871 | Oligo | KRT7          |
| OXSM. 1     | 2. 50E-05 | -0. 13947 | 0. 026 | 0. 083 | 0. 37331  | Oligo | OXSM          |
| RRP9. 3     | 2. 51E-05 | -0. 15103 | 0. 08  | 0. 159 | 0. 37488  | Oligo | RRP9          |
| PLCG2. 6    | 2. 51E-05 | -0. 14326 | 0. 005 | 0. 049 | 0. 374939 | Oligo | PLCG2         |
| ZNF704. 8   | 2. 51E-05 | 0. 267239 | 0. 181 | 0. 121 | 0. 374976 | Oligo | ZNF704        |
| LINC01003   | 2. 51E-05 | -0. 12708 | 0. 106 | 0. 195 | 0. 37548  | Oligo | LINC01003     |

|             |           |           |        |        |           |       |            |
|-------------|-----------|-----------|--------|--------|-----------|-------|------------|
| NFIL3. 8    | 2. 52E-05 | -0. 22299 | 0. 028 | 0. 085 | 0. 376179 | Oligo | NFIL3      |
| MAP3K7. 5   | 2. 52E-05 | 0. 418696 | 0. 261 | 0. 203 | 0. 376405 | Oligo | MAP3K7     |
| LBR. 5      | 2. 52E-05 | -0. 15659 | 0. 141 | 0. 236 | 0. 376468 | Oligo | LBR        |
| HIST1H4J    | 2. 53E-05 | -0. 16805 | 0. 007 | 0. 053 | 0. 37747  | Oligo | HIST1H4J   |
| B3GALT6. 5  | 2. 55E-05 | -0. 11926 | 0. 066 | 0. 141 | 0. 380591 | Oligo | B3GALT6    |
| ACSBG1. 6   | 2. 58E-05 | -0. 14293 | 0. 021 | 0. 076 | 0. 385721 | Oligo | ACSBG1     |
| CLK4. 5     | 2. 58E-05 | -0. 16389 | 0. 085 | 0. 165 | 0. 385809 | Oligo | CLK4       |
| TSC22D3. 7  | 2. 60E-05 | -0. 18002 | 0. 355 | 0. 46  | 0. 389024 | Oligo | TSC22D3    |
| PLA2G7. 7   | 2. 60E-05 | -0. 19252 | 0. 007 | 0. 053 | 0. 389149 | Oligo | PLA2G7     |
| AGPAT1. 3   | 2. 62E-05 | 0. 358151 | 0. 287 | 0. 225 | 0. 391424 | Oligo | AGPAT1     |
| MEX3B. 7    | 2. 65E-05 | -0. 15094 | 0. 014 | 0. 064 | 0. 396008 | Oligo | MEX3B      |
| KIAA0895L   | 2. 65E-05 | -0. 11093 | 0. 033 | 0. 094 | 0. 396386 | Oligo | KIAA0895L  |
| TBK1. 3     | 2. 68E-05 | -0. 16258 | 0. 075 | 0. 153 | 0. 40097  | Oligo | TBK1       |
| DAPK1. 5    | 2. 69E-05 | -0. 15068 | 0. 012 | 0. 061 | 0. 401517 | Oligo | DAPK1      |
| IL6ST. 8    | 2. 71E-05 | 0. 24623  | 0. 311 | 0. 252 | 0. 405626 | Oligo | IL6ST      |
| RUNX3. 7    | 2. 72E-05 | -0. 18158 | 0      | 0. 04  | 0. 40608  | Oligo | RUNX3      |
| XRCC6BP1. 2 | 2. 72E-05 | -0. 19905 | 0. 026 | 0. 082 | 0. 406846 | Oligo | XRCC6BP1   |
| DPYSL4. 9   | 2. 73E-05 | -0. 10714 | 0. 078 | 0. 157 | 0. 407825 | Oligo | DPYSL4     |
| ZNF883. 8   | 2. 73E-05 | -0. 10374 | 0. 068 | 0. 143 | 0. 408612 | Oligo | ZNF883     |
| DNAJC17. 3  | 2. 74E-05 | -0. 18733 | 0. 031 | 0. 089 | 0. 409287 | Oligo | DNAJC17    |
| RTP4. 2     | 2. 74E-05 | 0. 140748 | 0. 068 | 0. 032 | 0. 409828 | Oligo | RTP4       |
| EFNA2. 7    | 2. 76E-05 | -0. 10299 | 0. 007 | 0. 053 | 0. 411931 | Oligo | EFNA2      |
| THBS3       | 2. 76E-05 | -0. 11173 | 0. 012 | 0. 061 | 0. 412126 | Oligo | THBS3      |
| ITGA4. 8    | 2. 76E-05 | -0. 1737  | 0. 002 | 0. 044 | 0. 412232 | Oligo | ITGA4      |
| THOC1. 3    | 2. 78E-05 | -0. 15507 | 0. 073 | 0. 149 | 0. 415678 | Oligo | THOC1      |
| SLFN11. 6   | 2. 78E-05 | -0. 16125 | 0. 002 | 0. 044 | 0. 416129 | Oligo | SLFN11     |
| VARS. 2     | 2. 78E-05 | -0. 14486 | 0. 082 | 0. 161 | 0. 416142 | Oligo | VARS       |
| FNDC3A. 4   | 2. 80E-05 | -0. 13761 | 0. 125 | 0. 218 | 0. 418163 | Oligo | FNDC3A     |
| TRIT1. 3    | 2. 80E-05 | -0. 18013 | 0. 031 | 0. 09  | 0. 418304 | Oligo | TRIT1      |
| BCAR1. 7    | 2. 82E-05 | 0. 389342 | 0. 228 | 0. 17  | 0. 421096 | Oligo | BCAR1      |
| RNF139. 6   | 2. 82E-05 | -0. 11337 | 0. 158 | 0. 259 | 0. 421908 | Oligo | RNF139     |
| GIMAP6. 7   | 2. 83E-05 | -0. 19176 | 0. 002 | 0. 044 | 0. 422586 | Oligo | GIMAP6     |
| BATF. 6     | 2. 84E-05 | -0. 17445 | 0      | 0. 04  | 0. 423774 | Oligo | BATF       |
| SIPA1L1. 2  | 2. 84E-05 | -0. 12657 | 0. 085 | 0. 167 | 0. 424039 | Oligo | SIPA1L1    |
| GPRIN3. 9   | 2. 84E-05 | -0. 1891  | 0. 012 | 0. 06  | 0. 424534 | Oligo | GPRIN3     |
| QSOX1. 7    | 2. 86E-05 | -0. 17093 | 0. 144 | 0. 24  | 0. 428066 | Oligo | QSOX1      |
| GORASP2. 5  | 2. 87E-05 | -0. 12084 | 0. 186 | 0. 297 | 0. 428662 | Oligo | GORASP2    |
| FAM217B. 8  | 2. 87E-05 | 0. 282434 | 0. 214 | 0. 153 | 0. 429521 | Oligo | FAM217B    |
| ARHGAP27. 2 | 2. 87E-05 | -0. 16783 | 0. 009 | 0. 057 | 0. 429617 | Oligo | ARHGAP27   |
| KIFC1. 7    | 2. 88E-05 | -0. 15676 | 0. 012 | 0. 061 | 0. 430127 | Oligo | KIFC1      |
| RCHY1. 5    | 2. 91E-05 | -0. 10893 | 0. 115 | 0. 203 | 0. 435261 | Oligo | RCHY1      |
| DICER1-AS   | 2. 92E-05 | 0. 292841 | 0. 096 | 0. 052 | 0. 436662 | Oligo | DICER1-AS1 |
| GFER. 4     | 2. 94E-05 | -0. 10807 | 0. 12  | 0. 212 | 0. 439186 | Oligo | GFER       |
| PON2. 9     | 2. 94E-05 | 0. 189238 | 0. 534 | 0. 447 | 0. 439222 | Oligo | PON2       |
| ZNF430. 5   | 2. 96E-05 | -0. 18151 | 0. 106 | 0. 192 | 0. 441625 | Oligo | ZNF430     |
| CTU2. 4     | 2. 96E-05 | -0. 11021 | 0. 061 | 0. 135 | 0. 441813 | Oligo | CTU2       |
| SORBS2. 7   | 2. 96E-05 | -0. 163   | 0. 007 | 0. 052 | 0. 442161 | Oligo | SORBS2     |
| NUS1. 2     | 2. 96E-05 | -0. 11571 | 0. 075 | 0. 154 | 0. 443072 | Oligo | NUS1       |
| DSCR3. 3    | 2. 97E-05 | -0. 16539 | 0. 087 | 0. 167 | 0. 444445 | Oligo | DSCR3      |
| CCDC88C. 1  | 2. 98E-05 | -0. 1263  | 0. 002 | 0. 044 | 0. 445406 | Oligo | CCDC88C    |
| KITLG. 3    | 2. 98E-05 | -0. 10373 | 0. 002 | 0. 044 | 0. 446062 | Oligo | KITLG      |



|           |          |          |       |       |          |       |                |
|-----------|----------|----------|-------|-------|----------|-------|----------------|
| TMEM86A.7 | 2.99E-05 | -0.18032 | 0.005 | 0.048 | 0.447541 | Oligo | TMEM86A        |
| ETV3.8    | 3.00E-05 | -0.19237 | 0.024 | 0.078 | 0.448139 | Oligo | ETV3           |
| LYVE1.7   | 3.02E-05 | -0.30466 | 0     | 0.039 | 0.451765 | Oligo | LYVE1          |
| KLHDC3.6  | 3.05E-05 | -0.11266 | 0.242 | 0.367 | 0.455121 | Oligo | KLHDC3         |
| PODXL.5   | 3.05E-05 | -0.10371 | 0.019 | 0.072 | 0.456426 | Oligo | PODXL          |
| RUNDC3A.9 | 3.08E-05 | 0.205396 | 0.155 | 0.095 | 0.460261 | Oligo | RUNDC3A        |
| TSPAN33.7 | 3.09E-05 | -0.14955 | 0.002 | 0.044 | 0.4611   | Oligo | TSPAN33        |
| SRGAP1.7  | 3.10E-05 | -0.20267 | 0.139 | 0.228 | 0.462987 | Oligo | SRGAP1         |
| RP5-864K1 | 3.12E-05 | 0.219875 | 0.047 | 0.019 | 0.465617 | Oligo | RP5-864K19.4   |
| CTD-2020K | 3.12E-05 | 0.321597 | 0.054 | 0.023 | 0.466503 | Oligo | CTD-2020K17.1  |
| ZNF350.1  | 3.13E-05 | -0.11525 | 0.035 | 0.097 | 0.467372 | Oligo | ZNF350         |
| SFMBT1.1  | 3.13E-05 | -0.15781 | 0.019 | 0.071 | 0.468378 | Oligo | SFMBT1         |
| PAK7.8    | 3.14E-05 | -0.14438 | 0.005 | 0.048 | 0.468507 | Oligo | PAK7           |
| PLB1.8    | 3.14E-05 | -0.17352 | 0.002 | 0.044 | 0.468833 | Oligo | PLB1           |
| SARNP.2   | 3.14E-05 | -0.19935 | 0.056 | 0.125 | 0.468927 | Oligo | SARNP          |
| ZNF273.7  | 3.15E-05 | -0.11522 | 0.028 | 0.086 | 0.47066  | Oligo | ZNF273         |
| CD72.6    | 3.15E-05 | -0.18364 | 0.007 | 0.052 | 0.470875 | Oligo | CD72           |
| RP11-793H | 3.15E-05 | 0.132106 | 0.016 | 0.004 | 0.470947 | Oligo | RP11-793H13.10 |
| CXCL12.4  | 3.16E-05 | -0.22063 | 0.002 | 0.044 | 0.471943 | Oligo | CXCL12         |
| AR.5      | 3.16E-05 | -0.11157 | 0.005 | 0.048 | 0.472526 | Oligo | AR             |
| PAG1.4    | 3.17E-05 | -0.17445 | 0.092 | 0.172 | 0.474454 | Oligo | PAG1           |
| SNHG12.6  | 3.21E-05 | -0.22903 | 0.066 | 0.137 | 0.480017 | Oligo | SNHG12         |
| TICAM1.1  | 3.22E-05 | -0.14349 | 0.033 | 0.093 | 0.481265 | Oligo | TICAM1         |
| INA.6     | 3.23E-05 | -0.14098 | 0.002 | 0.044 | 0.483154 | Oligo | INA            |
| RRS1.3    | 3.25E-05 | -0.14905 | 0.071 | 0.145 | 0.485379 | Oligo | RRS1           |
| RAD51AP1. | 3.27E-05 | -0.10961 | 0.016 | 0.068 | 0.489205 | Oligo | RAD51AP1       |
| ZNF496.1  | 3.28E-05 | -0.10003 | 0.012 | 0.06  | 0.489802 | Oligo | ZNF496         |
| TROAP.8   | 3.28E-05 | -0.13334 | 0.005 | 0.048 | 0.490291 | Oligo | TROAP          |
| MIR181A1H | 3.28E-05 | 0.239007 | 0.172 | 0.11  | 0.490892 | Oligo | MIR181A1HG     |
| DGAT1.2   | 3.30E-05 | -0.10297 | 0.031 | 0.09  | 0.493356 | Oligo | DGAT1          |
| BCAP29.3  | 3.31E-05 | -0.10365 | 0.209 | 0.321 | 0.494672 | Oligo | BCAP29         |
| KCNAB1    | 3.33E-05 | 0.144359 | 0.026 | 0.008 | 0.498144 | Oligo | KCNAB1         |
| VWA3B.4   | 3.36E-05 | -0.10449 | 0     | 0.039 | 0.502574 | Oligo | VWA3B          |
| PDIA5.3   | 3.36E-05 | -0.12097 | 0.019 | 0.072 | 0.502837 | Oligo | PDIA5          |
| CNTLN.1   | 3.37E-05 | -0.14519 | 0.042 | 0.106 | 0.503821 | Oligo | CNTLN          |
| CPLX1.6   | 3.38E-05 | -0.15109 | 0.002 | 0.043 | 0.505429 | Oligo | CPLX1          |
| H1FO.1    | 3.39E-05 | -0.13697 | 0.172 | 0.267 | 0.506743 | Oligo | H1FO           |
| AC096772. | 3.41E-05 | 0.103099 | 0.049 | 0.02  | 0.508869 | Oligo | AC096772.6     |
| MED26.1   | 3.41E-05 | -0.1369  | 0.021 | 0.075 | 0.510006 | Oligo | MED26          |
| WDR76.2   | 3.43E-05 | -0.11489 | 0.009 | 0.056 | 0.512162 | Oligo | WDR76          |
| ULK3.4    | 3.44E-05 | -0.12476 | 0.073 | 0.149 | 0.514321 | Oligo | ULK3           |
| MAP3K13.6 | 3.45E-05 | -0.11004 | 0.28  | 0.398 | 0.515237 | Oligo | MAP3K13        |
| SLC25A14. | 3.45E-05 | -0.11029 | 0.033 | 0.092 | 0.515322 | Oligo | SLC25A14       |
| KCNAB2.7  | 3.50E-05 | -0.17666 | 0.024 | 0.078 | 0.523665 | Oligo | KCNAB2         |
| SREK1IP1. | 3.51E-05 | -0.10818 | 0.226 | 0.342 | 0.524359 | Oligo | SREK1IP1       |
| SLC50A1.7 | 3.55E-05 | -0.13351 | 0.089 | 0.17  | 0.530928 | Oligo | SLC50A1        |
| INTS1.1   | 3.56E-05 | 0.227959 | 0.139 | 0.085 | 0.532207 | Oligo | INTS1          |
| RBBP7.7   | 3.58E-05 | -0.12453 | 0.299 | 0.429 | 0.534623 | Oligo | RBBP7          |
| VTI1B.5   | 3.59E-05 | -0.12739 | 0.235 | 0.351 | 0.535877 | Oligo | VTI1B          |
| PRKX.4    | 3.59E-05 | -0.17817 | 0.049 | 0.114 | 0.536777 | Oligo | PRKX           |
| APPL2     | 3.61E-05 | -0.14812 | 0.101 | 0.184 | 0.540039 | Oligo | APPL2          |

|            |          |          |       |       |          |       |            |
|------------|----------|----------|-------|-------|----------|-------|------------|
| VAV2.1     | 3.62E-05 | -0.10128 | 0.007 | 0.052 | 0.540295 | Oligo | VAV2       |
| CFDP1.6    | 3.62E-05 | -0.14291 | 0.299 | 0.42  | 0.541456 | Oligo | CFDP1      |
| MFAP4.6    | 3.63E-05 | -0.16255 | 0.009 | 0.056 | 0.542035 | Oligo | MFAP4      |
| NR2C1.3    | 3.64E-05 | -0.14375 | 0.038 | 0.099 | 0.543707 | Oligo | NR2C1      |
| SLC32A1.7  | 3.66E-05 | -0.1554  | 0     | 0.039 | 0.547292 | Oligo | SLC32A1    |
| ZSWIM8.3   | 3.68E-05 | 0.227635 | 0.127 | 0.076 | 0.549767 | Oligo | ZSWIM8     |
| AC091729.3 | 3.68E-05 | -0.10634 | 0.026 | 0.082 | 0.549986 | Oligo | AC091729.9 |
| ASAP1.5    | 3.69E-05 | -0.15385 | 0.136 | 0.231 | 0.551771 | Oligo | ASAP1      |
| ZNF708.6   | 3.71E-05 | 0.253775 | 0.151 | 0.096 | 0.554879 | Oligo | ZNF708     |
| GABPB2.1   | 3.72E-05 | 0.219299 | 0.106 | 0.059 | 0.555824 | Oligo | GABPB2     |
| NRIP1.3    | 3.72E-05 | -0.13997 | 0.056 | 0.125 | 0.555925 | Oligo | NRIP1      |
| WWOX.3     | 3.73E-05 | 0.264796 | 0.153 | 0.097 | 0.557599 | Oligo | WWOX       |
| ASCL2.8    | 3.74E-05 | -0.15471 | 0     | 0.039 | 0.559078 | Oligo | ASCL2      |
| SETD6.5    | 3.74E-05 | -0.12831 | 0.033 | 0.093 | 0.559361 | Oligo | SETD6      |
| FAM219A.5  | 3.80E-05 | 0.273969 | 0.141 | 0.089 | 0.567155 | Oligo | FAM219A    |
| EPHX1.4    | 3.82E-05 | 0.404735 | 0.292 | 0.23  | 0.570182 | Oligo | EPHX1      |
| SET.5      | 3.83E-05 | -0.14241 | 0.464 | 0.564 | 0.573088 | Oligo | SET        |
| MAST1.2    | 3.86E-05 | -0.13339 | 0.005 | 0.047 | 0.576554 | Oligo | MAST1      |
| METTL13.3  | 3.86E-05 | -0.13769 | 0.056 | 0.125 | 0.576744 | Oligo | METTL13    |
| EXTL2.7    | 3.87E-05 | -0.13961 | 0.089 | 0.17  | 0.577987 | Oligo | EXTL2      |
| KCNQ3.4    | 3.88E-05 | -0.17249 | 0.002 | 0.043 | 0.58016  | Oligo | KCNQ3      |
| GPR146.1   | 3.88E-05 | 0.121699 | 0.049 | 0.02  | 0.580438 | Oligo | GPR146     |
| ZNF276.2   | 3.90E-05 | 0.324902 | 0.141 | 0.088 | 0.583353 | Oligo | ZNF276     |
| IL15.7     | 3.90E-05 | -0.16425 | 0     | 0.038 | 0.583414 | Oligo | IL15       |
| OSCP1.4    | 3.90E-05 | -0.10235 | 0.016 | 0.068 | 0.583531 | Oligo | OSCP1      |
| POLR3D.7   | 3.91E-05 | -0.15822 | 0.059 | 0.128 | 0.583729 | Oligo | POLR3D     |
| KIAA0040.3 | 3.92E-05 | -0.16559 | 0.005 | 0.047 | 0.586223 | Oligo | KIAA0040   |
| PRMT5.7    | 3.93E-05 | -0.12492 | 0.078 | 0.154 | 0.587184 | Oligo | PRMT5      |
| MYNN.3     | 3.93E-05 | -0.16519 | 0.042 | 0.105 | 0.587788 | Oligo | MYNN       |
| EED.2      | 3.95E-05 | -0.12904 | 0.038 | 0.099 | 0.589867 | Oligo | EED        |
| Clorf50.4  | 3.95E-05 | -0.12465 | 0.099 | 0.183 | 0.590656 | Oligo | Clorf50    |
| HS3ST3B1.3 | 3.97E-05 | -0.14316 | 0.002 | 0.043 | 0.593046 | Oligo | HS3ST3B1   |
| TBC1D9.7   | 3.98E-05 | -0.14224 | 0.009 | 0.055 | 0.595489 | Oligo | TBC1D9     |
| FGGY.2     | 3.99E-05 | -0.12593 | 0.031 | 0.089 | 0.596133 | Oligo | FGGY       |
| FAM118A.6  | 3.99E-05 | -0.18542 | 0.066 | 0.135 | 0.596615 | Oligo | FAM118A    |
| MICALL2.4  | 4.00E-05 | -0.10962 | 0.019 | 0.071 | 0.597387 | Oligo | MICALL2    |
| STK38.2    | 4.01E-05 | -0.11122 | 0.021 | 0.074 | 0.599901 | Oligo | STK38      |
| POLM.1     | 4.02E-05 | -0.12464 | 0.038 | 0.098 | 0.600072 | Oligo | POLM       |
| HARS2.1    | 4.04E-05 | -0.13528 | 0.028 | 0.085 | 0.603193 | Oligo | HARS2      |
| CKAP2L.8   | 4.05E-05 | -0.13295 | 0.005 | 0.047 | 0.605614 | Oligo | CKAP2L     |
| SPTSSB.5   | 4.07E-05 | -0.14187 | 0     | 0.038 | 0.608808 | Oligo | SPTSSB     |
| RFX1.3     | 4.10E-05 | -0.111   | 0.033 | 0.092 | 0.611965 | Oligo | RFX1       |
| CDCA5.7    | 4.15E-05 | -0.1223  | 0.005 | 0.047 | 0.619818 | Oligo | CDCA5      |
| GAL.5      | 4.16E-05 | -0.16251 | 0     | 0.038 | 0.621914 | Oligo | GAL        |
| MARCH9.8   | 4.16E-05 | -0.11182 | 0.08  | 0.157 | 0.62219  | Oligo | 9-Mar      |
| BMP2K.7    | 4.17E-05 | -0.21988 | 0.054 | 0.119 | 0.623216 | Oligo | BMP2K      |
| ADNP2.2    | 4.18E-05 | 0.22197  | 0.125 | 0.075 | 0.625048 | Oligo | ADNP2      |
| SH3YL1.6   | 4.18E-05 | 0.428393 | 0.24  | 0.179 | 0.625266 | Oligo | SH3YL1     |
| NME6.2     | 4.20E-05 | -0.14193 | 0.047 | 0.111 | 0.627347 | Oligo | NME6       |
| TRIM32.4   | 4.20E-05 | -0.10309 | 0.012 | 0.059 | 0.627774 | Oligo | TRIM32     |
| ZNF18      | 4.21E-05 | -0.10553 | 0.009 | 0.055 | 0.628997 | Oligo | ZNF18      |

|             |          |          |       |       |          |       |               |
|-------------|----------|----------|-------|-------|----------|-------|---------------|
| FAM159A.8   | 4.22E-05 | -0.18486 | 0.005 | 0.047 | 0.630935 | Oligo | FAM159A       |
| METAP1D.7   | 4.22E-05 | -0.16829 | 0.059 | 0.127 | 0.631105 | Oligo | METAP1D       |
| CISD1.7     | 4.24E-05 | -0.17224 | 0.235 | 0.34  | 0.633583 | Oligo | CISD1         |
| CCNF.3      | 4.25E-05 | -0.10443 | 0     | 0.038 | 0.635303 | Oligo | CCNF          |
| CD180.8     | 4.25E-05 | -0.1547  | 0     | 0.038 | 0.635303 | Oligo | CD180         |
| HUS1.2      | 4.26E-05 | -0.13807 | 0.054 | 0.12  | 0.636247 | Oligo | HUS1          |
| NPHP1.4     | 4.28E-05 | -0.10947 | 0.019 | 0.071 | 0.639283 | Oligo | NPHP1         |
| ATP5D.8     | 4.30E-05 | -0.16753 | 0.532 | 0.617 | 0.641871 | Oligo | ATP5D         |
| SLC25A24.4  | 4.30E-05 | -0.15564 | 0.04  | 0.101 | 0.642078 | Oligo | SLC25A24      |
| CRYZ.8      | 4.30E-05 | -0.10065 | 0.056 | 0.126 | 0.643214 | Oligo | CRYZ          |
| CHEK1.4     | 4.32E-05 | -0.10046 | 0.026 | 0.082 | 0.64559  | Oligo | CHEK1         |
| NAIP.9      | 4.34E-05 | -0.15527 | 0.047 | 0.111 | 0.649252 | Oligo | NAIP          |
| SH2D4A.1    | 4.44E-05 | -0.11005 | 0     | 0.038 | 0.662948 | Oligo | SH2D4A        |
| ALPK1.4     | 4.44E-05 | -0.14505 | 0     | 0.038 | 0.662948 | Oligo | ALPK1         |
| HINT2.4     | 4.46E-05 | -0.17437 | 0.235 | 0.35  | 0.666135 | Oligo | HINT2         |
| LOX.6       | 4.46E-05 | -0.21313 | 0.005 | 0.046 | 0.666453 | Oligo | LOX           |
| KRBOX4.4    | 4.47E-05 | -0.16119 | 0.052 | 0.118 | 0.667275 | Oligo | KRBOX4        |
| GAS8.4      | 4.54E-05 | -0.11433 | 0.019 | 0.07  | 0.677992 | Oligo | GAS8          |
| CACNA2D1.4  | 4.56E-05 | 0.191402 | 0.064 | 0.029 | 0.681393 | Oligo | CACNA2D1      |
| ANKRD13B.4  | 4.56E-05 | 0.229493 | 0.089 | 0.048 | 0.681789 | Oligo | ANKRD13B      |
| CENPA.8     | 4.57E-05 | -0.14996 | 0.007 | 0.051 | 0.682753 | Oligo | CENPA         |
| CSK.9       | 4.58E-05 | -0.21365 | 0.078 | 0.15  | 0.683953 | Oligo | CSK           |
| AURKB.8     | 4.58E-05 | -0.17415 | 0.007 | 0.05  | 0.684478 | Oligo | AURKB         |
| FGD4.8      | 4.58E-05 | -0.23126 | 0.078 | 0.149 | 0.684518 | Oligo | FGD4          |
| SIX1.7      | 4.59E-05 | -0.11859 | 0.012 | 0.059 | 0.686314 | Oligo | SIX1          |
| FBXO27.4    | 4.60E-05 | 0.128053 | 0.049 | 0.021 | 0.687177 | Oligo | FBXO27        |
| BDNF-AS.7   | 4.62E-05 | 0.352177 | 0.108 | 0.062 | 0.690387 | Oligo | BDNF-AS       |
| RP11-76E1.4 | 4.63E-05 | -0.21238 | 0     | 0.038 | 0.691793 | Oligo | RP11-76E17.3  |
| ATN1.7      | 4.65E-05 | 0.356301 | 0.238 | 0.181 | 0.695369 | Oligo | ATN1          |
| AP2B1.8     | 4.67E-05 | 0.247592 | 0.384 | 0.339 | 0.698185 | Oligo | AP2B1         |
| PDK3.5      | 4.68E-05 | -0.14571 | 0.014 | 0.062 | 0.699701 | Oligo | PDK3          |
| DENND2D.5   | 4.73E-05 | -0.17527 | 0.005 | 0.046 | 0.707072 | Oligo | DENND2D       |
| PTOV1.8     | 4.75E-05 | 0.306955 | 0.485 | 0.437 | 0.71028  | Oligo | PTOV1         |
| CCNA2.8     | 4.76E-05 | -0.16428 | 0.012 | 0.058 | 0.711817 | Oligo | CCNA2         |
| LRRCC1.6    | 4.77E-05 | -0.11224 | 0.066 | 0.138 | 0.713459 | Oligo | LRRCC1        |
| TMEM39A.4   | 4.79E-05 | -0.18154 | 0.035 | 0.093 | 0.71594  | Oligo | TMEM39A       |
| SLC35A1.3   | 4.82E-05 | -0.16329 | 0.068 | 0.139 | 0.720344 | Oligo | SLC35A1       |
| PLD2.5      | 4.85E-05 | -0.11799 | 0.031 | 0.088 | 0.724178 | Oligo | PLD2          |
| RP11-448A.4 | 4.87E-05 | -0.12263 | 0.035 | 0.094 | 0.728064 | Oligo | RP11-448A19.1 |
| SEC22C.5    | 4.89E-05 | 0.31688  | 0.285 | 0.225 | 0.730758 | Oligo | SEC22C        |
| CDADC1.4    | 4.94E-05 | -0.14385 | 0.045 | 0.109 | 0.738351 | Oligo | CDADC1        |
| ZUFSP.2     | 4.94E-05 | -0.11736 | 0.031 | 0.087 | 0.738728 | Oligo | ZUFSP         |
| RP11-48B3.4 | 4.94E-05 | 0.126045 | 0.026 | 0.008 | 0.738831 | Oligo | RP11-48B3.3   |
| NOS1AP.8    | 4.98E-05 | -0.10404 | 0.026 | 0.081 | 0.743493 | Oligo | NOS1AP        |
| QPRT.5      | 5.00E-05 | -0.17065 | 0.052 | 0.117 | 0.74715  | Oligo | QPRT          |
| LRP10.5     | 5.03E-05 | -0.10944 | 0.158 | 0.255 | 0.751815 | Oligo | LRP10         |
| DDR2.7      | 5.08E-05 | -0.11506 | 0.012 | 0.059 | 0.759538 | Oligo | DDR2          |
| SOGA1.8     | 5.10E-05 | 0.361111 | 0.209 | 0.153 | 0.762112 | Oligo | SOGA1         |
| SLC25A28.5  | 5.11E-05 | 0.266555 | 0.094 | 0.051 | 0.76308  | Oligo | SLC25A28      |
| CTD-2199C.5 | 5.11E-05 | 0.156159 | 0.019 | 0.005 | 0.763563 | Oligo | CTD-219904.1  |
| DMXL2.6     | 5.12E-05 | -0.15631 | 0.028 | 0.083 | 0.76586  | Oligo | DMXL2         |

|             |           |           |        |        |           |       |                |
|-------------|-----------|-----------|--------|--------|-----------|-------|----------------|
| YWHAQ. 8    | 5. 17E-05 | 0. 1508   | 0. 678 | 0. 642 | 0. 77202  | Oligo | YWHAQ          |
| HSPA13. 8   | 5. 18E-05 | -0. 17085 | 0. 12  | 0. 203 | 0. 774079 | Oligo | HSPA13         |
| RHOBTB3. 9  | 5. 19E-05 | -0. 1564  | 0. 296 | 0. 413 | 0. 776043 | Oligo | RHOBTB3        |
| HSPB6. 7    | 5. 20E-05 | -0. 14105 | 0. 014 | 0. 062 | 0. 776641 | Oligo | HSPB6          |
| ADNP. 8     | 5. 23E-05 | -0. 10843 | 0. 108 | 0. 196 | 0. 781566 | Oligo | ADNP           |
| IL10RB-AS   | 5. 23E-05 | -0. 17439 | 0. 005 | 0. 046 | 0. 781957 | Oligo | IL10RB-AS1     |
| PGBD1. 5    | 5. 24E-05 | -0. 10957 | 0. 021 | 0. 073 | 0. 782875 | Oligo | PGBD1          |
| ATG4A       | 5. 24E-05 | -0. 15134 | 0. 019 | 0. 069 | 0. 78318  | Oligo | ATG4A          |
| MCM4. 7     | 5. 26E-05 | -0. 1157  | 0. 038 | 0. 098 | 0. 78569  | Oligo | MCM4           |
| JDP2. 9     | 5. 26E-05 | -0. 21097 | 0. 021 | 0. 072 | 0. 786662 | Oligo | JDP2           |
| HAS2. 6     | 5. 28E-05 | -0. 14248 | 0. 009 | 0. 054 | 0. 788654 | Oligo | HAS2           |
| ERMAP. 3    | 5. 30E-05 | -0. 12393 | 0. 005 | 0. 046 | 0. 792232 | Oligo | ERMAP          |
| RP11-294J   | 5. 37E-05 | 0. 248197 | 0. 191 | 0. 132 | 0. 801931 | Oligo | RP11-294J22. 6 |
| PELI1. 6    | 5. 37E-05 | -0. 24802 | 0. 132 | 0. 212 | 0. 80277  | Oligo | PELI1          |
| TIMM10B. 3  | 5. 37E-05 | -0. 12958 | 0. 096 | 0. 178 | 0. 802941 | Oligo | TIMM10B        |
| KCND2. 3    | 5. 37E-05 | -0. 11183 | 0      | 0. 037 | 0. 802968 | Oligo | KCND2          |
| PHKG2. 5    | 5. 38E-05 | -0. 20778 | 0. 082 | 0. 157 | 0. 803711 | Oligo | PHKG2          |
| PTGIR       | 5. 38E-05 | 0. 185692 | 0. 026 | 0. 008 | 0. 804122 | Oligo | PTGIR          |
| U2AF1L4. 4  | 5. 38E-05 | -0. 12717 | 0. 115 | 0. 199 | 0. 80424  | Oligo | U2AF1L4        |
| VPS37D. 7   | 5. 38E-05 | -0. 11699 | 0. 014 | 0. 062 | 0. 804395 | Oligo | VPS37D         |
| IQCB1. 2    | 5. 43E-05 | -0. 14498 | 0. 056 | 0. 124 | 0. 811654 | Oligo | IQCB1          |
| HSP90AA1. 1 | 5. 43E-05 | 0. 114409 | 0. 833 | 0. 89  | 0. 812163 | Oligo | HSP90AA1       |
| GNPAT. 5    | 5. 47E-05 | -0. 14457 | 0. 148 | 0. 243 | 0. 817876 | Oligo | GNPAT          |
| TMCO4. 2    | 5. 49E-05 | -0. 12147 | 0      | 0. 037 | 0. 820242 | Oligo | TMCO4          |
| SMIM3. 6    | 5. 49E-05 | -0. 41843 | 0      | 0. 037 | 0. 820242 | Oligo | SMIM3          |
| YPEL4. 3    | 5. 52E-05 | 0. 142278 | 0. 078 | 0. 039 | 0. 825385 | Oligo | YPEL4          |
| CHST2. 6    | 5. 53E-05 | -0. 13963 | 0. 068 | 0. 138 | 0. 825803 | Oligo | CHST2          |
| UNC80. 3    | 5. 54E-05 | -0. 1008  | 0. 002 | 0. 041 | 0. 827409 | Oligo | UNC80          |
| KDM5A. 3    | 5. 59E-05 | -0. 1431  | 0. 153 | 0. 251 | 0. 835302 | Oligo | KDM5A          |
| RASAL2. 2   | 5. 60E-05 | -0. 1111  | 0. 026 | 0. 08  | 0. 836778 | Oligo | RASAL2         |
| STAG1. 1    | 5. 64E-05 | -0. 12928 | 0. 061 | 0. 13  | 0. 842391 | Oligo | STAG1          |
| SPAG5. 5    | 5. 71E-05 | -0. 1171  | 0. 005 | 0. 046 | 0. 852589 | Oligo | SPAG5          |
| CDC45. 3    | 5. 73E-05 | -0. 10403 | 0      | 0. 037 | 0. 855912 | Oligo | CDC45          |
| RAP1A. 9    | 5. 79E-05 | 0. 20996  | 0. 555 | 0. 514 | 0. 865246 | Oligo | RAP1A          |
| MARVELD1. 1 | 5. 80E-05 | -0. 11279 | 0. 002 | 0. 041 | 0. 867071 | Oligo | MARVELD1       |
| GBP4. 4     | 5. 81E-05 | -0. 17223 | 0. 019 | 0. 069 | 0. 86783  | Oligo | GBP4           |
| BEST3. 7    | 5. 82E-05 | -0. 21023 | 0. 033 | 0. 089 | 0. 869701 | Oligo | BEST3          |
| ARX. 8      | 5. 86E-05 | -0. 1377  | 0. 002 | 0. 041 | 0. 875509 | Oligo | ARX            |
| AAGAB. 2    | 5. 88E-05 | -0. 12965 | 0. 052 | 0. 117 | 0. 879434 | Oligo | AAGAB          |
| MDFIC. 3    | 5. 94E-05 | -0. 10342 | 0. 005 | 0. 045 | 0. 887858 | Oligo | MDFIC          |
| SGMS1. 2    | 5. 97E-05 | 0. 19706  | 0. 104 | 0. 059 | 0. 892798 | Oligo | SGMS1          |
| NRARP. 4    | 5. 98E-05 | -0. 13386 | 0      | 0. 037 | 0. 893128 | Oligo | NRARP          |
| FBLN5. 4    | 6. 01E-05 | -0. 17608 | 0. 002 | 0. 041 | 0. 898339 | Oligo | FBLN5          |
| UTP15. 1    | 6. 03E-05 | -0. 11155 | 0. 014 | 0. 061 | 0. 901117 | Oligo | UTP15          |
| TLR7. 6     | 6. 03E-05 | -0. 22126 | 0. 012 | 0. 057 | 0. 901325 | Oligo | TLR7           |
| CCDC136. 7  | 6. 08E-05 | -0. 13057 | 0. 035 | 0. 093 | 0. 908413 | Oligo | CCDC136        |
| PRKCH. 6    | 6. 08E-05 | -0. 18981 | 0. 005 | 0. 045 | 0. 908942 | Oligo | PRKCH          |
| NAA35. 4    | 6. 10E-05 | -0. 10811 | 0. 068 | 0. 139 | 0. 911111 | Oligo | NAA35          |
| DLGAP5. 8   | 6. 11E-05 | -0. 11531 | 0      | 0. 037 | 0. 912338 | Oligo | DLGAP5         |
| RAB27A. 6   | 6. 11E-05 | -0. 14409 | 0. 026 | 0. 08  | 0. 913707 | Oligo | RAB27A         |
| LPCAT3. 2   | 6. 18E-05 | -0. 1515  | 0. 078 | 0. 151 | 0. 923113 | Oligo | LPCAT3         |

|            |           |           |        |        |           |       |          |
|------------|-----------|-----------|--------|--------|-----------|-------|----------|
| AGT. 7     | 6. 18E-05 | -0. 31259 | 0. 144 | 0. 223 | 0. 923603 | Oligo | AGT      |
| TMEM179B.  | 6. 20E-05 | -0. 13125 | 0. 296 | 0. 418 | 0. 92611  | Oligo | TMEM179B |
| CA8. 8     | 6. 22E-05 | -0. 19727 | 0. 012 | 0. 057 | 0. 929384 | Oligo | CA8      |
| MXRA8. 3   | 6. 24E-05 | -0. 11225 | 0      | 0. 036 | 0. 931959 | Oligo | MXRA8    |
| RAB4A. 4   | 6. 25E-05 | -0. 18056 | 0. 238 | 0. 345 | 0. 934326 | Oligo | RAB4A    |
| ACAP3. 9   | 6. 27E-05 | 0. 303781 | 0. 275 | 0. 214 | 0. 937409 | Oligo | ACAP3    |
| PQLC1. 5   | 6. 32E-05 | -0. 13728 | 0. 066 | 0. 137 | 0. 944498 | Oligo | PQLC1    |
| POFUT2. 2  | 6. 35E-05 | -0. 12372 | 0. 033 | 0. 09  | 0. 948848 | Oligo | POFUT2   |
| FBX034. 3  | 6. 45E-05 | -0. 14035 | 0. 035 | 0. 093 | 0. 963655 | Oligo | FBX034   |
| F8         | 6. 46E-05 | -0. 12198 | 0. 009 | 0. 053 | 0. 964951 | Oligo | F8       |
| HSPB8. 5   | 6. 46E-05 | -0. 14505 | 0. 002 | 0. 041 | 0. 966115 | Oligo | HSPB8    |
| FEM1C. 4   | 6. 48E-05 | -0. 12303 | 0. 071 | 0. 142 | 0. 968414 | Oligo | FEM1C    |
| KPNA3. 4   | 6. 48E-05 | -0. 11629 | 0. 16  | 0. 259 | 0. 968535 | Oligo | KPNA3    |
| PPP1CB. 6  | 6. 49E-05 | -0. 22601 | 0. 407 | 0. 51  | 0. 969866 | Oligo | PPP1CB   |
| CHCHD4. 2  | 6. 59E-05 | -0. 11928 | 0. 052 | 0. 116 | 0. 984934 | Oligo | CHCHD4   |
| ZNF263. 3  | 6. 64E-05 | -0. 11642 | 0. 061 | 0. 13  | 0. 991916 | Oligo | ZNF263   |
| POLD3. 2   | 6. 66E-05 | -0. 14995 | 0. 04  | 0. 098 | 0. 994737 | Oligo | POLD3    |
| PDE3B. 3   | 6. 66E-05 | -0. 14797 | 0. 002 | 0. 041 | 0. 995227 | Oligo | PDE3B    |
| SUGP1. 4   | 6. 67E-05 | -0. 1216  | 0. 068 | 0. 138 | 0. 99751  | Oligo | SUGP1    |
| PTEN. 8    | 6. 73E-05 | -0. 1463  | 0. 064 | 0. 132 | 1         | Oligo | PTEN     |
| B3GNT2. 7  | 6. 76E-05 | -0. 12344 | 0. 019 | 0. 068 | 1         | Oligo | B3GNT2   |
| PTPRU. 1   | 6. 79E-05 | 0. 10588  | 0. 033 | 0. 011 | 1         | Oligo | PTPRU    |
| PDHX. 6    | 6. 81E-05 | -0. 10061 | 0. 094 | 0. 174 | 1         | Oligo | PDHX     |
| KIF2C. 7   | 6. 83E-05 | -0. 12801 | 0. 005 | 0. 045 | 1         | Oligo | KIF2C    |
| PIK3R5. 8  | 6. 84E-05 | -0. 17853 | 0. 007 | 0. 049 | 1         | Oligo | PIK3R5   |
| RBM28. 5   | 6. 86E-05 | -0. 12004 | 0. 087 | 0. 166 | 1         | Oligo | RBM28    |
| ATP8B4. 7  | 6. 87E-05 | -0. 18102 | 0. 005 | 0. 045 | 1         | Oligo | ATP8B4   |
| WDR86. 4   | 6. 88E-05 | -0. 10828 | 0. 005 | 0. 045 | 1         | Oligo | WDR86    |
| INTS8. 2   | 6. 97E-05 | -0. 12665 | 0. 035 | 0. 093 | 1         | Oligo | INTS8    |
| TNF. 6     | 6. 99E-05 | -0. 21844 | 0. 005 | 0. 044 | 1         | Oligo | TNF      |
| FBXW5. 6   | 7. 03E-05 | -0. 14529 | 0. 188 | 0. 292 | 1         | Oligo | FBXW5    |
| KIAA1715.  | 7. 06E-05 | -0. 14044 | 0. 162 | 0. 259 | 1         | Oligo | KIAA1715 |
| POGK. 4    | 7. 08E-05 | 0. 234735 | 0. 184 | 0. 127 | 1         | Oligo | POGK     |
| CEP95. 5   | 7. 08E-05 | -0. 10599 | 0. 059 | 0. 126 | 1         | Oligo | CEP95    |
| RRP8. 3    | 7. 12E-05 | -0. 13872 | 0. 061 | 0. 13  | 1         | Oligo | RRP8     |
| ZNF714. 4  | 7. 14E-05 | -0. 15437 | 0. 045 | 0. 105 | 1         | Oligo | ZNF714   |
| G3BP1. 4   | 7. 16E-05 | -0. 10688 | 0. 209 | 0. 318 | 1         | Oligo | G3BP1    |
| FOLR1. 5   | 7. 24E-05 | -0. 2     | 0      | 0. 036 | 1         | Oligo | FOLR1    |
| IL2RG. 5   | 7. 24E-05 | -0. 23334 | 0. 005 | 0. 044 | 1         | Oligo | IL2RG    |
| BMP7. 9    | 7. 27E-05 | 0. 307576 | 0. 221 | 0. 164 | 1         | Oligo | BMP7     |
| HNRNPH1. 4 | 7. 32E-05 | -0. 17731 | 0. 348 | 0. 461 | 1         | Oligo | HNRNPH1  |
| C15orf61.  | 7. 33E-05 | -0. 11106 | 0. 096 | 0. 176 | 1         | Oligo | C15orf61 |
| DCLRE1C. 4 | 7. 34E-05 | -0. 10203 | 0. 064 | 0. 133 | 1         | Oligo | DCLRE1C  |
| SNX27. 3   | 7. 34E-05 | 0. 37048  | 0. 294 | 0. 242 | 1         | Oligo | SNX27    |
| KCNQ1. 8   | 7. 37E-05 | -0. 16862 | 0. 002 | 0. 04  | 1         | Oligo | KCNQ1    |
| BBS5       | 7. 42E-05 | 0. 16614  | 0. 059 | 0. 027 | 1         | Oligo | BBS5     |
| ARL11. 8   | 7. 48E-05 | -0. 15219 | 0. 002 | 0. 04  | 1         | Oligo | ARL11    |
| FOXO1. 5   | 7. 48E-05 | 0. 192148 | 0. 12  | 0. 072 | 1         | Oligo | FOXO1    |
| RIOK2. 2   | 7. 49E-05 | -0. 18758 | 0. 059 | 0. 124 | 1         | Oligo | RIOK2    |
| GPR153. 2  | 7. 53E-05 | -0. 10056 | 0. 002 | 0. 04  | 1         | Oligo | GPR153   |
| TRIQQ. 2   | 7. 54E-05 | 0. 153167 | 0. 104 | 0. 058 | 1         | Oligo | TRIQQ    |

|            |          |          |       |       |         |               |
|------------|----------|----------|-------|-------|---------|---------------|
| HTRA1.9    | 7.66E-05 | 0.246481 | 0.518 | 0.458 | 1 Oligo | HTRA1         |
| DNAJC16    | 7.68E-05 | 0.283264 | 0.118 | 0.071 | 1 Oligo | DNAJC16       |
| PCYOX1L.2  | 7.68E-05 | -0.11824 | 0.019 | 0.068 | 1 Oligo | PCYOX1L       |
| DDX20.2    | 7.71E-05 | -0.1098  | 0.024 | 0.075 | 1 Oligo | DDX20         |
| ACSL5.8    | 7.71E-05 | -0.14732 | 0     | 0.036 | 1 Oligo | ACSL5         |
| ZGLP1.2    | 7.78E-05 | -0.14097 | 0.007 | 0.048 | 1 Oligo | ZGLP1         |
| CNKSR3.8   | 7.83E-05 | 0.33863  | 0.167 | 0.116 | 1 Oligo | CNKSR3        |
| ZSWIM4.2   | 7.85E-05 | -0.13928 | 0.009 | 0.053 | 1 Oligo | ZSWIM4        |
| C2CD2      | 7.87E-05 | 0.121661 | 0.08  | 0.042 | 1 Oligo | C2CD2         |
| IRS2.5     | 7.88E-05 | -0.19461 | 0.249 | 0.352 | 1 Oligo | IRS2          |
| CRKL.2     | 7.89E-05 | 0.289922 | 0.174 | 0.12  | 1 Oligo | CRKL          |
| ASPM.9     | 7.90E-05 | -0.1512  | 0.007 | 0.048 | 1 Oligo | ASPM          |
| APOL4.5    | 7.91E-05 | -0.14503 | 0.005 | 0.044 | 1 Oligo | APOL4         |
| GATSL3.1   | 7.97E-05 | -0.13486 | 0.007 | 0.048 | 1 Oligo | GATSL3        |
| DAZAP2.7   | 8.02E-05 | 0.182812 | 0.56  | 0.535 | 1 Oligo | DAZAP2        |
| ST8SIA5.6  | 8.06E-05 | -0.1179  | 0.005 | 0.044 | 1 Oligo | ST8SIA5       |
| PRR5.8     | 8.09E-05 | -0.1319  | 0.007 | 0.048 | 1 Oligo | PRR5          |
| ARHGAP11A  | 8.23E-05 | -0.10584 | 0.002 | 0.04  | 1 Oligo | ARHGAP11A     |
| PRKAR2B.7  | 8.25E-05 | -0.14411 | 0.021 | 0.07  | 1 Oligo | PRKAR2B       |
| HAGHL.1    | 8.26E-05 | 0.208878 | 0.155 | 0.103 | 1 Oligo | HAGHL         |
| CDK20.6    | 8.29E-05 | -0.12225 | 0.014 | 0.06  | 1 Oligo | CDK20         |
| RP11-157E  | 8.31E-05 | 0.107263 | 0.012 | 0.002 | 1 Oligo | RP11-157B13.7 |
| MAP3K7CL.8 | 8.39E-05 | -0.13487 | 0.005 | 0.044 | 1 Oligo | MAP3K7CL      |
| WIPF1.9    | 8.43E-05 | 0.200434 | 0.285 | 0.217 | 1 Oligo | WIPF1         |
| MITD1.3    | 8.43E-05 | -0.1184  | 0.148 | 0.237 | 1 Oligo | MITD1         |
| ARL8B.3    | 8.48E-05 | 0.253791 | 0.264 | 0.204 | 1 Oligo | ARL8B         |
| SAG        | 8.53E-05 | 0.118469 | 0.019 | 0.005 | 1 Oligo | SAG           |
| MIS12.6    | 8.65E-05 | -0.10007 | 0.073 | 0.144 | 1 Oligo | MIS12         |
| SCN3B.7    | 8.66E-05 | -0.14683 | 0.024 | 0.074 | 1 Oligo | SCN3B         |
| SLC30A7.2  | 8.67E-05 | -0.10148 | 0.087 | 0.164 | 1 Oligo | SLC30A7       |
| PTPRS.9    | 8.75E-05 | 0.239927 | 0.32  | 0.256 | 1 Oligo | PTPRS         |
| PWWP2B.3   | 8.76E-05 | -0.11033 | 0     | 0.035 | 1 Oligo | PWWP2B        |
| SRC.1      | 8.84E-05 | -0.11484 | 0.005 | 0.044 | 1 Oligo | SRC           |
| RC3H2.2    | 8.85E-05 | 0.206183 | 0.146 | 0.094 | 1 Oligo | RC3H2         |
| APIP.6     | 8.94E-05 | 0.391723 | 0.289 | 0.231 | 1 Oligo | APIP          |
| CTSK.5     | 8.95E-05 | -0.14341 | 0.009 | 0.052 | 1 Oligo | CTSK          |
| DENND1C.7  | 8.95E-05 | -0.16482 | 0     | 0.035 | 1 Oligo | DENND1C       |
| USP42.7    | 8.97E-05 | -0.12072 | 0.059 | 0.125 | 1 Oligo | USP42         |
| A1BG-AS1   | 8.97E-05 | -0.11237 | 0.009 | 0.052 | 1 Oligo | A1BG-AS1      |
| CDCP1.6    | 9.15E-05 | -0.14744 | 0     | 0.035 | 1 Oligo | CDCP1         |
| LRRC24.7   | 9.15E-05 | -0.11427 | 0.021 | 0.07  | 1 Oligo | LRRC24        |
| GNA13.8    | 9.15E-05 | -0.22096 | 0.108 | 0.183 | 1 Oligo | GNA13         |
| NUDT10.6   | 9.15E-05 | -0.13173 | 0.009 | 0.052 | 1 Oligo | NUDT10        |
| INSIG2.2   | 9.16E-05 | -0.12378 | 0.122 | 0.206 | 1 Oligo | INSIG2        |
| MBOAT2.8   | 9.17E-05 | 0.270337 | 0.238 | 0.179 | 1 Oligo | MBOAT2        |
| HMGCS1.6   | 9.20E-05 | -0.11231 | 0.106 | 0.186 | 1 Oligo | HMGCS1        |
| GSE1.8     | 9.21E-05 | -0.16534 | 0.038 | 0.093 | 1 Oligo | GSE1          |
| SAMD4A.2   | 9.29E-05 | -0.13005 | 0.033 | 0.088 | 1 Oligo | SAMD4A        |
| RP11-138A  | 9.29E-05 | -0.17487 | 0.042 | 0.101 | 1 Oligo | RP11-138A9.2  |
| DPEP2.7    | 9.34E-05 | -0.17664 | 0     | 0.035 | 1 Oligo | DPEP2         |
| CDH11.7    | 9.35E-05 | -0.11319 | 0.054 | 0.118 | 1 Oligo | CDH11         |

|           |          |          |       |       |         |              |
|-----------|----------|----------|-------|-------|---------|--------------|
| ATXN2.7   | 9.36E-05 | 0.353449 | 0.273 | 0.22  | 1 Oligo | ATXN2        |
| ZNF586.1  | 9.36E-05 | -0.12675 | 0.005 | 0.043 | 1 Oligo | ZNF586       |
| NEK7.2    | 9.45E-05 | 0.203181 | 0.122 | 0.074 | 1 Oligo | NEK7         |
| TOP3A.2   | 9.53E-05 | -0.10739 | 0.035 | 0.092 | 1 Oligo | TOP3A        |
| APOBEC3B. | 9.54E-05 | -0.10197 | 0     | 0.035 | 1 Oligo | APOBEC3B     |
| RAB22A.6  | 9.55E-05 | -0.11362 | 0.148 | 0.242 | 1 Oligo | RAB22A       |
| FANCI.5   | 9.60E-05 | -0.10294 | 0.007 | 0.048 | 1 Oligo | FANCI        |
| FHL2.6    | 9.60E-05 | -0.11052 | 0.007 | 0.048 | 1 Oligo | FHL2         |
| CCDC181.7 | 9.61E-05 | -0.10663 | 0.028 | 0.081 | 1 Oligo | CCDC181      |
| GBA.4     | 9.61E-05 | 0.226984 | 0.186 | 0.128 | 1 Oligo | GBA          |
| GSTP1.5   | 9.66E-05 | 0.188622 | 0.802 | 0.822 | 1 Oligo | GSTP1        |
| AGPS.4    | 9.67E-05 | 0.207337 | 0.179 | 0.12  | 1 Oligo | AGPS         |
| LTV1.3    | 9.67E-05 | -0.12105 | 0.108 | 0.189 | 1 Oligo | LTV1         |
| MAP3K5.4  | 9.68E-05 | -0.13123 | 0.009 | 0.051 | 1 Oligo | MAP3K5       |
| NUP50.5   | 9.77E-05 | -0.10481 | 0.054 | 0.119 | 1 Oligo | NUP50        |
| TES.9     | 9.81E-05 | -0.17317 | 0.007 | 0.048 | 1 Oligo | TES          |
| CD1D.7    | 9.86E-05 | -0.19381 | 0.002 | 0.039 | 1 Oligo | CD1D         |
| PBRM1.7   | 9.90E-05 | -0.1459  | 0.153 | 0.243 | 1 Oligo | PBRM1        |
| BRCA2.3   | 9.99E-05 | -0.1065  | 0.007 | 0.048 | 1 Oligo | BRCA2        |
| TGM2.4    | 9.99E-05 | -0.14182 | 0.002 | 0.039 | 1 Oligo | TGM2         |
| RCOR2.7   | 0.0001   | -0.12305 | 0.007 | 0.047 | 1 Oligo | RCOR2        |
| IFT46.5   | 0.0001   | -0.10345 | 0.049 | 0.111 | 1 Oligo | IFT46        |
| AC009948. | 0.000101 | -0.15022 | 0.012 | 0.055 | 1 Oligo | AC009948.5   |
| MAST4.5   | 0.000101 | 0.169235 | 0.092 | 0.051 | 1 Oligo | MAST4        |
| ZNF780A.3 | 0.000101 | -0.17148 | 0.021 | 0.07  | 1 Oligo | ZNF780A      |
| PLCB2.9   | 0.000101 | -0.17376 | 0.016 | 0.063 | 1 Oligo | PLCB2        |
| RP11-22N1 | 0.000102 | -0.16055 | 0     | 0.034 | 1 Oligo | RP11-22N19.2 |
| RNASE3.7  | 0.000102 | -0.20337 | 0     | 0.034 | 1 Oligo | RNASE3       |
| AHSA1.2   | 0.000102 | 0.335411 | 0.431 | 0.397 | 1 Oligo | AHSA1        |
| PPIP5K2.3 | 0.000102 | -0.10919 | 0.064 | 0.13  | 1 Oligo | PPIP5K2      |
| RHOA.7    | 0.000102 | 0.162575 | 0.746 | 0.755 | 1 Oligo | RHOA         |
| TRIP4.2   | 0.000103 | -0.14234 | 0.052 | 0.114 | 1 Oligo | TRIP4        |
| GRK5      | 0.000104 | -0.10592 | 0     | 0.034 | 1 Oligo | GRK5         |
| P2RY6.8   | 0.000104 | -0.14011 | 0     | 0.034 | 1 Oligo | P2RY6        |
| NCAPG.7   | 0.000104 | -0.1166  | 0.005 | 0.043 | 1 Oligo | NCAPG        |
| SULT1A1.7 | 0.000104 | -0.18416 | 0.009 | 0.051 | 1 Oligo | SULT1A1      |
| TLCD2     | 0.000105 | 0.146079 | 0.016 | 0.004 | 1 Oligo | TLCD2        |
| STK33.7   | 0.000106 | -0.10395 | 0.021 | 0.07  | 1 Oligo | STK33        |
| ABHD15.8  | 0.000106 | -0.10846 | 0.014 | 0.059 | 1 Oligo | ABHD15       |
| ERAP2.1   | 0.000106 | -0.13077 | 0.028 | 0.081 | 1 Oligo | ERAP2        |
| HOXB3.4   | 0.000106 | -0.11789 | 0     | 0.034 | 1 Oligo | HOXB3        |
| SLC9A9.8  | 0.000107 | 0.223368 | 0.127 | 0.076 | 1 Oligo | SLC9A9       |
| TMEM2.4   | 0.000107 | -0.13958 | 0.019 | 0.066 | 1 Oligo | TMEM2        |
| POLR2B.7  | 0.000107 | -0.12629 | 0.172 | 0.265 | 1 Oligo | POLR2B       |
| ZDHHC21.3 | 0.000108 | 0.198991 | 0.148 | 0.097 | 1 Oligo | ZDHHC21      |
| RND1.5    | 0.000108 | -0.16763 | 0.019 | 0.066 | 1 Oligo | RND1         |
| HIGD1A.4  | 0.000108 | 0.220852 | 0.459 | 0.426 | 1 Oligo | HIGD1A       |
| EIF1AY.7  | 0.000108 | 0.236777 | 0.233 | 0.176 | 1 Oligo | EIF1AY       |
| FAN1      | 0.000108 | 0.177122 | 0.094 | 0.053 | 1 Oligo | FAN1         |
| SYN1.3    | 0.000109 | -0.11061 | 0.002 | 0.039 | 1 Oligo | SYN1         |
| AC109826. | 0.000109 | -0.17931 | 0.002 | 0.038 | 1 Oligo | AC109826.1   |

|           |          |          |       |       |         |              |
|-----------|----------|----------|-------|-------|---------|--------------|
| CMKLR1.7  | 0.000109 | -0.17188 | 0.009 | 0.051 | 1 Oligo | CMKLR1       |
| RP4-756G2 | 0.000109 | 0.137665 | 0.021 | 0.006 | 1 Oligo | RP4-756G23.5 |
| GRAMD4.4  | 0.00011  | -0.13558 | 0.016 | 0.062 | 1 Oligo | GRAMD4       |
| LTBR.9    | 0.00011  | -0.14197 | 0.04  | 0.097 | 1 Oligo | LTBR         |
| TDRD7     | 0.000111 | 0.122934 | 0.064 | 0.03  | 1 Oligo | TDRD7        |
| KCNN4.5   | 0.000111 | -0.1251  | 0     | 0.034 | 1 Oligo | KCNN4        |
| GAB3.7    | 0.000111 | -0.14473 | 0     | 0.034 | 1 Oligo | GAB3         |
| CXorf40B. | 0.000111 | -0.10434 | 0.082 | 0.156 | 1 Oligo | CXorf40B     |
| KIAA1524. | 0.000111 | -0.10906 | 0.009 | 0.051 | 1 Oligo | KIAA1524     |
| RBM14.5   | 0.000111 | -0.10111 | 0.113 | 0.195 | 1 Oligo | RBM14        |
| GOLT1B.6  | 0.000112 | -0.13023 | 0.153 | 0.241 | 1 Oligo | GOLT1B       |
| RPGRIP1L. | 0.000113 | -0.10058 | 0.014 | 0.059 | 1 Oligo | RPGRIP1L     |
| SNRK.3    | 0.000114 | -0.1304  | 0.033 | 0.087 | 1 Oligo | SNRK         |
| RP3-522D1 | 0.000114 | -0.14387 | 0.002 | 0.038 | 1 Oligo | RP3-522D1.1  |
| CALCRL.1  | 0.000115 | -0.1218  | 0.005 | 0.043 | 1 Oligo | CALCRL       |
| CLEC9A.7  | 0.000116 | -0.21631 | 0     | 0.034 | 1 Oligo | CLEC9A       |
| ZNF140.5  | 0.000116 | -0.13686 | 0.049 | 0.109 | 1 Oligo | ZNF140       |
| PSTPIP1.7 | 0.000117 | -0.16956 | 0.005 | 0.042 | 1 Oligo | PSTPIP1      |
| MTRNR2L8. | 0.000117 | 0.352546 | 0.252 | 0.188 | 1 Oligo | MTRNR2L8     |
| LRRC4.2   | 0.000117 | -0.13555 | 0.007 | 0.046 | 1 Oligo | LRRC4        |
| HOXA-AS2. | 0.000117 | -0.13127 | 0.002 | 0.038 | 1 Oligo | HOXA-AS2     |
| CCDC170.3 | 0.000118 | -0.13172 | 0.007 | 0.047 | 1 Oligo | CCDC170      |
| SLC8B1.9  | 0.000119 | -0.1575  | 0.042 | 0.1   | 1 Oligo | SLC8B1       |
| EMC10.4   | 0.000119 | 0.265371 | 0.485 | 0.449 | 1 Oligo | EMC10        |
| NXF1.3    | 0.00012  | -0.14428 | 0.12  | 0.201 | 1 Oligo | NXF1         |
| C16orf45. | 0.000121 | -0.13863 | 0.224 | 0.322 | 1 Oligo | C16orf45     |
| FAM212A.7 | 0.000121 | -0.2123  | 0.009 | 0.05  | 1 Oligo | FAM212A      |
| PMM2      | 0.000121 | -0.10322 | 0.005 | 0.042 | 1 Oligo | PMM2         |
| ATP11B    | 0.000121 | 0.162927 | 0.094 | 0.053 | 1 Oligo | ATP11B       |
| GPC6.5    | 0.000122 | -0.12292 | 0.005 | 0.042 | 1 Oligo | GPC6         |
| CMPK2.5   | 0.000123 | -0.12887 | 0.014 | 0.058 | 1 Oligo | CMPK2        |
| FAM149A.4 | 0.000123 | -0.13593 | 0     | 0.034 | 1 Oligo | FAM149A      |
| GORAB.7   | 0.000123 | -0.11749 | 0.026 | 0.077 | 1 Oligo | GORAB        |
| LDLRAD3.7 | 0.000126 | 0.269802 | 0.228 | 0.174 | 1 Oligo | LDLRAD3      |
| DUSP15.7  | 0.000126 | 0.2453   | 0.139 | 0.092 | 1 Oligo | DUSP15       |
| RPH3A.4   | 0.000126 | -0.12228 | 0     | 0.033 | 1 Oligo | RPH3A        |
| C1QTNF4.7 | 0.000126 | -0.13313 | 0.014 | 0.058 | 1 Oligo | C1QTNF4      |
| ERLIN2.2  | 0.000126 | -0.13619 | 0.061 | 0.125 | 1 Oligo | ERLIN2       |
| EMG1.4    | 0.000126 | -0.14473 | 0.148 | 0.238 | 1 Oligo | EMG1         |
| ADSS.4    | 0.000127 | 0.254928 | 0.24  | 0.185 | 1 Oligo | ADSS         |
| PLAGL1.6  | 0.000128 | -0.15082 | 0.005 | 0.042 | 1 Oligo | PLAGL1       |
| HEXIM1.3  | 0.000129 | -0.15156 | 0.134 | 0.221 | 1 Oligo | HEXIM1       |
| CBWD2     | 0.00013  | -0.13944 | 0.071 | 0.139 | 1 Oligo | CBWD2        |
| TRPM2.9   | 0.00013  | -0.20469 | 0.012 | 0.053 | 1 Oligo | TRPM2        |
| HLX.4     | 0.000132 | -0.14557 | 0.005 | 0.042 | 1 Oligo | HLX          |
| TBC1D8.2  | 0.000132 | -0.14631 | 0.007 | 0.046 | 1 Oligo | TBC1D8       |
| SYPL1.3   | 0.000134 | 0.280503 | 0.452 | 0.404 | 1 Oligo | SYPL1        |
| EMILIN3.4 | 0.000134 | -0.10379 | 0     | 0.033 | 1 Oligo | EMILIN3      |
| PUSL1.2   | 0.000134 | -0.10279 | 0.059 | 0.123 | 1 Oligo | PUSL1        |
| RTN2.6    | 0.000137 | -0.14586 | 0.033 | 0.086 | 1 Oligo | RTN2         |
| EGFL7.2   | 0.000137 | -0.14067 | 0.002 | 0.038 | 1 Oligo | EGFL7        |



|             |          |          |       |       |         |               |
|-------------|----------|----------|-------|-------|---------|---------------|
| NPTN. 5     | 0.000137 | 0.204045 | 0.104 | 0.06  | 1 Oligo | NPTN          |
| CDK8. 4     | 0.000137 | -0.11384 | 0.031 | 0.083 | 1 Oligo | CDK8          |
| DNAJB5. 4   | 0.000138 | -0.11143 | 0.031 | 0.082 | 1 Oligo | DNAJB5        |
| THEMIS2. 9  | 0.00014  | -0.24787 | 0.169 | 0.245 | 1 Oligo | THEMIS2       |
| TMEM5. 7    | 0.000141 | -0.12468 | 0.127 | 0.211 | 1 Oligo | TMEM5         |
| FAM13A-AS   | 0.000141 | 0.106882 | 0.021 | 0.006 | 1 Oligo | FAM13A-AS1    |
| RCC2. 6     | 0.000142 | -0.14887 | 0.101 | 0.177 | 1 Oligo | RCC2          |
| AC147651. 1 | 0.000143 | -0.1557  | 0.002 | 0.037 | 1 Oligo | AC147651. 4   |
| ZNF700      | 0.000144 | -0.13088 | 0.012 | 0.054 | 1 Oligo | ZNF700        |
| NCAPG2. 4   | 0.000145 | -0.12017 | 0.019 | 0.065 | 1 Oligo | NCAPG2        |
| NSL1. 5     | 0.000145 | 0.311184 | 0.393 | 0.345 | 1 Oligo | NSL1          |
| CXADR. 9    | 0.000145 | 0.199932 | 0.374 | 0.305 | 1 Oligo | CXADR         |
| TMEM106A. 1 | 0.000145 | -0.14126 | 0.019 | 0.065 | 1 Oligo | TMEM106A      |
| GABPB1. 4   | 0.000145 | -0.10401 | 0.049 | 0.109 | 1 Oligo | GABPB1        |
| CDCA3. 8    | 0.000146 | -0.13733 | 0.012 | 0.054 | 1 Oligo | CDCA3         |
| MFS7. 7     | 0.000146 | -0.12127 | 0     | 0.033 | 1 Oligo | MFS7          |
| ANPEP. 7    | 0.000146 | -0.14532 | 0     | 0.033 | 1 Oligo | ANPEP         |
| GTF3C2. 1   | 0.000147 | -0.12843 | 0.047 | 0.106 | 1 Oligo | GTF3C2        |
| SLC7A6. 2   | 0.000147 | -0.13942 | 0.021 | 0.068 | 1 Oligo | SLC7A6        |
| ZFAND5. 9   | 0.000147 | -0.16232 | 0.353 | 0.467 | 1 Oligo | ZFAND5        |
| SNAP23. 8   | 0.000147 | -0.13173 | 0.16  | 0.247 | 1 Oligo | SNAP23        |
| COPG1. 1    | 0.000148 | -0.10664 | 0.146 | 0.234 | 1 Oligo | COPG1         |
| CLTB. 7     | 0.00015  | -0.12956 | 0.318 | 0.446 | 1 Oligo | CLTB          |
| NMRK1. 7    | 0.00015  | -0.14601 | 0.075 | 0.142 | 1 Oligo | NMRK1         |
| GFPT2. 5    | 0.00015  | -0.11791 | 0.012 | 0.054 | 1 Oligo | GFPT2         |
| TAF1A. 3    | 0.00015  | -0.1267  | 0.014 | 0.058 | 1 Oligo | TAF1A         |
| CRELD2. 6   | 0.00015  | -0.12632 | 0.191 | 0.286 | 1 Oligo | CRELD2        |
| FAM207A. 4  | 0.000151 | -0.10253 | 0.122 | 0.208 | 1 Oligo | FAM207A       |
| TBL1XR1. 6  | 0.000151 | 0.267986 | 0.294 | 0.246 | 1 Oligo | TBL1XR1       |
| KCNH2. 7    | 0.000153 | -0.14111 | 0.021 | 0.068 | 1 Oligo | KCNH2         |
| NEFM. 1     | 0.000155 | 0.135798 | 0.028 | 0.01  | 1 Oligo | NEFM          |
| TBRG4. 6    | 0.000155 | -0.14953 | 0.153 | 0.241 | 1 Oligo | TBRG4         |
| KIAA1551. 1 | 0.000156 | -0.10924 | 0.035 | 0.089 | 1 Oligo | KIAA1551      |
| SPG11. 4    | 0.000156 | 0.232178 | 0.167 | 0.114 | 1 Oligo | SPG11         |
| TRPM4. 3    | 0.000157 | -0.12292 | 0.005 | 0.041 | 1 Oligo | TRPM4         |
| SLC1A4. 6   | 0.000157 | -0.1584  | 0.026 | 0.074 | 1 Oligo | SLC1A4        |
| CLIC2. 6    | 0.000158 | -0.17453 | 0.007 | 0.045 | 1 Oligo | CLIC2         |
| MSI2. 6     | 0.000158 | -0.1703  | 0.233 | 0.325 | 1 Oligo | MSI2          |
| CTH. 4      | 0.000159 | -0.1309  | 0.014 | 0.057 | 1 Oligo | CTH           |
| SLC16A1-A   | 0.000159 | 0.301093 | 0.082 | 0.045 | 1 Oligo | SLC16A1-AS1   |
| TTC26. 6    | 0.00016  | -0.12511 | 0.009 | 0.049 | 1 Oligo | TTC26         |
| SDCBP2. 4   | 0.000161 | -0.11155 | 0.007 | 0.045 | 1 Oligo | SDCBP2        |
| HMMR. 5     | 0.000161 | -0.11683 | 0.005 | 0.041 | 1 Oligo | HMMR          |
| DDX60L. 4   | 0.000161 | -0.14502 | 0.014 | 0.057 | 1 Oligo | DDX60L        |
| UBE2G2      | 0.000163 | -0.11725 | 0.169 | 0.265 | 1 Oligo | UBE2G2        |
| LRRC58. 4   | 0.000163 | 0.34452  | 0.254 | 0.205 | 1 Oligo | LRRC58        |
| FZD1. 1     | 0.000164 | -0.10962 | 0.007 | 0.045 | 1 Oligo | FZD1          |
| RP11-796E   | 0.000165 | -0.22966 | 0.021 | 0.067 | 1 Oligo | RP11-796E2. 4 |
| OGFOD1. 3   | 0.000166 | -0.1205  | 0.082 | 0.153 | 1 Oligo | OGFOD1        |
| DACT1. 2    | 0.000166 | -0.10439 | 0     | 0.032 | 1 Oligo | DACT1         |
| CCDC69. 7   | 0.000167 | -0.12281 | 0.002 | 0.037 | 1 Oligo | CCDC69        |

|             |          |          |       |       |         |                |
|-------------|----------|----------|-------|-------|---------|----------------|
| EPHB6. 1    | 0.000168 | -0.15724 | 0.007 | 0.045 | 1 Oligo | EPHB6          |
| EPC1. 6     | 0.000168 | -0.11751 | 0.193 | 0.295 | 1 Oligo | EPC1           |
| MAP3K3. 6   | 0.000169 | 0.215304 | 0.106 | 0.062 | 1 Oligo | MAP3K3         |
| CACNA2D3. 0 | 0.000169 | -0.12896 | 0     | 0.032 | 1 Oligo | CACNA2D3       |
| CD3EAP      | 0.00017  | -0.11514 | 0.042 | 0.098 | 1 Oligo | CD3EAP         |
| DCLRE1B. 2  | 0.000171 | -0.11023 | 0.014 | 0.057 | 1 Oligo | DCLRE1B        |
| DPYD. 7     | 0.000171 | -0.22697 | 0.047 | 0.103 | 1 Oligo | DPYD           |
| BCL2L2      | 0.000172 | 0.21723  | 0.073 | 0.038 | 1 Oligo | BCL2L2         |
| SNCB. 3     | 0.000173 | -0.10996 | 0     | 0.032 | 1 Oligo | SNCB           |
| CENPE. 8    | 0.000173 | -0.15211 | 0.014 | 0.057 | 1 Oligo | CENPE          |
| AC002456. 0 | 0.000173 | -0.13018 | 0.007 | 0.045 | 1 Oligo | AC002456. 2    |
| LMTK2       | 0.000174 | 0.157122 | 0.054 | 0.025 | 1 Oligo | LMTK2          |
| MARCH2. 7   | 0.000175 | -0.15383 | 0.151 | 0.236 | 1 Oligo | 2-Mar          |
| HERC5. 3    | 0.000175 | -0.11989 | 0.026 | 0.075 | 1 Oligo | HERC5          |
| RAPH1. 2    | 0.000175 | -0.12219 | 0.021 | 0.068 | 1 Oligo | RAPH1          |
| GPR17       | 0.000176 | 0.168451 | 0.035 | 0.014 | 1 Oligo | GPR17          |
| C15orf57. 0 | 0.000176 | -0.11746 | 0.064 | 0.126 | 1 Oligo | C15orf57       |
| MAZ. 7      | 0.000177 | -0.12912 | 0.16  | 0.254 | 1 Oligo | MAZ            |
| RGS14. 1    | 0.000179 | -0.12046 | 0.002 | 0.037 | 1 Oligo | RGS14          |
| PRKDC. 5    | 0.000179 | -0.103   | 0.195 | 0.296 | 1 Oligo | PRKDC          |
| KLF11. 5    | 0.000179 | -0.12552 | 0.005 | 0.041 | 1 Oligo | KLF11          |
| FAM83D. 2   | 0.00018  | -0.10096 | 0.002 | 0.037 | 1 Oligo | FAM83D         |
| WRAP73. 3   | 0.00018  | -0.13889 | 0.08  | 0.149 | 1 Oligo | WRAP73         |
| SP140. 8    | 0.000181 | -0.14786 | 0     | 0.032 | 1 Oligo | SP140          |
| MORF4L1. 2  | 0.000181 | 0.200763 | 0.713 | 0.746 | 1 Oligo | MORF4L1        |
| SLC38A10. 0 | 0.000182 | -0.13752 | 0.122 | 0.202 | 1 Oligo | SLC38A10       |
| IFIT3. 7    | 0.000183 | 0.248324 | 0.16  | 0.106 | 1 Oligo | IFIT3          |
| HJURP. 7    | 0.000184 | -0.12528 | 0.005 | 0.041 | 1 Oligo | HJURP          |
| CLVS1. 5    | 0.000184 | -0.11912 | 0     | 0.032 | 1 Oligo | CLVS1          |
| FAM177B. 5  | 0.000184 | -0.16324 | 0     | 0.032 | 1 Oligo | FAM177B        |
| CHST15. 4   | 0.000185 | -0.15466 | 0.005 | 0.04  | 1 Oligo | CHST15         |
| MAPK14. 3   | 0.000187 | -0.11307 | 0.052 | 0.112 | 1 Oligo | MAPK14         |
| SFMBT2. 7   | 0.000187 | -0.24917 | 0.031 | 0.079 | 1 Oligo | SFMBT2         |
| SLCO4A1. 5  | 0.000188 | -0.11558 | 0.002 | 0.036 | 1 Oligo | SLCO4A1        |
| PCBD2. 3    | 0.000188 | -0.11284 | 0.033 | 0.085 | 1 Oligo | PCBD2          |
| ADAM10. 5   | 0.000189 | 0.269468 | 0.238 | 0.182 | 1 Oligo | ADAM10         |
| ARHGEF4. 6  | 0.000189 | 0.235318 | 0.092 | 0.053 | 1 Oligo | ARHGEF4        |
| ONECUT2. 6  | 0.000191 | -0.11772 | 0.007 | 0.045 | 1 Oligo | ONECUT2        |
| UBXN2B. 4   | 0.000192 | -0.12623 | 0.085 | 0.154 | 1 Oligo | UBXN2B         |
| BRD3. 8     | 0.000193 | -0.14206 | 0.186 | 0.278 | 1 Oligo | BRD3           |
| ADAM8. 7    | 0.000193 | -0.15564 | 0.007 | 0.045 | 1 Oligo | ADAM8          |
| PDZD4. 7    | 0.000195 | -0.1066  | 0.009 | 0.049 | 1 Oligo | PDZD4          |
| RP11-742E   | 0.000197 | -0.15274 | 0     | 0.032 | 1 Oligo | RP11-742B18. 1 |
| RP11-383M   | 0.000199 | 0.155825 | 0.019 | 0.005 | 1 Oligo | RP11-383M4. 6  |
| RBAK-RBAK   | 0.000205 | -0.16441 | 0.047 | 0.103 | 1 Oligo | RBAK-RBAKDN    |
| EFNA4. 1    | 0.000206 | -0.11668 | 0.007 | 0.044 | 1 Oligo | EFNA4          |
| FLVCR2. 6   | 0.000206 | -0.1317  | 0.002 | 0.036 | 1 Oligo | FLVCR2         |
| SH3RF3. 1   | 0.000206 | -0.1228  | 0.002 | 0.036 | 1 Oligo | SH3RF3         |
| HAUS4. 9    | 0.000206 | -0.19133 | 0.019 | 0.063 | 1 Oligo | HAUS4          |
| RFC1. 5     | 0.000207 | 0.406679 | 0.32  | 0.275 | 1 Oligo | RFC1           |
| TXNL4A. 5   | 0.000208 | 0.165524 | 0.447 | 0.409 | 1 Oligo | TXNL4A         |

|                     |          |       |       |         |                |
|---------------------|----------|-------|-------|---------|----------------|
| SLC25A11. 0.000209  | -0.14426 | 0.306 | 0.424 | 1 Oligo | SLC25A11       |
| RP11-176H 0.000209  | 0.191252 | 0.049 | 0.022 | 1 Oligo | RP11-176H8. 1  |
| SLC9A6. 2 0.000209  | 0.218561 | 0.099 | 0.058 | 1 Oligo | SLC9A6         |
| AIM1. 5 0.000209    | -0.15124 | 0.002 | 0.036 | 1 Oligo | AIM1           |
| MOB1B. 3 0.000209   | -0.12287 | 0.024 | 0.07  | 1 Oligo | MOB1B          |
| NFATC2. 6 0.000211  | -0.1848  | 0.009 | 0.048 | 1 Oligo | NFATC2         |
| XRCC4. 1 0.000213   | -0.11868 | 0.047 | 0.104 | 1 Oligo | XRCC4          |
| RN7SL832F 0.000213  | 0.179691 | 0.054 | 0.025 | 1 Oligo | RN7SL832P      |
| TBC1D10C. 0.000214  | -0.15385 | 0     | 0.031 | 1 Oligo | TBC1D10C       |
| THRA. 7 0.000214    | 0.36908  | 0.294 | 0.237 | 1 Oligo | THRA           |
| AFAP1. 6 0.000218   | -0.10704 | 0.035 | 0.087 | 1 Oligo | AFAP1          |
| EXOSC4. 2 0.000219  | -0.11926 | 0.165 | 0.255 | 1 Oligo | EXOSC4         |
| UBTD2. 5 0.000219   | -0.10949 | 0.049 | 0.108 | 1 Oligo | UBTD2          |
| HPS1. 8 0.00022     | 0.132718 | 0.167 | 0.109 | 1 Oligo | HPS1           |
| VEGFB. 4 0.000223   | -0.10791 | 0.078 | 0.147 | 1 Oligo | VEGFB          |
| NDUFB7. 6 0.000223  | 0.243075 | 0.736 | 0.719 | 1 Oligo | NDUFB7         |
| MB21D2. 6 0.000224  | -0.15629 | 0.014 | 0.055 | 1 Oligo | MB21D2         |
| ICAM2. 8 0.000225   | -0.16383 | 0.002 | 0.036 | 1 Oligo | ICAM2          |
| PHF11. 8 0.000227   | -0.13108 | 0.078 | 0.144 | 1 Oligo | PHF11          |
| HSPBAP1. 4 0.000228 | -0.12767 | 0.026 | 0.073 | 1 Oligo | HSPBAP1        |
| C6orf141. 0.000228  | -0.12469 | 0     | 0.031 | 1 Oligo | C6orf141       |
| ACTR6. 5 0.000229   | 0.11385  | 0.144 | 0.237 | 1 Oligo | ACTR6          |
| BBS4. 3 0.000229    | -0.10156 | 0.035 | 0.087 | 1 Oligo | BBS4           |
| RASL10A 0.00023     | -0.10214 | 0.005 | 0.04  | 1 Oligo | RASL10A        |
| DHX34 0.000232      | -0.10297 | 0.016 | 0.059 | 1 Oligo | DHX34          |
| CTB-61M7. 0.000232  | -0.19361 | 0.005 | 0.039 | 1 Oligo | CTB-61M7. 2    |
| NF1. 5 0.000232     | 0.327108 | 0.273 | 0.221 | 1 Oligo | NF1            |
| FABP6. 8 0.000234   | -0.13922 | 0.005 | 0.04  | 1 Oligo | FABP6          |
| ZNF106. 7 0.000239  | -0.12552 | 0.169 | 0.261 | 1 Oligo | ZNF106         |
| SMURF2. 3 0.000239  | -0.12141 | 0.066 | 0.128 | 1 Oligo | SMURF2         |
| ACSF3. 1 0.00024    | -0.14007 | 0.056 | 0.116 | 1 Oligo | ACSF3          |
| PDZRN4. 6 0.00024   | -0.13501 | 0.005 | 0.04  | 1 Oligo | PDZRN4         |
| RAPGEF6. 1 0.00024  | 0.203539 | 0.085 | 0.047 | 1 Oligo | RAPGEF6        |
| RP11-403I 0.000244  | -0.20512 | 0.002 | 0.035 | 1 Oligo | RP11-403I13. 5 |
| TMC8. 7 0.000245    | -0.12739 | 0.007 | 0.044 | 1 Oligo | TMC8           |
| B3GALNT2. 0.000245  | -0.1361  | 0.04  | 0.093 | 1 Oligo | B3GALNT2       |
| CYBRD1. 3 0.000245  | -0.13014 | 0.106 | 0.179 | 1 Oligo | CYBRD1         |
| AP3S2 0.000247      | 0.22451  | 0.101 | 0.06  | 1 Oligo | AP3S2          |
| SPR. 2 0.000248     | -0.12033 | 0.028 | 0.077 | 1 Oligo | SPR            |
| SLC17A9. 8 0.000248 | -0.12786 | 0     | 0.031 | 1 Oligo | SLC17A9        |
| GNLY. 3 0.000248    | -0.21487 | 0     | 0.031 | 1 Oligo | GNLY           |
| SRSF6. 5 0.000251   | -0.14344 | 0.254 | 0.363 | 1 Oligo | SRSF6          |
| AREL1 0.000251      | 0.16438  | 0.092 | 0.053 | 1 Oligo | AREL1          |
| PTPN13. 7 0.000252  | 0.256418 | 0.136 | 0.091 | 1 Oligo | PTPN13         |
| ZNF467. 6 0.000253  | -0.12721 | 0.002 | 0.035 | 1 Oligo | ZNF467         |
| TTC27. 1 0.000253   | -0.13273 | 0.031 | 0.079 | 1 Oligo | TTC27          |
| IGFBP7-AS 0.000254  | -0.10287 | 0     | 0.031 | 1 Oligo | IGFBP7-AS1     |
| RXRA. 5 0.000254    | -0.17344 | 0.045 | 0.098 | 1 Oligo | RXRA           |
| RP11-15A1 0.000254  | 0.142503 | 0.092 | 0.052 | 1 Oligo | RP11-15A1. 3   |
| RAB11FIP2 0.000256  | 0.229991 | 0.111 | 0.068 | 1 Oligo | RAB11FIP2      |
| ANKRD28. 5 0.000258 | 0.224627 | 0.162 | 0.111 | 1 Oligo | ANKRD28        |

|           |          |          |       |       |         |                    |
|-----------|----------|----------|-------|-------|---------|--------------------|
| XXbac-BPG | 0.000258 | 0.212941 | 0.068 | 0.036 | 1 Oligo | XXbac-BPGBPG55C20. |
| HINT3.5   | 0.000259 | 0.295582 | 0.252 | 0.197 | 1 Oligo | HINT3              |
| MIR7-3HG. | 0.000259 | -0.17473 | 0.002 | 0.035 | 1 Oligo | MIR7-3HG           |
| RP3-508I1 | 0.000259 | -0.10346 | 0     | 0.03  | 1 Oligo | RP3-508I15.14      |
| CDK5R2.6  | 0.000259 | -0.12111 | 0.002 | 0.035 | 1 Oligo | CDK5R2             |
| FAM168B.4 | 0.00026  | 0.312423 | 0.212 | 0.161 | 1 Oligo | FAM168B            |
| CNEP1R1.2 | 0.000262 | -0.10715 | 0.054 | 0.113 | 1 Oligo | CNEP1R1            |
| RBM17.4   | 0.000263 | -0.1254  | 0.264 | 0.373 | 1 Oligo | RBM17              |
| PCSK1.6   | 0.000264 | -0.14337 | 0.002 | 0.035 | 1 Oligo | PCSK1              |
| CTD-3076C | 0.000265 | 0.114572 | 0.012 | 0.002 | 1 Oligo | CTD-3076017.2      |
| RPP14.5   | 0.000266 | -0.11109 | 0.113 | 0.19  | 1 Oligo | RPP14              |
| C3orf70.8 | 0.000268 | -0.10339 | 0.047 | 0.102 | 1 Oligo | C3orf70            |
| H2AFJ.9   | 0.00027  | 0.335375 | 0.313 | 0.257 | 1 Oligo | H2AFJ              |
| NR1H3.2   | 0.00027  | -0.10701 | 0.014 | 0.055 | 1 Oligo | NR1H3              |
| ZCCHC12.2 | 0.00027  | -0.11528 | 0     | 0.03  | 1 Oligo | ZCCHC12            |
| ATF7IP2.8 | 0.000271 | -0.17483 | 0.007 | 0.043 | 1 Oligo | ATF7IP2            |
| RP11-553L | 0.000271 | 0.257736 | 0.278 | 0.224 | 1 Oligo | RP11-553L6.5       |
| RP11-421L | 0.000274 | -0.11889 | 0.033 | 0.083 | 1 Oligo | RP11-421L21.3      |
| LIN54.1   | 0.000275 | 0.114593 | 0.071 | 0.037 | 1 Oligo | LIN54              |
| PTDSS2.8  | 0.000276 | 0.320977 | 0.2   | 0.15  | 1 Oligo | PTDSS2             |
| PIP4K2B.4 | 0.000278 | 0.313807 | 0.148 | 0.101 | 1 Oligo | PIP4K2B            |
| CSPG5.8   | 0.000279 | -0.14588 | 0.054 | 0.11  | 1 Oligo | CSPG5              |
| ITGAV.5   | 0.000279 | 0.240228 | 0.325 | 0.277 | 1 Oligo | ITGAV              |
| TSHZ3.1   | 0.00028  | -0.109   | 0.002 | 0.035 | 1 Oligo | TSHZ3              |
| OAS3.3    | 0.000281 | -0.1108  | 0.014 | 0.055 | 1 Oligo | OAS3               |
| FRAT2.2   | 0.000285 | -0.10893 | 0.009 | 0.047 | 1 Oligo | FRAT2              |
| NEK2.6    | 0.000285 | -0.10809 | 0.002 | 0.035 | 1 Oligo | NEK2               |
| SERINC5.3 | 0.000288 | 0.373303 | 0.106 | 0.065 | 1 Oligo | SERINC5            |
| LMNA.5    | 0.000288 | 0.233089 | 0.461 | 0.414 | 1 Oligo | LMNA               |
| PLA2G2A.4 | 0.000289 | -0.42771 | 0.005 | 0.039 | 1 Oligo | PLA2G2A            |
| LIMK2.3   | 0.000291 | -0.13636 | 0.038 | 0.088 | 1 Oligo | LIMK2              |
| ZNF181.6  | 0.000291 | -0.11871 | 0.045 | 0.099 | 1 Oligo | ZNF181             |
| STARD13.2 | 0.000293 | 0.131192 | 0.085 | 0.047 | 1 Oligo | STARD13            |
| SPINT1.8  | 0.000293 | -0.11996 | 0.002 | 0.035 | 1 Oligo | SPINT1             |
| NEUROD1.6 | 0.000293 | -0.10559 | 0.005 | 0.039 | 1 Oligo | NEUROD1            |
| HOXC6.2   | 0.000294 | -0.10015 | 0     | 0.03  | 1 Oligo | HOXC6              |
| SIGLEC1.5 | 0.000294 | -0.14056 | 0     | 0.03  | 1 Oligo | SIGLEC1            |
| IL1R2.5   | 0.000294 | -0.17714 | 0     | 0.03  | 1 Oligo | IL1R2              |
| ECM1.4    | 0.000294 | -0.10965 | 0.007 | 0.043 | 1 Oligo | ECM1               |
| ATP2A2.4  | 0.000295 | 0.248457 | 0.322 | 0.277 | 1 Oligo | ATP2A2             |
| MYO7A.7   | 0.000298 | -0.15763 | 0.002 | 0.034 | 1 Oligo | MYO7A              |
| ZNF143.1  | 0.000299 | -0.10898 | 0.033 | 0.083 | 1 Oligo | ZNF143             |
| CHST9.1   | 0.000299 | -0.10348 | 0.002 | 0.034 | 1 Oligo | CHST9              |
| TRAPPC6B. | 0.000301 | -0.12214 | 0.073 | 0.137 | 1 Oligo | TRAPPC6B           |
| CD52.7    | 0.000302 | -0.31618 | 0.014 | 0.053 | 1 Oligo | CD52               |
| ZNF507.1  | 0.000302 | 0.188616 | 0.08  | 0.044 | 1 Oligo | ZNF507             |
| RP5-1177M | 0.000305 | -0.17223 | 0.009 | 0.046 | 1 Oligo | RP5-1177M21.1      |
| ANGPTL4.5 | 0.000308 | -0.35732 | 0.052 | 0.103 | 1 Oligo | ANGPTL4            |
| BCL11B.6  | 0.000313 | -0.12992 | 0.002 | 0.034 | 1 Oligo | BCL11B             |
| AQP9.4    | 0.000314 | -0.12725 | 0     | 0.03  | 1 Oligo | AQP9               |
| SMIM14.7  | 0.000314 | 0.31983  | 0.376 | 0.329 | 1 Oligo | SMIM14             |

|             |          |          |       |       |         |                |
|-------------|----------|----------|-------|-------|---------|----------------|
| DEK. 6      | 0.000315 | -0.11991 | 0.36  | 0.468 | 1 Oligo | DEK            |
| FAM72A. 4   | 0.000316 | -0.10814 | 0.007 | 0.043 | 1 Oligo | FAM72A         |
| LPCAT2. 9   | 0.000317 | -0.29114 | 0.092 | 0.149 | 1 Oligo | LPCAT2         |
| AP006222. 0 | 0.000319 | 0.347168 | 0.259 | 0.209 | 1 Oligo | AP006222. 2    |
| ZNF681. 2   | 0.000319 | -0.10245 | 0.007 | 0.043 | 1 Oligo | ZNF681         |
| TAB2. 4     | 0.000322 | -0.1543  | 0.068 | 0.129 | 1 Oligo | TAB2           |
| TLR3. 4     | 0.000322 | -0.15821 | 0.002 | 0.034 | 1 Oligo | TLR3           |
| LPAR2. 2    | 0.000323 | -0.10402 | 0.002 | 0.034 | 1 Oligo | LPAR2          |
| SLC05A1. 7  | 0.000323 | -0.11907 | 0.007 | 0.042 | 1 Oligo | SLC05A1        |
| LINC01114   | 0.000323 | -0.10781 | 0.002 | 0.034 | 1 Oligo | LINC01114      |
| HGF. 3      | 0.000327 | -0.13404 | 0     | 0.03  | 1 Oligo | HGF            |
| SP2         | 0.000328 | 0.196859 | 0.122 | 0.078 | 1 Oligo | SP2            |
| UNC13D. 8   | 0.000329 | -0.13019 | 0.012 | 0.05  | 1 Oligo | UNC13D         |
| C16orf70. 0 | 0.000329 | 0.144433 | 0.108 | 0.065 | 1 Oligo | C16orf70       |
| IFITM1. 3   | 0.000338 | -0.20515 | 0.005 | 0.038 | 1 Oligo | IFITM1         |
| BCL11A. 6   | 0.000339 | -0.11502 | 0.012 | 0.05  | 1 Oligo | BCL11A         |
| ZNF675. 1   | 0.000342 | -0.10455 | 0.024 | 0.068 | 1 Oligo | ZNF675         |
| DSC2. 7     | 0.000343 | -0.13401 | 0.002 | 0.034 | 1 Oligo | DSC2           |
| QTRTD1. 1   | 0.000344 | -0.10005 | 0.04  | 0.092 | 1 Oligo | QTRTD1         |
| RNF150. 3   | 0.000345 | -0.1176  | 0.007 | 0.042 | 1 Oligo | RNF150         |
| DEDD. 1     | 0.000346 | -0.13134 | 0.061 | 0.12  | 1 Oligo | DEDD           |
| SESN3. 3    | 0.000347 | -0.14245 | 0.087 | 0.152 | 1 Oligo | SESN3          |
| NSF. 1      | 0.000347 | -0.11328 | 0.075 | 0.139 | 1 Oligo | NSF            |
| CREBL2. 7   | 0.000348 | -0.14689 | 0.12  | 0.191 | 1 Oligo | CREBL2         |
| MMP9. 3     | 0.000349 | -0.10985 | 0     | 0.029 | 1 Oligo | MMP9           |
| ITGB2-AS1   | 0.000349 | -0.15959 | 0     | 0.029 | 1 Oligo | ITGB2-AS1      |
| APOM        | 0.00035  | -0.11902 | 0.012 | 0.05  | 1 Oligo | APOM           |
| DUS4L. 6    | 0.000353 | -0.11536 | 0.033 | 0.081 | 1 Oligo | DUS4L          |
| BRI3BP. 4   | 0.000354 | 0.239286 | 0.16  | 0.111 | 1 Oligo | BRI3BP         |
| RAB4B. 4    | 0.000354 | 0.280612 | 0.313 | 0.261 | 1 Oligo | RAB4B          |
| PRRG4. 7    | 0.000355 | -0.11675 | 0.009 | 0.046 | 1 Oligo | PRRG4          |
| ZNF300. 8   | 0.000356 | -0.11456 | 0.026 | 0.071 | 1 Oligo | ZNF300         |
| RP3-47704   | 0.000356 | -0.1471  | 0     | 0.029 | 1 Oligo | RP3-47704. 14  |
| RP11-489C   | 0.000356 | -0.1561  | 0     | 0.029 | 1 Oligo | RP11-489018. 1 |
| MXD3. 8     | 0.000356 | -0.12672 | 0.021 | 0.064 | 1 Oligo | MXD3           |
| CYB5R3. 4   | 0.000358 | 0.281736 | 0.398 | 0.359 | 1 Oligo | CYB5R3         |
| CENPJ. 5    | 0.000359 | -0.12743 | 0.024 | 0.067 | 1 Oligo | CENPJ          |
| ATP13A1. 3  | 0.000362 | -0.12362 | 0.094 | 0.164 | 1 Oligo | ATP13A1        |
| C6orf15. 6  | 0.000364 | -0.17641 | 0     | 0.029 | 1 Oligo | C6orf15        |
| EEF1G. 3    | 0.000368 | -0.14629 | 0.049 | 0.105 | 1 Oligo | EEF1G          |
| LIMD1. 1    | 0.000369 | -0.10054 | 0.033 | 0.081 | 1 Oligo | LIMD1          |
| DGKG. 3     | 0.000372 | -0.10279 | 0.012 | 0.049 | 1 Oligo | DGKG           |
| URI1. 6     | 0.000374 | -0.11095 | 0.141 | 0.224 | 1 Oligo | URI1           |
| NRIP3. 4    | 0.000375 | -0.11721 | 0.005 | 0.038 | 1 Oligo | NRIP3          |
| AVIL. 7     | 0.000378 | -0.12654 | 0.04  | 0.091 | 1 Oligo | AVIL           |
| GOLPH3L. 3  | 0.000378 | -0.11729 | 0.033 | 0.081 | 1 Oligo | GOLPH3L        |
| C2orf74. 1  | 0.000379 | 0.386286 | 0.052 | 0.025 | 1 Oligo | C2orf74        |
| PIK3CB. 1   | 0.000381 | 0.19653  | 0.101 | 0.062 | 1 Oligo | PIK3CB         |
| COQ5. 5     | 0.000383 | 0.10007  | 0.118 | 0.199 | 1 Oligo | COQ5           |
| MAPK8. 4    | 0.000383 | -0.11415 | 0.047 | 0.101 | 1 Oligo | MAPK8          |
| GLUD1. 5    | 0.000384 | 0.274538 | 0.304 | 0.246 | 1 Oligo | GLUD1          |

|             |          |          |       |       |         |                |
|-------------|----------|----------|-------|-------|---------|----------------|
| EID2B. 7    | 0.000389 | -0.10841 | 0.04  | 0.091 | 1 Oligo | EID2B          |
| RASA2. 3    | 0.000389 | -0.11772 | 0.031 | 0.078 | 1 Oligo | RASA2          |
| WDSUB1. 3   | 0.000395 | -0.13067 | 0.031 | 0.078 | 1 Oligo | WDSUB1         |
| PGAM2. 8    | 0.000398 | -0.16817 | 0.012 | 0.049 | 1 Oligo | PGAM2          |
| SPN. 9      | 0.000399 | -0.10352 | 0.016 | 0.057 | 1 Oligo | SPN            |
| C3orf17. 2  | 0.000399 | -0.11432 | 0.08  | 0.145 | 1 Oligo | C3orf17        |
| TOMM40L. 3  | 0.000401 | -0.12712 | 0.021 | 0.063 | 1 Oligo | TOMM40L        |
| PJA2. 7     | 0.000404 | 0.210594 | 0.376 | 0.334 | 1 Oligo | PJA2           |
| ENGASE      | 0.000404 | -0.10169 | 0.016 | 0.057 | 1 Oligo | ENGASE         |
| DAPP1. 8    | 0.000405 | -0.13471 | 0     | 0.029 | 1 Oligo | DAPP1          |
| PDE6D. 6    | 0.000406 | 0.281245 | 0.24  | 0.187 | 1 Oligo | PDE6D          |
| SHOC2. 3    | 0.000407 | -0.11763 | 0.087 | 0.154 | 1 Oligo | SHOC2          |
| PSORS1C1. 0 | 0.000408 | -0.11505 | 0.005 | 0.037 | 1 Oligo | PSORS1C1       |
| HEY2. 5     | 0.000408 | 0.277648 | 0.101 | 0.062 | 1 Oligo | HEY2           |
| IL2RA. 7    | 0.00041  | -0.23201 | 0.002 | 0.033 | 1 Oligo | IL2RA          |
| IRF2. 3     | 0.00041  | -0.15966 | 0.127 | 0.201 | 1 Oligo | IRF2           |
| TRAF4. 8    | 0.000417 | -0.13288 | 0.184 | 0.272 | 1 Oligo | TRAF4          |
| FAM76A. 1   | 0.000419 | 0.235141 | 0.132 | 0.088 | 1 Oligo | FAM76A         |
| RAB33B. 1   | 0.000419 | 0.146804 | 0.096 | 0.057 | 1 Oligo | RAB33B         |
| GPT2. 7     | 0.00042  | 0.250907 | 0.195 | 0.145 | 1 Oligo | GPT2           |
| MCCC2. 4    | 0.000426 | -0.11258 | 0.073 | 0.135 | 1 Oligo | MCCC2          |
| OCLN        | 0.000426 | 0.107898 | 0.047 | 0.022 | 1 Oligo | OCLN           |
| PPIL6. 8    | 0.00043  | -0.10475 | 0.012 | 0.049 | 1 Oligo | PPIL6          |
| NAA40. 2    | 0.00043  | -0.13654 | 0.035 | 0.083 | 1 Oligo | NAA40          |
| PCED1B. 7   | 0.000434 | -0.14239 | 0.005 | 0.037 | 1 Oligo | PCED1B         |
| UQCRQ. 5    | 0.000436 | 0.197607 | 0.769 | 0.8   | 1 Oligo | UQCRQ          |
| NDUFA4L2. 0 | 0.000438 | -0.1263  | 0.007 | 0.041 | 1 Oligo | NDUFA4L2       |
| FZD5        | 0.000439 | 0.200178 | 0.054 | 0.027 | 1 Oligo | FZD5           |
| SLC38A7. 3  | 0.000443 | -0.10934 | 0.054 | 0.11  | 1 Oligo | SLC38A7        |
| GZF1. 2     | 0.000443 | -0.13276 | 0.052 | 0.105 | 1 Oligo | GZF1           |
| POC1B. 2    | 0.000444 | 0.190112 | 0.125 | 0.081 | 1 Oligo | POC1B          |
| SRBD1. 3    | 0.000445 | -0.1318  | 0.038 | 0.087 | 1 Oligo | SRBD1          |
| ZBTB2. 3    | 0.00045  | -0.10531 | 0.028 | 0.074 | 1 Oligo | ZBTB2          |
| TTBK1       | 0.000452 | 0.134397 | 0.038 | 0.016 | 1 Oligo | TTBK1          |
| GTPBP8. 1   | 0.000454 | -0.14831 | 0.056 | 0.112 | 1 Oligo | GTPBP8         |
| RP11-514C   | 0.00046  | -0.11726 | 0     | 0.028 | 1 Oligo | RP11-514012. 4 |
| TCEAL6. 5   | 0.000463 | -0.12826 | 0.005 | 0.037 | 1 Oligo | TCEAL6         |
| DDHD2. 6    | 0.000466 | 0.231689 | 0.151 | 0.104 | 1 Oligo | DDHD2          |
| DCUN1D2     | 0.000472 | 0.16187  | 0.064 | 0.033 | 1 Oligo | DCUN1D2        |
| SLC44A2. 7  | 0.000476 | 0.265781 | 0.252 | 0.201 | 1 Oligo | SLC44A2        |
| ZNF483      | 0.000483 | 0.196695 | 0.045 | 0.02  | 1 Oligo | ZNF483         |
| FAM58A. 3   | 0.000483 | 0.28718  | 0.202 | 0.152 | 1 Oligo | FAM58A         |
| NUP214. 8   | 0.000483 | -0.2683  | 0.129 | 0.198 | 1 Oligo | NUP214         |
| DISP1. 2    | 0.000486 | -0.13325 | 0.005 | 0.036 | 1 Oligo | DISP1          |
| RPS6KA1. 9  | 0.000487 | -0.18346 | 0.075 | 0.133 | 1 Oligo | RPS6KA1        |
| ARMCX2. 6   | 0.00049  | -0.13287 | 0.085 | 0.149 | 1 Oligo | ARMCX2         |
| IRAK4. 3    | 0.000496 | -0.13259 | 0.047 | 0.1   | 1 Oligo | IRAK4          |
| APEX2. 5    | 0.000499 | -0.15204 | 0.045 | 0.096 | 1 Oligo | APEX2          |
| UBA6-AS1. 0 | 0.000499 | 0.32475  | 0.125 | 0.082 | 1 Oligo | UBA6-AS1       |
| MAOA. 2     | 0.000499 | -0.11164 | 0.002 | 0.032 | 1 Oligo | MAOA           |
| GJA1. 6     | 0.000499 | -0.25345 | 0.035 | 0.081 | 1 Oligo | GJA1           |

|            |          |          |       |       |         |           |
|------------|----------|----------|-------|-------|---------|-----------|
| NUP54.5    | 0.000501 | -0.15835 | 0.111 | 0.18  | 1 Oligo | NUP54     |
| WHSC1L1.8  | 0.000501 | -0.12706 | 0.278 | 0.376 | 1 Oligo | WHSC1L1   |
| CEP70.6    | 0.000503 | -0.11534 | 0.047 | 0.099 | 1 Oligo | CEP70     |
| SCN9A.6    | 0.000506 | -0.1319  | 0.005 | 0.036 | 1 Oligo | SCN9A     |
| POLE4.6    | 0.000507 | -0.11611 | 0.198 | 0.288 | 1 Oligo | POLE4     |
| CDC48.6    | 0.000513 | -0.1064  | 0.007 | 0.041 | 1 Oligo | CDC48     |
| ZNF460     | 0.000514 | -0.10298 | 0.002 | 0.032 | 1 Oligo | ZNF460    |
| TIPIN.5    | 0.000515 | -0.12946 | 0.08  | 0.143 | 1 Oligo | TIPIN     |
| TTC7B      | 0.000515 | 0.164407 | 0.068 | 0.037 | 1 Oligo | TTC7B     |
| ASCC1.2    | 0.000519 | 0.316776 | 0.16  | 0.112 | 1 Oligo | ASCC1     |
| MMS22L.3   | 0.000521 | 0.237355 | 0.101 | 0.062 | 1 Oligo | MMS22L    |
| PPP1R3C.2  | 0.000522 | -0.10274 | 0     | 0.028 | 1 Oligo | PPP1R3C   |
| CKAP5.8    | 0.000528 | 0.254384 | 0.205 | 0.154 | 1 Oligo | CKAP5     |
| GTDC1.1    | 0.00053  | 0.261667 | 0.144 | 0.097 | 1 Oligo | GTDC1     |
| ZNF664.6   | 0.000531 | 0.284695 | 0.195 | 0.147 | 1 Oligo | ZNF664    |
| PSD4.4     | 0.000532 | -0.10709 | 0.002 | 0.032 | 1 Oligo | PSD4      |
| SH3KBP1.9  | 0.000533 | 0.30516  | 0.299 | 0.239 | 1 Oligo | SH3KBP1   |
| SCARF1.7   | 0.000533 | -0.1226  | 0     | 0.027 | 1 Oligo | SCARF1    |
| HSDL2.2    | 0.000534 | -0.12238 | 0.094 | 0.163 | 1 Oligo | HSDL2     |
| PIGK.1     | 0.000537 | 0.330697 | 0.2   | 0.15  | 1 Oligo | PIGK      |
| TMEM259.4  | 0.000538 | -0.1208  | 0.24  | 0.339 | 1 Oligo | TMEM259   |
| ZNF37A.6   | 0.000543 | 0.246567 | 0.184 | 0.137 | 1 Oligo | ZNF37A    |
| CSRNP3.8   | 0.000553 | -0.15253 | 0.049 | 0.101 | 1 Oligo | CSRNP3    |
| FBXL15.8   | 0.000555 | -0.16297 | 0.127 | 0.198 | 1 Oligo | FBXL15    |
| IFT80.4    | 0.000555 | 0.301197 | 0.108 | 0.069 | 1 Oligo | IFT80     |
| FAM13B.4   | 0.000557 | 0.229216 | 0.127 | 0.084 | 1 Oligo | FAM13B    |
| SCAF1.6    | 0.00056  | 0.253683 | 0.2   | 0.152 | 1 Oligo | SCAF1     |
| AGO3.4     | 0.000568 | 0.331441 | 0.238 | 0.191 | 1 Oligo | AGO3      |
| MAPK13.5   | 0.000568 | -0.12001 | 0.002 | 0.032 | 1 Oligo | MAPK13    |
| CATSPER1.0 | 0.000568 | -0.14133 | 0     | 0.027 | 1 Oligo | CATSPER1  |
| ALOX15B.7  | 0.000581 | -0.14158 | 0     | 0.027 | 1 Oligo | ALOX15B   |
| UROS.4     | 0.000582 | 0.3797   | 0.289 | 0.251 | 1 Oligo | UROS      |
| MACF1.6    | 0.000587 | 0.271346 | 0.362 | 0.32  | 1 Oligo | MACF1     |
| ITPR1.4    | 0.000589 | -0.11222 | 0.005 | 0.036 | 1 Oligo | ITPR1     |
| STAU2.6    | 0.00059  | -0.10923 | 0.106 | 0.176 | 1 Oligo | STAU2     |
| TFB1M.1    | 0.000591 | -0.11174 | 0.047 | 0.098 | 1 Oligo | TFB1M     |
| NUTF2.3    | 0.000593 | -0.10566 | 0.341 | 0.453 | 1 Oligo | NUTF2     |
| GPR132.6   | 0.000595 | -0.12108 | 0.002 | 0.032 | 1 Oligo | GPR132    |
| HELQ.1     | 0.000598 | -0.12123 | 0.024 | 0.065 | 1 Oligo | HELQ      |
| CSNK2A2.1  | 0.000611 | -0.12701 | 0.061 | 0.117 | 1 Oligo | CSNK2A2   |
| CDT1.6     | 0.000613 | -0.10228 | 0.021 | 0.062 | 1 Oligo | CDT1      |
| DHRS4-AS1  | 0.000613 | 0.202317 | 0.019 | 0.006 | 1 Oligo | DHRS4-AS1 |
| IL7R.7     | 0.000618 | -0.17457 | 0.016 | 0.055 | 1 Oligo | IL7R      |
| FAM118B.5  | 0.000618 | -0.11031 | 0.085 | 0.149 | 1 Oligo | FAM118B   |
| CDC42SE1.0 | 0.000623 | 0.211494 | 0.355 | 0.302 | 1 Oligo | CDC42SE1  |
| RAB3C.5    | 0.000632 | -0.11788 | 0.007 | 0.039 | 1 Oligo | RAB3C     |
| MIER1.3    | 0.000634 | -0.12398 | 0.106 | 0.177 | 1 Oligo | MIER1     |
| ZNF804A.2  | 0.000643 | -0.11513 | 0.007 | 0.039 | 1 Oligo | ZNF804A   |
| RSPH1.3    | 0.000646 | -0.10812 | 0     | 0.027 | 1 Oligo | RSPH1     |
| SLFN12.5   | 0.000646 | -0.10985 | 0     | 0.027 | 1 Oligo | SLFN12    |
| ATHL1.2    | 0.000646 | -0.11404 | 0.005 | 0.035 | 1 Oligo | ATHL1     |

|            |          |          |       |       |         |         |
|------------|----------|----------|-------|-------|---------|---------|
| LHX1. 5    | 0.000649 | -0.11541 | 0.002 | 0.031 | 1 Oligo | LHX1    |
| FERMT1. 6  | 0.00065  | -0.12114 | 0.014 | 0.051 | 1 Oligo | FERMT1  |
| FKBP15. 8  | 0.000653 | -0.12345 | 0.08  | 0.14  | 1 Oligo | FKBP15  |
| ATP6V1D. 3 | 0.000656 | -0.12622 | 0.271 | 0.374 | 1 Oligo | ATP6V1D |
| FHIT. 5    | 0.000662 | 0.319034 | 0.167 | 0.114 | 1 Oligo | FHIT    |
| NFIA. 8    | 0.000668 | 0.180334 | 0.442 | 0.377 | 1 Oligo | NFIA    |
| SLC9B1     | 0.000669 | 0.136915 | 0.031 | 0.012 | 1 Oligo | SLC9B1  |
| RASSF3. 7  | 0.00067  | -0.1299  | 0.009 | 0.043 | 1 Oligo | RASSF3  |
| TMEM30A. 3 | 0.00067  | 0.260273 | 0.369 | 0.333 | 1 Oligo | TMEM30A |
| UAP1L1. 2  | 0.000673 | 0.1808   | 0.096 | 0.059 | 1 Oligo | UAP1L1  |
| CCR5. 6    | 0.000674 | -0.11114 | 0     | 0.027 | 1 Oligo | CCR5    |
| ZNF680. 7  | 0.000681 | -0.11884 | 0.108 | 0.176 | 1 Oligo | ZNF680  |
| IL17RB. 7  | 0.000686 | -0.10624 | 0.012 | 0.047 | 1 Oligo | IL17RB  |
| TOPBP1. 6  | 0.000694 | -0.10731 | 0.045 | 0.094 | 1 Oligo | TOPBP1  |
| KDM2A. 1   | 0.000694 | -0.10159 | 0.071 | 0.129 | 1 Oligo | KDM2A   |
| APOBR. 8   | 0.000698 | -0.14688 | 0.007 | 0.039 | 1 Oligo | APOBR   |
| VKORC1. 4  | 0.000701 | -0.10879 | 0.393 | 0.5   | 1 Oligo | VKORC1  |
| RAB2B. 3   | 0.000702 | 0.207646 | 0.122 | 0.08  | 1 Oligo | RAB2B   |
| LACTB2. 3  | 0.000704 | 0.326439 | 0.2   | 0.149 | 1 Oligo | LACTB2  |
| SNX9. 7    | 0.000705 | 0.322379 | 0.238 | 0.188 | 1 Oligo | SNX9    |
| PLVAP. 5   | 0.000707 | -0.15018 | 0.002 | 0.031 | 1 Oligo | PLVAP   |
| MYL9. 2    | 0.000708 | -0.1276  | 0.005 | 0.035 | 1 Oligo | MYL9    |
| HEBP1. 5   | 0.000709 | 0.21506  | 0.242 | 0.187 | 1 Oligo | HEBP1   |
| KPNA4. 4   | 0.00071  | -0.12891 | 0.113 | 0.183 | 1 Oligo | KPNA4   |
| ITGB7. 6   | 0.000718 | -0.10981 | 0     | 0.026 | 1 Oligo | ITGB7   |
| HOXC8. 5   | 0.000727 | -0.11709 | 0.005 | 0.035 | 1 Oligo | HOXC8   |
| IGIP       | 0.000731 | 0.132285 | 0.047 | 0.022 | 1 Oligo | IGIP    |
| VNN2. 6    | 0.000734 | -0.10862 | 0     | 0.026 | 1 Oligo | VNN2    |
| PHYHD1. 1  | 0.000734 | -0.11412 | 0     | 0.026 | 1 Oligo | PHYHD1  |
| SNRPN. 9   | 0.000736 | 0.519718 | 0.141 | 0.097 | 1 Oligo | SNRPN   |
| SKIV2L2. 5 | 0.000748 | -0.13064 | 0.094 | 0.158 | 1 Oligo | SKIV2L2 |
| TMEM71. 3  | 0.000749 | -0.11675 | 0     | 0.026 | 1 Oligo | TMEM71  |
| LXN. 5     | 0.000749 | -0.12044 | 0     | 0.026 | 1 Oligo | LXN     |
| UGGT2      | 0.00075  | -0.10715 | 0.042 | 0.091 | 1 Oligo | UGGT2   |
| CPQ. 7     | 0.000754 | 0.220229 | 0.233 | 0.176 | 1 Oligo | CPQ     |
| ABCE1. 4   | 0.000756 | -0.11181 | 0.169 | 0.253 | 1 Oligo | ABCE1   |
| LTB4R. 7   | 0.000761 | -0.12131 | 0.005 | 0.035 | 1 Oligo | LTB4R   |
| MAP4K1. 7  | 0.000769 | -0.13905 | 0.002 | 0.03  | 1 Oligo | MAP4K1  |
| CENPP. 2   | 0.000781 | -0.11632 | 0.014 | 0.05  | 1 Oligo | CENPP   |
| HK3. 5     | 0.000782 | -0.10014 | 0     | 0.026 | 1 Oligo | HK3     |
| DGKA. 2    | 0.000783 | -0.127   | 0.007 | 0.038 | 1 Oligo | DGKA    |
| NAV3. 3    | 0.000785 | 0.105129 | 0.054 | 0.027 | 1 Oligo | NAV3    |
| SCN3A. 8   | 0.000794 | -0.13386 | 0.031 | 0.073 | 1 Oligo | SCN3A   |
| COX14. 5   | 0.000795 | 0.26773  | 0.487 | 0.459 | 1 Oligo | COX14   |
| MMP7. 4    | 0.0008   | -0.23348 | 0.002 | 0.03  | 1 Oligo | MMP7    |
| MYH7B      | 0.000802 | 0.100418 | 0.04  | 0.018 | 1 Oligo | MYH7B   |
| MLLT10. 3  | 0.000816 | -0.12455 | 0.071 | 0.128 | 1 Oligo | MLLT10  |
| MICU3. 7   | 0.000819 | 0.122591 | 0.125 | 0.081 | 1 Oligo | MICU3   |
| ASCC2. 3   | 0.000821 | -0.10235 | 0.136 | 0.208 | 1 Oligo | ASCC2   |
| LFNG. 1    | 0.000822 | -0.10503 | 0.012 | 0.046 | 1 Oligo | LFNG    |
| OXNAD1. 2  | 0.000822 | -0.11472 | 0.028 | 0.071 | 1 Oligo | OXNAD1  |



|           |          |          |       |       |         |               |
|-----------|----------|----------|-------|-------|---------|---------------|
| SLC35B4.5 | 0.00083  | -0.11781 | 0.122 | 0.194 | 1 Oligo | SLC35B4       |
| C10orf10. | 0.000831 | -0.31922 | 0.045 | 0.092 | 1 Oligo | C10orf10      |
| MCM5.8    | 0.000832 | -0.11446 | 0.092 | 0.152 | 1 Oligo | MCM5          |
| GNG11.3   | 0.000834 | -0.14838 | 0.007 | 0.038 | 1 Oligo | GNG11         |
| RELT.8    | 0.00084  | -0.146   | 0.04  | 0.086 | 1 Oligo | RELT          |
| TFAP2B.5  | 0.000847 | -0.10402 | 0.002 | 0.03  | 1 Oligo | TFAP2B        |
| CYP19A1.4 | 0.000851 | -0.12212 | 0     | 0.026 | 1 Oligo | CYP19A1       |
| TMEM181.9 | 0.000855 | 0.260396 | 0.207 | 0.162 | 1 Oligo | TMEM181       |
| AC009501. | 0.000863 | 0.340997 | 0.2   | 0.155 | 1 Oligo | AC009501.4    |
| TMEM121.7 | 0.000873 | 0.183179 | 0.148 | 0.104 | 1 Oligo | TMEM121       |
| RP11-212F | 0.000879 | 0.261225 | 0.132 | 0.09  | 1 Oligo | RP11-212P7.2  |
| MATR3.8   | 0.00088  | -0.15071 | 0.384 | 0.49  | 1 Oligo | MATR3         |
| DUT.7     | 0.000885 | -0.15151 | 0.353 | 0.459 | 1 Oligo | DUT           |
| ALDH18A1. | 0.000886 | -0.10456 | 0.04  | 0.087 | 1 Oligo | ALDH18A1      |
| GRASP.7   | 0.00089  | -0.12025 | 0.016 | 0.053 | 1 Oligo | GRASP         |
| RP11-138A | 0.00089  | -0.21377 | 0.073 | 0.127 | 1 Oligo | RP11-138A9.1  |
| KIAA0196. | 0.00089  | 0.219322 | 0.155 | 0.109 | 1 Oligo | KIAA0196      |
| OASL.5    | 0.000903 | -0.11865 | 0.002 | 0.03  | 1 Oligo | OASL          |
| SGCB.6    | 0.000903 | 0.268527 | 0.372 | 0.324 | 1 Oligo | SGCB          |
| KLHL4.7   | 0.000905 | 0.202493 | 0.169 | 0.125 | 1 Oligo | KLHL4         |
| SYT4.1    | 0.000908 | -0.1013  | 0     | 0.025 | 1 Oligo | SYT4          |
| CCER2.8   | 0.000915 | -0.12742 | 0.019 | 0.056 | 1 Oligo | CCER2         |
| DSTN.9    | 0.00092  | 0.221262 | 0.64  | 0.617 | 1 Oligo | DSTN          |
| ANKRD13A. | 0.000925 | 0.26976  | 0.139 | 0.095 | 1 Oligo | ANKRD13A      |
| HKR1.8    | 0.000926 | -0.11274 | 0.064 | 0.118 | 1 Oligo | HKR1          |
| RP11-445F | 0.000935 | -0.12038 | 0.002 | 0.03  | 1 Oligo | RP11-445F12.1 |
| CD163L1.2 | 0.000938 | -0.12668 | 0.009 | 0.041 | 1 Oligo | CD163L1       |
| EPS8.3    | 0.00094  | 0.172845 | 0.176 | 0.124 | 1 Oligo | EPS8          |
| PRIMPOL.1 | 0.00094  | -0.11613 | 0.04  | 0.086 | 1 Oligo | PRIMPOL       |
| PCDHB10.8 | 0.000944 | -0.13929 | 0.054 | 0.104 | 1 Oligo | PCDHB10       |
| SUMF1.3   | 0.000944 | -0.13573 | 0.08  | 0.139 | 1 Oligo | SUMF1         |
| RPS6KA4.8 | 0.000964 | -0.12892 | 0.068 | 0.124 | 1 Oligo | RPS6KA4       |
| LINC00882 | 0.000966 | 0.254839 | 0.056 | 0.029 | 1 Oligo | LINC00882     |
| LTB.4     | 0.000968 | -0.18094 | 0.005 | 0.034 | 1 Oligo | LTB           |
| TNRC18.3  | 0.000972 | -0.11588 | 0.033 | 0.076 | 1 Oligo | TNRC18        |
| CDK11B.2  | 0.000975 | -0.11472 | 0.085 | 0.145 | 1 Oligo | CDK11B        |
| FKBP8.4   | 0.000982 | 0.223601 | 0.633 | 0.646 | 1 Oligo | FKBP8         |
| ACSM5.4   | 0.000986 | -0.13862 | 0.005 | 0.034 | 1 Oligo | ACSM5         |
| ECHDC3.7  | 0.000989 | -0.11047 | 0.005 | 0.034 | 1 Oligo | ECHDC3        |
| EMD.3     | 0.001004 | -0.13509 | 0.202 | 0.287 | 1 Oligo | EMD           |
| NPPA.6    | 0.001007 | -0.13614 | 0.002 | 0.029 | 1 Oligo | NPPA          |
| FMN1.8    | 0.001017 | -0.12539 | 0.005 | 0.033 | 1 Oligo | FMN1          |
| UBE2B.1   | 0.001019 | -0.11952 | 0.376 | 0.489 | 1 Oligo | UBE2B         |
| ATP9B.1   | 0.001028 | 0.191787 | 0.118 | 0.077 | 1 Oligo | ATP9B         |
| MRPS25.3  | 0.00103  | -0.1541  | 0.186 | 0.267 | 1 Oligo | MRPS25        |
| CEACAM4.7 | 0.001031 | -0.10709 | 0     | 0.025 | 1 Oligo | CEACAM4       |
| FAM179B.6 | 0.001035 | 0.346277 | 0.16  | 0.117 | 1 Oligo | FAM179B       |
| SLC19A2.1 | 0.001043 | -0.1316  | 0.012 | 0.045 | 1 Oligo | SLC19A2       |
| NME1-NME2 | 0.001043 | -0.10053 | 0.047 | 0.095 | 1 Oligo | NME1-NME2     |
| PRDM2.2   | 0.001052 | 0.224014 | 0.195 | 0.146 | 1 Oligo | PRDM2         |
| PLCD1.1   | 0.001052 | -0.10082 | 0.014 | 0.049 | 1 Oligo | PLCD1         |

|           |          |          |       |       |         |               |
|-----------|----------|----------|-------|-------|---------|---------------|
| PLEK2.6   | 0.001053 | -0.10334 | 0     | 0.025 | 1 Oligo | PLEK2         |
| EXOC4.4   | 0.001054 | -0.10759 | 0.104 | 0.166 | 1 Oligo | EXOC4         |
| ASS1.3    | 0.001055 | -0.1393  | 0.002 | 0.029 | 1 Oligo | ASS1          |
| HOXB-AS1. | 0.001063 | -0.12924 | 0.005 | 0.033 | 1 Oligo | HOXB-AS1      |
| SSR1.7    | 0.001076 | -0.11396 | 0.365 | 0.472 | 1 Oligo | SSR1          |
| PDZD8     | 0.001093 | 0.167741 | 0.111 | 0.072 | 1 Oligo | PDZD8         |
| KB-1507C5 | 0.001099 | -0.11086 | 0     | 0.024 | 1 Oligo | KB-1507C5.4   |
| MSH6.6    | 0.001121 | -0.10947 | 0.073 | 0.129 | 1 Oligo | MSH6          |
| TAOK2.1   | 0.001124 | 0.239565 | 0.132 | 0.091 | 1 Oligo | TAOK2         |
| GHDC.5    | 0.001126 | -0.13673 | 0.047 | 0.095 | 1 Oligo | GHDC          |
| MIEN1.2   | 0.001134 | 0.248918 | 0.499 | 0.484 | 1 Oligo | MIEN1         |
| HLA-F.9   | 0.00114  | -0.23958 | 0.092 | 0.148 | 1 Oligo | HLA-F         |
| RP5-894A1 | 0.001146 | 0.104387 | 0.049 | 0.025 | 1 Oligo | RP5-894A10.2  |
| EIF1AX.6  | 0.00115  | 0.246488 | 0.546 | 0.56  | 1 Oligo | EIF1AX        |
| RNF122.1  | 0.001151 | -0.12918 | 0.007 | 0.037 | 1 Oligo | RNF122        |
| DHFRL1.4  | 0.001151 | 0.231774 | 0.101 | 0.065 | 1 Oligo | DHFRL1        |
| LIX1.3    | 0.001164 | 0.157334 | 0.042 | 0.02  | 1 Oligo | LIX1          |
| FUBP1.8   | 0.001168 | -0.10302 | 0.155 | 0.227 | 1 Oligo | FUBP1         |
| MLXIPL.5  | 0.001174 | -0.15782 | 0.009 | 0.04  | 1 Oligo | MLXIPL        |
| SCAMP5.7  | 0.001189 | 0.170019 | 0.136 | 0.094 | 1 Oligo | SCAMP5        |
| COR07.8   | 0.001192 | 0.19969  | 0.209 | 0.156 | 1 Oligo | COR07         |
| CLTA.6    | 0.001192 | 0.13684  | 0.595 | 0.629 | 1 Oligo | CLTA          |
| MYT1.7    | 0.001207 | -0.12672 | 0.009 | 0.04  | 1 Oligo | MYT1          |
| C1orf228. | 0.001207 | -0.1253  | 0.005 | 0.033 | 1 Oligo | C1orf228      |
| TNS3.8    | 0.001211 | -0.15414 | 0.033 | 0.075 | 1 Oligo | TNS3          |
| IRAK2.2   | 0.001215 | -0.11256 | 0.016 | 0.051 | 1 Oligo | IRAK2         |
| SPNS3.6   | 0.001223 | -0.12072 | 0     | 0.024 | 1 Oligo | SPNS3         |
| RP11-597D | 0.001223 | -0.1368  | 0     | 0.024 | 1 Oligo | RP11-597D13.8 |
| CCSAP.4   | 0.001227 | 0.212304 | 0.141 | 0.098 | 1 Oligo | CCSAP         |
| GLTSCR1L  | 0.001246 | 0.157358 | 0.061 | 0.033 | 1 Oligo | GLTSCR1L      |
| FGFR10P.2 | 0.001282 | -0.10322 | 0.038 | 0.082 | 1 Oligo | FGFR10P       |
| ARHGAP5.6 | 0.001282 | 0.226608 | 0.238 | 0.192 | 1 Oligo | ARHGAP5       |
| DNAJA4.5  | 0.001283 | 0.103538 | 0.099 | 0.06  | 1 Oligo | DNAJA4        |
| METTL12.2 | 0.001286 | -0.13374 | 0.104 | 0.167 | 1 Oligo | METTL12       |
| PLEKH02.9 | 0.001298 | -0.1781  | 0.056 | 0.104 | 1 Oligo | PLEKH02       |
| OTOA.6    | 0.001299 | -0.11712 | 0.005 | 0.033 | 1 Oligo | OTOA          |
| CST7.5    | 0.001303 | -0.1835  | 0.007 | 0.036 | 1 Oligo | CST7          |
| TMEM87B.5 | 0.001303 | -0.10637 | 0.028 | 0.068 | 1 Oligo | TMEM87B       |
| RRN3.3    | 0.001326 | -0.12655 | 0.08  | 0.136 | 1 Oligo | RRN3          |
| ZNF415.2  | 0.001333 | 0.19287  | 0.059 | 0.031 | 1 Oligo | ZNF415        |
| RP11-676J | 0.001354 | -0.10262 | 0.005 | 0.032 | 1 Oligo | RP11-676J15.1 |
| TRIM58    | 0.001354 | 0.150884 | 0.035 | 0.016 | 1 Oligo | TRIM58        |
| PCP4.7    | 0.001363 | -0.16198 | 0.009 | 0.04  | 1 Oligo | PCP4          |
| AC005618. | 0.001368 | -0.10848 | 0.012 | 0.044 | 1 Oligo | AC005618.6    |
| COPRS.6   | 0.001378 | -0.11427 | 0.242 | 0.337 | 1 Oligo | COPRS         |
| PCSK2.5   | 0.001392 | -0.10407 | 0.002 | 0.028 | 1 Oligo | PCSK2         |
| MAP9.7    | 0.001392 | -0.13152 | 0.125 | 0.191 | 1 Oligo | MAP9          |
| IL12RB1.8 | 0.001409 | -0.13392 | 0.005 | 0.032 | 1 Oligo | IL12RB1       |
| CEP85L.5  | 0.001413 | -0.10362 | 0.064 | 0.115 | 1 Oligo | CEP85L        |
| EMC6.4    | 0.001414 | -0.14007 | 0.348 | 0.437 | 1 Oligo | EMC6          |
| HDDC3.3   | 0.001414 | 0.104049 | 0.089 | 0.151 | 1 Oligo | HDDC3         |

|             |          |          |       |       |         |            |
|-------------|----------|----------|-------|-------|---------|------------|
| RGMB. 8     | 0.001415 | -0.21849 | 0.082 | 0.134 | 1 Oligo | RGMB       |
| ENAH. 8     | 0.00142  | 0.25432  | 0.304 | 0.262 | 1 Oligo | ENAH       |
| RNASE4. 3   | 0.001434 | -0.17138 | 0.007 | 0.036 | 1 Oligo | RNASE4     |
| GGCX. 1     | 0.001445 | -0.13845 | 0.113 | 0.177 | 1 Oligo | GGCX       |
| ACBD5. 4    | 0.001452 | 0.256948 | 0.209 | 0.166 | 1 Oligo | ACBD5      |
| PHACTR1. 8  | 0.001461 | -0.2668  | 0.071 | 0.119 | 1 Oligo | PHACTR1    |
| RASGEF1B. 0 | 0.001464 | -0.23578 | 0.073 | 0.122 | 1 Oligo | RASGEF1B   |
| HOXA9. 5    | 0.001466 | -0.10373 | 0.007 | 0.036 | 1 Oligo | HOXA9      |
| KIAA2013. 0 | 0.001474 | 0.261768 | 0.193 | 0.149 | 1 Oligo | KIAA2013   |
| TLN1. 9     | 0.001475 | -0.10299 | 0.205 | 0.288 | 1 Oligo | TLN1       |
| NUDT6. 1    | 0.001506 | -0.11861 | 0.031 | 0.071 | 1 Oligo | NUDT6      |
| RBM5. 6     | 0.001506 | -0.12355 | 0.198 | 0.281 | 1 Oligo | RBM5       |
| HDAC4. 1    | 0.001513 | 0.164514 | 0.078 | 0.046 | 1 Oligo | HDAC4      |
| AC068535. 0 | 0.001513 | -0.10155 | 0     | 0.023 | 1 Oligo | AC068535.2 |
| SCARB1. 4   | 0.001517 | -0.12294 | 0.059 | 0.109 | 1 Oligo | SCARB1     |
| PPP1R1C. 6  | 0.001527 | -0.11552 | 0.002 | 0.027 | 1 Oligo | PPP1R1C    |
| CHIC1       | 0.001538 | 0.123255 | 0.047 | 0.024 | 1 Oligo | CHIC1      |
| TVP23A. 1   | 0.00154  | -0.13062 | 0.007 | 0.036 | 1 Oligo | TVP23A     |
| EAPP. 6     | 0.00155  | 0.119683 | 0.259 | 0.358 | 1 Oligo | EAPP       |
| ATP1A2. 6   | 0.001553 | -0.21338 | 0.026 | 0.063 | 1 Oligo | ATP1A2     |
| PIK3CD. 6   | 0.001559 | -0.12412 | 0.005 | 0.031 | 1 Oligo | PIK3CD     |
| DLEU1. 3    | 0.001566 | -0.10194 | 0.045 | 0.09  | 1 Oligo | DLEU1      |
| CNIH1. 4    | 0.001571 | -0.11154 | 0.282 | 0.376 | 1 Oligo | CNIH1      |
| PTPN22. 6   | 0.001578 | -0.1136  | 0.002 | 0.027 | 1 Oligo | PTPN22     |
| CFB. 2      | 0.001579 | -0.10487 | 0     | 0.023 | 1 Oligo | CFB        |
| ZNF26       | 0.001589 | 0.100332 | 0.019 | 0.006 | 1 Oligo | ZNF26      |
| KMT2E-AS1   | 0.001606 | -0.12491 | 0.045 | 0.089 | 1 Oligo | KMT2E-AS1  |
| KCNE3. 8    | 0.001609 | -0.1094  | 0.002 | 0.027 | 1 Oligo | KCNE3      |
| PPM1N. 4    | 0.001614 | -0.13458 | 0.009 | 0.039 | 1 Oligo | PPM1N      |
| TNFAIP6. 7  | 0.001625 | -0.16143 | 0.061 | 0.111 | 1 Oligo | TNFAIP6    |
| PAIP2. 2    | 0.001627 | 0.239257 | 0.621 | 0.631 | 1 Oligo | PAIP2      |
| PDK2. 4     | 0.001639 | 0.21638  | 0.207 | 0.163 | 1 Oligo | PDK2       |
| CYP4V2. 1   | 0.001647 | 0.14397  | 0.087 | 0.053 | 1 Oligo | CYP4V2     |
| TPSAB1. 4   | 0.001648 | -0.1537  | 0     | 0.023 | 1 Oligo | TPSAB1     |
| ZFC3H1. 2   | 0.001652 | -0.12657 | 0.073 | 0.126 | 1 Oligo | ZFC3H1     |
| TTL. 4      | 0.001673 | 0.303787 | 0.158 | 0.116 | 1 Oligo | TTL        |
| MIR4458HG   | 0.001677 | 0.135211 | 0.214 | 0.158 | 1 Oligo | MIR4458HG  |
| TMEM62      | 0.001681 | 0.176637 | 0.071 | 0.041 | 1 Oligo | TMEM62     |
| ZNF396      | 0.001681 | 0.144395 | 0.028 | 0.011 | 1 Oligo | ZNF396     |
| SC5D. 4     | 0.001687 | 0.275851 | 0.219 | 0.172 | 1 Oligo | SC5D       |
| ARHGEF25. 0 | 0.001695 | -0.10712 | 0.028 | 0.067 | 1 Oligo | ARHGEF25   |
| BDH2. 3     | 0.001718 | -0.13554 | 0.087 | 0.143 | 1 Oligo | BDH2       |
| TMEM18. 3   | 0.00173  | 0.337636 | 0.252 | 0.206 | 1 Oligo | TMEM18     |
| STEAP1. 4   | 0.001737 | -0.11424 | 0.002 | 0.027 | 1 Oligo | STEAP1     |
| WAC. 3      | 0.001744 | 0.274168 | 0.299 | 0.262 | 1 Oligo | WAC        |
| FEM1B. 1    | 0.001748 | 0.327526 | 0.153 | 0.112 | 1 Oligo | FEM1B      |
| SLC44A3. 4  | 0.001771 | -0.10347 | 0.005 | 0.031 | 1 Oligo | SLC44A3    |
| CIITA. 5    | 0.001773 | -0.14505 | 0.009 | 0.039 | 1 Oligo | CIITA      |
| NFAM1. 7    | 0.001775 | -0.1331  | 0.007 | 0.035 | 1 Oligo | NFAM1      |
| ABHD1       | 0.001785 | 0.192234 | 0.028 | 0.011 | 1 Oligo | ABHD1      |
| FAM21A      | 0.001787 | 0.236616 | 0.04  | 0.019 | 1 Oligo | FAM21A     |

|           |          |          |       |       |         |              |
|-----------|----------|----------|-------|-------|---------|--------------|
| NAF1.6    | 0.001791 | -0.17842 | 0.064 | 0.111 | 1 Oligo | NAF1         |
| ALDH3B1.7 | 0.001794 | -0.12844 | 0.033 | 0.073 | 1 Oligo | ALDH3B1      |
| TRAF2.1   | 0.001794 | 0.100345 | 0.04  | 0.084 | 1 Oligo | TRAF2        |
| FRZB.5    | 0.001795 | -0.15311 | 0.014 | 0.046 | 1 Oligo | FRZB         |
| TMEM160.8 | 0.001817 | -0.14236 | 0.369 | 0.469 | 1 Oligo | TMEM160      |
| FAT1.6    | 0.001822 | 0.187018 | 0.099 | 0.065 | 1 Oligo | FAT1         |
| RP11-353N | 0.001833 | -0.10862 | 0     | 0.022 | 1 Oligo | RP11-353N4.5 |
| CHRNE.6   | 0.001837 | -0.11436 | 0.002 | 0.027 | 1 Oligo | CHRNE        |
| PPM1K.4   | 0.00184  | 0.392748 | 0.261 | 0.223 | 1 Oligo | PPM1K        |
| CA5A.2    | 0.001849 | 0.132416 | 0.021 | 0.008 | 1 Oligo | CA5A         |
| LCMT2     | 0.001854 | 0.270864 | 0.059 | 0.032 | 1 Oligo | LCMT2        |
| ROBO3.2   | 0.001863 | -0.12801 | 0.068 | 0.118 | 1 Oligo | ROBO3        |
| TREML1.6  | 0.001873 | -0.11285 | 0     | 0.022 | 1 Oligo | TREML1       |
| SERPINF2. | 0.001887 | -0.11584 | 0.002 | 0.027 | 1 Oligo | SERPINF2     |
| PRMT7.2   | 0.00189  | -0.1066  | 0.054 | 0.102 | 1 Oligo | PRMT7        |
| BNC2.5    | 0.001891 | -0.11152 | 0.002 | 0.027 | 1 Oligo | BNC2         |
| PEAK1.4   | 0.001892 | 0.224587 | 0.104 | 0.068 | 1 Oligo | PEAK1        |
| FAM8A1.4  | 0.001965 | 0.159061 | 0.12  | 0.082 | 1 Oligo | FAM8A1       |
| TRMT13.4  | 0.001966 | 0.26856  | 0.179 | 0.135 | 1 Oligo | TRMT13       |
| SUSD4.6   | 0.001978 | -0.10602 | 0.012 | 0.042 | 1 Oligo | SUSD4        |
| RNF146.5  | 0.001996 | 0.338587 | 0.294 | 0.253 | 1 Oligo | RNF146       |
| HIST1H2BK | 0.001999 | -0.21082 | 0.148 | 0.21  | 1 Oligo | HIST1H2BK    |
| PSMB5.6   | 0.002024 | 0.251747 | 0.593 | 0.595 | 1 Oligo | PSMB5        |
| C11orf1.4 | 0.002057 | -0.12978 | 0.089 | 0.147 | 1 Oligo | C11orf1      |
| CLTC.5    | 0.002061 | 0.16333  | 0.379 | 0.348 | 1 Oligo | CLTC         |
| SAMD9.2   | 0.00207  | -0.13473 | 0.038 | 0.079 | 1 Oligo | SAMD9        |
| USP38.1   | 0.002121 | 0.125974 | 0.125 | 0.085 | 1 Oligo | USP38        |
| CTSW.4    | 0.002121 | -0.191   | 0.005 | 0.03  | 1 Oligo | CTSW         |
| OPHN1.7   | 0.002135 | -0.10135 | 0.033 | 0.072 | 1 Oligo | OPHN1        |
| ALG14.4   | 0.002137 | 0.312443 | 0.193 | 0.15  | 1 Oligo | ALG14        |
| MXD1.6    | 0.002153 | -0.1609  | 0.08  | 0.13  | 1 Oligo | MXD1         |
| ADPRH.5   | 0.002194 | -0.10404 | 0.007 | 0.034 | 1 Oligo | ADPRH        |
| NOVA1.9   | 0.002208 | -0.19827 | 0.489 | 0.479 | 1 Oligo | NOVA1        |
| FAU.7     | 0.002214 | 0.114687 | 0.922 | 0.959 | 1 Oligo | FAU          |
| SPSB1.4   | 0.002242 | 0.138745 | 0.104 | 0.068 | 1 Oligo | SPSB1        |
| LINC00937 | 0.002252 | -0.12688 | 0.007 | 0.034 | 1 Oligo | LINC00937    |
| GOLGA4.3  | 0.002266 | 0.215757 | 0.372 | 0.346 | 1 Oligo | GOLGA4       |
| BANP.3    | 0.002277 | -0.10397 | 0.04  | 0.081 | 1 Oligo | BANP         |
| RAB3IL1.6 | 0.002277 | -0.10721 | 0.007 | 0.034 | 1 Oligo | RAB3IL1      |
| MT1A.6    | 0.002284 | -0.1462  | 0.005 | 0.03  | 1 Oligo | MT1A         |
| SLC2A9.7  | 0.002289 | -0.10576 | 0.002 | 0.026 | 1 Oligo | SLC2A9       |
| TFAP2A.6  | 0.002302 | -0.10575 | 0.009 | 0.038 | 1 Oligo | TFAP2A       |
| LAMTOR4.2 | 0.002305 | 0.170374 | 0.736 | 0.765 | 1 Oligo | LAMTOR4      |
| PPP2R2A.5 | 0.002315 | 0.339771 | 0.329 | 0.299 | 1 Oligo | PPP2R2A      |
| DHX58.3   | 0.002338 | -0.10623 | 0.012 | 0.041 | 1 Oligo | DHX58        |
| EIF3J.5   | 0.002369 | 0.258247 | 0.398 | 0.377 | 1 Oligo | EIF3J        |
| DUSP23.8  | 0.002382 | -0.27874 | 0.139 | 0.19  | 1 Oligo | DUSP23       |
| CYSLTR1.7 | 0.002396 | -0.10731 | 0.002 | 0.026 | 1 Oligo | CYSLTR1      |
| FAM98B.4  | 0.0024   | 0.181285 | 0.132 | 0.094 | 1 Oligo | FAM98B       |
| APO05530. | 0.002407 | -0.12856 | 0.005 | 0.03  | 1 Oligo | APO05530.2   |
| MTMR2.4   | 0.002418 | 0.297679 | 0.184 | 0.145 | 1 Oligo | MTMR2        |

|           |          |          |       |       |         |                |
|-----------|----------|----------|-------|-------|---------|----------------|
| CA3.5     | 0.002431 | -0.2354  | 0.012 | 0.041 | 1 Oligo | CA3            |
| PLA2G4A.5 | 0.002448 | -0.12705 | 0.007 | 0.033 | 1 Oligo | PLA2G4A        |
| PPARG.6   | 0.002459 | -0.10649 | 0.002 | 0.026 | 1 Oligo | PPARG          |
| RPUSD4.1  | 0.002467 | -0.12214 | 0.054 | 0.1   | 1 Oligo | RPUSD4         |
| CD70.2    | 0.002472 | -0.12684 | 0     | 0.021 | 1 Oligo | CD70           |
| RP5-892K4 | 0.002505 | 0.129462 | 0.026 | 0.01  | 1 Oligo | RP5-892K4.1    |
| KLHL6.8   | 0.002511 | -0.14684 | 0.019 | 0.052 | 1 Oligo | KLHL6          |
| RECQL5    | 0.002528 | 0.181225 | 0.082 | 0.051 | 1 Oligo | RECQL5         |
| TOM1.7    | 0.002533 | -0.12039 | 0.106 | 0.162 | 1 Oligo | TOM1           |
| NEU4.6    | 0.002534 | -0.15542 | 0.028 | 0.065 | 1 Oligo | NEU4           |
| NRDE2.2   | 0.002548 | 0.274523 | 0.136 | 0.097 | 1 Oligo | NRDE2          |
| GARNL3.1  | 0.002564 | 0.128285 | 0.056 | 0.031 | 1 Oligo | GARNL3         |
| DCAF16.5  | 0.002569 | 0.25517  | 0.158 | 0.118 | 1 Oligo | DCAF16         |
| DSEL.9    | 0.002587 | 0.190165 | 0.271 | 0.223 | 1 Oligo | DSEL           |
| FGD3.5    | 0.002617 | -0.14401 | 0.012 | 0.04  | 1 Oligo | FGD3           |
| BCL2L15.1 | 0.002622 | 0.107737 | 0.026 | 0.01  | 1 Oligo | BCL2L15        |
| RBKS.2    | 0.002637 | -0.11229 | 0.012 | 0.041 | 1 Oligo | RBKS           |
| METTL8.3  | 0.00265  | -0.10487 | 0.071 | 0.122 | 1 Oligo | METTL8         |
| RUNX2.5   | 0.002652 | -0.11252 | 0.005 | 0.029 | 1 Oligo | RUNX2          |
| ASTN2.1   | 0.002679 | 0.164653 | 0.061 | 0.034 | 1 Oligo | ASTN2          |
| MT1H.2    | 0.002693 | -0.12122 | 0     | 0.021 | 1 Oligo | MT1H           |
| GPR37L1.8 | 0.002708 | 0.267293 | 0.122 | 0.083 | 1 Oligo | GPR37L1        |
| GPHN.5    | 0.002726 | 0.235043 | 0.099 | 0.065 | 1 Oligo | GPHN           |
| AC015936. | 0.002751 | -0.10274 | 0     | 0.021 | 1 Oligo | AC015936.3     |
| PRKCG.5   | 0.002751 | -0.15305 | 0     | 0.021 | 1 Oligo | PRKCG          |
| TLR10.7   | 0.002752 | -0.1043  | 0.002 | 0.025 | 1 Oligo | TLR10          |
| PSMD5-AS1 | 0.002777 | 0.278307 | 0.224 | 0.18  | 1 Oligo | PSMD5-AS1      |
| SCML1.4   | 0.002787 | -0.10641 | 0.052 | 0.095 | 1 Oligo | SCML1          |
| SLC10A3.2 | 0.002797 | -0.10293 | 0.042 | 0.084 | 1 Oligo | SLC10A3        |
| KCNK6.7   | 0.002811 | -0.10218 | 0.012 | 0.041 | 1 Oligo | KCNK6          |
| CPED1.6   | 0.002811 | -0.10325 | 0.007 | 0.033 | 1 Oligo | CPED1          |
| PTPN11.3  | 0.002837 | 0.29326  | 0.186 | 0.147 | 1 Oligo | PTPN11         |
| AGRN.4    | 0.002843 | 0.194105 | 0.129 | 0.093 | 1 Oligo | AGRN           |
| TSLP.5    | 0.002871 | -0.12401 | 0     | 0.021 | 1 Oligo | TSLP           |
| FAM78A.7  | 0.002875 | -0.1413  | 0.009 | 0.037 | 1 Oligo | FAM78A         |
| ADRBK2.7  | 0.002875 | -0.11959 | 0.021 | 0.054 | 1 Oligo | ADRBK2         |
| ZNF706.1  | 0.002908 | 0.181521 | 0.576 | 0.574 | 1 Oligo | ZNF706         |
| CP.4      | 0.00292  | -0.12755 | 0.005 | 0.029 | 1 Oligo | CP             |
| PRADC1.7  | 0.002926 | -0.11602 | 0.151 | 0.219 | 1 Oligo | PRADC1         |
| POLR2J3.8 | 0.002952 | 0.156163 | 0.242 | 0.342 | 1 Oligo | POLR2J3        |
| TAPT1-AS1 | 0.002963 | 0.141526 | 0.092 | 0.059 | 1 Oligo | TAPT1-AS1      |
| RETN.6    | 0.002997 | -0.11085 | 0     | 0.02  | 1 Oligo | RETN           |
| CARD11.7  | 0.003012 | -0.10777 | 0.005 | 0.029 | 1 Oligo | CARD11         |
| GPR137C.6 | 0.003041 | 0.143157 | 0.078 | 0.048 | 1 Oligo | GPR137C        |
| HP.4      | 0.00306  | -0.30028 | 0.002 | 0.025 | 1 Oligo | HP             |
| MYO9B.6   | 0.003063 | 0.226041 | 0.306 | 0.268 | 1 Oligo | MYO9B          |
| USP40     | 0.003095 | 0.122528 | 0.111 | 0.074 | 1 Oligo | USP40          |
| FASTKD1.1 | 0.003098 | -0.1183  | 0.038 | 0.077 | 1 Oligo | FASTKD1        |
| SFXN3.3   | 0.003098 | 0.222721 | 0.151 | 0.11  | 1 Oligo | SFXN3          |
| AC023590. | 0.003122 | 0.119065 | 0.071 | 0.042 | 1 Oligo | AC023590.1     |
| C7orf55-L | 0.003151 | -0.11327 | 0.256 | 0.342 | 1 Oligo | C7orf55-LUC7L2 |

|           |          |          |       |       |         |                |
|-----------|----------|----------|-------|-------|---------|----------------|
| ZFHx4.8   | 0.003179 | 0.319787 | 0.188 | 0.15  | 1 Oligo | ZFHx4          |
| CTA-384D8 | 0.00319  | -0.10079 | 0.002 | 0.024 | 1 Oligo | CTA-384D8.34   |
| CLEC10A.4 | 0.003195 | -0.1121  | 0     | 0.02  | 1 Oligo | CLEC10A        |
| FITM2.1   | 0.003198 | 0.20601  | 0.078 | 0.048 | 1 Oligo | FITM2          |
| GTPBP1.4  | 0.003232 | 0.243512 | 0.139 | 0.1   | 1 Oligo | GTPBP1         |
| BROX.5    | 0.00324  | 0.236153 | 0.273 | 0.233 | 1 Oligo | BROX           |
| RP11-473M | 0.003253 | 0.172419 | 0.047 | 0.025 | 1 Oligo | RP11-473M20.16 |
| ARL5B.5   | 0.003257 | -0.10067 | 0.047 | 0.089 | 1 Oligo | ARL5B          |
| EXOC1.5   | 0.003269 | 0.187577 | 0.292 | 0.248 | 1 Oligo | EXOC1          |
| PIGU.6    | 0.003278 | 0.367127 | 0.207 | 0.17  | 1 Oligo | PIGU           |
| YIPF4.4   | 0.0033   | 0.30463  | 0.393 | 0.374 | 1 Oligo | YIPF4          |
| SLAMF9.5  | 0.003335 | -0.12015 | 0     | 0.02  | 1 Oligo | SLAMF9         |
| ACY3.5    | 0.003335 | -0.12029 | 0     | 0.02  | 1 Oligo | ACY3           |
| LINC00339 | 0.003367 | -0.1036  | 0.028 | 0.063 | 1 Oligo | LINC00339      |
| SEC22A.2  | 0.003392 | -0.11587 | 0.059 | 0.103 | 1 Oligo | SEC22A         |
| NDP.7     | 0.003414 | 0.410918 | 0.146 | 0.11  | 1 Oligo | NDP            |
| LINC00599 | 0.003414 | -0.11001 | 0.009 | 0.036 | 1 Oligo | LINC00599      |
| SEL1L.4   | 0.003421 | 0.210568 | 0.214 | 0.172 | 1 Oligo | SEL1L          |
| FBN1      | 0.00343  | 0.147325 | 0.056 | 0.032 | 1 Oligo | FBN1           |
| SEMA6B.4  | 0.003443 | -0.11385 | 0.019 | 0.05  | 1 Oligo | SEMA6B         |
| THEM4.4   | 0.003464 | 0.202735 | 0.111 | 0.075 | 1 Oligo | THEM4          |
| AMACR     | 0.00348  | 0.110141 | 0.028 | 0.012 | 1 Oligo | AMACR          |
| RAP2A.1   | 0.003485 | 0.158748 | 0.172 | 0.13  | 1 Oligo | RAP2A          |
| PWWP2A.6  | 0.003528 | 0.232854 | 0.165 | 0.125 | 1 Oligo | PWWP2A         |
| SRRM4.6   | 0.003559 | -0.1011  | 0.007 | 0.032 | 1 Oligo | SRRM4          |
| PTCRA.5   | 0.003585 | -0.11204 | 0.002 | 0.024 | 1 Oligo | PTCRA          |
| RASSF4.9  | 0.003592 | -0.18331 | 0.264 | 0.332 | 1 Oligo | RASSF4         |
| TGOLN2.7  | 0.003598 | 0.297482 | 0.395 | 0.372 | 1 Oligo | TGOLN2         |
| RP11-284F | 0.003609 | 0.158333 | 0.021 | 0.008 | 1 Oligo | RP11-284F21.8  |
| URB1.1    | 0.003654 | 0.15595  | 0.078 | 0.049 | 1 Oligo | URB1           |
| PPP1R12C. | 0.003683 | 0.189268 | 0.118 | 0.082 | 1 Oligo | PPP1R12C       |
| ADRBK1.9  | 0.003685 | -0.13144 | 0.052 | 0.094 | 1 Oligo | ADRBK1         |
| TAL1.5    | 0.003754 | -0.16119 | 0.009 | 0.035 | 1 Oligo | TAL1           |
| WSB1.5    | 0.003783 | 0.194656 | 0.635 | 0.652 | 1 Oligo | WSB1           |
| GNAI2.9   | 0.003788 | 0.174455 | 0.494 | 0.482 | 1 Oligo | GNAI2          |
| ACSL4.7   | 0.003797 | -0.1042  | 0.045 | 0.085 | 1 Oligo | ACSL4          |
| STC2.4    | 0.003866 | -0.13623 | 0.014 | 0.042 | 1 Oligo | STC2           |
| ATG3.7    | 0.003874 | 0.278971 | 0.395 | 0.376 | 1 Oligo | ATG3           |
| SZT2      | 0.003907 | 0.114892 | 0.078 | 0.048 | 1 Oligo | SZT2           |
| HMGB1.4   | 0.003923 | 0.157332 | 0.861 | 0.861 | 1 Oligo | HMGB1          |
| LUZP2.5   | 0.003927 | -0.1006  | 0.019 | 0.049 | 1 Oligo | LUZP2          |
| C16orf89. | 0.003959 | -0.10501 | 0     | 0.019 | 1 Oligo | C16orf89       |
| RP11-84C1 | 0.003959 | -0.1105  | 0     | 0.019 | 1 Oligo | RP11-84C10.2   |
| AC074289. | 0.003979 | -0.12773 | 0.028 | 0.062 | 1 Oligo | AC074289.1     |
| AP000439. | 0.003983 | -0.14715 | 0.005 | 0.028 | 1 Oligo | AP000439.1     |
| TAF13.4   | 0.003986 | 0.19216  | 0.174 | 0.136 | 1 Oligo | TAF13          |
| TRIP12.3  | 0.004032 | 0.230813 | 0.202 | 0.164 | 1 Oligo | TRIP12         |
| TARS2.1   | 0.004052 | -0.10269 | 0.066 | 0.112 | 1 Oligo | TARS2          |
| ZNF358.7  | 0.0041   | 0.223573 | 0.202 | 0.163 | 1 Oligo | ZNF358         |
| ARHGAP17. | 0.004103 | 0.180385 | 0.118 | 0.082 | 1 Oligo | ARHGAP17       |
| CCDC144A. | 0.004123 | 0.183012 | 0.115 | 0.081 | 1 Oligo | CCDC144A       |

|            |          |          |       |       |         |               |
|------------|----------|----------|-------|-------|---------|---------------|
| HAAO. 8    | 0.004142 | -0.1072  | 0.002 | 0.024 | 1 Oligo | HAAO          |
| TNRC6A. 5  | 0.004153 | 0.395434 | 0.247 | 0.213 | 1 Oligo | TNRC6A        |
| CHURC1. 4  | 0.004171 | 0.233478 | 0.414 | 0.4   | 1 Oligo | CHURC1        |
| BIRC3. 5   | 0.00427  | -0.15917 | 0.031 | 0.065 | 1 Oligo | BIRC3         |
| RBPJ. 7    | 0.004318 | 0.202722 | 0.478 | 0.469 | 1 Oligo | RBPJ          |
| TCF4. 9    | 0.004377 | -0.11478 | 0.464 | 0.525 | 1 Oligo | TCF4          |
| TLR4. 7    | 0.004383 | -0.1293  | 0.014 | 0.042 | 1 Oligo | TLR4          |
| RNU12. 5   | 0.004388 | -0.16414 | 0.012 | 0.038 | 1 Oligo | RNU12         |
| RP11-792A  | 0.004425 | 0.311497 | 0.247 | 0.209 | 1 Oligo | RP11-792A8. 4 |
| ZNF605. 1  | 0.004449 | 0.344561 | 0.108 | 0.075 | 1 Oligo | ZNF605        |
| WDR59. 1   | 0.00445  | 0.200511 | 0.144 | 0.106 | 1 Oligo | WDR59         |
| EPG5. 1    | 0.004451 | 0.230734 | 0.075 | 0.047 | 1 Oligo | EPG5          |
| RP11-11N9  | 0.004455 | -0.1141  | 0.024 | 0.055 | 1 Oligo | RP11-11N9. 4  |
| PIKFYVE. 1 | 0.004509 | 0.179383 | 0.115 | 0.081 | 1 Oligo | PIKFYVE       |
| FAM122A. 6 | 0.004593 | -0.11657 | 0.094 | 0.145 | 1 Oligo | FAM122A       |
| SLC7A8. 4  | 0.004671 | -0.14142 | 0.016 | 0.045 | 1 Oligo | SLC7A8        |
| ADAMDEC1.  | 0.004705 | -0.14298 | 0.012 | 0.038 | 1 Oligo | ADAMDEC1      |
| TET2. 4    | 0.004775 | -0.11635 | 0.049 | 0.09  | 1 Oligo | TET2          |
| RARRES3. 4 | 0.004909 | 0.189974 | 0.294 | 0.242 | 1 Oligo | RARRES3       |
| ELOVL5. 3  | 0.005021 | 0.322242 | 0.341 | 0.323 | 1 Oligo | ELOVL5        |
| DGKD. 1    | 0.005081 | 0.181459 | 0.089 | 0.059 | 1 Oligo | DGKD          |
| GALT. 3    | 0.005097 | -0.13463 | 0.045 | 0.083 | 1 Oligo | GALT          |
| HAUS7. 1   | 0.005162 | -0.13231 | 0.052 | 0.092 | 1 Oligo | HAUS7         |
| C14orf2. 4 | 0.005178 | 0.153013 | 0.633 | 0.655 | 1 Oligo | C14orf2       |
| TMED7. 2   | 0.005194 | 0.199584 | 0.304 | 0.27  | 1 Oligo | TMED7         |
| NCOA4. 9   | 0.005204 | 0.217598 | 0.299 | 0.261 | 1 Oligo | NCOA4         |
| ZMAT1. 4   | 0.005205 | 0.179378 | 0.129 | 0.092 | 1 Oligo | ZMAT1         |
| PTPN23. 2  | 0.00521  | 0.186473 | 0.108 | 0.075 | 1 Oligo | PTPN23        |
| ITIH5      | 0.005215 | 0.116411 | 0.016 | 0.006 | 1 Oligo | ITIH5         |
| CNPY2. 7   | 0.005279 | 0.246054 | 0.565 | 0.569 | 1 Oligo | CNPY2         |
| PECR. 1    | 0.00529  | -0.11691 | 0.042 | 0.08  | 1 Oligo | PECR          |
| PLEKHM1. 3 | 0.005371 | 0.184923 | 0.106 | 0.073 | 1 Oligo | PLEKHM1       |
| ZNF557     | 0.005373 | -0.10986 | 0.016 | 0.045 | 1 Oligo | ZNF557        |
| ARPC5. 8   | 0.005446 | 0.204524 | 0.645 | 0.673 | 1 Oligo | ARPC5         |
| ZNF275. 5  | 0.005456 | 0.165543 | 0.085 | 0.055 | 1 Oligo | ZNF275        |
| HAGH. 5    | 0.00565  | 0.211163 | 0.374 | 0.352 | 1 Oligo | HAGH          |
| RIPPLY2. 4 | 0.005674 | 0.178877 | 0.061 | 0.037 | 1 Oligo | RIPPLY2       |
| C21orf33.  | 0.005689 | -0.11568 | 0.28  | 0.367 | 1 Oligo | C21orf33      |
| FKTN. 1    | 0.005697 | 0.189179 | 0.092 | 0.062 | 1 Oligo | FKTN          |
| USP48. 4   | 0.005714 | 0.283629 | 0.249 | 0.213 | 1 Oligo | USP48         |
| COX19. 4   | 0.005716 | -0.10288 | 0.169 | 0.233 | 1 Oligo | COX19         |
| KPNA6. 3   | 0.005736 | 0.308846 | 0.264 | 0.233 | 1 Oligo | KPNA6         |
| FBRS. 2    | 0.005738 | 0.193839 | 0.148 | 0.112 | 1 Oligo | FBRS          |
| UCHL1. 7   | 0.005804 | 0.180047 | 0.489 | 0.434 | 1 Oligo | UCHL1         |
| PIK3R1. 7  | 0.005817 | -0.12711 | 0.242 | 0.31  | 1 Oligo | PIK3R1        |
| PIK3IP1. 7 | 0.005843 | 0.131881 | 0.212 | 0.159 | 1 Oligo | PIK3IP1       |
| FKBP2. 4   | 0.005855 | 0.193355 | 0.593 | 0.59  | 1 Oligo | FKBP2         |
| NDUFC2. 3  | 0.005857 | 0.196717 | 0.725 | 0.754 | 1 Oligo | NDUFC2        |
| PPP4R2. 3  | 0.005859 | 0.310336 | 0.289 | 0.26  | 1 Oligo | PPP4R2        |
| MADD. 1    | 0.005866 | 0.158005 | 0.089 | 0.059 | 1 Oligo | MADD          |
| MAGT1. 4   | 0.005873 | 0.179272 | 0.242 | 0.201 | 1 Oligo | MAGT1         |

|             |          |          |       |       |         |                |
|-------------|----------|----------|-------|-------|---------|----------------|
| ING4. 7     | 0.005892 | 0.103992 | 0.191 | 0.269 | 1 Oligo | ING4           |
| ACVR2B      | 0.005986 | 0.146842 | 0.049 | 0.027 | 1 Oligo | ACVR2B         |
| CSTF2T. 2   | 0.006015 | 0.313072 | 0.155 | 0.12  | 1 Oligo | CSTF2T         |
| RP11-452L   | 0.006037 | 0.152301 | 0.021 | 0.008 | 1 Oligo | RP11-452L6. 7  |
| TBC1D16. 3  | 0.006043 | -0.10389 | 0.087 | 0.135 | 1 Oligo | TBC1D16        |
| MARK2. 3    | 0.006091 | 0.190841 | 0.16  | 0.123 | 1 Oligo | MARK2          |
| FAM171B. 7  | 0.006249 | 0.199342 | 0.146 | 0.11  | 1 Oligo | FAM171B        |
| NR1I3       | 0.006394 | 0.161229 | 0.024 | 0.01  | 1 Oligo | NR1I3          |
| FAM45A. 3   | 0.006425 | 0.338149 | 0.228 | 0.19  | 1 Oligo | FAM45A         |
| HMG3. 5     | 0.006464 | 0.315304 | 0.605 | 0.609 | 1 Oligo | HMG3           |
| COL8A1. 1   | 0.006481 | -0.11171 | 0.002 | 0.022 | 1 Oligo | COL8A1         |
| RNASEH2C. 0 | 0.006506 | 0.183416 | 0.398 | 0.372 | 1 Oligo | RNASEH2C       |
| KDM3B. 2    | 0.006519 | 0.238005 | 0.144 | 0.108 | 1 Oligo | KDM3B          |
| LZTFL1. 3   | 0.006576 | -0.10161 | 0.04  | 0.076 | 1 Oligo | LZTFL1         |
| RP2. 8      | 0.006602 | -0.12073 | 0.042 | 0.079 | 1 Oligo | RP2            |
| HARBI1      | 0.006864 | 0.249888 | 0.068 | 0.043 | 1 Oligo | HARBI1         |
| COG3        | 0.006873 | 0.17243  | 0.099 | 0.068 | 1 Oligo | COG3           |
| CDC42. 5    | 0.006877 | 0.123988 | 0.602 | 0.621 | 1 Oligo | CDC42          |
| CHST3. 6    | 0.006909 | 0.22595  | 0.092 | 0.063 | 1 Oligo | CHST3          |
| FAM19A5. 6  | 0.006939 | 0.16877  | 0.073 | 0.046 | 1 Oligo | FAM19A5        |
| USF1. 3     | 0.00696  | -0.1237  | 0.026 | 0.056 | 1 Oligo | USF1           |
| LGALS8. 5   | 0.007021 | -0.13258 | 0.104 | 0.153 | 1 Oligo | LGALS8         |
| COPA. 6     | 0.007039 | 0.252295 | 0.336 | 0.312 | 1 Oligo | COPA           |
| ASUN. 4     | 0.007075 | 0.129787 | 0.146 | 0.109 | 1 Oligo | ASUN           |
| HBEGF. 9    | 0.007119 | -0.20519 | 0.172 | 0.217 | 1 Oligo | HBEGF          |
| NUDT14. 9   | 0.007143 | -0.1601  | 0.141 | 0.194 | 1 Oligo | NUDT14         |
| MYO5A. 4    | 0.007152 | 0.198969 | 0.146 | 0.111 | 1 Oligo | MYO5A          |
| ZBTB4. 2    | 0.007168 | 0.250939 | 0.151 | 0.115 | 1 Oligo | ZBTB4          |
| TUSC1. 5    | 0.00721  | 0.177238 | 0.111 | 0.077 | 1 Oligo | TUSC1          |
| MRO. 5      | 0.007236 | -0.1044  | 0.002 | 0.021 | 1 Oligo | MRO            |
| TBC1D2B. 7  | 0.007243 | -0.13386 | 0.024 | 0.053 | 1 Oligo | TBC1D2B        |
| AATF. 4     | 0.007245 | -0.11391 | 0.219 | 0.293 | 1 Oligo | AATF           |
| AL133245. 0 | 0.007438 | 0.119058 | 0.026 | 0.012 | 1 Oligo | AL133245. 2    |
| ISOC1. 5    | 0.007591 | -0.11098 | 0.113 | 0.166 | 1 Oligo | ISOC1          |
| UBA3. 2     | 0.00763  | 0.259232 | 0.278 | 0.244 | 1 Oligo | UBA3           |
| AP1G2. 7    | 0.00772  | -0.14518 | 0.024 | 0.052 | 1 Oligo | AP1G2          |
| C5orf45. 5  | 0.007768 | 0.105735 | 0.113 | 0.17  | 1 Oligo | C5orf45        |
| RASL11B. 8  | 0.007803 | -0.15981 | 0.026 | 0.055 | 1 Oligo | RASL11B        |
| CANX. 3     | 0.007847 | -0.11305 | 0.471 | 0.577 | 1 Oligo | CANX           |
| PCGF3. 3    | 0.008022 | -0.10381 | 0.073 | 0.116 | 1 Oligo | PCGF3          |
| HSD3B7. 5   | 0.008053 | -0.15079 | 0.042 | 0.076 | 1 Oligo | HSD3B7         |
| WWP2. 3     | 0.008055 | 0.159367 | 0.101 | 0.07  | 1 Oligo | WWP2           |
| IFIT5. 4    | 0.008154 | 0.183544 | 0.115 | 0.082 | 1 Oligo | IFIT5          |
| ZRANB1. 2   | 0.008226 | 0.128901 | 0.092 | 0.062 | 1 Oligo | ZRANB1         |
| CCDC92. 5   | 0.008238 | 0.140881 | 0.134 | 0.1   | 1 Oligo | CCDC92         |
| MON1B. 1    | 0.008315 | 0.246268 | 0.139 | 0.105 | 1 Oligo | MON1B          |
| SNAI1. 7    | 0.008487 | -0.102   | 0.019 | 0.046 | 1 Oligo | SNAI1          |
| RP11-166F   | 0.008537 | 0.106063 | 0.04  | 0.021 | 1 Oligo | RP11-166P13. 3 |
| IRGQ. 5     | 0.00855  | 0.227157 | 0.118 | 0.086 | 1 Oligo | IRGQ           |
| PSMD10      | 0.008643 | 0.322801 | 0.209 | 0.176 | 1 Oligo | PSMD10         |
| TMBIM1. 6   | 0.00886  | 0.232178 | 0.282 | 0.243 | 1 Oligo | TMBIM1         |



|              |          |          |       |       |             |                |
|--------------|----------|----------|-------|-------|-------------|----------------|
| PPARD. 8     | 0.009005 | -0.10201 | 0.068 | 0.11  | 1 Oligo     | PPARD          |
| P2RY12. 5    | 0.009032 | -0.11287 | 0.002 | 0.02  | 1 Oligo     | P2RY12         |
| TMIGD2. 5    | 0.009058 | -0.11959 | 0.002 | 0.02  | 1 Oligo     | TMIGD2         |
| NUDT18. 2    | 0.00924  | 0.217964 | 0.061 | 0.037 | 1 Oligo     | NUDT18         |
| BBS10. 3     | 0.009244 | 0.140796 | 0.08  | 0.053 | 1 Oligo     | BBS10          |
| FAM66C. 3    | 0.009261 | 0.146032 | 0.066 | 0.041 | 1 Oligo     | FAM66C         |
| PANK3. 2     | 0.009321 | 0.175175 | 0.146 | 0.113 | 1 Oligo     | PANK3          |
| SZRD1. 4     | 0.009421 | -0.15029 | 0.202 | 0.267 | 1 Oligo     | SZRD1          |
| AGA. 3       | 0.00948  | 0.330632 | 0.188 | 0.152 | 1 Oligo     | AGA            |
| SETDB2. 1    | 0.009588 | -0.10092 | 0.028 | 0.058 | 1 Oligo     | SETDB2         |
| RAB7A. 3     | 0.009721 | 0.136875 | 0.628 | 0.66  | 1 Oligo     | RAB7A          |
| LRRFIP2. 4   | 0.009921 | 0.271841 | 0.219 | 0.186 | 1 Oligo     | LRRFIP2        |
| TSC2. 5      | 0.009971 | 0.168136 | 0.169 | 0.134 | 1 Oligo     | TSC2           |
| DNAAF1. 5    | 0.009995 | -0.11431 | 0.007 | 0.028 | 1 Oligo     | DNAAF1         |
| DLL3. 9      | 0        | 1.331082 | 0.669 | 0.109 | 0 Opc-G     | DLL3           |
| HES6. 8      | 0        | 1.295178 | 0.79  | 0.252 | 0 Opc-G     | HES6           |
| NKAIN4. 7    | 0        | 1.101077 | 0.496 | 0.075 | 0 Opc-G     | NKAIN4         |
| DLL1. 6      | 0        | 0.943794 | 0.419 | 0.048 | 0 Opc-G     | DLL1           |
| CA10. 5      | 0        | 0.717357 | 0.268 | 0.016 | 0 Opc-G     | CA10           |
| ASCL1. 9     | #####    | 1.091838 | 0.665 | 0.154 | ##### Opc-G | ASCL1          |
| VIPR2. 9     | #####    | 0.939699 | 0.445 | 0.058 | ##### Opc-G | VIPR2          |
| OLIG2. 9     | #####    | 1.242434 | 0.628 | 0.148 | ##### Opc-G | OLIG2          |
| RP11-676J    | #####    | 0.630872 | 0.257 | 0.016 | ##### Opc-G | RP11-676J15. 1 |
| TMEM100. 1   | #####    | 0.902835 | 0.447 | 0.065 | ##### Opc-G | TMEM100        |
| OLIG1. 10    | #####    | 1.176474 | 0.623 | 0.15  | ##### Opc-G | OLIG1          |
| NEU4. 7      | #####    | 0.857645 | 0.365 | 0.043 | ##### Opc-G | NEU4           |
| BCAN. 10     | #####    | 1.196766 | 0.74  | 0.245 | ##### Opc-G | BCAN           |
| SOX8. 10     | #####    | 1.0652   | 0.597 | 0.149 | ##### Opc-G | SOX8           |
| GLCCI1. 9    | #####    | 0.998469 | 0.557 | 0.124 | ##### Opc-G | GLCCI1         |
| SHD. 9       | #####    | 0.941474 | 0.51  | 0.1   | ##### Opc-G | SHD            |
| TNR. 7       | #####    | 0.798434 | 0.325 | 0.037 | ##### Opc-G | TNR            |
| FXYD6. 10    | #####    | 0.819257 | 0.921 | 0.43  | ##### Opc-G | FXYD6          |
| NOVA1. 10    | #####    | 0.820295 | 0.918 | 0.45  | ##### Opc-G | NOVA1          |
| BEST3. 8     | #####    | 0.938816 | 0.399 | 0.066 | ##### Opc-G | BEST3          |
| ASIC4. 9     | #####    | 0.884314 | 0.525 | 0.114 | ##### Opc-G | ASIC4          |
| CCND2. 10    | #####    | 1.007808 | 0.742 | 0.299 | ##### Opc-G | CCND2          |
| SCD5. 9      | #####    | 0.86715  | 0.796 | 0.367 | ##### Opc-G | SCD5           |
| RP11-161M    | #####    | 1.002507 | 0.538 | 0.142 | ##### Opc-G | RP11-161M6. 2  |
| PTPRZ1. 10   | #####    | 0.845706 | 0.813 | 0.356 | ##### Opc-G | PTPRZ1         |
| DSEL. 10     | #####    | 0.976191 | 0.612 | 0.199 | ##### Opc-G | DSEL           |
| FERMT1. 7    | #####    | 0.747618 | 0.28  | 0.034 | ##### Opc-G | FERMT1         |
| CSPG5. 9     | #####    | 0.848667 | 0.426 | 0.087 | ##### Opc-G | CSPG5          |
| RAB3IP. 7    | #####    | 1.001604 | 0.643 | 0.22  | ##### Opc-G | RAB3IP         |
| MARCKSL1. 10 | #####    | 0.754818 | 0.915 | 0.52  | ##### Opc-G | MARCKSL1       |
| CCER2. 9     | #####    | 0.665289 | 0.291 | 0.039 | ##### Opc-G | CCER2          |
| SOX4. 9      | #####    | 0.860488 | 0.858 | 0.418 | ##### Opc-G | SOX4           |
| CACNA1A. 9   | #####    | 0.726679 | 0.392 | 0.076 | ##### Opc-G | CACNA1A        |
| COL20A1      | #####    | 0.409144 | 0.149 | 0.009 | ##### Opc-G | COL20A1        |
| MEG3. 9      | #####    | 0.786839 | 0.745 | 0.275 | ##### Opc-G | MEG3           |
| RP11-849I    | #####    | 0.874076 | 0.445 | 0.111 | ##### Opc-G | RP11-849I19. 1 |
| GSX1         | #####    | 0.504106 | 0.167 | 0.012 | ##### Opc-G | GSX1           |

|           |       |          |       |       |       |       |               |
|-----------|-------|----------|-------|-------|-------|-------|---------------|
| NROB1     | ##### | 0.242514 | 0.096 | 0.002 | ##### | Opc-G | NROB1         |
| RFTN2.10  | ##### | 0.743963 | 0.443 | 0.106 | ##### | Opc-G | RFTN2         |
| LHFPL3.1C | ##### | 0.905885 | 0.413 | 0.1   | ##### | Opc-G | LHFPL3        |
| NPPA.7    | ##### | 0.580759 | 0.19  | 0.018 | ##### | Opc-G | NPPA          |
| GPM6A.9   | ##### | 0.619419 | 0.913 | 0.477 | ##### | Opc-G | GPM6A         |
| TUBB2B.9  | ##### | 0.629534 | 0.962 | 0.528 | ##### | Opc-G | TUBB2B        |
| S100B.9   | ##### | 0.62755  | 0.895 | 0.503 | ##### | Opc-G | S100B         |
| SRI.9     | ##### | 0.476651 | 0.981 | 0.712 | ##### | Opc-G | SRI           |
| CMTM5.8   | ##### | 0.604673 | 0.389 | 0.08  | ##### | Opc-G | CMTM5         |
| MEST.9    | ##### | 0.760056 | 0.739 | 0.363 | ##### | Opc-G | MEST          |
| FXYD7.9   | ##### | 0.734965 | 0.322 | 0.062 | ##### | Opc-G | FXYD7         |
| SCRG1.9   | ##### | 0.766209 | 0.704 | 0.322 | ##### | Opc-G | SCRG1         |
| EYA1      | ##### | 0.408181 | 0.173 | 0.017 | ##### | Opc-G | EYA1          |
| LRRN1.9   | ##### | 0.737507 | 0.373 | 0.088 | ##### | Opc-G | LRRN1         |
| S100A11.1 | ##### | -1.35954 | 0.191 | 0.688 | ##### | Opc-G | S100A11       |
| RASL11B.9 | ##### | 0.714259 | 0.258 | 0.04  | ##### | Opc-G | RASL11B       |
| MLLT11.8  | ##### | 0.647512 | 0.857 | 0.427 | ##### | Opc-G | MLLT11        |
| AC004540. | ##### | 0.670796 | 0.419 | 0.103 | ##### | Opc-G | AC004540.4    |
| PFN2.8    | ##### | 0.671516 | 0.795 | 0.41  | ##### | Opc-G | PFN2          |
| LAPTM4B.1 | ##### | 0.761136 | 0.676 | 0.308 | ##### | Opc-G | LAPTM4B       |
| CKB.10    | ##### | 0.590192 | 0.94  | 0.558 | ##### | Opc-G | CKB           |
| AGAP2-AS1 | ##### | 0.810278 | 0.348 | 0.078 | ##### | Opc-G | AGAP2-AS1     |
| KLRC2.9   | ##### | 0.702699 | 0.384 | 0.091 | ##### | Opc-G | KLRC2         |
| OR4N2.1   | ##### | 0.295613 | 0.109 | 0.006 | ##### | Opc-G | OR4N2         |
| RP11-231C | ##### | 0.331398 | 0.109 | 0.006 | ##### | Opc-G | RP11-231C18.1 |
| SCG3.10   | ##### | 0.75484  | 0.631 | 0.242 | ##### | Opc-G | SCG3          |
| C1orf61.8 | ##### | 0.628274 | 0.873 | 0.512 | ##### | Opc-G | C1orf61       |
| MAP2.10   | ##### | 0.728169 | 0.683 | 0.315 | ##### | Opc-G | MAP2          |
| CDKN2A.4  | ##### | 0.780685 | 0.359 | 0.085 | ##### | Opc-G | CDKN2A        |
| RHOBTB3.1 | ##### | 0.675596 | 0.734 | 0.387 | ##### | Opc-G | RHOBTB3       |
| CENPV.9   | ##### | 0.77088  | 0.582 | 0.233 | ##### | Opc-G | CENPV         |
| ARHGEF25. | ##### | 0.62305  | 0.273 | 0.052 | ##### | Opc-G | ARHGEF25      |
| AC114730. | ##### | 0.527871 | 0.171 | 0.019 | ##### | Opc-G | AC114730.3    |
| BEX1.9    | ##### | 0.695459 | 0.724 | 0.326 | ##### | Opc-G | BEX1          |
| PCDH15.1  | ##### | 0.294278 | 0.117 | 0.008 | ##### | Opc-G | PCDH15        |
| ETV1.10   | ##### | 0.966421 | 0.534 | 0.225 | ##### | Opc-G | ETV1          |
| MASP1.6   | ##### | 0.453676 | 0.206 | 0.029 | ##### | Opc-G | MASP1         |
| GPC2.10   | ##### | 0.672706 | 0.481 | 0.147 | ##### | Opc-G | GPC2          |
| AGAP2.6   | ##### | 0.550821 | 0.247 | 0.043 | ##### | Opc-G | AGAP2         |
| ELAVL4.9  | ##### | 0.632308 | 0.523 | 0.156 | ##### | Opc-G | ELAVL4        |
| SERPINE2. | ##### | 0.721038 | 0.63  | 0.271 | ##### | Opc-G | SERPINE2      |
| PODXL2.1C | ##### | 0.70057  | 0.639 | 0.286 | ##### | Opc-G | PODXL2        |
| PITX2.2   | ##### | 0.379177 | 0.168 | 0.019 | ##### | Opc-G | PITX2         |
| LMO1.9    | ##### | 0.620537 | 0.291 | 0.06  | ##### | Opc-G | LMO1          |
| OMG.8     | ##### | 0.539704 | 0.307 | 0.064 | ##### | Opc-G | OMG           |
| EGR1.7    | ##### | 0.64693  | 0.796 | 0.476 | ##### | Opc-G | EGR1          |
| C7orf55.8 | ##### | 0.601794 | 0.757 | 0.401 | ##### | Opc-G | C7orf55       |
| NRXN1.9   | ##### | 0.67625  | 0.467 | 0.143 | ##### | Opc-G | NRXN1         |
| FAM181B.8 | ##### | 0.730516 | 0.504 | 0.183 | ##### | Opc-G | FAM181B       |
| SOX2.10   | ##### | 0.601446 | 0.788 | 0.405 | ##### | Opc-G | SOX2          |
| TENM3     | ##### | 0.330657 | 0.145 | 0.014 | ##### | Opc-G | TENM3         |

|            |          |          |       |       |          |       |                |
|------------|----------|----------|-------|-------|----------|-------|----------------|
| B4GALNT1.  | #####    | 0.829646 | 0.41  | 0.125 | #####    | Opc-G | B4GALNT1       |
| C1QL1.8    | #####    | 0.732363 | 0.357 | 0.098 | #####    | Opc-G | C1QL1          |
| MDK.9      | #####    | 0.514957 | 0.84  | 0.468 | #####    | Opc-G | MDK            |
| NTM.8      | #####    | 0.63471  | 0.367 | 0.094 | #####    | Opc-G | NTM            |
| DSCAM.7    | #####    | 0.585953 | 0.283 | 0.06  | #####    | Opc-G | DSCAM          |
| TFAP2B.6   | #####    | 0.397855 | 0.165 | 0.02  | #####    | Opc-G | TFAP2B         |
| CLIC1.8    | #####    | -1.06517 | 0.221 | 0.649 | #####    | Opc-G | CLIC1          |
| NPC2.9     | #####    | -1.09736 | 0.327 | 0.716 | #####    | Opc-G | NPC2           |
| PCSK1N.9   | #####    | 0.619508 | 0.783 | 0.396 | #####    | Opc-G | PCSK1N         |
| SMOC1.5    | #####    | 0.499724 | 0.18  | 0.025 | #####    | Opc-G | SMOC1          |
| ARC.8      | #####    | 0.76771  | 0.511 | 0.188 | #####    | Opc-G | ARC            |
| DTX3.6     | #####    | 0.908842 | 0.538 | 0.236 | #####    | Opc-G | DTX3           |
| IFITM10.5  | #####    | 0.61951  | 0.388 | 0.108 | #####    | Opc-G | IFITM10        |
| RP5-1177M  | #####    | 0.541006 | 0.212 | 0.034 | #####    | Opc-G | RP5-1177M21.1  |
| CHD7.9     | #####    | 0.686787 | 0.601 | 0.268 | #####    | Opc-G | CHD7           |
| TSC22D1.9  | #####    | 0.519759 | 0.869 | 0.488 | #####    | Opc-G | TSC22D1        |
| CRMP1.9    | #####    | 0.64157  | 0.604 | 0.243 | #####    | Opc-G | CRMP1          |
| PDGFRA.9   | #####    | 0.946063 | 0.398 | 0.132 | #####    | Opc-G | PDGFRA         |
| ZDHHC22.7  | #####    | 0.455015 | 0.202 | 0.033 | #####    | Opc-G | ZDHHC22        |
| BTBD17.9   | #####    | 0.521374 | 0.225 | 0.04  | #####    | Opc-G | BTBD17         |
| HLA-E.10   | #####    | -1.08581 | 0.186 | 0.623 | #####    | Opc-G | HLA-E          |
| HOXA10.1C  | #####    | 0.522661 | 0.287 | 0.063 | #####    | Opc-G | HOXA10         |
| PHF14.9    | #####    | 0.588253 | 0.736 | 0.402 | #####    | Opc-G | PHF14          |
| GPR17.1    | #####    | 0.348774 | 0.107 | 0.008 | #####    | Opc-G | GPR17          |
| NFIB.10    | #####    | 0.611639 | 0.72  | 0.355 | 1.31E-99 | Opc-G | NFIB           |
| TSC22D4.1  | #####    | 0.562414 | 0.787 | 0.449 | 1.75E-98 | Opc-G | TSC22D4        |
| GSN.9      | #####    | -1.17909 | 0.116 | 0.536 | 3.43E-98 | Opc-G | GSN            |
| B3GALT2.4  | #####    | 0.388753 | 0.175 | 0.025 | 4.77E-98 | Opc-G | B3GALT2        |
| STMN4.9    | #####    | 0.609829 | 0.652 | 0.283 | 2.49E-96 | Opc-G | STMN4          |
| PHACTR3.9  | #####    | 0.505758 | 0.281 | 0.064 | 3.56E-96 | Opc-G | PHACTR3        |
| TUBA1A.9   | #####    | 0.333572 | 0.995 | 0.795 | 7.31E-96 | Opc-G | TUBA1A         |
| THY1.8     | 1.19E-99 | 0.641231 | 0.541 | 0.237 | 1.78E-95 | Opc-G | THY1           |
| TSPAN7.8   | 1.08E-98 | 0.598149 | 0.624 | 0.289 | 1.61E-94 | Opc-G | TSPAN7         |
| SOX11.9    | 1.17E-98 | 0.644375 | 0.587 | 0.251 | 1.75E-94 | Opc-G | SOX11          |
| MYT1.8     | 1.96E-98 | 0.434535 | 0.184 | 0.029 | 2.93E-94 | Opc-G | MYT1           |
| CSPG4      | 2.25E-98 | 0.373763 | 0.158 | 0.022 | 3.36E-94 | Opc-G | CSPG4          |
| KCNQ2.9    | 3.43E-98 | 0.653495 | 0.49  | 0.197 | 5.13E-94 | Opc-G | KCNQ2          |
| UCHL1.8    | 4.56E-98 | 0.52522  | 0.79  | 0.413 | 6.82E-94 | Opc-G | UCHL1          |
| GDAP1L1.9  | 6.51E-98 | 0.576018 | 0.325 | 0.086 | 9.74E-94 | Opc-G | GDAP1L1        |
| KCNQ10T1.1 | 1.06E-97 | 0.642204 | 0.577 | 0.258 | 1.58E-93 | Opc-G | KCNQ10T1       |
| POLR2F.7   | 1.22E-97 | 0.472352 | 0.801 | 0.525 | 1.82E-93 | Opc-G | POLR2F         |
| FAM212B.8  | 1.26E-97 | 0.580191 | 0.311 | 0.085 | 1.88E-93 | Opc-G | FAM212B        |
| MARCH9.9   | 1.49E-97 | 0.863773 | 0.393 | 0.138 | 2.22E-93 | Opc-G | 9-Mar          |
| CNTN1.3    | 4.01E-97 | 0.428169 | 0.183 | 0.029 | 5.99E-93 | Opc-G | CNTN1          |
| RP11-277F  | 5.87E-97 | 0.562942 | 0.25  | 0.055 | 8.77E-93 | Opc-G | RP11-277F12.20 |
| HLA-DRB1.9 | 7.6E-97  | -1.34159 | 0.19  | 0.556 | 1.46E-92 | Opc-G | HLA-DRB1       |
| PAX3       | 1.20E-96 | 0.251574 | 0.104 | 0.009 | 1.79E-92 | Opc-G | PAX3           |
| ODC1.9     | 1.17E-95 | 0.643141 | 0.654 | 0.376 | 1.75E-91 | Opc-G | ODC1           |
| DBN1.10    | 2.39E-95 | 0.613009 | 0.612 | 0.291 | 3.58E-91 | Opc-G | DBN1           |
| EGFR.9     | 1.17E-94 | 0.639477 | 0.611 | 0.279 | 1.75E-90 | Opc-G | EGFR           |
| CCT2.5     | 2.00E-94 | 0.644196 | 0.776 | 0.53  | 2.99E-90 | Opc-G | CCT2           |

|             |           |           |        |        |           |       |          |
|-------------|-----------|-----------|--------|--------|-----------|-------|----------|
| NFIA. 9     | 5. 63E-94 | 0. 559065 | 0. 691 | 0. 358 | 8. 41E-90 | Opc-G | NFIA     |
| ACAP3. 10   | 6. 95E-94 | 0. 670831 | 0. 478 | 0. 198 | 1. 04E-89 | Opc-G | ACAP3    |
| SEZ6L. 9    | 1. 08E-93 | 0. 63807  | 0. 37  | 0. 119 | 1. 62E-89 | Opc-G | SEZ6L    |
| TSPAN12. 8  | 6. 83E-93 | 0. 592687 | 0. 343 | 0. 105 | 1. 02E-88 | Opc-G | TSPAN12  |
| ATP1A3. 9   | 1. 25E-92 | 0. 550115 | 0. 361 | 0. 105 | 1. 87E-88 | Opc-G | ATP1A3   |
| GADD45G. 9  | 3. 81E-92 | 0. 655246 | 0. 56  | 0. 235 | 5. 69E-88 | Opc-G | GADD45G  |
| CADM2. 9    | 5. 13E-92 | 0. 610674 | 0. 458 | 0. 17  | 7. 66E-88 | Opc-G | CADM2    |
| PCSK2. 6    | 1. 85E-91 | 0. 420912 | 0. 145 | 0. 019 | 2. 76E-87 | Opc-G | PCSK2    |
| NKX2-2. 9   | 4. 65E-91 | 0. 546409 | 0. 402 | 0. 13  | 6. 95E-87 | Opc-G | NKX2-2   |
| CDK4. 5     | 6. 03E-91 | 0. 732066 | 0. 699 | 0. 47  | 9. 01E-87 | Opc-G | CDK4     |
| MBD6. 5     | 8. 85E-91 | 0. 723007 | 0. 372 | 0. 124 | 1. 32E-86 | Opc-G | MBD6     |
| HLA-C. 6    | 9. 85E-91 | -0. 67321 | 0. 578 | 0. 818 | 1. 47E-86 | Opc-G | HLA-C    |
| AVIL. 8     | 1. 39E-90 | 0. 571493 | 0. 288 | 0. 076 | 2. 08E-86 | Opc-G | AVIL     |
| SLC22A17. 1 | 1. 87E-90 | 0. 634027 | 0. 559 | 0. 266 | 2. 80E-86 | Opc-G | SLC22A17 |
| DGKB. 3     | 2. 09E-90 | 0. 4025   | 0. 161 | 0. 024 | 3. 12E-86 | Opc-G | DGKB     |
| JPH4. 7     | 2. 81E-90 | 0. 438778 | 0. 231 | 0. 048 | 4. 20E-86 | Opc-G | JPH4     |
| HOXB8. 1    | 3. 02E-90 | 0. 281997 | 0. 115 | 0. 012 | 4. 51E-86 | Opc-G | HOXB8    |
| TRAF4. 9    | 3. 45E-90 | 0. 704427 | 0. 523 | 0. 252 | 5. 16E-86 | Opc-G | TRAF4    |
| NELL2. 8    | 5. 52E-90 | 0. 572534 | 0. 318 | 0. 092 | 8. 25E-86 | Opc-G | NELL2    |
| MAGED1. 9   | 5. 62E-90 | 0. 563553 | 0. 63  | 0. 326 | 8. 40E-86 | Opc-G | MAGED1   |
| NCAM1. 10   | 6. 14E-90 | 0. 565491 | 0. 635 | 0. 315 | 9. 17E-86 | Opc-G | NCAM1    |
| SAT1. 8     | 1. 17E-89 | -0. 81263 | 0. 598 | 0. 816 | 1. 75E-85 | Opc-G | SAT1     |
| CLIP2. 9    | 1. 99E-89 | 0. 613155 | 0. 425 | 0. 16  | 2. 98E-85 | Opc-G | CLIP2    |
| ANXA2. 8    | 1. 07E-88 | -1. 12032 | 0. 15  | 0. 538 | 1. 60E-84 | Opc-G | ANXA2    |
| CTSB. 7     | 4. 58E-88 | -0. 83044 | 0. 514 | 0. 773 | 6. 85E-84 | Opc-G | CTSB     |
| POU4F1. 1   | 1. 22E-87 | 0. 317806 | 0. 135 | 0. 017 | 1. 82E-83 | Opc-G | POU4F1   |
| ZBTB20. 8   | 4. 80E-87 | 0. 564954 | 0. 672 | 0. 366 | 7. 17E-83 | Opc-G | ZBTB20   |
| FCGRT. 9    | 7. 39E-87 | -1. 05325 | 0. 201 | 0. 573 | 1. 10E-82 | Opc-G | FCGRT    |
| ARPC1B. 1C  | 7. 46E-87 | -1. 05679 | 0. 189 | 0. 554 | 1. 12E-82 | Opc-G | ARPC1B   |
| HLA-DPA1. 7 | 6. 64E-87 | -1. 23015 | 0. 214 | 0. 554 | 1. 14E-82 | Opc-G | HLA-DPA1 |
| STMN1. 9    | 7. 67E-87 | 0. 400309 | 0. 936 | 0. 61  | 1. 15E-82 | Opc-G | STMN1    |
| HLA-DPB1. 8 | 5. 53E-87 | -1. 2806  | 0. 165 | 0. 516 | 1. 28E-82 | Opc-G | HLA-DPB1 |
| NGFRAP1. 9  | 1. 30E-86 | 0. 349312 | 0. 971 | 0. 622 | 1. 95E-82 | Opc-G | NGFRAP1  |
| SGCE. 7     | 1. 42E-86 | 0. 447759 | 0. 399 | 0. 129 | 2. 12E-82 | Opc-G | SGCE     |
| FSCN1. 9    | 5. 46E-86 | 0. 531785 | 0. 74  | 0. 488 | 8. 16E-82 | Opc-G | FSCN1    |
| MYL12A. 9   | 1. 94E-85 | -0. 97948 | 0. 198 | 0. 567 | 2. 90E-81 | Opc-G | MYL12A   |
| ZNF462. 9   | 1. 61E-84 | 0. 641803 | 0. 413 | 0. 161 | 2. 41E-80 | Opc-G | ZNF462   |
| SALL3. 5    | 1. 67E-84 | 0. 38429  | 0. 176 | 0. 032 | 2. 50E-80 | Opc-G | SALL3    |
| AMOTL2. 7   | 2. 14E-84 | 0. 469389 | 0. 268 | 0. 069 | 3. 20E-80 | Opc-G | AMOTL2   |
| SGCB. 7     | 2. 63E-84 | 0. 61189  | 0. 585 | 0. 308 | 3. 93E-80 | Opc-G | SGCB     |
| MDFI. 7     | 2. 88E-84 | 0. 557491 | 0. 275 | 0. 075 | 4. 31E-80 | Opc-G | MDFI     |
| HLA-DRB5. 2 | 4. 8E-83  | -1. 46009 | 0. 059 | 0. 422 | 3. 71E-79 | Opc-G | HLA-DRB5 |
| NDRG2. 7    | 3. 23E-83 | 0. 524543 | 0. 673 | 0. 338 | 4. 83E-79 | Opc-G | NDRG2    |
| NCAN. 8     | 5. 50E-83 | 0. 472582 | 0. 268 | 0. 067 | 8. 22E-79 | Opc-G | NCAN     |
| TNK2. 5     | 6. 18E-83 | 0. 627886 | 0. 34  | 0. 113 | 9. 23E-79 | Opc-G | TNK2     |
| CRIP2. 8    | 8. 39E-83 | 0. 599669 | 0. 582 | 0. 296 | 1. 25E-78 | Opc-G | CRIP2    |
| METTL1. 7   | 1. 32E-82 | 0. 68915  | 0. 369 | 0. 133 | 1. 98E-78 | Opc-G | METTL1   |
| HLA-DRA. 9  | 1. 49E-82 | -1. 07476 | 0. 38  | 0. 65  | 2. 23E-78 | Opc-G | HLA-DRA  |
| UBE2E3. 9   | 1. 92E-82 | 0. 491706 | 0. 728 | 0. 442 | 2. 86E-78 | Opc-G | UBE2E3   |
| BEX2. 9     | 3. 51E-82 | 0. 547958 | 0. 552 | 0. 237 | 5. 25E-78 | Opc-G | BEX2     |
| CD68. 10    | 3. 67E-82 | -1. 25045 | 0. 113 | 0. 463 | 5. 48E-78 | Opc-G | CD68     |

|             |           |           |        |        |           |       |          |
|-------------|-----------|-----------|--------|--------|-----------|-------|----------|
| MARCKS. 7   | 4. 15E-82 | 0. 417002 | 0. 833 | 0. 582 | 6. 20E-78 | Opc-G | MARCKS   |
| TSPAN3. 8   | 5. 75E-82 | 0. 485392 | 0. 708 | 0. 443 | 8. 59E-78 | Opc-G | TSPAN3   |
| SOX6. 9     | 1. 25E-81 | 0. 636281 | 0. 359 | 0. 127 | 1. 87E-77 | Opc-G | SOX6     |
| GSTA4. 9    | 1. 52E-81 | 0. 547293 | 0. 572 | 0. 271 | 2. 28E-77 | Opc-G | GSTA4    |
| AIF1. 10    | 3. 58E-81 | -1. 38143 | 0. 086 | 0. 432 | 5. 35E-77 | Opc-G | AIF1     |
| LDHB. 6     | 1. 03E-80 | 0. 287542 | 0. 978 | 0. 765 | 1. 54E-76 | Opc-G | LDHB     |
| TSM. 7      | 1. 23E-80 | 0. 718194 | 0. 518 | 0. 26  | 1. 84E-76 | Opc-G | TSM      |
| NTN4. 1     | 1. 32E-80 | 0. 268533 | 0. 113 | 0. 013 | 1. 98E-76 | Opc-G | NTN4     |
| HOXA2. 9    | 1. 43E-80 | 0. 447752 | 0. 249 | 0. 06  | 2. 13E-76 | Opc-G | HOXA2    |
| DBI. 9      | 1. 60E-80 | 0. 236976 | 0. 992 | 0. 833 | 2. 40E-76 | Opc-G | DBI      |
| CSNK1E. 9   | 1. 90E-80 | 0. 581879 | 0. 566 | 0. 289 | 2. 84E-76 | Opc-G | CSNK1E   |
| RAMP1. 9    | 1. 91E-80 | 0. 386331 | 0. 734 | 0. 39  | 2. 86E-76 | Opc-G | RAMP1    |
| NXPH1. 10   | 6. 52E-80 | 0. 64045  | 0. 348 | 0. 122 | 9. 75E-76 | Opc-G | NXPH1    |
| SNX22. 2    | 2. 03E-79 | 0. 41786  | 0. 232 | 0. 054 | 3. 04E-75 | Opc-G | SNX22    |
| IFITM3. 5   | 8. 84E-79 | -0. 9783  | 0. 139 | 0. 527 | 1. 32E-74 | Opc-G | IFITM3   |
| MEX3A. 9    | 9. 19E-79 | 0. 575493 | 0. 417 | 0. 162 | 1. 37E-74 | Opc-G | MEX3A    |
| ABAT. 10    | 1. 55E-78 | 0. 58449  | 0. 385 | 0. 145 | 2. 32E-74 | Opc-G | ABAT     |
| SLC8A3      | 2. 75E-78 | 0. 212806 | 0. 075 | 0. 005 | 4. 11E-74 | Opc-G | SLC8A3   |
| LAPTM5. 10  | 3. 60E-78 | -1. 28798 | 0. 127 | 0. 456 | 5. 38E-74 | Opc-G | LAPTM5   |
| XRCC6BP1. 6 | 3. 67E-78 | 0. 488452 | 0. 258 | 0. 068 | 5. 49E-74 | Opc-G | XRCC6BP1 |
| SRPK2. 7    | 5. 61E-78 | 0. 520247 | 0. 676 | 0. 393 | 8. 38E-74 | Opc-G | SRPK2    |
| CD44. 7     | 5. 72E-78 | -1. 1436  | 0. 046 | 0. 405 | 8. 55E-74 | Opc-G | CD44     |
| LNX1. 7     | 9. 00E-78 | 0. 562924 | 0. 232 | 0. 058 | 1. 34E-73 | Opc-G | LNX1     |
| TOX3. 8     | 1. 73E-77 | 0. 474859 | 0. 234 | 0. 056 | 2. 58E-73 | Opc-G | TOX3     |
| HLA-A. 8    | 1. 79E-77 | -0. 5544  | 0. 705 | 0. 909 | 2. 68E-73 | Opc-G | HLA-A    |
| CAPG. 10    | 2. 54E-77 | -1. 12953 | 0. 086 | 0. 436 | 3. 80E-73 | Opc-G | CAPG     |
| NUP107. 9   | 3. 73E-77 | 0. 785244 | 0. 455 | 0. 208 | 5. 58E-73 | Opc-G | NUP107   |
| ST6GAL2. 6  | 4. 21E-77 | 0. 393169 | 0. 161 | 0. 029 | 6. 29E-73 | Opc-G | ST6GAL2  |
| RAB33A. 8   | 4. 69E-77 | 0. 511518 | 0. 307 | 0. 093 | 7. 01E-73 | Opc-G | RAB33A   |
| KIF5A. 8    | 1. 46E-76 | 0. 60081  | 0. 327 | 0. 108 | 2. 18E-72 | Opc-G | KIF5A    |
| FRS2. 7     | 1. 54E-76 | 0. 656977 | 0. 306 | 0. 098 | 2. 31E-72 | Opc-G | FRS2     |
| CADM4. 9    | 1. 67E-76 | 0. 559988 | 0. 512 | 0. 247 | 2. 50E-72 | Opc-G | CADM4    |
| ZFPM2. 4    | 2. 00E-76 | 0. 401777 | 0. 138 | 0. 021 | 2. 99E-72 | Opc-G | ZFPM2    |
| CBX3. 8     | 4. 11E-76 | 0. 411825 | 0. 776 | 0. 539 | 6. 14E-72 | Opc-G | CBX3     |
| PHYHIPL. 8  | 8. 53E-76 | 0. 552365 | 0. 43  | 0. 169 | 1. 28E-71 | Opc-G | PHYHIPL  |
| YWHAQ. 9    | 4. 34E-75 | 0. 367808 | 0. 885 | 0. 627 | 6. 48E-71 | Opc-G | YWHAQ    |
| NEAT1. 7    | 4. 34E-75 | -0. 65422 | 0. 519 | 0. 779 | 6. 49E-71 | Opc-G | NEAT1    |
| CNTFR. 9    | 4. 86E-75 | 0. 528707 | 0. 337 | 0. 116 | 7. 26E-71 | Opc-G | CNTFR    |
| SUB1. 8     | 4. 94E-75 | 0. 26845  | 0. 94  | 0. 744 | 7. 38E-71 | Opc-G | SUB1     |
| MAGEH1. 9   | 5. 31E-75 | 0. 538    | 0. 586 | 0. 3   | 7. 94E-71 | Opc-G | MAGEH1   |
| FCER1G. 10  | 5. 42E-75 | -1. 28551 | 0. 139 | 0. 462 | 8. 10E-71 | Opc-G | FCER1G   |
| HLA-DMA. 1  | 5. 42E-75 | -1. 22523 | 0. 094 | 0. 429 | 8. 10E-71 | Opc-G | HLA-DMA  |
| CRB1. 6     | 1. 19E-74 | 0. 469262 | 0. 228 | 0. 057 | 1. 77E-70 | Opc-G | CRB1     |
| A2M. 8      | 1. 73E-74 | -1. 07787 | 0. 138 | 0. 485 | 2. 58E-70 | Opc-G | A2M      |
| CXXC4. 8    | 2. 87E-74 | 0. 463387 | 0. 247 | 0. 066 | 4. 28E-70 | Opc-G | CXXC4    |
| NTRK3. 6    | 4. 06E-74 | 0. 442257 | 0. 223 | 0. 056 | 6. 07E-70 | Opc-G | NTRK3    |
| PIK3R1. 8   | 4. 85E-74 | 0. 574253 | 0. 561 | 0. 29  | 7. 25E-70 | Opc-G | PIK3R1   |
| HOXA9. 6    | 7. 18E-74 | 0. 316783 | 0. 154 | 0. 027 | 1. 07E-69 | Opc-G | HOXA9    |
| GPM6B. 10   | 1. 03E-73 | 0. 284868 | 0. 952 | 0. 596 | 1. 54E-69 | Opc-G | GPM6B    |
| STMN2. 10   | 1. 36E-73 | 0. 60802  | 0. 451 | 0. 169 | 2. 03E-69 | Opc-G | STMN2    |
| NFIX. 9     | 1. 54E-73 | 0. 574015 | 0. 592 | 0. 315 | 2. 30E-69 | Opc-G | NFIX     |

|            |           |           |        |        |           |       |                |
|------------|-----------|-----------|--------|--------|-----------|-------|----------------|
| SLC35E3. 8 | 1. 89E-73 | 0. 706263 | 0. 411 | 0. 172 | 2. 82E-69 | Opc-G | SLC35E3        |
| CTTNBP2. 8 | 3. 28E-73 | 0. 53068  | 0. 351 | 0. 122 | 4. 90E-69 | Opc-G | CTTNBP2        |
| RP11-620J  | 7. 76E-73 | 0. 685182 | 0. 503 | 0. 254 | 1. 16E-68 | Opc-G | RP11-620J15. 3 |
| CTSS. 10   | 1. 19E-72 | -1. 21598 | 0. 045 | 0. 375 | 1. 78E-68 | Opc-G | CTSS           |
| MAGI2. 9   | 1. 26E-72 | 0. 482118 | 0. 295 | 0. 092 | 1. 89E-68 | Opc-G | MAGI2          |
| SOD2. 6    | 1. 43E-72 | -1. 09918 | 0. 227 | 0. 557 | 2. 13E-68 | Opc-G | SOD2           |
| BST2. 9    | 2. 18E-72 | -0. 86651 | 0. 127 | 0. 51  | 3. 25E-68 | Opc-G | BST2           |
| MCM7. 9    | 2. 97E-72 | 0. 56882  | 0. 505 | 0. 237 | 4. 43E-68 | Opc-G | MCM7           |
| HOTAIRM1.  | 3. 20E-72 | 0. 49651  | 0. 43  | 0. 165 | 4. 78E-68 | Opc-G | HOTAIRM1       |
| BCHE. 7    | 4. 24E-72 | 0. 560877 | 0. 413 | 0. 171 | 6. 34E-68 | Opc-G | BCHE           |
| MIAT. 9    | 4. 86E-72 | 0. 496091 | 0. 406 | 0. 152 | 7. 26E-68 | Opc-G | MIAT           |
| HLA-B. 7   | 5. 42E-72 | -0. 58448 | 0. 702 | 0. 862 | 8. 10E-68 | Opc-G | HLA-B          |
| RIC3. 7    | 1. 40E-71 | 0. 5046   | 0. 48  | 0. 214 | 2. 10E-67 | Opc-G | RIC3           |
| CEBPB. 10  | 1. 48E-71 | -0. 89218 | 0. 113 | 0. 456 | 2. 22E-67 | Opc-G | CEBPB          |
| KCTD16     | 2. 61E-71 | 0. 276543 | 0. 102 | 0. 012 | 3. 89E-67 | Opc-G | KCTD16         |
| SEPT2. 3   | 3. 02E-71 | 0. 356779 | 0. 795 | 0. 567 | 4. 51E-67 | Opc-G | 2-Sep          |
| GALNT13. 6 | 4. 49E-71 | 0. 41303  | 0. 173 | 0. 035 | 6. 71E-67 | Opc-G | GALNT13        |
| CXCL16. 9  | 5. 48E-71 | -0. 93309 | 0. 13  | 0. 475 | 8. 19E-67 | Opc-G | CXCL16         |
| HOXB7. 3   | 5. 96E-71 | 0. 382719 | 0. 214 | 0. 051 | 8. 90E-67 | Opc-G | HOXB7          |
| SRGN. 10   | 8. 14E-71 | -1. 17193 | 0. 234 | 0. 517 | 1. 22E-66 | Opc-G | SRGN           |
| LPAR4      | 1. 17E-70 | 0. 230745 | 0. 085 | 0. 008 | 1. 74E-66 | Opc-G | LPAR4          |
| RPAIN. 8   | 1. 20E-70 | 0. 437518 | 0. 742 | 0. 468 | 1. 80E-66 | Opc-G | RPAIN          |
| ARHGDI1. 1 | 1. 21E-70 | -1. 26068 | 0. 075 | 0. 391 | 1. 81E-66 | Opc-G | ARHGDI1        |
| ACO09506.  | 2. 33E-70 | 0. 535748 | 0. 247 | 0. 07  | 3. 49E-66 | Opc-G | ACO09506. 1    |
| VAMP8. 10  | 2. 92E-70 | -1. 26547 | 0. 045 | 0. 363 | 4. 37E-66 | Opc-G | VAMP8          |
| GRIA2. 9   | 4. 54E-70 | 0. 573537 | 0. 444 | 0. 196 | 6. 79E-66 | Opc-G | GRIA2          |
| ALOX5AP. 1 | 4. 67E-70 | -1. 27009 | 0. 107 | 0. 419 | 6. 98E-66 | Opc-G | ALOX5AP        |
| CTSC. 10   | 6. 18E-70 | -1. 13245 | 0. 081 | 0. 404 | 9. 24E-66 | Opc-G | CTSC           |
| ANTXR1. 6  | 6. 27E-70 | 0. 485794 | 0. 262 | 0. 079 | 9. 37E-66 | Opc-G | ANTXR1         |
| APEX1. 2   | 6. 39E-70 | 0. 378606 | 0. 78  | 0. 521 | 9. 55E-66 | Opc-G | APEX1          |
| GLIPR1. 9  | 7. 61E-70 | -1. 0217  | 0. 029 | 0. 355 | 1. 14E-65 | Opc-G | GLIPR1         |
| CNPY2. 8   | 8. 25E-70 | 0. 341464 | 0. 807 | 0. 553 | 1. 23E-65 | Opc-G | CNPY2          |
| RGS10. 10  | 8. 57E-70 | -1. 2064  | 0. 042 | 0. 362 | 1. 28E-65 | Opc-G | RGS10          |
| TCEAL2. 8  | 1. 03E-69 | 0. 534004 | 0. 422 | 0. 163 | 1. 53E-65 | Opc-G | TCEAL2         |
| TSPAN13. 1 | 1. 14E-69 | 0. 488602 | 0. 586 | 0. 28  | 1. 70E-65 | Opc-G | TSPAN13        |
| TCF12. 9   | 1. 51E-69 | 0. 525743 | 0. 527 | 0. 268 | 2. 26E-65 | Opc-G | TCF12          |
| VSIG4. 10  | 2. 43E-69 | -1. 31064 | 0. 07  | 0. 385 | 3. 64E-65 | Opc-G | VSIG4          |
| KMT2E. 8   | 2. 44E-69 | 0. 420296 | 0. 769 | 0. 522 | 3. 65E-65 | Opc-G | KMT2E          |
| APOD. 9    | 3. 83E-69 | 0. 336469 | 0. 407 | 0. 144 | 5. 72E-65 | Opc-G | APOD           |
| PCDHB16. 8 | 5. 47E-69 | 0. 553304 | 0. 337 | 0. 127 | 8. 17E-65 | Opc-G | PCDHB16        |
| RP11-571M  | 1. 21E-68 | 0. 273166 | 0. 134 | 0. 022 | 1. 80E-64 | Opc-G | RP11-571M6. 17 |
| COL4A4     | 1. 27E-68 | 0. 186671 | 0. 068 | 0. 005 | 1. 90E-64 | Opc-G | COL4A4         |
| ZNF3. 7    | 1. 50E-68 | 0. 534423 | 0. 433 | 0. 19  | 2. 24E-64 | Opc-G | ZNF3           |
| VIM. 8     | 1. 54E-68 | -0. 72268 | 0. 417 | 0. 68  | 2. 30E-64 | Opc-G | VIM            |
| ST3GAL5. 5 | 2. 42E-68 | 0. 527348 | 0. 417 | 0. 176 | 3. 62E-64 | Opc-G | ST3GAL5        |
| CD74. 9    | 2. 48E-68 | -0. 80056 | 0. 624 | 0. 76  | 3. 70E-64 | Opc-G | CD74           |
| CNPY1. 9   | 2. 57E-68 | 0. 495141 | 0. 239 | 0. 066 | 3. 84E-64 | Opc-G | CNPY1          |
| MAGI1. 9   | 1. 49E-67 | 0. 568537 | 0. 421 | 0. 182 | 2. 23E-63 | Opc-G | MAGI1          |
| CXCR4. 8   | 1. 55E-67 | -1. 15705 | 0. 087 | 0. 409 | 2. 31E-63 | Opc-G | CXCR4          |
| C1QC. 10   | 2. 04E-67 | -1. 17001 | 0. 24  | 0. 519 | 3. 05E-63 | Opc-G | C1QC           |
| FYN. 8     | 5. 95E-67 | 0. 510914 | 0. 555 | 0. 311 | 8. 89E-63 | Opc-G | FYN            |

|              |           |           |        |        |           |       |               |
|--------------|-----------|-----------|--------|--------|-----------|-------|---------------|
| SCG5. 9      | 9. 79E-67 | 0. 476556 | 0. 586 | 0. 311 | 1. 46E-62 | Opc-G | SCG5          |
| HLA-DQA1. 1. | 1. 10E-66 | -1. 32145 | 0. 019 | 0. 325 | 1. 64E-62 | Opc-G | HLA-DQA1      |
| SIX1. 8      | 1. 69E-66 | 0. 43529  | 0. 195 | 0. 048 | 2. 53E-62 | Opc-G | SIX1          |
| CD14. 10     | 2. 44E-66 | -1. 19265 | 0. 124 | 0. 427 | 3. 65E-62 | Opc-G | CD14          |
| RP3-525N1 4. | 1. 0E-66  | 0. 538976 | 0. 357 | 0. 136 | 6. 13E-62 | Opc-G | RP3-525N10. 2 |
| TCF4. 10     | 4. 43E-66 | 0. 387989 | 0. 791 | 0. 505 | 6. 62E-62 | Opc-G | TCF4          |
| C8orf46. 8   | 6. 86E-66 | 0. 499343 | 0. 344 | 0. 126 | 1. 02E-61 | Opc-G | C8orf46       |
| TSPAN31. 5   | 7. 14E-66 | 0. 692544 | 0. 508 | 0. 281 | 1. 07E-61 | Opc-G | TSPAN31       |
| HLA-DQB1. 7. | 7. 71E-66 | -1. 2309  | 0. 041 | 0. 344 | 1. 15E-61 | Opc-G | HLA-DQB1      |
| FCGR3A. 1C   | 9. 00E-66 | -1. 25735 | 0. 057 | 0. 36  | 1. 35E-61 | Opc-G | FCGR3A        |
| TTC3. 9      | 1. 01E-65 | 0. 412868 | 0. 76  | 0. 5   | 1. 51E-61 | Opc-G | TTC3          |
| RAC1. 5      | 1. 11E-65 | 0. 262005 | 0. 892 | 0. 733 | 1. 66E-61 | Opc-G | RAC1          |
| NME1. 8      | 1. 12E-65 | 0. 363354 | 0. 821 | 0. 551 | 1. 67E-61 | Opc-G | NME1          |
| RGS1. 10     | 2. 23E-65 | -1. 22994 | 0. 186 | 0. 464 | 3. 33E-61 | Opc-G | RGS1          |
| THRA. 8      | 2. 74E-65 | 0. 534232 | 0. 473 | 0. 223 | 4. 09E-61 | Opc-G | THRA          |
| LIMA1. 9     | 2. 79E-65 | 0. 57152  | 0. 534 | 0. 303 | 4. 18E-61 | Opc-G | LIMA1         |
| EMP3. 9      | 2. 84E-65 | -0. 88116 | 0. 131 | 0. 47  | 4. 25E-61 | Opc-G | EMP3          |
| HIPK2. 8     | 3. 96E-65 | 0. 538295 | 0. 444 | 0. 206 | 5. 91E-61 | Opc-G | HIPK2         |
| HLA-DMB. 9   | 5. 93E-65 | -1. 24095 | 0. 038 | 0. 339 | 8. 87E-61 | Opc-G | HLA-DMB       |
| DCTN2. 4     | 6. 04E-65 | 0. 590896 | 0. 668 | 0. 496 | 9. 03E-61 | Opc-G | DCTN2         |
| DDR1. 8      | 6. 13E-65 | 0. 480538 | 0. 564 | 0. 316 | 9. 17E-61 | Opc-G | DDR1          |
| CD53. 10     | 8. 21E-65 | -1. 21244 | 0. 034 | 0. 334 | 1. 23E-60 | Opc-G | CD53          |
| RHOG. 10     | 8. 31E-65 | -0. 95207 | 0. 113 | 0. 429 | 1. 24E-60 | Opc-G | RHOG          |
| PLAUR. 10    | 1. 52E-64 | -1. 15555 | 0. 082 | 0. 386 | 2. 27E-60 | Opc-G | PLAUR         |
| GMFG. 10     | 1. 94E-64 | -1. 17683 | 0. 019 | 0. 316 | 2. 90E-60 | Opc-G | GMFG          |
| METAP1D. 8   | 2. 45E-64 | 0. 535594 | 0. 311 | 0. 112 | 3. 66E-60 | Opc-G | METAP1D       |
| C1orf162. 2. | 5. 1E-64  | -1. 23295 | 0. 042 | 0. 341 | 3. 75E-60 | Opc-G | C1orf162      |
| HOXB4        | 3. 18E-64 | 0. 279829 | 0. 117 | 0. 018 | 4. 75E-60 | Opc-G | HOXB4         |
| PRDX2. 10    | 4. 20E-64 | 0. 290037 | 0. 966 | 0. 683 | 6. 28E-60 | Opc-G | PRDX2         |
| TMEM121. 8   | 1. 17E-63 | 0. 524467 | 0. 277 | 0. 094 | 1. 75E-59 | Opc-G | TMEM121       |
| SLC16A3. 1   | 1. 59E-63 | -0. 97685 | 0. 037 | 0. 339 | 2. 37E-59 | Opc-G | SLC16A3       |
| MS4A6A. 1C   | 1. 67E-63 | -1. 25991 | 0. 064 | 0. 359 | 2. 49E-59 | Opc-G | MS4A6A        |
| LINGO1. 6    | 1. 87E-63 | 0. 364248 | 0. 146 | 0. 028 | 2. 80E-59 | Opc-G | LINGO1        |
| CIB1. 9      | 2. 06E-63 | -0. 79827 | 0. 179 | 0. 513 | 3. 08E-59 | Opc-G | CIB1          |
| ITGB2. 10    | 3. 23E-63 | -1. 14279 | 0. 046 | 0. 342 | 4. 83E-59 | Opc-G | ITGB2         |
| FAM84B. 7    | 3. 48E-63 | 0. 528835 | 0. 247 | 0. 076 | 5. 21E-59 | Opc-G | FAM84B        |
| CYBA. 10     | 4. 13E-63 | -1. 11041 | 0. 137 | 0. 423 | 6. 17E-59 | Opc-G | CYBA          |
| RBP1. 8      | 4. 46E-63 | 0. 4126   | 0. 743 | 0. 441 | 6. 66E-59 | Opc-G | RBP1          |
| SYNGR2. 1C   | 7. 18E-63 | -0. 91699 | 0. 045 | 0. 347 | 1. 07E-58 | Opc-G | SYNGR2        |
| RNASET2. 1   | 8. 53E-63 | -0. 94713 | 0. 206 | 0. 501 | 1. 27E-58 | Opc-G | RNASET2       |
| MS4A7. 10    | 8. 59E-63 | -1. 19519 | 0. 055 | 0. 35  | 1. 28E-58 | Opc-G | MS4A7         |
| LMO4. 10     | 9. 43E-63 | 0. 413877 | 0. 716 | 0. 462 | 1. 41E-58 | Opc-G | LMO4          |
| DNER. 8      | 1. 06E-62 | 0. 476676 | 0. 548 | 0. 262 | 1. 58E-58 | Opc-G | DNER          |
| TYROBP. 1C   | 2. 33E-62 | -1. 19026 | 0. 212 | 0. 476 | 3. 48E-58 | Opc-G | TYROBP        |
| PCBP4. 10    | 3. 39E-62 | 0. 5168   | 0. 48  | 0. 241 | 5. 07E-58 | Opc-G | PCBP4         |
| LUZP2. 6     | 4. 49E-62 | 0. 383998 | 0. 175 | 0. 04  | 6. 71E-58 | Opc-G | LUZP2         |
| C1QA. 10     | 5. 26E-62 | -1. 05013 | 0. 302 | 0. 553 | 7. 86E-58 | Opc-G | C1QA          |
| ANGPTL2. 7   | 5. 32E-62 | 0. 432908 | 0. 273 | 0. 088 | 7. 95E-58 | Opc-G | ANGPTL2       |
| RPS6KL1. 8   | 7. 59E-62 | 0. 465864 | 0. 272 | 0. 089 | 1. 13E-57 | Opc-G | RPS6KL1       |
| TREM2. 10    | 7. 63E-62 | -1. 24145 | 0. 079 | 0. 369 | 1. 14E-57 | Opc-G | TREM2         |
| CHI3L1. 9    | 1. 14E-61 | -1. 20787 | 0. 224 | 0. 544 | 1. 70E-57 | Opc-G | CHI3L1        |

|            |           |           |        |        |           |       |               |
|------------|-----------|-----------|--------|--------|-----------|-------|---------------|
| PLTP. 8    | 1. 23E-61 | -1. 00529 | 0. 18  | 0. 489 | 1. 83E-57 | Opc-G | PLTP          |
| ATP6VOE2.  | 1. 34E-61 | 0. 40646  | 0. 712 | 0. 435 | 2. 01E-57 | Opc-G | ATP6VOE2      |
| CTSH. 10   | 1. 66E-61 | -1. 04029 | 0. 022 | 0. 314 | 2. 48E-57 | Opc-G | CTSH          |
| GLUL. 6    | 2. 03E-61 | -0. 6686  | 0. 628 | 0. 797 | 3. 04E-57 | Opc-G | GLUL          |
| C11orf96.  | 3. 16E-61 | 0. 560769 | 0. 324 | 0. 121 | 4. 72E-57 | Opc-G | C11orf96      |
| CORO1A. 1C | 4. 24E-61 | -1. 02373 | 0. 093 | 0. 391 | 6. 34E-57 | Opc-G | CORO1A        |
| TMSB15A. 1 | 7. 06E-61 | 0. 487582 | 0. 4   | 0. 164 | 1. 06E-56 | Opc-G | TMSB15A       |
| PIP4K2C. 6 | 9. 24E-61 | 0. 529446 | 0. 283 | 0. 098 | 1. 38E-56 | Opc-G | PIP4K2C       |
| SCN3A. 9   | 1. 15E-60 | 0. 414135 | 0. 221 | 0. 062 | 1. 72E-56 | Opc-G | SCN3A         |
| MYL6B. 9   | 1. 16E-60 | 0. 418833 | 0. 686 | 0. 426 | 1. 74E-56 | Opc-G | MYL6B         |
| HCST. 10   | 1. 60E-60 | -1. 17228 | 0. 018 | 0. 302 | 2. 39E-56 | Opc-G | HCST          |
| CD37. 10   | 2. 88E-60 | -1. 14119 | 0. 033 | 0. 319 | 4. 31E-56 | Opc-G | CD37          |
| CDK6. 8    | 3. 43E-60 | 0. 59354  | 0. 411 | 0. 192 | 5. 12E-56 | Opc-G | CDK6          |
| PLP1. 9    | 3. 90E-60 | 0. 251199 | 0. 395 | 0. 156 | 5. 83E-56 | Opc-G | PLP1          |
| LINC00461  | 4. 60E-60 | 0. 475375 | 0. 568 | 0. 304 | 6. 87E-56 | Opc-G | LINC00461     |
| DUSP26. 8  | 4. 74E-60 | 0. 439909 | 0. 254 | 0. 077 | 7. 09E-56 | Opc-G | DUSP26        |
| SEZ6. 10   | 5. 91E-60 | 0. 622131 | 0. 324 | 0. 127 | 8. 83E-56 | Opc-G | SEZ6          |
| C7orf61. 3 | 7. 07E-60 | 0. 377233 | 0. 135 | 0. 026 | 1. 06E-55 | Opc-G | C7orf61       |
| HSPE1. 8   | 1. 09E-59 | 0. 238444 | 0. 914 | 0. 717 | 1. 62E-55 | Opc-G | HSPE1         |
| ZNF428. 1C | 1. 16E-59 | 0. 376712 | 0. 765 | 0. 53  | 1. 73E-55 | Opc-G | ZNF428        |
| REPIN1. 9  | 1. 36E-59 | 0. 5303   | 0. 484 | 0. 26  | 2. 03E-55 | Opc-G | REPIN1        |
| FCGR2A. 1C | 2. 69E-59 | -1. 10395 | 0. 025 | 0. 307 | 4. 02E-55 | Opc-G | FCGR2A        |
| CDH13. 4   | 3. 01E-59 | 0. 401535 | 0. 183 | 0. 045 | 4. 50E-55 | Opc-G | CDH13         |
| LST1. 10   | 4. 41E-59 | -1. 1391  | 0. 049 | 0. 33  | 6. 59E-55 | Opc-G | LST1          |
| RGMB. 9    | 9. 69E-59 | 0. 55947  | 0. 318 | 0. 119 | 1. 45E-54 | Opc-G | RGMB          |
| KLHL23. 1C | 1. 04E-58 | 0. 482793 | 0. 361 | 0. 148 | 1. 55E-54 | Opc-G | KLHL23        |
| AFAP1L2    | 1. 36E-58 | 0. 205893 | 0. 094 | 0. 013 | 2. 03E-54 | Opc-G | AFAP1L2       |
| IER2. 9    | 1. 59E-58 | 0. 405364 | 0. 791 | 0. 603 | 2. 38E-54 | Opc-G | IER2          |
| LRRTM1. 1  | 2. 09E-58 | 0. 250587 | 0. 113 | 0. 018 | 3. 12E-54 | Opc-G | LRRTM1        |
| RNASE6. 1C | 4. 94E-58 | -1. 12693 | 0. 018 | 0. 292 | 7. 38E-54 | Opc-G | RNASE6        |
| PSAP. 7    | 5. 95E-58 | -0. 53793 | 0. 693 | 0. 827 | 8. 89E-54 | Opc-G | PSAP          |
| DPP6. 7    | 7. 15E-58 | 0. 51992  | 0. 352 | 0. 149 | 1. 07E-53 | Opc-G | DPP6          |
| CTD-2339F  | 1. 18E-57 | 0. 325148 | 0. 075 | 0. 008 | 1. 76E-53 | Opc-G | CTD-2339F6. 1 |
| YEATS4. 8  | 1. 24E-57 | 0. 679605 | 0. 449 | 0. 238 | 1. 86E-53 | Opc-G | YEATS4        |
| LY86. 10   | 1. 51E-57 | -1. 14021 | 0. 033 | 0. 309 | 2. 26E-53 | Opc-G | LY86          |
| H1FX. 9    | 1. 58E-57 | 0. 491775 | 0. 607 | 0. 37  | 2. 36E-53 | Opc-G | H1FX          |
| MMP16. 8   | 1. 66E-57 | 0. 498252 | 0. 264 | 0. 092 | 2. 49E-53 | Opc-G | MMP16         |
| AES. 9     | 2. 13E-57 | 0. 432341 | 0. 638 | 0. 395 | 3. 18E-53 | Opc-G | AES           |
| RCN2. 9    | 2. 19E-57 | 0. 417927 | 0. 698 | 0. 451 | 3. 28E-53 | Opc-G | RCN2          |
| FIS1. 7    | 2. 43E-57 | 0. 283281 | 0. 857 | 0. 623 | 3. 63E-53 | Opc-G | FIS1          |
| TAGLN3. 9  | 2. 74E-57 | 0. 46219  | 0. 414 | 0. 173 | 4. 09E-53 | Opc-G | TAGLN3        |
| MDH2. 6    | 2. 93E-57 | 0. 276937 | 0. 876 | 0. 646 | 4. 38E-53 | Opc-G | MDH2          |
| LRRC17. 7  | 3. 31E-57 | 0. 471639 | 0. 217 | 0. 064 | 4. 94E-53 | Opc-G | LRRC17        |
| RSBN1L. 8  | 4. 21E-57 | 0. 460454 | 0. 582 | 0. 34  | 6. 28E-53 | Opc-G | RSBN1L        |
| DCX. 10    | 6. 09E-57 | 0. 46269  | 0. 436 | 0. 189 | 9. 10E-53 | Opc-G | DCX           |
| MS4A4A. 1C | 6. 95E-57 | -1. 17259 | 0. 031 | 0. 303 | 1. 04E-52 | Opc-G | MS4A4A        |
| HEY1. 8    | 8. 13E-57 | 0. 549698 | 0. 459 | 0. 233 | 1. 21E-52 | Opc-G | HEY1          |
| MFF. 5     | 1. 19E-56 | 0. 374984 | 0. 706 | 0. 475 | 1. 78E-52 | Opc-G | MFF           |
| FPR1. 10   | 1. 27E-56 | -1. 14022 | 0. 027 | 0. 302 | 1. 90E-52 | Opc-G | FPR1          |
| VAMP5. 5   | 2. 09E-56 | -0. 83337 | 0. 105 | 0. 416 | 3. 12E-52 | Opc-G | VAMP5         |
| PYCARD. 1C | 2. 16E-56 | -0. 98568 | 0. 029 | 0. 302 | 3. 22E-52 | Opc-G | PYCARD        |



|             |           |           |        |        |           |       |                |
|-------------|-----------|-----------|--------|--------|-----------|-------|----------------|
| B2M. 8      | 2. 17E-56 | -0. 38843 | 0. 97  | 0. 97  | 3. 25E-52 | Opc-G | B2M            |
| CTSL. 10    | 2. 21E-56 | -0. 81865 | 0. 245 | 0. 542 | 3. 30E-52 | Opc-G | CTSL           |
| PAK3. 10    | 2. 22E-56 | 0. 459299 | 0. 339 | 0. 13  | 3. 32E-52 | Opc-G | PAK3           |
| C1QB. 10    | 3. 24E-56 | -0. 95549 | 0. 363 | 0. 583 | 4. 85E-52 | Opc-G | C1QB           |
| C3. 9       | 7. 77E-56 | -1. 02313 | 0. 148 | 0. 418 | 1. 16E-51 | Opc-G | C3             |
| LINC00844   | 8. 13E-56 | 0. 428397 | 0. 279 | 0. 095 | 1. 21E-51 | Opc-G | LINC00844      |
| GPR183. 1C  | 1. 18E-55 | -1. 16709 | 0. 038 | 0. 307 | 1. 76E-51 | Opc-G | GPR183         |
| AC004540. 1 | 1. 88E-55 | 0. 432983 | 0. 228 | 0. 07  | 2. 81E-51 | Opc-G | AC004540. 5    |
| C7orf50. 5  | 2. 02E-55 | 0. 383397 | 0. 706 | 0. 495 | 3. 02E-51 | Opc-G | C7orf50        |
| RNF165. 9   | 2. 29E-55 | 0. 377405 | 0. 205 | 0. 058 | 3. 42E-51 | Opc-G | RNF165         |
| FIP1L1. 6   | 2. 54E-55 | 0. 573053 | 0. 493 | 0. 284 | 3. 80E-51 | Opc-G | FIP1L1         |
| DES. 1      | 3. 68E-55 | 0. 298506 | 0. 108 | 0. 018 | 5. 51E-51 | Opc-G | DES            |
| BMP7. 10    | 4. 37E-55 | 0. 547835 | 0. 35  | 0. 154 | 6. 54E-51 | Opc-G | BMP7           |
| C10orf54. 4 | 4. 41E-55 | -1. 05121 | 0. 037 | 0. 305 | 6. 59E-51 | Opc-G | C10orf54       |
| HCLS1. 10   | 4. 78E-55 | -1. 04858 | 0. 037 | 0. 307 | 7. 14E-51 | Opc-G | HCLS1          |
| KCND2. 4    | 5. 89E-55 | 0. 326804 | 0. 138 | 0. 029 | 8. 80E-51 | Opc-G | KCND2          |
| MIDN. 7     | 6. 23E-55 | 0. 450798 | 0. 623 | 0. 4   | 9. 32E-51 | Opc-G | MIDN           |
| IFITM2. 1C  | 1. 21E-54 | -0. 99666 | 0. 03  | 0. 3   | 1. 81E-50 | Opc-G | IFITM2         |
| LNX1-AS1. 1 | 1. 29E-54 | 0. 205526 | 0. 072 | 0. 008 | 1. 92E-50 | Opc-G | LNX1-AS1       |
| FGF12. 6    | 1. 32E-54 | 0. 427569 | 0. 165 | 0. 04  | 1. 97E-50 | Opc-G | FGF12          |
| TMEM59L. 8  | 1. 65E-54 | 0. 501056 | 0. 47  | 0. 244 | 2. 46E-50 | Opc-G | TMEM59L        |
| CCT6A. 6    | 1. 84E-54 | 0. 325401 | 0. 779 | 0. 561 | 2. 75E-50 | Opc-G | CCT6A          |
| MDM2. 4     | 4. 37E-54 | 0. 645566 | 0. 396 | 0. 193 | 6. 53E-50 | Opc-G | MDM2           |
| CREM. 9     | 4. 91E-54 | -0. 83895 | 0. 131 | 0. 425 | 7. 34E-50 | Opc-G | CREM           |
| HIST1H4C. 5 | 7. 3E-54  | 0. 386392 | 0. 661 | 0. 409 | 8. 56E-50 | Opc-G | HIST1H4C       |
| PGRMC1. 8   | 5. 83E-54 | 0. 420784 | 0. 657 | 0. 433 | 8. 71E-50 | Opc-G | PGRMC1         |
| ITGB1. 6    | 6. 93E-54 | -0. 7341  | 0. 119 | 0. 403 | 1. 04E-49 | Opc-G | ITGB1          |
| HSP90AA1. 7 | 5. 1E-54  | 0. 162014 | 0. 978 | 0. 882 | 1. 12E-49 | Opc-G | HSP90AA1       |
| SLITRK1. 1  | 8. 83E-54 | 0. 206982 | 0. 102 | 0. 016 | 1. 32E-49 | Opc-G | SLITRK1        |
| ADAM22. 8   | 9. 99E-54 | 0. 383784 | 0. 194 | 0. 054 | 1. 49E-49 | Opc-G | ADAM22         |
| S100A10. 1  | 1. 29E-53 | -0. 78322 | 0. 262 | 0. 563 | 1. 93E-49 | Opc-G | S100A10        |
| APBB2. 8    | 1. 53E-53 | 0. 457553 | 0. 276 | 0. 102 | 2. 28E-49 | Opc-G | APBB2          |
| SERPINA1. 2 | 4. 2E-53  | -1. 04517 | 0. 052 | 0. 316 | 3. 62E-49 | Opc-G | SERPINA1       |
| LSM7. 7     | 2. 79E-53 | 0. 298618 | 0. 851 | 0. 616 | 4. 17E-49 | Opc-G | LSM7           |
| ZEB1. 9     | 3. 05E-53 | 0. 528753 | 0. 38  | 0. 18  | 4. 56E-49 | Opc-G | ZEB1           |
| SH3BGRL3. 3 | 1. 2E-53  | -0. 55255 | 0. 638 | 0. 786 | 4. 66E-49 | Opc-G | SH3BGRL3       |
| S100A4. 1C  | 3. 15E-53 | -1. 10926 | 0. 048 | 0. 312 | 4. 71E-49 | Opc-G | S100A4         |
| LINC01003   | 3. 76E-53 | 0. 534254 | 0. 38  | 0. 18  | 5. 62E-49 | Opc-G | LINC01003      |
| KLHL7. 8    | 4. 52E-53 | 0. 476039 | 0. 49  | 0. 265 | 6. 75E-49 | Opc-G | KLHL7          |
| GYPC. 10    | 5. 81E-53 | -0. 85072 | 0. 053 | 0. 327 | 8. 68E-49 | Opc-G | GYPC           |
| GPR34. 10   | 6. 39E-53 | -1. 0958  | 0. 026 | 0. 283 | 9. 54E-49 | Opc-G | GPR34          |
| FCGR1A. 1C  | 7. 19E-53 | -1. 09732 | 0. 019 | 0. 275 | 1. 07E-48 | Opc-G | FCGR1A         |
| SERPINB1. 1 | 1. 13E-52 | -0. 99584 | 0. 023 | 0. 283 | 1. 68E-48 | Opc-G | SERPINB1       |
| GRID2. 4    | 1. 75E-52 | 0. 335299 | 0. 158 | 0. 039 | 2. 61E-48 | Opc-G | GRID2          |
| OSTF1. 9    | 2. 05E-52 | -0. 86238 | 0. 041 | 0. 308 | 3. 06E-48 | Opc-G | OSTF1          |
| USP46. 9    | 3. 76E-52 | 0. 562318 | 0. 305 | 0. 126 | 5. 62E-48 | Opc-G | USP46          |
| TTY14       | 3. 98E-52 | 0. 210802 | 0. 096 | 0. 015 | 5. 95E-48 | Opc-G | TTY14          |
| RP11-315A   | 6. 77E-52 | 0. 282839 | 0. 134 | 0. 029 | 1. 01E-47 | Opc-G | RP11-315A16. 1 |
| CD163. 10   | 8. 10E-52 | -1. 05772 | 0. 036 | 0. 292 | 1. 21E-47 | Opc-G | CD163          |
| KCNH2. 8    | 8. 62E-52 | 0. 362275 | 0. 199 | 0. 057 | 1. 29E-47 | Opc-G | KCNH2          |
| GPSM3. 10   | 1. 50E-51 | -1. 00366 | 0. 025 | 0. 278 | 2. 24E-47 | Opc-G | GPSM3          |

|             |           |           |        |        |           |       |                |
|-------------|-----------|-----------|--------|--------|-----------|-------|----------------|
| TYMP. 10    | 1. 67E-51 | -0. 91199 | 0. 063 | 0. 323 | 2. 50E-47 | Opc-G | TYMP           |
| MAPT. 10    | 1. 88E-51 | 0. 470378 | 0. 505 | 0. 27  | 2. 82E-47 | Opc-G | MAPT           |
| CPVL. 10    | 2. 05E-51 | -0. 95464 | 0. 097 | 0. 366 | 3. 07E-47 | Opc-G | CPVL           |
| NRXN2. 10   | 3. 42E-51 | 0. 398751 | 0. 286 | 0. 105 | 5. 11E-47 | Opc-G | NRXN2          |
| RTN3. 8     | 3. 58E-51 | 0. 276971 | 0. 857 | 0. 641 | 5. 35E-47 | Opc-G | RTN3           |
| HOXB2. 7    | 4. 61E-51 | 0. 360356 | 0. 235 | 0. 074 | 6. 89E-47 | Opc-G | HOXB2          |
| ATCAY. 9    | 8. 65E-51 | 0. 428286 | 0. 292 | 0. 109 | 1. 29E-46 | Opc-G | ATCAY          |
| HMOX1. 10   | 1. 44E-50 | -0. 99401 | 0. 053 | 0. 311 | 2. 14E-46 | Opc-G | HMOX1          |
| EN1. 7      | 1. 53E-50 | 0. 343138 | 0. 193 | 0. 055 | 2. 29E-46 | Opc-G | EN1            |
| NRCAM. 9    | 1. 93E-50 | 0. 459867 | 0. 47  | 0. 256 | 2. 89E-46 | Opc-G | NRCAM          |
| POLR2J. 6   | 1. 98E-50 | 0. 261419 | 0. 851 | 0. 63  | 2. 95E-46 | Opc-G | POLR2J         |
| MAD2L2. 7   | 2. 09E-50 | 0. 410315 | 0. 6   | 0. 378 | 3. 13E-46 | Opc-G | MAD2L2         |
| YWHAE. 9    | 2. 47E-50 | 0. 210939 | 0. 943 | 0. 739 | 3. 69E-46 | Opc-G | YWHAE          |
| IP6K2. 9    | 2. 67E-50 | 0. 345151 | 0. 656 | 0. 42  | 3. 99E-46 | Opc-G | IP6K2          |
| SGK1. 10    | 3. 15E-50 | -0. 86706 | 0. 189 | 0. 453 | 4. 71E-46 | Opc-G | SGK1           |
| C16orf45. 3 | 2. 21E-50 | 0. 422422 | 0. 526 | 0. 304 | 4. 80E-46 | Opc-G | C16orf45       |
| THSD7A. 9   | 3. 60E-50 | 0. 377944 | 0. 336 | 0. 13  | 5. 38E-46 | Opc-G | THSD7A         |
| TMEM98. 7   | 4. 25E-50 | 0. 436262 | 0. 436 | 0. 222 | 6. 34E-46 | Opc-G | TMEM98         |
| TBX5. 1     | 9. 15E-50 | 0. 16709  | 0. 074 | 0. 009 | 1. 37E-45 | Opc-G | TBX5           |
| ANXA1. 7    | 1. 02E-49 | -0. 88635 | 0. 143 | 0. 428 | 1. 52E-45 | Opc-G | ANXA1          |
| ZKSCAN1. 9  | 1. 20E-49 | 0. 410154 | 0. 522 | 0. 303 | 1. 80E-45 | Opc-G | ZKSCAN1        |
| GOLM1. 9    | 2. 09E-49 | 0. 430467 | 0. 522 | 0. 302 | 3. 12E-45 | Opc-G | GOLM1          |
| C3AR1. 10   | 2. 59E-49 | -1. 00743 | 0. 012 | 0. 253 | 3. 87E-45 | Opc-G | C3AR1          |
| SAMSN1. 10  | 3. 07E-49 | -0. 98617 | 0. 023 | 0. 267 | 4. 59E-45 | Opc-G | SAMSN1         |
| TNFRSF1A. 3 | 2. 26E-49 | -0. 64513 | 0. 112 | 0. 389 | 4. 87E-45 | Opc-G | TNFRSF1A       |
| PDAP1. 7    | 3. 34E-49 | 0. 314226 | 0. 73  | 0. 523 | 5. 00E-45 | Opc-G | PDAP1          |
| GRIK2. 1    | 3. 54E-49 | 0. 264524 | 0. 124 | 0. 026 | 5. 29E-45 | Opc-G | GRIK2          |
| TUBB. 8     | 4. 95E-49 | 0. 210805 | 0. 941 | 0. 759 | 7. 40E-45 | Opc-G | TUBB           |
| PAFAH1B3. 5 | 5. 63E-49 | 0. 395408 | 0. 649 | 0. 409 | 8. 42E-45 | Opc-G | PAFAH1B3       |
| MYCN. 1     | 8. 12E-49 | 0. 256146 | 0. 097 | 0. 016 | 1. 21E-44 | Opc-G | MYCN           |
| CSF1R. 10   | 1. 20E-48 | -0. 9999  | 0. 04  | 0. 283 | 1. 79E-44 | Opc-G | CSF1R          |
| LMO3. 7     | 1. 30E-48 | 0. 373992 | 0. 227 | 0. 073 | 1. 95E-44 | Opc-G | LMO3           |
| SCPEP1. 9   | 1. 81E-48 | -0. 81865 | 0. 098 | 0. 363 | 2. 71E-44 | Opc-G | SCPEP1         |
| ZNF92. 8    | 2. 00E-48 | 0. 408458 | 0. 322 | 0. 134 | 3. 00E-44 | Opc-G | ZNF92          |
| MEX3B. 8    | 2. 23E-48 | 0. 357058 | 0. 187 | 0. 054 | 3. 33E-44 | Opc-G | MEX3B          |
| SLC25A6. 5  | 2. 57E-48 | 0. 135375 | 0. 973 | 0. 85  | 3. 84E-44 | Opc-G | SLC25A6        |
| FXD5. 10    | 2. 73E-48 | -0. 95722 | 0. 107 | 0. 356 | 4. 08E-44 | Opc-G | FXD5           |
| LRRC4C. 7   | 3. 10E-48 | 0. 39754  | 0. 243 | 0. 086 | 4. 63E-44 | Opc-G | LRRC4C         |
| CA8. 9      | 3. 22E-48 | 0. 439742 | 0. 172 | 0. 047 | 4. 82E-44 | Opc-G | CA8            |
| RP11-698N   | 3. 74E-48 | 0. 460169 | 0. 175 | 0. 05  | 5. 59E-44 | Opc-G | RP11-698N11. 2 |
| CPXM1. 9    | 3. 86E-48 | 0. 46696  | 0. 281 | 0. 113 | 5. 76E-44 | Opc-G | CPXM1          |
| PBX1. 8     | 3. 90E-48 | 0. 481937 | 0. 399 | 0. 202 | 5. 82E-44 | Opc-G | PBX1           |
| IL13RA1. 1  | 3. 93E-48 | -0. 73613 | 0. 022 | 0. 264 | 5. 87E-44 | Opc-G | IL13RA1        |
| HOTAIR      | 4. 09E-48 | 0. 174141 | 0. 077 | 0. 01  | 6. 12E-44 | Opc-G | HOTAIR         |
| PMP2. 9     | 4. 22E-48 | 0. 398434 | 0. 587 | 0. 334 | 6. 31E-44 | Opc-G | PMP2           |
| TMEM176B. 4 | 4. 74E-48 | -0. 92781 | 0. 108 | 0. 368 | 7. 09E-44 | Opc-G | TMEM176B       |
| PLSCR1. 10  | 5. 85E-48 | -0. 77155 | 0. 108 | 0. 376 | 8. 75E-44 | Opc-G | PLSCR1         |
| C12orf57. 6 | 6. 88E-48 | 0. 275934 | 0. 754 | 0. 522 | 1. 03E-43 | Opc-G | C12orf57       |
| THEMIS2. 1  | 7. 03E-48 | -0. 85574 | 0. 018 | 0. 257 | 1. 05E-43 | Opc-G | THEMIS2        |
| GRN. 10     | 7. 08E-48 | -0. 68757 | 0. 348 | 0. 585 | 1. 06E-43 | Opc-G | GRN            |
| NREP. 9     | 7. 59E-48 | 0. 435462 | 0. 484 | 0. 259 | 1. 13E-43 | Opc-G | NREP           |

|            |          |          |       |       |          |       |                |
|------------|----------|----------|-------|-------|----------|-------|----------------|
| LILRB4.1C  | 1.29E-47 | -1.00818 | 0.031 | 0.27  | 1.93E-43 | Opc-G | LILRB4         |
| ATP10B.2   | 1.55E-47 | 0.246966 | 0.108 | 0.02  | 2.32E-43 | Opc-G | ATP10B         |
| POLD4.8    | 1.96E-47 | -0.70684 | 0.158 | 0.438 | 2.93E-43 | Opc-G | POLD4          |
| VAMP2.9    | 2.15E-47 | 0.280653 | 0.848 | 0.608 | 3.21E-43 | Opc-G | VAMP2          |
| SNTG1.9    | 4.15E-47 | 0.437845 | 0.328 | 0.142 | 6.21E-43 | Opc-G | SNTG1          |
| WSCD1.8    | 5.71E-47 | 0.476867 | 0.288 | 0.12  | 8.53E-43 | Opc-G | WSCD1          |
| BLVRA.8    | 6.06E-47 | 0.370791 | 0.559 | 0.325 | 9.06E-43 | Opc-G | BLVRA          |
| NUDT10.7   | 6.36E-47 | 0.289347 | 0.161 | 0.043 | 9.50E-43 | Opc-G | NUDT10         |
| CBX5.8     | 7.86E-47 | 0.417499 | 0.541 | 0.331 | 1.17E-42 | Opc-G | CBX5           |
| BZW2.6     | 7.99E-47 | 0.420319 | 0.474 | 0.257 | 1.19E-42 | Opc-G | BZW2           |
| INHBB.3    | 9.87E-47 | 0.275605 | 0.12  | 0.025 | 1.48E-42 | Opc-G | INHBB          |
| COL4A3     | 9.96E-47 | 0.161947 | 0.056 | 0.005 | 1.49E-42 | Opc-G | COL4A3         |
| ASIC1.7    | 1.58E-46 | 0.320314 | 0.164 | 0.044 | 2.36E-42 | Opc-G | ASIC1          |
| PCDHB7.8   | 1.71E-46 | 0.331405 | 0.201 | 0.062 | 2.56E-42 | Opc-G | PCDHB7         |
| NCALD.8    | 1.73E-46 | 0.424544 | 0.284 | 0.114 | 2.58E-42 | Opc-G | NCALD          |
| TGFB1.10   | 2.35E-46 | -0.65917 | 0.022 | 0.259 | 3.51E-42 | Opc-G | TGFB1          |
| HAVCR2.1C  | 2.47E-46 | -0.95754 | 0.015 | 0.246 | 3.69E-42 | Opc-G | HAVCR2         |
| EEF2.3     | 2.57E-46 | 0.14774  | 0.94  | 0.822 | 3.84E-42 | Opc-G | EEF2           |
| CTDSP2.6   | 3.20E-46 | 0.624308 | 0.444 | 0.266 | 4.78E-42 | Opc-G | CTDSP2         |
| ILF2.7     | 4.29E-46 | 0.285036 | 0.794 | 0.559 | 6.41E-42 | Opc-G | ILF2           |
| C1orf54.1  | 4.54E-46 | -0.81285 | 0.011 | 0.24  | 6.78E-42 | Opc-G | C1orf54        |
| PPP1R9A.9  | 5.62E-46 | 0.353438 | 0.202 | 0.063 | 8.39E-42 | Opc-G | PPP1R9A        |
| HNRNPA1.3  | 7.10E-46 | 0.113621 | 0.971 | 0.871 | 1.06E-41 | Opc-G | HNRNPA1        |
| C5orf38.3  | 8.05E-46 | 0.278696 | 0.12  | 0.026 | 1.20E-41 | Opc-G | C5orf38        |
| MYO10.9    | 8.13E-46 | 0.489497 | 0.367 | 0.183 | 1.22E-41 | Opc-G | MYO10          |
| ERV3-1.9   | 9.45E-46 | 0.424212 | 0.466 | 0.247 | 1.41E-41 | Opc-G | ERV3-1         |
| MAPK10.9   | 1.03E-45 | 0.449764 | 0.377 | 0.183 | 1.54E-41 | Opc-G | MAPK10         |
| FGF9.9     | 1.48E-45 | 0.330129 | 0.161 | 0.043 | 2.21E-41 | Opc-G | FGF9           |
| ADORA3.1C  | 1.66E-45 | -0.96018 | 0.042 | 0.275 | 2.48E-41 | Opc-G | ADORA3         |
| TIMP1.8    | 1.68E-45 | -0.71942 | 0.407 | 0.635 | 2.52E-41 | Opc-G | TIMP1          |
| FBLN1.9    | 1.70E-45 | 0.496281 | 0.223 | 0.076 | 2.55E-41 | Opc-G | FBLN1          |
| RILPL2.1C  | 2.11E-45 | -0.81802 | 0.037 | 0.273 | 3.16E-41 | Opc-G | RILPL2         |
| HOXC-AS1.2 | 1.8E-45  | 0.229762 | 0.101 | 0.019 | 3.26E-41 | Opc-G | HOXC-AS1       |
| NDUFA5.8   | 2.52E-45 | 0.264962 | 0.781 | 0.563 | 3.76E-41 | Opc-G | NDUFA5         |
| NAMPT.9    | 2.57E-45 | -0.89549 | 0.199 | 0.453 | 3.84E-41 | Opc-G | NAMPT          |
| IFNGR1.1C  | 3.08E-45 | -0.75817 | 0.199 | 0.453 | 4.60E-41 | Opc-G | IFNGR1         |
| SYNE2.10   | 4.05E-45 | 0.453213 | 0.35  | 0.162 | 6.05E-41 | Opc-G | SYNE2          |
| OS9.3      | 4.47E-45 | 0.504192 | 0.653 | 0.528 | 6.68E-41 | Opc-G | OS9            |
| PDLIM3.8   | 5.47E-45 | 0.36453  | 0.272 | 0.104 | 8.17E-41 | Opc-G | PDLIM3         |
| CTSZ.10    | 7.07E-45 | -0.83816 | 0.038 | 0.271 | 1.06E-40 | Opc-G | CTSZ           |
| ATAT1.10   | 7.22E-45 | 0.417773 | 0.492 | 0.275 | 1.08E-40 | Opc-G | ATAT1          |
| RCOR2.8    | 9.13E-45 | 0.358744 | 0.149 | 0.039 | 1.36E-40 | Opc-G | RCOR2          |
| RND3.9     | 1.27E-44 | 0.477171 | 0.444 | 0.229 | 1.89E-40 | Opc-G | RND3           |
| GNB2.7     | 1.35E-44 | 0.314219 | 0.751 | 0.557 | 2.02E-40 | Opc-G | GNB2           |
| CDKN2C.7   | 1.44E-44 | 0.396345 | 0.492 | 0.268 | 2.16E-40 | Opc-G | CDKN2C         |
| SYT11.10   | 1.90E-44 | 0.380021 | 0.593 | 0.37  | 2.84E-40 | Opc-G | SYT11          |
| OLR1.10    | 2.55E-44 | -0.95054 | 0.037 | 0.264 | 3.82E-40 | Opc-G | OLR1           |
| LGALS1.8   | 3.00E-44 | -0.56844 | 0.512 | 0.717 | 4.49E-40 | Opc-G | LGALS1         |
| BAALC.9    | 3.21E-44 | 0.448825 | 0.545 | 0.332 | 4.79E-40 | Opc-G | BAALC          |
| WBSCR22.8  | 4.37E-44 | 0.311351 | 0.695 | 0.48  | 6.53E-40 | Opc-G | WBSCR22        |
| RP11-1275  | 8.50E-44 | 0.331682 | 0.176 | 0.052 | 1.27E-39 | Opc-G | RP11-1275H24.1 |

|             |           |           |        |        |           |       |             |
|-------------|-----------|-----------|--------|--------|-----------|-------|-------------|
| GRIK3. 5    | 1. 39E-43 | 0. 314469 | 0. 145 | 0. 038 | 2. 08E-39 | Opc-G | GRIK3       |
| PTN. 8      | 1. 40E-43 | 0. 246286 | 0. 906 | 0. 597 | 2. 09E-39 | Opc-G | PTN         |
| SMARCB1. 8  | 1. 85E-43 | 0. 378091 | 0. 6   | 0. 402 | 2. 77E-39 | Opc-G | SMARCB1     |
| RSF1. 8     | 1. 86E-43 | 0. 366611 | 0. 613 | 0. 404 | 2. 79E-39 | Opc-G | RSF1        |
| TBXAS1. 1C  | 1. 91E-43 | -0. 91518 | 0. 031 | 0. 255 | 2. 85E-39 | Opc-G | TBXAS1      |
| TM4SF1. 1C  | 2. 13E-43 | 0. 42004  | 0. 26  | 0. 103 | 3. 18E-39 | Opc-G | TM4SF1      |
| MUM1. 9     | 2. 77E-43 | 0. 387539 | 0. 555 | 0. 351 | 4. 14E-39 | Opc-G | MUM1        |
| SLC11A1. 1  | 3. 29E-43 | -0. 88239 | 0. 086 | 0. 32  | 4. 92E-39 | Opc-G | SLC11A1     |
| TSPAN11     | 3. 30E-43 | 0. 244793 | 0. 094 | 0. 017 | 4. 94E-39 | Opc-G | TSPAN11     |
| METRN. 10   | 3. 42E-43 | 0. 448425 | 0. 499 | 0. 28  | 5. 12E-39 | Opc-G | METRN       |
| ATP5J2. 6   | 4. 53E-43 | 0. 148135 | 0. 955 | 0. 798 | 6. 77E-39 | Opc-G | ATP5J2      |
| FAM213A. 8  | 5. 04E-43 | 0. 350438 | 0. 577 | 0. 37  | 7. 54E-39 | Opc-G | FAM213A     |
| PTOV1. 9    | 5. 07E-43 | 0. 362383 | 0. 643 | 0. 425 | 7. 58E-39 | Opc-G | PTOV1       |
| NLGN3. 8    | 5. 13E-43 | 0. 443599 | 0. 258 | 0. 104 | 7. 67E-39 | Opc-G | NLGN3       |
| BLVRB. 7    | 5. 31E-43 | -0. 65956 | 0. 117 | 0. 391 | 7. 93E-39 | Opc-G | BLVRB       |
| CCT7. 7     | 6. 23E-43 | 0. 305149 | 0. 728 | 0. 516 | 9. 31E-39 | Opc-G | CCT7        |
| SIAH1. 8    | 7. 70E-43 | 0. 427655 | 0. 413 | 0. 216 | 1. 15E-38 | Opc-G | SIAH1       |
| PRR13. 8    | 8. 41E-43 | -0. 64182 | 0. 302 | 0. 559 | 1. 26E-38 | Opc-G | PRR13       |
| PPP1R14A. 1 | 0. 7E-42  | 0. 24581  | 0. 264 | 0. 096 | 1. 59E-38 | Opc-G | PPP1R14A    |
| PTPRS. 10   | 1. 39E-42 | 0. 467647 | 0. 445 | 0. 245 | 2. 08E-38 | Opc-G | PTPRS       |
| LRP4. 7     | 1. 52E-42 | 0. 323407 | 0. 171 | 0. 051 | 2. 28E-38 | Opc-G | LRP4        |
| COL9A1      | 1. 60E-42 | 0. 141844 | 0. 066 | 0. 009 | 2. 39E-38 | Opc-G | COL9A1      |
| SATB1. 4    | 1. 75E-42 | 0. 346814 | 0. 292 | 0. 119 | 2. 62E-38 | Opc-G | SATB1       |
| ARF5. 3     | 1. 81E-42 | 0. 314199 | 0. 716 | 0. 516 | 2. 70E-38 | Opc-G | ARF5        |
| IFI30. 10   | 1. 89E-42 | -0. 89636 | 0. 016 | 0. 233 | 2. 82E-38 | Opc-G | IFI30       |
| ZNF711. 9   | 2. 14E-42 | 0. 416522 | 0. 303 | 0. 131 | 3. 19E-38 | Opc-G | ZNF711      |
| NHP2. 7     | 2. 27E-42 | 0. 274351 | 0. 777 | 0. 567 | 3. 39E-38 | Opc-G | NHP2        |
| RAB32. 10   | 2. 43E-42 | -0. 56151 | 0. 027 | 0. 253 | 3. 63E-38 | Opc-G | RAB32       |
| CDH10       | 2. 66E-42 | 0. 255357 | 0. 112 | 0. 024 | 3. 97E-38 | Opc-G | CDH10       |
| HOXB3. 5    | 3. 04E-42 | 0. 220457 | 0. 12  | 0. 027 | 4. 54E-38 | Opc-G | HOXB3       |
| HIP1. 7     | 3. 05E-42 | 0. 41575  | 0. 333 | 0. 157 | 4. 56E-38 | Opc-G | HIP1        |
| FAM110B. 8  | 3. 19E-42 | 0. 4268   | 0. 357 | 0. 175 | 4. 77E-38 | Opc-G | FAM110B     |
| CD86. 10    | 3. 43E-42 | -0. 90609 | 0. 014 | 0. 227 | 5. 12E-38 | Opc-G | CD86        |
| TTC9B. 10   | 4. 02E-42 | 0. 449106 | 0. 277 | 0. 11  | 6. 01E-38 | Opc-G | TTC9B       |
| AC016700. 4 | 0. 5E-42  | 0. 297856 | 0. 117 | 0. 027 | 6. 06E-38 | Opc-G | AC016700. 5 |
| ZIC1. 8     | 4. 53E-42 | 0. 447795 | 0. 255 | 0. 105 | 6. 77E-38 | Opc-G | ZIC1        |
| SRM. 8      | 4. 67E-42 | 0. 412366 | 0. 552 | 0. 352 | 6. 97E-38 | Opc-G | SRM         |
| RTN4. 10    | 5. 68E-42 | 0. 250599 | 0. 85  | 0. 69  | 8. 49E-38 | Opc-G | RTN4        |
| WBP5. 8     | 6. 40E-42 | 0. 255995 | 0. 721 | 0. 488 | 9. 56E-38 | Opc-G | WBP5        |
| CCDC109B. 7 | 1. 2E-42  | -0. 56816 | 0. 109 | 0. 365 | 1. 06E-37 | Opc-G | CCDC109B    |
| PTPRD. 9    | 8. 77E-42 | 0. 298288 | 0. 199 | 0. 064 | 1. 31E-37 | Opc-G | PTPRD       |
| FAM221A. 1  | 1. 03E-41 | 0. 378864 | 0. 351 | 0. 166 | 1. 53E-37 | Opc-G | FAM221A     |
| ITGB8. 8    | 1. 09E-41 | 0. 448193 | 0. 411 | 0. 228 | 1. 63E-37 | Opc-G | ITGB8       |
| FABP7. 8    | 1. 10E-41 | 0. 440534 | 0. 604 | 0. 369 | 1. 64E-37 | Opc-G | FABP7       |
| NNAT. 10    | 1. 14E-41 | 0. 576254 | 0. 383 | 0. 183 | 1. 70E-37 | Opc-G | NNAT        |
| SPP1. 7     | 1. 15E-41 | -0. 54104 | 0. 82  | 0. 856 | 1. 72E-37 | Opc-G | SPP1        |
| SPI1. 10    | 1. 36E-41 | -0. 82878 | 0. 036 | 0. 252 | 2. 03E-37 | Opc-G | SPI1        |
| MKLN1. 6    | 1. 69E-41 | 0. 424066 | 0. 406 | 0. 218 | 2. 53E-37 | Opc-G | MKLN1       |
| LGALS9. 1C  | 1. 97E-41 | -0. 87257 | 0. 037 | 0. 254 | 2. 95E-37 | Opc-G | LGALS9      |
| IQGAP1. 8   | 2. 09E-41 | -0. 56968 | 0. 04  | 0. 267 | 3. 12E-37 | Opc-G | IQGAP1      |
| PLLP. 9     | 2. 70E-41 | 0. 355909 | 0. 19  | 0. 06  | 4. 03E-37 | Opc-G | PLLP        |

|           |          |          |       |       |          |       |            |
|-----------|----------|----------|-------|-------|----------|-------|------------|
| SP100.9   | 3.08E-41 | -0.74789 | 0.066 | 0.302 | 4.60E-37 | Opc-G | SP100      |
| AC004158. | 4.13E-41 | 0.423804 | 0.269 | 0.113 | 6.18E-37 | Opc-G | AC004158.3 |
| UGT8.8    | 4.27E-41 | 0.196319 | 0.157 | 0.042 | 6.39E-37 | Opc-G | UGT8       |
| PON2.10   | 4.58E-41 | 0.328482 | 0.661 | 0.436 | 6.84E-37 | Opc-G | PON2       |
| NKD1.2    | 4.61E-41 | 0.246498 | 0.122 | 0.029 | 6.89E-37 | Opc-G | NKD1       |
| CELF5.10  | 5.48E-41 | 0.318791 | 0.232 | 0.081 | 8.19E-37 | Opc-G | CELF5      |
| NUPR1.8   | 5.48E-41 | -0.79578 | 0.098 | 0.339 | 8.20E-37 | Opc-G | NUPR1      |
| MTRNR2L1. | 7.55E-41 | 0.433109 | 0.388 | 0.18  | 1.13E-36 | Opc-G | MTRNR2L1   |
| PLP2.9    | 7.82E-41 | -0.7196  | 0.111 | 0.359 | 1.17E-36 | Opc-G | PLP2       |
| STOM.9    | 8.48E-41 | -0.76291 | 0.044 | 0.265 | 1.27E-36 | Opc-G | STOM       |
| METTL21B. | 8.62E-41 | 0.330102 | 0.179 | 0.057 | 1.29E-36 | Opc-G | METTL21B   |
| CYP27B1   | 9.69E-41 | 0.155774 | 0.066 | 0.009 | 1.45E-36 | Opc-G | CYP27B1    |
| C14orf132 | 1.03E-40 | 0.360239 | 0.228 | 0.082 | 1.54E-36 | Opc-G | C14orf132  |
| BUD31.8   | 1.11E-40 | 0.22902  | 0.82  | 0.615 | 1.66E-36 | Opc-G | BUD31      |
| HMGB3.9   | 1.45E-40 | 0.387034 | 0.477 | 0.266 | 2.17E-36 | Opc-G | HMGB3      |
| BAZ2B.6   | 1.64E-40 | 0.426603 | 0.5   | 0.308 | 2.45E-36 | Opc-G | BAZ2B      |
| C5AR1.9   | 1.78E-40 | -0.89106 | 0.037 | 0.251 | 2.66E-36 | Opc-G | C5AR1      |
| LYZ.10    | 1.98E-40 | -0.86256 | 0.014 | 0.219 | 2.96E-36 | Opc-G | LYZ        |
| LY96.10   | 2.16E-40 | -0.6421  | 0.023 | 0.236 | 3.23E-36 | Opc-G | LY96       |
| HNRNPA0.8 | 2.23E-40 | 0.267601 | 0.795 | 0.631 | 3.33E-36 | Opc-G | HNRNPA0    |
| TAGLN2.1C | 2.52E-40 | -0.60469 | 0.255 | 0.532 | 3.76E-36 | Opc-G | TAGLN2     |
| F2R.10    | 2.58E-40 | 0.426294 | 0.327 | 0.158 | 3.86E-36 | Opc-G | F2R        |
| MRFAP1.9  | 2.69E-40 | 0.204591 | 0.847 | 0.659 | 4.03E-36 | Opc-G | MRFAP1     |
| IER3.10   | 2.74E-40 | -0.8826  | 0.042 | 0.255 | 4.09E-36 | Opc-G | IER3       |
| FAM3C.9   | 2.88E-40 | 0.361327 | 0.605 | 0.426 | 4.31E-36 | Opc-G | FAM3C      |
| GPR1.1    | 3.54E-40 | 0.239282 | 0.1   | 0.02  | 5.29E-36 | Opc-G | GPR1       |
| OPCML.1   | 4.78E-40 | 0.187876 | 0.087 | 0.016 | 7.15E-36 | Opc-G | OPCML      |
| PPP2R1A.7 | 4.98E-40 | 0.297242 | 0.691 | 0.503 | 7.44E-36 | Opc-G | PPP2R1A    |
| TCEAL7.8  | 6.02E-40 | 0.347025 | 0.501 | 0.289 | 9.00E-36 | Opc-G | TCEAL7     |
| ARHGEF2.9 | 7.89E-40 | 0.40855  | 0.473 | 0.277 | 1.18E-35 | Opc-G | ARHGEF2    |
| CD164.9   | 8.01E-40 | -0.59606 | 0.258 | 0.506 | 1.20E-35 | Opc-G | CD164      |
| HOXC11    | 8.27E-40 | 0.158289 | 0.078 | 0.013 | 1.24E-35 | Opc-G | HOXC11     |
| SLC30A3   | 8.49E-40 | 0.156614 | 0.071 | 0.011 | 1.27E-35 | Opc-G | SLC30A3    |
| PTMS.9    | 8.49E-40 | 0.335529 | 0.776 | 0.538 | 1.27E-35 | Opc-G | PTMS       |
| GSTO1.8   | 1.34E-39 | -0.62611 | 0.22  | 0.472 | 2.01E-35 | Opc-G | GSTO1      |
| LRRC4.3   | 1.84E-39 | 0.281779 | 0.142 | 0.039 | 2.75E-35 | Opc-G | LRRC4      |
| ZNF219.2  | 1.90E-39 | 0.327555 | 0.179 | 0.058 | 2.83E-35 | Opc-G | ZNF219     |
| HIP1R.9   | 1.97E-39 | 0.377558 | 0.249 | 0.099 | 2.94E-35 | Opc-G | HIP1R      |
| LAT2.10   | 2.08E-39 | -0.81434 | 0.014 | 0.215 | 3.12E-35 | Opc-G | LAT2       |
| EFS.8     | 2.17E-39 | 0.409004 | 0.242 | 0.097 | 3.24E-35 | Opc-G | EFS        |
| PID1.7    | 2.24E-39 | 0.405709 | 0.26  | 0.107 | 3.35E-35 | Opc-G | PID1       |
| KIF5C.10  | 2.32E-39 | 0.451789 | 0.449 | 0.256 | 3.47E-35 | Opc-G | KIF5C      |
| RAP1B.7   | 2.74E-39 | -0.60554 | 0.204 | 0.449 | 4.09E-35 | Opc-G | RAP1B      |
| ZNF331.9  | 2.83E-39 | -0.82431 | 0.108 | 0.329 | 4.24E-35 | Opc-G | ZNF331     |
| FAM127A.7 | 3.09E-39 | 0.318324 | 0.652 | 0.446 | 4.61E-35 | Opc-G | FAM127A    |
| PTPRC.10  | 3.11E-39 | -0.81202 | 0.015 | 0.216 | 4.64E-35 | Opc-G | PTPRC      |
| EVI2B.10  | 3.41E-39 | -0.85434 | 0.015 | 0.215 | 5.09E-35 | Opc-G | EVI2B      |
| GLRX.9    | 4.03E-39 | -0.74502 | 0.161 | 0.403 | 6.02E-35 | Opc-G | GLRX       |
| SCNN1A.3  | 4.12E-39 | 0.39882  | 0.154 | 0.044 | 6.15E-35 | Opc-G | SCNN1A     |
| SLA.10    | 4.27E-39 | -0.80937 | 0.014 | 0.214 | 6.39E-35 | Opc-G | SLA        |
| CD300A.1C | 4.45E-39 | -0.80969 | 0.007 | 0.204 | 6.65E-35 | Opc-G | CD300A     |

|             |           |           |        |        |           |       |                |
|-------------|-----------|-----------|--------|--------|-----------|-------|----------------|
| TGFBI. 10   | 7. 38E-39 | -0. 8061  | 0. 016 | 0. 218 | 1. 10E-34 | Opc-G | TGFBI          |
| MGAT1. 10   | 7. 59E-39 | -0. 65887 | 0. 139 | 0. 372 | 1. 13E-34 | Opc-G | MGAT1          |
| HNRNPAB. 9  | 7. 64E-39 | 0. 370801 | 0. 568 | 0. 386 | 1. 14E-34 | Opc-G | HNRNPAB        |
| ANXA11. 10  | 8. 64E-39 | -0. 64195 | 0. 023 | 0. 229 | 1. 29E-34 | Opc-G | ANXA11         |
| SLC26A10. 9 | 9. 38E-39 | 0. 220325 | 0. 096 | 0. 02  | 1. 40E-34 | Opc-G | SLC26A10       |
| LGALS3. 8   | 9. 87E-39 | -0. 78839 | 0. 26  | 0. 496 | 1. 48E-34 | Opc-G | LGALS3         |
| RAB20. 9    | 1. 08E-38 | -0. 74955 | 0. 038 | 0. 249 | 1. 62E-34 | Opc-G | RAB20          |
| DNASE2. 8   | 1. 09E-38 | -0. 58713 | 0. 146 | 0. 399 | 1. 63E-34 | Opc-G | DNASE2         |
| MVP. 6      | 1. 15E-38 | -0. 58763 | 0. 027 | 0. 239 | 1. 72E-34 | Opc-G | MVP            |
| CD83. 9     | 1. 62E-38 | -0. 91903 | 0. 097 | 0. 308 | 2. 42E-34 | Opc-G | CD83           |
| HDAC2. 9    | 2. 20E-38 | 0. 333147 | 0. 633 | 0. 435 | 3. 29E-34 | Opc-G | HDAC2          |
| CAHM. 8     | 2. 27E-38 | 0. 422853 | 0. 217 | 0. 083 | 3. 39E-34 | Opc-G | CAHM           |
| CLK1. 5     | 2. 29E-38 | 0. 325582 | 0. 622 | 0. 409 | 3. 42E-34 | Opc-G | CLK1           |
| TRIB2. 10   | 2. 37E-38 | 0. 434786 | 0. 436 | 0. 251 | 3. 55E-34 | Opc-G | TRIB2          |
| CDCA7L. 6   | 3. 02E-38 | 0. 410128 | 0. 301 | 0. 139 | 4. 51E-34 | Opc-G | CDCA7L         |
| KIAA1211. 3 | 3. 23E-38 | 0. 215401 | 0. 097 | 0. 02  | 4. 83E-34 | Opc-G | KIAA1211       |
| EIF4H. 5    | 4. 58E-38 | 0. 251876 | 0. 71  | 0. 529 | 6. 84E-34 | Opc-G | EIF4H          |
| APOC2. 9    | 4. 72E-38 | -1. 01027 | 0. 008 | 0. 201 | 7. 05E-34 | Opc-G | APOC2          |
| RP11-553L   | 4. 82E-38 | 0. 481127 | 0. 385 | 0. 216 | 7. 20E-34 | Opc-G | RP11-553L6. 5  |
| BHLHE41. 8  | 5. 51E-38 | -0. 63467 | 0. 019 | 0. 22  | 8. 23E-34 | Opc-G | BHLHE41        |
| CREB5. 9    | 5. 68E-38 | 0. 454481 | 0. 399 | 0. 224 | 8. 48E-34 | Opc-G | CREB5          |
| C1QBP. 7    | 5. 78E-38 | 0. 307882 | 0. 743 | 0. 542 | 8. 64E-34 | Opc-G | C1QBP          |
| ZNF714. 5   | 6. 25E-38 | 0. 358031 | 0. 238 | 0. 094 | 9. 34E-34 | Opc-G | ZNF714         |
| HNRNPK. 6   | 6. 72E-38 | 0. 154378 | 0. 922 | 0. 78  | 1. 00E-33 | Opc-G | HNRNPK         |
| LINC00599   | 6. 98E-38 | 0. 227018 | 0. 12  | 0. 029 | 1. 04E-33 | Opc-G | LINC00599      |
| ANXA6. 3    | 9. 42E-38 | 0. 391623 | 0. 344 | 0. 174 | 1. 41E-33 | Opc-G | ANXA6          |
| HEPN1. 9    | 1. 03E-37 | 0. 37861  | 0. 377 | 0. 193 | 1. 55E-33 | Opc-G | HEPN1          |
| NT5C3B. 9   | 1. 04E-37 | 0. 398879 | 0. 503 | 0. 32  | 1. 55E-33 | Opc-G | NT5C3B         |
| ELFN1       | 1. 16E-37 | 0. 194139 | 0. 09  | 0. 018 | 1. 74E-33 | Opc-G | ELFN1          |
| CASC15. 8   | 1. 22E-37 | 0. 358783 | 0. 232 | 0. 09  | 1. 83E-33 | Opc-G | CASC15         |
| ZNF821. 10  | 1. 27E-37 | 0. 369409 | 0. 324 | 0. 153 | 1. 89E-33 | Opc-G | ZNF821         |
| CPSF6. 7    | 1. 31E-37 | 0. 413269 | 0. 495 | 0. 318 | 1. 96E-33 | Opc-G | CPSF6          |
| SFPQ. 7     | 1. 37E-37 | 0. 288859 | 0. 702 | 0. 532 | 2. 05E-33 | Opc-G | SFPQ           |
| SLCO2B1. 9  | 1. 88E-37 | -0. 84501 | 0. 034 | 0. 233 | 2. 81E-33 | Opc-G | SLCO2B1        |
| LHX1. 6     | 1. 93E-37 | 0. 286582 | 0. 108 | 0. 025 | 2. 88E-33 | Opc-G | LHX1           |
| PSMB5. 7    | 1. 95E-37 | 0. 220927 | 0. 78  | 0. 582 | 2. 92E-33 | Opc-G | PSMB5          |
| PEG10. 7    | 2. 29E-37 | 0. 318964 | 0. 243 | 0. 093 | 3. 43E-33 | Opc-G | PEG10          |
| CD63. 9     | 2. 40E-37 | -0. 3459  | 0. 904 | 0. 926 | 3. 59E-33 | Opc-G | CD63           |
| LDHA. 6     | 3. 42E-37 | -0. 49049 | 0. 637 | 0. 775 | 5. 12E-33 | Opc-G | LDHA           |
| RBFOX2. 9   | 3. 96E-37 | 0. 390251 | 0. 389 | 0. 204 | 5. 92E-33 | Opc-G | RBFOX2         |
| SRP72. 5    | 3. 98E-37 | 0. 368493 | 0. 607 | 0. 448 | 5. 95E-33 | Opc-G | SRP72          |
| HOXA7. 8    | 4. 07E-37 | 0. 331408 | 0. 24  | 0. 092 | 6. 09E-33 | Opc-G | HOXA7          |
| TLE2. 9     | 4. 25E-37 | 0. 387825 | 0. 214 | 0. 082 | 6. 35E-33 | Opc-G | TLE2           |
| SRRM3. 9    | 4. 40E-37 | 0. 383785 | 0. 189 | 0. 064 | 6. 57E-33 | Opc-G | SRRM3          |
| NAV2. 6     | 4. 54E-37 | 0. 418786 | 0. 254 | 0. 109 | 6. 79E-33 | Opc-G | NAV2           |
| ZNF667-AS   | 4. 72E-37 | 0. 323582 | 0. 581 | 0. 375 | 7. 05E-33 | Opc-G | ZNF667-AS1     |
| CAP1. 9     | 4. 74E-37 | -0. 52255 | 0. 395 | 0. 605 | 7. 08E-33 | Opc-G | CAP1           |
| PNMA1. 9    | 5. 04E-37 | 0. 416935 | 0. 451 | 0. 272 | 7. 52E-33 | Opc-G | PNMA1          |
| RTKN. 10    | 5. 16E-37 | 0. 440487 | 0. 322 | 0. 161 | 7. 71E-33 | Opc-G | RTKN           |
| SPINT2. 10  | 7. 15E-37 | -0. 71907 | 0. 031 | 0. 229 | 1. 07E-32 | Opc-G | SPINT2         |
| RP11-488C   | 8. 67E-37 | 0. 328508 | 0. 178 | 0. 06  | 1. 30E-32 | Opc-G | RP11-488C13. 5 |

|             |           |           |        |        |           |       |           |
|-------------|-----------|-----------|--------|--------|-----------|-------|-----------|
| AASDH. 5    | 9. 01E-37 | 0. 457103 | 0. 313 | 0. 154 | 1. 35E-32 | Opc-G | AASDH     |
| HNRNPA2B1   | 9. 67E-37 | 0. 111228 | 0. 967 | 0. 837 | 1. 44E-32 | Opc-G | HNRNPA2B1 |
| ATRNL1. 1   | 1. 18E-36 | 0. 215121 | 0. 079 | 0. 014 | 1. 76E-32 | Opc-G | ATRNL1    |
| DYNC1I1. 1  | 1. 36E-36 | 0. 400047 | 0. 242 | 0. 095 | 2. 04E-32 | Opc-G | DYNC1I1   |
| CBR1. 8     | 1. 51E-36 | 0. 285401 | 0. 665 | 0. 463 | 2. 25E-32 | Opc-G | CBR1      |
| PNISR. 6    | 1. 78E-36 | 0. 229652 | 0. 784 | 0. 6   | 2. 66E-32 | Opc-G | PNISR     |
| LIPA. 9     | 1. 87E-36 | -0. 72008 | 0. 13  | 0. 348 | 2. 79E-32 | Opc-G | LIPA      |
| HOXB5. 1    | 1. 98E-36 | 0. 153566 | 0. 071 | 0. 012 | 2. 95E-32 | Opc-G | HOXB5     |
| SUMO2. 6    | 2. 21E-36 | 0. 115701 | 0. 958 | 0. 812 | 3. 30E-32 | Opc-G | SUMO2     |
| LINC00511   | 2. 42E-36 | 0. 413988 | 0. 253 | 0. 11  | 3. 62E-32 | Opc-G | LINC00511 |
| TPP1. 8     | 2. 46E-36 | -0. 61318 | 0. 109 | 0. 337 | 3. 68E-32 | Opc-G | TPP1      |
| NCBP2. 8    | 2. 51E-36 | 0. 317911 | 0. 613 | 0. 429 | 3. 75E-32 | Opc-G | NCBP2     |
| PPP1R14B. 2 | 5. 1E-36  | 0. 376542 | 0. 53  | 0. 332 | 3. 75E-32 | Opc-G | PPP1R14B  |
| SPOCD1. 8   | 2. 85E-36 | -0. 83175 | 0. 03  | 0. 23  | 4. 25E-32 | Opc-G | SPOCD1    |
| PLIN2. 8    | 3. 11E-36 | -0. 88792 | 0. 146 | 0. 355 | 4. 64E-32 | Opc-G | PLIN2     |
| CASP4. 10   | 3. 37E-36 | -0. 64107 | 0. 036 | 0. 241 | 5. 04E-32 | Opc-G | CASP4     |
| MMP2. 6     | 3. 44E-36 | 0. 405127 | 0. 393 | 0. 216 | 5. 15E-32 | Opc-G | MMP2      |
| UNC93B1. 1  | 4. 37E-36 | -0. 59208 | 0. 02  | 0. 213 | 6. 54E-32 | Opc-G | UNC93B1   |
| IL18. 10    | 4. 52E-36 | -0. 81085 | 0. 016 | 0. 205 | 6. 76E-32 | Opc-G | IL18      |
| RGS19. 10   | 4. 97E-36 | -0. 62922 | 0. 075 | 0. 289 | 7. 42E-32 | Opc-G | RGS19     |
| COPS6. 6    | 5. 22E-36 | 0. 225347 | 0. 788 | 0. 592 | 7. 80E-32 | Opc-G | COPS6     |
| LINC00643   | 5. 56E-36 | 0. 206852 | 0. 072 | 0. 012 | 8. 31E-32 | Opc-G | LINC00643 |
| CASP1. 9    | 6. 93E-36 | -0. 64611 | 0. 036 | 0. 239 | 1. 04E-31 | Opc-G | CASP1     |
| OLFML3. 9   | 8. 73E-36 | -0. 78708 | 0. 04  | 0. 239 | 1. 30E-31 | Opc-G | OLFML3    |
| APC2. 9     | 9. 76E-36 | 0. 474625 | 0. 29  | 0. 138 | 1. 46E-31 | Opc-G | APC2      |
| ZNHIT1. 3   | 1. 34E-35 | 0. 192368 | 0. 836 | 0. 639 | 2. 00E-31 | Opc-G | ZNHIT1    |
| TCEAL4. 8   | 1. 37E-35 | 0. 252132 | 0. 743 | 0. 56  | 2. 04E-31 | Opc-G | TCEAL4    |
| HSP90AB1. 1 | 1. 68E-35 | 0. 139126 | 0. 933 | 0. 813 | 2. 51E-31 | Opc-G | HSP90AB1  |
| PDE9A. 6    | 1. 77E-35 | 0. 332919 | 0. 182 | 0. 063 | 2. 64E-31 | Opc-G | PDE9A     |
| MOB3B. 7    | 2. 05E-35 | 0. 313426 | 0. 223 | 0. 085 | 3. 06E-31 | Opc-G | MOB3B     |
| SMARCA4. 9  | 2. 22E-35 | 0. 362172 | 0. 534 | 0. 349 | 3. 32E-31 | Opc-G | SMARCA4   |
| TMBIM1. 7   | 2. 59E-35 | -0. 5917  | 0. 049 | 0. 257 | 3. 88E-31 | Opc-G | TMBIM1    |
| QKI. 7      | 2. 76E-35 | 0. 27658  | 0. 66  | 0. 458 | 4. 12E-31 | Opc-G | QKI       |
| CALCRL. 2   | 2. 92E-35 | 0. 275029 | 0. 128 | 0. 035 | 4. 37E-31 | Opc-G | CALCRL    |
| SLC29A4. 7  | 2. 93E-35 | 0. 362607 | 0. 198 | 0. 075 | 4. 38E-31 | Opc-G | SLC29A4   |
| CSF2RA. 9   | 3. 97E-35 | -0. 82045 | 0. 026 | 0. 214 | 5. 94E-31 | Opc-G | CSF2RA    |
| ARPC1A. 8   | 4. 19E-35 | 0. 214958 | 0. 738 | 0. 546 | 6. 26E-31 | Opc-G | ARPC1A    |
| FEZ1. 9     | 4. 35E-35 | 0. 269959 | 0. 645 | 0. 415 | 6. 50E-31 | Opc-G | FEZ1      |
| BCAR1. 8    | 8. 29E-35 | 0. 421508 | 0. 317 | 0. 162 | 1. 24E-30 | Opc-G | BCAR1     |
| S100A9. 10  | 8. 43E-35 | -0. 96558 | 0. 045 | 0. 236 | 1. 26E-30 | Opc-G | S100A9    |
| PSAT1. 9    | 8. 68E-35 | 0. 369854 | 0. 367 | 0. 192 | 1. 30E-30 | Opc-G | PSAT1     |
| LIMS1. 10   | 8. 82E-35 | -0. 59406 | 0. 23  | 0. 454 | 1. 32E-30 | Opc-G | LIMS1     |
| ABI3. 10    | 8. 89E-35 | -0. 75087 | 0. 018 | 0. 201 | 1. 33E-30 | Opc-G | ABI3      |
| NEK6. 6     | 1. 01E-34 | -0. 52623 | 0. 087 | 0. 303 | 1. 51E-30 | Opc-G | NEK6      |
| H2AFJ. 10   | 1. 02E-34 | -0. 6307  | 0. 066 | 0. 272 | 1. 52E-30 | Opc-G | H2AFJ     |
| JUN. 7      | 1. 04E-34 | 0. 28079  | 0. 796 | 0. 664 | 1. 55E-30 | Opc-G | JUN       |
| ZNF423      | 1. 12E-34 | 0. 176239 | 0. 079 | 0. 015 | 1. 67E-30 | Opc-G | ZNF423    |
| KCNK2       | 1. 24E-34 | 0. 129611 | 0. 059 | 0. 009 | 1. 85E-30 | Opc-G | KCNK2     |
| EMILIN3. 5  | 1. 47E-34 | 0. 300126 | 0. 108 | 0. 027 | 2. 20E-30 | Opc-G | EMILIN3   |
| ADAP2. 10   | 1. 71E-34 | -0. 72588 | 0. 015 | 0. 195 | 2. 55E-30 | Opc-G | ADAP2     |
| CPLX1. 7    | 1. 84E-34 | 0. 353481 | 0. 128 | 0. 036 | 2. 75E-30 | Opc-G | CPLX1     |

|             |           |           |        |        |           |       |                |
|-------------|-----------|-----------|--------|--------|-----------|-------|----------------|
| TCEAL5. 8   | 1. 90E-34 | 0. 355934 | 0. 264 | 0. 111 | 2. 83E-30 | Opc-G | TCEAL5         |
| CTSD. 8     | 2. 06E-34 | -0. 56754 | 0. 497 | 0. 649 | 3. 08E-30 | Opc-G | CTSD           |
| LTC4S. 10   | 2. 56E-34 | -0. 70737 | 0. 004 | 0. 179 | 3. 83E-30 | Opc-G | LTC4S          |
| PCMTD2. 8   | 2. 85E-34 | 0. 430839 | 0. 378 | 0. 217 | 4. 25E-30 | Opc-G | PCMTD2         |
| ARL2BP. 7   | 2. 89E-34 | 0. 342169 | 0. 568 | 0. 394 | 4. 31E-30 | Opc-G | ARL2BP         |
| OCIAD1. 6   | 2. 98E-34 | 0. 199086 | 0. 791 | 0. 626 | 4. 45E-30 | Opc-G | OCIAD1         |
| MNDA. 10    | 3. 28E-34 | -0. 75206 | 0. 01  | 0. 188 | 4. 91E-30 | Opc-G | MNDA           |
| DUSP9       | 3. 42E-34 | 0. 17158  | 0. 045 | 0. 005 | 5. 11E-30 | Opc-G | DUSP9          |
| FAM19A5. 7  | 3. 74E-34 | 0. 313766 | 0. 138 | 0. 041 | 5. 58E-30 | Opc-G | FAM19A5        |
| CLIP3. 9    | 3. 97E-34 | 0. 404628 | 0. 351 | 0. 187 | 5. 94E-30 | Opc-G | CLIP3          |
| HNRNPDL. 5  | 4. 43E-34 | 0. 131829 | 0. 929 | 0. 789 | 6. 62E-30 | Opc-G | HNRNPDL        |
| TIA1. 10    | 4. 81E-34 | 0. 404479 | 0. 404 | 0. 238 | 7. 18E-30 | Opc-G | TIA1           |
| PLEKHH2. 5  | 4. 87E-34 | 0. 329958 | 0. 173 | 0. 062 | 7. 29E-30 | Opc-G | PLEKHH2        |
| PUF60. 6    | 5. 95E-34 | 0. 251642 | 0. 72  | 0. 53  | 8. 89E-30 | Opc-G | PUF60          |
| HLA-DQA2. 6 | 6. 13E-34 | -0. 9774  | 0. 008 | 0. 183 | 9. 16E-30 | Opc-G | HLA-DQA2       |
| FGL2. 10    | 6. 16E-34 | -0. 74294 | 0. 011 | 0. 188 | 9. 21E-30 | Opc-G | FGL2           |
| HN1. 5      | 8. 08E-34 | 0. 217625 | 0. 861 | 0. 663 | 1. 21E-29 | Opc-G | HN1            |
| FOLR2. 10   | 8. 34E-34 | -0. 93933 | 0. 012 | 0. 189 | 1. 25E-29 | Opc-G | FOLR2          |
| DNAJB6. 3   | 9. 37E-34 | 0. 175048 | 0. 855 | 0. 699 | 1. 40E-29 | Opc-G | DNAJB6         |
| AXL. 9      | 1. 00E-33 | -0. 73792 | 0. 014 | 0. 192 | 1. 50E-29 | Opc-G | AXL            |
| NAP1L4. 7   | 1. 01E-33 | 0. 323244 | 0. 572 | 0. 392 | 1. 51E-29 | Opc-G | NAP1L4         |
| OLFM2. 8    | 1. 11E-33 | 0. 4097   | 0. 35  | 0. 181 | 1. 66E-29 | Opc-G | OLFM2          |
| STRAP. 7    | 1. 11E-33 | 0. 244945 | 0. 732 | 0. 541 | 1. 66E-29 | Opc-G | STRAP          |
| EIF1B. 8    | 1. 13E-33 | 0. 238127 | 0. 757 | 0. 577 | 1. 69E-29 | Opc-G | EIF1B          |
| VBP1. 7     | 1. 33E-33 | 0. 265483 | 0. 664 | 0. 475 | 1. 99E-29 | Opc-G | VBP1           |
| C2orf80. 9  | 1. 38E-33 | 0. 416744 | 0. 25  | 0. 11  | 2. 06E-29 | Opc-G | C2orf80        |
| FCGR1B. 9   | 1. 40E-33 | -0. 80104 | 0. 003 | 0. 174 | 2. 09E-29 | Opc-G | FCGR1B         |
| CCZ1. 7     | 1. 40E-33 | 0. 361066 | 0. 508 | 0. 34  | 2. 09E-29 | Opc-G | CCZ1           |
| IGFBP3. 8   | 1. 69E-33 | -0. 7419  | 0. 023 | 0. 206 | 2. 53E-29 | Opc-G | IGFBP3         |
| INSM1. 10   | 1. 77E-33 | 0. 409673 | 0. 247 | 0. 108 | 2. 64E-29 | Opc-G | INSM1          |
| GULP1       | 1. 86E-33 | 0. 166515 | 0. 072 | 0. 013 | 2. 78E-29 | Opc-G | GULP1          |
| NUDT11. 8   | 1. 99E-33 | 0. 410447 | 0. 261 | 0. 117 | 2. 98E-29 | Opc-G | NUDT11         |
| ERH. 6      | 2. 03E-33 | 0. 16884  | 0. 884 | 0. 702 | 3. 03E-29 | Opc-G | ERH            |
| TPM3. 10    | 2. 40E-33 | -0. 51292 | 0. 358 | 0. 571 | 3. 58E-29 | Opc-G | TPM3           |
| HERPUD1. 8  | 2. 45E-33 | -0. 56057 | 0. 478 | 0. 653 | 3. 66E-29 | Opc-G | HERPUD1        |
| LAIR1. 10   | 2. 60E-33 | -0. 80538 | 0. 056 | 0. 242 | 3. 89E-29 | Opc-G | LAIR1          |
| ATXN10. 6   | 2. 67E-33 | 0. 316555 | 0. 589 | 0. 41  | 3. 99E-29 | Opc-G | ATXN10         |
| GNG2. 6     | 2. 86E-33 | 0. 33397  | 0. 337 | 0. 169 | 4. 28E-29 | Opc-G | GNG2           |
| TNFRSF1B. 2 | 2. 95E-33 | -0. 67241 | 0. 02  | 0. 199 | 4. 41E-29 | Opc-G | TNFRSF1B       |
| RP11-14N7   | 2. 98E-33 | 0. 414937 | 0. 354 | 0. 195 | 4. 46E-29 | Opc-G | RP11-14N7. 2   |
| PKIA. 10    | 3. 22E-33 | 0. 290134 | 0. 22  | 0. 085 | 4. 81E-29 | Opc-G | PKIA           |
| HSPD1. 9    | 3. 61E-33 | 0. 211514 | 0. 775 | 0. 604 | 5. 39E-29 | Opc-G | HSPD1          |
| CYBB. 10    | 3. 77E-33 | -0. 74056 | 0. 025 | 0. 203 | 5. 64E-29 | Opc-G | CYBB           |
| PSD2. 6     | 3. 96E-33 | 0. 258688 | 0. 126 | 0. 035 | 5. 92E-29 | Opc-G | PSD2           |
| NIFK. 6     | 4. 48E-33 | 0. 329741 | 0. 514 | 0. 337 | 6. 69E-29 | Opc-G | NIFK           |
| MAPT-AS1. 4 | 4. 95E-33 | 0. 248892 | 0. 085 | 0. 018 | 7. 40E-29 | Opc-G | MAPT-AS1       |
| SIGIRR. 7   | 5. 28E-33 | -0. 51078 | 0. 025 | 0. 207 | 7. 89E-29 | Opc-G | SIGIRR         |
| MAP3K8. 1C  | 5. 34E-33 | -0. 70574 | 0. 018 | 0. 194 | 7. 98E-29 | Opc-G | MAP3K8         |
| RP11-713F   | 5. 65E-33 | 0. 208238 | 0. 098 | 0. 023 | 8. 45E-29 | Opc-G | RP11-713P17. 3 |
| PLEK. 10    | 5. 66E-33 | -0. 75153 | 0. 012 | 0. 186 | 8. 46E-29 | Opc-G | PLEK           |
| GSX2        | 5. 80E-33 | 0. 180009 | 0. 064 | 0. 011 | 8. 66E-29 | Opc-G | GSX2           |



|            |               |           |        |        |           |       |           |
|------------|---------------|-----------|--------|--------|-----------|-------|-----------|
| KIAA1549.  | 6. 04E-33     | 0. 330634 | 0. 214 | 0. 086 | 9. 02E-29 | Opc-G | KIAA1549  |
| RBMX.      | 6. 53E-33     | 0. 216801 | 0. 725 | 0. 556 | 9. 75E-29 | Opc-G | RBMX      |
| REC8.      | 9. 37E-33     | 0. 317183 | 0. 189 | 0. 07  | 1. 40E-28 | Opc-G | REC8      |
| ZFP36.     | 7. 1. 01E-32  | -0. 61223 | 0. 407 | 0. 584 | 1. 50E-28 | Opc-G | ZFP36     |
| TAF7.      | 9. 1. 05E-32  | 0. 231143 | 0. 739 | 0. 541 | 1. 58E-28 | Opc-G | TAF7      |
| TMEM35.    | 9. 1. 10E-32  | 0. 326493 | 0. 213 | 0. 084 | 1. 65E-28 | Opc-G | TMEM35    |
| ELF1.      | 10. 1. 20E-32 | -0. 62777 | 0. 061 | 0. 256 | 1. 80E-28 | Opc-G | ELF1      |
| GBP2.      | 7. 1. 38E-32  | -0. 64625 | 0. 034 | 0. 22  | 2. 06E-28 | Opc-G | GBP2      |
| COL9A2.    | 5. 1. 38E-32  | 0. 305281 | 0. 208 | 0. 081 | 2. 07E-28 | Opc-G | COL9A2    |
| FXYD1.     | 4. 1. 48E-32  | 0. 311904 | 0. 107 | 0. 027 | 2. 22E-28 | Opc-G | FXYD1     |
| PPDPF.     | 6. 1. 56E-32  | 0. 188284 | 0. 9   | 0. 698 | 2. 33E-28 | Opc-G | PPDPF     |
| MSR1.      | 10. 1. 60E-32 | -0. 74265 | 0. 018 | 0. 191 | 2. 39E-28 | Opc-G | MSR1      |
| RNF149.    | 1C 1. 65E-32  | -0. 64783 | 0. 087 | 0. 283 | 2. 46E-28 | Opc-G | RNF149    |
| RUNDC3A.   | 1. 1. 73E-32  | 0. 360873 | 0. 22  | 0. 089 | 2. 58E-28 | Opc-G | RUNDC3A   |
| TMEM106B.  | 1. 1. 90E-32  | 0. 334258 | 0. 495 | 0. 32  | 2. 84E-28 | Opc-G | TMEM106B  |
| STXBP2.    | 1C 2. 03E-32  | -0. 67315 | 0. 012 | 0. 183 | 3. 03E-28 | Opc-G | STXBP2    |
| HEXB.      | 10. 2. 29E-32 | -0. 51734 | 0. 197 | 0. 419 | 3. 43E-28 | Opc-G | HEXB      |
| SERP2.     | 8. 2. 32E-32  | 0. 342108 | 0. 225 | 0. 093 | 3. 47E-28 | Opc-G | SERP2     |
| PLXDC2.    | 1C 2. 65E-32  | -0. 72619 | 0. 04  | 0. 22  | 3. 95E-28 | Opc-G | PLXDC2    |
| IGFBP2.    | 8. 3. 00E-32  | 0. 300354 | 0. 62  | 0. 358 | 4. 49E-28 | Opc-G | IGFBP2    |
| SOX1.      | 3. 17E-32     | 0. 157712 | 0. 066 | 0. 011 | 4. 74E-28 | Opc-G | SOX1      |
| CCT3.      | 7. 3. 20E-32  | 0. 216201 | 0. 742 | 0. 567 | 4. 79E-28 | Opc-G | CCT3      |
| RHBDF2.    | 1C 3. 32E-32  | -0. 67754 | 0. 016 | 0. 188 | 4. 95E-28 | Opc-G | RHBDF2    |
| NRP2.      | 7. 3. 38E-32  | -0. 47887 | 0. 042 | 0. 233 | 5. 06E-28 | Opc-G | NRP2      |
| MGST2.     | 10. 3. 41E-32 | -0. 65678 | 0. 07  | 0. 266 | 5. 10E-28 | Opc-G | MGST2     |
| TERF2IP.   | 9. 3. 52E-32  | 0. 289498 | 0. 701 | 0. 505 | 5. 26E-28 | Opc-G | TERF2IP   |
| TUBB4A.    | 1C 3. 84E-32  | 0. 172949 | 0. 262 | 0. 108 | 5. 74E-28 | Opc-G | TUBB4A    |
| BCL11A.    | 7. 4. 00E-32  | 0. 253986 | 0. 138 | 0. 042 | 5. 98E-28 | Opc-G | BCL11A    |
| RGR.       | 4. 33E-32     | 0. 202957 | 0. 063 | 0. 011 | 6. 47E-28 | Opc-G | RGR       |
| TUBA1C.    | 8. 4. 44E-32  | -0. 53276 | 0. 161 | 0. 394 | 6. 63E-28 | Opc-G | TUBA1C    |
| ATP6VOE1.  | 4. 77E-32     | -0. 45794 | 0. 652 | 0. 768 | 7. 12E-28 | Opc-G | ATP6VOE1  |
| RHO.       | 8. 4. 81E-32  | 0. 39312  | 0. 269 | 0. 125 | 7. 18E-28 | Opc-G | RHO       |
| CLEC7A.    | 1C 4. 81E-32  | -0. 70354 | 0. 015 | 0. 186 | 7. 19E-28 | Opc-G | CLEC7A    |
| CCDC136.   | 8. 4. 92E-32  | 0. 317559 | 0. 209 | 0. 083 | 7. 36E-28 | Opc-G | CCDC136   |
| NR4A2.     | 10. 5. 95E-32 | -0. 79004 | 0. 079 | 0. 263 | 8. 89E-28 | Opc-G | NR4A2     |
| STAB1.     | 9. 7. 65E-32  | -0. 7282  | 0. 007 | 0. 172 | 1. 14E-27 | Opc-G | STAB1     |
| RARRES2.   | 9. 1. 01E-31  | 0. 111136 | 0. 313 | 0. 138 | 1. 51E-27 | Opc-G | RARRES2   |
| OPHN1.     | 8. 1. 15E-31  | 0. 365168 | 0. 175 | 0. 064 | 1. 71E-27 | Opc-G | OPHN1     |
| GTF2IRD2E. | 1. 16E-31     | 0. 32724  | 0. 275 | 0. 128 | 1. 73E-27 | Opc-G | GTF2IRD2B |
| TNFRSF12A. | 1. 27E-31     | -0. 57474 | 0. 096 | 0. 3   | 1. 89E-27 | Opc-G | TNFRSF12A |
| SMDT1.     | 4. 1. 40E-31  | 0. 261525 | 0. 719 | 0. 548 | 2. 09E-27 | Opc-G | SMDT1     |
| FAM26F.    | 1C 1. 51E-31  | -0. 63825 | 0. 011 | 0. 177 | 2. 26E-27 | Opc-G | FAM26F    |
| RRBP1.     | 5. 1. 70E-31  | -0. 48853 | 0. 102 | 0. 31  | 2. 54E-27 | Opc-G | RRBP1     |
| TM6SF1.    | 1C 1. 72E-31  | -0. 73196 | 0. 005 | 0. 168 | 2. 57E-27 | Opc-G | TM6SF1    |
| PAK7.      | 9. 1. 80E-31  | 0. 225879 | 0. 135 | 0. 041 | 2. 69E-27 | Opc-G | PAK7      |
| ARPC3.     | 8. 2. 30E-31  | -0. 40325 | 0. 71  | 0. 81  | 3. 44E-27 | Opc-G | ARPC3     |
| LINC00632. | 2. 44E-31     | 0. 31166  | 0. 212 | 0. 083 | 3. 64E-27 | Opc-G | LINC00632 |
| IL1B.      | 9. 2. 44E-31  | -0. 82055 | 0. 055 | 0. 233 | 3. 65E-27 | Opc-G | IL1B      |
| LYN.       | 10. 2. 88E-31 | -0. 56951 | 0. 015 | 0. 184 | 4. 30E-27 | Opc-G | LYN       |
| RAP1A.     | 10. 2. 99E-31 | -0. 54972 | 0. 314 | 0. 529 | 4. 47E-27 | Opc-G | RAP1A     |
| PGM5.      | 2. 3. 01E-31  | 0. 177177 | 0. 094 | 0. 022 | 4. 50E-27 | Opc-G | PGM5      |

|             |           |           |        |        |           |       |                |
|-------------|-----------|-----------|--------|--------|-----------|-------|----------------|
| ING3. 5     | 3. 04E-31 | 0. 340757 | 0. 335 | 0. 175 | 4. 54E-27 | Opc-G | ING3           |
| RDH11. 4    | 3. 52E-31 | 0. 294335 | 0. 551 | 0. 377 | 5. 27E-27 | Opc-G | RDH11          |
| PARVG. 10   | 3. 63E-31 | -0. 6772  | 0. 008 | 0. 172 | 5. 42E-27 | Opc-G | PARVG          |
| SEPT7. 10   | 4. 02E-31 | 0. 163628 | 0. 854 | 0. 693 | 6. 01E-27 | Opc-G | 7-Sep          |
| CYSTM1. 9   | 4. 22E-31 | -0. 54651 | 0. 124 | 0. 338 | 6. 31E-27 | Opc-G | CYSTM1         |
| EIF1AY. 8   | 4. 61E-31 | 0. 42543  | 0. 314 | 0. 169 | 6. 88E-27 | Opc-G | EIF1AY         |
| SLC31A2. 1  | 4. 92E-31 | -0. 69181 | 0. 03  | 0. 203 | 7. 35E-27 | Opc-G | SLC31A2        |
| SIGLEC10. 5 | 5. 19E-31 | -0. 67145 | 0. 01  | 0. 172 | 7. 76E-27 | Opc-G | SIGLEC10       |
| SEMA5A. 7   | 5. 72E-31 | 0. 34748  | 0. 223 | 0. 096 | 8. 55E-27 | Opc-G | SEMA5A         |
| FHL1. 10    | 5. 94E-31 | 0. 321182 | 0. 537 | 0. 345 | 8. 87E-27 | Opc-G | FHL1           |
| FERMT3. 1C  | 6. 51E-31 | -0. 64564 | 0. 012 | 0. 177 | 9. 73E-27 | Opc-G | FERMT3         |
| SLC37A3. 7  | 6. 79E-31 | 0. 34958  | 0. 26  | 0. 121 | 1. 01E-26 | Opc-G | SLC37A3        |
| CARD16. 8   | 7. 00E-31 | -0. 61041 | 0. 052 | 0. 241 | 1. 05E-26 | Opc-G | CARD16         |
| RP11-588G   | 7. 07E-31 | 0. 142902 | 0. 046 | 0. 006 | 1. 06E-26 | Opc-G | RP11-588G21. 2 |
| RNASE2. 1C  | 7. 13E-31 | -0. 76277 | 0. 007 | 0. 168 | 1. 07E-26 | Opc-G | RNASE2         |
| BHLHE40. 8  | 7. 29E-31 | -0. 53437 | 0. 029 | 0. 204 | 1. 09E-26 | Opc-G | BHLHE40        |
| NLGN2. 7    | 7. 74E-31 | 0. 361137 | 0. 202 | 0. 084 | 1. 16E-26 | Opc-G | NLGN2          |
| GATS. 7     | 9. 48E-31 | 0. 255924 | 0. 161 | 0. 056 | 1. 42E-26 | Opc-G | GATS           |
| YBX1. 6     | 1. 04E-30 | 0. 167575 | 0. 888 | 0. 755 | 1. 56E-26 | Opc-G | YBX1           |
| GTF2I. 9    | 1. 20E-30 | 0. 367519 | 0. 544 | 0. 419 | 1. 80E-26 | Opc-G | GTF2I          |
| EPHB1. 6    | 1. 28E-30 | 0. 254996 | 0. 131 | 0. 04  | 1. 91E-26 | Opc-G | EPHB1          |
| SLC7A7. 1C  | 1. 49E-30 | -0. 69476 | 0. 019 | 0. 185 | 2. 22E-26 | Opc-G | SLC7A7         |
| BCR. 4      | 1. 84E-30 | 0. 351306 | 0. 158 | 0. 057 | 2. 76E-26 | Opc-G | BCR            |
| KCTD12. 1C  | 2. 01E-30 | -0. 58732 | 0. 064 | 0. 248 | 3. 00E-26 | Opc-G | KCTD12         |
| CNPY3. 10   | 2. 07E-30 | -0. 59739 | 0. 219 | 0. 425 | 3. 10E-26 | Opc-G | CNPY3          |
| CCL2. 4     | 2. 16E-30 | -0. 89523 | 0. 056 | 0. 237 | 3. 23E-26 | Opc-G | CCL2           |
| BRINP2. 7   | 2. 25E-30 | 0. 388481 | 0. 172 | 0. 066 | 3. 37E-26 | Opc-G | BRINP2         |
| TNFSF13B. 2 | 5. 0E-30  | -0. 69838 | 0. 041 | 0. 214 | 3. 73E-26 | Opc-G | TNFSF13B       |
| ELAVL3. 1C  | 2. 81E-30 | 0. 398892 | 0. 47  | 0. 3   | 4. 20E-26 | Opc-G | ELAVL3         |
| SLITRK2. 5  | 2. 82E-30 | 0. 206401 | 0. 108 | 0. 029 | 4. 21E-26 | Opc-G | SLITRK2        |
| SCFD2. 3    | 3. 01E-30 | 0. 38956  | 0. 197 | 0. 081 | 4. 50E-26 | Opc-G | SCFD2          |
| SCAMP2. 1C  | 3. 08E-30 | -0. 58605 | 0. 178 | 0. 387 | 4. 60E-26 | Opc-G | SCAMP2         |
| DPYSL4. 1C  | 3. 20E-30 | 0. 360451 | 0. 288 | 0. 145 | 4. 78E-26 | Opc-G | DPYSL4         |
| CHGA. 3     | 3. 47E-30 | 0. 247266 | 0. 093 | 0. 023 | 5. 18E-26 | Opc-G | CHGA           |
| RGS2. 8     | 3. 79E-30 | -0. 78107 | 0. 298 | 0. 455 | 5. 66E-26 | Opc-G | RGS2           |
| FCGBP. 9    | 3. 98E-30 | -0. 84821 | 0. 064 | 0. 24  | 5. 95E-26 | Opc-G | FCGBP          |
| RP11-390E   | 4. 57E-30 | 0. 380247 | 0. 249 | 0. 116 | 6. 83E-26 | Opc-G | RP11-390E23. 6 |
| LRRTM2. 8   | 4. 99E-30 | 0. 365104 | 0. 217 | 0. 095 | 7. 46E-26 | Opc-G | LRRTM2         |
| AGTRAP. 6   | 5. 16E-30 | -0. 53024 | 0. 09  | 0. 294 | 7. 71E-26 | Opc-G | AGTRAP         |
| GAA. 9      | 6. 32E-30 | -0. 50221 | 0. 124 | 0. 333 | 9. 44E-26 | Opc-G | GAA            |
| CMTM7. 10   | 6. 44E-30 | -0. 56563 | 0. 014 | 0. 174 | 9. 63E-26 | Opc-G | CMTM7          |
| SH3BP4. 3   | 6. 68E-30 | 0. 310041 | 0. 18  | 0. 07  | 9. 98E-26 | Opc-G | SH3BP4         |
| PILRA. 9    | 7. 42E-30 | -0. 72934 | 0. 015 | 0. 175 | 1. 11E-25 | Opc-G | PILRA          |
| CSRP1. 7    | 7. 80E-30 | -0. 53757 | 0. 061 | 0. 25  | 1. 17E-25 | Opc-G | CSRP1          |
| ARPC5. 9    | 9. 28E-30 | -0. 45008 | 0. 527 | 0. 682 | 1. 39E-25 | Opc-G | ARPC5          |
| AIF1L. 9    | 9. 37E-30 | 0. 260272 | 0. 243 | 0. 105 | 1. 40E-25 | Opc-G | AIF1L          |
| LGMN. 9     | 9. 94E-30 | -0. 65614 | 0. 165 | 0. 363 | 1. 48E-25 | Opc-G | LGMN           |
| FYB. 10     | 1. 04E-29 | -0. 71678 | 0. 059 | 0. 234 | 1. 55E-25 | Opc-G | FYB            |
| GDI1. 9     | 1. 09E-29 | 0. 251687 | 0. 656 | 0. 474 | 1. 63E-25 | Opc-G | GDI1           |
| MAGED2. 1C  | 1. 12E-29 | 0. 252773 | 0. 678 | 0. 497 | 1. 68E-25 | Opc-G | MAGED2         |
| ENHO. 9     | 1. 24E-29 | 0. 421202 | 0. 277 | 0. 142 | 1. 85E-25 | Opc-G | ENHO           |

|            |          |          |       |       |          |       |           |
|------------|----------|----------|-------|-------|----------|-------|-----------|
| LITAF.10   | 1.44E-29 | -0.63256 | 0.284 | 0.471 | 2.15E-25 | Opc-G | LITAF     |
| MYO1F.10   | 1.45E-29 | -0.64822 | 0.027 | 0.194 | 2.17E-25 | Opc-G | MYO1F     |
| XRCC5.9    | 1.57E-29 | 0.223147 | 0.712 | 0.55  | 2.35E-25 | Opc-G | XRCC5     |
| TMEM176A.1 | 1.60E-29 | -0.70288 | 0.06  | 0.238 | 2.39E-25 | Opc-G | TMEM176A  |
| RNPS1.5    | 1.61E-29 | 0.221689 | 0.687 | 0.524 | 2.40E-25 | Opc-G | RNPS1     |
| WAS.10     | 1.61E-29 | -0.64758 | 0.022 | 0.185 | 2.40E-25 | Opc-G | WAS       |
| LINC01094  | 1.88E-29 | -0.6689  | 0.008 | 0.163 | 2.81E-25 | Opc-G | LINC01094 |
| SMARCD3.9  | 2.20E-29 | 0.384817 | 0.37  | 0.222 | 3.28E-25 | Opc-G | SMARCD3   |
| OCIAD2.9   | 2.21E-29 | -0.68387 | 0.187 | 0.401 | 3.30E-25 | Opc-G | OCIAD2    |
| GSDMD.9    | 2.40E-29 | -0.47864 | 0.026 | 0.195 | 3.59E-25 | Opc-G | GSDMD     |
| TREM1.9    | 2.59E-29 | -0.78889 | 0.015 | 0.174 | 3.87E-25 | Opc-G | TREM1     |
| CAV2.5     | 2.80E-29 | 0.235834 | 0.126 | 0.038 | 4.19E-25 | Opc-G | CAV2      |
| C3orf70.9  | 3.00E-29 | 0.364818 | 0.213 | 0.093 | 4.48E-25 | Opc-G | C3orf70   |
| SMIM18.9   | 3.62E-29 | 0.270102 | 0.157 | 0.055 | 5.41E-25 | Opc-G | SMIM18    |
| CREG1.10   | 3.76E-29 | -0.56223 | 0.119 | 0.309 | 5.62E-25 | Opc-G | CREG1     |
| TMEM196.2  | 3.91E-29 | 0.178118 | 0.094 | 0.024 | 5.84E-25 | Opc-G | TMEM196   |
| ARHGAP18.4 | 2.22E-29 | -0.60537 | 0.02  | 0.182 | 6.30E-25 | Opc-G | ARHGAP18  |
| APOC1.9    | 4.77E-29 | -0.80674 | 0.428 | 0.522 | 7.13E-25 | Opc-G | APOC1     |
| CDKN1A.8   | 5.47E-29 | -0.63475 | 0.128 | 0.319 | 8.18E-25 | Opc-G | CDKN1A    |
| HCK.10     | 7.09E-29 | -0.64084 | 0.019 | 0.177 | 1.06E-24 | Opc-G | HCK       |
| TTYH1.10   | 7.53E-29 | 0.31379  | 0.449 | 0.256 | 1.13E-24 | Opc-G | TTYH1     |
| KIRREL3.2  | 7.67E-29 | 0.193269 | 0.092 | 0.023 | 1.15E-24 | Opc-G | KIRREL3   |
| GDAP1.9    | 7.69E-29 | 0.336081 | 0.288 | 0.143 | 1.15E-24 | Opc-G | GDAP1     |
| MPLKIP.6   | 8.44E-29 | 0.271408 | 0.596 | 0.435 | 1.26E-24 | Opc-G | MPLKIP    |
| SQRDL.10   | 9.23E-29 | -0.57893 | 0.014 | 0.17  | 1.38E-24 | Opc-G | SQRDL     |
| UPP1.9     | 9.81E-29 | -0.55211 | 0.078 | 0.266 | 1.47E-24 | Opc-G | UPP1      |
| LINC01117  | 1.10E-28 | 0.188416 | 0.079 | 0.018 | 1.65E-24 | Opc-G | LINC01117 |
| CAPZB.9    | 1.14E-28 | -0.45546 | 0.575 | 0.71  | 1.70E-24 | Opc-G | CAPZB     |
| ZNF677.7   | 1.21E-28 | 0.314883 | 0.34  | 0.188 | 1.80E-24 | Opc-G | ZNF677    |
| NANS.10    | 1.22E-28 | -0.57594 | 0.171 | 0.372 | 1.83E-24 | Opc-G | NANS      |
| C7orf26.8  | 1.26E-28 | 0.353114 | 0.29  | 0.149 | 1.88E-24 | Opc-G | C7orf26   |
| ARPP21.7   | 1.38E-28 | 0.279216 | 0.135 | 0.044 | 2.06E-24 | Opc-G | ARPP21    |
| PTPN6.10   | 1.49E-28 | -0.62381 | 0.016 | 0.172 | 2.22E-24 | Opc-G | PTPN6     |
| CORO1C.6   | 1.62E-28 | 0.331539 | 0.52  | 0.363 | 2.42E-24 | Opc-G | CORO1C    |
| PCDH17.8   | 1.71E-28 | 0.373202 | 0.324 | 0.183 | 2.55E-24 | Opc-G | PCDH17    |
| S100A8.10  | 1.77E-28 | -0.86668 | 0.034 | 0.195 | 2.65E-24 | Opc-G | S100A8    |
| PAICS.9    | 2.02E-28 | 0.359401 | 0.449 | 0.299 | 3.01E-24 | Opc-G | PAICS     |
| VAMP3.7    | 2.03E-28 | -0.52531 | 0.156 | 0.361 | 3.03E-24 | Opc-G | VAMP3     |
| PLA2G16.8  | 2.36E-28 | -0.60637 | 0.208 | 0.417 | 3.52E-24 | Opc-G | PLA2G16   |
| APBB1IP.1  | 2.37E-28 | -0.61651 | 0.014 | 0.166 | 3.55E-24 | Opc-G | APBB1IP   |
| DUSP23.9   | 2.38E-28 | -0.58858 | 0.033 | 0.198 | 3.55E-24 | Opc-G | DUSP23    |
| STC2.5     | 2.53E-28 | 0.346822 | 0.119 | 0.036 | 3.78E-24 | Opc-G | STC2      |
| COX6A1.6   | 2.80E-28 | 0.103986 | 0.97  | 0.836 | 4.19E-24 | Opc-G | COX6A1    |
| MPPED2.8   | 3.31E-28 | 0.305217 | 0.198 | 0.082 | 4.94E-24 | Opc-G | MPPED2    |
| TFAP2A.7   | 3.32E-28 | 0.209828 | 0.111 | 0.032 | 4.96E-24 | Opc-G | TFAP2A    |
| POLR2B.8   | 3.50E-28 | 0.444192 | 0.396 | 0.253 | 5.23E-24 | Opc-G | POLR2B    |
| ZNF680.8   | 3.68E-28 | 0.337716 | 0.309 | 0.165 | 5.49E-24 | Opc-G | ZNF680    |
| ACHE.6     | 4.32E-28 | 0.232552 | 0.123 | 0.038 | 6.46E-24 | Opc-G | ACHE      |
| IGSF6.10   | 4.60E-28 | -0.68053 | 0.012 | 0.163 | 6.87E-24 | Opc-G | IGSF6     |
| ANKS1B.9   | 4.86E-28 | 0.232114 | 0.234 | 0.099 | 7.27E-24 | Opc-G | ANKS1B    |
| POP7.8     | 5.22E-28 | 0.282629 | 0.544 | 0.384 | 7.80E-24 | Opc-G | POP7      |

|           |          |          |       |       |          |       |               |
|-----------|----------|----------|-------|-------|----------|-------|---------------|
| PRDX6.6   | 5.38E-28 | -0.54038 | 0.489 | 0.633 | 8.03E-24 | Opc-G | PRDX6         |
| HOXC9.10  | 5.99E-28 | 0.271346 | 0.197 | 0.078 | 8.95E-24 | Opc-G | HOXC9         |
| PARVB.10  | 6.02E-28 | -0.4423  | 0.018 | 0.174 | 8.99E-24 | Opc-G | PARVB         |
| NDUFB11.3 | 6.27E-28 | 0.145926 | 0.881 | 0.725 | 9.37E-24 | Opc-G | NDUFB11       |
| SMARCE1.7 | 6.35E-28 | 0.285882 | 0.53  | 0.368 | 9.48E-24 | Opc-G | SMARCE1       |
| CD302.10  | 6.55E-28 | -0.61094 | 0.048 | 0.215 | 9.78E-24 | Opc-G | CD302         |
| APBA2.10  | 7.06E-28 | 0.383862 | 0.34  | 0.198 | 1.05E-23 | Opc-G | APBA2         |
| MATR3.9   | 7.20E-28 | 0.280397 | 0.638 | 0.476 | 1.08E-23 | Opc-G | MATR3         |
| IFI35.8   | 7.26E-28 | -0.44956 | 0.059 | 0.243 | 1.08E-23 | Opc-G | IFI35         |
| MTSS1.6   | 7.26E-28 | 0.295268 | 0.372 | 0.202 | 1.09E-23 | Opc-G | MTSS1         |
| C8orf33.6 | 7.39E-28 | 0.324812 | 0.462 | 0.309 | 1.10E-23 | Opc-G | C8orf33       |
| PCBP1.7   | 7.85E-28 | 0.228935 | 0.719 | 0.579 | 1.17E-23 | Opc-G | PCBP1         |
| PLAU.10   | 8.22E-28 | -0.48851 | 0.018 | 0.173 | 1.23E-23 | Opc-G | PLAU          |
| TBCA.8    | 8.29E-28 | 0.155468 | 0.878 | 0.699 | 1.24E-23 | Opc-G | TBCA          |
| CSF3R.9   | 8.33E-28 | -0.66188 | 0.012 | 0.162 | 1.24E-23 | Opc-G | CSF3R         |
| FAM212B-A | 8.44E-28 | 0.206362 | 0.082 | 0.019 | 1.26E-23 | Opc-G | FAM212B-AS1   |
| PKM.7     | 9.01E-28 | -0.39302 | 0.727 | 0.773 | 1.35E-23 | Opc-G | PKM           |
| RP11-536C | 9.54E-28 | 0.168058 | 0.052 | 0.008 | 1.43E-23 | Opc-G | RP11-536018.1 |
| PPM1G.9   | 1.04E-27 | 0.304608 | 0.563 | 0.409 | 1.55E-23 | Opc-G | PPM1G         |
| CALM1.10  | 1.20E-27 | 0.16333  | 0.923 | 0.762 | 1.79E-23 | Opc-G | CALM1         |
| IRF8.10   | 1.31E-27 | -0.61874 | 0.016 | 0.168 | 1.95E-23 | Opc-G | IRF8          |
| CD69.7    | 1.37E-27 | -0.76078 | 0.014 | 0.163 | 2.05E-23 | Opc-G | CD69          |
| SIRT2.8   | 1.45E-27 | 0.275144 | 0.557 | 0.407 | 2.17E-23 | Opc-G | SIRT2         |
| IGLON5.6  | 1.45E-27 | 0.199792 | 0.131 | 0.042 | 2.17E-23 | Opc-G | IGLON5        |
| SLC44A1.7 | 1.45E-27 | 0.336269 | 0.46  | 0.304 | 2.17E-23 | Opc-G | SLC44A1       |
| CSMD1     | 1.48E-27 | 0.159052 | 0.066 | 0.013 | 2.21E-23 | Opc-G | CSMD1         |
| MKRN3.6   | 1.63E-27 | 0.238712 | 0.123 | 0.039 | 2.44E-23 | Opc-G | MKRN3         |
| SLC2A5.1C | 1.70E-27 | -0.74601 | 0.026 | 0.18  | 2.55E-23 | Opc-G | SLC2A5        |
| AP1S1.9   | 1.75E-27 | 0.258006 | 0.622 | 0.457 | 2.62E-23 | Opc-G | AP1S1         |
| NDUFB9.4  | 1.90E-27 | 0.18099  | 0.844 | 0.679 | 2.84E-23 | Opc-G | NDUFB9        |
| CD4.10    | 2.06E-27 | -0.61293 | 0.015 | 0.164 | 3.08E-23 | Opc-G | CD4           |
| KHDRBS1.8 | 2.15E-27 | 0.280565 | 0.637 | 0.476 | 3.21E-23 | Opc-G | KHDRBS1       |
| SERPINB9  | 2.23E-27 | -0.60897 | 0.01  | 0.156 | 3.33E-23 | Opc-G | SERPINB9      |
| PTGS1.10  | 2.62E-27 | -0.52072 | 0.015 | 0.166 | 3.92E-23 | Opc-G | PTGS1         |
| MAML2.9   | 2.65E-27 | 0.374718 | 0.328 | 0.189 | 3.96E-23 | Opc-G | MAML2         |
| PTBP2.8   | 2.73E-27 | 0.290161 | 0.221 | 0.098 | 4.08E-23 | Opc-G | PTBP2         |
| ZMIZ1.3   | 2.75E-27 | 0.321354 | 0.265 | 0.13  | 4.10E-23 | Opc-G | ZMIZ1         |
| CTNNA2.7  | 2.86E-27 | 0.275592 | 0.148 | 0.052 | 4.28E-23 | Opc-G | CTNNA2        |
| RP11-259K | 2.90E-27 | 0.18334  | 0.075 | 0.017 | 4.34E-23 | Opc-G | RP11-259K15.2 |
| DNM3.8    | 2.92E-27 | 0.282839 | 0.195 | 0.081 | 4.36E-23 | Opc-G | DNM3          |
| CBX2.6    | 3.07E-27 | 0.314129 | 0.158 | 0.061 | 4.58E-23 | Opc-G | CBX2          |
| SHFM1.6   | 3.08E-27 | 0.128063 | 0.887 | 0.712 | 4.61E-23 | Opc-G | SHFM1         |
| PSIP1.8   | 3.12E-27 | 0.304945 | 0.546 | 0.373 | 4.66E-23 | Opc-G | PSIP1         |
| SNCA.10   | 3.40E-27 | -0.656   | 0.008 | 0.153 | 5.09E-23 | Opc-G | SNCA          |
| LRRN3.9   | 3.80E-27 | 0.325684 | 0.231 | 0.105 | 5.67E-23 | Opc-G | LRRN3         |
| RARRES3.5 | 3.88E-27 | -0.59054 | 0.072 | 0.255 | 5.80E-23 | Opc-G | RARRES3       |
| CCDC28B.9 | 3.91E-27 | 0.412512 | 0.354 | 0.21  | 5.84E-23 | Opc-G | CCDC28B       |
| SSR3.9    | 4.03E-27 | -0.52346 | 0.336 | 0.539 | 6.02E-23 | Opc-G | SSR3          |
| CD58.10   | 4.13E-27 | -0.51671 | 0.063 | 0.238 | 6.17E-23 | Opc-G | CD58          |
| NAE1.7    | 4.88E-27 | 0.327402 | 0.484 | 0.331 | 7.29E-23 | Opc-G | NAE1          |
| ARRB2.10  | 5.17E-27 | -0.58437 | 0.223 | 0.412 | 7.72E-23 | Opc-G | ARRB2         |

|           |          |          |       |       |          |       |               |
|-----------|----------|----------|-------|-------|----------|-------|---------------|
| DYNC1LI2. | 5.78E-27 | 0.333162 | 0.485 | 0.335 | 8.63E-23 | Opc-G | DYNC1LI2      |
| CAST.7    | 6.32E-27 | -0.45228 | 0.134 | 0.33  | 9.44E-23 | Opc-G | CAST          |
| MAP1A.9   | 6.87E-27 | 0.391155 | 0.363 | 0.221 | 1.03E-22 | Opc-G | MAP1A         |
| ENG.10    | 6.90E-27 | -0.56915 | 0.023 | 0.174 | 1.03E-22 | Opc-G | ENG           |
| COL11A1   | 7.42E-27 | 0.153582 | 0.068 | 0.014 | 1.11E-22 | Opc-G | COL11A1       |
| PROM1     | 8.46E-27 | 0.194505 | 0.086 | 0.022 | 1.26E-22 | Opc-G | PROM1         |
| YIPF6.6   | 1.01E-26 | 0.284405 | 0.46  | 0.303 | 1.51E-22 | Opc-G | YIPF6         |
| RB1.10    | 1.02E-26 | -0.55468 | 0.133 | 0.316 | 1.53E-22 | Opc-G | RB1           |
| DHRS3.8   | 1.05E-26 | -0.554   | 0.026 | 0.181 | 1.57E-22 | Opc-G | DHRS3         |
| BCL2A1.1C | 1.09E-26 | -0.63324 | 0.019 | 0.166 | 1.63E-22 | Opc-G | BCL2A1        |
| NCF4.10   | 1.11E-26 | -0.64679 | 0.011 | 0.155 | 1.65E-22 | Opc-G | NCF4          |
| NUPL2.6   | 1.16E-26 | 0.319562 | 0.411 | 0.259 | 1.74E-22 | Opc-G | NUPL2         |
| AGPAT2.1C | 1.18E-26 | -0.3992  | 0.03  | 0.189 | 1.76E-22 | Opc-G | AGPAT2        |
| RAB34.6   | 1.31E-26 | -0.48451 | 0.108 | 0.295 | 1.95E-22 | Opc-G | RAB34         |
| SNRPF.6   | 1.32E-26 | 0.203631 | 0.697 | 0.537 | 1.97E-22 | Opc-G | SNRPF         |
| RP11-143A | 1.38E-26 | 0.119027 | 0.034 | 0.004 | 2.06E-22 | Opc-G | RP11-143A12.3 |
| NES.10    | 1.46E-26 | 0.310842 | 0.456 | 0.264 | 2.19E-22 | Opc-G | NES           |
| SCIN.10   | 1.49E-26 | -0.71839 | 0.015 | 0.16  | 2.22E-22 | Opc-G | SCIN          |
| SORL1.8   | 1.63E-26 | -0.57635 | 0.068 | 0.238 | 2.44E-22 | Opc-G | SORL1         |
| LINC01116 | 1.73E-26 | 0.401225 | 0.25  | 0.125 | 2.59E-22 | Opc-G | LINC01116     |
| PNN.7     | 1.76E-26 | 0.267178 | 0.545 | 0.392 | 2.63E-22 | Opc-G | PNN           |
| SPTLC2.1C | 2.20E-26 | -0.55384 | 0.056 | 0.22  | 3.29E-22 | Opc-G | SPTLC2        |
| RUFY3.9   | 2.33E-26 | 0.330164 | 0.455 | 0.295 | 3.48E-22 | Opc-G | RUFY3         |
| EXOC1.6   | 2.50E-26 | 0.412588 | 0.38  | 0.24  | 3.73E-22 | Opc-G | EXOC1         |
| ARL9.9    | 2.51E-26 | 0.401175 | 0.209 | 0.097 | 3.75E-22 | Opc-G | ARL9          |
| EIF5B.5   | 2.59E-26 | 0.201314 | 0.653 | 0.513 | 3.88E-22 | Opc-G | EIF5B         |
| CALD1.8   | 2.78E-26 | 0.205897 | 0.596 | 0.408 | 4.15E-22 | Opc-G | CALD1         |
| SLC25A4.1 | 2.81E-26 | 0.25984  | 0.586 | 0.416 | 4.20E-22 | Opc-G | SLC25A4       |
| ADD2.8    | 2.88E-26 | 0.302574 | 0.191 | 0.081 | 4.31E-22 | Opc-G | ADD2          |
| MKRN1.9   | 3.20E-26 | 0.296845 | 0.56  | 0.398 | 4.78E-22 | Opc-G | MKRN1         |
| MMP14.8   | 3.53E-26 | -0.46569 | 0.061 | 0.232 | 5.28E-22 | Opc-G | MMP14         |
| TRIM13.6  | 3.54E-26 | 0.301578 | 0.399 | 0.239 | 5.29E-22 | Opc-G | TRIM13        |
| DLX5.10   | 3.59E-26 | 0.343949 | 0.284 | 0.134 | 5.37E-22 | Opc-G | DLX5          |
| PMP22.8   | 3.74E-26 | -0.48629 | 0.23  | 0.441 | 5.59E-22 | Opc-G | PMP22         |
| HBEGF.10  | 3.91E-26 | -0.60329 | 0.061 | 0.226 | 5.84E-22 | Opc-G | HBEGF         |
| GTF2IRD2. | 4.02E-26 | 0.321382 | 0.231 | 0.109 | 6.01E-22 | Opc-G | GTF2IRD2      |
| CH25H.6   | 4.16E-26 | -0.7958  | 0.014 | 0.156 | 6.21E-22 | Opc-G | CH25H         |
| FBXO21.7  | 4.28E-26 | 0.313011 | 0.455 | 0.298 | 6.39E-22 | Opc-G | FBXO21        |
| REV3L.7   | 4.34E-26 | 0.385894 | 0.337 | 0.2   | 6.48E-22 | Opc-G | REV3L         |
| PLD4.10   | 4.80E-26 | -0.67354 | 0.019 | 0.162 | 7.17E-22 | Opc-G | PLD4          |
| LRP6.9    | 4.95E-26 | 0.323157 | 0.223 | 0.105 | 7.39E-22 | Opc-G | LRP6          |
| SEPT6.8   | 5.03E-26 | -0.45167 | 0.025 | 0.175 | 7.51E-22 | Opc-G | 6-Sep         |
| RUNX1.9   | 5.03E-26 | -0.44486 | 0.041 | 0.2   | 7.52E-22 | Opc-G | RUNX1         |
| RP11-332H | 5.06E-26 | 0.370845 | 0.24  | 0.119 | 7.56E-22 | Opc-G | RP11-332H14.2 |
| NLGN1.8   | 5.07E-26 | 0.399877 | 0.251 | 0.13  | 7.57E-22 | Opc-G | NLGN1         |
| DTD1.9    | 5.16E-26 | 0.312792 | 0.545 | 0.381 | 7.71E-22 | Opc-G | DTD1          |
| PFKFB3.9  | 5.33E-26 | -0.49569 | 0.081 | 0.255 | 7.96E-22 | Opc-G | PFKFB3        |
| LPCAT2.1C | 5.74E-26 | -0.53668 | 0.014 | 0.156 | 8.58E-22 | Opc-G | LPCAT2        |
| APP.9     | 5.98E-26 | 0.217547 | 0.72  | 0.511 | 8.93E-22 | Opc-G | APP           |
| RHOB.7    | 6.22E-26 | 0.251974 | 0.742 | 0.6   | 9.30E-22 | Opc-G | RHOB          |
| CHCHD10.8 | 6.35E-26 | -0.45525 | 0.204 | 0.393 | 9.49E-22 | Opc-G | CHCHD10       |

|               |           |           |        |        |           |       |                |
|---------------|-----------|-----------|--------|--------|-----------|-------|----------------|
| KMT2C. 7      | 6. 62E-26 | 0. 353454 | 0. 398 | 0. 252 | 9. 89E-22 | Opc-G | KMT2C          |
| PABPN1. 6     | 6. 87E-26 | 0. 299107 | 0. 495 | 0. 346 | 1. 03E-21 | Opc-G | PABPN1         |
| TCEA2. 9      | 7. 19E-26 | 0. 314719 | 0. 533 | 0. 357 | 1. 07E-21 | Opc-G | TCEA2          |
| HEXA. 9       | 7. 89E-26 | -0. 52094 | 0. 205 | 0. 402 | 1. 18E-21 | Opc-G | HEXA           |
| ADAM28. 9     | 8. 82E-26 | -0. 63511 | 0. 011 | 0. 15  | 1. 32E-21 | Opc-G | ADAM28         |
| CASP9. 4      | 9. 01E-26 | 0. 430657 | 0. 182 | 0. 078 | 1. 35E-21 | Opc-G | CASP9          |
| STRIP2        | 9. 58E-26 | 0. 168667 | 0. 072 | 0. 017 | 1. 43E-21 | Opc-G | STRIP2         |
| FOSL2. 9      | 1. 00E-25 | -0. 44621 | 0. 038 | 0. 196 | 1. 49E-21 | Opc-G | FOSL2          |
| ACSL1. 9      | 1. 01E-25 | -0. 57168 | 0. 072 | 0. 238 | 1. 50E-21 | Opc-G | ACSL1          |
| RHBDD2. 9     | 1. 02E-25 | 0. 238368 | 0. 609 | 0. 449 | 1. 52E-21 | Opc-G | RHBDD2         |
| TLN1. 10      | 1. 07E-25 | -0. 46677 | 0. 112 | 0. 296 | 1. 60E-21 | Opc-G | TLN1           |
| GIMAP4. 1C    | 1. 26E-25 | -0. 64834 | 0. 016 | 0. 159 | 1. 88E-21 | Opc-G | GIMAP4         |
| WIPI1. 8      | 1. 26E-25 | -0. 47128 | 0. 038 | 0. 195 | 1. 88E-21 | Opc-G | WIPI1          |
| MLLT4. 8      | 1. 28E-25 | 0. 399833 | 0. 284 | 0. 154 | 1. 92E-21 | Opc-G | MLLT4          |
| RANBP1. 9     | 1. 34E-25 | 0. 21202  | 0. 745 | 0. 567 | 2. 00E-21 | Opc-G | RANBP1         |
| DHPS. 7       | 1. 38E-25 | 0. 261486 | 0. 596 | 0. 437 | 2. 06E-21 | Opc-G | DHPS           |
| CCND1. 6      | 1. 44E-25 | 0. 370778 | 0. 359 | 0. 21  | 2. 15E-21 | Opc-G | CCND1          |
| SERPINB6. 1   | 1. 52E-25 | -0. 44558 | 0. 286 | 0. 491 | 2. 27E-21 | Opc-G | SERPINB6       |
| MFSD1. 10     | 1. 53E-25 | -0. 5576  | 0. 171 | 0. 355 | 2. 28E-21 | Opc-G | MFSD1          |
| FAM129A. 6    | 1. 55E-25 | -0. 37757 | 0. 01  | 0. 148 | 2. 32E-21 | Opc-G | FAM129A        |
| MZT2B. 6      | 1. 67E-25 | 0. 255846 | 0. 745 | 0. 583 | 2. 50E-21 | Opc-G | MZT2B          |
| SLN. 7        | 1. 81E-25 | -0. 82885 | 0. 023 | 0. 171 | 2. 70E-21 | Opc-G | SLN            |
| FCGR2B. 1C    | 1. 86E-25 | -0. 69769 | 0. 014 | 0. 153 | 2. 78E-21 | Opc-G | FCGR2B         |
| L1CAM. 6      | 1. 89E-25 | 0. 280685 | 0. 102 | 0. 03  | 2. 82E-21 | Opc-G | L1CAM          |
| NFKBIA. 9     | 1. 89E-25 | -0. 50643 | 0. 344 | 0. 51  | 2. 83E-21 | Opc-G | NFKBIA         |
| HSPA2. 7      | 1. 89E-25 | 0. 28292  | 0. 247 | 0. 117 | 2. 83E-21 | Opc-G | HSPA2          |
| LCP1. 9       | 1. 92E-25 | -0. 58401 | 0. 012 | 0. 151 | 2. 87E-21 | Opc-G | LCP1           |
| ACO05618. 6   | 2. 02E-25 | 0. 230297 | 0. 117 | 0. 038 | 3. 03E-21 | Opc-G | ACO05618. 6    |
| FAM105A. 1    | 2. 12E-25 | -0. 59167 | 0. 026 | 0. 172 | 3. 17E-21 | Opc-G | FAM105A        |
| F13A1. 7      | 2. 20E-25 | -0. 78904 | 0. 023 | 0. 168 | 3. 29E-21 | Opc-G | F13A1          |
| CRISPLD1. 1   | 2. 35E-25 | 0. 361849 | 0. 19  | 0. 083 | 3. 50E-21 | Opc-G | CRISPLD1       |
| GPNMB. 9      | 2. 43E-25 | -0. 71225 | 0. 056 | 0. 21  | 3. 63E-21 | Opc-G | GPNMB          |
| RBPJ. 8       | 2. 63E-25 | 0. 257308 | 0. 616 | 0. 459 | 3. 92E-21 | Opc-G | RBPJ           |
| MLF2. 9       | 2. 83E-25 | 0. 189423 | 0. 791 | 0. 597 | 4. 23E-21 | Opc-G | MLF2           |
| CSTA. 10      | 2. 90E-25 | -0. 54565 | 0. 004 | 0. 137 | 4. 33E-21 | Opc-G | CSTA           |
| HHIP-AS1. 1   | 3. 05E-25 | 0. 1495   | 0. 071 | 0. 016 | 4. 56E-21 | Opc-G | HHIP-AS1       |
| FRMD4B. 1C    | 3. 15E-25 | -0. 55963 | 0. 023 | 0. 168 | 4. 71E-21 | Opc-G | FRMD4B         |
| NKAIN3. 9     | 3. 35E-25 | 0. 338868 | 0. 238 | 0. 117 | 5. 00E-21 | Opc-G | NKAIN3         |
| LSAMP. 8      | 3. 42E-25 | 0. 334109 | 0. 306 | 0. 163 | 5. 12E-21 | Opc-G | LSAMP          |
| DDIT3. 5      | 3. 43E-25 | 0. 351031 | 0. 542 | 0. 42  | 5. 12E-21 | Opc-G | DDIT3          |
| GPX3. 9       | 3. 43E-25 | -0. 5397  | 0. 019 | 0. 162 | 5. 13E-21 | Opc-G | GPX3           |
| GPR65. 10     | 3. 47E-25 | -0. 56208 | 0. 007 | 0. 142 | 5. 18E-21 | Opc-G | GPR65          |
| CITF22-92A. 6 | 3. 55E-25 | 0. 205162 | 0. 06  | 0. 012 | 5. 31E-21 | Opc-G | CITF22-92A6. 1 |
| CRIPT. 4      | 3. 69E-25 | 0. 311577 | 0. 46  | 0. 317 | 5. 52E-21 | Opc-G | CRIPT          |
| SBDS. 9       | 4. 04E-25 | 0. 135082 | 0. 772 | 0. 599 | 6. 04E-21 | Opc-G | SBDS           |
| HAMP. 10      | 4. 35E-25 | -0. 79249 | 0. 027 | 0. 17  | 6. 50E-21 | Opc-G | HAMP           |
| P4HA1. 5      | 4. 44E-25 | -0. 45092 | 0. 067 | 0. 235 | 6. 64E-21 | Opc-G | P4HA1          |
| MYEOV2. 4     | 4. 71E-25 | 0. 138343 | 0. 833 | 0. 663 | 7. 05E-21 | Opc-G | MYEOV2         |
| CXXC5. 10     | 4. 85E-25 | 0. 288132 | 0. 541 | 0. 369 | 7. 25E-21 | Opc-G | CXXC5          |
| SSR2. 4       | 5. 15E-25 | 0. 130152 | 0. 844 | 0. 705 | 7. 70E-21 | Opc-G | SSR2           |
| ELL2. 8       | 5. 21E-25 | -0. 54398 | 0. 048 | 0. 202 | 7. 78E-21 | Opc-G | ELL2           |

|             |           |           |        |        |           |       |                |
|-------------|-----------|-----------|--------|--------|-----------|-------|----------------|
| MYH9. 9     | 5. 25E-25 | -0. 44588 | 0. 042 | 0. 198 | 7. 85E-21 | Opc-G | MYH9           |
| VCAN. 7     | 5. 39E-25 | 0. 311061 | 0. 391 | 0. 236 | 8. 05E-21 | Opc-G | VCAN           |
| SQSTM1. 6   | 5. 59E-25 | -0. 43736 | 0. 37  | 0. 534 | 8. 35E-21 | Opc-G | SQSTM1         |
| LHFPL2. 9   | 5. 82E-25 | -0. 48388 | 0. 025 | 0. 17  | 8. 70E-21 | Opc-G | LHFPL2         |
| BCL7A. 9    | 5. 84E-25 | 0. 327893 | 0. 272 | 0. 141 | 8. 73E-21 | Opc-G | BCL7A          |
| BSG. 9      | 5. 86E-25 | 0. 113205 | 0. 893 | 0. 731 | 8. 75E-21 | Opc-G | BSG            |
| TIMM13. 3   | 6. 01E-25 | 0. 229609 | 0. 766 | 0. 579 | 8. 98E-21 | Opc-G | TIMM13         |
| SRRM2. 5    | 7. 12E-25 | 0. 237527 | 0. 675 | 0. 523 | 1. 06E-20 | Opc-G | SRRM2          |
| NOA1. 6     | 7. 30E-25 | 0. 382874 | 0. 258 | 0. 135 | 1. 09E-20 | Opc-G | NOA1           |
| NAGA. 10    | 7. 59E-25 | -0. 5169  | 0. 041 | 0. 194 | 1. 13E-20 | Opc-G | NAGA           |
| LINC00152   | 7. 80E-25 | -0. 40201 | 0. 086 | 0. 27  | 1. 17E-20 | Opc-G | LINC00152      |
| BPGM. 6     | 8. 20E-25 | 0. 331118 | 0. 369 | 0. 225 | 1. 22E-20 | Opc-G | BPGM           |
| GNAS. 9     | 8. 54E-25 | 0. 198303 | 0. 831 | 0. 635 | 1. 28E-20 | Opc-G | GNAS           |
| FAH. 9      | 9. 17E-25 | -0. 431   | 0. 022 | 0. 167 | 1. 37E-20 | Opc-G | FAH            |
| POLD2. 7    | 9. 67E-25 | 0. 223945 | 0. 568 | 0. 411 | 1. 45E-20 | Opc-G | POLD2          |
| RP9. 8      | 9. 68E-25 | 0. 363391 | 0. 302 | 0. 171 | 1. 45E-20 | Opc-G | RP9            |
| WRB. 9      | 1. 03E-24 | 0. 235786 | 0. 568 | 0. 41  | 1. 54E-20 | Opc-G | WRB            |
| DHX36. 8    | 1. 03E-24 | 0. 278292 | 0. 557 | 0. 417 | 1. 54E-20 | Opc-G | DHX36          |
| SULT1C4     | 1. 11E-24 | 0. 153454 | 0. 074 | 0. 018 | 1. 65E-20 | Opc-G | SULT1C4        |
| DYNLT3. 4   | 1. 21E-24 | -0. 42127 | 0. 12  | 0. 306 | 1. 81E-20 | Opc-G | DYNLT3         |
| SMC04. 10   | 1. 29E-24 | -0. 49475 | 0. 008 | 0. 141 | 1. 93E-20 | Opc-G | SMC04          |
| FAM57B. 9   | 1. 42E-24 | 0. 378891 | 0. 193 | 0. 085 | 2. 12E-20 | Opc-G | FAM57B         |
| KLF6. 8     | 1. 48E-24 | -0. 53149 | 0. 377 | 0. 542 | 2. 21E-20 | Opc-G | KLF6           |
| OLFM1. 9    | 1. 64E-24 | 0. 361623 | 0. 27  | 0. 143 | 2. 44E-20 | Opc-G | OLFM1          |
| TNFAIP3. 1  | 1. 66E-24 | -0. 62582 | 0. 03  | 0. 172 | 2. 48E-20 | Opc-G | TNFAIP3        |
| ALOX5. 10   | 1. 95E-24 | -0. 54874 | 0. 012 | 0. 147 | 2. 92E-20 | Opc-G | ALOX5          |
| LAMP2. 7    | 1. 99E-24 | -0. 50547 | 0. 296 | 0. 482 | 2. 97E-20 | Opc-G | LAMP2          |
| HEPACAM. 9  | 2. 04E-24 | 0. 265696 | 0. 313 | 0. 169 | 3. 04E-20 | Opc-G | HEPACAM        |
| YWHAG. 8    | 2. 14E-24 | 0. 292496 | 0. 529 | 0. 381 | 3. 20E-20 | Opc-G | YWHAG          |
| AKAP9. 8    | 2. 16E-24 | 0. 263336 | 0. 597 | 0. 44  | 3. 22E-20 | Opc-G | AKAP9          |
| ALKBH4. 7   | 2. 26E-24 | 0. 345484 | 0. 321 | 0. 19  | 3. 38E-20 | Opc-G | ALKBH4         |
| ARMCX3. 8   | 2. 33E-24 | 0. 261966 | 0. 567 | 0. 42  | 3. 49E-20 | Opc-G | ARMCX3         |
| RP11-262H   | 2. 39E-24 | 0. 327258 | 0. 227 | 0. 111 | 3. 58E-20 | Opc-G | RP11-262H14. 4 |
| AFF3. 6     | 2. 61E-24 | 0. 261911 | 0. 133 | 0. 047 | 3. 90E-20 | Opc-G | AFF3           |
| MSN. 10     | 2. 63E-24 | -0. 44802 | 0. 193 | 0. 388 | 3. 94E-20 | Opc-G | MSN            |
| DSCAML1. 2  | 2. 67E-24 | 0. 181745 | 0. 087 | 0. 024 | 3. 99E-20 | Opc-G | DSCAML1        |
| NOC2L. 8    | 2. 81E-24 | 0. 314395 | 0. 447 | 0. 304 | 4. 20E-20 | Opc-G | NOC2L          |
| NDN. 9      | 2. 99E-24 | -0. 2975  | 0. 046 | 0. 207 | 4. 47E-20 | Opc-G | NDN            |
| STMN3. 8    | 3. 22E-24 | 0. 323096 | 0. 451 | 0. 297 | 4. 81E-20 | Opc-G | STMN3          |
| TMEM200C    | 3. 47E-24 | 0. 109022 | 0. 059 | 0. 012 | 5. 19E-20 | Opc-G | TMEM200C       |
| EIF3H. 5    | 3. 47E-24 | 0. 177571 | 0. 802 | 0. 66  | 5. 19E-20 | Opc-G | EIF3H          |
| RP11-212F   | 3. 51E-24 | 0. 294018 | 0. 19  | 0. 085 | 5. 24E-20 | Opc-G | RP11-212P7. 2  |
| DDX18. 2    | 3. 60E-24 | 0. 186838 | 0. 648 | 0. 491 | 5. 38E-20 | Opc-G | DDX18          |
| CHI3L2. 6   | 3. 73E-24 | -1. 13902 | 0. 044 | 0. 19  | 5. 58E-20 | Opc-G | CHI3L2         |
| TWF2. 10    | 3. 94E-24 | -0. 46529 | 0. 167 | 0. 352 | 5. 89E-20 | Opc-G | TWF2           |
| SCAMP5. 8   | 4. 11E-24 | 0. 312533 | 0. 195 | 0. 089 | 6. 15E-20 | Opc-G | SCAMP5         |
| ENTPD1. 1C  | 4. 54E-24 | -0. 59061 | 0. 03  | 0. 171 | 6. 78E-20 | Opc-G | ENTPD1         |
| NIN. 2      | 5. 13E-24 | 0. 313198 | 0. 239 | 0. 12  | 7. 67E-20 | Opc-G | NIN            |
| CLASP2. 9   | 5. 23E-24 | 0. 322948 | 0. 333 | 0. 188 | 7. 81E-20 | Opc-G | CLASP2         |
| HOXA-AS2. 5 | 5. 53E-24 | 0. 222575 | 0. 105 | 0. 033 | 8. 26E-20 | Opc-G | HOXA-AS2       |
| RP11-792A   | 5. 76E-24 | 0. 3564   | 0. 336 | 0. 202 | 8. 61E-20 | Opc-G | RP11-792A8. 4  |

|             |           |           |        |        |           |       |                |
|-------------|-----------|-----------|--------|--------|-----------|-------|----------------|
| CFD. 9      | 6. 17E-24 | -0. 62245 | 0. 027 | 0. 165 | 9. 23E-20 | Opc-G | CFD            |
| PCDHB10. 9  | 6. 74E-24 | 0. 29689  | 0. 208 | 0. 095 | 1. 01E-19 | Opc-G | PCDHB10        |
| TMEM173. 1  | 6. 80E-24 | -0. 5603  | 0. 007 | 0. 134 | 1. 02E-19 | Opc-G | TMEM173        |
| DENND2A. 6  | 6. 88E-24 | 0. 333634 | 0. 191 | 0. 088 | 1. 03E-19 | Opc-G | DENND2A        |
| LSP1. 10    | 7. 05E-24 | -0. 66347 | 0. 034 | 0. 175 | 1. 05E-19 | Opc-G | LSP1           |
| PDK4. 9     | 7. 15E-24 | -0. 62483 | 0. 036 | 0. 178 | 1. 07E-19 | Opc-G | PDK4           |
| ICAM1. 8    | 1. 01E-23 | -0. 49337 | 0. 03  | 0. 173 | 1. 50E-19 | Opc-G | ICAM1          |
| EPB41L2. 8  | 1. 06E-23 | -0. 50568 | 0. 146 | 0. 322 | 1. 59E-19 | Opc-G | EPB41L2        |
| MAP4K4. 8   | 1. 08E-23 | 0. 301839 | 0. 384 | 0. 239 | 1. 61E-19 | Opc-G | MAP4K4         |
| BEX4. 8     | 1. 08E-23 | 0. 187543 | 0. 657 | 0. 464 | 1. 62E-19 | Opc-G | BEX4           |
| USP53. 10   | 1. 09E-23 | -0. 54474 | 0. 016 | 0. 149 | 1. 62E-19 | Opc-G | USP53          |
| PSMB7. 5    | 1. 13E-23 | 0. 154539 | 0. 788 | 0. 63  | 1. 69E-19 | Opc-G | PSMB7          |
| CCNI. 7     | 1. 15E-23 | 0. 179016 | 0. 84  | 0. 697 | 1. 72E-19 | Opc-G | CCNI           |
| IL1RAP. 5   | 1. 16E-23 | -0. 33915 | 0. 026 | 0. 169 | 1. 73E-19 | Opc-G | IL1RAP         |
| FUOM. 10    | 1. 21E-23 | -0. 51972 | 0. 016 | 0. 149 | 1. 80E-19 | Opc-G | FUOM           |
| HIF3A       | 1. 25E-23 | 0. 214852 | 0. 077 | 0. 02  | 1. 86E-19 | Opc-G | HIF3A          |
| SWAP70. 1C  | 1. 39E-23 | -0. 42839 | 0. 071 | 0. 232 | 2. 08E-19 | Opc-G | SWAP70         |
| TMEFF2. 1C  | 1. 44E-23 | 0. 271837 | 0. 173 | 0. 071 | 2. 15E-19 | Opc-G | TMEFF2         |
| ING4. 8     | 1. 68E-23 | 0. 318302 | 0. 399 | 0. 258 | 2. 52E-19 | Opc-G | ING4           |
| EIF3L. 5    | 1. 71E-23 | 0. 166285 | 0. 728 | 0. 598 | 2. 56E-19 | Opc-G | EIF3L          |
| DACT1. 3    | 1. 80E-23 | 0. 210964 | 0. 093 | 0. 027 | 2. 68E-19 | Opc-G | DACT1          |
| EPB41L4A-   | 1. 86E-23 | 0. 262785 | 0. 441 | 0. 284 | 2. 78E-19 | Opc-G | EPB41L4A-AS1   |
| HLA-F. 10   | 1. 92E-23 | -0. 48668 | 0. 019 | 0. 155 | 2. 87E-19 | Opc-G | HLA-F          |
| RP11-307C   | 1. 99E-23 | 0. 105954 | 0. 031 | 0. 004 | 2. 98E-19 | Opc-G | RP11-307C19. 2 |
| NOVA1-AS1   | 2. 10E-23 | 0. 196991 | 0. 098 | 0. 03  | 3. 14E-19 | Opc-G | NOVA1-AS1      |
| NMT2. 7     | 2. 24E-23 | 0. 314452 | 0. 197 | 0. 091 | 3. 35E-19 | Opc-G | NMT2           |
| RNF213. 9   | 2. 26E-23 | -0. 42632 | 0. 098 | 0. 272 | 3. 37E-19 | Opc-G | RNF213         |
| NRBF2. 5    | 2. 35E-23 | -0. 40776 | 0. 108 | 0. 282 | 3. 51E-19 | Opc-G | NRBF2          |
| CD33. 10    | 2. 35E-23 | -0. 5616  | 0. 004 | 0. 128 | 3. 51E-19 | Opc-G | CD33           |
| LANCL2. 9   | 2. 38E-23 | 0. 308756 | 0. 276 | 0. 144 | 3. 56E-19 | Opc-G | LANCL2         |
| MIR4458HG   | 2. 55E-23 | 0. 231883 | 0. 291 | 0. 151 | 3. 81E-19 | Opc-G | MIR4458HG      |
| TUBB6. 8    | 2. 57E-23 | -0. 40763 | 0. 042 | 0. 193 | 3. 84E-19 | Opc-G | TUBB6          |
| ASRGL1. 8   | 2. 66E-23 | 0. 317962 | 0. 332 | 0. 192 | 3. 97E-19 | Opc-G | ASRGL1         |
| PTGER4. 9   | 2. 67E-23 | -0. 53045 | 0. 007 | 0. 132 | 3. 99E-19 | Opc-G | PTGER4         |
| KISS1. 1    | 2. 70E-23 | 0. 164052 | 0. 033 | 0. 004 | 4. 04E-19 | Opc-G | KISS1          |
| RPS6KA1. 1  | 2. 71E-23 | -0. 47966 | 0. 011 | 0. 139 | 4. 06E-19 | Opc-G | RPS6KA1        |
| SIRPA. 9    | 2. 89E-23 | -0. 43435 | 0. 09  | 0. 254 | 4. 32E-19 | Opc-G | SIRPA          |
| EZH2. 9     | 3. 29E-23 | 0. 283855 | 0. 276 | 0. 145 | 4. 91E-19 | Opc-G | EZH2           |
| CISD3. 9    | 3. 52E-23 | -0. 37327 | 0. 092 | 0. 264 | 5. 27E-19 | Opc-G | CISD3          |
| CDC34. 8    | 3. 67E-23 | 0. 357303 | 0. 357 | 0. 227 | 5. 48E-19 | Opc-G | CDC34          |
| EMC10. 5    | 3. 67E-23 | 0. 238838 | 0. 594 | 0. 44  | 5. 48E-19 | Opc-G | EMC10          |
| OSM. 9      | 3. 76E-23 | -0. 67586 | 0. 022 | 0. 154 | 5. 62E-19 | Opc-G | OSM            |
| GRIA3. 7    | 3. 77E-23 | 0. 377558 | 0. 28  | 0. 161 | 5. 64E-19 | Opc-G | GRIA3          |
| FAM60A. 6   | 3. 88E-23 | 0. 326309 | 0. 294 | 0. 167 | 5. 80E-19 | Opc-G | FAM60A         |
| PQLC3. 9    | 4. 04E-23 | -0. 38647 | 0. 045 | 0. 194 | 6. 03E-19 | Opc-G | PQLC3          |
| PHGDH. 9    | 4. 53E-23 | 0. 293537 | 0. 335 | 0. 191 | 6. 77E-19 | Opc-G | PHGDH          |
| VASP. 10    | 4. 65E-23 | -0. 43245 | 0. 087 | 0. 25  | 6. 95E-19 | Opc-G | VASP           |
| PDXK. 9     | 4. 70E-23 | -0. 38095 | 0. 119 | 0. 296 | 7. 03E-19 | Opc-G | PDXK           |
| BTF3L4. 3   | 4. 95E-23 | 0. 200421 | 0. 652 | 0. 502 | 7. 39E-19 | Opc-G | BTF3L4         |
| KIAA1755. 5 | 5. 20E-23 | 0. 12856  | 0. 061 | 0. 013 | 7. 77E-19 | Opc-G | KIAA1755       |
| ELAVL2. 1C  | 5. 20E-23 | 0. 208855 | 0. 178 | 0. 073 | 7. 77E-19 | Opc-G | ELAVL2         |



|             |           |           |        |        |           |       |          |
|-------------|-----------|-----------|--------|--------|-----------|-------|----------|
| BMP2        | 5. 51E-23 | 0. 177113 | 0. 067 | 0. 016 | 8. 24E-19 | Opc-G | BMP2     |
| SFRP2       | 5. 54E-23 | 0. 105359 | 0. 041 | 0. 006 | 8. 28E-19 | Opc-G | SFRP2    |
| TMSB15B. 9  | 5. 75E-23 | 0. 336541 | 0. 303 | 0. 173 | 8. 59E-19 | Opc-G | TMSB15B  |
| PTAFR. 10   | 5. 98E-23 | -0. 52408 | 0. 008 | 0. 133 | 8. 94E-19 | Opc-G | PTAFR    |
| ANKRD46. 7  | 6. 03E-23 | 0. 304032 | 0. 279 | 0. 149 | 9. 02E-19 | Opc-G | ANKRD46  |
| CACNG4. 7   | 6. 59E-23 | 0. 230738 | 0. 124 | 0. 045 | 9. 85E-19 | Opc-G | CACNG4   |
| CNP. 8      | 6. 88E-23 | 0. 167332 | 0. 507 | 0. 368 | 1. 03E-18 | Opc-G | CNP      |
| KRT10. 6    | 6. 92E-23 | 0. 214868 | 0. 71  | 0. 548 | 1. 03E-18 | Opc-G | KRT10    |
| CHADL. 6    | 7. 42E-23 | 0. 148757 | 0. 113 | 0. 037 | 1. 11E-18 | Opc-G | CHADL    |
| H2AFV. 8    | 8. 07E-23 | 0. 225596 | 0. 663 | 0. 513 | 1. 21E-18 | Opc-G | H2AFV    |
| LPAR6. 10   | 8. 17E-23 | -0. 58792 | 0. 093 | 0. 247 | 1. 22E-18 | Opc-G | LPAR6    |
| ZDHHC12. 1  | 8. 61E-23 | -0. 45044 | 0. 102 | 0. 271 | 1. 29E-18 | Opc-G | ZDHHC12  |
| PTRF. 10    | 9. 00E-23 | -0. 36771 | 0. 045 | 0. 194 | 1. 35E-18 | Opc-G | PTRF     |
| ZNF326. 7   | 9. 43E-23 | 0. 325653 | 0. 373 | 0. 239 | 1. 41E-18 | Opc-G | ZNF326   |
| RHEB. 4     | 1. 03E-22 | 0. 177166 | 0. 779 | 0. 628 | 1. 54E-18 | Opc-G | RHEB     |
| COPS8. 9    | 1. 06E-22 | 0. 209371 | 0. 604 | 0. 46  | 1. 59E-18 | Opc-G | COPS8    |
| CDH2. 9     | 1. 07E-22 | 0. 308104 | 0. 425 | 0. 275 | 1. 60E-18 | Opc-G | CDH2     |
| NFKBID. 8   | 1. 08E-22 | -0. 52719 | 0. 019 | 0. 148 | 1. 61E-18 | Opc-G | NFKBID   |
| PREX1. 9    | 1. 09E-22 | -0. 4282  | 0. 071 | 0. 228 | 1. 63E-18 | Opc-G | PREX1    |
| NCF1. 10    | 1. 10E-22 | -0. 49169 | 0. 008 | 0. 131 | 1. 64E-18 | Opc-G | NCF1     |
| FMNL1. 10   | 1. 13E-22 | -0. 48027 | 0. 008 | 0. 132 | 1. 69E-18 | Opc-G | FMNL1    |
| PSMG3. 9    | 1. 15E-22 | 0. 295527 | 0. 458 | 0. 318 | 1. 71E-18 | Opc-G | PSMG3    |
| CSRNP3. 9   | 1. 18E-22 | 0. 259017 | 0. 204 | 0. 092 | 1. 77E-18 | Opc-G | CSRNP3   |
| C6orf48. 5  | 1. 19E-22 | 0. 120944 | 0. 773 | 0. 638 | 1. 77E-18 | Opc-G | C6orf48  |
| SIPA1. 10   | 1. 30E-22 | -0. 40401 | 0. 018 | 0. 147 | 1. 94E-18 | Opc-G | SIPA1    |
| MEIS1. 8    | 1. 60E-22 | 0. 340574 | 0. 178 | 0. 081 | 2. 38E-18 | Opc-G | MEIS1    |
| PARP14. 8   | 1. 65E-22 | -0. 35951 | 0. 027 | 0. 165 | 2. 47E-18 | Opc-G | PARP14   |
| PTPRE. 8    | 1. 72E-22 | -0. 46188 | 0. 112 | 0. 28  | 2. 58E-18 | Opc-G | PTPRE    |
| SERPING1. 1 | 1. 79E-22 | -0. 84365 | 0. 09  | 0. 243 | 2. 68E-18 | Opc-G | SERPING1 |
| FUCA1. 8    | 1. 86E-22 | -0. 45451 | 0. 075 | 0. 229 | 2. 78E-18 | Opc-G | FUCA1    |
| CEBPD. 7    | 1. 94E-22 | -0. 4099  | 0. 276 | 0. 471 | 2. 89E-18 | Opc-G | CEBPD    |
| SPAG16. 9   | 2. 15E-22 | 0. 323291 | 0. 423 | 0. 288 | 3. 21E-18 | Opc-G | SPAG16   |
| MAPKAPK3. 2 | 2. 21E-22 | -0. 39155 | 0. 038 | 0. 179 | 3. 30E-18 | Opc-G | MAPKAPK3 |
| RBBP4. 5    | 2. 22E-22 | 0. 243642 | 0. 559 | 0. 422 | 3. 32E-18 | Opc-G | RBBP4    |
| CNOT4. 7    | 2. 40E-22 | 0. 316435 | 0. 402 | 0. 263 | 3. 59E-18 | Opc-G | CNOT4    |
| PRAF2. 8    | 2. 41E-22 | 0. 319416 | 0. 43  | 0. 294 | 3. 60E-18 | Opc-G | PRAF2    |
| KCNJ10. 8   | 2. 46E-22 | 0. 185028 | 0. 128 | 0. 047 | 3. 68E-18 | Opc-G | KCNJ10   |
| CAPZA1. 9   | 2. 58E-22 | -0. 4143  | 0. 224 | 0. 404 | 3. 85E-18 | Opc-G | CAPZA1   |
| NCKAP1L. 1  | 2. 60E-22 | -0. 52115 | 0. 008 | 0. 129 | 3. 88E-18 | Opc-G | NCKAP1L  |
| PDZD4. 8    | 2. 99E-22 | 0. 243998 | 0. 119 | 0. 042 | 4. 47E-18 | Opc-G | PDZD4    |
| TMEM169. 7  | 3. 07E-22 | 0. 251701 | 0. 137 | 0. 053 | 4. 58E-18 | Opc-G | TMEM169  |
| MOAP1. 8    | 3. 16E-22 | 0. 318754 | 0. 342 | 0. 209 | 4. 72E-18 | Opc-G | MOAP1    |
| STAT3. 3    | 3. 54E-22 | 0. 255214 | 0. 581 | 0. 449 | 5. 30E-18 | Opc-G | STAT3    |
| ITM2C. 10   | 3. 56E-22 | 0. 19899  | 0. 56  | 0. 408 | 5. 33E-18 | Opc-G | ITM2C    |
| PRMT1. 6    | 3. 57E-22 | 0. 199124 | 0. 698 | 0. 544 | 5. 34E-18 | Opc-G | PRMT1    |
| CDKN2B      | 3. 71E-22 | 0. 150742 | 0. 068 | 0. 017 | 5. 54E-18 | Opc-G | CDKN2B   |
| RAB2A. 6    | 3. 72E-22 | 0. 196523 | 0. 725 | 0. 582 | 5. 56E-18 | Opc-G | RAB2A    |
| ZNF286A. 6  | 3. 77E-22 | 0. 255377 | 0. 138 | 0. 054 | 5. 63E-18 | Opc-G | ZNF286A  |
| HNRNPM. 8   | 3. 77E-22 | 0. 226038 | 0. 678 | 0. 534 | 5. 64E-18 | Opc-G | HNRNPM   |
| NNT-AS1. 8  | 3. 94E-22 | 0. 364387 | 0. 34  | 0. 213 | 5. 88E-18 | Opc-G | NNT-AS1  |
| ZCCHC24. 8  | 4. 07E-22 | 0. 262027 | 0. 198 | 0. 093 | 6. 08E-18 | Opc-G | ZCCHC24  |

|            |           |           |        |        |           |       |               |
|------------|-----------|-----------|--------|--------|-----------|-------|---------------|
| BAMBI. 7   | 4. 22E-22 | 0. 284865 | 0. 153 | 0. 064 | 6. 31E-18 | Opc-G | BAMBI         |
| ABHD14B. 7 | 4. 24E-22 | -0. 40231 | 0. 044 | 0. 188 | 6. 33E-18 | Opc-G | ABHD14B       |
| PTCH1. 3   | 4. 29E-22 | 0. 209011 | 0. 124 | 0. 046 | 6. 41E-18 | Opc-G | PTCH1         |
| NME4. 7    | 4. 78E-22 | 0. 274276 | 0. 515 | 0. 373 | 7. 15E-18 | Opc-G | NME4          |
| VM01. 9    | 4. 84E-22 | -0. 61592 | 0. 034 | 0. 168 | 7. 24E-18 | Opc-G | VM01          |
| ADM. 8     | 4. 92E-22 | -0. 64465 | 0. 052 | 0. 194 | 7. 35E-18 | Opc-G | ADM           |
| EID1. 7    | 4. 95E-22 | 0. 106581 | 0. 87  | 0. 697 | 7. 40E-18 | Opc-G | EID1          |
| DPP7. 9    | 4. 97E-22 | -0. 41236 | 0. 294 | 0. 478 | 7. 43E-18 | Opc-G | DPP7          |
| RP11-552D  | 5. 28E-22 | -0. 64082 | 0. 008 | 0. 127 | 7. 89E-18 | Opc-G | RP11-552D4. 1 |
| DNAAF2. 9  | 5. 33E-22 | 0. 337814 | 0. 287 | 0. 165 | 7. 96E-18 | Opc-G | DNAAF2        |
| FILIP1L. 9 | 6. 12E-22 | -0. 40448 | 0. 026 | 0. 157 | 9. 14E-18 | Opc-G | FILIP1L       |
| PHF11. 9   | 6. 71E-22 | -0. 34632 | 0. 02  | 0. 15  | 1. 00E-17 | Opc-G | PHF11         |
| NGDN. 5    | 6. 72E-22 | 0. 28825  | 0. 393 | 0. 254 | 1. 00E-17 | Opc-G | NGDN          |
| SNRPE. 8   | 7. 02E-22 | 0. 148251 | 0. 71  | 0. 571 | 1. 05E-17 | Opc-G | SNRPE         |
| FAM155A. 2 | 7. 07E-22 | 0. 171987 | 0. 086 | 0. 025 | 1. 06E-17 | Opc-G | FAM155A       |
| IL10RA. 1C | 7. 16E-22 | -0. 53044 | 0. 02  | 0. 146 | 1. 07E-17 | Opc-G | IL10RA        |
| SDSL. 9    | 7. 25E-22 | -0. 36593 | 0. 049 | 0. 196 | 1. 08E-17 | Opc-G | SDSL          |
| MT3. 10    | 7. 67E-22 | 0. 219231 | 0. 682 | 0. 477 | 1. 15E-17 | Opc-G | MT3           |
| CTSK. 6    | 7. 86E-22 | 0. 188301 | 0. 124 | 0. 045 | 1. 18E-17 | Opc-G | CTSK          |
| MOB1A. 10  | 8. 05E-22 | -0. 47056 | 0. 178 | 0. 351 | 1. 20E-17 | Opc-G | MOB1A         |
| CD59. 6    | 8. 52E-22 | -0. 45664 | 0. 385 | 0. 564 | 1. 27E-17 | Opc-G | CD59          |
| NOTCH1. 4  | 8. 69E-22 | 0. 325357 | 0. 209 | 0. 104 | 1. 30E-17 | Opc-G | NOTCH1        |
| NNMT. 8    | 9. 15E-22 | -0. 68553 | 0. 033 | 0. 166 | 1. 37E-17 | Opc-G | NNMT          |
| ZNF138. 7  | 9. 23E-22 | 0. 331612 | 0. 255 | 0. 138 | 1. 38E-17 | Opc-G | ZNF138        |
| POMZP3. 7  | 9. 33E-22 | 0. 277086 | 0. 178 | 0. 08  | 1. 39E-17 | Opc-G | POMZP3        |
| SERF2. 6   | 9. 59E-22 | -0. 27568 | 0. 91  | 0. 895 | 1. 43E-17 | Opc-G | SERF2         |
| C2. 8      | 9. 86E-22 | -0. 53938 | 0. 005 | 0. 122 | 1. 47E-17 | Opc-G | C2            |
| BCS1L. 6   | 1. 00E-21 | 0. 332638 | 0. 28  | 0. 158 | 1. 50E-17 | Opc-G | BCS1L         |
| RAC2. 10   | 1. 09E-21 | -0. 52761 | 0. 008 | 0. 126 | 1. 63E-17 | Opc-G | RAC2          |
| SDC2. 7    | 1. 23E-21 | -0. 44539 | 0. 056 | 0. 201 | 1. 84E-17 | Opc-G | SDC2          |
| PRDM8. 5   | 1. 26E-21 | 0. 157149 | 0. 087 | 0. 026 | 1. 89E-17 | Opc-G | PRDM8         |
| SOCS3. 9   | 1. 26E-21 | -0. 42806 | 0. 183 | 0. 359 | 1. 89E-17 | Opc-G | SOCS3         |
| SETD5. 10  | 1. 45E-21 | 0. 299461 | 0. 414 | 0. 28  | 2. 17E-17 | Opc-G | SETD5         |
| CHST2. 7   | 1. 48E-21 | -0. 27237 | 0. 018 | 0. 144 | 2. 21E-17 | Opc-G | CHST2         |
| CYC1. 8    | 1. 68E-21 | 0. 223772 | 0. 679 | 0. 53  | 2. 51E-17 | Opc-G | CYC1          |
| COA1. 5    | 1. 69E-21 | 0. 22008  | 0. 529 | 0. 388 | 2. 52E-17 | Opc-G | COA1          |
| GNA15. 10  | 1. 81E-21 | -0. 45657 | 0. 003 | 0. 116 | 2. 70E-17 | Opc-G | GNA15         |
| REEP4. 10  | 1. 88E-21 | -0. 40668 | 0. 04  | 0. 176 | 2. 80E-17 | Opc-G | REEP4         |
| LRRC4B. 1C | 1. 92E-21 | 0. 328107 | 0. 235 | 0. 126 | 2. 87E-17 | Opc-G | LRRC4B        |
| CHGB. 7    | 1. 92E-21 | 0. 269264 | 0. 183 | 0. 081 | 2. 87E-17 | Opc-G | CHGB          |
| CPE. 9     | 2. 02E-21 | 0. 239918 | 0. 556 | 0. 378 | 3. 01E-17 | Opc-G | CPE           |
| CHIC2. 5   | 2. 09E-21 | 0. 420112 | 0. 355 | 0. 236 | 3. 12E-17 | Opc-G | CHIC2         |
| RP11-357K  | 2. 20E-21 | 0. 143074 | 0. 051 | 0. 01  | 3. 28E-17 | Opc-G | RP11-357K6. 1 |
| KLF12. 8   | 2. 20E-21 | 0. 277389 | 0. 175 | 0. 079 | 3. 29E-17 | Opc-G | KLF12         |
| CCT4. 5    | 2. 30E-21 | 0. 165483 | 0. 701 | 0. 551 | 3. 44E-17 | Opc-G | CCT4          |
| RNF44. 3   | 2. 37E-21 | 0. 315535 | 0. 214 | 0. 107 | 3. 54E-17 | Opc-G | RNF44         |
| PADI2. 8   | 2. 38E-21 | -0. 53202 | 0. 02  | 0. 142 | 3. 55E-17 | Opc-G | PADI2         |
| SLC38A1. 7 | 2. 65E-21 | 0. 229027 | 0. 264 | 0. 133 | 3. 96E-17 | Opc-G | SLC38A1       |
| TCIRG1. 1C | 2. 72E-21 | -0. 45029 | 0. 014 | 0. 133 | 4. 07E-17 | Opc-G | TCIRG1        |
| CBR4. 7    | 2. 75E-21 | 0. 293877 | 0. 306 | 0. 18  | 4. 11E-17 | Opc-G | CBR4          |
| HOXA10-AS  | 2. 93E-21 | 0. 111345 | 0. 048 | 0. 009 | 4. 38E-17 | Opc-G | HOXA10-AS     |

|            |           |           |        |        |           |       |                |
|------------|-----------|-----------|--------|--------|-----------|-------|----------------|
| BIN2. 9    | 3. 03E-21 | -0. 48568 | 0. 005 | 0. 119 | 4. 53E-17 | Opc-G | BIN2           |
| WIPF1. 10  | 3. 08E-21 | -0. 47372 | 0. 081 | 0. 229 | 4. 60E-17 | Opc-G | WIPF1          |
| DOCK8. 10  | 3. 18E-21 | -0. 4939  | 0. 011 | 0. 128 | 4. 75E-17 | Opc-G | DOCK8          |
| RICTOR. 6  | 3. 25E-21 | 0. 272518 | 0. 309 | 0. 178 | 4. 86E-17 | Opc-G | RICTOR         |
| TMED4. 9   | 3. 40E-21 | 0. 200627 | 0. 572 | 0. 429 | 5. 09E-17 | Opc-G | TMED4          |
| COL6A2. 9  | 3. 50E-21 | -0. 41235 | 0. 037 | 0. 171 | 5. 23E-17 | Opc-G | COL6A2         |
| C1S. 8     | 3. 55E-21 | -0. 64963 | 0. 037 | 0. 17  | 5. 30E-17 | Opc-G | C1S            |
| NSG1. 10   | 3. 68E-21 | 0. 25537  | 0. 316 | 0. 166 | 5. 49E-17 | Opc-G | NSG1           |
| CAMKMT. 6  | 3. 97E-21 | 0. 326071 | 0. 16  | 0. 069 | 5. 93E-17 | Opc-G | CAMKMT         |
| RP11-445F  | 4. 24E-21 | 0. 230952 | 0. 085 | 0. 025 | 6. 33E-17 | Opc-G | RP11-445F12. 1 |
| NCOR2. 5   | 4. 39E-21 | 0. 309892 | 0. 351 | 0. 223 | 6. 55E-17 | Opc-G | NCOR2          |
| NPY        | 4. 45E-21 | 0. 187955 | 0. 067 | 0. 017 | 6. 65E-17 | Opc-G | NPY            |
| FNDC4. 8   | 4. 60E-21 | 0. 328997 | 0. 311 | 0. 191 | 6. 87E-17 | Opc-G | FNDC4          |
| SMARCC2. 8 | 5. 01E-21 | 0. 322856 | 0. 385 | 0. 255 | 7. 49E-17 | Opc-G | SMARCC2        |
| RAB11B. 7  | 5. 20E-21 | 0. 209179 | 0. 638 | 0. 495 | 7. 76E-17 | Opc-G | RAB11B         |
| DLX2. 10   | 5. 62E-21 | 0. 258507 | 0. 217 | 0. 101 | 8. 41E-17 | Opc-G | DLX2           |
| SH3BP5. 8  | 5. 67E-21 | -0. 37329 | 0. 066 | 0. 21  | 8. 47E-17 | Opc-G | SH3BP5         |
| HMHA1. 10  | 6. 03E-21 | -0. 46823 | 0. 004 | 0. 115 | 9. 01E-17 | Opc-G | HMHA1          |
| RP11-21A7  | 6. 14E-21 | 0. 108546 | 0. 034 | 0. 005 | 9. 18E-17 | Opc-G | RP11-21A7A. 4  |
| B4GALT1. 1 | 6. 22E-21 | -0. 46765 | 0. 011 | 0. 128 | 9. 30E-17 | Opc-G | B4GALT1        |
| VPS51. 4   | 6. 82E-21 | 0. 284537 | 0. 388 | 0. 255 | 1. 02E-16 | Opc-G | VPS51          |
| SPTBN2. 1  | 7. 04E-21 | 0. 167967 | 0. 082 | 0. 024 | 1. 05E-16 | Opc-G | SPTBN2         |
| STX4. 6    | 7. 18E-21 | -0. 43597 | 0. 152 | 0. 325 | 1. 07E-16 | Opc-G | STX4           |
| PCGF5. 6   | 7. 19E-21 | -0. 39095 | 0. 048 | 0. 188 | 1. 08E-16 | Opc-G | PCGF5          |
| FAM222A. 5 | 7. 22E-21 | 0. 186214 | 0. 086 | 0. 026 | 1. 08E-16 | Opc-G | FAM222A        |
| GLTSCR2. 8 | 7. 30E-21 | 0. 212194 | 0. 686 | 0. 556 | 1. 09E-16 | Opc-G | GLTSCR2        |
| DAPL1. 2   | 7. 73E-21 | 0. 344761 | 0. 128 | 0. 049 | 1. 16E-16 | Opc-G | DAPL1          |
| TMEM219. 8 | 8. 55E-21 | -0. 40249 | 0. 384 | 0. 572 | 1. 28E-16 | Opc-G | TMEM219        |
| NRP1. 8    | 8. 61E-21 | -0. 32057 | 0. 038 | 0. 174 | 1. 29E-16 | Opc-G | NRP1           |
| SELM. 8    | 8. 65E-21 | -0. 42955 | 0. 056 | 0. 197 | 1. 29E-16 | Opc-G | SELM           |
| LTF. 7     | 8. 76E-21 | -1. 09579 | 0. 033 | 0. 159 | 1. 31E-16 | Opc-G | LTF            |
| HPRT1. 8   | 9. 63E-21 | -0. 431   | 0. 087 | 0. 24  | 1. 44E-16 | Opc-G | HPRT1          |
| SSB. 5     | 9. 96E-21 | 0. 146286 | 0. 717 | 0. 584 | 1. 49E-16 | Opc-G | SSB            |
| FBP1. 10   | 1. 01E-20 | -0. 463   | 0. 01  | 0. 124 | 1. 50E-16 | Opc-G | FBP1           |
| SSBP1. 5   | 1. 11E-20 | 0. 105406 | 0. 761 | 0. 63  | 1. 66E-16 | Opc-G | SSBP1          |
| STX11. 9   | 1. 16E-20 | -0. 48811 | 0. 008 | 0. 121 | 1. 73E-16 | Opc-G | STX11          |
| CCDC88A. 8 | 1. 20E-20 | 0. 254177 | 0. 538 | 0. 408 | 1. 79E-16 | Opc-G | CCDC88A        |
| IDS. 3     | 1. 34E-20 | -0. 3711  | 0. 198 | 0. 38  | 2. 00E-16 | Opc-G | IDS            |
| M6PR. 10   | 1. 35E-20 | -0. 45632 | 0. 223 | 0. 393 | 2. 02E-16 | Opc-G | M6PR           |
| CTSA. 10   | 1. 42E-20 | -0. 41844 | 0. 239 | 0. 41  | 2. 12E-16 | Opc-G | CTSA           |
| ALCAM. 8   | 1. 44E-20 | 0. 305502 | 0. 317 | 0. 188 | 2. 16E-16 | Opc-G | ALCAM          |
| SET. 6     | 1. 48E-20 | 0. 176193 | 0. 68  | 0. 553 | 2. 22E-16 | Opc-G | SET            |
| ANAPC16. 8 | 1. 54E-20 | -0. 44348 | 0. 359 | 0. 536 | 2. 29E-16 | Opc-G | ANAPC16        |
| MEGF11     | 1. 54E-20 | 0. 20421  | 0. 093 | 0. 03  | 2. 30E-16 | Opc-G | MEGF11         |
| ZNF300. 9  | 1. 61E-20 | 0. 24552  | 0. 152 | 0. 064 | 2. 40E-16 | Opc-G | ZNF300         |
| C1R. 10    | 1. 77E-20 | -0. 67444 | 0. 077 | 0. 225 | 2. 64E-16 | Opc-G | C1R            |
| OAZ1. 6    | 1. 99E-20 | -0. 24859 | 0. 932 | 0. 926 | 2. 97E-16 | Opc-G | OAZ1           |
| EWSR1. 4   | 2. 02E-20 | 0. 212339 | 0. 586 | 0. 456 | 3. 02E-16 | Opc-G | EWSR1          |
| TP53I3. 4  | 2. 13E-20 | 0. 306517 | 0. 251 | 0. 138 | 3. 18E-16 | Opc-G | TP53I3         |
| NTRK2. 8   | 2. 27E-20 | 0. 286215 | 0. 23  | 0. 113 | 3. 40E-16 | Opc-G | NTRK2          |
| TRA2A. 4   | 2. 36E-20 | 0. 261915 | 0. 463 | 0. 335 | 3. 53E-16 | Opc-G | TRA2A          |

|             |          |          |       |       |          |       |               |
|-------------|----------|----------|-------|-------|----------|-------|---------------|
| WWTR1.10    | 2.43E-20 | -0.30792 | 0.037 | 0.168 | 3.63E-16 | Opc-G | WWTR1         |
| TSPAN6.8    | 2.49E-20 | 0.293923 | 0.254 | 0.143 | 3.73E-16 | Opc-G | TSPAN6        |
| NONO.9      | 2.50E-20 | 0.235488 | 0.567 | 0.448 | 3.74E-16 | Opc-G | NONO          |
| TGIF1.7     | 2.61E-20 | -0.45095 | 0.198 | 0.368 | 3.90E-16 | Opc-G | TGIF1         |
| IKBIP.8     | 2.66E-20 | -0.42849 | 0.086 | 0.236 | 3.97E-16 | Opc-G | IKBIP         |
| LRP10.6     | 2.79E-20 | -0.35564 | 0.102 | 0.261 | 4.17E-16 | Opc-G | LRP10         |
| PAWR        | 2.93E-20 | 0.111461 | 0.06  | 0.014 | 4.37E-16 | Opc-G | PAWR          |
| RBM23.2     | 2.93E-20 | 0.211705 | 0.399 | 0.255 | 4.38E-16 | Opc-G | RBM23         |
| CYTH4.10    | 3.22E-20 | -0.47543 | 0.008 | 0.119 | 4.81E-16 | Opc-G | CYTH4         |
| PPP1R15A.3  | 3.34E-20 | -0.41498 | 0.316 | 0.477 | 4.99E-16 | Opc-G | PPP1R15A      |
| NDFIP1.10   | 3.38E-20 | 0.204298 | 0.75  | 0.591 | 5.05E-16 | Opc-G | NDFIP1        |
| JAM2.10     | 3.41E-20 | 0.28824  | 0.374 | 0.244 | 5.10E-16 | Opc-G | JAM2          |
| QSOX1.8     | 3.43E-20 | -0.35918 | 0.093 | 0.246 | 5.13E-16 | Opc-G | QSOX1         |
| HNRNPA1L2.3 | 3.46E-20 | 0.261932 | 0.322 | 0.192 | 5.18E-16 | Opc-G | HNRNPA1L2     |
| SNF8.7      | 3.55E-20 | 0.245314 | 0.585 | 0.451 | 5.30E-16 | Opc-G | SNF8          |
| ENOPH1.8    | 3.61E-20 | 0.248838 | 0.511 | 0.381 | 5.39E-16 | Opc-G | ENOPH1        |
| LBH.10      | 3.89E-20 | 0.232441 | 0.277 | 0.145 | 5.82E-16 | Opc-G | LBH           |
| TMEM206.8   | 4.16E-20 | 0.341037 | 0.344 | 0.223 | 6.21E-16 | Opc-G | TMEM206       |
| WHSC1L1.9   | 4.45E-20 | 0.286071 | 0.493 | 0.365 | 6.66E-16 | Opc-G | WHSC1L1       |
| CD84.10     | 4.89E-20 | -0.51074 | 0.02  | 0.136 | 7.30E-16 | Opc-G | CD84          |
| FAXC.9      | 4.94E-20 | 0.284828 | 0.173 | 0.08  | 7.38E-16 | Opc-G | FAXC          |
| SUMO1.4     | 4.97E-20 | 0.11094  | 0.791 | 0.648 | 7.42E-16 | Opc-G | SUMO1         |
| MEF2A.10    | 4.98E-20 | -0.44346 | 0.081 | 0.224 | 7.44E-16 | Opc-G | MEF2A         |
| CKLF.10     | 5.08E-20 | -0.44946 | 0.361 | 0.53  | 7.59E-16 | Opc-G | CKLF          |
| CTBS.7      | 5.14E-20 | -0.33978 | 0.036 | 0.164 | 7.69E-16 | Opc-G | CTBS          |
| PSMB8.7     | 5.65E-20 | -0.33625 | 0.232 | 0.427 | 8.45E-16 | Opc-G | PSMB8         |
| NCF2.10     | 6.98E-20 | -0.43866 | 0.003 | 0.108 | 1.04E-15 | Opc-G | NCF2          |
| SYK.10      | 7.06E-20 | -0.43857 | 0.005 | 0.113 | 1.05E-15 | Opc-G | SYK           |
| DNAJC3.6    | 7.22E-20 | -0.38285 | 0.138 | 0.302 | 1.08E-15 | Opc-G | DNAJC3        |
| TPM4.8      | 7.69E-20 | -0.38667 | 0.365 | 0.506 | 1.15E-15 | Opc-G | TPM4          |
| ATP5B.6     | 7.99E-20 | 0.10103  | 0.906 | 0.767 | 1.19E-15 | Opc-G | ATP5B         |
| PHB2.3      | 8.18E-20 | 0.197499 | 0.567 | 0.435 | 1.22E-15 | Opc-G | PHB2          |
| CYFIP2.8    | 8.88E-20 | 0.317587 | 0.209 | 0.107 | 1.33E-15 | Opc-G | CYFIP2        |
| KDM1A.8     | 9.04E-20 | 0.335495 | 0.314 | 0.196 | 1.35E-15 | Opc-G | KDM1A         |
| SLC2A3.9    | 9.11E-20 | -0.50784 | 0.115 | 0.264 | 1.36E-15 | Opc-G | SLC2A3        |
| PCGF2.8     | 9.55E-20 | 0.314802 | 0.266 | 0.156 | 1.43E-15 | Opc-G | PCGF2         |
| DGUOK.7     | 9.72E-20 | 0.159627 | 0.654 | 0.506 | 1.45E-15 | Opc-G | DGUOK         |
| COPS5.4     | 1.01E-19 | 0.245972 | 0.526 | 0.402 | 1.52E-15 | Opc-G | COPS5         |
| PCDHB5.1    | 1.02E-19 | 0.166046 | 0.049 | 0.01  | 1.52E-15 | Opc-G | PCDHB5        |
| RP11-182L.1 | 1.09E-19 | 0.216072 | 0.149 | 0.064 | 1.64E-15 | Opc-G | RP11-182L21.6 |
| WDR6.7      | 1.15E-19 | 0.269786 | 0.352 | 0.224 | 1.72E-15 | Opc-G | WDR6          |
| POU3F3.9    | 1.30E-19 | 0.290795 | 0.26  | 0.147 | 1.94E-15 | Opc-G | POU3F3        |
| PNKD.6      | 1.34E-19 | 0.21121  | 0.585 | 0.448 | 2.01E-15 | Opc-G | PNKD          |
| USP42.8     | 1.39E-19 | 0.303562 | 0.221 | 0.116 | 2.08E-15 | Opc-G | USP42         |
| SOX5.8      | 1.41E-19 | 0.274194 | 0.175 | 0.083 | 2.11E-15 | Opc-G | SOX5          |
| RAB31.9     | 1.42E-19 | 0.235929 | 0.587 | 0.451 | 2.13E-15 | Opc-G | RAB31         |
| CCDC167.6   | 1.49E-19 | 0.271716 | 0.507 | 0.374 | 2.22E-15 | Opc-G | CCDC167       |
| TRA2B.7     | 1.68E-19 | 0.168749 | 0.648 | 0.533 | 2.52E-15 | Opc-G | TRA2B         |
| HLA-DQB2.1  | 1.69E-19 | -0.65193 | 0.001 | 0.104 | 2.53E-15 | Opc-G | HLA-DQB2      |
| TMEM109.9   | 1.73E-19 | -0.43968 | 0.074 | 0.213 | 2.59E-15 | Opc-G | TMEM109       |
| MBOAT7.7    | 1.79E-19 | -0.31451 | 0.098 | 0.253 | 2.68E-15 | Opc-G | MBOAT7        |

|           |          |          |       |       |          |       |               |
|-----------|----------|----------|-------|-------|----------|-------|---------------|
| CIQTNF4.8 | 1.81E-19 | 0.180187 | 0.131 | 0.051 | 2.70E-15 | Opc-G | CIQTNF4       |
| PPCS.7    | 1.90E-19 | -0.41227 | 0.165 | 0.331 | 2.85E-15 | Opc-G | PPCS          |
| RP11-118F | 1.93E-19 | 0.167981 | 0.049 | 0.01  | 2.88E-15 | Opc-G | RP11-118F19.1 |
| CRTAC1.1  | 2.08E-19 | 0.160338 | 0.071 | 0.02  | 3.11E-15 | Opc-G | CRTAC1        |
| SNHG15.5  | 2.11E-19 | -0.3259  | 0.079 | 0.231 | 3.15E-15 | Opc-G | SNHG15        |
| ZBTB16.5  | 2.13E-19 | 0.305512 | 0.268 | 0.148 | 3.18E-15 | Opc-G | ZBTB16        |
| LPAR5.8   | 2.19E-19 | -0.4442  | 0.005 | 0.11  | 3.28E-15 | Opc-G | LPAR5         |
| TNC.9     | 2.24E-19 | -0.41203 | 0.067 | 0.21  | 3.35E-15 | Opc-G | TNC           |
| MYCNOS.1  | 2.32E-19 | 0.14523  | 0.053 | 0.012 | 3.47E-15 | Opc-G | MYCNOS        |
| ARMC1.7   | 2.35E-19 | 0.320094 | 0.377 | 0.256 | 3.52E-15 | Opc-G | ARMC1         |
| GRHPR.6   | 2.38E-19 | 0.23442  | 0.511 | 0.385 | 3.56E-15 | Opc-G | GRHPR         |
| VANGL2.7  | 2.39E-19 | 0.231675 | 0.153 | 0.067 | 3.58E-15 | Opc-G | VANGL2        |
| CBX1.8    | 2.48E-19 | 0.260065 | 0.489 | 0.359 | 3.71E-15 | Opc-G | CBX1          |
| SNX10.6   | 2.51E-19 | -0.37749 | 0.094 | 0.237 | 3.75E-15 | Opc-G | SNX10         |
| S100A13.8 | 2.52E-19 | -0.38715 | 0.138 | 0.306 | 3.77E-15 | Opc-G | S100A13       |
| NLRP1.9   | 2.64E-19 | 0.263354 | 0.481 | 0.329 | 3.95E-15 | Opc-G | NLRP1         |
| GPX1.10   | 2.72E-19 | -0.34381 | 0.81  | 0.814 | 4.06E-15 | Opc-G | GPX1          |
| GCNT2.3   | 2.72E-19 | 0.167665 | 0.108 | 0.039 | 4.06E-15 | Opc-G | GCNT2         |
| ZC3H15.5  | 2.81E-19 | 0.194152 | 0.627 | 0.495 | 4.19E-15 | Opc-G | ZC3H15        |
| KIF19.1   | 3.04E-19 | 0.121298 | 0.042 | 0.008 | 4.55E-15 | Opc-G | KIF19         |
| RCSL1.9   | 3.05E-19 | -0.5006  | 0.016 | 0.127 | 4.55E-15 | Opc-G | RCSL1         |
| TCP1.6    | 3.06E-19 | 0.161321 | 0.667 | 0.513 | 4.57E-15 | Opc-G | TCP1          |
| NUDT14.1C | 3.11E-19 | -0.41755 | 0.066 | 0.2   | 4.65E-15 | Opc-G | NUDT14        |
| SRSF9.7   | 3.19E-19 | 0.204893 | 0.713 | 0.551 | 4.77E-15 | Opc-G | SRSF9         |
| RP11-637A | 3.30E-19 | 0.115428 | 0.052 | 0.012 | 4.92E-15 | Opc-G | RP11-637A17.2 |
| SCAND1.7  | 3.34E-19 | 0.213313 | 0.709 | 0.561 | 4.99E-15 | Opc-G | SCAND1        |
| ABI2.8    | 3.36E-19 | 0.266493 | 0.477 | 0.354 | 5.03E-15 | Opc-G | ABI2          |
| TGFBR2.9  | 3.53E-19 | -0.36791 | 0.014 | 0.124 | 5.28E-15 | Opc-G | TGFBR2        |
| ARHGAP4.1 | 3.66E-19 | -0.44003 | 0.014 | 0.122 | 5.47E-15 | Opc-G | ARHGAP4       |
| KLC1.9    | 3.68E-19 | 0.246987 | 0.486 | 0.351 | 5.49E-15 | Opc-G | KLC1          |
| PLS3.8    | 3.78E-19 | -0.34194 | 0.082 | 0.23  | 5.64E-15 | Opc-G | PLS3          |
| GNA13.9   | 3.90E-19 | -0.40283 | 0.057 | 0.188 | 5.82E-15 | Opc-G | GNA13         |
| ALDOA.8   | 3.95E-19 | -0.27705 | 0.82  | 0.847 | 5.91E-15 | Opc-G | ALDOA         |
| MPP1.10   | 4.11E-19 | -0.45553 | 0.074 | 0.209 | 6.14E-15 | Opc-G | MPP1          |
| ZNF775.8  | 4.11E-19 | 0.2828   | 0.182 | 0.089 | 6.15E-15 | Opc-G | ZNF775        |
| RBM47.10  | 4.12E-19 | -0.34945 | 0.014 | 0.123 | 6.16E-15 | Opc-G | RBM47         |
| SLC1A5.9  | 4.14E-19 | -0.39193 | 0.027 | 0.145 | 6.19E-15 | Opc-G | SLC1A5        |
| SUSD3.9   | 4.28E-19 | -0.45572 | 0.001 | 0.101 | 6.40E-15 | Opc-G | SUSD3         |
| WIPI2.5   | 4.46E-19 | 0.261594 | 0.512 | 0.39  | 6.66E-15 | Opc-G | WIPI2         |
| H1FO.2    | 4.54E-19 | 0.243713 | 0.399 | 0.255 | 6.79E-15 | Opc-G | H1FO          |
| GAS6.9    | 4.62E-19 | -0.4045  | 0.075 | 0.213 | 6.90E-15 | Opc-G | GAS6          |
| HMBOX1.8  | 4.84E-19 | 0.269762 | 0.307 | 0.185 | 7.24E-15 | Opc-G | HMBOX1        |
| KIF21A.1C | 4.92E-19 | 0.280572 | 0.428 | 0.294 | 7.35E-15 | Opc-G | KIF21A        |
| ARMCX1.9  | 5.10E-19 | 0.250278 | 0.333 | 0.205 | 7.62E-15 | Opc-G | ARMCX1        |
| MYADM.7   | 5.14E-19 | -0.41711 | 0.066 | 0.201 | 7.68E-15 | Opc-G | MYADM         |
| TSN.6     | 5.38E-19 | 0.230883 | 0.496 | 0.369 | 8.05E-15 | Opc-G | TSN           |
| DAB2.9    | 5.78E-19 | -0.5193  | 0.038 | 0.158 | 8.64E-15 | Opc-G | DAB2          |
| MRC2.5    | 5.85E-19 | -0.28758 | 0.049 | 0.182 | 8.74E-15 | Opc-G | MRC2          |
| CAMLG.9   | 6.00E-19 | 0.163888 | 0.624 | 0.485 | 8.97E-15 | Opc-G | CAMLG         |
| DRAXIN.9  | 6.61E-19 | 0.294782 | 0.257 | 0.146 | 9.87E-15 | Opc-G | DRAXIN        |
| DGKG.4    | 6.69E-19 | 0.288354 | 0.113 | 0.044 | 1.00E-14 | Opc-G | DGKG          |

|             |           |           |        |        |           |       |             |
|-------------|-----------|-----------|--------|--------|-----------|-------|-------------|
| SOX9. 9     | 6. 93E-19 | 0. 302677 | 0. 404 | 0. 263 | 1. 04E-14 | Opc-G | SOX9        |
| MGAT4A. 1C  | 7. 28E-19 | -0. 54077 | 0. 096 | 0. 229 | 1. 09E-14 | Opc-G | MGAT4A      |
| EBI3. 9     | 7. 83E-19 | -0. 45658 | 0. 003 | 0. 102 | 1. 17E-14 | Opc-G | EBI3        |
| ZBTB38. 3   | 8. 62E-19 | -0. 34781 | 0. 06  | 0. 195 | 1. 29E-14 | Opc-G | ZBTB38      |
| MSI2. 7     | 8. 84E-19 | 0. 253028 | 0. 455 | 0. 312 | 1. 32E-14 | Opc-G | MSI2        |
| MAN2A1. 7   | 9. 19E-19 | -0. 33845 | 0. 011 | 0. 117 | 1. 37E-14 | Opc-G | MAN2A1      |
| ASF1A. 8    | 9. 19E-19 | 0. 31128  | 0. 344 | 0. 227 | 1. 37E-14 | Opc-G | ASF1A       |
| AC093901. 9 | 9. 36E-19 | 0. 10787  | 0. 044 | 0. 009 | 1. 40E-14 | Opc-G | AC093901. 1 |
| LUC7L3. 7   | 9. 47E-19 | 0. 186929 | 0. 649 | 0. 501 | 1. 42E-14 | Opc-G | LUC7L3      |
| XIST. 10    | 9. 82E-19 | -0. 43858 | 0. 122 | 0. 276 | 1. 47E-14 | Opc-G | XIST        |
| GNG4. 9     | 1. 00E-18 | 0. 306675 | 0. 209 | 0. 11  | 1. 50E-14 | Opc-G | GNG4        |
| TMEM165. 4  | 1. 03E-18 | 0. 321429 | 0. 541 | 0. 451 | 1. 53E-14 | Opc-G | TMEM165     |
| CHRD1       | 1. 06E-18 | 0. 202841 | 0. 098 | 0. 035 | 1. 59E-14 | Opc-G | CHRD1       |
| AC084219. 1 | 1. 06E-18 | 0. 152557 | 0. 094 | 0. 032 | 1. 59E-14 | Opc-G | AC084219. 4 |
| DCLK2. 10   | 1. 07E-18 | 0. 30711  | 0. 305 | 0. 189 | 1. 60E-14 | Opc-G | DCLK2       |
| CD01. 10    | 1. 08E-18 | 0. 245304 | 0. 359 | 0. 226 | 1. 62E-14 | Opc-G | CD01        |
| CDKN1C. 8   | 1. 09E-18 | 0. 256013 | 0. 213 | 0. 107 | 1. 63E-14 | Opc-G | CDKN1C      |
| GRIA4. 8    | 1. 11E-18 | 0. 299793 | 0. 227 | 0. 123 | 1. 65E-14 | Opc-G | GRIA4       |
| DPF1. 9     | 1. 12E-18 | 0. 301031 | 0. 242 | 0. 134 | 1. 67E-14 | Opc-G | DPF1        |
| PTX3. 9     | 1. 14E-18 | -0. 31214 | 0. 014 | 0. 122 | 1. 71E-14 | Opc-G | PTX3        |
| GTF3C6. 5   | 1. 23E-18 | 0. 165759 | 0. 639 | 0. 506 | 1. 83E-14 | Opc-G | GTF3C6      |
| HNMT. 9     | 1. 25E-18 | -0. 54346 | 0. 093 | 0. 227 | 1. 87E-14 | Opc-G | HNMT        |
| ARID5A. 6   | 1. 31E-18 | -0. 38267 | 0. 141 | 0. 3   | 1. 96E-14 | Opc-G | ARID5A      |
| AOAH. 9     | 1. 32E-18 | -0. 51327 | 0. 02  | 0. 13  | 1. 97E-14 | Opc-G | AOAH        |
| MYEF2. 8    | 1. 36E-18 | 0. 305267 | 0. 296 | 0. 186 | 2. 03E-14 | Opc-G | MYEF2       |
| HIVEP3. 6   | 1. 40E-18 | -0. 24207 | 0. 037 | 0. 16  | 2. 10E-14 | Opc-G | HIVEP3      |
| CLEC5A. 9   | 1. 50E-18 | -0. 49119 | 0. 005 | 0. 106 | 2. 25E-14 | Opc-G | CLEC5A      |
| EPN2. 9     | 1. 58E-18 | 0. 338257 | 0. 344 | 0. 23  | 2. 36E-14 | Opc-G | EPN2        |
| VMP1. 5     | 1. 59E-18 | -0. 40229 | 0. 317 | 0. 482 | 2. 37E-14 | Opc-G | VMP1        |
| ARHGAP15. 1 | 1. 74E-18 | -0. 44353 | 0. 004 | 0. 103 | 2. 60E-14 | Opc-G | ARHGAP15    |
| IGFBP5. 1C  | 1. 75E-18 | 0. 156518 | 0. 411 | 0. 259 | 2. 62E-14 | Opc-G | IGFBP5      |
| TNFAIP8L2   | 1. 76E-18 | -0. 42197 | 0. 003 | 0. 101 | 2. 63E-14 | Opc-G | TNFAIP8L2   |
| HSPA1B. 6   | 1. 78E-18 | 0. 259764 | 0. 537 | 0. 402 | 2. 66E-14 | Opc-G | HSPA1B      |
| TMEM179. 1  | 1. 81E-18 | 0. 150772 | 0. 077 | 0. 023 | 2. 71E-14 | Opc-G | TMEM179     |
| VEZT. 7     | 1. 84E-18 | 0. 282701 | 0. 337 | 0. 219 | 2. 75E-14 | Opc-G | VEZT        |
| WDR60. 7    | 1. 86E-18 | 0. 314545 | 0. 342 | 0. 225 | 2. 77E-14 | Opc-G | WDR60       |
| TCF7L1      | 1. 93E-18 | 0. 186253 | 0. 094 | 0. 033 | 2. 89E-14 | Opc-G | TCF7L1      |
| TOP2B. 9    | 2. 02E-18 | 0. 305957 | 0. 346 | 0. 23  | 3. 02E-14 | Opc-G | TOP2B       |
| AC073283. 2 | 2. 04E-18 | 0. 179038 | 0. 074 | 0. 022 | 3. 05E-14 | Opc-G | AC073283. 4 |
| EIF1AX. 7   | 2. 04E-18 | 0. 132136 | 0. 676 | 0. 552 | 3. 05E-14 | Opc-G | EIF1AX      |
| SAMHD1. 1C  | 2. 14E-18 | -0. 44268 | 0. 087 | 0. 223 | 3. 20E-14 | Opc-G | SAMHD1      |
| HSD17B11. 2 | 2. 15E-18 | -0. 52756 | 0. 24  | 0. 386 | 3. 21E-14 | Opc-G | HSD17B11    |
| DUSP4. 8    | 2. 28E-18 | -0. 36055 | 0. 057 | 0. 188 | 3. 40E-14 | Opc-G | DUSP4       |
| ZSCAN18. 7  | 2. 38E-18 | 0. 291843 | 0. 346 | 0. 224 | 3. 56E-14 | Opc-G | ZSCAN18     |
| KANK1. 7    | 2. 43E-18 | 0. 266834 | 0. 176 | 0. 086 | 3. 64E-14 | Opc-G | KANK1       |
| HOXC8. 6    | 2. 50E-18 | 0. 182381 | 0. 09  | 0. 03  | 3. 73E-14 | Opc-G | HOXC8       |
| AC007161. 2 | 2. 59E-18 | 0. 127056 | 0. 029 | 0. 004 | 3. 87E-14 | Opc-G | AC007161. 5 |
| MILR1. 10   | 2. 64E-18 | -0. 47149 | 0. 005 | 0. 105 | 3. 95E-14 | Opc-G | MILR1       |
| AKAP8L. 8   | 2. 82E-18 | 0. 292447 | 0. 359 | 0. 242 | 4. 21E-14 | Opc-G | AKAP8L      |
| SERPINF1. 2 | 2. 90E-18 | -0. 46705 | 0. 092 | 0. 233 | 4. 34E-14 | Opc-G | SERPINF1    |
| MAP2K3. 9   | 2. 98E-18 | -0. 32037 | 0. 064 | 0. 197 | 4. 45E-14 | Opc-G | MAP2K3      |

|             |           |           |        |        |           |       |                  |
|-------------|-----------|-----------|--------|--------|-----------|-------|------------------|
| BTG1. 9     | 3. 04E-18 | 0. 159677 | 0. 828 | 0. 68  | 4. 55E-14 | Opc-G | BTG1             |
| SNRNP70. 6  | 3. 10E-18 | 0. 220201 | 0. 586 | 0. 468 | 4. 64E-14 | Opc-G | SNRNP70          |
| ETS2. 10    | 3. 17E-18 | -0. 49982 | 0. 087 | 0. 215 | 4. 73E-14 | Opc-G | ETS2             |
| ELOVL1. 6   | 3. 38E-18 | -0. 362   | 0. 094 | 0. 24  | 5. 05E-14 | Opc-G | ELOVL1           |
| FAM198A     | 3. 51E-18 | 0. 12599  | 0. 064 | 0. 017 | 5. 25E-14 | Opc-G | FAM198A          |
| TLR2. 10    | 3. 54E-18 | -0. 47213 | 0. 014 | 0. 118 | 5. 28E-14 | Opc-G | TLR2             |
| IPO9. 6     | 3. 74E-18 | 0. 280126 | 0. 34  | 0. 224 | 5. 58E-14 | Opc-G | IPO9             |
| YIPF4. 5    | 3. 74E-18 | 0. 227702 | 0. 49  | 0. 367 | 5. 59E-14 | Opc-G | YIPF4            |
| DPYSL3. 9   | 4. 30E-18 | 0. 266425 | 0. 445 | 0. 314 | 6. 42E-14 | Opc-G | DPYSL3           |
| PPP1R18. 1  | 4. 35E-18 | -0. 42965 | 0. 153 | 0. 302 | 6. 51E-14 | Opc-G | PPP1R18          |
| LMAN1. 6    | 4. 42E-18 | -0. 38261 | 0. 176 | 0. 339 | 6. 61E-14 | Opc-G | LMAN1            |
| PYGL. 9     | 4. 45E-18 | -0. 42862 | 0. 07  | 0. 2   | 6. 65E-14 | Opc-G | PYGL             |
| EHMT2. 8    | 4. 53E-18 | 0. 325433 | 0. 305 | 0. 193 | 6. 77E-14 | Opc-G | EHMT2            |
| RSRC2. 4    | 4. 65E-18 | 0. 179043 | 0. 594 | 0. 467 | 6. 94E-14 | Opc-G | RSRC2            |
| COA4. 4     | 4. 76E-18 | 0. 25537  | 0. 499 | 0. 379 | 7. 11E-14 | Opc-G | COA4             |
| IRF1. 7     | 4. 82E-18 | 0. 284844 | 0. 321 | 0. 198 | 7. 20E-14 | Opc-G | IRF1             |
| CYTIP. 9    | 4. 94E-18 | -0. 49603 | 0. 01  | 0. 11  | 7. 39E-14 | Opc-G | CYTIP            |
| XKR4. 8     | 4. 99E-18 | 0. 216645 | 0. 127 | 0. 052 | 7. 46E-14 | Opc-G | XKR4             |
| NDRG1. 6    | 5. 15E-18 | -0. 55035 | 0. 056 | 0. 179 | 7. 70E-14 | Opc-G | NDRG1            |
| TNRC6B. 5   | 5. 33E-18 | 0. 232467 | 0. 473 | 0. 344 | 7. 97E-14 | Opc-G | TNRC6B           |
| ENAH. 9     | 5. 34E-18 | 0. 273948 | 0. 38  | 0. 256 | 7. 98E-14 | Opc-G | ENAH             |
| SPARCL1. 9  | 5. 35E-18 | 0. 138339 | 0. 499 | 0. 335 | 8. 00E-14 | Opc-G | SPARCL1          |
| SFT2D1. 1C  | 5. 42E-18 | -0. 41584 | 0. 348 | 0. 512 | 8. 09E-14 | Opc-G | SFT2D1           |
| NANOS1. 1   | 5. 46E-18 | 0. 161871 | 0. 055 | 0. 013 | 8. 16E-14 | Opc-G | NANOS1           |
| PCBP2. 5    | 5. 83E-18 | 0. 14702  | 0. 783 | 0. 655 | 8. 71E-14 | Opc-G | PCBP2            |
| MAP1B. 9    | 6. 09E-18 | 0. 11047  | 0. 777 | 0. 518 | 9. 09E-14 | Opc-G | MAP1B            |
| SNRNP200. 6 | 6. 29E-18 | 0. 254107 | 0. 399 | 0. 276 | 9. 40E-14 | Opc-G | SNRNP200         |
| RASSF4. 1C  | 6. 41E-18 | -0. 43291 | 0. 179 | 0. 339 | 9. 58E-14 | Opc-G | RASSF4           |
| SMARCD1. 8  | 6. 50E-18 | 0. 315916 | 0. 317 | 0. 208 | 9. 71E-14 | Opc-G | SMARCD1          |
| HOXC6. 3    | 6. 81E-18 | 0. 158927 | 0. 081 | 0. 025 | 1. 02E-13 | Opc-G | HOXC6            |
| PLBD1. 10   | 6. 89E-18 | -0. 36049 | 0. 004 | 0. 1   | 1. 03E-13 | Opc-G | PLBD1            |
| DUOX1. 9    | 7. 01E-18 | 0. 194663 | 0. 138 | 0. 058 | 1. 05E-13 | Opc-G | DUOX1            |
| AC002454. 7 | 7. 11E-18 | 0. 153767 | 0. 056 | 0. 014 | 1. 06E-13 | Opc-G | AC002454. 1      |
| LILRB1. 1C  | 7. 15E-18 | -0. 40248 | 0. 003 | 0. 098 | 1. 07E-13 | Opc-G | LILRB1           |
| RNF180. 9   | 7. 44E-18 | 0. 33438  | 0. 266 | 0. 161 | 1. 11E-13 | Opc-G | RNF180           |
| PSMC2. 5    | 7. 45E-18 | 0. 180142 | 0. 581 | 0. 451 | 1. 11E-13 | Opc-G | PSMC2            |
| KAT7. 4     | 7. 58E-18 | 0. 309983 | 0. 242 | 0. 141 | 1. 13E-13 | Opc-G | KAT7             |
| CTA-293F1   | 7. 66E-18 | 0. 200568 | 0. 089 | 0. 03  | 1. 15E-13 | Opc-G | CTA-293F17. 1    |
| SYT17. 6    | 7. 76E-18 | 0. 315323 | 0. 257 | 0. 153 | 1. 16E-13 | Opc-G | SYT17            |
| SPHK1. 8    | 8. 02E-18 | -0. 26564 | 0. 011 | 0. 113 | 1. 20E-13 | Opc-G | SPHK1            |
| COTL1. 9    | 8. 33E-18 | -0. 38027 | 0. 378 | 0. 518 | 1. 24E-13 | Opc-G | COTL1            |
| UBQLN2. 9   | 8. 36E-18 | 0. 278919 | 0. 332 | 0. 213 | 1. 25E-13 | Opc-G | UBQLN2           |
| DHRX. 3     | 8. 44E-18 | 0. 320182 | 0. 335 | 0. 226 | 1. 26E-13 | Opc-G | DHRX             |
| FAM32A. 7   | 8. 76E-18 | 0. 192441 | 0. 567 | 0. 444 | 1. 31E-13 | Opc-G | FAM32A           |
| KCNMA1. 8   | 8. 77E-18 | -0. 36499 | 0. 034 | 0. 15  | 1. 31E-13 | Opc-G | KCNMA1           |
| DGCR2. 5    | 8. 81E-18 | 0. 290449 | 0. 251 | 0. 146 | 1. 32E-13 | Opc-G | DGCR2            |
| FZD3. 7     | 9. 02E-18 | 0. 284003 | 0. 388 | 0. 269 | 1. 35E-13 | Opc-G | FZD3             |
| RP11-1094   | 9. 11E-18 | 0. 2958   | 0. 342 | 0. 227 | 1. 36E-13 | Opc-G | RP11-1094M14. 11 |
| WASF2. 8    | 9. 23E-18 | -0. 38983 | 0. 288 | 0. 448 | 1. 38E-13 | Opc-G | WASF2            |
| ARL4C. 8    | 9. 79E-18 | 0. 27127  | 0. 503 | 0. 37  | 1. 46E-13 | Opc-G | ARL4C            |
| NUBP2. 5    | 1. 00E-17 | 0. 226008 | 0. 495 | 0. 374 | 1. 49E-13 | Opc-G | NUBP2            |

|            |          |          |       |       |          |       |          |
|------------|----------|----------|-------|-------|----------|-------|----------|
| AKAP13.9   | 1.00E-17 | -0.45161 | 0.186 | 0.334 | 1.50E-13 | Opc-G | AKAP13   |
| NXN.5      | 1.01E-17 | 0.196251 | 0.092 | 0.032 | 1.50E-13 | Opc-G | NXN      |
| RNASE1.7   | 1.03E-17 | -0.78258 | 0.059 | 0.176 | 1.54E-13 | Opc-G | RNASE1   |
| DECRI.5    | 1.04E-17 | 0.216285 | 0.525 | 0.404 | 1.56E-13 | Opc-G | DECRI    |
| C16orf87.1 | 1.11E-17 | 0.275624 | 0.31  | 0.197 | 1.65E-13 | Opc-G | C16orf87 |
| FTX.5      | 1.11E-17 | 0.193813 | 0.191 | 0.094 | 1.66E-13 | Opc-G | FTX      |
| TNRC6C.9   | 1.11E-17 | 0.27423  | 0.275 | 0.165 | 1.66E-13 | Opc-G | TNRC6C   |
| CIAPIN1.6  | 1.14E-17 | 0.287015 | 0.366 | 0.253 | 1.70E-13 | Opc-G | CIAPIN1  |
| RCN1.10    | 1.14E-17 | 0.262931 | 0.478 | 0.346 | 1.70E-13 | Opc-G | RCN1     |
| FANCL.6    | 1.18E-17 | 0.255855 | 0.242 | 0.136 | 1.76E-13 | Opc-G | FANCL    |
| SDR39U1.5  | 1.22E-17 | 0.238671 | 0.389 | 0.267 | 1.82E-13 | Opc-G | SDR39U1  |
| YTHDF2.8   | 1.22E-17 | 0.193568 | 0.549 | 0.423 | 1.82E-13 | Opc-G | YTHDF2   |
| PRKAR1B.7  | 1.24E-17 | 0.287712 | 0.223 | 0.121 | 1.85E-13 | Opc-G | PRKAR1B  |
| RNF144B.9  | 1.25E-17 | -0.43825 | 0.007 | 0.104 | 1.86E-13 | Opc-G | RNF144B  |
| TERF1.5    | 1.26E-17 | 0.254712 | 0.433 | 0.316 | 1.88E-13 | Opc-G | TERF1    |
| NR2F2.7    | 1.37E-17 | 0.157428 | 0.108 | 0.041 | 2.04E-13 | Opc-G | NR2F2    |
| ZNF107.1   | 1.37E-17 | 0.1779   | 0.097 | 0.035 | 2.04E-13 | Opc-G | ZNF107   |
| PRKRIP1.7  | 1.44E-17 | 0.306622 | 0.346 | 0.234 | 2.16E-13 | Opc-G | PRKRIP1  |
| HPCA.8     | 1.50E-17 | 0.271307 | 0.13  | 0.055 | 2.24E-13 | Opc-G | HPCA     |
| STRA13.4   | 1.53E-17 | 0.215625 | 0.567 | 0.443 | 2.28E-13 | Opc-G | STRA13   |
| PPP2CA.5   | 1.54E-17 | 0.215897 | 0.593 | 0.472 | 2.31E-13 | Opc-G | PPP2CA   |
| UBE2H.8    | 1.56E-17 | 0.29028  | 0.366 | 0.252 | 2.34E-13 | Opc-G | UBE2H    |
| NPL.9      | 1.60E-17 | -0.50995 | 0.082 | 0.208 | 2.38E-13 | Opc-G | NPL      |
| CD99.6     | 1.62E-17 | -0.35797 | 0.497 | 0.647 | 2.41E-13 | Opc-G | CD99     |
| SLC25A37.1 | 1.65E-17 | -0.42305 | 0.165 | 0.32  | 2.46E-13 | Opc-G | SLC25A37 |
| SIGLEC9.1  | 1.69E-17 | -0.40183 | 0.004 | 0.099 | 2.52E-13 | Opc-G | SIGLEC9  |
| CSTB.8     | 1.73E-17 | -0.36213 | 0.594 | 0.696 | 2.59E-13 | Opc-G | CSTB     |
| HNRNPL.6   | 1.92E-17 | 0.25146  | 0.378 | 0.256 | 2.87E-13 | Opc-G | HNRNPL   |
| GLDN.9     | 1.94E-17 | -0.40155 | 0.007 | 0.103 | 2.90E-13 | Opc-G | GLDN     |
| TIMM50.3   | 2.03E-17 | 0.247704 | 0.419 | 0.303 | 3.04E-13 | Opc-G | TIMM50   |
| RHOA.8     | 2.06E-17 | -0.3248  | 0.717 | 0.757 | 3.08E-13 | Opc-G | RHOA     |
| BCL2L12.5  | 2.10E-17 | -0.25821 | 0.025 | 0.134 | 3.14E-13 | Opc-G | BCL2L12  |
| TAGAP.10   | 2.13E-17 | -0.48199 | 0.01  | 0.107 | 3.19E-13 | Opc-G | TAGAP    |
| MPV17.2    | 2.26E-17 | 0.229461 | 0.458 | 0.338 | 3.37E-13 | Opc-G | MPV17    |
| PPM1B.5    | 2.30E-17 | 0.261691 | 0.417 | 0.293 | 3.44E-13 | Opc-G | PPM1B    |
| POLR2J3.9  | 2.41E-17 | 0.220974 | 0.449 | 0.331 | 3.60E-13 | Opc-G | POLR2J3  |
| SLC29A1.9  | 2.62E-17 | -0.43857 | 0.034 | 0.144 | 3.91E-13 | Opc-G | SLC29A1  |
| ODF3B.10   | 2.63E-17 | -0.3361  | 0.005 | 0.1   | 3.92E-13 | Opc-G | ODF3B    |
| KRIT1.8    | 2.67E-17 | 0.272322 | 0.322 | 0.209 | 3.98E-13 | Opc-G | KRIT1    |
| CA14.9     | 2.81E-17 | 0.240642 | 0.116 | 0.047 | 4.19E-13 | Opc-G | CA14     |
| RASGEF1B.3 | 3.01E-17 | -0.4606  | 0.023 | 0.127 | 4.49E-13 | Opc-G | RASGEF1B |
| ITPR2.8    | 3.15E-17 | -0.30636 | 0.029 | 0.138 | 4.71E-13 | Opc-G | ITPR2    |
| C6orf1.2   | 3.22E-17 | -0.3545  | 0.204 | 0.371 | 4.81E-13 | Opc-G | C6orf1   |
| MAGT1.5    | 3.23E-17 | -0.30768 | 0.077 | 0.211 | 4.82E-13 | Opc-G | MAGT1    |
| STK25.8    | 3.25E-17 | 0.287447 | 0.404 | 0.295 | 4.85E-13 | Opc-G | STK25    |
| ATOX1.4    | 3.45E-17 | 0.238978 | 0.12  | 0.049 | 5.15E-13 | Opc-G | ATOX1    |
| CYFIP1.9   | 3.53E-17 | -0.4466  | 0.15  | 0.292 | 5.27E-13 | Opc-G | CYFIP1   |
| ZNF268.7   | 3.57E-17 | 0.274433 | 0.206 | 0.111 | 5.34E-13 | Opc-G | ZNF268   |
| NR4A3.9    | 3.61E-17 | -0.5239  | 0.046 | 0.158 | 5.40E-13 | Opc-G | NR4A3    |
| COX16.3    | 3.62E-17 | 0.210431 | 0.623 | 0.492 | 5.40E-13 | Opc-G | COX16    |
| GNAI1.8    | 3.73E-17 | 0.230239 | 0.197 | 0.099 | 5.58E-13 | Opc-G | GNAI1    |



|             |           |           |        |        |           |       |          |
|-------------|-----------|-----------|--------|--------|-----------|-------|----------|
| FLAD1. 6    | 3. 75E-17 | 0. 292395 | 0. 336 | 0. 225 | 5. 61E-13 | Opc-G | FLAD1    |
| AFF4. 7     | 3. 80E-17 | 0. 266506 | 0. 445 | 0. 333 | 5. 67E-13 | Opc-G | AFF4     |
| S100A6. 9   | 3. 87E-17 | -0. 47171 | 0. 57  | 0. 648 | 5. 78E-13 | Opc-G | S100A6   |
| MTSS1L. 6   | 3. 95E-17 | 0. 258168 | 0. 175 | 0. 088 | 5. 91E-13 | Opc-G | MTSS1L   |
| CNOT7. 7    | 4. 20E-17 | 0. 243632 | 0. 475 | 0. 361 | 6. 27E-13 | Opc-G | CNOT7    |
| SNN. 10     | 4. 26E-17 | 0. 282981 | 0. 339 | 0. 218 | 6. 37E-13 | Opc-G | SNN      |
| YBEY. 5     | 4. 34E-17 | 0. 25593  | 0. 328 | 0. 214 | 6. 48E-13 | Opc-G | YBEY     |
| ILK. 5      | 4. 47E-17 | -0. 39326 | 0. 21  | 0. 375 | 6. 68E-13 | Opc-G | ILK      |
| EPB41L3. 1  | 4. 54E-17 | -0. 4199  | 0. 014 | 0. 111 | 6. 78E-13 | Opc-G | EPB41L3  |
| PRPF40A. 6  | 4. 99E-17 | 0. 210364 | 0. 561 | 0. 443 | 7. 46E-13 | Opc-G | PRPF40A  |
| MIS18BP1. 4 | 4. 99E-17 | -0. 38652 | 0. 041 | 0. 154 | 7. 46E-13 | Opc-G | MIS18BP1 |
| SELPLG. 8   | 5. 08E-17 | -0. 51592 | 0. 025 | 0. 128 | 7. 59E-13 | Opc-G | SELPLG   |
| P2RX4. 9    | 5. 22E-17 | -0. 40183 | 0. 063 | 0. 184 | 7. 81E-13 | Opc-G | P2RX4    |
| REL. 10     | 5. 33E-17 | -0. 49034 | 0. 173 | 0. 306 | 7. 96E-13 | Opc-G | REL      |
| ELN. 7      | 5. 52E-17 | 0. 198358 | 0. 199 | 0. 102 | 8. 25E-13 | Opc-G | ELN      |
| B3GAT2. 5   | 5. 53E-17 | 0. 246787 | 0. 163 | 0. 078 | 8. 26E-13 | Opc-G | B3GAT2   |
| ATRX. 7     | 5. 54E-17 | 0. 199707 | 0. 564 | 0. 436 | 8. 28E-13 | Opc-G | ATRX     |
| TRADD. 5    | 5. 86E-17 | -0. 25658 | 0. 052 | 0. 175 | 8. 75E-13 | Opc-G | TRADD    |
| NTAN1. 7    | 5. 94E-17 | -0. 27719 | 0. 075 | 0. 208 | 8. 88E-13 | Opc-G | NTAN1    |
| WSB1. 6     | 5. 95E-17 | 0. 111565 | 0. 772 | 0. 644 | 8. 89E-13 | Opc-G | WSB1     |
| SMARCC1. 8  | 6. 05E-17 | 0. 293592 | 0. 357 | 0. 248 | 9. 04E-13 | Opc-G | SMARCC1  |
| VEGFA. 7    | 6. 07E-17 | -0. 36929 | 0. 089 | 0. 224 | 9. 07E-13 | Opc-G | VEGFA    |
| BAZ1A. 6    | 6. 13E-17 | 0. 27283  | 0. 43  | 0. 312 | 9. 17E-13 | Opc-G | BAZ1A    |
| FZD7. 7     | 6. 22E-17 | -0. 19383 | 0. 008 | 0. 103 | 9. 30E-13 | Opc-G | FZD7     |
| LPXN. 10    | 6. 31E-17 | -0. 40425 | 0. 016 | 0. 116 | 9. 43E-13 | Opc-G | LPXN     |
| RASSF5. 9   | 6. 32E-17 | -0. 38893 | 0. 023 | 0. 126 | 9. 44E-13 | Opc-G | RASSF5   |
| PARP9. 5    | 6. 46E-17 | -0. 26944 | 0. 053 | 0. 178 | 9. 66E-13 | Opc-G | PARP9    |
| SEPW1. 4    | 6. 46E-17 | 0. 104233 | 0. 814 | 0. 663 | 9. 66E-13 | Opc-G | SEPW1    |
| IL17RA. 1C  | 6. 48E-17 | -0. 33263 | 0. 022 | 0. 126 | 9. 68E-13 | Opc-G | IL17RA   |
| SOAT1. 10   | 6. 63E-17 | -0. 38057 | 0. 078 | 0. 206 | 9. 91E-13 | Opc-G | SOAT1    |
| MT2A. 9     | 6. 76E-17 | -0. 40288 | 0. 717 | 0. 788 | 1. 01E-12 | Opc-G | MT2A     |
| HPGDS. 9    | 6. 93E-17 | -0. 44868 | 0. 004 | 0. 095 | 1. 04E-12 | Opc-G | HPGDS    |
| MAD1L1. 4   | 7. 01E-17 | 0. 252567 | 0. 257 | 0. 15  | 1. 05E-12 | Opc-G | MAD1L1   |
| NABP1. 8    | 7. 44E-17 | -0. 42781 | 0. 026 | 0. 13  | 1. 11E-12 | Opc-G | NABP1    |
| PRR4. 9     | 7. 55E-17 | 0. 298198 | 0. 318 | 0. 21  | 1. 13E-12 | Opc-G | PRR4     |
| EVI2A. 9    | 7. 57E-17 | -0. 56051 | 0. 104 | 0. 231 | 1. 13E-12 | Opc-G | EVI2A    |
| ZNF267. 9   | 7. 60E-17 | -0. 32737 | 0. 03  | 0. 139 | 1. 14E-12 | Opc-G | ZNF267   |
| SP110. 8    | 8. 20E-17 | -0. 38411 | 0. 077 | 0. 206 | 1. 23E-12 | Opc-G | SP110    |
| SUCLG2. 7   | 8. 51E-17 | -0. 31442 | 0. 109 | 0. 254 | 1. 27E-12 | Opc-G | SUCLG2   |
| ANXA7. 7    | 8. 76E-17 | -0. 38223 | 0. 191 | 0. 348 | 1. 31E-12 | Opc-G | ANXA7    |
| TMEM141. 7  | 9. 07E-17 | -0. 36558 | 0. 116 | 0. 261 | 1. 36E-12 | Opc-G | TMEM141  |
| CLEC2B. 1C  | 9. 11E-17 | -0. 55598 | 0. 093 | 0. 212 | 1. 36E-12 | Opc-G | CLEC2B   |
| LCP2. 10    | 9. 81E-17 | -0. 4234  | 0. 02  | 0. 121 | 1. 47E-12 | Opc-G | LCP2     |
| AKAP7. 8    | 9. 90E-17 | 0. 316092 | 0. 295 | 0. 188 | 1. 48E-12 | Opc-G | AKAP7    |
| HSPA1A. 6   | 1. 02E-16 | 0. 286998 | 0. 585 | 0. 486 | 1. 52E-12 | Opc-G | HSPA1A   |
| KRCC1. 1    | 1. 06E-16 | 0. 237972 | 0. 34  | 0. 223 | 1. 59E-12 | Opc-G | KRCC1    |
| TRIB1. 6    | 1. 08E-16 | -0. 40039 | 0. 049 | 0. 164 | 1. 62E-12 | Opc-G | TRIB1    |
| CX3CR1. 9   | 1. 11E-16 | -0. 47381 | 0. 012 | 0. 107 | 1. 66E-12 | Opc-G | CX3CR1   |
| TRIM24. 9   | 1. 16E-16 | 0. 300458 | 0. 29  | 0. 185 | 1. 73E-12 | Opc-G | TRIM24   |
| KIF1B. 9    | 1. 17E-16 | 0. 262971 | 0. 406 | 0. 287 | 1. 74E-12 | Opc-G | KIF1B    |
| RNPEP. 10   | 1. 19E-16 | -0. 34907 | 0. 1   | 0. 232 | 1. 78E-12 | Opc-G | RNPEP    |

|            |          |          |       |       |          |       |          |
|------------|----------|----------|-------|-------|----------|-------|----------|
| ROMO1.5    | 1.20E-16 | 0.137297 | 0.753 | 0.584 | 1.79E-12 | Opc-G | ROMO1    |
| TAPBP.9    | 1.21E-16 | -0.3446  | 0.195 | 0.352 | 1.80E-12 | Opc-G | TAPBP    |
| RRAS.3     | 1.21E-16 | -0.21901 | 0.014 | 0.112 | 1.81E-12 | Opc-G | RRAS     |
| PALD1.9    | 1.25E-16 | -0.3953  | 0.012 | 0.108 | 1.87E-12 | Opc-G | PALD1    |
| BMP2K.8    | 1.31E-16 | -0.34393 | 0.022 | 0.123 | 1.96E-12 | Opc-G | BMP2K    |
| AASS.6     | 1.33E-16 | 0.297724 | 0.201 | 0.109 | 1.98E-12 | Opc-G | AASS     |
| IL10.10    | 1.33E-16 | -0.49148 | 0.015 | 0.112 | 1.99E-12 | Opc-G | IL10     |
| PLK3.8     | 1.38E-16 | -0.41763 | 0.117 | 0.249 | 2.06E-12 | Opc-G | PLK3     |
| ARPC4.10   | 1.41E-16 | -0.38185 | 0.377 | 0.523 | 2.11E-12 | Opc-G | ARPC4    |
| HTATIP2.9  | 1.44E-16 | -0.33956 | 0.041 | 0.154 | 2.15E-12 | Opc-G | HTATIP2  |
| PSME1.9    | 1.45E-16 | -0.35299 | 0.425 | 0.594 | 2.17E-12 | Opc-G | PSME1    |
| RHOQ.6     | 1.47E-16 | -0.27141 | 0.051 | 0.169 | 2.19E-12 | Opc-G | RHOQ     |
| UBE2I.6    | 1.48E-16 | 0.140512 | 0.691 | 0.569 | 2.22E-12 | Opc-G | UBE2I    |
| LGALS3BP.1 | 1.50E-16 | -0.40542 | 0.302 | 0.459 | 2.24E-12 | Opc-G | LGALS3BP |
| IRS2.6     | 1.53E-16 | -0.33616 | 0.205 | 0.358 | 2.29E-12 | Opc-G | IRS2     |
| SCIMP.10   | 1.56E-16 | -0.37458 | 0.001 | 0.088 | 2.33E-12 | Opc-G | SCIMP    |
| CDK2AP2.7  | 1.57E-16 | -0.34728 | 0.179 | 0.339 | 2.35E-12 | Opc-G | CDK2AP2  |
| TP53.3     | 1.60E-16 | 0.246866 | 0.202 | 0.108 | 2.38E-12 | Opc-G | TP53     |
| ARHGAP30.1 | 1.63E-16 | -0.38228 | 0.008 | 0.1   | 2.43E-12 | Opc-G | ARHGAP30 |
| KDM7A.2    | 1.69E-16 | 0.173867 | 0.134 | 0.058 | 2.52E-12 | Opc-G | KDM7A    |
| CCL3.10    | 1.73E-16 | -0.6875  | 0.344 | 0.427 | 2.58E-12 | Opc-G | CCL3     |
| MAP3K1.3   | 1.74E-16 | 0.263741 | 0.179 | 0.092 | 2.59E-12 | Opc-G | MAP3K1   |
| ZNF804A.3  | 1.79E-16 | 0.163814 | 0.094 | 0.034 | 2.68E-12 | Opc-G | ZNF804A  |
| PARP1.5    | 1.80E-16 | 0.195183 | 0.585 | 0.464 | 2.69E-12 | Opc-G | PARP1    |
| MPST.5     | 1.80E-16 | 0.311151 | 0.406 | 0.3   | 2.69E-12 | Opc-G | MPST     |
| GABRB3.1   | 1.85E-16 | 0.108672 | 0.049 | 0.012 | 2.76E-12 | Opc-G | GABRB3   |
| TFPT.7     | 1.91E-16 | -0.36148 | 0.168 | 0.317 | 2.86E-12 | Opc-G | TFPT     |
| MESDC2.5   | 1.95E-16 | -0.38798 | 0.249 | 0.414 | 2.92E-12 | Opc-G | MESDC2   |
| DENND3.1C  | 1.98E-16 | -0.40167 | 0.012 | 0.106 | 2.96E-12 | Opc-G | DENND3   |
| CHCHD3.6   | 2.06E-16 | 0.214633 | 0.477 | 0.362 | 3.08E-12 | Opc-G | CHCHD3   |
| C10orf11.2 | 2.07E-16 | -0.35389 | 0.012 | 0.107 | 3.09E-12 | Opc-G | C10orf11 |
| PLXNB1.8   | 2.07E-16 | 0.209585 | 0.15  | 0.07  | 3.09E-12 | Opc-G | PLXNB1   |
| FAM195A.6  | 2.20E-16 | -0.26138 | 0.117 | 0.263 | 3.29E-12 | Opc-G | FAM195A  |
| ATP5D.9    | 2.29E-16 | 0.189251 | 0.768 | 0.604 | 3.43E-12 | Opc-G | ATP5D    |
| STARD3NL.2 | 2.34E-16 | 0.193484 | 0.508 | 0.39  | 3.49E-12 | Opc-G | STARD3NL |
| CAMK1.6    | 2.45E-16 | -0.33411 | 0.102 | 0.234 | 3.66E-12 | Opc-G | CAMK1    |
| APRT.8     | 2.52E-16 | -0.36426 | 0.384 | 0.541 | 3.77E-12 | Opc-G | APRT     |
| RENBP.9    | 2.57E-16 | -0.40874 | 0.036 | 0.142 | 3.84E-12 | Opc-G | RENBP    |
| KYNU.10    | 2.59E-16 | -0.38436 | 0.003 | 0.09  | 3.87E-12 | Opc-G | KYNU     |
| CCRL2.9    | 2.60E-16 | -0.4067  | 0.005 | 0.094 | 3.89E-12 | Opc-G | CCRL2    |
| PTK2B.7    | 2.70E-16 | -0.33022 | 0.029 | 0.133 | 4.03E-12 | Opc-G | PTK2B    |
| DEF6.10    | 2.71E-16 | -0.35453 | 0.007 | 0.097 | 4.04E-12 | Opc-G | DEF6     |
| SLC22A18.2 | 2.76E-16 | -0.29791 | 0.026 | 0.13  | 4.12E-12 | Opc-G | SLC22A18 |
| DCTN3.3    | 2.83E-16 | 0.152063 | 0.642 | 0.508 | 4.23E-12 | Opc-G | DCTN3    |
| ACTN1.7    | 2.89E-16 | -0.3285  | 0.122 | 0.264 | 4.32E-12 | Opc-G | ACTN1    |
| HEBP1.6    | 2.93E-16 | -0.34524 | 0.074 | 0.197 | 4.38E-12 | Opc-G | HEBP1    |
| CLU.10     | 3.06E-16 | -0.41925 | 0.747 | 0.785 | 4.57E-12 | Opc-G | CLU      |
| TUB.1      | 3.08E-16 | 0.105525 | 0.052 | 0.013 | 4.61E-12 | Opc-G | TUB      |
| SLIRP.4    | 3.14E-16 | 0.123318 | 0.764 | 0.612 | 4.69E-12 | Opc-G | SLIRP    |
| APOBEC3G.3 | 3.17E-16 | -0.35086 | 0.023 | 0.124 | 4.74E-12 | Opc-G | APOBEC3G |
| TRIM38.9   | 3.22E-16 | -0.34897 | 0.011 | 0.104 | 4.81E-12 | Opc-G | TRIM38   |

|            |           |           |        |        |           |       |                |
|------------|-----------|-----------|--------|--------|-----------|-------|----------------|
| ARSJ. 8    | 3. 31E-16 | -0. 17472 | 0. 026 | 0. 131 | 4. 94E-12 | Opc-G | ARSJ           |
| AC113189.  | 3. 31E-16 | 0. 206779 | 0. 135 | 0. 061 | 4. 95E-12 | Opc-G | AC113189. 5    |
| RP11-686C  | 3. 38E-16 | 0. 224863 | 0. 082 | 0. 028 | 5. 05E-12 | Opc-G | RP11-68606. 2  |
| PRODH      | 3. 42E-16 | 0. 186217 | 0. 061 | 0. 018 | 5. 11E-12 | Opc-G | PRODH          |
| CEBPA. 9   | 3. 48E-16 | -0. 37087 | 0. 015 | 0. 11  | 5. 20E-12 | Opc-G | CEBPA          |
| CD320. 8   | 3. 51E-16 | 0. 239819 | 0. 433 | 0. 31  | 5. 25E-12 | Opc-G | CD320          |
| TNFSF12. 1 | 3. 71E-16 | -0. 37286 | 0. 072 | 0. 193 | 5. 54E-12 | Opc-G | TNFSF12        |
| FGD4. 9    | 3. 73E-16 | -0. 42801 | 0. 045 | 0. 153 | 5. 58E-12 | Opc-G | FGD4           |
| BCKDK. 9   | 3. 87E-16 | -0. 3391  | 0. 173 | 0. 323 | 5. 79E-12 | Opc-G | BCKDK          |
| BTK. 10    | 3. 91E-16 | -0. 35786 | 0. 004 | 0. 091 | 5. 85E-12 | Opc-G | BTK            |
| HECW1. 1   | 4. 07E-16 | 0. 127009 | 0. 071 | 0. 022 | 6. 09E-12 | Opc-G | HECW1          |
| FBXL18     | 4. 19E-16 | 0. 163021 | 0. 093 | 0. 034 | 6. 26E-12 | Opc-G | FBXL18         |
| SPTAN1. 8  | 4. 29E-16 | 0. 255529 | 0. 365 | 0. 253 | 6. 42E-12 | Opc-G | SPTAN1         |
| ZNF146. 7  | 4. 32E-16 | 0. 291166 | 0. 325 | 0. 221 | 6. 45E-12 | Opc-G | ZNF146         |
| TMEM134. 5 | 4. 33E-16 | -0. 32322 | 0. 168 | 0. 319 | 6. 47E-12 | Opc-G | TMEM134        |
| FKBP7. 6   | 4. 35E-16 | 0. 221686 | 0. 172 | 0. 086 | 6. 51E-12 | Opc-G | FKBP7          |
| CLDN12. 1C | 4. 46E-16 | 0. 277613 | 0. 228 | 0. 132 | 6. 66E-12 | Opc-G | CLDN12         |
| SF1. 6     | 4. 47E-16 | 0. 17567  | 0. 616 | 0. 5   | 6. 68E-12 | Opc-G | SF1            |
| SERPINH1.  | 4. 75E-16 | -0. 28732 | 0. 085 | 0. 217 | 7. 10E-12 | Opc-G | SERPINH1       |
| GBAS. 5    | 4. 83E-16 | 0. 212133 | 0. 512 | 0. 392 | 7. 22E-12 | Opc-G | GBAS           |
| ORAI1. 5   | 4. 87E-16 | -0. 22029 | 0. 027 | 0. 131 | 7. 27E-12 | Opc-G | ORAI1          |
| LIMS2      | 5. 06E-16 | 0. 104199 | 0. 037 | 0. 007 | 7. 56E-12 | Opc-G | LIMS2          |
| CNDP2. 9   | 5. 39E-16 | -0. 35636 | 0. 284 | 0. 441 | 8. 06E-12 | Opc-G | CNDP2          |
| AQP1. 3    | 5. 43E-16 | 0. 129651 | 0. 107 | 0. 042 | 8. 12E-12 | Opc-G | AQP1           |
| HLA-DOA. 8 | 5. 43E-16 | -0. 39781 | 0. 01  | 0. 1   | 8. 12E-12 | Opc-G | HLA-DOA        |
| DHX9. 6    | 5. 49E-16 | 0. 252677 | 0. 381 | 0. 271 | 8. 20E-12 | Opc-G | DHX9           |
| SNCAIP. 9  | 5. 50E-16 | 0. 269768 | 0. 161 | 0. 08  | 8. 21E-12 | Opc-G | SNCAIP         |
| MERTK. 9   | 5. 54E-16 | -0. 43156 | 0. 03  | 0. 131 | 8. 28E-12 | Opc-G | MERTK          |
| TMED5. 8   | 5. 54E-16 | -0. 37244 | 0. 167 | 0. 315 | 8. 28E-12 | Opc-G | TMED5          |
| MOSPD3. 6  | 5. 61E-16 | 0. 240071 | 0. 393 | 0. 28  | 8. 39E-12 | Opc-G | MOSPD3         |
| DRAM2. 9   | 5. 67E-16 | -0. 45313 | 0. 202 | 0. 345 | 8. 48E-12 | Opc-G | DRAM2          |
| CBS. 8     | 5. 79E-16 | 0. 307364 | 0. 247 | 0. 151 | 8. 65E-12 | Opc-G | CBS            |
| EBF1. 1    | 5. 81E-16 | 0. 112521 | 0. 052 | 0. 013 | 8. 68E-12 | Opc-G | EBF1           |
| GPSM2. 8   | 5. 91E-16 | 0. 273025 | 0. 276 | 0. 17  | 8. 84E-12 | Opc-G | GPSM2          |
| FNDC3B. 6  | 5. 93E-16 | -0. 27425 | 0. 061 | 0. 181 | 8. 87E-12 | Opc-G | FNDC3B         |
| PPP1CC. 6  | 6. 05E-16 | 0. 210568 | 0. 552 | 0. 438 | 9. 03E-12 | Opc-G | PPP1CC         |
| RP11-448A  | 6. 18E-16 | 0. 285242 | 0. 169 | 0. 087 | 9. 23E-12 | Opc-G | RP11-448A19. 1 |
| SMC6. 7    | 6. 33E-16 | 0. 319154 | 0. 247 | 0. 151 | 9. 46E-12 | Opc-G | SMC6           |
| IL10RB. 1C | 6. 69E-16 | -0. 39035 | 0. 117 | 0. 252 | 1. 00E-11 | Opc-G | IL10RB         |
| NEURL1B    | 6. 69E-16 | 0. 160586 | 0. 079 | 0. 027 | 1. 00E-11 | Opc-G | NEURL1B        |
| ALDH7A1. 5 | 6. 85E-16 | 0. 277407 | 0. 376 | 0. 269 | 1. 02E-11 | Opc-G | ALDH7A1        |
| EMC4. 1    | 6. 90E-16 | 0. 138361 | 0. 592 | 0. 475 | 1. 03E-11 | Opc-G | EMC4           |
| SHC1. 4    | 6. 92E-16 | -0. 24335 | 0. 03  | 0. 136 | 1. 03E-11 | Opc-G | SHC1           |
| NAP1L5. 8  | 7. 25E-16 | 0. 267124 | 0. 224 | 0. 128 | 1. 08E-11 | Opc-G | NAP1L5         |
| SORT1. 6   | 7. 27E-16 | -0. 29975 | 0. 101 | 0. 238 | 1. 09E-11 | Opc-G | SORT1          |
| COA5. 4    | 7. 41E-16 | 0. 245277 | 0. 41  | 0. 299 | 1. 11E-11 | Opc-G | COA5           |
| BATF3. 4   | 7. 42E-16 | -0. 229   | 0. 008 | 0. 098 | 1. 11E-11 | Opc-G | BATF3          |
| ZNF302. 9  | 7. 43E-16 | 0. 166399 | 0. 432 | 0. 307 | 1. 11E-11 | Opc-G | ZNF302         |
| DSE. 10    | 7. 48E-16 | -0. 40941 | 0. 04  | 0. 144 | 1. 12E-11 | Opc-G | DSE            |
| CXCL14. 7  | 7. 90E-16 | -0. 4445  | 0. 04  | 0. 148 | 1. 18E-11 | Opc-G | CXCL14         |
| ITGAX. 9   | 7. 96E-16 | -0. 40601 | 0. 008 | 0. 096 | 1. 19E-11 | Opc-G | ITGAX          |

|           |          |          |       |       |          |       |                |
|-----------|----------|----------|-------|-------|----------|-------|----------------|
| CLOCK.7   | 8.12E-16 | 0.351519 | 0.213 | 0.122 | 1.21E-11 | 0pc-G | CLOCK          |
| TEAD2.8   | 8.12E-16 | 0.291177 | 0.164 | 0.085 | 1.21E-11 | 0pc-G | TEAD2          |
| DLD.7     | 8.92E-16 | 0.203987 | 0.459 | 0.336 | 1.33E-11 | 0pc-G | DLD            |
| PGAP1.9   | 8.99E-16 | 0.277595 | 0.28  | 0.177 | 1.34E-11 | 0pc-G | PGAP1          |
| AHNAK.5   | 9.13E-16 | -0.30914 | 0.025 | 0.124 | 1.36E-11 | 0pc-G | AHNAK          |
| CA12.10   | 9.25E-16 | -0.28035 | 0.036 | 0.143 | 1.38E-11 | 0pc-G | CA12           |
| ICOSLG.1C | 9.42E-16 | -0.33178 | 0.008 | 0.096 | 1.41E-11 | 0pc-G | ICOSLG         |
| ABHD6.3   | 9.64E-16 | 0.279998 | 0.183 | 0.097 | 1.44E-11 | 0pc-G | ABHD6          |
| ADAM9.7   | 9.81E-16 | -0.31613 | 0.184 | 0.339 | 1.47E-11 | 0pc-G | ADAM9          |
| RP11-345J | 1.07E-15 | -0.23357 | 0.104 | 0.243 | 1.59E-11 | 0pc-G | RP11-345J4.5   |
| POSTN.9   | 1.08E-15 | -0.29679 | 0.031 | 0.136 | 1.61E-11 | 0pc-G | POSTN          |
| MYL12B.8  | 1.08E-15 | -0.30781 | 0.663 | 0.731 | 1.62E-11 | 0pc-G | MYL12B         |
| SLC25A19. | 1.11E-15 | -0.38643 | 0.061 | 0.176 | 1.66E-11 | 0pc-G | SLC25A19       |
| SNX9.8    | 1.12E-15 | -0.32309 | 0.075 | 0.197 | 1.67E-11 | 0pc-G | SNX9           |
| XBP1.9    | 1.12E-15 | -0.38554 | 0.239 | 0.38  | 1.68E-11 | 0pc-G | XBP1           |
| ARHGAP9.1 | 1.14E-15 | -0.34001 | 0.005 | 0.091 | 1.70E-11 | 0pc-G | ARHGAP9        |
| CCDC126.6 | 1.14E-15 | 0.244188 | 0.202 | 0.11  | 1.71E-11 | 0pc-G | CCDC126        |
| PSMB9.8   | 1.18E-15 | -0.35318 | 0.249 | 0.416 | 1.77E-11 | 0pc-G | PSMB9          |
| SAA1.7    | 1.22E-15 | -1.12558 | 0.027 | 0.125 | 1.82E-11 | 0pc-G | SAA1           |
| MANBA.10  | 1.24E-15 | -0.36323 | 0.027 | 0.127 | 1.86E-11 | 0pc-G | MANBA          |
| NCKAP5L.2 | 1.26E-15 | 0.219363 | 0.202 | 0.108 | 1.89E-11 | 0pc-G | NCKAP5L        |
| B3GNT5.9  | 1.27E-15 | -0.33718 | 0.041 | 0.148 | 1.90E-11 | 0pc-G | B3GNT5         |
| PLIN3.6   | 1.31E-15 | -0.37077 | 0.219 | 0.367 | 1.95E-11 | 0pc-G | PLIN3          |
| ARL15.1   | 1.32E-15 | 0.153822 | 0.105 | 0.042 | 1.98E-11 | 0pc-G | ARL15          |
| BRD3.9    | 1.35E-15 | 0.289331 | 0.374 | 0.268 | 2.02E-11 | 0pc-G | BRD3           |
| POLR2H.7  | 1.37E-15 | 0.220062 | 0.426 | 0.316 | 2.05E-11 | 0pc-G | POLR2H         |
| LRRC25.1C | 1.37E-15 | -0.37914 | 0.01  | 0.098 | 2.05E-11 | 0pc-G | LRRC25         |
| LSM1.5    | 1.42E-15 | 0.179491 | 0.568 | 0.448 | 2.12E-11 | 0pc-G | LSM1           |
| C7orf55-L | 1.45E-15 | 0.262357 | 0.441 | 0.332 | 2.16E-11 | 0pc-G | C7orf55-LUC7L2 |
| MGST1.7   | 1.57E-15 | -0.80287 | 0.046 | 0.151 | 2.35E-11 | 0pc-G | MGST1          |
| ATIC.2    | 1.59E-15 | 0.272175 | 0.327 | 0.218 | 2.37E-11 | 0pc-G | ATIC           |
| TECR.7    | 1.65E-15 | -0.3756  | 0.422 | 0.551 | 2.46E-11 | 0pc-G | TECR           |
| RTF1.8    | 1.65E-15 | 0.209247 | 0.536 | 0.423 | 2.47E-11 | 0pc-G | RTF1           |
| YAE1D1.8  | 1.72E-15 | 0.311623 | 0.253 | 0.154 | 2.57E-11 | 0pc-G | YAE1D1         |
| P2RY13.8  | 1.73E-15 | -0.45831 | 0.005 | 0.09  | 2.59E-11 | 0pc-G | P2RY13         |
| GRIN2B.1  | 1.73E-15 | 0.102336 | 0.056 | 0.016 | 2.59E-11 | 0pc-G | GRIN2B         |
| TTYH2.8   | 1.80E-15 | -0.284   | 0.023 | 0.121 | 2.69E-11 | 0pc-G | TTYH2          |
| SLC39A1.6 | 1.88E-15 | -0.38609 | 0.249 | 0.396 | 2.81E-11 | 0pc-G | SLC39A1        |
| NPDC1.8   | 1.92E-15 | 0.267856 | 0.436 | 0.316 | 2.86E-11 | 0pc-G | NPDC1          |
| OGFRL1.1C | 2.08E-15 | -0.38999 | 0.074 | 0.189 | 3.11E-11 | 0pc-G | OGFRL1         |
| EPHB6.2   | 2.17E-15 | 0.180167 | 0.101 | 0.04  | 3.25E-11 | 0pc-G | EPHB6          |
| C9orf3.8  | 2.18E-15 | 0.285297 | 0.187 | 0.099 | 3.26E-11 | 0pc-G | C9orf3         |
| MSI1.8    | 2.20E-15 | 0.275233 | 0.223 | 0.129 | 3.29E-11 | 0pc-G | MSI1           |
| ADPGK.10  | 2.21E-15 | -0.34796 | 0.134 | 0.27  | 3.30E-11 | 0pc-G | ADPGK          |
| FADS2.7   | 2.25E-15 | 0.313559 | 0.221 | 0.131 | 3.36E-11 | 0pc-G | FADS2          |
| SULF1     | 2.30E-15 | 0.158556 | 0.056 | 0.016 | 3.44E-11 | 0pc-G | SULF1          |
| TIMM8B.6  | 2.34E-15 | 0.151471 | 0.663 | 0.536 | 3.50E-11 | 0pc-G | TIMM8B         |
| LDLRAD3.8 | 2.35E-15 | 0.310047 | 0.265 | 0.17  | 3.51E-11 | 0pc-G | LDLRAD3        |
| SYT1.10   | 2.35E-15 | 0.146914 | 0.191 | 0.094 | 3.52E-11 | 0pc-G | SYT1           |
| FAM200A.6 | 2.37E-15 | 0.239211 | 0.175 | 0.091 | 3.54E-11 | 0pc-G | FAM200A        |
| HPS1.9    | 2.37E-15 | -0.36506 | 0.022 | 0.117 | 3.55E-11 | 0pc-G | HPS1           |

|            |           |           |        |        |           |       |               |
|------------|-----------|-----------|--------|--------|-----------|-------|---------------|
| IL32. 8    | 2. 44E-15 | -0. 46767 | 0. 015 | 0. 106 | 3. 64E-11 | Opc-G | IL32          |
| CCL4L2. 8  | 2. 47E-15 | -0. 62479 | 0. 007 | 0. 092 | 3. 69E-11 | Opc-G | CCL4L2        |
| MCF2L. 7   | 2. 52E-15 | 0. 180123 | 0. 179 | 0. 09  | 3. 76E-11 | Opc-G | MCF2L         |
| SOBP. 8    | 2. 53E-15 | 0. 294367 | 0. 221 | 0. 128 | 3. 79E-11 | Opc-G | SOBP          |
| EPHB3. 1   | 2. 59E-15 | 0. 181906 | 0. 104 | 0. 042 | 3. 88E-11 | Opc-G | EPHB3         |
| PRTFDC1. 6 | 2. 71E-15 | 0. 285191 | 0. 223 | 0. 129 | 4. 05E-11 | Opc-G | PRTFDC1       |
| ASXL3. 2   | 2. 71E-15 | 0. 16524  | 0. 079 | 0. 028 | 4. 06E-11 | Opc-G | ASXL3         |
| ICAM3. 7   | 2. 73E-15 | -0. 25789 | 0. 015 | 0. 107 | 4. 08E-11 | Opc-G | ICAM3         |
| ZNF638. 7  | 2. 78E-15 | 0. 252844 | 0. 354 | 0. 245 | 4. 16E-11 | Opc-G | ZNF638        |
| CHD9. 5    | 2. 82E-15 | 0. 186598 | 0. 57  | 0. 46  | 4. 22E-11 | Opc-G | CHD9          |
| PSMB10. 9  | 2. 87E-15 | -0. 38684 | 0. 131 | 0. 263 | 4. 28E-11 | Opc-G | PSMB10        |
| LINC00574  | 3. 03E-15 | 0. 101085 | 0. 042 | 0. 01  | 4. 53E-11 | Opc-G | LINC00574     |
| GNG5. 8    | 3. 05E-15 | -0. 31876 | 0. 586 | 0. 648 | 4. 55E-11 | Opc-G | GNG5          |
| C7orf73. 7 | 3. 06E-15 | 0. 100952 | 0. 679 | 0. 546 | 4. 58E-11 | Opc-G | C7orf73       |
| PSPC1. 8   | 3. 15E-15 | 0. 264719 | 0. 309 | 0. 204 | 4. 71E-11 | Opc-G | PSPC1         |
| SRRT. 7    | 3. 20E-15 | 0. 256686 | 0. 317 | 0. 21  | 4. 79E-11 | Opc-G | SRRT          |
| ZNF22. 8   | 3. 29E-15 | 0. 267472 | 0. 377 | 0. 269 | 4. 91E-11 | Opc-G | ZNF22         |
| DUSP2. 9   | 3. 31E-15 | -0. 45503 | 0. 023 | 0. 116 | 4. 95E-11 | Opc-G | DUSP2         |
| ACP1. 5    | 3. 35E-15 | 0. 148098 | 0. 611 | 0. 491 | 5. 01E-11 | Opc-G | ACP1          |
| TUBB2A. 9  | 3. 36E-15 | 0. 176926 | 0. 65  | 0. 466 | 5. 01E-11 | Opc-G | TUBB2A        |
| BEND5. 8   | 3. 40E-15 | 0. 238872 | 0. 227 | 0. 131 | 5. 08E-11 | Opc-G | BEND5         |
| NLRP3. 9   | 3. 47E-15 | -0. 38894 | 0. 008 | 0. 093 | 5. 18E-11 | Opc-G | NLRP3         |
| RELB. 5    | 3. 55E-15 | -0. 21177 | 0. 012 | 0. 101 | 5. 30E-11 | Opc-G | RELB          |
| SPOCK2. 8  | 3. 64E-15 | -0. 26365 | 0. 04  | 0. 146 | 5. 43E-11 | Opc-G | SPOCK2        |
| NOL4. 8    | 3. 68E-15 | 0. 187979 | 0. 134 | 0. 061 | 5. 50E-11 | Opc-G | NOL4          |
| CD48. 10   | 3. 78E-15 | -0. 39102 | 0. 003 | 0. 083 | 5. 64E-11 | Opc-G | CD48          |
| ZFP36L1. 6 | 3. 85E-15 | -0. 40466 | 0. 43  | 0. 568 | 5. 75E-11 | Opc-G | ZFP36L1       |
| TMC6. 10   | 3. 97E-15 | -0. 37496 | 0. 023 | 0. 117 | 5. 93E-11 | Opc-G | TMC6          |
| RAF1. 8    | 3. 98E-15 | 0. 256373 | 0. 376 | 0. 27  | 5. 95E-11 | Opc-G | RAF1          |
| CPT1C. 7   | 3. 99E-15 | 0. 244194 | 0. 187 | 0. 1   | 5. 96E-11 | Opc-G | CPT1C         |
| ATP2B2     | 4. 13E-15 | 0. 116436 | 0. 046 | 0. 012 | 6. 17E-11 | Opc-G | ATP2B2        |
| EFNA2. 8   | 4. 15E-15 | 0. 199453 | 0. 111 | 0. 047 | 6. 20E-11 | Opc-G | EFNA2         |
| BAG3. 6    | 4. 16E-15 | -0. 29599 | 0. 02  | 0. 114 | 6. 22E-11 | Opc-G | BAG3          |
| ARHGEF9. 7 | 4. 22E-15 | 0. 264132 | 0. 204 | 0. 114 | 6. 30E-11 | Opc-G | ARHGEF9       |
| ZFAND2A. 7 | 4. 23E-15 | 0. 218842 | 0. 391 | 0. 276 | 6. 33E-11 | Opc-G | ZFAND2A       |
| AMER2. 9   | 4. 28E-15 | 0. 137334 | 0. 206 | 0. 108 | 6. 40E-11 | Opc-G | AMER2         |
| SLPI. 7    | 4. 34E-15 | -1. 06904 | 0. 053 | 0. 156 | 6. 48E-11 | Opc-G | SLPI          |
| GADD45GIP1 | 4. 36E-15 | 0. 190273 | 0. 712 | 0. 553 | 6. 51E-11 | Opc-G | GADD45GIP1    |
| SOX13      | 4. 51E-15 | 0. 1821   | 0. 085 | 0. 031 | 6. 74E-11 | Opc-G | SOX13         |
| HIBCH. 6   | 4. 53E-15 | 0. 251222 | 0. 342 | 0. 238 | 6. 77E-11 | Opc-G | HIBCH         |
| RN7SL832P  | 4. 64E-15 | 0. 136866 | 0. 071 | 0. 023 | 6. 93E-11 | Opc-G | RN7SL832P     |
| CFLAR. 6   | 4. 69E-15 | -0. 38882 | 0. 186 | 0. 327 | 7. 01E-11 | Opc-G | CFLAR         |
| TRIM44. 8  | 4. 84E-15 | 0. 271749 | 0. 385 | 0. 28  | 7. 24E-11 | Opc-G | TRIM44        |
| FAM49B. 9  | 4. 86E-15 | -0. 35626 | 0. 378 | 0. 514 | 7. 26E-11 | Opc-G | FAM49B        |
| ORMDL3. 6  | 4. 92E-15 | 0. 235135 | 0. 213 | 0. 121 | 7. 36E-11 | Opc-G | ORMDL3        |
| SUCLG1. 6  | 5. 09E-15 | 0. 212626 | 0. 538 | 0. 43  | 7. 60E-11 | Opc-G | SUCLG1        |
| COX20. 5   | 5. 13E-15 | 0. 167482 | 0. 563 | 0. 453 | 7. 67E-11 | Opc-G | COX20         |
| CCDC142. 4 | 5. 26E-15 | 0. 193691 | 0. 131 | 0. 06  | 7. 86E-11 | Opc-G | CCDC142       |
| ZNF827. 7  | 5. 27E-15 | 0. 331951 | 0. 193 | 0. 109 | 7. 88E-11 | Opc-G | ZNF827        |
| RP11-436K  | 5. 35E-15 | 0. 153274 | 0. 078 | 0. 027 | 7. 99E-11 | Opc-G | RP11-436K8. 1 |
| TPST2. 8   | 5. 63E-15 | -0. 30281 | 0. 061 | 0. 174 | 8. 42E-11 | Opc-G | TPST2         |



|             |           |           |        |        |           |       |                |
|-------------|-----------|-----------|--------|--------|-----------|-------|----------------|
| DPP4. 7     | 1. 75E-14 | -0. 16525 | 0. 004 | 0. 083 | 2. 62E-10 | Opc-G | DPP4           |
| ST3GAL1. 9  | 1. 76E-14 | -0. 31835 | 0. 019 | 0. 108 | 2. 63E-10 | Opc-G | ST3GAL1        |
| MNAT1. 6    | 1. 79E-14 | 0. 279059 | 0. 283 | 0. 187 | 2. 67E-10 | Opc-G | MNAT1          |
| CCR1. 9     | 1. 80E-14 | -0. 34964 | 0. 007 | 0. 087 | 2. 69E-10 | Opc-G | CCR1           |
| OSCAR. 10   | 1. 85E-14 | -0. 29607 | 0. 001 | 0. 077 | 2. 76E-10 | Opc-G | OSCAR          |
| ILKAP. 6    | 1. 88E-14 | 0. 280615 | 0. 322 | 0. 223 | 2. 81E-10 | Opc-G | ILKAP          |
| ZBTB18. 3   | 1. 88E-14 | 0. 218038 | 0. 111 | 0. 048 | 2. 82E-10 | Opc-G | ZBTB18         |
| RP11-111M   | 1. 95E-14 | 0. 231966 | 0. 171 | 0. 091 | 2. 92E-10 | Opc-G | RP11-111M22. 3 |
| PVRL2. 8    | 1. 97E-14 | -0. 29051 | 0. 122 | 0. 251 | 2. 94E-10 | Opc-G | PVRL2          |
| ZHX2. 2     | 2. 05E-14 | 0. 173662 | 0. 109 | 0. 047 | 3. 06E-10 | Opc-G | ZHX2           |
| CDH20. 1    | 2. 06E-14 | 0. 116929 | 0. 057 | 0. 017 | 3. 07E-10 | Opc-G | CDH20          |
| ZSCAN16. 4  | 2. 22E-14 | 0. 195608 | 0. 128 | 0. 059 | 3. 32E-10 | Opc-G | ZSCAN16        |
| MOB4. 7     | 2. 22E-14 | 0. 180995 | 0. 473 | 0. 365 | 3. 32E-10 | Opc-G | MOB4           |
| THBD. 9     | 2. 31E-14 | -0. 39416 | 0. 015 | 0. 099 | 3. 45E-10 | Opc-G | THBD           |
| NCL. 6      | 2. 33E-14 | 0. 148565 | 0. 649 | 0. 549 | 3. 49E-10 | Opc-G | NCL            |
| TMEM160. 9  | 2. 37E-14 | 0. 208032 | 0. 572 | 0. 459 | 3. 54E-10 | Opc-G | TMEM160        |
| LILRA2. 1C  | 2. 42E-14 | -0. 38679 | 0. 008 | 0. 089 | 3. 62E-10 | Opc-G | LILRA2         |
| ST8SIA4. 1  | 2. 60E-14 | -0. 35062 | 0. 031 | 0. 125 | 3. 89E-10 | Opc-G | ST8SIA4        |
| TWISTNB. 4  | 2. 68E-14 | 0. 192335 | 0. 37  | 0. 262 | 4. 01E-10 | Opc-G | TWISTNB        |
| GM2A. 8     | 2. 75E-14 | -0. 31645 | 0. 046 | 0. 15  | 4. 11E-10 | Opc-G | GM2A           |
| NDUFB10. 3  | 2. 80E-14 | 0. 116751 | 0. 794 | 0. 63  | 4. 18E-10 | Opc-G | NDUFB10        |
| FGR. 10     | 2. 91E-14 | -0. 34095 | 0. 008 | 0. 088 | 4. 35E-10 | Opc-G | FGR            |
| KLHDC2. 8   | 2. 93E-14 | 0. 248261 | 0. 399 | 0. 296 | 4. 38E-10 | Opc-G | KLHDC2         |
| IFNGR2. 9   | 2. 99E-14 | -0. 33595 | 0. 261 | 0. 398 | 4. 48E-10 | Opc-G | IFNGR2         |
| UBTD1. 4    | 3. 02E-14 | -0. 18416 | 0. 025 | 0. 118 | 4. 52E-10 | Opc-G | UBTD1          |
| CECR6       | 3. 26E-14 | 0. 132841 | 0. 059 | 0. 018 | 4. 88E-10 | Opc-G | CECR6          |
| NDUFS3. 4   | 3. 27E-14 | 0. 13532  | 0. 601 | 0. 482 | 4. 89E-10 | Opc-G | NDUFS3         |
| TRIM22. 8   | 3. 28E-14 | -0. 36624 | 0. 042 | 0. 141 | 4. 89E-10 | Opc-G | TRIM22         |
| OTUD1. 8    | 3. 28E-14 | -0. 35453 | 0. 018 | 0. 103 | 4. 90E-10 | Opc-G | OTUD1          |
| ARRDC1. 9   | 3. 28E-14 | -0. 28432 | 0. 041 | 0. 14  | 4. 90E-10 | Opc-G | ARRDC1         |
| IRAK3. 10   | 3. 37E-14 | -0. 32366 | 0. 003 | 0. 078 | 5. 04E-10 | Opc-G | IRAK3          |
| SASH3. 10   | 3. 52E-14 | -0. 33165 | 0. 005 | 0. 083 | 5. 26E-10 | Opc-G | SASH3          |
| GPR84. 10   | 3. 53E-14 | -0. 3378  | 0. 003 | 0. 078 | 5. 27E-10 | Opc-G | GPR84          |
| PRDM1. 9    | 3. 58E-14 | -0. 36399 | 0. 019 | 0. 105 | 5. 35E-10 | Opc-G | PRDM1          |
| ABHD12. 6   | 3. 72E-14 | -0. 31542 | 0. 253 | 0. 39  | 5. 56E-10 | Opc-G | ABHD12         |
| ZNF75A. 8   | 3. 81E-14 | 0. 262443 | 0. 306 | 0. 208 | 5. 70E-10 | Opc-G | ZNF75A         |
| COLGALT1. 3 | 3. 89E-14 | -0. 3091  | 0. 083 | 0. 199 | 5. 81E-10 | Opc-G | COLGALT1       |
| FRYL. 9     | 3. 91E-14 | 0. 274686 | 0. 276 | 0. 182 | 5. 84E-10 | Opc-G | FRYL           |
| NT5C3A. 8   | 3. 92E-14 | 0. 22141  | 0. 398 | 0. 287 | 5. 85E-10 | Opc-G | NT5C3A         |
| ANXA4. 8    | 3. 95E-14 | -0. 3345  | 0. 083 | 0. 201 | 5. 91E-10 | Opc-G | ANXA4          |
| PIP4K2A. 6  | 3. 97E-14 | -0. 364   | 0. 045 | 0. 143 | 5. 94E-10 | Opc-G | PIP4K2A        |
| KLHL5. 4    | 4. 05E-14 | -0. 26124 | 0. 066 | 0. 177 | 6. 05E-10 | Opc-G | KLHL5          |
| MINOS1. 8   | 4. 18E-14 | -0. 29859 | 0. 544 | 0. 646 | 6. 24E-10 | Opc-G | MINOS1         |
| VAX2. 9     | 4. 29E-14 | 0. 230595 | 0. 149 | 0. 075 | 6. 41E-10 | Opc-G | VAX2           |
| TMPRSS5. 1  | 4. 30E-14 | 0. 148259 | 0. 066 | 0. 022 | 6. 43E-10 | Opc-G | TMPRSS5        |
| PAXIP1-AS   | 4. 42E-14 | 0. 284241 | 0. 245 | 0. 153 | 6. 61E-10 | Opc-G | PAXIP1-AS1     |
| RBM25. 4    | 4. 49E-14 | 0. 18746  | 0. 537 | 0. 434 | 6. 71E-10 | Opc-G | RBM25          |
| ZNF791. 6   | 4. 51E-14 | 0. 251286 | 0. 367 | 0. 264 | 6. 75E-10 | Opc-G | ZNF791         |
| HDAC4. 2    | 4. 63E-14 | 0. 200875 | 0. 102 | 0. 043 | 6. 91E-10 | Opc-G | HDAC4          |
| RILP. 10    | 4. 66E-14 | -0. 24156 | 0. 02  | 0. 108 | 6. 96E-10 | Opc-G | RILP           |
| TSEN2. 8    | 5. 11E-14 | 0. 267489 | 0. 16  | 0. 084 | 7. 64E-10 | Opc-G | TSEN2          |

|            |          |          |       |       |          |       |           |
|------------|----------|----------|-------|-------|----------|-------|-----------|
| SLC24A3    | 5.14E-14 | 0.146334 | 0.072 | 0.026 | 7.68E-10 | Opc-G | SLC24A3   |
| NUDT1.4    | 5.16E-14 | 0.201467 | 0.462 | 0.343 | 7.72E-10 | Opc-G | NUDT1     |
| SCO2.9     | 5.30E-14 | -0.28305 | 0.096 | 0.219 | 7.92E-10 | Opc-G | SCO2      |
| BDH2.4     | 5.31E-14 | -0.27346 | 0.045 | 0.148 | 7.94E-10 | Opc-G | BDH2      |
| HK1.7      | 5.47E-14 | -0.28837 | 0.086 | 0.202 | 8.17E-10 | Opc-G | HK1       |
| ZNF503.3   | 5.49E-14 | 0.234656 | 0.182 | 0.098 | 8.20E-10 | Opc-G | ZNF503    |
| ATL1.7     | 5.57E-14 | 0.233292 | 0.197 | 0.111 | 8.32E-10 | Opc-G | ATL1      |
| ERGIC3.7   | 5.61E-14 | 0.11872  | 0.723 | 0.566 | 8.38E-10 | Opc-G | ERGIC3    |
| ORAI3.8    | 5.64E-14 | -0.26695 | 0.046 | 0.148 | 8.42E-10 | Opc-G | ORAI3     |
| LINC-PINT  | 5.66E-14 | 0.248009 | 0.186 | 0.101 | 8.46E-10 | Opc-G | LINC-PINT |
| RPRM.10    | 5.74E-14 | 0.161247 | 0.135 | 0.062 | 8.58E-10 | Opc-G | RPRM      |
| UBE2V2.8   | 6.11E-14 | 0.155164 | 0.607 | 0.487 | 9.13E-10 | Opc-G | UBE2V2    |
| RFFL.10    | 6.17E-14 | -0.24718 | 0.063 | 0.171 | 9.21E-10 | Opc-G | RFFL      |
| ZSCAN21.7  | 6.28E-14 | 0.217437 | 0.179 | 0.097 | 9.38E-10 | Opc-G | ZSCAN21   |
| AK1.6      | 6.34E-14 | 0.206981 | 0.439 | 0.328 | 9.48E-10 | Opc-G | AK1       |
| TTY15.4    | 6.43E-14 | 0.181797 | 0.115 | 0.051 | 9.60E-10 | Opc-G | TTY15     |
| BPTF.7     | 6.48E-14 | 0.266858 | 0.4   | 0.305 | 9.68E-10 | Opc-G | BPTF      |
| TNFAIP2.8  | 6.48E-14 | -0.29123 | 0.004 | 0.079 | 9.69E-10 | Opc-G | TNFAIP2   |
| RHOH.9     | 6.60E-14 | -0.37641 | 0.005 | 0.082 | 9.87E-10 | Opc-G | RHOH      |
| COMMD2.6   | 6.67E-14 | 0.253695 | 0.383 | 0.283 | 9.96E-10 | Opc-G | COMMD2    |
| SDC4.5     | 6.98E-14 | -0.2663  | 0.016 | 0.101 | 1.04E-09 | Opc-G | SDC4      |
| MX1.7      | 7.10E-14 | -0.35643 | 0.033 | 0.126 | 1.06E-09 | Opc-G | MX1       |
| MT1E.9     | 7.18E-14 | -0.48913 | 0.247 | 0.389 | 1.07E-09 | Opc-G | MT1E      |
| IL6R.10    | 7.20E-14 | -0.32619 | 0.011 | 0.091 | 1.08E-09 | Opc-G | IL6R      |
| NIPSNAP3A  | 7.30E-14 | -0.32952 | 0.09  | 0.207 | 1.09E-09 | Opc-G | NIPSNAP3A |
| PSMD14.7   | 7.38E-14 | 0.14175  | 0.564 | 0.461 | 1.10E-09 | Opc-G | PSMD14    |
| ZNF195.6   | 7.42E-14 | 0.227165 | 0.251 | 0.156 | 1.11E-09 | Opc-G | ZNF195    |
| FAM229B.9  | 7.51E-14 | 0.241501 | 0.387 | 0.286 | 1.12E-09 | Opc-G | FAM229B   |
| QTRT1.8    | 7.53E-14 | 0.247537 | 0.421 | 0.325 | 1.13E-09 | Opc-G | QTRT1     |
| CD40.10    | 7.54E-14 | -0.2923  | 0     | 0.071 | 1.13E-09 | Opc-G | CD40      |
| CLNS1A.6   | 8.04E-14 | 0.141    | 0.594 | 0.485 | 1.20E-09 | Opc-G | CLNS1A    |
| AKIRIN2.7  | 8.23E-14 | 0.216962 | 0.482 | 0.374 | 1.23E-09 | Opc-G | AKIRIN2   |
| SIL1.7     | 8.30E-14 | -0.28084 | 0.131 | 0.263 | 1.24E-09 | Opc-G | SIL1      |
| ECHDC2.6   | 8.49E-14 | -0.23874 | 0.078 | 0.196 | 1.27E-09 | Opc-G | ECHDC2    |
| AP1S2.8    | 8.62E-14 | -0.28608 | 0.399 | 0.507 | 1.29E-09 | Opc-G | AP1S2     |
| EFR3A.8    | 8.93E-14 | -0.21271 | 0.046 | 0.148 | 1.33E-09 | Opc-G | EFR3A     |
| GCA.10     | 9.07E-14 | -0.39693 | 0.179 | 0.307 | 1.36E-09 | Opc-G | GCA       |
| RBM4.8     | 9.20E-14 | 0.284774 | 0.309 | 0.214 | 1.37E-09 | Opc-G | RBM4      |
| ARFGAP2.5  | 9.39E-14 | 0.227825 | 0.389 | 0.285 | 1.40E-09 | Opc-G | ARFGAP2   |
| BCL11B.7   | 9.51E-14 | 0.16214  | 0.081 | 0.03  | 1.42E-09 | Opc-G | BCL11B    |
| MIF.7      | 9.75E-14 | 0.115022 | 0.796 | 0.662 | 1.46E-09 | Opc-G | MIF       |
| CACNA2D4.9 | 9.78E-14 | -0.34251 | 0.004 | 0.078 | 1.46E-09 | Opc-G | CACNA2D4  |
| SYPL1.4    | 1.06E-13 | -0.39208 | 0.266 | 0.415 | 1.59E-09 | Opc-G | SYPL1     |
| TANC1.8    | 1.10E-13 | 0.269911 | 0.182 | 0.103 | 1.64E-09 | Opc-G | TANC1     |
| RIN3.10    | 1.10E-13 | -0.33267 | 0.03  | 0.121 | 1.65E-09 | Opc-G | RIN3      |
| PLXND1.8   | 1.16E-13 | -0.30422 | 0.019 | 0.103 | 1.73E-09 | Opc-G | PLXND1    |
| RPS6KA4.9  | 1.16E-13 | -0.25309 | 0.034 | 0.127 | 1.74E-09 | Opc-G | RPS6KA4   |
| ENOSF1.7   | 1.16E-13 | -0.23161 | 0.036 | 0.13  | 1.74E-09 | Opc-G | ENOSF1    |
| SH2B3.10   | 1.17E-13 | -0.32022 | 0.026 | 0.114 | 1.75E-09 | Opc-G | SH2B3     |
| HNRNPR.5   | 1.17E-13 | 0.142675 | 0.622 | 0.513 | 1.75E-09 | Opc-G | HNRNPR    |
| BTG2.6     | 1.19E-13 | 0.146737 | 0.582 | 0.46  | 1.77E-09 | Opc-G | BTG2      |



|            |          |          |       |       |          |       |               |
|------------|----------|----------|-------|-------|----------|-------|---------------|
| UHMK1.4    | 1.19E-13 | -0.22884 | 0.09  | 0.211 | 1.77E-09 | Opc-G | UHMK1         |
| KCNMB2.4   | 1.26E-13 | 0.147694 | 0.079 | 0.029 | 1.89E-09 | Opc-G | KCNMB2        |
| PIGF.8     | 1.27E-13 | 0.217094 | 0.38  | 0.281 | 1.90E-09 | Opc-G | PIGF          |
| GIMAP1.9   | 1.31E-13 | -0.31485 | 0.004 | 0.078 | 1.96E-09 | Opc-G | GIMAP1        |
| SRSF2.8    | 1.32E-13 | 0.149942 | 0.72  | 0.598 | 1.97E-09 | Opc-G | SRSF2         |
| ANGPTL4.6  | 1.33E-13 | -0.45188 | 0.022 | 0.107 | 1.98E-09 | Opc-G | ANGPTL4       |
| CLSTN1.6   | 1.38E-13 | 0.227952 | 0.376 | 0.276 | 2.06E-09 | Opc-G | CLSTN1        |
| CPQ.8      | 1.40E-13 | -0.33978 | 0.075 | 0.185 | 2.09E-09 | Opc-G | CPQ           |
| ZNF814.5   | 1.43E-13 | 0.222964 | 0.201 | 0.117 | 2.13E-09 | Opc-G | ZNF814        |
| GALNT2.4   | 1.47E-13 | -0.29439 | 0.124 | 0.252 | 2.19E-09 | Opc-G | GALNT2        |
| ST14.10    | 1.48E-13 | -0.29832 | 0.004 | 0.077 | 2.21E-09 | Opc-G | ST14          |
| ATP5G1.3   | 1.51E-13 | 0.11206  | 0.732 | 0.61  | 2.25E-09 | Opc-G | ATP5G1        |
| CECR5.5    | 1.51E-13 | 0.289092 | 0.336 | 0.246 | 2.26E-09 | Opc-G | CECR5         |
| ZEB2.6     | 1.51E-13 | 0.165917 | 0.422 | 0.296 | 2.26E-09 | Opc-G | ZEB2          |
| CD300C.1C  | 1.52E-13 | -0.31527 | 0.001 | 0.072 | 2.27E-09 | Opc-G | CD300C        |
| AP4M1.8    | 1.63E-13 | 0.259089 | 0.283 | 0.187 | 2.43E-09 | Opc-G | AP4M1         |
| MEIS3.8    | 1.64E-13 | 0.257276 | 0.209 | 0.124 | 2.44E-09 | Opc-G | MEIS3         |
| PCDHB2.8   | 1.65E-13 | 0.205301 | 0.146 | 0.075 | 2.47E-09 | Opc-G | PCDHB2        |
| SPPL2A.1C  | 1.65E-13 | -0.29061 | 0.081 | 0.191 | 2.47E-09 | Opc-G | SPPL2A        |
| ZNF781.4   | 1.70E-13 | 0.17001  | 0.097 | 0.041 | 2.54E-09 | Opc-G | ZNF781        |
| GALK1.7    | 1.71E-13 | -0.23971 | 0.092 | 0.212 | 2.55E-09 | Opc-G | GALK1         |
| SH3BP1.1C  | 1.74E-13 | -0.28734 | 0.029 | 0.117 | 2.61E-09 | Opc-G | SH3BP1        |
| DNAJC2.7   | 1.84E-13 | 0.228964 | 0.391 | 0.292 | 2.74E-09 | Opc-G | DNAJC2        |
| DCTN1.7    | 1.91E-13 | 0.225956 | 0.31  | 0.209 | 2.85E-09 | Opc-G | DCTN1         |
| SECISBP2.1 | 1.95E-13 | 0.257181 | 0.346 | 0.247 | 2.91E-09 | Opc-G | SECISBP2      |
| AREG.10    | 1.98E-13 | -0.46675 | 0     | 0.069 | 2.96E-09 | Opc-G | AREG          |
| TRIP6.9    | 2.01E-13 | -0.30123 | 0.127 | 0.257 | 3.00E-09 | Opc-G | TRIP6         |
| DLGAP4.7   | 2.03E-13 | 0.225882 | 0.388 | 0.287 | 3.04E-09 | Opc-G | DLGAP4        |
| DDX1.7     | 2.07E-13 | 0.20066  | 0.449 | 0.354 | 3.09E-09 | Opc-G | DDX1          |
| ZBTB17.4   | 2.07E-13 | 0.238141 | 0.187 | 0.106 | 3.10E-09 | Opc-G | ZBTB17        |
| PRCP.6     | 2.07E-13 | 0.202762 | 0.454 | 0.348 | 3.10E-09 | Opc-G | PRCP          |
| BIN1.8     | 2.09E-13 | -0.43143 | 0.257 | 0.368 | 3.12E-09 | Opc-G | BIN1          |
| GABBR1.8   | 2.09E-13 | 0.23484  | 0.146 | 0.074 | 3.12E-09 | Opc-G | GABBR1        |
| KCNF1.10   | 2.26E-13 | -0.19955 | 0.036 | 0.129 | 3.38E-09 | Opc-G | KCNF1         |
| NDUFV3.3   | 2.33E-13 | 0.189873 | 0.499 | 0.404 | 3.48E-09 | Opc-G | NDUFV3        |
| CALM3.8    | 2.34E-13 | 0.128973 | 0.706 | 0.585 | 3.49E-09 | Opc-G | CALM3         |
| ZNF559.8   | 2.38E-13 | 0.255693 | 0.227 | 0.139 | 3.56E-09 | Opc-G | ZNF559        |
| RP11-395G  | 2.39E-13 | -0.24721 | 0.075 | 0.184 | 3.57E-09 | Opc-G | RP11-395G23.3 |
| ILVBL.4    | 2.41E-13 | -0.26141 | 0.128 | 0.26  | 3.60E-09 | Opc-G | ILVBL         |
| ADIPOR1.7  | 2.41E-13 | -0.30427 | 0.243 | 0.389 | 3.60E-09 | Opc-G | ADIPOR1       |
| KHDC1.8    | 2.46E-13 | 0.195618 | 0.127 | 0.06  | 3.68E-09 | Opc-G | KHDC1         |
| AHSA1.3    | 2.46E-13 | 0.156914 | 0.5   | 0.392 | 3.68E-09 | Opc-G | AHSA1         |
| PGK1.6     | 2.48E-13 | -0.3219  | 0.709 | 0.757 | 3.70E-09 | Opc-G | PGK1          |
| CDK1.8     | 2.48E-13 | -0.32437 | 0.019 | 0.101 | 3.70E-09 | Opc-G | CDK1          |
| VAV1.10    | 2.54E-13 | -0.30573 | 0.005 | 0.078 | 3.79E-09 | Opc-G | VAV1          |
| ASAH1.8    | 2.54E-13 | -0.38136 | 0.56  | 0.658 | 3.80E-09 | Opc-G | ASAH1         |
| GCHFR.9    | 2.54E-13 | -0.30734 | 0.007 | 0.081 | 3.80E-09 | Opc-G | GCHFR         |
| ATF4.4     | 2.59E-13 | 0.117011 | 0.617 | 0.51  | 3.87E-09 | Opc-G | ATF4          |
| VPS28.3    | 2.61E-13 | 0.101578 | 0.745 | 0.629 | 3.91E-09 | Opc-G | VPS28         |
| KBTBD7.6   | 2.65E-13 | 0.198766 | 0.157 | 0.082 | 3.96E-09 | Opc-G | KBTBD7        |
| CCDC28A.9  | 2.71E-13 | -0.3129  | 0.061 | 0.165 | 4.04E-09 | Opc-G | CCDC28A       |

|            |          |          |       |       |          |       |          |
|------------|----------|----------|-------|-------|----------|-------|----------|
| SNRNP25.6  | 2.94E-13 | 0.204778 | 0.443 | 0.343 | 4.39E-09 | Opc-G | SNRNP25  |
| TRIM9.8    | 2.98E-13 | 0.281949 | 0.32  | 0.227 | 4.45E-09 | Opc-G | TRIM9    |
| IGSF21.8   | 3.07E-13 | 0.162973 | 0.268 | 0.156 | 4.58E-09 | Opc-G | IGSF21   |
| CECR1.8    | 3.13E-13 | -0.3136  | 0.004 | 0.075 | 4.68E-09 | Opc-G | CECR1    |
| ZNF713.3   | 3.35E-13 | 0.157729 | 0.101 | 0.043 | 5.00E-09 | Opc-G | ZNF713   |
| ISG20.5    | 3.38E-13 | -0.34987 | 0.036 | 0.128 | 5.06E-09 | Opc-G | ISG20    |
| SPATS2L.5  | 3.59E-13 | -0.30455 | 0.205 | 0.34  | 5.36E-09 | Opc-G | SPATS2L  |
| PCDH11X.1  | 3.62E-13 | 0.16164  | 0.067 | 0.023 | 5.41E-09 | Opc-G | PCDH11X  |
| IL4R.10    | 3.67E-13 | -0.28912 | 0.004 | 0.075 | 5.49E-09 | Opc-G | IL4R     |
| PDCD5.8    | 3.79E-13 | 0.104131 | 0.652 | 0.532 | 5.66E-09 | Opc-G | PDCD5    |
| OPTN.8     | 3.80E-13 | -0.19785 | 0.044 | 0.141 | 5.68E-09 | Opc-G | OPTN     |
| ZNF273.8   | 3.86E-13 | 0.199535 | 0.154 | 0.08  | 5.77E-09 | Opc-G | ZNF273   |
| COL4A1.7   | 3.90E-13 | -0.15221 | 0.027 | 0.116 | 5.83E-09 | Opc-G | COL4A1   |
| CD55.9     | 3.95E-13 | -0.4081  | 0.036 | 0.123 | 5.90E-09 | Opc-G | CD55     |
| LRRC8A.8   | 4.06E-13 | 0.255375 | 0.254 | 0.163 | 6.07E-09 | Opc-G | LRRC8A   |
| GPR19.5    | 4.08E-13 | 0.171081 | 0.098 | 0.041 | 6.09E-09 | Opc-G | GPR19    |
| TACC1.7    | 4.12E-13 | -0.29706 | 0.184 | 0.321 | 6.15E-09 | Opc-G | TACC1    |
| C10orf10.4 | 4.25E-13 | -0.53274 | 0.016 | 0.095 | 6.35E-09 | Opc-G | C10orf10 |
| ANKRD9.4   | 4.35E-13 | -0.19117 | 0.014 | 0.092 | 6.50E-09 | Opc-G | ANKRD9   |
| PMAIP1.9   | 4.37E-13 | -0.42449 | 0.012 | 0.088 | 6.53E-09 | Opc-G | PMAIP1   |
| ZNF100.1   | 4.37E-13 | 0.183066 | 0.13  | 0.063 | 6.53E-09 | Opc-G | ZNF100   |
| ACOT9.9    | 4.49E-13 | -0.29721 | 0.079 | 0.189 | 6.71E-09 | Opc-G | ACOT9    |
| ACAP1.8    | 4.66E-13 | -0.2615  | 0.01  | 0.084 | 6.97E-09 | Opc-G | ACAP1    |
| TNFRSF14.4 | 4.75E-13 | -0.35028 | 0.033 | 0.121 | 7.09E-09 | Opc-G | TNFRSF14 |
| CUX1.4     | 4.76E-13 | 0.227304 | 0.332 | 0.235 | 7.11E-09 | Opc-G | CUX1     |
| PMPCB.5    | 4.76E-13 | 0.164998 | 0.444 | 0.336 | 7.12E-09 | Opc-G | PMPCB    |
| ZHX1.9     | 4.85E-13 | 0.301785 | 0.292 | 0.203 | 7.25E-09 | Opc-G | ZHX1     |
| BEST1.7    | 4.86E-13 | -0.40324 | 0.161 | 0.282 | 7.26E-09 | Opc-G | BEST1    |
| HOXA3.9    | 4.94E-13 | 0.14061  | 0.116 | 0.052 | 7.39E-09 | Opc-G | HOXA3    |
| EPHA3.9    | 4.97E-13 | -0.12228 | 0.005 | 0.077 | 7.43E-09 | Opc-G | EPHA3    |
| ILF3.6     | 5.07E-13 | 0.181781 | 0.508 | 0.405 | 7.57E-09 | Opc-G | ILF3     |
| RNF150.4   | 5.34E-13 | 0.148299 | 0.092 | 0.037 | 7.98E-09 | Opc-G | RNF150   |
| C19orf43.5 | 5.34E-13 | 0.141743 | 0.788 | 0.665 | 7.99E-09 | Opc-G | C19orf43 |
| SEMA6D.1C  | 5.35E-13 | -0.24659 | 0.061 | 0.163 | 7.99E-09 | Opc-G | SEMA6D   |
| PTPRK.7    | 5.35E-13 | 0.129771 | 0.117 | 0.053 | 7.99E-09 | Opc-G | PTPRK    |
| SRSF11.5   | 5.38E-13 | 0.126517 | 0.648 | 0.532 | 8.04E-09 | Opc-G | SRSF11   |
| ZNF217.3   | 5.41E-13 | -0.17489 | 0.014 | 0.092 | 8.08E-09 | Opc-G | ZNF217   |
| ARRDC2.8   | 5.43E-13 | -0.29849 | 0.014 | 0.091 | 8.11E-09 | Opc-G | ARRDC2   |
| RFTN1.3    | 5.59E-13 | -0.17844 | 0.027 | 0.115 | 8.35E-09 | Opc-G | RFTN1    |
| INPP5D.1C  | 5.79E-13 | -0.36883 | 0.014 | 0.09  | 8.65E-09 | Opc-G | INPP5D   |
| C2orf68.2  | 5.80E-13 | 0.207083 | 0.223 | 0.134 | 8.67E-09 | Opc-G | C2orf68  |
| EPM2AIP1.5 | 5.82E-13 | 0.231883 | 0.29  | 0.192 | 8.70E-09 | Opc-G | EPM2AIP1 |
| SHKBP1.9   | 6.02E-13 | -0.23026 | 0.119 | 0.245 | 9.00E-09 | Opc-G | SHKBP1   |
| MGP.9      | 6.03E-13 | -0.81992 | 0.026 | 0.109 | 9.01E-09 | Opc-G | MGP      |
| ZNF704.9   | 6.06E-13 | 0.266246 | 0.201 | 0.118 | 9.05E-09 | Opc-G | ZNF704   |
| DHX33.6    | 6.13E-13 | 0.285612 | 0.194 | 0.116 | 9.15E-09 | Opc-G | DHX33    |
| LYRM7.6    | 6.22E-13 | 0.226693 | 0.29  | 0.195 | 9.30E-09 | Opc-G | LYRM7    |
| TSPAN4.6   | 6.38E-13 | -0.2794  | 0.078 | 0.187 | 9.54E-09 | Opc-G | TSPAN4   |
| APOE.8     | 6.45E-13 | -0.28555 | 0.698 | 0.685 | 9.64E-09 | Opc-G | APOE     |
| CXorf21.1  | 6.54E-13 | -0.35335 | 0.008 | 0.081 | 9.77E-09 | Opc-G | CXorf21  |
| SIGLEC7.1  | 6.58E-13 | -0.31278 | 0.007 | 0.079 | 9.83E-09 | Opc-G | SIGLEC7  |

|           |          |          |       |       |          |       |             |
|-----------|----------|----------|-------|-------|----------|-------|-------------|
| FOXN2.4   | 7.10E-13 | 0.210783 | 0.212 | 0.125 | 1.06E-08 | Opc-G | FOXN2       |
| PTPRN2.5  | 7.17E-13 | 0.197202 | 0.314 | 0.205 | 1.07E-08 | Opc-G | PTPRN2      |
| APOL6.2   | 7.24E-13 | -0.20014 | 0.018 | 0.098 | 1.08E-08 | Opc-G | APOL6       |
| NQO2.5    | 7.26E-13 | -0.25569 | 0.131 | 0.261 | 1.08E-08 | Opc-G | NQO2        |
| Clorf122. | 7.41E-13 | 0.158098 | 0.604 | 0.481 | 1.11E-08 | Opc-G | Clorf122    |
| ATG3.8    | 7.44E-13 | -0.27341 | 0.236 | 0.386 | 1.11E-08 | Opc-G | ATG3        |
| HSD17B10. | 7.51E-13 | 0.113534 | 0.602 | 0.488 | 1.12E-08 | Opc-G | HSD17B10    |
| FAM114A1. | 7.69E-13 | -0.25118 | 0.03  | 0.117 | 1.15E-08 | Opc-G | FAM114A1    |
| MRFAP1L1. | 7.70E-13 | 0.251599 | 0.307 | 0.214 | 1.15E-08 | Opc-G | MRFAP1L1    |
| BCAP29.4  | 7.80E-13 | 0.179563 | 0.417 | 0.31  | 1.17E-08 | Opc-G | BCAP29      |
| GADD45B.6 | 7.86E-13 | -0.42603 | 0.388 | 0.497 | 1.18E-08 | Opc-G | GADD45B     |
| SLC39A6.7 | 8.20E-13 | 0.230464 | 0.415 | 0.322 | 1.23E-08 | Opc-G | SLC39A6     |
| IRF7.9    | 8.42E-13 | -0.27464 | 0.066 | 0.167 | 1.26E-08 | Opc-G | IRF7        |
| PROCR.9   | 8.64E-13 | -0.29081 | 0.004 | 0.073 | 1.29E-08 | Opc-G | PROCR       |
| ALDH3B1.8 | 8.76E-13 | -0.25618 | 0.005 | 0.076 | 1.31E-08 | Opc-G | ALDH3B1     |
| MIR497HG. | 9.09E-13 | 0.282493 | 0.128 | 0.063 | 1.36E-08 | Opc-G | MIR497HG    |
| IGFBP7.8  | 9.19E-13 | -0.37975 | 0.158 | 0.276 | 1.37E-08 | Opc-G | IGFBP7      |
| MX2.10    | 9.34E-13 | -0.2951  | 0.001 | 0.068 | 1.40E-08 | Opc-G | MX2         |
| CASD1.7   | 9.51E-13 | 0.214419 | 0.142 | 0.072 | 1.42E-08 | Opc-G | CASD1       |
| DAZAP2.8  | 9.85E-13 | -0.34695 | 0.411 | 0.545 | 1.47E-08 | Opc-G | DAZAP2      |
| CCND3.7   | 9.88E-13 | -0.34265 | 0.143 | 0.267 | 1.48E-08 | Opc-G | CCND3       |
| ETHE1.5   | 9.98E-13 | -0.31511 | 0.164 | 0.297 | 1.49E-08 | Opc-G | ETHE1       |
| HOXD3.1   | 1.01E-12 | 0.150724 | 0.067 | 0.024 | 1.51E-08 | Opc-G | HOXD3       |
| GUCY1A2.4 | 1.02E-12 | 0.175613 | 0.083 | 0.033 | 1.53E-08 | Opc-G | GUCY1A2     |
| NASP.5    | 1.03E-12 | 0.17505  | 0.507 | 0.402 | 1.54E-08 | Opc-G | NASP        |
| PRKCD.9   | 1.03E-12 | -0.27653 | 0.011 | 0.085 | 1.54E-08 | Opc-G | PRKCD       |
| JAK1.5    | 1.04E-12 | -0.23264 | 0.134 | 0.261 | 1.55E-08 | Opc-G | JAK1        |
| GPR37L1.9 | 1.04E-12 | 0.256227 | 0.153 | 0.08  | 1.55E-08 | Opc-G | GPR37L1     |
| PAIP1.9   | 1.04E-12 | 0.202885 | 0.489 | 0.389 | 1.56E-08 | Opc-G | PAIP1       |
| KLHL9.6   | 1.05E-12 | 0.208936 | 0.184 | 0.104 | 1.57E-08 | Opc-G | KLHL9       |
| CKS1B.6   | 1.07E-12 | -0.30609 | 0.142 | 0.267 | 1.60E-08 | Opc-G | CKS1B       |
| SLC8B1.1C | 1.07E-12 | -0.25677 | 0.022 | 0.103 | 1.61E-08 | Opc-G | SLC8B1      |
| CAP2.7    | 1.08E-12 | 0.169949 | 0.115 | 0.053 | 1.62E-08 | Opc-G | CAP2        |
| CREBL2.8  | 1.10E-12 | -0.31385 | 0.087 | 0.195 | 1.64E-08 | Opc-G | CREBL2      |
| PDE8A.4   | 1.12E-12 | -0.21086 | 0.016 | 0.094 | 1.68E-08 | Opc-G | PDE8A       |
| CYP3A5.6  | 1.15E-12 | 0.205687 | 0.117 | 0.056 | 1.72E-08 | Opc-G | CYP3A5      |
| U2AF1.4   | 1.17E-12 | 0.119896 | 0.746 | 0.623 | 1.75E-08 | Opc-G | U2AF1       |
| MARCH2.8  | 1.19E-12 | -0.25986 | 0.12  | 0.24  | 1.77E-08 | Opc-G | 2-Mar       |
| PPP1R1C.7 | 1.21E-12 | 0.196826 | 0.067 | 0.024 | 1.80E-08 | Opc-G | PPP1R1C     |
| PAQR4.9   | 1.24E-12 | 0.23733  | 0.249 | 0.158 | 1.85E-08 | Opc-G | PAQR4       |
| FAIM2.9   | 1.24E-12 | 0.194508 | 0.281 | 0.185 | 1.85E-08 | Opc-G | FAIM2       |
| LYST.4    | 1.25E-12 | -0.22309 | 0.056 | 0.156 | 1.86E-08 | Opc-G | LYST        |
| EMB.10    | 1.29E-12 | -0.31431 | 0.008 | 0.079 | 1.93E-08 | Opc-G | EMB         |
| ITGA3.7   | 1.34E-12 | -0.17387 | 0.022 | 0.104 | 2.00E-08 | Opc-G | ITGA3       |
| CD82.5    | 1.35E-12 | 0.230557 | 0.331 | 0.233 | 2.01E-08 | Opc-G | CD82        |
| DOCK2.10  | 1.40E-12 | -0.31451 | 0.01  | 0.082 | 2.09E-08 | Opc-G | DOCK2       |
| MMADHC.2  | 1.42E-12 | 0.162322 | 0.523 | 0.43  | 2.12E-08 | Opc-G | MMADHC      |
| ANGEL1.1  | 1.42E-12 | 0.163917 | 0.094 | 0.04  | 2.12E-08 | Opc-G | ANGEL1      |
| ID2.7     | 1.49E-12 | -0.34233 | 0.582 | 0.659 | 2.22E-08 | Opc-G | ID2         |
| LDOC1.9   | 1.52E-12 | 0.173759 | 0.158 | 0.083 | 2.27E-08 | Opc-G | LDOC1       |
| RNASEH1-A | 1.52E-12 | 0.290878 | 0.257 | 0.173 | 2.27E-08 | Opc-G | RNASEH1-AS1 |

|            |           |           |        |        |           |       |             |
|------------|-----------|-----------|--------|--------|-----------|-------|-------------|
| MZT2A. 7   | 1. 54E-12 | 0. 199531 | 0. 5   | 0. 408 | 2. 30E-08 | Opc-G | MZT2A       |
| PICALM. 1C | 1. 55E-12 | -0. 31889 | 0. 167 | 0. 289 | 2. 31E-08 | Opc-G | PICALM      |
| SLC16A10.  | 1. 59E-12 | -0. 39376 | 0. 016 | 0. 092 | 2. 38E-08 | Opc-G | SLC16A10    |
| ZNF738. 9  | 1. 60E-12 | 0. 254155 | 0. 223 | 0. 139 | 2. 39E-08 | Opc-G | ZNF738      |
| PLAT. 7    | 1. 62E-12 | 0. 308671 | 0. 193 | 0. 115 | 2. 42E-08 | Opc-G | PLAT        |
| NSUN6. 3   | 1. 66E-12 | 0. 196542 | 0. 139 | 0. 071 | 2. 47E-08 | Opc-G | NSUN6       |
| BMPR2. 7   | 1. 66E-12 | 0. 267083 | 0. 258 | 0. 172 | 2. 48E-08 | Opc-G | BMPR2       |
| ANO6. 3    | 1. 73E-12 | -0. 15711 | 0. 025 | 0. 108 | 2. 58E-08 | Opc-G | ANO6        |
| ZNF385A. 1 | 1. 74E-12 | -0. 27965 | 0. 049 | 0. 142 | 2. 60E-08 | Opc-G | ZNF385A     |
| IL4I1. 8   | 1. 75E-12 | -0. 27878 | 0. 003 | 0. 069 | 2. 62E-08 | Opc-G | IL4I1       |
| SLC39A4. 8 | 1. 76E-12 | -0. 29785 | 0. 018 | 0. 095 | 2. 63E-08 | Opc-G | SLC39A4     |
| PLOD1. 5   | 1. 78E-12 | -0. 23962 | 0. 086 | 0. 198 | 2. 66E-08 | Opc-G | PLOD1       |
| METTL9. 9  | 1. 84E-12 | 0. 186604 | 0. 567 | 0. 462 | 2. 74E-08 | Opc-G | METTL9      |
| APH1B. 6   | 1. 84E-12 | -0. 27813 | 0. 042 | 0. 133 | 2. 75E-08 | Opc-G | APH1B       |
| ATP1A1. 5  | 1. 87E-12 | -0. 29245 | 0. 348 | 0. 481 | 2. 80E-08 | Opc-G | ATP1A1      |
| PILRB. 5   | 1. 89E-12 | 0. 205744 | 0. 247 | 0. 155 | 2. 82E-08 | Opc-G | PILRB       |
| SMPDL3A. 8 | 1. 89E-12 | -0. 28979 | 0. 041 | 0. 13  | 2. 82E-08 | Opc-G | SMPDL3A     |
| DNASE1L1.  | 1. 89E-12 | -0. 25057 | 0. 007 | 0. 077 | 2. 83E-08 | Opc-G | DNASE1L1    |
| SFRP1. 9   | 1. 91E-12 | -0. 15518 | 0. 022 | 0. 103 | 2. 85E-08 | Opc-G | SFRP1       |
| TRAPPC1. 5 | 1. 91E-12 | -0. 31763 | 0. 503 | 0. 623 | 2. 86E-08 | Opc-G | TRAPPC1     |
| BLNK. 8    | 1. 92E-12 | -0. 33985 | 0. 004 | 0. 071 | 2. 86E-08 | Opc-G | BLNK        |
| IKZF1. 9   | 1. 92E-12 | -0. 29072 | 0. 003 | 0. 069 | 2. 87E-08 | Opc-G | IKZF1       |
| MSX1. 7    | 1. 93E-12 | 0. 217225 | 0. 123 | 0. 061 | 2. 89E-08 | Opc-G | MSX1        |
| HTATSF1. 6 | 1. 94E-12 | 0. 22182  | 0. 369 | 0. 268 | 2. 90E-08 | Opc-G | HTATSF1     |
| DPYD. 8    | 1. 96E-12 | -0. 2914  | 0. 025 | 0. 106 | 2. 92E-08 | Opc-G | DPYD        |
| PHACTR1. 9 | 1. 98E-12 | -0. 42879 | 0. 038 | 0. 123 | 2. 96E-08 | Opc-G | PHACTR1     |
| RAB3C. 6   | 1. 99E-12 | 0. 179623 | 0. 086 | 0. 035 | 2. 97E-08 | Opc-G | RAB3C       |
| TNFAIP8. 9 | 2. 00E-12 | -0. 31301 | 0. 005 | 0. 074 | 2. 99E-08 | Opc-G | TNFAIP8     |
| AVPI1. 7   | 2. 01E-12 | -0. 31942 | 0. 02  | 0. 099 | 3. 00E-08 | Opc-G | AVPI1       |
| C15orf48.  | 2. 03E-12 | -0. 34874 | 0. 005 | 0. 073 | 3. 04E-08 | Opc-G | C15orf48    |
| LINC00237  | 2. 12E-12 | 0. 136594 | 0. 079 | 0. 031 | 3. 16E-08 | Opc-G | LINC00237   |
| AC004951.  | 2. 13E-12 | 0. 242407 | 0. 236 | 0. 151 | 3. 18E-08 | Opc-G | AC004951. 6 |
| EIF3B. 4   | 2. 16E-12 | 0. 239538 | 0. 332 | 0. 241 | 3. 23E-08 | Opc-G | EIF3B       |
| AAMP. 5    | 2. 18E-12 | 0. 156787 | 0. 519 | 0. 421 | 3. 25E-08 | Opc-G | AAMP        |
| TMEM107. 4 | 2. 22E-12 | -0. 27044 | 0. 108 | 0. 225 | 3. 31E-08 | Opc-G | TMEM107     |
| PDLIM7. 6  | 2. 27E-12 | -0. 26575 | 0. 128 | 0. 246 | 3. 39E-08 | Opc-G | PDLIM7      |
| ABCC3. 5   | 2. 28E-12 | -0. 2575  | 0. 023 | 0. 104 | 3. 41E-08 | Opc-G | ABCC3       |
| RIN1. 6    | 2. 30E-12 | -0. 12494 | 0. 012 | 0. 087 | 3. 44E-08 | Opc-G | RIN1        |
| SH3TC1. 9  | 2. 34E-12 | -0. 33574 | 0. 012 | 0. 084 | 3. 49E-08 | Opc-G | SH3TC1      |
| MANBAL. 1C | 2. 45E-12 | 0. 201224 | 0. 423 | 0. 329 | 3. 67E-08 | Opc-G | MANBAL      |
| SMAP2. 9   | 2. 46E-12 | -0. 38355 | 0. 134 | 0. 243 | 3. 67E-08 | Opc-G | SMAP2       |
| PLEKHA4. 9 | 2. 47E-12 | -0. 13844 | 0. 04  | 0. 132 | 3. 69E-08 | Opc-G | PLEKHA4     |
| HSBP1L1. 6 | 2. 53E-12 | -0. 21979 | 0. 008 | 0. 078 | 3. 78E-08 | Opc-G | HSBP1L1     |
| ACSS3. 8   | 2. 57E-12 | -0. 1122  | 0. 03  | 0. 117 | 3. 83E-08 | Opc-G | ACSS3       |
| NUDT16. 1C | 2. 57E-12 | -0. 29506 | 0. 111 | 0. 226 | 3. 84E-08 | Opc-G | NUDT16      |
| DACT3. 8   | 2. 57E-12 | 0. 181316 | 0. 142 | 0. 073 | 3. 85E-08 | Opc-G | DACT3       |
| HBB. 5     | 2. 58E-12 | -0. 49476 | 0. 307 | 0. 405 | 3. 85E-08 | Opc-G | HBB         |
| CXCL2. 7   | 2. 61E-12 | -0. 42673 | 0. 016 | 0. 091 | 3. 91E-08 | Opc-G | CXCL2       |
| IGF1. 8    | 2. 63E-12 | -0. 31029 | 0. 001 | 0. 065 | 3. 93E-08 | Opc-G | IGF1        |
| TNPO3. 4   | 2. 64E-12 | 0. 252564 | 0. 221 | 0. 137 | 3. 94E-08 | Opc-G | TNPO3       |
| C14orf37.  | 2. 69E-12 | 0. 207582 | 0. 186 | 0. 107 | 4. 02E-08 | Opc-G | C14orf37    |

|             |           |           |        |        |           |       |               |
|-------------|-----------|-----------|--------|--------|-----------|-------|---------------|
| SYS1. 3     | 2. 71E-12 | -0. 27371 | 0. 127 | 0. 248 | 4. 05E-08 | Opc-G | SYS1          |
| PFKM. 6     | 2. 72E-12 | 0. 250403 | 0. 265 | 0. 178 | 4. 06E-08 | Opc-G | PFKM          |
| CEP68. 4    | 2. 73E-12 | 0. 214083 | 0. 234 | 0. 146 | 4. 08E-08 | Opc-G | CEP68         |
| TSPO. 9     | 2. 73E-12 | -0. 34674 | 0. 515 | 0. 6   | 4. 09E-08 | Opc-G | TSPO          |
| IL16. 9     | 2. 86E-12 | -0. 31491 | 0. 005 | 0. 073 | 4. 28E-08 | Opc-G | IL16          |
| CARD9. 10   | 2. 87E-12 | -0. 25866 | 0. 005 | 0. 073 | 4. 28E-08 | Opc-G | CARD9         |
| SNAP25. 9   | 2. 89E-12 | 0. 20345  | 0. 231 | 0. 137 | 4. 32E-08 | Opc-G | SNAP25        |
| FLOT1. 9    | 2. 92E-12 | -0. 28738 | 0. 389 | 0. 51  | 4. 36E-08 | Opc-G | FLOT1         |
| ZNF786. 7   | 2. 97E-12 | 0. 195955 | 0. 133 | 0. 067 | 4. 44E-08 | Opc-G | ZNF786        |
| OLA1. 5     | 2. 97E-12 | 0. 140107 | 0. 583 | 0. 482 | 4. 44E-08 | Opc-G | OLA1          |
| VPS37D. 8   | 2. 98E-12 | 0. 188614 | 0. 117 | 0. 056 | 4. 45E-08 | Opc-G | VPS37D        |
| PLXNB2. 6   | 3. 02E-12 | -0. 23468 | 0. 063 | 0. 163 | 4. 51E-08 | Opc-G | PLXNB2        |
| COA3. 7     | 3. 09E-12 | 0. 13392  | 0. 575 | 0. 47  | 4. 62E-08 | Opc-G | COA3          |
| PTPN2. 8    | 3. 12E-12 | -0. 36873 | 0. 143 | 0. 255 | 4. 66E-08 | Opc-G | PTPN2         |
| PXDN. 6     | 3. 20E-12 | 0. 263917 | 0. 168 | 0. 097 | 4. 79E-08 | Opc-G | PXDN          |
| SLAMF8. 1C  | 3. 26E-12 | -0. 27697 | 0. 003 | 0. 067 | 4. 87E-08 | Opc-G | SLAMF8        |
| DCK. 7      | 3. 29E-12 | -0. 31345 | 0. 154 | 0. 274 | 4. 92E-08 | Opc-G | DCK           |
| HNRNPD. 8   | 3. 30E-12 | 0. 191859 | 0. 508 | 0. 408 | 4. 94E-08 | Opc-G | HNRNPD        |
| ZNF212. 6   | 3. 30E-12 | 0. 183126 | 0. 128 | 0. 064 | 4. 94E-08 | Opc-G | ZNF212        |
| CD93. 10    | 3. 38E-12 | -0. 29528 | 0. 007 | 0. 075 | 5. 05E-08 | Opc-G | CD93          |
| ZNF385D. 7  | 3. 43E-12 | -0. 19507 | 0. 031 | 0. 116 | 5. 12E-08 | Opc-G | ZNF385D       |
| PHACTR2. 6  | 3. 44E-12 | -0. 17448 | 0. 014 | 0. 087 | 5. 14E-08 | Opc-G | PHACTR2       |
| DNAJC7. 5   | 3. 50E-12 | 0. 153174 | 0. 552 | 0. 459 | 5. 23E-08 | Opc-G | DNAJC7        |
| NDUFB6. 4   | 3. 55E-12 | 0. 13334  | 0. 596 | 0. 49  | 5. 30E-08 | Opc-G | NDUFB6        |
| RP11-390F   | 3. 69E-12 | -0. 18185 | 0. 045 | 0. 139 | 5. 52E-08 | Opc-G | RP11-390P2. 4 |
| ECSIT. 5    | 3. 93E-12 | 0. 266011 | 0. 348 | 0. 262 | 5. 88E-08 | Opc-G | ECSIT         |
| ORMDL2. 7   | 3. 93E-12 | -0. 36384 | 0. 158 | 0. 28  | 5. 88E-08 | Opc-G | ORMDL2        |
| ZNF91. 7    | 3. 97E-12 | 0. 247449 | 0. 292 | 0. 204 | 5. 93E-08 | Opc-G | ZNF91         |
| USF1. 4     | 4. 08E-12 | 0. 215177 | 0. 111 | 0. 052 | 6. 10E-08 | Opc-G | USF1          |
| HSD3B7. 6   | 4. 17E-12 | -0. 24174 | 0. 01  | 0. 08  | 6. 23E-08 | Opc-G | HSD3B7        |
| GPX4. 5     | 4. 18E-12 | -0. 23254 | 0. 854 | 0. 841 | 6. 25E-08 | Opc-G | GPX4          |
| GDI2. 9     | 4. 20E-12 | -0. 34244 | 0. 372 | 0. 496 | 6. 28E-08 | Opc-G | GDI2          |
| GK. 9       | 4. 41E-12 | -0. 33088 | 0. 053 | 0. 144 | 6. 59E-08 | Opc-G | GK            |
| ACADVL. 5   | 4. 49E-12 | -0. 26509 | 0. 322 | 0. 459 | 6. 72E-08 | Opc-G | ACADVL        |
| UNC5B. 9    | 4. 56E-12 | -0. 2728  | 0. 015 | 0. 088 | 6. 81E-08 | Opc-G | UNC5B         |
| EXOC4. 5    | 4. 64E-12 | 0. 215919 | 0. 246 | 0. 158 | 6. 93E-08 | Opc-G | EXOC4         |
| EXOSC4. 3   | 4. 75E-12 | 0. 275693 | 0. 329 | 0. 246 | 7. 10E-08 | Opc-G | EXOSC4        |
| CDKN2AIP. 4 | 4. 80E-12 | 0. 20314  | 0. 23  | 0. 142 | 7. 18E-08 | Opc-G | CDKN2AIP      |
| GALM. 9     | 4. 82E-12 | -0. 28081 | 0. 042 | 0. 13  | 7. 21E-08 | Opc-G | GALM          |
| EFNB1. 6    | 4. 92E-12 | 0. 205246 | 0. 165 | 0. 091 | 7. 35E-08 | Opc-G | EFNB1         |
| CLEC4E. 8   | 4. 93E-12 | -0. 34846 | 0      | 0. 062 | 7. 37E-08 | Opc-G | CLEC4E        |
| ITGA5. 6    | 4. 97E-12 | -0. 24739 | 0. 015 | 0. 088 | 7. 42E-08 | Opc-G | ITGA5         |
| BRI3BP. 5   | 4. 97E-12 | -0. 18194 | 0. 033 | 0. 118 | 7. 42E-08 | Opc-G | BRI3BP        |
| SEC11A. 9   | 5. 00E-12 | -0. 34568 | 0. 495 | 0. 597 | 7. 47E-08 | Opc-G | SEC11A        |
| NR1H2. 8    | 5. 04E-12 | -0. 29198 | 0. 18  | 0. 312 | 7. 53E-08 | Opc-G | NR1H2         |
| UTRN. 6     | 5. 28E-12 | -0. 20292 | 0. 031 | 0. 115 | 7. 89E-08 | Opc-G | UTRN          |
| GAPT. 10    | 5. 33E-12 | -0. 28635 | 0. 001 | 0. 064 | 7. 96E-08 | Opc-G | GAPT          |
| GLRX5. 7    | 5. 44E-12 | 0. 259359 | 0. 378 | 0. 291 | 8. 13E-08 | Opc-G | GLRX5         |
| TPRKB. 6    | 5. 47E-12 | 0. 163507 | 0. 454 | 0. 357 | 8. 18E-08 | Opc-G | TPRKB         |
| NQO1. 6     | 5. 67E-12 | -0. 17338 | 0. 03  | 0. 114 | 8. 47E-08 | Opc-G | NQO1          |
| KRBOX4. 5   | 5. 94E-12 | 0. 208331 | 0. 189 | 0. 11  | 8. 87E-08 | Opc-G | KRBOX4        |

|            |          |          |       |       |          |       |          |
|------------|----------|----------|-------|-------|----------|-------|----------|
| NAT16.1    | 5.95E-12 | 0.135368 | 0.06  | 0.021 | 8.89E-08 | Opc-G | NAT16    |
| EIF5.4     | 6.32E-12 | 0.108503 | 0.758 | 0.643 | 9.45E-08 | Opc-G | EIF5     |
| CYB5R1.4   | 6.33E-12 | -0.30474 | 0.143 | 0.266 | 9.46E-08 | Opc-G | CYB5R1   |
| MBD4.7     | 6.35E-12 | -0.29163 | 0.149 | 0.271 | 9.48E-08 | Opc-G | MBD4     |
| GRIK4      | 6.37E-12 | 0.103744 | 0.06  | 0.021 | 9.52E-08 | Opc-G | GRIK4    |
| PHB.7      | 6.37E-12 | 0.106994 | 0.682 | 0.546 | 9.52E-08 | Opc-G | PHB      |
| MAN1C1.2   | 6.38E-12 | -0.18184 | 0.015 | 0.088 | 9.53E-08 | Opc-G | MAN1C1   |
| KLF2.6     | 6.43E-12 | -0.40944 | 0.051 | 0.137 | 9.60E-08 | Opc-G | KLF2     |
| FUCA2.10   | 6.45E-12 | -0.27872 | 0.134 | 0.25  | 9.64E-08 | Opc-G | FUCA2    |
| TBCC.9     | 6.56E-12 | 0.223972 | 0.311 | 0.215 | 9.81E-08 | Opc-G | TBCC     |
| EMP1.6     | 6.56E-12 | -0.23733 | 0.078 | 0.185 | 9.81E-08 | Opc-G | EMP1     |
| ANAPC13.7  | 6.68E-12 | 0.183519 | 0.449 | 0.347 | 9.99E-08 | Opc-G | ANAPC13  |
| STK17B.8   | 6.86E-12 | -0.4024  | 0.052 | 0.138 | 1.02E-07 | Opc-G | STK17B   |
| GSG1L.7    | 6.88E-12 | 0.290139 | 0.113 | 0.055 | 1.03E-07 | Opc-G | GSG1L    |
| PTPN1.8    | 6.88E-12 | -0.23502 | 0.12  | 0.239 | 1.03E-07 | Opc-G | PTPN1    |
| CD47.5     | 6.99E-12 | -0.28966 | 0.258 | 0.392 | 1.04E-07 | Opc-G | CD47     |
| PSME2.8    | 7.06E-12 | -0.28853 | 0.433 | 0.565 | 1.05E-07 | Opc-G | PSME2    |
| PPARD.9    | 7.22E-12 | -0.24171 | 0.031 | 0.113 | 1.08E-07 | Opc-G | PPARD    |
| EAPP.7     | 7.27E-12 | 0.151635 | 0.445 | 0.348 | 1.09E-07 | Opc-G | EAPP     |
| RASGRP3.8  | 7.30E-12 | -0.32454 | 0.007 | 0.073 | 1.09E-07 | Opc-G | RASGRP3  |
| ZNF277.3   | 7.35E-12 | 0.165111 | 0.261 | 0.166 | 1.10E-07 | Opc-G | ZNF277   |
| APOBEC3C.7 | 7.36E-12 | -0.28938 | 0.045 | 0.134 | 1.10E-07 | Opc-G | APOBEC3C |
| LRCH3.7    | 7.50E-12 | 0.232774 | 0.212 | 0.133 | 1.12E-07 | Opc-G | LRCH3    |
| TOMM22.6   | 7.55E-12 | 0.122484 | 0.561 | 0.463 | 1.13E-07 | Opc-G | TOMM22   |
| SPATS2.8   | 7.73E-12 | 0.249843 | 0.342 | 0.253 | 1.15E-07 | Opc-G | SPATS2   |
| LIFR-AS1.7 | 7.78E-12 | 0.19125  | 0.075 | 0.03  | 1.16E-07 | Opc-G | LIFR-AS1 |
| CCT5.7     | 8.19E-12 | 0.123471 | 0.583 | 0.475 | 1.22E-07 | Opc-G | CCT5     |
| ATF3.9     | 8.38E-12 | -0.35454 | 0.195 | 0.309 | 1.25E-07 | Opc-G | ATF3     |
| CACNA2D1.8 | 8.55E-12 | 0.120829 | 0.072 | 0.028 | 1.28E-07 | Opc-G | CACNA2D1 |
| HMGB2.9    | 8.58E-12 | -0.41598 | 0.413 | 0.5   | 1.28E-07 | Opc-G | HMGB2    |
| ZNF511.7   | 8.75E-12 | -0.21056 | 0.093 | 0.202 | 1.31E-07 | Opc-G | ZNF511   |
| RUVBL1.7   | 8.79E-12 | 0.247029 | 0.347 | 0.261 | 1.31E-07 | Opc-G | RUVBL1   |
| DCAF6.6    | 8.92E-12 | -0.23541 | 0.072 | 0.172 | 1.33E-07 | Opc-G | DCAF6    |
| NUP35.4    | 8.95E-12 | 0.185049 | 0.184 | 0.107 | 1.34E-07 | Opc-G | NUP35    |
| IRF5.10    | 9.11E-12 | -0.2634  | 0.001 | 0.063 | 1.36E-07 | Opc-G | IRF5     |
| EFNA1.7    | 9.12E-12 | 0.164734 | 0.206 | 0.123 | 1.36E-07 | Opc-G | EFNA1    |
| P4HA2.5    | 9.32E-12 | -0.17783 | 0.014 | 0.085 | 1.39E-07 | Opc-G | P4HA2    |
| CDK5.7     | 9.69E-12 | 0.266209 | 0.32  | 0.232 | 1.45E-07 | Opc-G | CDK5     |
| LPIN1.6    | 1.01E-11 | 0.214435 | 0.214 | 0.132 | 1.51E-07 | Opc-G | LPIN1    |
| CCL20.9    | 1.04E-11 | -0.32444 | 0.003 | 0.065 | 1.56E-07 | Opc-G | CCL20    |
| SFMBT2.8   | 1.05E-11 | -0.31396 | 0.012 | 0.082 | 1.57E-07 | Opc-G | SFMBT2   |
| GGA2.10    | 1.06E-11 | -0.27794 | 0.055 | 0.145 | 1.58E-07 | Opc-G | GGA2     |
| PYCR1.6    | 1.09E-11 | 0.280998 | 0.26  | 0.179 | 1.62E-07 | Opc-G | PYCR1    |
| VSTM2A.8   | 1.14E-11 | 0.285281 | 0.179 | 0.1   | 1.70E-07 | Opc-G | VSTM2A   |
| MMP19.6    | 1.14E-11 | -0.26419 | 0.001 | 0.062 | 1.71E-07 | Opc-G | MMP19    |
| SLC39A14.1 | 1.16E-11 | -0.227   | 0.023 | 0.1   | 1.73E-07 | Opc-G | SLC39A14 |
| CHST10.7   | 1.25E-11 | 0.238102 | 0.212 | 0.134 | 1.87E-07 | Opc-G | CHST10   |
| ZP3.3      | 1.26E-11 | 0.180613 | 0.131 | 0.067 | 1.88E-07 | Opc-G | ZP3      |
| DYNC1H1.8  | 1.26E-11 | 0.213472 | 0.419 | 0.332 | 1.89E-07 | Opc-G | DYNC1H1  |
| SPCS3.8    | 1.31E-11 | -0.3247  | 0.208 | 0.333 | 1.96E-07 | Opc-G | SPCS3    |
| ARVCF.7    | 1.33E-11 | 0.181284 | 0.108 | 0.052 | 1.98E-07 | Opc-G | ARVCF    |

|            |          |          |       |       |          |       |            |
|------------|----------|----------|-------|-------|----------|-------|------------|
| ABL2.9     | 1.37E-11 | -0.39414 | 0.165 | 0.275 | 2.05E-07 | Opc-G | ABL2       |
| YAF2.7     | 1.37E-11 | 0.173624 | 0.439 | 0.34  | 2.05E-07 | Opc-G | YAF2       |
| KMT2A.9    | 1.38E-11 | 0.248626 | 0.318 | 0.23  | 2.06E-07 | Opc-G | KMT2A      |
| FKBP3.5    | 1.47E-11 | 0.115608 | 0.571 | 0.471 | 2.20E-07 | Opc-G | FKBP3      |
| ETFDH.5    | 1.48E-11 | 0.224311 | 0.195 | 0.117 | 2.20E-07 | Opc-G | ETFDH      |
| ACSF2.6    | 1.48E-11 | -0.18069 | 0.005 | 0.069 | 2.21E-07 | Opc-G | ACSF2      |
| PLEC.8     | 1.49E-11 | -0.24443 | 0.089 | 0.193 | 2.22E-07 | Opc-G | PLEC       |
| VPS29.6    | 1.49E-11 | -0.32594 | 0.436 | 0.561 | 2.23E-07 | Opc-G | VPS29      |
| TMEM145.7  | 1.51E-11 | 0.21594  | 0.128 | 0.065 | 2.26E-07 | Opc-G | TMEM145    |
| MARS.4     | 1.58E-11 | 0.203521 | 0.288 | 0.2   | 2.36E-07 | Opc-G | MARS       |
| CACNG7.6   | 1.58E-11 | 0.23658  | 0.145 | 0.08  | 2.36E-07 | Opc-G | CACNG7     |
| MYO1E.2    | 1.61E-11 | -0.16832 | 0.007 | 0.071 | 2.40E-07 | Opc-G | MYO1E      |
| VCAM1.8    | 1.61E-11 | -0.30896 | 0.01  | 0.076 | 2.40E-07 | Opc-G | VCAM1      |
| OXR1.8     | 1.62E-11 | 0.235747 | 0.333 | 0.246 | 2.42E-07 | Opc-G | OXR1       |
| SIGLEC8.7  | 1.64E-11 | -0.34133 | 0.014 | 0.082 | 2.45E-07 | Opc-G | SIGLEC8    |
| ZC3H12A.8  | 1.64E-11 | -0.27866 | 0.012 | 0.08  | 2.45E-07 | Opc-G | ZC3H12A    |
| ANKRD22.9  | 1.67E-11 | -0.29234 | 0.005 | 0.069 | 2.50E-07 | Opc-G | ANKRD22    |
| HHEX.10    | 1.68E-11 | -0.27155 | 0.001 | 0.061 | 2.50E-07 | Opc-G | HHEX       |
| C19orf24.1 | 1.68E-11 | -0.256   | 0.245 | 0.373 | 2.51E-07 | Opc-G | C19orf24   |
| ARHGEF7.8  | 1.68E-11 | 0.21088  | 0.24  | 0.152 | 2.52E-07 | Opc-G | ARHGEF7    |
| S100A16.9  | 1.71E-11 | -0.34413 | 0.187 | 0.315 | 2.56E-07 | Opc-G | S100A16    |
| TMEM70.7   | 1.75E-11 | -0.32891 | 0.273 | 0.403 | 2.61E-07 | Opc-G | TMEM70     |
| RDX.9      | 1.82E-11 | 0.151395 | 0.609 | 0.482 | 2.71E-07 | Opc-G | RDX        |
| CAT.8      | 1.82E-11 | -0.37187 | 0.191 | 0.312 | 2.71E-07 | Opc-G | CAT        |
| MXRA7.7    | 1.82E-11 | -0.20542 | 0.074 | 0.173 | 2.72E-07 | Opc-G | MXRA7      |
| TRABD.10   | 1.82E-11 | -0.29237 | 0.152 | 0.266 | 2.72E-07 | Opc-G | TRABD      |
| MPHOSPH10  | 1.92E-11 | 0.233923 | 0.321 | 0.232 | 2.88E-07 | Opc-G | MPHOSPH10  |
| PROS1.2    | 2.01E-11 | -0.18914 | 0.022 | 0.097 | 3.00E-07 | Opc-G | PROS1      |
| SPTBN1.8   | 2.05E-11 | 0.207935 | 0.361 | 0.269 | 3.06E-07 | Opc-G | SPTBN1     |
| FAM96A.8   | 2.13E-11 | -0.33006 | 0.238 | 0.364 | 3.18E-07 | Opc-G | FAM96A     |
| HNRNPU.5   | 2.14E-11 | 0.135888 | 0.615 | 0.524 | 3.20E-07 | Opc-G | HNRNPU     |
| SESTD1.7   | 2.27E-11 | 0.235695 | 0.238 | 0.154 | 3.39E-07 | Opc-G | SESTD1     |
| LEPROTL1   | 2.27E-11 | 0.139292 | 0.475 | 0.382 | 3.40E-07 | Opc-G | LEPROTL1   |
| SNHG9.6    | 2.29E-11 | 0.189467 | 0.389 | 0.299 | 3.42E-07 | Opc-G | SNHG9      |
| SLC1A3.9   | 2.47E-11 | -0.32136 | 0.372 | 0.484 | 3.70E-07 | Opc-G | SLC1A3     |
| CLEC4A.1C  | 2.49E-11 | -0.27995 | 0.004 | 0.065 | 3.72E-07 | Opc-G | CLEC4A     |
| CNIH3.7    | 2.51E-11 | -0.15937 | 0.074 | 0.175 | 3.75E-07 | Opc-G | CNIH3      |
| CSTF2T.3   | 2.54E-11 | 0.187373 | 0.193 | 0.116 | 3.80E-07 | Opc-G | CSTF2T     |
| RELT.9     | 2.55E-11 | -0.21704 | 0.018 | 0.089 | 3.81E-07 | Opc-G | RELT       |
| MIR155HG   | 2.55E-11 | -0.18791 | 0.001 | 0.06  | 3.82E-07 | Opc-G | MIR155HG   |
| SHISA4.8   | 2.55E-11 | 0.286329 | 0.322 | 0.241 | 3.82E-07 | Opc-G | SHISA4     |
| GREB1.1    | 2.64E-11 | 0.130851 | 0.061 | 0.022 | 3.94E-07 | Opc-G | GREB1      |
| ABCF2.7    | 2.66E-11 | 0.23489  | 0.295 | 0.21  | 3.98E-07 | Opc-G | ABCF2      |
| ADAM15.5   | 2.72E-11 | -0.19646 | 0.038 | 0.121 | 4.07E-07 | Opc-G | ADAM15     |
| FES.10     | 2.74E-11 | -0.28076 | 0.015 | 0.084 | 4.10E-07 | Opc-G | FES        |
| DCAF13.7   | 2.74E-11 | 0.220839 | 0.398 | 0.312 | 4.10E-07 | Opc-G | DCAF13     |
| MTMR9.7    | 2.75E-11 | 0.237439 | 0.27  | 0.184 | 4.11E-07 | Opc-G | MTMR9      |
| NRROS.7    | 2.78E-11 | -0.29951 | 0.008 | 0.072 | 4.15E-07 | Opc-G | NRROS      |
| ATP6VOB.7  | 2.78E-11 | -0.25969 | 0.762 | 0.8   | 4.16E-07 | Opc-G | ATP6VOB    |
| ACO68535   | 2.79E-11 | 0.142116 | 0.057 | 0.02  | 4.17E-07 | Opc-G | ACO68535.2 |
| FPR3.10    | 2.84E-11 | -0.23726 | 0.001 | 0.06  | 4.24E-07 | Opc-G | FPR3       |

|             |           |           |        |        |           |       |          |
|-------------|-----------|-----------|--------|--------|-----------|-------|----------|
| GAS1. 10    | 2. 87E-11 | 0. 291804 | 0. 217 | 0. 139 | 4. 29E-07 | Opc-G | GAS1     |
| HVCN1. 9    | 2. 97E-11 | -0. 27029 | 0. 026 | 0. 101 | 4. 43E-07 | Opc-G | HVCN1    |
| GOPC. 8     | 2. 98E-11 | 0. 242548 | 0. 339 | 0. 252 | 4. 45E-07 | Opc-G | GOPC     |
| TACC2. 6    | 3. 00E-11 | 0. 218186 | 0. 109 | 0. 054 | 4. 49E-07 | Opc-G | TACC2    |
| ELK3. 6     | 3. 01E-11 | -0. 20701 | 0. 02  | 0. 093 | 4. 50E-07 | Opc-G | ELK3     |
| EIF4EBP1. 3 | 3. 05E-11 | 0. 144153 | 0. 526 | 0. 42  | 4. 56E-07 | Opc-G | EIF4EBP1 |
| GLB1. 7     | 3. 12E-11 | -0. 30466 | 0. 139 | 0. 252 | 4. 67E-07 | Opc-G | GLB1     |
| TMOD3. 7    | 3. 16E-11 | -0. 19395 | 0. 057 | 0. 15  | 4. 72E-07 | Opc-G | TMOD3    |
| ANP32E. 8   | 3. 20E-11 | -0. 21863 | 0. 153 | 0. 275 | 4. 79E-07 | Opc-G | ANP32E   |
| TFEC. 10    | 3. 21E-11 | -0. 24956 | 0. 001 | 0. 06  | 4. 80E-07 | Opc-G | TFEC     |
| HOPX. 9     | 3. 26E-11 | -0. 31668 | 0. 172 | 0. 29  | 4. 87E-07 | Opc-G | HOPX     |
| HRH1. 9     | 3. 29E-11 | -0. 17023 | 0. 025 | 0. 101 | 4. 91E-07 | Opc-G | HRH1     |
| EHBPI1L. 9  | 3. 33E-11 | -0. 18235 | 0. 01  | 0. 075 | 4. 97E-07 | Opc-G | EHBPI1L  |
| RAPGEF1. 7  | 3. 34E-11 | -0. 28779 | 0. 041 | 0. 122 | 4. 99E-07 | Opc-G | RAPGEF1  |
| MIR22HG. 8  | 3. 39E-11 | -0. 27084 | 0. 037 | 0. 118 | 5. 06E-07 | Opc-G | MIR22HG  |
| CXCL3. 7    | 3. 48E-11 | -0. 40935 | 0. 011 | 0. 076 | 5. 20E-07 | Opc-G | CXCL3    |
| NFKB2. 9    | 3. 49E-11 | -0. 21012 | 0. 004 | 0. 065 | 5. 21E-07 | Opc-G | NFKB2    |
| ABCA1. 5    | 3. 56E-11 | -0. 26555 | 0. 135 | 0. 246 | 5. 32E-07 | Opc-G | ABCA1    |
| EIF2AK1. 7  | 3. 63E-11 | 0. 223569 | 0. 407 | 0. 327 | 5. 42E-07 | Opc-G | EIF2AK1  |
| CAPRN1. 7   | 3. 69E-11 | 0. 235045 | 0. 395 | 0. 315 | 5. 52E-07 | Opc-G | CAPRN1   |
| TXN2. 4     | 3. 70E-11 | 0. 173261 | 0. 516 | 0. 428 | 5. 53E-07 | Opc-G | TXN2     |
| THBS1. 8    | 3. 74E-11 | -0. 38345 | 0. 016 | 0. 085 | 5. 59E-07 | Opc-G | THBS1    |
| ING5. 4     | 3. 81E-11 | 0. 234166 | 0. 184 | 0. 112 | 5. 70E-07 | Opc-G | ING5     |
| RBMS1. 7    | 3. 94E-11 | -0. 26875 | 0. 143 | 0. 257 | 5. 89E-07 | Opc-G | RBMS1    |
| RND1. 6     | 3. 96E-11 | 0. 168794 | 0. 122 | 0. 06  | 5. 91E-07 | Opc-G | RND1     |
| TMEM37. 6   | 3. 99E-11 | -0. 28258 | 0. 005 | 0. 067 | 5. 97E-07 | Opc-G | TMEM37   |
| IFI27. 5    | 4. 01E-11 | -0. 39659 | 0. 038 | 0. 118 | 5. 99E-07 | Opc-G | IFI27    |
| ZNF74. 5    | 4. 05E-11 | 0. 171459 | 0. 111 | 0. 054 | 6. 05E-07 | Opc-G | ZNF74    |
| PIK3R3. 8   | 4. 06E-11 | 0. 162419 | 0. 206 | 0. 127 | 6. 06E-07 | Opc-G | PIK3R3   |
| GSTM3. 7    | 4. 09E-11 | 0. 201111 | 0. 354 | 0. 263 | 6. 11E-07 | Opc-G | GSTM3    |
| KPNB1. 8    | 4. 25E-11 | 0. 162602 | 0. 526 | 0. 442 | 6. 36E-07 | Opc-G | KPNB1    |
| DHX57. 5    | 4. 28E-11 | 0. 202371 | 0. 16  | 0. 091 | 6. 39E-07 | Opc-G | DHX57    |
| GBP1. 6     | 4. 41E-11 | -0. 29045 | 0. 066 | 0. 159 | 6. 59E-07 | Opc-G | GBP1     |
| HNRNPH3. 9  | 4. 52E-11 | 0. 146523 | 0. 534 | 0. 439 | 6. 76E-07 | Opc-G | HNRNPH3  |
| METRNL. 9   | 4. 52E-11 | -0. 26337 | 0. 018 | 0. 087 | 6. 76E-07 | Opc-G | METRNL   |
| DCP1A. 5    | 4. 55E-11 | 0. 228277 | 0. 309 | 0. 221 | 6. 80E-07 | Opc-G | DCP1A    |
| RALBP1. 4   | 4. 57E-11 | -0. 24622 | 0. 183 | 0. 311 | 6. 83E-07 | Opc-G | RALBP1   |
| SLC40A1. 8  | 4. 59E-11 | -0. 26128 | 0. 056 | 0. 144 | 6. 86E-07 | Opc-G | SLC40A1  |
| DLX6. 10    | 4. 60E-11 | 0. 107362 | 0. 113 | 0. 053 | 6. 87E-07 | Opc-G | DLX6     |
| TBC1D22A. 4 | 4. 66E-11 | -0. 25028 | 0. 045 | 0. 128 | 6. 96E-07 | Opc-G | TBC1D22A |
| MAGEF1. 9   | 4. 67E-11 | 0. 221727 | 0. 445 | 0. 358 | 6. 97E-07 | Opc-G | MAGEF1   |
| RBM48. 4    | 4. 70E-11 | 0. 18655  | 0. 154 | 0. 086 | 7. 02E-07 | Opc-G | RBM48    |
| ELMOD1. 7   | 4. 74E-11 | -0. 11268 | 0. 016 | 0. 086 | 7. 08E-07 | Opc-G | ELMOD1   |
| FN1. 8      | 4. 74E-11 | -0. 38661 | 0. 071 | 0. 16  | 7. 08E-07 | Opc-G | FN1      |
| MYBPHL      | 4. 76E-11 | 0. 110159 | 0. 034 | 0. 009 | 7. 11E-07 | Opc-G | MYBPHL   |
| TROVE2. 8   | 4. 82E-11 | 0. 139601 | 0. 526 | 0. 427 | 7. 20E-07 | Opc-G | TROVE2   |
| RBM6. 5     | 4. 85E-11 | 0. 187557 | 0. 402 | 0. 307 | 7. 25E-07 | Opc-G | RBM6     |
| PCK2. 8     | 4. 88E-11 | -0. 21276 | 0. 01  | 0. 073 | 7. 29E-07 | Opc-G | PCK2     |
| LYRM5. 7    | 5. 01E-11 | 0. 204417 | 0. 417 | 0. 336 | 7. 49E-07 | Opc-G | LYRM5    |
| WDR1. 7     | 5. 05E-11 | -0. 29237 | 0. 295 | 0. 423 | 7. 55E-07 | Opc-G | WDR1     |
| FAM171B. 8  | 5. 06E-11 | 0. 223862 | 0. 179 | 0. 106 | 7. 56E-07 | Opc-G | FAM171B  |





|            |           |           |        |        |           |       |         |
|------------|-----------|-----------|--------|--------|-----------|-------|---------|
| TACC3. 6   | 8. 60E-11 | -0. 22431 | 0. 015 | 0. 081 | 1. 29E-06 | Opc-G | TACC3   |
| DNAJC1. 5  | 8. 62E-11 | -0. 18059 | 0. 089 | 0. 191 | 1. 29E-06 | Opc-G | DNAJC1  |
| OSMR. 8    | 8. 64E-11 | -0. 12185 | 0. 019 | 0. 089 | 1. 29E-06 | Opc-G | OSMR    |
| COQ2. 9    | 8. 78E-11 | -0. 24306 | 0. 089 | 0. 186 | 1. 31E-06 | Opc-G | COQ2    |
| GSE1. 9    | 8. 79E-11 | 0. 1989   | 0. 156 | 0. 087 | 1. 31E-06 | Opc-G | GSE1    |
| RDH10. 9   | 8. 92E-11 | -0. 20134 | 0. 02  | 0. 09  | 1. 33E-06 | Opc-G | RDH10   |
| GARS. 8    | 8. 94E-11 | 0. 205019 | 0. 38  | 0. 287 | 1. 34E-06 | Opc-G | GARS    |
| ZNF493. 7  | 9. 01E-11 | 0. 232993 | 0. 231 | 0. 153 | 1. 35E-06 | Opc-G | ZNF493  |
| PHF21B. 1  | 9. 10E-11 | 0. 159918 | 0. 068 | 0. 027 | 1. 36E-06 | Opc-G | PHF21B  |
| FNBP1. 6   | 9. 10E-11 | -0. 2774  | 0. 156 | 0. 27  | 1. 36E-06 | Opc-G | FNBP1   |
| FAM198B. 7 | 9. 12E-11 | -0. 25287 | 0. 005 | 0. 064 | 1. 36E-06 | Opc-G | FAM198B |
| UBE2C. 10  | 9. 13E-11 | -0. 37169 | 0. 042 | 0. 121 | 1. 36E-06 | Opc-G | UBE2C   |
| PRPSAP2. 6 | 9. 16E-11 | 0. 221437 | 0. 347 | 0. 261 | 1. 37E-06 | Opc-G | PRPSAP2 |
| SRGAP3. 7  | 9. 19E-11 | 0. 173226 | 0. 224 | 0. 14  | 1. 37E-06 | Opc-G | SRGAP3  |
| HPS3. 6    | 9. 68E-11 | -0. 22227 | 0. 06  | 0. 148 | 1. 45E-06 | Opc-G | HPS3    |
| MYO1G. 10  | 9. 69E-11 | -0. 23848 | 0. 005 | 0. 064 | 1. 45E-06 | Opc-G | MYO1G   |
| TLR1. 10   | 9. 74E-11 | -0. 26968 | 0. 01  | 0. 072 | 1. 46E-06 | Opc-G | TLR1    |
| FGD2. 9    | 9. 81E-11 | -0. 30083 | 0. 005 | 0. 064 | 1. 47E-06 | Opc-G | FGD2    |
| DUSP10. 2  | 9. 85E-11 | 0. 220374 | 0. 26  | 0. 174 | 1. 47E-06 | Opc-G | DUSP10  |
| ZC2HC1A. 9 | 9. 85E-11 | 0. 206708 | 0. 298 | 0. 205 | 1. 47E-06 | Opc-G | ZC2HC1A |
| SDF2L1. 6  | 9. 86E-11 | -0. 29823 | 0. 249 | 0. 367 | 1. 47E-06 | Opc-G | SDF2L1  |
| DUSP22. 9  | 1. 01E-10 | -0. 27051 | 0. 038 | 0. 116 | 1. 50E-06 | Opc-G | DUSP22  |
| CCDC88B. 4 | 1. 01E-10 | -0. 24344 | 0. 018 | 0. 086 | 1. 50E-06 | Opc-G | CCDC88B |
| CASP7. 3   | 1. 01E-10 | -0. 16581 | 0. 02  | 0. 091 | 1. 51E-06 | Opc-G | CASP7   |
| NBL1. 8    | 1. 02E-10 | -0. 26187 | 0. 089 | 0. 184 | 1. 53E-06 | Opc-G | NBL1    |
| UBXN4. 6   | 1. 03E-10 | 0. 119811 | 0. 646 | 0. 538 | 1. 54E-06 | Opc-G | UBXN4   |
| CCNY. 6    | 1. 05E-10 | -0. 19663 | 0. 036 | 0. 114 | 1. 56E-06 | Opc-G | CCNY    |
| PFN1. 9    | 1. 05E-10 | -0. 13991 | 0. 87  | 0. 805 | 1. 57E-06 | Opc-G | PFN1    |
| LILRB2. 1C | 1. 06E-10 | -0. 2553  | 0. 001 | 0. 057 | 1. 58E-06 | Opc-G | LILRB2  |
| KLF4. 10   | 1. 06E-10 | -0. 3965  | 0. 12  | 0. 212 | 1. 59E-06 | Opc-G | KLF4    |
| ADA. 5     | 1. 08E-10 | -0. 15797 | 0. 025 | 0. 097 | 1. 61E-06 | Opc-G | ADA     |
| SNAP23. 9  | 1. 09E-10 | -0. 297   | 0. 141 | 0. 251 | 1. 62E-06 | Opc-G | SNAP23  |
| LNP1. 2    | 1. 12E-10 | 0. 114373 | 0. 07  | 0. 028 | 1. 68E-06 | Opc-G | LNP1    |
| NTHL1. 4   | 1. 16E-10 | 0. 289276 | 0. 258 | 0. 183 | 1. 74E-06 | Opc-G | NTHL1   |
| CFI. 6     | 1. 18E-10 | -0. 1947  | 0. 005 | 0. 064 | 1. 76E-06 | Opc-G | CFI     |
| TEN1. 5    | 1. 18E-10 | -0. 16964 | 0. 085 | 0. 184 | 1. 77E-06 | Opc-G | TEN1    |
| STK4. 7    | 1. 19E-10 | -0. 31343 | 0. 178 | 0. 294 | 1. 78E-06 | Opc-G | STK4    |
| ERP44. 8   | 1. 20E-10 | -0. 30569 | 0. 28  | 0. 403 | 1. 80E-06 | Opc-G | ERP44   |
| RND2. 7    | 1. 21E-10 | 0. 258542 | 0. 235 | 0. 158 | 1. 80E-06 | Opc-G | RND2    |
| REEP3. 5   | 1. 22E-10 | -0. 22823 | 0. 138 | 0. 252 | 1. 82E-06 | Opc-G | REEP3   |
| CCPG1. 4   | 1. 22E-10 | -0. 2281  | 0. 113 | 0. 219 | 1. 82E-06 | Opc-G | CCPG1   |
| GNG11. 4   | 1. 23E-10 | 0. 126198 | 0. 081 | 0. 034 | 1. 84E-06 | Opc-G | GNG11   |
| PDIA5. 4   | 1. 24E-10 | -0. 17348 | 0. 011 | 0. 074 | 1. 86E-06 | Opc-G | PDIA5   |
| PRKRA. 5   | 1. 24E-10 | 0. 169701 | 0. 444 | 0. 355 | 1. 86E-06 | Opc-G | PRKRA   |
| DOK2. 9    | 1. 25E-10 | -0. 25853 | 0. 003 | 0. 059 | 1. 87E-06 | Opc-G | DOK2    |
| FKBP15. 9  | 1. 29E-10 | -0. 23502 | 0. 057 | 0. 143 | 1. 93E-06 | Opc-G | FKBP15  |
| MFSD12. 7  | 1. 31E-10 | -0. 2115  | 0. 096 | 0. 198 | 1. 96E-06 | Opc-G | MFSD12  |
| LRWD1. 6   | 1. 32E-10 | 0. 229329 | 0. 242 | 0. 165 | 1. 98E-06 | Opc-G | LRWD1   |
| HES1. 7    | 1. 33E-10 | -0. 28595 | 0. 102 | 0. 203 | 1. 99E-06 | Opc-G | HES1    |
| ERBB3. 8   | 1. 39E-10 | 0. 109151 | 0. 082 | 0. 035 | 2. 07E-06 | Opc-G | ERBB3   |
| OAS1. 7    | 1. 40E-10 | -0. 32648 | 0. 053 | 0. 138 | 2. 09E-06 | Opc-G | OAS1    |



|                |          |          |       |       |          |       |              |
|----------------|----------|----------|-------|-------|----------|-------|--------------|
| TRPV2.10       | 2.45E-10 | -0.23533 | 0.005 | 0.062 | 3.66E-06 | Opc-G | TRPV2        |
| MTMR11.5       | 2.49E-10 | -0.15685 | 0.012 | 0.075 | 3.72E-06 | Opc-G | MTMR11       |
| NMI.9          | 2.49E-10 | -0.29245 | 0.093 | 0.188 | 3.72E-06 | Opc-G | NMI          |
| ZMIZ2.7        | 2.52E-10 | 0.197212 | 0.163 | 0.095 | 3.77E-06 | Opc-G | ZMIZ2        |
| TMEM156.8      | 2.56E-10 | -0.27896 | 0.004 | 0.059 | 3.82E-06 | Opc-G | TMEM156      |
| MYH10.8        | 2.65E-10 | 0.233562 | 0.225 | 0.148 | 3.96E-06 | Opc-G | MYH10        |
| VKORC1.5       | 2.66E-10 | -0.29826 | 0.37  | 0.504 | 3.98E-06 | Opc-G | VKORC1       |
| VCL.4          | 2.69E-10 | -0.14363 | 0.03  | 0.104 | 4.02E-06 | Opc-G | VCL          |
| VPS25.5        | 2.70E-10 | 0.159875 | 0.41  | 0.324 | 4.04E-06 | Opc-G | VPS25        |
| CHD6.9         | 2.72E-10 | 0.258695 | 0.317 | 0.24  | 4.06E-06 | Opc-G | CHD6         |
| CHD4.6         | 2.73E-10 | 0.207568 | 0.399 | 0.317 | 4.08E-06 | Opc-G | CHD4         |
| FAIM.5         | 2.74E-10 | 0.215559 | 0.216 | 0.142 | 4.09E-06 | Opc-G | FAIM         |
| PPP2R2A.6      | 2.74E-10 | 0.169738 | 0.38  | 0.295 | 4.10E-06 | Opc-G | PPP2R2A      |
| ZNF793.6       | 2.75E-10 | 0.201055 | 0.175 | 0.106 | 4.11E-06 | Opc-G | ZNF793       |
| RBM28.6        | 2.76E-10 | 0.215367 | 0.235 | 0.158 | 4.13E-06 | Opc-G | RBM28        |
| TMEM178B.2     | 2.77E-10 | 0.179273 | 0.107 | 0.053 | 4.14E-06 | Opc-G | TMEM178B     |
| UBASH3B.6      | 2.79E-10 | -0.15242 | 0.015 | 0.079 | 4.17E-06 | Opc-G | UBASH3B      |
| SCRT1.1        | 2.80E-10 | 0.10973  | 0.053 | 0.019 | 4.19E-06 | Opc-G | SCRT1        |
| CREB1.6        | 2.82E-10 | 0.206519 | 0.318 | 0.236 | 4.21E-06 | Opc-G | CREB1        |
| SLC9A3R1.2     | 2.82E-10 | 0.303638 | 0.217 | 0.146 | 4.21E-06 | Opc-G | SLC9A3R1     |
| RP6-91H8.2     | 2.84E-10 | -0.29564 | 0.004 | 0.059 | 4.25E-06 | Opc-G | RP6-91H8.3   |
| TPI1.6         | 2.90E-10 | -0.21062 | 0.884 | 0.865 | 4.33E-06 | Opc-G | TPI1         |
| EI24.7         | 2.91E-10 | 0.169833 | 0.514 | 0.428 | 4.36E-06 | Opc-G | EI24         |
| NEDD9.7        | 2.92E-10 | -0.27051 | 0.123 | 0.227 | 4.36E-06 | Opc-G | NEDD9        |
| TRMT5.2        | 2.93E-10 | 0.158573 | 0.123 | 0.065 | 4.38E-06 | Opc-G | TRMT5        |
| HPSE.9         | 3.01E-10 | -0.25493 | 0.005 | 0.062 | 4.49E-06 | Opc-G | HPSE         |
| ZNF131.8       | 3.03E-10 | 0.219653 | 0.31  | 0.227 | 4.53E-06 | Opc-G | ZNF131       |
| VEZF1.9        | 3.05E-10 | 0.206873 | 0.316 | 0.233 | 4.55E-06 | Opc-G | VEZF1        |
| CYB5A.6        | 3.05E-10 | -0.2827  | 0.221 | 0.349 | 4.56E-06 | Opc-G | CYB5A        |
| GHITM.8        | 3.08E-10 | -0.32497 | 0.407 | 0.531 | 4.61E-06 | Opc-G | GHITM        |
| METTL2B.4      | 3.19E-10 | 0.205969 | 0.273 | 0.193 | 4.76E-06 | Opc-G | METTL2B      |
| EVA1B.5        | 3.20E-10 | -0.13254 | 0.046 | 0.128 | 4.79E-06 | Opc-G | EVA1B        |
| ZNF207.2       | 3.24E-10 | 0.112915 | 0.54  | 0.45  | 4.84E-06 | Opc-G | ZNF207       |
| ITGA7.8        | 3.25E-10 | -0.10498 | 0.055 | 0.142 | 4.86E-06 | Opc-G | ITGA7        |
| EPHX1.5        | 3.37E-10 | -0.2682  | 0.128 | 0.239 | 5.03E-06 | Opc-G | EPHX1        |
| RTN4RL2.3      | 3.40E-10 | 0.101021 | 0.052 | 0.018 | 5.08E-06 | Opc-G | RTN4RL2      |
| IRF2BPL.7      | 3.43E-10 | 0.218888 | 0.317 | 0.236 | 5.13E-06 | Opc-G | IRF2BPL      |
| TRAF3IP2-AS1.3 | 3.50E-10 | 0.207979 | 0.137 | 0.076 | 5.24E-06 | Opc-G | TRAF3IP2-AS1 |
| EEPD1.7        | 3.54E-10 | -0.2009  | 0.014 | 0.075 | 5.29E-06 | Opc-G | EEPD1        |
| UBXN2A.6       | 3.58E-10 | 0.239575 | 0.257 | 0.183 | 5.35E-06 | Opc-G | UBXN2A       |
| SLC50A1.8      | 3.63E-10 | -0.2801  | 0.081 | 0.173 | 5.43E-06 | Opc-G | SLC50A1      |
| PTEN.9         | 3.68E-10 | -0.22337 | 0.053 | 0.134 | 5.50E-06 | Opc-G | PTEN         |
| PTPN4.8        | 3.85E-10 | 0.17067  | 0.167 | 0.098 | 5.75E-06 | Opc-G | PTPN4        |
| OBFC1.4        | 4.01E-10 | -0.21626 | 0.023 | 0.091 | 5.99E-06 | Opc-G | OBFC1        |
| SIPA1L1.3      | 4.34E-10 | -0.16979 | 0.077 | 0.17  | 6.48E-06 | Opc-G | SIPA1L1      |
| HMGN1.6        | 4.37E-10 | 0.100878 | 0.777 | 0.657 | 6.54E-06 | Opc-G | HMGN1        |
| BIRC3.6        | 4.46E-10 | -0.30691 | 0.01  | 0.068 | 6.66E-06 | Opc-G | BIRC3        |
| PHAX.6         | 4.52E-10 | 0.183142 | 0.38  | 0.3   | 6.76E-06 | Opc-G | PHAX         |
| SYP.9          | 4.52E-10 | 0.209806 | 0.206 | 0.129 | 6.76E-06 | Opc-G | SYP          |
| NFE2L3.2       | 4.59E-10 | 0.109427 | 0.07  | 0.028 | 6.86E-06 | Opc-G | NFE2L3       |
| NUDCD3.6       | 4.61E-10 | 0.227576 | 0.273 | 0.193 | 6.88E-06 | Opc-G | NUDCD3       |

|              |          |          |       |       |          |       |               |
|--------------|----------|----------|-------|-------|----------|-------|---------------|
| MBNL1.9      | 4.62E-10 | -0.2545  | 0.127 | 0.23  | 6.90E-06 | Opc-G | MBNL1         |
| FAM20A.9     | 4.62E-10 | -0.22663 | 0.007 | 0.063 | 6.91E-06 | Opc-G | FAM20A        |
| GPX8.9       | 4.64E-10 | -0.11083 | 0.008 | 0.066 | 6.93E-06 | Opc-G | GPX8          |
| EPOR.6       | 4.68E-10 | -0.17286 | 0.012 | 0.073 | 6.99E-06 | Opc-G | EPOR          |
| ARHGAP26.4   | 4.72E-10 | -0.25375 | 0.027 | 0.096 | 7.05E-06 | Opc-G | ARHGAP26      |
| CLECL1.9     | 4.75E-10 | -0.20435 | 0     | 0.051 | 7.10E-06 | Opc-G | CLECL1        |
| NOP58.7      | 4.76E-10 | 0.169975 | 0.377 | 0.286 | 7.11E-06 | Opc-G | NOP58         |
| GNGT2.10     | 4.76E-10 | -0.23714 | 0.003 | 0.056 | 7.11E-06 | Opc-G | GNGT2         |
| WDR12.5      | 4.80E-10 | 0.256949 | 0.209 | 0.138 | 7.18E-06 | Opc-G | WDR12         |
| APOL4.6      | 4.81E-10 | 0.148659 | 0.087 | 0.04  | 7.19E-06 | Opc-G | APOL4         |
| HADHA.6      | 4.82E-10 | 0.128353 | 0.526 | 0.436 | 7.21E-06 | Opc-G | HADHA         |
| BCL7B.6      | 5.04E-10 | 0.185228 | 0.406 | 0.316 | 7.53E-06 | Opc-G | BCL7B         |
| TM7SF2.8     | 5.04E-10 | 0.258457 | 0.303 | 0.226 | 7.54E-06 | Opc-G | TM7SF2        |
| ZNF43.8      | 5.22E-10 | 0.232134 | 0.204 | 0.133 | 7.79E-06 | Opc-G | ZNF43         |
| RIPK2.8      | 5.24E-10 | -0.27113 | 0.083 | 0.174 | 7.83E-06 | Opc-G | RIPK2         |
| HTRA2.5      | 5.25E-10 | 0.246485 | 0.298 | 0.219 | 7.85E-06 | Opc-G | HTRA2         |
| ZNF439.9     | 5.45E-10 | 0.244185 | 0.216 | 0.143 | 8.14E-06 | Opc-G | ZNF439        |
| CFL2.8       | 5.45E-10 | 0.148007 | 0.411 | 0.322 | 8.14E-06 | Opc-G | CFL2          |
| POMC.9       | 5.52E-10 | -0.22376 | 0     | 0.05  | 8.25E-06 | Opc-G | POMC          |
| POU3F2.8     | 5.55E-10 | 0.206693 | 0.299 | 0.21  | 8.30E-06 | Opc-G | POU3F2        |
| MAPK8IP1.5   | 5.78E-10 | 0.234107 | 0.265 | 0.186 | 8.64E-06 | Opc-G | MAPK8IP1      |
| FBXL3.6      | 5.87E-10 | 0.222117 | 0.249 | 0.171 | 8.77E-06 | Opc-G | FBXL3         |
| TAP1.5       | 5.91E-10 | -0.21667 | 0.146 | 0.261 | 8.84E-06 | Opc-G | TAP1          |
| SLC27A1.5    | 5.94E-10 | -0.18398 | 0.075 | 0.166 | 8.87E-06 | Opc-G | SLC27A1       |
| MIR181A1HG.5 | 5.95E-10 | 0.135659 | 0.183 | 0.108 | 8.90E-06 | Opc-G | MIR181A1HG    |
| ZNF649.7     | 6.00E-10 | 0.207402 | 0.148 | 0.086 | 8.97E-06 | Opc-G | ZNF649        |
| TMEM63A.5    | 6.38E-10 | -0.21007 | 0.014 | 0.074 | 9.54E-06 | Opc-G | TMEM63A       |
| PRPS2.5      | 6.47E-10 | -0.20717 | 0.051 | 0.13  | 9.67E-06 | Opc-G | PRPS2         |
| MAN1B1.3     | 6.47E-10 | -0.18992 | 0.122 | 0.228 | 9.67E-06 | Opc-G | MAN1B1        |
| HAPLN1.1     | 6.49E-10 | 0.107233 | 0.03  | 0.008 | 9.70E-06 | Opc-G | HAPLN1        |
| CLHC1.5      | 6.49E-10 | 0.21548  | 0.12  | 0.064 | 9.70E-06 | Opc-G | CLHC1         |
| CCL3L3.7     | 6.54E-10 | -0.64948 | 0.004 | 0.057 | 9.78E-06 | Opc-G | CCL3L3        |
| GOLIM4.6     | 6.67E-10 | 0.213346 | 0.4   | 0.322 | 9.97E-06 | Opc-G | GOLIM4        |
| ITGB5.7      | 6.76E-10 | -0.21697 | 0.005 | 0.06  | 1.01E-05 | Opc-G | ITGB5         |
| NUP214.9     | 6.80E-10 | -0.37039 | 0.109 | 0.201 | 1.02E-05 | Opc-G | NUP214        |
| CDC42EP4.4   | 6.83E-10 | 0.212141 | 0.277 | 0.196 | 1.02E-05 | Opc-G | CDC42EP4      |
| MAP2K1.9     | 6.88E-10 | -0.26545 | 0.168 | 0.275 | 1.03E-05 | Opc-G | MAP2K1        |
| RCAN3.4      | 6.88E-10 | -0.15377 | 0.007 | 0.062 | 1.03E-05 | Opc-G | RCAN3         |
| SPATA13.6    | 6.89E-10 | -0.24154 | 0.081 | 0.17  | 1.03E-05 | Opc-G | SPATA13       |
| CAND2.6      | 6.90E-10 | 0.119398 | 0.061 | 0.024 | 1.03E-05 | Opc-G | CAND2         |
| GIGYF1.3     | 6.92E-10 | 0.175914 | 0.172 | 0.103 | 1.03E-05 | Opc-G | GIGYF1        |
| IQGAP2.4     | 6.97E-10 | -0.14188 | 0.066 | 0.154 | 1.04E-05 | Opc-G | IQGAP2        |
| DNAJC19.7    | 7.10E-10 | 0.130424 | 0.464 | 0.384 | 1.06E-05 | Opc-G | DNAJC19       |
| TRAP1.7      | 7.18E-10 | 0.249397 | 0.325 | 0.254 | 1.07E-05 | Opc-G | TRAP1         |
| ENO1.6       | 7.19E-10 | -0.21926 | 0.81  | 0.793 | 1.07E-05 | Opc-G | ENO1          |
| OSBPL8.6     | 7.19E-10 | -0.21663 | 0.199 | 0.319 | 1.08E-05 | Opc-G | OSBPL8        |
| CCNA2.9      | 7.26E-10 | -0.18469 | 0.005 | 0.06  | 1.08E-05 | Opc-G | CCNA2         |
| NINJ1.10     | 7.51E-10 | -0.37111 | 0.37  | 0.457 | 1.12E-05 | Opc-G | NINJ1         |
| CYHR1.7      | 7.63E-10 | 0.248558 | 0.347 | 0.274 | 1.14E-05 | Opc-G | CYHR1         |
| FARSB.7      | 7.86E-10 | 0.19893  | 0.307 | 0.227 | 1.17E-05 | Opc-G | FARSB         |
| RP11-430H.1  | 8.03E-10 | 0.150222 | 0.079 | 0.035 | 1.20E-05 | Opc-G | RP11-430H10.1 |



|           |          |          |       |       |          |       |            |
|-----------|----------|----------|-------|-------|----------|-------|------------|
| LSM12.5   | 1.37E-09 | -0.18597 | 0.156 | 0.266 | 2.05E-05 | Opc-G | LSM12      |
| TRAF3IP3. | 1.38E-09 | -0.26216 | 0.004 | 0.055 | 2.06E-05 | Opc-G | TRAF3IP3   |
| IMPA2.6   | 1.39E-09 | -0.16364 | 0.008 | 0.063 | 2.08E-05 | Opc-G | IMPA2      |
| ATP2B1.5  | 1.40E-09 | -0.23481 | 0.242 | 0.362 | 2.09E-05 | Opc-G | ATP2B1     |
| COX11.6   | 1.41E-09 | 0.193447 | 0.388 | 0.314 | 2.11E-05 | Opc-G | COX11      |
| ATP6V1B2. | 1.45E-09 | -0.30268 | 0.306 | 0.415 | 2.17E-05 | Opc-G | ATP6V1B2   |
| BCL3.6    | 1.45E-09 | -0.16448 | 0.019 | 0.081 | 2.17E-05 | Opc-G | BCL3       |
| FKBP2.5   | 1.48E-09 | -0.26272 | 0.475 | 0.598 | 2.21E-05 | Opc-G | FKBP2      |
| PYURF.6   | 1.51E-09 | 0.1327   | 0.65  | 0.533 | 2.26E-05 | Opc-G | PYURF      |
| PTPN7.10  | 1.52E-09 | -0.28749 | 0.02  | 0.082 | 2.27E-05 | Opc-G | PTPN7      |
| RAB10.3   | 1.58E-09 | 0.110534 | 0.579 | 0.49  | 2.36E-05 | Opc-G | RAB10      |
| SDS.10    | 1.59E-09 | -0.3241  | 0.008 | 0.062 | 2.37E-05 | Opc-G | SDS        |
| DLEU7.9   | 1.62E-09 | -0.23056 | 0.003 | 0.053 | 2.43E-05 | Opc-G | DLEU7      |
| HK2.7     | 1.64E-09 | -0.21064 | 0.025 | 0.089 | 2.45E-05 | Opc-G | HK2        |
| SGIP1.7   | 1.64E-09 | 0.136674 | 0.097 | 0.047 | 2.46E-05 | Opc-G | SGIP1      |
| LINC00936 | 1.68E-09 | -0.29828 | 0.066 | 0.146 | 2.51E-05 | Opc-G | LINC00936  |
| ACIN1.6   | 1.69E-09 | 0.221775 | 0.335 | 0.26  | 2.52E-05 | Opc-G | ACIN1      |
| SIGLEC14. | 1.69E-09 | -0.21787 | 0     | 0.047 | 2.53E-05 | Opc-G | SIGLEC14   |
| SMCHD1.7  | 1.69E-09 | -0.1797  | 0.098 | 0.193 | 2.53E-05 | Opc-G | SMCHD1     |
| RASGRP1.8 | 1.77E-09 | -0.10544 | 0.014 | 0.072 | 2.65E-05 | Opc-G | RASGRP1    |
| CIR1.3    | 1.79E-09 | 0.14236  | 0.411 | 0.324 | 2.68E-05 | Opc-G | CIR1       |
| THSD4.4   | 1.81E-09 | 0.169158 | 0.059 | 0.023 | 2.70E-05 | Opc-G | THSD4      |
| RAB5A.6   | 1.86E-09 | 0.111145 | 0.53  | 0.442 | 2.79E-05 | Opc-G | RAB5A      |
| IKBKE.9   | 1.89E-09 | -0.19929 | 0.007 | 0.06  | 2.83E-05 | Opc-G | IKBKE      |
| SLC4A7.5  | 1.92E-09 | -0.23998 | 0.123 | 0.22  | 2.87E-05 | Opc-G | SLC4A7     |
| SBK1.10   | 1.93E-09 | 0.185185 | 0.126 | 0.068 | 2.89E-05 | Opc-G | SBK1       |
| ZFP36L2.9 | 1.95E-09 | -0.30463 | 0.434 | 0.521 | 2.91E-05 | Opc-G | ZFP36L2    |
| CCNB1.8   | 1.95E-09 | -0.2628  | 0.029 | 0.095 | 2.91E-05 | Opc-G | CCNB1      |
| CORO1B.9  | 2.00E-09 | -0.29156 | 0.255 | 0.368 | 2.99E-05 | Opc-G | CORO1B     |
| CALCOCO1. | 2.03E-09 | 0.175096 | 0.217 | 0.143 | 3.04E-05 | Opc-G | CALCOCO1   |
| LINC00665 | 2.05E-09 | 0.225392 | 0.253 | 0.182 | 3.07E-05 | Opc-G | LINC00665  |
| DHCR24.7  | 2.06E-09 | -0.14254 | 0.031 | 0.1   | 3.08E-05 | Opc-G | DHCR24     |
| ARID5B.8  | 2.07E-09 | -0.32271 | 0.25  | 0.362 | 3.09E-05 | Opc-G | ARID5B     |
| MPDU1.3   | 2.08E-09 | 0.149331 | 0.392 | 0.312 | 3.11E-05 | Opc-G | MPDU1      |
| RAMP2.9   | 2.08E-09 | 0.272303 | 0.199 | 0.131 | 3.11E-05 | Opc-G | RAMP2      |
| MED30.5   | 2.08E-09 | 0.204353 | 0.329 | 0.248 | 3.11E-05 | Opc-G | MED30      |
| LINC00662 | 2.12E-09 | 0.272033 | 0.25  | 0.178 | 3.18E-05 | Opc-G | LINC00662  |
| C17orf62. | 2.15E-09 | -0.2702  | 0.26  | 0.375 | 3.21E-05 | Opc-G | C17orf62   |
| FOXD1     | 2.17E-09 | 0.158342 | 0.066 | 0.028 | 3.25E-05 | Opc-G | FOXD1      |
| MAP3K13.7 | 2.19E-09 | 0.133016 | 0.474 | 0.388 | 3.27E-05 | Opc-G | MAP3K13    |
| LAP3.8    | 2.21E-09 | -0.28874 | 0.38  | 0.499 | 3.30E-05 | Opc-G | LAP3       |
| SAYS1.2   | 2.21E-09 | -0.16463 | 0.046 | 0.122 | 3.31E-05 | Opc-G | SAYS1      |
| MAP4K5.8  | 2.27E-09 | 0.206587 | 0.223 | 0.15  | 3.40E-05 | Opc-G | MAP4K5     |
| FOSL1.5   | 2.29E-09 | -0.11516 | 0.001 | 0.049 | 3.43E-05 | Opc-G | FOSL1      |
| MR1.8     | 2.29E-09 | -0.22476 | 0.027 | 0.093 | 3.43E-05 | Opc-G | MR1        |
| CERS2.4   | 2.30E-09 | -0.23603 | 0.135 | 0.238 | 3.44E-05 | Opc-G | CERS2      |
| NRG1.2    | 2.33E-09 | 0.139219 | 0.059 | 0.023 | 3.47E-05 | Opc-G | NRG1       |
| ATP6V1A.4 | 2.37E-09 | -0.18035 | 0.108 | 0.205 | 3.54E-05 | Opc-G | ATP6V1A    |
| PHLPP1.1C | 2.42E-09 | 0.167497 | 0.141 | 0.081 | 3.62E-05 | Opc-G | PHLPP1     |
| ST6GALNAC | 2.43E-09 | -0.15154 | 0.052 | 0.13  | 3.63E-05 | Opc-G | ST6GALNAC4 |
| RBM15B.8  | 2.46E-09 | 0.241278 | 0.236 | 0.167 | 3.67E-05 | Opc-G | RBM15B     |





|            |          |          |       |       |          |       |                |
|------------|----------|----------|-------|-------|----------|-------|----------------|
| DCBLD2.9   | 4.21E-09 | -0.15834 | 0.067 | 0.148 | 6.30E-05 | Opc-G | DCBLD2         |
| CYB561.6   | 4.26E-09 | -0.12893 | 0.022 | 0.083 | 6.37E-05 | Opc-G | CYB561         |
| NUDT7      | 4.35E-09 | 0.135127 | 0.067 | 0.029 | 6.50E-05 | Opc-G | NUDT7          |
| ANG.7      | 4.39E-09 | -0.28104 | 0.026 | 0.088 | 6.57E-05 | Opc-G | ANG            |
| LDLRAP1.5  | 4.40E-09 | -0.15784 | 0.008 | 0.06  | 6.58E-05 | Opc-G | LDLRAP1        |
| VPS26A.7   | 4.44E-09 | -0.24071 | 0.148 | 0.249 | 6.63E-05 | Opc-G | VPS26A         |
| PRKAR2B.8  | 4.47E-09 | 0.148478 | 0.122 | 0.065 | 6.68E-05 | Opc-G | PRKAR2B        |
| CDCA3.9    | 4.49E-09 | -0.17422 | 0.005 | 0.055 | 6.71E-05 | Opc-G | CDCA3          |
| ATF5.7     | 4.70E-09 | -0.28523 | 0.109 | 0.199 | 7.03E-05 | Opc-G | ATF5           |
| LRMP.8     | 4.73E-09 | -0.20449 | 0.001 | 0.048 | 7.08E-05 | Opc-G | LRMP           |
| BRSK2.5    | 4.79E-09 | 0.144947 | 0.079 | 0.037 | 7.15E-05 | Opc-G | BRSK2          |
| PLB1.9     | 4.80E-09 | -0.18048 | 0     | 0.045 | 7.18E-05 | Opc-G | PLB1           |
| ETV5.7     | 4.84E-09 | -0.17876 | 0.156 | 0.265 | 7.23E-05 | Opc-G | ETV5           |
| AKIP1.4    | 4.85E-09 | -0.2341  | 0.183 | 0.294 | 7.25E-05 | Opc-G | AKIP1          |
| TMBIM6.5   | 4.96E-09 | -0.24387 | 0.851 | 0.837 | 7.42E-05 | Opc-G | TMBIM6         |
| FAM126B.5  | 4.98E-09 | 0.150007 | 0.208 | 0.135 | 7.44E-05 | Opc-G | FAM126B        |
| MPEG1.8    | 4.98E-09 | -0.18304 | 0     | 0.045 | 7.45E-05 | Opc-G | MPEG1          |
| CCNE2.7    | 5.07E-09 | 0.17502  | 0.107 | 0.055 | 7.58E-05 | Opc-G | CCNE2          |
| PSTPIP2.7  | 5.09E-09 | -0.14498 | 0.001 | 0.047 | 7.61E-05 | Opc-G | PSTPIP2        |
| UNC80.4    | 5.14E-09 | 0.17418  | 0.079 | 0.037 | 7.68E-05 | Opc-G | UNC80          |
| LANCL1.8   | 5.16E-09 | 0.146941 | 0.18  | 0.113 | 7.71E-05 | Opc-G | LANCL1         |
| MALT1.8    | 5.29E-09 | -0.16251 | 0.019 | 0.078 | 7.90E-05 | Opc-G | MALT1          |
| ZNF655.2   | 5.31E-09 | 0.136268 | 0.316 | 0.234 | 7.94E-05 | Opc-G | ZNF655         |
| CREB3L4.2  | 5.38E-09 | 0.171659 | 0.094 | 0.047 | 8.04E-05 | Opc-G | CREB3L4        |
| PAPSS1.5   | 5.43E-09 | 0.19702  | 0.366 | 0.289 | 8.11E-05 | Opc-G | PAPSS1         |
| EDEM2.5    | 5.45E-09 | -0.24635 | 0.143 | 0.247 | 8.15E-05 | Opc-G | EDEM2          |
| QPCT.6     | 5.60E-09 | -0.19236 | 0.003 | 0.05  | 8.36E-05 | Opc-G | QPCT           |
| ZNF524.4   | 5.61E-09 | -0.17494 | 0.101 | 0.194 | 8.38E-05 | Opc-G | ZNF524         |
| LGR4.9     | 5.67E-09 | -0.10028 | 0.037 | 0.106 | 8.48E-05 | Opc-G | LGR4           |
| GPRIN3.1C  | 5.69E-09 | -0.2183  | 0.01  | 0.062 | 8.51E-05 | Opc-G | GPRIN3         |
| NFKBIE.8   | 5.77E-09 | -0.18249 | 0.061 | 0.139 | 8.63E-05 | Opc-G | NFKBIE         |
| LL22NC03-5 | 5.80E-09 | 0.126765 | 0.075 | 0.034 | 8.67E-05 | Opc-G | LL22NC03-2H8.5 |
| VPS72.6    | 5.90E-09 | 0.171186 | 0.347 | 0.271 | 8.82E-05 | Opc-G | VPS72          |
| RAB13.9    | 5.93E-09 | -0.27769 | 0.262 | 0.379 | 8.87E-05 | Opc-G | RAB13          |
| ZC3H6.7    | 5.93E-09 | 0.250667 | 0.21  | 0.143 | 8.87E-05 | Opc-G | ZC3H6          |
| LMBR1.7    | 5.94E-09 | 0.230745 | 0.168 | 0.106 | 8.88E-05 | Opc-G | LMBR1          |
| TRAM1.8    | 5.95E-09 | -0.26036 | 0.321 | 0.441 | 8.89E-05 | Opc-G | TRAM1          |
| GLRX2.3    | 6.22E-09 | -0.1284  | 0.079 | 0.169 | 9.29E-05 | Opc-G | GLRX2          |
| MARCH6.8   | 6.22E-09 | 0.129951 | 0.437 | 0.352 | 9.29E-05 | Opc-G | 6-Mar          |
| C19orf66.6 | 6.39E-09 | -0.19083 | 0.154 | 0.263 | 9.56E-05 | Opc-G | C19orf66       |
| MTHFD1L.9  | 6.46E-09 | -0.19925 | 0.063 | 0.14  | 9.65E-05 | Opc-G | MTHFD1L        |
| RBM5.7     | 6.52E-09 | 0.183009 | 0.351 | 0.274 | 9.74E-05 | Opc-G | RBM5           |
| PRPF6.8    | 6.52E-09 | 0.171611 | 0.423 | 0.348 | 9.75E-05 | Opc-G | PRPF6          |
| MDFIC.4    | 6.63E-09 | -0.11256 | 0.001 | 0.047 | 9.91E-05 | Opc-G | MDFIC          |
| NIPSNAP1.6 | 6.67E-09 | 0.220011 | 0.232 | 0.163 | 9.96E-05 | Opc-G | NIPSNAP1       |
| THYN1.7    | 6.69E-09 | 0.111137 | 0.48  | 0.401 | 9.99E-05 | Opc-G | THYN1          |
| ABR.6      | 6.72E-09 | -0.20039 | 0.07  | 0.15  | 0.0001   | Opc-G | ABR            |
| ARSA.7     | 6.74E-09 | -0.25459 | 0.063 | 0.139 | 0.000101 | Opc-G | ARSA           |
| RP11-725F  | 6.74E-09 | 0.141426 | 0.056 | 0.022 | 0.000101 | Opc-G | RP11-725P16.2  |
| MYOF.7     | 6.81E-09 | -0.1711  | 0.001 | 0.047 | 0.000102 | Opc-G | MYOF           |
| PRKCH.7    | 6.93E-09 | -0.2164  | 0.001 | 0.047 | 0.000104 | Opc-G | PRKCH          |

|            |          |          |       |       |          |       |           |
|------------|----------|----------|-------|-------|----------|-------|-----------|
| NUFIP1.6   | 6.97E-09 | 0.237446 | 0.173 | 0.111 | 0.000104 | Opc-G | NUFIP1    |
| FAS.3      | 7.15E-09 | -0.21939 | 0.015 | 0.071 | 0.000107 | Opc-G | FAS       |
| NUDT22.7   | 7.26E-09 | -0.20615 | 0.164 | 0.277 | 0.000108 | Opc-G | NUDT22    |
| POU2F2.8   | 7.33E-09 | -0.29004 | 0.066 | 0.14  | 0.00011  | Opc-G | POU2F2    |
| WARS.6     | 7.38E-09 | -0.24966 | 0.115 | 0.207 | 0.00011  | Opc-G | WARS      |
| DOCK5.9    | 7.38E-09 | -0.2522  | 0.008 | 0.058 | 0.00011  | Opc-G | DOCK5     |
| CNN2.6     | 7.43E-09 | -0.19211 | 0.015 | 0.07  | 0.000111 | Opc-G | CNN2      |
| TMEM97.7   | 7.44E-09 | 0.262598 | 0.234 | 0.168 | 0.000111 | Opc-G | TMEM97    |
| GLTP.6     | 7.46E-09 | 0.151708 | 0.343 | 0.263 | 0.000111 | Opc-G | GLTP      |
| NDUFV1.4   | 7.49E-09 | 0.11444  | 0.551 | 0.475 | 0.000112 | Opc-G | NDUFV1    |
| SOX15.8    | 7.50E-09 | 0.162268 | 0.122 | 0.067 | 0.000112 | Opc-G | SOX15     |
| RBM7.3     | 7.52E-09 | -0.20733 | 0.145 | 0.249 | 0.000112 | Opc-G | RBM7      |
| ZNF566.7   | 7.59E-09 | 0.164621 | 0.176 | 0.111 | 0.000113 | Opc-G | ZNF566    |
| NFKB1.8    | 7.62E-09 | -0.24256 | 0.041 | 0.108 | 0.000114 | Opc-G | NFKB1     |
| ABHD17B.1  | 7.62E-09 | 0.172656 | 0.189 | 0.12  | 0.000114 | Opc-G | ABHD17B   |
| ITPRIPL2.7 | 7.88E-09 | -0.14124 | 0.019 | 0.077 | 0.000118 | Opc-G | ITPRIPL2  |
| DCTN6.4    | 7.89E-09 | 0.136229 | 0.512 | 0.439 | 0.000118 | Opc-G | DCTN6     |
| CNRIP1.7   | 7.92E-09 | 0.227037 | 0.273 | 0.2   | 0.000118 | Opc-G | CNRIP1    |
| ESYT1.9    | 7.99E-09 | -0.19968 | 0.052 | 0.125 | 0.000119 | Opc-G | ESYT1     |
| GIMAP5.8   | 7.99E-09 | -0.22874 | 0.005 | 0.054 | 0.000119 | Opc-G | GIMAP5    |
| PNPT1.6    | 8.01E-09 | 0.206597 | 0.264 | 0.192 | 0.00012  | Opc-G | PNPT1     |
| TOP2A.10   | 8.07E-09 | -0.29039 | 0.029 | 0.09  | 0.000121 | Opc-G | TOP2A     |
| EPHA4.7    | 8.07E-09 | 0.197046 | 0.133 | 0.078 | 0.000121 | Opc-G | EPHA4     |
| DOLPP1.6   | 8.50E-09 | 0.179656 | 0.158 | 0.098 | 0.000127 | Opc-G | DOLPP1    |
| CCDC93.6   | 8.54E-09 | 0.212964 | 0.189 | 0.123 | 0.000128 | Opc-G | CCDC93    |
| FAM89B.9   | 8.63E-09 | 0.222699 | 0.311 | 0.242 | 0.000129 | Opc-G | FAM89B    |
| TMEM144.5  | 8.66E-09 | -0.40142 | 0.023 | 0.081 | 0.000129 | Opc-G | TMEM144   |
| LBR.6      | 8.73E-09 | 0.176537 | 0.307 | 0.227 | 0.00013  | Opc-G | LBR       |
| SLC39A11.8 | 8.83E-09 | -0.15472 | 0.019 | 0.077 | 0.000132 | Opc-G | SLC39A11  |
| ZNF292.7   | 8.95E-09 | 0.212905 | 0.335 | 0.259 | 0.000134 | Opc-G | ZNF292    |
| UBE2E2.5   | 8.98E-09 | 0.108406 | 0.331 | 0.234 | 0.000134 | Opc-G | UBE2E2    |
| COQ7.7     | 9.03E-09 | 0.204725 | 0.255 | 0.183 | 0.000135 | Opc-G | COQ7      |
| CD72.7     | 9.05E-09 | -0.19823 | 0.005 | 0.053 | 0.000135 | Opc-G | CD72      |
| PDGFB.7    | 9.10E-09 | -0.22449 | 0.003 | 0.049 | 0.000136 | Opc-G | PDGFB     |
| GRB14      | 9.29E-09 | 0.11975  | 0.064 | 0.028 | 0.000139 | Opc-G | GRB14     |
| STX3.3     | 9.32E-09 | -0.17836 | 0.02  | 0.079 | 0.000139 | Opc-G | STX3      |
| CARD8.9    | 9.34E-09 | -0.27881 | 0.075 | 0.153 | 0.00014  | Opc-G | CARD8     |
| EIF2B1.5   | 9.41E-09 | 0.195723 | 0.35  | 0.278 | 0.000141 | Opc-G | EIF2B1    |
| CDC42.6    | 9.51E-09 | -0.26261 | 0.545 | 0.626 | 0.000142 | Opc-G | CDC42     |
| ITPKB.3    | 9.57E-09 | -0.1734  | 0.019 | 0.077 | 0.000143 | Opc-G | ITPKB     |
| PNPO.6     | 9.59E-09 | -0.19245 | 0.023 | 0.082 | 0.000143 | Opc-G | PNPO      |
| METTL5.4   | 9.67E-09 | 0.139689 | 0.433 | 0.355 | 0.000144 | Opc-G | METTL5    |
| IKBKG.5    | 9.78E-09 | -0.16708 | 0.061 | 0.138 | 0.000146 | Opc-G | IKBKG     |
| COR07.9    | 9.78E-09 | 0.13694  | 0.232 | 0.153 | 0.000146 | Opc-G | COR07     |
| MAST1.3    | 1.00E-08 | 0.138081 | 0.087 | 0.043 | 0.00015  | Opc-G | MAST1     |
| KIAA1211L  | 1.02E-08 | -0.10494 | 0.008 | 0.059 | 0.000152 | Opc-G | KIAA1211L |
| C16orf13   | 1.03E-08 | 0.145494 | 0.537 | 0.455 | 0.000153 | Opc-G | C16orf13  |
| EVI5.3     | 1.04E-08 | -0.13707 | 0.098 | 0.19  | 0.000156 | Opc-G | EVI5      |
| HAT1.5     | 1.07E-08 | 0.169303 | 0.367 | 0.292 | 0.00016  | Opc-G | HAT1      |
| DERL2.6    | 1.10E-08 | -0.26352 | 0.242 | 0.359 | 0.000164 | Opc-G | DERL2     |
| RAC3.9     | 1.11E-08 | 0.255084 | 0.246 | 0.179 | 0.000166 | Opc-G | RAC3      |

|            |          |          |       |       |          |       |              |
|------------|----------|----------|-------|-------|----------|-------|--------------|
| ID3.9      | 1.11E-08 | -0.48218 | 0.182 | 0.27  | 0.000167 | Opc-G | ID3          |
| JAM3.6     | 1.13E-08 | 0.192318 | 0.212 | 0.145 | 0.000169 | Opc-G | JAM3         |
| MYCBP.6    | 1.14E-08 | -0.19031 | 0.033 | 0.097 | 0.000171 | Opc-G | MYCBP        |
| ZFP82.7    | 1.15E-08 | 0.203478 | 0.167 | 0.105 | 0.000172 | Opc-G | ZFP82        |
| PRSS23.8   | 1.15E-08 | -0.25163 | 0.023 | 0.081 | 0.000172 | Opc-G | PRSS23       |
| SPOP.7     | 1.15E-08 | 0.209049 | 0.376 | 0.304 | 0.000172 | Opc-G | SPOP         |
| NINJ2.9    | 1.17E-08 | -0.37561 | 0.031 | 0.091 | 0.000175 | Opc-G | NINJ2        |
| MAP3K2.4   | 1.18E-08 | -0.17068 | 0.113 | 0.206 | 0.000177 | Opc-G | MAP3K2       |
| ZMYND15.7  | 1.21E-08 | -0.16579 | 0.01  | 0.06  | 0.000181 | Opc-G | ZMYND15      |
| MORF4L1.3  | 1.21E-08 | -0.22232 | 0.725 | 0.746 | 0.000181 | Opc-G | MORF4L1      |
| RAB27A.7   | 1.22E-08 | -0.21724 | 0.023 | 0.082 | 0.000182 | Opc-G | RAB27A       |
| CCDC25.7   | 1.23E-08 | 0.203777 | 0.365 | 0.292 | 0.000184 | Opc-G | CCDC25       |
| TMC8.8     | 1.23E-08 | -0.19053 | 0.001 | 0.045 | 0.000184 | Opc-G | TMC8         |
| ARMCX5.5   | 1.23E-08 | 0.130241 | 0.127 | 0.071 | 0.000184 | Opc-G | ARMCX5       |
| PRDX3.8    | 1.24E-08 | -0.28579 | 0.351 | 0.474 | 0.000186 | Opc-G | PRDX3        |
| LMCD1.6    | 1.25E-08 | -0.11932 | 0.027 | 0.089 | 0.000187 | Opc-G | LMCD1        |
| C21orf62.1 | 1.28E-08 | -0.15142 | 0.079 | 0.163 | 0.000191 | Opc-G | C21orf62     |
| MYLK.7     | 1.29E-08 | -0.20512 | 0.011 | 0.062 | 0.000193 | Opc-G | MYLK         |
| ANAPC7.6   | 1.32E-08 | 0.227826 | 0.234 | 0.168 | 0.000198 | Opc-G | ANAPC7       |
| ERICH1.6   | 1.34E-08 | -0.20404 | 0.171 | 0.279 | 0.0002   | Opc-G | ERICH1       |
| MAP7D3.3   | 1.34E-08 | -0.14633 | 0.049 | 0.122 | 0.0002   | Opc-G | MAP7D3       |
| GRB2.10    | 1.36E-08 | -0.24544 | 0.392 | 0.486 | 0.000203 | Opc-G | GRB2         |
| OSGEPL1.4  | 1.36E-08 | 0.152871 | 0.117 | 0.065 | 0.000204 | Opc-G | OSGEPL1      |
| PNMAL1.8   | 1.38E-08 | 0.200415 | 0.15  | 0.092 | 0.000206 | Opc-G | PNMAL1       |
| COPZ2.3    | 1.38E-08 | -0.1113  | 0.008 | 0.058 | 0.000207 | Opc-G | COPZ2        |
| MTHFD2L.5  | 1.39E-08 | 0.252629 | 0.268 | 0.202 | 0.000207 | Opc-G | MTHFD2L      |
| ABRACL.8   | 1.39E-08 | -0.27625 | 0.209 | 0.311 | 0.000208 | Opc-G | ABRACL       |
| MAP3K5.5   | 1.39E-08 | -0.13479 | 0.005 | 0.053 | 0.000208 | Opc-G | MAP3K5       |
| PTPRA.7    | 1.41E-08 | 0.151354 | 0.445 | 0.348 | 0.000211 | Opc-G | PTPRA        |
| DENND2D.6  | 1.41E-08 | -0.1857  | 0.003 | 0.048 | 0.000211 | Opc-G | DENND2D      |
| IL1ORB-AS  | 1.44E-08 | -0.21354 | 0.003 | 0.047 | 0.000215 | Opc-G | IL1ORB-AS1   |
| MAPK8IP2.1 | 1.47E-08 | 0.156877 | 0.082 | 0.04  | 0.000219 | Opc-G | MAPK8IP2     |
| CTNNAL1.8  | 1.47E-08 | 0.230116 | 0.208 | 0.143 | 0.00022  | Opc-G | CTNNAL1      |
| PSRC1.7    | 1.48E-08 | -0.20163 | 0.161 | 0.271 | 0.000221 | Opc-G | PSRC1        |
| SEMA6C.1   | 1.50E-08 | 0.108051 | 0.067 | 0.029 | 0.000223 | Opc-G | SEMA6C       |
| ADH5.7     | 1.50E-08 | 0.138087 | 0.455 | 0.384 | 0.000225 | Opc-G | ADH5         |
| SYT6.5     | 1.51E-08 | 0.108669 | 0.094 | 0.047 | 0.000226 | Opc-G | SYT6         |
| WDR18.7    | 1.52E-08 | 0.203556 | 0.351 | 0.282 | 0.000227 | Opc-G | WDR18        |
| PRKDC.6    | 1.52E-08 | 0.213051 | 0.357 | 0.288 | 0.000228 | Opc-G | PRKDC        |
| BNIP2.9    | 1.53E-08 | -0.23119 | 0.169 | 0.27  | 0.000228 | Opc-G | BNIP2        |
| CHERP.6    | 1.61E-08 | 0.189134 | 0.235 | 0.164 | 0.000241 | Opc-G | CHERP        |
| TNKS2.5    | 1.62E-08 | -0.14927 | 0.045 | 0.114 | 0.000241 | Opc-G | TNKS2        |
| NCOA4.10   | 1.62E-08 | -0.26247 | 0.171 | 0.269 | 0.000242 | Opc-G | NCOA4        |
| ROM1.8     | 1.64E-08 | -0.15945 | 0.046 | 0.118 | 0.000245 | Opc-G | ROM1         |
| PLA2G7.8   | 1.65E-08 | -0.208   | 0.007 | 0.054 | 0.000246 | Opc-G | PLA2G7       |
| TMEM161B-  | 1.66E-08 | 0.147162 | 0.373 | 0.283 | 0.000248 | Opc-G | TMEM161B-AS1 |
| MBD2.4     | 1.67E-08 | -0.14594 | 0.015 | 0.068 | 0.000249 | Opc-G | MBD2         |
| C7orf60.3  | 1.67E-08 | 0.153077 | 0.122 | 0.068 | 0.00025  | Opc-G | C7orf60      |
| NUSAP1.9   | 1.71E-08 | -0.30785 | 0.044 | 0.108 | 0.000255 | Opc-G | NUSAP1       |
| ATF7IP2.9  | 1.72E-08 | -0.20849 | 0.001 | 0.044 | 0.000257 | Opc-G | ATF7IP2      |
| TAGLN.6    | 1.73E-08 | -0.44517 | 0.019 | 0.074 | 0.000258 | Opc-G | TAGLN        |

|            |           |           |        |        |           |       |            |
|------------|-----------|-----------|--------|--------|-----------|-------|------------|
| TAPBPL. 6  | 1. 74E-08 | -0. 22263 | 0. 055 | 0. 127 | 0. 00026  | Opc-G | TAPBPL     |
| ACTA2. 5   | 1. 75E-08 | -0. 17328 | 0. 007 | 0. 055 | 0. 000261 | Opc-G | ACTA2      |
| ANXA2R. 9  | 1. 75E-08 | 0. 210298 | 0. 216 | 0. 148 | 0. 000262 | Opc-G | ANXA2R     |
| UCP2. 10   | 1. 75E-08 | -0. 4607  | 0. 206 | 0. 277 | 0. 000262 | Opc-G | UCP2       |
| FAM131B. 8 | 1. 76E-08 | 0. 160378 | 0. 127 | 0. 072 | 0. 000262 | Opc-G | FAM131B    |
| SRSF1. 5   | 1. 77E-08 | 0. 132412 | 0. 464 | 0. 393 | 0. 000264 | Opc-G | SRSF1      |
| ARSG. 3    | 1. 77E-08 | -0. 18756 | 0. 029 | 0. 089 | 0. 000264 | Opc-G | ARSG       |
| SHOC2. 4   | 1. 77E-08 | -0. 18225 | 0. 077 | 0. 156 | 0. 000264 | Opc-G | SHOC2      |
| ATG16L2. 9 | 1. 81E-08 | -0. 2001  | 0. 03  | 0. 091 | 0. 000271 | Opc-G | ATG16L2    |
| PITPNA-AS  | 1. 83E-08 | 0. 225201 | 0. 258 | 0. 191 | 0. 000273 | Opc-G | PITPNA-AS1 |
| OBSL1. 8   | 1. 84E-08 | 0. 238172 | 0. 205 | 0. 142 | 0. 000275 | Opc-G | OBSL1      |
| PDIA3. 10  | 1. 86E-08 | -0. 23154 | 0. 51  | 0. 588 | 0. 000278 | Opc-G | PDIA3      |
| AP1B1. 10  | 1. 87E-08 | -0. 27857 | 0. 172 | 0. 264 | 0. 000279 | Opc-G | AP1B1      |
| TUSC1. 6   | 1. 88E-08 | 0. 120517 | 0. 133 | 0. 075 | 0. 000281 | Opc-G | TUSC1      |
| XAF1. 5    | 1. 90E-08 | -0. 23543 | 0. 045 | 0. 113 | 0. 000284 | Opc-G | XAF1       |
| NHSL1. 4   | 1. 96E-08 | 0. 183399 | 0. 16  | 0. 099 | 0. 000293 | Opc-G | NHSL1      |
| IGF2BP3. 8 | 1. 97E-08 | 0. 210694 | 0. 161 | 0. 104 | 0. 000295 | Opc-G | IGF2BP3    |
| TBRG4. 7   | 1. 97E-08 | 0. 186742 | 0. 306 | 0. 233 | 0. 000295 | Opc-G | TBRG4      |
| PDCD7. 5   | 1. 98E-08 | 0. 242459 | 0. 28  | 0. 217 | 0. 000295 | Opc-G | PDCD7      |
| GRAMD1A. 7 | 1. 98E-08 | 0. 201808 | 0. 342 | 0. 27  | 0. 000296 | Opc-G | GRAMD1A    |
| SPN. 10    | 2. 00E-08 | -0. 21723 | 0. 01  | 0. 059 | 0. 000299 | Opc-G | SPN        |
| ASF1B. 7   | 2. 02E-08 | -0. 16236 | 0. 012 | 0. 063 | 0. 000302 | Opc-G | ASF1B      |
| DTD2. 5    | 2. 02E-08 | 0. 221826 | 0. 119 | 0. 068 | 0. 000302 | Opc-G | DTD2       |
| ZNF883. 9  | 2. 10E-08 | 0. 228842 | 0. 199 | 0. 137 | 0. 000313 | Opc-G | ZNF883     |
| MTHFS. 7   | 2. 10E-08 | -0. 22383 | 0. 108 | 0. 194 | 0. 000314 | Opc-G | MTHFS      |
| KCNQ1. 9   | 2. 12E-08 | -0. 17585 | 0      | 0. 041 | 0. 000316 | Opc-G | KCNQ1      |
| POM121. 4  | 2. 12E-08 | 0. 188076 | 0. 22  | 0. 153 | 0. 000318 | Opc-G | POM121     |
| KIAA0226L  | 2. 15E-08 | 0. 103603 | 0. 153 | 0. 091 | 0. 000321 | Opc-G | KIAA0226L  |
| SLC9A9. 9  | 2. 15E-08 | -0. 25416 | 0. 025 | 0. 082 | 0. 000322 | Opc-G | SLC9A9     |
| PTP4A2. 7  | 2. 17E-08 | -0. 23132 | 0. 369 | 0. 458 | 0. 000324 | Opc-G | PTP4A2     |
| SNRNP27. 4 | 2. 27E-08 | 0. 136535 | 0. 418 | 0. 348 | 0. 00034  | Opc-G | SNRNP27    |
| SRGAP2. 7  | 2. 28E-08 | -0. 30264 | 0. 149 | 0. 238 | 0. 000341 | Opc-G | SRGAP2     |
| CSNK1D. 7  | 2. 32E-08 | -0. 20574 | 0. 25  | 0. 367 | 0. 000346 | Opc-G | CSNK1D     |
| JOSD1. 9   | 2. 32E-08 | -0. 18606 | 0. 082 | 0. 163 | 0. 000346 | Opc-G | JOSD1      |
| RUNX3. 8   | 2. 36E-08 | -0. 1862  | 0      | 0. 041 | 0. 000353 | Opc-G | RUNX3      |
| ZNF519. 2  | 2. 37E-08 | 0. 121515 | 0. 081 | 0. 039 | 0. 000354 | Opc-G | ZNF519     |
| ZNF276. 3  | 2. 37E-08 | 0. 164478 | 0. 143 | 0. 086 | 0. 000355 | Opc-G | ZNF276     |
| CENPE. 9   | 2. 41E-08 | -0. 18767 | 0. 01  | 0. 058 | 0. 00036  | Opc-G | CENPE      |
| RAB8A. 6   | 2. 43E-08 | -0. 25956 | 0. 251 | 0. 363 | 0. 000362 | Opc-G | RAB8A      |
| ADRB2. 8   | 2. 46E-08 | -0. 23134 | 0. 004 | 0. 049 | 0. 000368 | Opc-G | ADRB2      |
| MAPK3. 4   | 2. 47E-08 | -0. 19807 | 0. 119 | 0. 213 | 0. 00037  | Opc-G | MAPK3      |
| C7orf43. 4 | 2. 49E-08 | 0. 161328 | 0. 117 | 0. 066 | 0. 000372 | Opc-G | C7orf43    |
| DAP. 6     | 2. 49E-08 | -0. 19292 | 0. 179 | 0. 283 | 0. 000373 | Opc-G | DAP        |
| ECHS1. 5   | 2. 50E-08 | -0. 26612 | 0. 331 | 0. 441 | 0. 000373 | Opc-G | ECHS1      |
| RB1CC1. 8  | 2. 50E-08 | 0. 216891 | 0. 343 | 0. 272 | 0. 000373 | Opc-G | RB1CC1     |
| GLDC. 6    | 2. 53E-08 | 0. 198501 | 0. 115 | 0. 065 | 0. 000378 | Opc-G | GLDC       |
| RNF135. 10 | 2. 54E-08 | -0. 21701 | 0. 048 | 0. 115 | 0. 000379 | Opc-G | RNF135     |
| GNPTAB. 4  | 2. 54E-08 | -0. 21082 | 0. 082 | 0. 161 | 0. 00038  | Opc-G | GNPTAB     |
| TFDP1. 5   | 2. 56E-08 | -0. 12299 | 0. 105 | 0. 197 | 0. 000382 | Opc-G | TFDP1      |
| KIF2C. 8   | 2. 59E-08 | -0. 1358  | 0. 003 | 0. 046 | 0. 000387 | Opc-G | KIF2C      |
| KANSL1-AS  | 2. 62E-08 | -0. 12741 | 0. 107 | 0. 199 | 0. 000391 | Opc-G | KANSL1-AS1 |

|            |           |           |        |        |           |       |                |
|------------|-----------|-----------|--------|--------|-----------|-------|----------------|
| ADAM8. 8   | 2. 62E-08 | -0. 19135 | 0. 003 | 0. 046 | 0. 000391 | Opc-G | ADAM8          |
| SMO. 6     | 2. 63E-08 | 0. 169617 | 0. 093 | 0. 049 | 0. 000393 | Opc-G | SMO            |
| HSD17B8. 3 | 2. 63E-08 | -0. 15839 | 0. 037 | 0. 102 | 0. 000393 | Opc-G | HSD17B8        |
| HIST2H2AA  | 2. 65E-08 | -0. 22307 | 0. 015 | 0. 066 | 0. 000396 | Opc-G | HIST2H2AA3     |
| DNAJC4. 6  | 2. 69E-08 | -0. 18647 | 0. 137 | 0. 234 | 0. 000402 | Opc-G | DNAJC4         |
| ADAM19. 6  | 2. 70E-08 | -0. 10975 | 0. 025 | 0. 083 | 0. 000403 | Opc-G | ADAM19         |
| PRDM2. 3   | 2. 72E-08 | 0. 149339 | 0. 213 | 0. 144 | 0. 000406 | Opc-G | PRDM2          |
| ATP8B4. 8  | 2. 72E-08 | -0. 18888 | 0. 003 | 0. 046 | 0. 000406 | Opc-G | ATP8B4         |
| REEP5. 8   | 2. 72E-08 | -0. 29653 | 0. 488 | 0. 591 | 0. 000407 | Opc-G | REEP5          |
| EIF2B4. 5  | 2. 73E-08 | 0. 186418 | 0. 253 | 0. 183 | 0. 000408 | Opc-G | EIF2B4         |
| JKAMP. 4   | 2. 76E-08 | 0. 164609 | 0. 365 | 0. 295 | 0. 000413 | Opc-G | JKAMP          |
| HOMER1. 9  | 2. 78E-08 | -0. 11555 | 0. 079 | 0. 162 | 0. 000415 | Opc-G | HOMER1         |
| CYLD. 6    | 2. 80E-08 | -0. 24435 | 0. 09  | 0. 17  | 0. 000418 | Opc-G | CYLD           |
| YLPM1. 3   | 2. 84E-08 | 0. 20179  | 0. 172 | 0. 111 | 0. 000424 | Opc-G | YLPM1          |
| CHD3. 6    | 2. 86E-08 | 0. 16695  | 0. 176 | 0. 111 | 0. 000427 | Opc-G | CHD3           |
| MYL6. 6    | 2. 89E-08 | -0. 20037 | 0. 975 | 0. 939 | 0. 000432 | Opc-G | MYL6           |
| ARHGAP20.  | 2. 92E-08 | -0. 10375 | 0. 012 | 0. 063 | 0. 000436 | Opc-G | ARHGAP20       |
| LSM2. 5    | 2. 93E-08 | 0. 102945 | 0. 531 | 0. 442 | 0. 000437 | Opc-G | LSM2           |
| EN2. 1     | 2. 93E-08 | 0. 10862  | 0. 055 | 0. 022 | 0. 000437 | Opc-G | EN2            |
| CCDC57. 1C | 2. 94E-08 | -0. 21824 | 0. 045 | 0. 111 | 0. 000439 | Opc-G | CCDC57         |
| TLR5. 7    | 3. 00E-08 | -0. 22619 | 0. 004 | 0. 048 | 0. 000449 | Opc-G | TLR5           |
| B4GALT4. 3 | 3. 01E-08 | -0. 14227 | 0. 066 | 0. 143 | 0. 000449 | Opc-G | B4GALT4        |
| CAPN10. 4  | 3. 03E-08 | 0. 189021 | 0. 138 | 0. 083 | 0. 000453 | Opc-G | CAPN10         |
| PAAF1. 6   | 3. 04E-08 | 0. 199083 | 0. 264 | 0. 195 | 0. 000454 | Opc-G | PAAF1          |
| TSHZ2. 8   | 3. 04E-08 | 0. 102199 | 0. 093 | 0. 047 | 0. 000455 | Opc-G | TSHZ2          |
| PHLDA2. 4  | 3. 06E-08 | -0. 12648 | 0. 007 | 0. 053 | 0. 000458 | Opc-G | PHLDA2         |
| AP2S1. 8   | 3. 07E-08 | -0. 24593 | 0. 623 | 0. 663 | 0. 000458 | Opc-G | AP2S1          |
| BBX. 6     | 3. 07E-08 | 0. 150502 | 0. 473 | 0. 402 | 0. 000459 | Opc-G | BBX            |
| DOK3. 10   | 3. 11E-08 | -0. 19093 | 0. 016 | 0. 069 | 0. 000464 | Opc-G | DOK3           |
| VRK2. 9    | 3. 14E-08 | -0. 19269 | 0. 01  | 0. 058 | 0. 00047  | Opc-G | VRK2           |
| SLC25A13.  | 3. 15E-08 | 0. 189655 | 0. 187 | 0. 123 | 0. 00047  | Opc-G | SLC25A13       |
| RNF19A. 9  | 3. 16E-08 | -0. 18089 | 0. 116 | 0. 208 | 0. 000473 | Opc-G | RNF19A         |
| APOBR. 9   | 3. 18E-08 | -0. 17283 | 0      | 0. 04  | 0. 000475 | Opc-G | APOBR          |
| SLC16A4. 3 | 3. 18E-08 | -0. 10128 | 0. 014 | 0. 065 | 0. 000475 | Opc-G | SLC16A4        |
| AK2. 6     | 3. 28E-08 | -0. 26989 | 0. 28  | 0. 398 | 0. 000491 | Opc-G | AK2            |
| UBTF. 7    | 3. 29E-08 | 0. 21846  | 0. 288 | 0. 222 | 0. 000491 | Opc-G | UBTF           |
| AIDA. 5    | 3. 36E-08 | -0. 25857 | 0. 149 | 0. 241 | 0. 000503 | Opc-G | AIDA           |
| REEP1. 10  | 3. 38E-08 | 0. 14424  | 0. 134 | 0. 077 | 0. 000505 | Opc-G | REEP1          |
| BAZ1B. 9   | 3. 38E-08 | 0. 202331 | 0. 361 | 0. 294 | 0. 000506 | Opc-G | BAZ1B          |
| IL6. 4     | 3. 42E-08 | -0. 20548 | 0. 001 | 0. 043 | 0. 000512 | Opc-G | IL6            |
| ARPC2. 8   | 3. 43E-08 | -0. 20529 | 0. 787 | 0. 773 | 0. 000513 | Opc-G | ARPC2          |
| GIMAP2. 9  | 3. 45E-08 | -0. 26181 | 0. 025 | 0. 08  | 0. 000515 | Opc-G | GIMAP2         |
| DYNC1LI1.  | 3. 45E-08 | 0. 174864 | 0. 339 | 0. 262 | 0. 000515 | Opc-G | DYNC1LI1       |
| PPP2R5A. 2 | 3. 48E-08 | -0. 12802 | 0. 048 | 0. 117 | 0. 000521 | Opc-G | PPP2R5A        |
| SAA2. 7    | 3. 49E-08 | -0. 64857 | 0. 008 | 0. 055 | 0. 000522 | Opc-G | SAA2           |
| SEPP1. 6   | 3. 55E-08 | -0. 5025  | 0. 253 | 0. 334 | 0. 000531 | Opc-G | SEPP1          |
| CTD-2035E  | 3. 61E-08 | 0. 117849 | 0. 074 | 0. 035 | 0. 000539 | Opc-G | CTD-2035E11. 3 |
| RHN01. 5   | 3. 64E-08 | -0. 17253 | 0. 111 | 0. 201 | 0. 000543 | Opc-G | RHN01          |
| ASL. 7     | 3. 66E-08 | -0. 24318 | 0. 094 | 0. 176 | 0. 000546 | Opc-G | ASL            |
| MPHOSPH8.  | 3. 70E-08 | 0. 105338 | 0. 47  | 0. 394 | 0. 000553 | Opc-G | MPHOSPH8       |
| SYNCRIP. 7 | 3. 71E-08 | 0. 151303 | 0. 452 | 0. 379 | 0. 000554 | Opc-G | SYNCRIP        |

|            |           |           |        |        |           |       |                |
|------------|-----------|-----------|--------|--------|-----------|-------|----------------|
| TBC1D2B. 8 | 3. 75E-08 | -0. 18764 | 0. 008 | 0. 055 | 0. 00056  | Opc-G | TBC1D2B        |
| MSL3. 1    | 3. 76E-08 | -0. 21233 | 0. 075 | 0. 152 | 0. 000562 | Opc-G | MSL3           |
| RP11-386I  | 3. 77E-08 | -0. 25718 | 0. 018 | 0. 07  | 0. 000564 | Opc-G | RP11-386I14. 4 |
| CASP8. 9   | 3. 78E-08 | -0. 17341 | 0. 005 | 0. 05  | 0. 000564 | Opc-G | CASP8          |
| ECT2. 7    | 3. 79E-08 | -0. 13172 | 0. 007 | 0. 052 | 0. 000566 | Opc-G | ECT2           |
| ZC4H2. 6   | 3. 84E-08 | 0. 119198 | 0. 096 | 0. 049 | 0. 000573 | Opc-G | ZC4H2          |
| Clorf123.  | 3. 86E-08 | 0. 151442 | 0. 407 | 0. 336 | 0. 000577 | Opc-G | Clorf123       |
| WBP1L. 8   | 3. 91E-08 | -0. 224   | 0. 048 | 0. 113 | 0. 000584 | Opc-G | WBP1L          |
| TMEM52B. 1 | 3. 91E-08 | -0. 21912 | 0. 005 | 0. 05  | 0. 000584 | Opc-G | TMEM52B        |
| PHF20L1. 9 | 3. 91E-08 | 0. 215253 | 0. 366 | 0. 304 | 0. 000585 | Opc-G | PHF20L1        |
| SOCS6. 6   | 3. 94E-08 | -0. 21123 | 0. 141 | 0. 236 | 0. 000589 | Opc-G | SOCS6          |
| NSD1. 5    | 3. 98E-08 | 0. 195962 | 0. 296 | 0. 228 | 0. 000594 | Opc-G | NSD1           |
| NACC1. 4   | 4. 02E-08 | -0. 10967 | 0. 075 | 0. 156 | 0. 000601 | Opc-G | NACC1          |
| PHIP. 6    | 4. 04E-08 | 0. 156626 | 0. 402 | 0. 327 | 0. 000604 | Opc-G | PHIP           |
| ASNS. 10   | 4. 06E-08 | 0. 142774 | 0. 25  | 0. 172 | 0. 000607 | Opc-G | ASNS           |
| SERTAD1. 6 | 4. 08E-08 | -0. 31052 | 0. 221 | 0. 322 | 0. 00061  | Opc-G | SERTAD1        |
| REX02. 9   | 4. 09E-08 | -0. 30768 | 0. 22  | 0. 325 | 0. 000611 | Opc-G | REX02          |
| POMT1. 7   | 4. 10E-08 | 0. 210459 | 0. 195 | 0. 133 | 0. 000613 | Opc-G | POMT1          |
| STXBP3. 4  | 4. 12E-08 | -0. 20438 | 0. 111 | 0. 199 | 0. 000615 | Opc-G | STXBP3         |
| AC109826.  | 4. 12E-08 | -0. 1882  | 0      | 0. 04  | 0. 000615 | Opc-G | AC109826. 1    |
| NLGN4X. 8  | 4. 13E-08 | 0. 209181 | 0. 158 | 0. 102 | 0. 000618 | Opc-G | NLGN4X         |
| PAQR6. 8   | 4. 14E-08 | 0. 145741 | 0. 122 | 0. 069 | 0. 000618 | Opc-G | PAQR6          |
| GPR108. 6  | 4. 18E-08 | -0. 20738 | 0. 167 | 0. 272 | 0. 000624 | Opc-G | GPR108         |
| SSRP1. 8   | 4. 18E-08 | 0. 172636 | 0. 419 | 0. 35  | 0. 000624 | Opc-G | SSRP1          |
| PPFIBP1. 7 | 4. 25E-08 | -0. 12101 | 0. 079 | 0. 161 | 0. 000636 | Opc-G | PPFIBP1        |
| ACBD5. 5   | 4. 27E-08 | -0. 14262 | 0. 089 | 0. 173 | 0. 000638 | Opc-G | ACBD5          |
| KIF16B. 1  | 4. 31E-08 | -0. 12173 | 0. 014 | 0. 064 | 0. 000645 | Opc-G | KIF16B         |
| GJB2. 6    | 4. 37E-08 | -0. 17438 | 0. 007 | 0. 052 | 0. 000653 | Opc-G | GJB2           |
| SNX20. 9   | 4. 39E-08 | -0. 16799 | 0. 004 | 0. 047 | 0. 000657 | Opc-G | SNX20          |
| IL15. 8    | 4. 43E-08 | -0. 16847 | 0      | 0. 039 | 0. 000662 | Opc-G | IL15           |
| TIPARP. 7  | 4. 44E-08 | -0. 24465 | 0. 094 | 0. 174 | 0. 000664 | Opc-G | TIPARP         |
| PJA1. 8    | 4. 48E-08 | 0. 20501  | 0. 258 | 0. 188 | 0. 000669 | Opc-G | PJA1           |
| PRKCB. 9   | 4. 60E-08 | -0. 15671 | 0. 003 | 0. 045 | 0. 000688 | Opc-G | PRKCB          |
| LRP5. 3    | 4. 68E-08 | 0. 174647 | 0. 092 | 0. 048 | 0. 0007   | Opc-G | LRP5           |
| FGF1. 8    | 4. 73E-08 | -0. 15429 | 0. 036 | 0. 098 | 0. 000707 | Opc-G | FGF1           |
| ZBTB2. 4   | 4. 74E-08 | 0. 166854 | 0. 12  | 0. 069 | 0. 000708 | Opc-G | ZBTB2          |
| DALRD3. 6  | 4. 75E-08 | -0. 13753 | 0. 087 | 0. 17  | 0. 00071  | Opc-G | DALRD3         |
| CELF3. 10  | 4. 76E-08 | 0. 139452 | 0. 115 | 0. 063 | 0. 000711 | Opc-G | CELF3          |
| PSEN2. 4   | 4. 77E-08 | -0. 13975 | 0. 048 | 0. 116 | 0. 000713 | Opc-G | PSEN2          |
| SELL. 6    | 4. 77E-08 | -0. 20835 | 0      | 0. 039 | 0. 000713 | Opc-G | SELL           |
| ASNSD1. 8  | 4. 80E-08 | 0. 162731 | 0. 336 | 0. 267 | 0. 000717 | Opc-G | ASNSD1         |
| SEMA4A. 8  | 4. 86E-08 | -0. 16199 | 0. 007 | 0. 052 | 0. 000726 | Opc-G | SEMA4A         |
| HOXC10. 8  | 4. 87E-08 | 0. 143113 | 0. 097 | 0. 051 | 0. 000728 | Opc-G | HOXC10         |
| LRRC1. 8   | 4. 94E-08 | 0. 180411 | 0. 117 | 0. 067 | 0. 000738 | Opc-G | LRRC1          |
| SAMD14. 7  | 4. 95E-08 | 0. 136644 | 0. 111 | 0. 061 | 0. 000739 | Opc-G | SAMD14         |
| CEP290. 6  | 4. 95E-08 | -0. 10822 | 0. 081 | 0. 163 | 0. 000739 | Opc-G | CEP290         |
| TRIM33. 6  | 4. 97E-08 | 0. 185537 | 0. 246 | 0. 179 | 0. 000742 | Opc-G | TRIM33         |
| STOX2. 10  | 4. 97E-08 | 0. 1597   | 0. 146 | 0. 089 | 0. 000742 | Opc-G | STOX2          |
| FAM210A. 5 | 5. 07E-08 | -0. 18858 | 0. 071 | 0. 146 | 0. 000758 | Opc-G | FAM210A        |
| ALG2. 5    | 5. 09E-08 | -0. 15366 | 0. 087 | 0. 168 | 0. 000761 | Opc-G | ALG2           |
| INTS12. 7  | 5. 10E-08 | 0. 187491 | 0. 227 | 0. 16  | 0. 000763 | Opc-G | INTS12         |

|            |          |          |       |       |          |       |            |
|------------|----------|----------|-------|-------|----------|-------|------------|
| GBP3.3     | 5.15E-08 | -0.19115 | 0.029 | 0.087 | 0.00077  | Opc-G | GBP3       |
| PITPNM1.3  | 5.19E-08 | -0.10095 | 0.011 | 0.059 | 0.000776 | Opc-G | PITPNM1    |
| TTC7A.9    | 5.21E-08 | -0.19638 | 0.023 | 0.078 | 0.000778 | Opc-G | TTC7A      |
| ZNF282     | 5.22E-08 | 0.138498 | 0.09  | 0.047 | 0.000781 | Opc-G | ZNF282     |
| EMP2.4     | 5.24E-08 | -0.2456  | 0.046 | 0.112 | 0.000783 | Opc-G | EMP2       |
| CUEDC2.4   | 5.27E-08 | 0.136105 | 0.462 | 0.396 | 0.000787 | Opc-G | CUEDC2     |
| RASSF3.8   | 5.27E-08 | -0.15066 | 0.003 | 0.044 | 0.000787 | Opc-G | RASSF3     |
| CSNK1G2.4  | 5.33E-08 | -0.13508 | 0.071 | 0.148 | 0.000797 | Opc-G | CSNK1G2    |
| TFE3.2     | 5.34E-08 | -0.14829 | 0.052 | 0.121 | 0.000799 | Opc-G | TFE3       |
| PIM2.4     | 5.46E-08 | -0.1617  | 0.01  | 0.056 | 0.000816 | Opc-G | PIM2       |
| NSUN5.3    | 5.54E-08 | 0.158172 | 0.29  | 0.219 | 0.000828 | Opc-G | NSUN5      |
| HS3ST3B1.5 | 5.58E-08 | -0.15342 | 0.003 | 0.044 | 0.000834 | Opc-G | HS3ST3B1   |
| GPR158     | 5.58E-08 | 0.153314 | 0.057 | 0.025 | 0.000834 | Opc-G | GPR158     |
| NDUFS1.6   | 5.60E-08 | 0.190008 | 0.317 | 0.251 | 0.000836 | Opc-G | NDUFS1     |
| CERCAM.8   | 5.64E-08 | -0.15977 | 0.061 | 0.134 | 0.000842 | Opc-G | CERCAM     |
| DHCR7.8    | 5.70E-08 | -0.12279 | 0.097 | 0.183 | 0.000851 | Opc-G | DHCR7      |
| IFI16.8    | 5.70E-08 | -0.36406 | 0.316 | 0.398 | 0.000852 | Opc-G | IFI16      |
| MIR181A2H  | 5.72E-08 | 0.102247 | 0.057 | 0.025 | 0.000854 | Opc-G | MIR181A2HG |
| WIPF3.9    | 5.75E-08 | -0.1609  | 0.036 | 0.096 | 0.00086  | Opc-G | WIPF3      |
| DPCD.7     | 5.76E-08 | -0.18093 | 0.085 | 0.166 | 0.000861 | Opc-G | DPCD       |
| UBE2L6.5   | 5.78E-08 | -0.28236 | 0.367 | 0.48  | 0.000864 | Opc-G | UBE2L6     |
| ZNHIT3.3   | 5.87E-08 | 0.137438 | 0.447 | 0.38  | 0.000877 | Opc-G | ZNHIT3     |
| DOCK4.7    | 5.89E-08 | -0.28686 | 0.093 | 0.166 | 0.000881 | Opc-G | DOCK4      |
| HDDC2.5    | 5.90E-08 | 0.136802 | 0.46  | 0.396 | 0.000882 | Opc-G | HDDC2      |
| RSBN1.8    | 5.97E-08 | 0.163154 | 0.287 | 0.212 | 0.000893 | Opc-G | RSBN1      |
| C12orf75.5 | 5.98E-08 | -0.26491 | 0.116 | 0.198 | 0.000893 | Opc-G | C12orf75   |
| RAB8B.7    | 6.00E-08 | -0.14089 | 0.081 | 0.16  | 0.000896 | Opc-G | RAB8B      |
| RCOR1.2    | 6.01E-08 | -0.11574 | 0.02  | 0.074 | 0.000898 | Opc-G | RCOR1      |
| USP49.2    | 6.14E-08 | 0.125768 | 0.081 | 0.04  | 0.000918 | Opc-G | USP49      |
| SF3B2.6    | 6.19E-08 | 0.109463 | 0.593 | 0.52  | 0.000925 | Opc-G | SF3B2      |
| TOP1.5     | 6.20E-08 | 0.159479 | 0.458 | 0.384 | 0.000927 | Opc-G | TOP1       |
| UBE2D4.3   | 6.22E-08 | 0.205667 | 0.251 | 0.185 | 0.000929 | Opc-G | UBE2D4     |
| NCKAP5.2   | 6.33E-08 | 0.119777 | 0.112 | 0.062 | 0.000946 | Opc-G | NCKAP5     |
| CHST9.2    | 6.36E-08 | 0.170571 | 0.067 | 0.031 | 0.000951 | Opc-G | CHST9      |
| TCF7.7     | 6.39E-08 | 0.15413  | 0.202 | 0.136 | 0.000955 | Opc-G | TCF7       |
| USP11.9    | 6.40E-08 | 0.126803 | 0.43  | 0.347 | 0.000956 | Opc-G | USP11      |
| ARHGAP27.6 | 6.41E-08 | -0.2015  | 0.011 | 0.058 | 0.000958 | Opc-G | ARHGAP27   |
| AC147651.4 | 6.41E-08 | -0.16657 | 0     | 0.039 | 0.000958 | Opc-G | AC147651.4 |
| CLCF1.5    | 6.57E-08 | -0.15807 | 0.003 | 0.044 | 0.000982 | Opc-G | CLCF1      |
| CCL4.9     | 6.59E-08 | -0.61201 | 0.281 | 0.327 | 0.000984 | Opc-G | CCL4       |
| TMEM50A.6  | 6.59E-08 | -0.28831 | 0.508 | 0.598 | 0.000985 | Opc-G | TMEM50A    |
| USMG5.8    | 6.67E-08 | -0.2461  | 0.557 | 0.624 | 0.000997 | Opc-G | USMG5      |
| CCDC88C.2  | 6.75E-08 | 0.11563  | 0.081 | 0.04  | 0.001009 | Opc-G | CCDC88C    |
| BRD9.3     | 6.78E-08 | 0.176753 | 0.257 | 0.189 | 0.001013 | Opc-G | BRD9       |
| ERP29.7    | 6.80E-08 | -0.24112 | 0.51  | 0.618 | 0.001016 | Opc-G | ERP29      |
| GSAP.8     | 6.80E-08 | -0.21582 | 0.027 | 0.082 | 0.001017 | Opc-G | GSAP       |
| STUB1.6    | 6.83E-08 | 0.140055 | 0.534 | 0.456 | 0.001021 | Opc-G | STUB1      |
| YPEL4.4    | 6.86E-08 | 0.146354 | 0.078 | 0.038 | 0.001026 | Opc-G | YPEL4      |
| CD7.7      | 6.88E-08 | -0.27406 | 0.004 | 0.046 | 0.001029 | Opc-G | CD7        |
| SLC10A3.3  | 6.98E-08 | -0.14817 | 0.029 | 0.086 | 0.001043 | Opc-G | SLC10A3    |
| JOSD2.8    | 7.07E-08 | -0.19703 | 0.227 | 0.342 | 0.001057 | Opc-G | JOSD2      |

|            |           |           |        |        |           |       |               |
|------------|-----------|-----------|--------|--------|-----------|-------|---------------|
| SYBU. 8    | 7. 08E-08 | 0. 208529 | 0. 137 | 0. 083 | 0. 001057 | Opc-G | SYBU          |
| FADS1. 6   | 7. 08E-08 | 0. 216071 | 0. 279 | 0. 214 | 0. 001059 | Opc-G | FADS1         |
| EPAS1. 7   | 7. 17E-08 | -0. 15455 | 0. 044 | 0. 109 | 0. 001071 | Opc-G | EPAS1         |
| TUBGCP4. 5 | 7. 23E-08 | 0. 15118  | 0. 18  | 0. 119 | 0. 001081 | Opc-G | TUBGCP4       |
| RP4-798A1  | 7. 31E-08 | 0. 140831 | 0. 077 | 0. 037 | 0. 001093 | Opc-G | RP4-798A10. 7 |
| FTL. 10    | 7. 40E-08 | -0. 26687 | 0. 993 | 0. 994 | 0. 001106 | Opc-G | FTL           |
| FAM214B. 3 | 7. 42E-08 | -0. 17085 | 0. 055 | 0. 123 | 0. 001109 | Opc-G | FAM214B       |
| IGF2R. 4   | 7. 47E-08 | -0. 13821 | 0. 038 | 0. 1   | 0. 001117 | Opc-G | IGF2R         |
| RPH3A. 5   | 7. 49E-08 | 0. 17408  | 0. 066 | 0. 03  | 0. 001119 | Opc-G | RPH3A         |
| VMA21. 8   | 7. 51E-08 | -0. 24238 | 0. 238 | 0. 347 | 0. 001122 | Opc-G | VMA21         |
| FURIN. 6   | 7. 62E-08 | -0. 18258 | 0. 022 | 0. 075 | 0. 001138 | Opc-G | FURIN         |
| ZMYM2. 6   | 7. 63E-08 | 0. 17027  | 0. 272 | 0. 2   | 0. 001141 | Opc-G | ZMYM2         |
| GAS2L3. 6  | 7. 66E-08 | -0. 10666 | 0. 019 | 0. 072 | 0. 001145 | Opc-G | GAS2L3        |
| BATF. 7    | 7. 74E-08 | -0. 17474 | 0. 001 | 0. 041 | 0. 001157 | Opc-G | BATF          |
| SLC6A6. 3  | 7. 76E-08 | -0. 20408 | 0. 016 | 0. 066 | 0. 001159 | Opc-G | SLC6A6        |
| IL2RG. 6   | 7. 80E-08 | -0. 24878 | 0. 004 | 0. 046 | 0. 001166 | Opc-G | IL2RG         |
| FKBP14. 2  | 7. 80E-08 | 0. 165808 | 0. 146 | 0. 091 | 0. 001166 | Opc-G | FKBP14        |
| EDEM1. 7   | 7. 81E-08 | -0. 18029 | 0. 027 | 0. 083 | 0. 001168 | Opc-G | EDEM1         |
| NKG7. 7    | 7. 83E-08 | -0. 26881 | 0. 008 | 0. 053 | 0. 00117  | Opc-G | NKG7          |
| AP006222.  | 7. 84E-08 | -0. 2061  | 0. 126 | 0. 217 | 0. 001172 | Opc-G | AP006222. 2   |
| FLI1. 10   | 8. 01E-08 | -0. 2199  | 0. 01  | 0. 055 | 0. 001197 | Opc-G | FLI1          |
| SLC25A38.  | 8. 06E-08 | 0. 192351 | 0. 204 | 0. 142 | 0. 001205 | Opc-G | SLC25A38      |
| NDC80. 8   | 8. 28E-08 | -0. 14777 | 0. 007 | 0. 051 | 0. 001237 | Opc-G | NDC80         |
| FAM78A. 8  | 8. 30E-08 | -0. 169   | 0      | 0. 038 | 0. 00124  | Opc-G | FAM78A        |
| POMGNT2. 7 | 8. 37E-08 | 0. 223748 | 0. 195 | 0. 137 | 0. 001251 | Opc-G | POMGNT2       |
| DDX52. 6   | 8. 39E-08 | 0. 192351 | 0. 303 | 0. 24  | 0. 001254 | Opc-G | DDX52         |
| NPRL3. 6   | 8. 41E-08 | 0. 206466 | 0. 251 | 0. 186 | 0. 001256 | Opc-G | NPRL3         |
| GBGT1. 9   | 8. 43E-08 | -0. 17651 | 0. 008 | 0. 053 | 0. 001259 | Opc-G | GBGT1         |
| ARHGAP25.  | 8. 48E-08 | -0. 1599  | 0. 018 | 0. 069 | 0. 001267 | Opc-G | ARHGAP25      |
| NOTCH2NL.  | 8. 52E-08 | -0. 11997 | 0. 089 | 0. 172 | 0. 001273 | Opc-G | NOTCH2NL      |
| AURKA. 7   | 8. 53E-08 | -0. 17839 | 0. 026 | 0. 081 | 0. 001274 | Opc-G | AURKA         |
| KHDRBS3. 9 | 8. 56E-08 | 0. 243163 | 0. 277 | 0. 211 | 0. 001279 | Opc-G | KHDRBS3       |
| LYVE1. 8   | 8. 58E-08 | -0. 30498 | 0. 001 | 0. 04  | 0. 001282 | Opc-G | LYVE1         |
| RREB1. 10  | 8. 76E-08 | -0. 16934 | 0. 022 | 0. 075 | 0. 001309 | Opc-G | RREB1         |
| SLC31A1. 8 | 8. 77E-08 | -0. 21089 | 0. 093 | 0. 173 | 0. 00131  | Opc-G | SLC31A1       |
| KBTBD6. 7  | 8. 79E-08 | 0. 169241 | 0. 191 | 0. 127 | 0. 001313 | Opc-G | KBTBD6        |
| GBA. 5     | 8. 83E-08 | -0. 21089 | 0. 064 | 0. 135 | 0. 00132  | Opc-G | GBA           |
| CPSF4. 6   | 8. 94E-08 | 0. 178469 | 0. 26  | 0. 192 | 0. 001336 | Opc-G | CPSF4         |
| PLCG2. 7   | 9. 17E-08 | -0. 19945 | 0. 007 | 0. 05  | 0. 001371 | Opc-G | PLCG2         |
| CHL1. 8    | 9. 20E-08 | -0. 1688  | 0. 081 | 0. 158 | 0. 001375 | Opc-G | CHL1          |
| CACNG2. 1  | 9. 25E-08 | 0. 108225 | 0. 038 | 0. 014 | 0. 001382 | Opc-G | CACNG2        |
| ZBTB10. 4  | 9. 34E-08 | 0. 192094 | 0. 139 | 0. 086 | 0. 001396 | Opc-G | ZBTB10        |
| FKBP1A. 6  | 9. 43E-08 | -0. 23091 | 0. 701 | 0. 699 | 0. 001409 | Opc-G | FKBP1A        |
| UGP2. 5    | 9. 48E-08 | -0. 24795 | 0. 355 | 0. 468 | 0. 001417 | Opc-G | UGP2          |
| CD2AP. 5   | 9. 50E-08 | -0. 13357 | 0. 029 | 0. 085 | 0. 00142  | Opc-G | CD2AP         |
| KLHL35. 9  | 9. 59E-08 | 0. 101625 | 0. 153 | 0. 09  | 0. 001434 | Opc-G | KLHL35        |
| NCAM2. 8   | 9. 64E-08 | 0. 123356 | 0. 115 | 0. 064 | 0. 001441 | Opc-G | NCAM2         |
| ULK2. 3    | 9. 73E-08 | -0. 10603 | 0. 016 | 0. 066 | 0. 001454 | Opc-G | ULK2          |
| AMPD3. 7   | 9. 74E-08 | -0. 17295 | 0. 01  | 0. 055 | 0. 001456 | Opc-G | AMPD3         |
| PLEKHJ1. 6 | 9. 81E-08 | 0. 149989 | 0. 43  | 0. 362 | 0. 001467 | Opc-G | PLEKHJ1       |
| CMKLR1. 8  | 9. 89E-08 | -0. 19633 | 0. 008 | 0. 052 | 0. 001478 | Opc-G | CMKLR1        |



|             |           |           |        |        |           |       |                |
|-------------|-----------|-----------|--------|--------|-----------|-------|----------------|
| G6PD. 4     | 9. 99E-08 | -0. 19226 | 0. 141 | 0. 234 | 0. 001493 | Opc-G | G6PD           |
| PLD2. 6     | 1. 01E-07 | -0. 14391 | 0. 031 | 0. 089 | 0. 001512 | Opc-G | PLD2           |
| LMBRD1. 6   | 1. 02E-07 | -0. 28385 | 0. 137 | 0. 222 | 0. 001522 | Opc-G | LMBRD1         |
| C1RL. 3     | 1. 03E-07 | -0. 18256 | 0. 012 | 0. 06  | 0. 001533 | Opc-G | C1RL           |
| FHOD1. 10   | 1. 04E-07 | -0. 16765 | 0. 012 | 0. 059 | 0. 00155  | Opc-G | FHOD1          |
| ARMC10. 6   | 1. 04E-07 | 0. 200576 | 0. 354 | 0. 293 | 0. 001551 | Opc-G | ARMC10         |
| GCSH. 9     | 1. 04E-07 | 0. 146455 | 0. 425 | 0. 342 | 0. 00156  | Opc-G | GCSH           |
| C19orf68. 1 | 1. 04E-07 | 0. 123225 | 0. 077 | 0. 038 | 0. 001561 | Opc-G | C19orf68       |
| VAMP7. 4    | 1. 05E-07 | -0. 16055 | 0. 09  | 0. 171 | 0. 001574 | Opc-G | VAMP7          |
| MITF. 9     | 1. 07E-07 | -0. 22893 | 0. 038 | 0. 097 | 0. 001603 | Opc-G | MITF           |
| ARAP1. 8    | 1. 08E-07 | -0. 22705 | 0. 049 | 0. 112 | 0. 00162  | Opc-G | ARAP1          |
| CWC27. 7    | 1. 13E-07 | 0. 189282 | 0. 324 | 0. 26  | 0. 001689 | Opc-G | CWC27          |
| NOP10. 10   | 1. 15E-07 | -0. 25144 | 0. 56  | 0. 609 | 0. 001712 | Opc-G | NOP10          |
| C14orf1. 7  | 1. 15E-07 | 0. 126    | 0. 363 | 0. 288 | 0. 001716 | Opc-G | C14orf1        |
| SULT1A1. 8  | 1. 15E-07 | -0. 18472 | 0. 008 | 0. 052 | 0. 001723 | Opc-G | SULT1A1        |
| SLC35F1. 7  | 1. 16E-07 | 0. 230608 | 0. 178 | 0. 122 | 0. 001737 | Opc-G | SLC35F1        |
| PDK3. 6     | 1. 17E-07 | -0. 1418  | 0. 015 | 0. 063 | 0. 001743 | Opc-G | PDK3           |
| COX19. 5    | 1. 17E-07 | 0. 150487 | 0. 296 | 0. 226 | 0. 001754 | Opc-G | COX19          |
| KNOP1. 7    | 1. 18E-07 | 0. 221025 | 0. 317 | 0. 256 | 0. 001757 | Opc-G | KNOP1          |
| CDKN3. 9    | 1. 19E-07 | -0. 2073  | 0. 037 | 0. 095 | 0. 001778 | Opc-G | CDKN3          |
| HOXD10      | 1. 20E-07 | 0. 103435 | 0. 06  | 0. 027 | 0. 001787 | Opc-G | HOXD10         |
| MICAL3. 5   | 1. 22E-07 | 0. 1504   | 0. 123 | 0. 072 | 0. 001818 | Opc-G | MICAL3         |
| PHF5A. 3    | 1. 22E-07 | 0. 145666 | 0. 389 | 0. 323 | 0. 001825 | Opc-G | PHF5A          |
| NOL11. 7    | 1. 23E-07 | 0. 210098 | 0. 247 | 0. 185 | 0. 001832 | Opc-G | NOL11          |
| IER5. 6     | 1. 23E-07 | -0. 24459 | 0. 126 | 0. 208 | 0. 001842 | Opc-G | IER5           |
| ASCL2. 9    | 1. 24E-07 | -0. 15461 | 0. 001 | 0. 04  | 0. 001853 | Opc-G | ASCL2          |
| ATXN1. 5    | 1. 25E-07 | -0. 166   | 0. 089 | 0. 168 | 0. 001864 | Opc-G | ATXN1          |
| NMRK1. 8    | 1. 28E-07 | -0. 27759 | 0. 074 | 0. 144 | 0. 001911 | Opc-G | NMRK1          |
| LHPP. 6     | 1. 28E-07 | -0. 35195 | 0. 048 | 0. 109 | 0. 00192  | Opc-G | LHPP           |
| HRH2. 7     | 1. 30E-07 | -0. 16766 | 0. 003 | 0. 042 | 0. 001942 | Opc-G | HRH2           |
| LTBR. 10    | 1. 31E-07 | -0. 28211 | 0. 041 | 0. 099 | 0. 001956 | Opc-G | LTBR           |
| TRIM25. 5   | 1. 31E-07 | -0. 10192 | 0. 033 | 0. 091 | 0. 001957 | Opc-G | TRIM25         |
| EFCAB14. 5  | 1. 32E-07 | -0. 16891 | 0. 122 | 0. 209 | 0. 001968 | Opc-G | EFCAB14        |
| MICA. 3     | 1. 35E-07 | -0. 13189 | 0. 005 | 0. 047 | 0. 002021 | Opc-G | MICA           |
| ADAM10. 6   | 1. 36E-07 | -0. 22596 | 0. 107 | 0. 189 | 0. 002033 | Opc-G | ADAM10         |
| AURKB. 9    | 1. 36E-07 | -0. 17268 | 0. 008 | 0. 051 | 0. 002037 | Opc-G | AURKB          |
| RASSF7. 7   | 1. 38E-07 | -0. 13738 | 0. 022 | 0. 074 | 0. 002064 | Opc-G | RASSF7         |
| DYNLL2. 1C  | 1. 39E-07 | 0. 203019 | 0. 266 | 0. 202 | 0. 002081 | Opc-G | DYNLL2         |
| POLR3A. 1   | 1. 41E-07 | 0. 133994 | 0. 102 | 0. 057 | 0. 002114 | Opc-G | POLR3A         |
| KLF3. 3     | 1. 42E-07 | -0. 16947 | 0. 131 | 0. 22  | 0. 002118 | Opc-G | KLF3           |
| ZBED3. 7    | 1. 42E-07 | 0. 200687 | 0. 137 | 0. 085 | 0. 00212  | Opc-G | ZBED3          |
| MTDH. 5     | 1. 44E-07 | 0. 123561 | 0. 695 | 0. 604 | 0. 002149 | Opc-G | MTDH           |
| CTD-2035E   | 1. 46E-07 | 0. 111149 | 0. 049 | 0. 02  | 0. 002179 | Opc-G | CTD-2035E11. 4 |
| ARL1. 5     | 1. 46E-07 | -0. 21558 | 0. 213 | 0. 32  | 0. 002186 | Opc-G | ARL1           |
| SEPT5. 1    | 1. 47E-07 | 0. 109302 | 0. 064 | 0. 03  | 0. 002194 | Opc-G | 5-Sep          |
| H6PD. 2     | 1. 48E-07 | -0. 13457 | 0. 038 | 0. 098 | 0. 002214 | Opc-G | H6PD           |
| ZBTB7B. 5   | 1. 48E-07 | -0. 12769 | 0. 004 | 0. 044 | 0. 002215 | Opc-G | ZBTB7B         |
| CD180. 9    | 1. 52E-07 | -0. 15718 | 0. 001 | 0. 039 | 0. 002264 | Opc-G | CD180          |
| TBC1D12. 8  | 1. 52E-07 | -0. 19504 | 0. 049 | 0. 111 | 0. 002276 | Opc-G | TBC1D12        |
| MAFB. 8     | 1. 55E-07 | -0. 37572 | 0. 264 | 0. 318 | 0. 002319 | Opc-G | MAFB           |
| ERAP2. 2    | 1. 57E-07 | -0. 12755 | 0. 027 | 0. 082 | 0. 002353 | Opc-G | ERAP2          |

|            |           |           |        |        |           |       |                |
|------------|-----------|-----------|--------|--------|-----------|-------|----------------|
| TIMM10B. 4 | 1. 60E-07 | -0. 17111 | 0. 098 | 0. 181 | 0. 002385 | Opc-G | TIMM10B        |
| RFXAP. 5   | 1. 61E-07 | 0. 180938 | 0. 146 | 0. 092 | 0. 002406 | Opc-G | RFXAP          |
| RCAN2. 7   | 1. 61E-07 | -0. 17321 | 0. 005 | 0. 046 | 0. 002407 | Opc-G | RCAN2          |
| PTGR1. 5   | 1. 63E-07 | -0. 2306  | 0. 108 | 0. 191 | 0. 002433 | Opc-G | PTGR1          |
| CRYBB1. 8  | 1. 67E-07 | -0. 19708 | 0. 004 | 0. 044 | 0. 00249  | Opc-G | CRYBB1         |
| ID4. 9     | 1. 68E-07 | -0. 24256 | 0. 141 | 0. 22  | 0. 002518 | Opc-G | ID4            |
| U73166. 2. | 1. 70E-07 | 0. 126195 | 0. 059 | 0. 026 | 0. 002547 | Opc-G | U73166. 2      |
| RGMA. 9    | 1. 70E-07 | 0. 235811 | 0. 261 | 0. 196 | 0. 002547 | Opc-G | RGMA           |
| CTC-459F4  | 1. 71E-07 | 0. 15019  | 0. 108 | 0. 062 | 0. 002559 | Opc-G | CTC-459F4. 3   |
| IFI27L1. 6 | 1. 71E-07 | 0. 213426 | 0. 243 | 0. 182 | 0. 002561 | Opc-G | IFI27L1        |
| TPCN1. 7   | 1. 72E-07 | -0. 17956 | 0. 036 | 0. 093 | 0. 002565 | Opc-G | TPCN1          |
| ARL11. 9   | 1. 74E-07 | -0. 17061 | 0. 003 | 0. 041 | 0. 0026   | Opc-G | ARL11          |
| PIM3. 8    | 1. 76E-07 | -0. 22111 | 0. 116 | 0. 195 | 0. 002629 | Opc-G | PIM3           |
| FAM122B. 2 | 1. 78E-07 | -0. 1521  | 0. 042 | 0. 103 | 0. 002654 | Opc-G | FAM122B        |
| HSF1. 3    | 1. 78E-07 | 0. 17498  | 0. 337 | 0. 274 | 0. 002656 | Opc-G | HSF1           |
| NCAPG. 8   | 1. 79E-07 | -0. 10771 | 0. 004 | 0. 044 | 0. 002679 | Opc-G | NCAPG          |
| RP11-76E1  | 1. 80E-07 | -0. 21188 | 0. 001 | 0. 039 | 0. 002689 | Opc-G | RP11-76E17. 3  |
| STYXL1. 4  | 1. 82E-07 | 0. 172858 | 0. 184 | 0. 123 | 0. 002722 | Opc-G | STYXL1         |
| ABI1. 10   | 1. 84E-07 | -0. 24825 | 0. 157 | 0. 246 | 0. 002756 | Opc-G | ABI1           |
| LRRC26. 1  | 1. 86E-07 | 0. 108469 | 0. 046 | 0. 019 | 0. 002773 | Opc-G | LRRC26         |
| PLK1. 7    | 1. 89E-07 | -0. 178   | 0. 012 | 0. 057 | 0. 002824 | Opc-G | PLK1           |
| PI3. 6     | 1. 91E-07 | -0. 38901 | 0. 011 | 0. 055 | 0. 00286  | Opc-G | PI3            |
| ZNF862     | 1. 93E-07 | 0. 114366 | 0. 06  | 0. 027 | 0. 002885 | Opc-G | ZNF862         |
| FIGN. 7    | 1. 94E-07 | 0. 17285  | 0. 135 | 0. 084 | 0. 002896 | Opc-G | FIGN           |
| FAM200B. 6 | 2. 08E-07 | 0. 127287 | 0. 429 | 0. 362 | 0. 003111 | Opc-G | FAM200B        |
| COX17. 5   | 2. 10E-07 | -0. 27857 | 0. 417 | 0. 525 | 0. 003137 | Opc-G | COX17          |
| NT5DC1. 5  | 2. 13E-07 | -0. 20125 | 0. 011 | 0. 055 | 0. 003177 | Opc-G | NT5DC1         |
| SLC35B2. 6 | 2. 16E-07 | 0. 17042  | 0. 362 | 0. 296 | 0. 00322  | Opc-G | SLC35B2        |
| ZNF789. 4  | 2. 18E-07 | 0. 15332  | 0. 127 | 0. 076 | 0. 003255 | Opc-G | ZNF789         |
| TNF. 7     | 2. 19E-07 | -0. 21501 | 0. 005 | 0. 045 | 0. 003278 | Opc-G | TNF            |
| TMEM158. 9 | 2. 20E-07 | -0. 13014 | 0. 071 | 0. 144 | 0. 003283 | Opc-G | TMEM158        |
| TCEAL6. 6  | 2. 23E-07 | 0. 168588 | 0. 07  | 0. 033 | 0. 003336 | Opc-G | TCEAL6         |
| SH3KBP1. 1 | 2. 24E-07 | -0. 21519 | 0. 161 | 0. 246 | 0. 003343 | Opc-G | SH3KBP1        |
| WBP4. 7    | 2. 26E-07 | 0. 162843 | 0. 363 | 0. 301 | 0. 003378 | Opc-G | WBP4           |
| IMMP2L. 8  | 2. 27E-07 | 0. 175617 | 0. 204 | 0. 141 | 0. 003387 | Opc-G | IMMP2L         |
| DRAM1. 7   | 2. 28E-07 | -0. 1324  | 0. 025 | 0. 077 | 0. 003409 | Opc-G | DRAM1          |
| CTB-61M7.  | 2. 29E-07 | -0. 20098 | 0. 003 | 0. 041 | 0. 003419 | Opc-G | CTB-61M7. 2    |
| RNASE3. 8  | 2. 33E-07 | -0. 20849 | 0      | 0. 035 | 0. 003476 | Opc-G | RNASE3         |
| B3GALT4. 6 | 2. 36E-07 | -0. 15103 | 0. 005 | 0. 045 | 0. 003521 | Opc-G | B3GALT4        |
| RFX4. 8    | 2. 36E-07 | 0. 201508 | 0. 206 | 0. 147 | 0. 003534 | Opc-G | RFX4           |
| CMPK2. 6   | 2. 40E-07 | -0. 15231 | 0. 014 | 0. 059 | 0. 00358  | Opc-G | CMPK2          |
| SPAG4. 6   | 2. 40E-07 | -0. 18662 | 0. 008 | 0. 05  | 0. 003588 | Opc-G | SPAG4          |
| UBE2D1. 6  | 2. 40E-07 | -0. 15832 | 0. 173 | 0. 273 | 0. 003594 | Opc-G | UBE2D1         |
| PIK3R5. 9  | 2. 42E-07 | -0. 18555 | 0. 008 | 0. 05  | 0. 003624 | Opc-G | PIK3R5         |
| GIT2. 7    | 2. 43E-07 | -0. 19723 | 0. 085 | 0. 158 | 0. 003631 | Opc-G | GIT2           |
| ATG7. 6    | 2. 43E-07 | -0. 18316 | 0. 052 | 0. 115 | 0. 003631 | Opc-G | ATG7           |
| UAP1. 6    | 2. 43E-07 | -0. 18133 | 0. 108 | 0. 19  | 0. 003632 | Opc-G | UAP1           |
| STAT5A. 8  | 2. 44E-07 | -0. 16161 | 0. 011 | 0. 055 | 0. 003644 | Opc-G | STAT5A         |
| MKI67. 9   | 2. 44E-07 | -0. 17495 | 0. 018 | 0. 066 | 0. 003648 | Opc-G | MKI67          |
| RP11-545E  | 2. 46E-07 | -0. 10501 | 0. 01  | 0. 053 | 0. 003681 | Opc-G | RP11-545E17. 3 |
| APIP. 7    | 2. 47E-07 | -0. 22748 | 0. 15  | 0. 239 | 0. 003686 | Opc-G | APIP           |

|           |          |          |       |       |          |       |            |
|-----------|----------|----------|-------|-------|----------|-------|------------|
| NR4A1.9   | 2.47E-07 | -0.40708 | 0.214 | 0.277 | 0.003695 | Opc-G | NR4A1      |
| BCAP31.6  | 2.48E-07 | -0.26508 | 0.534 | 0.624 | 0.003712 | Opc-G | BCAP31     |
| FHL3.5    | 2.51E-07 | -0.12898 | 0.086 | 0.164 | 0.003745 | Opc-G | FHL3       |
| RPN1.5    | 2.51E-07 | -0.26416 | 0.305 | 0.417 | 0.003756 | Opc-G | RPN1       |
| TPX2.9    | 2.52E-07 | -0.1892  | 0.031 | 0.086 | 0.003759 | Opc-G | TPX2       |
| HS2ST1.9  | 2.53E-07 | -0.13434 | 0.098 | 0.18  | 0.003774 | Opc-G | HS2ST1     |
| ZNF286B.1 | 2.53E-07 | 0.114373 | 0.07  | 0.034 | 0.003777 | Opc-G | ZNF286B    |
| LPIN2.5   | 2.54E-07 | -0.16321 | 0.081 | 0.154 | 0.003789 | Opc-G | LPIN2      |
| GLRB.6    | 2.58E-07 | 0.192643 | 0.1   | 0.057 | 0.003853 | Opc-G | GLRB       |
| SEC14L1.6 | 2.60E-07 | -0.17367 | 0.197 | 0.298 | 0.003882 | Opc-G | SEC14L1    |
| CTNS.2    | 2.61E-07 | -0.11466 | 0.031 | 0.087 | 0.003895 | Opc-G | CTNS       |
| EFNA4.2   | 2.61E-07 | -0.11996 | 0.005 | 0.045 | 0.003902 | Opc-G | EFNA4      |
| SUSD4.7   | 2.61E-07 | 0.168247 | 0.077 | 0.039 | 0.003904 | Opc-G | SUSD4      |
| LUZP1.3   | 2.65E-07 | -0.19527 | 0.112 | 0.193 | 0.003964 | Opc-G | LUZP1      |
| CMSS1.7   | 2.71E-07 | 0.183977 | 0.347 | 0.286 | 0.004052 | Opc-G | CMSS1      |
| ZNF783.2  | 2.76E-07 | 0.15996  | 0.098 | 0.055 | 0.00412  | Opc-G | ZNF783     |
| UPF3B.7   | 2.76E-07 | 0.151052 | 0.318 | 0.247 | 0.00412  | Opc-G | UPF3B      |
| ZBED5.8   | 2.83E-07 | 0.181541 | 0.238 | 0.175 | 0.004235 | Opc-G | ZBED5      |
| PATZ1.3   | 2.84E-07 | 0.160496 | 0.131 | 0.081 | 0.00424  | Opc-G | PATZ1      |
| EHD4.9    | 2.87E-07 | -0.18502 | 0.038 | 0.095 | 0.004283 | Opc-G | EHD4       |
| CLEC9A.8  | 2.90E-07 | -0.22172 | 0     | 0.035 | 0.004334 | Opc-G | CLEC9A     |
| EIF2S3.6  | 2.90E-07 | -0.22017 | 0.204 | 0.301 | 0.004335 | Opc-G | EIF2S3     |
| CSGALNACT | 2.92E-07 | -0.16106 | 0.04  | 0.097 | 0.004366 | Opc-G | CSGALNACT2 |
| SNAI1.8   | 2.94E-07 | -0.18168 | 0.007 | 0.047 | 0.004398 | Opc-G | SNAI1      |
| CBX4.10   | 2.95E-07 | 0.19644  | 0.168 | 0.112 | 0.004402 | Opc-G | CBX4       |
| RAB42.6   | 3.04E-07 | -0.13751 | 0.01  | 0.052 | 0.004543 | Opc-G | RAB42      |
| RALB.7    | 3.05E-07 | -0.19038 | 0.087 | 0.162 | 0.004552 | Opc-G | RALB       |
| TMEM179B  | 3.06E-07 | -0.23526 | 0.316 | 0.42  | 0.004572 | Opc-G | TMEM179B   |
| MAPK1IP1L | 3.06E-07 | 0.112642 | 0.436 | 0.372 | 0.004572 | Opc-G | MAPK1IP1L  |
| B3GNT2.8  | 3.07E-07 | -0.13547 | 0.02  | 0.069 | 0.004587 | Opc-G | B3GNT2     |
| FAM66C.4  | 3.11E-07 | 0.130797 | 0.078 | 0.04  | 0.004642 | Opc-G | FAM66C     |
| TGM2.5    | 3.18E-07 | -0.13801 | 0.003 | 0.04  | 0.004758 | Opc-G | TGM2       |
| SSH3      | 3.19E-07 | -0.10952 | 0.014 | 0.059 | 0.004774 | Opc-G | SSH3       |
| CCNB1IP1  | 3.26E-07 | 0.180109 | 0.223 | 0.161 | 0.004873 | Opc-G | CCNB1IP1   |
| TICAM1.2  | 3.26E-07 | -0.13211 | 0.037 | 0.094 | 0.004878 | Opc-G | TICAM1     |
| TPD52L2.7 | 3.32E-07 | -0.21451 | 0.23  | 0.33  | 0.004958 | Opc-G | TPD52L2    |
| FBXW5.7   | 3.32E-07 | -0.19043 | 0.195 | 0.294 | 0.004965 | Opc-G | FBXW5      |
| RGS12.9   | 3.33E-07 | 0.153213 | 0.339 | 0.266 | 0.004975 | Opc-G | RGS12      |
| CCDC112.9 | 3.34E-07 | 0.231746 | 0.316 | 0.257 | 0.004986 | Opc-G | CCDC112    |
| ABCA8.8   | 3.36E-07 | -0.20628 | 0.026 | 0.078 | 0.005015 | Opc-G | ABCA8      |
| KDM5B.9   | 3.36E-07 | 0.198856 | 0.219 | 0.158 | 0.00502  | Opc-G | KDM5B      |
| UBE2R2.7  | 3.41E-07 | 0.163367 | 0.347 | 0.282 | 0.00509  | Opc-G | UBE2R2     |
| ASPM.10   | 3.43E-07 | -0.14877 | 0.008 | 0.049 | 0.005132 | Opc-G | ASPM       |
| VPS13C.3  | 3.44E-07 | -0.17063 | 0.101 | 0.179 | 0.005143 | Opc-G | VPS13C     |
| UST       | 3.44E-07 | 0.101293 | 0.067 | 0.032 | 0.005145 | Opc-G | UST        |
| DPAGT1.4  | 3.47E-07 | -0.19419 | 0.077 | 0.147 | 0.005185 | Opc-G | DPAGT1     |
| PLCB2.10  | 3.50E-07 | -0.22165 | 0.018 | 0.064 | 0.005234 | Opc-G | PLCB2      |
| OSTM1.5   | 3.51E-07 | -0.17466 | 0.146 | 0.234 | 0.005244 | Opc-G | OSTM1      |
| CPS1.1    | 3.52E-07 | 0.106798 | 0.03  | 0.01  | 0.005254 | Opc-G | CPS1       |
| FUT11.2   | 3.53E-07 | -0.12661 | 0.025 | 0.076 | 0.005268 | Opc-G | FUT11      |
| RIMKLB.8  | 3.54E-07 | 0.171889 | 0.208 | 0.147 | 0.005287 | Opc-G | RIMKLB     |

|           |          |          |       |       |          |       |              |
|-----------|----------|----------|-------|-------|----------|-------|--------------|
| PPP2R5E.7 | 3.56E-07 | 0.192912 | 0.305 | 0.243 | 0.005326 | Opc-G | PPP2R5E      |
| PAK1.9    | 3.57E-07 | -0.31704 | 0.107 | 0.174 | 0.005332 | Opc-G | PAK1         |
| NAGPA.5   | 3.57E-07 | -0.13765 | 0.051 | 0.113 | 0.005339 | Opc-G | NAGPA        |
| PPP2R2B.8 | 3.60E-07 | 0.150673 | 0.281 | 0.215 | 0.005372 | Opc-G | PPP2R2B      |
| OSBPL3.2  | 3.60E-07 | -0.13598 | 0.023 | 0.073 | 0.00538  | Opc-G | OSBPL3       |
| ZWINT.7   | 3.63E-07 | -0.18684 | 0.04  | 0.096 | 0.005426 | Opc-G | ZWINT        |
| TAPT1-AS1 | 3.63E-07 | 0.176443 | 0.101 | 0.058 | 0.00543  | Opc-G | TAPT1-AS1    |
| MATN2.7   | 3.67E-07 | 0.122287 | 0.109 | 0.063 | 0.005491 | Opc-G | MATN2        |
| NCK1.3    | 3.77E-07 | -0.18342 | 0.156 | 0.25  | 0.00563  | Opc-G | NCK1         |
| DTYMK.9   | 3.77E-07 | 0.134995 | 0.399 | 0.325 | 0.005632 | Opc-G | DTYMK        |
| RP11-536K | 3.88E-07 | -0.2134  | 0.003 | 0.039 | 0.005802 | Opc-G | RP11-536K7.3 |
| ANKRD6.2  | 3.90E-07 | 0.163285 | 0.085 | 0.045 | 0.005834 | Opc-G | ANKRD6       |
| FAM64A.1C | 3.91E-07 | -0.19356 | 0.023 | 0.072 | 0.005836 | Opc-G | FAM64A       |
| CBLN4.10  | 3.95E-07 | -0.10684 | 0.029 | 0.082 | 0.005898 | Opc-G | CBLN4        |
| SLC16A1.8 | 3.95E-07 | 0.120495 | 0.299 | 0.229 | 0.005908 | Opc-G | SLC16A1      |
| FRMD3.7   | 3.96E-07 | -0.13322 | 0.014 | 0.058 | 0.005915 | Opc-G | FRMD3        |
| NT5E.5    | 3.98E-07 | 0.114876 | 0.104 | 0.059 | 0.005949 | Opc-G | NT5E         |
| GOLGB1.3  | 3.99E-07 | -0.17322 | 0.153 | 0.246 | 0.005969 | Opc-G | GOLGB1       |
| GNG7.9    | 4.05E-07 | -0.17453 | 0.206 | 0.305 | 0.00605  | Opc-G | GNG7         |
| BBOX1.9   | 4.10E-07 | -0.12968 | 0.07  | 0.142 | 0.006131 | Opc-G | BBOX1        |
| NCEH1.8   | 4.10E-07 | -0.12706 | 0.022 | 0.071 | 0.006132 | Opc-G | NCEH1        |
| MXD4.5    | 4.11E-07 | 0.180986 | 0.249 | 0.184 | 0.006142 | Opc-G | MXD4         |
| RRM2.9    | 4.20E-07 | -0.21054 | 0.019 | 0.065 | 0.00628  | Opc-G | RRM2         |
| CD52.8    | 4.22E-07 | -0.35375 | 0.012 | 0.055 | 0.006303 | Opc-G | CD52         |
| TMEM106A  | 4.23E-07 | -0.20114 | 0.019 | 0.066 | 0.006324 | Opc-G | TMEM106A     |
| HDAC1.5   | 4.29E-07 | -0.18431 | 0.142 | 0.231 | 0.006415 | Opc-G | HDAC1        |
| KLHL6.9   | 4.29E-07 | -0.22282 | 0.011 | 0.053 | 0.006416 | Opc-G | KLHL6        |
| ITFG2.2   | 4.29E-07 | 0.146279 | 0.163 | 0.107 | 0.006418 | Opc-G | ITFG2        |
| LYSMD2.6  | 4.32E-07 | -0.15917 | 0.116 | 0.198 | 0.006455 | Opc-G | LYSMD2       |
| SNAPIN.2  | 4.39E-07 | 0.117756 | 0.434 | 0.373 | 0.006558 | Opc-G | SNAPIN       |
| ZDHHC6.5  | 4.43E-07 | -0.17015 | 0.096 | 0.173 | 0.006624 | Opc-G | ZDHHC6       |
| ACADS.3   | 4.54E-07 | -0.12896 | 0.057 | 0.122 | 0.006786 | Opc-G | ACADS        |
| PRMT6.3   | 4.60E-07 | 0.164218 | 0.139 | 0.089 | 0.006875 | Opc-G | PRMT6        |
| SSH1.4    | 4.65E-07 | -0.15318 | 0.033 | 0.087 | 0.006947 | Opc-G | SSH1         |
| NOP56.5   | 4.70E-07 | 0.138434 | 0.471 | 0.41  | 0.007017 | Opc-G | NOP56        |
| CAMK2D.7  | 4.70E-07 | -0.16276 | 0.158 | 0.249 | 0.007025 | Opc-G | CAMK2D       |
| SKA2.8    | 4.78E-07 | 0.159135 | 0.37  | 0.302 | 0.007137 | Opc-G | SKA2         |
| CPSF3.3   | 4.85E-07 | 0.184016 | 0.234 | 0.172 | 0.007241 | Opc-G | CPSF3        |
| GMDS.4    | 4.85E-07 | -0.11397 | 0.037 | 0.093 | 0.007244 | Opc-G | GMDS         |
| SLC35A2.3 | 4.86E-07 | -0.16004 | 0.094 | 0.171 | 0.007265 | Opc-G | SLC35A2      |
| RALA.7    | 4.91E-07 | 0.155367 | 0.421 | 0.356 | 0.007333 | Opc-G | RALA         |
| FAM72A.5  | 4.94E-07 | -0.14279 | 0.005 | 0.044 | 0.007377 | Opc-G | FAM72A       |
| GINM1.2   | 4.99E-07 | -0.1517  | 0.198 | 0.303 | 0.007451 | Opc-G | GINM1        |
| DNAJB12.7 | 5.03E-07 | -0.20151 | 0.082 | 0.152 | 0.007516 | Opc-G | DNAJB12      |
| ENPP4.6   | 5.03E-07 | -0.1729  | 0.014 | 0.057 | 0.007517 | Opc-G | ENPP4        |
| ANLN.9    | 5.04E-07 | -0.22845 | 0.019 | 0.065 | 0.007529 | Opc-G | ANLN         |
| MYL9.3    | 5.10E-07 | -0.14467 | 0.001 | 0.036 | 0.007625 | Opc-G | MYL9         |
| SENP2.5   | 5.20E-07 | 0.196857 | 0.186 | 0.129 | 0.007778 | Opc-G | SENP2        |
| ZKSCAN5.6 | 5.22E-07 | 0.144074 | 0.108 | 0.063 | 0.007802 | Opc-G | ZKSCAN5      |
| C22orf39  | 5.23E-07 | 0.193003 | 0.316 | 0.256 | 0.007815 | Opc-G | C22orf39     |
| FECH.1    | 5.30E-07 | -0.13407 | 0.06  | 0.125 | 0.007919 | Opc-G | FECH         |

|           |          |          |       |       |          |       |              |
|-----------|----------|----------|-------|-------|----------|-------|--------------|
| TTC28.7   | 5.30E-07 | 0.19892  | 0.142 | 0.092 | 0.007927 | Opc-G | TTC28        |
| GPR75-ASE | 5.32E-07 | 0.17997  | 0.133 | 0.083 | 0.007944 | Opc-G | GPR75-ASB3   |
| MMD.7     | 5.41E-07 | -0.22551 | 0.167 | 0.25  | 0.008088 | Opc-G | MMD          |
| MTA1.7    | 5.43E-07 | 0.242955 | 0.242 | 0.187 | 0.008113 | Opc-G | MTA1         |
| KIAA0930. | 5.52E-07 | -0.23927 | 0.082 | 0.149 | 0.00825  | Opc-G | KIAA0930     |
| RASD1.7   | 5.53E-07 | 0.205161 | 0.193 | 0.13  | 0.008263 | Opc-G | RASD1        |
| CLN8.7    | 5.53E-07 | -0.32601 | 0.195 | 0.274 | 0.008266 | Opc-G | CLN8         |
| MBIP.8    | 5.61E-07 | 0.182753 | 0.236 | 0.176 | 0.008388 | Opc-G | MBIP         |
| VPS37B.8  | 5.64E-07 | 0.150208 | 0.317 | 0.25  | 0.008422 | Opc-G | VPS37B       |
| RBP7.5    | 5.65E-07 | -0.21912 | 0.008 | 0.048 | 0.008436 | Opc-G | RBP7         |
| LY6H.9    | 5.65E-07 | -0.21472 | 0.036 | 0.089 | 0.008446 | Opc-G | LY6H         |
| ARL6IP6.5 | 5.75E-07 | 0.17716  | 0.339 | 0.277 | 0.008588 | Opc-G | ARL6IP6      |
| SIPA1L2.3 | 5.75E-07 | -0.15202 | 0.061 | 0.126 | 0.008588 | Opc-G | SIPA1L2      |
| MAPKAPK5- | 5.78E-07 | 0.157083 | 0.283 | 0.219 | 0.008639 | Opc-G | MAPKAPK5-AS1 |
| MBOAT2.9  | 5.80E-07 | 0.172423 | 0.238 | 0.178 | 0.008661 | Opc-G | MBOAT2       |
| ITGAE.3   | 5.87E-07 | 0.104154 | 0.429 | 0.36  | 0.008767 | Opc-G | ITGAE        |
| DHODH.4   | 5.87E-07 | 0.18535  | 0.127 | 0.079 | 0.008768 | Opc-G | DHODH        |
| SETX.5    | 5.87E-07 | -0.16755 | 0.096 | 0.171 | 0.008776 | Opc-G | SETX         |
| ATP13A3.6 | 5.89E-07 | -0.17368 | 0.085 | 0.155 | 0.008799 | Opc-G | ATP13A3      |
| GATAD1.4  | 5.90E-07 | 0.169799 | 0.258 | 0.197 | 0.008822 | Opc-G | GATAD1       |
| RARA.5    | 5.94E-07 | 0.165882 | 0.145 | 0.092 | 0.008876 | Opc-G | RARA         |
| PTP4A1.5  | 5.97E-07 | 0.12467  | 0.467 | 0.403 | 0.008916 | Opc-G | PTP4A1       |
| COLEC12.2 | 6.01E-07 | -0.1451  | 0.001 | 0.036 | 0.008978 | Opc-G | COLEC12      |
| ACTR2.10  | 6.04E-07 | -0.24643 | 0.37  | 0.465 | 0.00903  | Opc-G | ACTR2        |
| DPEP2.8   | 6.09E-07 | -0.17589 | 0.001 | 0.036 | 0.009108 | Opc-G | DPEP2        |
| SEC61G.1C | 6.10E-07 | -0.3115  | 0.857 | 0.795 | 0.009109 | Opc-G | SEC61G       |
| ZNF670.1  | 6.17E-07 | 0.105973 | 0.085 | 0.045 | 0.009223 | Opc-G | ZNF670       |
| HERC5.4   | 6.17E-07 | -0.13008 | 0.026 | 0.076 | 0.009225 | Opc-G | HERC5        |
| IGDCC3.1C | 6.18E-07 | 0.181068 | 0.102 | 0.06  | 0.00923  | Opc-G | IGDCC3       |
| STK32B.4  | 6.21E-07 | 0.21794  | 0.101 | 0.059 | 0.009282 | Opc-G | STK32B       |
| GYG1.6    | 6.24E-07 | -0.24376 | 0.171 | 0.26  | 0.009329 | Opc-G | GYG1         |
| MINK1.5   | 6.26E-07 | -0.16726 | 0.049 | 0.108 | 0.009355 | Opc-G | MINK1        |
| SF3B3.4   | 6.30E-07 | 0.183882 | 0.246 | 0.186 | 0.009415 | Opc-G | SF3B3        |
| SNX2.10   | 6.34E-07 | -0.25434 | 0.318 | 0.416 | 0.009468 | Opc-G | SNX2         |
| B4GALT5.7 | 6.34E-07 | -0.14155 | 0.12  | 0.201 | 0.009469 | Opc-G | B4GALT5      |
| GMCL1.6   | 6.39E-07 | 0.196736 | 0.213 | 0.155 | 0.009551 | Opc-G | GMCL1        |
| BAIAP2.5  | 6.40E-07 | -0.14109 | 0.117 | 0.202 | 0.009561 | Opc-G | BAIAP2       |
| TUBA4A.5  | 6.44E-07 | -0.23123 | 0.014 | 0.057 | 0.009629 | Opc-G | TUBA4A       |
| KDM4B.6   | 6.49E-07 | 0.187627 | 0.184 | 0.128 | 0.009698 | Opc-G | KDM4B        |
| GPATCH4.4 | 6.52E-07 | 0.206299 | 0.247 | 0.189 | 0.009744 | Opc-G | GPATCH4      |
| STK17A.8  | 6.56E-07 | -0.18504 | 0.201 | 0.3   | 0.009804 | Opc-G | STK17A       |
| CDK5RAP2. | 6.56E-07 | -0.16067 | 0.055 | 0.117 | 0.00981  | Opc-G | CDK5RAP2     |
| SYNJ2.5   | 6.58E-07 | -0.11327 | 0.008 | 0.048 | 0.009831 | Opc-G | SYNJ2        |
| AKAP12.1C | 6.71E-07 | -0.22127 | 0.116 | 0.192 | 0.010026 | Opc-G | AKAP12       |
| TRAPPC2.2 | 6.75E-07 | 0.16936  | 0.145 | 0.093 | 0.010093 | Opc-G | TRAPPC2      |
| CCDC170.4 | 6.83E-07 | -0.13012 | 0.008 | 0.048 | 0.01021  | Opc-G | CCDC170      |
| DESI1.4   | 6.88E-07 | -0.15898 | 0.102 | 0.18  | 0.01028  | Opc-G | DESI1        |
| STX7.8    | 6.94E-07 | -0.26705 | 0.187 | 0.273 | 0.010375 | Opc-G | STX7         |
| NUF2.10   | 6.96E-07 | -0.16288 | 0.019 | 0.065 | 0.010405 | Opc-G | NUF2         |
| CCDC69.8  | 7.04E-07 | -0.13751 | 0.003 | 0.038 | 0.010526 | Opc-G | CCDC69       |
| GCLM.4    | 7.06E-07 | -0.12949 | 0.089 | 0.163 | 0.010556 | Opc-G | GCLM         |

|            |          |          |       |       |          |       |          |
|------------|----------|----------|-------|-------|----------|-------|----------|
| ZNF16.4    | 7.12E-07 | 0.180831 | 0.108 | 0.064 | 0.010642 | Opc-G | ZNF16    |
| ZNF106.8   | 7.13E-07 | -0.18984 | 0.171 | 0.263 | 0.010657 | Opc-G | ZNF106   |
| TREX1.2    | 7.14E-07 | -0.128   | 0.055 | 0.117 | 0.010663 | Opc-G | TREX1    |
| FSD1.8     | 7.14E-07 | 0.226066 | 0.206 | 0.151 | 0.010665 | Opc-G | FSD1     |
| ARID1A.6   | 7.19E-07 | 0.172625 | 0.301 | 0.238 | 0.010741 | Opc-G | ARID1A   |
| SH3D19.2   | 7.36E-07 | 0.110956 | 0.104 | 0.06  | 0.010993 | Opc-G | SH3D19   |
| B3GNTL1.3  | 7.43E-07 | -0.10866 | 0.018 | 0.063 | 0.011102 | Opc-G | B3GNTL1  |
| ABCC4.6    | 7.48E-07 | -0.11889 | 0.008 | 0.047 | 0.011181 | Opc-G | ABCC4    |
| P2RY6.9    | 7.50E-07 | -0.13728 | 0.001 | 0.035 | 0.011207 | Opc-G | P2RY6    |
| TRIM14.7   | 7.51E-07 | -0.12053 | 0.04  | 0.096 | 0.011222 | Opc-G | TRIM14   |
| GDF15.9    | 7.55E-07 | -0.21108 | 0.025 | 0.073 | 0.01129  | Opc-G | GDF15    |
| FBXO31.2   | 7.63E-07 | 0.15299  | 0.093 | 0.052 | 0.011402 | Opc-G | FBXO31   |
| TMEM237.7  | 7.65E-07 | 0.237553 | 0.24  | 0.183 | 0.011433 | Opc-G | TMEM237  |
| LOX.7      | 7.67E-07 | -0.19257 | 0.008 | 0.047 | 0.011461 | Opc-G | LOX      |
| GPR137B.6  | 7.70E-07 | -0.17905 | 0.149 | 0.235 | 0.011506 | Opc-G | GPR137B  |
| NMB.9      | 7.71E-07 | -0.18556 | 0.127 | 0.207 | 0.011521 | Opc-G | NMB      |
| USP22.9    | 7.72E-07 | 0.155893 | 0.377 | 0.315 | 0.011536 | Opc-G | USP22    |
| NR3C1.6    | 7.86E-07 | 0.187905 | 0.303 | 0.245 | 0.011742 | Opc-G | NR3C1    |
| EAF2.10    | 7.88E-07 | -0.21068 | 0.041 | 0.096 | 0.011773 | Opc-G | EAF2     |
| LUCAT1.3   | 7.88E-07 | -0.15036 | 0.003 | 0.038 | 0.011779 | Opc-G | LUCAT1   |
| CRTAP.10   | 7.93E-07 | -0.18717 | 0.156 | 0.242 | 0.011852 | Opc-G | CRTAP    |
| TXNDC12.6  | 7.97E-07 | -0.25402 | 0.337 | 0.438 | 0.011916 | Opc-G | TXNDC12  |
| NPC1.2     | 8.07E-07 | -0.16538 | 0.049 | 0.108 | 0.012062 | Opc-G | NPC1     |
| SYAP1.9    | 8.08E-07 | -0.23312 | 0.292 | 0.393 | 0.012078 | Opc-G | SYAP1    |
| GLI4.6     | 8.09E-07 | 0.200613 | 0.16  | 0.108 | 0.012084 | Opc-G | GLI4     |
| KIAA1191.8 | 8.11E-07 | 0.161835 | 0.317 | 0.261 | 0.012113 | Opc-G | KIAA1191 |
| NIPAL3.5   | 8.23E-07 | -0.18887 | 0.033 | 0.084 | 0.012302 | Opc-G | NIPAL3   |
| CST7.6     | 8.28E-07 | -0.20686 | 0.003 | 0.037 | 0.012378 | Opc-G | CST7     |
| SSR1.8     | 8.43E-07 | -0.25508 | 0.372 | 0.475 | 0.012599 | Opc-G | SSR1     |
| SPRYD3     | 8.44E-07 | -0.13968 | 0.033 | 0.085 | 0.012619 | Opc-G | SPRYD3   |
| AP1G2.8    | 8.50E-07 | -0.16878 | 0.012 | 0.054 | 0.01271  | Opc-G | AP1G2    |
| P4HB.6     | 8.55E-07 | -0.20375 | 0.542 | 0.574 | 0.01277  | Opc-G | P4HB     |
| ECHDC3.8   | 8.59E-07 | -0.14105 | 0.001 | 0.035 | 0.01284  | Opc-G | ECHDC3   |
| ARRDC4.2   | 8.59E-07 | 0.138974 | 0.111 | 0.065 | 0.012842 | Opc-G | ARRDC4   |
| C19orf48.8 | 8.74E-07 | 0.186518 | 0.284 | 0.223 | 0.013055 | Opc-G | C19orf48 |
| NUDT5.5    | 8.75E-07 | -0.18842 | 0.208 | 0.313 | 0.013072 | Opc-G | NUDT5    |
| CSRP2.8    | 8.78E-07 | -0.39874 | 0.225 | 0.306 | 0.013123 | Opc-G | CSRP2    |
| WDFY2.3    | 8.91E-07 | -0.11779 | 0.034 | 0.087 | 0.013315 | Opc-G | WDFY2    |
| DSC2.8     | 8.98E-07 | -0.13722 | 0.001 | 0.035 | 0.013423 | Opc-G | DSC2     |
| SOX12.9    | 9.05E-07 | 0.212512 | 0.163 | 0.112 | 0.013522 | Opc-G | SOX12    |
| FOXO3.6    | 9.06E-07 | 0.143597 | 0.335 | 0.268 | 0.013536 | Opc-G | FOXO3    |
| FBXO11.8   | 9.12E-07 | 0.183114 | 0.265 | 0.202 | 0.013628 | Opc-G | FBXO11   |
| SDC3.6     | 9.13E-07 | 0.185238 | 0.253 | 0.192 | 0.013645 | Opc-G | SDC3     |
| ZFP41      | 9.15E-07 | 0.13374  | 0.049 | 0.022 | 0.013669 | Opc-G | ZFP41    |
| C3orf58.3  | 9.30E-07 | -0.12936 | 0.038 | 0.093 | 0.013894 | Opc-G | C3orf58  |
| MARCH7.4   | 9.54E-07 | 0.169808 | 0.311 | 0.251 | 0.014263 | Opc-G | 7-Mar    |
| RMND5A.5   | 9.61E-07 | 0.141164 | 0.176 | 0.119 | 0.014366 | Opc-G | RMND5A   |
| CEP135.4   | 9.70E-07 | 0.169936 | 0.124 | 0.077 | 0.014498 | Opc-G | CEP135   |
| PURB.3     | 9.85E-07 | 0.197517 | 0.223 | 0.165 | 0.014724 | Opc-G | PURB     |
| MED24.7    | 9.97E-07 | 0.175861 | 0.223 | 0.165 | 0.014895 | Opc-G | MED24    |
| LARP4B.4   | 1.00E-06 | -0.10561 | 0.038 | 0.093 | 0.014977 | Opc-G | LARP4B   |

|             |           |           |        |        |           |       |           |
|-------------|-----------|-----------|--------|--------|-----------|-------|-----------|
| CELF2. 10   | 1. 01E-06 | -0. 26668 | 0. 299 | 0. 389 | 0. 015031 | Opc-G | CELF2     |
| TFAP4. 1    | 1. 01E-06 | 0. 128182 | 0. 092 | 0. 051 | 0. 015151 | Opc-G | TFAP4     |
| GART. 5     | 1. 02E-06 | 0. 181745 | 0. 255 | 0. 196 | 0. 015213 | Opc-G | GART      |
| TYW1. 4     | 1. 02E-06 | 0. 198839 | 0. 169 | 0. 116 | 0. 015307 | Opc-G | TYW1      |
| NKTR. 6     | 1. 02E-06 | 0. 13559  | 0. 415 | 0. 353 | 0. 01531  | Opc-G | NKTR      |
| FUBP3. 5    | 1. 03E-06 | 0. 185464 | 0. 294 | 0. 236 | 0. 01541  | Opc-G | FUBP3     |
| DHFRL1. 5   | 1. 04E-06 | 0. 152526 | 0. 107 | 0. 063 | 0. 015485 | Opc-G | DHFRL1    |
| TSR3. 6     | 1. 05E-06 | 0. 191246 | 0. 331 | 0. 272 | 0. 015665 | Opc-G | TSR3      |
| CENPN. 6    | 1. 08E-06 | -0. 14047 | 0. 037 | 0. 091 | 0. 016092 | Opc-G | CENPN     |
| ICA1. 5     | 1. 08E-06 | 0. 114496 | 0. 167 | 0. 11  | 0. 016191 | Opc-G | ICA1      |
| OAS3. 4     | 1. 08E-06 | -0. 12596 | 0. 014 | 0. 056 | 0. 0162   | Opc-G | OAS3      |
| SLC17A9. 9  | 1. 09E-06 | -0. 1312  | 0      | 0. 032 | 0. 016241 | Opc-G | SLC17A9   |
| SRPX2. 8    | 1. 09E-06 | -0. 12821 | 0. 016 | 0. 06  | 0. 016259 | Opc-G | SRPX2     |
| PIGP. 2     | 1. 09E-06 | -0. 20424 | 0. 148 | 0. 235 | 0. 016274 | Opc-G | PIGP      |
| PQLC1. 6    | 1. 09E-06 | -0. 10851 | 0. 071 | 0. 138 | 0. 016345 | Opc-G | PQLC1     |
| B4GALNT4. 1 | 1. 10E-06 | 0. 162982 | 0. 079 | 0. 043 | 0. 016473 | Opc-G | B4GALNT4  |
| CHMP1B. 7   | 1. 11E-06 | -0. 28039 | 0. 351 | 0. 443 | 0. 01661  | Opc-G | CHMP1B    |
| ALDOC. 6    | 1. 11E-06 | 0. 185976 | 0. 214 | 0. 151 | 0. 016652 | Opc-G | ALDOC     |
| HJURP. 8    | 1. 12E-06 | -0. 12699 | 0. 005 | 0. 042 | 0. 016724 | Opc-G | HJURP     |
| MXD3. 9     | 1. 13E-06 | -0. 14609 | 0. 02  | 0. 066 | 0. 016862 | Opc-G | MXD3      |
| TMX2. 3     | 1. 13E-06 | 0. 106179 | 0. 454 | 0. 394 | 0. 016889 | Opc-G | TMX2      |
| IWS1. 5     | 1. 14E-06 | 0. 18759  | 0. 268 | 0. 209 | 0. 016971 | Opc-G | IWS1      |
| SFT2D2. 5   | 1. 14E-06 | -0. 17573 | 0. 083 | 0. 152 | 0. 017045 | Opc-G | SFT2D2    |
| ICAM2. 9    | 1. 14E-06 | -0. 17487 | 0. 003 | 0. 037 | 0. 017088 | Opc-G | ICAM2     |
| TARDBP. 4   | 1. 15E-06 | 0. 140861 | 0. 351 | 0. 29  | 0. 017213 | Opc-G | TARDBP    |
| CLTB. 8     | 1. 16E-06 | 0. 134975 | 0. 497 | 0. 437 | 0. 017397 | Opc-G | CLTB      |
| ZIK1. 4     | 1. 17E-06 | 0. 134197 | 0. 089 | 0. 049 | 0. 017531 | Opc-G | ZIK1      |
| TK2. 4      | 1. 17E-06 | -0. 14845 | 0. 064 | 0. 128 | 0. 017548 | Opc-G | TK2       |
| SLC17A5. 6  | 1. 17E-06 | -0. 18726 | 0. 052 | 0. 109 | 0. 017552 | Opc-G | SLC17A5   |
| PLXNA3. 5   | 1. 19E-06 | 0. 134982 | 0. 107 | 0. 063 | 0. 01777  | Opc-G | PLXNA3    |
| DGKZ. 3     | 1. 19E-06 | -0. 12007 | 0. 119 | 0. 201 | 0. 017775 | Opc-G | DGKZ      |
| TROAP. 9    | 1. 19E-06 | -0. 11176 | 0. 01  | 0. 049 | 0. 01784  | Opc-G | TROAP     |
| LINC00685   | 1. 20E-06 | 0. 180846 | 0. 202 | 0. 146 | 0. 017926 | Opc-G | LINC00685 |
| USE1. 9     | 1. 20E-06 | 0. 12777  | 0. 389 | 0. 326 | 0. 017969 | Opc-G | USE1      |
| SPAG9. 8    | 1. 22E-06 | 0. 153651 | 0. 411 | 0. 349 | 0. 018183 | Opc-G | SPAG9     |
| CRB2. 7     | 1. 22E-06 | -0. 14228 | 0. 008 | 0. 046 | 0. 018227 | Opc-G | CRB2      |
| TRIM36. 1C  | 1. 22E-06 | 0. 192527 | 0. 238 | 0. 178 | 0. 018261 | Opc-G | TRIM36    |
| THUMP2. 1   | 1. 22E-06 | 0. 129977 | 0. 137 | 0. 087 | 0. 018283 | Opc-G | THUMP2    |
| IL2RA. 8    | 1. 23E-06 | -0. 23727 | 0. 001 | 0. 034 | 0. 01831  | Opc-G | IL2RA     |
| SEL1L. 5    | 1. 23E-06 | -0. 13106 | 0. 102 | 0. 178 | 0. 018342 | Opc-G | SEL1L     |
| ORC4. 9     | 1. 23E-06 | 0. 191105 | 0. 29  | 0. 231 | 0. 018349 | Opc-G | ORC4      |
| CHEK2. 4    | 1. 23E-06 | -0. 16289 | 0. 011 | 0. 051 | 0. 018377 | Opc-G | CHEK2     |
| FABP3. 5    | 1. 24E-06 | -0. 16654 | 0. 011 | 0. 051 | 0. 018499 | Opc-G | FABP3     |
| PSENN. 6    | 1. 24E-06 | -0. 26662 | 0. 392 | 0. 499 | 0. 018506 | Opc-G | PSENN     |
| NME3. 4     | 1. 24E-06 | -0. 2216  | 0. 329 | 0. 423 | 0. 018512 | Opc-G | NME3      |
| GEM. 5      | 1. 25E-06 | -0. 23922 | 0. 045 | 0. 1   | 0. 01866  | Opc-G | GEM       |
| GOT2. 6     | 1. 26E-06 | 0. 200757 | 0. 25  | 0. 193 | 0. 018775 | Opc-G | GOT2      |
| UBN2. 6     | 1. 26E-06 | 0. 148209 | 0. 158 | 0. 106 | 0. 01881  | Opc-G | UBN2      |
| LGALS8. 6   | 1. 27E-06 | -0. 1817  | 0. 087 | 0. 156 | 0. 018906 | Opc-G | LGALS8    |
| UNC50. 4    | 1. 27E-06 | 0. 104657 | 0. 41  | 0. 351 | 0. 019018 | Opc-G | UNC50     |
| LIFR. 7     | 1. 28E-06 | 0. 230047 | 0. 156 | 0. 107 | 0. 019121 | Opc-G | LIFR      |

|            |           |           |        |        |           |       |              |
|------------|-----------|-----------|--------|--------|-----------|-------|--------------|
| PPP1CA. 8  | 1. 29E-06 | -0. 25531 | 0. 505 | 0. 576 | 0. 019218 | Opc-G | PPP1CA       |
| MFSD7. 8   | 1. 31E-06 | -0. 12048 | 0. 001 | 0. 034 | 0. 019619 | Opc-G | MFSD7        |
| DLX1. 10   | 1. 32E-06 | 0. 166053 | 0. 171 | 0. 111 | 0. 01966  | Opc-G | DLX1         |
| ZNF253. 7  | 1. 32E-06 | 0. 176602 | 0. 127 | 0. 08  | 0. 019777 | Opc-G | ZNF253       |
| SPATC1L. 8 | 1. 33E-06 | 0. 217734 | 0. 245 | 0. 191 | 0. 019932 | Opc-G | SPATC1L      |
| FIBIN. 9   | 1. 35E-06 | 0. 230428 | 0. 283 | 0. 223 | 0. 020112 | Opc-G | FIBIN        |
| RNF141. 6  | 1. 36E-06 | -0. 19998 | 0. 137 | 0. 219 | 0. 020271 | Opc-G | RNF141       |
| ECM1. 5    | 1. 38E-06 | -0. 10306 | 0. 007 | 0. 044 | 0. 020569 | Opc-G | ECM1         |
| SH3GLB1. 6 | 1. 38E-06 | -0. 25648 | 0. 347 | 0. 435 | 0. 020676 | Opc-G | SH3GLB1      |
| GPR173. 2  | 1. 40E-06 | 0. 108026 | 0. 067 | 0. 034 | 0. 020918 | Opc-G | GPR173       |
| TLR4. 8    | 1. 40E-06 | -0. 17321 | 0. 007 | 0. 043 | 0. 02099  | Opc-G | TLR4         |
| TFRC. 8    | 1. 42E-06 | -0. 25664 | 0. 141 | 0. 214 | 0. 021151 | Opc-G | TFRC         |
| OTOA. 7    | 1. 42E-06 | -0. 13769 | 0. 001 | 0. 034 | 0. 021214 | Opc-G | OTOA         |
| ALPK1. 5   | 1. 43E-06 | -0. 13239 | 0. 004 | 0. 039 | 0. 02135  | Opc-G | ALPK1        |
| TBPL1. 5   | 1. 43E-06 | 0. 169814 | 0. 275 | 0. 214 | 0. 021358 | Opc-G | TBPL1        |
| TAF9B. 6   | 1. 44E-06 | 0. 210421 | 0. 194 | 0. 141 | 0. 021506 | Opc-G | TAF9B        |
| IL1R2. 6   | 1. 46E-06 | -0. 18166 | 0      | 0. 031 | 0. 021773 | Opc-G | IL1R2        |
| ZC3HAV1. 6 | 1. 48E-06 | -0. 18419 | 0. 108 | 0. 181 | 0. 022113 | Opc-G | ZC3HAV1      |
| TRIM2. 8   | 1. 48E-06 | 0. 17952  | 0. 28  | 0. 22  | 0. 022164 | Opc-G | TRIM2        |
| CKAP2L. 9  | 1. 49E-06 | -0. 12481 | 0. 01  | 0. 048 | 0. 022305 | Opc-G | CKAP2L       |
| AP3B2. 1   | 1. 50E-06 | 0. 101353 | 0. 053 | 0. 024 | 0. 022442 | Opc-G | AP3B2        |
| MARK3. 7   | 1. 50E-06 | 0. 154892 | 0. 343 | 0. 283 | 0. 022478 | Opc-G | MARK3        |
| TIGD1. 4   | 1. 55E-06 | 0. 145136 | 0. 104 | 0. 061 | 0. 023215 | Opc-G | TIGD1        |
| SPSB3. 5   | 1. 56E-06 | 0. 114668 | 0. 373 | 0. 3   | 0. 023306 | Opc-G | SPSB3        |
| BCAT1. 8   | 1. 56E-06 | -0. 13886 | 0. 15  | 0. 237 | 0. 023355 | Opc-G | BCAT1        |
| PPP2CB. 1C | 1. 58E-06 | 0. 174986 | 0. 351 | 0. 293 | 0. 023544 | Opc-G | PPP2CB       |
| EPRS. 6    | 1. 58E-06 | 0. 189126 | 0. 347 | 0. 29  | 0. 023584 | Opc-G | EPRS         |
| PIGH. 4    | 1. 58E-06 | 0. 164778 | 0. 262 | 0. 204 | 0. 02366  | Opc-G | PIGH         |
| ST3GAL6. 1 | 1. 59E-06 | -0. 27277 | 0. 059 | 0. 115 | 0. 023694 | Opc-G | ST3GAL6      |
| C5orf30. 7 | 1. 59E-06 | 0. 147005 | 0. 119 | 0. 072 | 0. 023723 | Opc-G | C5orf30      |
| MMAB. 5    | 1. 60E-06 | -0. 10147 | 0. 119 | 0. 202 | 0. 023954 | Opc-G | MMAB         |
| NAB2. 3    | 1. 61E-06 | -0. 12016 | 0. 078 | 0. 146 | 0. 024099 | Opc-G | NAB2         |
| SEC24D. 4  | 1. 61E-06 | -0. 11779 | 0. 041 | 0. 095 | 0. 024106 | Opc-G | SEC24D       |
| ENPP2. 4   | 1. 62E-06 | -0. 2685  | 0. 01  | 0. 047 | 0. 024159 | Opc-G | ENPP2        |
| DENND1C. 8 | 1. 62E-06 | -0. 16118 | 0. 003 | 0. 036 | 0. 024203 | Opc-G | DENND1C      |
| R3HCC1. 6  | 1. 63E-06 | 0. 19702  | 0. 336 | 0. 283 | 0. 024375 | Opc-G | R3HCC1       |
| HIPK3. 4   | 1. 65E-06 | -0. 13049 | 0. 04  | 0. 093 | 0. 024645 | Opc-G | HIPK3        |
| RBM10. 5   | 1. 65E-06 | 0. 202726 | 0. 254 | 0. 199 | 0. 024714 | Opc-G | RBM10        |
| RAP2B. 9   | 1. 65E-06 | -0. 18184 | 0. 1   | 0. 169 | 0. 024721 | Opc-G | RAP2B        |
| PCED1B. 8  | 1. 69E-06 | -0. 16657 | 0. 004 | 0. 038 | 0. 025195 | Opc-G | PCED1B       |
| JDP2. 10   | 1. 70E-06 | -0. 2324  | 0. 027 | 0. 073 | 0. 025365 | Opc-G | JDP2         |
| EPSTI1. 1C | 1. 71E-06 | -0. 27831 | 0. 07  | 0. 129 | 0. 025607 | Opc-G | EPSTI1       |
| CDCP1. 7   | 1. 71E-06 | -0. 14143 | 0. 003 | 0. 036 | 0. 025615 | Opc-G | CDCP1        |
| BLOC1S2. 5 | 1. 73E-06 | -0. 22865 | 0. 275 | 0. 375 | 0. 025886 | Opc-G | BLOC1S2      |
| FAM109A. 2 | 1. 74E-06 | 0. 127176 | 0. 09  | 0. 051 | 0. 026023 | Opc-G | FAM109A      |
| RP1-39G22  | 1. 78E-06 | 0. 198801 | 0. 179 | 0. 128 | 0. 026529 | Opc-G | RP1-39G22. 7 |
| CSRNP1. 1C | 1. 79E-06 | -0. 25979 | 0. 127 | 0. 195 | 0. 026756 | Opc-G | CSRNP1       |
| SNRK. 4    | 1. 79E-06 | 0. 161882 | 0. 13  | 0. 082 | 0. 026808 | Opc-G | SNRK         |
| SEN3       | 1. 80E-06 | 0. 108624 | 0. 07  | 0. 036 | 0. 026854 | Opc-G | SEN3         |
| NELFCD. 8  | 1. 81E-06 | 0. 136303 | 0. 396 | 0. 333 | 0. 026985 | Opc-G | NELFCD       |
| NAGLU      | 1. 83E-06 | -0. 11249 | 0. 036 | 0. 087 | 0. 027303 | Opc-G | NAGLU        |



|             |           |           |        |        |           |       |                |
|-------------|-----------|-----------|--------|--------|-----------|-------|----------------|
| BCL2. 5     | 1. 83E-06 | -0. 16798 | 0. 012 | 0. 052 | 0. 027314 | Opc-G | BCL2           |
| LYPLA1. 5   | 1. 86E-06 | 0. 130538 | 0. 464 | 0. 403 | 0. 027862 | Opc-G | LYPLA1         |
| DCUN1D4. 5  | 1. 88E-06 | 0. 166803 | 0. 146 | 0. 097 | 0. 02811  | Opc-G | DCUN1D4        |
| ADCY7. 10   | 1. 89E-06 | -0. 19377 | 0. 022 | 0. 066 | 0. 028207 | Opc-G | ADCY7          |
| TRIB3. 7    | 1. 89E-06 | -0. 12191 | 0. 029 | 0. 077 | 0. 02831  | Opc-G | TRIB3          |
| CLDN15. 6   | 1. 90E-06 | 0. 115823 | 0. 104 | 0. 061 | 0. 02841  | Opc-G | CLDN15         |
| HPCAL1. 6   | 1. 90E-06 | -0. 18464 | 0. 138 | 0. 215 | 0. 028458 | Opc-G | HPCAL1         |
| RBM4B. 7    | 1. 91E-06 | 0. 181058 | 0. 246 | 0. 188 | 0. 028584 | Opc-G | RBM4B          |
| COG8. 6     | 1. 92E-06 | 0. 164975 | 0. 137 | 0. 089 | 0. 028676 | Opc-G | COG8           |
| FBRS. 3     | 1. 94E-06 | -0. 13079 | 0. 057 | 0. 117 | 0. 028936 | Opc-G | FBRS           |
| GNG3. 8     | 1. 94E-06 | -0. 16192 | 0. 029 | 0. 076 | 0. 02902  | Opc-G | GNG3           |
| TMCC1. 7    | 1. 95E-06 | 0. 176537 | 0. 161 | 0. 11  | 0. 029193 | Opc-G | TMCC1          |
| NADSYN1. 4  | 1. 97E-06 | -0. 12766 | 0. 061 | 0. 124 | 0. 029396 | Opc-G | NADSYN1        |
| RNF157. 8   | 1. 97E-06 | 0. 231423 | 0. 18  | 0. 131 | 0. 02945  | Opc-G | RNF157         |
| RP11-410L   | 1. 98E-06 | 0. 25821  | 0. 173 | 0. 125 | 0. 029642 | Opc-G | RP11-410L14. 2 |
| ABHD15. 9   | 1. 99E-06 | -0. 14957 | 0. 018 | 0. 06  | 0. 029686 | Opc-G | ABHD15         |
| GNL3. 6     | 1. 99E-06 | 0. 116285 | 0. 403 | 0. 342 | 0. 029758 | Opc-G | GNL3           |
| GATAD2B. 8  | 2. 00E-06 | 0. 173401 | 0. 214 | 0. 157 | 0. 029827 | Opc-G | GATAD2B        |
| SVIP. 6     | 2. 01E-06 | -0. 31889 | 0. 109 | 0. 173 | 0. 029996 | Opc-G | SVIP           |
| HIST1H2BK   | 2. 01E-06 | -0. 2155  | 0. 138 | 0. 213 | 0. 03008  | Opc-G | HIST1H2BK      |
| RP3-47704   | 2. 03E-06 | -0. 15091 | 0      | 0. 03  | 0. 030273 | Opc-G | RP3-47704. 14  |
| ITFG1. 6    | 2. 05E-06 | 0. 132305 | 0. 404 | 0. 345 | 0. 030625 | Opc-G | ITFG1          |
| HDDC3. 4    | 2. 05E-06 | -0. 151   | 0. 085 | 0. 153 | 0. 030642 | Opc-G | HDDC3          |
| TANC2. 5    | 2. 05E-06 | 0. 178255 | 0. 242 | 0. 185 | 0. 030682 | Opc-G | TANC2          |
| SMAGP. 2    | 2. 06E-06 | -0. 12022 | 0. 037 | 0. 089 | 0. 030853 | Opc-G | SMAGP          |
| DUSP12. 6   | 2. 07E-06 | 0. 165867 | 0. 291 | 0. 232 | 0. 030945 | Opc-G | DUSP12         |
| SNRNP35. 4  | 2. 08E-06 | 0. 133471 | 0. 253 | 0. 192 | 0. 031066 | Opc-G | SNRNP35        |
| SMYD5. 2    | 2. 08E-06 | 0. 144231 | 0. 105 | 0. 063 | 0. 031103 | Opc-G | SMYD5          |
| CENPA. 9    | 2. 09E-06 | -0. 1349  | 0. 012 | 0. 052 | 0. 031276 | Opc-G | CENPA          |
| NAIP. 10    | 2. 09E-06 | -0. 22607 | 0. 056 | 0. 112 | 0. 031291 | Opc-G | NAIP           |
| YKT6. 6     | 2. 10E-06 | 0. 174749 | 0. 291 | 0. 235 | 0. 031328 | Opc-G | YKT6           |
| SNRPA. 4    | 2. 10E-06 | 0. 155538 | 0. 307 | 0. 249 | 0. 031402 | Opc-G | SNRPA          |
| BCL2L1. 3   | 2. 12E-06 | -0. 18725 | 0. 178 | 0. 27  | 0. 03174  | Opc-G | BCL2L1         |
| MAP4. 6     | 2. 14E-06 | 0. 13487  | 0. 393 | 0. 331 | 0. 031981 | Opc-G | MAP4           |
| RBCK1. 4    | 2. 15E-06 | -0. 20783 | 0. 25  | 0. 343 | 0. 032059 | Opc-G | RBCK1          |
| COA7. 3     | 2. 15E-06 | 0. 109137 | 0. 102 | 0. 06  | 0. 032063 | Opc-G | COA7           |
| PSMD5-AS1   | 2. 15E-06 | 0. 174093 | 0. 235 | 0. 178 | 0. 032125 | Opc-G | PSMD5-AS1      |
| TTC21B. 2   | 2. 15E-06 | 0. 11582  | 0. 081 | 0. 044 | 0. 032167 | Opc-G | TTC21B         |
| ARHGAP12. 2 | 2. 16E-06 | 0. 225752 | 0. 238 | 0. 186 | 0. 032331 | Opc-G | ARHGAP12       |
| FAM204A. 6  | 2. 17E-06 | -0. 21283 | 0. 176 | 0. 262 | 0. 032367 | Opc-G | FAM204A        |
| KCTD15. 4   | 2. 17E-06 | 0. 145457 | 0. 079 | 0. 043 | 0. 032397 | Opc-G | KCTD15         |
| NUCB1. 9    | 2. 18E-06 | -0. 25877 | 0. 363 | 0. 45  | 0. 032525 | Opc-G | NUCB1          |
| C10orf128   | 2. 18E-06 | -0. 15469 | 0. 001 | 0. 032 | 0. 032589 | Opc-G | C10orf128      |
| HMMR. 6     | 2. 18E-06 | -0. 12192 | 0. 007 | 0. 042 | 0. 0326   | Opc-G | HMMR           |
| KLHL13. 9   | 2. 18E-06 | 0. 18705  | 0. 143 | 0. 096 | 0. 032622 | Opc-G | KLHL13         |
| IVD. 3      | 2. 20E-06 | -0. 14796 | 0. 124 | 0. 204 | 0. 03288  | Opc-G | IVD            |
| SLC2A8. 5   | 2. 21E-06 | -0. 1391  | 0. 078 | 0. 143 | 0. 033065 | Opc-G | SLC2A8         |
| APBB3. 1    | 2. 22E-06 | -0. 17232 | 0. 037 | 0. 088 | 0. 033145 | Opc-G | APBB3          |
| PCDH19. 7   | 2. 22E-06 | 0. 191017 | 0. 097 | 0. 058 | 0. 033191 | Opc-G | PCDH19         |
| FLOT2. 5    | 2. 23E-06 | -0. 13417 | 0. 113 | 0. 191 | 0. 03337  | Opc-G | FLOT2          |
| DNM2. 7     | 2. 26E-06 | -0. 20094 | 0. 164 | 0. 248 | 0. 033754 | Opc-G | DNM2           |

|             |           |           |        |        |           |       |               |
|-------------|-----------|-----------|--------|--------|-----------|-------|---------------|
| LPAR1. 4    | 2. 29E-06 | -0. 12404 | 0. 012 | 0. 051 | 0. 034225 | Opc-G | LPAR1         |
| BCO2. 1     | 2. 29E-06 | -0. 17241 | 0. 011 | 0. 049 | 0. 034251 | Opc-G | BCO2          |
| PRR5. 9     | 2. 30E-06 | -0. 13484 | 0. 011 | 0. 049 | 0. 034383 | Opc-G | PRR5          |
| GUSB. 8     | 2. 36E-06 | -0. 25208 | 0. 197 | 0. 277 | 0. 035298 | Opc-G | GUSB          |
| DLGAP5. 9   | 2. 39E-06 | -0. 10746 | 0. 004 | 0. 037 | 0. 03567  | Opc-G | DLGAP5        |
| RNASE4. 4   | 2. 39E-06 | -0. 21846 | 0. 004 | 0. 037 | 0. 035758 | Opc-G | RNASE4        |
| ZNF140. 6   | 2. 40E-06 | 0. 17738  | 0. 154 | 0. 104 | 0. 035815 | Opc-G | ZNF140        |
| CITED1. 9   | 2. 41E-06 | -0. 17638 | 0. 087 | 0. 155 | 0. 03598  | Opc-G | CITED1        |
| AC010642. 2 | 2. 41E-06 | -0. 10924 | 0. 142 | 0. 228 | 0. 036049 | Opc-G | AC010642. 1   |
| NFATC2. 7   | 2. 41E-06 | -0. 17408 | 0. 011 | 0. 049 | 0. 036052 | Opc-G | NFATC2        |
| IFNAR1. 7   | 2. 43E-06 | -0. 1956  | 0. 202 | 0. 295 | 0. 036287 | Opc-G | IFNAR1        |
| BYSL. 6     | 2. 44E-06 | 0. 199378 | 0. 153 | 0. 104 | 0. 036513 | Opc-G | BYSL          |
| VAT1. 4     | 2. 45E-06 | -0. 12321 | 0. 127 | 0. 207 | 0. 036609 | Opc-G | VAT1          |
| PIM1. 5     | 2. 46E-06 | -0. 21736 | 0. 074 | 0. 134 | 0. 036807 | Opc-G | PIM1          |
| HDAC9. 7    | 2. 48E-06 | 0. 113631 | 0. 179 | 0. 122 | 0. 036994 | Opc-G | HDAC9         |
| OAS2. 5     | 2. 48E-06 | -0. 15371 | 0. 007 | 0. 042 | 0. 037078 | Opc-G | OAS2          |
| OSBPL1A. 7  | 2. 50E-06 | -0. 17695 | 0. 12  | 0. 195 | 0. 037379 | Opc-G | OSBPL1A       |
| TBC1D10C. 2 | 2. 50E-06 | -0. 15485 | 0. 001 | 0. 032 | 0. 037401 | Opc-G | TBC1D10C      |
| DAPP1. 9    | 2. 52E-06 | -0. 13822 | 0      | 0. 029 | 0. 037708 | Opc-G | DAPP1         |
| NVL. 6      | 2. 52E-06 | 0. 188597 | 0. 156 | 0. 105 | 0. 037728 | Opc-G | NVL           |
| TLR3. 5     | 2. 53E-06 | -0. 14459 | 0. 003 | 0. 035 | 0. 037817 | Opc-G | TLR3          |
| DNAJC15. 7  | 2. 53E-06 | -0. 20822 | 0. 294 | 0. 396 | 0. 037864 | Opc-G | DNAJC15       |
| STK24. 5    | 2. 54E-06 | -0. 10459 | 0. 048 | 0. 104 | 0. 037913 | Opc-G | STK24         |
| MYO1C. 4    | 2. 57E-06 | -0. 11349 | 0. 049 | 0. 105 | 0. 038393 | Opc-G | MYO1C         |
| SH2B2. 8    | 2. 58E-06 | 0. 144277 | 0. 157 | 0. 105 | 0. 038513 | Opc-G | SH2B2         |
| PLA2G2A. 5  | 2. 61E-06 | -0. 41328 | 0. 005 | 0. 039 | 0. 038975 | Opc-G | PLA2G2A       |
| HSPA5. 5    | 2. 66E-06 | -0. 24773 | 0. 611 | 0. 66  | 0. 039788 | Opc-G | HSPA5         |
| C15orf57. 2 | 2. 66E-06 | -0. 19421 | 0. 067 | 0. 128 | 0. 039823 | Opc-G | C15orf57      |
| PCBD2. 4    | 2. 67E-06 | -0. 10924 | 0. 036 | 0. 086 | 0. 039927 | Opc-G | PCBD2         |
| CLIC2. 7    | 2. 67E-06 | -0. 17488 | 0. 01  | 0. 046 | 0. 039971 | Opc-G | CLIC2         |
| LMF2. 5     | 2. 69E-06 | -0. 19178 | 0. 128 | 0. 206 | 0. 040245 | Opc-G | LMF2          |
| SHROOM2. 8  | 2. 70E-06 | 0. 172467 | 0. 096 | 0. 056 | 0. 040376 | Opc-G | SHROOM2       |
| TMEM54. 7   | 2. 72E-06 | 0. 200598 | 0. 243 | 0. 192 | 0. 040689 | Opc-G | TMEM54        |
| INPPL1. 5   | 2. 74E-06 | -0. 13077 | 0. 063 | 0. 124 | 0. 040913 | Opc-G | INPPL1        |
| MB21D1. 2   | 2. 75E-06 | -0. 10007 | 0. 004 | 0. 037 | 0. 04114  | Opc-G | MB21D1        |
| IFI6. 6     | 2. 77E-06 | -0. 2292  | 0. 321 | 0. 412 | 0. 041444 | Opc-G | IFI6          |
| ADIPOR2. 4  | 2. 79E-06 | -0. 17    | 0. 087 | 0. 155 | 0. 041644 | Opc-G | ADIPOR2       |
| MTF2. 7     | 2. 80E-06 | 0. 133363 | 0. 314 | 0. 25  | 0. 041836 | Opc-G | MTF2          |
| NUB1. 3     | 2. 83E-06 | 0. 14613  | 0. 311 | 0. 249 | 0. 042328 | Opc-G | NUB1          |
| HENMT1. 8   | 2. 84E-06 | -0. 15053 | 0. 003 | 0. 034 | 0. 042393 | Opc-G | HENMT1        |
| TP53I13. 7  | 2. 84E-06 | -0. 1416  | 0. 164 | 0. 25  | 0. 04245  | Opc-G | TP53I13       |
| ADRBK1. 1C  | 2. 85E-06 | -0. 17457 | 0. 044 | 0. 096 | 0. 042655 | Opc-G | ADRBK1        |
| CPED1. 7    | 2. 89E-06 | -0. 13884 | 0. 003 | 0. 034 | 0. 043159 | Opc-G | CPED1         |
| SH3BP2. 9   | 2. 91E-06 | -0. 15037 | 0. 078 | 0. 142 | 0. 043529 | Opc-G | SH3BP2        |
| SLC35B4. 6  | 2. 94E-06 | 0. 18496  | 0. 245 | 0. 188 | 0. 043972 | Opc-G | SLC35B4       |
| RAB1B. 4    | 2. 95E-06 | -0. 18753 | 0. 157 | 0. 241 | 0. 044103 | Opc-G | RAB1B         |
| ZC3HC1. 7   | 2. 96E-06 | 0. 169675 | 0. 172 | 0. 121 | 0. 044201 | Opc-G | ZC3HC1        |
| RP11-71N1   | 2. 96E-06 | 0. 290005 | 0. 182 | 0. 133 | 0. 044224 | Opc-G | RP11-71N10. 1 |
| CHMP4B. 6   | 2. 97E-06 | -0. 1953  | 0. 388 | 0. 458 | 0. 044384 | Opc-G | CHMP4B        |
| SEPT1. 2    | 2. 97E-06 | -0. 13571 | 0. 053 | 0. 11  | 0. 044384 | Opc-G | 1-Sep         |
| ARHGEF6. 4  | 3. 01E-06 | -0. 14852 | 0. 081 | 0. 146 | 0. 044973 | Opc-G | ARHGEF6       |

|             |           |           |        |        |           |       |               |
|-------------|-----------|-----------|--------|--------|-----------|-------|---------------|
| MELK. 6     | 3. 03E-06 | -0. 10513 | 0. 011 | 0. 048 | 0. 045354 | Opc-G | MELK          |
| WASL. 7     | 3. 04E-06 | 0. 20364  | 0. 232 | 0. 18  | 0. 045371 | Opc-G | WASL          |
| CTC-338M1   | 3. 08E-06 | 0. 173375 | 0. 108 | 0. 066 | 0. 045986 | Opc-G | CTC-338M12. 5 |
| SLC39A8. 8  | 3. 09E-06 | -0. 15376 | 0. 019 | 0. 061 | 0. 04623  | Opc-G | SLC39A8       |
| PLVAP. 6    | 3. 10E-06 | -0. 15488 | 0. 001 | 0. 032 | 0. 046391 | Opc-G | PLVAP         |
| BRIX1. 8    | 3. 11E-06 | 0. 132133 | 0. 307 | 0. 25  | 0. 046548 | Opc-G | BRIX1         |
| TMEM140. 5  | 3. 12E-06 | -0. 16237 | 0. 012 | 0. 05  | 0. 046591 | Opc-G | TMEM140       |
| SPATA2L. 4  | 3. 12E-06 | -0. 10982 | 0. 051 | 0. 107 | 0. 046644 | Opc-G | SPATA2L       |
| CDS2. 3     | 3. 14E-06 | -0. 15551 | 0. 164 | 0. 253 | 0. 046967 | Opc-G | CDS2          |
| ARRB1. 7    | 3. 17E-06 | -0. 15411 | 0. 008 | 0. 044 | 0. 047442 | Opc-G | ARRB1         |
| KIAA1614. 3 | 3. 18E-06 | 0. 108121 | 0. 068 | 0. 036 | 0. 047572 | Opc-G | KIAA1614      |
| LPL. 6      | 3. 23E-06 | -0. 15338 | 0. 093 | 0. 162 | 0. 048312 | Opc-G | LPL           |
| FUBP1. 9    | 3. 26E-06 | 0. 137129 | 0. 286 | 0. 22  | 0. 048704 | Opc-G | FUBP1         |
| ZNF430. 6   | 3. 30E-06 | 0. 14219  | 0. 245 | 0. 185 | 0. 049361 | Opc-G | ZNF430        |
| CDV3. 5     | 3. 31E-06 | -0. 16666 | 0. 187 | 0. 281 | 0. 049516 | Opc-G | CDV3          |
| POU2F1. 8   | 3. 31E-06 | 0. 185107 | 0. 212 | 0. 157 | 0. 04952  | Opc-G | POU2F1        |
| ACSL4. 8    | 3. 37E-06 | -0. 13098 | 0. 037 | 0. 086 | 0. 050305 | Opc-G | ACSL4         |
| ZFC3H1. 3   | 3. 38E-06 | -0. 11292 | 0. 067 | 0. 128 | 0. 050508 | Opc-G | ZFC3H1        |
| URGCP. 6    | 3. 40E-06 | 0. 152261 | 0. 164 | 0. 112 | 0. 050739 | Opc-G | URGCP         |
| ZNF780A. 4  | 3. 46E-06 | -0. 15987 | 0. 026 | 0. 071 | 0. 051757 | Opc-G | ZNF780A       |
| FFAR4. 5    | 3. 47E-06 | -0. 13849 | 0. 001 | 0. 031 | 0. 051819 | Opc-G | FFAR4         |
| HS6ST1. 3   | 3. 47E-06 | -0. 10468 | 0. 055 | 0. 112 | 0. 051829 | Opc-G | HS6ST1        |
| RCC2. 7     | 3. 49E-06 | 0. 104203 | 0. 232 | 0. 171 | 0. 052151 | Opc-G | RCC2          |
| GPATCH8. 7  | 3. 52E-06 | 0. 149412 | 0. 355 | 0. 3   | 0. 052629 | Opc-G | GPATCH8       |
| NFE2L2. 7   | 3. 58E-06 | -0. 19599 | 0. 377 | 0. 474 | 0. 053476 | Opc-G | NFE2L2        |
| SLC12A7. 5  | 3. 58E-06 | -0. 11538 | 0. 008 | 0. 044 | 0. 053491 | Opc-G | SLC12A7       |
| C11orf95. 3 | 3. 58E-06 | 0. 129639 | 0. 075 | 0. 041 | 0. 053497 | Opc-G | C11orf95      |
| SPTSSB. 6   | 3. 59E-06 | -0. 11695 | 0. 005 | 0. 039 | 0. 053678 | Opc-G | SPTSSB        |
| RUSC1. 6    | 3. 64E-06 | -0. 1046  | 0. 077 | 0. 142 | 0. 054332 | Opc-G | RUSC1         |
| APO00439. 3 | 3. 64E-06 | -0. 16277 | 0      | 0. 029 | 0. 054369 | Opc-G | APO00439. 1   |
| CTSW. 5     | 3. 65E-06 | -0. 20504 | 0. 001 | 0. 031 | 0. 054574 | Opc-G | CTSW          |
| ABHD5. 4    | 3. 68E-06 | -0. 19956 | 0. 059 | 0. 115 | 0. 054988 | Opc-G | ABHD5         |
| ARF6. 9     | 3. 68E-06 | -0. 17971 | 0. 253 | 0. 349 | 0. 055    | Opc-G | ARF6          |
| ATP2A2. 5   | 3. 68E-06 | 0. 144204 | 0. 336 | 0. 275 | 0. 055006 | Opc-G | ATP2A2        |
| MIER1. 4    | 3. 69E-06 | -0. 14988 | 0. 107 | 0. 179 | 0. 055076 | Opc-G | MIER1         |
| KCTD5. 5    | 3. 69E-06 | 0. 180965 | 0. 261 | 0. 204 | 0. 055098 | Opc-G | KCTD5         |
| AC009501. 3 | 3. 72E-06 | -0. 5223  | 0. 1   | 0. 16  | 0. 055548 | Opc-G | AC009501. 4   |
| IRAK1. 7    | 3. 72E-06 | -0. 16283 | 0. 096 | 0. 162 | 0. 055553 | Opc-G | IRAK1         |
| OLFML2B. 9  | 3. 75E-06 | -0. 2589  | 0. 027 | 0. 071 | 0. 056055 | Opc-G | OLFML2B       |
| ANPEP. 8    | 3. 84E-06 | -0. 13885 | 0. 003 | 0. 034 | 0. 057409 | Opc-G | ANPEP         |
| TMEM53. 5   | 3. 87E-06 | -0. 11517 | 0. 052 | 0. 108 | 0. 057759 | Opc-G | TMEM53        |
| PRKACA. 3   | 3. 87E-06 | -0. 12357 | 0. 087 | 0. 154 | 0. 057766 | Opc-G | PRKACA        |
| FAM159A. 9  | 3. 88E-06 | -0. 16736 | 0. 011 | 0. 047 | 0. 057918 | Opc-G | FAM159A       |
| ACTL6A. 7   | 3. 94E-06 | 0. 192619 | 0. 307 | 0. 254 | 0. 058939 | Opc-G | ACTL6A        |
| ISYNA1. 6   | 3. 99E-06 | -0. 12888 | 0. 075 | 0. 138 | 0. 05968  | Opc-G | ISYNA1        |
| MYNN. 4     | 4. 02E-06 | 0. 153301 | 0. 149 | 0. 1   | 0. 060029 | Opc-G | MYNN          |
| WDR70. 2    | 4. 04E-06 | 0. 137279 | 0. 204 | 0. 147 | 0. 060306 | Opc-G | WDR70         |
| MTMR4. 8    | 4. 04E-06 | 0. 192572 | 0. 209 | 0. 157 | 0. 060336 | Opc-G | MTMR4         |
| ZNF467. 7   | 4. 11E-06 | -0. 12797 | 0. 004 | 0. 036 | 0. 06141  | Opc-G | ZNF467        |
| EMC6. 5     | 4. 15E-06 | 0. 112282 | 0. 505 | 0. 429 | 0. 061986 | Opc-G | EMC6          |
| LRRC8B. 3   | 4. 19E-06 | 0. 139477 | 0. 13  | 0. 084 | 0. 062658 | Opc-G | LRRC8B        |

|            |          |          |       |       |          |       |               |
|------------|----------|----------|-------|-------|----------|-------|---------------|
| STRIP1.7   | 4.21E-06 | 0.157304 | 0.173 | 0.121 | 0.062968 | Opc-G | STRIP1        |
| GNB4.8     | 4.24E-06 | -0.18014 | 0.157 | 0.238 | 0.063321 | Opc-G | GNB4          |
| GS1-124K5  | 4.27E-06 | 0.194156 | 0.16  | 0.111 | 0.063755 | Opc-G | GS1-124K5.4   |
| LSM14A.5   | 4.33E-06 | 0.126176 | 0.432 | 0.378 | 0.064781 | Opc-G | LSM14A        |
| AAK1.6     | 4.36E-06 | 0.114243 | 0.34  | 0.272 | 0.065091 | Opc-G | AAK1          |
| OSBPL11.2  | 4.38E-06 | -0.11454 | 0.044 | 0.096 | 0.065438 | Opc-G | OSBPL11       |
| OASL.6     | 4.40E-06 | -0.13764 | 0.001 | 0.031 | 0.065769 | Opc-G | OASL          |
| C4orf27.7  | 4.47E-06 | 0.141832 | 0.373 | 0.315 | 0.066744 | Opc-G | C4orf27       |
| FAM212A.8  | 4.50E-06 | -0.21484 | 0.014 | 0.051 | 0.067304 | Opc-G | FAM212A       |
| ITGA4.9    | 4.55E-06 | -0.1518  | 0.01  | 0.045 | 0.067963 | Opc-G | ITGA4         |
| TMEM185B.4 | 4.57E-06 | 0.112823 | 0.087 | 0.05  | 0.06829  | Opc-G | TMEM185B      |
| MIR210HG.4 | 4.59E-06 | -0.10201 | 0.042 | 0.095 | 0.068552 | Opc-G | MIR210HG      |
| CTD-2336C  | 4.61E-06 | -0.11736 | 0.145 | 0.229 | 0.068875 | Opc-G | CTD-233602.1  |
| SHCBP1.6   | 4.71E-06 | -0.12265 | 0.016 | 0.056 | 0.070323 | Opc-G | SHCBP1        |
| FAM49A.6   | 4.76E-06 | -0.21388 | 0.108 | 0.175 | 0.071174 | Opc-G | FAM49A        |
| IL12RB1.9  | 4.88E-06 | -0.14875 | 0.003 | 0.033 | 0.072921 | Opc-G | IL12RB1       |
| CDC20.7    | 4.90E-06 | -0.19211 | 0.027 | 0.071 | 0.073181 | Opc-G | CDC20         |
| FO XK1.5   | 4.97E-06 | 0.158778 | 0.175 | 0.124 | 0.074311 | Opc-G | FO XK1        |
| SAMD9.3    | 5.08E-06 | -0.11352 | 0.033 | 0.08  | 0.075856 | Opc-G | SAMD9         |
| DDX17.5    | 5.09E-06 | 0.10637  | 0.488 | 0.42  | 0.075996 | Opc-G | DDX17         |
| FAM129B.7  | 5.09E-06 | -0.11272 | 0.03  | 0.076 | 0.076119 | Opc-G | FAM129B       |
| CDK2AP1.3  | 5.10E-06 | 0.14675  | 0.148 | 0.101 | 0.076254 | Opc-G | CDK2AP1       |
| ABCD4.5    | 5.11E-06 | 0.139821 | 0.31  | 0.253 | 0.076437 | Opc-G | ABCD4         |
| HSDL1.9    | 5.12E-06 | 0.17035  | 0.18  | 0.127 | 0.076522 | Opc-G | HSDL1         |
| CAMK2N2.1  | 5.12E-06 | 0.108005 | 0.051 | 0.024 | 0.07657  | Opc-G | CAMK2N2       |
| TRIO.8     | 5.13E-06 | 0.175862 | 0.224 | 0.169 | 0.07669  | Opc-G | TRIO          |
| ATP5E.7    | 5.13E-06 | -0.13758 | 0.966 | 0.91  | 0.076718 | Opc-G | ATP5E         |
| IGFLR1.7   | 5.16E-06 | -0.20891 | 0.018 | 0.057 | 0.077153 | Opc-G | IGFLR1        |
| DNAJC3-AS  | 5.19E-06 | 0.149584 | 0.083 | 0.047 | 0.077579 | Opc-G | DNAJC3-AS1    |
| RP11-191L  | 5.19E-06 | 0.126    | 0.046 | 0.021 | 0.077601 | Opc-G | RP11-191L17.1 |
| MT1G.8     | 5.23E-06 | -0.44664 | 0.074 | 0.131 | 0.078089 | Opc-G | MT1G          |
| TPST1.8    | 5.23E-06 | 0.156674 | 0.299 | 0.235 | 0.078177 | Opc-G | TPST1         |
| DMAP1.6    | 5.27E-06 | 0.150136 | 0.303 | 0.247 | 0.07873  | Opc-G | DMAP1         |
| FBRSL1.3   | 5.38E-06 | 0.153172 | 0.09  | 0.053 | 0.080466 | Opc-G | FBRSL1        |
| MPPE1      | 5.49E-06 | -0.19362 | 0.108 | 0.177 | 0.082009 | Opc-G | MPPE1         |
| CXCL12.5   | 5.51E-06 | -0.19577 | 0.01  | 0.044 | 0.082367 | Opc-G | CXCL12        |
| CD1D.8     | 5.52E-06 | -0.18898 | 0.007 | 0.04  | 0.08252  | Opc-G | CD1D          |
| DHX58.4    | 5.53E-06 | -0.10135 | 0.008 | 0.043 | 0.082687 | Opc-G | DHX58         |
| TSSC1.5    | 5.56E-06 | 0.149274 | 0.311 | 0.257 | 0.083111 | Opc-G | TSSC1         |
| FAM177B.6  | 5.57E-06 | -0.15856 | 0.003 | 0.033 | 0.083179 | Opc-G | FAM177B       |
| TMEM86A.8  | 5.58E-06 | -0.15655 | 0.012 | 0.049 | 0.083376 | Opc-G | TMEM86A       |
| TRAPPC3.3  | 5.63E-06 | -0.21968 | 0.344 | 0.444 | 0.084104 | Opc-G | TRAPPC3       |
| USP6NL.5   | 5.64E-06 | -0.11687 | 0.037 | 0.086 | 0.084264 | Opc-G | USP6NL        |
| RFX2.4     | 5.64E-06 | -0.14057 | 0.046 | 0.098 | 0.084285 | Opc-G | RFX2          |
| P2RY11.8   | 5.72E-06 | -0.16844 | 0.041 | 0.09  | 0.085438 | Opc-G | P2RY11        |
| SP140.9    | 5.73E-06 | -0.13143 | 0.003 | 0.033 | 0.085689 | Opc-G | SP140         |
| ARNT2.9    | 5.74E-06 | 0.189569 | 0.154 | 0.108 | 0.085715 | Opc-G | ARNT2         |
| BTN3A2.4   | 5.74E-06 | -0.17754 | 0.086 | 0.151 | 0.085769 | Opc-G | BTN3A2        |
| PCCB.3     | 5.77E-06 | 0.180504 | 0.224 | 0.171 | 0.086171 | Opc-G | PCCB          |
| HSPA13.9   | 5.77E-06 | 0.184614 | 0.251 | 0.196 | 0.086285 | Opc-G | HSPA13        |
| SEMA5B     | 5.78E-06 | 0.101315 | 0.057 | 0.029 | 0.086341 | Opc-G | SEMA5B        |

|             |           |           |        |        |           |       |                |
|-------------|-----------|-----------|--------|--------|-----------|-------|----------------|
| CIITA. 6    | 5. 78E-06 | -0. 15676 | 0. 007 | 0. 04  | 0. 086367 | Opc-G | CIITA          |
| SLC7A5. 9   | 5. 79E-06 | -0. 25975 | 0. 085 | 0. 142 | 0. 086573 | Opc-G | SLC7A5         |
| MAST4. 6    | 5. 84E-06 | 0. 124638 | 0. 087 | 0. 05  | 0. 087248 | Opc-G | MAST4          |
| MMP9. 4     | 5. 86E-06 | -0. 1108  | 0. 001 | 0. 03  | 0. 087574 | Opc-G | MMP9           |
| RAP2A. 2    | 5. 93E-06 | 0. 17242  | 0. 179 | 0. 128 | 0. 088654 | Opc-G | RAP2A          |
| NIPA2. 6    | 6. 04E-06 | -0. 13823 | 0. 182 | 0. 27  | 0. 090262 | Opc-G | NIPA2          |
| RP11-489C   | 6. 07E-06 | -0. 15595 | 0. 001 | 0. 03  | 0. 090727 | Opc-G | RP11-489018. 1 |
| ZNF429. 8   | 6. 10E-06 | 0. 154477 | 0. 176 | 0. 126 | 0. 091148 | Opc-G | ZNF429         |
| ATP6V1E2. 6 | 6. 15E-06 | 0. 138061 | 0. 097 | 0. 058 | 0. 091918 | Opc-G | ATP6V1E2       |
| ATF6. 5     | 6. 17E-06 | -0. 17213 | 0. 171 | 0. 254 | 0. 092138 | Opc-G | ATF6           |
| C4orf3. 6   | 6. 20E-06 | -0. 26568 | 0. 608 | 0. 649 | 0. 092628 | Opc-G | C4orf3         |
| CDC25B. 7   | 6. 22E-06 | -0. 11826 | 0. 123 | 0. 198 | 0. 092944 | Opc-G | CDC25B         |
| C1orf52. 9  | 6. 23E-06 | 0. 143799 | 0. 355 | 0. 304 | 0. 093044 | Opc-G | C1orf52        |
| ZNF846. 7   | 6. 23E-06 | -0. 1835  | 0. 029 | 0. 073 | 0. 093074 | Opc-G | ZNF846         |
| PIF1. 5     | 6. 23E-06 | -0. 1076  | 0. 015 | 0. 053 | 0. 093116 | Opc-G | PIF1           |
| TFPI. 5     | 6. 25E-06 | 0. 118746 | 0. 089 | 0. 051 | 0. 093416 | Opc-G | TFPI           |
| RP11-742E   | 6. 26E-06 | -0. 1485  | 0. 003 | 0. 032 | 0. 093478 | Opc-G | RP11-742B18. 1 |
| ANTXR2. 4   | 6. 26E-06 | 0. 105083 | 0. 092 | 0. 053 | 0. 093508 | Opc-G | ANTXR2         |
| MAPK13. 6   | 6. 26E-06 | -0. 11808 | 0. 003 | 0. 032 | 0. 093621 | Opc-G | MAPK13         |
| CTNND2. 7   | 6. 30E-06 | 0. 176771 | 0. 206 | 0. 154 | 0. 094133 | Opc-G | CTNND2         |
| STAT6. 10   | 6. 33E-06 | -0. 19196 | 0. 016 | 0. 054 | 0. 094641 | Opc-G | STAT6          |
| SLC25A39. 6 | 6. 38E-06 | -0. 19502 | 0. 321 | 0. 411 | 0. 095338 | Opc-G | SLC25A39       |
| ZNFX1. 2    | 6. 38E-06 | -0. 1111  | 0. 081 | 0. 145 | 0. 095371 | Opc-G | ZNFX1          |
| CP. 5       | 6. 38E-06 | -0. 13681 | 0. 001 | 0. 03  | 0. 095383 | Opc-G | CP             |
| PSMD6. 5    | 6. 44E-06 | 0. 106024 | 0. 403 | 0. 347 | 0. 096259 | Opc-G | PSMD6          |
| CDC73. 3    | 6. 58E-06 | -0. 14474 | 0. 119 | 0. 194 | 0. 098297 | Opc-G | CDC73          |
| PPT1. 9     | 6. 60E-06 | -0. 27721 | 0. 512 | 0. 559 | 0. 098638 | Opc-G | PPT1           |
| SMARCA5. 7  | 6. 64E-06 | 0. 139722 | 0. 398 | 0. 345 | 0. 099247 | Opc-G | SMARCA5        |
| SULF2. 5    | 6. 70E-06 | 0. 202871 | 0. 206 | 0. 156 | 0. 100186 | Opc-G | SULF2          |
| ETFB. 4     | 6. 72E-06 | -0. 22306 | 0. 418 | 0. 506 | 0. 100384 | Opc-G | ETFB           |
| MLXIPL. 6   | 6. 75E-06 | -0. 17911 | 0. 008 | 0. 041 | 0. 100849 | Opc-G | MLXIPL         |
| ITGB7. 7    | 6. 77E-06 | -0. 11271 | 0      | 0. 027 | 0. 101238 | Opc-G | ITGB7          |
| DMTF1. 6    | 6. 79E-06 | 0. 142639 | 0. 198 | 0. 145 | 0. 101499 | Opc-G | DMTF1          |
| ERBB2IP. 6  | 6. 80E-06 | -0. 13548 | 0. 146 | 0. 226 | 0. 101677 | Opc-G | ERBB2IP        |
| CENPM. 9    | 6. 92E-06 | -0. 13588 | 0. 031 | 0. 077 | 0. 103377 | Opc-G | CENPM          |
| GTF2IRD1. 7 | 7. 00E-06 | 0. 109179 | 0. 119 | 0. 075 | 0. 104579 | Opc-G | GTF2IRD1       |
| MLKL. 6     | 7. 00E-06 | -0. 12301 | 0. 001 | 0. 03  | 0. 104602 | Opc-G | MLKL           |
| VNN2. 7     | 7. 03E-06 | -0. 11148 | 0      | 0. 027 | 0. 105007 | Opc-G | VNN2           |
| MFSD2A. 6   | 7. 03E-06 | -0. 12789 | 0. 049 | 0. 102 | 0. 105019 | Opc-G | MFSD2A         |
| SSBP3. 8    | 7. 09E-06 | 0. 174685 | 0. 175 | 0. 125 | 0. 105976 | Opc-G | SSBP3          |
| LXN. 6      | 7. 29E-06 | -0. 1236  | 0      | 0. 027 | 0. 108917 | Opc-G | LXN            |
| LTB. 5      | 7. 32E-06 | -0. 18709 | 0. 004 | 0. 034 | 0. 109337 | Opc-G | LTB            |
| AHDC1. 8    | 7. 66E-06 | 0. 137137 | 0. 146 | 0. 098 | 0. 114499 | Opc-G | AHDC1          |
| ATP9A. 9    | 7. 73E-06 | 0. 196739 | 0. 156 | 0. 109 | 0. 11554  | Opc-G | ATP9A          |
| PYCR2. 4    | 7. 75E-06 | -0. 18151 | 0. 164 | 0. 246 | 0. 115838 | Opc-G | PYCR2          |
| HK3. 6      | 7. 84E-06 | -0. 1028  | 0      | 0. 027 | 0. 117178 | Opc-G | HK3            |
| RER1. 7     | 7. 88E-06 | -0. 20683 | 0. 426 | 0. 502 | 0. 117727 | Opc-G | RER1           |
| PRMT5. 8    | 8. 02E-06 | 0. 137549 | 0. 201 | 0. 147 | 0. 119908 | Opc-G | PRMT5          |
| STARD4. 3   | 8. 10E-06 | -0. 10316 | 0. 004 | 0. 034 | 0. 121021 | Opc-G | STARD4         |
| RNF111. 4   | 8. 11E-06 | -0. 1135  | 0. 037 | 0. 084 | 0. 121214 | Opc-G | RNF111         |
| SPECC1. 9   | 8. 15E-06 | 0. 147117 | 0. 347 | 0. 292 | 0. 121824 | Opc-G | SPECC1         |

|             |           |           |        |        |           |       |           |
|-------------|-----------|-----------|--------|--------|-----------|-------|-----------|
| ARL8A. 8    | 8. 16E-06 | 0. 135912 | 0. 324 | 0. 269 | 0. 121895 | Opc-G | ARL8A     |
| ELOF1. 7    | 8. 18E-06 | 0. 121292 | 0. 475 | 0. 42  | 0. 122243 | Opc-G | ELOF1     |
| SLC7A8. 5   | 8. 20E-06 | -0. 12089 | 0. 011 | 0. 046 | 0. 122509 | Opc-G | SLC7A8    |
| FRMD8. 3    | 8. 33E-06 | -0. 12609 | 0. 063 | 0. 12  | 0. 124556 | Opc-G | FRMD8     |
| CCNB2. 9    | 8. 34E-06 | -0. 17034 | 0. 025 | 0. 066 | 0. 124601 | Opc-G | CCNB2     |
| PPIC. 8     | 8. 38E-06 | -0. 11219 | 0. 113 | 0. 188 | 0. 125159 | Opc-G | PPIC      |
| GPHN. 6     | 8. 40E-06 | 0. 151864 | 0. 104 | 0. 064 | 0. 125499 | Opc-G | GPHN      |
| MAPRE3. 8   | 8. 47E-06 | 0. 193366 | 0. 23  | 0. 175 | 0. 126591 | Opc-G | MAPRE3    |
| ZNF197. 2   | 8. 49E-06 | 0. 133927 | 0. 104 | 0. 064 | 0. 126878 | Opc-G | ZNF197    |
| AP3S1. 5    | 8. 55E-06 | -0. 2264  | 0. 339 | 0. 433 | 0. 127755 | Opc-G | AP3S1     |
| GAS7. 3     | 8. 60E-06 | -0. 16312 | 0. 059 | 0. 113 | 0. 128518 | Opc-G | GAS7      |
| MTRNR2L8. 8 | 8. 63E-06 | -0. 36165 | 0. 128 | 0. 195 | 0. 128982 | Opc-G | MTRNR2L8  |
| COMTD1. 6   | 8. 69E-06 | -0. 107   | 0. 022 | 0. 063 | 0. 129846 | Opc-G | COMTD1    |
| SPG21. 7    | 8. 69E-06 | -0. 16718 | 0. 294 | 0. 391 | 0. 129857 | Opc-G | SPG21     |
| IFITM1. 4   | 8. 75E-06 | -0. 19261 | 0. 007 | 0. 039 | 0. 130709 | Opc-G | IFITM1    |
| HEXIM1. 4   | 8. 83E-06 | -0. 17667 | 0. 146 | 0. 223 | 0. 131938 | Opc-G | HEXIM1    |
| SFXN3. 4    | 8. 94E-06 | -0. 12928 | 0. 06  | 0. 115 | 0. 133539 | Opc-G | SFXN3     |
| SUMF1. 4    | 8. 94E-06 | -0. 13933 | 0. 079 | 0. 141 | 0. 133612 | Opc-G | SUMF1     |
| PPT2        | 8. 97E-06 | 0. 103159 | 0. 057 | 0. 029 | 0. 134109 | Opc-G | PPT2      |
| TPMT. 8     | 9. 19E-06 | -0. 18951 | 0. 127 | 0. 196 | 0. 137307 | Opc-G | TPMT      |
| MAP1S. 2    | 9. 26E-06 | -0. 13429 | 0. 107 | 0. 175 | 0. 138389 | Opc-G | MAP1S     |
| PEX5. 4     | 9. 27E-06 | 0. 126274 | 0. 134 | 0. 088 | 0. 138513 | Opc-G | PEX5      |
| SSBP2. 9    | 9. 29E-06 | -0. 15249 | 0. 186 | 0. 275 | 0. 138782 | Opc-G | SSBP2     |
| AIFM1. 5    | 9. 30E-06 | -0. 11643 | 0. 085 | 0. 149 | 0. 138992 | Opc-G | AIFM1     |
| IFIT1. 6    | 9. 33E-06 | -0. 18355 | 0. 031 | 0. 076 | 0. 139474 | Opc-G | IFIT1     |
| JAK3. 4     | 9. 39E-06 | -0. 11226 | 0. 001 | 0. 029 | 0. 140321 | Opc-G | JAK3      |
| C21orf59. 9 | 9. 40E-06 | 0. 122493 | 0. 363 | 0. 313 | 0. 140535 | Opc-G | C21orf59  |
| TNFRSF11A   | 9. 41E-06 | -0. 10644 | 0      | 0. 026 | 0. 140675 | Opc-G | TNFRSF11A |
| PTBP3. 6    | 9. 42E-06 | -0. 15887 | 0. 06  | 0. 114 | 0. 140743 | Opc-G | PTBP3     |
| CALCOCO2. 9 | 9. 50E-06 | -0. 15296 | 0. 124 | 0. 198 | 0. 142007 | Opc-G | CALCOCO2  |
| IGF1R. 6    | 9. 54E-06 | 0. 132018 | 0. 107 | 0. 067 | 0. 142558 | Opc-G | IGF1R     |
| CNFN. 4     | 9. 56E-06 | -0. 10525 | 0. 001 | 0. 029 | 0. 142909 | Opc-G | CNFN      |
| SQLE. 7     | 9. 56E-06 | 0. 234469 | 0. 292 | 0. 246 | 0. 142935 | Opc-G | SQLE      |
| BASP1. 9    | 9. 74E-06 | 0. 140802 | 0. 433 | 0. 368 | 0. 145578 | Opc-G | BASP1     |
| CCNG1. 5    | 9. 78E-06 | -0. 21689 | 0. 191 | 0. 275 | 0. 146182 | Opc-G | CCNG1     |
| TOX4. 1     | 9. 79E-06 | 0. 115899 | 0. 318 | 0. 258 | 0. 14637  | Opc-G | TOX4      |
| PCSK7. 5    | 9. 90E-06 | 0. 107238 | 0. 336 | 0. 278 | 0. 147939 | Opc-G | PCSK7     |
| TCOF1. 6    | 9. 90E-06 | -0. 23076 | 0. 133 | 0. 199 | 0. 147951 | Opc-G | TCOF1     |
| TMA16. 5    | 9. 93E-06 | 0. 157728 | 0. 251 | 0. 197 | 0. 148401 | Opc-G | TMA16     |
| RECK. 1     | 1. 00E-05 | -0. 10527 | 0. 026 | 0. 068 | 0. 15002  | Opc-G | RECK      |
| AGA. 4      | 1. 01E-05 | -0. 13995 | 0. 092 | 0. 157 | 0. 150485 | Opc-G | AGA       |
| FLNA. 8     | 1. 01E-05 | -0. 14296 | 0. 175 | 0. 255 | 0. 15152  | Opc-G | FLNA      |
| GALNT6. 6   | 1. 02E-05 | -0. 12627 | 0. 003 | 0. 031 | 0. 152505 | Opc-G | GALNT6    |
| TSHZ1. 6    | 1. 02E-05 | 0. 11507  | 0. 113 | 0. 071 | 0. 152825 | Opc-G | TSHZ1     |
| BET1L. 1    | 1. 02E-05 | -0. 10747 | 0. 064 | 0. 122 | 0. 153016 | Opc-G | BET1L     |
| MAP4K1. 8   | 1. 03E-05 | -0. 13932 | 0. 003 | 0. 031 | 0. 153839 | Opc-G | MAP4K1    |
| GABARAP. 7  | 1. 05E-05 | -0. 37445 | 0. 4   | 0. 465 | 0. 157291 | Opc-G | GABARAP   |
| SAR1A. 7    | 1. 07E-05 | -0. 23008 | 0. 223 | 0. 303 | 0. 160012 | Opc-G | SAR1A     |
| FAM111A. 6  | 1. 07E-05 | -0. 14916 | 0. 059 | 0. 113 | 0. 160389 | Opc-G | FAM111A   |
| HDAC10. 5   | 1. 08E-05 | -0. 13505 | 0. 057 | 0. 11  | 0. 160811 | Opc-G | HDAC10    |
| ITGA6. 4    | 1. 08E-05 | -0. 12087 | 0. 034 | 0. 08  | 0. 160945 | Opc-G | ITGA6     |

|             |           |           |        |        |           |       |                 |
|-------------|-----------|-----------|--------|--------|-----------|-------|-----------------|
| RP11-557H   | 1. 08E-05 | -0. 14216 | 0. 001 | 0. 029 | 0. 161002 | Opc-G | RP11-557H15. 4  |
| SMC4. 8     | 1. 08E-05 | -0. 1911  | 0. 145 | 0. 216 | 0. 161843 | Opc-G | SMC4            |
| HNRNPLL. 4  | 1. 09E-05 | 0. 166972 | 0. 239 | 0. 187 | 0. 162742 | Opc-G | HNRNPLL         |
| KLF7. 7     | 1. 09E-05 | 0. 136331 | 0. 264 | 0. 202 | 0. 162799 | Opc-G | KLF7            |
| EIF4G3. 3   | 1. 10E-05 | 0. 160571 | 0. 223 | 0. 171 | 0. 163649 | Opc-G | EIF4G3          |
| BAG1. 4     | 1. 10E-05 | 0. 127691 | 0. 41  | 0. 348 | 0. 163774 | Opc-G | BAG1            |
| B3GALNT2. 1 | 1. 11E-05 | 0. 174697 | 0. 131 | 0. 088 | 0. 165457 | Opc-G | B3GALNT2        |
| CCNDBP1. 8  | 1. 11E-05 | -0. 21556 | 0. 138 | 0. 209 | 0. 166614 | Opc-G | CCNDBP1         |
| HLX. 5      | 1. 12E-05 | -0. 12431 | 0. 01  | 0. 043 | 0. 16715  | Opc-G | HLX             |
| VEGFB. 5    | 1. 12E-05 | -0. 11418 | 0. 085 | 0. 148 | 0. 167185 | Opc-G | VEGFB           |
| SALL2. 2    | 1. 12E-05 | 0. 102604 | 0. 071 | 0. 039 | 0. 167417 | Opc-G | SALL2           |
| RANBP2. 8   | 1. 12E-05 | -0. 17813 | 0. 142 | 0. 213 | 0. 168056 | Opc-G | RANBP2          |
| RP11-398K   | 1. 13E-05 | 0. 133453 | 0. 115 | 0. 073 | 0. 168155 | Opc-G | RP11-398K22. 12 |
| KANSL2. 6   | 1. 13E-05 | 0. 143821 | 0. 198 | 0. 146 | 0. 168702 | Opc-G | KANSL2          |
| AMFR. 3     | 1. 13E-05 | -0. 10688 | 0. 107 | 0. 177 | 0. 168741 | Opc-G | AMFR            |
| NRDE2. 3    | 1. 13E-05 | 0. 100683 | 0. 143 | 0. 095 | 0. 169344 | Opc-G | NRDE2           |
| FAM134B. 8  | 1. 14E-05 | -0. 11554 | 0. 102 | 0. 17  | 0. 169957 | Opc-G | FAM134B         |
| PIEZO1. 5   | 1. 14E-05 | -0. 10195 | 0. 029 | 0. 072 | 0. 170388 | Opc-G | PIEZO1          |
| TRPS1. 1    | 1. 14E-05 | 0. 200893 | 0. 168 | 0. 122 | 0. 17059  | Opc-G | TRPS1           |
| RP1-223E5   | 1. 15E-05 | 0. 123866 | 0. 064 | 0. 034 | 0. 171474 | Opc-G | RP1-223E5. 4    |
| SPG7. 3     | 1. 15E-05 | 0. 14051  | 0. 291 | 0. 238 | 0. 171669 | Opc-G | SPG7            |
| TMEM205. 8  | 1. 17E-05 | -0. 21251 | 0. 406 | 0. 502 | 0. 174537 | Opc-G | TMEM205         |
| SCD. 9      | 1. 17E-05 | -0. 26171 | 0. 146 | 0. 217 | 0. 174887 | Opc-G | SCD             |
| FCER1A. 4   | 1. 17E-05 | -0. 13826 | 0      | 0. 026 | 0. 175167 | Opc-G | FCER1A          |
| ZNF736. 1   | 1. 20E-05 | 0. 106843 | 0. 079 | 0. 045 | 0. 179262 | Opc-G | ZNF736          |
| PUS3. 7     | 1. 21E-05 | 0. 160736 | 0. 157 | 0. 111 | 0. 180401 | Opc-G | PUS3            |
| CDH11. 8    | 1. 21E-05 | 0. 187722 | 0. 157 | 0. 113 | 0. 180615 | Opc-G | CDH11           |
| PNPLA6. 4   | 1. 22E-05 | -0. 13816 | 0. 104 | 0. 17  | 0. 181878 | Opc-G | PNPLA6          |
| HMGCL. 1    | 1. 24E-05 | -0. 16941 | 0. 145 | 0. 223 | 0. 184819 | Opc-G | HMGCL           |
| MPC1. 6     | 1. 24E-05 | -0. 23455 | 0. 421 | 0. 492 | 0. 185362 | Opc-G | MPC1            |
| CCAR2. 4    | 1. 24E-05 | 0. 159665 | 0. 194 | 0. 143 | 0. 185737 | Opc-G | CCAR2           |
| CARF. 5     | 1. 24E-05 | 0. 135136 | 0. 115 | 0. 074 | 0. 185813 | Opc-G | CARF            |
| GMPPA. 4    | 1. 25E-05 | -0. 12742 | 0. 097 | 0. 164 | 0. 187015 | Opc-G | GMPPA           |
| APO05530. 1 | 1. 26E-05 | -0. 14183 | 0. 003 | 0. 031 | 0. 187739 | Opc-G | APO05530. 2     |
| CLK4. 6     | 1. 26E-05 | 0. 172917 | 0. 212 | 0. 159 | 0. 18776  | Opc-G | CLK4            |
| YIPF1. 2    | 1. 26E-05 | -0. 13435 | 0. 113 | 0. 184 | 0. 187873 | Opc-G | YIPF1           |
| UGCG. 4     | 1. 26E-05 | -0. 16951 | 0. 1   | 0. 162 | 0. 188171 | Opc-G | UGCG            |
| SMIM8. 2    | 1. 26E-05 | 0. 134764 | 0. 149 | 0. 103 | 0. 188405 | Opc-G | SMIM8           |
| TSPAN15. 9  | 1. 28E-05 | -0. 22716 | 0. 037 | 0. 08  | 0. 19117  | Opc-G | TSPAN15         |
| SIGLEC1. 6  | 1. 29E-05 | -0. 13327 | 0. 003 | 0. 031 | 0. 192704 | Opc-G | SIGLEC1         |
| MSH6. 7     | 1. 29E-05 | 0. 146665 | 0. 173 | 0. 123 | 0. 192713 | Opc-G | MSH6            |
| KCNE3. 9    | 1. 29E-05 | -0. 11193 | 0. 001 | 0. 028 | 0. 193118 | Opc-G | KCNE3           |
| POLR2C. 8   | 1. 29E-05 | 0. 117623 | 0. 398 | 0. 347 | 0. 193498 | Opc-G | POLR2C          |
| PLEK2. 7    | 1. 31E-05 | -0. 10607 | 0      | 0. 025 | 0. 195463 | Opc-G | PLEK2           |
| TMEM25. 8   | 1. 31E-05 | 0. 181998 | 0. 165 | 0. 119 | 0. 195753 | Opc-G | TMEM25          |
| TPR. 6      | 1. 32E-05 | 0. 101004 | 0. 455 | 0. 401 | 0. 197301 | Opc-G | TPR             |
| METTL21A. 1 | 1. 32E-05 | 0. 103046 | 0. 235 | 0. 18  | 0. 197381 | Opc-G | METTL21A        |
| SLC15A4. 2  | 1. 35E-05 | -0. 12976 | 0. 033 | 0. 077 | 0. 201389 | Opc-G | SLC15A4         |
| CHAMP1. 4   | 1. 36E-05 | 0. 195102 | 0. 171 | 0. 126 | 0. 203326 | Opc-G | CHAMP1          |
| PHACTR4. 5  | 1. 37E-05 | 0. 138043 | 0. 251 | 0. 199 | 0. 204513 | Opc-G | PHACTR4         |
| SGPP1. 7    | 1. 37E-05 | -0. 143   | 0. 037 | 0. 082 | 0. 204954 | Opc-G | SGPP1           |

|            |           |           |        |        |           |       |                |
|------------|-----------|-----------|--------|--------|-----------|-------|----------------|
| HDHD3. 2   | 1. 38E-05 | -0. 11163 | 0. 059 | 0. 113 | 0. 205746 | Opc-G | HDHD3          |
| CATSPER1.  | 1. 39E-05 | -0. 13804 | 0. 001 | 0. 028 | 0. 207298 | Opc-G | CATSPER1       |
| KANSL1. 7  | 1. 39E-05 | 0. 163088 | 0. 213 | 0. 162 | 0. 207998 | Opc-G | KANSL1         |
| GCC2. 2    | 1. 40E-05 | -0. 19881 | 0. 195 | 0. 277 | 0. 209767 | Opc-G | GCC2           |
| CTPS2. 1   | 1. 40E-05 | 0. 12464  | 0. 079 | 0. 045 | 0. 209854 | Opc-G | CTPS2          |
| ERMAP. 4   | 1. 41E-05 | -0. 10173 | 0. 012 | 0. 047 | 0. 210379 | Opc-G | ERMAP          |
| WDFY4. 8   | 1. 41E-05 | -0. 12216 | 0. 001 | 0. 028 | 0. 211318 | Opc-G | WDFY4          |
| AQP9. 5    | 1. 42E-05 | -0. 12124 | 0. 003 | 0. 03  | 0. 211687 | Opc-G | AQP9           |
| NCKAP1. 7  | 1. 42E-05 | 0. 190085 | 0. 232 | 0. 185 | 0. 21291  | Opc-G | NCKAP1         |
| ZNF24. 8   | 1. 43E-05 | 0. 142949 | 0. 347 | 0. 297 | 0. 213102 | Opc-G | ZNF24          |
| ACAP2. 4   | 1. 43E-05 | -0. 14342 | 0. 115 | 0. 182 | 0. 213428 | Opc-G | ACAP2          |
| CYB561A3.  | 1. 43E-05 | -0. 17675 | 0. 093 | 0. 154 | 0. 213746 | Opc-G | CYB561A3       |
| PARP4. 3   | 1. 43E-05 | -0. 10606 | 0. 04  | 0. 087 | 0. 213844 | Opc-G | PARP4          |
| CBLL1. 2   | 1. 43E-05 | 0. 120242 | 0. 152 | 0. 104 | 0. 213869 | Opc-G | CBLL1          |
| CTD-2017D  | 1. 44E-05 | 0. 140645 | 0. 092 | 0. 055 | 0. 215006 | Opc-G | CTD-2017D11. 1 |
| FASTK. 7   | 1. 45E-05 | 0. 145606 | 0. 381 | 0. 335 | 0. 216722 | Opc-G | FASTK          |
| SPINT1. 9  | 1. 45E-05 | -0. 11154 | 0. 005 | 0. 035 | 0. 216848 | Opc-G | SPINT1         |
| TFDP2. 5   | 1. 46E-05 | 0. 151474 | 0. 265 | 0. 209 | 0. 217642 | Opc-G | TFDP2          |
| PSMD13. 5  | 1. 47E-05 | 0. 101757 | 0. 469 | 0. 409 | 0. 219143 | Opc-G | PSMD13         |
| ZNF12. 7   | 1. 48E-05 | 0. 181828 | 0. 167 | 0. 121 | 0. 220444 | Opc-G | ZNF12          |
| MYO7A. 8   | 1. 48E-05 | -0. 15191 | 0. 005 | 0. 035 | 0. 220462 | Opc-G | MYO7A          |
| GPT2. 8    | 1. 48E-05 | 0. 17258  | 0. 193 | 0. 144 | 0. 220874 | Opc-G | GPT2           |
| ZNF614. 1  | 1. 49E-05 | 0. 135999 | 0. 079 | 0. 046 | 0. 222797 | Opc-G | ZNF614         |
| ZYX. 9     | 1. 50E-05 | -0. 20261 | 0. 332 | 0. 406 | 0. 223994 | Opc-G | ZYX            |
| BRD8. 6    | 1. 51E-05 | 0. 147335 | 0. 21  | 0. 159 | 0. 226391 | Opc-G | BRD8           |
| FAM20C. 8  | 1. 54E-05 | -0. 18907 | 0. 153 | 0. 228 | 0. 229786 | Opc-G | FAM20C         |
| EMD. 4     | 1. 54E-05 | -0. 18339 | 0. 205 | 0. 289 | 0. 22991  | Opc-G | EMD            |
| HGF. 4     | 1. 56E-05 | -0. 12467 | 0. 003 | 0. 03  | 0. 232653 | Opc-G | HGF            |
| MTMR14. 7  | 1. 58E-05 | -0. 15967 | 0. 152 | 0. 226 | 0. 236548 | Opc-G | MTMR14         |
| HNRNPUL2.  | 1. 59E-05 | -0. 11436 | 0. 101 | 0. 167 | 0. 237158 | Opc-G | HNRNPUL2       |
| SH3GLB2. 4 | 1. 59E-05 | -0. 10691 | 0. 066 | 0. 122 | 0. 23741  | Opc-G | SH3GLB2        |
| LDLR. 6    | 1. 60E-05 | -0. 10399 | 0. 051 | 0. 102 | 0. 238864 | Opc-G | LDLR           |
| MAG. 8     | 1. 60E-05 | -0. 35821 | 0. 008 | 0. 039 | 0. 239145 | Opc-G | MAG            |
| MICU3. 8   | 1. 64E-05 | 0. 14306  | 0. 123 | 0. 08  | 0. 24447  | Opc-G | MICU3          |
| TMEM198. 7 | 1. 64E-05 | 0. 206672 | 0. 156 | 0. 112 | 0. 244788 | Opc-G | TMEM198        |
| LUC7L. 7   | 1. 66E-05 | 0. 173273 | 0. 291 | 0. 242 | 0. 247361 | Opc-G | LUC7L          |
| ADCK2. 6   | 1. 67E-05 | -0. 15649 | 0. 085 | 0. 143 | 0. 249444 | Opc-G | ADCK2          |
| PTCRA. 6   | 1. 69E-05 | -0. 11792 | 0      | 0. 025 | 0. 252437 | Opc-G | PTCRA          |
| TTLL1. 5   | 1. 70E-05 | 0. 170818 | 0. 13  | 0. 088 | 0. 254612 | Opc-G | TTLL1          |
| LONP2. 6   | 1. 71E-05 | 0. 133346 | 0. 299 | 0. 245 | 0. 255366 | Opc-G | LONP2          |
| DRAP1. 1   | 1. 72E-05 | -0. 1724  | 0. 654 | 0. 676 | 0. 256983 | Opc-G | DRAP1          |
| HSPA14. 3  | 1. 73E-05 | -0. 10508 | 0. 083 | 0. 145 | 0. 258091 | Opc-G | HSPA14         |
| KCNN4. 6   | 1. 73E-05 | -0. 11336 | 0. 005 | 0. 035 | 0. 259233 | Opc-G | KCNN4          |
| GPR132. 7  | 1. 75E-05 | -0. 13065 | 0. 004 | 0. 032 | 0. 260844 | Opc-G | GPR132         |
| AP5B1. 4   | 1. 75E-05 | -0. 11887 | 0. 018 | 0. 054 | 0. 260859 | Opc-G | AP5B1          |
| CEND1. 7   | 1. 75E-05 | 0. 195277 | 0. 182 | 0. 136 | 0. 261878 | Opc-G | CEND1          |
| SMC5. 2    | 1. 76E-05 | -0. 11386 | 0. 115 | 0. 184 | 0. 262741 | Opc-G | SMC5           |
| PRKD3. 4   | 1. 77E-05 | 0. 140406 | 0. 194 | 0. 143 | 0. 264248 | Opc-G | PRKD3          |
| ENSA. 7    | 1. 77E-05 | -0. 20809 | 0. 421 | 0. 506 | 0. 264754 | Opc-G | ENSA           |
| PTPN18. 1C | 1. 80E-05 | -0. 15293 | 0. 143 | 0. 215 | 0. 268778 | Opc-G | PTPN18         |
| TRMT10C. 7 | 1. 81E-05 | 0. 18821  | 0. 294 | 0. 247 | 0. 269871 | Opc-G | TRMT10C        |



|              |           |           |        |        |           |       |          |
|--------------|-----------|-----------|--------|--------|-----------|-------|----------|
| OGFR. 4      | 1. 81E-05 | -0. 12154 | 0. 204 | 0. 292 | 0. 270481 | Opc-G | OGFR     |
| DDR GK1. 3   | 1. 82E-05 | -0. 17412 | 0. 322 | 0. 424 | 0. 271409 | Opc-G | DDR GK1  |
| IRAK2. 3     | 1. 82E-05 | -0. 12249 | 0. 016 | 0. 052 | 0. 271886 | Opc-G | IRAK2    |
| DHX30. 5     | 1. 84E-05 | 0. 176893 | 0. 298 | 0. 255 | 0. 274274 | Opc-G | DHX30    |
| ALDH18A1. 1. | 1. 84E-05 | 0. 160353 | 0. 124 | 0. 083 | 0. 275535 | Opc-G | ALDH18A1 |
| USP36. 7     | 1. 85E-05 | -0. 17675 | 0. 085 | 0. 142 | 0. 276295 | Opc-G | USP36    |
| GDPD1. 7     | 1. 86E-05 | 0. 152911 | 0. 102 | 0. 064 | 0. 277549 | Opc-G | GDPD1    |
| UTP23. 4     | 1. 86E-05 | 0. 20534  | 0. 194 | 0. 146 | 0. 278051 | Opc-G | UTP23    |
| AHR. 9       | 1. 87E-05 | -0. 16936 | 0. 026 | 0. 065 | 0. 279857 | Opc-G | AHR      |
| IFIT2. 7     | 1. 88E-05 | -0. 17604 | 0. 04  | 0. 085 | 0. 280537 | Opc-G | IFIT2    |
| TMPO. 8      | 1. 89E-05 | 0. 104723 | 0. 253 | 0. 19  | 0. 281761 | Opc-G | TMPO     |
| RGS3. 7      | 1. 89E-05 | 0. 172559 | 0. 148 | 0. 104 | 0. 282199 | Opc-G | RGS3     |
| CSK. 10      | 1. 89E-05 | -0. 21457 | 0. 094 | 0. 151 | 0. 282791 | Opc-G | CSK      |
| ALKBH7. 3    | 1. 90E-05 | -0. 17584 | 0. 385 | 0. 477 | 0. 28341  | Opc-G | ALKBH7   |
| SMAD9. 7     | 1. 92E-05 | 0. 123589 | 0. 108 | 0. 068 | 0. 287286 | Opc-G | SMAD9    |
| RPS6KB2. 5   | 1. 94E-05 | -0. 14603 | 0. 154 | 0. 232 | 0. 289774 | Opc-G | RPS6KB2  |
| TMEM255B. 1. | 1. 95E-05 | -0. 21777 | 0. 02  | 0. 057 | 0. 292036 | Opc-G | TMEM255B |
| DPF2. 5      | 1. 96E-05 | 0. 139223 | 0. 273 | 0. 221 | 0. 292748 | Opc-G | DPF2     |
| GLIS2        | 1. 96E-05 | 0. 131002 | 0. 064 | 0. 035 | 0. 292876 | Opc-G | GLIS2    |
| SLC32A1. 8   | 1. 97E-05 | -0. 11585 | 0. 008 | 0. 039 | 0. 293787 | Opc-G | SLC32A1  |
| TIFA. 5      | 2. 03E-05 | -0. 12579 | 0. 022 | 0. 06  | 0. 302672 | Opc-G | TIFA     |
| NUDT4. 2     | 2. 03E-05 | 0. 138931 | 0. 251 | 0. 2   | 0. 302772 | Opc-G | NUDT4    |
| CCDC106. 1   | 2. 03E-05 | -0. 12614 | 0. 161 | 0. 237 | 0. 303427 | Opc-G | CCDC106  |
| RPP30. 5     | 2. 05E-05 | -0. 17404 | 0. 108 | 0. 173 | 0. 305881 | Opc-G | RPP30    |
| TRUB2. 5     | 2. 06E-05 | 0. 200121 | 0. 257 | 0. 21  | 0. 308096 | Opc-G | TRUB2    |
| OPA3. 1      | 2. 09E-05 | -0. 12285 | 0. 06  | 0. 113 | 0. 311647 | Opc-G | OPA3     |
| DTNBP1. 7    | 2. 09E-05 | -0. 11484 | 0. 138 | 0. 211 | 0. 312548 | Opc-G | DTNBP1   |
| APC. 9       | 2. 11E-05 | 0. 178364 | 0. 26  | 0. 21  | 0. 315724 | Opc-G | APC      |
| IFT27. 7     | 2. 12E-05 | 0. 174573 | 0. 301 | 0. 254 | 0. 316896 | Opc-G | IFT27    |
| GMIP. 9      | 2. 16E-05 | -0. 14699 | 0. 034 | 0. 077 | 0. 322531 | Opc-G | GMIP     |
| ITSN1. 4     | 2. 19E-05 | -0. 15118 | 0. 09  | 0. 15  | 0. 326595 | Opc-G | ITSN1    |
| TCEAL1. 7    | 2. 19E-05 | 0. 123844 | 0. 306 | 0. 252 | 0. 327084 | Opc-G | TCEAL1   |
| PGM1. 6      | 2. 20E-05 | 0. 143538 | 0. 298 | 0. 247 | 0. 328505 | Opc-G | PGM1     |
| PIANP. 8     | 2. 21E-05 | 0. 190901 | 0. 119 | 0. 079 | 0. 330311 | Opc-G | PIANP    |
| IL27RA. 4    | 2. 21E-05 | -0. 10743 | 0. 02  | 0. 058 | 0. 330344 | Opc-G | IL27RA   |
| PACSIN2. 9   | 2. 24E-05 | -0. 12757 | 0. 112 | 0. 178 | 0. 33443  | Opc-G | PACSIN2  |
| CHN2. 6      | 2. 26E-05 | -0. 21625 | 0. 053 | 0. 101 | 0. 337104 | Opc-G | CHN2     |
| BTG3. 7      | 2. 28E-05 | 0. 108    | 0. 425 | 0. 368 | 0. 341287 | Opc-G | BTG3     |
| ACTL6B. 9    | 2. 28E-05 | 0. 158077 | 0. 116 | 0. 074 | 0. 3414   | Opc-G | ACTL6B   |
| PKN1. 4      | 2. 29E-05 | -0. 11248 | 0. 167 | 0. 248 | 0. 342353 | Opc-G | PKN1     |
| ZNF384. 1    | 2. 30E-05 | 0. 11436  | 0. 1   | 0. 062 | 0. 343542 | Opc-G | ZNF384   |
| RCBTB1. 5    | 2. 32E-05 | 0. 100838 | 0. 109 | 0. 069 | 0. 347137 | Opc-G | RCBTB1   |
| ZNF398. 7    | 2. 33E-05 | 0. 100013 | 0. 092 | 0. 055 | 0. 348581 | Opc-G | ZNF398   |
| PI4K2A. 8    | 2. 34E-05 | -0. 12566 | 0. 027 | 0. 067 | 0. 350083 | Opc-G | PI4K2A   |
| DPF3. 6      | 2. 35E-05 | 0. 18764  | 0. 178 | 0. 133 | 0. 351059 | Opc-G | DPF3     |
| FOLR1. 6     | 2. 39E-05 | -0. 16469 | 0. 007 | 0. 036 | 0. 356436 | Opc-G | FOLR1    |
| SNAPC2. 3    | 2. 39E-05 | -0. 11456 | 0. 134 | 0. 208 | 0. 357144 | Opc-G | SNAPC2   |
| ARL2. 6      | 2. 40E-05 | -0. 26384 | 0. 359 | 0. 444 | 0. 358689 | Opc-G | ARL2     |
| EGLN3. 6     | 2. 42E-05 | -0. 15601 | 0. 026 | 0. 065 | 0. 361094 | Opc-G | EGLN3    |
| CHD1. 7      | 2. 42E-05 | -0. 17154 | 0. 219 | 0. 298 | 0. 362059 | Opc-G | CHD1     |
| GHDC. 6      | 2. 43E-05 | -0. 13378 | 0. 048 | 0. 096 | 0. 363414 | Opc-G | GHDC     |

|            |          |          |       |       |          |       |           |
|------------|----------|----------|-------|-------|----------|-------|-----------|
| ACSL5.9    | 2.44E-05 | -0.13083 | 0.007 | 0.036 | 0.36442  | Opc-G | ACSL5     |
| TMC06      | 2.45E-05 | -0.10114 | 0.011 | 0.043 | 0.365935 | Opc-G | TMC06     |
| CNEP1R1.3  | 2.47E-05 | -0.12978 | 0.061 | 0.114 | 0.369395 | Opc-G | CNEP1R1   |
| NRIP1.4    | 2.48E-05 | -0.10301 | 0.071 | 0.126 | 0.371089 | Opc-G | NRIP1     |
| ZDHHC4.8   | 2.51E-05 | 0.11277  | 0.396 | 0.352 | 0.375512 | Opc-G | ZDHHC4    |
| PPP1R10.5  | 2.54E-05 | 0.116178 | 0.34  | 0.284 | 0.379832 | Opc-G | PPP1R10   |
| APOL2.6    | 2.55E-05 | -0.22721 | 0.053 | 0.102 | 0.381778 | Opc-G | APOL2     |
| ACYP2.7    | 2.60E-05 | 0.112349 | 0.358 | 0.309 | 0.38843  | Opc-G | ACYP2     |
| FAM46A.6   | 2.61E-05 | 0.170856 | 0.243 | 0.193 | 0.390297 | Opc-G | FAM46A    |
| CFB.3      | 2.62E-05 | -0.10764 | 0     | 0.024 | 0.391365 | Opc-G | CFB       |
| PTK2.7     | 2.62E-05 | 0.151693 | 0.224 | 0.175 | 0.391633 | Opc-G | PTK2      |
| LIPT1.1    | 2.63E-05 | 0.115282 | 0.116 | 0.076 | 0.393029 | Opc-G | LIPT1     |
| OSTC.7     | 2.64E-05 | -0.22876 | 0.423 | 0.508 | 0.395225 | Opc-G | OSTC      |
| PDCD4.9    | 2.65E-05 | -0.22279 | 0.096 | 0.152 | 0.396391 | Opc-G | PDCD4     |
| NUMB.9     | 2.65E-05 | -0.19825 | 0.112 | 0.174 | 0.396655 | Opc-G | NUMB      |
| MGRN1.6    | 2.66E-05 | 0.151732 | 0.255 | 0.205 | 0.398234 | Opc-G | MGRN1     |
| KCNIP1.8   | 2.69E-05 | 0.160786 | 0.139 | 0.096 | 0.402309 | Opc-G | KCNIP1    |
| SKIL.8     | 2.73E-05 | -0.24899 | 0.223 | 0.29  | 0.407531 | Opc-G | SKIL      |
| TBKBP1     | 2.75E-05 | 0.120706 | 0.06  | 0.032 | 0.41023  | Opc-G | TBKBP1    |
| SKIV2L2.6  | 2.75E-05 | 0.14376  | 0.202 | 0.153 | 0.410674 | Opc-G | SKIV2L2   |
| CCL5.5     | 2.76E-05 | -0.32618 | 0.022 | 0.058 | 0.412359 | Opc-G | CCL5      |
| CYP19A1.5  | 2.82E-05 | -0.11474 | 0.001 | 0.026 | 0.421676 | Opc-G | CYP19A1   |
| UBAC1.5    | 2.84E-05 | -0.13845 | 0.148 | 0.223 | 0.423762 | Opc-G | UBAC1     |
| RECQL.6    | 2.85E-05 | -0.11765 | 0.111 | 0.177 | 0.425256 | Opc-G | RECQL     |
| TTF2.2     | 2.85E-05 | -0.11067 | 0.027 | 0.067 | 0.425821 | Opc-G | TTF2      |
| EML2.4     | 2.85E-05 | -0.13097 | 0.041 | 0.086 | 0.426074 | Opc-G | EML2      |
| RNPEPL1.7  | 2.88E-05 | -0.12869 | 0.078 | 0.134 | 0.430364 | Opc-G | RNPEPL1   |
| TNIP2.5    | 2.93E-05 | -0.11064 | 0.104 | 0.169 | 0.437841 | Opc-G | TNIP2     |
| COL6A1.9   | 3.00E-05 | -0.18354 | 0.164 | 0.233 | 0.44774  | Opc-G | COL6A1    |
| TLR10.8    | 3.03E-05 | -0.11618 | 0.001 | 0.026 | 0.453295 | Opc-G | TLR10     |
| TNFRSF21.3 | 3.04E-05 | 0.213216 | 0.205 | 0.16  | 0.454284 | Opc-G | TNFRSF21  |
| RAB11FIP1  | 3.05E-05 | -0.11418 | 0.003 | 0.028 | 0.455582 | Opc-G | RAB11FIP1 |
| MMP7.5     | 3.05E-05 | -0.22093 | 0.004 | 0.031 | 0.456121 | Opc-G | MMP7      |
| INPP1.6    | 3.08E-05 | 0.148364 | 0.197 | 0.148 | 0.46017  | Opc-G | INPP1     |
| GID8.3     | 3.08E-05 | -0.12616 | 0.171 | 0.252 | 0.460682 | Opc-G | GID8      |
| ZNF431.1   | 3.10E-05 | 0.128005 | 0.123 | 0.081 | 0.463152 | Opc-G | ZNF431    |
| RAB4B.5    | 3.11E-05 | -0.15391 | 0.186 | 0.268 | 0.464805 | Opc-G | RAB4B     |
| RNF181.4   | 3.12E-05 | -0.25048 | 0.477 | 0.56  | 0.466679 | Opc-G | RNF181    |
| CYB5R3.5   | 3.15E-05 | 0.12586  | 0.407 | 0.358 | 0.471207 | Opc-G | CYB5R3    |
| ISCU.6     | 3.16E-05 | -0.22017 | 0.505 | 0.57  | 0.471983 | Opc-G | ISCU      |
| TGS1.4     | 3.18E-05 | 0.150604 | 0.206 | 0.157 | 0.475367 | Opc-G | TGS1      |
| EHD1.7     | 3.20E-05 | 0.14983  | 0.165 | 0.119 | 0.477897 | Opc-G | EHD1      |
| MAN2B2.1   | 3.21E-05 | -0.11068 | 0.037 | 0.08  | 0.479091 | Opc-G | MAN2B2    |
| NIFK-AS1.3 | 3.21E-05 | 0.123952 | 0.127 | 0.085 | 0.479478 | Opc-G | NIFK-AS1  |
| TLE1.8     | 3.21E-05 | 0.209346 | 0.209 | 0.167 | 0.480101 | Opc-G | TLE1      |
| PVRL1.9    | 3.24E-05 | 0.107178 | 0.096 | 0.059 | 0.483609 | Opc-G | PVRL1     |
| CCDC18.6   | 3.26E-05 | -0.13451 | 0.037 | 0.079 | 0.486938 | Opc-G | CCDC18    |
| C12orf10.3 | 3.27E-05 | 0.132457 | 0.362 | 0.315 | 0.488543 | Opc-G | C12orf10  |
| GTPBP10.3  | 3.28E-05 | 0.107174 | 0.137 | 0.093 | 0.489927 | Opc-G | GTPBP10   |
| TPT1.7     | 3.28E-05 | -0.10439 | 0.988 | 0.951 | 0.490635 | Opc-G | TPT1      |
| HSD11B1.2  | 3.28E-05 | -0.13452 | 0.001 | 0.026 | 0.490725 | Opc-G | HSD11B1   |

|              |          |          |       |       |          |       |              |
|--------------|----------|----------|-------|-------|----------|-------|--------------|
| BNIP3.7      | 3.30E-05 | -0.18089 | 0.146 | 0.219 | 0.493423 | Opc-G | BNIP3        |
| POGZ.7       | 3.32E-05 | 0.141726 | 0.258 | 0.207 | 0.496373 | Opc-G | POGZ         |
| ACO2.1       | 3.35E-05 | 0.104207 | 0.408 | 0.362 | 0.500685 | Opc-G | ACO2         |
| HOMER3.5     | 3.36E-05 | -0.11184 | 0.168 | 0.246 | 0.502549 | Opc-G | HOMER3       |
| LAMP1.8      | 3.37E-05 | -0.19007 | 0.474 | 0.524 | 0.503261 | Opc-G | LAMP1        |
| DHRS4L2.4    | 3.38E-05 | -0.14188 | 0.182 | 0.267 | 0.505319 | Opc-G | DHRS4L2      |
| ANKRD40.5    | 3.40E-05 | -0.13611 | 0.115 | 0.179 | 0.508809 | Opc-G | ANKRD40      |
| C1orf109.3   | 3.41E-05 | 0.146179 | 0.175 | 0.129 | 0.509217 | Opc-G | C1orf109     |
| NDUFA9.5     | 3.41E-05 | 0.11105  | 0.429 | 0.381 | 0.509732 | Opc-G | NDUFA9       |
| SLC29A3.5    | 3.45E-05 | -0.14783 | 0.014 | 0.046 | 0.516232 | Opc-G | SLC29A3      |
| RAD54L2.6    | 3.48E-05 | 0.157095 | 0.148 | 0.104 | 0.520381 | Opc-G | RAD54L2      |
| PEX10.6      | 3.49E-05 | 0.194058 | 0.234 | 0.189 | 0.520911 | Opc-G | PEX10        |
| PITPNA.4     | 3.49E-05 | -0.10648 | 0.119 | 0.186 | 0.521353 | Opc-G | PITPNA       |
| TREML1.7     | 3.51E-05 | -0.11582 | 0     | 0.023 | 0.524253 | Opc-G | TREML1       |
| JADE2.2      | 3.52E-05 | -0.10461 | 0.016 | 0.051 | 0.525396 | Opc-G | JADE2        |
| AFAP1.7      | 3.53E-05 | 0.155921 | 0.123 | 0.083 | 0.527645 | Opc-G | AFAP1        |
| FAM103A1.3   | 3.53E-05 | -0.14637 | 0.169 | 0.248 | 0.528163 | Opc-G | FAM103A1     |
| KLF15.4      | 3.54E-05 | 0.143006 | 0.067 | 0.037 | 0.529222 | Opc-G | KLF15        |
| SESN1.7      | 3.54E-05 | -0.19448 | 0.057 | 0.105 | 0.529669 | Opc-G | SESN1        |
| RMND5B.5     | 3.61E-05 | 0.146922 | 0.209 | 0.161 | 0.539086 | Opc-G | RMND5B       |
| MLF1.7       | 3.64E-05 | -0.11264 | 0.167 | 0.247 | 0.543381 | Opc-G | MLF1         |
| CASC3.6      | 3.69E-05 | 0.171645 | 0.231 | 0.182 | 0.551212 | Opc-G | CASC3        |
| SLFN5.3      | 3.70E-05 | -0.11958 | 0.025 | 0.062 | 0.553402 | Opc-G | SLFN5        |
| HNRNPF.6     | 3.73E-05 | -0.21132 | 0.437 | 0.513 | 0.556989 | Opc-G | HNRNPF       |
| MFGE8.6      | 3.81E-05 | 0.140203 | 0.235 | 0.187 | 0.569878 | Opc-G | MFGE8        |
| CEACAM4.8    | 3.85E-05 | -0.10447 | 0.001 | 0.025 | 0.575103 | Opc-G | CEACAM4      |
| NDEL1.4      | 3.87E-05 | -0.14526 | 0.097 | 0.157 | 0.579079 | Opc-G | NDEL1        |
| ZFHX4.9      | 3.88E-05 | 0.196419 | 0.191 | 0.149 | 0.57958  | Opc-G | ZFHX4        |
| PIK3R2.2     | 3.88E-05 | 0.105284 | 0.081 | 0.048 | 0.579782 | Opc-G | PIK3R2       |
| ZNF674-AS1   | 3.90E-05 | 0.144045 | 0.086 | 0.052 | 0.582973 | Opc-G | ZNF674-AS1   |
| RP4-635E18.8 | 3.91E-05 | 0.105878 | 0.079 | 0.047 | 0.584452 | Opc-G | RP4-635E18.8 |
| RP11-214N9.1 | 3.92E-05 | 0.103596 | 0.042 | 0.02  | 0.586186 | Opc-G | RP11-214N9.1 |
| USP8.2       | 3.93E-05 | -0.18    | 0.183 | 0.264 | 0.587703 | Opc-G | USP8         |
| RAB3IL1.7    | 3.98E-05 | -0.11542 | 0.007 | 0.035 | 0.594737 | Opc-G | RAB3IL1      |
| ALOX15B.8    | 4.01E-05 | -0.13667 | 0.003 | 0.028 | 0.599754 | Opc-G | ALOX15B      |
| CTD-307407.5 | 4.09E-05 | 0.114097 | 0.092 | 0.057 | 0.611783 | Opc-G | CTD-307407.5 |
| GNPTG.4      | 4.11E-05 | 0.152814 | 0.303 | 0.255 | 0.613592 | Opc-G | GNPTG        |
| FBXO17.10    | 4.12E-05 | 0.228393 | 0.183 | 0.141 | 0.616153 | Opc-G | FBXO17       |
| GLA.9        | 4.13E-05 | -0.22546 | 0.156 | 0.219 | 0.617059 | Opc-G | GLA          |
| CTA-384D8.34 | 4.14E-05 | -0.10469 | 0.001 | 0.025 | 0.61834  | Opc-G | CTA-384D8.34 |
| CREB3L2.8    | 4.23E-05 | -0.16598 | 0.075 | 0.127 | 0.632052 | Opc-G | CREB3L2      |
| MRT04.4      | 4.27E-05 | 0.167237 | 0.288 | 0.243 | 0.637643 | Opc-G | MRT04        |
| C1orf35.8    | 4.30E-05 | 0.154751 | 0.31  | 0.26  | 0.64291  | Opc-G | C1orf35      |
| ST18.6       | 4.30E-05 | -0.13497 | 0.011 | 0.041 | 0.643235 | Opc-G | ST18         |
| TNFAIP8L3.8  | 4.33E-05 | -0.10239 | 0.004 | 0.03  | 0.646539 | Opc-G | TNFAIP8L3    |
| CENPW.6      | 4.36E-05 | -0.16766 | 0.07  | 0.121 | 0.651669 | Opc-G | CENPW        |
| ANKRD17.7    | 4.39E-05 | 0.1759   | 0.26  | 0.214 | 0.655662 | Opc-G | ANKRD17      |
| IFIT3.8      | 4.39E-05 | -0.18609 | 0.061 | 0.111 | 0.655716 | Opc-G | IFIT3        |
| CYTL1.9      | 4.39E-05 | -0.2658  | 0.066 | 0.113 | 0.656648 | Opc-G | CYTL1        |
| CAPS.5       | 4.41E-05 | -0.102   | 0.033 | 0.074 | 0.659733 | Opc-G | CAPS         |
| TNIP1.5      | 4.42E-05 | -0.13459 | 0.142 | 0.213 | 0.659811 | Opc-G | TNIP1        |

|             |           |           |        |        |           |       |                |
|-------------|-----------|-----------|--------|--------|-----------|-------|----------------|
| KCNK6. 8    | 4. 42E-05 | -0. 12054 | 0. 011 | 0. 042 | 0. 660052 | Opc-G | KCNK6          |
| KIFC1. 8    | 4. 45E-05 | -0. 13536 | 0. 025 | 0. 061 | 0. 664998 | Opc-G | KIFC1          |
| ANAPC4. 1   | 4. 45E-05 | -0. 11044 | 0. 06  | 0. 11  | 0. 66525  | Opc-G | ANAPC4         |
| RP11-539L   | 4. 50E-05 | 0. 145375 | 0. 135 | 0. 093 | 0. 672395 | Opc-G | RP11-539L10. 3 |
| ITGB2-AS1   | 4. 52E-05 | -0. 15307 | 0. 004 | 0. 03  | 0. 675973 | Opc-G | ITGB2-AS1      |
| CDCA8. 7    | 4. 56E-05 | -0. 1034  | 0. 011 | 0. 041 | 0. 681324 | Opc-G | CDCA8          |
| ARL10. 6    | 4. 56E-05 | 0. 158196 | 0. 126 | 0. 086 | 0. 681435 | Opc-G | ARL10          |
| ZNF85. 3    | 4. 58E-05 | 0. 113774 | 0. 123 | 0. 082 | 0. 684441 | Opc-G | ZNF85          |
| LRRC61. 8   | 4. 60E-05 | -0. 14449 | 0. 029 | 0. 066 | 0. 687533 | Opc-G | LRRC61         |
| KIF20B. 6   | 4. 62E-05 | -0. 179   | 0. 046 | 0. 09  | 0. 690648 | Opc-G | KIF20B         |
| ARL8B. 4    | 4. 64E-05 | -0. 1347  | 0. 141 | 0. 21  | 0. 69329  | Opc-G | ARL8B          |
| CLN6. 7     | 4. 67E-05 | -0. 14516 | 0. 079 | 0. 133 | 0. 697773 | Opc-G | CLN6           |
| PRCC. 5     | 4. 68E-05 | 0. 105202 | 0. 348 | 0. 3   | 0. 699015 | Opc-G | PRCC           |
| ZBTB1. 4    | 4. 69E-05 | 0. 134571 | 0. 212 | 0. 162 | 0. 700505 | Opc-G | ZBTB1          |
| GSS. 5      | 4. 71E-05 | -0. 13339 | 0. 168 | 0. 245 | 0. 704    | Opc-G | GSS            |
| MTFMT. 3    | 4. 74E-05 | -0. 11121 | 0. 055 | 0. 103 | 0. 708563 | Opc-G | MTFMT          |
| SLC38A6. 6  | 4. 76E-05 | -0. 12737 | 0. 055 | 0. 103 | 0. 711349 | Opc-G | SLC38A6        |
| DHX15. 6    | 4. 81E-05 | 0. 128831 | 0. 291 | 0. 241 | 0. 718638 | Opc-G | DHX15          |
| GPN1. 4     | 4. 84E-05 | 0. 120349 | 0. 268 | 0. 221 | 0. 723444 | Opc-G | GPN1           |
| GALNT15. 6  | 4. 84E-05 | -0. 16489 | 0. 011 | 0. 041 | 0. 723636 | Opc-G | GALNT15        |
| C16orf91. 4 | 4. 84E-05 | 0. 170895 | 0. 238 | 0. 193 | 0. 723959 | Opc-G | C16orf91       |
| CNOT6. 3    | 4. 85E-05 | 0. 14402  | 0. 108 | 0. 071 | 0. 725237 | Opc-G | CNOT6          |
| PXDC1. 5    | 4. 87E-05 | 0. 195267 | 0. 193 | 0. 149 | 0. 727701 | Opc-G | PXDC1          |
| DENND6B. 1  | 4. 87E-05 | -0. 15517 | 0. 057 | 0. 105 | 0. 728385 | Opc-G | DENND6B        |
| PHLDB1. 9   | 4. 88E-05 | 0. 121093 | 0. 186 | 0. 139 | 0. 729034 | Opc-G | PHLDB1         |
| ASTN1. 5    | 4. 95E-05 | 0. 171841 | 0. 127 | 0. 089 | 0. 739953 | Opc-G | ASTN1          |
| IRAK4. 4    | 4. 96E-05 | -0. 12367 | 0. 053 | 0. 101 | 0. 741626 | Opc-G | IRAK4          |
| MED17. 6    | 4. 98E-05 | 0. 142064 | 0. 236 | 0. 186 | 0. 744344 | Opc-G | MED17          |
| IMMP1L. 8   | 5. 00E-05 | 0. 140552 | 0. 275 | 0. 229 | 0. 747605 | Opc-G | IMMP1L         |
| STAT2. 3    | 5. 09E-05 | -0. 1629  | 0. 087 | 0. 142 | 0. 760508 | Opc-G | STAT2          |
| SPNS3. 7    | 5. 14E-05 | -0. 11759 | 0. 001 | 0. 025 | 0. 768412 | Opc-G | SPNS3          |
| PTGES2. 4   | 5. 19E-05 | 0. 154115 | 0. 309 | 0. 264 | 0. 77564  | Opc-G | PTGES2         |
| TLK1. 7     | 5. 22E-05 | 0. 1787   | 0. 268 | 0. 225 | 0. 78032  | Opc-G | TLK1           |
| GXYLT1. 2   | 5. 26E-05 | -0. 10083 | 0. 029 | 0. 067 | 0. 785758 | Opc-G | GXYLT1         |
| RBM42. 5    | 5. 27E-05 | 0. 107681 | 0. 433 | 0. 383 | 0. 787625 | Opc-G | RBM42          |
| CYTH2. 8    | 5. 28E-05 | 0. 129225 | 0. 385 | 0. 338 | 0. 788727 | Opc-G | CYTH2          |
| AMDHD2. 7   | 5. 28E-05 | -0. 12217 | 0. 074 | 0. 126 | 0. 789345 | Opc-G | AMDHD2         |
| TTC38. 4    | 5. 31E-05 | -0. 12782 | 0. 046 | 0. 091 | 0. 793742 | Opc-G | TTC38          |
| SETD7. 4    | 5. 32E-05 | -0. 13805 | 0. 057 | 0. 106 | 0. 794275 | Opc-G | SETD7          |
| CASP10. 5   | 5. 32E-05 | -0. 11855 | 0. 003 | 0. 027 | 0. 794581 | Opc-G | CASP10         |
| ITPR1. 5    | 5. 34E-05 | -0. 10051 | 0. 008 | 0. 036 | 0. 798177 | Opc-G | ITPR1          |
| TRIAP1. 7   | 5. 39E-05 | 0. 142594 | 0. 351 | 0. 311 | 0. 806046 | Opc-G | TRIAP1         |
| IRF3. 3     | 5. 41E-05 | -0. 13361 | 0. 171 | 0. 249 | 0. 808461 | Opc-G | IRF3           |
| GRK4. 7     | 5. 47E-05 | 0. 138562 | 0. 137 | 0. 095 | 0. 81694  | Opc-G | GRK4           |
| FLVCR2. 7   | 5. 50E-05 | -0. 1055  | 0. 008 | 0. 036 | 0. 821846 | Opc-G | FLVCR2         |
| GPR155. 8   | 5. 50E-05 | 0. 116588 | 0. 235 | 0. 184 | 0. 822594 | Opc-G | GPR155         |
| EXOSC8. 8   | 5. 55E-05 | 0. 124387 | 0. 336 | 0. 286 | 0. 82954  | Opc-G | EXOSC8         |
| STARD7. 5   | 5. 56E-05 | 0. 129528 | 0. 358 | 0. 313 | 0. 831047 | Opc-G | STARD7         |
| STARD3. 2   | 5. 58E-05 | -0. 15346 | 0. 183 | 0. 26  | 0. 834312 | Opc-G | STARD3         |
| STAMPB. 5   | 5. 62E-05 | 0. 155989 | 0. 307 | 0. 263 | 0. 840067 | Opc-G | STAMPB         |
| PSMD3. 5    | 5. 62E-05 | 0. 119528 | 0. 447 | 0. 402 | 0. 840139 | Opc-G | PSMD3          |

|             |           |           |        |        |           |       |              |
|-------------|-----------|-----------|--------|--------|-----------|-------|--------------|
| RAD21. 9    | 5. 70E-05 | 0. 103058 | 0. 417 | 0. 363 | 0. 852548 | 0pc-G | RAD21        |
| WTAP. 6     | 5. 77E-05 | -0. 21058 | 0. 354 | 0. 425 | 0. 862656 | 0pc-G | WTAP         |
| GALC. 6     | 5. 78E-05 | -0. 10847 | 0. 057 | 0. 105 | 0. 863922 | 0pc-G | GALC         |
| AZIN1. 5    | 5. 80E-05 | 0. 125363 | 0. 377 | 0. 326 | 0. 867128 | 0pc-G | AZIN1        |
| PDHB. 4     | 5. 81E-05 | 0. 118662 | 0. 406 | 0. 36  | 0. 867618 | 0pc-G | PDHB         |
| DNASE1. 6   | 5. 83E-05 | 0. 114272 | 0. 119 | 0. 079 | 0. 871647 | 0pc-G | DNASE1       |
| STRN4. 5    | 5. 87E-05 | 0. 164558 | 0. 163 | 0. 121 | 0. 876888 | 0pc-G | STRN4        |
| USO1. 2     | 5. 90E-05 | -0. 15915 | 0. 15  | 0. 219 | 0. 881116 | 0pc-G | USO1         |
| SEPN1. 7    | 5. 92E-05 | -0. 12364 | 0. 143 | 0. 214 | 0. 884317 | 0pc-G | SEPN1        |
| SPTY2D1. 3  | 5. 92E-05 | -0. 12249 | 0. 07  | 0. 122 | 0. 885069 | 0pc-G | SPTY2D1      |
| TAL1. 6     | 5. 96E-05 | -0. 15239 | 0. 008 | 0. 036 | 0. 890193 | 0pc-G | TAL1         |
| TAB2. 5     | 5. 97E-05 | -0. 12586 | 0. 077 | 0. 13  | 0. 892158 | 0pc-G | TAB2         |
| APLN. 6     | 6. 00E-05 | -0. 11587 | 0. 007 | 0. 034 | 0. 897356 | 0pc-G | APLN         |
| C14orf142   | 6. 07E-05 | -0. 12972 | 0. 094 | 0. 154 | 0. 907017 | 0pc-G | C14orf142    |
| NOC3L. 3    | 6. 17E-05 | -0. 1055  | 0. 051 | 0. 097 | 0. 921666 | 0pc-G | NOC3L        |
| SKI. 6      | 6. 17E-05 | -0. 14047 | 0. 097 | 0. 155 | 0. 922408 | 0pc-G | SKI          |
| CNDP1. 8    | 6. 24E-05 | -0. 25597 | 0. 008 | 0. 036 | 0. 932203 | 0pc-G | CNDP1        |
| UBE2A. 4    | 6. 30E-05 | -0. 1941  | 0. 337 | 0. 428 | 0. 941569 | 0pc-G | UBE2A        |
| NGFR. 6     | 6. 33E-05 | 0. 102128 | 0. 063 | 0. 035 | 0. 945954 | 0pc-G | NGFR         |
| ANP32A. 1C  | 6. 34E-05 | -0. 22874 | 0. 351 | 0. 433 | 0. 947769 | 0pc-G | ANP32A       |
| SERPINB8. 6 | 6. 38E-05 | -0. 15318 | 0. 04  | 0. 081 | 0. 954036 | 0pc-G | SERPINB8     |
| TMEM71. 4   | 6. 39E-05 | -0. 10908 | 0. 003 | 0. 027 | 0. 954505 | 0pc-G | TMEM71       |
| UROS. 5     | 6. 39E-05 | -0. 13328 | 0. 18  | 0. 257 | 0. 955598 | 0pc-G | UROS         |
| TGFBR1. 1C  | 6. 44E-05 | -0. 19784 | 0. 111 | 0. 165 | 0. 962376 | 0pc-G | TGFBR1       |
| NAT14. 6    | 6. 47E-05 | 0. 192136 | 0. 219 | 0. 177 | 0. 966682 | 0pc-G | NAT14        |
| NADK. 5     | 6. 53E-05 | -0. 10675 | 0. 108 | 0. 171 | 0. 975917 | 0pc-G | NADK         |
| TCN2. 6     | 6. 56E-05 | -0. 17394 | 0. 056 | 0. 102 | 0. 979744 | 0pc-G | TCN2         |
| ZNF639. 8   | 6. 60E-05 | 0. 196736 | 0. 175 | 0. 134 | 0. 986671 | 0pc-G | ZNF639       |
| AGT. 8      | 6. 64E-05 | -0. 22198 | 0. 156 | 0. 224 | 0. 991588 | 0pc-G | AGT          |
| NFAM1. 8    | 6. 65E-05 | -0. 1347  | 0. 008 | 0. 036 | 0. 993965 | 0pc-G | NFAM1        |
| EPHB2. 4    | 6. 74E-05 | 0. 107216 | 0. 122 | 0. 081 | 1         | 0pc-G | EPHB2        |
| EIF3A. 5    | 6. 75E-05 | -0. 1424  | 0. 253 | 0. 338 | 1         | 0pc-G | EIF3A        |
| CES4A. 2    | 6. 77E-05 | -0. 12471 | 0      | 0. 021 | 1         | 0pc-G | CES4A        |
| AIG1. 4     | 6. 83E-05 | -0. 20067 | 0. 257 | 0. 339 | 1         | 0pc-G | AIG1         |
| BRD7. 6     | 6. 83E-05 | 0. 174821 | 0. 295 | 0. 251 | 1         | 0pc-G | BRD7         |
| DMXL1. 2    | 6. 84E-05 | -0. 11143 | 0. 046 | 0. 09  | 1         | 0pc-G | DMXL1        |
| GRASP. 8    | 6. 86E-05 | -0. 18949 | 0. 02  | 0. 054 | 1         | 0pc-G | GRASP        |
| SCN1B. 6    | 6. 86E-05 | -0. 16227 | 0. 034 | 0. 073 | 1         | 0pc-G | SCN1B        |
| NAA20. 4    | 6. 87E-05 | -0. 2055  | 0. 413 | 0. 502 | 1         | 0pc-G | NAA20        |
| GPLY. 4     | 6. 88E-05 | -0. 18971 | 0. 005 | 0. 031 | 1         | 0pc-G | GPLY         |
| ZNF513. 3   | 7. 09E-05 | 0. 141601 | 0. 108 | 0. 071 | 1         | 0pc-G | ZNF513       |
| SMIM4. 5    | 7. 12E-05 | -0. 18405 | 0. 197 | 0. 272 | 1         | 0pc-G | SMIM4        |
| ABHD3. 7    | 7. 14E-05 | -0. 16359 | 0. 126 | 0. 186 | 1         | 0pc-G | ABHD3        |
| RNASEH1. 6  | 7. 27E-05 | 0. 15232  | 0. 27  | 0. 226 | 1         | 0pc-G | RNASEH1      |
| CXorf38. 4  | 7. 33E-05 | -0. 10655 | 0. 033 | 0. 072 | 1         | 0pc-G | CXorf38      |
| TTI2. 1     | 7. 35E-05 | 0. 127776 | 0. 094 | 0. 06  | 1         | 0pc-G | TTI2         |
| RP11-51J9   | 7. 40E-05 | 0. 146461 | 0. 183 | 0. 138 | 1         | 0pc-G | RP11-51J9. 5 |
| SGOL1. 8    | 7. 41E-05 | -0. 14052 | 0. 025 | 0. 06  | 1         | 0pc-G | SGOL1        |
| ANKZF1. 6   | 7. 41E-05 | 0. 135855 | 0. 176 | 0. 131 | 1         | 0pc-G | ANKZF1       |
| PGM2. 6     | 7. 48E-05 | -0. 16079 | 0. 096 | 0. 152 | 1         | 0pc-G | PGM2         |
| ATM. 6      | 7. 49E-05 | -0. 17205 | 0. 13  | 0. 193 | 1         | 0pc-G | ATM          |

|            |          |          |       |       |         |              |
|------------|----------|----------|-------|-------|---------|--------------|
| AHCYL1.9   | 7.57E-05 | 0.128783 | 0.363 | 0.325 | 1 Opc-G | AHCYL1       |
| RNF19B.4   | 7.57E-05 | -0.11898 | 0.02  | 0.054 | 1 Opc-G | RNF19B       |
| SLC46A3.6  | 7.62E-05 | -0.1479  | 0.025 | 0.06  | 1 Opc-G | SLC46A3      |
| ALDH1A1.5  | 7.63E-05 | -0.1388  | 0.005 | 0.031 | 1 Opc-G | ALDH1A1      |
| ABTB1.9    | 7.83E-05 | -0.19593 | 0.061 | 0.107 | 1 Opc-G | ABTB1        |
| RRM2B.2    | 7.85E-05 | -0.11578 | 0.059 | 0.106 | 1 Opc-G | RRM2B        |
| LAPTM4A.6  | 7.86E-05 | -0.2276  | 0.76  | 0.773 | 1 Opc-G | LAPTM4A      |
| RNF220.6   | 7.89E-05 | 0.105394 | 0.193 | 0.145 | 1 Opc-G | RNF220       |
| TRNT1.4    | 7.89E-05 | -0.14168 | 0.081 | 0.135 | 1 Opc-G | TRNT1        |
| FTSJ2.6    | 7.96E-05 | 0.122395 | 0.28  | 0.234 | 1 Opc-G | FTSJ2        |
| HSPA4L.6   | 8.02E-05 | 0.101887 | 0.108 | 0.07  | 1 Opc-G | HSPA4L       |
| ZNF700.1   | 8.03E-05 | -0.10442 | 0.02  | 0.054 | 1 Opc-G | ZNF700       |
| TSC2.6     | 8.11E-05 | 0.154243 | 0.176 | 0.133 | 1 Opc-G | TSC2         |
| PPP1R35.9  | 8.24E-05 | 0.177593 | 0.197 | 0.155 | 1 Opc-G | PPP1R35      |
| IL6ST.9    | 8.26E-05 | -0.14695 | 0.183 | 0.258 | 1 Opc-G | IL6ST        |
| PNPLA2.5   | 8.27E-05 | -0.1247  | 0.148 | 0.216 | 1 Opc-G | PNPLA2       |
| TMEM126B.8 | 8.29E-05 | -0.17067 | 0.231 | 0.314 | 1 Opc-G | TMEM126B     |
| LTB4R.8    | 8.30E-05 | -0.11038 | 0.008 | 0.035 | 1 Opc-G | LTB4R        |
| MSH2.6     | 8.48E-05 | 0.144446 | 0.156 | 0.113 | 1 Opc-G | MSH2         |
| RP11-73E1  | 8.49E-05 | 0.14781  | 0.07  | 0.041 | 1 Opc-G | RP11-73E17.2 |
| CDK5R2.7   | 8.50E-05 | 0.116933 | 0.059 | 0.032 | 1 Opc-G | CDK5R2       |
| INADL.8    | 8.51E-05 | -0.10652 | 0.031 | 0.069 | 1 Opc-G | INADL        |
| ZNF222.3   | 8.56E-05 | 0.11075  | 0.083 | 0.051 | 1 Opc-G | ZNF222       |
| IMP4.3     | 8.67E-05 | 0.107249 | 0.395 | 0.356 | 1 Opc-G | IMP4         |
| LMNA.6     | 8.69E-05 | -0.18423 | 0.343 | 0.421 | 1 Opc-G | LMNA         |
| CLEC10A.5  | 8.75E-05 | -0.11505 | 0     | 0.021 | 1 Opc-G | CLEC10A      |
| OTUD6B.6   | 8.75E-05 | 0.199965 | 0.157 | 0.117 | 1 Opc-G | OTUD6B       |
| HSPBP1.6   | 8.77E-05 | 0.152991 | 0.327 | 0.285 | 1 Opc-G | HSPBP1       |
| F11R.9     | 8.86E-05 | -0.15736 | 0.025 | 0.059 | 1 Opc-G | F11R         |
| CACNA2D3.8 | 8.86E-05 | -0.11353 | 0.007 | 0.033 | 1 Opc-G | CACNA2D3     |
| DUS4L.7    | 8.97E-05 | 0.182893 | 0.113 | 0.077 | 1 Opc-G | DUS4L        |
| TRO.5      | 9.00E-05 | 0.10904  | 0.094 | 0.06  | 1 Opc-G | TRO          |
| CDK14.6    | 9.01E-05 | 0.181201 | 0.112 | 0.076 | 1 Opc-G | CDK14        |
| WHAMM.2    | 9.04E-05 | -0.10603 | 0.061 | 0.11  | 1 Opc-G | WHAMM        |
| IDH3A.2    | 9.10E-05 | -0.10475 | 0.115 | 0.178 | 1 Opc-G | IDH3A        |
| ADAMDEC1.9 | 9.14E-05 | -0.16681 | 0.011 | 0.039 | 1 Opc-G | ADAMDEC1     |
| PTGDS.7    | 9.21E-05 | -0.2706  | 0.235 | 0.166 | 1 Opc-G | PTGDS        |
| SLC2A1.7   | 9.27E-05 | -0.10262 | 0.086 | 0.141 | 1 Opc-G | SLC2A1       |
| MANEAL.1   | 9.40E-05 | 0.123186 | 0.066 | 0.038 | 1 Opc-G | MANEAL       |
| TNNI2.7    | 9.41E-05 | -0.10584 | 0     | 0.02  | 1 Opc-G | TNNI2        |
| SLAMF9.6   | 9.41E-05 | -0.1233  | 0     | 0.02  | 1 Opc-G | SLAMF9       |
| SAR1B.5    | 9.53E-05 | -0.17116 | 0.24  | 0.327 | 1 Opc-G | SAR1B        |
| PPIL1.6    | 9.61E-05 | 0.157811 | 0.235 | 0.192 | 1 Opc-G | PPIL1        |
| KAT2B.5    | 9.71E-05 | 0.140313 | 0.105 | 0.07  | 1 Opc-G | KAT2B        |
| FASTKD1.2  | 9.72E-05 | 0.14129  | 0.109 | 0.073 | 1 Opc-G | FASTKD1      |
| SCARF1.8   | 9.75E-05 | -0.10952 | 0.004 | 0.028 | 1 Opc-G | SCARF1       |
| ADPRH.6    | 9.78E-05 | -0.10161 | 0.008 | 0.035 | 1 Opc-G | ADPRH        |
| GRPEL1.4   | 9.81E-05 | -0.11408 | 0.195 | 0.275 | 1 Opc-G | GRPEL1       |
| LRP3.2     | 9.82E-05 | 0.121632 | 0.092 | 0.058 | 1 Opc-G | LRP3         |
| TRIM69.3   | 9.88E-05 | -0.12515 | 0.135 | 0.202 | 1 Opc-G | TRIM69       |
| PEMT.7     | 9.90E-05 | 0.16885  | 0.253 | 0.21  | 1 Opc-G | PEMT         |

|           |          |          |       |       |         |              |
|-----------|----------|----------|-------|-------|---------|--------------|
| CRIP1.8   | 9.95E-05 | -0.20041 | 0.012 | 0.041 | 1 Opc-G | CRIP1        |
| SLC27A3.5 | 0.0001   | -0.10066 | 0.074 | 0.126 | 1 Opc-G | SLC27A3      |
| BOC.7     | 0.000102 | 0.226468 | 0.119 | 0.084 | 1 Opc-G | BOC          |
| TJP2.5    | 0.000102 | -0.10706 | 0.022 | 0.055 | 1 Opc-G | TJP2         |
| PDE1C.5   | 0.000103 | -0.10372 | 0.012 | 0.041 | 1 Opc-G | PDE1C        |
| RP11-353N | 0.000103 | -0.10595 | 0.001 | 0.023 | 1 Opc-G | RP11-353N4.5 |
| MYRF.8    | 0.000103 | -0.15579 | 0.007 | 0.032 | 1 Opc-G | MYRF         |
| ZNF414.9  | 0.000104 | 0.179911 | 0.224 | 0.183 | 1 Opc-G | ZNF414       |
| SUOX.1    | 0.000104 | 0.108766 | 0.075 | 0.045 | 1 Opc-G | SUOX         |
| POMP.4    | 0.000105 | -0.16585 | 0.751 | 0.734 | 1 Opc-G | POMP         |
| SEC23IP.2 | 0.000105 | -0.12296 | 0.041 | 0.081 | 1 Opc-G | SEC23IP      |
| ATOX1.6   | 0.000106 | -0.21625 | 0.557 | 0.608 | 1 Opc-G | ATOX1        |
| PSTPIP1.8 | 0.000106 | -0.13717 | 0.014 | 0.043 | 1 Opc-G | PSTPIP1      |
| HP.5      | 0.000107 | -0.30843 | 0.003 | 0.025 | 1 Opc-G | HP           |
| VIMP.4    | 0.000107 | -0.22087 | 0.389 | 0.461 | 1 Opc-G | VIMP         |
| MOSPD2.4  | 0.000109 | -0.10459 | 0.064 | 0.112 | 1 Opc-G | MOSPD2       |
| TMEM178A. | 0.000109 | 0.119878 | 0.158 | 0.116 | 1 Opc-G | TMEM178A     |
| UBTD2.6   | 0.000109 | 0.163961 | 0.142 | 0.103 | 1 Opc-G | UBTD2        |
| CD3D.6    | 0.000109 | -0.21306 | 0     | 0.02  | 1 Opc-G | CD3D         |
| RPUSD1.5  | 0.000109 | 0.161166 | 0.173 | 0.131 | 1 Opc-G | RPUSD1       |
| RABIF.3   | 0.000109 | -0.14552 | 0.123 | 0.185 | 1 Opc-G | RABIF        |
| PTCH2.2   | 0.00011  | -0.10267 | 0.005 | 0.03  | 1 Opc-G | PTCH2        |
| AIM1.6    | 0.00011  | -0.14885 | 0.01  | 0.036 | 1 Opc-G | AIM1         |
| DPH5.3    | 0.000111 | 0.133014 | 0.206 | 0.162 | 1 Opc-G | DPH5         |
| GNA12.1   | 0.000111 | 0.166976 | 0.175 | 0.134 | 1 Opc-G | GNA12        |
| MAP7.7    | 0.000111 | -0.17791 | 0.012 | 0.041 | 1 Opc-G | MAP7         |
| ZFP14.7   | 0.000112 | 0.121371 | 0.15  | 0.109 | 1 Opc-G | ZFP14        |
| MAP3K11.6 | 0.000112 | -0.13995 | 0.126 | 0.186 | 1 Opc-G | MAP3K11      |
| NETO2.6   | 0.000113 | 0.204799 | 0.198 | 0.159 | 1 Opc-G | NETO2        |
| FPR2.7    | 0.000113 | -0.10196 | 0     | 0.02  | 1 Opc-G | FPR2         |
| PSMG3-AS1 | 0.000116 | 0.137749 | 0.079 | 0.049 | 1 Opc-G | PSMG3-AS1    |
| MPC2.5    | 0.000116 | -0.25518 | 0.52  | 0.586 | 1 Opc-G | MPC2         |
| MCAT.8    | 0.000116 | 0.226518 | 0.165 | 0.126 | 1 Opc-G | MCAT         |
| EXOC5.3   | 0.000118 | 0.165986 | 0.219 | 0.177 | 1 Opc-G | EXOC5        |
| TAF6.6    | 0.000118 | 0.121345 | 0.279 | 0.233 | 1 Opc-G | TAF6         |
| PIK3CD.7  | 0.00012  | -0.10702 | 0.007 | 0.032 | 1 Opc-G | PIK3CD       |
| KIAA0101. | 0.00012  | -0.22412 | 0.074 | 0.12  | 1 Opc-G | KIAA0101     |
| C11orf54  | 0.00012  | 0.139504 | 0.154 | 0.112 | 1 Opc-G | C11orf54     |
| ZNF394.3  | 0.000121 | 0.103985 | 0.186 | 0.139 | 1 Opc-G | ZNF394       |
| FAM50A.4  | 0.000122 | -0.14523 | 0.294 | 0.378 | 1 Opc-G | FAM50A       |
| VAR5.3    | 0.000122 | 0.168962 | 0.198 | 0.155 | 1 Opc-G | VAR5         |
| KCND3.7   | 0.000123 | 0.140482 | 0.087 | 0.056 | 1 Opc-G | KCND3        |
| COG5.2    | 0.000125 | 0.123002 | 0.137 | 0.097 | 1 Opc-G | COG5         |
| CABIN1.3  | 0.000125 | -0.11718 | 0.083 | 0.136 | 1 Opc-G | CABIN1       |
| C16orf89. | 0.000126 | -0.10778 | 0     | 0.02  | 1 Opc-G | C16orf89     |
| TRMT13.5  | 0.000126 | 0.127392 | 0.176 | 0.134 | 1 Opc-G | TRMT13       |
| HLTF.8    | 0.000127 | 0.196492 | 0.21  | 0.171 | 1 Opc-G | HLTF         |
| CLIP1.3   | 0.000127 | -0.11047 | 0.148 | 0.218 | 1 Opc-G | CLIP1        |
| SPEN.5    | 0.000128 | 0.149575 | 0.201 | 0.156 | 1 Opc-G | SPEN         |
| EGLN2.3   | 0.000128 | -0.16474 | 0.212 | 0.288 | 1 Opc-G | EGLN2        |
| NOL10.5   | 0.000129 | 0.147768 | 0.194 | 0.152 | 1 Opc-G | NOL10        |

|           |          |          |       |       |         |               |
|-----------|----------|----------|-------|-------|---------|---------------|
| SSSCA1.3  | 0.000131 | -0.15581 | 0.128 | 0.191 | 1 Opc-G | SSSCA1        |
| ZFAND6.3  | 0.000132 | -0.21267 | 0.373 | 0.455 | 1 Opc-G | ZFAND6        |
| FMN1.9    | 0.000132 | -0.11625 | 0.008 | 0.034 | 1 Opc-G | FMN1          |
| TMEM150A. | 0.000132 | -0.15524 | 0.097 | 0.153 | 1 Opc-G | TMEM150A      |
| GNG10.5   | 0.000132 | -0.2233  | 0.038 | 0.076 | 1 Opc-G | GNG10         |
| NUP98.1   | 0.000132 | -0.1454  | 0.056 | 0.1   | 1 Opc-G | NUP98         |
| CUTC.3    | 0.000134 | -0.13641 | 0.078 | 0.128 | 1 Opc-G | CUTC          |
| B3GAT3.3  | 0.000135 | -0.17663 | 0.302 | 0.384 | 1 Opc-G | B3GAT3        |
| OSER1-AS1 | 0.000136 | 0.169613 | 0.169 | 0.129 | 1 Opc-G | OSER1-AS1     |
| ERF.7     | 0.000136 | 0.154826 | 0.217 | 0.174 | 1 Opc-G | ERF           |
| HRSP12.7  | 0.000136 | 0.173525 | 0.236 | 0.195 | 1 Opc-G | HRSP12        |
| RP11-115C | 0.000136 | 0.139116 | 0.12  | 0.083 | 1 Opc-G | RP11-115C21.2 |
| SYTL2.7   | 0.000139 | -0.15736 | 0.04  | 0.078 | 1 Opc-G | SYTL2         |
| CDC26.5   | 0.000139 | -0.15647 | 0.191 | 0.267 | 1 Opc-G | CDC26         |
| PMEPA1.9  | 0.00014  | -0.1736  | 0.148 | 0.205 | 1 Opc-G | PMEPA1        |
| ACAA1.3   | 0.00014  | 0.124611 | 0.388 | 0.346 | 1 Opc-G | ACAA1         |
| CARD11.8  | 0.00014  | -0.10045 | 0.005 | 0.029 | 1 Opc-G | CARD11        |
| USP14.4   | 0.000141 | -0.10827 | 0.189 | 0.262 | 1 Opc-G | USP14         |
| NAV3.4    | 0.000144 | -0.10205 | 0.005 | 0.029 | 1 Opc-G | NAV3          |
| RP11-597D | 0.000144 | -0.13142 | 0.003 | 0.025 | 1 Opc-G | RP11-597D13.8 |
| PJA2.8    | 0.000144 | -0.14351 | 0.268 | 0.34  | 1 Opc-G | PJA2          |
| WDR55.3   | 0.000144 | -0.14458 | 0.072 | 0.12  | 1 Opc-G | WDR55         |
| HMG2.2    | 0.000145 | -0.2449  | 0.568 | 0.636 | 1 Opc-G | HMG2          |
| ACOT7.8   | 0.000148 | 0.148467 | 0.269 | 0.224 | 1 Opc-G | ACOT7         |
| CTC-444N2 | 0.000149 | 0.165484 | 0.172 | 0.132 | 1 Opc-G | CTC-444N24.11 |
| APOA1BP.3 | 0.000149 | 0.125642 | 0.41  | 0.373 | 1 Opc-G | APOA1BP       |
| CCDC97.1  | 0.000149 | 0.134387 | 0.141 | 0.101 | 1 Opc-G | CCDC97        |
| EIF5A.4   | 0.000149 | -0.18632 | 0.464 | 0.531 | 1 Opc-G | EIF5A         |
| RNF166.7  | 0.000153 | -0.18402 | 0.133 | 0.188 | 1 Opc-G | RNF166        |
| IRF2.4    | 0.000153 | -0.13971 | 0.138 | 0.202 | 1 Opc-G | IRF2          |
| CUL3.6    | 0.000153 | 0.157069 | 0.239 | 0.197 | 1 Opc-G | CUL3          |
| TMEM154.1 | 0.000153 | -0.1229  | 0.023 | 0.056 | 1 Opc-G | TMEM154       |
| HSP90B1.6 | 0.000154 | -0.19909 | 0.63  | 0.66  | 1 Opc-G | HSP90B1       |
| LACC1.6   | 0.000155 | -0.11364 | 0.01  | 0.036 | 1 Opc-G | LACC1         |
| LILRB3.7  | 0.000156 | -0.14246 | 0.014 | 0.042 | 1 Opc-G | LILRB3        |
| ARAP2.5   | 0.000157 | -0.10178 | 0.046 | 0.088 | 1 Opc-G | ARAP2         |
| ZFYVE19.4 | 0.000157 | -0.11771 | 0.063 | 0.11  | 1 Opc-G | ZFYVE19       |
| DENND4B.6 | 0.000157 | -0.10566 | 0.034 | 0.071 | 1 Opc-G | DENND4B       |
| GPBP1L1.5 | 0.000157 | -0.13331 | 0.145 | 0.21  | 1 Opc-G | GPBP1L1       |
| PPM1N.5   | 0.000158 | -0.1262  | 0.012 | 0.04  | 1 Opc-G | PPM1N         |
| DNAJC11.2 | 0.000158 | 0.117974 | 0.138 | 0.099 | 1 Opc-G | DNAJC11       |
| TRUB1.1   | 0.000159 | 0.107113 | 0.083 | 0.052 | 1 Opc-G | TRUB1         |
| LRCH4.9   | 0.000159 | -0.18685 | 0.137 | 0.192 | 1 Opc-G | LRCH4         |
| YPEL2.4   | 0.000162 | -0.1588  | 0.036 | 0.072 | 1 Opc-G | YPEL2         |
| SYMPK.6   | 0.000163 | 0.170898 | 0.262 | 0.22  | 1 Opc-G | SYMPK         |
| MRO.6     | 0.000164 | -0.1128  | 0.001 | 0.022 | 1 Opc-G | MRO           |
| LAGE3.3   | 0.000164 | -0.16258 | 0.322 | 0.404 | 1 Opc-G | LAGE3         |
| SERINC2.6 | 0.000168 | 0.1089   | 0.158 | 0.117 | 1 Opc-G | SERINC2       |
| C1orf228. | 0.000168 | -0.12065 | 0.008 | 0.033 | 1 Opc-G | C1orf228      |
| NDP.8     | 0.000174 | 0.161207 | 0.148 | 0.109 | 1 Opc-G | NDP           |
| SLC03A1.3 | 0.000174 | -0.11758 | 0.008 | 0.033 | 1 Opc-G | SLC03A1       |



|            |          |          |       |       |         |                |
|------------|----------|----------|-------|-------|---------|----------------|
| RCN3. 1    | 0.000176 | -0.11503 | 0.027 | 0.061 | 1 Opc-G | RCN3           |
| TNFRSF10E  | 0.000176 | -0.1953  | 0.063 | 0.105 | 1 Opc-G | TNFRSF10B      |
| SLC38A10.  | 0.000177 | -0.13257 | 0.141 | 0.202 | 1 Opc-G | SLC38A10       |
| SNAP29. 6  | 0.000178 | -0.10263 | 0.158 | 0.229 | 1 Opc-G | SNAP29         |
| EBPL. 7    | 0.000179 | 0.162676 | 0.337 | 0.3   | 1 Opc-G | EBPL           |
| C6orf62. 6 | 0.000179 | -0.17505 | 0.384 | 0.456 | 1 Opc-G | C6orf62        |
| RPRD1A. 6  | 0.000179 | 0.157595 | 0.247 | 0.205 | 1 Opc-G | RPRD1A         |
| MAP2K7. 4  | 0.00018  | 0.129124 | 0.238 | 0.193 | 1 Opc-G | MAP2K7         |
| TAF12. 4   | 0.00018  | -0.15055 | 0.236 | 0.314 | 1 Opc-G | TAF12          |
| RNF41. 3   | 0.00018  | 0.143876 | 0.206 | 0.164 | 1 Opc-G | RNF41          |
| HAAO. 9    | 0.000181 | -0.11119 | 0.003 | 0.024 | 1 Opc-G | HAAO           |
| DRG1. 4    | 0.000182 | 0.143836 | 0.284 | 0.243 | 1 Opc-G | DRG1           |
| FGF20. 5   | 0.000182 | -0.11232 | 0     | 0.019 | 1 Opc-G | FGF20          |
| NAGK. 7    | 0.000182 | -0.23387 | 0.317 | 0.386 | 1 Opc-G | NAGK           |
| TRAF3IP2.  | 0.000183 | 0.172808 | 0.13  | 0.093 | 1 Opc-G | TRAF3IP2       |
| HCG18. 6   | 0.000187 | 0.164152 | 0.148 | 0.11  | 1 Opc-G | HCG18          |
| ALG8. 3    | 0.000187 | -0.1065  | 0.12  | 0.183 | 1 Opc-G | ALG8           |
| CEACAM21.  | 0.000189 | -0.10217 | 0.001 | 0.021 | 1 Opc-G | CEACAM21       |
| CYB5B. 6   | 0.000189 | -0.14398 | 0.255 | 0.343 | 1 Opc-G | CYB5B          |
| AQP4. 9    | 0.000189 | -0.15565 | 0.112 | 0.169 | 1 Opc-G | AQP4           |
| GPR162. 8  | 0.00019  | 0.167417 | 0.137 | 0.1   | 1 Opc-G | GPR162         |
| SLC38A7. 4 | 0.00019  | 0.117687 | 0.146 | 0.106 | 1 Opc-G | SLC38A7        |
| PAPSS2. 4  | 0.000191 | -0.10182 | 0.003 | 0.024 | 1 Opc-G | PAPSS2         |
| BAP1. 3    | 0.000192 | 0.140279 | 0.178 | 0.137 | 1 Opc-G | BAP1           |
| ZNF527. 2  | 0.000192 | 0.107269 | 0.071 | 0.043 | 1 Opc-G | ZNF527         |
| DHRS9. 5   | 0.000192 | -0.16098 | 0.003 | 0.024 | 1 Opc-G | DHRS9          |
| RP11-514C  | 0.000193 | -0.10185 | 0.005 | 0.029 | 1 Opc-G | RP11-514012. 4 |
| COG4. 6    | 0.000196 | 0.146269 | 0.231 | 0.188 | 1 Opc-G | COG4           |
| MBLAC1. 1  | 0.000197 | 0.101628 | 0.042 | 0.022 | 1 Opc-G | MBLAC1         |
| MT1H. 3    | 0.000197 | -0.11918 | 0.001 | 0.021 | 1 Opc-G | MT1H           |
| YIF1B. 3   | 0.000199 | -0.15786 | 0.254 | 0.338 | 1 Opc-G | YIF1B          |
| ZNF568. 7  | 0.000199 | 0.127538 | 0.134 | 0.096 | 1 Opc-G | ZNF568         |
| NAP1L3. 7  | 0.000199 | 0.110895 | 0.141 | 0.099 | 1 Opc-G | NAP1L3         |
| NME7. 10   | 0.0002   | 0.155106 | 0.199 | 0.159 | 1 Opc-G | NME7           |
| TMEM57. 7  | 0.000201 | 0.153397 | 0.217 | 0.172 | 1 Opc-G | TMEM57         |
| AK3. 2     | 0.000203 | 0.155041 | 0.275 | 0.235 | 1 Opc-G | AK3            |
| IGFBP6. 7  | 0.000204 | -0.16223 | 0.033 | 0.068 | 1 Opc-G | IGFBP6         |
| PPARG. 7   | 0.000206 | -0.10041 | 0.004 | 0.026 | 1 Opc-G | PPARG          |
| KCNAB2. 8  | 0.000207 | -0.14137 | 0.041 | 0.079 | 1 Opc-G | KCNAB2         |
| POM121C. 6 | 0.000208 | 0.146553 | 0.179 | 0.138 | 1 Opc-G | POM121C        |
| DFFA. 4    | 0.000209 | 0.112396 | 0.258 | 0.217 | 1 Opc-G | DFFA           |
| HSPB8. 6   | 0.00021  | -0.14582 | 0.014 | 0.041 | 1 Opc-G | HSPB8          |
| NPAS3. 9   | 0.00021  | 0.179163 | 0.195 | 0.156 | 1 Opc-G | NPAS3          |
| C18orf8. 4 | 0.000211 | -0.10294 | 0.07  | 0.116 | 1 Opc-G | C18orf8        |
| MKNK2. 4   | 0.000211 | -0.11005 | 0.127 | 0.188 | 1 Opc-G | MKNK2          |
| PARP2. 6   | 0.000214 | 0.140783 | 0.149 | 0.108 | 1 Opc-G | PARP2          |
| CSNK2A1. 7 | 0.000215 | 0.130201 | 0.35  | 0.314 | 1 Opc-G | CSNK2A1        |
| TSC22D3. 8 | 0.000215 | -0.30605 | 0.421 | 0.459 | 1 Opc-G | TSC22D3        |
| RP11-395A  | 0.000217 | 0.122009 | 0.108 | 0.074 | 1 Opc-G | RP11-395A13. 2 |
| TM7SF3. 4  | 0.000219 | -0.10967 | 0.183 | 0.255 | 1 Opc-G | TM7SF3         |
| ADSL. 5    | 0.000219 | 0.12672  | 0.296 | 0.254 | 1 Opc-G | ADSL           |

|           |          |          |       |       |         |               |
|-----------|----------|----------|-------|-------|---------|---------------|
| RAPH1.3   | 0.00022  | -0.10274 | 0.033 | 0.068 | 1 Opc-G | RAPH1         |
| ADRBK2.8  | 0.000221 | -0.12106 | 0.023 | 0.055 | 1 Opc-G | ADRBK2        |
| ODF2L.4   | 0.000222 | -0.14627 | 0.122 | 0.178 | 1 Opc-G | ODF2L         |
| RP11-452F | 0.000222 | -0.19757 | 0.083 | 0.13  | 1 Opc-G | RP11-452F19.3 |
| IFT52.7   | 0.000222 | 0.152193 | 0.291 | 0.254 | 1 Opc-G | IFT52         |
| CHDH.3    | 0.000222 | 0.120339 | 0.097 | 0.064 | 1 Opc-G | CHDH          |
| ZNF626.6  | 0.000223 | 0.14911  | 0.179 | 0.14  | 1 Opc-G | ZNF626        |
| NECAP1.7  | 0.000223 | 0.107166 | 0.243 | 0.195 | 1 Opc-G | NECAP1        |
| PRRG4.8   | 0.000223 | -0.14052 | 0.018 | 0.047 | 1 Opc-G | PRRG4         |
| ZNF274.5  | 0.000224 | 0.105929 | 0.15  | 0.109 | 1 Opc-G | ZNF274        |
| LPCAT1.5  | 0.000224 | 0.155986 | 0.223 | 0.179 | 1 Opc-G | LPCAT1        |
| TLN2.5    | 0.000227 | -0.13893 | 0.055 | 0.096 | 1 Opc-G | TLN2          |
| CTPS1.7   | 0.000228 | 0.123019 | 0.142 | 0.103 | 1 Opc-G | CTPS1         |
| DGCR6.4   | 0.000228 | 0.17061  | 0.19  | 0.151 | 1 Opc-G | DGCR6         |
| MS4A14.7  | 0.000229 | -0.10227 | 0.003 | 0.023 | 1 Opc-G | MS4A14        |
| NKX6-2.8  | 0.000233 | -0.17179 | 0.004 | 0.026 | 1 Opc-G | NKX6-2        |
| TSPYL4.6  | 0.000234 | 0.112848 | 0.139 | 0.101 | 1 Opc-G | TSPYL4        |
| IGF2BP2.7 | 0.000235 | 0.146392 | 0.112 | 0.078 | 1 Opc-G | IGF2BP2       |
| GPRC5B.8  | 0.000236 | 0.129277 | 0.258 | 0.216 | 1 Opc-G | GPRC5B        |
| RETN.7    | 0.000239 | -0.10732 | 0.001 | 0.021 | 1 Opc-G | RETN          |
| ELAVL1.5  | 0.000239 | 0.112176 | 0.383 | 0.341 | 1 Opc-G | ELAVL1        |
| EVL.6     | 0.00024  | -0.27259 | 0.299 | 0.355 | 1 Opc-G | EVL           |
| NHSL2.5   | 0.00024  | -0.34959 | 0.023 | 0.054 | 1 Opc-G | NHSL2         |
| ANXA5.6   | 0.000241 | -0.14552 | 0.732 | 0.726 | 1 Opc-G | ANXA5         |
| RP11-160C | 0.000241 | -0.11554 | 0.007 | 0.03  | 1 Opc-G | RP11-16005.1  |
| TPSAB1.5  | 0.000242 | -0.14265 | 0.003 | 0.023 | 1 Opc-G | TPSAB1        |
| SPHK2.6   | 0.000244 | 0.143864 | 0.165 | 0.126 | 1 Opc-G | SPHK2         |
| MGMT.9    | 0.000245 | -0.19109 | 0.104 | 0.155 | 1 Opc-G | MGMT          |
| PRKD1.5   | 0.000247 | 0.109518 | 0.078 | 0.049 | 1 Opc-G | PRKD1         |
| UNC119.5  | 0.000248 | -0.11613 | 0.156 | 0.221 | 1 Opc-G | UNC119        |
| HSF2.6    | 0.000251 | 0.11312  | 0.157 | 0.115 | 1 Opc-G | HSF2          |
| NAP1L1.5  | 0.000253 | -0.17896 | 0.648 | 0.676 | 1 Opc-G | NAP1L1        |
| MBP.5     | 0.000254 | -0.27461 | 0.316 | 0.233 | 1 Opc-G | MBP           |
| FAHD2A.4  | 0.000254 | 0.122618 | 0.21  | 0.17  | 1 Opc-G | FAHD2A        |
| PLAGL1.7  | 0.000254 | -0.12676 | 0.015 | 0.043 | 1 Opc-G | PLAGL1        |
| TOPORS.6  | 0.000255 | 0.123173 | 0.221 | 0.176 | 1 Opc-G | TOPORS        |
| HAUS4.10  | 0.000256 | -0.17245 | 0.03  | 0.063 | 1 Opc-G | HAUS4         |
| C5orf24.8 | 0.000258 | 0.123618 | 0.333 | 0.294 | 1 Opc-G | C5orf24       |
| RERE.8    | 0.000264 | 0.133533 | 0.251 | 0.208 | 1 Opc-G | RERE          |
| C10orf76. | 0.000265 | -0.11636 | 0.026 | 0.058 | 1 Opc-G | C10orf76      |
| ADAP1.4   | 0.000265 | -0.12312 | 0.015 | 0.042 | 1 Opc-G | ADAP1         |
| MDM4.5    | 0.000267 | 0.109849 | 0.29  | 0.243 | 1 Opc-G | MDM4          |
| GNPAT.6   | 0.00027  | 0.119827 | 0.277 | 0.237 | 1 Opc-G | GNPAT         |
| FKBP5.10  | 0.000272 | -0.20384 | 0.254 | 0.321 | 1 Opc-G | FKBP5         |
| CCDC77.1  | 0.000272 | 0.114401 | 0.086 | 0.055 | 1 Opc-G | CCDC77        |
| SLC35F6.5 | 0.000273 | -0.12775 | 0.15  | 0.213 | 1 Opc-G | SLC35F6       |
| CARNS1.8  | 0.000275 | -0.2023  | 0.007 | 0.03  | 1 Opc-G | CARNS1        |
| PLRG1.6   | 0.000279 | 0.121115 | 0.277 | 0.235 | 1 Opc-G | PLRG1         |
| VPS45.4   | 0.00028  | 0.143836 | 0.206 | 0.166 | 1 Opc-G | VPS45         |
| CD2.7     | 0.000282 | -0.17167 | 0.001 | 0.02  | 1 Opc-G | CD2           |
| DUT.8     | 0.000283 | -0.1622  | 0.391 | 0.459 | 1 Opc-G | DUT           |

|            |          |          |       |       |         |               |
|------------|----------|----------|-------|-------|---------|---------------|
| TWSG1.3    | 0.000287 | -0.11955 | 0.109 | 0.166 | 1 Opc-G | TWSG1         |
| PIK3IP1.8  | 0.00029  | -0.28642 | 0.119 | 0.164 | 1 Opc-G | PIK3IP1       |
| MED27.4    | 0.000291 | 0.146129 | 0.189 | 0.148 | 1 Opc-G | MED27         |
| SNX18.6    | 0.000297 | -0.11644 | 0.071 | 0.116 | 1 Opc-G | SNX18         |
| TTC5.1     | 0.000298 | 0.1141   | 0.133 | 0.095 | 1 Opc-G | TTC5          |
| SAMD4B.6   | 0.000298 | 0.129742 | 0.261 | 0.22  | 1 Opc-G | SAMD4B        |
| SLC39A3.7  | 0.000299 | 0.127967 | 0.38  | 0.335 | 1 Opc-G | SLC39A3       |
| CPPED1.1C  | 0.000299 | -0.15919 | 0.036 | 0.07  | 1 Opc-G | CPPED1        |
| KHSRP.7    | 0.0003   | 0.135937 | 0.275 | 0.236 | 1 Opc-G | KHSRP         |
| LMF1.1     | 0.000301 | 0.131729 | 0.137 | 0.1   | 1 Opc-G | LMF1          |
| KIF22.5    | 0.000302 | -0.18762 | 0.142 | 0.2   | 1 Opc-G | KIF22         |
| ALDH16A1.  | 0.000302 | -0.12401 | 0.077 | 0.122 | 1 Opc-G | ALDH16A1      |
| COX14.6    | 0.000305 | -0.20363 | 0.381 | 0.465 | 1 Opc-G | COX14         |
| LGALSL.7   | 0.000307 | 0.117688 | 0.092 | 0.061 | 1 Opc-G | LGALSL        |
| LDLRAD4.8  | 0.000308 | -0.23283 | 0.102 | 0.149 | 1 Opc-G | LDLRAD4       |
| DDB1.2     | 0.00031  | 0.102695 | 0.331 | 0.287 | 1 Opc-G | DDB1          |
| SLC2A6.4   | 0.000311 | 0.110027 | 0.101 | 0.068 | 1 Opc-G | SLC2A6        |
| DDIT4.9    | 0.000311 | -0.28163 | 0.37  | 0.411 | 1 Opc-G | DDIT4         |
| ASPA.2     | 0.000313 | -0.14429 | 0.005 | 0.027 | 1 Opc-G | ASPA          |
| NDUF2AF2.6 | 0.000313 | 0.117371 | 0.309 | 0.27  | 1 Opc-G | NDUF2AF2      |
| SLC43A3.4  | 0.000313 | -0.14931 | 0.092 | 0.14  | 1 Opc-G | SLC43A3       |
| FPGS.4     | 0.000314 | -0.10343 | 0.1   | 0.153 | 1 Opc-G | FPGS          |
| EFCAB7.5   | 0.000316 | 0.132938 | 0.1   | 0.067 | 1 Opc-G | EFCAB7        |
| PLXNC1.1C  | 0.000316 | -0.11457 | 0.034 | 0.068 | 1 Opc-G | PLXNC1        |
| BRI3.5     | 0.000318 | -0.1664  | 0.422 | 0.471 | 1 Opc-G | BRI3          |
| ZNF397.7   | 0.000318 | 0.124905 | 0.202 | 0.16  | 1 Opc-G | ZNF397        |
| ATP5SL.4   | 0.000322 | 0.150876 | 0.266 | 0.228 | 1 Opc-G | ATP5SL        |
| KNSTRN.5   | 0.000323 | -0.10015 | 0.044 | 0.082 | 1 Opc-G | KNSTRN        |
| SUPT16H.8  | 0.000323 | 0.115914 | 0.29  | 0.246 | 1 Opc-G | SUPT16H       |
| RP11-472N  | 0.000327 | 0.106946 | 0.143 | 0.105 | 1 Opc-G | RP11-472N13.3 |
| CCDC85B.4  | 0.000328 | 0.105918 | 0.464 | 0.41  | 1 Opc-G | CCDC85B       |
| LTA4H.8    | 0.00033  | -0.19004 | 0.173 | 0.233 | 1 Opc-G | LTA4H         |
| YTHDC1.6   | 0.00033  | 0.127266 | 0.34  | 0.3   | 1 Opc-G | YTHDC1        |
| KDM4A.3    | 0.000332 | 0.13665  | 0.148 | 0.11  | 1 Opc-G | KDM4A         |
| ATP2B4.1   | 0.000337 | 0.120919 | 0.139 | 0.102 | 1 Opc-G | ATP2B4        |
| SERTAD2.4  | 0.00034  | 0.137563 | 0.157 | 0.118 | 1 Opc-G | SERTAD2       |
| EEF1A2.2   | 0.000341 | 0.120057 | 0.061 | 0.036 | 1 Opc-G | EEF1A2        |
| SSBP4.6    | 0.000341 | -0.10216 | 0.201 | 0.275 | 1 Opc-G | SSBP4         |
| RBMX2.4    | 0.000342 | 0.160637 | 0.272 | 0.233 | 1 Opc-G | RBMX2         |
| SCARB1.5   | 0.000344 | -0.13    | 0.067 | 0.11  | 1 Opc-G | SCARB1        |
| ATP6V1C1.  | 0.000344 | -0.12572 | 0.179 | 0.248 | 1 Opc-G | ATP6V1C1      |
| CTC-479C5  | 0.000344 | -0.1522  | 0.023 | 0.053 | 1 Opc-G | CTC-479C5.12  |
| TCERG1.6   | 0.000347 | 0.161613 | 0.242 | 0.202 | 1 Opc-G | TCERG1        |
| AGAP3.6    | 0.000349 | 0.10636  | 0.135 | 0.097 | 1 Opc-G | AGAP3         |
| TTC27.2    | 0.000349 | 0.115173 | 0.109 | 0.076 | 1 Opc-G | TTC27         |
| CEPT1.2    | 0.000349 | -0.12319 | 0.105 | 0.158 | 1 Opc-G | CEPT1         |
| VWA5A.3    | 0.00035  | -0.10173 | 0.052 | 0.092 | 1 Opc-G | VWA5A         |
| ELP6.5     | 0.000351 | 0.136294 | 0.253 | 0.212 | 1 Opc-G | ELP6          |
| PAK1IP1.7  | 0.000355 | 0.142726 | 0.253 | 0.213 | 1 Opc-G | PAK1IP1       |
| CHN1.9     | 0.000357 | 0.162341 | 0.253 | 0.213 | 1 Opc-G | CHN1          |
| KITLG.4    | 0.00036  | 0.126872 | 0.067 | 0.041 | 1 Opc-G | KITLG         |

|           |          |          |       |       |         |               |
|-----------|----------|----------|-------|-------|---------|---------------|
| CA3.6     | 0.000374 | -0.21159 | 0.015 | 0.042 | 1 Opc-G | CA3           |
| C19orf60. | 0.000375 | -0.1655  | 0.443 | 0.506 | 1 Opc-G | C19orf60      |
| BRAT1.5   | 0.000379 | 0.119026 | 0.224 | 0.181 | 1 Opc-G | BRAT1         |
| TP53I11.7 | 0.00038  | -0.11933 | 0.04  | 0.075 | 1 Opc-G | TP53I11       |
| RP11-84C1 | 0.000382 | -0.10871 | 0.001 | 0.02  | 1 Opc-G | RP11-84C10.2  |
| PPIF.8    | 0.000382 | -0.19115 | 0.171 | 0.224 | 1 Opc-G | PPIF          |
| D2HGDH.3  | 0.000384 | 0.141105 | 0.142 | 0.106 | 1 Opc-G | D2HGDH        |
| GPD1.9    | 0.000386 | 0.103184 | 0.075 | 0.046 | 1 Opc-G | GPD1          |
| UBXN2B.5  | 0.000389 | -0.15353 | 0.104 | 0.154 | 1 Opc-G | UBXN2B        |
| CMTM6.10  | 0.00039  | -0.2383  | 0.367 | 0.43  | 1 Opc-G | CMTM6         |
| ALDH1L1.9 | 0.000395 | 0.160651 | 0.093 | 0.062 | 1 Opc-G | ALDH1L1       |
| GEMIN2.4  | 0.000396 | 0.197724 | 0.143 | 0.108 | 1 Opc-G | GEMIN2        |
| FRMD4A.9  | 0.000396 | -0.25429 | 0.143 | 0.191 | 1 Opc-G | FRMD4A        |
| AC018647. | 0.000397 | -0.17646 | 0.016 | 0.043 | 1 Opc-G | AC018647.3    |
| ACTR3.6   | 0.000398 | -0.19275 | 0.492 | 0.564 | 1 Opc-G | ACTR3         |
| TSEN15.5  | 0.000401 | 0.154515 | 0.268 | 0.231 | 1 Opc-G | TSEN15        |
| C9orf72.8 | 0.000403 | -0.20864 | 0.107 | 0.153 | 1 Opc-G | C9orf72       |
| ZC3H7A.5  | 0.000407 | 0.144639 | 0.186 | 0.147 | 1 Opc-G | ZC3H7A        |
| UBE2T.9   | 0.000408 | -0.11802 | 0.083 | 0.13  | 1 Opc-G | UBE2T         |
| ZNF746.2  | 0.00041  | 0.100027 | 0.097 | 0.065 | 1 Opc-G | ZNF746        |
| NUP188.1  | 0.000412 | 0.120442 | 0.113 | 0.08  | 1 Opc-G | NUP188        |
| ZMYND8.7  | 0.000413 | 0.156674 | 0.243 | 0.205 | 1 Opc-G | ZMYND8        |
| DIRAS2.7  | 0.000414 | 0.1444   | 0.092 | 0.061 | 1 Opc-G | DIRAS2        |
| CA9.6     | 0.000416 | -0.10441 | 0.015 | 0.042 | 1 Opc-G | CA9           |
| PROSER1.3 | 0.000418 | 0.151435 | 0.104 | 0.072 | 1 Opc-G | PROSER1       |
| BIRC5.10  | 0.000422 | -0.18867 | 0.067 | 0.107 | 1 Opc-G | BIRC5         |
| FARSA.5   | 0.000429 | 0.103796 | 0.357 | 0.317 | 1 Opc-G | FARSA         |
| HYAL2.10  | 0.000433 | 0.14654  | 0.258 | 0.22  | 1 Opc-G | HYAL2         |
| UBE2K.3   | 0.000433 | -0.12361 | 0.225 | 0.304 | 1 Opc-G | UBE2K         |
| SMIM12.4  | 0.000433 | -0.12124 | 0.228 | 0.307 | 1 Opc-G | SMIM12        |
| RP11-212I | 0.000438 | -0.11269 | 0.004 | 0.024 | 1 Opc-G | RP11-212I21.4 |
| RP13-516M | 0.000441 | -0.11332 | 0.01  | 0.033 | 1 Opc-G | RP13-516M14.4 |
| MARC1.8   | 0.000442 | 0.137686 | 0.086 | 0.057 | 1 Opc-G | 1-Mar         |
| RUVBL2.5  | 0.000446 | 0.11287  | 0.351 | 0.316 | 1 Opc-G | RUVBL2        |
| GPRASP2.7 | 0.000447 | 0.110841 | 0.094 | 0.063 | 1 Opc-G | GPRASP2       |
| SNAPC1.5  | 0.00045  | -0.12139 | 0.133 | 0.192 | 1 Opc-G | SNAPC1        |
| SFXN5.8   | 0.000453 | -0.15099 | 0.134 | 0.192 | 1 Opc-G | SFXN5         |
| PTTG1IP.4 | 0.000455 | -0.15154 | 0.391 | 0.46  | 1 Opc-G | PTTG1IP       |
| ACAD10    | 0.000459 | 0.149651 | 0.096 | 0.065 | 1 Opc-G | ACAD10        |
| UBIAD1.2  | 0.000466 | 0.105932 | 0.135 | 0.099 | 1 Opc-G | UBIAD1        |
| SURF2.7   | 0.000469 | 0.149915 | 0.268 | 0.229 | 1 Opc-G | SURF2         |
| SOX21-AS1 | 0.000471 | 0.167379 | 0.092 | 0.063 | 1 Opc-G | SOX21-AS1     |
| TRAPPC6A. | 0.000471 | 0.107021 | 0.298 | 0.256 | 1 Opc-G | TRAPPC6A      |
| SARM1.1   | 0.000473 | 0.135349 | 0.09  | 0.061 | 1 Opc-G | SARM1         |
| MLLT3.7   | 0.000474 | 0.109418 | 0.127 | 0.092 | 1 Opc-G | MLLT3         |
| NUDT16L1. | 0.000477 | 0.136264 | 0.316 | 0.279 | 1 Opc-G | NUDT16L1      |
| DNAAF1.6  | 0.000477 | -0.15605 | 0.007 | 0.028 | 1 Opc-G | DNAAF1        |
| RASA2.4   | 0.000485 | -0.10207 | 0.042 | 0.078 | 1 Opc-G | RASA2         |
| CD70.3    | 0.000488 | -0.1172  | 0.003 | 0.022 | 1 Opc-G | CD70          |
| PHKB.3    | 0.000494 | 0.154135 | 0.228 | 0.19  | 1 Opc-G | PHKB          |
| TRAPPC12. | 0.000499 | 0.153725 | 0.234 | 0.195 | 1 Opc-G | TRAPPC12      |

|             |          |          |       |       |         |                |
|-------------|----------|----------|-------|-------|---------|----------------|
| EXOG. 8     | 0.000501 | 0.149521 | 0.191 | 0.154 | 1 Opc-G | EXOG           |
| ZNF682. 6   | 0.000501 | 0.123981 | 0.107 | 0.074 | 1 Opc-G | ZNF682         |
| EREG. 3     | 0.000502 | -0.13552 | 0.005 | 0.026 | 1 Opc-G | EREG           |
| LRPPRC. 4   | 0.000502 | 0.14178  | 0.204 | 0.165 | 1 Opc-G | LRPPRC         |
| RINT1. 7    | 0.00051  | 0.117624 | 0.128 | 0.093 | 1 Opc-G | RINT1          |
| ZNF853. 6   | 0.000511 | 0.114384 | 0.072 | 0.046 | 1 Opc-G | ZNF853         |
| C3orf14. 6  | 0.000521 | 0.15851  | 0.302 | 0.262 | 1 Opc-G | C3orf14        |
| NOM01. 2    | 0.000525 | 0.130691 | 0.134 | 0.099 | 1 Opc-G | NOM01          |
| ACSS1. 5    | 0.000526 | 0.122823 | 0.134 | 0.098 | 1 Opc-G | ACSS1          |
| CD3E. 5     | 0.000527 | -0.16241 | 0.001 | 0.019 | 1 Opc-G | CD3E           |
| TOR1AIP2. 0 | 0.000528 | -0.13364 | 0.189 | 0.255 | 1 Opc-G | TOR1AIP2       |
| CTD-2090I   | 0.000534 | -0.36794 | 0.026 | 0.055 | 1 Opc-G | CTD-2090I13. 1 |
| AARSD1. 6   | 0.000536 | 0.125114 | 0.139 | 0.103 | 1 Opc-G | AARSD1         |
| ELOVL4. 8   | 0.000537 | 0.125512 | 0.111 | 0.078 | 1 Opc-G | ELOVL4         |
| RGL1. 5     | 0.000539 | -0.11008 | 0.051 | 0.088 | 1 Opc-G | RGL1           |
| ERCC3. 3    | 0.000542 | 0.143671 | 0.18  | 0.142 | 1 Opc-G | ERCC3          |
| TANK. 2     | 0.000562 | -0.16072 | 0.258 | 0.336 | 1 Opc-G | TANK           |
| SLC25A17. 0 | 0.000563 | 0.166565 | 0.191 | 0.155 | 1 Opc-G | SLC25A17       |
| VPS41. 4    | 0.000564 | 0.119479 | 0.24  | 0.198 | 1 Opc-G | VPS41          |
| SMARCA2. 3  | 0.000567 | -0.16757 | 0.092 | 0.137 | 1 Opc-G | SMARCA2        |
| GAL3ST3. 8  | 0.000568 | 0.133338 | 0.086 | 0.057 | 1 Opc-G | GAL3ST3        |
| UBE2D3. 7   | 0.000572 | -0.2112  | 0.719 | 0.728 | 1 Opc-G | UBE2D3         |
| CKAP4. 8    | 0.000589 | 0.167936 | 0.242 | 0.207 | 1 Opc-G | CKAP4          |
| PRPF8. 3    | 0.000599 | 0.120001 | 0.292 | 0.254 | 1 Opc-G | PRPF8          |
| CLCN3. 8    | 0.0006   | 0.130789 | 0.283 | 0.246 | 1 Opc-G | CLCN3          |
| LEO1. 4     | 0.000606 | 0.141842 | 0.178 | 0.142 | 1 Opc-G | LEO1           |
| KLHL22. 4   | 0.000609 | 0.125646 | 0.119 | 0.086 | 1 Opc-G | KLHL22         |
| ZNF33A. 4   | 0.000611 | -0.11564 | 0.063 | 0.103 | 1 Opc-G | ZNF33A         |
| TIPRL. 5    | 0.000615 | -0.14838 | 0.201 | 0.27  | 1 Opc-G | TIPRL          |
| SLC10A4. 9  | 0.000619 | 0.182031 | 0.126 | 0.095 | 1 Opc-G | SLC10A4        |
| SCRN1. 9    | 0.000626 | 0.148502 | 0.213 | 0.177 | 1 Opc-G | SCRN1          |
| TMEM106C. 0 | 0.000628 | -0.14928 | 0.204 | 0.27  | 1 Opc-G | TMEM106C       |
| HECTD4. 5   | 0.00064  | 0.128344 | 0.122 | 0.088 | 1 Opc-G | HECTD4         |
| ZNF830. 6   | 0.000644 | 0.182756 | 0.224 | 0.189 | 1 Opc-G | ZNF830         |
| TAX1BP3. 6  | 0.000654 | -0.19406 | 0.311 | 0.386 | 1 Opc-G | TAX1BP3        |
| CDKL3. 4    | 0.000655 | 0.119773 | 0.143 | 0.107 | 1 Opc-G | CDKL3          |
| BPHL. 6     | 0.000659 | 0.14518  | 0.209 | 0.172 | 1 Opc-G | BPHL           |
| LZTR1       | 0.000659 | 0.114518 | 0.081 | 0.053 | 1 Opc-G | LZTR1          |
| NPM3. 6     | 0.000669 | -0.1377  | 0.16  | 0.22  | 1 Opc-G | NPM3           |
| KCNN2. 6    | 0.000673 | 0.108464 | 0.057 | 0.034 | 1 Opc-G | KCNN2          |
| DLG5. 5     | 0.000675 | 0.12979  | 0.105 | 0.074 | 1 Opc-G | DLG5           |
| MARK4. 5    | 0.000688 | 0.119545 | 0.101 | 0.071 | 1 Opc-G | MARK4          |
| FAM210B. 1  | 0.00069  | 0.192273 | 0.302 | 0.268 | 1 Opc-G | FAM210B        |
| PIGM. 3     | 0.000693 | 0.111858 | 0.116 | 0.083 | 1 Opc-G | PIGM           |
| SGOL2. 8    | 0.000698 | -0.11984 | 0.055 | 0.092 | 1 Opc-G | SGOL2          |
| DUSP1. 7    | 0.000698 | -0.19762 | 0.604 | 0.573 | 1 Opc-G | DUSP1          |
| CACHD1      | 0.0007   | 0.119648 | 0.056 | 0.033 | 1 Opc-G | CACHD1         |
| TRIM28. 6   | 0.000705 | 0.126649 | 0.283 | 0.247 | 1 Opc-G | TRIM28         |
| P2RY12. 6   | 0.00071  | -0.1031  | 0.003 | 0.021 | 1 Opc-G | P2RY12         |
| ZMAT3. 5    | 0.000711 | 0.122663 | 0.239 | 0.2   | 1 Opc-G | ZMAT3          |
| KIAA1033. 0 | 0.000714 | -0.13324 | 0.179 | 0.243 | 1 Opc-G | KIAA1033       |

|            |          |          |       |       |         |            |
|------------|----------|----------|-------|-------|---------|------------|
| CHRNE. 7   | 0.000715 | -0.11462 | 0.007 | 0.027 | 1 Opc-G | CHRNE      |
| DPH3. 4    | 0.000728 | -0.13564 | 0.156 | 0.217 | 1 Opc-G | DPH3       |
| CRLS1. 6   | 0.000736 | 0.1706   | 0.309 | 0.282 | 1 Opc-G | CRLS1      |
| HECA. 6    | 0.000739 | -0.10413 | 0.04  | 0.073 | 1 Opc-G | HECA       |
| NCBP2-AS2  | 0.000739 | 0.189923 | 0.303 | 0.275 | 1 Opc-G | NCBP2-AS2  |
| ANKIB1. 9  | 0.000755 | 0.14097  | 0.242 | 0.206 | 1 Opc-G | ANKIB1     |
| IBSP. 7    | 0.000756 | -0.16161 | 0.005 | 0.025 | 1 Opc-G | IBSP       |
| FOSB. 7    | 0.000757 | -0.26465 | 0.359 | 0.394 | 1 Opc-G | FOSB       |
| KLF9. 4    | 0.000759 | 0.153488 | 0.165 | 0.128 | 1 Opc-G | KLF9       |
| ERRFI1. 5  | 0.000764 | -0.11204 | 0.105 | 0.155 | 1 Opc-G | ERRFI1     |
| KLHL42. 9  | 0.000767 | 0.155737 | 0.193 | 0.157 | 1 Opc-G | KLHL42     |
| THOC2. 4   | 0.000771 | 0.132038 | 0.332 | 0.302 | 1 Opc-G | THOC2      |
| TIAL1. 3   | 0.000771 | -0.13591 | 0.167 | 0.229 | 1 Opc-G | TIAL1      |
| RORB. 6    | 0.000774 | 0.110656 | 0.06  | 0.036 | 1 Opc-G | RORB       |
| PXMP2. 8   | 0.000775 | 0.189753 | 0.25  | 0.221 | 1 Opc-G | PXMP2      |
| PSD3. 9    | 0.000775 | 0.136031 | 0.228 | 0.192 | 1 Opc-G | PSD3       |
| TRMT1. 7   | 0.000784 | -0.16944 | 0.198 | 0.261 | 1 Opc-G | TRMT1      |
| PBRM1. 8   | 0.00079  | 0.130838 | 0.276 | 0.237 | 1 Opc-G | PBRM1      |
| RRP15. 4   | 0.000792 | 0.107777 | 0.253 | 0.218 | 1 Opc-G | RRP15      |
| ACTR3B. 7  | 0.000802 | 0.129216 | 0.139 | 0.105 | 1 Opc-G | ACTR3B     |
| CHPF. 8    | 0.000802 | 0.148014 | 0.291 | 0.256 | 1 Opc-G | CHPF       |
| SLC11A2. 4 | 0.000807 | -0.14909 | 0.122 | 0.172 | 1 Opc-G | SLC11A2    |
| ZNF627. 5  | 0.000807 | 0.104879 | 0.107 | 0.075 | 1 Opc-G | ZNF627     |
| TTYH3. 7   | 0.000809 | 0.104601 | 0.287 | 0.244 | 1 Opc-G | TTYH3      |
| HYI. 3     | 0.000809 | 0.143776 | 0.175 | 0.137 | 1 Opc-G | HYI        |
| TMCC1-AS1  | 0.000818 | 0.11962  | 0.066 | 0.041 | 1 Opc-G | TMCC1-AS1  |
| SCAMP1. 7  | 0.000827 | 0.119696 | 0.251 | 0.211 | 1 Opc-G | SCAMP1     |
| IMMT. 5    | 0.000829 | 0.104031 | 0.335 | 0.3   | 1 Opc-G | IMMT       |
| SF3A2. 5   | 0.000836 | 0.110571 | 0.295 | 0.257 | 1 Opc-G | SF3A2      |
| RAD23B. 4  | 0.00087  | 0.106707 | 0.406 | 0.378 | 1 Opc-G | RAD23B     |
| DICER1-AS  | 0.00087  | 0.109008 | 0.079 | 0.052 | 1 Opc-G | DICER1-AS1 |
| HBA2. 5    | 0.000873 | -0.32995 | 0.157 | 0.2   | 1 Opc-G | HBA2       |
| NAF1. 7    | 0.000875 | -0.13699 | 0.072 | 0.112 | 1 Opc-G | NAF1       |
| UBE2B. 2   | 0.000878 | -0.17189 | 0.413 | 0.49  | 1 Opc-G | UBE2B      |
| CETN2. 8   | 0.000888 | -0.16415 | 0.253 | 0.327 | 1 Opc-G | CETN2      |
| BRMS1L. 5  | 0.000889 | 0.145658 | 0.128 | 0.095 | 1 Opc-G | BRMS1L     |
| COPG2. 6   | 0.00089  | 0.151793 | 0.149 | 0.115 | 1 Opc-G | COPG2      |
| PTDSS2. 9  | 0.00089  | 0.181925 | 0.183 | 0.15  | 1 Opc-G | PTDSS2     |
| ALG14. 5   | 0.000895 | 0.149546 | 0.184 | 0.149 | 1 Opc-G | ALG14      |
| MON2. 2    | 0.000909 | 0.141715 | 0.123 | 0.09  | 1 Opc-G | MON2       |
| ZNF454. 7  | 0.00091  | 0.11912  | 0.071 | 0.046 | 1 Opc-G | ZNF454     |
| LRRN2. 4   | 0.00091  | 0.127319 | 0.081 | 0.054 | 1 Opc-G | LRRN2      |
| TMEM14C. 8 | 0.00091  | -0.22535 | 0.549 | 0.594 | 1 Opc-G | TMEM14C    |
| ARL6IP4. 8 | 0.000915 | -0.15086 | 0.615 | 0.625 | 1 Opc-G | ARL6IP4    |
| RFC4. 7    | 0.000922 | 0.165407 | 0.191 | 0.154 | 1 Opc-G | RFC4       |
| RABGGTA. 1 | 0.000924 | -0.12087 | 0.086 | 0.131 | 1 Opc-G | RABGGTA    |
| NKIRAS1. 4 | 0.000934 | 0.13327  | 0.134 | 0.1   | 1 Opc-G | NKIRAS1    |
| ZFH3. 6    | 0.000938 | -0.14881 | 0.146 | 0.199 | 1 Opc-G | ZFH3       |
| LINC00526  | 0.000951 | 0.122405 | 0.108 | 0.078 | 1 Opc-G | LINC00526  |
| SEPT4. 9   | 0.000953 | -0.245   | 0.089 | 0.133 | 1 Opc-G | 4-Sep      |
| CDC42SE2.  | 0.000956 | -0.14591 | 0.164 | 0.222 | 1 Opc-G | CDC42SE2   |

|             |          |          |       |       |         |            |
|-------------|----------|----------|-------|-------|---------|------------|
| TOR2A.7     | 0.000957 | -0.11328 | 0.102 | 0.15  | 1 Opc-G | TOR2A      |
| COIL.7      | 0.000958 | 0.154413 | 0.217 | 0.183 | 1 Opc-G | COIL       |
| MFSD10.5    | 0.00096  | -0.12003 | 0.232 | 0.306 | 1 Opc-G | MFSD10     |
| NOM1.6      | 0.000963 | 0.114852 | 0.149 | 0.114 | 1 Opc-G | NOM1       |
| SIDT1.5     | 0.000967 | -0.12244 | 0.005 | 0.024 | 1 Opc-G | SIDT1      |
| SBN01.7     | 0.000981 | 0.134725 | 0.298 | 0.263 | 1 Opc-G | SBN01      |
| ZSCAN9.3    | 0.000982 | 0.107841 | 0.108 | 0.077 | 1 Opc-G | ZSCAN9     |
| RPAP2.6     | 0.000988 | 0.179894 | 0.216 | 0.182 | 1 Opc-G | RPAP2      |
| ZNF420.7    | 0.00099  | 0.17526  | 0.138 | 0.105 | 1 Opc-G | ZNF420     |
| FAM192A.5   | 0.001    | 0.110052 | 0.383 | 0.356 | 1 Opc-G | FAM192A    |
| TNKS.10     | 0.001002 | 0.166287 | 0.18  | 0.146 | 1 Opc-G | TNKS       |
| ANKRD39.6   | 0.001006 | 0.118234 | 0.202 | 0.165 | 1 Opc-G | ANKRD39    |
| GNPDA2.6    | 0.001008 | 0.117604 | 0.157 | 0.122 | 1 Opc-G | GNPDA2     |
| HDHD2.4     | 0.001016 | 0.10098  | 0.29  | 0.255 | 1 Opc-G | HDHD2      |
| SOWAHC.5    | 0.001017 | 0.115307 | 0.094 | 0.066 | 1 Opc-G | SOWAHC     |
| SP3.7       | 0.001021 | 0.119783 | 0.247 | 0.207 | 1 Opc-G | SP3        |
| KIAA1715.0  | 0.001028 | 0.11722  | 0.288 | 0.253 | 1 Opc-G | KIAA1715   |
| PLOD3.7     | 0.001033 | 0.113917 | 0.251 | 0.216 | 1 Opc-G | PLOD3      |
| CD46.2      | 0.00104  | -0.15785 | 0.179 | 0.238 | 1 Opc-G | CD46       |
| MAML1.8     | 0.001045 | -0.15506 | 0.079 | 0.12  | 1 Opc-G | MAML1      |
| UFM1.2      | 0.001047 | -0.12747 | 0.269 | 0.347 | 1 Opc-G | UFM1       |
| RMI1.3      | 0.001049 | 0.107569 | 0.086 | 0.058 | 1 Opc-G | RMI1       |
| MCM4.8      | 0.00105  | 0.11243  | 0.127 | 0.093 | 1 Opc-G | MCM4       |
| CLDN11.8    | 0.001051 | -0.3362  | 0.022 | 0.047 | 1 Opc-G | CLDN11     |
| GTF3C5.6    | 0.001056 | 0.133601 | 0.219 | 0.184 | 1 Opc-G | GTF3C5     |
| CDK5RAP3.0  | 0.001068 | -0.14336 | 0.333 | 0.411 | 1 Opc-G | CDK5RAP3   |
| SPOCK3.7    | 0.001078 | -0.1863  | 0.012 | 0.034 | 1 Opc-G | SPOCK3     |
| WDR92.5     | 0.00108  | 0.130403 | 0.108 | 0.077 | 1 Opc-G | WDR92      |
| USP1.8      | 0.001085 | 0.134755 | 0.29  | 0.256 | 1 Opc-G | USP1       |
| CDKN2AIPN.0 | 0.001089 | 0.119482 | 0.279 | 0.247 | 1 Opc-G | CDKN2AIPNL |
| MTRNR2L12.0 | 0.001094 | -0.38065 | 0.152 | 0.199 | 1 Opc-G | MTRNR2L12  |
| LDOC1L.7    | 0.001096 | 0.149696 | 0.115 | 0.085 | 1 Opc-G | LDOC1L     |
| PHC1.5      | 0.001114 | 0.113061 | 0.107 | 0.076 | 1 Opc-G | PHC1       |
| PROX1.9     | 0.001116 | 0.143325 | 0.199 | 0.162 | 1 Opc-G | PROX1      |
| HS1BP3.1    | 0.001129 | -0.10416 | 0.057 | 0.095 | 1 Opc-G | HS1BP3     |
| CDIP1.4     | 0.001134 | 0.134581 | 0.22  | 0.184 | 1 Opc-G | CDIP1      |
| PSMD1.5     | 0.001158 | 0.116529 | 0.351 | 0.321 | 1 Opc-G | PSMD1      |
| INTS1.2     | 0.001159 | 0.102444 | 0.117 | 0.085 | 1 Opc-G | INTS1      |
| TMED3.7     | 0.00116  | -0.13328 | 0.245 | 0.312 | 1 Opc-G | TMED3      |
| PSMG2.5     | 0.001166 | -0.1935  | 0.342 | 0.417 | 1 Opc-G | PSMG2      |
| AUTS2.9     | 0.001172 | 0.13467  | 0.15  | 0.116 | 1 Opc-G | AUTS2      |
| C11orf1.5   | 0.001178 | -0.10133 | 0.1   | 0.147 | 1 Opc-G | C11orf1    |
| UBAC2.9     | 0.001179 | -0.17606 | 0.214 | 0.275 | 1 Opc-G | UBAC2      |
| NKIRAS2.5   | 0.001193 | 0.121135 | 0.295 | 0.261 | 1 Opc-G | NKIRAS2    |
| KCTD17.4    | 0.001222 | 0.148406 | 0.167 | 0.133 | 1 Opc-G | KCTD17     |
| POLR3GL.3   | 0.001235 | -0.13334 | 0.279 | 0.355 | 1 Opc-G | POLR3GL    |
| SYNC.7      | 0.00124  | 0.111203 | 0.212 | 0.173 | 1 Opc-G | SYNC       |
| RASSF1.4    | 0.001247 | -0.12188 | 0.113 | 0.162 | 1 Opc-G | RASSF1     |
| NRG2.6      | 0.001263 | 0.124274 | 0.061 | 0.039 | 1 Opc-G | NRG2       |
| ERMN.8      | 0.001268 | -0.32296 | 0.016 | 0.039 | 1 Opc-G | ERMN       |
| TTC33.0     | 0.001275 | 0.1089   | 0.087 | 0.059 | 1 Opc-G | TTC33      |

|           |          |          |       |       |         |            |
|-----------|----------|----------|-------|-------|---------|------------|
| AC006129. | 0.001277 | -0.1006  | 0     | 0.014 | 1 Opc-G | AC006129.2 |
| SZRD1.5   | 0.001279 | -0.11028 | 0.201 | 0.269 | 1 Opc-G | SZRD1      |
| MECP2.2   | 0.001281 | -0.12511 | 0.149 | 0.205 | 1 Opc-G | MECP2      |
| KIF3A.7   | 0.00129  | 0.156373 | 0.268 | 0.232 | 1 Opc-G | KIF3A      |
| GREM1.2   | 0.001307 | -0.22906 | 0.012 | 0.034 | 1 Opc-G | GREM1      |
| ECI2.7    | 0.00131  | -0.17513 | 0.265 | 0.327 | 1 Opc-G | ECI2       |
| CACFD1.7  | 0.001327 | 0.126466 | 0.116 | 0.085 | 1 Opc-G | CACFD1     |
| SEP15.3   | 0.001353 | -0.19236 | 0.646 | 0.657 | 1 Opc-G | 15-Sep     |
| RUNX2.6   | 0.001353 | -0.10941 | 0.01  | 0.03  | 1 Opc-G | RUNX2      |
| ALDH6A1.7 | 0.001353 | 0.161564 | 0.236 | 0.205 | 1 Opc-G | ALDH6A1    |
| MED19.6   | 0.001365 | 0.108991 | 0.313 | 0.279 | 1 Opc-G | MED19      |
| ARID2.3   | 0.001368 | 0.102339 | 0.134 | 0.101 | 1 Opc-G | ARID2      |
| SAMM50.4  | 0.001375 | 0.130975 | 0.247 | 0.213 | 1 Opc-G | SAMM50     |
| ABCA2.10  | 0.001376 | -0.19518 | 0.061 | 0.098 | 1 Opc-G | ABCA2      |
| CDKAL1.3  | 0.001383 | 0.147689 | 0.123 | 0.091 | 1 Opc-G | CDKAL1     |
| SYVN1.2   | 0.001385 | -0.11486 | 0.067 | 0.105 | 1 Opc-G | SYVN1      |
| BLOC1S4.1 | 0.001393 | 0.162631 | 0.269 | 0.241 | 1 Opc-G | BLOC1S4    |
| GLYR1.2   | 0.001397 | 0.124566 | 0.243 | 0.207 | 1 Opc-G | GLYR1      |
| RABGAP1L. | 0.001401 | -0.15406 | 0.074 | 0.112 | 1 Opc-G | RABGAP1L   |
| COQ3.4    | 0.001415 | 0.126068 | 0.094 | 0.066 | 1 Opc-G | COQ3       |
| DKK3.8    | 0.001427 | 0.191623 | 0.228 | 0.198 | 1 Opc-G | DKK3       |
| DENND5B.8 | 0.001435 | 0.146313 | 0.124 | 0.094 | 1 Opc-G | DENND5B    |
| GTF2H2C.4 | 0.001439 | 0.106812 | 0.115 | 0.084 | 1 Opc-G | GTF2H2C    |
| PKIB.7    | 0.001446 | -0.1709  | 0.231 | 0.287 | 1 Opc-G | PKIB       |
| TMEM218.4 | 0.001453 | 0.133944 | 0.253 | 0.219 | 1 Opc-G | TMEM218    |
| DHX29.7   | 0.001454 | 0.105196 | 0.337 | 0.308 | 1 Opc-G | DHX29      |
| RBBP6.5   | 0.001457 | 0.140411 | 0.339 | 0.312 | 1 Opc-G | RBBP6      |
| PUM1.5    | 0.001469 | 0.132754 | 0.268 | 0.235 | 1 Opc-G | PUM1       |
| YRDC.5    | 0.001477 | 0.178642 | 0.191 | 0.159 | 1 Opc-G | YRDC       |
| PLCE1.7   | 0.00148  | 0.137806 | 0.09  | 0.063 | 1 Opc-G | PLCE1      |
| AGO1.4    | 0.001501 | 0.109819 | 0.119 | 0.088 | 1 Opc-G | AGO1       |
| ZNF581.5  | 0.00151  | -0.10465 | 0.124 | 0.176 | 1 Opc-G | ZNF581     |
| MCRS1.4   | 0.001518 | 0.14158  | 0.295 | 0.269 | 1 Opc-G | MCRS1      |
| STK10.9   | 0.001529 | -0.12497 | 0.042 | 0.074 | 1 Opc-G | STK10      |
| RNF24.7   | 0.001533 | 0.11964  | 0.28  | 0.246 | 1 Opc-G | RNF24      |
| PTPRCAP.6 | 0.001538 | -0.19035 | 0.008 | 0.027 | 1 Opc-G | PTPRCAP    |
| RIT1.6    | 0.001539 | -0.10201 | 0.16  | 0.217 | 1 Opc-G | RIT1       |
| ABHD17A.9 | 0.001551 | -0.10935 | 0.182 | 0.239 | 1 Opc-G | ABHD17A    |
| SAFB2.6   | 0.001559 | 0.108292 | 0.362 | 0.329 | 1 Opc-G | SAFB2      |
| AKNA.8    | 0.001564 | -0.17166 | 0.044 | 0.074 | 1 Opc-G | AKNA       |
| HHLA3.7   | 0.001565 | -0.10306 | 0.096 | 0.142 | 1 Opc-G | HHLA3      |
| ALDH2.7   | 0.001567 | -0.17774 | 0.322 | 0.374 | 1 Opc-G | ALDH2      |
| MAT2B.1   | 0.00157  | -0.1326  | 0.148 | 0.201 | 1 Opc-G | MAT2B      |
| VTI1A.6   | 0.001574 | -0.10408 | 0.037 | 0.067 | 1 Opc-G | VTI1A      |
| CTTNBP2NL | 0.001576 | -0.1148  | 0.111 | 0.156 | 1 Opc-G | CTTNBP2NL  |
| C2orf69.8 | 0.001577 | 0.151144 | 0.225 | 0.192 | 1 Opc-G | C2orf69    |
| CCZ1B.8   | 0.001579 | 0.187149 | 0.18  | 0.149 | 1 Opc-G | CCZ1B      |
| LAMTOR2.8 | 0.00158  | -0.17081 | 0.53  | 0.59  | 1 Opc-G | LAMTOR2    |
| UBQLN4.4  | 0.00158  | 0.114584 | 0.133 | 0.1   | 1 Opc-G | UBQLN4     |
| GRM3.5    | 0.00158  | -0.11089 | 0.005 | 0.023 | 1 Opc-G | GRM3       |
| RRP9.4    | 0.00158  | 0.168953 | 0.186 | 0.155 | 1 Opc-G | RRP9       |



|            |          |          |       |       |         |           |
|------------|----------|----------|-------|-------|---------|-----------|
| NFU1.3     | 0.001587 | 0.109961 | 0.328 | 0.299 | 1 Opc-G | NFU1      |
| IDI1.7     | 0.001588 | -0.14292 | 0.262 | 0.328 | 1 Opc-G | IDI1      |
| SETBP1.7   | 0.001621 | 0.117102 | 0.101 | 0.072 | 1 Opc-G | SETBP1    |
| CSTF3.7    | 0.001621 | 0.135458 | 0.296 | 0.265 | 1 Opc-G | CSTF3     |
| TRIM41.1   | 0.001623 | 0.116895 | 0.128 | 0.096 | 1 Opc-G | TRIM41    |
| C17orf97.0 | 0.001627 | 0.13972  | 0.081 | 0.055 | 1 Opc-G | C17orf97  |
| UBE3A.8    | 0.001628 | 0.147132 | 0.313 | 0.285 | 1 Opc-G | UBE3A     |
| GGH.8      | 0.001628 | 0.112735 | 0.296 | 0.261 | 1 Opc-G | GGH       |
| ADK.4      | 0.001629 | -0.1079  | 0.119 | 0.169 | 1 Opc-G | ADK       |
| CDK5R1.9   | 0.00163  | 0.102036 | 0.124 | 0.091 | 1 Opc-G | CDK5R1    |
| DMWD.7     | 0.001635 | 0.171693 | 0.169 | 0.14  | 1 Opc-G | DMWD      |
| RNFT2.7    | 0.001638 | 0.134323 | 0.094 | 0.067 | 1 Opc-G | RNFT2     |
| GOT1.2     | 0.001644 | -0.1377  | 0.092 | 0.134 | 1 Opc-G | GOT1      |
| DCTD.3     | 0.001648 | -0.11191 | 0.195 | 0.26  | 1 Opc-G | DCTD      |
| STXBP1.8   | 0.001659 | 0.126581 | 0.153 | 0.119 | 1 Opc-G | STXBP1    |
| HIST1H2BC  | 0.001679 | -0.11308 | 0.005 | 0.023 | 1 Opc-G | HIST1H2BC |
| LIMK1.3    | 0.001684 | -0.11302 | 0.097 | 0.141 | 1 Opc-G | LIMK1     |
| KIAA1429.0 | 0.001685 | 0.140204 | 0.139 | 0.107 | 1 Opc-G | KIAA1429  |
| HSPH1.6    | 0.001695 | 0.101687 | 0.388 | 0.359 | 1 Opc-G | HSPH1     |
| PCOLCE2.5  | 0.00171  | 0.107148 | 0.111 | 0.08  | 1 Opc-G | PCOLCE2   |
| PIGT.3     | 0.00173  | -0.16785 | 0.339 | 0.401 | 1 Opc-G | PIGT      |
| PWP1.6     | 0.001738 | 0.151263 | 0.325 | 0.301 | 1 Opc-G | PWP1      |
| EIF3J-AS1  | 0.001739 | 0.120025 | 0.157 | 0.125 | 1 Opc-G | EIF3J-AS1 |
| SARS2.2    | 0.001739 | 0.117667 | 0.102 | 0.073 | 1 Opc-G | SARS2     |
| IFNLR1.5   | 0.001752 | -0.10518 | 0.007 | 0.025 | 1 Opc-G | IFNLR1    |
| GINS2.6    | 0.001762 | 0.129779 | 0.13  | 0.097 | 1 Opc-G | GINS2     |
| RBM33.2    | 0.001798 | 0.114712 | 0.182 | 0.147 | 1 Opc-G | RBM33     |
| ZNF32.4    | 0.001807 | 0.1511   | 0.251 | 0.221 | 1 Opc-G | ZNF32     |
| SNHG10.4   | 0.001808 | 0.1557   | 0.122 | 0.092 | 1 Opc-G | SNHG10    |
| MAOB.8     | 0.001812 | -0.14621 | 0.064 | 0.101 | 1 Opc-G | MAOB      |
| RAB18.2    | 0.001817 | -0.14295 | 0.32  | 0.403 | 1 Opc-G | RAB18     |
| FCH01.5    | 0.001824 | -0.11363 | 0.018 | 0.041 | 1 Opc-G | FCH01     |
| SYNJ2BP.4  | 0.001848 | 0.13545  | 0.175 | 0.141 | 1 Opc-G | SYNJ2BP   |
| PDSS1.2    | 0.001853 | 0.109239 | 0.081 | 0.055 | 1 Opc-G | PDSS1     |
| KLHL20.5   | 0.001854 | 0.146325 | 0.169 | 0.137 | 1 Opc-G | KLHL20    |
| IFIT5.5    | 0.001855 | 0.1026   | 0.112 | 0.082 | 1 Opc-G | IFIT5     |
| BRF1.6     | 0.001857 | 0.118408 | 0.133 | 0.101 | 1 Opc-G | BRF1      |
| ATG9A.7    | 0.001863 | 0.117844 | 0.146 | 0.115 | 1 Opc-G | ATG9A     |
| HOOK3.5    | 0.001864 | 0.133483 | 0.311 | 0.282 | 1 Opc-G | HOOK3     |
| TRMU.3     | 0.001886 | 0.160447 | 0.161 | 0.13  | 1 Opc-G | TRMU      |
| ZNF354A.6  | 0.001889 | 0.108204 | 0.152 | 0.118 | 1 Opc-G | ZNF354A   |
| GPI.7      | 0.00189  | -0.14772 | 0.291 | 0.361 | 1 Opc-G | GPI       |
| MYCBP2.6   | 0.001891 | -0.15595 | 0.249 | 0.308 | 1 Opc-G | MYCBP2    |
| RNF38.3    | 0.001899 | 0.137096 | 0.123 | 0.093 | 1 Opc-G | RNF38     |
| SLC30A9.9  | 0.001929 | 0.140989 | 0.279 | 0.25  | 1 Opc-G | SLC30A9   |
| TBC1D8.3   | 0.001949 | -0.10553 | 0.022 | 0.046 | 1 Opc-G | TBC1D8    |
| EZR.8      | 0.001949 | 0.108504 | 0.367 | 0.341 | 1 Opc-G | EZR       |
| GPANK1.4   | 0.001982 | 0.128499 | 0.224 | 0.191 | 1 Opc-G | GPANK1    |
| NFASC.8    | 0.001994 | -0.14451 | 0.068 | 0.105 | 1 Opc-G | NFASC     |
| B4GALT2.6  | 0.002025 | 0.148484 | 0.102 | 0.075 | 1 Opc-G | B4GALT2   |
| CHST15.5   | 0.002034 | -0.10757 | 0.018 | 0.041 | 1 Opc-G | CHST15    |

|           |          |          |       |       |         |              |
|-----------|----------|----------|-------|-------|---------|--------------|
| FAM118A.7 | 0.002042 | -0.12434 | 0.094 | 0.135 | 1 Opc-G | FAM118A      |
| LCK.4     | 0.002056 | -0.11446 | 0.001 | 0.015 | 1 Opc-G | LCK          |
| MAPK6.5   | 0.002062 | 0.117231 | 0.204 | 0.17  | 1 Opc-G | MAPK6        |
| SNHG12.7  | 0.002068 | -0.18875 | 0.097 | 0.137 | 1 Opc-G | SNHG12       |
| TPGS1.4   | 0.002068 | 0.121607 | 0.336 | 0.308 | 1 Opc-G | TPGS1        |
| RP5-940J5 | 0.002079 | -0.27683 | 0.123 | 0.164 | 1 Opc-G | RP5-940J5.9  |
| PAPD4.2   | 0.002084 | -0.10784 | 0.133 | 0.182 | 1 Opc-G | PAPD4        |
| NCOA1.6   | 0.002087 | 0.141408 | 0.191 | 0.159 | 1 Opc-G | NCOA1        |
| FJX1.9    | 0.002089 | 0.125198 | 0.24  | 0.199 | 1 Opc-G | FJX1         |
| ITGAV.6   | 0.002103 | -0.11774 | 0.223 | 0.282 | 1 Opc-G | ITGAV        |
| RP5-827C2 | 0.002128 | 0.139587 | 0.089 | 0.062 | 1 Opc-G | RP5-827C21.4 |
| NAA50.3   | 0.002145 | -0.10699 | 0.209 | 0.276 | 1 Opc-G | NAA50        |
| MOG.8     | 0.002167 | -0.20637 | 0.012 | 0.032 | 1 Opc-G | MOG          |
| FAT3.7    | 0.002178 | 0.129788 | 0.079 | 0.055 | 1 Opc-G | FAT3         |
| FMNL3.8   | 0.00218  | -0.12986 | 0.048 | 0.079 | 1 Opc-G | FMNL3        |
| C5orf28.6 | 0.002182 | 0.129942 | 0.149 | 0.117 | 1 Opc-G | C5orf28      |
| RUNX1T1.5 | 0.002183 | 0.109046 | 0.053 | 0.033 | 1 Opc-G | RUNX1T1      |
| MTIF3.4   | 0.002195 | -0.1249  | 0.279 | 0.35  | 1 Opc-G | MTIF3        |
| RHOC.7    | 0.00221  | -0.18059 | 0.5   | 0.535 | 1 Opc-G | RHOC         |
| FBXL15.9  | 0.00225  | -0.1071  | 0.148 | 0.198 | 1 Opc-G | FBXL15       |
| LILRA4.4  | 0.002255 | -0.11352 | 0.007 | 0.024 | 1 Opc-G | LILRA4       |
| ARF1.6    | 0.002312 | -0.18217 | 0.68  | 0.695 | 1 Opc-G | ARF1         |
| COQ6.2    | 0.002331 | 0.10875  | 0.135 | 0.104 | 1 Opc-G | COQ6         |
| PDPN.6    | 0.002338 | -0.10749 | 0.516 | 0.445 | 1 Opc-G | PDPN         |
| TKT.6     | 0.002341 | -0.18666 | 0.449 | 0.513 | 1 Opc-G | TKT          |
| CASK.3    | 0.00236  | 0.127272 | 0.153 | 0.122 | 1 Opc-G | CASK         |
| PBK.10    | 0.002363 | -0.13807 | 0.045 | 0.075 | 1 Opc-G | PBK          |
| METTL23.4 | 0.00237  | -0.1186  | 0.255 | 0.323 | 1 Opc-G | METTL23      |
| MIEF1.3   | 0.002374 | 0.135413 | 0.175 | 0.144 | 1 Opc-G | MIEF1        |
| PPP6R2.3  | 0.002385 | 0.123048 | 0.18  | 0.148 | 1 Opc-G | PPP6R2       |
| ZNF664.7  | 0.002398 | 0.153624 | 0.178 | 0.147 | 1 Opc-G | ZNF664       |
| TMEM151A. | 0.002403 | -0.10413 | 0.02  | 0.044 | 1 Opc-G | TMEM151A     |
| INO80B.2  | 0.002408 | 0.102307 | 0.096 | 0.068 | 1 Opc-G | INO80B       |
| CMC2.5    | 0.002426 | -0.12845 | 0.245 | 0.309 | 1 Opc-G | CMC2         |
| CDCA7.9   | 0.002439 | 0.118914 | 0.156 | 0.121 | 1 Opc-G | CDCA7        |
| MLST8.6   | 0.00245  | 0.141391 | 0.261 | 0.235 | 1 Opc-G | MLST8        |
| PINX1.3   | 0.002469 | 0.142308 | 0.127 | 0.097 | 1 Opc-G | PINX1        |
| CCBL1.1   | 0.002484 | 0.102489 | 0.077 | 0.052 | 1 Opc-G | CCBL1        |
| TOP1MT.4  | 0.002539 | 0.131053 | 0.098 | 0.072 | 1 Opc-G | TOP1MT       |
| CMTM3.10  | 0.002549 | -0.13742 | 0.266 | 0.327 | 1 Opc-G | CMTM3        |
| ACAD8.5   | 0.002565 | 0.146285 | 0.21  | 0.181 | 1 Opc-G | ACAD8        |
| GSK3A.7   | 0.002565 | 0.135335 | 0.219 | 0.188 | 1 Opc-G | GSK3A        |
| USP7.3    | 0.00257  | 0.131461 | 0.165 | 0.133 | 1 Opc-G | USP7         |
| ANKRD50.3 | 0.002573 | 0.104256 | 0.071 | 0.048 | 1 Opc-G | ANKRD50      |
| PTRHD1.5  | 0.002583 | -0.14201 | 0.254 | 0.323 | 1 Opc-G | PTRHD1       |
| REEP2.8   | 0.002634 | 0.153763 | 0.228 | 0.2   | 1 Opc-G | REEP2        |
| CAPN3.7   | 0.002644 | -0.25386 | 0.022 | 0.045 | 1 Opc-G | CAPN3        |
| FAM168B.5 | 0.002667 | 0.127021 | 0.193 | 0.161 | 1 Opc-G | FAM168B      |
| COMMD10.5 | 0.002673 | -0.13356 | 0.172 | 0.229 | 1 Opc-G | COMMD10      |
| PSPH.9    | 0.002695 | 0.145858 | 0.186 | 0.155 | 1 Opc-G | PSPH         |
| ACSM5.5   | 0.00272  | -0.12363 | 0.014 | 0.034 | 1 Opc-G | ACSM5        |

|            |           |           |        |        |         |                |
|------------|-----------|-----------|--------|--------|---------|----------------|
| ACP2. 6    | 0. 002721 | -0. 11906 | 0. 189 | 0. 247 | 1 Opc-G | ACP2           |
| ASAP1. 6   | 0. 002745 | 0. 143989 | 0. 255 | 0. 226 | 1 Opc-G | ASAP1          |
| EEF1B2. 9  | 0. 002774 | -0. 19453 | 0. 787 | 0. 776 | 1 Opc-G | EEF1B2         |
| ARMCX6. 2  | 0. 002793 | -0. 13066 | 0. 189 | 0. 246 | 1 Opc-G | ARMCX6         |
| ZNF480. 2  | 0. 002844 | -0. 10177 | 0. 071 | 0. 108 | 1 Opc-G | ZNF480         |
| FGFR2. 8   | 0. 002855 | -0. 11532 | 0. 025 | 0. 049 | 1 Opc-G | FGFR2          |
| NUDT3. 8   | 0. 002887 | -0. 16931 | 0. 34  | 0. 404 | 1 Opc-G | NUDT3          |
| DCBLD1. 3  | 0. 002932 | 0. 119009 | 0. 115 | 0. 086 | 1 Opc-G | DCBLD1         |
| CAV1. 9    | 0. 002945 | -0. 49717 | 0. 096 | 0. 129 | 1 Opc-G | CAV1           |
| PLEKHM2. 2 | 0. 002953 | -0. 10249 | 0. 068 | 0. 104 | 1 Opc-G | PLEKHM2        |
| OXA1L. 9   | 0. 002954 | -0. 21004 | 0. 251 | 0. 305 | 1 Opc-G | OXA1L          |
| NECAP2. 6  | 0. 002959 | -0. 17419 | 0. 234 | 0. 296 | 1 Opc-G | NECAP2         |
| RAB9B. 6   | 0. 002998 | 0. 111916 | 0. 075 | 0. 051 | 1 Opc-G | RAB9B          |
| ATN1. 8    | 0. 003007 | 0. 109043 | 0. 212 | 0. 182 | 1 Opc-G | ATN1           |
| RAB11A. 4  | 0. 003013 | -0. 16841 | 0. 398 | 0. 471 | 1 Opc-G | RAB11A         |
| HARS. 5    | 0. 003015 | 0. 113155 | 0. 307 | 0. 279 | 1 Opc-G | HARS           |
| RXR. 3     | 0. 00305  | 0. 118633 | 0. 198 | 0. 165 | 1 Opc-G | RXR            |
| RP11-1143  | 0. 003067 | -0. 18843 | 0. 029 | 0. 053 | 1 Opc-G | RP11-1143G9. 4 |
| DOCK11. 9  | 0. 003068 | -0. 10853 | 0. 03  | 0. 056 | 1 Opc-G | DOCK11         |
| MAF. 9     | 0. 00308  | -0. 20391 | 0. 101 | 0. 137 | 1 Opc-G | MAF            |
| NOL3. 9    | 0. 003081 | 0. 152369 | 0. 195 | 0. 164 | 1 Opc-G | NOL3           |
| TMEM220. 8 | 0. 003089 | -0. 11404 | 0. 042 | 0. 071 | 1 Opc-G | TMEM220        |
| GSPT2. 8   | 0. 003098 | 0. 135639 | 0. 179 | 0. 147 | 1 Opc-G | GSPT2          |
| RP1-313I6  | 0. 003101 | -0. 10141 | 0. 029 | 0. 054 | 1 Opc-G | RP1-313I6. 12  |
| SCML1. 5   | 0. 003109 | -0. 13322 | 0. 063 | 0. 096 | 1 Opc-G | SCML1          |
| SLC20A1. 2 | 0. 00312  | -0. 12922 | 0. 135 | 0. 181 | 1 Opc-G | SLC20A1        |
| FAHD1. 4   | 0. 003121 | 0. 159111 | 0. 202 | 0. 174 | 1 Opc-G | FAHD1          |
| PREB. 5    | 0. 003137 | 0. 114945 | 0. 239 | 0. 208 | 1 Opc-G | PREB           |
| LRRC49. 5  | 0. 003138 | 0. 10176  | 0. 082 | 0. 057 | 1 Opc-G | LRRC49         |
| PFKL. 7    | 0. 003139 | -0. 13395 | 0. 303 | 0. 367 | 1 Opc-G | PFKL           |
| TUG1. 7    | 0. 003186 | 0. 155669 | 0. 202 | 0. 174 | 1 Opc-G | TUG1           |
| GCFC2. 3   | 0. 003187 | 0. 120763 | 0. 149 | 0. 119 | 1 Opc-G | GCFC2          |
| SUDS3. 8   | 0. 003209 | 0. 144435 | 0. 216 | 0. 186 | 1 Opc-G | SUDS3          |
| RP11-563K  | 0. 003217 | 0. 150824 | 0. 087 | 0. 063 | 1 Opc-G | RP11-563K23. 1 |
| CRYL1. 3   | 0. 003281 | -0. 14454 | 0. 247 | 0. 314 | 1 Opc-G | CRYL1          |
| AIMP2. 6   | 0. 003367 | 0. 102276 | 0. 27  | 0. 238 | 1 Opc-G | AIMP2          |
| CDK18. 7   | 0. 0034   | -0. 11718 | 0. 049 | 0. 079 | 1 Opc-G | CDK18          |
| PNP. 7     | 0. 003415 | -0. 147   | 0. 071 | 0. 105 | 1 Opc-G | PNP            |
| PTGFRN. 5  | 0. 003456 | 0. 132834 | 0. 13  | 0. 102 | 1 Opc-G | PTGFRN         |
| GMPR2. 4   | 0. 003513 | -0. 10663 | 0. 164 | 0. 218 | 1 Opc-G | GMPR2          |
| SYNGR1. 6  | 0. 003542 | -0. 12405 | 0. 078 | 0. 114 | 1 Opc-G | SYNGR1         |
| TBRG1. 2   | 0. 003565 | -0. 14558 | 0. 193 | 0. 248 | 1 Opc-G | TBRG1          |
| SFXN1. 6   | 0. 003574 | 0. 1341   | 0. 242 | 0. 215 | 1 Opc-G | SFXN1          |
| NPTN. 6    | 0. 003607 | -0. 10352 | 0. 037 | 0. 063 | 1 Opc-G | NPTN           |
| TRAFD1. 3  | 0. 003684 | 0. 114457 | 0. 158 | 0. 128 | 1 Opc-G | TRAFD1         |
| SCAI. 5    | 0. 003689 | 0. 103367 | 0. 109 | 0. 081 | 1 Opc-G | SCAI           |
| TCTA. 3    | 0. 003699 | 0. 124464 | 0. 19  | 0. 159 | 1 Opc-G | TCTA           |
| TBC1D4. 7  | 0. 003724 | -0. 11562 | 0. 026 | 0. 049 | 1 Opc-G | TBC1D4         |
| ALG3. 4    | 0. 003734 | -0. 12524 | 0. 179 | 0. 235 | 1 Opc-G | ALG3           |
| HCCS. 3    | 0. 00375  | -0. 10097 | 0. 123 | 0. 17  | 1 Opc-G | HCCS           |
| BROX. 6    | 0. 003772 | -0. 10714 | 0. 183 | 0. 238 | 1 Opc-G | BROX           |

|             |           |           |        |        |         |            |
|-------------|-----------|-----------|--------|--------|---------|------------|
| UTP6. 5     | 0. 003782 | -0. 1131  | 0. 16  | 0. 212 | 1 Opc-G | UTP6       |
| MARK1. 6    | 0. 00379  | 0. 11397  | 0. 09  | 0. 066 | 1 Opc-G | MARK1      |
| INSIG1. 8   | 0. 00379  | -0. 17099 | 0. 183 | 0. 23  | 1 Opc-G | INSIG1     |
| TOM1. 8     | 0. 003812 | -0. 1634  | 0. 122 | 0. 163 | 1 Opc-G | TOM1       |
| COPS7B. 5   | 0. 003818 | 0. 118015 | 0. 225 | 0. 195 | 1 Opc-G | COPS7B     |
| EMX2. 2     | 0. 003854 | 0. 112527 | 0. 045 | 0. 027 | 1 Opc-G | EMX2       |
| ITM2A. 9    | 0. 003868 | 0. 129881 | 0. 078 | 0. 054 | 1 Opc-G | ITM2A      |
| PPP1R2. 4   | 0. 003908 | -0. 14054 | 0. 303 | 0. 373 | 1 Opc-G | PPP1R2     |
| G3BP1. 5    | 0. 003929 | 0. 107675 | 0. 339 | 0. 312 | 1 Opc-G | G3BP1      |
| KAT6A. 4    | 0. 003956 | 0. 119328 | 0. 189 | 0. 156 | 1 Opc-G | KAT6A      |
| PCTP. 5     | 0. 003957 | -0. 10035 | 0. 045 | 0. 074 | 1 Opc-G | PCTP       |
| SUPT20H. 6  | 0. 003989 | 0. 128433 | 0. 234 | 0. 205 | 1 Opc-G | SUPT20H    |
| OPALIN. 6   | 0. 003999 | -0. 16853 | 0. 001 | 0. 014 | 1 Opc-G | OPALIN     |
| ARHGAP22. 0 | 0. 004032 | -0. 15121 | 0. 048 | 0. 076 | 1 Opc-G | ARHGAP22   |
| ATP6AP1. 8  | 0. 004034 | -0. 1358  | 0. 432 | 0. 497 | 1 Opc-G | ATP6AP1    |
| CBX6. 7     | 0. 004043 | 0. 106803 | 0. 27  | 0. 238 | 1 Opc-G | CBX6       |
| SMIM14. 8   | 0. 004047 | -0. 17568 | 0. 276 | 0. 334 | 1 Opc-G | SMIM14     |
| FAM53B. 6   | 0. 004094 | -0. 1117  | 0. 029 | 0. 053 | 1 Opc-G | FAM53B     |
| ANKRD54. 4  | 0. 004158 | 0. 130689 | 0. 167 | 0. 138 | 1 Opc-G | ANKRD54    |
| CD151. 9    | 0. 004178 | -0. 17941 | 0. 443 | 0. 485 | 1 Opc-G | CD151      |
| FNBP1L. 1C  | 0. 004264 | 0. 107989 | 0. 217 | 0. 183 | 1 Opc-G | FNBP1L     |
| NT5C2. 2    | 0. 004321 | -0. 13293 | 0. 094 | 0. 132 | 1 Opc-G | NT5C2      |
| ATP1B1. 8   | 0. 00434  | -0. 22977 | 0. 199 | 0. 237 | 1 Opc-G | ATP1B1     |
| ZRSR2. 3    | 0. 004357 | -0. 134   | 0. 09  | 0. 126 | 1 Opc-G | ZRSR2      |
| AADAT. 6    | 0. 004428 | 0. 113993 | 0. 072 | 0. 05  | 1 Opc-G | AADAT      |
| SCRN3. 5    | 0. 004516 | 0. 121784 | 0. 127 | 0. 099 | 1 Opc-G | SCRN3      |
| CMTR2. 3    | 0. 004523 | 0. 104839 | 0. 168 | 0. 137 | 1 Opc-G | CMTR2      |
| FBXO28. 1   | 0. 004549 | 0. 11354  | 0. 126 | 0. 097 | 1 Opc-G | FBXO28     |
| CPEB4. 6    | 0. 004555 | 0. 100424 | 0. 279 | 0. 244 | 1 Opc-G | CPEB4      |
| RBMXL1. 3   | 0. 004604 | 0. 115876 | 0. 182 | 0. 151 | 1 Opc-G | RBMXL1     |
| ZNF583. 7   | 0. 00463  | 0. 113092 | 0. 133 | 0. 104 | 1 Opc-G | ZNF583     |
| TMEM39A. 5  | 0. 004686 | -0. 10193 | 0. 061 | 0. 093 | 1 Opc-G | TMEM39A    |
| TMSB4X. 9   | 0. 004736 | -0. 17184 | 1      | 0. 996 | 1 Opc-G | TMSB4X     |
| SPPL3. 8    | 0. 004763 | 0. 122555 | 0. 225 | 0. 195 | 1 Opc-G | SPPL3      |
| BNIP1. 8    | 0. 004786 | 0. 155635 | 0. 146 | 0. 118 | 1 Opc-G | BNIP1      |
| ENDOV. 6    | 0. 004811 | 0. 128935 | 0. 245 | 0. 219 | 1 Opc-G | ENDOV      |
| MT1A. 7     | 0. 004832 | -0. 13556 | 0. 012 | 0. 03  | 1 Opc-G | MT1A       |
| PEX13. 2    | 0. 004838 | 0. 101576 | 0. 198 | 0. 167 | 1 Opc-G | PEX13      |
| AP2A2. 8    | 0. 004985 | -0. 11223 | 0. 201 | 0. 255 | 1 Opc-G | AP2A2      |
| GAB3. 8     | 0. 005016 | -0. 10629 | 0. 015 | 0. 034 | 1 Opc-G | GAB3       |
| DAAM2. 5    | 0. 005368 | -0. 11952 | 0. 007 | 0. 022 | 1 Opc-G | DAAM2      |
| RAB11B-AS1  | 0. 005392 | 0. 1775   | 0. 156 | 0. 13  | 1 Opc-G | RAB11B-AS1 |
| RPP14. 6    | 0. 005402 | 0. 128561 | 0. 214 | 0. 185 | 1 Opc-G | RPP14      |
| GTF2F2. 4   | 0. 005435 | 0. 105786 | 0. 322 | 0. 298 | 1 Opc-G | GTF2F2     |
| DNAJA3. 4   | 0. 005467 | 0. 134291 | 0. 198 | 0. 172 | 1 Opc-G | DNAJA3     |
| MTHFD1. 6   | 0. 005481 | 0. 136745 | 0. 213 | 0. 186 | 1 Opc-G | MTHFD1     |
| CLIC4. 9    | 0. 005597 | -0. 16006 | 0. 276 | 0. 336 | 1 Opc-G | CLIC4      |
| LOH12CR2. 0 | 0. 0056   | 0. 112602 | 0. 075 | 0. 053 | 1 Opc-G | LOH12CR2   |
| MOBP. 9     | 0. 005601 | -0. 27831 | 0. 018 | 0. 037 | 1 Opc-G | MOBP       |
| PRRC2B. 7   | 0. 005698 | 0. 112438 | 0. 262 | 0. 235 | 1 Opc-G | PRRC2B     |
| WNK1. 6     | 0. 005735 | -0. 11475 | 0. 223 | 0. 282 | 1 Opc-G | WNK1       |

|             |           |           |        |        |         |          |
|-------------|-----------|-----------|--------|--------|---------|----------|
| CISD2. 4    | 0. 005749 | -0. 16828 | 0. 343 | 0. 408 | 1 Opc-G | CISD2    |
| PURA. 7     | 0. 005768 | 0. 133235 | 0. 234 | 0. 206 | 1 Opc-G | PURA     |
| HRAS. 8     | 0. 005801 | 0. 127071 | 0. 316 | 0. 292 | 1 Opc-G | HRAS     |
| UBE2Q2. 5   | 0. 005822 | 0. 112949 | 0. 232 | 0. 203 | 1 Opc-G | UBE2Q2   |
| TOMM5. 7    | 0. 005904 | -0. 14061 | 0. 164 | 0. 212 | 1 Opc-G | TOMM5    |
| USP13. 4    | 0. 005924 | 0. 116663 | 0. 094 | 0. 07  | 1 Opc-G | USP13    |
| DDX21. 7    | 0. 00611  | -0. 13881 | 0. 247 | 0. 303 | 1 Opc-G | DDX21    |
| PAQR8. 7    | 0. 006112 | -0. 12847 | 0. 067 | 0. 098 | 1 Opc-G | PAQR8    |
| TRRAP       | 0. 006167 | 0. 110296 | 0. 109 | 0. 083 | 1 Opc-G | TRRAP    |
| ELMOD3. 5   | 0. 006222 | 0. 129843 | 0. 161 | 0. 133 | 1 Opc-G | ELMOD3   |
| NAB1. 5     | 0. 006236 | 0. 136334 | 0. 152 | 0. 124 | 1 Opc-G | NAB1     |
| RCAN1. 8    | 0. 006236 | -0. 15701 | 0. 217 | 0. 271 | 1 Opc-G | RCAN1    |
| CENPT. 7    | 0. 006328 | 0. 118243 | 0. 216 | 0. 188 | 1 Opc-G | CENPT    |
| RBM14. 6    | 0. 006349 | 0. 11639  | 0. 219 | 0. 19  | 1 Opc-G | RBM14    |
| ZNF263. 4   | 0. 006366 | 0. 132039 | 0. 154 | 0. 126 | 1 Opc-G | ZNF263   |
| UQCR11. 5   | 0. 006382 | -0. 3575  | 0. 085 | 0. 117 | 1 Opc-G | UQCR11   |
| C12orf43. 0 | 0. 006427 | 0. 10999  | 0. 183 | 0. 155 | 1 Opc-G | C12orf43 |
| TMBIM4. 6   | 0. 006427 | -0. 38107 | 0. 037 | 0. 06  | 1 Opc-G | TMBIM4   |
| AAMDC. 7    | 0. 006435 | -0. 14879 | 0. 161 | 0. 209 | 1 Opc-G | AAMDC    |
| SLC25A29. 0 | 0. 006446 | 0. 110373 | 0. 179 | 0. 151 | 1 Opc-G | SLC25A29 |
| CERS6. 7    | 0. 00651  | 0. 118795 | 0. 153 | 0. 125 | 1 Opc-G | CERS6    |
| EFCAB2. 2   | 0. 006515 | 0. 103209 | 0. 123 | 0. 095 | 1 Opc-G | EFCAB2   |
| AKT3. 4     | 0. 006536 | 0. 10252  | 0. 077 | 0. 054 | 1 Opc-G | AKT3     |
| DHRS7. 8    | 0. 006703 | -0. 22267 | 0. 522 | 0. 559 | 1 Opc-G | DHRS7    |
| ZNF275. 6   | 0. 006781 | 0. 15375  | 0. 077 | 0. 055 | 1 Opc-G | ZNF275   |
| ZNF227. 4   | 0. 006822 | 0. 10169  | 0. 123 | 0. 097 | 1 Opc-G | ZNF227   |
| KLHL4. 8    | 0. 006823 | 0. 142543 | 0. 15  | 0. 125 | 1 Opc-G | KLHL4    |
| YBX3. 4     | 0. 006834 | -0. 13692 | 0. 351 | 0. 408 | 1 Opc-G | YBX3     |
| DEPTOR. 6   | 0. 006879 | -0. 1483  | 0. 025 | 0. 045 | 1 Opc-G | DEPTOR   |
| POLB. 3     | 0. 006907 | 0. 10458  | 0. 109 | 0. 083 | 1 Opc-G | POLB     |
| RIPPLY2. 5  | 0. 007008 | 0. 131969 | 0. 055 | 0. 036 | 1 Opc-G | RIPPLY2  |
| RSU1. 5     | 0. 00702  | -0. 13735 | 0. 217 | 0. 272 | 1 Opc-G | RSU1     |
| CAPN1. 6    | 0. 007056 | -0. 11324 | 0. 208 | 0. 262 | 1 Opc-G | CAPN1    |
| HOXD-AS2    | 0. 0071   | 0. 113419 | 0. 063 | 0. 043 | 1 Opc-G | HOXD-AS2 |
| PBDC1. 3    | 0. 007123 | -0. 10232 | 0. 206 | 0. 264 | 1 Opc-G | PBDC1    |
| UBE2W. 3    | 0. 007198 | -0. 10212 | 0. 167 | 0. 216 | 1 Opc-G | UBE2W    |
| ITGAL. 4    | 0. 007199 | -0. 10195 | 0. 01  | 0. 025 | 1 Opc-G | ITGAL    |
| UIMC1. 4    | 0. 007211 | 0. 121647 | 0. 134 | 0. 107 | 1 Opc-G | UIMC1    |
| TRMT112. 5  | 0. 007278 | -0. 19314 | 0. 713 | 0. 706 | 1 Opc-G | TRMT112  |
| APTX. 3     | 0. 007324 | 0. 114918 | 0. 164 | 0. 137 | 1 Opc-G | APTX     |
| ARHGEF1. 7  | 0. 007499 | -0. 14316 | 0. 157 | 0. 199 | 1 Opc-G | ARHGEF1  |
| GLMN. 4     | 0. 007566 | 0. 108245 | 0. 115 | 0. 089 | 1 Opc-G | GLMN     |
| DOPEY2. 5   | 0. 00757  | -0. 10416 | 0. 044 | 0. 069 | 1 Opc-G | DOPEY2   |
| ELL. 6      | 0. 00759  | -0. 11577 | 0. 071 | 0. 102 | 1 Opc-G | ELL      |
| GPATCH11. 0 | 0. 00759  | 0. 144498 | 0. 163 | 0. 137 | 1 Opc-G | GPATCH11 |
| TMEM125. 6  | 0. 007636 | -0. 12992 | 0. 008 | 0. 023 | 1 Opc-G | TMEM125  |
| GADD45A. 1  | 0. 007713 | -0. 11181 | 0. 225 | 0. 282 | 1 Opc-G | GADD45A  |
| SFR1. 6     | 0. 007788 | -0. 11588 | 0. 044 | 0. 07  | 1 Opc-G | SFR1     |
| PRKX. 5     | 0. 007872 | -0. 11418 | 0. 082 | 0. 114 | 1 Opc-G | PRKX     |
| CGRRF1. 5   | 0. 007891 | 0. 135891 | 0. 189 | 0. 162 | 1 Opc-G | CGRRF1   |
| IPO5. 5     | 0. 008009 | 0. 118102 | 0. 238 | 0. 214 | 1 Opc-G | IPO5     |

|            |          |          |       |       |           |          |
|------------|----------|----------|-------|-------|-----------|----------|
| PWWP2A.7   | 0.008035 | 0.112063 | 0.153 | 0.125 | 1 Opc-G   | PWWP2A   |
| MEN1.5     | 0.008048 | 0.128575 | 0.141 | 0.115 | 1 Opc-G   | MEN1     |
| DTNA.9     | 0.008065 | -0.13468 | 0.201 | 0.256 | 1 Opc-G   | DTNA     |
| LMAN2.5    | 0.008165 | -0.18538 | 0.545 | 0.576 | 1 Opc-G   | LMAN2    |
| NFIL3.9    | 0.008205 | -0.12499 | 0.057 | 0.085 | 1 Opc-G   | NFIL3    |
| EXTL3.6    | 0.008229 | 0.146499 | 0.154 | 0.13  | 1 Opc-G   | EXTL3    |
| SLC24A2.8  | 0.008273 | -0.10168 | 0.015 | 0.033 | 1 Opc-G   | SLC24A2  |
| TXNDC17.8  | 0.008279 | -0.15417 | 0.481 | 0.528 | 1 Opc-G   | TXNDC17  |
| RNF103.4   | 0.00831  | 0.128896 | 0.127 | 0.101 | 1 Opc-G   | RNF103   |
| TWF1.4     | 0.008362 | 0.106317 | 0.286 | 0.262 | 1 Opc-G   | TWF1     |
| FAM98A.6   | 0.008407 | 0.131566 | 0.167 | 0.14  | 1 Opc-G   | FAM98A   |
| MT1X.8     | 0.008537 | -0.43738 | 0.559 | 0.579 | 1 Opc-G   | MT1X     |
| SIK1.9     | 0.008543 | -0.1628  | 0.074 | 0.102 | 1 Opc-G   | SIK1     |
| RIF1.7     | 0.008572 | 0.107508 | 0.245 | 0.218 | 1 Opc-G   | RIF1     |
| MBTPS2     | 0.008636 | 0.122265 | 0.093 | 0.07  | 1 Opc-G   | MBTPS2   |
| UBAP2L.2   | 0.008651 | 0.13456  | 0.239 | 0.215 | 1 Opc-G   | UBAP2L   |
| UBE4B.3    | 0.00866  | 0.125443 | 0.12  | 0.095 | 1 Opc-G   | UBE4B    |
| KATNB1.6   | 0.008696 | 0.137849 | 0.143 | 0.118 | 1 Opc-G   | KATNB1   |
| SCNM1.4    | 0.008737 | -0.12446 | 0.279 | 0.343 | 1 Opc-G   | SCNM1    |
| METTL8.4   | 0.008743 | 0.116852 | 0.145 | 0.118 | 1 Opc-G   | METTL8   |
| CHMP2B.4   | 0.00875  | -0.11012 | 0.246 | 0.311 | 1 Opc-G   | CHMP2B   |
| FBXO3.6    | 0.008793 | 0.13109  | 0.195 | 0.169 | 1 Opc-G   | FBXO3    |
| KLK6.8     | 0.008827 | -0.21631 | 0.015 | 0.032 | 1 Opc-G   | KLK6     |
| ZNF226.7   | 0.00884  | -0.13495 | 0.16  | 0.207 | 1 Opc-G   | ZNF226   |
| TCF3.6     | 0.009026 | 0.141815 | 0.152 | 0.128 | 1 Opc-G   | TCF3     |
| ROBO2.9    | 0.009028 | 0.142395 | 0.13  | 0.106 | 1 Opc-G   | ROBO2    |
| GBE1.7     | 0.009069 | -0.12661 | 0.145 | 0.188 | 1 Opc-G   | GBE1     |
| ATP5S.1    | 0.009086 | 0.102947 | 0.201 | 0.174 | 1 Opc-G   | ATP5S    |
| PIBF1.4    | 0.009141 | 0.111165 | 0.113 | 0.088 | 1 Opc-G   | PIBF1    |
| RAB5C.6    | 0.009212 | -0.17851 | 0.648 | 0.653 | 1 Opc-G   | RAB5C    |
| UPF2.4     | 0.009232 | -0.12763 | 0.173 | 0.22  | 1 Opc-G   | UPF2     |
| LRRC20.2   | 0.009259 | 0.107586 | 0.067 | 0.047 | 1 Opc-G   | LRRC20   |
| ETV3.9     | 0.009448 | -0.11408 | 0.052 | 0.078 | 1 Opc-G   | ETV3     |
| C14orf80.0 | 0.009524 | 0.11683  | 0.086 | 0.064 | 1 Opc-G   | C14orf80 |
| FAM134A.8  | 0.009559 | 0.100381 | 0.318 | 0.297 | 1 Opc-G   | FAM134A  |
| B3GALNT1.0 | 0.009562 | 0.104115 | 0.21  | 0.182 | 1 Opc-G   | B3GALNT1 |
| FAM229A.3  | 0.009607 | 0.110133 | 0.063 | 0.044 | 1 Opc-G   | FAM229A  |
| ATXN8OS.6  | 0.009643 | -0.332   | 0.056 | 0.081 | 1 Opc-G   | ATXN8OS  |
| C1orf216.0 | 0.009717 | 0.131017 | 0.152 | 0.126 | 1 Opc-G   | C1orf216 |
| RNMT.2     | 0.009768 | -0.11854 | 0.25  | 0.307 | 1 Opc-G   | RNMT     |
| AMD1.4     | 0.009825 | -0.18168 | 0.332 | 0.387 | 1 Opc-G   | AMD1     |
| ZFP1.5     | 0.00986  | 0.117952 | 0.087 | 0.065 | 1 Opc-G   | ZFP1     |
| EMID1.6    | 0.009895 | 0.137071 | 0.093 | 0.071 | 1 Opc-G   | EMID1    |
| HOPX.10    | 0        | 1.328004 | 0.958 | 0.172 | 0 Class-G | HOPX     |
| POSTN.10   | 0        | 1.284124 | 0.739 | 0.03  | 0 Class-G | POSTN    |
| NES.11     | 0        | 1.213808 | 0.951 | 0.165 | 0 Class-G | NES      |
| ID4.10     | 0        | 1.180793 | 0.863 | 0.109 | 0 Class-G | ID4      |
| SOX9.10    | 0        | 1.144176 | 0.935 | 0.163 | 0 Class-G | SOX9     |
| GPC1.9     | 0        | 1.121489 | 0.882 | 0.131 | 0 Class-G | GPC1     |
| SEMA6D.11  | 0        | 1.109863 | 0.811 | 0.05  | 0 Class-G | SEMA6D   |
| FABP7.9    | 0        | 1.108081 | 0.988 | 0.285 | 0 Class-G | FABP7    |

|            |   |          |       |       |           |                |
|------------|---|----------|-------|-------|-----------|----------------|
| KCNF1. 11  | 0 | 1.097692 | 0.716 | 0.026 | 0 Class-G | KCNF1          |
| TPM2. 8    | 0 | 1.093888 | 0.787 | 0.061 | 0 Class-G | TPM2           |
| COL9A3. 1C | 0 | 1.024309 | 0.796 | 0.086 | 0 Class-G | COL9A3         |
| IGFBP2. 9  | 0 | 1.018123 | 0.979 | 0.275 | 0 Class-G | IGFBP2         |
| IGFBP3. 9  | 0 | 1.014022 | 0.717 | 0.109 | 0 Class-G | IGFBP3         |
| FJX1. 10   | 0 | 1.000295 | 0.798 | 0.104 | 0 Class-G | FJX1           |
| POU3F2. 9  | 0 | 0.990373 | 0.859 | 0.111 | 0 Class-G | POU3F2         |
| TTYH1. 11  | 0 | 0.982559 | 0.866 | 0.17  | 0 Class-G | TTYH1          |
| IGFBP7. 9  | 0 | 0.982303 | 0.877 | 0.169 | 0 Class-G | IGFBP7         |
| METRN. 11  | 0 | 0.980011 | 0.943 | 0.188 | 0 Class-G | METRN          |
| EGFR. 10   | 0 | 0.946661 | 0.947 | 0.194 | 0 Class-G | EGFR           |
| ATP1B2. 1C | 0 | 0.943626 | 0.902 | 0.123 | 0 Class-G | ATP1B2         |
| SPRY1. 10  | 0 | 0.934777 | 0.885 | 0.126 | 0 Class-G | SPRY1          |
| LYPD1. 8   | 0 | 0.924177 | 0.83  | 0.092 | 0 Class-G | LYPD1          |
| RP11-395G  | 0 | 0.922005 | 0.735 | 0.086 | 0 Class-G | RP11-395G23. 3 |
| TNFRSF12A  | 0 | 0.91477  | 0.846 | 0.195 | 0 Class-G | TNFRSF12A      |
| WWTR1. 11  | 0 | 0.914091 | 0.741 | 0.065 | 0 Class-G | WWTR1          |
| RGMA. 10   | 0 | 0.906456 | 0.814 | 0.1   | 0 Class-G | RGMA           |
| COL6A2. 1C | 0 | 0.905207 | 0.711 | 0.073 | 0 Class-G | COL6A2         |
| NPAS3. 10  | 0 | 0.904731 | 0.768 | 0.059 | 0 Class-G | NPAS3          |
| F3. 10     | 0 | 0.900595 | 0.776 | 0.096 | 0 Class-G | F3             |
| CNIH3. 8   | 0 | 0.879481 | 0.794 | 0.066 | 0 Class-G | CNIH3          |
| FIBIN. 10  | 0 | 0.872132 | 0.886 | 0.119 | 0 Class-G | FIBIN          |
| PMEPA1. 1C | 0 | 0.871955 | 0.734 | 0.114 | 0 Class-G | PMEPA1         |
| EDNRB. 7   | 0 | 0.847708 | 0.733 | 0.098 | 0 Class-G | EDNRB          |
| COL6A1. 1C | 0 | 0.847562 | 0.837 | 0.129 | 0 Class-G | COL6A1         |
| SOCS2. 8   | 0 | 0.846887 | 0.72  | 0.064 | 0 Class-G | SOCS2          |
| CITED1. 1C | 0 | 0.844795 | 0.687 | 0.064 | 0 Class-G | CITED1         |
| SCG2. 10   | 0 | 0.844314 | 0.87  | 0.163 | 0 Class-G | SCG2           |
| SPRY2. 9   | 0 | 0.835949 | 0.84  | 0.116 | 0 Class-G | SPRY2          |
| LHX2. 9    | 0 | 0.827734 | 0.62  | 0.05  | 0 Class-G | LHX2           |
| PHLDA1. 7  | 0 | 0.820976 | 0.944 | 0.306 | 0 Class-G | PHLDA1         |
| FAM84A. 9  | 0 | 0.82007  | 0.69  | 0.055 | 0 Class-G | FAM84A         |
| ARSJ. 9    | 0 | 0.8141   | 0.665 | 0.036 | 0 Class-G | ARSJ           |
| PTPRZ1. 11 | 0 | 0.807762 | 0.972 | 0.288 | 0 Class-G | PTPRZ1         |
| TRIB2. 11  | 0 | 0.806813 | 0.892 | 0.16  | 0 Class-G | TRIB2          |
| JAG1. 9    | 0 | 0.806283 | 0.733 | 0.065 | 0 Class-G | JAG1           |
| PMP2. 10   | 0 | 0.804495 | 0.953 | 0.251 | 0 Class-G | PMP2           |
| MAP2K2. 7  | 0 | 0.790552 | 0.922 | 0.2   | 0 Class-G | MAP2K2         |
| CAMK2D. 8  | 0 | 0.789032 | 0.859 | 0.143 | 0 Class-G | CAMK2D         |
| ITGA7. 9   | 0 | 0.788481 | 0.699 | 0.045 | 0 Class-G | ITGA7          |
| TMEM158. 1 | 0 | 0.78758  | 0.665 | 0.054 | 0 Class-G | TMEM158        |
| PRR7. 10   | 0 | 0.787211 | 0.776 | 0.092 | 0 Class-G | PRR7           |
| SMAD1. 7   | 0 | 0.785696 | 0.722 | 0.088 | 0 Class-G | SMAD1          |
| DCBLD2. 1C | 0 | 0.778084 | 0.625 | 0.064 | 0 Class-G | DCBLD2         |
| LHFP. 10   | 0 | 0.776507 | 0.841 | 0.132 | 0 Class-G | LHFP           |
| CDH2. 10   | 0 | 0.77507  | 0.902 | 0.183 | 0 Class-G | CDH2           |
| MXRA7. 8   | 0 | 0.771008 | 0.737 | 0.074 | 0 Class-G | MXRA7          |
| COL4A2. 8  | 0 | 0.766103 | 0.672 | 0.04  | 0 Class-G | COL4A2         |
| NEK6. 7    | 0 | 0.761071 | 0.865 | 0.196 | 0 Class-G | NEK6           |
| PTPRA. 8   | 0 | 0.759186 | 0.944 | 0.258 | 0 Class-G | PTPRA          |

|            |   |          |       |       |           |          |
|------------|---|----------|-------|-------|-----------|----------|
| FAM181B. 9 | 0 | 0.75395  | 0.698 | 0.122 | 0 Class-G | FAM181B  |
| METTL7B. 7 | 0 | 0.752583 | 0.84  | 0.109 | 0 Class-G | METTL7B  |
| CBLN4. 11  | 0 | 0.748239 | 0.453 | 0.018 | 0 Class-G | CBLN4    |
| COL4A1. 8  | 0 | 0.743251 | 0.609 | 0.029 | 0 Class-G | COL4A1   |
| B4GALT5. 8 | 0 | 0.742443 | 0.75  | 0.106 | 0 Class-G | B4GALT5  |
| SEMA6A. 8  | 0 | 0.741963 | 0.788 | 0.103 | 0 Class-G | SEMA6A   |
| RAB34. 7   | 0 | 0.741667 | 0.882 | 0.185 | 0 Class-G | RAB34    |
| C21orf62.  | 0 | 0.740921 | 0.639 | 0.079 | 0 Class-G | C21orf62 |
| GCSH. 10   | 0 | 0.735792 | 0.939 | 0.25  | 0 Class-G | GCSH     |
| NPDC1. 9   | 0 | 0.733849 | 0.922 | 0.225 | 0 Class-G | NPDC1    |
| CHL1. 9    | 0 | 0.733348 | 0.674 | 0.067 | 0 Class-G | CHL1     |
| RFFL. 11   | 0 | 0.728503 | 0.686 | 0.079 | 0 Class-G | RFFL     |
| CHST2. 8   | 0 | 0.724242 | 0.628 | 0.056 | 0 Class-G | CHST2    |
| CCDC106. 1 | 0 | 0.723779 | 0.816 | 0.136 | 0 Class-G | CCDC106  |
| TLE1. 9    | 0 | 0.716399 | 0.726 | 0.079 | 0 Class-G | TLE1     |
| PLS3. 9    | 0 | 0.713078 | 0.814 | 0.124 | 0 Class-G | PLS3     |
| SERPINH1.  | 0 | 0.711505 | 0.803 | 0.112 | 0 Class-G | SERPINH1 |
| FZD7. 8    | 0 | 0.709442 | 0.545 | 0.024 | 0 Class-G | FZD7     |
| PJA2. 9    | 0 | 0.706449 | 0.915 | 0.24  | 0 Class-G | PJA2     |
| HES4. 9    | 0 | 0.701119 | 0.651 | 0.111 | 0 Class-G | HES4     |
| SOX2. 11   | 0 | 0.700268 | 0.981 | 0.339 | 0 Class-G | SOX2     |
| MSI2. 8    | 0 | 0.699169 | 0.927 | 0.222 | 0 Class-G | MSI2     |
| HEY1. 9    | 0 | 0.698358 | 0.791 | 0.158 | 0 Class-G | HEY1     |
| PIPOX. 9   | 0 | 0.69744  | 0.634 | 0.05  | 0 Class-G | PIPOX    |
| DHCR7. 9   | 0 | 0.695996 | 0.702 | 0.092 | 0 Class-G | DHCR7    |
| TSPAN5. 1C | 0 | 0.688011 | 0.839 | 0.168 | 0 Class-G | TSPAN5   |
| LGR4. 10   | 0 | 0.686991 | 0.56  | 0.027 | 0 Class-G | LGR4     |
| ZNF580. 7  | 0 | 0.682343 | 0.865 | 0.197 | 0 Class-G | ZNF580   |
| GAS1. 11   | 0 | 0.678325 | 0.575 | 0.074 | 0 Class-G | GAS1     |
| BAALC. 10  | 0 | 0.674909 | 0.921 | 0.251 | 0 Class-G | BAALC    |
| NMB. 10    | 0 | 0.674204 | 0.682 | 0.123 | 0 Class-G | NMB      |
| EPN2. 10   | 0 | 0.673138 | 0.802 | 0.145 | 0 Class-G | EPN2     |
| SEPN1. 8   | 0 | 0.671788 | 0.744 | 0.122 | 0 Class-G | SEPN1    |
| S100A16. 1 | 0 | 0.671192 | 0.944 | 0.203 | 0 Class-G | S100A16  |
| PRRX1. 10  | 0 | 0.670666 | 0.688 | 0.086 | 0 Class-G | PRRX1    |
| KHDRBS3. 1 | 0 | 0.670293 | 0.756 | 0.126 | 0 Class-G | KHDRBS3  |
| TRIM9. 9   | 0 | 0.668881 | 0.824 | 0.136 | 0 Class-G | TRIM9    |
| CHPT1. 8   | 0 | 0.665869 | 0.85  | 0.214 | 0 Class-G | CHPT1    |
| SLC4A4. 8  | 0 | 0.66246  | 0.496 | 0.045 | 0 Class-G | SLC4A4   |
| TCEA2. 10  | 0 | 0.659227 | 0.918 | 0.278 | 0 Class-G | TCEA2    |
| SACS. 8    | 0 | 0.656453 | 0.646 | 0.074 | 0 Class-G | SACS     |
| KLHDC8A. 1 | 0 | 0.655948 | 0.8   | 0.161 | 0 Class-G | KLHDC8A  |
| MRC2. 6    | 0 | 0.654946 | 0.717 | 0.085 | 0 Class-G | MRC2     |
| KCNQ2. 10  | 0 | 0.6532   | 0.717 | 0.133 | 0 Class-G | KCNQ2    |
| NLRP1. 10  | 0 | 0.651422 | 0.907 | 0.246 | 0 Class-G | NLRP1    |
| CPNE4. 8   | 0 | 0.651313 | 0.521 | 0.023 | 0 Class-G | CPNE4    |
| FKBP10. 1C | 0 | 0.650924 | 0.8   | 0.116 | 0 Class-G | FKBP10   |
| MLC1. 9    | 0 | 0.64883  | 0.64  | 0.068 | 0 Class-G | MLC1     |
| PPIC. 9    | 0 | 0.647262 | 0.747 | 0.091 | 0 Class-G | PPIC     |
| CTXN1. 10  | 0 | 0.646262 | 0.638 | 0.081 | 0 Class-G | CTXN1    |
| FLNA. 9    | 0 | 0.645956 | 0.805 | 0.16  | 0 Class-G | FLNA     |



|            |   |          |       |       |           |               |
|------------|---|----------|-------|-------|-----------|---------------|
| OSBPL6. 6  | 0 | 0.63753  | 0.66  | 0.074 | 0 Class-G | OSBPL6        |
| EFNB2. 9   | 0 | 0.637258 | 0.519 | 0.031 | 0 Class-G | EFNB2         |
| LIMA1. 10  | 0 | 0.633465 | 0.898 | 0.223 | 0 Class-G | LIMA1         |
| NOVA1. 11  | 0 | 0.632055 | 0.993 | 0.395 | 0 Class-G | NOVA1         |
| EFEMP2. 7  | 0 | 0.628797 | 0.745 | 0.127 | 0 Class-G | EFEMP2        |
| WLS. 8     | 0 | 0.627344 | 0.77  | 0.123 | 0 Class-G | WLS           |
| ITGB8. 9   | 0 | 0.626371 | 0.799 | 0.148 | 0 Class-G | ITGB8         |
| DST. 9     | 0 | 0.623804 | 0.914 | 0.288 | 0 Class-G | DST           |
| CNN3. 9    | 0 | 0.623319 | 0.984 | 0.384 | 0 Class-G | CNN3          |
| MMP24-AS1  | 0 | 0.622961 | 0.847 | 0.224 | 0 Class-G | MMP24-AS1     |
| BICD1. 8   | 0 | 0.622838 | 0.728 | 0.119 | 0 Class-G | BICD1         |
| ACSS3. 9   | 0 | 0.620805 | 0.582 | 0.035 | 0 Class-G | ACSS3         |
| NPTXR. 9   | 0 | 0.61838  | 0.582 | 0.053 | 0 Class-G | NPTXR         |
| EVA1B. 6   | 0 | 0.617202 | 0.569 | 0.05  | 0 Class-G | EVA1B         |
| TJP1. 8    | 0 | 0.616822 | 0.695 | 0.096 | 0 Class-G | TJP1          |
| ID1. 7     | 0 | 0.615774 | 0.44  | 0.068 | 0 Class-G | ID1           |
| FAM210B. 1 | 0 | 0.615234 | 0.777 | 0.187 | 0 Class-G | FAM210B       |
| EPHA3. 10  | 0 | 0.6139   | 0.458 | 0.01  | 0 Class-G | EPHA3         |
| SRPX. 9    | 0 | 0.61376  | 0.606 | 0.107 | 0 Class-G | SRPX          |
| DPF3. 7    | 0 | 0.613636 | 0.602 | 0.06  | 0 Class-G | DPF3          |
| ZFHx4. 10  | 0 | 0.613499 | 0.637 | 0.073 | 0 Class-G | ZFHx4         |
| GATM. 6    | 0 | 0.612015 | 0.907 | 0.262 | 0 Class-G | GATM          |
| CD320. 9   | 0 | 0.611778 | 0.908 | 0.221 | 0 Class-G | CD320         |
| RRBP1. 6   | 0 | 0.604807 | 0.862 | 0.204 | 0 Class-G | RRBP1         |
| SEPT9. 6   | 0 | 0.60288  | 0.889 | 0.251 | 0 Class-G | 9-Sep         |
| RP11-71N1  | 0 | 0.602564 | 0.589 | 0.062 | 0 Class-G | RP11-71N10. 1 |
| TM7SF2. 9  | 0 | 0.599115 | 0.737 | 0.148 | 0 Class-G | TM7SF2        |
| GRIA3. 8   | 0 | 0.598296 | 0.676 | 0.085 | 0 Class-G | GRIA3         |
| TLK1. 8    | 0 | 0.597617 | 0.763 | 0.141 | 0 Class-G | TLK1          |
| RP3-428L1  | 0 | 0.597463 | 0.357 | 0.023 | 0 Class-G | RP3-428L16. 2 |
| FZD3. 8    | 0 | 0.597404 | 0.838 | 0.185 | 0 Class-G | FZD3          |
| HMGCS1. 7  | 0 | 0.59567  | 0.626 | 0.11  | 0 Class-G | HMGCS1        |
| FERMT2. 8  | 0 | 0.595478 | 0.727 | 0.117 | 0 Class-G | FERMT2        |
| CHPF. 9    | 0 | 0.592839 | 0.8   | 0.17  | 0 Class-G | CHPF          |
| SSBP4. 7   | 0 | 0.592065 | 0.828 | 0.179 | 0 Class-G | SSBP4         |
| PPP1R14B.  | 0 | 0.591531 | 0.859 | 0.261 | 0 Class-G | PPP1R14B      |
| PLEKHA4. 1 | 0 | 0.59112  | 0.585 | 0.052 | 0 Class-G | PLEKHA4       |
| ETV1. 11   | 0 | 0.590481 | 0.841 | 0.147 | 0 Class-G | ETV1          |
| LMO2. 5    | 0 | 0.589053 | 0.585 | 0.096 | 0 Class-G | LMO2          |
| EHBP1. 8   | 0 | 0.586574 | 0.616 | 0.094 | 0 Class-G | EHBP1         |
| HOMER1. 1C | 0 | 0.586277 | 0.608 | 0.083 | 0 Class-G | HOMER1        |
| STMN3. 9   | 0 | 0.586262 | 0.86  | 0.216 | 0 Class-G | STMN3         |
| RNF19A. 1C | 0 | 0.584741 | 0.672 | 0.125 | 0 Class-G | RNF19A        |
| NAT14. 7   | 0 | 0.583986 | 0.697 | 0.095 | 0 Class-G | NAT14         |
| SPRED1. 6  | 0 | 0.581719 | 0.716 | 0.117 | 0 Class-G | SPRED1        |
| PTRF. 11   | 0 | 0.581142 | 0.708 | 0.1   | 0 Class-G | PTRF          |
| ABHD17A. 1 | 0 | 0.579939 | 0.767 | 0.148 | 0 Class-G | ABHD17A       |
| DAG1. 7    | 0 | 0.579744 | 0.669 | 0.092 | 0 Class-G | DAG1          |
| PDGFD. 8   | 0 | 0.579356 | 0.47  | 0.015 | 0 Class-G | PDGFD         |
| BTBD3. 9   | 0 | 0.578877 | 0.591 | 0.063 | 0 Class-G | BTBD3         |
| COPRS. 7   | 0 | 0.578341 | 0.868 | 0.246 | 0 Class-G | COPRS         |

|            |            |       |       |           |          |
|------------|------------|-------|-------|-----------|----------|
| SFRP1. 10  | 0 0.577655 | 0.508 | 0.031 | 0 Class-G | SFRP1    |
| PRKCA. 6   | 0 0.576033 | 0.683 | 0.119 | 0 Class-G | PRKCA    |
| ROBO1. 9   | 0 0.57531  | 0.626 | 0.105 | 0 Class-G | ROBO1    |
| CAMK2N1. 1 | 0 0.573835 | 0.841 | 0.231 | 0 Class-G | CAMK2N1  |
| TCF12. 10  | 0 0.570919 | 0.829 | 0.195 | 0 Class-G | TCF12    |
| DDR1. 9    | 0 0.570399 | 0.91  | 0.237 | 0 Class-G | DDR1     |
| ELOVL2. 1C | 0 0.56822  | 0.487 | 0.034 | 0 Class-G | ELOVL2   |
| AKAP7. 9   | 0 0.567903 | 0.65  | 0.12  | 0 Class-G | AKAP7    |
| TMEM54. 8  | 0 0.565738 | 0.699 | 0.113 | 0 Class-G | TMEM54   |
| ZNF385D. 8 | 0 0.564611 | 0.497 | 0.047 | 0 Class-G | ZNF385D  |
| FYN. 9     | 0 0.564499 | 0.886 | 0.235 | 0 Class-G | FYN      |
| HYAL2. 11  | 0 0.562533 | 0.726 | 0.141 | 0 Class-G | HYAL2    |
| MSM01. 7   | 0 0.562319 | 0.658 | 0.126 | 0 Class-G | MSM01    |
| PDLIM7. 7  | 0 0.561509 | 0.713 | 0.161 | 0 Class-G | PDLIM7   |
| VGLL4. 8   | 0 0.561355 | 0.87  | 0.227 | 0 Class-G | VGLL4    |
| FGFBP3. 8  | 0 0.561316 | 0.469 | 0.04  | 0 Class-G | FGFBP3   |
| MAP1LC3A.  | 0 0.561258 | 0.88  | 0.281 | 0 Class-G | MAP1LC3A |
| SLC35B2. 7 | 0 0.560674 | 0.83  | 0.214 | 0 Class-G | SLC35B2  |
| TLCD1. 8   | 0 0.559283 | 0.472 | 0.017 | 0 Class-G | TLCD1    |
| C17orf89.  | 0 0.559207 | 0.931 | 0.338 | 0 Class-G | C17orf89 |
| CTDNEP1. 5 | 0 0.557667 | 0.802 | 0.234 | 0 Class-G | CTDNEP1  |
| SPECC1. 1C | 0 0.557378 | 0.843 | 0.206 | 0 Class-G | SPECC1   |
| WSCD1. 9   | 0 0.556601 | 0.535 | 0.065 | 0 Class-G | WSCD1    |
| REEP2. 9   | 0 0.556516 | 0.716 | 0.118 | 0 Class-G | REEP2    |
| NETO2. 7   | 0 0.55573  | 0.603 | 0.089 | 0 Class-G | NETO2    |
| FMNL2. 8   | 0 0.554542 | 0.789 | 0.179 | 0 Class-G | FMNL2    |
| CXXC5. 11  | 0 0.5541   | 0.931 | 0.29  | 0 Class-G | CXXC5    |
| SH3GL1. 6  | 0 0.553982 | 0.775 | 0.164 | 0 Class-G | SH3GL1   |
| OGFOD3. 6  | 0 0.553253 | 0.729 | 0.139 | 0 Class-G | OGFOD3   |
| ECI2. 8    | 0 0.552333 | 0.848 | 0.237 | 0 Class-G | ECI2     |
| NRP2. 8    | 0 0.552293 | 0.71  | 0.141 | 0 Class-G | NRP2     |
| AGT. 9     | 0 0.551309 | 0.715 | 0.139 | 0 Class-G | AGT      |
| SLC1A2. 8  | 0 0.550071 | 0.515 | 0.073 | 0 Class-G | SLC1A2   |
| PPP2CB. 11 | 0 0.549208 | 0.823 | 0.211 | 0 Class-G | PPP2CB   |
| TNC. 10    | 0 0.54881  | 0.756 | 0.11  | 0 Class-G | TNC      |
| LDLRAD3. 9 | 0 0.54726  | 0.645 | 0.099 | 0 Class-G | LDLRAD3  |
| PCDH9. 8   | 0 0.5472   | 0.818 | 0.163 | 0 Class-G | PCDH9    |
| RBMS1. 8   | 0 0.547114 | 0.785 | 0.163 | 0 Class-G | RBMS1    |
| KIF21A. 11 | 0 0.54683  | 0.836 | 0.215 | 0 Class-G | KIF21A   |
| TRIM47. 1C | 0 0.546272 | 0.626 | 0.107 | 0 Class-G | TRIM47   |
| KCNE4. 8   | 0 0.545934 | 0.496 | 0.041 | 0 Class-G | KCNE4    |
| WEE1. 7    | 0 0.544653 | 0.567 | 0.082 | 0 Class-G | WEE1     |
| SLC39A3. 8 | 0 0.541969 | 0.874 | 0.251 | 0 Class-G | SLC39A3  |
| COLGALT2.  | 0 0.541961 | 0.592 | 0.065 | 0 Class-G | COLGALT2 |
| SLC25A23.  | 0 0.541758 | 0.578 | 0.061 | 0 Class-G | SLC25A23 |
| SEPT11. 9  | 0 0.541675 | 0.848 | 0.214 | 0 Class-G | 11-Sep   |
| CRLS1. 7   | 0 0.541419 | 0.811 | 0.197 | 0 Class-G | CRLS1    |
| DOK5. 9    | 0 0.54087  | 0.649 | 0.106 | 0 Class-G | DOK5     |
| GCAT. 9    | 0 0.536245 | 0.635 | 0.084 | 0 Class-G | GCAT     |
| IGSF10. 6  | 0 0.53611  | 0.485 | 0.036 | 0 Class-G | IGSF10   |
| ATP2B1. 6  | 0 0.534183 | 0.86  | 0.272 | 0 Class-G | ATP2B1   |

|            |             |        |        |           |            |
|------------|-------------|--------|--------|-----------|------------|
| RHOJ. 8    | 0 0. 533622 | 0. 517 | 0. 032 | 0 Class-G | RHOJ       |
| TRAF4. 10  | 0 0. 53281  | 0. 783 | 0. 185 | 0 Class-G | TRAF4      |
| FHL1. 11   | 0 0. 5321   | 0. 912 | 0. 266 | 0 Class-G | FHL1       |
| SYT11. 11  | 0 0. 530302 | 0. 93  | 0. 295 | 0 Class-G | SYT11      |
| SOX21. 7   | 0 0. 530297 | 0. 447 | 0. 035 | 0 Class-G | SOX21      |
| GIPC1. 7   | 0 0. 530201 | 0. 809 | 0. 179 | 0 Class-G | GIPC1      |
| MACF1. 7   | 0 0. 529326 | 0. 856 | 0. 234 | 0 Class-G | MACF1      |
| BCAT1. 9   | 0 0. 528864 | 0. 732 | 0. 149 | 0 Class-G | BCAT1      |
| TMEM132B.  | 0 0. 527188 | 0. 475 | 0. 041 | 0 Class-G | TMEM132B   |
| HEBP2. 6   | 0 0. 527092 | 0. 703 | 0. 14  | 0 Class-G | HEBP2      |
| HIVEP3. 7  | 0 0. 526831 | 0. 579 | 0. 083 | 0 Class-G | HIVEP3     |
| CHST7. 8   | 0 0. 525174 | 0. 498 | 0. 045 | 0 Class-G | CHST7      |
| DKK3. 9    | 0 0. 524541 | 0. 658 | 0. 125 | 0 Class-G | DKK3       |
| C5orf24. 9 | 0 0. 523296 | 0. 835 | 0. 208 | 0 Class-G | C5orf24    |
| AKAP12. 11 | 0 0. 522867 | 0. 634 | 0. 114 | 0 Class-G | AKAP12     |
| CERS1. 8   | 0 0. 522863 | 0. 554 | 0. 058 | 0 Class-G | CERS1      |
| OXLD1. 6   | 0 0. 522712 | 0. 773 | 0. 168 | 0 Class-G | OXLD1      |
| LMCD1. 7   | 0 0. 522457 | 0. 412 | 0. 032 | 0 Class-G | LMCD1      |
| TSEN34. 7  | 0 0. 522133 | 0. 893 | 0. 283 | 0 Class-G | TSEN34     |
| DMWD. 8    | 0 0. 521776 | 0. 579 | 0. 07  | 0 Class-G | DMWD       |
| LAMA5. 7   | 0 0. 521701 | 0. 515 | 0. 045 | 0 Class-G | LAMA5      |
| SLC35F2. 6 | 0 0. 521311 | 0. 483 | 0. 046 | 0 Class-G | SLC35F2    |
| GNG12. 8   | 0 0. 521226 | 0. 583 | 0. 065 | 0 Class-G | GNG12      |
| LAMC1. 7   | 0 0. 520042 | 0. 497 | 0. 038 | 0 Class-G | LAMC1      |
| SPATC1L. 9 | 0 0. 518101 | 0. 668 | 0. 117 | 0 Class-G | SPATC1L    |
| PITX1. 8   | 0 0. 515924 | 0. 446 | 0. 025 | 0 Class-G | PITX1      |
| GAMT. 8    | 0 0. 515727 | 0. 826 | 0. 213 | 0 Class-G | GAMT       |
| NFIC. 5    | 0 0. 513501 | 0. 949 | 0. 35  | 0 Class-G | NFIC       |
| SERINC2. 7 | 0 0. 512396 | 0. 48  | 0. 061 | 0 Class-G | SERINC2    |
| TEAD1. 6   | 0 0. 51235  | 0. 579 | 0. 074 | 0 Class-G | TEAD1      |
| ACTN1. 8   | 0 0. 511909 | 0. 76  | 0. 172 | 0 Class-G | ACTN1      |
| THSD1. 6   | 0 0. 511683 | 0. 46  | 0. 034 | 0 Class-G | THSD1      |
| LOXL1. 8   | 0 0. 511276 | 0. 413 | 0. 023 | 0 Class-G | LOXL1      |
| VWA1. 10   | 0 0. 511092 | 0. 592 | 0. 071 | 0 Class-G | VWA1       |
| TNFRSF19.  | 0 0. 510521 | 0. 491 | 0. 042 | 0 Class-G | TNFRSF19   |
| HOMER3. 6  | 0 0. 509792 | 0. 733 | 0. 161 | 0 Class-G | HOMER3     |
| REEP3. 6   | 0 0. 509331 | 0. 763 | 0. 16  | 0 Class-G | REEP3      |
| GOLM1. 10  | 0 0. 508626 | 0. 867 | 0. 226 | 0 Class-G | GOLM1      |
| TMEM131. 7 | 0 0. 508358 | 0. 577 | 0. 076 | 0 Class-G | TMEM131    |
| ENAH. 10   | 0 0. 508266 | 0. 768 | 0. 182 | 0 Class-G | ENAH       |
| TNIK. 7    | 0 0. 508258 | 0. 566 | 0. 075 | 0 Class-G | TNIK       |
| ELMOD1. 8  | 0 0. 5062   | 0. 441 | 0. 023 | 0 Class-G | ELMOD1     |
| GADD45GIP  | 0 0. 505285 | 0. 985 | 0. 494 | 0 Class-G | GADD45GIP1 |
| TP53I13. 8 | 0 0. 504671 | 0. 74  | 0. 164 | 0 Class-G | TP53I13    |
| CDC42EP4.  | 0 0. 504288 | 0. 572 | 0. 14  | 0 Class-G | CDC42EP4   |
| RAB22A. 7  | 0 0. 504073 | 0. 743 | 0. 156 | 0 Class-G | RAB22A     |
| MEST. 10   | 0 0. 504069 | 0. 913 | 0. 3   | 0 Class-G | MEST       |
| ACSBG1. 7  | 0 0. 504001 | 0. 412 | 0. 018 | 0 Class-G | ACSBG1     |
| NELFCD. 9  | 0 0. 502354 | 0. 878 | 0. 248 | 0 Class-G | NELFCD     |
| CHN1. 10   | 0 0. 502027 | 0. 699 | 0. 137 | 0 Class-G | CHN1       |
| SV2A. 7    | 0 0. 502019 | 0. 683 | 0. 123 | 0 Class-G | SV2A       |

|            |             |        |        |           |           |
|------------|-------------|--------|--------|-----------|-----------|
| ILDR2. 9   | 0 0. 501841 | 0. 43  | 0. 023 | 0 Class-G | ILDR2     |
| CASC4. 6   | 0 0. 501624 | 0. 712 | 0. 144 | 0 Class-G | CASC4     |
| FOXG1. 9   | 0 0. 50101  | 0. 58  | 0. 083 | 0 Class-G | FOXG1     |
| ECI1. 6    | 0 0. 500697 | 0. 714 | 0. 131 | 0 Class-G | ECI1      |
| POLDIP2. 9 | 0 0. 499337 | 0. 857 | 0. 264 | 0 Class-G | POLDIP2   |
| C16orf45.  | 0 0. 499179 | 0. 865 | 0. 229 | 0 Class-G | C16orf45  |
| TMEM203. 8 | 0 0. 498541 | 0. 767 | 0. 168 | 0 Class-G | TMEM203   |
| KIF1B. 10  | 0 0. 498066 | 0. 814 | 0. 209 | 0 Class-G | KIF1B     |
| SCARA3. 8  | 0 0. 497866 | 0. 554 | 0. 07  | 0 Class-G | SCARA3    |
| CERS4. 8   | 0 0. 497527 | 0. 69  | 0. 119 | 0 Class-G | CERS4     |
| SQLE. 8    | 0 0. 497195 | 0. 741 | 0. 168 | 0 Class-G | SQLE      |
| ZNF771. 7  | 0 0. 495907 | 0. 572 | 0. 077 | 0 Class-G | ZNF771    |
| ACSL3. 5   | 0 0. 492689 | 0. 84  | 0. 26  | 0 Class-G | ACSL3     |
| PCYT2. 6   | 0 0. 492594 | 0. 6   | 0. 088 | 0 Class-G | PCYT2     |
| BEND6. 9   | 0 0. 491859 | 0. 511 | 0. 055 | 0 Class-G | BEND6     |
| CNKSR3. 9  | 0 0. 488992 | 0. 503 | 0. 055 | 0 Class-G | CNKSR3    |
| CDC25B. 8  | 0 0. 488918 | 0. 664 | 0. 117 | 0 Class-G | CDC25B    |
| AQP4. 10   | 0 0. 488658 | 0. 549 | 0. 103 | 0 Class-G | AQP4      |
| PSRC1. 8   | 0 0. 488004 | 0. 797 | 0. 177 | 0 Class-G | PSRC1     |
| REST. 5    | 0 0. 48745  | 0. 654 | 0. 123 | 0 Class-G | REST      |
| SKA2. 9    | 0 0. 486212 | 0. 823 | 0. 222 | 0 Class-G | SKA2      |
| SPTBN1. 9  | 0 0. 485152 | 0. 8   | 0. 189 | 0 Class-G | SPTBN1    |
| TSR3. 7    | 0 0. 484946 | 0. 786 | 0. 193 | 0 Class-G | TSR3      |
| MAPK1. 4   | 0 0. 48458  | 0. 737 | 0. 161 | 0 Class-G | MAPK1     |
| FAM69C. 1C | 0 0. 484566 | 0. 423 | 0. 02  | 0 Class-G | FAM69C    |
| IL1RAP. 6  | 0 0. 484173 | 0. 553 | 0. 095 | 0 Class-G | IL1RAP    |
| PCBP4. 11  | 0 0. 483801 | 0. 745 | 0. 176 | 0 Class-G | PCBP4     |
| NRSN2. 9   | 0 0. 483543 | 0. 611 | 0. 091 | 0 Class-G | NRSN2     |
| TRPM3. 7   | 0 0. 483444 | 0. 391 | 0. 016 | 0 Class-G | TRPM3     |
| ABHD17C. 6 | 0 0. 482778 | 0. 433 | 0. 026 | 0 Class-G | ABHD17C   |
| CBS. 9     | 0 0. 481686 | 0. 563 | 0. 091 | 0 Class-G | CBS       |
| COL22A1. 7 | 0 0. 481285 | 0. 372 | 0. 023 | 0 Class-G | COL22A1   |
| P4HTM. 7   | 0 0. 48085  | 0. 773 | 0. 178 | 0 Class-G | P4HTM     |
| RGS6. 8    | 0 0. 480029 | 0. 457 | 0. 031 | 0 Class-G | RGS6      |
| AK4. 9     | 0 0. 479787 | 0. 642 | 0. 104 | 0 Class-G | AK4       |
| STIM2. 5   | 0 0. 479456 | 0. 607 | 0. 089 | 0 Class-G | STIM2     |
| ADAMTS9. 8 | 0 0. 47837  | 0. 398 | 0. 025 | 0 Class-G | ADAMTS9   |
| CKAP4. 9   | 0 0. 477936 | 0. 681 | 0. 132 | 0 Class-G | CKAP4     |
| LSM12. 6   | 0 0. 477334 | 0. 743 | 0. 18  | 0 Class-G | LSM12     |
| ITGAV. 7   | 0 0. 4772   | 0. 769 | 0. 198 | 0 Class-G | ITGAV     |
| SETD5. 11  | 0 0. 476582 | 0. 816 | 0. 202 | 0 Class-G | SETD5     |
| BPTF. 8    | 0 0. 475754 | 0. 814 | 0. 228 | 0 Class-G | BPTF      |
| KLHL4. 9   | 0 0. 475303 | 0. 528 | 0. 061 | 0 Class-G | KLHL4     |
| LINC00657  | 0 0. 475273 | 0. 863 | 0. 245 | 0 Class-G | LINC00657 |
| MAML2. 10  | 0 0. 475163 | 0. 665 | 0. 121 | 0 Class-G | MAML2     |
| ENC1. 10   | 0 0. 474804 | 0. 665 | 0. 152 | 0 Class-G | ENC1      |
| TAOK1. 7   | 0 0. 474657 | 0. 747 | 0. 179 | 0 Class-G | TAOK1     |
| UBE2M. 6   | 0 0. 474216 | 0. 714 | 0. 151 | 0 Class-G | UBE2M     |
| SLC35F1. 8 | 0 0. 474091 | 0. 514 | 0. 062 | 0 Class-G | SLC35F1   |
| PCDH17. 9  | 0 0. 471854 | 0. 634 | 0. 119 | 0 Class-G | PCDH17    |
| TGFB1I1. 9 | 0 0. 47182  | 0. 536 | 0. 059 | 0 Class-G | TGFB1I1   |

|            |            |       |       |           |           |
|------------|------------|-------|-------|-----------|-----------|
| SPATS2L. 6 | 0 0.470004 | 0.85  | 0.247 | 0 Class-G | SPATS2L   |
| ERBB2IP. 7 | 0 0.469599 | 0.685 | 0.146 | 0 Class-G | ERBB2IP   |
| KEAP1. 6   | 0 0.469534 | 0.782 | 0.188 | 0 Class-G | KEAP1     |
| NDN. 10    | 0 0.469393 | 0.651 | 0.122 | 0 Class-G | NDN       |
| RNF180. 1C | 0 0.469325 | 0.585 | 0.099 | 0 Class-G | RNF180    |
| APBA2. 11  | 0 0.468453 | 0.679 | 0.13  | 0 Class-G | APBA2     |
| CNIH2. 10  | 0 0.46679  | 0.509 | 0.068 | 0 Class-G | CNIH2     |
| TMEM132A.  | 0 0.466448 | 0.554 | 0.078 | 0 Class-G | TMEM132A  |
| LINC01003  | 0 0.466139 | 0.645 | 0.118 | 0 Class-G | LINC01003 |
| TAC01. 4   | 0 0.465953 | 0.619 | 0.102 | 0 Class-G | TAC01     |
| CSRP2. 9   | 0 0.465448 | 0.864 | 0.209 | 0 Class-G | CSRP2     |
| CCDC137. 6 | 0 0.464399 | 0.652 | 0.128 | 0 Class-G | CCDC137   |
| HS6ST2. 6  | 0 0.463918 | 0.369 | 0.012 | 0 Class-G | HS6ST2    |
| MFGE8. 7   | 0 0.463539 | 0.646 | 0.116 | 0 Class-G | MFGE8     |
| AP3D1. 6   | 0 0.462839 | 0.825 | 0.224 | 0 Class-G | AP3D1     |
| NRBF2. 6   | 0 0.462321 | 0.773 | 0.19  | 0 Class-G | NRBF2     |
| SLC25A1. 5 | 0 0.461428 | 0.652 | 0.12  | 0 Class-G | SLC25A1   |
| ALYREF. 9  | 0 0.460885 | 0.562 | 0.078 | 0 Class-G | ALYREF    |
| SEC14L2. 8 | 0 0.460598 | 0.509 | 0.051 | 0 Class-G | SEC14L2   |
| POMGNT1. 7 | 0 0.45941  | 0.771 | 0.174 | 0 Class-G | POMGNT1   |
| ABI2. 9    | 0 0.459353 | 0.898 | 0.274 | 0 Class-G | ABI2      |
| DPYSL3. 1C | 0 0.457619 | 0.834 | 0.238 | 0 Class-G | DPYSL3    |
| CA2. 9     | 0 0.45658  | 0.713 | 0.146 | 0 Class-G | CA2       |
| ADAM19. 7  | 0 0.455953 | 0.361 | 0.033 | 0 Class-G | ADAM19    |
| ABHD2. 5   | 0 0.455037 | 0.711 | 0.15  | 0 Class-G | ABHD2     |
| CHST8. 8   | 0 0.45464  | 0.345 | 0.022 | 0 Class-G | CHST8     |
| FNDC4. 9   | 0 0.454123 | 0.643 | 0.125 | 0 Class-G | FNDC4     |
| SNX21. 5   | 0 0.4539   | 0.511 | 0.054 | 0 Class-G | SNX21     |
| ANK2. 10   | 0 0.453827 | 0.585 | 0.095 | 0 Class-G | ANK2      |
| HSD11B1L.  | 0 0.453792 | 0.666 | 0.129 | 0 Class-G | HSD11B1L  |
| ENDOD1. 9  | 0 0.453665 | 0.567 | 0.074 | 0 Class-G | ENDOD1    |
| HEPN1. 10  | 0 0.453481 | 0.627 | 0.135 | 0 Class-G | HEPN1     |
| HMG20B. 5  | 0 0.453109 | 0.851 | 0.252 | 0 Class-G | HMG20B    |
| TPM1. 8    | 0 0.452186 | 0.734 | 0.174 | 0 Class-G | TPM1      |
| SRM. 9     | 0 0.451832 | 0.888 | 0.279 | 0 Class-G | SRM       |
| SPOCD1. 9  | 0 0.451545 | 0.673 | 0.143 | 0 Class-G | SPOCD1    |
| CAMK1. 7   | 0 0.45106  | 0.637 | 0.158 | 0 Class-G | CAMK1     |
| NCKAP1. 8  | 0 0.450821 | 0.636 | 0.115 | 0 Class-G | NCKAP1    |
| TAF10. 4   | 0 0.450621 | 0.678 | 0.152 | 0 Class-G | TAF10     |
| FAM89B. 1C | 0 0.450549 | 0.703 | 0.172 | 0 Class-G | FAM89B    |
| DHRS11. 8  | 0 0.450133 | 0.463 | 0.044 | 0 Class-G | DHRS11    |
| NTN1. 6    | 0 0.449747 | 0.411 | 0.028 | 0 Class-G | NTN1      |
| LAPTM4B. 1 | 0 0.449199 | 0.862 | 0.245 | 0 Class-G | LAPTM4B   |
| MCC. 7     | 0 0.448751 | 0.495 | 0.061 | 0 Class-G | MCC       |
| MAN1A2. 7  | 0 0.448147 | 0.646 | 0.132 | 0 Class-G | MAN1A2    |
| PSD3. 10   | 0 0.445957 | 0.643 | 0.121 | 0 Class-G | PSD3      |
| DBX2. 9    | 0 0.445819 | 0.357 | 0.017 | 0 Class-G | DBX2      |
| MYO10. 10  | 0 0.445233 | 0.616 | 0.125 | 0 Class-G | MYO10     |
| SPARC. 8   | 0 0.444176 | 0.958 | 0.29  | 0 Class-G | SPARC     |
| TNFAIP1. 8 | 0 0.441651 | 0.599 | 0.106 | 0 Class-G | TNFAIP1   |
| CAMK2B. 9  | 0 0.440317 | 0.463 | 0.056 | 0 Class-G | CAMK2B    |

|            |             |        |        |           |           |
|------------|-------------|--------|--------|-----------|-----------|
| TIMP3. 8   | 0 0. 439627 | 0. 464 | 0. 07  | 0 Class-G | TIMP3     |
| DPP4. 8    | 0 0. 438314 | 0. 406 | 0. 024 | 0 Class-G | DPP4      |
| LARP6. 8   | 0 0. 437756 | 0. 643 | 0. 119 | 0 Class-G | LARP6     |
| PITPNC1. 6 | 0 0. 437318 | 0. 48  | 0. 065 | 0 Class-G | PITPNC1   |
| AHCY. 6    | 0 0. 436605 | 0. 804 | 0. 211 | 0 Class-G | AHCY      |
| PHF23. 8   | 0 0. 436381 | 0. 653 | 0. 134 | 0 Class-G | PHF23     |
| LAMP5. 9   | 0 0. 435907 | 0. 425 | 0. 057 | 0 Class-G | LAMP5     |
| F2R. 11    | 0 0. 435496 | 0. 568 | 0. 103 | 0 Class-G | F2R       |
| NR2F6. 8   | 0 0. 435388 | 0. 533 | 0. 077 | 0 Class-G | NR2F6     |
| DZIP1. 8   | 0 0. 433981 | 0. 452 | 0. 045 | 0 Class-G | DZIP1     |
| BCL7C. 6   | 0 0. 433853 | 0. 727 | 0. 178 | 0 Class-G | BCL7C     |
| FREM2. 7   | 0 0. 432097 | 0. 36  | 0. 02  | 0 Class-G | FREM2     |
| MYEF2. 9   | 0 0. 431816 | 0. 625 | 0. 123 | 0 Class-G | MYEF2     |
| PDGFC. 6   | 0 0. 431675 | 0. 474 | 0. 061 | 0 Class-G | PDGFC     |
| PNMA1. 10  | 0 0. 4301   | 0. 767 | 0. 204 | 0 Class-G | PNMA1     |
| LRRC16A. 3 | 0 0. 429516 | 0. 366 | 0. 026 | 0 Class-G | LRRC16A   |
| ZEB1. 10   | 0 0. 429291 | 0. 617 | 0. 123 | 0 Class-G | ZEB1      |
| BRD7. 7    | 0 0. 428877 | 0. 728 | 0. 176 | 0 Class-G | BRD7      |
| ADAM9. 8   | 0 0. 427493 | 0. 853 | 0. 244 | 0 Class-G | ADAM9     |
| ITGA3. 8   | 0 0. 427096 | 0. 429 | 0. 045 | 0 Class-G | ITGA3     |
| CCDC80. 9  | 0 0. 426268 | 0. 408 | 0. 065 | 0 Class-G | CCDC80    |
| LONRF2. 6  | 0 0. 425863 | 0. 394 | 0. 043 | 0 Class-G | LONRF2    |
| NT5DC2. 7  | 0 0. 425807 | 0. 565 | 0. 099 | 0 Class-G | NT5DC2    |
| L3HYPDH. 4 | 0 0. 425597 | 0. 506 | 0. 062 | 0 Class-G | L3HYPDH   |
| AKT1S1. 5  | 0 0. 425508 | 0. 72  | 0. 161 | 0 Class-G | AKT1S1    |
| SLC2A4RG.  | 0 0. 424916 | 0. 486 | 0. 067 | 0 Class-G | SLC2A4RG  |
| CREB5. 10  | 0 0. 424384 | 0. 703 | 0. 158 | 0 Class-G | CREB5     |
| MDGA1. 6   | 0 0. 42416  | 0. 375 | 0. 02  | 0 Class-G | MDGA1     |
| NCBP2-AS2  | 0 0. 423969 | 0. 757 | 0. 198 | 0 Class-G | NCBP2-AS2 |
| DLG1. 9    | 0 0. 423681 | 0. 58  | 0. 098 | 0 Class-G | DLG1      |
| CDH6. 7    | 0 0. 423531 | 0. 357 | 0. 021 | 0 Class-G | CDH6      |
| ZNF608. 7  | 0 0. 42296  | 0. 545 | 0. 094 | 0 Class-G | ZNF608    |
| TP53RK. 5  | 0 0. 422728 | 0. 622 | 0. 121 | 0 Class-G | TP53RK    |
| EFTUD2. 5  | 0 0. 422377 | 0. 656 | 0. 143 | 0 Class-G | EFTUD2    |
| NR2F1. 7   | 0 0. 422294 | 0. 552 | 0. 102 | 0 Class-G | NR2F1     |
| RRP36. 5   | 0 0. 421879 | 0. 527 | 0. 083 | 0 Class-G | RRP36     |
| SALL1. 8   | 0 0. 42181  | 0. 532 | 0. 073 | 0 Class-G | SALL1     |
| CBX6. 8    | 0 0. 42161  | 0. 682 | 0. 168 | 0 Class-G | CBX6      |
| LTBP3. 5   | 0 0. 42132  | 0. 656 | 0. 137 | 0 Class-G | LTBP3     |
| ETV4. 9    | 0 0. 420938 | 0. 355 | 0. 033 | 0 Class-G | ETV4      |
| CPNE2. 9   | 0 0. 419581 | 0. 588 | 0. 11  | 0 Class-G | CPNE2     |
| MVB12A. 6  | 0 0. 419477 | 0. 814 | 0. 219 | 0 Class-G | MVB12A    |
| ZNF358. 8  | 0 0. 419347 | 0. 58  | 0. 097 | 0 Class-G | ZNF358    |
| ACTN4. 7   | 0 0. 419026 | 0. 842 | 0. 249 | 0 Class-G | ACTN4     |
| SLC10A4. 1 | 0 0. 418981 | 0. 416 | 0. 044 | 0 Class-G | SLC10A4   |
| BOC. 8     | 0 0. 418942 | 0. 411 | 0. 034 | 0 Class-G | BOC       |
| ESF1. 7    | 0 0. 41843  | 0. 855 | 0. 262 | 0 Class-G | ESF1      |
| PTX3. 10   | 0 0. 418179 | 0. 452 | 0. 06  | 0 Class-G | PTX3      |
| HSPBP1. 7  | 0 0. 418154 | 0. 785 | 0. 206 | 0 Class-G | HSPBP1    |
| ZNF436. 6  | 0 0. 417811 | 0. 361 | 0. 032 | 0 Class-G | ZNF436    |
| PIGX. 8    | 0 0. 417454 | 0. 714 | 0. 177 | 0 Class-G | PIGX      |

|            |             |        |        |           |          |
|------------|-------------|--------|--------|-----------|----------|
| DHCR24. 8  | 0 0. 417219 | 0. 437 | 0. 04  | 0 Class-G | DHCR24   |
| CTHRC1. 7  | 0 0. 417007 | 0. 31  | 0. 024 | 0 Class-G | CTHRC1   |
| WDR18. 8   | 0 0. 415954 | 0. 769 | 0. 207 | 0 Class-G | WDR18    |
| MCHR1. 7   | 0 0. 415814 | 0. 317 | 0. 017 | 0 Class-G | MCHR1    |
| TRIO. 9    | 0 0. 41552  | 0. 545 | 0. 111 | 0 Class-G | TRIO     |
| CDYL. 6    | 0 0. 414791 | 0. 469 | 0. 057 | 0 Class-G | CDYL     |
| EXTL3. 7   | 0 0. 414743 | 0. 494 | 0. 072 | 0 Class-G | EXTL3    |
| SPRED2. 5  | 0 0. 414341 | 0. 46  | 0. 056 | 0 Class-G | SPRED2   |
| EIF1AY. 9  | 0 0. 413008 | 0. 594 | 0. 11  | 0 Class-G | EIF1AY   |
| CAPN2. 6   | 0 0. 412436 | 0. 726 | 0. 175 | 0 Class-G | CAPN2    |
| PRAF2. 9   | 0 0. 412347 | 0. 811 | 0. 219 | 0 Class-G | PRAF2    |
| SHISA4. 9  | 0 0. 412244 | 0. 733 | 0. 167 | 0 Class-G | SHISA4   |
| SMARCD3. 1 | 0 0. 412175 | 0. 681 | 0. 158 | 0 Class-G | SMARCD3  |
| PKIG. 9    | 0 0. 412063 | 0. 828 | 0. 226 | 0 Class-G | PKIG     |
| SOX12. 10  | 0 0. 411748 | 0. 468 | 0. 058 | 0 Class-G | SOX12    |
| KCNIP1. 9  | 0 0. 411716 | 0. 367 | 0. 054 | 0 Class-G | KCNIP1   |
| ARHGEF26.  | 0 0. 411505 | 0. 485 | 0. 066 | 0 Class-G | ARHGEF26 |
| RAC3. 10   | 0 0. 411487 | 0. 572 | 0. 119 | 0 Class-G | RAC3     |
| TAP1. 6    | 0 0. 411457 | 0. 708 | 0. 179 | 0 Class-G | TAP1     |
| PYGB. 6    | 0 0. 410696 | 0. 66  | 0. 137 | 0 Class-G | PYGB     |
| ARHGAP21.  | 0 0. 410279 | 0. 74  | 0. 17  | 0 Class-G | ARHGAP21 |
| IQGAP2. 5  | 0 0. 40967  | 0. 523 | 0. 088 | 0 Class-G | IQGAP2   |
| C1orf21. 9 | 0 0. 409604 | 0. 631 | 0. 13  | 0 Class-G | C1orf21  |
| CSNK1G2. 5 | 0 0. 409284 | 0. 529 | 0. 08  | 0 Class-G | CSNK1G2  |
| DLGAP4. 8  | 0 0. 409282 | 0. 782 | 0. 213 | 0 Class-G | DLGAP4   |
| GSS. 6     | 0 0. 409049 | 0. 691 | 0. 166 | 0 Class-G | GSS      |
| DESI2. 5   | 0 0. 408054 | 0. 611 | 0. 126 | 0 Class-G | DESI2    |
| RGS17. 8   | 0 0. 406137 | 0. 529 | 0. 102 | 0 Class-G | RGS17    |
| CCDC28B. 1 | 0 0. 406042 | 0. 688 | 0. 142 | 0 Class-G | CCDC28B  |
| B3GALT6. 6 | 0 0. 405781 | 0. 532 | 0. 074 | 0 Class-G | B3GALT6  |
| CRIP2. 9   | 0 0. 40545  | 0. 837 | 0. 228 | 0 Class-G | CRIP2    |
| TBC1D20. 5 | 0 0. 405424 | 0. 614 | 0. 112 | 0 Class-G | TBC1D20  |
| PAM. 9     | 0 0. 404196 | 0. 576 | 0. 098 | 0 Class-G | PAM      |
| GADD45A. 1 | 0 0. 403876 | 0. 754 | 0. 201 | 0 Class-G | GADD45A  |
| VAPB. 6    | 0 0. 403691 | 0. 634 | 0. 126 | 0 Class-G | VAPB     |
| CYB5D2. 6  | 0 0. 403453 | 0. 72  | 0. 153 | 0 Class-G | CYB5D2   |
| HS2ST1. 1C | 0 0. 403196 | 0. 592 | 0. 106 | 0 Class-G | HS2ST1   |
| CA12. 11   | 0 0. 402884 | 0. 534 | 0. 071 | 0 Class-G | CA12     |
| SORBS1. 7  | 0 0. 402835 | 0. 406 | 0. 042 | 0 Class-G | SORBS1   |
| DEXI. 7    | 0 0. 402549 | 0. 64  | 0. 136 | 0 Class-G | DEXI     |
| ENOSF1. 8  | 0 0. 402197 | 0. 488 | 0. 065 | 0 Class-G | ENOSF1   |
| DGCR6L. 4  | 0 0. 401182 | 0. 844 | 0. 252 | 0 Class-G | DGCR6L   |
| DUSP15. 8  | 0 0. 400955 | 0. 417 | 0. 04  | 0 Class-G | DUSP15   |
| CDC34. 9   | 0 0. 399592 | 0. 682 | 0. 162 | 0 Class-G | CDC34    |
| CTTN. 9    | 0 0. 398717 | 0. 671 | 0. 157 | 0 Class-G | CTTN     |
| PEX10. 7   | 0 0. 398387 | 0. 616 | 0. 123 | 0 Class-G | PEX10    |
| BAIAP2. 6  | 0 0. 398132 | 0. 625 | 0. 127 | 0 Class-G | BAIAP2   |
| COL16A1. 8 | 0 0. 397884 | 0. 329 | 0. 032 | 0 Class-G | COL16A1  |
| FAM104A. 6 | 0 0. 397836 | 0. 7   | 0. 165 | 0 Class-G | FAM104A  |
| SCRN1. 10  | 0 0. 397749 | 0. 589 | 0. 112 | 0 Class-G | SCRN1    |
| DEAF1. 9   | 0 0. 397546 | 0. 66  | 0. 139 | 0 Class-G | DEAF1    |

|            |            |       |       |           |               |
|------------|------------|-------|-------|-----------|---------------|
| STRADB. 5  | 0 0.397052 | 0.665 | 0.147 | 0 Class-G | STRADB        |
| DMRTA2. 6  | 0 0.396833 | 0.352 | 0.031 | 0 Class-G | DMRTA2        |
| ZNF593. 5  | 0 0.396606 | 0.815 | 0.218 | 0 Class-G | ZNF593        |
| STAT1. 5   | 0 0.396446 | 0.648 | 0.161 | 0 Class-G | STAT1         |
| ADORA1. 8  | 0 0.396424 | 0.48  | 0.063 | 0 Class-G | ADORA1        |
| RIN1. 7    | 0 0.395799 | 0.385 | 0.033 | 0 Class-G | RIN1          |
| MBOAT7. 8  | 0 0.395643 | 0.716 | 0.166 | 0 Class-G | MBOAT7        |
| MRGBP. 5   | 0 0.395618 | 0.532 | 0.084 | 0 Class-G | MRGBP         |
| YTHDF1. 4  | 0 0.395482 | 0.603 | 0.114 | 0 Class-G | YTHDF1        |
| GTF2F2. 5  | 0 0.395163 | 0.776 | 0.221 | 0 Class-G | GTF2F2        |
| ENHO. 10   | 0 0.395033 | 0.505 | 0.092 | 0 Class-G | ENHO          |
| SEZ6L2. 9  | 0 0.394546 | 0.736 | 0.198 | 0 Class-G | SEZ6L2        |
| PYCR1. 7   | 0 0.394521 | 0.606 | 0.115 | 0 Class-G | PYCR1         |
| MGARP. 6   | 0 0.394206 | 0.401 | 0.027 | 0 Class-G | MGARP         |
| NUFIP2. 4  | 0 0.394171 | 0.686 | 0.163 | 0 Class-G | NUFIP2        |
| RFXANK. 5  | 0 0.393985 | 0.866 | 0.236 | 0 Class-G | RFXANK        |
| SYNM. 8    | 0 0.393499 | 0.367 | 0.023 | 0 Class-G | SYNM          |
| ZNF414. 1C | 0 0.393453 | 0.599 | 0.118 | 0 Class-G | ZNF414        |
| RASGRP1. 9 | 0 0.392983 | 0.352 | 0.023 | 0 Class-G | RASGRP1       |
| URI1. 7    | 0 0.392869 | 0.682 | 0.146 | 0 Class-G | URI1          |
| PITPNA. 5  | 0 0.392686 | 0.582 | 0.116 | 0 Class-G | PITPNA        |
| BRD4. 7    | 0 0.392584 | 0.833 | 0.244 | 0 Class-G | BRD4          |
| MTHFD2L. 6 | 0 0.392042 | 0.66  | 0.132 | 0 Class-G | MTHFD2L       |
| SPATA6. 4  | 0 0.391999 | 0.536 | 0.094 | 0 Class-G | SPATA6        |
| PALLD. 7   | 0 0.39195  | 0.578 | 0.136 | 0 Class-G | PALLD         |
| ZNRF1. 9   | 0 0.391795 | 0.443 | 0.063 | 0 Class-G | ZNRF1         |
| ARL9. 10   | 0 0.390984 | 0.41  | 0.054 | 0 Class-G | ARL9          |
| DGKZ. 4    | 0 0.390305 | 0.617 | 0.127 | 0 Class-G | DGKZ          |
| SLC35C2. 4 | 0 0.389602 | 0.727 | 0.176 | 0 Class-G | SLC35C2       |
| MESP1. 7   | 0 0.389538 | 0.483 | 0.074 | 0 Class-G | MESP1         |
| HS6ST1. 4  | 0 0.38939  | 0.419 | 0.058 | 0 Class-G | HS6ST1        |
| MGAT4B. 3  | 0 0.389035 | 0.44  | 0.049 | 0 Class-G | MGAT4B        |
| ROCK2. 4   | 0 0.388458 | 0.525 | 0.091 | 0 Class-G | ROCK2         |
| BCAM. 8    | 0 0.388285 | 0.455 | 0.052 | 0 Class-G | BCAM          |
| CC2D1A. 6  | 0 0.388209 | 0.613 | 0.116 | 0 Class-G | CC2D1A        |
| CAPRIN2. 7 | 0 0.388088 | 0.423 | 0.052 | 0 Class-G | CAPRIN2       |
| SDC3. 7    | 0 0.388021 | 0.624 | 0.126 | 0 Class-G | SDC3          |
| DDAH1. 8   | 0 0.387576 | 0.431 | 0.074 | 0 Class-G | DDAH1         |
| PPAT. 8    | 0 0.387038 | 0.495 | 0.086 | 0 Class-G | PPAT          |
| FAM134B. 9 | 0 0.386173 | 0.552 | 0.102 | 0 Class-G | FAM134B       |
| GGT7. 7    | 0 0.385687 | 0.579 | 0.098 | 0 Class-G | GGT7          |
| PTPN13. 8  | 0 0.385623 | 0.414 | 0.041 | 0 Class-G | PTPN13        |
| ACLY. 6    | 0 0.385496 | 0.66  | 0.144 | 0 Class-G | ACLY          |
| YES1. 5    | 0 0.385445 | 0.484 | 0.073 | 0 Class-G | YES1          |
| RP11-390F  | 0 0.385434 | 0.503 | 0.072 | 0 Class-G | RP11-390P2. 4 |
| NACC1. 5   | 0 0.385391 | 0.547 | 0.086 | 0 Class-G | NACC1         |
| GAS2L1. 8  | 0 0.384927 | 0.532 | 0.09  | 0 Class-G | GAS2L1        |
| SNTA1. 7   | 0 0.384788 | 0.406 | 0.033 | 0 Class-G | SNTA1         |
| PKIB. 8    | 0 0.384647 | 0.768 | 0.205 | 0 Class-G | PKIB          |
| ZHX3. 6    | 0 0.384042 | 0.469 | 0.062 | 0 Class-G | ZHX3          |
| TMEM181. 1 | 0 0.383594 | 0.552 | 0.1   | 0 Class-G | TMEM181       |



|            |             |        |        |           |          |
|------------|-------------|--------|--------|-----------|----------|
| ZFYVE21. 6 | 0 0. 383593 | 0. 736 | 0. 189 | 0 Class-G | ZFYVE21  |
| CDC42EP1.  | 0 0. 383577 | 0. 476 | 0. 071 | 0 Class-G | CDC42EP1 |
| EYA4. 6    | 0 0. 383458 | 0. 321 | 0. 014 | 0 Class-G | EYA4     |
| NOTCH2. 4  | 0 0. 38341  | 0. 521 | 0. 085 | 0 Class-G | NOTCH2   |
| SSFA2. 7   | 0 0. 382993 | 0. 589 | 0. 12  | 0 Class-G | SSFA2    |
| ATRN. 4    | 0 0. 382863 | 0. 487 | 0. 065 | 0 Class-G | ATRN     |
| KIF3B. 10  | 0 0. 382824 | 0. 483 | 0. 072 | 0 Class-G | KIF3B    |
| CCDC102B.  | 0 0. 382228 | 0. 415 | 0. 049 | 0 Class-G | CCDC102B |
| RABEP1. 6  | 0 0. 381016 | 0. 708 | 0. 178 | 0 Class-G | RABEP1   |
| POLR3H. 6  | 0 0. 380994 | 0. 666 | 0. 141 | 0 Class-G | POLR3H   |
| NCOA6. 8   | 0 0. 38054  | 0. 497 | 0. 077 | 0 Class-G | NCOA6    |
| TIMM22. 7  | 0 0. 380118 | 0. 706 | 0. 167 | 0 Class-G | TIMM22   |
| IL6ST. 10  | 0 0. 379611 | 0. 733 | 0. 176 | 0 Class-G | IL6ST    |
| C19orf25.  | 0 0. 379434 | 0. 789 | 0. 219 | 0 Class-G | C19orf25 |
| PDGFRA. 1C | 0 0. 379167 | 0. 499 | 0. 091 | 0 Class-G | PDGFRA   |
| DUS1L. 3   | 0 0. 379128 | 0. 504 | 0. 072 | 0 Class-G | DUS1L    |
| ST8SIA1. 7 | 0 0. 37887  | 0. 394 | 0. 042 | 0 Class-G | ST8SIA1  |
| SREBF2. 5  | 0 0. 37858  | 0. 469 | 0. 063 | 0 Class-G | SREBF2   |
| CIB2. 7    | 0 0. 378189 | 0. 372 | 0. 029 | 0 Class-G | CIB2     |
| C22orf39.  | 0 0. 376787 | 0. 722 | 0. 184 | 0 Class-G | C22orf39 |
| DAPK3. 7   | 0 0. 376757 | 0. 677 | 0. 167 | 0 Class-G | DAPK3    |
| GPRC5B. 9  | 0 0. 376678 | 0. 707 | 0. 139 | 0 Class-G | GPRC5B   |
| RBM38. 7   | 0 0. 37624  | 0. 509 | 0. 074 | 0 Class-G | RBM38    |
| MBD3. 4    | 0 0. 3759   | 0. 561 | 0. 099 | 0 Class-G | MBD3     |
| ALDH3A2. 5 | 0 0. 375869 | 0. 657 | 0. 162 | 0 Class-G | ALDH3A2  |
| SSX2IP. 3  | 0 0. 375561 | 0. 406 | 0. 046 | 0 Class-G | SSX2IP   |
| CDS2. 4    | 0 0. 375165 | 0. 728 | 0. 169 | 0 Class-G | CDS2     |
| CSAD. 7    | 0 0. 375025 | 0. 571 | 0. 102 | 0 Class-G | CSAD     |
| NRCAM. 10  | 0 0. 37482  | 0. 735 | 0. 194 | 0 Class-G | NRCAM    |
| RNF157. 9  | 0 0. 374559 | 0. 475 | 0. 078 | 0 Class-G | RNF157   |
| PAXBP1. 7  | 0 0. 374128 | 0. 531 | 0. 099 | 0 Class-G | PAXBP1   |
| LDLR. 7    | 0 0. 373655 | 0. 41  | 0. 048 | 0 Class-G | LDLR     |
| NBPF10. 5  | 0 0. 373009 | 0. 498 | 0. 088 | 0 Class-G | NBPF10   |
| NECAB3. 4  | 0 0. 3728   | 0. 412 | 0. 046 | 0 Class-G | NECAB3   |
| NBPF1. 9   | 0 0. 372559 | 0. 667 | 0. 165 | 0 Class-G | NBPF1    |
| RND2. 8    | 0 0. 372439 | 0. 567 | 0. 097 | 0 Class-G | RND2     |
| GLG1. 7    | 0 0. 372256 | 0. 727 | 0. 191 | 0 Class-G | GLG1     |
| TIMM44. 6  | 0 0. 371193 | 0. 726 | 0. 187 | 0 Class-G | TIMM44   |
| ORAI1. 6   | 0 0. 370672 | 0. 482 | 0. 066 | 0 Class-G | ORAI1    |
| MANBAL. 11 | 0 0. 370478 | 0. 845 | 0. 251 | 0 Class-G | MANBAL   |
| IL17RC. 4  | 0 0. 368513 | 0. 458 | 0. 061 | 0 Class-G | IL17RC   |
| FGFR1. 6   | 0 0. 368284 | 0. 555 | 0. 107 | 0 Class-G | FGFR1    |
| ITGA2. 8   | 0 0. 368271 | 0. 281 | 0. 026 | 0 Class-G | ITGA2    |
| IGF2BP3. 9 | 0 0. 368013 | 0. 412 | 0. 058 | 0 Class-G | IGF2BP3  |
| CTNNBIP1.  | 0 0. 367172 | 0. 614 | 0. 149 | 0 Class-G | CTNNBIP1 |
| PXMP2. 9   | 0 0. 367162 | 0. 65  | 0. 153 | 0 Class-G | PXMP2    |
| SMPD1. 7   | 0 0. 367159 | 0. 673 | 0. 165 | 0 Class-G | SMPD1    |
| CYSTM1. 1C | 0 0. 367002 | 0. 836 | 0. 241 | 0 Class-G | CYSTM1   |
| SH3PXD2B.  | 0 0. 366796 | 0. 445 | 0. 063 | 0 Class-G | SH3PXD2B |
| DHRS13. 6  | 0 0. 366598 | 0. 401 | 0. 048 | 0 Class-G | DHRS13   |
| ZFAND3. 4  | 0 0. 366471 | 0. 729 | 0. 198 | 0 Class-G | ZFAND3   |

|            |            |       |       |           |               |
|------------|------------|-------|-------|-----------|---------------|
| LPP. 3     | 0 0.366181 | 0.664 | 0.144 | 0 Class-G | LPP           |
| THOP1. 8   | 0 0.366172 | 0.604 | 0.135 | 0 Class-G | THOP1         |
| GALNT1. 4  | 0 0.365882 | 0.614 | 0.139 | 0 Class-G | GALNT1        |
| LONP1. 4   | 0 0.365691 | 0.628 | 0.135 | 0 Class-G | LONP1         |
| AC093673.  | 0 0.365049 | 0.562 | 0.116 | 0 Class-G | AC093673. 5   |
| EMP1. 7    | 0 0.364737 | 0.548 | 0.118 | 0 Class-G | EMP1          |
| SNAPC2. 4  | 0 0.36452  | 0.619 | 0.135 | 0 Class-G | SNAPC2        |
| ARHGAP12.  | 0 0.363651 | 0.602 | 0.122 | 0 Class-G | ARHGAP12      |
| NOTCH3. 5  | 0 0.363535 | 0.326 | 0.017 | 0 Class-G | NOTCH3        |
| TRIM37. 8  | 0 0.363487 | 0.511 | 0.09  | 0 Class-G | TRIM37        |
| PEMT. 8    | 0 0.363056 | 0.666 | 0.138 | 0 Class-G | PEMT          |
| PAICS. 10  | 0 0.362773 | 0.81  | 0.226 | 0 Class-G | PAICS         |
| BATF3. 5   | 0 0.362636 | 0.407 | 0.041 | 0 Class-G | BATF3         |
| POFUT1. 5  | 0 0.361799 | 0.463 | 0.06  | 0 Class-G | POFUT1        |
| COL5A2. 8  | 0 0.361634 | 0.309 | 0.022 | 0 Class-G | COL5A2        |
| CACNG8. 6  | 0 0.360345 | 0.363 | 0.025 | 0 Class-G | CACNG8        |
| RAB3GAP2.  | 0 0.359108 | 0.555 | 0.107 | 0 Class-G | RAB3GAP2      |
| STK39. 7   | 0 0.359006 | 0.403 | 0.052 | 0 Class-G | STK39         |
| RP11-345P  | 0 0.358899 | 0.53  | 0.104 | 0 Class-G | RP11-345P4. 9 |
| MTA1. 8    | 0 0.35888  | 0.595 | 0.124 | 0 Class-G | MTA1          |
| BMP7. 11   | 0 0.358797 | 0.53  | 0.106 | 0 Class-G | BMP7          |
| TEAD2. 9   | 0 0.35806  | 0.382 | 0.042 | 0 Class-G | TEAD2         |
| ASTN1. 6   | 0 0.357996 | 0.402 | 0.04  | 0 Class-G | ASTN1         |
| C14orf1. 8 | 0 0.35778  | 0.767 | 0.215 | 0 Class-G | C14orf1       |
| FSTL1. 8   | 0 0.357583 | 0.443 | 0.06  | 0 Class-G | FSTL1         |
| CREB3L1. 6 | 0 0.357441 | 0.313 | 0.021 | 0 Class-G | CREB3L1       |
| TSKU. 7    | 0 0.357235 | 0.377 | 0.038 | 0 Class-G | TSKU          |
| PPP2R2B. 9 | 0 0.357064 | 0.672 | 0.145 | 0 Class-G | PPP2R2B       |
| C6orf226.  | 0 0.356846 | 0.611 | 0.121 | 0 Class-G | C6orf226      |
| ABHD14A. 5 | 0 0.356774 | 0.662 | 0.15  | 0 Class-G | ABHD14A       |
| BBOX1. 10  | 0 0.356707 | 0.557 | 0.069 | 0 Class-G | BBOX1         |
| ASAP2. 7   | 0 0.356695 | 0.394 | 0.046 | 0 Class-G | ASAP2         |
| ERF. 8     | 0 0.356605 | 0.571 | 0.113 | 0 Class-G | ERF           |
| SPOCK2. 9  | 0 0.356319 | 0.503 | 0.08  | 0 Class-G | SPOCK2        |
| EHD2. 9    | 0 0.356103 | 0.361 | 0.036 | 0 Class-G | EHD2          |
| ZNF579. 7  | 0 0.354786 | 0.443 | 0.06  | 0 Class-G | ZNF579        |
| DDX49. 7   | 0 0.354505 | 0.745 | 0.197 | 0 Class-G | DDX49         |
| CPNE5. 6   | 0 0.353683 | 0.282 | 0.013 | 0 Class-G | CPNE5         |
| CLPTM1L. 2 | 0 0.352231 | 0.534 | 0.089 | 0 Class-G | CLPTM1L       |
| DLC1. 8    | 0 0.35217  | 0.369 | 0.04  | 0 Class-G | DLC1          |
| PPFIA1. 2  | 0 0.351143 | 0.531 | 0.108 | 0 Class-G | PPFIA1        |
| SRRD. 6    | 0 0.351126 | 0.454 | 0.061 | 0 Class-G | SRRD          |
| MRAS. 7    | 0 0.35086  | 0.545 | 0.106 | 0 Class-G | MRAS          |
| ADA. 6     | 0 0.350637 | 0.387 | 0.045 | 0 Class-G | ADA           |
| ARHGEF12.  | 0 0.34997  | 0.541 | 0.098 | 0 Class-G | ARHGEF12      |
| AKAP8L. 9  | 0 0.349867 | 0.693 | 0.176 | 0 Class-G | AKAP8L        |
| TEN1. 6    | 0 0.347886 | 0.57  | 0.114 | 0 Class-G | TEN1          |
| TMEM129. 4 | 0 0.347532 | 0.555 | 0.11  | 0 Class-G | TMEM129       |
| CORO2B. 7  | 0 0.346537 | 0.405 | 0.051 | 0 Class-G | CORO2B        |
| CHRNA9. 7  | 0 0.345382 | 0.258 | 0.015 | 0 Class-G | CHRNA9        |
| RFTN1. 4   | 0 0.345048 | 0.41  | 0.06  | 0 Class-G | RFTN1         |

|            |             |        |        |           |                |
|------------|-------------|--------|--------|-----------|----------------|
| SYT17. 7   | 0 0. 344683 | 0. 526 | 0. 099 | 0 Class-G | SYT17          |
| ALDH7A1. 6 | 0 0. 344499 | 0. 743 | 0. 199 | 0 Class-G | ALDH7A1        |
| MTRF1L. 7  | 0 0. 344091 | 0. 57  | 0. 128 | 0 Class-G | MTRF1L         |
| ROB02. 10  | 0 0. 343414 | 0. 398 | 0. 06  | 0 Class-G | ROB02          |
| CTD-3184A  | 0 0. 343319 | 0. 415 | 0. 045 | 0 Class-G | CTD-3184A7. 4  |
| SLC27A1. 6 | 0 0. 342628 | 0. 505 | 0. 104 | 0 Class-G | SLC27A1        |
| NLN. 7     | 0 0. 342553 | 0. 577 | 0. 121 | 0 Class-G | NLN            |
| TET1. 9    | 0 0. 342515 | 0. 354 | 0. 038 | 0 Class-G | TET1           |
| PCED1A. 4  | 0 0. 341534 | 0. 483 | 0. 073 | 0 Class-G | PCED1A         |
| FAM57A. 6  | 0 0. 340928 | 0. 387 | 0. 046 | 0 Class-G | FAM57A         |
| ACBD5. 6   | 0 0. 340189 | 0. 552 | 0. 105 | 0 Class-G | ACBD5          |
| DID01. 6   | 0 0. 339729 | 0. 506 | 0. 09  | 0 Class-G | DID01          |
| SORBS3. 7  | 0 0. 339107 | 0. 549 | 0. 111 | 0 Class-G | SORBS3         |
| PLCD3. 6   | 0 0. 338845 | 0. 317 | 0. 026 | 0 Class-G | PLCD3          |
| SYMPK. 7   | 0 0. 338581 | 0. 634 | 0. 156 | 0 Class-G | SYMPK          |
| TANC2. 6   | 0 0. 33818  | 0. 576 | 0. 126 | 0 Class-G | TANC2          |
| SPRY4. 6   | 0 0. 337291 | 0. 308 | 0. 028 | 0 Class-G | SPRY4          |
| KCNJ16. 8  | 0 0. 336965 | 0. 25  | 0. 022 | 0 Class-G | KCNJ16         |
| OAF. 3     | 0 0. 33672  | 0. 324 | 0. 025 | 0 Class-G | OAF            |
| PANK2. 4   | 0 0. 336611 | 0. 624 | 0. 14  | 0 Class-G | PANK2          |
| RMDN3. 4   | 0 0. 336429 | 0. 679 | 0. 169 | 0 Class-G | RMDN3          |
| TMEM189. 6 | 0 0. 33622  | 0. 584 | 0. 122 | 0 Class-G | TMEM189        |
| RASSF8. 6  | 0 0. 335963 | 0. 355 | 0. 044 | 0 Class-G | RASSF8         |
| FAM92A1. 8 | 0 0. 335764 | 0. 602 | 0. 135 | 0 Class-G | FAM92A1        |
| FUBP3. 6   | 0 0. 335483 | 0. 671 | 0. 169 | 0 Class-G | FUBP3          |
| RRAS. 4    | 0 0. 33506  | 0. 415 | 0. 055 | 0 Class-G | RRAS           |
| PKN1. 5    | 0 0. 334917 | 0. 682 | 0. 171 | 0 Class-G | PKN1           |
| NOTCH2NL.  | 0 0. 33468  | 0. 525 | 0. 108 | 0 Class-G | NOTCH2NL       |
| TCF3. 7    | 0 0. 334438 | 0. 465 | 0. 075 | 0 Class-G | TCF3           |
| TANC1. 9   | 0 0. 333801 | 0. 413 | 0. 058 | 0 Class-G | TANC1          |
| RP11-660L  | 0 0. 333391 | 0. 464 | 0. 068 | 0 Class-G | RP11-660L16. 2 |
| SIPA1L1. 4 | 0 0. 332451 | 0. 549 | 0. 102 | 0 Class-G | SIPA1L1        |
| PLOD2. 8   | 0 0. 332435 | 0. 526 | 0. 102 | 0 Class-G | PLOD2          |
| DCAKD. 8   | 0 0. 332074 | 0. 474 | 0. 084 | 0 Class-G | DCAKD          |
| AGGF1. 3   | 0 0. 331968 | 0. 634 | 0. 152 | 0 Class-G | AGGF1          |
| ZNF827. 8  | 0 0. 331578 | 0. 426 | 0. 064 | 0 Class-G | ZNF827         |
| KANK2. 6   | 0 0. 330617 | 0. 384 | 0. 043 | 0 Class-G | KANK2          |
| MTMR2. 5   | 0 0. 330573 | 0. 494 | 0. 089 | 0 Class-G | MTMR2          |
| SYCE1L. 3  | 0 0. 330472 | 0. 329 | 0. 029 | 0 Class-G | SYCE1L         |
| PITPNA-AS  | 0 0. 330447 | 0. 603 | 0. 129 | 0 Class-G | PITPNA-AS1     |
| DPY19L1. 6 | 0 0. 329516 | 0. 405 | 0. 055 | 0 Class-G | DPY19L1        |
| ARHGAP35.  | 0 0. 329083 | 0. 486 | 0. 091 | 0 Class-G | ARHGAP35       |
| MED12L. 3  | 0 0. 329064 | 0. 309 | 0. 021 | 0 Class-G | MED12L         |
| KCTD3. 5   | 0 0. 328463 | 0. 477 | 0. 088 | 0 Class-G | KCTD3          |
| KIF9. 9    | 0 0. 327958 | 0. 585 | 0. 107 | 0 Class-G | KIF9           |
| ENDOG. 7   | 0 0. 327895 | 0. 492 | 0. 091 | 0 Class-G | ENDOG          |
| FAM222B. 7 | 0 0. 32766  | 0. 428 | 0. 062 | 0 Class-G | FAM222B        |
| SMG6. 4    | 0 0. 327279 | 0. 443 | 0. 07  | 0 Class-G | SMG6           |
| CCDC130. 6 | 0 0. 327183 | 0. 667 | 0. 156 | 0 Class-G | CCDC130        |
| ADAMTS6. 6 | 0 0. 327049 | 0. 303 | 0. 027 | 0 Class-G | ADAMTS6        |
| FBXW9. 5   | 0 0. 326987 | 0. 431 | 0. 06  | 0 Class-G | FBXW9          |

|            |            |       |       |           |                |
|------------|------------|-------|-------|-----------|----------------|
| CRNDE. 6   | 0 0.326682 | 0.544 | 0.119 | 0 Class-G | CRNDE          |
| UBE2Q1. 3  | 0 0.326161 | 0.534 | 0.101 | 0 Class-G | UBE2Q1         |
| ASPSCR1. 4 | 0 0.326094 | 0.664 | 0.166 | 0 Class-G | ASPSCR1        |
| PTK7. 5    | 0 0.325396 | 0.38  | 0.047 | 0 Class-G | PTK7           |
| HELZ2. 7   | 0 0.323999 | 0.395 | 0.051 | 0 Class-G | HELZ2          |
| SOX21-AS1  | 0 0.323625 | 0.297 | 0.026 | 0 Class-G | SOX21-AS1      |
| PTGFRN. 6  | 0 0.323503 | 0.397 | 0.056 | 0 Class-G | PTGFRN         |
| MMAB. 6    | 0 0.322762 | 0.6   | 0.131 | 0 Class-G | MMAB           |
| CDH11. 9   | 0 0.322677 | 0.426 | 0.065 | 0 Class-G | CDH11          |
| REEP6      | 0 0.322617 | 0.363 | 0.036 | 0 Class-G | REEP6          |
| PLEKHG1. 2 | 0 0.322264 | 0.294 | 0.017 | 0 Class-G | PLEKHG1        |
| PLCG1. 6   | 0 0.322185 | 0.385 | 0.054 | 0 Class-G | PLCG1          |
| LAMB1. 6   | 0 0.322142 | 0.398 | 0.053 | 0 Class-G | LAMB1          |
| NRBP2. 8   | 0 0.321555 | 0.441 | 0.069 | 0 Class-G | NRBP2          |
| ST3GAL4. 6 | 0 0.321126 | 0.426 | 0.073 | 0 Class-G | ST3GAL4        |
| NACC2. 7   | 0 0.320232 | 0.395 | 0.055 | 0 Class-G | NACC2          |
| RALGAPB. 4 | 0 0.319722 | 0.42  | 0.06  | 0 Class-G | RALGAPB        |
| ENTPD6. 4  | 0 0.319659 | 0.591 | 0.134 | 0 Class-G | ENTPD6         |
| TRIP11. 2  | 0 0.31933  | 0.579 | 0.125 | 0 Class-G | TRIP11         |
| GPR137. 6  | 0 0.319125 | 0.622 | 0.141 | 0 Class-G | GPR137         |
| PLAT. 8    | 0 0.318516 | 0.413 | 0.072 | 0 Class-G | PLAT           |
| H2AFY2. 4  | 0 0.318446 | 0.406 | 0.054 | 0 Class-G | H2AFY2         |
| RAB11B-AS  | 0 0.31819  | 0.461 | 0.078 | 0 Class-G | RAB11B-AS1     |
| RBBP9. 4   | 0 0.318155 | 0.381 | 0.047 | 0 Class-G | RBBP9          |
| E2F5. 5    | 0 0.317445 | 0.312 | 0.025 | 0 Class-G | E2F5           |
| FAM168A. 5 | 0 0.317113 | 0.442 | 0.076 | 0 Class-G | FAM168A        |
| FGFRL1. 3  | 0 0.316961 | 0.283 | 0.018 | 0 Class-G | FGFRL1         |
| PDRG1. 8   | 0 0.316669 | 0.73  | 0.193 | 0 Class-G | PDRG1          |
| COQ9. 7    | 0 0.316385 | 0.686 | 0.169 | 0 Class-G | COQ9           |
| CEND1. 8   | 0 0.316061 | 0.468 | 0.085 | 0 Class-G | CEND1          |
| FAM63B. 5  | 0 0.316015 | 0.6   | 0.14  | 0 Class-G | FAM63B         |
| WDR34. 7   | 0 0.315815 | 0.606 | 0.142 | 0 Class-G | WDR34          |
| HABP4. 6   | 0 0.315551 | 0.427 | 0.069 | 0 Class-G | HABP4          |
| DVL2. 8    | 0 0.31533  | 0.542 | 0.117 | 0 Class-G | DVL2           |
| PPFIBP1. 8 | 0 0.315275 | 0.504 | 0.099 | 0 Class-G | PPFIBP1        |
| SHC1. 5    | 0 0.315079 | 0.458 | 0.076 | 0 Class-G | SHC1           |
| PTDSS2. 1C | 0 0.314801 | 0.491 | 0.097 | 0 Class-G | PTDSS2         |
| PCGF2. 9   | 0 0.314395 | 0.523 | 0.104 | 0 Class-G | PCGF2          |
| PTRH1. 4   | 0 0.314379 | 0.565 | 0.125 | 0 Class-G | PTRH1          |
| SOGA1. 9   | 0 0.31437  | 0.495 | 0.099 | 0 Class-G | SOGA1          |
| RP11-410L  | 0 0.314368 | 0.457 | 0.075 | 0 Class-G | RP11-410L14. 2 |
| PSMG4. 5   | 0 0.314143 | 0.592 | 0.133 | 0 Class-G | PSMG4          |
| THAP11. 5  | 0 0.313714 | 0.54  | 0.116 | 0 Class-G | THAP11         |
| PDDC1. 6   | 0 0.313658 | 0.498 | 0.088 | 0 Class-G | PDDC1          |
| PARVA. 8   | 0 0.31329  | 0.384 | 0.048 | 0 Class-G | PARVA          |
| NFS1. 4    | 0 0.313238 | 0.466 | 0.08  | 0 Class-G | NFS1           |
| G6PD. 5    | 0 0.313154 | 0.645 | 0.16  | 0 Class-G | G6PD           |
| CTB-3102C  | 0 0.312924 | 0.418 | 0.064 | 0 Class-G | CTB-31020. 2   |
| RBM26. 7   | 0 0.312643 | 0.614 | 0.147 | 0 Class-G | RBM26          |
| SATB2. 4   | 0 0.312461 | 0.327 | 0.031 | 0 Class-G | SATB2          |
| SLC2A10. 6 | 0 0.312164 | 0.31  | 0.024 | 0 Class-G | SLC2A10        |

|            |             |        |        |           |               |
|------------|-------------|--------|--------|-----------|---------------|
| FGF1. 9    | 0 0. 312118 | 0. 357 | 0. 051 | 0 Class-G | FGF1          |
| EPDR1. 7   | 0 0. 311854 | 0. 438 | 0. 076 | 0 Class-G | EPDR1         |
| SUPT6H. 3  | 0 0. 311332 | 0. 558 | 0. 109 | 0 Class-G | SUPT6H        |
| MAPK12. 5  | 0 0. 310723 | 0. 327 | 0. 027 | 0 Class-G | MAPK12        |
| SIRT7. 4   | 0 0. 310591 | 0. 607 | 0. 141 | 0 Class-G | SIRT7         |
| PACSIN3. 8 | 0 0. 309901 | 0. 327 | 0. 027 | 0 Class-G | PACSIN3       |
| RDH5. 6    | 0 0. 309454 | 0. 406 | 0. 053 | 0 Class-G | RDH5          |
| ARNT2. 10  | 0 0. 309377 | 0. 417 | 0. 061 | 0 Class-G | ARNT2         |
| RSAD1. 6   | 0 0. 309286 | 0. 483 | 0. 093 | 0 Class-G | RSAD1         |
| ADO. 7     | 0 0. 309012 | 0. 449 | 0. 073 | 0 Class-G | ADO           |
| LRIG1. 9   | 0 0. 308584 | 0. 4   | 0. 06  | 0 Class-G | LRIG1         |
| LRRTM3. 6  | 0 0. 308119 | 0. 261 | 0. 018 | 0 Class-G | LRRTM3        |
| FAT3. 8    | 0 0. 308047 | 0. 26  | 0. 023 | 0 Class-G | FAT3          |
| NCLN. 4    | 0 0. 308043 | 0. 514 | 0. 108 | 0 Class-G | NCLN          |
| RP11-505K  | 0 0. 308034 | 0. 363 | 0. 034 | 0 Class-G | RP11-505K9. 1 |
| MAN1B1. 4  | 0 0. 307501 | 0. 638 | 0. 154 | 0 Class-G | MAN1B1        |
| MED16. 5   | 0 0. 307052 | 0. 506 | 0. 102 | 0 Class-G | MED16         |
| SFXN5. 9   | 0 0. 30669  | 0. 594 | 0. 122 | 0 Class-G | SFXN5         |
| MTG2. 4    | 0 0. 306259 | 0. 485 | 0. 092 | 0 Class-G | MTG2          |
| IMPAD1. 5  | 0 0. 305161 | 0. 568 | 0. 124 | 0 Class-G | IMPAD1        |
| ARFGEF1. 3 | 0 0. 304923 | 0. 43  | 0. 073 | 0 Class-G | ARFGEF1       |
| FAT1. 7    | 0 0. 304844 | 0. 305 | 0. 027 | 0 Class-G | FAT1          |
| FBN2       | 0 0. 304411 | 0. 253 | 0. 013 | 0 Class-G | FBN2          |
| KALRN. 8   | 0 0. 303998 | 0. 365 | 0. 051 | 0 Class-G | KALRN         |
| C6orf120.  | 0 0. 303535 | 0. 454 | 0. 086 | 0 Class-G | C6orf120      |
| LAMB2. 6   | 0 0. 302625 | 0. 383 | 0. 048 | 0 Class-G | LAMB2         |
| MAFG-AS1.  | 0 0. 302409 | 0. 307 | 0. 026 | 0 Class-G | MAFG-AS1      |
| WIZ. 5     | 0 0. 302394 | 0. 421 | 0. 06  | 0 Class-G | WIZ           |
| MED31. 4   | 0 0. 302386 | 0. 642 | 0. 147 | 0 Class-G | MED31         |
| APPBP2. 7  | 0 0. 302194 | 0. 611 | 0. 143 | 0 Class-G | APPBP2        |
| NUMBL. 7   | 0 0. 302102 | 0. 361 | 0. 045 | 0 Class-G | NUMBL         |
| ZNF524. 5  | 0 0. 301908 | 0. 569 | 0. 125 | 0 Class-G | ZNF524        |
| UQCC1. 6   | 0 0. 300884 | 0. 52  | 0. 107 | 0 Class-G | UQCC1         |
| RP11-14N7  | 0 0. 300273 | 0. 601 | 0. 14  | 0 Class-G | RP11-14N7. 2  |
| DGCR6. 5   | 0 0. 300117 | 0. 507 | 0. 096 | 0 Class-G | DGCR6         |
| PTAR1. 5   | 0 0. 299857 | 0. 461 | 0. 083 | 0 Class-G | PTAR1         |
| CHST3. 7   | 0 0. 299797 | 0. 308 | 0. 024 | 0 Class-G | CHST3         |
| C20orf96.  | 0 0. 29941  | 0. 5   | 0. 093 | 0 Class-G | C20orf96      |
| TXLNA. 4   | 0 0. 298373 | 0. 471 | 0. 085 | 0 Class-G | TXLNA         |
| R3HDM2. 5  | 0 0. 298143 | 0. 52  | 0. 109 | 0 Class-G | R3HDM2        |
| HMBS. 3    | 0 0. 298067 | 0. 598 | 0. 131 | 0 Class-G | HMBS          |
| ZMYND11. 7 | 0 0. 297937 | 0. 476 | 0. 092 | 0 Class-G | ZMYND11       |
| NDP. 9     | 0 0. 297511 | 0. 413 | 0. 062 | 0 Class-G | NDP           |
| MFS12. 8   | 0 0. 296514 | 0. 58  | 0. 128 | 0 Class-G | MFS12         |
| NID1       | 0 0. 29545  | 0. 264 | 0. 013 | 0 Class-G | NID1          |
| MED13. 3   | 0 0. 29513  | 0. 511 | 0. 104 | 0 Class-G | MED13         |
| SLC35D2. 5 | 0 0. 294314 | 0. 386 | 0. 054 | 0 Class-G | SLC35D2       |
| TMEM108. 6 | 0 0. 293041 | 0. 324 | 0. 04  | 0 Class-G | TMEM108       |
| TBX2       | 0 0. 292748 | 0. 239 | 0. 013 | 0 Class-G | TBX2          |
| C19orf52.  | 0 0. 292571 | 0. 535 | 0. 115 | 0 Class-G | C19orf52      |
| SLC9A3R2.  | 0 0. 292255 | 0. 409 | 0. 063 | 0 Class-G | SLC9A3R2      |

|            |            |       |       |           |               |
|------------|------------|-------|-------|-----------|---------------|
| ZNF506. 6  | 0 0.292043 | 0.425 | 0.071 | 0 Class-G | ZNF506        |
| LAMA4. 8   | 0 0.292015 | 0.316 | 0.031 | 0 Class-G | LAMA4         |
| ACOT8. 3   | 0 0.291602 | 0.611 | 0.14  | 0 Class-G | ACOT8         |
| FRMD5. 6   | 0 0.291242 | 0.283 | 0.021 | 0 Class-G | FRMD5         |
| MECR. 6    | 0 0.290781 | 0.519 | 0.102 | 0 Class-G | MECR          |
| RHBDF1. 5  | 0 0.289808 | 0.27  | 0.016 | 0 Class-G | RHBDF1        |
| DENND2A. 7 | 0 0.289039 | 0.358 | 0.051 | 0 Class-G | DENND2A       |
| AP5S1. 3   | 0 0.288917 | 0.387 | 0.05  | 0 Class-G | AP5S1         |
| GRIA1. 3   | 0 0.287892 | 0.24  | 0.016 | 0 Class-G | GRIA1         |
| EVA1C. 8   | 0 0.287796 | 0.298 | 0.035 | 0 Class-G | EVA1C         |
| DNAL4. 3   | 0 0.287046 | 0.445 | 0.076 | 0 Class-G | DNAL4         |
| STK32A. 6  | 0 0.287026 | 0.281 | 0.018 | 0 Class-G | STK32A        |
| ADAL. 1    | 0 0.286951 | 0.408 | 0.066 | 0 Class-G | ADAL          |
| SGSM2. 4   | 0 0.286659 | 0.4   | 0.054 | 0 Class-G | SGSM2         |
| MRI1. 4    | 0 0.286298 | 0.402 | 0.063 | 0 Class-G | MRI1          |
| C17orf100  | 0 0.286232 | 0.353 | 0.047 | 0 Class-G | C17orf100     |
| PLXNA1. 3  | 0 0.285195 | 0.333 | 0.045 | 0 Class-G | PLXNA1        |
| WDR54. 7   | 0 0.284862 | 0.66  | 0.164 | 0 Class-G | WDR54         |
| RP4-665J2  | 0 0.284558 | 0.438 | 0.074 | 0 Class-G | RP4-665J23. 1 |
| PIK3C2A. 2 | 0 0.284458 | 0.461 | 0.088 | 0 Class-G | PIK3C2A       |
| MAP3K4. 1  | 0 0.284182 | 0.348 | 0.048 | 0 Class-G | MAP3K4        |
| DUSP14. 8  | 0 0.283985 | 0.563 | 0.116 | 0 Class-G | DUSP14        |
| LRRC3B     | 0 0.282617 | 0.207 | 0.012 | 0 Class-G | LRRC3B        |
| TMEM161A.  | 0 0.282607 | 0.528 | 0.113 | 0 Class-G | TMEM161A      |
| SYDE1. 6   | 0 0.282202 | 0.304 | 0.032 | 0 Class-G | SYDE1         |
| HRH1. 10   | 0 0.281176 | 0.38  | 0.05  | 0 Class-G | HRH1          |
| PARD3. 6   | 0 0.281174 | 0.277 | 0.024 | 0 Class-G | PARD3         |
| LINC00152  | 0 0.280894 | 0.706 | 0.185 | 0 Class-G | LINC00152     |
| UBE20. 7   | 0 0.280619 | 0.415 | 0.068 | 0 Class-G | UBE20         |
| TMTC3. 3   | 0 0.280377 | 0.35  | 0.047 | 0 Class-G | TMTC3         |
| HEY2. 6    | 0 0.280355 | 0.278 | 0.029 | 0 Class-G | HEY2          |
| SHOX2. 7   | 0 0.279921 | 0.283 | 0.027 | 0 Class-G | SHOX2         |
| DNM1. 6    | 0 0.279883 | 0.312 | 0.034 | 0 Class-G | DNM1          |
| TCF7L2. 4  | 0 0.279856 | 0.364 | 0.05  | 0 Class-G | TCF7L2        |
| TYRO3. 9   | 0 0.279765 | 0.398 | 0.062 | 0 Class-G | TYRO3         |
| ZNF512B. 4 | 0 0.279569 | 0.314 | 0.035 | 0 Class-G | ZNF512B       |
| CACNG7. 7  | 0 0.278694 | 0.334 | 0.043 | 0 Class-G | CACNG7        |
| RALGAPA2.  | 0 0.278305 | 0.397 | 0.064 | 0 Class-G | RALGAPA2      |
| ARHGEF6. 5 | 0 0.278241 | 0.466 | 0.089 | 0 Class-G | ARHGEF6       |
| SAP30L. 6  | 0 0.277801 | 0.352 | 0.05  | 0 Class-G | SAP30L        |
| RGAG4. 6   | 0 0.27655  | 0.277 | 0.027 | 0 Class-G | RGAG4         |
| NDFIP2. 7  | 0 0.276393 | 0.585 | 0.128 | 0 Class-G | NDFIP2        |
| LTBP1. 6   | 0 0.275194 | 0.24  | 0.019 | 0 Class-G | LTBP1         |
| ZNF217. 4  | 0 0.27472  | 0.339 | 0.046 | 0 Class-G | ZNF217        |
| PRKAA1. 1  | 0 0.274581 | 0.482 | 0.09  | 0 Class-G | PRKAA1        |
| RPP25L. 2  | 0 0.274553 | 0.533 | 0.107 | 0 Class-G | RPP25L        |
| C11orf68.  | 0 0.274344 | 0.392 | 0.06  | 0 Class-G | C11orf68      |
| TMEM63B. 4 | 0 0.273164 | 0.455 | 0.083 | 0 Class-G | TMEM63B       |
| B3GALT1. 7 | 0 0.271773 | 0.253 | 0.017 | 0 Class-G | B3GALT1       |
| SSBP2. 10  | 0 0.27167  | 0.75  | 0.191 | 0 Class-G | SSBP2         |
| ANGPTL1. 1 | 0 0.270074 | 0.212 | 0.011 | 0 Class-G | ANGPTL1       |

|            |       |          |       |       |               |             |
|------------|-------|----------|-------|-------|---------------|-------------|
| ZFHx4-AS1  | 0     | 0.269644 | 0.253 | 0.017 | 0 Class-G     | ZFHx4-AS1   |
| OSMR. 9    | 0     | 0.268825 | 0.344 | 0.043 | 0 Class-G     | OSMR        |
| SHROOM3. 1 | 0     | 0.267162 | 0.232 | 0.01  | 0 Class-G     | SHROOM3     |
| CTU1. 4    | 0     | 0.265028 | 0.317 | 0.038 | 0 Class-G     | CTU1        |
| IZUM04. 6  | 0     | 0.264803 | 0.287 | 0.03  | 0 Class-G     | IZUM04      |
| ADAM12     | 0     | 0.263792 | 0.224 | 0.016 | 0 Class-G     | ADAM12      |
| CMTM8      | 0     | 0.262922 | 0.252 | 0.015 | 0 Class-G     | CMTM8       |
| TEAD4. 7   | 0     | 0.259859 | 0.267 | 0.017 | 0 Class-G     | TEAD4       |
| TNKS1BP1.  | 0     | 0.257414 | 0.308 | 0.035 | 0 Class-G     | TNKS1BP1    |
| IVD. 4     | 0     | 0.256183 | 0.597 | 0.134 | 0 Class-G     | IVD         |
| TMED1. 7   | 0     | 0.255799 | 0.779 | 0.211 | 0 Class-G     | TMED1       |
| ASPHD2. 1  | 0     | 0.254495 | 0.266 | 0.025 | 0 Class-G     | ASPHD2      |
| SLC25A18.  | 0     | 0.251287 | 0.364 | 0.042 | 0 Class-G     | SLC25A18    |
| S100A13. 9 | 0     | 0.248274 | 0.795 | 0.214 | 0 Class-G     | S100A13     |
| OSBPL10    | 0     | 0.248122 | 0.226 | 0.015 | 0 Class-G     | OSBPL10     |
| HOMER2. 2  | 0     | 0.247168 | 0.264 | 0.021 | 0 Class-G     | HOMER2      |
| NEIL2. 8   | 0     | 0.246715 | 0.594 | 0.134 | 0 Class-G     | NEIL2       |
| TOM1L1. 6  | 0     | 0.245638 | 0.261 | 0.024 | 0 Class-G     | TOM1L1      |
| HSD17B1. 4 | 0     | 0.244611 | 0.263 | 0.022 | 0 Class-G     | HSD17B1     |
| TRIM7      | 0     | 0.244482 | 0.232 | 0.012 | 0 Class-G     | TRIM7       |
| SEPT8. 11  | 0     | 0.244141 | 0.582 | 0.132 | 0 Class-G     | 8-Sep       |
| EFHC1. 9   | 0     | 0.239931 | 0.607 | 0.14  | 0 Class-G     | EFHC1       |
| ZNRF3      | 0     | 0.239453 | 0.238 | 0.018 | 0 Class-G     | ZNRF3       |
| PCDHGA10   | 0     | 0.239309 | 0.213 | 0.01  | 0 Class-G     | PCDHGA10    |
| C9orf116.  | 0     | 0.238833 | 0.315 | 0.037 | 0 Class-G     | C9orf116    |
| KDELR3. 3  | 0     | 0.234374 | 0.272 | 0.025 | 0 Class-G     | KDELR3      |
| SWI5. 8    | 0     | 0.2329   | 0.685 | 0.173 | 0 Class-G     | SWI5        |
| ACOX2. 4   | 0     | 0.226286 | 0.25  | 0.02  | 0 Class-G     | ACOX2       |
| GPX8. 10   | 0     | 0.222988 | 0.275 | 0.028 | 0 Class-G     | GPX8        |
| BOK. 11    | 0     | 0.211649 | 0.315 | 0.037 | 0 Class-G     | BOK         |
| DTNA. 10   | 0     | 0.203898 | 0.708 | 0.178 | 0 Class-G     | DTNA        |
| PTMA. 8    | 0     | -0.5334  | 0.998 | 0.962 | 0 Class-G     | PTMA        |
| UBC. 5     | 0     | -0.61132 | 0.992 | 0.944 | 0 Class-G     | UBC         |
| FOS. 7     | 0     | -1.0019  | 0.799 | 0.847 | 0 Class-G     | FOS         |
| SPP1. 8    | 0     | -1.13308 | 0.762 | 0.869 | 0 Class-G     | SPP1        |
| CD74. 10   | 0     | -1.50544 | 0.434 | 0.803 | 0 Class-G     | CD74        |
| HLA-DRA. 1 | 0     | -1.57784 | 0.253 | 0.695 | 0 Class-G     | HLA-DRA     |
| LINC00461  | ##### | 0.405862 | 0.822 | 0.238 | ##### Class-G | LINC00461   |
| VIM. 9     | ##### | 0.538152 | 0.992 | 0.61  | ##### Class-G | VIM         |
| NUDT8. 3   | ##### | 0.256055 | 0.296 | 0.034 | ##### Class-G | NUDT8       |
| PCDH19. 8  | ##### | 0.265339 | 0.267 | 0.026 | ##### Class-G | PCDH19      |
| MCUR1. 7   | ##### | 0.384122 | 0.707 | 0.189 | ##### Class-G | MCUR1       |
| MAN1C1. 3  | ##### | 0.237328 | 0.329 | 0.044 | ##### Class-G | MAN1C1      |
| SUZ12. 5   | ##### | 0.327734 | 0.577 | 0.132 | ##### Class-G | SUZ12       |
| BLOC1S4. 1 | ##### | 0.34449  | 0.672 | 0.173 | ##### Class-G | BLOC1S4     |
| TM9SF4. 4  | ##### | 0.276356 | 0.561 | 0.127 | ##### Class-G | TM9SF4      |
| FDX1L. 5   | ##### | 0.273596 | 0.709 | 0.186 | ##### Class-G | FDX1L       |
| PGPEP1. 3  | ##### | 0.268069 | 0.445 | 0.083 | ##### Class-G | PGPEP1      |
| RP1-79C4.  | ##### | 0.247783 | 0.241 | 0.02  | ##### Class-G | RP1-79C4. 4 |
| CNR1. 8    | ##### | 0.319464 | 0.3   | 0.036 | ##### Class-G | CNR1        |
| NUDT16L1.  | ##### | 0.345415 | 0.746 | 0.205 | ##### Class-G | NUDT16L1    |

|           |       |          |       |       |       |         |                 |
|-----------|-------|----------|-------|-------|-------|---------|-----------------|
| GATAD2A.1 | ##### | 0.254059 | 0.433 | 0.078 | ##### | Class-G | GATAD2A         |
| MAP9.8    | ##### | 0.313696 | 0.564 | 0.127 | ##### | Class-G | MAP9            |
| NMT1.3    | ##### | 0.350371 | 0.716 | 0.195 | ##### | Class-G | NMT1            |
| TMEM98.8  | ##### | 0.346354 | 0.653 | 0.167 | ##### | Class-G | TMEM98          |
| FASN.9    | ##### | 0.304846 | 0.405 | 0.069 | ##### | Class-G | FASN            |
| ZMYM4.4   | ##### | 0.290629 | 0.426 | 0.076 | ##### | Class-G | ZMYM4           |
| FKBP9.8   | ##### | 0.320436 | 0.537 | 0.118 | ##### | Class-G | FKBP9           |
| ICMT.4    | ##### | 0.294323 | 0.441 | 0.082 | ##### | Class-G | ICMT            |
| CDK16.5   | ##### | 0.338906 | 0.653 | 0.167 | ##### | Class-G | CDK16           |
| SORT1.7   | ##### | 0.294469 | 0.646 | 0.161 | ##### | Class-G | SORT1           |
| AP2B1.9   | ##### | 0.422774 | 0.841 | 0.259 | ##### | Class-G | AP2B1           |
| PPP2R5A.3 | ##### | 0.263716 | 0.396 | 0.066 | ##### | Class-G | PPP2R5A         |
| CSNK2A1.8 | ##### | 0.381494 | 0.808 | 0.236 | ##### | Class-G | CSNK2A1         |
| LENG8.4   | ##### | 0.303302 | 0.634 | 0.156 | ##### | Class-G | LENG8           |
| CTNND2.8  | ##### | 0.324921 | 0.495 | 0.102 | ##### | Class-G | CTNND2          |
| XIAP.3    | ##### | 0.284011 | 0.612 | 0.148 | ##### | Class-G | XIAP            |
| A1BG.4    | ##### | 0.362467 | 0.771 | 0.222 | ##### | Class-G | A1BG            |
| GALNS.3   | ##### | 0.285547 | 0.437 | 0.081 | ##### | Class-G | GALNS           |
| DDX52.7   | ##### | 0.303123 | 0.674 | 0.174 | ##### | Class-G | DDX52           |
| RP11-1094 | ##### | 0.282427 | 0.656 | 0.165 | ##### | Class-G | RP11-1094M14.11 |
| TRIP6.10  | ##### | 0.267406 | 0.685 | 0.178 | ##### | Class-G | TRIP6           |
| OBSL1.9   | ##### | 0.288127 | 0.469 | 0.093 | ##### | Class-G | OBSL1           |
| RABL6.6   | ##### | 0.341016 | 0.679 | 0.176 | ##### | Class-G | RABL6           |
| RASSF2.4  | ##### | 0.30739  | 0.705 | 0.186 | ##### | Class-G | RASSF2          |
| ABCD3.6   | ##### | 0.329308 | 0.572 | 0.134 | ##### | Class-G | ABCD3           |
| TENM1.7   | ##### | 0.317303 | 0.294 | 0.035 | ##### | Class-G | TENM1           |
| SULF2.6   | ##### | 0.344414 | 0.495 | 0.104 | ##### | Class-G | SULF2           |
| BAIAP2-AS | ##### | 0.235189 | 0.274 | 0.029 | ##### | Class-G | BAIAP2-AS1      |
| RGS20     | ##### | 0.234497 | 0.195 | 0.01  | ##### | Class-G | RGS20           |
| ZCCHC3.8  | ##### | 0.258143 | 0.38  | 0.061 | ##### | Class-G | ZCCHC3          |
| FBXO9.5   | ##### | 0.300825 | 0.597 | 0.143 | ##### | Class-G | FBXO9           |
| IGF2BP2.8 | ##### | 0.335739 | 0.315 | 0.042 | ##### | Class-G | IGF2BP2         |
| DUSP4.9   | ##### | 0.285968 | 0.543 | 0.12  | ##### | Class-G | DUSP4           |
| JAM2.11   | ##### | 0.26792  | 0.691 | 0.181 | ##### | Class-G | JAM2            |
| TMEM259.5 | ##### | 0.395933 | 0.838 | 0.253 | ##### | Class-G | TMEM259         |
| C19orf24. | ##### | 0.443201 | 0.863 | 0.283 | ##### | Class-G | C19orf24        |
| PPP1R8.4  | ##### | 0.264593 | 0.629 | 0.156 | ##### | Class-G | PPP1R8          |
| SLC25A33. | ##### | 0.326681 | 0.618 | 0.153 | ##### | Class-G | SLC25A33        |
| PABPC1L.2 | ##### | 0.255116 | 0.285 | 0.033 | ##### | Class-G | PABPC1L         |
| PDLIM5.4  | ##### | 0.31593  | 0.618 | 0.154 | ##### | Class-G | PDLIM5          |
| MIB2.7    | ##### | 0.291659 | 0.475 | 0.096 | ##### | Class-G | MIB2            |
| METTL23.5 | ##### | 0.38235  | 0.794 | 0.241 | ##### | Class-G | METTL23         |
| PET117.4  | ##### | 0.265727 | 0.54  | 0.121 | ##### | Class-G | PET117          |
| DPYSL5.1C | ##### | 0.313608 | 0.505 | 0.107 | ##### | Class-G | DPYSL5          |
| SLC4A3.7  | ##### | 0.256029 | 0.341 | 0.049 | ##### | Class-G | SLC4A3          |
| TRIM16.7  | ##### | 0.276087 | 0.433 | 0.08  | ##### | Class-G | TRIM16          |
| CNKSR2.8  | ##### | 0.254226 | 0.268 | 0.028 | ##### | Class-G | CNKSR2          |
| NTHL1.5   | ##### | 0.235329 | 0.559 | 0.127 | ##### | Class-G | NTHL1           |
| NF1.6     | ##### | 0.303153 | 0.628 | 0.157 | ##### | Class-G | NF1             |
| RP11-66N1 | ##### | 0.241377 | 0.332 | 0.046 | ##### | Class-G | RP11-66N11.8    |
| IRS2.7    | ##### | 0.407965 | 0.851 | 0.266 | ##### | Class-G | IRS2            |



|                 |          |       |       |               |               |
|-----------------|----------|-------|-------|---------------|---------------|
| C18orf21. ##### | 0.286422 | 0.506 | 0.109 | ##### Class-G | C18orf21      |
| PRPF4B.4 #####  | 0.33341  | 0.723 | 0.2   | ##### Class-G | PRPF4B        |
| CHCHD10.9 ##### | 0.493758 | 0.905 | 0.295 | ##### Class-G | CHCHD10       |
| SEMA3E.5 #####  | 0.31114  | 0.24  | 0.021 | ##### Class-G | SEMA3E        |
| ZNF521.6 #####  | 0.273934 | 0.324 | 0.044 | ##### Class-G | ZNF521        |
| C12orf76. ##### | 0.245282 | 0.717 | 0.192 | ##### Class-G | C12orf76      |
| CRK.6 #####     | 0.397535 | 0.8   | 0.237 | ##### Class-G | CRK           |
| ATPAF2.6 #####  | 0.250508 | 0.611 | 0.148 | ##### Class-G | ATPAF2        |
| ICT1.4 #####    | 0.278195 | 0.656 | 0.168 | ##### Class-G | ICT1          |
| NLGN1.9 #####   | 0.307592 | 0.449 | 0.087 | ##### Class-G | NLGN1         |
| PHLDA3.7 #####  | 0.29908  | 0.52  | 0.114 | ##### Class-G | PHLDA3        |
| OXTR.1 #####    | 0.30741  | 0.212 | 0.015 | ##### Class-G | OXTR          |
| MAPK11.6 #####  | 0.24016  | 0.248 | 0.023 | ##### Class-G | MAPK11        |
| MOXD1.8 #####   | 0.280867 | 0.243 | 0.022 | ##### Class-G | MOXD1         |
| HRAS.9 #####    | 0.39907  | 0.757 | 0.218 | ##### Class-G | HRAS          |
| PLOD1.6 #####   | 0.260899 | 0.563 | 0.13  | ##### Class-G | PLOD1         |
| PXN.4 #####     | 0.277289 | 0.418 | 0.076 | ##### Class-G | PXN           |
| FAM69B.6 #####  | 0.246464 | 0.258 | 0.026 | ##### Class-G | FAM69B        |
| MPND.2 #####    | 0.277844 | 0.34  | 0.05  | ##### Class-G | MPND          |
| RP11-680F ##### | 0.196544 | 0.175 | 0.007 | ##### Class-G | RP11-680F8.1  |
| GTPBP6.4 #####  | 0.30661  | 0.603 | 0.148 | ##### Class-G | GTPBP6        |
| PCMTD2.9 #####  | 0.322888 | 0.636 | 0.16  | ##### Class-G | PCMTD2        |
| OGFR.5 #####    | 0.343119 | 0.751 | 0.211 | ##### Class-G | OGFR          |
| IQCK.6 #####    | 0.259135 | 0.423 | 0.078 | ##### Class-G | IQCK          |
| SLC35E2B. ##### | 0.268622 | 0.465 | 0.092 | ##### Class-G | SLC35E2B      |
| MLST8.7 #####   | 0.281829 | 0.655 | 0.168 | ##### Class-G | MLST8         |
| GID8.4 #####    | 0.281062 | 0.677 | 0.177 | ##### Class-G | GID8          |
| LRRN2.5 #####   | 0.2618   | 0.251 | 0.024 | ##### Class-G | LRRN2         |
| KHSRP.8 #####   | 0.32429  | 0.657 | 0.17  | ##### Class-G | KHSRP         |
| ST5.9 #####     | 0.247861 | 0.477 | 0.098 | ##### Class-G | ST5           |
| ZNF322.7 #####  | 0.269651 | 0.439 | 0.083 | ##### Class-G | ZNF322        |
| RP13-1032 ##### | 0.25886  | 0.312 | 0.041 | ##### Class-G | RP13-1032I1.7 |
| MAP7D3.4 #####  | 0.233703 | 0.401 | 0.071 | ##### Class-G | MAP7D3        |
| LSM14B.4 #####  | 0.259187 | 0.364 | 0.057 | ##### Class-G | LSM14B        |
| DHX40.7 #####   | 0.293107 | 0.45  | 0.088 | ##### Class-G | DHX40         |
| GAP43.10 #####  | 0.474111 | 0.913 | 0.393 | ##### Class-G | GAP43         |
| GRIK1 #####     | 0.239262 | 0.193 | 0.011 | ##### Class-G | GRIK1         |
| GSK3A.8 #####   | 0.287917 | 0.559 | 0.13  | ##### Class-G | GSK3A         |
| SCO1.4 #####    | 0.287864 | 0.507 | 0.11  | ##### Class-G | SCO1          |
| ZDHHC24.6 ##### | 0.275803 | 0.555 | 0.128 | ##### Class-G | ZDHHC24       |
| HEG1.3 #####    | 0.267183 | 0.292 | 0.036 | ##### Class-G | HEG1          |
| LSS.8 #####     | 0.273525 | 0.357 | 0.056 | ##### Class-G | LSS           |
| RNASEH1-A ##### | 0.261147 | 0.534 | 0.12  | ##### Class-G | RNASEH1-AS1   |
| LIX1L.3 #####   | 0.287939 | 0.451 | 0.089 | ##### Class-G | LIX1L         |
| THUMPD3.5 ##### | 0.24054  | 0.566 | 0.133 | ##### Class-G | THUMPD3       |
| TAF13.5 #####   | 0.274442 | 0.445 | 0.087 | ##### Class-G | TAF13         |
| TRIM24.1C ##### | 0.345641 | 0.558 | 0.132 | ##### Class-G | TRIM24        |
| LRFN4.4 #####   | 0.239413 | 0.297 | 0.037 | ##### Class-G | LRFN4         |
| CEP290.7 #####  | 0.295292 | 0.488 | 0.104 | ##### Class-G | CEP290        |
| RTKN.11 #####   | 0.23832  | 0.52  | 0.114 | ##### Class-G | RTKN          |
| C2CD4A #####    | 0.253255 | 0.153 | 0.003 | ##### Class-G | C2CD4A        |

|           |       |          |       |       |       |         |               |
|-----------|-------|----------|-------|-------|-------|---------|---------------|
| SLC26A11. | ##### | 0.24923  | 0.374 | 0.061 | ##### | Class-G | SLC26A11      |
| P2RY1.1   | ##### | 0.258787 | 0.224 | 0.018 | ##### | Class-G | P2RY1         |
| CKB.11    | ##### | 0.550822 | 0.995 | 0.515 | ##### | Class-G | CKB           |
| CTC-444N2 | ##### | 0.264914 | 0.441 | 0.085 | ##### | Class-G | CTC-444N24.11 |
| ZNF444.7  | ##### | 0.300407 | 0.494 | 0.106 | ##### | Class-G | ZNF444        |
| TGIF2.4   | ##### | 0.240376 | 0.323 | 0.045 | ##### | Class-G | TGIF2         |
| VCL.5     | ##### | 0.259807 | 0.358 | 0.057 | ##### | Class-G | VCL           |
| LIFR.8    | ##### | 0.293876 | 0.382 | 0.065 | ##### | Class-G | LIFR          |
| MBOAT2.1C | ##### | 0.333989 | 0.535 | 0.124 | ##### | Class-G | MBOAT2        |
| CLASP1.8  | ##### | 0.281234 | 0.447 | 0.087 | ##### | Class-G | CLASP1        |
| ARHGAP5.7 | ##### | 0.273666 | 0.566 | 0.133 | ##### | Class-G | ARHGAP5       |
| SMARCA4.1 | ##### | 0.415573 | 0.876 | 0.277 | ##### | Class-G | SMARCA4       |
| RNF24.8   | ##### | 0.347803 | 0.669 | 0.179 | ##### | Class-G | RNF24         |
| CDH4.9    | ##### | 0.281535 | 0.329 | 0.047 | ##### | Class-G | CDH4          |
| RAB9A.6   | ##### | 0.275503 | 0.775 | 0.227 | ##### | Class-G | RAB9A         |
| PCYOX1.4  | ##### | 0.266557 | 0.537 | 0.122 | ##### | Class-G | PCYOX1        |
| RP11-553L | ##### | 0.297779 | 0.636 | 0.159 | ##### | Class-G | RP11-553L6.5  |
| GJC1.6    | ##### | 0.257144 | 0.269 | 0.03  | ##### | Class-G | GJC1          |
| TMEM255A. | ##### | 0.28941  | 0.364 | 0.06  | ##### | Class-G | TMEM255A      |
| RCN1.11   | ##### | 0.407003 | 0.865 | 0.271 | ##### | Class-G | RCN1          |
| TNFRSF21. | ##### | 0.320964 | 0.498 | 0.108 | ##### | Class-G | TNFRSF21      |
| SRGN.11   | ##### | -1.74599 | 0.094 | 0.565 | ##### | Class-G | SRGN          |
| PPFIA3.8  | ##### | 0.259952 | 0.335 | 0.049 | ##### | Class-G | PPFIA3        |
| BCHE.8    | ##### | 0.354082 | 0.543 | 0.128 | ##### | Class-G | BCHE          |
| SUGP2.7   | ##### | 0.279632 | 0.674 | 0.176 | ##### | Class-G | SUGP2         |
| E2F6.5    | ##### | 0.250815 | 0.46  | 0.093 | ##### | Class-G | E2F6          |
| STRN3.3   | ##### | 0.2604   | 0.428 | 0.081 | ##### | Class-G | STRN3         |
| NR2E1.4   | ##### | 0.249851 | 0.247 | 0.024 | ##### | Class-G | NR2E1         |
| PXDN.7    | ##### | 0.290791 | 0.361 | 0.058 | ##### | Class-G | PXDN          |
| TTYH2.9   | ##### | 0.187651 | 0.398 | 0.069 | ##### | Class-G | TTYH2         |
| EVI5.4    | ##### | 0.292407 | 0.544 | 0.126 | ##### | Class-G | EVI5          |
| ZFR.7     | ##### | 0.34735  | 0.778 | 0.228 | ##### | Class-G | ZFR           |
| R3HDM4.5  | ##### | 0.291032 | 0.577 | 0.139 | ##### | Class-G | R3HDM4        |
| PDP1.7    | ##### | 0.362804 | 0.415 | 0.079 | ##### | Class-G | PDP1          |
| RRP8.4    | ##### | 0.227395 | 0.422 | 0.079 | ##### | Class-G | RRP8          |
| PDCD7.6   | ##### | 0.304091 | 0.617 | 0.156 | ##### | Class-G | PDCD7         |
| RNF187.8  | ##### | 0.419871 | 0.893 | 0.293 | ##### | Class-G | RNF187        |
| SOCS6.7   | ##### | 0.284018 | 0.636 | 0.163 | ##### | Class-G | SOCS6         |
| LRRC4B.11 | ##### | 0.28672  | 0.435 | 0.084 | ##### | Class-G | LRRC4B        |
| LYST.5    | ##### | 0.257742 | 0.473 | 0.097 | ##### | Class-G | LYST          |
| DCLK2.11  | ##### | 0.352833 | 0.564 | 0.136 | ##### | Class-G | DCLK2         |
| CBY1.6    | ##### | 0.22692  | 0.492 | 0.105 | ##### | Class-G | CBY1          |
| EXTL2.8   | ##### | 0.279502 | 0.509 | 0.112 | ##### | Class-G | EXTL2         |
| UBXN6.5   | ##### | 0.347876 | 0.768 | 0.223 | ##### | Class-G | UBXN6         |
| SLC35E4.1 | ##### | 0.244686 | 0.269 | 0.03  | ##### | Class-G | SLC35E4       |
| NAB2.4    | ##### | 0.266579 | 0.453 | 0.091 | ##### | Class-G | NAB2          |
| NQO1.7    | ##### | 0.253904 | 0.377 | 0.065 | ##### | Class-G | NQO1          |
| CCDC109B. | ##### | 0.467839 | 0.831 | 0.27  | ##### | Class-G | CCDC109B      |
| USP8.3    | ##### | 0.237828 | 0.693 | 0.188 | ##### | Class-G | USP8          |
| DUSP6.3   | ##### | 0.334128 | 0.657 | 0.177 | ##### | Class-G | DUSP6         |
| ST6GALNAC | ##### | 0.23284  | 0.154 | 0.004 | ##### | Class-G | ST6GALNAC5    |

|            |       |           |        |        |       |         |             |
|------------|-------|-----------|--------|--------|-------|---------|-------------|
| TCTN1. 8   | ##### | 0. 229445 | 0. 602 | 0. 148 | ##### | Class-G | TCTN1       |
| SDF4. 4    | ##### | 0. 48397  | 0. 9   | 0. 322 | ##### | Class-G | SDF4        |
| FAM184B. 4 | ##### | 0. 187562 | 0. 379 | 0. 064 | ##### | Class-G | FAM184B     |
| UBTD1. 5   | ##### | 0. 246917 | 0. 386 | 0. 067 | ##### | Class-G | UBTD1       |
| C11orf49.  | ##### | 0. 2545   | 0. 651 | 0. 169 | ##### | Class-G | C11orf49    |
| TOP1. 6    | ##### | 0. 460578 | 0. 884 | 0. 308 | ##### | Class-G | TOP1        |
| LZTS1. 9   | ##### | 0. 260743 | 0. 259 | 0. 028 | ##### | Class-G | LZTS1       |
| AHNAK2     | ##### | 0. 271823 | 0. 198 | 0. 013 | ##### | Class-G | AHNAK2      |
| TSR1. 6    | ##### | 0. 269204 | 0. 552 | 0. 13  | ##### | Class-G | TSR1        |
| FADD. 4    | ##### | 0. 270026 | 0. 439 | 0. 087 | ##### | Class-G | FADD        |
| FAM120A. 7 | ##### | 0. 284302 | 0. 596 | 0. 147 | ##### | Class-G | FAM120A     |
| STK17A. 9  | ##### | 0. 376839 | 0. 746 | 0. 219 | ##### | Class-G | STK17A      |
| SEMA5A. 8  | ##### | 0. 352182 | 0. 364 | 0. 061 | ##### | Class-G | SEMA5A      |
| DNALI1. 8  | ##### | 0. 219451 | 0. 387 | 0. 068 | ##### | Class-G | DNALI1      |
| PTPN14. 4  | ##### | 0. 220307 | 0. 281 | 0. 034 | ##### | Class-G | PTPN14      |
| TMEM53. 6  | ##### | 0. 193107 | 0. 369 | 0. 062 | ##### | Class-G | TMEM53      |
| GTF2E2. 4  | ##### | 0. 273261 | 0. 549 | 0. 129 | ##### | Class-G | GTF2E2      |
| DCLK1. 8   | ##### | 0. 347166 | 0. 469 | 0. 099 | ##### | Class-G | DCLK1       |
| GPX7. 6    | ##### | 0. 193815 | 0. 528 | 0. 119 | ##### | Class-G | GPX7        |
| HOXD11. 7  | ##### | 0. 261052 | 0. 3   | 0. 04  | ##### | Class-G | HOXD11      |
| DOLK. 6    | ##### | 0. 239616 | 0. 417 | 0. 079 | ##### | Class-G | DOLK        |
| PRPSAP1. 9 | ##### | 0. 361778 | 0. 776 | 0. 229 | ##### | Class-G | PRPSAP1     |
| GLIS3. 4   | ##### | 0. 270688 | 0. 303 | 0. 041 | ##### | Class-G | GLIS3       |
| TMEM42. 5  | ##### | 0. 209329 | 0. 494 | 0. 106 | ##### | Class-G | TMEM42      |
| LETM1. 3   | ##### | 0. 301243 | 0. 54  | 0. 127 | ##### | Class-G | LETM1       |
| PLEKHB1. 8 | ##### | 0. 119864 | 0. 608 | 0. 148 | ##### | Class-G | PLEKHB1     |
| ADNP. 9    | ##### | 0. 29154  | 0. 56  | 0. 133 | ##### | Class-G | ADNP        |
| PHYH. 2    | ##### | 0. 19653  | 0. 507 | 0. 111 | ##### | Class-G | PHYH        |
| LYRM2. 4   | ##### | 0. 30448  | 0. 757 | 0. 218 | ##### | Class-G | LYRM2       |
| STAU1. 7   | ##### | 0. 419913 | 0. 859 | 0. 286 | ##### | Class-G | STAU1       |
| CLIC4. 10  | ##### | 0. 349034 | 0. 811 | 0. 254 | ##### | Class-G | CLIC4       |
| ALKBH5. 7  | ##### | 0. 414914 | 0. 792 | 0. 247 | ##### | Class-G | ALKBH5      |
| SPNS1. 6   | ##### | 0. 362151 | 0. 745 | 0. 216 | ##### | Class-G | SPNS1       |
| GMPR. 3    | ##### | 0. 26355  | 0. 315 | 0. 044 | ##### | Class-G | GMPR        |
| IFT43. 8   | ##### | 0. 210518 | 0. 691 | 0. 186 | ##### | Class-G | IFT43       |
| WIPF2. 4   | ##### | 0. 257706 | 0. 576 | 0. 14  | ##### | Class-G | WIPF2       |
| DNPEP. 4   | ##### | 0. 290807 | 0. 656 | 0. 174 | ##### | Class-G | DNPEP       |
| PXDC1. 6   | ##### | 0. 296809 | 0. 472 | 0. 1   | ##### | Class-G | PXDC1       |
| EIF1. 8    | ##### | -0. 49558 | 1      | 0. 97  | ##### | Class-G | EIF1        |
| GALNT2. 5  | ##### | 0. 275462 | 0. 66  | 0. 176 | ##### | Class-G | GALNT2      |
| MED11. 2   | ##### | 0. 227072 | 0. 612 | 0. 153 | ##### | Class-G | MED11       |
| ACACA. 4   | ##### | 0. 23831  | 0. 342 | 0. 053 | ##### | Class-G | ACACA       |
| PIGS. 4    | ##### | 0. 241318 | 0. 538 | 0. 124 | ##### | Class-G | PIGS        |
| AGPAT5. 7  | ##### | 0. 258338 | 0. 589 | 0. 147 | ##### | Class-G | AGPAT5      |
| ACO07405.  | ##### | 0. 231234 | 0. 278 | 0. 033 | ##### | Class-G | ACO07405. 6 |
| PRRT2. 8   | ##### | 0. 240487 | 0. 335 | 0. 051 | ##### | Class-G | PRRT2       |
| ROM1. 9    | ##### | 0. 164818 | 0. 388 | 0. 068 | ##### | Class-G | ROM1        |
| FAM219B. 4 | ##### | 0. 240578 | 0. 468 | 0. 098 | ##### | Class-G | FAM219B     |
| TPGS1. 5   | ##### | 0. 360704 | 0. 782 | 0. 233 | ##### | Class-G | TPGS1       |
| ZNF148. 3  | ##### | 0. 271519 | 0. 668 | 0. 18  | ##### | Class-G | ZNF148      |
| LPL. 7     | ##### | 0. 340532 | 0. 478 | 0. 106 | ##### | Class-G | LPL         |

|           |       |          |       |       |       |         |              |
|-----------|-------|----------|-------|-------|-------|---------|--------------|
| WSB2.9    | ##### | 0.31146  | 0.618 | 0.159 | ##### | Class-G | WSB2         |
| NRIP1.5   | ##### | 0.30541  | 0.406 | 0.076 | ##### | Class-G | NRIP1        |
| FAM78B    | ##### | 0.187286 | 0.185 | 0.01  | ##### | Class-G | FAM78B       |
| EPB41L1.8 | ##### | 0.241927 | 0.328 | 0.049 | ##### | Class-G | EPB41L1      |
| IARS.6    | ##### | 0.275158 | 0.592 | 0.148 | ##### | Class-G | IARS         |
| ENDOV.7   | ##### | 0.232997 | 0.616 | 0.156 | ##### | Class-G | ENDOV        |
| DVL3.5    | ##### | 0.285702 | 0.473 | 0.101 | ##### | Class-G | DVL3         |
| EMID1.7   | ##### | 0.269774 | 0.288 | 0.037 | ##### | Class-G | EMID1        |
| PRRC2A.5  | ##### | 0.279386 | 0.66  | 0.175 | ##### | Class-G | PRRC2A       |
| GAN.7     | ##### | 0.278468 | 0.448 | 0.091 | ##### | Class-G | GAN          |
| GALK1.8   | ##### | 0.254871 | 0.581 | 0.143 | ##### | Class-G | GALK1        |
| CPD.6     | ##### | 0.266287 | 0.488 | 0.107 | ##### | Class-G | CPD          |
| IGDCC4    | ##### | 0.217945 | 0.213 | 0.017 | ##### | Class-G | IGDCC4       |
| TMEM134.6 | ##### | 0.305064 | 0.781 | 0.232 | ##### | Class-G | TMEM134      |
| HOOK2.8   | ##### | 0.224168 | 0.645 | 0.167 | ##### | Class-G | HOOK2        |
| RRAGD.4   | ##### | 0.292962 | 0.42  | 0.082 | ##### | Class-G | RRAGD        |
| FSD1.9    | ##### | 0.27142  | 0.477 | 0.102 | ##### | Class-G | FSD1         |
| C19orf66. | ##### | 0.253477 | 0.684 | 0.186 | ##### | Class-G | C19orf66     |
| PTPN9.3   | ##### | 0.236592 | 0.411 | 0.078 | ##### | Class-G | PTPN9        |
| USP22.10  | ##### | 0.358957 | 0.796 | 0.241 | ##### | Class-G | USP22        |
| IFT81.8   | ##### | 0.278268 | 0.485 | 0.106 | ##### | Class-G | IFT81        |
| PCIF1.3   | ##### | 0.202456 | 0.453 | 0.092 | ##### | Class-G | PCIF1        |
| SHC4.6    | ##### | 0.26627  | 0.249 | 0.026 | ##### | Class-G | SHC4         |
| RP11-81A2 | ##### | 0.206578 | 0.24  | 0.023 | ##### | Class-G | RP11-81A22.5 |
| TRIM69.4  | ##### | 0.23294  | 0.568 | 0.137 | ##### | Class-G | TRIM69       |
| CHST10.8  | ##### | 0.290232 | 0.443 | 0.09  | ##### | Class-G | CHST10       |
| AGRN.5    | ##### | 0.251358 | 0.342 | 0.054 | ##### | Class-G | AGRN         |
| OXR1.9    | ##### | 0.316598 | 0.668 | 0.184 | ##### | Class-G | OXR1         |
| CAMSAP2.7 | ##### | 0.271673 | 0.465 | 0.098 | ##### | Class-G | CAMSAP2      |
| TMEM67.7  | ##### | 0.22534  | 0.343 | 0.055 | ##### | Class-G | TMEM67       |
| ZNF577.7  | ##### | 0.261419 | 0.335 | 0.052 | ##### | Class-G | ZNF577       |
| SCAMP4.7  | ##### | 0.29613  | 0.703 | 0.197 | ##### | Class-G | SCAMP4       |
| F12.8     | ##### | 0.277586 | 0.301 | 0.041 | ##### | Class-G | F12          |
| SH3RF1.7  | ##### | 0.253472 | 0.37  | 0.063 | ##### | Class-G | SH3RF1       |
| PPP1CB.7  | ##### | 0.481042 | 0.964 | 0.431 | ##### | Class-G | PPP1CB       |
| SUCO.5    | ##### | 0.254656 | 0.474 | 0.101 | ##### | Class-G | SUCO         |
| EEA1.5    | ##### | 0.352094 | 0.65  | 0.179 | ##### | Class-G | EEA1         |
| ATN1.9    | ##### | 0.279313 | 0.535 | 0.126 | ##### | Class-G | ATN1         |
| GLRX5.8   | ##### | 0.321728 | 0.763 | 0.22  | ##### | Class-G | GLRX5        |
| ATP6VOE2. | ##### | 0.46701  | 0.963 | 0.369 | ##### | Class-G | ATP6VOE2     |
| GAD1.10   | ##### | 0.3866   | 0.381 | 0.069 | ##### | Class-G | GAD1         |
| RBCK1.5   | ##### | 0.361426 | 0.817 | 0.259 | ##### | Class-G | RBCK1        |
| MAZ.8     | ##### | 0.315363 | 0.668 | 0.182 | ##### | Class-G | MAZ          |
| C9orf69.2 | ##### | 0.241498 | 0.337 | 0.053 | ##### | Class-G | C9orf69      |
| FEM1C.5   | ##### | 0.281564 | 0.441 | 0.09  | ##### | Class-G | FEM1C        |
| CHST14.3  | ##### | 0.239061 | 0.301 | 0.042 | ##### | Class-G | CHST14       |
| BLM.5     | ##### | 0.259957 | 0.305 | 0.043 | ##### | Class-G | BLM          |
| DOCK7.3   | ##### | 0.25213  | 0.412 | 0.079 | ##### | Class-G | DOCK7        |
| ACOX1.3   | ##### | 0.272592 | 0.497 | 0.112 | ##### | Class-G | ACOX1        |
| CERCAM.9  | ##### | 0.20897  | 0.421 | 0.082 | ##### | Class-G | CERCAM       |
| IRF3.4    | ##### | 0.234928 | 0.659 | 0.176 | ##### | Class-G | IRF3         |

|           |       |          |       |       |       |         |           |
|-----------|-------|----------|-------|-------|-------|---------|-----------|
| FAM43A    | ##### | 0.225843 | 0.196 | 0.013 | ##### | Class-G | FAM43A    |
| SCYL2.4   | ##### | 0.276948 | 0.431 | 0.087 | ##### | Class-G | SCYL2     |
| FTL.11    | ##### | -0.54077 | 1     | 0.993 | ##### | Class-G | FTL       |
| SMARCD1.9 | ##### | 0.288975 | 0.598 | 0.152 | ##### | Class-G | SMARCD1   |
| BRINP2.8  | ##### | 0.306243 | 0.286 | 0.037 | ##### | Class-G | BRINP2    |
| CD276.4   | ##### | 0.30423  | 0.61  | 0.159 | ##### | Class-G | CD276     |
| AKAP6.8   | ##### | 0.289672 | 0.357 | 0.06  | ##### | Class-G | AKAP6     |
| TXLNB     | ##### | 0.19484  | 0.182 | 0.01  | ##### | Class-G | TXLNB     |
| IDS.4     | ##### | 0.38186  | 0.857 | 0.289 | ##### | Class-G | IDS       |
| WASF3.6   | ##### | 0.286719 | 0.295 | 0.04  | ##### | Class-G | WASF3     |
| IFRD2.4   | ##### | 0.276741 | 0.585 | 0.147 | ##### | Class-G | IFRD2     |
| TMEM80.3  | ##### | 0.229118 | 0.505 | 0.114 | ##### | Class-G | TMEM80    |
| CLPP.4    | ##### | 0.369398 | 0.909 | 0.315 | ##### | Class-G | CLPP      |
| MEX3C.5   | ##### | 0.272637 | 0.338 | 0.054 | ##### | Class-G | MEX3C     |
| SHC3.1    | ##### | 0.214769 | 0.223 | 0.02  | ##### | Class-G | SHC3      |
| RBM27.7   | ##### | 0.30244  | 0.617 | 0.162 | ##### | Class-G | RBM27     |
| MAPKAP1.4 | ##### | 0.288958 | 0.665 | 0.182 | ##### | Class-G | MAPKAP1   |
| LIPE-AS1. | ##### | 0.234071 | 0.389 | 0.071 | ##### | Class-G | LIPE-AS1  |
| JAKMIP2.7 | ##### | 0.272987 | 0.465 | 0.1   | ##### | Class-G | JAKMIP2   |
| KNOP1.8   | ##### | 0.301851 | 0.681 | 0.191 | ##### | Class-G | KNOP1     |
| DALRD3.7  | ##### | 0.250156 | 0.496 | 0.111 | ##### | Class-G | DALRD3    |
| C8orf82.8 | ##### | 0.284054 | 0.507 | 0.116 | ##### | Class-G | C8orf82   |
| SAMD1.3   | ##### | 0.239733 | 0.359 | 0.061 | ##### | Class-G | SAMD1     |
| CDC42BPB. | ##### | 0.241143 | 0.396 | 0.074 | ##### | Class-G | CDC42BPB  |
| MARK3.8   | ##### | 0.307081 | 0.74  | 0.213 | ##### | Class-G | MARK3     |
| ZNF644.4  | ##### | 0.277088 | 0.671 | 0.184 | ##### | Class-G | ZNF644    |
| NADK.6    | ##### | 0.256857 | 0.498 | 0.113 | ##### | Class-G | NADK      |
| PLA2G5.9  | ##### | 0.198811 | 0.373 | 0.065 | ##### | Class-G | PLA2G5    |
| CALM2.7   | ##### | -0.47795 | 1     | 0.921 | ##### | Class-G | CALM2     |
| EIF2AK4.5 | ##### | 0.269747 | 0.527 | 0.125 | ##### | Class-G | EIF2AK4   |
| LINC00094 | ##### | 0.277794 | 0.415 | 0.082 | ##### | Class-G | LINC00094 |
| SLC44A2.8 | ##### | 0.277104 | 0.571 | 0.142 | ##### | Class-G | SLC44A2   |
| GLDC.7    | ##### | 0.228562 | 0.275 | 0.035 | ##### | Class-G | GLDC      |
| SNHG9.7   | ##### | 0.26876  | 0.774 | 0.228 | ##### | Class-G | SNHG9     |
| SCD.10    | ##### | 0.175648 | 0.592 | 0.15  | ##### | Class-G | SCD       |
| IER5L.3   | ##### | 0.251952 | 0.346 | 0.057 | ##### | Class-G | IER5L     |
| TASP1.5   | ##### | 0.195654 | 0.334 | 0.053 | ##### | Class-G | TASP1     |
| PMP22.9   | ##### | 0.348947 | 0.942 | 0.343 | ##### | Class-G | PMP22     |
| FGF14.9   | ##### | 0.269045 | 0.317 | 0.047 | ##### | Class-G | FGF14     |
| DDX42.6   | ##### | 0.268377 | 0.602 | 0.156 | ##### | Class-G | DDX42     |
| GNA11.5   | ##### | 0.253505 | 0.364 | 0.064 | ##### | Class-G | GNA11     |
| TRMT61A.2 | ##### | 0.219844 | 0.412 | 0.081 | ##### | Class-G | TRMT61A   |
| DHX30.6   | ##### | 0.277994 | 0.675 | 0.189 | ##### | Class-G | DHX30     |
| IDI1.8    | ##### | 0.314487 | 0.784 | 0.249 | ##### | Class-G | IDI1      |
| ZBTB7A.5  | ##### | 0.253325 | 0.522 | 0.122 | ##### | Class-G | ZBTB7A    |
| WNK3.8    | ##### | 0.265928 | 0.395 | 0.075 | ##### | Class-G | WNK3      |
| SLC22A4   | ##### | 0.238335 | 0.218 | 0.019 | ##### | Class-G | SLC22A4   |
| UBE3A.9   | ##### | 0.346394 | 0.729 | 0.215 | ##### | Class-G | UBE3A     |
| ERRFI1.6  | ##### | 0.31408  | 0.46  | 0.101 | ##### | Class-G | ERRFI1    |
| PTPRS.11  | ##### | 0.35285  | 0.67  | 0.191 | ##### | Class-G | PTPRS     |
| CADM4.10  | ##### | 0.311568 | 0.692 | 0.193 | ##### | Class-G | CADM4     |

|            |       |           |        |        |       |         |           |
|------------|-------|-----------|--------|--------|-------|---------|-----------|
| VAV3. 3    | ##### | 0. 264496 | 0. 266 | 0. 032 | ##### | Class-G | VAV3      |
| MORN2. 8   | ##### | 0. 220933 | 0. 686 | 0. 193 | ##### | Class-G | MORN2     |
| DFFA. 5    | ##### | 0. 208183 | 0. 607 | 0. 156 | ##### | Class-G | DFFA      |
| AKT2. 3    | ##### | 0. 275873 | 0. 531 | 0. 129 | ##### | Class-G | AKT2      |
| TMX4. 7    | ##### | 0. 306649 | 0. 656 | 0. 179 | ##### | Class-G | TMX4      |
| HEPACAM. 1 | ##### | 0. 368558 | 0. 509 | 0. 123 | ##### | Class-G | HEPACAM   |
| FNDC3B. 7  | ##### | 0. 25579  | 0. 51  | 0. 119 | ##### | Class-G | FNDC3B    |
| CNP. 9     | ##### | 0. 218473 | 0. 878 | 0. 295 | ##### | Class-G | CNP       |
| MAEL       | ##### | 0. 190066 | 0. 17  | 0. 009 | ##### | Class-G | MAEL      |
| GTF2H3. 4  | ##### | 0. 237555 | 0. 443 | 0. 092 | ##### | Class-G | GTF2H3    |
| PEX11G. 2  | ##### | 0. 205481 | 0. 284 | 0. 038 | ##### | Class-G | PEX11G    |
| CELSR2. 8  | ##### | 0. 235078 | 0. 333 | 0. 053 | ##### | Class-G | CELSR2    |
| MMP11      | ##### | 0. 20891  | 0. 18  | 0. 011 | ##### | Class-G | MMP11     |
| PSEN2. 5   | ##### | 0. 220898 | 0. 377 | 0. 069 | ##### | Class-G | PSEN2     |
| B9D1. 6    | ##### | 0. 183081 | 0. 351 | 0. 06  | ##### | Class-G | B9D1      |
| ZNF83. 4   | ##### | 0. 24107  | 0. 559 | 0. 138 | ##### | Class-G | ZNF83     |
| EPHA4. 8   | ##### | 0. 263049 | 0. 304 | 0. 045 | ##### | Class-G | EPHA4     |
| SIK3. 7    | ##### | 0. 213008 | 0. 364 | 0. 064 | ##### | Class-G | SIK3      |
| DTWD1. 1   | ##### | 0. 221481 | 0. 431 | 0. 088 | ##### | Class-G | DTWD1     |
| ARMC6. 5   | ##### | 0. 260512 | 0. 48  | 0. 108 | ##### | Class-G | ARMC6     |
| SCARF2     | ##### | 0. 200814 | 0. 203 | 0. 016 | ##### | Class-G | SCARF2    |
| DMPK. 5    | ##### | 0. 234299 | 0. 264 | 0. 033 | ##### | Class-G | DMPK      |
| SLC35A4. 2 | ##### | 0. 214951 | 0. 582 | 0. 147 | ##### | Class-G | SLC35A4   |
| GANAB. 5   | ##### | 0. 297506 | 0. 705 | 0. 202 | ##### | Class-G | GANAB     |
| FLOT2. 6   | ##### | 0. 193133 | 0. 537 | 0. 128 | ##### | Class-G | FLOT2     |
| POLRMT. 3  | ##### | 0. 269813 | 0. 417 | 0. 084 | ##### | Class-G | POLRMT    |
| CHD6. 10   | ##### | 0. 272455 | 0. 652 | 0. 178 | ##### | Class-G | CHD6      |
| LINC00665  | ##### | 0. 211509 | 0. 534 | 0. 129 | ##### | Class-G | LINC00665 |
| RNF126. 7  | ##### | 0. 321765 | 0. 737 | 0. 218 | ##### | Class-G | RNF126    |
| KCMF1. 6   | ##### | 0. 265957 | 0. 542 | 0. 134 | ##### | Class-G | KCMF1     |
| ARAP3. 7   | ##### | 0. 24372  | 0. 263 | 0. 032 | ##### | Class-G | ARAP3     |
| OTP. 1     | ##### | 0. 224702 | 0. 21  | 0. 018 | ##### | Class-G | OTP       |
| TOMM40. 8  | ##### | 0. 363749 | 0. 8   | 0. 25  | ##### | Class-G | TOMM40    |
| ITGB1. 7   | ##### | 0. 443417 | 0. 851 | 0. 31  | ##### | Class-G | ITGB1     |
| ZNF626. 7  | ##### | 0. 235792 | 0. 441 | 0. 094 | ##### | Class-G | ZNF626    |
| NF2. 3     | ##### | 0. 247341 | 0. 46  | 0. 101 | ##### | Class-G | NF2       |
| ANKRD26. 2 | ##### | 0. 241585 | 0. 378 | 0. 07  | ##### | Class-G | ANKRD26   |
| ICAM3. 8   | ##### | 0. 172244 | 0. 351 | 0. 06  | ##### | Class-G | ICAM3     |
| CARS2. 1   | ##### | 0. 224567 | 0. 424 | 0. 087 | ##### | Class-G | CARS2     |
| ASPHD1. 8  | ##### | 0. 235146 | 0. 432 | 0. 089 | ##### | Class-G | ASPHD1    |
| NFIX. 10   | ##### | 0. 346233 | 0. 823 | 0. 252 | ##### | Class-G | NFIX      |
| MAP1A. 10  | ##### | 0. 233529 | 0. 623 | 0. 165 | ##### | Class-G | MAP1A     |
| AGBL5. 3   | ##### | 0. 2353   | 0. 309 | 0. 047 | ##### | Class-G | AGBL5     |
| FADS1. 7   | ##### | 0. 281132 | 0. 595 | 0. 156 | ##### | Class-G | FADS1     |
| STK33. 8   | ##### | 0. 211474 | 0. 271 | 0. 035 | ##### | Class-G | STK33     |
| CDK2AP1. 4 | ##### | 0. 238902 | 0. 357 | 0. 062 | ##### | Class-G | CDK2AP1   |
| TWF1. 5    | ##### | 0. 286564 | 0. 683 | 0. 195 | ##### | Class-G | TWF1      |
| NPLOC4     | ##### | 0. 210067 | 0. 411 | 0. 082 | ##### | Class-G | NPLOC4    |
| CCDC6. 2   | ##### | 0. 227305 | 0. 371 | 0. 068 | ##### | Class-G | CCDC6     |
| AKR7A2. 5  | ##### | 0. 333461 | 0. 776 | 0. 239 | ##### | Class-G | AKR7A2    |
| FAM20C. 9  | ##### | 0. 262589 | 0. 603 | 0. 161 | ##### | Class-G | FAM20C    |

|            |       |          |       |       |       |         |                |
|------------|-------|----------|-------|-------|-------|---------|----------------|
| WASL. 8    | ##### | 0.260144 | 0.526 | 0.127 | ##### | Class-G | WASL           |
| RITA1. 6   | ##### | 0.220861 | 0.418 | 0.085 | ##### | Class-G | RITA1          |
| GNL1. 4    | ##### | 0.27093  | 0.643 | 0.177 | ##### | Class-G | GNL1           |
| TTPAL. 4   | ##### | 0.213624 | 0.443 | 0.094 | ##### | Class-G | TTPAL          |
| FGF2       | ##### | 0.201289 | 0.206 | 0.017 | ##### | Class-G | FGF2           |
| CCDC102A   | ##### | 0.20198  | 0.205 | 0.017 | ##### | Class-G | CCDC102A       |
| TMEM183A.  | ##### | 0.321418 | 0.739 | 0.219 | ##### | Class-G | TMEM183A       |
| PUSL1. 3   | ##### | 0.242708 | 0.394 | 0.076 | ##### | Class-G | PUSL1          |
| EML3. 5    | ##### | 0.209086 | 0.381 | 0.071 | ##### | Class-G | EML3           |
| ARHGAP20.  | ##### | 0.26058  | 0.249 | 0.029 | ##### | Class-G | ARHGAP20       |
| EGLN2. 4   | ##### | 0.271515 | 0.719 | 0.212 | ##### | Class-G | EGLN2          |
| TSPAN6. 9  | ##### | 0.199    | 0.455 | 0.099 | ##### | Class-G | TSPAN6         |
| THAP7. 4   | ##### | 0.211776 | 0.58  | 0.149 | ##### | Class-G | THAP7          |
| ZNF160. 1  | ##### | 0.230732 | 0.372 | 0.068 | ##### | Class-G | ZNF160         |
| TTC37. 4   | ##### | 0.270301 | 0.525 | 0.128 | ##### | Class-G | TTC37          |
| UBE2J1. 4  | ##### | 0.354632 | 0.703 | 0.212 | ##### | Class-G | UBE2J1         |
| OTUD4. 3   | ##### | 0.253116 | 0.343 | 0.059 | ##### | Class-G | OTUD4          |
| APOC1. 10  | ##### | -1.58356 | 0.161 | 0.574 | ##### | Class-G | APOC1          |
| PAX6. 7    | ##### | 0.246096 | 0.296 | 0.043 | ##### | Class-G | PAX6           |
| LARP1. 5   | ##### | 0.276519 | 0.663 | 0.185 | ##### | Class-G | LARP1          |
| CECR5. 6   | ##### | 0.279775 | 0.663 | 0.185 | ##### | Class-G | CECR5          |
| SLC25A29.  | ##### | 0.239279 | 0.463 | 0.102 | ##### | Class-G | SLC25A29       |
| TMEM223. 3 | ##### | 0.21584  | 0.611 | 0.162 | ##### | Class-G | TMEM223        |
| RRS1. 4    | ##### | 0.248191 | 0.439 | 0.094 | ##### | Class-G | RRS1           |
| TMEM198. 8 | ##### | 0.270086 | 0.379 | 0.072 | ##### | Class-G | TMEM198        |
| ACBD6. 6   | ##### | 0.259489 | 0.709 | 0.207 | ##### | Class-G | ACBD6          |
| FHL3. 6    | ##### | 0.217268 | 0.476 | 0.107 | ##### | Class-G | FHL3           |
| SIGMAR1. 3 | ##### | 0.258417 | 0.501 | 0.118 | ##### | Class-G | SIGMAR1        |
| RP11-263K  | ##### | 0.218779 | 0.263 | 0.033 | ##### | Class-G | RP11-263K19. 4 |
| LENG1. 4   | ##### | 0.194371 | 0.561 | 0.143 | ##### | Class-G | LENG1          |
| ARFRP1. 2  | ##### | 0.25277  | 0.648 | 0.182 | ##### | Class-G | ARFRP1         |
| APC2. 10   | ##### | 0.268405 | 0.452 | 0.098 | ##### | Class-G | APC2           |
| PGM2L1. 9  | ##### | 0.340626 | 0.651 | 0.191 | ##### | Class-G | PGM2L1         |
| SNHG7. 5   | ##### | 0.364837 | 0.825 | 0.268 | ##### | Class-G | SNHG7          |
| CNOT3. 5   | ##### | 0.255267 | 0.48  | 0.11  | ##### | Class-G | CNOT3          |
| TMEM59L. 9 | ##### | 0.310976 | 0.673 | 0.191 | ##### | Class-G | TMEM59L        |
| HDGF. 5    | ##### | 0.271967 | 0.705 | 0.203 | ##### | Class-G | HDGF           |
| ANO6. 4    | ##### | 0.193866 | 0.352 | 0.062 | ##### | Class-G | ANO6           |
| SDCCAG3. 3 | ##### | 0.20809  | 0.335 | 0.056 | ##### | Class-G | SDCCAG3        |
| HLA-DRB1.  | ##### | -1.59062 | 0.189 | 0.589 | ##### | Class-G | HLA-DRB1       |
| ELOVL6. 7  | ##### | 0.222875 | 0.329 | 0.054 | ##### | Class-G | ELOVL6         |
| LIMD1. 2   | ##### | 0.232285 | 0.297 | 0.044 | ##### | Class-G | LIMD1          |
| ATG4D. 5   | ##### | 0.271826 | 0.475 | 0.109 | ##### | Class-G | ATG4D          |
| TRIM16L. 4 | ##### | 0.206823 | 0.281 | 0.039 | ##### | Class-G | TRIM16L        |
| XXYLT1. 8  | ##### | 0.230673 | 0.404 | 0.081 | ##### | Class-G | XXYLT1         |
| ZFPL1. 5   | ##### | 0.224446 | 0.628 | 0.171 | ##### | Class-G | ZFPL1          |
| THBS4. 6   | ##### | 0.248218 | 0.224 | 0.023 | ##### | Class-G | THBS4          |
| TMEM47. 8  | ##### | 0.278731 | 0.297 | 0.045 | ##### | Class-G | TMEM47         |
| FDFT1. 7   | ##### | 0.261744 | 0.753 | 0.233 | ##### | Class-G | FDFT1          |
| PTCHD1     | ##### | 0.183267 | 0.178 | 0.011 | ##### | Class-G | PTCHD1         |
| HDAC1. 6   | ##### | 0.228595 | 0.608 | 0.163 | ##### | Class-G | HDAC1          |

|            |       |           |        |        |       |         |               |
|------------|-------|-----------|--------|--------|-------|---------|---------------|
| FER. 4     | ##### | 0. 229472 | 0. 33  | 0. 055 | ##### | Class-G | FER           |
| MAP2. 11   | ##### | 0. 349274 | 0. 834 | 0. 257 | ##### | Class-G | MAP2          |
| UBL4A. 8   | ##### | 0. 242421 | 0. 521 | 0. 127 | ##### | Class-G | UBL4A         |
| CRELD1. 2  | ##### | 0. 202637 | 0. 502 | 0. 119 | ##### | Class-G | CRELD1        |
| ASXL1. 6   | ##### | 0. 228457 | 0. 512 | 0. 122 | ##### | Class-G | ASXL1         |
| TNRC6B. 6  | ##### | 0. 354017 | 0. 833 | 0. 274 | ##### | Class-G | TNRC6B        |
| TFPT. 8    | ##### | 0. 295813 | 0. 752 | 0. 236 | ##### | Class-G | TFPT          |
| FBX018. 2  | ##### | 0. 226512 | 0. 421 | 0. 088 | ##### | Class-G | FBX018        |
| F8A1. 4    | ##### | 0. 232351 | 0. 432 | 0. 092 | ##### | Class-G | F8A1          |
| FEZ1. 10   | ##### | 0. 393188 | 0. 956 | 0. 344 | ##### | Class-G | FEZ1          |
| PRICKLE2   | ##### | 0. 210282 | 0. 198 | 0. 016 | ##### | Class-G | PRICKLE2      |
| CCDC58. 6  | ##### | 0. 234504 | 0. 44  | 0. 095 | ##### | Class-G | CCDC58        |
| SERPINE2.  | ##### | 0. 348687 | 0. 728 | 0. 222 | ##### | Class-G | SERPINE2      |
| DCAF8. 3   | ##### | 0. 226246 | 0. 571 | 0. 148 | ##### | Class-G | DCAF8         |
| TNPO2. 7   | ##### | 0. 239872 | 0. 515 | 0. 124 | ##### | Class-G | TNPO2         |
| MIEF1. 4   | ##### | 0. 231562 | 0. 444 | 0. 097 | ##### | Class-G | MIEF1         |
| ZNF787. 1  | ##### | 0. 206071 | 0. 284 | 0. 04  | ##### | Class-G | ZNF787        |
| RP11-345J  | ##### | 0. 263666 | 0. 628 | 0. 17  | ##### | Class-G | RP11-345J4. 5 |
| MPG. 4     | ##### | 0. 325438 | 0. 825 | 0. 266 | ##### | Class-G | MPG           |
| MTHFD1. 7  | ##### | 0. 243502 | 0. 529 | 0. 132 | ##### | Class-G | MTHFD1        |
| SIX5       | ##### | 0. 194852 | 0. 187 | 0. 014 | ##### | Class-G | SIX5          |
| SLC52A2. 5 | ##### | 0. 311342 | 0. 708 | 0. 21  | ##### | Class-G | SLC52A2       |
| LINC01023  | ##### | 0. 178931 | 0. 257 | 0. 032 | ##### | Class-G | LINC01023     |
| ANKRD52. 1 | ##### | 0. 207787 | 0. 288 | 0. 042 | ##### | Class-G | ANKRD52       |
| ZIC1. 9    | ##### | 0. 265894 | 0. 375 | 0. 071 | ##### | Class-G | ZIC1          |
| GRAMD3. 1C | ##### | 0. 239607 | 0. 431 | 0. 093 | ##### | Class-G | GRAMD3        |
| ANKRD17. 8 | ##### | 0. 271032 | 0. 589 | 0. 156 | ##### | Class-G | ANKRD17       |
| ZMYND8. 8  | ##### | 0. 272105 | 0. 568 | 0. 149 | ##### | Class-G | ZMYND8        |
| GLT8D1. 4  | ##### | 0. 275448 | 0. 704 | 0. 206 | ##### | Class-G | GLT8D1        |
| DNTTIP1. 4 | ##### | 0. 317653 | 0. 797 | 0. 253 | ##### | Class-G | DNTTIP1       |
| PLIN3. 7   | ##### | 0. 290309 | 0. 854 | 0. 277 | ##### | Class-G | PLIN3         |
| FLYWCH2. 5 | ##### | 0. 250571 | 0. 763 | 0. 235 | ##### | Class-G | FLYWCH2       |
| CASP7. 4   | ##### | 0. 229337 | 0. 312 | 0. 049 | ##### | Class-G | CASP7         |
| NABP2. 6   | ##### | 0. 218415 | 0. 702 | 0. 206 | ##### | Class-G | NABP2         |
| EPS15L1. 6 | ##### | 0. 219347 | 0. 487 | 0. 113 | ##### | Class-G | EPS15L1       |
| C1QB. 11   | ##### | -1. 5853  | 0. 278 | 0. 617 | ##### | Class-G | C1QB          |
| G6PC3. 4   | ##### | 0. 296692 | 0. 82  | 0. 27  | ##### | Class-G | G6PC3         |
| ANKRD16. 2 | ##### | 0. 194076 | 0. 226 | 0. 024 | ##### | Class-G | ANKRD16       |
| FNDC3A. 5  | ##### | 0. 239736 | 0. 584 | 0. 154 | ##### | Class-G | FNDC3A        |
| XRR1. 5    | ##### | 0. 229375 | 0. 408 | 0. 084 | ##### | Class-G | XRR1          |
| SLC35E1. 3 | ##### | 0. 207551 | 0. 478 | 0. 11  | ##### | Class-G | SLC35E1       |
| UBE2Q2. 6  | ##### | 0. 264279 | 0. 564 | 0. 146 | ##### | Class-G | UBE2Q2        |
| SUDS3. 9   | ##### | 0. 266452 | 0. 53  | 0. 132 | ##### | Class-G | SUDS3         |
| IFT57. 9   | ##### | 0. 20949  | 0. 648 | 0. 182 | ##### | Class-G | IFT57         |
| C19orf12.  | ##### | 0. 213415 | 0. 437 | 0. 094 | ##### | Class-G | C19orf12      |
| DAXX. 4    | ##### | 0. 258272 | 0. 557 | 0. 145 | ##### | Class-G | DAXX          |
| ATXN2. 8   | ##### | 0. 238832 | 0. 598 | 0. 16  | ##### | Class-G | ATXN2         |
| NLGN4X. 9  | ##### | 0. 275469 | 0. 354 | 0. 065 | ##### | Class-G | NLGN4X        |
| LDOC1L. 8  | ##### | 0. 222153 | 0. 312 | 0. 05  | ##### | Class-G | LDOC1L        |
| MYL5. 3    | ##### | 0. 182802 | 0. 334 | 0. 057 | ##### | Class-G | MYL5          |
| PALM. 7    | ##### | 0. 245881 | 0. 351 | 0. 064 | ##### | Class-G | PALM          |



|            |       |           |        |        |       |         |               |
|------------|-------|-----------|--------|--------|-------|---------|---------------|
| FKBP1B. 5  | ##### | 0. 231018 | 0. 392 | 0. 078 | ##### | Class-G | FKBP1B        |
| BCAN. 11   | ##### | 0. 418663 | 0. 678 | 0. 21  | ##### | Class-G | BCAN          |
| CLCN3. 9   | ##### | 0. 271688 | 0. 647 | 0. 183 | ##### | Class-G | CLCN3         |
| FAM103A1.  | ##### | 0. 164363 | 0. 641 | 0. 178 | ##### | Class-G | FAM103A1      |
| UBE2S. 8   | ##### | 0. 352279 | 0. 831 | 0. 264 | ##### | Class-G | UBE2S         |
| FAM208A. 2 | ##### | 0. 242861 | 0. 429 | 0. 093 | ##### | Class-G | FAM208A       |
| TEX2. 3    | ##### | 0. 216781 | 0. 285 | 0. 041 | ##### | Class-G | TEX2          |
| MFSD3. 4   | ##### | 0. 229837 | 0. 387 | 0. 076 | ##### | Class-G | MFSD3         |
| RFC1. 6    | ##### | 0. 234793 | 0. 702 | 0. 207 | ##### | Class-G | RFC1          |
| MT1E. 10   | ##### | 0. 173533 | 0. 873 | 0. 299 | ##### | Class-G | MT1E          |
| C1QTNF6    | ##### | 0. 203498 | 0. 191 | 0. 015 | ##### | Class-G | C1QTNF6       |
| TNKS. 11   | ##### | 0. 246016 | 0. 448 | 0. 1   | ##### | Class-G | TNKS          |
| FAM129A. 7 | ##### | 0. 27601  | 0. 428 | 0. 093 | ##### | Class-G | FAM129A       |
| CFL2. 9    | ##### | 0. 214075 | 0. 794 | 0. 251 | ##### | Class-G | CFL2          |
| UBE2J2. 8  | ##### | 0. 349577 | 0. 802 | 0. 258 | ##### | Class-G | UBE2J2        |
| RFX4. 9    | ##### | 0. 232194 | 0. 451 | 0. 101 | ##### | Class-G | RFX4          |
| SOX6. 10   | ##### | 0. 270043 | 0. 432 | 0. 094 | ##### | Class-G | SOX6          |
| USP34. 5   | ##### | 0. 253265 | 0. 572 | 0. 151 | ##### | Class-G | USP34         |
| IPO5. 6    | ##### | 0. 257876 | 0. 583 | 0. 156 | ##### | Class-G | IPO5          |
| NDUF5. 4   | ##### | 0. 194804 | 0. 417 | 0. 088 | ##### | Class-G | NDUF5         |
| ANKRD9. 5  | ##### | 0. 185236 | 0. 314 | 0. 051 | ##### | Class-G | ANKRD9        |
| CTB-113I2  | ##### | 0. 209625 | 0. 245 | 0. 029 | ##### | Class-G | CTB-113I20. 2 |
| TLK2. 3    | ##### | 0. 216272 | 0. 394 | 0. 079 | ##### | Class-G | TLK2          |
| TMEM115. 4 | ##### | 0. 234228 | 0. 566 | 0. 149 | ##### | Class-G | TMEM115       |
| KAT7. 5    | ##### | 0. 22705  | 0. 445 | 0. 099 | ##### | Class-G | KAT7          |
| RABEPK. 7  | ##### | 0. 182879 | 0. 552 | 0. 142 | ##### | Class-G | RABEPK        |
| MTMR4. 9   | ##### | 0. 230326 | 0. 472 | 0. 109 | ##### | Class-G | MTMR4         |
| PCDH10. 8  | ##### | 0. 198422 | 0. 266 | 0. 035 | ##### | Class-G | PCDH10        |
| ASAP1. 7   | ##### | 0. 264491 | 0. 608 | 0. 165 | ##### | Class-G | ASAP1         |
| SYS1. 4    | ##### | 0. 187373 | 0. 635 | 0. 176 | ##### | Class-G | SYS1          |
| NADK2. 4   | ##### | 0. 246412 | 0. 339 | 0. 06  | ##### | Class-G | NADK2         |
| SLC16A2. 5 | ##### | 0. 21627  | 0. 229 | 0. 025 | ##### | Class-G | SLC16A2       |
| MTSS1L. 7  | ##### | 0. 234653 | 0. 327 | 0. 056 | ##### | Class-G | MTSS1L        |
| NLK. 5     | ##### | 0. 221645 | 0. 286 | 0. 042 | ##### | Class-G | NLK           |
| ACAD8. 6   | ##### | 0. 226894 | 0. 518 | 0. 128 | ##### | Class-G | ACAD8         |
| EXOSC4. 4  | ##### | 0. 232105 | 0. 654 | 0. 186 | ##### | Class-G | EXOSC4        |
| PTP4A2. 8  | ##### | 0. 44192  | 0. 935 | 0. 374 | ##### | Class-G | PTP4A2        |
| ARFGAP1. 3 | ##### | 0. 221257 | 0. 445 | 0. 099 | ##### | Class-G | ARFGAP1       |
| OCIAD2. 1C | ##### | 0. 190228 | 0. 858 | 0. 31  | ##### | Class-G | OCIAD2        |
| ANKRD35. 5 | ##### | 0. 245929 | 0. 42  | 0. 09  | ##### | Class-G | ANKRD35       |
| KLHL42. 1C | ##### | 0. 246919 | 0. 468 | 0. 108 | ##### | Class-G | KLHL42        |
| INPPL1. 6  | ##### | 0. 194071 | 0. 386 | 0. 076 | ##### | Class-G | INPPL1        |
| AGPAT3. 5  | ##### | 0. 204016 | 0. 407 | 0. 085 | ##### | Class-G | AGPAT3        |
| KCTD6. 3   | ##### | 0. 222469 | 0. 378 | 0. 075 | ##### | Class-G | KCTD6         |
| THAP3. 6   | ##### | 0. 170137 | 0. 418 | 0. 088 | ##### | Class-G | THAP3         |
| UCKL1. 4   | ##### | 0. 226175 | 0. 466 | 0. 107 | ##### | Class-G | UCKL1         |
| PLEKHH3. 6 | ##### | 0. 204889 | 0. 303 | 0. 048 | ##### | Class-G | PLEKHH3       |
| FAM199X. 3 | ##### | 0. 219205 | 0. 358 | 0. 067 | ##### | Class-G | FAM199X       |
| TRPT1. 4   | ##### | 0. 201577 | 0. 598 | 0. 162 | ##### | Class-G | TRPT1         |
| FBXO44. 7  | ##### | 0. 193546 | 0. 432 | 0. 094 | ##### | Class-G | FBXO44        |
| MEIS1. 9   | ##### | 0. 274417 | 0. 309 | 0. 05  | ##### | Class-G | MEIS1         |

|           |       |          |       |       |       |         |              |
|-----------|-------|----------|-------|-------|-------|---------|--------------|
| RP11-25K1 | ##### | 0.233327 | 0.341 | 0.061 | ##### | Class-G | RP11-25K19.1 |
| SPAG9.9   | ##### | 0.353627 | 0.828 | 0.275 | ##### | Class-G | SPAG9        |
| PRKDC.7   | ##### | 0.293896 | 0.729 | 0.221 | ##### | Class-G | PRKDC        |
| RNF40.4   | ##### | 0.240576 | 0.5   | 0.122 | ##### | Class-G | RNF40        |
| LRRRC58.5 | ##### | 0.24119  | 0.562 | 0.148 | ##### | Class-G | LRRRC58      |
| CANT1.4   | ##### | 0.244709 | 0.498 | 0.122 | ##### | Class-G | CANT1        |
| PHACTR2.7 | ##### | 0.211612 | 0.301 | 0.047 | ##### | Class-G | PHACTR2      |
| RHOQ.7    | ##### | 0.235795 | 0.472 | 0.111 | ##### | Class-G | RHOQ         |
| SLC16A4.4 | ##### | 0.19364  | 0.249 | 0.031 | ##### | Class-G | SLC16A4      |
| BCAT2.4   | ##### | 0.283865 | 0.42  | 0.092 | ##### | Class-G | BCAT2        |
| KIAA2013. | ##### | 0.202677 | 0.452 | 0.102 | ##### | Class-G | KIAA2013     |
| PQLC2.1   | ##### | 0.20728  | 0.383 | 0.076 | ##### | Class-G | PQLC2        |
| TTL7.10   | ##### | 0.185797 | 0.626 | 0.174 | ##### | Class-G | TTL7         |
| ALDH6A1.8 | ##### | 0.221068 | 0.563 | 0.149 | ##### | Class-G | ALDH6A1      |
| FBX017.11 | ##### | 0.258855 | 0.433 | 0.097 | ##### | Class-G | FBX017       |
| SNTB2.4   | ##### | 0.208051 | 0.328 | 0.057 | ##### | Class-G | SNTB2        |
| FAM217B.9 | ##### | 0.224694 | 0.461 | 0.105 | ##### | Class-G | FAM217B      |
| LIN7A.5   | ##### | 0.174586 | 0.195 | 0.017 | ##### | Class-G | LIN7A        |
| ANKRD54.5 | ##### | 0.191503 | 0.426 | 0.093 | ##### | Class-G | ANKRD54      |
| RCN2.10   | ##### | 0.471235 | 0.951 | 0.388 | ##### | Class-G | RCN2         |
| Clorf50.5 | ##### | 0.194283 | 0.511 | 0.126 | ##### | Class-G | Clorf50      |
| FBXW2.5   | ##### | 0.224581 | 0.536 | 0.136 | ##### | Class-G | FBXW2        |
| MACROD1.4 | ##### | 0.230351 | 0.388 | 0.079 | ##### | Class-G | MACROD1      |
| SLC35D1   | ##### | 0.19274  | 0.236 | 0.027 | ##### | Class-G | SLC35D1      |
| SYNRG.6   | ##### | 0.228716 | 0.527 | 0.134 | ##### | Class-G | SYNRG        |
| MAGEF1.1C | ##### | 0.331753 | 0.854 | 0.283 | ##### | Class-G | MAGEF1       |
| CIZ1.5    | ##### | 0.240884 | 0.506 | 0.126 | ##### | Class-G | CIZ1         |
| CLSTN1.7  | ##### | 0.260166 | 0.707 | 0.213 | ##### | Class-G | CLSTN1       |
| COIL.8    | ##### | 0.235871 | 0.517 | 0.131 | ##### | Class-G | COIL         |
| TP53BP1.5 | ##### | 0.215099 | 0.332 | 0.059 | ##### | Class-G | TP53BP1      |
| MUM1.10   | ##### | 0.320309 | 0.855 | 0.284 | ##### | Class-G | MUM1         |
| ADORA2B   | ##### | 0.188481 | 0.177 | 0.013 | ##### | Class-G | ADORA2B      |
| PODXL.6   | ##### | 0.229579 | 0.268 | 0.038 | ##### | Class-G | PODXL        |
| CCDC85B.5 | ##### | 0.424306 | 0.883 | 0.337 | ##### | Class-G | CCDC85B      |
| PDE8B.5   | ##### | 0.207778 | 0.211 | 0.021 | ##### | Class-G | PDE8B        |
| UBTF.8    | ##### | 0.235251 | 0.605 | 0.165 | ##### | Class-G | UBTF         |
| RAE1.6    | ##### | 0.214016 | 0.682 | 0.2   | ##### | Class-G | RAE1         |
| FARSA.6   | ##### | 0.269116 | 0.773 | 0.246 | ##### | Class-G | FARSA        |
| SRR.8     | ##### | 0.218911 | 0.455 | 0.105 | ##### | Class-G | SRR          |
| NANOS3.8  | ##### | 0.199709 | 0.25  | 0.032 | ##### | Class-G | NANOS3       |
| CHMP6.4   | ##### | 0.221008 | 0.539 | 0.139 | ##### | Class-G | CHMP6        |
| NNT-AS1.9 | ##### | 0.218374 | 0.589 | 0.161 | ##### | Class-G | NNT-AS1      |
| SNUPN.4   | ##### | 0.188751 | 0.473 | 0.112 | ##### | Class-G | SNUPN        |
| PTGES2.5  | ##### | 0.277065 | 0.676 | 0.2   | ##### | Class-G | PTGES2       |
| RGL3.2    | ##### | 0.18049  | 0.201 | 0.018 | ##### | Class-G | RGL3         |
| CHMP4B.7  | ##### | 0.446196 | 0.925 | 0.377 | ##### | Class-G | CHMP4B       |
| ZNF37A.7  | ##### | 0.211706 | 0.423 | 0.092 | ##### | Class-G | ZNF37A       |
| ECHDC2.7  | ##### | 0.199248 | 0.524 | 0.133 | ##### | Class-G | ECHDC2       |
| CAPRIN1.8 | ##### | 0.33268  | 0.772 | 0.246 | ##### | Class-G | CAPRIN1      |
| GOLGA8A   | ##### | 0.200173 | 0.262 | 0.036 | ##### | Class-G | GOLGA8A      |
| EPN1.3    | ##### | 0.309593 | 0.799 | 0.258 | ##### | Class-G | EPN1         |

|           |       |          |       |       |       |         |               |
|-----------|-------|----------|-------|-------|-------|---------|---------------|
| FBXW11.4  | ##### | 0.233881 | 0.509 | 0.127 | ##### | Class-G | FBXW11        |
| ZNF260.6  | ##### | 0.21339  | 0.337 | 0.061 | ##### | Class-G | ZNF260        |
| CDC42BPA. | ##### | 0.259751 | 0.504 | 0.126 | ##### | Class-G | CDC42BPA      |
| HLA-DPB1. | ##### | -1.54258 | 0.147 | 0.551 | ##### | Class-G | HLA-DPB1      |
| PROX1.10  | ##### | 0.285326 | 0.474 | 0.113 | ##### | Class-G | PROX1         |
| PDCD2.8   | ##### | 0.314459 | 0.724 | 0.224 | ##### | Class-G | PDCD2         |
| VPS16.4   | ##### | 0.236478 | 0.495 | 0.122 | ##### | Class-G | VPS16         |
| BNIP3.8   | ##### | 0.16687  | 0.577 | 0.156 | ##### | Class-G | BNIP3         |
| SCAF1.7   | ##### | 0.245092 | 0.452 | 0.105 | ##### | Class-G | SCAF1         |
| PPP1R14C. | ##### | 0.243456 | 0.243 | 0.031 | ##### | Class-G | PPP1R14C      |
| NELFB.5   | ##### | 0.240496 | 0.443 | 0.101 | ##### | Class-G | NELFB         |
| ZNF511.8  | ##### | 0.219251 | 0.542 | 0.139 | ##### | Class-G | ZNF511        |
| PPP1R37.6 | ##### | 0.234064 | 0.413 | 0.089 | ##### | Class-G | PPP1R37       |
| SLC39A6.8 | ##### | 0.308932 | 0.789 | 0.253 | ##### | Class-G | SLC39A6       |
| CSNK1G3.8 | ##### | 0.234013 | 0.452 | 0.104 | ##### | Class-G | CSNK1G3       |
| PCSK1N.1C | ##### | 0.517725 | 0.901 | 0.342 | ##### | Class-G | PCSK1N        |
| CCDC66.8  | ##### | 0.253451 | 0.603 | 0.168 | ##### | Class-G | CCDC66        |
| DBNDD1.8  | ##### | 0.214735 | 0.262 | 0.036 | ##### | Class-G | DBNDD1        |
| HAGHL.2   | ##### | 0.225593 | 0.349 | 0.065 | ##### | Class-G | HAGHL         |
| MSRB1.4   | ##### | 0.181565 | 0.588 | 0.16  | ##### | Class-G | MSRB1         |
| NOS1AP.9  | ##### | 0.235625 | 0.289 | 0.045 | ##### | Class-G | NOS1AP        |
| C16orf52. | ##### | 0.22202  | 0.328 | 0.058 | ##### | Class-G | C16orf52      |
| WDR13.4   | ##### | 0.218995 | 0.714 | 0.215 | ##### | Class-G | WDR13         |
| ZFP64.4   | ##### | 0.205796 | 0.283 | 0.043 | ##### | Class-G | ZFP64         |
| CTD-3138E | ##### | 0.179984 | 0.294 | 0.046 | ##### | Class-G | CTD-3138B18.5 |
| PHF12.2   | ##### | 0.208759 | 0.361 | 0.07  | ##### | Class-G | PHF12         |
| TRIM25.6  | ##### | 0.187619 | 0.309 | 0.051 | ##### | Class-G | TRIM25        |
| ETV5.8    | ##### | 0.250355 | 0.665 | 0.192 | ##### | Class-G | ETV5          |
| SNX5.7    | ##### | 0.33345  | 0.884 | 0.314 | ##### | Class-G | SNX5          |
| C5orf51.2 | ##### | 0.214782 | 0.32  | 0.055 | ##### | Class-G | C5orf51       |
| SNX27.4   | ##### | 0.241289 | 0.633 | 0.181 | ##### | Class-G | SNX27         |
| KANSL1-AS | ##### | 0.193732 | 0.534 | 0.137 | ##### | Class-G | KANSL1-AS1    |
| GNB5.7    | ##### | 0.215357 | 0.359 | 0.069 | ##### | Class-G | GNB5          |
| IRF2BP1.8 | ##### | 0.23643  | 0.35  | 0.066 | ##### | Class-G | IRF2BP1       |
| PCDH1.6   | ##### | 0.235921 | 0.24  | 0.03  | ##### | Class-G | PCDH1         |
| HGS.5     | ##### | 0.226403 | 0.577 | 0.157 | ##### | Class-G | HGS           |
| ERLEC1.4  | ##### | 0.28907  | 0.837 | 0.284 | ##### | Class-G | ERLEC1        |
| POLR2M.2  | ##### | 0.231693 | 0.463 | 0.11  | ##### | Class-G | POLR2M        |
| MSANTD4.6 | ##### | 0.232228 | 0.391 | 0.082 | ##### | Class-G | MSANTD4       |
| RGS1.11   | ##### | -1.62545 | 0.086 | 0.506 | ##### | Class-G | RGS1          |
| EMC6.6    | ##### | 0.406059 | 0.906 | 0.357 | ##### | Class-G | EMC6          |
| TSPAN17.4 | ##### | 0.243172 | 0.439 | 0.1   | ##### | Class-G | TSPAN17       |
| FAM179B.7 | ##### | 0.193577 | 0.378 | 0.076 | ##### | Class-G | FAM179B       |
| ERAL1.5   | ##### | 0.2256   | 0.623 | 0.178 | ##### | Class-G | ERAL1         |
| CLTC.6    | ##### | 0.339005 | 0.814 | 0.273 | ##### | Class-G | CLTC          |
| PRPF31.6  | ##### | 0.308733 | 0.882 | 0.312 | ##### | Class-G | PRPF31        |
| MMP16.9   | ##### | 0.24974  | 0.344 | 0.064 | ##### | Class-G | MMP16         |
| SMAD4.4   | ##### | 0.235518 | 0.383 | 0.079 | ##### | Class-G | SMAD4         |
| PES1.5    | ##### | 0.196396 | 0.531 | 0.136 | ##### | Class-G | PES1          |
| ISOC2.8   | ##### | 0.237493 | 0.821 | 0.272 | ##### | Class-G | ISOC2         |
| OSBPL2.5  | ##### | 0.203751 | 0.409 | 0.088 | ##### | Class-G | OSBPL2        |

|           |       |          |       |       |       |         |             |
|-----------|-------|----------|-------|-------|-------|---------|-------------|
| RHBDD3.3  | ##### | 0.229705 | 0.442 | 0.102 | ##### | Class-G | RHBDD3      |
| MAPK8IP1. | ##### | 0.199667 | 0.531 | 0.136 | ##### | Class-G | MAPK8IP1    |
| FIGN.8    | ##### | 0.251161 | 0.307 | 0.052 | ##### | Class-G | FIGN        |
| DDA1.4    | ##### | 0.238608 | 0.787 | 0.253 | ##### | Class-G | DDA1        |
| HEXIM2.3  | ##### | 0.174232 | 0.292 | 0.046 | ##### | Class-G | HEXIM2      |
| CRNKL1.4  | ##### | 0.22095  | 0.445 | 0.102 | ##### | Class-G | CRNKL1      |
| HLA-DPA1. | ##### | -1.48692 | 0.211 | 0.586 | ##### | Class-G | HLA-DPA1    |
| ECSIT.6   | ##### | 0.213646 | 0.674 | 0.201 | ##### | Class-G | ECSIT       |
| MEGF8.2   | ##### | 0.223118 | 0.303 | 0.05  | ##### | Class-G | MEGF8       |
| DCHS1.8   | ##### | 0.226905 | 0.3   | 0.049 | ##### | Class-G | DCHS1       |
| RNFT1.5   | ##### | 0.171987 | 0.552 | 0.145 | ##### | Class-G | RNFT1       |
| APOO.8    | ##### | 0.205415 | 0.6   | 0.168 | ##### | Class-G | APOO        |
| METTL2A.6 | ##### | 0.23195  | 0.458 | 0.109 | ##### | Class-G | METTL2A     |
| DSEL.11   | ##### | 0.254311 | 0.593 | 0.165 | ##### | Class-G | DSEL        |
| RPP38.2   | ##### | 0.186384 | 0.407 | 0.088 | ##### | Class-G | RPP38       |
| AGPAT1.4  | ##### | 0.206177 | 0.598 | 0.166 | ##### | Class-G | AGPAT1      |
| NCOR1.9   | ##### | 0.430642 | 0.938 | 0.387 | ##### | Class-G | NCOR1       |
| TRMT2A.1  | ##### | 0.241507 | 0.426 | 0.096 | ##### | Class-G | TRMT2A      |
| PBX1.9    | ##### | 0.248142 | 0.574 | 0.155 | ##### | Class-G | PBX1        |
| PM20D2.4  | ##### | 0.237189 | 0.3   | 0.049 | ##### | Class-G | PM20D2      |
| PIGZ.5    | ##### | 0.191967 | 0.247 | 0.032 | ##### | Class-G | PIGZ        |
| SDHAF1.6  | ##### | 0.215611 | 0.498 | 0.124 | ##### | Class-G | SDHAF1      |
| TFAM.2    | ##### | 0.197992 | 0.506 | 0.128 | ##### | Class-G | TFAM        |
| DCPS.5    | ##### | 0.165872 | 0.489 | 0.12  | ##### | Class-G | DCPS        |
| C5orf45.6 | ##### | 0.152755 | 0.482 | 0.116 | ##### | Class-G | C5orf45     |
| TTC19.8   | ##### | 0.310509 | 0.831 | 0.278 | ##### | Class-G | TTC19       |
| CRIM1.6   | ##### | 0.233271 | 0.248 | 0.033 | ##### | Class-G | CRIM1       |
| NLGN3.9   | ##### | 0.244504 | 0.364 | 0.073 | ##### | Class-G | NLGN3       |
| ELMOD3.6  | ##### | 0.186687 | 0.412 | 0.09  | ##### | Class-G | ELMOD3      |
| EBPL.8    | ##### | 0.292727 | 0.743 | 0.23  | ##### | Class-G | EBPL        |
| APC.10    | ##### | 0.260962 | 0.569 | 0.155 | ##### | Class-G | APC         |
| RHOBTB3.1 | ##### | 0.380298 | 0.916 | 0.325 | ##### | Class-G | RHOBTB3     |
| C20orf27. | ##### | 0.328902 | 0.819 | 0.285 | ##### | Class-G | C20orf27    |
| GON4L.7   | ##### | 0.216858 | 0.572 | 0.156 | ##### | Class-G | GON4L       |
| BAG5.7    | ##### | 0.201764 | 0.514 | 0.131 | ##### | Class-G | BAG5        |
| ANKRD40.6 | ##### | 0.246523 | 0.492 | 0.123 | ##### | Class-G | ANKRD40     |
| SEZ6L.10  | ##### | 0.382625 | 0.406 | 0.091 | ##### | Class-G | SEZ6L       |
| PIGT.4    | ##### | 0.311333 | 0.876 | 0.319 | ##### | Class-G | PIGT        |
| THY1.9    | ##### | 0.263765 | 0.65  | 0.191 | ##### | Class-G | THY1        |
| HOXD-AS2. | ##### | 0.188181 | 0.2   | 0.019 | ##### | Class-G | HOXD-AS2    |
| KIAA1211L | ##### | 0.20092  | 0.229 | 0.027 | ##### | Class-G | KIAA1211L   |
| EXD2.3    | ##### | 0.205875 | 0.322 | 0.057 | ##### | Class-G | EXD2        |
| ALKBH2.1C | ##### | 0.183716 | 0.534 | 0.14  | ##### | Class-G | ALKBH2      |
| SEC23B.3  | ##### | 0.235324 | 0.679 | 0.204 | ##### | Class-G | SEC23B      |
| STX17.3   | ##### | 0.196681 | 0.36  | 0.071 | ##### | Class-G | STX17       |
| FARP1.4   | ##### | 0.22442  | 0.514 | 0.132 | ##### | Class-G | FARP1       |
| CLIP3.10  | ##### | 0.186967 | 0.542 | 0.141 | ##### | Class-G | CLIP3       |
| ABCD4.6   | ##### | 0.214613 | 0.654 | 0.191 | ##### | Class-G | ABCD4       |
| ARNTL.4   | ##### | 0.227348 | 0.324 | 0.059 | ##### | Class-G | ARNTL       |
| ZNF770.3  | ##### | 0.217029 | 0.4   | 0.086 | ##### | Class-G | ZNF770      |
| RP1-39G22 | ##### | 0.202631 | 0.401 | 0.087 | ##### | Class-G | RP1-39G22.7 |

|           |       |          |       |       |       |         |                |
|-----------|-------|----------|-------|-------|-------|---------|----------------|
| GRWD1.3   | ##### | 0.20318  | 0.45  | 0.106 | ##### | Class-G | GRWD1          |
| FAM172A.7 | ##### | 0.225149 | 0.535 | 0.141 | ##### | Class-G | FAM172A        |
| GPATCH4.5 | ##### | 0.200783 | 0.528 | 0.138 | ##### | Class-G | GPATCH4        |
| PDGFA.7   | ##### | 0.303337 | 0.325 | 0.06  | ##### | Class-G | PDGFA          |
| TARBP2.3  | ##### | 0.20012  | 0.433 | 0.1   | ##### | Class-G | TARBP2         |
| RPUSD3.1  | ##### | 0.173922 | 0.535 | 0.14  | ##### | Class-G | RPUSD3         |
| GCLM.5    | ##### | 0.265984 | 0.454 | 0.11  | ##### | Class-G | GCLM           |
| MCCC2.5   | ##### | 0.18616  | 0.407 | 0.088 | ##### | Class-G | MCCC2          |
| PDK2.5    | ##### | 0.210303 | 0.469 | 0.114 | ##### | Class-G | PDK2           |
| SEC61G.11 | ##### | 0.18314  | 0.998 | 0.767 | ##### | Class-G | SEC61G         |
| AMFR.4    | ##### | 0.20772  | 0.488 | 0.121 | ##### | Class-G | AMFR           |
| PIP4K2B.5 | ##### | 0.193051 | 0.34  | 0.064 | ##### | Class-G | PIP4K2B        |
| YAP1.2    | ##### | 0.189415 | 0.193 | 0.018 | ##### | Class-G | YAP1           |
| B4GALT7.3 | ##### | 0.232995 | 0.558 | 0.152 | ##### | Class-G | B4GALT7        |
| SETD9.2   | ##### | 0.145589 | 0.404 | 0.088 | ##### | Class-G | SETD9          |
| B3GAT3.4  | ##### | 0.288476 | 0.851 | 0.302 | ##### | Class-G | B3GAT3         |
| CEP164.2  | ##### | 0.186894 | 0.447 | 0.105 | ##### | Class-G | CEP164         |
| MEOX2.9   | ##### | 0.291544 | 0.282 | 0.045 | ##### | Class-G | MEOX2          |
| TMX3.3    | ##### | 0.215581 | 0.454 | 0.109 | ##### | Class-G | TMX3           |
| TRIM65.1  | ##### | 0.181681 | 0.279 | 0.043 | ##### | Class-G | TRIM65         |
| KLHL13.1C | ##### | 0.23815  | 0.331 | 0.061 | ##### | Class-G | KLHL13         |
| FAM207A.5 | ##### | 0.209025 | 0.554 | 0.148 | ##### | Class-G | FAM207A        |
| ADCK4.5   | ##### | 0.214348 | 0.391 | 0.084 | ##### | Class-G | ADCK4          |
| EML1.3    | ##### | 0.198632 | 0.287 | 0.046 | ##### | Class-G | EML1           |
| LAPTM5.11 | ##### | -1.61337 | 0.086 | 0.493 | ##### | Class-G | LAPTM5         |
| CMBL.8    | ##### | 0.214173 | 0.391 | 0.083 | ##### | Class-G | CMBL           |
| CRAT.4    | ##### | 0.222517 | 0.461 | 0.111 | ##### | Class-G | CRAT           |
| C21orf59. | ##### | 0.246921 | 0.761 | 0.243 | ##### | Class-G | C21orf59       |
| POMT2.3   | ##### | 0.199298 | 0.267 | 0.04  | ##### | Class-G | POMT2          |
| CSTF3.8   | ##### | 0.233646 | 0.671 | 0.201 | ##### | Class-G | CSTF3          |
| POMGNT2.8 | ##### | 0.228863 | 0.42  | 0.095 | ##### | Class-G | POMGNT2        |
| MIR210HG. | ##### | 0.217808 | 0.314 | 0.055 | ##### | Class-G | MIR210HG       |
| DHX33.7   | ##### | 0.22321  | 0.378 | 0.079 | ##### | Class-G | DHX33          |
| RP11-977G | ##### | 0.181886 | 0.259 | 0.037 | ##### | Class-G | RP11-977G19.11 |
| RGS3.8    | ##### | 0.257063 | 0.346 | 0.067 | ##### | Class-G | RGS3           |
| MCAT.9    | ##### | 0.204002 | 0.395 | 0.085 | ##### | Class-G | MCAT           |
| BCL2L12.6 | ##### | 0.198327 | 0.393 | 0.084 | ##### | Class-G | BCL2L12        |
| PURA.8    | ##### | 0.241949 | 0.556 | 0.151 | ##### | Class-G | PURA           |
| SECISBP2L | ##### | 0.181631 | 0.489 | 0.122 | ##### | Class-G | SECISBP2L      |
| HPS4.4    | ##### | 0.174371 | 0.508 | 0.13  | ##### | Class-G | HPS4           |
| RALBP1.5  | ##### | 0.249808 | 0.736 | 0.232 | ##### | Class-G | RALBP1         |
| FAM208B.2 | ##### | 0.202719 | 0.297 | 0.05  | ##### | Class-G | FAM208B        |
| VPS26B.8  | ##### | 0.248783 | 0.602 | 0.171 | ##### | Class-G | VPS26B         |
| PDLIM2.7  | ##### | 0.173935 | 0.624 | 0.177 | ##### | Class-G | PDLIM2         |
| EBF4.5    | ##### | 0.19876  | 0.226 | 0.027 | ##### | Class-G | EBF4           |
| C1QC.11   | ##### | -1.63226 | 0.187 | 0.553 | ##### | Class-G | C1QC           |
| TMEM251.4 | ##### | 0.172805 | 0.628 | 0.179 | ##### | Class-G | TMEM251        |
| NARF.6    | ##### | 0.31217  | 0.766 | 0.258 | ##### | Class-G | NARF           |
| STK11.2   | ##### | 0.210181 | 0.32  | 0.058 | ##### | Class-G | STK11          |
| MAP4K3.2  | ##### | 0.209311 | 0.287 | 0.046 | ##### | Class-G | MAP4K3         |
| WDR25.4   | ##### | 0.18298  | 0.328 | 0.06  | ##### | Class-G | WDR25          |

|            |       |          |       |       |       |         |                |
|------------|-------|----------|-------|-------|-------|---------|----------------|
| DNP1. 6    | ##### | 0.299537 | 0.864 | 0.297 | ##### | Class-G | DNP1           |
| SPIRE1. 4  | ##### | 0.223225 | 0.327 | 0.06  | ##### | Class-G | SPIRE1         |
| DIAPH1. 7  | ##### | 0.21068  | 0.415 | 0.093 | ##### | Class-G | DIAPH1         |
| STAMP. 6   | ##### | 0.188589 | 0.669 | 0.2   | ##### | Class-G | STAMP          |
| POLR2J3. 1 | ##### | 0.221641 | 0.803 | 0.263 | ##### | Class-G | POLR2J3        |
| ELMO2. 6   | ##### | 0.21204  | 0.394 | 0.085 | ##### | Class-G | ELMO2          |
| HMGA2      | ##### | 0.250538 | 0.144 | 0.007 | ##### | Class-G | HMGA2          |
| CENPV. 10  | ##### | 0.298551 | 0.648 | 0.191 | ##### | Class-G | CENPV          |
| CPSF2. 1   | ##### | 0.191668 | 0.386 | 0.082 | ##### | Class-G | CPSF2          |
| RP11-375N  | ##### | 0.185698 | 0.149 | 0.008 | ##### | Class-G | RP11-375N15. 2 |
| NME4. 8    | ##### | 0.354595 | 0.85  | 0.305 | ##### | Class-G | NME4           |
| PTN. 9     | ##### | 0.306672 | 0.999 | 0.554 | ##### | Class-G | PTN            |
| ZNF664. 8  | ##### | 0.20322  | 0.437 | 0.102 | ##### | Class-G | ZNF664         |
| EYA2. 3    | ##### | 0.232083 | 0.28  | 0.045 | ##### | Class-G | EYA2           |
| CRYZ. 9    | ##### | 0.161955 | 0.382 | 0.081 | ##### | Class-G | CRYZ           |
| KIAA1456.  | ##### | 0.215407 | 0.206 | 0.022 | ##### | Class-G | KIAA1456       |
| AC007246.  | ##### | 0.199271 | 0.346 | 0.067 | ##### | Class-G | AC007246. 3    |
| ZNF768. 4  | ##### | 0.196443 | 0.319 | 0.058 | ##### | Class-G | ZNF768         |
| COQ4. 6    | ##### | 0.2205   | 0.67  | 0.202 | ##### | Class-G | COQ4           |
| HEXDC. 3   | ##### | 0.189311 | 0.361 | 0.073 | ##### | Class-G | HEXDC          |
| AKAP11. 6  | ##### | 0.213677 | 0.437 | 0.103 | ##### | Class-G | AKAP11         |
| PRRC2B. 8  | ##### | 0.221503 | 0.612 | 0.175 | ##### | Class-G | PRRC2B         |
| DAP. 7     | ##### | 0.254986 | 0.688 | 0.209 | ##### | Class-G | DAP            |
| C1orf61. 9 | ##### | 0.419515 | 0.969 | 0.464 | ##### | Class-G | C1orf61        |
| KIAA1715.  | ##### | 0.239458 | 0.645 | 0.191 | ##### | Class-G | KIAA1715       |
| ST3GAL2. 4 | ##### | 0.206531 | 0.33  | 0.062 | ##### | Class-G | ST3GAL2        |
| SFXN1. 7   | ##### | 0.183205 | 0.573 | 0.159 | ##### | Class-G | SFXN1          |
| IFT52. 8   | ##### | 0.183189 | 0.65  | 0.192 | ##### | Class-G | IFT52          |
| CTSF. 8    | ##### | 0.237183 | 0.674 | 0.204 | ##### | Class-G | CTSF           |
| RGS2. 9    | ##### | -1.51546 | 0.101 | 0.502 | ##### | Class-G | RGS2           |
| ERBB2. 4   | ##### | 0.161907 | 0.233 | 0.03  | ##### | Class-G | ERBB2          |
| SCRIB. 3   | ##### | 0.203044 | 0.311 | 0.055 | ##### | Class-G | SCRIB          |
| QSER1. 7   | ##### | 0.235494 | 0.37  | 0.077 | ##### | Class-G | QSER1          |
| LRRC37B. 5 | ##### | 0.210841 | 0.358 | 0.072 | ##### | Class-G | LRRC37B        |
| TRUB2. 6   | ##### | 0.182261 | 0.563 | 0.155 | ##### | Class-G | TRUB2          |
| SMOX. 9    | ##### | 0.178314 | 0.626 | 0.185 | ##### | Class-G | SMOX           |
| MYO6. 8    | ##### | 0.237215 | 0.587 | 0.165 | ##### | Class-G | MYO6           |
| ABCF1. 7   | ##### | 0.245914 | 0.702 | 0.215 | ##### | Class-G | ABCF1          |
| RPRD1A. 7  | ##### | 0.213143 | 0.553 | 0.151 | ##### | Class-G | RPRD1A         |
| ZNF584. 5  | ##### | 0.213508 | 0.3   | 0.051 | ##### | Class-G | ZNF584         |
| NDRG4. 10  | ##### | 0.196519 | 0.461 | 0.111 | ##### | Class-G | NDRG4          |
| ALDH5A1. 2 | ##### | 0.184082 | 0.227 | 0.028 | ##### | Class-G | ALDH5A1        |
| DNAJC21. 1 | ##### | 0.210943 | 0.379 | 0.081 | ##### | Class-G | DNAJC21        |
| ZNF599. 6  | ##### | 0.188364 | 0.27  | 0.042 | ##### | Class-G | ZNF599         |
| NPAS2      | ##### | 0.202079 | 0.186 | 0.017 | ##### | Class-G | NPAS2          |
| FRA10AC1.  | ##### | 0.184332 | 0.457 | 0.11  | ##### | Class-G | FRA10AC1       |
| UBE2H. 9   | ##### | 0.23559  | 0.654 | 0.194 | ##### | Class-G | UBE2H          |
| NT5C. 5    | ##### | 0.267645 | 0.765 | 0.247 | ##### | Class-G | NT5C           |
| EIF3J-AS1  | ##### | 0.152249 | 0.39  | 0.084 | ##### | Class-G | EIF3J-AS1      |
| ILVBL. 5   | ##### | 0.196427 | 0.642 | 0.188 | ##### | Class-G | ILVBL          |
| MTMR11. 6  | ##### | 0.157516 | 0.264 | 0.039 | ##### | Class-G | MTMR11         |

|            |       |           |        |        |       |         |            |
|------------|-------|-----------|--------|--------|-------|---------|------------|
| MAP6. 7    | ##### | 0. 215067 | 0. 322 | 0. 059 | ##### | Class-G | MAP6       |
| MCRS1. 5   | ##### | 0. 199696 | 0. 676 | 0. 204 | ##### | Class-G | MCRS1      |
| ANKS3. 7   | ##### | 0. 212477 | 0. 474 | 0. 118 | ##### | Class-G | ANKS3      |
| RHOT1. 6   | ##### | 0. 26473  | 0. 628 | 0. 187 | ##### | Class-G | RHOT1      |
| RRAS2. 7   | ##### | 0. 216187 | 0. 28  | 0. 045 | ##### | Class-G | RRAS2      |
| BCAS4. 4   | ##### | 0. 134934 | 0. 298 | 0. 051 | ##### | Class-G | BCAS4      |
| PIGL. 2    | ##### | 0. 156521 | 0. 298 | 0. 051 | ##### | Class-G | PIGL       |
| IMMP1L. 9  | ##### | 0. 171859 | 0. 6   | 0. 171 | ##### | Class-G | IMMP1L     |
| ELAC2. 2   | ##### | 0. 207726 | 0. 441 | 0. 106 | ##### | Class-G | ELAC2      |
| Clorf226   | ##### | 0. 192228 | 0. 161 | 0. 011 | ##### | Class-G | Clorf226   |
| YTHDF3-AS  | ##### | 0. 16158  | 0. 236 | 0. 031 | ##### | Class-G | YTHDF3-AS1 |
| RAB21. 5   | ##### | 0. 197438 | 0. 547 | 0. 148 | ##### | Class-G | RAB21      |
| SMAD5. 6   | ##### | 0. 203736 | 0. 476 | 0. 121 | ##### | Class-G | SMAD5      |
| TARS. 5    | ##### | 0. 205851 | 0. 587 | 0. 168 | ##### | Class-G | TARS       |
| ST6GALNAC  | ##### | 0. 174035 | 0. 386 | 0. 083 | ##### | Class-G | ST6GALNAC4 |
| SLN. 8     | ##### | 0. 146917 | 0. 455 | 0. 114 | ##### | Class-G | SLN        |
| SEC14L1. 7 | ##### | 0. 204218 | 0. 71  | 0. 223 | ##### | Class-G | SEC14L1    |
| PLEKHJ1. 7 | ##### | 0. 259407 | 0. 839 | 0. 289 | ##### | Class-G | PLEKHJ1    |
| MAFG. 5    | ##### | 0. 216167 | 0. 506 | 0. 132 | ##### | Class-G | MAFG       |
| TUG1. 8    | ##### | 0. 208082 | 0. 488 | 0. 124 | ##### | Class-G | TUG1       |
| PKN2. 4    | ##### | 0. 198219 | 0. 559 | 0. 154 | ##### | Class-G | PKN2       |
| BTBD2. 2   | ##### | 0. 211275 | 0. 324 | 0. 06  | ##### | Class-G | BTBD2      |
| KCND3. 8   | ##### | 0. 211447 | 0. 231 | 0. 03  | ##### | Class-G | KCND3      |
| DPP8. 2    | ##### | 0. 193178 | 0. 452 | 0. 11  | ##### | Class-G | DPP8       |
| WDR83. 5   | ##### | 0. 181079 | 0. 478 | 0. 121 | ##### | Class-G | WDR83      |
| TADA3. 4   | ##### | 0. 308747 | 0. 856 | 0. 314 | ##### | Class-G | TADA3      |
| SIAE. 5    | ##### | 0. 161974 | 0. 306 | 0. 054 | ##### | Class-G | SIAE       |
| PRKRIR. 4  | ##### | 0. 216802 | 0. 348 | 0. 07  | ##### | Class-G | PRKRIR     |
| PTPN1. 9   | ##### | 0. 210287 | 0. 599 | 0. 172 | ##### | Class-G | PTPN1      |
| BTBD1. 4   | ##### | 0. 202288 | 0. 434 | 0. 102 | ##### | Class-G | BTBD1      |
| FAM46A. 7  | ##### | 0. 231017 | 0. 525 | 0. 142 | ##### | Class-G | FAM46A     |
| PABPN1. 7  | ##### | 0. 25527  | 0. 823 | 0. 279 | ##### | Class-G | PABPN1     |
| NME3. 5    | ##### | 0. 332638 | 0. 901 | 0. 338 | ##### | Class-G | NME3       |
| HERC2. 4   | ##### | 0. 197412 | 0. 512 | 0. 135 | ##### | Class-G | HERC2      |
| C1QA. 11   | ##### | -1. 56145 | 0. 264 | 0. 582 | ##### | Class-G | C1QA       |
| DENR. 6    | ##### | 0. 267515 | 0. 761 | 0. 248 | ##### | Class-G | DENR       |
| HMGCR. 6   | ##### | 0. 261959 | 0. 345 | 0. 07  | ##### | Class-G | HMGCR      |
| ADAR. 3    | ##### | 0. 237312 | 0. 741 | 0. 237 | ##### | Class-G | ADAR       |
| STX10. 2   | ##### | 0. 253168 | 0. 826 | 0. 279 | ##### | Class-G | STX10      |
| FAM174A. 5 | ##### | 0. 215176 | 0. 579 | 0. 164 | ##### | Class-G | FAM174A    |
| RANGRF. 3  | ##### | 0. 134672 | 0. 559 | 0. 153 | ##### | Class-G | RANGRF     |
| TYROBP. 11 | ##### | -1. 65531 | 0. 133 | 0. 513 | ##### | Class-G | TYROBP     |
| CNGA3      | ##### | 0. 182486 | 0. 154 | 0. 01  | ##### | Class-G | CNGA3      |
| CCNL2. 8   | ##### | 0. 257969 | 0. 71  | 0. 222 | ##### | Class-G | CCNL2      |
| ZNF337. 3  | ##### | 0. 185016 | 0. 261 | 0. 039 | ##### | Class-G | ZNF337     |
| EDEM3. 1   | ##### | 0. 198935 | 0. 357 | 0. 073 | ##### | Class-G | EDEM3      |
| NDRG3. 7   | ##### | 0. 206715 | 0. 491 | 0. 126 | ##### | Class-G | NDRG3      |
| PRKACA. 4  | ##### | 0. 181057 | 0. 435 | 0. 103 | ##### | Class-G | PRKACA     |
| MLEC. 5    | ##### | 0. 354713 | 0. 883 | 0. 322 | ##### | Class-G | MLEC       |
| C1QL1. 9   | ##### | 0. 289294 | 0. 357 | 0. 075 | ##### | Class-G | C1QL1      |
| FLCN. 5    | ##### | 0. 191498 | 0. 404 | 0. 092 | ##### | Class-G | FLCN       |

|           |       |          |       |       |       |         |               |
|-----------|-------|----------|-------|-------|-------|---------|---------------|
| CCDC82.5  | ##### | 0.23744  | 0.668 | 0.207 | ##### | Class-G | CCDC82        |
| TMEM25.9  | ##### | 0.190327 | 0.377 | 0.081 | ##### | Class-G | TMEM25        |
| CRELD2.7  | ##### | 0.259955 | 0.693 | 0.216 | ##### | Class-G | CRELD2        |
| SPTAN1.9  | ##### | 0.231768 | 0.649 | 0.196 | ##### | Class-G | SPTAN1        |
| PIANP.9   | ##### | 0.214207 | 0.287 | 0.048 | ##### | Class-G | PIANP         |
| NFE2L1.4  | ##### | 0.200372 | 0.509 | 0.135 | ##### | Class-G | NFE2L1        |
| ZDHHC15.7 | ##### | 0.199237 | 0.237 | 0.032 | ##### | Class-G | ZDHHC15       |
| AP1S2.9   | ##### | 0.456327 | 0.939 | 0.428 | ##### | Class-G | AP1S2         |
| GEMIN7.3  | ##### | 0.138033 | 0.455 | 0.111 | ##### | Class-G | GEMIN7        |
| PIAS3     | ##### | 0.190358 | 0.283 | 0.047 | ##### | Class-G | PIAS3         |
| DHFR.7    | ##### | 0.2255   | 0.436 | 0.104 | ##### | Class-G | DHFR          |
| PPP1R16A. | ##### | 0.214833 | 0.472 | 0.12  | ##### | Class-G | PPP1R16A      |
| ZNF439.1C | ##### | 0.209579 | 0.431 | 0.102 | ##### | Class-G | ZNF439        |
| ENKUR.8   | ##### | 0.147019 | 0.264 | 0.041 | ##### | Class-G | ENKUR         |
| NEK8.1    | ##### | 0.179584 | 0.219 | 0.027 | ##### | Class-G | NEK8          |
| JMY.6     | ##### | 0.248716 | 0.329 | 0.064 | ##### | Class-G | JMY           |
| RAB32.11  | ##### | 0.211378 | 0.617 | 0.177 | ##### | Class-G | RAB32         |
| GTF2H2.8  | ##### | 0.197744 | 0.503 | 0.132 | ##### | Class-G | GTF2H2        |
| SEC22C.6  | ##### | 0.186785 | 0.589 | 0.168 | ##### | Class-G | SEC22C        |
| C12orf73. | ##### | 0.184822 | 0.443 | 0.107 | ##### | Class-G | C12orf73      |
| FLRT3.7   | ##### | 0.248672 | 0.228 | 0.03  | ##### | Class-G | FLRT3         |
| MUS81.5   | ##### | 0.204115 | 0.483 | 0.123 | ##### | Class-G | MUS81         |
| DPY19L3.5 | ##### | 0.194969 | 0.302 | 0.054 | ##### | Class-G | DPY19L3       |
| MAMLD1    | ##### | 0.175925 | 0.176 | 0.015 | ##### | Class-G | MAMLD1        |
| TXNL4A.6  | ##### | 0.342215 | 0.887 | 0.332 | ##### | Class-G | TXNL4A        |
| GNAS.10   | ##### | 0.365003 | 0.99  | 0.591 | ##### | Class-G | GNAS          |
| ZMYND19.1 | ##### | 0.179265 | 0.232 | 0.031 | ##### | Class-G | ZMYND19       |
| MAPK6.6   | ##### | 0.207112 | 0.477 | 0.122 | ##### | Class-G | MAPK6         |
| GINM1.3   | ##### | 0.228516 | 0.719 | 0.228 | ##### | Class-G | GINM1         |
| FAM120C   | ##### | 0.188772 | 0.24  | 0.033 | ##### | Class-G | FAM120C       |
| ACAT2.8   | ##### | 0.293273 | 0.666 | 0.214 | ##### | Class-G | ACAT2         |
| MMP15.8   | ##### | 0.205088 | 0.243 | 0.034 | ##### | Class-G | MMP15         |
| CES2.5    | ##### | 0.227316 | 0.499 | 0.132 | ##### | Class-G | CES2          |
| QTRT1.9   | ##### | 0.199014 | 0.778 | 0.258 | ##### | Class-G | QTRT1         |
| NAT9.6    | ##### | 0.168772 | 0.54  | 0.148 | ##### | Class-G | NAT9          |
| TIMM10B.5 | ##### | 0.127297 | 0.485 | 0.125 | ##### | Class-G | TIMM10B       |
| ZNFX1.3   | ##### | 0.165895 | 0.415 | 0.096 | ##### | Class-G | ZNFX1         |
| RAD51C.7  | ##### | 0.188699 | 0.665 | 0.201 | ##### | Class-G | RAD51C        |
| ZHX1.10   | ##### | 0.227503 | 0.551 | 0.153 | ##### | Class-G | ZHX1          |
| NADSYN1.5 | ##### | 0.143475 | 0.371 | 0.079 | ##### | Class-G | NADSYN1       |
| LONRF1.7  | ##### | 0.207813 | 0.322 | 0.061 | ##### | Class-G | LONRF1        |
| RP11-400F | ##### | 0.202996 | 0.286 | 0.048 | ##### | Class-G | RP11-400F19.6 |
| HINT2.5   | ##### | 0.292044 | 0.801 | 0.271 | ##### | Class-G | HINT2         |
| ANKIB1.1C | ##### | 0.227324 | 0.55  | 0.152 | ##### | Class-G | ANKIB1        |
| MEIS3.9   | ##### | 0.221633 | 0.391 | 0.087 | ##### | Class-G | MEIS3         |
| DUSP3.5   | ##### | 0.187518 | 0.485 | 0.125 | ##### | Class-G | DUSP3         |
| SLC35G2.9 | ##### | 0.160297 | 0.364 | 0.077 | ##### | Class-G | SLC35G2       |
| FAM200B.7 | ##### | 0.259112 | 0.827 | 0.291 | ##### | Class-G | FAM200B       |
| GTF3C1.3  | ##### | 0.170141 | 0.343 | 0.068 | ##### | Class-G | GTF3C1        |
| PPP1R35.1 | ##### | 0.22404  | 0.447 | 0.11  | ##### | Class-G | PPP1R35       |
| TOMM34.5  | ##### | 0.163046 | 0.405 | 0.092 | ##### | Class-G | TOMM34        |



|           |       |          |       |       |       |         |          |
|-----------|-------|----------|-------|-------|-------|---------|----------|
| UBALD1.7  | ##### | 0.217377 | 0.467 | 0.118 | ##### | Class-G | UBALD1   |
| LUZP1.4   | ##### | 0.203423 | 0.506 | 0.135 | ##### | Class-G | LUZP1    |
| FAM229B.1 | ##### | 0.177251 | 0.714 | 0.223 | ##### | Class-G | FAM229B  |
| ATP13A4   | ##### | 0.165814 | 0.155 | 0.011 | ##### | Class-G | ATP13A4  |
| WAC.4     | ##### | 0.226067 | 0.653 | 0.2   | ##### | Class-G | WAC      |
| SUPT20H.7 | ##### | 0.196001 | 0.548 | 0.151 | ##### | Class-G | SUPT20H  |
| UBXN2A.7  | ##### | 0.212909 | 0.509 | 0.135 | ##### | Class-G | UBXN2A   |
| AMOTL1.5  | ##### | 0.187315 | 0.249 | 0.036 | ##### | Class-G | AMOTL1   |
| SLC30A5.6 | ##### | 0.217065 | 0.541 | 0.15  | ##### | Class-G | SLC30A5  |
| SGTA.6    | ##### | 0.230143 | 0.76  | 0.243 | ##### | Class-G | SGTA     |
| NT5C3B.1C | ##### | 0.309021 | 0.779 | 0.258 | ##### | Class-G | NT5C3B   |
| GPS1.7    | ##### | 0.244868 | 0.763 | 0.252 | ##### | Class-G | GPS1     |
| HMGXB3.2  | ##### | 0.211839 | 0.38  | 0.084 | ##### | Class-G | HMGXB3   |
| GSTZ1.4   | ##### | 0.121929 | 0.448 | 0.11  | ##### | Class-G | GSTZ1    |
| PSMF1.2   | ##### | 0.280219 | 0.882 | 0.32  | ##### | Class-G | PSMF1    |
| GOLIM4.7  | ##### | 0.319069 | 0.757 | 0.256 | ##### | Class-G | GOLIM4   |
| MPP5.6    | ##### | 0.166354 | 0.317 | 0.06  | ##### | Class-G | MPP5     |
| EIF4G3.4  | ##### | 0.199494 | 0.48  | 0.124 | ##### | Class-G | EIF4G3   |
| SLC23A2.3 | ##### | 0.179726 | 0.343 | 0.069 | ##### | Class-G | SLC23A2  |
| CSF1.9    | ##### | 0.205158 | 0.314 | 0.059 | ##### | Class-G | CSF1     |
| LGALS3.9  | ##### | 0.131815 | 0.952 | 0.404 | ##### | Class-G | LGALS3   |
| ZMAT5.4   | ##### | 0.1335   | 0.603 | 0.175 | ##### | Class-G | ZMAT5    |
| TMEM121.9 | ##### | 0.210264 | 0.339 | 0.067 | ##### | Class-G | TMEM121  |
| C1orf122. | ##### | 0.374806 | 0.953 | 0.412 | ##### | Class-G | C1orf122 |
| RALY.5    | ##### | 0.42326  | 0.911 | 0.382 | ##### | Class-G | RALY     |
| CHCHD6.7  | ##### | 0.190267 | 0.601 | 0.176 | ##### | Class-G | CHCHD6   |
| URM1.3    | ##### | 0.226106 | 0.816 | 0.283 | ##### | Class-G | URM1     |
| RPS6KB1.2 | ##### | 0.195831 | 0.386 | 0.087 | ##### | Class-G | RPS6KB1  |
| GORAB.8   | ##### | 0.173443 | 0.268 | 0.043 | ##### | Class-G | GORAB    |
| ZNF32.5   | ##### | 0.194259 | 0.576 | 0.165 | ##### | Class-G | ZNF32    |
| EXOG.9    | ##### | 0.165597 | 0.445 | 0.109 | ##### | Class-G | EXOG     |
| TENM4     | ##### | 0.169294 | 0.176 | 0.016 | ##### | Class-G | TENM4    |
| KATNAL1.4 | ##### | 0.180173 | 0.283 | 0.048 | ##### | Class-G | KATNAL1  |
| FRYL.10   | ##### | 0.196796 | 0.508 | 0.135 | ##### | Class-G | FRYL     |
| PFKM.7    | ##### | 0.217377 | 0.498 | 0.132 | ##### | Class-G | PFKM     |
| CTNNA1.9  | ##### | 0.221716 | 0.422 | 0.102 | ##### | Class-G | CTNNA1   |
| RWDD2B.1  | ##### | 0.17629  | 0.252 | 0.038 | ##### | Class-G | RWDD2B   |
| SHB.3     | ##### | 0.181891 | 0.226 | 0.03  | ##### | Class-G | SHB      |
| PRPF6.9   | ##### | 0.237347 | 0.816 | 0.277 | ##### | Class-G | PRPF6    |
| XPOT.7    | ##### | 0.216816 | 0.465 | 0.119 | ##### | Class-G | XPOT     |
| RNF10.6   | ##### | 0.252213 | 0.782 | 0.259 | ##### | Class-G | RNF10    |
| TCFL5     | ##### | 0.160586 | 0.179 | 0.017 | ##### | Class-G | TCFL5    |
| ZNF883.1C | ##### | 0.178455 | 0.412 | 0.096 | ##### | Class-G | ZNF883   |
| ZNF629.3  | ##### | 0.186374 | 0.255 | 0.039 | ##### | Class-G | ZNF629   |
| QKI.8     | ##### | 0.373602 | 0.949 | 0.393 | ##### | Class-G | QKI      |
| TLE4.7    | ##### | 0.222971 | 0.455 | 0.116 | ##### | Class-G | TLE4     |
| PTP4A3.7  | ##### | 0.235324 | 0.297 | 0.054 | ##### | Class-G | PTP4A3   |
| TPRA1.3   | ##### | 0.195387 | 0.454 | 0.114 | ##### | Class-G | TPRA1    |
| TRAF7.6   | ##### | 0.202267 | 0.508 | 0.137 | ##### | Class-G | TRAF7    |
| RRP15.5   | ##### | 0.150574 | 0.571 | 0.162 | ##### | Class-G | RRP15    |
| FBLN7.1   | ##### | 0.18679  | 0.2   | 0.022 | ##### | Class-G | FBLN7    |

|           |       |          |       |       |       |         |          |
|-----------|-------|----------|-------|-------|-------|---------|----------|
| TNFRSF1A. | ##### | 0.342427 | 0.845 | 0.294 | ##### | Class-G | TNFRSF1A |
| FBN1.1    | ##### | 0.160758 | 0.16  | 0.012 | ##### | Class-G | FBN1     |
| JOSD2.9   | ##### | 0.23176  | 0.788 | 0.261 | ##### | Class-G | JOSD2    |
| TMC03.3   | ##### | 0.194614 | 0.538 | 0.149 | ##### | Class-G | TMC03    |
| TRIP10.4  | ##### | 0.188388 | 0.321 | 0.062 | ##### | Class-G | TRIP10   |
| MIER1.5   | ##### | 0.181328 | 0.479 | 0.124 | ##### | Class-G | MIER1    |
| ALOX5AP.1 | ##### | -1.58532 | 0.06  | 0.454 | ##### | Class-G | ALOX5AP  |
| SF3A2.6   | ##### | 0.238091 | 0.645 | 0.196 | ##### | Class-G | SF3A2    |
| ATP5D.10  | ##### | 0.401183 | 0.981 | 0.554 | ##### | Class-G | ATP5D    |
| DNAJC5.4  | ##### | 0.192669 | 0.555 | 0.156 | ##### | Class-G | DNAJC5   |
| NPHP3.4   | ##### | 0.177602 | 0.344 | 0.071 | ##### | Class-G | NPHP3    |
| PRR14L.3  | ##### | 0.181942 | 0.301 | 0.055 | ##### | Class-G | PRR14L   |
| SLAIN1.1C | ##### | 0.143185 | 0.54  | 0.148 | ##### | Class-G | SLAIN1   |
| ZNF576.5  | ##### | 0.157816 | 0.403 | 0.094 | ##### | Class-G | ZNF576   |
| MRPS23.7  | ##### | 0.223121 | 0.824 | 0.292 | ##### | Class-G | MRPS23   |
| C5orf42.7 | ##### | 0.204058 | 0.31  | 0.059 | ##### | Class-G | C5orf42  |
| PAIP1.10  | ##### | 0.35299  | 0.874 | 0.317 | ##### | Class-G | PAIP1    |
| SPARCL1.1 | ##### | 0.25313  | 0.764 | 0.277 | ##### | Class-G | SPARCL1  |
| MFSD10.6  | ##### | 0.216132 | 0.725 | 0.232 | ##### | Class-G | MFSD10   |
| ANKFY1.2  | ##### | 0.191274 | 0.398 | 0.092 | ##### | Class-G | ANKFY1   |
| IFI27L1.7 | ##### | 0.149623 | 0.501 | 0.134 | ##### | Class-G | IFI27L1  |
| PGM3.5    | ##### | 0.21355  | 0.476 | 0.125 | ##### | Class-G | PGM3     |
| GNPNAT1.4 | ##### | 0.176007 | 0.326 | 0.065 | ##### | Class-G | GNPNAT1  |
| NREP.10   | ##### | 0.246685 | 0.674 | 0.207 | ##### | Class-G | NREP     |
| ZNF43.9   | ##### | 0.215727 | 0.401 | 0.094 | ##### | Class-G | ZNF43    |
| SLC22A17. | ##### | 0.215846 | 0.694 | 0.217 | ##### | Class-G | SLC22A17 |
| STK19.2   | ##### | 0.18531  | 0.379 | 0.085 | ##### | Class-G | STK19    |
| C17orf58. | ##### | 0.219887 | 0.499 | 0.135 | ##### | Class-G | C17orf58 |
| CAPNS1.6  | ##### | 0.258097 | 0.785 | 0.267 | ##### | Class-G | CAPNS1   |
| BMI1.6    | ##### | 0.19337  | 0.406 | 0.096 | ##### | Class-G | BMI1     |
| FOXJ3.2   | ##### | 0.197601 | 0.347 | 0.073 | ##### | Class-G | FOXJ3    |
| C1orf131. | ##### | 0.147507 | 0.528 | 0.147 | ##### | Class-G | C1orf131 |
| RANBP3.4  | ##### | 0.19903  | 0.571 | 0.165 | ##### | Class-G | RANBP3   |
| MAU2.3    | ##### | 0.187076 | 0.372 | 0.082 | ##### | Class-G | MAU2     |
| MARK1.7   | ##### | 0.218602 | 0.248 | 0.038 | ##### | Class-G | MARK1    |
| RNMTL1.6  | ##### | 0.185689 | 0.386 | 0.088 | ##### | Class-G | RNMTL1   |
| KCNMB4.9  | ##### | 0.144613 | 0.374 | 0.082 | ##### | Class-G | KCNMB4   |
| FZR1.5    | ##### | 0.210953 | 0.438 | 0.109 | ##### | Class-G | FZR1     |
| COA5.5    | ##### | 0.188136 | 0.73  | 0.237 | ##### | Class-G | COA5     |
| IPO7.4    | ##### | 0.212208 | 0.549 | 0.156 | ##### | Class-G | IPO7     |
| ITPA.3    | ##### | 0.264554 | 0.873 | 0.328 | ##### | Class-G | ITPA     |
| DPM3.3    | ##### | 0.196485 | 0.811 | 0.277 | ##### | Class-G | DPM3     |
| CCDC43.6  | ##### | 0.153309 | 0.528 | 0.145 | ##### | Class-G | CCDC43   |
| SH3BP5.9  | ##### | 0.256563 | 0.527 | 0.148 | ##### | Class-G | SH3BP5   |
| KANK1.8   | ##### | 0.174041 | 0.305 | 0.057 | ##### | Class-G | KANK1    |
| IFT27.8   | ##### | 0.205248 | 0.636 | 0.195 | ##### | Class-G | IFT27    |
| PRKD1.6   | ##### | 0.205616 | 0.207 | 0.025 | ##### | Class-G | PRKD1    |
| MFAP3L.8  | ##### | 0.181857 | 0.218 | 0.028 | ##### | Class-G | MFAP3L   |
| DPP6.8    | ##### | 0.266436 | 0.446 | 0.115 | ##### | Class-G | DPP6     |
| SDF2.5    | ##### | 0.236859 | 0.808 | 0.283 | ##### | Class-G | SDF2     |
| IRF2BPL.8 | ##### | 0.255679 | 0.604 | 0.182 | ##### | Class-G | IRF2BPL  |

|             |       |           |        |        |       |         |                |
|-------------|-------|-----------|--------|--------|-------|---------|----------------|
| EMC8. 6     | ##### | 0. 244394 | 0. 662 | 0. 208 | ##### | Class-G | EMC8           |
| R3HDM1. 4   | ##### | 0. 198349 | 0. 38  | 0. 086 | ##### | Class-G | R3HDM1         |
| CD151. 10   | ##### | 0. 261425 | 0. 951 | 0. 405 | ##### | Class-G | CD151          |
| CLPTM1. 2   | ##### | 0. 277858 | 0. 787 | 0. 273 | ##### | Class-G | CLPTM1         |
| N6AMT1. 1   | ##### | 0. 167303 | 0. 238 | 0. 034 | ##### | Class-G | N6AMT1         |
| DHRXS. 4    | ##### | 0. 206416 | 0. 592 | 0. 174 | ##### | Class-G | DHRXS          |
| PPP2R4. 3   | ##### | 0. 205004 | 0. 596 | 0. 178 | ##### | Class-G | PPP2R4         |
| CD14. 11    | ##### | -1. 55067 | 0. 076 | 0. 463 | ##### | Class-G | CD14           |
| CDV3. 6     | ##### | 0. 196506 | 0. 672 | 0. 21  | ##### | Class-G | CDV3           |
| CUL5. 6     | ##### | 0. 213834 | 0. 569 | 0. 166 | ##### | Class-G | CUL5           |
| TOM1L2. 7   | ##### | 0. 172174 | 0. 365 | 0. 08  | ##### | Class-G | TOM1L2         |
| AUTS2. 10   | ##### | 0. 211193 | 0. 361 | 0. 079 | ##### | Class-G | AUTS2          |
| AFG3L2. 2   | ##### | 0. 212168 | 0. 54  | 0. 153 | ##### | Class-G | AFG3L2         |
| RRP9. 5     | ##### | 0. 175001 | 0. 44  | 0. 11  | ##### | Class-G | RRP9           |
| DPF2. 6     | ##### | 0. 181988 | 0. 572 | 0. 167 | ##### | Class-G | DPF2           |
| LINC00667   | ##### | 0. 131637 | 0. 614 | 0. 183 | ##### | Class-G | LINC00667      |
| PFDN4. 7    | ##### | 0. 289925 | 0. 82  | 0. 284 | ##### | Class-G | PFDN4          |
| TMEM199. 5  | ##### | 0. 150394 | 0. 61  | 0. 182 | ##### | Class-G | TMEM199        |
| SLC35B1. 5  | ##### | 0. 28064  | 0. 858 | 0. 315 | ##### | Class-G | SLC35B1        |
| BOLA3. 6    | ##### | 0. 235527 | 0. 771 | 0. 264 | ##### | Class-G | BOLA3          |
| SLC22A23. 3 | ##### | 0. 160185 | 0. 246 | 0. 037 | ##### | Class-G | SLC22A23       |
| STK40. 2    | ##### | 0. 192052 | 0. 372 | 0. 083 | ##### | Class-G | STK40          |
| CASP6. 8    | ##### | 0. 182099 | 0. 452 | 0. 115 | ##### | Class-G | CASP6          |
| TMEM260     | ##### | 0. 198345 | 0. 263 | 0. 043 | ##### | Class-G | TMEM260        |
| SLMAP. 2    | ##### | 0. 178005 | 0. 379 | 0. 086 | ##### | Class-G | SLMAP          |
| CTD-3065J   | ##### | 0. 159741 | 0. 188 | 0. 02  | ##### | Class-G | CTD-3065J16. 9 |
| YY1. 7      | ##### | 0. 289293 | 0. 78  | 0. 268 | ##### | Class-G | YY1            |
| HDLBP. 5    | ##### | 0. 244701 | 0. 777 | 0. 264 | ##### | Class-G | HDLBP          |
| ZNF532. 7   | ##### | 0. 193875 | 0. 306 | 0. 058 | ##### | Class-G | ZNF532         |
| UBALD2. 5   | ##### | 0. 21475  | 0. 643 | 0. 197 | ##### | Class-G | UBALD2         |
| MT3. 11     | ##### | 0. 195438 | 0. 952 | 0. 415 | ##### | Class-G | MT3            |
| REPS1. 7    | ##### | 0. 221117 | 0. 378 | 0. 086 | ##### | Class-G | REPS1          |
| CYHR1. 8    | ##### | 0. 187224 | 0. 678 | 0. 213 | ##### | Class-G | CYHR1          |
| SNAP29. 7   | ##### | 0. 156894 | 0. 578 | 0. 167 | ##### | Class-G | SNAP29         |
| RIMKLA. 3   | ##### | 0. 188334 | 0. 211 | 0. 027 | ##### | Class-G | RIMKLA         |
| OTUD7B. 8   | ##### | 0. 179557 | 0. 323 | 0. 065 | ##### | Class-G | OTUD7B         |
| ZBTB80S. 5  | ##### | 0. 153666 | 0. 707 | 0. 227 | ##### | Class-G | ZBTB80S        |
| ZNF528. 7   | ##### | 0. 198806 | 0. 337 | 0. 07  | ##### | Class-G | ZNF528         |
| ACSS2. 1    | ##### | 0. 167332 | 0. 28  | 0. 049 | ##### | Class-G | ACSS2          |
| MGRN1. 7    | ##### | 0. 192582 | 0. 543 | 0. 154 | ##### | Class-G | MGRN1          |
| RNF213. 10  | ##### | 0. 128136 | 0. 65  | 0. 198 | ##### | Class-G | RNF213         |
| MTFR1L. 7   | ##### | 0. 196482 | 0. 699 | 0. 224 | ##### | Class-G | MTFR1L         |
| NKAIN3. 10  | ##### | 0. 284018 | 0. 371 | 0. 084 | ##### | Class-G | NKAIN3         |
| LYRM5. 8    | ##### | 0. 173143 | 0. 788 | 0. 268 | ##### | Class-G | LYRM5          |
| PINK1. 6    | ##### | 0. 236105 | 0. 534 | 0. 154 | ##### | Class-G | PINK1          |
| ANAPC15. 5  | ##### | 0. 159963 | 0. 645 | 0. 199 | ##### | Class-G | ANAPC15        |
| BOD1. 10    | ##### | 0. 237527 | 0. 724 | 0. 234 | ##### | Class-G | BOD1           |
| TRIM44. 9   | ##### | 0. 269648 | 0. 679 | 0. 223 | ##### | Class-G | TRIM44         |
| WDR73. 5    | ##### | 0. 15286  | 0. 408 | 0. 098 | ##### | Class-G | WDR73          |
| LIMCH1. 8   | ##### | 0. 211102 | 0. 428 | 0. 107 | ##### | Class-G | LIMCH1         |
| IGDCC3. 11  | ##### | 0. 200142 | 0. 236 | 0. 034 | ##### | Class-G | IGDCC3         |

|           |       |          |       |       |       |         |             |
|-----------|-------|----------|-------|-------|-------|---------|-------------|
| TRIM28.7  | ##### | 0.198551 | 0.622 | 0.189 | ##### | Class-G | TRIM28      |
| NOL8.4    | ##### | 0.190834 | 0.494 | 0.134 | ##### | Class-G | NOL8        |
| MKS1.3    | ##### | 0.165999 | 0.3   | 0.056 | ##### | Class-G | MKS1        |
| C9orf9.7  | ##### | 0.175188 | 0.341 | 0.072 | ##### | Class-G | C9orf9      |
| REX04.4   | ##### | 0.205441 | 0.506 | 0.139 | ##### | Class-G | REX04       |
| LARS.7    | ##### | 0.264723 | 0.782 | 0.269 | ##### | Class-G | LARS        |
| PDZD11.6  | ##### | 0.190741 | 0.811 | 0.285 | ##### | Class-G | PDZD11      |
| FAF1.3    | ##### | 0.199666 | 0.454 | 0.118 | ##### | Class-G | FAF1        |
| CISD1.8   | ##### | 0.170647 | 0.771 | 0.266 | ##### | Class-G | CISD1       |
| SLC12A4.3 | ##### | 0.175245 | 0.244 | 0.037 | ##### | Class-G | SLC12A4     |
| KCTD20.3  | ##### | 0.188327 | 0.498 | 0.137 | ##### | Class-G | KCTD20      |
| TNIP2.6   | ##### | 0.196103 | 0.455 | 0.117 | ##### | Class-G | TNIP2       |
| SURF2.8   | ##### | 0.162718 | 0.589 | 0.174 | ##### | Class-G | SURF2       |
| DTD1.10   | ##### | 0.33958  | 0.846 | 0.317 | ##### | Class-G | DTD1        |
| ZSCAN16-A | ##### | 0.164786 | 0.637 | 0.196 | ##### | Class-G | ZSCAN16-AS1 |
| COPS7A.2  | ##### | 0.160513 | 0.674 | 0.211 | ##### | Class-G | COPS7A      |
| GRIA4.9   | ##### | 0.278439 | 0.379 | 0.088 | ##### | Class-G | GRIA4       |
| INTS3.2   | ##### | 0.187541 | 0.341 | 0.072 | ##### | Class-G | INTS3       |
| AVEN      | ##### | 0.159621 | 0.18  | 0.018 | ##### | Class-G | AVEN        |
| GAB1.8    | ##### | 0.186852 | 0.324 | 0.065 | ##### | Class-G | GAB1        |
| EIF2B5.5  | ##### | 0.16546  | 0.494 | 0.133 | ##### | Class-G | EIF2B5      |
| JRKL.3    | ##### | 0.164273 | 0.267 | 0.045 | ##### | Class-G | JRKL        |
| TRIM2.9   | ##### | 0.191422 | 0.571 | 0.166 | ##### | Class-G | TRIM2       |
| LRWD1.7   | ##### | 0.214444 | 0.464 | 0.122 | ##### | Class-G | LRWD1       |
| PLEKHH2.6 | ##### | 0.200078 | 0.25  | 0.039 | ##### | Class-G | PLEKHH2     |
| FUZ.4     | ##### | 0.189612 | 0.446 | 0.114 | ##### | Class-G | FUZ         |
| INO80E.6  | ##### | 0.186508 | 0.576 | 0.168 | ##### | Class-G | INO80E      |
| OSBPL8.7  | ##### | 0.285557 | 0.73  | 0.243 | ##### | Class-G | OSBPL8      |
| ADSL.6    | ##### | 0.175443 | 0.635 | 0.195 | ##### | Class-G | ADSL        |
| C3.10     | ##### | -1.44753 | 0.073 | 0.455 | ##### | Class-G | C3          |
| CS.3      | ##### | 0.175052 | 0.446 | 0.114 | ##### | Class-G | CS          |
| SPATS2.9  | ##### | 0.177517 | 0.643 | 0.196 | ##### | Class-G | SPATS2      |
| SMIM4.6   | ##### | 0.176364 | 0.653 | 0.204 | ##### | Class-G | SMIM4       |
| MVK.2     | ##### | 0.187251 | 0.272 | 0.047 | ##### | Class-G | MVK         |
| CASK.4    | ##### | 0.1498   | 0.371 | 0.083 | ##### | Class-G | CASK        |
| TOR1AIP2. | ##### | 0.205931 | 0.619 | 0.191 | ##### | Class-G | TOR1AIP2    |
| AP006222. | ##### | 0.109111 | 0.546 | 0.156 | ##### | Class-G | AP006222.2  |
| RIMS4     | ##### | 0.150569 | 0.139 | 0.008 | ##### | Class-G | RIMS4       |
| DHTKD1.3  | ##### | 0.154228 | 0.373 | 0.085 | ##### | Class-G | DHTKD1      |
| KRR1.2    | ##### | 0.16362  | 0.583 | 0.174 | ##### | Class-G | KRR1        |
| NPAS1.1   | ##### | 0.150146 | 0.168 | 0.015 | ##### | Class-G | NPAS1       |
| SIRT6.4   | ##### | 0.179034 | 0.514 | 0.143 | ##### | Class-G | SIRT6       |
| UROS.6    | ##### | 0.20384  | 0.625 | 0.191 | ##### | Class-G | UROS        |
| PMM1.7    | ##### | 0.113268 | 0.59  | 0.175 | ##### | Class-G | PMM1        |
| LINC00511 | ##### | 0.228043 | 0.36  | 0.08  | ##### | Class-G | LINC00511   |
| SRD5A1.5  | ##### | 0.190507 | 0.341 | 0.072 | ##### | Class-G | SRD5A1      |
| ELAVL1.6  | ##### | 0.271994 | 0.793 | 0.271 | ##### | Class-G | ELAVL1      |
| MINA.1    | ##### | 0.147    | 0.39  | 0.091 | ##### | Class-G | MINA        |
| RWDD4.5   | ##### | 0.208118 | 0.574 | 0.17  | ##### | Class-G | RWDD4       |
| DLEU1.4   | ##### | 0.166617 | 0.294 | 0.055 | ##### | Class-G | DLEU1       |
| LMO4.11   | ##### | 0.389668 | 0.952 | 0.4   | ##### | Class-G | LMO4        |

|            |       |          |       |       |       |         |                |
|------------|-------|----------|-------|-------|-------|---------|----------------|
| JAM3. 7    | ##### | 0.186165 | 0.422 | 0.104 | ##### | Class-G | JAM3           |
| KIF2A. 10  | ##### | 0.223081 | 0.589 | 0.177 | ##### | Class-G | KIF2A          |
| ZNF639. 9  | ##### | 0.195693 | 0.397 | 0.094 | ##### | Class-G | ZNF639         |
| FADS2. 8   | ##### | 0.20775  | 0.396 | 0.094 | ##### | Class-G | FADS2          |
| TRPC4AP. 6 | ##### | 0.230025 | 0.619 | 0.19  | ##### | Class-G | TRPC4AP        |
| FXYP6. 11  | ##### | 0.38589  | 0.967 | 0.378 | ##### | Class-G | FXYP6          |
| ELOF1. 8   | ##### | 0.254365 | 0.907 | 0.344 | ##### | Class-G | ELOF1          |
| GNA12. 2   | ##### | 0.153659 | 0.397 | 0.094 | ##### | Class-G | GNA12          |
| CAPN5. 5   | ##### | 0.198103 | 0.249 | 0.039 | ##### | Class-G | CAPN5          |
| ARCN1. 2   | ##### | 0.164761 | 0.475 | 0.126 | ##### | Class-G | ARCN1          |
| C17orf80.  | ##### | 0.184178 | 0.284 | 0.051 | ##### | Class-G | C17orf80       |
| RSPRY1. 9  | ##### | 0.194007 | 0.616 | 0.188 | ##### | Class-G | RSPRY1         |
| MCFD2. 3   | ##### | 0.170228 | 0.689 | 0.22  | ##### | Class-G | MCFD2          |
| MAD2L2. 8  | ##### | 0.300863 | 0.864 | 0.315 | ##### | Class-G | MAD2L2         |
| ATMIN. 9   | ##### | 0.193086 | 0.352 | 0.077 | ##### | Class-G | ATMIN          |
| CCND2. 11  | ##### | 0.224442 | 0.759 | 0.256 | ##### | Class-G | CCND2          |
| MNAT1. 7   | ##### | 0.134933 | 0.511 | 0.141 | ##### | Class-G | MNAT1          |
| MAGED1. 1C | ##### | 0.246104 | 0.791 | 0.272 | ##### | Class-G | MAGED1         |
| PTOV1. 10  | ##### | 0.370314 | 0.925 | 0.359 | ##### | Class-G | PTOV1          |
| TMEM136. 7 | ##### | 0.17469  | 0.292 | 0.055 | ##### | Class-G | TMEM136        |
| ESCO1. 2   | ##### | 0.18523  | 0.37  | 0.084 | ##### | Class-G | ESCO1          |
| RP11-698N  | ##### | 0.174034 | 0.223 | 0.031 | ##### | Class-G | RP11-698N11. 2 |
| TMEM8B. 5  | ##### | 0.184642 | 0.234 | 0.035 | ##### | Class-G | TMEM8B         |
| RNF34. 6   | ##### | 0.176558 | 0.511 | 0.143 | ##### | Class-G | RNF34          |
| PI4KB. 2   | ##### | 0.199817 | 0.539 | 0.156 | ##### | Class-G | PI4KB          |
| SMCHD1. 8  | ##### | 0.188409 | 0.498 | 0.137 | ##### | Class-G | SMCHD1         |
| IGF2R. 5   | ##### | 0.164194 | 0.312 | 0.061 | ##### | Class-G | IGF2R          |
| WDR41. 6   | ##### | 0.150155 | 0.572 | 0.169 | ##### | Class-G | WDR41          |
| TMEM41B. 4 | ##### | 0.161346 | 0.475 | 0.127 | ##### | Class-G | TMEM41B        |
| RPP40. 6   | ##### | 0.144672 | 0.357 | 0.079 | ##### | Class-G | RPP40          |
| AIF1. 11   | ##### | -1.59361 | 0.092 | 0.463 | ##### | Class-G | AIF1           |
| PSKH1      | ##### | 0.167269 | 0.24  | 0.037 | ##### | Class-G | PSKH1          |
| EXOC7. 9   | ##### | 0.23606  | 0.802 | 0.278 | ##### | Class-G | EXOC7          |
| APOPT1. 6  | ##### | 0.216633 | 0.852 | 0.304 | ##### | Class-G | APOPT1         |
| C14orf79   | ##### | 0.1534   | 0.181 | 0.019 | ##### | Class-G | C14orf79       |
| METTL12. 3 | ##### | 0.148446 | 0.453 | 0.117 | ##### | Class-G | METTL12        |
| SNX7. 3    | ##### | 0.178874 | 0.469 | 0.125 | ##### | Class-G | SNX7           |
| NPW        | ##### | 0.180448 | 0.192 | 0.022 | ##### | Class-G | NPW            |
| PFKP. 6    | ##### | 0.165527 | 0.425 | 0.106 | ##### | Class-G | PFKP           |
| EIF3J. 6   | ##### | 0.264637 | 0.84  | 0.302 | ##### | Class-G | EIF3J          |
| VPS72. 7   | ##### | 0.155772 | 0.67  | 0.212 | ##### | Class-G | VPS72          |
| SEPHS2. 5  | ##### | 0.260374 | 0.738 | 0.244 | ##### | Class-G | SEPHS2         |
| DEF8. 7    | ##### | 0.188576 | 0.656 | 0.207 | ##### | Class-G | DEF8           |
| FAM136A. 3 | ##### | 0.164107 | 0.642 | 0.2   | ##### | Class-G | FAM136A        |
| SGCB. 8    | ##### | 0.15887  | 0.77  | 0.253 | ##### | Class-G | SGCB           |
| PDS5B. 6   | ##### | 0.201956 | 0.455 | 0.12  | ##### | Class-G | PDS5B          |
| BCL2L1. 4  | ##### | 0.152633 | 0.645 | 0.202 | ##### | Class-G | BCL2L1         |
| TBL1X. 1   | ##### | 0.16936  | 0.241 | 0.037 | ##### | Class-G | TBL1X          |
| GATAD1. 5  | ##### | 0.17849  | 0.523 | 0.148 | ##### | Class-G | GATAD1         |
| CENPB. 2   | ##### | 0.172154 | 0.329 | 0.069 | ##### | Class-G | CENPB          |
| ZSWIM7     | ##### | 0.192379 | 0.784 | 0.271 | ##### | Class-G | ZSWIM7         |

|            |       |           |        |        |       |         |           |
|------------|-------|-----------|--------|--------|-------|---------|-----------|
| UPF3A. 10  | ##### | 0. 226701 | 0. 79  | 0. 272 | ##### | Class-G | UPF3A     |
| RYK. 4     | ##### | 0. 17206  | 0. 296 | 0. 056 | ##### | Class-G | RYK       |
| ACTB. 8    | ##### | -0. 42089 | 1      | 0. 991 | ##### | Class-G | ACTB      |
| RBFA. 4    | ##### | 0. 166294 | 0. 458 | 0. 12  | ##### | Class-G | RBFA      |
| CPE. 10    | ##### | 0. 344995 | 0. 841 | 0. 316 | ##### | Class-G | CPE       |
| PTGR1. 6   | ##### | 0. 102077 | 0. 493 | 0. 135 | ##### | Class-G | PTGR1     |
| KIF5C. 11  | ##### | 0. 208009 | 0. 657 | 0. 204 | ##### | Class-G | KIF5C     |
| KAT2A. 5   | ##### | 0. 218279 | 0. 44  | 0. 115 | ##### | Class-G | KAT2A     |
| FOXRED2. 2 | ##### | 0. 173238 | 0. 28  | 0. 05  | ##### | Class-G | FOXRED2   |
| SRP68. 4   | ##### | 0. 195933 | 0. 576 | 0. 173 | ##### | Class-G | SRP68     |
| SYT12      | ##### | 0. 132573 | 0. 149 | 0. 011 | ##### | Class-G | SYT12     |
| AR. 6      | ##### | 0. 171032 | 0. 193 | 0. 023 | ##### | Class-G | AR        |
| CIC. 3     | ##### | 0. 180356 | 0. 358 | 0. 08  | ##### | Class-G | CIC       |
| MDFI. 8    | ##### | 0. 220405 | 0. 29  | 0. 054 | ##### | Class-G | MDFI      |
| NOL12. 3   | ##### | 0. 111934 | 0. 563 | 0. 164 | ##### | Class-G | NOL12     |
| RNF208     | ##### | 0. 18063  | 0. 199 | 0. 024 | ##### | Class-G | RNF208    |
| FAM216A. 6 | ##### | 0. 166293 | 0. 363 | 0. 082 | ##### | Class-G | FAM216A   |
| UNC119. 6  | ##### | 0. 198318 | 0. 553 | 0. 162 | ##### | Class-G | UNC119    |
| DMD. 5     | ##### | 0. 232442 | 0. 282 | 0. 052 | ##### | Class-G | DMD       |
| GOLGA2. 3  | ##### | 0. 150979 | 0. 531 | 0. 152 | ##### | Class-G | GOLGA2    |
| MICALL2. 5 | ##### | 0. 176688 | 0. 247 | 0. 04  | ##### | Class-G | MICALL2   |
| CUEDC1. 7  | ##### | 0. 188251 | 0. 347 | 0. 076 | ##### | Class-G | CUEDC1    |
| TNRC6A. 6  | ##### | 0. 169955 | 0. 549 | 0. 16  | ##### | Class-G | TNRC6A    |
| KIAA0232.  | ##### | 0. 179689 | 0. 425 | 0. 107 | ##### | Class-G | KIAA0232  |
| UNK. 3     | ##### | 0. 146927 | 0. 374 | 0. 086 | ##### | Class-G | UNK       |
| ADD1. 8    | ##### | 0. 182613 | 0. 725 | 0. 239 | ##### | Class-G | ADD1      |
| GTF2F1. 2  | ##### | 0. 202159 | 0. 675 | 0. 219 | ##### | Class-G | GTF2F1    |
| OXCT1. 6   | ##### | 0. 181503 | 0. 415 | 0. 104 | ##### | Class-G | OXCT1     |
| NTMT1. 3   | ##### | 0. 186346 | 0. 751 | 0. 255 | ##### | Class-G | NTMT1     |
| ASPH. 6    | ##### | 0. 218859 | 0. 669 | 0. 213 | ##### | Class-G | ASPH      |
| TTC23      | ##### | 0. 165759 | 0. 194 | 0. 023 | ##### | Class-G | TTC23     |
| MVD. 3     | ##### | 0. 207024 | 0. 474 | 0. 13  | ##### | Class-G | MVD       |
| TSPAN12. 9 | ##### | 0. 252982 | 0. 358 | 0. 081 | ##### | Class-G | TSPAN12   |
| C9orf114.  | ##### | 0. 166151 | 0. 404 | 0. 099 | ##### | Class-G | C9orf114  |
| U2AF2. 4   | ##### | 0. 184898 | 0. 629 | 0. 196 | ##### | Class-G | U2AF2     |
| STK25. 9   | ##### | 0. 228868 | 0. 714 | 0. 235 | ##### | Class-G | STK25     |
| TSSC4. 6   | ##### | 0. 181044 | 0. 733 | 0. 243 | ##### | Class-G | TSSC4     |
| TRIAP1. 8  | ##### | 0. 146218 | 0. 737 | 0. 244 | ##### | Class-G | TRIAP1    |
| KANSL1. 8  | ##### | 0. 162495 | 0. 452 | 0. 119 | ##### | Class-G | KANSL1    |
| MARCH2. 9  | ##### | 0. 161543 | 0. 589 | 0. 174 | ##### | Class-G | 2-Mar     |
| ILF3-AS1.  | ##### | 0. 166669 | 0. 725 | 0. 242 | ##### | Class-G | ILF3-AS1  |
| ATP6V1G2.  | ##### | 0. 152595 | 0. 421 | 0. 105 | ##### | Class-G | ATP6V1G2  |
| VSIG4. 11  | ##### | -1. 5398  | 0. 039 | 0. 418 | ##### | Class-G | VSIG4     |
| LYPLA1. 6  | ##### | 0. 282227 | 0. 877 | 0. 33  | ##### | Class-G | LYPLA1    |
| KIAA1549L  | ##### | 0. 168985 | 0. 172 | 0. 017 | ##### | Class-G | KIAA1549L |
| SETX. 6    | ##### | 0. 157131 | 0. 453 | 0. 119 | ##### | Class-G | SETX      |
| TSPAN3. 9  | ##### | 0. 338907 | 0. 944 | 0. 38  | ##### | Class-G | TSPAN3    |
| NDUFS1. 7  | ##### | 0. 209397 | 0. 623 | 0. 195 | ##### | Class-G | NDUFS1    |
| MPRIP. 4   | ##### | 0. 147999 | 0. 434 | 0. 111 | ##### | Class-G | MPRIP     |
| MFAP1. 5   | ##### | 0. 156848 | 0. 466 | 0. 125 | ##### | Class-G | MFAP1     |
| PHAX. 7    | ##### | 0. 173174 | 0. 72  | 0. 237 | ##### | Class-G | PHAX      |

|           |       |          |       |       |       |         |              |
|-----------|-------|----------|-------|-------|-------|---------|--------------|
| SZRD1.6   | ##### | 0.1459   | 0.643 | 0.203 | ##### | Class-G | SZRD1        |
| MSI1.9    | ##### | 0.243066 | 0.388 | 0.094 | ##### | Class-G | MSI1         |
| TSTD3     | ##### | 0.148202 | 0.186 | 0.021 | ##### | Class-G | TSTD3        |
| PARP9.6   | ##### | 0.171386 | 0.459 | 0.123 | ##### | Class-G | PARP9        |
| C8orf88   | ##### | 0.162953 | 0.187 | 0.022 | ##### | Class-G | C8orf88      |
| HEXIM1.5  | ##### | 0.155542 | 0.554 | 0.163 | ##### | Class-G | HEXIM1       |
| DNAL1.3   | ##### | 0.141167 | 0.324 | 0.068 | ##### | Class-G | DNAL1        |
| CCDC14.8  | ##### | 0.188818 | 0.571 | 0.171 | ##### | Class-G | CCDC14       |
| EID2.8    | ##### | 0.18369  | 0.34  | 0.074 | ##### | Class-G | EID2         |
| CTD-2587M | ##### | 0.13493  | 0.121 | 0.005 | ##### | Class-G | CTD-2587M2.1 |
| SNHG10.5  | ##### | 0.179242 | 0.303 | 0.06  | ##### | Class-G | SNHG10       |
| USP48.5   | ##### | 0.20422  | 0.546 | 0.161 | ##### | Class-G | USP48        |
| GPATCH2L  | ##### | 0.180684 | 0.562 | 0.168 | ##### | Class-G | GPATCH2L     |
| CARS.6    | ##### | 0.16577  | 0.555 | 0.164 | ##### | Class-G | CARS         |
| TMEM222.7 | ##### | 0.159485 | 0.668 | 0.216 | ##### | Class-G | TMEM222      |
| SERINC5.4 | ##### | 0.142845 | 0.243 | 0.038 | ##### | Class-G | SERINC5      |
| TRIP12.4  | ##### | 0.170351 | 0.451 | 0.119 | ##### | Class-G | TRIP12       |
| RNF26.5   | ##### | 0.177347 | 0.435 | 0.112 | ##### | Class-G | RNF26        |
| PCSK5.2   | ##### | 0.207318 | 0.223 | 0.032 | ##### | Class-G | PCSK5        |
| CABIN1.4  | ##### | 0.153381 | 0.385 | 0.091 | ##### | Class-G | CABIN1       |
| KCTD17.5  | ##### | 0.179282 | 0.389 | 0.093 | ##### | Class-G | KCTD17       |
| DCUN1D5.5 | ##### | 0.203209 | 0.682 | 0.223 | ##### | Class-G | DCUN1D5      |
| RRP1.6    | ##### | 0.170886 | 0.536 | 0.157 | ##### | Class-G | RRP1         |
| PORCN     | ##### | 0.162116 | 0.273 | 0.049 | ##### | Class-G | PORCN        |
| C15orf61  | ##### | 0.149555 | 0.467 | 0.126 | ##### | Class-G | C15orf61     |
| THBS3.1   | ##### | 0.161436 | 0.223 | 0.032 | ##### | Class-G | THBS3        |
| MFI2-AS1  | ##### | 0.181692 | 0.26  | 0.045 | ##### | Class-G | MFI2-AS1     |
| TMCC1.8   | ##### | 0.198667 | 0.344 | 0.076 | ##### | Class-G | TMCC1        |
| MAPKAPK5  | ##### | 0.179002 | 0.485 | 0.134 | ##### | Class-G | MAPKAPK5     |
| TMEM5.8   | ##### | 0.154178 | 0.535 | 0.155 | ##### | Class-G | TMEM5        |
| PGM1.7    | ##### | 0.193884 | 0.609 | 0.192 | ##### | Class-G | PGM1         |
| TIMM10.5  | ##### | 0.225061 | 0.802 | 0.281 | ##### | Class-G | TIMM10       |
| APEH.3    | ##### | 0.160439 | 0.511 | 0.145 | ##### | Class-G | APEH         |
| RNF167.3  | ##### | 0.254777 | 0.867 | 0.332 | ##### | Class-G | RNF167       |
| FCER1G.11 | ##### | -1.58639 | 0.144 | 0.49  | ##### | Class-G | FCER1G       |
| PLEKHA3.7 | ##### | 0.208393 | 0.577 | 0.175 | ##### | Class-G | PLEKHA3      |
| ZBTB22.3  | ##### | 0.165698 | 0.283 | 0.052 | ##### | Class-G | ZBTB22       |
| RBM15B.9  | ##### | 0.184296 | 0.461 | 0.124 | ##### | Class-G | RBM15B       |
| FAM3A.2   | ##### | 0.155029 | 0.56  | 0.165 | ##### | Class-G | FAM3A        |
| PTPN11.4  | ##### | 0.216231 | 0.413 | 0.105 | ##### | Class-G | PTPN11       |
| ZNF146.8  | ##### | 0.189362 | 0.569 | 0.171 | ##### | Class-G | ZNF146       |
| CNOT11.2  | ##### | 0.180668 | 0.361 | 0.083 | ##### | Class-G | CNOT11       |
| GRHPR.7   | ##### | 0.227228 | 0.86  | 0.316 | ##### | Class-G | GRHPR        |
| MEN1.6    | ##### | 0.190927 | 0.351 | 0.078 | ##### | Class-G | MEN1         |
| CHAMP1.5  | ##### | 0.187722 | 0.375 | 0.088 | ##### | Class-G | CHAMP1       |
| SCRN2.3   | ##### | 0.128865 | 0.465 | 0.125 | ##### | Class-G | SCRN2        |
| TM7SF3.5  | ##### | 0.216828 | 0.611 | 0.192 | ##### | Class-G | TM7SF3       |
| ST6GALNAC | ##### | 0.152803 | 0.426 | 0.109 | ##### | Class-G | ST6GALNAC6   |
| FAM213B.3 | ##### | 0.182794 | 0.29  | 0.056 | ##### | Class-G | FAM213B      |
| ARMCX6.3  | ##### | 0.141135 | 0.597 | 0.184 | ##### | Class-G | ARMCX6       |
| CCNO      | ##### | 0.136442 | 0.124 | 0.006 | ##### | Class-G | CCNO         |

|           |       |          |       |       |       |         |            |
|-----------|-------|----------|-------|-------|-------|---------|------------|
| STX16.2   | ##### | 0.162502 | 0.534 | 0.155 | ##### | Class-G | STX16      |
| HLA-DRB5. | ##### | -1.616   | 0.085 | 0.451 | ##### | Class-G | HLA-DRB5   |
| PPP5C.7   | ##### | 0.21987  | 0.466 | 0.129 | ##### | Class-G | PPP5C      |
| GNG7.10   | ##### | 0.17262  | 0.699 | 0.233 | ##### | Class-G | GNG7       |
| DOT1L.2   | ##### | 0.166118 | 0.269 | 0.048 | ##### | Class-G | DOT1L      |
| PTMS.10   | ##### | 0.441177 | 0.974 | 0.484 | ##### | Class-G | PTMS       |
| AP2A1.4   | ##### | 0.180091 | 0.586 | 0.179 | ##### | Class-G | AP2A1      |
| LGR6      | ##### | 0.2617   | 0.122 | 0.006 | ##### | Class-G | LGR6       |
| RFNG.2    | ##### | 0.156473 | 0.314 | 0.064 | ##### | Class-G | RFNG       |
| RNF170.4  | ##### | 0.125789 | 0.451 | 0.118 | ##### | Class-G | RNF170     |
| SAC3D1.9  | ##### | 0.201089 | 0.457 | 0.123 | ##### | Class-G | SAC3D1     |
| RDH13.3   | ##### | 0.176508 | 0.257 | 0.044 | ##### | Class-G | RDH13      |
| TTC28.8   | ##### | 0.17532  | 0.304 | 0.061 | ##### | Class-G | TTC28      |
| YBX3.5    | ##### | 0.338066 | 0.867 | 0.329 | ##### | Class-G | YBX3       |
| FHL2.7    | ##### | 0.237527 | 0.189 | 0.023 | ##### | Class-G | FHL2       |
| CDK6.9    | ##### | 0.225155 | 0.524 | 0.153 | ##### | Class-G | CDK6       |
| HECTD1.4  | ##### | 0.1785   | 0.571 | 0.172 | ##### | Class-G | HECTD1     |
| CDKN2AIPN | ##### | 0.148811 | 0.609 | 0.19  | ##### | Class-G | CDKN2AIPNL |
| ZDHHC1    | ##### | 0.159224 | 0.185 | 0.021 | ##### | Class-G | ZDHHC1     |
| IPO9.7    | ##### | 0.185178 | 0.574 | 0.175 | ##### | Class-G | IPO9       |
| DESI1.5   | ##### | 0.130942 | 0.471 | 0.127 | ##### | Class-G | DESI1      |
| CHD4.7    | ##### | 0.230568 | 0.742 | 0.253 | ##### | Class-G | CHD4       |
| PRRT3.3   | ##### | 0.158483 | 0.243 | 0.039 | ##### | Class-G | PRRT3      |
| ARAF.2    | ##### | 0.153265 | 0.473 | 0.129 | ##### | Class-G | ARAF       |
| CALU.9    | ##### | 0.23415  | 0.883 | 0.325 | ##### | Class-G | CALU       |
| ISCA2.5   | ##### | 0.135777 | 0.669 | 0.218 | ##### | Class-G | ISCA2      |
| EIF4G1.4  | ##### | 0.192829 | 0.663 | 0.214 | ##### | Class-G | EIF4G1     |
| RIT1.7    | ##### | 0.132501 | 0.545 | 0.16  | ##### | Class-G | RIT1       |
| MPDZ.7    | ##### | 0.185783 | 0.284 | 0.054 | ##### | Class-G | MPDZ       |
| BMS1.2    | ##### | 0.145113 | 0.409 | 0.102 | ##### | Class-G | BMS1       |
| SPSB4.9   | ##### | 0.182128 | 0.221 | 0.032 | ##### | Class-G | SPSB4      |
| RNF169.2  | ##### | 0.186217 | 0.263 | 0.046 | ##### | Class-G | RNF169     |
| ZNF487    | ##### | 0.136402 | 0.186 | 0.022 | ##### | Class-G | ZNF487     |
| PCDHB16.9 | ##### | 0.223645 | 0.396 | 0.098 | ##### | Class-G | PCDHB16    |
| SIPA1L2.4 | ##### | 0.179947 | 0.359 | 0.083 | ##### | Class-G | SIPA1L2    |
| EPHX1.6   | ##### | 0.10402  | 0.577 | 0.176 | ##### | Class-G | EPHX1      |
| CAMTA1.4  | ##### | 0.310248 | 0.911 | 0.374 | ##### | Class-G | CAMTA1     |
| LSM14A.6  | ##### | 0.266916 | 0.846 | 0.305 | ##### | Class-G | LSM14A     |
| KLHL25.3  | ##### | 0.166796 | 0.207 | 0.028 | ##### | Class-G | KLHL25     |
| TMEM185A. | ##### | 0.174691 | 0.271 | 0.049 | ##### | Class-G | TMEM185A   |
| B4GALT2.7 | ##### | 0.174006 | 0.263 | 0.046 | ##### | Class-G | B4GALT2    |
| BOLA1.5   | ##### | 0.111741 | 0.42  | 0.107 | ##### | Class-G | BOLA1      |
| PGAP1.10  | ##### | 0.17875  | 0.485 | 0.134 | ##### | Class-G | PGAP1      |
| PREX1.10  | ##### | 0.132831 | 0.554 | 0.163 | ##### | Class-G | PREX1      |
| RDX.10    | ##### | 0.394374 | 0.953 | 0.415 | ##### | Class-G | RDX        |
| PNKP.2    | ##### | 0.150315 | 0.473 | 0.129 | ##### | Class-G | PNKP       |
| TFDP1.6   | ##### | 0.190586 | 0.498 | 0.141 | ##### | Class-G | TFDP1      |
| SLC12A2.9 | ##### | 0.128686 | 0.375 | 0.089 | ##### | Class-G | SLC12A2    |
| TMOD3.8   | ##### | 0.158803 | 0.404 | 0.101 | ##### | Class-G | TMOD3      |
| TMEM170A. | ##### | 0.151444 | 0.612 | 0.192 | ##### | Class-G | TMEM170A   |
| MKKS.6    | ##### | 0.260321 | 0.857 | 0.33  | ##### | Class-G | MKKS       |



|            |       |           |        |        |       |         |                |
|------------|-------|-----------|--------|--------|-------|---------|----------------|
| DCAF7. 6   | ##### | 0. 210113 | 0. 748 | 0. 25  | ##### | Class-G | DCAF7          |
| ZNF133. 3  | ##### | 0. 160845 | 0. 269 | 0. 048 | ##### | Class-G | ZNF133         |
| PLXNB2. 7  | ##### | 0. 121045 | 0. 432 | 0. 112 | ##### | Class-G | PLXNB2         |
| SGK223. 3  | ##### | 0. 173875 | 0. 253 | 0. 043 | ##### | Class-G | SGK223         |
| OTX1       | ##### | 0. 145502 | 0. 131 | 0. 008 | ##### | Class-G | OTX1           |
| EPS8L1. 1  | ##### | 0. 200025 | 0. 187 | 0. 023 | ##### | Class-G | EPS8L1         |
| LYPLA2. 4  | ##### | 0. 145249 | 0. 556 | 0. 166 | ##### | Class-G | LYPLA2         |
| SLC39A13.  | ##### | 0. 154177 | 0. 388 | 0. 095 | ##### | Class-G | SLC39A13       |
| PLA2G12A.  | ##### | 0. 207072 | 0. 578 | 0. 178 | ##### | Class-G | PLA2G12A       |
| RUFY2. 10  | ##### | 0. 161907 | 0. 415 | 0. 106 | ##### | Class-G | RUFY2          |
| NIPSNAP1.  | ##### | 0. 178831 | 0. 451 | 0. 121 | ##### | Class-G | NIPSNAP1       |
| ABHD12. 7  | ##### | 0. 294253 | 0. 846 | 0. 305 | ##### | Class-G | ABHD12         |
| WRNIP1. 3  | ##### | 0. 183198 | 0. 318 | 0. 068 | ##### | Class-G | WRNIP1         |
| LAYN. 8    | ##### | 0. 183555 | 0. 215 | 0. 031 | ##### | Class-G | LAYN           |
| SNAP47. 8  | ##### | 0. 132912 | 0. 519 | 0. 151 | ##### | Class-G | SNAP47         |
| DYNC1H1. 9 | ##### | 0. 204956 | 0. 775 | 0. 266 | ##### | Class-G | DYNC1H1        |
| ANKRD11. 6 | ##### | 0. 236163 | 0. 729 | 0. 248 | ##### | Class-G | ANKRD11        |
| STX2. 7    | ##### | 0. 171184 | 0. 329 | 0. 071 | ##### | Class-G | STX2           |
| KIAA0100.  | ##### | 0. 158896 | 0. 286 | 0. 055 | ##### | Class-G | KIAA0100       |
| HMG1. 6    | ##### | 0. 362784 | 0. 747 | 0. 28  | ##### | Class-G | HMG1           |
| IQGAP1. 9  | ##### | 0. 130208 | 0. 622 | 0. 192 | ##### | Class-G | IQGAP1         |
| ZNF581. 6  | ##### | 0. 115441 | 0. 464 | 0. 125 | ##### | Class-G | ZNF581         |
| APBA3. 2   | ##### | 0. 168789 | 0. 286 | 0. 055 | ##### | Class-G | APBA3          |
| TREM2. 11  | ##### | -1. 51208 | 0. 034 | 0. 402 | ##### | Class-G | TREM2          |
| NPB. 5     | ##### | 0. 140957 | 0. 241 | 0. 039 | ##### | Class-G | NPB            |
| KLF3. 4    | ##### | 0. 202831 | 0. 539 | 0. 161 | ##### | Class-G | KLF3           |
| SMARCA5. 8 | ##### | 0. 273813 | 0. 786 | 0. 277 | ##### | Class-G | SMARCA5        |
| AHCYL1. 1C | ##### | 0. 131444 | 0. 752 | 0. 258 | ##### | Class-G | AHCYL1         |
| UTP14C. 3  | ##### | 0. 193115 | 0. 272 | 0. 051 | ##### | Class-G | UTP14C         |
| BCAR1. 9   | ##### | 0. 18544  | 0. 458 | 0. 125 | ##### | Class-G | BCAR1          |
| NPM1. 4    | ##### | -0. 4475  | 0. 987 | 0. 849 | ##### | Class-G | NPM1           |
| CELSR1     | ##### | 0. 123111 | 0. 13  | 0. 008 | ##### | Class-G | CELSR1         |
| CLIP1. 4   | ##### | 0. 167687 | 0. 539 | 0. 161 | ##### | Class-G | CLIP1          |
| DHRS7B. 3  | ##### | 0. 131401 | 0. 486 | 0. 137 | ##### | Class-G | DHRS7B         |
| FAM195A. 7 | ##### | 0. 178874 | 0. 62  | 0. 194 | ##### | Class-G | FAM195A        |
| ARHGDIB. 1 | ##### | -1. 47987 | 0. 059 | 0. 423 | ##### | Class-G | ARHGDIB        |
| RP11-792A  | ##### | 0. 125196 | 0. 534 | 0. 157 | ##### | Class-G | RP11-792A8. 4  |
| TXNRD2. 4  | ##### | 0. 177659 | 0. 35  | 0. 08  | ##### | Class-G | TXNRD2         |
| EXD3       | ##### | 0. 158019 | 0. 264 | 0. 048 | ##### | Class-G | EXD3           |
| HIST2H2BE  | ##### | 0. 135959 | 0. 41  | 0. 104 | ##### | Class-G | HIST2H2BE      |
| OGFOD1. 4  | ##### | 0. 177397 | 0. 414 | 0. 107 | ##### | Class-G | OGFOD1         |
| NMNAT1. 2  | ##### | 0. 11692  | 0. 262 | 0. 047 | ##### | Class-G | NMNAT1         |
| ZRANB2. 4  | ##### | 0. 192181 | 0. 754 | 0. 26  | ##### | Class-G | ZRANB2         |
| DDRKG1. 4  | ##### | 0. 286285 | 0. 892 | 0. 34  | ##### | Class-G | DDRKG1         |
| NPHP1. 5   | ##### | 0. 1545   | 0. 243 | 0. 041 | ##### | Class-G | NPHP1          |
| ATXN1. 6   | ##### | 0. 14161  | 0. 441 | 0. 118 | ##### | Class-G | ATXN1          |
| RP11-379H  | ##### | 0. 156117 | 0. 25  | 0. 043 | ##### | Class-G | RP11-379H18. 1 |
| GPATCH2. 4 | ##### | 0. 135768 | 0. 437 | 0. 116 | ##### | Class-G | GPATCH2        |
| EFCAB14. 6 | ##### | 0. 180481 | 0. 52  | 0. 151 | ##### | Class-G | EFCAB14        |
| OLIG2. 10  | ##### | 0. 202321 | 0. 47  | 0. 131 | ##### | Class-G | OLIG2          |
| DCAF5. 3   | ##### | 0. 138186 | 0. 381 | 0. 092 | ##### | Class-G | DCAF5          |

|           |       |          |       |       |       |         |               |
|-----------|-------|----------|-------|-------|-------|---------|---------------|
| ARMC7.1   | ##### | 0.139006 | 0.288 | 0.057 | ##### | Class-G | ARMC7         |
| SLC27A3.6 | ##### | 0.179463 | 0.357 | 0.084 | ##### | Class-G | SLC27A3       |
| CLCC1.1   | ##### | 0.150263 | 0.389 | 0.096 | ##### | Class-G | CLCC1         |
| KDM5B.10  | ##### | 0.204887 | 0.437 | 0.117 | ##### | Class-G | KDM5B         |
| HLA-DMA.1 | ##### | -1.4251  | 0.104 | 0.458 | ##### | Class-G | HLA-DMA       |
| DIRAS1.8  | ##### | 0.207461 | 0.338 | 0.076 | ##### | Class-G | DIRAS1        |
| MORC4.2   | ##### | 0.17951  | 0.223 | 0.034 | ##### | Class-G | MORC4         |
| STON2     | ##### | 0.173842 | 0.186 | 0.023 | ##### | Class-G | STON2         |
| CEP104.4  | ##### | 0.177181 | 0.356 | 0.083 | ##### | Class-G | CEP104        |
| TNP01.2   | ##### | 0.219942 | 0.655 | 0.216 | ##### | Class-G | TNP01         |
| PQLC1.7   | ##### | 0.153414 | 0.382 | 0.093 | ##### | Class-G | PQLC1         |
| TUBG1.8   | ##### | 0.161874 | 0.578 | 0.177 | ##### | Class-G | TUBG1         |
| DRAXIN.1C | ##### | 0.202888 | 0.419 | 0.109 | ##### | Class-G | DRAXIN        |
| NCK2.5    | ##### | 0.176864 | 0.409 | 0.105 | ##### | Class-G | NCK2          |
| PIP5K1A.2 | ##### | 0.15968  | 0.407 | 0.104 | ##### | Class-G | PIP5K1A       |
| FAM171A1. | ##### | 0.155348 | 0.26  | 0.046 | ##### | Class-G | FAM171A1      |
| PPP4R2.4  | ##### | 0.16179  | 0.629 | 0.201 | ##### | Class-G | PPP4R2        |
| SMARCD2.3 | ##### | 0.146715 | 0.28  | 0.054 | ##### | Class-G | SMARCD2       |
| 2-Mar     | ##### | 0.174256 | 0.18  | 0.021 | ##### | Class-G | 2-Mar         |
| KLHDC10.5 | ##### | 0.183633 | 0.374 | 0.09  | ##### | Class-G | KLHDC10       |
| UBAC1.6   | ##### | 0.146708 | 0.547 | 0.164 | ##### | Class-G | UBAC1         |
| AC093323. | ##### | 0.176466 | 0.301 | 0.062 | ##### | Class-G | AC093323.3    |
| RP11-448A | ##### | 0.157018 | 0.295 | 0.059 | ##### | Class-G | RP11-448A19.1 |
| SLC30A9.1 | ##### | 0.171262 | 0.611 | 0.193 | ##### | Class-G | SLC30A9       |
| AC010642. | ##### | 0.169014 | 0.554 | 0.168 | ##### | Class-G | AC010642.1    |
| KDELC1    | ##### | 0.159063 | 0.183 | 0.022 | ##### | Class-G | KDELC1        |
| CALD1.9   | ##### | 0.222086 | 0.924 | 0.337 | ##### | Class-G | CALD1         |
| OSBP2.1   | ##### | 0.147028 | 0.16  | 0.016 | ##### | Class-G | OSBP2         |
| ATAD3A.4  | ##### | 0.203202 | 0.415 | 0.109 | ##### | Class-G | ATAD3A        |
| MS4A6A.11 | ##### | -1.48586 | 0.027 | 0.392 | ##### | Class-G | MS4A6A        |
| POLDIP3.4 | ##### | 0.155502 | 0.485 | 0.137 | ##### | Class-G | POLDIP3       |
| TUSC2.6   | ##### | 0.239618 | 0.761 | 0.266 | ##### | Class-G | TUSC2         |
| GIT1.6    | ##### | 0.159615 | 0.323 | 0.07  | ##### | Class-G | GIT1          |
| NXPH1.11  | ##### | 0.23482  | 0.384 | 0.095 | ##### | Class-G | NXPH1         |
| NEDD9.8   | ##### | 0.141034 | 0.551 | 0.166 | ##### | Class-G | NEDD9         |
| ZNF561.4  | ##### | 0.138811 | 0.334 | 0.074 | ##### | Class-G | ZNF561        |
| ELAC1     | ##### | 0.123899 | 0.358 | 0.083 | ##### | Class-G | ELAC1         |
| PRPF8.4   | ##### | 0.169526 | 0.62  | 0.197 | ##### | Class-G | PRPF8         |
| ZNF48.7   | ##### | 0.187694 | 0.303 | 0.063 | ##### | Class-G | ZNF48         |
| RIOK3.3   | ##### | 0.152867 | 0.499 | 0.143 | ##### | Class-G | RIOK3         |
| RARS2.5   | ##### | 0.153731 | 0.492 | 0.141 | ##### | Class-G | RARS2         |
| DRG2.4    | ##### | 0.152087 | 0.509 | 0.149 | ##### | Class-G | DRG2          |
| TMEM184B. | ##### | 0.157821 | 0.389 | 0.097 | ##### | Class-G | TMEM184B      |
| RDH10.10  | ##### | 0.248434 | 0.278 | 0.054 | ##### | Class-G | RDH10         |
| KDM5D.1   | ##### | 0.137209 | 0.184 | 0.022 | ##### | Class-G | KDM5D         |
| TRAP1.8   | ##### | 0.203366 | 0.621 | 0.199 | ##### | Class-G | TRAP1         |
| CTU2.5    | ##### | 0.160703 | 0.378 | 0.093 | ##### | Class-G | CTU2          |
| PREPL.8   | ##### | 0.156481 | 0.49  | 0.139 | ##### | Class-G | PREPL         |
| CTB-58E17 | ##### | 0.126805 | 0.218 | 0.033 | ##### | Class-G | CTB-58E17.1   |
| RUVBL2.6  | ##### | 0.178617 | 0.731 | 0.25  | ##### | Class-G | RUVBL2        |
| C12orf10. | ##### | 0.131185 | 0.733 | 0.25  | ##### | Class-G | C12orf10      |

|            |       |          |       |       |       |         |             |
|------------|-------|----------|-------|-------|-------|---------|-------------|
| BLMH. 4    | ##### | 0.161896 | 0.462 | 0.128 | ##### | Class-G | BLMH        |
| EDEM2. 6   | ##### | 0.102741 | 0.589 | 0.183 | ##### | Class-G | EDEM2       |
| CYB561. 7  | ##### | 0.150054 | 0.266 | 0.049 | ##### | Class-G | CYB561      |
| TREX1. 3   | ##### | 0.152889 | 0.339 | 0.076 | ##### | Class-G | TREX1       |
| CCDC34. 7  | ##### | 0.16295  | 0.448 | 0.121 | ##### | Class-G | CCDC34      |
| FAM160A2.  | ##### | 0.169675 | 0.338 | 0.077 | ##### | Class-G | FAM160A2    |
| NFKBIL1. 5 | ##### | 0.157079 | 0.518 | 0.153 | ##### | Class-G | NFKBIL1     |
| DDX27. 5   | ##### | 0.163501 | 0.665 | 0.219 | ##### | Class-G | DDX27       |
| ST7L. 3    | ##### | 0.157969 | 0.337 | 0.077 | ##### | Class-G | ST7L        |
| MAP2K4. 2  | ##### | 0.17369  | 0.305 | 0.064 | ##### | Class-G | MAP2K4      |
| ACP6. 1    | ##### | 0.158183 | 0.229 | 0.037 | ##### | Class-G | ACP6        |
| AC091729.  | ##### | 0.179168 | 0.267 | 0.05  | ##### | Class-G | AC091729. 9 |
| RAB4A. 5   | ##### | 0.234508 | 0.769 | 0.271 | ##### | Class-G | RAB4A       |
| SLC1A3. 1C | ##### | 0.298261 | 0.939 | 0.401 | ##### | Class-G | SLC1A3      |
| LEMD2. 3   | ##### | 0.184561 | 0.408 | 0.106 | ##### | Class-G | LEMD2       |
| OGFOD2     | ##### | 0.131911 | 0.302 | 0.062 | ##### | Class-G | OGFOD2      |
| NARFL. 4   | ##### | 0.153413 | 0.402 | 0.103 | ##### | Class-G | NARFL       |
| FTSJ3. 3   | ##### | 0.167927 | 0.408 | 0.106 | ##### | Class-G | FTSJ3       |
| MPST. 6    | ##### | 0.198311 | 0.713 | 0.24  | ##### | Class-G | MPST        |
| WRAP73. 4  | ##### | 0.15513  | 0.404 | 0.104 | ##### | Class-G | WRAP73      |
| PRKAR2A. 4 | ##### | 0.17355  | 0.603 | 0.191 | ##### | Class-G | PRKAR2A     |
| STOML2. 5  | ##### | 0.256    | 0.887 | 0.345 | ##### | Class-G | STOML2      |
| CPNE1. 3   | ##### | 0.180527 | 0.77  | 0.269 | ##### | Class-G | CPNE1       |
| EIF3B. 5   | ##### | 0.179462 | 0.602 | 0.189 | ##### | Class-G | EIF3B       |
| TLL1. 6    | ##### | 0.133327 | 0.29  | 0.058 | ##### | Class-G | TLL1        |
| FADS3. 5   | ##### | 0.172787 | 0.41  | 0.106 | ##### | Class-G | FADS3       |
| PIGU. 7    | ##### | 0.128686 | 0.452 | 0.125 | ##### | Class-G | PIGU        |
| COA6. 5    | ##### | 0.133611 | 0.657 | 0.214 | ##### | Class-G | COA6        |
| C19orf48.  | ##### | 0.199143 | 0.558 | 0.173 | ##### | Class-G | C19orf48    |
| NDUFAF6. 8 | ##### | 0.15951  | 0.472 | 0.133 | ##### | Class-G | NDUFAF6     |
| ZNF667-AS  | ##### | 0.142457 | 0.871 | 0.309 | ##### | Class-G | ZNF667-AS1  |
| PTHLH. 1   | ##### | 0.163476 | 0.152 | 0.014 | ##### | Class-G | PTHLH       |
| TAF6L. 1   | ##### | 0.179157 | 0.285 | 0.057 | ##### | Class-G | TAF6L       |
| TMEM97. 8  | ##### | 0.178604 | 0.452 | 0.126 | ##### | Class-G | TMEM97      |
| CSRP2BP. 3 | ##### | 0.165789 | 0.258 | 0.047 | ##### | Class-G | CSRP2BP     |
| PCDH8. 5   | ##### | 0.177161 | 0.19  | 0.024 | ##### | Class-G | PCDH8       |
| ZBTB20. 9  | ##### | 0.251219 | 0.855 | 0.309 | ##### | Class-G | ZBTB20      |
| SLC2A13. 2 | ##### | 0.190529 | 0.282 | 0.055 | ##### | Class-G | SLC2A13     |
| ACBD3. 4   | ##### | 0.173695 | 0.46  | 0.128 | ##### | Class-G | ACBD3       |
| TRMT6. 4   | ##### | 0.136727 | 0.468 | 0.131 | ##### | Class-G | TRMT6       |
| DNAJC10. 3 | ##### | 0.158791 | 0.502 | 0.147 | ##### | Class-G | DNAJC10     |
| ARGLU1. 8  | ##### | 0.363708 | 0.927 | 0.394 | ##### | Class-G | ARGLU1      |
| CLEC11A. 9 | ##### | 0.20281  | 0.571 | 0.176 | ##### | Class-G | CLEC11A     |
| PDHX. 7    | ##### | 0.146629 | 0.454 | 0.125 | ##### | Class-G | PDHX        |
| CACNB4. 5  | ##### | 0.147354 | 0.286 | 0.056 | ##### | Class-G | CACNB4      |
| WDR45B. 5  | ##### | 0.290393 | 0.864 | 0.328 | ##### | Class-G | WDR45B      |
| COA4. 5    | ##### | 0.191267 | 0.839 | 0.312 | ##### | Class-G | COA4        |
| TSEN15. 6  | ##### | 0.163444 | 0.571 | 0.178 | ##### | Class-G | TSEN15      |
| MAP3K1. 4  | ##### | 0.232067 | 0.302 | 0.064 | ##### | Class-G | MAP3K1      |
| IFNAR2. 7  | ##### | 0.169017 | 0.508 | 0.149 | ##### | Class-G | IFNAR2      |
| ST20. 2    | ##### | 0.134658 | 0.331 | 0.075 | ##### | Class-G | ST20        |

|            |       |          |       |       |       |         |          |
|------------|-------|----------|-------|-------|-------|---------|----------|
| AES. 10    | ##### | 0.276545 | 0.884 | 0.333 | ##### | Class-G | AES      |
| MIER2. 1   | ##### | 0.165247 | 0.326 | 0.072 | ##### | Class-G | MIER2    |
| PEX11B. 3  | ##### | 0.105044 | 0.377 | 0.092 | ##### | Class-G | PEX11B   |
| PWAR6. 6   | ##### | 0.169375 | 0.249 | 0.043 | ##### | Class-G | PWAR6    |
| ANAPC7. 7  | ##### | 0.171751 | 0.453 | 0.126 | ##### | Class-G | ANAPC7   |
| EIF2AK2. 3 | ##### | 0.182744 | 0.699 | 0.237 | ##### | Class-G | EIF2AK2  |
| SCD5. 10   | ##### | 0.283685 | 0.865 | 0.317 | ##### | Class-G | SCD5     |
| DUSP1. 8   | ##### | -1.00869 | 0.343 | 0.613 | ##### | Class-G | DUSP1    |
| ZBTB42     | ##### | 0.126531 | 0.129 | 0.008 | ##### | Class-G | ZBTB42   |
| GPATCH8. 8 | ##### | 0.174351 | 0.708 | 0.237 | ##### | Class-G | GPATCH8  |
| YIF1A. 7   | ##### | 0.222274 | 0.891 | 0.348 | ##### | Class-G | YIF1A    |
| PMPCA. 7   | ##### | 0.177308 | 0.594 | 0.189 | ##### | Class-G | PMPCA    |
| FAM102A. 7 | ##### | 0.106819 | 0.304 | 0.064 | ##### | Class-G | FAM102A  |
| UNC45A. 3  | ##### | 0.137226 | 0.432 | 0.116 | ##### | Class-G | UNC45A   |
| PNPLA2. 6  | ##### | 0.166187 | 0.533 | 0.16  | ##### | Class-G | PNPLA2   |
| MAVS. 2    | ##### | 0.118728 | 0.251 | 0.045 | ##### | Class-G | MAVS     |
| SPPL3. 9   | ##### | 0.140397 | 0.506 | 0.147 | ##### | Class-G | SPPL3    |
| COX4I1. 5  | ##### | -0.4457  | 0.998 | 0.896 | ##### | Class-G | COX4I1   |
| GSPT1. 7   | ##### | 0.258543 | 0.785 | 0.277 | ##### | Class-G | GSPT1    |
| AMMECR1    | ##### | 0.181702 | 0.203 | 0.029 | ##### | Class-G | AMMECR1  |
| KIAA1958.  | ##### | 0.183071 | 0.235 | 0.04  | ##### | Class-G | KIAA1958 |
| ENOPH1. 9  | ##### | 0.273124 | 0.85  | 0.314 | ##### | Class-G | ENOPH1   |
| LRRC59. 6  | ##### | 0.258182 | 0.788 | 0.287 | ##### | Class-G | LRRC59   |
| SEC23A. 3  | ##### | 0.12432  | 0.497 | 0.144 | ##### | Class-G | SEC23A   |
| IBTK. 3    | ##### | 0.159535 | 0.445 | 0.122 | ##### | Class-G | IBTK     |
| POGLUT1. 1 | ##### | 0.158636 | 0.332 | 0.076 | ##### | Class-G | POGLUT1  |
| DPH7. 8    | ##### | 0.178847 | 0.443 | 0.122 | ##### | Class-G | DPH7     |
| PSMD12. 5  | ##### | 0.211802 | 0.767 | 0.274 | ##### | Class-G | PSMD12   |
| SH2B1. 4   | ##### | 0.14291  | 0.41  | 0.107 | ##### | Class-G | SH2B1    |
| METTL16. 5 | ##### | 0.159153 | 0.327 | 0.073 | ##### | Class-G | METTL16  |
| DTYMK. 10  | ##### | 0.188655 | 0.759 | 0.259 | ##### | Class-G | DTYMK    |
| CSNK1E. 1C | ##### | 0.167305 | 0.715 | 0.239 | ##### | Class-G | CSNK1E   |
| TCEA1. 6   | ##### | 0.326286 | 0.949 | 0.408 | ##### | Class-G | TCEA1    |
| ADPRHL2. 6 | ##### | 0.167105 | 0.624 | 0.202 | ##### | Class-G | ADPRHL2  |
| VAMP5. 6   | ##### | 0.114869 | 0.85  | 0.323 | ##### | Class-G | VAMP5    |
| PQLC3. 10  | ##### | 0.136361 | 0.48  | 0.136 | ##### | Class-G | PQLC3    |
| TSC22D1. 1 | ##### | 0.393125 | 0.976 | 0.436 | ##### | Class-G | TSC22D1  |
| HAP1. 6    | ##### | 0.151188 | 0.238 | 0.04  | ##### | Class-G | HAP1     |
| DYRK1B. 3  | ##### | 0.156285 | 0.235 | 0.039 | ##### | Class-G | DYRK1B   |
| NLGN2. 8   | ##### | 0.185208 | 0.29  | 0.059 | ##### | Class-G | NLGN2    |
| ORAI2. 7   | ##### | 0.195037 | 0.651 | 0.215 | ##### | Class-G | ORAI2    |
| CYBA. 11   | ##### | -1.40157 | 0.112 | 0.452 | ##### | Class-G | CYBA     |
| HAS2. 7    | ##### | 0.170126 | 0.2   | 0.028 | ##### | Class-G | HAS2     |
| NSMF. 6    | ##### | 0.186289 | 0.341 | 0.08  | ##### | Class-G | NSMF     |
| ZBED3. 8   | ##### | 0.164823 | 0.283 | 0.056 | ##### | Class-G | ZBED3    |
| HDHD2. 5   | ##### | 0.130417 | 0.613 | 0.199 | ##### | Class-G | HDHD2    |
| NOP56. 6   | ##### | 0.25637  | 0.871 | 0.339 | ##### | Class-G | NOP56    |
| CMC1. 2    | ##### | 0.114036 | 0.651 | 0.214 | ##### | Class-G | CMC1     |
| PTCD3. 7   | ##### | 0.162312 | 0.565 | 0.175 | ##### | Class-G | PTCD3    |
| CUX1. 5    | ##### | 0.164305 | 0.584 | 0.185 | ##### | Class-G | CUX1     |
| FAU. 8     | ##### | -0.43775 | 0.999 | 0.951 | ##### | Class-G | FAU      |

|            |       |           |        |        |       |         |         |
|------------|-------|-----------|--------|--------|-------|---------|---------|
| TMOD2. 5   | ##### | 0. 169445 | 0. 329 | 0. 075 | ##### | Class-G | TMOD2   |
| C8orf59. 4 | ##### | 0. 270803 | 0. 848 | 0. 319 | ##### | Class-G | C8orf59 |
| PHF3. 3    | ##### | 0. 156173 | 0. 497 | 0. 145 | ##### | Class-G | PHF3    |
| SERINC3. 4 | ##### | 0. 224636 | 0. 803 | 0. 293 | ##### | Class-G | SERINC3 |
| TIMM23. 2  | ##### | 0. 102931 | 0. 415 | 0. 109 | ##### | Class-G | TIMM23  |
| ODC1. 10   | ##### | 0. 321004 | 0. 852 | 0. 318 | ##### | Class-G | ODC1    |
| CTSA. 11   | ##### | 0. 232805 | 0. 859 | 0. 324 | ##### | Class-G | CTSA    |
| CACTIN. 1  | ##### | 0. 173609 | 0. 229 | 0. 038 | ##### | Class-G | CACTIN  |
| SMARCC1. 9 | ##### | 0. 199696 | 0. 611 | 0. 196 | ##### | Class-G | SMARCC1 |
| BABAM1. 4  | ##### | 0. 194536 | 0. 869 | 0. 33  | ##### | Class-G | BABAM1  |
| RFK. 7     | ##### | 0. 184712 | 0. 579 | 0. 182 | ##### | Class-G | RFK     |
| ATP9A. 10  | ##### | 0. 16307  | 0. 333 | 0. 076 | ##### | Class-G | ATP9A   |
| CLUAP1. 9  | ##### | 0. 143544 | 0. 444 | 0. 123 | ##### | Class-G | CLUAP1  |
| HIGD1A. 5  | ##### | 0. 225499 | 0. 891 | 0. 351 | ##### | Class-G | HIGD1A  |
| AGO3. 5    | ##### | 0. 143678 | 0. 492 | 0. 143 | ##### | Class-G | AGO3    |
| PRCP. 7    | ##### | 0. 20363  | 0. 775 | 0. 286 | ##### | Class-G | PRCP    |
| ETAA1. 1   | ##### | 0. 141682 | 0. 201 | 0. 028 | ##### | Class-G | ETAA1   |
| PXN-AS1. 3 | ##### | 0. 146294 | 0. 266 | 0. 051 | ##### | Class-G | PXN-AS1 |
| LRRC8A. 9  | ##### | 0. 21741  | 0. 44  | 0. 124 | ##### | Class-G | LRRC8A  |
| PTBP1. 7   | ##### | 0. 193526 | 0. 745 | 0. 254 | ##### | Class-G | PTBP1   |
| POLR3K. 4  | ##### | 0. 102055 | 0. 548 | 0. 167 | ##### | Class-G | POLR3K  |
| PPP2R3B. 2 | ##### | 0. 150618 | 0. 236 | 0. 04  | ##### | Class-G | PPP2R3B |
| GPAM       | ##### | 0. 150659 | 0. 152 | 0. 014 | ##### | Class-G | GPAM    |
| MIB1. 2    | ##### | 0. 172118 | 0. 289 | 0. 06  | ##### | Class-G | MIB1    |
| FAM173A. 4 | ##### | 0. 211177 | 0. 672 | 0. 224 | ##### | Class-G | FAM173A |
| OSBPL1A. 8 | ##### | 0. 153475 | 0. 488 | 0. 142 | ##### | Class-G | OSBPL1A |
| ZNF205. 6  | ##### | 0. 157138 | 0. 326 | 0. 073 | ##### | Class-G | ZNF205  |
| TAF9B. 7   | ##### | 0. 147814 | 0. 398 | 0. 103 | ##### | Class-G | TAF9B   |
| LRRC42. 6  | ##### | 0. 137073 | 0. 397 | 0. 103 | ##### | Class-G | LRRC42  |
| BBX. 7     | ##### | 0. 223084 | 0. 87  | 0. 331 | ##### | Class-G | BBX     |
| SLC47A1    | ##### | 0. 144561 | 0. 166 | 0. 018 | ##### | Class-G | SLC47A1 |
| CRB2. 8    | ##### | 0. 159577 | 0. 179 | 0. 022 | ##### | Class-G | CRB2    |
| DENND5B. 9 | ##### | 0. 159173 | 0. 298 | 0. 063 | ##### | Class-G | DENND5B |
| TPST2. 9   | ##### | 0. 129055 | 0. 444 | 0. 122 | ##### | Class-G | TPST2   |
| CSTF1. 2   | ##### | 0. 12686  | 0. 369 | 0. 091 | ##### | Class-G | CSTF1   |
| MRS2. 1    | ##### | 0. 144135 | 0. 427 | 0. 116 | ##### | Class-G | MRS2    |
| KRI1. 2    | ##### | 0. 163922 | 0. 313 | 0. 069 | ##### | Class-G | KRI1    |
| CTBP1. 4   | ##### | 0. 159256 | 0. 548 | 0. 169 | ##### | Class-G | CTBP1   |
| SOCS4      | ##### | 0. 155224 | 0. 277 | 0. 055 | ##### | Class-G | SOCS4   |
| ZNF558. 6  | ##### | 0. 163668 | 0. 257 | 0. 048 | ##### | Class-G | ZNF558  |
| ASH1L. 6   | ##### | 0. 183167 | 0. 713 | 0. 244 | ##### | Class-G | ASH1L   |
| ABHD8. 6   | ##### | 0. 169421 | 0. 399 | 0. 103 | ##### | Class-G | ABHD8   |
| AGAP1. 8   | ##### | 0. 149938 | 0. 347 | 0. 082 | ##### | Class-G | AGAP1   |
| SAMD4B. 7  | ##### | 0. 114818 | 0. 552 | 0. 169 | ##### | Class-G | SAMD4B  |
| DCAF11. 4  | ##### | 0. 143544 | 0. 486 | 0. 142 | ##### | Class-G | DCAF11  |
| CPXM1. 10  | ##### | 0. 206107 | 0. 355 | 0. 086 | ##### | Class-G | CPXM1   |
| TULP3. 6   | ##### | 0. 173993 | 0. 357 | 0. 088 | ##### | Class-G | TULP3   |
| KPNA6. 4   | ##### | 0. 158917 | 0. 568 | 0. 18  | ##### | Class-G | KPNA6   |
| STARD7. 6  | ##### | 0. 201293 | 0. 722 | 0. 25  | ##### | Class-G | STARD7  |
| RNF8. 6    | ##### | 0. 16093  | 0. 44  | 0. 122 | ##### | Class-G | RNF8    |
| STRN4. 6   | ##### | 0. 174134 | 0. 353 | 0. 086 | ##### | Class-G | STRN4   |

|            |       |          |       |       |       |         |             |
|------------|-------|----------|-------|-------|-------|---------|-------------|
| GCDH. 2    | ##### | 0.142457 | 0.499 | 0.149 | ##### | Class-G | GCDH        |
| GSG1L. 8   | ##### | 0.129929 | 0.215 | 0.033 | ##### | Class-G | GSG1L       |
| THAP4. 3   | ##### | 0.147425 | 0.426 | 0.115 | ##### | Class-G | THAP4       |
| SEPHS1. 5  | ##### | 0.143008 | 0.333 | 0.077 | ##### | Class-G | SEPHS1      |
| C3orf17. 3 | ##### | 0.126025 | 0.394 | 0.101 | ##### | Class-G | C3orf17     |
| UHMK1. 5   | ##### | 0.168685 | 0.511 | 0.153 | ##### | Class-G | UHMK1       |
| PHF21A. 3  | ##### | 0.130906 | 0.332 | 0.076 | ##### | Class-G | PHF21A      |
| IDH3A. 3   | ##### | 0.127836 | 0.455 | 0.128 | ##### | Class-G | IDH3A       |
| PCDHGC3    | ##### | 0.138836 | 0.183 | 0.023 | ##### | Class-G | PCDHGC3     |
| TAB1. 1    | ##### | 0.180495 | 0.249 | 0.046 | ##### | Class-G | TAB1        |
| CCL3. 11   | ##### | -1.38107 | 0.135 | 0.469 | ##### | Class-G | CCL3        |
| RNASEH1. 7 | ##### | 0.140145 | 0.562 | 0.174 | ##### | Class-G | RNASEH1     |
| ATP5SL. 5  | ##### | 0.122854 | 0.563 | 0.176 | ##### | Class-G | ATP5SL      |
| RAMP2. 10  | ##### | 0.124703 | 0.38  | 0.096 | ##### | Class-G | RAMP2       |
| NR2C2AP. 8 | ##### | 0.109775 | 0.438 | 0.121 | ##### | Class-G | NR2C2AP     |
| AGFG1. 4   | ##### | 0.141263 | 0.371 | 0.092 | ##### | Class-G | AGFG1       |
| ZC3H7B. 3  | ##### | 0.129487 | 0.319 | 0.071 | ##### | Class-G | ZC3H7B      |
| LAGE3. 4   | ##### | 0.273771 | 0.841 | 0.326 | ##### | Class-G | LAGE3       |
| RUFY3. 10  | ##### | 0.181698 | 0.711 | 0.239 | ##### | Class-G | RUFY3       |
| EXT2. 6    | ##### | 0.171911 | 0.448 | 0.126 | ##### | Class-G | EXT2        |
| P4HA2. 6   | ##### | 0.154878 | 0.264 | 0.051 | ##### | Class-G | P4HA2       |
| C16orf91.  | ##### | 0.115755 | 0.497 | 0.146 | ##### | Class-G | C16orf91    |
| COMMD7. 5  | ##### | 0.278801 | 0.851 | 0.326 | ##### | Class-G | COMMD7      |
| NCOA1. 7   | ##### | 0.173397 | 0.428 | 0.118 | ##### | Class-G | NCOA1       |
| FCGR3A. 11 | ##### | -1.4453  | 0.041 | 0.39  | ##### | Class-G | FCGR3A      |
| LEO1. 5    | ##### | 0.16823  | 0.393 | 0.103 | ##### | Class-G | LEO1        |
| ARPC5L. 7  | ##### | 0.259307 | 0.807 | 0.298 | ##### | Class-G | ARPC5L      |
| EPHB4      | ##### | 0.139939 | 0.136 | 0.011 | ##### | Class-G | EPHB4       |
| GOT2. 7    | ##### | 0.144139 | 0.498 | 0.148 | ##### | Class-G | GOT2        |
| BTBD7. 2   | ##### | 0.135567 | 0.386 | 0.099 | ##### | Class-G | BTBD7       |
| PDIA5. 5   | ##### | 0.136419 | 0.24  | 0.042 | ##### | Class-G | PDIA5       |
| AC004951.  | ##### | 0.159058 | 0.42  | 0.113 | ##### | Class-G | AC004951. 6 |
| PRKCI. 2   | ##### | 0.180484 | 0.311 | 0.069 | ##### | Class-G | PRKCI       |
| UBN1. 7    | ##### | 0.175555 | 0.438 | 0.122 | ##### | Class-G | UBN1        |
| GALNT11. 7 | ##### | 0.163686 | 0.555 | 0.173 | ##### | Class-G | GALNT11     |
| MUL1. 2    | ##### | 0.132353 | 0.427 | 0.117 | ##### | Class-G | MUL1        |
| MYPOP. 2   | ##### | 0.171707 | 0.263 | 0.051 | ##### | Class-G | MYPOP       |
| SAMD8. 4   | ##### | 0.136441 | 0.394 | 0.103 | ##### | Class-G | SAMD8       |
| SIRT3. 2   | ##### | 0.161898 | 0.31  | 0.069 | ##### | Class-G | SIRT3       |
| LGALS3BP.  | ##### | 0.235053 | 0.915 | 0.373 | ##### | Class-G | LGALS3BP    |
| SEMA3A. 3  | ##### | 0.178367 | 0.192 | 0.026 | ##### | Class-G | SEMA3A      |
| TMEM178A.  | ##### | 0.214393 | 0.341 | 0.082 | ##### | Class-G | TMEM178A    |
| ZCCHC11. 5 | ##### | 0.152475 | 0.579 | 0.183 | ##### | Class-G | ZCCHC11     |
| AKT1. 3    | ##### | 0.118591 | 0.401 | 0.105 | ##### | Class-G | AKT1        |
| PAFAH1B1.  | ##### | 0.23186  | 0.808 | 0.296 | ##### | Class-G | PAFAH1B1    |
| SASH1. 7   | ##### | 0.190303 | 0.239 | 0.042 | ##### | Class-G | SASH1       |
| ATPAF1. 8  | ##### | 0.182282 | 0.575 | 0.185 | ##### | Class-G | ATPAF1      |
| EFR3A. 9   | ##### | 0.148622 | 0.391 | 0.101 | ##### | Class-G | EFR3A       |
| UBL3. 9    | ##### | 0.226727 | 0.783 | 0.284 | ##### | Class-G | UBL3        |
| IREB2. 3   | ##### | 0.103777 | 0.418 | 0.112 | ##### | Class-G | IREB2       |
| NBAS. 2    | ##### | 0.135213 | 0.316 | 0.071 | ##### | Class-G | NBAS        |

|           |       |          |       |       |       |         |           |
|-----------|-------|----------|-------|-------|-------|---------|-----------|
| KATNBL1.6 | ##### | 0.124499 | 0.603 | 0.194 | ##### | Class-G | KATNBL1   |
| C2orf76.2 | ##### | 0.108451 | 0.434 | 0.12  | ##### | Class-G | C2orf76   |
| FBXL17.1  | ##### | 0.145791 | 0.277 | 0.056 | ##### | Class-G | FBXL17    |
| C11orf57. | ##### | 0.143398 | 0.412 | 0.112 | ##### | Class-G | C11orf57  |
| ABLIM1.8  | ##### | 0.158957 | 0.2   | 0.029 | ##### | Class-G | ABLIM1    |
| PGP.5     | ##### | 0.183665 | 0.54  | 0.167 | ##### | Class-G | PGP       |
| DOHH.6    | ##### | 0.160529 | 0.491 | 0.145 | ##### | Class-G | DOHH      |
| ITGB1BP1. | ##### | 0.167606 | 0.832 | 0.314 | ##### | Class-G | ITGB1BP1  |
| RERE.9    | ##### | 0.151515 | 0.523 | 0.159 | ##### | Class-G | RERE      |
| RNF11.7   | ##### | 0.196726 | 0.707 | 0.242 | ##### | Class-G | RNF11     |
| BAD.6     | ##### | 0.238352 | 0.881 | 0.341 | ##### | Class-G | BAD       |
| RUSC1.7   | ##### | 0.160667 | 0.38  | 0.098 | ##### | Class-G | RUSC1     |
| CTNND1.3  | ##### | 0.150974 | 0.532 | 0.163 | ##### | Class-G | CTNND1    |
| CIAO1.4   | ##### | 0.148231 | 0.585 | 0.187 | ##### | Class-G | CIAO1     |
| PEF1.4    | ##### | 0.105692 | 0.727 | 0.253 | ##### | Class-G | PEF1      |
| CD53.11   | ##### | -1.35774 | 0.016 | 0.364 | ##### | Class-G | CD53      |
| ALKBH4.8  | ##### | 0.148967 | 0.499 | 0.149 | ##### | Class-G | ALKBH4    |
| C21orf2.3 | ##### | 0.158903 | 0.493 | 0.146 | ##### | Class-G | C21orf2   |
| POGZ.8    | ##### | 0.12248  | 0.524 | 0.159 | ##### | Class-G | POGZ      |
| KATNB1.7  | ##### | 0.17359  | 0.344 | 0.083 | ##### | Class-G | KATNB1    |
| FAM134A.9 | ##### | 0.201917 | 0.685 | 0.235 | ##### | Class-G | FAM134A   |
| HUWE1.3   | ##### | 0.141257 | 0.449 | 0.127 | ##### | Class-G | HUWE1     |
| ADCK3.4   | ##### | 0.157353 | 0.361 | 0.09  | ##### | Class-G | ADCK3     |
| C6orf47.2 | ##### | 0.152492 | 0.388 | 0.101 | ##### | Class-G | C6orf47   |
| ZNF544.5  | ##### | 0.132841 | 0.349 | 0.085 | ##### | Class-G | ZNF544    |
| PEX26.2   | ##### | 0.119757 | 0.332 | 0.077 | ##### | Class-G | PEX26     |
| RAB8B.8   | ##### | 0.124131 | 0.415 | 0.112 | ##### | Class-G | RAB8B     |
| ZNF121.4  | ##### | 0.149374 | 0.326 | 0.075 | ##### | Class-G | ZNF121    |
| LSM10.1   | ##### | 0.204883 | 0.862 | 0.339 | ##### | Class-G | LSM10     |
| POLR3F.7  | ##### | 0.146701 | 0.378 | 0.098 | ##### | Class-G | POLR3F    |
| SMARCB1.9 | ##### | 0.30186  | 0.874 | 0.339 | ##### | Class-G | SMARCB1   |
| DDX54.4   | ##### | 0.173244 | 0.498 | 0.15  | ##### | Class-G | DDX54     |
| RABEP2.2  | ##### | 0.146056 | 0.303 | 0.066 | ##### | Class-G | RABEP2    |
| ALKBH7.4  | ##### | 0.315213 | 0.932 | 0.396 | ##### | Class-G | ALKBH7    |
| KIAA0319L | ##### | 0.134943 | 0.471 | 0.137 | ##### | Class-G | KIAA0319L |
| FAM168B.6 | ##### | 0.141976 | 0.43  | 0.119 | ##### | Class-G | FAM168B   |
| SCYL1.2   | ##### | 0.173192 | 0.551 | 0.173 | ##### | Class-G | SCYL1     |
| TINF2.4   | ##### | 0.123463 | 0.594 | 0.192 | ##### | Class-G | TINF2     |
| FPGS.5    | ##### | 0.140175 | 0.405 | 0.108 | ##### | Class-G | FPGS      |
| MGAT2.4   | ##### | 0.146082 | 0.477 | 0.139 | ##### | Class-G | MGAT2     |
| HSP90AA1. | ##### | -0.37558 | 0.996 | 0.87  | ##### | Class-G | HSP90AA1  |
| NEK1.7    | ##### | 0.151775 | 0.357 | 0.089 | ##### | Class-G | NEK1      |
| UBFD1.3   | ##### | 0.168336 | 0.31  | 0.07  | ##### | Class-G | UBFD1     |
| GNB1.6    | ##### | 0.276918 | 0.878 | 0.339 | ##### | Class-G | GNB1      |
| QTRTD1.2  | ##### | 0.140697 | 0.283 | 0.059 | ##### | Class-G | QTRTD1    |
| ADAMTS3   | ##### | 0.121998 | 0.101 | 0.004 | ##### | Class-G | ADAMTS3   |
| CGREF1.2  | ##### | 0.149305 | 0.169 | 0.02  | ##### | Class-G | CGREF1    |
| SUPT7L.3  | ##### | 0.124715 | 0.481 | 0.142 | ##### | Class-G | SUPT7L    |
| DOCK6     | ##### | 0.140772 | 0.157 | 0.017 | ##### | Class-G | DOCK6     |
| C1orf162. | ##### | -1.38783 | 0.025 | 0.371 | ##### | Class-G | C1orf162  |
| ARFIP2.6  | ##### | 0.139814 | 0.585 | 0.188 | ##### | Class-G | ARFIP2    |

|           |       |          |       |       |       |         |          |
|-----------|-------|----------|-------|-------|-------|---------|----------|
| ATP13A1.4 | ##### | 0.167915 | 0.425 | 0.118 | ##### | Class-G | ATP13A1  |
| MDK.10    | ##### | 0.310442 | 0.92  | 0.421 | ##### | Class-G | MDK      |
| TMEM8A.1  | ##### | 0.115796 | 0.251 | 0.047 | ##### | Class-G | TMEM8A   |
| CDC73.4   | ##### | 0.124068 | 0.481 | 0.141 | ##### | Class-G | CDC73    |
| DPYSL4.11 | ##### | 0.188469 | 0.413 | 0.112 | ##### | Class-G | DPYSL4   |
| PDLIM1.7  | ##### | 0.165121 | 0.245 | 0.045 | ##### | Class-G | PDLIM1   |
| PRR14.5   | ##### | 0.140712 | 0.502 | 0.151 | ##### | Class-G | PRR14    |
| LRRC45.5  | ##### | 0.157685 | 0.28  | 0.058 | ##### | Class-G | LRRC45   |
| TBCD.4    | ##### | 0.134885 | 0.394 | 0.104 | ##### | Class-G | TBCD     |
| ALG12.4   | ##### | 0.123396 | 0.286 | 0.06  | ##### | Class-G | ALG12    |
| NCDN.6    | ##### | 0.164499 | 0.281 | 0.059 | ##### | Class-G | NCDN     |
| SPOP.8    | ##### | 0.163658 | 0.707 | 0.243 | ##### | Class-G | SPOP     |
| NIPA2.7   | ##### | 0.153971 | 0.625 | 0.205 | ##### | Class-G | NIPA2    |
| GTF2A1.1  | ##### | 0.143712 | 0.319 | 0.074 | ##### | Class-G | GTF2A1   |
| ZNF865    | ##### | 0.17023  | 0.234 | 0.041 | ##### | Class-G | ZNF865   |
| ATP5S.2   | ##### | 0.10018  | 0.453 | 0.13  | ##### | Class-G | ATP5S    |
| SMARCA1.8 | ##### | 0.163147 | 0.445 | 0.126 | ##### | Class-G | SMARCA1  |
| ETV2      | ##### | 0.130977 | 0.17  | 0.02  | ##### | Class-G | ETV2     |
| CDK5RAP1. | ##### | 0.139346 | 0.42  | 0.115 | ##### | Class-G | CDK5RAP1 |
| RBM10.6   | ##### | 0.153017 | 0.505 | 0.153 | ##### | Class-G | RBM10    |
| DNMT1.9   | ##### | 0.185145 | 0.664 | 0.224 | ##### | Class-G | DNMT1    |
| SERGEF.5  | ##### | 0.119864 | 0.439 | 0.123 | ##### | Class-G | SERGEF   |
| LRRC27.3  | ##### | 0.143747 | 0.272 | 0.055 | ##### | Class-G | LRRC27   |
| SMIM12.5  | ##### | 0.127578 | 0.694 | 0.238 | ##### | Class-G | SMIM12   |
| SOBP.9    | ##### | 0.174501 | 0.372 | 0.095 | ##### | Class-G | SOBP     |
| STK32C.2  | ##### | 0.105071 | 0.29  | 0.062 | ##### | Class-G | STK32C   |
| TUBB2A.1C | ##### | 0.342831 | 0.943 | 0.401 | ##### | Class-G | TUBB2A   |
| VPS53.5   | ##### | 0.137604 | 0.421 | 0.116 | ##### | Class-G | VPS53    |
| ATP6VOA2. | ##### | 0.148764 | 0.293 | 0.063 | ##### | Class-G | ATP6VOA2 |
| NCOA3.5   | ##### | 0.137511 | 0.355 | 0.088 | ##### | Class-G | NCOA3    |
| MRT04.5   | ##### | 0.119693 | 0.587 | 0.19  | ##### | Class-G | MRT04    |
| SCAP.7    | ##### | 0.169791 | 0.417 | 0.115 | ##### | Class-G | SCAP     |
| TSPAN9    | ##### | 0.132029 | 0.156 | 0.017 | ##### | Class-G | TSPAN9   |
| SRSF4.7   | ##### | 0.2331   | 0.796 | 0.288 | ##### | Class-G | SRSF4    |
| SF3A1.4   | ##### | 0.122487 | 0.451 | 0.129 | ##### | Class-G | SF3A1    |
| RPUSD2.3  | ##### | 0.141935 | 0.232 | 0.041 | ##### | Class-G | RPUSD2   |
| GFER.5    | ##### | 0.163861 | 0.517 | 0.158 | ##### | Class-G | GFER     |
| DPH2.6    | ##### | 0.141094 | 0.336 | 0.08  | ##### | Class-G | DPH2     |
| EI24.8    | ##### | 0.298165 | 0.904 | 0.356 | ##### | Class-G | EI24     |
| LIN7B.7   | ##### | 0.148605 | 0.348 | 0.085 | ##### | Class-G | LIN7B    |
| SYNJ2.6   | ##### | 0.129547 | 0.18  | 0.023 | ##### | Class-G | SYNJ2    |
| SREK1.8   | ##### | 0.146028 | 0.73  | 0.256 | ##### | Class-G | SREK1    |
| PCDHB2.9  | ##### | 0.195899 | 0.257 | 0.05  | ##### | Class-G | PCDHB2   |
| BAZ2A.3   | ##### | 0.129878 | 0.481 | 0.142 | ##### | Class-G | BAZ2A    |
| IL17RE    | ##### | 0.151955 | 0.167 | 0.02  | ##### | Class-G | IL17RE   |
| TRIM27.3  | ##### | 0.139282 | 0.519 | 0.159 | ##### | Class-G | TRIM27   |
| SNCAIP.1C | ##### | 0.192984 | 0.27  | 0.055 | ##### | Class-G | SNCAIP   |
| EXT1      | ##### | 0.146641 | 0.174 | 0.022 | ##### | Class-G | EXT1     |
| CRTC1.1   | ##### | 0.159525 | 0.285 | 0.06  | ##### | Class-G | CRTC1    |
| DNAJC16.1 | ##### | 0.142963 | 0.244 | 0.045 | ##### | Class-G | DNAJC16  |
| LHFPL3.11 | ##### | 0.184803 | 0.343 | 0.083 | ##### | Class-G | LHFPL3   |



|                 |          |       |       |               |               |
|-----------------|----------|-------|-------|---------------|---------------|
| EBNA1BP2. ##### | 0.152856 | 0.785 | 0.283 | ##### Class-G | EBNA1BP2      |
| ZNF493.8 #####  | 0.134518 | 0.419 | 0.115 | ##### Class-G | ZNF493        |
| SIGIRR.8 #####  | 0.133813 | 0.491 | 0.148 | ##### Class-G | SIGIRR        |
| ZNF720.2 #####  | 0.121466 | 0.36  | 0.091 | ##### Class-G | ZNF720        |
| PODXL2.11 ##### | 0.176519 | 0.715 | 0.241 | ##### Class-G | PODXL2        |
| ZNF12.8 #####   | 0.156864 | 0.351 | 0.087 | ##### Class-G | ZNF12         |
| OGG1.4 #####    | 0.112427 | 0.403 | 0.108 | ##### Class-G | OGG1          |
| C6orf89.3 ##### | 0.120714 | 0.538 | 0.168 | ##### Class-G | C6orf89       |
| FO XK2.1 #####  | 0.132995 | 0.263 | 0.052 | ##### Class-G | FO XK2        |
| ESRRA.1 #####   | 0.143398 | 0.31  | 0.07  | ##### Class-G | ESRRA         |
| SPATA33.7 ##### | 0.128814 | 0.394 | 0.105 | ##### Class-G | SPATA33       |
| OPTN.9 #####    | 0.148863 | 0.374 | 0.096 | ##### Class-G | OPTN          |
| PKD2 #####      | 0.151663 | 0.264 | 0.053 | ##### Class-G | PKD2          |
| POLD2.8 #####   | 0.174207 | 0.888 | 0.345 | ##### Class-G | POLD2         |
| RING1.1 #####   | 0.154212 | 0.616 | 0.204 | ##### Class-G | RING1         |
| MAPK1IP1L ##### | 0.171306 | 0.815 | 0.304 | ##### Class-G | MAPK1IP1L     |
| C17orf62. ##### | 0.236228 | 0.788 | 0.3   | ##### Class-G | C17orf62      |
| SFSWAP.6 #####  | 0.13349  | 0.455 | 0.131 | ##### Class-G | SFSWAP        |
| PTS.8 #####     | 0.139768 | 0.731 | 0.26  | ##### Class-G | PTS           |
| PHLPP1.11 ##### | 0.138246 | 0.269 | 0.055 | ##### Class-G | PHLPP1        |
| PPME1.8 #####   | 0.131517 | 0.463 | 0.135 | ##### Class-G | PPME1         |
| SIN3B.2 #####   | 0.152515 | 0.292 | 0.064 | ##### Class-G | SIN3B         |
| DLAT.4 #####    | 0.148959 | 0.354 | 0.089 | ##### Class-G | DLAT          |
| ABCE1.5 #####   | 0.142541 | 0.594 | 0.194 | ##### Class-G | ABCE1         |
| JMJD1C.8 #####  | 0.182105 | 0.751 | 0.266 | ##### Class-G | JMJD1C        |
| UNC119B.4 ##### | 0.165748 | 0.22  | 0.037 | ##### Class-G | UNC119B       |
| CPNE3.7 #####   | 0.168924 | 0.74  | 0.263 | ##### Class-G | CPNE3         |
| UBAP2L.3 #####  | 0.145278 | 0.532 | 0.165 | ##### Class-G | UBAP2L        |
| SENP6.4 #####   | 0.146603 | 0.535 | 0.167 | ##### Class-G | SENP6         |
| DCTD.4 #####    | 0.117215 | 0.604 | 0.199 | ##### Class-G | DCTD          |
| CNPY4.6 #####   | 0.134151 | 0.327 | 0.077 | ##### Class-G | CNPY4         |
| SMO.7 #####     | 0.159429 | 0.193 | 0.028 | ##### Class-G | SMO           |
| EXOC5.4 #####   | 0.137907 | 0.459 | 0.134 | ##### Class-G | EXOC5         |
| REPIN1.1C ##### | 0.197963 | 0.639 | 0.215 | ##### Class-G | REPIN1        |
| FGFR3 #####     | 0.215408 | 0.135 | 0.012 | ##### Class-G | FGFR3         |
| RP11-783K ##### | 0.122293 | 0.186 | 0.026 | ##### Class-G | RP11-783K16.5 |
| CDC27.4 #####   | 0.14354  | 0.427 | 0.12  | ##### Class-G | CDC27         |
| RASA1.3 #####   | 0.133118 | 0.313 | 0.072 | ##### Class-G | RASA1         |
| LRRC47.8 #####  | 0.177308 | 0.527 | 0.166 | ##### Class-G | LRRC47        |
| FAM189B.2 ##### | 0.148735 | 0.301 | 0.067 | ##### Class-G | FAM189B       |
| PUM1.6 #####    | 0.154723 | 0.569 | 0.183 | ##### Class-G | PUM1          |
| UPF1.1 #####    | 0.14002  | 0.282 | 0.06  | ##### Class-G | UPF1          |
| GPR162.9 #####  | 0.149686 | 0.305 | 0.069 | ##### Class-G | GPR162        |
| SGSM3.1 #####   | 0.14641  | 0.479 | 0.143 | ##### Class-G | SGSM3         |
| C22orf29. ##### | 0.144029 | 0.221 | 0.037 | ##### Class-G | C22orf29      |
| C1orf53.6 ##### | 0.133489 | 0.265 | 0.054 | ##### Class-G | C1orf53       |
| DYNLT3.5 #####  | 0.122528 | 0.673 | 0.233 | ##### Class-G | DYNLT3        |
| HELZ.3 #####    | 0.124906 | 0.491 | 0.148 | ##### Class-G | HELZ          |
| TRAF6 #####     | 0.107552 | 0.221 | 0.037 | ##### Class-G | TRAF6         |
| BCL9 #####      | 0.147173 | 0.186 | 0.026 | ##### Class-G | BCL9          |
| TRAM2.1 #####   | 0.147168 | 0.184 | 0.025 | ##### Class-G | TRAM2         |

|            |       |           |        |        |       |         |                |
|------------|-------|-----------|--------|--------|-------|---------|----------------|
| SPIN2B. 7  | ##### | 0. 124973 | 0. 314 | 0. 072 | ##### | Class-G | SPIN2B         |
| GOLGA8B. 4 | ##### | 0. 136872 | 0. 19  | 0. 027 | ##### | Class-G | GOLGA8B        |
| DLG4. 4    | ##### | 0. 131236 | 0. 244 | 0. 045 | ##### | Class-G | DLG4           |
| ATXN2L. 1  | ##### | 0. 136525 | 0. 455 | 0. 132 | ##### | Class-G | ATXN2L         |
| ACO2. 2    | ##### | 0. 181338 | 0. 791 | 0. 295 | ##### | Class-G | ACO2           |
| CCDC8. 5   | ##### | 0. 165903 | 0. 184 | 0. 026 | ##### | Class-G | CCDC8          |
| TCEB3. 4   | ##### | 0. 121707 | 0. 452 | 0. 131 | ##### | Class-G | TCEB3          |
| ZMAT3. 6   | ##### | 0. 134883 | 0. 502 | 0. 153 | ##### | Class-G | ZMAT3          |
| MYBBP1A. 1 | ##### | 0. 154622 | 0. 261 | 0. 052 | ##### | Class-G | MYBBP1A        |
| FAHD2A. 5  | ##### | 0. 119503 | 0. 444 | 0. 128 | ##### | Class-G | FAHD2A         |
| ZNF790. 3  | ##### | 0. 12479  | 0. 289 | 0. 063 | ##### | Class-G | ZNF790         |
| PANK3. 3   | ##### | 0. 143229 | 0. 329 | 0. 079 | ##### | Class-G | PANK3          |
| APOA1BP. 4 | ##### | 0. 161601 | 0. 822 | 0. 302 | ##### | Class-G | APOA1BP        |
| TMEM209. 4 | ##### | 0. 152916 | 0. 335 | 0. 082 | ##### | Class-G | TMEM209        |
| MAGT1. 6   | ##### | 0. 107824 | 0. 504 | 0. 154 | ##### | Class-G | MAGT1          |
| PPP1R9B. 2 | ##### | 0. 145923 | 0. 301 | 0. 067 | ##### | Class-G | PPP1R9B        |
| TIA1. 11   | ##### | 0. 12131  | 0. 592 | 0. 192 | ##### | Class-G | TIA1           |
| NOS2       | ##### | 0. 201314 | 0. 115 | 0. 007 | ##### | Class-G | NOS2           |
| SNX24. 3   | ##### | 0. 113927 | 0. 354 | 0. 089 | ##### | Class-G | SNX24          |
| NPRL3. 7   | ##### | 0. 156617 | 0. 477 | 0. 143 | ##### | Class-G | NPRL3          |
| STAG2. 3   | ##### | 0. 101989 | 0. 576 | 0. 188 | ##### | Class-G | STAG2          |
| ENKD1. 3   | ##### | 0. 15129  | 0. 221 | 0. 038 | ##### | Class-G | ENKD1          |
| SRPRB. 5   | ##### | 0. 110544 | 0. 603 | 0. 199 | ##### | Class-G | SRPRB          |
| RNF2. 3    | ##### | 0. 127233 | 0. 394 | 0. 106 | ##### | Class-G | RNF2           |
| TMEM177. 6 | ##### | 0. 132938 | 0. 254 | 0. 05  | ##### | Class-G | TMEM177        |
| FAM86B1    | ##### | 0. 147583 | 0. 163 | 0. 02  | ##### | Class-G | FAM86B1        |
| FAM98C. 3  | ##### | 0. 126421 | 0. 376 | 0. 099 | ##### | Class-G | FAM98C         |
| EIF4A1. 6  | ##### | -0. 34263 | 0. 992 | 0. 84  | ##### | Class-G | EIF4A1         |
| EXOSC10. 3 | ##### | 0. 127898 | 0. 393 | 0. 106 | ##### | Class-G | EXOSC10        |
| ACIN1. 7   | ##### | 0. 15125  | 0. 62  | 0. 207 | ##### | Class-G | ACIN1          |
| RP3-508I1  | ##### | 0. 274523 | 0. 135 | 0. 012 | ##### | Class-G | RP3-508I15. 14 |
| SHROOM2. 9 | ##### | 0. 164631 | 0. 21  | 0. 034 | ##### | Class-G | SHROOM2        |
| DHX8. 2    | ##### | 0. 141954 | 0. 318 | 0. 075 | ##### | Class-G | DHX8           |
| YDJC. 6    | ##### | 0. 13152  | 0. 389 | 0. 104 | ##### | Class-G | YDJC           |
| CCDC71. 3  | ##### | 0. 121284 | 0. 294 | 0. 065 | ##### | Class-G | CCDC71         |
| AP3B1. 4   | ##### | 0. 131656 | 0. 44  | 0. 126 | ##### | Class-G | AP3B1          |
| ARFGEF2. 1 | ##### | 0. 150284 | 0. 231 | 0. 042 | ##### | Class-G | ARFGEF2        |
| IARS2. 1   | ##### | 0. 141472 | 0. 503 | 0. 155 | ##### | Class-G | IARS2          |
| MAP2K5. 2  | ##### | 0. 146869 | 0. 289 | 0. 063 | ##### | Class-G | MAP2K5         |
| WARS. 7    | ##### | 0. 175325 | 0. 493 | 0. 154 | ##### | Class-G | WARS           |
| N6AMT2. 7  | ##### | 0. 117705 | 0. 365 | 0. 094 | ##### | Class-G | N6AMT2         |
| B3GNT9     | ##### | 0. 149285 | 0. 176 | 0. 023 | ##### | Class-G | B3GNT9         |
| DNAJA3. 5  | ##### | 0. 136622 | 0. 445 | 0. 129 | ##### | Class-G | DNAJA3         |
| ATG9A. 8   | ##### | 0. 147172 | 0. 333 | 0. 081 | ##### | Class-G | ATG9A          |
| KLHDC2. 9  | ##### | 0. 174839 | 0. 684 | 0. 24  | ##### | Class-G | KLHDC2         |
| NME5. 6    | ##### | 0. 133777 | 0. 186 | 0. 026 | ##### | Class-G | NME5           |
| NR1H2. 9   | ##### | 0. 114312 | 0. 695 | 0. 239 | ##### | Class-G | NR1H2          |
| TIMP2. 6   | ##### | 0. 133095 | 0. 742 | 0. 258 | ##### | Class-G | TIMP2          |
| UBE2G1. 9  | ##### | 0. 16386  | 0. 606 | 0. 201 | ##### | Class-G | UBE2G1         |
| PHF20L1. 1 | ##### | 0. 189549 | 0. 7   | 0. 244 | ##### | Class-G | PHF20L1        |
| MT1F. 9    | ##### | 0. 136591 | 0. 69  | 0. 242 | ##### | Class-G | MT1F           |

|            |       |           |        |        |       |         |                |
|------------|-------|-----------|--------|--------|-------|---------|----------------|
| ARL8A. 9   | ##### | 0. 137982 | 0. 635 | 0. 213 | ##### | Class-G | ARL8A          |
| CD47. 6    | ##### | 0. 230283 | 0. 831 | 0. 311 | ##### | Class-G | CD47           |
| TTYH3. 8   | ##### | 0. 155674 | 0. 585 | 0. 192 | ##### | Class-G | TTYH3          |
| TRPS1. 2   | ##### | 0. 152754 | 0. 349 | 0. 088 | ##### | Class-G | TRPS1          |
| NBN. 2     | ##### | 0. 141549 | 0. 394 | 0. 107 | ##### | Class-G | NBN            |
| UBASH3B. 7 | ##### | 0. 135242 | 0. 246 | 0. 047 | ##### | Class-G | UBASH3B        |
| ELP5. 6    | ##### | 0. 137227 | 0. 624 | 0. 209 | ##### | Class-G | ELP5           |
| RNF114. 4  | ##### | 0. 218794 | 0. 864 | 0. 341 | ##### | Class-G | RNF114         |
| PLSCR4. 5  | ##### | 0. 157192 | 0. 181 | 0. 025 | ##### | Class-G | PLSCR4         |
| PHTF1. 5   | ##### | 0. 147772 | 0. 341 | 0. 085 | ##### | Class-G | PHTF1          |
| RP11-472N  | ##### | 0. 130654 | 0. 315 | 0. 073 | ##### | Class-G | RP11-472N13. 3 |
| SDAD1. 5   | ##### | 0. 139068 | 0. 53  | 0. 168 | ##### | Class-G | SDAD1          |
| NCSTN. 3   | ##### | 0. 127874 | 0. 593 | 0. 198 | ##### | Class-G | NCSTN          |
| ZYX. 10    | ##### | 0. 290209 | 0. 825 | 0. 333 | ##### | Class-G | ZYX            |
| PIAS4. 5   | ##### | 0. 150124 | 0. 361 | 0. 094 | ##### | Class-G | PIAS4          |
| SARM1. 2   | ##### | 0. 14135  | 0. 218 | 0. 037 | ##### | Class-G | SARM1          |
| OLFM2. 9   | ##### | 0. 306668 | 0. 466 | 0. 146 | ##### | Class-G | OLFM2          |
| GLRX2. 4   | ##### | 0. 105741 | 0. 426 | 0. 12  | ##### | Class-G | GLRX2          |
| CRIPT. 5   | ##### | 0. 126132 | 0. 731 | 0. 26  | ##### | Class-G | CRIPT          |
| SAMD4A. 3  | ##### | 0. 162531 | 0. 269 | 0. 056 | ##### | Class-G | SAMD4A         |
| VPS13C. 4  | ##### | 0. 118927 | 0. 448 | 0. 13  | ##### | Class-G | VPS13C         |
| RHOC. 8    | ##### | 0. 246464 | 0. 97  | 0. 462 | ##### | Class-G | RHOC           |
| WBP4. 8    | ##### | 0. 109099 | 0. 692 | 0. 242 | ##### | Class-G | WBP4           |
| WAC-AS1. 1 | ##### | 0. 114461 | 0. 381 | 0. 101 | ##### | Class-G | WAC-AS1        |
| RPTOR. 1   | ##### | 0. 123374 | 0. 2   | 0. 031 | ##### | Class-G | RPTOR          |
| CEP250. 1  | ##### | 0. 127344 | 0. 233 | 0. 043 | ##### | Class-G | CEP250         |
| ZNF462. 1C | ##### | 0. 155549 | 0. 45  | 0. 132 | ##### | Class-G | ZNF462         |
| GGPS1. 8   | ##### | 0. 114028 | 0. 717 | 0. 252 | ##### | Class-G | GGPS1          |
| PLCE1. 8   | ##### | 0. 151299 | 0. 223 | 0. 039 | ##### | Class-G | PLCE1          |
| ZNF814. 6  | ##### | 0. 122377 | 0. 345 | 0. 086 | ##### | Class-G | ZNF814         |
| ALKBH8. 1  | ##### | 0. 151822 | 0. 181 | 0. 025 | ##### | Class-G | ALKBH8         |
| CSPG5. 10  | ##### | 0. 29867  | 0. 31  | 0. 075 | ##### | Class-G | CSPG5          |
| AAGAB. 3   | ##### | 0. 113703 | 0. 329 | 0. 08  | ##### | Class-G | AAGAB          |
| DPH6. 2    | ##### | 0. 11605  | 0. 296 | 0. 066 | ##### | Class-G | DPH6           |
| ECE1. 6    | ##### | 0. 127981 | 0. 256 | 0. 051 | ##### | Class-G | ECE1           |
| RUNX1. 10  | ##### | 0. 122603 | 0. 477 | 0. 143 | ##### | Class-G | RUNX1          |
| MS4A7. 11  | ##### | -1. 39289 | 0. 047 | 0. 378 | ##### | Class-G | MS4A7          |
| AASS. 7    | ##### | 0. 195565 | 0. 327 | 0. 08  | ##### | Class-G | AASS           |
| SMAGP. 3   | ##### | 0. 135624 | 0. 267 | 0. 056 | ##### | Class-G | SMAGP          |
| LLGL1. 8   | ##### | 0. 13895  | 0. 298 | 0. 067 | ##### | Class-G | LLGL1          |
| MTFMT. 4   | ##### | 0. 111544 | 0. 299 | 0. 068 | ##### | Class-G | MTFMT          |
| ZC3H14. 6  | ##### | 0. 10357  | 0. 5   | 0. 154 | ##### | Class-G | ZC3H14         |
| ZNF428. 11 | ##### | 0. 384627 | 0. 985 | 0. 473 | ##### | Class-G | ZNF428         |
| RORA. 6    | ##### | 0. 169016 | 0. 244 | 0. 047 | ##### | Class-G | RORA           |
| SIKE1. 3   | ##### | 0. 118494 | 0. 471 | 0. 142 | ##### | Class-G | SIKE1          |
| FAM50A. 5  | ##### | 0. 2458   | 0. 809 | 0. 302 | ##### | Class-G | FAM50A         |
| OSBP. 1    | ##### | 0. 145579 | 0. 279 | 0. 06  | ##### | Class-G | OSBP           |
| FAM98B. 5  | ##### | 0. 142269 | 0. 288 | 0. 064 | ##### | Class-G | FAM98B         |
| TCTN3. 3   | ##### | 0. 101638 | 0. 386 | 0. 104 | ##### | Class-G | TCTN3          |
| BMPR2. 8   | ##### | 0. 147936 | 0. 452 | 0. 133 | ##### | Class-G | BMPR2          |
| SAMD10. 6  | ##### | 0. 165714 | 0. 204 | 0. 033 | ##### | Class-G | SAMD10         |

|           |       |          |       |       |       |         |            |
|-----------|-------|----------|-------|-------|-------|---------|------------|
| C20orf24. | ##### | 0.344144 | 0.91  | 0.395 | ##### | Class-G | C20orf24   |
| PRCC.6    | ##### | 0.141386 | 0.686 | 0.241 | ##### | Class-G | PRCC       |
| SSRP1.9   | ##### | 0.235379 | 0.774 | 0.286 | ##### | Class-G | SSRP1      |
| POLR1E.4  | ##### | 0.135679 | 0.322 | 0.078 | ##### | Class-G | POLR1E     |
| PLCB1.8   | ##### | 0.155322 | 0.256 | 0.051 | ##### | Class-G | PLCB1      |
| ILF3.7    | ##### | 0.249505 | 0.866 | 0.337 | ##### | Class-G | ILF3       |
| NOC2L.9   | ##### | 0.14737  | 0.705 | 0.249 | ##### | Class-G | NOC2L      |
| COPZ2.4   | ##### | 0.123322 | 0.199 | 0.031 | ##### | Class-G | COPZ2      |
| DNAAF2.1C | ##### | 0.133414 | 0.443 | 0.129 | ##### | Class-G | DNAAF2     |
| ARL4C.9   | ##### | 0.293637 | 0.78  | 0.313 | ##### | Class-G | ARL4C      |
| SMARCAD1. | ##### | 0.14489  | 0.313 | 0.073 | ##### | Class-G | SMARCAD1   |
| PAK4.5    | ##### | 0.161037 | 0.329 | 0.081 | ##### | Class-G | PAK4       |
| DNAJB2.9  | ##### | 0.161823 | 0.707 | 0.25  | ##### | Class-G | DNAJB2     |
| AVL9      | ##### | 0.122219 | 0.33  | 0.08  | ##### | Class-G | AVL9       |
| SMC5.3    | ##### | 0.151278 | 0.454 | 0.135 | ##### | Class-G | SMC5       |
| TMUB1.4   | ##### | 0.175958 | 0.617 | 0.209 | ##### | Class-G | TMUB1      |
| ITCH.3    | ##### | 0.113094 | 0.316 | 0.075 | ##### | Class-G | ITCH       |
| STARD4-AS | ##### | 0.196851 | 0.352 | 0.09  | ##### | Class-G | STARD4-AS1 |
| OCEL1.5   | ##### | 0.101799 | 0.411 | 0.115 | ##### | Class-G | OCEL1      |
| CBR4.8    | ##### | 0.126625 | 0.471 | 0.142 | ##### | Class-G | CBR4       |
| PARD6A.6  | ##### | 0.146156 | 0.286 | 0.063 | ##### | Class-G | PARD6A     |
| TOP2B.10  | ##### | 0.146582 | 0.565 | 0.183 | ##### | Class-G | TOP2B      |
| TBC1D23   | ##### | 0.129769 | 0.403 | 0.112 | ##### | Class-G | TBC1D23    |
| ZNF688.1  | ##### | 0.119927 | 0.448 | 0.131 | ##### | Class-G | ZNF688     |
| GMPS.5    | ##### | 0.136473 | 0.463 | 0.139 | ##### | Class-G | GMPS       |
| NXT1.6    | ##### | 0.184819 | 0.71  | 0.252 | ##### | Class-G | NXT1       |
| PSMD5-AS1 | ##### | 0.13511  | 0.457 | 0.137 | ##### | Class-G | PSMD5-AS1  |
| EMC1.3    | ##### | 0.142114 | 0.36  | 0.094 | ##### | Class-G | EMC1       |
| TIMM13.4  | ##### | 0.280356 | 0.988 | 0.526 | ##### | Class-G | TIMM13     |
| BIVM.7    | ##### | 0.154031 | 0.318 | 0.076 | ##### | Class-G | BIVM       |
| PIGW.1    | ##### | 0.142186 | 0.214 | 0.037 | ##### | Class-G | PIGW       |
| PRKRA.6   | ##### | 0.170017 | 0.785 | 0.291 | ##### | Class-G | PRKRA      |
| ACAA1.4   | ##### | 0.199651 | 0.768 | 0.281 | ##### | Class-G | ACAA1      |
| ZNF649.8  | ##### | 0.151638 | 0.275 | 0.059 | ##### | Class-G | ZNF649     |
| MYO9B.7   | ##### | 0.12681  | 0.625 | 0.211 | ##### | Class-G | MYO9B      |
| GRAMD1C   | ##### | 0.162274 | 0.139 | 0.014 | ##### | Class-G | GRAMD1C    |
| FGF14-AS2 | ##### | 0.132405 | 0.19  | 0.029 | ##### | Class-G | FGF14-AS2  |
| CREB3.2   | ##### | 0.123212 | 0.638 | 0.218 | ##### | Class-G | CREB3      |
| ABCA3.7   | ##### | 0.167001 | 0.246 | 0.048 | ##### | Class-G | ABCA3      |
| RASSF8-AS | ##### | 0.11441  | 0.417 | 0.118 | ##### | Class-G | RASSF8-AS1 |
| SLC20A2.5 | ##### | 0.157066 | 0.321 | 0.078 | ##### | Class-G | SLC20A2    |
| LRP5.4    | ##### | 0.154508 | 0.189 | 0.028 | ##### | Class-G | LRP5       |
| NELFA.6   | ##### | 0.120865 | 0.377 | 0.101 | ##### | Class-G | NELFA      |
| ARHGEF3.2 | ##### | 0.120475 | 0.309 | 0.073 | ##### | Class-G | ARHGEF3    |
| IGSF11.7  | ##### | 0.158329 | 0.226 | 0.041 | ##### | Class-G | IGSF11     |
| ITGB2.11  | ##### | -1.30403 | 0.042 | 0.37  | ##### | Class-G | ITGB2      |
| DDX41.5   | ##### | 0.135894 | 0.572 | 0.189 | ##### | Class-G | DDX41      |
| SLC36A4.6 | ##### | 0.137596 | 0.48  | 0.146 | ##### | Class-G | SLC36A4    |
| FAM118B.6 | ##### | 0.130476 | 0.388 | 0.107 | ##### | Class-G | FAM118B    |
| SMC6.8    | ##### | 0.159512 | 0.408 | 0.116 | ##### | Class-G | SMC6       |
| LINC00526 | ##### | 0.111464 | 0.254 | 0.051 | ##### | Class-G | LINC00526  |

|           |       |          |       |       |       |         |          |
|-----------|-------|----------|-------|-------|-------|---------|----------|
| ZNF292.8  | ##### | 0.163403 | 0.612 | 0.207 | ##### | Class-G | ZNF292   |
| ZBTB4.3   | ##### | 0.112552 | 0.331 | 0.082 | ##### | Class-G | ZBTB4    |
| PRADC1.8  | ##### | 0.172487 | 0.52  | 0.167 | ##### | Class-G | PRADC1   |
| ZDHH8     | ##### | 0.181495 | 0.204 | 0.034 | ##### | Class-G | ZDHH8    |
| CBR3.6    | ##### | 0.159839 | 0.306 | 0.073 | ##### | Class-G | CBR3     |
| NRBP1.2   | ##### | 0.153271 | 0.751 | 0.273 | ##### | Class-G | NRBP1    |
| DCBLD1.4  | ##### | 0.158242 | 0.271 | 0.058 | ##### | Class-G | DCBLD1   |
| MAGI3.3   | ##### | 0.151822 | 0.199 | 0.032 | ##### | Class-G | MAGI3    |
| GALE.3    | ##### | 0.124188 | 0.408 | 0.115 | ##### | Class-G | GALE     |
| TATDN1.3  | ##### | 0.144712 | 0.559 | 0.184 | ##### | Class-G | TATDN1   |
| CCDC92.6  | ##### | 0.133246 | 0.3   | 0.069 | ##### | Class-G | CCDC92   |
| RAB40C.2  | ##### | 0.140597 | 0.253 | 0.051 | ##### | Class-G | RAB40C   |
| HLTF.9    | ##### | 0.124918 | 0.442 | 0.129 | ##### | Class-G | HLTF     |
| PNMA2.9   | ##### | 0.156995 | 0.373 | 0.101 | ##### | Class-G | PNMA2    |
| MPP6.7    | ##### | 0.160187 | 0.238 | 0.046 | ##### | Class-G | MPP6     |
| CDK12.2   | ##### | 0.130758 | 0.426 | 0.123 | ##### | Class-G | CDK12    |
| ACYP1.6   | ##### | 0.108258 | 0.449 | 0.132 | ##### | Class-G | ACYP1    |
| PCM1.7    | ##### | 0.180637 | 0.72  | 0.259 | ##### | Class-G | PCM1     |
| PPP2R5E.8 | ##### | 0.169915 | 0.582 | 0.192 | ##### | Class-G | PPP2R5E  |
| BAZ1B.10  | ##### | 0.190937 | 0.678 | 0.236 | ##### | Class-G | BAZ1B    |
| ZNF91.8   | ##### | 0.12679  | 0.511 | 0.16  | ##### | Class-G | ZNF91    |
| DDX17.6   | ##### | 0.278878 | 0.864 | 0.352 | ##### | Class-G | DDX17    |
| HLA-DQB1. | ##### | -1.35205 | 0.045 | 0.371 | ##### | Class-G | HLA-DQB1 |
| AAR2.4    | ##### | 0.131283 | 0.369 | 0.099 | ##### | Class-G | AAR2     |
| MSANTD3.6 | ##### | 0.144731 | 0.269 | 0.057 | ##### | Class-G | MSANTD3  |
| PPP1R12A. | ##### | 0.18993  | 0.775 | 0.291 | ##### | Class-G | PPP1R12A |
| PPP3CA.4  | ##### | 0.191365 | 0.571 | 0.193 | ##### | Class-G | PPP3CA   |
| ANP32E.9  | ##### | 0.136405 | 0.623 | 0.209 | ##### | Class-G | ANP32E   |
| DLG5.6    | ##### | 0.154224 | 0.245 | 0.049 | ##### | Class-G | DLG5     |
| KLC2.8    | ##### | 0.169073 | 0.338 | 0.086 | ##### | Class-G | KLC2     |
| CFL1.6    | ##### | -0.3505  | 0.999 | 0.942 | ##### | Class-G | CFL1     |
| GPR37L1.1 | ##### | 0.356791 | 0.258 | 0.056 | ##### | Class-G | GPR37L1  |
| MAK16.3   | ##### | 0.137848 | 0.28  | 0.062 | ##### | Class-G | MAK16    |
| TRADD.6   | ##### | 0.114669 | 0.432 | 0.125 | ##### | Class-G | TRADD    |
| UBE2G2.1  | ##### | 0.111009 | 0.61  | 0.205 | ##### | Class-G | UBE2G2   |
| PLOD3.8   | ##### | 0.137399 | 0.524 | 0.168 | ##### | Class-G | PLOD3    |
| TBC1D10B. | ##### | 0.146031 | 0.295 | 0.068 | ##### | Class-G | TBC1D10B |
| GRSF1.6   | ##### | 0.199903 | 0.712 | 0.259 | ##### | Class-G | GRSF1    |
| NPEPL1.2  | ##### | 0.156609 | 0.306 | 0.073 | ##### | Class-G | NPEPL1   |
| NAV1.7    | ##### | 0.169317 | 0.418 | 0.121 | ##### | Class-G | NAV1     |
| PHF10.2   | ##### | 0.140393 | 0.26  | 0.054 | ##### | Class-G | PHF10    |
| GLO1.8    | ##### | 0.193211 | 0.865 | 0.336 | ##### | Class-G | GLO1     |
| FAM126A.4 | ##### | 0.13121  | 0.367 | 0.099 | ##### | Class-G | FAM126A  |
| BECN1.5   | ##### | 0.103579 | 0.549 | 0.178 | ##### | Class-G | BECN1    |
| PSPH.10   | ##### | 0.165531 | 0.406 | 0.116 | ##### | Class-G | PSPH     |
| TRIOBP.4  | ##### | 0.1346   | 0.272 | 0.059 | ##### | Class-G | TRIOBP   |
| MAP7D1.8  | ##### | 0.196516 | 0.762 | 0.278 | ##### | Class-G | MAP7D1   |
| LY86.11   | ##### | -1.31031 | 0.013 | 0.338 | ##### | Class-G | LY86     |
| TBL1XR1.7 | ##### | 0.153343 | 0.583 | 0.193 | ##### | Class-G | TBL1XR1  |
| TMEM184C. | ##### | 0.128042 | 0.298 | 0.069 | ##### | Class-G | TMEM184C |
| ZNF880.5  | ##### | 0.121144 | 0.385 | 0.106 | ##### | Class-G | ZNF880   |

|            |       |          |       |       |       |         |             |
|------------|-------|----------|-------|-------|-------|---------|-------------|
| BROX. 7    | ##### | 0.139862 | 0.556 | 0.182 | ##### | Class-G | BROX        |
| TDG. 7     | ##### | 0.122061 | 0.63  | 0.215 | ##### | Class-G | TDG         |
| PTPRF. 9   | ##### | 0.136401 | 0.326 | 0.081 | ##### | Class-G | PTPRF       |
| LRRC14     | ##### | 0.140797 | 0.243 | 0.048 | ##### | Class-G | LRRC14      |
| C16orf72.  | ##### | 0.100565 | 0.352 | 0.091 | ##### | Class-G | C16orf72    |
| SLC39A9. 1 | ##### | 0.130089 | 0.286 | 0.064 | ##### | Class-G | SLC39A9     |
| PEX11A. 1  | ##### | 0.115608 | 0.204 | 0.034 | ##### | Class-G | PEX11A      |
| NEO1. 7    | ##### | 0.124942 | 0.237 | 0.046 | ##### | Class-G | NEO1        |
| NTAN1. 8   | ##### | 0.117128 | 0.491 | 0.152 | ##### | Class-G | NTAN1       |
| FDPS. 6    | ##### | 0.199294 | 0.856 | 0.344 | ##### | Class-G | FDPS        |
| CISD3. 10  | ##### | 0.105689 | 0.597 | 0.198 | ##### | Class-G | CISD3       |
| NFYB. 5    | ##### | 0.114564 | 0.458 | 0.139 | ##### | Class-G | NFYB        |
| SURF4. 3   | ##### | 0.190146 | 0.77  | 0.282 | ##### | Class-G | SURF4       |
| SLC35F5. 4 | ##### | 0.124343 | 0.374 | 0.101 | ##### | Class-G | SLC35F5     |
| TSC2. 7    | ##### | 0.132988 | 0.366 | 0.098 | ##### | Class-G | TSC2        |
| SMIM15. 3  | ##### | 0.129296 | 0.737 | 0.266 | ##### | Class-G | SMIM15      |
| VRK3. 7    | ##### | 0.104236 | 0.523 | 0.168 | ##### | Class-G | VRK3        |
| AHSA2. 3   | ##### | 0.111832 | 0.343 | 0.088 | ##### | Class-G | AHSA2       |
| NOTCH1. 5  | ##### | 0.183267 | 0.315 | 0.077 | ##### | Class-G | NOTCH1      |
| NPNT. 1    | ##### | 0.190992 | 0.136 | 0.013 | ##### | Class-G | NPNT        |
| ZKSCAN1. 1 | ##### | 0.144372 | 0.708 | 0.253 | ##### | Class-G | ZKSCAN1     |
| XPO6. 2    | ##### | 0.121066 | 0.326 | 0.081 | ##### | Class-G | XPO6        |
| FMN2. 8    | ##### | 0.164266 | 0.228 | 0.043 | ##### | Class-G | FMN2        |
| VAMP8. 11  | ##### | -1.37332 | 0.069 | 0.388 | ##### | Class-G | VAMP8       |
| BDNF-AS. 8 | ##### | 0.134964 | 0.218 | 0.039 | ##### | Class-G | BDNF-AS     |
| GPT2. 9    | ##### | 0.15007  | 0.388 | 0.108 | ##### | Class-G | GPT2        |
| KDM4B. 7   | ##### | 0.143355 | 0.358 | 0.095 | ##### | Class-G | KDM4B       |
| CCDC94. 2  | ##### | 0.108667 | 0.41  | 0.117 | ##### | Class-G | CCDC94      |
| APP. 10    | ##### | 0.333198 | 0.976 | 0.451 | ##### | Class-G | APP         |
| PPAN. 2    | ##### | 0.11781  | 0.423 | 0.122 | ##### | Class-G | PPAN        |
| ARMC10. 7  | ##### | 0.198746 | 0.672 | 0.235 | ##### | Class-G | ARMC10      |
| GPANK1. 5  | ##### | 0.118482 | 0.476 | 0.147 | ##### | Class-G | GPANK1      |
| POGK. 5    | ##### | 0.144232 | 0.354 | 0.093 | ##### | Class-G | POGK        |
| SLC5A6. 3  | ##### | 0.135975 | 0.307 | 0.074 | ##### | Class-G | SLC5A6      |
| SMAD2. 1   | ##### | 0.102665 | 0.47  | 0.143 | ##### | Class-G | SMAD2       |
| TMED3. 8   | ##### | 0.144116 | 0.691 | 0.245 | ##### | Class-G | TMED3       |
| RELB. 6    | ##### | 0.142698 | 0.286 | 0.065 | ##### | Class-G | RELB        |
| SP1. 1     | ##### | 0.135897 | 0.249 | 0.051 | ##### | Class-G | SP1         |
| ERAP2. 3   | ##### | 0.134756 | 0.25  | 0.051 | ##### | Class-G | ERAP2       |
| RNF111. 5  | ##### | 0.120411 | 0.255 | 0.053 | ##### | Class-G | RNF111      |
| SERPINA1.  | ##### | -1.25749 | 0.022 | 0.345 | ##### | Class-G | SERPINA1    |
| CLN5. 4    | ##### | 0.104127 | 0.531 | 0.17  | ##### | Class-G | CLN5        |
| HARS. 6    | ##### | 0.127078 | 0.642 | 0.222 | ##### | Class-G | HARS        |
| FNBP4. 5   | ##### | 0.148108 | 0.588 | 0.197 | ##### | Class-G | FNBP4       |
| ACO04158.  | ##### | 0.141878 | 0.34  | 0.087 | ##### | Class-G | ACO04158. 3 |
| UBA1. 4    | ##### | 0.168702 | 0.747 | 0.275 | ##### | Class-G | UBA1        |
| TCHP. 4    | ##### | 0.152198 | 0.316 | 0.078 | ##### | Class-G | TCHP        |
| OTUD5. 3   | ##### | 0.103285 | 0.364 | 0.097 | ##### | Class-G | OTUD5       |
| CLUH. 1    | ##### | 0.120173 | 0.229 | 0.043 | ##### | Class-G | CLUH        |
| SMYD2. 4   | ##### | 0.193033 | 0.371 | 0.103 | ##### | Class-G | SMYD2       |
| RRP1B. 7   | ##### | 0.157016 | 0.403 | 0.115 | ##### | Class-G | RRP1B       |

|           |       |          |       |       |       |         |              |
|-----------|-------|----------|-------|-------|-------|---------|--------------|
| ZNHIT2.3  | ##### | 0.129083 | 0.263 | 0.056 | ##### | Class-G | ZNHIT2       |
| ZNF224.3  | ##### | 0.105794 | 0.303 | 0.072 | ##### | Class-G | ZNF224       |
| HNRNPUL2. | ##### | 0.121915 | 0.418 | 0.121 | ##### | Class-G | HNRNPUL2     |
| LRRC41.2  | ##### | 0.114888 | 0.564 | 0.188 | ##### | Class-G | LRRC41       |
| PRR4.10   | ##### | 0.129433 | 0.52  | 0.167 | ##### | Class-G | PRR4         |
| FAM86C1   | ##### | 0.117913 | 0.163 | 0.021 | ##### | Class-G | FAM86C1      |
| REX01.2   | ##### | 0.138955 | 0.23  | 0.043 | ##### | Class-G | REX01        |
| FPR1.11   | ##### | -1.30779 | 0.008 | 0.33  | ##### | Class-G | FPR1         |
| ZNF287    | ##### | 0.113067 | 0.198 | 0.032 | ##### | Class-G | ZNF287       |
| SOS2.4    | ##### | 0.133207 | 0.258 | 0.054 | ##### | Class-G | SOS2         |
| TPD52L2.8 | ##### | 0.154744 | 0.722 | 0.259 | ##### | Class-G | TPD52L2      |
| MKL2.6    | ##### | 0.129942 | 0.246 | 0.049 | ##### | Class-G | MKL2         |
| NSRP1.3   | ##### | 0.12943  | 0.774 | 0.288 | ##### | Class-G | NSRP1        |
| ZNF234.1  | ##### | 0.144067 | 0.2   | 0.033 | ##### | Class-G | ZNF234       |
| XPO1.3    | ##### | 0.141488 | 0.598 | 0.203 | ##### | Class-G | XPO1         |
| YRDC.6    | ##### | 0.141131 | 0.414 | 0.119 | ##### | Class-G | YRDC         |
| CLINT1.3  | ##### | 0.13467  | 0.487 | 0.154 | ##### | Class-G | CLINT1       |
| ATAT1.11  | ##### | 0.10708  | 0.662 | 0.228 | ##### | Class-G | ATAT1        |
| ARHGEF4.7 | ##### | 0.122076 | 0.195 | 0.031 | ##### | Class-G | ARHGEF4      |
| HLA-DMB.1 | ##### | -1.35124 | 0.045 | 0.365 | ##### | Class-G | HLA-DMB      |
| C8orf33.7 | ##### | 0.164785 | 0.708 | 0.255 | ##### | Class-G | C8orf33      |
| LMNA.7    | ##### | 0.246335 | 0.874 | 0.341 | ##### | Class-G | LMNA         |
| HLA-DQA1. | ##### | -1.41134 | 0.031 | 0.351 | ##### | Class-G | HLA-DQA1     |
| C7orf55.9 | ##### | 0.171059 | 0.894 | 0.346 | ##### | Class-G | C7orf55      |
| SCAND1.8  | ##### | 0.348749 | 0.959 | 0.507 | ##### | Class-G | SCAND1       |
| ZFP91.2   | ##### | 0.138083 | 0.364 | 0.098 | ##### | Class-G | ZFP91        |
| GRIA2.10  | ##### | 0.175256 | 0.509 | 0.163 | ##### | Class-G | GRIA2        |
| FAM76B.3  | ##### | 0.133629 | 0.318 | 0.078 | ##### | Class-G | FAM76B       |
| SLC39A7.5 | ##### | 0.150834 | 0.683 | 0.243 | ##### | Class-G | SLC39A7      |
| TFE3.3    | ##### | 0.10048  | 0.327 | 0.082 | ##### | Class-G | TFE3         |
| MYL6B.10  | ##### | 0.233523 | 0.902 | 0.367 | ##### | Class-G | MYL6B        |
| TBCK.4    | ##### | 0.119922 | 0.253 | 0.052 | ##### | Class-G | TBCK         |
| SOX5.9    | ##### | 0.151124 | 0.27  | 0.059 | ##### | Class-G | SOX5         |
| CTA-445C9 | ##### | 0.159403 | 0.2   | 0.033 | ##### | Class-G | CTA-445C9.14 |
| SEC31A.1  | ##### | 0.124316 | 0.541 | 0.176 | ##### | Class-G | SEC31A       |
| GPR180.1  | ##### | 0.134154 | 0.257 | 0.054 | ##### | Class-G | GPR180       |
| DHX29.8   | ##### | 0.119993 | 0.694 | 0.247 | ##### | Class-G | DHX29        |
| HSPA14.4  | ##### | 0.118726 | 0.376 | 0.103 | ##### | Class-G | HSPA14       |
| IGSF8.8   | ##### | 0.132036 | 0.51  | 0.164 | ##### | Class-G | IGSF8        |
| ZNF75A.9  | ##### | 0.108089 | 0.516 | 0.165 | ##### | Class-G | ZNF75A       |
| MPV17L.2  | ##### | 0.142631 | 0.237 | 0.047 | ##### | Class-G | MPV17L       |
| THRB.1    | ##### | 0.114735 | 0.16  | 0.02  | ##### | Class-G | THRB         |
| PSAT1.10  | ##### | 0.177899 | 0.486 | 0.157 | ##### | Class-G | PSAT1        |
| CSE1L.8   | ##### | 0.150915 | 0.529 | 0.172 | ##### | Class-G | CSE1L        |
| STK32B.5  | ##### | 0.153793 | 0.211 | 0.037 | ##### | Class-G | STK32B       |
| EHMT2.9   | ##### | 0.132434 | 0.489 | 0.153 | ##### | Class-G | EHMT2        |
| DGCR2.6   | ##### | 0.131021 | 0.395 | 0.112 | ##### | Class-G | DGCR2        |
| FAHD1.5   | ##### | 0.117336 | 0.442 | 0.132 | ##### | Class-G | FAHD1        |
| DGAT1.3   | ##### | 0.118025 | 0.268 | 0.058 | ##### | Class-G | DGAT1        |
| HCLS1.11  | ##### | -1.23568 | 0.016 | 0.335 | ##### | Class-G | HCLS1        |
| KPNA4.5   | ##### | 0.135308 | 0.45  | 0.136 | ##### | Class-G | KPNA4        |

|           |       |          |       |       |       |         |               |
|-----------|-------|----------|-------|-------|-------|---------|---------------|
| UBTD2.7   | ##### | 0.137869 | 0.304 | 0.073 | ##### | Class-G | UBTD2         |
| PRMT6.4   | ##### | 0.123425 | 0.277 | 0.062 | ##### | Class-G | PRMT6         |
| DPY19L4.4 | ##### | 0.131504 | 0.279 | 0.063 | ##### | Class-G | DPY19L4       |
| SNAI2.5   | ##### | 0.159747 | 0.158 | 0.02  | ##### | Class-G | SNAI2         |
| CD37.11   | ##### | -1.28775 | 0.027 | 0.346 | ##### | Class-G | CD37          |
| CUL3.7    | ##### | 0.124057 | 0.489 | 0.153 | ##### | Class-G | CUL3          |
| ZDHHC16.3 | ##### | 0.141171 | 0.304 | 0.073 | ##### | Class-G | ZDHHC16       |
| VAC14.2   | ##### | 0.141078 | 0.374 | 0.103 | ##### | Class-G | VAC14         |
| SLC4A1AP. | ##### | 0.132431 | 0.44  | 0.133 | ##### | Class-G | SLC4A1AP      |
| HMGXB4.4  | ##### | 0.120937 | 0.53  | 0.172 | ##### | Class-G | HMGXB4        |
| RP11-262H | ##### | 0.142917 | 0.33  | 0.084 | ##### | Class-G | RP11-262H14.4 |
| ZFP36.8   | ##### | -1.07863 | 0.369 | 0.606 | ##### | Class-G | ZFP36         |
| TMEM104.2 | ##### | 0.118984 | 0.21  | 0.037 | ##### | Class-G | TMEM104       |
| PIAS2     | ##### | 0.120549 | 0.346 | 0.091 | ##### | Class-G | PIAS2         |
| CCNK.2    | ##### | 0.101505 | 0.341 | 0.088 | ##### | Class-G | CCNK          |
| MBD1.2    | ##### | 0.12176  | 0.395 | 0.112 | ##### | Class-G | MBD1          |
| DPM2.3    | ##### | 0.116338 | 0.756 | 0.279 | ##### | Class-G | DPM2          |
| SAP30BP.3 | ##### | 0.11826  | 0.779 | 0.293 | ##### | Class-G | SAP30BP       |
| MAPK7.7   | ##### | 0.135982 | 0.342 | 0.089 | ##### | Class-G | MAPK7         |
| TMEM64.4  | ##### | 0.147037 | 0.216 | 0.039 | ##### | Class-G | TMEM64        |
| TAF15.7   | ##### | 0.122536 | 0.624 | 0.216 | ##### | Class-G | TAF15         |
| HKR1.9    | ##### | 0.11946  | 0.326 | 0.082 | ##### | Class-G | HKR1          |
| STK35     | ##### | 0.131989 | 0.189 | 0.03  | ##### | Class-G | STK35         |
| TXNRD1.5  | ##### | 0.14864  | 0.555 | 0.186 | ##### | Class-G | TXNRD1        |
| MRM1      | ##### | 0.117138 | 0.144 | 0.016 | ##### | Class-G | MRM1          |
| RFX1.4    | ##### | 0.131248 | 0.272 | 0.061 | ##### | Class-G | RFX1          |
| PHF20.5   | ##### | 0.118211 | 0.711 | 0.256 | ##### | Class-G | PHF20         |
| CEP85L.6  | ##### | 0.138498 | 0.319 | 0.079 | ##### | Class-G | CEP85L        |
| GTPBP4.2  | ##### | 0.107603 | 0.512 | 0.164 | ##### | Class-G | GTPBP4        |
| CHID1.5   | ##### | 0.169183 | 0.886 | 0.363 | ##### | Class-G | CHID1         |
| SH3GLB2.5 | ##### | 0.128471 | 0.328 | 0.084 | ##### | Class-G | SH3GLB2       |
| RANBP9.3  | ##### | 0.121352 | 0.393 | 0.111 | ##### | Class-G | RANBP9        |
| NACA.5    | ##### | -0.38546 | 0.998 | 0.913 | ##### | Class-G | NACA          |
| RP11-5301 | ##### | 0.133611 | 0.155 | 0.019 | ##### | Class-G | RP11-53019.1  |
| SS18L1.5  | ##### | 0.151354 | 0.271 | 0.06  | ##### | Class-G | SS18L1        |
| DPP9.3    | ##### | 0.143523 | 0.347 | 0.093 | ##### | Class-G | DPP9          |
| GOLGA5.2  | ##### | 0.122525 | 0.387 | 0.109 | ##### | Class-G | GOLGA5        |
| WDR26.3   | ##### | 0.128911 | 0.411 | 0.119 | ##### | Class-G | WDR26         |
| ATP2A2.6  | ##### | 0.126693 | 0.634 | 0.221 | ##### | Class-G | ATP2A2        |
| MFSD5.2   | ##### | 0.119693 | 0.318 | 0.079 | ##### | Class-G | MFSD5         |
| CCDC157.2 | ##### | 0.126918 | 0.194 | 0.032 | ##### | Class-G | CCDC157       |
| ZYG11B.6  | ##### | 0.138466 | 0.388 | 0.11  | ##### | Class-G | ZYG11B        |
| ZNF227.5  | ##### | 0.142356 | 0.289 | 0.068 | ##### | Class-G | ZNF227        |
| DNM1L.6   | ##### | 0.132356 | 0.545 | 0.181 | ##### | Class-G | DNM1L         |
| CBL.3     | ##### | 0.131624 | 0.298 | 0.071 | ##### | Class-G | CBL           |
| VEZF1.10  | ##### | 0.166851 | 0.552 | 0.186 | ##### | Class-G | VEZF1         |
| NAA50.4   | ##### | 0.114904 | 0.623 | 0.215 | ##### | Class-G | NAA50         |
| ZNF429.9  | ##### | 0.109851 | 0.351 | 0.093 | ##### | Class-G | ZNF429        |
| MED25.2   | ##### | 0.138117 | 0.338 | 0.088 | ##### | Class-G | MED25         |
| AEBP2.2   | ##### | 0.144338 | 0.26  | 0.056 | ##### | Class-G | AEBP2         |
| GBA2.3    | ##### | 0.138432 | 0.262 | 0.057 | ##### | Class-G | GBA2          |



|            |       |           |        |        |       |         |                |
|------------|-------|-----------|--------|--------|-------|---------|----------------|
| HIP1. 8    | ##### | 0. 108708 | 0. 425 | 0. 126 | ##### | Class-G | HIP1           |
| RPAP2. 7   | ##### | 0. 13406  | 0. 457 | 0. 14  | ##### | Class-G | RPAP2          |
| PROSC. 2   | ##### | 0. 128977 | 0. 583 | 0. 198 | ##### | Class-G | PROSC          |
| DGCR14. 1  | ##### | 0. 125358 | 0. 332 | 0. 085 | ##### | Class-G | DGCR14         |
| EEF2K. 2   | ##### | 0. 10515  | 0. 174 | 0. 025 | ##### | Class-G | EEF2K          |
| ALKBH6. 3  | ##### | 0. 136072 | 0. 302 | 0. 073 | ##### | Class-G | ALKBH6         |
| NIFK. 7    | ##### | 0. 125179 | 0. 753 | 0. 282 | ##### | Class-G | NIFK           |
| KDM4A. 4   | ##### | 0. 139599 | 0. 317 | 0. 079 | ##### | Class-G | KDM4A          |
| RBM17. 5   | ##### | 0. 203715 | 0. 791 | 0. 3   | ##### | Class-G | RBM17          |
| YPEL1. 9   | ##### | 0. 154359 | 0. 277 | 0. 064 | ##### | Class-G | YPEL1          |
| RAI1. 4    | ##### | 0. 132832 | 0. 222 | 0. 042 | ##### | Class-G | RAI1           |
| MPC1. 7    | ##### | 0. 21779  | 0. 94  | 0. 414 | ##### | Class-G | MPC1           |
| CXADR. 10  | ##### | 0. 160142 | 0. 683 | 0. 246 | ##### | Class-G | CXADR          |
| TM9SF3. 6  | ##### | 0. 108994 | 0. 524 | 0. 17  | ##### | Class-G | TM9SF3         |
| MNT. 1     | ##### | 0. 117772 | 0. 276 | 0. 062 | ##### | Class-G | MNT            |
| GPR183. 11 | ##### | -1. 3153  | 0. 019 | 0. 334 | ##### | Class-G | GPR183         |
| STK36      | ##### | 0. 131052 | 0. 18  | 0. 027 | ##### | Class-G | STK36          |
| MYO1E. 3   | ##### | 0. 118991 | 0. 223 | 0. 042 | ##### | Class-G | MYO1E          |
| RIC8A. 6   | ##### | 0. 126435 | 0. 644 | 0. 227 | ##### | Class-G | RIC8A          |
| TEX261. 5  | ##### | 0. 12325  | 0. 421 | 0. 124 | ##### | Class-G | TEX261         |
| STT3B. 3   | ##### | 0. 101118 | 0. 494 | 0. 157 | ##### | Class-G | STT3B          |
| FBXW5. 8   | ##### | 0. 166341 | 0. 646 | 0. 229 | ##### | Class-G | FBXW5          |
| PDPK1. 6   | ##### | 0. 134376 | 0. 46  | 0. 143 | ##### | Class-G | PDPK1          |
| PPP6R2. 4  | ##### | 0. 11624  | 0. 39  | 0. 11  | ##### | Class-G | PPP6R2         |
| RP11-314A  | ##### | 0. 113973 | 0. 124 | 0. 011 | ##### | Class-G | RP11-314A20. 2 |
| SYBU. 9    | ##### | 0. 175443 | 0. 263 | 0. 058 | ##### | Class-G | SYBU           |
| RBBP6. 6   | ##### | 0. 14817  | 0. 699 | 0. 25  | ##### | Class-G | RBBP6          |
| GTF3C4. 3  | ##### | 0. 149734 | 0. 22  | 0. 041 | ##### | Class-G | GTF3C4         |
| ITPKC. 1   | ##### | 0. 133946 | 0. 18  | 0. 027 | ##### | Class-G | ITPKC          |
| SLC39A10.  | ##### | 0. 13293  | 0. 403 | 0. 117 | ##### | Class-G | SLC39A10       |
| PLAGL2. 1  | ##### | 0. 115554 | 0. 202 | 0. 035 | ##### | Class-G | PLAGL2         |
| ATP13A2. 5 | ##### | 0. 142853 | 0. 371 | 0. 102 | ##### | Class-G | ATP13A2        |
| KIF1C. 2   | ##### | 0. 123094 | 0. 257 | 0. 055 | ##### | Class-G | KIF1C          |
| YKT6. 7    | ##### | 0. 135269 | 0. 557 | 0. 187 | ##### | Class-G | YKT6           |
| RAB3D. 2   | ##### | 0. 114912 | 0. 238 | 0. 048 | ##### | Class-G | RAB3D          |
| C20orf194  | ##### | 0. 119352 | 0. 36  | 0. 098 | ##### | Class-G | C20orf194      |
| PDE8A. 5   | ##### | 0. 115646 | 0. 269 | 0. 06  | ##### | Class-G | PDE8A          |
| ZNF334. 7  | ##### | 0. 138876 | 0. 233 | 0. 046 | ##### | Class-G | ZNF334         |
| RBM12. 2   | ##### | 0. 116527 | 0. 336 | 0. 088 | ##### | Class-G | RBM12          |
| TOP1MT. 5  | ##### | 0. 141165 | 0. 235 | 0. 047 | ##### | Class-G | TOP1MT         |
| CHD1. 8    | ##### | 0. 147495 | 0. 655 | 0. 234 | ##### | Class-G | CHD1           |
| C1R. 11    | ##### | -0. 26534 | 0. 523 | 0. 165 | ##### | Class-G | C1R            |
| PPM1G. 10  | ##### | 0. 283964 | 0. 864 | 0. 346 | ##### | Class-G | PPM1G          |
| TMEM99. 6  | ##### | 0. 121467 | 0. 345 | 0. 092 | ##### | Class-G | TMEM99         |
| RP4-639F2  | ##### | 0. 13326  | 0. 159 | 0. 021 | ##### | Class-G | RP4-639F20. 1  |
| MS4A4A. 11 | ##### | -1. 30202 | 0. 018 | 0. 33  | ##### | Class-G | MS4A4A         |
| ZNF800. 6  | ##### | 0. 136782 | 0. 45  | 0. 138 | ##### | Class-G | ZNF800         |
| AKIRIN1. 7 | ##### | 0. 205056 | 0. 792 | 0. 299 | ##### | Class-G | AKIRIN1        |
| KDM5C. 3   | ##### | 0. 103566 | 0. 307 | 0. 075 | ##### | Class-G | KDM5C          |
| CRTC3. 4   | ##### | 0. 127193 | 0. 322 | 0. 082 | ##### | Class-G | CRTC3          |
| TP53BP2. 2 | ##### | 0. 136751 | 0. 298 | 0. 072 | ##### | Class-G | TP53BP2        |

|           |       |          |       |       |       |         |               |
|-----------|-------|----------|-------|-------|-------|---------|---------------|
| DCAF16.6  | ##### | 0.129427 | 0.328 | 0.085 | ##### | Class-G | DCAF16        |
| OPA1.3    | ##### | 0.118215 | 0.352 | 0.094 | ##### | Class-G | OPA1          |
| ITPR2.9   | ##### | 0.122667 | 0.353 | 0.095 | ##### | Class-G | ITPR2         |
| EARS2.1   | ##### | 0.127485 | 0.195 | 0.033 | ##### | Class-G | EARS2         |
| ZNF587.3  | ##### | 0.156017 | 0.255 | 0.055 | ##### | Class-G | ZNF587        |
| MED1.3    | ##### | 0.131212 | 0.327 | 0.084 | ##### | Class-G | MED1          |
| PNPLA6.5  | ##### | 0.10776  | 0.421 | 0.125 | ##### | Class-G | PNPLA6        |
| PNN.8     | ##### | 0.184376 | 0.844 | 0.329 | ##### | Class-G | PNN           |
| CEP350.2  | ##### | 0.122645 | 0.47  | 0.147 | ##### | Class-G | CEP350        |
| TYK2.2    | ##### | 0.118404 | 0.331 | 0.086 | ##### | Class-G | TYK2          |
| ATP11A.5  | ##### | 0.128344 | 0.284 | 0.066 | ##### | Class-G | ATP11A        |
| FAIM.6    | ##### | 0.110012 | 0.381 | 0.108 | ##### | Class-G | FAIM          |
| PLEKHF1.4 | ##### | 0.146734 | 0.166 | 0.023 | ##### | Class-G | PLEKHF1       |
| SLAIN2.5  | ##### | 0.132205 | 0.367 | 0.101 | ##### | Class-G | SLAIN2        |
| GSPT2.9   | ##### | 0.137597 | 0.388 | 0.11  | ##### | Class-G | GSPT2         |
| CRKL.3    | ##### | 0.139944 | 0.332 | 0.087 | ##### | Class-G | CRKL          |
| CLCN7.3   | ##### | 0.13961  | 0.397 | 0.115 | ##### | Class-G | CLCN7         |
| INTS2.1   | ##### | 0.124641 | 0.19  | 0.031 | ##### | Class-G | INTS2         |
| ZDHHC23   | ##### | 0.15084  | 0.11  | 0.008 | ##### | Class-G | ZDHHC23       |
| PTK2B.8   | ##### | 0.104446 | 0.344 | 0.091 | ##### | Class-G | PTK2B         |
| FAM69A.3  | ##### | 0.128907 | 0.204 | 0.036 | ##### | Class-G | FAM69A        |
| UBR5.1    | ##### | 0.116095 | 0.355 | 0.097 | ##### | Class-G | UBR5          |
| STEAP3.7  | ##### | 0.130829 | 0.406 | 0.121 | ##### | Class-G | STEAP3        |
| RP11-294J | ##### | 0.15976  | 0.357 | 0.098 | ##### | Class-G | RP11-294J22.6 |
| C7orf49.5 | ##### | 0.107119 | 0.497 | 0.16  | ##### | Class-G | C7orf49       |
| LRCH3.8   | ##### | 0.116039 | 0.365 | 0.101 | ##### | Class-G | LRCH3         |
| COX10.1   | ##### | 0.113368 | 0.216 | 0.04  | ##### | Class-G | COX10         |
| GTF2I.10  | ##### | 0.233384 | 0.896 | 0.35  | ##### | Class-G | GTF2I         |
| SDF2L1.7  | ##### | 0.168859 | 0.775 | 0.292 | ##### | Class-G | SDF2L1        |
| ERI3.7    | ##### | 0.151879 | 0.797 | 0.298 | ##### | Class-G | ERI3          |
| VAV2.2    | ##### | 0.132626 | 0.182 | 0.029 | ##### | Class-G | VAV2          |
| ELAVL3.11 | ##### | 0.140006 | 0.7   | 0.247 | ##### | Class-G | ELAVL3        |
| MARC1.9   | ##### | 0.15329  | 0.202 | 0.035 | ##### | Class-G | 1-Mar         |
| SLC9A3R1. | ##### | 0.120147 | 0.388 | 0.111 | ##### | Class-G | SLC9A3R1      |
| ZNF721.3  | ##### | 0.100446 | 0.386 | 0.11  | ##### | Class-G | ZNF721        |
| EIF2AK1.8 | ##### | 0.177777 | 0.729 | 0.267 | ##### | Class-G | EIF2AK1       |
| UCK2.3    | ##### | 0.125129 | 0.263 | 0.058 | ##### | Class-G | UCK2          |
| B9D2.2    | ##### | 0.106551 | 0.253 | 0.055 | ##### | Class-G | B9D2          |
| EP400.3   | ##### | 0.128052 | 0.323 | 0.083 | ##### | Class-G | EP400         |
| YIF1B.4   | ##### | 0.111137 | 0.731 | 0.268 | ##### | Class-G | YIF1B         |
| HCG18.7   | ##### | 0.121204 | 0.315 | 0.08  | ##### | Class-G | HCG18         |
| FAM131A.4 | ##### | 0.141155 | 0.341 | 0.091 | ##### | Class-G | FAM131A       |
| MAP2K7.5  | ##### | 0.117273 | 0.476 | 0.15  | ##### | Class-G | MAP2K7        |
| FAM120AOS | ##### | 0.11894  | 0.455 | 0.142 | ##### | Class-G | FAM120AOS     |
| ARHGAP32. | ##### | 0.167199 | 0.256 | 0.056 | ##### | Class-G | ARHGAP32      |
| CDK14.7   | ##### | 0.164303 | 0.243 | 0.051 | ##### | Class-G | CDK14         |
| OSGIN2    | ##### | 0.133416 | 0.216 | 0.041 | ##### | Class-G | OSGIN2        |
| ZNF606.3  | ##### | 0.131617 | 0.25  | 0.054 | ##### | Class-G | ZNF606        |
| PSMC1.6   | ##### | 0.108583 | 0.817 | 0.314 | ##### | Class-G | PSMC1         |
| CRCP.6    | ##### | 0.113011 | 0.448 | 0.138 | ##### | Class-G | CRCP          |
| TACC1.8   | ##### | 0.137949 | 0.688 | 0.252 | ##### | Class-G | TACC1         |

|            |       |          |       |       |       |         |               |
|------------|-------|----------|-------|-------|-------|---------|---------------|
| UBE2Z. 3   | ##### | 0.108383 | 0.438 | 0.133 | ##### | Class-G | UBE2Z         |
| POU3F3.1C  | ##### | 0.159127 | 0.395 | 0.115 | ##### | Class-G | POU3F3        |
| TPM4. 9    | ##### | 0.316904 | 0.916 | 0.429 | ##### | Class-G | TPM4          |
| PARD3B     | ##### | 0.131614 | 0.132 | 0.014 | ##### | Class-G | PARD3B        |
| MGA. 2     | ##### | 0.126414 | 0.291 | 0.07  | ##### | Class-G | MGA           |
| ZNF181. 7  | ##### | 0.156199 | 0.282 | 0.067 | ##### | Class-G | ZNF181        |
| DGCR8. 3   | ##### | 0.149661 | 0.252 | 0.055 | ##### | Class-G | DGCR8         |
| HCFC1. 3   | ##### | 0.110542 | 0.371 | 0.104 | ##### | Class-G | HCFC1         |
| RAB26. 1   | ##### | 0.122075 | 0.128 | 0.013 | ##### | Class-G | RAB26         |
| SEC61A1. 5 | ##### | 0.158578 | 0.785 | 0.297 | ##### | Class-G | SEC61A1       |
| RP11-390F  | ##### | 0.118647 | 0.143 | 0.017 | ##### | Class-G | RP11-390F4. 6 |
| GPR137B. 7 | ##### | 0.114717 | 0.54  | 0.179 | ##### | Class-G | GPR137B       |
| PIP5K1C. 2 | ##### | 0.119168 | 0.305 | 0.076 | ##### | Class-G | PIP5K1C       |
| LINC00685  | ##### | 0.124487 | 0.386 | 0.111 | ##### | Class-G | LINC00685     |
| MATN2. 8   | ##### | 0.167554 | 0.217 | 0.041 | ##### | Class-G | MATN2         |
| EMD. 5     | ##### | 0.110136 | 0.637 | 0.226 | ##### | Class-G | EMD           |
| ELOVL5. 4  | ##### | 0.14168  | 0.703 | 0.261 | ##### | Class-G | ELOVL5        |
| RELA. 3    | ##### | 0.103947 | 0.489 | 0.157 | ##### | Class-G | RELA          |
| TMEM206. 9 | ##### | 0.118021 | 0.538 | 0.181 | ##### | Class-G | TMEM206       |
| COG4. 7    | ##### | 0.123844 | 0.463 | 0.146 | ##### | Class-G | COG4          |
| RBP1. 9    | ##### | 0.232196 | 0.916 | 0.385 | ##### | Class-G | RBP1          |
| SLC25A11.  | ##### | 0.217201 | 0.86  | 0.347 | ##### | Class-G | SLC25A11      |
| IGF1R. 7   | ##### | 0.115237 | 0.224 | 0.044 | ##### | Class-G | IGF1R         |
| AK3. 3     | ##### | 0.117831 | 0.549 | 0.187 | ##### | Class-G | AK3           |
| LPCAT4. 3  | ##### | 0.101033 | 0.225 | 0.044 | ##### | Class-G | LPCAT4        |
| SLC35F6. 6 | ##### | 0.123452 | 0.497 | 0.162 | ##### | Class-G | SLC35F6       |
| PAQR3. 5   | ##### | 0.146397 | 0.24  | 0.05  | ##### | Class-G | PAQR3         |
| WDR12. 6   | ##### | 0.12513  | 0.372 | 0.105 | ##### | Class-G | WDR12         |
| FAM84B. 8  | ##### | 0.1765   | 0.26  | 0.059 | ##### | Class-G | FAM84B        |
| USP10. 6   | ##### | 0.102199 | 0.563 | 0.191 | ##### | Class-G | USP10         |
| STUB1. 7   | ##### | 0.301145 | 0.904 | 0.388 | ##### | Class-G | STUB1         |
| SESN3. 4   | ##### | 0.157058 | 0.384 | 0.112 | ##### | Class-G | SESN3         |
| KMT2A. 10  | ##### | 0.124724 | 0.549 | 0.185 | ##### | Class-G | KMT2A         |
| CAHM. 9    | ##### | 0.139634 | 0.27  | 0.062 | ##### | Class-G | CAHM          |
| ZNF446. 4  | ##### | 0.147522 | 0.237 | 0.049 | ##### | Class-G | ZNF446        |
| NOP14. 1   | ##### | 0.143587 | 0.249 | 0.054 | ##### | Class-G | NOP14         |
| PIGQ. 1    | ##### | 0.132856 | 0.309 | 0.078 | ##### | Class-G | PIGQ          |
| PEAK1. 5   | ##### | 0.135146 | 0.223 | 0.044 | ##### | Class-G | PEAK1         |
| AJUBA      | ##### | 0.119379 | 0.114 | 0.009 | ##### | Class-G | AJUBA         |
| RCOR3. 1   | ##### | 0.114317 | 0.343 | 0.093 | ##### | Class-G | RCOR3         |
| CHP1. 7    | ##### | 0.134    | 0.543 | 0.184 | ##### | Class-G | CHP1          |
| POMT1. 8   | ##### | 0.132758 | 0.36  | 0.101 | ##### | Class-G | POMT1         |
| AGL. 1     | ##### | 0.127025 | 0.265 | 0.06  | ##### | Class-G | AGL           |
| RNF14. 4   | ##### | 0.107685 | 0.472 | 0.15  | ##### | Class-G | RNF14         |
| HOXD9      | ##### | 0.123365 | 0.135 | 0.015 | ##### | Class-G | HOXD9         |
| TFG. 5     | ##### | 0.224625 | 0.834 | 0.338 | ##### | Class-G | TFG           |
| CHTOP. 6   | ##### | 0.126609 | 0.786 | 0.298 | ##### | Class-G | CHTOP         |
| TEAD3      | ##### | 0.115428 | 0.13  | 0.013 | ##### | Class-G | TEAD3         |
| SLC41A1. 2 | ##### | 0.130466 | 0.219 | 0.042 | ##### | Class-G | SLC41A1       |
| TPT1-AS1.  | ##### | 0.112552 | 0.364 | 0.102 | ##### | Class-G | TPT1-AS1      |
| IWS1. 6    | ##### | 0.10572  | 0.505 | 0.165 | ##### | Class-G | IWS1          |

|                 |       |           |        |        |       |         |                |
|-----------------|-------|-----------|--------|--------|-------|---------|----------------|
| HTT. 3          | ##### | 0. 107934 | 0. 329 | 0. 086 | ##### | Class-G | HTT            |
| GUF1. 1         | ##### | 0. 140652 | 0. 265 | 0. 06  | ##### | Class-G | GUF1           |
| PVR. 3          | ##### | 0. 134985 | 0. 22  | 0. 043 | ##### | Class-G | PVR            |
| UTP20. 2        | ##### | 0. 133544 | 0. 209 | 0. 039 | ##### | Class-G | UTP20          |
| SLC35A5. 5      | ##### | 0. 112635 | 0. 454 | 0. 143 | ##### | Class-G | SLC35A5        |
| C16orf46. ##### | ##### | 0. 127332 | 0. 178 | 0. 028 | ##### | Class-G | C16orf46       |
| TAOK2. 2        | ##### | 0. 121387 | 0. 273 | 0. 063 | ##### | Class-G | TAOK2          |
| RABGAP1. 7      | ##### | 0. 108968 | 0. 337 | 0. 09  | ##### | Class-G | RABGAP1        |
| ZC3H18. 6       | ##### | 0. 118245 | 0. 398 | 0. 117 | ##### | Class-G | ZC3H18         |
| CRY1. 5         | ##### | 0. 12461  | 0. 357 | 0. 1   | ##### | Class-G | CRY1           |
| CLDN12. 11      | ##### | 0. 138059 | 0. 361 | 0. 102 | ##### | Class-G | CLDN12         |
| RP11-1114       | ##### | 0. 145918 | 0. 255 | 0. 056 | ##### | Class-G | RP11-1114A5. 4 |
| IRX3            | ##### | 0. 119141 | 0. 122 | 0. 011 | ##### | Class-G | IRX3           |
| TPR. 7          | ##### | 0. 200663 | 0. 843 | 0. 333 | ##### | Class-G | TPR            |
| INTU. 3         | ##### | 0. 132939 | 0. 223 | 0. 044 | ##### | Class-G | INTU           |
| PLIN2. 9        | ##### | -1. 29808 | 0. 081 | 0. 385 | ##### | Class-G | PLIN2          |
| TTI1. 5         | ##### | 0. 128418 | 0. 281 | 0. 067 | ##### | Class-G | TTI1           |
| NSA2. 6         | ##### | 0. 193144 | 0. 828 | 0. 328 | ##### | Class-G | NSA2           |
| ZC3H4. 2        | ##### | 0. 154176 | 0. 26  | 0. 059 | ##### | Class-G | ZC3H4          |
| BCAR3. 1        | ##### | 0. 173818 | 0. 18  | 0. 029 | ##### | Class-G | BCAR3          |
| BRMS1. 4        | ##### | 0. 109784 | 0. 681 | 0. 25  | ##### | Class-G | BRMS1          |
| ZNF837          | ##### | 0. 121405 | 0. 139 | 0. 016 | ##### | Class-G | ZNF837         |
| CTD-2325M       | ##### | 0. 11848  | 0. 13  | 0. 013 | ##### | Class-G | CTD-2325M2. 1  |
| GPR107. 1       | ##### | 0. 1124   | 0. 293 | 0. 072 | ##### | Class-G | GPR107         |
| SRA1. 7         | ##### | 0. 149673 | 0. 828 | 0. 328 | ##### | Class-G | SRA1           |
| CCDC51. 3       | ##### | 0. 112662 | 0. 287 | 0. 069 | ##### | Class-G | CCDC51         |
| ASAP3           | ##### | 0. 134032 | 0. 15  | 0. 019 | ##### | Class-G | ASAP3          |
| SYNGAP1. 5      | ##### | 0. 113722 | 0. 19  | 0. 032 | ##### | Class-G | SYNGAP1        |
| WDR60. 8        | ##### | 0. 117769 | 0. 54  | 0. 181 | ##### | Class-G | WDR60          |
| ANKRD13C        | ##### | 0. 124769 | 0. 301 | 0. 075 | ##### | Class-G | ANKRD13C       |
| POLI. 3         | ##### | 0. 117302 | 0. 266 | 0. 061 | ##### | Class-G | POLI           |
| KPNA1. 2        | ##### | 0. 119722 | 0. 411 | 0. 123 | ##### | Class-G | KPNA1          |
| NFAT5. 3        | ##### | 0. 101853 | 0. 359 | 0. 1   | ##### | Class-G | NFAT5          |
| HSF1. 4         | ##### | 0. 13545  | 0. 625 | 0. 221 | ##### | Class-G | HSF1           |
| BICC1           | ##### | 0. 124917 | 0. 124 | 0. 012 | ##### | Class-G | BICC1          |
| ELK1. 4         | ##### | 0. 118692 | 0. 287 | 0. 07  | ##### | Class-G | ELK1           |
| PSORS1C1. ##### | ##### | 0. 127526 | 0. 147 | 0. 018 | ##### | Class-G | PSORS1C1       |
| RAD50. 6        | ##### | 0. 114132 | 0. 599 | 0. 211 | ##### | Class-G | RAD50          |
| RUFY1. 5        | ##### | 0. 102698 | 0. 391 | 0. 113 | ##### | Class-G | RUFY1          |
| ANKLE2. 3       | ##### | 0. 101004 | 0. 441 | 0. 136 | ##### | Class-G | ANKLE2         |
| DCAF15. 2       | ##### | 0. 136933 | 0. 307 | 0. 078 | ##### | Class-G | DCAF15         |
| DSTN. 10        | ##### | 0. 251824 | 0. 979 | 0. 559 | ##### | Class-G | DSTN           |
| GMFG. 11        | ##### | -1. 23832 | 0. 036 | 0. 341 | ##### | Class-G | GMFG           |
| COQ10A. 7       | ##### | 0. 106711 | 0. 288 | 0. 07  | ##### | Class-G | COQ10A         |
| FASTK. 8        | ##### | 0. 123288 | 0. 732 | 0. 273 | ##### | Class-G | FASTK          |
| ACBD4. 1        | ##### | 0. 108352 | 0. 183 | 0. 03  | ##### | Class-G | ACBD4          |
| ERC1. 4         | ##### | 0. 110742 | 0. 329 | 0. 087 | ##### | Class-G | ERC1           |
| ZNF516. 3       | ##### | 0. 153401 | 0. 274 | 0. 065 | ##### | Class-G | ZNF516         |
| ZFP82. 8        | ##### | 0. 103939 | 0. 306 | 0. 077 | ##### | Class-G | ZFP82          |
| XYLT2           | ##### | 0. 15192  | 0. 173 | 0. 027 | ##### | Class-G | XYLT2          |
| ANXA2R. 1C      | ##### | 0. 101491 | 0. 388 | 0. 113 | ##### | Class-G | ANXA2R         |

|           |       |          |       |       |       |         |               |
|-----------|-------|----------|-------|-------|-------|---------|---------------|
| SMAP1.5   | ##### | 0.142521 | 0.658 | 0.239 | ##### | Class-G | SMAP1         |
| PEX7.1    | ##### | 0.137426 | 0.253 | 0.056 | ##### | Class-G | PEX7          |
| NSFL1C.4  | ##### | 0.167428 | 0.834 | 0.331 | ##### | Class-G | NSFL1C        |
| SRSF9.8   | ##### | 0.34527  | 0.969 | 0.495 | ##### | Class-G | SRSF9         |
| OSCP1.5   | ##### | 0.109187 | 0.215 | 0.041 | ##### | Class-G | OSCP1         |
| CD82.6    | ##### | 0.141475 | 0.542 | 0.19  | ##### | Class-G | CD82          |
| TARBP1.4  | ##### | 0.124391 | 0.226 | 0.045 | ##### | Class-G | TARBP1        |
| NTRK3.7   | ##### | 0.144244 | 0.216 | 0.042 | ##### | Class-G | NTRK3         |
| LRPPRC.5  | ##### | 0.10403  | 0.42  | 0.126 | ##### | Class-G | LRPPRC        |
| FRMD8.4   | ##### | 0.134321 | 0.318 | 0.083 | ##### | Class-G | FRMD8         |
| CSNK1D.8  | ##### | 0.145378 | 0.772 | 0.292 | ##### | Class-G | CSNK1D        |
| SCCPDH.4  | ##### | 0.136505 | 0.795 | 0.308 | ##### | Class-G | SCCPDH        |
| KLC1.10   | ##### | 0.162798 | 0.775 | 0.292 | ##### | Class-G | KLC1          |
| TOLLIP-AS | ##### | 0.112069 | 0.146 | 0.018 | ##### | Class-G | TOLLIP-AS1    |
| CREBBP.2  | ##### | 0.105118 | 0.388 | 0.113 | ##### | Class-G | CREBBP        |
| DNAJC18.7 | ##### | 0.135423 | 0.33  | 0.089 | ##### | Class-G | DNAJC18       |
| CD68.11   | ##### | -1.34222 | 0.225 | 0.477 | ##### | Class-G | CD68          |
| MOGS.3    | ##### | 0.122064 | 0.333 | 0.089 | ##### | Class-G | MOGS          |
| CMTM3.11  | ##### | 0.160711 | 0.711 | 0.26  | ##### | Class-G | CMTM3         |
| GPM6B.11  | ##### | 0.200468 | 1     | 0.556 | ##### | Class-G | GPM6B         |
| MANEA.1   | ##### | 0.128572 | 0.238 | 0.05  | ##### | Class-G | MANEA         |
| RPGRIP1L. | ##### | 0.105181 | 0.196 | 0.035 | ##### | Class-G | RPGRIP1L      |
| GJB2.7    | ##### | 0.197096 | 0.177 | 0.028 | ##### | Class-G | GJB2          |
| PELP1.6   | ##### | 0.116399 | 0.384 | 0.112 | ##### | Class-G | PELP1         |
| AMZ2.5    | ##### | 0.128069 | 0.8   | 0.312 | ##### | Class-G | AMZ2          |
| KDM5A.4   | ##### | 0.109838 | 0.567 | 0.195 | ##### | Class-G | KDM5A         |
| NDST1.5   | ##### | 0.121706 | 0.26  | 0.059 | ##### | Class-G | NDST1         |
| KXD1.6    | ##### | 0.154301 | 0.901 | 0.375 | ##### | Class-G | KXD1          |
| ACSF3.2   | ##### | 0.111551 | 0.313 | 0.081 | ##### | Class-G | ACSF3         |
| PEX14.1   | ##### | 0.114069 | 0.281 | 0.067 | ##### | Class-G | PEX14         |
| TTLL4.3   | ##### | 0.117372 | 0.226 | 0.046 | ##### | Class-G | TTLL4         |
| BRD3.10   | ##### | 0.141872 | 0.617 | 0.219 | ##### | Class-G | BRD3          |
| TOMM70A.5 | ##### | 0.144081 | 0.334 | 0.091 | ##### | Class-G | TOMM70A       |
| CUL4B.1   | ##### | 0.135392 | 0.255 | 0.057 | ##### | Class-G | CUL4B         |
| LRP6.10   | ##### | 0.129844 | 0.31  | 0.079 | ##### | Class-G | LRP6          |
| D2HGDH.4  | ##### | 0.115635 | 0.304 | 0.077 | ##### | Class-G | D2HGDH        |
| GNB4.9    | ##### | 0.11707  | 0.535 | 0.183 | ##### | Class-G | GNB4          |
| CBFA2T2.7 | ##### | 0.127266 | 0.343 | 0.093 | ##### | Class-G | CBFA2T2       |
| ZSCAN30.1 | ##### | 0.130686 | 0.194 | 0.034 | ##### | Class-G | ZSCAN30       |
| ZNF333.1  | ##### | 0.125464 | 0.258 | 0.058 | ##### | Class-G | ZNF333        |
| CKAP5.9   | ##### | 0.12231  | 0.396 | 0.117 | ##### | Class-G | CKAP5         |
| RP11-111M | ##### | 0.108284 | 0.277 | 0.066 | ##### | Class-G | RP11-111M22.3 |
| SAT1.9    | ##### | -0.71762 | 0.916 | 0.784 | ##### | Class-G | SAT1          |
| LRRTM2.9  | ##### | 0.153794 | 0.29  | 0.072 | ##### | Class-G | LRRTM2        |
| TFCP2.1   | ##### | 0.13136  | 0.31  | 0.08  | ##### | Class-G | TFCP2         |
| RNASE6.11 | ##### | -1.21048 | 0.018 | 0.317 | ##### | Class-G | RNASE6        |
| MUT.6     | ##### | 0.115437 | 0.396 | 0.118 | ##### | Class-G | MUT           |
| SETD2.5   | ##### | 0.129706 | 0.37  | 0.107 | ##### | Class-G | SETD2         |
| TMEM205.9 | ##### | 0.126988 | 0.941 | 0.423 | ##### | Class-G | TMEM205       |
| RP11-159D | ##### | 0.132851 | 0.175 | 0.028 | ##### | Class-G | RP11-159D12.2 |
| ZNF426.7  | ##### | 0.115792 | 0.31  | 0.08  | ##### | Class-G | ZNF426        |

|            |       |           |        |        |       |         |                |
|------------|-------|-----------|--------|--------|-------|---------|----------------|
| SMG7. 1    | ##### | 0. 118538 | 0. 277 | 0. 066 | ##### | Class-G | SMG7           |
| RP11-146F  | ##### | 0. 118359 | 0. 166 | 0. 025 | ##### | Class-G | RP11-146F11. 1 |
| SLC25A22.  | ##### | 0. 131132 | 0. 312 | 0. 081 | ##### | Class-G | SLC25A22       |
| APITD1. 5  | ##### | 0. 105322 | 0. 248 | 0. 055 | ##### | Class-G | APITD1         |
| MORN4. 5   | ##### | 0. 124369 | 0. 18  | 0. 03  | ##### | Class-G | MORN4          |
| IPO4       | ##### | 0. 124179 | 0. 182 | 0. 03  | ##### | Class-G | IPO4           |
| FAM181A. 8 | ##### | 0. 12796  | 0. 213 | 0. 042 | ##### | Class-G | FAM181A        |
| LFNG. 2    | ##### | 0. 178008 | 0. 166 | 0. 025 | ##### | Class-G | LFNG           |
| EIF4ENIF1  | ##### | 0. 114159 | 0. 218 | 0. 043 | ##### | Class-G | EIF4ENIF1      |
| CDC16. 5   | ##### | 0. 126013 | 0. 47  | 0. 151 | ##### | Class-G | CDC16          |
| COG2. 2    | ##### | 0. 116396 | 0. 32  | 0. 085 | ##### | Class-G | COG2           |
| NPEPPS. 5  | ##### | 0. 107389 | 0. 522 | 0. 176 | ##### | Class-G | NPEPPS         |
| PLCB3. 2   | ##### | 0. 131807 | 0. 194 | 0. 035 | ##### | Class-G | PLCB3          |
| BBS7. 4    | ##### | 0. 109254 | 0. 277 | 0. 067 | ##### | Class-G | BBS7           |
| AF127936.  | ##### | 0. 10186  | 0. 114 | 0. 01  | ##### | Class-G | AF127936. 7    |
| NIPBL. 4   | ##### | 0. 109841 | 0. 551 | 0. 188 | ##### | Class-G | NIPBL          |
| CTDSPL2. 3 | ##### | 0. 128544 | 0. 302 | 0. 077 | ##### | Class-G | CTDSPL2        |
| MFN1. 1    | ##### | 0. 116637 | 0. 272 | 0. 065 | ##### | Class-G | MFN1           |
| USP9X. 3   | ##### | 0. 10641  | 0. 48  | 0. 156 | ##### | Class-G | USP9X          |
| PUM2. 2    | ##### | 0. 119334 | 0. 391 | 0. 116 | ##### | Class-G | PUM2           |
| FAF2. 6    | ##### | 0. 104408 | 0. 457 | 0. 145 | ##### | Class-G | FAF2           |
| ZNF513. 4  | ##### | 0. 116169 | 0. 231 | 0. 048 | ##### | Class-G | ZNF513         |
| C1orf216.  | ##### | 0. 122346 | 0. 341 | 0. 093 | ##### | Class-G | C1orf216       |
| GTF3C5. 7  | ##### | 0. 104716 | 0. 449 | 0. 143 | ##### | Class-G | GTF3C5         |
| GTF2H2C. 5 | ##### | 0. 107041 | 0. 257 | 0. 058 | ##### | Class-G | GTF2H2C        |
| USP16. 3   | ##### | 0. 13076  | 0. 773 | 0. 296 | ##### | Class-G | USP16          |
| SPHK1. 9   | ##### | 0. 150045 | 0. 297 | 0. 075 | ##### | Class-G | SPHK1          |
| KLF16. 2   | ##### | 0. 109362 | 0. 195 | 0. 035 | ##### | Class-G | KLF16          |
| TMEM231. 6 | ##### | 0. 130435 | 0. 205 | 0. 039 | ##### | Class-G | TMEM231        |
| ADAM23. 5  | ##### | 0. 139837 | 0. 176 | 0. 028 | ##### | Class-G | ADAM23         |
| STIM1. 2   | ##### | 0. 112202 | 0. 215 | 0. 042 | ##### | Class-G | STIM1          |
| NDE1. 5    | ##### | 0. 123633 | 0. 294 | 0. 075 | ##### | Class-G | NDE1           |
| SURF1. 3   | ##### | 0. 170732 | 0. 749 | 0. 287 | ##### | Class-G | SURF1          |
| IPP. 6     | ##### | 0. 122753 | 0. 2   | 0. 037 | ##### | Class-G | IPP            |
| EFNB3. 8   | ##### | 0. 130428 | 0. 231 | 0. 048 | ##### | Class-G | EFNB3          |
| SLC25A39.  | ##### | 0. 232177 | 0. 825 | 0. 336 | ##### | Class-G | SLC25A39       |
| ZNF672. 3  | ##### | 0. 11099  | 0. 364 | 0. 104 | ##### | Class-G | ZNF672         |
| TMX1. 6    | ##### | 0. 113876 | 0. 836 | 0. 332 | ##### | Class-G | TMX1           |
| DBT. 3     | ##### | 0. 110896 | 0. 284 | 0. 07  | ##### | Class-G | DBT            |
| TAF1. 1    | ##### | 0. 109853 | 0. 266 | 0. 062 | ##### | Class-G | TAF1           |
| OAZ1. 7    | ##### | -0. 3527  | 0. 999 | 0. 914 | ##### | Class-G | OAZ1           |
| VKORC1L1.  | ##### | 0. 129299 | 0. 345 | 0. 096 | ##### | Class-G | VKORC1L1       |
| THYN1. 8   | ##### | 0. 100436 | 0. 841 | 0. 335 | ##### | Class-G | THYN1          |
| C10orf54.  | ##### | -1. 18522 | 0. 033 | 0. 33  | ##### | Class-G | C10orf54       |
| MYO1C. 5   | ##### | 0. 114078 | 0. 288 | 0. 072 | ##### | Class-G | MYO1C          |
| LST1. 11   | ##### | -1. 27117 | 0. 059 | 0. 354 | ##### | Class-G | LST1           |
| PRKAA2. 8  | ##### | 0. 125686 | 0. 183 | 0. 031 | ##### | Class-G | PRKAA2         |
| GRB10. 8   | ##### | 0. 169623 | 0. 227 | 0. 048 | ##### | Class-G | GRB10          |
| GALNT7. 5  | ##### | 0. 132623 | 0. 263 | 0. 061 | ##### | Class-G | GALNT7         |
| MTIF2. 2   | ##### | 0. 104425 | 0. 361 | 0. 103 | ##### | Class-G | MTIF2          |
| SLC4A7. 6  | ##### | 0. 143448 | 0. 497 | 0. 168 | ##### | Class-G | SLC4A7         |

|            |       |           |        |        |       |         |           |
|------------|-------|-----------|--------|--------|-------|---------|-----------|
| BRI3. 6    | ##### | 0. 310825 | 0. 886 | 0. 399 | ##### | Class-G | BRI3      |
| SLC25A36.  | ##### | 0. 108185 | 0. 606 | 0. 214 | ##### | Class-G | SLC25A36  |
| FKTN. 2    | ##### | 0. 135108 | 0. 206 | 0. 04  | ##### | Class-G | FKTN      |
| CCDC47. 4  | ##### | 0. 194754 | 0. 834 | 0. 334 | ##### | Class-G | CCDC47    |
| PTPN12. 5  | ##### | 0. 132283 | 0. 515 | 0. 174 | ##### | Class-G | PTPN12    |
| MSH3. 2    | ##### | 0. 14908  | 0. 295 | 0. 075 | ##### | Class-G | MSH3      |
| CD163. 11  | ##### | -1. 20538 | 0. 022 | 0. 317 | ##### | Class-G | CD163     |
| SMCR5. 7   | ##### | 0. 120461 | 0. 267 | 0. 063 | ##### | Class-G | SMCR5     |
| CAST. 8    | ##### | 0. 117483 | 0. 697 | 0. 256 | ##### | Class-G | CAST      |
| SFT2D3     | ##### | 0. 116201 | 0. 189 | 0. 033 | ##### | Class-G | SFT2D3    |
| KCTD13. 8  | ##### | 0. 129177 | 0. 359 | 0. 102 | ##### | Class-G | KCTD13    |
| BRD9. 4    | ##### | 0. 122919 | 0. 461 | 0. 15  | ##### | Class-G | BRD9      |
| SNAPIN. 3  | ##### | 0. 100708 | 0. 795 | 0. 308 | ##### | Class-G | SNAPIN    |
| CLCN2      | ##### | 0. 128804 | 0. 138 | 0. 017 | ##### | Class-G | CLCN2     |
| SHISA5. 3  | ##### | 0. 100674 | 0. 702 | 0. 263 | ##### | Class-G | SHISA5    |
| CSNK1G1    | ##### | 0. 115527 | 0. 22  | 0. 045 | ##### | Class-G | CSNK1G1   |
| THOC2. 5   | ##### | 0. 117031 | 0. 665 | 0. 245 | ##### | Class-G | THOC2     |
| FTO. 6     | ##### | 0. 106247 | 0. 35  | 0. 099 | ##### | Class-G | FTO       |
| UGGT2. 1   | ##### | 0. 123285 | 0. 261 | 0. 061 | ##### | Class-G | UGGT2     |
| ADCY2. 3   | ##### | 0. 124682 | 0. 15  | 0. 021 | ##### | Class-G | ADCY2     |
| PIN1. 5    | ##### | 0. 258577 | 0. 96  | 0. 468 | ##### | Class-G | PIN1      |
| DNAJC1. 6  | ##### | 0. 10854  | 0. 448 | 0. 142 | ##### | Class-G | DNAJC1    |
| MEX3D. 6   | ##### | 0. 13609  | 0. 204 | 0. 039 | ##### | Class-G | MEX3D     |
| PPP1R11. 4 | ##### | 0. 106243 | 0. 764 | 0. 294 | ##### | Class-G | PPP1R11   |
| FDXR. 3    | ##### | 0. 113291 | 0. 31  | 0. 082 | ##### | Class-G | FDXR      |
| RIF1. 8    | ##### | 0. 115614 | 0. 509 | 0. 173 | ##### | Class-G | RIF1      |
| KLHL20. 6  | ##### | 0. 108278 | 0. 359 | 0. 103 | ##### | Class-G | KLHL20    |
| GLUL. 7    | ##### | -0. 70105 | 0. 899 | 0. 768 | ##### | Class-G | GLUL      |
| ZNF362. 2  | ##### | 0. 136084 | 0. 27  | 0. 065 | ##### | Class-G | ZNF362    |
| ERCC4. 4   | ##### | 0. 106692 | 0. 34  | 0. 095 | ##### | Class-G | ERCC4     |
| PPP2R2D. 3 | ##### | 0. 116222 | 0. 262 | 0. 061 | ##### | Class-G | PPP2R2D   |
| KLHDC9. 8  | ##### | 0. 121733 | 0. 228 | 0. 048 | ##### | Class-G | KLHDC9    |
| GOLGA1. 1  | ##### | 0. 112998 | 0. 246 | 0. 055 | ##### | Class-G | GOLGA1    |
| MTOR. 2    | ##### | 0. 113893 | 0. 218 | 0. 044 | ##### | Class-G | MTOR      |
| POLR3D. 9  | ##### | 0. 12472  | 0. 332 | 0. 092 | ##### | Class-G | POLR3D    |
| SHC2       | ##### | 0. 112271 | 0. 143 | 0. 018 | ##### | Class-G | SHC2      |
| OSER1-AS1  | ##### | 0. 112808 | 0. 343 | 0. 097 | ##### | Class-G | OSER1-AS1 |
| FGD5-AS1.  | ##### | 0. 121404 | 0. 685 | 0. 252 | ##### | Class-G | FGD5-AS1  |
| SLX4IP. 2  | ##### | 0. 11725  | 0. 193 | 0. 035 | ##### | Class-G | SLX4IP    |
| PNMAL1. 9  | ##### | 0. 144161 | 0. 273 | 0. 067 | ##### | Class-G | PNMAL1    |
| FECH. 2    | ##### | 0. 108042 | 0. 324 | 0. 088 | ##### | Class-G | FECH      |
| SGSH. 2    | ##### | 0. 110592 | 0. 206 | 0. 04  | ##### | Class-G | SGSH      |
| HAGH. 6    | ##### | 0. 149162 | 0. 76  | 0. 287 | ##### | Class-G | HAGH      |
| SERPINB1.  | ##### | -1. 13138 | 0. 016 | 0. 308 | ##### | Class-G | SERPINB1  |
| NAA25. 1   | ##### | 0. 100239 | 0. 367 | 0. 108 | ##### | Class-G | NAA25     |
| BCLAF1. 7  | ##### | 0. 165279 | 0. 807 | 0. 316 | ##### | Class-G | BCLAF1    |
| RAD23B. 5  | ##### | 0. 183609 | 0. 804 | 0. 31  | ##### | Class-G | RAD23B    |
| ARL10. 7   | ##### | 0. 140526 | 0. 259 | 0. 061 | ##### | Class-G | ARL10     |
| DHX9. 7    | ##### | 0. 107861 | 0. 619 | 0. 223 | ##### | Class-G | DHX9      |
| ZNF598. 3  | ##### | 0. 125146 | 0. 221 | 0. 046 | ##### | Class-G | ZNF598    |
| SOD3. 4    | ##### | 0. 207446 | 0. 15  | 0. 021 | ##### | Class-G | SOD3      |

|           |       |          |       |       |       |         |             |
|-----------|-------|----------|-------|-------|-------|---------|-------------|
| COG1.6    | ##### | 0.12634  | 0.3   | 0.078 | ##### | Class-G | COG1        |
| FAM58A.4  | ##### | 0.116856 | 0.386 | 0.116 | ##### | Class-G | FAM58A      |
| ZFP90.8   | ##### | 0.104449 | 0.343 | 0.096 | ##### | Class-G | ZFP90       |
| USP5.4    | ##### | 0.11819  | 0.516 | 0.177 | ##### | Class-G | USP5        |
| NAB1.6    | ##### | 0.125535 | 0.332 | 0.092 | ##### | Class-G | NAB1        |
| MAFB.9    | ##### | -1.02559 | 0.062 | 0.356 | ##### | Class-G | MAFB        |
| SLC30A7.3 | ##### | 0.113197 | 0.4   | 0.122 | ##### | Class-G | SLC30A7     |
| MAPK10.1C | ##### | 0.103358 | 0.466 | 0.15  | ##### | Class-G | MAPK10      |
| LZTS2.4   | ##### | 0.110447 | 0.241 | 0.053 | ##### | Class-G | LZTS2       |
| RFX3.2    | ##### | 0.140986 | 0.228 | 0.049 | ##### | Class-G | RFX3        |
| PHF19.7   | ##### | 0.100578 | 0.338 | 0.095 | ##### | Class-G | PHF19       |
| SPATA2L.5 | ##### | 0.107646 | 0.289 | 0.073 | ##### | Class-G | SPATA2L     |
| SNRNP27.5 | ##### | 0.107023 | 0.753 | 0.286 | ##### | Class-G | SNRNP27     |
| MTR       | ##### | 0.120003 | 0.265 | 0.064 | ##### | Class-G | MTR         |
| SMURF2.4  | ##### | 0.119704 | 0.332 | 0.092 | ##### | Class-G | SMURF2      |
| KIAA1161. | ##### | 0.114865 | 0.105 | 0.008 | ##### | Class-G | KIAA1161    |
| CCDC124.4 | ##### | 0.183748 | 0.919 | 0.397 | ##### | Class-G | CCDC124     |
| PEX12.3   | ##### | 0.110896 | 0.181 | 0.031 | ##### | Class-G | PEX12       |
| NUDT12.1  | ##### | 0.121985 | 0.207 | 0.041 | ##### | Class-G | NUDT12      |
| PNKD.7    | ##### | 0.127587 | 0.907 | 0.383 | ##### | Class-G | PNKD        |
| RNF185.1  | ##### | 0.109026 | 0.288 | 0.073 | ##### | Class-G | RNF185      |
| ERCC6L2.5 | ##### | 0.125307 | 0.252 | 0.059 | ##### | Class-G | ERCC6L2     |
| HIST1H4C. | ##### | 0.211736 | 0.851 | 0.355 | ##### | Class-G | HIST1H4C    |
| FCGR2A.11 | ##### | -1.18863 | 0.039 | 0.33  | ##### | Class-G | FCGR2A      |
| NNT.3     | ##### | 0.136226 | 0.351 | 0.102 | ##### | Class-G | NNT         |
| PHB.8     | ##### | 0.231271 | 0.964 | 0.487 | ##### | Class-G | PHB         |
| PHKB.4    | ##### | 0.104782 | 0.457 | 0.149 | ##### | Class-G | PHKB        |
| PI4KA.2   | ##### | 0.107506 | 0.271 | 0.066 | ##### | Class-G | PI4KA       |
| RAB39B.8  | ##### | 0.119285 | 0.261 | 0.062 | ##### | Class-G | RAB39B      |
| MARK4.6   | ##### | 0.12534  | 0.225 | 0.048 | ##### | Class-G | MARK4       |
| LRRFIP2.5 | ##### | 0.11167  | 0.448 | 0.145 | ##### | Class-G | LRRFIP2     |
| FAM127A.8 | ##### | 0.210217 | 0.906 | 0.386 | ##### | Class-G | FAM127A     |
| CTCF.6    | ##### | 0.115165 | 0.403 | 0.124 | ##### | Class-G | CTCF        |
| CHDH.4    | ##### | 0.135522 | 0.212 | 0.043 | ##### | Class-G | CHDH        |
| DOCK1.4   | ##### | 0.120275 | 0.18  | 0.031 | ##### | Class-G | DOCK1       |
| ZZZ3.3    | ##### | 0.113632 | 0.299 | 0.078 | ##### | Class-G | ZZZ3        |
| MAP2K3.1C | ##### | 0.112923 | 0.451 | 0.146 | ##### | Class-G | MAP2K3      |
| HP1BP3.9  | ##### | 0.248385 | 0.897 | 0.367 | ##### | Class-G | HP1BP3      |
| NRP1.9    | ##### | 0.125453 | 0.406 | 0.126 | ##### | Class-G | NRP1        |
| DIS3L.3   | ##### | 0.120833 | 0.286 | 0.073 | ##### | Class-G | DIS3L       |
| MIPEP.1   | ##### | 0.125152 | 0.203 | 0.04  | ##### | Class-G | MIPEP       |
| SLC45A1.2 | ##### | 0.123781 | 0.176 | 0.03  | ##### | Class-G | SLC45A1     |
| PTPN21    | ##### | 0.112896 | 0.126 | 0.014 | ##### | Class-G | PTPN21      |
| LRIG2     | ##### | 0.124938 | 0.201 | 0.039 | ##### | Class-G | LRIG2       |
| WDR82.6   | ##### | 0.113432 | 0.572 | 0.202 | ##### | Class-G | WDR82       |
| GPALPP1.4 | ##### | 0.11671  | 0.32  | 0.088 | ##### | Class-G | GPALPP1     |
| TESK1.2   | ##### | 0.121091 | 0.242 | 0.055 | ##### | Class-G | TESK1       |
| GPR34.11  | ##### | -1.20574 | 0.02  | 0.307 | ##### | Class-G | GPR34       |
| CTC-524C5 | ##### | 0.116981 | 0.315 | 0.085 | ##### | Class-G | CTC-524C5.2 |
| COL18A1.4 | ##### | 0.130951 | 0.181 | 0.032 | ##### | Class-G | COL18A1     |
| FASTKD3.1 | ##### | 0.101427 | 0.223 | 0.047 | ##### | Class-G | FASTKD3     |



|            |       |          |       |       |       |         |               |
|------------|-------|----------|-------|-------|-------|---------|---------------|
| NKTR. 7    | ##### | 0.123812 | 0.758 | 0.291 | ##### | Class-G | NKTR          |
| BCAS3. 1   | ##### | 0.104153 | 0.22  | 0.046 | ##### | Class-G | BCAS3         |
| PPP1R12C.  | ##### | 0.115296 | 0.247 | 0.057 | ##### | Class-G | PPP1R12C      |
| MZF1. 4    | ##### | 0.113086 | 0.265 | 0.064 | ##### | Class-G | MZF1          |
| TLE2. 10   | ##### | 0.198127 | 0.26  | 0.063 | ##### | Class-G | TLE2          |
| MAP3K13. 8 | ##### | 0.141314 | 0.812 | 0.325 | ##### | Class-G | MAP3K13       |
| SNAPC3. 5  | ##### | 0.131231 | 0.348 | 0.101 | ##### | Class-G | SNAPC3        |
| ZNF853. 7  | ##### | 0.135114 | 0.169 | 0.028 | ##### | Class-G | ZNF853        |
| MON1A. 6   | ##### | 0.118445 | 0.252 | 0.059 | ##### | Class-G | MON1A         |
| PRRT1. 5   | ##### | 0.112743 | 0.178 | 0.031 | ##### | Class-G | PRRT1         |
| RP11-672L  | ##### | 0.106488 | 0.109 | 0.01  | ##### | Class-G | RP11-672L10.6 |
| ELK4. 3    | ##### | 0.107363 | 0.294 | 0.077 | ##### | Class-G | ELK4          |
| RP11-119E  | ##### | 0.110097 | 0.198 | 0.038 | ##### | Class-G | RP11-119B16.2 |
| FXYD5. 11  | ##### | -1.20036 | 0.097 | 0.38  | ##### | Class-G | FXYD5         |
| ARHGEF18   | ##### | 0.126906 | 0.198 | 0.038 | ##### | Class-G | ARHGEF18      |
| FDX1. 5    | ##### | 0.135242 | 0.666 | 0.247 | ##### | Class-G | FDX1          |
| OTUD6B. 7  | ##### | 0.137326 | 0.317 | 0.087 | ##### | Class-G | OTUD6B        |
| SART1. 3   | ##### | 0.121156 | 0.467 | 0.154 | ##### | Class-G | SART1         |
| FCGR1A. 11 | ##### | -1.18912 | 0.014 | 0.299 | ##### | Class-G | FCGR1A        |
| LIG3. 1    | ##### | 0.136995 | 0.2   | 0.039 | ##### | Class-G | LIG3          |
| NENF. 6    | ##### | 0.2891   | 0.93  | 0.423 | ##### | Class-G | NENF          |
| TMEM160. 1 | ##### | 0.290667 | 0.904 | 0.394 | ##### | Class-G | TMEM160       |
| SPAST. 7   | ##### | 0.124761 | 0.303 | 0.081 | ##### | Class-G | SPAST         |
| ZNF25. 3   | ##### | 0.119428 | 0.233 | 0.051 | ##### | Class-G | ZNF25         |
| ZNF627. 6  | ##### | 0.111173 | 0.234 | 0.052 | ##### | Class-G | ZNF627        |
| AFAP1L1    | ##### | 0.128161 | 0.127 | 0.015 | ##### | Class-G | AFAP1L1       |
| CUL2. 2    | ##### | 0.104847 | 0.321 | 0.089 | ##### | Class-G | CUL2          |
| SHARPIN. 5 | ##### | 0.116184 | 0.658 | 0.243 | ##### | Class-G | SHARPIN       |
| TXNDC17. 9 | ##### | 0.201257 | 0.931 | 0.459 | ##### | Class-G | TXNDC17       |
| IRGQ. 6    | ##### | 0.112315 | 0.253 | 0.06  | ##### | Class-G | IRGQ          |
| CYTH2. 9   | ##### | 0.134844 | 0.73  | 0.278 | ##### | Class-G | CYTH2         |
| HDDC2. 6   | ##### | 0.121599 | 0.822 | 0.331 | ##### | Class-G | HDDC2         |
| LMNB2. 8   | ##### | 0.136829 | 0.312 | 0.085 | ##### | Class-G | LMNB2         |
| C4orf48. 7 | ##### | 0.333931 | 0.942 | 0.457 | ##### | Class-G | C4orf48       |
| SLC7A1     | ##### | 0.1103   | 0.233 | 0.052 | ##### | Class-G | SLC7A1        |
| CTSS. 11   | ##### | -1.25535 | 0.118 | 0.393 | ##### | Class-G | CTSS          |
| DCAF10. 5  | ##### | 0.108465 | 0.428 | 0.137 | ##### | Class-G | DCAF10        |
| HDAC5. 4   | ##### | 0.108051 | 0.412 | 0.13  | ##### | Class-G | HDAC5         |
| MOCS3      | ##### | 0.101205 | 0.179 | 0.031 | ##### | Class-G | MOCS3         |
| C3orf70. 1 | ##### | 0.191046 | 0.278 | 0.071 | ##### | Class-G | C3orf70       |
| CD99L2. 5  | ##### | 0.1078   | 0.337 | 0.096 | ##### | Class-G | CD99L2        |
| CBX8. 5    | ##### | 0.109894 | 0.222 | 0.047 | ##### | Class-G | CBX8          |
| NUS1. 3    | ##### | 0.117523 | 0.378 | 0.115 | ##### | Class-G | NUS1          |
| RNF214. 3  | ##### | 0.123597 | 0.289 | 0.076 | ##### | Class-G | RNF214        |
| MAP1S. 3   | ##### | 0.102704 | 0.415 | 0.131 | ##### | Class-G | MAP1S         |
| VCPIP1. 3  | ##### | 0.11673  | 0.258 | 0.062 | ##### | Class-G | VCPIP1        |
| PITPNM1. 4 | ##### | 0.104018 | 0.188 | 0.035 | ##### | Class-G | PITPNM1       |
| UTP18. 3   | ##### | 0.106043 | 0.586 | 0.211 | ##### | Class-G | UTP18         |
| FNBP1L. 11 | ##### | 0.106543 | 0.442 | 0.143 | ##### | Class-G | FNBP1L        |
| PSAP. 8    | ##### | -0.47877 | 0.971 | 0.794 | ##### | Class-G | PSAP          |
| ZFAND6. 4  | ##### | 0.128403 | 0.899 | 0.377 | ##### | Class-G | ZFAND6        |

|            |       |           |        |        |       |         |                |
|------------|-------|-----------|--------|--------|-------|---------|----------------|
| FBXW7. 7   | ##### | 0. 118953 | 0. 332 | 0. 094 | ##### | Class-G | FBXW7          |
| GAPVD1. 1  | ##### | 0. 1022   | 0. 423 | 0. 135 | ##### | Class-G | GAPVD1         |
| HIST2H2AC  | ##### | 0. 107438 | 0. 191 | 0. 036 | ##### | Class-G | HIST2H2AC      |
| PI4K2B. 4  | ##### | 0. 111013 | 0. 25  | 0. 059 | ##### | Class-G | PI4K2B         |
| PCNXL2. 3  | ##### | 0. 103158 | 0. 246 | 0. 057 | ##### | Class-G | PCNXL2         |
| KPNA3. 5   | ##### | 0. 118898 | 0. 569 | 0. 204 | ##### | Class-G | KPNA3          |
| TGFB2. 7   | ##### | 0. 148356 | 0. 21  | 0. 043 | ##### | Class-G | TGFB2          |
| CPT1A      | ##### | 0. 12682  | 0. 199 | 0. 039 | ##### | Class-G | CPT1A          |
| SENP5. 5   | ##### | 0. 116848 | 0. 351 | 0. 103 | ##### | Class-G | SENP5          |
| B3GALNT2.  | ##### | 0. 129487 | 0. 259 | 0. 063 | ##### | Class-G | B3GALNT2       |
| PLAUR. 11  | ##### | -1. 29949 | 0. 136 | 0. 404 | ##### | Class-G | PLAUR          |
| ZNF594     | ##### | 0. 118836 | 0. 145 | 0. 02  | ##### | Class-G | ZNF594         |
| ZNF793. 7  | ##### | 0. 112607 | 0. 298 | 0. 08  | ##### | Class-G | ZNF793         |
| GLI4. 7    | ##### | 0. 119592 | 0. 3   | 0. 08  | ##### | Class-G | GLI4           |
| EMILIN1. 2 | ##### | 0. 142109 | 0. 191 | 0. 036 | ##### | Class-G | EMILIN1        |
| AP006621.  | ##### | 0. 109918 | 0. 198 | 0. 039 | ##### | Class-G | AP006621. 5    |
| SYNC. 8    | ##### | 0. 120674 | 0. 421 | 0. 136 | ##### | Class-G | SYNC           |
| PML. 2     | ##### | 0. 122866 | 0. 28  | 0. 072 | ##### | Class-G | PML            |
| GAL3ST3. 9 | ##### | 0. 132768 | 0. 194 | 0. 037 | ##### | Class-G | GAL3ST3        |
| TMEM237. 8 | ##### | 0. 103835 | 0. 441 | 0. 145 | ##### | Class-G | TMEM237        |
| RUNDC1. 5  | ##### | 0. 115012 | 0. 347 | 0. 101 | ##### | Class-G | RUNDC1         |
| MYO19. 1   | ##### | 0. 101854 | 0. 24  | 0. 055 | ##### | Class-G | MYO19          |
| C19orf44   | ##### | 0. 108113 | 0. 129 | 0. 015 | ##### | Class-G | C19orf44       |
| PDZD2. 4   | ##### | 0. 160762 | 0. 158 | 0. 025 | ##### | Class-G | PDZD2          |
| TROVE2. 9  | ##### | 0. 168247 | 0. 876 | 0. 36  | ##### | Class-G | TROVE2         |
| INO80. 1   | ##### | 0. 10703  | 0. 227 | 0. 05  | ##### | Class-G | INO80          |
| NAP1L4. 8  | ##### | 0. 170443 | 0. 839 | 0. 332 | ##### | Class-G | NAP1L4         |
| BCKDHB. 3  | ##### | 0. 115024 | 0. 253 | 0. 061 | ##### | Class-G | BCKDHB         |
| G3BP1. 6   | ##### | 0. 111484 | 0. 669 | 0. 255 | ##### | Class-G | G3BP1          |
| CCZ1. 8    | ##### | 0. 149796 | 0. 747 | 0. 286 | ##### | Class-G | CCZ1           |
| RP11-395A  | ##### | 0. 141159 | 0. 229 | 0. 051 | ##### | Class-G | RP11-395A13. 2 |
| CSF1R. 11  | ##### | -1. 13662 | 0. 027 | 0. 307 | ##### | Class-G | CSF1R          |
| ERGIC2. 1  | ##### | 0. 104506 | 0. 743 | 0. 288 | ##### | Class-G | ERGIC2         |
| KTN1. 4    | ##### | 0. 306314 | 0. 94  | 0. 46  | ##### | Class-G | KTN1           |
| ST3GAL3. 7 | ##### | 0. 118819 | 0. 25  | 0. 06  | ##### | Class-G | ST3GAL3        |
| TRIM5. 2   | ##### | 0. 103232 | 0. 176 | 0. 031 | ##### | Class-G | TRIM5          |
| CA11       | ##### | 0. 125096 | 0. 28  | 0. 073 | ##### | Class-G | CA11           |
| OLIG1. 11  | ##### | 0. 112311 | 0. 428 | 0. 139 | ##### | Class-G | OLIG1          |
| NUBP2. 6   | ##### | 0. 13492  | 0. 793 | 0. 314 | ##### | Class-G | NUBP2          |
| AIF1L. 10  | ##### | 0. 280218 | 0. 295 | 0. 083 | ##### | Class-G | AIF1L          |
| S100A4. 11 | ##### | -1. 26643 | 0. 055 | 0. 335 | ##### | Class-G | S100A4         |
| IPO8. 1    | ##### | 0. 121754 | 0. 215 | 0. 046 | ##### | Class-G | IPO8           |
| FAM192A. 6 | ##### | 0. 10828  | 0. 756 | 0. 292 | ##### | Class-G | FAM192A        |
| CBX5. 9    | ##### | 0. 123487 | 0. 735 | 0. 28  | ##### | Class-G | CBX5           |
| WWP1. 1    | ##### | 0. 1149   | 0. 212 | 0. 044 | ##### | Class-G | WWP1           |
| ZNF18. 1   | ##### | 0. 102146 | 0. 181 | 0. 033 | ##### | Class-G | ZNF18          |
| PYG02. 2   | ##### | 0. 122415 | 0. 23  | 0. 052 | ##### | Class-G | PYG02          |
| ARF3. 5    | ##### | 0. 121002 | 0. 789 | 0. 311 | ##### | Class-G | ARF3           |
| PTPRG. 7   | ##### | 0. 129038 | 0. 221 | 0. 048 | ##### | Class-G | PTPRG          |
| PREX2. 1   | ##### | 0. 117441 | 0. 119 | 0. 013 | ##### | Class-G | PREX2          |
| ZNF496. 2  | ##### | 0. 114289 | 0. 192 | 0. 037 | ##### | Class-G | ZNF496         |

|            |       |           |        |        |       |         |                |
|------------|-------|-----------|--------|--------|-------|---------|----------------|
| WDR3. 3    | ##### | 0. 124494 | 0. 274 | 0. 071 | ##### | Class-G | WDR3           |
| RP11-192H  | ##### | 0. 115378 | 0. 304 | 0. 083 | ##### | Class-G | RP11-192H23. 6 |
| SEMA4B. 2  | ##### | 0. 131046 | 0. 177 | 0. 032 | ##### | Class-G | SEMA4B         |
| ARAP2. 6   | ##### | 0. 12577  | 0. 247 | 0. 059 | ##### | Class-G | ARAP2          |
| KIAA0753   | ##### | 0. 109561 | 0. 135 | 0. 018 | ##### | Class-G | KIAA0753       |
| SMIM13. 4  | ##### | 0. 114155 | 0. 248 | 0. 059 | ##### | Class-G | SMIM13         |
| IKBKG. 6   | ##### | 0. 107501 | 0. 34  | 0. 099 | ##### | Class-G | IKBKG          |
| TMEM201    | ##### | 0. 123809 | 0. 166 | 0. 028 | ##### | Class-G | TMEM201        |
| UBA2. 8    | ##### | 0. 156742 | 0. 751 | 0. 294 | ##### | Class-G | UBA2           |
| HNRNPD. 9  | ##### | 0. 229025 | 0. 848 | 0. 344 | ##### | Class-G | HNRNPD         |
| FAM76A. 2  | ##### | 0. 117736 | 0. 254 | 0. 062 | ##### | Class-G | FAM76A         |
| XPO5. 1    | ##### | 0. 126915 | 0. 225 | 0. 05  | ##### | Class-G | XPO5           |
| UNC80. 5   | ##### | 0. 112316 | 0. 149 | 0. 022 | ##### | Class-G | UNC80          |
| MARCH6. 9  | ##### | 0. 111255 | 0. 75  | 0. 293 | ##### | Class-G | 6-Mar          |
| ZZEF1. 2   | ##### | 0. 100047 | 0. 247 | 0. 059 | ##### | Class-G | ZZEF1          |
| MCF2L-AS1  | ##### | 0. 100068 | 0. 127 | 0. 015 | ##### | Class-G | MCF2L-AS1      |
| GPD1L. 1   | ##### | 0. 101745 | 0. 165 | 0. 028 | ##### | Class-G | GPD1L          |
| IFT80. 5   | ##### | 0. 106061 | 0. 216 | 0. 047 | ##### | Class-G | IFT80          |
| INTS5. 2   | ##### | 0. 112765 | 0. 241 | 0. 057 | ##### | Class-G | INTS5          |
| TMEM214. 2 | ##### | 0. 101996 | 0. 309 | 0. 086 | ##### | Class-G | TMEM214        |
| PAFAH1B2.  | ##### | 0. 132631 | 0. 694 | 0. 266 | ##### | Class-G | PAFAH1B2       |
| SAMSN1. 11 | ##### | -1. 10452 | 0. 016 | 0. 29  | ##### | Class-G | SAMSN1         |
| NUDT4. 3   | ##### | 0. 11765  | 0. 467 | 0. 16  | ##### | Class-G | NUDT4          |
| ZMYM3. 2   | ##### | 0. 108209 | 0. 232 | 0. 053 | ##### | Class-G | ZMYM3          |
| CAD. 1     | ##### | 0. 107695 | 0. 178 | 0. 033 | ##### | Class-G | CAD            |
| CCDC144A.  | ##### | 0. 118426 | 0. 24  | 0. 056 | ##### | Class-G | CCDC144A       |
| FOXP4      | ##### | 0. 101546 | 0. 139 | 0. 02  | ##### | Class-G | FOXP4          |
| TYMS. 8    | ##### | 0. 105801 | 0. 392 | 0. 123 | ##### | Class-G | TYMS           |
| FBX045. 2  | ##### | 0. 108943 | 0. 199 | 0. 04  | ##### | Class-G | FBX045         |
| RBM42. 6   | ##### | 0. 169426 | 0. 793 | 0. 32  | ##### | Class-G | RBM42          |
| MDM1. 2    | ##### | 0. 111276 | 0. 22  | 0. 048 | ##### | Class-G | MDM1           |
| ALS2. 2    | ##### | 0. 110216 | 0. 186 | 0. 036 | ##### | Class-G | ALS2           |
| FAM3C. 10  | ##### | 0. 219408 | 0. 875 | 0. 365 | ##### | Class-G | FAM3C          |
| TAPBP. 10  | ##### | 0. 10318  | 0. 733 | 0. 279 | ##### | Class-G | TAPBP          |
| DHX32. 2   | ##### | 0. 116372 | 0. 237 | 0. 055 | ##### | Class-G | DHX32          |
| GPSM3. 11  | ##### | -1. 11    | 0. 027 | 0. 301 | ##### | Class-G | GPSM3          |
| SLC25A25.  | ##### | 0. 119157 | 0. 398 | 0. 127 | ##### | Class-G | SLC25A25       |
| UBR1. 2    | ##### | 0. 123239 | 0. 229 | 0. 053 | ##### | Class-G | UBR1           |
| BMPR1A. 2  | ##### | 0. 121657 | 0. 209 | 0. 045 | ##### | Class-G | BMPR1A         |
| RP11-490M  | ##### | 0. 11128  | 0. 156 | 0. 025 | ##### | Class-G | RP11-490M8. 1  |
| H1FX. 10   | ##### | 0. 186528 | 0. 794 | 0. 318 | ##### | Class-G | H1FX           |
| MYO5A. 5   | ##### | 0. 110442 | 0. 298 | 0. 082 | ##### | Class-G | MYO5A          |
| RC3H2. 3   | ##### | 0. 110348 | 0. 267 | 0. 068 | ##### | Class-G | RC3H2          |
| RPUSD1. 6  | ##### | 0. 12281  | 0. 34  | 0. 1   | ##### | Class-G | RPUSD1         |
| PURB. 4    | ##### | 0. 102726 | 0. 404 | 0. 13  | ##### | Class-G | PURB           |
| THEM6. 4   | ##### | 0. 112623 | 0. 241 | 0. 057 | ##### | Class-G | THEM6          |
| CAPN10. 5  | ##### | 0. 103643 | 0. 248 | 0. 06  | ##### | Class-G | CAPN10         |
| PGAM5. 2   | ##### | 0. 119377 | 0. 183 | 0. 035 | ##### | Class-G | PGAM5          |
| MSX1. 8    | ##### | 0. 123308 | 0. 203 | 0. 042 | ##### | Class-G | MSX1           |
| RAD17. 5   | ##### | 0. 110591 | 0. 331 | 0. 097 | ##### | Class-G | RAD17          |
| IDH3B. 3   | ##### | 0. 12731  | 0. 853 | 0. 353 | ##### | Class-G | IDH3B          |

|           |       |          |       |       |       |         |          |
|-----------|-------|----------|-------|-------|-------|---------|----------|
| DYNC1LI2. | ##### | 0.122368 | 0.725 | 0.282 | ##### | Class-G | DYNC1LI2 |
| ERGIC3.8  | ##### | 0.202729 | 0.961 | 0.513 | ##### | Class-G | ERGIC3   |
| CMTM4.1   | ##### | 0.111779 | 0.142 | 0.021 | ##### | Class-G | CMTM4    |
| SLC25A4.1 | ##### | 0.133863 | 0.867 | 0.354 | ##### | Class-G | SLC25A4  |
| LMBR1.8   | ##### | 0.101865 | 0.294 | 0.08  | ##### | Class-G | LMBR1    |
| ZNF174.6  | ##### | 0.120318 | 0.213 | 0.047 | ##### | Class-G | ZNF174   |
| HCST.11   | ##### | -1.22026 | 0.05  | 0.323 | ##### | Class-G | HCST     |
| PPP1CC.7  | ##### | 0.215431 | 0.891 | 0.372 | ##### | Class-G | PPP1CC   |
| BTF3.4    | ##### | -0.37471 | 0.998 | 0.882 | ##### | Class-G | BTF3     |
| APOL6.3   | ##### | 0.115791 | 0.261 | 0.066 | ##### | Class-G | APOL6    |
| ZDHHC17.5 | ##### | 0.114443 | 0.284 | 0.076 | ##### | Class-G | ZDHHC17  |
| C8orf44.1 | ##### | 0.109598 | 0.193 | 0.039 | ##### | Class-G | C8orf44  |
| TUBGCP4.6 | ##### | 0.119092 | 0.317 | 0.091 | ##### | Class-G | TUBGCP4  |
| ACVR2A.4  | ##### | 0.128658 | 0.211 | 0.046 | ##### | Class-G | ACVR2A   |
| VPS13A.1  | ##### | 0.119744 | 0.232 | 0.054 | ##### | Class-G | VPS13A   |
| LMLN.1    | ##### | 0.115786 | 0.166 | 0.029 | ##### | Class-G | LMLN     |
| ACTR3B.8  | ##### | 0.137329 | 0.287 | 0.078 | ##### | Class-G | ACTR3B   |
| SRSF12.8  | ##### | 0.105511 | 0.219 | 0.049 | ##### | Class-G | SRSF12   |
| KAZN.8    | ##### | 0.138855 | 0.216 | 0.048 | ##### | Class-G | KAZN     |
| ZBTB45.1  | ##### | 0.107117 | 0.189 | 0.037 | ##### | Class-G | ZBTB45   |
| SYNGR3.1  | ##### | 0.102771 | 0.143 | 0.021 | ##### | Class-G | SYNGR3   |
| MSTO1.2   | ##### | 0.124492 | 0.246 | 0.06  | ##### | Class-G | MSTO1    |
| LRFN3.1   | ##### | 0.11083  | 0.143 | 0.021 | ##### | Class-G | LRFN3    |
| VPS4A.5   | ##### | 0.114225 | 0.659 | 0.25  | ##### | Class-G | VPS4A    |
| PFDN5.8   | ##### | -0.38096 | 0.99  | 0.867 | ##### | Class-G | PFDN5    |
| SKAP2.8   | ##### | -0.88154 | 0.032 | 0.309 | ##### | Class-G | SKAP2    |
| COL28A1   | ##### | 0.222009 | 0.112 | 0.012 | ##### | Class-G | COL28A1  |
| DUT.9     | ##### | 0.230883 | 0.896 | 0.383 | ##### | Class-G | DUT      |
| NSF.2     | ##### | 0.112734 | 0.343 | 0.103 | ##### | Class-G | NSF      |
| FEZ2.7    | ##### | 0.224465 | 0.879 | 0.378 | ##### | Class-G | FEZ2     |
| DDX1.8    | ##### | 0.106111 | 0.748 | 0.297 | ##### | Class-G | DDX1     |
| IPO9-AS1  | ##### | 0.115536 | 0.126 | 0.016 | ##### | Class-G | IPO9-AS1 |
| PAK2.4    | ##### | 0.161808 | 0.733 | 0.29  | ##### | Class-G | PAK2     |
| RTF1.9    | ##### | 0.196263 | 0.86  | 0.36  | ##### | Class-G | RTF1     |
| LILRB4.11 | ##### | -1.13665 | 0.024 | 0.293 | ##### | Class-G | LILRB4   |
| GLRB.7    | ##### | 0.129451 | 0.19  | 0.038 | ##### | Class-G | GLRB     |
| SP5       | ##### | 0.107108 | 0.103 | 0.01  | ##### | Class-G | SP5      |
| DNAJC22   | ##### | 0.101716 | 0.13  | 0.017 | ##### | Class-G | DNAJC22  |
| ATP1A2.8  | ##### | 0.434606 | 0.191 | 0.041 | ##### | Class-G | ATP1A2   |
| NXT2.3    | ##### | 0.115817 | 0.238 | 0.058 | ##### | Class-G | NXT2     |
| OLR1.11   | ##### | -1.10289 | 0.02  | 0.288 | ##### | Class-G | OLR1     |
| KIFC2.5   | ##### | 0.131698 | 0.207 | 0.045 | ##### | Class-G | KIFC2    |
| TMEM30A.4 | ##### | 0.101065 | 0.704 | 0.274 | ##### | Class-G | TMEM30A  |
| CBR1.9    | ##### | 0.147903 | 0.912 | 0.405 | ##### | Class-G | CBR1     |
| TM4SF1.11 | ##### | 0.118148 | 0.295 | 0.083 | ##### | Class-G | TM4SF1   |
| C3AR1.11  | ##### | -1.08818 | 0.01  | 0.275 | ##### | Class-G | C3AR1    |
| ADORA3.11 | ##### | -1.10732 | 0.03  | 0.298 | ##### | Class-G | ADORA3   |
| GTF2H5.3  | ##### | 0.121792 | 0.819 | 0.337 | ##### | Class-G | GTF2H5   |
| CACHD1.1  | ##### | 0.119377 | 0.134 | 0.019 | ##### | Class-G | CACHD1   |
| POPDC3.1  | ##### | 0.115171 | 0.109 | 0.011 | ##### | Class-G | POPDC3   |
| DCXR.4    | ##### | 0.181372 | 0.888 | 0.381 | ##### | Class-G | DCXR     |

|           |       |          |       |       |       |         |           |
|-----------|-------|----------|-------|-------|-------|---------|-----------|
| ENTPD5.2  | ##### | 0.10394  | 0.169 | 0.03  | ##### | Class-G | ENTPD5    |
| CASKIN2.4 | ##### | 0.112008 | 0.157 | 0.026 | ##### | Class-G | CASKIN2   |
| C17orf51. | ##### | 0.111235 | 0.207 | 0.045 | ##### | Class-G | C17orf51  |
| MFAP3.1   | ##### | 0.102225 | 0.186 | 0.037 | ##### | Class-G | MFAP3     |
| TMED7.3   | ##### | 0.113255 | 0.588 | 0.219 | ##### | Class-G | TMED7     |
| SAFB.6    | ##### | 0.102381 | 0.622 | 0.235 | ##### | Class-G | SAFB      |
| BRF1.7    | ##### | 0.100932 | 0.277 | 0.074 | ##### | Class-G | BRF1      |
| UEVLD.1   | ##### | 0.103694 | 0.247 | 0.061 | ##### | Class-G | UEVLD     |
| C16orf13. | ##### | 0.219897 | 0.9   | 0.388 | ##### | Class-G | C16orf13  |
| NUDT19.3  | ##### | 0.119814 | 0.271 | 0.072 | ##### | Class-G | NUDT19    |
| SDC1.5    | ##### | 0.138707 | 0.164 | 0.029 | ##### | Class-G | SDC1      |
| SOCS5.1   | ##### | 0.105904 | 0.201 | 0.043 | ##### | Class-G | SOCS5     |
| C1QBP.8   | ##### | 0.312698 | 0.952 | 0.489 | ##### | Class-G | C1QBP     |
| ATP6V1F.6 | ##### | -0.44124 | 0.967 | 0.774 | ##### | Class-G | ATP6V1F   |
| DZANK1    | ##### | 0.107771 | 0.148 | 0.023 | ##### | Class-G | DZANK1    |
| NCS1.5    | ##### | 0.114074 | 0.192 | 0.039 | ##### | Class-G | NCS1      |
| FAM8A1.5  | ##### | 0.118694 | 0.238 | 0.058 | ##### | Class-G | FAM8A1    |
| NAT10     | ##### | 0.103939 | 0.226 | 0.053 | ##### | Class-G | NAT10     |
| STRBP.9   | ##### | 0.105741 | 0.322 | 0.094 | ##### | Class-G | STRBP     |
| GRK6.5    | ##### | 0.10236  | 0.338 | 0.102 | ##### | Class-G | GRK6      |
| MMP2.7    | ##### | 0.133476 | 0.502 | 0.182 | ##### | Class-G | MMP2      |
| TMEM33.5  | ##### | 0.101656 | 0.61  | 0.232 | ##### | Class-G | TMEM33    |
| FITM2.2   | ##### | 0.104268 | 0.167 | 0.03  | ##### | Class-G | FITM2     |
| PPP2R5B.8 | ##### | 0.104942 | 0.396 | 0.129 | ##### | Class-G | PPP2R5B   |
| DGKG.5    | ##### | 0.143492 | 0.164 | 0.029 | ##### | Class-G | DGKG      |
| NUP43.1   | ##### | 0.120498 | 0.237 | 0.058 | ##### | Class-G | NUP43     |
| TMEM59.4  | ##### | -0.49249 | 0.951 | 0.758 | ##### | Class-G | TMEM59    |
| MPHOSPH9. | ##### | 0.117726 | 0.303 | 0.087 | ##### | Class-G | MPHOSPH9  |
| RNF217    | ##### | 0.10425  | 0.15  | 0.024 | ##### | Class-G | RNF217    |
| SLC20A1.3 | ##### | 0.125562 | 0.414 | 0.14  | ##### | Class-G | SLC20A1   |
| FOXD1.1   | ##### | 0.111918 | 0.121 | 0.015 | ##### | Class-G | FOXD1     |
| MYO9A.1   | ##### | 0.100977 | 0.231 | 0.055 | ##### | Class-G | MYO9A     |
| PAFAH1B3. | ##### | 0.130921 | 0.87  | 0.351 | ##### | Class-G | PAFAH1B3  |
| VSIG10.2  | ##### | 0.109006 | 0.194 | 0.041 | ##### | Class-G | VSIG10    |
| NPC2.10   | ##### | -0.93365 | 0.776 | 0.678 | ##### | Class-G | NPC2      |
| NME1.9    | ##### | 0.219622 | 0.965 | 0.503 | ##### | Class-G | NME1      |
| FOSL1.6   | ##### | 0.104467 | 0.159 | 0.028 | ##### | Class-G | FOSL1     |
| NAV2.7    | ##### | 0.141734 | 0.301 | 0.088 | ##### | Class-G | NAV2      |
| ASB16-AS1 | ##### | 0.100439 | 0.255 | 0.066 | ##### | Class-G | ASB16-AS1 |
| MSANTD2.3 | ##### | 0.108486 | 0.189 | 0.039 | ##### | Class-G | MSANTD2   |
| KCTD1.7   | ##### | 0.123649 | 0.198 | 0.043 | ##### | Class-G | KCTD1     |
| ZNF668.4  | ##### | 0.10054  | 0.236 | 0.058 | ##### | Class-G | ZNF668    |
| CYB5R3.6  | ##### | 0.104277 | 0.75  | 0.297 | ##### | Class-G | CYB5R3    |
| PGLS.6    | ##### | 0.274239 | 0.928 | 0.442 | ##### | Class-G | PGLS      |
| ID2.8     | ##### | -0.80649 | 0.629 | 0.658 | ##### | Class-G | ID2       |
| ZXDC.1    | ##### | 0.110573 | 0.198 | 0.043 | ##### | Class-G | ZXDC      |
| FAM32A.8  | ##### | 0.128783 | 0.887 | 0.381 | ##### | Class-G | FAM32A    |
| TXN2.5    | ##### | 0.137681 | 0.862 | 0.364 | ##### | Class-G | TXN2      |
| MNS1.6    | ##### | 0.105984 | 0.218 | 0.051 | ##### | Class-G | MNS1      |
| LARS2     | ##### | 0.108831 | 0.146 | 0.024 | ##### | Class-G | LARS2     |
| H3F3B.7   | ##### | -0.3442  | 1     | 0.966 | ##### | Class-G | H3F3B     |

|            |       |          |       |       |       |         |                |
|------------|-------|----------|-------|-------|-------|---------|----------------|
| BYSL. 7    | ##### | 0.106093 | 0.282 | 0.079 | ##### | Class-G | BYSL           |
| FAM184A. 5 | ##### | 0.120803 | 0.169 | 0.032 | ##### | Class-G | FAM184A        |
| FBX046     | ##### | 0.101459 | 0.146 | 0.024 | ##### | Class-G | FBX046         |
| SPG21. 8   | ##### | 0.118709 | 0.786 | 0.319 | ##### | Class-G | SPG21          |
| CXorf23. 3 | ##### | 0.108776 | 0.187 | 0.039 | ##### | Class-G | CXorf23        |
| NAA10. 6   | ##### | 0.149986 | 0.849 | 0.356 | ##### | Class-G | NAA10          |
| HAPLN3     | ##### | 0.110896 | 0.125 | 0.017 | ##### | Class-G | HAPLN3         |
| RPS19BP1.  | ##### | 0.192923 | 0.925 | 0.419 | ##### | Class-G | RPS19BP1       |
| LRRC17. 8  | ##### | 0.150765 | 0.216 | 0.051 | ##### | Class-G | LRRC17         |
| RP11-73E1  | ##### | 0.11022  | 0.15  | 0.025 | ##### | Class-G | RP11-73E17. 2  |
| HERPUD1. 9 | ##### | -0.88549 | 0.663 | 0.638 | ##### | Class-G | HERPUD1        |
| AGTRAP. 7  | ##### | -0.107   | 0.61  | 0.228 | ##### | Class-G | AGTRAP         |
| HRASLS. 6  | ##### | 0.100883 | 0.162 | 0.03  | ##### | Class-G | HRASLS         |
| CCL4. 10   | ##### | -1.20065 | 0.104 | 0.361 | ##### | Class-G | CCL4           |
| NCKIPSD. 1 | ##### | 0.104996 | 0.206 | 0.047 | ##### | Class-G | NCKIPSD        |
| SPEG. 7    | ##### | 0.107477 | 0.209 | 0.048 | ##### | Class-G | SPEG           |
| TACC2. 7   | ##### | 0.12639  | 0.181 | 0.037 | ##### | Class-G | TACC2          |
| CDR2L. 6   | ##### | 0.100598 | 0.195 | 0.042 | ##### | Class-G | CDR2L          |
| GPAA1. 4   | ##### | 0.14071  | 0.8   | 0.327 | ##### | Class-G | GPAA1          |
| LSM2. 6    | ##### | 0.14484  | 0.865 | 0.379 | ##### | Class-G | LSM2           |
| USP13. 5   | ##### | 0.116047 | 0.211 | 0.049 | ##### | Class-G | USP13          |
| ZNHIT6. 2  | ##### | 0.104842 | 0.255 | 0.067 | ##### | Class-G | ZNHIT6         |
| FLYWCH1. 4 | ##### | 0.113899 | 0.267 | 0.073 | ##### | Class-G | FLYWCH1        |
| ALDH4A1. 1 | ##### | 0.13094  | 0.167 | 0.032 | ##### | Class-G | ALDH4A1        |
| ARPC3. 9   | ##### | -0.44021 | 0.962 | 0.778 | ##### | Class-G | ARPC3          |
| TCF7L1. 1  | ##### | 0.115252 | 0.135 | 0.021 | ##### | Class-G | TCF7L1         |
| CHRD1. 1   | ##### | 0.121441 | 0.141 | 0.023 | ##### | Class-G | CHRD1          |
| PATZ1. 4   | ##### | 0.104667 | 0.235 | 0.059 | ##### | Class-G | PATZ1          |
| GALNT18    | ##### | 0.108629 | 0.123 | 0.017 | ##### | Class-G | GALNT18        |
| EVI2A. 10  | ##### | -1.00963 | 0.008 | 0.258 | ##### | Class-G | EVI2A          |
| GMDS. 5    | ##### | 0.103652 | 0.245 | 0.064 | ##### | Class-G | GMDS           |
| HAVCR2. 11 | ##### | -1.04573 | 0.016 | 0.267 | ##### | Class-G | HAVCR2         |
| TMED8. 1   | ##### | 0.100844 | 0.196 | 0.043 | ##### | Class-G | TMED8          |
| NR4A2. 11  | ##### | -1.02654 | 0.033 | 0.287 | ##### | Class-G | NR4A2          |
| TUBB2B. 10 | ##### | 0.331082 | 0.993 | 0.483 | ##### | Class-G | TUBB2B         |
| C8orf58. 1 | ##### | 0.102281 | 0.18  | 0.037 | ##### | Class-G | C8orf58        |
| ALDH1B1. 1 | ##### | 0.111395 | 0.207 | 0.048 | ##### | Class-G | ALDH1B1        |
| CAPS. 6    | ##### | 0.131536 | 0.208 | 0.049 | ##### | Class-G | CAPS           |
| COR01A. 11 | ##### | -1.18392 | 0.176 | 0.405 | ##### | Class-G | COR01A         |
| NCBP2. 9   | ##### | 0.135925 | 0.879 | 0.369 | ##### | Class-G | NCBP2          |
| FAM212B. 9 | ##### | 0.10336  | 0.263 | 0.072 | ##### | Class-G | FAM212B        |
| RP11-563K  | ##### | 0.144082 | 0.193 | 0.043 | ##### | Class-G | RP11-563K23. 1 |
| ZNF470. 1  | ##### | 0.108242 | 0.16  | 0.03  | ##### | Class-G | ZNF470         |
| FAM129B. 8 | ##### | 0.114758 | 0.212 | 0.051 | ##### | Class-G | FAM129B        |
| ZNF775. 9  | ##### | 0.118969 | 0.254 | 0.068 | ##### | Class-G | ZNF775         |
| TPT1. 8    | ##### | -0.39687 | 0.996 | 0.946 | ##### | Class-G | TPT1           |
| EEF1D. 8   | ##### | -0.41408 | 0.989 | 0.821 | ##### | Class-G | EEF1D          |
| FYB. 11    | ##### | -0.97008 | 0.012 | 0.257 | ##### | Class-G | FYB            |
| DHX36. 9   | ##### | 0.159778 | 0.841 | 0.358 | ##### | Class-G | DHX36          |
| NT5M. 1    | ##### | 0.102251 | 0.151 | 0.027 | ##### | Class-G | NT5M           |
| RAB31. 10  | ##### | 0.214343 | 0.887 | 0.39  | ##### | Class-G | RAB31          |

|           |       |          |       |       |       |         |          |
|-----------|-------|----------|-------|-------|-------|---------|----------|
| CEP112.1  | ##### | 0.111431 | 0.155 | 0.029 | ##### | Class-G | CEP112   |
| C6orf15.7 | ##### | 0.264263 | 0.112 | 0.014 | ##### | Class-G | C6orf15  |
| AKAP1.4   | ##### | 0.108521 | 0.304 | 0.092 | ##### | Class-G | AKAP1    |
| C9orf142. | ##### | 0.10322  | 0.767 | 0.312 | ##### | Class-G | C9orf142 |
| FBXL6.1   | ##### | 0.100293 | 0.202 | 0.047 | ##### | Class-G | FBXL6    |
| HAS3      | ##### | 0.114428 | 0.079 | 0.006 | ##### | Class-G | HAS3     |
| THOC3.4   | ##### | 0.114969 | 0.39  | 0.134 | ##### | Class-G | THOC3    |
| DAB2IP    | ##### | 0.105543 | 0.126 | 0.018 | ##### | Class-G | DAB2IP   |
| TIMM8B.7  | ##### | 0.184844 | 0.942 | 0.479 | ##### | Class-G | TIMM8B   |
| NOMO1.3   | ##### | 0.104047 | 0.264 | 0.074 | ##### | Class-G | NOMO1    |
| ACADVL.6  | ##### | 0.18666  | 0.874 | 0.381 | ##### | Class-G | ACADVL   |
| CRISPLD1. | ##### | 0.108545 | 0.243 | 0.065 | ##### | Class-G | CRISPLD1 |
| ABCA5.5   | ##### | 0.11179  | 0.237 | 0.062 | ##### | Class-G | ABCA5    |
| DUSP5.3   | ##### | 0.124944 | 0.21  | 0.051 | ##### | Class-G | DUSP5    |
| ATP6VOB.8 | ##### | -0.39571 | 0.962 | 0.771 | ##### | Class-G | ATP6VOB  |
| FKRP.2    | ##### | 0.114351 | 0.174 | 0.036 | ##### | Class-G | FKRP     |
| DIO2.4    | ##### | 0.221979 | 0.129 | 0.02  | ##### | Class-G | DIO2     |
| THSD4.5   | ##### | 0.20061  | 0.105 | 0.012 | ##### | Class-G | THSD4    |
| DIRAS2.8  | ##### | 0.173656 | 0.188 | 0.043 | ##### | Class-G | DIRAS2   |
| RNFT2.8   | ##### | 0.110474 | 0.201 | 0.047 | ##### | Class-G | RNFT2    |
| TMOD1.8   | ##### | 0.232609 | 0.355 | 0.125 | ##### | Class-G | TMOD1    |
| ZSCAN32.3 | ##### | 0.10191  | 0.197 | 0.046 | ##### | Class-G | ZSCAN32  |
| AHCYL2    | ##### | 0.129693 | 0.153 | 0.028 | ##### | Class-G | AHCYL2   |
| LARP1B.6  | ##### | 0.103315 | 0.299 | 0.091 | ##### | Class-G | LARP1B   |
| ASNA1.7   | ##### | 0.158115 | 0.941 | 0.451 | ##### | Class-G | ASNA1    |
| PPDPF.7   | ##### | 0.230805 | 0.991 | 0.665 | ##### | Class-G | PPDPF    |
| CLTB.9    | ##### | 0.197715 | 0.868 | 0.371 | ##### | Class-G | CLTB     |
| ADCY6     | ##### | 0.103062 | 0.138 | 0.023 | ##### | Class-G | ADCY6    |
| THRAP3.8  | ##### | 0.165597 | 0.856 | 0.369 | ##### | Class-G | THRAP3   |
| TRIB3.8   | ##### | 0.104666 | 0.211 | 0.052 | ##### | Class-G | TRIB3    |
| ZNF318.2  | ##### | 0.101865 | 0.18  | 0.039 | ##### | Class-G | ZNF318   |
| GPC4.4    | ##### | 0.125596 | 0.165 | 0.033 | ##### | Class-G | GPC4     |
| IL33.8    | ##### | 0.139726 | 0.15  | 0.028 | ##### | Class-G | IL33     |
| CSNK1A1.7 | ##### | 0.284917 | 0.965 | 0.491 | ##### | Class-G | CSNK1A1  |
| SLC4A8.4  | ##### | 0.11271  | 0.21  | 0.052 | ##### | Class-G | SLC4A8   |
| TTL12.3   | ##### | 0.108578 | 0.189 | 0.043 | ##### | Class-G | TTL12    |
| COX7C.4   | ##### | -0.33753 | 0.997 | 0.868 | ##### | Class-G | COX7C    |
| ATP5L.3   | ##### | -0.3472  | 0.99  | 0.838 | ##### | Class-G | ATP5L    |
| CACFD1.8  | ##### | 0.110566 | 0.237 | 0.063 | ##### | Class-G | CACFD1   |
| PHLDA2.5  | ##### | 0.121893 | 0.162 | 0.032 | ##### | Class-G | PHLDA2   |
| VWA3B.5   | ##### | 0.128512 | 0.133 | 0.022 | ##### | Class-G | VWA3B    |
| ABCA1.6   | ##### | 0.135455 | 0.507 | 0.195 | ##### | Class-G | ABCA1    |
| HES1.8    | ##### | 0.137277 | 0.43  | 0.159 | ##### | Class-G | HES1     |
| ETFB.5    | ##### | 0.140468 | 0.927 | 0.43  | ##### | Class-G | ETFB     |
| SLC02B1.1 | ##### | -0.97613 | 0.016 | 0.254 | ##### | Class-G | SLC02B1  |
| GPX1.11   | ##### | -0.46003 | 0.967 | 0.789 | ##### | Class-G | GPX1     |
| ECHS1.6   | ##### | 0.108184 | 0.841 | 0.368 | ##### | Class-G | ECHS1    |
| NAT8L.5   | ##### | 0.10314  | 0.161 | 0.032 | ##### | Class-G | NAT8L    |
| CD86.11   | ##### | -0.99388 | 0.011 | 0.247 | ##### | Class-G | CD86     |
| FIBP.6    | ##### | 0.142871 | 0.9   | 0.414 | ##### | Class-G | FIBP     |
| CNTNAP3B. | ##### | 0.121353 | 0.125 | 0.019 | ##### | Class-G | CNTNAP3B |

|             |           |           |        |        |           |         |             |
|-------------|-----------|-----------|--------|--------|-----------|---------|-------------|
| TBXAS1. 11  | #####     | -1. 02708 | 0. 035 | 0. 275 | #####     | Class-G | TBXAS1      |
| RTTN. 1     | #####     | 0. 115811 | 0. 146 | 0. 027 | 1. 03E-99 | Class-G | RTTN        |
| SOX13. 1    | #####     | 0. 116263 | 0. 126 | 0. 02  | 1. 46E-99 | Class-G | SOX13       |
| PGAM1. 7    | #####     | 0. 166954 | 0. 916 | 0. 434 | 1. 79E-99 | Class-G | PGAM1       |
| RAD23A. 5   | #####     | 0. 211945 | 0. 968 | 0. 501 | 2. 83E-99 | Class-G | RAD23A      |
| CTNNA1. 4   | #####     | 0. 118976 | 0. 84  | 0. 353 | 3. 43E-99 | Class-G | CTNNA1      |
| GDF15. 10   | #####     | 0. 249091 | 0. 2   | 0. 049 | 4. 24E-99 | Class-G | GDF15       |
| C11orf80    | #####     | 0. 104169 | 0. 144 | 0. 026 | 5. 39E-99 | Class-G | C11orf80    |
| RBPMS       | #####     | 0. 109506 | 0. 127 | 0. 02  | 7. 96E-99 | Class-G | RBPMS       |
| SRSF6. 6    | #####     | 0. 105919 | 0. 727 | 0. 299 | 9. 54E-99 | Class-G | SRSF6       |
| DONSON. 3   | #####     | 0. 111552 | 0. 223 | 0. 058 | 1. 20E-98 | Class-G | DONSON      |
| ZNF704. 1C  | #####     | 0. 100718 | 0. 303 | 0. 094 | 1. 28E-98 | Class-G | ZNF704      |
| ARVCF. 8    | #####     | 0. 106203 | 0. 171 | 0. 036 | 1. 28E-98 | Class-G | ARVCF       |
| PLXDC2. 11  | #####     | -0. 89626 | 0. 009 | 0. 242 | 1. 30E-98 | Class-G | PLXDC2      |
| SCMH1. 5    | #####     | 0. 108384 | 0. 218 | 0. 056 | 1. 96E-98 | Class-G | SCMH1       |
| FIZ1. 2     | #####     | 0. 100272 | 0. 158 | 0. 031 | 2. 19E-98 | Class-G | FIZ1        |
| HNRNPAB. 1  | #####     | 0. 169777 | 0. 793 | 0. 332 | 3. 91E-98 | Class-G | HNRNPAB     |
| KAT2B. 6    | #####     | 0. 103472 | 0. 204 | 0. 05  | 6. 47E-98 | Class-G | KAT2B       |
| SNRPB. 6    | #####     | 0. 221193 | 0. 951 | 0. 516 | 6. 53E-98 | Class-G | SNRPB       |
| SH3GLB1. 7  | #####     | 0. 118072 | 0. 83  | 0. 364 | 8. 62E-98 | Class-G | SH3GLB1     |
| PARD6B      | #####     | 0. 102513 | 0. 126 | 0. 02  | 2. 13E-97 | Class-G | PARD6B      |
| FCGBP. 10   | #####     | -1. 0908  | 0. 027 | 0. 262 | 4. 34E-97 | Class-G | FCGBP       |
| CEP78. 8    | #####     | 0. 102593 | 0. 283 | 0. 086 | 4. 43E-97 | Class-G | CEP78       |
| AC159540.   | #####     | 0. 120907 | 0. 227 | 0. 061 | 5. 06E-97 | Class-G | AC159540. 1 |
| ZNF324. 6   | #####     | 0. 10189  | 0. 224 | 0. 059 | 5. 32E-97 | Class-G | ZNF324      |
| C5AR1. 10   | #####     | -1. 03453 | 0. 036 | 0. 271 | 5. 85E-97 | Class-G | C5AR1       |
| DDX46. 6    | #####     | 0. 110188 | 0. 867 | 0. 378 | 7. 20E-97 | Class-G | DDX46       |
| MTPN. 6     | #####     | 0. 164937 | 0. 847 | 0. 364 | 1. 03E-96 | Class-G | MTPN        |
| SOX4. 10    | #####     | 0. 129526 | 0. 863 | 0. 377 | 3. 82E-96 | Class-G | SOX4        |
| MZT2A. 8    | #####     | 0. 127032 | 0. 817 | 0. 348 | 4. 45E-96 | Class-G | MZT2A       |
| EVI2B. 11   | #####     | -0. 93469 | 0. 007 | 0. 235 | 4. 64E-96 | Class-G | EVI2B       |
| ZFYVE9. 2   | #####     | 0. 101945 | 0. 155 | 0. 031 | 5. 20E-96 | Class-G | ZFYVE9      |
| SYNCRIP. 8  | #####     | 0. 117529 | 0. 768 | 0. 321 | 1. 20E-95 | Class-G | SYNCRIP     |
| RHPN1. 2    | #####     | 0. 101521 | 0. 156 | 0. 032 | 1. 25E-95 | Class-G | RHPN1       |
| YIPF3. 8    | #####     | 0. 104645 | 0. 923 | 0. 411 | 1. 37E-95 | Class-G | YIPF3       |
| SLA. 11     | 1. 12E-99 | -0. 89971 | 0. 007 | 0. 234 | 1. 67E-95 | Class-G | SLA         |
| CSF2RA. 1C  | 1. 34E-99 | -0. 95855 | 0. 008 | 0. 234 | 2. 00E-95 | Class-G | CSF2RA      |
| UBB. 7      | 2. 90E-99 | -0. 31856 | 0. 997 | 0. 897 | 4. 34E-95 | Class-G | UBB         |
| SPI1. 11    | 3. 97E-99 | -0. 94467 | 0. 039 | 0. 271 | 5. 93E-95 | Class-G | SPI1        |
| LAIR1. 11   | 6. 25E-99 | -0. 97212 | 0. 032 | 0. 263 | 9. 33E-95 | Class-G | LAIR1       |
| FOSB. 8     | 6. 52E-99 | -0. 96681 | 0. 209 | 0. 422 | 9. 74E-95 | Class-G | FOSB        |
| HSPA8. 6    | 1. 98E-98 | -0. 33826 | 0. 992 | 0. 845 | 2. 96E-94 | Class-G | HSPA8       |
| IL11RA. 2   | 2. 86E-98 | 0. 111497 | 0. 183 | 0. 043 | 4. 27E-94 | Class-G | IL11RA      |
| SLC24A3. 1  | 2. 87E-98 | 0. 118772 | 0. 109 | 0. 015 | 4. 29E-94 | Class-G | SLC24A3     |
| TBC1D24. 6  | 3. 63E-98 | 0. 114413 | 0. 201 | 0. 05  | 5. 43E-94 | Class-G | TBC1D24     |
| TMEM176B. 3 | 3. 87E-98 | -1. 18116 | 0. 164 | 0. 383 | 5. 78E-94 | Class-G | TMEM176B    |
| XRN2. 5     | 8. 70E-98 | 0. 148668 | 0. 874 | 0. 389 | 1. 30E-93 | Class-G | XRN2        |
| BAMBI. 8    | 8. 95E-98 | 0. 124492 | 0. 196 | 0. 049 | 1. 34E-93 | Class-G | BAMBI       |
| GLIS2. 1    | 1. 02E-97 | 0. 103404 | 0. 129 | 0. 022 | 1. 53E-93 | Class-G | GLIS2       |
| RGS10. 11   | 1. 78E-97 | -1. 19983 | 0. 158 | 0. 372 | 2. 66E-93 | Class-G | RGS10       |
| PTPRC. 11   | 3. 22E-97 | -0. 89295 | 0. 012 | 0. 234 | 4. 80E-93 | Class-G | PTPRC       |



|             |          |          |       |       |          |         |           |
|-------------|----------|----------|-------|-------|----------|---------|-----------|
| FAXDC2.7    | 3.27E-97 | 0.106171 | 0.173 | 0.039 | 4.88E-93 | Class-G | FAXDC2    |
| HNRNPA1.4   | 5.33E-97 | -0.29234 | 0.997 | 0.858 | 7.97E-93 | Class-G | HNRNPA1   |
| ACSS1.6     | 5.48E-97 | 0.100874 | 0.255 | 0.075 | 8.19E-93 | Class-G | ACSS1     |
| PABPC1.8    | 7.48E-97 | -0.48177 | 0.905 | 0.719 | 1.12E-92 | Class-G | PABPC1    |
| RHPN2.3     | 1.45E-96 | 0.10153  | 0.132 | 0.023 | 2.17E-92 | Class-G | RHPN2     |
| B3GNT2.9    | 1.96E-96 | 0.115333 | 0.19  | 0.046 | 2.93E-92 | Class-G | B3GNT2    |
| MARCKSL1.2  | 8.2E-96  | 0.249582 | 0.981 | 0.473 | 4.21E-92 | Class-G | MARCKSL1  |
| GRIK3.6     | 4.23E-96 | 0.144273 | 0.145 | 0.028 | 6.33E-92 | Class-G | GRIK3     |
| SSNA1.6     | 1.25E-95 | 0.123251 | 0.859 | 0.378 | 1.86E-91 | Class-G | SSNA1     |
| GBAS.6      | 2.46E-95 | 0.127963 | 0.79  | 0.336 | 3.67E-91 | Class-G | GBAS      |
| C19orf70.2  | 9.5E-95  | 0.123306 | 0.965 | 0.515 | 4.41E-91 | Class-G | C19orf70  |
| SPINT2.11   | 6.82E-95 | -0.83944 | 0.025 | 0.248 | 1.02E-90 | Class-G | SPINT2    |
| COX20.6     | 7.05E-95 | 0.115525 | 0.881 | 0.391 | 1.05E-90 | Class-G | COX20     |
| ADCYAP1R1.1 | 1.16E-94 | 0.120046 | 0.151 | 0.031 | 1.73E-90 | Class-G | ADCYAP1R1 |
| GNG4.10     | 2.67E-94 | 0.104828 | 0.281 | 0.089 | 3.99E-90 | Class-G | GNG4      |
| ANXA2.9     | 3.75E-94 | 0.136582 | 0.849 | 0.459 | 5.60E-90 | Class-G | ANXA2     |
| IL18.11     | 3.86E-94 | -0.90202 | 0.007 | 0.223 | 5.76E-90 | Class-G | IL18      |
| GPM6A.10    | 3.90E-94 | 0.166184 | 0.978 | 0.427 | 5.82E-90 | Class-G | GPM6A     |
| TCF4.11     | 7.93E-93 | 0.186875 | 0.959 | 0.452 | 1.18E-88 | Class-G | TCF4      |
| EPHB3.2     | 3.31E-92 | 0.118375 | 0.146 | 0.03  | 4.95E-88 | Class-G | EPHB3     |
| PARP1.6     | 3.41E-92 | 0.171527 | 0.899 | 0.402 | 5.10E-88 | Class-G | PARP1     |
| RHBDD2.1C   | 6.09E-92 | 0.11017  | 0.885 | 0.39  | 9.11E-88 | Class-G | RHBDD2    |
| LRP4.8      | 1.29E-91 | 0.112538 | 0.172 | 0.04  | 1.92E-87 | Class-G | LRP4      |
| RPAIN.9     | 1.45E-91 | 0.14565  | 0.905 | 0.417 | 2.17E-87 | Class-G | RPAIN     |
| FLOT1.10    | 2.08E-91 | 0.185067 | 0.908 | 0.436 | 3.11E-87 | Class-G | FLOT1     |
| IER3.11     | 2.63E-91 | -0.96474 | 0.052 | 0.272 | 3.93E-87 | Class-G | IER3      |
| KIF5B.7     | 3.65E-91 | 0.242998 | 0.91  | 0.447 | 5.45E-87 | Class-G | KIF5B     |
| IFI30.11    | 4.60E-91 | -0.96367 | 0.033 | 0.25  | 6.87E-87 | Class-G | IFI30     |
| APOC2.10    | 5.87E-91 | -1.0819  | 0.008 | 0.219 | 8.77E-87 | Class-G | APOC2     |
| PTTG1IP.5   | 7.34E-91 | 0.156284 | 0.867 | 0.389 | 1.10E-86 | Class-G | PTTG1IP   |
| COL23A1.8   | 9.5E-91  | 0.13404  | 0.075 | 0.007 | 1.34E-86 | Class-G | COL23A1   |
| PEA15.6     | 1.33E-90 | 0.106559 | 0.845 | 0.377 | 1.99E-86 | Class-G | PEA15     |
| SLC11A1.1   | 2.96E-90 | -1.07595 | 0.123 | 0.335 | 4.42E-86 | Class-G | SLC11A1   |
| CD300A.11   | 5.49E-90 | -0.85778 | 0.012 | 0.221 | 8.21E-86 | Class-G | CD300A    |
| TGFBI.11    | 8.08E-90 | -0.89161 | 0.022 | 0.235 | 1.21E-85 | Class-G | TGFBI     |
| GADD45B.7   | 8.50E-90 | -0.96932 | 0.34  | 0.515 | 1.27E-85 | Class-G | GADD45B   |
| TTC3.10     | 8.71E-90 | 0.218836 | 0.939 | 0.447 | 1.30E-85 | Class-G | TTC3      |
| METTL9.1C   | 2.24E-89 | 0.186443 | 0.876 | 0.402 | 3.35E-85 | Class-G | METTL9    |
| NR4A1.10    | 5.83E-89 | -0.93448 | 0.086 | 0.303 | 8.71E-85 | Class-G | NR4A1     |
| LGALS1.8    | 1.05E-88 | 0.106013 | 0.177 | 0.044 | 1.57E-84 | Class-G | LGALS1    |
| EIF6.3      | 1.67E-88 | 0.135466 | 0.929 | 0.454 | 2.50E-84 | Class-G | EIF6      |
| DDT.5       | 1.96E-88 | 0.125537 | 0.932 | 0.455 | 2.92E-84 | Class-G | DDT       |
| COL5A3.2    | 2.24E-88 | 0.117399 | 0.09  | 0.011 | 3.35E-84 | Class-G | COL5A3    |
| LINC00493.3 | 7.9E-88  | 0.113067 | 0.937 | 0.463 | 5.67E-84 | Class-G | LINC00493 |
| SNF8.8      | 4.59E-88 | 0.157555 | 0.868 | 0.393 | 6.85E-84 | Class-G | SNF8      |
| CYBB.11     | 7.75E-88 | -0.84464 | 0.015 | 0.221 | 1.16E-83 | Class-G | CYBB      |
| NT5E.6      | 1.07E-87 | 0.100535 | 0.175 | 0.043 | 1.60E-83 | Class-G | NT5E      |
| EPHA2.1     | 1.16E-87 | 0.107592 | 0.093 | 0.012 | 1.73E-83 | Class-G | EPHA2     |
| LAT2.11     | 1.43E-87 | -0.87701 | 0.024 | 0.232 | 2.13E-83 | Class-G | LAT2      |
| TMBIM6.6    | 1.54E-87 | -0.36126 | 0.993 | 0.813 | 2.30E-83 | Class-G | TMBIM6    |
| MGLL.6      | 1.75E-87 | 0.119706 | 0.324 | 0.116 | 2.62E-83 | Class-G | MGLL      |

|           |          |          |       |       |          |         |          |
|-----------|----------|----------|-------|-------|----------|---------|----------|
| SQSTM1.7  | 2.40E-87 | 0.199832 | 0.926 | 0.458 | 3.58E-83 | Class-G | SQSTM1   |
| UCP2.11   | 2.83E-87 | -0.97399 | 0.089 | 0.302 | 4.23E-83 | Class-G | UCP2     |
| HLA-DQA2. | 4.06E-87 | -1.05567 | 0.001 | 0.2   | 6.07E-83 | Class-G | HLA-DQA2 |
| HBB.6     | 4.31E-87 | -0.87046 | 0.213 | 0.429 | 6.44E-83 | Class-G | HBB      |
| POLR2K.4  | 4.65E-87 | 0.114665 | 0.908 | 0.421 | 6.95E-83 | Class-G | POLR2K   |
| ABCD2     | 1.16E-86 | 0.101575 | 0.079 | 0.008 | 1.74E-82 | Class-G | ABCD2    |
| P4HB.7    | 1.28E-86 | 0.250489 | 0.962 | 0.508 | 1.91E-82 | Class-G | P4HB     |
| CLEC2B.11 | 2.24E-86 | -0.86189 | 0.026 | 0.234 | 3.34E-82 | Class-G | CLEC2B   |
| EFNA2.9   | 4.25E-86 | 0.107809 | 0.153 | 0.034 | 6.35E-82 | Class-G | EFNA2    |
| ROMO1.6   | 4.74E-86 | 0.160566 | 0.951 | 0.537 | 7.08E-82 | Class-G | ROMO1    |
| MNDA.11   | 4.76E-86 | -0.83959 | 0.005 | 0.205 | 7.11E-82 | Class-G | MNDA     |
| EIF2S2.6  | 6.16E-86 | 0.145844 | 0.967 | 0.526 | 9.21E-82 | Class-G | EIF2S2   |
| ZFP30.3   | 4.12E-85 | 0.100126 | 0.149 | 0.033 | 6.15E-81 | Class-G | ZFP30    |
| COMT.8    | 8.34E-85 | 0.152924 | 0.958 | 0.48  | 1.25E-80 | Class-G | COMT     |
| LYZ.11    | 1.28E-84 | -0.90762 | 0.03  | 0.235 | 1.91E-80 | Class-G | LYZ      |
| C1S.9     | 1.38E-84 | -0.27241 | 0.36  | 0.13  | 2.07E-80 | Class-G | C1S      |
| CHCHD2.7  | 1.46E-84 | -0.27527 | 0.998 | 0.861 | 2.18E-80 | Class-G | CHCHD2   |
| COX16.4   | 1.77E-84 | 0.176478 | 0.898 | 0.435 | 2.65E-80 | Class-G | COX16    |
| NBEAL1.7  | 2.09E-84 | -0.84301 | 0.756 | 0.65  | 3.12E-80 | Class-G | NBEAL1   |
| RER1.8    | 5.57E-84 | 0.164864 | 0.904 | 0.43  | 8.32E-80 | Class-G | RER1     |
| FOLR2.11  | 1.68E-83 | -1.02134 | 0.009 | 0.205 | 2.52E-79 | Class-G | FOLR2    |
| NONO.10   | 2.27E-83 | 0.123529 | 0.871 | 0.387 | 3.39E-79 | Class-G | NONO     |
| CTSH.11   | 3.72E-83 | -1.02607 | 0.122 | 0.324 | 5.56E-79 | Class-G | CTSH     |
| PYURF.7   | 5.84E-83 | 0.218655 | 0.944 | 0.475 | 8.72E-79 | Class-G | PYURF    |
| GDI1.10   | 6.13E-83 | 0.125836 | 0.91  | 0.416 | 9.16E-79 | Class-G | GDI1     |
| EEF1B2.1C | 6.14E-83 | -0.4055  | 0.947 | 0.748 | 9.18E-79 | Class-G | EEF1B2   |
| PLEK.11   | 1.78E-82 | -0.83624 | 0.008 | 0.202 | 2.66E-78 | Class-G | PLEK     |
| SLC4A11   | 2.00E-82 | 0.132271 | 0.087 | 0.012 | 3.00E-78 | Class-G | SLC4A11  |
| ABI3.11   | 6.43E-82 | -0.83299 | 0.021 | 0.217 | 9.61E-78 | Class-G | ABI3     |
| CLEC7A.11 | 7.51E-82 | -0.7856  | 0.009 | 0.202 | 1.12E-77 | Class-G | CLEC7A   |
| KPNB1.9   | 7.86E-82 | 0.141237 | 0.845 | 0.383 | 1.17E-77 | Class-G | KPNB1    |
| MSR1.11   | 1.42E-81 | -0.82649 | 0.013 | 0.207 | 2.12E-77 | Class-G | MSR1     |
| FCGR1B.1C | 1.92E-81 | -0.86069 | 0.001 | 0.19  | 2.87E-77 | Class-G | FCGR1B   |
| SLC7A7.11 | 5.35E-81 | -0.79051 | 0.01  | 0.201 | 8.00E-77 | Class-G | SLC7A7   |
| MZT2B.7   | 5.57E-81 | 0.242688 | 0.962 | 0.533 | 8.32E-77 | Class-G | MZT2B    |
| MBP.6     | 2.33E-80 | -1.07745 | 0.062 | 0.267 | 3.48E-76 | Class-G | MBP      |
| MARCH1.9  | 2.38E-80 | -0.66636 | 0.021 | 0.218 | 3.56E-76 | Class-G | 1-Mar    |
| LGALS9.11 | 2.74E-80 | -0.92947 | 0.067 | 0.268 | 4.09E-76 | Class-G | LGALS9   |
| ADAP2.11  | 2.99E-80 | -0.78694 | 0.018 | 0.211 | 4.47E-76 | Class-G | ADAP2    |
| NNAT.11   | 4.44E-80 | -0.95729 | 0.025 | 0.223 | 6.64E-76 | Class-G | NNAT     |
| CD83.10   | 5.86E-80 | -1.04925 | 0.126 | 0.322 | 8.76E-76 | Class-G | CD83     |
| SKP1.8    | 1.00E-79 | -0.34722 | 0.999 | 0.843 | 1.50E-75 | Class-G | SKP1     |
| CTSC.11   | 1.05E-79 | -1.10361 | 0.245 | 0.406 | 1.57E-75 | Class-G | CTSC     |
| HMOX1.11  | 2.03E-79 | -1.05739 | 0.127 | 0.322 | 3.03E-75 | Class-G | HMOX1    |
| C9orf16.6 | 1.17E-78 | 0.202803 | 0.93  | 0.525 | 1.75E-74 | Class-G | C9orf16  |
| SIGLEC10. | 1.22E-78 | -0.73557 | 0.004 | 0.188 | 1.82E-74 | Class-G | SIGLEC10 |
| ANXA1.8   | 1.58E-78 | -1.06833 | 0.268 | 0.433 | 2.36E-74 | Class-G | ANXA1    |
| TNFSF13B. | 3.86E-78 | -0.81924 | 0.036 | 0.231 | 5.77E-74 | Class-G | TNFSF13B |
| PSMD3.6   | 3.97E-78 | 0.105252 | 0.774 | 0.344 | 5.93E-74 | Class-G | PSMD3    |
| NDUFS6.4  | 4.84E-78 | 0.141236 | 0.97  | 0.571 | 7.23E-74 | Class-G | NDUFS6   |
| FAM26F.11 | 1.31E-77 | -0.70757 | 0.008 | 0.193 | 1.96E-73 | Class-G | FAM26F   |

|            |           |          |       |       |                   |                |
|------------|-----------|----------|-------|-------|-------------------|----------------|
| CPM. 8     | 1. 67E-77 | -0.88116 | 0.064 | 0.263 | 2. 50E-73 Class-G | CPM            |
| SNRNP70. 7 | 1. 75E-77 | 0.151701 | 0.885 | 0.408 | 2. 61E-73 Class-G | SNRNP70        |
| MYBPC1. 7  | 2. 27E-77 | 0.172954 | 0.133 | 0.03  | 3. 40E-73 Class-G | MYBPC1         |
| PPIA. 5    | 2. 61E-77 | -0.29125 | 0.994 | 0.856 | 3. 90E-73 Class-G | PPIA           |
| APBB1IP. 1 | 3. 30E-77 | -0.6988  | 0.002 | 0.182 | 4. 94E-73 Class-G | APBB1IP        |
| RNASE2. 11 | 9. 26E-77 | -0.82895 | 0.003 | 0.183 | 1. 38E-72 Class-G | RNASE2         |
| CTSB. 8    | 1. 52E-76 | -0.58075 | 0.922 | 0.73  | 2. 27E-72 Class-G | CTSB           |
| HMOX2. 6   | 1. 54E-76 | -0.10939 | 0.583 | 0.248 | 2. 30E-72 Class-G | HMOX2          |
| ARL6IP1. 5 | 2. 53E-76 | -0.42431 | 0.931 | 0.711 | 3. 78E-72 Class-G | ARL6IP1        |
| STMN2. 11  | 2. 98E-76 | -0.99371 | 0.024 | 0.213 | 4. 45E-72 Class-G | STMN2          |
| APLP1. 11  | 5. 48E-76 | -0.11397 | 0.695 | 0.295 | 8. 20E-72 Class-G | APLP1          |
| PARVG. 11  | 6. 12E-76 | -0.7421  | 0.007 | 0.187 | 9. 14E-72 Class-G | PARVG          |
| CAPG. 11   | 7. 25E-76 | -1.09047 | 0.303 | 0.433 | 1. 08E-71 Class-G | CAPG           |
| MATR3. 10  | 8. 10E-76 | 0.150906 | 0.913 | 0.417 | 1. 21E-71 Class-G | MATR3          |
| TREM1. 10  | 8. 96E-76 | -0.88877 | 0.008 | 0.189 | 1. 34E-71 Class-G | TREM1          |
| AAMDC. 8   | 9. 99E-76 | -0.12652 | 0.426 | 0.17  | 1. 49E-71 Class-G | AAMDC          |
| FGL2. 11   | 1. 03E-75 | -0.80046 | 0.018 | 0.202 | 1. 54E-71 Class-G | FGL2           |
| HNRNPDL. 6 | 2. 08E-75 | -0.32925 | 0.985 | 0.767 | 3. 10E-71 Class-G | HNRNPDL        |
| PDK4. 10   | 2. 48E-75 | -0.78254 | 0.013 | 0.195 | 3. 70E-71 Class-G | PDK4           |
| IRF8. 11   | 3. 91E-75 | -0.71837 | 0.005 | 0.183 | 5. 84E-71 Class-G | IRF8           |
| PRRC2C. 7  | 5. 04E-75 | 0.109703 | 0.892 | 0.415 | 7. 53E-71 Class-G | PRRC2C         |
| GPRC5C. 3  | 7. 09E-75 | 0.11224  | 0.181 | 0.051 | 1. 06E-70 Class-G | GPRC5C         |
| PCDHB14. 5 | 1. 67E-74 | 0.158687 | 0.151 | 0.039 | 2. 49E-70 Class-G | PCDHB14        |
| MED28. 6   | 2. 02E-74 | -0.10089 | 0.661 | 0.286 | 3. 02E-70 Class-G | MED28          |
| PSMC5. 4   | 2. 81E-74 | 0.116738 | 0.957 | 0.489 | 4. 21E-70 Class-G | PSMC5          |
| ATP5G2. 4  | 4. 71E-74 | -0.32122 | 0.995 | 0.849 | 7. 04E-70 Class-G | ATP5G2         |
| RP11-15A1  | 5. 94E-74 | 0.110984 | 0.151 | 0.038 | 8. 88E-70 Class-G | RP11-15A1. 3   |
| LSP1. 11   | 1. 23E-73 | -0.80861 | 0.013 | 0.191 | 1. 83E-69 Class-G | LSP1           |
| SRRM2. 6   | 1. 71E-73 | 0.186126 | 0.94  | 0.466 | 2. 56E-69 Class-G | SRRM2          |
| RTFDC1. 3  | 1. 90E-73 | 0.131619 | 0.933 | 0.474 | 2. 84E-69 Class-G | RTFDC1         |
| F13A1. 8   | 2. 58E-73 | -0.92926 | 0.008 | 0.183 | 3. 85E-69 Class-G | F13A1          |
| LUC7L3. 8  | 8. 56E-73 | 0.125583 | 0.922 | 0.443 | 1. 28E-68 Class-G | LUC7L3         |
| SAP18. 3   | 9. 09E-73 | -0.40454 | 0.968 | 0.733 | 1. 36E-68 Class-G | SAP18          |
| SLC2A5. 11 | 1. 23E-72 | -0.8591  | 0.018 | 0.195 | 1. 85E-68 Class-G | SLC2A5         |
| STK4. 8    | 1. 59E-72 | -0.10627 | 0.565 | 0.241 | 2. 37E-68 Class-G | STK4           |
| ADRM1. 2   | 2. 16E-72 | 0.122703 | 0.899 | 0.445 | 3. 23E-68 Class-G | ADRM1          |
| ELN. 8     | 7. 85E-72 | 0.150691 | 0.243 | 0.086 | 1. 17E-67 Class-G | ELN            |
| PTPN6. 11  | 7. 99E-72 | -0.7038  | 0.012 | 0.186 | 1. 19E-67 Class-G | PTPN6          |
| S100A9. 11 | 8. 49E-72 | -1.07794 | 0.065 | 0.25  | 1. 27E-67 Class-G | S100A9         |
| RP11-544A  | 1. 97E-71 | 0.112657 | 0.202 | 0.063 | 2. 95E-67 Class-G | RP11-544A12. 8 |
| HAMP. 11   | 3. 44E-71 | -0.90303 | 0.012 | 0.185 | 5. 14E-67 Class-G | HAMP           |
| CYC1. 9    | 3. 70E-71 | 0.197675 | 0.94  | 0.474 | 5. 53E-67 Class-G | CYC1           |
| TMSB10. 8  | 4. 69E-71 | -0.36812 | 0.997 | 0.959 | 7. 01E-67 Class-G | TMSB10         |
| EAPP. 8    | 6. 06E-71 | -0.12377 | 0.683 | 0.3   | 9. 05E-67 Class-G | EAPP           |
| GNG5. 9    | 7. 73E-71 | 0.109698 | 0.979 | 0.589 | 1. 16E-66 Class-G | GNG5           |
| C6orf62. 7 | 9. 82E-71 | 0.10064  | 0.848 | 0.387 | 1. 47E-66 Class-G | C6orf62        |
| TM6SF1. 11 | 1. 00E-70 | -0.77955 | 0.011 | 0.182 | 1. 50E-66 Class-G | TM6SF1         |
| PRELID1. 5 | 1. 02E-70 | 0.234355 | 0.948 | 0.496 | 1. 53E-66 Class-G | PRELID1        |
| DUSP23. 1C | 1. 26E-70 | -0.72979 | 0.033 | 0.213 | 1. 89E-66 Class-G | DUSP23         |
| DNAJB6. 4  | 1. 46E-70 | -0.47745 | 0.922 | 0.674 | 2. 19E-66 Class-G | DNAJB6         |
| CSF3R. 10  | 2. 09E-70 | -0.73618 | 0.007 | 0.176 | 3. 12E-66 Class-G | CSF3R          |

|            |          |          |       |       |                  |              |
|------------|----------|----------|-------|-------|------------------|--------------|
| GIMAP4.11  | 2.53E-70 | -0.75162 | 0.005 | 0.173 | 3.78E-66 Class-G | GIMAP4       |
| GGA1.7     | 3.55E-70 | -0.10276 | 0.567 | 0.244 | 5.30E-66 Class-G | GGA1         |
| CTSZ.11    | 4.29E-70 | -0.89241 | 0.101 | 0.282 | 6.41E-66 Class-G | CTSZ         |
| SLC25A6.6  | 4.72E-70 | -0.28137 | 0.988 | 0.836 | 7.05E-66 Class-G | SLC25A6      |
| DAB2.10    | 5.08E-70 | -0.69732 | 0.006 | 0.174 | 7.59E-66 Class-G | DAB2         |
| WAS.11     | 1.74E-69 | -0.73435 | 0.025 | 0.199 | 2.59E-65 Class-G | WAS          |
| KLF15.5    | 3.17E-69 | 0.106592 | 0.119 | 0.026 | 4.74E-65 Class-G | KLF15        |
| EMILIN3.6  | 3.56E-69 | 0.116025 | 0.104 | 0.02  | 5.32E-65 Class-G | EMILIN3      |
| PCDH9-AS1  | 3.61E-69 | 0.108129 | 0.084 | 0.013 | 5.40E-65 Class-G | PCDH9-AS1    |
| SET.7      | 5.48E-69 | 0.197916 | 0.958 | 0.496 | 8.19E-65 Class-G | SET          |
| PLD4.11    | 5.53E-69 | -0.75208 | 0.01  | 0.177 | 8.26E-65 Class-G | PLD4         |
| LSM7.8     | 6.23E-69 | 0.172358 | 0.979 | 0.574 | 9.31E-65 Class-G | LSM7         |
| CD4.11     | 6.53E-69 | -0.68749 | 0.011 | 0.179 | 9.76E-65 Class-G | CD4          |
| LTF.8      | 8.32E-69 | -1.33046 | 0.008 | 0.174 | 1.24E-64 Class-G | LTF          |
| ELAVL4.1C  | 1.27E-68 | -0.71617 | 0.028 | 0.203 | 1.89E-64 Class-G | ELAVL4       |
| E2F1.6     | 1.34E-68 | 0.10596  | 0.149 | 0.039 | 2.00E-64 Class-G | E2F1         |
| TMEM45A.6  | 1.89E-68 | -0.1421  | 0.366 | 0.146 | 2.82E-64 Class-G | TMEM45A      |
| PILRA.10   | 4.55E-68 | -0.79281 | 0.019 | 0.189 | 6.80E-64 Class-G | PILRA        |
| APOE.9     | 5.66E-68 | -0.52134 | 0.696 | 0.684 | 8.46E-64 Class-G | APOE         |
| UQCRFS1.6  | 6.36E-68 | 0.189359 | 0.944 | 0.479 | 9.51E-64 Class-G | UQCRFS1      |
| PGK1.7     | 8.48E-68 | -0.4949  | 0.925 | 0.725 | 1.27E-63 Class-G | PGK1         |
| AURKAIP1.8 | 9.93E-68 | 0.177822 | 0.97  | 0.547 | 1.33E-63 Class-G | AURKAIP1     |
| SCIN.11    | 1.65E-67 | -0.80258 | 0.01  | 0.174 | 2.46E-63 Class-G | SCIN         |
| ADAM28.1C  | 1.71E-67 | -0.70276 | 0.003 | 0.164 | 2.55E-63 Class-G | ADAM28       |
| KRT10.7    | 2.94E-67 | 0.220978 | 0.944 | 0.495 | 4.39E-63 Class-G | KRT10        |
| FERMT3.11  | 4.37E-67 | -0.7058  | 0.022 | 0.19  | 6.52E-63 Class-G | FERMT3       |
| MTIF3.5    | 5.66E-67 | -0.10829 | 0.66  | 0.294 | 8.46E-63 Class-G | MTIF3        |
| IGSF6.11   | 1.15E-66 | -0.74712 | 0.013 | 0.176 | 1.72E-62 Class-G | IGSF6        |
| NGDN.6     | 1.32E-66 | -0.11649 | 0.513 | 0.222 | 1.97E-62 Class-G | NGDN         |
| ELMO1.8    | 1.56E-66 | -0.70334 | 0.039 | 0.215 | 2.33E-62 Class-G | ELMO1        |
| FAM105A.1  | 1.58E-66 | -0.69905 | 0.019 | 0.186 | 2.36E-62 Class-G | FAM105A      |
| SNRPB2.7   | 2.09E-66 | 0.12846  | 0.941 | 0.502 | 3.12E-62 Class-G | SNRPB2       |
| BCL2A1.11  | 3.26E-66 | -0.70505 | 0.016 | 0.18  | 4.87E-62 Class-G | BCL2A1       |
| FCGR2B.11  | 3.71E-66 | -0.78213 | 0.007 | 0.166 | 5.54E-62 Class-G | FCGR2B       |
| STXBP2.11  | 3.83E-66 | -0.71706 | 0.028 | 0.196 | 5.73E-62 Class-G | STXBP2       |
| TMEM165.5  | 4.38E-66 | 0.108205 | 0.842 | 0.393 | 6.55E-62 Class-G | TMEM165      |
| STX8.2     | 4.90E-66 | -0.1291  | 0.688 | 0.307 | 7.32E-62 Class-G | STX8         |
| SNCA.11    | 5.74E-66 | -0.71808 | 0.007 | 0.166 | 8.58E-62 Class-G | SNCA         |
| DTX3.7     | 8.76E-66 | -0.10711 | 0.499 | 0.215 | 1.31E-61 Class-G | DTX3         |
| HCK.11     | 8.81E-66 | -0.71588 | 0.024 | 0.191 | 1.32E-61 Class-G | HCK          |
| STAB1.10   | 1.39E-65 | -0.7617  | 0.02  | 0.185 | 2.08E-61 Class-G | STAB1        |
| LSM4.6     | 1.78E-65 | 0.181693 | 0.94  | 0.498 | 2.66E-61 Class-G | LSM4         |
| ENTPD1.11  | 2.29E-65 | -0.71571 | 0.021 | 0.185 | 3.42E-61 Class-G | ENTPD1       |
| BET1.7     | 2.54E-65 | -0.11183 | 0.438 | 0.186 | 3.80E-61 Class-G | BET1         |
| DERA.5     | 3.34E-65 | -0.11659 | 0.492 | 0.212 | 4.99E-61 Class-G | DERA         |
| TCEAL1.8   | 4.35E-65 | -0.10643 | 0.497 | 0.215 | 6.49E-61 Class-G | TCEAL1       |
| ALOX5.11   | 5.43E-65 | -0.63461 | 0.004 | 0.16  | 8.12E-61 Class-G | ALOX5        |
| LAMP1.9    | 7.90E-65 | 0.168177 | 0.923 | 0.455 | 1.18E-60 Class-G | LAMP1        |
| CD69.8     | 1.33E-64 | -0.828   | 0.015 | 0.176 | 1.99E-60 Class-G | CD69         |
| MTCH1.3    | 1.40E-64 | 0.183124 | 0.928 | 0.47  | 2.09E-60 Class-G | MTCH1        |
| TMEM161B-  | 1.40E-64 | -0.11175 | 0.558 | 0.245 | 2.10E-60 Class-G | TMEM161B-AS1 |

|              |          |          |       |       |          |         |           |
|--------------|----------|----------|-------|-------|----------|---------|-----------|
| POLR3GL. 4   | 1.49E-64 | -0.12619 | 0.672 | 0.298 | 2.23E-60 | Class-G | POLR3GL   |
| LAPTM4A. 7   | 1.85E-64 | -0.3994  | 0.963 | 0.741 | 2.77E-60 | Class-G | LAPTM4A   |
| OSM. 10      | 2.17E-64 | -0.78208 | 0.01  | 0.167 | 3.25E-60 | Class-G | OSM       |
| RAB10. 4     | 2.60E-64 | 0.125336 | 0.897 | 0.43  | 3.89E-60 | Class-G | RAB10     |
| XAF1. 6      | 3.69E-64 | 0.110751 | 0.238 | 0.087 | 5.52E-60 | Class-G | XAF1      |
| LANCL2. 1C   | 4.09E-64 | 0.149745 | 0.305 | 0.127 | 6.11E-60 | Class-G | LANCL2    |
| NCOA4. 11    | 4.82E-64 | -0.10767 | 0.515 | 0.221 | 7.20E-60 | Class-G | NCOA4     |
| TMEM261. 4   | 5.13E-64 | -0.10563 | 0.684 | 0.307 | 7.66E-60 | Class-G | TMEM261   |
| CFD. 10      | 5.67E-64 | -0.72455 | 0.018 | 0.179 | 8.47E-60 | Class-G | CFD       |
| LCP1. 10     | 5.93E-64 | -0.64697 | 0.008 | 0.164 | 8.86E-60 | Class-G | LCP1      |
| TRMT1. 8     | 6.47E-64 | -0.13969 | 0.501 | 0.217 | 9.67E-60 | Class-G | TRMT1     |
| ZNF302. 1C   | 6.83E-64 | -0.11822 | 0.599 | 0.268 | 1.02E-59 | Class-G | ZNF302    |
| ZNF90. 7     | 1.39E-63 | -1.07826 | 0.265 | 0.398 | 2.08E-59 | Class-G | ZNF90     |
| ARHGAP24. 2  | 0.7E-63  | -0.69801 | 0.013 | 0.171 | 3.09E-59 | Class-G | ARHGAP24  |
| TMED5. 9     | 2.85E-63 | -0.10197 | 0.587 | 0.26  | 4.26E-59 | Class-G | TMED5     |
| C8orf4. 9    | 5.49E-63 | -0.45478 | 0.451 | 0.191 | 8.20E-59 | Class-G | C8orf4    |
| IL10RA. 11   | 5.52E-63 | -0.63031 | 0.007 | 0.16  | 8.25E-59 | Class-G | IL10RA    |
| DLX5. 11     | 1.32E-62 | -0.76784 | 0.01  | 0.166 | 1.97E-58 | Class-G | DLX5      |
| MLF2. 10     | 1.62E-62 | 0.140787 | 0.977 | 0.549 | 2.42E-58 | Class-G | MLF2      |
| GNAI2. 10    | 2.16E-62 | 0.104559 | 0.878 | 0.418 | 3.23E-58 | Class-G | GNAI2     |
| DECR1. 6     | 9.50E-62 | -0.1043  | 0.77  | 0.353 | 1.42E-57 | Class-G | DECR1     |
| CLDND1. 7    | 2.86E-61 | -0.22496 | 0.744 | 0.336 | 4.27E-57 | Class-G | CLDND1    |
| MTRNR2L1. 3  | 1.8E-61  | -0.93723 | 0.049 | 0.216 | 4.75E-57 | Class-G | MTRNR2L1  |
| NCF4. 11     | 6.29E-61 | -0.71093 | 0.015 | 0.167 | 9.40E-57 | Class-G | NCF4      |
| IL1B. 10     | 8.23E-61 | -0.89643 | 0.079 | 0.245 | 1.23E-56 | Class-G | IL1B      |
| TOMM7. 4     | 8.38E-61 | -0.35635 | 0.993 | 0.829 | 1.25E-56 | Class-G | TOMM7     |
| ETS2. 11     | 2.04E-60 | -0.72325 | 0.066 | 0.23  | 3.06E-56 | Class-G | ETS2      |
| PQBP1. 4     | 3.82E-60 | -0.11183 | 0.647 | 0.295 | 5.70E-56 | Class-G | PQBP1     |
| IFI35. 9     | 4.80E-60 | -0.17844 | 0.451 | 0.195 | 7.18E-56 | Class-G | IFI35     |
| CH25H. 7     | 6.31E-60 | -0.85957 | 0.016 | 0.168 | 9.43E-56 | Class-G | CH25H     |
| TWISTNB. 5   | 1.06E-59 | -0.10864 | 0.514 | 0.229 | 1.59E-55 | Class-G | TWISTNB   |
| DEK. 7       | 1.14E-59 | 0.110053 | 0.847 | 0.401 | 1.71E-55 | Class-G | DEK       |
| SDCBP. 8     | 1.63E-59 | -0.4496  | 0.928 | 0.696 | 2.44E-55 | Class-G | SDCBP     |
| SLC25A37. 1  | 1.95E-59 | -0.16231 | 0.589 | 0.264 | 2.91E-55 | Class-G | SLC25A37  |
| HIST1H2AC. 2 | 3.2E-59  | -0.11524 | 0.338 | 0.139 | 3.46E-55 | Class-G | HIST1H2AC |
| S100A8. 11   | 3.52E-59 | -0.96675 | 0.049 | 0.207 | 5.26E-55 | Class-G | S100A8    |
| HNRNPA2B1. 6 | 8.2E-59  | -0.24153 | 0.998 | 0.82  | 1.02E-54 | Class-G | HNRNPA2B1 |
| GPR65. 11    | 1.10E-58 | -0.61882 | 0.008 | 0.154 | 1.64E-54 | Class-G | GPR65     |
| RNASE1. 8    | 1.20E-58 | -1.00085 | 0.035 | 0.191 | 1.79E-54 | Class-G | RNASE1    |
| PBDC1. 4     | 1.46E-58 | -0.11022 | 0.495 | 0.222 | 2.18E-54 | Class-G | PBDC1     |
| MARCKS. 8    | 1.51E-58 | 0.242133 | 0.964 | 0.538 | 2.26E-54 | Class-G | MARCKS    |
| CST3. 7      | 1.81E-58 | 0.165406 | 0.995 | 0.753 | 2.70E-54 | Class-G | CST3      |
| PSMB9. 9     | 2.86E-58 | -0.16644 | 0.76  | 0.347 | 4.27E-54 | Class-G | PSMB9     |
| SREK1IP1. 3  | 5.6E-58  | -0.13506 | 0.634 | 0.29  | 5.33E-54 | Class-G | SREK1IP1  |
| RANBP1. 1C   | 4.22E-58 | 0.173094 | 0.958 | 0.516 | 6.30E-54 | Class-G | RANBP1    |
| CD84. 11     | 5.74E-58 | -0.60111 | 0.007 | 0.149 | 8.58E-54 | Class-G | CD84      |
| MYO1F. 11    | 7.77E-58 | -0.73053 | 0.049 | 0.206 | 1.16E-53 | Class-G | MYO1F     |
| SNAPC1. 6    | 1.32E-57 | -0.11242 | 0.372 | 0.158 | 1.98E-53 | Class-G | SNAPC1    |
| TSC22D3. 9   | 1.54E-57 | -0.87372 | 0.403 | 0.465 | 2.30E-53 | Class-G | TSC22D3   |
| PTGER4. 1C   | 1.73E-57 | -0.57955 | 0.004 | 0.143 | 2.59E-53 | Class-G | PTGER4    |
| MAP3K8. 11   | 1.77E-57 | -0.75793 | 0.05  | 0.205 | 2.65E-53 | Class-G | MAP3K8    |

|             |           |           |        |        |                   |               |
|-------------|-----------|-----------|--------|--------|-------------------|---------------|
| MYL6. 7     | 4. 95E-57 | -0. 33012 | 0. 998 | 0. 932 | 7. 40E-53 Class-G | MYL6          |
| TSNAX. 2    | 5. 63E-57 | -0. 11776 | 0. 596 | 0. 273 | 8. 42E-53 Class-G | TSNAX         |
| TMEM107. 5  | 6. 51E-57 | -0. 12631 | 0. 421 | 0. 184 | 9. 73E-53 Class-G | TMEM107       |
| UROD. 6     | 7. 53E-57 | -0. 1363  | 0. 665 | 0. 309 | 1. 12E-52 Class-G | UROD          |
| DLX6-AS1. 9 | 6. 3E-57  | -0. 79662 | 0. 008 | 0. 15  | 1. 44E-52 Class-G | DLX6-AS1      |
| TUBA1B. 6   | 1. 72E-56 | -0. 3009  | 0. 995 | 0. 879 | 2. 57E-52 Class-G | TUBA1B        |
| ARID5A. 7   | 2. 14E-56 | -0. 10365 | 0. 543 | 0. 248 | 3. 20E-52 Class-G | ARID5A        |
| MFNG. 10    | 8. 74E-56 | -0. 54888 | 0. 007 | 0. 146 | 1. 31E-51 Class-G | MFNG          |
| UBAC2. 10   | 1. 50E-55 | -0. 12432 | 0. 511 | 0. 232 | 2. 24E-51 Class-G | UBAC2         |
| CD33. 11    | 1. 89E-55 | -0. 60664 | 0. 004 | 0. 139 | 2. 83E-51 Class-G | CD33          |
| CMC2. 6     | 3. 64E-55 | -0. 10914 | 0. 572 | 0. 261 | 5. 45E-51 Class-G | CMC2          |
| AOAH. 10    | 3. 77E-55 | -0. 61193 | 0. 006 | 0. 142 | 5. 63E-51 Class-G | AOAH          |
| NCKAP1L. 1  | 4. 70E-55 | -0. 58038 | 0. 005 | 0. 141 | 7. 02E-51 Class-G | NCKAP1L       |
| TMEM173. 1  | 6. 22E-55 | -0. 59869 | 0. 008 | 0. 146 | 9. 29E-51 Class-G | TMEM173       |
| RP11-552D   | 7. 26E-55 | -0. 69911 | 0. 004 | 0. 139 | 1. 08E-50 Class-G | RP11-552D4. 1 |
| SLPI. 8     | 1. 18E-54 | -1. 33327 | 0. 025 | 0. 17  | 1. 76E-50 Class-G | SLPI          |
| RCS1. 10    | 2. 05E-54 | -0. 58292 | 0. 005 | 0. 139 | 3. 06E-50 Class-G | RCS1          |
| PTAFR. 11   | 2. 27E-54 | -0. 58616 | 0. 008 | 0. 144 | 3. 39E-50 Class-G | PTAFR         |
| RASGEF1B. 2 | 3. 2E-54  | -0. 56708 | 0. 005 | 0. 139 | 3. 46E-50 Class-G | RASGEF1B      |
| SERPINB9. 4 | 1. 5E-54  | -0. 64457 | 0. 024 | 0. 166 | 6. 21E-50 Class-G | SERPINB9      |
| DOCK8. 11   | 4. 90E-54 | -0. 55675 | 0. 006 | 0. 14  | 7. 32E-50 Class-G | DOCK8         |
| ATP6VOA1. 7 | 4. 5E-54  | -0. 12239 | 0. 535 | 0. 244 | 1. 11E-49 Class-G | ATP6VOA1      |
| CD55. 10    | 9. 42E-54 | -0. 56008 | 0. 004 | 0. 136 | 1. 41E-49 Class-G | CD55          |
| SNAP23. 1C  | 1. 01E-53 | -0. 16884 | 0. 465 | 0. 208 | 1. 50E-49 Class-G | SNAP23        |
| AIP. 3      | 1. 23E-53 | -0. 13189 | 0. 565 | 0. 261 | 1. 83E-49 Class-G | AIP           |
| C14orf2. 5  | 2. 00E-53 | 0. 106362 | 0. 981 | 0. 601 | 2. 99E-49 Class-G | C14orf2       |
| PADI2. 9    | 2. 05E-53 | -0. 59412 | 0. 016 | 0. 154 | 3. 06E-49 Class-G | PADI2         |
| HES6. 9     | 2. 12E-53 | -0. 14542 | 0. 532 | 0. 246 | 3. 17E-49 Class-G | HES6          |
| QARS. 8     | 2. 62E-53 | -0. 11733 | 0. 527 | 0. 242 | 3. 92E-49 Class-G | QARS          |
| TCEAL2. 9   | 6. 10E-53 | -0. 58533 | 0. 048 | 0. 201 | 9. 12E-49 Class-G | TCEAL2        |
| CLDN5       | 6. 47E-53 | 0. 126233 | 0. 066 | 0. 011 | 9. 67E-49 Class-G | CLDN5         |
| PYCARD. 11  | 9. 20E-53 | -0. 90114 | 0. 166 | 0. 304 | 1. 37E-48 Class-G | PYCARD        |
| UQCR11. 6   | 1. 54E-52 | -1. 23769 | 0. 004 | 0. 133 | 2. 30E-48 Class-G | UQCR11        |
| NUP107. 1C  | 3. 54E-52 | -0. 13854 | 0. 423 | 0. 191 | 5. 30E-48 Class-G | NUP107        |
| ATP6VOE1. 3 | 8. 5E-52  | -0. 40555 | 0. 962 | 0. 727 | 5. 76E-48 Class-G | ATP6VOE1      |
| LINC01094   | 4. 59E-52 | -0. 69386 | 0. 033 | 0. 174 | 6. 85E-48 Class-G | LINC01094     |
| ZNF331. 1C  | 5. 18E-52 | -0. 91715 | 0. 204 | 0. 334 | 7. 74E-48 Class-G | ZNF331        |
| BIN2. 10    | 5. 73E-52 | -0. 5334  | 0. 003 | 0. 13  | 8. 57E-48 Class-G | BIN2          |
| MGST3. 5    | 8. 62E-52 | -0. 50901 | 0. 901 | 0. 659 | 1. 29E-47 Class-G | MGST3         |
| FAM162A. 9  | 1. 01E-51 | -0. 1746  | 0. 736 | 0. 346 | 1. 51E-47 Class-G | FAM162A       |
| ATP5J2. 7   | 1. 08E-51 | -0. 28239 | 0. 989 | 0. 778 | 1. 61E-47 Class-G | ATP5J2        |
| GADD45G. 1  | 1. 13E-51 | -0. 68476 | 0. 123 | 0. 277 | 1. 69E-47 Class-G | GADD45G       |
| KRCC1. 2    | 1. 20E-51 | -0. 10716 | 0. 432 | 0. 197 | 1. 80E-47 Class-G | KRCC1         |
| IGBP1. 3    | 1. 38E-51 | -0. 12216 | 0. 634 | 0. 298 | 2. 06E-47 Class-G | IGBP1         |
| JUNB. 6     | 1. 47E-51 | -0. 37971 | 0. 889 | 0. 697 | 2. 19E-47 Class-G | JUNB          |
| TAX1BP3. 7  | 1. 72E-51 | -0. 11232 | 0. 696 | 0. 33  | 2. 56E-47 Class-G | TAX1BP3       |
| ARMC8. 4    | 1. 99E-51 | -0. 10123 | 0. 383 | 0. 17  | 2. 98E-47 Class-G | ARMC8         |
| CSTA. 11    | 2. 02E-51 | -0. 5681  | 0. 015 | 0. 147 | 3. 02E-47 Class-G | CSTA          |
| BEX4. 9     | 2. 21E-51 | -0. 7209  | 0. 441 | 0. 482 | 3. 30E-47 Class-G | BEX4          |
| GNA15. 11   | 3. 08E-51 | -0. 49687 | 0. 002 | 0. 127 | 4. 60E-47 Class-G | GNA15         |
| CYB5R4. 1C  | 3. 69E-51 | -0. 11528 | 0. 344 | 0. 149 | 5. 52E-47 Class-G | CYB5R4        |

|             |           |           |        |        |                   |               |
|-------------|-----------|-----------|--------|--------|-------------------|---------------|
| FBP1. 11    | 6. 60E-51 | -0. 52468 | 0. 007 | 0. 135 | 9. 86E-47 Class-G | FBP1          |
| NUPL2. 7    | 6. 64E-51 | -0. 12892 | 0. 497 | 0. 231 | 9. 92E-47 Class-G | NUPL2         |
| CYTH4. 11   | 8. 23E-51 | -0. 53295 | 0. 004 | 0. 13  | 1. 23E-46 Class-G | CYTH4         |
| DNAJC15. 8  | 9. 13E-51 | -0. 1457  | 0. 714 | 0. 337 | 1. 36E-46 Class-G | DNAJC15       |
| RNASSET2. 1 | 1. 10E-50 | -0. 96319 | 0. 483 | 0. 483 | 1. 64E-46 Class-G | RNASSET2      |
| LPCAT2. 11  | 1. 22E-50 | -0. 59134 | 0. 03  | 0. 167 | 1. 83E-46 Class-G | LPCAT2        |
| NHLRC3. 4   | 2. 02E-50 | -0. 14688 | 0. 5   | 0. 232 | 3. 02E-46 Class-G | NHLRC3        |
| HNRNPK. 7   | 2. 25E-50 | -0. 23505 | 0. 994 | 0. 755 | 3. 36E-46 Class-G | HNRNPK        |
| KLF6. 9     | 3. 56E-50 | -0. 77122 | 0. 546 | 0. 529 | 5. 33E-46 Class-G | KLF6          |
| RAC2. 11    | 4. 07E-50 | -0. 58113 | 0. 01  | 0. 137 | 6. 09E-46 Class-G | RAC2          |
| HSP90AB1. 4 | 9. 99E-50 | -0. 19994 | 0. 993 | 0. 792 | 7. 46E-46 Class-G | HSP90AB1      |
| IGSF21. 9   | 6. 82E-50 | -0. 58091 | 0. 042 | 0. 183 | 1. 02E-45 Class-G | IGSF21        |
| NCL. 7      | 6. 91E-50 | 0. 143373 | 0. 935 | 0. 493 | 1. 03E-45 Class-G | NCL           |
| APLP2. 9    | 1. 21E-49 | 0. 158341 | 0. 968 | 0. 532 | 1. 80E-45 Class-G | APLP2         |
| ZNF655. 3   | 1. 37E-49 | -0. 1047  | 0. 446 | 0. 206 | 2. 04E-45 Class-G | ZNF655        |
| MALAT1. 1C  | 1. 57E-49 | -0. 2521  | 1      | 0. 995 | 2. 35E-45 Class-G | MALAT1        |
| PHACTR1. 1  | 2. 54E-49 | -0. 5875  | 0. 01  | 0. 135 | 3. 80E-45 Class-G | PHACTR1       |
| RP11-161M   | 3. 01E-49 | -0. 10458 | 0. 326 | 0. 141 | 4. 50E-45 Class-G | RP11-161M6. 2 |
| LSM6. 5     | 3. 14E-49 | -0. 10466 | 0. 603 | 0. 286 | 4. 69E-45 Class-G | LSM6          |
| CDC42SE2. 3 | 9. 98E-49 | -0. 11321 | 0. 412 | 0. 187 | 5. 95E-45 Class-G | CDC42SE2      |
| MED4. 3     | 6. 46E-49 | -0. 10707 | 0. 759 | 0. 36  | 9. 66E-45 Class-G | MED4          |
| NUBP1. 7    | 9. 92E-49 | -0. 14454 | 0. 409 | 0. 187 | 1. 48E-44 Class-G | NUBP1         |
| ITM2B. 6    | 1. 08E-48 | -0. 1645  | 0. 991 | 0. 768 | 1. 61E-44 Class-G | ITM2B         |
| BRE. 3      | 1. 21E-48 | -0. 14098 | 0. 423 | 0. 194 | 1. 81E-44 Class-G | BRE           |
| KLF4. 11    | 1. 31E-48 | -0. 70542 | 0. 084 | 0. 226 | 1. 96E-44 Class-G | KLF4          |
| HMHA1. 11   | 1. 89E-48 | -0. 50304 | 0. 005 | 0. 125 | 2. 82E-44 Class-G | HMHA1         |
| TMEM18. 4   | 2. 04E-48 | -0. 14537 | 0. 39  | 0. 177 | 3. 04E-44 Class-G | TMEM18        |
| TLR2. 11    | 2. 54E-48 | -0. 54495 | 0. 007 | 0. 128 | 3. 80E-44 Class-G | TLR2          |
| SERPING1. 2 | 6. 1E-48  | -1. 09021 | 0. 112 | 0. 254 | 3. 91E-44 Class-G | SERPING1      |
| IDH3G. 5    | 2. 87E-48 | -0. 10938 | 0. 729 | 0. 35  | 4. 28E-44 Class-G | IDH3G         |
| PPP1R10. 6  | 3. 08E-48 | -0. 12978 | 0. 531 | 0. 248 | 4. 61E-44 Class-G | PPP1R10       |
| GOLT1B. 7   | 3. 92E-48 | -0. 12147 | 0. 439 | 0. 205 | 5. 85E-44 Class-G | GOLT1B        |
| MGMT. 10    | 4. 74E-48 | -0. 6101  | 0. 036 | 0. 17  | 7. 09E-44 Class-G | MGMT          |
| EXOSC8. 9   | 4. 75E-48 | -0. 11393 | 0. 529 | 0. 25  | 7. 09E-44 Class-G | EXOSC8        |
| ARPC2. 9    | 5. 80E-48 | -0. 24968 | 0. 962 | 0. 743 | 8. 67E-44 Class-G | ARPC2         |
| AKAP13. 1C  | 8. 61E-48 | -0. 16555 | 0. 597 | 0. 281 | 1. 29E-43 Class-G | AKAP13        |
| OSER1. 5    | 8. 83E-48 | -0. 18082 | 0. 554 | 0. 26  | 1. 32E-43 Class-G | OSER1         |
| LTC4S. 11   | 9. 95E-48 | -0. 69749 | 0. 052 | 0. 187 | 1. 49E-43 Class-G | LTC4S         |
| GSTA4. 10   | 1. 20E-47 | -0. 14233 | 0. 534 | 0. 25  | 1. 79E-43 Class-G | GSTA4         |
| UBE2D3. 8   | 2. 11E-47 | -0. 34799 | 0. 949 | 0. 691 | 3. 15E-43 Class-G | UBE2D3        |
| COMMD3. 4   | 2. 51E-47 | -0. 15252 | 0. 646 | 0. 307 | 3. 75E-43 Class-G | COMMD3        |
| RIC3. 8     | 2. 57E-47 | -0. 1252  | 0. 426 | 0. 199 | 3. 84E-43 Class-G | RIC3          |
| EIF3K. 8    | 3. 12E-47 | -0. 40404 | 0. 96  | 0. 725 | 4. 66E-43 Class-G | EIF3K         |
| STX11. 10   | 3. 25E-47 | -0. 54147 | 0. 01  | 0. 131 | 4. 86E-43 Class-G | STX11         |
| SERTAD3. 1  | 3. 58E-47 | -0. 14604 | 0. 331 | 0. 148 | 5. 35E-43 Class-G | SERTAD3       |
| GLRX3. 6    | 3. 61E-47 | -0. 1514  | 0. 556 | 0. 263 | 5. 40E-43 Class-G | GLRX3         |
| HLA-B. 8    | 5. 08E-47 | -0. 35783 | 0. 992 | 0. 829 | 7. 59E-43 Class-G | HLA-B         |
| EMP3. 10    | 5. 20E-47 | -0. 12906 | 0. 819 | 0. 388 | 7. 77E-43 Class-G | EMP3          |
| TCEAL7. 9   | 6. 75E-47 | -0. 1802  | 0. 555 | 0. 261 | 1. 01E-42 Class-G | TCEAL7        |
| SRP19. 2    | 7. 32E-47 | -0. 11151 | 0. 731 | 0. 351 | 1. 09E-42 Class-G | SRP19         |
| GAA. 10     | 8. 10E-47 | -0. 15403 | 0. 589 | 0. 276 | 1. 21E-42 Class-G | GAA           |

|            |          |          |       |       |                  |             |
|------------|----------|----------|-------|-------|------------------|-------------|
| LINC00969  | 9.18E-47 | -0.11162 | 0.448 | 0.21  | 1.37E-42 Class-G | LINC00969   |
| NABP1.9    | 1.05E-46 | -0.53822 | 0.018 | 0.141 | 1.56E-42 Class-G | NABP1       |
| SYK.11     | 1.20E-46 | -0.47818 | 0.005 | 0.122 | 1.79E-42 Class-G | SYK         |
| TMEM119.9  | 1.21E-46 | -0.55849 | 0.005 | 0.121 | 1.80E-42 Class-G | TMEM119     |
| WRB.10     | 1.66E-46 | -0.14869 | 0.765 | 0.363 | 2.48E-42 Class-G | WRB         |
| SGK1.11    | 1.70E-46 | -0.93884 | 0.404 | 0.442 | 2.54E-42 Class-G | SGK1        |
| LCP2.11    | 1.72E-46 | -0.51784 | 0.012 | 0.132 | 2.57E-42 Class-G | LCP2        |
| FBL.7      | 1.89E-46 | -0.16247 | 0.68  | 0.328 | 2.83E-42 Class-G | FBL         |
| FAM204A.7  | 2.39E-46 | -0.14874 | 0.472 | 0.222 | 3.57E-42 Class-G | FAM204A     |
| HIST1H2BK  | 2.89E-46 | -0.13085 | 0.39  | 0.178 | 4.32E-42 Class-G | HIST1H2BK   |
| NR4A3.10   | 3.13E-46 | -0.64651 | 0.039 | 0.169 | 4.68E-42 Class-G | NR4A3       |
| SDCCAG8.6  | 3.32E-46 | -0.15707 | 0.596 | 0.286 | 4.96E-42 Class-G | SDCCAG8     |
| TNFRSF1B.3 | 3.78E-46 | -0.66376 | 0.072 | 0.207 | 5.65E-42 Class-G | TNFRSF1B    |
| ABCG1.8    | 4.06E-46 | -0.48572 | 0.024 | 0.149 | 6.07E-42 Class-G | ABCG1       |
| SAA1.8     | 4.30E-46 | -1.29807 | 0.015 | 0.136 | 6.42E-42 Class-G | SAA1        |
| ACSL1.10   | 4.84E-46 | -0.72864 | 0.112 | 0.246 | 7.24E-42 Class-G | ACSL1       |
| TMEM176A.4 | 4.85E-46 | -0.80889 | 0.11  | 0.246 | 7.25E-42 Class-G | TMEM176A    |
| TAGAP.11   | 7.18E-46 | -0.54588 | 0.003 | 0.117 | 1.07E-41 Class-G | TAGAP       |
| IL10.11    | 8.89E-46 | -0.59374 | 0.007 | 0.122 | 1.33E-41 Class-G | IL10        |
| EPB41L3.1  | 1.10E-45 | -0.47709 | 0.006 | 0.121 | 1.65E-41 Class-G | EPB41L3     |
| HLA-DQB2.1 | 1.16E-45 | -0.69844 | 0.001 | 0.113 | 1.73E-41 Class-G | HLA-DQB2    |
| SDHB.4     | 1.51E-45 | -0.10851 | 0.765 | 0.368 | 2.26E-41 Class-G | SDHB        |
| TRABD.11   | 1.72E-45 | -0.13423 | 0.478 | 0.223 | 2.56E-41 Class-G | TRABD       |
| GSTP1.6    | 2.07E-45 | -0.30816 | 0.992 | 0.794 | 3.09E-41 Class-G | GSTP1       |
| PPP1R7.5   | 2.10E-45 | -0.14947 | 0.641 | 0.307 | 3.14E-41 Class-G | PPP1R7      |
| NUMB.10    | 2.20E-45 | -0.11521 | 0.324 | 0.145 | 3.28E-41 Class-G | NUMB        |
| CTA-29F11  | 2.50E-45 | -0.19615 | 0.377 | 0.172 | 3.74E-41 Class-G | CTA-29F11.1 |
| SNX6.6     | 2.71E-45 | -0.11003 | 0.777 | 0.373 | 4.05E-41 Class-G | SNX6        |
| GNL2.4     | 3.15E-45 | -0.11284 | 0.384 | 0.178 | 4.71E-41 Class-G | GNL2        |
| LACTB2.4   | 4.04E-45 | -0.12587 | 0.29  | 0.128 | 6.03E-41 Class-G | LACTB2      |
| COX5A.7    | 5.89E-45 | 0.143195 | 0.964 | 0.538 | 8.80E-41 Class-G | COX5A       |
| H2AFJ.11   | 8.90E-45 | -0.22302 | 0.48  | 0.223 | 1.33E-40 Class-G | H2AFJ       |
| CWC25.3    | 8.96E-45 | -0.12316 | 0.374 | 0.173 | 1.34E-40 Class-G | CWC25       |
| UPF2.5     | 1.26E-44 | -0.16952 | 0.401 | 0.187 | 1.89E-40 Class-G | UPF2        |
| TPRKB.7    | 1.45E-44 | -0.1007  | 0.658 | 0.315 | 2.17E-40 Class-G | TPRKB       |
| CAPZB.10   | 1.61E-44 | -0.43161 | 0.919 | 0.666 | 2.40E-40 Class-G | CAPZB       |
| ST6GAL1.8  | 2.03E-44 | -0.46936 | 0.011 | 0.126 | 3.04E-40 Class-G | ST6GAL1     |
| MPZL1.5    | 2.10E-44 | -0.10223 | 0.454 | 0.215 | 3.14E-40 Class-G | MPZL1       |
| CNIH1.5    | 3.18E-44 | -0.16027 | 0.664 | 0.325 | 4.76E-40 Class-G | CNIH1       |
| TRIM13.7   | 3.45E-44 | -0.10264 | 0.454 | 0.216 | 5.16E-40 Class-G | TRIM13      |
| IER2.10    | 4.34E-44 | -0.54666 | 0.742 | 0.594 | 6.49E-40 Class-G | IER2        |
| CYTIP.10   | 4.55E-44 | -0.55388 | 0.007 | 0.12  | 6.80E-40 Class-G | CYTIP       |
| DYNC1I1.1  | 4.62E-44 | -0.423   | 0.007 | 0.12  | 6.90E-40 Class-G | DYNC1I1     |
| CHORDC1.3  | 5.50E-44 | -0.13505 | 0.392 | 0.183 | 8.22E-40 Class-G | CHORDC1     |
| CLEC5A.1C  | 7.64E-44 | -0.53461 | 0.005 | 0.115 | 1.14E-39 Class-G | CLEC5A      |
| VASP.11    | 9.22E-44 | -0.13843 | 0.442 | 0.207 | 1.38E-39 Class-G | VASP        |
| GPNMB.10   | 1.00E-43 | -0.81433 | 0.088 | 0.219 | 1.50E-39 Class-G | GPNMB       |
| NFKBIA.1C  | 1.44E-43 | -0.72552 | 0.51  | 0.498 | 2.15E-39 Class-G | NFKBIA      |
| GLB1.8     | 1.49E-43 | -0.12937 | 0.445 | 0.212 | 2.23E-39 Class-G | GLB1        |
| RCHY1.6    | 1.79E-43 | -0.13267 | 0.37  | 0.172 | 2.67E-39 Class-G | RCHY1       |
| NFU1.4     | 1.92E-43 | -0.12866 | 0.544 | 0.261 | 2.87E-39 Class-G | NFU1        |



|            |          |          |       |       |          |         |               |
|------------|----------|----------|-------|-------|----------|---------|---------------|
| PSMD9.4    | 2.04E-43 | -0.19355 | 0.509 | 0.243 | 3.05E-39 | Class-G | PSMD9         |
| LAMTOR4.3  | 2.05E-43 | -0.32255 | 0.976 | 0.729 | 3.06E-39 | Class-G | LAMTOR4       |
| NCF1.11    | 2.24E-43 | -0.52066 | 0.022 | 0.14  | 3.35E-39 | Class-G | NCF1          |
| GNB2L1.7   | 2.34E-43 | -0.29388 | 1     | 0.933 | 3.49E-39 | Class-G | GNB2L1        |
| RHOA.9     | 2.54E-43 | -0.32155 | 0.971 | 0.719 | 3.79E-39 | Class-G | RHOA          |
| HNRNPU.6   | 2.84E-43 | 0.107542 | 0.916 | 0.467 | 4.24E-39 | Class-G | HNRNPU        |
| TAF1D.3    | 3.66E-43 | -0.14408 | 0.617 | 0.298 | 5.47E-39 | Class-G | TAF1D         |
| CYFIP1.1C  | 3.86E-43 | -0.21453 | 0.52  | 0.244 | 5.76E-39 | Class-G | CYFIP1        |
| CHI3L2.7   | 5.18E-43 | -1.29006 | 0.07  | 0.199 | 7.73E-39 | Class-G | CHI3L2        |
| STK17B.9   | 5.26E-43 | -0.56721 | 0.029 | 0.15  | 7.86E-39 | Class-G | STK17B        |
| SIGLEC9.1  | 7.23E-43 | -0.45114 | 0.002 | 0.108 | 1.08E-38 | Class-G | SIGLEC9       |
| TNFAIP8L2  | 7.27E-43 | -0.45482 | 0.003 | 0.11  | 1.09E-38 | Class-G | TNFAIP8L2     |
| RP11-620J  | 8.22E-43 | -0.21334 | 0.49  | 0.234 | 1.23E-38 | Class-G | RP11-620J15.3 |
| EBI3.10    | 1.14E-42 | -0.48927 | 0.004 | 0.111 | 1.70E-38 | Class-G | EBI3          |
| LRRC25.11  | 1.15E-42 | -0.44901 | 0.002 | 0.107 | 1.72E-38 | Class-G | LRRC25        |
| EFEMP1.9   | 1.75E-42 | -0.32961 | 0.395 | 0.192 | 2.61E-38 | Class-G | EFEMP1        |
| TSM.8      | 1.84E-42 | -0.17882 | 0.498 | 0.24  | 2.74E-38 | Class-G | TSM           |
| ARHGAP4.1  | 2.19E-42 | -0.49293 | 0.018 | 0.132 | 3.27E-38 | Class-G | ARHGAP4       |
| NSMCE2.3   | 2.44E-42 | -0.13539 | 0.298 | 0.134 | 3.65E-38 | Class-G | NSMCE2        |
| GSDMD.10   | 2.79E-42 | -0.17131 | 0.345 | 0.159 | 4.17E-38 | Class-G | GSDMD         |
| MAX.4      | 2.93E-42 | -0.19113 | 0.532 | 0.255 | 4.38E-38 | Class-G | MAX           |
| PARL.4     | 3.24E-42 | -0.1169  | 0.607 | 0.294 | 4.84E-38 | Class-G | PARL          |
| APH1B.7    | 3.74E-42 | -0.12234 | 0.25  | 0.107 | 5.59E-38 | Class-G | APH1B         |
| TP53TG1.4  | 3.84E-42 | -0.21024 | 0.365 | 0.17  | 5.74E-38 | Class-G | TP53TG1       |
| LPAR5.9    | 4.03E-42 | -0.48011 | 0.01  | 0.119 | 6.03E-38 | Class-G | LPAR5         |
| S100A11.1  | 4.49E-42 | -0.60792 | 0.822 | 0.63  | 6.70E-38 | Class-G | S100A11       |
| ATF1.4     | 4.83E-42 | -0.10105 | 0.276 | 0.122 | 7.22E-38 | Class-G | ATF1          |
| NDUFA3.4   | 5.17E-42 | 0.104454 | 0.981 | 0.594 | 7.72E-38 | Class-G | NDUFA3        |
| NCF2.11    | 5.33E-42 | -0.46547 | 0.008 | 0.117 | 7.97E-38 | Class-G | NCF2          |
| LINCO0936  | 6.33E-42 | -0.1581  | 0.272 | 0.119 | 9.45E-38 | Class-G | LINCO0936     |
| MGST1.8    | 6.34E-42 | -1.0124  | 0.04  | 0.162 | 9.47E-38 | Class-G | MGST1         |
| ZNF430.7   | 6.75E-42 | -0.11894 | 0.349 | 0.163 | 1.01E-37 | Class-G | ZNF430        |
| TOX4.2     | 7.21E-42 | -0.13564 | 0.469 | 0.228 | 1.08E-37 | Class-G | TOX4          |
| CISD2.5    | 8.58E-42 | -0.11132 | 0.723 | 0.352 | 1.28E-37 | Class-G | CISD2         |
| SUSD3.10   | 1.04E-41 | -0.48523 | 0.005 | 0.11  | 1.55E-37 | Class-G | SUSD3         |
| ARHGAP30.1 | 1.21E-41 | -0.43158 | 0.004 | 0.109 | 1.81E-37 | Class-G | ARHGAP30      |
| FAM213A.9  | 1.55E-41 | -0.13477 | 0.68  | 0.334 | 2.31E-37 | Class-G | FAM213A       |
| ARHGAP15.1 | 1.61E-41 | -0.47485 | 0.006 | 0.112 | 2.41E-37 | Class-G | ARHGAP15      |
| POU2F2.9   | 1.63E-41 | -0.50792 | 0.033 | 0.152 | 2.43E-37 | Class-G | POU2F2        |
| SYT1.11    | 1.74E-41 | -0.43652 | 0.008 | 0.115 | 2.60E-37 | Class-G | SYT1          |
| BCAP29.5   | 2.08E-41 | -0.11843 | 0.559 | 0.277 | 3.11E-37 | Class-G | BCAP29        |
| SOX11.10   | 2.11E-41 | -0.17656 | 0.492 | 0.236 | 3.15E-37 | Class-G | SOX11         |
| HIST1H1C.3 | 3.84E-41 | -0.25356 | 0.348 | 0.162 | 5.74E-37 | Class-G | HIST1H1C      |
| PPIH.4     | 3.87E-41 | -0.16144 | 0.412 | 0.197 | 5.78E-37 | Class-G | PPIH          |
| LITAF.11   | 4.64E-41 | -0.81416 | 0.451 | 0.46  | 6.93E-37 | Class-G | LITAF         |
| CX3CR1.1C  | 7.11E-41 | -0.52893 | 0.01  | 0.116 | 1.06E-36 | Class-G | CX3CR1        |
| PPP1R2.5   | 8.41E-41 | -0.11845 | 0.657 | 0.321 | 1.26E-36 | Class-G | PPP1R2        |
| ACTG1.8    | 1.17E-40 | -0.26631 | 1     | 0.94  | 1.75E-36 | Class-G | ACTG1         |
| SELPLG.9   | 1.24E-40 | -0.60145 | 0.024 | 0.137 | 1.85E-36 | Class-G | SELPLG        |
| ASAH1.9    | 1.36E-40 | -0.56224 | 0.843 | 0.62  | 2.04E-36 | Class-G | ASAH1         |
| TMC6.11    | 1.44E-40 | -0.47414 | 0.017 | 0.127 | 2.15E-36 | Class-G | TMC6          |

|            |           |           |        |        |                   |           |
|------------|-----------|-----------|--------|--------|-------------------|-----------|
| EMC3. 1    | 2. 22E-40 | -0. 1178  | 0. 794 | 0. 393 | 3. 31E-36 Class-G | EMC3      |
| FGFR10P2.  | 2. 51E-40 | -0. 18445 | 0. 568 | 0. 277 | 3. 75E-36 Class-G | FGFR10P2  |
| NISCH. 5   | 2. 96E-40 | -0. 11086 | 0. 326 | 0. 152 | 4. 42E-36 Class-G | NISCH     |
| TNFAIP3. 1 | 3. 77E-40 | -0. 66722 | 0. 059 | 0. 18  | 5. 64E-36 Class-G | TNFAIP3   |
| GLRX. 10   | 3. 90E-40 | -0. 90705 | 0. 338 | 0. 396 | 5. 83E-36 Class-G | GLRX      |
| DOK1. 11   | 3. 92E-40 | -0. 12295 | 0. 292 | 0. 132 | 5. 86E-36 Class-G | DOK1      |
| GBE1. 8    | 8. 56E-40 | -0. 16202 | 0. 34  | 0. 16  | 1. 28E-35 Class-G | GBE1      |
| VMO1. 10   | 1. 04E-39 | -0. 72337 | 0. 057 | 0. 176 | 1. 56E-35 Class-G | VMO1      |
| SGCE. 8    | 1. 05E-39 | -0. 53754 | 0. 041 | 0. 163 | 1. 57E-35 Class-G | SGCE      |
| CYR61. 8   | 1. 43E-39 | -0. 13686 | 0. 308 | 0. 145 | 2. 14E-35 Class-G | CYR61     |
| HOTAIRM1.  | 1. 80E-39 | -0. 53527 | 0. 073 | 0. 2   | 2. 70E-35 Class-G | HOTAIRM1  |
| MYLIP. 9   | 2. 64E-39 | -0. 50535 | 0. 032 | 0. 145 | 3. 95E-35 Class-G | MYLIP     |
| ARID4A. 6  | 3. 16E-39 | -0. 11447 | 0. 488 | 0. 24  | 4. 72E-35 Class-G | ARID4A    |
| NUCB2. 6   | 3. 37E-39 | -0. 16212 | 0. 618 | 0. 302 | 5. 04E-35 Class-G | NUCB2     |
| CCL4L2. 9  | 3. 52E-39 | -0. 70361 | 0. 002 | 0. 1   | 5. 27E-35 Class-G | CCL4L2    |
| RBM39. 6   | 3. 90E-39 | 0. 103573 | 0. 973 | 0. 602 | 5. 83E-35 Class-G | RBM39     |
| RHOT2. 3   | 4. 12E-39 | -0. 10292 | 0. 446 | 0. 219 | 6. 16E-35 Class-G | RHOT2     |
| GLDN. 10   | 4. 40E-39 | -0. 44915 | 0. 009 | 0. 111 | 6. 58E-35 Class-G | GLDN      |
| KLHL35. 1C | 4. 46E-39 | -0. 43707 | 0. 007 | 0. 108 | 6. 67E-35 Class-G | KLHL35    |
| NIPSNAP3A  | 5. 33E-39 | -0. 15986 | 0. 364 | 0. 173 | 7. 96E-35 Class-G | NIPSNAP3A |
| GOS2. 8    | 6. 05E-39 | -0. 74158 | 0. 078 | 0. 201 | 9. 04E-35 Class-G | GOS2      |
| POLE3. 3   | 6. 08E-39 | -0. 13807 | 0. 439 | 0. 215 | 9. 08E-35 Class-G | POLE3     |
| UPP1. 10   | 6. 37E-39 | -0. 21435 | 0. 455 | 0. 222 | 9. 51E-35 Class-G | UPP1      |
| CD01. 11   | 6. 63E-39 | -0. 17268 | 0. 419 | 0. 205 | 9. 91E-35 Class-G | CD01      |
| THBD. 10   | 8. 23E-39 | -0. 46847 | 0. 008 | 0. 108 | 1. 23E-34 Class-G | THBD      |
| CHMP4A. 7  | 8. 78E-39 | -0. 10077 | 0. 825 | 0. 41  | 1. 31E-34 Class-G | CHMP4A    |
| DEF6. 11   | 1. 20E-38 | -0. 39862 | 0. 006 | 0. 105 | 1. 79E-34 Class-G | DEF6      |
| IMMP2L. 9  | 1. 31E-38 | -0. 11941 | 0. 273 | 0. 123 | 1. 96E-34 Class-G | IMMP2L    |
| FGR. 11    | 1. 32E-38 | -0. 39342 | 0. 001 | 0. 097 | 1. 98E-34 Class-G | FGR       |
| TMEM60. 5  | 1. 43E-38 | -0. 1643  | 0. 44  | 0. 216 | 2. 13E-34 Class-G | TMEM60    |
| LILRA2. 11 | 1. 73E-38 | -0. 45166 | 0. 002 | 0. 097 | 2. 58E-34 Class-G | LILRA2    |
| YEATS4. 9  | 2. 07E-38 | -0. 18546 | 0. 447 | 0. 219 | 3. 10E-34 Class-G | YEATS4    |
| DLD. 8     | 2. 37E-38 | -0. 13586 | 0. 607 | 0. 301 | 3. 55E-34 Class-G | DLD       |
| CCRL2. 10  | 2. 50E-38 | -0. 44294 | 0. 005 | 0. 102 | 3. 73E-34 Class-G | CCRL2     |
| PSMD6. 6   | 2. 77E-38 | -0. 14243 | 0. 613 | 0. 307 | 4. 14E-34 Class-G | PSMD6     |
| NDUFB2. 5  | 2. 91E-38 | -0. 28642 | 0. 987 | 0. 779 | 4. 35E-34 Class-G | NDUFB2    |
| NLRP3. 10  | 3. 00E-38 | -0. 43402 | 0. 004 | 0. 101 | 4. 48E-34 Class-G | NLRP3     |
| RCC2. 8    | 3. 14E-38 | -0. 11434 | 0. 321 | 0. 151 | 4. 69E-34 Class-G | RCC2      |
| CDKN2A. 5  | 3. 34E-38 | -0. 42992 | 0. 013 | 0. 117 | 5. 00E-34 Class-G | CDKN2A    |
| RALB. 8    | 3. 38E-38 | -0. 10032 | 0. 292 | 0. 135 | 5. 05E-34 Class-G | RALB      |
| FABP5. 8   | 3. 54E-38 | -0. 9232  | 0. 286 | 0. 41  | 5. 29E-34 Class-G | FABP5     |
| RPA2. 4    | 4. 05E-38 | -0. 161   | 0. 562 | 0. 28  | 6. 05E-34 Class-G | RPA2      |
| SEPT2. 4   | 4. 13E-38 | 0. 103685 | 0. 965 | 0. 518 | 6. 17E-34 Class-G | 2-Sep     |
| TYMP. 11   | 5. 44E-38 | -0. 86576 | 0. 228 | 0. 319 | 8. 13E-34 Class-G | TYMP      |
| CHI3L1. 1C | 7. 76E-38 | -0. 40494 | 0. 845 | 0. 472 | 1. 16E-33 Class-G | CHI3L1    |
| NUP62. 6   | 7. 77E-38 | -0. 1222  | 0. 421 | 0. 207 | 1. 16E-33 Class-G | NUP62     |
| TCIRG1. 11 | 8. 09E-38 | -0. 47707 | 0. 032 | 0. 141 | 1. 21E-33 Class-G | TCIRG1    |
| ELL2. 9    | 9. 69E-38 | -0. 63193 | 0. 091 | 0. 209 | 1. 45E-33 Class-G | ELL2      |
| ERICH1. 7  | 1. 09E-37 | -0. 18886 | 0. 485 | 0. 238 | 1. 63E-33 Class-G | ERICH1    |
| KYNU. 11   | 1. 25E-37 | -0. 41979 | 0. 003 | 0. 097 | 1. 86E-33 Class-G | KYNU      |
| NGFR. 7    | 1. 28E-37 | 0. 105429 | 0. 092 | 0. 027 | 1. 91E-33 Class-G | NGFR      |

|            |          |          |       |       |          |         |               |
|------------|----------|----------|-------|-------|----------|---------|---------------|
| GIT2.8     | 1.40E-37 | -0.10989 | 0.284 | 0.132 | 2.09E-33 | Class-G | GIT2          |
| HPGDS.10   | 1.40E-37 | -0.47927 | 0.006 | 0.103 | 2.10E-33 | Class-G | HPGDS         |
| ARHGAP9.1  | 1.58E-37 | -0.38459 | 0.004 | 0.099 | 2.37E-33 | Class-G | ARHGAP9       |
| LILRB1.11  | 1.61E-37 | -0.42969 | 0.008 | 0.105 | 2.41E-33 | Class-G | LILRB1        |
| CD44.8     | 1.88E-37 | -0.19015 | 0.662 | 0.337 | 2.80E-33 | Class-G | CD44          |
| BTK.11     | 2.12E-37 | -0.39414 | 0.004 | 0.099 | 3.16E-33 | Class-G | BTK           |
| RABGGTB.3  | 2.30E-37 | -0.11845 | 0.509 | 0.256 | 3.43E-33 | Class-G | RABGGTB       |
| GAL3ST4.9  | 2.35E-37 | -0.64537 | 0.071 | 0.188 | 3.52E-33 | Class-G | GAL3ST4       |
| SPCS3.9    | 2.41E-37 | -0.19147 | 0.579 | 0.284 | 3.61E-33 | Class-G | SPCS3         |
| SMIM14.9   | 3.19E-37 | -0.19417 | 0.583 | 0.289 | 4.77E-33 | Class-G | SMIM14        |
| SLC31A1.9  | 3.32E-37 | -0.11669 | 0.307 | 0.145 | 4.96E-33 | Class-G | SLC31A1       |
| SLC16A10.4 | 4.26E-37 | -0.47222 | 0.005 | 0.1   | 6.36E-33 | Class-G | SLC16A10      |
| RP11-798M  | 4.57E-37 | -0.10759 | 0.276 | 0.128 | 6.83E-33 | Class-G | RP11-798M19.6 |
| JMJD6.6    | 4.78E-37 | -0.16656 | 0.498 | 0.247 | 7.15E-33 | Class-G | JMJD6         |
| DSE.11     | 4.85E-37 | -0.51518 | 0.042 | 0.153 | 7.25E-33 | Class-G | DSE           |
| CCND3.8    | 5.88E-37 | -0.21577 | 0.459 | 0.227 | 8.78E-33 | Class-G | CCND3         |
| FTH1.7     | 5.98E-37 | -0.1645  | 0.999 | 0.922 | 8.94E-33 | Class-G | FTH1          |
| HLA-DOA.9  | 8.22E-37 | -0.44954 | 0.01  | 0.108 | 1.23E-32 | Class-G | HLA-DOA       |
| DNAJA1.5   | 8.33E-37 | -0.4769  | 0.805 | 0.6   | 1.24E-32 | Class-G | DNAJA1        |
| CUL1.4     | 9.84E-37 | -0.10309 | 0.414 | 0.205 | 1.47E-32 | Class-G | CUL1          |
| DDX21.8    | 1.17E-36 | -0.17047 | 0.529 | 0.263 | 1.74E-32 | Class-G | DDX21         |
| PDCL3.7    | 1.22E-36 | -0.20627 | 0.516 | 0.257 | 1.82E-32 | Class-G | PDCL3         |
| RNF144B.1  | 1.25E-36 | -0.49155 | 0.013 | 0.112 | 1.87E-32 | Class-G | RNF144B       |
| RHBDF2.11  | 1.31E-36 | -0.6562  | 0.079 | 0.194 | 1.96E-32 | Class-G | RHBDF2        |
| COPS4.4    | 1.52E-36 | -0.13628 | 0.568 | 0.284 | 2.27E-32 | Class-G | COPS4         |
| CNBP.4     | 1.55E-36 | -0.33936 | 0.971 | 0.712 | 2.31E-32 | Class-G | CNBP          |
| CIR1.4     | 1.59E-36 | -0.16309 | 0.577 | 0.288 | 2.37E-32 | Class-G | CIR1          |
| ARRDC1.1C  | 1.65E-36 | -0.10322 | 0.253 | 0.115 | 2.46E-32 | Class-G | ARRDC1        |
| HLA-F.11   | 2.28E-36 | -0.52346 | 0.049 | 0.162 | 3.40E-32 | Class-G | HLA-F         |
| ALG13.6    | 2.47E-36 | -0.18191 | 0.391 | 0.191 | 3.69E-32 | Class-G | ALG13         |
| P2RY13.9   | 2.94E-36 | -0.4965  | 0.005 | 0.098 | 4.39E-32 | Class-G | P2RY13        |
| SNX13.1    | 3.13E-36 | -0.1115  | 0.303 | 0.144 | 4.67E-32 | Class-G | SNX13         |
| FUCA1.9    | 3.49E-36 | -0.19798 | 0.395 | 0.191 | 5.21E-32 | Class-G | FUCA1         |
| HPS1.10    | 3.70E-36 | -0.45092 | 0.022 | 0.125 | 5.52E-32 | Class-G | HPS1          |
| IFITM2.11  | 3.72E-36 | -0.86707 | 0.198 | 0.297 | 5.56E-32 | Class-G | IFITM2        |
| SERBP1.2   | 4.31E-36 | 0.106677 | 0.965 | 0.571 | 6.45E-32 | Class-G | SERBP1        |
| NUDT16.11  | 4.90E-36 | -0.20246 | 0.393 | 0.191 | 7.32E-32 | Class-G | NUDT16        |
| DAD1.4     | 5.72E-36 | -0.38313 | 0.941 | 0.685 | 8.54E-32 | Class-G | DAD1          |
| COX19.6    | 7.29E-36 | -0.11924 | 0.408 | 0.202 | 1.09E-31 | Class-G | COX19         |
| PSMD13.6   | 1.06E-35 | -0.10171 | 0.72  | 0.363 | 1.59E-31 | Class-G | PSMD13        |
| FRG1.1     | 1.10E-35 | -0.17181 | 0.56  | 0.281 | 1.64E-31 | Class-G | FRG1          |
| DOCK2.11   | 1.11E-35 | -0.37771 | 0.001 | 0.09  | 1.66E-31 | Class-G | DOCK2         |
| ANXA4.9    | 1.11E-35 | -0.1983  | 0.351 | 0.168 | 1.66E-31 | Class-G | ANXA4         |
| EMB.11     | 1.31E-35 | -0.37097 | 0     | 0.087 | 1.96E-31 | Class-G | EMB           |
| TRA2A.5    | 1.37E-35 | -0.13494 | 0.599 | 0.302 | 2.04E-31 | Class-G | TRA2A         |
| ZMAT2.2    | 1.42E-35 | -0.1293  | 0.739 | 0.369 | 2.12E-31 | Class-G | ZMAT2         |
| TCN2.7     | 1.46E-35 | -0.11528 | 0.196 | 0.083 | 2.18E-31 | Class-G | TCN2          |
| B3GNT5.1C  | 1.48E-35 | -0.13628 | 0.264 | 0.121 | 2.21E-31 | Class-G | B3GNT5        |
| SH3TC1.1C  | 1.78E-35 | -0.39425 | 0.003 | 0.092 | 2.67E-31 | Class-G | SH3TC1        |
| PPHLN1.6   | 1.93E-35 | -0.16392 | 0.644 | 0.321 | 2.88E-31 | Class-G | PPHLN1        |
| AP3S1.6    | 1.93E-35 | -0.11882 | 0.754 | 0.373 | 2.89E-31 | Class-G | AP3S1         |

|            |          |          |       |       |          |         |            |
|------------|----------|----------|-------|-------|----------|---------|------------|
| CACUL1.6   | 2.05E-35 | -0.10845 | 0.365 | 0.18  | 3.07E-31 | Class-G | CACUL1     |
| HNMT.10    | 2.05E-35 | -0.70532 | 0.121 | 0.234 | 3.07E-31 | Class-G | HNMT       |
| CCDC53.2   | 2.43E-35 | -0.19922 | 0.576 | 0.288 | 3.64E-31 | Class-G | CCDC53     |
| PHKG2.7    | 2.87E-35 | -0.1474  | 0.284 | 0.133 | 4.29E-31 | Class-G | PHKG2      |
| ATXN80S.7  | 3.02E-35 | -0.76172 | 0.003 | 0.092 | 4.52E-31 | Class-G | ATXN80S    |
| IRF2BP2.8  | 3.03E-35 | -0.13268 | 0.549 | 0.278 | 4.53E-31 | Class-G | IRF2BP2    |
| NDFIP1.11  | 3.34E-35 | 0.153968 | 0.972 | 0.541 | 4.99E-31 | Class-G | NDFIP1     |
| DDX6.4     | 3.38E-35 | -0.16769 | 0.352 | 0.172 | 5.05E-31 | Class-G | DDX6       |
| MYH9.10    | 3.40E-35 | -0.14743 | 0.338 | 0.164 | 5.08E-31 | Class-G | MYH9       |
| RAB11A.5   | 3.41E-35 | -0.11419 | 0.814 | 0.41  | 5.10E-31 | Class-G | RAB11A     |
| RARRES2.1  | 3.74E-35 | -0.73439 | 0.053 | 0.165 | 5.59E-31 | Class-G | RARRES2    |
| MLLT11.9   | 4.01E-35 | -0.18449 | 0.81  | 0.396 | 6.00E-31 | Class-G | MLLT11     |
| MSRB2.7    | 4.03E-35 | -0.13291 | 0.449 | 0.223 | 6.02E-31 | Class-G | MSRB2      |
| ACTR1A.4   | 4.09E-35 | -0.13809 | 0.488 | 0.244 | 6.11E-31 | Class-G | ACTR1A     |
| NUB1.4     | 5.39E-35 | -0.14193 | 0.443 | 0.222 | 8.06E-31 | Class-G | NUB1       |
| TGOLN2.8   | 5.41E-35 | -0.13668 | 0.655 | 0.326 | 8.08E-31 | Class-G | TGOLN2     |
| SRSF2.9    | 5.60E-35 | 0.152964 | 0.955 | 0.548 | 8.37E-31 | Class-G | SRSF2      |
| BTG3.8     | 5.66E-35 | -0.10307 | 0.652 | 0.325 | 8.45E-31 | Class-G | BTG3       |
| ANP32A.11  | 6.13E-35 | -0.15663 | 0.758 | 0.374 | 9.16E-31 | Class-G | ANP32A     |
| ARF1.7     | 7.09E-35 | -0.34193 | 0.925 | 0.656 | 1.06E-30 | Class-G | ARF1       |
| DDX5.7     | 7.93E-35 | -0.14747 | 0.993 | 0.788 | 1.19E-30 | Class-G | DDX5       |
| AKR1B1.7   | 8.90E-35 | -0.50638 | 0.814 | 0.594 | 1.33E-30 | Class-G | AKR1B1     |
| CRYZL1.2   | 1.32E-34 | -0.1847  | 0.469 | 0.235 | 1.98E-30 | Class-G | CRYZL1     |
| EZR.9      | 1.61E-34 | -0.12711 | 0.593 | 0.301 | 2.40E-30 | Class-G | EZR        |
| TBCC.10    | 1.64E-34 | -0.13962 | 0.392 | 0.194 | 2.45E-30 | Class-G | TBCC       |
| SMPDL3A.9  | 1.93E-34 | -0.10563 | 0.235 | 0.107 | 2.89E-30 | Class-G | SMPDL3A    |
| ITGAM.11   | 1.98E-34 | -0.36918 | 0.002 | 0.088 | 2.96E-30 | Class-G | ITGAM      |
| ADPGK.11   | 2.02E-34 | -0.18227 | 0.461 | 0.229 | 3.02E-30 | Class-G | ADPGK      |
| TIPARP.8   | 2.04E-34 | -0.1249  | 0.305 | 0.146 | 3.04E-30 | Class-G | TIPARP     |
| LYL1.11    | 3.25E-34 | -0.37599 | 0.005 | 0.094 | 4.85E-30 | Class-G | LYL1       |
| FAM49A.7   | 4.10E-34 | -0.15106 | 0.309 | 0.148 | 6.12E-30 | Class-G | FAM49A     |
| SND1.3     | 4.38E-34 | -0.14075 | 0.445 | 0.224 | 6.54E-30 | Class-G | SND1       |
| HSPA6.6    | 4.42E-34 | -0.57069 | 0.017 | 0.113 | 6.61E-30 | Class-G | HSPA6      |
| APOD.10    | 5.38E-34 | -0.84129 | 0.064 | 0.176 | 8.04E-30 | Class-G | APOD       |
| LUZP2.7    | 6.68E-34 | 0.122063 | 0.109 | 0.038 | 9.98E-30 | Class-G | LUZP2      |
| IRAK3.11   | 6.92E-34 | -0.35419 | 0.001 | 0.085 | 1.03E-29 | Class-G | IRAK3      |
| ASL.8      | 7.51E-34 | -0.16909 | 0.306 | 0.149 | 1.12E-29 | Class-G | ASL        |
| TPP1.9     | 9.02E-34 | -0.22536 | 0.569 | 0.282 | 1.35E-29 | Class-G | TPP1       |
| XIST.11    | 9.22E-34 | -0.58081 | 0.166 | 0.282 | 1.38E-29 | Class-G | XIST       |
| CXorf21.1  | 1.08E-33 | -0.40247 | 0.003 | 0.088 | 1.62E-29 | Class-G | CXorf21    |
| SASH3.11   | 1.15E-33 | -0.36727 | 0.004 | 0.09  | 1.73E-29 | Class-G | SASH3      |
| ATP1B1.9   | 1.43E-33 | -0.62299 | 0.141 | 0.25  | 2.14E-29 | Class-G | ATP1B1     |
| SIGLEC8.8  | 2.38E-33 | -0.40065 | 0.004 | 0.089 | 3.56E-29 | Class-G | SIGLEC8    |
| TMEM69.3   | 2.40E-33 | -0.14339 | 0.301 | 0.147 | 3.58E-29 | Class-G | TMEM69     |
| TMEM256.6  | 2.46E-33 | -0.17011 | 0.747 | 0.378 | 3.67E-29 | Class-G | TMEM256    |
| CNRIP1.8   | 2.70E-33 | -0.12324 | 0.357 | 0.179 | 4.03E-29 | Class-G | CNRIP1     |
| TSR2.2     | 3.02E-33 | -0.16646 | 0.428 | 0.217 | 4.51E-29 | Class-G | TSR2       |
| SOCS3.10   | 3.03E-33 | -0.10721 | 0.596 | 0.308 | 4.52E-29 | Class-G | SOCS3      |
| FMNL1.11   | 3.20E-33 | -0.50119 | 0.038 | 0.138 | 4.78E-29 | Class-G | FMNL1      |
| INPP5D.11  | 3.62E-33 | -0.41769 | 0.009 | 0.097 | 5.41E-29 | Class-G | INPP5D     |
| AP001055.3 | 3.92E-33 | -0.40342 | 0.006 | 0.092 | 5.86E-29 | Class-G | AP001055.6 |

|             |           |           |        |        |           |         |          |
|-------------|-----------|-----------|--------|--------|-----------|---------|----------|
| CTSD. 9     | 4. 10E-33 | -0. 55507 | 0. 847 | 0. 605 | 6. 13E-29 | Class-G | CTSD     |
| TSPAN31. 6  | 4. 62E-33 | -0. 24065 | 0. 514 | 0. 259 | 6. 90E-29 | Class-G | TSPAN31  |
| MGP. 10     | 5. 17E-33 | -0. 95867 | 0. 022 | 0. 117 | 7. 72E-29 | Class-G | MGP      |
| SYPL1. 5    | 5. 56E-33 | -0. 21206 | 0. 71  | 0. 356 | 8. 31E-29 | Class-G | SYPL1    |
| CACNA2D4. 6 | 6. 13E-33 | -0. 37907 | 0. 002 | 0. 085 | 9. 16E-29 | Class-G | CACNA2D4 |
| ATP6V1H. 3  | 7. 15E-33 | -0. 17375 | 0. 558 | 0. 284 | 1. 07E-28 | Class-G | ATP6V1H  |
| FKBP15. 1C  | 7. 24E-33 | -0. 11216 | 0. 253 | 0. 119 | 1. 08E-28 | Class-G | FKBP15   |
| DCX. 11     | 8. 35E-33 | -0. 10885 | 0. 36  | 0. 179 | 1. 25E-28 | Class-G | DCX      |
| FAH. 10     | 1. 15E-32 | -0. 17951 | 0. 285 | 0. 137 | 1. 72E-28 | Class-G | FAH      |
| C1D. 3      | 1. 19E-32 | -0. 12013 | 0. 532 | 0. 273 | 1. 78E-28 | Class-G | C1D      |
| ENG. 11     | 1. 20E-32 | -0. 59041 | 0. 075 | 0. 18  | 1. 80E-28 | Class-G | ENG      |
| BLOC1S2. 6  | 1. 21E-32 | -0. 20075 | 0. 644 | 0. 323 | 1. 81E-28 | Class-G | BLOC1S2  |
| RHOH. 10    | 1. 34E-32 | -0. 42224 | 0. 005 | 0. 089 | 2. 01E-28 | Class-G | RHOH     |
| ARSA. 8     | 1. 36E-32 | -0. 14655 | 0. 249 | 0. 116 | 2. 03E-28 | Class-G | ARSA     |
| H2AFZ. 4    | 1. 43E-32 | -0. 29983 | 0. 944 | 0. 705 | 2. 13E-28 | Class-G | H2AFZ    |
| PSMG2. 6    | 1. 53E-32 | -0. 1786  | 0. 719 | 0. 362 | 2. 28E-28 | Class-G | PSMG2    |
| VAV1. 11    | 1. 58E-32 | -0. 34065 | 0. 003 | 0. 085 | 2. 36E-28 | Class-G | VAV1     |
| UBE2D2. 7   | 1. 80E-32 | 0. 126941 | 0. 962 | 0. 527 | 2. 69E-28 | Class-G | UBE2D2   |
| NSG1. 11    | 1. 86E-32 | -0. 63699 | 0. 084 | 0. 191 | 2. 78E-28 | Class-G | NSG1     |
| GPR84. 11   | 1. 98E-32 | -0. 37232 | 0. 003 | 0. 085 | 2. 95E-28 | Class-G | GPR84    |
| MILR1. 11   | 2. 11E-32 | -0. 49938 | 0. 019 | 0. 112 | 3. 15E-28 | Class-G | MILR1    |
| HSD17B11. 2 | 2. 22E-32 | -0. 8026  | 0. 34  | 0. 383 | 3. 32E-28 | Class-G | HSD17B11 |
| UBXN11. 7   | 2. 62E-32 | -0. 14679 | 0. 249 | 0. 117 | 3. 91E-28 | Class-G | UBXN11   |
| NFKBID. 9   | 2. 68E-32 | -0. 56027 | 0. 053 | 0. 155 | 4. 01E-28 | Class-G | NFKBID   |
| MMADHC. 3   | 3. 42E-32 | -0. 13181 | 0. 759 | 0. 383 | 5. 10E-28 | Class-G | MMADHC   |
| NECAP1. 8   | 3. 73E-32 | -0. 1337  | 0. 348 | 0. 174 | 5. 57E-28 | Class-G | NECAP1   |
| ETF1. 9     | 4. 15E-32 | -0. 19117 | 0. 6   | 0. 304 | 6. 20E-28 | Class-G | ETF1     |
| IL32. 9     | 4. 58E-32 | -0. 22099 | 0. 192 | 0. 085 | 6. 84E-28 | Class-G | IL32     |
| NUCB1. 10   | 5. 26E-32 | -0. 10588 | 0. 767 | 0. 392 | 7. 86E-28 | Class-G | NUCB1    |
| SNX3. 4     | 5. 59E-32 | 0. 122864 | 0. 99  | 0. 672 | 8. 35E-28 | Class-G | SNX3     |
| LETMD1. 1   | 5. 96E-32 | -0. 15493 | 0. 288 | 0. 14  | 8. 91E-28 | Class-G | LETMD1   |
| CAV1. 10    | 6. 26E-32 | -0. 81922 | 0. 04  | 0. 141 | 9. 36E-28 | Class-G | CAV1     |
| COQ2. 10    | 6. 44E-32 | -0. 11244 | 0. 318 | 0. 157 | 9. 62E-28 | Class-G | COQ2     |
| ARL4D. 10   | 6. 96E-32 | -0. 14993 | 0. 301 | 0. 147 | 1. 04E-27 | Class-G | ARL4D    |
| PLEKHB2. 6  | 7. 01E-32 | -0. 10246 | 0. 7   | 0. 35  | 1. 05E-27 | Class-G | PLEKHB2  |
| AP1S1. 10   | 7. 25E-32 | -0. 11702 | 0. 814 | 0. 411 | 1. 08E-27 | Class-G | AP1S1    |
| THBS1. 9    | 7. 51E-32 | -0. 47006 | 0. 008 | 0. 092 | 1. 12E-27 | Class-G | THBS1    |
| YWHAB. 4    | 8. 03E-32 | 0. 124156 | 0. 982 | 0. 657 | 1. 20E-27 | Class-G | YWHAB    |
| FCGRT. 10   | 9. 01E-32 | -0. 81343 | 0. 679 | 0. 529 | 1. 35E-27 | Class-G | FCGRT    |
| HAT1. 6     | 1. 02E-31 | -0. 1586  | 0. 506 | 0. 262 | 1. 52E-27 | Class-G | HAT1     |
| SIGLEC7. 1  | 1. 07E-31 | -0. 35477 | 0. 004 | 0. 086 | 1. 59E-27 | Class-G | SIGLEC7  |
| RAB3A. 10   | 1. 21E-31 | -0. 1408  | 0. 295 | 0. 142 | 1. 81E-27 | Class-G | RAB3A    |
| UGP2. 6     | 1. 23E-31 | -0. 11018 | 0. 793 | 0. 406 | 1. 84E-27 | Class-G | UGP2     |
| INSIG2. 3   | 1. 44E-31 | -0. 17484 | 0. 352 | 0. 178 | 2. 16E-27 | Class-G | INSIG2   |
| PMAIP1. 1C  | 1. 48E-31 | -0. 47706 | 0. 01  | 0. 095 | 2. 22E-27 | Class-G | PMAIP1   |
| TIPIN. 6    | 1. 53E-31 | -0. 17712 | 0. 256 | 0. 122 | 2. 29E-27 | Class-G | TIPIN    |
| STX12. 1    | 3. 28E-31 | -0. 14144 | 0. 704 | 0. 359 | 4. 90E-27 | Class-G | STX12    |
| LRRFIP1. 1  | 3. 94E-31 | -0. 18656 | 0. 617 | 0. 31  | 5. 88E-27 | Class-G | LRRFIP1  |
| CBWD5. 3    | 4. 11E-31 | -0. 10126 | 0. 224 | 0. 105 | 6. 15E-27 | Class-G | CBWD5    |
| METTL22. 4  | 4. 17E-31 | -0. 10957 | 0. 175 | 0. 076 | 6. 23E-27 | Class-G | METTL22  |
| UPF3B. 8    | 4. 19E-31 | -0. 17237 | 0. 433 | 0. 221 | 6. 26E-27 | Class-G | UPF3B    |

|             |           |           |        |        |                   |                 |
|-------------|-----------|-----------|--------|--------|-------------------|-----------------|
| EGR1. 8     | 4. 23E-31 | -0. 59417 | 0. 513 | 0. 493 | 6. 32E-27 Class-G | EGR1            |
| RP11-386G   | 4. 70E-31 | -0. 2043  | 0. 26  | 0. 125 | 7. 02E-27 Class-G | RP11-386G11. 10 |
| ST14. 11    | 4. 94E-31 | -0. 32755 | 0. 004 | 0. 084 | 7. 39E-27 Class-G | ST14            |
| TUBB. 9     | 5. 64E-31 | -0. 26289 | 0. 976 | 0. 737 | 8. 44E-27 Class-G | TUBB            |
| UBE2C. 11   | 5. 82E-31 | -0. 24396 | 0. 218 | 0. 1   | 8. 69E-27 Class-G | UBE2C           |
| TMBIM1. 8   | 6. 03E-31 | -0. 2646  | 0. 424 | 0. 215 | 9. 00E-27 Class-G | TMBIM1          |
| ATG7. 7     | 6. 45E-31 | -0. 10501 | 0. 208 | 0. 095 | 9. 64E-27 Class-G | ATG7            |
| TCEAL8. 2   | 7. 31E-31 | -0. 1584  | 0. 761 | 0. 39  | 1. 09E-26 Class-G | TCEAL8          |
| BLVRB. 8    | 9. 25E-31 | -0. 34662 | 0. 659 | 0. 328 | 1. 38E-26 Class-G | BLVRB           |
| NINJ2. 10   | 9. 33E-31 | -0. 46131 | 0. 014 | 0. 099 | 1. 39E-26 Class-G | NINJ2           |
| SH3BGRL. 7  | 9. 85E-31 | -0. 49276 | 0. 853 | 0. 615 | 1. 47E-26 Class-G | SH3BGRL         |
| THEMIS2. 1  | 9. 86E-31 | -0. 75434 | 0. 161 | 0. 255 | 1. 47E-26 Class-G | THEMIS2         |
| AREG. 11    | 1. 02E-30 | -0. 50008 | 0      | 0. 075 | 1. 52E-26 Class-G | AREG            |
| MAPKAPK3. 1 | 0. 3E-30  | -0. 13392 | 0. 304 | 0. 149 | 1. 55E-26 Class-G | MAPKAPK3        |
| HSPH1. 7    | 1. 15E-30 | -0. 1443  | 0. 623 | 0. 318 | 1. 72E-26 Class-G | HSPH1           |
| HNRNPH2. 4  | 1. 35E-30 | -0. 13223 | 0. 683 | 0. 354 | 2. 01E-26 Class-G | HNRNPH2         |
| CD93. 11    | 1. 58E-30 | -0. 34335 | 0. 004 | 0. 082 | 2. 36E-26 Class-G | CD93            |
| IFNGR1. 11  | 1. 66E-30 | -0. 78842 | 0. 451 | 0. 435 | 2. 49E-26 Class-G | IFNGR1          |
| CD48. 11    | 2. 02E-30 | -0. 41474 | 0. 008 | 0. 09  | 3. 02E-26 Class-G | CD48            |
| AP2A2. 9    | 2. 09E-30 | -0. 13077 | 0. 431 | 0. 222 | 3. 13E-26 Class-G | AP2A2           |
| CCR1. 10    | 2. 58E-30 | -0. 37867 | 0. 011 | 0. 093 | 3. 86E-26 Class-G | CCR1            |
| PMPCB. 6    | 2. 74E-30 | -0. 19382 | 0. 582 | 0. 304 | 4. 09E-26 Class-G | PMPCB           |
| HSPA1A. 7   | 3. 27E-30 | -0. 71383 | 0. 503 | 0. 49  | 4. 89E-26 Class-G | HSPA1A          |
| CD300C. 11  | 3. 84E-30 | -0. 3388  | 0. 002 | 0. 078 | 5. 74E-26 Class-G | CD300C          |
| IKZF1. 10   | 4. 32E-30 | -0. 3191  | 0. 001 | 0. 075 | 6. 46E-26 Class-G | IKZF1           |
| NOP58. 8    | 4. 57E-30 | -0. 15764 | 0. 495 | 0. 259 | 6. 84E-26 Class-G | NOP58           |
| TRAPPC2P1   | 5. 48E-30 | -0. 1891  | 0. 384 | 0. 198 | 8. 19E-26 Class-G | TRAPPC2P1       |
| IL16. 10    | 6. 28E-30 | -0. 34997 | 0. 003 | 0. 079 | 9. 39E-26 Class-G | IL16            |
| PCF11. 6    | 7. 04E-30 | -0. 15089 | 0. 352 | 0. 179 | 1. 05E-25 Class-G | PCF11           |
| CADM3. 8    | 7. 68E-30 | -0. 44439 | 0. 024 | 0. 113 | 1. 15E-25 Class-G | CADM3           |
| HOXB2. 8    | 7. 84E-30 | -0. 29977 | 0. 013 | 0. 096 | 1. 17E-25 Class-G | HOXB2           |
| HMBOX1. 9   | 7. 86E-30 | -0. 12061 | 0. 332 | 0. 17  | 1. 17E-25 Class-G | HMBOX1          |
| CYP20A1. 1  | 7. 96E-30 | -0. 17179 | 0. 29  | 0. 145 | 1. 19E-25 Class-G | CYP20A1         |
| AZI2. 5     | 8. 59E-30 | -0. 2245  | 0. 515 | 0. 266 | 1. 28E-25 Class-G | AZI2            |
| DNTTIP2. 4  | 8. 80E-30 | -0. 17315 | 0. 489 | 0. 254 | 1. 32E-25 Class-G | DNTTIP2         |
| COX6A1. 7   | 9. 96E-30 | -0. 21383 | 0. 998 | 0. 82  | 1. 49E-25 Class-G | COX6A1          |
| LINC00632   | 1. 09E-29 | -0. 33028 | 0. 018 | 0. 103 | 1. 63E-25 Class-G | LINC00632       |
| DDX24. 2    | 1. 10E-29 | -0. 11226 | 0. 833 | 0. 424 | 1. 65E-25 Class-G | DDX24           |
| GNB2. 8     | 1. 14E-29 | 0. 131246 | 0. 94  | 0. 509 | 1. 71E-25 Class-G | GNB2            |
| AHSA1. 4    | 1. 15E-29 | -0. 16695 | 0. 685 | 0. 352 | 1. 72E-25 Class-G | AHSA1           |
| NXF1. 4     | 1. 37E-29 | -0. 1555  | 0. 342 | 0. 174 | 2. 05E-25 Class-G | NXF1            |
| EIF3H. 6    | 1. 50E-29 | -0. 399   | 0. 893 | 0. 632 | 2. 24E-25 Class-G | EIF3H           |
| ITGAX. 10   | 1. 51E-29 | -0. 44236 | 0. 018 | 0. 103 | 2. 25E-25 Class-G | ITGAX           |
| KCNMB1. 1C  | 1. 62E-29 | -0. 49714 | 0. 027 | 0. 115 | 2. 42E-25 Class-G | KCNMB1          |
| IMPDH2. 9   | 1. 93E-29 | -0. 19429 | 0. 711 | 0. 368 | 2. 88E-25 Class-G | IMPDH2          |
| CYLD. 7     | 2. 07E-29 | -0. 14277 | 0. 29  | 0. 144 | 3. 09E-25 Class-G | CYLD            |
| LMBRD1. 7   | 2. 11E-29 | -0. 23927 | 0. 374 | 0. 191 | 3. 15E-25 Class-G | LMBRD1          |
| NDUFA4. 7   | 2. 12E-29 | -0. 24752 | 0. 999 | 0. 878 | 3. 16E-25 Class-G | NDUFA4          |
| LY6H. 10    | 2. 13E-29 | -0. 34899 | 0. 014 | 0. 097 | 3. 19E-25 Class-G | LY6H            |
| DOCK10. 8   | 2. 18E-29 | -0. 10428 | 0. 23  | 0. 109 | 3. 26E-25 Class-G | DOCK10          |
| BAG3. 7     | 2. 18E-29 | -0. 10668 | 0. 201 | 0. 093 | 3. 26E-25 Class-G | BAG3            |

|             |           |           |        |        |                   |          |
|-------------|-----------|-----------|--------|--------|-------------------|----------|
| RGS16. 8    | 2. 67E-29 | -0. 13859 | 0. 455 | 0. 246 | 3. 99E-25 Class-G | RGS16    |
| LYAR. 5     | 2. 93E-29 | -0. 14153 | 0. 303 | 0. 153 | 4. 38E-25 Class-G | LYAR     |
| C3orf14. 7  | 4. 44E-29 | -0. 17598 | 0. 451 | 0. 234 | 6. 63E-25 Class-G | C3orf14  |
| TBC1D14. 6  | 4. 49E-29 | -0. 11817 | 0. 299 | 0. 15  | 6. 71E-25 Class-G | TBC1D14  |
| HEXA. 10    | 4. 62E-29 | -0. 23161 | 0. 677 | 0. 342 | 6. 90E-25 Class-G | HEXA     |
| PCGF1. 2    | 4. 72E-29 | -0. 10071 | 0. 18  | 0. 081 | 7. 06E-25 Class-G | PCGF1    |
| SQRDL. 11   | 5. 11E-29 | -0. 57439 | 0. 077 | 0. 174 | 7. 63E-25 Class-G | SQRDL    |
| SNX8. 7     | 5. 20E-29 | -0. 12716 | 0. 261 | 0. 128 | 7. 77E-25 Class-G | SNX8     |
| AZIN1. 6    | 5. 49E-29 | -0. 14963 | 0. 563 | 0. 291 | 8. 21E-25 Class-G | AZIN1    |
| MPHOSPH6. 7 | 5. 2E-29  | -0. 22524 | 0. 494 | 0. 257 | 1. 12E-24 Class-G | MPHOSPH6 |
| TRAPPC6A. 7 | 7. 86E-29 | -0. 25861 | 0. 441 | 0. 229 | 1. 17E-24 Class-G | TRAPPC6A |
| ANKRD22. 1  | 9. 71E-29 | -0. 34246 | 0. 002 | 0. 075 | 1. 45E-24 Class-G | ANKRD22  |
| SLC11A2. 5  | 1. 02E-28 | -0. 11389 | 0. 294 | 0. 148 | 1. 52E-24 Class-G | SLC11A2  |
| ACTL6B. 1C  | 1. 23E-28 | -0. 31838 | 0. 01  | 0. 087 | 1. 83E-24 Class-G | ACTL6B   |
| HOXA2. 10   | 1. 26E-28 | -0. 26105 | 0. 007 | 0. 083 | 1. 89E-24 Class-G | HOXA2    |
| TLR1. 11    | 1. 27E-28 | -0. 32417 | 0. 004 | 0. 078 | 1. 89E-24 Class-G | TLR1     |
| PTGS2. 10   | 1. 50E-28 | -0. 30676 | 0. 001 | 0. 071 | 2. 25E-24 Class-G | PTGS2    |
| TCEAL5. 9   | 1. 74E-28 | -0. 3927  | 0. 041 | 0. 133 | 2. 59E-24 Class-G | TCEAL5   |
| RBM25. 5    | 2. 01E-28 | -0. 10243 | 0. 757 | 0. 388 | 3. 01E-24 Class-G | RBM25    |
| HMGB1. 5    | 2. 19E-28 | -0. 22205 | 0. 998 | 0. 839 | 3. 28E-24 Class-G | HMGB1    |
| GIMAP1. 1C  | 2. 30E-28 | -0. 34168 | 0. 008 | 0. 084 | 3. 44E-24 Class-G | GIMAP1   |
| CYCS. 4     | 2. 51E-28 | -0. 28123 | 0. 978 | 0. 694 | 3. 75E-24 Class-G | CYCS     |
| ODF2L. 5    | 2. 65E-28 | -0. 15883 | 0. 304 | 0. 154 | 3. 96E-24 Class-G | ODF2L    |
| CD40. 11    | 2. 80E-28 | -0. 30884 | 0. 004 | 0. 077 | 4. 19E-24 Class-G | CD40     |
| SH3BP2. 1C  | 3. 22E-28 | -0. 12362 | 0. 247 | 0. 12  | 4. 82E-24 Class-G | SH3BP2   |
| DENND3. 11  | 3. 65E-28 | -0. 43664 | 0. 027 | 0. 112 | 5. 45E-24 Class-G | DENND3   |
| TWF2. 11    | 4. 19E-28 | -0. 21037 | 0. 585 | 0. 301 | 6. 26E-24 Class-G | TWF2     |
| PIK3IP1. 9  | 5. 00E-28 | -0. 58243 | 0. 079 | 0. 174 | 7. 47E-24 Class-G | PIK3IP1  |
| CD58. 11    | 5. 06E-28 | -0. 25228 | 0. 389 | 0. 201 | 7. 56E-24 Class-G | CD58     |
| IRF1. 8     | 6. 53E-28 | -0. 16365 | 0. 347 | 0. 183 | 9. 76E-24 Class-G | IRF1     |
| MAML1. 9    | 7. 48E-28 | -0. 13906 | 0. 213 | 0. 101 | 1. 12E-23 Class-G | MAML1    |
| C9orf78. 3  | 7. 70E-28 | -0. 15541 | 0. 768 | 0. 39  | 1. 15E-23 Class-G | C9orf78  |
| DHRS7. 9    | 7. 97E-28 | -0. 60314 | 0. 669 | 0. 538 | 1. 19E-23 Class-G | DHRS7    |
| CCNDBP1. 9  | 8. 74E-28 | -0. 21408 | 0. 351 | 0. 181 | 1. 31E-23 Class-G | CCNDBP1  |
| RIN3. 11    | 9. 22E-28 | -0. 4478  | 0. 039 | 0. 128 | 1. 38E-23 Class-G | RIN3     |
| PLGRKT. 5   | 9. 41E-28 | -0. 21597 | 0. 452 | 0. 237 | 1. 41E-23 Class-G | PLGRKT   |
| TNFSF12. 1  | 9. 66E-28 | -0. 19559 | 0. 322 | 0. 163 | 1. 44E-23 Class-G | TNFSF12  |
| EFHD2. 10   | 1. 69E-27 | -0. 14958 | 0. 358 | 0. 186 | 2. 53E-23 Class-G | EFHD2    |
| CYTL1. 10   | 1. 81E-27 | -0. 5483  | 0. 036 | 0. 122 | 2. 71E-23 Class-G | CYTL1    |
| BEX5. 8     | 1. 94E-27 | -0. 40206 | 0. 024 | 0. 108 | 2. 90E-23 Class-G | BEX5     |
| SLC25A3. 4  | 2. 08E-27 | -0. 24602 | 0. 961 | 0. 711 | 3. 11E-23 Class-G | SLC25A3  |
| BLNK. 9     | 2. 40E-27 | -0. 37051 | 0. 005 | 0. 077 | 3. 59E-23 Class-G | BLNK     |
| DFNA5. 5    | 2. 76E-27 | -0. 15942 | 0. 334 | 0. 173 | 4. 12E-23 Class-G | DFNA5    |
| PFKFB3. 1C  | 3. 05E-27 | -0. 19994 | 0. 414 | 0. 216 | 4. 56E-23 Class-G | PFKFB3   |
| TSPAN15. 1  | 3. 24E-27 | -0. 33703 | 0. 012 | 0. 088 | 4. 85E-23 Class-G | TSPAN15  |
| CEBPA. 10   | 3. 32E-27 | -0. 4158  | 0. 032 | 0. 116 | 4. 96E-23 Class-G | CEBPA    |
| TMEM19. 6   | 4. 76E-27 | -0. 12585 | 0. 266 | 0. 134 | 7. 11E-23 Class-G | TMEM19   |
| TXNL1. 4    | 6. 18E-27 | -0. 13023 | 0. 808 | 0. 416 | 9. 23E-23 Class-G | TXNL1    |
| GAPT. 11    | 6. 65E-27 | -0. 31101 | 0. 002 | 0. 069 | 9. 94E-23 Class-G | GAPT     |
| TMBIM4. 7   | 7. 00E-27 | -0. 68768 | 0. 001 | 0. 068 | 1. 05E-22 Class-G | TMBIM4   |
| SSR4. 5     | 7. 28E-27 | -0. 2907  | 0. 979 | 0. 727 | 1. 09E-22 Class-G | SSR4     |

|           |    |          |          |       |       |          |         |               |
|-----------|----|----------|----------|-------|-------|----------|---------|---------------|
| DYNC1LI1. | 8. | 12E-27   | -0.152   | 0.447 | 0.237 | 1.21E-22 | Class-G | DYNC1LI1      |
| RAN.      | 7  | 8.41E-27 | -0.23343 | 0.982 | 0.72  | 1.26E-22 | Class-G | RAN           |
| ARL2.     | 7  | 9.06E-27 | -0.21597 | 0.748 | 0.388 | 1.35E-22 | Class-G | ARL2          |
| VOPP1.    | 5  | 1.04E-26 | -0.12943 | 0.486 | 0.259 | 1.56E-22 | Class-G | VOPP1         |
| SAAL1.    | 5  | 1.11E-26 | -0.11385 | 0.226 | 0.112 | 1.65E-22 | Class-G | SAAL1         |
| MBD4.     | 8  | 1.14E-26 | -0.20786 | 0.443 | 0.234 | 1.71E-22 | Class-G | MBD4          |
| RASGRP3.  | 9  | 1.21E-26 | -0.35492 | 0.007 | 0.078 | 1.81E-22 | Class-G | RASGRP3       |
| MAGEH1.   | 10 | 1.22E-26 | -0.21155 | 0.539 | 0.282 | 1.83E-22 | Class-G | MAGEH1        |
| COMMD1.   | 2  | 1.30E-26 | -0.25826 | 0.609 | 0.316 | 1.94E-22 | Class-G | COMMD1        |
| KCNQ10T1. | 1. | 86E-26   | -0.12927 | 0.458 | 0.249 | 2.78E-22 | Class-G | KCNQ10T1      |
| SCIMP.    | 11 | 1.92E-26 | -0.37717 | 0.017 | 0.094 | 2.86E-22 | Class-G | SCIMP         |
| FRMD4A.   | 10 | 1.97E-26 | -0.57124 | 0.109 | 0.201 | 2.94E-22 | Class-G | FRMD4A        |
| AAK1.     | 7  | 2.13E-26 | -0.16435 | 0.465 | 0.246 | 3.18E-22 | Class-G | AAK1          |
| LPXN.     | 11 | 2.14E-26 | -0.44868 | 0.038 | 0.122 | 3.19E-22 | Class-G | LPXN          |
| PSMA2.    | 5  | 2.35E-26 | -0.67745 | 0.003 | 0.07  | 3.52E-22 | Class-G | PSMA2         |
| ANXA7.    | 8  | 2.41E-26 | -0.26084 | 0.579 | 0.299 | 3.60E-22 | Class-G | ANXA7         |
| MTMR6.    | 5  | 2.57E-26 | -0.10628 | 0.252 | 0.127 | 3.84E-22 | Class-G | MTMR6         |
| CLEC4E.   | 9  | 2.57E-26 | -0.37342 | 0.001 | 0.067 | 3.85E-22 | Class-G | CLEC4E        |
| TSG101.   | 2  | 2.62E-26 | -0.18361 | 0.71  | 0.37  | 3.91E-22 | Class-G | TSG101        |
| MYO1G.    | 11 | 2.84E-26 | -0.27334 | 0.003 | 0.07  | 4.24E-22 | Class-G | MYO1G         |
| DOK2.     | 10 | 3.05E-26 | -0.2892  | 0     | 0.064 | 4.56E-22 | Class-G | DOK2          |
| PEG10.    | 8  | 3.07E-26 | -0.32372 | 0.03  | 0.114 | 4.58E-22 | Class-G | PEG10         |
| FGD2.     | 10 | 3.22E-26 | -0.33799 | 0.003 | 0.07  | 4.81E-22 | Class-G | FGD2          |
| IL1RN.    | 10 | 3.34E-26 | -0.38533 | 0.012 | 0.085 | 4.99E-22 | Class-G | IL1RN         |
| ZFAND2A.  | 8  | 3.43E-26 | -0.27943 | 0.476 | 0.252 | 5.13E-22 | Class-G | ZFAND2A       |
| TXNDC12.  | 7  | 3.61E-26 | -0.1805  | 0.74  | 0.382 | 5.40E-22 | Class-G | TXNDC12       |
| AL592183. | 3. | 64E-26   | -0.12165 | 0.283 | 0.146 | 5.44E-22 | Class-G | AL592183.1    |
| MYADM.    | 8  | 3.64E-26 | -0.19721 | 0.327 | 0.171 | 5.44E-22 | Class-G | MYADM         |
| DENND6B.  | 1  | 3.65E-26 | -0.13146 | 0.188 | 0.088 | 5.45E-22 | Class-G | DENND6B       |
| TRAM1.    | 9  | 4.26E-26 | -0.15238 | 0.746 | 0.382 | 6.37E-22 | Class-G | TRAM1         |
| MEAF6.    | 8  | 4.77E-26 | -0.13558 | 0.818 | 0.421 | 7.12E-22 | Class-G | MEAF6         |
| MDM2.     | 5  | 5.01E-26 | -0.15866 | 0.345 | 0.183 | 7.49E-22 | Class-G | MDM2          |
| RASAL3.   | 10 | 5.25E-26 | -0.27096 | 0.001 | 0.066 | 7.85E-22 | Class-G | RASAL3        |
| RP11-556E | 5. | 30E-26   | -0.30396 | 0     | 0.064 | 7.92E-22 | Class-G | RP11-556E13.1 |
| CELF5.    | 11 | 5.61E-26 | -0.31064 | 0.023 | 0.102 | 8.38E-22 | Class-G | CELF5         |
| NRROS.    | 8  | 7.16E-26 | -0.33435 | 0.008 | 0.078 | 1.07E-21 | Class-G | NRROS         |
| COX14.    | 7  | 8.02E-26 | -0.18239 | 0.787 | 0.406 | 1.20E-21 | Class-G | COX14         |
| ATG4C.    | 5  | 8.15E-26 | -0.15734 | 0.243 | 0.122 | 1.22E-21 | Class-G | ATG4C         |
| HMGB3.    | 10 | 8.59E-26 | -0.17719 | 0.472 | 0.247 | 1.28E-21 | Class-G | HMGB3         |
| CRLF3.    | 7  | 9.26E-26 | -0.11745 | 0.204 | 0.099 | 1.38E-21 | Class-G | CRLF3         |
| TTC9B.    | 11 | 9.61E-26 | -0.38443 | 0.045 | 0.132 | 1.44E-21 | Class-G | TTC9B         |
| CORO1C.   | 7  | 9.89E-26 | -0.1502  | 0.625 | 0.332 | 1.48E-21 | Class-G | CORO1C        |
| FAM20A.   | 10 | 1.05E-25 | -0.26466 | 0.003 | 0.069 | 1.57E-21 | Class-G | FAM20A        |
| SAR1A.    | 8  | 1.16E-25 | -0.19694 | 0.497 | 0.266 | 1.74E-21 | Class-G | SAR1A         |
| C2.       | 9  | 1.17E-25 | -0.52084 | 0.042 | 0.127 | 1.75E-21 | Class-G | C2            |
| MXI1.     | 6  | 1.25E-25 | -0.12229 | 0.233 | 0.117 | 1.86E-21 | Class-G | MXI1          |
| SREBF1.   | 3  | 1.30E-25 | -0.10344 | 0.209 | 0.101 | 1.94E-21 | Class-G | SREBF1        |
| CXCL3.    | 8  | 1.38E-25 | -0.47074 | 0.011 | 0.082 | 2.07E-21 | Class-G | CXCL3         |
| ABHD5.    | 5  | 1.69E-25 | -0.12501 | 0.2   | 0.097 | 2.53E-21 | Class-G | ABHD5         |
| TMEM156.  | 9  | 1.74E-25 | -0.30719 | 0.001 | 0.065 | 2.59E-21 | Class-G | TMEM156       |
| TFEC.     | 11 | 1.79E-25 | -0.26949 | 0.001 | 0.065 | 2.68E-21 | Class-G | TFEC          |



|             |           |           |        |        |                   |              |
|-------------|-----------|-----------|--------|--------|-------------------|--------------|
| MTDH. 6     | 2. 09E-25 | 0. 12258  | 0. 95  | 0. 554 | 3. 12E-21 Class-G | MTDH         |
| DUSP2. 10   | 2. 15E-25 | -0. 50421 | 0. 039 | 0. 122 | 3. 22E-21 Class-G | DUSP2        |
| BIN1. 9     | 2. 17E-25 | -0. 72369 | 0. 338 | 0. 365 | 3. 24E-21 Class-G | BIN1         |
| MARCO. 7    | 2. 58E-25 | -0. 42098 | 0. 003 | 0. 068 | 3. 85E-21 Class-G | MARCO        |
| HNRNPA1L2   | 2. 64E-25 | -0. 12453 | 0. 335 | 0. 179 | 3. 95E-21 Class-G | HNRNPA1L2    |
| SIK1. 10    | 2. 74E-25 | -0. 39975 | 0. 032 | 0. 111 | 4. 10E-21 Class-G | SIK1         |
| AXL. 10     | 2. 82E-25 | -0. 65451 | 0. 104 | 0. 193 | 4. 21E-21 Class-G | AXL          |
| GIMAP7. 8   | 2. 95E-25 | -0. 31372 | 0. 001 | 0. 063 | 4. 42E-21 Class-G | GIMAP7       |
| KAT8. 3     | 3. 42E-25 | -0. 12566 | 0. 297 | 0. 156 | 5. 12E-21 Class-G | KAT8         |
| SLAMF8. 11  | 3. 87E-25 | -0. 29517 | 0. 006 | 0. 073 | 5. 79E-21 Class-G | SLAMF8       |
| FN1. 9      | 4. 21E-25 | -0. 23069 | 0. 266 | 0. 136 | 6. 29E-21 Class-G | FN1          |
| SYTL3. 9    | 4. 35E-25 | -0. 34536 | 0. 007 | 0. 074 | 6. 50E-21 Class-G | SYTL3        |
| TMEM192. 2  | 4. 51E-25 | -0. 17836 | 0. 32  | 0. 168 | 6. 74E-21 Class-G | TMEM192      |
| SRSF3. 2    | 4. 53E-25 | -0. 23481 | 0. 962 | 0. 691 | 6. 78E-21 Class-G | SRSF3        |
| CCL3L3. 8   | 4. 74E-25 | -0. 71755 | 0. 001 | 0. 063 | 7. 09E-21 Class-G | CCL3L3       |
| CDKN1B. 9   | 6. 21E-25 | -0. 12481 | 0. 426 | 0. 232 | 9. 28E-21 Class-G | CDKN1B       |
| TMEFF2. 11  | 7. 32E-25 | -0. 27551 | 0. 015 | 0. 088 | 1. 09E-20 Class-G | TMEFF2       |
| UNC93B1. 1  | 1. 02E-24 | -0. 22325 | 0. 341 | 0. 178 | 1. 52E-20 Class-G | UNC93B1      |
| NDUFB8. 5   | 1. 05E-24 | -0. 63701 | 0. 002 | 0. 065 | 1. 57E-20 Class-G | NDUFB8       |
| FLI1. 11    | 1. 20E-24 | -0. 26862 | 0      | 0. 06  | 1. 79E-20 Class-G | FLI1         |
| FPR3. 11    | 1. 21E-24 | -0. 25725 | 0. 002 | 0. 065 | 1. 81E-20 Class-G | FPR3         |
| SP110. 9    | 1. 61E-24 | -0. 24658 | 0. 334 | 0. 176 | 2. 41E-20 Class-G | SP110        |
| NMI. 10     | 1. 76E-24 | -0. 18804 | 0. 305 | 0. 162 | 2. 63E-20 Class-G | NMI          |
| SMU1        | 2. 13E-24 | -0. 11332 | 0. 332 | 0. 179 | 3. 19E-20 Class-G | SMU1         |
| MAGOH. 5    | 2. 27E-24 | -0. 19165 | 0. 703 | 0. 367 | 3. 39E-20 Class-G | MAGOH        |
| BAG1. 5     | 2. 36E-24 | -0. 1178  | 0. 586 | 0. 314 | 3. 52E-20 Class-G | BAG1         |
| RENBP. 10   | 2. 37E-24 | -0. 47597 | 0. 062 | 0. 147 | 3. 54E-20 Class-G | RENBP        |
| EPB41L4A-   | 2. 43E-24 | -0. 22507 | 0. 486 | 0. 262 | 3. 63E-20 Class-G | EPB41L4A-AS1 |
| ELAVL2. 11  | 2. 64E-24 | -0. 27854 | 0. 018 | 0. 09  | 3. 95E-20 Class-G | ELAVL2       |
| GNGT2. 11   | 2. 68E-24 | -0. 26345 | 0. 001 | 0. 061 | 4. 01E-20 Class-G | GNGT2        |
| HHEX. 11    | 2. 92E-24 | -0. 29399 | 0. 004 | 0. 066 | 4. 37E-20 Class-G | HHEX         |
| PLAC8. 10   | 3. 45E-24 | -0. 38201 | 0. 01  | 0. 077 | 5. 15E-20 Class-G | PLAC8        |
| FAM133B. 3  | 3. 60E-24 | -0. 14552 | 0. 804 | 0. 416 | 5. 37E-20 Class-G | FAM133B      |
| SLC31A2. 1  | 3. 65E-24 | -0. 67029 | 0. 12  | 0. 204 | 5. 46E-20 Class-G | SLC31A2      |
| ENPP4. 7    | 3. 74E-24 | -0. 22752 | 0. 002 | 0. 063 | 5. 59E-20 Class-G | ENPP4        |
| PTPN18. 11  | 3. 82E-24 | -0. 18265 | 0. 352 | 0. 187 | 5. 71E-20 Class-G | PTPN18       |
| FUNDC2. 4   | 3. 88E-24 | -0. 22794 | 0. 68  | 0. 357 | 5. 81E-20 Class-G | FUNDC2       |
| DOCK5. 10   | 3. 90E-24 | -0. 29151 | 0. 002 | 0. 064 | 5. 82E-20 Class-G | DOCK5        |
| C19orf43. 4 | 4. 25E-24 | 0. 122205 | 0. 98  | 0. 622 | 6. 35E-20 Class-G | C19orf43     |
| OSCAR. 11   | 4. 26E-24 | -0. 30387 | 0. 013 | 0. 082 | 6. 37E-20 Class-G | OSCAR        |
| DERL1. 5    | 4. 96E-24 | -0. 20446 | 0. 518 | 0. 279 | 7. 41E-20 Class-G | DERL1        |
| RNF149. 11  | 5. 30E-24 | -0. 66239 | 0. 213 | 0. 28  | 7. 92E-20 Class-G | RNF149       |
| ATIC. 3     | 5. 68E-24 | -0. 14839 | 0. 369 | 0. 201 | 8. 49E-20 Class-G | ATIC         |
| RP6-91H8. 6 | 0. 3E-24  | -0. 32741 | 0. 003 | 0. 064 | 9. 01E-20 Class-G | RP6-91H8. 3  |
| LTBR. 11    | 6. 40E-24 | -0. 38273 | 0. 03  | 0. 106 | 9. 57E-20 Class-G | LTBR         |
| NPL. 10     | 6. 45E-24 | -0. 66734 | 0. 129 | 0. 212 | 9. 64E-20 Class-G | NPL          |
| PPP1R15A. 6 | 6. 52E-24 | -0. 58228 | 0. 503 | 0. 461 | 9. 74E-20 Class-G | PPP1R15A     |
| MYT1L. 10   | 7. 07E-24 | -0. 2508  | 0. 005 | 0. 067 | 1. 06E-19 Class-G | MYT1L        |
| PIGK. 2     | 7. 24E-24 | -0. 14129 | 0. 257 | 0. 134 | 1. 08E-19 Class-G | PIGK         |
| BCL7B. 7    | 7. 27E-24 | -0. 13665 | 0. 535 | 0. 287 | 1. 09E-19 Class-G | BCL7B        |
| LY6E. 5     | 7. 47E-24 | -0. 24366 | 0. 633 | 0. 334 | 1. 12E-19 Class-G | LY6E         |

|            |          |          |       |       |          |         |          |
|------------|----------|----------|-------|-------|----------|---------|----------|
| COX5B.7    | 8.52E-24 | -0.19889 | 0.998 | 0.824 | 1.27E-19 | Class-G | COX5B    |
| EIF4A2.7   | 9.19E-24 | -0.28854 | 0.955 | 0.681 | 1.37E-19 | Class-G | EIF4A2   |
| TRAF3IP3.9 | 3.2E-24  | -0.29343 | 0.001 | 0.061 | 1.39E-19 | Class-G | TRAF3IP3 |
| POLR1D.6   | 1.20E-23 | -0.20571 | 0.702 | 0.368 | 1.80E-19 | Class-G | POLR1D   |
| ATP1A3.1C  | 1.23E-23 | -0.37796 | 0.05  | 0.132 | 1.84E-19 | Class-G | ATP1A3   |
| TBC1D15    | 1.41E-23 | -0.11647 | 0.274 | 0.145 | 2.11E-19 | Class-G | TBC1D15  |
| C10orf11.1 | 1.42E-23 | -0.36047 | 0.035 | 0.112 | 2.12E-19 | Class-G | C10orf11 |
| CHRAC1.7   | 1.44E-23 | -0.12929 | 0.246 | 0.128 | 2.15E-19 | Class-G | CHRAC1   |
| PRPF38B.6  | 1.65E-23 | -0.13334 | 0.734 | 0.386 | 2.47E-19 | Class-G | PRPF38B  |
| SPSB3.6    | 1.76E-23 | -0.18367 | 0.502 | 0.272 | 2.63E-19 | Class-G | SPSB3    |
| RBM23.3    | 1.91E-23 | -0.21318 | 0.434 | 0.237 | 2.85E-19 | Class-G | RBM23    |
| PIK3AP1.1  | 2.02E-23 | -0.2702  | 0.009 | 0.074 | 3.02E-19 | Class-G | PIK3AP1  |
| CECR1.9    | 2.24E-23 | -0.32711 | 0.013 | 0.08  | 3.35E-19 | Class-G | CECR1    |
| C15orf48.2 | 2.41E-23 | -0.3675  | 0.012 | 0.078 | 3.60E-19 | Class-G | C15orf48 |
| RGS18.11   | 2.67E-23 | -0.26537 | 0.002 | 0.061 | 3.99E-19 | Class-G | RGS18    |
| CPVL.11    | 2.71E-23 | -0.89449 | 0.332 | 0.352 | 4.06E-19 | Class-G | CPVL     |
| TOM1.9     | 2.97E-23 | -0.17886 | 0.272 | 0.142 | 4.43E-19 | Class-G | TOM1     |
| HPSE.10    | 3.26E-23 | -0.29122 | 0.005 | 0.067 | 4.87E-19 | Class-G | HPSE     |
| GSN.10     | 3.64E-23 | -0.71732 | 0.617 | 0.492 | 5.44E-19 | Class-G | GSN      |
| CDKN1A.9   | 3.73E-23 | -0.63339 | 0.249 | 0.317 | 5.57E-19 | Class-G | CDKN1A   |
| ATP50.2    | 3.99E-23 | -0.26038 | 0.975 | 0.713 | 5.96E-19 | Class-G | ATP50    |
| CAMLG.10   | 4.45E-23 | -0.1258  | 0.839 | 0.437 | 6.65E-19 | Class-G | CAMLG    |
| CPPED1.11  | 4.59E-23 | -0.28618 | 0.012 | 0.077 | 6.87E-19 | Class-G | CPPED1   |
| PLCB2.11   | 4.73E-23 | -0.28536 | 0.007 | 0.07  | 7.06E-19 | Class-G | PLCB2    |
| RGS19.11   | 5.68E-23 | -0.29811 | 0.464 | 0.245 | 8.49E-19 | Class-G | RGS19    |
| STX4.7     | 5.74E-23 | -0.29582 | 0.524 | 0.279 | 8.58E-19 | Class-G | STX4     |
| TRPV2.11   | 5.98E-23 | -0.26672 | 0.006 | 0.067 | 8.94E-19 | Class-G | TRPV2    |
| VPS35.4    | 6.77E-23 | -0.14038 | 0.733 | 0.381 | 1.01E-18 | Class-G | VPS35    |
| SPCS2.3    | 6.82E-23 | -0.30423 | 0.963 | 0.692 | 1.02E-18 | Class-G | SPCS2    |
| POLE4.7    | 7.93E-23 | -0.19051 | 0.467 | 0.255 | 1.19E-18 | Class-G | POLE4    |
| VRK2.10    | 7.99E-23 | -0.23591 | 0.004 | 0.063 | 1.19E-18 | Class-G | VRK2     |
| SPN.11     | 8.14E-23 | -0.2675  | 0.004 | 0.064 | 1.22E-18 | Class-G | SPN      |
| PHACTR3.1  | 9.39E-23 | -0.25684 | 0.018 | 0.087 | 1.40E-18 | Class-G | PHACTR3  |
| SUPT4H1.4  | 1.09E-22 | -0.15745 | 0.836 | 0.439 | 1.63E-18 | Class-G | SUPT4H1  |
| ECH1.5     | 1.11E-22 | -0.10707 | 0.914 | 0.5   | 1.66E-18 | Class-G | ECH1     |
| IL6R.11    | 1.16E-22 | -0.35191 | 0.025 | 0.096 | 1.74E-18 | Class-G | IL6R     |
| CMTM5.9    | 1.22E-22 | -0.4641  | 0.035 | 0.11  | 1.83E-18 | Class-G | CMTM5    |
| HBEGF.11   | 1.38E-22 | -0.65273 | 0.149 | 0.226 | 2.06E-18 | Class-G | HBEGF    |
| RSBN1L.9   | 1.50E-22 | -0.20932 | 0.592 | 0.316 | 2.25E-18 | Class-G | RSBN1L   |
| NDUFC2.4   | 1.54E-22 | -0.24404 | 0.978 | 0.716 | 2.30E-18 | Class-G | NDUFC2   |
| SERTAD1.7  | 1.57E-22 | -0.35324 | 0.523 | 0.282 | 2.35E-18 | Class-G | SERTAD1  |
| STK38L.6   | 1.62E-22 | -0.16873 | 0.254 | 0.133 | 2.43E-18 | Class-G | STK38L   |
| DOK3.11    | 1.72E-22 | -0.26038 | 0.011 | 0.074 | 2.57E-18 | Class-G | DOK3     |
| TLR7.8     | 2.00E-22 | -0.3029  | 0.005 | 0.064 | 2.99E-18 | Class-G | TLR7     |
| CIRBP.7    | 2.01E-22 | -0.22876 | 0.999 | 0.844 | 3.01E-18 | Class-G | CIRBP    |
| DLX6.11    | 2.03E-22 | -0.23367 | 0.005 | 0.065 | 3.03E-18 | Class-G | DLX6     |
| SOD2.7     | 2.03E-22 | -0.83596 | 0.644 | 0.518 | 3.03E-18 | Class-G | SOD2     |
| PNPLA8.7   | 2.08E-22 | -0.18831 | 0.575 | 0.31  | 3.10E-18 | Class-G | PNPLA8   |
| PPCS.8     | 2.14E-22 | -0.23368 | 0.526 | 0.287 | 3.19E-18 | Class-G | PPCS     |
| AHR.10     | 2.21E-22 | -0.24731 | 0.009 | 0.071 | 3.31E-18 | Class-G | AHR      |
| SFMBT2.9   | 2.67E-22 | -0.37465 | 0.019 | 0.087 | 3.99E-18 | Class-G | SFMBT2   |

|            |          |          |       |       |                  |            |
|------------|----------|----------|-------|-------|------------------|------------|
| HMGB2.10   | 2.89E-22 | -0.69646 | 0.586 | 0.479 | 4.32E-18 Class-G | HMGB2      |
| SCN1B.7    | 3.14E-22 | -0.10115 | 0.133 | 0.06  | 4.69E-18 Class-G | SCN1B      |
| IL10RB.11  | 3.16E-22 | -0.2578  | 0.401 | 0.217 | 4.72E-18 Class-G | IL10RB     |
| DPY30.8    | 3.89E-22 | -0.14505 | 0.833 | 0.44  | 5.82E-18 Class-G | DPY30      |
| MT1X.9     | 3.98E-22 | -0.41992 | 0.935 | 0.519 | 5.96E-18 Class-G | MT1X       |
| CCL20.10   | 4.00E-22 | -0.34322 | 0.008 | 0.069 | 5.98E-18 Class-G | CCL20      |
| DLX2.11    | 4.29E-22 | -0.44824 | 0.044 | 0.119 | 6.41E-18 Class-G | DLX2       |
| ZNF267.1C  | 4.55E-22 | -0.16763 | 0.227 | 0.117 | 6.80E-18 Class-G | ZNF267     |
| NDEL1.5    | 4.64E-22 | -0.15806 | 0.258 | 0.136 | 6.93E-18 Class-G | NDEL1      |
| ARMCX1.1C  | 4.69E-22 | -0.17005 | 0.349 | 0.191 | 7.01E-18 Class-G | ARMCX1     |
| TUBB4A.11  | 5.02E-22 | -0.51306 | 0.052 | 0.129 | 7.50E-18 Class-G | TUBB4A     |
| MGAT4A.11  | 5.10E-22 | -0.64201 | 0.156 | 0.231 | 7.61E-18 Class-G | MGAT4A     |
| SDS.11     | 5.21E-22 | -0.35972 | 0.007 | 0.067 | 7.79E-18 Class-G | SDS        |
| CLECL1.1C  | 5.28E-22 | -0.22024 | 0.001 | 0.055 | 7.90E-18 Class-G | CLECL1     |
| MTRNR2L1C  | 5.43E-22 | -0.62967 | 0.018 | 0.083 | 8.11E-18 Class-G | MTRNR2L10  |
| OLFML2B.1  | 6.28E-22 | -0.33519 | 0.013 | 0.077 | 9.39E-18 Class-G | OLFML2B    |
| DNAJB12.8  | 6.33E-22 | -0.18072 | 0.249 | 0.132 | 9.46E-18 Class-G | DNAJB12    |
| ST3GAL5.6  | 6.73E-22 | -0.12032 | 0.31  | 0.171 | 1.01E-17 Class-G | ST3GAL5    |
| LILRB2.11  | 6.91E-22 | -0.27998 | 0.004 | 0.061 | 1.03E-17 Class-G | LILRB2     |
| RRP7A.7    | 6.96E-22 | -0.24346 | 0.472 | 0.257 | 1.04E-17 Class-G | RRP7A      |
| MAT2B.2    | 7.38E-22 | -0.21502 | 0.327 | 0.177 | 1.10E-17 Class-G | MAT2B      |
| OTUD1.9    | 7.48E-22 | -0.39183 | 0.036 | 0.108 | 1.12E-17 Class-G | OTUD1      |
| GPRIN3.11  | 7.51E-22 | -0.25929 | 0.007 | 0.067 | 1.12E-17 Class-G | GPRIN3     |
| HOXC9.11   | 8.30E-22 | -0.27957 | 0.025 | 0.095 | 1.24E-17 Class-G | HOXC9      |
| TNFAIP8.1  | 8.63E-22 | -0.33509 | 0.015 | 0.078 | 1.29E-17 Class-G | TNFAIP8    |
| POLD4.9    | 9.42E-22 | -0.20243 | 0.71  | 0.374 | 1.41E-17 Class-G | POLD4      |
| UBE2E2.6   | 9.60E-22 | -0.55698 | 0.179 | 0.25  | 1.44E-17 Class-G | UBE2E2     |
| SMIM18.1C  | 1.10E-21 | -0.22434 | 0.009 | 0.069 | 1.64E-17 Class-G | SMIM18     |
| PGM2.7     | 1.12E-21 | -0.17646 | 0.25  | 0.132 | 1.68E-17 Class-G | PGM2       |
| SPCS1.4    | 1.20E-21 | -0.2881  | 0.964 | 0.699 | 1.79E-17 Class-G | SPCS1      |
| PNPLA4.6   | 1.39E-21 | -0.30558 | 0.01  | 0.071 | 2.08E-17 Class-G | PNPLA4     |
| TRPM2.11   | 1.48E-21 | -0.24955 | 0.004 | 0.06  | 2.22E-17 Class-G | TRPM2      |
| RP1-17K7.1 | 1.57E-21 | -0.39739 | 0.005 | 0.063 | 2.35E-17 Class-G | RP1-17K7.2 |
| NHSL2.6    | 1.63E-21 | -0.50452 | 0.004 | 0.059 | 2.44E-17 Class-G | NHSL2      |
| CRMP1.10   | 1.75E-21 | -0.22631 | 0.44  | 0.237 | 2.62E-17 Class-G | CRMP1      |
| CDKN3.10   | 1.88E-21 | -0.10801 | 0.164 | 0.08  | 2.81E-17 Class-G | CDKN3      |
| COX6B1.4   | 1.88E-21 | -0.2243  | 0.996 | 0.821 | 2.81E-17 Class-G | COX6B1     |
| CXCL2.8    | 1.97E-21 | -0.48951 | 0.027 | 0.096 | 2.95E-17 Class-G | CXCL2      |
| FGF9.10    | 2.05E-21 | -0.20271 | 0.003 | 0.058 | 3.07E-17 Class-G | FGF9       |
| HEXB.11    | 2.07E-21 | -0.1596  | 0.688 | 0.359 | 3.09E-17 Class-G | HEXB       |
| CDC37L1.7  | 2.26E-21 | -0.1257  | 0.233 | 0.123 | 3.38E-17 Class-G | CDC37L1    |
| CDC42SE1.2 | 2.27E-21 | -0.17512 | 0.491 | 0.273 | 3.40E-17 Class-G | CDC42SE1   |
| NAAA.11    | 3.05E-21 | -0.15264 | 0.227 | 0.118 | 4.56E-17 Class-G | NAAA       |
| SNX20.10   | 3.26E-21 | -0.20638 | 0     | 0.052 | 4.87E-17 Class-G | SNX20      |
| GBGT1.10   | 3.31E-21 | -0.21668 | 0.003 | 0.058 | 4.95E-17 Class-G | GBGT1      |
| RNF5.4     | 3.46E-21 | -0.20194 | 0.65  | 0.348 | 5.17E-17 Class-G | RNF5       |
| APOBEC3G.3 | 3.65E-21 | -0.18611 | 0.203 | 0.104 | 5.46E-17 Class-G | APOBEC3G   |
| CD300LF.9  | 3.88E-21 | -0.21531 | 0.001 | 0.053 | 5.80E-17 Class-G | CD300LF    |
| MAT2A.5    | 3.95E-21 | -0.16567 | 0.637 | 0.342 | 5.90E-17 Class-G | MAT2A      |
| DPYD.9     | 3.96E-21 | -0.36561 | 0.039 | 0.111 | 5.92E-17 Class-G | DPYD       |
| DNAJC9.5   | 4.16E-21 | -0.12853 | 0.267 | 0.145 | 6.21E-17 Class-G | DNAJC9     |

|           |          |          |       |       |                  |               |
|-----------|----------|----------|-------|-------|------------------|---------------|
| SAA2.8    | 4.19E-21 | -0.73291 | 0.004 | 0.06  | 6.27E-17 Class-G | SAA2          |
| FAM96A.9  | 4.41E-21 | -0.29877 | 0.598 | 0.317 | 6.60E-17 Class-G | FAM96A        |
| DLEU7.10  | 4.44E-21 | -0.25703 | 0.003 | 0.057 | 6.63E-17 Class-G | DLEU7         |
| CYB561A3. | 4.50E-21 | -0.16571 | 0.252 | 0.134 | 6.73E-17 Class-G | CYB561A3      |
| REL.11    | 4.70E-21 | -0.69856 | 0.26  | 0.304 | 7.02E-17 Class-G | REL           |
| ACP1.6    | 5.74E-21 | -0.13909 | 0.84  | 0.443 | 8.58E-17 Class-G | ACP1          |
| HSD17B4.4 | 5.85E-21 | -0.17781 | 0.389 | 0.217 | 8.75E-17 Class-G | HSD17B4       |
| PTGES3.3  | 5.92E-21 | -0.21655 | 0.971 | 0.678 | 8.85E-17 Class-G | PTGES3        |
| PIM1.6    | 6.64E-21 | -0.38405 | 0.064 | 0.141 | 9.93E-17 Class-G | PIM1          |
| TMEM52B.1 | 7.33E-21 | -0.25508 | 0.002 | 0.055 | 1.10E-16 Class-G | TMEM52B       |
| S100A10.1 | 7.83E-21 | -0.21147 | 0.899 | 0.487 | 1.17E-16 Class-G | S100A10       |
| ADRB2.9   | 8.86E-21 | -0.26795 | 0.001 | 0.053 | 1.32E-16 Class-G | ADRB2         |
| RP11-480C | 9.45E-21 | -0.30637 | 0.002 | 0.055 | 1.41E-16 Class-G | RP11-480C22.1 |
| HBA2.6    | 1.01E-20 | -0.5549  | 0.126 | 0.209 | 1.51E-16 Class-G | HBA2          |
| ARHGAP18. | 1.02E-20 | -0.55127 | 0.106 | 0.183 | 1.53E-16 Class-G | ARHGAP18      |
| EGR3.5    | 1.03E-20 | -0.39208 | 0.042 | 0.114 | 1.54E-16 Class-G | EGR3          |
| CAPZA2.4  | 1.03E-20 | -0.30301 | 0.898 | 0.614 | 1.54E-16 Class-G | CAPZA2        |
| NKG7.8    | 1.04E-20 | -0.31156 | 0.004 | 0.057 | 1.55E-16 Class-G | NKG7          |
| CTD-2090I | 1.04E-20 | -0.51507 | 0.005 | 0.061 | 1.56E-16 Class-G | CTD-2090I13.1 |
| HILPDA.9  | 1.05E-20 | -0.439   | 0.371 | 0.203 | 1.57E-16 Class-G | HILPDA        |
| SDHC.5    | 1.06E-20 | -0.11219 | 0.914 | 0.499 | 1.59E-16 Class-G | SDHC          |
| DDX18.3   | 1.21E-20 | -0.13487 | 0.839 | 0.446 | 1.81E-16 Class-G | DDX18         |
| PLCG2.8   | 1.26E-20 | -0.24925 | 0.002 | 0.055 | 1.88E-16 Class-G | PLCG2         |
| ANG.8     | 1.26E-20 | -0.36451 | 0.027 | 0.093 | 1.88E-16 Class-G | ANG           |
| HOXA3.10  | 1.34E-20 | -0.1936  | 0.007 | 0.064 | 2.01E-16 Class-G | HOXA3         |
| HADHA.7   | 1.35E-20 | -0.14054 | 0.736 | 0.393 | 2.01E-16 Class-G | HADHA         |
| OSGEP.5   | 1.43E-20 | -0.23259 | 0.329 | 0.182 | 2.13E-16 Class-G | OSGEP         |
| GPN3.2    | 1.58E-20 | -0.23614 | 0.41  | 0.228 | 2.37E-16 Class-G | GPN3          |
| CLK1.6    | 1.60E-20 | -0.58993 | 0.446 | 0.419 | 2.40E-16 Class-G | CLK1          |
| KIF5A.9   | 1.67E-20 | -0.11429 | 0.207 | 0.108 | 2.50E-16 Class-G | KIF5A         |
| CREM.10   | 1.75E-20 | -0.37664 | 0.693 | 0.36  | 2.61E-16 Class-G | CREM          |
| KLHL6.10  | 1.94E-20 | -0.27565 | 0.004 | 0.058 | 2.90E-16 Class-G | KLHL6         |
| YBX1.7    | 1.97E-20 | 0.140885 | 0.991 | 0.726 | 2.95E-16 Class-G | YBX1          |
| HOXA10.11 | 2.02E-20 | -0.23312 | 0.021 | 0.086 | 3.02E-16 Class-G | HOXA10        |
| RPN1.6    | 2.10E-20 | -0.23901 | 0.682 | 0.365 | 3.14E-16 Class-G | RPN1          |
| EIF4EBP1. | 2.19E-20 | -0.16413 | 0.708 | 0.38  | 3.27E-16 Class-G | EIF4EBP1      |
| TES.11    | 2.20E-20 | -0.25029 | 0.002 | 0.053 | 3.29E-16 Class-G | TES           |
| SCG3.11   | 2.34E-20 | -0.13872 | 0.418 | 0.242 | 3.50E-16 Class-G | SCG3          |
| GIMAP6.9  | 2.37E-20 | -0.22384 | 0     | 0.05  | 3.54E-16 Class-G | GIMAP6        |
| C11orf71. | 2.87E-20 | -0.1057  | 0.082 | 0.032 | 4.29E-16 Class-G | C11orf71      |
| NUP35.5   | 3.06E-20 | -0.10611 | 0.19  | 0.099 | 4.58E-16 Class-G | NUP35         |
| NT5DC1.6  | 3.10E-20 | -0.24217 | 0.005 | 0.06  | 4.64E-16 Class-G | NT5DC1        |
| ATP6V1G1. | 3.79E-20 | -0.24633 | 0.978 | 0.718 | 5.66E-16 Class-G | ATP6V1G1      |
| SDHD.7    | 3.98E-20 | -0.21299 | 0.653 | 0.354 | 5.95E-16 Class-G | SDHD          |
| PPP1R9A.1 | 4.21E-20 | -0.21607 | 0.018 | 0.08  | 6.29E-16 Class-G | PPP1R9A       |
| PAK7.10   | 4.51E-20 | -0.1733  | 0.002 | 0.054 | 6.73E-16 Class-G | PAK7          |
| CREB3L2.9 | 4.99E-20 | -0.14516 | 0.209 | 0.11  | 7.45E-16 Class-G | CREB3L2       |
| M6PR.11   | 6.11E-20 | -0.24383 | 0.643 | 0.34  | 9.13E-16 Class-G | M6PR          |
| ENPP2.5   | 8.97E-20 | -0.30941 | 0.002 | 0.052 | 1.34E-15 Class-G | ENPP2         |
| IL4I1.9   | 9.00E-20 | -0.29193 | 0.015 | 0.073 | 1.34E-15 Class-G | IL4I1         |
| NCKAP5L.3 | 1.01E-19 | -0.12944 | 0.195 | 0.101 | 1.51E-15 Class-G | NCKAP5L       |

|            |          |          |       |       |                  |               |
|------------|----------|----------|-------|-------|------------------|---------------|
| ITGA5.7    | 1.07E-19 | -0.11909 | 0.149 | 0.073 | 1.60E-15 Class-G | ITGA5         |
| ZFAND1.1   | 1.08E-19 | -0.20386 | 0.288 | 0.159 | 1.62E-15 Class-G | ZFAND1        |
| ZBTB16.6   | 1.20E-19 | -0.48593 | 0.09  | 0.166 | 1.80E-15 Class-G | ZBTB16        |
| IKBIP.9    | 1.37E-19 | -0.23624 | 0.366 | 0.204 | 2.05E-15 Class-G | IKBIP         |
| TLR5.8     | 1.48E-19 | -0.25836 | 0.002 | 0.052 | 2.20E-15 Class-G | TLR5          |
| S100B.10   | 1.57E-19 | -0.19096 | 0.832 | 0.478 | 2.34E-15 Class-G | S100B         |
| AKAP9.9    | 1.76E-19 | -0.15118 | 0.754 | 0.4   | 2.63E-15 Class-G | AKAP9         |
| CMIP.6     | 1.97E-19 | -0.15051 | 0.283 | 0.155 | 2.94E-15 Class-G | CMIP          |
| RWDD1.3    | 2.14E-19 | -0.12511 | 0.868 | 0.471 | 3.19E-15 Class-G | RWDD1         |
| RALGDS.6   | 2.22E-19 | -0.11291 | 0.247 | 0.136 | 3.31E-15 Class-G | RALGDS        |
| ATF7IP2.1  | 2.24E-19 | -0.22763 | 0.001 | 0.048 | 3.35E-15 Class-G | ATF7IP2       |
| ADCY7.11   | 2.44E-19 | -0.27618 | 0.014 | 0.071 | 3.65E-15 Class-G | ADCY7         |
| EPB41L2.9  | 2.46E-19 | -0.28367 | 0.51  | 0.278 | 3.67E-15 Class-G | EPB41L2       |
| LRMP.9     | 2.82E-19 | -0.22329 | 0.002 | 0.052 | 4.22E-15 Class-G | LRMP          |
| SEPT6.9    | 2.91E-19 | -0.19907 | 0.273 | 0.148 | 4.34E-15 Class-G | 6-Sep         |
| S100A6.1C  | 3.55E-19 | -0.18069 | 0.938 | 0.595 | 5.30E-15 Class-G | S100A6        |
| INA.7      | 3.79E-19 | -0.16899 | 0.001 | 0.049 | 5.66E-15 Class-G | INA           |
| MIR22HG.9  | 4.45E-19 | -0.19116 | 0.192 | 0.1   | 6.65E-15 Class-G | MIR22HG       |
| PRDM1.10   | 4.67E-19 | -0.40334 | 0.042 | 0.109 | 6.98E-15 Class-G | PRDM1         |
| UGT8.9     | 4.68E-19 | -0.26576 | 0.005 | 0.057 | 6.99E-15 Class-G | UGT8          |
| IGF1.9     | 4.85E-19 | -0.31915 | 0.013 | 0.069 | 7.25E-15 Class-G | IGF1          |
| IL2RG.7    | 5.25E-19 | -0.27968 | 0.002 | 0.05  | 7.84E-15 Class-G | IL2RG         |
| PAK1.10    | 5.28E-19 | -0.47688 | 0.107 | 0.18  | 7.89E-15 Class-G | PAK1          |
| SH3BGR.7   | 5.44E-19 | -0.21704 | 0.207 | 0.11  | 8.12E-15 Class-G | SH3BGR        |
| ZNF394.4   | 5.52E-19 | -0.16097 | 0.235 | 0.127 | 8.25E-15 Class-G | ZNF394        |
| TMEM144.6  | 5.56E-19 | -0.48019 | 0.025 | 0.086 | 8.31E-15 Class-G | TMEM144       |
| CD52.9     | 6.10E-19 | -0.40229 | 0.007 | 0.059 | 9.11E-15 Class-G | CD52          |
| TPMT.9     | 6.15E-19 | -0.20304 | 0.309 | 0.172 | 9.20E-15 Class-G | TPMT          |
| IDNK.3     | 6.58E-19 | -0.12414 | 0.164 | 0.084 | 9.83E-15 Class-G | IDNK          |
| CCDC91.5   | 6.84E-19 | -0.17796 | 0.315 | 0.177 | 1.02E-14 Class-G | CCDC91        |
| NUPR1.9    | 7.84E-19 | -0.35169 | 0.525 | 0.291 | 1.17E-14 Class-G | NUPR1         |
| IL7R.9     | 1.08E-18 | -0.301   | 0.008 | 0.061 | 1.61E-14 Class-G | IL7R          |
| SIGLEC14.1 | 1.14E-18 | -0.22762 | 0.003 | 0.051 | 1.70E-14 Class-G | SIGLEC14      |
| ETFDH.6    | 1.15E-18 | -0.12583 | 0.202 | 0.109 | 1.72E-14 Class-G | ETFDH         |
| RP11-834C  | 1.18E-18 | -0.33962 | 0.039 | 0.106 | 1.76E-14 Class-G | RP11-834C11.4 |
| FES.11     | 1.33E-18 | -0.32194 | 0.027 | 0.088 | 1.99E-14 Class-G | FES           |
| PRAM1.9    | 1.37E-18 | -0.26535 | 0.008 | 0.06  | 2.04E-14 Class-G | PRAM1         |
| ATP8B4.9   | 1.50E-18 | -0.20983 | 0.002 | 0.05  | 2.23E-14 Class-G | ATP8B4        |
| RGCC.9     | 1.65E-18 | -0.39038 | 0.173 | 0.263 | 2.47E-14 Class-G | RGCC          |
| COMMD6.5   | 1.77E-18 | -0.2337  | 0.971 | 0.744 | 2.64E-14 Class-G | COMMD6        |
| POMC.10    | 1.88E-18 | -0.23388 | 0.005 | 0.054 | 2.80E-14 Class-G | POMC          |
| HTATIP2.1  | 2.14E-18 | -0.18702 | 0.241 | 0.131 | 3.19E-14 Class-G | HTATIP2       |
| ATP5B.7    | 2.99E-18 | -0.1959  | 0.985 | 0.741 | 4.46E-14 Class-G | ATP5B         |
| ANKH.7     | 3.06E-18 | -0.35792 | 0.085 | 0.159 | 4.57E-14 Class-G | ANKH          |
| MTSS1.7    | 3.46E-18 | -0.48998 | 0.156 | 0.222 | 5.17E-14 Class-G | MTSS1         |
| SP100.10   | 3.46E-18 | -0.7539  | 0.254 | 0.292 | 5.17E-14 Class-G | SP100         |
| ERV3-1.1C  | 3.93E-18 | -0.2268  | 0.417 | 0.235 | 5.87E-14 Class-G | ERV3-1        |
| ARL11.10   | 3.97E-18 | -0.19855 | 0.001 | 0.045 | 5.93E-14 Class-G | ARL11         |
| SLC8A1.9   | 4.04E-18 | -0.12177 | 0.235 | 0.13  | 6.03E-14 Class-G | SLC8A1        |
| PIK3R5.1C  | 4.05E-18 | -0.22043 | 0.005 | 0.054 | 6.05E-14 Class-G | PIK3R5        |
| NDUFB11.4  | 4.13E-18 | -0.23351 | 0.973 | 0.696 | 6.18E-14 Class-G | NDUFB11       |

|            |          |          |       |       |                  |            |
|------------|----------|----------|-------|-------|------------------|------------|
| PABPC4.11  | 4.23E-18 | -0.20495 | 0.532 | 0.295 | 6.32E-14 Class-G | PABPC4     |
| DGUOK.8    | 4.33E-18 | -0.12901 | 0.859 | 0.459 | 6.48E-14 Class-G | DGUOK      |
| SRSF5.2    | 4.39E-18 | -0.27812 | 0.928 | 0.656 | 6.56E-14 Class-G | SRSF5      |
| SRP14.4    | 4.98E-18 | -0.20042 | 0.995 | 0.846 | 7.45E-14 Class-G | SRP14      |
| SIPA1.11   | 5.20E-18 | -0.16983 | 0.229 | 0.125 | 7.78E-14 Class-G | SIPA1      |
| COPZ1.4    | 5.54E-18 | -0.18267 | 0.813 | 0.432 | 8.28E-14 Class-G | COPZ1      |
| RPA3.6     | 5.57E-18 | -0.27634 | 0.557 | 0.308 | 8.32E-14 Class-G | RPA3       |
| PICALM.11  | 5.82E-18 | -0.24318 | 0.454 | 0.253 | 8.69E-14 Class-G | PICALM     |
| SLC15A3.1  | 6.05E-18 | -0.27564 | 0.02  | 0.077 | 9.03E-14 Class-G | SLC15A3    |
| VKORC1.6   | 6.31E-18 | -0.16233 | 0.825 | 0.442 | 9.43E-14 Class-G | VKORC1     |
| PXK.4      | 6.44E-18 | -0.15267 | 0.229 | 0.125 | 9.62E-14 Class-G | PXK        |
| HUS1.3     | 6.47E-18 | -0.13984 | 0.195 | 0.105 | 9.66E-14 Class-G | HUS1       |
| SLC32A1.9  | 7.31E-18 | -0.17271 | 0     | 0.043 | 1.09E-13 Class-G | SLC32A1    |
| OSTC.8     | 7.39E-18 | -0.17828 | 0.836 | 0.449 | 1.10E-13 Class-G | OSTC       |
| NDUFA7.7   | 7.40E-18 | -0.426   | 0.003 | 0.049 | 1.11E-13 Class-G | NDUFA7     |
| ACER3.9    | 7.44E-18 | -0.19507 | 0.295 | 0.167 | 1.11E-13 Class-G | ACER3      |
| ZNF536.8   | 7.95E-18 | -0.17957 | 0.003 | 0.049 | 1.19E-13 Class-G | ZNF536     |
| ST18.7     | 7.98E-18 | -0.19305 | 0.001 | 0.046 | 1.19E-13 Class-G | ST18       |
| GIMAP5.9   | 8.30E-18 | -0.2494  | 0.008 | 0.057 | 1.24E-13 Class-G | GIMAP5     |
| RAB27A.8   | 8.34E-18 | -0.12514 | 0.138 | 0.068 | 1.25E-13 Class-G | RAB27A     |
| CTB-61M7.8 | 8.94E-18 | -0.22522 | 0.001 | 0.044 | 1.34E-13 Class-G | CTB-61M7.2 |
| SLC29A1.1  | 9.33E-18 | -0.48261 | 0.079 | 0.147 | 1.39E-13 Class-G | SLC29A1    |
| FAM53C.6   | 9.57E-18 | -0.25443 | 0.385 | 0.218 | 1.43E-13 Class-G | FAM53C     |
| CUTC.4     | 9.62E-18 | -0.17712 | 0.206 | 0.112 | 1.44E-13 Class-G | CUTC       |
| MAOB.9     | 9.71E-18 | -0.1567  | 0.167 | 0.087 | 1.45E-13 Class-G | MAOB       |
| CD7.8      | 1.03E-17 | -0.30737 | 0.004 | 0.05  | 1.55E-13 Class-G | CD7        |
| LYVE1.9    | 1.06E-17 | -0.33468 | 0.001 | 0.044 | 1.58E-13 Class-G | LYVE1      |
| CCDC57.11  | 1.06E-17 | -0.15673 | 0.181 | 0.095 | 1.58E-13 Class-G | CCDC57     |
| SELL.7     | 1.14E-17 | -0.22529 | 0     | 0.043 | 1.71E-13 Class-G | SELL       |
| MX2.11     | 1.17E-17 | -0.29193 | 0.017 | 0.072 | 1.76E-13 Class-G | MX2        |
| ACO69363.1 | 1.27E-17 | -0.30119 | 0.008 | 0.058 | 1.89E-13 Class-G | ACO69363.1 |
| TLR4.9     | 1.40E-17 | -0.20777 | 0.002 | 0.047 | 2.09E-13 Class-G | TLR4       |
| PRKCH.8    | 1.94E-17 | -0.23287 | 0.004 | 0.05  | 2.90E-13 Class-G | PRKCH      |
| IL13RA2.8  | 2.16E-17 | -0.25614 | 0.011 | 0.062 | 3.23E-13 Class-G | IL13RA2    |
| KCNJ3.1    | 2.31E-17 | -0.3154  | 0.005 | 0.051 | 3.45E-13 Class-G | KCNJ3      |
| FGD3.6     | 2.51E-17 | -0.18669 | 0.002 | 0.045 | 3.75E-13 Class-G | FGD3       |
| ASCL2.10   | 2.62E-17 | -0.17024 | 0.001 | 0.043 | 3.91E-13 Class-G | ASCL2      |
| DCAF12.2   | 2.65E-17 | -0.12156 | 0.219 | 0.122 | 3.96E-13 Class-G | DCAF12     |
| AUP1.7     | 2.65E-17 | -0.10307 | 0.863 | 0.466 | 3.97E-13 Class-G | AUP1       |
| SON.4      | 2.75E-17 | -0.2671  | 0.964 | 0.669 | 4.11E-13 Class-G | SON        |
| TFRC.9     | 2.80E-17 | -0.1928  | 0.33  | 0.189 | 4.18E-13 Class-G | TFRC       |
| UCHL3.6    | 3.23E-17 | -0.26746 | 0.392 | 0.224 | 4.82E-13 Class-G | UCHL3      |
| SORBS2.9   | 3.61E-17 | -0.17595 | 0.008 | 0.057 | 5.39E-13 Class-G | SORBS2     |
| WIPF1.11   | 3.70E-17 | -0.26794 | 0.351 | 0.198 | 5.53E-13 Class-G | WIPF1      |
| SLC38A1.8  | 3.81E-17 | -0.33507 | 0.081 | 0.151 | 5.69E-13 Class-G | SLC38A1    |
| TPX2.10    | 3.90E-17 | -0.11581 | 0.143 | 0.072 | 5.82E-13 Class-G | TPX2       |
| RPP30.6    | 4.09E-17 | -0.22059 | 0.269 | 0.152 | 6.11E-13 Class-G | RPP30      |
| APOBR.10   | 4.54E-17 | -0.1839  | 0.001 | 0.044 | 6.79E-13 Class-G | APOBR      |
| RPS6KA1.1  | 4.56E-17 | -0.43005 | 0.074 | 0.14  | 6.82E-13 Class-G | RPS6KA1    |
| KCNQ1.10   | 5.14E-17 | -0.18736 | 0.002 | 0.045 | 7.68E-13 Class-G | KCNQ1      |
| DEDD2.5    | 5.14E-17 | -0.14887 | 0.274 | 0.155 | 7.68E-13 Class-G | DEDD2      |

|            |          |          |       |       |          |         |              |
|------------|----------|----------|-------|-------|----------|---------|--------------|
| SSH2.6     | 5.20E-17 | -0.21958 | 0.281 | 0.159 | 7.77E-13 | Class-G | SSH2         |
| APIP.8     | 5.31E-17 | -0.23997 | 0.367 | 0.211 | 7.94E-13 | Class-G | APIP         |
| HRH2.8     | 5.91E-17 | -0.19115 | 0.002 | 0.046 | 8.84E-13 | Class-G | HRH2         |
| RP11-76E1  | 6.28E-17 | -0.23422 | 0.001 | 0.042 | 9.39E-13 | Class-G | RP11-76E17.3 |
| STAT6.11   | 9.17E-17 | -0.25084 | 0.01  | 0.059 | 1.37E-12 | Class-G | STAT6        |
| GCA.11     | 9.48E-17 | -0.66105 | 0.273 | 0.303 | 1.42E-12 | Class-G | GCA          |
| CSTB.9     | 9.54E-17 | -0.31375 | 0.945 | 0.648 | 1.43E-12 | Class-G | CSTB         |
| ANKRD12.5  | 1.00E-16 | -0.19565 | 0.699 | 0.381 | 1.50E-12 | Class-G | ANKRD12      |
| RP11-11N9  | 1.04E-16 | -0.22329 | 0.012 | 0.061 | 1.55E-12 | Class-G | RP11-11N9.4  |
| MEIS2.9    | 1.04E-16 | -0.24754 | 0.321 | 0.184 | 1.56E-12 | Class-G | MEIS2        |
| GPD1.10    | 1.05E-16 | -0.23145 | 0.008 | 0.055 | 1.57E-12 | Class-G | GPD1         |
| MCL1.8     | 1.07E-16 | -0.44315 | 0.802 | 0.565 | 1.60E-12 | Class-G | MCL1         |
| ERMN.9     | 1.16E-16 | -0.38898 | 0.002 | 0.044 | 1.74E-12 | Class-G | ERMN         |
| RP11-347F  | 1.25E-16 | -0.32355 | 0.019 | 0.072 | 1.86E-12 | Class-G | RP11-347P5.1 |
| SELK.6     | 1.37E-16 | -0.28621 | 0.958 | 0.659 | 2.05E-12 | Class-G | SELK         |
| PRRG4.9    | 1.39E-16 | -0.20875 | 0.006 | 0.051 | 2.08E-12 | Class-G | PRRG4        |
| FAM159A.1  | 1.39E-16 | -0.20248 | 0.006 | 0.051 | 2.08E-12 | Class-G | FAM159A      |
| ASCC1.3    | 1.39E-16 | -0.12823 | 0.186 | 0.101 | 2.08E-12 | Class-G | ASCC1        |
| LHPP.7     | 1.64E-16 | -0.29095 | 0.175 | 0.094 | 2.46E-12 | Class-G | LHPP         |
| LBR.7      | 1.65E-16 | -0.16142 | 0.365 | 0.211 | 2.47E-12 | Class-G | LBR          |
| SLFN11.7   | 1.67E-16 | -0.18227 | 0.005 | 0.049 | 2.50E-12 | Class-G | SLFN11       |
| VIPR2.10   | 1.71E-16 | -0.26774 | 0.032 | 0.091 | 2.56E-12 | Class-G | VIPR2        |
| PTPN7.11   | 1.79E-16 | -0.34468 | 0.03  | 0.086 | 2.68E-12 | Class-G | PTPN7        |
| CRYBB1.9   | 2.18E-16 | -0.23108 | 0.004 | 0.048 | 3.26E-12 | Class-G | CRYBB1       |
| HEBP1.7    | 2.46E-16 | -0.1833  | 0.3   | 0.171 | 3.68E-12 | Class-G | HEBP1        |
| PDZRN4.7   | 2.61E-16 | -0.16367 | 0.002 | 0.044 | 3.91E-12 | Class-G | PDZRN4       |
| LRRC61.9   | 2.68E-16 | -0.20009 | 0.019 | 0.071 | 4.00E-12 | Class-G | LRRC61       |
| PSMA6.6    | 2.77E-16 | -0.32165 | 0.352 | 0.202 | 4.15E-12 | Class-G | PSMA6        |
| TMEM55B.2  | 2.87E-16 | -0.18759 | 0.342 | 0.198 | 4.30E-12 | Class-G | TMEM55B      |
| DDIT4.10   | 3.20E-16 | -0.57675 | 0.409 | 0.409 | 4.79E-12 | Class-G | DDIT4        |
| MYL12B.9   | 3.22E-16 | -0.27315 | 0.952 | 0.69  | 4.81E-12 | Class-G | MYL12B       |
| ZC2HC1A.1  | 3.29E-16 | -0.19482 | 0.332 | 0.191 | 4.91E-12 | Class-G | ZC2HC1A      |
| IFITM10.6  | 3.36E-16 | -0.37154 | 0.07  | 0.135 | 5.02E-12 | Class-G | IFITM10      |
| LAP3.9     | 3.45E-16 | -0.23106 | 0.797 | 0.442 | 5.16E-12 | Class-G | LAP3         |
| FOXP1.7    | 3.51E-16 | -0.73893 | 0.181 | 0.239 | 5.24E-12 | Class-G | FOXP1        |
| ICAM2.10   | 4.44E-16 | -0.1955  | 0.001 | 0.04  | 6.63E-12 | Class-G | ICAM2        |
| DCTN3.4    | 4.75E-16 | -0.10967 | 0.858 | 0.46  | 7.11E-12 | Class-G | DCTN3        |
| DUSP26.9   | 4.99E-16 | -0.30785 | 0.038 | 0.096 | 7.46E-12 | Class-G | DUSP26       |
| CMKLR1.9   | 5.01E-16 | -0.22849 | 0.01  | 0.056 | 7.48E-12 | Class-G | CMKLR1       |
| NAMPT.10   | 5.10E-16 | -0.80572 | 0.491 | 0.429 | 7.62E-12 | Class-G | NAMPT        |
| BEX2.10    | 5.13E-16 | -0.58285 | 0.212 | 0.264 | 7.66E-12 | Class-G | BEX2         |
| CD1D.9     | 5.18E-16 | -0.21599 | 0.002 | 0.043 | 7.74E-12 | Class-G | CD1D         |
| RUNX3.9    | 6.10E-16 | -0.19799 | 0.003 | 0.044 | 9.12E-12 | Class-G | RUNX3        |
| SERPINF1.6 | 6.29E-16 | -0.63503 | 0.177 | 0.232 | 9.41E-12 | Class-G | SERPINF1     |
| PRDX1.8    | 6.37E-16 | -0.24285 | 0.99  | 0.778 | 9.52E-12 | Class-G | PRDX1        |
| ISG20.6    | 7.46E-16 | -0.27477 | 0.198 | 0.109 | 1.12E-11 | Class-G | ISG20        |
| BATF.8     | 7.52E-16 | -0.18824 | 0.003 | 0.044 | 1.12E-11 | Class-G | BATF         |
| MAG.9      | 7.80E-16 | -0.40546 | 0.002 | 0.043 | 1.16E-11 | Class-G | MAG          |
| IER3IP1.6  | 8.25E-16 | -0.41618 | 0.003 | 0.044 | 1.23E-11 | Class-G | IER3IP1      |
| FKBP7.7    | 8.69E-16 | -0.10575 | 0.153 | 0.081 | 1.30E-11 | Class-G | FKBP7        |
| UFC1.6     | 9.00E-16 | -0.10922 | 0.919 | 0.503 | 1.35E-11 | Class-G | UFC1         |

|            |           |           |        |        |                   |                |
|------------|-----------|-----------|--------|--------|-------------------|----------------|
| SEMA6B. 6  | 9. 01E-16 | -0. 18944 | 0. 01  | 0. 055 | 1. 35E-11 Class-G | SEMA6B         |
| CCT5. 8    | 9. 03E-16 | -0. 13019 | 0. 789 | 0. 432 | 1. 35E-11 Class-G | CCT5           |
| SCNN1A. 4  | 9. 10E-16 | -0. 28363 | 0. 011 | 0. 057 | 1. 36E-11 Class-G | SCNN1A         |
| DSC2. 9    | 9. 68E-16 | -0. 15203 | 0      | 0. 038 | 1. 45E-11 Class-G | DSC2           |
| TNF. 8     | 1. 09E-15 | -0. 24255 | 0. 006 | 0. 049 | 1. 63E-11 Class-G | TNF            |
| DPEP2. 9   | 1. 21E-15 | -0. 1938  | 0. 001 | 0. 039 | 1. 81E-11 Class-G | DPEP2          |
| RP5-1177M  | 1. 24E-15 | -0. 20747 | 0. 007 | 0. 051 | 1. 86E-11 Class-G | RP5-1177M21. 1 |
| BTG1. 10   | 1. 25E-15 | -0. 21711 | 0. 933 | 0. 649 | 1. 87E-11 Class-G | BTG1           |
| MOBP. 10   | 1. 28E-15 | -0. 34788 | 0. 002 | 0. 041 | 1. 92E-11 Class-G | MOBP           |
| A2M. 9     | 1. 32E-15 | -0. 73453 | 0. 546 | 0. 45  | 1. 97E-11 Class-G | A2M            |
| OLFML3. 1C | 1. 42E-15 | -0. 70984 | 0. 183 | 0. 234 | 2. 12E-11 Class-G | OLFML3         |
| PTPRN2. 6  | 1. 43E-15 | -0. 48898 | 0. 16  | 0. 22  | 2. 14E-11 Class-G | PTPRN2         |
| CD9. 5     | 1. 68E-15 | -0. 62021 | 0. 665 | 0. 549 | 2. 51E-11 Class-G | CD9            |
| WNT5A. 10  | 1. 69E-15 | -0. 20653 | 0. 016 | 0. 065 | 2. 52E-11 Class-G | WNT5A          |
| RNASE3. 9  | 1. 71E-15 | -0. 22315 | 0. 001 | 0. 038 | 2. 55E-11 Class-G | RNASE3         |
| CLEC4A. 11 | 1. 76E-15 | -0. 29064 | 0. 019 | 0. 068 | 2. 63E-11 Class-G | CLEC4A         |
| SEMA4A. 9  | 1. 82E-15 | -0. 19076 | 0. 01  | 0. 056 | 2. 72E-11 Class-G | SEMA4A         |
| LOX. 8     | 1. 83E-15 | -0. 12428 | 0. 085 | 0. 038 | 2. 73E-11 Class-G | LOX            |
| IRF5. 11   | 1. 94E-15 | -0. 26537 | 0. 017 | 0. 066 | 2. 90E-11 Class-G | IRF5           |
| MKRN1. 10  | 1. 97E-15 | -0. 18767 | 0. 667 | 0. 366 | 2. 94E-11 Class-G | MKRN1          |
| TMC8. 9    | 2. 06E-15 | -0. 19613 | 0. 006 | 0. 048 | 3. 08E-11 Class-G | TMC8           |
| PALD1. 10  | 2. 13E-15 | -0. 40098 | 0. 052 | 0. 11  | 3. 18E-11 Class-G | PALD1          |
| HSPA1B. 7  | 2. 17E-15 | -0. 64516 | 0. 42  | 0. 409 | 3. 24E-11 Class-G | HSPA1B         |
| MAD1L1. 5  | 2. 20E-15 | -0. 14022 | 0. 246 | 0. 142 | 3. 29E-11 Class-G | MAD1L1         |
| PKIA. 11   | 2. 26E-15 | -0. 27462 | 0. 044 | 0. 101 | 3. 37E-11 Class-G | PKIA           |
| ARG2. 7    | 2. 28E-15 | -0. 37082 | 0. 049 | 0. 107 | 3. 41E-11 Class-G | ARG2           |
| FXYD7. 10  | 2. 80E-15 | -0. 26529 | 0. 03  | 0. 086 | 4. 19E-11 Class-G | FXYD7          |
| MIR7-3HG.  | 2. 97E-15 | -0. 19817 | 0. 001 | 0. 039 | 4. 44E-11 Class-G | MIR7-3HG       |
| SCN3B. 8   | 3. 02E-15 | -0. 24259 | 0. 027 | 0. 079 | 4. 52E-11 Class-G | SCN3B          |
| PCED1B. 9  | 3. 05E-15 | -0. 18437 | 0. 002 | 0. 041 | 4. 56E-11 Class-G | PCED1B         |
| TMEM258. 5 | 3. 13E-15 | -0. 24711 | 0. 966 | 0. 69  | 4. 68E-11 Class-G | TMEM258        |
| RARRES3. 6 | 3. 15E-15 | -0. 41767 | 0. 378 | 0. 221 | 4. 71E-11 Class-G | RARRES3        |
| HSDL1. 10  | 3. 35E-15 | -0. 11781 | 0. 209 | 0. 118 | 5. 01E-11 Class-G | HSDL1          |
| SNN. 11    | 3. 37E-15 | -0. 1547  | 0. 349 | 0. 206 | 5. 04E-11 Class-G | SNN            |
| RXRA. 6    | 3. 47E-15 | -0. 1241  | 0. 159 | 0. 086 | 5. 19E-11 Class-G | RXRA           |
| PTPRO. 9   | 3. 62E-15 | -0. 24211 | 0. 032 | 0. 086 | 5. 41E-11 Class-G | PTPRO          |
| DYNLL1. 7  | 3. 80E-15 | -0. 21487 | 0. 993 | 0. 81  | 5. 67E-11 Class-G | DYNLL1         |
| SHFM1. 7   | 3. 93E-15 | -0. 23209 | 0. 972 | 0. 682 | 5. 88E-11 Class-G | SHFM1          |
| MBNL2. 5   | 3. 98E-15 | -0. 11326 | 0. 158 | 0. 085 | 5. 95E-11 Class-G | MBNL2          |
| ALCAM. 9   | 4. 10E-15 | -0. 14604 | 0. 303 | 0. 178 | 6. 13E-11 Class-G | ALCAM          |
| COX17. 6   | 4. 10E-15 | -0. 16942 | 0. 846 | 0. 464 | 6. 13E-11 Class-G | COX17          |
| CD180. 10  | 4. 20E-15 | -0. 16542 | 0. 003 | 0. 042 | 6. 27E-11 Class-G | CD180          |
| ARRB2. 11  | 4. 31E-15 | -0. 71395 | 0. 444 | 0. 393 | 6. 45E-11 Class-G | ARRB2          |
| HPCAL1. 7  | 4. 32E-15 | -0. 16491 | 0. 327 | 0. 191 | 6. 45E-11 Class-G | HPCAL1         |
| SMIM3. 7   | 4. 33E-15 | -0. 43324 | 0. 002 | 0. 041 | 6. 48E-11 Class-G | SMIM3          |
| NRXN1. 10  | 4. 43E-15 | -0. 38806 | 0. 107 | 0. 172 | 6. 62E-11 Class-G | NRXN1          |
| MPP1. 11   | 4. 70E-15 | -0. 55324 | 0. 154 | 0. 208 | 7. 02E-11 Class-G | MPP1           |
| ITM2A. 10  | 4. 88E-15 | -0. 24266 | 0. 015 | 0. 062 | 7. 29E-11 Class-G | ITM2A          |
| PSMB2. 5   | 5. 16E-15 | -0. 13197 | 0. 924 | 0. 517 | 7. 71E-11 Class-G | PSMB2          |
| PPFIA2. 7  | 5. 29E-15 | -0. 15928 | 0. 008 | 0. 052 | 7. 90E-11 Class-G | PPFIA2         |
| PRUNE2. 8  | 5. 45E-15 | -0. 1579  | 0. 187 | 0. 105 | 8. 14E-11 Class-G | PRUNE2         |



|             |           |           |        |        |                   |                |
|-------------|-----------|-----------|--------|--------|-------------------|----------------|
| IL4R. 11    | 5. 55E-15 | -0. 29252 | 0. 027 | 0. 078 | 8. 29E-11 Class-G | IL4R           |
| TXNDC11. 3  | 5. 72E-15 | -0. 11665 | 0. 187 | 0. 105 | 8. 56E-11 Class-G | TXNDC11        |
| PRKAG2-AS   | 5. 73E-15 | -0. 43962 | 0. 073 | 0. 133 | 8. 56E-11 Class-G | PRKAG2-AS1     |
| FAM50B. 2   | 5. 77E-15 | -0. 17328 | 0. 007 | 0. 048 | 8. 62E-11 Class-G | FAM50B         |
| FAM177B. 7  | 6. 20E-15 | -0. 18135 | 0      | 0. 036 | 9. 26E-11 Class-G | FAM177B        |
| BCL11B. 8   | 6. 33E-15 | -0. 14976 | 0. 001 | 0. 038 | 9. 47E-11 Class-G | BCL11B         |
| FABP6. 9    | 6. 55E-15 | -0. 16223 | 0. 004 | 0. 044 | 9. 79E-11 Class-G | FABP6          |
| GDAP1L1. 1  | 6. 65E-15 | -0. 32608 | 0. 051 | 0. 109 | 9. 94E-11 Class-G | GDAP1L1        |
| ADI1. 4     | 7. 38E-15 | -0. 16923 | 0. 659 | 0. 365 | 1. 10E-10 Class-G | ADI1           |
| GPR132. 8   | 7. 39E-15 | -0. 16446 | 0      | 0. 036 | 1. 10E-10 Class-G | GPR132         |
| NFAM1. 9    | 7. 47E-15 | -0. 16745 | 0. 002 | 0. 039 | 1. 12E-10 Class-G | NFAM1          |
| CNTN2. 7    | 7. 67E-15 | -0. 29403 | 0. 006 | 0. 047 | 1. 15E-10 Class-G | CNTN2          |
| EIF5B. 6    | 8. 07E-15 | -0. 14813 | 0. 856 | 0. 467 | 1. 21E-10 Class-G | EIF5B          |
| C10orf128   | 8. 07E-15 | -0. 17197 | 0      | 0. 035 | 1. 21E-10 Class-G | C10orf128      |
| LDHB. 7     | 8. 30E-15 | -0. 23248 | 0. 986 | 0. 745 | 1. 24E-10 Class-G | LDHB           |
| ECHDC3. 9   | 8. 34E-15 | -0. 15753 | 0. 001 | 0. 038 | 1. 25E-10 Class-G | ECHDC3         |
| ME2. 6      | 8. 61E-15 | -0. 19694 | 0. 347 | 0. 204 | 1. 29E-10 Class-G | ME2            |
| DCTN2. 5    | 8. 68E-15 | -0. 19227 | 0. 843 | 0. 452 | 1. 30E-10 Class-G | DCTN2          |
| CLEC9A. 9   | 9. 07E-15 | -0. 23645 | 0. 001 | 0. 038 | 1. 35E-10 Class-G | CLEC9A         |
| CHST11. 9   | 9. 15E-15 | -0. 16803 | 0. 328 | 0. 194 | 1. 37E-10 Class-G | CHST11         |
| CCNG1. 6    | 9. 48E-15 | -0. 27612 | 0. 417 | 0. 245 | 1. 42E-10 Class-G | CCNG1          |
| DENND1C. 9  | 9. 98E-15 | -0. 17879 | 0. 002 | 0. 039 | 1. 49E-10 Class-G | DENND1C        |
| GREM1. 3    | 1. 00E-14 | -0. 30881 | 0. 001 | 0. 038 | 1. 50E-10 Class-G | GREM1          |
| NDUF3AF3. 4 | 1. 09E-14 | -0. 12522 | 0. 847 | 0. 463 | 1. 62E-10 Class-G | NDUF3AF3       |
| TGFBR2. 1C  | 1. 09E-14 | -0. 18363 | 0. 189 | 0. 105 | 1. 63E-10 Class-G | TGFBR2         |
| PYGL. 10    | 1. 18E-14 | -0. 27708 | 0. 3   | 0. 175 | 1. 76E-10 Class-G | PYGL           |
| FBXL15. 1C  | 1. 20E-14 | -0. 19144 | 0. 305 | 0. 177 | 1. 80E-10 Class-G | FBXL15         |
| KCNK6. 9    | 1. 27E-14 | -0. 19488 | 0. 005 | 0. 045 | 1. 90E-10 Class-G | KCNK6          |
| TCEAL4. 9   | 1. 27E-14 | -0. 11601 | 0. 924 | 0. 514 | 1. 90E-10 Class-G | TCEAL4         |
| CCP110. 8   | 1. 32E-14 | -0. 12107 | 0. 196 | 0. 112 | 1. 98E-10 Class-G | CCP110         |
| COMMD8. 9   | 1. 47E-14 | -0. 26102 | 0. 348 | 0. 204 | 2. 20E-10 Class-G | COMMD8         |
| ZCCHC6. 9   | 1. 50E-14 | -0. 16577 | 0. 214 | 0. 122 | 2. 24E-10 Class-G | ZCCHC6         |
| TMEM255B. 1 | 1. 55E-14 | -0. 29207 | 0. 016 | 0. 062 | 2. 31E-10 Class-G | TMEM255B       |
| GLIPR1. 1C  | 1. 68E-14 | -0. 35818 | 0. 528 | 0. 303 | 2. 51E-10 Class-G | GLIPR1         |
| ARHGAP22. 1 | 1. 81E-14 | -0. 3019  | 0. 03  | 0. 082 | 2. 70E-10 Class-G | ARHGAP22       |
| CELF3. 11   | 1. 82E-14 | -0. 2171  | 0. 024 | 0. 073 | 2. 71E-10 Class-G | CELF3          |
| DEPTOR. 7   | 1. 94E-14 | -0. 23225 | 0. 008 | 0. 05  | 2. 90E-10 Class-G | DEPTOR         |
| LDHA. 7     | 2. 00E-14 | -0. 33875 | 0. 958 | 0. 735 | 2. 99E-10 Class-G | LDHA           |
| POMP. 5     | 2. 00E-14 | -0. 17663 | 0. 965 | 0. 697 | 2. 99E-10 Class-G | POMP           |
| CRIP1. 9    | 2. 08E-14 | -0. 25851 | 0. 005 | 0. 045 | 3. 11E-10 Class-G | CRIP1          |
| ARPC4. 11   | 2. 11E-14 | -0. 12298 | 0. 842 | 0. 46  | 3. 16E-10 Class-G | ARPC4          |
| ANP32B. 9   | 2. 12E-14 | -0. 12952 | 0. 74  | 0. 402 | 3. 17E-10 Class-G | ANP32B         |
| MPEG1. 9    | 2. 14E-14 | -0. 18754 | 0. 007 | 0. 048 | 3. 20E-10 Class-G | MPEG1          |
| TMEM163. 5  | 2. 17E-14 | -0. 19314 | 0. 021 | 0. 069 | 3. 24E-10 Class-G | TMEM163        |
| NCOA7. 6    | 2. 23E-14 | -0. 15644 | 0. 184 | 0. 104 | 3. 34E-10 Class-G | NCOA7          |
| TF. 10      | 2. 34E-14 | -0. 47095 | 0. 029 | 0. 08  | 3. 49E-10 Class-G | TF             |
| CXCR4. 9    | 2. 41E-14 | -0. 83443 | 0. 419 | 0. 384 | 3. 60E-10 Class-G | CXCR4          |
| AURKA. 8    | 2. 46E-14 | -0. 11266 | 0. 131 | 0. 069 | 3. 68E-10 Class-G | AURKA          |
| ACSM5. 6    | 2. 61E-14 | -0. 18809 | 0. 002 | 0. 038 | 3. 90E-10 Class-G | ACSM5          |
| RP11-742E   | 2. 71E-14 | -0. 16638 | 0. 001 | 0. 035 | 4. 06E-10 Class-G | RP11-742B18. 1 |
| CLDN11. 9   | 2. 79E-14 | -0. 40052 | 0. 01  | 0. 051 | 4. 17E-10 Class-G | CLDN11         |

|           |          |          |       |       |                  |             |
|-----------|----------|----------|-------|-------|------------------|-------------|
| ARPC5.10  | 2.90E-14 | -0.27931 | 0.916 | 0.633 | 4.33E-10 Class-G | ARPC5       |
| TOX3.9    | 2.90E-14 | -0.23102 | 0.025 | 0.074 | 4.34E-10 Class-G | TOX3        |
| UQCRH.5   | 3.02E-14 | -0.18292 | 0.985 | 0.747 | 4.51E-10 Class-G | UQCRH       |
| ALDH1A1.6 | 3.03E-14 | -0.16732 | 0     | 0.034 | 4.53E-10 Class-G | ALDH1A1     |
| SUMO2.7   | 3.44E-14 | -0.14665 | 0.986 | 0.794 | 5.13E-10 Class-G | SUMO2       |
| CELF4.10  | 3.54E-14 | -0.31823 | 0.045 | 0.1   | 5.29E-10 Class-G | CELF4       |
| MAGED2.11 | 3.54E-14 | -0.15203 | 0.83  | 0.456 | 5.30E-10 Class-G | MAGED2      |
| ALDH2.8   | 3.64E-14 | -0.55947 | 0.388 | 0.368 | 5.43E-10 Class-G | ALDH2       |
| RP3-460G2 | 3.70E-14 | -0.35033 | 0.019 | 0.066 | 5.52E-10 Class-G | RP3-460G2.2 |
| TBC1D10C. | 3.71E-14 | -0.17002 | 0.001 | 0.035 | 5.55E-10 Class-G | TBC1D10C    |
| HENMT1.9  | 3.77E-14 | -0.16867 | 0.002 | 0.037 | 5.63E-10 Class-G | HENMT1      |
| ARL6IP5.5 | 3.88E-14 | -0.38578 | 0.894 | 0.61  | 5.79E-10 Class-G | ARL6IP5     |
| GNG3.9    | 3.92E-14 | -0.27186 | 0.03  | 0.081 | 5.85E-10 Class-G | GNG3        |
| AP005530. | 4.31E-14 | -0.16405 | 0     | 0.034 | 6.44E-10 Class-G | AP005530.2  |
| MOG.9     | 4.43E-14 | -0.27931 | 0.001 | 0.036 | 6.62E-10 Class-G | MOG         |
| IL12RB1.1 | 4.46E-14 | -0.16829 | 0.001 | 0.036 | 6.67E-10 Class-G | IL12RB1     |
| EMP2.5    | 4.48E-14 | -0.17554 | 0.172 | 0.098 | 6.69E-10 Class-G | EMP2        |
| TAF7.10   | 4.51E-14 | -0.10771 | 0.907 | 0.496 | 6.74E-10 Class-G | TAF7        |
| HK2.8     | 4.63E-14 | -0.10005 | 0.14  | 0.076 | 6.92E-10 Class-G | HK2         |
| ADAM8.9   | 4.68E-14 | -0.20204 | 0.008 | 0.049 | 7.00E-10 Class-G | ADAM8       |
| CACNA2D3. | 4.69E-14 | -0.13892 | 0.001 | 0.036 | 7.01E-10 Class-G | CACNA2D3    |
| LACTB.11  | 4.79E-14 | -0.19093 | 0.259 | 0.151 | 7.17E-10 Class-G | LACTB       |
| RPRM.11   | 4.80E-14 | -0.25362 | 0.025 | 0.073 | 7.17E-10 Class-G | RPRM        |
| TAL1.7    | 4.80E-14 | -0.19358 | 0.003 | 0.039 | 7.17E-10 Class-G | TAL1        |
| THOC6.6   | 4.81E-14 | -0.21371 | 0.263 | 0.154 | 7.19E-10 Class-G | THOC6       |
| TOPORS.7  | 5.05E-14 | -0.15781 | 0.276 | 0.163 | 7.55E-10 Class-G | TOPORS      |
| C19orf38. | 5.08E-14 | -0.24019 | 0.012 | 0.054 | 7.59E-10 Class-G | C19orf38    |
| MAF.10    | 5.10E-14 | -0.42468 | 0.084 | 0.143 | 7.62E-10 Class-G | MAF         |
| PPP1R15B. | 5.78E-14 | -0.14824 | 0.187 | 0.106 | 8.64E-10 Class-G | PPP1R15B    |
| SNAI1.9   | 5.79E-14 | -0.21707 | 0.01  | 0.051 | 8.66E-10 Class-G | SNAI1       |
| CTSL.11   | 6.05E-14 | -0.66979 | 0.678 | 0.498 | 9.03E-10 Class-G | CTSL        |
| SPOCK3.8  | 6.12E-14 | -0.25881 | 0.002 | 0.038 | 9.15E-10 Class-G | SPOCK3      |
| SLC7A8.6  | 6.16E-14 | -0.20221 | 0.009 | 0.05  | 9.21E-10 Class-G | SLC7A8      |
| PDGFB.8   | 6.35E-14 | -0.23715 | 0.01  | 0.051 | 9.49E-10 Class-G | PDGFB       |
| BTG2.7    | 7.10E-14 | -0.58766 | 0.55  | 0.454 | 1.06E-09 Class-G | BTG2        |
| CNPY3.11  | 7.19E-14 | -0.6846  | 0.468 | 0.403 | 1.07E-09 Class-G | CNPY3       |
| ITPRIP.1C | 7.67E-14 | -0.10248 | 0.126 | 0.067 | 1.15E-09 Class-G | ITPRIP      |
| GDAP1.10  | 7.70E-14 | -0.15316 | 0.236 | 0.138 | 1.15E-09 Class-G | GDAP1       |
| TSHZ2.9   | 8.05E-14 | -0.19698 | 0.013 | 0.055 | 1.20E-09 Class-G | TSHZ2       |
| PIP4K2A.7 | 8.74E-14 | -0.20791 | 0.215 | 0.124 | 1.31E-09 Class-G | PIP4K2A     |
| KLF7.8    | 8.83E-14 | -0.1937  | 0.317 | 0.188 | 1.32E-09 Class-G | KLF7        |
| TP53.4    | 8.96E-14 | -0.11379 | 0.18  | 0.103 | 1.34E-09 Class-G | TP53        |
| DDX39A.6  | 1.01E-13 | -0.26851 | 0.635 | 0.353 | 1.50E-09 Class-G | DDX39A      |
| CCL5.6    | 1.08E-13 | -0.39797 | 0.018 | 0.062 | 1.61E-09 Class-G | CCL5        |
| SNAP25.1C | 1.36E-13 | -0.43074 | 0.093 | 0.151 | 2.03E-09 Class-G | SNAP25      |
| CLGN.4    | 1.57E-13 | -0.12132 | 0.005 | 0.042 | 2.35E-09 Class-G | CLGN        |
| TNFSF10.8 | 1.62E-13 | -0.35804 | 0.032 | 0.081 | 2.43E-09 Class-G | TNFSF10     |
| OSTF1.10  | 1.65E-13 | -0.70784 | 0.278 | 0.293 | 2.46E-09 Class-G | OSTF1       |
| SSR2.5    | 1.75E-13 | -0.21193 | 0.967 | 0.672 | 2.61E-09 Class-G | SSR2        |
| SP140.10  | 1.81E-13 | -0.16073 | 0.002 | 0.036 | 2.71E-09 Class-G | SP140       |
| ANGPTL4.7 | 1.85E-13 | -0.45983 | 0.055 | 0.109 | 2.76E-09 Class-G | ANGPTL4     |

|           |          |          |       |       |                  |               |
|-----------|----------|----------|-------|-------|------------------|---------------|
| EDIL3.7   | 1.94E-13 | -0.23651 | 0.002 | 0.037 | 2.90E-09 Class-G | EDIL3         |
| CD163L1.3 | 1.99E-13 | -0.14023 | 0.007 | 0.046 | 2.97E-09 Class-G | CD163L1       |
| FFAR4.6   | 2.37E-13 | -0.15587 | 0.001 | 0.034 | 3.54E-09 Class-G | FFAR4         |
| RICTOR.7  | 2.44E-13 | -0.21657 | 0.286 | 0.17  | 3.64E-09 Class-G | RICTOR        |
| FAM198B.8 | 2.49E-13 | -0.24628 | 0.022 | 0.067 | 3.71E-09 Class-G | FAM198B       |
| GALNT13.7 | 2.53E-13 | -0.15627 | 0.01  | 0.049 | 3.79E-09 Class-G | GALNT13       |
| TLE3.8    | 2.58E-13 | -0.34513 | 0.088 | 0.145 | 3.85E-09 Class-G | TLE3          |
| SLC25A5.6 | 2.63E-13 | -0.27825 | 0.947 | 0.684 | 3.93E-09 Class-G | SLC25A5       |
| SRRM1.5   | 2.64E-13 | -0.12912 | 0.85  | 0.463 | 3.94E-09 Class-G | SRRM1         |
| CD72.8    | 2.70E-13 | -0.21377 | 0.015 | 0.056 | 4.03E-09 Class-G | CD72          |
| ABHD17B.1 | 2.85E-13 | -0.12093 | 0.195 | 0.113 | 4.26E-09 Class-G | ABHD17B       |
| KCNQ3.5   | 2.95E-13 | -0.18532 | 0.008 | 0.047 | 4.41E-09 Class-G | KCNQ3         |
| PPP1R18.1 | 3.00E-13 | -0.3077  | 0.459 | 0.266 | 4.48E-09 Class-G | PPP1R18       |
| C14orf132 | 3.02E-13 | -0.25791 | 0.045 | 0.099 | 4.51E-09 Class-G | C14orf132     |
| RP3-47704 | 3.07E-13 | -0.16306 | 0.001 | 0.033 | 4.58E-09 Class-G | RP3-47704.14  |
| RP11-489C | 3.07E-13 | -0.17243 | 0.001 | 0.033 | 4.59E-09 Class-G | RP11-489018.1 |
| PLBD1.11  | 3.15E-13 | -0.33843 | 0.05  | 0.102 | 4.70E-09 Class-G | PLBD1         |
| CCNB1.9   | 3.18E-13 | -0.18386 | 0.147 | 0.081 | 4.75E-09 Class-G | CCNB1         |
| IFIT1.7   | 3.19E-13 | -0.10195 | 0.121 | 0.065 | 4.77E-09 Class-G | IFIT1         |
| LMBR1L.9  | 3.32E-13 | -0.1933  | 0.283 | 0.168 | 4.96E-09 Class-G | LMBR1L        |
| EZH2.10   | 3.47E-13 | -0.12744 | 0.237 | 0.14  | 5.19E-09 Class-G | EZH2          |
| SHD.10    | 3.51E-13 | -0.36234 | 0.078 | 0.134 | 5.24E-09 Class-G | SHD           |
| ACTR2.11  | 3.75E-13 | -0.17083 | 0.754 | 0.41  | 5.60E-09 Class-G | ACTR2         |
| ZFP36L2.1 | 3.81E-13 | -0.12596 | 0.811 | 0.467 | 5.70E-09 Class-G | ZFP36L2       |
| AP000439. | 3.88E-13 | -0.17632 | 0     | 0.031 | 5.79E-09 Class-G | AP000439.1    |
| S100A1.4  | 4.23E-13 | -0.32128 | 0.007 | 0.043 | 6.32E-09 Class-G | S100A1        |
| CST7.7    | 4.30E-13 | -0.22445 | 0.005 | 0.04  | 6.42E-09 Class-G | CST7          |
| AC109826. | 4.45E-13 | -0.19407 | 0.006 | 0.042 | 6.66E-09 Class-G | AC109826.1    |
| IL1R2.7   | 4.51E-13 | -0.19246 | 0.001 | 0.033 | 6.74E-09 Class-G | IL1R2         |
| SRRM4.7   | 4.58E-13 | -0.12868 | 0.002 | 0.036 | 6.85E-09 Class-G | SRRM4         |
| RFC2.5    | 4.76E-13 | -0.25104 | 0.369 | 0.221 | 7.12E-09 Class-G | RFC2          |
| RNASE4.5  | 4.79E-13 | -0.24127 | 0.005 | 0.04  | 7.17E-09 Class-G | RNASE4        |
| SLC7A5.1C | 4.82E-13 | -0.42588 | 0.091 | 0.146 | 7.20E-09 Class-G | SLC7A5        |
| GRASP.9   | 4.90E-13 | -0.25375 | 0.016 | 0.057 | 7.32E-09 Class-G | GRASP         |
| KLK6.9    | 4.99E-13 | -0.29219 | 0.002 | 0.036 | 7.45E-09 Class-G | KLK6          |
| MKNK1.10  | 4.99E-13 | -0.5193  | 0.125 | 0.178 | 7.46E-09 Class-G | MKNK1         |
| PTPN22.7  | 5.05E-13 | -0.13334 | 0     | 0.031 | 7.54E-09 Class-G | PTPN22        |
| IL2RA.9   | 5.56E-13 | -0.25944 | 0.003 | 0.037 | 8.31E-09 Class-G | IL2RA         |
| AQP9.6    | 5.80E-13 | -0.13878 | 0.001 | 0.033 | 8.67E-09 Class-G | AQP9          |
| WDR91.5   | 6.30E-13 | -0.11329 | 0.139 | 0.077 | 9.41E-09 Class-G | WDR91         |
| HOXB7.4   | 6.34E-13 | -0.2231  | 0.022 | 0.067 | 9.47E-09 Class-G | HOXB7         |
| DNAJB1.6  | 6.46E-13 | -0.55    | 0.822 | 0.575 | 9.65E-09 Class-G | DNAJB1        |
| PCP4.8    | 6.95E-13 | -0.21254 | 0.007 | 0.044 | 1.04E-08 Class-G | PCP4          |
| WDFY4.9   | 7.17E-13 | -0.13709 | 0     | 0.03  | 1.07E-08 Class-G | WDFY4         |
| SLC03A1.4 | 7.19E-13 | -0.15042 | 0.003 | 0.036 | 1.07E-08 Class-G | SLC03A1       |
| ASNS.11   | 7.99E-13 | -0.13741 | 0.267 | 0.162 | 1.19E-08 Class-G | ASNS          |
| OTOA.8    | 8.04E-13 | -0.14959 | 0.003 | 0.036 | 1.20E-08 Class-G | OTOA          |
| CDCP1.8   | 8.27E-13 | -0.15631 | 0.004 | 0.038 | 1.24E-08 Class-G | CDCP1         |
| LAMTOR2.9 | 8.27E-13 | -0.10818 | 0.928 | 0.531 | 1.24E-08 Class-G | LAMTOR2       |
| RNU12.6   | 8.65E-13 | -0.22743 | 0.007 | 0.043 | 1.29E-08 Class-G | RNU12         |
| MMD.8     | 9.17E-13 | -0.22608 | 0.375 | 0.223 | 1.37E-08 Class-G | MMD           |

|             |           |           |        |        |                   |                |
|-------------|-----------|-----------|--------|--------|-------------------|----------------|
| ANAPC13. 8  | 1. 06E-12 | -0. 26376 | 0. 554 | 0. 321 | 1. 58E-08 Class-G | ANAPC13        |
| FMN1. 10    | 1. 09E-12 | -0. 14442 | 0. 004 | 0. 037 | 1. 62E-08 Class-G | FMN1           |
| TMEM14B. 3  | 1. 10E-12 | -0. 12455 | 0. 837 | 0. 475 | 1. 65E-08 Class-G | TMEM14B        |
| ZFAND5. 1C  | 1. 14E-12 | -0. 13963 | 0. 753 | 0. 415 | 1. 71E-08 Class-G | ZFAND5         |
| CIB1. 10    | 1. 27E-12 | -0. 26439 | 0. 818 | 0. 439 | 1. 89E-08 Class-G | CIB1           |
| CCR5. 7     | 1. 32E-12 | -0. 12382 | 0      | 0. 03  | 1. 98E-08 Class-G | CCR5           |
| PLL. 10     | 1. 34E-12 | -0. 1463  | 0. 113 | 0. 061 | 2. 00E-08 Class-G | PLL            |
| BZW2. 7     | 1. 41E-12 | -0. 23017 | 0. 413 | 0. 247 | 2. 10E-08 Class-G | BZW2           |
| CCDC126. 7  | 1. 41E-12 | -0. 12963 | 0. 181 | 0. 105 | 2. 11E-08 Class-G | CCDC126        |
| PSENE. 7    | 1. 50E-12 | -0. 30187 | 0. 804 | 0. 441 | 2. 25E-08 Class-G | PSENE          |
| CNDP1. 9    | 1. 58E-12 | -0. 29368 | 0. 005 | 0. 039 | 2. 36E-08 Class-G | CNDP1          |
| SERINC1. 3  | 1. 63E-12 | -0. 2254  | 0. 667 | 0. 377 | 2. 43E-08 Class-G | SERINC1        |
| HOXA7. 9    | 1. 64E-12 | -0. 26713 | 0. 056 | 0. 109 | 2. 45E-08 Class-G | HOXA7          |
| DAPP1. 10   | 1. 67E-12 | -0. 14693 | 0. 001 | 0. 032 | 2. 50E-08 Class-G | DAPP1          |
| ARRB1. 8    | 1. 85E-12 | -0. 19551 | 0. 01  | 0. 047 | 2. 76E-08 Class-G | ARRB1          |
| LINC00599   | 1. 87E-12 | -0. 1362  | 0. 005 | 0. 04  | 2. 80E-08 Class-G | LINC00599      |
| BCAS1. 6    | 1. 88E-12 | -0. 22693 | 0. 01  | 0. 048 | 2. 82E-08 Class-G | BCAS1          |
| CAMK1D. 8   | 1. 89E-12 | -0. 13685 | 0. 175 | 0. 101 | 2. 82E-08 Class-G | CAMK1D         |
| SLC17A9. 1  | 2. 02E-12 | -0. 13966 | 0. 002 | 0. 034 | 3. 01E-08 Class-G | SLC17A9        |
| PTGDS. 8    | 2. 05E-12 | -0. 84914 | 0. 123 | 0. 177 | 3. 06E-08 Class-G | PTGDS          |
| PLTP. 9     | 2. 15E-12 | -0. 45505 | 0. 782 | 0. 419 | 3. 21E-08 Class-G | PLTP           |
| DLL3. 10    | 2. 23E-12 | -0. 46609 | 0. 098 | 0. 151 | 3. 34E-08 Class-G | DLL3           |
| HK3. 7      | 2. 44E-12 | -0. 11164 | 0      | 0. 029 | 3. 65E-08 Class-G | HK3            |
| C1RL. 4     | 2. 45E-12 | -0. 12763 | 0. 097 | 0. 05  | 3. 67E-08 Class-G | C1RL           |
| ITGB2-AS1   | 2. 75E-12 | -0. 17435 | 0. 002 | 0. 033 | 4. 11E-08 Class-G | ITGB2-AS1      |
| NDUFS2. 4   | 2. 89E-12 | -0. 12227 | 0. 886 | 0. 496 | 4. 32E-08 Class-G | NDUFS2         |
| ZNF330. 5   | 2. 90E-12 | -0. 2937  | 0. 328 | 0. 197 | 4. 33E-08 Class-G | ZNF330         |
| HOXA5. 7    | 2. 90E-12 | -0. 17998 | 0. 023 | 0. 066 | 4. 34E-08 Class-G | HOXA5          |
| GPR85. 1    | 3. 02E-12 | -0. 11867 | 0. 002 | 0. 034 | 4. 51E-08 Class-G | GPR85          |
| RNF175. 1   | 3. 03E-12 | -0. 11872 | 0. 005 | 0. 038 | 4. 53E-08 Class-G | RNF175         |
| SLC8B1. 11  | 3. 08E-12 | -0. 12014 | 0. 155 | 0. 088 | 4. 61E-08 Class-G | SLC8B1         |
| ARID3A. 4   | 3. 19E-12 | -0. 16599 | 0. 179 | 0. 104 | 4. 76E-08 Class-G | ARID3A         |
| MYO7A. 9    | 3. 23E-12 | -0. 17775 | 0. 005 | 0. 038 | 4. 82E-08 Class-G | MYO7A          |
| ARPC1B. 11  | 3. 30E-12 | -0. 59962 | 0. 701 | 0. 503 | 4. 93E-08 Class-G | ARPC1B         |
| AC147651. 3 | 3. 55E-12 | -0. 16742 | 0. 007 | 0. 041 | 5. 30E-08 Class-G | AC147651. 4    |
| RP11-557H   | 3. 65E-12 | -0. 1595  | 0. 001 | 0. 031 | 5. 46E-08 Class-G | RP11-557H15. 4 |
| SLC16A3. 1  | 3. 87E-12 | -0. 59003 | 0. 32  | 0. 32  | 5. 79E-08 Class-G | SLC16A3        |
| TALDO1. 9   | 3. 89E-12 | -0. 41644 | 0. 83  | 0. 559 | 5. 81E-08 Class-G | TALDO1         |
| LACC1. 7    | 4. 07E-12 | -0. 14564 | 0. 005 | 0. 039 | 6. 08E-08 Class-G | LACC1          |
| SCAMP2. 11  | 4. 10E-12 | -0. 37758 | 0. 599 | 0. 338 | 6. 13E-08 Class-G | SCAMP2         |
| MAN1A1. 1C  | 4. 16E-12 | -0. 19206 | 0. 015 | 0. 053 | 6. 21E-08 Class-G | MAN1A1         |
| DCK. 8      | 4. 17E-12 | -0. 26001 | 0. 408 | 0. 243 | 6. 23E-08 Class-G | DCK            |
| ACP5. 9     | 4. 17E-12 | -0. 22613 | 0. 015 | 0. 053 | 6. 24E-08 Class-G | ACP5           |
| YWHAH. 10   | 4. 45E-12 | -0. 38916 | 0. 785 | 0. 529 | 6. 65E-08 Class-G | YWHAH          |
| RBAK-RBAK   | 4. 83E-12 | -0. 10678 | 0. 158 | 0. 092 | 7. 21E-08 Class-G | RBAK-RBAKDN    |
| PDLIM3. 9   | 4. 83E-12 | -0. 14563 | 0. 176 | 0. 104 | 7. 22E-08 Class-G | PDLIM3         |
| RND3. 10    | 5. 03E-12 | -0. 26957 | 0. 367 | 0. 222 | 7. 51E-08 Class-G | RND3           |
| ANKS1B. 1C  | 5. 38E-12 | -0. 34969 | 0. 064 | 0. 115 | 8. 04E-08 Class-G | ANKS1B         |
| GAPDH. 8    | 5. 47E-12 | -0. 30269 | 1      | 0. 982 | 8. 17E-08 Class-G | GAPDH          |
| KCNE3. 10   | 5. 62E-12 | -0. 1261  | 0. 001 | 0. 031 | 8. 40E-08 Class-G | KCNE3          |
| PRKCB. 10   | 6. 15E-12 | -0. 1679  | 0. 011 | 0. 047 | 9. 19E-08 Class-G | PRKCB          |

|             |          |          |       |       |          |         |           |
|-------------|----------|----------|-------|-------|----------|---------|-----------|
| PSTPIP1.9   | 6.56E-12 | -0.18782 | 0.01  | 0.046 | 9.81E-08 | Class-G | PSTPIP1   |
| COLEC12.3   | 6.56E-12 | -0.15478 | 0.005 | 0.038 | 9.81E-08 | Class-G | COLEC12   |
| FHIT.6      | 6.64E-12 | -0.40066 | 0.072 | 0.124 | 9.93E-08 | Class-G | FHIT      |
| ATP5EP2.8   | 6.69E-12 | -0.42533 | 0.731 | 0.4   | 1.00E-07 | Class-G | ATP5EP2   |
| SYTL2.8     | 7.13E-12 | -0.125   | 0.123 | 0.068 | 1.07E-07 | Class-G | SYTL2     |
| ALOX15B.9   | 7.30E-12 | -0.1552  | 0.001 | 0.03  | 1.09E-07 | Class-G | ALOX15B   |
| CD164.10    | 7.31E-12 | -0.19779 | 0.806 | 0.439 | 1.09E-07 | Class-G | CD164     |
| HSPA2.8     | 7.57E-12 | -0.49004 | 0.079 | 0.132 | 1.13E-07 | Class-G | HSPA2     |
| PRDM8.6     | 7.57E-12 | -0.11371 | 0.003 | 0.034 | 1.13E-07 | Class-G | PRDM8     |
| CEACAM4.9   | 7.62E-12 | -0.11933 | 0     | 0.028 | 1.14E-07 | Class-G | CEACAM4   |
| SPINT1.10   | 7.72E-12 | -0.13897 | 0.005 | 0.038 | 1.15E-07 | Class-G | SPINT1    |
| TMC01.5     | 7.73E-12 | -0.15493 | 0.916 | 0.519 | 1.16E-07 | Class-G | TMC01     |
| FAM64A.11   | 7.75E-12 | -0.11292 | 0.114 | 0.062 | 1.16E-07 | Class-G | FAM64A    |
| CTSW.6      | 7.78E-12 | -0.22247 | 0.003 | 0.034 | 1.16E-07 | Class-G | CTSW      |
| RTN3.9      | 8.07E-12 | -0.2689  | 0.931 | 0.609 | 1.21E-07 | Class-G | RTN3      |
| SRRM3.10    | 8.25E-12 | -0.22503 | 0.033 | 0.078 | 1.23E-07 | Class-G | SRRM3     |
| KIAA1551.8  | 8.27E-12 | -0.11504 | 0.139 | 0.079 | 1.24E-07 | Class-G | KIAA1551  |
| DNAJB9.7    | 8.43E-12 | -0.59721 | 0.414 | 0.38  | 1.26E-07 | Class-G | DNAJB9    |
| CREBL2.9    | 8.53E-12 | -0.27577 | 0.287 | 0.173 | 1.28E-07 | Class-G | CREBL2    |
| ACSL5.10    | 8.72E-12 | -0.15353 | 0.006 | 0.039 | 1.30E-07 | Class-G | ACSL5     |
| FA2H.7      | 8.90E-12 | -0.15918 | 0.002 | 0.031 | 1.33E-07 | Class-G | FA2H      |
| ADAMDEC1.8  | 9.66E-12 | -0.19417 | 0.008 | 0.042 | 1.34E-07 | Class-G | ADAMDEC1  |
| ZFR2.6      | 9.11E-12 | -0.12539 | 0.008 | 0.043 | 1.36E-07 | Class-G | ZFR2      |
| AMD1.5      | 9.29E-12 | -0.2825  | 0.599 | 0.348 | 1.39E-07 | Class-G | AMD1      |
| RAB3C.7     | 9.62E-12 | -0.12859 | 0.008 | 0.043 | 1.44E-07 | Class-G | RAB3C     |
| RIPK2.9     | 9.72E-12 | -0.24025 | 0.255 | 0.154 | 1.45E-07 | Class-G | RIPK2     |
| EPS8.4      | 9.82E-12 | -0.30572 | 0.081 | 0.134 | 1.47E-07 | Class-G | EPS8      |
| SHMT1.7     | 9.92E-12 | -0.18295 | 0.182 | 0.108 | 1.48E-07 | Class-G | SHMT1     |
| CCT2.6      | 9.98E-12 | -0.17402 | 0.876 | 0.491 | 1.49E-07 | Class-G | CCT2      |
| CNTRL.7     | 1.03E-11 | -0.11771 | 0.181 | 0.108 | 1.54E-07 | Class-G | CNTRL     |
| PLCL1.3     | 1.15E-11 | -0.13936 | 0.005 | 0.036 | 1.72E-07 | Class-G | PLCL1     |
| TNFRSF11A.1 | 1.23E-11 | -0.11463 | 0.001 | 0.028 | 1.83E-07 | Class-G | TNFRSF11A |
| IGFBP6.8    | 1.29E-11 | -0.13146 | 0.109 | 0.059 | 1.92E-07 | Class-G | IGFBP6    |
| CCDC28A.1   | 1.55E-11 | -0.23519 | 0.24  | 0.145 | 2.32E-07 | Class-G | CCDC28A   |
| HOXA9.7     | 1.58E-11 | -0.11997 | 0.007 | 0.039 | 2.37E-07 | Class-G | HOXA9     |
| NKX6-2.9    | 1.59E-11 | -0.19566 | 0.001 | 0.028 | 2.38E-07 | Class-G | NKX6-2    |
| ASRGL1.9    | 1.65E-11 | -0.15867 | 0.301 | 0.184 | 2.47E-07 | Class-G | ASRGL1    |
| BGN.9       | 1.84E-11 | -0.30126 | 0.028 | 0.071 | 2.75E-07 | Class-G | BGN       |
| APOBEC3C.1  | 1.95E-11 | -0.22213 | 0.196 | 0.117 | 2.92E-07 | Class-G | APOBEC3C  |
| CDKN2AIP.1  | 1.98E-11 | -0.16321 | 0.223 | 0.135 | 2.95E-07 | Class-G | CDKN2AIP  |
| PRSS23.9    | 1.99E-11 | -0.14616 | 0.125 | 0.07  | 2.97E-07 | Class-G | PRSS23    |
| CATSPER1.2  | 2.05E-11 | -0.15516 | 0.002 | 0.03  | 3.06E-07 | Class-G | CATSPER1  |
| CACNA2D1.2  | 2.07E-11 | -0.1074  | 0.004 | 0.035 | 3.09E-07 | Class-G | CACNA2D1  |
| LXN.7       | 2.08E-11 | -0.13261 | 0.001 | 0.029 | 3.11E-07 | Class-G | LXN       |
| CPED1.8     | 2.17E-11 | -0.1514  | 0.005 | 0.037 | 3.25E-07 | Class-G | CPED1     |
| HP.6        | 2.50E-11 | -0.33986 | 0.001 | 0.028 | 3.74E-07 | Class-G | HP        |
| STC1.2      | 2.54E-11 | -0.11802 | 0.001 | 0.029 | 3.80E-07 | Class-G | STC1      |
| PLEK2.8     | 2.70E-11 | -0.11413 | 0.001 | 0.028 | 4.03E-07 | Class-G | PLEK2     |
| IBSP.8      | 2.70E-11 | -0.20001 | 0.001 | 0.028 | 4.04E-07 | Class-G | IBSP      |
| IGLON5.7    | 2.77E-11 | -0.15928 | 0.016 | 0.053 | 4.14E-07 | Class-G | IGLON5    |
| MT2A.10     | 3.00E-11 | -0.24428 | 0.996 | 0.749 | 4.48E-07 | Class-G | MT2A      |

|           |          |          |       |       |                  |               |
|-----------|----------|----------|-------|-------|------------------|---------------|
| P2RY6.10  | 3.03E-11 | -0.14375 | 0.006 | 0.037 | 4.53E-07 Class-G | P2RY6         |
| SERPINF2. | 3.17E-11 | -0.13657 | 0.002 | 0.03  | 4.74E-07 Class-G | SERPINF2      |
| RASSF4.11 | 3.32E-11 | -0.33791 | 0.506 | 0.3   | 4.97E-07 Class-G | RASSF4        |
| PPM1M.11  | 3.33E-11 | -0.10409 | 0.121 | 0.067 | 4.98E-07 Class-G | PPM1M         |
| SOX10.7   | 3.41E-11 | -0.17322 | 0.004 | 0.033 | 5.09E-07 Class-G | SOX10         |
| IL10RB-AS | 3.45E-11 | -0.22404 | 0.014 | 0.05  | 5.16E-07 Class-G | IL10RB-AS1    |
| MLXIPL.7  | 3.49E-11 | -0.20425 | 0.01  | 0.044 | 5.22E-07 Class-G | MLXIPL        |
| CARD11.9  | 3.51E-11 | -0.12402 | 0.003 | 0.032 | 5.24E-07 Class-G | CARD11        |
| MEF2C.11  | 3.57E-11 | -0.58509 | 0.271 | 0.285 | 5.33E-07 Class-G | MEF2C         |
| FCHSD2.3  | 3.59E-11 | -0.1025  | 0.129 | 0.073 | 5.37E-07 Class-G | FCHSD2        |
| AIM1.7    | 3.71E-11 | -0.17372 | 0.007 | 0.039 | 5.55E-07 Class-G | AIM1          |
| SH3BP1.11 | 3.78E-11 | -0.16613 | 0.173 | 0.102 | 5.65E-07 Class-G | SH3BP1        |
| RSL1D1.4  | 4.08E-11 | -0.18151 | 0.811 | 0.445 | 6.10E-07 Class-G | RSL1D1        |
| MFSD7.9   | 4.31E-11 | -0.12678 | 0.005 | 0.036 | 6.44E-07 Class-G | MFSD7         |
| SEMA4D.1C | 4.39E-11 | -0.32551 | 0.042 | 0.087 | 6.57E-07 Class-G | SEMA4D        |
| SLC6A6.4  | 4.46E-11 | -0.24267 | 0.028 | 0.069 | 6.67E-07 Class-G | SLC6A6        |
| DBF4.8    | 4.61E-11 | -0.13564 | 0.184 | 0.111 | 6.88E-07 Class-G | DBF4          |
| PLVAP.7   | 4.66E-11 | -0.15901 | 0.004 | 0.034 | 6.97E-07 Class-G | PLVAP         |
| TMEM125.7 | 4.77E-11 | -0.16354 | 0     | 0.026 | 7.13E-07 Class-G | TMEM125       |
| MAPK13.7  | 4.86E-11 | -0.13203 | 0.005 | 0.035 | 7.27E-07 Class-G | MAPK13        |
| MSRA.9    | 4.88E-11 | -0.22391 | 0.385 | 0.235 | 7.29E-07 Class-G | MSRA          |
| RP11-597C | 4.96E-11 | -0.15153 | 0.001 | 0.027 | 7.41E-07 Class-G | RP11-597D13.8 |
| SPNS3.8   | 4.96E-11 | -0.13355 | 0.001 | 0.027 | 7.42E-07 Class-G | SPNS3         |
| FAM49B.1C | 5.17E-11 | -0.51099 | 0.658 | 0.481 | 7.73E-07 Class-G | FAM49B        |
| GRM3.6    | 5.21E-11 | -0.13775 | 0     | 0.026 | 7.78E-07 Class-G | GRM3          |
| TPSAB1.6  | 5.21E-11 | -0.17084 | 0     | 0.026 | 7.78E-07 Class-G | TPSAB1        |
| GSTK1.9   | 5.26E-11 | -0.24389 | 0.866 | 0.475 | 7.87E-07 Class-G | GSTK1         |
| FRMD4B.11 | 5.26E-11 | -0.4815  | 0.118 | 0.166 | 7.87E-07 Class-G | FRMD4B        |
| ITGB7.8   | 5.36E-11 | -0.1199  | 0.002 | 0.029 | 8.01E-07 Class-G | ITGB7         |
| NME6.3    | 5.55E-11 | -0.16055 | 0.166 | 0.099 | 8.29E-07 Class-G | NME6          |
| DNAJB4.3  | 6.01E-11 | -0.17758 | 0.19  | 0.115 | 8.98E-07 Class-G | DNAJB4        |
| GALNT6.7  | 6.02E-11 | -0.13833 | 0.004 | 0.033 | 8.99E-07 Class-G | GALNT6        |
| IVNS1ABP. | 6.03E-11 | -0.24621 | 0.355 | 0.218 | 9.00E-07 Class-G | IVNS1ABP      |
| SEC62.5   | 6.07E-11 | -0.23848 | 0.959 | 0.647 | 9.07E-07 Class-G | SEC62         |
| ZFPM2.5   | 6.40E-11 | -0.12151 | 0.004 | 0.032 | 9.56E-07 Class-G | ZFPM2         |
| SLC2A9.8  | 6.43E-11 | -0.13307 | 0.002 | 0.029 | 9.61E-07 Class-G | SLC2A9        |
| FCER1A.5  | 6.59E-11 | -0.14679 | 0.001 | 0.028 | 9.84E-07 Class-G | FCER1A        |
| ATP6AP2.6 | 6.78E-11 | -0.28794 | 0.905 | 0.616 | 1.01E-06 Class-G | ATP6AP2       |
| ING3.6    | 7.13E-11 | -0.19994 | 0.273 | 0.17  | 1.06E-06 Class-G | ING3          |
| IFNLR1.6  | 7.79E-11 | -0.13579 | 0.001 | 0.028 | 1.16E-06 Class-G | IFNLR1        |
| AK5.5     | 7.83E-11 | -0.13985 | 0.002 | 0.029 | 1.17E-06 Class-G | AK5           |
| CELF2.11  | 8.05E-11 | -0.28733 | 0.599 | 0.348 | 1.20E-06 Class-G | CELF2         |
| RP11-353N | 8.06E-11 | -0.12103 | 0     | 0.025 | 1.20E-06 Class-G | RP11-353N4.5  |
| PSMC2.6   | 8.12E-11 | -0.22123 | 0.73  | 0.414 | 1.21E-06 Class-G | PSMC2         |
| RP11-403I | 8.18E-11 | -0.22021 | 0.007 | 0.038 | 1.22E-06 Class-G | RP11-403I13.5 |
| CHGA.4    | 8.39E-11 | -0.11015 | 0.003 | 0.031 | 1.25E-06 Class-G | CHGA          |
| STAC3.11  | 8.90E-11 | -0.29041 | 0.042 | 0.085 | 1.33E-06 Class-G | STAC3         |
| USP15.6   | 9.06E-11 | -0.26955 | 0.364 | 0.223 | 1.35E-06 Class-G | USP15         |
| GPR160.4  | 9.06E-11 | -0.10227 | 0.002 | 0.029 | 1.35E-06 Class-G | GPR160        |
| CEBPD.8   | 9.50E-11 | -0.15595 | 0.704 | 0.419 | 1.42E-06 Class-G | CEBPD         |
| CENPF.10  | 9.67E-11 | -0.17893 | 0.156 | 0.092 | 1.45E-06 Class-G | CENPF         |

|            |          |          |       |       |          |         |           |
|------------|----------|----------|-------|-------|----------|---------|-----------|
| CARD9.11   | 9.87E-11 | -0.25576 | 0.033 | 0.075 | 1.47E-06 | Class-G | CARD9     |
| PPARG.8    | 1.02E-10 | -0.12015 | 0.002 | 0.028 | 1.53E-06 | Class-G | PPARG     |
| AGAP2-AS1  | 1.06E-10 | -0.1475  | 0.147 | 0.087 | 1.59E-06 | Class-G | AGAP2-AS1 |
| LILRB3.8   | 1.06E-10 | -0.18093 | 0.012 | 0.045 | 1.59E-06 | Class-G | LILRB3    |
| L1CAM.7    | 1.07E-10 | -0.13591 | 0.008 | 0.039 | 1.60E-06 | Class-G | L1CAM     |
| KLHL24.6   | 1.08E-10 | -0.19009 | 0.265 | 0.165 | 1.62E-06 | Class-G | KLHL24    |
| DBI.10     | 1.13E-10 | -0.13863 | 0.998 | 0.818 | 1.68E-06 | Class-G | DBI       |
| PPIG.3     | 1.16E-10 | -0.13678 | 0.853 | 0.476 | 1.74E-06 | Class-G | PPIG      |
| MTHFD2.9   | 1.22E-10 | -0.55389 | 0.277 | 0.29  | 1.82E-06 | Class-G | MTHFD2    |
| KCNK13.5   | 1.32E-10 | -0.10334 | 0.001 | 0.027 | 1.98E-06 | Class-G | KCNK13    |
| PCL0.3     | 1.33E-10 | -0.10926 | 0.007 | 0.038 | 1.99E-06 | Class-G | PCL0      |
| RASSF1.5   | 1.35E-10 | -0.18408 | 0.236 | 0.146 | 2.01E-06 | Class-G | RASSF1    |
| GNLY.5     | 1.39E-10 | -0.22543 | 0.005 | 0.034 | 2.08E-06 | Class-G | GNLY      |
| ZNF804A.4  | 1.48E-10 | -0.12703 | 0.01  | 0.043 | 2.21E-06 | Class-G | ZNF804A   |
| CCDC170.5  | 1.53E-10 | -0.13924 | 0.015 | 0.05  | 2.28E-06 | Class-G | CCDC170   |
| JAKMIP1.4  | 1.54E-10 | -0.11156 | 0.006 | 0.036 | 2.30E-06 | Class-G | JAKMIP1   |
| LILRA4.5   | 1.56E-10 | -0.1429  | 0.001 | 0.027 | 2.33E-06 | Class-G | LILRA4    |
| HGF.5      | 1.57E-10 | -0.13938 | 0.004 | 0.032 | 2.34E-06 | Class-G | HGF       |
| PTCRA.7    | 1.57E-10 | -0.12539 | 0.001 | 0.027 | 2.35E-06 | Class-G | PTCRA     |
| SMPD3.1    | 1.63E-10 | -0.10085 | 0.004 | 0.031 | 2.43E-06 | Class-G | SMPD3     |
| MGST2.11   | 1.66E-10 | -0.66821 | 0.237 | 0.256 | 2.49E-06 | Class-G | MGST2     |
| ITGAL.5    | 1.69E-10 | -0.13343 | 0.002 | 0.028 | 2.52E-06 | Class-G | ITGAL     |
| DUSP22.10  | 1.84E-10 | -0.19071 | 0.17  | 0.102 | 2.74E-06 | Class-G | DUSP22    |
| PEBP1.10   | 1.85E-10 | -0.18731 | 0.999 | 0.772 | 2.76E-06 | Class-G | PEBP1     |
| PTER.4     | 1.93E-10 | -0.10251 | 0     | 0.024 | 2.88E-06 | Class-G | PTER      |
| HOXA-AS2.2 | 2.03E-10 | -0.12761 | 0.01  | 0.042 | 3.03E-06 | Class-G | HOXA-AS2  |
| SYP.10     | 2.05E-10 | -0.15178 | 0.2   | 0.123 | 3.06E-06 | Class-G | SYP       |
| RNF125.5   | 2.18E-10 | -0.13097 | 0.002 | 0.028 | 3.25E-06 | Class-G | RNF125    |
| PRKAG2.7   | 2.19E-10 | -0.41468 | 0.098 | 0.144 | 3.27E-06 | Class-G | PRKAG2    |
| MERTK.10   | 2.38E-10 | -0.41621 | 0.085 | 0.131 | 3.55E-06 | Class-G | MERTK     |
| GOT1.3     | 2.46E-10 | -0.19558 | 0.196 | 0.121 | 3.67E-06 | Class-G | GOT1      |
| CYSLTR1.8  | 2.56E-10 | -0.12443 | 0.002 | 0.029 | 3.83E-06 | Class-G | CYSLTR1   |
| IGFLR1.8   | 2.57E-10 | -0.28013 | 0.023 | 0.06  | 3.84E-06 | Class-G | IGFLR1    |
| BASP1.10   | 2.60E-10 | -0.25015 | 0.588 | 0.337 | 3.88E-06 | Class-G | BASP1     |
| RAB1A.5    | 2.60E-10 | -0.31668 | 0.878 | 0.578 | 3.89E-06 | Class-G | RAB1A     |
| RAB33A.9   | 2.94E-10 | -0.34551 | 0.067 | 0.112 | 4.39E-06 | Class-G | RAB33A    |
| ADAP1.5    | 3.01E-10 | -0.17135 | 0.013 | 0.045 | 4.50E-06 | Class-G | ADAP1     |
| CCER2.10   | 3.06E-10 | -0.18459 | 0.023 | 0.06  | 4.57E-06 | Class-G | CCER2     |
| TRMT112.6  | 3.13E-10 | -0.2682  | 0.961 | 0.665 | 4.68E-06 | Class-G | TRMT112   |
| DHRS9.6    | 3.15E-10 | -0.18231 | 0.001 | 0.026 | 4.71E-06 | Class-G | DHRS9     |
| ADAMTS4.6  | 3.25E-10 | -0.17363 | 0.007 | 0.036 | 4.85E-06 | Class-G | ADAMTS4   |
| BUB3.4     | 3.50E-10 | -0.30268 | 0.468 | 0.281 | 5.22E-06 | Class-G | BUB3      |
| SKIL.9     | 3.75E-10 | -0.2868  | 0.432 | 0.262 | 5.60E-06 | Class-G | SKIL      |
| RUNX2.7    | 3.82E-10 | -0.13982 | 0.005 | 0.032 | 5.71E-06 | Class-G | RUNX2     |
| ANKMY2.6   | 3.89E-10 | -0.10853 | 0.176 | 0.108 | 5.81E-06 | Class-G | ANKMY2    |
| ANLN.10    | 4.11E-10 | -0.26224 | 0.029 | 0.068 | 6.14E-06 | Class-G | ANLN      |
| PLA2G4A.6  | 4.16E-10 | -0.1335  | 0.007 | 0.037 | 6.22E-06 | Class-G | PLA2G4A   |
| ELL.7      | 4.17E-10 | -0.12045 | 0.152 | 0.091 | 6.24E-06 | Class-G | ELL       |
| ANKRD37.6  | 4.37E-10 | -0.23833 | 0.212 | 0.13  | 6.52E-06 | Class-G | ANKRD37   |
| MS4A14.8   | 4.44E-10 | -0.12276 | 0.001 | 0.026 | 6.64E-06 | Class-G | MS4A14    |
| SIDT1.6    | 4.82E-10 | -0.14838 | 0.002 | 0.027 | 7.20E-06 | Class-G | SIDT1     |

|           |          |          |       |       |                  |               |
|-----------|----------|----------|-------|-------|------------------|---------------|
| CARNS1.9  | 4.85E-10 | -0.2391  | 0.005 | 0.032 | 7.24E-06 Class-G | CARNS1        |
| SOD1.6    | 4.93E-10 | -0.24397 | 0.981 | 0.72  | 7.37E-06 Class-G | SOD1          |
| LY96.11   | 5.00E-10 | -0.28819 | 0.335 | 0.204 | 7.47E-06 Class-G | LY96          |
| SMOC1.6   | 5.00E-10 | -0.14084 | 0.008 | 0.038 | 7.47E-06 Class-G | SMOC1         |
| VNN2.8    | 5.09E-10 | -0.11676 | 0.003 | 0.029 | 7.60E-06 Class-G | VNN2          |
| FAM221A.1 | 5.35E-10 | -0.20999 | 0.259 | 0.164 | 8.00E-06 Class-G | FAM221A       |
| FAM57B.1C | 5.52E-10 | -0.10568 | 0.142 | 0.084 | 8.25E-06 Class-G | FAM57B        |
| SCN2A.5   | 5.80E-10 | -0.10744 | 0.005 | 0.033 | 8.67E-06 Class-G | SCN2A         |
| RP11-1143 | 6.02E-10 | -0.26955 | 0.021 | 0.057 | 8.99E-06 Class-G | RP11-1143G9.4 |
| ZCCHC12.3 | 6.14E-10 | -0.1093  | 0.005 | 0.033 | 9.17E-06 Class-G | ZCCHC12       |
| CA8.10    | 6.16E-10 | -0.20273 | 0.024 | 0.06  | 9.21E-06 Class-G | CA8           |
| LGI3.6    | 6.25E-10 | -0.14222 | 0.001 | 0.024 | 9.33E-06 Class-G | LGI3          |
| MAPRE2.5  | 6.37E-10 | -0.23572 | 0.275 | 0.172 | 9.52E-06 Class-G | MAPRE2        |
| TCEAL6.7  | 6.61E-10 | -0.14884 | 0.01  | 0.04  | 9.87E-06 Class-G | TCEAL6        |
| SLC17A5.7 | 6.94E-10 | -0.14797 | 0.16  | 0.097 | 1.04E-05 Class-G | SLC17A5       |
| RBFOX3.1  | 7.13E-10 | -0.1617  | 0.002 | 0.027 | 1.06E-05 Class-G | RBFOX3        |
| MAFF.8    | 7.31E-10 | -0.42229 | 0.136 | 0.177 | 1.09E-05 Class-G | MAFF          |
| EPHB6.3   | 7.34E-10 | -0.15967 | 0.015 | 0.048 | 1.10E-05 Class-G | EPHB6         |
| TFAP2A.8  | 7.41E-10 | -0.1168  | 0.01  | 0.041 | 1.11E-05 Class-G | TFAP2A        |
| HAAO.10   | 7.68E-10 | -0.1365  | 0.002 | 0.026 | 1.15E-05 Class-G | HAAO          |
| TFAP2B.7  | 7.68E-10 | -0.10466 | 0.005 | 0.033 | 1.15E-05 Class-G | TFAP2B        |
| TVP23A.2  | 7.85E-10 | -0.14722 | 0.009 | 0.039 | 1.17E-05 Class-G | TVP23A        |
| LINC0032C | 8.10E-10 | -0.18119 | 0.002 | 0.026 | 1.21E-05 Class-G | LINC00320     |
| AFMID.5   | 8.27E-10 | -0.18736 | 0.159 | 0.097 | 1.24E-05 Class-G | AFMID         |
| CTA-384D8 | 8.38E-10 | -0.11595 | 0.002 | 0.027 | 1.25E-05 Class-G | CTA-384D8.34  |
| FLNC.2    | 8.77E-10 | -0.10345 | 0.004 | 0.029 | 1.31E-05 Class-G | FLNC          |
| KIAA0930. | 8.87E-10 | -0.23902 | 0.216 | 0.133 | 1.33E-05 Class-G | KIAA0930      |
| SP9.9     | 9.13E-10 | -0.15066 | 0.013 | 0.045 | 1.36E-05 Class-G | SP9           |
| SLAMF9.7  | 9.24E-10 | -0.13379 | 0     | 0.022 | 1.38E-05 Class-G | SLAMF9        |
| IL15.9    | 9.73E-10 | -0.16099 | 0.011 | 0.041 | 1.45E-05 Class-G | IL15          |
| CASP10.6  | 1.03E-09 | -0.13596 | 0.004 | 0.029 | 1.54E-05 Class-G | CASP10        |
| B3GALT4.7 | 1.07E-09 | -0.15307 | 0.015 | 0.047 | 1.60E-05 Class-G | B3GALT4       |
| CEACAM21. | 1.18E-09 | -0.11155 | 0.001 | 0.023 | 1.76E-05 Class-G | CEACAM21      |
| MAN2B1.7  | 1.21E-09 | -0.10879 | 0.107 | 0.061 | 1.81E-05 Class-G | MAN2B1        |
| SYNDIG1.8 | 1.21E-09 | -0.15049 | 0.137 | 0.081 | 1.81E-05 Class-G | SYNDIG1       |
| TLR10.9   | 1.25E-09 | -0.1221  | 0.003 | 0.028 | 1.87E-05 Class-G | TLR10         |
| RASGRP4.3 | 1.27E-09 | -0.10015 | 0.001 | 0.023 | 1.89E-05 Class-G | RASGRP4       |
| NUDT14.11 | 1.28E-09 | -0.26353 | 0.284 | 0.177 | 1.91E-05 Class-G | NUDT14        |
| CES4A.3   | 1.41E-09 | -0.13072 | 0.001 | 0.023 | 2.11E-05 Class-G | CES4A         |
| FPR2.8    | 1.43E-09 | -0.11073 | 0     | 0.022 | 2.13E-05 Class-G | FPR2          |
| RP11-156K | 1.43E-09 | -0.11125 | 0     | 0.022 | 2.13E-05 Class-G | RP11-156K13.3 |
| LGMN.10   | 1.50E-09 | -0.39262 | 0.54  | 0.32  | 2.25E-05 Class-G | LGMN          |
| PIK3CG.6  | 1.64E-09 | -0.10403 | 0.002 | 0.025 | 2.46E-05 Class-G | PIK3CG        |
| BEX1.10   | 1.74E-09 | -0.28262 | 0.528 | 0.322 | 2.60E-05 Class-G | BEX1          |
| CLEC12A.6 | 1.78E-09 | -0.10611 | 0.001 | 0.023 | 2.65E-05 Class-G | CLEC12A       |
| ASGR1.8   | 1.80E-09 | -0.10583 | 0.114 | 0.066 | 2.70E-05 Class-G | ASGR1         |
| RP11-84C1 | 1.85E-09 | -0.12311 | 0     | 0.022 | 2.77E-05 Class-G | RP11-84C10.2  |
| UQCRC2.4  | 1.89E-09 | -0.18644 | 0.822 | 0.462 | 2.82E-05 Class-G | UQCRC2        |
| AURKB.10  | 1.91E-09 | -0.1855  | 0.02  | 0.053 | 2.85E-05 Class-G | AURKB         |
| PIP5K1B.2 | 1.94E-09 | -0.10813 | 0.004 | 0.028 | 2.91E-05 Class-G | PIP5K1B       |
| SGOL2.9   | 1.95E-09 | -0.12425 | 0.137 | 0.082 | 2.92E-05 Class-G | SGOL2         |



|            |           |           |        |        |           |         |                |
|------------|-----------|-----------|--------|--------|-----------|---------|----------------|
| UBE2B. 3   | 1. 99E-09 | -0. 18438 | 0. 784 | 0. 437 | 2. 98E-05 | Class-G | UBE2B          |
| HHIP. 7    | 2. 08E-09 | -0. 15586 | 0. 004 | 0. 029 | 3. 11E-05 | Class-G | HHIP           |
| BST2. 10   | 2. 09E-09 | -0. 54388 | 0. 554 | 0. 475 | 3. 13E-05 | Class-G | BST2           |
| ATP1B3. 8  | 2. 10E-09 | -0. 39745 | 0. 735 | 0. 514 | 3. 14E-05 | Class-G | ATP1B3         |
| NACA2. 4   | 2. 50E-09 | -0. 60696 | 0. 134 | 0. 173 | 3. 73E-05 | Class-G | NACA2          |
| PAG1. 5    | 2. 51E-09 | -0. 17939 | 0. 246 | 0. 157 | 3. 75E-05 | Class-G | PAG1           |
| SENCR. 5   | 2. 52E-09 | -0. 10586 | 0. 001 | 0. 022 | 3. 77E-05 | Class-G | SENCR          |
| CLEC10A. 6 | 2. 53E-09 | -0. 12329 | 0. 001 | 0. 022 | 3. 77E-05 | Class-G | CLEC10A        |
| GRB2. 11   | 2. 53E-09 | -0. 13255 | 0. 77  | 0. 433 | 3. 78E-05 | Class-G | GRB2           |
| NT5C2. 3   | 2. 58E-09 | -0. 16294 | 0. 19  | 0. 119 | 3. 85E-05 | Class-G | NT5C2          |
| HS3ST1. 9  | 2. 60E-09 | -0. 28747 | 0. 052 | 0. 094 | 3. 88E-05 | Class-G | HS3ST1         |
| SMDT1. 5   | 2. 65E-09 | -0. 1245  | 0. 884 | 0. 506 | 3. 95E-05 | Class-G | SMDT1          |
| GJB1. 8    | 2. 73E-09 | -0. 18817 | 0. 004 | 0. 028 | 4. 08E-05 | Class-G | GJB1           |
| TREML1. 8  | 2. 76E-09 | -0. 12089 | 0. 002 | 0. 025 | 4. 13E-05 | Class-G | TREML1         |
| EAF2. 11   | 2. 78E-09 | -0. 35476 | 0. 058 | 0. 098 | 4. 15E-05 | Class-G | EAF2           |
| SEPP1. 7   | 2. 79E-09 | -0. 79705 | 0. 337 | 0. 327 | 4. 17E-05 | Class-G | SEPP1          |
| RAP2B. 10  | 2. 97E-09 | -0. 17597 | 0. 241 | 0. 153 | 4. 44E-05 | Class-G | RAP2B          |
| DNAJC8. 3  | 2. 98E-09 | -0. 14708 | 0. 883 | 0. 497 | 4. 46E-05 | Class-G | DNAJC8         |
| SCN9A. 7   | 3. 05E-09 | -0. 1275  | 0. 01  | 0. 039 | 4. 56E-05 | Class-G | SCN9A          |
| ZNF92. 9   | 3. 23E-09 | -0. 15118 | 0. 213 | 0. 135 | 4. 82E-05 | Class-G | ZNF92          |
| SUN2. 6    | 3. 33E-09 | -0. 24581 | 0. 318 | 0. 202 | 4. 98E-05 | Class-G | SUN2           |
| CCDC152. 1 | 3. 36E-09 | -0. 14886 | 0. 101 | 0. 058 | 5. 02E-05 | Class-G | CCDC152        |
| CSF2RB. 7  | 3. 42E-09 | -0. 10792 | 0. 004 | 0. 028 | 5. 11E-05 | Class-G | CSF2RB         |
| PRKCD. 10  | 3. 42E-09 | -0. 27878 | 0. 047 | 0. 086 | 5. 11E-05 | Class-G | PRKCD          |
| CSK. 11    | 3. 48E-09 | -0. 21875 | 0. 217 | 0. 136 | 5. 21E-05 | Class-G | CSK            |
| TOR4A. 7   | 3. 63E-09 | -0. 10685 | 0. 004 | 0. 029 | 5. 42E-05 | Class-G | TOR4A          |
| ST8SIA4. 1 | 3. 64E-09 | -0. 35566 | 0. 083 | 0. 125 | 5. 44E-05 | Class-G | ST8SIA4        |
| RP11-676J  | 3. 75E-09 | -0. 10507 | 0. 008 | 0. 035 | 5. 60E-05 | Class-G | RP11-676J15. 1 |
| KCNN4. 7   | 3. 91E-09 | -0. 12503 | 0. 009 | 0. 037 | 5. 85E-05 | Class-G | KCNN4          |
| LBH. 11    | 3. 96E-09 | -0. 40228 | 0. 118 | 0. 159 | 5. 92E-05 | Class-G | LBH            |
| KCTD12. 11 | 4. 17E-09 | -0. 2946  | 0. 351 | 0. 217 | 6. 23E-05 | Class-G | KCTD12         |
| WBP1L. 9   | 4. 24E-09 | -0. 17945 | 0. 163 | 0. 1   | 6. 33E-05 | Class-G | WBP1L          |
| DAAM2. 6   | 4. 29E-09 | -0. 14458 | 0. 002 | 0. 024 | 6. 41E-05 | Class-G | DAAM2          |
| RAPGEF5. 8 | 4. 34E-09 | -0. 21874 | 0. 016 | 0. 046 | 6. 49E-05 | Class-G | RAPGEF5        |
| FGF20. 6   | 4. 43E-09 | -0. 12193 | 0      | 0. 021 | 6. 61E-05 | Class-G | FGF20          |
| GAS6. 10   | 4. 48E-09 | -0. 4442  | 0. 177 | 0. 209 | 6. 70E-05 | Class-G | GAS6           |
| CENPN. 7   | 4. 73E-09 | -0. 10081 | 0. 132 | 0. 08  | 7. 07E-05 | Class-G | CENPN          |
| CHD3. 7    | 4. 74E-09 | -0. 13335 | 0. 171 | 0. 106 | 7. 08E-05 | Class-G | CHD3           |
| SIGLEC1. 7 | 4. 86E-09 | -0. 14538 | 0. 007 | 0. 033 | 7. 26E-05 | Class-G | SIGLEC1        |
| VRK1. 3    | 5. 11E-09 | -0. 12496 | 0. 151 | 0. 093 | 7. 64E-05 | Class-G | VRK1           |
| PDE4DIP. 5 | 5. 32E-09 | -0. 19665 | 0. 375 | 0. 246 | 7. 95E-05 | Class-G | PDE4DIP        |
| BTF3L4. 4  | 5. 70E-09 | -0. 18641 | 0. 83  | 0. 46  | 8. 51E-05 | Class-G | BTF3L4         |
| B4GALT1. 1 | 5. 83E-09 | -0. 4289  | 0. 086 | 0. 126 | 8. 71E-05 | Class-G | B4GALT1        |
| RETN. 8    | 6. 06E-09 | -0. 12194 | 0. 001 | 0. 023 | 9. 06E-05 | Class-G | RETN           |
| TAPBPL. 7  | 6. 32E-09 | -0. 17903 | 0. 178 | 0. 113 | 9. 44E-05 | Class-G | TAPBPL         |
| PIAS1. 5   | 6. 37E-09 | -0. 24575 | 0. 23  | 0. 147 | 9. 53E-05 | Class-G | PIAS1          |
| JDP2. 11   | 6. 40E-09 | -0. 28234 | 0. 039 | 0. 076 | 9. 57E-05 | Class-G | JDP2           |
| METTL7A. 5 | 6. 62E-09 | -0. 13162 | 0. 303 | 0. 207 | 9. 89E-05 | Class-G | METTL7A        |
| KIF21B. 2  | 6. 67E-09 | -0. 10973 | 0. 006 | 0. 031 | 9. 98E-05 | Class-G | KIF21B         |
| HIGD2A. 8  | 7. 67E-09 | -0. 1251  | 0. 941 | 0. 566 | 0. 000115 | Class-G | HIGD2A         |
| MRO. 7     | 7. 72E-09 | -0. 12405 | 0. 002 | 0. 023 | 0. 000115 | Class-G | MRO            |

|           |          |          |       |       |          |         |               |
|-----------|----------|----------|-------|-------|----------|---------|---------------|
| FLVCR2.8  | 8.04E-09 | -0.13947 | 0.011 | 0.039 | 0.00012  | Class-G | FLVCR2        |
| SH3BGRL3. | 8.08E-09 | -0.26301 | 0.96  | 0.747 | 0.000121 | Class-G | SH3BGRL3      |
| NKAIN2.4  | 8.13E-09 | -0.10827 | 0     | 0.02  | 0.000122 | Class-G | NKAIN2        |
| NUP214.1C | 8.74E-09 | -0.3399  | 0.284 | 0.181 | 0.000131 | Class-G | NUP214        |
| TMED10.5  | 8.75E-09 | -0.15475 | 0.941 | 0.56  | 0.000131 | Class-G | TMED10        |
| OMG.9     | 8.78E-09 | -0.27707 | 0.046 | 0.085 | 0.000131 | Class-G | OMG           |
| PCSK6.3   | 8.87E-09 | -0.1136  | 0     | 0.02  | 0.000133 | Class-G | PCSK6         |
| TNNI2.8   | 9.46E-09 | -0.11238 | 0.001 | 0.022 | 0.000141 | Class-G | TNNI2         |
| SMCO4.11  | 9.66E-09 | -0.42054 | 0.099 | 0.138 | 0.000144 | Class-G | SMCO4         |
| SLC35E3.9 | 9.97E-09 | -0.28818 | 0.27  | 0.173 | 0.000149 | Class-G | SLC35E3       |
| SLC2A3.1C | 1.03E-08 | -0.60562 | 0.243 | 0.256 | 0.000153 | Class-G | SLC2A3        |
| SERPINE1. | 1.03E-08 | -0.29613 | 0.149 | 0.092 | 0.000154 | Class-G | SERPINE1      |
| DDIT3.6   | 1.10E-08 | -0.30737 | 0.657 | 0.39  | 0.000165 | Class-G | DDIT3         |
| KLRC2.10  | 1.13E-08 | -0.28565 | 0.074 | 0.115 | 0.000169 | Class-G | KLRC2         |
| ASIC4.10  | 1.15E-08 | -0.36586 | 0.103 | 0.145 | 0.000172 | Class-G | ASIC4         |
| ZRSR2.4   | 1.20E-08 | -0.15953 | 0.181 | 0.115 | 0.00018  | Class-G | ZRSR2         |
| ACAT1.3   | 1.22E-08 | -0.29864 | 0.552 | 0.336 | 0.000182 | Class-G | ACAT1         |
| SLCO5A1.8 | 1.22E-08 | -0.1341  | 0.016 | 0.045 | 0.000182 | Class-G | SLCO5A1       |
| HBP1.1    | 1.22E-08 | -0.27064 | 0.337 | 0.215 | 0.000182 | Class-G | HBP1          |
| MT01      | 1.25E-08 | -0.12195 | 0.127 | 0.077 | 0.000187 | Class-G | MT01          |
| CHRNE.8   | 1.30E-08 | -0.13353 | 0.005 | 0.029 | 0.000194 | Class-G | CHRNE         |
| AC074289. | 1.32E-08 | -0.27855 | 0.032 | 0.066 | 0.000197 | Class-G | AC074289.1    |
| CD3D.7    | 1.33E-08 | -0.22865 | 0.001 | 0.022 | 0.000198 | Class-G | CD3D          |
| DNAJA4.6  | 1.45E-08 | -0.2235  | 0.032 | 0.067 | 0.000217 | Class-G | DNAJA4        |
| GALT.4    | 1.53E-08 | -0.13555 | 0.123 | 0.074 | 0.000229 | Class-G | GALT          |
| RP11-212I | 1.62E-08 | -0.12599 | 0.004 | 0.026 | 0.000241 | Class-G | RP11-212I21.4 |
| CAPN3.8   | 1.66E-08 | -0.31413 | 0.018 | 0.047 | 0.000249 | Class-G | CAPN3         |
| RINT1.8   | 1.67E-08 | -0.10006 | 0.141 | 0.088 | 0.00025  | Class-G | RINT1         |
| PELI1.8   | 1.73E-08 | -0.48129 | 0.187 | 0.213 | 0.000258 | Class-G | PELI1         |
| IKBKE.10  | 1.77E-08 | -0.12319 | 0.09  | 0.051 | 0.000265 | Class-G | IKBKE         |
| AKR1C3.2  | 1.78E-08 | -0.10322 | 0     | 0.019 | 0.000266 | Class-G | AKR1C3        |
| MAP4K1.9  | 1.79E-08 | -0.15248 | 0.008 | 0.033 | 0.000268 | Class-G | MAP4K1        |
| H3F3C.2   | 1.81E-08 | -0.34959 | 0.025 | 0.058 | 0.000271 | Class-G | H3F3C         |
| EREG.4    | 1.83E-08 | -0.15104 | 0.005 | 0.028 | 0.000274 | Class-G | EREG          |
| CACYBP.5  | 1.98E-08 | -0.16601 | 0.817 | 0.455 | 0.000295 | Class-G | CACYBP        |
| MMP19.7   | 1.99E-08 | -0.24947 | 0.03  | 0.063 | 0.000298 | Class-G | MMP19         |
| HOXB-AS1. | 2.06E-08 | -0.13121 | 0.01  | 0.036 | 0.000307 | Class-G | HOXB-AS1      |
| LYN.11    | 2.15E-08 | -0.43868 | 0.145 | 0.179 | 0.000321 | Class-G | LYN           |
| SLC46A3.7 | 2.20E-08 | -0.20846 | 0.029 | 0.062 | 0.000329 | Class-G | SLC46A3       |
| PEX5L.6   | 2.27E-08 | -0.13469 | 0.004 | 0.026 | 0.00034  | Class-G | PEX5L         |
| MTUS1.6   | 2.27E-08 | -0.17869 | 0.21  | 0.137 | 0.00034  | Class-G | MTUS1         |
| PAPSS2.5  | 2.27E-08 | -0.11178 | 0.004 | 0.026 | 0.00034  | Class-G | PAPSS2        |
| PPA1.7    | 2.29E-08 | -0.44955 | 0.704 | 0.5   | 0.000343 | Class-G | PPA1          |
| C16orf54. | 2.31E-08 | -0.104   | 0     | 0.019 | 0.000345 | Class-G | C16orf54      |
| ARF4.5    | 2.45E-08 | -0.32984 | 0.868 | 0.581 | 0.000367 | Class-G | ARF4          |
| MAL.9     | 2.51E-08 | -0.26315 | 0.015 | 0.043 | 0.000376 | Class-G | MAL           |
| FUBP1.10  | 2.55E-08 | -0.21503 | 0.324 | 0.208 | 0.000382 | Class-G | FUBP1         |
| ARHGAP27. | 2.59E-08 | -0.22161 | 0.027 | 0.06  | 0.000388 | Class-G | ARHGAP27      |
| ATP5E.8   | 2.60E-08 | -0.10038 | 0.995 | 0.901 | 0.000388 | Class-G | ATP5E         |
| PDE1B.4   | 2.69E-08 | -0.10366 | 0.002 | 0.023 | 0.000403 | Class-G | PDE1B         |
| HPRT1.9   | 2.78E-08 | -0.50543 | 0.213 | 0.233 | 0.000415 | Class-G | HPRT1         |

|           |          |          |       |       |          |         |             |
|-----------|----------|----------|-------|-------|----------|---------|-------------|
| STK10.10  | 2.80E-08 | -0.13    | 0.11  | 0.066 | 0.000418 | Class-G | STK10       |
| ABL2.10   | 2.81E-08 | -0.36267 | 0.395 | 0.247 | 0.00042  | Class-G | ABL2        |
| CD2.8     | 2.85E-08 | -0.18567 | 0.002 | 0.022 | 0.000426 | Class-G | CD2         |
| FOLH1.6   | 2.92E-08 | -0.10846 | 0.001 | 0.021 | 0.000436 | Class-G | FOLH1       |
| TBC1D12.9 | 2.95E-08 | -0.13423 | 0.158 | 0.099 | 0.000441 | Class-G | TBC1D12     |
| KIAA1324L | 3.07E-08 | -0.11013 | 0.008 | 0.032 | 0.000458 | Class-G | KIAA1324L   |
| ZEB2-AS1. | 3.12E-08 | -0.1649  | 0.012 | 0.038 | 0.000466 | Class-G | ZEB2-AS1    |
| CDC20.8   | 3.12E-08 | -0.12677 | 0.105 | 0.062 | 0.000467 | Class-G | CDC20       |
| TACC3.7   | 3.12E-08 | -0.2241  | 0.046 | 0.082 | 0.000467 | Class-G | TACC3       |
| KPNA2.7   | 3.21E-08 | -0.2916  | 0.543 | 0.324 | 0.000479 | Class-G | KPNA2       |
| THSD7A.1C | 3.25E-08 | -0.39862 | 0.11  | 0.148 | 0.000486 | Class-G | THSD7A      |
| CA10.6    | 3.25E-08 | -0.11657 | 0.01  | 0.035 | 0.000486 | Class-G | CA10        |
| PRKAR2B.9 | 3.29E-08 | -0.18029 | 0.039 | 0.074 | 0.000492 | Class-G | PRKAR2B     |
| RP11-46H1 | 3.29E-08 | -0.2483  | 0.007 | 0.03  | 0.000492 | Class-G | RP11-46H1.3 |
| CIDEB.6   | 3.35E-08 | -0.1071  | 0.005 | 0.028 | 0.000501 | Class-G | CIDEB       |
| NAV3.5    | 3.36E-08 | -0.12434 | 0.007 | 0.031 | 0.000502 | Class-G | NAV3        |
| PICK1.5   | 3.40E-08 | -0.12925 | 0.132 | 0.081 | 0.000508 | Class-G | PICK1       |
| C10orf35. | 3.62E-08 | -0.18962 | 0.029 | 0.062 | 0.00054  | Class-G | C10orf35    |
| RAB11FIP1 | 3.65E-08 | -0.12396 | 0.007 | 0.03  | 0.000546 | Class-G | RAB11FIP1   |
| L3MBTL4.1 | 3.98E-08 | -0.13027 | 0.011 | 0.037 | 0.000595 | Class-G | L3MBTL4     |
| RAPGEF1.8 | 3.99E-08 | -0.19396 | 0.17  | 0.108 | 0.000596 | Class-G | RAPGEF1     |
| COTL1.10  | 4.06E-08 | -0.46336 | 0.677 | 0.482 | 0.000606 | Class-G | COTL1       |
| CFLAR.7   | 4.13E-08 | -0.37356 | 0.478 | 0.292 | 0.000617 | Class-G | CFLAR       |
| RCAN2.8   | 4.24E-08 | -0.17166 | 0.019 | 0.048 | 0.000634 | Class-G | RCAN2       |
| SLC1A5.1C | 4.27E-08 | -0.21471 | 0.2   | 0.128 | 0.000638 | Class-G | SLC1A5      |
| FLT1.4    | 4.59E-08 | -0.10134 | 0.002 | 0.023 | 0.000686 | Class-G | FLT1        |
| EIF1B.9   | 4.98E-08 | -0.404   | 0.82  | 0.55  | 0.000745 | Class-G | EIF1B       |
| UBE2T.10  | 5.03E-08 | -0.20993 | 0.185 | 0.117 | 0.000751 | Class-G | UBE2T       |
| SYT5.8    | 5.05E-08 | -0.13695 | 0.019 | 0.048 | 0.000755 | Class-G | SYT5        |
| EEF1G.4   | 5.15E-08 | -0.2696  | 0.152 | 0.095 | 0.00077  | Class-G | EEF1G       |
| C1orf198. | 5.48E-08 | -0.15639 | 0.153 | 0.097 | 0.000819 | Class-G | C1orf198    |
| LRRC2.2   | 5.70E-08 | -0.11861 | 0.002 | 0.021 | 0.000852 | Class-G | LRRC2       |
| C5AR2.3   | 5.77E-08 | -0.12266 | 0.001 | 0.019 | 0.000863 | Class-G | C5AR2       |
| ICA1.6    | 5.87E-08 | -0.17062 | 0.166 | 0.105 | 0.000877 | Class-G | ICA1        |
| NPPA.8    | 6.10E-08 | -0.13173 | 0.008 | 0.032 | 0.000912 | Class-G | NPPA        |
| ONECUT2.7 | 6.20E-08 | -0.13081 | 0.019 | 0.047 | 0.000927 | Class-G | ONECUT2     |
| SULT1A1.9 | 6.33E-08 | -0.21666 | 0.024 | 0.054 | 0.000946 | Class-G | SULT1A1     |
| SYT4.2    | 6.48E-08 | -0.1056  | 0.005 | 0.027 | 0.000968 | Class-G | SYT4        |
| SPNS2.2   | 6.54E-08 | -0.12829 | 0.01  | 0.034 | 0.000977 | Class-G | SPNS2       |
| SNX29.6   | 6.54E-08 | -0.16549 | 0.155 | 0.098 | 0.000978 | Class-G | SNX29       |
| CLVS1.6   | 6.82E-08 | -0.11347 | 0.01  | 0.034 | 0.001019 | Class-G | CLVS1       |
| GNAI1.9   | 7.03E-08 | -0.25652 | 0.073 | 0.11  | 0.00105  | Class-G | GNAI1       |
| LRPAP1.7  | 7.33E-08 | -0.18974 | 0.876 | 0.493 | 0.001096 | Class-G | LRPAP1      |
| ZNF846.8  | 7.51E-08 | -0.16559 | 0.107 | 0.064 | 0.001122 | Class-G | ZNF846      |
| LMNB1.9   | 7.51E-08 | -0.16054 | 0.215 | 0.139 | 0.001123 | Class-G | LMNB1       |
| TNS3.9    | 7.64E-08 | -0.23714 | 0.044 | 0.078 | 0.001142 | Class-G | TNS3        |
| HSD17B14. | 7.70E-08 | -0.28597 | 0.06  | 0.097 | 0.00115  | Class-G | HSD17B14    |
| PCSK2.7   | 8.11E-08 | -0.1045  | 0.007 | 0.03  | 0.001212 | Class-G | PCSK2       |
| MYT1.9    | 8.26E-08 | -0.13003 | 0.016 | 0.043 | 0.001235 | Class-G | MYT1        |
| MOB1A.11  | 8.27E-08 | -0.34752 | 0.517 | 0.311 | 0.001236 | Class-G | MOB1A       |
| MLKL.7    | 8.40E-08 | -0.12773 | 0.008 | 0.031 | 0.001255 | Class-G | MLKL        |

|           |          |          |       |       |          |         |              |
|-----------|----------|----------|-------|-------|----------|---------|--------------|
| STMN1.10  | 8.55E-08 | -0.44655 | 0.914 | 0.584 | 0.001278 | Class-G | STMN1        |
| BIRC5.11  | 8.74E-08 | -0.1873  | 0.152 | 0.097 | 0.001306 | Class-G | BIRC5        |
| GAD2.1    | 8.92E-08 | -0.10184 | 0.001 | 0.018 | 0.001333 | Class-G | GAD2         |
| RB1.11    | 8.99E-08 | -0.38536 | 0.459 | 0.28  | 0.001343 | Class-G | RB1          |
| KCNK1.4   | 9.32E-08 | -0.10096 | 0.002 | 0.022 | 0.001393 | Class-G | KCNK1        |
| CARD8.10  | 9.87E-08 | -0.24308 | 0.213 | 0.138 | 0.001475 | Class-G | CARD8        |
| CDC48.8   | 1.16E-07 | -0.13355 | 0.016 | 0.043 | 0.001739 | Class-G | CDC48        |
| HSPB8.7   | 1.17E-07 | -0.18515 | 0.016 | 0.043 | 0.001746 | Class-G | HSPB8        |
| LINC00869 | 1.19E-07 | -0.18912 | 0.001 | 0.019 | 0.001772 | Class-G | LINC00869    |
| ZDHHC13.2 | 1.19E-07 | -0.18953 | 0.034 | 0.066 | 0.001782 | Class-G | ZDHHC13      |
| RP2.9     | 1.21E-07 | -0.11416 | 0.115 | 0.071 | 0.001804 | Class-G | RP2          |
| CCDC115.2 | 1.25E-07 | -0.33772 | 0.496 | 0.305 | 0.001869 | Class-G | CCDC115      |
| TMEM106A  | 1.33E-07 | -0.25442 | 0.036 | 0.068 | 0.001981 | Class-G | TMEM106A     |
| PRCD.7    | 1.34E-07 | -0.17086 | 0.012 | 0.037 | 0.001999 | Class-G | PRCD         |
| C1orf228  | 1.37E-07 | -0.14172 | 0.011 | 0.035 | 0.002042 | Class-G | C1orf228     |
| KB-1507C5 | 1.39E-07 | -0.11356 | 0.005 | 0.027 | 0.002077 | Class-G | KB-1507C5.4  |
| LTB.6     | 1.41E-07 | -0.19848 | 0.012 | 0.036 | 0.002103 | Class-G | LTB          |
| TRIM22.9  | 1.45E-07 | -0.19571 | 0.191 | 0.125 | 0.002165 | Class-G | TRIM22       |
| SGOL1.9   | 1.45E-07 | -0.18829 | 0.031 | 0.062 | 0.002174 | Class-G | SGOL1        |
| RCL1.2    | 1.47E-07 | -0.10049 | 0.115 | 0.071 | 0.002202 | Class-G | RCL1         |
| ADM.9     | 1.52E-07 | -0.39467 | 0.261 | 0.173 | 0.002272 | Class-G | ADM          |
| TMIGD2.6  | 1.52E-07 | -0.14477 | 0.003 | 0.022 | 0.002279 | Class-G | TMIGD2       |
| NFATC2.8  | 1.55E-07 | -0.18622 | 0.022 | 0.05  | 0.002321 | Class-G | NFATC2       |
| EIF3E.7   | 1.64E-07 | -0.29431 | 0.913 | 0.603 | 0.002447 | Class-G | EIF3E        |
| CD247.2   | 1.68E-07 | -0.10348 | 0.001 | 0.019 | 0.00251  | Class-G | CD247        |
| TNFAIP2.9 | 1.91E-07 | -0.25729 | 0.046 | 0.079 | 0.002851 | Class-G | TNFAIP2      |
| KIAA0101  | 1.91E-07 | -0.21209 | 0.169 | 0.109 | 0.002853 | Class-G | KIAA0101     |
| RPP25.3   | 1.96E-07 | -0.10611 | 0.009 | 0.032 | 0.002927 | Class-G | RPP25        |
| SORL1.9   | 1.98E-07 | -0.54723 | 0.215 | 0.229 | 0.002957 | Class-G | SORL1        |
| IFI44L.7  | 2.12E-07 | -0.12402 | 0.194 | 0.133 | 0.003175 | Class-G | IFI44L       |
| RP11-862L | 2.33E-07 | -0.1456  | 0.002 | 0.02  | 0.003485 | Class-G | RP11-862L9.3 |
| RP11-536K | 2.35E-07 | -0.21406 | 0.015 | 0.041 | 0.003512 | Class-G | RP11-536K7.3 |
| HLA-E.11  | 2.37E-07 | -0.4773  | 0.836 | 0.557 | 0.003541 | Class-G | HLA-E        |
| CADPS.7   | 2.48E-07 | -0.19074 | 0.019 | 0.046 | 0.003707 | Class-G | CADPS        |
| MXD1.7    | 2.51E-07 | -0.3363  | 0.099 | 0.133 | 0.003745 | Class-G | MXD1         |
| SERF2.7   | 2.65E-07 | -0.22688 | 0.993 | 0.88  | 0.003964 | Class-G | SERF2        |
| PSMB1.3   | 2.72E-07 | -0.21211 | 0.967 | 0.685 | 0.004069 | Class-G | PSMB1        |
| SARNP.3   | 2.79E-07 | -0.22908 | 0.175 | 0.114 | 0.004169 | Class-G | SARNP        |
| DAZAP2.9  | 2.80E-07 | -0.23818 | 0.859 | 0.484 | 0.004178 | Class-G | DAZAP2       |
| CHADL.7   | 2.80E-07 | -0.18262 | 0.019 | 0.045 | 0.004185 | Class-G | CHADL        |
| SCARF1.9  | 2.93E-07 | -0.12767 | 0.008 | 0.03  | 0.004373 | Class-G | SCARF1       |
| GHRL.6    | 3.01E-07 | -0.104   | 0.087 | 0.052 | 0.004494 | Class-G | GHRL         |
| KIAA1107  | 3.05E-07 | -0.13633 | 0.02  | 0.047 | 0.004562 | Class-G | KIAA1107     |
| GFAP.7    | 3.17E-07 | -0.5234  | 0.341 | 0.351 | 0.004739 | Class-G | GFAP         |
| SELT.4    | 3.43E-07 | -0.28431 | 0.935 | 0.614 | 0.005128 | Class-G | SELT         |
| CD59.7    | 3.62E-07 | -0.23112 | 0.883 | 0.499 | 0.005407 | Class-G | CD59         |
| CXCL12.6  | 3.67E-07 | -0.21037 | 0.019 | 0.046 | 0.005489 | Class-G | CXCL12       |
| AMPD3.8   | 3.69E-07 | -0.1852  | 0.027 | 0.056 | 0.005522 | Class-G | AMPD3        |
| MBD6.6    | 3.79E-07 | -0.21352 | 0.198 | 0.13  | 0.005662 | Class-G | MBD6         |
| SLC43A2.9 | 3.81E-07 | -0.28145 | 0.354 | 0.228 | 0.005701 | Class-G | SLC43A2      |
| C14orf166 | 3.86E-07 | -0.14818 | 0.904 | 0.532 | 0.005774 | Class-G | C14orf166    |

|           |          |          |       |       |          |         |               |
|-----------|----------|----------|-------|-------|----------|---------|---------------|
| EPSTI1.11 | 4.19E-07 | -0.40241 | 0.095 | 0.13  | 0.006266 | Class-G | EPSTI1        |
| RAMP3.5   | 4.23E-07 | -0.13006 | 0.008 | 0.029 | 0.00632  | Class-G | RAMP3         |
| HCFC1R1.5 | 4.28E-07 | -0.32113 | 0.409 | 0.262 | 0.006389 | Class-G | HCFC1R1       |
| NINJ1.11  | 4.37E-07 | -0.57021 | 0.574 | 0.432 | 0.00653  | Class-G | NINJ1         |
| RP11-195F | 4.40E-07 | -0.12118 | 0.131 | 0.084 | 0.00658  | Class-G | RP11-195F19.5 |
| ACO06129. | 4.43E-07 | -0.10926 | 0     | 0.015 | 0.006624 | Class-G | ACO06129.2    |
| SP140L.7  | 4.44E-07 | -0.15854 | 0.115 | 0.072 | 0.006639 | Class-G | SP140L        |
| P2RY12.7  | 4.65E-07 | -0.11952 | 0.004 | 0.022 | 0.006945 | Class-G | P2RY12        |
| OPALIN.7  | 4.84E-07 | -0.18436 | 0     | 0.015 | 0.007226 | Class-G | OPALIN        |
| WBSCR22.9 | 5.01E-07 | -0.24406 | 0.782 | 0.446 | 0.007488 | Class-G | WBSCR22       |
| IFI16.9   | 5.08E-07 | -0.50215 | 0.441 | 0.385 | 0.007591 | Class-G | IFI16         |
| B3GALT2.5 | 5.46E-07 | -0.10255 | 0.014 | 0.038 | 0.008159 | Class-G | B3GALT2       |
| UNC13D.9  | 5.61E-07 | -0.16257 | 0.025 | 0.052 | 0.008383 | Class-G | UNC13D        |
| HSBP1.6   | 5.77E-07 | -0.17372 | 0.972 | 0.673 | 0.008629 | Class-G | HSBP1         |
| RNF181.5  | 5.79E-07 | -0.20999 | 0.859 | 0.505 | 0.008656 | Class-G | RNF181        |
| RASSF5.1C | 6.00E-07 | -0.36587 | 0.092 | 0.124 | 0.00897  | Class-G | RASSF5        |
| PCMT1.5   | 6.10E-07 | -0.16448 | 0.866 | 0.487 | 0.009117 | Class-G | PCMT1         |
| CITED2.8  | 6.25E-07 | -0.5052  | 0.394 | 0.346 | 0.009345 | Class-G | CITED2        |
| SLC3A2.3  | 6.37E-07 | -0.1302  | 0.905 | 0.536 | 0.00952  | Class-G | SLC3A2        |
| DEGS1.2   | 6.68E-07 | -0.23545 | 0.707 | 0.419 | 0.009979 | Class-G | DEGS1         |
| ANPEP.9   | 6.71E-07 | -0.14183 | 0.012 | 0.035 | 0.010031 | Class-G | ANPEP         |
| GGA2.11   | 6.90E-07 | -0.34227 | 0.112 | 0.143 | 0.010316 | Class-G | GGA2          |
| NFKB1.9   | 6.95E-07 | -0.16985 | 0.149 | 0.097 | 0.010383 | Class-G | NFKB1         |
| FGD4.10   | 7.04E-07 | -0.42832 | 0.121 | 0.151 | 0.010517 | Class-G | FGD4          |
| NDRG1.7   | 7.24E-07 | -0.54828 | 0.147 | 0.176 | 0.010812 | Class-G | NDRG1         |
| TFEB.8    | 7.38E-07 | -0.1283  | 0.114 | 0.072 | 0.011034 | Class-G | TFEB          |
| TMPO.9    | 7.65E-07 | -0.19373 | 0.274 | 0.18  | 0.011433 | Class-G | TMPO          |
| CYP19A1.6 | 7.68E-07 | -0.12492 | 0.007 | 0.027 | 0.01148  | Class-G | CYP19A1       |
| NFKB2.10  | 7.76E-07 | -0.12015 | 0.092 | 0.056 | 0.011591 | Class-G | NFKB2         |
| FAM78A.9  | 8.46E-07 | -0.15893 | 0.015 | 0.039 | 0.012649 | Class-G | FAM78A        |
| ACO04540. | 8.55E-07 | -0.31601 | 0.094 | 0.127 | 0.012776 | Class-G | ACO04540.4    |
| PHTF2.3   | 9.60E-07 | -0.11513 | 0.131 | 0.085 | 0.014346 | Class-G | PHTF2         |
| LINC01102 | 1.01E-06 | -0.21679 | 0.044 | 0.075 | 0.015097 | Class-G | LINC01102     |
| CKAP2L.1C | 1.09E-06 | -0.13243 | 0.023 | 0.049 | 0.016313 | Class-G | CKAP2L        |
| TCOF1.7   | 1.09E-06 | -0.29119 | 0.275 | 0.182 | 0.016352 | Class-G | TCOF1         |
| ZC3H12A.9 | 1.11E-06 | -0.27675 | 0.05  | 0.081 | 0.016517 | Class-G | ZC3H12A       |
| PLA2G7.9  | 1.14E-06 | -0.20272 | 0.028 | 0.055 | 0.017091 | Class-G | PLA2G7        |
| ZNF277.4  | 1.17E-06 | -0.25044 | 0.24  | 0.161 | 0.017493 | Class-G | ZNF277        |
| PTPN2.9   | 1.22E-06 | -0.31796 | 0.355 | 0.231 | 0.018167 | Class-G | PTPN2         |
| GSTO1.9   | 1.31E-06 | -0.62574 | 0.589 | 0.434 | 0.019626 | Class-G | GSTO1         |
| CHN2.7    | 1.33E-06 | -0.19456 | 0.14  | 0.091 | 0.01982  | Class-G | CHN2          |
| PAQR8.8   | 1.33E-06 | -0.13706 | 0.136 | 0.089 | 0.01991  | Class-G | PAQR8         |
| RBMX.7    | 1.35E-06 | -0.11522 | 0.896 | 0.512 | 0.020236 | Class-G | RBMX          |
| PSME2.9   | 1.38E-06 | -0.23455 | 0.865 | 0.507 | 0.020562 | Class-G | PSME2         |
| C21orf91. | 1.40E-06 | -0.12257 | 0.01  | 0.03  | 0.020953 | Class-G | C21orf91      |
| JAZF1.6   | 1.50E-06 | -0.19024 | 0.161 | 0.106 | 0.022361 | Class-G | JAZF1         |
| TMA7.6    | 1.51E-06 | -0.17327 | 0.994 | 0.828 | 0.022562 | Class-G | TMA7          |
| MYL12A.1C | 1.65E-06 | -0.45126 | 0.745 | 0.511 | 0.024636 | Class-G | MYL12A        |
| PIK3R1.9  | 1.66E-06 | -0.21719 | 0.434 | 0.287 | 0.024869 | Class-G | PIK3R1        |
| SMAD7.6   | 1.72E-06 | -0.13624 | 0.015 | 0.037 | 0.025635 | Class-G | SMAD7         |
| LHFPL2.1C | 1.85E-06 | -0.2945  | 0.227 | 0.15  | 0.027623 | Class-G | LHFPL2        |

|           |          |          |       |       |          |         |               |
|-----------|----------|----------|-------|-------|----------|---------|---------------|
| HAUS4.11  | 1.92E-06 | -0.25347 | 0.037 | 0.065 | 0.028629 | Class-G | HAUS4         |
| DDB2.4    | 1.96E-06 | -0.19821 | 0.134 | 0.088 | 0.029228 | Class-G | DDB2          |
| HINT1.6   | 2.04E-06 | -0.18663 | 0.995 | 0.8   | 0.03048  | Class-G | HINT1         |
| ADRBK1.11 | 2.05E-06 | -0.16465 | 0.132 | 0.086 | 0.030616 | Class-G | ADRBK1        |
| CCNE2.8   | 2.06E-06 | -0.18015 | 0.035 | 0.062 | 0.030831 | Class-G | CCNE2         |
| GM2A.9    | 2.63E-06 | -0.26613 | 0.201 | 0.134 | 0.039229 | Class-G | GM2A          |
| SOAT1.11  | 2.78E-06 | -0.29622 | 0.278 | 0.185 | 0.041537 | Class-G | SOAT1         |
| GALNT15.7 | 2.82E-06 | -0.18922 | 0.019 | 0.042 | 0.04215  | Class-G | GALNT15       |
| ARHGAP6.2 | 2.83E-06 | -0.10134 | 0.005 | 0.023 | 0.04236  | Class-G | ARHGAP6       |
| CCDC69.9  | 2.90E-06 | -0.13913 | 0.016 | 0.039 | 0.043327 | Class-G | CCDC69        |
| RPS6KA5.1 | 2.96E-06 | -0.21722 | 0.032 | 0.059 | 0.044265 | Class-G | RPS6KA5       |
| DENND2D.7 | 2.99E-06 | -0.18594 | 0.024 | 0.048 | 0.044685 | Class-G | DENND2D       |
| MR1.9     | 3.03E-06 | -0.18224 | 0.127 | 0.082 | 0.045238 | Class-G | MR1           |
| TSPAN14.6 | 3.03E-06 | -0.27849 | 0.3   | 0.198 | 0.045272 | Class-G | TSPAN14       |
| RND1.7    | 3.05E-06 | -0.17661 | 0.039 | 0.068 | 0.045603 | Class-G | RND1          |
| ITGA4.10  | 3.12E-06 | -0.16044 | 0.022 | 0.046 | 0.046596 | Class-G | ITGA4         |
| PROCR.10  | 3.13E-06 | -0.25732 | 0.044 | 0.073 | 0.046734 | Class-G | PROCR         |
| CHMP2A.5  | 3.56E-06 | -0.13589 | 0.97  | 0.603 | 0.053238 | Class-G | CHMP2A        |
| MCF2L.8   | 3.65E-06 | -0.13737 | 0.136 | 0.089 | 0.054617 | Class-G | MCF2L         |
| B2M.9     | 3.82E-06 | -0.28645 | 0.999 | 0.966 | 0.057018 | Class-G | B2M           |
| JAK3.5    | 4.08E-06 | -0.11567 | 0.01  | 0.03  | 0.060918 | Class-G | JAK3          |
| SPC25.9   | 4.27E-06 | -0.1941  | 0.038 | 0.065 | 0.063747 | Class-G | SPC25         |
| PLB1.10   | 4.33E-06 | -0.16761 | 0.022 | 0.045 | 0.064738 | Class-G | PLB1          |
| HN1.6     | 4.46E-06 | -0.20309 | 0.896 | 0.639 | 0.06659  | Class-G | HN1           |
| N4BP2L1.4 | 4.61E-06 | -0.26606 | 0.218 | 0.147 | 0.068886 | Class-G | N4BP2L1       |
| MT1H.4    | 4.68E-06 | -0.1225  | 0.005 | 0.022 | 0.069965 | Class-G | MT1H          |
| ATP5I.3   | 4.70E-06 | -0.14796 | 0.983 | 0.714 | 0.070233 | Class-G | ATP5I         |
| JPH4.8    | 5.06E-06 | -0.15859 | 0.036 | 0.064 | 0.075689 | Class-G | JPH4          |
| SCML1.6   | 5.10E-06 | -0.24762 | 0.067 | 0.098 | 0.076236 | Class-G | SCML1         |
| KIF22.6   | 5.40E-06 | -0.28504 | 0.274 | 0.184 | 0.080656 | Class-G | KIF22         |
| RRM2.10   | 5.64E-06 | -0.23693 | 0.039 | 0.066 | 0.084279 | Class-G | RRM2          |
| TMEM219.9 | 5.74E-06 | -0.1892  | 0.888 | 0.507 | 0.08584  | Class-G | TMEM219       |
| CLASP2.1C | 5.81E-06 | -0.23612 | 0.274 | 0.184 | 0.086772 | Class-G | CLASP2        |
| EDF1.2    | 6.06E-06 | -0.14268 | 0.986 | 0.753 | 0.090566 | Class-G | EDF1          |
| ATF3.10   | 6.16E-06 | -0.50663 | 0.32  | 0.299 | 0.09204  | Class-G | ATF3          |
| RP11-386I | 6.30E-06 | -0.27603 | 0.043 | 0.07  | 0.094153 | Class-G | RP11-386I14.4 |
| PGAM2.9   | 6.64E-06 | -0.12175 | 0.072 | 0.044 | 0.099285 | Class-G | PGAM2         |
| SEC11A.1C | 6.65E-06 | -0.20517 | 0.923 | 0.537 | 0.099315 | Class-G | SEC11A        |
| FAM149A.5 | 6.71E-06 | -0.12757 | 0.015 | 0.035 | 0.100208 | Class-G | FAM149A       |
| OST4.5    | 6.80E-06 | -0.17854 | 0.981 | 0.747 | 0.101558 | Class-G | OST4          |
| CD3E.6    | 6.97E-06 | -0.17096 | 0.004 | 0.02  | 0.104142 | Class-G | CD3E          |
| SMARCA2.4 | 7.06E-06 | -0.19085 | 0.185 | 0.126 | 0.105575 | Class-G | SMARCA2       |
| BNC2.6    | 7.10E-06 | -0.11306 | 0.01  | 0.028 | 0.106168 | Class-G | BNC2          |
| GZMK.3    | 7.19E-06 | -0.13084 | 0     | 0.012 | 0.107387 | Class-G | GZMK          |
| RELT.10   | 7.31E-06 | -0.12112 | 0.119 | 0.079 | 0.109217 | Class-G | RELT          |
| C9orf72.9 | 7.86E-06 | -0.37668 | 0.128 | 0.154 | 0.117489 | Class-G | C9orf72       |
| NKX2-2.1C | 8.26E-06 | -0.28085 | 0.122 | 0.152 | 0.123421 | Class-G | NKX2-2        |
| GZMA.6    | 8.58E-06 | -0.16417 | 0.002 | 0.017 | 0.128219 | Class-G | GZMA          |
| LCK.5     | 8.59E-06 | -0.12449 | 0.002 | 0.017 | 0.128377 | Class-G | LCK           |
| POLR2J.7  | 9.30E-06 | -0.10266 | 0.967 | 0.591 | 0.138922 | Class-G | POLR2J        |
| STX3.4    | 1.00E-05 | -0.12801 | 0.107 | 0.07  | 0.149947 | Class-G | STX3          |

|             |           |           |        |        |           |         |                |
|-------------|-----------|-----------|--------|--------|-----------|---------|----------------|
| PLK1. 8     | 1. 03E-05 | -0. 11743 | 0. 081 | 0. 05  | 0. 153767 | Class-G | PLK1           |
| GNA13. 10   | 1. 04E-05 | -0. 28976 | 0. 251 | 0. 169 | 0. 156038 | Class-G | GNA13          |
| NAF1. 8     | 1. 06E-05 | -0. 19243 | 0. 153 | 0. 103 | 0. 157901 | Class-G | NAF1           |
| SLC29A3. 6  | 1. 08E-05 | -0. 1733  | 0. 024 | 0. 047 | 0. 161269 | Class-G | SLC29A3        |
| FABP3. 6    | 1. 10E-05 | -0. 21079 | 0. 028 | 0. 052 | 0. 16368  | Class-G | FABP3          |
| NTM. 9      | 1. 14E-05 | -0. 23698 | 0. 084 | 0. 116 | 0. 169966 | Class-G | NTM            |
| SERPINB8. 1 | 1. 16E-05 | -0. 1304  | 0. 11  | 0. 073 | 0. 174061 | Class-G | SERPINB8       |
| ACSL4. 9    | 1. 22E-05 | -0. 1152  | 0. 118 | 0. 078 | 0. 182784 | Class-G | ACSL4          |
| KDM7A. 3    | 1. 23E-05 | -0. 17152 | 0. 04  | 0. 066 | 0. 184252 | Class-G | KDM7A          |
| PRDX3. 9    | 1. 24E-05 | -0. 36698 | 0. 73  | 0. 424 | 0. 184932 | Class-G | PRDX3          |
| LINC-PINT   | 1. 24E-05 | -0. 18308 | 0. 147 | 0. 099 | 0. 185816 | Class-G | LINC-PINT      |
| NFE2L3. 3   | 1. 25E-05 | -0. 10059 | 0. 014 | 0. 034 | 0. 186186 | Class-G | NFE2L3         |
| STOM. 10    | 1. 25E-05 | -0. 59844 | 0. 258 | 0. 25  | 0. 186943 | Class-G | STOM           |
| KLF10. 7    | 1. 27E-05 | -0. 45358 | 0. 227 | 0. 234 | 0. 189696 | Class-G | KLF10          |
| CTGF. 4     | 1. 38E-05 | -0. 13987 | 0. 013 | 0. 032 | 0. 205722 | Class-G | CTGF           |
| STX7. 9     | 1. 41E-05 | -0. 35824 | 0. 381 | 0. 249 | 0. 211259 | Class-G | STX7           |
| SNRPN. 10   | 1. 44E-05 | -0. 46758 | 0. 138 | 0. 092 | 0. 21522  | Class-G | SNRPN          |
| RHOG. 11    | 1. 54E-05 | -0. 6876  | 0. 515 | 0. 392 | 0. 229886 | Class-G | RHOG           |
| IFI44. 6    | 1. 59E-05 | -0. 2204  | 0. 25  | 0. 174 | 0. 237701 | Class-G | IFI44          |
| RIT2. 9     | 1. 74E-05 | -0. 2231  | 0. 052 | 0. 08  | 0. 260303 | Class-G | RIT2           |
| NHLH1. 4    | 1. 77E-05 | -0. 12316 | 0. 01  | 0. 027 | 0. 26454  | Class-G | NHLH1          |
| CENPW. 7    | 1. 90E-05 | -0. 19447 | 0. 163 | 0. 11  | 0. 284665 | Class-G | CENPW          |
| RP11-514C   | 1. 92E-05 | -0. 11497 | 0. 012 | 0. 03  | 0. 287628 | Class-G | RP11-514012. 4 |
| CENPM. 10   | 1. 98E-05 | -0. 10803 | 0. 104 | 0. 069 | 0. 296273 | Class-G | CENPM          |
| OXA1L. 10   | 2. 01E-05 | -0. 40179 | 0. 432 | 0. 28  | 0. 299771 | Class-G | OXA1L          |
| SEPT7. 11   | 2. 28E-05 | -0. 1941  | 0. 964 | 0. 66  | 0. 341462 | Class-G | 7-Sep          |
| ASPA. 3     | 2. 54E-05 | -0. 16369 | 0. 011 | 0. 028 | 0. 379757 | Class-G | ASPA           |
| SNHG8. 5    | 2. 55E-05 | -0. 33018 | 0. 718 | 0. 427 | 0. 380766 | Class-G | SNHG8          |
| GIMAP2. 1C  | 2. 72E-05 | -0. 28801 | 0. 055 | 0. 081 | 0. 406253 | Class-G | GIMAP2         |
| ODF3B. 11   | 2. 81E-05 | -0. 2867  | 0. 072 | 0. 098 | 0. 419756 | Class-G | ODF3B          |
| KIF1A. 9    | 2. 83E-05 | -0. 29117 | 0. 103 | 0. 13  | 0. 422671 | Class-G | KIF1A          |
| PRKCG. 6    | 2. 88E-05 | -0. 14846 | 0. 007 | 0. 022 | 0. 430525 | Class-G | PRKCG          |
| KIF20B. 7   | 2. 96E-05 | -0. 24737 | 0. 064 | 0. 091 | 0. 442803 | Class-G | KIF20B         |
| CXCL16. 1C  | 2. 97E-05 | -0. 44212 | 0. 726 | 0. 409 | 0. 444131 | Class-G | CXCL16         |
| DOCK11. 1C  | 3. 03E-05 | -0. 18631 | 0. 034 | 0. 057 | 0. 453539 | Class-G | DOCK11         |
| PLXDC1. 1   | 3. 12E-05 | -0. 1021  | 0. 01  | 0. 027 | 0. 466636 | Class-G | PLXDC1         |
| TMEM39A. 6  | 3. 43E-05 | -0. 15096 | 0. 126 | 0. 085 | 0. 512166 | Class-G | TMEM39A        |
| SEP15. 4    | 3. 43E-05 | -0. 11534 | 0. 957 | 0. 607 | 0. 512856 | Class-G | 15-Sep         |
| MED30. 6    | 3. 64E-05 | -0. 28213 | 0. 354 | 0. 237 | 0. 544671 | Class-G | MED30          |
| PER1. 8     | 4. 15E-05 | -0. 40733 | 0. 169 | 0. 187 | 0. 619872 | Class-G | PER1           |
| SYF2. 2     | 4. 27E-05 | -0. 28604 | 0. 817 | 0. 469 | 0. 637789 | Class-G | SYF2           |
| IL17RA. 11  | 4. 32E-05 | -0. 21187 | 0. 163 | 0. 112 | 0. 645646 | Class-G | IL17RA         |
| BTD         | 4. 41E-05 | -0. 14663 | 0. 11  | 0. 075 | 0. 659377 | Class-G | BTD            |
| SF3B5. 3    | 4. 55E-05 | -0. 12544 | 0. 931 | 0. 581 | 0. 679416 | Class-G | SF3B5          |
| HAUS7. 2    | 4. 57E-05 | -0. 16794 | 0. 125 | 0. 085 | 0. 683114 | Class-G | HAUS7          |
| ACO92580. 4 | 4. 66E-05 | -0. 1005  | 0. 001 | 0. 012 | 0. 696313 | Class-G | ACO92580. 4    |
| VPS28. 4    | 5. 12E-05 | -0. 27976 | 0. 911 | 0. 591 | 0. 765403 | Class-G | VPS28          |
| NFIL3. 10   | 5. 83E-05 | -0. 26208 | 0. 062 | 0. 087 | 0. 870604 | Class-G | NFIL3          |
| HMGN3. 6    | 5. 87E-05 | -0. 13147 | 0. 93  | 0. 556 | 0. 877707 | Class-G | HMGN3          |
| LTA4H. 9    | 6. 00E-05 | -0. 31259 | 0. 315 | 0. 215 | 0. 896393 | Class-G | LTA4H          |
| EEF1A1. 9   | 6. 06E-05 | -0. 16538 | 0. 984 | 0. 8   | 0. 90493  | Class-G | EEF1A1         |

|             |           |           |        |        |           |           |          |
|-------------|-----------|-----------|--------|--------|-----------|-----------|----------|
| NEDD4L. 7   | 6. 22E-05 | -0. 15381 | 0. 153 | 0. 106 | 0. 92939  | Class-G   | NEDD4L   |
| MEF2A. 11   | 6. 60E-05 | -0. 35437 | 0. 299 | 0. 202 | 0. 985732 | Class-G   | MEF2A    |
| ST3GAL6. 1  | 6. 77E-05 | -0. 34385 | 0. 09  | 0. 115 |           | 1 Class-G | ST3GAL6  |
| NEUROD2. 5  | 7. 06E-05 | -0. 12582 | 0. 015 | 0. 032 |           | 1 Class-G | NEUROD2  |
| MYC. 6      | 7. 54E-05 | -0. 29993 | 0. 227 | 0. 16  |           | 1 Class-G | MYC      |
| NUSAP1. 1C  | 7. 76E-05 | -0. 24952 | 0. 143 | 0. 098 |           | 1 Class-G | NUSAP1   |
| FAM107B. 7  | 7. 92E-05 | -0. 33726 | 0. 102 | 0. 125 |           | 1 Class-G | FAM107B  |
| BEST3. 9    | 8. 18E-05 | -0. 15368 | 0. 119 | 0. 082 |           | 1 Class-G | BEST3    |
| SESN2. 7    | 8. 26E-05 | -0. 15866 | 0. 141 | 0. 098 |           | 1 Class-G | SESN2    |
| DNAAF1. 7   | 8. 27E-05 | -0. 17511 | 0. 013 | 0. 029 |           | 1 Class-G | DNAAF1   |
| PTPRK. 8    | 8. 32E-05 | -0. 1866  | 0. 038 | 0. 06  |           | 1 Class-G | PTPRK    |
| ATPIF1. 2   | 8. 69E-05 | -0. 12381 | 0. 944 | 0. 571 |           | 1 Class-G | ATPIF1   |
| NDUFA1. 4   | 8. 82E-05 | -0. 18073 | 0. 971 | 0. 683 |           | 1 Class-G | NDUFA1   |
| NKX2-5. 8   | 9. 25E-05 | -0. 10919 | 0. 09  | 0. 06  |           | 1 Class-G | NKX2-5   |
| RPPH1. 4    | 9. 50E-05 | -0. 12826 | 0. 016 | 0. 033 |           | 1 Class-G | RPPH1    |
| UCHL1. 9    | 9. 53E-05 | -0. 38831 | 0. 671 | 0. 398 |           | 1 Class-G | UCHL1    |
| AKNA. 9     | 0. 0001   | -0. 25999 | 0. 052 | 0. 075 |           | 1 Class-G | AKNA     |
| KBTBD8. 4   | 0. 000101 | -0. 13002 | 0. 015 | 0. 032 |           | 1 Class-G | KBTBD8   |
| CPLX1. 8    | 0. 000101 | -0. 12818 | 0. 025 | 0. 045 |           | 1 Class-G | CPLX1    |
| SH3KBP1. 1  | 0. 000105 | -0. 28081 | 0. 332 | 0. 226 |           | 1 Class-G | SH3KBP1  |
| GPC2. 11    | 0. 000107 | -0. 40318 | 0. 155 | 0. 17  |           | 1 Class-G | GPC2     |
| ZNF273. 9   | 0. 000111 | -0. 11657 | 0. 115 | 0. 079 |           | 1 Class-G | ZNF273   |
| PLXNC1. 11  | 0. 000114 | -0. 19304 | 0. 047 | 0. 069 |           | 1 Class-G | PLXNC1   |
| TNFRSF14. 0 | 0. 000115 | -0. 35082 | 0. 095 | 0. 118 |           | 1 Class-G | TNFRSF14 |
| ANKRD46. 8  | 0. 000117 | -0. 20914 | 0. 21  | 0. 148 |           | 1 Class-G | ANKRD46  |
| GALM. 10    | 0. 000117 | -0. 23832 | 0. 169 | 0. 118 |           | 1 Class-G | GALM     |
| TRA2B. 8    | 0. 000119 | -0. 19717 | 0. 857 | 0. 488 |           | 1 Class-G | TRA2B    |
| CDKN1C. 9   | 0. 000121 | -0. 20179 | 0. 153 | 0. 107 |           | 1 Class-G | CDKN1C   |
| CD63. 10    | 0. 000121 | -0. 2163  | 0. 998 | 0. 912 |           | 1 Class-G | CD63     |
| DIAPH2. 6   | 0. 000123 | -0. 18399 | 0. 045 | 0. 068 |           | 1 Class-G | DIAPH2   |
| HJURP. 9    | 0. 000124 | -0. 12425 | 0. 023 | 0. 042 |           | 1 Class-G | HJURP    |
| RCBTB2. 9   | 0. 000124 | -0. 32327 | 0. 124 | 0. 145 |           | 1 Class-G | RCBTB2   |
| SPTLC2. 11  | 0. 000128 | -0. 51158 | 0. 209 | 0. 21  |           | 1 Class-G | SPTLC2   |
| APIG2. 9    | 0. 000131 | -0. 19439 | 0. 033 | 0. 054 |           | 1 Class-G | APIG2    |
| CRYAB. 10   | 0. 000132 | -0. 65048 | 0. 743 | 0. 46  |           | 1 Class-G | CRYAB    |
| TSPO. 10    | 0. 000132 | -0. 33656 | 0. 858 | 0. 551 |           | 1 Class-G | TSPO     |
| COL8A1. 2   | 0. 000134 | -0. 10767 | 0. 008 | 0. 023 |           | 1 Class-G | COL8A1   |
| RASL11B. 1  | 0. 000143 | -0. 19455 | 0. 036 | 0. 057 |           | 1 Class-G | RASL11B  |
| SELM. 9     | 0. 000149 | -0. 28736 | 0. 255 | 0. 177 |           | 1 Class-G | SELM     |
| CHIT1. 1    | 0. 000151 | -0. 12943 | 0. 004 | 0. 015 |           | 1 Class-G | CHIT1    |
| SSR3. 10    | 0. 000152 | -0. 31957 | 0. 83  | 0. 477 |           | 1 Class-G | SSR3     |
| TSPAN13. 1  | 0. 000157 | -0. 49206 | 0. 329 | 0. 294 |           | 1 Class-G | TSPAN13  |
| CPQ. 9      | 0. 000161 | -0. 32305 | 0. 24  | 0. 167 |           | 1 Class-G | CPQ      |
| F11R. 10    | 0. 000167 | -0. 20102 | 0. 039 | 0. 06  |           | 1 Class-G | F11R     |
| TCP1. 7     | 0. 000169 | -0. 18303 | 0. 83  | 0. 473 |           | 1 Class-G | TCP1     |
| KMT2E. 9    | 0. 000171 | -0. 2118  | 0. 85  | 0. 486 |           | 1 Class-G | KMT2E    |
| GAB2. 5     | 0. 000171 | -0. 11245 | 0. 091 | 0. 062 |           | 1 Class-G | GAB2     |
| MMP7. 6     | 0. 000185 | -0. 22938 | 0. 015 | 0. 032 |           | 1 Class-G | MMP7     |
| TBC1D2B. 9  | 0. 000186 | -0. 12296 | 0. 073 | 0. 048 |           | 1 Class-G | TBC1D2B  |
| DNM3. 9     | 0. 000199 | -0. 11525 | 0. 118 | 0. 083 |           | 1 Class-G | DNM3     |
| PCMTD1. 4   | 0. 0002   | -0. 22103 | 0. 203 | 0. 144 |           | 1 Class-G | PCMTD1   |



|             |          |          |       |       |           |               |
|-------------|----------|----------|-------|-------|-----------|---------------|
| BLOC1S1. 6  | 0.000208 | -0.265   | 0.925 | 0.603 | 1 Class-G | BLOC1S1       |
| TLR3. 6     | 0.000209 | -0.14818 | 0.018 | 0.035 | 1 Class-G | TLR3          |
| CLN8. 8     | 0.000216 | -0.5355  | 0.289 | 0.265 | 1 Class-G | CLN8          |
| TMEM70. 8   | 0.000226 | -0.3405  | 0.583 | 0.364 | 1 Class-G | TMEM70        |
| BRK1. 2     | 0.000237 | -0.14178 | 0.987 | 0.747 | 1 Class-G | BRK1          |
| KDM6B. 9    | 0.000239 | -0.43766 | 0.225 | 0.222 | 1 Class-G | KDM6B         |
| VDAC3. 6    | 0.000246 | -0.30934 | 0.717 | 0.423 | 1 Class-G | VDAC3         |
| IL13RA1. 1  | 0.000246 | -0.38425 | 0.349 | 0.233 | 1 Class-G | IL13RA1       |
| PIM3. 9     | 0.000255 | -0.25827 | 0.257 | 0.179 | 1 Class-G | PIM3          |
| ATP5G3. 3   | 0.000272 | -0.10911 | 0.973 | 0.698 | 1 Class-G | ATP5G3        |
| GPX3. 10    | 0.000274 | -0.31585 | 0.204 | 0.144 | 1 Class-G | GPX3          |
| TAC3. 4     | 0.000284 | -0.11116 | 0.012 | 0.026 | 1 Class-G | TAC3          |
| APEX1. 3    | 0.000288 | -0.26341 | 0.835 | 0.488 | 1 Class-G | APEX1         |
| MARCH3. 6   | 0.000315 | -0.2086  | 0.139 | 0.099 | 1 Class-G | 3-Mar         |
| ATF5. 8     | 0.000316 | -0.33623 | 0.261 | 0.183 | 1 Class-G | ATF5          |
| C9orf3. 9   | 0.000328 | -0.21138 | 0.139 | 0.099 | 1 Class-G | C9orf3        |
| ZDHHC2. 4   | 0.000342 | -0.10016 | 0.087 | 0.06  | 1 Class-G | ZDHHC2        |
| LINC00937   | 0.000345 | -0.12694 | 0.019 | 0.035 | 1 Class-G | LINC00937     |
| ANKRD44. 5  | 0.000345 | -0.30105 | 0.077 | 0.099 | 1 Class-G | ANKRD44       |
| HNRNPA0. 9  | 0.000358 | -0.12522 | 0.95  | 0.591 | 1 Class-G | HNRNPA0       |
| RABGAP1L. 0 | 0.000366 | -0.20448 | 0.146 | 0.104 | 1 Class-G | RABGAP1L      |
| MORF4L1. 4  | 0.000373 | -0.12002 | 0.982 | 0.706 | 1 Class-G | MORF4L1       |
| CSRNP1. 11  | 0.000376 | -0.40487 | 0.184 | 0.192 | 1 Class-G | CSRNP1        |
| CA3. 7      | 0.000392 | -0.2678  | 0.025 | 0.043 | 1 Class-G | CA3           |
| RP11-290E   | 0.000394 | -0.10845 | 0.007 | 0.02  | 1 Class-G | RP11-290D2. 6 |
| GLCCI1. 1C  | 0.000406 | -0.24144 | 0.201 | 0.143 | 1 Class-G | GLCCI1        |
| DAGLB. 8    | 0.000406 | -0.32705 | 0.104 | 0.123 | 1 Class-G | DAGLB         |
| RAB11FIP4   | 0.000424 | -0.14471 | 0.025 | 0.043 | 1 Class-G | RAB11FIP4     |
| CIITA. 7    | 0.000441 | -0.15387 | 0.023 | 0.04  | 1 Class-G | CIITA         |
| MAP1LC3B2   | 0.000444 | -0.25302 | 0.066 | 0.087 | 1 Class-G | MAP1LC3B2     |
| MFSD1. 11   | 0.000445 | -0.60811 | 0.412 | 0.333 | 1 Class-G | MFSD1         |
| GABARAPL2   | 0.000467 | -0.17153 | 0.988 | 0.703 | 1 Class-G | GABARAPL2     |
| MPC2. 6     | 0.000469 | -0.37286 | 0.84  | 0.539 | 1 Class-G | MPC2          |
| AATK. 7     | 0.000471 | -0.1916  | 0.019 | 0.035 | 1 Class-G | AATK          |
| UBXN1. 6    | 0.000496 | -0.25925 | 0.893 | 0.576 | 1 Class-G | UBXN1         |
| CLIC2. 8    | 0.000511 | -0.16824 | 0.029 | 0.046 | 1 Class-G | CLIC2         |
| C2orf74. 2  | 0.000524 | -0.21153 | 0.013 | 0.028 | 1 Class-G | C2orf74       |
| TMEM86A. 9  | 0.000533 | -0.16461 | 0.031 | 0.049 | 1 Class-G | TMEM86A       |
| GLA. 10     | 0.000536 | -0.46914 | 0.218 | 0.215 | 1 Class-G | GLA           |
| TNFAIP8L3   | 0.000574 | -0.10976 | 0.016 | 0.031 | 1 Class-G | TNFAIP8L3     |
| PI3. 7      | 0.000588 | -0.3683  | 0.073 | 0.049 | 1 Class-G | PI3           |
| SLC9A9. 1C  | 0.000593 | -0.27153 | 0.061 | 0.081 | 1 Class-G | SLC9A9        |
| SLC12A5. 8  | 0.000595 | -0.26216 | 0.075 | 0.095 | 1 Class-G | SLC12A5       |
| RAB20. 10   | 0.000617 | -0.58517 | 0.248 | 0.234 | 1 Class-G | RAB20         |
| SGPP1. 8    | 0.000619 | -0.11645 | 0.106 | 0.075 | 1 Class-G | SGPP1         |
| DHRS3. 9    | 0.000634 | -0.4159  | 0.16  | 0.173 | 1 Class-G | DHRS3         |
| MID1IP1. 5  | 0.000645 | -0.34858 | 0.356 | 0.246 | 1 Class-G | MID1IP1       |
| HSF2. 7     | 0.000645 | -0.17678 | 0.155 | 0.111 | 1 Class-G | HSF2          |
| DRAM2. 10   | 0.000678 | -0.5737  | 0.394 | 0.327 | 1 Class-G | DRAM2         |
| CREBRF. 3   | 0.000702 | -0.22067 | 0.172 | 0.124 | 1 Class-G | CREBRF        |
| TRIQQ. 3    | 0.000708 | -0.1758  | 0.043 | 0.062 | 1 Class-G | TRIQQ         |

|           |          |          |       |       |           |              |
|-----------|----------|----------|-------|-------|-----------|--------------|
| CARD16.9  | 0.000712 | -0.40212 | 0.221 | 0.231 | 1 Class-G | CARD16       |
| AC004540. | 0.000725 | -0.1032  | 0.106 | 0.075 | 1 Class-G | AC004540.5   |
| MCM7.10   | 0.00075  | -0.29107 | 0.345 | 0.239 | 1 Class-G | MCM7         |
| PTGS1.11  | 0.000785 | -0.28291 | 0.207 | 0.148 | 1 Class-G | PTGS1        |
| PTBP2.9   | 0.000792 | -0.13883 | 0.139 | 0.1   | 1 Class-G | PTBP2        |
| PAK3.11   | 0.000815 | -0.18598 | 0.187 | 0.136 | 1 Class-G | PAK3         |
| RP11-160C | 0.000844 | -0.12355 | 0.016 | 0.031 | 1 Class-G | RP11-16005.1 |
| GNA01.8   | 0.000859 | -0.23376 | 0.073 | 0.093 | 1 Class-G | GNA01        |
| PARK7.6   | 0.000878 | -0.10383 | 0.988 | 0.729 | 1 Class-G | PARK7        |
| GNG2.7    | 0.00089  | -0.2665  | 0.237 | 0.17  | 1 Class-G | GNG2         |
| TSC22D2.5 | 0.000902 | -0.21107 | 0.206 | 0.148 | 1 Class-G | TSC22D2      |
| CAP1.10   | 0.000942 | -0.29432 | 0.867 | 0.547 | 1 Class-G | CAP1         |
| HSBP1L1.7 | 0.000944 | -0.13069 | 0.099 | 0.07  | 1 Class-G | HSBP1L1      |
| WDR830S.4 | 0.000955 | -0.23437 | 0.981 | 0.705 | 1 Class-G | WDR830S      |
| SPOCK1.9  | 0.000997 | -0.21092 | 0.064 | 0.084 | 1 Class-G | SPOCK1       |
| TK1.8     | 0.001007 | -0.21095 | 0.054 | 0.073 | 1 Class-G | TK1          |
| GABARAP.8 | 0.001016 | -0.64342 | 0.619 | 0.435 | 1 Class-G | GABARAP      |
| PRC1.10   | 0.001027 | -0.15764 | 0.114 | 0.081 | 1 Class-G | PRC1         |
| SHCBP1.7  | 0.001032 | -0.12307 | 0.038 | 0.056 | 1 Class-G | SHCBP1       |
| GDI2.10   | 0.001063 | -0.30119 | 0.755 | 0.445 | 1 Class-G | GDI2         |
| SNRPD2.6  | 0.00107  | -0.19491 | 0.985 | 0.709 | 1 Class-G | SNRPD2       |
| PTPRCAP.7 | 0.001075 | -0.20503 | 0.015 | 0.028 | 1 Class-G | PTPRCAP      |
| TCEB2.8   | 0.001088 | -0.13626 | 0.989 | 0.796 | 1 Class-G | TCEB2        |
| VSTM2A.9  | 0.001136 | -0.46492 | 0.089 | 0.108 | 1 Class-G | VSTM2A       |
| CCDC18.7  | 0.001167 | -0.11819 | 0.101 | 0.073 | 1 Class-G | CCDC18       |
| FGF12.7   | 0.001181 | -0.13125 | 0.033 | 0.05  | 1 Class-G | FGF12        |
| TMEM246.8 | 0.001237 | -0.12698 | 0.033 | 0.05  | 1 Class-G | TMEM246      |
| GBP2.8    | 0.00124  | -0.38943 | 0.277 | 0.197 | 1 Class-G | GBP2         |
| CMTM6.11  | 0.001274 | -0.37178 | 0.645 | 0.39  | 1 Class-G | CMTM6        |
| YPEL4.5   | 0.001285 | -0.12342 | 0.027 | 0.043 | 1 Class-G | YPEL4        |
| FOLR1.7   | 0.001286 | -0.14258 | 0.049 | 0.032 | 1 Class-G | FOLR1        |
| LDOC1.10  | 0.001317 | -0.21744 | 0.07  | 0.091 | 1 Class-G | LDOC1        |
| AQP1.4    | 0.00132  | -0.11795 | 0.031 | 0.048 | 1 Class-G | AQP1         |
| P2RX4.10  | 0.001481 | -0.32789 | 0.234 | 0.167 | 1 Class-G | P2RX4        |
| NDUFS5.7  | 0.001527 | -0.1445  | 0.994 | 0.781 | 1 Class-G | NDUFS5       |
| PPIB.5    | 0.001528 | -0.19938 | 0.979 | 0.682 | 1 Class-G | PPIB         |
| UXT.7     | 0.00156  | -0.28837 | 0.836 | 0.489 | 1 Class-G | UXT          |
| B4GALNT1. | 0.001594 | -0.29054 | 0.187 | 0.136 | 1 Class-G | B4GALNT1     |
| ATRAID.4  | 0.001656 | -0.19492 | 0.931 | 0.559 | 1 Class-G | ATRAID       |
| CHGB.8    | 0.00168  | -0.23606 | 0.072 | 0.09  | 1 Class-G | CHGB         |
| BLVRA.9   | 0.001712 | -0.38332 | 0.48  | 0.317 | 1 Class-G | BLVRA        |
| XRCC5.10  | 0.001727 | -0.12973 | 0.874 | 0.509 | 1 Class-G | XRCC5        |
| CA9.7     | 0.001763 | -0.14806 | 0.027 | 0.042 | 1 Class-G | CA9          |
| RTN2.7    | 0.001826 | -0.19611 | 0.11  | 0.08  | 1 Class-G | RTN2         |
| ORMDL2.8  | 0.001928 | -0.42147 | 0.373 | 0.256 | 1 Class-G | ORMDL2       |
| ATP6V1B2. | 0.002007 | -0.48615 | 0.522 | 0.39  | 1 Class-G | ATP6V1B2     |
| NRXN2.11  | 0.002044 | -0.14621 | 0.15  | 0.111 | 1 Class-G | NRXN2        |
| FAM96B.4  | 0.002084 | -0.10509 | 0.95  | 0.61  | 1 Class-G | FAM96B       |
| RMRP.1    | 0.002188 | -0.10337 | 0.008 | 0.019 | 1 Class-G | RMRP         |
| FRZB.6    | 0.002189 | -0.20526 | 0.032 | 0.047 | 1 Class-G | FRZB         |
| NAA38.4   | 0.002202 | -0.37831 | 0.719 | 0.431 | 1 Class-G | NAA38        |

|           |          |          |       |       |           |              |
|-----------|----------|----------|-------|-------|-----------|--------------|
| CSGALNACT | 0.002241 | -0.23583 | 0.059 | 0.077 | 1 Class-G | CSGALNACT1   |
| RNF166.8  | 0.002245 | -0.2786  | 0.243 | 0.176 | 1 Class-G | RNF166       |
| VASH1.7   | 0.002293 | -0.24479 | 0.169 | 0.123 | 1 Class-G | VASH1        |
| ZNF467.8  | 0.002301 | -0.11368 | 0.022 | 0.036 | 1 Class-G | ZNF467       |
| RP11-138A | 0.002325 | -0.18379 | 0.127 | 0.094 | 1 Class-G | RP11-138A9.2 |
| NAA60.3   | 0.002338 | -0.12359 | 0.005 | 0.014 | 1 Class-G | NAA60        |
| CENPU.9   | 0.002358 | -0.16985 | 0.136 | 0.1   | 1 Class-G | CENPU        |
| P2RY11.9  | 0.002382 | -0.16626 | 0.113 | 0.082 | 1 Class-G | P2RY11       |
| C10orf10. | 0.002422 | -0.43076 | 0.118 | 0.086 | 1 Class-G | C10orf10     |
| PTPRD.10  | 0.002523 | -0.1904  | 0.058 | 0.075 | 1 Class-G | PTPRD        |
| LAT.1     | 0.002621 | -0.11058 | 0.048 | 0.032 | 1 Class-G | LAT          |
| TSPYL2.5  | 0.002834 | -0.19493 | 0.146 | 0.108 | 1 Class-G | TSPYL2       |
| PDCD4.10  | 0.002901 | -0.35988 | 0.139 | 0.15  | 1 Class-G | PDCD4        |
| APOL4.7   | 0.002944 | -0.11729 | 0.03  | 0.045 | 1 Class-G | APOL4        |
| SYNPO2L.1 | 0.00295  | -0.12485 | 0.008 | 0.019 | 1 Class-G | SYNPO2L      |
| OSR1.4    | 0.002968 | -0.12562 | 0.005 | 0.014 | 1 Class-G | OSR1         |
| NAP1L3.8  | 0.002992 | -0.13144 | 0.131 | 0.097 | 1 Class-G | NAP1L3       |
| TUBA4A.6  | 0.003153 | -0.17884 | 0.072 | 0.051 | 1 Class-G | TUBA4A       |
| TMEM243.6 | 0.0032   | -0.34121 | 0.265 | 0.192 | 1 Class-G | TMEM243      |
| CCNL1.4   | 0.003374 | -0.40118 | 0.74  | 0.489 | 1 Class-G | CCNL1        |
| FAM13A.3  | 0.003399 | -0.18911 | 0.127 | 0.094 | 1 Class-G | FAM13A       |
| NDUFB6.5  | 0.003436 | -0.28418 | 0.764 | 0.453 | 1 Class-G | NDUFB6       |
| FAM212A.9 | 0.00353  | -0.17559 | 0.065 | 0.046 | 1 Class-G | FAM212A      |
| COX7A2.5  | 0.003539 | -0.10945 | 0.988 | 0.781 | 1 Class-G | COX7A2       |
| CAT.9     | 0.003555 | -0.42394 | 0.423 | 0.285 | 1 Class-G | CAT          |
| GPR19.6   | 0.0036   | -0.13406 | 0.032 | 0.047 | 1 Class-G | GPR19        |
| YPEL2.5   | 0.003695 | -0.15009 | 0.091 | 0.066 | 1 Class-G | YPEL2        |
| CD81.9    | 0.003981 | -0.40643 | 0.662 | 0.402 | 1 Class-G | CD81         |
| TMEM100.1 | 0.004054 | -0.21883 | 0.073 | 0.091 | 1 Class-G | TMEM100      |
| SNX2.11   | 0.004063 | -0.36473 | 0.605 | 0.378 | 1 Class-G | SNX2         |
| CHCHD7.1C | 0.004136 | -0.53857 | 0.324 | 0.28  | 1 Class-G | CHCHD7       |
| BNIP3L.5  | 0.004173 | -0.32787 | 0.865 | 0.556 | 1 Class-G | BNIP3L       |
| MKI67.10  | 0.004226 | -0.19318 | 0.049 | 0.065 | 1 Class-G | MKI67        |
| SSBP1.6   | 0.004295 | -0.24673 | 0.924 | 0.592 | 1 Class-G | SSBP1        |
| STC2.6    | 0.00432  | -0.13576 | 0.029 | 0.043 | 1 Class-G | STC2         |
| TMEM37.7  | 0.004508 | -0.21006 | 0.082 | 0.06  | 1 Class-G | TMEM37       |
| SUPT3H    | 0.004516 | -0.12727 | 0.021 | 0.034 | 1 Class-G | SUPT3H       |
| CLN3.3    | 0.004673 | -0.11436 | 0.004 | 0.011 | 1 Class-G | CLN3         |
| SERPINI1. | 0.004945 | -0.10027 | 0.07  | 0.05  | 1 Class-G | SERPINI1     |
| ZEB2.7    | 0.004949 | -0.43267 | 0.346 | 0.297 | 1 Class-G | ZEB2         |
| CYTH1.8   | 0.00502  | -0.34236 | 0.153 | 0.159 | 1 Class-G | CYTH1        |
| HLA-G.1   | 0.005197 | -0.20981 | 0.039 | 0.054 | 1 Class-G | HLA-G        |
| CKS2.10   | 0.005254 | -0.56785 | 0.46  | 0.351 | 1 Class-G | CKS2         |
| CMTM7.11  | 0.005311 | -0.40083 | 0.161 | 0.165 | 1 Class-G | CMTM7        |
| NUF2.11   | 0.005397 | -0.17984 | 0.049 | 0.064 | 1 Class-G | NUF2         |
| FNIP2.7   | 0.005425 | -0.39298 | 0.198 | 0.195 | 1 Class-G | FNIP2        |
| FAM110A.5 | 0.005426 | -0.16571 | 0.06  | 0.076 | 1 Class-G | FAM110A      |
| STMN4.10  | 0.005584 | -0.47736 | 0.418 | 0.287 | 1 Class-G | STMN4        |
| FKBP5.11  | 0.005601 | -0.52648 | 0.368 | 0.308 | 1 Class-G | FKBP5        |
| HSD3B7.7  | 0.005608 | -0.15863 | 0.097 | 0.072 | 1 Class-G | HSD3B7       |
| ARRDC2.9  | 0.005935 | -0.26564 | 0.073 | 0.088 | 1 Class-G | ARRDC2       |

|             |          |          |       |       |           |             |
|-------------|----------|----------|-------|-------|-----------|-------------|
| KIF2C. 9    | 0.005936 | -0.11263 | 0.032 | 0.045 | 1 Class-G | KIF2C       |
| ICOSLG. 11  | 0.006004 | -0.26539 | 0.078 | 0.093 | 1 Class-G | ICOSLG      |
| TUSC1. 7    | 0.006012 | -0.14915 | 0.065 | 0.081 | 1 Class-G | TUSC1       |
| TNR. 8      | 0.006153 | -0.10867 | 0.041 | 0.057 | 1 Class-G | TNR         |
| RHEB. 5     | 0.006261 | -0.11732 | 0.94  | 0.588 | 1 Class-G | RHEB        |
| GPR82. 7    | 0.006382 | -0.22132 | 0.172 | 0.129 | 1 Class-G | GPR82       |
| PAIP2B. 1   | 0.006461 | -0.10132 | 0.015 | 0.025 | 1 Class-G | PAIP2B      |
| SELENBP1. 0 | 0.006494 | -0.10135 | 0.011 | 0.021 | 1 Class-G | SELENBP1    |
| NEU4. 8     | 0.006611 | -0.16254 | 0.05  | 0.065 | 1 Class-G | NEU4        |
| SBDS. 10    | 0.006622 | -0.16032 | 0.941 | 0.556 | 1 Class-G | SBDS        |
| CP. 6       | 0.006634 | -0.12423 | 0.018 | 0.03  | 1 Class-G | CP          |
| BCL2. 6     | 0.006639 | -0.16241 | 0.037 | 0.051 | 1 Class-G | BCL2        |
| WSB1. 7     | 0.006673 | -0.19084 | 0.924 | 0.607 | 1 Class-G | WSB1        |
| DNER. 9     | 0.006728 | -0.21909 | 0.363 | 0.266 | 1 Class-G | DNER        |
| TMEM140. 6  | 0.006876 | -0.11579 | 0.063 | 0.045 | 1 Class-G | TMEM140     |
| DHRS4. 7    | 0.00691  | -0.18145 | 0.104 | 0.078 | 1 Class-G | DHRS4       |
| HSPBAP1. 5  | 0.006945 | -0.1743  | 0.092 | 0.068 | 1 Class-G | HSPBAP1     |
| RBM47. 11   | 0.006946 | -0.21378 | 0.149 | 0.111 | 1 Class-G | RBM47       |
| ATP5L2. 4   | 0.006964 | -0.3588  | 0.081 | 0.095 | 1 Class-G | ATP5L2      |
| C1orf54. 1  | 0.006975 | -0.46808 | 0.301 | 0.213 | 1 Class-G | C1orf54     |
| MANBA. 11   | 0.007076 | -0.26451 | 0.154 | 0.115 | 1 Class-G | MANBA       |
| ACO09501. 0 | 0.007127 | -0.68883 | 0.203 | 0.149 | 1 Class-G | ACO09501. 4 |
| SYNGR2. 11  | 0.007351 | -0.47973 | 0.469 | 0.305 | 1 Class-G | SYNGR2      |
| MND1. 4     | 0.007536 | -0.10267 | 0.033 | 0.046 | 1 Class-G | MND1        |
| KLF2. 7     | 0.007608 | -0.42773 | 0.124 | 0.133 | 1 Class-G | KLF2        |
| DLX1. 11    | 0.007991 | -0.32484 | 0.105 | 0.116 | 1 Class-G | DLX1        |
| ATP5F1. 4   | 0.008019 | -0.25781 | 0.93  | 0.597 | 1 Class-G | ATP5F1      |
| PBK. 11     | 0.008067 | -0.15946 | 0.093 | 0.07  | 1 Class-G | PBK         |
| SOCS1. 5    | 0.008108 | -0.17202 | 0.041 | 0.055 | 1 Class-G | SOCS1       |
| XBP1. 10    | 0.008147 | -0.34009 | 0.529 | 0.345 | 1 Class-G | XBP1        |
| TXNIP. 6    | 0.008317 | -0.3391  | 0.643 | 0.414 | 1 Class-G | TXNIP       |
| MCM5. 9     | 0.008745 | -0.25392 | 0.19  | 0.143 | 1 Class-G | MCM5        |
| RUNDC3A. 1  | 0.00888  | -0.19966 | 0.086 | 0.099 | 1 Class-G | RUNDC3A     |
| PAIP2. 3    | 0.009022 | -0.23369 | 0.907 | 0.585 | 1 Class-G | PAIP2       |
| PIFO. 8     | 0.009055 | -0.16263 | 0.064 | 0.047 | 1 Class-G | PIFO        |
| PTPRN. 8    | 0.009085 | -0.18233 | 0.061 | 0.076 | 1 Class-G | PTPRN       |
| STYXL1. 5   | 0.009097 | -0.23587 | 0.16  | 0.121 | 1 Class-G | STYXL1      |
| EIF3M. 7    | 0.00927  | -0.27878 | 0.797 | 0.482 | 1 Class-G | EIF3M       |
| BAX. 10     | 0.009933 | -0.21245 | 0.878 | 0.515 | 1 Class-G | BAX         |
| SRCIN1. 8   | 0.009965 | -0.12671 | 0.021 | 0.032 | 1 Class-G | SRCIN1      |
| FAM64A. 12  | 0        | 1.632399 | 0.95  | 0.054 | 0 CSCL1   | FAM64A      |
| CENPF. 11   | 0        | 1.608087 | 0.96  | 0.086 | 0 CSCL1   | CENPF       |
| CDC20. 9    | 0        | 1.573233 | 0.95  | 0.053 | 0 CSCL1   | CDC20       |
| BIRC5. 12   | 0        | 1.559851 | 0.975 | 0.089 | 0 CSCL1   | BIRC5       |
| TPX2. 11    | 0        | 1.513817 | 0.925 | 0.068 | 0 CSCL1   | TPX2        |
| CCNB1. 10   | 0        | 1.500265 | 0.96  | 0.075 | 0 CSCL1   | CCNB1       |
| PBK. 12     | 0        | 1.493686 | 0.99  | 0.057 | 0 CSCL1   | PBK         |
| TOP2A. 11   | 0        | 1.4922   | 0.915 | 0.071 | 0 CSCL1   | TOP2A       |
| UBE2C. 12   | 0        | 1.481475 | 0.94  | 0.102 | 0 CSCL1   | UBE2C       |
| NUSAP1. 11  | 0        | 1.434081 | 0.96  | 0.09  | 0 CSCL1   | NUSAP1      |
| CDKN3. 11   | 0        | 1.424042 | 0.93  | 0.077 | 0 CSCL1   | CDKN3       |

|            |   |          |       |       |         |           |
|------------|---|----------|-------|-------|---------|-----------|
| CENPA. 10  | 0 | 1.389729 | 0.876 | 0.035 | 0 CSCL1 | CENPA     |
| AURKA. 9   | 0 | 1.386672 | 0.896 | 0.063 | 0 CSCL1 | AURKA     |
| PLK1. 9    | 0 | 1.36663  | 0.856 | 0.041 | 0 CSCL1 | PLK1      |
| CCNB2. 10  | 0 | 1.3619   | 0.9   | 0.049 | 0 CSCL1 | CCNB2     |
| NUF2. 12   | 0 | 1.336854 | 0.955 | 0.046 | 0 CSCL1 | NUF2      |
| ASPM. 11   | 0 | 1.330993 | 0.891 | 0.032 | 0 CSCL1 | ASPM      |
| CENPE. 10  | 0 | 1.308194 | 0.871 | 0.041 | 0 CSCL1 | CENPE     |
| PRC1. 11   | 0 | 1.273725 | 0.935 | 0.071 | 0 CSCL1 | PRC1      |
| SGOL2. 10  | 0 | 1.259725 | 0.915 | 0.075 | 0 CSCL1 | SGOL2     |
| GTSE1. 8   | 0 | 1.23636  | 0.881 | 0.043 | 0 CSCL1 | GTSE1     |
| MKI67. 11  | 0 | 1.221816 | 0.881 | 0.048 | 0 CSCL1 | MKI67     |
| CCNA2. 10  | 0 | 1.219445 | 0.886 | 0.042 | 0 CSCL1 | CCNA2     |
| DLGAP5. 1C | 0 | 1.162777 | 0.831 | 0.021 | 0 CSCL1 | DLGAP5    |
| CDCA3. 10  | 0 | 1.149468 | 0.841 | 0.039 | 0 CSCL1 | CDCA3     |
| MXD3. 10   | 0 | 1.130181 | 0.876 | 0.049 | 0 CSCL1 | MXD3      |
| TROAP. 10  | 0 | 1.123813 | 0.841 | 0.032 | 0 CSCL1 | TROAP     |
| SGOL1. 10  | 0 | 1.108802 | 0.861 | 0.043 | 0 CSCL1 | SGOL1     |
| HMMR. 7    | 0 | 1.087971 | 0.806 | 0.027 | 0 CSCL1 | HMMR      |
| CKAP2L. 11 | 0 | 1.076598 | 0.831 | 0.032 | 0 CSCL1 | CKAP2L    |
| ECT2. 8    | 0 | 1.071469 | 0.856 | 0.036 | 0 CSCL1 | ECT2      |
| KIF2C. 10  | 0 | 1.071366 | 0.831 | 0.03  | 0 CSCL1 | KIF2C     |
| DEPDC1. 4  | 0 | 1.069969 | 0.801 | 0.022 | 0 CSCL1 | DEPDC1    |
| NEK2. 7    | 0 | 1.032885 | 0.741 | 0.021 | 0 CSCL1 | NEK2      |
| KIF23. 7   | 0 | 1.02316  | 0.776 | 0.027 | 0 CSCL1 | KIF23     |
| KNSTRN. 6  | 0 | 1.020697 | 0.841 | 0.066 | 0 CSCL1 | KNSTRN    |
| KIFC1. 9   | 0 | 1.018634 | 0.796 | 0.046 | 0 CSCL1 | KIFC1     |
| AURKB. 11  | 0 | 1.016181 | 0.726 | 0.037 | 0 CSCL1 | AURKB     |
| TACC3. 8   | 0 | 1.016169 | 0.836 | 0.064 | 0 CSCL1 | TACC3     |
| BUB1. 6    | 0 | 0.997482 | 0.806 | 0.027 | 0 CSCL1 | BUB1      |
| CDCA8. 9   | 0 | 0.979333 | 0.751 | 0.027 | 0 CSCL1 | CDCA8     |
| PRR11. 4   | 0 | 0.975729 | 0.771 | 0.052 | 0 CSCL1 | PRR11     |
| NDC80. 9   | 0 | 0.965509 | 0.786 | 0.035 | 0 CSCL1 | NDC80     |
| HJURP. 10  | 0 | 0.963979 | 0.716 | 0.028 | 0 CSCL1 | HJURP     |
| RACGAP1. 5 | 0 | 0.960758 | 0.871 | 0.069 | 0 CSCL1 | RACGAP1   |
| FAM83D. 3  | 0 | 0.960549 | 0.657 | 0.025 | 0 CSCL1 | FAM83D    |
| SPC25. 10  | 0 | 0.959995 | 0.786 | 0.049 | 0 CSCL1 | SPC25     |
| CENPN. 8   | 0 | 0.943182 | 0.861 | 0.074 | 0 CSCL1 | CENPN     |
| FOXMI. 8   | 0 | 0.926327 | 0.836 | 0.038 | 0 CSCL1 | FOXMI     |
| CDCA2. 1   | 0 | 0.925004 | 0.711 | 0.019 | 0 CSCL1 | CDCA2     |
| SPC24. 9   | 0 | 0.918089 | 0.746 | 0.037 | 0 CSCL1 | SPC24     |
| SPAG5. 6   | 0 | 0.894397 | 0.751 | 0.032 | 0 CSCL1 | SPAG5     |
| NCAPG. 9   | 0 | 0.89276  | 0.756 | 0.029 | 0 CSCL1 | NCAPG     |
| SAPCD2. 7  | 0 | 0.884588 | 0.731 | 0.044 | 0 CSCL1 | SAPCD2    |
| KIF20A. 1  | 0 | 0.87563  | 0.677 | 0.016 | 0 CSCL1 | KIF20A    |
| KIF4A. 2   | 0 | 0.851602 | 0.697 | 0.023 | 0 CSCL1 | KIF4A     |
| GAS2L3. 7  | 0 | 0.848744 | 0.756 | 0.056 | 0 CSCL1 | GAS2L3    |
| KIF14. 1   | 0 | 0.844733 | 0.687 | 0.018 | 0 CSCL1 | KIF14     |
| ARHGAP11A  | 0 | 0.840158 | 0.677 | 0.027 | 0 CSCL1 | ARHGAP11A |
| NMU        | 0 | 0.799026 | 0.547 | 0.02  | 0 CSCL1 | NMU       |
| POC1A. 7   | 0 | 0.787399 | 0.706 | 0.045 | 0 CSCL1 | POC1A     |
| MELK. 7    | 0 | 0.785818 | 0.682 | 0.035 | 0 CSCL1 | MELK      |

|            |       |           |        |        |             |          |
|------------|-------|-----------|--------|--------|-------------|----------|
| SHCBP1. 8  | 0     | 0. 777015 | 0. 751 | 0. 041 | 0 CSCL1     | SHCBP1   |
| OIP5. 5    | 0     | 0. 762508 | 0. 642 | 0. 031 | 0 CSCL1     | OIP5     |
| DEPDC1B. 3 | 0     | 0. 760773 | 0. 637 | 0. 025 | 0 CSCL1     | DEPDC1B  |
| TTK. 1     | 0     | 0. 72478  | 0. 597 | 0. 017 | 0 CSCL1     | TTK      |
| KIAA1524.  | 0     | 0. 705204 | 0. 627 | 0. 039 | 0 CSCL1     | KIAA1524 |
| SKA3. 1    | 0     | 0. 691146 | 0. 592 | 0. 026 | 0 CSCL1     | SKA3     |
| KIF18A     | 0     | 0. 68761  | 0. 577 | 0. 017 | 0 CSCL1     | KIF18A   |
| CASC5. 1   | 0     | 0. 682953 | 0. 602 | 0. 021 | 0 CSCL1     | CASC5    |
| SKA1. 1    | 0     | 0. 680323 | 0. 627 | 0. 019 | 0 CSCL1     | SKA1     |
| BUB1B. 1   | 0     | 0. 678507 | 0. 587 | 0. 016 | 0 CSCL1     | BUB1B    |
| CEP55. 1   | 0     | 0. 665354 | 0. 592 | 0. 02  | 0 CSCL1     | CEP55    |
| CCNF. 4    | 0     | 0. 657602 | 0. 547 | 0. 028 | 0 CSCL1     | CCNF     |
| KIF15. 1   | 0     | 0. 655605 | 0. 567 | 0. 024 | 0 CSCL1     | KIF15    |
| CDCA5. 8   | 0     | 0. 654323 | 0. 612 | 0. 035 | 0 CSCL1     | CDCA5    |
| RTKN2      | 0     | 0. 644317 | 0. 582 | 0. 025 | 0 CSCL1     | RTKN2    |
| PARPBP. 2  | 0     | 0. 631102 | 0. 627 | 0. 036 | 0 CSCL1     | PARPBP   |
| CDC25C. 1  | 0     | 0. 621    | 0. 527 | 0. 013 | 0 CSCL1     | CDC25C   |
| NCAPH. 3   | 0     | 0. 610393 | 0. 537 | 0. 027 | 0 CSCL1     | NCAPH    |
| APOBEC3B.  | 0     | 0. 602935 | 0. 532 | 0. 025 | 0 CSCL1     | APOBEC3B |
| BORA. 1    | 0     | 0. 595103 | 0. 512 | 0. 023 | 0 CSCL1     | BORA     |
| DIAPH3. 1  | 0     | 0. 547488 | 0. 512 | 0. 024 | 0 CSCL1     | DIAPH3   |
| KIF18B. 1  | 0     | 0. 530927 | 0. 463 | 0. 015 | 0 CSCL1     | KIF18B   |
| TRIP13. 2  | ##### | 0. 639358 | 0. 597 | 0. 036 | ##### CSCL1 | TRIP13   |
| CENPK. 8   | ##### | 1. 002205 | 0. 871 | 0. 086 | ##### CSCL1 | CENPK    |
| ZWINT. 8   | ##### | 0. 922951 | 0. 841 | 0. 08  | ##### CSCL1 | ZWINT    |
| UBE2T. 11  | ##### | 1. 175296 | 0. 955 | 0. 112 | ##### CSCL1 | UBE2T    |
| MAD2L1. 8  | ##### | 1. 144552 | 0. 975 | 0. 113 | ##### CSCL1 | MAD2L1   |
| FAM72D. 1  | ##### | 0. 388181 | 0. 353 | 0. 012 | ##### CSCL1 | FAM72D   |
| TRAIP. 1   | ##### | 0. 492364 | 0. 478 | 0. 024 | ##### CSCL1 | TRAIP    |
| SMTN. 1    | ##### | 0. 506053 | 0. 493 | 0. 026 | ##### CSCL1 | SMTN     |
| KIF11. 1   | ##### | 0. 476898 | 0. 458 | 0. 022 | ##### CSCL1 | KIF11    |
| ASF1B. 8   | ##### | 0. 727549 | 0. 662 | 0. 05  | ##### CSCL1 | ASF1B    |
| SPDL1. 5   | ##### | 0. 700215 | 0. 672 | 0. 054 | ##### CSCL1 | SPDL1    |
| CENPM. 11  | ##### | 0. 782724 | 0. 726 | 0. 062 | ##### CSCL1 | CENPM    |
| PIF1. 6    | ##### | 0. 853983 | 0. 582 | 0. 042 | ##### CSCL1 | PIF1     |
| C21orf58.  | ##### | 0. 675274 | 0. 597 | 0. 044 | ##### CSCL1 | C21orf58 |
| CENPU. 10  | ##### | 0. 880718 | 0. 856 | 0. 092 | ##### CSCL1 | CENPU    |
| CDK1. 9    | ##### | 1. 111053 | 0. 791 | 0. 084 | ##### CSCL1 | CDK1     |
| IQGAP3. 1  | ##### | 0. 354761 | 0. 289 | 0. 009 | ##### CSCL1 | IQGAP3   |
| MYBL2. 8   | ##### | 0. 575375 | 0. 532 | 0. 036 | ##### CSCL1 | MYBL2    |
| FANCI. 6   | ##### | 0. 559584 | 0. 537 | 0. 038 | ##### CSCL1 | FANCI    |
| KIF20B. 8  | ##### | 0. 733876 | 0. 761 | 0. 075 | ##### CSCL1 | KIF20B   |
| ESCO2. 2   | ##### | 0. 487805 | 0. 453 | 0. 027 | ##### CSCL1 | ESCO2    |
| RRM2. 11   | ##### | 0. 67361  | 0. 632 | 0. 053 | ##### CSCL1 | RRM2     |
| CENPW. 8   | ##### | 0. 910254 | 0. 851 | 0. 105 | ##### CSCL1 | CENPW    |
| EME1. 1    | ##### | 0. 396043 | 0. 378 | 0. 019 | ##### CSCL1 | EME1     |
| MND1. 5    | ##### | 0. 495735 | 0. 512 | 0. 036 | ##### CSCL1 | MND1     |
| NCAPG2. 5  | ##### | 0. 578716 | 0. 617 | 0. 053 | ##### CSCL1 | NCAPG2   |
| PLK4. 1    | ##### | 0. 395062 | 0. 368 | 0. 019 | ##### CSCL1 | PLK4     |
| CKAP2. 9   | ##### | 1. 171465 | 0. 935 | 0. 155 | ##### CSCL1 | CKAP2    |
| APOLD1. 4  | ##### | 0. 553356 | 0. 527 | 0. 04  | ##### CSCL1 | APOLD1   |

|           |       |          |       |       |       |       |           |
|-----------|-------|----------|-------|-------|-------|-------|-----------|
| NCAPD2.5  | ##### | 0.565367 | 0.602 | 0.054 | ##### | CSCL1 | NCAPD2    |
| ANLN.11   | ##### | 0.501339 | 0.597 | 0.053 | ##### | CSCL1 | ANLN      |
| KIAA0101. | ##### | 0.781224 | 0.826 | 0.105 | ##### | CSCL1 | KIAA0101  |
| PTTG1.10  | ##### | 1.44212  | 0.98  | 0.217 | ##### | CSCL1 | PTTG1     |
| CCDC34.8  | ##### | 1.000793 | 0.915 | 0.154 | ##### | CSCL1 | CCDC34    |
| SMC4.9    | ##### | 1.177951 | 0.995 | 0.198 | ##### | CSCL1 | SMC4      |
| GINS1.5   | ##### | 0.51048  | 0.532 | 0.046 | ##### | CSCL1 | GINS1     |
| CCDC18.8  | ##### | 0.605103 | 0.647 | 0.067 | ##### | CSCL1 | CCDC18    |
| RAD51AP1. | ##### | 0.581141 | 0.597 | 0.057 | ##### | CSCL1 | RAD51AP1  |
| ARHGAP11B | ##### | 0.531008 | 0.443 | 0.031 | ##### | CSCL1 | ARHGAP11B |
| DBF4.9    | ##### | 0.835332 | 0.796 | 0.109 | ##### | CSCL1 | DBF4      |
| LMO7.1    | ##### | 0.484423 | 0.438 | 0.031 | ##### | CSCL1 | LMO7      |
| LMNB2.9   | ##### | 0.741693 | 0.761 | 0.106 | ##### | CSCL1 | LMNB2     |
| RANGAP1.5 | ##### | 0.639185 | 0.726 | 0.092 | ##### | CSCL1 | RANGAP1   |
| TK1.9     | ##### | 0.512477 | 0.597 | 0.061 | ##### | CSCL1 | TK1       |
| CIT.1     | ##### | 0.380155 | 0.393 | 0.028 | ##### | CSCL1 | CIT       |
| TYMS.9    | ##### | 0.866665 | 0.891 | 0.148 | ##### | CSCL1 | TYMS      |
| TNFAIP8L1 | ##### | 0.554811 | 0.627 | 0.071 | ##### | CSCL1 | TNFAIP8L1 |
| ETV4.10   | ##### | 0.633094 | 0.602 | 0.069 | ##### | CSCL1 | ETV4      |
| CENPH.7   | ##### | 0.714441 | 0.796 | 0.114 | ##### | CSCL1 | CENPH     |
| LMNB1.10  | ##### | 0.844236 | 0.856 | 0.137 | ##### | CSCL1 | LMNB1     |
| PAX6.8    | ##### | 0.64495  | 0.592 | 0.07  | ##### | CSCL1 | PAX6      |
| H2AFX.8   | ##### | 1.110478 | 0.94  | 0.207 | ##### | CSCL1 | H2AFX     |
| CDC25B.9  | ##### | 1.075926 | 0.881 | 0.182 | ##### | CSCL1 | CDC25B    |
| GPSM2.9   | ##### | 0.88048  | 0.896 | 0.164 | ##### | CSCL1 | GPSM2     |
| CEP112.2  | ##### | 0.388701 | 0.443 | 0.039 | ##### | CSCL1 | CEP112    |
| MNS1.7    | ##### | 0.513395 | 0.572 | 0.066 | ##### | CSCL1 | MNS1      |
| C14orf80. | ##### | 0.455879 | 0.532 | 0.057 | ##### | CSCL1 | C14orf80  |
| CKAP5.10  | ##### | 0.75706  | 0.821 | 0.145 | ##### | CSCL1 | CKAP5     |
| WDR62     | ##### | 0.291936 | 0.313 | 0.02  | ##### | CSCL1 | WDR62     |
| INCENP.1  | ##### | 0.326542 | 0.313 | 0.02  | ##### | CSCL1 | INCENP    |
| MTFR2.1   | ##### | 0.285678 | 0.269 | 0.015 | ##### | CSCL1 | MTFR2     |
| LRR1.5    | ##### | 0.512605 | 0.612 | 0.077 | ##### | CSCL1 | LRR1      |
| PKN3.1    | ##### | 0.253839 | 0.234 | 0.011 | ##### | CSCL1 | PKN3      |
| CEP70.7   | ##### | 0.605128 | 0.647 | 0.088 | ##### | CSCL1 | CEP70     |
| SAP30L.7  | ##### | 0.696578 | 0.602 | 0.083 | ##### | CSCL1 | SAP30L    |
| KIF22.7   | ##### | 0.751051 | 0.935 | 0.184 | ##### | CSCL1 | KIF22     |
| RDM1.1    | ##### | 0.224408 | 0.179 | 0.006 | ##### | CSCL1 | RDM1      |
| SMC2.8    | ##### | 0.869474 | 0.91  | 0.187 | ##### | CSCL1 | SMC2      |
| RNF26.6   | ##### | 0.684033 | 0.811 | 0.146 | ##### | CSCL1 | RNF26     |
| CENPO.1   | ##### | 0.373022 | 0.413 | 0.038 | ##### | CSCL1 | CENPO     |
| MIS18A.6  | ##### | 0.559858 | 0.667 | 0.096 | ##### | CSCL1 | MIS18A    |
| CRNDE.7   | ##### | 0.762633 | 0.856 | 0.167 | ##### | CSCL1 | CRNDE     |
| PHF19.8   | ##### | 0.629007 | 0.726 | 0.119 | ##### | CSCL1 | PHF19     |
| EMC9.4    | ##### | 0.763299 | 0.836 | 0.166 | ##### | CSCL1 | EMC9      |
| ORC6.8    | ##### | 0.547138 | 0.602 | 0.082 | ##### | CSCL1 | ORC6      |
| ODF2.6    | ##### | 0.585051 | 0.731 | 0.122 | ##### | CSCL1 | ODF2      |
| CEP135.5  | ##### | 0.450909 | 0.557 | 0.072 | ##### | CSCL1 | CEP135    |
| SCLT1.4   | ##### | 0.437227 | 0.507 | 0.06  | ##### | CSCL1 | SCLT1     |
| C8orf88.1 | ##### | 0.362566 | 0.393 | 0.039 | ##### | CSCL1 | C8orf88   |
| BRCA1.2   | ##### | 0.379829 | 0.453 | 0.049 | ##### | CSCL1 | BRCA1     |

|            |          |          |       |       |          |       |             |
|------------|----------|----------|-------|-------|----------|-------|-------------|
| CENPL. 2   | #####    | 0.341774 | 0.433 | 0.045 | #####    | CSCL1 | CENPL       |
| UBE2S. 9   | #####    | 1.155659 | 0.94  | 0.334 | #####    | CSCL1 | UBE2S       |
| GGH. 9     | #####    | 0.875258 | 0.965 | 0.251 | #####    | CSCL1 | GGH         |
| TMPO. 10   | #####    | 0.739482 | 0.886 | 0.182 | #####    | CSCL1 | TMPO        |
| SPA17. 8   | #####    | 0.481025 | 0.542 | 0.072 | #####    | CSCL1 | SPA17       |
| ITGB3BP. 8 | #####    | 0.590214 | 0.746 | 0.133 | #####    | CSCL1 | ITGB3BP     |
| PKMYT1. 6  | #####    | 0.395165 | 0.383 | 0.037 | #####    | CSCL1 | PKMYT1      |
| CKS1B. 7   | #####    | 0.892792 | 0.93  | 0.247 | #####    | CSCL1 | CKS1B       |
| ANP32E. 10 | #####    | 0.888362 | 0.945 | 0.256 | #####    | CSCL1 | ANP32E      |
| PAK4. 6    | #####    | 0.570384 | 0.652 | 0.106 | #####    | CSCL1 | PAK4        |
| ZWILCH. 5  | #####    | 0.413687 | 0.522 | 0.067 | #####    | CSCL1 | ZWILCH      |
| BCL2L12. 7 | #####    | 0.646131 | 0.667 | 0.118 | #####    | CSCL1 | BCL2L12     |
| RNASEH2A.  | #####    | 0.732224 | 0.881 | 0.199 | #####    | CSCL1 | RNASEH2A    |
| DBF4B      | #####    | 0.349853 | 0.338 | 0.031 | #####    | CSCL1 | DBF4B       |
| TIMELESS.  | #####    | 0.383767 | 0.463 | 0.055 | #####    | CSCL1 | TIMELESS    |
| DTYMK. 11  | #####    | 0.903832 | 0.975 | 0.318 | #####    | CSCL1 | DTYMK       |
| ARHGEF39.  | #####    | 0.283481 | 0.244 | 0.016 | #####    | CSCL1 | ARHGEF39    |
| REEP4. 11  | #####    | 0.639229 | 0.811 | 0.156 | #####    | CSCL1 | REEP4       |
| USP13. 6   | #####    | 0.406779 | 0.498 | 0.065 | #####    | CSCL1 | USP13       |
| RHN01. 6   | #####    | 0.642309 | 0.846 | 0.184 | #####    | CSCL1 | RHN01       |
| FBX05. 6   | #####    | 0.674474 | 0.567 | 0.088 | #####    | CSCL1 | FBX05       |
| AC004381.  | #####    | 0.335256 | 0.289 | 0.023 | #####    | CSCL1 | AC004381.6  |
| SOGA1. 10  | #####    | 0.673875 | 0.731 | 0.145 | #####    | CSCL1 | SOGA1       |
| MZT1. 6    | #####    | 0.795046 | 0.935 | 0.244 | #####    | CSCL1 | MZT1        |
| G2E3. 2    | #####    | 0.502192 | 0.602 | 0.095 | #####    | CSCL1 | G2E3        |
| FANCD2. 1  | #####    | 0.316854 | 0.338 | 0.032 | #####    | CSCL1 | FANCD2      |
| HMGB3. 11  | #####    | 0.873673 | 0.96  | 0.267 | #####    | CSCL1 | HMGB3       |
| RFC3. 6    | #####    | 0.455464 | 0.547 | 0.08  | #####    | CSCL1 | RFC3        |
| CENPQ. 3   | #####    | 0.456171 | 0.582 | 0.09  | #####    | CSCL1 | CENPQ       |
| C5orf34. 1 | #####    | 0.277362 | 0.264 | 0.02  | #####    | CSCL1 | C5orf34     |
| DHFR. 8    | #####    | 0.585119 | 0.726 | 0.141 | #####    | CSCL1 | DHFR        |
| CTC-260E6  | #####    | 0.227054 | 0.264 | 0.02  | #####    | CSCL1 | CTC-260E6.6 |
| BRCA2. 4   | #####    | 0.347271 | 0.378 | 0.04  | #####    | CSCL1 | BRCA2       |
| CHTF18. 1  | #####    | 0.333709 | 0.383 | 0.042 | #####    | CSCL1 | CHTF18      |
| CCDC150    | #####    | 0.212106 | 0.234 | 0.016 | #####    | CSCL1 | CCDC150     |
| WDR34. 8   | #####    | 0.684542 | 0.826 | 0.196 | 1.71E-99 | CSCL1 | WDR34       |
| HAUS8. 4   | #####    | 0.407495 | 0.517 | 0.075 | 2.46E-99 | CSCL1 | HAUS8       |
| ZNF530. 5  | #####    | 0.379958 | 0.423 | 0.053 | 1.91E-98 | CSCL1 | ZNF530      |
| EZH2. 11   | #####    | 0.599877 | 0.731 | 0.143 | 2.07E-98 | CSCL1 | EZH2        |
| EFCAB11. 3 | #####    | 0.325868 | 0.428 | 0.054 | 1.10E-97 | CSCL1 | EFCAB11     |
| PSRC1. 9   | #####    | 0.773291 | 0.905 | 0.253 | 5.36E-97 | CSCL1 | PSRC1       |
| SYDE1. 7   | #####    | 0.395987 | 0.458 | 0.063 | 8.71E-97 | CSCL1 | SYDE1       |
| CEP57L1. 7 | #####    | 0.428096 | 0.597 | 0.102 | 2.68E-96 | CSCL1 | CEP57L1     |
| PDGFC. 7   | #####    | 0.495938 | 0.617 | 0.111 | 6.94E-96 | CSCL1 | PDGFC       |
| TRIOBP. 5  | 3.30E-99 | 0.414098 | 0.522 | 0.081 | 4.94E-95 | CSCL1 | TRIOBP      |
| CDC45. 4   | 4.72E-98 | 0.283641 | 0.313 | 0.031 | 7.05E-94 | CSCL1 | CDC45       |
| STIL. 1    | 2.69E-97 | 0.218494 | 0.219 | 0.015 | 4.02E-93 | CSCL1 | STIL        |
| TBC1D31    | 1.30E-96 | 0.289566 | 0.303 | 0.029 | 1.95E-92 | CSCL1 | TBC1D31     |
| SLC47A1. 1 | 1.55E-96 | 0.305821 | 0.323 | 0.034 | 2.32E-92 | CSCL1 | SLC47A1     |
| METTL4. 2  | 3.39E-95 | 0.335185 | 0.468 | 0.067 | 5.07E-91 | CSCL1 | METTL4      |
| MGME1. 4   | 3.43E-95 | 0.494848 | 0.687 | 0.138 | 5.12E-91 | CSCL1 | MGME1       |



|           |          |          |       |       |          |       |           |
|-----------|----------|----------|-------|-------|----------|-------|-----------|
| SCARA3.9  | 7.65E-95 | 0.505365 | 0.657 | 0.129 | 1.14E-90 | CSCL1 | SCARA3    |
| E2F5.6    | 7.77E-94 | 0.333766 | 0.428 | 0.059 | 1.16E-89 | CSCL1 | E2F5      |
| NT5DC2.8  | 2.20E-93 | 0.547365 | 0.721 | 0.154 | 3.29E-89 | CSCL1 | NT5DC2    |
| C18orf54  | 2.48E-93 | 0.20873  | 0.219 | 0.016 | 3.70E-89 | CSCL1 | C18orf54  |
| TMEM97.9  | 3.29E-93 | 0.507654 | 0.751 | 0.162 | 4.92E-89 | CSCL1 | TMEM97    |
| HIST1H2BH | 1.13E-92 | 0.226016 | 0.244 | 0.02  | 1.69E-88 | CSCL1 | HIST1H2BH |
| ZMYM1.1   | 1.15E-92 | 0.314291 | 0.363 | 0.043 | 1.72E-88 | CSCL1 | ZMYM1     |
| FBLN7.2   | 1.42E-92 | 0.331652 | 0.353 | 0.042 | 2.12E-88 | CSCL1 | FBLN7     |
| ATAD5.5   | 2.18E-92 | 0.392863 | 0.468 | 0.068 | 3.26E-88 | CSCL1 | ATAD5     |
| CDKN2D.9  | 2.67E-92 | 0.585497 | 0.711 | 0.15  | 3.99E-88 | CSCL1 | CDKN2D    |
| CKS2.11   | 1.06E-91 | 0.872176 | 0.95  | 0.356 | 1.58E-87 | CSCL1 | CKS2      |
| MIS18BP1. | 8.16E-90 | 0.445795 | 0.697 | 0.137 | 1.22E-85 | CSCL1 | MIS18BP1  |
| GNG4.11   | 1.14E-89 | 0.480204 | 0.587 | 0.108 | 1.70E-85 | CSCL1 | GNG4      |
| HDGF.6    | 2.75E-89 | 0.669954 | 0.9   | 0.262 | 4.10E-85 | CSCL1 | HDGF      |
| ASRGL1.1C | 4.06E-89 | 0.599355 | 0.806 | 0.19  | 6.07E-85 | CSCL1 | ASRGL1    |
| FAM122B.3 | 4.80E-89 | 0.411613 | 0.537 | 0.092 | 7.17E-85 | CSCL1 | FAM122B   |
| GRK6.6    | 6.21E-89 | 0.473744 | 0.637 | 0.126 | 9.29E-85 | CSCL1 | GRK6      |
| ALYREF.1C | 6.90E-89 | 0.556244 | 0.647 | 0.137 | 1.03E-84 | CSCL1 | ALYREF    |
| ACYP1.7   | 1.84E-88 | 0.529616 | 0.736 | 0.167 | 2.75E-84 | CSCL1 | ACYP1     |
| SKA2.10   | 2.57E-88 | 0.763834 | 0.905 | 0.296 | 3.84E-84 | CSCL1 | SKA2      |
| CBR3.7    | 3.42E-88 | 0.463207 | 0.547 | 0.098 | 5.10E-84 | CSCL1 | CBR3      |
| SUV39H2.2 | 2.00E-87 | 0.300081 | 0.403 | 0.055 | 2.99E-83 | CSCL1 | SUV39H2   |
| KIAA0586. | 2.28E-87 | 0.319566 | 0.433 | 0.063 | 3.41E-83 | CSCL1 | KIAA0586  |
| LCORL.2   | 2.05E-86 | 0.329717 | 0.532 | 0.09  | 3.06E-82 | CSCL1 | LCORL     |
| RAD54L.1  | 3.24E-86 | 0.22364  | 0.204 | 0.015 | 4.84E-82 | CSCL1 | RAD54L    |
| CSE1L.9   | 3.80E-86 | 0.567969 | 0.831 | 0.212 | 5.67E-82 | CSCL1 | CSE1L     |
| PDGFRA.11 | 4.46E-86 | 0.531951 | 0.662 | 0.139 | 6.66E-82 | CSCL1 | PDGFRA    |
| TPM2.9    | 4.47E-86 | 0.795944 | 0.667 | 0.154 | 6.68E-82 | CSCL1 | TPM2      |
| ATAD2.7   | 4.96E-86 | 0.394466 | 0.453 | 0.069 | 7.42E-82 | CSCL1 | ATAD2     |
| CEP152.1  | 9.93E-86 | 0.279457 | 0.279 | 0.028 | 1.48E-81 | CSCL1 | CEP152    |
| GAS1.12   | 8.64E-85 | 0.628706 | 0.637 | 0.136 | 1.29E-80 | CSCL1 | GAS1      |
| TMSB15B.1 | 2.02E-84 | 0.511232 | 0.751 | 0.171 | 3.01E-80 | CSCL1 | TMSB15B   |
| ARHGAP33. | 7.78E-84 | 0.360506 | 0.473 | 0.075 | 1.16E-79 | CSCL1 | ARHGAP33  |
| XRCC2.2   | 1.60E-83 | 0.272323 | 0.318 | 0.037 | 2.38E-79 | CSCL1 | XRCC2     |
| TMEM237.9 | 3.68E-83 | 0.499971 | 0.751 | 0.177 | 5.50E-79 | CSCL1 | TMEM237   |
| VRK1.4    | 4.08E-83 | 0.391512 | 0.532 | 0.094 | 6.10E-79 | CSCL1 | VRK1      |
| ZNF724P   | 7.88E-83 | 0.226396 | 0.279 | 0.029 | 1.18E-78 | CSCL1 | ZNF724P   |
| ARSJ.10   | 8.47E-83 | 0.479808 | 0.592 | 0.117 | 1.27E-78 | CSCL1 | ARSJ      |
| CIB2.8    | 1.01E-82 | 0.401977 | 0.443 | 0.071 | 1.51E-78 | CSCL1 | CIB2      |
| LHX2.10   | 1.50E-82 | 0.631042 | 0.587 | 0.122 | 2.24E-78 | CSCL1 | LHX2      |
| EXOSC6.1  | 2.43E-82 | 0.258793 | 0.403 | 0.058 | 3.63E-78 | CSCL1 | EXOSC6    |
| NEURL1B.1 | 4.40E-82 | 0.291605 | 0.264 | 0.026 | 6.57E-78 | CSCL1 | NEURL1B   |
| KPNA2.8   | 5.99E-82 | 0.808027 | 0.945 | 0.345 | 8.96E-78 | CSCL1 | KPNA2     |
| CHEK1.5   | 9.96E-82 | 0.388747 | 0.458 | 0.073 | 1.49E-77 | CSCL1 | CHEK1     |
| MCM8.1    | 1.52E-81 | 0.234039 | 0.308 | 0.035 | 2.28E-77 | CSCL1 | MCM8      |
| RCC1.4    | 1.67E-81 | 0.3554   | 0.522 | 0.092 | 2.50E-77 | CSCL1 | RCC1      |
| LBR.8     | 3.63E-80 | 0.561064 | 0.846 | 0.222 | 5.42E-76 | CSCL1 | LBR       |
| DESI2.6   | 5.01E-80 | 0.555743 | 0.741 | 0.185 | 7.49E-76 | CSCL1 | DESI2     |
| WEE1.8    | 6.99E-80 | 0.479135 | 0.652 | 0.141 | 1.04E-75 | CSCL1 | WEE1      |
| CCDC74A.7 | 1.29E-79 | 0.334239 | 0.338 | 0.043 | 1.93E-75 | CSCL1 | CCDC74A   |
| HMGB2.11  | 1.54E-79 | 0.777444 | 1     | 0.486 | 2.30E-75 | CSCL1 | HMGB2     |

|             |           |           |        |        |           |       |          |
|-------------|-----------|-----------|--------|--------|-----------|-------|----------|
| GCAT. 10    | 1. 58E-79 | 0. 500028 | 0. 667 | 0. 152 | 2. 37E-75 | CSCL1 | GCAT     |
| TUBB6. 9    | 3. 56E-79 | 0. 485835 | 0. 721 | 0. 175 | 5. 32E-75 | CSCL1 | TUBB6    |
| NUP35. 6    | 3. 67E-79 | 0. 384406 | 0. 552 | 0. 104 | 5. 48E-75 | CSCL1 | NUP35    |
| ERI2. 1     | 4. 01E-79 | 0. 304324 | 0. 353 | 0. 047 | 5. 99E-75 | CSCL1 | ERI2     |
| NDC1. 1     | 5. 79E-79 | 0. 302716 | 0. 383 | 0. 055 | 8. 66E-75 | CSCL1 | NDC1     |
| C12orf75. 8 | 4. 41E-79 | 0. 461967 | 0. 761 | 0. 183 | 1. 26E-74 | CSCL1 | C12orf75 |
| SOX21. 8    | 8. 49E-79 | 0. 413581 | 0. 488 | 0. 086 | 1. 27E-74 | CSCL1 | SOX21    |
| NDE1. 6     | 1. 11E-78 | 0. 385072 | 0. 527 | 0. 098 | 1. 67E-74 | CSCL1 | NDE1     |
| QSER1. 8    | 1. 73E-78 | 0. 405159 | 0. 562 | 0. 11  | 2. 58E-74 | CSCL1 | QSER1    |
| TLE1. 10    | 2. 69E-78 | 0. 511243 | 0. 692 | 0. 161 | 4. 02E-74 | CSCL1 | TLE1     |
| DCAF15. 3   | 7. 72E-78 | 0. 397582 | 0. 537 | 0. 103 | 1. 15E-73 | CSCL1 | DCAF15   |
| CCSAP. 5    | 9. 60E-78 | 0. 357838 | 0. 512 | 0. 092 | 1. 44E-73 | CSCL1 | CCSAP    |
| IGFBP4. 5   | 1. 13E-77 | 0. 29464  | 0. 403 | 0. 06  | 1. 69E-73 | CSCL1 | IGFBP4   |
| DSN1. 5     | 1. 28E-77 | 0. 376275 | 0. 512 | 0. 092 | 1. 91E-73 | CSCL1 | DSN1     |
| GEN1        | 1. 63E-77 | 0. 212566 | 0. 229 | 0. 021 | 2. 43E-73 | CSCL1 | GEN1     |
| PPP2R5D. 2  | 4. 45E-77 | 0. 320877 | 0. 428 | 0. 068 | 6. 65E-73 | CSCL1 | PPP2R5D  |
| CDC27. 5    | 5. 59E-77 | 0. 4702   | 0. 667 | 0. 154 | 8. 36E-73 | CSCL1 | CDC27    |
| CNTRL. 8    | 7. 55E-77 | 0. 350486 | 0. 572 | 0. 11  | 1. 13E-72 | CSCL1 | CNTRL    |
| UBALD2. 6   | 1. 10E-76 | 0. 740844 | 0. 801 | 0. 25  | 1. 64E-72 | CSCL1 | UBALD2   |
| CTHRC1. 8   | 1. 20E-76 | 0. 396239 | 0. 388 | 0. 059 | 1. 80E-72 | CSCL1 | CTHRC1   |
| CDCA4. 7    | 1. 53E-76 | 0. 327933 | 0. 473 | 0. 081 | 2. 28E-72 | CSCL1 | CDCA4    |
| THOP1. 9    | 2. 68E-76 | 0. 523671 | 0. 751 | 0. 192 | 4. 00E-72 | CSCL1 | THOP1    |
| TMEM54. 9   | 8. 96E-76 | 0. 515462 | 0. 746 | 0. 186 | 1. 34E-71 | CSCL1 | TMEM54   |
| TEX30. 6    | 1. 51E-75 | 0. 439187 | 0. 677 | 0. 156 | 2. 26E-71 | CSCL1 | TEX30    |
| ILVBL. 6    | 1. 51E-75 | 0. 533058 | 0. 846 | 0. 241 | 2. 26E-71 | CSCL1 | ILVBL    |
| TUBG1. 9    | 3. 91E-75 | 0. 521158 | 0. 811 | 0. 224 | 5. 84E-71 | CSCL1 | TUBG1    |
| BARD1. 8    | 4. 17E-75 | 0. 461019 | 0. 627 | 0. 138 | 6. 23E-71 | CSCL1 | BARD1    |
| PKP4. 6     | 7. 81E-75 | 0. 235275 | 0. 353 | 0. 049 | 1. 17E-70 | CSCL1 | PKP4     |
| CEP78. 9    | 8. 02E-75 | 0. 347668 | 0. 547 | 0. 106 | 1. 20E-70 | CSCL1 | CEP78    |
| DRAXIN. 11  | 1. 42E-74 | 0. 476188 | 0. 642 | 0. 144 | 2. 13E-70 | CSCL1 | DRAXIN   |
| SOCS2. 9    | 1. 34E-73 | 0. 58366  | 0. 632 | 0. 148 | 2. 01E-69 | CSCL1 | SOCS2    |
| CENPJ. 6    | 1. 39E-73 | 0. 307255 | 0. 393 | 0. 06  | 2. 08E-69 | CSCL1 | CENPJ    |
| PSMC3IP. 8  | 1. 49E-73 | 0. 352114 | 0. 408 | 0. 064 | 2. 22E-69 | CSCL1 | PSMC3IP  |
| FAM110A. 6  | 2. 45E-73 | 0. 305686 | 0. 423 | 0. 067 | 3. 66E-69 | CSCL1 | FAM110A  |
| ELOVL2. 11  | 2. 47E-73 | 0. 393852 | 0. 488 | 0. 091 | 3. 68E-69 | CSCL1 | ELOVL2   |
| CHN1. 11    | 3. 92E-73 | 0. 512364 | 0. 776 | 0. 206 | 5. 86E-69 | CSCL1 | CHN1     |
| NCAPD3. 1   | 5. 52E-73 | 0. 285232 | 0. 448 | 0. 076 | 8. 25E-69 | CSCL1 | NCAPD3   |
| RBM38. 8    | 6. 65E-73 | 0. 400346 | 0. 592 | 0. 128 | 9. 94E-69 | CSCL1 | RBM38    |
| IFT81. 9    | 1. 36E-72 | 0. 460442 | 0. 647 | 0. 15  | 2. 03E-68 | CSCL1 | IFT81    |
| RAD21. 10   | 1. 71E-72 | 0. 666476 | 0. 955 | 0. 356 | 2. 56E-68 | CSCL1 | RAD21    |
| NRGN. 1     | 2. 70E-72 | 0. 241864 | 0. 289 | 0. 035 | 4. 04E-68 | CSCL1 | NRGN     |
| FZR1. 6     | 2. 98E-72 | 0. 457411 | 0. 632 | 0. 147 | 4. 45E-68 | CSCL1 | FZR1     |
| PRPSAP1. 1  | 4. 29E-72 | 0. 630025 | 0. 881 | 0. 296 | 6. 41E-68 | CSCL1 | PRPSAP1  |
| CHAF1A. 6   | 5. 06E-72 | 0. 366925 | 0. 463 | 0. 082 | 7. 56E-68 | CSCL1 | CHAF1A   |
| CRAT. 5     | 7. 48E-72 | 0. 398651 | 0. 657 | 0. 152 | 1. 12E-67 | CSCL1 | CRAT     |
| SASS6. 3    | 8. 65E-72 | 0. 255684 | 0. 373 | 0. 056 | 1. 29E-67 | CSCL1 | SASS6    |
| SAE1. 7     | 1. 51E-71 | 0. 55212  | 0. 871 | 0. 263 | 2. 26E-67 | CSCL1 | SAE1     |
| PGP. 6      | 1. 57E-71 | 0. 503668 | 0. 786 | 0. 209 | 2. 34E-67 | CSCL1 | PGP      |
| SEPHS1. 6   | 1. 79E-71 | 0. 355052 | 0. 527 | 0. 106 | 2. 67E-67 | CSCL1 | SEPHS1   |
| TMPO-AS1. 6 | 4. 8E-71  | 0. 199674 | 0. 249 | 0. 027 | 9. 69E-67 | CSCL1 | TMPO-AS1 |
| GMNN. 9     | 9. 56E-71 | 0. 376005 | 0. 706 | 0. 167 | 1. 43E-66 | CSCL1 | GMNN     |

|           |          |          |       |       |          |       |          |
|-----------|----------|----------|-------|-------|----------|-------|----------|
| WHSC1.8   | 9.57E-71 | 0.404175 | 0.637 | 0.145 | 1.43E-66 | CSCL1 | WHSC1    |
| FOPNL.5   | 1.51E-70 | 0.375777 | 0.736 | 0.184 | 2.26E-66 | CSCL1 | FOPNL    |
| HIST1H1B. | 1.60E-70 | 0.161047 | 0.129 | 0.007 | 2.40E-66 | CSCL1 | HIST1H1B |
| RANGRF.4  | 2.13E-70 | 0.406953 | 0.761 | 0.201 | 3.19E-66 | CSCL1 | RANGRF   |
| COL4A2.9  | 2.99E-70 | 0.469966 | 0.557 | 0.121 | 4.47E-66 | CSCL1 | COL4A2   |
| PCBD2.5   | 4.49E-70 | 0.312687 | 0.438 | 0.077 | 6.70E-66 | CSCL1 | PCBD2    |
| DMRTA2.7  | 6.43E-70 | 0.358166 | 0.413 | 0.07  | 9.61E-66 | CSCL1 | DMRTA2   |
| C2orf80.1 | 9.53E-70 | 0.483498 | 0.537 | 0.112 | 1.42E-65 | CSCL1 | C2orf80  |
| SEPT10.4  | 9.96E-70 | 0.382171 | 0.537 | 0.11  | 1.49E-65 | CSCL1 | 10-Sep   |
| COL4A1.9  | 1.28E-69 | 0.459227 | 0.507 | 0.104 | 1.91E-65 | CSCL1 | COL4A1   |
| CNTROB.2  | 1.67E-69 | 0.299338 | 0.408 | 0.068 | 2.49E-65 | CSCL1 | CNTROB   |
| WDR54.8   | 1.71E-69 | 0.449065 | 0.816 | 0.223 | 2.56E-65 | CSCL1 | WDR54    |
| ERI1.2    | 2.68E-69 | 0.343868 | 0.522 | 0.105 | 4.00E-65 | CSCL1 | ERI1     |
| CDC7.2    | 4.99E-69 | 0.269944 | 0.289 | 0.036 | 7.46E-65 | CSCL1 | CDC7     |
| PPP1R35.1 | 7.19E-69 | 0.43703  | 0.632 | 0.149 | 1.07E-64 | CSCL1 | PPP1R35  |
| POU3F2.1C | 8.40E-69 | 0.646653 | 0.746 | 0.207 | 1.25E-64 | CSCL1 | POU3F2   |
| EXOSC8.1C | 1.22E-68 | 0.470155 | 0.915 | 0.278 | 1.83E-64 | CSCL1 | EXOSC8   |
| CDKN2C.8  | 1.79E-68 | 0.742989 | 0.801 | 0.273 | 2.67E-64 | CSCL1 | CDKN2C   |
| UACA.3    | 1.88E-68 | 0.235917 | 0.383 | 0.061 | 2.81E-64 | CSCL1 | UACA     |
| TMEM106C. | 1.99E-68 | 0.557667 | 0.821 | 0.257 | 2.97E-64 | CSCL1 | TMEM106C |
| FTL.12    | 2.51E-68 | -0.63606 | 1     | 0.994 | 3.76E-64 | CSCL1 | FTL      |
| ZNF726    | 4.55E-68 | 0.234274 | 0.229 | 0.024 | 6.80E-64 | CSCL1 | ZNF726   |
| SNX21.6   | 6.47E-68 | 0.383381 | 0.527 | 0.111 | 9.66E-64 | CSCL1 | SNX21    |
| RFC5.4    | 8.93E-68 | 0.294615 | 0.458 | 0.083 | 1.34E-63 | CSCL1 | RFC5     |
| POSTN.11  | 9.51E-68 | 0.591877 | 0.557 | 0.122 | 1.42E-63 | CSCL1 | POSTN    |
| MRGBP.6   | 1.88E-67 | 0.402348 | 0.602 | 0.139 | 2.81E-63 | CSCL1 | MRGBP    |
| NCAPH2.5  | 3.49E-67 | 0.339795 | 0.567 | 0.122 | 5.22E-63 | CSCL1 | NCAPH2   |
| NUDT6.2   | 4.53E-67 | 0.28476  | 0.388 | 0.064 | 6.78E-63 | CSCL1 | NUDT6    |
| FSTL1.9   | 5.26E-67 | 0.390726 | 0.512 | 0.107 | 7.87E-63 | CSCL1 | FSTL1    |
| ZNF771.8  | 6.64E-67 | 0.423227 | 0.597 | 0.138 | 9.92E-63 | CSCL1 | ZNF771   |
| MDC1.1    | 8.30E-67 | 0.256807 | 0.358 | 0.056 | 1.24E-62 | CSCL1 | MDC1     |
| C17orf53. | 1.51E-66 | 0.179226 | 0.179 | 0.015 | 2.26E-62 | CSCL1 | C17orf53 |
| ETV1.12   | 1.90E-66 | 0.521626 | 0.816 | 0.234 | 2.84E-62 | CSCL1 | ETV1     |
| KCNF1.12  | 3.27E-66 | 0.520067 | 0.537 | 0.116 | 4.89E-62 | CSCL1 | KCNF1    |
| DLEU1.5   | 8.02E-66 | 0.325618 | 0.443 | 0.083 | 1.20E-61 | CSCL1 | DLEU1    |
| CCDC15    | 8.29E-66 | 0.217807 | 0.259 | 0.031 | 1.24E-61 | CSCL1 | CCDC15   |
| H1FX-AS1  | 1.02E-65 | 0.194793 | 0.199 | 0.019 | 1.52E-61 | CSCL1 | H1FX-AS1 |
| PITPNC1.7 | 1.10E-65 | 0.433008 | 0.532 | 0.116 | 1.64E-61 | CSCL1 | PITPNC1  |
| CMC2.7    | 1.21E-65 | 0.479422 | 0.915 | 0.294 | 1.80E-61 | CSCL1 | CMC2     |
| MAGOHB.7  | 2.21E-65 | 0.429162 | 0.811 | 0.228 | 3.30E-61 | CSCL1 | MAGOHB   |
| ENC1.11   | 2.51E-65 | 0.498833 | 0.781 | 0.214 | 3.76E-61 | CSCL1 | ENC1     |
| ITGA2.9   | 3.22E-65 | 0.371221 | 0.353 | 0.057 | 4.82E-61 | CSCL1 | ITGA2    |
| CPNE4.9   | 3.23E-65 | 0.413112 | 0.448 | 0.086 | 4.83E-61 | CSCL1 | CPNE4    |
| FZD2.1    | 4.29E-65 | 0.210204 | 0.279 | 0.036 | 6.41E-61 | CSCL1 | FZD2     |
| PXMP2.10  | 4.36E-65 | 0.475453 | 0.766 | 0.214 | 6.51E-61 | CSCL1 | PXMP2    |
| MAZ.9     | 4.92E-65 | 0.484602 | 0.826 | 0.24  | 7.35E-61 | CSCL1 | MAZ      |
| GNG12.9   | 5.50E-65 | 0.372546 | 0.572 | 0.13  | 8.22E-61 | CSCL1 | GNG12    |
| ITGA7.10  | 6.03E-65 | 0.397631 | 0.577 | 0.129 | 9.00E-61 | CSCL1 | ITGA7    |
| TMEM158.1 | 9.97E-65 | 0.504828 | 0.567 | 0.132 | 1.49E-60 | CSCL1 | TMEM158  |
| NRM.4     | 1.12E-64 | 0.327284 | 0.428 | 0.078 | 1.67E-60 | CSCL1 | NRM      |
| FREM2.8   | 1.39E-64 | 0.314294 | 0.373 | 0.062 | 2.07E-60 | CSCL1 | FREM2    |

|            |    |        |          |       |       |          |       |          |
|------------|----|--------|----------|-------|-------|----------|-------|----------|
| IMMP1L.1C  | 1. | 65E-64 | 0.409455 | 0.786 | 0.222 | 2.47E-60 | CSCL1 | IMMP1L   |
| GPC1.10    | 1. | 75E-64 | 0.662908 | 0.771 | 0.228 | 2.61E-60 | CSCL1 | GPC1     |
| LGR4.11    | 1. | 97E-64 | 0.405813 | 0.473 | 0.096 | 2.95E-60 | CSCL1 | LGR4     |
| SLC35D2.6  | 3. | 11E-64 | 0.354272 | 0.468 | 0.094 | 4.65E-60 | CSCL1 | SLC35D2  |
| BCL7C.7    | 4. | 14E-64 | 0.523994 | 0.811 | 0.245 | 6.19E-60 | CSCL1 | BCL7C    |
| TRAF3IP2.4 | 4. | 17E-64 | 0.33543  | 0.458 | 0.089 | 6.23E-60 | CSCL1 | TRAF3IP2 |
| CEP128.1   | 4. | 25E-64 | 0.123834 | 0.184 | 0.016 | 6.35E-60 | CSCL1 | CEP128   |
| NUP37.5    | 4. | 52E-64 | 0.337611 | 0.557 | 0.123 | 6.75E-60 | CSCL1 | NUP37    |
| MPHOSPH9.5 | 5. | 05E-64 | 0.33692  | 0.522 | 0.11  | 7.54E-60 | CSCL1 | MPHOSPH9 |
| TNFRSF19.8 | 8. | 95E-64 | 0.341341 | 0.483 | 0.098 | 1.34E-59 | CSCL1 | TNFRSF19 |
| TUBB4B.6   | 1. | 01E-63 | 0.605747 | 0.99  | 0.483 | 1.51E-59 | CSCL1 | TUBB4B   |
| CCHCR1.3   | 1. | 03E-63 | 0.2562   | 0.403 | 0.07  | 1.54E-59 | CSCL1 | CCHCR1   |
| NIF3L1.3   | 2. | 00E-63 | 0.307479 | 0.532 | 0.113 | 2.99E-59 | CSCL1 | NIF3L1   |
| SUGP2.8    | 2. | 06E-63 | 0.470245 | 0.801 | 0.237 | 3.08E-59 | CSCL1 | SUGP2    |
| TM4SF1.12  | 2. | 69E-63 | 0.387172 | 0.502 | 0.106 | 4.01E-59 | CSCL1 | TM4SF1   |
| CHEK2.5    | 3. | 52E-63 | 0.180809 | 0.308 | 0.044 | 5.26E-59 | CSCL1 | CHEK2    |
| EXO1.1     | 4. | 03E-63 | 0.182414 | 0.169 | 0.014 | 6.02E-59 | CSCL1 | EXO1     |
| TRIM69.5   | 4. | 13E-63 | 0.398496 | 0.706 | 0.189 | 6.18E-59 | CSCL1 | TRIM69   |
| SSX2IP.4   | 5. | 71E-63 | 0.316142 | 0.458 | 0.09  | 8.54E-59 | CSCL1 | SSX2IP   |
| SAC3D1.1C  | 1. | 03E-62 | 0.418129 | 0.642 | 0.162 | 1.54E-58 | CSCL1 | SAC3D1   |
| PALLD.8    | 1. | 08E-62 | 0.485062 | 0.701 | 0.189 | 1.61E-58 | CSCL1 | PALLD    |
| FBXO43     | 1. | 19E-62 | 0.123705 | 0.124 | 0.008 | 1.78E-58 | CSCL1 | FBXO43   |
| FZD7.9     | 1. | 92E-62 | 0.406131 | 0.453 | 0.091 | 2.88E-58 | CSCL1 | FZD7     |
| NES.12     | 2. | 02E-62 | 0.661552 | 0.856 | 0.266 | 3.03E-58 | CSCL1 | NES      |
| RUVBL2.7   | 2. | 45E-62 | 0.512597 | 0.91  | 0.307 | 3.66E-58 | CSCL1 | RUVBL2   |
| SUV39H1.1  | 2. | 71E-62 | 0.189708 | 0.254 | 0.031 | 4.05E-58 | CSCL1 | SUV39H1  |
| SLC16A14   | 3. | 10E-62 | 0.176783 | 0.229 | 0.026 | 4.64E-58 | CSCL1 | SLC16A14 |
| SAP30.7    | 4. | 29E-62 | 0.533412 | 0.776 | 0.231 | 6.42E-58 | CSCL1 | SAP30    |
| KRI1.3     | 5. | 02E-62 | 0.299489 | 0.478 | 0.097 | 7.50E-58 | CSCL1 | KRI1     |
| FAM111A.7  | 5. | 04E-62 | 0.310007 | 0.498 | 0.103 | 7.54E-58 | CSCL1 | FAM111A  |
| RFWD3.3    | 6. | 17E-62 | 0.237702 | 0.338 | 0.053 | 9.21E-58 | CSCL1 | RFWD3    |
| FEN1.5     | 7. | 98E-62 | 0.403915 | 0.562 | 0.129 | 1.19E-57 | CSCL1 | FEN1     |
| RRM1.8     | 1. | 68E-61 | 0.434369 | 0.677 | 0.176 | 2.51E-57 | CSCL1 | RRM1     |
| DAZAP1.4   | 2. | 36E-61 | 0.425614 | 0.776 | 0.222 | 3.52E-57 | CSCL1 | DAZAP1   |
| TCF19.2    | 2. | 41E-61 | 0.227726 | 0.303 | 0.044 | 3.61E-57 | CSCL1 | TCF19    |
| NBPF1.10   | 2. | 47E-61 | 0.45144  | 0.786 | 0.226 | 3.69E-57 | CSCL1 | NBPF1    |
| ACSS3.10   | 2. | 90E-61 | 0.366563 | 0.488 | 0.105 | 4.34E-57 | CSCL1 | ACSS3    |
| DHRS11.9   | 7. | 67E-61 | 0.330743 | 0.468 | 0.096 | 1.15E-56 | CSCL1 | DHRS11   |
| EYA2.4     | 8. | 24E-61 | 0.289447 | 0.398 | 0.072 | 1.23E-56 | CSCL1 | EYA2     |
| GJC1.7     | 8. | 54E-61 | 0.262496 | 0.353 | 0.059 | 1.28E-56 | CSCL1 | GJC1     |
| IFT122.1   | 8. | 58E-61 | 0.218866 | 0.328 | 0.051 | 1.28E-56 | CSCL1 | IFT122   |
| RHEBL1     | 9. | 07E-61 | 0.149293 | 0.169 | 0.015 | 1.36E-56 | CSCL1 | RHEBL1   |
| SACS.9     | 9. | 88E-61 | 0.394475 | 0.607 | 0.147 | 1.48E-56 | CSCL1 | SACS     |
| EPOR.7     | 1. | 10E-60 | 0.242606 | 0.373 | 0.064 | 1.64E-56 | CSCL1 | EPOR     |
| ERCC6L     | 1. | 18E-60 | 0.107772 | 0.09  | 0.004 | 1.77E-56 | CSCL1 | ERCC6L   |
| ASAP2.8    | 2. | 29E-60 | 0.340172 | 0.443 | 0.089 | 3.43E-56 | CSCL1 | ASAP2    |
| RAC3.11    | 3. | 99E-60 | 0.490192 | 0.652 | 0.175 | 5.97E-56 | CSCL1 | RAC3     |
| TRIM7.1    | 6. | 03E-60 | 0.242327 | 0.279 | 0.039 | 9.01E-56 | CSCL1 | TRIM7    |
| YPEL1.10   | 6. | 57E-60 | 0.260873 | 0.448 | 0.087 | 9.82E-56 | CSCL1 | YPEL1    |
| CHST2.9    | 1. | 03E-59 | 0.418839 | 0.547 | 0.129 | 1.54E-55 | CSCL1 | CHST2    |
| STK11.3    | 1. | 20E-59 | 0.305908 | 0.443 | 0.088 | 1.79E-55 | CSCL1 | STK11    |

|             |           |           |        |        |           |       |                |
|-------------|-----------|-----------|--------|--------|-----------|-------|----------------|
| NQ01. 8     | 1. 43E-59 | 0. 294063 | 0. 483 | 0. 102 | 2. 13E-55 | CSCL1 | NQ01           |
| ZEB1. 11    | 1. 85E-59 | 0. 406449 | 0. 692 | 0. 184 | 2. 77E-55 | CSCL1 | ZEB1           |
| HABP4. 7    | 2. 86E-59 | 0. 335404 | 0. 507 | 0. 112 | 4. 27E-55 | CSCL1 | HABP4          |
| NCKAP1. 9   | 3. 59E-59 | 0. 374676 | 0. 682 | 0. 18  | 5. 37E-55 | CSCL1 | NCKAP1         |
| TDP1. 2     | 3. 65E-59 | 0. 220257 | 0. 338 | 0. 055 | 5. 46E-55 | CSCL1 | TDP1           |
| C2orf69. 9  | 3. 69E-59 | 0. 405807 | 0. 692 | 0. 185 | 5. 51E-55 | CSCL1 | C2orf69        |
| COQ2. 11    | 3. 85E-59 | 0. 310408 | 0. 677 | 0. 171 | 5. 75E-55 | CSCL1 | COQ2           |
| EPHB4. 1    | 4. 10E-59 | 0. 184353 | 0. 219 | 0. 025 | 6. 13E-55 | CSCL1 | EPHB4          |
| IKBIP. 10   | 4. 36E-59 | 0. 340733 | 0. 771 | 0. 217 | 6. 52E-55 | CSCL1 | IKBIP          |
| LAMB1. 7    | 7. 11E-59 | 0. 278636 | 0. 463 | 0. 095 | 1. 06E-54 | CSCL1 | LAMB1          |
| CEP44. 2    | 1. 16E-58 | 0. 193129 | 0. 358 | 0. 06  | 1. 74E-54 | CSCL1 | CEP44          |
| C16orf59. 1 | 1. 28E-58 | 0. 241741 | 0. 284 | 0. 04  | 1. 91E-54 | CSCL1 | C16orf59       |
| NUDT1. 5    | 2. 04E-58 | 0. 495541 | 0. 97  | 0. 34  | 3. 05E-54 | CSCL1 | NUDT1          |
| MCM10. 1    | 2. 19E-58 | 0. 190668 | 0. 194 | 0. 02  | 3. 27E-54 | CSCL1 | MCM10          |
| RP11-798M   | 2. 24E-58 | 0. 287089 | 0. 592 | 0. 141 | 3. 34E-54 | CSCL1 | RP11-798M19. 6 |
| BMP7. 12    | 2. 26E-58 | 0. 415193 | 0. 622 | 0. 158 | 3. 37E-54 | CSCL1 | BMP7           |
| HIST2H2AC   | 2. 63E-58 | 0. 322867 | 0. 323 | 0. 053 | 3. 94E-54 | CSCL1 | HIST2H2AC      |
| XRCC4. 2    | 2. 65E-58 | 0. 264069 | 0. 468 | 0. 096 | 3. 97E-54 | CSCL1 | XRCC4          |
| CEP72       | 3. 33E-58 | 0. 163432 | 0. 174 | 0. 016 | 4. 98E-54 | CSCL1 | CEP72          |
| COL9A3. 11  | 3. 99E-58 | 0. 580145 | 0. 647 | 0. 178 | 5. 96E-54 | CSCL1 | COL9A3         |
| R3HDM1. 5   | 4. 80E-58 | 0. 334448 | 0. 527 | 0. 12  | 7. 17E-54 | CSCL1 | R3HDM1         |
| EFNB2. 10   | 6. 01E-58 | 0. 341253 | 0. 453 | 0. 093 | 8. 97E-54 | CSCL1 | EFNB2          |
| STK39. 8    | 6. 40E-58 | 0. 30944  | 0. 458 | 0. 095 | 9. 56E-54 | CSCL1 | STK39          |
| DPP4. 9     | 7. 55E-58 | 0. 275191 | 0. 388 | 0. 072 | 1. 13E-53 | CSCL1 | DPP4           |
| POC5. 1     | 9. 14E-58 | 0. 196557 | 0. 303 | 0. 046 | 1. 37E-53 | CSCL1 | POC5           |
| CANT1. 5    | 1. 16E-57 | 0. 362985 | 0. 637 | 0. 167 | 1. 74E-53 | CSCL1 | CANT1          |
| FDXR. 4     | 1. 23E-57 | 0. 29256  | 0. 493 | 0. 107 | 1. 83E-53 | CSCL1 | FDXR           |
| CENPV. 11   | 2. 22E-57 | 0. 532306 | 0. 796 | 0. 245 | 3. 31E-53 | CSCL1 | CENPV          |
| TMX4. 8     | 2. 96E-57 | 0. 442975 | 0. 786 | 0. 236 | 4. 42E-53 | CSCL1 | TMX4           |
| CDK5RAP2. 3 | 4. 7E-57  | 0. 293994 | 0. 488 | 0. 106 | 5. 18E-53 | CSCL1 | CDK5RAP2       |
| H2AFV. 9    | 5. 35E-57 | 0. 575269 | 1      | 0. 514 | 7. 99E-53 | CSCL1 | H2AFV          |
| MAD2L2. 9   | 1. 29E-56 | 0. 552282 | 0. 955 | 0. 382 | 1. 92E-52 | CSCL1 | MAD2L2         |
| DDX39A. 7   | 1. 54E-56 | 0. 517517 | 0. 98  | 0. 382 | 2. 31E-52 | CSCL1 | DDX39A         |
| UBL7-AS1. 1 | 1. 62E-56 | 0. 227867 | 0. 318 | 0. 051 | 2. 42E-52 | CSCL1 | UBL7-AS1       |
| B9D1. 7     | 1. 83E-56 | 0. 281852 | 0. 448 | 0. 094 | 2. 73E-52 | CSCL1 | B9D1           |
| PRR7. 11    | 4. 82E-56 | 0. 455563 | 0. 657 | 0. 18  | 7. 20E-52 | CSCL1 | PRR7           |
| ID1. 8      | 4. 86E-56 | 0. 404668 | 0. 502 | 0. 114 | 7. 26E-52 | CSCL1 | ID1            |
| OSBPL6. 7   | 4. 88E-56 | 0. 400988 | 0. 587 | 0. 149 | 7. 30E-52 | CSCL1 | OSBPL6         |
| PRRX1. 11   | 7. 71E-56 | 0. 384762 | 0. 627 | 0. 163 | 1. 15E-51 | CSCL1 | PRRX1          |
| SQLE. 9     | 8. 11E-56 | 0. 431481 | 0. 796 | 0. 239 | 1. 21E-51 | CSCL1 | SQLE           |
| DNALI1. 9   | 1. 04E-55 | 0. 318466 | 0. 478 | 0. 106 | 1. 55E-51 | CSCL1 | DNALI1         |
| ASCL1. 10   | 1. 10E-55 | 0. 45908  | 0. 662 | 0. 177 | 1. 65E-51 | CSCL1 | ASCL1          |
| RP11-111M   | 1. 18E-55 | 0. 306001 | 0. 433 | 0. 09  | 1. 76E-51 | CSCL1 | RP11-111M22. 3 |
| SOX9. 11    | 1. 18E-55 | 0. 637117 | 0. 801 | 0. 262 | 1. 76E-51 | CSCL1 | SOX9           |
| PTRF. 12    | 1. 59E-55 | 0. 435705 | 0. 642 | 0. 177 | 2. 38E-51 | CSCL1 | PTRF           |
| CNOT3. 6    | 1. 73E-55 | 0. 344622 | 0. 602 | 0. 155 | 2. 59E-51 | CSCL1 | CNOT3          |
| BBOX1. 11   | 3. 08E-55 | 0. 266277 | 0. 537 | 0. 13  | 4. 61E-51 | CSCL1 | BBOX1          |
| DNAJC9. 6   | 3. 87E-55 | 0. 255296 | 0. 622 | 0. 154 | 5. 78E-51 | CSCL1 | DNAJC9         |
| ASXL1. 7    | 6. 17E-55 | 0. 367852 | 0. 632 | 0. 169 | 9. 23E-51 | CSCL1 | ASXL1          |
| BOC. 9      | 6. 63E-55 | 0. 26297  | 0. 408 | 0. 081 | 9. 91E-51 | CSCL1 | BOC            |
| MFGE8. 8    | 1. 06E-54 | 0. 398528 | 0. 657 | 0. 182 | 1. 58E-50 | CSCL1 | MFGE8          |

|            |           |           |        |        |           |       |                |
|------------|-----------|-----------|--------|--------|-----------|-------|----------------|
| GPX8. 11   | 1. 06E-54 | 0. 223229 | 0. 333 | 0. 058 | 1. 58E-50 | CSCL1 | GPX8           |
| GLRX5. 9   | 1. 18E-54 | 0. 545538 | 0. 806 | 0. 287 | 1. 76E-50 | CSCL1 | GLRX5          |
| PITPNA-AS  | 1. 49E-54 | 0. 322024 | 0. 682 | 0. 187 | 2. 23E-50 | CSCL1 | PITPNA-AS1     |
| LAMC1. 8   | 1. 98E-54 | 0. 30483  | 0. 448 | 0. 096 | 2. 96E-50 | CSCL1 | LAMC1          |
| SMARCA1. 9 | 2. 06E-54 | 0. 35194  | 0. 622 | 0. 163 | 3. 08E-50 | CSCL1 | SMARCA1        |
| JAG1. 10   | 2. 69E-54 | 0. 428367 | 0. 582 | 0. 151 | 4. 02E-50 | CSCL1 | JAG1           |
| RECQL4. 1  | 4. 95E-54 | 0. 195395 | 0. 224 | 0. 028 | 7. 39E-50 | CSCL1 | RECQL4         |
| NMB. 11    | 5. 24E-54 | 0. 383643 | 0. 687 | 0. 194 | 7. 82E-50 | CSCL1 | NMB            |
| RP11-71N1  | 5. 28E-54 | 0. 327844 | 0. 537 | 0. 129 | 7. 90E-50 | CSCL1 | RP11-71N10. 1  |
| GAS2L1. 9  | 6. 36E-54 | 0. 355175 | 0. 567 | 0. 145 | 9. 51E-50 | CSCL1 | GAS2L1         |
| HN1L. 7    | 6. 50E-54 | 0. 30373  | 0. 577 | 0. 145 | 9. 71E-50 | CSCL1 | HN1L           |
| DZIP3. 7   | 1. 03E-53 | 0. 33603  | 0. 522 | 0. 124 | 1. 54E-49 | CSCL1 | DZIP3          |
| TRIB2. 12  | 1. 22E-53 | 0. 508044 | 0. 801 | 0. 253 | 1. 82E-49 | CSCL1 | TRIB2          |
| DAG1. 8    | 1. 48E-53 | 0. 351348 | 0. 622 | 0. 165 | 2. 22E-49 | CSCL1 | DAG1           |
| EDNRB. 8   | 1. 57E-53 | 0. 498568 | 0. 637 | 0. 179 | 2. 34E-49 | CSCL1 | EDNRB          |
| NUDCD2. 7  | 1. 58E-53 | 0. 479553 | 0. 95  | 0. 391 | 2. 37E-49 | CSCL1 | NUDCD2         |
| SIGMAR1. 4 | 1. 64E-53 | 0. 355452 | 0. 617 | 0. 164 | 2. 45E-49 | CSCL1 | SIGMAR1        |
| TSEN15. 7  | 1. 71E-53 | 0. 365051 | 0. 751 | 0. 224 | 2. 56E-49 | CSCL1 | TSEN15         |
| COL6A2. 11 | 1. 76E-53 | 0. 475226 | 0. 592 | 0. 155 | 2. 63E-49 | CSCL1 | COL6A2         |
| USP1. 9    | 2. 08E-53 | 0. 431614 | 0. 786 | 0. 249 | 3. 11E-49 | CSCL1 | USP1           |
| DCAF7. 7   | 2. 26E-53 | 0. 493932 | 0. 861 | 0. 311 | 3. 38E-49 | CSCL1 | DCAF7          |
| CDK16. 6   | 2. 27E-53 | 0. 37549  | 0. 761 | 0. 226 | 3. 39E-49 | CSCL1 | CDK16          |
| E2F8. 1    | 3. 00E-53 | 0. 121035 | 0. 129 | 0. 01  | 4. 49E-49 | CSCL1 | E2F8           |
| MEOX2. 10  | 3. 93E-53 | 0. 312197 | 0. 378 | 0. 073 | 5. 88E-49 | CSCL1 | MEOX2          |
| PIAS3. 1   | 3. 96E-53 | 0. 209781 | 0. 388 | 0. 075 | 5. 91E-49 | CSCL1 | PIAS3          |
| CCDC14. 9  | 4. 14E-53 | 0. 361301 | 0. 741 | 0. 218 | 6. 19E-49 | CSCL1 | CCDC14         |
| TUBA1C. 9  | 4. 38E-53 | 0. 532046 | 0. 886 | 0. 371 | 6. 54E-49 | CSCL1 | TUBA1C         |
| GNL1. 5    | 8. 82E-53 | 0. 374059 | 0. 771 | 0. 233 | 1. 32E-48 | CSCL1 | GNL1           |
| F2R. 12    | 1. 07E-52 | 0. 339378 | 0. 612 | 0. 161 | 1. 60E-48 | CSCL1 | F2R            |
| WWTR1. 12  | 1. 61E-52 | 0. 414812 | 0. 587 | 0. 153 | 2. 41E-48 | CSCL1 | WWTR1          |
| PIPOX. 10  | 1. 74E-52 | 0. 346855 | 0. 517 | 0. 125 | 2. 60E-48 | CSCL1 | PIPOX          |
| H2AFZ. 5   | 2. 48E-52 | 0. 406208 | 1      | 0. 734 | 3. 71E-48 | CSCL1 | H2AFZ          |
| DCBLD2. 11 | 2. 54E-52 | 0. 459864 | 0. 532 | 0. 136 | 3. 79E-48 | CSCL1 | DCBLD2         |
| RP11-390F  | 2. 70E-52 | 0. 306903 | 0. 522 | 0. 126 | 4. 03E-48 | CSCL1 | RP11-390P2. 4  |
| SLC10A4. 1 | 2. 70E-52 | 0. 336609 | 0. 423 | 0. 091 | 4. 04E-48 | CSCL1 | SLC10A4        |
| HOPX. 11   | 2. 70E-52 | 0. 716159 | 0. 786 | 0. 274 | 4. 04E-48 | CSCL1 | HOPX           |
| CEP164. 3  | 2. 81E-52 | 0. 309479 | 0. 567 | 0. 146 | 4. 20E-48 | CSCL1 | CEP164         |
| PRADC1. 9  | 3. 23E-52 | 0. 390165 | 0. 711 | 0. 208 | 4. 83E-48 | CSCL1 | PRADC1         |
| E2F7       | 3. 39E-52 | 0. 117969 | 0. 134 | 0. 011 | 5. 07E-48 | CSCL1 | E2F7           |
| RP11-620J  | 3. 81E-52 | 0. 316885 | 0. 826 | 0. 26  | 5. 69E-48 | CSCL1 | RP11-620J15. 3 |
| FJX1. 11   | 4. 10E-52 | 0. 419816 | 0. 692 | 0. 193 | 6. 12E-48 | CSCL1 | FJX1           |
| FANCM      | 4. 97E-52 | 0. 17777  | 0. 189 | 0. 021 | 7. 43E-48 | CSCL1 | FANCM          |
| CCDC77. 2  | 5. 90E-52 | 0. 209634 | 0. 313 | 0. 053 | 8. 81E-48 | CSCL1 | CCDC77         |
| HMG20B. 6  | 6. 15E-52 | 0. 52508  | 0. 871 | 0. 327 | 9. 20E-48 | CSCL1 | HMG20B         |
| PHGDH. 10  | 6. 66E-52 | 0. 380192 | 0. 677 | 0. 191 | 9. 95E-48 | CSCL1 | PHGDH          |
| COPRS. 8   | 6. 75E-52 | 0. 549283 | 0. 861 | 0. 324 | 1. 01E-47 | CSCL1 | COPRS          |
| CITED1. 11 | 7. 13E-52 | 0. 390043 | 0. 557 | 0. 144 | 1. 07E-47 | CSCL1 | CITED1         |
| NOTCH2. 5  | 7. 45E-52 | 0. 324075 | 0. 552 | 0. 139 | 1. 11E-47 | CSCL1 | NOTCH2         |
| MAP7D3. 5  | 8. 92E-52 | 0. 236788 | 0. 483 | 0. 111 | 1. 33E-47 | CSCL1 | MAP7D3         |
| MUS81. 6   | 9. 84E-52 | 0. 342341 | 0. 612 | 0. 166 | 1. 47E-47 | CSCL1 | MUS81          |
| DR1. 3     | 1. 22E-51 | 0. 330817 | 0. 761 | 0. 225 | 1. 82E-47 | CSCL1 | DR1            |

|             |          |          |       |       |          |       |           |
|-------------|----------|----------|-------|-------|----------|-------|-----------|
| TCF12.11    | 1.60E-51 | 0.487873 | 0.821 | 0.274 | 2.39E-47 | CSCL1 | TCF12     |
| NFYB.6      | 1.60E-51 | 0.289236 | 0.642 | 0.176 | 2.40E-47 | CSCL1 | NFYB      |
| TMEM209.5   | 1.62E-51 | 0.266987 | 0.483 | 0.111 | 2.42E-47 | CSCL1 | TMEM209   |
| SEC22C.7    | 1.81E-51 | 0.349048 | 0.726 | 0.219 | 2.71E-47 | CSCL1 | SEC22C    |
| CENPT.8     | 1.82E-51 | 0.34556  | 0.652 | 0.182 | 2.72E-47 | CSCL1 | CENPT     |
| RAD18.1     | 2.97E-51 | 0.237324 | 0.308 | 0.053 | 4.43E-47 | CSCL1 | RAD18     |
| NUP50.6     | 3.99E-51 | 0.284333 | 0.478 | 0.111 | 5.97E-47 | CSCL1 | NUP50     |
| BCAS4.5     | 4.51E-51 | 0.211962 | 0.393 | 0.081 | 6.74E-47 | CSCL1 | BCAS4     |
| AMH.8       | 4.74E-51 | 0.229564 | 0.308 | 0.053 | 7.08E-47 | CSCL1 | AMH       |
| TP53I13.9   | 5.98E-51 | 0.451368 | 0.746 | 0.236 | 8.94E-47 | CSCL1 | TP53I13   |
| CDK2.6      | 6.43E-51 | 0.277406 | 0.388 | 0.079 | 9.61E-47 | CSCL1 | CDK2      |
| POLR2D.4    | 7.12E-51 | 0.293355 | 0.532 | 0.132 | 1.06E-46 | CSCL1 | POLR2D    |
| BTBD3.10    | 7.19E-51 | 0.281551 | 0.532 | 0.13  | 1.07E-46 | CSCL1 | BTBD3     |
| APOO.9      | 7.91E-51 | 0.296329 | 0.741 | 0.22  | 1.18E-46 | CSCL1 | APOO      |
| KDELC1.1    | 9.04E-51 | 0.21759  | 0.264 | 0.041 | 1.35E-46 | CSCL1 | KDELC1    |
| AHCY.7      | 1.61E-50 | 0.429539 | 0.841 | 0.285 | 2.41E-46 | CSCL1 | AHCY      |
| TCTEX1D2.1  | 1.97E-50 | 0.311464 | 0.736 | 0.218 | 2.94E-46 | CSCL1 | TCTEX1D2  |
| DCXR.5      | 2.43E-50 | 0.490099 | 0.975 | 0.443 | 3.63E-46 | CSCL1 | DCXR      |
| EVA1B.7     | 2.81E-50 | 0.364776 | 0.483 | 0.117 | 4.19E-46 | CSCL1 | EVA1B     |
| DEK.8       | 3.21E-50 | 0.538903 | 0.975 | 0.455 | 4.80E-46 | CSCL1 | DEK       |
| REEP2.10    | 3.28E-50 | 0.373975 | 0.672 | 0.194 | 4.90E-46 | CSCL1 | REEP2     |
| UBA5.4      | 3.35E-50 | 0.310965 | 0.642 | 0.177 | 5.00E-46 | CSCL1 | UBA5      |
| GEMIN2.5    | 3.51E-50 | 0.269708 | 0.458 | 0.105 | 5.25E-46 | CSCL1 | GEMIN2    |
| YES1.6      | 3.72E-50 | 0.343105 | 0.502 | 0.124 | 5.56E-46 | CSCL1 | YES1      |
| TIMM10.6    | 3.73E-50 | 0.471824 | 0.881 | 0.345 | 5.58E-46 | CSCL1 | TIMM10    |
| FABP7.10    | 4.60E-50 | 0.668625 | 0.896 | 0.374 | 6.87E-46 | CSCL1 | FABP7     |
| HIRIP3.6    | 4.70E-50 | 0.305188 | 0.592 | 0.158 | 7.03E-46 | CSCL1 | HIRIP3    |
| SCG2.11     | 4.74E-50 | 0.586506 | 0.751 | 0.253 | 7.09E-46 | CSCL1 | SCG2      |
| PTMS.11     | 5.65E-50 | 0.551697 | 0.975 | 0.546 | 8.44E-46 | CSCL1 | PTMS      |
| PLEKHA4.1   | 7.38E-50 | 0.276525 | 0.502 | 0.12  | 1.10E-45 | CSCL1 | PLEKHA4   |
| CDC42BPA.7  | 7.88E-50 | 0.340802 | 0.617 | 0.171 | 1.18E-45 | CSCL1 | CDC42BPA  |
| PCNT.1      | 9.28E-50 | 0.212601 | 0.353 | 0.067 | 1.39E-45 | CSCL1 | PCNT      |
| RASSF1.6    | 1.10E-49 | 0.257831 | 0.587 | 0.151 | 1.65E-45 | CSCL1 | RASSF1    |
| NOTCH2NL.1  | 1.15E-49 | 0.317779 | 0.592 | 0.159 | 1.72E-45 | CSCL1 | NOTCH2NL  |
| SLC44A2.9   | 1.20E-49 | 0.338483 | 0.672 | 0.194 | 1.79E-45 | CSCL1 | SLC44A2   |
| GIT1.7      | 1.25E-49 | 0.253327 | 0.443 | 0.1   | 1.87E-45 | CSCL1 | GIT1      |
| ITGA3.9     | 1.45E-49 | 0.330445 | 0.418 | 0.093 | 2.17E-45 | CSCL1 | ITGA3     |
| RFC4.8      | 1.51E-49 | 0.322664 | 0.572 | 0.149 | 2.25E-45 | CSCL1 | RFC4      |
| ALDH3A2.6   | 1.68E-49 | 0.412814 | 0.711 | 0.224 | 2.51E-45 | CSCL1 | ALDH3A2   |
| KHDRBS3.1   | 2.29E-49 | 0.377157 | 0.701 | 0.206 | 3.43E-45 | CSCL1 | KHDRBS3   |
| PSPC1.9     | 2.43E-49 | 0.334384 | 0.697 | 0.203 | 3.63E-45 | CSCL1 | PSPC1     |
| RAB30-AS1.2 | 5.0E-49  | 0.239322 | 0.552 | 0.141 | 3.74E-45 | CSCL1 | RAB30-AS1 |
| CMSS1.8     | 2.67E-49 | 0.362052 | 0.831 | 0.28  | 3.99E-45 | CSCL1 | CMSS1     |
| ODC1.11     | 2.89E-49 | 0.559433 | 0.935 | 0.384 | 4.32E-45 | CSCL1 | ODC1      |
| GIPC1.8     | 3.11E-49 | 0.409273 | 0.796 | 0.259 | 4.65E-45 | CSCL1 | GIPC1     |
| PCYT2.7     | 3.14E-49 | 0.316767 | 0.577 | 0.153 | 4.69E-45 | CSCL1 | PCYT2     |
| C17orf58.3  | 2.7E-49  | 0.323918 | 0.637 | 0.178 | 4.89E-45 | CSCL1 | C17orf58  |
| C21orf62.4  | 1.3E-49  | 0.360383 | 0.572 | 0.151 | 6.17E-45 | CSCL1 | C21orf62  |
| RUVBL1.8    | 5.15E-49 | 0.333023 | 0.806 | 0.257 | 7.70E-45 | CSCL1 | RUVBL1    |
| LDLR.8      | 5.16E-49 | 0.247732 | 0.423 | 0.093 | 7.71E-45 | CSCL1 | LDLR      |
| F3.11       | 5.19E-49 | 0.436063 | 0.642 | 0.184 | 7.76E-45 | CSCL1 | F3        |

|           |          |          |       |       |          |       |          |
|-----------|----------|----------|-------|-------|----------|-------|----------|
| SH3GL1.7  | 5.96E-49 | 0.406631 | 0.761 | 0.241 | 8.90E-45 | CSCL1 | SH3GL1   |
| SERPINH1. | 6.20E-49 | 0.393256 | 0.677 | 0.201 | 9.27E-45 | CSCL1 | SERPINH1 |
| NLGN1.10  | 7.36E-49 | 0.307891 | 0.522 | 0.131 | 1.10E-44 | CSCL1 | NLGN1    |
| CTCF.7    | 7.37E-49 | 0.306243 | 0.582 | 0.156 | 1.10E-44 | CSCL1 | CTCF     |
| CCDC85C.1 | 8.49E-49 | 0.144222 | 0.199 | 0.025 | 1.27E-44 | CSCL1 | CCDC85C  |
| MEX3A.10  | 9.60E-49 | 0.292418 | 0.632 | 0.17  | 1.43E-44 | CSCL1 | MEX3A    |
| RASGRP1.1 | 1.00E-48 | 0.225873 | 0.338 | 0.064 | 1.49E-44 | CSCL1 | RASGRP1  |
| TMEM19.7  | 1.48E-48 | 0.262262 | 0.562 | 0.145 | 2.21E-44 | CSCL1 | TMEM19   |
| ZNF738.1C | 1.60E-48 | 0.259878 | 0.542 | 0.137 | 2.39E-44 | CSCL1 | ZNF738   |
| PNMA2.10  | 1.82E-48 | 0.333039 | 0.517 | 0.132 | 2.73E-44 | CSCL1 | PNMA2    |
| LAMA5.8   | 2.15E-48 | 0.32788  | 0.448 | 0.106 | 3.21E-44 | CSCL1 | LAMA5    |
| ABCD3.7   | 2.40E-48 | 0.351874 | 0.647 | 0.188 | 3.58E-44 | CSCL1 | ABCD3    |
| RAD54B    | 2.43E-48 | 0.174036 | 0.199 | 0.025 | 3.63E-44 | CSCL1 | RAD54B   |
| TSPAN5.11 | 2.58E-48 | 0.471315 | 0.771 | 0.253 | 3.86E-44 | CSCL1 | TSPAN5   |
| ST3GAL4.7 | 2.65E-48 | 0.319562 | 0.478 | 0.116 | 3.97E-44 | CSCL1 | ST3GAL4  |
| PSPH.11   | 3.06E-48 | 0.304676 | 0.567 | 0.15  | 4.57E-44 | CSCL1 | PSPH     |
| EXTL2.9   | 3.26E-48 | 0.336953 | 0.582 | 0.16  | 4.87E-44 | CSCL1 | EXTL2    |
| ROB01.10  | 3.63E-48 | 0.416209 | 0.602 | 0.171 | 5.42E-44 | CSCL1 | ROB01    |
| WRAP53.1  | 3.68E-48 | 0.216896 | 0.388 | 0.081 | 5.49E-44 | CSCL1 | WRAP53   |
| SMAD1.8   | 3.71E-48 | 0.379646 | 0.612 | 0.17  | 5.55E-44 | CSCL1 | SMAD1    |
| NTHL1.6   | 3.81E-48 | 0.296941 | 0.632 | 0.18  | 5.69E-44 | CSCL1 | NTHL1    |
| HIST1H1D. | 4.36E-48 | 0.1952   | 0.194 | 0.024 | 6.52E-44 | CSCL1 | HIST1H1D |
| AUNIP     | 4.68E-48 | 0.142109 | 0.124 | 0.01  | 6.99E-44 | CSCL1 | AUNIP    |
| RPA3.7    | 4.96E-48 | 0.38558  | 0.91  | 0.333 | 7.41E-44 | CSCL1 | RPA3     |
| ZNF43.10  | 5.60E-48 | 0.258466 | 0.522 | 0.131 | 8.36E-44 | CSCL1 | ZNF43    |
| DHRS7B.4  | 5.85E-48 | 0.245722 | 0.637 | 0.178 | 8.74E-44 | CSCL1 | DHRS7B   |
| C19orf48. | 5.88E-48 | 0.361725 | 0.711 | 0.219 | 8.79E-44 | CSCL1 | C19orf48 |
| CHST3.8   | 5.90E-48 | 0.240643 | 0.318 | 0.06  | 8.82E-44 | CSCL1 | CHST3    |
| MASTL.3   | 6.33E-48 | 0.17767  | 0.234 | 0.034 | 9.46E-44 | CSCL1 | MASTL    |
| SEMA6D.12 | 6.81E-48 | 0.389098 | 0.567 | 0.15  | 1.02E-43 | CSCL1 | SEMA6D   |
| LIG3.2    | 7.82E-48 | 0.227886 | 0.313 | 0.057 | 1.17E-43 | CSCL1 | LIG3     |
| ITGAE.4   | 8.08E-48 | 0.383145 | 0.93  | 0.355 | 1.21E-43 | CSCL1 | ITGAE    |
| LRRCC1.7  | 8.42E-48 | 0.336317 | 0.507 | 0.129 | 1.26E-43 | CSCL1 | LRRCC1   |
| DARS2.1   | 8.45E-48 | 0.160147 | 0.229 | 0.032 | 1.26E-43 | CSCL1 | DARS2    |
| FAM92A1.9 | 8.82E-48 | 0.338611 | 0.657 | 0.193 | 1.32E-43 | CSCL1 | FAM92A1  |
| TRMU.4    | 9.22E-48 | 0.247495 | 0.507 | 0.125 | 1.38E-43 | CSCL1 | TRMU     |
| TARBP2.4  | 9.27E-48 | 0.266915 | 0.537 | 0.14  | 1.39E-43 | CSCL1 | TARBP2   |
| DCP2.6    | 1.12E-47 | 0.247586 | 0.552 | 0.144 | 1.67E-43 | CSCL1 | DCP2     |
| FANCG.3   | 1.17E-47 | 0.212803 | 0.323 | 0.06  | 1.75E-43 | CSCL1 | FANCG    |
| LSM5.7    | 1.61E-47 | 0.479035 | 0.985 | 0.499 | 2.40E-43 | CSCL1 | LSM5     |
| PPIL1.7   | 1.73E-47 | 0.282239 | 0.647 | 0.186 | 2.58E-43 | CSCL1 | PPIL1    |
| SUN2.7    | 1.89E-47 | 0.268    | 0.716 | 0.21  | 2.83E-43 | CSCL1 | SUN2     |
| FBX017.12 | 1.91E-47 | 0.289965 | 0.532 | 0.137 | 2.85E-43 | CSCL1 | FBX017   |
| DDAH1.9   | 2.08E-47 | 0.335443 | 0.478 | 0.118 | 3.10E-43 | CSCL1 | DDAH1    |
| AGBL5.4   | 3.11E-47 | 0.257379 | 0.373 | 0.079 | 4.65E-43 | CSCL1 | AGBL5    |
| RNASEH2B. | 3.14E-47 | 0.338156 | 0.741 | 0.23  | 4.69E-43 | CSCL1 | RNASEH2B |
| CNIH3.9   | 3.37E-47 | 0.345194 | 0.587 | 0.161 | 5.04E-43 | CSCL1 | CNIH3    |
| BRD7.8    | 3.38E-47 | 0.386398 | 0.761 | 0.245 | 5.05E-43 | CSCL1 | BRD7     |
| TMSB15A.1 | 3.87E-47 | 0.351985 | 0.622 | 0.171 | 5.78E-43 | CSCL1 | TMSB15A  |
| TCF3.8    | 4.49E-47 | 0.311013 | 0.488 | 0.123 | 6.70E-43 | CSCL1 | TCF3     |
| TBX2.1    | 6.13E-47 | 0.200443 | 0.259 | 0.041 | 9.16E-43 | CSCL1 | TBX2     |



|            |           |           |        |        |           |       |         |
|------------|-----------|-----------|--------|--------|-----------|-------|---------|
| MAP2K2. 8  | 6. 23E-47 | 0. 507525 | 0. 826 | 0. 293 | 9. 31E-43 | CSCL1 | MAP2K2  |
| DCPS. 6    | 6. 24E-47 | 0. 27944  | 0. 587 | 0. 164 | 9. 32E-43 | CSCL1 | DCPS    |
| RAD51C. 8  | 6. 67E-47 | 0. 348564 | 0. 781 | 0. 258 | 9. 97E-43 | CSCL1 | RAD51C  |
| TRIM28. 8  | 6. 68E-47 | 0. 347805 | 0. 756 | 0. 241 | 9. 98E-43 | CSCL1 | TRIM28  |
| TMEM189. 7 | 6. 87E-47 | 0. 315589 | 0. 622 | 0. 18  | 1. 03E-42 | CSCL1 | TMEM189 |
| MKKS. 7    | 7. 34E-47 | 0. 447697 | 0. 92  | 0. 395 | 1. 10E-42 | CSCL1 | MKKS    |
| TSKU. 8    | 9. 41E-47 | 0. 242707 | 0. 378 | 0. 08  | 1. 41E-42 | CSCL1 | TSKU    |
| HOMER1. 11 | 9. 94E-47 | 0. 344898 | 0. 552 | 0. 15  | 1. 48E-42 | CSCL1 | HOMER1  |
| SNTA1. 8   | 1. 04E-46 | 0. 225341 | 0. 378 | 0. 08  | 1. 56E-42 | CSCL1 | SNTA1   |
| RHOJ. 9    | 1. 17E-46 | 0. 241567 | 0. 418 | 0. 094 | 1. 75E-42 | CSCL1 | RHOJ    |
| TUBD1. 2   | 1. 44E-46 | 0. 192399 | 0. 378 | 0. 079 | 2. 15E-42 | CSCL1 | TUBD1   |
| TNFAIP6. 8 | 1. 53E-46 | 0. 174012 | 0. 448 | 0. 104 | 2. 28E-42 | CSCL1 | TNFAIP6 |
| TEAD1. 7   | 1. 53E-46 | 0. 3636   | 0. 517 | 0. 138 | 2. 29E-42 | CSCL1 | TEAD1   |
| ECI1. 7    | 2. 43E-46 | 0. 370719 | 0. 667 | 0. 205 | 3. 63E-42 | CSCL1 | ECI1    |
| CEP89. 7   | 2. 76E-46 | 0. 256353 | 0. 493 | 0. 124 | 4. 12E-42 | CSCL1 | CEP89   |
| PPIH. 5    | 3. 39E-46 | 0. 240521 | 0. 721 | 0. 219 | 5. 06E-42 | CSCL1 | PPIH    |
| CHL1. 10   | 3. 47E-46 | 0. 359335 | 0. 542 | 0. 146 | 5. 18E-42 | CSCL1 | CHL1    |
| ZNF358. 9  | 3. 49E-46 | 0. 326597 | 0. 567 | 0. 158 | 5. 21E-42 | CSCL1 | ZNF358  |
| BRD8. 7    | 3. 62E-46 | 0. 281857 | 0. 572 | 0. 155 | 5. 41E-42 | CSCL1 | BRD8    |
| STK17A. 1C | 6. 15E-46 | 0. 381151 | 0. 846 | 0. 284 | 9. 18E-42 | CSCL1 | STK17A  |
| SPATA6. 5  | 6. 43E-46 | 0. 299185 | 0. 552 | 0. 149 | 9. 61E-42 | CSCL1 | SPATA6  |
| KBTBD2. 3  | 6. 66E-46 | 0. 242521 | 0. 458 | 0. 109 | 9. 95E-42 | CSCL1 | KBTBD2  |
| PXMP4. 2   | 6. 72E-46 | 0. 215643 | 0. 313 | 0. 059 | 1. 00E-41 | CSCL1 | PXMP4   |
| CIZ1. 6    | 7. 34E-46 | 0. 288903 | 0. 607 | 0. 172 | 1. 10E-41 | CSCL1 | CIZ1    |
| CSTF3. 9   | 7. 38E-46 | 0. 346613 | 0. 786 | 0. 258 | 1. 10E-41 | CSCL1 | CSTF3   |
| KDM1A. 9   | 8. 05E-46 | 0. 327949 | 0. 657 | 0. 195 | 1. 20E-41 | CSCL1 | KDM1A   |
| BUB3. 5    | 9. 06E-46 | 0. 362323 | 0. 846 | 0. 298 | 1. 35E-41 | CSCL1 | BUB3    |
| IGFBP2. 1C | 9. 14E-46 | 0. 607362 | 0. 891 | 0. 365 | 1. 37E-41 | CSCL1 | IGFBP2  |
| RRP36. 6   | 1. 07E-45 | 0. 267435 | 0. 532 | 0. 139 | 1. 61E-41 | CSCL1 | RRP36   |
| TCHP. 5    | 1. 14E-45 | 0. 231779 | 0. 448 | 0. 105 | 1. 71E-41 | CSCL1 | TCHP    |
| ERAL1. 6   | 1. 18E-45 | 0. 317028 | 0. 731 | 0. 232 | 1. 76E-41 | CSCL1 | ERAL1   |
| PHACTR4. 6 | 1. 23E-45 | 0. 256915 | 0. 667 | 0. 194 | 1. 85E-41 | CSCL1 | PHACTR4 |
| BTBD10. 6  | 1. 79E-45 | 0. 271539 | 0. 612 | 0. 174 | 2. 67E-41 | CSCL1 | BTBD10  |
| TJP1. 9    | 1. 80E-45 | 0. 324535 | 0. 607 | 0. 173 | 2. 69E-41 | CSCL1 | TJP1    |
| RNFT2. 9   | 2. 08E-45 | 0. 241337 | 0. 328 | 0. 064 | 3. 10E-41 | CSCL1 | RNFT2   |
| JADE1. 4   | 2. 08E-45 | 0. 263216 | 0. 478 | 0. 118 | 3. 11E-41 | CSCL1 | JADE1   |
| PGAP1. 11  | 2. 15E-45 | 0. 312994 | 0. 612 | 0. 176 | 3. 22E-41 | CSCL1 | PGAP1   |
| TGIF2. 5   | 2. 23E-45 | 0. 2559   | 0. 368 | 0. 079 | 3. 33E-41 | CSCL1 | TGIF2   |
| ILDR2. 10  | 2. 35E-45 | 0. 26557  | 0. 358 | 0. 075 | 3. 52E-41 | CSCL1 | ILDR2   |
| KATNAL1. 5 | 2. 56E-45 | 0. 226147 | 0. 363 | 0. 076 | 3. 82E-41 | CSCL1 | KATNAL1 |
| KLHL4. 10  | 2. 90E-45 | 0. 276649 | 0. 478 | 0. 121 | 4. 33E-41 | CSCL1 | KLHL4   |
| LSM4. 7    | 3. 56E-45 | 0. 466314 | 0. 995 | 0. 553 | 5. 33E-41 | CSCL1 | LSM4    |
| MYH10. 9   | 3. 57E-45 | 0. 320831 | 0. 542 | 0. 146 | 5. 33E-41 | CSCL1 | MYH10   |
| FOXG1. 10  | 3. 80E-45 | 0. 356476 | 0. 532 | 0. 147 | 5. 67E-41 | CSCL1 | FOXG1   |
| ENAH. 11   | 3. 94E-45 | 0. 425257 | 0. 766 | 0. 255 | 5. 88E-41 | CSCL1 | ENAH    |
| NUP88. 5   | 4. 12E-45 | 0. 259763 | 0. 483 | 0. 122 | 6. 16E-41 | CSCL1 | NUP88   |
| CLSPN. 7   | 4. 19E-45 | 0. 291044 | 0. 308 | 0. 058 | 6. 25E-41 | CSCL1 | CLSPN   |
| HP1BP3. 1C | 4. 47E-45 | 0. 494885 | 0. 95  | 0. 433 | 6. 69E-41 | CSCL1 | HP1BP3  |
| XPO1. 4    | 4. 71E-45 | 0. 326584 | 0. 766 | 0. 25  | 7. 04E-41 | CSCL1 | XPO1    |
| APITD1. 6  | 4. 85E-45 | 0. 222595 | 0. 363 | 0. 077 | 7. 25E-41 | CSCL1 | APITD1  |
| SLC36A4. 7 | 5. 61E-45 | 0. 303872 | 0. 632 | 0. 185 | 8. 38E-41 | CSCL1 | SLC36A4 |

|           |          |          |       |       |          |       |           |
|-----------|----------|----------|-------|-------|----------|-------|-----------|
| FAM210B.1 | 6.22E-45 | 0.467594 | 0.761 | 0.261 | 9.30E-41 | CSCL1 | FAM210B   |
| FUZ.5     | 6.46E-45 | 0.274882 | 0.562 | 0.154 | 9.65E-41 | CSCL1 | FUZ       |
| TFAM.3    | 7.32E-45 | 0.272317 | 0.602 | 0.173 | 1.09E-40 | CSCL1 | TFAM      |
| MCUR1.8   | 7.67E-45 | 0.3976   | 0.761 | 0.253 | 1.15E-40 | CSCL1 | MCUR1     |
| EGFR.11   | 7.91E-45 | 0.539624 | 0.816 | 0.291 | 1.18E-40 | CSCL1 | EGFR      |
| NFS1.5    | 9.53E-45 | 0.243023 | 0.498 | 0.128 | 1.42E-40 | CSCL1 | NFS1      |
| POLR3H.7  | 9.61E-45 | 0.320919 | 0.672 | 0.207 | 1.44E-40 | CSCL1 | POLR3H    |
| PPP2R3B.3 | 1.03E-44 | 0.195628 | 0.323 | 0.063 | 1.54E-40 | CSCL1 | PPP2R3B   |
| SORBS3.8  | 1.04E-44 | 0.319822 | 0.577 | 0.165 | 1.56E-40 | CSCL1 | SORBS3    |
| GABPB1.5  | 1.04E-44 | 0.248478 | 0.433 | 0.102 | 1.56E-40 | CSCL1 | GABPB1    |
| FANCA.3   | 1.08E-44 | 0.19531  | 0.299 | 0.054 | 1.62E-40 | CSCL1 | FANCA     |
| SFRP1.11  | 1.08E-44 | 0.27014  | 0.403 | 0.092 | 1.62E-40 | CSCL1 | SFRP1     |
| CCDC167.7 | 1.15E-44 | 0.430863 | 0.925 | 0.373 | 1.72E-40 | CSCL1 | CCDC167   |
| METRN.12  | 1.38E-44 | 0.488149 | 0.836 | 0.285 | 2.07E-40 | CSCL1 | METRN     |
| DYNLL2.11 | 1.49E-44 | 0.266517 | 0.672 | 0.198 | 2.23E-40 | CSCL1 | DYNLL2    |
| RFFL.12   | 1.63E-44 | 0.382846 | 0.557 | 0.158 | 2.43E-40 | CSCL1 | RFFL      |
| PCDH17.1C | 2.10E-44 | 0.2621   | 0.637 | 0.184 | 3.14E-40 | CSCL1 | PCDH17    |
| OSER1-AS1 | 2.35E-44 | 0.263254 | 0.488 | 0.125 | 3.51E-40 | CSCL1 | OSER1-AS1 |
| WDR41.7   | 2.46E-44 | 0.297878 | 0.692 | 0.217 | 3.68E-40 | CSCL1 | WDR41     |
| SPRY2.10  | 2.66E-44 | 0.42757  | 0.667 | 0.21  | 3.98E-40 | CSCL1 | SPRY2     |
| ENTPD6.5  | 2.70E-44 | 0.310486 | 0.637 | 0.191 | 4.03E-40 | CSCL1 | ENTPD6    |
| CBX2.7    | 2.92E-44 | 0.247738 | 0.318 | 0.062 | 4.37E-40 | CSCL1 | CBX2      |
| SUZ12.6   | 2.95E-44 | 0.344158 | 0.622 | 0.187 | 4.40E-40 | CSCL1 | SUZ12     |
| FAM120AOS | 3.34E-44 | 0.283932 | 0.612 | 0.178 | 4.99E-40 | CSCL1 | FAM120AOS |
| RNF34.7   | 3.55E-44 | 0.257406 | 0.637 | 0.187 | 5.31E-40 | CSCL1 | RNF34     |
| SEPT9.7   | 3.65E-44 | 0.488524 | 0.851 | 0.332 | 5.45E-40 | CSCL1 | 9-Sep     |
| OGFOD3.7  | 4.15E-44 | 0.35734  | 0.687 | 0.213 | 6.20E-40 | CSCL1 | OGFOD3    |
| SSRP1.10  | 4.35E-44 | 0.427335 | 0.915 | 0.345 | 6.50E-40 | CSCL1 | SSRP1     |
| C9orf40.1 | 4.37E-44 | 0.206838 | 0.259 | 0.044 | 6.54E-40 | CSCL1 | C9orf40   |
| TNPO2.8   | 4.50E-44 | 0.259541 | 0.602 | 0.172 | 6.73E-40 | CSCL1 | TNPO2     |
| FLNA.10   | 4.70E-44 | 0.424866 | 0.736 | 0.242 | 7.02E-40 | CSCL1 | FLNA      |
| DKC1.5    | 5.83E-44 | 0.327045 | 0.771 | 0.257 | 8.71E-40 | CSCL1 | DKC1      |
| PPP2R5C.5 | 5.92E-44 | 0.273034 | 0.761 | 0.249 | 8.84E-40 | CSCL1 | PPP2R5C   |
| STMN3.10  | 6.13E-44 | 0.421607 | 0.861 | 0.297 | 9.16E-40 | CSCL1 | STMN3     |
| WRNIP1.4  | 6.16E-44 | 0.254336 | 0.413 | 0.097 | 9.21E-40 | CSCL1 | WRNIP1    |
| MSI2.9    | 6.43E-44 | 0.434366 | 0.861 | 0.312 | 9.61E-40 | CSCL1 | MSI2      |
| DZIP1.9   | 6.46E-44 | 0.26545  | 0.413 | 0.097 | 9.65E-40 | CSCL1 | DZIP1     |
| GSS.7     | 7.24E-44 | 0.323087 | 0.726 | 0.232 | 1.08E-39 | CSCL1 | GSS       |
| MVB12A.7  | 7.72E-44 | 0.354841 | 0.851 | 0.293 | 1.15E-39 | CSCL1 | MVB12A    |
| MACROD1.5 | 8.35E-44 | 0.268967 | 0.463 | 0.116 | 1.25E-39 | CSCL1 | MACROD1   |
| ZNF599.7  | 9.24E-44 | 0.231488 | 0.338 | 0.069 | 1.38E-39 | CSCL1 | ZNF599    |
| CDC34.10  | 9.41E-44 | 0.316827 | 0.726 | 0.226 | 1.41E-39 | CSCL1 | CDC34     |
| HRAS.10   | 1.05E-43 | 0.413683 | 0.816 | 0.284 | 1.56E-39 | CSCL1 | HRAS      |
| ABHD17C.7 | 1.19E-43 | 0.285047 | 0.358 | 0.078 | 1.78E-39 | CSCL1 | ABHD17C   |
| TRAF2.2   | 1.46E-43 | 0.209489 | 0.363 | 0.078 | 2.18E-39 | CSCL1 | TRAF2     |
| MYEF2.10  | 1.59E-43 | 0.339588 | 0.622 | 0.186 | 2.38E-39 | CSCL1 | MYEF2     |
| DNTTIP1.5 | 1.71E-43 | 0.425855 | 0.846 | 0.321 | 2.56E-39 | CSCL1 | DNTTIP1   |
| MTFR1.2   | 1.77E-43 | 0.226194 | 0.398 | 0.091 | 2.64E-39 | CSCL1 | MTFR1     |
| CAMK2D.9  | 1.90E-43 | 0.410196 | 0.721 | 0.235 | 2.84E-39 | CSCL1 | CAMK2D    |
| HNRNPLL.5 | 1.94E-43 | 0.278255 | 0.627 | 0.183 | 2.90E-39 | CSCL1 | HNRNPLL   |
| PIGX.9    | 2.06E-43 | 0.351957 | 0.751 | 0.244 | 3.08E-39 | CSCL1 | PIGX      |

|           |          |          |       |       |          |       |               |
|-----------|----------|----------|-------|-------|----------|-------|---------------|
| DHCR7.10  | 2.12E-43 | 0.332306 | 0.587 | 0.17  | 3.17E-39 | CSCL1 | DHCR7         |
| MED7.3    | 2.15E-43 | 0.16527  | 0.453 | 0.109 | 3.22E-39 | CSCL1 | MED7          |
| PLOD2.9   | 2.43E-43 | 0.309008 | 0.552 | 0.155 | 3.63E-39 | CSCL1 | PLOD2         |
| PGM3.6    | 2.82E-43 | 0.294625 | 0.582 | 0.167 | 4.22E-39 | CSCL1 | PGM3          |
| UBC.6     | 3.56E-43 | -0.55948 | 0.995 | 0.95  | 5.33E-39 | CSCL1 | UBC           |
| ALDH7A1.7 | 4.25E-43 | 0.313597 | 0.791 | 0.266 | 6.34E-39 | CSCL1 | ALDH7A1       |
| SRR.9     | 4.25E-43 | 0.260687 | 0.537 | 0.147 | 6.35E-39 | CSCL1 | SRR           |
| TCEA2.11  | 4.33E-43 | 0.487359 | 0.92  | 0.358 | 6.48E-39 | CSCL1 | TCEA2         |
| SLC35B2.8 | 4.45E-43 | 0.425541 | 0.816 | 0.291 | 6.64E-39 | CSCL1 | SLC35B2       |
| CDR2      | 6.63E-43 | 0.139776 | 0.229 | 0.035 | 9.91E-39 | CSCL1 | CDR2          |
| LRRC37B.6 | 8.67E-43 | 0.22647  | 0.438 | 0.107 | 1.30E-38 | CSCL1 | LRRC37B       |
| RPA1.2    | 8.79E-43 | 0.29164  | 0.721 | 0.231 | 1.31E-38 | CSCL1 | RPA1          |
| MXRA7.9   | 1.03E-42 | 0.31963  | 0.567 | 0.16  | 1.55E-38 | CSCL1 | MXRA7         |
| CRY1.6    | 1.10E-42 | 0.253527 | 0.493 | 0.13  | 1.64E-38 | CSCL1 | CRY1          |
| PPME1.9   | 1.15E-42 | 0.260327 | 0.597 | 0.174 | 1.72E-38 | CSCL1 | PPME1         |
| EFEMP2.8  | 1.21E-42 | 0.328684 | 0.672 | 0.206 | 1.81E-38 | CSCL1 | EFEMP2        |
| SPECC1.11 | 1.23E-42 | 0.391824 | 0.821 | 0.287 | 1.83E-38 | CSCL1 | SPECC1        |
| TBCD.5    | 1.33E-42 | 0.222818 | 0.517 | 0.139 | 1.99E-38 | CSCL1 | TBCD          |
| ANAPC7.8  | 1.64E-42 | 0.261004 | 0.577 | 0.165 | 2.45E-38 | CSCL1 | ANAPC7        |
| ZMYND11.8 | 1.72E-42 | 0.255141 | 0.517 | 0.14  | 2.57E-38 | CSCL1 | ZMYND11       |
| DSEL.12   | 1.74E-42 | 0.306779 | 0.697 | 0.217 | 2.60E-38 | CSCL1 | DSEL          |
| ZNF326.8  | 1.86E-42 | 0.300979 | 0.736 | 0.239 | 2.78E-38 | CSCL1 | ZNF326        |
| THOC3.5   | 2.17E-42 | 0.269884 | 0.572 | 0.163 | 3.25E-38 | CSCL1 | THOC3         |
| RGMA.11   | 2.26E-42 | 0.375032 | 0.632 | 0.193 | 3.37E-38 | CSCL1 | RGMA          |
| NOTCH1.6  | 2.27E-42 | 0.241223 | 0.433 | 0.105 | 3.39E-38 | CSCL1 | NOTCH1        |
| FAM181B.1 | 2.45E-42 | 0.492902 | 0.617 | 0.196 | 3.67E-38 | CSCL1 | FAM181B       |
| PPP2R5E.9 | 2.59E-42 | 0.331426 | 0.731 | 0.239 | 3.86E-38 | CSCL1 | PPP2R5E       |
| PSIP1.9   | 2.62E-42 | 0.489568 | 0.92  | 0.374 | 3.92E-38 | CSCL1 | PSIP1         |
| C4orf46.3 | 2.67E-42 | 0.175012 | 0.343 | 0.071 | 4.00E-38 | CSCL1 | C4orf46       |
| RP11-318A | 2.80E-42 | 0.106765 | 0.124 | 0.012 | 4.18E-38 | CSCL1 | RP11-318A15.2 |
| KCNE4.9   | 3.04E-42 | 0.276885 | 0.413 | 0.099 | 4.54E-38 | CSCL1 | KCNE4         |
| MGAT2.5   | 3.10E-42 | 0.303629 | 0.597 | 0.179 | 4.63E-38 | CSCL1 | MGAT2         |
| NCOA6.9   | 3.13E-42 | 0.219896 | 0.498 | 0.129 | 4.68E-38 | CSCL1 | NCOA6         |
| IFT52.9   | 3.27E-42 | 0.289177 | 0.746 | 0.248 | 4.89E-38 | CSCL1 | IFT52         |
| GCLM.6    | 3.49E-42 | 0.249454 | 0.547 | 0.151 | 5.21E-38 | CSCL1 | GCLM          |
| APBB2.9   | 4.79E-42 | 0.273276 | 0.433 | 0.107 | 7.16E-38 | CSCL1 | APBB2         |
| FAM104B.4 | 5.59E-42 | 0.238117 | 0.612 | 0.183 | 8.36E-38 | CSCL1 | FAM104B       |
| PRKDC.8   | 5.77E-42 | 0.374988 | 0.801 | 0.283 | 8.63E-38 | CSCL1 | PRKDC         |
| KLHDC8A.1 | 6.03E-42 | 0.383678 | 0.741 | 0.242 | 9.01E-38 | CSCL1 | KLHDC8A       |
| MBD3.5    | 6.35E-42 | 0.266539 | 0.552 | 0.157 | 9.50E-38 | CSCL1 | MBD3          |
| PAICS.11  | 6.51E-42 | 0.332873 | 0.841 | 0.299 | 9.73E-38 | CSCL1 | PAICS         |
| CCDC80.1C | 6.52E-42 | 0.255661 | 0.433 | 0.107 | 9.74E-38 | CSCL1 | CCDC80        |
| THAP11.6  | 6.70E-42 | 0.262976 | 0.582 | 0.169 | 1.00E-37 | CSCL1 | THAP11        |
| NETO2.8   | 6.92E-42 | 0.303372 | 0.547 | 0.155 | 1.03E-37 | CSCL1 | NETO2         |
| KCTD3.6   | 7.19E-42 | 0.251886 | 0.507 | 0.136 | 1.07E-37 | CSCL1 | KCTD3         |
| METTL7B.8 | 8.37E-42 | 0.254104 | 0.662 | 0.204 | 1.25E-37 | CSCL1 | METTL7B       |
| FAM104A.7 | 8.38E-42 | 0.350285 | 0.697 | 0.232 | 1.25E-37 | CSCL1 | FAM104A       |
| SYNE2.11  | 8.58E-42 | 0.289018 | 0.577 | 0.167 | 1.28E-37 | CSCL1 | SYNE2         |
| PARD3.7   | 8.60E-42 | 0.216533 | 0.289 | 0.055 | 1.28E-37 | CSCL1 | PARD3         |
| NPHP1.6   | 9.84E-42 | 0.180047 | 0.318 | 0.065 | 1.47E-37 | CSCL1 | NPHP1         |
| SRRD.7    | 9.87E-42 | 0.229498 | 0.443 | 0.11  | 1.47E-37 | CSCL1 | SRRD          |

|           |    |          |          |       |       |          |       |            |
|-----------|----|----------|----------|-------|-------|----------|-------|------------|
| HNRNPUL2. | 1. | 1.8E-41  | 0.240088 | 0.552 | 0.156 | 1.76E-37 | CSCL1 | HNRNPUL2   |
| KHSRP.    | 9  | 1.23E-41 | 0.315477 | 0.711 | 0.23  | 1.83E-37 | CSCL1 | KHSRP      |
| SPSB4.    | 10 | 1.25E-41 | 0.198398 | 0.289 | 0.055 | 1.86E-37 | CSCL1 | SPSB4      |
| CEP97.    | 7  | 1.42E-41 | 0.209179 | 0.338 | 0.071 | 2.12E-37 | CSCL1 | CEP97      |
| CNIH4.    | 8  | 1.53E-41 | 0.353191 | 0.9   | 0.364 | 2.28E-37 | CSCL1 | CNIH4      |
| PHF7      |    | 1.54E-41 | 0.18003  | 0.239 | 0.039 | 2.30E-37 | CSCL1 | PHF7       |
| PITX1.    | 9  | 1.64E-41 | 0.26441  | 0.358 | 0.08  | 2.45E-37 | CSCL1 | PITX1      |
| IGFBP7.   | 1C | 1.87E-41 | 0.485989 | 0.741 | 0.261 | 2.80E-37 | CSCL1 | IGFBP7     |
| DKK3.     | 10 | 1.90E-41 | 0.310013 | 0.632 | 0.192 | 2.84E-37 | CSCL1 | DKK3       |
| IFI27L1.  | 8  | 1.93E-41 | 0.228943 | 0.602 | 0.178 | 2.89E-37 | CSCL1 | IFI27L1    |
| SDC1.     | 6  | 2.07E-41 | 0.216514 | 0.254 | 0.044 | 3.09E-37 | CSCL1 | SDC1       |
| FAM84A.   | 1C | 2.11E-41 | 0.308307 | 0.507 | 0.138 | 3.15E-37 | CSCL1 | FAM84A     |
| KIF21A.   | 12 | 2.46E-41 | 0.394622 | 0.831 | 0.293 | 3.68E-37 | CSCL1 | KIF21A     |
| MLC1.     | 10 | 2.60E-41 | 0.300877 | 0.512 | 0.142 | 3.89E-37 | CSCL1 | MLC1       |
| PTAR1.    | 6  | 2.68E-41 | 0.235165 | 0.488 | 0.13  | 4.01E-37 | CSCL1 | PTAR1      |
| PMEPA1.   | 11 | 2.72E-41 | 0.41369  | 0.622 | 0.194 | 4.06E-37 | CSCL1 | PMEPA1     |
| JAM2.     | 12 | 2.85E-41 | 0.272275 | 0.741 | 0.244 | 4.26E-37 | CSCL1 | JAM2       |
| EXTL3.    | 8  | 3.20E-41 | 0.240885 | 0.478 | 0.125 | 4.78E-37 | CSCL1 | EXTL3      |
| ACAT2.    | 9  | 3.21E-41 | 0.334001 | 0.796 | 0.269 | 4.80E-37 | CSCL1 | ACAT2      |
| FBXW2.    | 6  | 3.77E-41 | 0.285071 | 0.607 | 0.185 | 5.64E-37 | CSCL1 | FBXW2      |
| DAP.      | 8  | 3.79E-41 | 0.316346 | 0.791 | 0.267 | 5.66E-37 | CSCL1 | DAP        |
| SNRPB.    | 7  | 3.99E-41 | 0.412091 | 0.985 | 0.57  | 5.97E-37 | CSCL1 | SNRPB      |
| CSRP2.    | 10 | 4.12E-41 | 0.208556 | 0.841 | 0.292 | 6.15E-37 | CSCL1 | CSRP2      |
| CENPB.    | 3  | 4.32E-41 | 0.210281 | 0.413 | 0.1   | 6.45E-37 | CSCL1 | CENPB      |
| NEK6.     | 8  | 4.46E-41 | 0.492665 | 0.751 | 0.282 | 6.66E-37 | CSCL1 | NEK6       |
| FERMT2.   | 9  | 4.70E-41 | 0.299863 | 0.637 | 0.195 | 7.03E-37 | CSCL1 | FERMT2     |
| RSRC1.    | 3  | 4.82E-41 | 0.332745 | 0.821 | 0.295 | 7.21E-37 | CSCL1 | RSRC1      |
| FAM173B.  | 4  | 5.08E-41 | 0.172886 | 0.303 | 0.06  | 7.58E-37 | CSCL1 | FAM173B    |
| CETN3.    | 5  | 5.32E-41 | 0.236553 | 0.512 | 0.14  | 7.95E-37 | CSCL1 | CETN3      |
| LIMA1.    | 11 | 6.40E-41 | 0.397484 | 0.861 | 0.308 | 9.56E-37 | CSCL1 | LIMA1      |
| THSD1.    | 7  | 6.74E-41 | 0.24028  | 0.383 | 0.089 | 1.01E-36 | CSCL1 | THSD1      |
| PCM1.     | 8  | 6.91E-41 | 0.380729 | 0.841 | 0.315 | 1.03E-36 | CSCL1 | PCM1       |
| IRF3.     | 5  | 7.29E-41 | 0.248507 | 0.721 | 0.235 | 1.09E-36 | CSCL1 | IRF3       |
| LRWD1.    | 8  | 7.35E-41 | 0.268984 | 0.567 | 0.163 | 1.10E-36 | CSCL1 | LRWD1      |
| HEG1.     | 4  | 7.42E-41 | 0.218584 | 0.323 | 0.067 | 1.11E-36 | CSCL1 | HEG1       |
| DCLRE1C.  | 5  | 8.61E-41 | 0.207292 | 0.478 | 0.124 | 1.29E-36 | CSCL1 | DCLRE1C    |
| HSDL2.    | 4  | 9.06E-41 | 0.236816 | 0.542 | 0.154 | 1.35E-36 | CSCL1 | HSDL2      |
| CEP41.    | 4  | 9.12E-41 | 0.267407 | 0.517 | 0.145 | 1.36E-36 | CSCL1 | CEP41      |
| CCDC82.   | 6  | 9.86E-41 | 0.331574 | 0.761 | 0.263 | 1.47E-36 | CSCL1 | CCDC82     |
| RBBP8.    | 5  | 9.97E-41 | 0.217765 | 0.353 | 0.078 | 1.49E-36 | CSCL1 | RBBP8      |
| CD320.    | 10 | 1.03E-40 | 0.412218 | 0.846 | 0.309 | 1.53E-36 | CSCL1 | CD320      |
| ATP6VOA2. |    | 1.06E-40 | 0.199668 | 0.388 | 0.091 | 1.58E-36 | CSCL1 | ATP6VOA2   |
| BMI1.     | 7  | 1.09E-40 | 0.230146 | 0.498 | 0.133 | 1.63E-36 | CSCL1 | BMI1       |
| AGPAT5.   | 8  | 1.21E-40 | 0.250957 | 0.647 | 0.202 | 1.81E-36 | CSCL1 | AGPAT5     |
| UBE2M.    | 7  | 1.24E-40 | 0.344685 | 0.682 | 0.222 | 1.86E-36 | CSCL1 | UBE2M      |
| BTG3.     | 9  | 1.27E-40 | 0.394175 | 0.91  | 0.362 | 1.91E-36 | CSCL1 | BTG3       |
| IFT57.    | 10 | 1.35E-40 | 0.250664 | 0.726 | 0.239 | 2.01E-36 | CSCL1 | IFT57      |
| CRYZ.     | 10 | 1.39E-40 | 0.168595 | 0.458 | 0.118 | 2.08E-36 | CSCL1 | CRYZ       |
| TAF9B.    | 8  | 1.45E-40 | 0.236626 | 0.507 | 0.138 | 2.17E-36 | CSCL1 | TAF9B      |
| RBBP9.    | 5  | 1.48E-40 | 0.259707 | 0.378 | 0.089 | 2.21E-36 | CSCL1 | RBBP9      |
| CDKN2AIPN |    | 1.54E-40 | 0.25062  | 0.731 | 0.24  | 2.30E-36 | CSCL1 | CDKN2AIPNL |

|            |          |          |       |       |          |       |          |
|------------|----------|----------|-------|-------|----------|-------|----------|
| FKBP9.9    | 1.58E-40 | 0.249366 | 0.582 | 0.17  | 2.36E-36 | CSCL1 | FKBP9    |
| LIX1L.4    | 1.60E-40 | 0.275103 | 0.488 | 0.133 | 2.40E-36 | CSCL1 | LIX1L    |
| ICA1L.6    | 1.65E-40 | 0.222524 | 0.398 | 0.095 | 2.47E-36 | CSCL1 | ICA1L    |
| REST.6     | 1.77E-40 | 0.34213  | 0.612 | 0.191 | 2.64E-36 | CSCL1 | REST     |
| HS2ST1.11  | 1.84E-40 | 0.239161 | 0.577 | 0.167 | 2.75E-36 | CSCL1 | HS2ST1   |
| CRLS1.8    | 2.00E-40 | 0.363906 | 0.796 | 0.274 | 2.99E-36 | CSCL1 | CRLS1    |
| GLT8D1.5   | 2.02E-40 | 0.320022 | 0.776 | 0.267 | 3.02E-36 | CSCL1 | GLT8D1   |
| COL5A2.9   | 2.11E-40 | 0.230059 | 0.294 | 0.058 | 3.15E-36 | CSCL1 | COL5A2   |
| EPN2.11    | 2.26E-40 | 0.316322 | 0.711 | 0.229 | 3.37E-36 | CSCL1 | EPN2     |
| CD74.11    | 2.33E-40 | -1.32134 | 0.498 | 0.756 | 3.47E-36 | CSCL1 | CD74     |
| SLC4A8.5   | 2.53E-40 | 0.202434 | 0.328 | 0.07  | 3.78E-36 | CSCL1 | SLC4A8   |
| ZNF768.5   | 2.58E-40 | 0.199851 | 0.383 | 0.09  | 3.86E-36 | CSCL1 | ZNF768   |
| STAG1.2    | 2.65E-40 | 0.205006 | 0.473 | 0.122 | 3.95E-36 | CSCL1 | STAG1    |
| KIF5B.8    | 2.77E-40 | 0.468095 | 0.945 | 0.504 | 4.14E-36 | CSCL1 | KIF5B    |
| CDH2.11    | 2.98E-40 | 0.39465  | 0.806 | 0.275 | 4.46E-36 | CSCL1 | CDH2     |
| MID1.5     | 3.33E-40 | 0.167815 | 0.259 | 0.046 | 4.98E-36 | CSCL1 | MID1     |
| SEPT11.1C  | 3.39E-40 | 0.386006 | 0.811 | 0.294 | 5.06E-36 | CSCL1 | 11-Sep   |
| NEDD1.1    | 3.44E-40 | 0.210486 | 0.358 | 0.08  | 5.14E-36 | CSCL1 | NEDD1    |
| RAD51.1    | 3.70E-40 | 0.158416 | 0.184 | 0.025 | 5.53E-36 | CSCL1 | RAD51    |
| PLS3.10    | 3.74E-40 | 0.334441 | 0.667 | 0.213 | 5.60E-36 | CSCL1 | PLS3     |
| TBC1D7.3   | 4.01E-40 | 0.205072 | 0.547 | 0.156 | 5.99E-36 | CSCL1 | TBC1D7   |
| POC1B.3    | 4.14E-40 | 0.171443 | 0.353 | 0.078 | 6.19E-36 | CSCL1 | POC1B    |
| C1QL1.10   | 4.51E-40 | 0.249324 | 0.433 | 0.109 | 6.74E-36 | CSCL1 | C1QL1    |
| POLDIP3.5  | 4.57E-40 | 0.265796 | 0.592 | 0.179 | 6.83E-36 | CSCL1 | POLDIP3  |
| SNRPA1.7   | 4.96E-40 | 0.280506 | 0.806 | 0.286 | 7.41E-36 | CSCL1 | SNRPA1   |
| EMP2.6     | 5.31E-40 | 0.121338 | 0.423 | 0.103 | 7.93E-36 | CSCL1 | EMP2     |
| MEX3C.6    | 5.42E-40 | 0.210544 | 0.383 | 0.089 | 8.10E-36 | CSCL1 | MEX3C    |
| CBX1.9     | 5.44E-40 | 0.378628 | 0.925 | 0.357 | 8.13E-36 | CSCL1 | CBX1     |
| VEZF1.11   | 5.64E-40 | 0.273037 | 0.711 | 0.23  | 8.43E-36 | CSCL1 | VEZF1    |
| NRSN2.10   | 5.71E-40 | 0.27956  | 0.547 | 0.158 | 8.53E-36 | CSCL1 | NRSN2    |
| CAPRIN2.8  | 5.93E-40 | 0.248328 | 0.403 | 0.099 | 8.85E-36 | CSCL1 | CAPRIN2  |
| FHL1.12    | 5.95E-40 | 0.42579  | 0.915 | 0.347 | 8.89E-36 | CSCL1 | FHL1     |
| RNF157.1C  | 6.14E-40 | 0.22283  | 0.483 | 0.128 | 9.17E-36 | CSCL1 | RNF157   |
| BAP1.4     | 6.73E-40 | 0.226039 | 0.493 | 0.134 | 1.01E-35 | CSCL1 | BAP1     |
| FIGN.9     | 7.37E-40 | 0.282428 | 0.358 | 0.083 | 1.10E-35 | CSCL1 | FIGN     |
| NUCKS1.7   | 7.64E-40 | 0.387268 | 0.995 | 0.63  | 1.14E-35 | CSCL1 | NUCKS1   |
| MIIP.2     | 8.39E-40 | 0.247922 | 0.617 | 0.19  | 1.25E-35 | CSCL1 | MIIP     |
| SLC25A33.8 | 8.40E-40 | 0.275845 | 0.667 | 0.21  | 1.25E-35 | CSCL1 | SLC25A33 |
| CENPP.3    | 9.64E-40 | 0.157363 | 0.254 | 0.045 | 1.44E-35 | CSCL1 | CENPP    |
| ATP1B2.11  | 9.98E-40 | 0.332245 | 0.706 | 0.225 | 1.49E-35 | CSCL1 | ATP1B2   |
| SOX12.11   | 1.00E-39 | 0.239761 | 0.433 | 0.11  | 1.49E-35 | CSCL1 | SOX12    |
| ELAVL1.7   | 1.10E-39 | 0.387768 | 0.871 | 0.335 | 1.64E-35 | CSCL1 | ELAVL1   |
| MLH1.4     | 1.12E-39 | 0.174521 | 0.527 | 0.146 | 1.68E-35 | CSCL1 | MLH1     |
| CHAMP1.6   | 1.18E-39 | 0.234883 | 0.463 | 0.123 | 1.77E-35 | CSCL1 | CHAMP1   |
| CDC42EP4.1 | 1.35E-39 | 0.27669  | 0.627 | 0.193 | 2.02E-35 | CSCL1 | CDC42EP4 |
| CPNE2.10   | 1.40E-39 | 0.366823 | 0.552 | 0.171 | 2.09E-35 | CSCL1 | CPNE2    |
| S100A16.1  | 1.49E-39 | 0.358291 | 0.826 | 0.298 | 2.22E-35 | CSCL1 | S100A16  |
| IPP.7      | 1.59E-39 | 0.135616 | 0.289 | 0.056 | 2.38E-35 | CSCL1 | IPP      |
| PEMT.9     | 1.64E-39 | 0.254699 | 0.652 | 0.205 | 2.44E-35 | CSCL1 | PEMT     |
| ZNF414.11  | 1.64E-39 | 0.282562 | 0.587 | 0.178 | 2.45E-35 | CSCL1 | ZNF414   |
| AAAS.4     | 1.88E-39 | 0.220269 | 0.597 | 0.178 | 2.81E-35 | CSCL1 | AAAS     |

|            |          |          |       |       |          |       |               |
|------------|----------|----------|-------|-------|----------|-------|---------------|
| BOD1.11    | 2.00E-39 | 0.341669 | 0.821 | 0.294 | 2.99E-35 | CSCL1 | BOD1          |
| POLR3F.8   | 2.25E-39 | 0.221502 | 0.483 | 0.131 | 3.37E-35 | CSCL1 | POLR3F        |
| TTF2.3     | 2.33E-39 | 0.206459 | 0.299 | 0.06  | 3.48E-35 | CSCL1 | TTF2          |
| ZNF577.8   | 2.50E-39 | 0.215176 | 0.373 | 0.087 | 3.74E-35 | CSCL1 | ZNF577        |
| ZNRF1.10   | 2.81E-39 | 0.275507 | 0.428 | 0.111 | 4.20E-35 | CSCL1 | ZNRF1         |
| ETV5.9     | 3.07E-39 | 0.295746 | 0.741 | 0.25  | 4.59E-35 | CSCL1 | ETV5          |
| TMEM131.8  | 3.10E-39 | 0.287208 | 0.498 | 0.14  | 4.64E-35 | CSCL1 | TMEM131       |
| KNTC1.1    | 3.13E-39 | 0.154074 | 0.164 | 0.021 | 4.68E-35 | CSCL1 | KNTC1         |
| NR2F6.9    | 3.27E-39 | 0.276316 | 0.488 | 0.135 | 4.88E-35 | CSCL1 | NR2F6         |
| ACSL3.6    | 3.30E-39 | 0.432702 | 0.846 | 0.332 | 4.93E-35 | CSCL1 | ACSL3         |
| FHL2.8     | 3.52E-39 | 0.166502 | 0.244 | 0.043 | 5.27E-35 | CSCL1 | FHL2          |
| COMMD4.2   | 3.70E-39 | 0.278749 | 0.816 | 0.296 | 5.53E-35 | CSCL1 | COMMD4        |
| SRPK1.7    | 3.81E-39 | 0.251911 | 0.547 | 0.159 | 5.69E-35 | CSCL1 | SRPK1         |
| MORN2.9    | 3.93E-39 | 0.248082 | 0.751 | 0.253 | 5.88E-35 | CSCL1 | MORN2         |
| SRPX.10    | 4.07E-39 | 0.332357 | 0.562 | 0.17  | 6.08E-35 | CSCL1 | SRPX          |
| ANAPC15.6  | 4.14E-39 | 0.301993 | 0.726 | 0.253 | 6.19E-35 | CSCL1 | ANAPC15       |
| EXOSC3.4   | 4.31E-39 | 0.230209 | 0.532 | 0.153 | 6.44E-35 | CSCL1 | EXOSC3        |
| FIBIN.11   | 4.42E-39 | 0.400974 | 0.652 | 0.219 | 6.61E-35 | CSCL1 | FIBIN         |
| SMAD5.7    | 4.61E-39 | 0.200271 | 0.562 | 0.164 | 6.88E-35 | CSCL1 | SMAD5         |
| ATAD3A.5   | 4.61E-39 | 0.245316 | 0.517 | 0.145 | 6.89E-35 | CSCL1 | ATAD3A        |
| IGFBP3.1C  | 4.73E-39 | 0.446095 | 0.597 | 0.187 | 7.07E-35 | CSCL1 | IGFBP3        |
| DRG2.5     | 5.42E-39 | 0.210481 | 0.627 | 0.192 | 8.09E-35 | CSCL1 | DRG2          |
| PHF6.7     | 5.55E-39 | 0.238054 | 0.557 | 0.163 | 8.30E-35 | CSCL1 | PHF6          |
| COL6A1.11  | 5.91E-39 | 0.344549 | 0.682 | 0.221 | 8.83E-35 | CSCL1 | COL6A1        |
| NACC1.6    | 6.38E-39 | 0.243676 | 0.507 | 0.144 | 9.54E-35 | CSCL1 | NACC1         |
| CORO2B.8   | 6.55E-39 | 0.207255 | 0.393 | 0.096 | 9.79E-35 | CSCL1 | CORO2B        |
| C1orf21.1  | 6.59E-39 | 0.226034 | 0.627 | 0.193 | 9.85E-35 | CSCL1 | C1orf21       |
| TNC.11     | 6.68E-39 | 0.197734 | 0.627 | 0.193 | 9.99E-35 | CSCL1 | TNC           |
| GSK3A.9    | 7.00E-39 | 0.278453 | 0.592 | 0.183 | 1.05E-34 | CSCL1 | GSK3A         |
| LCMT1.3    | 7.17E-39 | 0.216684 | 0.761 | 0.254 | 1.07E-34 | CSCL1 | LCMT1         |
| SOX2.12    | 7.17E-39 | 0.547524 | 0.96  | 0.42  | 1.07E-34 | CSCL1 | SOX2          |
| PPID.2     | 7.47E-39 | 0.210418 | 0.642 | 0.202 | 1.12E-34 | CSCL1 | PPID          |
| FAF1.4     | 7.82E-39 | 0.23051  | 0.547 | 0.158 | 1.17E-34 | CSCL1 | FAF1          |
| BAMBI.9    | 8.17E-39 | 0.261572 | 0.308 | 0.065 | 1.22E-34 | CSCL1 | BAMBI         |
| UNK.4      | 8.38E-39 | 0.187734 | 0.458 | 0.121 | 1.25E-34 | CSCL1 | UNK           |
| RP13-650J  | 8.57E-39 | 0.138433 | 0.144 | 0.017 | 1.28E-34 | CSCL1 | RP13-650J16.1 |
| CTNNBIP1.9 | 9.21E-39 | 0.317416 | 0.647 | 0.207 | 1.38E-34 | CSCL1 | CTNNBIP1      |
| NABP2.7    | 9.74E-39 | 0.25215  | 0.776 | 0.267 | 1.46E-34 | CSCL1 | NABP2         |
| TLK1.9     | 9.81E-39 | 0.336325 | 0.672 | 0.22  | 1.47E-34 | CSCL1 | TLK1          |
| HOMER2.3   | 1.02E-38 | 0.176822 | 0.269 | 0.052 | 1.52E-34 | CSCL1 | HOMER2        |
| MDGA1.7    | 1.05E-38 | 0.238658 | 0.308 | 0.066 | 1.57E-34 | CSCL1 | MDGA1         |
| SETD2.6    | 1.11E-38 | 0.222378 | 0.498 | 0.137 | 1.65E-34 | CSCL1 | SETD2         |
| CSRNP2.4   | 1.18E-38 | 0.174884 | 0.358 | 0.082 | 1.77E-34 | CSCL1 | CSRNP2        |
| ASF1A.9    | 1.24E-38 | 0.247575 | 0.692 | 0.226 | 1.85E-34 | CSCL1 | ASF1A         |
| FANCB.1    | 1.31E-38 | 0.13122  | 0.159 | 0.02  | 1.96E-34 | CSCL1 | FANCB         |
| DNMT1.10   | 1.33E-38 | 0.321215 | 0.791 | 0.277 | 1.99E-34 | CSCL1 | DNMT1         |
| RNF4.1     | 1.34E-38 | 0.210308 | 0.572 | 0.171 | 2.00E-34 | CSCL1 | RNF4          |
| LAPTM4B.1  | 1.34E-38 | 0.375241 | 0.871 | 0.322 | 2.00E-34 | CSCL1 | LAPTM4B       |
| ANKRD54.6  | 1.51E-38 | 0.213565 | 0.483 | 0.134 | 2.26E-34 | CSCL1 | ANKRD54       |
| ANGPTL1.2  | 1.53E-38 | 0.199798 | 0.219 | 0.036 | 2.28E-34 | CSCL1 | ANGPTL1       |
| LSM12.7    | 1.57E-38 | 0.345818 | 0.726 | 0.251 | 2.35E-34 | CSCL1 | LSM12         |

|            |          |          |       |       |          |       |          |
|------------|----------|----------|-------|-------|----------|-------|----------|
| TSPAN17.5  | 1.58E-38 | 0.254557 | 0.502 | 0.142 | 2.35E-34 | CSCL1 | TSPAN17  |
| TMEM107.6  | 1.74E-38 | 0.188777 | 0.662 | 0.21  | 2.60E-34 | CSCL1 | TMEM107  |
| ZNF524.6   | 1.76E-38 | 0.249261 | 0.592 | 0.181 | 2.63E-34 | CSCL1 | ZNF524   |
| WLS.9      | 1.86E-38 | 0.324032 | 0.637 | 0.207 | 2.78E-34 | CSCL1 | WLS      |
| LYPD1.9    | 2.12E-38 | 0.303025 | 0.612 | 0.188 | 3.17E-34 | CSCL1 | LYPD1    |
| NELFB.6    | 2.35E-38 | 0.251471 | 0.502 | 0.143 | 3.51E-34 | CSCL1 | NELFB    |
| CCDC148    | 2.85E-38 | 0.14755  | 0.144 | 0.017 | 4.26E-34 | CSCL1 | CCDC148  |
| ENDOG.8    | 2.88E-38 | 0.267322 | 0.498 | 0.141 | 4.30E-34 | CSCL1 | ENDOG    |
| TMTC3.4    | 2.94E-38 | 0.235874 | 0.358 | 0.085 | 4.39E-34 | CSCL1 | TMTC3    |
| B4GALT5.9  | 3.11E-38 | 0.344829 | 0.597 | 0.189 | 4.65E-34 | CSCL1 | B4GALT5  |
| MAPKAP1.5  | 4.48E-38 | 0.282187 | 0.716 | 0.242 | 6.70E-34 | CSCL1 | MAPKAP1  |
| RALGAPA2.4 | 5.7E-38  | 0.184618 | 0.418 | 0.105 | 6.82E-34 | CSCL1 | RALGAPA2 |
| HMG2.3     | 4.74E-38 | 0.369334 | 0.94  | 0.626 | 7.08E-34 | CSCL1 | HMG2     |
| SEC61A2.5  | 4.79E-38 | 0.174495 | 0.338 | 0.075 | 7.16E-34 | CSCL1 | SEC61A2  |
| STRADB.6   | 5.05E-38 | 0.307413 | 0.652 | 0.213 | 7.55E-34 | CSCL1 | STRADB   |
| GTF3C5.8   | 5.09E-38 | 0.242821 | 0.582 | 0.179 | 7.61E-34 | CSCL1 | GTF3C5   |
| GALNS.4    | 5.44E-38 | 0.232921 | 0.463 | 0.126 | 8.13E-34 | CSCL1 | GALNS    |
| SF3A2.7    | 5.59E-38 | 0.314616 | 0.731 | 0.251 | 8.36E-34 | CSCL1 | SF3A2    |
| ACTL6A.8   | 5.93E-38 | 0.269596 | 0.726 | 0.25  | 8.86E-34 | CSCL1 | ACTL6A   |
| NNT.4      | 5.99E-38 | 0.238391 | 0.478 | 0.131 | 8.95E-34 | CSCL1 | NNT      |
| RABL6.7    | 6.05E-38 | 0.298429 | 0.711 | 0.239 | 9.04E-34 | CSCL1 | RABL6    |
| GNA11.6    | 6.09E-38 | 0.184712 | 0.408 | 0.101 | 9.09E-34 | CSCL1 | GNA11    |
| CSNK2A1.9  | 6.76E-38 | 0.355931 | 0.831 | 0.307 | 1.01E-33 | CSCL1 | CSNK2A1  |
| MCM4.9     | 6.80E-38 | 0.242273 | 0.378 | 0.091 | 1.02E-33 | CSCL1 | MCM4     |
| ZNF273.1C  | 7.29E-38 | 0.234491 | 0.348 | 0.08  | 1.09E-33 | CSCL1 | ZNF273   |
| TIMM22.8   | 7.36E-38 | 0.3011   | 0.697 | 0.235 | 1.10E-33 | CSCL1 | TIMM22   |
| SPATS2L.7  | 7.42E-38 | 0.436752 | 0.791 | 0.324 | 1.11E-33 | CSCL1 | SPATS2L  |
| SALL1.9    | 8.14E-38 | 0.275774 | 0.468 | 0.132 | 1.22E-33 | CSCL1 | SALL1    |
| PDLIM1.8   | 9.10E-38 | 0.186201 | 0.318 | 0.069 | 1.36E-33 | CSCL1 | PDLIM1   |
| PIK3R3.9   | 9.63E-38 | 0.184867 | 0.468 | 0.126 | 1.44E-33 | CSCL1 | PIK3R3   |
| UCHL5.4    | 1.01E-37 | 0.169955 | 0.512 | 0.142 | 1.50E-33 | CSCL1 | UCHL5    |
| KDM5B.11   | 1.06E-37 | 0.232822 | 0.537 | 0.155 | 1.59E-33 | CSCL1 | KDM5B    |
| PPFIBP1.9  | 1.15E-37 | 0.184393 | 0.527 | 0.149 | 1.72E-33 | CSCL1 | PPFIBP1  |
| ADD3.6     | 1.25E-37 | 0.196671 | 0.468 | 0.127 | 1.86E-33 | CSCL1 | ADD3     |
| C19orf52.1 | 1.39E-37 | 0.240101 | 0.557 | 0.167 | 2.08E-33 | CSCL1 | C19orf52 |
| POLH       | 1.58E-37 | 0.161245 | 0.224 | 0.038 | 2.37E-33 | CSCL1 | POLH     |
| TGFB1I1.1  | 1.60E-37 | 0.258768 | 0.443 | 0.121 | 2.39E-33 | CSCL1 | TGFB1I1  |
| GCSH.11    | 1.63E-37 | 0.462762 | 0.856 | 0.338 | 2.43E-33 | CSCL1 | GCSH     |
| SLC25A25.1 | 1.73E-37 | 0.261557 | 0.537 | 0.159 | 2.58E-33 | CSCL1 | SLC25A25 |
| UCKL1.5    | 1.83E-37 | 0.243562 | 0.517 | 0.152 | 2.73E-33 | CSCL1 | UCKL1    |
| METTL10.2  | 1.96E-37 | 0.157481 | 0.413 | 0.104 | 2.93E-33 | CSCL1 | METTL10  |
| HS6ST1.5   | 2.03E-37 | 0.216604 | 0.408 | 0.103 | 3.03E-33 | CSCL1 | HS6ST1   |
| C1orf109.2 | 2.07E-37 | 0.19565  | 0.468 | 0.126 | 3.09E-33 | CSCL1 | C1orf109 |
| RAB22A.8   | 2.20E-37 | 0.328357 | 0.677 | 0.231 | 3.29E-33 | CSCL1 | RAB22A   |
| ARMC1.8    | 2.25E-37 | 0.271014 | 0.746 | 0.256 | 3.37E-33 | CSCL1 | ARMC1    |
| HMBS.4     | 2.38E-37 | 0.250516 | 0.597 | 0.19  | 3.55E-33 | CSCL1 | HMBS     |
| SORT1.8    | 2.41E-37 | 0.251298 | 0.672 | 0.222 | 3.60E-33 | CSCL1 | SORT1    |
| RNF126.8   | 2.45E-37 | 0.328406 | 0.786 | 0.282 | 3.66E-33 | CSCL1 | RNF126   |
| TMEM138.4  | 2.54E-37 | 0.13854  | 0.562 | 0.166 | 3.80E-33 | CSCL1 | TMEM138  |
| TRIM47.11  | 2.67E-37 | 0.276023 | 0.567 | 0.173 | 3.98E-33 | CSCL1 | TRIM47   |
| ENKUR.9    | 2.99E-37 | 0.135725 | 0.313 | 0.068 | 4.46E-33 | CSCL1 | ENKUR    |

|           |          |          |       |       |          |       |               |
|-----------|----------|----------|-------|-------|----------|-------|---------------|
| VAMP4.1   | 3.19E-37 | 0.179954 | 0.433 | 0.113 | 4.76E-33 | CSCL1 | VAMP4         |
| STIM2.6   | 3.46E-37 | 0.250438 | 0.527 | 0.155 | 5.17E-33 | CSCL1 | STIM2         |
| SLC39A3.9 | 3.51E-37 | 0.411938 | 0.841 | 0.329 | 5.24E-33 | CSCL1 | SLC39A3       |
| IARS.7    | 3.53E-37 | 0.26995  | 0.627 | 0.203 | 5.27E-33 | CSCL1 | IARS          |
| FSD1.10   | 3.54E-37 | 0.267964 | 0.507 | 0.148 | 5.28E-33 | CSCL1 | FSD1          |
| RMDN3.5   | 3.72E-37 | 0.266285 | 0.692 | 0.233 | 5.55E-33 | CSCL1 | RMDN3         |
| HINT2.6   | 4.05E-37 | 0.375028 | 0.856 | 0.337 | 6.05E-33 | CSCL1 | HINT2         |
| IPO8.2    | 4.32E-37 | 0.152785 | 0.308 | 0.066 | 6.45E-33 | CSCL1 | IPO8          |
| PTGFRN.7  | 4.32E-37 | 0.221546 | 0.393 | 0.099 | 6.46E-33 | CSCL1 | PTGFRN        |
| PHLDA1.8  | 4.44E-37 | 0.540157 | 0.866 | 0.387 | 6.64E-33 | CSCL1 | PHLDA1        |
| PKN1.6    | 5.26E-37 | 0.307574 | 0.687 | 0.235 | 7.86E-33 | CSCL1 | PKN1          |
| CIAPIN1.7 | 5.38E-37 | 0.226453 | 0.741 | 0.251 | 8.04E-33 | CSCL1 | CIAPIN1       |
| THAP10    | 5.61E-37 | 0.165479 | 0.229 | 0.04  | 8.38E-33 | CSCL1 | THAP10        |
| LZIC.3    | 5.83E-37 | 0.228336 | 0.572 | 0.175 | 8.72E-33 | CSCL1 | LZIC          |
| RP11-395G | 5.93E-37 | 0.368207 | 0.557 | 0.171 | 8.86E-33 | CSCL1 | RP11-395G23.3 |
| TMEM129.5 | 6.15E-37 | 0.253179 | 0.547 | 0.166 | 9.19E-33 | CSCL1 | TMEM129       |
| CASP6.9   | 6.55E-37 | 0.242304 | 0.527 | 0.156 | 9.78E-33 | CSCL1 | CASP6         |
| SLC2A4RG. | 6.85E-37 | 0.249901 | 0.443 | 0.12  | 1.02E-32 | CSCL1 | SLC2A4RG      |
| MTA1.9    | 7.03E-37 | 0.266634 | 0.587 | 0.183 | 1.05E-32 | CSCL1 | MTA1          |
| POFUT1.6  | 7.22E-37 | 0.200233 | 0.423 | 0.111 | 1.08E-32 | CSCL1 | POFUT1        |
| WDR77.3   | 7.32E-37 | 0.198114 | 0.637 | 0.202 | 1.09E-32 | CSCL1 | WDR77         |
| ACP6.2    | 8.37E-37 | 0.141006 | 0.289 | 0.06  | 1.25E-32 | CSCL1 | ACP6          |
| AC010642. | 8.60E-37 | 0.238345 | 0.662 | 0.215 | 1.29E-32 | CSCL1 | AC010642.1    |
| CKB.12    | 8.66E-37 | 0.491984 | 0.995 | 0.575 | 1.29E-32 | CSCL1 | CKB           |
| KATNA1.3  | 8.79E-37 | 0.24067  | 0.468 | 0.133 | 1.31E-32 | CSCL1 | KATNA1        |
| ELAC2.3   | 9.34E-37 | 0.222543 | 0.507 | 0.146 | 1.40E-32 | CSCL1 | ELAC2         |
| NUDT4.4   | 1.04E-36 | 0.228795 | 0.622 | 0.196 | 1.56E-32 | CSCL1 | NUDT4         |
| STON2.1   | 1.12E-36 | 0.170843 | 0.234 | 0.042 | 1.67E-32 | CSCL1 | STON2         |
| KCNQ2.11  | 1.12E-36 | 0.283819 | 0.657 | 0.207 | 1.68E-32 | CSCL1 | KCNQ2         |
| PRAF2.10  | 1.15E-36 | 0.340612 | 0.816 | 0.293 | 1.72E-32 | CSCL1 | PRAF2         |
| HYAL2.12  | 1.31E-36 | 0.306561 | 0.657 | 0.215 | 1.96E-32 | CSCL1 | HYAL2         |
| DAXX.5    | 1.45E-36 | 0.224109 | 0.622 | 0.196 | 2.16E-32 | CSCL1 | DAXX          |
| CDCA7L.7  | 1.64E-36 | 0.241052 | 0.498 | 0.143 | 2.44E-32 | CSCL1 | CDCA7L        |
| EIF1AY.1C | 1.64E-36 | 0.307304 | 0.552 | 0.171 | 2.45E-32 | CSCL1 | EIF1AY        |
| PITPNA.6  | 1.67E-36 | 0.268093 | 0.567 | 0.175 | 2.50E-32 | CSCL1 | PITPNA        |
| RBM26.8   | 1.69E-36 | 0.241007 | 0.637 | 0.205 | 2.53E-32 | CSCL1 | RBM26         |
| LARP6.9   | 1.70E-36 | 0.226565 | 0.597 | 0.186 | 2.55E-32 | CSCL1 | LARP6         |
| DUS3L.5   | 1.70E-36 | 0.215368 | 0.488 | 0.137 | 2.55E-32 | CSCL1 | DUS3L         |
| CBX5.10   | 1.76E-36 | 0.36589  | 0.851 | 0.335 | 2.64E-32 | CSCL1 | CBX5          |
| PTPRZ1.12 | 2.00E-36 | 0.458251 | 0.935 | 0.374 | 2.99E-32 | CSCL1 | PTPRZ1        |
| PEX10.8   | 2.04E-36 | 0.254214 | 0.592 | 0.185 | 3.06E-32 | CSCL1 | PEX10         |
| CBY1.7    | 2.07E-36 | 0.209218 | 0.517 | 0.153 | 3.10E-32 | CSCL1 | CBY1          |
| NDN.11    | 2.19E-36 | 0.2502   | 0.612 | 0.189 | 3.27E-32 | CSCL1 | NDN           |
| TNKS.12   | 2.68E-36 | 0.249697 | 0.493 | 0.142 | 4.00E-32 | CSCL1 | TNKS          |
| C1orf112. | 2.97E-36 | 0.113051 | 0.219 | 0.037 | 4.44E-32 | CSCL1 | C1orf112      |
| RFX3.3    | 3.08E-36 | 0.153666 | 0.318 | 0.07  | 4.60E-32 | CSCL1 | RFX3          |
| ID4.11    | 3.09E-36 | 0.409484 | 0.632 | 0.208 | 4.62E-32 | CSCL1 | ID4           |
| PDE6D.8   | 3.12E-36 | 0.23466  | 0.587 | 0.182 | 4.66E-32 | CSCL1 | PDE6D         |
| SORBS1.8  | 3.13E-36 | 0.213213 | 0.363 | 0.088 | 4.68E-32 | CSCL1 | SORBS1        |
| SEPN1.9   | 3.17E-36 | 0.261078 | 0.637 | 0.202 | 4.73E-32 | CSCL1 | SEPN1         |
| C22orf39. | 3.22E-36 | 0.354799 | 0.697 | 0.252 | 4.81E-32 | CSCL1 | C22orf39      |



|            |          |          |       |       |          |       |               |
|------------|----------|----------|-------|-------|----------|-------|---------------|
| POLA2.2    | 3.30E-36 | 0.186433 | 0.254 | 0.048 | 4.93E-32 | CSCL1 | POLA2         |
| TRAF4.11   | 3.38E-36 | 0.384671 | 0.726 | 0.261 | 5.05E-32 | CSCL1 | TRAF4         |
| GTF2A1.2   | 3.45E-36 | 0.172059 | 0.403 | 0.103 | 5.15E-32 | CSCL1 | GTF2A1        |
| PCNXL4.1   | 3.73E-36 | 0.172961 | 0.438 | 0.118 | 5.57E-32 | CSCL1 | PCNXL4        |
| KLHL13.11  | 3.83E-36 | 0.224173 | 0.378 | 0.094 | 5.72E-32 | CSCL1 | KLHL13        |
| CAPN2.7    | 4.04E-36 | 0.283688 | 0.711 | 0.244 | 6.03E-32 | CSCL1 | CAPN2         |
| ARHGAP35.4 | 3.6E-36  | 0.283694 | 0.478 | 0.14  | 6.51E-32 | CSCL1 | ARHGAP35      |
| ZNF76.1    | 4.55E-36 | 0.21509  | 0.383 | 0.096 | 6.79E-32 | CSCL1 | ZNF76         |
| DCAKD.9    | 4.72E-36 | 0.205859 | 0.473 | 0.133 | 7.05E-32 | CSCL1 | DCAKD         |
| GTPBP6.5   | 4.96E-36 | 0.216685 | 0.642 | 0.204 | 7.41E-32 | CSCL1 | GTPBP6        |
| PRR14.6    | 5.48E-36 | 0.19173  | 0.617 | 0.193 | 8.18E-32 | CSCL1 | PRR14         |
| MESP1.8    | 5.50E-36 | 0.244104 | 0.453 | 0.126 | 8.22E-32 | CSCL1 | MESP1         |
| ATP5SL.6   | 5.66E-36 | 0.194384 | 0.677 | 0.223 | 8.45E-32 | CSCL1 | ATP5SL        |
| SNRPA.5    | 5.93E-36 | 0.26426  | 0.706 | 0.245 | 8.86E-32 | CSCL1 | SNRPA         |
| FTSJ1.2    | 6.47E-36 | 0.192128 | 0.468 | 0.131 | 9.67E-32 | CSCL1 | FTSJ1         |
| AP3D1.7    | 6.50E-36 | 0.374681 | 0.786 | 0.3   | 9.72E-32 | CSCL1 | AP3D1         |
| TAF6.7     | 6.57E-36 | 0.226062 | 0.687 | 0.228 | 9.81E-32 | CSCL1 | TAF6          |
| ZNF714.6   | 6.62E-36 | 0.235986 | 0.388 | 0.098 | 9.89E-32 | CSCL1 | ZNF714        |
| RP11-332H  | 6.80E-36 | 0.219002 | 0.443 | 0.121 | 1.02E-31 | CSCL1 | RP11-332H14.2 |
| GSTCD      | 6.82E-36 | 0.164011 | 0.219 | 0.038 | 1.02E-31 | CSCL1 | GSTCD         |
| NTN1.7     | 6.99E-36 | 0.211927 | 0.333 | 0.078 | 1.04E-31 | CSCL1 | NTN1          |
| RBM12.3    | 8.34E-36 | 0.198758 | 0.433 | 0.117 | 1.25E-31 | CSCL1 | RBM12         |
| GPRC5B.1C  | 9.26E-36 | 0.189246 | 0.647 | 0.211 | 1.38E-31 | CSCL1 | GPRC5B        |
| RAB23.2    | 9.27E-36 | 0.162867 | 0.244 | 0.046 | 1.39E-31 | CSCL1 | RAB23         |
| NIPA2.8    | 9.51E-36 | 0.23672  | 0.746 | 0.256 | 1.42E-31 | CSCL1 | NIPA2         |
| WDR18.9    | 1.02E-35 | 0.328642 | 0.771 | 0.277 | 1.52E-31 | CSCL1 | WDR18         |
| PAF1.2     | 1.05E-35 | 0.208048 | 0.627 | 0.203 | 1.56E-31 | CSCL1 | PAF1          |
| RBMXL1.4   | 1.05E-35 | 0.18029  | 0.507 | 0.147 | 1.57E-31 | CSCL1 | RBMXL1        |
| DSCC1.6    | 1.07E-35 | 0.195945 | 0.274 | 0.056 | 1.60E-31 | CSCL1 | DSCC1         |
| RNF19A.11  | 1.18E-35 | 0.314508 | 0.602 | 0.195 | 1.77E-31 | CSCL1 | RNF19A        |
| NFIX.11    | 1.19E-35 | 0.367796 | 0.851 | 0.323 | 1.78E-31 | CSCL1 | NFIX          |
| MIS12.7    | 1.23E-35 | 0.197618 | 0.478 | 0.136 | 1.84E-31 | CSCL1 | MIS12         |
| STRN4.7    | 1.26E-35 | 0.194944 | 0.438 | 0.118 | 1.88E-31 | CSCL1 | STRN4         |
| MORC4.3    | 1.30E-35 | 0.216011 | 0.274 | 0.057 | 1.94E-31 | CSCL1 | MORC4         |
| AAMDC.9    | 1.32E-35 | 0.154263 | 0.617 | 0.199 | 1.97E-31 | CSCL1 | AAMDC         |
| CERS1.9    | 1.42E-35 | 0.229705 | 0.443 | 0.122 | 2.12E-31 | CSCL1 | CERS1         |
| STK25.10   | 1.43E-35 | 0.281073 | 0.816 | 0.293 | 2.14E-31 | CSCL1 | STK25         |
| MCRS1.6    | 1.43E-35 | 0.233963 | 0.746 | 0.262 | 2.14E-31 | CSCL1 | MCRS1         |
| EBNA1BP2.1 | 1.47E-35 | 0.295046 | 0.881 | 0.344 | 2.20E-31 | CSCL1 | EBNA1BP2      |
| MED16.6    | 1.48E-35 | 0.24573  | 0.512 | 0.153 | 2.20E-31 | CSCL1 | MED16         |
| MTHFD2L.7  | 1.52E-35 | 0.261253 | 0.612 | 0.199 | 2.27E-31 | CSCL1 | MTHFD2L       |
| BLMH.5     | 1.58E-35 | 0.206118 | 0.552 | 0.169 | 2.36E-31 | CSCL1 | BLMH          |
| TOMM34.6   | 1.60E-35 | 0.219923 | 0.458 | 0.131 | 2.40E-31 | CSCL1 | TOMM34        |
| DCAF11.5   | 1.62E-35 | 0.199205 | 0.587 | 0.183 | 2.43E-31 | CSCL1 | DCAF11        |
| HEY2.7     | 1.68E-35 | 0.195843 | 0.284 | 0.06  | 2.51E-31 | CSCL1 | HEY2          |
| PPOX.4     | 1.70E-35 | 0.185704 | 0.403 | 0.104 | 2.54E-31 | CSCL1 | PPOX          |
| NUDT15.2   | 1.77E-35 | 0.170168 | 0.398 | 0.102 | 2.64E-31 | CSCL1 | NUDT15        |
| PPP2CB.12  | 1.78E-35 | 0.359505 | 0.781 | 0.288 | 2.66E-31 | CSCL1 | PPP2CB        |
| PYCR1.8    | 1.85E-35 | 0.246412 | 0.567 | 0.178 | 2.77E-31 | CSCL1 | PYCR1         |
| GSPT1.8    | 1.87E-35 | 0.386015 | 0.841 | 0.34  | 2.80E-31 | CSCL1 | GSPT1         |
| GINS4.2    | 1.91E-35 | 0.162408 | 0.229 | 0.041 | 2.85E-31 | CSCL1 | GINS4         |

|            |          |          |       |       |          |       |          |
|------------|----------|----------|-------|-------|----------|-------|----------|
| GOLM1.11   | 1.95E-35 | 0.32783  | 0.841 | 0.307 | 2.92E-31 | CSCL1 | GOLM1    |
| GANAB.6    | 1.98E-35 | 0.291736 | 0.741 | 0.264 | 2.96E-31 | CSCL1 | GANAB    |
| CCDC58.7   | 2.11E-35 | 0.231005 | 0.478 | 0.138 | 3.15E-31 | CSCL1 | CCDC58   |
| ABI2.10    | 2.17E-35 | 0.374328 | 0.886 | 0.352 | 3.24E-31 | CSCL1 | ABI2     |
| COLGALT2.2 | 2.28E-35 | 0.231788 | 0.468 | 0.133 | 3.41E-31 | CSCL1 | COLGALT2 |
| TTYH1.12   | 2.47E-35 | 0.337571 | 0.741 | 0.26  | 3.69E-31 | CSCL1 | TTYH1    |
| OXCT1.7    | 2.51E-35 | 0.228949 | 0.488 | 0.142 | 3.76E-31 | CSCL1 | OXCT1    |
| NCLN.5     | 2.57E-35 | 0.225635 | 0.527 | 0.158 | 3.83E-31 | CSCL1 | NCLN     |
| PPP5C.8    | 2.57E-35 | 0.217658 | 0.552 | 0.17  | 3.84E-31 | CSCL1 | PPP5C    |
| SEMA6A.9   | 2.57E-35 | 0.29363  | 0.602 | 0.192 | 3.84E-31 | CSCL1 | SEMA6A   |
| ATG4D.6    | 2.94E-35 | 0.259349 | 0.512 | 0.154 | 4.40E-31 | CSCL1 | ATG4D    |
| ITGB1BP1.2 | 2.98E-35 | 0.316737 | 0.886 | 0.378 | 4.46E-31 | CSCL1 | ITGB1BP1 |
| IARS2.2    | 3.22E-35 | 0.203022 | 0.617 | 0.196 | 4.81E-31 | CSCL1 | IARS2    |
| BCHE.9     | 3.27E-35 | 0.327769 | 0.557 | 0.18  | 4.89E-31 | CSCL1 | BCHE     |
| LYRM1.9    | 3.29E-35 | 0.182831 | 0.567 | 0.177 | 4.92E-31 | CSCL1 | LYRM1    |
| CEP57.7    | 3.56E-35 | 0.2552   | 0.657 | 0.223 | 5.32E-31 | CSCL1 | CEP57    |
| POLDIP2.1  | 3.83E-35 | 0.39805  | 0.856 | 0.338 | 5.72E-31 | CSCL1 | POLDIP2  |
| TEN1.7     | 3.83E-35 | 0.227907 | 0.557 | 0.172 | 5.72E-31 | CSCL1 | TEN1     |
| SUCO.6     | 4.02E-35 | 0.213692 | 0.502 | 0.148 | 6.01E-31 | CSCL1 | SUCO     |
| ST3GAL3.8  | 4.35E-35 | 0.194552 | 0.343 | 0.082 | 6.50E-31 | CSCL1 | ST3GAL3  |
| NID1.1     | 4.35E-35 | 0.166108 | 0.239 | 0.045 | 6.50E-31 | CSCL1 | NID1     |
| ING1.5     | 4.42E-35 | 0.137955 | 0.468 | 0.13  | 6.61E-31 | CSCL1 | ING1     |
| TMEM99.7   | 4.52E-35 | 0.192374 | 0.443 | 0.122 | 6.75E-31 | CSCL1 | TMEM99   |
| GEMIN6.4   | 4.56E-35 | 0.210978 | 0.517 | 0.156 | 6.81E-31 | CSCL1 | GEMIN6   |
| PTCD3.8    | 4.56E-35 | 0.231725 | 0.672 | 0.222 | 6.82E-31 | CSCL1 | PTCD3    |
| B9D2.3     | 4.58E-35 | 0.165385 | 0.333 | 0.078 | 6.85E-31 | CSCL1 | B9D2     |
| ZNF830.7   | 4.63E-35 | 0.194275 | 0.582 | 0.184 | 6.92E-31 | CSCL1 | ZNF830   |
| IPO5.7     | 5.32E-35 | 0.251918 | 0.632 | 0.209 | 7.94E-31 | CSCL1 | IPO5     |
| MEX3D.7    | 5.35E-35 | 0.17495  | 0.279 | 0.058 | 8.00E-31 | CSCL1 | MEX3D    |
| PDHA1.5    | 5.41E-35 | 0.225072 | 0.816 | 0.294 | 8.08E-31 | CSCL1 | PDHA1    |
| PMP2.11    | 6.02E-35 | 0.394841 | 0.876 | 0.341 | 9.00E-31 | CSCL1 | PMP2     |
| KCTD9.2    | 6.14E-35 | 0.164996 | 0.259 | 0.051 | 9.18E-31 | CSCL1 | KCTD9    |
| CS.4       | 6.49E-35 | 0.206312 | 0.517 | 0.155 | 9.69E-31 | CSCL1 | CS       |
| ING5.5     | 6.57E-35 | 0.166709 | 0.418 | 0.111 | 9.82E-31 | CSCL1 | ING5     |
| COIL.9     | 6.82E-35 | 0.202591 | 0.572 | 0.178 | 1.02E-30 | CSCL1 | COIL     |
| MANBAL.12  | 7.53E-35 | 0.26493  | 0.886 | 0.325 | 1.13E-30 | CSCL1 | MANBAL   |
| NUP54.6    | 9.43E-35 | 0.187251 | 0.557 | 0.171 | 1.41E-30 | CSCL1 | NUP54    |
| UBXN2A.8   | 1.00E-34 | 0.255465 | 0.567 | 0.181 | 1.50E-30 | CSCL1 | UBXN2A   |
| C20orf96.1 | 1.14E-34 | 0.202804 | 0.493 | 0.144 | 1.70E-30 | CSCL1 | C20orf96 |
| TNFAIP1.9  | 1.18E-34 | 0.238277 | 0.547 | 0.169 | 1.76E-30 | CSCL1 | TNFAIP1  |
| MLST8.8    | 1.19E-34 | 0.218699 | 0.677 | 0.229 | 1.78E-30 | CSCL1 | MLST8    |
| ADSL.7     | 1.20E-34 | 0.210645 | 0.721 | 0.249 | 1.80E-30 | CSCL1 | ADSL     |
| FKBP10.11  | 1.22E-34 | 0.230018 | 0.632 | 0.205 | 1.82E-30 | CSCL1 | FKBP10   |
| CNIH2.11   | 1.27E-34 | 0.261094 | 0.443 | 0.124 | 1.90E-30 | CSCL1 | CNIH2    |
| HDAC1.7    | 1.28E-34 | 0.235841 | 0.642 | 0.218 | 1.92E-30 | CSCL1 | HDAC1    |
| ZNF100.2   | 1.43E-34 | 0.137039 | 0.294 | 0.063 | 2.13E-30 | CSCL1 | ZNF100   |
| PHF1.6     | 1.47E-34 | 0.191777 | 0.537 | 0.163 | 2.20E-30 | CSCL1 | PHF1     |
| C12orf29.1 | 1.48E-34 | 0.18765  | 0.498 | 0.147 | 2.21E-30 | CSCL1 | C12orf29 |
| LMAN2L.7   | 1.53E-34 | 0.238283 | 0.403 | 0.109 | 2.29E-30 | CSCL1 | LMAN2L   |
| OARD1.5    | 1.54E-34 | 0.164941 | 0.672 | 0.224 | 2.31E-30 | CSCL1 | OARD1    |
| YTHDF1.5   | 1.59E-34 | 0.245238 | 0.557 | 0.176 | 2.38E-30 | CSCL1 | YTHDF1   |

|           |          |          |       |       |          |       |              |
|-----------|----------|----------|-------|-------|----------|-------|--------------|
| NACC2.8   | 1.84E-34 | 0.172413 | 0.383 | 0.098 | 2.75E-30 | CSCL1 | NACC2        |
| MBOAT2.11 | 1.87E-34 | 0.239055 | 0.557 | 0.175 | 2.80E-30 | CSCL1 | MBOAT2       |
| ADA.7     | 1.91E-34 | 0.231513 | 0.353 | 0.088 | 2.85E-30 | CSCL1 | ADA          |
| SSFA2.8   | 2.00E-34 | 0.233262 | 0.567 | 0.179 | 2.98E-30 | CSCL1 | SSFA2        |
| OTUD4.4   | 2.04E-34 | 0.194762 | 0.373 | 0.094 | 3.04E-30 | CSCL1 | OTUD4        |
| DCAF16.7  | 2.37E-34 | 0.161957 | 0.423 | 0.114 | 3.54E-30 | CSCL1 | DCAF16       |
| TMEM160.1 | 2.44E-34 | 0.441373 | 0.95  | 0.457 | 3.64E-30 | CSCL1 | TMEM160      |
| H1FX.11   | 2.54E-34 | 0.434628 | 0.866 | 0.376 | 3.79E-30 | CSCL1 | H1FX         |
| CHAC2.1   | 2.59E-34 | 0.177127 | 0.229 | 0.043 | 3.87E-30 | CSCL1 | CHAC2        |
| RALY.6    | 2.59E-34 | 0.435092 | 0.955 | 0.447 | 3.88E-30 | CSCL1 | RALY         |
| SCUBE2    | 2.62E-34 | 0.111218 | 0.149 | 0.02  | 3.92E-30 | CSCL1 | SCUBE2       |
| LSM14B.5  | 2.63E-34 | 0.246377 | 0.368 | 0.096 | 3.94E-30 | CSCL1 | LSM14B       |
| ELP5.7    | 2.71E-34 | 0.255483 | 0.726 | 0.259 | 4.05E-30 | CSCL1 | ELP5         |
| RAB28.1   | 2.74E-34 | 0.154372 | 0.642 | 0.21  | 4.10E-30 | CSCL1 | RAB28        |
| CCAR1.4   | 2.97E-34 | 0.225447 | 0.701 | 0.242 | 4.44E-30 | CSCL1 | CCAR1        |
| ADAMTS6.7 | 3.09E-34 | 0.202014 | 0.284 | 0.062 | 4.62E-30 | CSCL1 | ADAMTS6      |
| PSMG4.6   | 3.21E-34 | 0.234104 | 0.587 | 0.191 | 4.79E-30 | CSCL1 | PSMG4        |
| SNX5.8    | 3.38E-34 | 0.373087 | 0.871 | 0.386 | 5.05E-30 | CSCL1 | SNX5         |
| HSPBP1.8  | 3.38E-34 | 0.253347 | 0.786 | 0.279 | 5.05E-30 | CSCL1 | HSPBP1       |
| RBBP7.8   | 3.39E-34 | 0.306596 | 0.95  | 0.415 | 5.06E-30 | CSCL1 | RBBP7        |
| NAV2.8    | 3.59E-34 | 0.213188 | 0.418 | 0.112 | 5.37E-30 | CSCL1 | NAV2         |
| RP11-345J | 3.72E-34 | 0.275064 | 0.657 | 0.227 | 5.56E-30 | CSCL1 | RP11-345J4.5 |
| PTBP1.8   | 3.86E-34 | 0.297111 | 0.831 | 0.314 | 5.76E-30 | CSCL1 | PTBP1        |
| BCAM.9    | 3.86E-34 | 0.188616 | 0.393 | 0.104 | 5.77E-30 | CSCL1 | BCAM         |
| KNOP1.9   | 3.93E-34 | 0.235395 | 0.726 | 0.251 | 5.87E-30 | CSCL1 | KNOP1        |
| SNAI2.6   | 4.26E-34 | 0.159133 | 0.209 | 0.037 | 6.36E-30 | CSCL1 | SNAI2        |
| FOS.8     | 4.43E-34 | -0.89946 | 0.796 | 0.841 | 6.61E-30 | CSCL1 | FOS          |
| SMC1A.3   | 4.46E-34 | 0.245635 | 0.632 | 0.21  | 6.67E-30 | CSCL1 | SMC1A        |
| NBPF10.6  | 4.76E-34 | 0.255579 | 0.473 | 0.14  | 7.11E-30 | CSCL1 | NBPF10       |
| ECI2.9    | 4.96E-34 | 0.317799 | 0.821 | 0.314 | 7.41E-30 | CSCL1 | ECI2         |
| NOL11.8   | 5.13E-34 | 0.189526 | 0.577 | 0.182 | 7.67E-30 | CSCL1 | NOL11        |
| PLXNB2.8  | 5.36E-34 | 0.169522 | 0.502 | 0.151 | 8.01E-30 | CSCL1 | PLXNB2       |
| TOP1.7    | 5.43E-34 | 0.403589 | 0.891 | 0.38  | 8.12E-30 | CSCL1 | TOP1         |
| CASC4.7   | 5.45E-34 | 0.275296 | 0.642 | 0.217 | 8.15E-30 | CSCL1 | CASC4        |
| SPATS2.10 | 5.63E-34 | 0.250231 | 0.711 | 0.251 | 8.41E-30 | CSCL1 | SPATS2       |
| MPPED2.9  | 5.94E-34 | 0.315486 | 0.343 | 0.085 | 8.88E-30 | CSCL1 | MPPED2       |
| MOXD1.9   | 6.30E-34 | 0.180757 | 0.249 | 0.05  | 9.41E-30 | CSCL1 | MOXD1        |
| MBOAT7.9  | 6.59E-34 | 0.270157 | 0.677 | 0.235 | 9.85E-30 | CSCL1 | MBOAT7       |
| PSAT1.11  | 6.86E-34 | 0.210498 | 0.607 | 0.196 | 1.02E-29 | CSCL1 | PSAT1        |
| CUEDC1.8  | 6.87E-34 | 0.18533  | 0.408 | 0.109 | 1.03E-29 | CSCL1 | CUEDC1       |
| ACBD6.7   | 6.87E-34 | 0.261614 | 0.741 | 0.269 | 1.03E-29 | CSCL1 | ACBD6        |
| GLIS3.5   | 7.07E-34 | 0.219852 | 0.313 | 0.073 | 1.06E-29 | CSCL1 | GLIS3        |
| RBM42.7   | 7.22E-34 | 0.357809 | 0.915 | 0.377 | 1.08E-29 | CSCL1 | RBM42        |
| C1QTNF6.1 | 7.68E-34 | 0.15895  | 0.209 | 0.037 | 1.15E-29 | CSCL1 | C1QTNF6      |
| C5orf24.1 | 8.14E-34 | 0.304876 | 0.786 | 0.287 | 1.22E-29 | CSCL1 | C5orf24      |
| TRAF7.7   | 9.11E-34 | 0.207511 | 0.572 | 0.183 | 1.36E-29 | CSCL1 | TRAF7        |
| SPRY1.11  | 9.17E-34 | 0.344044 | 0.657 | 0.225 | 1.37E-29 | CSCL1 | SPRY1        |
| ELOVL5.5  | 9.53E-34 | 0.266155 | 0.836 | 0.315 | 1.42E-29 | CSCL1 | ELOVL5       |
| SNAPC1.7  | 9.86E-34 | 0.157127 | 0.572 | 0.181 | 1.47E-29 | CSCL1 | SNAPC1       |
| SLAIN1.11 | 9.97E-34 | 0.203123 | 0.597 | 0.196 | 1.49E-29 | CSCL1 | SLAIN1       |
| PRTFDC1.7 | 1.01E-33 | 0.153473 | 0.458 | 0.129 | 1.51E-29 | CSCL1 | PRTFDC1      |

|                 |           |           |        |        |           |       |              |
|-----------------|-----------|-----------|--------|--------|-----------|-------|--------------|
| PLAT. 9         | 1. 03E-33 | 0. 231098 | 0. 413 | 0. 114 | 1. 54E-29 | CSCL1 | PLAT         |
| CABIN1. 5       | 1. 04E-33 | 0. 149394 | 0. 453 | 0. 127 | 1. 56E-29 | CSCL1 | CABIN1       |
| ZW10. 1         | 1. 07E-33 | 0. 149805 | 0. 274 | 0. 058 | 1. 60E-29 | CSCL1 | ZW10         |
| SH3GLB2. 6      | 1. 07E-33 | 0. 157231 | 0. 418 | 0. 113 | 1. 61E-29 | CSCL1 | SH3GLB2      |
| BCL3. 7         | 1. 14E-33 | 0. 185032 | 0. 313 | 0. 073 | 1. 70E-29 | CSCL1 | BCL3         |
| PIGF. 9         | 1. 16E-33 | 0. 171652 | 0. 776 | 0. 279 | 1. 73E-29 | CSCL1 | PIGF         |
| TRMT61A. 3      | 1. 17E-33 | 0. 166713 | 0. 438 | 0. 122 | 1. 75E-29 | CSCL1 | TRMT61A      |
| ACTN1. 9        | 1. 22E-33 | 0. 342263 | 0. 677 | 0. 248 | 1. 83E-29 | CSCL1 | ACTN1        |
| SMARCA5. 9      | 1. 26E-33 | 0. 339242 | 0. 871 | 0. 339 | 1. 88E-29 | CSCL1 | SMARCA5      |
| TTF1. 5         | 1. 30E-33 | 0. 240661 | 0. 592 | 0. 196 | 1. 95E-29 | CSCL1 | TTF1         |
| SPP1. 9         | 1. 42E-33 | -0. 89659 | 0. 851 | 0. 854 | 2. 12E-29 | CSCL1 | SPP1         |
| CHPT1. 9        | 1. 48E-33 | 0. 327446 | 0. 801 | 0. 294 | 2. 21E-29 | CSCL1 | CHPT1        |
| MMAB. 7         | 1. 50E-33 | 0. 174587 | 0. 592 | 0. 19  | 2. 25E-29 | CSCL1 | MMAB         |
| GID8. 5         | 1. 51E-33 | 0. 256419 | 0. 677 | 0. 239 | 2. 26E-29 | CSCL1 | GID8         |
| EHBP1. 9        | 1. 51E-33 | 0. 268393 | 0. 522 | 0. 161 | 2. 26E-29 | CSCL1 | EHBP1        |
| ARMC6. 6        | 1. 52E-33 | 0. 220847 | 0. 507 | 0. 155 | 2. 27E-29 | CSCL1 | ARMC6        |
| PPAT. 9         | 1. 52E-33 | 0. 217849 | 0. 473 | 0. 138 | 2. 27E-29 | CSCL1 | PPAT         |
| XRCC1. 1        | 1. 54E-33 | 0. 181694 | 0. 428 | 0. 118 | 2. 30E-29 | CSCL1 | XRCC1        |
| LRRFIP2. 6      | 1. 56E-33 | 0. 217453 | 0. 567 | 0. 181 | 2. 33E-29 | CSCL1 | LRRFIP2      |
| FYN. 10         | 1. 57E-33 | 0. 341219 | 0. 846 | 0. 317 | 2. 35E-29 | CSCL1 | FYN          |
| KIF9. 10        | 1. 58E-33 | 0. 2194   | 0. 527 | 0. 168 | 2. 36E-29 | CSCL1 | KIF9         |
| MTRF1L. 8       | 1. 83E-33 | 0. 283283 | 0. 562 | 0. 183 | 2. 73E-29 | CSCL1 | MTRF1L       |
| HNRNPD. 1C      | 1. 89E-33 | 0. 4126   | 0. 905 | 0. 406 | 2. 82E-29 | CSCL1 | HNRNPD       |
| KEAP1. 7        | 1. 95E-33 | 0. 282408 | 0. 731 | 0. 264 | 2. 91E-29 | CSCL1 | KEAP1        |
| LYRM2. 5        | 2. 04E-33 | 0. 281239 | 0. 761 | 0. 286 | 3. 05E-29 | CSCL1 | LYRM2        |
| CCDC109B. 2     | 0. 4E-33  | 0. 413163 | 0. 836 | 0. 34  | 3. 05E-29 | CSCL1 | CCDC109B     |
| TRAF3IP2-AS1. 2 | 1. 1E-33  | 0. 189169 | 0. 318 | 0. 076 | 3. 15E-29 | CSCL1 | TRAF3IP2-AS1 |
| PFAS. 2         | 2. 2E-33  | 0. 118063 | 0. 209 | 0. 037 | 3. 32E-29 | CSCL1 | PFAS         |
| WDR5. 3         | 2. 3E-33  | 0. 186043 | 0. 418 | 0. 114 | 3. 51E-29 | CSCL1 | WDR5         |
| PRRC2A. 6       | 2. 5E-33  | 0. 27283  | 0. 662 | 0. 236 | 3. 74E-29 | CSCL1 | PRRC2A       |
| AC093323. 2     | 2. 5E-33  | 0. 207556 | 0. 358 | 0. 091 | 3. 74E-29 | CSCL1 | AC093323. 3  |
| HAGH. 7         | 2. 5E-33  | 0. 326521 | 0. 851 | 0. 344 | 3. 80E-29 | CSCL1 | HAGH         |
| MPND. 3         | 2. 9E-33  | 0. 179108 | 0. 348 | 0. 086 | 4. 44E-29 | CSCL1 | MPND         |
| HAUS3. 3        | 3. 3E-33  | 0. 16356  | 0. 333 | 0. 08  | 5. 03E-29 | CSCL1 | HAUS3        |
| SLC4A2. 2       | 3. 7E-33  | 0. 152433 | 0. 483 | 0. 14  | 5. 56E-29 | CSCL1 | SLC4A2       |
| SMPD4. 3        | 4. 1E-33  | 0. 15494  | 0. 383 | 0. 099 | 6. 16E-29 | CSCL1 | SMPD4        |
| PYGB. 7         | 4. 1E-33  | 0. 249623 | 0. 607 | 0. 204 | 6. 22E-29 | CSCL1 | PYGB         |
| ZNF146. 9       | 4. 1E-33  | 0. 194167 | 0. 657 | 0. 22  | 6. 26E-29 | CSCL1 | ZNF146       |
| TMEM132A. 4     | 3. 0E-33  | 0. 219206 | 0. 473 | 0. 139 | 6. 42E-29 | CSCL1 | TMEM132A     |
| BEND6. 10       | 4. 6E-33  | 0. 253583 | 0. 408 | 0. 114 | 6. 96E-29 | CSCL1 | BEND6        |
| PET117. 5       | 4. 9E-33  | 0. 177869 | 0. 552 | 0. 173 | 7. 41E-29 | CSCL1 | PET117       |
| HMGCR. 7        | 4. 9E-33  | 0. 1748   | 0. 393 | 0. 104 | 7. 41E-29 | CSCL1 | HMGCR        |
| INIP. 5         | 5. 4E-33  | 0. 169955 | 0. 587 | 0. 19  | 8. 12E-29 | CSCL1 | INIP         |
| DDX52. 8        | 5. 4E-33  | 0. 235962 | 0. 677 | 0. 236 | 8. 20E-29 | CSCL1 | DDX52        |
| EXOSC10. 4      | 5. 7E-33  | 0. 162037 | 0. 478 | 0. 141 | 8. 62E-29 | CSCL1 | EXOSC10      |
| UBE2Q1. 4       | 6. 0E-33  | 0. 186149 | 0. 512 | 0. 155 | 8. 99E-29 | CSCL1 | UBE2Q1       |
| U2AF2. 5        | 6. 0E-33  | 0. 208723 | 0. 711 | 0. 249 | 9. 07E-29 | CSCL1 | U2AF2        |
| SLC35A5. 6      | 6. 2E-33  | 0. 177592 | 0. 567 | 0. 18  | 9. 31E-29 | CSCL1 | SLC35A5      |
| ROCK2. 5        | 6. 4E-33  | 0. 229372 | 0. 483 | 0. 146 | 9. 70E-29 | CSCL1 | ROCK2        |
| HAUS6. 4        | 6. 5E-33  | 0. 180288 | 0. 343 | 0. 084 | 9. 77E-29 | CSCL1 | HAUS6        |
| HSPA13. 1C      | 6. 8E-33  | 0. 215641 | 0. 592 | 0. 193 | 1. 02E-28 | CSCL1 | HSPA13       |

|            |          |          |       |       |          |       |          |
|------------|----------|----------|-------|-------|----------|-------|----------|
| ABHD2.6    | 7.02E-33 | 0.260062 | 0.642 | 0.222 | 1.05E-28 | CSCL1 | ABHD2    |
| SAP130.1   | 7.58E-33 | 0.137422 | 0.239 | 0.047 | 1.13E-28 | CSCL1 | SAP130   |
| CRK.7      | 8.25E-33 | 0.322225 | 0.806 | 0.308 | 1.23E-28 | CSCL1 | CRK      |
| ASAP3.1    | 8.26E-33 | 0.167759 | 0.199 | 0.035 | 1.23E-28 | CSCL1 | ASAP3    |
| MZT2B.8    | 9.35E-33 | 0.39855  | 0.965 | 0.587 | 1.40E-28 | CSCL1 | MZT2B    |
| TOMM40.9   | 9.69E-33 | 0.33355  | 0.821 | 0.319 | 1.45E-28 | CSCL1 | TOMM40   |
| HIVEP3.8   | 9.89E-33 | 0.231194 | 0.488 | 0.147 | 1.48E-28 | CSCL1 | HIVEP3   |
| IFT43.9    | 1.01E-32 | 0.184246 | 0.701 | 0.249 | 1.51E-28 | CSCL1 | IFT43    |
| THY1.10    | 1.04E-32 | 0.261599 | 0.701 | 0.248 | 1.55E-28 | CSCL1 | THY1     |
| COL22A1.8  | 1.17E-32 | 0.242774 | 0.294 | 0.068 | 1.75E-28 | CSCL1 | COL22A1  |
| KCMF1.7    | 1.18E-32 | 0.217192 | 0.572 | 0.184 | 1.76E-28 | CSCL1 | KCMF1    |
| CCDC92.7   | 1.19E-32 | 0.163784 | 0.373 | 0.097 | 1.78E-28 | CSCL1 | CCDC92   |
| LIPE.5     | 1.21E-32 | 0.153606 | 0.269 | 0.057 | 1.81E-28 | CSCL1 | LIPE     |
| C9orf114.1 | 1.25E-32 | 0.217744 | 0.458 | 0.136 | 1.87E-28 | CSCL1 | C9orf114 |
| CCDC86.1   | 1.40E-32 | 0.166994 | 0.378 | 0.1   | 2.09E-28 | CSCL1 | CCDC86   |
| ZNF579.8   | 1.40E-32 | 0.208034 | 0.398 | 0.109 | 2.09E-28 | CSCL1 | ZNF579   |
| WBP11.3    | 1.41E-32 | 0.225662 | 0.771 | 0.282 | 2.11E-28 | CSCL1 | WBP11    |
| TLK2.4     | 1.53E-32 | 0.208011 | 0.418 | 0.118 | 2.29E-28 | CSCL1 | TLK2     |
| COQ9.8     | 1.67E-32 | 0.186553 | 0.687 | 0.234 | 2.50E-28 | CSCL1 | COQ9     |
| TSR1.7     | 1.68E-32 | 0.193563 | 0.567 | 0.183 | 2.51E-28 | CSCL1 | TSR1     |
| BNIP3.9    | 1.70E-32 | 0.197418 | 0.607 | 0.208 | 2.54E-28 | CSCL1 | BNIP3    |
| CSNK1G3.9  | 1.72E-32 | 0.210281 | 0.488 | 0.147 | 2.57E-28 | CSCL1 | CSNK1G3  |
| HSPA14.5   | 1.73E-32 | 0.173955 | 0.463 | 0.136 | 2.59E-28 | CSCL1 | HSPA14   |
| SLC35F2.7  | 1.78E-32 | 0.224545 | 0.383 | 0.103 | 2.66E-28 | CSCL1 | SLC35F2  |
| TXLNA.5    | 1.79E-32 | 0.209722 | 0.453 | 0.134 | 2.67E-28 | CSCL1 | TXLNA    |
| RABEPK.8   | 1.96E-32 | 0.166108 | 0.587 | 0.193 | 2.93E-28 | CSCL1 | RABEPK   |
| CSNK1G2.6  | 2.01E-32 | 0.245117 | 0.458 | 0.137 | 3.00E-28 | CSCL1 | CSNK1G2  |
| RANBP3.5   | 2.03E-32 | 0.18968  | 0.642 | 0.215 | 3.03E-28 | CSCL1 | RANBP3   |
| MYO10.11   | 2.07E-32 | 0.230003 | 0.572 | 0.188 | 3.09E-28 | CSCL1 | MYO10    |
| SCO1.5     | 2.07E-32 | 0.223491 | 0.512 | 0.16  | 3.10E-28 | CSCL1 | SCO1     |
| TWF1.6     | 2.07E-32 | 0.258638 | 0.706 | 0.256 | 3.10E-28 | CSCL1 | TWF1     |
| CLPX.1     | 2.08E-32 | 0.185784 | 0.478 | 0.143 | 3.11E-28 | CSCL1 | CLPX     |
| PARVA.9    | 2.10E-32 | 0.201797 | 0.353 | 0.091 | 3.14E-28 | CSCL1 | PARVA    |
| HEBP2.7    | 2.19E-32 | 0.302407 | 0.612 | 0.212 | 3.28E-28 | CSCL1 | HEBP2    |
| CHCHD4.3   | 2.26E-32 | 0.160346 | 0.398 | 0.109 | 3.37E-28 | CSCL1 | CHCHD4   |
| ARL17A     | 2.30E-32 | 0.12895  | 0.254 | 0.053 | 3.44E-28 | CSCL1 | ARL17A   |
| FZD3.9     | 2.34E-32 | 0.291629 | 0.746 | 0.268 | 3.49E-28 | CSCL1 | FZD3     |
| KRR1.3     | 2.62E-32 | 0.208431 | 0.642 | 0.224 | 3.91E-28 | CSCL1 | KRR1     |
| PPIL3.3    | 2.66E-32 | 0.19789  | 0.612 | 0.206 | 3.97E-28 | CSCL1 | PPIL3    |
| SGCB.9     | 2.82E-32 | 0.221617 | 0.836 | 0.317 | 4.22E-28 | CSCL1 | SGCB     |
| SIX5.1     | 2.84E-32 | 0.138935 | 0.199 | 0.035 | 4.25E-28 | CSCL1 | SIX5     |
| SPTBN1.1C  | 2.94E-32 | 0.273178 | 0.731 | 0.266 | 4.40E-28 | CSCL1 | SPTBN1   |
| ANK2.11    | 3.02E-32 | 0.231558 | 0.507 | 0.158 | 4.51E-28 | CSCL1 | ANK2     |
| REEP3.7    | 3.17E-32 | 0.292792 | 0.667 | 0.237 | 4.74E-28 | CSCL1 | REEP3    |
| NCOA3.6    | 3.19E-32 | 0.155727 | 0.428 | 0.12  | 4.76E-28 | CSCL1 | NCOA3    |
| PKIG.10    | 3.19E-32 | 0.237579 | 0.801 | 0.302 | 4.76E-28 | CSCL1 | PKIG     |
| GLO1.9     | 3.31E-32 | 0.306496 | 0.95  | 0.401 | 4.94E-28 | CSCL1 | GLO1     |
| C12orf43.3 | 3.36E-32 | 0.166327 | 0.498 | 0.151 | 5.02E-28 | CSCL1 | C12orf43 |
| RBM10.7    | 3.65E-32 | 0.21449  | 0.587 | 0.195 | 5.45E-28 | CSCL1 | RBM10    |
| ECSIT.7    | 3.72E-32 | 0.224121 | 0.711 | 0.26  | 5.56E-28 | CSCL1 | ECSIT    |
| AIMP2.7    | 3.92E-32 | 0.175885 | 0.672 | 0.233 | 5.86E-28 | CSCL1 | AIMP2    |

|             |           |           |        |        |           |       |                |
|-------------|-----------|-----------|--------|--------|-----------|-------|----------------|
| SLX4IP. 3   | 3. 96E-32 | 0. 116211 | 0. 259 | 0. 054 | 5. 92E-28 | CSCL1 | SLX4IP         |
| CD82. 7     | 4. 16E-32 | 0. 29968  | 0. 637 | 0. 232 | 6. 22E-28 | CSCL1 | CD82           |
| IGF2BP2. 9  | 4. 25E-32 | 0. 234175 | 0. 313 | 0. 076 | 6. 36E-28 | CSCL1 | IGF2BP2        |
| FAM136A. 4  | 4. 64E-32 | 0. 211125 | 0. 711 | 0. 254 | 6. 94E-28 | CSCL1 | FAM136A        |
| PIN1. 6     | 4. 75E-32 | 0. 35582  | 0. 975 | 0. 529 | 7. 10E-28 | CSCL1 | PIN1           |
| RASSF8. 7   | 4. 79E-32 | 0. 184867 | 0. 333 | 0. 083 | 7. 17E-28 | CSCL1 | RASSF8         |
| AP3B1. 5    | 4. 86E-32 | 0. 194766 | 0. 522 | 0. 164 | 7. 26E-28 | CSCL1 | AP3B1          |
| CKAP4. 10   | 4. 99E-32 | 0. 279481 | 0. 597 | 0. 203 | 7. 45E-28 | CSCL1 | CKAP4          |
| MCC. 8      | 5. 22E-32 | 0. 204868 | 0. 413 | 0. 116 | 7. 80E-28 | CSCL1 | MCC            |
| SDAD1. 6    | 5. 24E-32 | 0. 206409 | 0. 622 | 0. 211 | 7. 83E-28 | CSCL1 | SDAD1          |
| RPGRIP1L. 5 | 5. 56E-32 | 0. 165387 | 0. 254 | 0. 054 | 8. 31E-28 | CSCL1 | RPGRIP1L       |
| ICT1. 5     | 5. 81E-32 | 0. 260529 | 0. 637 | 0. 229 | 8. 69E-28 | CSCL1 | ICT1           |
| FGFR1. 7    | 5. 88E-32 | 0. 200026 | 0. 522 | 0. 164 | 8. 79E-28 | CSCL1 | FGFR1          |
| GINS3. 1    | 6. 05E-32 | 0. 144273 | 0. 189 | 0. 032 | 9. 05E-28 | CSCL1 | GINS3          |
| GINS2. 7    | 6. 18E-32 | 0. 236187 | 0. 363 | 0. 095 | 9. 23E-28 | CSCL1 | GINS2          |
| RSPRY1. 10  | 6. 18E-32 | 0. 243017 | 0. 672 | 0. 241 | 9. 24E-28 | CSCL1 | RSPRY1         |
| CTDNEP1. 6  | 6. 76E-32 | 0. 361191 | 0. 786 | 0. 305 | 1. 01E-27 | CSCL1 | CTDNEP1        |
| BOLA3. 7    | 6. 80E-32 | 0. 279127 | 0. 821 | 0. 327 | 1. 02E-27 | CSCL1 | BOLA3          |
| TMEM98. 9   | 6. 83E-32 | 0. 220602 | 0. 662 | 0. 227 | 1. 02E-27 | CSCL1 | TMEM98         |
| TMEM203. 9  | 7. 19E-32 | 0. 284192 | 0. 682 | 0. 245 | 1. 07E-27 | CSCL1 | TMEM203        |
| RHOBTB3. 1  | 7. 81E-32 | 0. 379523 | 0. 94  | 0. 399 | 1. 17E-27 | CSCL1 | RHOBTB3        |
| POLRMT. 4   | 8. 07E-32 | 0. 183989 | 0. 438 | 0. 126 | 1. 21E-27 | CSCL1 | POLRMT         |
| PAFAH2      | 8. 31E-32 | 0. 130511 | 0. 234 | 0. 046 | 1. 24E-27 | CSCL1 | PAFAH2         |
| TFDP1. 7    | 8. 51E-32 | 0. 219217 | 0. 567 | 0. 185 | 1. 27E-27 | CSCL1 | TFDP1          |
| SLC22A4. 1  | 8. 70E-32 | 0. 194525 | 0. 224 | 0. 044 | 1. 30E-27 | CSCL1 | SLC22A4        |
| SNAPC2. 5   | 8. 96E-32 | 0. 216241 | 0. 592 | 0. 196 | 1. 34E-27 | CSCL1 | SNAPC2         |
| RNF8. 7     | 8. 98E-32 | 0. 179942 | 0. 517 | 0. 161 | 1. 34E-27 | CSCL1 | RNF8           |
| DVL3. 6     | 9. 00E-32 | 0. 196803 | 0. 488 | 0. 148 | 1. 34E-27 | CSCL1 | DVL3           |
| TBC1D20. 6  | 9. 06E-32 | 0. 236251 | 0. 542 | 0. 177 | 1. 35E-27 | CSCL1 | TBC1D20        |
| RAE1. 7     | 9. 88E-32 | 0. 223536 | 0. 711 | 0. 26  | 1. 48E-27 | CSCL1 | RAE1           |
| HMGB1. 6    | 1. 01E-31 | 0. 152195 | 1      | 0. 859 | 1. 50E-27 | CSCL1 | HMGB1          |
| GTPBP8. 2   | 1. 04E-31 | 0. 142211 | 0. 388 | 0. 105 | 1. 55E-27 | CSCL1 | GTPBP8         |
| EIF1. 9     | 1. 12E-31 | -0. 43994 | 1      | 0. 973 | 1. 68E-27 | CSCL1 | EIF1           |
| ZADH2. 3    | 1. 14E-31 | 0. 214866 | 0. 368 | 0. 099 | 1. 70E-27 | CSCL1 | ZADH2          |
| NAT14. 8    | 1. 19E-31 | 0. 260502 | 0. 532 | 0. 173 | 1. 78E-27 | CSCL1 | NAT14          |
| EBPL. 9     | 1. 21E-31 | 0. 313761 | 0. 766 | 0. 294 | 1. 80E-27 | CSCL1 | EBPL           |
| STIP1. 7    | 1. 21E-31 | 0. 306372 | 0. 871 | 0. 363 | 1. 81E-27 | CSCL1 | STIP1          |
| TUG1. 9     | 1. 23E-31 | 0. 193256 | 0. 532 | 0. 169 | 1. 84E-27 | CSCL1 | TUG1           |
| ISCA2. 6    | 1. 24E-31 | 0. 189442 | 0. 741 | 0. 273 | 1. 85E-27 | CSCL1 | ISCA2          |
| RP11-538P   | 1. 25E-31 | 0. 159443 | 0. 323 | 0. 079 | 1. 87E-27 | CSCL1 | RP11-538P18. 2 |
| IFT46. 6    | 1. 27E-31 | 0. 172499 | 0. 383 | 0. 104 | 1. 90E-27 | CSCL1 | IFT46          |
| FAM43A. 1   | 1. 31E-31 | 0. 195896 | 0. 199 | 0. 036 | 1. 96E-27 | CSCL1 | FAM43A         |
| UNC119. 7   | 1. 32E-31 | 0. 203549 | 0. 622 | 0. 21  | 1. 97E-27 | CSCL1 | UNC119         |
| CDYL. 7     | 1. 40E-31 | 0. 220099 | 0. 393 | 0. 11  | 2. 09E-27 | CSCL1 | CDYL           |
| ZNF174. 7   | 1. 46E-31 | 0. 155465 | 0. 289 | 0. 066 | 2. 17E-27 | CSCL1 | ZNF174         |
| SUCLA2. 7   | 1. 47E-31 | 0. 172746 | 0. 771 | 0. 279 | 2. 20E-27 | CSCL1 | SUCLA2         |
| KIF3B. 11   | 1. 48E-31 | 0. 232484 | 0. 428 | 0. 125 | 2. 22E-27 | CSCL1 | KIF3B          |
| PRKAR2A. 5  | 1. 48E-31 | 0. 225571 | 0. 677 | 0. 241 | 2. 22E-27 | CSCL1 | PRKAR2A        |
| LYAR. 6     | 1. 54E-31 | 0. 152617 | 0. 532 | 0. 168 | 2. 30E-27 | CSCL1 | LYAR           |
| PDRG1. 9    | 1. 55E-31 | 0. 210423 | 0. 721 | 0. 26  | 2. 32E-27 | CSCL1 | PDRG1          |
| GBA. 6      | 1. 58E-31 | 0. 108175 | 0. 438 | 0. 125 | 2. 36E-27 | CSCL1 | GBA            |

|            |          |          |       |       |          |       |           |
|------------|----------|----------|-------|-------|----------|-------|-----------|
| PSMD10.1   | 1.61E-31 | 0.122947 | 0.542 | 0.171 | 2.41E-27 | CSCL1 | PSMD10    |
| SPATA5     | 1.61E-31 | 0.104189 | 0.199 | 0.035 | 2.41E-27 | CSCL1 | SPATA5    |
| ZNF664.9   | 1.65E-31 | 0.193212 | 0.473 | 0.143 | 2.47E-27 | CSCL1 | ZNF664    |
| IFT80.6    | 1.68E-31 | 0.15592  | 0.289 | 0.067 | 2.52E-27 | CSCL1 | IFT80     |
| ARHGEF12.1 | 1.81E-31 | 0.173808 | 0.502 | 0.154 | 2.70E-27 | CSCL1 | ARHGEF12  |
| GPS1.8     | 1.83E-31 | 0.276605 | 0.806 | 0.316 | 2.73E-27 | CSCL1 | GPS1      |
| FADD.5     | 1.85E-31 | 0.199481 | 0.443 | 0.131 | 2.76E-27 | CSCL1 | FADD      |
| VRK3.8     | 1.95E-31 | 0.193694 | 0.617 | 0.211 | 2.91E-27 | CSCL1 | VRK3      |
| PIGU.8     | 1.97E-31 | 0.147157 | 0.522 | 0.165 | 2.95E-27 | CSCL1 | PIGU      |
| C11orf24.1 | 1.99E-31 | 0.213233 | 0.453 | 0.137 | 2.97E-27 | CSCL1 | C11orf24  |
| MYCBP.7    | 2.11E-31 | 0.107509 | 0.348 | 0.089 | 3.15E-27 | CSCL1 | MYCBP     |
| IMPAD1.6   | 2.25E-31 | 0.202164 | 0.552 | 0.18  | 3.36E-27 | CSCL1 | IMPAD1    |
| PXN.5      | 2.26E-31 | 0.184396 | 0.418 | 0.119 | 3.37E-27 | CSCL1 | PXN       |
| FAT1.8     | 2.31E-31 | 0.216325 | 0.274 | 0.063 | 3.45E-27 | CSCL1 | FAT1      |
| TWSG1.4    | 2.51E-31 | 0.127891 | 0.507 | 0.157 | 3.75E-27 | CSCL1 | TWSG1     |
| OTUD6B.8   | 2.52E-31 | 0.192771 | 0.408 | 0.114 | 3.77E-27 | CSCL1 | OTUD6B    |
| PLEKHG1.3  | 2.55E-31 | 0.149865 | 0.249 | 0.052 | 3.81E-27 | CSCL1 | PLEKHG1   |
| TMEM79.2   | 2.64E-31 | 0.146952 | 0.249 | 0.052 | 3.95E-27 | CSCL1 | TMEM79    |
| GTF2E2.5   | 2.69E-31 | 0.205107 | 0.557 | 0.181 | 4.01E-27 | CSCL1 | GTF2E2    |
| TCTN1.9    | 2.73E-31 | 0.155017 | 0.612 | 0.205 | 4.09E-27 | CSCL1 | TCTN1     |
| NOL12.4    | 2.91E-31 | 0.183449 | 0.617 | 0.213 | 4.35E-27 | CSCL1 | NOL12     |
| DHRX.5     | 2.99E-31 | 0.23788  | 0.642 | 0.226 | 4.47E-27 | CSCL1 | DHRX      |
| CPSF3.4    | 3.09E-31 | 0.187171 | 0.532 | 0.17  | 4.61E-27 | CSCL1 | CPSF3     |
| CCDC137.7  | 3.13E-31 | 0.262804 | 0.577 | 0.195 | 4.67E-27 | CSCL1 | CCDC137   |
| ZC3HC1.8   | 3.23E-31 | 0.167267 | 0.418 | 0.119 | 4.83E-27 | CSCL1 | ZC3HC1    |
| P2RY1.2    | 3.33E-31 | 0.139213 | 0.224 | 0.044 | 4.97E-27 | CSCL1 | P2RY1     |
| GUCD1.4    | 3.35E-31 | 0.182664 | 0.413 | 0.118 | 5.00E-27 | CSCL1 | GUCD1     |
| C8orf33.8  | 3.41E-31 | 0.242336 | 0.826 | 0.309 | 5.10E-27 | CSCL1 | C8orf33   |
| GNPAT.7    | 3.47E-31 | 0.166361 | 0.667 | 0.232 | 5.19E-27 | CSCL1 | GNPAT     |
| MRC2.7     | 3.48E-31 | 0.193918 | 0.532 | 0.167 | 5.19E-27 | CSCL1 | MRC2      |
| TAF4.1     | 3.60E-31 | 0.133354 | 0.229 | 0.046 | 5.38E-27 | CSCL1 | TAF4      |
| WDHD1.1    | 3.61E-31 | 0.170066 | 0.189 | 0.033 | 5.40E-27 | CSCL1 | WDHD1     |
| PTK7.6     | 3.94E-31 | 0.194515 | 0.343 | 0.089 | 5.88E-27 | CSCL1 | PTK7      |
| NCBP2-AS2  | 4.12E-31 | 0.26815  | 0.736 | 0.269 | 6.16E-27 | CSCL1 | NCBP2-AS2 |
| NUDT2.5    | 4.17E-31 | 0.134132 | 0.532 | 0.168 | 6.23E-27 | CSCL1 | NUDT2     |
| SNX7.4     | 4.32E-31 | 0.195602 | 0.522 | 0.167 | 6.45E-27 | CSCL1 | SNX7      |
| C1orf174.4 | 4.36E-31 | 0.178985 | 0.483 | 0.148 | 6.52E-27 | CSCL1 | C1orf174  |
| NELFCD.1C  | 4.38E-31 | 0.331501 | 0.816 | 0.328 | 6.55E-27 | CSCL1 | NELFCD    |
| TBL1X.2    | 4.58E-31 | 0.155824 | 0.274 | 0.062 | 6.85E-27 | CSCL1 | TBL1X     |
| BAALC.11   | 4.59E-31 | 0.354746 | 0.856 | 0.337 | 6.86E-27 | CSCL1 | BAALC     |
| ABHD17A.1  | 4.65E-31 | 0.278896 | 0.647 | 0.228 | 6.94E-27 | CSCL1 | ABHD17A   |
| LCA5.4     | 4.68E-31 | 0.135324 | 0.234 | 0.047 | 6.99E-27 | CSCL1 | LCA5      |
| MED25.3    | 4.83E-31 | 0.187175 | 0.413 | 0.118 | 7.22E-27 | CSCL1 | MED25     |
| AKAP12.12  | 5.13E-31 | 0.213873 | 0.552 | 0.181 | 7.66E-27 | CSCL1 | AKAP12    |
| TTC9C.3    | 5.19E-31 | 0.169244 | 0.527 | 0.169 | 7.76E-27 | CSCL1 | TTC9C     |
| PRKRIP1.8  | 5.42E-31 | 0.187625 | 0.667 | 0.234 | 8.10E-27 | CSCL1 | PRKRIP1   |
| CLCN3.10   | 5.91E-31 | 0.21377  | 0.682 | 0.241 | 8.83E-27 | CSCL1 | CLCN3     |
| SYNRG.7    | 6.12E-31 | 0.16493  | 0.562 | 0.183 | 9.15E-27 | CSCL1 | SYNRG     |
| PSAP.9     | 6.46E-31 | -0.64523 | 0.9   | 0.817 | 9.65E-27 | CSCL1 | PSAP      |
| BLOC1S4.1  | 6.46E-31 | 0.242158 | 0.667 | 0.236 | 9.65E-27 | CSCL1 | BLOC1S4   |
| IFT74.1    | 6.56E-31 | 0.116658 | 0.308 | 0.074 | 9.80E-27 | CSCL1 | IFT74     |

|           |          |          |       |       |          |       |              |
|-----------|----------|----------|-------|-------|----------|-------|--------------|
| PKNOX1.2  | 6.89E-31 | 0.141904 | 0.383 | 0.104 | 1.03E-26 | CSCL1 | PKNOX1       |
| DOHH.7    | 7.54E-31 | 0.189518 | 0.567 | 0.187 | 1.13E-26 | CSCL1 | DOHH         |
| KIAA1958. | 7.61E-31 | 0.152045 | 0.279 | 0.063 | 1.14E-26 | CSCL1 | KIAA1958     |
| SNRNP25.7 | 8.08E-31 | 0.263966 | 0.836 | 0.341 | 1.21E-26 | CSCL1 | SNRNP25      |
| TP53RK.6  | 8.18E-31 | 0.242343 | 0.552 | 0.185 | 1.22E-26 | CSCL1 | TP53RK       |
| PPIC.10   | 8.43E-31 | 0.195589 | 0.542 | 0.177 | 1.26E-26 | CSCL1 | PPIC         |
| THAP3.7   | 9.07E-31 | 0.105598 | 0.443 | 0.129 | 1.36E-26 | CSCL1 | THAP3        |
| CNOT1.5   | 9.55E-31 | 0.138496 | 0.478 | 0.144 | 1.43E-26 | CSCL1 | CNOT1        |
| SMARCC1.1 | 1.00E-30 | 0.212747 | 0.701 | 0.247 | 1.50E-26 | CSCL1 | SMARCC1      |
| ALG8.4    | 1.01E-30 | 0.171702 | 0.532 | 0.172 | 1.51E-26 | CSCL1 | ALG8         |
| CTD-2325M | 1.02E-30 | 0.114544 | 0.169 | 0.027 | 1.53E-26 | CSCL1 | CTD-2325M2.1 |
| DHX8.3    | 1.03E-30 | 0.137    | 0.383 | 0.105 | 1.54E-26 | CSCL1 | DHX8         |
| CDKN1B.1C | 1.07E-30 | 0.224019 | 0.701 | 0.251 | 1.60E-26 | CSCL1 | CDKN1B       |
| DCUN1D5.6 | 1.09E-30 | 0.232337 | 0.751 | 0.279 | 1.62E-26 | CSCL1 | DCUN1D5      |
| ENKD1.4   | 1.09E-30 | 0.156259 | 0.269 | 0.06  | 1.63E-26 | CSCL1 | ENKD1        |
| TNFRSF12A | 1.15E-30 | 0.442638 | 0.706 | 0.279 | 1.73E-26 | CSCL1 | TNFRSF12A    |
| RRBP1.7   | 1.18E-30 | 0.34799  | 0.736 | 0.289 | 1.77E-26 | CSCL1 | RRBP1        |
| PPP1CC.8  | 1.27E-30 | 0.379463 | 0.93  | 0.437 | 1.90E-26 | CSCL1 | PPP1CC       |
| TRIM37.9  | 1.28E-30 | 0.192135 | 0.473 | 0.144 | 1.91E-26 | CSCL1 | TRIM37       |
| TPRKB.8   | 1.28E-30 | 0.245773 | 0.871 | 0.354 | 1.91E-26 | CSCL1 | TPRKB        |
| SMC3.7    | 1.28E-30 | 0.22195  | 0.746 | 0.277 | 1.92E-26 | CSCL1 | SMC3         |
| ZNF544.6  | 1.30E-30 | 0.134891 | 0.413 | 0.117 | 1.95E-26 | CSCL1 | ZNF544       |
| NR2F1.8   | 1.33E-30 | 0.21559  | 0.507 | 0.159 | 1.99E-26 | CSCL1 | NR2F1        |
| NFATC2IP. | 1.38E-30 | 0.159367 | 0.502 | 0.157 | 2.06E-26 | CSCL1 | NFATC2IP     |
| AKT1S1.6  | 1.38E-30 | 0.23275  | 0.657 | 0.233 | 2.07E-26 | CSCL1 | AKT1S1       |
| NAB2.5    | 1.45E-30 | 0.177916 | 0.453 | 0.136 | 2.17E-26 | CSCL1 | NAB2         |
| B4GALT4.4 | 1.53E-30 | 0.152199 | 0.448 | 0.133 | 2.29E-26 | CSCL1 | B4GALT4      |
| CDC42EP1. | 1.58E-30 | 0.17131  | 0.423 | 0.123 | 2.37E-26 | CSCL1 | CDC42EP1     |
| NPTXR.10  | 1.70E-30 | 0.192615 | 0.423 | 0.122 | 2.54E-26 | CSCL1 | NPTXR        |
| PGM1.8    | 1.89E-30 | 0.220941 | 0.672 | 0.243 | 2.82E-26 | CSCL1 | PGM1         |
| XPOT.8    | 1.91E-30 | 0.173566 | 0.512 | 0.162 | 2.86E-26 | CSCL1 | XPOT         |
| PABPC1L.3 | 1.93E-30 | 0.158825 | 0.279 | 0.064 | 2.88E-26 | CSCL1 | PABPC1L      |
| TAOK1.8   | 1.95E-30 | 0.27817  | 0.687 | 0.252 | 2.92E-26 | CSCL1 | TAOK1        |
| GAMT.9    | 2.20E-30 | 0.318219 | 0.751 | 0.291 | 3.29E-26 | CSCL1 | GAMT         |
| DHX30.7   | 2.23E-30 | 0.191037 | 0.701 | 0.25  | 3.33E-26 | CSCL1 | DHX30        |
| STX16.3   | 2.23E-30 | 0.170924 | 0.597 | 0.202 | 3.33E-26 | CSCL1 | STX16        |
| LHFP.11   | 2.27E-30 | 0.1946   | 0.657 | 0.224 | 3.39E-26 | CSCL1 | LHFP         |
| CTDSPL2.4 | 2.29E-30 | 0.186261 | 0.378 | 0.104 | 3.42E-26 | CSCL1 | CTDSPL2      |
| CWC27.8   | 2.31E-30 | 0.170271 | 0.711 | 0.256 | 3.46E-26 | CSCL1 | CWC27        |
| TMEM115.5 | 2.45E-30 | 0.186192 | 0.592 | 0.201 | 3.67E-26 | CSCL1 | TMEM115      |
| TM7SF3.6  | 2.51E-30 | 0.218666 | 0.682 | 0.243 | 3.75E-26 | CSCL1 | TM7SF3       |
| PRKCI.3   | 2.54E-30 | 0.188181 | 0.363 | 0.099 | 3.80E-26 | CSCL1 | PRKCI        |
| HSPB11.6  | 2.56E-30 | 0.232529 | 0.821 | 0.32  | 3.82E-26 | CSCL1 | HSPB11       |
| WSB2.10   | 2.57E-30 | 0.229712 | 0.622 | 0.217 | 3.83E-26 | CSCL1 | WSB2         |
| RNFT1.6   | 2.57E-30 | 0.172656 | 0.577 | 0.196 | 3.84E-26 | CSCL1 | RNFT1        |
| NUP93.4   | 2.57E-30 | 0.174977 | 0.537 | 0.175 | 3.84E-26 | CSCL1 | NUP93        |
| TMEM183A. | 2.62E-30 | 0.276718 | 0.751 | 0.284 | 3.92E-26 | CSCL1 | TMEM183A     |
| USP48.6   | 2.67E-30 | 0.203378 | 0.607 | 0.208 | 3.99E-26 | CSCL1 | USP48        |
| RAD17.6   | 2.69E-30 | 0.163831 | 0.428 | 0.125 | 4.02E-26 | CSCL1 | RAD17        |
| METTL2A.7 | 2.70E-30 | 0.193525 | 0.488 | 0.153 | 4.03E-26 | CSCL1 | METTL2A      |
| SPATC1L.1 | 2.71E-30 | 0.260766 | 0.557 | 0.188 | 4.05E-26 | CSCL1 | SPATC1L      |



|             |           |           |        |        |           |       |          |
|-------------|-----------|-----------|--------|--------|-----------|-------|----------|
| GLE1. 2     | 2. 83E-30 | 0. 138461 | 0. 388 | 0. 107 | 4. 23E-26 | CSCL1 | GLE1     |
| MED27. 5    | 2. 85E-30 | 0. 143955 | 0. 478 | 0. 145 | 4. 26E-26 | CSCL1 | MED27    |
| TSR3. 8     | 2. 88E-30 | 0. 290108 | 0. 716 | 0. 268 | 4. 30E-26 | CSCL1 | TSR3     |
| C17orf49. 2 | 2. 89E-30 | 0. 138268 | 0. 443 | 0. 132 | 4. 32E-26 | CSCL1 | C17orf49 |
| ARHGAP21. 2 | 2. 93E-30 | 0. 229103 | 0. 672 | 0. 243 | 4. 38E-26 | CSCL1 | ARHGAP21 |
| PAIP1. 11   | 2. 93E-30 | 0. 375298 | 0. 891 | 0. 387 | 4. 38E-26 | CSCL1 | PAIP1    |
| CDK5. 8     | 2. 93E-30 | 0. 146838 | 0. 667 | 0. 23  | 4. 38E-26 | CSCL1 | CDK5     |
| FAM229B. 1  | 2. 97E-30 | 0. 205416 | 0. 756 | 0. 284 | 4. 45E-26 | CSCL1 | FAM229B  |
| RBM27. 8    | 3. 04E-30 | 0. 21304  | 0. 632 | 0. 219 | 4. 54E-26 | CSCL1 | RBM27    |
| SYNCRIP. 9  | 3. 11E-30 | 0. 310052 | 0. 9   | 0. 374 | 4. 64E-26 | CSCL1 | SYNCRIP  |
| LEO1. 6     | 3. 13E-30 | 0. 171247 | 0. 458 | 0. 138 | 4. 68E-26 | CSCL1 | LEO1     |
| PDZRN3. 8   | 3. 18E-30 | 0. 197208 | 0. 249 | 0. 054 | 4. 75E-26 | CSCL1 | PDZRN3   |
| ZNF93. 3    | 3. 20E-30 | 0. 165474 | 0. 249 | 0. 054 | 4. 79E-26 | CSCL1 | ZNF93    |
| CDH6. 8     | 3. 58E-30 | 0. 168059 | 0. 279 | 0. 065 | 5. 35E-26 | CSCL1 | CDH6     |
| ACOT8. 4    | 3. 66E-30 | 0. 170873 | 0. 592 | 0. 199 | 5. 46E-26 | CSCL1 | ACOT8    |
| NT5C3B. 11  | 3. 69E-30 | 0. 305927 | 0. 826 | 0. 323 | 5. 52E-26 | CSCL1 | NT5C3B   |
| BPTF. 9     | 3. 69E-30 | 0. 320289 | 0. 771 | 0. 302 | 5. 52E-26 | CSCL1 | BPTF     |
| HADH. 4     | 3. 72E-30 | 0. 143825 | 0. 592 | 0. 201 | 5. 56E-26 | CSCL1 | HADH     |
| CGGBP1. 4   | 3. 84E-30 | 0. 195286 | 0. 716 | 0. 262 | 5. 74E-26 | CSCL1 | CGGBP1   |
| PLGRKT. 6   | 3. 93E-30 | 0. 122614 | 0. 721 | 0. 259 | 5. 87E-26 | CSCL1 | PLGRKT   |
| HNRNPUL1. 3 | 3. 96E-30 | 0. 283256 | 0. 9   | 0. 375 | 5. 91E-26 | CSCL1 | HNRNPUL1 |
| AGPAT3. 6   | 4. 09E-30 | 0. 136866 | 0. 428 | 0. 125 | 6. 10E-26 | CSCL1 | AGPAT3   |
| RDX. 11     | 4. 15E-30 | 0. 416819 | 0. 975 | 0. 482 | 6. 20E-26 | CSCL1 | RDX      |
| TMX3. 4     | 4. 38E-30 | 0. 172342 | 0. 488 | 0. 152 | 6. 54E-26 | CSCL1 | TMX3     |
| SV2A. 8     | 4. 43E-30 | 0. 242396 | 0. 577 | 0. 195 | 6. 62E-26 | CSCL1 | SV2A     |
| TMCO3. 4    | 4. 48E-30 | 0. 192954 | 0. 582 | 0. 197 | 6. 70E-26 | CSCL1 | TMCO3    |
| PGAM5. 3    | 4. 53E-30 | 0. 15587  | 0. 244 | 0. 052 | 6. 77E-26 | CSCL1 | PGAM5    |
| CARS2. 2    | 4. 91E-30 | 0. 203427 | 0. 428 | 0. 129 | 7. 33E-26 | CSCL1 | CARS2    |
| CCZ1B. 9    | 5. 58E-30 | 0. 136796 | 0. 478 | 0. 146 | 8. 34E-26 | CSCL1 | CCZ1B    |
| NGLY1. 4    | 5. 64E-30 | 0. 165445 | 0. 607 | 0. 208 | 8. 43E-26 | CSCL1 | NGLY1    |
| VPS45. 5    | 5. 94E-30 | 0. 133144 | 0. 512 | 0. 163 | 8. 88E-26 | CSCL1 | VPS45    |
| TMEM255A. 6 | 6. 04E-30 | 0. 159753 | 0. 363 | 0. 098 | 9. 02E-26 | CSCL1 | TMEM255A |
| TRAPPC11. 6 | 6. 16E-30 | 0. 157629 | 0. 318 | 0. 08  | 9. 21E-26 | CSCL1 | TRAPPC11 |
| PKN2. 5     | 6. 33E-30 | 0. 175383 | 0. 597 | 0. 204 | 9. 46E-26 | CSCL1 | PKN2     |
| BRD4. 8     | 6. 33E-30 | 0. 282293 | 0. 801 | 0. 319 | 9. 47E-26 | CSCL1 | BRD4     |
| TOMM70A. 6  | 6. 44E-30 | 0. 184813 | 0. 413 | 0. 12  | 9. 62E-26 | CSCL1 | TOMM70A  |
| HYLS1. 1    | 6. 44E-30 | 0. 219386 | 0. 189 | 0. 034 | 9. 63E-26 | CSCL1 | HYLS1    |
| DTD1. 11    | 6. 50E-30 | 0. 359763 | 0. 886 | 0. 383 | 9. 71E-26 | CSCL1 | DTD1     |
| CEP290. 8   | 6. 59E-30 | 0. 174185 | 0. 488 | 0. 152 | 9. 85E-26 | CSCL1 | CEP290   |
| UBE20. 8    | 6. 60E-30 | 0. 183208 | 0. 393 | 0. 112 | 9. 86E-26 | CSCL1 | UBE20    |
| C17orf89. 6 | 6. 75E-30 | 0. 410048 | 0. 9   | 0. 413 | 1. 01E-25 | CSCL1 | C17orf89 |
| SORD. 3     | 7. 00E-30 | 0. 115484 | 0. 338 | 0. 087 | 1. 05E-25 | CSCL1 | SORD     |
| PPP1R14B. 7 | 7. 13E-30 | 0. 375173 | 0. 816 | 0. 336 | 1. 07E-25 | CSCL1 | PPP1R14B |
| GPR137. 7   | 7. 18E-30 | 0. 199284 | 0. 587 | 0. 202 | 1. 07E-25 | CSCL1 | GPR137   |
| DAPK3. 8    | 7. 39E-30 | 0. 261527 | 0. 642 | 0. 232 | 1. 11E-25 | CSCL1 | DAPK3    |
| NEK1. 8     | 7. 68E-30 | 0. 202065 | 0. 413 | 0. 121 | 1. 15E-25 | CSCL1 | NEK1     |
| MIB1. 3     | 8. 09E-30 | 0. 153609 | 0. 338 | 0. 088 | 1. 21E-25 | CSCL1 | MIB1     |
| TEAD2. 10   | 8. 20E-30 | 0. 196871 | 0. 328 | 0. 086 | 1. 23E-25 | CSCL1 | TEAD2    |
| TAP1. 7     | 8. 32E-30 | 0. 255007 | 0. 667 | 0. 246 | 1. 24E-25 | CSCL1 | TAP1     |
| C11orf74. 8 | 8. 58E-30 | 0. 126577 | 0. 517 | 0. 165 | 1. 28E-25 | CSCL1 | C11orf74 |
| ADAM12. 1   | 8. 60E-30 | 0. 170366 | 0. 214 | 0. 042 | 1. 29E-25 | CSCL1 | ADAM12   |

|           |          |          |       |       |          |       |            |
|-----------|----------|----------|-------|-------|----------|-------|------------|
| KANSL1-AS | 8.93E-30 | 0.146522 | 0.562 | 0.187 | 1.33E-25 | CSCL1 | KANSL1-AS1 |
| MAP2.12   | 9.27E-30 | 0.32628  | 0.831 | 0.329 | 1.38E-25 | CSCL1 | MAP2       |
| MAFG-AS1. | 9.45E-30 | 0.164297 | 0.269 | 0.062 | 1.41E-25 | CSCL1 | MAFG-AS1   |
| GNAS-AS1  | 1.01E-29 | 0.131117 | 0.129 | 0.018 | 1.51E-25 | CSCL1 | GNAS-AS1   |
| CHRNA5    | 1.01E-29 | 0.142793 | 0.164 | 0.027 | 1.51E-25 | CSCL1 | CHRNA5     |
| PMS2.8    | 1.04E-29 | 0.114264 | 0.423 | 0.122 | 1.55E-25 | CSCL1 | PMS2       |
| SERPINE2. | 1.05E-29 | 0.279307 | 0.746 | 0.285 | 1.57E-25 | CSCL1 | SERPINE2   |
| RITA1.7   | 1.09E-29 | 0.149456 | 0.428 | 0.127 | 1.63E-25 | CSCL1 | RITA1      |
| LIMD1.3   | 1.09E-29 | 0.184464 | 0.303 | 0.076 | 1.64E-25 | CSCL1 | LIMD1      |
| KPNA3.6   | 1.16E-29 | 0.199693 | 0.692 | 0.248 | 1.73E-25 | CSCL1 | KPNA3      |
| ARHGAP12. | 1.30E-29 | 0.14937  | 0.557 | 0.183 | 1.95E-25 | CSCL1 | ARHGAP12   |
| PFKP.7    | 1.31E-29 | 0.140562 | 0.473 | 0.146 | 1.96E-25 | CSCL1 | PFKP       |
| FDFT1.8   | 1.32E-29 | 0.188819 | 0.781 | 0.297 | 1.98E-25 | CSCL1 | FDFT1      |
| SMARCA4.1 | 1.33E-29 | 0.342132 | 0.851 | 0.352 | 1.98E-25 | CSCL1 | SMARCA4    |
| TULP3.7   | 1.35E-29 | 0.177488 | 0.413 | 0.12  | 2.01E-25 | CSCL1 | TULP3      |
| SPRTN.5   | 1.36E-29 | 0.120995 | 0.418 | 0.121 | 2.03E-25 | CSCL1 | SPRTN      |
| CUL3.8    | 1.41E-29 | 0.206288 | 0.572 | 0.194 | 2.11E-25 | CSCL1 | CUL3       |
| ICK.6     | 1.50E-29 | 0.167044 | 0.318 | 0.081 | 2.25E-25 | CSCL1 | ICK        |
| APAF1.6   | 1.53E-29 | 0.115305 | 0.274 | 0.063 | 2.28E-25 | CSCL1 | APAF1      |
| MRT04.6   | 1.54E-29 | 0.163376 | 0.667 | 0.238 | 2.31E-25 | CSCL1 | MRT04      |
| LENG1.5   | 1.54E-29 | 0.159002 | 0.572 | 0.195 | 2.31E-25 | CSCL1 | LENG1      |
| CDH11.10  | 1.67E-29 | 0.175471 | 0.388 | 0.111 | 2.49E-25 | CSCL1 | CDH11      |
| C15orf61. | 1.89E-29 | 0.154507 | 0.517 | 0.168 | 2.83E-25 | CSCL1 | C15orf61   |
| NUDCD1.5  | 1.95E-29 | 0.134905 | 0.358 | 0.096 | 2.91E-25 | CSCL1 | NUDCD1     |
| SMAGP.4   | 2.02E-29 | 0.140641 | 0.318 | 0.081 | 3.02E-25 | CSCL1 | SMAGP      |
| HNRNPR.6  | 2.03E-29 | 0.357757 | 0.97  | 0.512 | 3.04E-25 | CSCL1 | HNRNPR     |
| MNAT1.8   | 2.05E-29 | 0.154029 | 0.552 | 0.187 | 3.07E-25 | CSCL1 | MNAT1      |
| FOXRED2.3 | 2.06E-29 | 0.191874 | 0.308 | 0.079 | 3.08E-25 | CSCL1 | FOXRED2    |
| SLC52A2.6 | 2.07E-29 | 0.234933 | 0.736 | 0.272 | 3.09E-25 | CSCL1 | SLC52A2    |
| RCOR1.3   | 2.07E-29 | 0.137711 | 0.284 | 0.067 | 3.10E-25 | CSCL1 | RCOR1      |
| HLA-DRA.1 | 2.17E-29 | -1.33731 | 0.373 | 0.637 | 3.24E-25 | CSCL1 | HLA-DRA    |
| DONSON.4  | 2.17E-29 | 0.171596 | 0.308 | 0.077 | 3.24E-25 | CSCL1 | DONSON     |
| ANXA2R.11 | 2.21E-29 | 0.157588 | 0.473 | 0.146 | 3.31E-25 | CSCL1 | ANXA2R     |
| ZNF385D.9 | 2.23E-29 | 0.205827 | 0.378 | 0.106 | 3.34E-25 | CSCL1 | ZNF385D    |
| ACOT7.9   | 2.25E-29 | 0.209892 | 0.622 | 0.22  | 3.36E-25 | CSCL1 | ACOT7      |
| STT3A.1   | 2.30E-29 | 0.118033 | 0.507 | 0.16  | 3.44E-25 | CSCL1 | STT3A      |
| TRMT6.5   | 2.68E-29 | 0.206104 | 0.517 | 0.172 | 4.01E-25 | CSCL1 | TRMT6      |
| MLLT3.8   | 2.77E-29 | 0.108422 | 0.343 | 0.089 | 4.15E-25 | CSCL1 | MLLT3      |
| CDK19.5   | 2.80E-29 | 0.156694 | 0.413 | 0.121 | 4.19E-25 | CSCL1 | CDK19      |
| RAB3GAP2. | 2.94E-29 | 0.199642 | 0.502 | 0.164 | 4.39E-25 | CSCL1 | RAB3GAP2   |
| FBXW11.5  | 2.99E-29 | 0.184215 | 0.527 | 0.175 | 4.46E-25 | CSCL1 | FBXW11     |
| UQCC1.7   | 2.99E-29 | 0.175922 | 0.498 | 0.159 | 4.47E-25 | CSCL1 | UQCC1      |
| NAE1.8    | 3.08E-29 | 0.255747 | 0.831 | 0.332 | 4.61E-25 | CSCL1 | NAE1       |
| THAP4.4   | 3.10E-29 | 0.177379 | 0.483 | 0.153 | 4.64E-25 | CSCL1 | THAP4      |
| SF3B3.5   | 3.18E-29 | 0.155848 | 0.557 | 0.183 | 4.75E-25 | CSCL1 | SF3B3      |
| GNPNAT1.5 | 3.29E-29 | 0.166244 | 0.353 | 0.097 | 4.91E-25 | CSCL1 | GNPNAT1    |
| SRP68.5   | 3.30E-29 | 0.201983 | 0.627 | 0.223 | 4.94E-25 | CSCL1 | SRP68      |
| PCNA.8    | 3.36E-29 | 0.220293 | 0.776 | 0.307 | 5.02E-25 | CSCL1 | PCNA       |
| C6orf120. | 3.38E-29 | 0.175131 | 0.438 | 0.132 | 5.05E-25 | CSCL1 | C6orf120   |
| TP53INP2. | 3.43E-29 | 0.124742 | 0.343 | 0.09  | 5.13E-25 | CSCL1 | TP53INP2   |
| ANKRD52.2 | 3.47E-29 | 0.161129 | 0.294 | 0.072 | 5.18E-25 | CSCL1 | ANKRD52    |

|           |          |          |       |       |          |       |                 |
|-----------|----------|----------|-------|-------|----------|-------|-----------------|
| C11orf80. | 3.48E-29 | 0.142053 | 0.204 | 0.04  | 5.21E-25 | CSCL1 | C11orf80        |
| GAR1.8    | 3.49E-29 | 0.141617 | 0.547 | 0.184 | 5.21E-25 | CSCL1 | GAR1            |
| SLC35F1.9 | 3.49E-29 | 0.223572 | 0.408 | 0.121 | 5.21E-25 | CSCL1 | SLC35F1         |
| IRF2BPL.9 | 3.49E-29 | 0.272272 | 0.637 | 0.235 | 5.21E-25 | CSCL1 | IRF2BPL         |
| DENR.7    | 3.51E-29 | 0.262699 | 0.791 | 0.312 | 5.24E-25 | CSCL1 | DENR            |
| FARP1.5   | 3.75E-29 | 0.164474 | 0.542 | 0.179 | 5.61E-25 | CSCL1 | FARP1           |
| CRYGD     | 3.92E-29 | 0.155443 | 0.104 | 0.012 | 5.87E-25 | CSCL1 | CRYGD           |
| TPGS2.5   | 4.03E-29 | 0.262665 | 0.821 | 0.33  | 6.02E-25 | CSCL1 | TPGS2           |
| CDADC1.5  | 4.05E-29 | 0.116898 | 0.368 | 0.102 | 6.06E-25 | CSCL1 | CDADC1          |
| ARL13B.7  | 4.08E-29 | 0.149495 | 0.448 | 0.137 | 6.09E-25 | CSCL1 | ARL13B          |
| ADORA2B.1 | 4.15E-29 | 0.125031 | 0.184 | 0.033 | 6.20E-25 | CSCL1 | ADORA2B         |
| PCGF2.10  | 4.15E-29 | 0.201428 | 0.488 | 0.157 | 6.20E-25 | CSCL1 | PCGF2           |
| CREB3.3   | 4.46E-29 | 0.198648 | 0.716 | 0.27  | 6.66E-25 | CSCL1 | CREB3           |
| TRIM24.11 | 4.53E-29 | 0.200033 | 0.557 | 0.185 | 6.77E-25 | CSCL1 | TRIM24          |
| CEP95.6   | 4.58E-29 | 0.150389 | 0.408 | 0.119 | 6.85E-25 | CSCL1 | CEP95           |
| IDH3A.4   | 4.83E-29 | 0.163992 | 0.512 | 0.168 | 7.22E-25 | CSCL1 | IDH3A           |
| RRP1.7    | 4.92E-29 | 0.162619 | 0.592 | 0.203 | 7.35E-25 | CSCL1 | RRP1            |
| ASPHD2.2  | 5.19E-29 | 0.145647 | 0.249 | 0.055 | 7.76E-25 | CSCL1 | ASPHD2          |
| MDFIC.5   | 5.19E-29 | 0.103623 | 0.209 | 0.041 | 7.76E-25 | CSCL1 | MDFIC           |
| UBTD1.6   | 5.21E-29 | 0.162486 | 0.378 | 0.107 | 7.78E-25 | CSCL1 | UBTD1           |
| EIF2B3.2  | 5.34E-29 | 0.125335 | 0.517 | 0.167 | 7.98E-25 | CSCL1 | EIF2B3          |
| VAPB.7    | 5.48E-29 | 0.235414 | 0.552 | 0.191 | 8.19E-25 | CSCL1 | VAPB            |
| MEST.11   | 5.54E-29 | 0.375913 | 0.881 | 0.378 | 8.28E-25 | CSCL1 | MEST            |
| BAZ1B.11  | 5.90E-29 | 0.278684 | 0.751 | 0.29  | 8.82E-25 | CSCL1 | BAZ1B           |
| MPST.7    | 6.39E-29 | 0.221764 | 0.786 | 0.298 | 9.55E-25 | CSCL1 | MPST            |
| CEP192    | 6.44E-29 | 0.123566 | 0.199 | 0.038 | 9.62E-25 | CSCL1 | CEP192          |
| C17orf80. | 6.56E-29 | 0.158868 | 0.313 | 0.08  | 9.80E-25 | CSCL1 | C17orf80        |
| TMEM218.5 | 6.59E-29 | 0.12934  | 0.617 | 0.215 | 9.84E-25 | CSCL1 | TMEM218         |
| CTNNAL1.1 | 6.77E-29 | 0.266433 | 0.443 | 0.142 | 1.01E-24 | CSCL1 | CTNNAL1         |
| F8A1.5    | 7.04E-29 | 0.163147 | 0.443 | 0.135 | 1.05E-24 | CSCL1 | F8A1            |
| MSRB1.5   | 7.43E-29 | 0.120873 | 0.617 | 0.213 | 1.11E-24 | CSCL1 | MSRB1           |
| KIF13A.2  | 7.64E-29 | 0.132045 | 0.249 | 0.055 | 1.14E-24 | CSCL1 | KIF13A          |
| MKS1.4    | 7.75E-29 | 0.131821 | 0.328 | 0.086 | 1.16E-24 | CSCL1 | MKS1            |
| NELFE.2   | 7.91E-29 | 0.241042 | 0.871 | 0.368 | 1.18E-24 | CSCL1 | NELFE           |
| PIK3C2A.3 | 8.07E-29 | 0.175639 | 0.438 | 0.135 | 1.21E-24 | CSCL1 | PIK3C2A         |
| PDDC1.7   | 8.19E-29 | 0.194881 | 0.448 | 0.141 | 1.22E-24 | CSCL1 | PDDC1           |
| JRKL.4    | 8.46E-29 | 0.136148 | 0.294 | 0.072 | 1.26E-24 | CSCL1 | JRKL            |
| CHRDL1.2  | 8.70E-29 | 0.129779 | 0.194 | 0.036 | 1.30E-24 | CSCL1 | CHRDL1          |
| DUS4L.8   | 8.78E-29 | 0.13411  | 0.303 | 0.075 | 1.31E-24 | CSCL1 | DUS4L           |
| MZT2A.9   | 8.83E-29 | 0.307125 | 0.91  | 0.405 | 1.32E-24 | CSCL1 | MZT2A           |
| TMEM260.1 | 8.88E-29 | 0.147307 | 0.289 | 0.07  | 1.33E-24 | CSCL1 | TMEM260         |
| IL17RC.5  | 9.04E-29 | 0.171265 | 0.388 | 0.112 | 1.35E-24 | CSCL1 | IL17RC          |
| RP11-1094 | 9.23E-29 | 0.193122 | 0.632 | 0.227 | 1.38E-24 | CSCL1 | RP11-1094M14.11 |
| HINT3.6   | 9.49E-29 | 0.151766 | 0.572 | 0.192 | 1.42E-24 | CSCL1 | HINT3           |
| PFDN4.8   | 9.49E-29 | 0.304088 | 0.846 | 0.351 | 1.42E-24 | CSCL1 | PFDN4           |
| ASPH.7    | 1.00E-28 | 0.270818 | 0.701 | 0.269 | 1.50E-24 | CSCL1 | ASPH            |
| SRGN.12   | 1.01E-28 | -1.52914 | 0.139 | 0.505 | 1.51E-24 | CSCL1 | SRGN            |
| VPS4A.6   | 1.05E-28 | 0.262916 | 0.761 | 0.3   | 1.56E-24 | CSCL1 | VPS4A           |
| SOCS4.1   | 1.07E-28 | 0.138278 | 0.318 | 0.082 | 1.60E-24 | CSCL1 | SOCS4           |
| PRMT3.4   | 1.07E-28 | 0.195234 | 0.323 | 0.085 | 1.60E-24 | CSCL1 | PRMT3           |
| CHPF.10   | 1.11E-28 | 0.264406 | 0.682 | 0.251 | 1.66E-24 | CSCL1 | CHPF            |

|             |           |           |        |        |           |       |                |
|-------------|-----------|-----------|--------|--------|-----------|-------|----------------|
| CDC16. 6    | 1. 11E-28 | 0. 17864  | 0. 562 | 0. 19  | 1. 66E-24 | CSCL1 | CDC16          |
| IN080C. 5   | 1. 12E-28 | 0. 135399 | 0. 493 | 0. 16  | 1. 68E-24 | CSCL1 | IN080C         |
| MEPCE. 2    | 1. 16E-28 | 0. 140856 | 0. 413 | 0. 123 | 1. 73E-24 | CSCL1 | MEPCE          |
| POP7. 9     | 1. 16E-28 | 0. 266376 | 0. 905 | 0. 385 | 1. 74E-24 | CSCL1 | POP7           |
| ATPAF1. 9   | 1. 17E-28 | 0. 195595 | 0. 652 | 0. 233 | 1. 74E-24 | CSCL1 | ATPAF1         |
| TSPAN12. 1  | 1. 18E-28 | 0. 232185 | 0. 393 | 0. 116 | 1. 77E-24 | CSCL1 | TSPAN12        |
| ACO09005. 1 | 1. 19E-28 | 0. 102473 | 0. 154 | 0. 025 | 1. 78E-24 | CSCL1 | ACO09005. 2    |
| AGPAT1. 5   | 1. 22E-28 | 0. 183414 | 0. 617 | 0. 22  | 1. 82E-24 | CSCL1 | AGPAT1         |
| CHST10. 9   | 1. 23E-28 | 0. 193297 | 0. 438 | 0. 134 | 1. 84E-24 | CSCL1 | CHST10         |
| LMNA. 8     | 1. 24E-28 | 0. 369345 | 0. 866 | 0. 408 | 1. 86E-24 | CSCL1 | LMNA           |
| SRRT. 8     | 1. 25E-28 | 0. 169146 | 0. 607 | 0. 21  | 1. 87E-24 | CSCL1 | SRRT           |
| NAA35. 5    | 1. 28E-28 | 0. 195125 | 0. 433 | 0. 132 | 1. 91E-24 | CSCL1 | NAA35          |
| PLIN3. 8    | 1. 28E-28 | 0. 304795 | 0. 786 | 0. 351 | 1. 92E-24 | CSCL1 | PLIN3          |
| GFER. 6     | 1. 31E-28 | 0. 198756 | 0. 582 | 0. 202 | 1. 96E-24 | CSCL1 | GFER           |
| ISOC2. 9    | 1. 31E-28 | 0. 250734 | 0. 811 | 0. 341 | 1. 96E-24 | CSCL1 | ISOC2          |
| PTGR1. 7    | 1. 35E-28 | 0. 111124 | 0. 537 | 0. 179 | 2. 02E-24 | CSCL1 | PTGR1          |
| IFT88. 6    | 1. 36E-28 | 0. 166351 | 0. 368 | 0. 104 | 2. 04E-24 | CSCL1 | IFT88          |
| UBLCP1. 1   | 1. 36E-28 | 0. 163109 | 0. 562 | 0. 191 | 2. 04E-24 | CSCL1 | UBLCP1         |
| CHCHD6. 8   | 1. 41E-28 | 0. 203284 | 0. 632 | 0. 228 | 2. 10E-24 | CSCL1 | CHCHD6         |
| FAM134A. 1  | 1. 43E-28 | 0. 253833 | 0. 746 | 0. 29  | 2. 14E-24 | CSCL1 | FAM134A        |
| ZNF682. 7   | 1. 44E-28 | 0. 158096 | 0. 294 | 0. 072 | 2. 16E-24 | CSCL1 | ZNF682         |
| SHOX2. 8    | 1. 45E-28 | 0. 170385 | 0. 259 | 0. 06  | 2. 17E-24 | CSCL1 | SHOX2          |
| UBTF. 9     | 1. 50E-28 | 0. 220268 | 0. 612 | 0. 22  | 2. 24E-24 | CSCL1 | UBTF           |
| OLFM1. 10   | 1. 53E-28 | 0. 241204 | 0. 458 | 0. 145 | 2. 28E-24 | CSCL1 | OLFM1          |
| SNHG10. 6   | 1. 54E-28 | 0. 182073 | 0. 333 | 0. 09  | 2. 30E-24 | CSCL1 | SNHG10         |
| DHRS13. 7   | 1. 60E-28 | 0. 186645 | 0. 343 | 0. 093 | 2. 39E-24 | CSCL1 | DHRS13         |
| SDHAF1. 7   | 1. 64E-28 | 0. 178661 | 0. 517 | 0. 171 | 2. 45E-24 | CSCL1 | SDHAF1         |
| PPP4R2. 5   | 1. 65E-28 | 0. 190353 | 0. 687 | 0. 254 | 2. 46E-24 | CSCL1 | PPP4R2         |
| TTC32. 5    | 1. 65E-28 | 0. 153147 | 0. 458 | 0. 144 | 2. 47E-24 | CSCL1 | TTC32          |
| KCNJ16. 9   | 1. 67E-28 | 0. 177991 | 0. 234 | 0. 051 | 2. 49E-24 | CSCL1 | KCNJ16         |
| CYB5D2. 7   | 1. 76E-28 | 0. 152487 | 0. 637 | 0. 226 | 2. 62E-24 | CSCL1 | CYB5D2         |
| PRIMPOL. 2  | 1. 76E-28 | 0. 12459  | 0. 313 | 0. 081 | 2. 63E-24 | CSCL1 | PRIMPOL        |
| FH. 6       | 1. 82E-28 | 0. 173464 | 0. 622 | 0. 219 | 2. 72E-24 | CSCL1 | FH             |
| PRKRIR. 5   | 1. 84E-28 | 0. 178478 | 0. 368 | 0. 104 | 2. 75E-24 | CSCL1 | PRKRIR         |
| TAF10. 5    | 1. 91E-28 | 0. 226796 | 0. 617 | 0. 219 | 2. 85E-24 | CSCL1 | TAF10          |
| DEXI. 8     | 1. 93E-28 | 0. 205766 | 0. 582 | 0. 2   | 2. 88E-24 | CSCL1 | DEXI           |
| MYLK-AS1    | 1. 95E-28 | 0. 115593 | 0. 184 | 0. 034 | 2. 92E-24 | CSCL1 | MYLK-AS1       |
| SEMA4B. 3   | 2. 03E-28 | 0. 158892 | 0. 229 | 0. 049 | 3. 03E-24 | CSCL1 | SEMA4B         |
| RP11-410L   | 2. 05E-28 | 0. 206025 | 0. 408 | 0. 123 | 3. 06E-24 | CSCL1 | RP11-410L14. 2 |
| TARDBP. 5   | 2. 09E-28 | 0. 196333 | 0. 751 | 0. 286 | 3. 13E-24 | CSCL1 | TARDBP         |
| RNF5. 5     | 2. 11E-28 | 0. 232054 | 0. 886 | 0. 382 | 3. 15E-24 | CSCL1 | RNF5           |
| MTMR2. 6    | 2. 11E-28 | 0. 186521 | 0. 448 | 0. 141 | 3. 16E-24 | CSCL1 | MTMR2          |
| SSBP4. 8    | 2. 12E-28 | 0. 271454 | 0. 697 | 0. 263 | 3. 17E-24 | CSCL1 | SSBP4          |
| CENPC. 2    | 2. 13E-28 | 0. 159173 | 0. 368 | 0. 103 | 3. 18E-24 | CSCL1 | CENPC          |
| OSBP. 2     | 2. 14E-28 | 0. 141344 | 0. 328 | 0. 087 | 3. 20E-24 | CSCL1 | OSBP           |
| SNRNP48. 2  | 2. 17E-28 | 0. 153521 | 0. 373 | 0. 106 | 3. 24E-24 | CSCL1 | SNRNP48        |
| NMT2. 8     | 2. 19E-28 | 0. 114723 | 0. 348 | 0. 094 | 3. 28E-24 | CSCL1 | NMT2           |
| ATN1. 10    | 2. 23E-28 | 0. 1749   | 0. 532 | 0. 177 | 3. 33E-24 | CSCL1 | ATN1           |
| EID2B. 8    | 2. 30E-28 | 0. 167768 | 0. 323 | 0. 085 | 3. 44E-24 | CSCL1 | EID2B          |
| RALBP1. 6   | 2. 42E-28 | 0. 202697 | 0. 776 | 0. 295 | 3. 61E-24 | CSCL1 | RALBP1         |
| BCAT1. 10   | 2. 55E-28 | 0. 221089 | 0. 627 | 0. 224 | 3. 81E-24 | CSCL1 | BCAT1          |

|            |          |          |       |       |          |       |          |
|------------|----------|----------|-------|-------|----------|-------|----------|
| ENOSF1.9   | 2.72E-28 | 0.167306 | 0.403 | 0.12  | 4.06E-24 | CSCL1 | ENOSF1   |
| CCDC84.1   | 2.76E-28 | 0.133993 | 0.343 | 0.093 | 4.13E-24 | CSCL1 | CCDC84   |
| MED19.7    | 2.81E-28 | 0.197679 | 0.721 | 0.274 | 4.20E-24 | CSCL1 | MED19    |
| UPF3A.11   | 2.90E-28 | 0.231318 | 0.841 | 0.336 | 4.34E-24 | CSCL1 | UPF3A    |
| EIF2AK4.6  | 3.01E-28 | 0.172017 | 0.527 | 0.175 | 4.50E-24 | CSCL1 | EIF2AK4  |
| C7orf49.6  | 3.07E-28 | 0.180512 | 0.577 | 0.201 | 4.59E-24 | CSCL1 | C7orf49  |
| DLG5.7     | 3.07E-28 | 0.12353  | 0.294 | 0.072 | 4.59E-24 | CSCL1 | DLG5     |
| AHCTF1.1   | 3.18E-28 | 0.130901 | 0.303 | 0.077 | 4.76E-24 | CSCL1 | AHCTF1   |
| FGFR10P.3  | 3.19E-28 | 0.119478 | 0.303 | 0.077 | 4.77E-24 | CSCL1 | FGFR10P  |
| SPAST.8    | 3.30E-28 | 0.192161 | 0.373 | 0.107 | 4.93E-24 | CSCL1 | SPAST    |
| CEP63.5    | 3.30E-28 | 0.180621 | 0.517 | 0.172 | 4.93E-24 | CSCL1 | CEP63    |
| SLC39A9.2  | 3.33E-28 | 0.133831 | 0.338 | 0.091 | 4.98E-24 | CSCL1 | SLC39A9  |
| EBP.4      | 3.33E-28 | 0.157308 | 0.667 | 0.244 | 4.98E-24 | CSCL1 | EBP      |
| GRSF1.7    | 3.43E-28 | 0.233014 | 0.811 | 0.314 | 5.13E-24 | CSCL1 | GRSF1    |
| LSG1.7     | 3.45E-28 | 0.152047 | 0.413 | 0.123 | 5.16E-24 | CSCL1 | LSG1     |
| PIAS4.6    | 3.50E-28 | 0.162204 | 0.418 | 0.126 | 5.23E-24 | CSCL1 | PIAS4    |
| ZFHX4.11   | 3.63E-28 | 0.175807 | 0.468 | 0.146 | 5.43E-24 | CSCL1 | ZFHX4    |
| HCCS.4     | 3.67E-28 | 0.116861 | 0.498 | 0.161 | 5.49E-24 | CSCL1 | HCCS     |
| EMC8.7     | 3.73E-28 | 0.21298  | 0.711 | 0.264 | 5.58E-24 | CSCL1 | EMC8     |
| FAM216A.7  | 3.74E-28 | 0.144993 | 0.398 | 0.117 | 5.59E-24 | CSCL1 | FAM216A  |
| AP5S1.4    | 3.89E-28 | 0.170811 | 0.338 | 0.093 | 5.81E-24 | CSCL1 | AP5S1    |
| DOLK.7     | 3.90E-28 | 0.171633 | 0.403 | 0.121 | 5.83E-24 | CSCL1 | DOLK     |
| PPP2R2D.4  | 3.91E-28 | 0.148769 | 0.323 | 0.086 | 5.84E-24 | CSCL1 | PPP2R2D  |
| FBXW9.6    | 4.01E-28 | 0.177247 | 0.373 | 0.107 | 5.99E-24 | CSCL1 | FBXW9    |
| CCDC6.3    | 4.02E-28 | 0.131635 | 0.373 | 0.106 | 6.01E-24 | CSCL1 | CCDC6    |
| CCDC106.1  | 4.11E-28 | 0.250285 | 0.632 | 0.225 | 6.15E-24 | CSCL1 | CCDC106  |
| SPATA33.8  | 4.12E-28 | 0.169842 | 0.448 | 0.14  | 6.16E-24 | CSCL1 | SPATA33  |
| ENHO.11    | 4.21E-28 | 0.180388 | 0.463 | 0.145 | 6.29E-24 | CSCL1 | ENHO     |
| RFTN1.5    | 4.21E-28 | 0.210905 | 0.363 | 0.105 | 6.29E-24 | CSCL1 | RFTN1    |
| PDK2.6     | 4.22E-28 | 0.146193 | 0.493 | 0.158 | 6.31E-24 | CSCL1 | PDK2     |
| C11orf49.4 | 4.50E-28 | 0.175724 | 0.632 | 0.23  | 6.72E-24 | CSCL1 | C11orf49 |
| CLPTM1L.3  | 4.56E-28 | 0.18919  | 0.458 | 0.146 | 6.81E-24 | CSCL1 | CLPTM1L  |
| NDUFAF5.5  | 4.56E-28 | 0.147378 | 0.423 | 0.129 | 6.82E-24 | CSCL1 | NDUFAF5  |
| ARFGAP1.4  | 4.64E-28 | 0.160485 | 0.453 | 0.142 | 6.94E-24 | CSCL1 | ARFGAP1  |
| POLR2A.3   | 4.70E-28 | 0.133267 | 0.587 | 0.205 | 7.03E-24 | CSCL1 | POLR2A   |
| GOT1.4     | 4.85E-28 | 0.102191 | 0.423 | 0.126 | 7.24E-24 | CSCL1 | GOT1     |
| C16orf91.5 | 5.02E-28 | 0.14135  | 0.557 | 0.189 | 7.51E-24 | CSCL1 | C16orf91 |
| HDAC6.2    | 5.03E-28 | 0.156083 | 0.378 | 0.109 | 7.51E-24 | CSCL1 | HDAC6    |
| CEP250.2   | 5.03E-28 | 0.124739 | 0.274 | 0.066 | 7.52E-24 | CSCL1 | CEP250   |
| VPS16.5    | 5.39E-28 | 0.161229 | 0.512 | 0.169 | 8.06E-24 | CSCL1 | VPS16    |
| SPRY4.7    | 5.44E-28 | 0.133725 | 0.269 | 0.064 | 8.13E-24 | CSCL1 | SPRY4    |
| BRMS1L.6   | 5.59E-28 | 0.13984  | 0.343 | 0.093 | 8.35E-24 | CSCL1 | BRMS1L   |
| TPM4.10    | 5.60E-28 | 0.39103  | 0.92  | 0.49  | 8.36E-24 | CSCL1 | TPM4     |
| PHF23.9    | 5.61E-28 | 0.18531  | 0.582 | 0.201 | 8.39E-24 | CSCL1 | PHF23    |
| PEF1.5     | 5.62E-28 | 0.175309 | 0.791 | 0.311 | 8.39E-24 | CSCL1 | PEF1     |
| NCK2.6     | 5.74E-28 | 0.158149 | 0.453 | 0.142 | 8.58E-24 | CSCL1 | NCK2     |
| CFL2.10    | 5.88E-28 | 0.171027 | 0.806 | 0.319 | 8.78E-24 | CSCL1 | CFL2     |
| SATB2.5    | 6.52E-28 | 0.178562 | 0.279 | 0.069 | 9.75E-24 | CSCL1 | SATB2    |
| KATNBL1.7  | 6.94E-28 | 0.189082 | 0.652 | 0.244 | 1.04E-23 | CSCL1 | KATNBL1  |
| ENDOD1.1C  | 7.08E-28 | 0.165422 | 0.443 | 0.138 | 1.06E-23 | CSCL1 | ENDOD1   |
| ENOPH1.1C  | 7.63E-28 | 0.306682 | 0.905 | 0.38  | 1.14E-23 | CSCL1 | ENOPH1   |

|            |          |          |       |       |          |       |             |
|------------|----------|----------|-------|-------|----------|-------|-------------|
| SMIM4.7    | 7.66E-28 | 0.156885 | 0.701 | 0.26  | 1.14E-23 | CSCL1 | SMIM4       |
| ZHX3.7     | 8.08E-28 | 0.219395 | 0.383 | 0.115 | 1.21E-23 | CSCL1 | ZHX3        |
| PCBP4.12   | 8.20E-28 | 0.22825  | 0.677 | 0.248 | 1.22E-23 | CSCL1 | PCBP4       |
| IFT27.9    | 8.20E-28 | 0.19693  | 0.672 | 0.249 | 1.23E-23 | CSCL1 | IFT27       |
| CLINT1.4   | 8.31E-28 | 0.13834  | 0.572 | 0.194 | 1.24E-23 | CSCL1 | CLINT1      |
| R3HDM4.6   | 9.39E-28 | 0.19303  | 0.557 | 0.194 | 1.40E-23 | CSCL1 | R3HDM4      |
| CLIC4.11   | 9.51E-28 | 0.232921 | 0.806 | 0.324 | 1.42E-23 | CSCL1 | CLIC4       |
| LEMD2.4    | 9.67E-28 | 0.170415 | 0.453 | 0.143 | 1.45E-23 | CSCL1 | LEMD2       |
| PDS5A.2    | 9.73E-28 | 0.141857 | 0.478 | 0.152 | 1.45E-23 | CSCL1 | PDS5A       |
| NCAM1.11   | 9.73E-28 | 0.195319 | 0.841 | 0.326 | 1.45E-23 | CSCL1 | NCAM1       |
| TPM1.9     | 9.74E-28 | 0.240221 | 0.652 | 0.245 | 1.46E-23 | CSCL1 | TPM1        |
| ROB02.11   | 1.00E-27 | 0.221755 | 0.358 | 0.103 | 1.50E-23 | CSCL1 | ROB02       |
| FGD5-AS1.1 | 1.02E-27 | 0.238923 | 0.766 | 0.305 | 1.52E-23 | CSCL1 | FGD5-AS1    |
| DPY19L4.5  | 1.04E-27 | 0.117358 | 0.333 | 0.089 | 1.55E-23 | CSCL1 | DPY19L4     |
| NRCAM.11   | 1.04E-27 | 0.226272 | 0.697 | 0.262 | 1.55E-23 | CSCL1 | NRCAM       |
| TMEM201.1  | 1.06E-27 | 0.147359 | 0.214 | 0.044 | 1.59E-23 | CSCL1 | TMEM201     |
| ELP6.6     | 1.09E-27 | 0.16504  | 0.582 | 0.209 | 1.63E-23 | CSCL1 | ELP6        |
| HLTF.10    | 1.11E-27 | 0.171127 | 0.502 | 0.168 | 1.66E-23 | CSCL1 | HLTF        |
| ZNF511.9   | 1.19E-27 | 0.227423 | 0.537 | 0.19  | 1.78E-23 | CSCL1 | ZNF511      |
| DPM2.4     | 1.19E-27 | 0.206907 | 0.836 | 0.338 | 1.78E-23 | CSCL1 | DPM2        |
| TUBB2A.11  | 1.24E-27 | 0.385732 | 0.965 | 0.469 | 1.86E-23 | CSCL1 | TUBB2A      |
| ERI3.8     | 1.30E-27 | 0.242509 | 0.881 | 0.36  | 1.94E-23 | CSCL1 | ERI3        |
| CNRIP1.9   | 1.30E-27 | 0.154189 | 0.572 | 0.198 | 1.94E-23 | CSCL1 | CNRIP1      |
| C17orf75.1 | 1.31E-27 | 0.130185 | 0.333 | 0.091 | 1.95E-23 | CSCL1 | C17orf75    |
| SGTA.7     | 1.32E-27 | 0.240014 | 0.771 | 0.308 | 1.98E-23 | CSCL1 | SGTA        |
| TMOD3.9    | 1.37E-27 | 0.11964  | 0.448 | 0.139 | 2.04E-23 | CSCL1 | TMOD3       |
| USP5.5     | 1.40E-27 | 0.212901 | 0.602 | 0.218 | 2.10E-23 | CSCL1 | USP5        |
| HMGXB4.5   | 1.41E-27 | 0.176495 | 0.607 | 0.216 | 2.10E-23 | CSCL1 | HMGXB4      |
| PCIF1.4    | 1.43E-27 | 0.142702 | 0.438 | 0.138 | 2.14E-23 | CSCL1 | PCIF1       |
| DDX10.1    | 1.43E-27 | 0.126153 | 0.393 | 0.116 | 2.14E-23 | CSCL1 | DDX10       |
| HRASLS.7   | 1.48E-27 | 0.181443 | 0.214 | 0.045 | 2.22E-23 | CSCL1 | HRASLS      |
| NTAN1.9    | 1.51E-27 | 0.183676 | 0.552 | 0.193 | 2.26E-23 | CSCL1 | NTAN1       |
| MGARP.7    | 1.54E-27 | 0.190073 | 0.294 | 0.076 | 2.31E-23 | CSCL1 | MGARP       |
| HOMER3.7   | 1.55E-27 | 0.280658 | 0.622 | 0.235 | 2.32E-23 | CSCL1 | HOMER3      |
| XRCC3.1    | 1.61E-27 | 0.114094 | 0.174 | 0.031 | 2.40E-23 | CSCL1 | XRCC3       |
| ACTR5.1    | 1.61E-27 | 0.138498 | 0.229 | 0.05  | 2.41E-23 | CSCL1 | ACTR5       |
| ZC3H14.7   | 1.62E-27 | 0.132716 | 0.567 | 0.197 | 2.42E-23 | CSCL1 | ZC3H14      |
| ZNF680.9   | 1.66E-27 | 0.167491 | 0.507 | 0.168 | 2.48E-23 | CSCL1 | ZNF680      |
| C8orf82.9  | 1.71E-27 | 0.207919 | 0.498 | 0.165 | 2.55E-23 | CSCL1 | C8orf82     |
| HIST1H4C.1 | 1.71E-27 | 0.529067 | 0.801 | 0.418 | 2.56E-23 | CSCL1 | HIST1H4C    |
| TAC01.5    | 1.78E-27 | 0.210299 | 0.502 | 0.169 | 2.65E-23 | CSCL1 | TAC01       |
| DOCK7.4    | 1.80E-27 | 0.116952 | 0.408 | 0.121 | 2.68E-23 | CSCL1 | DOCK7       |
| HNRNPH3.1  | 1.83E-27 | 0.325718 | 0.915 | 0.437 | 2.74E-23 | CSCL1 | HNRNPH3     |
| SURF4.4    | 1.87E-27 | 0.289132 | 0.816 | 0.342 | 2.80E-23 | CSCL1 | SURF4       |
| PTDSS2.11  | 1.91E-27 | 0.190369 | 0.458 | 0.147 | 2.85E-23 | CSCL1 | PTDSS2      |
| CTB-58E17  | 2.03E-27 | 0.101594 | 0.244 | 0.055 | 3.03E-23 | CSCL1 | CTB-58E17.1 |
| MED9.6     | 2.07E-27 | 0.135159 | 0.328 | 0.088 | 3.10E-23 | CSCL1 | MED9        |
| PPP2R4.4   | 2.13E-27 | 0.177384 | 0.632 | 0.229 | 3.18E-23 | CSCL1 | PPP2R4      |
| FAM89B.11  | 2.17E-27 | 0.28329  | 0.637 | 0.24  | 3.25E-23 | CSCL1 | FAM89B      |
| CCDC138.1  | 2.20E-27 | 0.118418 | 0.219 | 0.046 | 3.28E-23 | CSCL1 | CCDC138     |
| PDCD2.9    | 2.25E-27 | 0.268297 | 0.731 | 0.287 | 3.36E-23 | CSCL1 | PDCD2       |

|             |           |           |        |        |           |       |          |
|-------------|-----------|-----------|--------|--------|-----------|-------|----------|
| OPA1. 4     | 2. 37E-27 | 0. 195493 | 0. 408 | 0. 126 | 3. 55E-23 | CSCL1 | OPA1     |
| PNMA1. 11   | 2. 38E-27 | 0. 257032 | 0. 721 | 0. 276 | 3. 56E-23 | CSCL1 | PNMA1    |
| PAFAH1B3. 2 | 2. 39E-27 | 0. 310878 | 0. 93  | 0. 415 | 3. 58E-23 | CSCL1 | PAFAH1B3 |
| RECK. 2     | 2. 45E-27 | 0. 103627 | 0. 264 | 0. 062 | 3. 66E-23 | CSCL1 | RECK     |
| MANEA. 2    | 2. 58E-27 | 0. 155725 | 0. 289 | 0. 073 | 3. 86E-23 | CSCL1 | MANEA    |
| C2orf76. 3  | 2. 59E-27 | 0. 136141 | 0. 483 | 0. 159 | 3. 87E-23 | CSCL1 | C2orf76  |
| DBN1. 11    | 2. 65E-27 | 0. 237474 | 0. 776 | 0. 303 | 3. 96E-23 | CSCL1 | DBN1     |
| DUS1L. 4    | 2. 84E-27 | 0. 182909 | 0. 413 | 0. 128 | 4. 25E-23 | CSCL1 | DUS1L    |
| TMEM199. 6  | 3. 13E-27 | 0. 123478 | 0. 652 | 0. 235 | 4. 68E-23 | CSCL1 | TMEM199  |
| IPO9. 8     | 3. 18E-27 | 0. 15577  | 0. 627 | 0. 224 | 4. 76E-23 | CSCL1 | IPO9     |
| LONP1. 5    | 3. 18E-27 | 0. 173956 | 0. 572 | 0. 198 | 4. 76E-23 | CSCL1 | LONP1    |
| B4GALT7. 4  | 3. 22E-27 | 0. 155807 | 0. 582 | 0. 203 | 4. 81E-23 | CSCL1 | B4GALT7  |
| FAM200B. 8  | 3. 26E-27 | 0. 224426 | 0. 871 | 0. 357 | 4. 87E-23 | CSCL1 | FAM200B  |
| CYTH2. 10   | 3. 26E-27 | 0. 253826 | 0. 816 | 0. 333 | 4. 88E-23 | CSCL1 | CYTH2    |
| C11orf84    | 3. 27E-27 | 0. 107618 | 0. 194 | 0. 038 | 4. 89E-23 | CSCL1 | C11orf84 |
| UBE2J2. 9   | 3. 56E-27 | 0. 264631 | 0. 816 | 0. 326 | 5. 32E-23 | CSCL1 | UBE2J2   |
| DIMT1. 4    | 3. 64E-27 | 0. 125098 | 0. 532 | 0. 18  | 5. 43E-23 | CSCL1 | DIMT1    |
| ABAT. 11    | 3. 64E-27 | 0. 199641 | 0. 473 | 0. 154 | 5. 44E-23 | CSCL1 | ABAT     |
| ALG6. 3     | 3. 65E-27 | 0. 173092 | 0. 348 | 0. 099 | 5. 46E-23 | CSCL1 | ALG6     |
| CRNKL1. 5   | 3. 66E-27 | 0. 177569 | 0. 453 | 0. 145 | 5. 47E-23 | CSCL1 | CRNKL1   |
| ZNF12. 9    | 3. 67E-27 | 0. 157922 | 0. 398 | 0. 119 | 5. 49E-23 | CSCL1 | ZNF12    |
| INO80E. 7   | 3. 68E-27 | 0. 207742 | 0. 602 | 0. 219 | 5. 49E-23 | CSCL1 | INO80E   |
| UFD1L. 6    | 3. 70E-27 | 0. 187541 | 0. 791 | 0. 322 | 5. 53E-23 | CSCL1 | UFD1L    |
| TCERG1. 7   | 3. 74E-27 | 0. 191961 | 0. 562 | 0. 198 | 5. 58E-23 | CSCL1 | TCERG1   |
| RPE. 3      | 3. 75E-27 | 0. 116902 | 0. 473 | 0. 152 | 5. 61E-23 | CSCL1 | RPE      |
| R3HCC1. 7   | 3. 80E-27 | 0. 14787  | 0. 736 | 0. 278 | 5. 67E-23 | CSCL1 | R3HCC1   |
| CAHM. 10    | 3. 81E-27 | 0. 155799 | 0. 323 | 0. 087 | 5. 69E-23 | CSCL1 | CAHM     |
| EPHB3. 3    | 4. 08E-27 | 0. 158881 | 0. 209 | 0. 043 | 6. 10E-23 | CSCL1 | EPHB3    |
| OGFOD1. 5   | 4. 11E-27 | 0. 137191 | 0. 458 | 0. 145 | 6. 14E-23 | CSCL1 | OGFOD1   |
| HAUS1. 2    | 4. 36E-27 | 0. 137246 | 0. 622 | 0. 224 | 6. 51E-23 | CSCL1 | HAUS1    |
| SUPT20H. 8  | 4. 39E-27 | 0. 184573 | 0. 567 | 0. 201 | 6. 56E-23 | CSCL1 | SUPT20H  |
| ZNF85. 4    | 4. 63E-27 | 0. 159198 | 0. 308 | 0. 081 | 6. 93E-23 | CSCL1 | ZNF85    |
| TRIM36. 11  | 4. 79E-27 | 0. 178012 | 0. 522 | 0. 176 | 7. 16E-23 | CSCL1 | TRIM36   |
| ELMO2. 7    | 5. 04E-27 | 0. 185061 | 0. 403 | 0. 123 | 7. 53E-23 | CSCL1 | ELMO2    |
| SCD5. 11    | 5. 08E-27 | 0. 318162 | 0. 905 | 0. 385 | 7. 59E-23 | CSCL1 | SCD5     |
| CCDC25. 8   | 5. 22E-27 | 0. 157732 | 0. 751 | 0. 289 | 7. 80E-23 | CSCL1 | CCDC25   |
| G6PD. 6     | 5. 33E-27 | 0. 193616 | 0. 607 | 0. 221 | 7. 97E-23 | CSCL1 | G6PD     |
| SWI5. 9     | 5. 43E-27 | 0. 147835 | 0. 637 | 0. 238 | 8. 11E-23 | CSCL1 | SWI5     |
| GPALPP1. 5  | 5. 48E-27 | 0. 116828 | 0. 393 | 0. 116 | 8. 20E-23 | CSCL1 | GPALPP1  |
| STRBP. 10   | 5. 75E-27 | 0. 196187 | 0. 398 | 0. 122 | 8. 59E-23 | CSCL1 | STRBP    |
| ARID2. 4    | 5. 81E-27 | 0. 167722 | 0. 348 | 0. 098 | 8. 68E-23 | CSCL1 | ARID2    |
| FAM57A. 7   | 5. 82E-27 | 0. 162603 | 0. 328 | 0. 09  | 8. 69E-23 | CSCL1 | FAM57A   |
| SLC35E4. 2  | 5. 99E-27 | 0. 165141 | 0. 254 | 0. 061 | 8. 96E-23 | CSCL1 | SLC35E4  |
| SURF2. 9    | 6. 38E-27 | 0. 207635 | 0. 612 | 0. 225 | 9. 53E-23 | CSCL1 | SURF2    |
| PARD6G      | 6. 59E-27 | 0. 115342 | 0. 159 | 0. 027 | 9. 85E-23 | CSCL1 | PARD6G   |
| HMG5. 3     | 6. 64E-27 | 0. 19653  | 0. 318 | 0. 087 | 9. 93E-23 | CSCL1 | HMG5     |
| RAD1. 6     | 6. 89E-27 | 0. 13071  | 0. 512 | 0. 172 | 1. 03E-22 | CSCL1 | RAD1     |
| TXNRD1. 6   | 6. 94E-27 | 0. 194584 | 0. 627 | 0. 231 | 1. 04E-22 | CSCL1 | TXNRD1   |
| IL1RAP. 7   | 7. 07E-27 | 0. 225789 | 0. 468 | 0. 154 | 1. 06E-22 | CSCL1 | IL1RAP   |
| EIF5A2. 2   | 7. 09E-27 | 0. 117134 | 0. 239 | 0. 054 | 1. 06E-22 | CSCL1 | EIF5A2   |
| STX2. 8     | 7. 14E-27 | 0. 154411 | 0. 358 | 0. 103 | 1. 07E-22 | CSCL1 | STX2     |

|            |          |          |       |       |          |       |              |
|------------|----------|----------|-------|-------|----------|-------|--------------|
| FIP1L1.7   | 7.51E-27 | 0.167222 | 0.751 | 0.289 | 1.12E-22 | CSCL1 | FIP1L1       |
| OBSL1.10   | 7.66E-27 | 0.156489 | 0.443 | 0.141 | 1.15E-22 | CSCL1 | OBSL1        |
| TOPBP1.7   | 7.67E-27 | 0.17129  | 0.323 | 0.089 | 1.15E-22 | CSCL1 | TOPBP1       |
| DLAT.5     | 7.96E-27 | 0.162947 | 0.398 | 0.121 | 1.19E-22 | CSCL1 | DLAT         |
| FKBPL.5    | 8.03E-27 | 0.131323 | 0.259 | 0.062 | 1.20E-22 | CSCL1 | FKBPL        |
| GLTP.7     | 8.12E-27 | 0.15625  | 0.692 | 0.261 | 1.21E-22 | CSCL1 | GLTP         |
| IQGAP2.6   | 8.12E-27 | 0.180239 | 0.448 | 0.144 | 1.21E-22 | CSCL1 | IQGAP2       |
| NAV1.8     | 8.21E-27 | 0.149551 | 0.483 | 0.157 | 1.23E-22 | CSCL1 | NAV1         |
| AKAP8L.1C  | 8.23E-27 | 0.213176 | 0.652 | 0.242 | 1.23E-22 | CSCL1 | AKAP8L       |
| COQ5.6     | 8.28E-27 | 0.112638 | 0.547 | 0.19  | 1.24E-22 | CSCL1 | COQ5         |
| PARP2.7    | 8.30E-27 | 0.157316 | 0.368 | 0.107 | 1.24E-22 | CSCL1 | PARP2        |
| LSM14A.7   | 8.46E-27 | 0.271612 | 0.886 | 0.372 | 1.26E-22 | CSCL1 | LSM14A       |
| EMD.6      | 8.52E-27 | 0.191918 | 0.711 | 0.276 | 1.27E-22 | CSCL1 | EMD          |
| PPFIA3.9   | 8.82E-27 | 0.197255 | 0.313 | 0.086 | 1.32E-22 | CSCL1 | PPFIA3       |
| MAPRE1.5   | 9.25E-27 | 0.318732 | 0.945 | 0.469 | 1.38E-22 | CSCL1 | MAPRE1       |
| VKORC1L1.9 | 9.48E-27 | 0.177024 | 0.408 | 0.126 | 1.42E-22 | CSCL1 | VKORC1L1     |
| ELN.9      | 9.49E-27 | 0.185124 | 0.358 | 0.104 | 1.42E-22 | CSCL1 | ELN          |
| SMARCD1.1  | 9.69E-27 | 0.190744 | 0.582 | 0.208 | 1.45E-22 | CSCL1 | SMARCD1      |
| NCBP1.3    | 1.00E-26 | 0.112923 | 0.303 | 0.079 | 1.50E-22 | CSCL1 | NCBP1        |
| MED1.4     | 1.03E-26 | 0.148851 | 0.383 | 0.114 | 1.53E-22 | CSCL1 | MED1         |
| ARPC5L.8   | 1.03E-26 | 0.273765 | 0.866 | 0.361 | 1.54E-22 | CSCL1 | ARPC5L       |
| BCKDHB.4   | 1.05E-26 | 0.144651 | 0.313 | 0.084 | 1.56E-22 | CSCL1 | BCKDHB       |
| NUP98.2    | 1.07E-26 | 0.103512 | 0.338 | 0.093 | 1.61E-22 | CSCL1 | NUP98        |
| HLA-DRB1.1 | 1.08E-26 | -1.43316 | 0.224 | 0.538 | 1.62E-22 | CSCL1 | HLA-DRB1     |
| SOX11.11   | 1.09E-26 | 0.140047 | 0.711 | 0.265 | 1.63E-22 | CSCL1 | SOX11        |
| SLC27A4.3  | 1.10E-26 | 0.120818 | 0.244 | 0.056 | 1.64E-22 | CSCL1 | SLC27A4      |
| DGAT1.4    | 1.13E-26 | 0.128924 | 0.313 | 0.084 | 1.69E-22 | CSCL1 | DGAT1        |
| RFT1.4     | 1.13E-26 | 0.127181 | 0.418 | 0.131 | 1.69E-22 | CSCL1 | RFT1         |
| PIGL.3     | 1.14E-26 | 0.100355 | 0.308 | 0.082 | 1.71E-22 | CSCL1 | PIGL         |
| SF3A3.4    | 1.15E-26 | 0.127957 | 0.736 | 0.278 | 1.71E-22 | CSCL1 | SF3A3        |
| LAPTM5.12  | 1.21E-26 | -1.50055 | 0.075 | 0.442 | 1.81E-22 | CSCL1 | LAPTM5       |
| SLC39A6.9  | 1.22E-26 | 0.271576 | 0.776 | 0.32  | 1.82E-22 | CSCL1 | SLC39A6      |
| RTN4IP1    | 1.26E-26 | 0.113407 | 0.214 | 0.045 | 1.88E-22 | CSCL1 | RTN4IP1      |
| CDV3.7     | 1.26E-26 | 0.17065  | 0.706 | 0.268 | 1.88E-22 | CSCL1 | CDV3         |
| POLR3K.5   | 1.28E-26 | 0.131878 | 0.597 | 0.214 | 1.91E-22 | CSCL1 | POLR3K       |
| DVL2.9     | 1.31E-26 | 0.165932 | 0.507 | 0.171 | 1.95E-22 | CSCL1 | DVL2         |
| DGCR6L.5   | 1.31E-26 | 0.244819 | 0.816 | 0.327 | 1.96E-22 | CSCL1 | DGCR6L       |
| ZCCHC3.9   | 1.34E-26 | 0.159051 | 0.353 | 0.102 | 2.00E-22 | CSCL1 | ZCCHC3       |
| DDX42.7    | 1.34E-26 | 0.186889 | 0.587 | 0.212 | 2.01E-22 | CSCL1 | DDX42        |
| EFCAB2.3   | 1.41E-26 | 0.137501 | 0.333 | 0.093 | 2.11E-22 | CSCL1 | EFCAB2       |
| RP11-25K1  | 1.49E-26 | 0.14115  | 0.343 | 0.096 | 2.23E-22 | CSCL1 | RP11-25K19.1 |
| NT5C3A.9   | 1.51E-26 | 0.194942 | 0.741 | 0.286 | 2.26E-22 | CSCL1 | NT5C3A       |
| PDLIM7.8   | 1.56E-26 | 0.25357  | 0.627 | 0.232 | 2.33E-22 | CSCL1 | PDLIM7       |
| ZNF362.3   | 1.57E-26 | 0.145104 | 0.328 | 0.09  | 2.35E-22 | CSCL1 | ZNF362       |
| IP07.5     | 1.59E-26 | 0.160296 | 0.582 | 0.205 | 2.38E-22 | CSCL1 | IP07         |
| ZNF519.3   | 1.62E-26 | 0.153075 | 0.194 | 0.039 | 2.43E-22 | CSCL1 | ZNF519       |
| APOA1BP.5  | 1.66E-26 | 0.237303 | 0.861 | 0.367 | 2.48E-22 | CSCL1 | APOA1BP      |
| URI1.8     | 1.67E-26 | 0.185957 | 0.597 | 0.214 | 2.49E-22 | CSCL1 | URI1         |
| TBL2.3     | 1.85E-26 | 0.132455 | 0.532 | 0.183 | 2.77E-22 | CSCL1 | TBL2         |
| UBE2G1.1C  | 1.86E-26 | 0.220366 | 0.657 | 0.251 | 2.78E-22 | CSCL1 | UBE2G1       |
| AKT2.4     | 2.02E-26 | 0.126796 | 0.527 | 0.18  | 3.02E-22 | CSCL1 | AKT2         |



|            |          |          |       |       |          |       |          |
|------------|----------|----------|-------|-------|----------|-------|----------|
| STMN1.11   | 2.14E-26 | 0.343922 | 1     | 0.624 | 3.19E-22 | CSCL1 | STMN1    |
| PARG.1     | 2.14E-26 | 0.1065   | 0.209 | 0.044 | 3.20E-22 | CSCL1 | PARG     |
| TBP.1      | 2.15E-26 | 0.108395 | 0.299 | 0.078 | 3.22E-22 | CSCL1 | TBP      |
| CALM3.9    | 2.16E-26 | 0.35509  | 0.975 | 0.586 | 3.23E-22 | CSCL1 | CALM3    |
| MED21.5    | 2.19E-26 | 0.140638 | 0.572 | 0.204 | 3.27E-22 | CSCL1 | MED21    |
| AAGAB.4    | 2.30E-26 | 0.148494 | 0.373 | 0.11  | 3.44E-22 | CSCL1 | AAGAB    |
| CSTF1.3    | 2.32E-26 | 0.118559 | 0.408 | 0.125 | 3.47E-22 | CSCL1 | CSTF1    |
| PSME3.5    | 2.38E-26 | 0.138296 | 0.607 | 0.22  | 3.56E-22 | CSCL1 | PSME3    |
| TNIK.8     | 2.41E-26 | 0.171899 | 0.438 | 0.139 | 3.60E-22 | CSCL1 | TNIK     |
| PIGQ.2     | 2.41E-26 | 0.154622 | 0.363 | 0.106 | 3.60E-22 | CSCL1 | PIGQ     |
| SMC5.4     | 2.43E-26 | 0.182165 | 0.507 | 0.174 | 3.63E-22 | CSCL1 | SMC5     |
| NR2E1.5    | 2.44E-26 | 0.182234 | 0.229 | 0.052 | 3.65E-22 | CSCL1 | NR2E1    |
| REPS1.8    | 2.45E-26 | 0.17675  | 0.398 | 0.123 | 3.66E-22 | CSCL1 | REPS1    |
| SHC1.6     | 2.49E-26 | 0.132205 | 0.403 | 0.124 | 3.72E-22 | CSCL1 | SHC1     |
| C7orf55.1  | 2.55E-26 | 0.257668 | 0.935 | 0.414 | 3.82E-22 | CSCL1 | C7orf55  |
| TRIAP1.9   | 2.69E-26 | 0.144721 | 0.776 | 0.305 | 4.01E-22 | CSCL1 | TRIAP1   |
| FXR1.2     | 2.80E-26 | 0.214269 | 0.781 | 0.319 | 4.19E-22 | CSCL1 | FXR1     |
| ARNT2.11   | 2.82E-26 | 0.158611 | 0.363 | 0.107 | 4.21E-22 | CSCL1 | ARNT2    |
| EFTUD2.6   | 2.82E-26 | 0.160113 | 0.587 | 0.208 | 4.22E-22 | CSCL1 | EFTUD2   |
| KMT2A.11   | 3.01E-26 | 0.174968 | 0.627 | 0.229 | 4.49E-22 | CSCL1 | KMT2A    |
| GPX7.7     | 3.14E-26 | 0.137831 | 0.502 | 0.171 | 4.70E-22 | CSCL1 | GPX7     |
| PDZD11.7   | 3.16E-26 | 0.177685 | 0.851 | 0.35  | 4.73E-22 | CSCL1 | PDZD11   |
| DCTN3.5    | 3.44E-26 | 0.29668  | 0.985 | 0.508 | 5.14E-22 | CSCL1 | DCTN3    |
| C21orf59.3 | 3.52E-26 | 0.229362 | 0.751 | 0.309 | 5.27E-22 | CSCL1 | C21orf59 |
| SEMA3A.4   | 3.56E-26 | 0.171032 | 0.214 | 0.047 | 5.31E-22 | CSCL1 | SEMA3A   |
| SPAG1.1    | 3.64E-26 | 0.136337 | 0.204 | 0.043 | 5.44E-22 | CSCL1 | SPAG1    |
| KCTD17.6   | 3.67E-26 | 0.167101 | 0.413 | 0.13  | 5.49E-22 | CSCL1 | KCTD17   |
| SNUPN.5    | 3.78E-26 | 0.134906 | 0.473 | 0.157 | 5.65E-22 | CSCL1 | SNUPN    |
| KIF2A.11   | 3.82E-26 | 0.200382 | 0.617 | 0.229 | 5.71E-22 | CSCL1 | KIF2A    |
| CALU.10    | 3.83E-26 | 0.250654 | 0.896 | 0.395 | 5.72E-22 | CSCL1 | CALU     |
| SS18L1.6   | 4.24E-26 | 0.117193 | 0.318 | 0.086 | 6.34E-22 | CSCL1 | SS18L1   |
| IL17RB.8   | 4.26E-26 | 0.169232 | 0.204 | 0.043 | 6.36E-22 | CSCL1 | IL17RB   |
| B4GALT3.6  | 4.30E-26 | 0.127558 | 0.592 | 0.212 | 6.42E-22 | CSCL1 | B4GALT3  |
| EMC6.7     | 4.33E-26 | 0.333256 | 0.925 | 0.425 | 6.48E-22 | CSCL1 | EMC6     |
| RAB4A.6    | 4.44E-26 | 0.265919 | 0.801 | 0.333 | 6.63E-22 | CSCL1 | RAB4A    |
| WDFY1      | 4.58E-26 | 0.115284 | 0.299 | 0.079 | 6.84E-22 | CSCL1 | WDFY1    |
| HOXD11.8   | 4.66E-26 | 0.141401 | 0.284 | 0.073 | 6.96E-22 | CSCL1 | HOXD11   |
| PLEKH01.6  | 4.69E-26 | 0.165591 | 0.711 | 0.268 | 7.01E-22 | CSCL1 | PLEKH01  |
| PPCDC.2    | 4.79E-26 | 0.136886 | 0.264 | 0.065 | 7.15E-22 | CSCL1 | PPCDC    |
| CEP19.8    | 4.81E-26 | 0.145467 | 0.284 | 0.073 | 7.18E-22 | CSCL1 | CEP19    |
| IL6ST.11   | 4.87E-26 | 0.175064 | 0.662 | 0.247 | 7.28E-22 | CSCL1 | IL6ST    |
| CD47.7     | 4.90E-26 | 0.279921 | 0.876 | 0.375 | 7.32E-22 | CSCL1 | CD47     |
| UBE2Q2.7   | 4.92E-26 | 0.173936 | 0.562 | 0.199 | 7.35E-22 | CSCL1 | UBE2Q2   |
| TIA1.12    | 4.96E-26 | 0.169221 | 0.647 | 0.241 | 7.41E-22 | CSCL1 | TIA1     |
| ABCF1.8    | 4.97E-26 | 0.222713 | 0.701 | 0.277 | 7.43E-22 | CSCL1 | ABCF1    |
| TEX2.4     | 5.11E-26 | 0.16165  | 0.279 | 0.072 | 7.64E-22 | CSCL1 | TEX2     |
| ZNF436.7   | 5.36E-26 | 0.200743 | 0.284 | 0.074 | 8.01E-22 | CSCL1 | ZNF436   |
| TRDMT1     | 5.41E-26 | 0.108119 | 0.164 | 0.03  | 8.08E-22 | CSCL1 | TRDMT1   |
| PFDN5.9    | 5.51E-26 | -0.42476 | 0.995 | 0.882 | 8.23E-22 | CSCL1 | PFDN5    |
| CAD.2      | 5.62E-26 | 0.12315  | 0.224 | 0.05  | 8.40E-22 | CSCL1 | CAD      |
| MCM7.11    | 5.99E-26 | 0.218464 | 0.657 | 0.247 | 8.94E-22 | CSCL1 | MCM7     |

|            |    |        |          |       |       |          |       |          |
|------------|----|--------|----------|-------|-------|----------|-------|----------|
| GPATCH11.  | 6. | 06E-26 | 0.146406 | 0.423 | 0.133 | 9.05E-22 | CSCL1 | GPATCH11 |
| HS6ST2.7   | 6. | 24E-26 | 0.144918 | 0.249 | 0.059 | 9.32E-22 | CSCL1 | HS6ST2   |
| FARSA.7    | 6. | 36E-26 | 0.18774  | 0.791 | 0.311 | 9.50E-22 | CSCL1 | FARSA    |
| FAM120A.8  | 6. | 53E-26 | 0.175536 | 0.567 | 0.204 | 9.75E-22 | CSCL1 | FAM120A  |
| TESK1.3    | 6. | 64E-26 | 0.13807  | 0.294 | 0.077 | 9.92E-22 | CSCL1 | TESK1    |
| CHCHD3.7   | 6. | 74E-26 | 0.209    | 0.861 | 0.36  | 1.01E-21 | CSCL1 | CHCHD3   |
| EMID1.8    | 6. | 80E-26 | 0.128802 | 0.274 | 0.069 | 1.02E-21 | CSCL1 | EMID1    |
| SNRNP40.4  | 6. | 98E-26 | 0.156133 | 0.786 | 0.321 | 1.04E-21 | CSCL1 | SNRNP40  |
| CECR5.7    | 7. | 12E-26 | 0.220652 | 0.642 | 0.245 | 1.06E-21 | CSCL1 | CECR5    |
| SHROOM2.1  | 7. | 18E-26 | 0.131805 | 0.239 | 0.056 | 1.07E-21 | CSCL1 | SHROOM2  |
| B3GALT6.7  | 7. | 41E-26 | 0.150356 | 0.423 | 0.133 | 1.11E-21 | CSCL1 | B3GALT6  |
| STK16.3    | 7. | 62E-26 | 0.122763 | 0.527 | 0.182 | 1.14E-21 | CSCL1 | STK16    |
| APEH.4     | 7. | 78E-26 | 0.12404  | 0.547 | 0.19  | 1.16E-21 | CSCL1 | APEH     |
| METTL13.4  | 8. | 04E-26 | 0.143161 | 0.388 | 0.118 | 1.20E-21 | CSCL1 | METTL13  |
| FAU.9      | 8. | 16E-26 | -0.41447 | 1     | 0.957 | 1.22E-21 | CSCL1 | FAU      |
| IGSF11.8   | 8. | 51E-26 | 0.153352 | 0.259 | 0.064 | 1.27E-21 | CSCL1 | IGSF11   |
| METTL23.6  | 8. | 61E-26 | 0.261052 | 0.751 | 0.311 | 1.29E-21 | CSCL1 | METTL23  |
| CLDN10.8   | 8. | 65E-26 | 0.113577 | 0.229 | 0.052 | 1.29E-21 | CSCL1 | CLDN10   |
| KCTD13.9   | 9. | 02E-26 | 0.20429  | 0.418 | 0.133 | 1.35E-21 | CSCL1 | KCTD13   |
| TAF12.5    | 9. | 10E-26 | 0.138757 | 0.761 | 0.301 | 1.36E-21 | CSCL1 | TAF12    |
| ZNF569.5   | 9. | 31E-26 | 0.156575 | 0.264 | 0.066 | 1.39E-21 | CSCL1 | ZNF569   |
| BTN2A1.2   | 9. | 49E-26 | 0.114954 | 0.383 | 0.115 | 1.42E-21 | CSCL1 | BTN2A1   |
| RPP38.3    | 9. | 52E-26 | 0.127067 | 0.408 | 0.128 | 1.42E-21 | CSCL1 | RPP38    |
| ARFRP1.3   | 9. | 60E-26 | 0.132994 | 0.652 | 0.24  | 1.44E-21 | CSCL1 | ARFRP1   |
| DID01.7    | 9. | 71E-26 | 0.158199 | 0.443 | 0.143 | 1.45E-21 | CSCL1 | DID01    |
| ARAF.3     | 9. | 72E-26 | 0.137259 | 0.502 | 0.172 | 1.45E-21 | CSCL1 | ARAF     |
| FKBP14.3   | 9. | 98E-26 | 0.172896 | 0.323 | 0.091 | 1.49E-21 | CSCL1 | FKBP14   |
| CHST7.9    | 1. | 02E-25 | 0.189792 | 0.353 | 0.105 | 1.52E-21 | CSCL1 | CHST7    |
| KRAS.5     | 1. | 03E-25 | 0.169586 | 0.662 | 0.247 | 1.54E-21 | CSCL1 | KRAS     |
| RRP1B.8    | 1. | 05E-25 | 0.159583 | 0.458 | 0.151 | 1.56E-21 | CSCL1 | RRP1B    |
| ILKAP.7    | 1. | 06E-25 | 0.144198 | 0.612 | 0.222 | 1.59E-21 | CSCL1 | ILKAP    |
| H2AFY2.5   | 1. | 09E-25 | 0.162773 | 0.343 | 0.1   | 1.62E-21 | CSCL1 | H2AFY2   |
| CCNYL1.2   | 1. | 09E-25 | 0.107523 | 0.239 | 0.056 | 1.63E-21 | CSCL1 | CCNYL1   |
| FKTN.3     | 1. | 10E-25 | 0.133923 | 0.249 | 0.06  | 1.65E-21 | CSCL1 | FKTN     |
| ZCCHC17.6  | 1. | 13E-25 | 0.19761  | 0.831 | 0.343 | 1.69E-21 | CSCL1 | ZCCHC17  |
| IGF2BP3.1  | 1. | 14E-25 | 0.175704 | 0.353 | 0.104 | 1.71E-21 | CSCL1 | IGF2BP3  |
| LARP1.6    | 1. | 18E-25 | 0.186557 | 0.652 | 0.245 | 1.77E-21 | CSCL1 | LARP1    |
| PIM3.10    | 1. | 21E-25 | 0.168566 | 0.532 | 0.184 | 1.81E-21 | CSCL1 | PIM3     |
| DHPS.8     | 1. | 22E-25 | 0.254855 | 0.935 | 0.438 | 1.82E-21 | CSCL1 | DHPS     |
| NIPBL.5    | 1. | 29E-25 | 0.177958 | 0.622 | 0.232 | 1.93E-21 | CSCL1 | NIPBL    |
| DMWD.9     | 1. | 34E-25 | 0.174083 | 0.428 | 0.136 | 2.00E-21 | CSCL1 | DMWD     |
| PTP4A2.9   | 1. | 35E-25 | 0.355026 | 0.915 | 0.445 | 2.01E-21 | CSCL1 | PTP4A2   |
| POLD2.9    | 1. | 40E-25 | 0.213775 | 0.95  | 0.412 | 2.10E-21 | CSCL1 | POLD2    |
| PGAP2.4    | 1. | 42E-25 | 0.124534 | 0.373 | 0.112 | 2.12E-21 | CSCL1 | PGAP2    |
| CDC14B.4   | 1. | 46E-25 | 0.129313 | 0.249 | 0.06  | 2.18E-21 | CSCL1 | CDC14B   |
| BRIX1.9    | 1. | 48E-25 | 0.118665 | 0.657 | 0.246 | 2.21E-21 | CSCL1 | BRIX1    |
| SLC27A3.7  | 1. | 48E-25 | 0.111932 | 0.388 | 0.118 | 2.22E-21 | CSCL1 | SLC27A3  |
| PPP1R12C.1 | 1. | 57E-25 | 0.1208   | 0.299 | 0.08  | 2.35E-21 | CSCL1 | PPP1R12C |
| OSBPL8.8   | 1. | 60E-25 | 0.231682 | 0.771 | 0.303 | 2.39E-21 | CSCL1 | OSBPL8   |
| RNF2.4     | 1. | 61E-25 | 0.12661  | 0.438 | 0.142 | 2.41E-21 | CSCL1 | RNF2     |
| C16orf45.1 | 1. | 66E-25 | 0.208048 | 0.786 | 0.31  | 2.48E-21 | CSCL1 | C16orf45 |

|           |          |          |       |       |          |       |             |
|-----------|----------|----------|-------|-------|----------|-------|-------------|
| EMP1.8    | 1.68E-25 | 0.164426 | 0.498 | 0.173 | 2.51E-21 | CSCL1 | EMP1        |
| UBR7.5    | 1.73E-25 | 0.122457 | 0.373 | 0.113 | 2.58E-21 | CSCL1 | UBR7        |
| RHOT1.7   | 1.83E-25 | 0.218253 | 0.632 | 0.242 | 2.73E-21 | CSCL1 | RHOT1       |
| CBL.4     | 1.89E-25 | 0.126651 | 0.343 | 0.099 | 2.83E-21 | CSCL1 | CBL         |
| KCTD6.4   | 1.94E-25 | 0.146422 | 0.373 | 0.113 | 2.90E-21 | CSCL1 | KCTD6       |
| SMCHD1.9  | 1.96E-25 | 0.15068  | 0.522 | 0.181 | 2.93E-21 | CSCL1 | SMCHD1      |
| POMGNT2.9 | 1.96E-25 | 0.202017 | 0.418 | 0.136 | 2.93E-21 | CSCL1 | POMGNT2     |
| C1orf159. | 1.98E-25 | 0.117114 | 0.219 | 0.049 | 2.95E-21 | CSCL1 | C1orf159    |
| PDS5B.7   | 2.00E-25 | 0.140742 | 0.483 | 0.162 | 2.99E-21 | CSCL1 | PDS5B       |
| SESN3.5   | 2.07E-25 | 0.162148 | 0.443 | 0.145 | 3.10E-21 | CSCL1 | SESN3       |
| PEAK1.6   | 2.09E-25 | 0.121947 | 0.264 | 0.066 | 3.12E-21 | CSCL1 | PEAK1       |
| TIMM9.1   | 2.13E-25 | 0.133661 | 0.682 | 0.27  | 3.18E-21 | CSCL1 | TIMM9       |
| MAGEF1.11 | 2.20E-25 | 0.255226 | 0.851 | 0.355 | 3.29E-21 | CSCL1 | MAGEF1      |
| PSD3.11   | 2.33E-25 | 0.173556 | 0.532 | 0.188 | 3.48E-21 | CSCL1 | PSD3        |
| KDELR3.4  | 2.39E-25 | 0.117945 | 0.239 | 0.057 | 3.57E-21 | CSCL1 | KDELR3      |
| RCE1.4    | 2.45E-25 | 0.156695 | 0.398 | 0.124 | 3.66E-21 | CSCL1 | RCE1        |
| PLEKHJ1.8 | 2.49E-25 | 0.201598 | 0.871 | 0.358 | 3.72E-21 | CSCL1 | PLEKHJ1     |
| IQCK.7    | 2.51E-25 | 0.116694 | 0.393 | 0.122 | 3.75E-21 | CSCL1 | IQCK        |
| C9orf142. | 2.51E-25 | 0.240556 | 0.861 | 0.367 | 3.75E-21 | CSCL1 | C9orf142    |
| POLR1E.5  | 2.55E-25 | 0.118988 | 0.363 | 0.108 | 3.81E-21 | CSCL1 | POLR1E      |
| PCDH19.9  | 2.55E-25 | 0.157835 | 0.239 | 0.057 | 3.82E-21 | CSCL1 | PCDH19      |
| ZNF446.5  | 2.65E-25 | 0.117609 | 0.279 | 0.072 | 3.95E-21 | CSCL1 | ZNF446      |
| UTP6.6    | 2.67E-25 | 0.127881 | 0.567 | 0.203 | 3.99E-21 | CSCL1 | UTP6        |
| APPL1.4   | 2.76E-25 | 0.206443 | 0.721 | 0.288 | 4.13E-21 | CSCL1 | APPL1       |
| SCAF1.8   | 2.77E-25 | 0.142195 | 0.453 | 0.148 | 4.14E-21 | CSCL1 | SCAF1       |
| SPAG9.10  | 2.77E-25 | 0.254111 | 0.841 | 0.344 | 4.14E-21 | CSCL1 | SPAG9       |
| SMAD2.2   | 2.78E-25 | 0.113404 | 0.527 | 0.183 | 4.15E-21 | CSCL1 | SMAD2       |
| ZSCAN16-A | 2.80E-25 | 0.160527 | 0.652 | 0.251 | 4.19E-21 | CSCL1 | ZSCAN16-AS1 |
| FAM58A.5  | 2.96E-25 | 0.135928 | 0.453 | 0.149 | 4.43E-21 | CSCL1 | FAM58A      |
| ARL9.11   | 2.98E-25 | 0.185188 | 0.343 | 0.1   | 4.46E-21 | CSCL1 | ARL9        |
| THUMPD3.6 | 3.01E-25 | 0.124009 | 0.532 | 0.188 | 4.49E-21 | CSCL1 | THUMPD3     |
| SLC9A3R2. | 3.01E-25 | 0.15441  | 0.358 | 0.107 | 4.50E-21 | CSCL1 | SLC9A3R2    |
| QRSL1.2   | 3.23E-25 | 0.114965 | 0.393 | 0.121 | 4.83E-21 | CSCL1 | QRSL1       |
| SPRED1.7  | 3.32E-25 | 0.21875  | 0.542 | 0.195 | 4.97E-21 | CSCL1 | SPRED1      |
| PXN-AS1.4 | 3.51E-25 | 0.135972 | 0.289 | 0.077 | 5.25E-21 | CSCL1 | PXN-AS1     |
| ZCCHC8.1  | 3.55E-25 | 0.101864 | 0.303 | 0.082 | 5.31E-21 | CSCL1 | ZCCHC8      |
| PRKCA.7   | 3.57E-25 | 0.200675 | 0.542 | 0.193 | 5.34E-21 | CSCL1 | PRKCA       |
| DFFA.6    | 3.60E-25 | 0.14246  | 0.577 | 0.213 | 5.39E-21 | CSCL1 | DFFA        |
| HES1.9    | 3.62E-25 | 0.195491 | 0.537 | 0.191 | 5.41E-21 | CSCL1 | HES1        |
| BBS7.5    | 3.67E-25 | 0.140671 | 0.323 | 0.092 | 5.48E-21 | CSCL1 | BBS7        |
| MAEL.1    | 3.78E-25 | 0.138731 | 0.159 | 0.029 | 5.66E-21 | CSCL1 | MAEL        |
| TMEM63B.5 | 3.86E-25 | 0.13711  | 0.413 | 0.131 | 5.77E-21 | CSCL1 | TMEM63B     |
| TMEM60.6  | 3.89E-25 | 0.124905 | 0.632 | 0.24  | 5.81E-21 | CSCL1 | TMEM60      |
| DPP9.4    | 3.90E-25 | 0.101357 | 0.403 | 0.124 | 5.83E-21 | CSCL1 | DPP9        |
| TAB1.2    | 4.01E-25 | 0.139389 | 0.274 | 0.071 | 5.99E-21 | CSCL1 | TAB1        |
| RABEP1.7  | 4.16E-25 | 0.236392 | 0.637 | 0.246 | 6.22E-21 | CSCL1 | RABEP1      |
| PTPRA.9   | 4.22E-25 | 0.329362 | 0.836 | 0.346 | 6.31E-21 | CSCL1 | PTPRA       |
| JAGN1.6   | 4.23E-25 | 0.137327 | 0.781 | 0.312 | 6.32E-21 | CSCL1 | JAGN1       |
| HDHD2.6   | 4.35E-25 | 0.122809 | 0.662 | 0.25  | 6.50E-21 | CSCL1 | HDHD2       |
| SLMAP.3   | 4.41E-25 | 0.146698 | 0.393 | 0.122 | 6.58E-21 | CSCL1 | SLMAP       |
| CCDC112.1 | 4.42E-25 | 0.211637 | 0.657 | 0.254 | 6.60E-21 | CSCL1 | CCDC112     |

|            |          |          |       |       |          |       |          |
|------------|----------|----------|-------|-------|----------|-------|----------|
| UBE3A.10   | 4.49E-25 | 0.237963 | 0.706 | 0.28  | 6.71E-21 | CSCL1 | UBE3A    |
| AP2B1.10   | 4.53E-25 | 0.247162 | 0.821 | 0.332 | 6.77E-21 | CSCL1 | AP2B1    |
| CLPTM1.3   | 4.55E-25 | 0.230778 | 0.811 | 0.337 | 6.79E-21 | CSCL1 | CLPTM1   |
| TUBA1B.7   | 4.57E-25 | 0.142327 | 1     | 0.894 | 6.83E-21 | CSCL1 | TUBA1B   |
| TSSC4.7    | 4.57E-25 | 0.177169 | 0.761 | 0.304 | 6.84E-21 | CSCL1 | TSSC4    |
| POLE3.4    | 4.58E-25 | 0.110076 | 0.642 | 0.24  | 6.84E-21 | CSCL1 | POLE3    |
| TERF1.6    | 4.78E-25 | 0.212194 | 0.761 | 0.316 | 7.14E-21 | CSCL1 | TERF1    |
| TMEM231.7  | 5.02E-25 | 0.119875 | 0.244 | 0.059 | 7.50E-21 | CSCL1 | TMEM231  |
| EML1.4     | 5.03E-25 | 0.108203 | 0.289 | 0.076 | 7.51E-21 | CSCL1 | EML1     |
| XPO7.1     | 5.13E-25 | 0.138122 | 0.328 | 0.094 | 7.67E-21 | CSCL1 | XPO7     |
| WASL.9     | 5.35E-25 | 0.127387 | 0.517 | 0.178 | 7.99E-21 | CSCL1 | WASL     |
| ARL6IP1.6  | 5.38E-25 | 0.290114 | 0.995 | 0.737 | 8.04E-21 | CSCL1 | ARL6IP1  |
| ZNF232.8   | 5.42E-25 | 0.119141 | 0.289 | 0.076 | 8.10E-21 | CSCL1 | ZNF232   |
| TIPRL.6    | 5.43E-25 | 0.104019 | 0.677 | 0.259 | 8.12E-21 | CSCL1 | TIPRL    |
| MAPK7.8    | 5.70E-25 | 0.105529 | 0.393 | 0.12  | 8.52E-21 | CSCL1 | MAPK7    |
| NKIRAS2.6  | 5.76E-25 | 0.136349 | 0.677 | 0.256 | 8.61E-21 | CSCL1 | NKIRAS2  |
| XXYLT1.9   | 5.80E-25 | 0.160809 | 0.388 | 0.122 | 8.66E-21 | CSCL1 | XXYLT1   |
| SAT1.10    | 6.10E-25 | -0.79241 | 0.896 | 0.801 | 9.12E-21 | CSCL1 | SAT1     |
| YDJC.7     | 6.17E-25 | 0.144523 | 0.428 | 0.139 | 9.22E-21 | CSCL1 | YDJC     |
| LRRC58.6   | 6.18E-25 | 0.140565 | 0.562 | 0.2   | 9.23E-21 | CSCL1 | LRRC58   |
| STK32B.6   | 6.60E-25 | 0.121843 | 0.244 | 0.059 | 9.87E-21 | CSCL1 | STK32B   |
| MSANTD3.7  | 6.70E-25 | 0.13748  | 0.303 | 0.083 | 1.00E-20 | CSCL1 | MSANTD3  |
| TMED1.8    | 6.70E-25 | 0.110775 | 0.716 | 0.284 | 1.00E-20 | CSCL1 | TMED1    |
| VEGFA.8    | 6.85E-25 | 0.158982 | 0.572 | 0.21  | 1.02E-20 | CSCL1 | VEGFA    |
| TFCP2.2    | 7.11E-25 | 0.130055 | 0.363 | 0.108 | 1.06E-20 | CSCL1 | TFCP2    |
| SDC4.6     | 7.20E-25 | 0.100074 | 0.323 | 0.092 | 1.08E-20 | CSCL1 | SDC4     |
| CCDC74B.1  | 7.22E-25 | 0.121487 | 0.169 | 0.032 | 1.08E-20 | CSCL1 | CCDC74B  |
| PTGES2.6   | 7.25E-25 | 0.183553 | 0.677 | 0.26  | 1.08E-20 | CSCL1 | PTGES2   |
| FAM78B.1   | 7.26E-25 | 0.108967 | 0.169 | 0.033 | 1.09E-20 | CSCL1 | FAM78B   |
| WIZ.6      | 7.39E-25 | 0.160632 | 0.353 | 0.107 | 1.10E-20 | CSCL1 | WIZ      |
| ZNF48.8    | 7.39E-25 | 0.163793 | 0.323 | 0.092 | 1.10E-20 | CSCL1 | ZNF48    |
| GOLGA1.2   | 7.39E-25 | 0.103717 | 0.294 | 0.078 | 1.10E-20 | CSCL1 | GOLGA1   |
| DEF8.8     | 7.56E-25 | 0.164951 | 0.682 | 0.263 | 1.13E-20 | CSCL1 | DEF8     |
| SLC25A23.7 | 7.75E-25 | 0.185581 | 0.403 | 0.129 | 1.16E-20 | CSCL1 | SLC25A23 |
| OXLD1.7    | 7.79E-25 | 0.199688 | 0.647 | 0.246 | 1.16E-20 | CSCL1 | OXLD1    |
| UTP18.4    | 7.95E-25 | 0.217731 | 0.652 | 0.257 | 1.19E-20 | CSCL1 | UTP18    |
| ABHD3.8    | 8.09E-25 | 0.168696 | 0.507 | 0.177 | 1.21E-20 | CSCL1 | ABHD3    |
| AKAP8.4    | 8.11E-25 | 0.129141 | 0.413 | 0.13  | 1.21E-20 | CSCL1 | AKAP8    |
| STRN3.4    | 8.33E-25 | 0.137791 | 0.398 | 0.125 | 1.24E-20 | CSCL1 | STRN3    |
| DLGAP4.9   | 8.40E-25 | 0.218443 | 0.721 | 0.285 | 1.26E-20 | CSCL1 | DLGAP4   |
| CHMP1A.5   | 8.51E-25 | 0.151953 | 0.697 | 0.266 | 1.27E-20 | CSCL1 | CHMP1A   |
| TAF15.8    | 8.54E-25 | 0.164757 | 0.682 | 0.266 | 1.28E-20 | CSCL1 | TAF15    |
| AFG3L2.3   | 8.80E-25 | 0.148162 | 0.562 | 0.201 | 1.31E-20 | CSCL1 | AFG3L2   |
| RBM15B.1C  | 9.01E-25 | 0.134321 | 0.488 | 0.166 | 1.35E-20 | CSCL1 | RBM15B   |
| PILRB.6    | 9.13E-25 | 0.148043 | 0.468 | 0.156 | 1.36E-20 | CSCL1 | PILRB    |
| ADCK3.5    | 9.17E-25 | 0.139258 | 0.393 | 0.123 | 1.37E-20 | CSCL1 | ADCK3    |
| DPY19L1.7  | 9.48E-25 | 0.128017 | 0.343 | 0.1   | 1.42E-20 | CSCL1 | DPY19L1  |
| TARS.6     | 9.95E-25 | 0.145898 | 0.592 | 0.22  | 1.49E-20 | CSCL1 | TARS     |
| EI24.9     | 1.01E-24 | 0.301213 | 0.945 | 0.424 | 1.51E-20 | CSCL1 | EI24     |
| PGRMC2.6   | 1.02E-24 | 0.143759 | 0.597 | 0.219 | 1.53E-20 | CSCL1 | PGRMC2   |
| LMF2.6     | 1.03E-24 | 0.137733 | 0.537 | 0.195 | 1.55E-20 | CSCL1 | LMF2     |

|           |          |          |       |       |          |       |              |
|-----------|----------|----------|-------|-------|----------|-------|--------------|
| C9orf9.8  | 1.13E-24 | 0.130053 | 0.353 | 0.106 | 1.68E-20 | CSCL1 | C9orf9       |
| PDLIM5.5  | 1.14E-24 | 0.135681 | 0.587 | 0.213 | 1.71E-20 | CSCL1 | PDLIM5       |
| FARSB.8   | 1.17E-24 | 0.105018 | 0.612 | 0.226 | 1.74E-20 | CSCL1 | FARSB        |
| THOC2.6   | 1.23E-24 | 0.174546 | 0.741 | 0.296 | 1.84E-20 | CSCL1 | THOC2        |
| EGLN2.5   | 1.25E-24 | 0.19921  | 0.687 | 0.276 | 1.86E-20 | CSCL1 | EGLN2        |
| HMGA1.7   | 1.25E-24 | 0.345929 | 0.766 | 0.338 | 1.86E-20 | CSCL1 | HMGA1        |
| DHTKD1.4  | 1.28E-24 | 0.129597 | 0.383 | 0.121 | 1.91E-20 | CSCL1 | DHTKD1       |
| PRIM1.7   | 1.31E-24 | 0.152225 | 0.289 | 0.078 | 1.96E-20 | CSCL1 | PRIM1        |
| PN01.5    | 1.36E-24 | 0.150129 | 0.542 | 0.196 | 2.04E-20 | CSCL1 | PN01         |
| HLA-DPA1. | 1.40E-24 | -1.33088 | 0.244 | 0.538 | 2.09E-20 | CSCL1 | HLA-DPA1     |
| ILF3-AS1. | 1.48E-24 | 0.152997 | 0.756 | 0.302 | 2.21E-20 | CSCL1 | ILF3-AS1     |
| MARK2.4   | 1.56E-24 | 0.116184 | 0.388 | 0.12  | 2.33E-20 | CSCL1 | MARK2        |
| AKAP7.10  | 1.58E-24 | 0.228577 | 0.522 | 0.189 | 2.37E-20 | CSCL1 | AKAP7        |
| TMEM47.9  | 1.63E-24 | 0.179262 | 0.284 | 0.076 | 2.43E-20 | CSCL1 | TMEM47       |
| DPF2.7    | 1.64E-24 | 0.109109 | 0.597 | 0.218 | 2.45E-20 | CSCL1 | DPF2         |
| RP11-553L | 1.65E-24 | 0.179262 | 0.592 | 0.22  | 2.47E-20 | CSCL1 | RP11-553L6.5 |
| TIMM23.3  | 1.69E-24 | 0.136442 | 0.438 | 0.147 | 2.53E-20 | CSCL1 | TIMM23       |
| AFAP1.8   | 1.70E-24 | 0.131572 | 0.299 | 0.081 | 2.54E-20 | CSCL1 | AFAP1        |
| PARD6B.1  | 1.71E-24 | 0.116083 | 0.169 | 0.033 | 2.55E-20 | CSCL1 | PARD6B       |
| RGS17.9   | 1.72E-24 | 0.201574 | 0.458 | 0.157 | 2.58E-20 | CSCL1 | RGS17        |
| ST3GAL2.5 | 1.73E-24 | 0.147596 | 0.328 | 0.095 | 2.58E-20 | CSCL1 | ST3GAL2      |
| PRKRA.7   | 1.80E-24 | 0.225038 | 0.816 | 0.353 | 2.69E-20 | CSCL1 | PRKRA        |
| STX10.3   | 1.93E-24 | 0.207512 | 0.826 | 0.348 | 2.89E-20 | CSCL1 | STX10        |
| RBM14.7   | 1.95E-24 | 0.169176 | 0.522 | 0.186 | 2.91E-20 | CSCL1 | RBM14        |
| AP2A1.5   | 1.96E-24 | 0.149721 | 0.612 | 0.229 | 2.93E-20 | CSCL1 | AP2A1        |
| UQCC2.6   | 2.06E-24 | 0.218705 | 0.9   | 0.418 | 3.07E-20 | CSCL1 | UQCC2        |
| RWDD4.6   | 2.17E-24 | 0.187508 | 0.587 | 0.221 | 3.24E-20 | CSCL1 | RWDD4        |
| KCTD20.4  | 2.23E-24 | 0.151945 | 0.512 | 0.182 | 3.34E-20 | CSCL1 | KCTD20       |
| DOK5.10   | 2.25E-24 | 0.146707 | 0.507 | 0.177 | 3.36E-20 | CSCL1 | DOK5         |
| ACTN4.8   | 2.25E-24 | 0.225715 | 0.786 | 0.325 | 3.36E-20 | CSCL1 | ACTN4        |
| ARL10.8   | 2.40E-24 | 0.157131 | 0.303 | 0.085 | 3.59E-20 | CSCL1 | ARL10        |
| APPBP2.8  | 2.44E-24 | 0.146516 | 0.557 | 0.203 | 3.64E-20 | CSCL1 | APPBP2       |
| SLC41A1.3 | 2.50E-24 | 0.118174 | 0.254 | 0.064 | 3.73E-20 | CSCL1 | SLC41A1      |
| EXT2.7    | 2.52E-24 | 0.172064 | 0.478 | 0.166 | 3.76E-20 | CSCL1 | EXT2         |
| FADS2.9   | 2.52E-24 | 0.200293 | 0.403 | 0.132 | 3.77E-20 | CSCL1 | FADS2        |
| ZFR.8     | 2.56E-24 | 0.253315 | 0.711 | 0.298 | 3.83E-20 | CSCL1 | ZFR          |
| DHCR24.9  | 2.59E-24 | 0.146717 | 0.318 | 0.092 | 3.87E-20 | CSCL1 | DHCR24       |
| HN1.7     | 2.59E-24 | 0.309337 | 0.985 | 0.67  | 3.88E-20 | CSCL1 | HN1          |
| SAAL1.6   | 2.61E-24 | 0.100481 | 0.393 | 0.123 | 3.90E-20 | CSCL1 | SAAL1        |
| C1QB.12   | 2.63E-24 | -1.40368 | 0.343 | 0.574 | 3.93E-20 | CSCL1 | C1QB         |
| PTPN11.5  | 2.65E-24 | 0.192701 | 0.428 | 0.143 | 3.96E-20 | CSCL1 | PTPN11       |
| SHISA4.1C | 2.79E-24 | 0.161796 | 0.632 | 0.239 | 4.17E-20 | CSCL1 | SHISA4       |
| ABCE1.6   | 2.80E-24 | 0.154053 | 0.637 | 0.243 | 4.18E-20 | CSCL1 | ABCE1        |
| SDCCAG3.4 | 2.86E-24 | 0.126545 | 0.318 | 0.092 | 4.27E-20 | CSCL1 | SDCCAG3      |
| ING2.6    | 2.91E-24 | 0.172304 | 0.547 | 0.2   | 4.35E-20 | CSCL1 | ING2         |
| ADNP.10   | 2.93E-24 | 0.17044  | 0.522 | 0.187 | 4.38E-20 | CSCL1 | ADNP         |
| STOML2.6  | 2.94E-24 | 0.250074 | 0.92  | 0.412 | 4.39E-20 | CSCL1 | STOML2       |
| GOT2.8    | 2.95E-24 | 0.134688 | 0.537 | 0.191 | 4.41E-20 | CSCL1 | GOT2         |
| OSBPL5    | 3.04E-24 | 0.128183 | 0.194 | 0.042 | 4.54E-20 | CSCL1 | OSBPL5       |
| LONRF1.8  | 3.04E-24 | 0.147697 | 0.323 | 0.094 | 4.55E-20 | CSCL1 | LONRF1       |
| PLOD1.7   | 3.05E-24 | 0.116423 | 0.522 | 0.185 | 4.55E-20 | CSCL1 | PLOD1        |

|             |           |           |        |        |           |       |          |
|-------------|-----------|-----------|--------|--------|-----------|-------|----------|
| CYB5B. 7    | 3. 13E-24 | 0. 129068 | 0. 801 | 0. 329 | 4. 68E-20 | CSCL1 | CYB5B    |
| PHAX. 8     | 3. 35E-24 | 0. 14726  | 0. 746 | 0. 298 | 5. 00E-20 | CSCL1 | PHAX     |
| ZNF649. 9   | 3. 37E-24 | 0. 169682 | 0. 303 | 0. 086 | 5. 04E-20 | CSCL1 | ZNF649   |
| MUL1. 3     | 3. 38E-24 | 0. 138791 | 0. 458 | 0. 156 | 5. 05E-20 | CSCL1 | MUL1     |
| ILF3. 8     | 3. 43E-24 | 0. 286298 | 0. 9   | 0. 403 | 5. 13E-20 | CSCL1 | ILF3     |
| BICD1. 9    | 3. 56E-24 | 0. 205453 | 0. 547 | 0. 198 | 5. 32E-20 | CSCL1 | BICD1    |
| DDX54. 5    | 3. 61E-24 | 0. 162352 | 0. 532 | 0. 193 | 5. 39E-20 | CSCL1 | DDX54    |
| SIRT7. 5    | 3. 61E-24 | 0. 165482 | 0. 547 | 0. 2   | 5. 39E-20 | CSCL1 | SIRT7    |
| ORAI1. 7    | 3. 67E-24 | 0. 175674 | 0. 378 | 0. 12  | 5. 49E-20 | CSCL1 | ORAI1    |
| MECR. 7     | 3. 89E-24 | 0. 123027 | 0. 458 | 0. 156 | 5. 81E-20 | CSCL1 | MECR     |
| NOP58. 9    | 3. 91E-24 | 0. 12541  | 0. 726 | 0. 284 | 5. 84E-20 | CSCL1 | NOP58    |
| DTWD1. 2    | 3. 94E-24 | 0. 117456 | 0. 408 | 0. 132 | 5. 89E-20 | CSCL1 | DTWD1    |
| CHTF8. 2    | 3. 98E-24 | 0. 142718 | 0. 493 | 0. 173 | 5. 95E-20 | CSCL1 | CHTF8    |
| CCM2. 4     | 4. 02E-24 | 0. 15748  | 0. 711 | 0. 276 | 6. 01E-20 | CSCL1 | CCM2     |
| SMAD4. 5    | 4. 03E-24 | 0. 139861 | 0. 378 | 0. 117 | 6. 03E-20 | CSCL1 | SMAD4    |
| CUL5. 7     | 4. 05E-24 | 0. 154606 | 0. 587 | 0. 216 | 6. 05E-20 | CSCL1 | CUL5     |
| NXT2. 4     | 4. 06E-24 | 0. 150208 | 0. 289 | 0. 079 | 6. 06E-20 | CSCL1 | NXT2     |
| TPR. 8      | 4. 12E-24 | 0. 262022 | 0. 881 | 0. 396 | 6. 16E-20 | CSCL1 | TPR      |
| FAM46A. 8   | 4. 33E-24 | 0. 138463 | 0. 532 | 0. 19  | 6. 48E-20 | CSCL1 | FAM46A   |
| HCFC1. 4    | 4. 36E-24 | 0. 134674 | 0. 418 | 0. 137 | 6. 52E-20 | CSCL1 | HCFC1    |
| MTG2. 5     | 4. 57E-24 | 0. 132254 | 0. 433 | 0. 142 | 6. 83E-20 | CSCL1 | MTG2     |
| SLC25A14. 4 | 4. 61E-24 | 0. 106931 | 0. 308 | 0. 086 | 6. 89E-20 | CSCL1 | SLC25A14 |
| ADD2. 9     | 4. 70E-24 | 0. 151826 | 0. 303 | 0. 084 | 7. 02E-20 | CSCL1 | ADD2     |
| SMIM15. 4   | 4. 70E-24 | 0. 14319  | 0. 806 | 0. 324 | 7. 02E-20 | CSCL1 | SMIM15   |
| ACLY. 7     | 4. 77E-24 | 0. 159225 | 0. 572 | 0. 21  | 7. 13E-20 | CSCL1 | ACLY     |
| CTXN1. 11   | 4. 94E-24 | 0. 203186 | 0. 458 | 0. 154 | 7. 38E-20 | CSCL1 | CTXN1    |
| CNEP1R1. 4  | 5. 09E-24 | 0. 103587 | 0. 353 | 0. 106 | 7. 61E-20 | CSCL1 | CNEP1R1  |
| USP22. 11   | 5. 09E-24 | 0. 231102 | 0. 756 | 0. 312 | 7. 61E-20 | CSCL1 | USP22    |
| STT3B. 4    | 5. 10E-24 | 0. 121513 | 0. 547 | 0. 198 | 7. 61E-20 | CSCL1 | STT3B    |
| TMEM206. 1  | 5. 13E-24 | 0. 10373  | 0. 612 | 0. 224 | 7. 66E-20 | CSCL1 | TMEM206  |
| SCAMP4. 8   | 5. 20E-24 | 0. 144316 | 0. 682 | 0. 261 | 7. 76E-20 | CSCL1 | SCAMP4   |
| ZNF322. 8   | 5. 26E-24 | 0. 15762  | 0. 398 | 0. 129 | 7. 86E-20 | CSCL1 | ZNF322   |
| FAM98B. 6   | 5. 31E-24 | 0. 12197  | 0. 318 | 0. 091 | 7. 94E-20 | CSCL1 | FAM98B   |
| ELMOD1. 9   | 5. 31E-24 | 0. 180485 | 0. 284 | 0. 078 | 7. 94E-20 | CSCL1 | ELMOD1   |
| ZNF367. 1   | 5. 37E-24 | 0. 144058 | 0. 149 | 0. 027 | 8. 02E-20 | CSCL1 | ZNF367   |
| TUBE1. 4    | 5. 41E-24 | 0. 144312 | 0. 313 | 0. 09  | 8. 09E-20 | CSCL1 | TUBE1    |
| SUDS3. 10   | 5. 46E-24 | 0. 184576 | 0. 507 | 0. 183 | 8. 17E-20 | CSCL1 | SUDS3    |
| GNB4. 10    | 5. 51E-24 | 0. 110554 | 0. 612 | 0. 226 | 8. 24E-20 | CSCL1 | GNB4     |
| CXXC1. 4    | 5. 54E-24 | 0. 102172 | 0. 488 | 0. 168 | 8. 28E-20 | CSCL1 | CXXC1    |
| ZMYM4. 5    | 5. 56E-24 | 0. 162421 | 0. 383 | 0. 121 | 8. 31E-20 | CSCL1 | ZMYM4    |
| PLEKHA8. 4  | 5. 63E-24 | 0. 116701 | 0. 244 | 0. 06  | 8. 42E-20 | CSCL1 | PLEKHA8  |
| COPS7A. 3   | 5. 86E-24 | 0. 147283 | 0. 677 | 0. 269 | 8. 75E-20 | CSCL1 | COPS7A   |
| LAMP5. 10   | 5. 91E-24 | 0. 213589 | 0. 343 | 0. 105 | 8. 83E-20 | CSCL1 | LAMP5    |
| AK4. 10     | 6. 13E-24 | 0. 220396 | 0. 478 | 0. 174 | 9. 15E-20 | CSCL1 | AK4      |
| TTC39C. 5   | 6. 18E-24 | 0. 134154 | 0. 284 | 0. 077 | 9. 23E-20 | CSCL1 | TTC39C   |
| YRDC. 7     | 6. 27E-24 | 0. 150524 | 0. 458 | 0. 156 | 9. 37E-20 | CSCL1 | YRDC     |
| LYRM7. 7    | 6. 36E-24 | 0. 136389 | 0. 542 | 0. 195 | 9. 50E-20 | CSCL1 | LYRM7    |
| COQ4. 7     | 6. 42E-24 | 0. 144782 | 0. 672 | 0. 26  | 9. 59E-20 | CSCL1 | COQ4     |
| COX7C. 5    | 6. 52E-24 | -0. 37994 | 0. 99  | 0. 884 | 9. 75E-20 | CSCL1 | COX7C    |
| RIF1. 9     | 6. 54E-24 | 0. 150732 | 0. 577 | 0. 214 | 9. 78E-20 | CSCL1 | RIF1     |
| CCDC88A. 9  | 6. 89E-24 | 0. 27729  | 0. 891 | 0. 408 | 1. 03E-19 | CSCL1 | CCDC88A  |

|           |          |          |       |       |          |       |               |
|-----------|----------|----------|-------|-------|----------|-------|---------------|
| GPT2.10   | 6.97E-24 | 0.172716 | 0.423 | 0.142 | 1.04E-19 | CSCL1 | GPT2          |
| CTB-3102C | 7.11E-24 | 0.20091  | 0.353 | 0.11  | 1.06E-19 | CSCL1 | CTB-31020.2   |
| DHX40.8   | 7.11E-24 | 0.149583 | 0.413 | 0.134 | 1.06E-19 | CSCL1 | DHX40         |
| SOX21-AS1 | 7.34E-24 | 0.165881 | 0.244 | 0.061 | 1.10E-19 | CSCL1 | SOX21-AS1     |
| RP11-395A | 7.34E-24 | 0.145606 | 0.274 | 0.073 | 1.10E-19 | CSCL1 | RP11-395A13.2 |
| SNCAIP.11 | 7.41E-24 | 0.16152  | 0.294 | 0.082 | 1.11E-19 | CSCL1 | SNCAIP        |
| LMO4.12   | 7.45E-24 | 0.340533 | 0.935 | 0.47  | 1.11E-19 | CSCL1 | LMO4          |
| KPNA1.3   | 7.57E-24 | 0.142507 | 0.463 | 0.158 | 1.13E-19 | CSCL1 | KPNA1         |
| ZBTB7A.6  | 7.74E-24 | 0.169806 | 0.488 | 0.173 | 1.16E-19 | CSCL1 | ZBTB7A        |
| RPUSD3.2  | 7.79E-24 | 0.126168 | 0.522 | 0.19  | 1.16E-19 | CSCL1 | RPUSD3        |
| ANP32B.1C | 7.92E-24 | 0.292191 | 0.935 | 0.441 | 1.18E-19 | CSCL1 | ANP32B        |
| WDPCP     | 8.06E-24 | 0.127378 | 0.199 | 0.044 | 1.20E-19 | CSCL1 | WDPCP         |
| NSL1.6    | 8.56E-24 | 0.117097 | 0.821 | 0.338 | 1.28E-19 | CSCL1 | NSL1          |
| HEY1.10   | 8.60E-24 | 0.209076 | 0.627 | 0.24  | 1.29E-19 | CSCL1 | HEY1          |
| OTP.2     | 8.72E-24 | 0.138751 | 0.194 | 0.042 | 1.30E-19 | CSCL1 | OTP           |
| NUFIP2.5  | 8.87E-24 | 0.182688 | 0.607 | 0.23  | 1.33E-19 | CSCL1 | NUFIP2        |
| SMYD2.5   | 8.89E-24 | 0.12889  | 0.418 | 0.136 | 1.33E-19 | CSCL1 | SMYD2         |
| CDC23.5   | 9.62E-24 | 0.106575 | 0.383 | 0.12  | 1.44E-19 | CSCL1 | CDC23         |
| CRADD.4   | 9.80E-24 | 0.110268 | 0.338 | 0.101 | 1.46E-19 | CSCL1 | CRADD         |
| LRRC59.7  | 9.94E-24 | 0.250534 | 0.806 | 0.35  | 1.49E-19 | CSCL1 | LRRC59        |
| KATNB1.8  | 9.96E-24 | 0.162572 | 0.368 | 0.115 | 1.49E-19 | CSCL1 | KATNB1        |
| MOCS2.7   | 1.02E-23 | 0.121553 | 0.657 | 0.256 | 1.52E-19 | CSCL1 | MOCS2         |
| NARF.7    | 1.05E-23 | 0.227776 | 0.766 | 0.322 | 1.58E-19 | CSCL1 | NARF          |
| FBN2.1    | 1.06E-23 | 0.133604 | 0.199 | 0.044 | 1.59E-19 | CSCL1 | FBN2          |
| HPS4.5    | 1.07E-23 | 0.106104 | 0.502 | 0.177 | 1.60E-19 | CSCL1 | HPS4          |
| ALKBH5.8  | 1.08E-23 | 0.269583 | 0.751 | 0.316 | 1.61E-19 | CSCL1 | ALKBH5        |
| TERF2.1   | 1.14E-23 | 0.107314 | 0.289 | 0.079 | 1.70E-19 | CSCL1 | TERF2         |
| LRFN4.5   | 1.17E-23 | 0.153552 | 0.264 | 0.07  | 1.76E-19 | CSCL1 | LRFN4         |
| BCKDK.10  | 1.19E-23 | 0.165276 | 0.756 | 0.306 | 1.77E-19 | CSCL1 | BCKDK         |
| CHCHD5.3  | 1.20E-23 | 0.15785  | 0.851 | 0.364 | 1.79E-19 | CSCL1 | CHCHD5        |
| COX20.7   | 1.21E-23 | 0.260909 | 0.93  | 0.452 | 1.80E-19 | CSCL1 | COX20         |
| FBX045.3  | 1.21E-23 | 0.128346 | 0.239 | 0.059 | 1.81E-19 | CSCL1 | FBX045        |
| IDH1.5    | 1.24E-23 | 0.244128 | 0.831 | 0.372 | 1.85E-19 | CSCL1 | IDH1          |
| YIF1B.5   | 1.43E-23 | 0.130753 | 0.811 | 0.325 | 2.13E-19 | CSCL1 | YIF1B         |
| ASPSCR1.5 | 1.48E-23 | 0.162734 | 0.607 | 0.23  | 2.21E-19 | CSCL1 | ASPSCR1       |
| TMEM245.3 | 1.48E-23 | 0.112563 | 0.403 | 0.129 | 2.21E-19 | CSCL1 | TMEM245       |
| CERS2.5   | 1.51E-23 | 0.116627 | 0.597 | 0.225 | 2.26E-19 | CSCL1 | CERS2         |
| CAMSAP2.8 | 1.52E-23 | 0.143026 | 0.433 | 0.144 | 2.27E-19 | CSCL1 | CAMSAP2       |
| TAF1B.2   | 1.53E-23 | 0.138002 | 0.294 | 0.082 | 2.28E-19 | CSCL1 | TAF1B         |
| RPP25L.3  | 1.62E-23 | 0.107298 | 0.468 | 0.162 | 2.41E-19 | CSCL1 | RPP25L        |
| TXNRD2.5  | 1.63E-23 | 0.113619 | 0.368 | 0.114 | 2.43E-19 | CSCL1 | TXNRD2        |
| COPG2.7   | 1.71E-23 | 0.15751  | 0.363 | 0.113 | 2.55E-19 | CSCL1 | COPG2         |
| OXSR1.2   | 1.74E-23 | 0.1049   | 0.348 | 0.105 | 2.60E-19 | CSCL1 | OXSR1         |
| FAM168A.6 | 1.82E-23 | 0.12284  | 0.388 | 0.123 | 2.71E-19 | CSCL1 | FAM168A       |
| TMEM11.7  | 1.88E-23 | 0.15758  | 0.746 | 0.311 | 2.81E-19 | CSCL1 | TMEM11        |
| NOTCH3.6  | 1.88E-23 | 0.109192 | 0.234 | 0.057 | 2.82E-19 | CSCL1 | NOTCH3        |
| RNF24.9   | 1.89E-23 | 0.160961 | 0.637 | 0.242 | 2.82E-19 | CSCL1 | RNF24         |
| RIC8A.7   | 1.91E-23 | 0.154225 | 0.697 | 0.279 | 2.86E-19 | CSCL1 | RIC8A         |
| AASS.8    | 1.94E-23 | 0.149947 | 0.358 | 0.111 | 2.90E-19 | CSCL1 | AASS          |
| CPXM1.11  | 2.02E-23 | 0.159128 | 0.378 | 0.12  | 3.02E-19 | CSCL1 | CPXM1         |
| ALS2.3    | 2.14E-23 | 0.121194 | 0.224 | 0.054 | 3.19E-19 | CSCL1 | ALS2          |

|             |           |           |        |        |           |       |          |
|-------------|-----------|-----------|--------|--------|-----------|-------|----------|
| RBMX. 8     | 2. 23E-23 | 0. 277196 | 0. 995 | 0. 559 | 3. 33E-19 | CSCL1 | RBMX     |
| MUTYH. 1    | 2. 24E-23 | 0. 114546 | 0. 318 | 0. 092 | 3. 34E-19 | CSCL1 | MUTYH    |
| GCDH. 3     | 2. 25E-23 | 0. 102441 | 0. 532 | 0. 192 | 3. 36E-19 | CSCL1 | GCDH     |
| CBFB. 4     | 2. 26E-23 | 0. 146879 | 0. 592 | 0. 227 | 3. 38E-19 | CSCL1 | CBFB     |
| MED24. 8    | 2. 37E-23 | 0. 133727 | 0. 473 | 0. 163 | 3. 54E-19 | CSCL1 | MED24    |
| MRS2. 2     | 2. 38E-23 | 0. 107702 | 0. 453 | 0. 155 | 3. 56E-19 | CSCL1 | MRS2     |
| ZNF275. 7   | 2. 39E-23 | 0. 112529 | 0. 224 | 0. 053 | 3. 58E-19 | CSCL1 | ZNF275   |
| FBN1. 2     | 2. 40E-23 | 0. 114878 | 0. 159 | 0. 031 | 3. 58E-19 | CSCL1 | FBN1     |
| C11orf57. 2 | 2. 43E-23 | 0. 101912 | 0. 443 | 0. 149 | 3. 63E-19 | CSCL1 | C11orf57 |
| DDX49. 8    | 2. 45E-23 | 0. 188329 | 0. 672 | 0. 267 | 3. 66E-19 | CSCL1 | DDX49    |
| TADA3. 5    | 2. 46E-23 | 0. 234237 | 0. 861 | 0. 382 | 3. 67E-19 | CSCL1 | TADA3    |
| ANKRD35. 6  | 2. 52E-23 | 0. 174152 | 0. 398 | 0. 132 | 3. 76E-19 | CSCL1 | ANKRD35  |
| EIF2AK2. 4  | 2. 53E-23 | 0. 14446  | 0. 736 | 0. 294 | 3. 78E-19 | CSCL1 | EIF2AK2  |
| TMX2. 4     | 2. 63E-23 | 0. 18943  | 0. 886 | 0. 39  | 3. 92E-19 | CSCL1 | TMX2     |
| SPARCL1. 1  | 2. 68E-23 | 0. 115795 | 0. 801 | 0. 338 | 4. 01E-19 | CSCL1 | SPARCL1  |
| SAMM50. 5   | 2. 71E-23 | 0. 112649 | 0. 562 | 0. 209 | 4. 05E-19 | CSCL1 | SAMM50   |
| IL11RA. 3   | 2. 72E-23 | 0. 110829 | 0. 239 | 0. 059 | 4. 06E-19 | CSCL1 | IL11RA   |
| RAF1. 9     | 2. 74E-23 | 0. 130703 | 0. 697 | 0. 269 | 4. 09E-19 | CSCL1 | RAF1     |
| PRICKLE2. 2 | 2. 79E-23 | 0. 128366 | 0. 184 | 0. 039 | 4. 17E-19 | CSCL1 | PRICKLE2 |
| PRPF38A. 5  | 2. 79E-23 | 0. 130526 | 0. 701 | 0. 283 | 4. 17E-19 | CSCL1 | PRPF38A  |
| MTOR. 3     | 2. 81E-23 | 0. 113367 | 0. 254 | 0. 066 | 4. 21E-19 | CSCL1 | MTOR     |
| APOC1. 11   | 2. 93E-23 | -1. 34438 | 0. 244 | 0. 521 | 4. 38E-19 | CSCL1 | APOC1    |
| FASN. 10    | 3. 00E-23 | 0. 134584 | 0. 363 | 0. 112 | 4. 49E-19 | CSCL1 | FASN     |
| BABAM1. 5   | 3. 01E-23 | 0. 190576 | 0. 896 | 0. 397 | 4. 50E-19 | CSCL1 | BABAM1   |
| BRMS1. 5    | 3. 05E-23 | 0. 131933 | 0. 756 | 0. 303 | 4. 56E-19 | CSCL1 | BRMS1    |
| PLCB1. 9    | 3. 06E-23 | 0. 153884 | 0. 279 | 0. 077 | 4. 58E-19 | CSCL1 | PLCB1    |
| SLC9A3R1. 3 | 3. 21E-23 | 0. 122192 | 0. 433 | 0. 145 | 4. 80E-19 | CSCL1 | SLC9A3R1 |
| TXNDC12. 8  | 3. 23E-23 | 0. 172718 | 0. 93  | 0. 424 | 4. 83E-19 | CSCL1 | TXNDC12  |
| ILF2. 8     | 3. 33E-23 | 0. 290587 | 1      | 0. 567 | 4. 97E-19 | CSCL1 | ILF2     |
| RRP9. 6     | 3. 43E-23 | 0. 130168 | 0. 443 | 0. 152 | 5. 12E-19 | CSCL1 | RRP9     |
| GLUL. 8     | 3. 46E-23 | -0. 76156 | 0. 905 | 0. 784 | 5. 17E-19 | CSCL1 | GLUL     |
| DPYSL3. 11  | 3. 48E-23 | 0. 214994 | 0. 771 | 0. 314 | 5. 21E-19 | CSCL1 | DPYSL3   |
| POP5. 5     | 3. 55E-23 | 0. 117967 | 0. 706 | 0. 289 | 5. 30E-19 | CSCL1 | POP5     |
| CNOT11. 3   | 3. 62E-23 | 0. 160569 | 0. 368 | 0. 118 | 5. 42E-19 | CSCL1 | CNOT11   |
| RBL1. 2     | 3. 64E-23 | 0. 129426 | 0. 204 | 0. 047 | 5. 44E-19 | CSCL1 | RBL1     |
| SGSM3. 2    | 3. 68E-23 | 0. 134507 | 0. 512 | 0. 185 | 5. 50E-19 | CSCL1 | SGSM3    |
| NUP188. 2   | 3. 78E-23 | 0. 132821 | 0. 284 | 0. 079 | 5. 64E-19 | CSCL1 | NUP188   |
| MRAS. 8     | 3. 87E-23 | 0. 143993 | 0. 468 | 0. 162 | 5. 78E-19 | CSCL1 | MRAS     |
| ATXN2L. 2   | 4. 01E-23 | 0. 129005 | 0. 488 | 0. 172 | 6. 00E-19 | CSCL1 | ATXN2L   |
| EXOC5. 5    | 4. 09E-23 | 0. 114179 | 0. 493 | 0. 174 | 6. 11E-19 | CSCL1 | EXOC5    |
| MAP2K4. 3   | 4. 10E-23 | 0. 145348 | 0. 318 | 0. 094 | 6. 13E-19 | CSCL1 | MAP2K4   |
| AMMECR1. 1  | 4. 16E-23 | 0. 13456  | 0. 214 | 0. 051 | 6. 22E-19 | CSCL1 | AMMECR1  |
| GTF2F2. 6   | 4. 36E-23 | 0. 179482 | 0. 721 | 0. 292 | 6. 51E-19 | CSCL1 | GTF2F2   |
| SLC2A1. 8   | 4. 36E-23 | 0. 132958 | 0. 403 | 0. 133 | 6. 52E-19 | CSCL1 | SLC2A1   |
| TRAP1. 9    | 4. 40E-23 | 0. 202978 | 0. 632 | 0. 252 | 6. 57E-19 | CSCL1 | TRAP1    |
| GOLIM4. 8   | 4. 50E-23 | 0. 227781 | 0. 761 | 0. 319 | 6. 73E-19 | CSCL1 | GOLIM4   |
| CEP350. 3   | 4. 54E-23 | 0. 151857 | 0. 512 | 0. 187 | 6. 78E-19 | CSCL1 | CEP350   |
| POU3F3. 11  | 4. 57E-23 | 0. 136817 | 0. 443 | 0. 149 | 6. 83E-19 | CSCL1 | POU3F3   |
| NPDC1. 10   | 4. 61E-23 | 0. 267519 | 0. 801 | 0. 315 | 6. 88E-19 | CSCL1 | NPDC1    |
| BBIP1. 5    | 4. 69E-23 | 0. 115351 | 0. 488 | 0. 172 | 7. 01E-19 | CSCL1 | BBIP1    |
| DNM1L. 7    | 4. 72E-23 | 0. 13615  | 0. 597 | 0. 226 | 7. 06E-19 | CSCL1 | DNM1L    |



|               |          |          |       |       |          |       |               |
|---------------|----------|----------|-------|-------|----------|-------|---------------|
| SBN01.8       | 4.73E-23 | 0.137783 | 0.662 | 0.259 | 7.07E-19 | CSCL1 | SBN01         |
| UMPS.6        | 4.86E-23 | 0.124558 | 0.393 | 0.128 | 7.27E-19 | CSCL1 | UMPS          |
| PCDHGC3.1     | 4.99E-23 | 0.110796 | 0.194 | 0.043 | 7.46E-19 | CSCL1 | PCDHGC3       |
| NOL10.6       | 5.18E-23 | 0.100562 | 0.443 | 0.15  | 7.74E-19 | CSCL1 | NOL10         |
| C6orf203.5    | 5.31E-23 | 0.100757 | 0.463 | 0.16  | 7.94E-19 | CSCL1 | C6orf203      |
| TAF6L.2       | 5.32E-23 | 0.13623  | 0.299 | 0.085 | 7.95E-19 | CSCL1 | TAF6L         |
| PTOV1.11      | 5.46E-23 | 0.313802 | 0.94  | 0.43  | 8.16E-19 | CSCL1 | PTOV1         |
| ZNF839        | 5.51E-23 | 0.104039 | 0.134 | 0.023 | 8.23E-19 | CSCL1 | ZNF839        |
| GINM1.4       | 5.58E-23 | 0.154992 | 0.721 | 0.289 | 8.33E-19 | CSCL1 | GINM1         |
| CTB-5506.5    | 5.70E-23 | 0.107837 | 0.194 | 0.043 | 8.52E-19 | CSCL1 | CTB-5506.12   |
| COA1.6        | 5.82E-23 | 0.175164 | 0.871 | 0.389 | 8.70E-19 | CSCL1 | COA1          |
| MAPKAPK5.5    | 5.89E-23 | 0.139012 | 0.498 | 0.178 | 8.81E-19 | CSCL1 | MAPKAPK5      |
| STAT1.6       | 5.92E-23 | 0.166136 | 0.582 | 0.223 | 8.84E-19 | CSCL1 | STAT1         |
| KIAA1191.6    | 6.12E-23 | 0.107994 | 0.662 | 0.257 | 9.15E-19 | CSCL1 | KIAA1191      |
| RAB11B-AS1.6  | 6.19E-23 | 0.125476 | 0.393 | 0.127 | 9.26E-19 | CSCL1 | RAB11B-AS1    |
| RP11-326I11.3 | 6.27E-23 | 0.111229 | 0.154 | 0.029 | 9.38E-19 | CSCL1 | RP11-326I11.3 |
| NME7.11       | 6.57E-23 | 0.105189 | 0.453 | 0.156 | 9.83E-19 | CSCL1 | NME7          |
| IFNAR2.8      | 6.65E-23 | 0.12458  | 0.532 | 0.194 | 9.94E-19 | CSCL1 | IFNAR2        |
| NOC3L.4       | 6.83E-23 | 0.111752 | 0.308 | 0.09  | 1.02E-18 | CSCL1 | NOC3L         |
| MKRN2.2       | 7.04E-23 | 0.121407 | 0.433 | 0.147 | 1.05E-18 | CSCL1 | MKRN2         |
| LRRC16A.4     | 7.15E-23 | 0.132929 | 0.264 | 0.071 | 1.07E-18 | CSCL1 | LRRC16A       |
| ZNF770.4      | 7.19E-23 | 0.160814 | 0.383 | 0.126 | 1.07E-18 | CSCL1 | ZNF770        |
| POMT2.4       | 7.25E-23 | 0.102792 | 0.259 | 0.068 | 1.08E-18 | CSCL1 | POMT2         |
| ISYNA1.7      | 7.31E-23 | 0.113345 | 0.398 | 0.129 | 1.09E-18 | CSCL1 | ISYNA1        |
| P4HTM.8       | 7.89E-23 | 0.18655  | 0.652 | 0.255 | 1.18E-18 | CSCL1 | P4HTM         |
| NUP205.2      | 8.15E-23 | 0.114232 | 0.234 | 0.058 | 1.22E-18 | CSCL1 | NUP205        |
| ACAD9.3       | 8.22E-23 | 0.113701 | 0.358 | 0.111 | 1.23E-18 | CSCL1 | ACAD9         |
| CTNNBL1.3     | 8.39E-23 | 0.137073 | 0.711 | 0.289 | 1.25E-18 | CSCL1 | CTNNBL1       |
| CAPRIN1.9     | 8.63E-23 | 0.224691 | 0.756 | 0.313 | 1.29E-18 | CSCL1 | CAPRIN1       |
| VGLL4.9       | 8.72E-23 | 0.218601 | 0.756 | 0.31  | 1.30E-18 | CSCL1 | VGLL4         |
| LRRC47.9      | 8.80E-23 | 0.155725 | 0.562 | 0.21  | 1.32E-18 | CSCL1 | LRRC47        |
| SNAPC3.6      | 8.88E-23 | 0.181405 | 0.393 | 0.131 | 1.33E-18 | CSCL1 | SNAPC3        |
| TFG.6         | 8.89E-23 | 0.258104 | 0.886 | 0.4   | 1.33E-18 | CSCL1 | TFG           |
| ZNF660.2      | 9.38E-23 | 0.112622 | 0.204 | 0.047 | 1.40E-18 | CSCL1 | ZNF660        |
| RFC1.7        | 9.46E-23 | 0.112147 | 0.692 | 0.269 | 1.41E-18 | CSCL1 | RFC1          |
| LRRC40.6      | 9.70E-23 | 0.132923 | 0.413 | 0.138 | 1.45E-18 | CSCL1 | LRRC40        |
| AMZ2.6        | 1.02E-22 | 0.168776 | 0.856 | 0.372 | 1.52E-18 | CSCL1 | AMZ2          |
| C20orf27.1    | 1.02E-22 | 0.24743  | 0.796 | 0.352 | 1.53E-18 | CSCL1 | C20orf27      |
| CD276.5       | 1.05E-22 | 0.161061 | 0.572 | 0.216 | 1.57E-18 | CSCL1 | CD276         |
| ANKRD16.3     | 1.06E-22 | 0.119586 | 0.209 | 0.049 | 1.58E-18 | CSCL1 | ANKRD16       |
| ARHGAP19      | 1.06E-22 | 0.119429 | 0.144 | 0.026 | 1.59E-18 | CSCL1 | ARHGAP19      |
| CAMK1.8       | 1.08E-22 | 0.195516 | 0.577 | 0.22  | 1.62E-18 | CSCL1 | CAMK1         |
| NF2.4         | 1.09E-22 | 0.11921  | 0.433 | 0.146 | 1.63E-18 | CSCL1 | NF2           |
| SNX27.5       | 1.12E-22 | 0.140446 | 0.617 | 0.238 | 1.67E-18 | CSCL1 | SNX27         |
| PXDN.8        | 1.15E-22 | 0.151926 | 0.323 | 0.097 | 1.72E-18 | CSCL1 | PXDN          |
| RNASEH1.8     | 1.19E-22 | 0.134993 | 0.582 | 0.223 | 1.78E-18 | CSCL1 | RNASEH1       |
| SIAE.6        | 1.20E-22 | 0.100448 | 0.299 | 0.086 | 1.79E-18 | CSCL1 | SIAE          |
| TMEM126B.1    | 1.21E-22 | 0.110133 | 0.741 | 0.301 | 1.81E-18 | CSCL1 | TMEM126B      |
| MDM1.3        | 1.22E-22 | 0.127015 | 0.259 | 0.069 | 1.83E-18 | CSCL1 | MDM1          |
| CAPN5.6       | 1.25E-22 | 0.153258 | 0.249 | 0.066 | 1.87E-18 | CSCL1 | CAPN5         |
| NOC4L.4       | 1.26E-22 | 0.117424 | 0.443 | 0.151 | 1.89E-18 | CSCL1 | NOC4L         |

|            |           |           |        |        |           |       |                |
|------------|-----------|-----------|--------|--------|-----------|-------|----------------|
| NSMCE4A. 5 | 1. 30E-22 | 0. 130974 | 0. 433 | 0. 148 | 1. 94E-18 | CSCL1 | NSMCE4A        |
| MAN1A2. 8  | 1. 30E-22 | 0. 151229 | 0. 542 | 0. 198 | 1. 94E-18 | CSCL1 | MAN1A2         |
| PTPN13. 9  | 1. 33E-22 | 0. 139472 | 0. 303 | 0. 089 | 1. 99E-18 | CSCL1 | PTPN13         |
| AES. 11    | 1. 35E-22 | 0. 261277 | 0. 891 | 0. 402 | 2. 01E-18 | CSCL1 | AES            |
| PVR. 4     | 1. 40E-22 | 0. 103882 | 0. 249 | 0. 064 | 2. 09E-18 | CSCL1 | PVR            |
| KLHL7. 9   | 1. 43E-22 | 0. 201762 | 0. 672 | 0. 272 | 2. 14E-18 | CSCL1 | KLHL7          |
| PITHD1. 7  | 1. 44E-22 | 0. 193871 | 0. 806 | 0. 338 | 2. 15E-18 | CSCL1 | PITHD1         |
| NR2C2AP. 9 | 1. 47E-22 | 0. 121994 | 0. 458 | 0. 16  | 2. 19E-18 | CSCL1 | NR2C2AP        |
| ZBTB18. 4  | 1. 50E-22 | 0. 131254 | 0. 209 | 0. 049 | 2. 24E-18 | CSCL1 | ZBTB18         |
| TMUB2. 4   | 1. 52E-22 | 0. 107509 | 0. 652 | 0. 253 | 2. 27E-18 | CSCL1 | TMUB2          |
| SAFB. 7    | 1. 54E-22 | 0. 164813 | 0. 701 | 0. 282 | 2. 30E-18 | CSCL1 | SAFB           |
| ERBB2IP. 8 | 1. 54E-22 | 0. 126154 | 0. 582 | 0. 215 | 2. 31E-18 | CSCL1 | ERBB2IP        |
| NAP1L4. 9  | 1. 54E-22 | 0. 246202 | 0. 876 | 0. 395 | 2. 31E-18 | CSCL1 | NAP1L4         |
| OCIAD2. 11 | 1. 60E-22 | 0. 145099 | 0. 786 | 0. 38  | 2. 39E-18 | CSCL1 | OCIAD2         |
| SPOP. 9    | 1. 65E-22 | 0. 149861 | 0. 741 | 0. 301 | 2. 47E-18 | CSCL1 | SPOP           |
| NPAS3. 11  | 1. 72E-22 | 0. 17344  | 0. 448 | 0. 154 | 2. 57E-18 | CSCL1 | NPAS3          |
| CPSF2. 2   | 1. 77E-22 | 0. 119256 | 0. 373 | 0. 12  | 2. 64E-18 | CSCL1 | CPSF2          |
| DIAPH1. 8  | 1. 80E-22 | 0. 132415 | 0. 403 | 0. 134 | 2. 69E-18 | CSCL1 | DIAPH1         |
| NOP56. 7   | 1. 84E-22 | 0. 23832  | 0. 896 | 0. 405 | 2. 76E-18 | CSCL1 | NOP56          |
| LIN9       | 1. 87E-22 | 0. 111151 | 0. 144 | 0. 027 | 2. 79E-18 | CSCL1 | LIN9           |
| AP1M1. 4   | 1. 89E-22 | 0. 128688 | 0. 567 | 0. 217 | 2. 83E-18 | CSCL1 | AP1M1          |
| ARHGFEF26. | 1. 95E-22 | 0. 140165 | 0. 373 | 0. 121 | 2. 91E-18 | CSCL1 | ARHGFEF26      |
| HERC5. 5   | 1. 99E-22 | 0. 136674 | 0. 259 | 0. 07  | 2. 97E-18 | CSCL1 | HERC5          |
| MLF1. 8    | 2. 04E-22 | 0. 106951 | 0. 607 | 0. 235 | 3. 04E-18 | CSCL1 | MLF1           |
| CLPP. 5    | 2. 11E-22 | 0. 250329 | 0. 856 | 0. 39  | 3. 16E-18 | CSCL1 | CLPP           |
| RFX4. 10   | 2. 24E-22 | 0. 101909 | 0. 428 | 0. 146 | 3. 35E-18 | CSCL1 | RFX4           |
| ELAVL3. 12 | 2. 27E-22 | 0. 189746 | 0. 741 | 0. 303 | 3. 39E-18 | CSCL1 | ELAVL3         |
| CCDC130. 7 | 2. 27E-22 | 0. 1382   | 0. 577 | 0. 222 | 3. 40E-18 | CSCL1 | CCDC130        |
| DIS3L. 4   | 2. 28E-22 | 0. 107663 | 0. 328 | 0. 099 | 3. 41E-18 | CSCL1 | DIS3L          |
| DPH7. 9    | 2. 31E-22 | 0. 134078 | 0. 463 | 0. 162 | 3. 45E-18 | CSCL1 | DPH7           |
| SMARCE1. 8 | 2. 31E-22 | 0. 197619 | 0. 866 | 0. 37  | 3. 46E-18 | CSCL1 | SMARCE1        |
| LTBP1. 7   | 2. 33E-22 | 0. 119514 | 0. 204 | 0. 048 | 3. 48E-18 | CSCL1 | LTBP1          |
| NDUFAF6. 9 | 2. 33E-22 | 0. 110645 | 0. 493 | 0. 175 | 3. 49E-18 | CSCL1 | NDUFAF6        |
| MIPEP. 2   | 2. 44E-22 | 0. 1156   | 0. 234 | 0. 059 | 3. 64E-18 | CSCL1 | MIPEP          |
| TPT1. 9    | 2. 51E-22 | -0. 40995 | 0. 995 | 0. 952 | 3. 74E-18 | CSCL1 | TPT1           |
| RP11-563K  | 2. 51E-22 | 0. 119533 | 0. 239 | 0. 061 | 3. 75E-18 | CSCL1 | RP11-563K23. 1 |
| ATG3. 9    | 2. 53E-22 | 0. 190349 | 0. 846 | 0. 369 | 3. 78E-18 | CSCL1 | ATG3           |
| CDT1. 7    | 2. 59E-22 | 0. 167184 | 0. 229 | 0. 058 | 3. 87E-18 | CSCL1 | CDT1           |
| ARHGAP5. 8 | 2. 60E-22 | 0. 10984  | 0. 517 | 0. 188 | 3. 88E-18 | CSCL1 | ARHGAP5        |
| GORASP2. 6 | 2. 60E-22 | 0. 163323 | 0. 701 | 0. 286 | 3. 89E-18 | CSCL1 | GORASP2        |
| ADAM9. 9   | 2. 60E-22 | 0. 210801 | 0. 771 | 0. 322 | 3. 89E-18 | CSCL1 | ADAM9          |
| RNF14. 5   | 2. 62E-22 | 0. 153056 | 0. 512 | 0. 189 | 3. 92E-18 | CSCL1 | RNF14          |
| RPP40. 7   | 2. 88E-22 | 0. 115319 | 0. 358 | 0. 114 | 4. 30E-18 | CSCL1 | RPP40          |
| PGPEP1. 4  | 2. 92E-22 | 0. 133535 | 0. 388 | 0. 129 | 4. 36E-18 | CSCL1 | PGPEP1         |
| PGBD1. 6   | 3. 13E-22 | 0. 115445 | 0. 254 | 0. 068 | 4. 68E-18 | CSCL1 | PGBD1          |
| TCFL5. 1   | 3. 21E-22 | 0. 105473 | 0. 174 | 0. 037 | 4. 80E-18 | CSCL1 | TCFL5          |
| OLIG2. 11  | 3. 28E-22 | 0. 185526 | 0. 478 | 0. 173 | 4. 90E-18 | CSCL1 | OLIG2          |
| GTF3C1. 4  | 3. 33E-22 | 0. 128817 | 0. 333 | 0. 103 | 4. 98E-18 | CSCL1 | GTF3C1         |
| RYK. 5     | 3. 40E-22 | 0. 101779 | 0. 299 | 0. 086 | 5. 09E-18 | CSCL1 | RYK            |
| ARV1. 7    | 3. 44E-22 | 0. 111132 | 0. 478 | 0. 173 | 5. 14E-18 | CSCL1 | ARV1           |
| ELOVL6. 8  | 3. 53E-22 | 0. 11713  | 0. 303 | 0. 089 | 5. 28E-18 | CSCL1 | ELOVL6         |

|            |          |          |       |       |          |       |              |
|------------|----------|----------|-------|-------|----------|-------|--------------|
| ANKRD11.7  | 3.56E-22 | 0.195129 | 0.746 | 0.308 | 5.32E-18 | CSCL1 | ANKRD11      |
| CEP104.5   | 3.64E-22 | 0.103673 | 0.368 | 0.117 | 5.45E-18 | CSCL1 | CEP104       |
| PPP1R8.5   | 3.70E-22 | 0.116358 | 0.567 | 0.217 | 5.52E-18 | CSCL1 | PPP1R8       |
| ADAMTS9.9  | 3.76E-22 | 0.128815 | 0.269 | 0.074 | 5.61E-18 | CSCL1 | ADAMTS9      |
| C3orf70.1  | 3.77E-22 | 0.181327 | 0.318 | 0.096 | 5.63E-18 | CSCL1 | C3orf70      |
| HES6.10    | 3.91E-22 | 0.234421 | 0.667 | 0.279 | 5.84E-18 | CSCL1 | HES6         |
| EVI5.5     | 3.95E-22 | 0.121561 | 0.498 | 0.179 | 5.90E-18 | CSCL1 | EVI5         |
| LRTOMT.5   | 4.05E-22 | 0.124448 | 0.254 | 0.068 | 6.05E-18 | CSCL1 | LRTOMT       |
| ZNF580.8   | 4.09E-22 | 0.264083 | 0.692 | 0.284 | 6.11E-18 | CSCL1 | ZNF580       |
| ZFAND3.5   | 4.12E-22 | 0.170855 | 0.667 | 0.266 | 6.15E-18 | CSCL1 | ZFAND3       |
| TBL1XR1.8  | 4.19E-22 | 0.164579 | 0.612 | 0.242 | 6.26E-18 | CSCL1 | TBL1XR1      |
| SLC25A1.6  | 4.19E-22 | 0.15581  | 0.512 | 0.189 | 6.26E-18 | CSCL1 | SLC25A1      |
| RCN1.12    | 4.23E-22 | 0.244792 | 0.806 | 0.346 | 6.32E-18 | CSCL1 | RCN1         |
| SLC16A1.9  | 4.27E-22 | 0.119442 | 0.587 | 0.227 | 6.38E-18 | CSCL1 | SLC16A1      |
| SMG6.5     | 4.29E-22 | 0.123925 | 0.368 | 0.118 | 6.41E-18 | CSCL1 | SMG6         |
| GLOD4.5    | 4.31E-22 | 0.190441 | 0.851 | 0.381 | 6.45E-18 | CSCL1 | GLOD4        |
| C1orf123.4 | 4.37E-22 | 0.105646 | 0.791 | 0.333 | 6.53E-18 | CSCL1 | C1orf123     |
| CREB5.11   | 4.44E-22 | 0.101766 | 0.602 | 0.229 | 6.64E-18 | CSCL1 | CREB5        |
| RGS6.9     | 4.61E-22 | 0.165639 | 0.294 | 0.087 | 6.89E-18 | CSCL1 | RGS6         |
| MAPK1.5    | 4.66E-22 | 0.164628 | 0.612 | 0.236 | 6.96E-18 | CSCL1 | MAPK1        |
| FRYL.11    | 4.66E-22 | 0.13664  | 0.498 | 0.182 | 6.97E-18 | CSCL1 | FRYL         |
| WSCD1.10   | 4.67E-22 | 0.171282 | 0.383 | 0.126 | 6.98E-18 | CSCL1 | WSCD1        |
| CXXC5.12   | 4.70E-22 | 0.278839 | 0.846 | 0.372 | 7.03E-18 | CSCL1 | CXXC5        |
| FUBP3.7    | 4.88E-22 | 0.167459 | 0.597 | 0.234 | 7.29E-18 | CSCL1 | FUBP3        |
| ARL2BP.8   | 4.92E-22 | 0.224583 | 0.871 | 0.397 | 7.35E-18 | CSCL1 | ARL2BP       |
| HAT1.7     | 5.10E-22 | 0.133391 | 0.706 | 0.289 | 7.62E-18 | CSCL1 | HAT1         |
| PURA.9     | 5.20E-22 | 0.164112 | 0.532 | 0.202 | 7.77E-18 | CSCL1 | PURA         |
| C1QA.12    | 5.34E-22 | -1.40017 | 0.313 | 0.541 | 7.98E-18 | CSCL1 | C1QA         |
| EBF4.6     | 5.35E-22 | 0.129772 | 0.214 | 0.052 | 7.99E-18 | CSCL1 | EBF4         |
| GRIK3.7    | 5.40E-22 | 0.117948 | 0.189 | 0.042 | 8.07E-18 | CSCL1 | GRIK3        |
| ANKIB1.11  | 5.40E-22 | 0.142837 | 0.542 | 0.202 | 8.07E-18 | CSCL1 | ANKIB1       |
| MON1A.7    | 5.53E-22 | 0.114319 | 0.289 | 0.083 | 8.26E-18 | CSCL1 | MON1A        |
| RARS2.6    | 5.77E-22 | 0.103345 | 0.507 | 0.185 | 8.63E-18 | CSCL1 | RARS2        |
| SFPQ.8     | 5.80E-22 | 0.326046 | 0.955 | 0.535 | 8.66E-18 | CSCL1 | SFPQ         |
| NUP85.5    | 5.92E-22 | 0.105615 | 0.368 | 0.119 | 8.85E-18 | CSCL1 | NUP85        |
| N6AMT1.2   | 5.99E-22 | 0.103488 | 0.234 | 0.06  | 8.94E-18 | CSCL1 | N6AMT1       |
| HYI.4      | 6.08E-22 | 0.178292 | 0.398 | 0.135 | 9.08E-18 | CSCL1 | HYI          |
| DNAL4.4    | 6.17E-22 | 0.154011 | 0.373 | 0.123 | 9.22E-18 | CSCL1 | DNAL4        |
| BAG5.8     | 6.19E-22 | 0.124094 | 0.493 | 0.179 | 9.25E-18 | CSCL1 | BAG5         |
| ZNHIT6.3   | 6.28E-22 | 0.1427   | 0.303 | 0.09  | 9.38E-18 | CSCL1 | ZNHIT6       |
| ARIH2.4    | 6.33E-22 | 0.118736 | 0.627 | 0.243 | 9.46E-18 | CSCL1 | ARIH2        |
| STAMBP.7   | 6.70E-22 | 0.12448  | 0.642 | 0.259 | 1.00E-17 | CSCL1 | STAMBP       |
| MAPK11.7   | 6.72E-22 | 0.11456  | 0.214 | 0.052 | 1.00E-17 | CSCL1 | MAPK11       |
| MFAP1.6    | 6.76E-22 | 0.112895 | 0.468 | 0.168 | 1.01E-17 | CSCL1 | MFAP1        |
| C1QC.12    | 7.05E-22 | -1.4608  | 0.249 | 0.506 | 1.05E-17 | CSCL1 | C1QC         |
| C1orf131.7 | 7.06E-22 | 0.100336 | 0.522 | 0.195 | 1.06E-17 | CSCL1 | C1orf131     |
| REXO4.5    | 7.17E-22 | 0.133884 | 0.507 | 0.185 | 1.07E-17 | CSCL1 | REXO4        |
| HNRNPAB.1  | 7.21E-22 | 0.258133 | 0.886 | 0.389 | 1.08E-17 | CSCL1 | HNRNPAB      |
| EPN1.4     | 7.21E-22 | 0.198665 | 0.781 | 0.327 | 1.08E-17 | CSCL1 | EPN1         |
| RP11-126K  | 7.31E-22 | 0.126175 | 0.299 | 0.088 | 1.09E-17 | CSCL1 | RP11-126K1.6 |
| MSTO1.3    | 7.32E-22 | 0.111901 | 0.289 | 0.083 | 1.09E-17 | CSCL1 | MSTO1        |

|            |          |          |       |       |          |       |           |
|------------|----------|----------|-------|-------|----------|-------|-----------|
| RNF180.11  | 7.42E-22 | 0.180607 | 0.453 | 0.163 | 1.11E-17 | CSCL1 | RNF180    |
| DNAJC2.8   | 7.44E-22 | 0.150248 | 0.711 | 0.291 | 1.11E-17 | CSCL1 | DNAJC2    |
| SPAG16.1C  | 7.46E-22 | 0.112687 | 0.711 | 0.289 | 1.11E-17 | CSCL1 | SPAG16    |
| TNIP2.7    | 7.68E-22 | 0.128078 | 0.453 | 0.16  | 1.15E-17 | CSCL1 | TNIP2     |
| HLA-DPB1.7 | 7.82E-22 | -1.36262 | 0.234 | 0.499 | 1.17E-17 | CSCL1 | HLA-DPB1  |
| STAU1.8    | 8.04E-22 | 0.254029 | 0.821 | 0.358 | 1.20E-17 | CSCL1 | STAU1     |
| EZR.10     | 8.21E-22 | 0.13872  | 0.796 | 0.334 | 1.23E-17 | CSCL1 | EZR       |
| TRIP12.5   | 8.68E-22 | 0.120655 | 0.453 | 0.16  | 1.30E-17 | CSCL1 | TRIP12    |
| SETD4.5    | 8.71E-22 | 0.101367 | 0.373 | 0.121 | 1.30E-17 | CSCL1 | SETD4     |
| HGS.6      | 8.76E-22 | 0.13172  | 0.552 | 0.21  | 1.31E-17 | CSCL1 | HGS       |
| ZFP64.5    | 8.84E-22 | 0.141529 | 0.264 | 0.073 | 1.32E-17 | CSCL1 | ZFP64     |
| TCEB3.5    | 9.04E-22 | 0.115411 | 0.473 | 0.171 | 1.35E-17 | CSCL1 | TCEB3     |
| PANK2.5    | 9.12E-22 | 0.151875 | 0.532 | 0.203 | 1.36E-17 | CSCL1 | PANK2     |
| ALOX5AP.1  | 9.32E-22 | -1.41791 | 0.09  | 0.404 | 1.39E-17 | CSCL1 | ALOX5AP   |
| HMGCS1.8   | 9.43E-22 | 0.11352  | 0.498 | 0.177 | 1.41E-17 | CSCL1 | HMGCS1    |
| NOVA1-AS1  | 9.47E-22 | 0.100341 | 0.159 | 0.032 | 1.42E-17 | CSCL1 | NOVA1-AS1 |
| ITGB8.10   | 9.63E-22 | 0.141847 | 0.612 | 0.233 | 1.44E-17 | CSCL1 | ITGB8     |
| DCAF13.8   | 9.70E-22 | 0.138601 | 0.741 | 0.31  | 1.45E-17 | CSCL1 | DCAF13    |
| C16orf87.9 | 9.86E-22 | 0.138392 | 0.527 | 0.199 | 1.47E-17 | CSCL1 | C16orf87  |
| SZRD1.7    | 9.98E-22 | 0.103047 | 0.647 | 0.258 | 1.49E-17 | CSCL1 | SZRD1     |
| FAM20B     | 1.02E-21 | 0.114835 | 0.224 | 0.056 | 1.53E-17 | CSCL1 | FAM20B    |
| ERRFI1.7   | 1.03E-21 | 0.140452 | 0.423 | 0.147 | 1.54E-17 | CSCL1 | ERRFI1    |
| SNHG7.6    | 1.17E-21 | 0.207427 | 0.801 | 0.338 | 1.74E-17 | CSCL1 | SNHG7     |
| RFXANK.6   | 1.17E-21 | 0.136021 | 0.761 | 0.317 | 1.75E-17 | CSCL1 | RFXANK    |
| BPGM.7     | 1.17E-21 | 0.139704 | 0.587 | 0.228 | 1.75E-17 | CSCL1 | BPGM      |
| GRAMD1C.1  | 1.20E-21 | 0.116759 | 0.149 | 0.029 | 1.79E-17 | CSCL1 | GRAMD1C   |
| DDX11.1    | 1.22E-21 | 0.141841 | 0.204 | 0.049 | 1.82E-17 | CSCL1 | DDX11     |
| SLC35A3.2  | 1.25E-21 | 0.100832 | 0.368 | 0.119 | 1.87E-17 | CSCL1 | SLC35A3   |
| XAB2.3     | 1.25E-21 | 0.110106 | 0.478 | 0.172 | 1.87E-17 | CSCL1 | XAB2      |
| YY1.8      | 1.26E-21 | 0.220328 | 0.781 | 0.332 | 1.89E-17 | CSCL1 | YY1       |
| CTNND2.9   | 1.29E-21 | 0.154483 | 0.433 | 0.153 | 1.92E-17 | CSCL1 | CTNND2    |
| SART1.4    | 1.29E-21 | 0.143341 | 0.517 | 0.192 | 1.93E-17 | CSCL1 | SART1     |
| ABCA3.8    | 1.29E-21 | 0.129977 | 0.264 | 0.073 | 1.93E-17 | CSCL1 | ABCA3     |
| ZNF787.2   | 1.31E-21 | 0.109288 | 0.259 | 0.071 | 1.96E-17 | CSCL1 | ZNF787    |
| C8orf59.5  | 1.39E-21 | 0.240605 | 0.861 | 0.385 | 2.07E-17 | CSCL1 | C8orf59   |
| RCN2.11    | 1.40E-21 | 0.344413 | 0.93  | 0.459 | 2.10E-17 | CSCL1 | RCN2      |
| SPATA2.4   | 1.45E-21 | 0.103551 | 0.244 | 0.064 | 2.17E-17 | CSCL1 | SPATA2    |
| NFIC.6     | 1.47E-21 | 0.301995 | 0.861 | 0.426 | 2.19E-17 | CSCL1 | NFIC      |
| RAB21.6    | 1.47E-21 | 0.132473 | 0.527 | 0.198 | 2.20E-17 | CSCL1 | RAB21     |
| SLC35B1.6  | 1.48E-21 | 0.213021 | 0.866 | 0.383 | 2.21E-17 | CSCL1 | SLC35B1   |
| GOPC.9     | 1.49E-21 | 0.13504  | 0.637 | 0.251 | 2.23E-17 | CSCL1 | GOPC      |
| RANBP1.11  | 1.50E-21 | 0.317758 | 0.98  | 0.571 | 2.24E-17 | CSCL1 | RANBP1    |
| RHEB.6     | 1.51E-21 | 0.304737 | 1     | 0.631 | 2.26E-17 | CSCL1 | RHEB      |
| FAM192A.7  | 1.54E-21 | 0.185109 | 0.801 | 0.35  | 2.30E-17 | CSCL1 | FAM192A   |
| NUCB2.7    | 1.55E-21 | 0.130749 | 0.786 | 0.339 | 2.32E-17 | CSCL1 | NUCB2     |
| E2F6.6     | 1.56E-21 | 0.114066 | 0.408 | 0.14  | 2.33E-17 | CSCL1 | E2F6      |
| RNF214.4   | 1.64E-21 | 0.11849  | 0.328 | 0.102 | 2.45E-17 | CSCL1 | RNF214    |
| NONO.11    | 1.69E-21 | 0.269539 | 0.93  | 0.447 | 2.52E-17 | CSCL1 | NONO      |
| SLC2A8.6   | 1.72E-21 | 0.107316 | 0.398 | 0.135 | 2.56E-17 | CSCL1 | SLC2A8    |
| CTBP1.5    | 1.72E-21 | 0.114411 | 0.567 | 0.216 | 2.57E-17 | CSCL1 | CTBP1     |
| WDR83.6    | 1.74E-21 | 0.104677 | 0.463 | 0.166 | 2.59E-17 | CSCL1 | WDR83     |

|            |          |          |       |       |          |       |                |
|------------|----------|----------|-------|-------|----------|-------|----------------|
| HMGA2.1    | 1.75E-21 | 0.127243 | 0.134 | 0.024 | 2.61E-17 | CSCL1 | HMGA2          |
| C5orf51.3  | 1.79E-21 | 0.131833 | 0.299 | 0.089 | 2.68E-17 | CSCL1 | C5orf51        |
| RP11-977G  | 1.83E-21 | 0.111971 | 0.244 | 0.065 | 2.73E-17 | CSCL1 | RP11-977G19.11 |
| RALA.8     | 1.89E-21 | 0.186026 | 0.811 | 0.352 | 2.83E-17 | CSCL1 | RALA           |
| PJA2.10    | 1.90E-21 | 0.253703 | 0.781 | 0.327 | 2.84E-17 | CSCL1 | PJA2           |
| TXNDC17.1  | 1.92E-21 | 0.236467 | 0.95  | 0.517 | 2.87E-17 | CSCL1 | TXNDC17        |
| TADA2A.2   | 1.97E-21 | 0.121257 | 0.259 | 0.071 | 2.94E-17 | CSCL1 | TADA2A         |
| HMCE5.3    | 2.08E-21 | 0.114543 | 0.458 | 0.164 | 3.11E-17 | CSCL1 | HMCE5          |
| FNDC4.10   | 2.09E-21 | 0.140436 | 0.522 | 0.192 | 3.12E-17 | CSCL1 | FNDC4          |
| SENP5.6    | 2.20E-21 | 0.154171 | 0.393 | 0.133 | 3.28E-17 | CSCL1 | SENP5          |
| LTBP3.6    | 2.23E-21 | 0.139167 | 0.542 | 0.204 | 3.34E-17 | CSCL1 | LTBP3          |
| APBA2.12   | 2.24E-21 | 0.135287 | 0.537 | 0.201 | 3.34E-17 | CSCL1 | APBA2          |
| ZC3H7A.6   | 2.29E-21 | 0.131952 | 0.418 | 0.145 | 3.43E-17 | CSCL1 | ZC3H7A         |
| ZNF626.8   | 2.35E-21 | 0.107746 | 0.403 | 0.138 | 3.51E-17 | CSCL1 | ZNF626         |
| SLC25A11.2 | 2.43E-21 | 0.231116 | 0.896 | 0.411 | 3.63E-17 | CSCL1 | SLC25A11       |
| CHMP7.8    | 2.43E-21 | 0.104802 | 0.478 | 0.172 | 3.63E-17 | CSCL1 | CHMP7          |
| MYO19.2    | 2.45E-21 | 0.102642 | 0.274 | 0.078 | 3.65E-17 | CSCL1 | MYO19          |
| PTPN21.1   | 2.45E-21 | 0.10129  | 0.144 | 0.028 | 3.66E-17 | CSCL1 | PTPN21         |
| MARK1.8    | 2.46E-21 | 0.158544 | 0.239 | 0.064 | 3.67E-17 | CSCL1 | MARK1          |
| SRSF1.6    | 2.51E-21 | 0.186397 | 0.866 | 0.389 | 3.75E-17 | CSCL1 | SRSF1          |
| PALM.8     | 2.55E-21 | 0.133979 | 0.323 | 0.1   | 3.80E-17 | CSCL1 | PALM           |
| NSF.3      | 2.55E-21 | 0.125674 | 0.393 | 0.133 | 3.81E-17 | CSCL1 | NSF            |
| CCDC66.9   | 2.56E-21 | 0.122536 | 0.582 | 0.223 | 3.83E-17 | CSCL1 | CCDC66         |
| SLC35C2.5  | 2.67E-21 | 0.142191 | 0.622 | 0.247 | 3.98E-17 | CSCL1 | SLC35C2        |
| PAPD7      | 2.67E-21 | 0.121621 | 0.184 | 0.042 | 3.99E-17 | CSCL1 | PAPD7          |
| ZNF528.8   | 2.67E-21 | 0.109025 | 0.333 | 0.104 | 3.99E-17 | CSCL1 | ZNF528         |
| PLCG1.7    | 2.72E-21 | 0.138761 | 0.313 | 0.096 | 4.07E-17 | CSCL1 | PLCG1          |
| LSM2.7     | 2.72E-21 | 0.216748 | 0.92  | 0.439 | 4.07E-17 | CSCL1 | LSM2           |
| MCAT.10    | 2.78E-21 | 0.114279 | 0.378 | 0.124 | 4.16E-17 | CSCL1 | MCAT           |
| COG4.8     | 2.83E-21 | 0.119397 | 0.502 | 0.185 | 4.22E-17 | CSCL1 | COG4           |
| MARK4.7    | 2.84E-21 | 0.116917 | 0.254 | 0.069 | 4.25E-17 | CSCL1 | MARK4          |
| NDUFS1.8   | 2.88E-21 | 0.114783 | 0.637 | 0.248 | 4.30E-17 | CSCL1 | NDUFS1         |
| TMEM67.8   | 2.98E-21 | 0.102511 | 0.303 | 0.091 | 4.45E-17 | CSCL1 | TMEM67         |
| LLGL1.9    | 3.07E-21 | 0.123708 | 0.313 | 0.096 | 4.59E-17 | CSCL1 | LLGL1          |
| GNB1L.1    | 3.09E-21 | 0.108243 | 0.284 | 0.082 | 4.61E-17 | CSCL1 | GNB1L          |
| RUFY2.11   | 3.10E-21 | 0.120793 | 0.418 | 0.144 | 4.64E-17 | CSCL1 | RUFY2          |
| ZNF148.4   | 3.12E-21 | 0.104883 | 0.617 | 0.242 | 4.67E-17 | CSCL1 | ZNF148         |
| KCTD1.8    | 3.38E-21 | 0.120716 | 0.234 | 0.061 | 5.06E-17 | CSCL1 | KCTD1          |
| SLC30A9.1  | 3.41E-21 | 0.136801 | 0.617 | 0.245 | 5.10E-17 | CSCL1 | SLC30A9        |
| ZNF608.8   | 3.41E-21 | 0.157475 | 0.433 | 0.152 | 5.10E-17 | CSCL1 | ZNF608         |
| ZSWIM7.1   | 3.44E-21 | 0.125718 | 0.796 | 0.335 | 5.14E-17 | CSCL1 | ZSWIM7         |
| CARS.7     | 3.51E-21 | 0.120076 | 0.552 | 0.213 | 5.24E-17 | CSCL1 | CARS           |
| CPE.11     | 3.58E-21 | 0.241913 | 0.861 | 0.381 | 5.35E-17 | CSCL1 | CPE            |
| TOM1L1.7   | 3.65E-21 | 0.140377 | 0.214 | 0.055 | 5.45E-17 | CSCL1 | TOM1L1         |
| TNRC6C.1C  | 3.72E-21 | 0.119917 | 0.463 | 0.167 | 5.56E-17 | CSCL1 | TNRC6C         |
| DNAJB2.1C  | 3.74E-21 | 0.149119 | 0.731 | 0.307 | 5.60E-17 | CSCL1 | DNAJB2         |
| NRBP1.3    | 3.96E-21 | 0.16199  | 0.771 | 0.333 | 5.91E-17 | CSCL1 | NRBP1          |
| ARCN1.3    | 4.21E-21 | 0.115082 | 0.468 | 0.17  | 6.28E-17 | CSCL1 | ARCN1          |
| STK33.9    | 4.23E-21 | 0.145361 | 0.239 | 0.065 | 6.32E-17 | CSCL1 | STK33          |
| GADD45A.1  | 4.23E-21 | 0.162258 | 0.657 | 0.272 | 6.32E-17 | CSCL1 | GADD45A        |
| UBQLN1.5   | 4.34E-21 | 0.121527 | 0.682 | 0.275 | 6.48E-17 | CSCL1 | UBQLN1         |

|             |           |           |        |        |           |       |           |
|-------------|-----------|-----------|--------|--------|-----------|-------|-----------|
| ANXA6. 4    | 4. 36E-21 | 0. 117272 | 0. 488 | 0. 179 | 6. 52E-17 | CSCL1 | ANXA6     |
| DROSHA. 1   | 4. 37E-21 | 0. 113692 | 0. 254 | 0. 07  | 6. 53E-17 | CSCL1 | DROSHA    |
| KCTD5. 6    | 4. 41E-21 | 0. 137603 | 0. 532 | 0. 202 | 6. 59E-17 | CSCL1 | KCTD5     |
| TCF7L2. 5   | 4. 43E-21 | 0. 120467 | 0. 299 | 0. 09  | 6. 62E-17 | CSCL1 | TCF7L2    |
| SHC4. 7     | 4. 75E-21 | 0. 155765 | 0. 214 | 0. 055 | 7. 09E-17 | CSCL1 | SHC4      |
| EPHA3. 11   | 4. 83E-21 | 0. 146566 | 0. 254 | 0. 07  | 7. 21E-17 | CSCL1 | EPHA3     |
| IRF2BP1. 9  | 4. 87E-21 | 0. 156722 | 0. 323 | 0. 102 | 7. 28E-17 | CSCL1 | IRF2BP1   |
| COA6. 6     | 4. 88E-21 | 0. 131489 | 0. 652 | 0. 27  | 7. 29E-17 | CSCL1 | COA6      |
| AGT. 10     | 4. 93E-21 | 0. 115179 | 0. 547 | 0. 214 | 7. 37E-17 | CSCL1 | AGT       |
| NUDT11. 9   | 5. 05E-21 | 0. 144377 | 0. 368 | 0. 122 | 7. 54E-17 | CSCL1 | NUDT11    |
| PRMT5. 9    | 5. 06E-21 | 0. 105139 | 0. 418 | 0. 146 | 7. 56E-17 | CSCL1 | PRMT5     |
| PPP1CB. 8   | 5. 16E-21 | 0. 311142 | 0. 905 | 0. 499 | 7. 71E-17 | CSCL1 | PPP1CB    |
| SH3PXD2B. 5 | 5. 21E-21 | 0. 100477 | 0. 353 | 0. 113 | 7. 79E-17 | CSCL1 | SH3PXD2B  |
| COA4. 6     | 5. 49E-21 | 0. 15995  | 0. 846 | 0. 378 | 8. 21E-17 | CSCL1 | COA4      |
| PHF13. 3    | 5. 50E-21 | 0. 111575 | 0. 234 | 0. 062 | 8. 21E-17 | CSCL1 | PHF13     |
| DNM1. 7     | 5. 56E-21 | 0. 110458 | 0. 254 | 0. 07  | 8. 30E-17 | CSCL1 | DNM1      |
| INTS10. 5   | 5. 66E-21 | 0. 112895 | 0. 716 | 0. 295 | 8. 46E-17 | CSCL1 | INTS10    |
| RBCK1. 6    | 5. 76E-21 | 0. 200257 | 0. 771 | 0. 33  | 8. 61E-17 | CSCL1 | RBCK1     |
| C6orf226. 5 | 5. 78E-21 | 0. 103337 | 0. 498 | 0. 184 | 8. 64E-17 | CSCL1 | C6orf226  |
| RGS1. 12    | 5. 80E-21 | -1. 40964 | 0. 169 | 0. 452 | 8. 67E-17 | CSCL1 | RGS1      |
| MVK. 3      | 5. 84E-21 | 0. 126288 | 0. 264 | 0. 075 | 8. 73E-17 | CSCL1 | MVK       |
| ZSCAN32. 4  | 5. 94E-21 | 0. 110949 | 0. 239 | 0. 064 | 8. 88E-17 | CSCL1 | ZSCAN32   |
| PGM2L1. 1C  | 6. 00E-21 | 0. 141322 | 0. 622 | 0. 249 | 8. 97E-17 | CSCL1 | PGM2L1    |
| TET1. 10    | 6. 02E-21 | 0. 137819 | 0. 274 | 0. 079 | 9. 00E-17 | CSCL1 | TET1      |
| ARPP19. 7   | 6. 10E-21 | 0. 179626 | 0. 91  | 0. 417 | 9. 11E-17 | CSCL1 | ARPP19    |
| NAA50. 5    | 6. 16E-21 | 0. 137241 | 0. 647 | 0. 265 | 9. 21E-17 | CSCL1 | NAA50     |
| TIMM44. 7   | 6. 29E-21 | 0. 157323 | 0. 642 | 0. 256 | 9. 41E-17 | CSCL1 | TIMM44    |
| SLC39A10. 6 | 6. 77E-21 | 0. 105237 | 0. 433 | 0. 152 | 1. 01E-16 | CSCL1 | SLC39A10  |
| JAKMIP2. 8  | 7. 01E-21 | 0. 158333 | 0. 413 | 0. 146 | 1. 05E-16 | CSCL1 | JAKMIP2   |
| SRSF12. 9   | 7. 20E-21 | 0. 100928 | 0. 254 | 0. 07  | 1. 08E-16 | CSCL1 | SRSF12    |
| UNC119B. 5  | 7. 40E-21 | 0. 113895 | 0. 229 | 0. 06  | 1. 11E-16 | CSCL1 | UNC119B   |
| PROSC. 3    | 7. 51E-21 | 0. 10385  | 0. 622 | 0. 245 | 1. 12E-16 | CSCL1 | PROSC     |
| PRRT2. 9    | 7. 59E-21 | 0. 152435 | 0. 289 | 0. 087 | 1. 13E-16 | CSCL1 | PRRT2     |
| RPS6KB1. 3  | 7. 71E-21 | 0. 108543 | 0. 373 | 0. 125 | 1. 15E-16 | CSCL1 | RPS6KB1   |
| NTMT1. 4    | 7. 75E-21 | 0. 118857 | 0. 756 | 0. 317 | 1. 16E-16 | CSCL1 | NTMT1     |
| ZNF639. 1C  | 7. 81E-21 | 0. 15369  | 0. 383 | 0. 132 | 1. 17E-16 | CSCL1 | ZNF639    |
| COX4I1. 6   | 7. 83E-21 | -0. 39071 | 1      | 0. 909 | 1. 17E-16 | CSCL1 | COX4I1    |
| FEM1C. 6    | 7. 95E-21 | 0. 140157 | 0. 393 | 0. 135 | 1. 19E-16 | CSCL1 | FEM1C     |
| TSEN34. 8   | 8. 21E-21 | 0. 257047 | 0. 826 | 0. 36  | 1. 23E-16 | CSCL1 | TSEN34    |
| SLTM. 4     | 8. 21E-21 | 0. 16546  | 0. 781 | 0. 342 | 1. 23E-16 | CSCL1 | SLTM      |
| DDX27. 6    | 9. 16E-21 | 0. 102958 | 0. 677 | 0. 275 | 1. 37E-16 | CSCL1 | DDX27     |
| VBP1. 8     | 9. 32E-21 | 0. 215965 | 0. 95  | 0. 479 | 1. 39E-16 | CSCL1 | VBP1      |
| PSMG3-AS1   | 9. 36E-21 | 0. 113422 | 0. 199 | 0. 048 | 1. 40E-16 | CSCL1 | PSMG3-AS1 |
| CFDP1. 7    | 9. 39E-21 | 0. 142281 | 0. 905 | 0. 407 | 1. 40E-16 | CSCL1 | CFDP1     |
| C12orf49    | 9. 43E-21 | 0. 103893 | 0. 299 | 0. 09  | 1. 41E-16 | CSCL1 | C12orf49  |
| AATF. 5     | 9. 76E-21 | 0. 127885 | 0. 687 | 0. 284 | 1. 46E-16 | CSCL1 | AATF      |
| OGFR. 6     | 1. 01E-20 | 0. 130476 | 0. 697 | 0. 279 | 1. 52E-16 | CSCL1 | OGFR      |
| TXLNG. 7    | 1. 02E-20 | 0. 111168 | 0. 383 | 0. 129 | 1. 52E-16 | CSCL1 | TXLNG     |
| C21orf2. 4  | 1. 05E-20 | 0. 141741 | 0. 502 | 0. 189 | 1. 56E-16 | CSCL1 | C21orf2   |
| CHTOP. 7    | 1. 07E-20 | 0. 145225 | 0. 826 | 0. 359 | 1. 60E-16 | CSCL1 | CHTOP     |
| NLGN2. 9    | 1. 10E-20 | 0. 12779  | 0. 294 | 0. 088 | 1. 64E-16 | CSCL1 | NLGN2     |

|           |          |          |       |       |          |       |          |
|-----------|----------|----------|-------|-------|----------|-------|----------|
| GEMIN4.1  | 1.12E-20 | 0.118086 | 0.209 | 0.052 | 1.67E-16 | CSCL1 | GEMIN4   |
| BYSL.8    | 1.14E-20 | 0.115689 | 0.328 | 0.104 | 1.70E-16 | CSCL1 | BYSL     |
| NADK2.5   | 1.19E-20 | 0.136714 | 0.308 | 0.096 | 1.77E-16 | CSCL1 | NADK2    |
| RMND1.4   | 1.23E-20 | 0.120418 | 0.313 | 0.097 | 1.84E-16 | CSCL1 | RMND1    |
| TREM2.12  | 1.30E-20 | -1.37437 | 0.045 | 0.356 | 1.95E-16 | CSCL1 | TREM2    |
| MAGI3.4   | 1.31E-20 | 0.126136 | 0.209 | 0.053 | 1.96E-16 | CSCL1 | MAGI3    |
| REPIN1.11 | 1.33E-20 | 0.145247 | 0.667 | 0.267 | 1.99E-16 | CSCL1 | REPIN1   |
| ZFPL1.6   | 1.34E-20 | 0.113719 | 0.577 | 0.229 | 2.00E-16 | CSCL1 | ZFPL1    |
| MS4A6A.12 | 1.34E-20 | -1.36906 | 0.035 | 0.346 | 2.01E-16 | CSCL1 | MS4A6A   |
| DDR1.10   | 1.39E-20 | 0.195268 | 0.771 | 0.324 | 2.07E-16 | CSCL1 | DDR1     |
| PTS.9     | 1.42E-20 | 0.121693 | 0.751 | 0.319 | 2.13E-16 | CSCL1 | PTS      |
| MFI2-AS1. | 1.43E-20 | 0.165233 | 0.254 | 0.072 | 2.13E-16 | CSCL1 | MFI2-AS1 |
| PSMD14.8  | 1.46E-20 | 0.186518 | 0.95  | 0.459 | 2.18E-16 | CSCL1 | PSMD14   |
| ARNTL.5   | 1.48E-20 | 0.107124 | 0.303 | 0.092 | 2.20E-16 | CSCL1 | ARNTL    |
| NUDT5.6   | 1.50E-20 | 0.102973 | 0.706 | 0.299 | 2.24E-16 | CSCL1 | NUDT5    |
| CASC3.7   | 1.54E-20 | 0.116139 | 0.488 | 0.18  | 2.30E-16 | CSCL1 | CASC3    |
| DHX33.8   | 1.57E-20 | 0.134509 | 0.353 | 0.117 | 2.35E-16 | CSCL1 | DHX33    |
| RNMTL1.7  | 1.60E-20 | 0.142114 | 0.368 | 0.125 | 2.39E-16 | CSCL1 | RNMTL1   |
| DNAJA3.6  | 1.61E-20 | 0.121633 | 0.458 | 0.168 | 2.41E-16 | CSCL1 | DNAJA3   |
| TYROBP.12 | 1.70E-20 | -1.45941 | 0.199 | 0.464 | 2.55E-16 | CSCL1 | TYROBP   |
| PPP4R1.3  | 1.76E-20 | 0.106808 | 0.338 | 0.108 | 2.62E-16 | CSCL1 | PPP4R1   |
| MAP9.9    | 1.78E-20 | 0.13091  | 0.493 | 0.183 | 2.66E-16 | CSCL1 | MAP9     |
| DNAJC1.7  | 1.84E-20 | 0.123178 | 0.483 | 0.18  | 2.74E-16 | CSCL1 | DNAJC1   |
| WDR45B.6  | 1.90E-20 | 0.2467   | 0.856 | 0.395 | 2.84E-16 | CSCL1 | WDR45B   |
| TMEM68.7  | 1.93E-20 | 0.112992 | 0.448 | 0.162 | 2.88E-16 | CSCL1 | TMEM68   |
| USP14.5   | 1.97E-20 | 0.160113 | 0.617 | 0.251 | 2.95E-16 | CSCL1 | USP14    |
| SLAIN2.6  | 1.98E-20 | 0.123812 | 0.393 | 0.134 | 2.96E-16 | CSCL1 | SLAIN2   |
| FLYWCH2.6 | 2.01E-20 | 0.11428  | 0.726 | 0.302 | 3.01E-16 | CSCL1 | FLYWCH2  |
| CCNG2.9   | 2.02E-20 | 0.138096 | 0.483 | 0.176 | 3.02E-16 | CSCL1 | CCNG2    |
| MAN1B1.5  | 2.06E-20 | 0.10663  | 0.557 | 0.216 | 3.08E-16 | CSCL1 | MAN1B1   |
| ZDHHC16.4 | 2.13E-20 | 0.143224 | 0.318 | 0.102 | 3.19E-16 | CSCL1 | ZDHHC16  |
| ESF1.8    | 2.19E-20 | 0.190385 | 0.791 | 0.337 | 3.27E-16 | CSCL1 | ESF1     |
| UBA6-AS1. | 2.22E-20 | 0.108516 | 0.274 | 0.08  | 3.32E-16 | CSCL1 | UBA6-AS1 |
| EIF3B.6   | 2.28E-20 | 0.134363 | 0.602 | 0.241 | 3.41E-16 | CSCL1 | EIF3B    |
| ZNF444.8  | 2.30E-20 | 0.127323 | 0.433 | 0.155 | 3.44E-16 | CSCL1 | ZNF444   |
| FAM208A.3 | 2.40E-20 | 0.120841 | 0.393 | 0.135 | 3.58E-16 | CSCL1 | FAM208A  |
| HIVEP1    | 2.43E-20 | 0.100072 | 0.159 | 0.034 | 3.63E-16 | CSCL1 | HIVEP1   |
| SMARCD3.1 | 2.54E-20 | 0.144306 | 0.577 | 0.225 | 3.79E-16 | CSCL1 | SMARCD3  |
| NSRP1.4   | 2.64E-20 | 0.120762 | 0.806 | 0.348 | 3.95E-16 | CSCL1 | NSRP1    |
| TTI1.6    | 2.65E-20 | 0.108041 | 0.303 | 0.093 | 3.96E-16 | CSCL1 | TTI1     |
| C3orf17.4 | 2.65E-20 | 0.125227 | 0.393 | 0.138 | 3.97E-16 | CSCL1 | C3orf17  |
| NLGN4X.1C | 2.70E-20 | 0.155225 | 0.318 | 0.102 | 4.04E-16 | CSCL1 | NLGN4X   |
| CDC25A    | 2.83E-20 | 0.113286 | 0.119 | 0.021 | 4.23E-16 | CSCL1 | CDC25A   |
| BTBD2.3   | 2.83E-20 | 0.116296 | 0.303 | 0.094 | 4.23E-16 | CSCL1 | BTBD2    |
| RAP2A.3   | 2.85E-20 | 0.106921 | 0.378 | 0.127 | 4.26E-16 | CSCL1 | RAP2A    |
| C19orf24. | 2.88E-20 | 0.222585 | 0.816 | 0.357 | 4.31E-16 | CSCL1 | C19orf24 |
| POLR2H.8  | 2.92E-20 | 0.121548 | 0.736 | 0.316 | 4.36E-16 | CSCL1 | POLR2H   |
| COPS3.5   | 2.98E-20 | 0.12467  | 0.831 | 0.361 | 4.46E-16 | CSCL1 | COPS3    |
| USP33.3   | 3.00E-20 | 0.11194  | 0.473 | 0.174 | 4.48E-16 | CSCL1 | USP33    |
| GTF3C4.4  | 3.06E-20 | 0.131175 | 0.234 | 0.064 | 4.57E-16 | CSCL1 | GTF3C4   |
| KDM4A.5   | 3.07E-20 | 0.113848 | 0.338 | 0.109 | 4.58E-16 | CSCL1 | KDM4A    |

|            |          |          |       |       |          |       |              |
|------------|----------|----------|-------|-------|----------|-------|--------------|
| MED13.4    | 3.31E-20 | 0.114026 | 0.433 | 0.156 | 4.95E-16 | CSCL1 | MED13        |
| ZNF593.6   | 3.39E-20 | 0.132208 | 0.711 | 0.294 | 5.07E-16 | CSCL1 | ZNF593       |
| PPM1B.6    | 3.40E-20 | 0.12159  | 0.711 | 0.293 | 5.08E-16 | CSCL1 | PPM1B        |
| WDR12.7    | 3.48E-20 | 0.132574 | 0.393 | 0.138 | 5.20E-16 | CSCL1 | WDR12        |
| CTC-338M1  | 3.48E-20 | 0.101053 | 0.239 | 0.066 | 5.20E-16 | CSCL1 | CTC-338M12.5 |
| TANC1.10   | 3.52E-20 | 0.148904 | 0.323 | 0.105 | 5.25E-16 | CSCL1 | TANC1        |
| RAB34.8    | 3.79E-20 | 0.240902 | 0.657 | 0.277 | 5.66E-16 | CSCL1 | RAB34        |
| LIFR.9     | 3.99E-20 | 0.112403 | 0.328 | 0.106 | 5.96E-16 | CSCL1 | LIFR         |
| EPS15L1.7  | 4.09E-20 | 0.112006 | 0.443 | 0.161 | 6.11E-16 | CSCL1 | EPS15L1      |
| CBX6.9     | 4.19E-20 | 0.178185 | 0.577 | 0.234 | 6.26E-16 | CSCL1 | CBX6         |
| CYBA.12    | 4.32E-20 | -1.29501 | 0.119 | 0.41  | 6.46E-16 | CSCL1 | CYBA         |
| C9orf69.3  | 4.42E-20 | 0.100193 | 0.294 | 0.09  | 6.60E-16 | CSCL1 | C9orf69      |
| PAFAH1B2.4 | 4.59E-20 | 0.175037 | 0.741 | 0.319 | 6.86E-16 | CSCL1 | PAFAH1B2     |
| SSNA1.7    | 4.68E-20 | 0.221942 | 0.915 | 0.438 | 6.99E-16 | CSCL1 | SSNA1        |
| VPS26B.9   | 4.70E-20 | 0.133434 | 0.572 | 0.225 | 7.03E-16 | CSCL1 | VPS26B       |
| PPP2R3C.2  | 4.77E-20 | 0.115931 | 0.701 | 0.299 | 7.13E-16 | CSCL1 | PPP2R3C      |
| AC093673.4 | 4.85E-20 | 0.168738 | 0.458 | 0.173 | 7.25E-16 | CSCL1 | AC093673.5   |
| CCDC47.5   | 4.87E-20 | 0.223828 | 0.856 | 0.397 | 7.27E-16 | CSCL1 | CCDC47       |
| CHMP6.5    | 5.02E-20 | 0.102564 | 0.502 | 0.19  | 7.50E-16 | CSCL1 | CHMP6        |
| RSBN1.9    | 5.29E-20 | 0.102352 | 0.547 | 0.211 | 7.91E-16 | CSCL1 | RSBN1        |
| NLGN3.10   | 5.42E-20 | 0.161671 | 0.333 | 0.11  | 8.10E-16 | CSCL1 | NLGN3        |
| CCT5.9     | 5.63E-20 | 0.227442 | 0.945 | 0.474 | 8.42E-16 | CSCL1 | CCT5         |
| UGP2.7     | 5.72E-20 | 0.190213 | 0.91  | 0.453 | 8.55E-16 | CSCL1 | UGP2         |
| C1orf35.9  | 6.13E-20 | 0.116768 | 0.637 | 0.257 | 9.16E-16 | CSCL1 | C1orf35      |
| UBN1.8     | 6.16E-20 | 0.123572 | 0.443 | 0.162 | 9.21E-16 | CSCL1 | UBN1         |
| USP47.5    | 6.17E-20 | 0.126554 | 0.592 | 0.239 | 9.22E-16 | CSCL1 | USP47        |
| PIP4K2B.6  | 6.26E-20 | 0.100204 | 0.313 | 0.099 | 9.35E-16 | CSCL1 | PIP4K2B      |
| UBA2.9     | 6.27E-20 | 0.161902 | 0.821 | 0.35  | 9.37E-16 | CSCL1 | UBA2         |
| ARHGDI1.1  | 6.42E-20 | -1.33121 | 0.08  | 0.377 | 9.59E-16 | CSCL1 | ARHGDI1      |
| PCDH10.9   | 6.49E-20 | 0.141364 | 0.234 | 0.065 | 9.69E-16 | CSCL1 | PCDH10       |
| IFNAR1.8   | 7.00E-20 | 0.11327  | 0.672 | 0.283 | 1.05E-15 | CSCL1 | IFNAR1       |
| MEN1.7     | 7.01E-20 | 0.109385 | 0.343 | 0.113 | 1.05E-15 | CSCL1 | MEN1         |
| CAPN10-AS  | 7.08E-20 | 0.107765 | 0.164 | 0.036 | 1.06E-15 | CSCL1 | CAPN10-AS1   |
| NRBF2.7    | 7.12E-20 | 0.182075 | 0.632 | 0.265 | 1.06E-15 | CSCL1 | NRBF2        |
| YTHDC1.7   | 7.70E-20 | 0.151315 | 0.701 | 0.295 | 1.15E-15 | CSCL1 | YTHDC1       |
| EID2.9     | 7.86E-20 | 0.13543  | 0.328 | 0.107 | 1.17E-15 | CSCL1 | EID2         |
| PSMD12.6   | 7.91E-20 | 0.16538  | 0.766 | 0.335 | 1.18E-15 | CSCL1 | PSMD12       |
| MAK16.4    | 7.96E-20 | 0.126278 | 0.289 | 0.089 | 1.19E-15 | CSCL1 | MAK16        |
| ERF.9      | 8.11E-20 | 0.138684 | 0.458 | 0.172 | 1.21E-15 | CSCL1 | ERF          |
| ACIN1.8    | 8.30E-20 | 0.106369 | 0.637 | 0.258 | 1.24E-15 | CSCL1 | ACIN1        |
| TMF1.4     | 8.59E-20 | 0.100907 | 0.547 | 0.213 | 1.28E-15 | CSCL1 | TMF1         |
| CHD4.8     | 8.64E-20 | 0.142176 | 0.746 | 0.315 | 1.29E-15 | CSCL1 | CHD4         |
| RAB30.8    | 8.73E-20 | 0.107849 | 0.254 | 0.072 | 1.30E-15 | CSCL1 | RAB30        |
| CTTN.10    | 8.78E-20 | 0.119374 | 0.567 | 0.223 | 1.31E-15 | CSCL1 | CTTN         |
| SRSF4.8    | 8.84E-20 | 0.21442  | 0.791 | 0.352 | 1.32E-15 | CSCL1 | SRSF4        |
| HEATR1.1   | 8.96E-20 | 0.104854 | 0.224 | 0.06  | 1.34E-15 | CSCL1 | HEATR1       |
| KHDRBS1.9  | 9.21E-20 | 0.301012 | 0.94  | 0.478 | 1.38E-15 | CSCL1 | KHDRBS1      |
| NASP.6     | 9.38E-20 | 0.190885 | 0.871 | 0.401 | 1.40E-15 | CSCL1 | NASP         |
| RP9.9      | 9.47E-20 | 0.138379 | 0.463 | 0.174 | 1.41E-15 | CSCL1 | RP9          |
| PLCD3.7    | 9.71E-20 | 0.115329 | 0.234 | 0.064 | 1.45E-15 | CSCL1 | PLCD3        |
| FKBP4.7    | 9.82E-20 | 0.206638 | 0.711 | 0.314 | 1.47E-15 | CSCL1 | FKBP4        |



|             |          |          |       |       |          |       |           |
|-------------|----------|----------|-------|-------|----------|-------|-----------|
| MCCC2.6     | 9.92E-20 | 0.117381 | 0.373 | 0.129 | 1.48E-15 | CSCL1 | MCCC2     |
| EIF2AK1.9   | 1.00E-19 | 0.175498 | 0.756 | 0.324 | 1.50E-15 | CSCL1 | EIF2AK1   |
| LIG1.2      | 1.00E-19 | 0.146656 | 0.244 | 0.068 | 1.50E-15 | CSCL1 | LIG1      |
| HLA-DMA.1   | 1.02E-19 | -1.30644 | 0.129 | 0.413 | 1.52E-15 | CSCL1 | HLA-DMA   |
| PHIP.7      | 1.02E-19 | 0.143879 | 0.756 | 0.324 | 1.53E-15 | CSCL1 | PHIP      |
| ATP6VOE1.1  | 1.04E-19 | -0.59613 | 0.925 | 0.758 | 1.56E-15 | CSCL1 | ATP6VOE1  |
| VSIG4.12    | 1.05E-19 | -1.40097 | 0.075 | 0.37  | 1.57E-15 | CSCL1 | VSIG4     |
| LINC00511.1 | 1.08E-19 | 0.146565 | 0.343 | 0.115 | 1.61E-15 | CSCL1 | LINC00511 |
| CTU2.6      | 1.09E-19 | 0.107072 | 0.373 | 0.129 | 1.63E-15 | CSCL1 | CTU2      |
| PPM1G.11    | 1.10E-19 | 0.266864 | 0.886 | 0.41  | 1.64E-15 | CSCL1 | PPM1G     |
| FNBP4.6     | 1.10E-19 | 0.125921 | 0.607 | 0.246 | 1.64E-15 | CSCL1 | FNBP4     |
| APOM.1      | 1.10E-19 | 0.110214 | 0.189 | 0.046 | 1.64E-15 | CSCL1 | APOM      |
| PSTK.2      | 1.11E-19 | 0.109418 | 0.239 | 0.066 | 1.66E-15 | CSCL1 | PSTK      |
| GMPS.6      | 1.11E-19 | 0.100106 | 0.478 | 0.179 | 1.66E-15 | CSCL1 | GMPS      |
| SPARC.9     | 1.13E-19 | 0.106341 | 0.861 | 0.376 | 1.68E-15 | CSCL1 | SPARC     |
| CNR1.9      | 1.15E-19 | 0.11018  | 0.249 | 0.07  | 1.72E-15 | CSCL1 | CNR1      |
| HOXD-AS2.1  | 1.20E-19 | 0.11999  | 0.179 | 0.042 | 1.79E-15 | CSCL1 | HOXD-AS2  |
| AKIRIN1.8   | 1.21E-19 | 0.187942 | 0.821 | 0.36  | 1.81E-15 | CSCL1 | AKIRIN1   |
| SMARCB1.1   | 1.22E-19 | 0.266975 | 0.861 | 0.406 | 1.83E-15 | CSCL1 | SMARCB1   |
| SCCPDH.5    | 1.24E-19 | 0.133592 | 0.841 | 0.369 | 1.85E-15 | CSCL1 | SCCPDH    |
| PHF20L1.1   | 1.27E-19 | 0.198684 | 0.692 | 0.301 | 1.90E-15 | CSCL1 | PHF20L1   |
| MED30.7     | 1.37E-19 | 0.103236 | 0.612 | 0.247 | 2.04E-15 | CSCL1 | MED30     |
| MPP6.8      | 1.38E-19 | 0.177433 | 0.244 | 0.07  | 2.06E-15 | CSCL1 | MPP6      |
| USP10.7     | 1.47E-19 | 0.11692  | 0.582 | 0.237 | 2.19E-15 | CSCL1 | USP10     |
| GNB5.8      | 1.47E-19 | 0.138781 | 0.323 | 0.106 | 2.20E-15 | CSCL1 | GNB5      |
| MIB2.8      | 1.54E-19 | 0.106837 | 0.408 | 0.145 | 2.30E-15 | CSCL1 | MIB2      |
| KPNA4.6     | 1.55E-19 | 0.120369 | 0.468 | 0.175 | 2.32E-15 | CSCL1 | KPNA4     |
| SH3RF1.8    | 1.56E-19 | 0.116536 | 0.318 | 0.103 | 2.33E-15 | CSCL1 | SH3RF1    |
| ALDH16A1.1  | 1.57E-19 | 0.121512 | 0.348 | 0.115 | 2.34E-15 | CSCL1 | ALDH16A1  |
| SMC6.9      | 1.58E-19 | 0.157029 | 0.413 | 0.152 | 2.37E-15 | CSCL1 | SMC6      |
| TATDN1.4    | 1.59E-19 | 0.108356 | 0.577 | 0.23  | 2.37E-15 | CSCL1 | TATDN1    |
| HARS.7      | 1.59E-19 | 0.126467 | 0.657 | 0.275 | 2.38E-15 | CSCL1 | HARS      |
| ANKS3.8     | 1.63E-19 | 0.120151 | 0.443 | 0.163 | 2.43E-15 | CSCL1 | ANKS3     |
| AHI1.4      | 1.63E-19 | 0.102164 | 0.517 | 0.2   | 2.44E-15 | CSCL1 | AHI1      |
| C19orf25.1  | 1.65E-19 | 0.118575 | 0.716 | 0.292 | 2.47E-15 | CSCL1 | C19orf25  |
| EP400.4     | 1.74E-19 | 0.114338 | 0.338 | 0.113 | 2.60E-15 | CSCL1 | EP400     |
| DDA1.5      | 1.76E-19 | 0.131417 | 0.741 | 0.321 | 2.62E-15 | CSCL1 | DDA1      |
| NACA.6      | 1.79E-19 | -0.35239 | 0.995 | 0.923 | 2.67E-15 | CSCL1 | NACA      |
| MARK3.9     | 1.94E-19 | 0.159254 | 0.667 | 0.281 | 2.90E-15 | CSCL1 | MARK3     |
| PRCP.8      | 1.97E-19 | 0.13258  | 0.786 | 0.348 | 2.94E-15 | CSCL1 | PRCP      |
| UBE2E3.1C   | 2.06E-19 | 0.258529 | 0.94  | 0.452 | 3.07E-15 | CSCL1 | UBE2E3    |
| VWA1.11     | 2.09E-19 | 0.119194 | 0.393 | 0.14  | 3.12E-15 | CSCL1 | VWA1      |
| PDCD7.7     | 2.13E-19 | 0.125508 | 0.547 | 0.215 | 3.19E-15 | CSCL1 | PDCD7     |
| GBAS.7      | 2.18E-19 | 0.21214  | 0.871 | 0.392 | 3.26E-15 | CSCL1 | GBAS      |
| ARL6IP6.6   | 2.19E-19 | 0.126789 | 0.657 | 0.274 | 3.27E-15 | CSCL1 | ARL6IP6   |
| CDC5L.7     | 2.24E-19 | 0.1459   | 0.657 | 0.275 | 3.35E-15 | CSCL1 | CDC5L     |
| HLA-DRB5.2  | 2.28E-19 | -1.46156 | 0.124 | 0.404 | 3.41E-15 | CSCL1 | HLA-DRB5  |
| ZNF644.5    | 2.33E-19 | 0.102802 | 0.612 | 0.246 | 3.48E-15 | CSCL1 | ZNF644    |
| PEX14.2     | 2.38E-19 | 0.100863 | 0.299 | 0.094 | 3.55E-15 | CSCL1 | PEX14     |
| G6PC3.5     | 2.38E-19 | 0.128549 | 0.791 | 0.339 | 3.55E-15 | CSCL1 | G6PC3     |
| RDH14.5     | 2.50E-19 | 0.114228 | 0.478 | 0.183 | 3.74E-15 | CSCL1 | RDH14     |

|           |          |          |       |       |          |       |               |
|-----------|----------|----------|-------|-------|----------|-------|---------------|
| UBP1.2    | 2.60E-19 | 0.112285 | 0.244 | 0.069 | 3.88E-15 | CSCL1 | UBP1          |
| ATP6VOE2. | 2.60E-19 | 0.283962 | 0.935 | 0.444 | 3.89E-15 | CSCL1 | ATP6VOE2      |
| ABHD8.7   | 2.73E-19 | 0.104598 | 0.398 | 0.14  | 4.08E-15 | CSCL1 | ABHD8         |
| INTS2.2   | 2.76E-19 | 0.101304 | 0.199 | 0.051 | 4.13E-15 | CSCL1 | INTS2         |
| RP13-1032 | 2.88E-19 | 0.126712 | 0.259 | 0.076 | 4.30E-15 | CSCL1 | RP13-1032I1.7 |
| EIF2S1.5  | 2.92E-19 | 0.113015 | 0.726 | 0.312 | 4.37E-15 | CSCL1 | EIF2S1        |
| CAND1.5   | 2.97E-19 | 0.109256 | 0.567 | 0.229 | 4.44E-15 | CSCL1 | CAND1         |
| ETV2.1    | 3.00E-19 | 0.101249 | 0.169 | 0.039 | 4.48E-15 | CSCL1 | ETV2          |
| PMP22.10  | 3.20E-19 | 0.202727 | 0.846 | 0.42  | 4.78E-15 | CSCL1 | PMP22         |
| RBM28.7   | 3.24E-19 | 0.1014   | 0.433 | 0.158 | 4.84E-15 | CSCL1 | RBM28         |
| PPFIA1.3  | 3.30E-19 | 0.129345 | 0.438 | 0.162 | 4.93E-15 | CSCL1 | PPFIA1        |
| DUT.10    | 3.37E-19 | 0.274806 | 0.92  | 0.447 | 5.03E-15 | CSCL1 | DUT           |
| MPDZ.8    | 3.37E-19 | 0.112333 | 0.274 | 0.083 | 5.04E-15 | CSCL1 | MPDZ          |
| ELOF1.9   | 3.38E-19 | 0.167441 | 0.91  | 0.415 | 5.06E-15 | CSCL1 | ELOF1         |
| DCBLD1.5  | 3.41E-19 | 0.105609 | 0.279 | 0.085 | 5.09E-15 | CSCL1 | DCBLD1        |
| BRAT1.6   | 3.53E-19 | 0.133115 | 0.468 | 0.179 | 5.28E-15 | CSCL1 | BRAT1         |
| DBX2.10   | 3.62E-19 | 0.132015 | 0.224 | 0.062 | 5.41E-15 | CSCL1 | DBX2          |
| CD53.12   | 3.74E-19 | -1.2444  | 0.025 | 0.32  | 5.58E-15 | CSCL1 | CD53          |
| CD14.12   | 3.85E-19 | -1.36085 | 0.139 | 0.413 | 5.75E-15 | CSCL1 | CD14          |
| HIGD1A.6  | 3.86E-19 | 0.1743   | 0.9   | 0.419 | 5.78E-15 | CSCL1 | HIGD1A        |
| RGS2.10   | 3.98E-19 | -1.22433 | 0.184 | 0.45  | 5.94E-15 | CSCL1 | RGS2          |
| LRIG1.10  | 4.00E-19 | 0.113848 | 0.318 | 0.104 | 5.98E-15 | CSCL1 | LRIG1         |
| YBX3.6    | 4.16E-19 | 0.271717 | 0.811 | 0.398 | 6.22E-15 | CSCL1 | YBX3          |
| CHST8.9   | 4.19E-19 | 0.175217 | 0.229 | 0.065 | 6.26E-15 | CSCL1 | CHST8         |
| SNRPD3.8  | 4.27E-19 | 0.139417 | 0.881 | 0.406 | 6.38E-15 | CSCL1 | SNRPD3        |
| MALAT1.11 | 4.60E-19 | -0.32952 | 1     | 0.995 | 6.88E-15 | CSCL1 | MALAT1        |
| SCRN3.6   | 4.69E-19 | 0.121133 | 0.303 | 0.097 | 7.01E-15 | CSCL1 | SCRN3         |
| WDR60.9   | 4.78E-19 | 0.107058 | 0.567 | 0.226 | 7.14E-15 | CSCL1 | WDR60         |
| EEA1.6    | 4.81E-19 | 0.116804 | 0.602 | 0.239 | 7.18E-15 | CSCL1 | EEA1          |
| DYNC1LI2. | 4.86E-19 | 0.140804 | 0.776 | 0.337 | 7.26E-15 | CSCL1 | DYNC1LI2      |
| GOLPH3.2  | 5.09E-19 | 0.101449 | 0.473 | 0.179 | 7.60E-15 | CSCL1 | GOLPH3        |
| DDX23.4   | 5.13E-19 | 0.117898 | 0.418 | 0.154 | 7.66E-15 | CSCL1 | DDX23         |
| GAN.8     | 5.55E-19 | 0.104227 | 0.388 | 0.137 | 8.30E-15 | CSCL1 | GAN           |
| DDX1.9    | 5.56E-19 | 0.137829 | 0.801 | 0.352 | 8.31E-15 | CSCL1 | DDX1          |
| AEBP2.3   | 5.64E-19 | 0.113791 | 0.269 | 0.081 | 8.44E-15 | CSCL1 | AEBP2         |
| COPS7B.6  | 5.72E-19 | 0.102114 | 0.493 | 0.192 | 8.54E-15 | CSCL1 | COPS7B        |
| KIAA0753. | 5.96E-19 | 0.106199 | 0.149 | 0.032 | 8.91E-15 | CSCL1 | KIAA0753      |
| MLEC.6    | 6.01E-19 | 0.213578 | 0.876 | 0.392 | 8.98E-15 | CSCL1 | MLEC          |
| KAT7.6    | 6.11E-19 | 0.144105 | 0.393 | 0.143 | 9.14E-15 | CSCL1 | KAT7          |
| LARS.8    | 6.28E-19 | 0.13682  | 0.781 | 0.334 | 9.38E-15 | CSCL1 | LARS          |
| PSMC3.5   | 6.44E-19 | 0.205246 | 0.98  | 0.522 | 9.63E-15 | CSCL1 | PSMC3         |
| MS4A4A.12 | 6.62E-19 | -1.23607 | 0     | 0.291 | 9.89E-15 | CSCL1 | MS4A4A        |
| TMEM134.7 | 6.87E-19 | 0.105471 | 0.721 | 0.302 | 1.03E-14 | CSCL1 | TMEM134       |
| EIF3J.7   | 7.21E-19 | 0.182932 | 0.821 | 0.37  | 1.08E-14 | CSCL1 | EIF3J         |
| STARD7.7  | 7.51E-19 | 0.160178 | 0.711 | 0.309 | 1.12E-14 | CSCL1 | STARD7        |
| MMP16.10  | 7.53E-19 | 0.172183 | 0.303 | 0.1   | 1.12E-14 | CSCL1 | MMP16         |
| CCDC8.6   | 7.80E-19 | 0.111312 | 0.184 | 0.045 | 1.17E-14 | CSCL1 | CCDC8         |
| ADO.8     | 7.93E-19 | 0.114516 | 0.353 | 0.122 | 1.18E-14 | CSCL1 | ADO           |
| SERINC3.5 | 8.10E-19 | 0.142513 | 0.816 | 0.357 | 1.21E-14 | CSCL1 | SERINC3       |
| FGF14.10  | 8.89E-19 | 0.126899 | 0.269 | 0.082 | 1.33E-14 | CSCL1 | FGF14         |
| AK9.1     | 8.97E-19 | 0.154407 | 0.204 | 0.054 | 1.34E-14 | CSCL1 | AK9           |

|           |          |          |       |       |          |       |                |
|-----------|----------|----------|-------|-------|----------|-------|----------------|
| SCAF4.3   | 9.17E-19 | 0.100157 | 0.383 | 0.136 | 1.37E-14 | CSCL1 | SCAF4          |
| UTP14C.4  | 9.33E-19 | 0.101106 | 0.264 | 0.079 | 1.39E-14 | CSCL1 | UTP14C         |
| SRM.10    | 9.46E-19 | 0.220269 | 0.796 | 0.357 | 1.41E-14 | CSCL1 | SRM            |
| DPYSL4.12 | 1.03E-18 | 0.119046 | 0.413 | 0.15  | 1.54E-14 | CSCL1 | DPYSL4         |
| PHTF1.6   | 1.04E-18 | 0.114945 | 0.343 | 0.117 | 1.55E-14 | CSCL1 | PHTF1          |
| OXTR.2    | 1.04E-18 | 0.141907 | 0.169 | 0.04  | 1.56E-14 | CSCL1 | OXTR           |
| CNOT7.8   | 1.05E-18 | 0.120895 | 0.821 | 0.36  | 1.57E-14 | CSCL1 | CNOT7          |
| EXD2.4    | 1.10E-18 | 0.100639 | 0.289 | 0.091 | 1.64E-14 | CSCL1 | EXD2           |
| COPS8.10  | 1.15E-18 | 0.142031 | 0.965 | 0.461 | 1.72E-14 | CSCL1 | COPS8          |
| C3.11     | 1.17E-18 | -1.21757 | 0.129 | 0.406 | 1.74E-14 | CSCL1 | C3             |
| ARMC10.8  | 1.19E-18 | 0.146765 | 0.692 | 0.29  | 1.78E-14 | CSCL1 | ARMC10         |
| ICMT.5    | 1.21E-18 | 0.104095 | 0.368 | 0.129 | 1.81E-14 | CSCL1 | ICMT           |
| WNK3.9    | 1.23E-18 | 0.128766 | 0.338 | 0.116 | 1.84E-14 | CSCL1 | WNK3           |
| RFK.8     | 1.24E-18 | 0.120537 | 0.572 | 0.232 | 1.85E-14 | CSCL1 | RFK            |
| MSH3.3    | 1.25E-18 | 0.113567 | 0.313 | 0.103 | 1.87E-14 | CSCL1 | MSH3           |
| USP39.5   | 1.28E-18 | 0.107514 | 0.468 | 0.18  | 1.91E-14 | CSCL1 | USP39          |
| ZRANB2.5  | 1.31E-18 | 0.109952 | 0.746 | 0.322 | 1.95E-14 | CSCL1 | ZRANB2         |
| KXD1.7    | 1.31E-18 | 0.167393 | 0.896 | 0.441 | 1.96E-14 | CSCL1 | KXD1           |
| C7orf55-L | 1.35E-18 | 0.180415 | 0.746 | 0.331 | 2.01E-14 | CSCL1 | C7orf55-LUC7L2 |
| DGKZ.5    | 1.36E-18 | 0.119044 | 0.488 | 0.19  | 2.03E-14 | CSCL1 | DGKZ           |
| CIAO1.5   | 1.37E-18 | 0.109177 | 0.577 | 0.237 | 2.05E-14 | CSCL1 | CIAO1          |
| IWS1.7    | 1.40E-18 | 0.114908 | 0.517 | 0.208 | 2.09E-14 | CSCL1 | IWS1           |
| PBX1.10   | 1.43E-18 | 0.111134 | 0.527 | 0.209 | 2.13E-14 | CSCL1 | PBX1           |
| CSNK1G1.1 | 1.45E-18 | 0.100065 | 0.234 | 0.066 | 2.17E-14 | CSCL1 | CSNK1G1        |
| RNF20.4   | 1.56E-18 | 0.101076 | 0.398 | 0.144 | 2.33E-14 | CSCL1 | RNF20          |
| ZNF827.9  | 1.57E-18 | 0.1107   | 0.328 | 0.111 | 2.34E-14 | CSCL1 | ZNF827         |
| LRRTM2.1C | 1.63E-18 | 0.135681 | 0.303 | 0.099 | 2.44E-14 | CSCL1 | LRRTM2         |
| SHC3.2    | 1.66E-18 | 0.104766 | 0.184 | 0.046 | 2.48E-14 | CSCL1 | SHC3           |
| C1orf162. | 1.66E-18 | -1.26547 | 0.04  | 0.327 | 2.48E-14 | CSCL1 | C1orf162       |
| CNPY4.7   | 1.70E-18 | 0.11564  | 0.323 | 0.109 | 2.54E-14 | CSCL1 | CNPY4          |
| TEX261.6  | 1.72E-18 | 0.119021 | 0.428 | 0.161 | 2.56E-14 | CSCL1 | TEX261         |
| TRIM9.10  | 1.72E-18 | 0.126696 | 0.562 | 0.227 | 2.58E-14 | CSCL1 | TRIM9          |
| PRCC.7    | 1.73E-18 | 0.119476 | 0.687 | 0.297 | 2.59E-14 | CSCL1 | PRCC           |
| SAFB2.7   | 1.79E-18 | 0.130844 | 0.741 | 0.324 | 2.67E-14 | CSCL1 | SAFB2          |
| UBTD2.8   | 1.85E-18 | 0.121215 | 0.308 | 0.102 | 2.76E-14 | CSCL1 | UBTD2          |
| FCER1G.12 | 1.86E-18 | -1.39586 | 0.199 | 0.446 | 2.78E-14 | CSCL1 | FCER1G         |
| MLF2.11   | 1.90E-18 | 0.231128 | 0.99  | 0.602 | 2.84E-14 | CSCL1 | MLF2           |
| MYL6B.11  | 1.91E-18 | 0.204389 | 0.92  | 0.434 | 2.85E-14 | CSCL1 | MYL6B          |
| NPC2.11   | 1.91E-18 | -1.0136  | 0.776 | 0.69  | 2.86E-14 | CSCL1 | NPC2           |
| MSI1.10   | 1.94E-18 | 0.113158 | 0.373 | 0.131 | 2.90E-14 | CSCL1 | MSI1           |
| RSAD1.7   | 1.97E-18 | 0.124446 | 0.393 | 0.144 | 2.94E-14 | CSCL1 | RSAD1          |
| MPG.5     | 2.06E-18 | 0.1481   | 0.786 | 0.337 | 3.07E-14 | CSCL1 | MPG            |
| NUBP2.7   | 2.09E-18 | 0.143112 | 0.836 | 0.374 | 3.13E-14 | CSCL1 | NUBP2          |
| FBLN1.10  | 2.12E-18 | 0.168719 | 0.269 | 0.082 | 3.16E-14 | CSCL1 | FBLN1          |
| HCLS1.12  | 2.15E-18 | -1.14956 | 0.01  | 0.295 | 3.22E-14 | CSCL1 | HCLS1          |
| PES1.6    | 2.18E-18 | 0.103265 | 0.478 | 0.187 | 3.26E-14 | CSCL1 | PES1           |
| CASP3.6   | 2.25E-18 | 0.104408 | 0.488 | 0.192 | 3.36E-14 | CSCL1 | CASP3          |
| TSN.7     | 2.42E-18 | 0.141022 | 0.811 | 0.369 | 3.61E-14 | CSCL1 | TSN            |
| LSM3.2    | 2.43E-18 | 0.20229  | 0.985 | 0.553 | 3.63E-14 | CSCL1 | LSM3           |
| POGK.6    | 2.45E-18 | 0.110548 | 0.358 | 0.125 | 3.66E-14 | CSCL1 | POGK           |
| DNPEP.5   | 2.49E-18 | 0.122019 | 0.572 | 0.236 | 3.72E-14 | CSCL1 | DNPEP          |

|            |          |          |       |       |          |       |            |
|------------|----------|----------|-------|-------|----------|-------|------------|
| PLOD3.9    | 2.53E-18 | 0.10811  | 0.527 | 0.212 | 3.78E-14 | CSCL1 | PLOD3      |
| ATP2B1.7   | 2.55E-18 | 0.205757 | 0.776 | 0.347 | 3.81E-14 | CSCL1 | ATP2B1     |
| EYA4.7     | 2.66E-18 | 0.115882 | 0.204 | 0.055 | 3.98E-14 | CSCL1 | EYA4       |
| RRS1.5     | 2.77E-18 | 0.107838 | 0.383 | 0.138 | 4.14E-14 | CSCL1 | RRS1       |
| GAP43.11   | 2.80E-18 | 0.234858 | 0.876 | 0.459 | 4.18E-14 | CSCL1 | GAP43      |
| PTRH1.5    | 2.89E-18 | 0.101181 | 0.473 | 0.182 | 4.33E-14 | CSCL1 | PTRH1      |
| CHD6.11    | 2.90E-18 | 0.109401 | 0.582 | 0.239 | 4.33E-14 | CSCL1 | CHD6       |
| CNN3.10    | 3.15E-18 | 0.258282 | 0.95  | 0.46  | 4.70E-14 | CSCL1 | CNN3       |
| SEZ6L2.1C  | 3.15E-18 | 0.111102 | 0.652 | 0.267 | 4.71E-14 | CSCL1 | SEZ6L2     |
| MS4A7.12   | 3.16E-18 | -1.27328 | 0.055 | 0.337 | 4.73E-14 | CSCL1 | MS4A7      |
| CDH4.10    | 3.27E-18 | 0.130476 | 0.269 | 0.084 | 4.89E-14 | CSCL1 | CDH4       |
| TUSC2.7    | 3.34E-18 | 0.161437 | 0.746 | 0.328 | 4.99E-14 | CSCL1 | TUSC2      |
| LINC01116  | 3.35E-18 | 0.101399 | 0.363 | 0.129 | 5.00E-14 | CSCL1 | LINC01116  |
| PRDM5      | 3.39E-18 | 0.100534 | 0.114 | 0.021 | 5.06E-14 | CSCL1 | PRDM5      |
| TNP01.3    | 3.66E-18 | 0.1186   | 0.647 | 0.271 | 5.47E-14 | CSCL1 | TNP01      |
| LDOC1L.9   | 3.80E-18 | 0.108401 | 0.269 | 0.083 | 5.68E-14 | CSCL1 | LDOC1L     |
| RIN1.8     | 3.85E-18 | 0.123477 | 0.259 | 0.079 | 5.75E-14 | CSCL1 | RIN1       |
| NIFK.8     | 3.87E-18 | 0.110744 | 0.781 | 0.341 | 5.78E-14 | CSCL1 | NIFK       |
| SNRNP27.6  | 4.20E-18 | 0.121047 | 0.776 | 0.345 | 6.28E-14 | CSCL1 | SNRNP27    |
| TTYH3.9    | 4.23E-18 | 0.110899 | 0.582 | 0.241 | 6.32E-14 | CSCL1 | TTYH3      |
| CLDN12.12  | 4.31E-18 | 0.101129 | 0.373 | 0.134 | 6.44E-14 | CSCL1 | CLDN12     |
| HSPA4L.7   | 4.43E-18 | 0.116312 | 0.239 | 0.07  | 6.62E-14 | CSCL1 | HSPA4L     |
| PNMAL1.1C  | 4.60E-18 | 0.106238 | 0.289 | 0.093 | 6.88E-14 | CSCL1 | PNMAL1     |
| RBBP6.7    | 4.65E-18 | 0.136044 | 0.706 | 0.306 | 6.95E-14 | CSCL1 | RBBP6      |
| NOL7.3     | 4.70E-18 | 0.202956 | 0.9   | 0.431 | 7.03E-14 | CSCL1 | NOL7       |
| METTL5.5   | 4.73E-18 | 0.121122 | 0.771 | 0.353 | 7.07E-14 | CSCL1 | METTL5     |
| UBE2J1.5   | 4.76E-18 | 0.165564 | 0.637 | 0.274 | 7.12E-14 | CSCL1 | UBE2J1     |
| DCHS1.9    | 5.50E-18 | 0.112437 | 0.264 | 0.081 | 8.22E-14 | CSCL1 | DCHS1      |
| RBP1.10    | 5.82E-18 | 0.215098 | 0.93  | 0.452 | 8.70E-14 | CSCL1 | RBP1       |
| TAF13.6    | 5.94E-18 | 0.111614 | 0.368 | 0.133 | 8.87E-14 | CSCL1 | TAF13      |
| GNB1.7     | 5.98E-18 | 0.222719 | 0.856 | 0.407 | 8.94E-14 | CSCL1 | GNB1       |
| CXXC4.9    | 6.04E-18 | 0.149629 | 0.249 | 0.075 | 9.02E-14 | CSCL1 | CXXC4      |
| C18orf8.5  | 6.52E-18 | 0.117551 | 0.323 | 0.11  | 9.74E-14 | CSCL1 | C18orf8    |
| ZBTB10.5   | 6.56E-18 | 0.105157 | 0.274 | 0.086 | 9.80E-14 | CSCL1 | ZBTB10     |
| ZNF521.7   | 6.70E-18 | 0.137341 | 0.259 | 0.081 | 1.00E-13 | CSCL1 | ZNF521     |
| HTRA2.6    | 6.79E-18 | 0.103252 | 0.532 | 0.219 | 1.01E-13 | CSCL1 | HTRA2      |
| FCGR3A.12  | 7.01E-18 | -1.28016 | 0.07  | 0.346 | 1.05E-13 | CSCL1 | FCGR3A     |
| AC091729.9 | 7.72E-18 | 0.119428 | 0.254 | 0.077 | 1.15E-13 | CSCL1 | AC091729.9 |
| HMG1.7     | 7.77E-18 | 0.279868 | 0.995 | 0.659 | 1.16E-13 | CSCL1 | HMG1       |
| TXNL4A.7   | 7.85E-18 | 0.22679  | 0.836 | 0.403 | 1.17E-13 | CSCL1 | TXNL4A     |
| TRPC4AP.7  | 7.96E-18 | 0.111572 | 0.592 | 0.245 | 1.19E-13 | CSCL1 | TRPC4AP    |
| AGAP1.9    | 8.22E-18 | 0.10503  | 0.333 | 0.116 | 1.23E-13 | CSCL1 | AGAP1      |
| SCAMP1.8   | 9.19E-18 | 0.10464  | 0.517 | 0.209 | 1.37E-13 | CSCL1 | SCAMP1     |
| MEA1.4     | 9.30E-18 | 0.121237 | 0.896 | 0.425 | 1.39E-13 | CSCL1 | MEA1       |
| ZNF292.9   | 9.42E-18 | 0.120517 | 0.612 | 0.258 | 1.41E-13 | CSCL1 | ZNF292     |
| PSMD1.6    | 9.67E-18 | 0.105794 | 0.721 | 0.316 | 1.44E-13 | CSCL1 | PSMD1      |
| POMGNT1.8  | 9.74E-18 | 0.125908 | 0.602 | 0.252 | 1.46E-13 | CSCL1 | POMGNT1    |
| CCL3.12    | 9.76E-18 | -1.22373 | 0.169 | 0.427 | 1.46E-13 | CSCL1 | CCL3       |
| BCAN.12    | 9.77E-18 | 0.180642 | 0.612 | 0.27  | 1.46E-13 | CSCL1 | BCAN       |
| ZNF681.3   | 9.79E-18 | 0.110042 | 0.164 | 0.039 | 1.46E-13 | CSCL1 | ZNF681     |
| KLC2.9     | 1.01E-17 | 0.113974 | 0.338 | 0.117 | 1.51E-13 | CSCL1 | KLC2       |

|            |          |          |       |       |          |       |                |
|------------|----------|----------|-------|-------|----------|-------|----------------|
| MAML2.11   | 1.02E-17 | 0.110357 | 0.488 | 0.193 | 1.52E-13 | CSCL1 | MAML2          |
| PRPF6.10   | 1.05E-17 | 0.134401 | 0.766 | 0.346 | 1.57E-13 | CSCL1 | PRPF6          |
| PI4K2B.5   | 1.08E-17 | 0.12742  | 0.264 | 0.083 | 1.61E-13 | CSCL1 | PI4K2B         |
| ATP6V1F.7  | 1.26E-17 | -0.44625 | 0.98  | 0.798 | 1.88E-13 | CSCL1 | ATP6V1F        |
| B3GAT3.5   | 1.26E-17 | 0.151971 | 0.801 | 0.371 | 1.89E-13 | CSCL1 | B3GAT3         |
| AKIRIN2.8  | 1.30E-17 | 0.188212 | 0.791 | 0.374 | 1.94E-13 | CSCL1 | AKIRIN2        |
| CBS.10     | 1.30E-17 | 0.146427 | 0.408 | 0.153 | 1.95E-13 | CSCL1 | CBS            |
| PRPF31.7   | 1.31E-17 | 0.166549 | 0.831 | 0.384 | 1.96E-13 | CSCL1 | PRPF31         |
| MRPS23.8   | 1.35E-17 | 0.110515 | 0.791 | 0.359 | 2.01E-13 | CSCL1 | MRPS23         |
| ADAL.2     | 1.37E-17 | 0.128159 | 0.318 | 0.11  | 2.05E-13 | CSCL1 | ADAL           |
| RBM17.6    | 1.38E-17 | 0.159655 | 0.806 | 0.361 | 2.05E-13 | CSCL1 | RBM17          |
| FADS1.8    | 1.51E-17 | 0.118921 | 0.522 | 0.213 | 2.26E-13 | CSCL1 | FADS1          |
| MIR210HG.1 | 1.64E-17 | 0.111837 | 0.274 | 0.088 | 2.45E-13 | CSCL1 | MIR210HG       |
| NEAT1.8    | 1.66E-17 | -0.49522 | 0.866 | 0.761 | 2.48E-13 | CSCL1 | NEAT1          |
| FXVD6.12   | 1.67E-17 | 0.240563 | 0.965 | 0.452 | 2.50E-13 | CSCL1 | FXVD6          |
| RP11-277F  | 1.67E-17 | 0.158342 | 0.224 | 0.064 | 2.50E-13 | CSCL1 | RP11-277P12.20 |
| STARD3NL.1 | 1.82E-17 | 0.145463 | 0.841 | 0.39  | 2.73E-13 | CSCL1 | STARD3NL       |
| C20orf24.1 | 1.83E-17 | 0.276617 | 0.925 | 0.459 | 2.73E-13 | CSCL1 | C20orf24       |
| OSBPL10.1  | 1.85E-17 | 0.10522  | 0.169 | 0.042 | 2.76E-13 | CSCL1 | OSBPL10        |
| OAZ1.8     | 1.85E-17 | -0.31434 | 1     | 0.925 | 2.77E-13 | CSCL1 | OAZ1           |
| SRP14.5    | 1.91E-17 | -0.30083 | 0.995 | 0.864 | 2.85E-13 | CSCL1 | SRP14          |
| HDLBP.6    | 1.95E-17 | 0.104235 | 0.761 | 0.329 | 2.92E-13 | CSCL1 | HDLBP          |
| POLR2M.3   | 1.97E-17 | 0.114285 | 0.408 | 0.155 | 2.94E-13 | CSCL1 | POLR2M         |
| AIF1.12    | 2.08E-17 | -1.36215 | 0.169 | 0.415 | 3.11E-13 | CSCL1 | AIF1           |
| ZFP36.9    | 2.09E-17 | -1.06158 | 0.423 | 0.576 | 3.12E-13 | CSCL1 | ZFP36          |
| NUDT16L1.2 | 2.21E-17 | 0.117981 | 0.647 | 0.275 | 3.30E-13 | CSCL1 | NUDT16L1       |
| VAMP8.12   | 2.21E-17 | -1.27893 | 0.08  | 0.348 | 3.30E-13 | CSCL1 | VAMP8          |
| SRSF9.9    | 2.21E-17 | 0.302355 | 0.96  | 0.554 | 3.30E-13 | CSCL1 | SRSF9          |
| CHID1.6    | 2.21E-17 | 0.130607 | 0.91  | 0.428 | 3.31E-13 | CSCL1 | CHID1          |
| FOSL1.7    | 2.22E-17 | 0.115261 | 0.174 | 0.044 | 3.32E-13 | CSCL1 | FOSL1          |
| LGALS1.9   | 2.27E-17 | 0.177381 | 0.97  | 0.699 | 3.40E-13 | CSCL1 | LGALS1         |
| CACNG7.8   | 2.47E-17 | 0.110934 | 0.259 | 0.081 | 3.69E-13 | CSCL1 | CACNG7         |
| PAFAH1B1.2 | 2.48E-17 | 0.135795 | 0.821 | 0.36  | 3.70E-13 | CSCL1 | PAFAH1B1       |
| NPNT.2     | 2.59E-17 | 0.121938 | 0.134 | 0.029 | 3.88E-13 | CSCL1 | NPNT           |
| MFSD12.9   | 2.62E-17 | 0.105044 | 0.468 | 0.186 | 3.91E-13 | CSCL1 | MFSD12         |
| POLD3.3    | 2.69E-17 | 0.125546 | 0.284 | 0.093 | 4.02E-13 | CSCL1 | POLD3          |
| TUBB2B.11  | 3.04E-17 | 0.336865 | 0.995 | 0.547 | 4.55E-13 | CSCL1 | TUBB2B         |
| RNF114.5   | 3.07E-17 | 0.179    | 0.836 | 0.407 | 4.59E-13 | CSCL1 | RNF114         |
| DHX29.9    | 3.16E-17 | 0.108564 | 0.682 | 0.303 | 4.73E-13 | CSCL1 | DHX29          |
| NECAB3.5   | 3.64E-17 | 0.103618 | 0.289 | 0.095 | 5.43E-13 | CSCL1 | NECAB3         |
| ABHD12.8   | 3.99E-17 | 0.224637 | 0.781 | 0.374 | 5.96E-13 | CSCL1 | ABHD12         |
| PCSK1N.11  | 4.02E-17 | 0.30135  | 0.9   | 0.412 | 6.01E-13 | CSCL1 | PCSK1N         |
| FMNL2.9    | 4.06E-17 | 0.100711 | 0.632 | 0.259 | 6.07E-13 | CSCL1 | FMNL2          |
| CCND2.12   | 4.17E-17 | 0.127272 | 0.726 | 0.32  | 6.22E-13 | CSCL1 | CCND2          |
| NRP2.9     | 4.33E-17 | 0.144696 | 0.522 | 0.216 | 6.48E-13 | CSCL1 | NRP2           |
| PCDHB16.1  | 4.35E-17 | 0.137481 | 0.368 | 0.136 | 6.50E-13 | CSCL1 | PCDHB16        |
| MLLT4.9    | 4.39E-17 | 0.102565 | 0.413 | 0.157 | 6.56E-13 | CSCL1 | MLLT4          |
| REV3L.8    | 4.40E-17 | 0.110345 | 0.502 | 0.204 | 6.58E-13 | CSCL1 | REV3L          |
| HDAC2.10   | 4.60E-17 | 0.197047 | 0.9   | 0.44  | 6.87E-13 | CSCL1 | HDAC2          |
| ANKRD40.7  | 4.65E-17 | 0.121641 | 0.433 | 0.17  | 6.95E-13 | CSCL1 | ANKRD40        |
| ITPA.4     | 5.01E-17 | 0.152466 | 0.836 | 0.397 | 7.48E-13 | CSCL1 | ITPA           |

|            |          |          |       |       |          |       |               |
|------------|----------|----------|-------|-------|----------|-------|---------------|
| RNF145.5   | 5.14E-17 | 0.191037 | 0.786 | 0.37  | 7.69E-13 | CSCL1 | RNF145        |
| DUSP1.9    | 5.31E-17 | -0.87268 | 0.438 | 0.577 | 7.94E-13 | CSCL1 | DUSP1         |
| JAM3.8     | 5.34E-17 | 0.118153 | 0.383 | 0.145 | 7.98E-13 | CSCL1 | JAM3          |
| LST1.12    | 5.54E-17 | -1.19835 | 0.05  | 0.317 | 8.28E-13 | CSCL1 | LST1          |
| KLHDC3.7   | 5.55E-17 | 0.133316 | 0.776 | 0.355 | 8.29E-13 | CSCL1 | KLHDC3        |
| AKR7A2.6   | 5.86E-17 | 0.119157 | 0.721 | 0.308 | 8.76E-13 | CSCL1 | AKR7A2        |
| SNTB2.5    | 5.92E-17 | 0.10395  | 0.279 | 0.092 | 8.85E-13 | CSCL1 | SNTB2         |
| HLA-DQB1.5 | 5.98E-17 | -1.24824 | 0.065 | 0.33  | 8.93E-13 | CSCL1 | HLA-DQB1      |
| GPAA1.5    | 6.92E-17 | 0.167492 | 0.821 | 0.386 | 1.03E-12 | CSCL1 | GPAA1         |
| HLA-DMB.1  | 7.49E-17 | -1.24334 | 0.06  | 0.325 | 1.12E-12 | CSCL1 | HLA-DMB       |
| ZBED5-AS1  | 7.58E-17 | 0.124069 | 0.274 | 0.09  | 1.13E-12 | CSCL1 | ZBED5-AS1     |
| PSMD3.7    | 8.05E-17 | 0.171528 | 0.871 | 0.397 | 1.20E-12 | CSCL1 | PSMD3         |
| MTCH2.4    | 8.19E-17 | 0.147274 | 0.866 | 0.421 | 1.22E-12 | CSCL1 | MTCH2         |
| PTPRS.12   | 8.21E-17 | 0.103941 | 0.592 | 0.252 | 1.23E-12 | CSCL1 | PTPRS         |
| RNF10.7    | 8.56E-17 | 0.120082 | 0.736 | 0.325 | 1.28E-12 | CSCL1 | RNF10         |
| ACO11043.8 | 8.97E-17 | 0.129057 | 0.209 | 0.06  | 1.34E-12 | CSCL1 | ACO11043.1    |
| NAA10.7    | 9.13E-17 | 0.172391 | 0.871 | 0.418 | 1.36E-12 | CSCL1 | NAA10         |
| FDPS.7     | 1.01E-16 | 0.140931 | 0.861 | 0.408 | 1.51E-12 | CSCL1 | FDPS          |
| PSKH1.1    | 1.01E-16 | 0.110549 | 0.214 | 0.063 | 1.52E-12 | CSCL1 | PSKH1         |
| HAUS5.2    | 1.02E-16 | 0.105942 | 0.214 | 0.062 | 1.52E-12 | CSCL1 | HAUS5         |
| ANKRD36C.1 | 1.03E-16 | 0.135865 | 0.408 | 0.158 | 1.54E-12 | CSCL1 | ANKRD36C      |
| ACBD5.7    | 1.18E-16 | 0.100335 | 0.418 | 0.163 | 1.77E-12 | CSCL1 | ACBD5         |
| GPR183.12  | 1.19E-16 | -1.1979  | 0.03  | 0.294 | 1.78E-12 | CSCL1 | GPR183        |
| FPR1.12    | 1.20E-16 | -1.18347 | 0.025 | 0.289 | 1.79E-12 | CSCL1 | FPR1          |
| SERPINA1.1 | 1.23E-16 | -1.13117 | 0.04  | 0.304 | 1.84E-12 | CSCL1 | SERPINA1      |
| PLA2G12A.1 | 1.26E-16 | 0.105188 | 0.547 | 0.228 | 1.88E-12 | CSCL1 | PLA2G12A      |
| RP5-1065J  | 1.28E-16 | 0.104909 | 0.174 | 0.045 | 1.91E-12 | CSCL1 | RP5-1065J22.8 |
| VIM.10     | 1.29E-16 | 0.305549 | 0.905 | 0.659 | 1.92E-12 | CSCL1 | VIM           |
| HDDC2.7    | 1.31E-16 | 0.110843 | 0.846 | 0.393 | 1.95E-12 | CSCL1 | HDDC2         |
| SHROOM3.2  | 1.32E-16 | 0.1035   | 0.159 | 0.039 | 1.97E-12 | CSCL1 | SHROOM3       |
| ZNF138.8   | 1.33E-16 | 0.119401 | 0.378 | 0.141 | 1.99E-12 | CSCL1 | ZNF138        |
| U2SURP.5   | 1.46E-16 | 0.107635 | 0.786 | 0.362 | 2.18E-12 | CSCL1 | U2SURP        |
| FAM3C.11   | 1.54E-16 | 0.209033 | 0.896 | 0.429 | 2.30E-12 | CSCL1 | FAM3C         |
| PSMD11.7   | 1.57E-16 | 0.157676 | 0.841 | 0.4   | 2.35E-12 | CSCL1 | PSMD11        |
| CAMK2N1.1  | 1.74E-16 | 0.212021 | 0.672 | 0.31  | 2.60E-12 | CSCL1 | CAMK2N1       |
| BLM.6      | 1.75E-16 | 0.119764 | 0.244 | 0.077 | 2.61E-12 | CSCL1 | BLM           |
| ZNF853.8   | 1.79E-16 | 0.114211 | 0.174 | 0.045 | 2.68E-12 | CSCL1 | ZNF853        |
| NUMBL.8    | 1.88E-16 | 0.109643 | 0.264 | 0.086 | 2.81E-12 | CSCL1 | NUMBL         |
| HNRNPM.9   | 2.04E-16 | 0.277491 | 0.965 | 0.536 | 3.04E-12 | CSCL1 | HNRNPM        |
| CMTM8.1    | 2.14E-16 | 0.104226 | 0.174 | 0.046 | 3.20E-12 | CSCL1 | CMTM8         |
| ZC3H6.8    | 2.28E-16 | 0.10328  | 0.378 | 0.143 | 3.40E-12 | CSCL1 | ZC3H6         |
| FOXD1.2    | 2.67E-16 | 0.103807 | 0.129 | 0.028 | 3.99E-12 | CSCL1 | FOXD1         |
| PSMF1.3    | 2.84E-16 | 0.154971 | 0.821 | 0.391 | 4.24E-12 | CSCL1 | PSMF1         |
| ARID1A.7   | 2.85E-16 | 0.101168 | 0.557 | 0.236 | 4.25E-12 | CSCL1 | ARID1A        |
| HCST.12    | 3.03E-16 | -1.15932 | 0.03  | 0.289 | 4.52E-12 | CSCL1 | HCST          |
| TOMM7.5    | 3.29E-16 | -0.39923 | 0.995 | 0.849 | 4.91E-12 | CSCL1 | TOMM7         |
| ITGB1.8    | 3.83E-16 | 0.218607 | 0.781 | 0.379 | 5.73E-12 | CSCL1 | ITGB1         |
| HLA-DQA1.4 | 4.31E-16 | -1.29057 | 0.055 | 0.311 | 6.45E-12 | CSCL1 | HLA-DQA1      |
| ITGB2.12   | 4.50E-16 | -1.18021 | 0.075 | 0.328 | 6.72E-12 | CSCL1 | ITGB2         |
| C10orf54.4 | 4.54E-16 | -1.07901 | 0.035 | 0.292 | 6.79E-12 | CSCL1 | C10orf54      |
| LY86.12    | 4.73E-16 | -1.17078 | 0.04  | 0.296 | 7.08E-12 | CSCL1 | LY86          |

|            |          |          |       |       |          |       |               |
|------------|----------|----------|-------|-------|----------|-------|---------------|
| RP11-629G  | 4.95E-16 | 0.113392 | 0.104 | 0.02  | 7.40E-12 | CSCL1 | RP11-629G13.1 |
| NOVA1.12   | 4.96E-16 | 0.301547 | 0.965 | 0.47  | 7.41E-12 | CSCL1 | NOVA1         |
| FUBP1.11   | 4.96E-16 | 0.106558 | 0.522 | 0.219 | 7.41E-12 | CSCL1 | FUBP1         |
| CD37.12    | 5.01E-16 | -1.16333 | 0.05  | 0.305 | 7.49E-12 | CSCL1 | CD37          |
| SPIRE1.5   | 5.68E-16 | 0.102552 | 0.279 | 0.095 | 8.49E-12 | CSCL1 | SPIRE1        |
| QKI.9      | 5.86E-16 | 0.226135 | 0.925 | 0.463 | 8.76E-12 | CSCL1 | QKI           |
| CAMTA1.5   | 6.62E-16 | 0.19882  | 0.876 | 0.442 | 9.90E-12 | CSCL1 | CAMTA1        |
| MDK.11     | 6.65E-16 | 0.202636 | 0.965 | 0.483 | 9.93E-12 | CSCL1 | MDK           |
| VDAC3.7    | 6.79E-16 | 0.141661 | 0.891 | 0.457 | 1.02E-11 | CSCL1 | VDAC3         |
| RTF1.10    | 7.39E-16 | 0.17193  | 0.896 | 0.422 | 1.11E-11 | CSCL1 | RTF1          |
| CACTIN.2   | 7.64E-16 | 0.108326 | 0.209 | 0.062 | 1.14E-11 | CSCL1 | CACTIN        |
| DUSP6.4    | 8.30E-16 | 0.113969 | 0.547 | 0.239 | 1.24E-11 | CSCL1 | DUSP6         |
| RDH10.11   | 8.34E-16 | 0.106227 | 0.254 | 0.083 | 1.25E-11 | CSCL1 | RDH10         |
| CALD1.10   | 8.87E-16 | 0.115097 | 0.9   | 0.411 | 1.33E-11 | CSCL1 | CALD1         |
| ZNF22.9    | 8.93E-16 | 0.123658 | 0.597 | 0.27  | 1.33E-11 | CSCL1 | ZNF22         |
| LMCD1.8    | 9.13E-16 | 0.100645 | 0.254 | 0.083 | 1.36E-11 | CSCL1 | LMCD1         |
| MYL6.8     | 1.10E-15 | -0.34478 | 1     | 0.941 | 1.65E-11 | CSCL1 | MYL6          |
| YBX1.8     | 1.12E-15 | 0.216508 | 1     | 0.759 | 1.68E-11 | CSCL1 | YBX1          |
| SLC11A1.1  | 1.14E-15 | -1.04015 | 0.055 | 0.31  | 1.71E-11 | CSCL1 | SLC11A1       |
| NDUFV1.5   | 1.15E-15 | 0.176245 | 0.93  | 0.472 | 1.72E-11 | CSCL1 | NDUFV1        |
| EPHA4.9    | 1.23E-15 | 0.104096 | 0.244 | 0.079 | 1.83E-11 | CSCL1 | EPHA4         |
| LINC00657  | 1.28E-15 | 0.134275 | 0.726 | 0.325 | 1.91E-11 | CSCL1 | LINC00657     |
| MSH2.7     | 1.37E-15 | 0.103522 | 0.313 | 0.112 | 2.04E-11 | CSCL1 | MSH2          |
| PNN.9      | 1.40E-15 | 0.123966 | 0.851 | 0.393 | 2.09E-11 | CSCL1 | PNN           |
| POLR2K.5   | 1.48E-15 | 0.165743 | 0.95  | 0.481 | 2.21E-11 | CSCL1 | POLR2K        |
| LOXL1.9    | 1.50E-15 | 0.130954 | 0.234 | 0.075 | 2.24E-11 | CSCL1 | LOXL1         |
| RAN.8      | 1.50E-15 | 0.12565  | 1     | 0.752 | 2.25E-11 | CSCL1 | RAN           |
| C1orf61.1  | 1.55E-15 | 0.236509 | 0.95  | 0.528 | 2.31E-11 | CSCL1 | C1orf61       |
| PRKCSH.6   | 1.58E-15 | 0.111853 | 0.876 | 0.423 | 2.36E-11 | CSCL1 | PRKCSH        |
| VAX2.10    | 1.59E-15 | 0.138092 | 0.239 | 0.077 | 2.38E-11 | CSCL1 | VAX2          |
| ZBTB33.2   | 1.59E-15 | 0.112096 | 0.199 | 0.058 | 2.38E-11 | CSCL1 | ZBTB33        |
| EIF4A1.7   | 1.60E-15 | -0.29274 | 0.98  | 0.859 | 2.39E-11 | CSCL1 | EIF4A1        |
| RNASE6.12  | 1.60E-15 | -1.09951 | 0.03  | 0.279 | 2.39E-11 | CSCL1 | RNASE6        |
| PRPF4B.5   | 1.61E-15 | 0.111385 | 0.602 | 0.268 | 2.41E-11 | CSCL1 | PRPF4B        |
| PAXIP1-AS  | 1.62E-15 | 0.105864 | 0.393 | 0.154 | 2.42E-11 | CSCL1 | PAXIP1-AS1    |
| MOK.2      | 1.84E-15 | 0.109757 | 0.209 | 0.063 | 2.75E-11 | CSCL1 | MOK           |
| C17orf51.1 | 1.95E-15 | 0.100351 | 0.214 | 0.065 | 2.91E-11 | CSCL1 | C17orf51      |
| RNF167.4   | 1.97E-15 | 0.118487 | 0.846 | 0.4   | 2.94E-11 | CSCL1 | RNF167        |
| NSA2.7     | 2.00E-15 | 0.140094 | 0.836 | 0.391 | 2.99E-11 | CSCL1 | NSA2          |
| NCOR1.10   | 2.04E-15 | 0.251198 | 0.891 | 0.457 | 3.05E-11 | CSCL1 | NCOR1         |
| GPX1.12    | 2.04E-15 | -0.45379 | 0.965 | 0.811 | 3.05E-11 | CSCL1 | GPX1          |
| SLC25A6.7  | 2.05E-15 | -0.30593 | 1     | 0.855 | 3.06E-11 | CSCL1 | SLC25A6       |
| GMFG.12    | 2.27E-15 | -1.12809 | 0.055 | 0.302 | 3.39E-11 | CSCL1 | GMFG          |
| CCDC124.5  | 2.37E-15 | 0.170149 | 0.891 | 0.463 | 3.54E-11 | CSCL1 | CCDC124       |
| SYT11.12   | 2.41E-15 | 0.16488  | 0.821 | 0.376 | 3.61E-11 | CSCL1 | SYT11         |
| CYB5R3.7   | 2.45E-15 | 0.106616 | 0.761 | 0.354 | 3.67E-11 | CSCL1 | CYB5R3        |
| RRAGD.5    | 2.48E-15 | 0.123747 | 0.338 | 0.126 | 3.71E-11 | CSCL1 | RRAGD         |
| NFIA.10    | 2.59E-15 | 0.124357 | 0.796 | 0.372 | 3.87E-11 | CSCL1 | NFIA          |
| GPR34.12   | 2.78E-15 | -1.10348 | 0.025 | 0.271 | 4.16E-11 | CSCL1 | GPR34         |
| EPS8L1.2   | 2.81E-15 | 0.115465 | 0.164 | 0.044 | 4.20E-11 | CSCL1 | EPS8L1        |
| PTMA.9     | 2.93E-15 | -0.3477  | 1     | 0.966 | 4.38E-11 | CSCL1 | PTMA          |

|           |          |          |       |       |          |       |             |
|-----------|----------|----------|-------|-------|----------|-------|-------------|
| C17orf10C | 2.94E-15 | 0.115879 | 0.259 | 0.087 | 4.39E-11 | CSCL1 | C17orf100   |
| HAX1.3    | 3.01E-15 | 0.116825 | 0.876 | 0.439 | 4.49E-11 | CSCL1 | HAX1        |
| CTC-524C5 | 3.06E-15 | 0.108847 | 0.313 | 0.114 | 4.57E-11 | CSCL1 | CTC-524C5.2 |
| INSM1.11  | 3.18E-15 | 0.111519 | 0.313 | 0.113 | 4.76E-11 | CSCL1 | INSM1       |
| NME4.9    | 3.34E-15 | 0.149478 | 0.821 | 0.374 | 4.99E-11 | CSCL1 | NME4        |
| PTP4A1.6  | 3.85E-15 | 0.128515 | 0.856 | 0.399 | 5.75E-11 | CSCL1 | PTP4A1      |
| MAP3K4.2  | 4.15E-15 | 0.102292 | 0.259 | 0.088 | 6.21E-11 | CSCL1 | MAP3K4      |
| TMEM259.6 | 4.19E-15 | 0.137184 | 0.716 | 0.329 | 6.26E-11 | CSCL1 | TMEM259     |
| GAD1.11   | 4.26E-15 | 0.13309  | 0.303 | 0.11  | 6.37E-11 | CSCL1 | GAD1        |
| FCGR2A.12 | 4.65E-15 | -1.10567 | 0.05  | 0.293 | 6.95E-11 | CSCL1 | FCGR2A      |
| HNRNPA3.5 | 4.68E-15 | 0.1957   | 0.955 | 0.547 | 6.99E-11 | CSCL1 | HNRNPA3     |
| COPS5.5   | 4.72E-15 | 0.1019   | 0.836 | 0.403 | 7.06E-11 | CSCL1 | COPS5       |
| FCGR1A.12 | 4.84E-15 | -1.07895 | 0.02  | 0.263 | 7.23E-11 | CSCL1 | FCGR1A      |
| NSFL1C.5  | 4.87E-15 | 0.13119  | 0.816 | 0.395 | 7.28E-11 | CSCL1 | NSFL1C      |
| FGFRL1.4  | 5.39E-15 | 0.11149  | 0.184 | 0.053 | 8.05E-11 | CSCL1 | FGFRL1      |
| APOE.10   | 5.77E-15 | -0.68904 | 0.687 | 0.686 | 8.62E-11 | CSCL1 | APOE        |
| METTL9.11 | 5.97E-15 | 0.214114 | 0.92  | 0.46  | 8.92E-11 | CSCL1 | METTL9      |
| MIER2.2   | 6.29E-15 | 0.107776 | 0.294 | 0.105 | 9.41E-11 | CSCL1 | MIER2       |
| ALDH4A1.2 | 6.57E-15 | 0.119749 | 0.174 | 0.049 | 9.82E-11 | CSCL1 | ALDH4A1     |
| XRN2.6    | 7.12E-15 | 0.169472 | 0.896 | 0.45  | 1.06E-10 | CSCL1 | XRN2        |
| FEZ1.11   | 7.24E-15 | 0.15366  | 0.91  | 0.421 | 1.08E-10 | CSCL1 | FEZ1        |
| GGNBP2.4  | 7.79E-15 | 0.114451 | 0.816 | 0.383 | 1.16E-10 | CSCL1 | GGNBP2      |
| CIRBP.8   | 8.38E-15 | -0.31642 | 1     | 0.863 | 1.25E-10 | CSCL1 | CIRBP       |
| ARL4C.10  | 8.92E-15 | 0.202214 | 0.741 | 0.372 | 1.33E-10 | CSCL1 | ARL4C       |
| CD163.12  | 8.99E-15 | -1.09532 | 0.04  | 0.28  | 1.34E-10 | CSCL1 | CD163       |
| TMUB1.5   | 9.24E-15 | 0.10135  | 0.592 | 0.261 | 1.38E-10 | CSCL1 | TMUB1       |
| PIGT.5    | 9.86E-15 | 0.119322 | 0.821 | 0.39  | 1.47E-10 | CSCL1 | PIGT        |
| SDF2L1.8  | 9.87E-15 | 0.112544 | 0.756 | 0.353 | 1.47E-10 | CSCL1 | SDF2L1      |
| TPGS1.6   | 1.00E-14 | 0.107384 | 0.677 | 0.303 | 1.50E-10 | CSCL1 | TPGS1       |
| PHF14.10  | 1.03E-14 | 0.113117 | 0.891 | 0.414 | 1.54E-10 | CSCL1 | PHF14       |
| CLTC.7    | 1.08E-14 | 0.148221 | 0.731 | 0.342 | 1.62E-10 | CSCL1 | CLTC        |
| ZBTB20.1C | 1.21E-14 | 0.147066 | 0.791 | 0.378 | 1.81E-10 | CSCL1 | ZBTB20      |
| GATM.7    | 1.22E-14 | 0.133456 | 0.756 | 0.345 | 1.82E-10 | CSCL1 | GATM        |
| MDFI.9    | 1.28E-14 | 0.133164 | 0.249 | 0.085 | 1.92E-10 | CSCL1 | MDFI        |
| SPNS1.7   | 1.35E-14 | 0.101775 | 0.642 | 0.284 | 2.02E-10 | CSCL1 | SPNS1       |
| NME1.10   | 1.41E-14 | 0.206903 | 0.975 | 0.561 | 2.11E-10 | CSCL1 | NME1        |
| COMMD7.6  | 1.48E-14 | 0.161167 | 0.816 | 0.392 | 2.20E-10 | CSCL1 | COMMD7      |
| HERPUD1.1 | 1.49E-14 | -0.84951 | 0.667 | 0.642 | 2.22E-10 | CSCL1 | HERPUD1     |
| SRPK2.8   | 1.99E-14 | 0.110264 | 0.851 | 0.403 | 2.97E-10 | CSCL1 | SRPK2       |
| C3AR1.12  | 2.15E-14 | -1.00271 | 0.01  | 0.242 | 3.21E-10 | CSCL1 | C3AR1       |
| KPNB1.10  | 2.19E-14 | 0.193662 | 0.871 | 0.44  | 3.28E-10 | CSCL1 | KPNB1       |
| LILRB4.12 | 2.22E-14 | -1.03253 | 0.025 | 0.259 | 3.31E-10 | CSCL1 | LILRB4      |
| GPSM3.12  | 2.23E-14 | -1.00192 | 0.03  | 0.266 | 3.33E-10 | CSCL1 | GPSM3       |
| AP1S2.10  | 2.33E-14 | 0.269991 | 0.92  | 0.493 | 3.49E-10 | CSCL1 | AP1S2       |
| S100A4.12 | 2.40E-14 | -1.15485 | 0.065 | 0.3   | 3.59E-10 | CSCL1 | S100A4      |
| PAK2.5    | 2.56E-14 | 0.130668 | 0.736 | 0.345 | 3.83E-10 | CSCL1 | PAK2        |
| NUTF2.4   | 2.86E-14 | 0.121467 | 0.896 | 0.442 | 4.27E-10 | CSCL1 | NUTF2       |
| NPW.1     | 2.97E-14 | 0.103891 | 0.159 | 0.044 | 4.44E-10 | CSCL1 | NPW         |
| TCEA1.7   | 3.10E-14 | 0.209958 | 0.925 | 0.477 | 4.64E-10 | CSCL1 | TCEA1       |
| CTSB.9    | 3.24E-14 | -0.62449 | 0.9   | 0.754 | 4.85E-10 | CSCL1 | CTSB        |
| C16orf13. | 3.41E-14 | 0.191419 | 0.891 | 0.452 | 5.10E-10 | CSCL1 | C16orf13    |



|            |          |          |       |       |          |       |               |
|------------|----------|----------|-------|-------|----------|-------|---------------|
| NLRP1.11   | 3.42E-14 | 0.105649 | 0.761 | 0.331 | 5.12E-10 | CSCL1 | NLRP1         |
| RAB14.4    | 3.63E-14 | 0.110992 | 0.846 | 0.409 | 5.43E-10 | CSCL1 | RAB14         |
| ATP6VOB.9  | 3.67E-14 | -0.36602 | 0.97  | 0.795 | 5.49E-10 | CSCL1 | ATP6VOB       |
| RIMKLA.4   | 4.05E-14 | 0.109113 | 0.174 | 0.05  | 6.06E-10 | CSCL1 | RIMKLA        |
| CYC1.10    | 4.08E-14 | 0.238154 | 0.96  | 0.532 | 6.10E-10 | CSCL1 | CYC1          |
| HNRNPU.7   | 4.18E-14 | 0.222667 | 0.97  | 0.522 | 6.24E-10 | CSCL1 | HNRNPU        |
| SNF8.9     | 4.26E-14 | 0.187535 | 0.905 | 0.452 | 6.37E-10 | CSCL1 | SNF8          |
| SAMSN1.12  | 4.28E-14 | -0.99869 | 0.025 | 0.256 | 6.40E-10 | CSCL1 | SAMSN1        |
| PTN.10     | 4.37E-14 | 0.156654 | 0.975 | 0.61  | 6.53E-10 | CSCL1 | PTN           |
| UQCRC1.6   | 4.37E-14 | 0.142068 | 0.945 | 0.48  | 6.53E-10 | CSCL1 | UQCRC1        |
| TCP1.8     | 4.71E-14 | 0.175723 | 0.975 | 0.515 | 7.04E-10 | CSCL1 | TCP1          |
| PCDH1.7    | 4.94E-14 | 0.102677 | 0.189 | 0.057 | 7.38E-10 | CSCL1 | PCDH1         |
| ANAPC11.7  | 5.01E-14 | 0.125471 | 1     | 0.722 | 7.49E-10 | CSCL1 | ANAPC11       |
| MSX1.9     | 5.57E-14 | 0.105517 | 0.199 | 0.062 | 8.33E-10 | CSCL1 | MSX1          |
| NRIP1.6    | 6.04E-14 | 0.10396  | 0.313 | 0.119 | 9.03E-10 | CSCL1 | NRIP1         |
| ITGAV.8    | 6.05E-14 | 0.103079 | 0.607 | 0.273 | 9.04E-10 | CSCL1 | ITGAV         |
| LYPLA1.7   | 6.89E-14 | 0.106559 | 0.851 | 0.399 | 1.03E-09 | CSCL1 | LYPLA1        |
| GADD45GIP1 | 7.06E-14 | 0.266747 | 0.935 | 0.557 | 1.06E-09 | CSCL1 | GADD45GIP1    |
| PARP1.7    | 7.74E-14 | 0.199661 | 0.896 | 0.464 | 1.16E-09 | CSCL1 | PARP1         |
| UQCRFS1.7  | 8.87E-14 | 0.246709 | 0.97  | 0.537 | 1.32E-09 | CSCL1 | UQCRFS1       |
| GKAP1.8    | 8.88E-14 | 0.106615 | 0.249 | 0.087 | 1.33E-09 | CSCL1 | GKAP1         |
| TMSB10.9   | 9.04E-14 | -0.36304 | 1     | 0.964 | 1.35E-09 | CSCL1 | TMSB10        |
| CD68.12    | 9.28E-14 | -1.20503 | 0.279 | 0.444 | 1.39E-09 | CSCL1 | CD68          |
| DIRAS2.9   | 9.45E-14 | 0.145256 | 0.194 | 0.061 | 1.41E-09 | CSCL1 | DIRAS2        |
| NENF.7     | 9.70E-14 | 0.22369  | 0.935 | 0.486 | 1.45E-09 | CSCL1 | NENF          |
| CSF1R.12   | 9.90E-14 | -1.01379 | 0.045 | 0.272 | 1.48E-09 | CSCL1 | CSF1R         |
| IDS.5      | 1.02E-13 | 0.160889 | 0.711 | 0.363 | 1.53E-09 | CSCL1 | IDS           |
| PPP1R14C.1 | 1.08E-13 | 0.108279 | 0.189 | 0.058 | 1.62E-09 | CSCL1 | PPP1R14C      |
| RNF187.9   | 1.10E-13 | 0.126839 | 0.801 | 0.37  | 1.64E-09 | CSCL1 | RNF187        |
| SH3BGRL3.1 | 1.11E-13 | -0.48682 | 0.886 | 0.775 | 1.67E-09 | CSCL1 | SH3BGRL3      |
| OLR1.12    | 1.24E-13 | -1.00866 | 0.03  | 0.254 | 1.86E-09 | CSCL1 | OLR1          |
| FTH1.8     | 1.31E-13 | -0.20858 | 1     | 0.931 | 1.96E-09 | CSCL1 | FTH1          |
| ZNF207.3   | 1.43E-13 | 0.128645 | 0.881 | 0.448 | 2.14E-09 | CSCL1 | ZNF207        |
| RP11-849I1 | 1.46E-13 | 0.100018 | 0.328 | 0.128 | 2.18E-09 | CSCL1 | RP11-849I19.1 |
| CACYBP.6   | 1.53E-13 | 0.146739 | 0.955 | 0.498 | 2.29E-09 | CSCL1 | CACYBP        |
| PSMD2.7    | 1.58E-13 | 0.167565 | 0.891 | 0.454 | 2.37E-09 | CSCL1 | PSMD2         |
| SNRPD1.5   | 1.66E-13 | 0.162889 | 0.975 | 0.556 | 2.49E-09 | CSCL1 | SNRPD1        |
| TECR.8     | 1.74E-13 | 0.113714 | 0.94  | 0.536 | 2.60E-09 | CSCL1 | TECR          |
| HAVCR2.12  | 1.77E-13 | -0.95742 | 0.015 | 0.235 | 2.65E-09 | CSCL1 | HAVCR2        |
| KRT10.8    | 1.82E-13 | 0.250903 | 0.95  | 0.551 | 2.72E-09 | CSCL1 | KRT10         |
| GNAS.11    | 1.86E-13 | 0.210924 | 0.97  | 0.642 | 2.78E-09 | CSCL1 | GNAS          |
| BAD.7      | 1.94E-13 | 0.123731 | 0.836 | 0.41  | 2.90E-09 | CSCL1 | BAD           |
| PIGP.3     | 2.12E-13 | -0.11086 | 0.527 | 0.225 | 3.17E-09 | CSCL1 | PIGP          |
| PGRMC1.9   | 2.16E-13 | 0.165816 | 0.876 | 0.44  | 3.23E-09 | CSCL1 | PGRMC1        |
| HMG3.7     | 2.32E-13 | 0.15306  | 0.98  | 0.602 | 3.46E-09 | CSCL1 | HMG3          |
| IL13RA2.9  | 2.38E-13 | 0.200577 | 0.174 | 0.053 | 3.56E-09 | CSCL1 | IL13RA2       |
| CTSS.12    | 2.45E-13 | -1.10953 | 0.149 | 0.358 | 3.66E-09 | CSCL1 | CTSS          |
| NCBP2.10   | 2.49E-13 | 0.115827 | 0.891 | 0.433 | 3.72E-09 | CSCL1 | NCBP2         |
| ARPC3.10   | 2.58E-13 | -0.39154 | 0.975 | 0.801 | 3.86E-09 | CSCL1 | ARPC3         |
| GPBP1.6    | 2.60E-13 | 0.118474 | 0.896 | 0.441 | 3.89E-09 | CSCL1 | GPBP1         |
| LHFPL3.12  | 2.62E-13 | 0.166672 | 0.299 | 0.116 | 3.92E-09 | CSCL1 | LHFPL3        |

|             |           |           |        |        |           |       |           |
|-------------|-----------|-----------|--------|--------|-----------|-------|-----------|
| LNP1. 3     | 2. 97E-13 | 0. 102538 | 0. 119 | 0. 029 | 4. 44E-09 | CSCL1 | LNP1      |
| ADORA3. 12  | 2. 98E-13 | -1. 02199 | 0. 045 | 0. 264 | 4. 45E-09 | CSCL1 | ADORA3    |
| PDCD5. 9    | 2. 98E-13 | 0. 105141 | 0. 965 | 0. 532 | 4. 46E-09 | CSCL1 | PDCD5     |
| ASNA1. 8    | 3. 55E-13 | 0. 142633 | 0. 955 | 0. 512 | 5. 30E-09 | CSCL1 | ASNA1     |
| PRPF40A. 7  | 3. 55E-13 | 0. 144448 | 0. 881 | 0. 443 | 5. 31E-09 | CSCL1 | PRPF40A   |
| PYURF. 8    | 3. 87E-13 | 0. 23198  | 0. 97  | 0. 533 | 5. 79E-09 | CSCL1 | PYURF     |
| CBX3. 9     | 3. 90E-13 | 0. 217677 | 0. 99  | 0. 546 | 5. 83E-09 | CSCL1 | CBX3      |
| SNRPG. 6    | 5. 50E-13 | 0. 154923 | 0. 99  | 0. 633 | 8. 22E-09 | CSCL1 | SNRPG     |
| PPDPF. 8    | 6. 63E-13 | 0. 19907  | 0. 98  | 0. 706 | 9. 90E-09 | CSCL1 | PPDPF     |
| THRAP3. 9   | 8. 41E-13 | 0. 137888 | 0. 876 | 0. 43  | 1. 26E-08 | CSCL1 | THRAP3    |
| BEX4. 10    | 8. 71E-13 | -0. 79792 | 0. 303 | 0. 48  | 1. 30E-08 | CSCL1 | BEX4      |
| SDF4. 5     | 8. 79E-13 | 0. 196166 | 0. 821 | 0. 396 | 1. 31E-08 | CSCL1 | SDF4      |
| MARCKSL1. 1 | 1. 02E-12 | 0. 243583 | 0. 965 | 0. 537 | 1. 52E-08 | CSCL1 | MARCKSL1  |
| MMP24-AS1   | 1. 04E-12 | 0. 100914 | 0. 677 | 0. 305 | 1. 56E-08 | CSCL1 | MMP24-AS1 |
| PLAUR. 12   | 1. 11E-12 | -1. 08362 | 0. 169 | 0. 37  | 1. 66E-08 | CSCL1 | PLAUR     |
| HILPDA. 1C  | 1. 15E-12 | -0. 13489 | 0. 502 | 0. 222 | 1. 72E-08 | CSCL1 | HILPDA    |
| CD86. 12    | 1. 19E-12 | -0. 91285 | 0. 01  | 0. 217 | 1. 78E-08 | CSCL1 | CD86      |
| RAD23B. 6   | 1. 20E-12 | 0. 115585 | 0. 766 | 0. 373 | 1. 79E-08 | CSCL1 | RAD23B    |
| SNRPC. 3    | 1. 36E-12 | 0. 107825 | 0. 935 | 0. 505 | 2. 03E-08 | CSCL1 | SNRPC     |
| PLIN2. 10   | 1. 39E-12 | -1. 04185 | 0. 134 | 0. 346 | 2. 07E-08 | CSCL1 | PLIN2     |
| DST. 10     | 1. 43E-12 | 0. 167109 | 0. 756 | 0. 37  | 2. 14E-08 | CSCL1 | DST       |
| NDUFAF3. 5  | 1. 81E-12 | 0. 114373 | 0. 95  | 0. 51  | 2. 71E-08 | CSCL1 | NDUFAF3   |
| HNRNPH1. 6  | 1. 82E-12 | 0. 135706 | 0. 866 | 0. 449 | 2. 72E-08 | CSCL1 | HNRNPH1   |
| SERPINB1. 1 | 1. 88E-12 | -0. 96388 | 0. 06  | 0. 27  | 2. 82E-08 | CSCL1 | SERPINB1  |
| H3F3B. 8    | 2. 01E-12 | -0. 3008  | 1      | 0. 97  | 3. 00E-08 | CSCL1 | H3F3B     |
| ACTB. 9     | 2. 01E-12 | -0. 31731 | 1      | 0. 992 | 3. 01E-08 | CSCL1 | ACTB      |
| SPI1. 12    | 2. 14E-12 | -0. 87935 | 0. 035 | 0. 242 | 3. 20E-08 | CSCL1 | SPI1      |
| MAFB. 10    | 2. 31E-12 | -0. 8506  | 0. 109 | 0. 318 | 3. 45E-08 | CSCL1 | MAFB      |
| LAGE3. 5    | 2. 46E-12 | 0. 109392 | 0. 816 | 0. 391 | 3. 67E-08 | CSCL1 | LAGE3     |
| BST2. 11    | 3. 01E-12 | -0. 92662 | 0. 323 | 0. 489 | 4. 49E-08 | CSCL1 | BST2      |
| MAP1LC3A. 3 | 3. 06E-12 | 0. 137201 | 0. 776 | 0. 358 | 4. 58E-08 | CSCL1 | MAP1LC3A  |
| C5AR1. 11   | 3. 09E-12 | -0. 93333 | 0. 035 | 0. 241 | 4. 62E-08 | CSCL1 | C5AR1     |
| RGS10. 12   | 3. 57E-12 | -1. 14679 | 0. 154 | 0. 345 | 5. 34E-08 | CSCL1 | RGS10     |
| TBXAS1. 12  | 4. 10E-12 | -0. 9339  | 0. 04  | 0. 245 | 6. 12E-08 | CSCL1 | TBXAS1    |
| TMEM176B. 4 | 4. 36E-12 | -1. 12138 | 0. 164 | 0. 355 | 6. 51E-08 | CSCL1 | TMEM176B  |
| BTF3. 5     | 4. 36E-12 | -0. 318   | 1      | 0. 896 | 6. 52E-08 | CSCL1 | BTF3      |
| PPP2CA. 6   | 4. 55E-12 | 0. 154331 | 0. 905 | 0. 472 | 6. 80E-08 | CSCL1 | PPP2CA    |
| TAF9. 6     | 4. 59E-12 | 0. 124052 | 0. 93  | 0. 492 | 6. 86E-08 | CSCL1 | TAF9      |
| F12. 9      | 4. 76E-12 | 0. 102746 | 0. 214 | 0. 075 | 7. 12E-08 | CSCL1 | F12       |
| IFITM2. 12  | 4. 79E-12 | -0. 9527  | 0. 08  | 0. 286 | 7. 16E-08 | CSCL1 | IFITM2    |
| MORF4L2. 7  | 5. 87E-12 | 0. 167429 | 0. 985 | 0. 619 | 8. 77E-08 | CSCL1 | MORF4L2   |
| DDRGK1. 5   | 6. 57E-12 | 0. 125904 | 0. 816 | 0. 411 | 9. 82E-08 | CSCL1 | DDRGK1    |
| CSF2RA. 11  | 6. 82E-12 | -0. 87961 | 0. 01  | 0. 206 | 1. 02E-07 | CSCL1 | CSF2RA    |
| EVI2B. 12   | 6. 95E-12 | -0. 84872 | 0. 01  | 0. 206 | 1. 04E-07 | CSCL1 | EVI2B     |
| CFL1. 7     | 7. 05E-12 | -0. 26804 | 1      | 0. 949 | 1. 05E-07 | CSCL1 | CFL1      |
| PGAM1. 8    | 7. 27E-12 | 0. 139794 | 0. 881 | 0. 495 | 1. 09E-07 | CSCL1 | PGAM1     |
| SLA. 12     | 7. 42E-12 | -0. 82331 | 0. 01  | 0. 205 | 1. 11E-07 | CSCL1 | SLA       |
| ENSA. 8     | 8. 64E-12 | 0. 109774 | 0. 905 | 0. 493 | 1. 29E-07 | CSCL1 | ENSA      |
| FIBP. 7     | 8. 68E-12 | 0. 110087 | 0. 905 | 0. 475 | 1. 30E-07 | CSCL1 | FIBP      |
| ITM2B. 7    | 9. 06E-12 | -0. 2163  | 0. 98  | 0. 796 | 1. 35E-07 | CSCL1 | ITM2B     |
| SET. 8      | 9. 17E-12 | 0. 212897 | 0. 94  | 0. 554 | 1. 37E-07 | CSCL1 | SET       |

|             |           |           |        |        |           |       |          |
|-------------|-----------|-----------|--------|--------|-----------|-------|----------|
| LSM7. 9     | 9. 58E-12 | 0. 192618 | 0. 995 | 0. 624 | 1. 43E-07 | CSCL1 | LSM7     |
| NDUFS6. 5   | 9. 99E-12 | 0. 144151 | 0. 985 | 0. 621 | 1. 49E-07 | CSCL1 | NDUFS6   |
| PDAP1. 8    | 1. 20E-11 | 0. 144336 | 0. 99  | 0. 528 | 1. 80E-07 | CSCL1 | PDAP1    |
| FYB. 12     | 1. 33E-11 | -0. 85579 | 0. 03  | 0. 226 | 1. 99E-07 | CSCL1 | FYB      |
| MTPN. 7     | 1. 39E-11 | 0. 12972  | 0. 856 | 0. 425 | 2. 07E-07 | CSCL1 | MTPN     |
| MCHR1. 8    | 1. 45E-11 | 0. 100292 | 0. 174 | 0. 057 | 2. 16E-07 | CSCL1 | MCHR1    |
| NPM1. 5     | 1. 52E-11 | -0. 30714 | 1      | 0. 866 | 2. 28E-07 | CSCL1 | NPM1     |
| MFF. 6      | 1. 53E-11 | 0. 100607 | 0. 93  | 0. 481 | 2. 29E-07 | CSCL1 | MFF      |
| PLXDC2. 12  | 1. 64E-11 | -0. 80992 | 0. 02  | 0. 212 | 2. 45E-07 | CSCL1 | PLXDC2   |
| STUB1. 8    | 1. 64E-11 | 0. 184351 | 0. 891 | 0. 453 | 2. 46E-07 | CSCL1 | STUB1    |
| NBEAL1. 8   | 1. 67E-11 | -0. 80854 | 0. 756 | 0. 663 | 2. 50E-07 | CSCL1 | NBEAL1   |
| NDUFC1. 6   | 1. 82E-11 | 0. 104179 | 0. 945 | 0. 545 | 2. 72E-07 | CSCL1 | NDUFC1   |
| SERF2. 8    | 1. 84E-11 | -0. 32089 | 1      | 0. 894 | 2. 75E-07 | CSCL1 | SERF2    |
| SLCO2B1. 1  | 1. 89E-11 | -0. 87013 | 0. 03  | 0. 224 | 2. 82E-07 | CSCL1 | SLCO2B1  |
| APOC2. 11   | 1. 99E-11 | -0. 99747 | 0. 005 | 0. 192 | 2. 97E-07 | CSCL1 | APOC2    |
| CNPY1. 10   | 2. 11E-11 | 0. 139907 | 0. 209 | 0. 075 | 3. 15E-07 | CSCL1 | CNPY1    |
| CCDC85B. 6  | 2. 13E-11 | 0. 132082 | 0. 841 | 0. 406 | 3. 18E-07 | CSCL1 | CCDC85B  |
| FAM50A. 6   | 2. 24E-11 | 0. 115394 | 0. 736 | 0. 367 | 3. 34E-07 | CSCL1 | FAM50A   |
| HLA-B. 9    | 2. 33E-11 | -0. 4304  | 0. 95  | 0. 85  | 3. 48E-07 | CSCL1 | HLA-B    |
| RAD23A. 6   | 2. 41E-11 | 0. 164523 | 0. 94  | 0. 56  | 3. 61E-07 | CSCL1 | RAD23A   |
| ATP5G2. 5   | 2. 52E-11 | -0. 29113 | 0. 995 | 0. 867 | 3. 76E-07 | CSCL1 | ATP5G2   |
| UBE2D2. 8   | 2. 73E-11 | 0. 21075  | 0. 975 | 0. 581 | 4. 08E-07 | CSCL1 | UBE2D2   |
| IL18. 12    | 2. 87E-11 | -0. 8297  | 0. 01  | 0. 196 | 4. 30E-07 | CSCL1 | IL18     |
| RNASET2. 1  | 2. 99E-11 | -1. 03772 | 0. 393 | 0. 484 | 4. 47E-07 | CSCL1 | RNASET2  |
| CYBB. 12    | 3. 47E-11 | -0. 78209 | 0. 01  | 0. 195 | 5. 18E-07 | CSCL1 | CYBB     |
| ARL6IP5. 6  | 4. 01E-11 | -0. 62984 | 0. 756 | 0. 648 | 5. 99E-07 | CSCL1 | ARL6IP5  |
| SCRG1. 10   | 4. 15E-11 | 0. 101111 | 0. 662 | 0. 34  | 6. 21E-07 | CSCL1 | SCRG1    |
| SOD3. 5     | 4. 21E-11 | 0. 179245 | 0. 129 | 0. 038 | 6. 29E-07 | CSCL1 | SOD3     |
| PTPRC. 12   | 4. 23E-11 | -0. 80451 | 0. 02  | 0. 206 | 6. 33E-07 | CSCL1 | PTPRC    |
| LAT2. 12    | 4. 38E-11 | -0. 8176  | 0. 02  | 0. 206 | 6. 55E-07 | CSCL1 | LAT2     |
| ABI3. 12    | 4. 77E-11 | -0. 78231 | 0. 01  | 0. 193 | 7. 12E-07 | CSCL1 | ABI3     |
| NKAIN3. 11  | 4. 84E-11 | 0. 105578 | 0. 294 | 0. 122 | 7. 23E-07 | CSCL1 | NKAIN3   |
| PRKCDBP. 3  | 4. 92E-11 | 0. 107582 | 0. 114 | 0. 031 | 7. 36E-07 | CSCL1 | PRKCDBP  |
| IFI30. 12   | 5. 18E-11 | -0. 89836 | 0. 035 | 0. 222 | 7. 75E-07 | CSCL1 | IFI30    |
| ID3. 10     | 5. 90E-11 | -0. 1267  | 0. 542 | 0. 259 | 8. 81E-07 | CSCL1 | ID3      |
| CA2. 10     | 6. 17E-11 | -0. 16741 | 0. 488 | 0. 221 | 9. 22E-07 | CSCL1 | CA2      |
| COX5B. 8    | 6. 37E-11 | -0. 25542 | 0. 99  | 0. 846 | 9. 53E-07 | CSCL1 | COX5B    |
| GDI1. 11    | 6. 70E-11 | 0. 119089 | 0. 92  | 0. 478 | 1. 00E-06 | CSCL1 | GDI1     |
| PSMC5. 5    | 6. 92E-11 | 0. 128899 | 0. 95  | 0. 548 | 1. 03E-06 | CSCL1 | PSMC5    |
| SNRPF. 7    | 7. 14E-11 | 0. 107751 | 0. 975 | 0. 539 | 1. 07E-06 | CSCL1 | SNRPF    |
| TSC22D1. 1  | 7. 51E-11 | 0. 190005 | 0. 95  | 0. 504 | 1. 12E-06 | CSCL1 | TSC22D1  |
| FXYD5. 12   | 7. 62E-11 | -0. 96381 | 0. 164 | 0. 344 | 1. 14E-06 | CSCL1 | FXYD5    |
| ZFAND2A. 9  | 8. 56E-11 | -0. 1273  | 0. 592 | 0. 278 | 1. 28E-06 | CSCL1 | ZFAND2A  |
| CD300A. 12  | 9. 66E-11 | -0. 78571 | 0. 015 | 0. 195 | 1. 44E-06 | CSCL1 | CD300A   |
| C1orf122. 1 | 1. 02E-10 | 0. 158346 | 0. 915 | 0. 481 | 1. 53E-06 | CSCL1 | C1orf122 |
| GNB2L1. 8   | 1. 03E-10 | -0. 29964 | 1      | 0. 941 | 1. 53E-06 | CSCL1 | GNB2L1   |
| PYCARD. 12  | 1. 05E-10 | -0. 93302 | 0. 104 | 0. 288 | 1. 57E-06 | CSCL1 | PYCARD   |
| CORO1A. 12  | 1. 06E-10 | -1. 03518 | 0. 219 | 0. 375 | 1. 59E-06 | CSCL1 | CORO1A   |
| NT5E. 7     | 1. 07E-10 | 0. 104385 | 0. 174 | 0. 06  | 1. 60E-06 | CSCL1 | NT5E     |
| MNDA. 12    | 1. 23E-10 | -0. 76832 | 0. 005 | 0. 18  | 1. 84E-06 | CSCL1 | MNDA     |
| CD83. 11    | 1. 26E-10 | -0. 98126 | 0. 114 | 0. 298 | 1. 88E-06 | CSCL1 | CD83     |

|            |          |          |       |       |          |       |          |
|------------|----------|----------|-------|-------|----------|-------|----------|
| EIF2S2.7   | 1.27E-10 | 0.120727 | 0.965 | 0.581 | 1.90E-06 | CSCL1 | EIF2S2   |
| CTSH.12    | 1.30E-10 | -0.9785  | 0.119 | 0.299 | 1.95E-06 | CSCL1 | CTSH     |
| LGALS9.12  | 1.45E-10 | -0.87893 | 0.06  | 0.243 | 2.17E-06 | CSCL1 | LGALS9   |
| ZYX.11     | 1.45E-10 | 0.15076  | 0.726 | 0.396 | 2.17E-06 | CSCL1 | ZYX      |
| ACADVL.7   | 1.49E-10 | 0.112423 | 0.876 | 0.443 | 2.23E-06 | CSCL1 | ACADVL   |
| ZNF428.12  | 1.52E-10 | 0.242257 | 0.97  | 0.537 | 2.26E-06 | CSCL1 | ZNF428   |
| RER1.9     | 1.53E-10 | 0.149625 | 0.891 | 0.49  | 2.29E-06 | CSCL1 | RER1     |
| CTSD.10    | 1.58E-10 | -0.7147  | 0.771 | 0.637 | 2.35E-06 | CSCL1 | CTSD     |
| SKP1.9     | 1.87E-10 | -0.30791 | 1     | 0.862 | 2.79E-06 | CSCL1 | SKP1     |
| SPINT2.12  | 2.37E-10 | -0.72848 | 0.04  | 0.22  | 3.54E-06 | CSCL1 | SPINT2   |
| TGFBI.12   | 2.46E-10 | -0.78677 | 0.03  | 0.208 | 3.67E-06 | CSCL1 | TGFBI    |
| HLA-DQA2.2 | 5.7E-10  | -0.96476 | 0.005 | 0.175 | 3.84E-06 | CSCL1 | HLA-DQA2 |
| TYMP.12    | 2.60E-10 | -0.90316 | 0.134 | 0.31  | 3.89E-06 | CSCL1 | TYMP     |
| TSPAN3.1C  | 2.72E-10 | 0.117499 | 0.881 | 0.452 | 4.07E-06 | CSCL1 | TSPAN3   |
| H2AFJ.12   | 2.77E-10 | -0.12949 | 0.542 | 0.254 | 4.14E-06 | CSCL1 | H2AFJ    |
| FCGR1B.11  | 3.39E-10 | -0.78743 | 0     | 0.166 | 5.06E-06 | CSCL1 | FCGR1B   |
| MARCKS.9   | 3.49E-10 | 0.247231 | 0.96  | 0.591 | 5.22E-06 | CSCL1 | MARCKS   |
| ADRM1.3    | 3.56E-10 | 0.122555 | 0.94  | 0.502 | 5.33E-06 | CSCL1 | ADRM1    |
| FLOT1.11   | 4.03E-10 | 0.139454 | 0.9   | 0.496 | 6.02E-06 | CSCL1 | FLOT1    |
| SSR4.6     | 4.20E-10 | -0.36305 | 0.975 | 0.759 | 6.28E-06 | CSCL1 | SSR4     |
| PLEK.12    | 4.41E-10 | -0.76466 | 0.01  | 0.178 | 6.58E-06 | CSCL1 | PLEK     |
| DDX5.8     | 4.47E-10 | -0.1938  | 0.995 | 0.814 | 6.68E-06 | CSCL1 | DDX5     |
| CLEC7A.12  | 4.49E-10 | -0.7181  | 0.01  | 0.178 | 6.72E-06 | CSCL1 | CLEC7A   |
| HMOX1.12   | 4.95E-10 | -0.98077 | 0.124 | 0.298 | 7.39E-06 | CSCL1 | HMOX1    |
| SLC7A7.12  | 5.11E-10 | -0.71525 | 0.01  | 0.177 | 7.63E-06 | CSCL1 | SLC7A7   |
| HMOX2.7    | 5.25E-10 | -0.14343 | 0.612 | 0.289 | 7.85E-06 | CSCL1 | HMOX2    |
| SNRNP70.8  | 5.42E-10 | 0.132014 | 0.905 | 0.467 | 8.11E-06 | CSCL1 | SNRNP70  |
| FAM26F.12  | 5.62E-10 | -0.64584 | 0.005 | 0.17  | 8.39E-06 | CSCL1 | FAM26F   |
| MDM2.6     | 5.88E-10 | -0.14344 | 0.448 | 0.202 | 8.79E-06 | CSCL1 | MDM2     |
| NECAP2.7   | 6.11E-10 | -0.10439 | 0.597 | 0.286 | 9.13E-06 | CSCL1 | NECAP2   |
| PSMA4.4    | 6.24E-10 | 0.113811 | 0.92  | 0.531 | 9.33E-06 | CSCL1 | PSMA4    |
| SMS.6      | 6.39E-10 | 0.110183 | 0.945 | 0.566 | 9.55E-06 | CSCL1 | SMS      |
| S100A11.1  | 6.55E-10 | -0.69688 | 0.761 | 0.655 | 9.80E-06 | CSCL1 | S100A11  |
| LAIR1.12   | 6.98E-10 | -0.86011 | 0.06  | 0.234 | 1.04E-05 | CSCL1 | LAIR1    |
| GNB2.9     | 7.22E-10 | 0.208444 | 0.99  | 0.562 | 1.08E-05 | CSCL1 | GNB2     |
| ADAP2.12   | 7.93E-10 | -0.71956 | 0.02  | 0.187 | 1.18E-05 | CSCL1 | ADAP2    |
| C7orf50.6  | 8.07E-10 | 0.141692 | 0.93  | 0.5   | 1.21E-05 | CSCL1 | C7orf50  |
| SEPP1.8    | 1.08E-09 | -1.08682 | 0.164 | 0.331 | 1.62E-05 | CSCL1 | SEPP1    |
| CHMP4B.8   | 1.09E-09 | 0.170626 | 0.826 | 0.448 | 1.63E-05 | CSCL1 | CHMP4B   |
| OST4.6     | 1.14E-09 | -0.3034  | 0.975 | 0.777 | 1.70E-05 | CSCL1 | OST4     |
| EIF6.4     | 1.15E-09 | 0.111222 | 0.925 | 0.514 | 1.72E-05 | CSCL1 | EIF6     |
| CCT7.8     | 1.24E-09 | 0.112182 | 0.95  | 0.522 | 1.86E-05 | CSCL1 | CCT7     |
| CCL4.11    | 1.30E-09 | -1.00191 | 0.164 | 0.327 | 1.94E-05 | CSCL1 | CCL4     |
| PLD4.12    | 1.37E-09 | -0.70132 | 0     | 0.156 | 2.05E-05 | CSCL1 | PLD4     |
| NNMT.9     | 1.38E-09 | -0.18853 | 0.343 | 0.155 | 2.06E-05 | CSCL1 | NNMT     |
| MSR1.12    | 1.46E-09 | -0.7465  | 0.02  | 0.183 | 2.18E-05 | CSCL1 | MSR1     |
| CSF3R.11   | 1.53E-09 | -0.68296 | 0     | 0.155 | 2.28E-05 | CSCL1 | CSF3R    |
| SKAP2.9    | 1.58E-09 | -0.66691 | 0.095 | 0.273 | 2.36E-05 | CSCL1 | SKAP2    |
| ID2.9      | 1.66E-09 | -0.63715 | 0.736 | 0.653 | 2.48E-05 | CSCL1 | ID2      |
| U2AF1.5    | 1.70E-09 | 0.17584  | 0.98  | 0.625 | 2.54E-05 | CSCL1 | U2AF1    |
| NR4A2.12   | 1.77E-09 | -0.84614 | 0.085 | 0.254 | 2.65E-05 | CSCL1 | NR4A2    |

|           |          |          |       |       |          |       |          |
|-----------|----------|----------|-------|-------|----------|-------|----------|
| IRF8.12   | 1.90E-09 | -0.65389 | 0.005 | 0.161 | 2.84E-05 | CSCL1 | IRF8     |
| TM6SF1.12 | 1.94E-09 | -0.71667 | 0.005 | 0.161 | 2.90E-05 | CSCL1 | TM6SF1   |
| RNASE2.12 | 2.09E-09 | -0.75149 | 0.005 | 0.16  | 3.13E-05 | CSCL1 | RNASE2   |
| RHBDF2.12 | 2.11E-09 | -0.6885  | 0.02  | 0.18  | 3.15E-05 | CSCL1 | RHBDF2   |
| SNAP23.11 | 2.25E-09 | -0.15609 | 0.507 | 0.24  | 3.36E-05 | CSCL1 | SNAP23   |
| FCGBP.11  | 2.27E-09 | -0.92693 | 0.065 | 0.232 | 3.39E-05 | CSCL1 | FCGBP    |
| STX8.3    | 2.28E-09 | -0.11023 | 0.716 | 0.354 | 3.40E-05 | CSCL1 | STX8     |
| APBB1IP.1 | 2.40E-09 | -0.62979 | 0.005 | 0.159 | 3.59E-05 | CSCL1 | APBB1IP  |
| YWHAQ.10  | 2.81E-09 | 0.206625 | 0.995 | 0.637 | 4.20E-05 | CSCL1 | YWHAQ    |
| PA2G4.3   | 3.06E-09 | 0.119426 | 0.93  | 0.532 | 4.57E-05 | CSCL1 | PA2G4    |
| B2M.10    | 3.12E-09 | -0.35984 | 1     | 0.97  | 4.66E-05 | CSCL1 | B2M      |
| STAB1.11  | 3.22E-09 | -0.71299 | 0.01  | 0.164 | 4.82E-05 | CSCL1 | STAB1    |
| PARVG.12  | 3.29E-09 | -0.66643 | 0.01  | 0.164 | 4.92E-05 | CSCL1 | PARVG    |
| IER3.12   | 3.71E-09 | -0.84075 | 0.08  | 0.244 | 5.55E-05 | CSCL1 | IER3     |
| HCK.12    | 3.73E-09 | -0.66744 | 0.015 | 0.17  | 5.57E-05 | CSCL1 | HCK      |
| CSTB.10   | 4.21E-09 | -0.458   | 0.891 | 0.686 | 6.29E-05 | CSCL1 | CSTB     |
| UROD.7    | 4.24E-09 | -0.10904 | 0.706 | 0.353 | 6.33E-05 | CSCL1 | UROD     |
| HSP90AB1. | 5.05E-09 | -0.22344 | 0.985 | 0.818 | 7.54E-05 | CSCL1 | HSP90AB1 |
| SNCA.12   | 5.15E-09 | -0.66684 | 0     | 0.147 | 7.69E-05 | CSCL1 | SNCA     |
| PILRA.11  | 5.30E-09 | -0.72625 | 0.015 | 0.168 | 7.92E-05 | CSCL1 | PILRA    |
| MYO1F.12  | 5.34E-09 | -0.70209 | 0.03  | 0.186 | 7.98E-05 | CSCL1 | MYO1F    |
| PPIB.6    | 6.04E-09 | -0.40036 | 0.925 | 0.721 | 9.03E-05 | CSCL1 | PPIB     |
| FGL2.12   | 6.17E-09 | -0.72601 | 0.025 | 0.179 | 9.22E-05 | CSCL1 | FGL2     |
| ZNF226.8  | 6.22E-09 | -0.10176 | 0.418 | 0.2   | 9.29E-05 | CSCL1 | ZNF226   |
| NR4A1.11  | 6.24E-09 | -0.80749 | 0.114 | 0.276 | 9.33E-05 | CSCL1 | NR4A1    |
| GIMAP4.12 | 6.41E-09 | -0.68549 | 0.005 | 0.152 | 9.58E-05 | CSCL1 | GIMAP4   |
| CETN2.9   | 6.76E-09 | -0.10614 | 0.627 | 0.317 | 0.000101 | CSCL1 | CETN2    |
| MBP.7     | 7.93E-09 | -0.98352 | 0.08  | 0.241 | 0.000119 | CSCL1 | MBP      |
| SF3B2.7   | 8.08E-09 | 0.117092 | 0.93  | 0.517 | 0.000121 | CSCL1 | SF3B2    |
| CD4.12    | 8.21E-09 | -0.62764 | 0.01  | 0.158 | 0.000123 | CSCL1 | CD4      |
| EVI2A.11  | 8.22E-09 | -0.79321 | 0.065 | 0.226 | 0.000123 | CSCL1 | EVI2A    |
| ATP6V1G1. | 8.28E-09 | -0.30925 | 0.975 | 0.75  | 0.000124 | CSCL1 | ATP6V1G1 |
| PTPN6.12  | 8.29E-09 | -0.63479 | 0.015 | 0.164 | 0.000124 | CSCL1 | PTPN6    |
| LTC4S.12  | 8.45E-09 | -0.68019 | 0.02  | 0.171 | 0.000126 | CSCL1 | LTC4S    |
| WDR61.3   | 9.35E-09 | -0.10728 | 0.672 | 0.343 | 0.00014  | CSCL1 | WDR61    |
| SIL1.8    | 9.50E-09 | -0.13035 | 0.517 | 0.25  | 0.000142 | CSCL1 | SIL1     |
| SLC25A26  | 1.00E-08 | -0.11265 | 0.493 | 0.239 | 0.000149 | CSCL1 | SLC25A26 |
| LMO1.10   | 1.14E-08 | 0.1648   | 0.184 | 0.073 | 0.00017  | CSCL1 | LMO1     |
| IL10RA.12 | 1.14E-08 | -0.5791  | 0     | 0.141 | 0.00017  | CSCL1 | IL10RA   |
| EEF1D.9   | 1.17E-08 | -0.31188 | 1     | 0.842 | 0.000176 | CSCL1 | EEF1D    |
| MPHOSPH6. | 1.18E-08 | -0.1259  | 0.577 | 0.286 | 0.000176 | CSCL1 | MPHOSPH6 |
| STXBP2.12 | 1.23E-08 | -0.64241 | 0.025 | 0.175 | 0.000184 | CSCL1 | STXBP2   |
| LYZ.12    | 1.33E-08 | -0.8051  | 0.055 | 0.209 | 0.000199 | CSCL1 | LYZ      |
| TCF4.12   | 1.33E-08 | 0.125418 | 0.945 | 0.516 | 0.000199 | CSCL1 | TCF4     |
| NUDC.6    | 1.34E-08 | 0.101231 | 0.96  | 0.573 | 0.0002   | CSCL1 | NUDC     |
| SCNM1.5   | 1.37E-08 | -0.10886 | 0.667 | 0.334 | 0.000205 | CSCL1 | SCNM1    |
| ASL.9     | 1.50E-08 | -0.14326 | 0.363 | 0.167 | 0.000224 | CSCL1 | ASL      |
| GADD45B.8 | 1.50E-08 | -0.90281 | 0.423 | 0.492 | 0.000225 | CSCL1 | GADD45B  |
| SCIN.12   | 1.54E-08 | -0.72385 | 0.01  | 0.153 | 0.00023  | CSCL1 | SCIN     |
| PHB.9     | 1.60E-08 | 0.114946 | 0.94  | 0.548 | 0.000239 | CSCL1 | PHB      |
| PGLS.7    | 1.70E-08 | 0.151744 | 0.91  | 0.503 | 0.000253 | CSCL1 | PGLS     |

|             |           |           |        |        |           |       |          |
|-------------|-----------|-----------|--------|--------|-----------|-------|----------|
| LCP1. 11    | 1. 89E-08 | -0. 59544 | 0. 005 | 0. 144 | 0. 000282 | CSCL1 | LCP1     |
| KTN1. 5     | 1. 98E-08 | 0. 171353 | 0. 91  | 0. 52  | 0. 000296 | CSCL1 | KTN1     |
| CPM. 9      | 2. 01E-08 | -0. 80935 | 0. 085 | 0. 237 | 0. 000301 | CSCL1 | CPM      |
| HBB. 7      | 2. 04E-08 | -0. 77573 | 0. 274 | 0. 401 | 0. 000304 | CSCL1 | HBB      |
| TUBB. 10    | 2. 27E-08 | 0. 106134 | 1      | 0. 767 | 0. 000339 | CSCL1 | TUBB     |
| SH3KBP1. 1  | 2. 34E-08 | -0. 11733 | 0. 493 | 0. 237 | 0. 00035  | CSCL1 | SH3KBP1  |
| ADAM28. 11  | 2. 35E-08 | -0. 62423 | 0. 005 | 0. 144 | 0. 000351 | CSCL1 | ADAM28   |
| ZFAND1. 2   | 2. 40E-08 | -0. 10117 | 0. 368 | 0. 173 | 0. 000358 | CSCL1 | ZFAND1   |
| HAMP. 12    | 2. 44E-08 | -0. 8248  | 0. 02  | 0. 163 | 0. 000365 | CSCL1 | HAMP     |
| SUCLG2. 8   | 2. 45E-08 | -0. 104   | 0. 488 | 0. 241 | 0. 000366 | CSCL1 | SUCLG2   |
| TBRG1. 3    | 2. 58E-08 | -0. 11546 | 0. 488 | 0. 241 | 0. 000385 | CSCL1 | TBRG1    |
| GYG1. 7     | 2. 58E-08 | -0. 1356  | 0. 507 | 0. 25  | 0. 000386 | CSCL1 | GYG1     |
| CBLN4. 12   | 2. 59E-08 | 0. 108739 | 0. 189 | 0. 077 | 0. 000387 | CSCL1 | CBLN4    |
| HIST1H1C. 2 | 2. 61E-08 | -0. 15384 | 0. 383 | 0. 185 | 0. 00039  | CSCL1 | HIST1H1C |
| DHRS4L2. 5  | 2. 69E-08 | -0. 1268  | 0. 522 | 0. 257 | 0. 000401 | CSCL1 | DHRS4L2  |
| SNRPE. 9    | 2. 69E-08 | 0. 105599 | 0. 97  | 0. 573 | 0. 000402 | CSCL1 | SNRPE    |
| VPS26A. 8   | 2. 70E-08 | -0. 1657  | 0. 498 | 0. 238 | 0. 000404 | CSCL1 | VPS26A   |
| AURKAIP1. 2 | 2. 74E-08 | 0. 155135 | 0. 965 | 0. 6   | 0. 00041  | CSCL1 | AURKAIP1 |
| C1QBP. 9    | 2. 98E-08 | 0. 197652 | 0. 94  | 0. 548 | 0. 000445 | CSCL1 | C1QBP    |
| LSP1. 12    | 3. 00E-08 | -0. 72289 | 0. 025 | 0. 168 | 0. 000448 | CSCL1 | LSP1     |
| COX6B1. 5   | 3. 01E-08 | -0. 2624  | 0. 985 | 0. 843 | 0. 00045  | CSCL1 | COX6B1   |
| APIP. 9     | 3. 01E-08 | -0. 12122 | 0. 468 | 0. 229 | 0. 00045  | CSCL1 | APIP     |
| FERMT3. 12  | 3. 05E-08 | -0. 62069 | 0. 025 | 0. 169 | 0. 000455 | CSCL1 | FERMT3   |
| CD69. 9     | 3. 06E-08 | -0. 74361 | 0. 015 | 0. 156 | 0. 000457 | CSCL1 | CD69     |
| ALOX5. 12   | 3. 10E-08 | -0. 57898 | 0. 005 | 0. 141 | 0. 000463 | CSCL1 | ALOX5    |
| CLEC2B. 12  | 3. 13E-08 | -0. 69816 | 0. 055 | 0. 207 | 0. 000467 | CSCL1 | CLEC2B   |
| CTSC. 12    | 3. 21E-08 | -0. 97462 | 0. 279 | 0. 386 | 0. 00048  | CSCL1 | CTSC     |
| MATR3. 11   | 3. 21E-08 | 0. 110222 | 0. 881 | 0. 48  | 0. 00048  | CSCL1 | MATR3    |
| ETS2. 12    | 3. 41E-08 | -0. 65034 | 0. 06  | 0. 21  | 0. 00051  | CSCL1 | ETS2     |
| RNF41. 4    | 3. 58E-08 | -0. 11329 | 0. 353 | 0. 163 | 0. 000535 | CSCL1 | RNF41    |
| ZNF706. 2   | 3. 74E-08 | 0. 10947  | 0. 935 | 0. 568 | 0. 000559 | CSCL1 | ZNF706   |
| SLC2A5. 12  | 3. 80E-08 | -0. 76891 | 0. 03  | 0. 173 | 0. 000568 | CSCL1 | SLC2A5   |
| FCGR2B. 12  | 3. 89E-08 | -0. 70856 | 0. 01  | 0. 146 | 0. 000581 | CSCL1 | FCGR2B   |
| CUTC. 5     | 3. 96E-08 | -0. 12821 | 0. 279 | 0. 123 | 0. 000591 | CSCL1 | CUTC     |
| PCGF5. 7    | 4. 11E-08 | -0. 105   | 0. 368 | 0. 176 | 0. 000615 | CSCL1 | PCGF5    |
| FCGRT. 11   | 4. 19E-08 | -0. 90276 | 0. 607 | 0. 549 | 0. 000626 | CSCL1 | FCGRT    |
| CSTA. 12    | 4. 44E-08 | -0. 53629 | 0      | 0. 131 | 0. 000663 | CSCL1 | CSTA     |
| GLA. 11     | 4. 49E-08 | -0. 16769 | 0. 443 | 0. 212 | 0. 000671 | CSCL1 | GLA      |
| CHD2. 5     | 4. 90E-08 | -0. 10541 | 0. 577 | 0. 287 | 0. 000733 | CSCL1 | CHD2     |
| WAS. 12     | 4. 92E-08 | -0. 67249 | 0. 035 | 0. 177 | 0. 000735 | CSCL1 | WAS      |
| ARGLU1. 9   | 5. 03E-08 | 0. 108704 | 0. 881 | 0. 461 | 0. 000752 | CSCL1 | ARGLU1   |
| PADI2. 10   | 5. 17E-08 | -0. 5596  | 0. 005 | 0. 137 | 0. 000773 | CSCL1 | PADI2    |
| PDK4. 11    | 5. 37E-08 | -0. 6761  | 0. 03  | 0. 172 | 0. 000802 | CSCL1 | PDK4     |
| THEMIS2. 1  | 5. 64E-08 | -0. 79409 | 0. 1   | 0. 244 | 0. 000843 | CSCL1 | THEMIS2  |
| CISD1. 9    | 5. 89E-08 | -0. 1213  | 0. 662 | 0. 331 | 0. 000881 | CSCL1 | CISD1    |
| AIP. 4      | 6. 18E-08 | -0. 10537 | 0. 587 | 0. 299 | 0. 000924 | CSCL1 | AIP      |
| S100A8. 12  | 6. 58E-08 | -0. 88187 | 0. 045 | 0. 187 | 0. 000984 | CSCL1 | S100A8   |
| FAM127B. 8  | 6. 88E-08 | -0. 10029 | 0. 587 | 0. 295 | 0. 001028 | CSCL1 | FAM127B  |
| IGSF6. 12   | 6. 91E-08 | -0. 67279 | 0. 02  | 0. 156 | 0. 001033 | CSCL1 | IGSF6    |
| PIK3IP1. 1  | 6. 94E-08 | -0. 61513 | 0. 025 | 0. 163 | 0. 001038 | CSCL1 | PIK3IP1  |
| COMMD6. 6   | 7. 33E-08 | -0. 28832 | 0. 98  | 0. 773 | 0. 001096 | CSCL1 | COMMD6   |

|              |           |           |        |        |           |       |               |
|--------------|-----------|-----------|--------|--------|-----------|-------|---------------|
| TFPI. 6      | 7. 74E-08 | 0. 134942 | 0. 139 | 0. 052 | 0. 001157 | CSCL1 | TFPI          |
| EIF4G2. 9    | 8. 33E-08 | 0. 161162 | 0. 99  | 0. 654 | 0. 001244 | CSCL1 | EIF4G2        |
| PTGER4. 11   | 8. 38E-08 | -0. 5301  | 0      | 0. 126 | 0. 001253 | CSCL1 | PTGER4        |
| IRF2. 5      | 8. 40E-08 | -0. 10785 | 0. 398 | 0. 195 | 0. 001255 | CSCL1 | IRF2          |
| DNAJC15. 9   | 8. 54E-08 | -0. 1313  | 0. 746 | 0. 384 | 0. 001276 | CSCL1 | DNAJC15       |
| OSM. 11      | 8. 84E-08 | -0. 69992 | 0. 015 | 0. 148 | 0. 00132  | CSCL1 | OSM           |
| SPCS3. 10    | 9. 23E-08 | -0. 13564 | 0. 632 | 0. 32  | 0. 001379 | CSCL1 | SPCS3         |
| TNFRSF1B. 9  | 9. 44E-08 | -0. 64561 | 0. 05  | 0. 191 | 0. 001411 | CSCL1 | TNFRSF1B      |
| TMEM59. 5    | 1. 00E-07 | -0. 34073 | 0. 975 | 0. 782 | 0. 0015   | CSCL1 | TMEM59        |
| SERPINF1. 1  | 1. 05E-07 | -0. 78214 | 0. 085 | 0. 227 | 0. 001573 | CSCL1 | SERPINF1      |
| GUSB. 9      | 1. 11E-07 | -0. 11703 | 0. 532 | 0. 268 | 0. 001658 | CSCL1 | GUSB          |
| CALM1. 11    | 1. 12E-07 | 0. 109412 | 0. 995 | 0. 768 | 0. 001674 | CSCL1 | CALM1         |
| MTCH1. 4     | 1. 15E-07 | 0. 15225  | 0. 955 | 0. 527 | 0. 001721 | CSCL1 | MTCH1         |
| GTF3A. 7     | 1. 18E-07 | 0. 119163 | 0. 9   | 0. 498 | 0. 001758 | CSCL1 | GTF3A         |
| DUSP23. 11   | 1. 18E-07 | -0. 63591 | 0. 05  | 0. 19  | 0. 001759 | CSCL1 | DUSP23        |
| BCL2A1. 12   | 1. 19E-07 | -0. 61593 | 0. 025 | 0. 159 | 0. 001776 | CSCL1 | BCL2A1        |
| FOSB. 9      | 1. 19E-07 | -0. 78774 | 0. 294 | 0. 393 | 0. 001785 | CSCL1 | FOSB          |
| CSRP1. 8     | 1. 21E-07 | -0. 16344 | 0. 463 | 0. 234 | 0. 001807 | CSCL1 | CSRP1         |
| DOCK8. 12    | 1. 24E-07 | -0. 50948 | 0      | 0. 123 | 0. 001852 | CSCL1 | DOCK8         |
| SIGLEC10. 1  | 1. 28E-07 | -0. 63951 | 0. 03  | 0. 164 | 0. 00191  | CSCL1 | SIGLEC10      |
| AGTRAP. 8    | 1. 30E-07 | -0. 22389 | 0. 547 | 0. 277 | 0. 001938 | CSCL1 | AGTRAP        |
| SRSF2. 10    | 1. 31E-07 | 0. 183225 | 0. 965 | 0. 599 | 0. 001964 | CSCL1 | SRSF2         |
| ARHGEF2. 1   | 1. 36E-07 | -0. 10125 | 0. 567 | 0. 284 | 0. 002026 | CSCL1 | ARHGEF2       |
| TREM1. 11    | 1. 37E-07 | -0. 73793 | 0. 03  | 0. 166 | 0. 002043 | CSCL1 | TREM1         |
| RABIF. 4     | 1. 39E-07 | -0. 101   | 0. 363 | 0. 178 | 0. 002071 | CSCL1 | RABIF         |
| CFD. 11      | 1. 41E-07 | -0. 62257 | 0. 025 | 0. 158 | 0. 002108 | CSCL1 | CFD           |
| P4HB. 8      | 1. 44E-07 | 0. 168413 | 0. 95  | 0. 565 | 0. 002147 | CSCL1 | P4HB          |
| RP11-552D. 1 | 1. 44E-07 | -0. 64416 | 0      | 0. 122 | 0. 002149 | CSCL1 | RP11-552D4. 1 |
| SRP9. 6      | 1. 57E-07 | 0. 101488 | 1      | 0. 675 | 0. 002351 | CSCL1 | SRP9          |
| NDUFB2. 6    | 1. 64E-07 | -0. 27346 | 0. 995 | 0. 805 | 0. 002455 | CSCL1 | NDUFB2        |
| PPP1R10. 7   | 1. 65E-07 | -0. 11818 | 0. 557 | 0. 283 | 0. 002467 | CSCL1 | PPP1R10       |
| EIF4A2. 8    | 1. 65E-07 | -0. 36769 | 0. 95  | 0. 715 | 0. 002468 | CSCL1 | EIF4A2        |
| ARFGAP2. 6   | 1. 70E-07 | -0. 10342 | 0. 567 | 0. 287 | 0. 002545 | CSCL1 | ARFGAP2       |
| GPR65. 12    | 1. 78E-07 | -0. 55575 | 0. 01  | 0. 136 | 0. 002664 | CSCL1 | GPR65         |
| TGFB1. 11    | 1. 79E-07 | -0. 1554  | 0. 488 | 0. 24  | 0. 002678 | CSCL1 | TGFB1         |
| VMO1. 11     | 1. 80E-07 | -0. 70481 | 0. 03  | 0. 162 | 0. 002684 | CSCL1 | VMO1          |
| LINC00667    | 1. 82E-07 | -0. 11164 | 0. 473 | 0. 24  | 0. 002723 | CSCL1 | LINC00667     |
| BLVRA. 10    | 1. 83E-07 | -0. 12407 | 0. 642 | 0. 334 | 0. 002741 | CSCL1 | BLVRA         |
| TANK. 3      | 1. 86E-07 | -0. 10187 | 0. 637 | 0. 326 | 0. 002774 | CSCL1 | TANK          |
| DNTTIP2. 5   | 1. 87E-07 | -0. 11501 | 0. 552 | 0. 282 | 0. 002799 | CSCL1 | DNTTIP2       |
| SREK1IP1. 1  | 1. 92E-07 | -0. 1397  | 0. 642 | 0. 333 | 0. 002868 | CSCL1 | SREK1IP1      |
| NCF4. 12     | 2. 05E-07 | -0. 63717 | 0. 02  | 0. 148 | 0. 003064 | CSCL1 | NCF4          |
| FOLR2. 12    | 2. 23E-07 | -0. 85321 | 0. 045 | 0. 18  | 0. 003325 | CSCL1 | FOLR2         |
| CTSZ. 12     | 2. 39E-07 | -0. 76808 | 0. 124 | 0. 258 | 0. 00357  | CSCL1 | CTSZ          |
| DNAJB12. 9   | 2. 39E-07 | -0. 13022 | 0. 308 | 0. 145 | 0. 003576 | CSCL1 | DNAJB12       |
| IL10RB. 12   | 2. 45E-07 | -0. 17654 | 0. 478 | 0. 239 | 0. 003664 | CSCL1 | IL10RB        |
| PCBD1. 5     | 2. 56E-07 | -0. 11365 | 0. 632 | 0. 325 | 0. 003831 | CSCL1 | PCBD1         |
| SRRM2. 7     | 2. 59E-07 | 0. 132908 | 0. 91  | 0. 526 | 0. 003876 | CSCL1 | SRRM2         |
| AOAH. 11     | 2. 60E-07 | -0. 55567 | 0. 005 | 0. 125 | 0. 003893 | CSCL1 | AOAH          |
| SLC43A2. 1   | 2. 64E-07 | -0. 12961 | 0. 483 | 0. 241 | 0. 003948 | CSCL1 | SLC43A2       |
| PSMB9. 10    | 2. 76E-07 | -0. 13735 | 0. 746 | 0. 399 | 0. 004122 | CSCL1 | PSMB9         |

|            |          |          |       |       |          |       |           |
|------------|----------|----------|-------|-------|----------|-------|-----------|
| C14orf119  | 2.94E-07 | -0.11915 | 0.587 | 0.308 | 0.004392 | CSCL1 | C14orf119 |
| CFLAR.8    | 2.94E-07 | -0.2009  | 0.617 | 0.313 | 0.004398 | CSCL1 | CFLAR     |
| RNF113A.1  | 3.07E-07 | -0.11831 | 0.289 | 0.134 | 0.004593 | CSCL1 | RNF113A   |
| NCKAP1L.1  | 3.08E-07 | -0.51954 | 0.005 | 0.124 | 0.004607 | CSCL1 | NCKAP1L   |
| DAB2.11    | 3.09E-07 | -0.59266 | 0.025 | 0.152 | 0.004613 | CSCL1 | DAB2      |
| FAM105A.1  | 3.15E-07 | -0.6081  | 0.035 | 0.165 | 0.004704 | CSCL1 | FAM105A   |
| LETMD1.2   | 3.22E-07 | -0.11918 | 0.328 | 0.158 | 0.004809 | CSCL1 | LETMD1    |
| CCS.4      | 3.23E-07 | -0.14937 | 0.502 | 0.256 | 0.004823 | CSCL1 | CCS       |
| IL1B.11    | 3.46E-07 | -0.81853 | 0.09  | 0.224 | 0.005172 | CSCL1 | IL1B      |
| PARVB.11   | 3.53E-07 | -0.10425 | 0.333 | 0.161 | 0.005278 | CSCL1 | PARVB     |
| PDE4B.7    | 3.75E-07 | -0.14403 | 0.532 | 0.272 | 0.005599 | CSCL1 | PDE4B     |
| GNPMB.11   | 3.75E-07 | -0.78338 | 0.07  | 0.203 | 0.005606 | CSCL1 | GNPMB     |
| PMPCB.7    | 3.80E-07 | -0.1183  | 0.637 | 0.338 | 0.005675 | CSCL1 | PMPCB     |
| SNX9.9     | 3.91E-07 | -0.10418 | 0.378 | 0.186 | 0.005841 | CSCL1 | SNX9      |
| CD33.12    | 3.98E-07 | -0.54858 | 0.005 | 0.122 | 0.005943 | CSCL1 | CD33      |
| FGFR10P2.4 | 4.01E-07 | -0.10027 | 0.582 | 0.313 | 0.005995 | CSCL1 | FGFR10P2  |
| DIRAS3.9   | 4.09E-07 | -0.20908 | 0.259 | 0.121 | 0.006112 | CSCL1 | DIRAS3    |
| QARS.9     | 4.13E-07 | -0.15491 | 0.547 | 0.277 | 0.006173 | CSCL1 | QARS      |
| MAP3K8.12  | 4.20E-07 | -0.67571 | 0.055 | 0.186 | 0.006281 | CSCL1 | MAP3K8    |
| SCFD1.5    | 4.30E-07 | -0.12859 | 0.483 | 0.248 | 0.006433 | CSCL1 | SCFD1     |
| TLR2.12    | 4.58E-07 | -0.50284 | 0     | 0.113 | 0.006845 | CSCL1 | TLR2      |
| TMEM173.1  | 4.61E-07 | -0.53785 | 0.01  | 0.128 | 0.006888 | CSCL1 | TMEM173   |
| C1R.12     | 4.80E-07 | -0.42533 | 0.418 | 0.212 | 0.00717  | CSCL1 | C1R       |
| NUBP1.8    | 5.10E-07 | -0.15128 | 0.423 | 0.214 | 0.007615 | CSCL1 | NUBP1     |
| PTAFR.12   | 5.35E-07 | -0.52382 | 0.01  | 0.127 | 0.007988 | CSCL1 | PTAFR     |
| NEMF.2     | 5.38E-07 | -0.10313 | 0.627 | 0.322 | 0.008039 | CSCL1 | NEMF      |
| PHACTR1.1  | 5.44E-07 | -0.54176 | 0.005 | 0.12  | 0.008128 | CSCL1 | PHACTR1   |
| PRELID1.6  | 5.53E-07 | 0.163029 | 0.925 | 0.553 | 0.008261 | CSCL1 | PRELID1   |
| F13A1.9    | 5.58E-07 | -0.78494 | 0.035 | 0.161 | 0.00834  | CSCL1 | F13A1     |
| COLGALT1.5 | 5.83E-07 | -0.10366 | 0.378 | 0.189 | 0.008712 | CSCL1 | COLGALT1  |
| ANXA1.9    | 5.93E-07 | -0.80452 | 0.303 | 0.412 | 0.008869 | CSCL1 | ANXA1     |
| CYB561D2.6 | 6.08E-07 | -0.15676 | 0.438 | 0.222 | 0.009079 | CSCL1 | CYB561D2  |
| ASAH1.10   | 6.29E-07 | -0.5771  | 0.856 | 0.648 | 0.009404 | CSCL1 | ASAH1     |
| MLXIP.4    | 6.41E-07 | -0.11587 | 0.363 | 0.18  | 0.009584 | CSCL1 | MLXIP     |
| LASP1.7    | 6.43E-07 | -0.10545 | 0.408 | 0.206 | 0.009613 | CSCL1 | LASP1     |
| HMHA1.12   | 6.49E-07 | -0.45895 | 0     | 0.11  | 0.009702 | CSCL1 | HMHA1     |
| AP2A2.10   | 6.50E-07 | -0.1154  | 0.488 | 0.248 | 0.009719 | CSCL1 | AP2A2     |
| SRSF5.3    | 6.55E-07 | -0.36025 | 0.92  | 0.69  | 0.00979  | CSCL1 | SRSF5     |
| KDEL2.5    | 6.60E-07 | 0.135744 | 0.965 | 0.562 | 0.009858 | CSCL1 | KDEL2     |
| ARHGAP4.1  | 7.04E-07 | -0.46149 | 0.005 | 0.118 | 0.01052  | CSCL1 | ARHGAP4   |
| ENTPD1.12  | 7.23E-07 | -0.63285 | 0.04  | 0.164 | 0.0108   | CSCL1 | ENTPD1    |
| MESDC2.6   | 7.62E-07 | -0.1337  | 0.756 | 0.398 | 0.011386 | CSCL1 | MESDC2    |
| LCP2.12    | 7.94E-07 | -0.47529 | 0.005 | 0.117 | 0.011867 | CSCL1 | LCP2      |
| UQCR11.7   | 8.51E-07 | -1.12719 | 0.005 | 0.117 | 0.012722 | CSCL1 | UQCR11    |
| HSPA8.7    | 8.61E-07 | -0.23203 | 1     | 0.863 | 0.012863 | CSCL1 | HSPA8     |
| IL10.12    | 8.79E-07 | -0.54869 | 0     | 0.108 | 0.013128 | CSCL1 | IL10      |
| HSD17B11.8 | 8.89E-07 | -0.1523  | 0.697 | 0.371 | 0.013285 | CSCL1 | HSD17B11  |
| SYK.12     | 9.08E-07 | -0.43836 | 0     | 0.108 | 0.013576 | CSCL1 | SYK       |
| COMMD8.1C  | 9.24E-07 | -0.15617 | 0.433 | 0.221 | 0.013812 | CSCL1 | COMMD8    |
| CD58.12    | 9.28E-07 | -0.18949 | 0.438 | 0.224 | 0.01387  | CSCL1 | CD58      |
| NFKBIA.11  | 9.49E-07 | -0.73639 | 0.512 | 0.5   | 0.014175 | CSCL1 | NFKBIA    |



|            |          |          |       |       |          |       |           |
|------------|----------|----------|-------|-------|----------|-------|-----------|
| BHLHE40.9  | 9.54E-07 | -0.14779 | 0.378 | 0.19  | 0.01425  | CSCL1 | BHLHE40   |
| LINC01094  | 1.00E-06 | -0.63051 | 0.035 | 0.156 | 0.014955 | CSCL1 | LINC01094 |
| EPB41L3.1  | 1.00E-06 | -0.44004 | 0     | 0.107 | 0.015012 | CSCL1 | EPB41L3   |
| ATM.7      | 1.01E-06 | -0.12351 | 0.368 | 0.186 | 0.015021 | CSCL1 | ATM       |
| IDH3G.6    | 1.09E-06 | -0.11856 | 0.751 | 0.397 | 0.016262 | CSCL1 | IDH3G     |
| NDUFA4.8   | 1.16E-06 | -0.23444 | 1     | 0.893 | 0.01732  | CSCL1 | NDUFA4    |
| JUNB.7     | 1.20E-06 | -0.35375 | 0.886 | 0.721 | 0.017877 | CSCL1 | JUNB      |
| MFNG.11    | 1.21E-06 | -0.4812  | 0.015 | 0.129 | 0.018019 | CSCL1 | MFNG      |
| LPAR5.10   | 1.23E-06 | -0.44587 | 0     | 0.105 | 0.018349 | CSCL1 | LPAR5     |
| GSDMD.11   | 1.24E-06 | -0.20423 | 0.368 | 0.182 | 0.018553 | CSCL1 | GSDMD     |
| PLA2G5.1C  | 1.26E-06 | -0.1422  | 0.229 | 0.107 | 0.018796 | CSCL1 | PLA2G5    |
| VAMP3.8    | 1.29E-06 | -0.11812 | 0.642 | 0.343 | 0.019261 | CSCL1 | VAMP3     |
| CH25H.8    | 1.30E-06 | -0.73645 | 0.03  | 0.149 | 0.019423 | CSCL1 | CH25H     |
| SCAND1.9   | 1.33E-06 | 0.157216 | 0.935 | 0.564 | 0.019902 | CSCL1 | SCAND1    |
| PRDX1.9    | 1.35E-06 | -0.27855 | 0.99  | 0.805 | 0.020227 | CSCL1 | PRDX1     |
| CD46.3     | 1.36E-06 | -0.12541 | 0.443 | 0.23  | 0.020309 | CSCL1 | CD46      |
| TMEM14A.8  | 1.42E-06 | -0.13851 | 0.607 | 0.319 | 0.021221 | CSCL1 | TMEM14A   |
| LYPLAL1.2  | 1.43E-06 | -0.14464 | 0.448 | 0.233 | 0.021369 | CSCL1 | LYPLAL1   |
| AXL.11     | 1.43E-06 | -0.68588 | 0.06  | 0.183 | 0.021378 | CSCL1 | AXL       |
| JTB.5      | 1.44E-06 | 0.14194  | 0.99  | 0.603 | 0.02157  | CSCL1 | JTB       |
| CD55.11    | 1.45E-06 | -0.49684 | 0.01  | 0.12  | 0.021646 | CSCL1 | CD55      |
| RNASE1.9   | 1.47E-06 | -0.9066  | 0.05  | 0.171 | 0.021921 | CSCL1 | RNASE1    |
| GLIPR2.1C  | 1.47E-06 | -0.10742 | 0.498 | 0.265 | 0.021923 | CSCL1 | GLIPR2    |
| STEAP3.8   | 1.51E-06 | -0.10769 | 0.318 | 0.159 | 0.022511 | CSCL1 | STEAP3    |
| MEIS2.10   | 1.51E-06 | -0.15603 | 0.393 | 0.2   | 0.022522 | CSCL1 | MEIS2     |
| TMEM176A.1 | 1.57E-06 | -0.74623 | 0.104 | 0.229 | 0.023522 | CSCL1 | TMEM176A  |
| PHYKPL.4   | 1.64E-06 | -0.1139  | 0.393 | 0.199 | 0.024447 | CSCL1 | PHYKPL    |
| CX3CR1.11  | 1.68E-06 | -0.49508 | 0     | 0.103 | 0.025047 | CSCL1 | CX3CR1    |
| FBP1.12    | 1.69E-06 | -0.46022 | 0.01  | 0.119 | 0.025278 | CSCL1 | FBP1      |
| EMC3.2     | 1.70E-06 | -0.10491 | 0.841 | 0.443 | 0.025426 | CSCL1 | EMC3      |
| NCF1.12    | 1.76E-06 | -0.48455 | 0.015 | 0.125 | 0.026356 | CSCL1 | NCF1      |
| ABCG1.9    | 1.80E-06 | -0.42742 | 0.02  | 0.133 | 0.026866 | CSCL1 | ABCG1     |
| INSIG2.4   | 1.90E-06 | -0.15189 | 0.388 | 0.199 | 0.028426 | CSCL1 | INSIG2    |
| ARHGAP18.1 | 1.94E-06 | -0.61726 | 0.055 | 0.174 | 0.029063 | CSCL1 | ARHGAP18  |
| CD84.12    | 2.06E-06 | -0.52329 | 0.02  | 0.131 | 0.030714 | CSCL1 | CD84      |
| ARHGAP24.2 | 2.20E-06 | -0.60732 | 0.035 | 0.15  | 0.032901 | CSCL1 | ARHGAP24  |
| TSC22D3.1  | 2.23E-06 | -0.76446 | 0.428 | 0.457 | 0.033336 | CSCL1 | TSC22D3   |
| SELPLG.1C  | 2.31E-06 | -0.55996 | 0.015 | 0.123 | 0.034486 | CSCL1 | SELPLG    |
| MITD1.4    | 2.42E-06 | -0.12569 | 0.438 | 0.231 | 0.036102 | CSCL1 | MITD1     |
| ZC3HAV1.7  | 2.60E-06 | -0.11504 | 0.343 | 0.174 | 0.038909 | CSCL1 | ZC3HAV1   |
| SERPINB9.2 | 2.62E-06 | -0.58214 | 0.035 | 0.148 | 0.039196 | CSCL1 | SERPINB9  |
| OLFML3.11  | 2.67E-06 | -0.78906 | 0.109 | 0.229 | 0.039872 | CSCL1 | OLFML3    |
| PABPC1.9   | 2.72E-06 | -0.30453 | 0.95  | 0.741 | 0.040638 | CSCL1 | PABPC1    |
| ELL2.10    | 2.75E-06 | -0.59543 | 0.075 | 0.195 | 0.041066 | CSCL1 | ELL2      |
| SEPT2.5    | 2.76E-06 | 0.109934 | 0.975 | 0.574 | 0.041171 | CSCL1 | 2-Sep     |
| HLA-DQB2.2 | 2.82E-06 | -0.63476 | 0     | 0.099 | 0.042119 | CSCL1 | HLA-DQB2  |
| NDEL1.6    | 2.83E-06 | -0.11503 | 0.303 | 0.151 | 0.042328 | CSCL1 | NDEL1     |
| BIN2.11    | 2.95E-06 | -0.47267 | 0.01  | 0.114 | 0.044034 | CSCL1 | BIN2      |
| RCSD1.11   | 2.95E-06 | -0.50482 | 0.015 | 0.122 | 0.044098 | CSCL1 | RCSD1     |
| COQ10B.5   | 2.96E-06 | -0.1265  | 0.488 | 0.259 | 0.044229 | CSCL1 | COQ10B    |
| S100A9.12  | 3.02E-06 | -0.95712 | 0.109 | 0.226 | 0.045072 | CSCL1 | S100A9    |

|             |           |           |        |        |           |       |              |
|-------------|-----------|-----------|--------|--------|-----------|-------|--------------|
| PIP4K2A. 8  | 3. 03E-06 | -0. 10422 | 0. 274 | 0. 135 | 0. 045294 | CSCL1 | PIP4K2A      |
| APLP2. 10   | 3. 04E-06 | 0. 133362 | 0. 96  | 0. 586 | 0. 045416 | CSCL1 | APLP2        |
| CYTH4. 12   | 3. 06E-06 | -0. 4773  | 0. 01  | 0. 114 | 0. 045694 | CSCL1 | CYTH4        |
| GABARAP. 9  | 3. 08E-06 | -0. 81318 | 0. 443 | 0. 461 | 0. 04601  | CSCL1 | GABARAP      |
| YIPF5. 5    | 3. 15E-06 | -0. 1054  | 0. 478 | 0. 258 | 0. 047043 | CSCL1 | YIPF5        |
| PGK1. 8     | 3. 16E-06 | -0. 39231 | 0. 96  | 0. 75  | 0. 047269 | CSCL1 | PGK1         |
| NR4A3. 11   | 3. 38E-06 | -0. 60435 | 0. 04  | 0. 153 | 0. 050453 | CSCL1 | NR4A3        |
| RAB4B. 6    | 3. 40E-06 | -0. 14988 | 0. 493 | 0. 259 | 0. 050882 | CSCL1 | RAB4B        |
| PNPLA8. 8   | 3. 42E-06 | -0. 12083 | 0. 642 | 0. 342 | 0. 051131 | CSCL1 | PNPLA8       |
| EEF1A1. 1C  | 3. 44E-06 | -0. 3288  | 0. 93  | 0. 824 | 0. 051386 | CSCL1 | EEF1A1       |
| TMC6. 12    | 3. 50E-06 | -0. 43349 | 0. 01  | 0. 113 | 0. 052313 | CSCL1 | TMC6         |
| UCHL3. 7    | 3. 50E-06 | -0. 15126 | 0. 458 | 0. 244 | 0. 052334 | CSCL1 | UCHL3        |
| LIPA. 10    | 3. 55E-06 | -0. 7668  | 0. 244 | 0. 336 | 0. 053106 | CSCL1 | LIPA         |
| SLC35E3. 1  | 3. 65E-06 | -0. 22263 | 0. 363 | 0. 184 | 0. 054577 | CSCL1 | SLC35E3      |
| DAD1. 5     | 3. 67E-06 | -0. 3686  | 0. 955 | 0. 717 | 0. 05479  | CSCL1 | DAD1         |
| RAC2. 12    | 3. 73E-06 | -0. 49935 | 0. 015 | 0. 121 | 0. 055801 | CSCL1 | RAC2         |
| DDX19B. 2   | 4. 01E-06 | -0. 10313 | 0. 378 | 0. 199 | 0. 059977 | CSCL1 | DDX19B       |
| CDKN2A. 6   | 4. 03E-06 | -0. 44405 | 0. 005 | 0. 104 | 0. 060229 | CSCL1 | CDKN2A       |
| ARHGAP30. 4 | 4. 10E-06 | -0. 39477 | 0      | 0. 096 | 0. 061218 | CSCL1 | ARHGAP30     |
| FMNL1. 12   | 4. 26E-06 | -0. 47187 | 0. 02  | 0. 126 | 0. 063658 | CSCL1 | FMNL1        |
| CRYZL1. 3   | 4. 32E-06 | -0. 14759 | 0. 493 | 0. 264 | 0. 064509 | CSCL1 | CRYZL1       |
| TSNAX. 3    | 4. 40E-06 | -0. 14898 | 0. 582 | 0. 313 | 0. 065823 | CSCL1 | TSNAX        |
| YWHAE. 10   | 4. 45E-06 | 0. 115611 | 1      | 0. 748 | 0. 066496 | CSCL1 | YWHAE        |
| IFI35. 10   | 4. 80E-06 | -0. 22711 | 0. 433 | 0. 228 | 0. 071799 | CSCL1 | IFI35        |
| COMMD3. 5   | 4. 81E-06 | -0. 16851 | 0. 657 | 0. 349 | 0. 07185  | CSCL1 | COMMD3       |
| EIF3K. 9    | 4. 82E-06 | -0. 34069 | 0. 96  | 0. 755 | 0. 072018 | CSCL1 | EIF3K        |
| SNX6. 7     | 5. 08E-06 | -0. 11411 | 0. 796 | 0. 423 | 0. 075941 | CSCL1 | SNX6         |
| ATP5D. 11   | 5. 10E-06 | 0. 177786 | 0. 955 | 0. 608 | 0. 076161 | CSCL1 | ATP5D        |
| DCK. 9      | 5. 12E-06 | -0. 13536 | 0. 493 | 0. 262 | 0. 076504 | CSCL1 | DCK          |
| SGK1. 12    | 5. 27E-06 | -0. 83696 | 0. 408 | 0. 437 | 0. 078823 | CSCL1 | SGK1         |
| ATP5L. 4    | 5. 53E-06 | -0. 23779 | 0. 995 | 0. 857 | 0. 08257  | CSCL1 | ATP5L        |
| COX5A. 8    | 5. 55E-06 | 0. 127259 | 0. 96  | 0. 592 | 0. 082969 | CSCL1 | COX5A        |
| TPPP3. 10   | 5. 62E-06 | -0. 1273  | 0. 294 | 0. 151 | 0. 08392  | CSCL1 | TPPP3        |
| TSC22D2. 6  | 5. 70E-06 | -0. 11701 | 0. 308 | 0. 154 | 0. 085146 | CSCL1 | TSC22D2      |
| CLEC5A. 11  | 5. 88E-06 | -0. 48672 | 0. 005 | 0. 101 | 0. 087879 | CSCL1 | CLEC5A       |
| TRA2A. 6    | 6. 05E-06 | -0. 13507 | 0. 632 | 0. 338 | 0. 090457 | CSCL1 | TRA2A        |
| NFKBID. 1C  | 6. 20E-06 | -0. 543   | 0. 035 | 0. 142 | 0. 092714 | CSCL1 | NFKBID       |
| LRRFIP1. 1  | 6. 37E-06 | -0. 1411  | 0. 652 | 0. 348 | 0. 095151 | CSCL1 | LRRFIP1      |
| RASGEF1B. 6 | 6. 54E-06 | -0. 48749 | 0. 02  | 0. 122 | 0. 097742 | CSCL1 | RASGEF1B     |
| CLK4. 7     | 6. 71E-06 | -0. 11797 | 0. 313 | 0. 16  | 0. 100274 | CSCL1 | CLK4         |
| GNS. 9      | 6. 91E-06 | -0. 13487 | 0. 378 | 0. 196 | 0. 103216 | CSCL1 | GNS          |
| TMEM179B. 6 | 6. 92E-06 | -0. 10725 | 0. 761 | 0. 407 | 0. 103448 | CSCL1 | TMEM179B     |
| RNF144B. 1  | 7. 04E-06 | -0. 45109 | 0. 005 | 0. 1   | 0. 10528  | CSCL1 | RNF144B      |
| TCOF1. 8    | 7. 17E-06 | -0. 19108 | 0. 373 | 0. 192 | 0. 107101 | CSCL1 | TCOF1        |
| FABP5. 9    | 7. 33E-06 | -0. 89947 | 0. 284 | 0. 394 | 0. 10961  | CSCL1 | FABP5        |
| GIT2. 9     | 7. 53E-06 | -0. 13339 | 0. 299 | 0. 15  | 0. 112498 | CSCL1 | GIT2         |
| CARD16. 1C  | 7. 59E-06 | -0. 60547 | 0. 109 | 0. 231 | 0. 113497 | CSCL1 | CARD16       |
| CSNK1A1. 8  | 7. 78E-06 | 0. 144533 | 0. 935 | 0. 551 | 0. 11632  | CSCL1 | CSNK1A1      |
| RP11-51J9   | 7. 92E-06 | -0. 14602 | 0. 274 | 0. 138 | 0. 118317 | CSCL1 | RP11-51J9. 5 |
| CPVL. 12    | 7. 98E-06 | -0. 91513 | 0. 279 | 0. 35  | 0. 119301 | CSCL1 | CPVL         |
| KIDINS22C   | 8. 12E-06 | -0. 11046 | 0. 498 | 0. 265 | 0. 121399 | CSCL1 | KIDINS220    |

|             |           |           |        |        |           |       |           |
|-------------|-----------|-----------|--------|--------|-----------|-------|-----------|
| GLDN. 11    | 8. 48E-06 | -0. 40619 | 0. 005 | 0. 098 | 0. 126722 | CSCL1 | GLDN      |
| CMTM6. 12   | 8. 90E-06 | -0. 15904 | 0. 791 | 0. 419 | 0. 133026 | CSCL1 | CMTM6     |
| MSN. 11     | 9. 30E-06 | -0. 14793 | 0. 701 | 0. 37  | 0. 139018 | CSCL1 | MSN       |
| SC5D. 5     | 9. 50E-06 | -0. 10505 | 0. 323 | 0. 171 | 0. 141943 | CSCL1 | SC5D      |
| SDHD. 8     | 9. 57E-06 | -0. 16995 | 0. 741 | 0. 39  | 0. 143037 | CSCL1 | SDHD      |
| ISG15. 9    | 9. 65E-06 | -0. 17153 | 0. 637 | 0. 352 | 0. 144217 | CSCL1 | ISG15     |
| ZFHX3. 7    | 9. 87E-06 | -0. 17066 | 0. 373 | 0. 192 | 0. 147556 | CSCL1 | ZFHX3     |
| PAPD4. 3    | 1. 02E-05 | -0. 10796 | 0. 338 | 0. 177 | 0. 152753 | CSCL1 | PAPD4     |
| SUSD3. 11   | 1. 02E-05 | -0. 43615 | 0. 005 | 0. 097 | 0. 152901 | CSCL1 | SUSD3     |
| DUSP2. 11   | 1. 04E-05 | -0. 49202 | 0. 015 | 0. 112 | 0. 155191 | CSCL1 | DUSP2     |
| C5orf28. 7  | 1. 04E-05 | -0. 10508 | 0. 239 | 0. 117 | 0. 155422 | CSCL1 | C5orf28   |
| HIPK2. 9    | 1. 08E-05 | -0. 10542 | 0. 408 | 0. 218 | 0. 161388 | CSCL1 | HIPK2     |
| CAST. 9     | 1. 09E-05 | -0. 10227 | 0. 577 | 0. 314 | 0. 162896 | CSCL1 | CAST      |
| RPN1. 7     | 1. 10E-05 | -0. 15532 | 0. 741 | 0. 404 | 0. 164128 | CSCL1 | RPN1      |
| TNFAIP8L2   | 1. 10E-05 | -0. 40803 | 0. 005 | 0. 096 | 0. 164899 | CSCL1 | TNFAIP8L2 |
| H2AFY. 8    | 1. 13E-05 | 0. 130014 | 0. 965 | 0. 601 | 0. 168291 | CSCL1 | H2AFY     |
| CCL4L2. 1C  | 1. 14E-05 | -0. 64244 | 0      | 0. 088 | 0. 17066  | CSCL1 | CCL4L2    |
| CCL2. 5     | 1. 15E-05 | -0. 39502 | 0. 418 | 0. 222 | 0. 171215 | CSCL1 | CCL2      |
| SLC50A1. 9  | 1. 16E-05 | -0. 17528 | 0. 318 | 0. 165 | 0. 173    | CSCL1 | SLC50A1   |
| LITAF. 12   | 1. 17E-05 | -0. 77425 | 0. 463 | 0. 459 | 0. 17427  | CSCL1 | LITAF     |
| WDR45. 1    | 1. 18E-05 | -0. 182   | 0. 463 | 0. 247 | 0. 176052 | CSCL1 | WDR45     |
| GOS2. 9     | 1. 18E-05 | -0. 6994  | 0. 075 | 0. 186 | 0. 176317 | CSCL1 | GOS2      |
| ASMTL. 2    | 1. 19E-05 | -0. 11053 | 0. 313 | 0. 162 | 0. 178046 | CSCL1 | ASMTL     |
| BTG1. 11    | 1. 20E-05 | -0. 30498 | 0. 93  | 0. 685 | 0. 178851 | CSCL1 | BTG1      |
| CAPN1. 7    | 1. 20E-05 | -0. 12491 | 0. 473 | 0. 255 | 0. 179769 | CSCL1 | CAPN1     |
| USF2. 5     | 1. 21E-05 | -0. 12699 | 0. 597 | 0. 321 | 0. 180913 | CSCL1 | USF2      |
| IL6R. 12    | 1. 22E-05 | -0. 34907 | 0      | 0. 087 | 0. 182126 | CSCL1 | IL6R      |
| DARS. 6     | 1. 22E-05 | -0. 11987 | 0. 726 | 0. 397 | 0. 182229 | CSCL1 | DARS      |
| NCF2. 12    | 1. 23E-05 | -0. 41951 | 0. 01  | 0. 103 | 0. 183385 | CSCL1 | NCF2      |
| POLR1D. 7   | 1. 25E-05 | -0. 12315 | 0. 741 | 0. 41  | 0. 186419 | CSCL1 | POLR1D    |
| LPCAT2. 12  | 1. 26E-05 | -0. 51719 | 0. 045 | 0. 149 | 0. 188543 | CSCL1 | LPCAT2    |
| SAP18. 4    | 1. 26E-05 | -0. 2883  | 0. 995 | 0. 762 | 0. 18871  | CSCL1 | SAP18     |
| BRK1. 3     | 1. 28E-05 | -0. 20738 | 0. 99  | 0. 777 | 0. 190827 | CSCL1 | BRK1      |
| HSP90AA1. 1 | 1. 29E-05 | -0. 19474 | 1      | 0. 886 | 0. 193147 | CSCL1 | HSP90AA1  |
| SOD2. 8     | 1. 31E-05 | -0. 88704 | 0. 607 | 0. 535 | 0. 196037 | CSCL1 | SOD2      |
| ATF5. 9     | 1. 34E-05 | -0. 18567 | 0. 363 | 0. 191 | 0. 199876 | CSCL1 | ATF5      |
| PDXK. 10    | 1. 36E-05 | -0. 13155 | 0. 517 | 0. 281 | 0. 203385 | CSCL1 | PDXK      |
| ATG7. 8     | 1. 38E-05 | -0. 10645 | 0. 224 | 0. 109 | 0. 206083 | CSCL1 | ATG7      |
| NKTR. 8     | 1. 38E-05 | -0. 11317 | 0. 657 | 0. 352 | 0. 206424 | CSCL1 | NKTR      |
| C21orf33. 1 | 1. 39E-05 | -0. 11474 | 0. 662 | 0. 358 | 0. 207431 | CSCL1 | C21orf33  |
| TAGAP. 12   | 1. 39E-05 | -0. 48007 | 0. 01  | 0. 102 | 0. 20801  | CSCL1 | TAGAP     |
| DHRS1. 2    | 1. 40E-05 | -0. 14173 | 0. 294 | 0. 152 | 0. 208533 | CSCL1 | DHRS1     |
| SDHB. 5     | 1. 42E-05 | -0. 10911 | 0. 756 | 0. 418 | 0. 212628 | CSCL1 | SDHB      |
| IFI6. 7     | 1. 45E-05 | -0. 15105 | 0. 731 | 0. 401 | 0. 216535 | CSCL1 | IFI6      |
| STX11. 11   | 1. 49E-05 | -0. 47722 | 0. 02  | 0. 116 | 0. 222309 | CSCL1 | STX11     |
| LRRC25. 12  | 1. 50E-05 | -0. 39953 | 0. 005 | 0. 094 | 0. 224361 | CSCL1 | LRRC25    |
| MAT2A. 6    | 1. 54E-05 | -0. 11684 | 0. 706 | 0. 378 | 0. 229839 | CSCL1 | MAT2A     |
| LILRA2. 12  | 1. 55E-05 | -0. 40778 | 0      | 0. 085 | 0. 231066 | CSCL1 | LILRA2    |
| MOB1A. 12   | 1. 60E-05 | -0. 21497 | 0. 632 | 0. 335 | 0. 238753 | CSCL1 | MOB1A     |
| TOB2. 5     | 1. 60E-05 | -0. 10404 | 0. 363 | 0. 194 | 0. 239375 | CSCL1 | TOB2      |
| PRDX5. 7    | 1. 61E-05 | -0. 26285 | 0. 99  | 0. 738 | 0. 240921 | CSCL1 | PRDX5     |

|             |           |           |        |        |           |       |                 |
|-------------|-----------|-----------|--------|--------|-----------|-------|-----------------|
| UPP1. 11    | 1. 77E-05 | -0. 14501 | 0. 448 | 0. 251 | 0. 265134 | CSCL1 | UPP1            |
| NAMPT. 11   | 1. 80E-05 | -0. 91702 | 0. 433 | 0. 437 | 0. 268369 | CSCL1 | NAMPT           |
| MYH9. 11    | 1. 80E-05 | -0. 1357  | 0. 348 | 0. 185 | 0. 268683 | CSCL1 | MYH9            |
| BIN1. 10    | 1. 83E-05 | -0. 69252 | 0. 294 | 0. 362 | 0. 274042 | CSCL1 | BIN1            |
| DNAJB9. 8   | 1. 88E-05 | -0. 69553 | 0. 328 | 0. 386 | 0. 280416 | CSCL1 | DNAJB9          |
| PSMD13. 7   | 1. 89E-05 | -0. 10775 | 0. 751 | 0. 407 | 0. 282413 | CSCL1 | PSMD13          |
| CYB5R1. 5   | 1. 90E-05 | -0. 22336 | 0. 478 | 0. 254 | 0. 283565 | CSCL1 | CYB5R1          |
| EEF2. 4     | 1. 93E-05 | -0. 15354 | 0. 98  | 0. 827 | 0. 288207 | CSCL1 | EEF2            |
| SERPING1. 1 | 1. 95E-05 | -0. 96108 | 0. 129 | 0. 236 | 0. 291118 | CSCL1 | SERPING1        |
| NSMCE2. 4   | 1. 96E-05 | -0. 1168  | 0. 294 | 0. 154 | 0. 29274  | CSCL1 | NSMCE2          |
| DCAF12. 3   | 1. 98E-05 | -0. 11344 | 0. 264 | 0. 133 | 0. 295685 | CSCL1 | DCAF12          |
| TMBIM6. 7   | 2. 00E-05 | -0. 25161 | 0. 995 | 0. 836 | 0. 298487 | CSCL1 | TMBIM6          |
| RBFOX2. 1C  | 2. 01E-05 | -0. 10561 | 0. 393 | 0. 213 | 0. 300658 | CSCL1 | RBFOX2          |
| TMEM119. 1  | 2. 03E-05 | -0. 49017 | 0. 015 | 0. 107 | 0. 303852 | CSCL1 | TMEM119         |
| SLC43A3. 5  | 2. 11E-05 | -0. 10516 | 0. 264 | 0. 135 | 0. 315726 | CSCL1 | SLC43A3         |
| LYL1. 12    | 2. 16E-05 | -0. 34547 | 0      | 0. 083 | 0. 322787 | CSCL1 | LYL1            |
| AFMID. 6    | 2. 17E-05 | -0. 15287 | 0. 214 | 0. 103 | 0. 324017 | CSCL1 | AFMID           |
| ATP2C1. 2   | 2. 19E-05 | -0. 116   | 0. 408 | 0. 22  | 0. 327979 | CSCL1 | ATP2C1          |
| IFITM10. 7  | 2. 22E-05 | -0. 40102 | 0. 03  | 0. 127 | 0. 331287 | CSCL1 | IFITM10         |
| ZMAT2. 3    | 2. 22E-05 | -0. 10207 | 0. 746 | 0. 415 | 0. 331601 | CSCL1 | ZMAT2           |
| CEBPA. 11   | 2. 27E-05 | -0. 39995 | 0. 015 | 0. 106 | 0. 339906 | CSCL1 | CEBPA           |
| NMRAL1. 2   | 2. 31E-05 | -0. 11649 | 0. 423 | 0. 235 | 0. 344476 | CSCL1 | NMRAL1          |
| CYTIP. 11   | 2. 33E-05 | -0. 49555 | 0. 015 | 0. 105 | 0. 348882 | CSCL1 | CYTIP           |
| CD2BP2. 2   | 2. 35E-05 | -0. 13156 | 0. 587 | 0. 324 | 0. 351195 | CSCL1 | CD2BP2          |
| PRKAG2-AS   | 2. 37E-05 | -0. 46489 | 0. 03  | 0. 126 | 0. 354112 | CSCL1 | PRKAG2-AS1      |
| QDPR. 8     | 2. 39E-05 | -0. 18943 | 0. 647 | 0. 355 | 0. 356572 | CSCL1 | QDPR            |
| EFHD2. 11   | 2. 47E-05 | -0. 19382 | 0. 393 | 0. 207 | 0. 368985 | CSCL1 | EFHD2           |
| CXADR. 11   | 2. 56E-05 | -0. 11598 | 0. 547 | 0. 303 | 0. 382369 | CSCL1 | CXADR           |
| SH3TC1. 11  | 2. 57E-05 | -0. 36018 | 0      | 0. 081 | 0. 383385 | CSCL1 | SH3TC1          |
| ST6GAL1. 9  | 2. 67E-05 | -0. 40815 | 0. 02  | 0. 112 | 0. 399745 | CSCL1 | ST6GAL1         |
| SBF2. 4     | 2. 78E-05 | -0. 15793 | 0. 338 | 0. 18  | 0. 415939 | CSCL1 | SBF2            |
| LTBR. 12    | 2. 79E-05 | -0. 38249 | 0. 01  | 0. 097 | 0. 417098 | CSCL1 | LTBR            |
| CTSL. 12    | 2. 82E-05 | -0. 74211 | 0. 597 | 0. 522 | 0. 421507 | CSCL1 | CTSL            |
| STK4. 9     | 2. 88E-05 | -0. 20355 | 0. 517 | 0. 283 | 0. 430989 | CSCL1 | STK4            |
| HIST1H2BK   | 2. 92E-05 | -0. 1051  | 0. 373 | 0. 205 | 0. 437078 | CSCL1 | HIST1H2BK       |
| FAM45A. 4   | 3. 01E-05 | -0. 12427 | 0. 348 | 0. 188 | 0. 44922  | CSCL1 | FAM45A          |
| TNFSF13B. 3 | 3. 01E-05 | -0. 58605 | 0. 1   | 0. 205 | 0. 45014  | CSCL1 | TNFSF13B        |
| RP11-386G   | 3. 05E-05 | -0. 14962 | 0. 269 | 0. 141 | 0. 455396 | CSCL1 | RP11-386G11. 10 |
| MYADM. 9    | 3. 13E-05 | -0. 17391 | 0. 353 | 0. 19  | 0. 467297 | CSCL1 | MYADM           |
| HLA-DOA. 1  | 3. 17E-05 | -0. 41141 | 0. 01  | 0. 096 | 0. 47439  | CSCL1 | HLA-DOA         |
| CD48. 12    | 3. 18E-05 | -0. 38211 | 0      | 0. 08  | 0. 475155 | CSCL1 | CD48            |
| RCHY1. 7    | 3. 24E-05 | -0. 15361 | 0. 363 | 0. 197 | 0. 483858 | CSCL1 | RCHY1           |
| KLHL35. 11  | 3. 31E-05 | -0. 3875  | 0. 01  | 0. 095 | 0. 494193 | CSCL1 | KLHL35          |
| YIPF2. 2    | 3. 34E-05 | -0. 11169 | 0. 229 | 0. 117 | 0. 499786 | CSCL1 | YIPF2           |
| ARHGAP9. 1  | 3. 44E-05 | -0. 33885 | 0. 005 | 0. 087 | 0. 514624 | CSCL1 | ARHGAP9         |
| MCL1. 9     | 3. 45E-05 | -0. 51504 | 0. 756 | 0. 596 | 0. 515095 | CSCL1 | MCL1            |
| ARL8B. 5    | 3. 49E-05 | -0. 11332 | 0. 373 | 0. 203 | 0. 520908 | CSCL1 | ARL8B           |
| CAPG. 12    | 3. 56E-05 | -0. 89333 | 0. 408 | 0. 415 | 0. 531522 | CSCL1 | CAPG            |
| CRTAP. 11   | 3. 69E-05 | -0. 16178 | 0. 428 | 0. 233 | 0. 552024 | CSCL1 | CRTAP           |
| MAF. 11     | 3. 72E-05 | -0. 4568  | 0. 04  | 0. 137 | 0. 556509 | CSCL1 | MAF             |
| EAPP. 9     | 3. 83E-05 | -0. 20154 | 0. 627 | 0. 35  | 0. 572801 | CSCL1 | EAPP            |

|            |          |          |       |       |          |       |            |
|------------|----------|----------|-------|-------|----------|-------|------------|
| NUDT16.12  | 3.98E-05 | -0.1738  | 0.393 | 0.216 | 0.594718 | CSCL1 | NUDT16     |
| P2RY13.1C  | 4.05E-05 | -0.45143 | 0.005 | 0.086 | 0.605618 | CSCL1 | P2RY13     |
| KYNU.12    | 4.25E-05 | -0.37209 | 0.005 | 0.086 | 0.634596 | CSCL1 | KYNU       |
| ATXN3.3    | 4.40E-05 | -0.13589 | 0.289 | 0.154 | 0.657053 | CSCL1 | ATXN3      |
| LILRB1.12  | 4.42E-05 | -0.37959 | 0.01  | 0.093 | 0.660047 | CSCL1 | LILRB1     |
| NEDD9.9    | 4.51E-05 | -0.16978 | 0.398 | 0.217 | 0.673976 | CSCL1 | NEDD9      |
| FN1.10     | 4.62E-05 | -0.18621 | 0.289 | 0.152 | 0.690206 | CSCL1 | FN1        |
| RXRA.7     | 4.67E-05 | -0.1008  | 0.194 | 0.095 | 0.6977   | CSCL1 | RXRA       |
| CNBP.5     | 4.70E-05 | -0.31174 | 0.975 | 0.744 | 0.701751 | CSCL1 | CNBP       |
| DEF6.12    | 4.77E-05 | -0.34676 | 0.01  | 0.093 | 0.712563 | CSCL1 | DEF6       |
| PMAIP1.11  | 4.77E-05 | -0.43026 | 0.005 | 0.085 | 0.713498 | CSCL1 | PMAIP1     |
| FGR.12     | 4.81E-05 | -0.34822 | 0.005 | 0.084 | 0.719528 | CSCL1 | FGR        |
| ITGAX.11   | 4.82E-05 | -0.41062 | 0.01  | 0.092 | 0.721043 | CSCL1 | ITGAX      |
| LTF.9      | 5.08E-05 | -1.05598 | 0.055 | 0.153 | 0.7589   | CSCL1 | LTF        |
| ARID5A.8   | 5.26E-05 | -0.19597 | 0.517 | 0.286 | 0.786195 | CSCL1 | ARID5A     |
| ZNF277.5   | 5.53E-05 | -0.17839 | 0.318 | 0.17  | 0.826018 | CSCL1 | ZNF277     |
| NT5C2.4    | 5.55E-05 | -0.13325 | 0.249 | 0.127 | 0.828674 | CSCL1 | NT5C2      |
| NABP1.10   | 5.58E-05 | -0.47009 | 0.035 | 0.125 | 0.833472 | CSCL1 | NABP1      |
| MT1F.10    | 5.59E-05 | -0.12544 | 0.522 | 0.301 | 0.835009 | CSCL1 | MT1F       |
| TSG101.3   | 5.60E-05 | -0.14431 | 0.746 | 0.412 | 0.836648 | CSCL1 | TSG101     |
| KIFAP3.8   | 5.61E-05 | -0.10799 | 0.363 | 0.2   | 0.837915 | CSCL1 | KIFAP3     |
| IRAK3.12   | 5.72E-05 | -0.31808 | 0     | 0.075 | 0.855128 | CSCL1 | IRAK3      |
| ARRDC1.11  | 5.72E-05 | -0.11536 | 0.254 | 0.132 | 0.855475 | CSCL1 | ARRDC1     |
| SQRDL.12   | 5.73E-05 | -0.51668 | 0.065 | 0.162 | 0.856033 | CSCL1 | SQRDL      |
| EDF1.3     | 5.77E-05 | -0.17187 | 1     | 0.782 | 0.862521 | CSCL1 | EDF1       |
| PBXIP1.5   | 6.02E-05 | -0.14005 | 0.254 | 0.133 | 0.8991   | CSCL1 | PBXIP1     |
| CDC42SE1.6 | 6.09E-05 | -0.16303 | 0.542 | 0.3   | 0.90938  | CSCL1 | CDC42SE1   |
| SLU7.4     | 6.16E-05 | -0.18091 | 0.567 | 0.309 | 0.919949 | CSCL1 | SLU7       |
| RENBP.11   | 6.22E-05 | -0.47084 | 0.045 | 0.137 | 0.929587 | CSCL1 | RENBP      |
| HPGDS.11   | 6.26E-05 | -0.42093 | 0.01  | 0.09  | 0.936143 | CSCL1 | HPGDS      |
| ST14.12    | 6.30E-05 | -0.29989 | 0     | 0.074 | 0.941112 | CSCL1 | ST14       |
| APH1B.8    | 6.39E-05 | -0.16858 | 0.244 | 0.125 | 0.95439  | CSCL1 | APH1B      |
| EEF1B2.11  | 6.40E-05 | -0.25895 | 0.99  | 0.773 | 0.955888 | CSCL1 | EEF1B2     |
| POU2F2.1C  | 6.47E-05 | -0.44387 | 0.045 | 0.137 | 0.96747  | CSCL1 | POU2F2     |
| TMEM55B.3  | 6.52E-05 | -0.17056 | 0.398 | 0.215 | 0.974614 | CSCL1 | TMEM55B    |
| CCRL2.11   | 6.71E-05 | -0.38295 | 0.01  | 0.09  | 1        | CSCL1 | CCRL2      |
| HLA-A.9    | 6.72E-05 | -0.26798 | 1     | 0.894 | 1        | CSCL1 | HLA-A      |
| KCNMB1.11  | 6.78E-05 | -0.46874 | 0.02  | 0.104 | 1        | CSCL1 | KCNMB1     |
| CHP1.8     | 6.93E-05 | -0.13206 | 0.418 | 0.231 | 1        | CSCL1 | CHP1       |
| GNA15.12   | 7.05E-05 | -0.41781 | 0.025 | 0.111 | 1        | CSCL1 | GNA15      |
| NAA25.2    | 7.22E-05 | -0.10022 | 0.269 | 0.142 | 1        | CSCL1 | NAA25      |
| APO01055.7 | 7.26E-05 | -0.3609  | 0.005 | 0.081 | 1        | CSCL1 | APO01055.6 |
| MGAT4A.12  | 7.26E-05 | -0.64423 | 0.129 | 0.222 | 1        | CSCL1 | MGAT4A     |
| ZNF655.4   | 7.27E-05 | -0.1463  | 0.423 | 0.236 | 1        | CSCL1 | ZNF655     |
| FAM162A.1  | 7.34E-05 | -0.23665 | 0.716 | 0.395 | 1        | CSCL1 | FAM162A    |
| RAB11A.6   | 7.35E-05 | -0.11309 | 0.826 | 0.46  | 1        | CSCL1 | RAB11A     |
| MTRNR2L1.7 | 7.35E-05 | -0.64888 | 0.095 | 0.194 | 1        | CSCL1 | MTRNR2L1   |
| RANBP2.9   | 7.49E-05 | -0.14162 | 0.373 | 0.206 | 1        | CSCL1 | RANBP2     |
| COX6A1.8   | 7.56E-05 | -0.19006 | 0.995 | 0.842 | 1        | CSCL1 | COX6A1     |
| LAMTOR4.4  | 7.63E-05 | -0.25668 | 0.985 | 0.76  | 1        | CSCL1 | LAMTOR4    |
| SCG3.12    | 7.72E-05 | -0.11007 | 0.458 | 0.263 | 1        | CSCL1 | SCG3       |

|            |           |           |        |        |         |           |
|------------|-----------|-----------|--------|--------|---------|-----------|
| ATXN80S. 8 | 7. 75E-05 | -0. 6928  | 0. 005 | 0. 081 | 1 CSCL1 | ATXN80S   |
| NECAP1. 9  | 7. 82E-05 | -0. 12477 | 0. 353 | 0. 196 | 1 CSCL1 | NECAP1    |
| MT2A. 11   | 8. 12E-05 | -0. 15603 | 0. 99  | 0. 78  | 1 CSCL1 | MT2A      |
| CD93. 12   | 8. 13E-05 | -0. 31282 | 0      | 0. 072 | 1 CSCL1 | CD93      |
| COMMD9. 6  | 8. 38E-05 | -0. 18026 | 0. 547 | 0. 305 | 1 CSCL1 | COMMD9    |
| ARL2. 8    | 8. 48E-05 | -0. 17879 | 0. 776 | 0. 432 | 1 CSCL1 | ARL2      |
| FNBP1. 7   | 8. 50E-05 | -0. 17517 | 0. 468 | 0. 259 | 1 CSCL1 | FNBP1     |
| ASB8. 7    | 8. 52E-05 | -0. 13313 | 0. 383 | 0. 214 | 1 CSCL1 | ASB8      |
| ATP5I. 4   | 8. 66E-05 | -0. 2081  | 0. 985 | 0. 747 | 1 CSCL1 | ATP5I     |
| NDUFA1. 5  | 8. 82E-05 | -0. 25808 | 0. 985 | 0. 719 | 1 CSCL1 | NDUFA1    |
| GIGYF1. 4  | 9. 00E-05 | -0. 11037 | 0. 209 | 0. 105 | 1 CSCL1 | GIGYF1    |
| DENND3. 12 | 9. 14E-05 | -0. 40224 | 0. 02  | 0. 102 | 1 CSCL1 | DENND3    |
| ADM. 10    | 9. 26E-05 | -0. 16793 | 0. 323 | 0. 183 | 1 CSCL1 | ADM       |
| PQLC3. 11  | 9. 29E-05 | -0. 14252 | 0. 333 | 0. 182 | 1 CSCL1 | PQLC3     |
| QSOX1. 9   | 9. 35E-05 | -0. 13763 | 0. 418 | 0. 233 | 1 CSCL1 | QSOX1     |
| SASH3. 12  | 9. 52E-05 | -0. 31928 | 0. 005 | 0. 079 | 1 CSCL1 | SASH3     |
| SIGLEC9. 1 | 9. 80E-05 | -0. 3884  | 0. 015 | 0. 094 | 1 CSCL1 | SIGLEC9   |
| ENG. 12    | 0. 000102 | -0. 53225 | 0. 075 | 0. 166 | 1 CSCL1 | ENG       |
| SLC38A6. 7 | 0. 000102 | -0. 1118  | 0. 194 | 0. 098 | 1 CSCL1 | SLC38A6   |
| INPP5D. 12 | 0. 000103 | -0. 37916 | 0. 01  | 0. 086 | 1 CSCL1 | INPP5D    |
| DOCK2. 12  | 0. 000104 | -0. 32746 | 0. 005 | 0. 078 | 1 CSCL1 | DOCK2     |
| ALG13. 7   | 0. 000105 | -0. 18949 | 0. 388 | 0. 216 | 1 CSCL1 | ALG13     |
| EXOC1. 7   | 0. 000106 | -0. 14338 | 0. 438 | 0. 246 | 1 CSCL1 | EXOC1     |
| DLD. 9     | 0. 000106 | -0. 12777 | 0. 587 | 0. 34  | 1 CSCL1 | DLD       |
| VAMP5. 7   | 0. 000108 | -0. 283   | 0. 736 | 0. 391 | 1 CSCL1 | VAMP5     |
| IL16. 11   | 0. 000108 | -0. 31732 | 0      | 0. 07  | 1 CSCL1 | IL16      |
| GABARAPL2  | 0. 000109 | -0. 24895 | 0. 98  | 0. 739 | 1 CSCL1 | GABARAPL2 |
| SORL1. 10  | 0. 000109 | -0. 62574 | 0. 139 | 0. 229 | 1 CSCL1 | SORL1     |
| ZNF562. 5  | 0. 00011  | -0. 12174 | 0. 259 | 0. 139 | 1 CSCL1 | ZNF562    |
| LINC00969  | 0. 00011  | -0. 1594  | 0. 428 | 0. 24  | 1 CSCL1 | LINC00969 |
| TSC22D4. 1 | 0. 00011  | -0. 17655 | 0. 806 | 0. 464 | 1 CSCL1 | TSC22D4   |
| TSP0. 11   | 0. 000112 | -0. 50324 | 0. 791 | 0. 591 | 1 CSCL1 | TSP0      |
| SIRT2. 9   | 0. 000113 | -0. 18373 | 0. 746 | 0. 41  | 1 CSCL1 | SIRT2     |
| LYN. 12    | 0. 000114 | -0. 52686 | 0. 085 | 0. 175 | 1 CSCL1 | LYN       |
| CXorf21. 1 | 0. 000116 | -0. 35817 | 0. 005 | 0. 077 | 1 CSCL1 | CXorf21   |
| ALDH9A1. 5 | 0. 000117 | -0. 15965 | 0. 587 | 0. 334 | 1 CSCL1 | ALDH9A1   |
| ANAPC13. 9 | 0. 000118 | -0. 17125 | 0. 622 | 0. 349 | 1 CSCL1 | ANAPC13   |
| TMEM205. 1 | 0. 000124 | -0. 1142  | 0. 876 | 0. 489 | 1 CSCL1 | TMEM205   |
| DDX21. 9   | 0. 000124 | -0. 19492 | 0. 527 | 0. 296 | 1 CSCL1 | DDX21     |
| UNC45A. 4  | 0. 000125 | -0. 10222 | 0. 289 | 0. 158 | 1 CSCL1 | UNC45A    |
| BLNK. 10   | 0. 000127 | -0. 34237 | 0      | 0. 068 | 1 CSCL1 | BLNK      |
| ITGAM. 12  | 0. 000127 | -0. 3201  | 0. 005 | 0. 077 | 1 CSCL1 | ITGAM     |
| PHF11. 10  | 0. 000128 | -0. 10625 | 0. 259 | 0. 14  | 1 CSCL1 | PHF11     |
| HSD17B4. 5 | 0. 000132 | -0. 13788 | 0. 418 | 0. 238 | 1 CSCL1 | HSD17B4   |
| CAPZB. 11  | 0. 000133 | -0. 34287 | 0. 94  | 0. 697 | 1 CSCL1 | CAPZB     |
| SLC18B1. 7 | 0. 000134 | -0. 12721 | 0. 313 | 0. 176 | 1 CSCL1 | SLC18B1   |
| AP4M1. 9   | 0. 000136 | -0. 11329 | 0. 338 | 0. 191 | 1 CSCL1 | AP4M1     |
| TNFAIP3. 1 | 0. 000141 | -0. 58324 | 0. 075 | 0. 165 | 1 CSCL1 | TNFAIP3   |
| RNMT. 3    | 0. 000141 | -0. 16403 | 0. 537 | 0. 3   | 1 CSCL1 | RNMT      |
| ZMYM2. 7   | 0. 000143 | -0. 13731 | 0. 363 | 0. 202 | 1 CSCL1 | ZMYM2     |
| FUOM. 11   | 0. 000146 | -0. 48806 | 0. 055 | 0. 142 | 1 CSCL1 | FUOM      |

|           |          |          |       |       |   |       |          |
|-----------|----------|----------|-------|-------|---|-------|----------|
| IVNS1ABP. | 0.00015  | -0.22581 | 0.428 | 0.234 | 1 | CSCL1 | IVNS1ABP |
| TMEM51.9  | 0.00015  | -0.10039 | 0.224 | 0.117 | 1 | CSCL1 | TMEM51   |
| SIGLEC7.1 | 0.00015  | -0.3197  | 0.005 | 0.075 | 1 | CSCL1 | SIGLEC7  |
| CYTL1.11  | 0.000151 | -0.50247 | 0.03  | 0.112 | 1 | CSCL1 | CYTL1    |
| ATP5J2.8  | 0.000152 | -0.20629 | 1     | 0.804 | 1 | CSCL1 | ATP5J2   |
| GPR155.9  | 0.000152 | -0.11823 | 0.328 | 0.184 | 1 | CSCL1 | GPR155   |
| CCR1.11   | 0.000152 | -0.34522 | 0.01  | 0.083 | 1 | CSCL1 | CCR1     |
| TMBIM1.9  | 0.000152 | -0.28741 | 0.438 | 0.241 | 1 | CSCL1 | TMBIM1   |
| ARHGAP15. | 0.000153 | -0.39422 | 0.02  | 0.098 | 1 | CSCL1 | ARHGAP15 |
| EBI3.11   | 0.000155 | -0.42195 | 0.02  | 0.097 | 1 | CSCL1 | EBI3     |
| TOX4.3    | 0.000155 | -0.16931 | 0.453 | 0.259 | 1 | CSCL1 | TOX4     |
| ZBTB1.5   | 0.000156 | -0.1022  | 0.294 | 0.162 | 1 | CSCL1 | ZBTB1    |
| SDCCAG8.7 | 0.000157 | -0.19481 | 0.572 | 0.325 | 1 | CSCL1 | SDCCAG8  |
| FKBP15.11 | 0.000157 | -0.12974 | 0.254 | 0.136 | 1 | CSCL1 | FKBP15   |
| GNPTG.5   | 0.00016  | -0.14954 | 0.448 | 0.255 | 1 | CSCL1 | GNPTG    |
| GPR84.12  | 0.000161 | -0.33019 | 0.005 | 0.075 | 1 | CSCL1 | GPR84    |
| CACNA2D4. | 0.000162 | -0.33266 | 0.005 | 0.075 | 1 | CSCL1 | CACNA2D4 |
| AMD1.6    | 0.000163 | -0.20881 | 0.682 | 0.378 | 1 | CSCL1 | AMD1     |
| ABI1.11   | 0.000164 | -0.22531 | 0.423 | 0.237 | 1 | CSCL1 | ABI1     |
| PACS2.5   | 0.000166 | -0.14204 | 0.249 | 0.133 | 1 | CSCL1 | PACS2    |
| ANKRD22.1 | 0.000167 | -0.31015 | 0     | 0.066 | 1 | CSCL1 | ANKRD22  |
| AREG.12   | 0.000169 | -0.44943 | 0     | 0.066 | 1 | CSCL1 | AREG     |
| MTHFS.8   | 0.000169 | -0.14599 | 0.333 | 0.186 | 1 | CSCL1 | MTHFS    |
| ZNF791.7  | 0.000171 | -0.14513 | 0.463 | 0.267 | 1 | CSCL1 | ZNF791   |
| PIK3AP1.1 | 0.000174 | -0.25255 | 0     | 0.066 | 1 | CSCL1 | PIK3AP1  |
| REL.12    | 0.000178 | -0.68498 | 0.234 | 0.299 | 1 | CSCL1 | REL      |
| MTDH.7    | 0.000179 | 0.119971 | 0.94  | 0.604 | 1 | CSCL1 | MTDH     |
| LACTB.12  | 0.00018  | -0.14386 | 0.299 | 0.164 | 1 | CSCL1 | LACTB    |
| DDB2.5    | 0.000181 | -0.16147 | 0.184 | 0.092 | 1 | CSCL1 | DDB2     |
| ARPC1B.12 | 0.000187 | -0.68312 | 0.652 | 0.529 | 1 | CSCL1 | ARPC1B   |
| CCDC159.2 | 0.000189 | -0.18525 | 0.269 | 0.147 | 1 | CSCL1 | CCDC159  |
| RAB3IP.8  | 0.000191 | -0.15246 | 0.418 | 0.243 | 1 | CSCL1 | RAB3IP   |
| GLRX.11   | 0.000192 | -0.81416 | 0.373 | 0.389 | 1 | CSCL1 | GLRX     |
| CCNH.6    | 0.000193 | -0.2053  | 0.716 | 0.406 | 1 | CSCL1 | CCNH     |
| SAR1A.9   | 0.000194 | -0.15448 | 0.507 | 0.294 | 1 | CSCL1 | SAR1A    |
| SRP54.4   | 0.000197 | -0.15428 | 0.468 | 0.269 | 1 | CSCL1 | SRP54    |
| NINJ2.11  | 0.000199 | -0.4152  | 0.015 | 0.088 | 1 | CSCL1 | NINJ2    |
| TMA7.7    | 0.000201 | -0.19542 | 0.99  | 0.849 | 1 | CSCL1 | TMA7     |
| THBD.11   | 0.000204 | -0.39689 | 0.02  | 0.096 | 1 | CSCL1 | THBD     |
| CREG1.11  | 0.000207 | -0.63072 | 0.234 | 0.298 | 1 | CSCL1 | CREG1    |
| GCC2.3    | 0.000209 | -0.20647 | 0.478 | 0.268 | 1 | CSCL1 | GCC2     |
| ELMO1.9   | 0.00021  | -0.50471 | 0.1   | 0.192 | 1 | CSCL1 | ELMO1    |
| CLIP3.11  | 0.000211 | -0.11805 | 0.343 | 0.195 | 1 | CSCL1 | CLIP3    |
| PGM2.8    | 0.000214 | -0.16417 | 0.269 | 0.146 | 1 | CSCL1 | PGM2     |
| SLPI.9    | 0.000215 | -1.1194  | 0.065 | 0.151 | 1 | CSCL1 | SLPI     |
| HDDC3.5   | 0.000229 | -0.10257 | 0.264 | 0.147 | 1 | CSCL1 | HDDC3    |
| ATXN1.7   | 0.000233 | -0.11253 | 0.289 | 0.161 | 1 | CSCL1 | ATXN1    |
| BTK.12    | 0.000237 | -0.34069 | 0.015 | 0.087 | 1 | CSCL1 | BTK      |
| SRP19.3   | 0.000243 | -0.17301 | 0.711 | 0.399 | 1 | CSCL1 | SRP19    |
| PSMC4.3   | 0.000248 | -0.10541 | 0.856 | 0.488 | 1 | CSCL1 | PSMC4    |
| DPYD.10   | 0.000249 | -0.33254 | 0.025 | 0.102 | 1 | CSCL1 | DPYD     |

|            |          |          |       |       |   |       |           |
|------------|----------|----------|-------|-------|---|-------|-----------|
| RING1.2    | 0.00025  | -0.10679 | 0.448 | 0.258 | 1 | CSCL1 | RING1     |
| PSENE8.8   | 0.000252 | -0.1956  | 0.851 | 0.486 | 1 | CSCL1 | PSENE8    |
| DDIT3.7    | 0.000256 | -0.21188 | 0.756 | 0.422 | 1 | CSCL1 | DDIT3     |
| CHURC1.5   | 0.000261 | -0.14886 | 0.701 | 0.395 | 1 | CSCL1 | CHURC1    |
| SIGLEC8.9  | 0.000263 | -0.35469 | 0.01  | 0.079 | 1 | CSCL1 | SIGLEC8   |
| FAM96A.1C  | 0.000264 | -0.24119 | 0.622 | 0.352 | 1 | CSCL1 | FAM96A    |
| ORMDL1.2   | 0.000264 | -0.10321 | 0.846 | 0.476 | 1 | CSCL1 | ORMDL1    |
| KLF4.12    | 0.000281 | -0.58634 | 0.124 | 0.208 | 1 | CSCL1 | KLF4      |
| UBE2L6.6   | 0.000282 | -0.1931  | 0.841 | 0.467 | 1 | CSCL1 | UBE2L6    |
| HGSNAT.5   | 0.000282 | -0.13441 | 0.358 | 0.203 | 1 | CSCL1 | HGSNAT    |
| USP53.11   | 0.000282 | -0.51691 | 0.06  | 0.143 | 1 | CSCL1 | USP53     |
| FGD2.11    | 0.000282 | -0.30769 | 0     | 0.062 | 1 | CSCL1 | FGD2      |
| HLA-C.7    | 0.000284 | -0.26227 | 0.93  | 0.801 | 1 | CSCL1 | HLA-C     |
| COPG1.2    | 0.000287 | -0.1195  | 0.393 | 0.228 | 1 | CSCL1 | COPG1     |
| FAM221A.1  | 0.00029  | -0.1294  | 0.308 | 0.175 | 1 | CSCL1 | FAM221A   |
| KIAA1033.0 | 0.000291 | -0.12758 | 0.408 | 0.236 | 1 | CSCL1 | KIAA1033  |
| CALCOCO1.0 | 0.000296 | -0.10916 | 0.264 | 0.145 | 1 | CSCL1 | CALCOCO1  |
| MARCH6.1C  | 0.000301 | -0.12973 | 0.612 | 0.352 | 1 | CSCL1 | 6-Mar     |
| TFSM.9     | 0.000304 | -0.23481 | 0.478 | 0.272 | 1 | CSCL1 | TFSM      |
| RASGRP3.1  | 0.000304 | -0.32222 | 0.005 | 0.07  | 1 | CSCL1 | RASGRP3   |
| GAPT.12    | 0.000307 | -0.27907 | 0     | 0.061 | 1 | CSCL1 | GAPT      |
| CRYAB.11   | 0.000309 | -1.05    | 0.572 | 0.498 | 1 | CSCL1 | CRYAB     |
| EGR2.8     | 0.000311 | -0.1359  | 0.328 | 0.189 | 1 | CSCL1 | EGR2      |
| PLAC8.11   | 0.000321 | -0.35427 | 0.005 | 0.069 | 1 | CSCL1 | PLAC8     |
| DEGS1.3    | 0.000323 | -0.10523 | 0.781 | 0.454 | 1 | CSCL1 | DEGS1     |
| FAM20A.11  | 0.000323 | -0.23963 | 0     | 0.061 | 1 | CSCL1 | FAM20A    |
| SDCBP.9    | 0.000325 | -0.31334 | 0.97  | 0.724 | 1 | CSCL1 | SDCBP     |
| RSU1.6     | 0.000329 | -0.22564 | 0.473 | 0.265 | 1 | CSCL1 | RSU1      |
| TRMT1.9    | 0.000335 | -0.25699 | 0.448 | 0.254 | 1 | CSCL1 | TRMT1     |
| NUP214.11  | 0.000342 | -0.30986 | 0.348 | 0.192 | 1 | CSCL1 | NUP214    |
| ITSN2.8    | 0.000342 | -0.14235 | 0.318 | 0.179 | 1 | CSCL1 | ITSN2     |
| COPZ1.5    | 0.000346 | -0.1106  | 0.821 | 0.48  | 1 | CSCL1 | COPZ1     |
| SCD.11     | 0.000346 | -0.24502 | 0.368 | 0.21  | 1 | CSCL1 | SCD       |
| PTGDS.9    | 0.00035  | -0.84936 | 0.085 | 0.171 | 1 | CSCL1 | PTGDS     |
| SLC48A1.6  | 0.000355 | -0.14351 | 0.239 | 0.131 | 1 | CSCL1 | SLC48A1   |
| TPST2.10   | 0.000358 | -0.14591 | 0.294 | 0.165 | 1 | CSCL1 | TPST2     |
| HPS1.11    | 0.000362 | -0.37026 | 0.035 | 0.112 | 1 | CSCL1 | HPS1      |
| ATP6AP2.7  | 0.000363 | -0.3375  | 0.886 | 0.652 | 1 | CSCL1 | ATP6AP2   |
| IGSF21.1C  | 0.000366 | -0.44274 | 0.08  | 0.165 | 1 | CSCL1 | IGSF21    |
| GPRIN3.12  | 0.000375 | -0.2418  | 0     | 0.059 | 1 | CSCL1 | GPRIN3    |
| GLB1.9     | 0.000376 | -0.21183 | 0.428 | 0.241 | 1 | CSCL1 | GLB1      |
| NUPR1.10   | 0.000389 | -0.77993 | 0.279 | 0.325 | 1 | CSCL1 | NUPR1     |
| MOAP1.9    | 0.000389 | -0.13405 | 0.373 | 0.215 | 1 | CSCL1 | MOAP1     |
| TDP2.5     | 0.000391 | -0.15225 | 0.318 | 0.18  | 1 | CSCL1 | TDP2      |
| TRAPPC2P1  | 0.000392 | -0.21608 | 0.388 | 0.221 | 1 | CSCL1 | TRAPPC2P1 |
| ETF1.10    | 0.000393 | -0.19393 | 0.592 | 0.341 | 1 | CSCL1 | ETF1      |
| PAPSS1.6   | 0.000397 | -0.12651 | 0.498 | 0.291 | 1 | CSCL1 | PAPSS1    |
| C4orf3.7   | 0.000399 | -0.38247 | 0.91  | 0.642 | 1 | CSCL1 | C4orf3    |
| GATAD1.6   | 0.000401 | -0.13281 | 0.348 | 0.198 | 1 | CSCL1 | GATAD1    |
| CLEC4E.1C  | 0.000407 | -0.33483 | 0     | 0.059 | 1 | CSCL1 | CLEC4E    |
| DCTN2.6    | 0.00041  | -0.13095 | 0.886 | 0.5   | 1 | CSCL1 | DCTN2     |



|           |          |          |       |       |   |       |               |
|-----------|----------|----------|-------|-------|---|-------|---------------|
| PEBP1.11  | 0.000412 | -0.21206 | 0.995 | 0.8   | 1 | CSCL1 | PEBP1         |
| GSN.11    | 0.000412 | -0.68971 | 0.612 | 0.508 | 1 | CSCL1 | GSN           |
| RNF216.5  | 0.000415 | -0.1304  | 0.388 | 0.227 | 1 | CSCL1 | RNF216        |
| PALD1.11  | 0.000421 | -0.39255 | 0.03  | 0.103 | 1 | CSCL1 | PALD1         |
| PNRC2.1   | 0.000424 | -0.16414 | 0.119 | 0.056 | 1 | CSCL1 | PNRC2         |
| MTRNR2L1C | 0.000424 | -0.55757 | 0.01  | 0.075 | 1 | CSCL1 | MTRNR2L10     |
| VAV1.12   | 0.00043  | -0.28847 | 0.01  | 0.075 | 1 | CSCL1 | VAV1          |
| SCPEP1.1C | 0.000442 | -0.75574 | 0.318 | 0.347 | 1 | CSCL1 | SCPEP1        |
| MMP2.8    | 0.000444 | -0.13817 | 0.388 | 0.224 | 1 | CSCL1 | MMP2          |
| CYB561A3. | 0.000447 | -0.13113 | 0.264 | 0.148 | 1 | CSCL1 | CYB561A3      |
| BRWD1.9   | 0.000448 | -0.10076 | 0.408 | 0.239 | 1 | CSCL1 | BRWD1         |
| CALM2.8   | 0.000449 | -0.22276 | 1     | 0.931 | 1 | CSCL1 | CALM2         |
| A2M.10    | 0.00045  | -0.77946 | 0.517 | 0.463 | 1 | CSCL1 | A2M           |
| KLF6.10   | 0.000453 | -0.61719 | 0.632 | 0.53  | 1 | CSCL1 | KLF6          |
| CHST11.1C | 0.000456 | -0.1573  | 0.368 | 0.21  | 1 | CSCL1 | CHST11        |
| GIMAP1.11 | 0.000459 | -0.30425 | 0.01  | 0.074 | 1 | CSCL1 | GIMAP1        |
| FAM53C.7  | 0.000464 | -0.23535 | 0.418 | 0.238 | 1 | CSCL1 | FAM53C        |
| FAM133B.4 | 0.000467 | -0.13073 | 0.831 | 0.465 | 1 | CSCL1 | FAM133B       |
| NLRP3.11  | 0.000471 | -0.36343 | 0.02  | 0.089 | 1 | CSCL1 | NLRP3         |
| NDUFB8.6  | 0.000471 | -0.59695 | 0     | 0.057 | 1 | CSCL1 | NDUFB8        |
| CRBN.1    | 0.000474 | -0.18018 | 0.483 | 0.282 | 1 | CSCL1 | CRBN          |
| TAGLN3.1C | 0.000475 | -0.14731 | 0.323 | 0.185 | 1 | CSCL1 | TAGLN3        |
| SOCS3.11  | 0.000484 | -0.15809 | 0.592 | 0.344 | 1 | CSCL1 | SOCS3         |
| FPR3.12   | 0.000487 | -0.23142 | 0     | 0.057 | 1 | CSCL1 | FPR3          |
| NPL.11    | 0.000487 | -0.64379 | 0.124 | 0.202 | 1 | CSCL1 | NPL           |
| TSPAN31.7 | 0.00049  | -0.29755 | 0.512 | 0.291 | 1 | CSCL1 | TSPAN31       |
| IKZF1.11  | 0.000496 | -0.27824 | 0.005 | 0.066 | 1 | CSCL1 | IKZF1         |
| OSCAR.12  | 0.000505 | -0.27231 | 0.01  | 0.074 | 1 | CSCL1 | OSCAR         |
| TFEC.12   | 0.000507 | -0.24098 | 0     | 0.057 | 1 | CSCL1 | TFEC          |
| SYTL3.10  | 0.000511 | -0.31564 | 0.005 | 0.065 | 1 | CSCL1 | SYTL3         |
| SPATA13.7 | 0.000521 | -0.16685 | 0.289 | 0.163 | 1 | CSCL1 | SPATA13       |
| TLR7.9    | 0.000523 | -0.27843 | 0     | 0.057 | 1 | CSCL1 | TLR7          |
| NAGK.8    | 0.000528 | -0.25919 | 0.677 | 0.376 | 1 | CSCL1 | NAGK          |
| TRAPPC2L. | 0.000532 | -0.16412 | 0.721 | 0.414 | 1 | CSCL1 | TRAPPC2L      |
| SPN.12    | 0.000534 | -0.24431 | 0     | 0.056 | 1 | CSCL1 | SPN           |
| VAT1.5    | 0.000539 | -0.12473 | 0.343 | 0.199 | 1 | CSCL1 | VAT1          |
| DOK2.11   | 0.00054  | -0.25718 | 0     | 0.056 | 1 | CSCL1 | DOK2          |
| DUSP11.2  | 0.000549 | -0.12695 | 0.308 | 0.181 | 1 | CSCL1 | DUSP11        |
| STX6.6    | 0.000557 | -0.1713  | 0.343 | 0.195 | 1 | CSCL1 | STX6          |
| FOXO3.7   | 0.000559 | -0.13873 | 0.458 | 0.269 | 1 | CSCL1 | FOXO3         |
| CXCL2.9   | 0.000563 | -0.44399 | 0.02  | 0.088 | 1 | CSCL1 | CXCL2         |
| RP11-556E | 0.000575 | -0.27051 | 0     | 0.056 | 1 | CSCL1 | RP11-556E13.1 |
| ACAT1.4   | 0.000579 | -0.21296 | 0.627 | 0.362 | 1 | CSCL1 | ACAT1         |
| FOXP1.8   | 0.000594 | -0.77467 | 0.159 | 0.232 | 1 | CSCL1 | FOXP1         |
| LGALS3BP. | 0.000594 | -0.13183 | 0.786 | 0.443 | 1 | CSCL1 | LGALS3BP      |
| SETD7.5   | 0.000607 | -0.10538 | 0.189 | 0.102 | 1 | CSCL1 | SETD7         |
| GIMAP7.9  | 0.000612 | -0.27981 | 0     | 0.055 | 1 | CSCL1 | GIMAP7        |
| SAA1.9    | 0.000622 | -1.07935 | 0.045 | 0.12  | 1 | CSCL1 | SAA1          |
| DNAJC4.7  | 0.000623 | -0.14564 | 0.383 | 0.226 | 1 | CSCL1 | DNAJC4        |
| ATP1B1.1C | 0.000632 | -0.53243 | 0.159 | 0.236 | 1 | CSCL1 | ATP1B1        |
| ATP5J.4   | 0.000639 | -0.18585 | 0.975 | 0.747 | 1 | CSCL1 | ATP5J         |

|            |          |          |       |       |   |       |          |
|------------|----------|----------|-------|-------|---|-------|----------|
| CCL3L3.9   | 0.000645 | -0.65352 | 0     | 0.055 | 1 | CSCL1 | CCL3L3   |
| ARPC2.10   | 0.000647 | -0.16622 | 0.975 | 0.77  | 1 | CSCL1 | ARPC2    |
| RARRES2.1  | 0.000648 | -0.17027 | 0.254 | 0.147 | 1 | CSCL1 | RARRES2  |
| PICALM.12  | 0.000681 | -0.19781 | 0.478 | 0.278 | 1 | CSCL1 | PICALM   |
| HPCAL1.8   | 0.000686 | -0.13118 | 0.358 | 0.207 | 1 | CSCL1 | HPCAL1   |
| LILRB2.12  | 0.000687 | -0.25368 | 0     | 0.054 | 1 | CSCL1 | LILRB2   |
| GGA1.8     | 0.000693 | -0.22451 | 0.493 | 0.286 | 1 | CSCL1 | GGA1     |
| TSPAN15.1  | 0.000695 | -0.29686 | 0.015 | 0.079 | 1 | CSCL1 | TSPAN15  |
| MPP1.12    | 0.000709 | -0.51454 | 0.124 | 0.202 | 1 | CSCL1 | MPP1     |
| GPR137B.8  | 0.000712 | -0.1625  | 0.393 | 0.227 | 1 | CSCL1 | GPR137B  |
| MAOB.10    | 0.000713 | -0.10426 | 0.179 | 0.097 | 1 | CSCL1 | MAOB     |
| RHOH.11    | 0.000724 | -0.36386 | 0.015 | 0.078 | 1 | CSCL1 | RHOH     |
| UPF2.6     | 0.000733 | -0.22146 | 0.368 | 0.215 | 1 | CSCL1 | UPF2     |
| MKNK1.11   | 0.000734 | -0.51904 | 0.095 | 0.172 | 1 | CSCL1 | MKNK1    |
| BAZ2B.7    | 0.00074  | -0.16282 | 0.542 | 0.316 | 1 | CSCL1 | BAZ2B    |
| HBEGF.12   | 0.000757 | -0.62405 | 0.144 | 0.217 | 1 | CSCL1 | HBEGF    |
| SFR1.7     | 0.000765 | -0.11296 | 0.134 | 0.067 | 1 | CSCL1 | SFR1     |
| SMCO4.12   | 0.000767 | -0.44071 | 0.06  | 0.134 | 1 | CSCL1 | SMCO4    |
| MEAF6.9    | 0.000767 | -0.12949 | 0.816 | 0.471 | 1 | CSCL1 | MEAF6    |
| RGS18.12   | 0.000778 | -0.24099 | 0     | 0.053 | 1 | CSCL1 | RGS18    |
| KCTD12.12  | 0.000782 | -0.56591 | 0.169 | 0.237 | 1 | CSCL1 | KCTD12   |
| GNGT2.12   | 0.000786 | -0.23486 | 0     | 0.053 | 1 | CSCL1 | GNGT2    |
| THOC6.7    | 0.000787 | -0.1087  | 0.284 | 0.167 | 1 | CSCL1 | THOC6    |
| TRAF3IP3.0 | 0.000794 | -0.26252 | 0     | 0.053 | 1 | CSCL1 | TRAF3IP3 |
| CCL20.11   | 0.000795 | -0.30799 | 0.005 | 0.062 | 1 | CSCL1 | CCL20    |
| PSMA2.6    | 0.000798 | -0.59484 | 0.005 | 0.062 | 1 | CSCL1 | PSMA2    |
| TCEB2.9    | 0.000799 | -0.16207 | 1     | 0.82  | 1 | CSCL1 | TCEB2    |
| SLC25A19.0 | 0.000801 | -0.22637 | 0.294 | 0.166 | 1 | CSCL1 | SLC25A19 |
| RIPK2.10   | 0.000827 | -0.18284 | 0.289 | 0.166 | 1 | CSCL1 | RIPK2    |
| TOR2A.8    | 0.000831 | -0.10098 | 0.254 | 0.145 | 1 | CSCL1 | TOR2A    |
| TRPM2.12   | 0.000846 | -0.22669 | 0     | 0.053 | 1 | CSCL1 | TRPM2    |
| RGCC.10    | 0.000849 | -0.50673 | 0.174 | 0.251 | 1 | CSCL1 | RGCC     |
| HTRA1.10   | 0.000854 | -0.12339 | 0.791 | 0.454 | 1 | CSCL1 | HTRA1    |
| NRROS.9    | 0.000872 | -0.30296 | 0.01  | 0.069 | 1 | CSCL1 | NRROS    |
| C2.10      | 0.000879 | -0.46601 | 0.045 | 0.116 | 1 | CSCL1 | C2       |
| OLFML2B.1  | 0.000884 | -0.30362 | 0.01  | 0.069 | 1 | CSCL1 | OLFML2B  |
| KLF9.5     | 0.000885 | -0.11498 | 0.229 | 0.129 | 1 | CSCL1 | KLF9     |
| ATIC.4     | 0.000886 | -0.13707 | 0.373 | 0.222 | 1 | CSCL1 | ATIC     |
| CD300C.12  | 0.00089  | -0.29012 | 0.01  | 0.069 | 1 | CSCL1 | CD300C   |
| TGOLN2.9   | 0.000903 | -0.1797  | 0.642 | 0.368 | 1 | CSCL1 | TGOLN2   |
| SLC8A1.1C  | 0.000918 | -0.15431 | 0.254 | 0.143 | 1 | CSCL1 | SLC8A1   |
| ASNS.12    | 0.000934 | -0.11094 | 0.299 | 0.175 | 1 | CSCL1 | ASNS     |
| SLC16A3.1  | 0.000944 | -0.65873 | 0.284 | 0.321 | 1 | CSCL1 | SLC16A3  |
| UXT.8      | 0.000952 | -0.12564 | 0.886 | 0.532 | 1 | CSCL1 | UXT      |
| METTL22.5  | 0.000959 | -0.10035 | 0.164 | 0.088 | 1 | CSCL1 | METTL22  |
| ARHGEF1.8  | 0.000966 | -0.19556 | 0.338 | 0.194 | 1 | CSCL1 | ARHGEF1  |
| GIMAP5.1C  | 0.000978 | -0.23158 | 0     | 0.051 | 1 | CSCL1 | GIMAP5   |
| ITPR2.10   | 0.000983 | -0.10653 | 0.229 | 0.13  | 1 | CSCL1 | ITPR2    |
| GAA.11     | 0.000992 | -0.2455  | 0.552 | 0.316 | 1 | CSCL1 | GAA      |
| TNFSF10.9  | 0.001015 | -0.34416 | 0.015 | 0.075 | 1 | CSCL1 | TNFSF10  |
| PNRC1.9    | 0.001015 | -0.44703 | 0.682 | 0.537 | 1 | CSCL1 | PNRC1    |

|           |          |          |       |       |   |       |               |
|-----------|----------|----------|-------|-------|---|-------|---------------|
| DNAJB6.5  | 0.001028 | -0.28083 | 0.96  | 0.704 | 1 | CSCL1 | DNAJB6        |
| TRPV2.12  | 0.001028 | -0.23689 | 0.005 | 0.06  | 1 | CSCL1 | TRPV2         |
| ATP6V1C1. | 0.001034 | -0.17093 | 0.403 | 0.241 | 1 | CSCL1 | ATP6V1C1      |
| TMBIM4.8  | 0.001038 | -0.58809 | 0.005 | 0.06  | 1 | CSCL1 | TMBIM4        |
| S100B.11  | 0.001041 | -0.148   | 0.841 | 0.522 | 1 | CSCL1 | S100B         |
| MYT1L.11  | 0.001044 | -0.21754 | 0.005 | 0.06  | 1 | CSCL1 | MYT1L         |
| C10orf11. | 0.001059 | -0.33379 | 0.035 | 0.102 | 1 | CSCL1 | C10orf11      |
| LAPTM4A.8 | 0.001071 | -0.25345 | 0.99  | 0.769 | 1 | CSCL1 | LAPTM4A       |
| FBX044.8  | 0.00108  | -0.1153  | 0.244 | 0.14  | 1 | CSCL1 | FBX044        |
| DHRS7.10  | 0.001092 | -0.53943 | 0.697 | 0.554 | 1 | CSCL1 | DHRS7         |
| HPSE.11   | 0.001098 | -0.25477 | 0.005 | 0.059 | 1 | CSCL1 | HPSE          |
| HLA-E.12  | 0.001103 | -0.52579 | 0.751 | 0.593 | 1 | CSCL1 | HLA-E         |
| MIAT.10   | 0.001107 | -0.42494 | 0.095 | 0.169 | 1 | CSCL1 | MIAT          |
| GAPDH.9   | 0.001123 | -0.28131 | 1     | 0.985 | 1 | CSCL1 | GAPDH         |
| SEMA4D.11 | 0.001139 | -0.31986 | 0.02  | 0.081 | 1 | CSCL1 | SEMA4D        |
| RHOB.8    | 0.001162 | -0.36041 | 0.791 | 0.606 | 1 | CSCL1 | RHOB          |
| RIT1.8    | 0.001176 | -0.15198 | 0.353 | 0.211 | 1 | CSCL1 | RIT1          |
| MAN2C1.2  | 0.001178 | -0.17787 | 0.234 | 0.132 | 1 | CSCL1 | MAN2C1        |
| IRF2BP2.9 | 0.001187 | -0.17897 | 0.527 | 0.312 | 1 | CSCL1 | IRF2BP2       |
| GNPDA1.4  | 0.001196 | -0.17368 | 0.398 | 0.237 | 1 | CSCL1 | GNPDA1        |
| MYCBP2.7  | 0.001202 | -0.14261 | 0.502 | 0.301 | 1 | CSCL1 | MYCBP2        |
| HHEX.12   | 0.001236 | -0.24987 | 0.005 | 0.058 | 1 | CSCL1 | HHEX          |
| FGD4.11   | 0.001251 | -0.42924 | 0.075 | 0.148 | 1 | CSCL1 | FGD4          |
| HADHB.5   | 0.001258 | -0.14465 | 0.811 | 0.455 | 1 | CSCL1 | HADHB         |
| PSME4.2   | 0.001276 | -0.10304 | 0.234 | 0.134 | 1 | CSCL1 | PSME4         |
| ORMDL2.9  | 0.001299 | -0.30789 | 0.463 | 0.269 | 1 | CSCL1 | ORMDL2        |
| COMMD1.3  | 0.001316 | -0.24057 | 0.597 | 0.353 | 1 | CSCL1 | COMMD1        |
| CHFR.3    | 0.001321 | -0.11544 | 0.214 | 0.121 | 1 | CSCL1 | CHFR          |
| ZNF846.9  | 0.001337 | -0.11706 | 0.134 | 0.069 | 1 | CSCL1 | ZNF846        |
| RP11-480C | 0.00135  | -0.2765  | 0     | 0.049 | 1 | CSCL1 | RP11-480C22.1 |
| SLC25A46. | 0.001365 | -0.10262 | 0.259 | 0.151 | 1 | CSCL1 | SLC25A46      |
| CNDP2.10  | 0.001365 | -0.1346  | 0.746 | 0.425 | 1 | CSCL1 | CNDP2         |
| NUCB1.11  | 0.00139  | -0.14332 | 0.756 | 0.44  | 1 | CSCL1 | NUCB1         |
| OSGEP.6   | 0.00141  | -0.21709 | 0.338 | 0.2   | 1 | CSCL1 | OSGEP         |
| TMEM156.1 | 0.001437 | -0.27054 | 0.005 | 0.057 | 1 | CSCL1 | TMEM156       |
| CLECL1.11 | 0.001437 | -0.19581 | 0     | 0.048 | 1 | CSCL1 | CLECL1        |
| MX2.12    | 0.001445 | -0.27373 | 0.01  | 0.065 | 1 | CSCL1 | MX2           |
| ATG13.2   | 0.001449 | -0.10907 | 0.224 | 0.128 | 1 | CSCL1 | ATG13         |
| DBNL.9    | 0.00145  | -0.18143 | 0.741 | 0.42  | 1 | CSCL1 | DBNL          |
| PIK3R5.11 | 0.001452 | -0.20185 | 0     | 0.048 | 1 | CSCL1 | PIK3R5        |
| PTPN7.12  | 0.00146  | -0.32855 | 0.02  | 0.079 | 1 | CSCL1 | PTPN7         |
| RP6-91H8. | 0.001467 | -0.29057 | 0.005 | 0.057 | 1 | CSCL1 | RP6-91H8.3    |
| MARCH1.1C | 0.00147  | -0.38269 | 0.114 | 0.192 | 1 | CSCL1 | 1-Mar         |
| TCEAL7.1C | 0.001479 | -0.20773 | 0.493 | 0.299 | 1 | CSCL1 | TCEAL7        |
| TMEM52B.1 | 0.001483 | -0.23116 | 0     | 0.048 | 1 | CSCL1 | TMEM52B       |
| ACSL1.11  | 0.001495 | -0.58255 | 0.164 | 0.228 | 1 | CSCL1 | ACSL1         |
| ZNF267.11 | 0.001495 | -0.15751 | 0.229 | 0.131 | 1 | CSCL1 | ZNF267        |
| TSTD1.6   | 0.001512 | -0.14794 | 0.323 | 0.195 | 1 | CSCL1 | TSTD1         |
| SLAMF8.12 | 0.001531 | -0.25882 | 0.01  | 0.064 | 1 | CSCL1 | SLAMF8        |
| CECR1.10  | 0.001553 | -0.28412 | 0.015 | 0.072 | 1 | CSCL1 | CECR1         |
| SARS.7    | 0.001573 | -0.15197 | 0.766 | 0.437 | 1 | CSCL1 | SARS          |

|             |          |          |       |       |   |       |          |
|-------------|----------|----------|-------|-------|---|-------|----------|
| TMEM63A. 6  | 0.001575 | -0.11463 | 0.134 | 0.07  | 1 | CSCL1 | TMEM63A  |
| SYP. 11     | 0.001577 | -0.10356 | 0.229 | 0.132 | 1 | CSCL1 | SYP      |
| FBXO25. 2   | 0.001578 | -0.10019 | 0.254 | 0.15  | 1 | CSCL1 | FBXO25   |
| DOCK5. 11   | 0.001587 | -0.2554  | 0.005 | 0.056 | 1 | CSCL1 | DOCK5    |
| PAK7. 11    | 0.001611 | -0.15719 | 0     | 0.047 | 1 | CSCL1 | PAK7     |
| PCSK7. 6    | 0.001637 | -0.18873 | 0.463 | 0.279 | 1 | CSCL1 | PCSK7    |
| NUMB. 11    | 0.001661 | -0.19909 | 0.289 | 0.168 | 1 | CSCL1 | NUMB     |
| ITGA5. 8    | 0.001663 | -0.12442 | 0.154 | 0.083 | 1 | CSCL1 | ITGA5    |
| CXorf40A. 0 | 0.001671 | -0.10021 | 0.159 | 0.087 | 1 | CSCL1 | CXorf40A |
| RIN3. 12    | 0.001674 | -0.38607 | 0.05  | 0.116 | 1 | CSCL1 | RIN3     |
| SOAT1. 12   | 0.001678 | -0.23088 | 0.333 | 0.195 | 1 | CSCL1 | SOAT1    |
| TES. 12     | 0.001679 | -0.22694 | 0     | 0.047 | 1 | CSCL1 | TES      |
| SREBF1. 4   | 0.00169  | -0.12688 | 0.204 | 0.115 | 1 | CSCL1 | SREBF1   |
| DCX. 12     | 0.001695 | -0.15322 | 0.338 | 0.202 | 1 | CSCL1 | DCX      |
| TCIRG1. 12  | 0.00172  | -0.4028  | 0.06  | 0.127 | 1 | CSCL1 | TCIRG1   |
| IFNGR2. 10  | 0.00173  | -0.12434 | 0.667 | 0.385 | 1 | CSCL1 | IFNGR2   |
| NFKBIE. 9   | 0.001744 | -0.10511 | 0.229 | 0.132 | 1 | CSCL1 | NFKBIE   |
| ZNF33A. 5   | 0.001751 | -0.10324 | 0.179 | 0.099 | 1 | CSCL1 | ZNF33A   |
| RPS6KA1. 1  | 0.001762 | -0.42352 | 0.065 | 0.132 | 1 | CSCL1 | RPS6KA1  |
| FNIP1. 3    | 0.001782 | -0.10403 | 0.184 | 0.103 | 1 | CSCL1 | FNIP1    |
| TAX1BP3. 8  | 0.001783 | -0.22842 | 0.652 | 0.377 | 1 | CSCL1 | TAX1BP3  |
| TLR5. 9     | 0.001844 | -0.23379 | 0     | 0.046 | 1 | CSCL1 | TLR5     |
| WBP2. 4     | 0.001848 | -0.17321 | 0.796 | 0.446 | 1 | CSCL1 | WBP2     |
| GAL3ST4. 1  | 0.001853 | -0.55089 | 0.104 | 0.172 | 1 | CSCL1 | GAL3ST4  |
| SLC12A9. 7  | 0.001859 | -0.15203 | 0.333 | 0.199 | 1 | CSCL1 | SLC12A9  |
| C15orf48. 0 | 0.001869 | -0.3344  | 0.015 | 0.07  | 1 | CSCL1 | C15orf48 |
| FAM159A. 1  | 0.001902 | -0.19454 | 0     | 0.046 | 1 | CSCL1 | FAM159A  |
| HNMT. 11    | 0.001928 | -0.58729 | 0.154 | 0.22  | 1 | CSCL1 | HNMT     |
| IGF1. 10    | 0.001934 | -0.28658 | 0.01  | 0.062 | 1 | CSCL1 | IGF1     |
| CLEC4A. 12  | 0.001955 | -0.27173 | 0.01  | 0.062 | 1 | CSCL1 | CLEC4A   |
| SMARCA2. 5  | 0.001958 | -0.13161 | 0.229 | 0.133 | 1 | CSCL1 | SMARCA2  |
| EIF2S3. 7   | 0.001976 | -0.18942 | 0.488 | 0.291 | 1 | CSCL1 | EIF2S3   |
| PTGS2. 11   | 0.001982 | -0.2573  | 0.01  | 0.062 | 1 | CSCL1 | PTGS2    |
| LRMP. 10    | 0.001983 | -0.20262 | 0     | 0.045 | 1 | CSCL1 | LRMP     |
| ANXA11. 11  | 0.001989 | -0.53348 | 0.154 | 0.217 | 1 | CSCL1 | ANXA11   |
| ARHGAP22. 0 | 0.001991 | -0.11321 | 0.139 | 0.073 | 1 | CSCL1 | ARHGAP22 |
| M6PR. 12    | 0.002016 | -0.22077 | 0.652 | 0.377 | 1 | CSCL1 | M6PR     |
| HADHA. 8    | 0.002021 | -0.13316 | 0.746 | 0.436 | 1 | CSCL1 | HADHA    |
| SNX20. 11   | 0.002024 | -0.1827  | 0     | 0.045 | 1 | CSCL1 | SNX20    |
| PRAM1. 10   | 0.002028 | -0.24142 | 0.005 | 0.054 | 1 | CSCL1 | PRAM1    |
| MFSD1. 12   | 0.002036 | -0.6858  | 0.333 | 0.344 | 1 | CSCL1 | MFSD1    |
| IRF1. 9     | 0.002043 | -0.22456 | 0.338 | 0.204 | 1 | CSCL1 | IRF1     |
| SIGLEC14. 0 | 0.002045 | -0.20882 | 0     | 0.045 | 1 | CSCL1 | SIGLEC14 |
| TIPIN. 7    | 0.002075 | -0.19606 | 0.239 | 0.139 | 1 | CSCL1 | TIPIN    |
| IDNK. 4     | 0.002115 | -0.12919 | 0.169 | 0.094 | 1 | CSCL1 | IDNK     |
| CSRNP1. 12  | 0.002124 | -0.47013 | 0.124 | 0.192 | 1 | CSCL1 | CSRNP1   |
| WDR830S. 5  | 0.002149 | -0.27052 | 0.975 | 0.74  | 1 | CSCL1 | WDR830S  |
| EMB. 12     | 0.002178 | -0.30398 | 0.02  | 0.076 | 1 | CSCL1 | EMB      |
| SLC7A8. 7   | 0.002199 | -0.19341 | 0     | 0.045 | 1 | CSCL1 | SLC7A8   |
| EMP3. 11    | 0.002224 | -0.19783 | 0.751 | 0.444 | 1 | CSCL1 | EMP3     |
| CPPED1. 12  | 0.002266 | -0.25428 | 0.015 | 0.069 | 1 | CSCL1 | CPPED1   |

|            |          |          |       |       |   |       |          |
|------------|----------|----------|-------|-------|---|-------|----------|
| HMBOX1.1C  | 0.00228  | -0.13949 | 0.313 | 0.191 | 1 | CSCL1 | HMBOX1   |
| ERV3-1.11  | 0.002324 | -0.17609 | 0.423 | 0.258 | 1 | CSCL1 | ERV3-1   |
| NT5DC1.7   | 0.002325 | -0.22109 | 0.005 | 0.053 | 1 | CSCL1 | NT5DC1   |
| FLI1.12    | 0.00235  | -0.2321  | 0.005 | 0.053 | 1 | CSCL1 | FLI1     |
| ARMCX2.7   | 0.002362 | -0.14804 | 0.244 | 0.145 | 1 | CSCL1 | ARMCX2   |
| SPSB3.7    | 0.002371 | -0.23147 | 0.512 | 0.301 | 1 | CSCL1 | SPSB3    |
| HSPA1A.8   | 0.002386 | -0.63018 | 0.552 | 0.491 | 1 | CSCL1 | HSPA1A   |
| SEC62.6    | 0.00239  | -0.25291 | 0.955 | 0.686 | 1 | CSCL1 | SEC62    |
| GFAP.8     | 0.002393 | -0.59016 | 0.294 | 0.351 | 1 | CSCL1 | GFAP     |
| ATP8B4.1C  | 0.002415 | -0.18913 | 0     | 0.044 | 1 | CSCL1 | ATP8B4   |
| MBD6.7     | 0.002418 | -0.20657 | 0.239 | 0.137 | 1 | CSCL1 | MBD6     |
| PRDM1.11   | 0.002431 | -0.36826 | 0.04  | 0.101 | 1 | CSCL1 | PRDM1    |
| CD40.12    | 0.002439 | -0.26555 | 0.015 | 0.068 | 1 | CSCL1 | CD40     |
| IL2RG.8    | 0.00244  | -0.25051 | 0     | 0.044 | 1 | CSCL1 | IL2RG    |
| AMPD3.9    | 0.00244  | -0.1875  | 0.005 | 0.053 | 1 | CSCL1 | AMPD3    |
| NHSL2.7    | 0.002452 | -0.44971 | 0.005 | 0.052 | 1 | CSCL1 | NHSL2    |
| ABCA2.11   | 0.002481 | -0.20441 | 0.169 | 0.094 | 1 | CSCL1 | ABCA2    |
| PPIF.9     | 0.002486 | -0.20201 | 0.368 | 0.218 | 1 | CSCL1 | PPIF     |
| POLE4.8    | 0.00252  | -0.20121 | 0.468 | 0.281 | 1 | CSCL1 | POLE4    |
| ELP2.4     | 0.002538 | -0.13482 | 0.328 | 0.201 | 1 | CSCL1 | ELP2     |
| GIMAP6.1C  | 0.002543 | -0.19835 | 0     | 0.043 | 1 | CSCL1 | GIMAP6   |
| FLCN.6     | 0.002625 | -0.12104 | 0.229 | 0.134 | 1 | CSCL1 | FLCN     |
| PLEC.9     | 0.00263  | -0.16193 | 0.308 | 0.184 | 1 | CSCL1 | PLEC     |
| CLASP2.11  | 0.002633 | -0.15482 | 0.323 | 0.195 | 1 | CSCL1 | CLASP2   |
| ACTR2.12   | 0.002638 | -0.11129 | 0.771 | 0.453 | 1 | CSCL1 | ACTR2    |
| DPYSL2.9   | 0.002662 | -0.10716 | 0.706 | 0.418 | 1 | CSCL1 | DPYSL2   |
| EIF5AL1.4  | 0.00267  | -0.10829 | 0.204 | 0.119 | 1 | CSCL1 | EIF5AL1  |
| WASF2.9    | 0.002695 | -0.16963 | 0.746 | 0.433 | 1 | CSCL1 | WASF2    |
| MARCO.8    | 0.002696 | -0.37102 | 0.01  | 0.06  | 1 | CSCL1 | MARCO    |
| SH3BGRL.8  | 0.002706 | -0.41793 | 0.915 | 0.644 | 1 | CSCL1 | SH3BGRL  |
| PRKCB.11   | 0.002735 | -0.16652 | 0     | 0.043 | 1 | CSCL1 | PRKCB    |
| CXCL12.7   | 0.002735 | -0.2212  | 0     | 0.043 | 1 | CSCL1 | CXCL12   |
| FKBP11.5   | 0.002782 | -0.15795 | 0.199 | 0.115 | 1 | CSCL1 | FKBP11   |
| PPARD.10   | 0.002783 | -0.14282 | 0.189 | 0.107 | 1 | CSCL1 | PPARD    |
| XIST.12    | 0.002791 | -0.4661  | 0.204 | 0.267 | 1 | CSCL1 | XIST     |
| CD72.9     | 0.002846 | -0.20233 | 0.005 | 0.051 | 1 | CSCL1 | CD72     |
| ESYT1.10   | 0.002858 | -0.11056 | 0.204 | 0.119 | 1 | CSCL1 | ESYT1    |
| KLHL6.11   | 0.002868 | -0.24637 | 0.005 | 0.051 | 1 | CSCL1 | KLHL6    |
| SMYD4.2    | 0.002871 | -0.12725 | 0.199 | 0.116 | 1 | CSCL1 | SMYD4    |
| KCNQ10T1.1 | 0.002871 | -0.16877 | 0.448 | 0.275 | 1 | CSCL1 | KCNQ10T1 |
| DSE.12     | 0.002875 | -0.42144 | 0.075 | 0.139 | 1 | CSCL1 | DSE      |
| ATF7IP2.1  | 0.00288  | -0.20244 | 0     | 0.042 | 1 | CSCL1 | ATF7IP2  |
| STMN2.12   | 0.002886 | -0.58268 | 0.119 | 0.188 | 1 | CSCL1 | STMN2    |
| SPOCK1.1C  | 0.002908 | -0.24793 | 0.025 | 0.082 | 1 | CSCL1 | SPOCK1   |
| STMN4.11   | 0.002922 | -0.58388 | 0.249 | 0.307 | 1 | CSCL1 | STMN4    |
| CCNDBP1.1  | 0.002927 | -0.24694 | 0.338 | 0.202 | 1 | CSCL1 | CCNDBP1  |
| CRYBB1.1C  | 0.00294  | -0.21035 | 0     | 0.042 | 1 | CSCL1 | CRYBB1   |
| FES.12     | 0.002953 | -0.29488 | 0.025 | 0.08  | 1 | CSCL1 | FES      |
| BCL2L1.5   | 0.002987 | -0.22482 | 0.438 | 0.261 | 1 | CSCL1 | BCL2L1   |
| LACTB2.5   | 0.002994 | -0.12579 | 0.244 | 0.149 | 1 | CSCL1 | LACTB2   |
| NKG7.9     | 0.003018 | -0.28065 | 0.005 | 0.051 | 1 | CSCL1 | NKG7     |

|           |          |          |       |       |   |       |               |
|-----------|----------|----------|-------|-------|---|-------|---------------|
| STAC3.12  | 0.003025 | -0.28883 | 0.025 | 0.08  | 1 | CSCL1 | STAC3         |
| BET1L.2   | 0.003047 | -0.10323 | 0.199 | 0.117 | 1 | CSCL1 | BET1L         |
| SRGAP1.8  | 0.00305  | -0.17245 | 0.363 | 0.223 | 1 | CSCL1 | SRGAP1        |
| DLEU7.11  | 0.003118 | -0.22706 | 0.005 | 0.05  | 1 | CSCL1 | DLEU7         |
| OAT.3     | 0.003216 | -0.22895 | 0.388 | 0.235 | 1 | CSCL1 | OAT           |
| CMKLR1.1C | 0.003216 | -0.21032 | 0.005 | 0.05  | 1 | CSCL1 | CMKLR1        |
| PPP1R18.1 | 0.003222 | -0.2892  | 0.493 | 0.289 | 1 | CSCL1 | PPP1R18       |
| TMSB4X.1C | 0.003223 | -0.24535 | 1     | 0.997 | 1 | CSCL1 | TMSB4X        |
| B3GAT1.8  | 0.003292 | -0.12031 | 0.159 | 0.088 | 1 | CSCL1 | B3GAT1        |
| EIF4EBP2. | 0.003307 | -0.10894 | 0.234 | 0.139 | 1 | CSCL1 | EIF4EBP2      |
| ELL.8     | 0.003375 | -0.11263 | 0.174 | 0.099 | 1 | CSCL1 | ELL           |
| STX12.2   | 0.003388 | -0.17008 | 0.672 | 0.403 | 1 | CSCL1 | STX12         |
| FAIM2.10  | 0.003404 | -0.18583 | 0.308 | 0.189 | 1 | CSCL1 | FAIM2         |
| RASAL3.11 | 0.003437 | -0.2227  | 0.01  | 0.058 | 1 | CSCL1 | RASAL3        |
| DDIT4.11  | 0.003487 | -0.62977 | 0.428 | 0.408 | 1 | CSCL1 | DDIT4         |
| IL17RA.12 | 0.003492 | -0.16244 | 0.204 | 0.118 | 1 | CSCL1 | IL17RA        |
| POMP.6    | 0.003505 | -0.15631 | 0.985 | 0.731 | 1 | CSCL1 | POMP          |
| TAF1D.4   | 0.003528 | -0.22586 | 0.567 | 0.339 | 1 | CSCL1 | TAF1D         |
| LBH.12    | 0.003671 | -0.39536 | 0.09  | 0.154 | 1 | CSCL1 | LBH           |
| TMEM144.7 | 0.003675 | -0.43026 | 0.025 | 0.078 | 1 | CSCL1 | TMEM144       |
| SNHG8.6   | 0.00371  | -0.56675 | 0.532 | 0.467 | 1 | CSCL1 | SNHG8         |
| LY6E.6    | 0.003748 | -0.24723 | 0.622 | 0.371 | 1 | CSCL1 | LY6E          |
| RP11-834C | 0.003766 | -0.32274 | 0.04  | 0.098 | 1 | CSCL1 | RP11-834C11.4 |
| MAL.10    | 0.003771 | -0.26749 | 0     | 0.04  | 1 | CSCL1 | MAL           |
| UBE2D3.9  | 0.00378  | -0.23355 | 0.945 | 0.724 | 1 | CSCL1 | UBE2D3        |
| EFNA1.8   | 0.003808 | -0.19384 | 0.214 | 0.127 | 1 | CSCL1 | EFNA1         |
| MLXIPL.8  | 0.003811 | -0.19503 | 0     | 0.04  | 1 | CSCL1 | MLXIPL        |
| ADCY7.12  | 0.003814 | -0.25675 | 0.015 | 0.064 | 1 | CSCL1 | ADCY7         |
| ARHGEF7.9 | 0.003838 | -0.17837 | 0.264 | 0.156 | 1 | CSCL1 | ARHGEF7       |
| TM7SF2.1C | 0.003847 | -0.13925 | 0.378 | 0.228 | 1 | CSCL1 | TM7SF2        |
| LDLRAD4.9 | 0.00395  | -0.42812 | 0.085 | 0.147 | 1 | CSCL1 | LDLRAD4       |
| DEDD2.6   | 0.003962 | -0.12941 | 0.279 | 0.17  | 1 | CSCL1 | DEDD2         |
| PLCG2.9   | 0.003965 | -0.22134 | 0.005 | 0.048 | 1 | CSCL1 | PLCG2         |
| CCL5.7    | 0.003966 | -0.36931 | 0.01  | 0.056 | 1 | CSCL1 | CCL5          |
| POLK.4    | 0.003978 | -0.16353 | 0.294 | 0.178 | 1 | CSCL1 | POLK          |
| ACP5.10   | 0.004004 | -0.2127  | 0.005 | 0.048 | 1 | CSCL1 | ACP5          |
| ARL11.11  | 0.004013 | -0.17673 | 0     | 0.04  | 1 | CSCL1 | ARL11         |
| GPX3.11   | 0.004097 | -0.25748 | 0.254 | 0.151 | 1 | CSCL1 | GPX3          |
| SCIMP.12  | 0.004103 | -0.33713 | 0.03  | 0.084 | 1 | CSCL1 | SCIMP         |
| RNF166.9  | 0.004112 | -0.19766 | 0.303 | 0.183 | 1 | CSCL1 | RNF166        |
| KCNQ1.11  | 0.00414  | -0.16841 | 0     | 0.039 | 1 | CSCL1 | KCNQ1         |
| BTG2.8    | 0.004182 | -0.61123 | 0.552 | 0.466 | 1 | CSCL1 | BTG2          |
| MGMT.11   | 0.004194 | -0.43786 | 0.09  | 0.153 | 1 | CSCL1 | MGMT          |
| ZNF780A.5 | 0.004228 | -0.10071 | 0.124 | 0.067 | 1 | CSCL1 | ZNF780A       |
| IGFLR1.9  | 0.004297 | -0.27632 | 0.01  | 0.056 | 1 | CSCL1 | IGFLR1        |
| CCND3.9   | 0.004298 | -0.27391 | 0.423 | 0.257 | 1 | CSCL1 | CCND3         |
| TNFAIP8.1 | 0.004341 | -0.29289 | 0.02  | 0.07  | 1 | CSCL1 | TNFAIP8       |
| DIS3L2.4  | 0.004356 | -0.11447 | 0.174 | 0.101 | 1 | CSCL1 | DIS3L2        |
| CASP1.10  | 0.004392 | -0.52785 | 0.169 | 0.227 | 1 | CSCL1 | CASP1         |
| CTB-61M7. | 0.004406 | -0.20123 | 0     | 0.039 | 1 | CSCL1 | CTB-61M7.2    |
| IER3IP1.7 | 0.004406 | -0.38372 | 0     | 0.039 | 1 | CSCL1 | IER3IP1       |

|           |          |          |       |       |   |       |               |
|-----------|----------|----------|-------|-------|---|-------|---------------|
| RAPGEF1.9 | 0.004471 | -0.18053 | 0.199 | 0.116 | 1 | CSCL1 | RAPGEF1       |
| LYVE1.10  | 0.004498 | -0.29955 | 0     | 0.039 | 1 | CSCL1 | LYVE1         |
| ISG20L2.7 | 0.004515 | -0.17848 | 0.363 | 0.222 | 1 | CSCL1 | ISG20L2       |
| SFT2D1.11 | 0.004519 | -0.12757 | 0.861 | 0.495 | 1 | CSCL1 | SFT2D1        |
| GABARAPL1 | 0.004538 | -0.54709 | 0.264 | 0.298 | 1 | CSCL1 | GABARAPL1     |
| SLC15A3.1 | 0.004545 | -0.26109 | 0.02  | 0.07  | 1 | CSCL1 | SLC15A3       |
| ERMN.10   | 0.004545 | -0.35465 | 0     | 0.039 | 1 | CSCL1 | ERMN          |
| PAQR4.10  | 0.004608 | -0.10404 | 0.264 | 0.162 | 1 | CSCL1 | PAQR4         |
| CARD9.12  | 0.004635 | -0.24917 | 0.02  | 0.07  | 1 | CSCL1 | CARD9         |
| TIMP1.9   | 0.004673 | -0.23655 | 0.891 | 0.616 | 1 | CSCL1 | TIMP1         |
| CD1D.10   | 0.004738 | -0.19702 | 0     | 0.038 | 1 | CSCL1 | CD1D          |
| NFATC2.9  | 0.0048   | -0.19313 | 0.005 | 0.047 | 1 | CSCL1 | NFATC2        |
| CIR1.5    | 0.004844 | -0.2228  | 0.532 | 0.326 | 1 | CSCL1 | CIR1          |
| TUBB4A.12 | 0.004854 | -0.44082 | 0.06  | 0.119 | 1 | CSCL1 | TUBB4A        |
| BIRC6.3   | 0.0049   | -0.12919 | 0.294 | 0.182 | 1 | CSCL1 | BIRC6         |
| SELT.5    | 0.004927 | -0.31354 | 0.905 | 0.655 | 1 | CSCL1 | SELT          |
| GPC2.12   | 0.004932 | -0.15671 | 0.274 | 0.166 | 1 | CSCL1 | GPC2          |
| NDUFA13.6 | 0.004944 | -0.21995 | 0.995 | 0.768 | 1 | CSCL1 | NDUFA13       |
| APOL2.7   | 0.004982 | -0.19467 | 0.169 | 0.098 | 1 | CSCL1 | APOL2         |
| ASCL2.11  | 0.00499  | -0.15192 | 0     | 0.038 | 1 | CSCL1 | ASCL2         |
| AC109826. | 0.00499  | -0.18028 | 0     | 0.038 | 1 | CSCL1 | AC109826.1    |
| MAG.10    | 0.00499  | -0.36773 | 0     | 0.038 | 1 | CSCL1 | MAG           |
| TNFAIP2.1 | 0.00502  | -0.27616 | 0.025 | 0.076 | 1 | CSCL1 | TNFAIP2       |
| ACER3.10  | 0.005023 | -0.22551 | 0.303 | 0.183 | 1 | CSCL1 | ACER3         |
| ADRB2.10  | 0.005023 | -0.23057 | 0.005 | 0.047 | 1 | CSCL1 | ADRB2         |
| PTPN18.12 | 0.00506  | -0.22089 | 0.343 | 0.208 | 1 | CSCL1 | PTPN18        |
| PLCB2.12  | 0.005067 | -0.25079 | 0.015 | 0.062 | 1 | CSCL1 | PLCB2         |
| PDGFB.9   | 0.005093 | -0.22118 | 0.005 | 0.046 | 1 | CSCL1 | PDGFB         |
| PDCD6IP.1 | 0.005154 | -0.22382 | 0.473 | 0.285 | 1 | CSCL1 | PDCD6IP       |
| LIMS1.11  | 0.005171 | -0.18669 | 0.751 | 0.434 | 1 | CSCL1 | LIMS1         |
| CD300LF.1 | 0.005198 | -0.18582 | 0.005 | 0.046 | 1 | CSCL1 | CD300LF       |
| SELL.8    | 0.005201 | -0.19965 | 0     | 0.037 | 1 | CSCL1 | SELL          |
| C18orf32. | 0.005208 | -0.19638 | 0.378 | 0.233 | 1 | CSCL1 | C18orf32      |
| SLC16A10. | 0.005223 | -0.39163 | 0.035 | 0.088 | 1 | CSCL1 | SLC16A10      |
| CD180.11  | 0.00531  | -0.15191 | 0     | 0.037 | 1 | CSCL1 | CD180         |
| BID.8     | 0.005322 | -0.21238 | 0.592 | 0.353 | 1 | CSCL1 | BID           |
| RNF149.12 | 0.005347 | -0.57784 | 0.234 | 0.271 | 1 | CSCL1 | RNF149        |
| UCHL1.10  | 0.005354 | -0.22893 | 0.721 | 0.431 | 1 | CSCL1 | UCHL1         |
| SLC31A2.1 | 0.005399 | -0.61225 | 0.139 | 0.193 | 1 | CSCL1 | SLC31A2       |
| MGST1.9   | 0.005487 | -0.77472 | 0.085 | 0.146 | 1 | CSCL1 | MGST1         |
| STK17B.1C | 0.0055   | -0.25851 | 0.224 | 0.131 | 1 | CSCL1 | STK17B        |
| GALC.7    | 0.005513 | -0.10021 | 0.174 | 0.101 | 1 | CSCL1 | GALC          |
| TWF2.12   | 0.005522 | -0.27507 | 0.572 | 0.337 | 1 | CSCL1 | TWF2          |
| CTD-2090I | 0.005539 | -0.45463 | 0.01  | 0.054 | 1 | CSCL1 | CTD-2090I13.1 |
| EIF5B.7   | 0.005662 | -0.12817 | 0.896 | 0.515 | 1 | CSCL1 | EIF5B         |
| GMIP.10   | 0.005676 | -0.23003 | 0.025 | 0.075 | 1 | CSCL1 | GMIP          |
| TLR1.12   | 0.005684 | -0.25057 | 0.02  | 0.069 | 1 | CSCL1 | TLR1          |
| MAPKAPK3. | 0.005688 | -0.183   | 0.279 | 0.169 | 1 | CSCL1 | MAPKAPK3      |
| ENPP2.6   | 0.005736 | -0.27098 | 0.005 | 0.045 | 1 | CSCL1 | ENPP2         |
| UNC93B1.1 | 0.005745 | -0.44582 | 0.144 | 0.202 | 1 | CSCL1 | UNC93B1       |
| TEX264.4  | 0.005747 | -0.25576 | 0.672 | 0.391 | 1 | CSCL1 | TEX264        |

|           |          |          |       |       |   |       |          |
|-----------|----------|----------|-------|-------|---|-------|----------|
| RNF213.11 | 0.005889 | -0.26608 | 0.428 | 0.258 | 1 | CSCL1 | RNF213   |
| CALHM2.9  | 0.005955 | -0.19675 | 0.015 | 0.061 | 1 | CSCL1 | CALHM2   |
| MOBP.11   | 0.006015 | -0.3161  | 0     | 0.036 | 1 | CSCL1 | MOBP     |
| SMIM3.8   | 0.006015 | -0.41177 | 0     | 0.036 | 1 | CSCL1 | SMIM3    |
| P2RX4.11  | 0.006082 | -0.24991 | 0.289 | 0.175 | 1 | CSCL1 | P2RX4    |
| CD52.10   | 0.00612  | -0.36087 | 0.01  | 0.053 | 1 | CSCL1 | CD52     |
| STAT6.12  | 0.006129 | -0.22882 | 0.01  | 0.053 | 1 | CSCL1 | STAT6    |
| GTF2IRD2. | 0.00618  | -0.12489 | 0.194 | 0.115 | 1 | CSCL1 | GTF2IRD2 |
| TBC1D15.1 | 0.006182 | -0.15849 | 0.264 | 0.162 | 1 | CSCL1 | TBC1D15  |
| SLC29A3.7 | 0.006217 | -0.18343 | 0.005 | 0.045 | 1 | CSCL1 | SLC29A3  |
| JPH4.9    | 0.006232 | -0.18125 | 0.015 | 0.061 | 1 | CSCL1 | JPH4     |
| BACE1.7   | 0.006248 | -0.10162 | 0.194 | 0.117 | 1 | CSCL1 | BACE1    |
| HNRNPK.8  | 0.006293 | -0.1338  | 1     | 0.785 | 1 | CSCL1 | HNRNPK   |
| NDRG2.8   | 0.006315 | -0.55524 | 0.338 | 0.359 | 1 | CSCL1 | NDRG2    |
| PRKCH.9   | 0.006404 | -0.208   | 0.005 | 0.044 | 1 | CSCL1 | PRKCH    |
| RASGRP2.7 | 0.006452 | -0.18852 | 0.01  | 0.052 | 1 | CSCL1 | RASGRP2  |
| GRINA.7   | 0.006476 | -0.17705 | 0.766 | 0.431 | 1 | CSCL1 | GRINA    |
| GBP2.9    | 0.006539 | -0.54586 | 0.154 | 0.209 | 1 | CSCL1 | GBP2     |
| GRASP.10  | 0.006548 | -0.23402 | 0.01  | 0.052 | 1 | CSCL1 | GRASP    |
| IFI27L2.5 | 0.006548 | -0.57821 | 0.552 | 0.47  | 1 | CSCL1 | IFI27L2  |
| RASSF5.11 | 0.006552 | -0.37714 | 0.065 | 0.12  | 1 | CSCL1 | RASSF5   |
| SDS.12    | 0.00666  | -0.3171  | 0.015 | 0.059 | 1 | CSCL1 | SDS      |
| HOXA9.8   | 0.006673 | -0.12208 | 0     | 0.035 | 1 | CSCL1 | HOXA9    |
| IRF5.12   | 0.00673  | -0.23509 | 0.015 | 0.06  | 1 | CSCL1 | IRF5     |
| HSPA6.7   | 0.006764 | -0.41884 | 0.045 | 0.1   | 1 | CSCL1 | HSPA6    |
| RALB.9    | 0.006767 | -0.16483 | 0.254 | 0.155 | 1 | CSCL1 | RALB     |
| USP36.8   | 0.006818 | -0.13755 | 0.224 | 0.137 | 1 | CSCL1 | USP36    |
| ETV3.10   | 0.00683  | -0.11132 | 0.134 | 0.075 | 1 | CSCL1 | ETV3     |
| CD7.9     | 0.006884 | -0.2622  | 0.005 | 0.044 | 1 | CSCL1 | CD7      |
| ADAM8.10  | 0.006889 | -0.18904 | 0.005 | 0.044 | 1 | CSCL1 | ADAM8    |
| ICAM2.11  | 0.006956 | -0.17359 | 0     | 0.035 | 1 | CSCL1 | ICAM2    |
| CAPN3.9   | 0.00703  | -0.29665 | 0.005 | 0.044 | 1 | CSCL1 | CAPN3    |
| ACSL5.11  | 0.007102 | -0.14466 | 0     | 0.035 | 1 | CSCL1 | ACSL5    |
| TAL1.8    | 0.007102 | -0.17608 | 0     | 0.035 | 1 | CSCL1 | TAL1     |
| TNF.9     | 0.007109 | -0.21986 | 0.005 | 0.044 | 1 | CSCL1 | TNF      |
| SLC25A3.5 | 0.007139 | -0.18246 | 0.975 | 0.742 | 1 | CSCL1 | SLC25A3  |
| NDUFA7.8  | 0.007342 | -0.37761 | 0.005 | 0.043 | 1 | CSCL1 | NDUFA7   |
| PIAS1.6   | 0.007395 | -0.19824 | 0.254 | 0.157 | 1 | CSCL1 | PIAS1    |
| SMAD7.7   | 0.007403 | -0.13856 | 0     | 0.034 | 1 | CSCL1 | SMAD7    |
| CNDP1.10  | 0.007403 | -0.26782 | 0     | 0.034 | 1 | CSCL1 | CNDP1    |
| TFRC.10   | 0.007455 | -0.44092 | 0.154 | 0.21  | 1 | CSCL1 | TFRC     |
| UGCG.5    | 0.007467 | -0.13528 | 0.254 | 0.156 | 1 | CSCL1 | UGCG     |
| ZNF467.9  | 0.00748  | -0.1307  | 0     | 0.034 | 1 | CSCL1 | ZNF467   |
| MIR7-3HG. | 0.007558 | -0.17922 | 0     | 0.034 | 1 | CSCL1 | MIR7-3HG |
| TMC8.10   | 0.007572 | -0.18003 | 0.005 | 0.043 | 1 | CSCL1 | TMC8     |
| DENND1C.1 | 0.007637 | -0.16186 | 0     | 0.034 | 1 | CSCL1 | DENND1C  |
| NFE2L2.8  | 0.007684 | -0.11731 | 0.816 | 0.462 | 1 | CSCL1 | NFE2L2   |
| CCDC91.6  | 0.007736 | -0.17035 | 0.308 | 0.195 | 1 | CSCL1 | CCDC91   |
| DPEP2.10  | 0.007798 | -0.1735  | 0     | 0.034 | 1 | CSCL1 | DPEP2    |
| CD63.11   | 0.007807 | -0.30181 | 0.975 | 0.924 | 1 | CSCL1 | CD63     |
| DERA.6    | 0.007847 | -0.22326 | 0.393 | 0.249 | 1 | CSCL1 | DERA     |



|           |          |          |       |       |   |       |              |
|-----------|----------|----------|-------|-------|---|-------|--------------|
| SPINT1.11 | 0.007879 | -0.13087 | 0     | 0.034 | 1 | CSCL1 | SPINT1       |
| RBM23.4   | 0.007901 | -0.23756 | 0.418 | 0.262 | 1 | CSCL1 | RBM23        |
| LONP2.7   | 0.007929 | -0.16184 | 0.388 | 0.246 | 1 | CSCL1 | LONP2        |
| ATP6V1H.4 | 0.007979 | -0.25735 | 0.527 | 0.319 | 1 | CSCL1 | ATP6V1H      |
| BEX2.11   | 0.00799  | -0.50658 | 0.209 | 0.258 | 1 | CSCL1 | BEX2         |
| GBP1.7    | 0.008025 | -0.17227 | 0.239 | 0.152 | 1 | CSCL1 | GBP1         |
| RP11-161M | 0.008129 | -0.22174 | 0.269 | 0.165 | 1 | CSCL1 | RP11-161M6.2 |
| ABR.7     | 0.00814  | -0.16328 | 0.234 | 0.144 | 1 | CSCL1 | ABR          |
| GBGT1.11  | 0.008177 | -0.17604 | 0.01  | 0.051 | 1 | CSCL1 | GBGT1        |
| MPEG1.10  | 0.008232 | -0.15802 | 0.005 | 0.043 | 1 | CSCL1 | MPEG1        |
| NINJ1.12  | 0.008274 | -0.61206 | 0.542 | 0.45  | 1 | CSCL1 | NINJ1        |
| UQCRC2.5  | 0.008281 | -0.12335 | 0.861 | 0.507 | 1 | CSCL1 | UQCRC2       |
| CBWD5.4   | 0.008292 | -0.15694 | 0.199 | 0.12  | 1 | CSCL1 | CBWD5        |
| MMP14.9   | 0.008302 | -0.2082  | 0.348 | 0.22  | 1 | CSCL1 | MMP14        |
| TXNIP.7   | 0.008332 | -0.2341  | 0.741 | 0.441 | 1 | CSCL1 | TXNIP        |
| MAN2B1.8  | 0.008453 | -0.1021  | 0.119 | 0.066 | 1 | CSCL1 | MAN2B1       |
| FAM13A.4  | 0.008471 | -0.12076 | 0.164 | 0.097 | 1 | CSCL1 | FAM13A       |
| KCNN4.8   | 0.008474 | -0.12281 | 0     | 0.033 | 1 | CSCL1 | KCNN4        |
| DDX18.4   | 0.008551 | -0.13714 | 0.831 | 0.495 | 1 | CSCL1 | DDX18        |
| ATP5E.9   | 0.008561 | -0.18145 | 0.995 | 0.912 | 1 | CSCL1 | ATP5E        |
| ACSM5.7   | 0.008563 | -0.17017 | 0     | 0.033 | 1 | CSCL1 | ACSM5        |
| CNOT6L.3  | 0.008565 | -0.10936 | 0.179 | 0.107 | 1 | CSCL1 | CNOT6L       |
| CYB5A.7   | 0.00862  | -0.26656 | 0.557 | 0.338 | 1 | CSCL1 | CYB5A        |
| CLEC9A.1C | 0.008652 | -0.21253 | 0     | 0.033 | 1 | CSCL1 | CLEC9A       |
| LTB.7     | 0.008743 | -0.1935  | 0     | 0.033 | 1 | CSCL1 | LTB          |
| GREM1.4   | 0.008743 | -0.279   | 0     | 0.033 | 1 | CSCL1 | GREM1        |
| ST3GAL6.1 | 0.00885  | -0.37871 | 0.06  | 0.112 | 1 | CSCL1 | ST3GAL6      |
| SYNDIG1.9 | 0.00888  | -0.28273 | 0.04  | 0.09  | 1 | CSCL1 | SYNDIG1      |
| CPED1.9   | 0.008926 | -0.14319 | 0     | 0.033 | 1 | CSCL1 | CPED1        |
| SP140L.8  | 0.008932 | -0.13449 | 0.134 | 0.077 | 1 | CSCL1 | SP140L       |
| BDH2.5    | 0.00899  | -0.1897  | 0.224 | 0.14  | 1 | CSCL1 | BDH2         |
| PLBD1.12  | 0.009041 | -0.31541 | 0.045 | 0.095 | 1 | CSCL1 | PLBD1        |
| TLR4.10   | 0.009158 | -0.17616 | 0.005 | 0.042 | 1 | CSCL1 | TLR4         |
| PEPD.3    | 0.009297 | -0.21058 | 0.736 | 0.424 | 1 | CSCL1 | PEPD         |
| DICER1.3  | 0.009322 | -0.1465  | 0.274 | 0.173 | 1 | CSCL1 | DICER1       |
| CELF2.12  | 0.009338 | -0.26828 | 0.637 | 0.379 | 1 | CSCL1 | CELF2        |
| C1QTNF4.9 | 0.009389 | -0.15547 | 0.015 | 0.057 | 1 | CSCL1 | C1QTNF4      |
| SEP15.5   | 0.00939  | -0.27276 | 0.905 | 0.652 | 1 | CSCL1 | 15-Sep       |
| WIPF1.12  | 0.009451 | -0.28355 | 0.353 | 0.217 | 1 | CSCL1 | WIPF1        |
| IL2RA.10  | 0.009502 | -0.23461 | 0     | 0.032 | 1 | CSCL1 | IL2RA        |
| ROB03.3   | 0.009636 | -0.14659 | 0.189 | 0.115 | 1 | CSCL1 | ROB03        |
| ZCCHC6.1C | 0.009648 | -0.17666 | 0.219 | 0.134 | 1 | CSCL1 | ZCCHC6       |
| MFSD7.10  | 0.009701 | -0.11905 | 0     | 0.032 | 1 | CSCL1 | MFSD7        |
| TP53TG1.5 | 0.00975  | -0.25742 | 0.308 | 0.195 | 1 | CSCL1 | TP53TG1      |
| COR01B.1C | 0.009815 | -0.22982 | 0.597 | 0.357 | 1 | CSCL1 | COR01B       |
| OTOA.9    | 0.009905 | -0.13671 | 0     | 0.032 | 1 | CSCL1 | OTOA         |
| GNG7.11   | 0.009941 | -0.29013 | 0.478 | 0.296 | 1 | CSCL1 | GNG7         |
| UBE2C.13  | 0        | 1.686765 | 0.737 | 0.092 | 0 | CSCL2 | UBE2C        |
| TOP2A.12  | 0        | 1.6532   | 0.702 | 0.061 | 0 | CSCL2 | TOP2A        |
| NUSAP1.12 | 0        | 1.578214 | 0.726 | 0.079 | 0 | CSCL2 | NUSAP1       |
| PBK.13    | 0        | 1.559586 | 0.704 | 0.048 | 0 | CSCL2 | PBK          |

|            |       |          |       |       |       |       |          |
|------------|-------|----------|-------|-------|-------|-------|----------|
| CENPF. 12  | 0     | 1.491724 | 0.656 | 0.079 | 0     | CSCL2 | CENPF    |
| BIRC5. 13  | 0     | 1.448877 | 0.7   | 0.081 | 0     | CSCL2 | BIRC5    |
| UBE2T. 12  | 0     | 1.443938 | 0.737 | 0.102 | 0     | CSCL2 | UBE2T    |
| RRM2. 12   | 0     | 1.344805 | 0.589 | 0.041 | 0     | CSCL2 | RRM2     |
| MAD2L1. 9  | 0     | 1.335075 | 0.733 | 0.104 | 0     | CSCL2 | MAD2L1   |
| CDK1. 10   | 0     | 1.324925 | 0.625 | 0.075 | 0     | CSCL2 | CDK1     |
| KIAA0101.  | 0     | 1.287579 | 0.667 | 0.095 | 0     | CSCL2 | KIAA0101 |
| FAM64A. 13 | 0     | 1.275822 | 0.561 | 0.049 | 0     | CSCL2 | FAM64A   |
| CENPU. 11  | 0     | 1.270843 | 0.678 | 0.082 | 0     | CSCL2 | CENPU    |
| SGOL1. 11  | 0     | 1.217085 | 0.583 | 0.036 | 0     | CSCL2 | SGOL1    |
| NUF2. 13   | 0     | 1.156642 | 0.517 | 0.044 | 0     | CSCL2 | NUF2     |
| SPC25. 11  | 0     | 1.149141 | 0.503 | 0.044 | 0     | CSCL2 | SPC25    |
| MKI67. 12  | 0     | 1.118242 | 0.486 | 0.046 | 0     | CSCL2 | MKI67    |
| AURKB. 12  | 0     | 1.118086 | 0.466 | 0.032 | 0     | CSCL2 | AURKB    |
| ORC6. 9    | 0     | 1.067909 | 0.592 | 0.071 | 0     | CSCL2 | ORC6     |
| HJURP. 11  | 0     | 0.98655  | 0.377 | 0.026 | 0     | CSCL2 | HJURP    |
| CKAP2L. 12 | 0     | 0.980957 | 0.428 | 0.03  | 0     | CSCL2 | CKAP2L   |
| CDT1. 8    | 0     | 0.952533 | 0.477 | 0.044 | 0     | CSCL2 | CDT1     |
| CDCA5. 9   | 0     | 0.880308 | 0.404 | 0.031 | 0     | CSCL2 | CDCA5    |
| PKMYT1. 7  | 0     | 0.84117  | 0.426 | 0.027 | 0     | CSCL2 | PKMYT1   |
| ESCO2. 3   | 0     | 0.777612 | 0.364 | 0.021 | 0     | CSCL2 | ESCO2    |
| FOXM1. 9   | ##### | 0.89038  | 0.428 | 0.037 | ##### | CSCL2 | FOXM1    |
| CDC45. 5   | ##### | 0.758057 | 0.347 | 0.023 | ##### | CSCL2 | CDC45    |
| KIFC1. 10  | ##### | 0.929065 | 0.453 | 0.043 | ##### | CSCL2 | KIFC1    |
| XRCC2. 3   | ##### | 0.792321 | 0.375 | 0.028 | ##### | CSCL2 | XRCC2    |
| TYMS. 10   | ##### | 1.263509 | 0.724 | 0.138 | ##### | CSCL2 | TYMS     |
| TPX2. 12   | ##### | 1.170757 | 0.532 | 0.064 | ##### | CSCL2 | TPX2     |
| ZWINT. 9   | ##### | 1.041917 | 0.57  | 0.073 | ##### | CSCL2 | ZWINT    |
| NCAPH. 4   | ##### | 0.766442 | 0.342 | 0.023 | ##### | CSCL2 | NCAPH    |
| PRC1. 12   | ##### | 1.186119 | 0.543 | 0.068 | ##### | CSCL2 | PRC1     |
| CLSPN. 8   | ##### | 0.914131 | 0.457 | 0.046 | ##### | CSCL2 | CLSPN    |
| GTSE1. 9   | ##### | 0.941738 | 0.435 | 0.042 | ##### | CSCL2 | GTSE1    |
| CCNA2. 11  | ##### | 0.977092 | 0.428 | 0.041 | ##### | CSCL2 | CCNA2    |
| CENPK. 9   | ##### | 1.036296 | 0.57  | 0.08  | ##### | CSCL2 | CENPK    |
| ASF1B. 9   | ##### | 0.915383 | 0.444 | 0.045 | ##### | CSCL2 | ASF1B    |
| NDC80. 10  | ##### | 1.003497 | 0.391 | 0.034 | ##### | CSCL2 | NDC80    |
| CENPM. 12  | ##### | 0.980968 | 0.492 | 0.057 | ##### | CSCL2 | CENPM    |
| SMC4. 10   | ##### | 1.325333 | 0.786 | 0.189 | ##### | CSCL2 | SMC4     |
| C21orf58.  | ##### | 0.79247  | 0.402 | 0.039 | ##### | CSCL2 | C21orf58 |
| CENPH. 8   | ##### | 1.035456 | 0.625 | 0.106 | ##### | CSCL2 | CENPH    |
| MXD3. 11   | ##### | 0.928525 | 0.435 | 0.048 | ##### | CSCL2 | MXD3     |
| GINS2. 8   | ##### | 1.045428 | 0.545 | 0.082 | ##### | CSCL2 | GINS2    |
| MELK. 8    | ##### | 0.817307 | 0.366 | 0.033 | ##### | CSCL2 | MELK     |
| DTL. 1     | ##### | 0.59147  | 0.26  | 0.015 | ##### | CSCL2 | DTL      |
| NCAPG. 10  | ##### | 0.785331 | 0.342 | 0.029 | ##### | CSCL2 | NCAPG    |
| CCNB2. 11  | ##### | 1.08401  | 0.428 | 0.049 | ##### | CSCL2 | CCNB2    |
| FAM111B. 1 | ##### | 0.628435 | 0.272 | 0.017 | ##### | CSCL2 | FAM111B  |
| KIF15. 2   | ##### | 0.66527  | 0.3   | 0.023 | ##### | CSCL2 | KIF15    |
| E2F1. 7    | ##### | 0.786775 | 0.386 | 0.041 | ##### | CSCL2 | E2F1     |
| ATAD2. 8   | ##### | 0.865257 | 0.453 | 0.061 | ##### | CSCL2 | ATAD2    |
| RAD51. 2   | ##### | 0.590919 | 0.269 | 0.018 | ##### | CSCL2 | RAD51    |

|           |       |          |       |       |       |       |            |
|-----------|-------|----------|-------|-------|-------|-------|------------|
| CDCA8.10  | ##### | 0.889598 | 0.318 | 0.028 | ##### | CSCL2 | CDCA8      |
| RAD51AP1. | ##### | 0.848664 | 0.417 | 0.052 | ##### | CSCL2 | RAD51AP1   |
| EZH2.12   | ##### | 1.022874 | 0.638 | 0.134 | ##### | CSCL2 | EZH2       |
| MND1.6    | ##### | 0.710032 | 0.336 | 0.033 | ##### | CSCL2 | MND1       |
| CDKN3.12  | ##### | 1.207832 | 0.49  | 0.076 | ##### | CSCL2 | CDKN3      |
| SGOL2.11  | ##### | 1.035777 | 0.481 | 0.074 | ##### | CSCL2 | SGOL2      |
| MYBL2.9   | ##### | 0.721296 | 0.333 | 0.033 | ##### | CSCL2 | MYBL2      |
| ECT2.9    | ##### | 0.810595 | 0.351 | 0.037 | ##### | CSCL2 | ECT2       |
| SPC24.10  | ##### | 0.81768  | 0.349 | 0.037 | ##### | CSCL2 | SPC24      |
| ASPM.12   | ##### | 0.906343 | 0.34  | 0.035 | ##### | CSCL2 | ASPM       |
| LMNB1.11  | ##### | 1.039316 | 0.618 | 0.131 | ##### | CSCL2 | LMNB1      |
| SKA3.2    | ##### | 0.583066 | 0.294 | 0.026 | ##### | CSCL2 | SKA3       |
| KIF2C.11  | ##### | 0.804429 | 0.322 | 0.032 | ##### | CSCL2 | KIF2C      |
| E2F2.1    | ##### | 0.364529 | 0.155 | 0.005 | ##### | CSCL2 | E2F2       |
| PTTG1.11  | ##### | 1.348007 | 0.74  | 0.21  | ##### | CSCL2 | PTTG1      |
| SMC2.9    | ##### | 1.029302 | 0.693 | 0.18  | ##### | CSCL2 | SMC2       |
| HMGB2.12  | ##### | 1.084286 | 0.951 | 0.476 | ##### | CSCL2 | HMGB2      |
| CENPN.9   | ##### | 0.922244 | 0.461 | 0.072 | ##### | CSCL2 | CENPN      |
| TK1.10    | ##### | 0.793082 | 0.417 | 0.057 | ##### | CSCL2 | TK1        |
| CDC6.2    | ##### | 0.613091 | 0.276 | 0.024 | ##### | CSCL2 | CDC6       |
| CDCA3.11  | ##### | 0.964471 | 0.347 | 0.04  | ##### | CSCL2 | CDCA3      |
| ZNF367.2  | ##### | 0.5423   | 0.252 | 0.02  | ##### | CSCL2 | ZNF367     |
| HELLS.5   | ##### | 0.770698 | 0.382 | 0.051 | ##### | CSCL2 | HELLS      |
| EXO1.2    | ##### | 0.414819 | 0.185 | 0.01  | ##### | CSCL2 | EXO1       |
| WDR62.1   | ##### | 0.490392 | 0.227 | 0.017 | ##### | CSCL2 | WDR62      |
| MCM10.2   | ##### | 0.423791 | 0.216 | 0.015 | ##### | CSCL2 | MCM10      |
| HES6.11   | ##### | 1.117565 | 0.779 | 0.266 | ##### | CSCL2 | HES6       |
| MCM2.4    | ##### | 0.737401 | 0.377 | 0.053 | ##### | CSCL2 | MCM2       |
| RFC3.7    | ##### | 0.803654 | 0.442 | 0.073 | ##### | CSCL2 | RFC3       |
| FBXO5.7   | ##### | 0.910089 | 0.455 | 0.082 | ##### | CSCL2 | FBXO5      |
| SPAG5.7   | ##### | 0.716398 | 0.302 | 0.034 | ##### | CSCL2 | SPAG5      |
| CENPE.11  | ##### | 0.947231 | 0.338 | 0.044 | ##### | CSCL2 | CENPE      |
| TACC3.9   | ##### | 0.802928 | 0.411 | 0.064 | ##### | CSCL2 | TACC3      |
| RAD54L.2  | ##### | 0.392064 | 0.185 | 0.012 | ##### | CSCL2 | RAD54L     |
| PSMC3IP.9 | ##### | 0.735722 | 0.384 | 0.058 | ##### | CSCL2 | PSMC3IP    |
| MCM7.12   | ##### | 1.061216 | 0.711 | 0.236 | ##### | CSCL2 | MCM7       |
| HMGB3.12  | ##### | 1.019201 | 0.766 | 0.259 | ##### | CSCL2 | HMGB3      |
| RACGAP1.6 | ##### | 0.865534 | 0.415 | 0.07  | ##### | CSCL2 | RACGAP1    |
| WDR76.3   | ##### | 0.662533 | 0.329 | 0.043 | ##### | CSCL2 | WDR76      |
| FANCI.7   | ##### | 0.625435 | 0.302 | 0.036 | ##### | CSCL2 | FANCI      |
| H2AFX.9   | ##### | 1.027276 | 0.664 | 0.201 | ##### | CSCL2 | H2AFX      |
| NEK2.8    | ##### | 0.731227 | 0.252 | 0.025 | ##### | CSCL2 | NEK2       |
| FAM83D.4  | ##### | 0.721985 | 0.258 | 0.026 | ##### | CSCL2 | FAM83D     |
| MCM4.10   | ##### | 0.800945 | 0.442 | 0.082 | ##### | CSCL2 | MCM4       |
| FBLN1.11  | ##### | 0.764913 | 0.428 | 0.071 | ##### | CSCL2 | FBLN1      |
| CHEK1.6   | ##### | 0.727936 | 0.404 | 0.067 | ##### | CSCL2 | CHEK1      |
| AC004381. | ##### | 0.524615 | 0.225 | 0.019 | ##### | CSCL2 | AC004381.6 |
| ASCL1.11  | ##### | 0.927806 | 0.638 | 0.167 | ##### | CSCL2 | ASCL1      |
| RNASEH2A. | ##### | 0.938247 | 0.662 | 0.193 | ##### | CSCL2 | RNASEH2A   |
| FEN1.6    | ##### | 0.905244 | 0.532 | 0.12  | ##### | CSCL2 | FEN1       |
| CCNB1.11  | ##### | 1.130568 | 0.426 | 0.077 | ##### | CSCL2 | CCNB1      |

|            |       |           |        |        |       |       |           |
|------------|-------|-----------|--------|--------|-------|-------|-----------|
| KIF23. 8   | ##### | 0. 6808   | 0. 274 | 0. 03  | ##### | CSCL2 | KIF23     |
| GGH. 10    | ##### | 0. 942199 | 0. 74  | 0. 244 | ##### | CSCL2 | GGH       |
| CDCA4. 8   | ##### | 0. 817969 | 0. 419 | 0. 075 | ##### | CSCL2 | CDCA4     |
| CDC20. 10  | ##### | 1. 034455 | 0. 366 | 0. 056 | ##### | CSCL2 | CDC20     |
| CASC5. 2   | ##### | 0. 514744 | 0. 236 | 0. 022 | ##### | CSCL2 | CASC5     |
| OIP5. 6    | ##### | 0. 675808 | 0. 278 | 0. 032 | ##### | CSCL2 | OIP5      |
| TMSB15A. 1 | ##### | 0. 894156 | 0. 62  | 0. 161 | ##### | CSCL2 | TMSB15A   |
| CCNE2. 9   | ##### | 0. 703958 | 0. 338 | 0. 047 | ##### | CSCL2 | CCNE2     |
| CHAF1A. 7  | ##### | 0. 735028 | 0. 417 | 0. 076 | ##### | CSCL2 | CHAF1A    |
| CENPA. 11  | ##### | 0. 799963 | 0. 302 | 0. 039 | ##### | CSCL2 | CENPA     |
| NMU. 1     | ##### | 0. 661295 | 0. 225 | 0. 021 | ##### | CSCL2 | NMU       |
| TRIP13. 3  | ##### | 0. 560154 | 0. 291 | 0. 036 | ##### | CSCL2 | TRIP13    |
| HIST1H4C.  | ##### | 1. 119486 | 0. 83  | 0. 408 | ##### | CSCL2 | HIST1H4C  |
| RTKN2. 1   | ##### | 0. 536287 | 0. 247 | 0. 026 | ##### | CSCL2 | RTKN2     |
| DHFR. 9    | ##### | 0. 8871   | 0. 536 | 0. 135 | ##### | CSCL2 | DHFR      |
| CDC25C. 2  | ##### | 0. 531101 | 0. 194 | 0. 015 | ##### | CSCL2 | CDC25C    |
| RFC4. 9    | ##### | 0. 849268 | 0. 558 | 0. 14  | ##### | CSCL2 | RFC4      |
| TMPO. 11   | ##### | 0. 856579 | 0. 625 | 0. 176 | ##### | CSCL2 | TMPO      |
| CKAP2. 10  | ##### | 1. 010304 | 0. 574 | 0. 153 | ##### | CSCL2 | CKAP2     |
| TENM3. 1   | ##### | 0. 411045 | 0. 196 | 0. 016 | ##### | CSCL2 | TENM3     |
| GMNN. 10   | ##### | 0. 809875 | 0. 594 | 0. 16  | ##### | CSCL2 | GMNN      |
| FANCD2. 2  | ##### | 0. 525651 | 0. 254 | 0. 028 | ##### | CSCL2 | FANCD2    |
| DBF4. 10   | ##### | 0. 871753 | 0. 481 | 0. 106 | ##### | CSCL2 | DBF4      |
| BEST3. 10  | ##### | 0. 821407 | 0. 408 | 0. 074 | ##### | CSCL2 | BEST3     |
| KIF4A. 3   | ##### | 0. 6155   | 0. 241 | 0. 026 | ##### | CSCL2 | KIF4A     |
| SHCBP1. 9  | ##### | 0. 651645 | 0. 307 | 0. 043 | ##### | CSCL2 | SHCBP1    |
| SKA1. 2    | ##### | 0. 610622 | 0. 221 | 0. 022 | ##### | CSCL2 | SKA1      |
| KIF20A. 2  | ##### | 0. 544117 | 0. 212 | 0. 02  | ##### | CSCL2 | KIF20A    |
| TROAP. 11  | ##### | 0. 723344 | 0. 283 | 0. 037 | ##### | CSCL2 | TROAP     |
| TIMELESS.  | ##### | 0. 657239 | 0. 331 | 0. 051 | ##### | CSCL2 | TIMELESS  |
| C16orf59.  | ##### | 0. 582202 | 0. 276 | 0. 035 | ##### | CSCL2 | C16orf59  |
| POC1A. 8   | ##### | 0. 698887 | 0. 313 | 0. 046 | ##### | CSCL2 | POC1A     |
| PHGDH. 11  | ##### | 0. 857833 | 0. 629 | 0. 182 | ##### | CSCL2 | PHGDH     |
| PCNA. 9    | ##### | 0. 934202 | 0. 737 | 0. 298 | ##### | CSCL2 | PCNA      |
| VIPR2. 11  | ##### | 0. 708537 | 0. 393 | 0. 07  | ##### | CSCL2 | VIPR2     |
| PCSK2. 8   | ##### | 0. 477839 | 0. 21  | 0. 02  | ##### | CSCL2 | PCSK2     |
| DLGAP5. 11 | ##### | 0. 66685  | 0. 238 | 0. 027 | ##### | CSCL2 | DLGAP5    |
| TTK. 2     | ##### | 0. 636373 | 0. 205 | 0. 02  | ##### | CSCL2 | TTK       |
| BUB1. 7    | ##### | 0. 713951 | 0. 254 | 0. 032 | ##### | CSCL2 | BUB1      |
| SHD. 11    | ##### | 0. 721419 | 0. 497 | 0. 111 | ##### | CSCL2 | SHD       |
| H2AFZ. 6   | ##### | 0. 629537 | 0. 974 | 0. 73  | ##### | CSCL2 | H2AFZ     |
| TUBB. 11   | ##### | 0. 568065 | 0. 993 | 0. 762 | ##### | CSCL2 | TUBB      |
| NCAPG2. 6  | ##### | 0. 566288 | 0. 325 | 0. 053 | ##### | CSCL2 | NCAPG2    |
| H2AFV. 10  | ##### | 0. 784448 | 0. 881 | 0. 508 | ##### | CSCL2 | H2AFV     |
| STMN1. 12  | ##### | 0. 745392 | 0. 993 | 0. 616 | ##### | CSCL2 | STMN1     |
| ARHGAP11E  | ##### | 0. 528362 | 0. 247 | 0. 03  | ##### | CSCL2 | ARHGAP11B |
| ARHGAP11A  | ##### | 0. 600762 | 0. 245 | 0. 03  | ##### | CSCL2 | ARHGAP11A |
| MCM3. 7    | ##### | 0. 791562 | 0. 501 | 0. 128 | ##### | CSCL2 | MCM3      |
| FANCA. 4   | ##### | 0. 579774 | 0. 309 | 0. 048 | ##### | CSCL2 | FANCA     |
| DEPDC1B. 4 | ##### | 0. 540164 | 0. 234 | 0. 028 | ##### | CSCL2 | DEPDC1B   |
| CENPO. 2   | ##### | 0. 5259   | 0. 26  | 0. 035 | ##### | CSCL2 | CENPO     |

|           |          |          |       |       |          |       |               |
|-----------|----------|----------|-------|-------|----------|-------|---------------|
| CKS2.12   | #####    | 0.916885 | 0.79  | 0.349 | #####    | CSCL2 | CKS2          |
| CNPY1.11  | #####    | 0.607132 | 0.36  | 0.066 | #####    | CSCL2 | CNPY1         |
| BARD1.9   | #####    | 0.796376 | 0.501 | 0.132 | #####    | CSCL2 | BARD1         |
| RP11-676J | #####    | 0.456912 | 0.216 | 0.024 | #####    | CSCL2 | RP11-676J15.1 |
| TCF19.3   | #####    | 0.567362 | 0.272 | 0.039 | #####    | CSCL2 | TCF19         |
| C19orf48. | #####    | 0.838992 | 0.618 | 0.211 | #####    | CSCL2 | C19orf48      |
| CDC25A.1  | #####    | 0.367953 | 0.177 | 0.016 | #####    | CSCL2 | CDC25A        |
| KIF18B.2  | #####    | 0.365319 | 0.177 | 0.016 | #####    | CSCL2 | KIF18B        |
| ATAD5.6   | #####    | 0.643064 | 0.344 | 0.064 | #####    | CSCL2 | ATAD5         |
| CDCA7L.8  | #####    | 0.739278 | 0.499 | 0.135 | #####    | CSCL2 | CDCA7L        |
| TUBA1B.8  | #####    | 0.463481 | 1     | 0.891 | #####    | CSCL2 | TUBA1B        |
| DSN1.6    | #####    | 0.683211 | 0.397 | 0.088 | #####    | CSCL2 | DSN1          |
| CDCA2.2   | #####    | 0.500014 | 0.208 | 0.024 | #####    | CSCL2 | CDCA2         |
| BRCA2.5   | #####    | 0.527692 | 0.26  | 0.037 | #####    | CSCL2 | BRCA2         |
| CCDC34.9  | #####    | 0.881675 | 0.523 | 0.153 | #####    | CSCL2 | CCDC34        |
| BUB1B.2   | #####    | 0.435713 | 0.185 | 0.019 | #####    | CSCL2 | BUB1B         |
| VRK1.5    | #####    | 0.661629 | 0.402 | 0.089 | #####    | CSCL2 | VRK1          |
| DIAPH3.2  | #####    | 0.481335 | 0.21  | 0.025 | #####    | CSCL2 | DIAPH3        |
| BRCA1.3   | #####    | 0.530687 | 0.285 | 0.047 | #####    | CSCL2 | BRCA1         |
| DEK.9     | #####    | 0.761564 | 0.799 | 0.451 | #####    | CSCL2 | DEK           |
| DTYMK.12  | #####    | 0.805735 | 0.724 | 0.314 | #####    | CSCL2 | DTYMK         |
| ASRGL1.11 | #####    | 0.75017  | 0.574 | 0.186 | #####    | CSCL2 | ASRGL1        |
| RMI2.2    | #####    | 0.467974 | 0.23  | 0.031 | #####    | CSCL2 | RMI2          |
| RRM1.9    | #####    | 0.765784 | 0.545 | 0.171 | 1.16E-99 | CSCL2 | RRM1          |
| CEP152.2  | #####    | 0.420643 | 0.208 | 0.025 | 2.58E-99 | CSCL2 | CEP152        |
| CKB.13    | #####    | 0.695544 | 0.954 | 0.567 | 2.91E-99 | CSCL2 | CKB           |
| HMGB1.7   | #####    | 0.396336 | 0.987 | 0.856 | 4.62E-98 | CSCL2 | HMGB1         |
| SYNE2.12  | #####    | 0.690726 | 0.53  | 0.16  | 1.89E-97 | CSCL2 | SYNE2         |
| SOX2.13   | #####    | 0.742581 | 0.848 | 0.413 | 6.98E-97 | CSCL2 | SOX2          |
| CEP135.6  | #####    | 0.740491 | 0.336 | 0.07  | 1.27E-96 | CSCL2 | CEP135        |
| LMO1.11   | #####    | 0.649131 | 0.331 | 0.064 | 3.20E-96 | CSCL2 | LMO1          |
| EME1.2    | #####    | 0.371079 | 0.177 | 0.019 | 4.47E-96 | CSCL2 | EME1          |
| CENPW.9   | #####    | 0.694941 | 0.428 | 0.105 | 6.03E-96 | CSCL2 | CENPW         |
| B4GALNT1. | 1.39E-99 | 0.910351 | 0.464 | 0.13  | 2.08E-95 | CSCL2 | B4GALNT1      |
| CDK2.7    | 7.25E-99 | 0.666193 | 0.344 | 0.073 | 1.08E-94 | CSCL2 | CDK2          |
| NUDT1.6   | 7.96E-99 | 0.697406 | 0.757 | 0.334 | 1.19E-94 | CSCL2 | NUDT1         |
| RANBP1.12 | 8.36E-99 | 0.730231 | 0.901 | 0.565 | 1.25E-94 | CSCL2 | RANBP1        |
| GLCCI1.11 | 7.75E-98 | 0.693009 | 0.492 | 0.138 | 1.16E-93 | CSCL2 | GLCCI1        |
| UBE2S.10  | 1.80E-97 | 1.003244 | 0.704 | 0.33  | 2.68E-93 | CSCL2 | UBE2S         |
| MMS22L.4  | 1.83E-97 | 0.534389 | 0.296 | 0.054 | 2.74E-93 | CSCL2 | MMS22L        |
| RASL11B.1 | 9.93E-97 | 0.611975 | 0.272 | 0.045 | 1.48E-92 | CSCL2 | RASL11B       |
| KIF11.2   | 1.34E-96 | 0.430216 | 0.192 | 0.023 | 2.01E-92 | CSCL2 | KIF11         |
| DSEL.13   | 2.71E-96 | 0.799828 | 0.592 | 0.21  | 4.05E-92 | CSCL2 | DSEL          |
| LIG1.3    | 2.82E-95 | 0.569241 | 0.313 | 0.062 | 4.21E-91 | CSCL2 | LIG1          |
| NPC2.12   | 5.17E-95 | -1.38852 | 0.263 | 0.709 | 7.73E-91 | CSCL2 | NPC2          |
| TFAP2B.8  | 9.60E-95 | 0.38311  | 0.19  | 0.023 | 1.44E-90 | CSCL2 | TFAP2B        |
| E2F8.2    | 1.57E-94 | 0.295752 | 0.115 | 0.008 | 2.35E-90 | CSCL2 | E2F8          |
| TUBB2B.12 | 1.46E-93 | 0.619787 | 0.965 | 0.538 | 2.19E-89 | CSCL2 | TUBB2B        |
| RFC5.5    | 7.13E-93 | 0.595376 | 0.351 | 0.079 | 1.07E-88 | CSCL2 | RFC5          |
| PLK4.2    | 1.74E-92 | 0.364903 | 0.17  | 0.019 | 2.60E-88 | CSCL2 | PLK4          |
| MCM6.3    | 1.88E-92 | 0.637368 | 0.355 | 0.082 | 2.81E-88 | CSCL2 | MCM6          |

|            |          |          |       |       |          |       |               |
|------------|----------|----------|-------|-------|----------|-------|---------------|
| PITX2.3    | 5.45E-92 | 0.357547 | 0.185 | 0.022 | 8.15E-88 | CSCL2 | PITX2         |
| POLA2.3    | 5.71E-92 | 0.454143 | 0.258 | 0.044 | 8.53E-88 | CSCL2 | POLA2         |
| NPY.1      | 2.24E-91 | 0.477034 | 0.15  | 0.015 | 3.35E-87 | CSCL2 | NPY           |
| RPA3.8     | 1.29E-90 | 0.709207 | 0.733 | 0.327 | 1.93E-86 | CSCL2 | RPA3          |
| S100A11.1  | 2.67E-90 | -1.36477 | 0.225 | 0.674 | 3.99E-86 | CSCL2 | S100A11       |
| DNAJC9.7   | 7.29E-90 | 0.637098 | 0.492 | 0.149 | 1.09E-85 | CSCL2 | DNAJC9        |
| KIAA1524.8 | 7.77E-90 | 0.570382 | 0.247 | 0.042 | 1.31E-85 | CSCL2 | KIAA1524      |
| PSIP1.10   | 3.36E-89 | 0.760262 | 0.744 | 0.369 | 5.01E-85 | CSCL2 | PSIP1         |
| CDKN2C.9   | 5.64E-88 | 0.855562 | 0.642 | 0.268 | 8.43E-84 | CSCL2 | CDKN2C        |
| APOLD1.5   | 6.15E-88 | 0.568272 | 0.243 | 0.041 | 9.19E-84 | CSCL2 | APOLD1        |
| ZNF273.11  | 6.39E-88 | 0.537226 | 0.336 | 0.074 | 9.55E-84 | CSCL2 | ZNF273        |
| PLK1.10    | 1.25E-87 | 0.828985 | 0.258 | 0.046 | 1.86E-83 | CSCL2 | PLK1          |
| TMEM100.1  | 2.30E-87 | 0.501926 | 0.353 | 0.078 | 3.43E-83 | CSCL2 | TMEM100       |
| CENPV.12   | 2.58E-86 | 0.716603 | 0.611 | 0.241 | 3.85E-82 | CSCL2 | CENPV         |
| KLHL23.11  | 2.71E-86 | 0.66425  | 0.481 | 0.148 | 4.05E-82 | CSCL2 | KLHL23        |
| RP11-849I  | 3.17E-86 | 0.667733 | 0.428 | 0.12  | 4.74E-82 | CSCL2 | RP11-849I19.1 |
| GSX1.1     | 4.72E-86 | 0.343371 | 0.155 | 0.016 | 7.06E-82 | CSCL2 | GSX1          |
| NFIB.11    | 9.69E-85 | 0.687403 | 0.779 | 0.362 | 1.45E-80 | CSCL2 | NFIB          |
| NEURL1B.2  | 1.35E-84 | 0.41809  | 0.183 | 0.024 | 2.02E-80 | CSCL2 | NEURL1B       |
| CDKN2A.7   | 2.01E-84 | 0.778363 | 0.366 | 0.092 | 3.00E-80 | CSCL2 | CDKN2A        |
| HMMR.8     | 3.08E-84 | 0.566404 | 0.214 | 0.033 | 4.60E-80 | CSCL2 | HMMR          |
| PARPBP.3   | 9.65E-84 | 0.512935 | 0.23  | 0.038 | 1.44E-79 | CSCL2 | PARPBP        |
| AGAP2-AS1  | 1.18E-83 | 0.761846 | 0.349 | 0.085 | 1.76E-79 | CSCL2 | AGAP2-AS1     |
| KPNA2.9    | 1.37E-83 | 0.833607 | 0.711 | 0.341 | 2.04E-79 | CSCL2 | KPNA2         |
| STIL.2     | 2.35E-83 | 0.31471  | 0.139 | 0.014 | 3.52E-79 | CSCL2 | STIL          |
| SFRP2.1    | 3.57E-83 | 0.21182  | 0.091 | 0.005 | 5.33E-79 | CSCL2 | SFRP2         |
| HOXA10.12  | 4.51E-83 | 0.539784 | 0.316 | 0.068 | 6.75E-79 | CSCL2 | HOXA10        |
| XRCC6BP1.9 | 7.07E-82 | 0.627024 | 0.313 | 0.071 | 1.45E-77 | CSCL2 | XRCC6BP1      |
| ZWILCH.6   | 1.08E-81 | 0.515986 | 0.305 | 0.066 | 1.61E-77 | CSCL2 | ZWILCH        |
| NUP107.11  | 1.11E-81 | 0.928551 | 0.543 | 0.21  | 1.66E-77 | CSCL2 | NUP107        |
| CCND2.13   | 3.11E-81 | 0.751476 | 0.671 | 0.313 | 4.64E-77 | CSCL2 | CCND2         |
| CKS1B.8    | 3.20E-81 | 0.79746  | 0.6   | 0.245 | 4.78E-77 | CSCL2 | CKS1B         |
| CCDC150.1  | 5.49E-81 | 0.298599 | 0.141 | 0.015 | 8.21E-77 | CSCL2 | CCDC150       |
| YEATS4.1C  | 5.94E-81 | 0.947572 | 0.576 | 0.238 | 8.88E-77 | CSCL2 | YEATS4        |
| DLL3.11    | 7.27E-81 | 0.669082 | 0.455 | 0.131 | 1.09E-76 | CSCL2 | DLL3          |
| PRIM1.8    | 9.79E-81 | 0.563062 | 0.318 | 0.072 | 1.46E-76 | CSCL2 | PRIM1         |
| MIS18A.7   | 1.08E-80 | 0.590821 | 0.369 | 0.095 | 1.62E-76 | CSCL2 | MIS18A        |
| HOXB2.9    | 1.11E-80 | 0.541595 | 0.329 | 0.074 | 1.67E-76 | CSCL2 | HOXB2         |
| LRR1.6     | 1.35E-80 | 0.623254 | 0.327 | 0.077 | 2.02E-76 | CSCL2 | LRR1          |
| NASP.7     | 3.13E-80 | 0.655873 | 0.751 | 0.395 | 4.68E-76 | CSCL2 | NASP          |
| BCAN.13    | 3.33E-80 | 0.771661 | 0.634 | 0.261 | 4.98E-76 | CSCL2 | BCAN          |
| OLIG2.12   | 3.72E-80 | 0.673947 | 0.501 | 0.165 | 5.55E-76 | CSCL2 | OLIG2         |
| CCNF.5     | 7.84E-80 | 0.442098 | 0.199 | 0.03  | 1.17E-75 | CSCL2 | CCNF          |
| WDR34.9    | 2.91E-79 | 0.706735 | 0.523 | 0.194 | 4.35E-75 | CSCL2 | WDR34         |
| DEPDC1.5   | 4.75E-79 | 0.503348 | 0.194 | 0.029 | 7.10E-75 | CSCL2 | DEPDC1        |
| KIF18A.1   | 9.52E-79 | 0.322939 | 0.163 | 0.021 | 1.42E-74 | CSCL2 | KIF18A        |
| GINS1.6    | 1.62E-78 | 0.527128 | 0.245 | 0.047 | 2.42E-74 | CSCL2 | GINS1         |
| AC009506.2 | 4.4E-78  | 0.522583 | 0.313 | 0.071 | 3.64E-74 | CSCL2 | AC009506.1    |
| HIST1H1D.5 | 9.2E-78  | 0.466438 | 0.166 | 0.021 | 8.85E-74 | CSCL2 | HIST1H1D      |
| TEX30.7    | 7.24E-78 | 0.645356 | 0.468 | 0.153 | 1.08E-73 | CSCL2 | TEX30         |
| CRNDE.8    | 7.41E-78 | 0.724591 | 0.479 | 0.167 | 1.11E-73 | CSCL2 | CRNDE         |

|            |          |          |       |       |          |       |            |
|------------|----------|----------|-------|-------|----------|-------|------------|
| ZNF680.1C  | 1.97E-77 | 0.629252 | 0.486 | 0.161 | 2.94E-73 | CSCL2 | ZNF680     |
| ODC1.12    | 2.13E-77 | 0.69787  | 0.709 | 0.381 | 3.18E-73 | CSCL2 | ODC1       |
| SEZ6.11    | 4.01E-77 | 0.717001 | 0.419 | 0.128 | 5.99E-73 | CSCL2 | SEZ6       |
| MTFR2.2    | 7.06E-77 | 0.363819 | 0.135 | 0.014 | 1.06E-72 | CSCL2 | MTFR2      |
| USP1.10    | 9.84E-77 | 0.647334 | 0.594 | 0.245 | 1.47E-72 | CSCL2 | USP1       |
| DLL1.7     | 3.01E-76 | 0.511654 | 0.291 | 0.062 | 4.49E-72 | CSCL2 | DLL1       |
| TSPAN12.1  | 3.73E-76 | 0.652185 | 0.384 | 0.11  | 5.57E-72 | CSCL2 | TSPAN12    |
| RFC2.6     | 1.62E-75 | 0.657654 | 0.578 | 0.228 | 2.43E-71 | CSCL2 | RFC2       |
| LHFPL3.13  | 1.87E-75 | 0.682565 | 0.38  | 0.109 | 2.80E-71 | CSCL2 | LHFPL3     |
| SAT1.11    | 4.15E-75 | -0.92338 | 0.563 | 0.812 | 6.20E-71 | CSCL2 | SAT1       |
| KIF20B.9   | 5.42E-75 | 0.583926 | 0.325 | 0.078 | 8.10E-71 | CSCL2 | KIF20B     |
| ETV1.13    | 2.56E-74 | 0.811364 | 0.552 | 0.232 | 3.83E-70 | CSCL2 | ETV1       |
| HMG2.4     | 2.95E-74 | 0.649334 | 0.843 | 0.623 | 4.41E-70 | CSCL2 | HMG2       |
| RAD21.11   | 3.49E-74 | 0.674746 | 0.711 | 0.352 | 5.21E-70 | CSCL2 | RAD21      |
| RECQL4.2   | 4.20E-74 | 0.379712 | 0.177 | 0.026 | 6.27E-70 | CSCL2 | RECQL4     |
| GINS3.2    | 6.10E-74 | 0.342548 | 0.188 | 0.029 | 9.12E-70 | CSCL2 | GINS3      |
| KIF22.8    | 1.10E-73 | 0.599707 | 0.521 | 0.184 | 1.64E-69 | CSCL2 | KIF22      |
| YBX1.9     | 1.12E-73 | 0.41671  | 0.943 | 0.756 | 1.68E-69 | CSCL2 | YBX1       |
| TMEM237.1  | 4.59E-73 | 0.589673 | 0.492 | 0.174 | 6.86E-69 | CSCL2 | TMEM237    |
| MCM8.2     | 4.65E-73 | 0.3918   | 0.201 | 0.034 | 6.95E-69 | CSCL2 | MCM8       |
| NRXN1.11   | 5.72E-73 | 0.543749 | 0.486 | 0.15  | 8.56E-69 | CSCL2 | NRXN1      |
| NUCKS1.8   | 1.03E-72 | 0.526923 | 0.901 | 0.626 | 1.54E-68 | CSCL2 | NUCKS1     |
| TRAIIP.2   | 1.26E-72 | 0.352695 | 0.177 | 0.026 | 1.88E-68 | CSCL2 | TRAIIP     |
| HOXA2.11   | 1.27E-72 | 0.412127 | 0.294 | 0.063 | 1.91E-68 | CSCL2 | HOXA2      |
| C5orf34.2  | 1.37E-72 | 0.399514 | 0.15  | 0.019 | 2.04E-68 | CSCL2 | C5orf34    |
| SAPCD2.8   | 1.67E-72 | 0.592263 | 0.243 | 0.049 | 2.49E-68 | CSCL2 | SAPCD2     |
| KNSTRN.7   | 4.40E-72 | 0.651938 | 0.298 | 0.07  | 6.57E-68 | CSCL2 | KNSTRN     |
| FXD6.13    | 6.38E-72 | 0.632017 | 0.852 | 0.445 | 9.53E-68 | CSCL2 | FXD6       |
| PEG10.9    | 1.92E-71 | 0.532586 | 0.355 | 0.092 | 2.86E-67 | CSCL2 | PEG10      |
| WHSC1.9    | 3.04E-71 | 0.598367 | 0.433 | 0.142 | 4.54E-67 | CSCL2 | WHSC1      |
| ZNF738.11  | 3.39E-71 | 0.564899 | 0.422 | 0.133 | 5.06E-67 | CSCL2 | ZNF738     |
| AC002454.1 | 1.12E-70 | 0.320455 | 0.121 | 0.012 | 1.67E-66 | CSCL2 | AC002454.1 |
| CDK6.10    | 1.23E-70 | 0.737951 | 0.506 | 0.193 | 1.83E-66 | CSCL2 | CDK6       |
| HAUS8.5    | 2.13E-70 | 0.545762 | 0.305 | 0.074 | 3.18E-66 | CSCL2 | HAUS8      |
| LRRN1.10   | 2.24E-70 | 0.570126 | 0.353 | 0.096 | 3.34E-66 | CSCL2 | LRRN1      |
| ITGB3BP.9  | 3.01E-70 | 0.633733 | 0.415 | 0.132 | 4.49E-66 | CSCL2 | ITGB3BP    |
| KIF14.2    | 4.83E-70 | 0.431449 | 0.166 | 0.024 | 7.22E-66 | CSCL2 | KIF14      |
| NEAT1.9    | 7.18E-70 | -0.79804 | 0.499 | 0.773 | 1.07E-65 | CSCL2 | NEAT1      |
| BMP7.13    | 1.07E-69 | 0.625242 | 0.446 | 0.155 | 1.60E-65 | CSCL2 | BMP7       |
| ZNF92.10   | 2.64E-69 | 0.531129 | 0.428 | 0.135 | 3.95E-65 | CSCL2 | ZNF92      |
| HIRIP3.7   | 2.90E-69 | 0.611832 | 0.45  | 0.154 | 4.33E-65 | CSCL2 | HIRIP3     |
| DNMT1.11   | 3.09E-69 | 0.717347 | 0.6   | 0.274 | 4.61E-65 | CSCL2 | DNMT1      |
| PTPRZ1.13  | 6.33E-69 | 0.623884 | 0.755 | 0.369 | 9.46E-65 | CSCL2 | PTPRZ1     |
| MPPED2.1C  | 1.61E-68 | 0.507426 | 0.316 | 0.08  | 2.41E-64 | CSCL2 | MPPED2     |
| CBX5.11    | 2.47E-68 | 0.600472 | 0.664 | 0.331 | 3.68E-64 | CSCL2 | CBX5       |
| HOXA9.9    | 2.61E-68 | 0.355099 | 0.183 | 0.029 | 3.90E-64 | CSCL2 | HOXA9      |
| CHAF1B.1   | 2.86E-68 | 0.372475 | 0.192 | 0.032 | 4.27E-64 | CSCL2 | CHAF1B     |
| ANP32E.11  | 3.13E-68 | 0.76018  | 0.576 | 0.255 | 4.68E-64 | CSCL2 | ANP32E     |
| PRIM2.2    | 3.63E-68 | 0.434343 | 0.238 | 0.048 | 5.42E-64 | CSCL2 | PRIM2      |
| MAGI1.10   | 5.61E-68 | 0.579928 | 0.503 | 0.185 | 8.38E-64 | CSCL2 | MAGI1      |
| SH3BGRL3.1 | 1.12E-67 | -0.7798  | 0.55  | 0.786 | 1.68E-63 | CSCL2 | SH3BGRL3   |

|           |          |          |       |       |          |       |            |
|-----------|----------|----------|-------|-------|----------|-------|------------|
| MNS1.8    | 4.81E-67 | 0.55822  | 0.276 | 0.066 | 7.20E-63 | CSCL2 | MNS1       |
| ARL6IP6.7 | 6.36E-67 | 0.62286  | 0.605 | 0.268 | 9.51E-63 | CSCL2 | ARL6IP6    |
| HAT1.8    | 1.14E-66 | 0.591466 | 0.634 | 0.283 | 1.71E-62 | CSCL2 | HAT1       |
| NFIA.11   | 1.37E-66 | 0.590699 | 0.731 | 0.365 | 2.04E-62 | CSCL2 | NFIA       |
| CTSB.10   | 1.90E-66 | -0.89057 | 0.525 | 0.766 | 2.85E-62 | CSCL2 | CTSB       |
| SGCB.10   | 2.21E-66 | 0.6737   | 0.645 | 0.313 | 3.30E-62 | CSCL2 | SGCB       |
| ACYP1.8   | 3.13E-66 | 0.622063 | 0.459 | 0.165 | 4.68E-62 | CSCL2 | ACYP1      |
| ARHGAP33. | 3.35E-66 | 0.474885 | 0.296 | 0.073 | 5.01E-62 | CSCL2 | ARHGAP33   |
| OLFM1.11  | 3.90E-66 | 0.572121 | 0.426 | 0.14  | 5.84E-62 | CSCL2 | OLFM1      |
| AC004540. | 4.73E-66 | 0.507158 | 0.389 | 0.112 | 7.07E-62 | CSCL2 | AC004540.4 |
| AURKA.10  | 7.43E-66 | 0.76813  | 0.283 | 0.069 | 1.11E-61 | CSCL2 | AURKA      |
| CBX2.8    | 1.55E-65 | 0.431243 | 0.258 | 0.059 | 2.31E-61 | CSCL2 | CBX2       |
| CBX3.10   | 2.51E-65 | 0.525345 | 0.823 | 0.543 | 3.75E-61 | CSCL2 | CBX3       |
| LSM5.8    | 3.24E-65 | 0.543212 | 0.812 | 0.495 | 4.84E-61 | CSCL2 | LSM5       |
| TMSB15B.1 | 4.25E-65 | 0.633148 | 0.468 | 0.17  | 6.34E-61 | CSCL2 | TMSB15B    |
| INSM1.12  | 7.66E-65 | 0.578993 | 0.36  | 0.107 | 1.15E-60 | CSCL2 | INSM1      |
| PARP2.8   | 1.15E-64 | 0.526617 | 0.353 | 0.101 | 1.72E-60 | CSCL2 | PARP2      |
| FCGRT.12  | 2.15E-64 | -1.16361 | 0.161 | 0.566 | 3.22E-60 | CSCL2 | FCGRT      |
| HLA-DRB1. | 2.30E-64 | -1.4482  | 0.179 | 0.547 | 3.44E-60 | CSCL2 | HLA-DRB1   |
| MZT1.7    | 2.91E-64 | 0.704716 | 0.565 | 0.243 | 4.34E-60 | CSCL2 | MZT1       |
| SKA2.11   | 3.54E-64 | 0.666022 | 0.618 | 0.294 | 5.29E-60 | CSCL2 | SKA2       |
| PAFAH1B3. | 5.06E-64 | 0.593606 | 0.751 | 0.411 | 7.56E-60 | CSCL2 | PAFAH1B3   |
| GINS4.3   | 1.07E-63 | 0.386305 | 0.203 | 0.038 | 1.60E-59 | CSCL2 | GINS4      |
| GPSM2.10  | 1.27E-63 | 0.671859 | 0.453 | 0.166 | 1.90E-59 | CSCL2 | GPSM2      |
| ELAVL4.11 | 2.50E-63 | 0.538121 | 0.501 | 0.166 | 3.73E-59 | CSCL2 | ELAVL4     |
| PDGFRA.12 | 5.76E-63 | 0.804196 | 0.397 | 0.138 | 8.60E-59 | CSCL2 | PDGFRA     |
| RHOBTB3.1 | 7.37E-63 | 0.579489 | 0.737 | 0.395 | 1.10E-58 | CSCL2 | RHOBTB3    |
| PHF19.9   | 7.59E-63 | 0.624408 | 0.377 | 0.119 | 1.13E-58 | CSCL2 | PHF19      |
| CDC7.3    | 8.88E-63 | 0.348184 | 0.192 | 0.035 | 1.33E-58 | CSCL2 | CDC7       |
| NCAPD2.6  | 9.18E-63 | 0.428261 | 0.247 | 0.056 | 1.37E-58 | CSCL2 | NCAPD2     |
| SOX4.11   | 1.07E-62 | 0.619786 | 0.792 | 0.431 | 1.60E-58 | CSCL2 | SOX4       |
| GNG4.12   | 1.19E-62 | 0.577707 | 0.353 | 0.106 | 1.79E-58 | CSCL2 | GNG4       |
| SOX8.11   | 1.34E-62 | 0.561966 | 0.466 | 0.166 | 2.00E-58 | CSCL2 | SOX8       |
| HOXB4.1   | 1.58E-62 | 0.271911 | 0.143 | 0.019 | 2.36E-58 | CSCL2 | HOXB4      |
| RBMX.9    | 3.55E-62 | 0.499825 | 0.843 | 0.555 | 5.31E-58 | CSCL2 | RBMX       |
| CENPP.4   | 4.48E-62 | 0.464005 | 0.212 | 0.042 | 6.69E-58 | CSCL2 | CENPP      |
| AVIL.9    | 4.67E-62 | 0.552362 | 0.302 | 0.08  | 6.98E-58 | CSCL2 | AVIL       |
| SCRG1.11  | 6.50E-62 | 0.548987 | 0.689 | 0.332 | 9.71E-58 | CSCL2 | SCRG1      |
| TUBB4B.7  | 6.60E-62 | 0.646455 | 0.795 | 0.48  | 9.86E-58 | CSCL2 | TUBB4B     |
| CDK4.6    | 1.03E-61 | 0.751185 | 0.748 | 0.473 | 1.54E-57 | CSCL2 | CDK4       |
| C1QTNF2.1 | 1.41E-61 | 0.2773   | 0.13  | 0.017 | 2.10E-57 | CSCL2 | C1QTNF2    |
| TMEM97.1C | 2.57E-61 | 0.586038 | 0.439 | 0.161 | 3.84E-57 | CSCL2 | TMEM97     |
| SOX11.12  | 2.90E-61 | 0.589797 | 0.609 | 0.259 | 4.33E-57 | CSCL2 | SOX11      |
| DPF1.10   | 4.26E-61 | 0.580166 | 0.395 | 0.13  | 6.36E-57 | CSCL2 | DPF1       |
| GSN.12    | 5.03E-61 | -1.12582 | 0.124 | 0.525 | 7.51E-57 | CSCL2 | GSN        |
| LSM4.8    | 6.51E-61 | 0.518714 | 0.837 | 0.549 | 9.73E-57 | CSCL2 | LSM4       |
| HNRNPA2B1 | 1.29E-60 | 0.292726 | 0.958 | 0.841 | 1.93E-56 | CSCL2 | HNRNPA2B1  |
| SAE1.8    | 1.70E-60 | 0.732957 | 0.57  | 0.261 | 2.54E-56 | CSCL2 | SAE1       |
| MAD2L2.1C | 1.73E-60 | 0.579015 | 0.715 | 0.379 | 2.58E-56 | CSCL2 | MAD2L2     |
| CNTLN.2   | 2.19E-60 | 0.467822 | 0.331 | 0.095 | 3.27E-56 | CSCL2 | CNTLN      |
| ATP6VOE1. | 5.82E-60 | -0.71956 | 0.554 | 0.769 | 8.70E-56 | CSCL2 | ATP6VOE1   |



|           |    |          |          |       |       |          |       |                |
|-----------|----|----------|----------|-------|-------|----------|-------|----------------|
| MARCKSL1. | 6. | 52E-60   | 0.514483 | 0.865 | 0.532 | 9.74E-56 | CSCL2 | MARCKSL1       |
| HIST1H2BH | 6. | 92E-60   | 0.373669 | 0.137 | 0.019 | 1.03E-55 | CSCL2 | HIST1H2BH      |
| RP11-620J | 1. | 61E-59   | 0.800368 | 0.547 | 0.258 | 2.41E-55 | CSCL2 | RP11-620J15.3  |
| SPP1.     | 10 | 2.53E-59 | -0.78689 | 0.713 | 0.859 | 3.79E-55 | CSCL2 | SPP1           |
| TOX3.     | 10 | 4.72E-59 | 0.382472 | 0.258 | 0.06  | 7.05E-55 | CSCL2 | TOX3           |
| CCDC15.   | 1  | 5.94E-59 | 0.353796 | 0.17  | 0.029 | 8.88E-55 | CSCL2 | CCDC15         |
| GPR1.     | 2  | 6.59E-59 | 0.267755 | 0.143 | 0.021 | 9.85E-55 | CSCL2 | GPR1           |
| DUT.      | 11 | 8.97E-59 | 0.584763 | 0.731 | 0.444 | 1.34E-54 | CSCL2 | DUT            |
| POLE2.    | 1  | 1.33E-58 | 0.322281 | 0.17  | 0.029 | 1.99E-54 | CSCL2 | POLE2          |
| LMNB2.    | 10 | 1.44E-58 | 0.560317 | 0.342 | 0.108 | 2.16E-54 | CSCL2 | LMNB2          |
| C14orf80. | 2. | 80E-58   | 0.416209 | 0.245 | 0.058 | 4.19E-54 | CSCL2 | C14orf80       |
| ZIC1.     | 10 | 4.06E-58 | 0.569281 | 0.336 | 0.105 | 6.07E-54 | CSCL2 | ZIC1           |
| OLIG1.    | 12 | 9.55E-58 | 0.556114 | 0.468 | 0.168 | 1.43E-53 | CSCL2 | OLIG1          |
| GPC2.     | 13 | 1.10E-57 | 0.466884 | 0.457 | 0.156 | 1.65E-53 | CSCL2 | GPC2           |
| DGKB.     | 4  | 1.52E-57 | 0.31127  | 0.166 | 0.028 | 2.27E-53 | CSCL2 | DGKB           |
| ARPC1B.   | 13 | 4.15E-57 | -1.13142 | 0.194 | 0.544 | 6.20E-53 | CSCL2 | ARPC1B         |
| SRSF10.   | 7  | 4.38E-57 | 0.540586 | 0.536 | 0.228 | 6.55E-53 | CSCL2 | SRSF10         |
| DRAXIN.   | 12 | 4.85E-57 | 0.560678 | 0.402 | 0.142 | 7.24E-53 | CSCL2 | DRAXIN         |
| RHEB.     | 7  | 6.20E-57 | 0.4823   | 0.879 | 0.628 | 9.26E-53 | CSCL2 | RHEB           |
| CENPJ.    | 7  | 1.33E-56 | 0.387646 | 0.245 | 0.058 | 1.98E-52 | CSCL2 | CENPJ          |
| RAB3IP.   | 9  | 1.47E-56 | 0.661371 | 0.534 | 0.235 | 2.19E-52 | CSCL2 | RAB3IP         |
| POU4F1.   | 2  | 1.52E-56 | 0.26442  | 0.139 | 0.02  | 2.27E-52 | CSCL2 | POU4F1         |
| ZNF726.   | 1  | 1.62E-56 | 0.324179 | 0.146 | 0.023 | 2.42E-52 | CSCL2 | ZNF726         |
| PRR11.    | 5  | 2.72E-56 | 0.461689 | 0.238 | 0.057 | 4.07E-52 | CSCL2 | PRR11          |
| FIGNL1.   | 5  | 4.11E-56 | 0.400007 | 0.199 | 0.04  | 6.14E-52 | CSCL2 | FIGNL1         |
| FAM111A.  | 8  | 4.95E-56 | 0.541324 | 0.331 | 0.1   | 7.39E-52 | CSCL2 | FAM111A        |
| TMEM106C. | 9. | 74E-56   | 0.552482 | 0.556 | 0.255 | 1.46E-51 | CSCL2 | TMEM106C       |
| FANCG.    | 4  | 1.35E-55 | 0.394442 | 0.238 | 0.057 | 2.02E-51 | CSCL2 | FANCG          |
| SCD5.     | 12 | 1.98E-55 | 0.564292 | 0.698 | 0.382 | 2.97E-51 | CSCL2 | SCD5           |
| HOXB3.    | 6  | 2.06E-55 | 0.263839 | 0.163 | 0.028 | 3.08E-51 | CSCL2 | HOXB3          |
| HOXA3.    | 11 | 2.52E-55 | 0.348752 | 0.225 | 0.049 | 3.76E-51 | CSCL2 | HOXA3          |
| HLA-DPA1. | 2. | 93E-55   | -1.23026 | 0.208 | 0.546 | 4.39E-51 | CSCL2 | HLA-DPA1       |
| ILF2.     | 9  | 3.12E-55 | 0.474739 | 0.854 | 0.563 | 4.66E-51 | CSCL2 | ILF2           |
| LIN9.     | 1  | 7.36E-55 | 0.270695 | 0.148 | 0.024 | 1.10E-50 | CSCL2 | LIN9           |
| TUBG1.    | 10 | 9.08E-55 | 0.581167 | 0.51  | 0.222 | 1.36E-50 | CSCL2 | TUBG1          |
| FANCL.    | 7  | 1.40E-54 | 0.468774 | 0.389 | 0.133 | 2.09E-50 | CSCL2 | FANCL          |
| MARCH9.   | 1C | 4.70E-54 | 0.684607 | 0.391 | 0.145 | 7.03E-50 | CSCL2 | 9-Mar          |
| KHDRBS1.  | 1  | 1.55E-53 | 0.537079 | 0.777 | 0.474 | 2.32E-49 | CSCL2 | KHDRBS1        |
| CD68.     | 13 | 1.61E-53 | -1.31415 | 0.102 | 0.455 | 2.40E-49 | CSCL2 | CD68           |
| HLA-DRB5. | 1. | 90E-53   | -1.54944 | 0.055 | 0.413 | 2.85E-49 | CSCL2 | HLA-DRB5       |
| SGCE.     | 9  | 2.15E-53 | 0.29415  | 0.417 | 0.135 | 3.22E-49 | CSCL2 | SGCE           |
| WDHD1.    | 2  | 2.57E-53 | 0.346111 | 0.166 | 0.031 | 3.84E-49 | CSCL2 | WDHD1          |
| HOXC11.   | 1  | 5.09E-53 | 0.22345  | 0.108 | 0.013 | 7.60E-49 | CSCL2 | HOXC11         |
| TSPO.     | 12 | 5.71E-53 | -0.909   | 0.294 | 0.607 | 8.53E-49 | CSCL2 | TSPO           |
| PSAP.     | 10 | 1.31E-52 | -0.57895 | 0.651 | 0.825 | 1.96E-48 | CSCL2 | PSAP           |
| RP11-277F | 1. | 43E-52   | 0.45671  | 0.243 | 0.06  | 2.13E-48 | CSCL2 | RP11-277P12.20 |
| HLA-C.    | 8  | 1.95E-52 | -0.52576 | 0.536 | 0.814 | 2.91E-48 | CSCL2 | HLA-C          |
| ANLN.     | 12 | 2.00E-52 | 0.275225 | 0.236 | 0.055 | 2.99E-48 | CSCL2 | ANLN           |
| IFITM3.   | 6  | 2.62E-52 | -1.00908 | 0.139 | 0.517 | 3.92E-48 | CSCL2 | IFITM3         |
| DDX39A.   | 8  | 3.48E-52 | 0.587501 | 0.691 | 0.38  | 5.20E-48 | CSCL2 | DDX39A         |
| AUNIP.    | 1  | 6.44E-52 | 0.276906 | 0.088 | 0.009 | 9.62E-48 | CSCL2 | AUNIP          |

|            |          |          |       |       |          |       |                |
|------------|----------|----------|-------|-------|----------|-------|----------------|
| SLC35E3.1  | 7.98E-52 | 0.675847 | 0.437 | 0.177 | 1.19E-47 | CSCL2 | SLC35E3        |
| EYA1.1     | 1.10E-51 | 0.242577 | 0.139 | 0.022 | 1.65E-47 | CSCL2 | EYA1           |
| MCM5.10    | 1.70E-51 | 0.48351  | 0.395 | 0.14  | 2.54E-47 | CSCL2 | MCM5           |
| MEST.12    | 2.81E-51 | 0.563098 | 0.68  | 0.375 | 4.20E-47 | CSCL2 | MEST           |
| HLA-DRA.1  | 2.98E-51 | -1.07415 | 0.395 | 0.643 | 4.46E-47 | CSCL2 | HLA-DRA        |
| FAM181B.1  | 3.47E-51 | 0.571691 | 0.477 | 0.192 | 5.18E-47 | CSCL2 | FAM181B        |
| CCDC14.1C  | 4.13E-51 | 0.505367 | 0.499 | 0.216 | 6.17E-47 | CSCL2 | CCDC14         |
| HLA-B.10   | 5.19E-51 | -0.50288 | 0.656 | 0.859 | 7.76E-47 | CSCL2 | HLA-B          |
| SPDL1.6    | 9.10E-51 | 0.462229 | 0.232 | 0.058 | 1.36E-46 | CSCL2 | SPDL1          |
| HMGXB4.6   | 1.04E-50 | 0.524877 | 0.49  | 0.212 | 1.55E-46 | CSCL2 | HMGXB4         |
| SRGN.13    | 1.04E-50 | -1.26447 | 0.192 | 0.511 | 1.55E-46 | CSCL2 | SRGN           |
| NELL2.9    | 1.44E-50 | 0.404034 | 0.318 | 0.097 | 2.15E-46 | CSCL2 | NELL2          |
| NOL4.9     | 2.88E-50 | 0.395014 | 0.234 | 0.058 | 4.30E-46 | CSCL2 | NOL4           |
| HMGN1.8    | 3.44E-50 | 0.39715  | 0.874 | 0.656 | 5.14E-46 | CSCL2 | HMGN1          |
| CD44.9     | 4.95E-50 | -1.22077 | 0.049 | 0.396 | 7.40E-46 | CSCL2 | CD44           |
| PAQR4.11   | 5.07E-50 | 0.507383 | 0.406 | 0.154 | 7.57E-46 | CSCL2 | PAQR4          |
| H1FX.12    | 5.81E-50 | 0.594611 | 0.658 | 0.374 | 8.68E-46 | CSCL2 | H1FX           |
| CD74.12    | 6.25E-50 | -0.8576  | 0.605 | 0.757 | 9.33E-46 | CSCL2 | CD74           |
| HIST1H1B.7 | 7.00E-50 | 0.228328 | 0.075 | 0.007 | 1.05E-45 | CSCL2 | HIST1H1B       |
| LAPTM5.13  | 7.31E-50 | -1.29791 | 0.11  | 0.449 | 1.09E-45 | CSCL2 | LAPTM5         |
| ZNF138.9   | 8.07E-50 | 0.444024 | 0.384 | 0.136 | 1.21E-45 | CSCL2 | ZNF138         |
| MYL12A.11  | 9.97E-50 | -0.97085 | 0.236 | 0.556 | 1.49E-45 | CSCL2 | MYL12A         |
| C7orf55-L  | 1.03E-49 | 0.51617  | 0.631 | 0.327 | 1.54E-45 | CSCL2 | C7orf55-LUC7L2 |
| HLA-A.10   | 1.12E-49 | -0.44792 | 0.742 | 0.902 | 1.68E-45 | CSCL2 | HLA-A          |
| ZNF714.7   | 1.43E-49 | 0.5095   | 0.307 | 0.095 | 2.14E-45 | CSCL2 | ZNF714         |
| A2M.11     | 1.51E-49 | -1.17732 | 0.139 | 0.477 | 2.26E-45 | CSCL2 | A2M            |
| GRIK2.2    | 1.84E-49 | 0.262646 | 0.152 | 0.027 | 2.76E-45 | CSCL2 | GRIK2          |
| CD63.12    | 2.21E-49 | -0.4519  | 0.839 | 0.928 | 3.30E-45 | CSCL2 | CD63           |
| C2orf80.1  | 3.59E-49 | 0.490055 | 0.333 | 0.11  | 5.36E-45 | CSCL2 | C2orf80        |
| GRN.11     | 3.63E-49 | -0.88707 | 0.283 | 0.582 | 5.42E-45 | CSCL2 | GRN            |
| CA10.7     | 4.63E-49 | 0.263816 | 0.152 | 0.027 | 6.92E-45 | CSCL2 | CA10           |
| NOVA1.13   | 4.70E-49 | 0.486706 | 0.808 | 0.466 | 7.02E-45 | CSCL2 | NOVA1          |
| YWHAQ.11   | 6.41E-49 | 0.419913 | 0.876 | 0.634 | 9.58E-45 | CSCL2 | YWHAQ          |
| EGFR.12    | 6.70E-49 | 0.650777 | 0.594 | 0.288 | 1.00E-44 | CSCL2 | EGFR           |
| NKAIN4.8   | 7.12E-49 | 0.442158 | 0.309 | 0.093 | 1.06E-44 | CSCL2 | NKAIN4         |
| PFN2.9     | 8.12E-49 | 0.4838   | 0.731 | 0.422 | 1.21E-44 | CSCL2 | PFN2           |
| CNTFR.10   | 9.28E-49 | 0.441388 | 0.353 | 0.121 | 1.39E-44 | CSCL2 | CNTFR          |
| MSH6.8     | 9.53E-49 | 0.463515 | 0.344 | 0.118 | 1.42E-44 | CSCL2 | MSH6           |
| HNRNPD.11  | 1.09E-48 | 0.508051 | 0.68  | 0.404 | 1.62E-44 | CSCL2 | HNRNPD         |
| AC016700.1 | 1.25E-48 | 0.256371 | 0.152 | 0.027 | 1.87E-44 | CSCL2 | AC016700.5     |
| RNASEH2B.1 | 1.53E-48 | 0.510488 | 0.508 | 0.228 | 2.28E-44 | CSCL2 | RNASEH2B       |
| ANP32B.11  | 1.78E-48 | 0.52667  | 0.728 | 0.438 | 2.66E-44 | CSCL2 | ANP32B         |
| C1QC.13    | 2.34E-48 | -1.29503 | 0.212 | 0.513 | 3.50E-44 | CSCL2 | C1QC           |
| CARHSP1.9  | 3.66E-48 | 0.46549  | 0.704 | 0.412 | 5.48E-44 | CSCL2 | CARHSP1        |
| IGFBP2.11  | 4.16E-48 | 0.563923 | 0.735 | 0.359 | 6.22E-44 | CSCL2 | IGFBP2         |
| C4orf46.4  | 4.93E-48 | 0.370624 | 0.252 | 0.068 | 7.37E-44 | CSCL2 | C4orf46        |
| DDX11.2    | 5.70E-48 | 0.33091  | 0.199 | 0.046 | 8.52E-44 | CSCL2 | DDX11          |
| CTPS1.8    | 6.87E-48 | 0.419946 | 0.307 | 0.098 | 1.03E-43 | CSCL2 | CTPS1          |
| AIF1L.11   | 8.37E-48 | 0.485134 | 0.331 | 0.104 | 1.25E-43 | CSCL2 | AIF1L          |
| TYROBP.13  | 1.25E-47 | -1.32241 | 0.157 | 0.472 | 1.87E-43 | CSCL2 | TYROBP         |
| C1QB.13    | 1.53E-47 | -1.13858 | 0.313 | 0.58  | 2.29E-43 | CSCL2 | C1QB           |

|            |          |          |       |       |          |       |               |
|------------|----------|----------|-------|-------|----------|-------|---------------|
| ELAVL2.12  | 2.16E-47 | 0.381416 | 0.265 | 0.072 | 3.22E-43 | CSCL2 | ELAVL2        |
| DSCC1.7    | 2.23E-47 | 0.418296 | 0.214 | 0.053 | 3.33E-43 | CSCL2 | DSCC1         |
| SMARCA4.1  | 2.90E-47 | 0.490916 | 0.653 | 0.349 | 4.33E-43 | CSCL2 | SMARCA4       |
| POLE.1     | 3.25E-47 | 0.224715 | 0.135 | 0.023 | 4.85E-43 | CSCL2 | POLE          |
| RP11-571M  | 4.18E-47 | 0.221777 | 0.141 | 0.024 | 6.25E-43 | CSCL2 | RP11-571M6.17 |
| TUBA1A.1C  | 4.97E-47 | 0.304867 | 0.985 | 0.8   | 7.42E-43 | CSCL2 | TUBA1A        |
| BTG3.10    | 6.31E-47 | 0.516055 | 0.664 | 0.359 | 9.43E-43 | CSCL2 | BTG3          |
| SRSF3.3    | 9.56E-47 | 0.334025 | 0.921 | 0.721 | 1.43E-42 | CSCL2 | SRSF3         |
| HLA-E.13   | 1.08E-46 | -0.7049  | 0.252 | 0.61  | 1.61E-42 | CSCL2 | HLA-E         |
| FTL.13     | 2.25E-46 | -0.39881 | 0.969 | 0.995 | 3.36E-42 | CSCL2 | FTL           |
| POLD4.10   | 2.62E-46 | -0.94942 | 0.099 | 0.434 | 3.91E-42 | CSCL2 | POLD4         |
| ELN.10     | 2.65E-46 | 0.384948 | 0.313 | 0.1   | 3.95E-42 | CSCL2 | ELN           |
| MSH2.8     | 2.94E-46 | 0.461154 | 0.32  | 0.108 | 4.40E-42 | CSCL2 | MSH2          |
| HLA-DPB1.3 | 4.45E-46 | -1.19114 | 0.212 | 0.506 | 5.16E-42 | CSCL2 | HLA-DPB1      |
| UBE2E3.11  | 4.34E-46 | 0.465671 | 0.74  | 0.449 | 6.49E-42 | CSCL2 | UBE2E3        |
| CD14.13    | 4.90E-46 | -1.31363 | 0.104 | 0.421 | 7.32E-42 | CSCL2 | CD14          |
| CIT.2      | 5.03E-46 | 0.27522  | 0.152 | 0.029 | 7.52E-42 | CSCL2 | CIT           |
| CLGN.5     | 1.08E-45 | 0.317924 | 0.159 | 0.031 | 1.61E-41 | CSCL2 | CLGN          |
| MGME1.5    | 1.71E-45 | 0.478883 | 0.369 | 0.139 | 2.55E-41 | CSCL2 | MGME1         |
| CDCA7.10   | 2.00E-45 | 0.451583 | 0.336 | 0.114 | 2.99E-41 | CSCL2 | CDCA7         |
| TONSL      | 2.06E-45 | 0.246009 | 0.121 | 0.019 | 3.08E-41 | CSCL2 | TONSL         |
| SSRP1.11   | 2.10E-45 | 0.517104 | 0.625 | 0.344 | 3.14E-41 | CSCL2 | SSRP1         |
| AIF1.13    | 2.14E-45 | -1.31121 | 0.108 | 0.423 | 3.19E-41 | CSCL2 | AIF1          |
| CHTF18.2   | 2.23E-45 | 0.318393 | 0.185 | 0.042 | 3.34E-41 | CSCL2 | CHTF18        |
| C1orf61.1  | 3.45E-45 | 0.421369 | 0.845 | 0.522 | 5.15E-41 | CSCL2 | C1orf61       |
| PAICS.12   | 3.54E-45 | 0.588611 | 0.561 | 0.298 | 5.29E-41 | CSCL2 | PAICS         |
| CENPL.3    | 3.60E-45 | 0.374997 | 0.194 | 0.046 | 5.38E-41 | CSCL2 | CENPL         |
| DBN1.12    | 4.42E-45 | 0.464986 | 0.6   | 0.3   | 6.60E-41 | CSCL2 | DBN1          |
| EMILIN3.7  | 5.52E-45 | 0.360082 | 0.146 | 0.027 | 8.24E-41 | CSCL2 | EMILIN3       |
| RNASSET2.1 | 6.68E-45 | -1.06221 | 0.188 | 0.495 | 9.98E-41 | CSCL2 | RNASSET2      |
| AGAP2.7    | 6.75E-45 | 0.327869 | 0.205 | 0.05  | 1.01E-40 | CSCL2 | AGAP2         |
| RMI1.4     | 7.07E-45 | 0.421557 | 0.212 | 0.054 | 1.06E-40 | CSCL2 | RMI1          |
| CRMP1.11   | 7.36E-45 | 0.451123 | 0.563 | 0.253 | 1.10E-40 | CSCL2 | CRMP1         |
| CAPG.13    | 8.56E-45 | -1.12205 | 0.106 | 0.427 | 1.28E-40 | CSCL2 | CAPG          |
| FANCC      | 1.06E-44 | 0.230625 | 0.117 | 0.018 | 1.58E-40 | CSCL2 | FANCC         |
| ALOX5AP.1  | 1.26E-44 | -1.32141 | 0.102 | 0.411 | 1.89E-40 | CSCL2 | ALOX5AP       |
| SFPQ.9     | 1.73E-44 | 0.45318  | 0.788 | 0.532 | 2.59E-40 | CSCL2 | SFPQ          |
| RAD1.7     | 1.86E-44 | 0.537802 | 0.415 | 0.169 | 2.78E-40 | CSCL2 | RAD1          |
| RBBP8.6    | 2.44E-44 | 0.410312 | 0.254 | 0.076 | 3.64E-40 | CSCL2 | RBBP8         |
| CHI3L1.11  | 2.89E-44 | -1.36882 | 0.236 | 0.536 | 4.32E-40 | CSCL2 | CHI3L1        |
| HNRNPAB.1  | 3.13E-44 | 0.499723 | 0.649 | 0.387 | 4.67E-40 | CSCL2 | HNRNPAB       |
| RFTN2.11   | 3.55E-44 | 0.421344 | 0.342 | 0.119 | 5.30E-40 | CSCL2 | RFTN2         |
| SRSF2.11   | 4.33E-44 | 0.397565 | 0.812 | 0.597 | 6.48E-40 | CSCL2 | SRSF2         |
| CXCL16.11  | 4.82E-44 | -0.95511 | 0.141 | 0.466 | 7.20E-40 | CSCL2 | CXCL16        |
| RGS10.13   | 5.27E-44 | -1.21904 | 0.038 | 0.354 | 7.88E-40 | CSCL2 | RGS10         |
| VSIG4.13   | 6.19E-44 | -1.3126  | 0.062 | 0.377 | 9.25E-40 | CSCL2 | VSIG4         |
| ARHGDIB.1  | 7.15E-44 | -1.26544 | 0.071 | 0.384 | 1.07E-39 | CSCL2 | ARHGDIB       |
| MEX3B.9    | 7.65E-44 | 0.325896 | 0.219 | 0.056 | 1.14E-39 | CSCL2 | MEX3B         |
| CDKN2D.1C  | 9.06E-44 | 0.588126 | 0.382 | 0.151 | 1.35E-39 | CSCL2 | CDKN2D        |
| CTSL.13    | 9.43E-44 | -0.91374 | 0.223 | 0.536 | 1.41E-39 | CSCL2 | CTSL          |
| GLUL.9     | 1.14E-43 | -0.63573 | 0.64  | 0.792 | 1.71E-39 | CSCL2 | GLUL          |

|             |          |          |       |       |          |       |           |
|-------------|----------|----------|-------|-------|----------|-------|-----------|
| POLD3.4     | 1.26E-43 | 0.430105 | 0.278 | 0.089 | 1.88E-39 | CSCL2 | POLD3     |
| CCDC18.9    | 1.44E-43 | 0.419403 | 0.245 | 0.07  | 2.15E-39 | CSCL2 | CCDC18    |
| EXOSC8.11   | 1.49E-43 | 0.487232 | 0.563 | 0.278 | 2.22E-39 | CSCL2 | EXOSC8    |
| ARHGFEF25.1 | 1.61E-43 | 0.388175 | 0.221 | 0.059 | 2.41E-39 | CSCL2 | ARHGFEF25 |
| CEP55.2     | 2.25E-43 | 0.355101 | 0.137 | 0.025 | 3.36E-39 | CSCL2 | CEP55     |
| HNRNPR.7    | 2.62E-43 | 0.435501 | 0.762 | 0.51  | 3.91E-39 | CSCL2 | HNRNPR    |
| VAMP8.13    | 2.67E-43 | -1.26315 | 0.044 | 0.355 | 4.00E-39 | CSCL2 | VAMP8     |
| HOTAIR.1    | 2.89E-43 | 0.15701  | 0.091 | 0.011 | 4.31E-39 | CSCL2 | HOTAIR    |
| NONO.12     | 3.13E-43 | 0.477725 | 0.72  | 0.444 | 4.68E-39 | CSCL2 | NONO      |
| HDAC2.11    | 4.38E-43 | 0.472813 | 0.715 | 0.437 | 6.54E-39 | CSCL2 | HDAC2     |
| CTSS.13     | 4.47E-43 | -1.17629 | 0.053 | 0.366 | 6.69E-39 | CSCL2 | CTSS      |
| CPXM1.12    | 4.48E-43 | 0.442979 | 0.325 | 0.116 | 6.70E-39 | CSCL2 | CPXM1     |
| C17orf53.4  | 4.65E-43 | 0.20144  | 0.102 | 0.015 | 6.94E-39 | CSCL2 | C17orf53  |
| TMPO-AS1.4  | 4.84E-43 | 0.290358 | 0.139 | 0.026 | 7.23E-39 | CSCL2 | TMPO-AS1  |
| C1orf162.5  | 5.07E-43 | -1.29088 | 0.026 | 0.334 | 7.57E-39 | CSCL2 | C1orf162  |
| WEE1.9      | 5.17E-43 | 0.459303 | 0.362 | 0.141 | 7.73E-39 | CSCL2 | WEE1      |
| SLC30A3.1   | 5.78E-43 | 0.182295 | 0.091 | 0.012 | 8.63E-39 | CSCL2 | SLC30A3   |
| NEDD1.2     | 6.79E-43 | 0.339511 | 0.258 | 0.078 | 1.02E-38 | CSCL2 | NEDD1     |
| HOXA10-AS   | 7.88E-43 | 0.155934 | 0.079 | 0.009 | 1.18E-38 | CSCL2 | HOXA10-AS |
| TMEM98.1C   | 1.00E-42 | 0.403286 | 0.494 | 0.225 | 1.50E-38 | CSCL2 | TMEM98    |
| RCC1.5      | 1.04E-42 | 0.432582 | 0.285 | 0.092 | 1.56E-38 | CSCL2 | RCC1      |
| RGS1.13     | 1.11E-42 | -1.27667 | 0.174 | 0.458 | 1.65E-38 | CSCL2 | RGS1      |
| CSE1L.10    | 1.28E-42 | 0.519326 | 0.468 | 0.213 | 1.91E-38 | CSCL2 | CSE1L     |
| HLA-DQA1.1  | 1.56E-42 | -1.3458  | 0.013 | 0.318 | 2.33E-38 | CSCL2 | HLA-DQA1  |
| MLLT11.1C   | 1.60E-42 | 0.469625 | 0.762 | 0.441 | 2.39E-38 | CSCL2 | MLLT11    |
| HLA-DMA.1   | 1.78E-42 | -1.22033 | 0.124 | 0.42  | 2.66E-38 | CSCL2 | HLA-DMA   |
| CCT2.7      | 2.30E-42 | 0.569342 | 0.773 | 0.536 | 3.43E-38 | CSCL2 | CCT2      |
| S100A6.11   | 2.36E-42 | -0.83222 | 0.395 | 0.653 | 3.53E-38 | CSCL2 | S100A6    |
| CBX1.10     | 2.36E-42 | 0.482246 | 0.638 | 0.356 | 3.53E-38 | CSCL2 | CBX1      |
| LGALS3.1C   | 2.47E-42 | -1.11386 | 0.185 | 0.493 | 3.69E-38 | CSCL2 | LGALS3    |
| KCTD16.1    | 2.56E-42 | 0.22074  | 0.102 | 0.015 | 3.83E-38 | CSCL2 | KCTD16    |
| PCDHB7.9    | 2.81E-42 | 0.32279  | 0.234 | 0.064 | 4.20E-38 | CSCL2 | PCDHB7    |
| NCAPD3.2    | 2.82E-42 | 0.418182 | 0.252 | 0.076 | 4.22E-38 | CSCL2 | NCAPD3    |
| HLA-DQB1.3  | 3.05E-42 | -1.23671 | 0.031 | 0.337 | 4.56E-38 | CSCL2 | HLA-DQB1  |
| PHYHIPL.9   | 3.13E-42 | 0.423364 | 0.437 | 0.175 | 4.67E-38 | CSCL2 | PHYHIPL   |
| PLTP.10     | 3.14E-42 | -1.03971 | 0.172 | 0.482 | 4.69E-38 | CSCL2 | PLTP      |
| MEX3A.11    | 4.63E-42 | 0.467638 | 0.413 | 0.169 | 6.93E-38 | CSCL2 | MEX3A     |
| TMEM176B.6  | 6.85E-42 | -1.18283 | 0.055 | 0.364 | 1.02E-37 | CSCL2 | TMEM176B  |
| SLITRK2.6   | 9.72E-42 | 0.251919 | 0.148 | 0.03  | 1.45E-37 | CSCL2 | SLITRK2   |
| KNTC1.2     | 1.14E-41 | 0.286787 | 0.117 | 0.02  | 1.71E-37 | CSCL2 | KNTC1     |
| ERCC6L.1    | 1.49E-41 | 0.154471 | 0.051 | 0.004 | 2.23E-37 | CSCL2 | ERCC6L    |
| RAD18.2     | 1.63E-41 | 0.372176 | 0.199 | 0.051 | 2.43E-37 | CSCL2 | RAD18     |
| TCF4.13     | 1.83E-41 | 0.428018 | 0.808 | 0.512 | 2.74E-37 | CSCL2 | TCF4      |
| TFAP2A.9    | 3.84E-41 | 0.239974 | 0.155 | 0.032 | 5.73E-37 | CSCL2 | TFAP2A    |
| FAM72D.2    | 5.54E-41 | 0.190726 | 0.099 | 0.015 | 8.28E-37 | CSCL2 | FAM72D    |
| NCAPH2.6    | 6.28E-41 | 0.42359  | 0.329 | 0.122 | 9.38E-37 | CSCL2 | NCAPH2    |
| BAZ1B.12    | 6.65E-41 | 0.482723 | 0.547 | 0.288 | 9.94E-37 | CSCL2 | BAZ1B     |
| GLIPR1.11   | 7.28E-41 | -1.02011 | 0.042 | 0.346 | 1.09E-36 | CSCL2 | GLIPR1    |
| ANXA2.10    | 8.64E-41 | -0.80298 | 0.208 | 0.526 | 1.29E-36 | CSCL2 | ANXA2     |
| MZT2B.9     | 8.91E-41 | 0.447261 | 0.817 | 0.584 | 1.33E-36 | CSCL2 | MZT2B     |
| GMFG.13     | 9.10E-41 | -1.18068 | 0.013 | 0.309 | 1.36E-36 | CSCL2 | GMFG      |

|            |          |          |       |       |          |       |          |
|------------|----------|----------|-------|-------|----------|-------|----------|
| FCGR3A.13  | 9.89E-41 | -1.27729 | 0.057 | 0.353 | 1.48E-36 | CSCL2 | FCGR3A   |
| SLC16A3.1  | 1.25E-40 | -0.99659 | 0.031 | 0.332 | 1.87E-36 | CSCL2 | SLC16A3  |
| FCER1G.13  | 1.32E-40 | -1.24827 | 0.177 | 0.452 | 1.97E-36 | CSCL2 | FCER1G   |
| TREM2.13   | 1.36E-40 | -1.29836 | 0.068 | 0.362 | 2.04E-36 | CSCL2 | TREM2    |
| CD53.13    | 1.44E-40 | -1.19378 | 0.029 | 0.327 | 2.16E-36 | CSCL2 | CD53     |
| C2orf69.1  | 1.53E-40 | 0.47095  | 0.419 | 0.185 | 2.28E-36 | CSCL2 | C2orf69  |
| DSCAM.8    | 1.56E-40 | 0.31987  | 0.236 | 0.068 | 2.33E-36 | CSCL2 | DSCAM    |
| LRRC17.9   | 1.82E-40 | 0.406371 | 0.232 | 0.068 | 2.72E-36 | CSCL2 | LRRC17   |
| HSP90AA1.2 | 0.08E-40 | 0.229906 | 0.974 | 0.885 | 3.10E-36 | CSCL2 | HSP90AA1 |
| ZBTB20.11  | 2.28E-40 | 0.448591 | 0.678 | 0.374 | 3.40E-36 | CSCL2 | ZBTB20   |
| SRRT.9     | 2.31E-40 | 0.453062 | 0.459 | 0.207 | 3.44E-36 | CSCL2 | SRRT     |
| SALL3.6    | 2.65E-40 | 0.293907 | 0.161 | 0.036 | 3.95E-36 | CSCL2 | SALL3    |
| PODXL2.12  | 2.80E-40 | 0.489132 | 0.578 | 0.297 | 4.18E-36 | CSCL2 | PODXL2   |
| C1QA.13    | 3.23E-40 | -1.09302 | 0.305 | 0.546 | 4.83E-36 | CSCL2 | C1QA     |
| TSFM.10    | 3.38E-40 | 0.626646 | 0.501 | 0.267 | 5.05E-36 | CSCL2 | TSFM     |
| MAP2.13    | 6.00E-40 | 0.43066  | 0.627 | 0.326 | 8.97E-36 | CSCL2 | MAP2     |
| SOD2.9     | 6.50E-40 | -1.0027  | 0.278 | 0.546 | 9.72E-36 | CSCL2 | SOD2     |
| VAMP5.8    | 7.87E-40 | -0.957   | 0.099 | 0.409 | 1.18E-35 | CSCL2 | VAMP5    |
| MBD6.8     | 9.26E-40 | 0.578905 | 0.338 | 0.131 | 1.38E-35 | CSCL2 | MBD6     |
| RAN.9      | 1.04E-39 | 0.294267 | 0.918 | 0.75  | 1.56E-35 | CSCL2 | RAN      |
| HNRNPA1.5  | 1.13E-39 | 0.216209 | 0.967 | 0.874 | 1.69E-35 | CSCL2 | HNRNPA1  |
| PARP1.8    | 1.23E-39 | 0.43067  | 0.72  | 0.462 | 1.84E-35 | CSCL2 | PARP1    |
| ING3.7     | 1.71E-39 | 0.400494 | 0.415 | 0.175 | 2.55E-35 | CSCL2 | ING3     |
| PBX1.11    | 1.89E-39 | 0.472141 | 0.446 | 0.205 | 2.82E-35 | CSCL2 | PBX1     |
| HLA-DMB.1  | 2.27E-39 | -1.2163  | 0.04  | 0.332 | 3.40E-35 | CSCL2 | HLA-DMB  |
| ZNF682.8   | 2.48E-39 | 0.353634 | 0.234 | 0.07  | 3.70E-35 | CSCL2 | ZNF682   |
| CRISPLD1.3 | 3.22E-39 | 0.456439 | 0.256 | 0.083 | 4.81E-35 | CSCL2 | CRISPLD1 |
| H2AFY.9    | 3.90E-39 | 0.402608 | 0.821 | 0.598 | 5.83E-35 | CSCL2 | H2AFY    |
| HOXA7.10   | 4.18E-39 | 0.330992 | 0.291 | 0.094 | 6.25E-35 | CSCL2 | HOXA7    |
| C3.12      | 4.34E-39 | -1.14589 | 0.135 | 0.412 | 6.48E-35 | CSCL2 | C3       |
| CASP2.5    | 4.57E-39 | 0.348294 | 0.278 | 0.093 | 6.83E-35 | CSCL2 | CASP2    |
| ZNF724P.1  | 5.62E-39 | 0.333766 | 0.139 | 0.029 | 8.40E-35 | CSCL2 | ZNF724P  |
| RHN01.7    | 6.25E-39 | 0.520802 | 0.419 | 0.186 | 9.34E-35 | CSCL2 | RHN01    |
| GPX1.13    | 6.37E-39 | -0.51671 | 0.742 | 0.816 | 9.52E-35 | CSCL2 | GPX1     |
| ZFP36.10   | 6.99E-39 | -0.83232 | 0.318 | 0.583 | 1.04E-34 | CSCL2 | ZFP36    |
| ZNF428.13  | 7.91E-39 | 0.411241 | 0.81  | 0.534 | 1.18E-34 | CSCL2 | ZNF428   |
| HEY1.11    | 8.05E-39 | 0.537494 | 0.49  | 0.237 | 1.20E-34 | CSCL2 | HEY1     |
| CD37.13    | 8.53E-39 | -1.1764  | 0.026 | 0.312 | 1.28E-34 | CSCL2 | CD37     |
| SUB1.9     | 1.27E-38 | 0.274095 | 0.923 | 0.75  | 1.90E-34 | CSCL2 | SUB1     |
| NREP.11    | 1.42E-38 | 0.461344 | 0.536 | 0.262 | 2.12E-34 | CSCL2 | NREP     |
| RAD54B.1   | 1.43E-38 | 0.229647 | 0.126 | 0.024 | 2.14E-34 | CSCL2 | RAD54B   |
| KPNB1.11   | 1.73E-38 | 0.437326 | 0.706 | 0.437 | 2.59E-34 | CSCL2 | KPNB1    |
| CRTAC1.2   | 1.98E-38 | 0.245167 | 0.113 | 0.019 | 2.97E-34 | CSCL2 | CRTAC1   |
| CPVL.13    | 2.29E-38 | -1.10473 | 0.073 | 0.36  | 3.42E-34 | CSCL2 | CPVL     |
| FPR1.13    | 2.64E-38 | -1.21376 | 0.013 | 0.295 | 3.95E-34 | CSCL2 | FPR1     |
| PHF14.11   | 3.01E-38 | 0.419442 | 0.691 | 0.412 | 4.50E-34 | CSCL2 | PHF14    |
| GADD45G.1  | 3.13E-38 | 0.461388 | 0.525 | 0.245 | 4.68E-34 | CSCL2 | GADD45G  |
| NT5DC2.9   | 3.19E-38 | 0.461324 | 0.369 | 0.156 | 4.77E-34 | CSCL2 | NT5DC2   |
| RBP1.11    | 3.24E-38 | 0.381162 | 0.77  | 0.447 | 4.83E-34 | CSCL2 | RBP1     |
| SUPT16H.9  | 4.00E-38 | 0.440882 | 0.492 | 0.239 | 5.98E-34 | CSCL2 | SUPT16H  |
| HERPUD1.1  | 4.79E-38 | -0.73084 | 0.426 | 0.651 | 7.15E-34 | CSCL2 | HERPUD1  |

|           |          |          |       |       |          |       |          |
|-----------|----------|----------|-------|-------|----------|-------|----------|
| EXOSC9.3  | 5.01E-38 | 0.436495 | 0.358 | 0.141 | 7.49E-34 | CSCL2 | EXOSC9   |
| TRIM36.12 | 5.15E-38 | 0.439147 | 0.4   | 0.173 | 7.70E-34 | CSCL2 | TRIM36   |
| SERPINA1. | 5.54E-38 | -1.13584 | 0.029 | 0.31  | 8.28E-34 | CSCL2 | SERPINA1 |
| SET.9     | 6.35E-38 | 0.397378 | 0.784 | 0.552 | 9.50E-34 | CSCL2 | SET      |
| CENPT.9   | 7.82E-38 | 0.448911 | 0.413 | 0.181 | 1.17E-33 | CSCL2 | CENPT    |
| BST2.12   | 9.24E-38 | -0.66284 | 0.155 | 0.499 | 1.38E-33 | CSCL2 | BST2     |
| CEP72.1   | 9.84E-38 | 0.327954 | 0.099 | 0.016 | 1.47E-33 | CSCL2 | CEP72    |
| SMC3.8    | 1.03E-37 | 0.480144 | 0.53  | 0.276 | 1.54E-33 | CSCL2 | SMC3     |
| ZNF43.11  | 1.19E-37 | 0.45357  | 0.331 | 0.13  | 1.78E-33 | CSCL2 | ZNF43    |
| ZNF85.5   | 1.56E-37 | 0.339926 | 0.247 | 0.078 | 2.34E-33 | CSCL2 | ZNF85    |
| HNRNPA0.1 | 1.57E-37 | 0.37943  | 0.841 | 0.633 | 2.35E-33 | CSCL2 | HNRNPA0  |
| LST1.13   | 1.76E-37 | -1.16191 | 0.044 | 0.323 | 2.63E-33 | CSCL2 | LST1     |
| CTSD.11   | 2.23E-37 | -0.72503 | 0.442 | 0.647 | 3.34E-33 | CSCL2 | CTSD     |
| LY86.13   | 2.55E-37 | -1.18603 | 0.026 | 0.303 | 3.80E-33 | CSCL2 | LY86     |
| MFAP4.7   | 2.95E-37 | 0.315486 | 0.185 | 0.049 | 4.40E-33 | CSCL2 | MFAP4    |
| CALM3.10  | 2.96E-37 | 0.443923 | 0.821 | 0.583 | 4.43E-33 | CSCL2 | CALM3    |
| PROM1.1   | 3.16E-37 | 0.22118  | 0.119 | 0.022 | 4.72E-33 | CSCL2 | PROM1    |
| B2M.11    | 3.19E-37 | -0.30117 | 0.947 | 0.971 | 4.77E-33 | CSCL2 | B2M      |
| SNRPG.7   | 3.28E-37 | 0.324152 | 0.848 | 0.631 | 4.90E-33 | CSCL2 | SNRPG    |
| CCDC167.8 | 3.63E-37 | 0.439794 | 0.634 | 0.373 | 5.42E-33 | CSCL2 | CCDC167  |
| ATP1A3.11 | 3.80E-37 | 0.393376 | 0.32  | 0.113 | 5.68E-33 | CSCL2 | ATP1A3   |
| GPM6A.11  | 3.93E-37 | 0.366836 | 0.806 | 0.492 | 5.88E-33 | CSCL2 | GPM6A    |
| MDK.12    | 4.07E-37 | 0.319621 | 0.79  | 0.479 | 6.09E-33 | CSCL2 | MDK      |
| NCAM1.12  | 4.88E-37 | 0.432955 | 0.603 | 0.325 | 7.30E-33 | CSCL2 | NCAM1    |
| MS4A7.13  | 5.70E-37 | -1.20291 | 0.068 | 0.343 | 8.51E-33 | CSCL2 | MS4A7    |
| TCEAL2.1C | 7.01E-37 | 0.410072 | 0.419 | 0.17  | 1.05E-32 | CSCL2 | TCEAL2   |
| JADE1.5   | 7.79E-37 | 0.464039 | 0.311 | 0.116 | 1.16E-32 | CSCL2 | JADE1    |
| CHD7.10   | 7.87E-37 | 0.45145  | 0.536 | 0.279 | 1.18E-32 | CSCL2 | CHD7     |
| PAX6.9    | 8.27E-37 | 0.417768 | 0.23  | 0.072 | 1.24E-32 | CSCL2 | PAX6     |
| ITGB2.13  | 1.28E-36 | -1.1322  | 0.062 | 0.334 | 1.92E-32 | CSCL2 | ITGB2    |
| FUS.5     | 1.41E-36 | 0.356522 | 0.848 | 0.635 | 2.11E-32 | CSCL2 | FUS      |
| SCG3.13   | 1.53E-36 | 0.441138 | 0.534 | 0.256 | 2.29E-32 | CSCL2 | SCG3     |
| ARL6IP5.7 | 1.75E-36 | -0.61068 | 0.43  | 0.659 | 2.62E-32 | CSCL2 | ARL6IP5  |
| PTTG2.1   | 2.01E-36 | 0.183179 | 0.053 | 0.005 | 3.01E-32 | CSCL2 | PTTG2    |
| APRT.9    | 2.19E-36 | -0.75074 | 0.276 | 0.541 | 3.28E-32 | CSCL2 | APRT     |
| LIPA.11   | 2.32E-36 | -0.89534 | 0.062 | 0.345 | 3.47E-32 | CSCL2 | LIPA     |
| PXMP2.11  | 2.40E-36 | 0.523155 | 0.437 | 0.214 | 3.59E-32 | CSCL2 | PXMP2    |
| HNRNPM.1C | 2.54E-36 | 0.431128 | 0.766 | 0.534 | 3.79E-32 | CSCL2 | HNRNPM   |
| PLA2G16.9 | 2.84E-36 | -0.86899 | 0.124 | 0.415 | 4.24E-32 | CSCL2 | PLA2G16  |
| NAMPT.12  | 3.09E-36 | -1.02669 | 0.172 | 0.448 | 4.62E-32 | CSCL2 | NAMPT    |
| APBB2.10  | 3.15E-36 | 0.387435 | 0.291 | 0.105 | 4.70E-32 | CSCL2 | APBB2    |
| POP7.10   | 3.53E-36 | 0.396324 | 0.647 | 0.384 | 5.28E-32 | CSCL2 | POP7     |
| ZEB1.12   | 3.54E-36 | 0.49657  | 0.402 | 0.184 | 5.29E-32 | CSCL2 | ZEB1     |
| NOSTRIN   | 4.41E-36 | 0.114732 | 0.046 | 0.003 | 6.60E-32 | CSCL2 | NOSTRIN  |
| SGK1.13   | 4.74E-36 | -0.9265  | 0.168 | 0.448 | 7.08E-32 | CSCL2 | SGK1     |
| HCLS1.13  | 4.93E-36 | -1.05791 | 0.026 | 0.301 | 7.37E-32 | CSCL2 | HCLS1    |
| XRCC5.11  | 5.24E-36 | 0.378897 | 0.773 | 0.552 | 7.83E-32 | CSCL2 | XRCC5    |
| PAX3.1    | 5.62E-36 | 0.165271 | 0.084 | 0.012 | 8.40E-32 | CSCL2 | PAX3     |
| PRR13.9   | 5.68E-36 | -0.74221 | 0.289 | 0.553 | 8.49E-32 | CSCL2 | PRR13    |
| CEP78.10  | 6.83E-36 | 0.40561  | 0.289 | 0.107 | 1.02E-31 | CSCL2 | CEP78    |
| S100A4.13 | 7.70E-36 | -1.14464 | 0.033 | 0.306 | 1.15E-31 | CSCL2 | S100A4   |

|              |          |          |       |       |          |       |          |
|--------------|----------|----------|-------|-------|----------|-------|----------|
| CACNA2D1. 8. | 0.01E-36 | 0.21995  | 0.13  | 0.026 | 1.20E-31 | CSCL2 | CACNA2D1 |
| MS4A6A. 13   | 8.53E-36 | -1.22093 | 0.084 | 0.351 | 1.28E-31 | CSCL2 | MS4A6A   |
| NXPH1. 12    | 9.44E-36 | 0.462828 | 0.327 | 0.128 | 1.41E-31 | CSCL2 | NXPH1    |
| ARPC3. 11    | 9.61E-36 | -0.46116 | 0.717 | 0.808 | 1.44E-31 | CSCL2 | ARPC3    |
| FCGR2A. 13   | 1.23E-35 | -1.08112 | 0.029 | 0.299 | 1.84E-31 | CSCL2 | FCGR2A   |
| COL9A1. 1    | 1.51E-35 | 0.137366 | 0.075 | 0.01  | 2.26E-31 | CSCL2 | COL9A1   |
| DTX3. 8      | 2.54E-35 | 0.630975 | 0.464 | 0.247 | 3.80E-31 | CSCL2 | DTX3     |
| PPM1G. 12    | 2.78E-35 | 0.431684 | 0.66  | 0.409 | 4.16E-31 | CSCL2 | PPM1G    |
| RNASE6. 13   | 3.05E-35 | -1.09715 | 0.02  | 0.285 | 4.55E-31 | CSCL2 | RNASE6   |
| AMPH. 1      | 3.19E-35 | 0.198837 | 0.108 | 0.019 | 4.76E-31 | CSCL2 | AMPH     |
| TBC1D31. 1   | 3.35E-35 | 0.318606 | 0.137 | 0.03  | 5.00E-31 | CSCL2 | TBC1D31  |
| PRTFDC1. 8   | 3.35E-35 | 0.364452 | 0.327 | 0.127 | 5.01E-31 | CSCL2 | PRTFDC1  |
| PIP4K2C. 7   | 4.11E-35 | 0.419447 | 0.283 | 0.102 | 6.15E-31 | CSCL2 | PIP4K2C  |
| PYCARD. 13   | 4.51E-35 | -0.9756  | 0.026 | 0.295 | 6.74E-31 | CSCL2 | PYCARD   |
| GLRX. 12     | 5.64E-35 | -0.90171 | 0.119 | 0.399 | 8.43E-31 | CSCL2 | GLRX     |
| SERPINE2. 5  | 7.7E-35  | 0.485608 | 0.539 | 0.283 | 8.63E-31 | CSCL2 | SERPINE2 |
| SERF2. 9     | 6.08E-35 | -0.38496 | 0.857 | 0.897 | 9.09E-31 | CSCL2 | SERF2    |
| FAM161A. 7   | 6.31E-35 | 0.396597 | 0.278 | 0.101 | 9.43E-31 | CSCL2 | FAM161A  |
| HCST. 13     | 6.78E-35 | -1.13952 | 0.031 | 0.294 | 1.01E-30 | CSCL2 | HCST     |
| BLVRB. 9     | 7.08E-35 | -0.8738  | 0.099 | 0.385 | 1.06E-30 | CSCL2 | BLVRB    |
| SNRPB. 8     | 8.84E-35 | 0.374313 | 0.821 | 0.568 | 1.32E-30 | CSCL2 | SNRPB    |
| RHOG. 12     | 9.31E-35 | -0.90037 | 0.148 | 0.42  | 1.39E-30 | CSCL2 | RHOG     |
| MS4A4A. 13   | 9.89E-35 | -1.15244 | 0.033 | 0.296 | 1.48E-30 | CSCL2 | MS4A4A   |
| NETO2. 9     | 1.02E-34 | 0.479944 | 0.358 | 0.153 | 1.53E-30 | CSCL2 | NETO2    |
| SERPINB1. 1  | 2.3E-34  | -1.03751 | 0.015 | 0.277 | 1.83E-30 | CSCL2 | SERPINB1 |
| NKX2-2. 11   | 1.77E-34 | 0.38601  | 0.353 | 0.139 | 2.64E-30 | CSCL2 | NKX2-2   |
| CTSC. 13     | 1.84E-34 | -1.00468 | 0.128 | 0.394 | 2.76E-30 | CSCL2 | CTSC     |
| FANCB. 2     | 1.92E-34 | 0.19465  | 0.106 | 0.019 | 2.87E-30 | CSCL2 | FANCB    |
| VBP1. 9      | 2.33E-34 | 0.355979 | 0.751 | 0.476 | 3.48E-30 | CSCL2 | VBP1     |
| NGFRAP1. 1   | 2.87E-34 | 0.281523 | 0.923 | 0.633 | 4.28E-30 | CSCL2 | NGFRAP1  |
| CYBA. 13     | 3.99E-34 | -1.0384  | 0.163 | 0.414 | 5.96E-30 | CSCL2 | CYBA     |
| SCPEP1. 11   | 5.20E-34 | -0.93567 | 0.091 | 0.357 | 7.76E-30 | CSCL2 | SCPEP1   |
| PHIP. 8      | 5.26E-34 | 0.443787 | 0.572 | 0.322 | 7.85E-30 | CSCL2 | PHIP     |
| CIB1. 11     | 6.32E-34 | -0.73547 | 0.245 | 0.502 | 9.45E-30 | CSCL2 | CIB1     |
| DCX. 13      | 7.79E-34 | 0.375288 | 0.444 | 0.195 | 1.16E-29 | CSCL2 | DCX      |
| BUB3. 6      | 9.01E-34 | 0.430159 | 0.554 | 0.298 | 1.35E-29 | CSCL2 | BUB3     |
| GAS1. 13     | 9.42E-34 | 0.551169 | 0.329 | 0.137 | 1.41E-29 | CSCL2 | GAS1     |
| IL17RB. 9    | 1.07E-33 | 0.357623 | 0.161 | 0.041 | 1.59E-29 | CSCL2 | IL17RB   |
| AMOTL2. 8    | 1.18E-33 | 0.255158 | 0.236 | 0.075 | 1.77E-29 | CSCL2 | AMOTL2   |
| POU3F2. 11   | 1.34E-33 | 0.491777 | 0.439 | 0.207 | 2.01E-29 | CSCL2 | POU3F2   |
| SLC16A14. 1  | 6.8E-33  | 0.238552 | 0.121 | 0.025 | 2.51E-29 | CSCL2 | SLC16A14 |
| RAC1. 6      | 2.23E-33 | 0.288391 | 0.916 | 0.736 | 3.34E-29 | CSCL2 | RAC1     |
| ASAH1. 11    | 2.29E-33 | -0.67569 | 0.472 | 0.659 | 3.42E-29 | CSCL2 | ASAH1    |
| C3orf70. 1   | 2.62E-33 | 0.401799 | 0.263 | 0.094 | 3.92E-29 | CSCL2 | C3orf70  |
| ZNF704. 11   | 2.87E-33 | 0.393102 | 0.302 | 0.116 | 4.29E-29 | CSCL2 | ZNF704   |
| CSF1R. 13    | 4.04E-33 | -1.03361 | 0.024 | 0.278 | 6.03E-29 | CSCL2 | CSF1R    |
| ILF3. 9      | 4.05E-33 | 0.389985 | 0.656 | 0.402 | 6.05E-29 | CSCL2 | ILF3     |
| TIMP1. 10    | 4.49E-33 | -0.77127 | 0.411 | 0.629 | 6.71E-29 | CSCL2 | TIMP1    |
| TSPAN13. 1   | 6.13E-33 | 0.407212 | 0.563 | 0.288 | 9.16E-29 | CSCL2 | TSPAN13  |
| NUP35. 7     | 6.26E-33 | 0.368872 | 0.283 | 0.105 | 9.36E-29 | CSCL2 | NUP35    |
| CMC2. 8      | 8.79E-33 | 0.39926  | 0.539 | 0.296 | 1.31E-28 | CSCL2 | CMC2     |

|           |          |          |       |       |          |       |               |
|-----------|----------|----------|-------|-------|----------|-------|---------------|
| SAC3D1.11 | 8.99E-33 | 0.488271 | 0.36  | 0.162 | 1.34E-28 | CSCL2 | SAC3D1        |
| CXCR4.10  | 9.16E-33 | -0.88883 | 0.13  | 0.399 | 1.37E-28 | CSCL2 | CXCR4         |
| RP11-118F | 9.86E-33 | 0.181443 | 0.075 | 0.01  | 1.47E-28 | CSCL2 | RP11-118F19.1 |
| PSAT1.12  | 1.03E-32 | 0.432489 | 0.422 | 0.194 | 1.54E-28 | CSCL2 | PSAT1         |
| SMC1A.4   | 1.23E-32 | 0.421017 | 0.43  | 0.209 | 1.83E-28 | CSCL2 | SMC1A         |
| ZNF711.1C | 1.33E-32 | 0.373754 | 0.331 | 0.134 | 1.99E-28 | CSCL2 | ZNF711        |
| CEBPB.11  | 1.95E-32 | -0.69543 | 0.177 | 0.445 | 2.91E-28 | CSCL2 | CEBPB         |
| NPPA.9    | 2.38E-32 | 0.294466 | 0.119 | 0.025 | 3.55E-28 | CSCL2 | NPPA          |
| TP73      | 2.51E-32 | 0.265226 | 0.126 | 0.028 | 3.76E-28 | CSCL2 | TP73          |
| FXD5.13   | 3.05E-32 | -0.98012 | 0.091 | 0.35  | 4.55E-28 | CSCL2 | FXD5          |
| SYNGR2.12 | 3.46E-32 | -0.83746 | 0.079 | 0.338 | 5.17E-28 | CSCL2 | SYNGR2        |
| SPSB4.11  | 3.60E-32 | 0.292611 | 0.183 | 0.054 | 5.38E-28 | CSCL2 | SPSB4         |
| SNRPE.10  | 3.70E-32 | 0.336934 | 0.808 | 0.57  | 5.53E-28 | CSCL2 | SNRPE         |
| ATP6VOB.1 | 4.02E-32 | -0.43695 | 0.724 | 0.801 | 6.00E-28 | CSCL2 | ATP6VOB       |
| RAC3.12   | 4.68E-32 | 0.412305 | 0.382 | 0.175 | 6.99E-28 | CSCL2 | RAC3          |
| C4orf27.8 | 4.76E-32 | 0.371285 | 0.558 | 0.309 | 7.11E-28 | CSCL2 | C4orf27       |
| CTSH.13   | 4.91E-32 | -0.93599 | 0.051 | 0.305 | 7.33E-28 | CSCL2 | CTSH          |
| NTM.10    | 4.91E-32 | 0.340651 | 0.289 | 0.104 | 7.34E-28 | CSCL2 | NTM           |
| CENPQ.4   | 5.13E-32 | 0.334836 | 0.256 | 0.092 | 7.67E-28 | CSCL2 | CENPQ         |
| BCHE.10   | 5.64E-32 | 0.468958 | 0.389 | 0.178 | 8.43E-28 | CSCL2 | BCHE          |
| MEIS1.10  | 5.94E-32 | 0.304968 | 0.236 | 0.081 | 8.88E-28 | CSCL2 | MEIS1         |
| IFITM2.13 | 6.69E-32 | -0.92236 | 0.038 | 0.293 | 1.00E-27 | CSCL2 | IFITM2        |
| IQGAP3.2  | 7.89E-32 | 0.214715 | 0.077 | 0.011 | 1.18E-27 | CSCL2 | IQGAP3        |
| GPSM3.13  | 8.96E-32 | -1.01284 | 0.026 | 0.272 | 1.34E-27 | CSCL2 | GPSM3         |
| CSTB.11   | 8.99E-32 | -0.54352 | 0.536 | 0.696 | 1.34E-27 | CSCL2 | CSTB          |
| CTA-384D8 | 9.63E-32 | 0.202565 | 0.11  | 0.022 | 1.44E-27 | CSCL2 | CTA-384D8.36  |
| PPIA.6    | 1.01E-31 | 0.179305 | 0.969 | 0.871 | 1.51E-27 | CSCL2 | PPIA          |
| CD163.13  | 1.15E-31 | -1.06578 | 0.04  | 0.285 | 1.73E-27 | CSCL2 | CD163         |
| C10orf54. | 1.21E-31 | -1.02848 | 0.051 | 0.298 | 1.81E-27 | CSCL2 | C10orf54      |
| ZNF3.8    | 1.27E-31 | 0.390656 | 0.419 | 0.197 | 1.90E-27 | CSCL2 | ZNF3          |
| CHRDL1.3  | 1.31E-31 | 0.28059  | 0.141 | 0.035 | 1.96E-27 | CSCL2 | CHRDL1        |
| TRA2B.9   | 2.28E-31 | 0.343751 | 0.744 | 0.532 | 3.41E-27 | CSCL2 | TRA2B         |
| PLAUR.13  | 2.41E-31 | -1.07792 | 0.135 | 0.376 | 3.60E-27 | CSCL2 | PLAUR         |
| RFWD3.4   | 2.77E-31 | 0.375111 | 0.181 | 0.053 | 4.14E-27 | CSCL2 | RFWD3         |
| RBBP4.6   | 3.15E-31 | 0.385022 | 0.651 | 0.422 | 4.70E-27 | CSCL2 | RBBP4         |
| SUMO2.8   | 4.93E-31 | 0.205936 | 0.936 | 0.817 | 7.37E-27 | CSCL2 | SUMO2         |
| METTL1.8  | 5.36E-31 | 0.483984 | 0.325 | 0.14  | 8.00E-27 | CSCL2 | METTL1        |
| SESTD1.8  | 5.46E-31 | 0.399428 | 0.349 | 0.151 | 8.16E-27 | CSCL2 | SESTD1        |
| CRB1.7    | 5.62E-31 | 0.256863 | 0.203 | 0.062 | 8.40E-27 | CSCL2 | CRB1          |
| FCGR1A.13 | 6.04E-31 | -1.04632 | 0.026 | 0.268 | 9.03E-27 | CSCL2 | FCGR1A        |
| LSM3.3    | 6.31E-31 | 0.314907 | 0.784 | 0.551 | 9.43E-27 | CSCL2 | LSM3          |
| GSTK1.10  | 6.81E-31 | -0.72013 | 0.302 | 0.539 | 1.02E-26 | CSCL2 | GSTK1         |
| MPHOSPH9. | 7.84E-31 | 0.398526 | 0.283 | 0.11  | 1.17E-26 | CSCL2 | MPHOSPH9      |
| BEX1.11   | 8.19E-31 | 0.370304 | 0.627 | 0.34  | 1.22E-26 | CSCL2 | BEX1          |
| MEIS2.11  | 8.60E-31 | 0.354271 | 0.424 | 0.194 | 1.29E-26 | CSCL2 | MEIS2         |
| SAMSN1.13 | 9.39E-31 | -0.9738  | 0.022 | 0.261 | 1.40E-26 | CSCL2 | SAMSN1        |
| SRI.10    | 9.83E-31 | 0.241767 | 0.905 | 0.722 | 1.47E-26 | CSCL2 | SRI           |
| SPATS2.11 | 1.05E-30 | 0.413037 | 0.477 | 0.25  | 1.56E-26 | CSCL2 | SPATS2        |
| GRIA2.11  | 1.09E-30 | 0.401242 | 0.422 | 0.203 | 1.63E-26 | CSCL2 | GRIA2         |
| CACNA1A.1 | 1.17E-30 | 0.289829 | 0.256 | 0.089 | 1.74E-26 | CSCL2 | CACNA1A       |
| CD99.7    | 1.46E-30 | -0.63115 | 0.457 | 0.645 | 2.18E-26 | CSCL2 | CD99          |



|            |     |          |          |       |       |          |       |           |
|------------|-----|----------|----------|-------|-------|----------|-------|-----------|
| HNRNPUL1.  | 1.  | 67E-30   | 0.375301 | 0.609 | 0.375 | 2.50E-26 | CSCL2 | HNRNPUL1  |
| GEN1.      | 1.  | 78E-30   | 0.198131 | 0.106 | 0.021 | 2.66E-26 | CSCL2 | GEN1      |
| CCNE1.     | 1.  | 18E-30   | 0.262912 | 0.117 | 0.026 | 3.26E-26 | CSCL2 | CCNE1     |
| LAPTM4B.   | 1.  | 3.06E-30 | 0.417194 | 0.567 | 0.322 | 4.58E-26 | CSCL2 | LAPTM4B   |
| EGR1.      | 9.  | 3.84E-30 | 0.42429  | 0.695 | 0.488 | 5.73E-26 | CSCL2 | EGR1      |
| TPGS2.     | 6.  | 4.02E-30 | 0.433346 | 0.567 | 0.329 | 6.01E-26 | CSCL2 | TPGS2     |
| MDM2.      | 7.  | 4.98E-30 | 0.603769 | 0.389 | 0.199 | 7.45E-26 | CSCL2 | MDM2      |
| CHAC2.     | 2.  | 5.06E-30 | 0.232227 | 0.155 | 0.041 | 7.55E-26 | CSCL2 | CHAC2     |
| HN1.       | 8.  | 5.46E-30 | 0.33586  | 0.876 | 0.667 | 8.16E-26 | CSCL2 | HN1       |
| ACAT2.     | 10. | 5.66E-30 | 0.440863 | 0.49  | 0.269 | 8.45E-26 | CSCL2 | ACAT2     |
| FAM212B.   | 1.  | 5.88E-30 | 0.300541 | 0.254 | 0.093 | 8.79E-26 | CSCL2 | FAM212B   |
| THEMIS2.   | 1.  | 6.05E-30 | -0.87053 | 0.018 | 0.251 | 9.04E-26 | CSCL2 | THEMIS2   |
| ZNF107.    | 1.  | 9.09E-30 | 0.264581 | 0.139 | 0.035 | 1.36E-25 | CSCL2 | ZNF107    |
| ABAT.      | 12. | 9.30E-30 | 0.364976 | 0.347 | 0.152 | 1.39E-25 | CSCL2 | ABAT      |
| CBR3.      | 8.  | 9.48E-30 | 0.419484 | 0.258 | 0.099 | 1.42E-25 | CSCL2 | CBR3      |
| KIF5A.     | 10. | 1.04E-29 | 0.39122  | 0.289 | 0.115 | 1.55E-25 | CSCL2 | KIF5A     |
| SLC11A1.   | 1.  | 1.09E-29 | -0.94773 | 0.075 | 0.314 | 1.63E-25 | CSCL2 | SLC11A1   |
| NUP62.     | 7.  | 1.22E-29 | 0.329899 | 0.455 | 0.228 | 1.82E-25 | CSCL2 | NUP62     |
| SDC1.      | 7.  | 1.30E-29 | 0.290595 | 0.157 | 0.044 | 1.95E-25 | CSCL2 | SDC1      |
| HNRNPH3.   | 1.  | 1.37E-29 | 0.37102  | 0.664 | 0.437 | 2.04E-25 | CSCL2 | HNRNPH3   |
| LBR.       | 9.  | 1.52E-29 | 0.422827 | 0.439 | 0.224 | 2.27E-25 | CSCL2 | LBR       |
| IL13RA1.   | 1.  | 1.75E-29 | -0.73344 | 0.024 | 0.258 | 2.62E-25 | CSCL2 | IL13RA1   |
| PSPC1.     | 10. | 1.97E-29 | 0.404253 | 0.415 | 0.203 | 2.94E-25 | CSCL2 | PSPC1     |
| TMEM35.    | 10. | 2.01E-29 | 0.299906 | 0.245 | 0.085 | 3.00E-25 | CSCL2 | TMEM35    |
| ACTL6A.    | 9.  | 2.07E-29 | 0.380117 | 0.472 | 0.249 | 3.10E-25 | CSCL2 | ACTL6A    |
| C3AR1.     | 13. | 2.11E-29 | -0.98961 | 0.018 | 0.247 | 3.15E-25 | CSCL2 | C3AR1     |
| CREM.      | 11. | 2.13E-29 | -0.71065 | 0.159 | 0.416 | 3.19E-25 | CSCL2 | CREM      |
| SRPK2.     | 9.  | 2.27E-29 | 0.409463 | 0.647 | 0.401 | 3.40E-25 | CSCL2 | SRPK2     |
| CPSF6.     | 8.  | 2.28E-29 | 0.406105 | 0.543 | 0.321 | 3.40E-25 | CSCL2 | CPSF6     |
| LILRB4.    | 13. | 2.53E-29 | -0.97602 | 0.031 | 0.264 | 3.79E-25 | CSCL2 | LILRB4    |
| TBXAS1.    | 13. | 2.62E-29 | -0.8975  | 0.02  | 0.25  | 3.92E-25 | CSCL2 | TBXAS1    |
| TIA1.      | 13. | 2.91E-29 | 0.368801 | 0.459 | 0.24  | 4.34E-25 | CSCL2 | TIA1      |
| XP01.      | 5.  | 2.94E-29 | 0.392962 | 0.468 | 0.25  | 4.40E-25 | CSCL2 | XP01      |
| LRRCC1.    | 8.  | 2.99E-29 | 0.394359 | 0.305 | 0.129 | 4.47E-25 | CSCL2 | LRRCC1    |
| ZC4H2.     | 7.  | 3.59E-29 | 0.288078 | 0.168 | 0.048 | 5.37E-25 | CSCL2 | ZC4H2     |
| ZFPM2.     | 6.  | 3.79E-29 | 0.244473 | 0.115 | 0.025 | 5.67E-25 | CSCL2 | ZFPM2     |
| HNRNPA1L2. | 3.  | 3.86E-29 | 0.421546 | 0.397 | 0.193 | 5.77E-25 | CSCL2 | HNRNPA1L2 |
| SF3B3.     | 6.  | 3.91E-29 | 0.364397 | 0.386 | 0.182 | 5.84E-25 | CSCL2 | SF3B3     |
| FIP1L1.    | 8.  | 4.01E-29 | 0.443708 | 0.501 | 0.288 | 6.00E-25 | CSCL2 | FIP1L1    |
| CLIC1.     | 9.  | 4.42E-29 | -0.54002 | 0.419 | 0.631 | 6.61E-25 | CSCL2 | CLIC1     |
| HMOX1.     | 13. | 4.74E-29 | -0.97609 | 0.068 | 0.304 | 7.08E-25 | CSCL2 | HMOX1     |
| MTHFD1.    | 8.  | 5.03E-29 | 0.424244 | 0.373 | 0.18  | 7.52E-25 | CSCL2 | MTHFD1    |
| LIMA1.     | 12. | 5.51E-29 | 0.429442 | 0.541 | 0.309 | 8.24E-25 | CSCL2 | LIMA1     |
| S100A10.   | 1.  | 7.07E-29 | -0.66246 | 0.3   | 0.554 | 1.06E-24 | CSCL2 | S100A10   |
| GPR183.    | 13. | 7.72E-29 | -1.06159 | 0.066 | 0.299 | 1.15E-24 | CSCL2 | GPR183    |
| HAVCR2.    | 13. | 7.80E-29 | -0.96236 | 0.015 | 0.24  | 1.17E-24 | CSCL2 | HAVCR2    |
| CDH24.     | 2.  | 8.66E-29 | 0.222764 | 0.126 | 0.03  | 1.29E-24 | CSCL2 | CDH24     |
| GPR34.     | 13. | 1.04E-28 | -1.0354  | 0.046 | 0.276 | 1.55E-24 | CSCL2 | GPR34     |
| CLOCK.     | 8.  | 1.13E-28 | 0.429239 | 0.291 | 0.122 | 1.68E-24 | CSCL2 | CLOCK     |
| DNASE2.    | 9.  | 1.22E-28 | -0.67907 | 0.146 | 0.393 | 1.82E-24 | CSCL2 | DNASE2    |
| SEPT2.     | 6.  | 1.27E-28 | 0.29264  | 0.775 | 0.573 | 1.90E-24 | CSCL2 | 2-Sep     |

|             |           |           |        |        |           |       |          |
|-------------|-----------|-----------|--------|--------|-----------|-------|----------|
| CEP85       | 1. 38E-28 | 0. 172439 | 0. 108 | 0. 023 | 2. 06E-24 | CSCL2 | CEP85    |
| MIS18BP1.   | 1. 52E-28 | 0. 374327 | 0. 331 | 0. 139 | 2. 27E-24 | CSCL2 | MIS18BP1 |
| SUV39H1. 2  | 1. 52E-28 | 0. 240001 | 0. 128 | 0. 031 | 2. 27E-24 | CSCL2 | SUV39H1  |
| E2F7. 1     | 1. 55E-28 | 0. 134149 | 0. 071 | 0. 011 | 2. 32E-24 | CSCL2 | E2F7     |
| CHCHD3. 8   | 1. 57E-28 | 0. 362717 | 0. 589 | 0. 36  | 2. 34E-24 | CSCL2 | CHCHD3   |
| TPP1. 10    | 1. 57E-28 | -0. 6908  | 0. 086 | 0. 332 | 2. 34E-24 | CSCL2 | TPP1     |
| SRSF1. 7    | 1. 60E-28 | 0. 335153 | 0. 627 | 0. 388 | 2. 40E-24 | CSCL2 | SRSF1    |
| CAMKK1      | 1. 91E-28 | 0. 214332 | 0. 102 | 0. 021 | 2. 86E-24 | CSCL2 | CAMKK1   |
| SCFD2. 4    | 2. 00E-28 | 0. 326266 | 0. 23  | 0. 082 | 2. 99E-24 | CSCL2 | SCFD2    |
| GRID2. 5    | 2. 21E-28 | 0. 248936 | 0. 152 | 0. 042 | 3. 30E-24 | CSCL2 | GRID2    |
| ADAM22. 9   | 2. 74E-28 | 0. 311558 | 0. 185 | 0. 058 | 4. 09E-24 | CSCL2 | ADAM22   |
| MASTL. 4    | 2. 77E-28 | 0. 401879 | 0. 132 | 0. 033 | 4. 14E-24 | CSCL2 | MASTL    |
| FSCN1. 10   | 3. 20E-28 | 0. 371569 | 0. 709 | 0. 496 | 4. 78E-24 | CSCL2 | FSCN1    |
| PPAT. 10    | 3. 32E-28 | 0. 485701 | 0. 305 | 0. 137 | 4. 96E-24 | CSCL2 | PPAT     |
| ADORA3. 13  | 3. 52E-28 | -0. 9691  | 0. 044 | 0. 269 | 5. 25E-24 | CSCL2 | ADORA3   |
| FAM221A. 1  | 3. 53E-28 | 0. 29813  | 0. 375 | 0. 17  | 5. 27E-24 | CSCL2 | FAM221A  |
| HOXC9. 12   | 3. 54E-28 | 0. 287429 | 0. 232 | 0. 079 | 5. 29E-24 | CSCL2 | HOXC9    |
| KCNAB3      | 3. 68E-28 | 0. 211078 | 0. 119 | 0. 028 | 5. 50E-24 | CSCL2 | KCNAB3   |
| RIF1. 10    | 3. 81E-28 | 0. 400101 | 0. 417 | 0. 212 | 5. 69E-24 | CSCL2 | RIF1     |
| RPA2. 5     | 3. 82E-28 | 0. 3829   | 0. 545 | 0. 31  | 5. 71E-24 | CSCL2 | RPA2     |
| RUVBL2. 8   | 4. 05E-28 | 0. 459635 | 0. 534 | 0. 309 | 6. 06E-24 | CSCL2 | RUVBL2   |
| NRCAM. 12   | 4. 37E-28 | 0. 36007  | 0. 481 | 0. 261 | 6. 53E-24 | CSCL2 | NRCAM    |
| DCLRE1B. 3  | 4. 77E-28 | 0. 267418 | 0. 17  | 0. 051 | 7. 12E-24 | CSCL2 | DCLRE1B  |
| OSTF1. 11   | 4. 82E-28 | -0. 83687 | 0. 068 | 0. 3   | 7. 20E-24 | CSCL2 | OSTF1    |
| MARCKS. 1C  | 5. 60E-28 | 0. 324585 | 0. 81  | 0. 589 | 8. 37E-24 | CSCL2 | MARCKS   |
| DCTN2. 7    | 6. 13E-28 | 0. 494778 | 0. 664 | 0. 501 | 9. 17E-24 | CSCL2 | DCTN2    |
| NUDT10. 8   | 6. 13E-28 | 0. 210037 | 0. 161 | 0. 046 | 9. 17E-24 | CSCL2 | NUDT10   |
| KIF21A. 13  | 6. 75E-28 | 0. 470319 | 0. 517 | 0. 294 | 1. 01E-23 | CSCL2 | KIF21A   |
| RNF219. 6   | 7. 17E-28 | 0. 360042 | 0. 272 | 0. 108 | 1. 07E-23 | CSCL2 | RNF219   |
| OXCT1. 8    | 7. 34E-28 | 0. 465774 | 0. 313 | 0. 141 | 1. 10E-23 | CSCL2 | OXCT1    |
| PCDH11X. 2  | 7. 97E-28 | 0. 232191 | 0. 106 | 0. 023 | 1. 19E-23 | CSCL2 | PCDH11X  |
| CCT6A. 7    | 9. 66E-28 | 0. 316098 | 0. 77  | 0. 567 | 1. 44E-23 | CSCL2 | CCT6A    |
| EMP3. 12    | 9. 98E-28 | -0. 64056 | 0. 194 | 0. 459 | 1. 49E-23 | CSCL2 | EMP3     |
| OLR1. 13    | 9. 98E-28 | -0. 96891 | 0. 038 | 0. 259 | 1. 49E-23 | CSCL2 | OLR1     |
| HNRNPA3. 6  | 1. 08E-27 | 0. 320398 | 0. 757 | 0. 546 | 1. 62E-23 | CSCL2 | HNRNPA3  |
| BRIX1. 10   | 1. 16E-27 | 0. 381704 | 0. 461 | 0. 245 | 1. 74E-23 | CSCL2 | BRIX1    |
| MAGED1. 11  | 1. 19E-27 | 0. 353225 | 0. 578 | 0. 335 | 1. 78E-23 | CSCL2 | MAGED1   |
| NT5C3A. 1C  | 1. 30E-27 | 0. 352043 | 0. 517 | 0. 285 | 1. 95E-23 | CSCL2 | NT5C3A   |
| NAP1L4. 1C  | 1. 64E-27 | 0. 366776 | 0. 62  | 0. 395 | 2. 45E-23 | CSCL2 | NAP1L4   |
| PCDHB16. 1  | 1. 67E-27 | 0. 337093 | 0. 307 | 0. 133 | 2. 50E-23 | CSCL2 | PCDHB16  |
| SNRPA. 6    | 1. 70E-27 | 0. 360499 | 0. 459 | 0. 244 | 2. 54E-23 | CSCL2 | SNRPA    |
| MVP. 7      | 1. 78E-27 | -0. 65728 | 0. 015 | 0. 234 | 2. 65E-23 | CSCL2 | MVP      |
| RNPS1. 6    | 1. 81E-27 | 0. 313708 | 0. 746 | 0. 526 | 2. 70E-23 | CSCL2 | RNPS1    |
| LGALS9. 13  | 1. 81E-27 | -0. 88996 | 0. 029 | 0. 249 | 2. 70E-23 | CSCL2 | LGALS9   |
| SOX1. 1     | 2. 01E-27 | 0. 151304 | 0. 075 | 0. 012 | 3. 01E-23 | CSCL2 | SOX1     |
| KIAA1841. 2 | 0. 7E-27  | 0. 228622 | 0. 19  | 0. 061 | 3. 09E-23 | CSCL2 | KIAA1841 |
| EFNB1. 7    | 2. 09E-27 | 0. 283954 | 0. 243 | 0. 09  | 3. 13E-23 | CSCL2 | EFNB1    |
| TMEM219. 1  | 2. 13E-27 | -0. 58925 | 0. 342 | 0. 569 | 3. 18E-23 | CSCL2 | TMEM219  |
| RAB20. 11   | 2. 20E-27 | -0. 81031 | 0. 024 | 0. 245 | 3. 29E-23 | CSCL2 | RAB20    |
| ZNF184. 2   | 2. 38E-27 | 0. 218155 | 0. 159 | 0. 045 | 3. 56E-23 | CSCL2 | ZNF184   |
| ZNF530. 6   | 2. 43E-27 | 0. 323314 | 0. 174 | 0. 055 | 3. 63E-23 | CSCL2 | ZNF530   |

|           |          |          |       |       |          |       |          |
|-----------|----------|----------|-------|-------|----------|-------|----------|
| STOM.11   | 2.71E-27 | -0.73928 | 0.035 | 0.26  | 4.05E-23 | CSCL2 | STOM     |
| TRIB2.13  | 2.80E-27 | 0.422201 | 0.475 | 0.254 | 4.18E-23 | CSCL2 | TRIB2    |
| PTOV1.12  | 3.25E-27 | 0.370425 | 0.675 | 0.429 | 4.86E-23 | CSCL2 | PTOV1    |
| CADM2.10  | 3.32E-27 | 0.321925 | 0.391 | 0.18  | 4.96E-23 | CSCL2 | CADM2    |
| CCT5.10   | 3.35E-27 | 0.336058 | 0.713 | 0.473 | 5.01E-23 | CSCL2 | CCT5     |
| C5AR1.12  | 4.27E-27 | -0.93617 | 0.029 | 0.246 | 6.38E-23 | CSCL2 | C5AR1    |
| KIRREL3.3 | 4.40E-27 | 0.16888  | 0.108 | 0.024 | 6.57E-23 | CSCL2 | KIRREL3  |
| NFIX.12   | 4.89E-27 | 0.361391 | 0.558 | 0.323 | 7.30E-23 | CSCL2 | NFIX     |
| SPI1.13   | 6.18E-27 | -0.845   | 0.031 | 0.247 | 9.24E-23 | CSCL2 | SPI1     |
| B3GALT2.6 | 6.26E-27 | 0.212388 | 0.126 | 0.031 | 9.35E-23 | CSCL2 | B3GALT2  |
| LDHB.8    | 6.69E-27 | 0.242183 | 0.943 | 0.772 | 1.00E-22 | CSCL2 | LDHB     |
| UBTF.10   | 6.96E-27 | 0.404102 | 0.417 | 0.219 | 1.04E-22 | CSCL2 | UBTF     |
| EWSR1.5   | 7.15E-27 | 0.345775 | 0.682 | 0.456 | 1.07E-22 | CSCL2 | EWSR1    |
| ZDHHC22.8 | 8.57E-27 | 0.229838 | 0.143 | 0.039 | 1.28E-22 | CSCL2 | ZDHHC22  |
| SEPT7.12  | 9.00E-27 | 0.292077 | 0.907 | 0.695 | 1.34E-22 | CSCL2 | 7-Sep    |
| MYEF2.11  | 9.83E-27 | 0.455066 | 0.373 | 0.186 | 1.47E-22 | CSCL2 | MYEF2    |
| HHIP-AS1. | 9.84E-27 | 0.147673 | 0.088 | 0.017 | 1.47E-22 | CSCL2 | HHIP-AS1 |
| UBA2.10   | 9.90E-27 | 0.423243 | 0.572 | 0.349 | 1.48E-22 | CSCL2 | UBA2     |
| MIS12.8   | 1.05E-26 | 0.344968 | 0.307 | 0.135 | 1.57E-22 | CSCL2 | MIS12    |
| RAP1A.11  | 1.15E-26 | -0.63134 | 0.309 | 0.524 | 1.71E-22 | CSCL2 | RAP1A    |
| TSPAN7.9  | 1.26E-26 | 0.314074 | 0.545 | 0.301 | 1.89E-22 | CSCL2 | TSPAN7   |
| ZNF300.1C | 1.27E-26 | 0.270572 | 0.194 | 0.064 | 1.89E-22 | CSCL2 | ZNF300   |
| ARC.9     | 1.28E-26 | 0.361274 | 0.415 | 0.2   | 1.91E-22 | CSCL2 | ARC      |
| CASP4.11  | 1.43E-26 | -0.77157 | 0.022 | 0.236 | 2.13E-22 | CSCL2 | CASP4    |
| ACOT7.10  | 1.46E-26 | 0.416546 | 0.422 | 0.219 | 2.19E-22 | CSCL2 | ACOT7    |
| PPM1D.4   | 1.47E-26 | 0.311725 | 0.236 | 0.089 | 2.20E-22 | CSCL2 | PPM1D    |
| SIX1.9    | 1.54E-26 | 0.253752 | 0.17  | 0.052 | 2.30E-22 | CSCL2 | SIX1     |
| LNX1.8    | 1.54E-26 | 0.316008 | 0.192 | 0.064 | 2.31E-22 | CSCL2 | LNX1     |
| FGF9.11   | 1.69E-26 | 0.19913  | 0.161 | 0.046 | 2.52E-22 | CSCL2 | FGF9     |
| ABI2.11   | 1.70E-26 | 0.381106 | 0.583 | 0.353 | 2.54E-22 | CSCL2 | ABI2     |
| IFI30.13  | 1.71E-26 | -0.91662 | 0.018 | 0.227 | 2.56E-22 | CSCL2 | IFI30    |
| NOTCH1.7  | 1.92E-26 | 0.361045 | 0.258 | 0.105 | 2.87E-22 | CSCL2 | NOTCH1   |
| KLRC2.11  | 2.21E-26 | 0.320471 | 0.267 | 0.103 | 3.31E-22 | CSCL2 | KLRC2    |
| TUBGCP3.3 | 2.40E-26 | 0.284928 | 0.254 | 0.099 | 3.59E-22 | CSCL2 | TUBGCP3  |
| DIRAS2.1C | 2.89E-26 | 0.285398 | 0.181 | 0.058 | 4.31E-22 | CSCL2 | DIRAS2   |
| CLU.11    | 3.11E-26 | -0.54927 | 0.702 | 0.786 | 4.65E-22 | CSCL2 | CLU      |
| HYLS1.2   | 3.54E-26 | 0.327938 | 0.128 | 0.033 | 5.29E-22 | CSCL2 | HYLS1    |
| RILPL2.11 | 3.64E-26 | -0.80516 | 0.049 | 0.267 | 5.44E-22 | CSCL2 | RILPL2   |
| POMZP3.8  | 3.74E-26 | 0.297338 | 0.221 | 0.081 | 5.59E-22 | CSCL2 | POMZP3   |
| BORA.2    | 3.77E-26 | 0.285903 | 0.115 | 0.028 | 5.63E-22 | CSCL2 | BORA     |
| AES.12    | 4.02E-26 | 0.353111 | 0.636 | 0.401 | 6.01E-22 | CSCL2 | AES      |
| TGFB1.12  | 4.41E-26 | -0.65414 | 0.038 | 0.253 | 6.60E-22 | CSCL2 | TGFB1    |
| SMOC1.7   | 4.60E-26 | 0.214316 | 0.124 | 0.031 | 6.88E-22 | CSCL2 | SMOC1    |
| IPO9.9    | 5.10E-26 | 0.358349 | 0.426 | 0.224 | 7.62E-22 | CSCL2 | IPO9     |
| THSD7A.11 | 5.52E-26 | 0.277375 | 0.325 | 0.135 | 8.25E-22 | CSCL2 | THSD7A   |
| RNF182.8  | 5.80E-26 | 0.255813 | 0.152 | 0.045 | 8.66E-22 | CSCL2 | RNF182   |
| C18orf54. | 6.08E-26 | 0.177065 | 0.086 | 0.017 | 9.09E-22 | CSCL2 | C18orf54 |
| TAGLN3.11 | 6.14E-26 | 0.310157 | 0.393 | 0.18  | 9.18E-22 | CSCL2 | TAGLN3   |
| RNF168.7  | 6.28E-26 | 0.295969 | 0.32  | 0.141 | 9.38E-22 | CSCL2 | RNF168   |
| MEG3.10   | 6.73E-26 | 0.306212 | 0.552 | 0.295 | 1.01E-21 | CSCL2 | MEG3     |
| HAUS1.3   | 7.29E-26 | 0.369814 | 0.428 | 0.223 | 1.09E-21 | CSCL2 | HAUS1    |

|             |          |          |       |       |          |       |           |
|-------------|----------|----------|-------|-------|----------|-------|-----------|
| RCN2.12     | 7.62E-26 | 0.349119 | 0.713 | 0.457 | 1.14E-21 | CSCL2 | RCN2      |
| ANXA1.10    | 7.63E-26 | -0.67947 | 0.168 | 0.42  | 1.14E-21 | CSCL2 | ANXA1     |
| RARRES2.1   | 7.95E-26 | 0.177401 | 0.338 | 0.142 | 1.19E-21 | CSCL2 | RARRES2   |
| RAD51C.9    | 7.96E-26 | 0.386509 | 0.464 | 0.259 | 1.19E-21 | CSCL2 | RAD51C    |
| NAE1.9      | 8.31E-26 | 0.360495 | 0.552 | 0.332 | 1.24E-21 | CSCL2 | NAE1      |
| ING2.7      | 9.07E-26 | 0.372404 | 0.391 | 0.199 | 1.35E-21 | CSCL2 | ING2      |
| ZNF519.4    | 1.02E-25 | 0.281638 | 0.137 | 0.038 | 1.53E-21 | CSCL2 | ZNF519    |
| TPRKB.9     | 1.07E-25 | 0.332654 | 0.581 | 0.355 | 1.61E-21 | CSCL2 | TPRKB     |
| ZNF462.11   | 1.08E-25 | 0.338865 | 0.353 | 0.17  | 1.62E-21 | CSCL2 | ZNF462    |
| CKAP5.11    | 1.09E-25 | 0.44707  | 0.318 | 0.15  | 1.62E-21 | CSCL2 | CKAP5     |
| CALU.11     | 1.18E-25 | 0.315512 | 0.62  | 0.394 | 1.76E-21 | CSCL2 | CALU      |
| PNN.10      | 1.34E-25 | 0.350058 | 0.614 | 0.393 | 2.00E-21 | CSCL2 | PNN       |
| CDC25B.1C   | 1.43E-25 | 0.52552  | 0.366 | 0.187 | 2.13E-21 | CSCL2 | CDC25B    |
| NRM.5       | 1.46E-25 | 0.321133 | 0.214 | 0.079 | 2.18E-21 | CSCL2 | NRM       |
| TP53.5      | 1.47E-25 | 0.299938 | 0.265 | 0.108 | 2.19E-21 | CSCL2 | TP53      |
| CDC5L.8     | 1.53E-25 | 0.403758 | 0.479 | 0.273 | 2.28E-21 | CSCL2 | CDC5L     |
| SNRNP200.1  | 1.55E-25 | 0.317486 | 0.494 | 0.276 | 2.32E-21 | CSCL2 | SNRNP200  |
| LY96.12     | 1.57E-25 | -0.64846 | 0.022 | 0.231 | 2.35E-21 | CSCL2 | LY96      |
| RND3.11     | 1.62E-25 | 0.363959 | 0.45  | 0.234 | 2.42E-21 | CSCL2 | RND3      |
| GYPC.11     | 1.82E-25 | -0.68055 | 0.091 | 0.318 | 2.71E-21 | CSCL2 | GYPC      |
| NLGN1.11    | 1.84E-25 | 0.370777 | 0.296 | 0.131 | 2.74E-21 | CSCL2 | NLGN1     |
| PSMC3.6     | 2.28E-25 | 0.303996 | 0.748 | 0.521 | 3.40E-21 | CSCL2 | PSMC3     |
| APOC2.12    | 2.34E-25 | -1.0238  | 0     | 0.197 | 3.50E-21 | CSCL2 | APOC2     |
| PTBP2.10    | 2.41E-25 | 0.309674 | 0.254 | 0.1   | 3.60E-21 | CSCL2 | PTBP2     |
| APOC1.12    | 2.46E-25 | -0.91434 | 0.382 | 0.521 | 3.68E-21 | CSCL2 | APOC1     |
| KIAA1549.2  | 2.53E-25 | 0.26755  | 0.234 | 0.088 | 3.78E-21 | CSCL2 | KIAA1549  |
| PDS5B.8     | 2.73E-25 | 0.336713 | 0.34  | 0.16  | 4.09E-21 | CSCL2 | PDS5B     |
| TMBIM1.1C   | 2.78E-25 | -0.64613 | 0.038 | 0.253 | 4.16E-21 | CSCL2 | TMBIM1    |
| SNRPD1.6    | 3.10E-25 | 0.285474 | 0.77  | 0.555 | 4.64E-21 | CSCL2 | SNRPD1    |
| CHD9.6      | 3.12E-25 | 0.356626 | 0.66  | 0.459 | 4.66E-21 | CSCL2 | CHD9      |
| CD86.13     | 3.26E-25 | -0.87282 | 0.018 | 0.221 | 4.87E-21 | CSCL2 | CD86      |
| SUGP2.9     | 3.37E-25 | 0.4318   | 0.433 | 0.239 | 5.04E-21 | CSCL2 | SUGP2     |
| EVI2B.13    | 3.84E-25 | -0.85382 | 0.011 | 0.21  | 5.74E-21 | CSCL2 | EVI2B     |
| CTSZ.13     | 4.20E-25 | -0.82785 | 0.055 | 0.264 | 6.27E-21 | CSCL2 | CTSZ      |
| PTMS.12     | 4.77E-25 | 0.370484 | 0.79  | 0.544 | 7.12E-21 | CSCL2 | PTMS      |
| CHN1.12     | 4.79E-25 | 0.40056  | 0.404 | 0.208 | 7.16E-21 | CSCL2 | CHN1      |
| KLHDC8A.1   | 5.18E-25 | 0.437585 | 0.446 | 0.242 | 7.73E-21 | CSCL2 | KLHDC8A   |
| STMN3.11    | 5.30E-25 | 0.344145 | 0.525 | 0.298 | 7.92E-21 | CSCL2 | STMN3     |
| UBL7-AS1.5  | 5.88E-25 | 0.266855 | 0.163 | 0.052 | 8.79E-21 | CSCL2 | UBL7-AS1  |
| DHRS2.6     | 6.94E-25 | 0.293462 | 0.026 | 0.002 | 1.04E-20 | CSCL2 | DHRS2     |
| POLD2.10    | 7.45E-25 | 0.283175 | 0.642 | 0.412 | 1.11E-20 | CSCL2 | POLD2     |
| OLFML3.12   | 7.48E-25 | -0.83806 | 0.029 | 0.234 | 1.12E-20 | CSCL2 | OLFML3    |
| CD300A.13   | 7.84E-25 | -0.80926 | 0.004 | 0.199 | 1.17E-20 | CSCL2 | CD300A    |
| KIAA1211.8  | 7.70E-25 | 0.175655 | 0.099 | 0.022 | 1.30E-20 | CSCL2 | KIAA1211  |
| TYMP.13     | 9.11E-25 | -0.82709 | 0.104 | 0.315 | 1.36E-20 | CSCL2 | TYMP      |
| CSF2RA.12   | 1.01E-24 | -0.87686 | 0.013 | 0.21  | 1.50E-20 | CSCL2 | CSF2RA    |
| TCP1.9      | 1.08E-24 | 0.301569 | 0.733 | 0.514 | 1.61E-20 | CSCL2 | TCP1      |
| C14orf132.1 | 1.09E-24 | 0.225544 | 0.234 | 0.086 | 1.63E-20 | CSCL2 | C14orf132 |
| CORO1A.13   | 1.15E-24 | -0.8829  | 0.181 | 0.38  | 1.72E-20 | CSCL2 | CORO1A    |
| GAA.12      | 1.23E-24 | -0.65387 | 0.108 | 0.328 | 1.84E-20 | CSCL2 | GAA       |
| TUSC1.8     | 1.25E-24 | 0.235062 | 0.208 | 0.073 | 1.87E-20 | CSCL2 | TUSC1     |

|            |          |          |       |       |          |       |               |
|------------|----------|----------|-------|-------|----------|-------|---------------|
| TTY14.1    | 1.26E-24 | 0.138144 | 0.086 | 0.017 | 1.89E-20 | CSCL2 | TTY14         |
| LANCL2.11  | 1.27E-24 | 0.418905 | 0.325 | 0.145 | 1.89E-20 | CSCL2 | LANCL2        |
| MFSD1.13   | 1.39E-24 | -0.73997 | 0.135 | 0.352 | 2.08E-20 | CSCL2 | MFSD1         |
| PLIN2.11   | 1.39E-24 | -0.96725 | 0.143 | 0.35  | 2.08E-20 | CSCL2 | PLIN2         |
| ASF1A.10   | 1.49E-24 | 0.389694 | 0.424 | 0.227 | 2.23E-20 | CSCL2 | ASF1A         |
| SPIN4      | 1.61E-24 | 0.176689 | 0.086 | 0.018 | 2.41E-20 | CSCL2 | SPIN4         |
| SLC16A9.7  | 1.72E-24 | 0.233494 | 0.146 | 0.044 | 2.57E-20 | CSCL2 | SLC16A9       |
| IFNGR1.12  | 1.77E-24 | -0.71636 | 0.238 | 0.445 | 2.64E-20 | CSCL2 | IFNGR1        |
| BRD7.9     | 2.35E-24 | 0.355051 | 0.446 | 0.246 | 3.51E-20 | CSCL2 | BRD7          |
| CD320.11   | 2.56E-24 | 0.404457 | 0.532 | 0.309 | 3.83E-20 | CSCL2 | CD320         |
| USP46.10   | 2.71E-24 | 0.410495 | 0.287 | 0.131 | 4.05E-20 | CSCL2 | USP46         |
| TM4SF1.13  | 2.83E-24 | 0.275696 | 0.258 | 0.107 | 4.23E-20 | CSCL2 | TM4SF1        |
| CTNNAL1.1  | 3.08E-24 | 0.388676 | 0.302 | 0.141 | 4.60E-20 | CSCL2 | CTNNAL1       |
| HTATSF1.7  | 3.61E-24 | 0.36078  | 0.477 | 0.266 | 5.40E-20 | CSCL2 | HTATSF1       |
| UBXN2A.9   | 3.89E-24 | 0.310207 | 0.36  | 0.18  | 5.81E-20 | CSCL2 | UBXN2A        |
| U2AF1.6    | 3.99E-24 | 0.284292 | 0.812 | 0.624 | 5.96E-20 | CSCL2 | U2AF1         |
| SNCAIP.12  | 4.26E-24 | 0.290638 | 0.212 | 0.08  | 6.37E-20 | CSCL2 | SNCAIP        |
| MAGOHB.8   | 5.15E-24 | 0.429956 | 0.422 | 0.23  | 7.69E-20 | CSCL2 | MAGOHB        |
| PGP.7      | 5.46E-24 | 0.390872 | 0.397 | 0.212 | 8.15E-20 | CSCL2 | PGP           |
| GNG11.5    | 5.68E-24 | 0.180738 | 0.126 | 0.034 | 8.48E-20 | CSCL2 | GNG11         |
| PPIH.6     | 5.80E-24 | 0.310603 | 0.419 | 0.22  | 8.67E-20 | CSCL2 | PPIH          |
| EPS8.5     | 5.93E-24 | 0.306233 | 0.285 | 0.12  | 8.86E-20 | CSCL2 | EPS8          |
| CCP110.9   | 6.57E-24 | 0.299163 | 0.276 | 0.118 | 9.82E-20 | CSCL2 | CCP110        |
| CDKN1B.11  | 7.97E-24 | 0.34977  | 0.464 | 0.251 | 1.19E-19 | CSCL2 | CDKN1B        |
| TUBB2A.12  | 8.61E-24 | 0.340343 | 0.746 | 0.467 | 1.29E-19 | CSCL2 | TUBB2A        |
| DCLRE1C.6  | 1.01E-23 | 0.332316 | 0.28  | 0.124 | 1.50E-19 | CSCL2 | DCLRE1C       |
| PTPRC.13   | 1.01E-23 | -0.78462 | 0.018 | 0.211 | 1.51E-19 | CSCL2 | PTPRC         |
| RGS2.11    | 1.02E-23 | -0.83584 | 0.276 | 0.452 | 1.53E-19 | CSCL2 | RGS2          |
| RARRES3.7  | 1.05E-23 | -0.83967 | 0.046 | 0.251 | 1.56E-19 | CSCL2 | RARRES3       |
| GNB2.10    | 1.09E-23 | 0.29901  | 0.746 | 0.562 | 1.63E-19 | CSCL2 | GNB2          |
| G2E3.3     | 1.10E-23 | 0.442425 | 0.241 | 0.099 | 1.65E-19 | CSCL2 | G2E3          |
| FOXRED2.4  | 1.41E-23 | 0.266316 | 0.205 | 0.078 | 2.11E-19 | CSCL2 | FOXRED2       |
| SERPING1.1 | 1.45E-23 | -1.05573 | 0.042 | 0.242 | 2.16E-19 | CSCL2 | SERPING1      |
| RP11-332H  | 1.52E-23 | 0.324555 | 0.274 | 0.121 | 2.27E-19 | CSCL2 | RP11-332H14.2 |
| IL18.13    | 1.59E-23 | -0.80368 | 0.011 | 0.2   | 2.38E-19 | CSCL2 | IL18          |
| ZNF100.3   | 1.61E-23 | 0.237076 | 0.181 | 0.062 | 2.41E-19 | CSCL2 | ZNF100        |
| TDP1.3     | 1.62E-23 | 0.258643 | 0.168 | 0.055 | 2.42E-19 | CSCL2 | TDP1          |
| CDH10.1    | 1.62E-23 | 0.19495  | 0.108 | 0.027 | 2.43E-19 | CSCL2 | CDH10         |
| KLHL7.10   | 1.67E-23 | 0.334845 | 0.477 | 0.271 | 2.50E-19 | CSCL2 | KLHL7         |
| EMC9.5     | 1.73E-23 | 0.471388 | 0.338 | 0.171 | 2.59E-19 | CSCL2 | EMC9          |
| LAIR1.13   | 1.86E-23 | -0.84574 | 0.042 | 0.238 | 2.77E-19 | CSCL2 | LAIR1         |
| GMCL1.7    | 1.90E-23 | 0.322724 | 0.32  | 0.152 | 2.85E-19 | CSCL2 | GMCL1         |
| PLXDC2.13  | 1.91E-23 | -0.78233 | 0.024 | 0.217 | 2.85E-19 | CSCL2 | PLXDC2        |
| SUZ12.7    | 2.02E-23 | 0.369307 | 0.362 | 0.188 | 3.03E-19 | CSCL2 | SUZ12         |
| RPA1.3     | 2.46E-23 | 0.330009 | 0.428 | 0.232 | 3.68E-19 | CSCL2 | RPA1          |
| CTDSP2.7   | 2.63E-23 | 0.484597 | 0.442 | 0.27  | 3.93E-19 | CSCL2 | CTDSP2        |
| UNG.7      | 2.79E-23 | 0.346703 | 0.265 | 0.116 | 4.17E-19 | CSCL2 | UNG           |
| PGRMC1.1C  | 2.86E-23 | 0.337231 | 0.653 | 0.439 | 4.27E-19 | CSCL2 | PGRMC1        |
| NUPR1.11   | 2.86E-23 | -0.7053  | 0.11  | 0.332 | 4.28E-19 | CSCL2 | NUPR1         |
| SDCBP.10   | 2.89E-23 | -0.42811 | 0.618 | 0.733 | 4.32E-19 | CSCL2 | SDCBP         |
| PTPRS.13   | 3.76E-23 | 0.36481  | 0.45  | 0.25  | 5.62E-19 | CSCL2 | PTPRS         |

|            |          |          |       |       |          |       |            |
|------------|----------|----------|-------|-------|----------|-------|------------|
| C7orf50.7  | 4.42E-23 | 0.300524 | 0.706 | 0.5   | 6.60E-19 | CSCL2 | C7orf50    |
| TSPAN3.11  | 4.97E-23 | 0.330105 | 0.662 | 0.451 | 7.43E-19 | CSCL2 | TSPAN3     |
| RASSF4.12  | 5.02E-23 | -0.65686 | 0.121 | 0.338 | 7.50E-19 | CSCL2 | RASSF4     |
| DHRS7.11   | 5.98E-23 | -0.63266 | 0.395 | 0.563 | 8.93E-19 | CSCL2 | DHRS7      |
| GJC1.8     | 6.02E-23 | 0.298659 | 0.17  | 0.059 | 8.99E-19 | CSCL2 | GJC1       |
| CACYBP.7   | 6.03E-23 | 0.29539  | 0.711 | 0.498 | 9.02E-19 | CSCL2 | CACYBP     |
| PFDN5.10   | 6.30E-23 | -0.29834 | 0.85  | 0.885 | 9.42E-19 | CSCL2 | PFDN5      |
| C4orf3.8   | 6.44E-23 | -0.49097 | 0.523 | 0.651 | 9.63E-19 | CSCL2 | C4orf3     |
| POLR2B.9   | 6.67E-23 | 0.433382 | 0.435 | 0.255 | 9.96E-19 | CSCL2 | POLR2B     |
| PAXIP1-AS  | 6.82E-23 | 0.336534 | 0.318 | 0.152 | 1.02E-18 | CSCL2 | PAXIP1-AS1 |
| SEZ6L.11   | 7.08E-23 | 0.37031  | 0.289 | 0.129 | 1.06E-18 | CSCL2 | SEZ6L      |
| AFF3.7     | 7.38E-23 | 0.23596  | 0.155 | 0.048 | 1.10E-18 | CSCL2 | AFF3       |
| MTSS1.8    | 7.76E-23 | 0.2506   | 0.417 | 0.205 | 1.16E-18 | CSCL2 | MTSS1      |
| HAUS5.3    | 8.04E-23 | 0.251437 | 0.174 | 0.06  | 1.20E-18 | CSCL2 | HAUS5      |
| TMEM179.2  | 8.19E-23 | 0.172712 | 0.099 | 0.023 | 1.22E-18 | CSCL2 | TMEM179    |
| MEOX2.11   | 8.72E-23 | 0.272491 | 0.199 | 0.074 | 1.30E-18 | CSCL2 | MEOX2      |
| SQSTM1.8   | 8.77E-23 | -0.49664 | 0.366 | 0.53  | 1.31E-18 | CSCL2 | SQSTM1     |
| TRAF4.12   | 8.82E-23 | 0.381698 | 0.461 | 0.261 | 1.32E-18 | CSCL2 | TRAF4      |
| SMIM18.11  | 9.36E-23 | 0.244616 | 0.172 | 0.056 | 1.40E-18 | CSCL2 | SMIM18     |
| MYOT.1     | 9.36E-23 | 0.136141 | 0.057 | 0.009 | 1.40E-18 | CSCL2 | MYOT       |
| ELAVL3.13  | 9.61E-23 | 0.338949 | 0.519 | 0.302 | 1.44E-18 | CSCL2 | ELAVL3     |
| ANXA2R.12  | 1.00E-22 | 0.292173 | 0.311 | 0.146 | 1.50E-18 | CSCL2 | ANXA2R     |
| TNFAIP6.9  | 1.10E-22 | 0.424014 | 0.249 | 0.104 | 1.64E-18 | CSCL2 | TNFAIP6    |
| MYL6B.12   | 1.22E-22 | 0.331632 | 0.667 | 0.433 | 1.82E-18 | CSCL2 | MYL6B      |
| MNDA.13    | 1.23E-22 | -0.77597 | 0.004 | 0.184 | 1.84E-18 | CSCL2 | MNDA       |
| CYBB.13    | 1.27E-22 | -0.77185 | 0.015 | 0.199 | 1.90E-18 | CSCL2 | CYBB       |
| ZNF75A.10  | 1.32E-22 | 0.308308 | 0.391 | 0.207 | 1.97E-18 | CSCL2 | ZNF75A     |
| CXXC4.10   | 1.40E-22 | 0.234844 | 0.199 | 0.073 | 2.10E-18 | CSCL2 | CXXC4      |
| MYO10.12   | 1.42E-22 | 0.374108 | 0.366 | 0.187 | 2.12E-18 | CSCL2 | MYO10      |
| NOP56.8    | 1.42E-22 | 0.317162 | 0.62  | 0.405 | 2.12E-18 | CSCL2 | NOP56      |
| TNPO3.5    | 1.51E-22 | 0.353737 | 0.296 | 0.136 | 2.26E-18 | CSCL2 | TNPO3      |
| NRGN.2     | 1.54E-22 | 0.201356 | 0.126 | 0.036 | 2.30E-18 | CSCL2 | NRGN       |
| GRIA4.10   | 1.55E-22 | 0.28146  | 0.28  | 0.123 | 2.31E-18 | CSCL2 | GRIA4      |
| SF3A2.8    | 1.58E-22 | 0.314927 | 0.446 | 0.252 | 2.36E-18 | CSCL2 | SF3A2      |
| SP100.11   | 1.58E-22 | -0.65277 | 0.086 | 0.295 | 2.36E-18 | CSCL2 | SP100      |
| GSTO1.10   | 1.63E-22 | -0.6087  | 0.254 | 0.464 | 2.44E-18 | CSCL2 | GSTO1      |
| VWCE       | 1.67E-22 | 0.142732 | 0.086 | 0.019 | 2.49E-18 | CSCL2 | VWCE       |
| GGCT.9     | 1.86E-22 | 0.243228 | 0.592 | 0.378 | 2.78E-18 | CSCL2 | GGCT       |
| WRAP53.2   | 1.95E-22 | 0.277642 | 0.21  | 0.081 | 2.92E-18 | CSCL2 | WRAP53     |
| LAMP2.8    | 2.08E-22 | -0.60052 | 0.276 | 0.479 | 3.11E-18 | CSCL2 | LAMP2      |
| AP001347.2 | 2.13E-22 | 0.225784 | 0.097 | 0.023 | 3.18E-18 | CSCL2 | AP001347.6 |
| TNFRSF1A.2 | 2.32E-22 | -0.50324 | 0.172 | 0.38  | 3.46E-18 | CSCL2 | TNFRSF1A   |
| CTDSPL2.5  | 2.33E-22 | 0.295544 | 0.245 | 0.104 | 3.48E-18 | CSCL2 | CTDSPL2    |
| KCTD12.13  | 2.34E-22 | -0.62085 | 0.046 | 0.244 | 3.50E-18 | CSCL2 | KCTD12     |
| IER2.11    | 2.48E-22 | 0.344107 | 0.735 | 0.61  | 3.70E-18 | CSCL2 | IER2       |
| SLBP.8     | 2.53E-22 | 0.387265 | 0.488 | 0.304 | 3.79E-18 | CSCL2 | SLBP       |
| CTCF.8     | 2.73E-22 | 0.384136 | 0.32  | 0.157 | 4.08E-18 | CSCL2 | CTCF       |
| KCND2.5    | 2.81E-22 | 0.169619 | 0.119 | 0.032 | 4.20E-18 | CSCL2 | KCND2      |
| TGFBI.13   | 3.00E-22 | -0.77717 | 0.026 | 0.212 | 4.48E-18 | CSCL2 | TGFBI      |
| ALDH7A1.8  | 3.26E-22 | 0.358687 | 0.461 | 0.268 | 4.87E-18 | CSCL2 | ALDH7A1    |
| EFS.9      | 3.38E-22 | 0.25792  | 0.241 | 0.1   | 5.05E-18 | CSCL2 | EFS        |

|            |          |          |       |       |          |       |                |
|------------|----------|----------|-------|-------|----------|-------|----------------|
| EIF2AK1.1  | 3.68E-22 | 0.351835 | 0.53  | 0.324 | 5.49E-18 | CSCL2 | EIF2AK1        |
| ST6GAL2.7  | 3.72E-22 | 0.208081 | 0.121 | 0.034 | 5.56E-18 | CSCL2 | ST6GAL2        |
| CAPZB.12   | 3.93E-22 | -0.45185 | 0.605 | 0.705 | 5.88E-18 | CSCL2 | CAPZB          |
| NOP58.10   | 4.37E-22 | 0.335951 | 0.488 | 0.284 | 6.53E-18 | CSCL2 | NOP58          |
| UNC93B1.1  | 4.68E-22 | -0.60073 | 0.024 | 0.208 | 6.99E-18 | CSCL2 | UNC93B1        |
| PBRM1.9    | 5.04E-22 | 0.355446 | 0.422 | 0.232 | 7.53E-18 | CSCL2 | PBRM1          |
| CD164.11   | 5.35E-22 | -0.48252 | 0.289 | 0.498 | 7.99E-18 | CSCL2 | CD164          |
| C1orf54.1  | 5.45E-22 | -0.69328 | 0.042 | 0.233 | 8.15E-18 | CSCL2 | C1orf54        |
| DPYSL4.13  | 5.87E-22 | 0.331491 | 0.307 | 0.148 | 8.77E-18 | CSCL2 | DPYSL4         |
| BAZ2B.8    | 5.96E-22 | 0.331051 | 0.517 | 0.312 | 8.91E-18 | CSCL2 | BAZ2B          |
| PRDX5.8    | 6.92E-22 | -0.41044 | 0.651 | 0.746 | 1.03E-17 | CSCL2 | PRDX5          |
| TOP3A.3    | 6.97E-22 | 0.259348 | 0.214 | 0.085 | 1.04E-17 | CSCL2 | TOP3A          |
| CYSTM1.11  | 6.98E-22 | -0.57029 | 0.121 | 0.333 | 1.04E-17 | CSCL2 | CYSTM1         |
| RBBP7.9    | 7.82E-22 | 0.286854 | 0.627 | 0.416 | 1.17E-17 | CSCL2 | RBBP7          |
| PCSK1N.12  | 7.87E-22 | 0.299143 | 0.693 | 0.409 | 1.18E-17 | CSCL2 | PCSK1N         |
| CHCHD10.1  | 9.42E-22 | -0.50577 | 0.181 | 0.389 | 1.41E-17 | CSCL2 | CHCHD10        |
| CDC42BPA.9 | 9.96E-22 | 0.371078 | 0.34  | 0.172 | 1.49E-17 | CSCL2 | CDC42BPA       |
| PKIA.12    | 1.01E-21 | 0.231282 | 0.227 | 0.088 | 1.50E-17 | CSCL2 | PKIA           |
| CD81.10    | 1.01E-21 | -0.65455 | 0.245 | 0.446 | 1.51E-17 | CSCL2 | CD81           |
| CREG1.12   | 1.02E-21 | -0.61474 | 0.104 | 0.305 | 1.53E-17 | CSCL2 | CREG1          |
| XRCC3.2    | 1.05E-21 | 0.224026 | 0.113 | 0.031 | 1.58E-17 | CSCL2 | XRCC3          |
| IFI35.11   | 1.10E-21 | -0.55587 | 0.042 | 0.239 | 1.64E-17 | CSCL2 | IFI35          |
| CDH2.12    | 1.23E-21 | 0.394126 | 0.475 | 0.277 | 1.84E-17 | CSCL2 | CDH2           |
| BHLHE41.9  | 1.27E-21 | -0.57123 | 0.029 | 0.215 | 1.90E-17 | CSCL2 | BHLHE41        |
| PTBP1.9    | 1.30E-21 | 0.339413 | 0.51  | 0.316 | 1.95E-17 | CSCL2 | PTBP1          |
| TRIM24.12  | 1.33E-21 | 0.328531 | 0.358 | 0.185 | 1.98E-17 | CSCL2 | TRIM24         |
| BRD8.8     | 1.34E-21 | 0.35773  | 0.318 | 0.156 | 2.00E-17 | CSCL2 | BRD8           |
| GRIK3.8    | 1.41E-21 | 0.23334  | 0.135 | 0.041 | 2.11E-17 | CSCL2 | GRIK3          |
| ELF1.11    | 1.51E-21 | -0.67973 | 0.06  | 0.251 | 2.26E-17 | CSCL2 | ELF1           |
| FARSB.9    | 1.56E-21 | 0.334349 | 0.413 | 0.225 | 2.33E-17 | CSCL2 | FARSB          |
| HNRNPU.8   | 1.56E-21 | 0.29809  | 0.724 | 0.522 | 2.33E-17 | CSCL2 | HNRNPU         |
| MFI2-AS1.1 | 1.61E-21 | 0.318224 | 0.185 | 0.071 | 2.40E-17 | CSCL2 | MFI2-AS1       |
| ING5.6     | 1.66E-21 | 0.248885 | 0.254 | 0.111 | 2.48E-17 | CSCL2 | ING5           |
| ABI3.13    | 1.71E-21 | -0.75818 | 0.02  | 0.197 | 2.55E-17 | CSCL2 | ABI3           |
| HLA-DQA2.1 | 1.81E-21 | -0.97055 | 0.007 | 0.179 | 2.70E-17 | CSCL2 | HLA-DQA2       |
| SPOCD1.1C  | 1.85E-21 | -0.85393 | 0.04  | 0.225 | 2.76E-17 | CSCL2 | SPOCD1         |
| RP11-1275  | 1.87E-21 | 0.186048 | 0.166 | 0.056 | 2.79E-17 | CSCL2 | RP11-1275H24.1 |
| PLCXD1.1   | 1.96E-21 | 0.216432 | 0.148 | 0.048 | 2.92E-17 | CSCL2 | PLCXD1         |
| PPDPF.9    | 1.96E-21 | 0.212464 | 0.879 | 0.704 | 2.93E-17 | CSCL2 | PPDPF          |
| TRIM28.9   | 2.07E-21 | 0.327396 | 0.426 | 0.243 | 3.09E-17 | CSCL2 | TRIM28         |
| YWHAE.11   | 2.26E-21 | 0.231493 | 0.916 | 0.746 | 3.37E-17 | CSCL2 | YWHAE          |
| SLITRK1.2  | 2.33E-21 | 0.119844 | 0.086 | 0.019 | 3.49E-17 | CSCL2 | SLITRK1        |
| KBTBD2.4   | 2.35E-21 | 0.281171 | 0.252 | 0.109 | 3.50E-17 | CSCL2 | KBTBD2         |
| LRRC4.4    | 2.36E-21 | 0.183673 | 0.137 | 0.041 | 3.53E-17 | CSCL2 | LRRC4          |
| ZIK1.5     | 2.60E-21 | 0.203843 | 0.148 | 0.048 | 3.88E-17 | CSCL2 | ZIK1           |
| LINC00844  | 2.62E-21 | 0.244676 | 0.245 | 0.101 | 3.91E-17 | CSCL2 | LINC00844      |
| ACAP3.11   | 2.66E-21 | 0.325258 | 0.386 | 0.209 | 3.98E-17 | CSCL2 | ACAP3          |
| RALY.7     | 2.69E-21 | 0.322998 | 0.68  | 0.447 | 4.03E-17 | CSCL2 | RALY           |
| MAP3K8.13  | 2.71E-21 | -0.72276 | 0.015 | 0.19  | 4.05E-17 | CSCL2 | MAP3K8         |
| MGST2.12   | 2.76E-21 | -0.73556 | 0.071 | 0.261 | 4.13E-17 | CSCL2 | MGST2          |
| WBP5.9     | 2.96E-21 | 0.208914 | 0.717 | 0.494 | 4.42E-17 | CSCL2 | WBP5           |

|            |          |          |       |       |          |       |              |
|------------|----------|----------|-------|-------|----------|-------|--------------|
| FRS2.8     | 3.09E-21 | 0.406407 | 0.241 | 0.106 | 4.62E-17 | CSCL2 | FRS2         |
| LRP4.9     | 3.22E-21 | 0.193264 | 0.161 | 0.055 | 4.81E-17 | CSCL2 | LRP4         |
| GLRX5.10   | 3.32E-21 | 0.436031 | 0.477 | 0.289 | 4.97E-17 | CSCL2 | GLRX5        |
| SPINT2.13  | 3.93E-21 | -0.69443 | 0.042 | 0.223 | 5.88E-17 | CSCL2 | SPINT2       |
| SASS6.4    | 3.99E-21 | 0.272698 | 0.163 | 0.057 | 5.97E-17 | CSCL2 | SASS6        |
| TMEM176A.4 | 4.22E-21 | -0.80055 | 0.051 | 0.234 | 6.30E-17 | CSCL2 | TMEM176A     |
| FCGBP.12   | 4.27E-21 | -0.93493 | 0.055 | 0.236 | 6.38E-17 | CSCL2 | FCGBP        |
| SLCO2B1.1  | 4.66E-21 | -0.8173  | 0.046 | 0.228 | 6.97E-17 | CSCL2 | SLCO2B1      |
| GBP2.10    | 4.68E-21 | -0.56804 | 0.031 | 0.215 | 7.00E-17 | CSCL2 | GBP2         |
| ZNF114     | 4.92E-21 | 0.15295  | 0.084 | 0.019 | 7.36E-17 | CSCL2 | ZNF114       |
| TCF12.12   | 4.97E-21 | 0.385644 | 0.47  | 0.276 | 7.43E-17 | CSCL2 | TCF12        |
| HP1BP3.11  | 5.13E-21 | 0.369773 | 0.634 | 0.434 | 7.66E-17 | CSCL2 | HP1BP3       |
| C12orf57.5 | 5.64E-21 | 0.245829 | 0.742 | 0.528 | 8.43E-17 | CSCL2 | C12orf57     |
| CLEC7A.13  | 6.70E-21 | -0.71279 | 0.011 | 0.182 | 1.00E-16 | CSCL2 | CLEC7A       |
| CDK5RAP2.7 | 1.6E-21  | 0.297933 | 0.247 | 0.107 | 1.07E-16 | CSCL2 | CDK5RAP2     |
| RAB32.12   | 8.09E-21 | -0.49698 | 0.057 | 0.246 | 1.21E-16 | CSCL2 | RAB32        |
| PRADC1.1C  | 8.98E-21 | 0.36626  | 0.384 | 0.21  | 1.34E-16 | CSCL2 | PRADC1       |
| ENOPH1.11  | 9.01E-21 | 0.323627 | 0.585 | 0.381 | 1.35E-16 | CSCL2 | ENOPH1       |
| ZNF326.9   | 9.95E-21 | 0.355254 | 0.417 | 0.241 | 1.49E-16 | CSCL2 | ZNF326       |
| S100A9.13  | 1.02E-20 | -0.94154 | 0.051 | 0.231 | 1.52E-16 | CSCL2 | S100A9       |
| SLC7A7.13  | 1.04E-20 | -0.69942 | 0.011 | 0.181 | 1.55E-16 | CSCL2 | SLC7A7       |
| FAM26F.13  | 1.08E-20 | -0.64886 | 0.007 | 0.173 | 1.62E-16 | CSCL2 | FAM26F       |
| CSPG5.11   | 1.09E-20 | 0.360039 | 0.241 | 0.103 | 1.62E-16 | CSCL2 | CSPG5        |
| SMARCC1.1  | 1.14E-20 | 0.356435 | 0.426 | 0.248 | 1.70E-16 | CSCL2 | SMARCC1      |
| SLA.13     | 1.15E-20 | -0.76337 | 0.033 | 0.209 | 1.73E-16 | CSCL2 | SLA          |
| WHSC1L1.1  | 1.21E-20 | 0.322011 | 0.565 | 0.365 | 1.81E-16 | CSCL2 | WHSC1L1      |
| ERV3-1.12  | 1.25E-20 | 0.263552 | 0.455 | 0.253 | 1.86E-16 | CSCL2 | ERV3-1       |
| FAM3C.12   | 1.32E-20 | 0.359187 | 0.62  | 0.429 | 1.97E-16 | CSCL2 | FAM3C        |
| RQCD1.4    | 1.39E-20 | 0.318139 | 0.349 | 0.181 | 2.08E-16 | CSCL2 | RQCD1        |
| ZNF625.4   | 1.43E-20 | 0.198374 | 0.141 | 0.046 | 2.13E-16 | CSCL2 | ZNF625       |
| HNRNPDL.7  | 1.44E-20 | 0.152416 | 0.901 | 0.793 | 2.14E-16 | CSCL2 | HNRNPDL      |
| ZNF232.9   | 1.62E-20 | 0.321724 | 0.192 | 0.075 | 2.42E-16 | CSCL2 | ZNF232       |
| TPR.9      | 1.66E-20 | 0.307642 | 0.603 | 0.397 | 2.48E-16 | CSCL2 | TPR          |
| TRAPPC1.6  | 1.72E-20 | -0.46219 | 0.475 | 0.621 | 2.57E-16 | CSCL2 | TRAPPC1      |
| RAF1.10    | 1.74E-20 | 0.306555 | 0.455 | 0.27  | 2.60E-16 | CSCL2 | RAF1         |
| ADD2.10    | 1.77E-20 | 0.266599 | 0.208 | 0.083 | 2.64E-16 | CSCL2 | ADD2         |
| CPSF4.7    | 1.84E-20 | 0.307004 | 0.358 | 0.189 | 2.75E-16 | CSCL2 | CPSF4        |
| TCERG1.8   | 1.85E-20 | 0.310721 | 0.369 | 0.198 | 2.77E-16 | CSCL2 | TCERG1       |
| BHLHE40.1  | 1.90E-20 | -0.50351 | 0.024 | 0.2   | 2.83E-16 | CSCL2 | BHLHE40      |
| ILKAP.8    | 1.93E-20 | 0.297977 | 0.4   | 0.222 | 2.88E-16 | CSCL2 | ILKAP        |
| MAPK10.11  | 2.13E-20 | 0.265763 | 0.362 | 0.188 | 3.19E-16 | CSCL2 | MAPK10       |
| COPS6.7    | 2.16E-20 | 0.216513 | 0.795 | 0.596 | 3.23E-16 | CSCL2 | COPS6        |
| SRSF7.4    | 2.17E-20 | 0.223892 | 0.764 | 0.584 | 3.24E-16 | CSCL2 | SRSF7        |
| HAUS3.4    | 2.19E-20 | 0.226902 | 0.203 | 0.079 | 3.27E-16 | CSCL2 | HAUS3        |
| VEZF1.12   | 2.21E-20 | 0.301693 | 0.415 | 0.231 | 3.30E-16 | CSCL2 | VEZF1        |
| RDX.12     | 2.22E-20 | 0.302652 | 0.709 | 0.482 | 3.32E-16 | CSCL2 | RDX          |
| RP11-161M  | 2.25E-20 | 0.28668  | 0.327 | 0.16  | 3.37E-16 | CSCL2 | RP11-161M6.2 |
| PGAP1.12   | 2.37E-20 | 0.353073 | 0.34  | 0.177 | 3.55E-16 | CSCL2 | PGAP1        |
| PSMD1.7    | 2.37E-20 | 0.339497 | 0.508 | 0.315 | 3.55E-16 | CSCL2 | PSMD1        |
| LMO7.2     | 2.38E-20 | 0.266575 | 0.119 | 0.035 | 3.56E-16 | CSCL2 | LMO7         |
| USP11.10   | 2.39E-20 | 0.361319 | 0.554 | 0.344 | 3.57E-16 | CSCL2 | USP11        |



|            |          |          |       |       |          |       |             |
|------------|----------|----------|-------|-------|----------|-------|-------------|
| TTF1.6     | 2.58E-20 | 0.32551  | 0.364 | 0.197 | 3.85E-16 | CSCL2 | TTF1        |
| ASIC4.11   | 2.61E-20 | 0.214709 | 0.3   | 0.133 | 3.90E-16 | CSCL2 | ASIC4       |
| HNRNPH1.7  | 2.77E-20 | 0.358923 | 0.625 | 0.45  | 4.14E-16 | CSCL2 | HNRNPH1     |
| CTC-260E6  | 2.87E-20 | 0.197528 | 0.088 | 0.021 | 4.30E-16 | CSCL2 | CTC-260E6.6 |
| PHTF2.4    | 2.90E-20 | 0.258574 | 0.214 | 0.086 | 4.34E-16 | CSCL2 | PHTF2       |
| TOPBP1.8   | 3.09E-20 | 0.29763  | 0.212 | 0.088 | 4.62E-16 | CSCL2 | TOPBP1      |
| Clorf106   | 3.21E-20 | 0.129178 | 0.073 | 0.015 | 4.80E-16 | CSCL2 | Clorf106    |
| ZNF430.8   | 3.22E-20 | 0.294928 | 0.353 | 0.183 | 4.81E-16 | CSCL2 | ZNF430      |
| AXL.12     | 3.35E-20 | -0.67071 | 0.018 | 0.187 | 5.01E-16 | CSCL2 | AXL         |
| FGL2.13    | 3.53E-20 | -0.71197 | 0.015 | 0.183 | 5.28E-16 | CSCL2 | FGL2        |
| CHRNA5.1   | 3.66E-20 | 0.176694 | 0.099 | 0.026 | 5.47E-16 | CSCL2 | CHRNA5      |
| PRR4.11    | 3.83E-20 | 0.299714 | 0.386 | 0.21  | 5.72E-16 | CSCL2 | PRR4        |
| ENAH.12    | 3.84E-20 | 0.335963 | 0.437 | 0.257 | 5.75E-16 | CSCL2 | ENAH        |
| MSR1.13    | 3.94E-20 | -0.70962 | 0.018 | 0.186 | 5.88E-16 | CSCL2 | MSR1        |
| ARL6IP1.7  | 4.08E-20 | 0.287342 | 0.868 | 0.737 | 6.10E-16 | CSCL2 | ARL6IP1     |
| PLEK.13    | 4.09E-20 | -0.75045 | 0.015 | 0.181 | 6.12E-16 | CSCL2 | PLEK        |
| CLIP2.10   | 4.24E-20 | 0.261682 | 0.336 | 0.17  | 6.34E-16 | CSCL2 | CLIP2       |
| SEP15.6    | 4.33E-20 | -0.44402 | 0.543 | 0.661 | 6.48E-16 | CSCL2 | 15-Sep      |
| HSPD1.10   | 4.65E-20 | 0.235619 | 0.77  | 0.608 | 6.95E-16 | CSCL2 | HSPD1       |
| REV1.6     | 4.65E-20 | 0.28916  | 0.322 | 0.161 | 6.95E-16 | CSCL2 | REV1        |
| ADAP2.13   | 4.66E-20 | -0.69289 | 0.022 | 0.19  | 6.96E-16 | CSCL2 | ADAP2       |
| LAT2.13    | 4.74E-20 | -0.76168 | 0.038 | 0.209 | 7.08E-16 | CSCL2 | LAT2        |
| LIN52      | 4.79E-20 | 0.223098 | 0.155 | 0.054 | 7.16E-16 | CSCL2 | LIN52       |
| MZT2A.10   | 5.51E-20 | 0.303354 | 0.623 | 0.405 | 8.23E-16 | CSCL2 | MZT2A       |
| DLX1.12    | 6.59E-20 | 0.243024 | 0.256 | 0.109 | 9.84E-16 | CSCL2 | DLX1        |
| CRABP1.1   | 6.97E-20 | 0.32095  | 0.053 | 0.009 | 1.04E-15 | CSCL2 | CRABP1      |
| RSBN1L.10  | 7.19E-20 | 0.262458 | 0.556 | 0.347 | 1.08E-15 | CSCL2 | RSBN1L      |
| EBF1.2     | 7.46E-20 | 0.119598 | 0.068 | 0.014 | 1.12E-15 | CSCL2 | EBF1        |
| CHI3L2.8   | 7.91E-20 | -1.20881 | 0.02  | 0.187 | 1.18E-15 | CSCL2 | CHI3L2      |
| GTF2I.11   | 8.31E-20 | 0.311999 | 0.6   | 0.42  | 1.24E-15 | CSCL2 | GTF2I       |
| PRKDC.9    | 8.95E-20 | 0.331975 | 0.461 | 0.285 | 1.34E-15 | CSCL2 | PRKDC       |
| REC8.6     | 9.56E-20 | 0.266184 | 0.19  | 0.073 | 1.43E-15 | CSCL2 | REC8        |
| TMED10.6   | 9.83E-20 | -0.48161 | 0.475 | 0.619 | 1.47E-15 | CSCL2 | TMED10      |
| SAAL1.7    | 1.05E-19 | 0.317856 | 0.265 | 0.122 | 1.57E-15 | CSCL2 | SAAL1       |
| LRRC4C.8   | 1.06E-19 | 0.217741 | 0.219 | 0.09  | 1.58E-15 | CSCL2 | LRRC4C      |
| GLI3       | 1.11E-19 | 0.180418 | 0.095 | 0.025 | 1.65E-15 | CSCL2 | GLI3        |
| ID2.10     | 1.13E-19 | -0.49721 | 0.541 | 0.659 | 1.69E-15 | CSCL2 | ID2         |
| FOLR2.13   | 1.17E-19 | -0.9162  | 0.02  | 0.184 | 1.74E-15 | CSCL2 | FOLR2       |
| KCNQ10T1.1 | 1.17E-19 | 0.325309 | 0.466 | 0.271 | 1.75E-15 | CSCL2 | KCNQ10T1    |
| HBEGF.13   | 1.22E-19 | -0.67169 | 0.046 | 0.222 | 1.82E-15 | CSCL2 | HBEGF       |
| CELF5.12   | 1.26E-19 | 0.195843 | 0.219 | 0.086 | 1.89E-15 | CSCL2 | CELF5       |
| FCGR1B.12  | 1.32E-19 | -0.75038 | 0.009 | 0.169 | 1.98E-15 | CSCL2 | FCGR1B      |
| DPP7.10    | 1.36E-19 | -0.47098 | 0.285 | 0.474 | 2.03E-15 | CSCL2 | DPP7        |
| HIST2H2AC  | 1.36E-19 | 0.28226  | 0.152 | 0.054 | 2.04E-15 | CSCL2 | HIST2H2AC   |
| COMMD6.7   | 1.41E-19 | -0.36422 | 0.7   | 0.779 | 2.10E-15 | CSCL2 | COMMD6      |
| DHPS.9     | 1.43E-19 | 0.279255 | 0.647 | 0.439 | 2.13E-15 | CSCL2 | DHPS        |
| BCL7A.10   | 1.46E-19 | 0.271915 | 0.298 | 0.144 | 2.19E-15 | CSCL2 | BCL7A       |
| KAT7.7     | 1.48E-19 | 0.274533 | 0.291 | 0.142 | 2.20E-15 | CSCL2 | KAT7        |
| NMT2.9     | 1.48E-19 | 0.258281 | 0.219 | 0.093 | 2.21E-15 | CSCL2 | NMT2        |
| PSPH.12    | 1.54E-19 | 0.27781  | 0.305 | 0.151 | 2.30E-15 | CSCL2 | PSPH        |
| VSTM2L.1   | 1.58E-19 | 0.127871 | 0.057 | 0.01  | 2.37E-15 | CSCL2 | VSTM2L      |

|             |           |           |        |        |           |       |                |
|-------------|-----------|-----------|--------|--------|-----------|-------|----------------|
| NKD1. 3     | 1. 81E-19 | 0. 180436 | 0. 11  | 0. 031 | 2. 71E-15 | CSCL2 | NKD1           |
| MATR3. 12   | 1. 86E-19 | 0. 31422  | 0. 673 | 0. 479 | 2. 79E-15 | CSCL2 | MATR3          |
| IER3. 13    | 1. 89E-19 | -0. 7729  | 0. 073 | 0. 248 | 2. 82E-15 | CSCL2 | IER3           |
| TSC22D1. 1  | 1. 90E-19 | 0. 269227 | 0. 777 | 0. 501 | 2. 85E-15 | CSCL2 | TSC22D1        |
| KMT2A. 12   | 2. 00E-19 | 0. 314125 | 0. 404 | 0. 229 | 2. 99E-15 | CSCL2 | KMT2A          |
| C16orf87. 2 | 2. 04E-19 | 0. 262045 | 0. 369 | 0. 198 | 3. 04E-15 | CSCL2 | C16orf87       |
| SIGIRR. 9   | 2. 08E-19 | -0. 4959  | 0. 031 | 0. 203 | 3. 11E-15 | CSCL2 | SIGIRR         |
| NEK6. 9     | 2. 10E-19 | -0. 50579 | 0. 106 | 0. 297 | 3. 14E-15 | CSCL2 | NEK6           |
| RNF149. 13  | 2. 11E-19 | -0. 63635 | 0. 095 | 0. 278 | 3. 15E-15 | CSCL2 | RNF149         |
| GOLM1. 12   | 2. 23E-19 | 0. 320194 | 0. 512 | 0. 308 | 3. 33E-15 | CSCL2 | GOLM1          |
| RP5-1177M   | 2. 23E-19 | 0. 202851 | 0. 132 | 0. 041 | 3. 33E-15 | CSCL2 | RP5-1177M21. 1 |
| SFT2D1. 12  | 2. 26E-19 | -0. 5677  | 0. 358 | 0. 507 | 3. 38E-15 | CSCL2 | SFT2D1         |
| LIMS1. 12   | 2. 28E-19 | -0. 58992 | 0. 278 | 0. 446 | 3. 40E-15 | CSCL2 | LIMS1          |
| HEXA. 11    | 2. 28E-19 | -0. 54943 | 0. 201 | 0. 397 | 3. 40E-15 | CSCL2 | HEXA           |
| HCK. 13     | 2. 29E-19 | -0. 65947 | 0. 013 | 0. 173 | 3. 43E-15 | CSCL2 | HCK            |
| HIGD2A. 9   | 2. 42E-19 | -0. 44487 | 0. 479 | 0. 624 | 3. 62E-15 | CSCL2 | HIGD2A         |
| SIAH1. 9    | 2. 51E-19 | 0. 300217 | 0. 4   | 0. 222 | 3. 75E-15 | CSCL2 | SIAH1          |
| POU3F3. 12  | 2. 52E-19 | 0. 288779 | 0. 3   | 0. 148 | 3. 76E-15 | CSCL2 | POU3F3         |
| IGSF6. 13   | 2. 82E-19 | -0. 70509 | 0. 004 | 0. 159 | 4. 21E-15 | CSCL2 | IGSF6          |
| EVI2A. 12   | 3. 07E-19 | -0. 78776 | 0. 057 | 0. 23  | 4. 58E-15 | CSCL2 | EVI2A          |
| EN2. 2      | 3. 26E-19 | 0. 13275  | 0. 088 | 0. 022 | 4. 87E-15 | CSCL2 | EN2            |
| RIMKLB. 9   | 3. 39E-19 | 0. 262381 | 0. 298 | 0. 145 | 5. 07E-15 | CSCL2 | RIMKLB         |
| MBOAT2. 12  | 3. 59E-19 | 0. 396053 | 0. 329 | 0. 176 | 5. 36E-15 | CSCL2 | MBOAT2         |
| CHEK2. 6    | 3. 65E-19 | 0. 215821 | 0. 137 | 0. 045 | 5. 46E-15 | CSCL2 | CHEK2          |
| FUBP1. 12   | 3. 75E-19 | 0. 318147 | 0. 393 | 0. 218 | 5. 61E-15 | CSCL2 | FUBP1          |
| EFCAB2. 4   | 3. 78E-19 | 0. 275599 | 0. 219 | 0. 092 | 5. 65E-15 | CSCL2 | EFCAB2         |
| NDE1. 7     | 4. 02E-19 | 0. 289403 | 0. 227 | 0. 1   | 6. 00E-15 | CSCL2 | NDE1           |
| MYH10. 10   | 4. 15E-19 | 0. 307916 | 0. 296 | 0. 147 | 6. 20E-15 | CSCL2 | MYH10          |
| FKBP2. 6    | 4. 40E-19 | -0. 44098 | 0. 433 | 0. 596 | 6. 57E-15 | CSCL2 | FKBP2          |
| HDGF. 7     | 4. 61E-19 | 0. 425601 | 0. 428 | 0. 267 | 6. 89E-15 | CSCL2 | HDGF           |
| ARPC1A. 9   | 4. 64E-19 | 0. 20414  | 0. 751 | 0. 55  | 6. 93E-15 | CSCL2 | ARPC1A         |
| KLF12. 9    | 4. 77E-19 | 0. 223523 | 0. 199 | 0. 08  | 7. 12E-15 | CSCL2 | KLF12          |
| LTC4S. 13   | 4. 80E-19 | -0. 6705  | 0. 015 | 0. 174 | 7. 17E-15 | CSCL2 | LTC4S          |
| SLC38A1. 9  | 4. 82E-19 | 0. 250766 | 0. 296 | 0. 135 | 7. 21E-15 | CSCL2 | SLC38A1        |
| TMEM150A. 4 | 4. 99E-19 | -0. 45522 | 0. 002 | 0. 155 | 7. 46E-15 | CSCL2 | TMEM150A       |
| SEPT10. 5   | 5. 16E-19 | 0. 285822 | 0. 245 | 0. 112 | 7. 71E-15 | CSCL2 | 10-Sep         |
| BCAP31. 7   | 5. 60E-19 | -0. 45853 | 0. 479 | 0. 624 | 8. 37E-15 | CSCL2 | BCAP31         |
| CEP70. 8    | 6. 08E-19 | 0. 376083 | 0. 214 | 0. 093 | 9. 09E-15 | CSCL2 | CEP70          |
| GPANK1. 6   | 6. 62E-19 | 0. 286976 | 0. 344 | 0. 187 | 9. 89E-15 | CSCL2 | GPANK1         |
| TNFSF13B. 6 | 6. 64E-19 | -0. 67161 | 0. 042 | 0. 21  | 9. 93E-15 | CSCL2 | TNFSF13B       |
| RNASE2. 13  | 6. 81E-19 | -0. 7455  | 0. 009 | 0. 164 | 1. 02E-14 | CSCL2 | RNASE2         |
| SELT. 6     | 6. 84E-19 | -0. 41895 | 0. 539 | 0. 664 | 1. 02E-14 | CSCL2 | SELT           |
| FYB. 13     | 7. 31E-19 | -0. 73854 | 0. 06  | 0. 229 | 1. 09E-14 | CSCL2 | FYB            |
| PDAP1. 9    | 7. 50E-19 | 0. 224725 | 0. 72  | 0. 528 | 1. 12E-14 | CSCL2 | PDAP1          |
| TFPI. 7     | 7. 75E-19 | 0. 231703 | 0. 146 | 0. 05  | 1. 16E-14 | CSCL2 | TFPI           |
| NIF3L1. 4   | 8. 15E-19 | 0. 282781 | 0. 252 | 0. 115 | 1. 22E-14 | CSCL2 | NIF3L1         |
| LINC01094   | 8. 24E-19 | -0. 66733 | 0. 007 | 0. 16  | 1. 23E-14 | CSCL2 | LINC01094      |
| SRP9. 7     | 8. 59E-19 | 0. 225045 | 0. 863 | 0. 674 | 1. 28E-14 | CSCL2 | SRP9           |
| SMARCB1. 1  | 8. 71E-19 | 0. 284474 | 0. 611 | 0. 406 | 1. 30E-14 | CSCL2 | SMARCB1        |
| NOM1. 7     | 8. 79E-19 | 0. 273692 | 0. 243 | 0. 111 | 1. 31E-14 | CSCL2 | NOM1           |
| COA1. 7     | 9. 05E-19 | 0. 24512  | 0. 587 | 0. 389 | 1. 35E-14 | CSCL2 | COA1           |

|            |          |          |       |       |          |       |           |
|------------|----------|----------|-------|-------|----------|-------|-----------|
| CD83.12    | 9.49E-19 | -0.83487 | 0.13  | 0.301 | 1.42E-14 | CSCL2 | CD83      |
| BEND5.9    | 9.64E-19 | 0.210766 | 0.278 | 0.131 | 1.44E-14 | CSCL2 | BEND5     |
| FABP7.11   | 9.82E-19 | 0.332502 | 0.62  | 0.374 | 1.47E-14 | CSCL2 | FABP7     |
| GADD45B.9  | 1.03E-18 | -0.62723 | 0.34  | 0.496 | 1.54E-14 | CSCL2 | GADD45B   |
| RIC3.9     | 1.11E-18 | 0.220017 | 0.406 | 0.224 | 1.67E-14 | CSCL2 | RIC3      |
| RPAIN.10   | 1.13E-18 | 0.248291 | 0.698 | 0.477 | 1.70E-14 | CSCL2 | RPAIN     |
| SERPINF1.1 | 1.14E-18 | -0.70223 | 0.06  | 0.231 | 1.71E-14 | CSCL2 | SERPINF1  |
| PARVG.13   | 1.19E-18 | -0.66999 | 0.013 | 0.168 | 1.77E-14 | CSCL2 | PARVG     |
| S100A8.13  | 1.28E-18 | -0.89427 | 0.031 | 0.191 | 1.92E-14 | CSCL2 | S100A8    |
| COPG2.8    | 1.31E-18 | 0.24294  | 0.245 | 0.112 | 1.96E-14 | CSCL2 | COPG2     |
| MED30.8    | 1.36E-18 | 0.322733 | 0.426 | 0.247 | 2.03E-14 | CSCL2 | MED30     |
| WIPI1.9    | 1.39E-18 | -0.53104 | 0.029 | 0.192 | 2.07E-14 | CSCL2 | WIPI1     |
| MFGE8.9    | 1.45E-18 | 0.33692  | 0.34  | 0.184 | 2.17E-14 | CSCL2 | MFGE8     |
| POLE3.5    | 1.45E-18 | 0.278754 | 0.419 | 0.24  | 2.17E-14 | CSCL2 | POLE3     |
| ALDOA.9    | 1.50E-18 | -0.26409 | 0.808 | 0.847 | 2.24E-14 | CSCL2 | ALDOA     |
| CASP1.11   | 1.51E-18 | -0.51061 | 0.055 | 0.233 | 2.25E-14 | CSCL2 | CASP1     |
| HOXB8.2    | 1.51E-18 | 0.116224 | 0.073 | 0.016 | 2.25E-14 | CSCL2 | HOXB8     |
| CADM4.11   | 1.59E-18 | 0.294303 | 0.433 | 0.257 | 2.37E-14 | CSCL2 | CADM4     |
| SLC31A2.1  | 1.60E-18 | -0.67246 | 0.035 | 0.199 | 2.39E-14 | CSCL2 | SLC31A2   |
| TAF15.9    | 1.60E-18 | 0.35748  | 0.439 | 0.267 | 2.39E-14 | CSCL2 | TAF15     |
| FADS1.9    | 1.61E-18 | 0.281807 | 0.377 | 0.211 | 2.40E-14 | CSCL2 | FADS1     |
| B3GAT2.6   | 1.61E-18 | 0.231843 | 0.194 | 0.078 | 2.40E-14 | CSCL2 | B3GAT2    |
| ANXA11.12  | 1.62E-18 | -0.44648 | 0.049 | 0.223 | 2.42E-14 | CSCL2 | ANXA11    |
| TM6SF1.13  | 1.62E-18 | -0.70596 | 0.011 | 0.164 | 2.42E-14 | CSCL2 | TM6SF1    |
| LRRC47.1C  | 1.62E-18 | 0.329698 | 0.377 | 0.21  | 2.43E-14 | CSCL2 | LRRC47    |
| PTGES3.4   | 1.67E-18 | 0.211478 | 0.87  | 0.713 | 2.49E-14 | CSCL2 | PTGES3    |
| SCLT1.5    | 1.68E-18 | 0.187067 | 0.17  | 0.064 | 2.51E-14 | CSCL2 | SCLT1     |
| CALM2.9    | 1.73E-18 | 0.10723  | 0.976 | 0.931 | 2.59E-14 | CSCL2 | CALM2     |
| CPQ.10     | 1.87E-18 | -0.56487 | 0.024 | 0.184 | 2.80E-14 | CSCL2 | CPQ       |
| RANGAP1.6  | 1.93E-18 | 0.238842 | 0.223 | 0.098 | 2.88E-14 | CSCL2 | RANGAP1   |
| ATP10B.3   | 2.11E-18 | 0.13349  | 0.091 | 0.023 | 3.15E-14 | CSCL2 | ATP10B    |
| FDPS.8     | 2.15E-18 | 0.292377 | 0.618 | 0.408 | 3.21E-14 | CSCL2 | FDPS      |
| C7orf55.1  | 2.23E-18 | 0.26802  | 0.623 | 0.415 | 3.33E-14 | CSCL2 | C7orf55   |
| MMP24-AS1  | 2.24E-18 | -0.4964  | 0.137 | 0.319 | 3.35E-14 | CSCL2 | MMP24-AS1 |
| WAS.13     | 2.25E-18 | -0.6625  | 0.024 | 0.18  | 3.37E-14 | CSCL2 | WAS       |
| DONSON.5   | 2.26E-18 | 0.256378 | 0.188 | 0.077 | 3.38E-14 | CSCL2 | DONSON    |
| PPP1CC.9   | 2.37E-18 | 0.367029 | 0.62  | 0.438 | 3.54E-14 | CSCL2 | PPP1CC    |
| RFC1.8     | 2.45E-18 | 0.288786 | 0.437 | 0.27  | 3.66E-14 | CSCL2 | RFC1      |
| FERMT3.13  | 2.45E-18 | -0.63395 | 0.018 | 0.172 | 3.66E-14 | CSCL2 | FERMT3    |
| GDI1.12    | 2.61E-18 | 0.292281 | 0.689 | 0.478 | 3.89E-14 | CSCL2 | GDI1      |
| NNAT.12    | 2.61E-18 | 0.430692 | 0.36  | 0.189 | 3.90E-14 | CSCL2 | NNAT      |
| SNRNP40.5  | 2.68E-18 | 0.286982 | 0.51  | 0.322 | 4.00E-14 | CSCL2 | SNRNP40   |
| SEPP1.9    | 2.86E-18 | -0.9639  | 0.168 | 0.335 | 4.28E-14 | CSCL2 | SEPP1     |
| CSF3R.12   | 3.01E-18 | -0.67468 | 0.009 | 0.158 | 4.50E-14 | CSCL2 | CSF3R     |
| CTTNBP2.9  | 3.08E-18 | 0.184214 | 0.283 | 0.131 | 4.60E-14 | CSCL2 | CTTNBP2   |
| RBL1.3     | 3.10E-18 | 0.188373 | 0.135 | 0.046 | 4.63E-14 | CSCL2 | RBL1      |
| IL1B.12    | 3.10E-18 | -0.78185 | 0.062 | 0.228 | 4.63E-14 | CSCL2 | IL1B      |
| POLR2D.5   | 3.14E-18 | 0.318696 | 0.269 | 0.133 | 4.70E-14 | CSCL2 | POLR2D    |
| ZNF131.9   | 3.14E-18 | 0.279239 | 0.4   | 0.225 | 4.70E-14 | CSCL2 | ZNF131    |
| PFKFB3.11  | 3.18E-18 | -0.55883 | 0.077 | 0.251 | 4.75E-14 | CSCL2 | PFKFB3    |
| SIGLEC10.3 | 3.32E-18 | -0.64699 | 0.015 | 0.168 | 4.96E-14 | CSCL2 | SIGLEC10  |

|           |    |          |          |       |       |          |       |              |
|-----------|----|----------|----------|-------|-------|----------|-------|--------------|
| ATP6V0E2. | 3. | 36E-18   | 0.314223 | 0.673 | 0.444 | 5.02E-14 | CSCL2 | ATP6V0E2     |
| TMEM205.  | 1  | 3.50E-18 | -0.50482 | 0.342 | 0.502 | 5.24E-14 | CSCL2 | TMEM205      |
| ZNF212.   | 7  | 4.00E-18 | 0.243107 | 0.168 | 0.064 | 5.98E-14 | CSCL2 | ZNF212       |
| SNRNP70.  | 9  | 4.04E-18 | 0.306385 | 0.66  | 0.468 | 6.03E-14 | CSCL2 | SNRNP70      |
| LCP1.     | 12 | 4.04E-18 | -0.60576 | 0.002 | 0.148 | 6.03E-14 | CSCL2 | LCP1         |
| HPCA.     | 9  | 4.17E-18 | 0.242399 | 0.155 | 0.056 | 6.23E-14 | CSCL2 | HPCA         |
| KNOP1.    | 10 | 4.27E-18 | 0.269954 | 0.424 | 0.253 | 6.38E-14 | CSCL2 | KNOP1        |
| HAUS6.    | 5  | 4.44E-18 | 0.262911 | 0.201 | 0.084 | 6.64E-14 | CSCL2 | HAUS6        |
| FBX043.   | 1  | 4.61E-18 | 0.122957 | 0.049 | 0.008 | 6.89E-14 | CSCL2 | FBX043       |
| RUVBL1.   | 9  | 4.69E-18 | 0.252048 | 0.437 | 0.259 | 7.01E-14 | CSCL2 | RUVBL1       |
| AAAS.     | 5  | 4.86E-18 | 0.331557 | 0.336 | 0.18  | 7.27E-14 | CSCL2 | AAAS         |
| LRRTM2.   | 11 | 4.96E-18 | 0.272473 | 0.221 | 0.098 | 7.42E-14 | CSCL2 | LRRTM2       |
| PSMB8.    | 8  | 4.97E-18 | -0.40264 | 0.221 | 0.423 | 7.43E-14 | CSCL2 | PSMB8        |
| DAZAP1.   | 5  | 5.05E-18 | 0.343563 | 0.391 | 0.225 | 7.55E-14 | CSCL2 | DAZAP1       |
| STXBP2.   | 13 | 5.07E-18 | -0.64398 | 0.024 | 0.179 | 7.58E-14 | CSCL2 | STXBP2       |
| SLC2A5.   | 13 | 5.15E-18 | -0.75011 | 0.022 | 0.176 | 7.69E-14 | CSCL2 | SLC2A5       |
| CEP41.    | 5  | 5.19E-18 | 0.288171 | 0.291 | 0.145 | 7.75E-14 | CSCL2 | CEP41        |
| FXYD7.    | 11 | 5.32E-18 | 0.259667 | 0.188 | 0.073 | 7.96E-14 | CSCL2 | FXYD7        |
| SMTN.     | 2  | 5.39E-18 | 0.227328 | 0.106 | 0.031 | 8.05E-14 | CSCL2 | SMTN         |
| NR4A2.    | 13 | 5.42E-18 | -0.79018 | 0.095 | 0.258 | 8.10E-14 | CSCL2 | NR4A2        |
| ZNF302.   | 11 | 5.50E-18 | 0.171943 | 0.506 | 0.307 | 8.23E-14 | CSCL2 | ZNF302       |
| OLA1.     | 6  | 5.88E-18 | 0.250673 | 0.691 | 0.48  | 8.79E-14 | CSCL2 | OLA1         |
| LINC00461 | 6. | 09E-18   | 0.263022 | 0.521 | 0.312 | 9.11E-14 | CSCL2 | LINC00461    |
| CSTF3.    | 10 | 6.55E-18 | 0.331825 | 0.435 | 0.26  | 9.80E-14 | CSCL2 | CSTF3        |
| ACP1.     | 7  | 6.69E-18 | 0.285675 | 0.689 | 0.491 | 1.00E-13 | CSCL2 | ACP1         |
| SERPINB6. | 6. | 72E-18   | -0.43451 | 0.313 | 0.484 | 1.00E-13 | CSCL2 | SERPINB6     |
| TAGLN2.   | 11 | 6.76E-18 | -0.309   | 0.285 | 0.524 | 1.01E-13 | CSCL2 | TAGLN2       |
| SH3BP4.   | 4  | 6.93E-18 | 0.211749 | 0.181 | 0.073 | 1.04E-13 | CSCL2 | SH3BP4       |
| DHX9.     | 8  | 7.16E-18 | 0.296395 | 0.444 | 0.272 | 1.07E-13 | CSCL2 | DHX9         |
| DCTN3.    | 6  | 8.27E-18 | 0.301678 | 0.693 | 0.509 | 1.24E-13 | CSCL2 | DCTN3        |
| PLD4.     | 13 | 8.29E-18 | -0.67474 | 0.011 | 0.159 | 1.24E-13 | CSCL2 | PLD4         |
| FEZ1.     | 12 | 8.52E-18 | 0.254762 | 0.662 | 0.42  | 1.27E-13 | CSCL2 | FEZ1         |
| PHACTR3.  | 1  | 8.74E-18 | 0.200711 | 0.188 | 0.073 | 1.31E-13 | CSCL2 | PHACTR3      |
| LYN.      | 13 | 9.12E-18 | -0.51449 | 0.024 | 0.18  | 1.36E-13 | CSCL2 | LYN          |
| MGAT1.    | 11 | 9.21E-18 | -0.57986 | 0.188 | 0.364 | 1.38E-13 | CSCL2 | MGAT1        |
| EXOG.     | 10 | 9.23E-18 | 0.279321 | 0.291 | 0.151 | 1.38E-13 | CSCL2 | EXOG         |
| SLC37A3.  | 8  | 9.46E-18 | 0.253288 | 0.26  | 0.124 | 1.41E-13 | CSCL2 | SLC37A3      |
| STAB1.    | 12 | 9.60E-18 | -0.69535 | 0.018 | 0.167 | 1.43E-13 | CSCL2 | STAB1        |
| ENTPD1.   | 13 | 9.70E-18 | -0.63971 | 0.018 | 0.168 | 1.45E-13 | CSCL2 | ENTPD1       |
| LAMTOR1.  | 6  | 9.82E-18 | -0.3862  | 0.565 | 0.658 | 1.47E-13 | CSCL2 | LAMTOR1      |
| IRF8.     | 13 | 1.01E-17 | -0.6383  | 0.015 | 0.164 | 1.52E-13 | CSCL2 | IRF8         |
| JUN.      | 8  | 1.03E-17 | 0.299938 | 0.819 | 0.666 | 1.54E-13 | CSCL2 | JUN          |
| FUCA1.    | 10 | 1.04E-17 | -0.54681 | 0.06  | 0.226 | 1.55E-13 | CSCL2 | FUCA1        |
| TLN1.     | 11 | 1.10E-17 | -0.48483 | 0.11  | 0.292 | 1.64E-13 | CSCL2 | TLN1         |
| TTF2.     | 4  | 1.15E-17 | 0.175664 | 0.161 | 0.061 | 1.72E-13 | CSCL2 | TTF2         |
| ATP5E.    | 10 | 1.19E-17 | -0.22645 | 0.896 | 0.915 | 1.78E-13 | CSCL2 | ATP5E        |
| F13A1.    | 10 | 1.21E-17 | -0.82137 | 0.015 | 0.165 | 1.82E-13 | CSCL2 | F13A1        |
| TREM1.    | 12 | 1.28E-17 | -0.79112 | 0.02  | 0.17  | 1.92E-13 | CSCL2 | TREM1        |
| TNFRSF1B. | 1. | 31E-17   | -0.55467 | 0.035 | 0.194 | 1.95E-13 | CSCL2 | TNFRSF1B     |
| TMEM161B- | 1. | 34E-17   | 0.286541 | 0.468 | 0.282 | 2.00E-13 | CSCL2 | TMEM161B-AS1 |
| RP3-525N1 | 1. | 34E-17   | 0.216098 | 0.294 | 0.144 | 2.01E-13 | CSCL2 | RP3-525N10.2 |

|            |           |           |        |        |           |       |         |
|------------|-----------|-----------|--------|--------|-----------|-------|---------|
| OAZ1. 9    | 1. 35E-17 | -0. 20164 | 0. 936 | 0. 926 | 2. 02E-13 | CSCL2 | OAZ1    |
| SELM. 10   | 1. 36E-17 | -0. 48231 | 0. 033 | 0. 195 | 2. 03E-13 | CSCL2 | SELM    |
| FAXC. 10   | 1. 36E-17 | 0. 226257 | 0. 196 | 0. 081 | 2. 03E-13 | CSCL2 | FAXC    |
| CD4. 13    | 1. 36E-17 | -0. 61232 | 0. 013 | 0. 161 | 2. 04E-13 | CSCL2 | CD4     |
| PSMD14. 9  | 1. 37E-17 | 0. 274274 | 0. 66  | 0. 459 | 2. 05E-13 | CSCL2 | PSMD14  |
| POLD1. 2   | 1. 39E-17 | 0. 187727 | 0. 148 | 0. 053 | 2. 08E-13 | CSCL2 | POLD1   |
| CCDC77. 3  | 1. 45E-17 | 0. 239688 | 0. 148 | 0. 054 | 2. 16E-13 | CSCL2 | CCDC77  |
| RHOC. 9    | 1. 45E-17 | -0. 43097 | 0. 386 | 0. 539 | 2. 17E-13 | CSCL2 | RHOC    |
| HOXB5. 2   | 1. 46E-17 | 0. 113863 | 0. 064 | 0. 013 | 2. 18E-13 | CSCL2 | HOXB5   |
| LSP1. 13   | 1. 49E-17 | -0. 72414 | 0. 022 | 0. 172 | 2. 23E-13 | CSCL2 | LSP1    |
| ARMC1. 9   | 1. 50E-17 | 0. 295102 | 0. 435 | 0. 257 | 2. 25E-13 | CSCL2 | ARMC1   |
| CYTH2. 11  | 1. 63E-17 | 0. 346207 | 0. 508 | 0. 334 | 2. 44E-13 | CSCL2 | CYTH2   |
| CEP128. 2  | 1. 67E-17 | 0. 151802 | 0. 073 | 0. 017 | 2. 50E-13 | CSCL2 | CEP128  |
| STRIP2. 1  | 1. 68E-17 | 0. 146321 | 0. 075 | 0. 018 | 2. 51E-13 | CSCL2 | STRIP2  |
| ZNF274. 6  | 1. 71E-17 | 0. 220352 | 0. 236 | 0. 106 | 2. 56E-13 | CSCL2 | ZNF274  |
| SNCA. 13   | 1. 77E-17 | -0. 66195 | 0. 007 | 0. 15  | 2. 65E-13 | CSCL2 | SNCA    |
| TOE1. 1    | 1. 91E-17 | 0. 269701 | 0. 168 | 0. 065 | 2. 85E-13 | CSCL2 | TOE1    |
| CCNG2. 10  | 1. 98E-17 | 0. 271971 | 0. 338 | 0. 175 | 2. 95E-13 | CSCL2 | CCNG2   |
| RNF165. 10 | 2. 06E-17 | 0. 204956 | 0. 166 | 0. 064 | 3. 08E-13 | CSCL2 | RNF165  |
| SOCS3. 12  | 2. 07E-17 | -0. 4677  | 0. 17  | 0. 356 | 3. 09E-13 | CSCL2 | SOCS3   |
| AP4M1. 10  | 2. 12E-17 | 0. 283818 | 0. 344 | 0. 187 | 3. 17E-13 | CSCL2 | AP4M1   |
| ICAM1. 9   | 2. 15E-17 | -0. 54747 | 0. 02  | 0. 17  | 3. 22E-13 | CSCL2 | ICAM1   |
| PCDHB10. 1 | 2. 22E-17 | 0. 217882 | 0. 223 | 0. 097 | 3. 31E-13 | CSCL2 | PCDHB10 |
| ZBED1. 6   | 2. 23E-17 | 0. 239179 | 0. 272 | 0. 134 | 3. 33E-13 | CSCL2 | ZBED1   |
| COL20A1. 1 | 2. 33E-17 | 0. 137242 | 0. 068 | 0. 015 | 3. 48E-13 | CSCL2 | COL20A1 |
| NUP88. 6   | 2. 33E-17 | 0. 271113 | 0. 254 | 0. 123 | 3. 48E-13 | CSCL2 | NUP88   |
| NDUFA1. 6  | 2. 41E-17 | -0. 35991 | 0. 664 | 0. 726 | 3. 60E-13 | CSCL2 | NDUFA1  |
| SULF1. 1   | 2. 48E-17 | 0. 134339 | 0. 071 | 0. 016 | 3. 71E-13 | CSCL2 | SULF1   |
| MYL12B. 10 | 2. 51E-17 | -0. 34865 | 0. 675 | 0. 729 | 3. 76E-13 | CSCL2 | MYL12B  |
| SLC2A3. 11 | 2. 53E-17 | -0. 63064 | 0. 091 | 0. 261 | 3. 78E-13 | CSCL2 | SLC2A3  |
| KCTD15. 5  | 2. 58E-17 | 0. 186068 | 0. 126 | 0. 042 | 3. 86E-13 | CSCL2 | KCTD15  |
| NBEAL1. 9  | 2. 63E-17 | -0. 56239 | 0. 525 | 0. 67  | 3. 93E-13 | CSCL2 | NBEAL1  |
| SDSL. 10   | 2. 63E-17 | -0. 43915 | 0. 033 | 0. 193 | 3. 94E-13 | CSCL2 | SDSL    |
| LYZ. 13    | 2. 65E-17 | -0. 73731 | 0. 055 | 0. 212 | 3. 97E-13 | CSCL2 | LYZ     |
| NCL. 8     | 2. 68E-17 | 0. 277294 | 0. 726 | 0. 548 | 4. 01E-13 | CSCL2 | NCL     |
| CEP57L1. 8 | 2. 85E-17 | 0. 288529 | 0. 227 | 0. 106 | 4. 26E-13 | CSCL2 | CEP57L1 |
| ANAPC16. 9 | 2. 88E-17 | -0. 53386 | 0. 364 | 0. 532 | 4. 30E-13 | CSCL2 | ANAPC16 |
| COX20. 8   | 3. 10E-17 | 0. 274818 | 0. 649 | 0. 452 | 4. 63E-13 | CSCL2 | COX20   |
| NUP93. 5   | 3. 41E-17 | 0. 250873 | 0. 327 | 0. 176 | 5. 09E-13 | CSCL2 | NUP93   |
| SCAMP2. 12 | 3. 43E-17 | -0. 62925 | 0. 214 | 0. 381 | 5. 13E-13 | CSCL2 | SCAMP2  |
| STRA13. 5  | 3. 56E-17 | 0. 230107 | 0. 647 | 0. 443 | 5. 32E-13 | CSCL2 | STRA13  |
| EXOC1. 8   | 3. 57E-17 | 0. 370383 | 0. 4   | 0. 243 | 5. 34E-13 | CSCL2 | EXOC1   |
| SRPK1. 8   | 3. 58E-17 | 0. 314349 | 0. 305 | 0. 16  | 5. 35E-13 | CSCL2 | SRPK1   |
| IGLON5. 8  | 3. 61E-17 | 0. 138471 | 0. 132 | 0. 044 | 5. 40E-13 | CSCL2 | IGLON5  |
| RBM4. 9    | 3. 77E-17 | 0. 216772 | 0. 38  | 0. 213 | 5. 64E-13 | CSCL2 | RBM4    |
| HNRNPK. 9  | 3. 79E-17 | 0. 149273 | 0. 905 | 0. 784 | 5. 66E-13 | CSCL2 | HNRNPK  |
| INTS7. 2   | 3. 82E-17 | 0. 196618 | 0. 15  | 0. 055 | 5. 71E-13 | CSCL2 | INTS7   |
| PILRB. 7   | 3. 83E-17 | 0. 269674 | 0. 302 | 0. 155 | 5. 72E-13 | CSCL2 | PILRB   |
| RP9. 10    | 4. 00E-17 | 0. 238795 | 0. 325 | 0. 173 | 5. 97E-13 | CSCL2 | RP9     |
| CMTM7. 12  | 4. 00E-17 | -0. 54179 | 0. 022 | 0. 17  | 5. 98E-13 | CSCL2 | CMTM7   |
| SNRPF. 8   | 4. 42E-17 | 0. 231089 | 0. 72  | 0. 54  | 6. 61E-13 | CSCL2 | SNRPF   |

|           |          |          |       |       |          |       |               |
|-----------|----------|----------|-------|-------|----------|-------|---------------|
| FAM213A.1 | 4.43E-17 | 0.222981 | 0.556 | 0.376 | 6.62E-13 | CSCL2 | FAM213A       |
| FUT9.2    | 4.53E-17 | 0.110837 | 0.066 | 0.015 | 6.77E-13 | CSCL2 | FUT9          |
| NAV2.9    | 4.56E-17 | 0.279952 | 0.241 | 0.113 | 6.82E-13 | CSCL2 | NAV2          |
| MYO1F.13  | 4.60E-17 | -0.64033 | 0.038 | 0.19  | 6.87E-13 | CSCL2 | MYO1F         |
| FCGR2B.13 | 4.61E-17 | -0.71468 | 0.009 | 0.149 | 6.89E-13 | CSCL2 | FCGR2B        |
| CARD16.11 | 4.61E-17 | -0.48627 | 0.064 | 0.236 | 6.90E-13 | CSCL2 | CARD16        |
| PPP5C.9   | 4.66E-17 | 0.300982 | 0.316 | 0.171 | 6.97E-13 | CSCL2 | PPP5C         |
| NFYB.7    | 4.78E-17 | 0.262791 | 0.327 | 0.178 | 7.14E-13 | CSCL2 | NFYB          |
| SQRDL.13  | 4.88E-17 | -0.58243 | 0.02  | 0.166 | 7.30E-13 | CSCL2 | SQRDL         |
| CHIC2.6   | 5.00E-17 | 0.375895 | 0.389 | 0.238 | 7.47E-13 | CSCL2 | CHIC2         |
| ATXN10.7  | 5.10E-17 | 0.232423 | 0.609 | 0.413 | 7.62E-13 | CSCL2 | ATXN10        |
| AC004540. | 5.21E-17 | 0.214788 | 0.185 | 0.075 | 7.79E-13 | CSCL2 | AC004540.5    |
| CHCHD2.8  | 5.25E-17 | 0.103793 | 0.951 | 0.877 | 7.85E-13 | CSCL2 | CHCHD2        |
| STX4.8    | 5.28E-17 | -0.5444  | 0.143 | 0.321 | 7.89E-13 | CSCL2 | STX4          |
| ZP3.4     | 5.30E-17 | 0.189682 | 0.17  | 0.067 | 7.92E-13 | CSCL2 | ZP3           |
| CCDC74A.8 | 5.42E-17 | 0.214544 | 0.13  | 0.045 | 8.09E-13 | CSCL2 | CCDC74A       |
| POLH.1    | 5.58E-17 | 0.196877 | 0.117 | 0.038 | 8.34E-13 | CSCL2 | POLH          |
| CACNG4.8  | 5.76E-17 | 0.192592 | 0.132 | 0.046 | 8.61E-13 | CSCL2 | CACNG4        |
| IQGAP1.10 | 5.92E-17 | -0.43633 | 0.088 | 0.259 | 8.85E-13 | CSCL2 | IQGAP1        |
| NUP160.7  | 6.10E-17 | 0.212712 | 0.305 | 0.156 | 9.11E-13 | CSCL2 | NUP160        |
| RUNX1.11  | 6.11E-17 | -0.46313 | 0.04  | 0.196 | 9.13E-13 | CSCL2 | RUNX1         |
| HOXB7.5   | 6.13E-17 | 0.144315 | 0.157 | 0.057 | 9.17E-13 | CSCL2 | HOXB7         |
| BCS1L.7   | 6.32E-17 | 0.24359  | 0.307 | 0.16  | 9.44E-13 | CSCL2 | BCS1L         |
| RHBDF2.13 | 6.51E-17 | -0.6236  | 0.033 | 0.183 | 9.73E-13 | CSCL2 | RHBDF2        |
| PASK      | 7.08E-17 | 0.100192 | 0.062 | 0.013 | 1.06E-12 | CSCL2 | PASK          |
| IDH2.8    | 7.23E-17 | 0.311792 | 0.596 | 0.42  | 1.08E-12 | CSCL2 | IDH2          |
| SORL1.11  | 7.25E-17 | -0.60646 | 0.071 | 0.233 | 1.08E-12 | CSCL2 | SORL1         |
| IFI27L1.9 | 7.26E-17 | 0.318809 | 0.327 | 0.18  | 1.08E-12 | CSCL2 | IFI27L1       |
| PTPRE.9   | 7.34E-17 | -0.56245 | 0.108 | 0.276 | 1.10E-12 | CSCL2 | PTPRE         |
| NCF4.13   | 7.58E-17 | -0.64919 | 0.011 | 0.151 | 1.13E-12 | CSCL2 | NCF4          |
| RP11-637A | 7.98E-17 | 0.108706 | 0.06  | 0.012 | 1.19E-12 | CSCL2 | RP11-637A17.2 |
| MT1X.10   | 7.99E-17 | -0.71071 | 0.439 | 0.583 | 1.19E-12 | CSCL2 | MT1X          |
| LRRC1.9   | 8.07E-17 | 0.225615 | 0.168 | 0.066 | 1.21E-12 | CSCL2 | LRRC1         |
| CYP27B1.1 | 8.12E-17 | 0.105524 | 0.055 | 0.011 | 1.21E-12 | CSCL2 | CYP27B1       |
| CCL2.6    | 8.13E-17 | -0.84367 | 0.071 | 0.232 | 1.22E-12 | CSCL2 | CCL2          |
| RPRML     | 8.18E-17 | 0.18478  | 0.051 | 0.009 | 1.22E-12 | CSCL2 | RPRML         |
| WSCD1.11  | 8.31E-17 | 0.288331 | 0.256 | 0.126 | 1.24E-12 | CSCL2 | WSCD1         |
| ADCY1.1   | 8.42E-17 | 0.142991 | 0.073 | 0.017 | 1.26E-12 | CSCL2 | ADCY1         |
| FYN.11    | 8.75E-17 | 0.270129 | 0.51  | 0.319 | 1.31E-12 | CSCL2 | FYN           |
| TTC3.11   | 8.93E-17 | 0.247787 | 0.726 | 0.508 | 1.33E-12 | CSCL2 | TTC3          |
| DPP6.9    | 8.95E-17 | 0.262319 | 0.3   | 0.156 | 1.34E-12 | CSCL2 | DPP6          |
| DLX6.12   | 9.29E-17 | 0.208499 | 0.148 | 0.053 | 1.39E-12 | CSCL2 | DLX6          |
| DNMT3B    | 9.40E-17 | 0.122208 | 0.051 | 0.009 | 1.40E-12 | CSCL2 | DNMT3B        |
| UPP1.12   | 9.46E-17 | -0.46234 | 0.088 | 0.261 | 1.41E-12 | CSCL2 | UPP1          |
| CYCS.5    | 9.51E-17 | 0.164683 | 0.881 | 0.728 | 1.42E-12 | CSCL2 | CYCS          |
| SLC20A1.4 | 9.82E-17 | 0.256867 | 0.325 | 0.172 | 1.47E-12 | CSCL2 | SLC20A1       |
| CEBPD.9   | 1.01E-16 | -0.40899 | 0.283 | 0.466 | 1.50E-12 | CSCL2 | CEBPD         |
| TNR.9     | 1.02E-16 | 0.205477 | 0.143 | 0.051 | 1.53E-12 | CSCL2 | TNR           |
| SCIN.13   | 1.06E-16 | -0.72144 | 0.015 | 0.156 | 1.59E-12 | CSCL2 | SCIN          |
| RP11-553L | 1.16E-16 | 0.287493 | 0.377 | 0.22  | 1.73E-12 | CSCL2 | RP11-553L6.5  |
| PCM1.9    | 1.17E-16 | 0.287139 | 0.497 | 0.317 | 1.74E-12 | CSCL2 | PCM1          |

|           |          |          |       |       |          |       |              |
|-----------|----------|----------|-------|-------|----------|-------|--------------|
| FHL1.13   | 1.27E-16 | 0.29909  | 0.543 | 0.349 | 1.90E-12 | CSCL2 | FHL1         |
| BLM.7     | 1.33E-16 | 0.222185 | 0.181 | 0.076 | 1.99E-12 | CSCL2 | BLM          |
| ANTXR1.7  | 1.44E-16 | 0.267703 | 0.196 | 0.086 | 2.16E-12 | CSCL2 | ANTXR1       |
| HOXA-AS2. | 1.45E-16 | 0.150235 | 0.11  | 0.034 | 2.17E-12 | CSCL2 | HOXA-AS2     |
| SOX15.9   | 1.46E-16 | 0.257515 | 0.168 | 0.066 | 2.18E-12 | CSCL2 | SOX15        |
| ARSE      | 1.48E-16 | 0.124181 | 0.057 | 0.012 | 2.21E-12 | CSCL2 | ARSE         |
| ISG15.10  | 1.53E-16 | -0.38225 | 0.17  | 0.364 | 2.29E-12 | CSCL2 | ISG15        |
| DLX5.12   | 1.54E-16 | 0.209142 | 0.294 | 0.138 | 2.30E-12 | CSCL2 | DLX5         |
| ARID2.5   | 1.62E-16 | 0.219409 | 0.216 | 0.098 | 2.42E-12 | CSCL2 | ARID2        |
| USP53.12  | 1.63E-16 | -0.55706 | 0.009 | 0.146 | 2.43E-12 | CSCL2 | USP53        |
| FERMT1.8  | 1.67E-16 | 0.207934 | 0.132 | 0.046 | 2.50E-12 | CSCL2 | FERMT1       |
| PGBD1.7   | 1.72E-16 | 0.207492 | 0.166 | 0.067 | 2.57E-12 | CSCL2 | PGBD1        |
| REV3L.9   | 1.80E-16 | 0.295572 | 0.355 | 0.203 | 2.69E-12 | CSCL2 | REV3L        |
| LIN54.2   | 1.81E-16 | 0.18304  | 0.11  | 0.035 | 2.70E-12 | CSCL2 | LIN54        |
| PTPN6.13  | 1.84E-16 | -0.59533 | 0.024 | 0.167 | 2.74E-12 | CSCL2 | PTPN6        |
| POLR2J3.1 | 1.85E-16 | 0.228762 | 0.508 | 0.332 | 2.76E-12 | CSCL2 | POLR2J3      |
| PIK3IP1.1 | 1.88E-16 | -0.57996 | 0.022 | 0.166 | 2.81E-12 | CSCL2 | PIK3IP1      |
| PLSCR1.11 | 1.99E-16 | -0.63082 | 0.199 | 0.366 | 2.97E-12 | CSCL2 | PLSCR1       |
| NT5C3B.12 | 2.05E-16 | 0.28655  | 0.51  | 0.324 | 3.06E-12 | CSCL2 | NT5C3B       |
| GIMAP4.13 | 2.16E-16 | -0.65477 | 0.015 | 0.155 | 3.23E-12 | CSCL2 | GIMAP4       |
| IGF2BP3.1 | 2.22E-16 | 0.280948 | 0.219 | 0.103 | 3.32E-12 | CSCL2 | IGF2BP3      |
| CNTROB.3  | 2.31E-16 | 0.252848 | 0.17  | 0.07  | 3.46E-12 | CSCL2 | CNTROB       |
| GSDMD.12  | 2.39E-16 | -0.46784 | 0.038 | 0.191 | 3.58E-12 | CSCL2 | GSDMD        |
| ARHGAP18. | 2.59E-16 | -0.5681  | 0.031 | 0.178 | 3.87E-12 | CSCL2 | ARHGAP18     |
| NFIC.7    | 2.67E-16 | 0.257862 | 0.638 | 0.426 | 3.99E-12 | CSCL2 | NFIC         |
| LNX1-AS1. | 2.72E-16 | 0.116636 | 0.053 | 0.01  | 4.07E-12 | CSCL2 | LNX1-AS1     |
| ALOX5.13  | 2.78E-16 | -0.57154 | 0.009 | 0.144 | 4.16E-12 | CSCL2 | ALOX5        |
| FAM210B.1 | 2.87E-16 | 0.330517 | 0.426 | 0.264 | 4.29E-12 | CSCL2 | FAM210B      |
| KMT2E.10  | 3.07E-16 | 0.222356 | 0.726 | 0.53  | 4.58E-12 | CSCL2 | KMT2E        |
| CORO1C.8  | 3.24E-16 | 0.281983 | 0.554 | 0.366 | 4.85E-12 | CSCL2 | CORO1C       |
| C8orf46.9 | 3.44E-16 | 0.247979 | 0.274 | 0.134 | 5.15E-12 | CSCL2 | C8orf46      |
| ONECUT2.8 | 3.45E-16 | 0.149344 | 0.121 | 0.04  | 5.16E-12 | CSCL2 | ONECUT2      |
| USP37.3   | 3.49E-16 | 0.202105 | 0.159 | 0.063 | 5.22E-12 | CSCL2 | USP37        |
| ZC3H8.7   | 3.57E-16 | 0.231341 | 0.276 | 0.142 | 5.34E-12 | CSCL2 | ZC3H8        |
| BIN1.11   | 3.71E-16 | -0.60619 | 0.21  | 0.367 | 5.54E-12 | CSCL2 | BIN1         |
| PILRA.12  | 3.72E-16 | -0.69169 | 0.029 | 0.17  | 5.55E-12 | CSCL2 | PILRA        |
| GPR137B.9 | 3.73E-16 | -0.39954 | 0.073 | 0.236 | 5.57E-12 | CSCL2 | GPR137B      |
| NME3.6    | 3.84E-16 | -0.4635  | 0.26  | 0.423 | 5.73E-12 | CSCL2 | NME3         |
| RP11-436K | 4.09E-16 | 0.178792 | 0.095 | 0.028 | 6.12E-12 | CSCL2 | RP11-436K8.1 |
| INCENP.2  | 4.14E-16 | 0.127326 | 0.084 | 0.023 | 6.18E-12 | CSCL2 | INCENP       |
| CAMK2N2.2 | 4.18E-16 | 0.16285  | 0.084 | 0.023 | 6.24E-12 | CSCL2 | CAMK2N2      |
| FUOM.12   | 4.24E-16 | -0.53725 | 0.011 | 0.146 | 6.34E-12 | CSCL2 | FUOM         |
| UBR7.6    | 4.28E-16 | 0.316258 | 0.234 | 0.112 | 6.40E-12 | CSCL2 | UBR7         |
| PCDH7     | 4.36E-16 | 0.11905  | 0.06  | 0.013 | 6.52E-12 | CSCL2 | PCDH7        |
| TPM3.11   | 4.55E-16 | -0.40415 | 0.43  | 0.563 | 6.80E-12 | CSCL2 | TPM3         |
| APBB1IP.1 | 4.63E-16 | -0.58057 | 0.022 | 0.162 | 6.92E-12 | CSCL2 | APBB1IP      |
| NME1.11   | 4.67E-16 | 0.228696 | 0.779 | 0.559 | 6.97E-12 | CSCL2 | NME1         |
| HN1L.8    | 4.67E-16 | 0.278616 | 0.28  | 0.147 | 6.98E-12 | CSCL2 | HN1L         |
| HLTF.11   | 4.78E-16 | 0.268874 | 0.309 | 0.168 | 7.15E-12 | CSCL2 | HLTF         |
| CDKN2AIP. | 4.91E-16 | 0.23678  | 0.28  | 0.142 | 7.34E-12 | CSCL2 | CDKN2AIP     |
| CSR2.11   | 4.99E-16 | 0.104354 | 0.514 | 0.293 | 7.45E-12 | CSCL2 | CSR2         |

|             |           |           |        |        |           |       |                 |
|-------------|-----------|-----------|--------|--------|-----------|-------|-----------------|
| CBS. 11     | 5. 09E-16 | 0. 304604 | 0. 285 | 0. 152 | 7. 61E-12 | CSCL2 | CBS             |
| NFKBIA. 12  | 5. 14E-16 | -0. 48787 | 0. 366 | 0. 505 | 7. 67E-12 | CSCL2 | NFKBIA          |
| NAA38. 5    | 5. 33E-16 | 0. 144395 | 0. 651 | 0. 464 | 7. 97E-12 | CSCL2 | NAA38           |
| ETS2. 13    | 5. 35E-16 | -0. 5902  | 0. 062 | 0. 213 | 8. 00E-12 | CSCL2 | ETS2            |
| TWF2. 13    | 5. 39E-16 | -0. 4853  | 0. 174 | 0. 347 | 8. 06E-12 | CSCL2 | TWF2            |
| ODF2. 7     | 5. 42E-16 | 0. 396457 | 0. 252 | 0. 127 | 8. 10E-12 | CSCL2 | ODF2            |
| RBM10. 8    | 5. 65E-16 | 0. 28497  | 0. 342 | 0. 197 | 8. 44E-12 | CSCL2 | RBM10           |
| C19orf57    | 5. 67E-16 | 0. 176695 | 0. 097 | 0. 029 | 8. 47E-12 | CSCL2 | C19orf57        |
| SPATA33. 9  | 6. 01E-16 | 0. 291704 | 0. 269 | 0. 141 | 8. 98E-12 | CSCL2 | SPATA33         |
| SP3. 8      | 6. 18E-16 | 0. 239703 | 0. 36  | 0. 204 | 9. 24E-12 | CSCL2 | SP3             |
| CDKAL1. 4   | 6. 41E-16 | 0. 21446  | 0. 201 | 0. 089 | 9. 58E-12 | CSCL2 | CDKAL1          |
| RP11-398K   | 6. 48E-16 | 0. 216409 | 0. 172 | 0. 072 | 9. 68E-12 | CSCL2 | RP11-398K22. 12 |
| HMG5. 4     | 6. 48E-16 | 0. 268725 | 0. 196 | 0. 086 | 9. 68E-12 | CSCL2 | HMG5            |
| PYGL. 11    | 6. 60E-16 | -0. 50572 | 0. 046 | 0. 198 | 9. 87E-12 | CSCL2 | PYGL            |
| SERPINB9. 6 | 6. 68E-16 | -0. 56314 | 0. 015 | 0. 152 | 9. 99E-12 | CSCL2 | SERPINB9        |
| CHAMP1. 7   | 6. 95E-16 | 0. 294953 | 0. 245 | 0. 124 | 1. 04E-11 | CSCL2 | CHAMP1          |
| THOP1. 10   | 7. 24E-16 | 0. 305482 | 0. 34  | 0. 196 | 1. 08E-11 | CSCL2 | THOP1           |
| ZFP36L1. 7  | 7. 30E-16 | -0. 48447 | 0. 428 | 0. 565 | 1. 09E-11 | CSCL2 | ZFP36L1         |
| PPCS. 9     | 7. 30E-16 | -0. 51079 | 0. 155 | 0. 327 | 1. 09E-11 | CSCL2 | PPCS            |
| AGTRAP. 9   | 7. 34E-16 | -0. 58141 | 0. 119 | 0. 288 | 1. 10E-11 | CSCL2 | AGTRAP          |
| EXOC5. 6    | 7. 76E-16 | 0. 305798 | 0. 316 | 0. 174 | 1. 16E-11 | CSCL2 | EXOC5           |
| APOBEC3B. 7 | 7. 77E-16 | 0. 320003 | 0. 099 | 0. 031 | 1. 16E-11 | CSCL2 | APOBEC3B        |
| UPF3A. 12   | 7. 79E-16 | 0. 259082 | 0. 517 | 0. 338 | 1. 16E-11 | CSCL2 | UPF3A           |
| GPNMB. 12   | 8. 29E-16 | -0. 69659 | 0. 057 | 0. 206 | 1. 24E-11 | CSCL2 | GPNMB           |
| ZC3H18. 7   | 8. 53E-16 | 0. 255494 | 0. 287 | 0. 151 | 1. 27E-11 | CSCL2 | ZC3H18          |
| HSF2. 8     | 8. 59E-16 | 0. 276873 | 0. 236 | 0. 113 | 1. 28E-11 | CSCL2 | HSF2            |
| FADS2. 10   | 8. 73E-16 | 0. 250744 | 0. 258 | 0. 132 | 1. 31E-11 | CSCL2 | FADS2           |
| CYC1. 11    | 8. 80E-16 | 0. 296237 | 0. 735 | 0. 532 | 1. 31E-11 | CSCL2 | CYC1            |
| PPP1R9A. 1  | 8. 82E-16 | 0. 175163 | 0. 17  | 0. 067 | 1. 32E-11 | CSCL2 | PPP1R9A         |
| NIN. 3      | 9. 30E-16 | 0. 251543 | 0. 247 | 0. 123 | 1. 39E-11 | CSCL2 | NIN             |
| KCNQ2. 12   | 9. 88E-16 | 0. 301047 | 0. 362 | 0. 209 | 1. 48E-11 | CSCL2 | KCNQ2           |
| PIGX. 10    | 9. 91E-16 | 0. 303456 | 0. 402 | 0. 247 | 1. 48E-11 | CSCL2 | PIGX            |
| DHRS3. 10   | 9. 96E-16 | -0. 48788 | 0. 031 | 0. 177 | 1. 49E-11 | CSCL2 | DHRS3           |
| NOA1. 7     | 1. 01E-15 | 0. 298952 | 0. 267 | 0. 138 | 1. 51E-11 | CSCL2 | NOA1            |
| STAG1. 3    | 1. 01E-15 | 0. 235853 | 0. 247 | 0. 123 | 1. 52E-11 | CSCL2 | STAG1           |
| ZNF22. 10   | 1. 07E-15 | 0. 228637 | 0. 437 | 0. 269 | 1. 60E-11 | CSCL2 | ZNF22           |
| FKBP1A. 7   | 1. 10E-15 | -0. 29547 | 0. 682 | 0. 7   | 1. 64E-11 | CSCL2 | FKBP1A          |
| CTNNB1. 4   | 1. 12E-15 | 0. 249077 | 0. 459 | 0. 29  | 1. 68E-11 | CSCL2 | CTNNB1          |
| PIN1. 7     | 1. 22E-15 | 0. 264526 | 0. 731 | 0. 529 | 1. 83E-11 | CSCL2 | PIN1            |
| MSN. 12     | 1. 26E-15 | -0. 48784 | 0. 21  | 0. 382 | 1. 88E-11 | CSCL2 | MSN             |
| SOGA1. 11   | 1. 27E-15 | 0. 302571 | 0. 283 | 0. 15  | 1. 89E-11 | CSCL2 | SOGA1           |
| CD59. 8     | 1. 28E-15 | -0. 46395 | 0. 408 | 0. 559 | 1. 91E-11 | CSCL2 | CD59            |
| USP13. 7    | 1. 30E-15 | 0. 272183 | 0. 163 | 0. 068 | 1. 95E-11 | CSCL2 | USP13           |
| PIK3R3. 1C  | 1. 38E-15 | 0. 17165  | 0. 258 | 0. 127 | 2. 06E-11 | CSCL2 | PIK3R3          |
| CD302. 11   | 1. 38E-15 | -0. 60215 | 0. 062 | 0. 21  | 2. 07E-11 | CSCL2 | CD302           |
| BRD3. 11    | 1. 40E-15 | 0. 270404 | 0. 437 | 0. 268 | 2. 10E-11 | CSCL2 | BRD3            |
| ITGB8. 11   | 1. 53E-15 | 0. 271911 | 0. 393 | 0. 233 | 2. 28E-11 | CSCL2 | ITGB8           |
| TFDP1. 8    | 1. 55E-15 | 0. 334337 | 0. 325 | 0. 186 | 2. 32E-11 | CSCL2 | TFDP1           |
| CCDC138. 2  | 1. 60E-15 | 0. 176848 | 0. 128 | 0. 046 | 2. 39E-11 | CSCL2 | CCDC138         |
| CALD1. 11   | 1. 65E-15 | 0. 215419 | 0. 62  | 0. 411 | 2. 47E-11 | CSCL2 | CALD1           |
| PTCH1. 4    | 1. 67E-15 | 0. 170717 | 0. 13  | 0. 047 | 2. 49E-11 | CSCL2 | PTCH1           |



|           |     |        |          |       |       |          |       |          |
|-----------|-----|--------|----------|-------|-------|----------|-------|----------|
| MAPKAPK3. | 1.  | 69E-15 | -0.42471 | 0.033 | 0.176 | 2.52E-11 | CSCL2 | MAPKAPK3 |
| DMTF1.    | 7.  | 76E-15 | 0.226261 | 0.276 | 0.143 | 2.63E-11 | CSCL2 | DMTF1    |
| EPB41.    | 3.  | 81E-15 | 0.168393 | 0.148 | 0.056 | 2.71E-11 | CSCL2 | EPB41    |
| ZC2HC1A.  | 1.  | 85E-15 | 0.274487 | 0.364 | 0.204 | 2.77E-11 | CSCL2 | ZC2HC1A  |
| METRN.    | 13. | 87E-15 | 0.285934 | 0.479 | 0.287 | 2.79E-11 | CSCL2 | METRN    |
| PID1.     | 8.  | 98E-15 | 0.221133 | 0.236 | 0.112 | 2.96E-11 | CSCL2 | PID1     |
| CCAR2.    | 5.  | 01E-15 | 0.222682 | 0.274 | 0.141 | 3.00E-11 | CSCL2 | CCAR2    |
| THAP10.   | 1.  | 03E-15 | 0.186883 | 0.117 | 0.04  | 3.04E-11 | CSCL2 | THAP10   |
| ADAM28.   | 12. | 05E-15 | -0.6275  | 0.015 | 0.146 | 3.07E-11 | CSCL2 | ADAM28   |
| HNRNPLL.  | 6.  | 06E-15 | 0.279624 | 0.327 | 0.185 | 3.08E-11 | CSCL2 | HNRNPLL  |
| GUCY1B3.  | 1.  | 13E-15 | 0.166193 | 0.077 | 0.021 | 3.18E-11 | CSCL2 | GUCY1B3  |
| NUP155.   | 1.  | 22E-15 | 0.225691 | 0.155 | 0.062 | 3.32E-11 | CSCL2 | NUP155   |
| GPR65.    | 13. | 32E-15 | -0.49685 | 0.009 | 0.138 | 3.47E-11 | CSCL2 | GPR65    |
| KDEL2.    | 2.  | 35E-15 | 0.232197 | 0.168 | 0.071 | 3.52E-11 | CSCL2 | KDEL2    |
| ANXA4.    | 10. | 46E-15 | -0.48008 | 0.051 | 0.2   | 3.67E-11 | CSCL2 | ANXA4    |
| ARID1A.   | 8.  | 54E-15 | 0.283504 | 0.386 | 0.236 | 3.79E-11 | CSCL2 | ARID1A   |
| C19orf43. | 2.  | 64E-15 | 0.249944 | 0.843 | 0.666 | 3.94E-11 | CSCL2 | C19orf43 |
| NUP205.   | 3.  | 79E-15 | 0.191808 | 0.148 | 0.058 | 4.17E-11 | CSCL2 | NUP205   |
| LGALS3BP. | 2.  | 81E-15 | -0.39115 | 0.283 | 0.456 | 4.20E-11 | CSCL2 | LGALS3BP |
| CSNK1E.   | 11. | 83E-15 | 0.234483 | 0.472 | 0.299 | 4.24E-11 | CSCL2 | CSNK1E   |
| CEP57.    | 8.  | 89E-15 | 0.280079 | 0.377 | 0.224 | 4.32E-11 | CSCL2 | CEP57    |
| RENBP.    | 12. | 00E-15 | -0.49038 | 0.011 | 0.14  | 4.48E-11 | CSCL2 | RENBP    |
| SNRPD3.   | 9.  | 05E-15 | 0.274686 | 0.585 | 0.407 | 4.55E-11 | CSCL2 | SNRPD3   |
| UPF3B.    | 9.  | 08E-15 | 0.262159 | 0.406 | 0.245 | 4.60E-11 | CSCL2 | UPF3B    |
| DAAM1.    | 8.  | 15E-15 | 0.276988 | 0.393 | 0.235 | 4.70E-11 | CSCL2 | DAAM1    |
| EXOSC2.   | 3.  | 17E-15 | 0.207174 | 0.196 | 0.089 | 4.73E-11 | CSCL2 | EXOSC2   |
| CRIP2.    | 10. | 20E-15 | 0.239369 | 0.49  | 0.307 | 4.78E-11 | CSCL2 | CRIP2    |
| NME4.     | 10. | 33E-15 | 0.281403 | 0.57  | 0.374 | 4.97E-11 | CSCL2 | NME4     |
| CFD.      | 12. | 34E-15 | -0.61667 | 0.026 | 0.161 | 5.00E-11 | CSCL2 | CFD      |
| CSTA.     | 13. | 64E-15 | -0.50164 | 0.007 | 0.133 | 5.44E-11 | CSCL2 | CSTA     |
| LRP10.    | 7.  | 76E-15 | -0.39673 | 0.095 | 0.258 | 5.62E-11 | CSCL2 | LRP10    |
| COPS8.    | 11. | 25E-15 | 0.212578 | 0.662 | 0.462 | 6.35E-11 | CSCL2 | COPS8    |
| SEPT6.    | 10. | 27E-15 | -0.46012 | 0.033 | 0.171 | 6.38E-11 | CSCL2 | 6-Sep    |
| DUSP3.    | 6.  | 33E-15 | -0.34524 | 0.038 | 0.181 | 6.47E-11 | CSCL2 | DUSP3    |
| UBE2I.    | 7.  | 51E-15 | 0.208292 | 0.737 | 0.57  | 6.73E-11 | CSCL2 | UBE2I    |
| CEP76.    | 2.  | 78E-15 | 0.197424 | 0.119 | 0.042 | 7.14E-11 | CSCL2 | CEP76    |
| TTL.      | 5.  | 87E-15 | 0.216837 | 0.232 | 0.113 | 7.28E-11 | CSCL2 | TTL      |
| NEU4.     | 9.  | 98E-15 | 0.248655 | 0.152 | 0.06  | 7.44E-11 | CSCL2 | NEU4     |
| ELL2.     | 11. | 05E-15 | -0.50213 | 0.053 | 0.198 | 7.55E-11 | CSCL2 | ELL2     |
| CDH13.    | 5.  | 34E-15 | 0.217463 | 0.135 | 0.05  | 7.98E-11 | CSCL2 | CDH13    |
| NPL.      | 12. | 34E-15 | -0.62895 | 0.062 | 0.206 | 7.98E-11 | CSCL2 | NPL      |
| BAALC.    | 12. | 64E-15 | 0.325708 | 0.528 | 0.338 | 8.43E-11 | CSCL2 | BAALC    |
| DDAH1.    | 10. | 75E-15 | 0.260272 | 0.238 | 0.12  | 8.59E-11 | CSCL2 | DDAH1    |
| CCZ1.     | 9.  | 83E-15 | 0.262246 | 0.512 | 0.344 | 8.71E-11 | CSCL2 | CCZ1     |
| ANKRD6.   | 3.  | 84E-15 | 0.177023 | 0.124 | 0.045 | 8.73E-11 | CSCL2 | ANKRD6   |
| ZNF681.   | 4.  | 86E-15 | 0.187705 | 0.113 | 0.038 | 8.76E-11 | CSCL2 | ZNF681   |
| TRIM13.   | 8.  | 15E-15 | 0.237173 | 0.404 | 0.243 | 9.20E-11 | CSCL2 | TRIM13   |
| NAA16.    | 5.  | 23E-15 | 0.217147 | 0.236 | 0.117 | 9.32E-11 | CSCL2 | NAA16    |
| CCT4.     | 6.  | 35E-15 | 0.208362 | 0.728 | 0.553 | 9.49E-11 | CSCL2 | CCT4     |
| IL10RA.   | 13. | 63E-15 | -0.54922 | 0.015 | 0.143 | 9.91E-11 | CSCL2 | IL10RA   |
| SMAD9.    | 8.  | 67E-15 | 0.197749 | 0.163 | 0.067 | 9.97E-11 | CSCL2 | SMAD9    |

|             |           |           |        |        |           |       |          |
|-------------|-----------|-----------|--------|--------|-----------|-------|----------|
| DCP2. 7     | 6. 72E-15 | 0. 274238 | 0. 276 | 0. 145 | 1. 00E-10 | CSCL2 | DCP2     |
| TSPAN11. 1  | 6. 78E-15 | 0. 117178 | 0. 075 | 0. 02  | 1. 01E-10 | CSCL2 | TSPAN11  |
| SMARCD1. 1  | 6. 94E-15 | 0. 267751 | 0. 353 | 0. 209 | 1. 04E-10 | CSCL2 | SMARCD1  |
| KIF5B. 9    | 6. 96E-15 | 0. 268791 | 0. 687 | 0. 505 | 1. 04E-10 | CSCL2 | KIF5B    |
| GNB5. 9     | 7. 12E-15 | 0. 270645 | 0. 216 | 0. 106 | 1. 06E-10 | CSCL2 | GNB5     |
| GPM6B. 12   | 7. 19E-15 | 0. 139638 | 0. 892 | 0. 608 | 1. 08E-10 | CSCL2 | GPM6B    |
| ZNF93. 4    | 7. 43E-15 | 0. 204103 | 0. 139 | 0. 054 | 1. 11E-10 | CSCL2 | ZNF93    |
| GSTA4. 11   | 7. 49E-15 | 0. 202827 | 0. 461 | 0. 283 | 1. 12E-10 | CSCL2 | GSTA4    |
| SIL1. 9     | 7. 58E-15 | -0. 48309 | 0. 102 | 0. 261 | 1. 13E-10 | CSCL2 | SIL1     |
| PTGS1. 12   | 7. 59E-15 | -0. 45442 | 0. 026 | 0. 162 | 1. 13E-10 | CSCL2 | PTGS1    |
| PA2G4. 4    | 7. 67E-15 | 0. 235336 | 0. 693 | 0. 533 | 1. 15E-10 | CSCL2 | PA2G4    |
| C6orf1. 3   | 7. 72E-15 | -0. 47663 | 0. 201 | 0. 367 | 1. 15E-10 | CSCL2 | C6orf1   |
| C5orf38. 4  | 7. 83E-15 | 0. 134087 | 0. 095 | 0. 029 | 1. 17E-10 | CSCL2 | C5orf38  |
| FILIP1L. 1  | 7. 98E-15 | -0. 41586 | 0. 022 | 0. 154 | 1. 19E-10 | CSCL2 | FILIP1L  |
| PIF1. 7     | 8. 37E-15 | 0. 371952 | 0. 126 | 0. 048 | 1. 25E-10 | CSCL2 | PIF1     |
| PDK4. 12    | 8. 52E-15 | -0. 65747 | 0. 04  | 0. 175 | 1. 27E-10 | CSCL2 | PDK4     |
| E2F3. 4     | 8. 95E-15 | 0. 242284 | 0. 183 | 0. 082 | 1. 34E-10 | CSCL2 | E2F3     |
| SLPI. 10    | 9. 01E-15 | -1. 22556 | 0. 024 | 0. 155 | 1. 35E-10 | CSCL2 | SLPI     |
| APBA2. 13   | 1. 05E-14 | 0. 255191 | 0. 347 | 0. 201 | 1. 57E-10 | CSCL2 | APBA2    |
| RNH1. 7     | 1. 07E-14 | -0. 453   | 0. 442 | 0. 542 | 1. 60E-10 | CSCL2 | RNH1     |
| RFXAP. 6    | 1. 08E-14 | 0. 204136 | 0. 199 | 0. 091 | 1. 62E-10 | CSCL2 | RFXAP    |
| C16orf45. 1 | 1. 08E-14 | 0. 277999 | 0. 488 | 0. 311 | 1. 62E-10 | CSCL2 | C16orf45 |
| ASXL3. 3    | 1. 08E-14 | 0. 137648 | 0. 093 | 0. 028 | 1. 62E-10 | CSCL2 | ASXL3    |
| PQLC3. 12   | 1. 10E-14 | -0. 37893 | 0. 046 | 0. 19  | 1. 65E-10 | CSCL2 | PQLC3    |
| ERH. 7      | 1. 13E-14 | 0. 157047 | 0. 848 | 0. 708 | 1. 69E-10 | CSCL2 | ERH      |
| BPGM. 8     | 1. 16E-14 | 0. 254146 | 0. 382 | 0. 228 | 1. 74E-10 | CSCL2 | BPGM     |
| CH25H. 9    | 1. 16E-14 | -0. 70642 | 0. 022 | 0. 152 | 1. 74E-10 | CSCL2 | CH25H    |
| SYNC. 9     | 1. 18E-14 | 0. 33913  | 0. 302 | 0. 171 | 1. 76E-10 | CSCL2 | SYNC     |
| CAST. 10    | 1. 18E-14 | -0. 42802 | 0. 161 | 0. 325 | 1. 76E-10 | CSCL2 | CAST     |
| GLO1. 10    | 1. 18E-14 | 0. 254367 | 0. 576 | 0. 404 | 1. 77E-10 | CSCL2 | GLO1     |
| ATCAY. 10   | 1. 19E-14 | 0. 237555 | 0. 241 | 0. 116 | 1. 78E-10 | CSCL2 | ATCAY    |
| ZBTB18. 5   | 1. 19E-14 | 0. 184838 | 0. 13  | 0. 049 | 1. 78E-10 | CSCL2 | ZBTB18   |
| TERF1. 7    | 1. 22E-14 | 0. 243337 | 0. 486 | 0. 317 | 1. 82E-10 | CSCL2 | TERF1    |
| LMO4. 13    | 1. 22E-14 | 0. 229502 | 0. 667 | 0. 47  | 1. 83E-10 | CSCL2 | LMO4     |
| VMO1. 12    | 1. 24E-14 | -0. 60302 | 0. 031 | 0. 165 | 1. 85E-10 | CSCL2 | VMO1     |
| NRP2. 10    | 1. 24E-14 | -0. 36748 | 0. 075 | 0. 227 | 1. 85E-10 | CSCL2 | NRP2     |
| AOAH. 12    | 1. 24E-14 | -0. 55491 | 0. 007 | 0. 128 | 1. 86E-10 | CSCL2 | AOAH     |
| ARID5B. 9   | 1. 25E-14 | -0. 53165 | 0. 205 | 0. 361 | 1. 87E-10 | CSCL2 | ARID5B   |
| PSMB10. 10  | 1. 25E-14 | -0. 53229 | 0. 108 | 0. 261 | 1. 87E-10 | CSCL2 | PSMB10   |
| NAB1. 7     | 1. 37E-14 | 0. 223698 | 0. 241 | 0. 121 | 2. 04E-10 | CSCL2 | NAB1     |
| MSI1. 11    | 1. 41E-14 | 0. 266035 | 0. 252 | 0. 13  | 2. 11E-10 | CSCL2 | MSI1     |
| ZNF649. 10  | 1. 42E-14 | 0. 217794 | 0. 188 | 0. 086 | 2. 13E-10 | CSCL2 | ZNF649   |
| FAM105A. 1  | 1. 46E-14 | -0. 5371  | 0. 033 | 0. 168 | 2. 18E-10 | CSCL2 | FAM105A  |
| RAMP1. 10   | 1. 51E-14 | 0. 161182 | 0. 605 | 0. 404 | 2. 25E-10 | CSCL2 | RAMP1    |
| LACTB. 13   | 1. 52E-14 | -0. 38363 | 0. 035 | 0. 171 | 2. 27E-10 | CSCL2 | LACTB    |
| DUSP23. 12  | 1. 52E-14 | -0. 44309 | 0. 049 | 0. 193 | 2. 28E-10 | CSCL2 | DUSP23   |
| OSM. 12     | 1. 57E-14 | -0. 65774 | 0. 022 | 0. 15  | 2. 34E-10 | CSCL2 | OSM      |
| THRA. 9     | 1. 57E-14 | 0. 235265 | 0. 395 | 0. 233 | 2. 35E-10 | CSCL2 | THRA     |
| RGS19. 12   | 1. 61E-14 | -0. 48832 | 0. 124 | 0. 282 | 2. 40E-10 | CSCL2 | RGS19    |
| LRRTM1. 2   | 1. 64E-14 | 0. 117045 | 0. 079 | 0. 022 | 2. 45E-10 | CSCL2 | LRRTM1   |
| PTN. 11     | 1. 68E-14 | 0. 171445 | 0. 845 | 0. 607 | 2. 51E-10 | CSCL2 | PTN      |

|            |           |           |        |        |           |       |                 |
|------------|-----------|-----------|--------|--------|-----------|-------|-----------------|
| REX02. 10  | 1. 69E-14 | -0. 48577 | 0. 159 | 0. 325 | 2. 53E-10 | CSCL2 | REX02           |
| PTAFR. 13  | 1. 71E-14 | -0. 53267 | 0. 009 | 0. 13  | 2. 55E-10 | CSCL2 | PTAFR           |
| POLR2F. 8  | 1. 73E-14 | 0. 183498 | 0. 704 | 0. 535 | 2. 59E-10 | CSCL2 | POLR2F          |
| CD69. 10   | 1. 78E-14 | -0. 70947 | 0. 029 | 0. 158 | 2. 66E-10 | CSCL2 | CD69            |
| CCT7. 9    | 1. 79E-14 | 0. 223878 | 0. 693 | 0. 523 | 2. 67E-10 | CSCL2 | CCT7            |
| ECI1. 8    | 1. 81E-14 | 0. 306958 | 0. 347 | 0. 208 | 2. 70E-10 | CSCL2 | ECI1            |
| CAP1. 11   | 1. 81E-14 | -0. 38835 | 0. 488 | 0. 596 | 2. 71E-10 | CSCL2 | CAP1            |
| UCHL1. 11  | 2. 00E-14 | 0. 170766 | 0. 649 | 0. 428 | 2. 98E-10 | CSCL2 | UCHL1           |
| GAS6. 11   | 2. 10E-14 | -0. 46694 | 0. 066 | 0. 21  | 3. 13E-10 | CSCL2 | GAS6            |
| EXOC4. 6   | 2. 17E-14 | 0. 201015 | 0. 294 | 0. 159 | 3. 25E-10 | CSCL2 | EXOC4           |
| AC004951.  | 2. 29E-14 | 0. 223878 | 0. 28  | 0. 151 | 3. 42E-10 | CSCL2 | AC004951. 6     |
| TRADD. 7   | 2. 31E-14 | -0. 33373 | 0. 035 | 0. 173 | 3. 45E-10 | CSCL2 | TRADD           |
| SIMC1. 2   | 2. 37E-14 | 0. 176018 | 0. 13  | 0. 05  | 3. 54E-10 | CSCL2 | SIMC1           |
| DOCK8. 13  | 2. 38E-14 | -0. 50328 | 0. 007 | 0. 125 | 3. 55E-10 | CSCL2 | DOCK8           |
| PLAU. 11   | 2. 44E-14 | -0. 38601 | 0. 033 | 0. 168 | 3. 64E-10 | CSCL2 | PLAU            |
| NELFE. 3   | 2. 52E-14 | 0. 21153  | 0. 543 | 0. 37  | 3. 77E-10 | CSCL2 | NELFE           |
| GNAS. 12   | 2. 60E-14 | 0. 276128 | 0. 837 | 0. 64  | 3. 88E-10 | CSCL2 | GNAS            |
| COR01B. 11 | 2. 60E-14 | -0. 51167 | 0. 216 | 0. 367 | 3. 89E-10 | CSCL2 | COR01B          |
| STRN4. 8   | 2. 62E-14 | 0. 23244  | 0. 234 | 0. 119 | 3. 91E-10 | CSCL2 | STRN4           |
| RBM14. 8   | 2. 63E-14 | 0. 250721 | 0. 322 | 0. 186 | 3. 92E-10 | CSCL2 | RBM14           |
| ZDHHC12. 1 | 2. 65E-14 | -0. 45164 | 0. 108 | 0. 267 | 3. 96E-10 | CSCL2 | ZDHHC12         |
| GTPBP1. 5  | 2. 78E-14 | 0. 175709 | 0. 208 | 0. 097 | 4. 15E-10 | CSCL2 | GTPBP1          |
| PHF11. 11  | 2. 81E-14 | -0. 38899 | 0. 02  | 0. 147 | 4. 20E-10 | CSCL2 | PHF11           |
| HIP1. 9    | 2. 84E-14 | 0. 182797 | 0. 3   | 0. 162 | 4. 25E-10 | CSCL2 | HIP1            |
| KRIT1. 9   | 3. 02E-14 | 0. 251684 | 0. 355 | 0. 211 | 4. 52E-10 | CSCL2 | KRIT1           |
| TAF6. 8    | 3. 18E-14 | 0. 288136 | 0. 371 | 0. 231 | 4. 76E-10 | CSCL2 | TAF6            |
| ZBED5. 9   | 3. 34E-14 | 0. 252512 | 0. 309 | 0. 174 | 4. 99E-10 | CSCL2 | ZBED5           |
| CA14. 10   | 3. 35E-14 | 0. 235426 | 0. 128 | 0. 048 | 5. 00E-10 | CSCL2 | CA14            |
| ZNF280B    | 3. 38E-14 | 0. 127979 | 0. 095 | 0. 031 | 5. 05E-10 | CSCL2 | ZNF280B         |
| CD151. 11  | 3. 47E-14 | -0. 52172 | 0. 369 | 0. 487 | 5. 18E-10 | CSCL2 | CD151           |
| GNA15. 13  | 3. 47E-14 | -0. 4587  | 0      | 0. 113 | 5. 19E-10 | CSCL2 | GNA15           |
| DNAJC4. 8  | 3. 51E-14 | -0. 42026 | 0. 082 | 0. 234 | 5. 25E-10 | CSCL2 | DNAJC4          |
| SYNCRIP. 1 | 3. 56E-14 | 0. 267322 | 0. 543 | 0. 377 | 5. 31E-10 | CSCL2 | SYNCRIP         |
| ZNF829     | 3. 56E-14 | 0. 151236 | 0. 102 | 0. 034 | 5. 32E-10 | CSCL2 | ZNF829          |
| FBX021. 8  | 3. 56E-14 | 0. 241275 | 0. 468 | 0. 302 | 5. 32E-10 | CSCL2 | FBX021          |
| CD33. 13   | 3. 61E-14 | -0. 54089 | 0. 007 | 0. 124 | 5. 40E-10 | CSCL2 | CD33            |
| ADH5. 8    | 3. 61E-14 | 0. 204715 | 0. 563 | 0. 382 | 5. 40E-10 | CSCL2 | ADH5            |
| ZNF620. 6  | 3. 74E-14 | 0. 174556 | 0. 141 | 0. 056 | 5. 59E-10 | CSCL2 | ZNF620          |
| FAM19A5. 8 | 3. 77E-14 | 0. 175508 | 0. 121 | 0. 044 | 5. 63E-10 | CSCL2 | FAM19A5         |
| LTF. 10    | 3. 86E-14 | -1. 16875 | 0. 029 | 0. 156 | 5. 77E-10 | CSCL2 | LTF             |
| IGFBP3. 11 | 3. 89E-14 | -0. 57727 | 0. 057 | 0. 2   | 5. 81E-10 | CSCL2 | IGFBP3          |
| SFMBT1. 2  | 3. 97E-14 | 0. 183308 | 0. 157 | 0. 066 | 5. 93E-10 | CSCL2 | SFMBT1          |
| ACSL1. 12  | 3. 99E-14 | -0. 5524  | 0. 088 | 0. 233 | 5. 96E-10 | CSCL2 | ACSL1           |
| HNRNPL. 7  | 4. 06E-14 | 0. 21738  | 0. 417 | 0. 258 | 6. 06E-10 | CSCL2 | HNRNPL          |
| FKBP8. 5   | 4. 11E-14 | -0. 34327 | 0. 6   | 0. 648 | 6. 14E-10 | CSCL2 | FKBP8           |
| HOXC-AS1.  | 4. 18E-14 | 0. 131992 | 0. 077 | 0. 022 | 6. 25E-10 | CSCL2 | HOXC-AS1        |
| EIF4H. 6   | 4. 31E-14 | 0. 189714 | 0. 687 | 0. 535 | 6. 44E-10 | CSCL2 | EIF4H           |
| TCTEX1D2.  | 4. 50E-14 | 0. 252842 | 0. 364 | 0. 222 | 6. 72E-10 | CSCL2 | TCTEX1D2        |
| HSPE1. 9   | 4. 53E-14 | 0. 135209 | 0. 839 | 0. 725 | 6. 77E-10 | CSCL2 | HSPE1           |
| ATP6V1F. 8 | 4. 56E-14 | -0. 31382 | 0. 764 | 0. 803 | 6. 82E-10 | CSCL2 | ATP6V1F         |
| RP11-196G  | 4. 58E-14 | 0. 127261 | 0. 057 | 0. 013 | 6. 84E-10 | CSCL2 | RP11-196G18. 23 |

|             |           |           |        |        |           |       |                |
|-------------|-----------|-----------|--------|--------|-----------|-------|----------------|
| TMEM173. 1  | 4. 74E-14 | -0. 50781 | 0. 011 | 0. 131 | 7. 08E-10 | CSCL2 | TMEM173        |
| LPCAT2. 13  | 4. 88E-14 | -0. 51715 | 0. 026 | 0. 152 | 7. 29E-10 | CSCL2 | LPCAT2         |
| AC011043. 5 | 1. 5E-14  | 0. 256897 | 0. 146 | 0. 059 | 7. 70E-10 | CSCL2 | AC011043. 1    |
| IL1RAP. 8   | 5. 45E-14 | -0. 3612  | 0. 033 | 0. 165 | 8. 15E-10 | CSCL2 | IL1RAP         |
| COMMD4. 3   | 5. 53E-14 | 0. 245314 | 0. 459 | 0. 299 | 8. 26E-10 | CSCL2 | COMMD4         |
| ZBTB8A. 9   | 5. 62E-14 | 0. 226761 | 0. 208 | 0. 099 | 8. 40E-10 | CSCL2 | ZBTB8A         |
| RGMB. 10    | 5. 67E-14 | 0. 187458 | 0. 254 | 0. 127 | 8. 47E-10 | CSCL2 | RGMB           |
| FUZ. 6      | 5. 73E-14 | 0. 345184 | 0. 278 | 0. 156 | 8. 56E-10 | CSCL2 | FUZ            |
| KBTBD6. 8   | 5. 84E-14 | 0. 205129 | 0. 247 | 0. 127 | 8. 72E-10 | CSCL2 | KBTBD6         |
| HIPK2. 10   | 5. 93E-14 | 0. 193916 | 0. 369 | 0. 215 | 8. 86E-10 | CSCL2 | HIPK2          |
| P4HA1. 6    | 5. 97E-14 | -0. 43477 | 0. 082 | 0. 23  | 8. 92E-10 | CSCL2 | P4HA1          |
| NDC1. 2     | 6. 00E-14 | 0. 197612 | 0. 141 | 0. 057 | 8. 97E-10 | CSCL2 | NDC1           |
| ELP6. 7     | 6. 12E-14 | 0. 225676 | 0. 351 | 0. 21  | 9. 15E-10 | CSCL2 | ELP6           |
| ZNF146. 1C  | 6. 32E-14 | 0. 256829 | 0. 366 | 0. 222 | 9. 44E-10 | CSCL2 | ZNF146         |
| ANAPC11. 8  | 6. 60E-14 | 0. 157877 | 0. 865 | 0. 721 | 9. 86E-10 | CSCL2 | ANAPC11        |
| COQ7. 8     | 7. 03E-14 | 0. 229277 | 0. 32  | 0. 182 | 1. 05E-09 | CSCL2 | COQ7           |
| MAGEF1. 12  | 7. 10E-14 | 0. 284512 | 0. 525 | 0. 357 | 1. 06E-09 | CSCL2 | MAGEF1         |
| SSR4. 7     | 7. 11E-14 | -0. 31733 | 0. 709 | 0. 765 | 1. 06E-09 | CSCL2 | SSR4           |
| NANS. 11    | 7. 36E-14 | -0. 48462 | 0. 208 | 0. 366 | 1. 10E-09 | CSCL2 | NANS           |
| LITAF. 13   | 7. 39E-14 | -0. 56884 | 0. 338 | 0. 464 | 1. 11E-09 | CSCL2 | LITAF          |
| FBP1. 13    | 7. 80E-14 | -0. 47676 | 0. 007 | 0. 121 | 1. 17E-09 | CSCL2 | FBP1           |
| FTSJ2. 7    | 7. 89E-14 | 0. 206008 | 0. 38  | 0. 231 | 1. 18E-09 | CSCL2 | FTSJ2          |
| PTGER4. 12  | 7. 98E-14 | -0. 51002 | 0. 011 | 0. 128 | 1. 19E-09 | CSCL2 | PTGER4         |
| DKC1. 6     | 8. 10E-14 | 0. 276636 | 0. 413 | 0. 26  | 1. 21E-09 | CSCL2 | DKC1           |
| ZFP82. 9    | 8. 23E-14 | 0. 205388 | 0. 214 | 0. 105 | 1. 23E-09 | CSCL2 | ZFP82          |
| NCALD. 9    | 9. 28E-14 | 0. 189375 | 0. 238 | 0. 12  | 1. 39E-09 | CSCL2 | NCALD          |
| TFDP2. 6    | 9. 67E-14 | 0. 253261 | 0. 349 | 0. 207 | 1. 45E-09 | CSCL2 | TFDP2          |
| CSRNP3. 1C  | 9. 85E-14 | 0. 178567 | 0. 205 | 0. 095 | 1. 47E-09 | CSCL2 | CSRNP3         |
| FOSL2. 10   | 9. 88E-14 | -0. 38995 | 0. 053 | 0. 191 | 1. 48E-09 | CSCL2 | FOSL2          |
| CCSAP. 6    | 9. 89E-14 | 0. 27215  | 0. 201 | 0. 095 | 1. 48E-09 | CSCL2 | CCSAP          |
| RCSL1. 12   | 9. 98E-14 | -0. 51501 | 0. 009 | 0. 124 | 1. 49E-09 | CSCL2 | RCSL1          |
| RBMXL1. 5   | 1. 04E-13 | 0. 255882 | 0. 272 | 0. 148 | 1. 56E-09 | CSCL2 | RBMXL1         |
| C11orf96. 1 | 1. 05E-13 | 0. 187656 | 0. 256 | 0. 129 | 1. 56E-09 | CSCL2 | C11orf96       |
| SLC26A10. 1 | 1. 05E-13 | 0. 115227 | 0. 077 | 0. 022 | 1. 57E-09 | CSCL2 | SLC26A10       |
| KLF6. 11    | 1. 05E-13 | -0. 4605  | 0. 428 | 0. 535 | 1. 57E-09 | CSCL2 | KLF6           |
| PSME1. 10   | 1. 05E-13 | -0. 37409 | 0. 446 | 0. 589 | 1. 58E-09 | CSCL2 | PSME1          |
| FANCE       | 1. 07E-13 | 0. 133678 | 0. 086 | 0. 027 | 1. 59E-09 | CSCL2 | FANCE          |
| FAH. 11     | 1. 08E-13 | -0. 43082 | 0. 033 | 0. 163 | 1. 61E-09 | CSCL2 | FAH            |
| CASC15. 9   | 1. 11E-13 | 0. 184557 | 0. 203 | 0. 095 | 1. 66E-09 | CSCL2 | CASC15         |
| TIMM50. 4   | 1. 15E-13 | 0. 269516 | 0. 464 | 0. 304 | 1. 72E-09 | CSCL2 | TIMM50         |
| NNT-AS1. 1  | 1. 16E-13 | 0. 257304 | 0. 358 | 0. 216 | 1. 73E-09 | CSCL2 | NNT-AS1        |
| CTD-2035E   | 1. 23E-13 | 0. 13894  | 0. 102 | 0. 034 | 1. 84E-09 | CSCL2 | CTD-2035E11. 3 |
| NCKAP1L. 1  | 1. 23E-13 | -0. 51998 | 0. 011 | 0. 126 | 1. 84E-09 | CSCL2 | NCKAP1L        |
| SMARCC2. 9  | 1. 26E-13 | 0. 218199 | 0. 415 | 0. 257 | 1. 89E-09 | CSCL2 | SMARCC2        |
| PLD3. 6     | 1. 27E-13 | -0. 42709 | 0. 424 | 0. 533 | 1. 89E-09 | CSCL2 | PLD3           |
| TNFRSF12A   | 1. 28E-13 | -0. 4379  | 0. 135 | 0. 293 | 1. 91E-09 | CSCL2 | TNFRSF12A      |
| POT1. 3     | 1. 31E-13 | 0. 193741 | 0. 174 | 0. 078 | 1. 96E-09 | CSCL2 | POT1           |
| ABHD14B. 8  | 1. 40E-13 | -0. 42984 | 0. 049 | 0. 184 | 2. 09E-09 | CSCL2 | ABHD14B        |
| TSPAN5. 12  | 1. 47E-13 | 0. 325265 | 0. 415 | 0. 256 | 2. 20E-09 | CSCL2 | TSPAN5         |
| NSRP1. 5    | 1. 48E-13 | 0. 272675 | 0. 514 | 0. 35  | 2. 21E-09 | CSCL2 | NSRP1          |
| DUOX1. 10   | 1. 48E-13 | 0. 151902 | 0. 148 | 0. 06  | 2. 21E-09 | CSCL2 | DUOX1          |

|              |          |          |       |       |          |       |              |
|--------------|----------|----------|-------|-------|----------|-------|--------------|
| SRRM2.8      | 1.49E-13 | 0.214    | 0.695 | 0.526 | 2.23E-09 | CSCL2 | SRRM2        |
| REEP5.9      | 1.51E-13 | -0.36139 | 0.464 | 0.59  | 2.25E-09 | CSCL2 | REEP5        |
| PPP2R1A.8    | 1.54E-13 | 0.228487 | 0.687 | 0.508 | 2.30E-09 | CSCL2 | PPP2R1A      |
| ARPC2.11     | 1.57E-13 | -0.24763 | 0.768 | 0.774 | 2.34E-09 | CSCL2 | ARPC2        |
| RIN3.13      | 1.58E-13 | -0.44031 | 0.007 | 0.12  | 2.36E-09 | CSCL2 | RIN3         |
| ALKBH2.11    | 1.59E-13 | 0.228508 | 0.322 | 0.19  | 2.38E-09 | CSCL2 | ALKBH2       |
| STX11.12     | 1.67E-13 | -0.49836 | 0.007 | 0.119 | 2.49E-09 | CSCL2 | STX11        |
| COPS3.6      | 1.68E-13 | 0.212629 | 0.534 | 0.362 | 2.50E-09 | CSCL2 | COPS3        |
| TMEM179B.1   | 1.68E-13 | -0.44148 | 0.267 | 0.419 | 2.51E-09 | CSCL2 | TMEM179B     |
| SOX9.12      | 1.71E-13 | 0.287847 | 0.437 | 0.265 | 2.56E-09 | CSCL2 | SOX9         |
| NKAIN3.12    | 1.90E-13 | 0.205201 | 0.236 | 0.12  | 2.84E-09 | CSCL2 | NKAIN3       |
| ARHGAP24.1   | 1.93E-13 | -0.54311 | 0.029 | 0.153 | 2.88E-09 | CSCL2 | ARHGAP24     |
| SLC25A37.1   | 1.96E-13 | -0.45751 | 0.159 | 0.316 | 2.94E-09 | CSCL2 | SLC25A37     |
| PRPF4.2      | 2.10E-13 | 0.252816 | 0.296 | 0.169 | 3.13E-09 | CSCL2 | PRPF4        |
| EN1.8        | 2.13E-13 | 0.155484 | 0.148 | 0.06  | 3.18E-09 | CSCL2 | EN1          |
| SNAP25.11    | 2.17E-13 | 0.207262 | 0.269 | 0.137 | 3.24E-09 | CSCL2 | SNAP25       |
| M6PR.13      | 2.23E-13 | -0.48095 | 0.247 | 0.388 | 3.33E-09 | CSCL2 | M6PR         |
| LINC00632.2  | 2.27E-13 | 0.220874 | 0.19  | 0.087 | 3.39E-09 | CSCL2 | LINC00632    |
| NUDT15.3     | 2.29E-13 | 0.253298 | 0.21  | 0.103 | 3.42E-09 | CSCL2 | NUDT15       |
| ICA1L.7      | 2.29E-13 | 0.205084 | 0.201 | 0.096 | 3.43E-09 | CSCL2 | ICA1L        |
| TLK1.10      | 2.30E-13 | 0.2966   | 0.355 | 0.223 | 3.43E-09 | CSCL2 | TLK1         |
| NCF1.13      | 2.38E-13 | -0.47555 | 0.013 | 0.128 | 3.56E-09 | CSCL2 | NCF1         |
| TGFBR2.11    | 2.39E-13 | -0.39704 | 0.009 | 0.121 | 3.57E-09 | CSCL2 | TGFBR2       |
| TNFAIP3.1    | 2.41E-13 | -0.59211 | 0.042 | 0.168 | 3.60E-09 | CSCL2 | TNFAIP3      |
| NRSN1.8      | 2.46E-13 | 0.180123 | 0.139 | 0.057 | 3.68E-09 | CSCL2 | NRSN1        |
| ZNF441.3     | 2.59E-13 | 0.149763 | 0.115 | 0.042 | 3.88E-09 | CSCL2 | ZNF441       |
| PGK1.9       | 2.64E-13 | -0.3264  | 0.733 | 0.754 | 3.94E-09 | CSCL2 | PGK1         |
| SKP2.1       | 2.71E-13 | 0.147845 | 0.132 | 0.053 | 4.05E-09 | CSCL2 | SKP2         |
| C19orf60.2   | 2.77E-13 | -0.34296 | 0.375 | 0.507 | 4.14E-09 | CSCL2 | C19orf60     |
| MAP4K4.9     | 2.81E-13 | 0.140208 | 0.402 | 0.242 | 4.21E-09 | CSCL2 | MAP4K4       |
| GAS2L3.8     | 2.83E-13 | 0.294529 | 0.15  | 0.065 | 4.22E-09 | CSCL2 | GAS2L3       |
| RP11-552D4.1 | 2.83E-13 | -0.61531 | 0.011 | 0.124 | 4.23E-09 | CSCL2 | RP11-552D4.1 |
| CDKN2AIPNL.2 | 2.85E-13 | 0.246552 | 0.389 | 0.243 | 4.26E-09 | CSCL2 | CDKN2AIPNL   |
| C19orf70.2   | 2.87E-13 | -0.3482  | 0.486 | 0.582 | 4.29E-09 | CSCL2 | C19orf70     |
| ZW10.2       | 2.99E-13 | 0.177528 | 0.141 | 0.058 | 4.46E-09 | CSCL2 | ZW10         |
| EHMT2.10     | 3.01E-13 | 0.218247 | 0.331 | 0.195 | 4.49E-09 | CSCL2 | EHMT2        |
| SMC04.13     | 3.06E-13 | -0.46864 | 0.02  | 0.137 | 4.57E-09 | CSCL2 | SMC04        |
| RNF13.8      | 3.06E-13 | -0.44334 | 0.353 | 0.486 | 4.58E-09 | CSCL2 | RNF13        |
| EPHB6.4      | 3.10E-13 | 0.160475 | 0.113 | 0.041 | 4.64E-09 | CSCL2 | EPHB6        |
| NUDT16.13    | 3.15E-13 | -0.45898 | 0.084 | 0.225 | 4.71E-09 | CSCL2 | NUDT16       |
| STMN2.13     | 3.31E-13 | 0.143875 | 0.347 | 0.18  | 4.95E-09 | CSCL2 | STMN2        |
| SNHG8.7      | 3.36E-13 | -0.48159 | 0.327 | 0.474 | 5.02E-09 | CSCL2 | SNHG8        |
| CHMP1B.8     | 3.50E-13 | -0.474   | 0.302 | 0.443 | 5.22E-09 | CSCL2 | CHMP1B       |
| FIGN.10      | 3.50E-13 | 0.198059 | 0.179 | 0.084 | 5.24E-09 | CSCL2 | FIGN         |
| BCL7B.8      | 3.88E-13 | 0.212148 | 0.479 | 0.316 | 5.79E-09 | CSCL2 | BCL7B        |
| ENG.13       | 3.89E-13 | -0.51679 | 0.044 | 0.17  | 5.81E-09 | CSCL2 | ENG          |
| DBF4B.1      | 3.92E-13 | 0.160482 | 0.097 | 0.033 | 5.86E-09 | CSCL2 | DBF4B        |
| MKLN1.7      | 3.93E-13 | 0.242213 | 0.362 | 0.224 | 5.87E-09 | CSCL2 | MKLN1        |
| COMMD2.7     | 4.26E-13 | 0.208902 | 0.442 | 0.283 | 6.37E-09 | CSCL2 | COMMD2       |
| LPAR6.11     | 4.26E-13 | -0.62684 | 0.108 | 0.243 | 6.37E-09 | CSCL2 | LPAR6        |
| FAM110B.9    | 4.34E-13 | 0.215818 | 0.316 | 0.181 | 6.48E-09 | CSCL2 | FAM110B      |

|            |          |          |       |       |          |       |            |
|------------|----------|----------|-------|-------|----------|-------|------------|
| GPR19.7    | 4.43E-13 | 0.176095 | 0.115 | 0.042 | 6.62E-09 | CSCL2 | GPR19      |
| CENPC.3    | 4.46E-13 | 0.23415  | 0.212 | 0.104 | 6.66E-09 | CSCL2 | CENPC      |
| PDHA1.6    | 4.48E-13 | 0.34265  | 0.442 | 0.297 | 6.69E-09 | CSCL2 | PDHA1      |
| RAB5C.7    | 4.60E-13 | -0.32572 | 0.605 | 0.655 | 6.88E-09 | CSCL2 | RAB5C      |
| BCL2A1.13  | 4.64E-13 | -0.52425 | 0.038 | 0.162 | 6.93E-09 | CSCL2 | BCL2A1     |
| YAE1D1.9   | 4.66E-13 | 0.198467 | 0.283 | 0.155 | 6.97E-09 | CSCL2 | YAE1D1     |
| ABCA1.7    | 4.73E-13 | -0.39312 | 0.099 | 0.244 | 7.07E-09 | CSCL2 | ABCA1      |
| FGF12.8    | 4.79E-13 | 0.207318 | 0.119 | 0.045 | 7.15E-09 | CSCL2 | FGF12      |
| CREB5.12   | 4.80E-13 | 0.303466 | 0.371 | 0.229 | 7.18E-09 | CSCL2 | CREB5      |
| C3orf14.8  | 4.81E-13 | 0.269095 | 0.402 | 0.259 | 7.19E-09 | CSCL2 | C3orf14    |
| RRBP1.8    | 4.88E-13 | -0.31764 | 0.155 | 0.303 | 7.30E-09 | CSCL2 | RRBP1      |
| AKNAD1.1   | 5.11E-13 | 0.138025 | 0.077 | 0.023 | 7.63E-09 | CSCL2 | AKNAD1     |
| MFF.7      | 5.11E-13 | 0.190071 | 0.649 | 0.483 | 7.64E-09 | CSCL2 | MFF        |
| TLR2.13    | 5.17E-13 | -0.48799 | 0.007 | 0.115 | 7.72E-09 | CSCL2 | TLR2       |
| GPX3.12    | 5.52E-13 | -0.51468 | 0.035 | 0.157 | 8.26E-09 | CSCL2 | GPX3       |
| LRRC20.3   | 5.58E-13 | 0.149516 | 0.119 | 0.046 | 8.34E-09 | CSCL2 | LRRC20     |
| SLC16A1.1  | 5.59E-13 | 0.193689 | 0.375 | 0.228 | 8.35E-09 | CSCL2 | SLC16A1    |
| XRCC1.2    | 5.87E-13 | 0.239234 | 0.23  | 0.119 | 8.77E-09 | CSCL2 | XRCC1      |
| PSMB5.8    | 5.87E-13 | 0.188249 | 0.781 | 0.587 | 8.77E-09 | CSCL2 | PSMB5      |
| PDLIM3.1C  | 6.01E-13 | 0.153518 | 0.223 | 0.11  | 8.99E-09 | CSCL2 | PDLIM3     |
| PATZ1.5    | 6.16E-13 | 0.166915 | 0.174 | 0.08  | 9.21E-09 | CSCL2 | PATZ1      |
| PDZD4.9    | 6.62E-13 | 0.159921 | 0.117 | 0.044 | 9.89E-09 | CSCL2 | PDZD4      |
| EIF1AY.11  | 6.71E-13 | 0.227493 | 0.298 | 0.173 | 1.00E-08 | CSCL2 | EIF1AY     |
| TMBIM6.8   | 6.83E-13 | -0.23614 | 0.823 | 0.839 | 1.02E-08 | CSCL2 | TMBIM6     |
| MLH1.5     | 6.95E-13 | 0.301405 | 0.267 | 0.148 | 1.04E-08 | CSCL2 | MLH1       |
| AC005618.6 | 6.98E-13 | 0.130382 | 0.11  | 0.04  | 1.04E-08 | CSCL2 | AC005618.6 |
| KDELR2.6   | 7.02E-13 | 0.204455 | 0.709 | 0.563 | 1.05E-08 | CSCL2 | KDELR2     |
| RSRC2.5    | 7.04E-13 | 0.240921 | 0.645 | 0.469 | 1.05E-08 | CSCL2 | RSRC2      |
| ANKMY2.7   | 7.13E-13 | 0.161562 | 0.227 | 0.113 | 1.06E-08 | CSCL2 | ANKMY2     |
| PJA1.9     | 7.29E-13 | 0.201996 | 0.325 | 0.187 | 1.09E-08 | CSCL2 | PJA1       |
| S100A13.1  | 7.35E-13 | -0.38682 | 0.143 | 0.302 | 1.10E-08 | CSCL2 | S100A13    |
| C1S.10     | 7.65E-13 | -0.64328 | 0.042 | 0.167 | 1.14E-08 | CSCL2 | C1S        |
| RNASE1.1C  | 7.96E-13 | -0.84353 | 0.051 | 0.174 | 1.19E-08 | CSCL2 | RNASE1     |
| ITGB1.9    | 8.07E-13 | -0.40091 | 0.256 | 0.391 | 1.21E-08 | CSCL2 | ITGB1      |
| BIN2.12    | 8.14E-13 | -0.4762  | 0.009 | 0.117 | 1.22E-08 | CSCL2 | BIN2       |
| IPO5.8     | 8.29E-13 | 0.259528 | 0.342 | 0.211 | 1.24E-08 | CSCL2 | IPO5       |
| C7orf49.7  | 8.37E-13 | 0.211475 | 0.336 | 0.202 | 1.25E-08 | CSCL2 | C7orf49    |
| C9orf142.8 | 8.41E-13 | 0.228106 | 0.528 | 0.37  | 1.26E-08 | CSCL2 | C9orf142   |
| CCL3.13    | 8.42E-13 | -0.77602 | 0.344 | 0.425 | 1.26E-08 | CSCL2 | CCL3       |
| ALKBH7.5   | 8.52E-13 | -0.29089 | 0.34  | 0.477 | 1.27E-08 | CSCL2 | ALKBH7     |
| HTRA2.7    | 8.61E-13 | 0.19613  | 0.36  | 0.219 | 1.29E-08 | CSCL2 | HTRA2      |
| CIAPIN1.8  | 8.65E-13 | 0.233579 | 0.4   | 0.254 | 1.29E-08 | CSCL2 | CIAPIN1    |
| CUX1.6     | 8.73E-13 | 0.233804 | 0.375 | 0.235 | 1.31E-08 | CSCL2 | CUX1       |
| CYTH4.13   | 8.86E-13 | -0.47954 | 0.009 | 0.116 | 1.32E-08 | CSCL2 | CYTH4      |
| NAGA.11    | 8.91E-13 | -0.49161 | 0.06  | 0.19  | 1.33E-08 | CSCL2 | NAGA       |
| HOXD8.1    | 8.92E-13 | 0.103445 | 0.086 | 0.027 | 1.33E-08 | CSCL2 | HOXD8      |
| SERTAD1.8  | 9.24E-13 | -0.46592 | 0.168 | 0.322 | 1.38E-08 | CSCL2 | SERTAD1    |
| KIAA1614.9 | 9.29E-13 | 0.169066 | 0.099 | 0.035 | 1.39E-08 | CSCL2 | KIAA1614   |
| RBM47.12   | 9.37E-13 | -0.35958 | 0.011 | 0.121 | 1.40E-08 | CSCL2 | RBM47      |
| STARD4-AS  | 9.50E-13 | 0.231436 | 0.234 | 0.123 | 1.42E-08 | CSCL2 | STARD4-AS1 |
| RALA.9     | 9.56E-13 | 0.245922 | 0.517 | 0.353 | 1.43E-08 | CSCL2 | RALA       |

|           |          |          |       |       |          |       |          |
|-----------|----------|----------|-------|-------|----------|-------|----------|
| RFX4.11   | 9.63E-13 | 0.259614 | 0.263 | 0.146 | 1.44E-08 | CSCL2 | RFX4     |
| HOXD10.1  | 9.92E-13 | 0.127713 | 0.084 | 0.027 | 1.48E-08 | CSCL2 | HOXD10   |
| SLC2A4RG. | 9.95E-13 | 0.266383 | 0.227 | 0.122 | 1.49E-08 | CSCL2 | SLC2A4RG |
| CLDN10.9  | 9.95E-13 | 0.242585 | 0.13  | 0.052 | 1.49E-08 | CSCL2 | CLDN10   |
| TBX5.2    | 9.99E-13 | 0.103961 | 0.051 | 0.012 | 1.49E-08 | CSCL2 | TBX5     |
| TCIRG1.13 | 1.02E-12 | -0.41763 | 0.018 | 0.13  | 1.52E-08 | CSCL2 | TCIRG1   |
| NCF2.13   | 1.03E-12 | -0.43    | 0.002 | 0.105 | 1.54E-08 | CSCL2 | NCF2     |
| ZSCAN16.5 | 1.03E-12 | 0.17084  | 0.143 | 0.06  | 1.54E-08 | CSCL2 | ZSCAN16  |
| CEBPZ.7   | 1.04E-12 | 0.168847 | 0.417 | 0.265 | 1.55E-08 | CSCL2 | CEBPZ    |
| FAM162A.1 | 1.06E-12 | -0.29418 | 0.227 | 0.408 | 1.58E-08 | CSCL2 | FAM162A  |
| NUP50.7   | 1.06E-12 | 0.208559 | 0.221 | 0.113 | 1.58E-08 | CSCL2 | NUP50    |
| C2.11     | 1.07E-12 | -0.52876 | 0.011 | 0.119 | 1.59E-08 | CSCL2 | C2       |
| GPRASP2.8 | 1.07E-12 | 0.157026 | 0.146 | 0.062 | 1.60E-08 | CSCL2 | GPRASP2  |
| TMEM54.1C | 1.09E-12 | 0.295092 | 0.318 | 0.19  | 1.63E-08 | CSCL2 | TMEM54   |
| NUDT14.12 | 1.10E-12 | -0.44203 | 0.066 | 0.197 | 1.64E-08 | CSCL2 | NUDT14   |
| CNN3.11   | 1.13E-12 | 0.217172 | 0.728 | 0.458 | 1.69E-08 | CSCL2 | CNN3     |
| BLMH.6    | 1.15E-12 | 0.278956 | 0.294 | 0.17  | 1.72E-08 | CSCL2 | BLMH     |
| H3F3A.4   | 1.16E-12 | 0.116765 | 0.773 | 0.746 | 1.73E-08 | CSCL2 | H3F3A    |
| PAK3.12   | 1.16E-12 | 0.156307 | 0.267 | 0.138 | 1.73E-08 | CSCL2 | PAK3     |
| CNOT10.3  | 1.20E-12 | 0.187412 | 0.23  | 0.118 | 1.79E-08 | CSCL2 | CNOT10   |
| IFT81.10  | 1.20E-12 | 0.265539 | 0.272 | 0.154 | 1.79E-08 | CSCL2 | IFT81    |
| DHX15.7   | 1.20E-12 | 0.22732  | 0.38  | 0.239 | 1.80E-08 | CSCL2 | DHX15    |
| PRPF38A.6 | 1.23E-12 | 0.216431 | 0.435 | 0.284 | 1.84E-08 | CSCL2 | PRPF38A  |
| CHTOP.8   | 1.24E-12 | 0.25284  | 0.519 | 0.361 | 1.85E-08 | CSCL2 | CHTOP    |
| SRP72.6   | 1.25E-12 | 0.273879 | 0.596 | 0.453 | 1.87E-08 | CSCL2 | SRP72    |
| BCAR1.10  | 1.25E-12 | 0.215369 | 0.291 | 0.167 | 1.87E-08 | CSCL2 | BCAR1    |
| C1R.13    | 1.26E-12 | -0.60902 | 0.082 | 0.221 | 1.88E-08 | CSCL2 | C1R      |
| SLC22A18. | 1.27E-12 | -0.34665 | 0.015 | 0.128 | 1.90E-08 | CSCL2 | SLC22A18 |
| TPST2.11  | 1.28E-12 | -0.36913 | 0.046 | 0.172 | 1.91E-08 | CSCL2 | TPST2    |
| PCGF2.11  | 1.28E-12 | 0.217795 | 0.276 | 0.158 | 1.91E-08 | CSCL2 | PCGF2    |
| QSOX1.10  | 1.30E-12 | -0.32536 | 0.099 | 0.242 | 1.94E-08 | CSCL2 | QSOX1    |
| DENND3.13 | 1.34E-12 | -0.42865 | 0.002 | 0.104 | 2.00E-08 | CSCL2 | DENND3   |
| CYTIP.12  | 1.35E-12 | -0.51468 | 0.004 | 0.108 | 2.01E-08 | CSCL2 | CYTIP    |
| MMP16.11  | 1.35E-12 | 0.220184 | 0.199 | 0.099 | 2.02E-08 | CSCL2 | MMP16    |
| RPH3A.6   | 1.37E-12 | 0.133736 | 0.091 | 0.03  | 2.05E-08 | CSCL2 | RPH3A    |
| SLN.9     | 1.38E-12 | -0.63441 | 0.042 | 0.166 | 2.07E-08 | CSCL2 | SLN      |
| SBK1.11   | 1.39E-12 | 0.184431 | 0.157 | 0.068 | 2.08E-08 | CSCL2 | SBK1     |
| MGAT4A.13 | 1.41E-12 | -0.55475 | 0.095 | 0.226 | 2.11E-08 | CSCL2 | MGAT4A   |
| SP110.10  | 1.43E-12 | -0.3496  | 0.066 | 0.203 | 2.13E-08 | CSCL2 | SP110    |
| PPT1.10   | 1.43E-12 | -0.42728 | 0.455 | 0.56  | 2.13E-08 | CSCL2 | PPT1     |
| ADAT1.3   | 1.43E-12 | 0.197591 | 0.205 | 0.103 | 2.13E-08 | CSCL2 | ADAT1    |
| HAMP.13   | 1.49E-12 | -0.73656 | 0.046 | 0.165 | 2.22E-08 | CSCL2 | HAMP     |
| GM2A.10   | 1.50E-12 | -0.44102 | 0.031 | 0.148 | 2.24E-08 | CSCL2 | GM2A     |
| LHFPL2.11 | 1.53E-12 | -0.47627 | 0.044 | 0.165 | 2.28E-08 | CSCL2 | LHFPL2   |
| DNER.10   | 1.56E-12 | 0.171447 | 0.455 | 0.273 | 2.32E-08 | CSCL2 | DNER     |
| LAP3.10   | 1.59E-12 | -0.39913 | 0.358 | 0.497 | 2.38E-08 | CSCL2 | LAP3     |
| HYI.5     | 1.70E-12 | 0.236624 | 0.252 | 0.134 | 2.54E-08 | CSCL2 | HYI      |
| TSR2.3    | 1.72E-12 | 0.214606 | 0.384 | 0.241 | 2.56E-08 | CSCL2 | TSR2     |
| C22orf39. | 1.72E-12 | 0.28018  | 0.393 | 0.254 | 2.57E-08 | CSCL2 | C22orf39 |
| MAZ.10    | 1.78E-12 | 0.304126 | 0.38  | 0.245 | 2.66E-08 | CSCL2 | MAZ      |
| SNRNP25.8 | 1.80E-12 | 0.213923 | 0.499 | 0.344 | 2.69E-08 | CSCL2 | SNRNP25  |

|            |           |           |        |        |           |       |                |
|------------|-----------|-----------|--------|--------|-----------|-------|----------------|
| SFXN1. 8   | 1. 81E-12 | 0. 236179 | 0. 342 | 0. 212 | 2. 70E-08 | CSCL2 | SFXN1          |
| SLC22A17.  | 1. 84E-12 | 0. 224389 | 0. 43  | 0. 278 | 2. 75E-08 | CSCL2 | SLC22A17       |
| C1orf112.  | 1. 88E-12 | 0. 186594 | 0. 104 | 0. 038 | 2. 81E-08 | CSCL2 | C1orf112       |
| NAPEPLD. 7 | 1. 91E-12 | 0. 190712 | 0. 194 | 0. 095 | 2. 86E-08 | CSCL2 | NAPEPLD        |
| CNDP2. 11  | 1. 91E-12 | -0. 4107  | 0. 305 | 0. 436 | 2. 86E-08 | CSCL2 | CNDP2          |
| TSPAN31. 8 | 1. 94E-12 | 0. 348022 | 0. 408 | 0. 29  | 2. 89E-08 | CSCL2 | TSPAN31        |
| CD84. 13   | 1. 99E-12 | -0. 50083 | 0. 022 | 0. 133 | 2. 97E-08 | CSCL2 | CD84           |
| DEPDC7. 1  | 2. 00E-12 | 0. 119846 | 0. 077 | 0. 024 | 2. 99E-08 | CSCL2 | DEPDC7         |
| BAZ1A. 7   | 2. 01E-12 | 0. 225925 | 0. 464 | 0. 314 | 3. 00E-08 | CSCL2 | BAZ1A          |
| RP5-1024C  | 2. 02E-12 | 0. 142306 | 0. 053 | 0. 013 | 3. 02E-08 | CSCL2 | RP5-1024C24. 1 |
| NR2F2. 8   | 2. 03E-12 | 0. 185413 | 0. 113 | 0. 042 | 3. 03E-08 | CSCL2 | NR2F2          |
| DDR1. 11   | 2. 06E-12 | 0. 236429 | 0. 488 | 0. 325 | 3. 08E-08 | CSCL2 | DDR1           |
| TAPBP. 11  | 2. 10E-12 | -0. 40245 | 0. 203 | 0. 348 | 3. 13E-08 | CSCL2 | TAPBP          |
| OCIAD2. 12 | 2. 12E-12 | -0. 58227 | 0. 243 | 0. 393 | 3. 17E-08 | CSCL2 | OCIAD2         |
| PRDX6. 7   | 2. 14E-12 | -0. 37873 | 0. 572 | 0. 626 | 3. 21E-08 | CSCL2 | PRDX6          |
| MLLT4. 10  | 2. 18E-12 | 0. 266077 | 0. 276 | 0. 157 | 3. 26E-08 | CSCL2 | MLLT4          |
| SLC39A6. 1 | 2. 23E-12 | 0. 208364 | 0. 472 | 0. 322 | 3. 33E-08 | CSCL2 | SLC39A6        |
| VASP. 12   | 2. 23E-12 | -0. 41437 | 0. 106 | 0. 245 | 3. 33E-08 | CSCL2 | VASP           |
| CAHM. 11   | 2. 25E-12 | 0. 247216 | 0. 181 | 0. 088 | 3. 36E-08 | CSCL2 | CAHM           |
| TRIM59. 2  | 2. 28E-12 | 0. 159997 | 0. 073 | 0. 022 | 3. 40E-08 | CSCL2 | TRIM59         |
| ATL1. 8    | 2. 33E-12 | 0. 247095 | 0. 219 | 0. 112 | 3. 48E-08 | CSCL2 | ATL1           |
| TRAF3IP2.  | 2. 34E-12 | 0. 224678 | 0. 19  | 0. 092 | 3. 50E-08 | CSCL2 | TRAF3IP2       |
| RNF144B. 1 | 2. 44E-12 | -0. 46672 | 0. 002 | 0. 102 | 3. 65E-08 | CSCL2 | RNF144B        |
| RAE1. 8    | 2. 45E-12 | 0. 295862 | 0. 404 | 0. 262 | 3. 66E-08 | CSCL2 | RAE1           |
| SIRPA. 10  | 2. 47E-12 | -0. 43965 | 0. 113 | 0. 249 | 3. 69E-08 | CSCL2 | SIRPA          |
| SEPT11. 11 | 2. 47E-12 | 0. 299394 | 0. 439 | 0. 297 | 3. 69E-08 | CSCL2 | 11-Sep         |
| PARVB. 12  | 2. 54E-12 | -0. 36641 | 0. 046 | 0. 169 | 3. 80E-08 | CSCL2 | PARVB          |
| ARHGAP4. 1 | 2. 58E-12 | -0. 44126 | 0. 013 | 0. 12  | 3. 86E-08 | CSCL2 | ARHGAP4        |
| YIF1A. 8   | 2. 62E-12 | -0. 45775 | 0. 305 | 0. 429 | 3. 92E-08 | CSCL2 | YIF1A          |
| GALNT13. 8 | 2. 71E-12 | 0. 160976 | 0. 11  | 0. 041 | 4. 05E-08 | CSCL2 | GALNT13        |
| MEF2C. 12  | 2. 81E-12 | -0. 56589 | 0. 157 | 0. 288 | 4. 19E-08 | CSCL2 | MEF2C          |
| LUC7L3. 9  | 2. 85E-12 | 0. 204255 | 0. 695 | 0. 503 | 4. 26E-08 | CSCL2 | LUC7L3         |
| ELOVL1. 7  | 2. 86E-12 | -0. 45795 | 0. 097 | 0. 236 | 4. 28E-08 | CSCL2 | ELOVL1         |
| KHSRP. 10  | 2. 98E-12 | 0. 222998 | 0. 369 | 0. 233 | 4. 45E-08 | CSCL2 | KHSRP          |
| NCOA4. 12  | 2. 99E-12 | -0. 436   | 0. 126 | 0. 268 | 4. 47E-08 | CSCL2 | NCOA4          |
| AHI1. 5    | 3. 01E-12 | 0. 211007 | 0. 336 | 0. 2   | 4. 49E-08 | CSCL2 | AHI1           |
| ATAD3A. 6  | 3. 13E-12 | 0. 230289 | 0. 26  | 0. 147 | 4. 68E-08 | CSCL2 | ATAD3A         |
| KMT2C. 8   | 3. 17E-12 | 0. 191717 | 0. 406 | 0. 256 | 4. 74E-08 | CSCL2 | KMT2C          |
| BCAP29. 6  | 3. 30E-12 | 0. 218032 | 0. 47  | 0. 311 | 4. 94E-08 | CSCL2 | BCAP29         |
| ZNF384. 2  | 3. 45E-12 | 0. 10896  | 0. 143 | 0. 061 | 5. 15E-08 | CSCL2 | ZNF384         |
| HLA-DQB2.  | 3. 48E-12 | -0. 63497 | 0. 002 | 0. 101 | 5. 19E-08 | CSCL2 | HLA-DQB2       |
| RNF181. 6  | 3. 48E-12 | -0. 43265 | 0. 459 | 0. 558 | 5. 20E-08 | CSCL2 | RNF181         |
| DAZAP2. 10 | 3. 52E-12 | -0. 37748 | 0. 424 | 0. 541 | 5. 26E-08 | CSCL2 | DAZAP2         |
| CEBPA. 12  | 3. 63E-12 | -0. 40874 | 0. 007 | 0. 108 | 5. 42E-08 | CSCL2 | CEBPA          |
| LRWD1. 9   | 3. 64E-12 | 0. 238135 | 0. 285 | 0. 166 | 5. 44E-08 | CSCL2 | LRWD1          |
| PMP22. 11  | 3. 66E-12 | -0. 4202  | 0. 302 | 0. 432 | 5. 47E-08 | CSCL2 | PMP22          |
| SETD5. 12  | 3. 72E-12 | 0. 228611 | 0. 433 | 0. 283 | 5. 56E-08 | CSCL2 | SETD5          |
| PBXIP1. 6  | 3. 76E-12 | -0. 38894 | 0. 026 | 0. 139 | 5. 62E-08 | CSCL2 | PBXIP1         |
| SMARCE1. 9 | 3. 88E-12 | 0. 201293 | 0. 528 | 0. 372 | 5. 80E-08 | CSCL2 | SMARCE1        |
| GLDN. 12   | 3. 89E-12 | -0. 41791 | 0. 002 | 0. 101 | 5. 81E-08 | CSCL2 | GLDN           |
| LPAR5. 11  | 3. 96E-12 | -0. 4433  | 0. 007 | 0. 107 | 5. 92E-08 | CSCL2 | LPAR5          |



|           |          |          |       |       |          |       |           |
|-----------|----------|----------|-------|-------|----------|-------|-----------|
| C8orf33.9 | 3.98E-12 | 0.206658 | 0.461 | 0.313 | 5.94E-08 | CSCL2 | C8orf33   |
| ZNF501.1  | 4.02E-12 | 0.138936 | 0.102 | 0.037 | 6.01E-08 | CSCL2 | ZNF501    |
| FBXW7.8   | 4.06E-12 | 0.205459 | 0.232 | 0.123 | 6.07E-08 | CSCL2 | FBXW7     |
| DDX23.5   | 4.21E-12 | 0.190595 | 0.272 | 0.154 | 6.29E-08 | CSCL2 | DDX23     |
| KLHDC3.8  | 4.25E-12 | 0.204485 | 0.512 | 0.356 | 6.35E-08 | CSCL2 | KLHDC3    |
| TMEM121.1 | 4.25E-12 | 0.249063 | 0.199 | 0.102 | 6.36E-08 | CSCL2 | TMEM121   |
| TNFSF12.1 | 4.33E-12 | -0.45513 | 0.066 | 0.19  | 6.47E-08 | CSCL2 | TNFSF12   |
| LYPD6.1   | 4.34E-12 | 0.108946 | 0.068 | 0.02  | 6.48E-08 | CSCL2 | LYPD6     |
| USP42.9   | 4.43E-12 | 0.181043 | 0.227 | 0.118 | 6.62E-08 | CSCL2 | USP42     |
| ATOX1.7   | 4.46E-12 | -0.34617 | 0.521 | 0.608 | 6.67E-08 | CSCL2 | ATOX1     |
| SNAP23.12 | 4.49E-12 | -0.39899 | 0.11  | 0.25  | 6.71E-08 | CSCL2 | SNAP23    |
| EFHD1.7   | 4.56E-12 | 0.138212 | 0.135 | 0.055 | 6.81E-08 | CSCL2 | EFHD1     |
| FMNL1.13  | 4.58E-12 | -0.43786 | 0.02  | 0.128 | 6.84E-08 | CSCL2 | FMNL1     |
| BZW1.6    | 4.74E-12 | 0.225631 | 0.7   | 0.532 | 7.08E-08 | CSCL2 | BZW1      |
| ASNS.13   | 4.93E-12 | 0.206603 | 0.307 | 0.172 | 7.37E-08 | CSCL2 | ASNS      |
| CFDP1.8   | 4.94E-12 | 0.151472 | 0.581 | 0.409 | 7.38E-08 | CSCL2 | CFDP1     |
| HTATIP2.1 | 5.02E-12 | -0.39891 | 0.035 | 0.151 | 7.51E-08 | CSCL2 | HTATIP2   |
| CXCL14.8  | 5.06E-12 | -0.53135 | 0.031 | 0.146 | 7.57E-08 | CSCL2 | CXCL14    |
| LINC00152 | 5.40E-12 | -0.31508 | 0.117 | 0.264 | 8.07E-08 | CSCL2 | LINC00152 |
| DYNLT3.6  | 5.43E-12 | -0.35062 | 0.152 | 0.3   | 8.12E-08 | CSCL2 | DYNLT3    |
| GNG7.12   | 5.58E-12 | -0.40891 | 0.157 | 0.305 | 8.33E-08 | CSCL2 | GNG7      |
| SPTBN2.2  | 5.67E-12 | 0.115323 | 0.079 | 0.026 | 8.47E-08 | CSCL2 | SPTBN2    |
| PDXK.11   | 5.81E-12 | -0.41645 | 0.15  | 0.29  | 8.68E-08 | CSCL2 | PDXK      |
| CLN6.8    | 5.81E-12 | 0.20672  | 0.236 | 0.125 | 8.68E-08 | CSCL2 | CLN6      |
| TCEAL5.1C | 6.01E-12 | 0.121535 | 0.234 | 0.116 | 8.98E-08 | CSCL2 | TCEAL5    |
| GPT2.11   | 6.05E-12 | 0.182994 | 0.256 | 0.143 | 9.04E-08 | CSCL2 | GPT2      |
| PSENN.9   | 6.23E-12 | -0.45474 | 0.369 | 0.497 | 9.32E-08 | CSCL2 | PSENN     |
| EID3      | 6.29E-12 | 0.142356 | 0.086 | 0.029 | 9.39E-08 | CSCL2 | EID3      |
| BTBD17.1C | 6.56E-12 | 0.143183 | 0.124 | 0.049 | 9.80E-08 | CSCL2 | BTBD17    |
| KIAA0907  | 6.64E-12 | 0.228433 | 0.318 | 0.189 | 9.93E-08 | CSCL2 | KIAA0907  |
| RNF213.12 | 6.69E-12 | -0.42484 | 0.126 | 0.267 | 1.00E-07 | CSCL2 | RNF213    |
| BOD1.12   | 6.76E-12 | 0.215847 | 0.446 | 0.297 | 1.01E-07 | CSCL2 | BOD1      |
| SCO2.10   | 6.96E-12 | -0.38108 | 0.082 | 0.216 | 1.04E-07 | CSCL2 | SCO2      |
| UBE2V2.9  | 6.99E-12 | 0.172371 | 0.669 | 0.488 | 1.04E-07 | CSCL2 | UBE2V2    |
| FRMD4B.12 | 7.03E-12 | -0.49793 | 0.046 | 0.164 | 1.05E-07 | CSCL2 | FRMD4B    |
| GARS.9    | 7.07E-12 | 0.233006 | 0.435 | 0.287 | 1.06E-07 | CSCL2 | GARS      |
| ICOSLG.12 | 7.25E-12 | -0.35411 | 0     | 0.095 | 1.08E-07 | CSCL2 | ICOSLG    |
| SLC44A2.1 | 7.29E-12 | 0.220182 | 0.327 | 0.198 | 1.09E-07 | CSCL2 | SLC44A2   |
| TMEM9B.3  | 7.40E-12 | -0.38766 | 0.446 | 0.54  | 1.11E-07 | CSCL2 | TMEM9B    |
| ZNF83.5   | 7.48E-12 | 0.246389 | 0.318 | 0.193 | 1.12E-07 | CSCL2 | ZNF83     |
| HLA-F.12  | 7.52E-12 | -0.48496 | 0.038 | 0.15  | 1.12E-07 | CSCL2 | HLA-F     |
| SAA1.10   | 7.54E-12 | -1.14465 | 0.018 | 0.123 | 1.13E-07 | CSCL2 | SAA1      |
| MPP6.9    | 7.61E-12 | 0.190225 | 0.152 | 0.07  | 1.14E-07 | CSCL2 | MPP6      |
| KDM1A.10  | 7.74E-12 | 0.196122 | 0.327 | 0.198 | 1.16E-07 | CSCL2 | KDM1A     |
| PLBD1.13  | 7.97E-12 | -0.36326 | 0.002 | 0.098 | 1.19E-07 | CSCL2 | PLBD1     |
| CTNNA2.8  | 8.13E-12 | 0.16932  | 0.132 | 0.055 | 1.21E-07 | CSCL2 | CTNNA2    |
| MIR22HG.1 | 8.14E-12 | -0.38442 | 0.013 | 0.117 | 1.22E-07 | CSCL2 | MIR22HG   |
| RBFOX2.11 | 8.19E-12 | 0.217877 | 0.347 | 0.211 | 1.22E-07 | CSCL2 | RBFOX2    |
| GABARAP.1 | 8.24E-12 | -0.56541 | 0.349 | 0.465 | 1.23E-07 | CSCL2 | GABARAP   |
| TRIB1.7   | 8.24E-12 | -0.43247 | 0.044 | 0.161 | 1.23E-07 | CSCL2 | TRIB1     |
| GTF2IRD1  | 8.26E-12 | 0.188464 | 0.161 | 0.074 | 1.23E-07 | CSCL2 | GTF2IRD1  |

|           |          |          |       |       |          |       |               |
|-----------|----------|----------|-------|-------|----------|-------|---------------|
| FAM60A.7  | 8.37E-12 | 0.216354 | 0.289 | 0.17  | 1.25E-07 | CSCL2 | FAM60A        |
| ITGAE.5   | 8.51E-12 | 0.215507 | 0.519 | 0.359 | 1.27E-07 | CSCL2 | ITGAE         |
| CPSF3.5   | 8.54E-12 | 0.2529   | 0.289 | 0.172 | 1.28E-07 | CSCL2 | CPSF3         |
| OS9.4     | 8.57E-12 | 0.36255  | 0.607 | 0.533 | 1.28E-07 | CSCL2 | OS9           |
| IDS.6     | 8.80E-12 | -0.31768 | 0.23  | 0.374 | 1.31E-07 | CSCL2 | IDS           |
| SPTLC2.12 | 8.85E-12 | -0.49616 | 0.088 | 0.215 | 1.32E-07 | CSCL2 | SPTLC2        |
| SELPLG.11 | 8.87E-12 | -0.52783 | 0.02  | 0.125 | 1.33E-07 | CSCL2 | SELPLG        |
| ZNF503.4  | 8.89E-12 | 0.190017 | 0.201 | 0.1   | 1.33E-07 | CSCL2 | ZNF503        |
| EIF3B.7   | 9.23E-12 | 0.187055 | 0.377 | 0.242 | 1.38E-07 | CSCL2 | EIF3B         |
| DCAF7.8   | 9.43E-12 | 0.298215 | 0.45  | 0.315 | 1.41E-07 | CSCL2 | DCAF7         |
| CD58.13   | 9.50E-12 | -0.40067 | 0.099 | 0.232 | 1.42E-07 | CSCL2 | CD58          |
| BRAT1.7   | 9.65E-12 | 0.265028 | 0.3   | 0.179 | 1.44E-07 | CSCL2 | BRAT1         |
| CCT3.8    | 9.70E-12 | 0.177547 | 0.748 | 0.571 | 1.45E-07 | CSCL2 | CCT3          |
| CSRP1.9   | 9.76E-12 | -0.34339 | 0.102 | 0.244 | 1.46E-07 | CSCL2 | CSRP1         |
| RAC2.13   | 9.99E-12 | -0.46611 | 0.018 | 0.123 | 1.49E-07 | CSCL2 | RAC2          |
| PCMTD2.1C | 1.00E-11 | 0.251416 | 0.349 | 0.222 | 1.50E-07 | CSCL2 | PCMTD2        |
| GSX2.1    | 1.01E-11 | 0.136608 | 0.051 | 0.013 | 1.51E-07 | CSCL2 | GSX2          |
| CA2.11    | 1.03E-11 | -0.49644 | 0.097 | 0.231 | 1.54E-07 | CSCL2 | CA2           |
| LAMTOR2.1 | 1.05E-11 | -0.36429 | 0.494 | 0.59  | 1.57E-07 | CSCL2 | LAMTOR2       |
| NUDT11.1C | 1.07E-11 | 0.188265 | 0.232 | 0.122 | 1.60E-07 | CSCL2 | NUDT11        |
| NSMCE4A.6 | 1.07E-11 | 0.229379 | 0.263 | 0.148 | 1.60E-07 | CSCL2 | NSMCE4A       |
| HPS1.12   | 1.09E-11 | -0.42303 | 0.013 | 0.115 | 1.63E-07 | CSCL2 | HPS1          |
| ASNSD1.9  | 1.10E-11 | 0.199205 | 0.408 | 0.266 | 1.64E-07 | CSCL2 | ASNSD1        |
| IMMP1L.11 | 1.11E-11 | 0.26164  | 0.355 | 0.227 | 1.66E-07 | CSCL2 | IMMP1L        |
| TAGAP.13  | 1.11E-11 | -0.48113 | 0.007 | 0.104 | 1.66E-07 | CSCL2 | TAGAP         |
| ARID5A.9  | 1.12E-11 | -0.41376 | 0.155 | 0.295 | 1.67E-07 | CSCL2 | ARID5A        |
| NOL11.9   | 1.16E-11 | 0.163179 | 0.311 | 0.184 | 1.74E-07 | CSCL2 | NOL11         |
| SKIV2L2.7 | 1.20E-11 | 0.24327  | 0.267 | 0.152 | 1.79E-07 | CSCL2 | SKIV2L2       |
| KLF4.13   | 1.21E-11 | -0.55671 | 0.091 | 0.211 | 1.81E-07 | CSCL2 | KLF4          |
| HSPA1A.9  | 1.22E-11 | 0.269562 | 0.629 | 0.486 | 1.83E-07 | CSCL2 | HSPA1A        |
| SIGLEC9.1 | 1.23E-11 | -0.41212 | 0.002 | 0.096 | 1.84E-07 | CSCL2 | SIGLEC9       |
| B4GALT1.1 | 1.28E-11 | -0.45309 | 0.02  | 0.124 | 1.91E-07 | CSCL2 | B4GALT1       |
| PICALM.13 | 1.30E-11 | -0.40382 | 0.148 | 0.287 | 1.94E-07 | CSCL2 | PICALM        |
| PTCD3.9   | 1.31E-11 | 0.280465 | 0.349 | 0.225 | 1.96E-07 | CSCL2 | PTCD3         |
| SNX9.10   | 1.37E-11 | -0.39896 | 0.071 | 0.194 | 2.04E-07 | CSCL2 | SNX9          |
| TOPORS.8  | 1.39E-11 | 0.210324 | 0.298 | 0.174 | 2.08E-07 | CSCL2 | TOPORS        |
| AHNAK.6   | 1.40E-11 | -0.33751 | 0.018 | 0.122 | 2.10E-07 | CSCL2 | AHNAK         |
| ELAVL1.8  | 1.42E-11 | 0.247902 | 0.488 | 0.338 | 2.12E-07 | CSCL2 | ELAVL1        |
| SIPA1.12  | 1.42E-11 | -0.38201 | 0.033 | 0.144 | 2.12E-07 | CSCL2 | SIPA1         |
| GTDC1.2   | 1.42E-11 | 0.161053 | 0.192 | 0.095 | 2.12E-07 | CSCL2 | GTDC1         |
| EIF5.5    | 1.43E-11 | 0.219318 | 0.799 | 0.644 | 2.14E-07 | CSCL2 | EIF5          |
| CHST9.3   | 1.45E-11 | 0.170236 | 0.088 | 0.031 | 2.17E-07 | CSCL2 | CHST9         |
| FAM110A.7 | 1.48E-11 | 0.215333 | 0.155 | 0.07  | 2.22E-07 | CSCL2 | FAM110A       |
| ZNF423.1  | 1.48E-11 | 0.115567 | 0.062 | 0.017 | 2.22E-07 | CSCL2 | ZNF423        |
| TSN.8     | 1.51E-11 | 0.185133 | 0.525 | 0.371 | 2.26E-07 | CSCL2 | TSN           |
| ANKLE2.4  | 1.54E-11 | 0.174259 | 0.296 | 0.175 | 2.30E-07 | CSCL2 | ANKLE2        |
| DCAF16.8  | 1.54E-11 | 0.189614 | 0.216 | 0.115 | 2.30E-07 | CSCL2 | DCAF16        |
| LGALS1.1C | 1.55E-11 | -0.28819 | 0.62  | 0.707 | 2.31E-07 | CSCL2 | LGALS1        |
| RP11-231C | 1.55E-11 | 0.101188 | 0.046 | 0.011 | 2.32E-07 | CSCL2 | RP11-231C18.1 |
| FOXG1.11  | 1.56E-11 | 0.267414 | 0.258 | 0.149 | 2.33E-07 | CSCL2 | FOXG1         |
| PPM1B.7   | 1.56E-11 | 0.208746 | 0.446 | 0.295 | 2.33E-07 | CSCL2 | PPM1B         |

|           |          |          |       |       |          |       |           |
|-----------|----------|----------|-------|-------|----------|-------|-----------|
| SRSF9.10  | 1.59E-11 | 0.242343 | 0.726 | 0.555 | 2.38E-07 | CSCL2 | SRSF9     |
| PIK3R1.1C | 1.61E-11 | 0.20884  | 0.459 | 0.301 | 2.40E-07 | CSCL2 | PIK3R1    |
| ZNF567.5  | 1.66E-11 | 0.195345 | 0.185 | 0.092 | 2.49E-07 | CSCL2 | ZNF567    |
| THAP5.7   | 1.70E-11 | 0.183841 | 0.296 | 0.174 | 2.54E-07 | CSCL2 | THAP5     |
| TNC.12    | 1.70E-11 | -0.38246 | 0.077 | 0.206 | 2.55E-07 | CSCL2 | TNC       |
| PTTG1IP.6 | 1.71E-11 | -0.35546 | 0.342 | 0.461 | 2.56E-07 | CSCL2 | PTTG1IP   |
| TTC21B.3  | 1.72E-11 | 0.188101 | 0.11  | 0.043 | 2.56E-07 | CSCL2 | TTC21B    |
| ALDH2.9   | 1.72E-11 | -0.45158 | 0.249 | 0.376 | 2.58E-07 | CSCL2 | ALDH2     |
| MT1E.11   | 1.74E-11 | -0.53838 | 0.241 | 0.386 | 2.61E-07 | CSCL2 | MT1E      |
| RNF112.3  | 1.76E-11 | 0.12646  | 0.095 | 0.034 | 2.63E-07 | CSCL2 | RNF112    |
| TMEM160.1 | 1.76E-11 | 0.274473 | 0.616 | 0.46  | 2.64E-07 | CSCL2 | TMEM160   |
| PPIG.4    | 1.81E-11 | 0.179615 | 0.678 | 0.523 | 2.70E-07 | CSCL2 | PPIG      |
| SEPT5.2   | 1.81E-11 | 0.121462 | 0.086 | 0.03  | 2.70E-07 | CSCL2 | 5-Sep     |
| IP6K2.10  | 1.81E-11 | 0.157909 | 0.609 | 0.428 | 2.71E-07 | CSCL2 | IP6K2     |
| PREX1.11  | 1.86E-11 | -0.36553 | 0.091 | 0.223 | 2.78E-07 | CSCL2 | PREX1     |
| MRC2.8    | 1.89E-11 | -0.34446 | 0.06  | 0.178 | 2.83E-07 | CSCL2 | MRC2      |
| TMEM119.1 | 1.94E-11 | -0.49706 | 0.011 | 0.109 | 2.90E-07 | CSCL2 | TMEM119   |
| TNFAIP8L2 | 1.96E-11 | -0.41413 | 0.004 | 0.098 | 2.92E-07 | CSCL2 | TNFAIP8L2 |
| MASP1.7   | 1.97E-11 | 0.10327  | 0.102 | 0.037 | 2.94E-07 | CSCL2 | MASP1     |
| POLR2J.8  | 1.97E-11 | 0.112504 | 0.786 | 0.638 | 2.94E-07 | CSCL2 | POLR2J    |
| ITPR2.11  | 1.97E-11 | -0.29177 | 0.026 | 0.136 | 2.94E-07 | CSCL2 | ITPR2     |
| SNTG1.10  | 1.98E-11 | 0.174245 | 0.263 | 0.149 | 2.95E-07 | CSCL2 | SNTG1     |
| SYK.13    | 2.00E-11 | -0.39332 | 0.011 | 0.11  | 2.98E-07 | CSCL2 | SYK       |
| NUFIP1.7  | 2.08E-11 | 0.255937 | 0.21  | 0.111 | 3.11E-07 | CSCL2 | NUFIP1    |
| NKTR.9    | 2.08E-11 | 0.180521 | 0.508 | 0.351 | 3.11E-07 | CSCL2 | NKTR      |
| CD55.12   | 2.08E-11 | -0.47961 | 0.02  | 0.122 | 3.11E-07 | CSCL2 | CD55      |
| FAM49B.11 | 2.11E-11 | -0.37596 | 0.411 | 0.51  | 3.16E-07 | CSCL2 | FAM49B    |
| WDR83OS.6 | 2.15E-11 | -0.31381 | 0.715 | 0.745 | 3.22E-07 | CSCL2 | WDR83OS   |
| TNFRSF14. | 2.17E-11 | -0.42823 | 0.018 | 0.119 | 3.24E-07 | CSCL2 | TNFRSF14  |
| PPP2R5E.1 | 2.18E-11 | 0.212652 | 0.373 | 0.242 | 3.26E-07 | CSCL2 | PPP2R5E   |
| ARHGAP30. | 2.20E-11 | -0.39388 | 0.004 | 0.098 | 3.29E-07 | CSCL2 | ARHGAP30  |
| TRIM38.1C | 2.21E-11 | -0.37715 | 0.007 | 0.102 | 3.30E-07 | CSCL2 | TRIM38    |
| ITM2B.8   | 2.24E-11 | -0.15778 | 0.834 | 0.798 | 3.34E-07 | CSCL2 | ITM2B     |
| MCAM.4    | 2.32E-11 | 0.1328   | 0.104 | 0.04  | 3.47E-07 | CSCL2 | MCAM      |
| HMHA1.13  | 2.33E-11 | -0.42716 | 0.013 | 0.112 | 3.48E-07 | CSCL2 | HMHA1     |
| YAF2.8    | 2.35E-11 | 0.179724 | 0.497 | 0.341 | 3.51E-07 | CSCL2 | YAF2      |
| THBD.12   | 2.37E-11 | -0.4243  | 0.004 | 0.098 | 3.54E-07 | CSCL2 | THBD      |
| JAM3.9    | 2.38E-11 | 0.186655 | 0.256 | 0.145 | 3.56E-07 | CSCL2 | JAM3      |
| MDC1.2    | 2.39E-11 | 0.195637 | 0.132 | 0.058 | 3.57E-07 | CSCL2 | MDC1      |
| RASGEF1B. | 2.40E-11 | -0.47618 | 0.022 | 0.125 | 3.59E-07 | CSCL2 | RASGEF1B  |
| CCNB1IP1. | 2.42E-11 | 0.192255 | 0.28  | 0.16  | 3.61E-07 | CSCL2 | CCNB1IP1  |
| HLA-DOA.1 | 2.56E-11 | -0.41458 | 0.004 | 0.098 | 3.82E-07 | CSCL2 | HLA-DOA   |
| HSPA4L.8  | 2.58E-11 | 0.168133 | 0.152 | 0.07  | 3.86E-07 | CSCL2 | HSPA4L    |
| TCEAL7.11 | 2.64E-11 | 0.117534 | 0.457 | 0.296 | 3.94E-07 | CSCL2 | TCEAL7    |
| SCN3A.10  | 2.64E-11 | 0.15844  | 0.152 | 0.069 | 3.94E-07 | CSCL2 | SCN3A     |
| ZNF254.8  | 2.64E-11 | 0.176474 | 0.247 | 0.137 | 3.94E-07 | CSCL2 | ZNF254    |
| MPDU1.4   | 2.67E-11 | 0.182036 | 0.461 | 0.311 | 3.99E-07 | CSCL2 | MPDU1     |
| FBXL18.1  | 2.68E-11 | 0.116194 | 0.097 | 0.036 | 4.00E-07 | CSCL2 | FBXL18    |
| ZNF713.4  | 2.70E-11 | 0.107176 | 0.113 | 0.044 | 4.03E-07 | CSCL2 | ZNF713    |
| IMMT.6    | 2.70E-11 | 0.21562  | 0.435 | 0.297 | 4.03E-07 | CSCL2 | IMMT      |
| BLVRA.11  | 2.76E-11 | 0.104931 | 0.501 | 0.333 | 4.13E-07 | CSCL2 | BLVRA     |

|            |           |           |        |        |           |       |           |
|------------|-----------|-----------|--------|--------|-----------|-------|-----------|
| CTBS. 8    | 2. 78E-11 | -0. 36803 | 0. 046 | 0. 16  | 4. 15E-07 | CSCL2 | CTBS      |
| MUTYH. 2   | 2. 83E-11 | 0. 224387 | 0. 185 | 0. 093 | 4. 23E-07 | CSCL2 | MUTYH     |
| GNAI2. 11  | 2. 87E-11 | -0. 33566 | 0. 371 | 0. 487 | 4. 29E-07 | CSCL2 | GNAI2     |
| ZHX2. 3    | 2. 92E-11 | 0. 163753 | 0. 117 | 0. 048 | 4. 37E-07 | CSCL2 | ZHX2      |
| SLC50A1. 1 | 2. 96E-11 | -0. 42747 | 0. 055 | 0. 172 | 4. 43E-07 | CSCL2 | SLC50A1   |
| WBP11. 4   | 2. 98E-11 | 0. 150405 | 0. 435 | 0. 285 | 4. 45E-07 | CSCL2 | WBP11     |
| YPEL5. 5   | 3. 06E-11 | -0. 46016 | 0. 333 | 0. 457 | 4. 57E-07 | CSCL2 | YPEL5     |
| ABHD3. 9   | 3. 08E-11 | 0. 237762 | 0. 3   | 0. 178 | 4. 60E-07 | CSCL2 | ABHD3     |
| SH3BP5. 1C | 3. 11E-11 | -0. 31527 | 0. 079 | 0. 206 | 4. 65E-07 | CSCL2 | SH3BP5    |
| MKRN1. 11  | 3. 14E-11 | 0. 204598 | 0. 57  | 0. 402 | 4. 70E-07 | CSCL2 | MKRN1     |
| ZSCAN21. 8 | 3. 15E-11 | 0. 150278 | 0. 194 | 0. 098 | 4. 71E-07 | CSCL2 | ZSCAN21   |
| FKBPL. 6   | 3. 15E-11 | 0. 204921 | 0. 139 | 0. 062 | 4. 71E-07 | CSCL2 | FKBPL     |
| ARRB2. 12  | 3. 18E-11 | -0. 52359 | 0. 287 | 0. 405 | 4. 75E-07 | CSCL2 | ARRB2     |
| PADI2. 11  | 3. 25E-11 | -0. 4669  | 0. 033 | 0. 139 | 4. 86E-07 | CSCL2 | PADI2     |
| ZNF821. 11 | 3. 27E-11 | 0. 195725 | 0. 276 | 0. 159 | 4. 88E-07 | CSCL2 | ZNF821    |
| PSRC1. 10  | 3. 31E-11 | 0. 334199 | 0. 384 | 0. 259 | 4. 95E-07 | CSCL2 | PSRC1     |
| PCDH17. 11 | 3. 34E-11 | 0. 290525 | 0. 302 | 0. 187 | 4. 99E-07 | CSCL2 | PCDH17    |
| TFPT. 9    | 3. 37E-11 | -0. 41237 | 0. 179 | 0. 313 | 5. 03E-07 | CSCL2 | TFPT      |
| ZNF670. 2  | 3. 40E-11 | 0. 110707 | 0. 113 | 0. 045 | 5. 08E-07 | CSCL2 | ZNF670    |
| RNF157. 11 | 3. 43E-11 | 0. 205446 | 0. 234 | 0. 13  | 5. 13E-07 | CSCL2 | RNF157    |
| PRDX2. 11  | 3. 44E-11 | 0. 128542 | 0. 883 | 0. 694 | 5. 14E-07 | CSCL2 | PRDX2     |
| EBI3. 12   | 3. 50E-11 | -0. 43989 | 0. 007 | 0. 1   | 5. 24E-07 | CSCL2 | EBI3      |
| VIM. 11    | 3. 53E-11 | -0. 24199 | 0. 565 | 0. 667 | 5. 27E-07 | CSCL2 | VIM       |
| LMO2. 6    | 3. 62E-11 | -0. 27139 | 0. 051 | 0. 169 | 5. 41E-07 | CSCL2 | LMO2      |
| MANBA. 12  | 3. 65E-11 | -0. 38012 | 0. 022 | 0. 125 | 5. 45E-07 | CSCL2 | MANBA     |
| MAGI2. 10  | 3. 72E-11 | 0. 216367 | 0. 199 | 0. 101 | 5. 56E-07 | CSCL2 | MAGI2     |
| LPXN. 12   | 3. 73E-11 | -0. 42314 | 0. 015 | 0. 114 | 5. 58E-07 | CSCL2 | LPXN      |
| UBE2L6. 7  | 3. 74E-11 | -0. 39529 | 0. 355 | 0. 478 | 5. 59E-07 | CSCL2 | UBE2L6    |
| RTN3. 10   | 3. 74E-11 | 0. 144594 | 0. 792 | 0. 649 | 5. 60E-07 | CSCL2 | RTN3      |
| ETHE1. 6   | 3. 80E-11 | -0. 44275 | 0. 159 | 0. 294 | 5. 69E-07 | CSCL2 | ETHE1     |
| NUP85. 6   | 3. 83E-11 | 0. 201921 | 0. 221 | 0. 119 | 5. 72E-07 | CSCL2 | NUP85     |
| POLR2H. 9  | 3. 85E-11 | 0. 214249 | 0. 464 | 0. 317 | 5. 76E-07 | CSCL2 | POLR2H    |
| TLE2. 11   | 3. 91E-11 | 0. 249349 | 0. 177 | 0. 087 | 5. 84E-07 | CSCL2 | TLE2      |
| ADIPOR1. 8 | 3. 95E-11 | -0. 38891 | 0. 247 | 0. 385 | 5. 90E-07 | CSCL2 | ADIPOR1   |
| LRRC25. 13 | 3. 95E-11 | -0. 40317 | 0. 004 | 0. 096 | 5. 91E-07 | CSCL2 | LRRC25    |
| DUSP2. 12  | 4. 07E-11 | -0. 45599 | 0. 015 | 0. 114 | 6. 08E-07 | CSCL2 | DUSP2     |
| MAP2K3. 11 | 4. 07E-11 | -0. 33488 | 0. 071 | 0. 194 | 6. 08E-07 | CSCL2 | MAP2K3    |
| KHDC1. 9   | 4. 19E-11 | 0. 166931 | 0. 139 | 0. 061 | 6. 27E-07 | CSCL2 | KHDC1     |
| RNF130. 11 | 4. 22E-11 | -0. 36473 | 0. 353 | 0. 467 | 6. 30E-07 | CSCL2 | RNF130    |
| HIST1H2AC  | 4. 22E-11 | -0. 17694 | 0. 053 | 0. 171 | 6. 30E-07 | CSCL2 | HIST1H2AC |
| VDAC3. 8   | 4. 33E-11 | 0. 190907 | 0. 62  | 0. 458 | 6. 47E-07 | CSCL2 | VDAC3     |
| KLHL22. 5  | 4. 39E-11 | 0. 167326 | 0. 172 | 0. 084 | 6. 56E-07 | CSCL2 | KLHL22    |
| FAM122B. 4 | 4. 42E-11 | 0. 1963   | 0. 19  | 0. 096 | 6. 61E-07 | CSCL2 | FAM122B   |
| PLEC. 10   | 4. 43E-11 | -0. 33235 | 0. 068 | 0. 191 | 6. 62E-07 | CSCL2 | PLEC      |
| RASSF5. 12 | 4. 48E-11 | -0. 3864  | 0. 022 | 0. 123 | 6. 69E-07 | CSCL2 | RASSF5    |
| LSM14A. 8  | 4. 51E-11 | 0. 255775 | 0. 536 | 0. 375 | 6. 73E-07 | CSCL2 | LSM14A    |
| LYST. 6    | 4. 61E-11 | -0. 28707 | 0. 042 | 0. 154 | 6. 89E-07 | CSCL2 | LYST      |
| SUSD3. 12  | 4. 66E-11 | -0. 43642 | 0. 007 | 0. 099 | 6. 96E-07 | CSCL2 | SUSD3     |
| SNRPA1. 8  | 4. 70E-11 | 0. 128345 | 0. 437 | 0. 289 | 7. 03E-07 | CSCL2 | SNRPA1    |
| TRA2A. 7   | 4. 75E-11 | 0. 200628 | 0. 477 | 0. 338 | 7. 10E-07 | CSCL2 | TRA2A     |
| CDH20. 2   | 4. 76E-11 | 0. 101599 | 0. 062 | 0. 018 | 7. 11E-07 | CSCL2 | CDH20     |

|             |           |           |        |        |           |       |             |
|-------------|-----------|-----------|--------|--------|-----------|-------|-------------|
| TFAP4. 2    | 5. 05E-11 | 0. 152416 | 0. 121 | 0. 051 | 7. 54E-07 | CSCL2 | TFAP4       |
| FKBP4. 8    | 5. 13E-11 | 0. 209359 | 0. 461 | 0. 315 | 7. 66E-07 | CSCL2 | FKBP4       |
| SPHK1. 10   | 5. 23E-11 | -0. 27238 | 0. 013 | 0. 11  | 7. 82E-07 | CSCL2 | SPHK1       |
| TEAD2. 11   | 5. 30E-11 | 0. 221796 | 0. 172 | 0. 087 | 7. 92E-07 | CSCL2 | TEAD2       |
| GDAP1L1. 1  | 5. 32E-11 | 0. 159188 | 0. 196 | 0. 097 | 7. 95E-07 | CSCL2 | GDAP1L1     |
| WWTR1. 13   | 5. 33E-11 | -0. 32727 | 0. 051 | 0. 164 | 7. 96E-07 | CSCL2 | WWTR1       |
| PRPSAP1. 1  | 5. 43E-11 | 0. 250691 | 0. 439 | 0. 301 | 8. 12E-07 | CSCL2 | PRPSAP1     |
| SMAP2. 10   | 5. 52E-11 | -0. 48702 | 0. 119 | 0. 241 | 8. 24E-07 | CSCL2 | SMAP2       |
| ABCC3. 6    | 5. 64E-11 | -0. 33828 | 0. 009 | 0. 103 | 8. 43E-07 | CSCL2 | ABCC3       |
| LCP2. 13    | 5. 85E-11 | -0. 43793 | 0. 02  | 0. 119 | 8. 75E-07 | CSCL2 | LCP2        |
| ZNF253. 8   | 5. 95E-11 | 0. 167373 | 0. 166 | 0. 08  | 8. 89E-07 | CSCL2 | ZNF253      |
| SPECC1. 12  | 5. 98E-11 | 0. 222327 | 0. 428 | 0. 291 | 8. 94E-07 | CSCL2 | SPECC1      |
| MEF2A. 12   | 5. 99E-11 | -0. 44707 | 0. 097 | 0. 22  | 8. 95E-07 | CSCL2 | MEF2A       |
| POLA1       | 6. 28E-11 | 0. 125976 | 0. 088 | 0. 032 | 9. 39E-07 | CSCL2 | POLA1       |
| POLE4. 9    | 6. 46E-11 | 0. 183517 | 0. 424 | 0. 279 | 9. 65E-07 | CSCL2 | POLE4       |
| MDFI. 10    | 6. 47E-11 | 0. 215881 | 0. 17  | 0. 084 | 9. 67E-07 | CSCL2 | MDFI        |
| MTF2. 8     | 6. 50E-11 | 0. 215581 | 0. 382 | 0. 249 | 9. 72E-07 | CSCL2 | MTF2        |
| DRAP1. 2    | 6. 53E-11 | -0. 26671 | 0. 656 | 0. 675 | 9. 76E-07 | CSCL2 | DRAP1       |
| ASAP2. 9    | 6. 57E-11 | 0. 217223 | 0. 179 | 0. 092 | 9. 83E-07 | CSCL2 | ASAP2       |
| ANXA6. 5    | 6. 60E-11 | 0. 235341 | 0. 296 | 0. 18  | 9. 86E-07 | CSCL2 | ANXA6       |
| AKR1A1. 9   | 6. 62E-11 | -0. 41536 | 0. 384 | 0. 502 | 9. 89E-07 | CSCL2 | AKR1A1      |
| DDX56. 8    | 6. 71E-11 | 0. 231371 | 0. 382 | 0. 252 | 1. 00E-06 | CSCL2 | DDX56       |
| STK25. 11   | 6. 82E-11 | 0. 229283 | 0. 428 | 0. 297 | 1. 02E-06 | CSCL2 | STK25       |
| LDHA. 8     | 6. 89E-11 | -0. 29475 | 0. 773 | 0. 766 | 1. 03E-06 | CSCL2 | LDHA        |
| TMC6. 13    | 6. 90E-11 | -0. 41181 | 0. 018 | 0. 115 | 1. 03E-06 | CSCL2 | TMC6        |
| NNMT. 10    | 6. 91E-11 | -0. 3934  | 0. 049 | 0. 162 | 1. 03E-06 | CSCL2 | NNMT        |
| CISD3. 11   | 6. 95E-11 | -0. 35225 | 0. 126 | 0. 259 | 1. 04E-06 | CSCL2 | CISD3       |
| TTI1. 7     | 6. 98E-11 | 0. 171422 | 0. 183 | 0. 093 | 1. 04E-06 | CSCL2 | TTI1        |
| ZNF286A. 7  | 7. 13E-11 | 0. 124767 | 0. 13  | 0. 056 | 1. 07E-06 | CSCL2 | ZNF286A     |
| IRS2. 8     | 7. 13E-11 | -0. 37907 | 0. 221 | 0. 353 | 1. 07E-06 | CSCL2 | IRS2        |
| SF1. 7      | 7. 30E-11 | 0. 165802 | 0. 656 | 0. 501 | 1. 09E-06 | CSCL2 | SF1         |
| ACIN1. 9    | 7. 44E-11 | 0. 20524  | 0. 395 | 0. 26  | 1. 11E-06 | CSCL2 | ACIN1       |
| RRAS. 5     | 7. 52E-11 | -0. 23947 | 0. 013 | 0. 11  | 1. 12E-06 | CSCL2 | RRAS        |
| PNRC1. 10   | 7. 57E-11 | -0. 31301 | 0. 442 | 0. 544 | 1. 13E-06 | CSCL2 | PNRC1       |
| CXCL2. 10   | 7. 66E-11 | -0. 49579 | 0. 002 | 0. 09  | 1. 14E-06 | CSCL2 | CXCL2       |
| FN3KRP. 5   | 7. 81E-11 | 0. 194472 | 0. 344 | 0. 216 | 1. 17E-06 | CSCL2 | FN3KRP      |
| ENO1. 7     | 7. 85E-11 | -0. 18055 | 0. 808 | 0. 794 | 1. 17E-06 | CSCL2 | ENO1        |
| KCNMA1. 9   | 7. 91E-11 | -0. 32814 | 0. 038 | 0. 147 | 1. 18E-06 | CSCL2 | KCNMA1      |
| DDX55. 6    | 8. 02E-11 | 0. 217047 | 0. 212 | 0. 114 | 1. 20E-06 | CSCL2 | DDX55       |
| AC004158. 8 | 8. 03E-11 | 0. 184128 | 0. 219 | 0. 119 | 1. 20E-06 | CSCL2 | AC004158. 3 |
| GPR75-ASE   | 8. 08E-11 | 0. 242619 | 0. 168 | 0. 083 | 1. 21E-06 | CSCL2 | GPR75-ASB3  |
| EVL. 7      | 8. 11E-11 | -0. 49315 | 0. 23  | 0. 357 | 1. 21E-06 | CSCL2 | EVL         |
| CEP192. 1   | 8. 16E-11 | 0. 103481 | 0. 099 | 0. 038 | 1. 22E-06 | CSCL2 | CEP192      |
| AGPAT2. 11  | 8. 16E-11 | -0. 29402 | 0. 064 | 0. 184 | 1. 22E-06 | CSCL2 | AGPAT2      |
| SIVA1. 6    | 8. 26E-11 | 0. 196358 | 0. 634 | 0. 479 | 1. 23E-06 | CSCL2 | SIVA1       |
| MARCH2. 1C  | 8. 28E-11 | -0. 32977 | 0. 108 | 0. 238 | 1. 24E-06 | CSCL2 | 2-Mar       |
| LG MN. 11   | 8. 48E-11 | -0. 42733 | 0. 221 | 0. 356 | 1. 27E-06 | CSCL2 | LG MN       |
| UFD1L. 7    | 8. 48E-11 | 0. 227449 | 0. 461 | 0. 325 | 1. 27E-06 | CSCL2 | UFD1L       |
| VAMP3. 9    | 8. 53E-11 | -0. 40402 | 0. 219 | 0. 353 | 1. 27E-06 | CSCL2 | VAMP3       |
| ARID4A. 7   | 8. 55E-11 | 0. 169765 | 0. 413 | 0. 269 | 1. 28E-06 | CSCL2 | ARID4A      |
| DCUN1D4. 6  | 8. 58E-11 | 0. 171356 | 0. 188 | 0. 096 | 1. 28E-06 | CSCL2 | DCUN1D4     |

|           |          |          |       |       |          |       |            |
|-----------|----------|----------|-------|-------|----------|-------|------------|
| ARHGEF7.1 | 8.80E-11 | 0.163861 | 0.272 | 0.153 | 1.32E-06 | CSCL2 | ARHGEF7    |
| ACO05076. | 8.81E-11 | 0.199743 | 0.091 | 0.033 | 1.32E-06 | CSCL2 | ACO05076.5 |
| PLIN3.9   | 8.84E-11 | -0.29616 | 0.216 | 0.364 | 1.32E-06 | CSCL2 | PLIN3      |
| COTL1.11  | 8.84E-11 | -0.32496 | 0.402 | 0.514 | 1.32E-06 | CSCL2 | COTL1      |
| NFKBID.11 | 8.86E-11 | -0.46922 | 0.04  | 0.144 | 1.32E-06 | CSCL2 | NFKBID     |
| RORB.7    | 9.31E-11 | 0.226651 | 0.095 | 0.035 | 1.39E-06 | CSCL2 | RORB       |
| PRDM1.12  | 9.33E-11 | -0.40132 | 0.011 | 0.103 | 1.39E-06 | CSCL2 | PRDM1      |
| MAD1L1.6  | 9.34E-11 | 0.132774 | 0.269 | 0.152 | 1.40E-06 | CSCL2 | MAD1L1     |
| PPP1R15A. | 9.40E-11 | -0.41768 | 0.369 | 0.471 | 1.40E-06 | CSCL2 | PPP1R15A   |
| FAHD2A.6  | 9.44E-11 | 0.201892 | 0.28  | 0.168 | 1.41E-06 | CSCL2 | FAHD2A     |
| ORAI3.9   | 9.55E-11 | -0.31424 | 0.038 | 0.145 | 1.43E-06 | CSCL2 | ORAI3      |
| CCR1.12   | 9.59E-11 | -0.36374 | 0     | 0.085 | 1.43E-06 | CSCL2 | CCR1       |
| ALYREF.11 | 9.68E-11 | 0.266131 | 0.241 | 0.142 | 1.45E-06 | CSCL2 | ALYREF     |
| SUN1.9    | 9.87E-11 | 0.238499 | 0.325 | 0.203 | 1.47E-06 | CSCL2 | SUN1       |
| ISG20.7   | 9.89E-11 | -0.41156 | 0.024 | 0.126 | 1.48E-06 | CSCL2 | ISG20      |
| RPS6KA1.1 | 1.01E-10 | -0.43742 | 0.033 | 0.135 | 1.51E-06 | CSCL2 | RPS6KA1    |
| GPATCH8.9 | 1.01E-10 | 0.175038 | 0.439 | 0.298 | 1.51E-06 | CSCL2 | GPATCH8    |
| CLEC5A.12 | 1.02E-10 | -0.46902 | 0.011 | 0.103 | 1.52E-06 | CSCL2 | CLEC5A     |
| A1BG.5    | 1.03E-10 | -0.37322 | 0.17  | 0.304 | 1.54E-06 | CSCL2 | A1BG       |
| ANXA7.9   | 1.03E-10 | -0.32449 | 0.208 | 0.344 | 1.54E-06 | CSCL2 | ANXA7      |
| SPOCK2.1C | 1.04E-10 | -0.25733 | 0.035 | 0.143 | 1.56E-06 | CSCL2 | SPOCK2     |
| REPIN1.12 | 1.05E-10 | 0.224426 | 0.402 | 0.269 | 1.57E-06 | CSCL2 | REPIN1     |
| WDR90.1   | 1.06E-10 | 0.112824 | 0.084 | 0.03  | 1.58E-06 | CSCL2 | WDR90      |
| MPHOSPH1C | 1.08E-10 | 0.166898 | 0.364 | 0.233 | 1.61E-06 | CSCL2 | MPHOSPH10  |
| DAB2.12   | 1.09E-10 | -0.53452 | 0.049 | 0.154 | 1.62E-06 | CSCL2 | DAB2       |
| SOX5.10   | 1.13E-10 | 0.211112 | 0.17  | 0.085 | 1.69E-06 | CSCL2 | SOX5       |
| PARP9.7   | 1.16E-10 | -0.26868 | 0.057 | 0.174 | 1.74E-06 | CSCL2 | PARP9      |
| PRPF3.3   | 1.16E-10 | 0.139898 | 0.21  | 0.111 | 1.74E-06 | CSCL2 | PRPF3      |
| GTF2IRD2E | 1.19E-10 | 0.154913 | 0.241 | 0.133 | 1.77E-06 | CSCL2 | GTF2IRD2B  |
| BUD31.9   | 1.20E-10 | 0.110996 | 0.779 | 0.622 | 1.79E-06 | CSCL2 | BUD31      |
| C1orf35.1 | 1.20E-10 | 0.227947 | 0.389 | 0.258 | 1.80E-06 | CSCL2 | C1orf35    |
| HSPA1B.8  | 1.22E-10 | 0.266627 | 0.536 | 0.405 | 1.83E-06 | CSCL2 | HSPA1B     |
| LUC7L.8   | 1.25E-10 | 0.187306 | 0.371 | 0.24  | 1.86E-06 | CSCL2 | LUC7L      |
| PARP14.9  | 1.25E-10 | -0.29303 | 0.049 | 0.161 | 1.87E-06 | CSCL2 | PARP14     |
| GRINA.8   | 1.26E-10 | -0.3832  | 0.329 | 0.441 | 1.88E-06 | CSCL2 | GRINA      |
| METTL21B. | 1.27E-10 | 0.158846 | 0.137 | 0.062 | 1.89E-06 | CSCL2 | METTL21B   |
| ATF3.11   | 1.28E-10 | -0.41608 | 0.183 | 0.307 | 1.91E-06 | CSCL2 | ATF3       |
| NDRG1.8   | 1.29E-10 | -0.51059 | 0.062 | 0.176 | 1.92E-06 | CSCL2 | NDRG1      |
| P2RY13.11 | 1.29E-10 | -0.46337 | 0.002 | 0.088 | 1.93E-06 | CSCL2 | P2RY13     |
| MKNK1.12  | 1.30E-10 | -0.47151 | 0.062 | 0.175 | 1.94E-06 | CSCL2 | MKNK1      |
| ATP6AP2.8 | 1.30E-10 | -0.32188 | 0.607 | 0.658 | 1.94E-06 | CSCL2 | ATP6AP2    |
| PHACTR4.7 | 1.30E-10 | 0.222293 | 0.316 | 0.197 | 1.95E-06 | CSCL2 | PHACTR4    |
| CTSA.12   | 1.34E-10 | -0.33763 | 0.278 | 0.404 | 2.00E-06 | CSCL2 | CTSA       |
| MIR497HG. | 1.37E-10 | 0.135813 | 0.141 | 0.064 | 2.04E-06 | CSCL2 | MIR497HG   |
| HOXC10.9  | 1.39E-10 | 0.125855 | 0.121 | 0.051 | 2.07E-06 | CSCL2 | HOXC10     |
| FBXO32.1C | 1.39E-10 | -0.42585 | 0.049 | 0.158 | 2.08E-06 | CSCL2 | FBXO32     |
| LINC01116 | 1.39E-10 | 0.164495 | 0.232 | 0.129 | 2.08E-06 | CSCL2 | LINC01116  |
| NINJ1.13  | 1.44E-10 | -0.50939 | 0.364 | 0.455 | 2.14E-06 | CSCL2 | NINJ1      |
| CCDC88A.1 | 1.45E-10 | 0.17469  | 0.556 | 0.411 | 2.17E-06 | CSCL2 | CCDC88A    |
| UBE2R2.8  | 1.45E-10 | 0.210251 | 0.415 | 0.281 | 2.17E-06 | CSCL2 | UBE2R2     |
| CX3CR1.12 | 1.48E-10 | -0.47951 | 0.013 | 0.105 | 2.22E-06 | CSCL2 | CX3CR1     |

|           |          |          |       |       |          |       |               |
|-----------|----------|----------|-------|-------|----------|-------|---------------|
| RSF1.9    | 1.54E-10 | 0.168162 | 0.572 | 0.411 | 2.30E-06 | CSCL2 | RSF1          |
| HADH.5    | 1.54E-10 | 0.147074 | 0.325 | 0.203 | 2.30E-06 | CSCL2 | HADH          |
| LILRB1.13 | 1.57E-10 | -0.37779 | 0.007 | 0.095 | 2.34E-06 | CSCL2 | LILRB1        |
| DTNA.11   | 1.59E-10 | -0.41835 | 0.13  | 0.258 | 2.38E-06 | CSCL2 | DTNA          |
| FAM195A.8 | 1.60E-10 | -0.22842 | 0.124 | 0.259 | 2.39E-06 | CSCL2 | FAM195A       |
| DEF6.13   | 1.61E-10 | -0.3577  | 0.007 | 0.095 | 2.40E-06 | CSCL2 | DEF6          |
| LSM2.8    | 1.61E-10 | 0.170212 | 0.609 | 0.441 | 2.41E-06 | CSCL2 | LSM2          |
| C1orf123. | 1.61E-10 | 0.201973 | 0.483 | 0.335 | 2.41E-06 | CSCL2 | C1orf123      |
| VPS4A.7   | 1.62E-10 | 0.190897 | 0.439 | 0.302 | 2.42E-06 | CSCL2 | VPS4A         |
| LILRA2.13 | 1.65E-10 | -0.40607 | 0.002 | 0.087 | 2.47E-06 | CSCL2 | LILRA2        |
| TRAP1.10  | 1.67E-10 | 0.223165 | 0.382 | 0.253 | 2.49E-06 | CSCL2 | TRAP1         |
| CCER2.11  | 1.71E-10 | 0.156838 | 0.124 | 0.052 | 2.56E-06 | CSCL2 | CCER2         |
| RP11-182L | 1.81E-10 | 0.138204 | 0.143 | 0.066 | 2.71E-06 | CSCL2 | RP11-182L21.6 |
| GNAI1.10  | 1.82E-10 | 0.158021 | 0.199 | 0.101 | 2.72E-06 | CSCL2 | GNAI1         |
| UCK1.4    | 1.82E-10 | 0.193011 | 0.296 | 0.18  | 2.72E-06 | CSCL2 | UCK1          |
| FKBP3.6   | 1.85E-10 | 0.171018 | 0.64  | 0.47  | 2.76E-06 | CSCL2 | FKBP3         |
| MYCN.2    | 1.86E-10 | 0.102674 | 0.064 | 0.02  | 2.78E-06 | CSCL2 | MYCN          |
| GDAP1.11  | 1.86E-10 | 0.243421 | 0.258 | 0.147 | 2.78E-06 | CSCL2 | GDAP1         |
| RNF7.5    | 1.87E-10 | -0.37526 | 0.448 | 0.535 | 2.79E-06 | CSCL2 | RNF7          |
| XRN2.7    | 1.89E-10 | 0.21449  | 0.605 | 0.452 | 2.83E-06 | CSCL2 | XRN2          |
| C1orf109. | 1.92E-10 | 0.201977 | 0.227 | 0.128 | 2.87E-06 | CSCL2 | C1orf109      |
| MERTK.11  | 1.93E-10 | -0.41132 | 0.029 | 0.128 | 2.88E-06 | CSCL2 | MERTK         |
| NLGN3.11  | 1.94E-10 | 0.203675 | 0.203 | 0.11  | 2.89E-06 | CSCL2 | NLGN3         |
| ALKBH4.9  | 1.94E-10 | 0.199883 | 0.309 | 0.194 | 2.90E-06 | CSCL2 | ALKBH4        |
| ZNF512.8  | 1.94E-10 | 0.214885 | 0.219 | 0.12  | 2.90E-06 | CSCL2 | ZNF512        |
| INTS1.3   | 1.99E-10 | 0.131733 | 0.17  | 0.084 | 2.97E-06 | CSCL2 | INTS1         |
| PRDX1.10  | 1.99E-10 | -0.25838 | 0.795 | 0.809 | 2.98E-06 | CSCL2 | PRDX1         |
| DYNC1LI2. | 2.00E-10 | 0.220438 | 0.488 | 0.339 | 2.99E-06 | CSCL2 | DYNC1LI2      |
| NUCB2.8   | 2.04E-10 | 0.221683 | 0.486 | 0.341 | 3.05E-06 | CSCL2 | NUCB2         |
| TSEN15.8  | 2.09E-10 | 0.226702 | 0.351 | 0.228 | 3.12E-06 | CSCL2 | TSEN15        |
| SHKBP1.10 | 2.09E-10 | -0.30597 | 0.115 | 0.242 | 3.12E-06 | CSCL2 | SHKBP1        |
| ROM1.10   | 2.12E-10 | -0.29514 | 0.02  | 0.117 | 3.16E-06 | CSCL2 | ROM1          |
| GTF3C5.9  | 2.14E-10 | 0.223273 | 0.296 | 0.182 | 3.20E-06 | CSCL2 | GTF3C5        |
| CCL4L2.11 | 2.16E-10 | -0.64524 | 0.004 | 0.09  | 3.24E-06 | CSCL2 | CCL4L2        |
| NRBF2.8   | 2.20E-10 | -0.37921 | 0.15  | 0.276 | 3.29E-06 | CSCL2 | NRBF2         |
| SPIRE2.1  | 2.22E-10 | 0.117993 | 0.093 | 0.035 | 3.32E-06 | CSCL2 | SPIRE2        |
| PLK3.9    | 2.25E-10 | -0.45738 | 0.126 | 0.245 | 3.36E-06 | CSCL2 | PLK3          |
| DAXX.6    | 2.32E-10 | 0.221109 | 0.316 | 0.199 | 3.47E-06 | CSCL2 | DAXX          |
| HOXA5.8   | 2.33E-10 | 0.113108 | 0.132 | 0.057 | 3.48E-06 | CSCL2 | HOXA5         |
| RSU1.7    | 2.34E-10 | -0.4384  | 0.148 | 0.274 | 3.50E-06 | CSCL2 | RSU1          |
| PCGF6     | 2.34E-10 | 0.159573 | 0.155 | 0.074 | 3.50E-06 | CSCL2 | PCGF6         |
| ST3GAL5.7 | 2.38E-10 | 0.226171 | 0.305 | 0.186 | 3.56E-06 | CSCL2 | ST3GAL5       |
| ZDHHC24.7 | 2.42E-10 | -0.22012 | 0.071 | 0.192 | 3.62E-06 | CSCL2 | ZDHHC24       |
| FAM129A.8 | 2.48E-10 | -0.31268 | 0.04  | 0.144 | 3.70E-06 | CSCL2 | FAM129A       |
| PSMB9.11  | 2.54E-10 | -0.2404  | 0.247 | 0.411 | 3.80E-06 | CSCL2 | PSMB9         |
| LSM10.2   | 2.55E-10 | -0.34534 | 0.289 | 0.418 | 3.81E-06 | CSCL2 | LSM10         |
| GART.6    | 2.55E-10 | 0.16766  | 0.313 | 0.195 | 3.82E-06 | CSCL2 | GART          |
| C7orf26.9 | 2.58E-10 | 0.185612 | 0.265 | 0.153 | 3.86E-06 | CSCL2 | C7orf26       |
| CPSF1.1   | 2.61E-10 | 0.17987  | 0.168 | 0.083 | 3.90E-06 | CSCL2 | CPSF1         |
| IL6R.13   | 2.61E-10 | -0.34688 | 0.004 | 0.089 | 3.91E-06 | CSCL2 | IL6R          |
| ANKRD36.6 | 2.72E-10 | 0.202266 | 0.298 | 0.181 | 4.06E-06 | CSCL2 | ANKRD36       |

|           |          |          |       |       |          |       |               |
|-----------|----------|----------|-------|-------|----------|-------|---------------|
| SAT2.7    | 2.72E-10 | -0.38456 | 0.528 | 0.588 | 4.07E-06 | CSCL2 | SAT2          |
| MAP1B.10  | 2.73E-10 | 0.137931 | 0.751 | 0.525 | 4.08E-06 | CSCL2 | MAP1B         |
| FAM171B.9 | 2.74E-10 | 0.188707 | 0.201 | 0.107 | 4.09E-06 | CSCL2 | FAM171B       |
| SFI1      | 2.75E-10 | 0.160432 | 0.121 | 0.053 | 4.11E-06 | CSCL2 | SFI1          |
| PEPD.4    | 2.76E-10 | -0.40943 | 0.318 | 0.433 | 4.12E-06 | CSCL2 | PEPD          |
| DNAJC2.9  | 2.80E-10 | 0.209627 | 0.422 | 0.293 | 4.18E-06 | CSCL2 | DNAJC2        |
| OST4.7    | 2.84E-10 | -0.25009 | 0.762 | 0.781 | 4.25E-06 | CSCL2 | OST4          |
| COX14.8   | 2.98E-10 | -0.39404 | 0.347 | 0.464 | 4.46E-06 | CSCL2 | COX14         |
| ABCF1.9   | 3.00E-10 | 0.234989 | 0.404 | 0.279 | 4.48E-06 | CSCL2 | ABCF1         |
| SQLE.10   | 3.01E-10 | 0.288533 | 0.362 | 0.244 | 4.50E-06 | CSCL2 | SQLE          |
| CCRL2.12  | 3.02E-10 | -0.40496 | 0.007 | 0.092 | 4.51E-06 | CSCL2 | CCRL2         |
| FNBP1L.12 | 3.11E-10 | 0.219664 | 0.298 | 0.18  | 4.65E-06 | CSCL2 | FNBP1L        |
| LRRC57.2  | 3.13E-10 | 0.109056 | 0.135 | 0.061 | 4.68E-06 | CSCL2 | LRRC57        |
| MRFAP1.1C | 3.14E-10 | 0.13578  | 0.815 | 0.665 | 4.69E-06 | CSCL2 | MRFAP1        |
| CCAR1.5   | 3.26E-10 | 0.175255 | 0.373 | 0.245 | 4.87E-06 | CSCL2 | CCAR1         |
| SCML1.7   | 3.29E-10 | 0.162755 | 0.181 | 0.09  | 4.92E-06 | CSCL2 | SCML1         |
| C6orf15.8 | 3.29E-10 | 0.42635  | 0.075 | 0.026 | 4.92E-06 | CSCL2 | C6orf15       |
| APOE.11   | 3.30E-10 | -0.28251 | 0.698 | 0.685 | 4.93E-06 | CSCL2 | APOE          |
| SRSF12.1C | 3.35E-10 | 0.16733  | 0.146 | 0.07  | 5.01E-06 | CSCL2 | SRSF12        |
| TROVE2.1C | 3.40E-10 | 0.199353 | 0.585 | 0.427 | 5.08E-06 | CSCL2 | TROVE2        |
| LYL1.13   | 3.45E-10 | -0.34406 | 0.002 | 0.084 | 5.15E-06 | CSCL2 | LYL1          |
| TOMM40.1C | 3.45E-10 | 0.236183 | 0.461 | 0.322 | 5.15E-06 | CSCL2 | TOMM40        |
| MGST1.10  | 3.49E-10 | -0.83127 | 0.046 | 0.149 | 5.21E-06 | CSCL2 | MGST1         |
| ZNF219.3  | 3.50E-10 | 0.138008 | 0.137 | 0.063 | 5.24E-06 | CSCL2 | ZNF219        |
| PSMG3.10  | 3.52E-10 | 0.164767 | 0.457 | 0.322 | 5.26E-06 | CSCL2 | PSMG3         |
| ARHGEF39. | 3.56E-10 | 0.116824 | 0.06  | 0.018 | 5.32E-06 | CSCL2 | ARHGEF39      |
| WASF2.10  | 3.56E-10 | -0.30142 | 0.313 | 0.443 | 5.32E-06 | CSCL2 | WASF2         |
| CYFIP1.11 | 3.59E-10 | -0.40926 | 0.163 | 0.288 | 5.37E-06 | CSCL2 | CYFIP1        |
| HUNK      | 3.76E-10 | 0.12499  | 0.073 | 0.025 | 5.61E-06 | CSCL2 | HUNK          |
| AKAP13.11 | 3.76E-10 | -0.42188 | 0.21  | 0.33  | 5.62E-06 | CSCL2 | AKAP13        |
| PSMA4.5   | 3.86E-10 | 0.193759 | 0.702 | 0.531 | 5.76E-06 | CSCL2 | PSMA4         |
| RP11-1114 | 3.92E-10 | 0.157254 | 0.163 | 0.081 | 5.86E-06 | CSCL2 | RP11-1114A5.4 |
| NR4A3.12  | 3.93E-10 | -0.52781 | 0.053 | 0.155 | 5.88E-06 | CSCL2 | NR4A3         |
| PRPF40A.8 | 3.95E-10 | 0.180458 | 0.609 | 0.444 | 5.91E-06 | CSCL2 | PRPF40A       |
| EPB41L3.1 | 3.97E-10 | -0.39727 | 0.018 | 0.109 | 5.94E-06 | CSCL2 | EPB41L3       |
| SH3BP1.12 | 4.05E-10 | -0.32878 | 0.022 | 0.115 | 6.05E-06 | CSCL2 | SH3BP1        |
| STARD7.8  | 4.05E-10 | 0.193945 | 0.446 | 0.311 | 6.05E-06 | CSCL2 | STARD7        |
| KDM6B.10  | 4.06E-10 | -0.40719 | 0.108 | 0.227 | 6.07E-06 | CSCL2 | KDM6B         |
| NFATC2IP. | 4.06E-10 | 0.203756 | 0.265 | 0.158 | 6.07E-06 | CSCL2 | NFATC2IP      |
| TGS1.5    | 4.14E-10 | 0.180379 | 0.263 | 0.156 | 6.18E-06 | CSCL2 | TGS1          |
| CAT.10    | 4.17E-10 | -0.45958 | 0.188 | 0.309 | 6.22E-06 | CSCL2 | CAT           |
| LAMTOR4.5 | 4.20E-10 | -0.26995 | 0.757 | 0.764 | 6.27E-06 | CSCL2 | LAMTOR4       |
| AGAP3.7   | 4.23E-10 | 0.157038 | 0.185 | 0.096 | 6.32E-06 | CSCL2 | AGAP3         |
| CTPS2.2   | 4.27E-10 | 0.123147 | 0.108 | 0.045 | 6.39E-06 | CSCL2 | CTPS2         |
| EIF1.10   | 4.27E-10 | -0.20944 | 0.969 | 0.974 | 6.39E-06 | CSCL2 | EIF1          |
| KYNU.13   | 4.31E-10 | -0.37325 | 0.004 | 0.087 | 6.44E-06 | CSCL2 | KYNU          |
| RP11-698N | 4.32E-10 | 0.171188 | 0.124 | 0.055 | 6.45E-06 | CSCL2 | RP11-698N11.2 |
| CNOT7.9   | 4.37E-10 | 0.197011 | 0.506 | 0.363 | 6.54E-06 | CSCL2 | CNOT7         |
| GEMIN2.6  | 4.43E-10 | 0.152693 | 0.199 | 0.107 | 6.62E-06 | CSCL2 | GEMIN2        |
| ZNF677.8  | 4.45E-10 | 0.158445 | 0.311 | 0.193 | 6.64E-06 | CSCL2 | ZNF677        |
| F2R.13    | 4.49E-10 | 0.233327 | 0.272 | 0.165 | 6.72E-06 | CSCL2 | F2R           |



|             |           |           |        |        |           |       |               |
|-------------|-----------|-----------|--------|--------|-----------|-------|---------------|
| ORC5. 7     | 4. 56E-10 | 0. 140463 | 0. 188 | 0. 096 | 6. 81E-06 | CSCL2 | ORC5          |
| ARMC6. 7    | 4. 57E-10 | 0. 280759 | 0. 258 | 0. 157 | 6. 84E-06 | CSCL2 | ARMC6         |
| ZNF638. 8   | 4. 63E-10 | 0. 14127  | 0. 377 | 0. 246 | 6. 91E-06 | CSCL2 | ZNF638        |
| FOXRED1. 4  | 4. 70E-10 | 0. 229483 | 0. 192 | 0. 103 | 7. 02E-06 | CSCL2 | FOXRED1       |
| VCPKMT. 2   | 4. 71E-10 | 0. 166836 | 0. 143 | 0. 067 | 7. 04E-06 | CSCL2 | VCPKMT        |
| RRP7A. 8    | 4. 84E-10 | 0. 121184 | 0. 419 | 0. 282 | 7. 23E-06 | CSCL2 | RRP7A         |
| LPCAT1. 6   | 4. 88E-10 | 0. 199834 | 0. 291 | 0. 177 | 7. 30E-06 | CSCL2 | LPCAT1        |
| HSPH1. 8    | 5. 07E-10 | 0. 210843 | 0. 494 | 0. 355 | 7. 58E-06 | CSCL2 | HSPH1         |
| APOBEC3G. 5 | 5. 22E-10 | -0. 3659  | 0. 026 | 0. 122 | 7. 80E-06 | CSCL2 | APOBEC3G      |
| SYS1. 5     | 5. 24E-10 | -0. 3143  | 0. 119 | 0. 245 | 7. 82E-06 | CSCL2 | SYS1          |
| LNP1. 4     | 5. 24E-10 | 0. 11092  | 0. 079 | 0. 028 | 7. 83E-06 | CSCL2 | LNP1          |
| LCORL. 3    | 5. 24E-10 | 0. 192336 | 0. 181 | 0. 094 | 7. 84E-06 | CSCL2 | LCORL         |
| SH2B2. 9    | 5. 30E-10 | 0. 176516 | 0. 196 | 0. 105 | 7. 92E-06 | CSCL2 | SH2B2         |
| METTL2B. 5  | 5. 33E-10 | 0. 198922 | 0. 307 | 0. 194 | 7. 96E-06 | CSCL2 | METTL2B       |
| PPIB. 7     | 5. 39E-10 | -0. 29117 | 0. 691 | 0. 725 | 8. 06E-06 | CSCL2 | PPIB          |
| TMEM134. 8  | 5. 45E-10 | -0. 37022 | 0. 188 | 0. 314 | 8. 15E-06 | CSCL2 | TMEM134       |
| ZNF775. 1C  | 5. 51E-10 | 0. 157083 | 0. 177 | 0. 091 | 8. 24E-06 | CSCL2 | ZNF775        |
| EIF4EBP1. 5 | 5. 52E-10 | 0. 19591  | 0. 572 | 0. 421 | 8. 24E-06 | CSCL2 | EIF4EBP1      |
| FZD3. 10    | 5. 54E-10 | 0. 259892 | 0. 406 | 0. 271 | 8. 28E-06 | CSCL2 | FZD3          |
| NOP10. 11   | 5. 58E-10 | -0. 31201 | 0. 572 | 0. 608 | 8. 34E-06 | CSCL2 | NOP10         |
| ATP1A1. 6   | 5. 63E-10 | -0. 30156 | 0. 366 | 0. 477 | 8. 42E-06 | CSCL2 | ATP1A1        |
| STEAP3. 9   | 5. 66E-10 | -0. 3999  | 0. 06  | 0. 166 | 8. 46E-06 | CSCL2 | STEAP3        |
| ITGAX. 12   | 5. 69E-10 | -0. 38315 | 0. 009 | 0. 094 | 8. 50E-06 | CSCL2 | ITGAX         |
| C10orf11. 5 | 5. 70E-10 | -0. 33913 | 0. 015 | 0. 104 | 8. 52E-06 | CSCL2 | C10orf11      |
| ODF3B. 12   | 5. 82E-10 | -0. 3221  | 0. 011 | 0. 097 | 8. 70E-06 | CSCL2 | ODF3B         |
| CDK16. 7    | 5. 84E-10 | 0. 23021  | 0. 349 | 0. 23  | 8. 73E-06 | CSCL2 | CDK16         |
| IL10RB. 13  | 5. 90E-10 | -0. 44418 | 0. 128 | 0. 248 | 8. 82E-06 | CSCL2 | IL10RB        |
| PRMT6. 5    | 6. 06E-10 | 0. 18293  | 0. 172 | 0. 089 | 9. 06E-06 | CSCL2 | PRMT6         |
| TSHZ1. 7    | 6. 08E-10 | 0. 18375  | 0. 148 | 0. 071 | 9. 09E-06 | CSCL2 | TSHZ1         |
| ATP5EP2. 9  | 6. 13E-10 | -0. 54345 | 0. 34  | 0. 451 | 9. 17E-06 | CSCL2 | ATP5EP2       |
| ATP6AP1. 9  | 6. 23E-10 | -0. 30913 | 0. 4   | 0. 496 | 9. 31E-06 | CSCL2 | ATP6AP1       |
| CA12. 12    | 6. 37E-10 | -0. 17782 | 0. 038 | 0. 14  | 9. 51E-06 | CSCL2 | CA12          |
| DDX39B. 2   | 6. 40E-10 | 0. 181551 | 0. 196 | 0. 106 | 9. 56E-06 | CSCL2 | DDX39B        |
| MTRNR2L8. 6 | 6. 44E-10 | -0. 68173 | 0. 084 | 0. 195 | 9. 63E-06 | CSCL2 | MTRNR2L8      |
| RNF126. 9   | 6. 46E-10 | 0. 251728 | 0. 415 | 0. 286 | 9. 65E-06 | CSCL2 | RNF126        |
| IL10. 13    | 6. 46E-10 | -0. 50861 | 0. 02  | 0. 11  | 9. 66E-06 | CSCL2 | IL10          |
| IRF2BPL. 1  | 6. 50E-10 | 0. 201211 | 0. 355 | 0. 237 | 9. 72E-06 | CSCL2 | IRF2BPL       |
| FUNDC2. 5   | 6. 51E-10 | 0. 139576 | 0. 558 | 0. 396 | 9. 73E-06 | CSCL2 | FUNDC2        |
| CYTL1. 12   | 6. 59E-10 | -0. 48008 | 0. 022 | 0. 114 | 9. 85E-06 | CSCL2 | CYTL1         |
| CNTRL. 9    | 6. 60E-10 | 0. 148105 | 0. 212 | 0. 115 | 9. 86E-06 | CSCL2 | CNTRL         |
| RP11-111M   | 6. 61E-10 | 0. 208407 | 0. 177 | 0. 092 | 9. 88E-06 | CSCL2 | RP11-111M2. 3 |
| TKT. 7      | 6. 85E-10 | -0. 32756 | 0. 413 | 0. 512 | 1. 02E-05 | CSCL2 | TKT           |
| PKM. 8      | 6. 90E-10 | -0. 24651 | 0. 781 | 0. 77  | 1. 03E-05 | CSCL2 | PKM           |
| DGCR8. 4    | 6. 98E-10 | 0. 167548 | 0. 159 | 0. 079 | 1. 04E-05 | CSCL2 | DGCR8         |
| NNT. 5      | 7. 09E-10 | 0. 199666 | 0. 232 | 0. 133 | 1. 06E-05 | CSCL2 | NNT           |
| ARHGAP9. 1  | 7. 55E-10 | -0. 33599 | 0. 007 | 0. 089 | 1. 13E-05 | CSCL2 | ARHGAP9       |
| MGP. 11     | 7. 57E-10 | -0. 8194  | 0. 018 | 0. 107 | 1. 13E-05 | CSCL2 | MGP           |
| EGR2. 9     | 7. 61E-10 | -0. 42011 | 0. 084 | 0. 196 | 1. 14E-05 | CSCL2 | EGR2          |
| NES. 13     | 7. 75E-10 | 0. 19493  | 0. 435 | 0. 269 | 1. 16E-05 | CSCL2 | NES           |
| ZYX. 12     | 7. 75E-10 | -0. 37055 | 0. 298 | 0. 406 | 1. 16E-05 | CSCL2 | ZYX           |
| TRAF3IP2-   | 7. 83E-10 | 0. 173219 | 0. 155 | 0. 077 | 1. 17E-05 | CSCL2 | TRAF3IP2-AS1  |

|              |          |          |       |       |          |       |            |
|--------------|----------|----------|-------|-------|----------|-------|------------|
| CDC23.6      | 7.98E-10 | 0.229813 | 0.214 | 0.121 | 1.19E-05 | CSCL2 | CDC23      |
| TRMU.5       | 8.00E-10 | 0.199981 | 0.225 | 0.128 | 1.19E-05 | CSCL2 | TRMU       |
| NABP1.11     | 8.16E-10 | -0.44079 | 0.033 | 0.128 | 1.22E-05 | CSCL2 | NABP1      |
| DYNLL2.12    | 8.25E-10 | 0.210329 | 0.316 | 0.201 | 1.23E-05 | CSCL2 | DYNLL2     |
| MED19.8      | 8.27E-10 | 0.24222  | 0.402 | 0.276 | 1.24E-05 | CSCL2 | MED19      |
| SPAG16.11    | 8.31E-10 | 0.196319 | 0.426 | 0.291 | 1.24E-05 | CSCL2 | SPAG16     |
| HCFC1.5      | 8.56E-10 | 0.195807 | 0.236 | 0.138 | 1.28E-05 | CSCL2 | HCFC1      |
| SCMH1.6      | 8.82E-10 | 0.200288 | 0.152 | 0.076 | 1.32E-05 | CSCL2 | SCMH1      |
| ACD.6        | 8.83E-10 | 0.152279 | 0.272 | 0.164 | 1.32E-05 | CSCL2 | ACD        |
| PSMB7.6      | 9.04E-10 | 0.158016 | 0.786 | 0.634 | 1.35E-05 | CSCL2 | PSMB7      |
| ICAM3.9      | 9.14E-10 | -0.25768 | 0.015 | 0.104 | 1.37E-05 | CSCL2 | ICAM3      |
| AFAP1L2.1    | 9.16E-10 | 0.101286 | 0.055 | 0.016 | 1.37E-05 | CSCL2 | AFAP1L2    |
| CHERP.7      | 9.35E-10 | 0.184412 | 0.272 | 0.164 | 1.40E-05 | CSCL2 | CHERP      |
| VAV1.13      | 9.39E-10 | -0.31416 | 0     | 0.077 | 1.40E-05 | CSCL2 | VAV1       |
| FH.7         | 9.47E-10 | 0.186818 | 0.342 | 0.221 | 1.41E-05 | CSCL2 | FH         |
| RMND5B.6     | 9.63E-10 | 0.196298 | 0.265 | 0.16  | 1.44E-05 | CSCL2 | RMND5B     |
| ANKRD36C.9   | 9.65E-10 | 0.266731 | 0.265 | 0.158 | 1.44E-05 | CSCL2 | ANKRD36C   |
| HPGDS.12     | 9.75E-10 | -0.40268 | 0.009 | 0.092 | 1.46E-05 | CSCL2 | HPGDS      |
| CACNA2D4.9   | 9.85E-10 | -0.34834 | 0     | 0.077 | 1.47E-05 | CSCL2 | CACNA2D4   |
| SLC1A3.11    | 9.89E-10 | -0.33599 | 0.38  | 0.481 | 1.48E-05 | CSCL2 | SLC1A3     |
| RBM23.5      | 1.00E-09 | 0.123959 | 0.395 | 0.259 | 1.50E-05 | CSCL2 | RBM23      |
| CCS.5        | 1.01E-09 | -0.40597 | 0.141 | 0.265 | 1.51E-05 | CSCL2 | CCS        |
| SRSF4.9      | 1.02E-09 | 0.215912 | 0.486 | 0.355 | 1.53E-05 | CSCL2 | SRSF4      |
| COX4I1.7     | 1.04E-09 | -0.21296 | 0.903 | 0.911 | 1.55E-05 | CSCL2 | COX4I1     |
| DOCK2.13     | 1.04E-09 | -0.34116 | 0.002 | 0.08  | 1.55E-05 | CSCL2 | DOCK2      |
| MIR181A1HG.1 | 1.06E-09 | 0.153158 | 0.203 | 0.109 | 1.58E-05 | CSCL2 | MIR181A1HG |
| DENND2A.8    | 1.07E-09 | 0.185857 | 0.174 | 0.091 | 1.61E-05 | CSCL2 | DENND2A    |
| HNMT.12      | 1.08E-09 | -0.49167 | 0.11  | 0.223 | 1.61E-05 | CSCL2 | HNMT       |
| ANAPC5.7     | 1.08E-09 | 0.127567 | 0.543 | 0.39  | 1.62E-05 | CSCL2 | ANAPC5     |
| GHITM.9      | 1.13E-09 | -0.38176 | 0.428 | 0.527 | 1.68E-05 | CSCL2 | GHITM      |
| CEP63.6      | 1.14E-09 | 0.218341 | 0.28  | 0.174 | 1.71E-05 | CSCL2 | CEP63      |
| RHOH.12      | 1.15E-09 | -0.38471 | 0.002 | 0.08  | 1.72E-05 | CSCL2 | RHOH       |
| ZNF566.8     | 1.15E-09 | 0.135847 | 0.205 | 0.111 | 1.72E-05 | CSCL2 | ZNF566     |
| ISOC1.6      | 1.17E-09 | 0.190842 | 0.267 | 0.16  | 1.75E-05 | CSCL2 | ISOC1      |
| PABPN1.8     | 1.18E-09 | 0.154218 | 0.499 | 0.349 | 1.76E-05 | CSCL2 | PABPN1     |
| RAB18.3      | 1.18E-09 | -0.32431 | 0.274 | 0.403 | 1.76E-05 | CSCL2 | RAB18      |
| GNS.10       | 1.20E-09 | -0.2994  | 0.088 | 0.204 | 1.79E-05 | CSCL2 | GNS        |
| RPS6KL1.9    | 1.21E-09 | 0.162649 | 0.185 | 0.097 | 1.81E-05 | CSCL2 | RPS6KL1    |
| UQCR11.8     | 1.21E-09 | -0.90144 | 0.026 | 0.118 | 1.82E-05 | CSCL2 | UQCR11     |
| RAB23.3      | 1.22E-09 | 0.165736 | 0.108 | 0.047 | 1.82E-05 | CSCL2 | RAB23      |
| GNG2.8       | 1.23E-09 | 0.126239 | 0.294 | 0.175 | 1.84E-05 | CSCL2 | GNG2       |
| ENHO.12      | 1.24E-09 | 0.16647  | 0.249 | 0.146 | 1.85E-05 | CSCL2 | ENHO       |
| NINJ2.12     | 1.24E-09 | -0.42683 | 0.009 | 0.09  | 1.85E-05 | CSCL2 | NINJ2      |
| RELB.7       | 1.24E-09 | -0.21838 | 0.013 | 0.099 | 1.86E-05 | CSCL2 | RELB       |
| NRXN2.12     | 1.25E-09 | 0.146578 | 0.21  | 0.113 | 1.87E-05 | CSCL2 | NRXN2      |
| PRKCD.11     | 1.29E-09 | -0.30112 | 0.004 | 0.083 | 1.92E-05 | CSCL2 | PRKCD      |
| PON2.11      | 1.29E-09 | 0.158563 | 0.596 | 0.445 | 1.93E-05 | CSCL2 | PON2       |
| TMEM39B.3    | 1.30E-09 | 0.146935 | 0.221 | 0.124 | 1.94E-05 | CSCL2 | TMEM39B    |
| DDIT4.12     | 1.31E-09 | -0.39006 | 0.302 | 0.413 | 1.96E-05 | CSCL2 | DDIT4      |
| CYB5R1.6     | 1.32E-09 | -0.40092 | 0.141 | 0.263 | 1.97E-05 | CSCL2 | CYB5R1     |
| SCLY         | 1.34E-09 | 0.110588 | 0.091 | 0.036 | 2.00E-05 | CSCL2 | SCLY       |

|            |           |           |        |        |           |       |                  |
|------------|-----------|-----------|--------|--------|-----------|-------|------------------|
| RAB34. 9   | 1. 34E-09 | -0. 36355 | 0. 17  | 0. 288 | 2. 00E-05 | CSCL2 | RAB34            |
| AP3B2. 2   | 1. 35E-09 | 0. 100028 | 0. 071 | 0. 024 | 2. 01E-05 | CSCL2 | AP3B2            |
| CCM2. 5    | 1. 35E-09 | 0. 191057 | 0. 406 | 0. 279 | 2. 01E-05 | CSCL2 | CCM2             |
| CNOT4. 8   | 1. 39E-09 | 0. 133318 | 0. 402 | 0. 267 | 2. 08E-05 | CSCL2 | CNOT4            |
| EFR3A. 10  | 1. 40E-09 | -0. 27945 | 0. 046 | 0. 146 | 2. 10E-05 | CSCL2 | EFR3A            |
| NEUROD1. 7 | 1. 41E-09 | 0. 198945 | 0. 091 | 0. 036 | 2. 11E-05 | CSCL2 | NEUROD1          |
| NUBP2. 8   | 1. 45E-09 | 0. 147067 | 0. 523 | 0. 376 | 2. 17E-05 | CSCL2 | NUBP2            |
| FGR. 13    | 1. 51E-09 | -0. 34676 | 0. 007 | 0. 086 | 2. 25E-05 | CSCL2 | FGR              |
| MILR1. 12  | 1. 51E-09 | -0. 38549 | 0. 015 | 0. 102 | 2. 25E-05 | CSCL2 | MILR1            |
| BMP2K. 9   | 1. 54E-09 | -0. 34108 | 0. 029 | 0. 12  | 2. 30E-05 | CSCL2 | BMP2K            |
| MIR503HG   | 1. 58E-09 | 0. 126818 | 0. 068 | 0. 023 | 2. 36E-05 | CSCL2 | MIR503HG         |
| UBTD2. 9   | 1. 59E-09 | 0. 186901 | 0. 188 | 0. 102 | 2. 38E-05 | CSCL2 | UBTD2            |
| EPB41L2. 1 | 1. 59E-09 | -0. 46857 | 0. 201 | 0. 315 | 2. 38E-05 | CSCL2 | EPB41L2          |
| HNRNPC. 5  | 1. 62E-09 | 0. 136689 | 0. 823 | 0. 688 | 2. 42E-05 | CSCL2 | HNRNPC           |
| FBL. 8     | 1. 63E-09 | 0. 173184 | 0. 521 | 0. 372 | 2. 44E-05 | CSCL2 | FBL              |
| ATP6V1G1.  | 1. 67E-09 | -0. 26913 | 0. 751 | 0. 754 | 2. 50E-05 | CSCL2 | ATP6V1G1         |
| ARPP19. 8  | 1. 68E-09 | 0. 191926 | 0. 565 | 0. 42  | 2. 51E-05 | CSCL2 | ARPP19           |
| OGFRL1. 11 | 1. 71E-09 | -0. 41228 | 0. 079 | 0. 186 | 2. 55E-05 | CSCL2 | OGFRL1           |
| MED27. 6   | 1. 72E-09 | 0. 256637 | 0. 245 | 0. 147 | 2. 57E-05 | CSCL2 | MED27            |
| MAML2. 12  | 1. 73E-09 | 0. 159943 | 0. 307 | 0. 193 | 2. 58E-05 | CSCL2 | MAML2            |
| SAMHD1. 11 | 1. 73E-09 | -0. 41812 | 0. 108 | 0. 219 | 2. 59E-05 | CSCL2 | SAMHD1           |
| MYH9. 12   | 1. 75E-09 | -0. 38336 | 0. 084 | 0. 192 | 2. 61E-05 | CSCL2 | MYH9             |
| CUL1. 5    | 1. 76E-09 | 0. 184246 | 0. 355 | 0. 23  | 2. 63E-05 | CSCL2 | CUL1             |
| SP4. 2     | 1. 81E-09 | 0. 11324  | 0. 117 | 0. 051 | 2. 70E-05 | CSCL2 | SP4              |
| H2AFJ. 13  | 1. 81E-09 | -0. 35043 | 0. 139 | 0. 264 | 2. 70E-05 | CSCL2 | H2AFJ            |
| STARD9. 1  | 1. 82E-09 | 0. 108499 | 0. 091 | 0. 036 | 2. 72E-05 | CSCL2 | STARD9           |
| TM2D2. 3   | 1. 83E-09 | -0. 43381 | 0. 221 | 0. 345 | 2. 74E-05 | CSCL2 | TM2D2            |
| METTL21A.  | 1. 84E-09 | 0. 17622  | 0. 287 | 0. 179 | 2. 75E-05 | CSCL2 | METTL21A         |
| CASC3. 8   | 1. 87E-09 | 0. 201041 | 0. 289 | 0. 181 | 2. 79E-05 | CSCL2 | CASC3            |
| NEU1. 7    | 1. 87E-09 | -0. 37411 | 0. 172 | 0. 297 | 2. 79E-05 | CSCL2 | NEU1             |
| ITGAM. 13  | 1. 87E-09 | -0. 29982 | 0. 002 | 0. 079 | 2. 80E-05 | CSCL2 | ITGAM            |
| ANGPTL4. 8 | 2. 01E-09 | -0. 42195 | 0. 018 | 0. 105 | 3. 00E-05 | CSCL2 | ANGPTL4          |
| HSD17B11.  | 2. 02E-09 | -0. 46868 | 0. 267 | 0. 381 | 3. 02E-05 | CSCL2 | HSD17B11         |
| DRAM2. 11  | 2. 03E-09 | -0. 49138 | 0. 23  | 0. 34  | 3. 03E-05 | CSCL2 | DRAM2            |
| PPP1R18. 1 | 2. 04E-09 | -0. 42208 | 0. 181 | 0. 297 | 3. 05E-05 | CSCL2 | PPP1R18          |
| EED. 3     | 2. 05E-09 | 0. 139272 | 0. 179 | 0. 094 | 3. 06E-05 | CSCL2 | EED              |
| PSMD6. 7   | 2. 05E-09 | 0. 154531 | 0. 49  | 0. 345 | 3. 07E-05 | CSCL2 | PSMD6            |
| ABHD17B. 1 | 2. 06E-09 | 0. 150042 | 0. 219 | 0. 121 | 3. 07E-05 | CSCL2 | ABHD17B          |
| PDE7B      | 2. 06E-09 | 0. 141375 | 0. 049 | 0. 014 | 3. 08E-05 | CSCL2 | PDE7B            |
| CLN8. 9    | 2. 08E-09 | -0. 49141 | 0. 161 | 0. 273 | 3. 11E-05 | CSCL2 | CLN8             |
| SRSF6. 7   | 2. 18E-09 | 0. 208191 | 0. 479 | 0. 354 | 3. 25E-05 | CSCL2 | SRSF6            |
| MMP14. 10  | 2. 18E-09 | -0. 33794 | 0. 11  | 0. 226 | 3. 26E-05 | CSCL2 | MMP14            |
| EI24. 10   | 2. 19E-09 | 0. 209764 | 0. 589 | 0. 427 | 3. 27E-05 | CSCL2 | EI24             |
| TEX264. 5  | 2. 20E-09 | -0. 40929 | 0. 278 | 0. 4   | 3. 29E-05 | CSCL2 | TEX264           |
| PHC1. 6    | 2. 23E-09 | 0. 183331 | 0. 15  | 0. 075 | 3. 33E-05 | CSCL2 | PHC1             |
| SUV39H2. 3 | 2. 29E-09 | 0. 209665 | 0. 126 | 0. 059 | 3. 43E-05 | CSCL2 | SUV39H2          |
| SUCLG2. 9  | 2. 30E-09 | -0. 33865 | 0. 13  | 0. 25  | 3. 43E-05 | CSCL2 | SUCLG2           |
| CXXC5. 13  | 2. 33E-09 | 0. 224208 | 0. 534 | 0. 374 | 3. 49E-05 | CSCL2 | CXXC5            |
| SLC39A4. 9 | 2. 35E-09 | -0. 3047  | 0. 011 | 0. 093 | 3. 52E-05 | CSCL2 | SLC39A4          |
| RP11-1094  | 2. 38E-09 | 0. 198228 | 0. 347 | 0. 23  | 3. 55E-05 | CSCL2 | RP11-1094M14. 11 |
| SHC1. 7    | 2. 46E-09 | -0. 25813 | 0. 038 | 0. 133 | 3. 68E-05 | CSCL2 | SHC1             |

|            |          |          |       |       |          |       |          |
|------------|----------|----------|-------|-------|----------|-------|----------|
| HSPA13.11  | 2.49E-09 | 0.162777 | 0.309 | 0.195 | 3.72E-05 | CSCL2 | HSPA13   |
| HOXC8.7    | 2.50E-09 | 0.117146 | 0.084 | 0.032 | 3.73E-05 | CSCL2 | HOXC8    |
| UBN2.7     | 2.50E-09 | 0.143119 | 0.194 | 0.106 | 3.74E-05 | CSCL2 | UBN2     |
| EIF5B.8    | 2.54E-09 | 0.100968 | 0.664 | 0.516 | 3.79E-05 | CSCL2 | EIF5B    |
| DYNC1I1.1  | 2.62E-09 | 0.140413 | 0.194 | 0.101 | 3.92E-05 | CSCL2 | DYNC1I1  |
| PALD1.12   | 2.63E-09 | -0.38412 | 0.02  | 0.105 | 3.92E-05 | CSCL2 | PALD1    |
| BDH2.6     | 2.66E-09 | -0.33782 | 0.046 | 0.145 | 3.98E-05 | CSCL2 | BDH2     |
| CERK.6     | 2.69E-09 | 0.146905 | 0.192 | 0.104 | 4.01E-05 | CSCL2 | CERK     |
| CEP89.8    | 2.78E-09 | 0.263218 | 0.219 | 0.127 | 4.16E-05 | CSCL2 | CEP89    |
| SMARCD3.1  | 2.81E-09 | 0.242329 | 0.338 | 0.227 | 4.19E-05 | CSCL2 | SMARCD3  |
| SH3BGRL.9  | 2.82E-09 | -0.3352  | 0.605 | 0.65  | 4.22E-05 | CSCL2 | SH3BGRL  |
| GPR84.13   | 2.88E-09 | -0.33774 | 0.002 | 0.076 | 4.30E-05 | CSCL2 | GPR84    |
| RBM28.8    | 2.89E-09 | 0.15926  | 0.26  | 0.159 | 4.32E-05 | CSCL2 | RBM28    |
| SMPD4.4    | 2.92E-09 | 0.181052 | 0.185 | 0.101 | 4.36E-05 | CSCL2 | SMPD4    |
| PDE6D.9    | 2.92E-09 | 0.217123 | 0.294 | 0.185 | 4.36E-05 | CSCL2 | PDE6D    |
| PDE7A.5    | 2.92E-09 | 0.123595 | 0.159 | 0.079 | 4.36E-05 | CSCL2 | PDE7A    |
| AP5M1.3    | 2.92E-09 | 0.186703 | 0.252 | 0.152 | 4.37E-05 | CSCL2 | AP5M1    |
| IGFBP4.6   | 2.95E-09 | 0.204782 | 0.132 | 0.063 | 4.41E-05 | CSCL2 | IGFBP4   |
| PLXND1.9   | 3.03E-09 | -0.32706 | 0.018 | 0.101 | 4.52E-05 | CSCL2 | PLXND1   |
| NLGN4X.11  | 3.03E-09 | 0.241967 | 0.185 | 0.102 | 4.53E-05 | CSCL2 | NLGN4X   |
| IRAK3.13   | 3.04E-09 | -0.31655 | 0.002 | 0.076 | 4.54E-05 | CSCL2 | IRAK3    |
| MOB4.8     | 3.08E-09 | 0.104958 | 0.521 | 0.366 | 4.60E-05 | CSCL2 | MOB4     |
| GPRIN1.1   | 3.08E-09 | 0.159537 | 0.093 | 0.038 | 4.60E-05 | CSCL2 | GPRIN1   |
| RABL6.8    | 3.08E-09 | 0.200145 | 0.355 | 0.242 | 4.60E-05 | CSCL2 | RABL6    |
| KIAA0586.3 | 3.10E-09 | 0.189999 | 0.137 | 0.067 | 4.64E-05 | CSCL2 | KIAA0586 |
| SSR3.11    | 3.13E-09 | -0.38681 | 0.442 | 0.53  | 4.67E-05 | CSCL2 | SSR3     |
| NSL1.7     | 3.26E-09 | 0.116832 | 0.481 | 0.341 | 4.87E-05 | CSCL2 | NSL1     |
| ERI2.2     | 3.30E-09 | 0.136684 | 0.113 | 0.05  | 4.93E-05 | CSCL2 | ERI2     |
| BZW2.8     | 3.36E-09 | 0.145485 | 0.404 | 0.265 | 5.02E-05 | CSCL2 | BZW2     |
| SPRTN.6    | 3.37E-09 | 0.218    | 0.214 | 0.122 | 5.03E-05 | CSCL2 | SPRTN    |
| BAIAP2.7   | 3.38E-09 | -0.25139 | 0.088 | 0.202 | 5.05E-05 | CSCL2 | BAIAP2   |
| CREB1.7    | 3.38E-09 | 0.197679 | 0.353 | 0.237 | 5.05E-05 | CSCL2 | CREB1    |
| JOSD2.10   | 3.40E-09 | -0.29468 | 0.212 | 0.34  | 5.08E-05 | CSCL2 | JOSD2    |
| TMEM178A.3 | 3.41E-09 | 0.228554 | 0.203 | 0.115 | 5.10E-05 | CSCL2 | TMEM178A |
| LYRM7.8    | 3.41E-09 | 0.180995 | 0.311 | 0.197 | 5.10E-05 | CSCL2 | LYRM7    |
| AASDH.6    | 3.43E-09 | 0.252712 | 0.258 | 0.16  | 5.12E-05 | CSCL2 | AASDH    |
| NMRK1.9    | 3.47E-09 | -0.39384 | 0.046 | 0.143 | 5.19E-05 | CSCL2 | NMRK1    |
| PDCD5.10   | 3.55E-09 | 0.14257  | 0.7   | 0.533 | 5.31E-05 | CSCL2 | PDCD5    |
| ST14.13    | 3.58E-09 | -0.30249 | 0.002 | 0.076 | 5.35E-05 | CSCL2 | ST14     |
| CREBL2.1C  | 3.62E-09 | -0.36866 | 0.086 | 0.193 | 5.41E-05 | CSCL2 | CREBL2   |
| TMEM60.7   | 3.77E-09 | 0.113217 | 0.369 | 0.242 | 5.63E-05 | CSCL2 | TMEM60   |
| MAD2L1BP.3 | 3.77E-09 | 0.218578 | 0.256 | 0.156 | 5.63E-05 | CSCL2 | MAD2L1BP |
| LRRFIP1.1  | 3.87E-09 | -0.42877 | 0.249 | 0.358 | 5.78E-05 | CSCL2 | LRRFIP1  |
| ARHGEF2.1  | 3.88E-09 | 0.141256 | 0.422 | 0.283 | 5.79E-05 | CSCL2 | ARHGEF2  |
| PAK4.7     | 3.90E-09 | 0.228333 | 0.199 | 0.112 | 5.82E-05 | CSCL2 | PAK4     |
| PSMD2.8    | 3.93E-09 | 0.166397 | 0.6   | 0.456 | 5.87E-05 | CSCL2 | PSMD2    |
| CHCHD7.11  | 3.97E-09 | -0.39649 | 0.174 | 0.29  | 5.93E-05 | CSCL2 | CHCHD7   |
| ZNF736.2   | 4.00E-09 | 0.133602 | 0.104 | 0.045 | 5.98E-05 | CSCL2 | ZNF736   |
| GBP1.8     | 4.18E-09 | -0.30362 | 0.055 | 0.158 | 6.25E-05 | CSCL2 | GBP1     |
| TCEA2.12   | 4.26E-09 | 0.188574 | 0.53  | 0.362 | 6.37E-05 | CSCL2 | TCEA2    |
| AADAT.7    | 4.29E-09 | 0.157539 | 0.11  | 0.049 | 6.41E-05 | CSCL2 | AADAT    |

|           |              |           |        |        |           |       |             |
|-----------|--------------|-----------|--------|--------|-----------|-------|-------------|
| RBAK-RBAK | 4. 37E-09    | 0. 14131  | 0. 183 | 0. 098 | 6. 53E-05 | CSCL2 | RBAK-RBAKDN |
| APITD1.   | 7 4. 43E-09  | 0. 188825 | 0. 152 | 0. 079 | 6. 62E-05 | CSCL2 | APITD1      |
| SAFB.     | 8 4. 43E-09  | 0. 20616  | 0. 408 | 0. 284 | 6. 62E-05 | CSCL2 | SAFB        |
| SERINC3.  | 6 4. 45E-09  | -0. 31616 | 0. 256 | 0. 369 | 6. 65E-05 | CSCL2 | SERINC3     |
| UNC5B.    | 10 4. 49E-09 | -0. 29225 | 0. 009 | 0. 087 | 6. 71E-05 | CSCL2 | UNC5B       |
| S100A16.  | 1 4. 69E-09  | -0. 30927 | 0. 181 | 0. 312 | 7. 01E-05 | CSCL2 | S100A16     |
| DHRXS.    | 6 4. 71E-09  | 0. 216045 | 0. 342 | 0. 228 | 7. 03E-05 | CSCL2 | DHRXS       |
| NDUFB6.   | 6 4. 75E-09  | 0. 165395 | 0. 649 | 0. 491 | 7. 10E-05 | CSCL2 | NDUFB6      |
| KIAA1328  | 4. 78E-09    | 0. 106105 | 0. 13  | 0. 061 | 7. 14E-05 | CSCL2 | KIAA1328    |
| PPP2R3B.  | 4 4. 80E-09  | 0. 173578 | 0. 132 | 0. 065 | 7. 17E-05 | CSCL2 | PPP2R3B     |
| PSEN2.    | 6 4. 83E-09  | -0. 22602 | 0. 026 | 0. 115 | 7. 22E-05 | CSCL2 | PSEN2       |
| ATP5G2.   | 6 4. 83E-09  | -0. 21906 | 0. 861 | 0. 87  | 7. 22E-05 | CSCL2 | ATP5G2      |
| RNF5.     | 6 4. 95E-09  | 0. 15103  | 0. 532 | 0. 385 | 7. 40E-05 | CSCL2 | RNF5        |
| CDKN1A.   | 1C 5. 05E-09 | -0. 34388 | 0. 199 | 0. 312 | 7. 55E-05 | CSCL2 | CDKN1A      |
| EPM2AIP1. | 5. 05E-09    | 0. 17041  | 0. 307 | 0. 194 | 7. 55E-05 | CSCL2 | EPM2AIP1    |
| HES4.     | 10 5. 09E-09 | 0. 292853 | 0. 287 | 0. 183 | 7. 61E-05 | CSCL2 | HES4        |
| DERA.     | 7 5. 10E-09  | 0. 156384 | 0. 362 | 0. 247 | 7. 62E-05 | CSCL2 | DERA        |
| SCIMP.    | 13 5. 26E-09 | -0. 34055 | 0. 009 | 0. 086 | 7. 86E-05 | CSCL2 | SCIMP       |
| YPEL1.    | 11 5. 40E-09 | 0. 155704 | 0. 17  | 0. 09  | 8. 07E-05 | CSCL2 | YPEL1       |
| GAP43.    | 12 5. 42E-09 | -0. 59166 | 0. 428 | 0. 468 | 8. 10E-05 | CSCL2 | GAP43       |
| FGF1.     | 10 5. 45E-09 | -0. 26984 | 0. 015 | 0. 097 | 8. 14E-05 | CSCL2 | FGF1        |
| TTC9B.    | 12 5. 47E-09 | 0. 226705 | 0. 21  | 0. 117 | 8. 18E-05 | CSCL2 | TTC9B       |
| PTK2B.    | 9 5. 48E-09  | -0. 3165  | 0. 038 | 0. 131 | 8. 18E-05 | CSCL2 | PTK2B       |
| GNPDA2.   | 7 5. 49E-09  | 0. 121056 | 0. 212 | 0. 121 | 8. 20E-05 | CSCL2 | GNPDA2      |
| MED21.    | 6 5. 65E-09  | 0. 20859  | 0. 316 | 0. 206 | 8. 45E-05 | CSCL2 | MED21       |
| BTK.      | 13 5. 75E-09 | -0. 32533 | 0. 011 | 0. 089 | 8. 60E-05 | CSCL2 | BTK         |
| ZBTB2.    | 5 5. 75E-09  | 0. 131205 | 0. 141 | 0. 069 | 8. 60E-05 | CSCL2 | ZBTB2       |
| TMEM116.  | 4 5. 80E-09  | 0. 128052 | 0. 128 | 0. 06  | 8. 67E-05 | CSCL2 | TMEM116     |
| THY1.     | 11 5. 84E-09 | 0. 142805 | 0. 373 | 0. 251 | 8. 73E-05 | CSCL2 | THY1        |
| MKRN3.    | 7 5. 86E-09  | 0. 115524 | 0. 099 | 0. 042 | 8. 76E-05 | CSCL2 | MKRN3       |
| BLNK.     | 11 5. 97E-09 | -0. 34882 | 0      | 0. 07  | 8. 92E-05 | CSCL2 | BLNK        |
| SNRNP27.  | 7 5. 99E-09  | 0. 149942 | 0. 477 | 0. 347 | 8. 96E-05 | CSCL2 | SNRNP27     |
| UBL5.     | 7 6. 01E-09  | -0. 21201 | 0. 826 | 0. 831 | 8. 99E-05 | CSCL2 | UBL5        |
| CD48.     | 13 6. 05E-09 | -0. 3742  | 0. 007 | 0. 081 | 9. 04E-05 | CSCL2 | CD48        |
| NUDT22.   | 8 6. 23E-09  | -0. 3456  | 0. 157 | 0. 274 | 9. 31E-05 | CSCL2 | NUDT22      |
| CNIH2.    | 12 6. 29E-09 | 0. 252895 | 0. 212 | 0. 127 | 9. 40E-05 | CSCL2 | CNIH2       |
| NSUN6.    | 4 6. 33E-09  | 0. 128942 | 0. 146 | 0. 072 | 9. 46E-05 | CSCL2 | NSUN6       |
| PPP2R3C.  | 3 6. 45E-09  | 0. 194865 | 0. 424 | 0. 301 | 9. 64E-05 | CSCL2 | PPP2R3C     |
| PLEKH02.  | 1 6. 47E-09  | -0. 30456 | 0. 022 | 0. 105 | 9. 66E-05 | CSCL2 | PLEKH02     |
| MYL6.     | 9 6. 56E-09  | -0. 19457 | 0. 943 | 0. 942 | 9. 81E-05 | CSCL2 | MYL6        |
| TMED3.    | 9 6. 60E-09  | -0. 33934 | 0. 194 | 0. 313 | 9. 87E-05 | CSCL2 | TMED3       |
| SERTAD2.  | 5 6. 61E-09  | 0. 151728 | 0. 208 | 0. 117 | 9. 88E-05 | CSCL2 | SERTAD2     |
| PPIL1.    | 8 6. 70E-09  | 0. 20047  | 0. 296 | 0. 19  | 0. 0001   | CSCL2 | PPIL1       |
| DCLK2.    | 12 6. 78E-09 | 0. 203454 | 0. 298 | 0. 192 | 0. 000101 | CSCL2 | DCLK2       |
| HOPX.     | 12 6. 82E-09 | -0. 39946 | 0. 163 | 0. 287 | 0. 000102 | CSCL2 | HOPX        |
| TNFAIP2.  | 1 6. 83E-09  | -0. 28086 | 0. 004 | 0. 078 | 0. 000102 | CSCL2 | TNFAIP2     |
| PPP2R5D.  | 3 6. 90E-09  | 0. 135634 | 0. 143 | 0. 071 | 0. 000103 | CSCL2 | PPP2R5D     |
| GYG1.     | 8 6. 97E-09  | -0. 32913 | 0. 141 | 0. 259 | 0. 000104 | CSCL2 | GYG1        |
| LRRN3.    | 10 7. 19E-09 | 0. 188869 | 0. 199 | 0. 11  | 0. 000107 | CSCL2 | LRRN3       |
| CD93.     | 13 7. 24E-09 | -0. 30172 | 0. 002 | 0. 073 | 0. 000108 | CSCL2 | CD93        |
| STARD3NL. | 7. 56E-09    | 0. 200997 | 0. 53  | 0. 392 | 0. 000113 | CSCL2 | STARD3NL    |

|           |          |          |       |       |          |       |          |
|-----------|----------|----------|-------|-------|----------|-------|----------|
| SRM.11    | 7.58E-09 | 0.220207 | 0.501 | 0.359 | 0.000113 | CSCL2 | SRM      |
| ATAT1.12  | 7.60E-09 | 0.153217 | 0.417 | 0.283 | 0.000114 | CSCL2 | ATAT1    |
| ARHGEF26. | 7.64E-09 | 0.239179 | 0.208 | 0.122 | 0.000114 | CSCL2 | ARHGEF26 |
| FGD4.12   | 7.74E-09 | -0.39658 | 0.055 | 0.15  | 0.000116 | CSCL2 | FGD4     |
| ADAM9.10  | 7.77E-09 | -0.32023 | 0.221 | 0.334 | 0.000116 | CSCL2 | ADAM9    |
| RB1.12    | 7.78E-09 | -0.45244 | 0.201 | 0.309 | 0.000116 | CSCL2 | RB1      |
| PITHD1.8  | 8.03E-09 | 0.296852 | 0.464 | 0.341 | 0.00012  | CSCL2 | PITHD1   |
| DHRS4L2.6 | 8.17E-09 | -0.26743 | 0.143 | 0.267 | 0.000122 | CSCL2 | DHRS4L2  |
| GPAA1.6   | 8.18E-09 | 0.185655 | 0.528 | 0.388 | 0.000122 | CSCL2 | GPAA1    |
| CREBZF.8  | 8.29E-09 | 0.173836 | 0.219 | 0.128 | 0.000124 | CSCL2 | CREBZF   |
| XRCC6.3   | 8.33E-09 | 0.150681 | 0.682 | 0.552 | 0.000124 | CSCL2 | XRCC6    |
| MUM1.11   | 8.39E-09 | 0.181073 | 0.494 | 0.359 | 0.000125 | CSCL2 | MUM1     |
| STX7.10   | 8.47E-09 | -0.39044 | 0.157 | 0.272 | 0.000127 | CSCL2 | STX7     |
| INIP.6    | 8.60E-09 | 0.159724 | 0.3   | 0.193 | 0.000129 | CSCL2 | INIP     |
| ABRACL.9  | 8.63E-09 | -0.35814 | 0.194 | 0.309 | 0.000129 | CSCL2 | ABRACL   |
| MPG.6     | 8.64E-09 | -0.30929 | 0.227 | 0.35  | 0.000129 | CSCL2 | MPG      |
| POLDIP3.6 | 8.75E-09 | 0.161122 | 0.285 | 0.182 | 0.000131 | CSCL2 | POLDIP3  |
| PCBP2.6   | 8.83E-09 | 0.155712 | 0.801 | 0.657 | 0.000132 | CSCL2 | PCBP2    |
| ADORA1.9  | 8.92E-09 | -0.25245 | 0.035 | 0.125 | 0.000133 | CSCL2 | ADORA1   |
| FNBP1.8   | 8.93E-09 | -0.36025 | 0.152 | 0.267 | 0.000133 | CSCL2 | FNBP1    |
| C1QL1.11  | 8.96E-09 | 0.263647 | 0.194 | 0.111 | 0.000134 | CSCL2 | C1QL1    |
| PRKAR1B.8 | 9.07E-09 | 0.148085 | 0.216 | 0.124 | 0.000136 | CSCL2 | PRKAR1B  |
| MX1.8     | 9.10E-09 | -0.38968 | 0.035 | 0.123 | 0.000136 | CSCL2 | MX1      |
| PCP4.9    | 9.15E-09 | 0.166039 | 0.091 | 0.037 | 0.000137 | CSCL2 | PCP4     |
| GIMAP1.12 | 9.21E-09 | -0.31585 | 0.004 | 0.076 | 0.000138 | CSCL2 | GIMAP1   |
| AP1B1.11  | 9.26E-09 | -0.46719 | 0.159 | 0.263 | 0.000138 | CSCL2 | AP1B1    |
| TMEM109.1 | 9.45E-09 | -0.44352 | 0.106 | 0.209 | 0.000141 | CSCL2 | TMEM109  |
| DPYSL5.11 | 9.64E-09 | 0.179019 | 0.258 | 0.159 | 0.000144 | CSCL2 | DPYSL5   |
| EIF5AL1.5 | 9.76E-09 | 0.142339 | 0.208 | 0.117 | 0.000146 | CSCL2 | EIF5AL1  |
| DUSP1.10  | 9.81E-09 | -0.3165  | 0.556 | 0.575 | 0.000147 | CSCL2 | DUSP1    |
| RMND5A.6  | 1.01E-08 | 0.119535 | 0.212 | 0.119 | 0.000151 | CSCL2 | RMND5A   |
| SEC61B.4  | 1.02E-08 | -0.21443 | 0.726 | 0.737 | 0.000153 | CSCL2 | SEC61B   |
| TMEM59.6  | 1.03E-08 | -0.21444 | 0.779 | 0.786 | 0.000153 | CSCL2 | TMEM59   |
| POMGNT2.1 | 1.04E-08 | 0.193613 | 0.227 | 0.137 | 0.000156 | CSCL2 | POMGNT2  |
| ITGA5.9   | 1.06E-08 | -0.27394 | 0.011 | 0.087 | 0.000158 | CSCL2 | ITGA5    |
| BTN3A2.5  | 1.07E-08 | -0.35642 | 0.055 | 0.151 | 0.00016  | CSCL2 | BTN3A2   |
| ERICH1.8  | 1.08E-08 | -0.38746 | 0.161 | 0.277 | 0.000161 | CSCL2 | ERICH1   |
| METTL17.2 | 1.08E-08 | 0.139322 | 0.203 | 0.114 | 0.000162 | CSCL2 | METTL17  |
| ENC1.12   | 1.09E-08 | 0.181463 | 0.34  | 0.22  | 0.000162 | CSCL2 | ENC1     |
| NR2F1.9   | 1.10E-08 | 0.207405 | 0.258 | 0.162 | 0.000164 | CSCL2 | NR2F1    |
| ZNF827.1C | 1.12E-08 | 0.193613 | 0.194 | 0.111 | 0.000167 | CSCL2 | ZNF827   |
| NCKAP1.1C | 1.13E-08 | 0.234034 | 0.285 | 0.184 | 0.000168 | CSCL2 | NCKAP1   |
| AREG.13   | 1.13E-08 | -0.45748 | 0     | 0.067 | 0.000169 | CSCL2 | AREG     |
| FAM133B.5 | 1.13E-08 | 0.122001 | 0.607 | 0.465 | 0.00017  | CSCL2 | FAM133B  |
| SLC15A3.1 | 1.15E-08 | -0.27451 | 0.002 | 0.071 | 0.000172 | CSCL2 | SLC15A3  |
| CXorf21.1 | 1.16E-08 | -0.34959 | 0.007 | 0.079 | 0.000173 | CSCL2 | CXorf21  |
| ARHGAP15. | 1.16E-08 | -0.38241 | 0.02  | 0.1   | 0.000174 | CSCL2 | ARHGAP15 |
| POLR2C.9  | 1.16E-08 | 0.149649 | 0.477 | 0.345 | 0.000174 | CSCL2 | POLR2C   |
| YEATS2.1  | 1.18E-08 | 0.146361 | 0.132 | 0.065 | 0.000176 | CSCL2 | YEATS2   |
| SOBP.10   | 1.18E-08 | 0.175931 | 0.221 | 0.131 | 0.000177 | CSCL2 | SOBP     |
| ZNF281.7  | 1.20E-08 | 0.171031 | 0.287 | 0.181 | 0.000179 | CSCL2 | ZNF281   |

|           |          |          |       |       |          |       |         |
|-----------|----------|----------|-------|-------|----------|-------|---------|
| BNIP3L.6  | 1.20E-08 | -0.32613 | 0.539 | 0.601 | 0.00018  | CSCL2 | BNIP3L  |
| RNF180.12 | 1.21E-08 | 0.215467 | 0.26  | 0.164 | 0.00018  | CSCL2 | RNF180  |
| FAM155A.3 | 1.26E-08 | 0.103232 | 0.073 | 0.027 | 0.000188 | CSCL2 | FAM155A |
| HSPA5.6   | 1.26E-08 | -0.27723 | 0.607 | 0.659 | 0.000189 | CSCL2 | HSPA5   |
| BUD13     | 1.27E-08 | 0.243958 | 0.152 | 0.08  | 0.00019  | CSCL2 | BUD13   |
| SOWAHC.6  | 1.27E-08 | 0.13816  | 0.132 | 0.065 | 0.00019  | CSCL2 | SOWAHC  |
| PAIP1.12  | 1.29E-08 | 0.195652 | 0.53  | 0.39  | 0.000192 | CSCL2 | PAIP1   |
| RASGRP3.1 | 1.30E-08 | -0.32008 | 0.002 | 0.071 | 0.000195 | CSCL2 | RASGRP3 |
| EDEM2.7   | 1.31E-08 | -0.28517 | 0.13  | 0.245 | 0.000196 | CSCL2 | EDEM2   |
| ZNF136.8  | 1.35E-08 | 0.182091 | 0.174 | 0.094 | 0.000202 | CSCL2 | ZNF136  |
| ELOVL5.6  | 1.36E-08 | 0.132393 | 0.446 | 0.319 | 0.000203 | CSCL2 | ELOVL5  |
| SH3BP2.11 | 1.39E-08 | -0.29571 | 0.049 | 0.142 | 0.000208 | CSCL2 | SH3BP2  |
| DCTPP1.6  | 1.39E-08 | 0.167143 | 0.444 | 0.326 | 0.000208 | CSCL2 | DCTPP1  |
| ZNF569.6  | 1.40E-08 | 0.167502 | 0.135 | 0.066 | 0.000209 | CSCL2 | ZNF569  |
| PPP1R35.1 | 1.41E-08 | 0.182429 | 0.247 | 0.154 | 0.000211 | CSCL2 | PPP1R35 |
| CD300C.13 | 1.42E-08 | -0.30835 | 0.002 | 0.07  | 0.000212 | CSCL2 | CD300C  |
| ZNF789.5  | 1.42E-08 | 0.116779 | 0.15  | 0.077 | 0.000213 | CSCL2 | ZNF789  |
| ARRDC1.12 | 1.44E-08 | -0.30628 | 0.046 | 0.138 | 0.000215 | CSCL2 | ARRDC1  |
| CMSS1.9   | 1.44E-08 | 0.183579 | 0.404 | 0.285 | 0.000215 | CSCL2 | CMSS1   |
| FHOD3.2   | 1.46E-08 | 0.127315 | 0.084 | 0.034 | 0.000218 | CSCL2 | FHOD3   |
| RNF4.2    | 1.46E-08 | 0.200144 | 0.272 | 0.174 | 0.000219 | CSCL2 | RNF4    |
| KIF2A.12  | 1.47E-08 | 0.204544 | 0.342 | 0.231 | 0.00022  | CSCL2 | KIF2A   |
| COMT.9    | 1.48E-08 | -0.32922 | 0.497 | 0.549 | 0.000221 | CSCL2 | COMT    |
| NUP37.6   | 1.49E-08 | 0.172518 | 0.216 | 0.127 | 0.000223 | CSCL2 | NUP37   |
| EMB.13    | 1.49E-08 | -0.32548 | 0.007 | 0.078 | 0.000223 | CSCL2 | EMB     |
| STX3.5    | 1.50E-08 | -0.24599 | 0.007 | 0.078 | 0.000224 | CSCL2 | STX3    |
| ST8SIA5.7 | 1.51E-08 | 0.17163  | 0.095 | 0.04  | 0.000226 | CSCL2 | ST8SIA5 |
| SAP30.8   | 1.54E-08 | 0.231741 | 0.349 | 0.236 | 0.00023  | CSCL2 | SAP30   |
| DOLPP1.7  | 1.54E-08 | 0.194017 | 0.179 | 0.098 | 0.00023  | CSCL2 | DOLPP1  |
| ZKSCAN5.7 | 1.55E-08 | 0.104217 | 0.13  | 0.063 | 0.000231 | CSCL2 | ZKSCAN5 |
| ACOT9.10  | 1.59E-08 | -0.35093 | 0.084 | 0.186 | 0.000237 | CSCL2 | ACOT9   |
| TMEM42.6  | 1.60E-08 | -0.2313  | 0.064 | 0.165 | 0.000239 | CSCL2 | TMEM42  |
| NEDD4L.8  | 1.62E-08 | 0.100823 | 0.199 | 0.109 | 0.000242 | CSCL2 | NEDD4L  |
| INPP5D.13 | 1.62E-08 | -0.37226 | 0.013 | 0.088 | 0.000243 | CSCL2 | INPP5D  |
| IL1RN.11  | 1.63E-08 | -0.34278 | 0.007 | 0.078 | 0.000243 | CSCL2 | IL1RN   |
| MXRA7.10  | 1.63E-08 | -0.25596 | 0.071 | 0.171 | 0.000243 | CSCL2 | MXRA7   |
| MED25.4   | 1.67E-08 | 0.260065 | 0.203 | 0.12  | 0.000249 | CSCL2 | MED25   |
| SASH3.13  | 1.68E-08 | -0.32262 | 0.009 | 0.081 | 0.00025  | CSCL2 | SASH3   |
| CECR1.11  | 1.70E-08 | -0.30878 | 0.004 | 0.074 | 0.000253 | CSCL2 | CECR1   |
| EVI5.6    | 1.70E-08 | -0.2662  | 0.084 | 0.188 | 0.000254 | CSCL2 | EVI5    |
| CASD1.8   | 1.71E-08 | 0.146502 | 0.146 | 0.074 | 0.000256 | CSCL2 | CASD1   |
| LEPROT.3  | 1.71E-08 | -0.28827 | 0.278 | 0.395 | 0.000256 | CSCL2 | LEPROT  |
| POMP.7    | 1.72E-08 | -0.18456 | 0.737 | 0.735 | 0.000256 | CSCL2 | POMP    |
| ZNF431.2  | 1.75E-08 | 0.105638 | 0.157 | 0.081 | 0.000261 | CSCL2 | ZNF431  |
| QSER1.9   | 1.75E-08 | 0.160688 | 0.199 | 0.115 | 0.000261 | CSCL2 | QSER1   |
| ANXA5.7   | 1.78E-08 | -0.21145 | 0.711 | 0.727 | 0.000266 | CSCL2 | ANXA5   |
| BRD9.5    | 1.79E-08 | 0.196657 | 0.291 | 0.19  | 0.000268 | CSCL2 | BRD9    |
| RILP.11   | 1.79E-08 | -0.2396  | 0.024 | 0.106 | 0.000268 | CSCL2 | RILP    |
| PPP4R1.4  | 1.85E-08 | 0.145792 | 0.192 | 0.109 | 0.000276 | CSCL2 | PPP4R1  |
| BANF1.4   | 1.86E-08 | 0.119594 | 0.799 | 0.656 | 0.000277 | CSCL2 | BANF1   |
| FNDC3B.8  | 1.86E-08 | -0.26956 | 0.077 | 0.177 | 0.000278 | CSCL2 | FNDC3B  |

|           |          |          |       |       |          |       |          |
|-----------|----------|----------|-------|-------|----------|-------|----------|
| COMMD9.7  | 1.86E-08 | -0.34616 | 0.194 | 0.314 | 0.000279 | CSCL2 | COMMD9   |
| TPT1.10   | 1.88E-08 | -0.22578 | 0.936 | 0.954 | 0.000282 | CSCL2 | TPT1     |
| BCL7C.8   | 1.89E-08 | 0.310034 | 0.355 | 0.251 | 0.000282 | CSCL2 | BCL7C    |
| SIGLEC7.1 | 1.92E-08 | -0.31599 | 0.007 | 0.077 | 0.000287 | CSCL2 | SIGLEC7  |
| MPST.8    | 1.95E-08 | 0.195643 | 0.424 | 0.301 | 0.000291 | CSCL2 | MPST     |
| PPP1R14C. | 2.01E-08 | 0.268103 | 0.119 | 0.058 | 0.0003   | CSCL2 | PPP1R14C |
| SPATA20.7 | 2.02E-08 | -0.28724 | 0.044 | 0.134 | 0.000302 | CSCL2 | SPATA20  |
| LHX2.11   | 2.06E-08 | 0.17204  | 0.216 | 0.126 | 0.000308 | CSCL2 | LHX2     |
| CD40.13   | 2.07E-08 | -0.25919 | 0.002 | 0.07  | 0.000309 | CSCL2 | CD40     |
| KLHL13.12 | 2.07E-08 | 0.215181 | 0.172 | 0.096 | 0.000309 | CSCL2 | KLHL13   |
| SLC25A25. | 2.08E-08 | 0.219694 | 0.258 | 0.162 | 0.000311 | CSCL2 | SLC25A25 |
| PTPN1.10  | 2.09E-08 | -0.31587 | 0.128 | 0.236 | 0.000313 | CSCL2 | PTPN1    |
| TAGLN.7   | 2.09E-08 | -0.49442 | 0.004 | 0.073 | 0.000313 | CSCL2 | TAGLN    |
| TARDBP.6  | 2.10E-08 | 0.159994 | 0.411 | 0.29  | 0.000313 | CSCL2 | TARDBP   |
| MAT2A.7   | 2.13E-08 | 0.137789 | 0.519 | 0.378 | 0.000318 | CSCL2 | MAT2A    |
| C19orf68. | 2.17E-08 | 0.10314  | 0.091 | 0.038 | 0.000324 | CSCL2 | C19orf68 |
| HRH1.11   | 2.17E-08 | -0.2258  | 0.02  | 0.099 | 0.000324 | CSCL2 | HRH1     |
| CCHCR1.4  | 2.18E-08 | 0.186023 | 0.141 | 0.073 | 0.000326 | CSCL2 | CCHCR1   |
| EPHA4.10  | 2.18E-08 | 0.165385 | 0.15  | 0.079 | 0.000326 | CSCL2 | EPHA4    |
| TULP3.8   | 2.21E-08 | 0.194399 | 0.208 | 0.122 | 0.00033  | CSCL2 | TULP3    |
| MR1.10    | 2.23E-08 | -0.28262 | 0.015 | 0.092 | 0.000333 | CSCL2 | MR1      |
| TAF9B.9   | 2.24E-08 | 0.264002 | 0.227 | 0.141 | 0.000334 | CSCL2 | TAF9B    |
| PNMA1.12  | 2.24E-08 | 0.192478 | 0.397 | 0.279 | 0.000335 | CSCL2 | PNMA1    |
| HMG3.8    | 2.27E-08 | 0.142127 | 0.753 | 0.603 | 0.00034  | CSCL2 | HMG3     |
| NUP54.7   | 2.27E-08 | 0.163248 | 0.276 | 0.174 | 0.00034  | CSCL2 | NUP54    |
| ALMS1     | 2.31E-08 | 0.122598 | 0.099 | 0.044 | 0.000345 | CSCL2 | ALMS1    |
| VCAN.8    | 2.32E-08 | 0.155099 | 0.362 | 0.241 | 0.000346 | CSCL2 | VCAN     |
| NAAA.12   | 2.32E-08 | -0.28824 | 0.046 | 0.137 | 0.000347 | CSCL2 | NAAA     |
| NABP2.8   | 2.37E-08 | 0.191235 | 0.382 | 0.272 | 0.000354 | CSCL2 | NABP2    |
| RTN4.11   | 2.38E-08 | 0.144426 | 0.823 | 0.695 | 0.000355 | CSCL2 | RTN4     |
| U2SURP.6  | 2.39E-08 | 0.159503 | 0.494 | 0.364 | 0.000356 | CSCL2 | U2SURP   |
| COL6A2.12 | 2.40E-08 | -0.34066 | 0.071 | 0.166 | 0.000359 | CSCL2 | COL6A2   |
| NDUFB11.5 | 2.48E-08 | 0.111095 | 0.839 | 0.731 | 0.000371 | CSCL2 | NDUFB11  |
| SCAF4.4   | 2.51E-08 | 0.154202 | 0.23  | 0.137 | 0.000375 | CSCL2 | SCAF4    |
| MORC4.4   | 2.56E-08 | 0.267869 | 0.119 | 0.058 | 0.000383 | CSCL2 | MORC4    |
| USMG5.9   | 2.57E-08 | -0.25585 | 0.578 | 0.622 | 0.000385 | CSCL2 | USMG5    |
| CBX4.11   | 2.61E-08 | 0.116661 | 0.199 | 0.112 | 0.00039  | CSCL2 | CBX4     |
| GOLIM4.9  | 2.61E-08 | 0.201151 | 0.444 | 0.322 | 0.00039  | CSCL2 | GOLIM4   |
| GLOD4.6   | 2.63E-08 | 0.103739 | 0.523 | 0.384 | 0.000394 | CSCL2 | GLOD4    |
| OSGEPL1.5 | 2.68E-08 | 0.126495 | 0.132 | 0.066 | 0.0004   | CSCL2 | OSGEPL1  |
| EHD2.10   | 2.70E-08 | -0.15428 | 0.011 | 0.084 | 0.000403 | CSCL2 | EHD2     |
| HIST1H1E. | 2.70E-08 | 0.101349 | 0.086 | 0.036 | 0.000404 | CSCL2 | HIST1H1E |
| C21orf62. | 2.71E-08 | -0.30999 | 0.066 | 0.161 | 0.000405 | CSCL2 | C21orf62 |
| NUPL2.8   | 2.79E-08 | 0.15567  | 0.386 | 0.264 | 0.000418 | CSCL2 | NUPL2    |
| YTHDC1.8  | 2.80E-08 | 0.21687  | 0.413 | 0.298 | 0.000418 | CSCL2 | YTHDC1   |
| ATP6V1B2. | 2.84E-08 | -0.37626 | 0.325 | 0.412 | 0.000424 | CSCL2 | ATP6V1B2 |
| TMEM169.8 | 2.84E-08 | 0.151111 | 0.117 | 0.056 | 0.000425 | CSCL2 | TMEM169  |
| CHD3.8    | 2.85E-08 | 0.161606 | 0.199 | 0.112 | 0.000425 | CSCL2 | CHD3     |
| ITGA3.10  | 2.87E-08 | -0.19925 | 0.022 | 0.102 | 0.000429 | CSCL2 | ITGA3    |
| DDX20.3   | 2.90E-08 | 0.177246 | 0.139 | 0.07  | 0.000433 | CSCL2 | DDX20    |
| C5orf30.8 | 2.94E-08 | 0.135036 | 0.143 | 0.073 | 0.000439 | CSCL2 | C5orf30  |



|           |          |          |       |       |          |       |               |
|-----------|----------|----------|-------|-------|----------|-------|---------------|
| OSCAR.13  | 3.08E-08 | -0.27863 | 0.007 | 0.075 | 0.00046  | CSCL2 | OSCAR         |
| SLC29A4.8 | 3.11E-08 | 0.122024 | 0.152 | 0.08  | 0.000465 | CSCL2 | SLC29A4       |
| DPYD.11   | 3.12E-08 | -0.29995 | 0.024 | 0.104 | 0.000466 | CSCL2 | DPYD          |
| ZFR.9     | 3.15E-08 | 0.270982 | 0.415 | 0.301 | 0.000471 | CSCL2 | ZFR           |
| CAMKMT.7  | 3.16E-08 | 0.16586  | 0.141 | 0.072 | 0.000473 | CSCL2 | CAMKMT        |
| SH3TC1.12 | 3.24E-08 | -0.29904 | 0.011 | 0.083 | 0.000485 | CSCL2 | SH3TC1        |
| PDE9A.7   | 3.27E-08 | 0.102425 | 0.137 | 0.068 | 0.000488 | CSCL2 | PDE9A         |
| RAD9A.2   | 3.28E-08 | 0.115798 | 0.221 | 0.132 | 0.00049  | CSCL2 | RAD9A         |
| UBTD1.7   | 3.30E-08 | -0.12865 | 0.031 | 0.115 | 0.000493 | CSCL2 | UBTD1         |
| TRIM26.2  | 3.30E-08 | 0.130953 | 0.174 | 0.094 | 0.000493 | CSCL2 | TRIM26        |
| TRAM1.10  | 3.30E-08 | -0.34776 | 0.34  | 0.437 | 0.000494 | CSCL2 | TRAM1         |
| SLC16A1-A | 3.34E-08 | 0.223341 | 0.099 | 0.044 | 0.000498 | CSCL2 | SLC16A1-AS1   |
| PMP2.12   | 3.34E-08 | 0.146603 | 0.497 | 0.344 | 0.000499 | CSCL2 | PMP2          |
| ARRDC2.1C | 3.39E-08 | -0.31194 | 0.015 | 0.089 | 0.000506 | CSCL2 | ARRDC2        |
| PPHLN1.7  | 3.45E-08 | 0.145678 | 0.49  | 0.361 | 0.000516 | CSCL2 | PPHLN1        |
| PNPT1.7   | 3.47E-08 | 0.125165 | 0.3   | 0.193 | 0.000518 | CSCL2 | PNPT1         |
| RP11-448A | 3.51E-08 | 0.156943 | 0.163 | 0.089 | 0.000524 | CSCL2 | RP11-448A19.1 |
| NAV1.9    | 3.51E-08 | 0.196952 | 0.252 | 0.159 | 0.000524 | CSCL2 | NAV1          |
| MORF4L2.8 | 3.52E-08 | 0.199625 | 0.781 | 0.619 | 0.000526 | CSCL2 | MORF4L2       |
| METAP1D.9 | 3.55E-08 | 0.143347 | 0.208 | 0.121 | 0.000531 | CSCL2 | METAP1D       |
| AVPI1.8   | 3.58E-08 | -0.3139  | 0.02  | 0.097 | 0.000535 | CSCL2 | AVPI1         |
| NUP188.3  | 3.58E-08 | 0.170578 | 0.15  | 0.079 | 0.000535 | CSCL2 | NUP188        |
| SYT1.12   | 3.62E-08 | 0.100697 | 0.183 | 0.096 | 0.000542 | CSCL2 | SYT1          |
| MPP1.13   | 3.64E-08 | -0.44088 | 0.108 | 0.204 | 0.000544 | CSCL2 | MPP1          |
| PTRF.13   | 3.64E-08 | -0.20443 | 0.086 | 0.189 | 0.000545 | CSCL2 | PTRF          |
| ZNF667-AS | 3.67E-08 | 0.14033  | 0.53  | 0.382 | 0.000549 | CSCL2 | ZNF667-AS1    |
| GABPB1.6  | 3.70E-08 | 0.141358 | 0.185 | 0.104 | 0.000553 | CSCL2 | GABPB1        |
| FAM76B.4  | 3.78E-08 | 0.16915  | 0.19  | 0.109 | 0.000565 | CSCL2 | FAM76B        |
| SNN.12    | 3.79E-08 | 0.14809  | 0.338 | 0.221 | 0.000566 | CSCL2 | SNN           |
| SWAP70.11 | 3.90E-08 | -0.32179 | 0.121 | 0.226 | 0.000583 | CSCL2 | SWAP70        |
| VCAM1.9   | 3.92E-08 | -0.32588 | 0.007 | 0.075 | 0.000586 | CSCL2 | VCAM1         |
| CHMP2A.6  | 3.98E-08 | -0.28458 | 0.631 | 0.656 | 0.000595 | CSCL2 | CHMP2A        |
| OTUD1.10  | 3.99E-08 | -0.35409 | 0.024 | 0.101 | 0.000597 | CSCL2 | OTUD1         |
| NUP133.2  | 4.01E-08 | 0.205329 | 0.166 | 0.091 | 0.000599 | CSCL2 | NUP133        |
| NVL.7     | 4.04E-08 | 0.216386 | 0.185 | 0.105 | 0.000604 | CSCL2 | NVL           |
| FGD5-AS1. | 4.05E-08 | 0.212398 | 0.422 | 0.308 | 0.000605 | CSCL2 | FGD5-AS1      |
| SCNN1A.5  | 4.05E-08 | 0.169777 | 0.108 | 0.049 | 0.000606 | CSCL2 | SCNN1A        |
| TNPO2.9   | 4.06E-08 | 0.181137 | 0.272 | 0.176 | 0.000607 | CSCL2 | TNPO2         |
| DNP1.7    | 4.12E-08 | -0.26587 | 0.267 | 0.381 | 0.000616 | CSCL2 | DNP1          |
| SH2B3.11  | 4.17E-08 | -0.30169 | 0.031 | 0.112 | 0.000623 | CSCL2 | SH2B3         |
| ZNF230.1  | 4.20E-08 | 0.159918 | 0.106 | 0.049 | 0.000628 | CSCL2 | ZNF230        |
| RP11-127E | 4.22E-08 | 0.106914 | 0.102 | 0.045 | 0.00063  | CSCL2 | RP11-127B20.3 |
| EIF1AX.8  | 4.24E-08 | 0.141932 | 0.702 | 0.554 | 0.000633 | CSCL2 | EIF1AX        |
| COPS7B.7  | 4.31E-08 | 0.140064 | 0.294 | 0.193 | 0.000644 | CSCL2 | COPS7B        |
| VMP1.6    | 4.31E-08 | -0.30716 | 0.393 | 0.475 | 0.000645 | CSCL2 | VMP1          |
| RP11-536C | 4.36E-08 | 0.118507 | 0.038 | 0.01  | 0.000651 | CSCL2 | RP11-536018.1 |
| EPHB1.7   | 4.37E-08 | 0.109759 | 0.099 | 0.044 | 0.000653 | CSCL2 | EPHB1         |
| USP5.6    | 4.37E-08 | 0.196994 | 0.325 | 0.22  | 0.000653 | CSCL2 | USP5          |
| VEGFA.9   | 4.46E-08 | -0.3355  | 0.115 | 0.22  | 0.000667 | CSCL2 | VEGFA         |
| ARSJ.11   | 4.49E-08 | -0.18212 | 0.042 | 0.128 | 0.000671 | CSCL2 | ARSJ          |
| KIAA1586. | 4.50E-08 | 0.163555 | 0.194 | 0.112 | 0.000673 | CSCL2 | KIAA1586      |

|           |          |          |       |       |          |       |               |
|-----------|----------|----------|-------|-------|----------|-------|---------------|
| THAP7.5   | 4.51E-08 | 0.194058 | 0.305 | 0.206 | 0.000674 | CSCL2 | THAP7         |
| RP11-395G | 4.64E-08 | -0.25857 | 0.082 | 0.181 | 0.000694 | CSCL2 | RP11-395G23.3 |
| UQCRFS1.8 | 4.68E-08 | 0.257013 | 0.702 | 0.538 | 0.000699 | CSCL2 | UQCRFS1       |
| TMED9.5   | 4.72E-08 | -0.2175  | 0.682 | 0.689 | 0.000705 | CSCL2 | TMED9         |
| METTL7B.9 | 4.79E-08 | -0.26316 | 0.104 | 0.216 | 0.000716 | CSCL2 | METTL7B       |
| SYPL1.6   | 4.81E-08 | -0.4064  | 0.309 | 0.41  | 0.000719 | CSCL2 | SYPL1         |
| KRT10.9   | 4.86E-08 | 0.172809 | 0.715 | 0.552 | 0.000726 | CSCL2 | KRT10         |
| IL4R.12   | 4.86E-08 | -0.28562 | 0.007 | 0.073 | 0.000726 | CSCL2 | IL4R          |
| ABL2.11   | 4.86E-08 | -0.44871 | 0.17  | 0.272 | 0.000727 | CSCL2 | ABL2          |
| PHAX.9    | 4.87E-08 | 0.188367 | 0.419 | 0.301 | 0.000727 | CSCL2 | PHAX          |
| SLAMF8.13 | 4.90E-08 | -0.27114 | 0.002 | 0.066 | 0.000732 | CSCL2 | SLAMF8        |
| CTD-2336C | 4.99E-08 | -0.27973 | 0.119 | 0.228 | 0.000745 | CSCL2 | CTD-233602.1  |
| ATP6VOE2- | 5.05E-08 | 0.141569 | 0.077 | 0.031 | 0.000755 | CSCL2 | ATP6VOE2-AS1  |
| MXD4.6    | 5.07E-08 | -0.27931 | 0.091 | 0.192 | 0.000758 | CSCL2 | MXD4          |
| NSUN5.4   | 5.13E-08 | 0.128166 | 0.329 | 0.219 | 0.000767 | CSCL2 | NSUN5         |
| U2AF2.6   | 5.18E-08 | 0.17025  | 0.362 | 0.253 | 0.000774 | CSCL2 | U2AF2         |
| TAF7.11   | 5.18E-08 | 0.156406 | 0.711 | 0.547 | 0.000775 | CSCL2 | TAF7          |
| SFXN3.5   | 5.21E-08 | -0.25649 | 0.033 | 0.115 | 0.000778 | CSCL2 | SFXN3         |
| NLRP3.12  | 5.21E-08 | -0.3621  | 0.018 | 0.09  | 0.000779 | CSCL2 | NLRP3         |
| USP39.6   | 5.27E-08 | 0.146277 | 0.28  | 0.181 | 0.000787 | CSCL2 | USP39         |
| C2orf68.3 | 5.28E-08 | 0.147537 | 0.225 | 0.136 | 0.000789 | CSCL2 | C2orf68       |
| RTF1.11   | 5.33E-08 | 0.169707 | 0.558 | 0.425 | 0.000797 | CSCL2 | RTF1          |
| JDP2.12   | 5.35E-08 | -0.29896 | 0.007 | 0.073 | 0.000799 | CSCL2 | JDP2          |
| PPP2CA.7  | 5.40E-08 | 0.212151 | 0.611 | 0.474 | 0.000807 | CSCL2 | PPP2CA        |
| MCL1.10   | 5.45E-08 | -0.30573 | 0.541 | 0.601 | 0.000814 | CSCL2 | MCL1          |
| SIGLEC8.1 | 5.46E-08 | -0.34478 | 0.011 | 0.08  | 0.000816 | CSCL2 | SIGLEC8       |
| CACNB3.7  | 5.61E-08 | 0.142292 | 0.119 | 0.058 | 0.000838 | CSCL2 | CACNB3        |
| ZNF850    | 5.61E-08 | 0.113077 | 0.044 | 0.013 | 0.000838 | CSCL2 | ZNF850        |
| FSD1.11   | 5.67E-08 | 0.19766  | 0.241 | 0.151 | 0.000847 | CSCL2 | FSD1          |
| CAPN10-AS | 5.74E-08 | 0.113874 | 0.086 | 0.036 | 0.000857 | CSCL2 | CAPN10-AS1    |
| USP49.3   | 5.79E-08 | 0.129265 | 0.093 | 0.04  | 0.000865 | CSCL2 | USP49         |
| NEK4      | 5.82E-08 | 0.142308 | 0.128 | 0.064 | 0.00087  | CSCL2 | NEK4          |
| TRIM33.7  | 5.83E-08 | 0.213036 | 0.278 | 0.179 | 0.000871 | CSCL2 | TRIM33        |
| ASPH.8    | 5.98E-08 | 0.243089 | 0.382 | 0.273 | 0.000894 | CSCL2 | ASPH          |
| JAM2.13   | 6.04E-08 | 0.134097 | 0.366 | 0.248 | 0.000903 | CSCL2 | JAM2          |
| CA8.11    | 6.27E-08 | 0.151653 | 0.113 | 0.053 | 0.000936 | CSCL2 | CA8           |
| P2RX4.12  | 6.31E-08 | -0.35564 | 0.086 | 0.18  | 0.000943 | CSCL2 | P2RX4         |
| PRR3.6    | 6.41E-08 | 0.138999 | 0.177 | 0.1   | 0.000958 | CSCL2 | PRR3          |
| SCCPDH.6  | 6.43E-08 | 0.179466 | 0.499 | 0.372 | 0.000961 | CSCL2 | SCCPDH        |
| SLC8B1.12 | 6.45E-08 | -0.2602  | 0.024 | 0.1   | 0.000963 | CSCL2 | SLC8B1        |
| HIVEP3.9  | 6.48E-08 | -0.20096 | 0.064 | 0.156 | 0.000969 | CSCL2 | HIVEP3        |
| PLOD1.8   | 6.49E-08 | -0.26097 | 0.093 | 0.195 | 0.000971 | CSCL2 | PLOD1         |
| PLP2.10   | 6.59E-08 | -0.29244 | 0.227 | 0.349 | 0.000985 | CSCL2 | PLP2          |
| CDC42EP4. | 6.61E-08 | 0.307604 | 0.296 | 0.197 | 0.000988 | CSCL2 | CDC42EP4      |
| TMEM11.8  | 6.69E-08 | 0.149682 | 0.433 | 0.314 | 0.001    | CSCL2 | TMEM11        |
| ZBTB10.6  | 6.72E-08 | 0.14     | 0.159 | 0.086 | 0.001004 | CSCL2 | ZBTB10        |
| VPS13C.5  | 6.73E-08 | -0.27596 | 0.082 | 0.178 | 0.001005 | CSCL2 | VPS13C        |
| THBS1.10  | 6.84E-08 | -0.3773  | 0.013 | 0.083 | 0.001022 | CSCL2 | THBS1         |
| RNF145.6  | 6.93E-08 | 0.172062 | 0.501 | 0.372 | 0.001036 | CSCL2 | RNF145        |
| CHST2.10  | 6.95E-08 | -0.19662 | 0.051 | 0.139 | 0.001039 | CSCL2 | CHST2         |
| CERS6.8   | 7.12E-08 | 0.16927  | 0.208 | 0.123 | 0.001064 | CSCL2 | CERS6         |

|              |          |          |       |       |          |       |            |
|--------------|----------|----------|-------|-------|----------|-------|------------|
| FANCM.1      | 7.13E-08 | 0.107901 | 0.062 | 0.023 | 0.001066 | CSCL2 | FANCM      |
| RBM25.6      | 7.14E-08 | 0.117075 | 0.572 | 0.435 | 0.001067 | CSCL2 | RBM25      |
| VANGL2.8     | 7.19E-08 | 0.10968  | 0.137 | 0.07  | 0.001074 | CSCL2 | VANGL2     |
| HSBP1L1.8    | 7.24E-08 | -0.19568 | 0.009 | 0.077 | 0.001081 | CSCL2 | HSBP1L1    |
| DSE.13       | 7.35E-08 | -0.32321 | 0.055 | 0.141 | 0.001098 | CSCL2 | DSE        |
| THUMPD2.2    | 7.37E-08 | 0.208698 | 0.159 | 0.087 | 0.001101 | CSCL2 | THUMPD2    |
| C19orf66.7   | 7.41E-08 | -0.23265 | 0.143 | 0.26  | 0.001107 | CSCL2 | C19orf66   |
| GSTM4.7      | 7.67E-08 | -0.31608 | 0.106 | 0.209 | 0.001146 | CSCL2 | GSTM4      |
| C20orf27.7   | 7.71E-08 | -0.32194 | 0.265 | 0.364 | 0.001152 | CSCL2 | C20orf27   |
| SYAP1.10     | 7.73E-08 | -0.36257 | 0.287 | 0.391 | 0.001156 | CSCL2 | SYAP1      |
| IL32.10      | 7.90E-08 | -0.44735 | 0.026 | 0.103 | 0.00118  | CSCL2 | IL32       |
| SLC1A5.11    | 7.98E-08 | -0.28299 | 0.053 | 0.141 | 0.001192 | CSCL2 | SLC1A5     |
| NXT1.7       | 8.04E-08 | 0.167283 | 0.437 | 0.312 | 0.001201 | CSCL2 | NXT1       |
| EPAS1.8      | 8.04E-08 | -0.25681 | 0.029 | 0.108 | 0.001202 | CSCL2 | EPAS1      |
| CRYAB.12     | 8.07E-08 | -0.69457 | 0.446 | 0.502 | 0.001206 | CSCL2 | CRYAB      |
| ZC3HC1.9     | 8.10E-08 | 0.156788 | 0.203 | 0.121 | 0.001211 | CSCL2 | ZC3HC1     |
| GCA.12       | 8.11E-08 | -0.43492 | 0.199 | 0.303 | 0.001211 | CSCL2 | GCA        |
| PROCR.11     | 8.27E-08 | -0.28603 | 0.007 | 0.071 | 0.001235 | CSCL2 | PROCR      |
| AUTS2.11     | 8.35E-08 | 0.171124 | 0.196 | 0.115 | 0.001248 | CSCL2 | AUTS2      |
| IRF7.10      | 8.46E-08 | -0.32229 | 0.073 | 0.164 | 0.001264 | CSCL2 | IRF7       |
| IP07.6       | 8.52E-08 | 0.197015 | 0.307 | 0.208 | 0.001273 | CSCL2 | IP07       |
| NUDCD2.8     | 8.64E-08 | 0.165009 | 0.517 | 0.396 | 0.001291 | CSCL2 | NUDCD2     |
| FES.13       | 8.68E-08 | -0.29979 | 0.013 | 0.082 | 0.001297 | CSCL2 | FES        |
| CDC34.11     | 8.98E-08 | 0.235073 | 0.331 | 0.231 | 0.001342 | CSCL2 | CDC34      |
| KARS.5       | 8.99E-08 | 0.114136 | 0.503 | 0.368 | 0.001344 | CSCL2 | KARS       |
| TSC22D3.1    | 9.04E-08 | -0.43718 | 0.393 | 0.459 | 0.001351 | CSCL2 | TSC22D3    |
| ZNF180.1     | 9.05E-08 | 0.108894 | 0.088 | 0.038 | 0.001353 | CSCL2 | ZNF180     |
| CARD9.13     | 9.05E-08 | -0.25668 | 0.007 | 0.071 | 0.001353 | CSCL2 | CARD9      |
| EEF1A2.3     | 9.10E-08 | 0.169877 | 0.084 | 0.036 | 0.001359 | CSCL2 | EEF1A2     |
| TRIP6.11     | 9.18E-08 | -0.27514 | 0.143 | 0.253 | 0.001372 | CSCL2 | TRIP6      |
| ARAP1.9      | 9.31E-08 | -0.31226 | 0.033 | 0.111 | 0.001391 | CSCL2 | ARAP1      |
| SRSF11.6     | 9.32E-08 | 0.179537 | 0.669 | 0.534 | 0.001393 | CSCL2 | SRSF11     |
| KLHL42.11    | 9.39E-08 | 0.214968 | 0.243 | 0.155 | 0.001403 | CSCL2 | KLHL42     |
| SUPT20H.9    | 9.41E-08 | 0.168462 | 0.3   | 0.203 | 0.001406 | CSCL2 | SUPT20H    |
| MAFB.11      | 9.49E-08 | -0.44652 | 0.238 | 0.317 | 0.001418 | CSCL2 | MAFB       |
| AC093673.9   | 9.78E-08 | -0.26054 | 0.084 | 0.182 | 0.001461 | CSCL2 | AC093673.5 |
| NIFK-AS1.9   | 9.78E-08 | 0.119875 | 0.157 | 0.085 | 0.001462 | CSCL2 | NIFK-AS1   |
| STMN4.12     | 9.93E-08 | 0.154414 | 0.442 | 0.3   | 0.001484 | CSCL2 | STMN4      |
| LINC00936.9  | 9.96E-08 | -0.34254 | 0.057 | 0.144 | 0.001488 | CSCL2 | LINC00936  |
| RNASEH1.9    | 1.00E-07 | 0.165303 | 0.329 | 0.225 | 0.001497 | CSCL2 | RNASEH1    |
| GFM2.3       | 1.00E-07 | 0.193017 | 0.157 | 0.086 | 0.001499 | CSCL2 | GFM2       |
| CASP3.7      | 1.01E-07 | 0.227314 | 0.291 | 0.193 | 0.001515 | CSCL2 | CASP3      |
| CSTF2T.4     | 1.03E-07 | 0.178303 | 0.199 | 0.118 | 0.001534 | CSCL2 | CSTF2T     |
| CDV3.8       | 1.04E-07 | -0.24559 | 0.166 | 0.28  | 0.001552 | CSCL2 | CDV3       |
| GSE1.10      | 1.04E-07 | 0.119715 | 0.163 | 0.088 | 0.001552 | CSCL2 | GSE1       |
| OGG1.5       | 1.05E-07 | 0.155351 | 0.234 | 0.146 | 0.001566 | CSCL2 | OGG1       |
| SSBP3.9      | 1.07E-07 | 0.169248 | 0.208 | 0.125 | 0.001596 | CSCL2 | SSBP3      |
| ST6GALNAC4.1 | 1.08E-07 | -0.19644 | 0.044 | 0.129 | 0.001618 | CSCL2 | ST6GALNAC4 |
| IKZF1.12     | 1.08E-07 | -0.27115 | 0.004 | 0.067 | 0.001619 | CSCL2 | IKZF1      |
| MNAT1.9      | 1.09E-07 | 0.139135 | 0.285 | 0.189 | 0.001622 | CSCL2 | MNAT1      |
| TMEM145.8    | 1.09E-07 | 0.106572 | 0.132 | 0.067 | 0.001631 | CSCL2 | TMEM145    |

|            |          |          |       |       |          |       |               |
|------------|----------|----------|-------|-------|----------|-------|---------------|
| ST8SIA4.1  | 1.10E-07 | -0.3407  | 0.042 | 0.122 | 0.001637 | CSCL2 | ST8SIA4       |
| PKN3.2     | 1.10E-07 | 0.104033 | 0.044 | 0.014 | 0.001646 | CSCL2 | PKN3          |
| ZNF611.1   | 1.11E-07 | 0.135604 | 0.119 | 0.059 | 0.001656 | CSCL2 | ZNF611        |
| TLR1.13    | 1.11E-07 | -0.29035 | 0.007 | 0.07  | 0.001659 | CSCL2 | TLR1          |
| RP11-488C  | 1.11E-07 | 0.131724 | 0.128 | 0.065 | 0.001661 | CSCL2 | RP11-488C13.5 |
| CLASP2.12  | 1.12E-07 | 0.14358  | 0.302 | 0.193 | 0.001668 | CSCL2 | CLASP2        |
| STAC3.13   | 1.12E-07 | -0.27642 | 0.013 | 0.082 | 0.001681 | CSCL2 | STAC3         |
| GLYR1.3    | 1.13E-07 | 0.150169 | 0.309 | 0.205 | 0.001686 | CSCL2 | GLYR1         |
| LAMTOR5.5  | 1.14E-07 | -0.25621 | 0.684 | 0.692 | 0.0017   | CSCL2 | LAMTOR5       |
| NIFK.9     | 1.14E-07 | 0.122573 | 0.47  | 0.343 | 0.001709 | CSCL2 | NIFK          |
| NUP43.2    | 1.16E-07 | 0.230476 | 0.148 | 0.08  | 0.001732 | CSCL2 | NUP43         |
| PTPN4.9    | 1.17E-07 | 0.14493  | 0.177 | 0.099 | 0.001747 | CSCL2 | PTPN4         |
| ARF5.4     | 1.17E-07 | 0.138991 | 0.651 | 0.524 | 0.001751 | CSCL2 | ARF5          |
| CHURC1.6   | 1.19E-07 | -0.34427 | 0.307 | 0.404 | 0.001774 | CSCL2 | CHURC1        |
| BRMS1L.7   | 1.19E-07 | 0.148459 | 0.168 | 0.095 | 0.001774 | CSCL2 | BRMS1L        |
| PMPCB.8    | 1.20E-07 | 0.116478 | 0.468 | 0.338 | 0.001794 | CSCL2 | PMPCB         |
| CCDC159.3  | 1.21E-07 | -0.29826 | 0.062 | 0.152 | 0.001813 | CSCL2 | CCDC159       |
| ANKRD46.9  | 1.22E-07 | 0.115895 | 0.249 | 0.153 | 0.001816 | CSCL2 | ANKRD46       |
| UQCRC2.6   | 1.23E-07 | -0.26067 | 0.415 | 0.517 | 0.001832 | CSCL2 | UQCRC2        |
| REEP1.11   | 1.24E-07 | 0.151119 | 0.148 | 0.078 | 0.001854 | CSCL2 | REEP1         |
| SMO.8      | 1.25E-07 | 0.130211 | 0.104 | 0.049 | 0.001866 | CSCL2 | SMO           |
| DDB1.3     | 1.25E-07 | 0.124475 | 0.413 | 0.285 | 0.001867 | CSCL2 | DDB1          |
| GPR108.7   | 1.25E-07 | -0.33835 | 0.163 | 0.27  | 0.001871 | CSCL2 | GPR108        |
| PPIC.11    | 1.25E-07 | -0.27766 | 0.091 | 0.187 | 0.001874 | CSCL2 | PPIC          |
| GKAP1.9    | 1.26E-07 | 0.208956 | 0.157 | 0.087 | 0.001886 | CSCL2 | GKAP1         |
| PYCR1.9    | 1.26E-07 | 0.193798 | 0.269 | 0.181 | 0.001887 | CSCL2 | PYCR1         |
| RGMA.12    | 1.27E-07 | 0.18393  | 0.302 | 0.196 | 0.001893 | CSCL2 | RGMA          |
| DDX42.8    | 1.28E-07 | 0.158901 | 0.316 | 0.214 | 0.001908 | CSCL2 | DDX42         |
| SCD.12     | 1.29E-07 | -0.4031  | 0.119 | 0.216 | 0.001927 | CSCL2 | SCD           |
| C14orf93   | 1.29E-07 | 0.13694  | 0.088 | 0.039 | 0.001932 | CSCL2 | C14orf93      |
| SART3.5    | 1.29E-07 | 0.153855 | 0.203 | 0.122 | 0.001934 | CSCL2 | SART3         |
| COX7C.6    | 1.30E-07 | -0.16255 | 0.898 | 0.885 | 0.001948 | CSCL2 | COX7C         |
| ETF1.11    | 1.31E-07 | -0.34856 | 0.247 | 0.349 | 0.001953 | CSCL2 | ETF1          |
| LMO3.8     | 1.33E-07 | 0.118341 | 0.152 | 0.08  | 0.001988 | CSCL2 | LMO3          |
| DNMT3A.4   | 1.33E-07 | 0.151173 | 0.172 | 0.098 | 0.00199  | CSCL2 | DNMT3A        |
| GAPT.13    | 1.33E-07 | -0.27344 | 0.002 | 0.062 | 0.001993 | CSCL2 | GAPT          |
| MGMT.12    | 1.34E-07 | -0.38065 | 0.066 | 0.155 | 0.002008 | CSCL2 | MGMT          |
| KCNH2.9    | 1.35E-07 | 0.104423 | 0.128 | 0.064 | 0.002011 | CSCL2 | KCNH2         |
| TMEM50A.7  | 1.35E-07 | -0.28425 | 0.532 | 0.594 | 0.002018 | CSCL2 | TMEM50A       |
| PTPN7.13   | 1.35E-07 | -0.3094  | 0.013 | 0.081 | 0.002023 | CSCL2 | PTPN7         |
| ZCCHC8.2   | 1.36E-07 | 0.135428 | 0.152 | 0.083 | 0.002037 | CSCL2 | ZCCHC8        |
| ORMDL2.1C  | 1.37E-07 | -0.40095 | 0.172 | 0.276 | 0.002042 | CSCL2 | ORMDL2        |
| PHF21B.2   | 1.37E-07 | 0.126635 | 0.071 | 0.028 | 0.002053 | CSCL2 | PHF21B        |
| PRPF19.3   | 1.38E-07 | 0.147678 | 0.355 | 0.249 | 0.002069 | CSCL2 | PRPF19        |
| AAED1.9    | 1.40E-07 | -0.29234 | 0.091 | 0.185 | 0.002093 | CSCL2 | AAED1         |
| ZNF331.11  | 1.40E-07 | -0.51919 | 0.234 | 0.319 | 0.002097 | CSCL2 | ZNF331        |
| ERI3.9     | 1.42E-07 | 0.130139 | 0.49  | 0.364 | 0.002126 | CSCL2 | ERI3          |
| PVRL2.9    | 1.43E-07 | -0.28891 | 0.146 | 0.247 | 0.002133 | CSCL2 | PVRL2         |
| POGZ.9     | 1.46E-07 | 0.180924 | 0.305 | 0.207 | 0.002179 | CSCL2 | POGZ          |
| APOBEC3C.1 | 1.46E-07 | -0.33576 | 0.049 | 0.131 | 0.002189 | CSCL2 | APOBEC3C      |
| TMEM165.6  | 1.48E-07 | 0.237425 | 0.561 | 0.452 | 0.002207 | CSCL2 | TMEM165       |

|           |          |          |       |       |          |       |               |
|-----------|----------|----------|-------|-------|----------|-------|---------------|
| DOK2.12   | 1.50E-07 | -0.26223 | 0     | 0.058 | 0.002248 | CSCL2 | DOK2          |
| WBP2.5    | 1.52E-07 | -0.25473 | 0.355 | 0.456 | 0.00227  | CSCL2 | WBP2          |
| PIGP.4    | 1.52E-07 | -0.31711 | 0.128 | 0.234 | 0.002278 | CSCL2 | PIGP          |
| SNHG10.7  | 1.53E-07 | 0.176454 | 0.161 | 0.091 | 0.00229  | CSCL2 | SNHG10        |
| NR4A1.12  | 1.58E-07 | -0.50365 | 0.194 | 0.276 | 0.002362 | CSCL2 | NR4A1         |
| PELP1.7   | 1.64E-07 | 0.179575 | 0.234 | 0.147 | 0.002444 | CSCL2 | PELP1         |
| TNFSF10.1 | 1.64E-07 | -0.32413 | 0.011 | 0.077 | 0.002446 | CSCL2 | TNFSF10       |
| WDR92.6   | 1.65E-07 | 0.155435 | 0.143 | 0.077 | 0.002467 | CSCL2 | WDR92         |
| DDIT3.8   | 1.65E-07 | 0.237544 | 0.517 | 0.424 | 0.002473 | CSCL2 | DDIT3         |
| ZNF420.8  | 1.66E-07 | 0.125512 | 0.181 | 0.104 | 0.002483 | CSCL2 | ZNF420        |
| DOCK4.8   | 1.70E-07 | -0.36026 | 0.077 | 0.165 | 0.002535 | CSCL2 | DOCK4         |
| CXXC1.5   | 1.70E-07 | 0.170759 | 0.26  | 0.17  | 0.002545 | CSCL2 | CXXC1         |
| BCLAF1.8  | 1.71E-07 | 0.163839 | 0.501 | 0.38  | 0.002549 | CSCL2 | BCLAF1        |
| NMI.11    | 1.72E-07 | -0.32581 | 0.091 | 0.186 | 0.002567 | CSCL2 | NMI           |
| RP11-556E | 1.73E-07 | -0.27579 | 0     | 0.057 | 0.002583 | CSCL2 | RP11-556E13.1 |
| UBE2E2.7  | 1.74E-07 | 0.112441 | 0.358 | 0.235 | 0.002594 | CSCL2 | UBE2E2        |
| TRPV2.13  | 1.76E-07 | -0.24447 | 0.002 | 0.061 | 0.002636 | CSCL2 | TRPV2         |
| GCFC2.4   | 1.77E-07 | 0.203214 | 0.196 | 0.117 | 0.002649 | CSCL2 | GCFC2         |
| PKNOX1.3  | 1.82E-07 | 0.137465 | 0.183 | 0.106 | 0.00272  | CSCL2 | PKNOX1        |
| MFAP1.7   | 1.84E-07 | 0.182791 | 0.26  | 0.169 | 0.002745 | CSCL2 | MFAP1         |
| TYRO3.10  | 1.85E-07 | 0.148999 | 0.181 | 0.106 | 0.00276  | CSCL2 | TYRO3         |
| LRRC40.7  | 1.85E-07 | 0.148422 | 0.227 | 0.139 | 0.00277  | CSCL2 | LRRC40        |
| NIPSNAP3A | 1.87E-07 | -0.32035 | 0.106 | 0.204 | 0.002792 | CSCL2 | NIPSNAP3A     |
| SMC6.10   | 1.90E-07 | 0.203313 | 0.238 | 0.153 | 0.00284  | CSCL2 | SMC6          |
| HERC2.5   | 1.92E-07 | 0.133901 | 0.28  | 0.184 | 0.002871 | CSCL2 | HERC2         |
| FLII.9    | 1.92E-07 | -0.29857 | 0.097 | 0.191 | 0.002873 | CSCL2 | FLII          |
| PNMA2.11  | 1.92E-07 | 0.255035 | 0.216 | 0.136 | 0.002873 | CSCL2 | PNMA2         |
| FHL3.7    | 1.93E-07 | -0.19224 | 0.071 | 0.163 | 0.00288  | CSCL2 | FHL3          |
| NOC2L.10  | 1.95E-07 | 0.12203  | 0.426 | 0.308 | 0.002915 | CSCL2 | NOC2L         |
| FOSB.10   | 1.97E-07 | -0.38866 | 0.316 | 0.395 | 0.002951 | CSCL2 | FOSB          |
| ATXN80S.9 | 1.98E-07 | -0.62518 | 0.015 | 0.082 | 0.002963 | CSCL2 | ATXN80S       |
| HPSE.12   | 1.99E-07 | -0.26571 | 0.002 | 0.061 | 0.002981 | CSCL2 | HPSE          |
| CAPN1.8   | 2.00E-07 | -0.24401 | 0.157 | 0.263 | 0.002991 | CSCL2 | CAPN1         |
| CCDC112.1 | 2.02E-07 | 0.157257 | 0.369 | 0.256 | 0.003013 | CSCL2 | CCDC112       |
| HEXB.12   | 2.02E-07 | -0.18015 | 0.3   | 0.41  | 0.003016 | CSCL2 | HEXB          |
| TTYH2.10  | 2.03E-07 | -0.28739 | 0.04  | 0.118 | 0.003033 | CSCL2 | TTYH2         |
| DPY30.9   | 2.09E-07 | 0.128245 | 0.636 | 0.49  | 0.00312  | CSCL2 | DPY30         |
| COL6A1.12 | 2.09E-07 | -0.32888 | 0.137 | 0.232 | 0.003129 | CSCL2 | COL6A1        |
| ZFP1.6    | 2.10E-07 | 0.130263 | 0.126 | 0.064 | 0.00314  | CSCL2 | ZFP1          |
| SNW1.2    | 2.12E-07 | 0.175017 | 0.464 | 0.349 | 0.003168 | CSCL2 | SNW1          |
| TRMT112.7 | 2.12E-07 | -0.27124 | 0.689 | 0.707 | 0.003171 | CSCL2 | TRMT112       |
| SBNO1.9   | 2.13E-07 | 0.140559 | 0.371 | 0.261 | 0.003182 | CSCL2 | SBNO1         |
| LHFP.12   | 2.14E-07 | 0.156092 | 0.34  | 0.227 | 0.0032   | CSCL2 | LHFP          |
| ABCD3.8   | 2.15E-07 | 0.208459 | 0.285 | 0.192 | 0.00322  | CSCL2 | ABCD3         |
| IGF1.11   | 2.26E-07 | -0.30039 | 0.004 | 0.064 | 0.003373 | CSCL2 | IGF1          |
| CNIH4.9   | 2.31E-07 | 0.196412 | 0.494 | 0.369 | 0.003448 | CSCL2 | CNIH4         |
| THUMP3.7  | 2.32E-07 | 0.173947 | 0.278 | 0.19  | 0.003461 | CSCL2 | THUMP3        |
| AGT.11    | 2.32E-07 | -0.3752  | 0.124 | 0.224 | 0.003471 | CSCL2 | AGT           |
| CLEC4E.11 | 2.34E-07 | -0.33434 | 0.002 | 0.06  | 0.003492 | CSCL2 | CLEC4E        |
| MCRS1.7   | 2.41E-07 | 0.179056 | 0.369 | 0.266 | 0.003601 | CSCL2 | MCRS1         |
| SHF.2     | 2.43E-07 | 0.109812 | 0.091 | 0.041 | 0.003626 | CSCL2 | SHF           |

|            |          |          |       |       |          |       |               |
|------------|----------|----------|-------|-------|----------|-------|---------------|
| ZNF143.2   | 2.43E-07 | 0.130007 | 0.146 | 0.078 | 0.003637 | CSCL2 | ZNF143        |
| SMPDL3A.1  | 2.44E-07 | -0.3233  | 0.049 | 0.128 | 0.003644 | CSCL2 | SMPDL3A       |
| LINCO0910  | 2.46E-07 | 0.107381 | 0.143 | 0.076 | 0.003675 | CSCL2 | LINCO0910     |
| ANKRD22.1  | 2.48E-07 | -0.29888 | 0.007 | 0.067 | 0.0037   | CSCL2 | ANKRD22       |
| CLEC2B.13  | 2.48E-07 | -0.54161 | 0.126 | 0.208 | 0.003704 | CSCL2 | CLEC2B        |
| DMAP1.7    | 2.50E-07 | 0.155206 | 0.355 | 0.247 | 0.003743 | CSCL2 | DMAP1         |
| HRAS.11    | 2.54E-07 | 0.217582 | 0.397 | 0.289 | 0.003801 | CSCL2 | HRAS          |
| EIF2B4.6   | 2.55E-07 | 0.147307 | 0.28  | 0.184 | 0.003811 | CSCL2 | EIF2B4        |
| LILRB2.13  | 2.56E-07 | -0.25867 | 0     | 0.056 | 0.003828 | CSCL2 | LILRB2        |
| RP11-563K  | 2.58E-07 | 0.145894 | 0.121 | 0.062 | 0.003858 | CSCL2 | RP11-563K23.1 |
| ATP1B2.12  | 2.59E-07 | -0.28335 | 0.139 | 0.237 | 0.003866 | CSCL2 | ATP1B2        |
| TRRAP.1    | 2.62E-07 | 0.131855 | 0.15  | 0.082 | 0.003914 | CSCL2 | TRRAP         |
| IL16.12    | 2.64E-07 | -0.29829 | 0.009 | 0.071 | 0.003944 | CSCL2 | IL16          |
| PLAC8.12   | 2.64E-07 | -0.34775 | 0.009 | 0.07  | 0.003947 | CSCL2 | PLAC8         |
| MAN1C1.4   | 2.66E-07 | -0.15806 | 0.018 | 0.086 | 0.003979 | CSCL2 | MAN1C1        |
| EVA1B.8    | 2.66E-07 | -0.1605  | 0.044 | 0.126 | 0.003982 | CSCL2 | EVA1B         |
| TADA2A.3   | 2.73E-07 | 0.142373 | 0.135 | 0.072 | 0.004073 | CSCL2 | TADA2A        |
| RASAL3.12  | 2.73E-07 | -0.24506 | 0.002 | 0.059 | 0.004079 | CSCL2 | RASAL3        |
| SNHG15.6   | 2.73E-07 | -0.31213 | 0.121 | 0.226 | 0.004084 | CSCL2 | SNHG15        |
| ERP29.8    | 2.74E-07 | -0.26796 | 0.565 | 0.613 | 0.004093 | CSCL2 | ERP29         |
| ZNF250.5   | 2.77E-07 | 0.126586 | 0.146 | 0.078 | 0.004138 | CSCL2 | ZNF250        |
| BOK.12     | 2.79E-07 | -0.19374 | 0.013 | 0.078 | 0.004166 | CSCL2 | BOK           |
| MYO1G.12   | 2.81E-07 | -0.24455 | 0.004 | 0.063 | 0.004192 | CSCL2 | MYO1G         |
| UBA7.10    | 2.86E-07 | -0.3005  | 0.018 | 0.084 | 0.004281 | CSCL2 | UBA7          |
| PIBF1.5    | 2.87E-07 | 0.149691 | 0.157 | 0.087 | 0.004293 | CSCL2 | PIBF1         |
| NRROS.10   | 2.90E-07 | -0.29732 | 0.009 | 0.07  | 0.004326 | CSCL2 | NRROS         |
| C1QBP.10   | 2.91E-07 | 0.200948 | 0.704 | 0.548 | 0.004343 | CSCL2 | C1QBP         |
| HNRNPUL2.2 | 2.91E-07 | 0.168567 | 0.247 | 0.159 | 0.004345 | CSCL2 | HNRNPUL2      |
| NTHL1.7    | 2.94E-07 | 0.200573 | 0.272 | 0.184 | 0.004387 | CSCL2 | NTHL1         |
| PHACTR2.8  | 2.94E-07 | -0.17159 | 0.018 | 0.085 | 0.004399 | CSCL2 | PHACTR2       |
| PIK3AP1.1  | 2.94E-07 | -0.23849 | 0.007 | 0.067 | 0.004401 | CSCL2 | PIK3AP1       |
| HSD3B7.8   | 2.99E-07 | -0.245   | 0.013 | 0.078 | 0.004465 | CSCL2 | HSD3B7        |
| ACTN1.10   | 3.01E-07 | -0.29923 | 0.159 | 0.259 | 0.004503 | CSCL2 | ACTN1         |
| JUNB.8     | 3.03E-07 | -0.18461 | 0.664 | 0.726 | 0.004532 | CSCL2 | JUNB          |
| ZNF814.7   | 3.06E-07 | 0.140247 | 0.199 | 0.119 | 0.004572 | CSCL2 | ZNF814        |
| ALDH18A1.3 | 3.09E-07 | 0.164109 | 0.15  | 0.083 | 0.00462  | CSCL2 | ALDH18A1      |
| FAM184A.6  | 3.12E-07 | 0.140234 | 0.102 | 0.049 | 0.004659 | CSCL2 | FAM184A       |
| ADAM10.7   | 3.12E-07 | -0.2954  | 0.093 | 0.187 | 0.00466  | CSCL2 | ADAM10        |
| DUSP22.11  | 3.12E-07 | -0.2858  | 0.038 | 0.114 | 0.004661 | CSCL2 | DUSP22        |
| CCDC28A.1  | 3.15E-07 | -0.31692 | 0.073 | 0.162 | 0.004706 | CSCL2 | CCDC28A       |
| SPPL3.10   | 3.23E-07 | 0.129579 | 0.289 | 0.194 | 0.004823 | CSCL2 | SPPL3         |
| TMEM18.5   | 3.26E-07 | 0.1789   | 0.3   | 0.204 | 0.004877 | CSCL2 | TMEM18        |
| LRPAP1.8   | 3.26E-07 | -0.2714  | 0.479 | 0.55  | 0.004878 | CSCL2 | LRPAP1        |
| KBTBD7.7   | 3.27E-07 | 0.149412 | 0.152 | 0.084 | 0.004887 | CSCL2 | KBTBD7        |
| TBCCD1.1   | 3.28E-07 | 0.119339 | 0.121 | 0.062 | 0.004897 | CSCL2 | TBCCD1        |
| RGS18.13   | 3.38E-07 | -0.24576 | 0     | 0.054 | 0.00505  | CSCL2 | RGS18         |
| NELFCD.11  | 3.41E-07 | 0.151142 | 0.455 | 0.332 | 0.005103 | CSCL2 | NELFCD        |
| FPR3.13    | 3.43E-07 | -0.23303 | 0.002 | 0.058 | 0.005127 | CSCL2 | FPR3          |
| HM13.4     | 3.46E-07 | -0.27058 | 0.402 | 0.478 | 0.005177 | CSCL2 | HM13          |
| EPHX1.7    | 3.48E-07 | -0.34261 | 0.135 | 0.236 | 0.005202 | CSCL2 | EPHX1         |
| KCNMB1.12  | 3.49E-07 | -0.38918 | 0.033 | 0.105 | 0.005216 | CSCL2 | KCNMB1        |

|             |           |           |        |        |           |       |                |
|-------------|-----------|-----------|--------|--------|-----------|-------|----------------|
| RHOQ. 8     | 3. 50E-07 | -0. 24735 | 0. 075 | 0. 165 | 0. 005234 | CSCL2 | RHOQ           |
| SCAI. 6     | 3. 50E-07 | 0. 112636 | 0. 148 | 0. 08  | 0. 005237 | CSCL2 | SCAI           |
| UBASH3B. 8  | 3. 54E-07 | -0. 17018 | 0. 013 | 0. 078 | 0. 005286 | CSCL2 | UBASH3B        |
| RBM15. 1    | 3. 60E-07 | 0. 12903  | 0. 099 | 0. 047 | 0. 005373 | CSCL2 | RBM15          |
| PCGF5. 8    | 3. 63E-07 | -0. 25139 | 0. 088 | 0. 183 | 0. 005419 | CSCL2 | PCGF5          |
| IFNGR2. 11  | 3. 65E-07 | -0. 32284 | 0. 307 | 0. 393 | 0. 005448 | CSCL2 | IFNGR2         |
| SOAT1. 13   | 3. 65E-07 | -0. 35765 | 0. 11  | 0. 201 | 0. 00546  | CSCL2 | SOAT1          |
| TAF1A. 4    | 3. 66E-07 | 0. 112684 | 0. 11  | 0. 054 | 0. 005467 | CSCL2 | TAF1A          |
| ARPC5. 11   | 3. 69E-07 | -0. 2126  | 0. 678 | 0. 672 | 0. 005517 | CSCL2 | ARPC5          |
| ATP2A2. 7   | 3. 71E-07 | 0. 154237 | 0. 38  | 0. 275 | 0. 00554  | CSCL2 | ATP2A2         |
| ILK. 6      | 3. 71E-07 | -0. 31507 | 0. 267 | 0. 369 | 0. 005546 | CSCL2 | ILK            |
| SP140L. 9   | 3. 71E-07 | -0. 26935 | 0. 015 | 0. 08  | 0. 005551 | CSCL2 | SP140L         |
| WDR82. 7    | 3. 71E-07 | 0. 188883 | 0. 349 | 0. 25  | 0. 005551 | CSCL2 | WDR82          |
| THAP9-AS1   | 3. 76E-07 | 0. 120087 | 0. 32  | 0. 217 | 0. 005616 | CSCL2 | THAP9-AS1      |
| SLC25A11. 3 | 3. 77E-07 | 0. 169361 | 0. 541 | 0. 415 | 0. 005638 | CSCL2 | SLC25A11       |
| RHOA. 10    | 3. 77E-07 | -0. 22089 | 0. 766 | 0. 754 | 0. 00564  | CSCL2 | RHOA           |
| GALNT2. 6   | 3. 79E-07 | -0. 34063 | 0. 15  | 0. 247 | 0. 005666 | CSCL2 | GALNT2         |
| CSPG4. 1    | 3. 80E-07 | 0. 102315 | 0. 071 | 0. 029 | 0. 005676 | CSCL2 | CSPG4          |
| PAN2        | 3. 85E-07 | 0. 114284 | 0. 11  | 0. 054 | 0. 005756 | CSCL2 | PAN2           |
| DENR. 8     | 3. 85E-07 | 0. 149889 | 0. 435 | 0. 316 | 0. 005759 | CSCL2 | DENR           |
| MT1F. 11    | 4. 03E-07 | -0. 33166 | 0. 205 | 0. 309 | 0. 006016 | CSCL2 | MT1F           |
| HMGCL. 2    | 4. 03E-07 | -0. 27338 | 0. 121 | 0. 222 | 0. 006029 | CSCL2 | HMGCL          |
| AP001055. 4 | 4. 05E-07 | -0. 33867 | 0. 018 | 0. 082 | 0. 00605  | CSCL2 | AP001055. 6    |
| SIAH2. 6    | 4. 07E-07 | 0. 120953 | 0. 311 | 0. 206 | 0. 006077 | CSCL2 | SIAH2          |
| PCBP1. 8    | 4. 14E-07 | 0. 133656 | 0. 687 | 0. 584 | 0. 006188 | CSCL2 | PCBP1          |
| SFMBT2. 1C  | 4. 14E-07 | -0. 31568 | 0. 015 | 0. 08  | 0. 006193 | CSCL2 | SFMBT2         |
| CGGBP1. 5   | 4. 15E-07 | 0. 210145 | 0. 366 | 0. 266 | 0. 006199 | CSCL2 | CGGBP1         |
| TFEB. 9     | 4. 15E-07 | -0. 2287  | 0. 015 | 0. 08  | 0. 006201 | CSCL2 | TFEB           |
| BATF3. 6    | 4. 15E-07 | -0. 17431 | 0. 024 | 0. 095 | 0. 006201 | CSCL2 | BATF3          |
| PTCD1. 2    | 4. 19E-07 | 0. 119381 | 0. 146 | 0. 079 | 0. 006263 | CSCL2 | PTCD1          |
| RWDD4. 7    | 4. 20E-07 | 0. 162027 | 0. 32  | 0. 223 | 0. 006282 | CSCL2 | RWDD4          |
| FAU. 10     | 4. 27E-07 | -0. 22118 | 0. 951 | 0. 958 | 0. 006381 | CSCL2 | FAU            |
| SDR39U1. 6  | 4. 31E-07 | 0. 166635 | 0. 375 | 0. 27  | 0. 006435 | CSCL2 | SDR39U1        |
| RP11-544A   | 4. 32E-07 | 0. 12859  | 0. 148 | 0. 08  | 0. 006458 | CSCL2 | RP11-544A12. 8 |
| ZNF669. 5   | 4. 32E-07 | 0. 111889 | 0. 166 | 0. 093 | 0. 006459 | CSCL2 | ZNF669         |
| ZNF77       | 4. 39E-07 | 0. 109028 | 0. 086 | 0. 039 | 0. 006555 | CSCL2 | ZNF77          |
| BDP1. 5     | 4. 43E-07 | 0. 187287 | 0. 34  | 0. 241 | 0. 006619 | CSCL2 | BDP1           |
| DGUOK. 9    | 4. 46E-07 | 0. 111419 | 0. 656 | 0. 51  | 0. 006659 | CSCL2 | DGUOK          |
| COX7A2L. 3  | 4. 55E-07 | -0. 27731 | 0. 57  | 0. 614 | 0. 006795 | CSCL2 | COX7A2L        |
| FRYL. 12    | 4. 56E-07 | 0. 1649   | 0. 274 | 0. 184 | 0. 006821 | CSCL2 | FRYL           |
| ZNF793. 8   | 4. 58E-07 | 0. 15714  | 0. 181 | 0. 107 | 0. 006838 | CSCL2 | ZNF793         |
| ERCC3. 4    | 4. 59E-07 | 0. 146861 | 0. 225 | 0. 141 | 0. 006853 | CSCL2 | ERCC3          |
| PLS3. 11    | 4. 59E-07 | -0. 17777 | 0. 128 | 0. 225 | 0. 006866 | CSCL2 | PLS3           |
| GPHN. 7     | 4. 67E-07 | 0. 110108 | 0. 124 | 0. 064 | 0. 006978 | CSCL2 | GPHN           |
| MAGEH1. 11  | 4. 73E-07 | 0. 103091 | 0. 435 | 0. 313 | 0. 007073 | CSCL2 | MAGEH1         |
| TBCC. 11    | 4. 73E-07 | 0. 145928 | 0. 322 | 0. 217 | 0. 007076 | CSCL2 | TBCC           |
| IRF3. 6     | 4. 77E-07 | -0. 23833 | 0. 143 | 0. 248 | 0. 007134 | CSCL2 | IRF3           |
| PRPSAP2. 7  | 4. 85E-07 | 0. 147533 | 0. 373 | 0. 262 | 0. 007243 | CSCL2 | PRPSAP2        |
| CD9. 6      | 4. 86E-07 | -0. 38735 | 0. 503 | 0. 568 | 0. 007263 | CSCL2 | CD9            |
| EFCAB7. 6   | 4. 86E-07 | 0. 140925 | 0. 128 | 0. 067 | 0. 007268 | CSCL2 | EFCAB7         |
| GNPTAB. 5   | 4. 90E-07 | -0. 30256 | 0. 075 | 0. 159 | 0. 007329 | CSCL2 | GNPTAB         |

|            |          |          |       |       |          |       |               |
|------------|----------|----------|-------|-------|----------|-------|---------------|
| RP11-436C  | 4.95E-07 | 0.11692  | 0.044 | 0.014 | 0.007392 | CSCL2 | RP11-436D23.1 |
| UBQLN2.1C  | 4.98E-07 | 0.12894  | 0.318 | 0.217 | 0.007438 | CSCL2 | UBQLN2        |
| ECHDC2.8   | 5.00E-07 | -0.19624 | 0.097 | 0.192 | 0.007474 | CSCL2 | ECHDC2        |
| ZNF268.8   | 5.01E-07 | 0.119746 | 0.19  | 0.114 | 0.007482 | CSCL2 | ZNF268        |
| LMBRD1.8   | 5.04E-07 | -0.37993 | 0.126 | 0.22  | 0.007538 | CSCL2 | LMBRD1        |
| VSIG10.3   | 5.13E-07 | 0.148132 | 0.117 | 0.06  | 0.00766  | CSCL2 | VSIG10        |
| ARHGAP27.5 | 5.16E-07 | -0.22612 | 0.002 | 0.057 | 0.007705 | CSCL2 | ARHGAP27      |
| PHF5A.4    | 5.16E-07 | 0.122885 | 0.433 | 0.323 | 0.007713 | CSCL2 | PHF5A         |
| UBE2D3.1C  | 5.17E-07 | -0.20025 | 0.702 | 0.729 | 0.00772  | CSCL2 | UBE2D3        |
| TOM1.10    | 5.17E-07 | -0.29125 | 0.077 | 0.164 | 0.007723 | CSCL2 | TOM1          |
| METRNL.1C  | 5.19E-07 | -0.29218 | 0.02  | 0.085 | 0.00775  | CSCL2 | METRNL        |
| TICAM1.3   | 5.20E-07 | -0.20005 | 0.024 | 0.093 | 0.007765 | CSCL2 | TICAM1        |
| PRKD3.5    | 5.23E-07 | 0.121094 | 0.23  | 0.143 | 0.007822 | CSCL2 | PRKD3         |
| NBPF1.11   | 5.30E-07 | 0.208497 | 0.325 | 0.232 | 0.007919 | CSCL2 | NBPF1         |
| SCAMP1.9   | 5.31E-07 | 0.200886 | 0.307 | 0.21  | 0.00794  | CSCL2 | SCAMP1        |
| DCXR.6     | 5.32E-07 | 0.149458 | 0.57  | 0.448 | 0.00795  | CSCL2 | DCXR          |
| DCAF6.7    | 5.32E-07 | -0.22961 | 0.079 | 0.169 | 0.007952 | CSCL2 | DCAF6         |
| TRIM41.2   | 5.33E-07 | 0.160325 | 0.166 | 0.096 | 0.007961 | CSCL2 | TRIM41        |
| LSAMP.9    | 5.35E-07 | 0.123335 | 0.267 | 0.168 | 0.007991 | CSCL2 | LSAMP         |
| UBQLN4.5   | 5.35E-07 | 0.197507 | 0.17  | 0.1   | 0.007998 | CSCL2 | UBQLN4        |
| ZNF292.1C  | 5.41E-07 | 0.12836  | 0.366 | 0.26  | 0.008086 | CSCL2 | ZNF292        |
| Clorf159.5 | 5.49E-07 | 0.135745 | 0.102 | 0.05  | 0.008203 | CSCL2 | Clorf159      |
| MSRA.10    | 5.52E-07 | 0.126608 | 0.366 | 0.252 | 0.008246 | CSCL2 | MSRA          |
| GLB1.10    | 5.53E-07 | -0.3351  | 0.152 | 0.248 | 0.00826  | CSCL2 | GLB1          |
| ZNF7.5     | 5.60E-07 | 0.143058 | 0.245 | 0.157 | 0.008369 | CSCL2 | ZNF7          |
| FN1.11     | 5.61E-07 | -0.41574 | 0.075 | 0.158 | 0.008377 | CSCL2 | FN1           |
| GIMAP5.11  | 5.61E-07 | -0.23618 | 0     | 0.053 | 0.008386 | CSCL2 | GIMAP5        |
| CBY1.8     | 5.65E-07 | 0.1731   | 0.238 | 0.156 | 0.008441 | CSCL2 | CBY1          |
| CEP97.8    | 5.72E-07 | 0.113605 | 0.137 | 0.073 | 0.008543 | CSCL2 | CEP97         |
| YWHAG.9    | 5.80E-07 | 0.151426 | 0.508 | 0.386 | 0.008665 | CSCL2 | YWHAG         |
| THOC2.7    | 5.81E-07 | 0.163218 | 0.411 | 0.299 | 0.008681 | CSCL2 | THOC2         |
| MMP19.8    | 5.83E-07 | -0.24962 | 0.004 | 0.06  | 0.008705 | CSCL2 | MMP19         |
| ZNF766.5   | 5.85E-07 | 0.199423 | 0.199 | 0.123 | 0.008746 | CSCL2 | ZNF766        |
| OBFC1.5    | 6.03E-07 | -0.23449 | 0.022 | 0.089 | 0.009017 | CSCL2 | OBFC1         |
| FGFR10P.4  | 6.04E-07 | 0.154126 | 0.141 | 0.078 | 0.009025 | CSCL2 | FGFR10P       |
| PDCD7.8    | 6.07E-07 | 0.18099  | 0.309 | 0.217 | 0.009074 | CSCL2 | PDCD7         |
| FAM69C.11  | 6.16E-07 | -0.11275 | 0.015 | 0.079 | 0.009202 | CSCL2 | FAM69C        |
| HSPB11.7   | 6.18E-07 | 0.17632  | 0.435 | 0.324 | 0.009238 | CSCL2 | HSPB11        |
| OPHN1.9    | 6.20E-07 | 0.138868 | 0.13  | 0.069 | 0.009261 | CSCL2 | OPHN1         |
| STAG2.4    | 6.21E-07 | 0.124162 | 0.342 | 0.239 | 0.00928  | CSCL2 | STAG2         |
| GPRASP1.1  | 6.22E-07 | 0.105581 | 0.06  | 0.023 | 0.009299 | CSCL2 | GPRASP1       |
| IGDCC3.12  | 6.23E-07 | 0.131664 | 0.117 | 0.06  | 0.009317 | CSCL2 | IGDCC3        |
| UBN1.9     | 6.24E-07 | 0.149557 | 0.247 | 0.163 | 0.009323 | CSCL2 | UBN1          |
| AMH.9      | 6.30E-07 | 0.157529 | 0.108 | 0.055 | 0.009411 | CSCL2 | AMH           |
| NOL10.7    | 6.32E-07 | 0.162045 | 0.234 | 0.152 | 0.009442 | CSCL2 | NOL10         |
| FBXL15.11  | 6.32E-07 | -0.25681 | 0.106 | 0.199 | 0.009446 | CSCL2 | FBXL15        |
| LHPP.8     | 6.32E-07 | -0.37499 | 0.035 | 0.108 | 0.009446 | CSCL2 | LHPP          |
| NOL3.10    | 6.47E-07 | -0.29201 | 0.082 | 0.169 | 0.009668 | CSCL2 | NOL3          |
| AASS.9     | 6.51E-07 | 0.133498 | 0.185 | 0.112 | 0.009735 | CSCL2 | AASS          |
| SLC27A1.7  | 6.54E-07 | -0.23018 | 0.077 | 0.163 | 0.009772 | CSCL2 | SLC27A1       |
| CCL3L3.1C  | 6.64E-07 | -0.64184 | 0.002 | 0.056 | 0.009926 | CSCL2 | CCL3L3        |



|             |           |           |        |        |           |       |                |
|-------------|-----------|-----------|--------|--------|-----------|-------|----------------|
| NGFR. 8     | 6. 65E-07 | 0. 130749 | 0. 079 | 0. 035 | 0. 009941 | CSCL2 | NGFR           |
| SF3B4. 3    | 6. 68E-07 | 0. 126226 | 0. 428 | 0. 317 | 0. 009983 | CSCL2 | SF3B4          |
| RAB4B. 7    | 6. 70E-07 | -0. 28126 | 0. 163 | 0. 267 | 0. 010008 | CSCL2 | RAB4B          |
| CLDN12. 13  | 6. 91E-07 | 0. 241061 | 0. 216 | 0. 135 | 0. 010322 | CSCL2 | CLDN12         |
| BRK1. 4     | 6. 91E-07 | -0. 16927 | 0. 788 | 0. 78  | 0. 01033  | CSCL2 | BRK1           |
| DOK3. 12    | 6. 94E-07 | -0. 21696 | 0. 009 | 0. 068 | 0. 01037  | CSCL2 | DOK3           |
| SF3B1. 6    | 7. 00E-07 | 0. 131463 | 0. 558 | 0. 431 | 0. 010455 | CSCL2 | SF3B1          |
| SREK1. 9    | 7. 01E-07 | 0. 198198 | 0. 422 | 0. 319 | 0. 010477 | CSCL2 | SREK1          |
| CNOT8. 4    | 7. 08E-07 | 0. 167144 | 0. 269 | 0. 178 | 0. 010581 | CSCL2 | CNOT8          |
| ZNF548. 4   | 7. 19E-07 | 0. 147138 | 0. 126 | 0. 066 | 0. 010745 | CSCL2 | ZNF548         |
| MAPRE1. 6   | 7. 31E-07 | 0. 179457 | 0. 603 | 0. 472 | 0. 010923 | CSCL2 | MAPRE1         |
| ZNF524. 7   | 7. 39E-07 | -0. 20312 | 0. 097 | 0. 191 | 0. 01105  | CSCL2 | ZNF524         |
| THOC3. 6    | 7. 40E-07 | 0. 117923 | 0. 254 | 0. 166 | 0. 011053 | CSCL2 | THOC3          |
| CABLES2     | 7. 40E-07 | 0. 110368 | 0. 06  | 0. 023 | 0. 011057 | CSCL2 | CABLES2        |
| RP13-1032   | 7. 41E-07 | 0. 173857 | 0. 137 | 0. 077 | 0. 011071 | CSCL2 | RP13-1032I1. 7 |
| UQCRC1. 7   | 7. 49E-07 | 0. 138361 | 0. 627 | 0. 483 | 0. 011186 | CSCL2 | UQCRC1         |
| GLIPR2. 11  | 7. 51E-07 | -0. 24151 | 0. 168 | 0. 273 | 0. 011222 | CSCL2 | GLIPR2         |
| ZNF853. 9   | 7. 54E-07 | 0. 126562 | 0. 095 | 0. 046 | 0. 011269 | CSCL2 | ZNF853         |
| DTD1. 12    | 7. 64E-07 | 0. 145943 | 0. 521 | 0. 386 | 0. 011411 | CSCL2 | DTD1           |
| NDUFS1. 9   | 7. 67E-07 | 0. 187426 | 0. 347 | 0. 251 | 0. 011468 | CSCL2 | NDUFS1         |
| FAM49A. 8   | 7. 73E-07 | -0. 30534 | 0. 088 | 0. 174 | 0. 011549 | CSCL2 | FAM49A         |
| SDC2. 8     | 7. 76E-07 | -0. 25147 | 0. 104 | 0. 196 | 0. 0116   | CSCL2 | SDC2           |
| TMEM68. 8   | 7. 87E-07 | 0. 172065 | 0. 249 | 0. 164 | 0. 011755 | CSCL2 | TMEM68         |
| NDUFB4. 4   | 7. 87E-07 | -0. 19447 | 0. 658 | 0. 681 | 0. 011765 | CSCL2 | NDUFB4         |
| ABR. 8      | 7. 93E-07 | -0. 26415 | 0. 066 | 0. 148 | 0. 011857 | CSCL2 | ABR            |
| UMPS. 7     | 7. 95E-07 | 0. 21574  | 0. 205 | 0. 13  | 0. 011875 | CSCL2 | UMPS           |
| NKIRAS2. 7  | 7. 95E-07 | 0. 121939 | 0. 362 | 0. 259 | 0. 011881 | CSCL2 | NKIRAS2        |
| TRIM44. 1C  | 8. 04E-07 | 0. 166299 | 0. 389 | 0. 283 | 0. 012016 | CSCL2 | TRIM44         |
| MEPCE. 3    | 8. 10E-07 | 0. 148929 | 0. 201 | 0. 125 | 0. 012111 | CSCL2 | MEPCE          |
| FZR1. 7     | 8. 16E-07 | 0. 219668 | 0. 232 | 0. 152 | 0. 01219  | CSCL2 | FZR1           |
| TMEM144. 8  | 8. 26E-07 | -0. 42938 | 0. 018 | 0. 08  | 0. 012343 | CSCL2 | TMEM144        |
| TAX1BP3. 9  | 8. 29E-07 | -0. 38736 | 0. 3   | 0. 385 | 0. 012387 | CSCL2 | TAX1BP3        |
| PNKD. 8     | 8. 30E-07 | 0. 123007 | 0. 589 | 0. 452 | 0. 012403 | CSCL2 | PNKD           |
| IWS1. 8     | 8. 36E-07 | 0. 1738   | 0. 3   | 0. 209 | 0. 012496 | CSCL2 | IWS1           |
| NFKBIZ. 11  | 8. 40E-07 | -0. 30001 | 0. 093 | 0. 178 | 0. 01255  | CSCL2 | NFKBIZ         |
| ECHS1. 7    | 8. 41E-07 | -0. 28031 | 0. 36  | 0. 437 | 0. 012573 | CSCL2 | ECHS1          |
| CSTF1. 4    | 8. 52E-07 | 0. 137625 | 0. 203 | 0. 127 | 0. 012738 | CSCL2 | CSTF1          |
| NSD1. 6     | 8. 72E-07 | 0. 159355 | 0. 325 | 0. 229 | 0. 013024 | CSCL2 | NSD1           |
| GTF2IRD2. 8 | 8. 76E-07 | 0. 112787 | 0. 19  | 0. 113 | 0. 01309  | CSCL2 | GTF2IRD2       |
| FAM20C. 1C  | 8. 81E-07 | -0. 29844 | 0. 132 | 0. 227 | 0. 013165 | CSCL2 | FAM20C         |
| TRMT10C. 8  | 8. 90E-07 | 0. 114128 | 0. 347 | 0. 246 | 0. 013306 | CSCL2 | TRMT10C        |
| DCAF15. 4   | 9. 07E-07 | 0. 143625 | 0. 179 | 0. 107 | 0. 013554 | CSCL2 | DCAF15         |
| MX2. 13     | 9. 09E-07 | -0. 26914 | 0. 009 | 0. 066 | 0. 013579 | CSCL2 | MX2            |
| REEP6. 1    | 9. 23E-07 | -0. 13452 | 0. 02  | 0. 085 | 0. 013794 | CSCL2 | REEP6          |
| BIRC3. 7    | 9. 34E-07 | -0. 2965  | 0. 009 | 0. 066 | 0. 013963 | CSCL2 | BIRC3          |
| EMC8. 8     | 9. 38E-07 | 0. 213823 | 0. 373 | 0. 268 | 0. 014012 | CSCL2 | EMC8           |
| BBOX1. 12   | 9. 44E-07 | -0. 20633 | 0. 057 | 0. 141 | 0. 0141   | CSCL2 | BBOX1          |
| ABHD8. 8    | 9. 51E-07 | -0. 17668 | 0. 064 | 0. 148 | 0. 01421  | CSCL2 | ABHD8          |
| URGCP. 7    | 9. 57E-07 | 0. 168322 | 0. 188 | 0. 113 | 0. 014297 | CSCL2 | URGCP          |
| ZC3H7A. 7   | 9. 61E-07 | 0. 143445 | 0. 23  | 0. 146 | 0. 014367 | CSCL2 | ZC3H7A         |
| ACBD6. 8    | 9. 64E-07 | 0. 194812 | 0. 371 | 0. 273 | 0. 014405 | CSCL2 | ACBD6          |

|             |           |           |        |        |           |       |                |
|-------------|-----------|-----------|--------|--------|-----------|-------|----------------|
| CYLD. 8     | 9. 70E-07 | -0. 31203 | 0. 084 | 0. 168 | 0. 014494 | CSCL2 | CYLD           |
| GMPS. 7     | 9. 77E-07 | 0. 176954 | 0. 267 | 0. 181 | 0. 014603 | CSCL2 | GMPS           |
| ITGB5. 8    | 9. 80E-07 | -0. 21733 | 0. 004 | 0. 058 | 0. 01465  | CSCL2 | ITGB5          |
| PRPF38B. 7  | 9. 91E-07 | 0. 15545  | 0. 554 | 0. 43  | 0. 014805 | CSCL2 | PRPF38B        |
| POM121. 5   | 1. 00E-06 | 0. 137614 | 0. 236 | 0. 154 | 0. 014945 | CSCL2 | POM121         |
| TMEM63A. 7  | 1. 00E-06 | -0. 2404  | 0. 013 | 0. 073 | 0. 015003 | CSCL2 | TMEM63A        |
| PDS5A. 3    | 1. 01E-06 | 0. 143959 | 0. 236 | 0. 155 | 0. 015125 | CSCL2 | PDS5A          |
| PRRC2A. 7   | 1. 02E-06 | 0. 171779 | 0. 336 | 0. 239 | 0. 015309 | CSCL2 | PRRC2A         |
| YWHAH. 11   | 1. 03E-06 | 0. 159789 | 0. 72  | 0. 559 | 0. 01534  | CSCL2 | YWHAH          |
| PCNXL4. 2   | 1. 03E-06 | 0. 112506 | 0. 194 | 0. 12  | 0. 015442 | CSCL2 | PCNXL4         |
| PRCC. 8     | 1. 04E-06 | 0. 177976 | 0. 402 | 0. 299 | 0. 015549 | CSCL2 | PRCC           |
| GNGT2. 13   | 1. 04E-06 | -0. 23158 | 0. 002 | 0. 054 | 0. 015569 | CSCL2 | GNGT2          |
| ERAL1. 7    | 1. 04E-06 | 0. 13646  | 0. 336 | 0. 237 | 0. 015577 | CSCL2 | ERAL1          |
| RBM7. 4     | 1. 05E-06 | -0. 26453 | 0. 148 | 0. 247 | 0. 015622 | CSCL2 | RBM7           |
| SNAPIN. 4   | 1. 05E-06 | 0. 124925 | 0. 488 | 0. 372 | 0. 01565  | CSCL2 | SNAPIN         |
| TRAF3IP3. 1 | 1. 05E-06 | -0. 26009 | 0. 002 | 0. 054 | 0. 0157   | CSCL2 | TRAF3IP3       |
| FIZ1. 3     | 1. 06E-06 | 0. 12902  | 0. 097 | 0. 047 | 0. 015832 | CSCL2 | FIZ1           |
| PIM1. 7     | 1. 07E-06 | 0. 13992  | 0. 21  | 0. 127 | 0. 015959 | CSCL2 | PIM1           |
| RP6-91H8. 1 | 1. 09E-06 | -0. 2921  | 0. 004 | 0. 058 | 0. 016218 | CSCL2 | RP6-91H8. 3    |
| YTHDF2. 9   | 1. 09E-06 | 0. 114455 | 0. 547 | 0. 426 | 0. 016257 | CSCL2 | YTHDF2         |
| RP11-390E   | 1. 09E-06 | 0. 14908  | 0. 196 | 0. 121 | 0. 016291 | CSCL2 | RP11-390E23. 6 |
| ARMC10. 9   | 1. 10E-06 | 0. 167035 | 0. 393 | 0. 293 | 0. 016458 | CSCL2 | ARMC10         |
| SAMD14. 8   | 1. 14E-06 | 0. 118273 | 0. 119 | 0. 062 | 0. 016996 | CSCL2 | SAMD14         |
| RP11-480C   | 1. 14E-06 | -0. 28188 | 0      | 0. 05  | 0. 017102 | CSCL2 | RP11-480C22. 1 |
| SAA2. 9     | 1. 15E-06 | -0. 68241 | 0. 002 | 0. 054 | 0. 017185 | CSCL2 | SAA2           |
| IL17RA. 13  | 1. 15E-06 | -0. 2969  | 0. 049 | 0. 122 | 0. 017213 | CSCL2 | IL17RA         |
| FXR1. 3     | 1. 16E-06 | 0. 192022 | 0. 426 | 0. 323 | 0. 017353 | CSCL2 | FXR1           |
| SAMD1. 4    | 1. 17E-06 | 0. 168384 | 0. 168 | 0. 1   | 0. 017495 | CSCL2 | SAMD1          |
| OCEL1. 6    | 1. 17E-06 | -0. 22797 | 0. 075 | 0. 16  | 0. 017527 | CSCL2 | OCEL1          |
| COPS5. 6    | 1. 17E-06 | 0. 136152 | 0. 534 | 0. 405 | 0. 017527 | CSCL2 | COPS5          |
| TAPBPL. 8   | 1. 18E-06 | -0. 17215 | 0. 049 | 0. 125 | 0. 017651 | CSCL2 | TAPBPL         |
| PLEKHB1. 9  | 1. 18E-06 | -0. 34258 | 0. 124 | 0. 216 | 0. 0177   | CSCL2 | PLEKHB1        |
| TUBGCP4. 7  | 1. 18E-06 | 0. 159041 | 0. 194 | 0. 12  | 0. 017701 | CSCL2 | TUBGCP4        |
| OSMR. 10    | 1. 20E-06 | -0. 14715 | 0. 022 | 0. 087 | 0. 017871 | CSCL2 | OSMR           |
| MAN1A1. 11  | 1. 20E-06 | -0. 19362 | 0      | 0. 05  | 0. 017905 | CSCL2 | MAN1A1         |
| GBAS. 8     | 1. 22E-06 | 0. 16349  | 0. 508 | 0. 396 | 0. 0182   | CSCL2 | GBAS           |
| RAP1B. 8    | 1. 22E-06 | -0. 21857 | 0. 344 | 0. 438 | 0. 018262 | CSCL2 | RAP1B          |
| TMEM37. 8   | 1. 23E-06 | -0. 27546 | 0. 009 | 0. 065 | 0. 018456 | CSCL2 | TMEM37         |
| USP22. 12   | 1. 25E-06 | 0. 103407 | 0. 435 | 0. 315 | 0. 018673 | CSCL2 | USP22          |
| RP11-192H   | 1. 25E-06 | 0. 128095 | 0. 183 | 0. 111 | 0. 018727 | CSCL2 | RP11-192H23. 6 |
| ZNF207. 4   | 1. 25E-06 | 0. 157037 | 0. 585 | 0. 45  | 0. 018755 | CSCL2 | ZNF207         |
| SIK1. 11    | 1. 27E-06 | -0. 32663 | 0. 035 | 0. 103 | 0. 018926 | CSCL2 | SIK1           |
| C15orf48. 1 | 1. 27E-06 | -0. 33086 | 0. 013 | 0. 071 | 0. 018936 | CSCL2 | C15orf48       |
| MT1G. 9     | 1. 29E-06 | -0. 49277 | 0. 055 | 0. 131 | 0. 019287 | CSCL2 | MT1G           |
| SETD6. 6    | 1. 30E-06 | 0. 14105  | 0. 152 | 0. 088 | 0. 019389 | CSCL2 | SETD6          |
| PHF2. 1     | 1. 31E-06 | 0. 160222 | 0. 11  | 0. 057 | 0. 019523 | CSCL2 | PHF2           |
| PRNP. 6     | 1. 31E-06 | -0. 2298  | 0. 386 | 0. 469 | 0. 019541 | CSCL2 | PRNP           |
| RP11-14N7   | 1. 32E-06 | 0. 113955 | 0. 291 | 0. 201 | 0. 019795 | CSCL2 | RP11-14N7. 2   |
| ZNF385D. 1  | 1. 33E-06 | -0. 14907 | 0. 04  | 0. 113 | 0. 019884 | CSCL2 | ZNF385D        |
| AGAP1. 10   | 1. 34E-06 | 0. 129039 | 0. 19  | 0. 117 | 0. 02003  | CSCL2 | AGAP1          |
| LDOC1L. 1C  | 1. 35E-06 | 0. 179238 | 0. 146 | 0. 084 | 0. 020115 | CSCL2 | LDOC1L         |

|             |           |           |        |        |           |       |           |
|-------------|-----------|-----------|--------|--------|-----------|-------|-----------|
| SDS. 13     | 1. 35E-06 | -0. 32378 | 0. 007 | 0. 061 | 0. 020202 | CSCL2 | SDS       |
| ASAP1. 8    | 1. 36E-06 | 0. 201101 | 0. 309 | 0. 224 | 0. 020273 | CSCL2 | ASAP1     |
| SCAMP5. 9   | 1. 37E-06 | 0. 167465 | 0. 159 | 0. 093 | 0. 020428 | CSCL2 | SCAMP5    |
| EAF2. 12    | 1. 38E-06 | -0. 28004 | 0. 029 | 0. 095 | 0. 0206   | CSCL2 | EAF2      |
| WIPF1. 13   | 1. 38E-06 | -0. 39196 | 0. 137 | 0. 223 | 0. 02061  | CSCL2 | WIPF1     |
| CNIH3. 10   | 1. 38E-06 | -0. 12507 | 0. 086 | 0. 172 | 0. 020623 | CSCL2 | CNIH3     |
| TTYH1. 13   | 1. 42E-06 | 0. 24397  | 0. 382 | 0. 263 | 0. 021216 | CSCL2 | TTYH1     |
| PCBP4. 13   | 1. 45E-06 | 0. 14982  | 0. 353 | 0. 252 | 0. 021723 | CSCL2 | PCBP4     |
| MBIP. 9     | 1. 47E-06 | 0. 114482 | 0. 267 | 0. 176 | 0. 022029 | CSCL2 | MBIP      |
| NR1H2. 10   | 1. 49E-06 | -0. 29976 | 0. 21  | 0. 307 | 0. 022271 | CSCL2 | NR1H2     |
| GFPT1. 5    | 1. 51E-06 | 0. 163824 | 0. 159 | 0. 092 | 0. 022495 | CSCL2 | GFPT1     |
| PARP10. 6   | 1. 53E-06 | -0. 20038 | 0. 024 | 0. 089 | 0. 022928 | CSCL2 | PARP10    |
| NUDT4. 5    | 1. 55E-06 | 0. 163543 | 0. 287 | 0. 2   | 0. 023129 | CSCL2 | NUDT4     |
| CCNDBP1. 1  | 1. 57E-06 | -0. 34338 | 0. 119 | 0. 208 | 0. 023485 | CSCL2 | CCNDBP1   |
| DBR1. 3     | 1. 58E-06 | 0. 114426 | 0. 137 | 0. 076 | 0. 023557 | CSCL2 | DBR1      |
| MAPK3. 5    | 1. 59E-06 | -0. 28634 | 0. 117 | 0. 21  | 0. 023721 | CSCL2 | MAPK3     |
| EXO5. 1     | 1. 59E-06 | 0. 105338 | 0. 051 | 0. 019 | 0. 023811 | CSCL2 | EXO5      |
| ASXL1. 8    | 1. 60E-06 | 0. 190698 | 0. 254 | 0. 174 | 0. 023868 | CSCL2 | ASXL1     |
| SMARCA1. 1  | 1. 60E-06 | 0. 199407 | 0. 247 | 0. 168 | 0. 023977 | CSCL2 | SMARCA1   |
| VDAC2. 2    | 1. 62E-06 | 0. 12114  | 0. 77  | 0. 634 | 0. 024154 | CSCL2 | VDAC2     |
| SLC9A3R2. 1 | 1. 62E-06 | -0. 16485 | 0. 042 | 0. 115 | 0. 024234 | CSCL2 | SLC9A3R2  |
| MTMR9. 8    | 1. 62E-06 | 0. 118296 | 0. 278 | 0. 186 | 0. 02426  | CSCL2 | MTMR9     |
| SLC25A22. 1 | 1. 63E-06 | 0. 122894 | 0. 181 | 0. 11  | 0. 024348 | CSCL2 | SLC25A22  |
| CERCAM. 1C  | 1. 63E-06 | -0. 23201 | 0. 055 | 0. 132 | 0. 024397 | CSCL2 | CERCAM    |
| KRCC1. 3    | 1. 64E-06 | 0. 111987 | 0. 322 | 0. 227 | 0. 024558 | CSCL2 | KRCC1     |
| LYRM2. 6    | 1. 68E-06 | 0. 205489 | 0. 389 | 0. 29  | 0. 025074 | CSCL2 | LYRM2     |
| PYCR1. 2    | 1. 69E-06 | 0. 141604 | 0. 097 | 0. 048 | 0. 025219 | CSCL2 | PYCR1     |
| CSRNP1. 13  | 1. 69E-06 | -0. 37596 | 0. 113 | 0. 194 | 0. 025243 | CSCL2 | CSRNP1    |
| GABARAPL2   | 1. 69E-06 | -0. 21948 | 0. 773 | 0. 742 | 0. 025318 | CSCL2 | GABARAPL2 |
| APOO. 10    | 1. 70E-06 | 0. 231581 | 0. 311 | 0. 226 | 0. 025345 | CSCL2 | APOO      |
| PTP4A1. 7   | 1. 70E-06 | 0. 163704 | 0. 521 | 0. 402 | 0. 025394 | CSCL2 | PTP4A1    |
| PCNT. 2     | 1. 73E-06 | 0. 145895 | 0. 128 | 0. 07  | 0. 025846 | CSCL2 | PCNT      |
| KIAA0556    | 1. 73E-06 | 0. 115231 | 0. 062 | 0. 025 | 0. 025884 | CSCL2 | KIAA0556  |
| IGF2R. 6    | 1. 75E-06 | -0. 1742  | 0. 031 | 0. 099 | 0. 02617  | CSCL2 | IGF2R     |
| JAK1. 6     | 1. 76E-06 | -0. 19838 | 0. 157 | 0. 256 | 0. 026264 | CSCL2 | JAK1      |
| NFATC2. 1C  | 1. 77E-06 | -0. 20739 | 0      | 0. 048 | 0. 026437 | CSCL2 | NFATC2    |
| UBE2D4. 4   | 1. 78E-06 | 0. 155201 | 0. 274 | 0. 186 | 0. 0266   | CSCL2 | UBE2D4    |
| MYL5. 4     | 1. 78E-06 | -0. 20337 | 0. 031 | 0. 098 | 0. 026663 | CSCL2 | MYL5      |
| CLASP1. 9   | 1. 78E-06 | 0. 116782 | 0. 212 | 0. 135 | 0. 026664 | CSCL2 | CLASP1    |
| MARS. 5     | 1. 80E-06 | 0. 13568  | 0. 289 | 0. 203 | 0. 026959 | CSCL2 | MARS      |
| SDC4. 7     | 1. 81E-06 | -0. 19998 | 0. 031 | 0. 099 | 0. 027002 | CSCL2 | SDC4      |
| SMAD5. 8    | 1. 82E-06 | 0. 165941 | 0. 247 | 0. 167 | 0. 027164 | CSCL2 | SMAD5     |
| POLR3K. 6   | 1. 82E-06 | 0. 176633 | 0. 305 | 0. 218 | 0. 02726  | CSCL2 | POLR3K    |
| DNASE1L1. 1 | 1. 83E-06 | -0. 21598 | 0. 015 | 0. 075 | 0. 027306 | CSCL2 | DNASE1L1  |
| IL4I1. 10   | 1. 84E-06 | -0. 25067 | 0. 011 | 0. 067 | 0. 027453 | CSCL2 | IL4I1     |
| PITPNA. 7   | 1. 86E-06 | -0. 20268 | 0. 097 | 0. 185 | 0. 027744 | CSCL2 | PITPNA    |
| CPSF7. 3    | 1. 86E-06 | 0. 15777  | 0. 272 | 0. 183 | 0. 027833 | CSCL2 | CPSF7     |
| ITGB1BP1. 1 | 1. 89E-06 | 0. 117245 | 0. 506 | 0. 382 | 0. 02821  | CSCL2 | ITGB1BP1  |
| LCLAT1. 1   | 1. 89E-06 | 0. 107068 | 0. 102 | 0. 051 | 0. 028252 | CSCL2 | LCLAT1    |
| DIS3L. 5    | 1. 90E-06 | 0. 145713 | 0. 168 | 0. 1   | 0. 028342 | CSCL2 | DIS3L     |
| HHEX. 13    | 1. 90E-06 | -0. 25581 | 0. 007 | 0. 06  | 0. 02837  | CSCL2 | HHEX      |

|             |           |           |        |        |           |       |                |
|-------------|-----------|-----------|--------|--------|-----------|-------|----------------|
| RPAP2. 8    | 1. 91E-06 | 0. 14523  | 0. 267 | 0. 181 | 0. 028472 | CSCL2 | RPAP2          |
| EFCAB14. 7  | 1. 91E-06 | -0. 22227 | 0. 117 | 0. 207 | 0. 028612 | CSCL2 | EFCAB14        |
| SLC25A44. 1 | 1. 93E-06 | 0. 136737 | 0. 157 | 0. 091 | 0. 028868 | CSCL2 | SLC25A44       |
| HAGH. 8     | 1. 93E-06 | 0. 212981 | 0. 453 | 0. 349 | 0. 028892 | CSCL2 | HAGH           |
| AMPD2. 7    | 1. 95E-06 | -0. 27078 | 0. 075 | 0. 155 | 0. 029173 | CSCL2 | AMPD2          |
| CCL20. 12   | 1. 96E-06 | -0. 30522 | 0. 009 | 0. 063 | 0. 029296 | CSCL2 | CCL20          |
| KBTBD11. 3  | 1. 97E-06 | 0. 103287 | 0. 062 | 0. 025 | 0. 029401 | CSCL2 | KBTBD11        |
| HDAC6. 3    | 1. 97E-06 | 0. 147374 | 0. 181 | 0. 111 | 0. 029422 | CSCL2 | HDAC6          |
| LAMB2. 7    | 1. 97E-06 | -0. 18972 | 0. 031 | 0. 098 | 0. 029479 | CSCL2 | LAMB2          |
| SYTL3. 11   | 1. 97E-06 | -0. 30023 | 0. 011 | 0. 066 | 0. 029506 | CSCL2 | SYTL3          |
| EML3. 6     | 1. 98E-06 | -0. 16934 | 0. 044 | 0. 117 | 0. 029613 | CSCL2 | EML3           |
| NQO1. 9     | 2. 03E-06 | -0. 18222 | 0. 04  | 0. 111 | 0. 030352 | CSCL2 | NQO1           |
| IL7R. 10    | 2. 05E-06 | -0. 27828 | 0. 004 | 0. 055 | 0. 030702 | CSCL2 | IL7R           |
| DLEU7. 12   | 2. 07E-06 | -0. 23248 | 0. 002 | 0. 052 | 0. 030873 | CSCL2 | DLEU7          |
| SHISA4. 11  | 2. 07E-06 | -0. 27092 | 0. 157 | 0. 25  | 0. 030976 | CSCL2 | SHISA4         |
| CHST10. 1C  | 2. 08E-06 | 0. 123072 | 0. 212 | 0. 136 | 0. 031144 | CSCL2 | CHST10         |
| MAN2A1. 8   | 2. 09E-06 | -0. 21055 | 0. 042 | 0. 113 | 0. 031219 | CSCL2 | MAN2A1         |
| GBGT1. 12   | 2. 10E-06 | -0. 18269 | 0. 002 | 0. 052 | 0. 031341 | CSCL2 | GBGT1          |
| ROGDI. 6    | 2. 11E-06 | -0. 24003 | 0. 139 | 0. 231 | 0. 031465 | CSCL2 | ROGDI          |
| GSPT1. 9    | 2. 12E-06 | 0. 149149 | 0. 459 | 0. 344 | 0. 031667 | CSCL2 | GSPT1          |
| C9orf116. 2 | 1. 6E-06  | -0. 1148  | 0. 018 | 0. 078 | 0. 032346 | CSCL2 | C9orf116       |
| CD300LF. 1  | 2. 17E-06 | -0. 19531 | 0      | 0. 047 | 0. 032486 | CSCL2 | CD300LF        |
| CNPY3. 12   | 2. 19E-06 | -0. 42534 | 0. 351 | 0. 415 | 0. 032797 | CSCL2 | CNPY3          |
| SEPHS2. 6   | 2. 20E-06 | -0. 2408  | 0. 216 | 0. 317 | 0. 032848 | CSCL2 | SEPHS2         |
| FGD2. 12    | 2. 22E-06 | -0. 27632 | 0. 009 | 0. 063 | 0. 033149 | CSCL2 | FGD2           |
| RNF19A. 12  | 2. 27E-06 | -0. 27426 | 0. 119 | 0. 205 | 0. 033908 | CSCL2 | RNF19A         |
| TLR5. 10    | 2. 28E-06 | -0. 23843 | 0      | 0. 047 | 0. 034008 | CSCL2 | TLR5           |
| GANAB. 7    | 2. 29E-06 | 0. 148446 | 0. 364 | 0. 269 | 0. 034189 | CSCL2 | GANAB          |
| PHACTR1. 1  | 2. 30E-06 | -0. 41331 | 0. 051 | 0. 12  | 0. 034325 | CSCL2 | PHACTR1        |
| PRAM1. 11   | 2. 31E-06 | -0. 23718 | 0. 004 | 0. 055 | 0. 034591 | CSCL2 | PRAM1          |
| ZNF385A. 1  | 2. 35E-06 | -0. 28878 | 0. 064 | 0. 14  | 0. 035123 | CSCL2 | ZNF385A        |
| MTRNR2L1C   | 2. 35E-06 | -0. 4996  | 0. 018 | 0. 076 | 0. 035159 | CSCL2 | MTRNR2L10      |
| CXCL3. 9    | 2. 36E-06 | -0. 18476 | 0. 015 | 0. 074 | 0. 035241 | CSCL2 | CXCL3          |
| PMF1. 4     | 2. 37E-06 | 0. 108486 | 0. 422 | 0. 316 | 0. 035369 | CSCL2 | PMF1           |
| RAB31. 11   | 2. 37E-06 | -0. 29612 | 0. 4   | 0. 462 | 0. 035419 | CSCL2 | RAB31          |
| CALM1. 12   | 2. 38E-06 | 0. 172898 | 0. 905 | 0. 766 | 0. 035511 | CSCL2 | CALM1          |
| FARP1. 6    | 2. 44E-06 | 0. 140345 | 0. 267 | 0. 182 | 0. 036508 | CSCL2 | FARP1          |
| SPAG9. 11   | 2. 45E-06 | 0. 143482 | 0. 461 | 0. 349 | 0. 036594 | CSCL2 | SPAG9          |
| KANSL1-AS   | 2. 46E-06 | -0. 22148 | 0. 108 | 0. 197 | 0. 036716 | CSCL2 | KANSL1-AS1     |
| ORC3. 1     | 2. 47E-06 | 0. 187208 | 0. 17  | 0. 103 | 0. 036837 | CSCL2 | ORC3           |
| PMAIP1. 12  | 2. 48E-06 | -0. 35934 | 0. 024 | 0. 086 | 0. 037086 | CSCL2 | PMAIP1         |
| RP11-262H   | 2. 51E-06 | 0. 109996 | 0. 188 | 0. 116 | 0. 037437 | CSCL2 | RP11-262H14. 4 |
| CNRIP1. 1C  | 2. 55E-06 | 0. 173068 | 0. 287 | 0. 201 | 0. 038085 | CSCL2 | CNRIP1         |
| NAGPA. 6    | 2. 55E-06 | -0. 19523 | 0. 042 | 0. 112 | 0. 038133 | CSCL2 | NAGPA          |
| RFX2. 5     | 2. 57E-06 | 0. 126054 | 0. 157 | 0. 093 | 0. 038343 | CSCL2 | RFX2           |
| SNRPC. 4    | 2. 59E-06 | 0. 100626 | 0. 636 | 0. 507 | 0. 038714 | CSCL2 | SNRPC          |
| PHF13. 4    | 2. 59E-06 | 0. 111622 | 0. 117 | 0. 063 | 0. 038767 | CSCL2 | PHF13          |
| CAMSAP1. 3  | 2. 62E-06 | 0. 123752 | 0. 143 | 0. 082 | 0. 039183 | CSCL2 | CAMSAP1        |
| PRKRIP1. 9  | 2. 63E-06 | 0. 114211 | 0. 331 | 0. 238 | 0. 0393   | CSCL2 | PRKRIP1        |
| COX6B1. 6   | 2. 64E-06 | -0. 16349 | 0. 843 | 0. 846 | 0. 039408 | CSCL2 | COX6B1         |
| CDK2AP1. 5  | 2. 64E-06 | 0. 102065 | 0. 168 | 0. 101 | 0. 039508 | CSCL2 | CDK2AP1        |

|            |          |          |       |       |          |       |            |
|------------|----------|----------|-------|-------|----------|-------|------------|
| CYFIP2.9   | 2.66E-06 | 0.17202  | 0.181 | 0.111 | 0.039796 | CSCL2 | CYFIP2     |
| HK1.8      | 2.69E-06 | -0.24741 | 0.113 | 0.199 | 0.040162 | CSCL2 | HK1        |
| MINOS1.9   | 2.73E-06 | -0.21727 | 0.631 | 0.64  | 0.040843 | CSCL2 | MINOS1     |
| TMEM156.1  | 2.74E-06 | -0.27167 | 0.007 | 0.058 | 0.040875 | CSCL2 | TMEM156    |
| ELOVL2.12  | 2.74E-06 | 0.248147 | 0.159 | 0.095 | 0.040972 | CSCL2 | ELOVL2     |
| CHDH.5     | 2.77E-06 | 0.100868 | 0.119 | 0.064 | 0.041467 | CSCL2 | CHDH       |
| SNX20.12   | 2.80E-06 | -0.18642 | 0     | 0.046 | 0.04178  | CSCL2 | SNX20      |
| AC079922.2 | 2.80E-06 | 0.157874 | 0.077 | 0.036 | 0.04186  | CSCL2 | AC079922.3 |
| DLX2.12    | 2.81E-06 | 0.144279 | 0.179 | 0.105 | 0.041953 | CSCL2 | DLX2       |
| SPRED1.8   | 2.81E-06 | -0.19365 | 0.117 | 0.204 | 0.041981 | CSCL2 | SPRED1     |
| KANSL2.7   | 2.83E-06 | 0.110065 | 0.227 | 0.146 | 0.042273 | CSCL2 | KANSL2     |
| MIR155HG.2 | 2.83E-06 | -0.16767 | 0.007 | 0.059 | 0.042345 | CSCL2 | MIR155HG   |
| MYO1E.4    | 2.84E-06 | -0.15379 | 0.013 | 0.07  | 0.042367 | CSCL2 | MYO1E      |
| IL17RC.6   | 2.84E-06 | -0.12725 | 0.046 | 0.119 | 0.042453 | CSCL2 | IL17RC     |
| USP36.9    | 2.85E-06 | -0.28717 | 0.066 | 0.142 | 0.042601 | CSCL2 | USP36      |
| SIGLEC14.2 | 2.86E-06 | -0.21302 | 0     | 0.046 | 0.042746 | CSCL2 | SIGLEC14   |
| TIMP3.9    | 2.86E-06 | -0.15401 | 0.053 | 0.128 | 0.042799 | CSCL2 | TIMP3      |
| MANBAL.13  | 2.87E-06 | 0.120288 | 0.442 | 0.33  | 0.042959 | CSCL2 | MANBAL     |
| PPIF.10    | 2.88E-06 | 0.100746 | 0.32  | 0.217 | 0.043046 | CSCL2 | PPIF       |
| XBP1.11    | 2.92E-06 | -0.31624 | 0.296 | 0.374 | 0.043575 | CSCL2 | XBP1       |
| ROB02.12   | 2.92E-06 | 0.176421 | 0.17  | 0.105 | 0.043707 | CSCL2 | ROB02      |
| CAMK1.9    | 2.96E-06 | -0.20156 | 0.141 | 0.229 | 0.044221 | CSCL2 | CAMK1      |
| FAM20A.12  | 2.99E-06 | -0.21957 | 0.009 | 0.062 | 0.044736 | CSCL2 | FAM20A     |
| TYW1.5     | 3.02E-06 | 0.104508 | 0.188 | 0.116 | 0.045084 | CSCL2 | TYW1       |
| GRB2.12    | 3.03E-06 | -0.25016 | 0.417 | 0.483 | 0.045344 | CSCL2 | GRB2       |
| RIN2.7     | 3.04E-06 | -0.31772 | 0.057 | 0.129 | 0.045466 | CSCL2 | RIN2       |
| TLR7.10    | 3.05E-06 | -0.271   | 0.007 | 0.058 | 0.045536 | CSCL2 | TLR7       |
| MLLT3.9    | 3.06E-06 | 0.162626 | 0.155 | 0.091 | 0.045748 | CSCL2 | MLLT3      |
| FLI1.13    | 3.07E-06 | -0.23442 | 0.004 | 0.054 | 0.04593  | CSCL2 | FLI1       |
| RCCD1.3    | 3.08E-06 | 0.160512 | 0.106 | 0.055 | 0.046082 | CSCL2 | RCCD1      |
| MTA1.10    | 3.11E-06 | 0.187476 | 0.269 | 0.187 | 0.046531 | CSCL2 | MTA1       |
| IARS.8     | 3.14E-06 | 0.134092 | 0.296 | 0.207 | 0.046895 | CSCL2 | IARS       |
| NR3C1.7    | 3.15E-06 | 0.128574 | 0.34  | 0.245 | 0.047056 | CSCL2 | NR3C1      |
| MOB1A.13   | 3.16E-06 | -0.32554 | 0.263 | 0.343 | 0.047263 | CSCL2 | MOB1A      |
| SMCR5.8    | 3.18E-06 | 0.130883 | 0.152 | 0.089 | 0.047492 | CSCL2 | SMCR5      |
| PPP2R2A.7  | 3.18E-06 | 0.105536 | 0.402 | 0.296 | 0.047519 | CSCL2 | PPP2R2A    |
| VAX2.11    | 3.19E-06 | 0.130354 | 0.137 | 0.077 | 0.047621 | CSCL2 | VAX2       |
| UBE3A.11   | 3.21E-06 | 0.139585 | 0.389 | 0.283 | 0.047977 | CSCL2 | UBE3A      |
| KDELR3.5   | 3.21E-06 | -0.11151 | 0.009 | 0.062 | 0.048001 | CSCL2 | KDELR3     |
| BRPF1.1    | 3.24E-06 | 0.114265 | 0.108 | 0.057 | 0.048347 | CSCL2 | BRPF1      |
| NPAT.3     | 3.24E-06 | 0.103786 | 0.139 | 0.079 | 0.048431 | CSCL2 | NPAT       |
| SPN.13     | 3.25E-06 | -0.23489 | 0.007 | 0.057 | 0.048503 | CSCL2 | SPN        |
| MARCH6.11  | 3.29E-06 | 0.133245 | 0.464 | 0.353 | 0.049166 | CSCL2 | 6-Mar      |
| PSME3.6    | 3.29E-06 | 0.148315 | 0.313 | 0.223 | 0.049175 | CSCL2 | PSME3      |
| ADM.11     | 3.29E-06 | -0.38153 | 0.104 | 0.188 | 0.049207 | CSCL2 | ADM        |
| CCDC57.12  | 3.31E-06 | -0.26558 | 0.042 | 0.11  | 0.049481 | CSCL2 | CCDC57     |
| FRMD6      | 3.34E-06 | 0.146752 | 0.062 | 0.026 | 0.049884 | CSCL2 | FRMD6      |
| SPATA13.8  | 3.35E-06 | -0.25843 | 0.086 | 0.168 | 0.050072 | CSCL2 | SPATA13    |
| MYOF.8     | 3.36E-06 | -0.17234 | 0     | 0.046 | 0.05016  | CSCL2 | MYOF       |
| FAM200A.7  | 3.40E-06 | 0.107649 | 0.159 | 0.094 | 0.050751 | CSCL2 | FAM200A    |
| NDN.12     | 3.41E-06 | -0.17775 | 0.108 | 0.2   | 0.051027 | CSCL2 | NDN        |

|             |           |           |        |        |           |       |          |
|-------------|-----------|-----------|--------|--------|-----------|-------|----------|
| OAS1. 8     | 3. 42E-06 | -0. 19615 | 0. 057 | 0. 135 | 0. 051077 | CSCL2 | OAS1     |
| AMPD3. 10   | 3. 42E-06 | -0. 18354 | 0. 004 | 0. 054 | 0. 051077 | CSCL2 | AMPD3    |
| PRKCH. 10   | 3. 43E-06 | -0. 21657 | 0      | 0. 046 | 0. 051319 | CSCL2 | PRKCH    |
| PRMT5. 10   | 3. 46E-06 | 0. 136395 | 0. 227 | 0. 148 | 0. 051653 | CSCL2 | PRMT5    |
| VWA5A. 4    | 3. 46E-06 | -0. 18872 | 0. 029 | 0. 092 | 0. 051674 | CSCL2 | VWA5A    |
| IRF5. 13    | 3. 46E-06 | -0. 24474 | 0. 009 | 0. 061 | 0. 051732 | CSCL2 | IRF5     |
| ZSCAN32. 5  | 3. 47E-06 | 0. 100902 | 0. 119 | 0. 065 | 0. 051912 | CSCL2 | ZSCAN32  |
| C19orf38. 3 | 3. 48E-06 | -0. 23196 | 0. 002 | 0. 05  | 0. 051939 | CSCL2 | C19orf38 |
| KLC1. 11    | 3. 52E-06 | 0. 134596 | 0. 475 | 0. 355 | 0. 05254  | CSCL2 | KLC1     |
| MARCO. 9    | 3. 54E-06 | -0. 36151 | 0. 009 | 0. 061 | 0. 052953 | CSCL2 | MARCO    |
| ACP5. 11    | 3. 58E-06 | -0. 21535 | 0. 002 | 0. 049 | 0. 053433 | CSCL2 | ACP5     |
| RBM8A. 5    | 3. 58E-06 | 0. 102361 | 0. 731 | 0. 608 | 0. 053491 | CSCL2 | RBM8A    |
| ARL13B. 8   | 3. 59E-06 | 0. 201454 | 0. 212 | 0. 14  | 0. 053707 | CSCL2 | ARL13B   |
| FOPNL. 6    | 3. 60E-06 | 0. 123804 | 0. 274 | 0. 19  | 0. 053771 | CSCL2 | FOPNL    |
| CHRN1. 8    | 3. 60E-06 | -0. 26927 | 0. 073 | 0. 152 | 0. 053853 | CSCL2 | CHRN1    |
| SLC16A10. 3 | 3. 60E-06 | -0. 3739  | 0. 029 | 0. 089 | 0. 053856 | CSCL2 | SLC16A10 |
| RERE. 10    | 3. 63E-06 | 0. 14285  | 0. 296 | 0. 207 | 0. 054176 | CSCL2 | RERE     |
| PAF1. 3     | 3. 63E-06 | 0. 192146 | 0. 294 | 0. 207 | 0. 054237 | CSCL2 | PAF1     |
| SYCE2. 1    | 3. 65E-06 | 0. 105054 | 0. 035 | 0. 011 | 0. 054479 | CSCL2 | SYCE2    |
| ZC3H14. 8   | 3. 65E-06 | 0. 156954 | 0. 283 | 0. 2   | 0. 054488 | CSCL2 | ZC3H14   |
| SDHC. 6     | 3. 66E-06 | -0. 24124 | 0. 506 | 0. 559 | 0. 054645 | CSCL2 | SDHC     |
| ATP5H. 5    | 3. 67E-06 | -0. 22457 | 0. 645 | 0. 649 | 0. 054777 | CSCL2 | ATP5H    |
| SLC39A11. 3 | 3. 67E-06 | -0. 1763  | 0. 018 | 0. 075 | 0. 054879 | CSCL2 | SLC39A11 |
| NPC1. 3     | 3. 72E-06 | -0. 22765 | 0. 04  | 0. 107 | 0. 055659 | CSCL2 | NPC1     |
| PRKRIR. 6   | 3. 74E-06 | 0. 147689 | 0. 172 | 0. 106 | 0. 055845 | CSCL2 | PRKRIR   |
| P4HA2. 7    | 3. 76E-06 | -0. 10415 | 0. 022 | 0. 083 | 0. 056211 | CSCL2 | P4HA2    |
| CPE. 12     | 3. 78E-06 | 0. 107265 | 0. 528 | 0. 384 | 0. 056543 | CSCL2 | CPE      |
| CEP170. 6   | 3. 82E-06 | 0. 177023 | 0. 353 | 0. 258 | 0. 057051 | CSCL2 | CEP170   |
| SLC39A14. 3 | 3. 85E-06 | -0. 23926 | 0. 033 | 0. 097 | 0. 057476 | CSCL2 | SLC39A14 |
| C9orf3. 10  | 3. 85E-06 | 0. 165846 | 0. 17  | 0. 102 | 0. 057566 | CSCL2 | C9orf3   |
| FBXO17. 13  | 3. 88E-06 | 0. 158223 | 0. 214 | 0. 141 | 0. 058028 | CSCL2 | FBXO17   |
| MAPT. 11    | 3. 90E-06 | 0. 123043 | 0. 389 | 0. 281 | 0. 058314 | CSCL2 | MAPT     |
| CPT1C. 8    | 3. 93E-06 | 0. 102319 | 0. 172 | 0. 102 | 0. 058756 | CSCL2 | CPT1C    |
| RBM42. 8    | 3. 94E-06 | 0. 201938 | 0. 497 | 0. 382 | 0. 058831 | CSCL2 | RBM42    |
| TRMT5. 3    | 3. 94E-06 | 0. 127363 | 0. 121 | 0. 066 | 0. 058838 | CSCL2 | TRMT5    |
| PPP1CA. 9   | 3. 94E-06 | -0. 26535 | 0. 547 | 0. 572 | 0. 058914 | CSCL2 | PPP1CA   |
| CLECL1. 12  | 3. 97E-06 | -0. 19164 | 0. 002 | 0. 049 | 0. 059327 | CSCL2 | CLECL1   |
| PIK3R5. 12  | 4. 00E-06 | -0. 19907 | 0. 002 | 0. 049 | 0. 059725 | CSCL2 | PIK3R5   |
| AKAP1. 5    | 4. 04E-06 | 0. 11734  | 0. 19  | 0. 119 | 0. 060313 | CSCL2 | AKAP1    |
| UBXN7. 3    | 4. 04E-06 | 0. 112665 | 0. 183 | 0. 114 | 0. 060432 | CSCL2 | UBXN7    |
| HOMER3. 8   | 4. 05E-06 | -0. 23802 | 0. 155 | 0. 245 | 0. 06045  | CSCL2 | HOMER3   |
| DAPL1. 3    | 4. 06E-06 | 0. 198435 | 0. 102 | 0. 052 | 0. 060627 | CSCL2 | DAPL1    |
| ZNF35. 3    | 4. 06E-06 | 0. 134588 | 0. 106 | 0. 056 | 0. 060657 | CSCL2 | ZNF35    |
| TNFAIP8. 1  | 4. 09E-06 | -0. 24434 | 0. 015 | 0. 072 | 0. 061094 | CSCL2 | TNFAIP8  |
| ZC3H12A. 1  | 4. 10E-06 | -0. 16594 | 0. 02  | 0. 078 | 0. 061196 | CSCL2 | ZC3H12A  |
| ARPC5L. 9   | 4. 11E-06 | 0. 159648 | 0. 477 | 0. 365 | 0. 061399 | CSCL2 | ARPC5L   |
| MSL1. 4     | 4. 12E-06 | 0. 102814 | 0. 234 | 0. 155 | 0. 061551 | CSCL2 | MSL1     |
| AEN. 2      | 4. 17E-06 | 0. 170546 | 0. 146 | 0. 084 | 0. 062327 | CSCL2 | AEN      |
| ACADM. 4    | 4. 18E-06 | 0. 137568 | 0. 428 | 0. 326 | 0. 062411 | CSCL2 | ACADM    |
| SLC10A4. 1  | 4. 21E-06 | 0. 140915 | 0. 157 | 0. 094 | 0. 062955 | CSCL2 | SLC10A4  |
| ACSF2. 7    | 4. 23E-06 | -0. 18278 | 0. 013 | 0. 068 | 0. 063182 | CSCL2 | ACSF2    |

|           |          |          |       |       |          |       |            |
|-----------|----------|----------|-------|-------|----------|-------|------------|
| CSTF2.1   | 4.24E-06 | 0.12889  | 0.119 | 0.065 | 0.063325 | CSCL2 | CSTF2      |
| AC114730. | 4.26E-06 | 0.152161 | 0.064 | 0.027 | 0.06369  | CSCL2 | AC114730.3 |
| NUCB1.12  | 4.32E-06 | -0.24923 | 0.364 | 0.448 | 0.064494 | CSCL2 | NUCB1      |
| MCHR1.9   | 4.41E-06 | -0.10523 | 0.009 | 0.061 | 0.065903 | CSCL2 | MCHR1      |
| ZNF71.7   | 4.42E-06 | 0.132201 | 0.143 | 0.082 | 0.066081 | CSCL2 | ZNF71      |
| TMEM47.1C | 4.46E-06 | 0.143805 | 0.135 | 0.078 | 0.06663  | CSCL2 | TMEM47     |
| KCTD5.7   | 4.46E-06 | 0.145691 | 0.294 | 0.204 | 0.066688 | CSCL2 | KCTD5      |
| ENDOD1.11 | 4.47E-06 | -0.13921 | 0.068 | 0.147 | 0.066782 | CSCL2 | ENDOD1     |
| AKIRIN2.9 | 4.52E-06 | 0.156434 | 0.488 | 0.377 | 0.067609 | CSCL2 | AKIRIN2    |
| ARSA.9    | 4.53E-06 | -0.2947  | 0.064 | 0.138 | 0.067669 | CSCL2 | ARSA       |
| PTGS2.12  | 4.56E-06 | -0.24809 | 0.011 | 0.063 | 0.068217 | CSCL2 | PTGS2      |
| OLFML2B.1 | 4.57E-06 | -0.28943 | 0.015 | 0.07  | 0.068332 | CSCL2 | OLFML2B    |
| TMEM161B. | 4.72E-06 | 0.109963 | 0.117 | 0.064 | 0.070492 | CSCL2 | TMEM161B   |
| RAB7A.4   | 4.73E-06 | -0.18162 | 0.647 | 0.659 | 0.07075  | CSCL2 | RAB7A      |
| SEC11A.11 | 4.74E-06 | -0.27407 | 0.565 | 0.592 | 0.070823 | CSCL2 | SEC11A     |
| LSM6.6    | 4.75E-06 | 0.125016 | 0.435 | 0.327 | 0.070926 | CSCL2 | LSM6       |
| TRIM11.3  | 4.77E-06 | 0.105812 | 0.159 | 0.095 | 0.071303 | CSCL2 | TRIM11     |
| SEC24D.5  | 4.79E-06 | -0.17694 | 0.031 | 0.094 | 0.071549 | CSCL2 | SEC24D     |
| LRP1.5    | 4.81E-06 | -0.32785 | 0.272 | 0.353 | 0.071928 | CSCL2 | LRP1       |
| SLC9A9.11 | 4.82E-06 | -0.27102 | 0.022 | 0.08  | 0.07208  | CSCL2 | SLC9A9     |
| CLEC4A.13 | 4.83E-06 | -0.25405 | 0.011 | 0.063 | 0.072133 | CSCL2 | CLEC4A     |
| COPZ2.5   | 4.83E-06 | -0.10279 | 0.007 | 0.057 | 0.072208 | CSCL2 | COPZ2      |
| KCNF1.13  | 4.87E-06 | -0.18093 | 0.055 | 0.126 | 0.07283  | CSCL2 | KCNF1      |
| GALM.11   | 4.88E-06 | -0.27826 | 0.057 | 0.127 | 0.072965 | CSCL2 | GALM       |
| ZNF639.11 | 4.88E-06 | 0.148465 | 0.205 | 0.134 | 0.072966 | CSCL2 | ZNF639     |
| SNX16.1   | 4.88E-06 | 0.201266 | 0.102 | 0.052 | 0.072969 | CSCL2 | SNX16      |
| TCF3.9    | 4.89E-06 | 0.140093 | 0.194 | 0.127 | 0.073119 | CSCL2 | TCF3       |
| KLF2.8    | 4.94E-06 | -0.36683 | 0.064 | 0.134 | 0.073825 | CSCL2 | KLF2       |
| TTL5.2    | 4.99E-06 | 0.114956 | 0.102 | 0.053 | 0.074525 | CSCL2 | TTL5       |
| CRELD1.3  | 5.02E-06 | -0.22787 | 0.093 | 0.176 | 0.075059 | CSCL2 | CRELD1     |
| BASP1.11  | 5.12E-06 | 0.160999 | 0.475 | 0.368 | 0.076533 | CSCL2 | BASP1      |
| LGALS8.7  | 5.16E-06 | -0.15441 | 0.075 | 0.155 | 0.077064 | CSCL2 | LGALS8     |
| GNL1.6    | 5.17E-06 | 0.140162 | 0.327 | 0.239 | 0.077281 | CSCL2 | GNL1       |
| DVL3.7    | 5.19E-06 | 0.138907 | 0.225 | 0.151 | 0.077507 | CSCL2 | DVL3       |
| TRAPPC3.4 | 5.25E-06 | -0.32234 | 0.364 | 0.44  | 0.078513 | CSCL2 | TRAPPC3    |
| MRE11A.2  | 5.26E-06 | 0.16748  | 0.102 | 0.052 | 0.078597 | CSCL2 | MRE11A     |
| YY1.9     | 5.27E-06 | 0.124677 | 0.45  | 0.336 | 0.07878  | CSCL2 | YY1        |
| NAALAD2   | 5.28E-06 | 0.101879 | 0.029 | 0.008 | 0.078899 | CSCL2 | NAALAD2    |
| ADNP.11   | 5.30E-06 | 0.2001   | 0.272 | 0.19  | 0.079137 | CSCL2 | ADNP       |
| EXOSC3.5  | 5.33E-06 | 0.180017 | 0.232 | 0.157 | 0.079646 | CSCL2 | EXOSC3     |
| TES.13    | 5.35E-06 | -0.22813 | 0.002 | 0.048 | 0.079939 | CSCL2 | TES        |
| MAP1A.11  | 5.37E-06 | 0.114252 | 0.318 | 0.226 | 0.080218 | CSCL2 | MAP1A      |
| PRKCB.12  | 5.42E-06 | -0.16994 | 0     | 0.044 | 0.081    | CSCL2 | PRKCB      |
| ORMDL3.7  | 5.45E-06 | 0.102211 | 0.196 | 0.124 | 0.081417 | CSCL2 | ORMDL3     |
| NDUFA13.7 | 5.53E-06 | -0.25349 | 0.762 | 0.772 | 0.082651 | CSCL2 | NDUFA13    |
| CFLAR.9   | 5.53E-06 | -0.32669 | 0.234 | 0.322 | 0.082675 | CSCL2 | CFLAR      |
| MPEG1.11  | 5.55E-06 | -0.1789  | 0     | 0.044 | 0.082868 | CSCL2 | MPEG1      |
| SMCHD1.1C | 5.57E-06 | 0.137703 | 0.265 | 0.184 | 0.083201 | CSCL2 | SMCHD1     |
| BYSL.9    | 5.59E-06 | 0.109528 | 0.17  | 0.105 | 0.083498 | CSCL2 | BYSL       |
| ALDH3B1.9 | 5.65E-06 | -0.19652 | 0.018 | 0.074 | 0.084418 | CSCL2 | ALDH3B1    |
| PROS1.3   | 5.68E-06 | -0.14348 | 0.031 | 0.094 | 0.084933 | CSCL2 | PROS1      |

|           |          |          |       |       |          |       |               |
|-----------|----------|----------|-------|-------|----------|-------|---------------|
| MAST2.4   | 5.70E-06 | 0.149379 | 0.121 | 0.068 | 0.085215 | CSCL2 | MAST2         |
| FAM198B.9 | 5.76E-06 | -0.2155  | 0.011 | 0.063 | 0.086121 | CSCL2 | FAM198B       |
| MTHFS.9   | 5.79E-06 | -0.29388 | 0.11  | 0.192 | 0.08657  | CSCL2 | MTHFS         |
| MED17.7   | 5.85E-06 | 0.112227 | 0.272 | 0.186 | 0.087465 | CSCL2 | MED17         |
| PEX11G.3  | 5.90E-06 | -0.12655 | 0.018 | 0.074 | 0.08815  | CSCL2 | PEX11G        |
| RCN1.13   | 5.97E-06 | 0.179178 | 0.464 | 0.35  | 0.089141 | CSCL2 | RCN1          |
| NAA15.6   | 6.02E-06 | 0.110409 | 0.298 | 0.212 | 0.089952 | CSCL2 | NAA15         |
| PDGFB.10  | 6.07E-06 | -0.22517 | 0.002 | 0.047 | 0.090667 | CSCL2 | PDGFB         |
| ZMYND15.8 | 6.09E-06 | -0.17909 | 0.009 | 0.059 | 0.091009 | CSCL2 | ZMYND15       |
| GTF2H2.9  | 6.09E-06 | 0.185223 | 0.26  | 0.181 | 0.091065 | CSCL2 | GTF2H2        |
| NFKB2.11  | 6.14E-06 | -0.1811  | 0.011 | 0.063 | 0.091735 | CSCL2 | NFKB2         |
| GIMAP2.11 | 6.21E-06 | -0.28456 | 0.022 | 0.079 | 0.092872 | CSCL2 | GIMAP2        |
| MGST3.6   | 6.25E-06 | -0.28685 | 0.669 | 0.694 | 0.093464 | CSCL2 | MGST3         |
| ARHGEF3.3 | 6.32E-06 | -0.2043  | 0.042 | 0.109 | 0.094412 | CSCL2 | ARHGEF3       |
| HBS1L.7   | 6.32E-06 | 0.169143 | 0.269 | 0.188 | 0.094519 | CSCL2 | HBS1L         |
| SNF8.10   | 6.35E-06 | 0.127573 | 0.576 | 0.455 | 0.094928 | CSCL2 | SNF8          |
| PIP4K2A.9 | 6.36E-06 | -0.31677 | 0.068 | 0.14  | 0.095088 | CSCL2 | PIP4K2A       |
| VPS45.6   | 6.39E-06 | 0.160917 | 0.243 | 0.166 | 0.095474 | CSCL2 | VPS45         |
| STIP1.8   | 6.43E-06 | 0.110543 | 0.479 | 0.367 | 0.096018 | CSCL2 | STIP1         |
| TCN2.8    | 6.50E-06 | -0.23546 | 0.038 | 0.102 | 0.097071 | CSCL2 | TCN2          |
| MBD3.6    | 6.50E-06 | 0.176113 | 0.234 | 0.161 | 0.097096 | CSCL2 | MBD3          |
| SREBF1.5  | 6.56E-06 | -0.22835 | 0.051 | 0.119 | 0.098008 | CSCL2 | SREBF1        |
| IKBKE.11  | 6.56E-06 | -0.20897 | 0.009 | 0.058 | 0.098035 | CSCL2 | IKBKE         |
| ARVCF.9   | 6.59E-06 | 0.101337 | 0.102 | 0.053 | 0.098408 | CSCL2 | ARVCF         |
| CTD-2090I | 6.62E-06 | -0.448   | 0.007 | 0.055 | 0.098968 | CSCL2 | CTD-2090I13.1 |
| CMKLR1.11 | 6.67E-06 | -0.2014  | 0.004 | 0.051 | 0.099635 | CSCL2 | CMKLR1        |
| ARFGAP2.7 | 6.72E-06 | 0.115876 | 0.389 | 0.288 | 0.100364 | CSCL2 | ARFGAP2       |
| GRPEL2.1  | 6.72E-06 | 0.117961 | 0.106 | 0.056 | 0.100411 | CSCL2 | GRPEL2        |
| ABCF2.8   | 6.73E-06 | 0.106207 | 0.3   | 0.212 | 0.100519 | CSCL2 | ABCF2         |
| XAB2.4    | 6.84E-06 | 0.12287  | 0.258 | 0.174 | 0.102263 | CSCL2 | XAB2          |
| STUB1.9   | 6.86E-06 | 0.176833 | 0.594 | 0.455 | 0.102544 | CSCL2 | STUB1         |
| C1RL.5    | 6.90E-06 | -0.22546 | 0.009 | 0.058 | 0.103116 | CSCL2 | C1RL          |
| RP11-379H | 6.92E-06 | 0.114985 | 0.124 | 0.07  | 0.10337  | CSCL2 | RP11-379H18.1 |
| ATP5B.8   | 6.97E-06 | 0.108585 | 0.883 | 0.771 | 0.104125 | CSCL2 | ATP5B         |
| DHRS1.3   | 6.98E-06 | -0.2554  | 0.079 | 0.157 | 0.104359 | CSCL2 | DHRS1         |
| MFS10.7   | 6.99E-06 | -0.27938 | 0.216 | 0.305 | 0.104392 | CSCL2 | MFS10         |
| LRP6.11   | 7.02E-06 | 0.158198 | 0.174 | 0.109 | 0.104947 | CSCL2 | LRP6          |
| SAMD4B.8  | 7.05E-06 | 0.11154  | 0.309 | 0.219 | 0.105322 | CSCL2 | SAMD4B        |
| ZBTB49    | 7.05E-06 | 0.123986 | 0.066 | 0.029 | 0.105362 | CSCL2 | ZBTB49        |
| SLC6A6.5  | 7.11E-06 | -0.23337 | 0.013 | 0.065 | 0.106324 | CSCL2 | SLC6A6        |
| PSTPIP1.1 | 7.12E-06 | -0.18422 | 0     | 0.043 | 0.106473 | CSCL2 | PSTPIP1       |
| SYNE1.5   | 7.13E-06 | 0.1142   | 0.19  | 0.12  | 0.106527 | CSCL2 | SYNE1         |
| ZMIZ1.4   | 7.14E-06 | 0.107979 | 0.212 | 0.136 | 0.106699 | CSCL2 | ZMIZ1         |
| SOD1.7    | 7.14E-06 | -0.22013 | 0.762 | 0.756 | 0.106701 | CSCL2 | SOD1          |
| EHBP1L1.1 | 7.17E-06 | -0.16977 | 0.018 | 0.073 | 0.107077 | CSCL2 | EHBP1L1       |
| FAM84B.9  | 7.34E-06 | 0.143749 | 0.143 | 0.085 | 0.109674 | CSCL2 | FAM84B        |
| C11orf54. | 7.38E-06 | 0.150916 | 0.181 | 0.112 | 0.110241 | CSCL2 | C11orf54      |
| DOT1L.3   | 7.39E-06 | 0.126385 | 0.132 | 0.077 | 0.110404 | CSCL2 | DOT1L         |
| GCAT.11   | 7.56E-06 | 0.239765 | 0.23  | 0.158 | 0.112973 | CSCL2 | GCAT          |
| BCL2L1.6  | 7.57E-06 | -0.25714 | 0.177 | 0.267 | 0.113118 | CSCL2 | BCL2L1        |
| PDLIM1.9  | 7.61E-06 | 0.10573  | 0.126 | 0.071 | 0.113674 | CSCL2 | PDLIM1        |



|              |           |           |        |        |           |       |           |
|--------------|-----------|-----------|--------|--------|-----------|-------|-----------|
| DENND2D. 8   | 7. 64E-06 | -0. 19378 | 0. 002 | 0. 047 | 0. 114099 | CSCL2 | DENND2D   |
| DHCR7. 11    | 7. 65E-06 | -0. 17587 | 0. 097 | 0. 181 | 0. 114359 | CSCL2 | DHCR7     |
| CHP1. 9      | 7. 71E-06 | -0. 26618 | 0. 155 | 0. 238 | 0. 115148 | CSCL2 | CHP1      |
| LRMP. 11     | 7. 71E-06 | -0. 20399 | 0. 002 | 0. 046 | 0. 115285 | CSCL2 | LRMP      |
| RGS12. 10    | 7. 80E-06 | 0. 103303 | 0. 369 | 0. 267 | 0. 116603 | CSCL2 | RGS12     |
| ZNF439. 11   | 7. 85E-06 | 0. 173994 | 0. 216 | 0. 145 | 0. 117251 | CSCL2 | ZNF439    |
| INPPL1. 7    | 7. 97E-06 | -0. 21202 | 0. 053 | 0. 122 | 0. 119157 | CSCL2 | INPPL1    |
| CHRA1. 8     | 8. 03E-06 | 0. 147989 | 0. 219 | 0. 141 | 0. 119963 | CSCL2 | CHRA1     |
| TIMM21. 4    | 8. 03E-06 | 0. 143361 | 0. 216 | 0. 144 | 0. 119971 | CSCL2 | TIMM21    |
| VAT1. 6      | 8. 08E-06 | -0. 26587 | 0. 121 | 0. 205 | 0. 1208   | CSCL2 | VAT1      |
| SGTA. 8      | 8. 10E-06 | 0. 164513 | 0. 413 | 0. 312 | 0. 121028 | CSCL2 | SGTA      |
| POLR2K. 6    | 8. 14E-06 | 0. 144891 | 0. 596 | 0. 485 | 0. 12161  | CSCL2 | POLR2K    |
| PSMC6. 6     | 8. 18E-06 | 0. 153222 | 0. 499 | 0. 383 | 0. 122314 | CSCL2 | PSMC6     |
| LRP11. 2     | 8. 19E-06 | 0. 128377 | 0. 091 | 0. 046 | 0. 122418 | CSCL2 | LRP11     |
| TFEC. 13     | 8. 20E-06 | -0. 21774 | 0. 009 | 0. 058 | 0. 122502 | CSCL2 | TFEC      |
| DIRAS3. 1C   | 8. 31E-06 | -0. 3903  | 0. 057 | 0. 126 | 0. 124195 | CSCL2 | DIRAS3    |
| WIZ. 7       | 8. 39E-06 | 0. 113851 | 0. 172 | 0. 108 | 0. 125448 | CSCL2 | WIZ       |
| EIF2B1. 6    | 8. 44E-06 | 0. 182986 | 0. 371 | 0. 279 | 0. 126183 | CSCL2 | EIF2B1    |
| TTC32. 6     | 8. 45E-06 | 0. 146107 | 0. 219 | 0. 146 | 0. 126332 | CSCL2 | TTC32     |
| MED24. 9     | 8. 45E-06 | 0. 147579 | 0. 243 | 0. 165 | 0. 126347 | CSCL2 | MED24     |
| TMBIM4. 9    | 8. 59E-06 | -0. 57391 | 0. 011 | 0. 061 | 0. 128384 | CSCL2 | TMBIM4    |
| RNASEH2C. 8  | 6. 0E-06  | 0. 130382 | 0. 477 | 0. 369 | 0. 128457 | CSCL2 | RNASEH2C  |
| SLC25A17. 8  | 6. 0E-06  | 0. 11557  | 0. 23  | 0. 154 | 0. 128498 | CSCL2 | SLC25A17  |
| HAGHL. 3     | 8. 65E-06 | -0. 16858 | 0. 042 | 0. 107 | 0. 129327 | CSCL2 | HAGHL     |
| DUSP10. 3    | 8. 66E-06 | 0. 100191 | 0. 265 | 0. 176 | 0. 129431 | CSCL2 | DUSP10    |
| EIF3K. 10    | 8. 82E-06 | -0. 21882 | 0. 735 | 0. 759 | 0. 131853 | CSCL2 | EIF3K     |
| MTRNR2L12. 8 | 8. 4E-06  | -0. 67383 | 0. 124 | 0. 199 | 0. 132088 | CSCL2 | MTRNR2L12 |
| DID01. 8     | 8. 84E-06 | 0. 141566 | 0. 216 | 0. 145 | 0. 132127 | CSCL2 | DID01     |
| GSKIP. 1     | 8. 90E-06 | 0. 103608 | 0. 221 | 0. 145 | 0. 132933 | CSCL2 | GSKIP     |
| DUSP4. 10    | 8. 95E-06 | -0. 21434 | 0. 102 | 0. 183 | 0. 133712 | CSCL2 | DUSP4     |
| TRPM2. 13    | 8. 95E-06 | -0. 21687 | 0. 007 | 0. 054 | 0. 133748 | CSCL2 | TRPM2     |
| SMARCA5. 1   | 9. 01E-06 | 0. 158637 | 0. 442 | 0. 345 | 0. 134623 | CSCL2 | SMARCA5   |
| SLC7A5. 11   | 9. 02E-06 | -0. 35257 | 0. 073 | 0. 141 | 0. 134769 | CSCL2 | SLC7A5    |
| SF3B2. 8     | 9. 03E-06 | 0. 102739 | 0. 66  | 0. 519 | 0. 134962 | CSCL2 | SF3B2     |
| C17orf58. 9  | 9. 05E-06 | 0. 180501 | 0. 26  | 0. 183 | 0. 135305 | CSCL2 | C17orf58  |
| CECR5. 8     | 9. 24E-06 | 0. 178724 | 0. 336 | 0. 248 | 0. 13809  | CSCL2 | CECR5     |
| GALK1. 9     | 9. 25E-06 | -0. 17325 | 0. 121 | 0. 207 | 0. 138192 | CSCL2 | GALK1     |
| CD46. 4      | 9. 36E-06 | -0. 24079 | 0. 148 | 0. 237 | 0. 139943 | CSCL2 | CD46      |
| DOCK5. 12    | 9. 44E-06 | -0. 24334 | 0. 009 | 0. 057 | 0. 141048 | CSCL2 | DOCK5     |
| HVCN1. 10    | 9. 45E-06 | -0. 29086 | 0. 038 | 0. 099 | 0. 141277 | CSCL2 | HVCN1     |
| SUMF1. 5     | 9. 53E-06 | -0. 18459 | 0. 066 | 0. 14  | 0. 142418 | CSCL2 | SUMF1     |
| ATP1A2. 9    | 9. 60E-06 | 0. 174872 | 0. 113 | 0. 06  | 0. 143441 | CSCL2 | ATP1A2    |
| NEDD9. 10    | 9. 60E-06 | -0. 27327 | 0. 141 | 0. 224 | 0. 143456 | CSCL2 | NEDD9     |
| PDCD2. 10    | 9. 63E-06 | 0. 226955 | 0. 386 | 0. 291 | 0. 143935 | CSCL2 | PDCD2     |
| PLCG2. 10    | 9. 66E-06 | -0. 22438 | 0. 004 | 0. 049 | 0. 144366 | CSCL2 | PLCG2     |
| APLP2. 11    | 9. 67E-06 | -0. 18004 | 0. 565 | 0. 594 | 0. 14445  | CSCL2 | APLP2     |
| TMEM255B. 9  | 9. 77E-06 | -0. 25971 | 0. 009 | 0. 057 | 0. 145996 | CSCL2 | TMEM255B  |
| RBM6. 6      | 9. 83E-06 | 0. 100424 | 0. 411 | 0. 309 | 0. 146901 | CSCL2 | RBM6      |
| CRYL1. 4     | 9. 92E-06 | -0. 32151 | 0. 227 | 0. 313 | 0. 148293 | CSCL2 | CRYL1     |
| STAT5A. 9    | 9. 96E-06 | -0. 14578 | 0. 007 | 0. 054 | 0. 148808 | CSCL2 | STAT5A    |
| EFNA2. 10    | 9. 97E-06 | 0. 114804 | 0. 095 | 0. 049 | 0. 148961 | CSCL2 | EFNA2     |

|             |           |           |        |        |           |       |                |
|-------------|-----------|-----------|--------|--------|-----------|-------|----------------|
| CNPY4. 8    | 1. 00E-05 | 0. 11211  | 0. 174 | 0. 11  | 0. 150047 | CSCL2 | CNPY4          |
| DNAJC3. 7   | 1. 00E-05 | -0. 26114 | 0. 212 | 0. 295 | 0. 150181 | CSCL2 | DNAJC3         |
| NQO2. 6     | 1. 01E-05 | -0. 25887 | 0. 166 | 0. 256 | 0. 150612 | CSCL2 | NQO2           |
| CERS2. 6    | 1. 02E-05 | -0. 27142 | 0. 15  | 0. 234 | 0. 151897 | CSCL2 | CERS2          |
| XPO7. 2     | 1. 02E-05 | 0. 148526 | 0. 157 | 0. 096 | 0. 152363 | CSCL2 | XPO7           |
| HSD17B8. 4  | 1. 02E-05 | -0. 19416 | 0. 038 | 0. 1   | 0. 153079 | CSCL2 | HSD17B8        |
| TSPAN15. 1  | 1. 03E-05 | -0. 27215 | 0. 024 | 0. 08  | 0. 153176 | CSCL2 | TSPAN15        |
| ADAMTS6. 8  | 1. 03E-05 | 0. 18288  | 0. 113 | 0. 064 | 0. 153399 | CSCL2 | ADAMTS6        |
| ANAPC13. 1  | 1. 03E-05 | 0. 111725 | 0. 457 | 0. 35  | 0. 153862 | CSCL2 | ANAPC13        |
| KCTD1. 9    | 1. 04E-05 | 0. 190499 | 0. 113 | 0. 062 | 0. 155447 | CSCL2 | KCTD1          |
| KCNK6. 10   | 1. 05E-05 | -0. 18393 | 0      | 0. 041 | 0. 156776 | CSCL2 | KCNK6          |
| RECQL. 7    | 1. 06E-05 | 0. 130897 | 0. 249 | 0. 169 | 0. 158211 | CSCL2 | RECQL          |
| ZFHx4. 12   | 1. 07E-05 | 0. 137441 | 0. 221 | 0. 149 | 0. 159773 | CSCL2 | ZFHx4          |
| HEBP1. 8    | 1. 07E-05 | -0. 2456  | 0. 113 | 0. 192 | 0. 160295 | CSCL2 | HEBP1          |
| RIC8A. 8    | 1. 09E-05 | 0. 109221 | 0. 38  | 0. 282 | 0. 162557 | CSCL2 | RIC8A          |
| RPUSD4. 2   | 1. 09E-05 | 0. 107524 | 0. 159 | 0. 096 | 0. 163041 | CSCL2 | RPUSD4         |
| PWWP2A. 8   | 1. 10E-05 | 0. 163248 | 0. 192 | 0. 124 | 0. 163896 | CSCL2 | PWWP2A         |
| NRP1. 10    | 1. 12E-05 | -0. 17909 | 0. 091 | 0. 169 | 0. 166975 | CSCL2 | NRP1           |
| ATP6V1E1. 1 | 1. 12E-05 | -0. 27232 | 0. 355 | 0. 436 | 0. 166977 | CSCL2 | ATP6V1E1       |
| ADPGK. 12   | 1. 12E-05 | -0. 31019 | 0. 183 | 0. 264 | 0. 167477 | CSCL2 | ADPGK          |
| PPFIBP1. 1  | 1. 12E-05 | -0. 13046 | 0. 082 | 0. 159 | 0. 167565 | CSCL2 | PPFIBP1        |
| TMEM52B. 1  | 1. 13E-05 | -0. 22797 | 0. 004 | 0. 049 | 0. 168534 | CSCL2 | TMEM52B        |
| RNFT2. 10   | 1. 13E-05 | 0. 169181 | 0. 117 | 0. 067 | 0. 16875  | CSCL2 | RNFT2          |
| RP11-629G   | 1. 14E-05 | 0. 11818  | 0. 051 | 0. 02  | 0. 17092  | CSCL2 | RP11-629G13. 1 |
| AGK. 4      | 1. 15E-05 | 0. 167624 | 0. 159 | 0. 097 | 0. 172193 | CSCL2 | AGK            |
| AC093323. 1 | 1. 15E-05 | 0. 122173 | 0. 152 | 0. 093 | 0. 172554 | CSCL2 | AC093323. 3    |
| ARHGEF9. 8  | 1. 16E-05 | 0. 158034 | 0. 183 | 0. 117 | 0. 172815 | CSCL2 | ARHGEF9        |
| AKNA. 10    | 1. 16E-05 | -0. 19563 | 0. 02  | 0. 074 | 0. 17298  | CSCL2 | AKNA           |
| SEMA4D. 12  | 1. 16E-05 | -0. 27722 | 0. 026 | 0. 083 | 0. 173518 | CSCL2 | SEMA4D         |
| ELK3. 7     | 1. 16E-05 | -0. 18303 | 0. 031 | 0. 091 | 0. 173541 | CSCL2 | ELK3           |
| ARNT2. 12   | 1. 16E-05 | 0. 167696 | 0. 17  | 0. 109 | 0. 173895 | CSCL2 | ARNT2          |
| CCDC88B. 5  | 1. 17E-05 | -0. 23776 | 0. 026 | 0. 084 | 0. 17436  | CSCL2 | CCDC88B        |
| ZFP62. 1    | 1. 17E-05 | 0. 135857 | 0. 141 | 0. 084 | 0. 174393 | CSCL2 | ZFP62          |
| POMC. 11    | 1. 17E-05 | -0. 21001 | 0. 004 | 0. 049 | 0. 1749   | CSCL2 | POMC           |
| PDLIM2. 8   | 1. 18E-05 | -0. 22733 | 0. 155 | 0. 244 | 0. 176602 | CSCL2 | PDLIM2         |
| ALG3. 5     | 1. 18E-05 | -0. 29338 | 0. 15  | 0. 235 | 0. 177028 | CSCL2 | ALG3           |
| MBOAT7. 1C  | 1. 19E-05 | -0. 14283 | 0. 157 | 0. 246 | 0. 177291 | CSCL2 | MBOAT7         |
| RIC8B. 7    | 1. 19E-05 | 0. 166167 | 0. 15  | 0. 091 | 0. 177878 | CSCL2 | RIC8B          |
| ATP8B4. 11  | 1. 20E-05 | -0. 18911 | 0. 002 | 0. 045 | 0. 178696 | CSCL2 | ATP8B4         |
| CPPED1. 13  | 1. 20E-05 | -0. 23757 | 0. 018 | 0. 07  | 0. 179541 | CSCL2 | CPPED1         |
| PLA2G15. 1  | 1. 21E-05 | -0. 27308 | 0. 071 | 0. 141 | 0. 18118  | CSCL2 | PLA2G15        |
| PRR5. 10    | 1. 23E-05 | -0. 17893 | 0. 004 | 0. 049 | 0. 183553 | CSCL2 | PRR5           |
| SH3GLB1. 8  | 1. 23E-05 | -0. 25885 | 0. 366 | 0. 432 | 0. 183695 | CSCL2 | SH3GLB1        |
| NFKB1. 10   | 1. 24E-05 | -0. 25793 | 0. 044 | 0. 106 | 0. 184972 | CSCL2 | NFKB1          |
| GCSH. 12    | 1. 25E-05 | 0. 198321 | 0. 464 | 0. 342 | 0. 186286 | CSCL2 | GCSH           |
| POM121C. 7  | 1. 25E-05 | 0. 122077 | 0. 21  | 0. 138 | 0. 187525 | CSCL2 | POM121C        |
| ARL11. 12   | 1. 26E-05 | -0. 18034 | 0      | 0. 04  | 0. 188053 | CSCL2 | ARL11          |
| GIMAP7. 1C  | 1. 26E-05 | -0. 22501 | 0. 009 | 0. 056 | 0. 188583 | CSCL2 | GIMAP7         |
| KLHL6. 12   | 1. 28E-05 | -0. 24446 | 0. 007 | 0. 052 | 0. 191567 | CSCL2 | KLHL6          |
| ISCU. 7     | 1. 29E-05 | -0. 25004 | 0. 53  | 0. 568 | 0. 192785 | CSCL2 | ISCU           |
| RABGAP1L. 1 | 1. 29E-05 | -0. 26768 | 0. 049 | 0. 112 | 0. 192848 | CSCL2 | RABGAP1L       |

|             |           |           |        |        |           |       |          |
|-------------|-----------|-----------|--------|--------|-----------|-------|----------|
| SSPN. 5     | 1. 30E-05 | -0. 18041 | 0. 044 | 0. 108 | 0. 194191 | CSCL2 | SSPN     |
| LMAN2L. 8   | 1. 31E-05 | 0. 208678 | 0. 174 | 0. 111 | 0. 196209 | CSCL2 | LMAN2L   |
| QPCT. 7     | 1. 32E-05 | -0. 18355 | 0. 004 | 0. 049 | 0. 197165 | CSCL2 | QPCT     |
| ABHD15. 1C  | 1. 32E-05 | -0. 1896  | 0. 011 | 0. 059 | 0. 197171 | CSCL2 | ABHD15   |
| STRBP. 11   | 1. 34E-05 | 0. 156386 | 0. 19  | 0. 124 | 0. 200154 | CSCL2 | STRBP    |
| FAM214B. 4  | 1. 34E-05 | -0. 16087 | 0. 053 | 0. 121 | 0. 200358 | CSCL2 | FAM214B  |
| GIMAP6. 11  | 1. 34E-05 | -0. 19826 | 0. 002 | 0. 044 | 0. 200554 | CSCL2 | GIMAP6   |
| PUM2. 3     | 1. 35E-05 | 0. 131663 | 0. 223 | 0. 152 | 0. 201187 | CSCL2 | PUM2     |
| MAX. 5      | 1. 36E-05 | -0. 32864 | 0. 212 | 0. 298 | 0. 202758 | CSCL2 | MAX      |
| MFSD12. 1C  | 1. 37E-05 | -0. 24421 | 0. 115 | 0. 194 | 0. 203989 | CSCL2 | MFSD12   |
| NDUF6. 1    | 1. 37E-05 | 0. 188858 | 0. 252 | 0. 178 | 0. 204632 | CSCL2 | NDUF6    |
| C10orf10. 1 | 1. 37E-05 | -0. 19827 | 0. 033 | 0. 093 | 0. 205211 | CSCL2 | C10orf10 |
| C4orf48. 8  | 1. 39E-05 | -0. 20177 | 0. 492 | 0. 527 | 0. 206993 | CSCL2 | C4orf48  |
| UGGT1. 2    | 1. 39E-05 | 0. 104513 | 0. 172 | 0. 108 | 0. 207379 | CSCL2 | UGGT1    |
| BAG3. 8     | 1. 43E-05 | -0. 22483 | 0. 046 | 0. 11  | 0. 213057 | CSCL2 | BAG3     |
| DVL2. 10    | 1. 45E-05 | 0. 115335 | 0. 247 | 0. 174 | 0. 216146 | CSCL2 | DVL2     |
| PRPS1. 5    | 1. 46E-05 | 0. 110261 | 0. 269 | 0. 187 | 0. 21758  | CSCL2 | PRPS1    |
| SPHK2. 7    | 1. 47E-05 | 0. 144296 | 0. 192 | 0. 126 | 0. 220047 | CSCL2 | SPHK2    |
| GRIA3. 9    | 1. 48E-05 | 0. 180668 | 0. 241 | 0. 165 | 0. 220458 | CSCL2 | GRIA3    |
| ZNF581. 7   | 1. 49E-05 | -0. 25453 | 0. 099 | 0. 176 | 0. 222331 | CSCL2 | ZNF581   |
| SAMD9L. 5   | 1. 50E-05 | -0. 17978 | 0. 04  | 0. 102 | 0. 22362  | CSCL2 | SAMD9L   |
| SPG21. 9    | 1. 53E-05 | -0. 25099 | 0. 309 | 0. 388 | 0. 228091 | CSCL2 | SPG21    |
| NKG7. 10    | 1. 54E-05 | -0. 25645 | 0. 007 | 0. 052 | 0. 229918 | CSCL2 | NKG7     |
| KITLG. 5    | 1. 55E-05 | 0. 122148 | 0. 082 | 0. 041 | 0. 23175  | CSCL2 | KITLG    |
| C19orf53. 1 | 1. 57E-05 | -0. 20846 | 0. 706 | 0. 682 | 0. 234051 | CSCL2 | C19orf53 |
| APOL6. 4    | 1. 58E-05 | -0. 15768 | 0. 035 | 0. 096 | 0. 236336 | CSCL2 | APOL6    |
| EFHD2. 12   | 1. 59E-05 | -0. 2611  | 0. 132 | 0. 213 | 0. 237021 | CSCL2 | EFHD2    |
| TRIM37. 1C  | 1. 59E-05 | 0. 149999 | 0. 216 | 0. 147 | 0. 238159 | CSCL2 | TRIM37   |
| PNPLA6. 6   | 1. 61E-05 | -0. 20523 | 0. 093 | 0. 169 | 0. 240994 | CSCL2 | PNPLA6   |
| ITFG1. 7    | 1. 61E-05 | 0. 122004 | 0. 444 | 0. 345 | 0. 241287 | CSCL2 | ITFG1    |
| LYVE1. 11   | 1. 62E-05 | -0. 30531 | 0      | 0. 04  | 0. 241451 | CSCL2 | LYVE1    |
| ANKRD17. 9  | 1. 63E-05 | 0. 18576  | 0. 291 | 0. 214 | 0. 243639 | CSCL2 | ANKRD17  |
| TNRC6C. 11  | 1. 64E-05 | 0. 12674  | 0. 245 | 0. 169 | 0. 245824 | CSCL2 | TNRC6C   |
| ADRB2. 11   | 1. 65E-05 | -0. 23144 | 0. 004 | 0. 047 | 0. 246005 | CSCL2 | ADRB2    |
| MTHFD1L. 1  | 1. 65E-05 | -0. 21547 | 0. 068 | 0. 138 | 0. 246158 | CSCL2 | MTHFD1L  |
| MESP1. 9    | 1. 65E-05 | 0. 264137 | 0. 19  | 0. 129 | 0. 246192 | CSCL2 | MESP1    |
| CALHM2. 1C  | 1. 67E-05 | -0. 19678 | 0. 013 | 0. 062 | 0. 24996  | CSCL2 | CALHM2   |
| VAPB. 8     | 1. 68E-05 | 0. 198329 | 0. 269 | 0. 194 | 0. 251467 | CSCL2 | VAPB     |
| ARHGAP26. 1 | 1. 68E-05 | -0. 22604 | 0. 035 | 0. 094 | 0. 251675 | CSCL2 | ARHGAP26 |
| C9orf40. 2  | 1. 70E-05 | 0. 12079  | 0. 088 | 0. 046 | 0. 253914 | CSCL2 | C9orf40  |
| ORC4. 10    | 1. 70E-05 | 0. 128775 | 0. 318 | 0. 231 | 0. 254763 | CSCL2 | ORC4     |
| ERGIC1. 3   | 1. 74E-05 | -0. 21342 | 0. 203 | 0. 293 | 0. 260313 | CSCL2 | ERGIC1   |
| WBP1L. 10   | 1. 75E-05 | -0. 20851 | 0. 049 | 0. 112 | 0. 261539 | CSCL2 | WBP1L    |
| WASF1. 8    | 1. 75E-05 | 0. 118285 | 0. 152 | 0. 092 | 0. 262162 | CSCL2 | WASF1    |
| DDX46. 7    | 1. 77E-05 | 0. 118548 | 0. 545 | 0. 443 | 0. 263871 | CSCL2 | DDX46    |
| DST. 11     | 1. 78E-05 | -0. 26161 | 0. 318 | 0. 379 | 0. 265388 | CSCL2 | DST      |
| ATF7IP2. 1  | 1. 78E-05 | -0. 20115 | 0. 002 | 0. 043 | 0. 265994 | CSCL2 | ATF7IP2  |
| KHK. 2      | 1. 78E-05 | 0. 123434 | 0. 135 | 0. 08  | 0. 266348 | CSCL2 | KHK      |
| ZSCAN18. 8  | 1. 79E-05 | 0. 102236 | 0. 318 | 0. 228 | 0. 266756 | CSCL2 | ZSCAN18  |
| YIPF1. 3    | 1. 79E-05 | -0. 26617 | 0. 106 | 0. 183 | 0. 267183 | CSCL2 | YIPF1    |
| C12orf75. 1 | 1. 79E-05 | 0. 160415 | 0. 272 | 0. 19  | 0. 267388 | CSCL2 | C12orf75 |

|            |           |           |        |        |           |       |             |
|------------|-----------|-----------|--------|--------|-----------|-------|-------------|
| BCL3. 8    | 1. 80E-05 | -0. 13528 | 0. 024 | 0. 079 | 0. 268296 | CSCL2 | BCL3        |
| CD1D. 11   | 1. 81E-05 | -0. 201   | 0      | 0. 039 | 0. 270484 | CSCL2 | CD1D        |
| BPTF. 10   | 1. 81E-05 | 0. 156381 | 0. 404 | 0. 307 | 0. 270973 | CSCL2 | BPTF        |
| ATP6VOD1.  | 1. 82E-05 | -0. 27869 | 0. 466 | 0. 512 | 0. 271306 | CSCL2 | ATP6VOD1    |
| ADCY7. 13  | 1. 85E-05 | -0. 22075 | 0. 015 | 0. 065 | 0. 275735 | CSCL2 | ADCY7       |
| CHMP4B. 9  | 1. 85E-05 | -0. 20847 | 0. 415 | 0. 456 | 0. 276501 | CSCL2 | CHMP4B      |
| CRYBB1. 11 | 1. 85E-05 | -0. 21038 | 0. 002 | 0. 043 | 0. 276532 | CSCL2 | CRYBB1      |
| C17orf62.  | 1. 87E-05 | -0. 30593 | 0. 302 | 0. 371 | 0. 279145 | CSCL2 | C17orf62    |
| FLOT1. 12  | 1. 87E-05 | -0. 18723 | 0. 446 | 0. 505 | 0. 279163 | CSCL2 | FLOT1       |
| MLST8. 9   | 1. 89E-05 | 0. 110069 | 0. 316 | 0. 233 | 0. 281724 | CSCL2 | MLST8       |
| NCOA5. 3   | 1. 90E-05 | 0. 122797 | 0. 135 | 0. 08  | 0. 284199 | CSCL2 | NCOA5       |
| TMSB10. 1C | 1. 92E-05 | -0. 21314 | 0. 956 | 0. 965 | 0. 287012 | CSCL2 | TMSB10      |
| SYNJ2. 7   | 1. 93E-05 | -0. 1239  | 0. 004 | 0. 047 | 0. 288865 | CSCL2 | SYNJ2       |
| XIST. 13   | 1. 95E-05 | -0. 22301 | 0. 172 | 0. 27  | 0. 292058 | CSCL2 | XIST        |
| FAM129B. 9 | 1. 96E-05 | -0. 15203 | 0. 022 | 0. 075 | 0. 292155 | CSCL2 | FAM129B     |
| SRR. 10    | 1. 96E-05 | 0. 152994 | 0. 219 | 0. 151 | 0. 293296 | CSCL2 | SRR         |
| LSG1. 8    | 1. 96E-05 | 0. 116137 | 0. 192 | 0. 125 | 0. 293555 | CSCL2 | LSG1        |
| TSC22D4. 1 | 1. 97E-05 | 0. 103909 | 0. 585 | 0. 465 | 0. 294054 | CSCL2 | TSC22D4     |
| ACTR3B. 9  | 1. 97E-05 | 0. 141655 | 0. 166 | 0. 105 | 0. 294274 | CSCL2 | ACTR3B      |
| TNK2. 6    | 1. 98E-05 | 0. 102317 | 0. 192 | 0. 125 | 0. 295806 | CSCL2 | TNK2        |
| TMEM79. 3  | 1. 98E-05 | 0. 177798 | 0. 099 | 0. 054 | 0. 295954 | CSCL2 | TMEM79      |
| RDH10. 12  | 1. 99E-05 | -0. 16844 | 0. 031 | 0. 088 | 0. 297511 | CSCL2 | RDH10       |
| HS3ST3B1.  | 2. 00E-05 | -0. 14504 | 0. 002 | 0. 043 | 0. 298344 | CSCL2 | HS3ST3B1    |
| KPNA3. 7   | 2. 00E-05 | 0. 147682 | 0. 34  | 0. 252 | 0. 298954 | CSCL2 | KPNA3       |
| ACAP1. 9   | 2. 01E-05 | -0. 18241 | 0. 026 | 0. 082 | 0. 29975  | CSCL2 | ACAP1       |
| ITPKB. 4   | 2. 02E-05 | -0. 18306 | 0. 022 | 0. 075 | 0. 301177 | CSCL2 | ITPKB       |
| GNL2. 5    | 2. 02E-05 | 0. 133764 | 0. 285 | 0. 203 | 0. 302286 | CSCL2 | GNL2        |
| AC109826.  | 2. 03E-05 | -0. 18395 | 0      | 0. 039 | 0. 302996 | CSCL2 | AC109826. 1 |
| TFE3. 4    | 2. 04E-05 | -0. 18557 | 0. 053 | 0. 119 | 0. 304531 | CSCL2 | TFE3        |
| FAM134B. 1 | 2. 08E-05 | -0. 12449 | 0. 091 | 0. 168 | 0. 310422 | CSCL2 | FAM134B     |
| APOA1BP. 6 | 2. 08E-05 | 0. 172981 | 0. 461 | 0. 372 | 0. 310478 | CSCL2 | APOA1BP     |
| CD52. 11   | 2. 08E-05 | -0. 35799 | 0. 009 | 0. 054 | 0. 310619 | CSCL2 | CD52        |
| PRCP. 9    | 2. 08E-05 | 0. 119455 | 0. 455 | 0. 351 | 0. 311321 | CSCL2 | PRCP        |
| PHOSPHO2.  | 2. 11E-05 | 0. 109192 | 0. 084 | 0. 043 | 0. 314811 | CSCL2 | PHOSPHO2    |
| EIF5A. 5   | 2. 12E-05 | 0. 156718 | 0. 636 | 0. 522 | 0. 316465 | CSCL2 | EIF5A       |
| IL15. 10   | 2. 12E-05 | -0. 16463 | 0      | 0. 038 | 0. 317067 | CSCL2 | IL15        |
| IGSF11. 9  | 2. 13E-05 | 0. 127034 | 0. 115 | 0. 065 | 0. 319041 | CSCL2 | IGSF11      |
| HSPBP1. 9  | 2. 16E-05 | 0. 19853  | 0. 373 | 0. 284 | 0. 323329 | CSCL2 | HSPBP1      |
| LPAR1. 5   | 2. 17E-05 | -0. 1407  | 0. 007 | 0. 051 | 0. 324239 | CSCL2 | LPAR1       |
| LTBR. 13   | 2. 18E-05 | -0. 30218 | 0. 04  | 0. 097 | 0. 325306 | CSCL2 | LTBR        |
| SLC39A3. 1 | 2. 18E-05 | 0. 164972 | 0. 437 | 0. 334 | 0. 325856 | CSCL2 | SLC39A3     |
| CA11. 1    | 2. 20E-05 | -0. 17834 | 0. 042 | 0. 104 | 0. 329162 | CSCL2 | CA11        |
| ARRDC4. 3  | 2. 21E-05 | 0. 105595 | 0. 117 | 0. 066 | 0. 329714 | CSCL2 | ARRDC4      |
| SELL. 9    | 2. 22E-05 | -0. 20369 | 0      | 0. 038 | 0. 331789 | CSCL2 | SELL        |
| POC5. 2    | 2. 23E-05 | 0. 130391 | 0. 093 | 0. 048 | 0. 333624 | CSCL2 | POC5        |
| IL10RB-AS  | 2. 24E-05 | -0. 21072 | 0. 004 | 0. 046 | 0. 335096 | CSCL2 | IL10RB-AS1  |
| PCCB. 4    | 2. 26E-05 | 0. 146265 | 0. 245 | 0. 171 | 0. 337295 | CSCL2 | PCCB        |
| HDHD3. 3   | 2. 27E-05 | -0. 19841 | 0. 049 | 0. 112 | 0. 338801 | CSCL2 | HDHD3       |
| ADAP1. 6   | 2. 30E-05 | -0. 1665  | 0. 002 | 0. 042 | 0. 343217 | CSCL2 | ADAP1       |
| ORAI1. 8   | 2. 34E-05 | -0. 14269 | 0. 06  | 0. 127 | 0. 349264 | CSCL2 | ORAI1       |
| GPATCH11.  | 2. 35E-05 | 0. 186485 | 0. 201 | 0. 136 | 0. 35154  | CSCL2 | GPATCH11    |

|           |          |          |       |       |          |       |               |
|-----------|----------|----------|-------|-------|----------|-------|---------------|
| ZNF473    | 2.36E-05 | 0.105665 | 0.082 | 0.041 | 0.352498 | CSCL2 | ZNF473        |
| MDM4.6    | 2.36E-05 | 0.140145 | 0.329 | 0.243 | 0.352513 | CSCL2 | MDM4          |
| LEO1.7    | 2.36E-05 | 0.159233 | 0.21  | 0.141 | 0.35338  | CSCL2 | LEO1          |
| ASH2L.5   | 2.37E-05 | 0.128115 | 0.249 | 0.173 | 0.353993 | CSCL2 | ASH2L         |
| REL.13    | 2.37E-05 | -0.44202 | 0.241 | 0.3   | 0.354618 | CSCL2 | REL           |
| RP11-783K | 2.38E-05 | -0.14958 | 0.007 | 0.05  | 0.354962 | CSCL2 | RP11-783K16.5 |
| GUCY1A2.5 | 2.38E-05 | 0.119652 | 0.073 | 0.035 | 0.355916 | CSCL2 | GUCY1A2       |
| PHF6.8    | 2.40E-05 | 0.111751 | 0.241 | 0.167 | 0.358255 | CSCL2 | PHF6          |
| FURIN.7   | 2.40E-05 | -0.20756 | 0.022 | 0.074 | 0.359249 | CSCL2 | FURIN         |
| LRRC4B.12 | 2.42E-05 | 0.143753 | 0.196 | 0.131 | 0.361314 | CSCL2 | LRRC4B        |
| ZBTB38.4  | 2.43E-05 | -0.27015 | 0.113 | 0.19  | 0.36277  | CSCL2 | ZBTB38        |
| MAGT1.7   | 2.44E-05 | -0.20784 | 0.126 | 0.206 | 0.36493  | CSCL2 | MAGT1         |
| ARGLU1.1C | 2.46E-05 | 0.130229 | 0.594 | 0.463 | 0.367996 | CSCL2 | ARGLU1        |
| NHSL2.8   | 2.46E-05 | -0.41817 | 0.009 | 0.053 | 0.368236 | CSCL2 | NHSL2         |
| FABP3.7   | 2.48E-05 | -0.1835  | 0.007 | 0.05  | 0.37018  | CSCL2 | FABP3         |
| CETN3.6   | 2.50E-05 | 0.177467 | 0.21  | 0.144 | 0.373781 | CSCL2 | CETN3         |
| DCPS.7    | 2.53E-05 | 0.138165 | 0.241 | 0.169 | 0.377574 | CSCL2 | DCPS          |
| ZNF708.7  | 2.54E-05 | 0.112498 | 0.155 | 0.095 | 0.379059 | CSCL2 | ZNF708        |
| LMNA.9    | 2.54E-05 | -0.12367 | 0.338 | 0.419 | 0.379517 | CSCL2 | LMNA          |
| RP11-76E1 | 2.54E-05 | -0.21286 | 0     | 0.038 | 0.380173 | CSCL2 | RP11-76E17.3  |
| MTX2.7    | 2.56E-05 | 0.11778  | 0.415 | 0.318 | 0.382733 | CSCL2 | MTX2          |
| DEPTOR.8  | 2.57E-05 | -0.21694 | 0.004 | 0.046 | 0.384015 | CSCL2 | DEPTOR        |
| GMPR.4    | 2.57E-05 | -0.15024 | 0.029 | 0.084 | 0.384227 | CSCL2 | GMPR          |
| CWC27.9   | 2.57E-05 | 0.10533  | 0.344 | 0.26  | 0.384764 | CSCL2 | CWC27         |
| KPTN.2    | 2.62E-05 | 0.156465 | 0.13  | 0.077 | 0.391881 | CSCL2 | KPTN          |
| SNX10.7   | 2.64E-05 | -0.28113 | 0.157 | 0.231 | 0.394508 | CSCL2 | SNX10         |
| PCDH19.1C | 2.66E-05 | 0.168495 | 0.104 | 0.058 | 0.397779 | CSCL2 | PCDH19        |
| TMEM163.6 | 2.66E-05 | -0.16985 | 0.015 | 0.064 | 0.398223 | CSCL2 | TMEM163       |
| CAPRIN1.1 | 2.67E-05 | 0.10396  | 0.417 | 0.316 | 0.398406 | CSCL2 | CAPRIN1       |
| RALGPS1.6 | 2.68E-05 | 0.147187 | 0.097 | 0.052 | 0.40008  | CSCL2 | RALGPS1       |
| CSF1.10   | 2.68E-05 | -0.14028 | 0.038 | 0.097 | 0.401152 | CSCL2 | CSF1          |
| MYADM.10  | 2.69E-05 | -0.26053 | 0.119 | 0.196 | 0.401951 | CSCL2 | MYADM         |
| MANSC1.5  | 2.70E-05 | 0.135708 | 0.102 | 0.056 | 0.402966 | CSCL2 | MANSC1        |
| GABARAPL1 | 2.70E-05 | -0.35348 | 0.225 | 0.3   | 0.404052 | CSCL2 | GABARAPL1     |
| BCKDK.11  | 2.70E-05 | -0.24746 | 0.236 | 0.317 | 0.404202 | CSCL2 | BCKDK         |
| PCID2.5   | 2.71E-05 | 0.118099 | 0.254 | 0.177 | 0.404812 | CSCL2 | PCID2         |
| HIST2H2BE | 2.73E-05 | -0.17864 | 0.077 | 0.15  | 0.407456 | CSCL2 | HIST2H2BE     |
| CTNND2.1C | 2.75E-05 | 0.104374 | 0.227 | 0.155 | 0.410718 | CSCL2 | CTNND2        |
| TOP1.8    | 2.76E-05 | 0.152008 | 0.497 | 0.385 | 0.411891 | CSCL2 | TOP1          |
| SLC25A13. | 2.80E-05 | 0.116623 | 0.19  | 0.124 | 0.417856 | CSCL2 | SLC25A13      |
| FZD7.10   | 2.81E-05 | -0.12651 | 0.04  | 0.1   | 0.419423 | CSCL2 | FZD7          |
| PJA2.11   | 2.82E-05 | -0.26141 | 0.267 | 0.338 | 0.420713 | CSCL2 | PJA2          |
| LY6H.11   | 2.82E-05 | -0.27102 | 0.033 | 0.088 | 0.421959 | CSCL2 | LY6H          |
| CLTC.8    | 2.82E-05 | -0.22555 | 0.28  | 0.352 | 0.422056 | CSCL2 | CLTC          |
| EXOSC10.5 | 2.84E-05 | 0.149701 | 0.212 | 0.144 | 0.424862 | CSCL2 | EXOSC10       |
| CAMTA2.2  | 2.85E-05 | -0.17201 | 0.026 | 0.08  | 0.426264 | CSCL2 | CAMTA2        |
| AP2A1.6   | 2.90E-05 | 0.119671 | 0.316 | 0.233 | 0.433379 | CSCL2 | AP2A1         |
| UBXN4.7   | 2.94E-05 | 0.123432 | 0.669 | 0.539 | 0.439574 | CSCL2 | UBXN4         |
| TESC.3    | 2.96E-05 | -0.12123 | 0.002 | 0.041 | 0.442984 | CSCL2 | TESC          |
| METTL3.5  | 2.98E-05 | 0.110669 | 0.185 | 0.12  | 0.444859 | CSCL2 | METTL3        |
| RREB1.11  | 3.00E-05 | -0.17448 | 0.022 | 0.074 | 0.447602 | CSCL2 | RREB1         |

|           |          |          |       |       |          |       |               |
|-----------|----------|----------|-------|-------|----------|-------|---------------|
| RAD54L2.7 | 3.05E-05 | 0.102235 | 0.166 | 0.104 | 0.455441 | CSCL2 | RAD54L2       |
| TMX4.9    | 3.10E-05 | 0.17855  | 0.318 | 0.243 | 0.463849 | CSCL2 | TMX4          |
| DAPK3.9   | 3.11E-05 | 0.199939 | 0.316 | 0.236 | 0.464438 | CSCL2 | DAPK3         |
| STC1.3    | 3.11E-05 | 0.140961 | 0.055 | 0.024 | 0.464622 | CSCL2 | STC1          |
| PPP2R5A.4 | 3.14E-05 | -0.13705 | 0.051 | 0.115 | 0.469912 | CSCL2 | PPP2R5A       |
| CD7.10    | 3.15E-05 | -0.27215 | 0.004 | 0.045 | 0.470004 | CSCL2 | CD7           |
| CSNK2A1.1 | 3.17E-05 | 0.178974 | 0.411 | 0.313 | 0.474013 | CSCL2 | CSNK2A1       |
| SPCS1.5   | 3.17E-05 | -0.20852 | 0.744 | 0.736 | 0.474041 | CSCL2 | SPCS1         |
| RFTN1.6   | 3.20E-05 | -0.14816 | 0.049 | 0.112 | 0.478185 | CSCL2 | RFTN1         |
| ZFAND2A.1 | 3.24E-05 | 0.100112 | 0.364 | 0.28  | 0.483837 | CSCL2 | ZFAND2A       |
| CTD-2270L | 3.24E-05 | -0.10412 | 0.011 | 0.057 | 0.484303 | CSCL2 | CTD-2270L9.4  |
| H1FO.3    | 3.24E-05 | 0.256734 | 0.353 | 0.26  | 0.484778 | CSCL2 | H1FO          |
| ELMOD1.1C | 3.25E-05 | -0.10424 | 0.029 | 0.084 | 0.486384 | CSCL2 | ELMOD1        |
| BLOC1S2.7 | 3.27E-05 | -0.27915 | 0.291 | 0.371 | 0.48928  | CSCL2 | BLOC1S2       |
| TTC1.4    | 3.29E-05 | -0.24892 | 0.294 | 0.376 | 0.491626 | CSCL2 | TTC1          |
| TP53TG1.6 | 3.33E-05 | -0.27491 | 0.124 | 0.2   | 0.497527 | CSCL2 | TP53TG1       |
| ZNF12.10  | 3.33E-05 | 0.128005 | 0.183 | 0.122 | 0.497595 | CSCL2 | ZNF12         |
| RAD23B.7  | 3.36E-05 | 0.14807  | 0.475 | 0.376 | 0.50281  | CSCL2 | RAD23B        |
| GPD2.2    | 3.38E-05 | 0.107627 | 0.143 | 0.088 | 0.504797 | CSCL2 | GPD2          |
| IL2RG.9   | 3.39E-05 | -0.24709 | 0.004 | 0.045 | 0.506024 | CSCL2 | IL2RG         |
| DHX29.10  | 3.46E-05 | 0.128651 | 0.4   | 0.306 | 0.517329 | CSCL2 | DHX29         |
| ST3GAL3.9 | 3.47E-05 | 0.186975 | 0.137 | 0.084 | 0.518801 | CSCL2 | ST3GAL3       |
| DPP4.10   | 3.47E-05 | -0.12044 | 0.026 | 0.08  | 0.519168 | CSCL2 | DPP4          |
| BEST1.8   | 3.49E-05 | -0.34057 | 0.203 | 0.278 | 0.521238 | CSCL2 | BEST1         |
| DESI2.7   | 3.50E-05 | 0.189539 | 0.263 | 0.192 | 0.522361 | CSCL2 | DESI2         |
| NAGLU.1   | 3.52E-05 | -0.15827 | 0.031 | 0.086 | 0.525471 | CSCL2 | NAGLU         |
| GALNT15.8 | 3.53E-05 | -0.20918 | 0.002 | 0.041 | 0.526933 | CSCL2 | GALNT15       |
| RBMX2.5   | 3.53E-05 | 0.115682 | 0.318 | 0.232 | 0.527678 | CSCL2 | RBMX2         |
| PNMAL1.11 | 3.54E-05 | 0.187204 | 0.15  | 0.094 | 0.528322 | CSCL2 | PNMAL1        |
| SLC35B4.7 | 3.54E-05 | 0.117725 | 0.265 | 0.188 | 0.528507 | CSCL2 | SLC35B4       |
| PLCB2.13  | 3.54E-05 | -0.1882  | 0.015 | 0.063 | 0.529236 | CSCL2 | PLCB2         |
| PXN.6     | 3.56E-05 | -0.17888 | 0.062 | 0.127 | 0.531259 | CSCL2 | PXN           |
| MTIF3.6   | 3.58E-05 | -0.30322 | 0.265 | 0.349 | 0.534956 | CSCL2 | MTIF3         |
| SLC15A4.3 | 3.59E-05 | -0.15476 | 0.024 | 0.076 | 0.536442 | CSCL2 | SLC15A4       |
| SRPX2.9   | 3.60E-05 | -0.14028 | 0.013 | 0.059 | 0.537654 | CSCL2 | SRPX2         |
| NAA10.8   | 3.65E-05 | 0.112538 | 0.543 | 0.421 | 0.546101 | CSCL2 | NAA10         |
| CTU2.7    | 3.70E-05 | 0.164899 | 0.194 | 0.13  | 0.552684 | CSCL2 | CTU2          |
| MID1.6    | 3.70E-05 | 0.144989 | 0.091 | 0.048 | 0.553174 | CSCL2 | MID1          |
| IFT52.10  | 3.71E-05 | 0.104873 | 0.338 | 0.253 | 0.55515  | CSCL2 | IFT52         |
| TRIM9.11  | 3.74E-05 | 0.173641 | 0.313 | 0.229 | 0.558949 | CSCL2 | TRIM9         |
| TMEM53.7  | 3.75E-05 | -0.18468 | 0.046 | 0.107 | 0.560348 | CSCL2 | TMEM53        |
| SLC40A1.9 | 3.75E-05 | -0.26669 | 0.075 | 0.141 | 0.560358 | CSCL2 | SLC40A1       |
| KDM2B.5   | 3.77E-05 | 0.105091 | 0.201 | 0.132 | 0.563223 | CSCL2 | KDM2B         |
| RP11-119E | 3.81E-05 | 0.128489 | 0.104 | 0.058 | 0.569273 | CSCL2 | RP11-119B16.2 |
| AP3M2.6   | 3.81E-05 | 0.142386 | 0.143 | 0.089 | 0.569868 | CSCL2 | AP3M2         |
| GDI2.11   | 3.87E-05 | -0.24697 | 0.433 | 0.491 | 0.577749 | CSCL2 | GDI2          |
| WDR60.10  | 3.94E-05 | 0.148772 | 0.309 | 0.229 | 0.589287 | CSCL2 | WDR60         |
| RNMTL1.8  | 3.95E-05 | 0.126656 | 0.19  | 0.127 | 0.590461 | CSCL2 | RNMTL1        |
| CCND3.10  | 3.97E-05 | -0.32476 | 0.183 | 0.263 | 0.592599 | CSCL2 | CCND3         |
| DEF8.9    | 3.97E-05 | 0.162623 | 0.353 | 0.267 | 0.592991 | CSCL2 | DEF8          |
| TCHP.6    | 4.01E-05 | 0.15039  | 0.168 | 0.109 | 0.599831 | CSCL2 | TCHP          |

|             |          |          |       |       |          |       |            |
|-------------|----------|----------|-------|-------|----------|-------|------------|
| KCNQ1.12    | 4.02E-05 | -0.16461 | 0.002 | 0.04  | 0.600091 | CSCL2 | KCNQ1      |
| CDC42.7     | 4.02E-05 | -0.19276 | 0.603 | 0.621 | 0.600333 | CSCL2 | CDC42      |
| APP.11      | 4.06E-05 | 0.121599 | 0.68  | 0.518 | 0.607431 | CSCL2 | APP        |
| FOLR1.8     | 4.10E-05 | -0.20045 | 0     | 0.036 | 0.611975 | CSCL2 | FOLR1      |
| DNAJA3.7    | 4.10E-05 | 0.18953  | 0.241 | 0.171 | 0.613281 | CSCL2 | DNAJA3     |
| PHKB.5      | 4.11E-05 | 0.11907  | 0.265 | 0.189 | 0.613805 | CSCL2 | PHKB       |
| AATF.6      | 4.11E-05 | 0.123889 | 0.375 | 0.287 | 0.614616 | CSCL2 | AATF       |
| PDLIM7.9    | 4.14E-05 | -0.20964 | 0.163 | 0.241 | 0.618387 | CSCL2 | PDLIM7     |
| SULT1A1.1   | 4.15E-05 | -0.21357 | 0.009 | 0.051 | 0.620355 | CSCL2 | SULT1A1    |
| ING1.6      | 4.18E-05 | 0.125222 | 0.199 | 0.133 | 0.625217 | CSCL2 | ING1       |
| CCDC151.8   | 4.19E-05 | -0.22244 | 0.018 | 0.065 | 0.626777 | CSCL2 | CCDC151    |
| VKORC1.7    | 4.22E-05 | -0.27443 | 0.435 | 0.499 | 0.630591 | CSCL2 | VKORC1     |
| RRM2B.3     | 4.24E-05 | -0.1694  | 0.046 | 0.105 | 0.633197 | CSCL2 | RRM2B      |
| SERP2.9     | 4.24E-05 | 0.103069 | 0.159 | 0.099 | 0.633609 | CSCL2 | SERP2      |
| RUNX3.10    | 4.25E-05 | -0.17597 | 0.002 | 0.04  | 0.635376 | CSCL2 | RUNX3      |
| DHX34.1     | 4.25E-05 | 0.123107 | 0.102 | 0.056 | 0.635741 | CSCL2 | DHX34      |
| AKAP8.5     | 4.29E-05 | 0.11982  | 0.199 | 0.133 | 0.640936 | CSCL2 | AKAP8      |
| TEAD1.8     | 4.29E-05 | 0.185447 | 0.203 | 0.142 | 0.64133  | CSCL2 | TEAD1      |
| ATP6V1A.5   | 4.31E-05 | -0.11781 | 0.121 | 0.202 | 0.644212 | CSCL2 | ATP6V1A    |
| SYNGR1.7    | 4.33E-05 | -0.2296  | 0.053 | 0.114 | 0.646423 | CSCL2 | SYNGR1     |
| NCBP1.4     | 4.37E-05 | 0.105231 | 0.132 | 0.081 | 0.652949 | CSCL2 | NCBP1      |
| Clorf21.1   | 4.40E-05 | 0.190845 | 0.269 | 0.197 | 0.657795 | CSCL2 | Clorf21    |
| TMC8.11     | 4.41E-05 | -0.14789 | 0.004 | 0.044 | 0.658757 | CSCL2 | TMC8       |
| USP47.6     | 4.46E-05 | 0.105063 | 0.329 | 0.241 | 0.666782 | CSCL2 | USP47      |
| PPARD.11    | 4.46E-05 | -0.21725 | 0.051 | 0.111 | 0.667019 | CSCL2 | PPARD      |
| CTB-61M7.4  | 4.49E-05 | -0.20068 | 0.002 | 0.04  | 0.671373 | CSCL2 | CTB-61M7.2 |
| VPS28.5     | 4.51E-05 | -0.24113 | 0.596 | 0.638 | 0.674617 | CSCL2 | VPS28      |
| FAM174A.6   | 4.52E-05 | -0.18322 | 0.143 | 0.226 | 0.675679 | CSCL2 | FAM174A    |
| ATRX.8      | 4.60E-05 | 0.123326 | 0.556 | 0.44  | 0.687006 | CSCL2 | ATRX       |
| PLB1.11     | 4.63E-05 | -0.16142 | 0.004 | 0.044 | 0.69197  | CSCL2 | PLB1       |
| LINC00511.4 | 4.64E-05 | 0.161904 | 0.177 | 0.117 | 0.692812 | CSCL2 | LINC00511  |
| SLC4A8.6    | 4.64E-05 | 0.147138 | 0.121 | 0.072 | 0.6938   | CSCL2 | SLC4A8     |
| TTC28.9     | 4.64E-05 | 0.108388 | 0.148 | 0.093 | 0.694103 | CSCL2 | TTC28      |
| THOC1.4     | 4.69E-05 | 0.117518 | 0.212 | 0.143 | 0.700391 | CSCL2 | THOC1      |
| KRBOX4.6    | 4.69E-05 | 0.101787 | 0.177 | 0.113 | 0.700862 | CSCL2 | KRBOX4     |
| DOK1.12     | 4.85E-05 | -0.23901 | 0.088 | 0.157 | 0.725497 | CSCL2 | DOK1       |
| PDCL.3      | 4.87E-05 | 0.102215 | 0.267 | 0.191 | 0.727321 | CSCL2 | PDCL       |
| PLEKHH2.7   | 4.88E-05 | 0.134642 | 0.115 | 0.067 | 0.728933 | CSCL2 | PLEKHH2    |
| C19orf24.4  | 4.88E-05 | -0.19845 | 0.296 | 0.367 | 0.72924  | CSCL2 | C19orf24   |
| USP10.8     | 4.88E-05 | 0.120222 | 0.32  | 0.24  | 0.729328 | CSCL2 | USP10      |
| COLGALT2.4  | 4.89E-05 | 0.201483 | 0.199 | 0.136 | 0.731369 | CSCL2 | COLGALT2   |
| RFX3.4      | 4.90E-05 | 0.12755  | 0.121 | 0.072 | 0.732012 | CSCL2 | RFX3       |
| NFASC.9     | 4.91E-05 | -0.24574 | 0.046 | 0.105 | 0.734438 | CSCL2 | NFASC      |
| SLC35C2.6   | 4.93E-05 | -0.21669 | 0.177 | 0.256 | 0.736562 | CSCL2 | SLC35C2    |
| UROD.8      | 4.93E-05 | -0.18959 | 0.276 | 0.363 | 0.736967 | CSCL2 | UROD       |
| CEP44.3     | 4.97E-05 | 0.127486 | 0.11  | 0.064 | 0.742277 | CSCL2 | CEP44      |
| EXTL2.10    | 5.06E-05 | 0.168648 | 0.232 | 0.165 | 0.755759 | CSCL2 | EXTL2      |
| APOBR.11    | 5.06E-05 | -0.16385 | 0.002 | 0.039 | 0.756027 | CSCL2 | APOBR      |
| RAPGEF1.1   | 5.06E-05 | -0.28354 | 0.06  | 0.119 | 0.756068 | CSCL2 | RAPGEF1    |
| FAM120A.9   | 5.08E-05 | -0.17979 | 0.135 | 0.213 | 0.758816 | CSCL2 | FAM120A    |
| POU2F2.11   | 5.10E-05 | -0.33287 | 0.077 | 0.138 | 0.762326 | CSCL2 | POU2F2     |

|           |          |          |       |       |          |       |            |
|-----------|----------|----------|-------|-------|----------|-------|------------|
| ALDOC.7   | 5.12E-05 | -0.27674 | 0.091 | 0.158 | 0.764396 | CSCL2 | ALDOC      |
| CREB3L2.1 | 5.12E-05 | -0.24637 | 0.064 | 0.126 | 0.765387 | CSCL2 | CREB3L2    |
| DENND1C.1 | 5.14E-05 | -0.16519 | 0     | 0.035 | 0.76755  | CSCL2 | DENND1C    |
| PITPNA-AS | 5.15E-05 | 0.121128 | 0.263 | 0.193 | 0.769032 | CSCL2 | PITPNA-AS1 |
| TOP2B.11  | 5.15E-05 | 0.139165 | 0.316 | 0.234 | 0.769193 | CSCL2 | TOP2B      |
| GNA13.11  | 5.17E-05 | -0.30069 | 0.115 | 0.183 | 0.772967 | CSCL2 | GNA13      |
| PITPNB.2  | 5.22E-05 | 0.138249 | 0.238 | 0.169 | 0.780792 | CSCL2 | PITPNB     |
| PHYH.3    | 5.24E-05 | -0.10612 | 0.093 | 0.17  | 0.783499 | CSCL2 | PHYH       |
| DENND6B.1 | 5.26E-05 | -0.23752 | 0.046 | 0.104 | 0.785443 | CSCL2 | DENND6B    |
| RBP7.6    | 5.29E-05 | -0.20647 | 0.007 | 0.047 | 0.790034 | CSCL2 | RBP7       |
| AP1M1.5   | 5.30E-05 | 0.111252 | 0.296 | 0.22  | 0.792528 | CSCL2 | AP1M1      |
| MGAT4B.4  | 5.31E-05 | -0.12325 | 0.046 | 0.106 | 0.793786 | CSCL2 | MGAT4B     |
| CADM3.9   | 5.32E-05 | -0.33136 | 0.046 | 0.102 | 0.79467  | CSCL2 | CADM3      |
| SERPINE1. | 5.36E-05 | -0.16675 | 0.044 | 0.102 | 0.800648 | CSCL2 | SERPINE1   |
| MYLK.8    | 5.36E-05 | -0.22925 | 0.015 | 0.061 | 0.801161 | CSCL2 | MYLK       |
| DPEP2.11  | 5.37E-05 | -0.17705 | 0     | 0.035 | 0.803112 | CSCL2 | DPEP2      |
| ARRB1.9   | 5.39E-05 | -0.17677 | 0.004 | 0.043 | 0.805611 | CSCL2 | ARRB1      |
| COL22A1.9 | 5.45E-05 | -0.11926 | 0.024 | 0.074 | 0.814873 | CSCL2 | COL22A1    |
| AHCY.8    | 5.47E-05 | 0.147383 | 0.382 | 0.291 | 0.817548 | CSCL2 | AHCY       |
| TGM2.6    | 5.49E-05 | -0.13895 | 0.002 | 0.039 | 0.820413 | CSCL2 | TGM2       |
| SERTAD3.2 | 5.49E-05 | -0.2895  | 0.104 | 0.176 | 0.820622 | CSCL2 | SERTAD3    |
| SPINT1.12 | 5.50E-05 | -0.13361 | 0     | 0.035 | 0.821505 | CSCL2 | SPINT1     |
| ELP3      | 5.51E-05 | 0.105799 | 0.172 | 0.111 | 0.822942 | CSCL2 | ELP3       |
| TMEM147.2 | 5.55E-05 | -0.17872 | 0.567 | 0.597 | 0.829015 | CSCL2 | TMEM147    |
| GPS1.9    | 5.57E-05 | 0.125012 | 0.413 | 0.321 | 0.832958 | CSCL2 | GPS1       |
| SENP1     | 5.59E-05 | 0.115498 | 0.057 | 0.026 | 0.835487 | CSCL2 | SENP1      |
| KIAA1715. | 5.63E-05 | 0.107597 | 0.331 | 0.252 | 0.841708 | CSCL2 | KIAA1715   |
| GPRIN3.13 | 5.67E-05 | -0.21201 | 0.015 | 0.06  | 0.84777  | CSCL2 | GPRIN3     |
| FAM89B.12 | 5.72E-05 | 0.125787 | 0.325 | 0.243 | 0.854089 | CSCL2 | FAM89B     |
| BET1L.3   | 5.73E-05 | -0.14656 | 0.057 | 0.12  | 0.856832 | CSCL2 | BET1L      |
| TMEM14C.9 | 5.77E-05 | -0.25085 | 0.556 | 0.592 | 0.862437 | CSCL2 | TMEM14C    |
| ABCC4.7   | 5.79E-05 | -0.12898 | 0.007 | 0.047 | 0.865384 | CSCL2 | ABCC4      |
| TXNRD1.7  | 5.85E-05 | 0.152794 | 0.313 | 0.235 | 0.874764 | CSCL2 | TXNRD1     |
| SDHA.2    | 5.88E-05 | 0.107518 | 0.404 | 0.302 | 0.87797  | CSCL2 | SDHA       |
| C17orf89. | 5.90E-05 | 0.158529 | 0.543 | 0.416 | 0.881376 | CSCL2 | C17orf89   |
| ATG16L2.1 | 5.90E-05 | -0.20668 | 0.035 | 0.089 | 0.881404 | CSCL2 | ATG16L2    |
| KLHL36.4  | 5.91E-05 | -0.15039 | 0.04  | 0.096 | 0.882557 | CSCL2 | KLHL36     |
| TLR4.11   | 5.91E-05 | -0.18146 | 0.004 | 0.042 | 0.883654 | CSCL2 | TLR4       |
| LMAN1.7   | 5.93E-05 | -0.31539 | 0.254 | 0.332 | 0.886138 | CSCL2 | LMAN1      |
| STAT6.13  | 5.94E-05 | -0.18753 | 0.011 | 0.054 | 0.88814  | CSCL2 | STAT6      |
| TXLNG.8   | 5.94E-05 | 0.130258 | 0.194 | 0.131 | 0.88829  | CSCL2 | TXLNG      |
| PGPEP1.5  | 5.95E-05 | -0.20311 | 0.071 | 0.136 | 0.888831 | CSCL2 | PGPEP1     |
| XXYLT1.1C | 5.96E-05 | 0.157874 | 0.183 | 0.124 | 0.890326 | CSCL2 | XXYLT1     |
| TRIM22.1C | 5.98E-05 | -0.29844 | 0.075 | 0.137 | 0.893421 | CSCL2 | TRIM22     |
| P2RY6.11  | 6.02E-05 | -0.14043 | 0     | 0.034 | 0.899377 | CSCL2 | P2RY6      |
| C16orf91. | 6.04E-05 | 0.110403 | 0.263 | 0.193 | 0.902259 | CSCL2 | C16orf91   |
| TBK1.5    | 6.06E-05 | -0.15869 | 0.084 | 0.152 | 0.905482 | CSCL2 | TBK1       |
| PTEN.10   | 6.06E-05 | -0.21622 | 0.068 | 0.132 | 0.905563 | CSCL2 | PTEN       |
| RNPEP.11  | 6.06E-05 | -0.23881 | 0.15  | 0.227 | 0.906305 | CSCL2 | RNPEP      |
| FNBP4.7   | 6.07E-05 | 0.150262 | 0.327 | 0.249 | 0.907768 | CSCL2 | FNBP4      |
| HERC4.3   | 6.13E-05 | -0.17059 | 0.055 | 0.117 | 0.916274 | CSCL2 | HERC4      |



|           |          |          |       |       |          |       |               |
|-----------|----------|----------|-------|-------|----------|-------|---------------|
| CCDC181.8 | 6.13E-05 | 0.147234 | 0.128 | 0.078 | 0.916339 | CSCL2 | CCDC181       |
| CCNI.8    | 6.14E-05 | 0.102072 | 0.804 | 0.702 | 0.918166 | CSCL2 | CCNI          |
| KLHL25.4  | 6.17E-05 | 0.126359 | 0.093 | 0.051 | 0.921726 | CSCL2 | KLHL25        |
| RP11-126K | 6.17E-05 | 0.119334 | 0.143 | 0.089 | 0.922553 | CSCL2 | RP11-126K1.6  |
| FAM57B.11 | 6.18E-05 | 0.143272 | 0.146 | 0.09  | 0.923227 | CSCL2 | FAM57B        |
| URM1.4    | 6.20E-05 | -0.25811 | 0.291 | 0.361 | 0.926814 | CSCL2 | URM1          |
| ZC3H6.9   | 6.25E-05 | 0.102394 | 0.212 | 0.144 | 0.933367 | CSCL2 | ZC3H6         |
| PGLS.8    | 6.26E-05 | -0.1825  | 0.497 | 0.511 | 0.936153 | CSCL2 | PGLS          |
| TM7SF2.11 | 6.27E-05 | -0.17955 | 0.155 | 0.233 | 0.936525 | CSCL2 | TM7SF2        |
| HSD17B14. | 6.29E-05 | -0.23446 | 0.04  | 0.094 | 0.940117 | CSCL2 | HSD17B14      |
| TTC7A.10  | 6.30E-05 | -0.19808 | 0.026 | 0.077 | 0.940788 | CSCL2 | TTC7A         |
| MICA.4    | 6.31E-05 | -0.14206 | 0.007 | 0.046 | 0.942245 | CSCL2 | MICA          |
| GRASP.11  | 6.32E-05 | -0.21891 | 0.011 | 0.053 | 0.944709 | CSCL2 | GRASP         |
| GOLGA3    | 6.35E-05 | -0.18371 | 0.06  | 0.123 | 0.948395 | CSCL2 | GOLGA3        |
| GAL3ST4.1 | 6.36E-05 | -0.43297 | 0.113 | 0.174 | 0.950174 | CSCL2 | GAL3ST4       |
| PNP0.7    | 6.36E-05 | -0.10409 | 0.029 | 0.081 | 0.950635 | CSCL2 | PNP0          |
| SNAP47.9  | 6.43E-05 | 0.115403 | 0.272 | 0.2   | 0.961302 | CSCL2 | SNAP47        |
| TP53I3.5  | 6.44E-05 | 0.100259 | 0.21  | 0.143 | 0.962442 | CSCL2 | TP53I3        |
| FBX06.4   | 6.45E-05 | -0.15088 | 0.026 | 0.077 | 0.963425 | CSCL2 | FBX06         |
| CALR.6    | 6.45E-05 | -0.17949 | 0.693 | 0.692 | 0.964612 | CSCL2 | CALR          |
| BRWD1.10  | 6.49E-05 | 0.148762 | 0.32  | 0.238 | 0.969393 | CSCL2 | BRWD1         |
| RP11-263K | 6.50E-05 | -0.13541 | 0.02  | 0.067 | 0.970921 | CSCL2 | RP11-263K19.4 |
| GLDC.8    | 6.50E-05 | 0.148444 | 0.113 | 0.067 | 0.972063 | CSCL2 | GLDC          |
| NOC4L.5   | 6.51E-05 | 0.152379 | 0.219 | 0.154 | 0.972248 | CSCL2 | NOC4L         |
| UNK.5     | 6.51E-05 | 0.141476 | 0.185 | 0.124 | 0.972734 | CSCL2 | UNK           |
| GMIP.11   | 6.51E-05 | -0.19724 | 0.026 | 0.076 | 0.9735   | CSCL2 | GMIP          |
| LRRC45.6  | 6.58E-05 | 0.108465 | 0.139 | 0.087 | 0.983022 | CSCL2 | LRRC45        |
| ECHDC3.1C | 6.59E-05 | -0.14395 | 0     | 0.034 | 0.984616 | CSCL2 | ECHDC3        |
| PSTPIP2.8 | 6.62E-05 | -0.1279  | 0.007 | 0.046 | 0.989382 | CSCL2 | PSTPIP2       |
| ABTB1.10  | 6.64E-05 | -0.17856 | 0.049 | 0.106 | 0.99246  | CSCL2 | ABTB1         |
| IFITM1.5  | 6.67E-05 | -0.21423 | 0.002 | 0.038 | 0.996616 | CSCL2 | IFITM1        |
| THBS3.2   | 6.67E-05 | -0.11055 | 0.015 | 0.061 | 0.997188 | CSCL2 | THBS3         |
| CBLL1.3   | 6.73E-05 | 0.129762 | 0.163 | 0.105 | 1        | CSCL2 | CBLL1         |
| PPP3R1.4  | 6.76E-05 | 0.121305 | 0.17  | 0.111 | 1        | CSCL2 | PPP3R1        |
| DAD1.6    | 6.81E-05 | -0.22522 | 0.715 | 0.721 | 1        | CSCL2 | DAD1          |
| DHX57.6   | 6.90E-05 | 0.108349 | 0.148 | 0.093 | 1        | CSCL2 | DHX57         |
| KRTCAP2.5 | 6.93E-05 | -0.29011 | 0.521 | 0.558 | 1        | CSCL2 | KRTCAP2       |
| VRK2.11   | 6.98E-05 | -0.18972 | 0.013 | 0.056 | 1        | CSCL2 | VRK2          |
| C5orf24.1 | 7.00E-05 | 0.15479  | 0.377 | 0.293 | 1        | CSCL2 | C5orf24       |
| CWC25.4   | 7.02E-05 | 0.144271 | 0.276 | 0.198 | 1        | CSCL2 | CWC25         |
| RSBN1.10  | 7.05E-05 | 0.119453 | 0.296 | 0.214 | 1        | CSCL2 | RSBN1         |
| BAMBI.10  | 7.06E-05 | 0.104101 | 0.115 | 0.068 | 1        | CSCL2 | BAMBI         |
| CCDC25.9  | 7.15E-05 | 0.140108 | 0.382 | 0.293 | 1        | CSCL2 | CCDC25        |
| ALPK1.6   | 7.20E-05 | -0.14138 | 0.002 | 0.038 | 1        | CSCL2 | ALPK1         |
| HENMT1.1C | 7.21E-05 | -0.15607 | 0     | 0.034 | 1        | CSCL2 | HENMT1        |
| ZMYND8.9  | 7.23E-05 | 0.142858 | 0.278 | 0.205 | 1        | CSCL2 | ZMYND8        |
| PLCE1.9   | 7.24E-05 | 0.123728 | 0.108 | 0.063 | 1        | CSCL2 | PLCE1         |
| CD180.12  | 7.24E-05 | -0.13242 | 0.002 | 0.038 | 1        | CSCL2 | CD180         |
| ZFP90.9   | 7.30E-05 | 0.137541 | 0.19  | 0.129 | 1        | CSCL2 | ZFP90         |
| DNPEP.6   | 7.31E-05 | -0.20299 | 0.168 | 0.244 | 1        | CSCL2 | DNPEP         |
| CRB2.9    | 7.33E-05 | -0.15839 | 0.007 | 0.045 | 1        | CSCL2 | CRB2          |

|            |          |          |       |       |         |            |
|------------|----------|----------|-------|-------|---------|------------|
| PROX1.11   | 7.44E-05 | 0.120473 | 0.232 | 0.161 | 1 CSCL2 | PROX1      |
| EPS15.6    | 7.48E-05 | -0.20312 | 0.086 | 0.153 | 1 CSCL2 | EPS15      |
| PXN-AS1.5  | 7.48E-05 | 0.122707 | 0.128 | 0.079 | 1 CSCL2 | PXN-AS1    |
| ZNF593.7   | 7.49E-05 | -0.25933 | 0.223 | 0.305 | 1 CSCL2 | ZNF593     |
| SPA17.9    | 7.53E-05 | 0.172686 | 0.128 | 0.079 | 1 CSCL2 | SPA17      |
| LRIF1.7    | 7.56E-05 | 0.127298 | 0.269 | 0.194 | 1 CSCL2 | LRIF1      |
| COQ3.5     | 7.64E-05 | 0.129528 | 0.113 | 0.066 | 1 CSCL2 | COQ3       |
| MYLIP.10   | 7.65E-05 | -0.33114 | 0.073 | 0.131 | 1 CSCL2 | MYLIP      |
| GLT8D1.6   | 7.65E-05 | 0.189408 | 0.353 | 0.273 | 1 CSCL2 | GLT8D1     |
| APH1B.9    | 7.68E-05 | -0.19163 | 0.066 | 0.13  | 1 CSCL2 | APH1B      |
| ST3GAL4.8  | 7.68E-05 | 0.234305 | 0.177 | 0.12  | 1 CSCL2 | ST3GAL4    |
| FIBIN.12   | 7.69E-05 | -0.18356 | 0.152 | 0.23  | 1 CSCL2 | FIBIN      |
| C1orf43.2  | 7.82E-05 | -0.16719 | 0.576 | 0.597 | 1 CSCL2 | C1orf43    |
| PDCD4.11   | 7.83E-05 | -0.29693 | 0.088 | 0.151 | 1 CSCL2 | PDCD4      |
| GSAP.9     | 7.84E-05 | -0.21881 | 0.031 | 0.081 | 1 CSCL2 | GSAP       |
| BAG5.9     | 7.88E-05 | 0.144207 | 0.252 | 0.182 | 1 CSCL2 | BAG5       |
| WBSCR16.6  | 7.88E-05 | 0.11383  | 0.208 | 0.142 | 1 CSCL2 | WBSCR16    |
| VGLL4.10   | 7.89E-05 | 0.102319 | 0.419 | 0.313 | 1 CSCL2 | VGLL4      |
| PLP1.10    | 8.00E-05 | -0.24435 | 0.252 | 0.168 | 1 CSCL2 | PLP1       |
| TSR1.8     | 8.05E-05 | 0.135636 | 0.256 | 0.187 | 1 CSCL2 | TSR1       |
| POLR3GL.5  | 8.06E-05 | -0.22611 | 0.269 | 0.354 | 1 CSCL2 | POLR3GL    |
| DGCR2.7    | 8.07E-05 | 0.150359 | 0.214 | 0.15  | 1 CSCL2 | DGCR2      |
| PDE4A.7    | 8.10E-05 | -0.16085 | 0.038 | 0.091 | 1 CSCL2 | PDE4A      |
| WSB2.11    | 8.13E-05 | 0.126177 | 0.296 | 0.221 | 1 CSCL2 | WSB2       |
| ATP5D.12   | 8.13E-05 | 0.213095 | 0.762 | 0.608 | 1 CSCL2 | ATP5D      |
| AC147651.8 | 8.15E-05 | -0.15065 | 0.002 | 0.037 | 1 CSCL2 | AC147651.4 |
| C19orf52.8 | 8.23E-05 | 0.206375 | 0.236 | 0.171 | 1 CSCL2 | C19orf52   |
| IL2RA.11   | 8.26E-05 | -0.23927 | 0     | 0.033 | 1 CSCL2 | IL2RA      |
| ZFP37.6    | 8.31E-05 | 0.159038 | 0.091 | 0.049 | 1 CSCL2 | ZFP37      |
| SEPT4.10   | 8.38E-05 | -0.3643  | 0.071 | 0.132 | 1 CSCL2 | 4-Sep      |
| SNAPC2.6   | 8.44E-05 | -0.13039 | 0.128 | 0.206 | 1 CSCL2 | SNAPC2     |
| SCG5.10    | 8.56E-05 | -0.3098  | 0.256 | 0.331 | 1 CSCL2 | SCG5       |
| TFRC.11    | 8.62E-05 | -0.29854 | 0.143 | 0.212 | 1 CSCL2 | TFRC       |
| ANPEP.10   | 8.64E-05 | -0.14565 | 0     | 0.033 | 1 CSCL2 | ANPEP      |
| RAB13.10   | 8.72E-05 | -0.27817 | 0.302 | 0.374 | 1 CSCL2 | RAB13      |
| TRIB3.9    | 8.75E-05 | -0.12774 | 0.026 | 0.076 | 1 CSCL2 | TRIB3      |
| TRIM27.4   | 8.76E-05 | 0.104569 | 0.283 | 0.207 | 1 CSCL2 | TRIM27     |
| TANGO2.1C  | 8.77E-05 | -0.20115 | 0.035 | 0.087 | 1 CSCL2 | TANGO2     |
| LYRM5.9    | 8.79E-05 | -0.27914 | 0.265 | 0.344 | 1 CSCL2 | LYRM5      |
| APOL3.3    | 8.84E-05 | -0.13431 | 0.002 | 0.037 | 1 CSCL2 | APOL3      |
| MKNK2.5    | 8.84E-05 | -0.18847 | 0.115 | 0.187 | 1 CSCL2 | MKNK2      |
| RBKS.3     | 8.87E-05 | -0.13186 | 0.004 | 0.041 | 1 CSCL2 | RBKS       |
| KHNYN.1    | 8.91E-05 | -0.14224 | 0.02  | 0.066 | 1 CSCL2 | KHNYN      |
| MLXIPL.9   | 8.95E-05 | -0.19289 | 0.004 | 0.041 | 1 CSCL2 | MLXIPL     |
| FAM78A.1C  | 9.14E-05 | -0.16089 | 0.002 | 0.037 | 1 CSCL2 | FAM78A     |
| ITPRIPL2.9 | 9.15E-05 | -0.14369 | 0.026 | 0.075 | 1 CSCL2 | ITPRIPL2   |
| HUWE1.4    | 9.21E-05 | 0.136592 | 0.236 | 0.17  | 1 CSCL2 | HUWE1      |
| IFI44L.8   | 9.36E-05 | -0.13105 | 0.077 | 0.144 | 1 CSCL2 | IFI44L     |
| ATG4D.7    | 9.37E-05 | 0.136778 | 0.223 | 0.158 | 1 CSCL2 | ATG4D      |
| FLVCR1.3   | 9.37E-05 | 0.139801 | 0.126 | 0.076 | 1 CSCL2 | FLVCR1     |
| CFI.7      | 9.47E-05 | -0.16203 | 0.018 | 0.062 | 1 CSCL2 | CFI        |

|            |          |          |       |       |         |          |
|------------|----------|----------|-------|-------|---------|----------|
| LUCAT1.4   | 9.61E-05 | -0.15061 | 0.002 | 0.037 | 1 CSCL2 | LUCAT1   |
| STAMPB.8   | 9.68E-05 | 0.121121 | 0.344 | 0.263 | 1 CSCL2 | STAMPB   |
| LSM14B.6   | 9.79E-05 | 0.143952 | 0.15  | 0.098 | 1 CSCL2 | LSM14B   |
| MAPK7.9    | 9.84E-05 | 0.143094 | 0.181 | 0.123 | 1 CSCL2 | MAPK7    |
| MACROD1.6  | 9.84E-05 | 0.173075 | 0.177 | 0.12  | 1 CSCL2 | MACROD1  |
| IRAK2.4    | 9.87E-05 | -0.15802 | 0.011 | 0.051 | 1 CSCL2 | IRAK2    |
| ARHGAP25.9 | 9.88E-05 | -0.21189 | 0.022 | 0.068 | 1 CSCL2 | ARHGAP25 |
| IER5L.4    | 9.89E-05 | -0.13945 | 0.044 | 0.1   | 1 CSCL2 | IER5L    |
| HK2.9      | 9.89E-05 | -0.19605 | 0.035 | 0.087 | 1 CSCL2 | HK2      |
| CD72.10    | 9.92E-05 | -0.14882 | 0.011 | 0.052 | 1 CSCL2 | CD72     |
| CST7.8     | 9.92E-05 | -0.20688 | 0.002 | 0.037 | 1 CSCL2 | CST7     |
| SLC30A9.1  | 9.94E-05 | 0.1214   | 0.329 | 0.249 | 1 CSCL2 | SLC30A9  |
| MUS81.7    | 9.96E-05 | 0.125348 | 0.241 | 0.171 | 1 CSCL2 | MUS81    |
| HKR1.10    | 9.97E-05 | 0.113343 | 0.172 | 0.114 | 1 CSCL2 | HKR1     |
| YPEL2.6    | 9.99E-05 | -0.18788 | 0.024 | 0.071 | 1 CSCL2 | YPEL2    |
| RBM15B.11  | 0.0001   | 0.140416 | 0.236 | 0.168 | 1 CSCL2 | RBM15B   |
| MNT.2      | 0.0001   | -0.14301 | 0.04  | 0.094 | 1 CSCL2 | MNT      |
| ZSCAN9.4   | 0.000101 | 0.125911 | 0.126 | 0.077 | 1 CSCL2 | ZSCAN9   |
| WDR54.9    | 0.000101 | 0.152486 | 0.305 | 0.231 | 1 CSCL2 | WDR54    |
| PLCG1.8    | 0.000101 | 0.148087 | 0.15  | 0.098 | 1 CSCL2 | PLCG1    |
| SEL1L.6    | 0.000101 | -0.16195 | 0.106 | 0.176 | 1 CSCL2 | SEL1L    |
| PTPRA.10   | 0.000101 | 0.107438 | 0.475 | 0.349 | 1 CSCL2 | PTPRA    |
| IL12RB1.1  | 0.000101 | -0.15366 | 0     | 0.032 | 1 CSCL2 | IL12RB1  |
| NCOR1.11   | 0.000102 | 0.11257  | 0.596 | 0.459 | 1 CSCL2 | NCOR1    |
| KLF3.5     | 0.000102 | -0.19749 | 0.141 | 0.217 | 1 CSCL2 | KLF3     |
| TRMT1.10   | 0.000103 | -0.30031 | 0.188 | 0.26  | 1 CSCL2 | TRMT1    |
| PDIA5.6    | 0.000103 | -0.14072 | 0.024 | 0.072 | 1 CSCL2 | PDIA5    |
| CAV1.11    | 0.000103 | -0.46907 | 0.071 | 0.129 | 1 CSCL2 | CAV1     |
| DCAF8.4    | 0.000104 | -0.19083 | 0.135 | 0.21  | 1 CSCL2 | DCAF8    |
| COQ2.12    | 0.000104 | 0.13381  | 0.249 | 0.177 | 1 CSCL2 | COQ2     |
| TMEM91.8   | 0.000106 | -0.18415 | 0.026 | 0.074 | 1 CSCL2 | TMEM91   |
| SCARA3.10  | 0.000106 | 0.191427 | 0.194 | 0.135 | 1 CSCL2 | SCARA3   |
| ZNF615.1   | 0.000107 | 0.113433 | 0.088 | 0.049 | 1 CSCL2 | ZNF615   |
| SNX2.12    | 0.000109 | -0.2724  | 0.344 | 0.413 | 1 CSCL2 | SNX2     |
| DTX3L.3    | 0.000109 | -0.14757 | 0.031 | 0.081 | 1 CSCL2 | DTX3L    |
| FAM46A.9   | 0.00011  | 0.137151 | 0.265 | 0.193 | 1 CSCL2 | FAM46A   |
| FAM177B.8  | 0.000111 | -0.16362 | 0     | 0.032 | 1 CSCL2 | FAM177B  |
| ZNF574.6   | 0.000111 | 0.141938 | 0.137 | 0.085 | 1 CSCL2 | ZNF574   |
| LSS.9      | 0.000111 | -0.1163  | 0.044 | 0.1   | 1 CSCL2 | LSS      |
| ABI1.12    | 0.000112 | -0.27661 | 0.172 | 0.243 | 1 CSCL2 | ABI1     |
| PPP2R5C.6  | 0.000112 | 0.114232 | 0.338 | 0.254 | 1 CSCL2 | PPP2R5C  |
| ZNF106.9   | 0.000112 | -0.24842 | 0.185 | 0.26  | 1 CSCL2 | ZNF106   |
| EMC7.2     | 0.000113 | -0.28958 | 0.4   | 0.456 | 1 CSCL2 | EMC7     |
| PKIB.9     | 0.000114 | -0.24597 | 0.221 | 0.286 | 1 CSCL2 | PKIB     |
| PCK2.9     | 0.000114 | -0.15467 | 0.024 | 0.071 | 1 CSCL2 | PCK2     |
| SEPT8.12   | 0.000115 | 0.106339 | 0.265 | 0.193 | 1 CSCL2 | 8-Sep    |
| LARS.9     | 0.000115 | 0.10925  | 0.428 | 0.338 | 1 CSCL2 | LARS     |
| FAF2.7     | 0.000115 | 0.163679 | 0.254 | 0.187 | 1 CSCL2 | FAF2     |
| PDE4DIP.6  | 0.000115 | -0.25886 | 0.199 | 0.266 | 1 CSCL2 | PDE4DIP  |
| ST8SIA1.8  | 0.000116 | 0.141311 | 0.139 | 0.09  | 1 CSCL2 | ST8SIA1  |
| MAPK13.8   | 0.000116 | -0.12585 | 0     | 0.032 | 1 CSCL2 | MAPK13   |

|           |          |          |       |       |   |       |            |
|-----------|----------|----------|-------|-------|---|-------|------------|
| GPR132.9  | 0.000116 | -0.14826 | 0     | 0.032 | 1 | CSCL2 | GPR132     |
| MAF.12    | 0.000116 | -0.34323 | 0.079 | 0.137 | 1 | CSCL2 | MAF        |
| UBE2G2.2  | 0.000116 | 0.119373 | 0.338 | 0.259 | 1 | CSCL2 | UBE2G2     |
| CELF2.13  | 0.000116 | -0.31776 | 0.327 | 0.385 | 1 | CSCL2 | CELF2      |
| PI3.8     | 0.000117 | -0.40203 | 0.013 | 0.054 | 1 | CSCL2 | PI3        |
| SEMA4A.1C | 0.000117 | -0.16089 | 0.011 | 0.051 | 1 | CSCL2 | SEMA4A     |
| FLNA.11   | 0.000117 | -0.2038  | 0.181 | 0.253 | 1 | CSCL2 | FLNA       |
| PIK3CD.8  | 0.000119 | -0.12992 | 0     | 0.032 | 1 | CSCL2 | PIK3CD     |
| C10orf128 | 0.000119 | -0.15509 | 0     | 0.032 | 1 | CSCL2 | C10orf128  |
| FLVCR2.9  | 0.000119 | -0.12945 | 0.002 | 0.036 | 1 | CSCL2 | FLVCR2     |
| ACADVL.8  | 0.000121 | -0.20421 | 0.395 | 0.453 | 1 | CSCL2 | ACADVL     |
| ATP5SL.7  | 0.000121 | 0.122982 | 0.305 | 0.228 | 1 | CSCL2 | ATP5SL     |
| PIAS4.7   | 0.000121 | 0.181509 | 0.188 | 0.129 | 1 | CSCL2 | PIAS4      |
| OPTN.10   | 0.000123 | -0.10814 | 0.073 | 0.138 | 1 | CSCL2 | OPTN       |
| ARHGAP22. | 0.000123 | -0.23488 | 0.029 | 0.076 | 1 | CSCL2 | ARHGAP22   |
| PDGFD.9   | 0.000125 | -0.10155 | 0.031 | 0.081 | 1 | CSCL2 | PDGFD      |
| CMTM6.13  | 0.000125 | -0.29704 | 0.373 | 0.428 | 1 | CSCL2 | CMTM6      |
| PPP1R14B. | 0.000126 | 0.112705 | 0.446 | 0.341 | 1 | CSCL2 | PPP1R14B   |
| TOMM20.2  | 0.000126 | -0.22751 | 0.472 | 0.518 | 1 | CSCL2 | TOMM20     |
| GHDC.7    | 0.000127 | -0.16477 | 0.042 | 0.095 | 1 | CSCL2 | GHDC       |
| SIN3A.1   | 0.000127 | 0.124221 | 0.139 | 0.088 | 1 | CSCL2 | SIN3A      |
| SLC44A3.5 | 0.000127 | -0.11864 | 0     | 0.031 | 1 | CSCL2 | SLC44A3    |
| SEC62.7   | 0.000127 | -0.23288 | 0.682 | 0.691 | 1 | CSCL2 | SEC62      |
| RIPK2.11  | 0.000128 | -0.14529 | 0.104 | 0.171 | 1 | CSCL2 | RIPK2      |
| DOCK10.9  | 0.000128 | -0.22289 | 0.068 | 0.128 | 1 | CSCL2 | DOCK10     |
| CDH11.11  | 0.000128 | 0.143778 | 0.168 | 0.113 | 1 | CSCL2 | CDH11      |
| ZBTB7B.6  | 0.000128 | -0.13017 | 0.007 | 0.043 | 1 | CSCL2 | ZBTB7B     |
| CYBRD1.5  | 0.000129 | -0.20883 | 0.108 | 0.179 | 1 | CSCL2 | CYBRD1     |
| DNAJC18.8 | 0.00013  | 0.211838 | 0.179 | 0.12  | 1 | CSCL2 | DNAJC18    |
| ACO09501. | 0.000132 | -0.61734 | 0.099 | 0.159 | 1 | CSCL2 | ACO09501.4 |
| ZNF267.12 | 0.000133 | -0.26623 | 0.075 | 0.135 | 1 | CSCL2 | ZNF267     |
| C6orf120. | 0.000133 | -0.13124 | 0.075 | 0.14  | 1 | CSCL2 | C6orf120   |
| GOPC.10   | 0.000134 | 0.172979 | 0.325 | 0.255 | 1 | CSCL2 | GOPC       |
| RANBP3.6  | 0.000135 | 0.119673 | 0.291 | 0.22  | 1 | CSCL2 | RANBP3     |
| DCAF10.6  | 0.000137 | 0.101138 | 0.243 | 0.175 | 1 | CSCL2 | DCAF10     |
| ALG6.4    | 0.000138 | 0.146338 | 0.155 | 0.101 | 1 | CSCL2 | ALG6       |
| MINK1.6   | 0.000138 | -0.17389 | 0.051 | 0.106 | 1 | CSCL2 | MINK1      |
| ACSL4.10  | 0.000138 | -0.16951 | 0.035 | 0.085 | 1 | CSCL2 | ACSL4      |
| SERP1.8   | 0.000138 | -0.1809  | 0.596 | 0.604 | 1 | CSCL2 | SERP1      |
| CCDC124.6 | 0.000143 | 0.110896 | 0.585 | 0.466 | 1 | CSCL2 | CCDC124    |
| SNAI1.10  | 0.000143 | -0.1881  | 0.009 | 0.046 | 1 | CSCL2 | SNAI1      |
| ACYP2.8   | 0.000146 | -0.30372 | 0.243 | 0.315 | 1 | CSCL2 | ACYP2      |
| ERI1.3    | 0.000147 | 0.100205 | 0.166 | 0.11  | 1 | CSCL2 | ERI1       |
| MSI2.10   | 0.000148 | 0.11091  | 0.424 | 0.317 | 1 | CSCL2 | MSI2       |
| ELP5.8    | 0.000148 | 0.110606 | 0.344 | 0.264 | 1 | CSCL2 | ELP5       |
| FBRS.4    | 0.000148 | -0.15515 | 0.057 | 0.115 | 1 | CSCL2 | FBRS       |
| TBRG4.8   | 0.000149 | 0.124443 | 0.311 | 0.235 | 1 | CSCL2 | TBRG4      |
| CLCF1.6   | 0.00015  | -0.15667 | 0.007 | 0.043 | 1 | CSCL2 | CLCF1      |
| RCAN3.5   | 0.000151 | -0.12084 | 0.018 | 0.061 | 1 | CSCL2 | RCAN3      |
| SCG2.12   | 0.000151 | -0.16083 | 0.183 | 0.265 | 1 | CSCL2 | SCG2       |
| BST1.4    | 0.000151 | -0.11322 | 0.004 | 0.039 | 1 | CSCL2 | BST1       |

|           |          |          |       |       |         |              |
|-----------|----------|----------|-------|-------|---------|--------------|
| EID2.10   | 0.000152 | 0.117178 | 0.163 | 0.109 | 1 CSCL2 | EID2         |
| RAB27A.9  | 0.000153 | -0.12468 | 0.031 | 0.08  | 1 CSCL2 | RAB27A       |
| BCL6.3    | 0.000153 | -0.22673 | 0.071 | 0.13  | 1 CSCL2 | BCL6         |
| NELFB.7   | 0.000154 | 0.103473 | 0.208 | 0.147 | 1 CSCL2 | NELFB        |
| RP1-39G22 | 0.000155 | 0.128128 | 0.185 | 0.129 | 1 CSCL2 | RP1-39G22.7  |
| OXLD1.8   | 0.000156 | -0.20626 | 0.181 | 0.256 | 1 CSCL2 | OXLD1        |
| ANKRD42.1 | 0.000158 | -0.14397 | 0.018 | 0.06  | 1 CSCL2 | ANKRD42      |
| ATXN1.8   | 0.000158 | -0.20419 | 0.099 | 0.166 | 1 CSCL2 | ATXN1        |
| GNA11.7   | 0.000159 | 0.128074 | 0.157 | 0.104 | 1 CSCL2 | GNA11        |
| FOXO1.6   | 0.000159 | 0.138454 | 0.117 | 0.072 | 1 CSCL2 | FOXO1        |
| VSTM2A.1C | 0.000159 | -0.34608 | 0.053 | 0.107 | 1 CSCL2 | VSTM2A       |
| G3BP1.7   | 0.000159 | 0.149133 | 0.391 | 0.311 | 1 CSCL2 | G3BP1        |
| TPCN1.8   | 0.00016  | -0.23668 | 0.042 | 0.092 | 1 CSCL2 | TPCN1        |
| PLA2G7.1C | 0.000161 | -0.1874  | 0.013 | 0.053 | 1 CSCL2 | PLA2G7       |
| C1orf174. | 0.000161 | 0.101086 | 0.214 | 0.152 | 1 CSCL2 | C1orf174     |
| SLC25A38. | 0.000163 | 0.123319 | 0.205 | 0.143 | 1 CSCL2 | SLC25A38     |
| UBE2D1.7  | 0.000163 | -0.23169 | 0.194 | 0.27  | 1 CSCL2 | UBE2D1       |
| WRNIP1.5  | 0.000165 | 0.116206 | 0.152 | 0.101 | 1 CSCL2 | WRNIP1       |
| DHFRL1.6  | 0.000165 | 0.137027 | 0.108 | 0.064 | 1 CSCL2 | DHFRL1       |
| CAD.3     | 0.000167 | 0.114328 | 0.091 | 0.051 | 1 CSCL2 | CAD          |
| MAN1B1.6  | 0.000167 | -0.19929 | 0.152 | 0.224 | 1 CSCL2 | MAN1B1       |
| TMED1.9   | 0.000169 | -0.25602 | 0.216 | 0.294 | 1 CSCL2 | TMED1        |
| ADSSL1.6  | 0.000172 | -0.13884 | 0.033 | 0.082 | 1 CSCL2 | ADSSL1       |
| RP11-536K | 0.000173 | -0.20722 | 0.004 | 0.038 | 1 CSCL2 | RP11-536K7.3 |
| HNRNPU-AS | 0.000173 | 0.105906 | 0.15  | 0.096 | 1 CSCL2 | HNRNPU-AS1   |
| UBL3.10   | 0.000173 | -0.17732 | 0.285 | 0.357 | 1 CSCL2 | UBL3         |
| PKP4.7    | 0.000174 | 0.110211 | 0.093 | 0.052 | 1 CSCL2 | PKP4         |
| AP1G2.10  | 0.000176 | -0.17452 | 0.013 | 0.053 | 1 CSCL2 | AP1G2        |
| SMC5.5    | 0.000176 | 0.147812 | 0.243 | 0.177 | 1 CSCL2 | SMC5         |
| MAPKAPK5. | 0.000177 | 0.11936  | 0.249 | 0.181 | 1 CSCL2 | MAPKAPK5     |
| TRAF7.8   | 0.000179 | 0.132231 | 0.254 | 0.187 | 1 CSCL2 | TRAF7        |
| SIGLEC1.8 | 0.000182 | -0.14089 | 0     | 0.03  | 1 CSCL2 | SIGLEC1      |
| AP005530. | 0.000182 | -0.14789 | 0     | 0.03  | 1 CSCL2 | AP005530.2   |
| EDEM1.8   | 0.000183 | -0.17529 | 0.033 | 0.081 | 1 CSCL2 | EDEM1        |
| SPTBN1.11 | 0.000184 | 0.172703 | 0.349 | 0.271 | 1 CSCL2 | SPTBN1       |
| YME1L1.9  | 0.000185 | -0.2514  | 0.188 | 0.263 | 1 CSCL2 | YME1L1       |
| MYNN.5    | 0.000185 | 0.111942 | 0.155 | 0.101 | 1 CSCL2 | MYNN         |
| TLR3.7    | 0.000187 | -0.15928 | 0.002 | 0.034 | 1 CSCL2 | TLR3         |
| TAF9.7    | 0.000189 | 0.108066 | 0.607 | 0.495 | 1 CSCL2 | TAF9         |
| RASSF7.8  | 0.000192 | -0.13979 | 0.026 | 0.072 | 1 CSCL2 | RASSF7       |
| FAM98B.7  | 0.000192 | 0.117145 | 0.143 | 0.093 | 1 CSCL2 | FAM98B       |
| CASP8.10  | 0.000193 | -0.16785 | 0.011 | 0.049 | 1 CSCL2 | CASP8        |
| MIR210HG. | 0.000194 | -0.15973 | 0.042 | 0.093 | 1 CSCL2 | MIR210HG     |
| SLC29A3.8 | 0.000194 | -0.1598  | 0.009 | 0.045 | 1 CSCL2 | SLC29A3      |
| LAMP1.10  | 0.000194 | -0.21049 | 0.519 | 0.521 | 1 CSCL2 | LAMP1        |
| AQP9.7    | 0.000195 | -0.12755 | 0     | 0.03  | 1 CSCL2 | AQP9         |
| HSP90B1.7 | 0.000196 | 0.123393 | 0.768 | 0.653 | 1 CSCL2 | HSP90B1      |
| CLEC9A.11 | 0.000196 | -0.21269 | 0.002 | 0.034 | 1 CSCL2 | CLEC9A       |
| ENPP4.8   | 0.000198 | -0.14538 | 0.015 | 0.056 | 1 CSCL2 | ENPP4        |
| UBXN11.8  | 0.000198 | -0.14838 | 0.077 | 0.138 | 1 CSCL2 | UBXN11       |
| SKI.7     | 0.0002   | -0.22599 | 0.093 | 0.154 | 1 CSCL2 | SKI          |

|           |          |          |       |       |   |       |               |
|-----------|----------|----------|-------|-------|---|-------|---------------|
| UQCC2.7   | 0.0002   | 0.106722 | 0.521 | 0.423 | 1 | CSCL2 | UQCC2         |
| TBC1D17.5 | 0.0002   | -0.21377 | 0.095 | 0.158 | 1 | CSCL2 | TBC1D17       |
| DSC2.10   | 0.000202 | -0.13286 | 0.002 | 0.034 | 1 | CSCL2 | DSC2          |
| EDF1.4    | 0.000202 | -0.14003 | 0.812 | 0.785 | 1 | CSCL2 | EDF1          |
| MTURN.6   | 0.000203 | 0.116771 | 0.126 | 0.077 | 1 | CSCL2 | MTURN         |
| HGF.6     | 0.000204 | -0.13435 | 0     | 0.03  | 1 | CSCL2 | HGF           |
| IL6.5     | 0.000207 | -0.17811 | 0.007 | 0.041 | 1 | CSCL2 | IL6           |
| MEX3D.8   | 0.000207 | 0.117153 | 0.102 | 0.06  | 1 | CSCL2 | MEX3D         |
| USP28.1   | 0.000209 | 0.124456 | 0.093 | 0.053 | 1 | CSCL2 | USP28         |
| DHX36.10  | 0.00021  | 0.107787 | 0.534 | 0.421 | 1 | CSCL2 | DHX36         |
| NCOR2.6   | 0.00021  | 0.110909 | 0.3   | 0.228 | 1 | CSCL2 | NCOR2         |
| UCHL5.5   | 0.000211 | 0.148619 | 0.208 | 0.146 | 1 | CSCL2 | UCHL5         |
| KIAA0930. | 0.000211 | -0.27102 | 0.088 | 0.147 | 1 | CSCL2 | KIAA0930      |
| OAZ2.2    | 0.000211 | -0.18358 | 0.472 | 0.507 | 1 | CSCL2 | OAZ2          |
| C12orf4.1 | 0.000211 | 0.103624 | 0.137 | 0.087 | 1 | CSCL2 | C12orf4       |
| HIST1H2BJ | 0.000212 | 0.315989 | 0.042 | 0.018 | 1 | CSCL2 | HIST1H2BJ     |
| GPX4.6    | 0.000212 | -0.13225 | 0.865 | 0.841 | 1 | CSCL2 | GPX4          |
| METTL8.5  | 0.000213 | 0.127831 | 0.172 | 0.118 | 1 | CSCL2 | METTL8        |
| ALKBH1    | 0.000213 | 0.144663 | 0.102 | 0.059 | 1 | CSCL2 | ALKBH1        |
| PNPLA4.7  | 0.000214 | -0.24342 | 0.022 | 0.064 | 1 | CSCL2 | PNPLA4        |
| STARD4.4  | 0.000215 | -0.10707 | 0.002 | 0.034 | 1 | CSCL2 | STARD4        |
| GEMIN6.5  | 0.000216 | 0.103129 | 0.221 | 0.16  | 1 | CSCL2 | GEMIN6        |
| CSPP1.6   | 0.000216 | 0.144785 | 0.157 | 0.104 | 1 | CSCL2 | CSPP1         |
| LTBP4     | 0.000216 | -0.15143 | 0.029 | 0.075 | 1 | CSCL2 | LTBP4         |
| STX18.1   | 0.000218 | 0.105365 | 0.221 | 0.157 | 1 | CSCL2 | STX18         |
| ITGB2-AS1 | 0.000218 | -0.15996 | 0     | 0.029 | 1 | CSCL2 | ITGB2-AS1     |
| FMN1.11   | 0.00022  | -0.12927 | 0.002 | 0.033 | 1 | CSCL2 | FMN1          |
| INPP1.7   | 0.00022  | 0.164692 | 0.208 | 0.149 | 1 | CSCL2 | INPP1         |
| BCO2.2    | 0.00022  | -0.2066  | 0.011 | 0.048 | 1 | CSCL2 | BCO2          |
| MTCH1.5   | 0.000221 | 0.111601 | 0.658 | 0.529 | 1 | CSCL2 | MTCH1         |
| ELM01.10  | 0.000222 | -0.34884 | 0.132 | 0.192 | 1 | CSCL2 | ELM01         |
| RP3-47704 | 0.000223 | -0.14744 | 0     | 0.029 | 1 | CSCL2 | RP3-47704.14  |
| RP11-489C | 0.000223 | -0.15646 | 0     | 0.029 | 1 | CSCL2 | RP11-489018.1 |
| AGBL5.5   | 0.000224 | 0.107566 | 0.128 | 0.082 | 1 | CSCL2 | AGBL5         |
| NDUFB8.7  | 0.000225 | -0.45061 | 0.018 | 0.058 | 1 | CSCL2 | NDUFB8        |
| ERP44.9   | 0.000228 | -0.26724 | 0.349 | 0.397 | 1 | CSCL2 | ERP44         |
| AHR.11    | 0.000228 | -0.18692 | 0.022 | 0.064 | 1 | CSCL2 | AHR           |
| PLA2G4C.4 | 0.00023  | -0.10506 | 0.009 | 0.045 | 1 | CSCL2 | PLA2G4C       |
| SLFN5.4   | 0.000231 | -0.15538 | 0.02  | 0.061 | 1 | CSCL2 | SLFN5         |
| PFKFB2.2  | 0.000231 | -0.10831 | 0.004 | 0.037 | 1 | CSCL2 | PFKFB2        |
| SPOCK1.11 | 0.000231 | -0.20294 | 0.035 | 0.083 | 1 | CSCL2 | SPOCK1        |
| HRH2.9    | 0.000232 | -0.15729 | 0.007 | 0.041 | 1 | CSCL2 | HRH2          |
| DNAJC12.3 | 0.000232 | -0.17452 | 0.035 | 0.083 | 1 | CSCL2 | DNAJC12       |
| SH3KBP1.1 | 0.000238 | -0.21897 | 0.177 | 0.244 | 1 | CSCL2 | SH3KBP1       |
| CARD11.1C | 0.000239 | -0.11706 | 0     | 0.029 | 1 | CSCL2 | CARD11        |
| MTMR10.3  | 0.000239 | -0.15071 | 0.024 | 0.068 | 1 | CSCL2 | MTMR10        |
| ZNF426.8  | 0.00024  | 0.116828 | 0.163 | 0.11  | 1 | CSCL2 | ZNF426        |
| PRUNE2.9  | 0.000242 | -0.23536 | 0.064 | 0.119 | 1 | CSCL2 | PRUNE2        |
| COIL.10   | 0.000242 | 0.139804 | 0.247 | 0.183 | 1 | CSCL2 | COIL          |
| CBLN4.13  | 0.000243 | -0.10378 | 0.033 | 0.081 | 1 | CSCL2 | CBLN4         |
| N4BP2L1.5 | 0.000243 | -0.28412 | 0.099 | 0.16  | 1 | CSCL2 | N4BP2L1       |

|             |          |          |       |       |   |       |               |
|-------------|----------|----------|-------|-------|---|-------|---------------|
| G6PD. 7     | 0.000244 | -0.19566 | 0.161 | 0.231 | 1 | CSCL2 | G6PD          |
| MAPK6. 7    | 0.000246 | 0.131805 | 0.232 | 0.17  | 1 | CSCL2 | MAPK6         |
| PRKAG2. 8   | 0.000248 | -0.31076 | 0.084 | 0.139 | 1 | CSCL2 | PRKAG2        |
| FAM122A. 7  | 0.000248 | 0.102184 | 0.203 | 0.141 | 1 | CSCL2 | FAM122A       |
| UBE2D2. 9   | 0.00025  | 0.119044 | 0.691 | 0.584 | 1 | CSCL2 | UBE2D2        |
| C11orf71. 0 | 0.000251 | -0.18155 | 0.007 | 0.041 | 1 | CSCL2 | C11orf71      |
| ATPIF1. 3   | 0.000255 | -0.16939 | 0.607 | 0.624 | 1 | CSCL2 | ATPIF1        |
| NDUFS7. 2   | 0.000255 | -0.18062 | 0.583 | 0.619 | 1 | CSCL2 | NDUFS7        |
| BACH1. 7    | 0.00026  | -0.18154 | 0.055 | 0.11  | 1 | CSCL2 | BACH1         |
| ITGA7. 11   | 0.00026  | -0.12383 | 0.079 | 0.139 | 1 | CSCL2 | ITGA7         |
| EIF4ENIF1   | 0.000261 | 0.117157 | 0.108 | 0.066 | 1 | CSCL2 | EIF4ENIF1     |
| WDFY2. 4    | 0.000262 | -0.14935 | 0.038 | 0.086 | 1 | CSCL2 | WDFY2         |
| ANAPC7. 9   | 0.000266 | 0.122276 | 0.232 | 0.169 | 1 | CSCL2 | ANAPC7        |
| ITPRIP. 11  | 0.000267 | -0.13179 | 0.031 | 0.077 | 1 | CSCL2 | ITPRIP        |
| RNASEH1-A   | 0.000268 | 0.122432 | 0.236 | 0.175 | 1 | CSCL2 | RNASEH1-AS1   |
| RINT1. 9    | 0.000268 | 0.115191 | 0.146 | 0.093 | 1 | CSCL2 | RINT1         |
| ZNF217. 5   | 0.00027  | -0.11917 | 0.04  | 0.089 | 1 | CSCL2 | ZNF217        |
| VPS51. 5    | 0.000271 | 0.130155 | 0.338 | 0.26  | 1 | CSCL2 | VPS51         |
| KLHDC2. 10  | 0.000277 | 0.123843 | 0.384 | 0.299 | 1 | CSCL2 | KLHDC2        |
| STRIP1. 8   | 0.000278 | 0.119965 | 0.179 | 0.122 | 1 | CSCL2 | STRIP1        |
| TMEM50B. 6  | 0.000279 | -0.24111 | 0.234 | 0.306 | 1 | CSCL2 | TMEM50B       |
| SDCCAG8. 8  | 0.00028  | -0.26797 | 0.263 | 0.332 | 1 | CSCL2 | SDCCAG8       |
| UNC119B. 6  | 0.000284 | 0.115086 | 0.102 | 0.061 | 1 | CSCL2 | UNC119B       |
| RIT1. 9     | 0.000284 | -0.23606 | 0.148 | 0.216 | 1 | CSCL2 | RIT1          |
| JAK3. 6     | 0.000287 | -0.11762 | 0     | 0.028 | 1 | CSCL2 | JAK3          |
| PRDX3. 10   | 0.000287 | -0.27175 | 0.413 | 0.469 | 1 | CSCL2 | PRDX3         |
| SLK. 1      | 0.000289 | -0.11508 | 0.026 | 0.07  | 1 | CSCL2 | SLK           |
| TRIM25. 7   | 0.00029  | -0.12643 | 0.04  | 0.089 | 1 | CSCL2 | TRIM25        |
| FKBP5. 12   | 0.000291 | -0.28331 | 0.26  | 0.319 | 1 | CSCL2 | FKBP5         |
| METTL2A. 8  | 0.000293 | 0.112089 | 0.216 | 0.156 | 1 | CSCL2 | METTL2A       |
| MOG. 10     | 0.000295 | -0.25167 | 0.002 | 0.032 | 1 | CSCL2 | MOG           |
| PIFO. 9     | 0.000295 | -0.19886 | 0.013 | 0.051 | 1 | CSCL2 | PIFO          |
| MESDC2. 7   | 0.000302 | -0.24707 | 0.336 | 0.407 | 1 | CSCL2 | MESDC2        |
| PIPOX. 11   | 0.000303 | 0.284203 | 0.183 | 0.13  | 1 | CSCL2 | PIPOX         |
| PRR19       | 0.000306 | 0.108124 | 0.049 | 0.023 | 1 | CSCL2 | PRR19         |
| TMEM151A. 0 | 0.000306 | -0.13857 | 0.009 | 0.044 | 1 | CSCL2 | TMEM151A      |
| PSD4. 5     | 0.00031  | -0.11358 | 0.002 | 0.032 | 1 | CSCL2 | PSD4          |
| EHD4. 10    | 0.00031  | -0.18639 | 0.044 | 0.093 | 1 | CSCL2 | EHD4          |
| NADSYN1. 6  | 0.000311 | -0.13813 | 0.064 | 0.122 | 1 | CSCL2 | NADSYN1       |
| FAM212A. 1  | 0.000313 | -0.21084 | 0.013 | 0.05  | 1 | CSCL2 | FAM212A       |
| SP140. 11   | 0.000316 | -0.14457 | 0.002 | 0.032 | 1 | CSCL2 | SP140         |
| CETN2. 10   | 0.000318 | -0.29677 | 0.256 | 0.325 | 1 | CSCL2 | CETN2         |
| FAM102A. 8  | 0.000319 | -0.18442 | 0.049 | 0.1   | 1 | CSCL2 | FAM102A       |
| TRIM14. 8   | 0.000324 | -0.14115 | 0.044 | 0.094 | 1 | CSCL2 | TRIM14        |
| RBMS1. 9    | 0.000324 | -0.15084 | 0.183 | 0.253 | 1 | CSCL2 | RBMS1         |
| RP11-345F   | 0.000326 | 0.16216  | 0.221 | 0.162 | 1 | CSCL2 | RP11-345P4. 9 |
| PTPN2. 10   | 0.000327 | -0.27305 | 0.19  | 0.25  | 1 | CSCL2 | PTPN2         |
| RNF135. 11  | 0.000328 | -0.195   | 0.06  | 0.113 | 1 | CSCL2 | RNF135        |
| CHST14. 4   | 0.00033  | 0.130734 | 0.119 | 0.076 | 1 | CSCL2 | CHST14        |
| MTFMT. 5    | 0.000333 | -0.17262 | 0.051 | 0.102 | 1 | CSCL2 | MTFMT         |
| UNC119. 8   | 0.000333 | -0.16097 | 0.15  | 0.22  | 1 | CSCL2 | UNC119        |

|            |          |          |       |       |   |       |               |
|------------|----------|----------|-------|-------|---|-------|---------------|
| ABHD11.3   | 0.000333 | 0.100343 | 0.232 | 0.166 | 1 | CSCL2 | ABHD11        |
| POLR1E.6   | 0.000333 | 0.131056 | 0.161 | 0.11  | 1 | CSCL2 | POLR1E        |
| BATF.9     | 0.000335 | -0.15237 | 0.007 | 0.04  | 1 | CSCL2 | BATF          |
| REEP3.8    | 0.000336 | -0.12997 | 0.177 | 0.247 | 1 | CSCL2 | REEP3         |
| GJB2.8     | 0.000337 | -0.10021 | 0.013 | 0.051 | 1 | CSCL2 | GJB2          |
| CTNS.3     | 0.000337 | -0.13053 | 0.038 | 0.086 | 1 | CSCL2 | CTNS          |
| MARCH7.5   | 0.000338 | 0.123234 | 0.329 | 0.252 | 1 | CSCL2 | 7-Mar         |
| FAS.4      | 0.000338 | -0.22662 | 0.026 | 0.069 | 1 | CSCL2 | FAS           |
| TIPARP.9   | 0.000338 | -0.19349 | 0.11  | 0.171 | 1 | CSCL2 | TIPARP        |
| MPC2.7     | 0.000339 | -0.22425 | 0.563 | 0.582 | 1 | CSCL2 | MPC2          |
| IRAK4.5    | 0.00034  | -0.16515 | 0.049 | 0.1   | 1 | CSCL2 | IRAK4         |
| FAM159A.1  | 0.000341 | -0.16559 | 0.011 | 0.046 | 1 | CSCL2 | FAM159A       |
| KCTD17.7   | 0.000343 | 0.144592 | 0.188 | 0.133 | 1 | CSCL2 | KCTD17        |
| TCEA1.8    | 0.000343 | 0.157646 | 0.609 | 0.479 | 1 | CSCL2 | TCEA1         |
| PTPN22.8   | 0.000343 | -0.12002 | 0     | 0.028 | 1 | CSCL2 | PTPN22        |
| SCARF1.1C  | 0.000343 | -0.12289 | 0     | 0.028 | 1 | CSCL2 | SCARF1        |
| TRAPPC6A.0 | 0.000344 | -0.28724 | 0.19  | 0.261 | 1 | CSCL2 | TRAPPC6A      |
| AP5B1.5    | 0.000345 | -0.12864 | 0.015 | 0.053 | 1 | CSCL2 | AP5B1         |
| RP11-742E  | 0.000345 | -0.15036 | 0.002 | 0.032 | 1 | CSCL2 | RP11-742B18.1 |
| RASA3.4    | 0.000346 | -0.1626  | 0.046 | 0.096 | 1 | CSCL2 | RASA3         |
| C11orf31.0 | 0.000349 | -0.19563 | 0.656 | 0.668 | 1 | CSCL2 | C11orf31      |
| KCNE3.11   | 0.000351 | -0.11516 | 0     | 0.027 | 1 | CSCL2 | KCNE3         |
| MOCS2.8    | 0.000355 | 0.14131  | 0.333 | 0.26  | 1 | CSCL2 | MOCS2         |
| EMD.7      | 0.000358 | 0.114302 | 0.36  | 0.281 | 1 | CSCL2 | EMD           |
| CAAP1.2    | 0.000362 | 0.115242 | 0.135 | 0.088 | 1 | CSCL2 | CAAP1         |
| KIAA1191.0 | 0.000365 | 0.111591 | 0.333 | 0.261 | 1 | CSCL2 | KIAA1191      |
| CATSPER1.0 | 0.000368 | -0.14166 | 0     | 0.027 | 1 | CSCL2 | CATSPER1      |
| HOXD-AS2.0 | 0.000368 | 0.141418 | 0.077 | 0.043 | 1 | CSCL2 | HOXD-AS2      |
| CCPG1.5    | 0.000374 | -0.15123 | 0.146 | 0.215 | 1 | CSCL2 | CCPG1         |
| WDFY4.10   | 0.000376 | -0.12342 | 0     | 0.027 | 1 | CSCL2 | WDFY4         |
| BTG2.9     | 0.000378 | -0.28309 | 0.428 | 0.469 | 1 | CSCL2 | BTG2          |
| TBC1D10C.0 | 0.00038  | -0.15033 | 0.002 | 0.031 | 1 | CSCL2 | TBC1D10C      |
| QARS.10    | 0.00038  | -0.21233 | 0.214 | 0.285 | 1 | CSCL2 | QARS          |
| NFAM1.10   | 0.000382 | -0.14697 | 0.004 | 0.035 | 1 | CSCL2 | NFAM1         |
| CCL4.12    | 0.000388 | -0.58915 | 0.309 | 0.325 | 1 | CSCL2 | CCL4          |
| NFE2L2.9   | 0.000393 | -0.18796 | 0.435 | 0.469 | 1 | CSCL2 | NFE2L2        |
| PAPD4.4    | 0.000393 | -0.2373  | 0.119 | 0.182 | 1 | CSCL2 | PAPD4         |
| ABHD2.7    | 0.000396 | -0.17816 | 0.163 | 0.232 | 1 | CSCL2 | ABHD2         |
| ACTA2.6    | 0.000398 | -0.15096 | 0.015 | 0.053 | 1 | CSCL2 | ACTA2         |
| MYD88.6    | 0.000398 | -0.14773 | 0.075 | 0.132 | 1 | CSCL2 | MYD88         |
| RP11-386I  | 0.000402 | -0.2258  | 0.026 | 0.068 | 1 | CSCL2 | RP11-386I14.4 |
| MYL9.4     | 0.000404 | -0.13291 | 0.004 | 0.035 | 1 | CSCL2 | MYL9          |
| MBNL2.6    | 0.000412 | -0.20409 | 0.049 | 0.097 | 1 | CSCL2 | MBNL2         |
| ZNF467.1C  | 0.000412 | -0.11851 | 0.004 | 0.035 | 1 | CSCL2 | ZNF467        |
| NAT14.9    | 0.000412 | 0.151148 | 0.236 | 0.177 | 1 | CSCL2 | NAT14         |
| STK32B.7   | 0.000412 | 0.116275 | 0.099 | 0.06  | 1 | CSCL2 | STK32B        |
| C15orf57.0 | 0.000415 | -0.20901 | 0.071 | 0.126 | 1 | CSCL2 | C15orf57      |
| DPH7.10    | 0.000417 | 0.122225 | 0.225 | 0.165 | 1 | CSCL2 | DPH7          |
| FAT3.9     | 0.000418 | 0.125949 | 0.093 | 0.055 | 1 | CSCL2 | FAT3          |
| CIZ1.7     | 0.000418 | 0.147242 | 0.238 | 0.177 | 1 | CSCL2 | CIZ1          |
| LGALS1.9   | 0.00042  | 0.100299 | 0.102 | 0.061 | 1 | CSCL2 | LGALS1        |



|            |          |          |       |       |   |       |          |
|------------|----------|----------|-------|-------|---|-------|----------|
| SLFN12.6   | 0.000421 | -0.1101  | 0     | 0.027 | 1 | CSCL2 | SLFN12   |
| DRAM1.8    | 0.000425 | -0.12635 | 0.031 | 0.075 | 1 | CSCL2 | DRAM1    |
| RASSF1.7   | 0.000425 | 0.135561 | 0.219 | 0.156 | 1 | CSCL2 | RASSF1   |
| RABGGTB.4  | 0.000429 | -0.21167 | 0.23  | 0.294 | 1 | CSCL2 | RABGGTB  |
| ASCL2.12   | 0.00043  | -0.13945 | 0.007 | 0.038 | 1 | CSCL2 | ASCL2    |
| CYB5R4.11  | 0.000435 | -0.24746 | 0.117 | 0.179 | 1 | CSCL2 | CYB5R4   |
| PLVAP.8    | 0.000436 | -0.14798 | 0.002 | 0.031 | 1 | CSCL2 | PLVAP    |
| GOT2.9     | 0.000439 | 0.133262 | 0.256 | 0.195 | 1 | CSCL2 | GOT2     |
| CASP10.7   | 0.00044  | -0.12749 | 0     | 0.027 | 1 | CSCL2 | CASP10   |
| CLIC4.12   | 0.000442 | 0.161966 | 0.426 | 0.329 | 1 | CSCL2 | CLIC4    |
| SUDS3.11   | 0.000443 | 0.123457 | 0.247 | 0.186 | 1 | CSCL2 | SUDS3    |
| ZNFX1.4    | 0.000446 | -0.18506 | 0.084 | 0.143 | 1 | CSCL2 | ZNFX1    |
| IQGAP2.7   | 0.000446 | -0.1452  | 0.093 | 0.151 | 1 | CSCL2 | IQGAP2   |
| SLC7A8.8   | 0.000449 | -0.17162 | 0.011 | 0.045 | 1 | CSCL2 | SLC7A8   |
| RPS6KB2.6  | 0.000451 | -0.21862 | 0.161 | 0.229 | 1 | CSCL2 | RPS6KB2  |
| GATM.8     | 0.000452 | -0.22371 | 0.305 | 0.354 | 1 | CSCL2 | GATM     |
| SLC17A9.1  | 0.000452 | -0.12155 | 0.002 | 0.031 | 1 | CSCL2 | SLC17A9  |
| SUN2.8     | 0.000453 | 0.110758 | 0.287 | 0.216 | 1 | CSCL2 | SUN2     |
| CTSF.9     | 0.000454 | -0.14507 | 0.196 | 0.273 | 1 | CSCL2 | CTSF     |
| ATG7.9     | 0.000454 | -0.22745 | 0.062 | 0.113 | 1 | CSCL2 | ATG7     |
| VAPA.6     | 0.000456 | -0.11333 | 0.636 | 0.633 | 1 | CSCL2 | VAPA     |
| VHL.5      | 0.000459 | 0.12395  | 0.221 | 0.161 | 1 | CSCL2 | VHL      |
| R3HCC1.8   | 0.00046  | 0.104493 | 0.364 | 0.283 | 1 | CSCL2 | R3HCC1   |
| ACBD4.2    | 0.00046  | -0.10509 | 0.015 | 0.053 | 1 | CSCL2 | ACBD4    |
| SPAG4.7    | 0.00046  | -0.16119 | 0.013 | 0.049 | 1 | CSCL2 | SPAG4    |
| PPP1R3B.4  | 0.000464 | -0.15922 | 0.026 | 0.068 | 1 | CSCL2 | PPP1R3B  |
| SERINC1.4  | 0.000466 | -0.24001 | 0.371 | 0.42  | 1 | CSCL2 | SERINC1  |
| BTN3A1.1   | 0.000467 | -0.14154 | 0.031 | 0.074 | 1 | CSCL2 | BTN3A1   |
| HS6ST1.6   | 0.000467 | -0.12501 | 0.057 | 0.111 | 1 | CSCL2 | HS6ST1   |
| ITSN2.9    | 0.000468 | -0.2122  | 0.121 | 0.184 | 1 | CSCL2 | ITSN2    |
| MYO7A.10   | 0.000469 | -0.15582 | 0.004 | 0.034 | 1 | CSCL2 | MYO7A    |
| ITGB7.9    | 0.000471 | -0.11007 | 0     | 0.026 | 1 | CSCL2 | ITGB7    |
| FKBP1B.6   | 0.000472 | -0.10456 | 0.068 | 0.124 | 1 | CSCL2 | FKBP1B   |
| SLC25A19.0 | 0.000474 | -0.29389 | 0.115 | 0.171 | 1 | CSCL2 | SLC25A19 |
| WDR55.4    | 0.000475 | -0.16755 | 0.066 | 0.119 | 1 | CSCL2 | WDR55    |
| POLR3F.9   | 0.000475 | 0.10243  | 0.19  | 0.135 | 1 | CSCL2 | POLR3F   |
| CTSW.7     | 0.000477 | -0.20098 | 0.002 | 0.03  | 1 | CSCL2 | CTSW     |
| TBC1D12.1  | 0.000479 | -0.20872 | 0.06  | 0.109 | 1 | CSCL2 | TBC1D12  |
| USP48.7    | 0.000481 | 0.155779 | 0.278 | 0.212 | 1 | CSCL2 | USP48    |
| TNIK.9     | 0.000481 | -0.10151 | 0.086 | 0.146 | 1 | CSCL2 | TNIK     |
| TRMT6.6    | 0.000482 | 0.104319 | 0.236 | 0.176 | 1 | CSCL2 | TRMT6    |
| LPP.4      | 0.000488 | -0.17261 | 0.15  | 0.22  | 1 | CSCL2 | LPP      |
| NDEL1.7    | 0.000488 | -0.22778 | 0.097 | 0.156 | 1 | CSCL2 | NDEL1    |
| CLIC2.9    | 0.000488 | -0.16291 | 0.011 | 0.045 | 1 | CSCL2 | CLIC2    |
| SPOCK3.9   | 0.000489 | -0.23307 | 0.004 | 0.034 | 1 | CSCL2 | SPOCK3   |
| SLC39A1.7  | 0.000494 | -0.28458 | 0.34  | 0.389 | 1 | CSCL2 | SLC39A1  |
| PMS1.3     | 0.000496 | 0.100135 | 0.168 | 0.115 | 1 | CSCL2 | PMS1     |
| GRWD1.4    | 0.000498 | 0.108792 | 0.21  | 0.152 | 1 | CSCL2 | GRWD1    |
| RBM41.4    | 0.000503 | 0.165259 | 0.13  | 0.084 | 1 | CSCL2 | RBM41    |
| HSF2BP     | 0.000503 | 0.107462 | 0.033 | 0.014 | 1 | CSCL2 | HSF2BP   |
| BCAT1.11   | 0.000504 | -0.12348 | 0.163 | 0.234 | 1 | CSCL2 | BCAT1    |

|           |          |          |       |       |   |       |                |
|-----------|----------|----------|-------|-------|---|-------|----------------|
| ARMCX5.6  | 0.000509 | 0.106065 | 0.117 | 0.073 | 1 | CSCL2 | ARMCX5         |
| DYRK1A.1  | 0.000512 | 0.108119 | 0.126 | 0.081 | 1 | CSCL2 | DYRK1A         |
| RFXANK.7  | 0.000515 | -0.22702 | 0.256 | 0.327 | 1 | CSCL2 | RFXANK         |
| HK3.8     | 0.000516 | -0.10038 | 0     | 0.026 | 1 | CSCL2 | HK3            |
| EMC10.6   | 0.000518 | 0.102359 | 0.55  | 0.446 | 1 | CSCL2 | EMC10          |
| DHX38.4   | 0.000525 | 0.108023 | 0.166 | 0.113 | 1 | CSCL2 | DHX38          |
| CYSLTR1.9 | 0.000528 | -0.11735 | 0     | 0.026 | 1 | CSCL2 | CYSLTR1        |
| GAB3.9    | 0.000533 | -0.13381 | 0.004 | 0.034 | 1 | CSCL2 | GAB3           |
| ACSM5.8   | 0.000534 | -0.16203 | 0.004 | 0.034 | 1 | CSCL2 | ACSM5          |
| ATPAF1.1C | 0.000535 | 0.224495 | 0.3   | 0.237 | 1 | CSCL2 | ATPAF1         |
| STK10.11  | 0.000538 | -0.17449 | 0.031 | 0.073 | 1 | CSCL2 | STK10          |
| HMCES.4   | 0.000539 | 0.106602 | 0.225 | 0.167 | 1 | CSCL2 | HMCES          |
| KCNN4.9   | 0.000541 | -0.11023 | 0.004 | 0.034 | 1 | CSCL2 | KCNN4          |
| ADAM8.11  | 0.000541 | -0.16507 | 0.011 | 0.044 | 1 | CSCL2 | ADAM8          |
| WDR1.8    | 0.000544 | -0.20636 | 0.364 | 0.417 | 1 | CSCL2 | WDR1           |
| RP11-258C | 0.000545 | 0.104822 | 0.055 | 0.028 | 1 | CSCL2 | RP11-258C19.7  |
| AZIN1.7   | 0.00055  | 0.131712 | 0.404 | 0.327 | 1 | CSCL2 | AZIN1          |
| EFNA1.9   | 0.000553 | -0.19254 | 0.075 | 0.131 | 1 | CSCL2 | EFNA1          |
| TTC5.2    | 0.000554 | 0.150031 | 0.143 | 0.095 | 1 | CSCL2 | TTC5           |
| TBC1D22A. | 0.000554 | -0.16974 | 0.071 | 0.125 | 1 | CSCL2 | TBC1D22A       |
| HBP1.2    | 0.000557 | -0.21735 | 0.17  | 0.234 | 1 | CSCL2 | HBP1           |
| TRMT61B.8 | 0.000562 | 0.132411 | 0.219 | 0.161 | 1 | CSCL2 | TRMT61B        |
| TMEM55A.6 | 0.000562 | -0.1858  | 0.163 | 0.235 | 1 | CSCL2 | TMEM55A        |
| GPRC5C.4  | 0.000563 | -0.10123 | 0.029 | 0.071 | 1 | CSCL2 | GPRC5C         |
| OASL.7    | 0.000563 | -0.10648 | 0.002 | 0.03  | 1 | CSCL2 | OASL           |
| CYP19A1.7 | 0.000565 | -0.12241 | 0     | 0.026 | 1 | CSCL2 | CYP19A1        |
| RP11-212F | 0.000565 | 0.121617 | 0.135 | 0.09  | 1 | CSCL2 | RP11-212P7.2   |
| SKP1.10   | 0.000573 | -0.16277 | 0.896 | 0.863 | 1 | CSCL2 | SKP1           |
| CDK2AP2.8 | 0.000574 | -0.23261 | 0.265 | 0.331 | 1 | CSCL2 | CDK2AP2        |
| ATG3.10   | 0.000578 | -0.14194 | 0.313 | 0.379 | 1 | CSCL2 | ATG3           |
| NIPBL.6   | 0.000581 | 0.102373 | 0.305 | 0.236 | 1 | CSCL2 | NIPBL          |
| IFT46.7   | 0.000582 | 0.149246 | 0.157 | 0.107 | 1 | CSCL2 | IFT46          |
| ASB16-AS1 | 0.000583 | 0.109238 | 0.137 | 0.091 | 1 | CSCL2 | ASB16-AS1      |
| MIEN1.3   | 0.000584 | -0.21886 | 0.442 | 0.486 | 1 | CSCL2 | MIEN1          |
| WARS.8    | 0.000584 | -0.14468 | 0.139 | 0.204 | 1 | CSCL2 | WARS           |
| UBE2N.7   | 0.000585 | 0.117554 | 0.629 | 0.517 | 1 | CSCL2 | UBE2N          |
| FBLN5.5   | 0.000587 | -0.10916 | 0.009 | 0.041 | 1 | CSCL2 | FBLN5          |
| LL22NC03- | 0.000588 | 0.107309 | 0.066 | 0.036 | 1 | CSCL2 | LL22NC03-2H8.5 |
| SART1.5   | 0.000589 | 0.127046 | 0.256 | 0.196 | 1 | CSCL2 | SART1          |
| SLC6A8.6  | 0.000591 | -0.16127 | 0.066 | 0.12  | 1 | CSCL2 | SLC6A8         |
| VAMP7.5   | 0.000592 | -0.1511  | 0.106 | 0.168 | 1 | CSCL2 | VAMP7          |
| ASL.10    | 0.000594 | -0.22396 | 0.115 | 0.173 | 1 | CSCL2 | ASL            |
| PCED1B.1C | 0.000595 | -0.15843 | 0.007 | 0.037 | 1 | CSCL2 | PCED1B         |
| BAG4.1    | 0.000596 | 0.136378 | 0.15  | 0.102 | 1 | CSCL2 | BAG4           |
| NDUFA7.9  | 0.000597 | -0.34982 | 0.011 | 0.044 | 1 | CSCL2 | NDUFA7         |
| TNFAIP8L3 | 0.000599 | -0.11384 | 0.002 | 0.03  | 1 | CSCL2 | TNFAIP8L3      |
| GNPDA1.5  | 0.000601 | -0.21438 | 0.172 | 0.242 | 1 | CSCL2 | GNPDA1         |
| CSF2RB.8  | 0.000605 | -0.10173 | 0     | 0.025 | 1 | CSCL2 | CSF2RB         |
| TLR10.10  | 0.000605 | -0.11751 | 0     | 0.025 | 1 | CSCL2 | TLR10          |
| CPED1.10  | 0.00061  | -0.12641 | 0.004 | 0.033 | 1 | CSCL2 | CPED1          |
| H6PD.3    | 0.000612 | -0.17315 | 0.049 | 0.096 | 1 | CSCL2 | H6PD           |

|            |          |          |       |       |         |               |
|------------|----------|----------|-------|-------|---------|---------------|
| DYRK4. 4   | 0.000612 | -0.1819  | 0.15  | 0.22  | 1 CSCL2 | DYRK4         |
| ARSG. 4    | 0.000618 | -0.17368 | 0.042 | 0.087 | 1 CSCL2 | ARSG          |
| KLHDC8B. 6 | 0.000625 | -0.131   | 0.055 | 0.105 | 1 CSCL2 | KLHDC8B       |
| ACO1. 1    | 0.000626 | 0.101646 | 0.143 | 0.095 | 1 CSCL2 | ACO1          |
| DCAKD. 10  | 0.000629 | 0.137825 | 0.188 | 0.137 | 1 CSCL2 | DCAKD         |
| ZFP36L2. 1 | 0.00063  | -0.27331 | 0.521 | 0.515 | 1 CSCL2 | ZFP36L2       |
| NEDD8. 5   | 0.000632 | -0.1725  | 0.744 | 0.745 | 1 CSCL2 | NEDD8         |
| RP5-940J5  | 0.000632 | -0.33749 | 0.108 | 0.164 | 1 CSCL2 | RP5-940J5. 9  |
| ITGAL. 6   | 0.000633 | -0.1233  | 0     | 0.025 | 1 CSCL2 | ITGAL         |
| L3HYPDH. 5 | 0.000635 | -0.14748 | 0.073 | 0.127 | 1 CSCL2 | L3HYPDH       |
| ISOC2. 10  | 0.000636 | -0.18435 | 0.287 | 0.352 | 1 CSCL2 | ISOC2         |
| PORCN. 1   | 0.000637 | -0.12315 | 0.038 | 0.083 | 1 CSCL2 | PORCN         |
| HDDC3. 6   | 0.000655 | -0.19512 | 0.093 | 0.151 | 1 CSCL2 | HDDC3         |
| FCER1A. 6  | 0.000662 | -0.13506 | 0     | 0.025 | 1 CSCL2 | FCER1A        |
| CCDC69. 10 | 0.000662 | -0.12286 | 0.007 | 0.037 | 1 CSCL2 | CCDC69        |
| TOLLIP. 2  | 0.000667 | -0.18742 | 0.201 | 0.268 | 1 CSCL2 | TOLLIP        |
| MTA2. 1    | 0.000675 | 0.1298   | 0.104 | 0.065 | 1 CSCL2 | MTA2          |
| RNF125. 6  | 0.000677 | -0.1203  | 0     | 0.025 | 1 CSCL2 | RNF125        |
| SPATA6. 6  | 0.000679 | -0.11745 | 0.099 | 0.158 | 1 CSCL2 | SPATA6        |
| SLC48A1. 7 | 0.000681 | -0.23804 | 0.082 | 0.134 | 1 CSCL2 | SLC48A1       |
| NFATC1. 6  | 0.000685 | -0.14798 | 0.018 | 0.054 | 1 CSCL2 | NFATC1        |
| KCMF1. 8   | 0.000689 | 0.123984 | 0.247 | 0.189 | 1 CSCL2 | KCMF1         |
| DLGAP1-AS  | 0.00069  | -0.18385 | 0.046 | 0.093 | 1 CSCL2 | DLGAP1-AS1    |
| MAP1LC3B.  | 0.000692 | -0.16722 | 0.545 | 0.567 | 1 CSCL2 | MAP1LC3B      |
| PCYT2. 8   | 0.000692 | -0.10251 | 0.102 | 0.162 | 1 CSCL2 | PCYT2         |
| IFNLR1. 7  | 0.000693 | -0.12466 | 0     | 0.025 | 1 CSCL2 | IFNLR1        |
| RAB42. 7   | 0.000696 | -0.1117  | 0.015 | 0.051 | 1 CSCL2 | RAB42         |
| COLGALT1.  | 0.000702 | -0.23863 | 0.135 | 0.194 | 1 CSCL2 | COLGALT1      |
| HSPA14. 6  | 0.000702 | 0.118621 | 0.192 | 0.14  | 1 CSCL2 | HSPA14        |
| TOMM7. 6   | 0.000707 | -0.20435 | 0.854 | 0.852 | 1 CSCL2 | TOMM7         |
| RP1-79C4.  | 0.000709 | 0.112541 | 0.084 | 0.05  | 1 CSCL2 | RP1-79C4. 4   |
| VIMP. 5    | 0.00071  | -0.251   | 0.424 | 0.458 | 1 CSCL2 | VIMP          |
| TAB2. 6    | 0.000712 | -0.13382 | 0.075 | 0.128 | 1 CSCL2 | TAB2          |
| TPI1. 7    | 0.00072  | -0.10625 | 0.923 | 0.863 | 1 CSCL2 | TPI1          |
| MLKL. 8    | 0.000721 | -0.11879 | 0.002 | 0.029 | 1 CSCL2 | MLKL          |
| CTA-384D8  | 0.000725 | -0.10718 | 0     | 0.025 | 1 CSCL2 | CTA-384D8. 34 |
| APOL2. 8   | 0.000732 | -0.22834 | 0.053 | 0.101 | 1 CSCL2 | APOL2         |
| MFSD7. 11  | 0.000735 | -0.10443 | 0.004 | 0.033 | 1 CSCL2 | MFSD7         |
| TBC1D9B. 5 | 0.000739 | -0.14166 | 0.104 | 0.162 | 1 CSCL2 | TBC1D9B       |
| SCRN2. 4   | 0.000743 | -0.18921 | 0.115 | 0.175 | 1 CSCL2 | SCRN2         |
| SLC24A2. 9 | 0.000744 | -0.15897 | 0.004 | 0.033 | 1 CSCL2 | SLC24A2       |
| ITGAV. 9   | 0.000746 | -0.19396 | 0.221 | 0.281 | 1 CSCL2 | ITGAV         |
| DAPP1. 11  | 0.000748 | -0.13189 | 0.002 | 0.029 | 1 CSCL2 | DAPP1         |
| PLEKHM2. 3 | 0.000749 | -0.17649 | 0.055 | 0.104 | 1 CSCL2 | PLEKHM2       |
| PEX16. 1   | 0.000759 | -0.22094 | 0.163 | 0.23  | 1 CSCL2 | PEX16         |
| WWP1. 2    | 0.000768 | -0.11367 | 0.029 | 0.069 | 1 CSCL2 | WWP1          |
| SLC39A13.  | 0.00077  | -0.15504 | 0.082 | 0.138 | 1 CSCL2 | SLC39A13      |
| SLC46A3. 8 | 0.000777 | -0.17902 | 0.022 | 0.059 | 1 CSCL2 | SLC46A3       |
| SEC14L1. 8 | 0.000781 | -0.20184 | 0.227 | 0.294 | 1 CSCL2 | SEC14L1       |
| FNTB. 5    | 0.000786 | 0.134918 | 0.128 | 0.084 | 1 CSCL2 | FNTB          |
| IL27RA. 5  | 0.000795 | -0.10884 | 0.02  | 0.057 | 1 CSCL2 | IL27RA        |

|             |          |          |       |       |         |                |
|-------------|----------|----------|-------|-------|---------|----------------|
| OTP. 3      | 0.000795 | 0.134364 | 0.075 | 0.044 | 1 CSCL2 | OTP            |
| CDC26. 6    | 0.000798 | -0.16965 | 0.199 | 0.265 | 1 CSCL2 | CDC26          |
| SLC17A5. 8  | 0.000802 | -0.2067  | 0.06  | 0.108 | 1 CSCL2 | SLC17A5        |
| COL16A1. 9  | 0.000806 | -0.10535 | 0.033 | 0.076 | 1 CSCL2 | COL16A1        |
| SPTAN1. 1C  | 0.000808 | 0.12277  | 0.327 | 0.257 | 1 CSCL2 | SPTAN1         |
| PIP5K1A. 3  | 0.00081  | 0.110134 | 0.199 | 0.144 | 1 CSCL2 | PIP5K1A        |
| ZNF644. 6   | 0.000817 | 0.134244 | 0.316 | 0.25  | 1 CSCL2 | ZNF644         |
| SLC35C1. 1  | 0.000819 | -0.13244 | 0.035 | 0.077 | 1 CSCL2 | SLC35C1        |
| DNAJB12. 1  | 0.000825 | -0.20814 | 0.095 | 0.15  | 1 CSCL2 | DNAJB12        |
| ENPP2. 7    | 0.00083  | -0.24495 | 0.013 | 0.046 | 1 CSCL2 | ENPP2          |
| PTCRA. 8    | 0.00083  | -0.11517 | 0     | 0.024 | 1 CSCL2 | PTCRA          |
| SPNS3. 9    | 0.00083  | -0.121   | 0     | 0.024 | 1 CSCL2 | SPNS3          |
| RP11-597D   | 0.00083  | -0.13712 | 0     | 0.024 | 1 CSCL2 | RP11-597D13. 8 |
| SIDT1. 7    | 0.00083  | -0.13809 | 0     | 0.024 | 1 CSCL2 | SIDT1          |
| TBC1D4. 8   | 0.000832 | -0.1644  | 0.015 | 0.049 | 1 CSCL2 | TBC1D4         |
| MANEAL. 2   | 0.00085  | 0.100051 | 0.068 | 0.038 | 1 CSCL2 | MANEAL         |
| SIGMAR1. 5  | 0.000862 | 0.121066 | 0.223 | 0.17  | 1 CSCL2 | SIGMAR1        |
| SLC29A1. 1  | 0.000874 | -0.32457 | 0.091 | 0.139 | 1 CSCL2 | SLC29A1        |
| CYB561D2. 0 | 0.000877 | -0.2901  | 0.168 | 0.228 | 1 CSCL2 | CYB561D2       |
| LRPPRC. 6   | 0.000878 | 0.127901 | 0.221 | 0.166 | 1 CSCL2 | LRPPRC         |
| TMEM140. 7  | 0.000902 | -0.14057 | 0.015 | 0.049 | 1 CSCL2 | TMEM140        |
| FECH. 3     | 0.000907 | -0.1122  | 0.071 | 0.123 | 1 CSCL2 | FECH           |
| CUL3. 9     | 0.000911 | 0.113534 | 0.258 | 0.198 | 1 CSCL2 | CUL3           |
| PGAM4       | 0.000911 | 0.103497 | 0.022 | 0.008 | 1 CSCL2 | PGAM4          |
| ATP5C1. 7   | 0.000913 | -0.15771 | 0.596 | 0.586 | 1 CSCL2 | ATP5C1         |
| MTFP1. 5    | 0.00092  | -0.13997 | 0.029 | 0.069 | 1 CSCL2 | MTFP1          |
| TMEM192. 3  | 0.00092  | -0.1704  | 0.13  | 0.192 | 1 CSCL2 | TMEM192        |
| AP006222. 0 | 0.000927 | -0.20358 | 0.15  | 0.213 | 1 CSCL2 | AP006222. 2    |
| HAAO. 11    | 0.00093  | -0.12877 | 0     | 0.024 | 1 CSCL2 | HAAO           |
| TRIM21. 2   | 0.000933 | -0.10587 | 0.011 | 0.043 | 1 CSCL2 | TRIM21         |
| ACSL5. 12   | 0.000938 | -0.13142 | 0.007 | 0.035 | 1 CSCL2 | ACSL5          |
| GALT. 5     | 0.00094  | -0.14623 | 0.04  | 0.083 | 1 CSCL2 | GALT           |
| RAB11FIP1   | 0.000945 | -0.11118 | 0.002 | 0.028 | 1 CSCL2 | RAB11FIP1      |
| QRSL1. 3    | 0.000948 | 0.126523 | 0.172 | 0.124 | 1 CSCL2 | QRSL1          |
| ST3GAL1. 1  | 0.000956 | -0.18097 | 0.057 | 0.104 | 1 CSCL2 | ST3GAL1        |
| DNALI1. 1C  | 0.000956 | 0.151932 | 0.157 | 0.111 | 1 CSCL2 | DNALI1         |
| RPS6KA4. 1  | 0.000957 | -0.17195 | 0.073 | 0.124 | 1 CSCL2 | RPS6KA4        |
| FERMT2. 1C  | 0.000957 | 0.157632 | 0.26  | 0.2   | 1 CSCL2 | FERMT2         |
| CIITA. 8    | 0.000961 | -0.14485 | 0.009 | 0.039 | 1 CSCL2 | CIITA          |
| EEPD1. 8    | 0.000962 | -0.16537 | 0.033 | 0.073 | 1 CSCL2 | EEPD1          |
| SERGEF. 6   | 0.000969 | -0.17573 | 0.11  | 0.17  | 1 CSCL2 | SERGEF         |
| TMEM216. 3  | 0.000978 | -0.21151 | 0.04  | 0.082 | 1 CSCL2 | TMEM216        |
| CTS0. 1     | 0.000979 | -0.13038 | 0.064 | 0.114 | 1 CSCL2 | CTS0           |
| AP000439. 0 | 0.000983 | -0.13618 | 0.002 | 0.028 | 1 CSCL2 | AP000439. 1    |
| OSTC. 9     | 0.000983 | -0.26108 | 0.481 | 0.504 | 1 CSCL2 | OSTC           |
| TMED5. 10   | 0.000994 | -0.25012 | 0.249 | 0.308 | 1 CSCL2 | TMED5          |
| DHRS9. 7    | 0.000995 | -0.16736 | 0     | 0.023 | 1 CSCL2 | DHRS9          |
| RP11-403I   | 0.000997 | -0.19348 | 0.007 | 0.035 | 1 CSCL2 | RP11-403I13. 5 |
| KIAA0513. 0 | 0.001006 | -0.11385 | 0.013 | 0.046 | 1 CSCL2 | KIAA0513       |
| CD2AP. 6    | 0.001009 | -0.10351 | 0.04  | 0.083 | 1 CSCL2 | CD2AP          |
| SUPT4H1. 5  | 0.001018 | -0.20014 | 0.457 | 0.496 | 1 CSCL2 | SUPT4H1        |

|            |          |          |       |       |   |       |               |
|------------|----------|----------|-------|-------|---|-------|---------------|
| DNAJC22.1  | 0.001019 | 0.110774 | 0.06  | 0.032 | 1 | CSCL2 | DNAJC22       |
| RPS6KA2.4  | 0.001025 | -0.12287 | 0.064 | 0.113 | 1 | CSCL2 | RPS6KA2       |
| HEXIM1.6   | 0.001032 | -0.18169 | 0.159 | 0.221 | 1 | CSCL2 | HEXIM1        |
| PPP1R11.5  | 0.001032 | -0.20168 | 0.302 | 0.362 | 1 | CSCL2 | PPP1R11       |
| ARF1.8     | 0.001033 | -0.16588 | 0.709 | 0.693 | 1 | CSCL2 | ARF1          |
| PLAGL1.8   | 0.001037 | -0.12548 | 0.011 | 0.042 | 1 | CSCL2 | PLAGL1        |
| TANC1.11   | 0.001038 | 0.105239 | 0.152 | 0.106 | 1 | CSCL2 | TANC1         |
| CTD-3138E  | 0.00104  | -0.13331 | 0.04  | 0.083 | 1 | CSCL2 | CTD-3138B18.5 |
| TUBA4A.7   | 0.001049 | -0.17825 | 0.02  | 0.055 | 1 | CSCL2 | TUBA4A        |
| LRRC59.8   | 0.001049 | 0.100886 | 0.442 | 0.354 | 1 | CSCL2 | LRRC59        |
| FLOT2.7    | 0.00106  | -0.18444 | 0.126 | 0.188 | 1 | CSCL2 | FLOT2         |
| METTL9.12  | 0.001068 | 0.104369 | 0.565 | 0.464 | 1 | CSCL2 | METTL9        |
| DR1.4      | 0.001078 | 0.167273 | 0.291 | 0.232 | 1 | CSCL2 | DR1           |
| CCL5.8     | 0.00108  | -0.3479  | 0.022 | 0.057 | 1 | CSCL2 | CCL5          |
| ARF3.6     | 0.001088 | -0.20809 | 0.327 | 0.38  | 1 | CSCL2 | ARF3          |
| MS4A14.9   | 0.00109  | -0.11178 | 0     | 0.023 | 1 | CSCL2 | MS4A14        |
| TMEM209.6  | 0.001097 | 0.124961 | 0.163 | 0.116 | 1 | CSCL2 | TMEM209       |
| ALOX15B.1  | 0.001099 | -0.13893 | 0.002 | 0.027 | 1 | CSCL2 | ALOX15B       |
| CTNNA1.5   | 0.001102 | -0.22083 | 0.377 | 0.423 | 1 | CSCL2 | CTNNA1        |
| CDCP1.9    | 0.001105 | -0.13146 | 0.007 | 0.035 | 1 | CSCL2 | CDCP1         |
| EFNA3.7    | 0.001112 | -0.1301  | 0.024 | 0.061 | 1 | CSCL2 | EFNA3         |
| RNPEPL1.8  | 0.001125 | -0.21886 | 0.082 | 0.132 | 1 | CSCL2 | RNPEPL1       |
| IQCG.7     | 0.001142 | -0.16127 | 0.073 | 0.124 | 1 | CSCL2 | IQCG          |
| COLEC12.4  | 0.001155 | -0.12824 | 0.007 | 0.035 | 1 | CSCL2 | COLEC12       |
| RBM5.8     | 0.001156 | 0.110869 | 0.344 | 0.276 | 1 | CSCL2 | RBM5          |
| CHRNE.9    | 0.001158 | -0.12274 | 0.002 | 0.027 | 1 | CSCL2 | CHRNE         |
| PROSER1.4  | 0.001162 | 0.1026   | 0.113 | 0.072 | 1 | CSCL2 | PROSER1       |
| FAM92A1.1  | 0.001168 | 0.143465 | 0.256 | 0.199 | 1 | CSCL2 | FAM92A1       |
| ZNF559.9   | 0.001178 | 0.119952 | 0.194 | 0.143 | 1 | CSCL2 | ZNF559        |
| IFT20.2    | 0.00118  | -0.16581 | 0.274 | 0.347 | 1 | CSCL2 | IFT20         |
| UBXN1.7    | 0.001181 | -0.21535 | 0.609 | 0.621 | 1 | CSCL2 | UBXN1         |
| PRMT7.3    | 0.00119  | 0.144554 | 0.143 | 0.099 | 1 | CSCL2 | PRMT7         |
| GTF2B.6    | 0.00119  | -0.28167 | 0.252 | 0.302 | 1 | CSCL2 | GTF2B         |
| IPCEF1.5   | 0.001193 | -0.1059  | 0     | 0.023 | 1 | CSCL2 | IPCEF1        |
| CSNK1D.9   | 0.001197 | -0.22894 | 0.309 | 0.362 | 1 | CSCL2 | CSNK1D        |
| SF3A1.5    | 0.001222 | 0.117265 | 0.225 | 0.172 | 1 | CSCL2 | SF3A1         |
| REST.7     | 0.001223 | 0.172809 | 0.247 | 0.196 | 1 | CSCL2 | REST          |
| P2RY11.1C  | 0.001223 | -0.20133 | 0.046 | 0.088 | 1 | CSCL2 | P2RY11        |
| UBE2W.4    | 0.001228 | -0.15994 | 0.155 | 0.216 | 1 | CSCL2 | UBE2W         |
| ST6GAL1.1  | 0.001234 | -0.29005 | 0.068 | 0.112 | 1 | CSCL2 | ST6GAL1       |
| KIAA1143.0 | 0.001235 | 0.103303 | 0.272 | 0.208 | 1 | CSCL2 | KIAA1143      |
| USP32.1    | 0.001246 | -0.12442 | 0.055 | 0.102 | 1 | CSCL2 | USP32         |
| AZGP1.8    | 0.001258 | -0.15242 | 0.022 | 0.058 | 1 | CSCL2 | AZGP1         |
| DNAJC15.1  | 0.00127  | -0.25571 | 0.338 | 0.392 | 1 | CSCL2 | DNAJC15       |
| NCEH1.9    | 0.001273 | -0.1168  | 0.031 | 0.07  | 1 | CSCL2 | NCEH1         |
| RP11-353N  | 0.001277 | -0.10887 | 0     | 0.022 | 1 | CSCL2 | RP11-353N4.5  |
| ZCCHC17.7  | 0.001284 | 0.109036 | 0.428 | 0.348 | 1 | CSCL2 | ZCCHC17       |
| FUCA2.11   | 0.001286 | -0.25632 | 0.19  | 0.245 | 1 | CSCL2 | FUCA2         |
| WDR48.6    | 0.001289 | 0.114407 | 0.188 | 0.136 | 1 | CSCL2 | WDR48         |
| CCR5.8     | 0.001294 | -0.10713 | 0.002 | 0.026 | 1 | CSCL2 | CCR5          |
| BGN.10     | 0.001298 | -0.24194 | 0.029 | 0.066 | 1 | CSCL2 | BGN           |

|             |          |          |       |       |   |       |                |
|-------------|----------|----------|-------|-------|---|-------|----------------|
| TNF. 10     | 0.001301 | -0.18644 | 0.013 | 0.044 | 1 | CSCL2 | TNF            |
| TREML1. 9   | 0.001307 | -0.11311 | 0     | 0.022 | 1 | CSCL2 | TREML1         |
| UBL4A. 9    | 0.001309 | 0.10152  | 0.238 | 0.18  | 1 | CSCL2 | UBL4A          |
| IFIT2. 8    | 0.001316 | -0.17434 | 0.042 | 0.084 | 1 | CSCL2 | IFIT2          |
| RAB3IL1. 8  | 0.001324 | -0.11296 | 0.007 | 0.034 | 1 | CSCL2 | RAB3IL1        |
| TMEM70. 9   | 0.001335 | -0.23627 | 0.347 | 0.397 | 1 | CSCL2 | TMEM70         |
| MMP7. 7     | 0.001337 | -0.23255 | 0.004 | 0.03  | 1 | CSCL2 | MMP7           |
| RP11-140K   | 0.001341 | -0.13542 | 0.04  | 0.082 | 1 | CSCL2 | RP11-140K17. 3 |
| UBXN6. 6    | 0.001358 | -0.15846 | 0.236 | 0.302 | 1 | CSCL2 | UBXN6          |
| BNIP3. 10   | 0.00136  | -0.10594 | 0.152 | 0.217 | 1 | CSCL2 | BNIP3          |
| METTL10. 3  | 0.001364 | 0.111164 | 0.155 | 0.107 | 1 | CSCL2 | METTL10        |
| EML2. 5     | 0.001367 | -0.11708 | 0.042 | 0.085 | 1 | CSCL2 | EML2           |
| THSD4. 6    | 0.001368 | 0.151933 | 0.049 | 0.025 | 1 | CSCL2 | THSD4          |
| B3GALT4. 8  | 0.001368 | -0.13123 | 0.013 | 0.044 | 1 | CSCL2 | B3GALT4        |
| MAP3K5. 6   | 0.001369 | -0.10757 | 0.018 | 0.051 | 1 | CSCL2 | MAP3K5         |
| ABCG1. 10   | 0.001375 | -0.25236 | 0.086 | 0.133 | 1 | CSCL2 | ABCG1          |
| SSSCA1. 4   | 0.001378 | -0.18694 | 0.128 | 0.19  | 1 | CSCL2 | SSSCA1         |
| HAP1. 7     | 0.001381 | -0.10658 | 0.031 | 0.07  | 1 | CSCL2 | HAP1           |
| HSPB8. 8    | 0.00142  | -0.16844 | 0.011 | 0.041 | 1 | CSCL2 | HSPB8          |
| TPMT. 10    | 0.00143  | -0.21559 | 0.139 | 0.194 | 1 | CSCL2 | TPMT           |
| DMWD. 10    | 0.001431 | 0.128382 | 0.188 | 0.14  | 1 | CSCL2 | DMWD           |
| CLYBL. 4    | 0.001433 | -0.14753 | 0.026 | 0.063 | 1 | CSCL2 | CLYBL          |
| FAM168B. 7  | 0.001434 | 0.109541 | 0.212 | 0.161 | 1 | CSCL2 | FAM168B        |
| VNN2. 9     | 0.001437 | -0.10214 | 0.002 | 0.026 | 1 | CSCL2 | VNN2           |
| GREM1. 5    | 0.00144  | -0.25834 | 0.007 | 0.034 | 1 | CSCL2 | GREM1          |
| FAM65C. 1   | 0.001443 | -0.10365 | 0.004 | 0.03  | 1 | CSCL2 | FAM65C         |
| ITGA4. 11   | 0.001446 | -0.146   | 0.013 | 0.044 | 1 | CSCL2 | ITGA4          |
| SIRT6. 5    | 0.001461 | 0.121685 | 0.249 | 0.193 | 1 | CSCL2 | SIRT6          |
| ENO2. 9     | 0.001462 | 0.196437 | 0.349 | 0.281 | 1 | CSCL2 | ENO2           |
| SHISA5. 4   | 0.001464 | -0.1699  | 0.267 | 0.327 | 1 | CSCL2 | SHISA5         |
| TMEM5. 9    | 0.001466 | -0.16041 | 0.148 | 0.211 | 1 | CSCL2 | TMEM5          |
| CRTAP. 12   | 0.001467 | -0.1658  | 0.177 | 0.239 | 1 | CSCL2 | CRTAP          |
| BAP1. 5     | 0.001469 | 0.108936 | 0.188 | 0.138 | 1 | CSCL2 | BAP1           |
| SF3B5. 4    | 0.001471 | -0.18657 | 0.631 | 0.63  | 1 | CSCL2 | SF3B5          |
| YES1. 7     | 0.001479 | 0.164443 | 0.174 | 0.129 | 1 | CSCL2 | YES1           |
| PSMA2. 7    | 0.001491 | -0.40462 | 0.026 | 0.062 | 1 | CSCL2 | PSMA2          |
| B3GNT5. 11  | 0.001503 | -0.10691 | 0.093 | 0.143 | 1 | CSCL2 | B3GNT5         |
| DNAJB9. 9   | 0.001511 | -0.31425 | 0.351 | 0.386 | 1 | CSCL2 | DNAJB9         |
| SERPINB8. 0 | 0.001511 | -0.18109 | 0.04  | 0.08  | 1 | CSCL2 | SERPINB8       |
| ZNF664. 10  | 0.001516 | 0.11066  | 0.199 | 0.147 | 1 | CSCL2 | ZNF664         |
| PLXNA4. 9   | 0.001522 | -0.12575 | 0.038 | 0.078 | 1 | CSCL2 | PLXNA4         |
| RRP12. 1    | 0.001524 | -0.11023 | 0.013 | 0.044 | 1 | CSCL2 | RRP12          |
| IL1R2. 8    | 0.001534 | -0.10894 | 0.004 | 0.03  | 1 | CSCL2 | IL1R2          |
| ACADS. 4    | 0.001535 | -0.15225 | 0.071 | 0.12  | 1 | CSCL2 | ACADS          |
| SGSM3. 3    | 0.001556 | 0.103336 | 0.247 | 0.188 | 1 | CSCL2 | SGSM3          |
| PTBP3. 7    | 0.001564 | -0.17492 | 0.066 | 0.113 | 1 | CSCL2 | PTBP3          |
| N4BP2. 6    | 0.001566 | 0.145265 | 0.161 | 0.115 | 1 | CSCL2 | N4BP2          |
| RNF19B. 5   | 0.001567 | -0.13525 | 0.02  | 0.053 | 1 | CSCL2 | RNF19B         |
| SMIM3. 9    | 0.001578 | -0.36364 | 0.009 | 0.037 | 1 | CSCL2 | SMIM3          |
| SURF2. 10   | 0.001578 | 0.107286 | 0.287 | 0.23  | 1 | CSCL2 | SURF2          |
| SSR1. 9     | 0.001589 | -0.21185 | 0.433 | 0.47  | 1 | CSCL2 | SSR1           |

|           |          |          |       |       |   |       |            |
|-----------|----------|----------|-------|-------|---|-------|------------|
| DESI1.6   | 0.001593 | -0.13656 | 0.119 | 0.177 | 1 | CSCL2 | DESI1      |
| MAN2B1.9  | 0.001593 | -0.14537 | 0.031 | 0.069 | 1 | CSCL2 | MAN2B1     |
| RFFL.13   | 0.001593 | -0.13453 | 0.113 | 0.167 | 1 | CSCL2 | RFFL       |
| CKAP4.11  | 0.001607 | 0.105104 | 0.265 | 0.207 | 1 | CSCL2 | CKAP4      |
| CNN2.7    | 0.001608 | -0.1609  | 0.031 | 0.068 | 1 | CSCL2 | CNN2       |
| SLC35F2.8 | 0.001628 | -0.10103 | 0.062 | 0.11  | 1 | CSCL2 | SLC35F2    |
| LIX1.4    | 0.00164  | -0.10219 | 0     | 0.021 | 1 | CSCL2 | LIX1       |
| VPS26B.1C | 0.00165  | 0.17285  | 0.285 | 0.229 | 1 | CSCL2 | VPS26B     |
| HIST2H2AA | 0.001654 | -0.19211 | 0.029 | 0.065 | 1 | CSCL2 | HIST2H2AA3 |
| GJB1.9    | 0.001658 | -0.17358 | 0.002 | 0.026 | 1 | CSCL2 | GJB1       |
| AC069363. | 0.001663 | -0.23548 | 0.02  | 0.052 | 1 | CSCL2 | AC069363.1 |
| RUNX2.8   | 0.001677 | -0.11312 | 0.004 | 0.03  | 1 | CSCL2 | RUNX2      |
| TBC1D2B.1 | 0.001681 | -0.15015 | 0.02  | 0.053 | 1 | CSCL2 | TBC1D2B    |
| GTPBP3.6  | 0.001686 | 0.126668 | 0.157 | 0.111 | 1 | CSCL2 | GTPBP3     |
| TNFRSF11A | 0.001693 | -0.10119 | 0.002 | 0.025 | 1 | CSCL2 | TNFRSF11A  |
| TMEM230.2 | 0.001695 | -0.15299 | 0.64  | 0.615 | 1 | CSCL2 | TMEM230    |
| FBXW5.9   | 0.001697 | -0.11316 | 0.225 | 0.291 | 1 | CSCL2 | FBXW5      |
| ZNF266.1  | 0.001697 | 0.163066 | 0.121 | 0.081 | 1 | CSCL2 | ZNF266     |
| CARNS1.1C | 0.001702 | -0.20981 | 0.004 | 0.029 | 1 | CSCL2 | CARNS1     |
| CPNE2.11  | 0.001712 | 0.242484 | 0.225 | 0.175 | 1 | CSCL2 | CPNE2      |
| VIM-AS1.5 | 0.001712 | -0.1752  | 0.066 | 0.114 | 1 | CSCL2 | VIM-AS1    |
| PHKG2.8   | 0.001716 | -0.21861 | 0.104 | 0.157 | 1 | CSCL2 | PHKG2      |
| MRO.8     | 0.001716 | -0.11395 | 0     | 0.021 | 1 | CSCL2 | MRO        |
| TBC1D16.4 | 0.00173  | -0.15271 | 0.084 | 0.136 | 1 | CSCL2 | TBC1D16    |
| HINT2.7   | 0.001734 | 0.178764 | 0.411 | 0.343 | 1 | CSCL2 | HINT2      |
| CAMK2D.1C | 0.001743 | -0.17144 | 0.19  | 0.246 | 1 | CSCL2 | CAMK2D     |
| CCDC109B. | 0.00175  | -0.11026 | 0.276 | 0.352 | 1 | CSCL2 | CCDC109B   |
| SORBS3.9  | 0.001752 | 0.119848 | 0.221 | 0.17  | 1 | CSCL2 | SORBS3     |
| ATG4C.6   | 0.001756 | 0.115098 | 0.19  | 0.137 | 1 | CSCL2 | ATG4C      |
| THAP11.7  | 0.001768 | 0.111416 | 0.225 | 0.174 | 1 | CSCL2 | THAP11     |
| BLOC1S1.7 | 0.001773 | -0.22451 | 0.656 | 0.648 | 1 | CSCL2 | BLOC1S1    |
| TSSC4.8   | 0.001774 | 0.109884 | 0.38  | 0.309 | 1 | CSCL2 | TSSC4      |
| RGN.9     | 0.001775 | -0.16186 | 0.035 | 0.074 | 1 | CSCL2 | RGN        |
| NCDN.7    | 0.001775 | -0.10201 | 0.049 | 0.092 | 1 | CSCL2 | NCDN       |
| CSK.12    | 0.00181  | -0.1949  | 0.099 | 0.149 | 1 | CSCL2 | CSK        |
| SLC25A14. | 0.001816 | 0.105156 | 0.13  | 0.089 | 1 | CSCL2 | SLC25A14   |
| EFEMP1.1C | 0.001878 | -0.66543 | 0.179 | 0.223 | 1 | CSCL2 | EFEMP1     |
| CEACAM21. | 0.001879 | -0.1029  | 0     | 0.021 | 1 | CSCL2 | CEACAM21   |
| IDNK.5    | 0.001891 | -0.17804 | 0.053 | 0.097 | 1 | CSCL2 | IDNK       |
| SEPHS1.7  | 0.001894 | 0.110232 | 0.155 | 0.111 | 1 | CSCL2 | SEPHS1     |
| OTOA.10   | 0.001916 | -0.11915 | 0.007 | 0.033 | 1 | CSCL2 | OTOA       |
| CP.7      | 0.001921 | -0.11624 | 0.004 | 0.029 | 1 | CSCL2 | CP         |
| MT1H.5    | 0.001923 | -0.12151 | 0     | 0.021 | 1 | CSCL2 | MT1H       |
| PRRG4.10  | 0.001927 | -0.12337 | 0.015 | 0.046 | 1 | CSCL2 | PRRG4      |
| ERMN.11   | 0.001956 | -0.34207 | 0.011 | 0.039 | 1 | CSCL2 | ERMN       |
| CES4A.4   | 0.001967 | -0.12181 | 0     | 0.021 | 1 | CSCL2 | CES4A      |
| PRMT3.5   | 0.001968 | 0.108038 | 0.128 | 0.088 | 1 | CSCL2 | PRMT3      |
| UBE2F.3   | 0.001988 | -0.20441 | 0.272 | 0.332 | 1 | CSCL2 | UBE2F      |
| ANKRD28.6 | 0.001989 | -0.14053 | 0.068 | 0.115 | 1 | CSCL2 | ANKRD28    |
| FEZ2.8    | 0.001992 | -0.10649 | 0.411 | 0.45  | 1 | CSCL2 | FEZ2       |
| FADS3.6   | 0.001993 | -0.15699 | 0.099 | 0.151 | 1 | CSCL2 | FADS3      |

|             |          |          |       |       |         |                |
|-------------|----------|----------|-------|-------|---------|----------------|
| MEF2D. 3    | 0.001996 | -0.18066 | 0.038 | 0.075 | 1 CSCL2 | MEF2D          |
| KRI1. 4     | 0.002006 | 0.110456 | 0.143 | 0.102 | 1 CSCL2 | KRI1           |
| IGFBP6. 9   | 0.002018 | -0.18775 | 0.031 | 0.067 | 1 CSCL2 | IGFBP6         |
| PTK7. 7     | 0.002023 | 0.111695 | 0.132 | 0.092 | 1 CSCL2 | PTK7           |
| CMTM3. 12   | 0.002031 | -0.20817 | 0.274 | 0.326 | 1 CSCL2 | CMTM3          |
| HP. 7       | 0.002035 | -0.3069  | 0.002 | 0.025 | 1 CSCL2 | HP             |
| RNF26. 7    | 0.002036 | 0.143249 | 0.203 | 0.156 | 1 CSCL2 | RNF26          |
| ATP13A3. 7  | 0.002082 | -0.10098 | 0.099 | 0.152 | 1 CSCL2 | ATP13A3        |
| COMTD1. 7   | 0.002091 | -0.1214  | 0.026 | 0.061 | 1 CSCL2 | COMTD1         |
| IQSEC2. 3   | 0.002091 | -0.12346 | 0.022 | 0.055 | 1 CSCL2 | IQSEC2         |
| LYSMD2. 7   | 0.002102 | -0.14603 | 0.137 | 0.195 | 1 CSCL2 | LYSMD2         |
| DOK5. 11    | 0.002119 | -0.2264  | 0.132 | 0.185 | 1 CSCL2 | DOK5           |
| SRP14. 6    | 0.002139 | -0.11341 | 0.887 | 0.866 | 1 CSCL2 | SRP14          |
| TVP23A. 3   | 0.002152 | -0.12774 | 0.009 | 0.036 | 1 CSCL2 | TVP23A         |
| RETN. 9     | 0.002154 | -0.11111 | 0     | 0.02  | 1 CSCL2 | RETN           |
| CAPZA1. 1C  | 0.002165 | -0.19639 | 0.344 | 0.394 | 1 CSCL2 | CAPZA1         |
| SLC12A7. 6  | 0.002173 | -0.11105 | 0.013 | 0.042 | 1 CSCL2 | SLC12A7        |
| ENOSF1. 1C  | 0.00218  | -0.14344 | 0.077 | 0.126 | 1 CSCL2 | ENOSF1         |
| ACAA1. 5    | 0.002199 | -0.15951 | 0.294 | 0.351 | 1 CSCL2 | ACAA1          |
| TMEM256. 7  | 0.00221  | -0.28026 | 0.391 | 0.432 | 1 CSCL2 | TMEM256        |
| APC. 11     | 0.002218 | 0.101735 | 0.272 | 0.211 | 1 CSCL2 | APC            |
| FHOD1. 11   | 0.002219 | -0.15644 | 0.024 | 0.057 | 1 CSCL2 | FHOD1          |
| SMOX. 10    | 0.002227 | -0.23748 | 0.192 | 0.249 | 1 CSCL2 | SMOX           |
| ICAM2. 12   | 0.002235 | -0.14591 | 0.009 | 0.035 | 1 CSCL2 | ICAM2          |
| HMOX2. 8    | 0.002249 | -0.27735 | 0.241 | 0.297 | 1 CSCL2 | HMOX2          |
| HLX. 6      | 0.002253 | -0.14193 | 0.013 | 0.042 | 1 CSCL2 | HLX            |
| PALM. 9     | 0.002269 | 0.143209 | 0.143 | 0.102 | 1 CSCL2 | PALM           |
| KANSL1. 9   | 0.002279 | 0.120343 | 0.216 | 0.163 | 1 CSCL2 | KANSL1         |
| SLC1A2. 9   | 0.002286 | 0.193121 | 0.181 | 0.133 | 1 CSCL2 | SLC1A2         |
| ETFB. 6     | 0.002296 | -0.15478 | 0.457 | 0.502 | 1 CSCL2 | ETFB           |
| DZIP3. 8    | 0.002301 | 0.147647 | 0.174 | 0.129 | 1 CSCL2 | DZIP3          |
| ARSK. 1     | 0.002303 | 0.1019   | 0.084 | 0.052 | 1 CSCL2 | ARSK           |
| AIDA. 6     | 0.002305 | -0.18439 | 0.179 | 0.238 | 1 CSCL2 | AIDA           |
| CAPS. 7     | 0.002323 | -0.12251 | 0.035 | 0.073 | 1 CSCL2 | CAPS           |
| AIG1. 5     | 0.002338 | -0.26453 | 0.28  | 0.336 | 1 CSCL2 | AIG1           |
| RP11-514C   | 0.002352 | -0.10821 | 0.004 | 0.028 | 1 CSCL2 | RP11-514012. 4 |
| TEX261. 7   | 0.002359 | 0.157358 | 0.214 | 0.164 | 1 CSCL2 | TEX261         |
| PLA2G2A. 6  | 0.002381 | -0.40656 | 0.011 | 0.038 | 1 CSCL2 | PLA2G2A        |
| RP4-613B2   | 0.002382 | -0.10947 | 0.009 | 0.035 | 1 CSCL2 | RP4-613B23. 1  |
| TMEM245. 4  | 0.002425 | 0.14011  | 0.179 | 0.132 | 1 CSCL2 | TMEM245        |
| DNAAF1. 8   | 0.002434 | -0.16045 | 0.004 | 0.028 | 1 CSCL2 | DNAAF1         |
| KIF13B. 3   | 0.002438 | -0.13094 | 0.038 | 0.075 | 1 CSCL2 | KIF13B         |
| SLC30A1. 4  | 0.002441 | -0.10297 | 0.049 | 0.091 | 1 CSCL2 | SLC30A1        |
| TMOD3. 10   | 0.002455 | -0.14093 | 0.095 | 0.146 | 1 CSCL2 | TMOD3          |
| SYTL2. 9    | 0.002457 | -0.15627 | 0.04  | 0.077 | 1 CSCL2 | SYTL2          |
| LINC00493   | 0.002465 | -0.21558 | 0.532 | 0.53  | 1 CSCL2 | LINC00493      |
| KIAA1429. 0 | 0.002469 | 0.108794 | 0.152 | 0.108 | 1 CSCL2 | KIAA1429       |
| RP11-557H   | 0.002483 | -0.13955 | 0.004 | 0.028 | 1 CSCL2 | RP11-557H15. 4 |
| EEF1D. 10   | 0.00249  | -0.17297 | 0.837 | 0.845 | 1 CSCL2 | EEF1D          |
| SMAGP. 5    | 0.002495 | -0.11074 | 0.046 | 0.087 | 1 CSCL2 | SMAGP          |
| UHMK1. 6    | 0.002502 | -0.13615 | 0.148 | 0.205 | 1 CSCL2 | UHMK1          |



|           |          |          |       |       |   |       |               |
|-----------|----------|----------|-------|-------|---|-------|---------------|
| MBNL1.10  | 0.002512 | -0.22373 | 0.172 | 0.226 | 1 | CSCL2 | MBNL1         |
| UTRN.7    | 0.002539 | -0.1211  | 0.066 | 0.111 | 1 | CSCL2 | UTRN          |
| RAB3A.11  | 0.002546 | -0.18547 | 0.115 | 0.166 | 1 | CSCL2 | RAB3A         |
| MTMR2.7   | 0.002549 | 0.114835 | 0.19  | 0.144 | 1 | CSCL2 | MTMR2         |
| ZNF33A.6  | 0.002557 | -0.17406 | 0.06  | 0.103 | 1 | CSCL2 | ZNF33A        |
| RP1-293L6 | 0.002562 | 0.116326 | 0.024 | 0.01  | 1 | CSCL2 | RP1-293L6.1   |
| HS3ST1.1C | 0.002568 | -0.24424 | 0.051 | 0.089 | 1 | CSCL2 | HS3ST1        |
| RAB40B.1C | 0.002575 | -0.17143 | 0.084 | 0.132 | 1 | CSCL2 | RAB40B        |
| RALB.10   | 0.002575 | -0.19358 | 0.108 | 0.159 | 1 | CSCL2 | RALB          |
| CAPN3.10  | 0.002578 | -0.28536 | 0.015 | 0.044 | 1 | CSCL2 | CAPN3         |
| STX12.3   | 0.002579 | -0.2439  | 0.366 | 0.409 | 1 | CSCL2 | STX12         |
| ARHGAP35. | 0.002581 | 0.109541 | 0.192 | 0.144 | 1 | CSCL2 | ARHGAP35      |
| HHATL.5   | 0.002585 | -0.1167  | 0     | 0.02  | 1 | CSCL2 | HHATL         |
| CMIP.7    | 0.002596 | -0.1981  | 0.124 | 0.175 | 1 | CSCL2 | CMIP          |
| FBLIM1.5  | 0.002601 | -0.13    | 0.049 | 0.09  | 1 | CSCL2 | FBLIM1        |
| CSGALNACT | 0.002611 | -0.22268 | 0.04  | 0.076 | 1 | CSCL2 | CSGALNACT1    |
| ZNF780A.6 | 0.00262  | -0.14778 | 0.033 | 0.069 | 1 | CSCL2 | ZNF780A       |
| SEMA6D.13 | 0.002625 | -0.13494 | 0.108 | 0.159 | 1 | CSCL2 | SEMA6D        |
| TGFBR1.11 | 0.002636 | -0.19597 | 0.115 | 0.164 | 1 | CSCL2 | TGFBR1        |
| CITED1.12 | 0.002646 | -0.22207 | 0.104 | 0.153 | 1 | CSCL2 | CITED1        |
| IGSF8.9   | 0.002663 | -0.1666  | 0.157 | 0.215 | 1 | CSCL2 | IGSF8         |
| EPRS.7    | 0.002664 | 0.143714 | 0.353 | 0.292 | 1 | CSCL2 | EPRS          |
| RP11-212I | 0.002683 | -0.11428 | 0.002 | 0.024 | 1 | CSCL2 | RP11-212I21.4 |
| RP11-156K | 0.002705 | -0.10003 | 0     | 0.019 | 1 | CSCL2 | RP11-156K13.3 |
| ARPC4.12  | 0.002712 | -0.1774  | 0.499 | 0.514 | 1 | CSCL2 | ARPC4         |
| PLA2G5.11 | 0.002713 | -0.11685 | 0.064 | 0.11  | 1 | CSCL2 | PLA2G5        |
| MAP2K1.1C | 0.002718 | -0.17972 | 0.212 | 0.271 | 1 | CSCL2 | MAP2K1        |
| SCAPER.3  | 0.002781 | 0.158594 | 0.155 | 0.111 | 1 | CSCL2 | SCAPER        |
| CCNY.7    | 0.002799 | -0.14252 | 0.066 | 0.11  | 1 | CSCL2 | CCNY          |
| UBALD2.7  | 0.002824 | 0.123218 | 0.318 | 0.257 | 1 | CSCL2 | UBALD2        |
| CTDSP1.9  | 0.002834 | -0.23851 | 0.172 | 0.224 | 1 | CSCL2 | CTDSP1        |
| ACER3.11  | 0.002842 | -0.22182 | 0.135 | 0.187 | 1 | CSCL2 | ACER3         |
| MAST3.4   | 0.002846 | -0.13172 | 0.042 | 0.08  | 1 | CSCL2 | MAST3         |
| ACTR2.13  | 0.002851 | -0.21171 | 0.433 | 0.46  | 1 | CSCL2 | ACTR2         |
| LTB4R.9   | 0.002854 | -0.1073  | 0.009 | 0.034 | 1 | CSCL2 | LTB4R         |
| TMA7.8    | 0.00287  | -0.15247 | 0.861 | 0.851 | 1 | CSCL2 | TMA7          |
| TMEM86A.1 | 0.00288  | -0.13456 | 0.018 | 0.048 | 1 | CSCL2 | TMEM86A       |
| RTN2.8    | 0.002881 | -0.18745 | 0.046 | 0.085 | 1 | CSCL2 | RTN2          |
| TPD52L2.9 | 0.002886 | -0.17463 | 0.272 | 0.326 | 1 | CSCL2 | TPD52L2       |
| RP11-84C1 | 0.002897 | -0.11076 | 0     | 0.019 | 1 | CSCL2 | RP11-84C10.2  |
| COX15.2   | 0.002907 | -0.13959 | 0.035 | 0.071 | 1 | CSCL2 | COX15         |
| ERAP2.4   | 0.002909 | -0.12705 | 0.042 | 0.081 | 1 | CSCL2 | ERAP2         |
| GCHFR.10  | 0.002933 | -0.13521 | 0.04  | 0.078 | 1 | CSCL2 | GCHFR         |
| IVD.5     | 0.002942 | -0.1715  | 0.146 | 0.201 | 1 | CSCL2 | IVD           |
| LY6E.7    | 0.002944 | -0.23506 | 0.32  | 0.378 | 1 | CSCL2 | LY6E          |
| MAPK8.5   | 0.00297  | 0.120416 | 0.139 | 0.097 | 1 | CSCL2 | MAPK8         |
| RNASE3.1C | 0.002984 | -0.17588 | 0.009 | 0.034 | 1 | CSCL2 | RNASE3        |
| SIRT5     | 0.003032 | -0.12261 | 0.035 | 0.072 | 1 | CSCL2 | SIRT5         |
| SH3BGR.8  | 0.003039 | -0.22523 | 0.079 | 0.125 | 1 | CSCL2 | SH3BGR        |
| CDS2.5    | 0.003041 | -0.19167 | 0.192 | 0.25  | 1 | CSCL2 | CDS2          |
| UFM1.3    | 0.003051 | -0.22193 | 0.291 | 0.344 | 1 | CSCL2 | UFM1          |

|             |           |           |        |        |         |           |
|-------------|-----------|-----------|--------|--------|---------|-----------|
| PPA2. 5     | 0. 003056 | -0. 13965 | 0. 254 | 0. 318 | 1 CSCL2 | PPA2      |
| PTPRCAP. 8  | 0. 003058 | -0. 18426 | 0. 004 | 0. 027 | 1 CSCL2 | PTPRCAP   |
| GAL. 6      | 0. 003088 | -0. 11812 | 0. 011 | 0. 038 | 1 CSCL2 | GAL       |
| LIFR. 10    | 0. 003098 | 0. 19428  | 0. 148 | 0. 108 | 1 CSCL2 | LIFR      |
| DDX60L. 5   | 0. 003107 | -0. 12572 | 0. 024 | 0. 057 | 1 CSCL2 | DDX60L    |
| BIRC2. 2    | 0. 003134 | -0. 20572 | 0. 23  | 0. 283 | 1 CSCL2 | BIRC2     |
| ASPA. 4     | 0. 003141 | -0. 15656 | 0. 004 | 0. 027 | 1 CSCL2 | ASPA      |
| GFOD2. 7    | 0. 003158 | 0. 104221 | 0. 174 | 0. 13  | 1 CSCL2 | GFOD2     |
| ARHGEF10L   | 0. 003166 | -0. 11239 | 0. 029 | 0. 062 | 1 CSCL2 | ARHGEF10L |
| MAPK11. 8   | 0. 003171 | 0. 108301 | 0. 084 | 0. 054 | 1 CSCL2 | MAPK11    |
| ZNF511. 1C  | 0. 003177 | -0. 14315 | 0. 141 | 0. 198 | 1 CSCL2 | ZNF511    |
| CS. 5       | 0. 003195 | 0. 105828 | 0. 208 | 0. 159 | 1 CSCL2 | CS        |
| PPM1M. 12   | 0. 003223 | -0. 13637 | 0. 04  | 0. 076 | 1 CSCL2 | PPM1M     |
| LTA4H. 10   | 0. 003226 | -0. 22225 | 0. 181 | 0. 231 | 1 CSCL2 | LTA4H     |
| GALNT6. 8   | 0. 003233 | -0. 12    | 0. 007 | 0. 03  | 1 CSCL2 | GALNT6    |
| CREBRF. 4   | 0. 003234 | -0. 19107 | 0. 086 | 0. 133 | 1 CSCL2 | CREBRF    |
| HEXDC. 4    | 0. 003246 | -0. 14838 | 0. 071 | 0. 115 | 1 CSCL2 | HEXDC     |
| ZDHHC9. 1C  | 0. 003246 | -0. 23954 | 0. 119 | 0. 169 | 1 CSCL2 | ZDHHC9    |
| FRA10AC1. 1 | 0. 00326  | -0. 129   | 0. 108 | 0. 161 | 1 CSCL2 | FRA10AC1  |
| GLRB. 8     | 0. 00327  | 0. 119212 | 0. 091 | 0. 058 | 1 CSCL2 | GLRB      |
| NFKBIE. 1C  | 0. 003284 | -0. 13288 | 0. 088 | 0. 136 | 1 CSCL2 | NFKBIE    |
| FAM98A. 7   | 0. 003289 | 0. 119918 | 0. 185 | 0. 14  | 1 CSCL2 | FAM98A    |
| FFAR4. 7    | 0. 003295 | -0. 11798 | 0. 007 | 0. 03  | 1 CSCL2 | FFAR4     |
| PCTP. 6     | 0. 003303 | -0. 15473 | 0. 038 | 0. 074 | 1 CSCL2 | PCTP      |
| ARHGEF12. 1 | 0. 003326 | -0. 11229 | 0. 108 | 0. 162 | 1 CSCL2 | ARHGEF12  |
| NEK1. 9     | 0. 003331 | 0. 106211 | 0. 168 | 0. 125 | 1 CSCL2 | NEK1      |
| SERPINF2. 1 | 0. 003366 | -0. 10854 | 0. 004 | 0. 027 | 1 CSCL2 | SERPINF2  |
| NACA. 7     | 0. 003371 | -0. 12676 | 0. 938 | 0. 924 | 1 CSCL2 | NACA      |
| TMEM181. 1  | 0. 003383 | 0. 127081 | 0. 208 | 0. 162 | 1 CSCL2 | TMEM181   |
| C17orf80. 1 | 0. 003439 | 0. 105397 | 0. 119 | 0. 083 | 1 CSCL2 | C17orf80  |
| COG4. 9     | 0. 003441 | 0. 110259 | 0. 241 | 0. 189 | 1 CSCL2 | COG4      |
| COL9A3. 12  | 0. 003449 | 0. 351238 | 0. 232 | 0. 184 | 1 CSCL2 | COL9A3    |
| ATF7IP. 4   | 0. 003538 | 0. 130797 | 0. 152 | 0. 111 | 1 CSCL2 | ATF7IP    |
| KCNAB2. 9   | 0. 003542 | -0. 19605 | 0. 042 | 0. 078 | 1 CSCL2 | KCNAB2    |
| EAF1. 3     | 0. 003547 | -0. 21097 | 0. 082 | 0. 126 | 1 CSCL2 | EAF1      |
| DDRK1. 6    | 0. 003566 | -0. 13449 | 0. 366 | 0. 42  | 1 CSCL2 | DDRK1     |
| PNPLA2. 7   | 0. 003574 | -0. 14785 | 0. 159 | 0. 214 | 1 CSCL2 | PNPLA2    |
| NAIP. 11    | 0. 003591 | -0. 25767 | 0. 071 | 0. 11  | 1 CSCL2 | NAIP      |
| DHX40. 9    | 0. 003595 | 0. 127929 | 0. 181 | 0. 137 | 1 CSCL2 | DHX40     |
| PGM2. 9     | 0. 003633 | -0. 12364 | 0. 102 | 0. 15  | 1 CSCL2 | PGM2      |
| FGF20. 7    | 0. 00364  | -0. 10969 | 0      | 0. 018 | 1 CSCL2 | FGF20     |
| QSOX2. 1    | 0. 003654 | 0. 130952 | 0. 073 | 0. 045 | 1 CSCL2 | QSOX2     |
| STAT2. 4    | 0. 003664 | -0. 21046 | 0. 095 | 0. 14  | 1 CSCL2 | STAT2     |
| KLHL24. 7   | 0. 003685 | -0. 22623 | 0. 132 | 0. 181 | 1 CSCL2 | KLHL24    |
| UBE2J2. 1C  | 0. 003695 | 0. 103118 | 0. 4   | 0. 332 | 1 CSCL2 | UBE2J2    |
| TNS3. 10    | 0. 003697 | -0. 1877  | 0. 04  | 0. 075 | 1 CSCL2 | TNS3      |
| F11R. 11    | 0. 003708 | -0. 14258 | 0. 026 | 0. 058 | 1 CSCL2 | F11R      |
| METTL16. 6  | 0. 003752 | 0. 105402 | 0. 148 | 0. 108 | 1 CSCL2 | METTL16   |
| SMIM20. 4   | 0. 003759 | -0. 25601 | 0. 291 | 0. 342 | 1 CSCL2 | SMIM20    |
| MAPKAPK2. 1 | 0. 003805 | -0. 16969 | 0. 088 | 0. 135 | 1 CSCL2 | MAPKAPK2  |
| IRF2BP2. 1  | 0. 003807 | -0. 23421 | 0. 269 | 0. 318 | 1 CSCL2 | IRF2BP2   |

|            |          |          |       |       |   |       |          |
|------------|----------|----------|-------|-------|---|-------|----------|
| POMGNT1.9  | 0.003848 | 0.128078 | 0.313 | 0.256 | 1 | CSCL2 | POMGNT1  |
| DOCK11.11  | 0.00385  | -0.14475 | 0.024 | 0.055 | 1 | CSCL2 | DOCK11   |
| FAM127B.9  | 0.003912 | -0.15163 | 0.236 | 0.303 | 1 | CSCL2 | FAM127B  |
| RANBP2.1C  | 0.003959 | -0.2196  | 0.161 | 0.211 | 1 | CSCL2 | RANBP2   |
| ARHGEF6.6  | 0.003962 | -0.12    | 0.097 | 0.144 | 1 | CSCL2 | ARHGEF6  |
| TRABD.12   | 0.003988 | -0.23752 | 0.212 | 0.261 | 1 | CSCL2 | TRABD    |
| USP6NL.6   | 0.003989 | -0.11896 | 0.046 | 0.084 | 1 | CSCL2 | USP6NL   |
| IRF2.6     | 0.004003 | -0.16145 | 0.146 | 0.2   | 1 | CSCL2 | IRF2     |
| NARFL.5    | 0.00401  | 0.118275 | 0.188 | 0.143 | 1 | CSCL2 | NARFL    |
| TMOD1.9    | 0.004012 | -0.12899 | 0.11  | 0.159 | 1 | CSCL2 | TMOD1    |
| NEIL2.9    | 0.004019 | -0.1536  | 0.146 | 0.2   | 1 | CSCL2 | NEIL2    |
| ZNF121.5   | 0.004019 | 0.101251 | 0.15  | 0.109 | 1 | CSCL2 | ZNF121   |
| ACAT1.5    | 0.004019 | -0.20021 | 0.318 | 0.368 | 1 | CSCL2 | ACAT1    |
| ZNF614.2   | 0.004046 | 0.101934 | 0.075 | 0.047 | 1 | CSCL2 | ZNF614   |
| SDHAF1.8   | 0.004049 | 0.104403 | 0.223 | 0.175 | 1 | CSCL2 | SDHAF1   |
| TMEM259.7  | 0.004051 | 0.117819 | 0.413 | 0.332 | 1 | CSCL2 | TMEM259  |
| TBC1D9.8   | 0.00412  | -0.12558 | 0.024 | 0.055 | 1 | CSCL2 | TBC1D9   |
| BIVM.8     | 0.004151 | 0.13141  | 0.148 | 0.109 | 1 | CSCL2 | BIVM     |
| CPM.10     | 0.004162 | -0.30405 | 0.19  | 0.236 | 1 | CSCL2 | CPM      |
| SEL1L3.3   | 0.004169 | -0.12588 | 0.038 | 0.072 | 1 | CSCL2 | SEL1L3   |
| WDR45.2    | 0.004192 | -0.24353 | 0.199 | 0.253 | 1 | CSCL2 | WDR45    |
| CUTA.8     | 0.004196 | -0.14083 | 0.713 | 0.681 | 1 | CSCL2 | CUTA     |
| DEXI.9     | 0.004252 | -0.11361 | 0.152 | 0.209 | 1 | CSCL2 | DEXI     |
| BRI3.7     | 0.00427  | -0.11775 | 0.461 | 0.468 | 1 | CSCL2 | BRI3     |
| FAM210A.6  | 0.004277 | -0.1307  | 0.095 | 0.143 | 1 | CSCL2 | FAM210A  |
| LARP6.10   | 0.004333 | -0.13346 | 0.141 | 0.195 | 1 | CSCL2 | LARP6    |
| TEN1.8     | 0.004351 | -0.11002 | 0.126 | 0.18  | 1 | CSCL2 | TEN1     |
| PCSK6.4    | 0.004371 | -0.10216 | 0     | 0.018 | 1 | CSCL2 | PCSK6    |
| ATP2B4.2   | 0.004378 | -0.13636 | 0.064 | 0.106 | 1 | CSCL2 | ATP2B4   |
| IER3IP1.8  | 0.004402 | -0.2999  | 0.013 | 0.039 | 1 | CSCL2 | IER3IP1  |
| C1orf228.0 | 0.004409 | -0.11723 | 0.009 | 0.033 | 1 | CSCL2 | C1orf228 |
| GRAMD3.11  | 0.00442  | -0.12599 | 0.095 | 0.142 | 1 | CSCL2 | GRAMD3   |
| RPS6KA3.8  | 0.004429 | -0.17074 | 0.093 | 0.139 | 1 | CSCL2 | RPS6KA3  |
| DNAJC5.5   | 0.004454 | -0.13474 | 0.159 | 0.214 | 1 | CSCL2 | DNAJC5   |
| SFT2D2.6   | 0.004501 | -0.17038 | 0.102 | 0.149 | 1 | CSCL2 | SFT2D2   |
| ALG13.8    | 0.00451  | -0.17799 | 0.168 | 0.221 | 1 | CSCL2 | ALG13    |
| PIH1D1.4   | 0.004514 | -0.23475 | 0.344 | 0.392 | 1 | CSCL2 | PIH1D1   |
| TBC1D10A.0 | 0.004539 | -0.13339 | 0.04  | 0.075 | 1 | CSCL2 | TBC1D10A |
| CLIP4.2    | 0.004556 | -0.10181 | 0.026 | 0.058 | 1 | CSCL2 | CLIP4    |
| SNX18.7    | 0.004585 | -0.14062 | 0.073 | 0.115 | 1 | CSCL2 | SNX18    |
| MLEC.7     | 0.004586 | 0.110732 | 0.479 | 0.397 | 1 | CSCL2 | MLEC     |
| C10orf76.0 | 0.004629 | -0.1385  | 0.026 | 0.057 | 1 | CSCL2 | C10orf76 |
| DPAGT1.5   | 0.00463  | -0.16181 | 0.097 | 0.144 | 1 | CSCL2 | DPAGT1   |
| SNAPC3.7   | 0.004649 | 0.108081 | 0.179 | 0.134 | 1 | CSCL2 | SNAPC3   |
| SCN1B.8    | 0.004676 | -0.15685 | 0.038 | 0.072 | 1 | CSCL2 | SCN1B    |
| SRP68.6    | 0.004679 | 0.123819 | 0.28  | 0.228 | 1 | CSCL2 | SRP68    |
| PRMT2.3    | 0.004697 | -0.19696 | 0.411 | 0.451 | 1 | CSCL2 | PRMT2    |
| ITPR1.6    | 0.004707 | -0.10866 | 0.011 | 0.036 | 1 | CSCL2 | ITPR1    |
| CSNK1G3.1  | 0.00471  | 0.157016 | 0.194 | 0.151 | 1 | CSCL2 | CSNK1G3  |
| TSPAN4.7   | 0.004724 | -0.19766 | 0.132 | 0.182 | 1 | CSCL2 | TSPAN4   |
| PDE4B.8    | 0.004748 | -0.20151 | 0.227 | 0.278 | 1 | CSCL2 | PDE4B    |

|             |          |          |       |       |   |       |           |
|-------------|----------|----------|-------|-------|---|-------|-----------|
| PRKACB. 5   | 0.00477  | -0.19517 | 0.166 | 0.217 | 1 | CSCL2 | PRKACB    |
| SPNS1. 8    | 0.004781 | -0.15837 | 0.241 | 0.292 | 1 | CSCL2 | SPNS1     |
| TUG1. 10    | 0.004782 | 0.128091 | 0.223 | 0.173 | 1 | CSCL2 | TUG1      |
| SNX30. 3    | 0.004799 | -0.13827 | 0.031 | 0.063 | 1 | CSCL2 | SNX30     |
| TCP11L1. 1  | 0.00481  | 0.129836 | 0.073 | 0.045 | 1 | CSCL2 | TCP11L1   |
| C20orf194   | 0.004838 | -0.14711 | 0.091 | 0.136 | 1 | CSCL2 | C20orf194 |
| NKX6-2. 1C  | 0.004872 | -0.16669 | 0.004 | 0.025 | 1 | CSCL2 | NKX6-2    |
| B3GALNT1. 0 | 0.004892 | 0.12317  | 0.23  | 0.182 | 1 | CSCL2 | B3GALNT1  |
| APBB3. 2    | 0.004968 | -0.1261  | 0.049 | 0.086 | 1 | CSCL2 | APBB3     |
| FBX018. 3   | 0.005012 | -0.12433 | 0.091 | 0.136 | 1 | CSCL2 | FBX018    |
| SETD7. 6    | 0.005017 | -0.15436 | 0.064 | 0.105 | 1 | CSCL2 | SETD7     |
| EIF3E. 8    | 0.00502  | -0.1586  | 0.658 | 0.646 | 1 | CSCL2 | EIF3E     |
| NIPAL3. 6   | 0.00503  | -0.15528 | 0.046 | 0.082 | 1 | CSCL2 | NIPAL3    |
| COL4A3BP. 0 | 0.005112 | -0.11591 | 0.099 | 0.146 | 1 | CSCL2 | COL4A3BP  |
| LLPH. 4     | 0.005127 | -0.20934 | 0.216 | 0.27  | 1 | CSCL2 | LLPH      |
| SETX. 7     | 0.005146 | -0.12692 | 0.117 | 0.168 | 1 | CSCL2 | SETX      |
| HDAC5. 5    | 0.005158 | -0.11939 | 0.121 | 0.171 | 1 | CSCL2 | HDAC5     |
| ANKRD12. 6  | 0.005173 | -0.26464 | 0.404 | 0.427 | 1 | CSCL2 | ANKRD12   |
| GLS. 5      | 0.005184 | -0.13938 | 0.086 | 0.13  | 1 | CSCL2 | GLS       |
| CACNA2D3. 0 | 0.005193 | -0.10266 | 0.009 | 0.032 | 1 | CSCL2 | CACNA2D3  |
| ROB03. 4    | 0.005194 | -0.21652 | 0.077 | 0.118 | 1 | CSCL2 | ROB03     |
| UROS. 7     | 0.005199 | -0.12625 | 0.199 | 0.254 | 1 | CSCL2 | UROS      |
| AGA. 5      | 0.005227 | -0.20951 | 0.108 | 0.155 | 1 | CSCL2 | AGA       |
| PCYT1A. 3   | 0.005242 | -0.12939 | 0.086 | 0.131 | 1 | CSCL2 | PCYT1A    |
| GAMT. 10    | 0.005263 | 0.129934 | 0.36  | 0.297 | 1 | CSCL2 | GAMT      |
| TMEM203. 1  | 0.005263 | 0.119782 | 0.309 | 0.25  | 1 | CSCL2 | TMEM203   |
| GZF1. 3     | 0.005264 | -0.11535 | 0.064 | 0.105 | 1 | CSCL2 | GZF1      |
| WDR26. 4    | 0.005273 | -0.15664 | 0.115 | 0.162 | 1 | CSCL2 | WDR26     |
| NENF. 8     | 0.005273 | 0.129983 | 0.605 | 0.49  | 1 | CSCL2 | NENF      |
| SNX6. 8     | 0.005275 | -0.21711 | 0.393 | 0.431 | 1 | CSCL2 | SNX6      |
| INHBA. 3    | 0.005292 | -0.10295 | 0.002 | 0.021 | 1 | CSCL2 | INHBA     |
| MSL3. 2     | 0.005343 | -0.16361 | 0.102 | 0.149 | 1 | CSCL2 | MSL3      |
| CYB561A3. 0 | 0.005354 | -0.155   | 0.106 | 0.152 | 1 | CSCL2 | CYB561A3  |
| IQSEC1. 4   | 0.005393 | -0.11869 | 0.035 | 0.068 | 1 | CSCL2 | IQSEC1    |
| ADAMDEC1. 0 | 0.005393 | -0.15877 | 0.013 | 0.038 | 1 | CSCL2 | ADAMDEC1  |
| HLA-G. 2    | 0.005394 | -0.19813 | 0.024 | 0.053 | 1 | CSCL2 | HLA-G     |
| TPPP3. 11   | 0.005399 | -0.26606 | 0.11  | 0.155 | 1 | CSCL2 | TPPP3     |
| TMEM141. 8  | 0.005489 | -0.175   | 0.201 | 0.254 | 1 | CSCL2 | TMEM141   |
| DGKZ. 6     | 0.005497 | -0.12105 | 0.146 | 0.198 | 1 | CSCL2 | DGKZ      |
| MITF. 10    | 0.005507 | -0.16116 | 0.057 | 0.095 | 1 | CSCL2 | MITF      |
| PDE8A. 6    | 0.00554  | -0.13502 | 0.053 | 0.091 | 1 | CSCL2 | PDE8A     |
| HSD17B7. 2  | 0.005571 | -0.16997 | 0.077 | 0.119 | 1 | CSCL2 | HSD17B7   |
| NAA20. 5    | 0.005643 | -0.18831 | 0.475 | 0.497 | 1 | CSCL2 | NAA20     |
| EIF3H. 7    | 0.005692 | -0.17633 | 0.664 | 0.669 | 1 | CSCL2 | EIF3H     |
| SPCS3. 11   | 0.005735 | -0.23568 | 0.28  | 0.327 | 1 | CSCL2 | SPCS3     |
| C1orf50. 6  | 0.005777 | -0.12865 | 0.13  | 0.182 | 1 | CSCL2 | C1orf50   |
| RMDN2       | 0.005836 | -0.10706 | 0.018 | 0.045 | 1 | CSCL2 | RMDN2     |
| MEN1. 8     | 0.005839 | 0.103641 | 0.155 | 0.115 | 1 | CSCL2 | MEN1      |
| CLN5. 5     | 0.005871 | -0.19384 | 0.17  | 0.223 | 1 | CSCL2 | CLN5      |
| ATP6V1C1. 0 | 0.005945 | -0.22242 | 0.194 | 0.245 | 1 | CSCL2 | ATP6V1C1  |
| RAB1A. 6    | 0.00597  | -0.1584  | 0.62  | 0.62  | 1 | CSCL2 | RAB1A     |

|            |          |          |       |       |   |       |              |
|------------|----------|----------|-------|-------|---|-------|--------------|
| COX5A.9    | 0.005974 | 0.149291 | 0.713 | 0.593 | 1 | CSCL2 | COX5A        |
| TMEM258.6  | 0.005983 | -0.16321 | 0.751 | 0.728 | 1 | CSCL2 | TMEM258      |
| FGFR1.8    | 0.006011 | 0.115393 | 0.214 | 0.168 | 1 | CSCL2 | FGFR1        |
| HDAC10.6   | 0.006166 | -0.1375  | 0.068 | 0.109 | 1 | CSCL2 | HDAC10       |
| CTNNBIP1.0 | 0.006167 | 0.117811 | 0.265 | 0.213 | 1 | CSCL2 | CTNNBIP1     |
| PHYKPL.5   | 0.006228 | -0.1804  | 0.155 | 0.204 | 1 | CSCL2 | PHYKPL       |
| SLC25A29.0 | 0.006251 | 0.1293   | 0.194 | 0.151 | 1 | CSCL2 | SLC25A29     |
| LRRC42.7   | 0.006327 | 0.103597 | 0.183 | 0.143 | 1 | CSCL2 | LRRC42       |
| TMIGD2.7   | 0.006364 | -0.13152 | 0.002 | 0.02  | 1 | CSCL2 | TMIGD2       |
| SLC25A39.0 | 0.006397 | -0.15308 | 0.371 | 0.406 | 1 | CSCL2 | SLC25A39     |
| ZNF772     | 0.006447 | 0.105779 | 0.04  | 0.021 | 1 | CSCL2 | ZNF772       |
| SLC35F1.1  | 0.006465 | 0.133245 | 0.163 | 0.124 | 1 | CSCL2 | SLC35F1      |
| ABCA8.9    | 0.006477 | -0.15395 | 0.042 | 0.076 | 1 | CSCL2 | ABCA8        |
| P2RY12.8   | 0.006544 | -0.11015 | 0.002 | 0.02  | 1 | CSCL2 | P2RY12       |
| LILRA4.6   | 0.006557 | -0.12134 | 0.004 | 0.024 | 1 | CSCL2 | LILRA4       |
| FGF14-AS2  | 0.00656  | 0.112082 | 0.077 | 0.05  | 1 | CSCL2 | FGF14-AS2    |
| PIAS3.2    | 0.006638 | -0.10707 | 0.046 | 0.082 | 1 | CSCL2 | PIAS3        |
| ACOT11.1   | 0.006669 | -0.11056 | 0.011 | 0.034 | 1 | CSCL2 | ACOT11       |
| SPTSSB.7   | 0.006743 | -0.10898 | 0.013 | 0.038 | 1 | CSCL2 | SPTSSB       |
| AATK.8     | 0.006749 | -0.17096 | 0.011 | 0.034 | 1 | CSCL2 | AATK         |
| CCDC106.1  | 0.006783 | -0.10322 | 0.183 | 0.234 | 1 | CSCL2 | CCDC106      |
| ADPRH.7    | 0.006866 | -0.10575 | 0.011 | 0.034 | 1 | CSCL2 | ADPRH        |
| LIMK1.4    | 0.006899 | -0.17942 | 0.097 | 0.139 | 1 | CSCL2 | LIMK1        |
| TBCD.6     | 0.006963 | 0.102484 | 0.185 | 0.143 | 1 | CSCL2 | TBCD         |
| TNFAIP8L1  | 0.006998 | 0.15852  | 0.113 | 0.079 | 1 | CSCL2 | TNFAIP8L1    |
| MKS1.5     | 0.007054 | 0.115368 | 0.124 | 0.089 | 1 | CSCL2 | MKS1         |
| SLC38A10.0 | 0.007086 | -0.18596 | 0.152 | 0.2   | 1 | CSCL2 | SLC38A10     |
| ANKRD50.4  | 0.007092 | 0.100479 | 0.075 | 0.048 | 1 | CSCL2 | ANKRD50      |
| AMDHD2.8   | 0.007103 | -0.10816 | 0.082 | 0.125 | 1 | CSCL2 | AMDHD2       |
| GCLC.7     | 0.007123 | -0.1427  | 0.062 | 0.099 | 1 | CSCL2 | GCLC         |
| PSMA1.6    | 0.007132 | -0.18881 | 0.598 | 0.612 | 1 | CSCL2 | PSMA1        |
| ACY3.6     | 0.007143 | -0.11739 | 0.002 | 0.02  | 1 | CSCL2 | ACY3         |
| CXCL12.8   | 0.007198 | -0.17801 | 0.018 | 0.043 | 1 | CSCL2 | CXCL12       |
| AKR1B1.8   | 0.007212 | -0.21315 | 0.629 | 0.625 | 1 | CSCL2 | AKR1B1       |
| SPSB1.5    | 0.007241 | -0.10762 | 0.038 | 0.07  | 1 | CSCL2 | SPSB1        |
| SESN1.8    | 0.007319 | -0.18964 | 0.066 | 0.103 | 1 | CSCL2 | SESN1        |
| RP11-138A  | 0.007362 | -0.21542 | 0.064 | 0.1   | 1 | CSCL2 | RP11-138A9.2 |
| LYPD1.10   | 0.007376 | -0.20692 | 0.155 | 0.197 | 1 | CSCL2 | LYPD1        |
| MSRB2.8    | 0.007499 | -0.18231 | 0.208 | 0.257 | 1 | CSCL2 | MSRB2        |
| ACOT13.3   | 0.007505 | -0.1702  | 0.166 | 0.22  | 1 | CSCL2 | ACOT13       |
| GRPEL1.5   | 0.007628 | -0.13362 | 0.214 | 0.272 | 1 | CSCL2 | GRPEL1       |
| STK19.3    | 0.007656 | -0.10282 | 0.084 | 0.128 | 1 | CSCL2 | STK19        |
| NUP214.12  | 0.00766  | -0.27294 | 0.152 | 0.197 | 1 | CSCL2 | NUP214       |
| SEPN1.10   | 0.007691 | -0.16924 | 0.168 | 0.211 | 1 | CSCL2 | SEPN1        |
| COMMD8.11  | 0.007719 | -0.27853 | 0.183 | 0.226 | 1 | CSCL2 | COMMD8       |
| RELA.4     | 0.007748 | -0.15183 | 0.157 | 0.206 | 1 | CSCL2 | RELA         |
| MAP4K1.1C  | 0.007754 | -0.12697 | 0.009 | 0.03  | 1 | CSCL2 | MAP4K1       |
| PINK1.7    | 0.007802 | -0.11732 | 0.157 | 0.209 | 1 | CSCL2 | PINK1        |
| MLF1.9     | 0.007972 | -0.14687 | 0.19  | 0.244 | 1 | CSCL2 | MLF1         |
| PRSS23.1C  | 0.008019 | -0.19389 | 0.046 | 0.079 | 1 | CSCL2 | PRSS23       |
| TBRG1.4    | 0.008043 | -0.15006 | 0.196 | 0.247 | 1 | CSCL2 | TBRG1        |

|           |          |          |       |       |         |          |
|-----------|----------|----------|-------|-------|---------|----------|
| KLHL5.5   | 0.008052 | -0.14344 | 0.126 | 0.172 | 1 CSCL2 | KLHL5    |
| RAB5A.7   | 0.008064 | -0.13717 | 0.413 | 0.449 | 1 CSCL2 | RAB5A    |
| ASGR1.9   | 0.008092 | -0.15239 | 0.042 | 0.074 | 1 CSCL2 | ASGR1    |
| AP4B1     | 0.008137 | 0.11514  | 0.086 | 0.057 | 1 CSCL2 | AP4B1    |
| OTUB1.1   | 0.008154 | -0.22897 | 0.344 | 0.382 | 1 CSCL2 | OTUB1    |
| TIMMDC1.4 | 0.008158 | -0.16466 | 0.333 | 0.389 | 1 CSCL2 | TIMMDC1  |
| ESRRA.2   | 0.008161 | -0.12124 | 0.066 | 0.105 | 1 CSCL2 | ESRRA    |
| MAP7D3.6  | 0.008216 | -0.11849 | 0.077 | 0.119 | 1 CSCL2 | MAP7D3   |
| TMEM101.3 | 0.008366 | -0.17637 | 0.157 | 0.208 | 1 CSCL2 | TMEM101  |
| MTX1.3    | 0.008367 | -0.18898 | 0.194 | 0.248 | 1 CSCL2 | MTX1     |
| RASSF3.9  | 0.008387 | -0.11222 | 0.018 | 0.043 | 1 CSCL2 | RASSF3   |
| SNX29.7   | 0.008428 | -0.14553 | 0.068 | 0.107 | 1 CSCL2 | SNX29    |
| SCARB1.6  | 0.008451 | -0.10379 | 0.071 | 0.109 | 1 CSCL2 | SCARB1   |
| ZC3H4.3   | 0.008458 | 0.127988 | 0.119 | 0.085 | 1 CSCL2 | ZC3H4    |
| SRSF5.4   | 0.00852  | -0.16532 | 0.704 | 0.694 | 1 CSCL2 | SRSF5    |
| OGFOD3.8  | 0.008532 | -0.12205 | 0.174 | 0.223 | 1 CSCL2 | OGFOD3   |
| C16orf89. | 0.008596 | -0.10177 | 0.002 | 0.019 | 1 CSCL2 | C16orf89 |
| SRD5A3.6  | 0.008637 | 0.11583  | 0.203 | 0.161 | 1 CSCL2 | SRD5A3   |
| USP8.4    | 0.008659 | -0.1939  | 0.212 | 0.261 | 1 CSCL2 | USP8     |
| CDC123.6  | 0.008665 | -0.20228 | 0.294 | 0.338 | 1 CSCL2 | CDC123   |
| MAML3.6   | 0.008701 | -0.12077 | 0.013 | 0.036 | 1 CSCL2 | MAML3    |
| LRRC8C.9  | 0.008709 | -0.11985 | 0.031 | 0.06  | 1 CSCL2 | LRRC8C   |
| CYB5D1.2  | 0.00871  | -0.11772 | 0.026 | 0.054 | 1 CSCL2 | CYB5D1   |
| FBXL17.2  | 0.008743 | -0.11612 | 0.053 | 0.088 | 1 CSCL2 | FBXL17   |
| PCBD1.6   | 0.008821 | -0.20793 | 0.287 | 0.332 | 1 CSCL2 | PCBD1    |
| ZNF846.1C | 0.008897 | -0.1266  | 0.04  | 0.071 | 1 CSCL2 | ZNF846   |
| YIPF2.3   | 0.0089   | -0.14502 | 0.079 | 0.12  | 1 CSCL2 | YIPF2    |
| ATL3.7    | 0.008975 | -0.13836 | 0.097 | 0.139 | 1 CSCL2 | ATL3     |
| RAP2B.11  | 0.009122 | -0.15462 | 0.124 | 0.167 | 1 CSCL2 | RAP2B    |
| STK40.3   | 0.009162 | -0.10009 | 0.084 | 0.125 | 1 CSCL2 | STK40    |
| SIPA1L1.5 | 0.009224 | -0.13917 | 0.121 | 0.166 | 1 CSCL2 | SIPA1L1  |
| B3GAT3.6  | 0.009261 | -0.21863 | 0.347 | 0.38  | 1 CSCL2 | B3GAT3   |
| PPM1N.6   | 0.009284 | -0.13302 | 0.015 | 0.039 | 1 CSCL2 | PPM1N    |
| GSK3A.10  | 0.009286 | 0.113214 | 0.232 | 0.188 | 1 CSCL2 | GSK3A    |
| PRRT2.10  | 0.009384 | 0.120204 | 0.121 | 0.089 | 1 CSCL2 | PRRT2    |
| GFER.7    | 0.009464 | 0.131891 | 0.252 | 0.207 | 1 CSCL2 | GFER     |
| MT2A.12   | 0.009464 | -0.17969 | 0.795 | 0.784 | 1 CSCL2 | MT2A     |
| HSD17B12. | 0.009505 | -0.20367 | 0.38  | 0.415 | 1 CSCL2 | HSD17B12 |
| RABAC1.6  | 0.009518 | -0.15924 | 0.673 | 0.664 | 1 CSCL2 | RABAC1   |
| AIM1.8    | 0.009588 | -0.14663 | 0.013 | 0.036 | 1 CSCL2 | AIM1     |
| TXNDC17.1 | 0.009615 | -0.17211 | 0.528 | 0.525 | 1 CSCL2 | TXNDC17  |
| ADCY6.1   | 0.009674 | 0.118042 | 0.062 | 0.038 | 1 CSCL2 | ADCY6    |
| GLI4.8    | 0.009757 | 0.108311 | 0.146 | 0.11  | 1 CSCL2 | GLI4     |
| NUMB.12   | 0.009786 | -0.21335 | 0.13  | 0.172 | 1 CSCL2 | NUMB     |
| LASP1.8   | 0.009846 | -0.16827 | 0.163 | 0.211 | 1 CSCL2 | LASP1    |
| RGS3.9    | 0.009892 | 0.123353 | 0.141 | 0.105 | 1 CSCL2 | RGS3     |
| ABCA2.12  | 0.009979 | -0.25641 | 0.062 | 0.097 | 1 CSCL2 | ABCA2    |
| CD52.12   | 0        | 2.477892 | 0.905 | 0.036 | 0 Tce11 | CD52     |
| CD3D.8    | 0        | 2.461922 | 0.805 | 0.004 | 0 Tce11 | CD3D     |
| CCL5.9    | 0        | 2.366534 | 0.727 | 0.043 | 0 Tce11 | CCL5     |
| IL32.11   | 0        | 2.325551 | 0.85  | 0.086 | 0 Tce11 | IL32     |

|                 |          |          |       |       |       |          |             |
|-----------------|----------|----------|-------|-------|-------|----------|-------------|
| PTPRCAP. 9      | 0        | 2.312259 | 0.809 | 0.011 | 0     | Tcell    | PTPRCAP     |
| CD2. 9          | 0        | 2.228489 | 0.736 | 0.005 | 0     | Tcell    | CD2         |
| CD3E. 7         | 0        | 2.204977 | 0.75  | 0.004 | 0     | Tcell    | CD3E        |
| GZMA. 7         | 0        | 2.127551 | 0.568 | 0.004 | 0     | Tcell    | GZMA        |
| CTSW. 8         | 0        | 1.951698 | 0.586 | 0.019 | 0     | Tcell    | CTSW        |
| LTB. 8          | 0        | 1.899191 | 0.545 | 0.023 | 0     | Tcell    | LTB         |
| GZMK. 4         | 0        | 1.892491 | 0.414 | 0.003 | 0     | Tcell    | GZMK        |
| CD7. 11         | 0        | 1.888422 | 0.568 | 0.033 | 0     | Tcell    | CD7         |
| LCK. 6          | 0        | 1.879524 | 0.627 | 0.003 | 0     | Tcell    | LCK         |
| IL2RG. 10       | 0        | 1.844879 | 0.636 | 0.032 | 0     | Tcell    | IL2RG       |
| TUBA4A. 8       | 0        | 1.829523 | 0.618 | 0.043 | 0     | Tcell    | TUBA4A      |
| CD3G. 1         | 0        | 1.733144 | 0.509 | 0.001 | 0     | Tcell    | CD3G        |
| KLRB1           | 0        | 1.672429 | 0.345 | 0.002 | 0     | Tcell    | KLRB1       |
| AC092580.       | 0        | 1.671582 | 0.45  | 0.002 | 0     | Tcell    | AC092580. 4 |
| IFITM1. 6       | 0        | 1.659796 | 0.514 | 0.028 | 0     | Tcell    | IFITM1      |
| CRIP1. 10       | 0        | 1.641555 | 0.527 | 0.03  | 0     | Tcell    | CRIP1       |
| LAT. 2          | 0        | 1.605248 | 0.509 | 0.025 | 0     | Tcell    | LAT         |
| GZMH            | 0        | 1.569695 | 0.35  | 0.001 | 0     | Tcell    | GZMH        |
| CD8A            | 0        | 1.548524 | 0.305 | 0.006 | 0     | Tcell    | CD8A        |
| CD96            | 0        | 1.491478 | 0.405 | 0.006 | 0     | Tcell    | CD96        |
| CD27            | 0        | 1.482831 | 0.382 | 0.003 | 0     | Tcell    | CD27        |
| XCL1            | 0        | 1.441228 | 0.282 | 0     | 0     | Tcell    | XCL1        |
| PRF1            | 0        | 1.433655 | 0.336 | 0.001 | 0     | Tcell    | PRF1        |
| GZMM            | 0        | 1.413157 | 0.364 | 0.002 | 0     | Tcell    | GZMM        |
| CD247. 3        | 0        | 1.412903 | 0.395 | 0.009 | 0     | Tcell    | CD247       |
| SKAP1           | 0        | 1.398696 | 0.373 | 0.001 | 0     | Tcell    | SKAP1       |
| SIT1            | 0        | 1.364164 | 0.382 | 0.005 | 0     | Tcell    | SIT1        |
| GZMB            | 0        | 1.356796 | 0.232 | 0.003 | 0     | Tcell    | GZMB        |
| CD8B            | 0        | 1.342759 | 0.255 | 0.001 | 0     | Tcell    | CD8B        |
| CXCR3           | 0        | 1.251401 | 0.3   | 0.001 | 0     | Tcell    | CXCR3       |
| IL2RB           | 0        | 1.243784 | 0.336 | 0.001 | 0     | Tcell    | IL2RB       |
| XCL2            | 0        | 1.227679 | 0.25  | 0.001 | 0     | Tcell    | XCL2        |
| GATA3           | 0        | 1.195065 | 0.295 | 0.002 | 0     | Tcell    | GATA3       |
| CD6             | 0        | 1.194611 | 0.282 | 0.003 | 0     | Tcell    | CD6         |
| ZAP70           | 0        | 1.154124 | 0.305 | 0.001 | 0     | Tcell    | ZAP70       |
| CXCR6           | 0        | 1.141293 | 0.241 | 0.001 | 0     | Tcell    | CXCR6       |
| SH2D1A          | 0        | 1.140791 | 0.264 | 0.001 | 0     | Tcell    | SH2D1A      |
| TRAT1           | 0        | 1.113325 | 0.236 | 0.001 | 0     | Tcell    | TRAT1       |
| ZNF683          | 0        | 1.098594 | 0.214 | 0     | 0     | Tcell    | ZNF683      |
| SAMD3           | 0        | 1.088066 | 0.245 | 0     | 0     | Tcell    | SAMD3       |
| ICOS            | 0        | 1.064789 | 0.25  | 0.001 | 0     | Tcell    | ICOS        |
| TIGIT           | 0        | 1.040604 | 0.214 | 0.001 | 0     | Tcell    | TIGIT       |
| SLA2            | 0        | 1.005488 | 0.25  | 0.002 | 0     | Tcell    | SLA2        |
| RGL4            | 0        | 1.00491  | 0.241 | 0.001 | 0     | Tcell    | RGL4        |
| SIRPG           | 0        | 0.883913 | 0.168 | 0.001 | 0     | Tcell    | SIRPG       |
| CD40LG          | 0        | 0.872083 | 0.168 | 0     | 0     | Tcell    | CD40LG      |
| TBC1D10C. ##### | 1.481375 | 0.45     | 0.022 | ##### | Tcell | TBC1D10C |             |
| CST7. 9 #####   | 1.648601 | 0.482    | 0.027 | ##### | Tcell | CST7     |             |
| PYHIN1 #####    | 1.027457 | 0.2      | 0.003 | ##### | Tcell | PYHIN1   |             |
| TC2N #####      | 1.022452 | 0.223    | 0.004 | ##### | Tcell | TC2N     |             |
| FAM46C #####    | 1.057066 | 0.273    | 0.007 | ##### | Tcell | FAM46C   |             |

|           |       |          |       |       |       |       |                |
|-----------|-------|----------|-------|-------|-------|-------|----------------|
| TNFRSF18  | ##### | 1.190898 | 0.232 | 0.005 | ##### | Tcell | TNFRSF18       |
| PTGER2    | ##### | 1.115071 | 0.245 | 0.005 | ##### | Tcell | PTGER2         |
| ITK       | ##### | 1.042294 | 0.245 | 0.006 | ##### | Tcell | ITK            |
| GRAP2     | ##### | 0.735579 | 0.145 | 0.001 | ##### | Tcell | GRAP2          |
| SLAMF1    | ##### | 0.944609 | 0.177 | 0.003 | ##### | Tcell | SLAMF1         |
| CYTIP.13  | ##### | 1.763335 | 0.714 | 0.092 | ##### | Tcell | CYTIP          |
| SH2D2A    | ##### | 1.012883 | 0.236 | 0.007 | ##### | Tcell | SH2D2A         |
| CTLA4.1   | ##### | 1.016869 | 0.223 | 0.006 | ##### | Tcell | CTLA4          |
| NKG7.11   | ##### | 1.873007 | 0.495 | 0.041 | ##### | Tcell | NKG7           |
| GPR171.1  | ##### | 1.272374 | 0.314 | 0.015 | ##### | Tcell | GPR171         |
| STAT4     | ##### | 1.016182 | 0.227 | 0.007 | ##### | Tcell | STAT4          |
| RP11-1399 | ##### | 0.564843 | 0.086 | 0     | ##### | Tcell | RP11-1399P15.1 |
| KLRD1     | ##### | 1.079969 | 0.195 | 0.005 | ##### | Tcell | KLRD1          |
| ETS1      | ##### | 1.326563 | 0.35  | 0.021 | ##### | Tcell | ETS1           |
| ITM2A.11  | ##### | 1.512472 | 0.495 | 0.047 | ##### | Tcell | ITM2A          |
| RAC2.14   | ##### | 1.63687  | 0.7   | 0.108 | ##### | Tcell | RAC2           |
| RUNX3.11  | ##### | 1.332115 | 0.405 | 0.031 | ##### | Tcell | RUNX3          |
| CD69.11   | ##### | 1.85905  | 0.773 | 0.141 | ##### | Tcell | CD69           |
| ACAP1.10  | ##### | 1.585649 | 0.568 | 0.07  | ##### | Tcell | ACAP1          |
| SOCS1.6   | ##### | 1.512279 | 0.464 | 0.045 | ##### | Tcell | SOCS1          |
| AIM1.9    | ##### | 1.257101 | 0.377 | 0.028 | ##### | Tcell | AIM1           |
| DUSP2.13  | ##### | 1.750451 | 0.65  | 0.1   | ##### | Tcell | DUSP2          |
| KLRC1     | ##### | 0.86978  | 0.109 | 0.001 | ##### | Tcell | KLRC1          |
| IFNG      | ##### | 0.607006 | 0.082 | 0     | ##### | Tcell | IFNG           |
| RHOH.13   | ##### | 1.519646 | 0.545 | 0.068 | ##### | Tcell | RHOH           |
| SYTL1     | ##### | 0.798379 | 0.186 | 0.006 | ##### | Tcell | SYTL1          |
| ISG20.8   | ##### | 1.556411 | 0.664 | 0.111 | ##### | Tcell | ISG20          |
| NCR3      | ##### | 0.609833 | 0.1   | 0.001 | ##### | Tcell | NCR3           |
| LSP1.14   | ##### | 1.538167 | 0.759 | 0.155 | ##### | Tcell | LSP1           |
| IL7R.11   | ##### | 1.576106 | 0.436 | 0.046 | ##### | Tcell | IL7R           |
| CD48.14   | ##### | 1.578606 | 0.527 | 0.07  | ##### | Tcell | CD48           |
| APOBEC3H  | ##### | 0.938632 | 0.186 | 0.007 | ##### | Tcell | APOBEC3H       |
| S1PR4.1   | ##### | 0.79339  | 0.191 | 0.007 | ##### | Tcell | S1PR4          |
| RP11-347F | ##### | 1.383775 | 0.468 | 0.057 | ##### | Tcell | RP11-347P5.1   |
| TBX21     | ##### | 0.53478  | 0.086 | 0.001 | ##### | Tcell | TBX21          |
| PRKCH.11  | ##### | 1.175176 | 0.382 | 0.037 | ##### | Tcell | PRKCH          |
| CXCR4.11  | ##### | 1.56725  | 0.955 | 0.378 | ##### | Tcell | CXCR4          |
| ICAM3.10  | ##### | 1.554222 | 0.559 | 0.092 | ##### | Tcell | ICAM3          |
| STK17B.11 | ##### | 1.489452 | 0.632 | 0.123 | ##### | Tcell | STK17B         |
| S100A4.14 | ##### | 1.480441 | 0.864 | 0.285 | ##### | Tcell | S100A4         |
| LAX1      | ##### | 0.527833 | 0.105 | 0.002 | ##### | Tcell | LAX1           |
| KRT81     | ##### | 0.582367 | 0.073 | 0.001 | ##### | Tcell | KRT81          |
| TNFAIP3.1 | ##### | 1.488225 | 0.673 | 0.153 | ##### | Tcell | TNFAIP3        |
| KRT86     | ##### | 0.705799 | 0.1   | 0.002 | ##### | Tcell | KRT86          |
| AQP3      | ##### | 0.878951 | 0.177 | 0.009 | ##### | Tcell | AQP3           |
| AC002331. | ##### | 0.372327 | 0.05  | 0     | ##### | Tcell | AC002331.1     |
| PTPRC.14  | ##### | 1.347713 | 0.727 | 0.193 | ##### | Tcell | PTPRC          |
| KLRK1     | ##### | 0.652191 | 0.1   | 0.002 | ##### | Tcell | KLRK1          |
| TSC22D3.1 | ##### | 1.375253 | 0.927 | 0.447 | ##### | Tcell | TSC22D3        |
| RNF125.7  | ##### | 0.989068 | 0.25  | 0.02  | ##### | Tcell | RNF125         |
| SIDT1-AS1 | ##### | 0.43077  | 0.082 | 0.001 | ##### | Tcell | SIDT1-AS1      |



|            |          |          |       |       |          |       |          |
|------------|----------|----------|-------|-------|----------|-------|----------|
| ARHGDIB. 1 | #####    | 1.206531 | 0.909 | 0.361 | #####    | Tcell | ARHGDIB  |
| TRAF3IP3.  | #####    | 1.144768 | 0.368 | 0.046 | #####    | Tcell | TRAF3IP3 |
| MATK. 1    | #####    | 0.937345 | 0.205 | 0.014 | #####    | Tcell | MATK     |
| GIMAP7. 11 | #####    | 1.234268 | 0.373 | 0.048 | 1.04E-99 | Tcell | GIMAP7   |
| HCST. 14   | #####    | 1.258827 | 0.823 | 0.274 | 1.47E-97 | Tcell | HCST     |
| DOK2. 13   | #####    | 1.112751 | 0.373 | 0.049 | 2.60E-97 | Tcell | DOK2     |
| LCP1. 13   | #####    | 1.323319 | 0.586 | 0.134 | 3.61E-97 | Tcell | LCP1     |
| CLEC2D. 2  | 4.70E-98 | 0.865794 | 0.25  | 0.022 | 7.03E-94 | Tcell | CLEC2D   |
| CD79B. 1   | 7.09E-98 | 0.596204 | 0.114 | 0.004 | 1.06E-93 | Tcell | CD79B    |
| ZFP36L2. 1 | 7.55E-97 | 1.348526 | 0.882 | 0.509 | 1.13E-92 | Tcell | ZFP36L2  |
| PDCD1      | 1.90E-95 | 0.70593  | 0.15  | 0.008 | 2.84E-91 | Tcell | PDCD1    |
| HLA-C. 9   | 2.14E-94 | 0.791689 | 0.986 | 0.8   | 3.19E-90 | Tcell | HLA-C    |
| HLA-B. 11  | 1.23E-93 | 0.779869 | 0.986 | 0.849 | 1.84E-89 | Tcell | HLA-B    |
| SRGN. 14   | 2.17E-93 | 1.030475 | 0.959 | 0.49  | 3.25E-89 | Tcell | SRGN     |
| COR01A. 14 | 5.80E-93 | 1.181277 | 0.845 | 0.364 | 8.66E-89 | Tcell | COR01A   |
| CLIC3      | 5.15E-92 | 0.702103 | 0.123 | 0.005 | 7.69E-88 | Tcell | CLIC3    |
| B2M. 12    | 3.33E-91 | 0.691912 | 1     | 0.97  | 4.98E-87 | Tcell | B2M      |
| EOMES      | 1.31E-86 | 0.390278 | 0.055 | 0.001 | 1.95E-82 | Tcell | EOMES    |
| FCRL6      | 1.31E-86 | 0.415837 | 0.055 | 0.001 | 1.96E-82 | Tcell | FCRL6    |
| TNFRSF25   | 1.18E-84 | 0.811267 | 0.191 | 0.015 | 1.77E-80 | Tcell | TNFRSF25 |
| MYL12A. 12 | 6.54E-83 | 1.070904 | 0.882 | 0.537 | 9.77E-79 | Tcell | MYL12A   |
| BTG1. 12   | 5.85E-82 | 1.007603 | 0.886 | 0.685 | 8.74E-78 | Tcell | BTG1     |
| CYBA. 14   | 1.16E-81 | 1.01344  | 0.868 | 0.396 | 1.73E-77 | Tcell | CYBA     |
| PFN1. 10   | 2.63E-81 | 0.715235 | 0.923 | 0.806 | 3.94E-77 | Tcell | PFN1     |
| GMFG. 14   | 4.46E-81 | 1.146509 | 0.782 | 0.289 | 6.66E-77 | Tcell | GMFG     |
| TMSB4X. 11 | 6.78E-81 | 0.508458 | 1     | 0.997 | 1.01E-76 | Tcell | TMSB4X   |
| RGS1. 14   | 7.03E-79 | 1.065823 | 0.877 | 0.439 | 1.05E-74 | Tcell | RGS1     |
| SEPT1. 3   | 9.95E-79 | 1.251495 | 0.459 | 0.1   | 1.49E-74 | Tcell | 1-Sep    |
| BIRC3. 8   | 2.32E-78 | 1.180091 | 0.359 | 0.059 | 3.47E-74 | Tcell | BIRC3    |
| LAG3       | 1.86E-77 | 0.74568  | 0.168 | 0.013 | 2.78E-73 | Tcell | LAG3     |
| PTPN7. 14  | 1.05E-76 | 1.144889 | 0.395 | 0.072 | 1.57E-72 | Tcell | PTPN7    |
| HLA-A. 11  | 1.66E-76 | 0.579824 | 0.982 | 0.894 | 2.48E-72 | Tcell | HLA-A    |
| EVL. 8     | 1.63E-74 | 1.134166 | 0.773 | 0.344 | 2.43E-70 | Tcell | EVL      |
| RHOF. 3    | 6.62E-74 | 1.034862 | 0.309 | 0.047 | 9.89E-70 | Tcell | RHOF     |
| MAP4K1. 11 | 5.97E-71 | 0.871251 | 0.227 | 0.026 | 8.91E-67 | Tcell | MAP4K1   |
| PTPN22. 9  | 3.02E-70 | 0.821961 | 0.214 | 0.023 | 4.52E-66 | Tcell | PTPN22   |
| HLA-E. 14  | 8.14E-70 | 0.886156 | 0.895 | 0.59  | 1.22E-65 | Tcell | HLA-E    |
| SH3BGRL3.  | 1.26E-69 | 0.695443 | 0.95  | 0.774 | 1.88E-65 | Tcell | SH3BGRL3 |
| RORA. 7    | 1.74E-67 | 1.209877 | 0.359 | 0.069 | 2.60E-63 | Tcell | RORA     |
| APOBEC3G.  | 7.86E-65 | 1.194021 | 0.45  | 0.112 | 1.17E-60 | Tcell | APOBEC3G |
| JUNB. 9    | 3.69E-64 | 0.904077 | 0.864 | 0.721 | 5.52E-60 | Tcell | JUNB     |
| MALAT1. 12 | 1.74E-63 | 0.438687 | 1     | 0.995 | 2.61E-59 | Tcell | MALAT1   |
| CCR7. 2    | 8.39E-63 | 0.628873 | 0.123 | 0.008 | 1.25E-58 | Tcell | CCR7     |
| DDIT4. 13  | 2.52E-62 | 1.061101 | 0.768 | 0.402 | 3.77E-58 | Tcell | DDIT4    |
| TNFRSF4    | 3.53E-62 | 0.655189 | 0.127 | 0.009 | 5.28E-58 | Tcell | TNFRSF4  |
| RASAL3. 13 | 6.97E-62 | 0.956123 | 0.305 | 0.052 | 1.04E-57 | Tcell | RASAL3   |
| HSH2D. 1   | 2.28E-61 | 0.621895 | 0.109 | 0.007 | 3.41E-57 | Tcell | HSH2D    |
| EEF1D. 11  | 1.46E-59 | 0.581313 | 0.959 | 0.843 | 2.19E-55 | Tcell | EEF1D    |
| ACTB. 10   | 2.51E-59 | 0.333617 | 0.991 | 0.992 | 3.75E-55 | Tcell | ACTB     |
| FXVD5. 14  | 3.79E-59 | 1.024973 | 0.741 | 0.333 | 5.66E-55 | Tcell | FXVD5    |
| HPGD. 1    | 1.21E-58 | 0.457759 | 0.082 | 0.004 | 1.81E-54 | Tcell | HPGD     |

|           |          |          |       |       |          |       |              |
|-----------|----------|----------|-------|-------|----------|-------|--------------|
| TNFAIP8.1 | 3.32E-58 | 0.967056 | 0.332 | 0.064 | 4.96E-54 | Tcell | TNFAIP8      |
| AKNA.11   | 5.16E-58 | 1.053139 | 0.336 | 0.067 | 7.71E-54 | Tcell | AKNA         |
| SCML4.1   | 7.94E-58 | 0.751423 | 0.141 | 0.012 | 1.19E-53 | Tcell | SCML4        |
| CAMK4.1   | 1.69E-57 | 0.779469 | 0.186 | 0.021 | 2.52E-53 | Tcell | CAMK4        |
| PTMA.10   | 2.33E-57 | 0.410095 | 0.986 | 0.966 | 3.49E-53 | Tcell | PTMA         |
| PABPC1.1C | 1.14E-56 | 0.681776 | 0.882 | 0.742 | 1.71E-52 | Tcell | PABPC1       |
| RAB37     | 1.30E-56 | 0.454916 | 0.082 | 0.004 | 1.95E-52 | Tcell | RAB37        |
| EEF1A1.11 | 8.18E-56 | 0.584646 | 0.95  | 0.823 | 1.22E-51 | Tcell | EEF1A1       |
| PRDM1.13  | 1.71E-55 | 1.155378 | 0.391 | 0.094 | 2.56E-51 | Tcell | PRDM1        |
| ZFP36.11  | 2.86E-55 | 0.796128 | 0.873 | 0.567 | 4.27E-51 | Tcell | ZFP36        |
| HLA-F.13  | 3.91E-55 | 1.092726 | 0.477 | 0.14  | 5.85E-51 | Tcell | HLA-F        |
| RP11-138A | 3.97E-55 | 1.148791 | 0.386 | 0.093 | 5.94E-51 | Tcell | RP11-138A9.2 |
| IRF4.1    | 1.50E-54 | 0.501817 | 0.082 | 0.004 | 2.24E-50 | Tcell | IRF4         |
| CD37.14   | 2.45E-54 | 0.942762 | 0.718 | 0.293 | 3.66E-50 | Tcell | CD37         |
| RP11-356I | 2.72E-54 | 0.790673 | 0.168 | 0.018 | 4.06E-50 | Tcell | RP11-356I2.4 |
| PIK3IP1.1 | 7.33E-54 | 1.121859 | 0.495 | 0.154 | 1.10E-49 | Tcell | PIK3IP1      |
| PRKCQ.1   | 1.05E-53 | 0.471936 | 0.095 | 0.006 | 1.57E-49 | Tcell | PRKCQ        |
| TXNIP.8   | 3.62E-53 | 1.132711 | 0.741 | 0.44  | 5.41E-49 | Tcell | TXNIP        |
| CD53.14   | 8.05E-53 | 0.872002 | 0.727 | 0.307 | 1.20E-48 | Tcell | CD53         |
| TPT1.11   | 8.08E-53 | 0.486302 | 0.973 | 0.953 | 1.21E-48 | Tcell | TPT1         |
| SYTL3.12  | 2.51E-52 | 1.017826 | 0.305 | 0.06  | 3.75E-48 | Tcell | SYTL3        |
| PTGER4.13 | 5.26E-52 | 1.114387 | 0.427 | 0.118 | 7.86E-48 | Tcell | PTGER4       |
| TMSB10.11 | 1.16E-51 | 0.352645 | 0.995 | 0.964 | 1.74E-47 | Tcell | TMSB10       |
| BATF.10   | 1.72E-51 | 0.863405 | 0.227 | 0.035 | 2.56E-47 | Tcell | BATF         |
| TNFRSF9   | 4.16E-51 | 0.471942 | 0.082 | 0.004 | 6.21E-47 | Tcell | TNFRSF9      |
| GBP5      | 4.64E-51 | 0.55275  | 0.132 | 0.012 | 6.93E-47 | Tcell | GBP5         |
| FAU.11    | 6.13E-51 | 0.408244 | 0.991 | 0.957 | 9.16E-47 | Tcell | FAU          |
| CRTAM     | 2.18E-50 | 0.691439 | 0.123 | 0.01  | 3.26E-46 | Tcell | CRTAM        |
| TMA7.9    | 3.18E-49 | 0.440924 | 0.932 | 0.849 | 4.76E-45 | Tcell | TMA7         |
| CASP8.11  | 3.50E-49 | 0.861841 | 0.25  | 0.043 | 5.23E-45 | Tcell | CASP8        |
| ITGB7.10  | 3.64E-49 | 0.69309  | 0.177 | 0.022 | 5.44E-45 | Tcell | ITGB7        |
| PIM2.5    | 4.94E-49 | 1.025952 | 0.264 | 0.049 | 7.38E-45 | Tcell | PIM2         |
| PTN.12    | 5.63E-49 | -1.64903 | 0.082 | 0.626 | 8.41E-45 | Tcell | PTN          |
| PARP8.4   | 6.07E-49 | 1.082289 | 0.3   | 0.063 | 9.07E-45 | Tcell | PARP8        |
| IKZF1.13  | 1.23E-48 | 0.907243 | 0.295 | 0.06  | 1.84E-44 | Tcell | IKZF1        |
| CCND3.11  | 1.39E-46 | 1.109719 | 0.582 | 0.253 | 2.08E-42 | Tcell | CCND3        |
| LEF1      | 5.66E-46 | 0.628993 | 0.127 | 0.012 | 8.47E-42 | Tcell | LEF1         |
| EMB.14    | 6.25E-46 | 0.937195 | 0.314 | 0.07  | 9.33E-42 | Tcell | EMB          |
| CNN2.8    | 9.45E-46 | 1.004503 | 0.291 | 0.062 | 1.41E-41 | Tcell | CNN2         |
| BIN2.13   | 9.71E-46 | 0.949209 | 0.391 | 0.107 | 1.45E-41 | Tcell | BIN2         |
| GNLY.6    | 9.92E-46 | 1.319863 | 0.186 | 0.027 | 1.48E-41 | Tcell | GNLY         |
| ARPC2.12  | 1.61E-45 | 0.555028 | 0.855 | 0.772 | 2.40E-41 | Tcell | ARPC2        |
| HNRNPA1.6 | 2.19E-45 | 0.445217 | 0.914 | 0.876 | 3.27E-41 | Tcell | HNRNPA1      |
| MYO1G.13  | 2.93E-45 | 0.861398 | 0.277 | 0.057 | 4.38E-41 | Tcell | MYO1G        |
| IFITM2.14 | 3.76E-45 | 0.949151 | 0.627 | 0.276 | 5.62E-41 | Tcell | IFITM2       |
| MARCKS.11 | 1.63E-44 | -1.18837 | 0.086 | 0.607 | 2.43E-40 | Tcell | MARCKS       |
| FTH1.9    | 2.31E-44 | 0.353611 | 0.959 | 0.932 | 3.45E-40 | Tcell | FTH1         |
| NPM1.6    | 4.38E-44 | 0.453702 | 0.918 | 0.868 | 6.55E-40 | Tcell | NPM1         |
| GCHFR.11  | 6.91E-44 | 0.970755 | 0.309 | 0.072 | 1.03E-39 | Tcell | GCHFR        |
| EIF1.11   | 1.92E-43 | 0.322699 | 0.986 | 0.974 | 2.87E-39 | Tcell | EIF1         |
| INPP4B    | 3.17E-43 | 0.502822 | 0.1   | 0.008 | 4.74E-39 | Tcell | INPP4B       |

|           |          |          |       |       |          |       |            |
|-----------|----------|----------|-------|-------|----------|-------|------------|
| RASSF5.13 | 4.16E-43 | 0.948376 | 0.391 | 0.114 | 6.21E-39 | Tcell | RASSF5     |
| TMIGD2.8  | 7.15E-43 | 0.752861 | 0.145 | 0.017 | 1.07E-38 | Tcell | TMIGD2     |
| PSTPIP1.1 | 1.12E-42 | 0.746328 | 0.218 | 0.038 | 1.67E-38 | Tcell | PSTPIP1    |
| NGFRAP1.1 | 1.81E-42 | -1.17412 | 0.136 | 0.654 | 2.71E-38 | Tcell | NGFRAP1    |
| DDX5.9    | 2.33E-42 | 0.473801 | 0.855 | 0.816 | 3.48E-38 | Tcell | DDX5       |
| PMAIP1.13 | 4.57E-42 | 1.084443 | 0.323 | 0.079 | 6.83E-38 | Tcell | PMAIP1     |
| LINC00649 | 6.92E-42 | 0.479889 | 0.077 | 0.005 | 1.03E-37 | Tcell | LINC00649  |
| FLT3LG.1  | 7.14E-42 | 0.783063 | 0.205 | 0.034 | 1.07E-37 | Tcell | FLT3LG     |
| ATP5E.11  | 7.73E-42 | 0.341485 | 0.932 | 0.913 | 1.16E-37 | Tcell | ATP5E      |
| PIP4K2A.1 | 9.00E-42 | 1.035439 | 0.414 | 0.132 | 1.34E-37 | Tcell | PIP4K2A    |
| CLIC1.10  | 1.31E-41 | 0.653521 | 0.832 | 0.619 | 1.96E-37 | Tcell | CLIC1      |
| SAMSN1.14 | 3.16E-41 | 0.840791 | 0.591 | 0.245 | 4.72E-37 | Tcell | SAMSN1     |
| C16orf54. | 5.73E-41 | 0.673202 | 0.127 | 0.014 | 8.56E-37 | Tcell | C16orf54   |
| TMEM2.5   | 6.41E-41 | 0.917873 | 0.273 | 0.06  | 9.57E-37 | Tcell | TMEM2      |
| SERF2.10  | 1.15E-40 | 0.386605 | 0.923 | 0.895 | 1.73E-36 | Tcell | SERF2      |
| STK4.10   | 1.18E-40 | 1.115822 | 0.577 | 0.281 | 1.77E-36 | Tcell | STK4       |
| S100A6.12 | 1.80E-40 | 0.566773 | 0.873 | 0.639 | 2.68E-36 | Tcell | S100A6     |
| ITGAL.7   | 2.13E-40 | 0.665113 | 0.159 | 0.022 | 3.18E-36 | Tcell | ITGAL      |
| AC006129. | 2.75E-40 | 0.691766 | 0.114 | 0.011 | 4.11E-36 | Tcell | AC006129.2 |
| IPCEF1.6  | 3.04E-40 | 0.613255 | 0.15  | 0.019 | 4.55E-36 | Tcell | IPCEF1     |
| HSBP1.7   | 4.57E-40 | -0.90054 | 0.209 | 0.724 | 6.82E-36 | Tcell | HSBP1      |
| SPON2.1   | 5.51E-40 | 0.661402 | 0.15  | 0.02  | 8.23E-36 | Tcell | SPON2      |
| LEPROTL1. | 1.26E-39 | 1.068133 | 0.65  | 0.383 | 1.88E-35 | Tcell | LEPROTL1   |
| RCAN3.6   | 2.14E-39 | 0.934292 | 0.255 | 0.055 | 3.19E-35 | Tcell | RCAN3      |
| CD160     | 1.90E-38 | 0.444734 | 0.064 | 0.004 | 2.84E-34 | Tcell | CD160      |
| DENND2D.9 | 4.12E-38 | 0.759552 | 0.218 | 0.041 | 6.16E-34 | Tcell | DENND2D    |
| ZBP1      | 5.35E-38 | 0.455262 | 0.086 | 0.007 | 7.99E-34 | Tcell | ZBP1       |
| SP140.12  | 5.35E-38 | 0.677012 | 0.177 | 0.028 | 7.99E-34 | Tcell | SP140      |
| SPN.14    | 6.81E-38 | 0.829668 | 0.245 | 0.052 | 1.02E-33 | Tcell | SPN        |
| GNB2L1.9  | 7.79E-38 | 0.340719 | 0.959 | 0.942 | 1.16E-33 | Tcell | GNB2L1     |
| STK17A.11 | 1.76E-37 | 1.086621 | 0.559 | 0.288 | 2.63E-33 | Tcell | STK17A     |
| UQCRB.7   | 2.07E-37 | 0.608744 | 0.777 | 0.676 | 3.09E-33 | Tcell | UQCRB      |
| TUBB2B.13 | 3.06E-37 | -1.28413 | 0.1   | 0.563 | 4.58E-33 | Tcell | TUBB2B     |
| LY6E.8    | 3.21E-37 | 0.926464 | 0.636 | 0.371 | 4.80E-33 | Tcell | LY6E       |
| CCR2.2    | 6.25E-37 | 0.357502 | 0.064 | 0.004 | 9.35E-33 | Tcell | CCR2       |
| ARHGAP15. | 7.48E-37 | 0.919746 | 0.332 | 0.092 | 1.12E-32 | Tcell | ARHGAP15   |
| ARHGAP30. | 9.84E-37 | 0.851936 | 0.327 | 0.09  | 1.47E-32 | Tcell | ARHGAP30   |
| RARRES3.8 | 1.44E-36 | 0.813925 | 0.555 | 0.238 | 2.16E-32 | Tcell | RARRES3    |
| NOVA1.14  | 1.48E-36 | -1.3835  | 0.032 | 0.488 | 2.21E-32 | Tcell | NOVA1      |
| RGS14.2   | 1.51E-36 | 0.733131 | 0.186 | 0.032 | 2.26E-32 | Tcell | RGS14      |
| UBC.7     | 1.80E-36 | 0.30113  | 0.955 | 0.951 | 2.70E-32 | Tcell | UBC        |
| CFL1.8    | 4.60E-36 | 0.263232 | 0.95  | 0.95  | 6.87E-32 | Tcell | CFL1       |
| WBP5.10   | 4.64E-36 | -1.13417 | 0.045 | 0.511 | 6.93E-32 | Tcell | WBP5       |
| CKB.14    | 1.51E-35 | -1.13878 | 0.159 | 0.59  | 2.26E-31 | Tcell | CKB        |
| RTN3.11   | 2.65E-35 | -0.90209 | 0.177 | 0.664 | 3.96E-31 | Tcell | RTN3       |
| IRF1.10   | 2.86E-35 | 0.966476 | 0.482 | 0.201 | 4.28E-31 | Tcell | IRF1       |
| SLC1A3.12 | 3.73E-35 | -1.21116 | 0.032 | 0.485 | 5.57E-31 | Tcell | SLC1A3     |
| BTF3.6    | 4.27E-35 | 0.374665 | 0.932 | 0.897 | 6.38E-31 | Tcell | BTF3       |
| HBA2.7    | 4.30E-35 | 1.373133 | 0.468 | 0.192 | 6.42E-31 | Tcell | HBA2       |
| QKI.10    | 6.52E-35 | -1.1019  | 0.032 | 0.479 | 9.74E-31 | Tcell | QKI        |
| TAGAP.14  | 1.80E-34 | 0.904761 | 0.332 | 0.096 | 2.69E-30 | Tcell | TAGAP      |

|            |          |          |       |       |          |       |              |
|------------|----------|----------|-------|-------|----------|-------|--------------|
| CCDC88C.3  | 4.83E-34 | 0.801202 | 0.2   | 0.039 | 7.21E-30 | Tcell | CCDC88C      |
| ITGA1      | 4.98E-34 | 0.410531 | 0.077 | 0.006 | 7.44E-30 | Tcell | ITGA1        |
| EEF2.5     | 7.60E-34 | 0.371139 | 0.886 | 0.828 | 1.14E-29 | Tcell | EEF2         |
| HMHA1.14   | 8.36E-34 | 0.905508 | 0.341 | 0.104 | 1.25E-29 | Tcell | HMHA1        |
| RP11-138A  | 1.13E-33 | 0.989475 | 0.364 | 0.121 | 1.70E-29 | Tcell | RP11-138A9.1 |
| HBB.8      | 1.38E-33 | 1.180985 | 0.65  | 0.394 | 2.06E-29 | Tcell | HBB          |
| DUSP1.11   | 3.51E-33 | 0.679542 | 0.759 | 0.571 | 5.24E-29 | Tcell | DUSP1        |
| NFKBIA.13  | 4.10E-33 | 0.834259 | 0.7   | 0.496 | 6.12E-29 | Tcell | NFKBIA       |
| LAPTM5.14  | 6.26E-33 | 0.626128 | 0.764 | 0.43  | 9.35E-29 | Tcell | LAPTM5       |
| GPSM3.14   | 6.93E-33 | 0.805775 | 0.564 | 0.256 | 1.04E-28 | Tcell | GPSM3        |
| RAB31.12   | 1.29E-32 | -1.01509 | 0.036 | 0.468 | 1.93E-28 | Tcell | RAB31        |
| TCEAL4.1C  | 1.41E-32 | -0.91225 | 0.114 | 0.58  | 2.10E-28 | Tcell | TCEAL4       |
| TCF4.14    | 1.99E-32 | -0.96051 | 0.077 | 0.532 | 2.98E-28 | Tcell | TCF4         |
| MYL12B.11  | 2.52E-32 | 0.501971 | 0.805 | 0.725 | 3.76E-28 | Tcell | MYL12B       |
| WIPF1.14   | 3.71E-32 | 1.010321 | 0.477 | 0.215 | 5.54E-28 | Tcell | WIPF1        |
| MAP1B.11   | 4.42E-32 | -1.08521 | 0.095 | 0.542 | 6.61E-28 | Tcell | MAP1B        |
| GPM6B.13   | 8.67E-32 | -1.06362 | 0.195 | 0.627 | 1.30E-27 | Tcell | GPM6B        |
| CCL4.13    | 8.93E-32 | 1.152847 | 0.582 | 0.32  | 1.33E-27 | Tcell | CCL4         |
| PIM1.8     | 1.02E-31 | 0.903513 | 0.364 | 0.126 | 1.52E-27 | Tcell | PIM1         |
| ALAS2      | 1.82E-31 | 0.301644 | 0.045 | 0.002 | 2.72E-27 | Tcell | ALAS2        |
| PSME1.11   | 4.58E-31 | 0.645329 | 0.745 | 0.58  | 6.84E-27 | Tcell | PSME1        |
| H3F3B.9    | 4.95E-31 | 0.276515 | 0.982 | 0.97  | 7.39E-27 | Tcell | H3F3B        |
| PPDPF.10   | 5.61E-31 | 0.461593 | 0.845 | 0.709 | 8.39E-27 | Tcell | PPDPF        |
| NBEAL1.1C  | 5.93E-31 | 0.586352 | 0.823 | 0.662 | 8.86E-27 | Tcell | NBEAL1       |
| GIMAP5.12  | 6.78E-31 | 0.801488 | 0.214 | 0.047 | 1.01E-26 | Tcell | GIMAP5       |
| PRDX4.9    | 1.48E-30 | -0.90358 | 0.109 | 0.555 | 2.22E-26 | Tcell | PRDX4        |
| FSCN1.11   | 1.51E-30 | -0.92058 | 0.082 | 0.512 | 2.26E-26 | Tcell | FSCN1        |
| GLTSCR2.9  | 1.79E-30 | 0.756608 | 0.695 | 0.561 | 2.67E-26 | Tcell | GLTSCR2      |
| CTSL.14    | 2.16E-30 | -1.03649 | 0.095 | 0.532 | 3.22E-26 | Tcell | CTSL         |
| FYB.14     | 2.36E-30 | 0.76905  | 0.505 | 0.217 | 3.53E-26 | Tcell | FYB          |
| SLA.14     | 5.00E-30 | 0.801916 | 0.473 | 0.197 | 7.47E-26 | Tcell | SLA          |
| ITGA4.12   | 5.71E-30 | 0.757845 | 0.191 | 0.04  | 8.53E-26 | Tcell | ITGA4        |
| C1orf61.1  | 5.80E-30 | -1.12407 | 0.145 | 0.542 | 8.67E-26 | Tcell | C1orf61      |
| CALM1.13   | 9.63E-30 | 0.388775 | 0.85  | 0.77  | 1.44E-25 | Tcell | CALM1        |
| PDCD4.12   | 1.29E-29 | 0.951147 | 0.382 | 0.144 | 1.92E-25 | Tcell | PDCD4        |
| BCL11B.9   | 1.33E-29 | 0.759946 | 0.164 | 0.03  | 1.99E-25 | Tcell | BCL11B       |
| RHOB.9     | 1.47E-29 | -0.79886 | 0.164 | 0.617 | 2.20E-25 | Tcell | RHOB         |
| TSC22D1.1  | 1.53E-29 | -0.99    | 0.095 | 0.52  | 2.29E-25 | Tcell | TSC22D1      |
| CDC42SE2.1 | 1.99E-29 | 0.979033 | 0.459 | 0.214 | 2.98E-25 | Tcell | CDC42SE2     |
| ARPC1B.14  | 1.99E-29 | 0.63213  | 0.736 | 0.527 | 2.98E-25 | Tcell | ARPC1B       |
| RDX.13     | 2.39E-29 | -0.89306 | 0.077 | 0.498 | 3.58E-25 | Tcell | RDX          |
| PMCH       | 2.89E-29 | 0.155643 | 0.023 | 0     | 4.31E-25 | Tcell | PMCH         |
| ZNF331.12  | 2.95E-29 | 0.886148 | 0.573 | 0.311 | 4.41E-25 | Tcell | ZNF331       |
| ATP5L.5    | 3.01E-29 | 0.366504 | 0.873 | 0.859 | 4.50E-25 | Tcell | ATP5L        |
| RBP1.12    | 3.81E-29 | -1.09551 | 0.059 | 0.467 | 5.70E-25 | Tcell | RBP1         |
| PDPN.7     | 3.87E-29 | -1.06446 | 0.05  | 0.457 | 5.78E-25 | Tcell | PDPN         |
| CNN3.12    | 3.94E-29 | -1.10702 | 0.068 | 0.476 | 5.89E-25 | Tcell | CNN3         |
| APP.12     | 4.02E-29 | -0.90971 | 0.105 | 0.532 | 6.00E-25 | Tcell | APP          |
| PFDN5.11   | 7.70E-29 | 0.362064 | 0.891 | 0.884 | 1.15E-24 | Tcell | PFDN5        |
| OST4.8     | 8.26E-29 | 0.422454 | 0.827 | 0.779 | 1.23E-24 | Tcell | OST4         |
| SOX4.12    | 1.11E-28 | -1.16518 | 0.05  | 0.453 | 1.66E-24 | Tcell | SOX4         |

|             |           |           |        |        |           |       |               |
|-------------|-----------|-----------|--------|--------|-----------|-------|---------------|
| RP4-594I1   | 1. 31E-28 | 0. 462296 | 0. 1   | 0. 012 | 1. 95E-24 | Tcell | RP4-594I10. 3 |
| GAP43. 13   | 1. 32E-28 | -1. 23781 | 0. 073 | 0. 474 | 1. 97E-24 | Tcell | GAP43         |
| CST3. 8     | 1. 45E-28 | -0. 653   | 0. 382 | 0. 794 | 2. 17E-24 | Tcell | CST3          |
| OASL. 8     | 2. 62E-28 | 0. 65807  | 0. 15  | 0. 027 | 3. 92E-24 | Tcell | OASL          |
| FNBP1. 9    | 2. 84E-28 | 0. 935269 | 0. 5   | 0. 258 | 4. 25E-24 | Tcell | FNBP1         |
| HSPA8. 8    | 3. 26E-28 | 0. 348783 | 0. 9   | 0. 865 | 4. 88E-24 | Tcell | HSPA8         |
| ZNF667-AS   | 4. 89E-28 | -1. 00048 | 0. 014 | 0. 395 | 7. 31E-24 | Tcell | ZNF667-AS1    |
| GPM6A. 12   | 5. 15E-28 | -0. 86444 | 0. 095 | 0. 512 | 7. 69E-24 | Tcell | GPM6A         |
| PSMB9. 12   | 5. 30E-28 | 0. 74561  | 0. 627 | 0. 401 | 7. 92E-24 | Tcell | PSMB9         |
| IL16. 13    | 6. 29E-28 | 0. 742203 | 0. 245 | 0. 065 | 9. 40E-24 | Tcell | IL16          |
| P2RY8. 1    | 6. 53E-28 | 0. 425287 | 0. 1   | 0. 013 | 9. 76E-24 | Tcell | P2RY8         |
| SEPT6. 11   | 7. 04E-28 | 0. 910663 | 0. 395 | 0. 161 | 1. 05E-23 | Tcell | 6-Sep         |
| PCED1B. 11  | 1. 16E-27 | 0. 68627  | 0. 168 | 0. 033 | 1. 73E-23 | Tcell | PCED1B        |
| ANXA6. 6    | 1. 35E-27 | 0. 9607   | 0. 409 | 0. 18  | 2. 02E-23 | Tcell | ANXA6         |
| FXVD6. 14   | 1. 47E-27 | -1. 03691 | 0. 077 | 0. 468 | 2. 20E-23 | Tcell | FXVD6         |
| SOX2. 14    | 1. 50E-27 | -1. 07473 | 0. 05  | 0. 437 | 2. 23E-23 | Tcell | SOX2          |
| RHOBTB3. 1  | 1. 60E-27 | -0. 90598 | 0. 032 | 0. 416 | 2. 39E-23 | Tcell | RHOBTB3       |
| PMP22. 12   | 1. 81E-27 | -1. 11943 | 0. 045 | 0. 435 | 2. 71E-23 | Tcell | PMP22         |
| CALD1. 12   | 1. 97E-27 | -0. 98025 | 0. 036 | 0. 427 | 2. 95E-23 | Tcell | CALD1         |
| MEST. 13    | 2. 73E-27 | -0. 97041 | 0. 023 | 0. 393 | 4. 08E-23 | Tcell | MEST          |
| CD9. 7      | 3. 88E-27 | -0. 99145 | 0. 164 | 0. 573 | 5. 79E-23 | Tcell | CD9           |
| PPP2R5C. 7  | 5. 67E-27 | 1. 069781 | 0. 482 | 0. 253 | 8. 47E-23 | Tcell | PPP2R5C       |
| EEF1B2. 12  | 6. 37E-27 | 0. 488069 | 0. 805 | 0. 776 | 9. 52E-23 | Tcell | EEF1B2        |
| FKBP11. 6   | 7. 07E-27 | 1. 049694 | 0. 318 | 0. 112 | 1. 06E-22 | Tcell | FKBP11        |
| YWHAE. 12   | 7. 24E-27 | -0. 66193 | 0. 355 | 0. 76  | 1. 08E-22 | Tcell | YWHAE         |
| KLF6. 12    | 8. 08E-27 | 0. 710116 | 0. 714 | 0. 528 | 1. 21E-22 | Tcell | KLF6          |
| ELF1. 12    | 9. 93E-27 | 0. 848025 | 0. 486 | 0. 239 | 1. 48E-22 | Tcell | ELF1          |
| DST. 12     | 1. 14E-26 | -0. 94254 | 0. 018 | 0. 383 | 1. 70E-22 | Tcell | DST           |
| MYL6. 10    | 1. 39E-26 | 0. 209857 | 0. 941 | 0. 942 | 2. 07E-22 | Tcell | MYL6          |
| HTRA1. 11   | 1. 97E-26 | -0. 8648  | 0. 073 | 0. 467 | 2. 95E-22 | Tcell | HTRA1         |
| DEF6. 14    | 2. 09E-26 | 0. 787358 | 0. 282 | 0. 088 | 3. 12E-22 | Tcell | DEF6          |
| NCF1. 14    | 2. 56E-26 | 0. 800707 | 0. 336 | 0. 119 | 3. 82E-22 | Tcell | NCF1          |
| PCSK1N. 13  | 3. 35E-26 | -1. 02871 | 0. 055 | 0. 427 | 5. 00E-22 | Tcell | PCSK1N        |
| SEMA4D. 13  | 3. 61E-26 | 0. 740914 | 0. 264 | 0. 077 | 5. 39E-22 | Tcell | SEMA4D        |
| DPYSL2. 10  | 4. 06E-26 | -0. 81623 | 0. 05  | 0. 43  | 6. 07E-22 | Tcell | DPYSL2        |
| SLFN5. 5    | 4. 98E-26 | 0. 729801 | 0. 218 | 0. 057 | 7. 45E-22 | Tcell | SLFN5         |
| RCS1. 13    | 5. 25E-26 | 0. 760356 | 0. 336 | 0. 116 | 7. 84E-22 | Tcell | RCS1          |
| PON2. 12    | 6. 61E-26 | -0. 9123  | 0. 073 | 0. 458 | 9. 88E-22 | Tcell | PON2          |
| LINC00944   | 6. 70E-26 | 0. 421457 | 0. 027 | 0. 001 | 1. 00E-21 | Tcell | LINC00944     |
| CCR6. 1     | 6. 91E-26 | 0. 415313 | 0. 068 | 0. 006 | 1. 03E-21 | Tcell | CCR6          |
| RAMP1. 11   | 8. 37E-26 | -1. 19733 | 0. 05  | 0. 419 | 1. 25E-21 | Tcell | RAMP1         |
| SPOCK2. 11  | 1. 11E-25 | 0. 971836 | 0. 345 | 0. 135 | 1. 66E-21 | Tcell | SPOCK2        |
| S100A10. 1  | 2. 44E-25 | 0. 512112 | 0. 768 | 0. 54  | 3. 65E-21 | Tcell | S100A10       |
| SCD5. 13    | 2. 47E-25 | -0. 92814 | 0. 036 | 0. 401 | 3. 68E-21 | Tcell | SCD5          |
| APOBEC3C. 3 | 5. 56E-25 | 0. 889594 | 0. 332 | 0. 124 | 5. 33E-21 | Tcell | APOBEC3C      |
| EPS8L2      | 4. 99E-25 | 0. 421748 | 0. 091 | 0. 012 | 7. 45E-21 | Tcell | EPS8L2        |
| ATOX1. 8    | 5. 47E-25 | -0. 74657 | 0. 195 | 0. 612 | 8. 18E-21 | Tcell | ATOX1         |
| FABP7. 12   | 6. 64E-25 | -1. 24787 | 0. 041 | 0. 39  | 9. 93E-21 | Tcell | FABP7         |
| CLEC2B. 14  | 7. 57E-25 | 0. 78215  | 0. 441 | 0. 2   | 1. 13E-20 | Tcell | CLEC2B        |
| S100B. 12   | 9. 74E-25 | -0. 75175 | 0. 141 | 0. 535 | 1. 45E-20 | Tcell | S100B         |
| NFIA. 12    | 1. 02E-24 | -0. 86576 | 0. 027 | 0. 386 | 1. 52E-20 | Tcell | NFIA          |

|             |          |          |       |       |          |       |             |
|-------------|----------|----------|-------|-------|----------|-------|-------------|
| MT3.12      | 1.09E-24 | -1.14799 | 0.127 | 0.497 | 1.63E-20 | Tcell | MT3         |
| EIF3F.7     | 1.74E-24 | 0.559263 | 0.714 | 0.603 | 2.61E-20 | Tcell | EIF3F       |
| CCDC69.11   | 1.88E-24 | 0.636898 | 0.159 | 0.033 | 2.81E-20 | Tcell | CCDC69      |
| APLP2.12    | 1.96E-24 | -0.69868 | 0.186 | 0.601 | 2.93E-20 | Tcell | APLP2       |
| KIAA1551.2  | 2.01E-24 | 0.876984 | 0.264 | 0.084 | 3.00E-20 | Tcell | KIAA1551    |
| IL10RA.14   | 2.03E-24 | 0.834394 | 0.35  | 0.134 | 3.03E-20 | Tcell | IL10RA      |
| RP11-47L3.2 | 2.12E-24 | 0.364813 | 0.077 | 0.009 | 3.17E-20 | Tcell | RP11-47L3.1 |
| TTC39C.6    | 2.13E-24 | 0.836881 | 0.25  | 0.077 | 3.18E-20 | Tcell | TTC39C      |
| NFIB.12     | 2.29E-24 | -0.96482 | 0.032 | 0.385 | 3.42E-20 | Tcell | NFIB        |
| TUBA1A.11   | 2.81E-24 | -0.61966 | 0.541 | 0.813 | 4.19E-20 | Tcell | TUBA1A      |
| FEZ1.13     | 4.15E-24 | -0.85334 | 0.068 | 0.437 | 6.20E-20 | Tcell | FEZ1        |
| FCGRT.13    | 4.19E-24 | -0.80617 | 0.155 | 0.558 | 6.26E-20 | Tcell | FCGRT       |
| TIMP1.11    | 7.68E-24 | -0.89394 | 0.241 | 0.628 | 1.15E-19 | Tcell | TIMP1       |
| ABRACL.1C   | 7.77E-24 | 0.853673 | 0.509 | 0.3   | 1.16E-19 | Tcell | ABRACL      |
| PMP2.13     | 9.71E-24 | -1.1648  | 0.023 | 0.356 | 1.45E-19 | Tcell | PMP2        |
| ID2.11      | 1.15E-23 | 0.605157 | 0.759 | 0.652 | 1.71E-19 | Tcell | ID2         |
| OXNAD1.3    | 1.39E-23 | 0.805401 | 0.227 | 0.066 | 2.08E-19 | Tcell | OXNAD1      |
| CD70.4      | 1.64E-23 | 0.616177 | 0.114 | 0.019 | 2.45E-19 | Tcell | CD70        |
| AC016831.1  | 1.67E-23 | 0.804965 | 0.232 | 0.068 | 2.50E-19 | Tcell | AC016831.7  |
| RAB27A.1C   | 1.94E-23 | 0.793413 | 0.245 | 0.075 | 2.89E-19 | Tcell | RAB27A      |
| NACA.8      | 2.21E-23 | 0.280134 | 0.905 | 0.925 | 3.30E-19 | Tcell | NACA        |
| MLLT11.11   | 2.26E-23 | -0.8623  | 0.095 | 0.461 | 3.37E-19 | Tcell | MLLT11      |
| MARCKSL1.3  | 3.35E-23 | -0.87394 | 0.2   | 0.551 | 5.01E-19 | Tcell | MARCKSL1    |
| PTPRZ1.14   | 3.63E-23 | -0.95276 | 0.045 | 0.391 | 5.42E-19 | Tcell | PTPRZ1      |
| ZC3HAV1.8   | 4.41E-23 | 0.938036 | 0.382 | 0.173 | 6.59E-19 | Tcell | ZC3HAV1     |
| RAB11FIP1.4 | 4.88E-23 | 0.513875 | 0.132 | 0.025 | 7.29E-19 | Tcell | RAB11FIP1   |
| ARHGEF1.9   | 4.97E-23 | 0.830876 | 0.405 | 0.192 | 7.42E-19 | Tcell | ARHGEF1     |
| ARPC1A.1C   | 5.70E-23 | -0.63927 | 0.159 | 0.566 | 8.52E-19 | Tcell | ARPC1A      |
| LAIR2.5     | 7.77E-23 | 0.223799 | 0.032 | 0.001 | 8.63E-19 | Tcell | LAIR2       |
| FAM213A.1   | 8.10E-23 | -0.78227 | 0.045 | 0.389 | 1.21E-18 | Tcell | FAM213A     |
| DUSP4.11    | 8.80E-23 | 0.992973 | 0.382 | 0.176 | 1.31E-18 | Tcell | DUSP4       |
| MEI1.1      | 1.15E-22 | 0.640259 | 0.105 | 0.016 | 1.72E-18 | Tcell | MEI1        |
| EI24.11     | 1.28E-22 | -0.70263 | 0.077 | 0.44  | 1.91E-18 | Tcell | EI24        |
| ASAH1.12    | 1.30E-22 | -0.61518 | 0.236 | 0.659 | 1.95E-18 | Tcell | ASAH1       |
| CHID1.7     | 1.37E-22 | -0.78518 | 0.086 | 0.443 | 2.05E-18 | Tcell | CHID1       |
| CHI3L1.12   | 1.54E-22 | -1.06639 | 0.159 | 0.531 | 2.30E-18 | Tcell | CHI3L1      |
| HMGB1.8     | 1.54E-22 | 0.288491 | 0.895 | 0.86  | 2.31E-18 | Tcell | HMGB1       |
| PNRC1.11    | 1.57E-22 | 0.674267 | 0.65  | 0.538 | 2.35E-18 | Tcell | PNRC1       |
| IFITM3.7    | 1.77E-22 | -0.88828 | 0.141 | 0.51  | 2.65E-18 | Tcell | IFITM3      |
| CD44.10     | 1.85E-22 | 0.642735 | 0.605 | 0.378 | 2.77E-18 | Tcell | CD44        |
| GRN.12      | 1.86E-22 | -0.68212 | 0.177 | 0.578 | 2.78E-18 | Tcell | GRN         |
| COMMD6.8    | 2.46E-22 | 0.437043 | 0.809 | 0.776 | 3.68E-18 | Tcell | COMMD6      |
| SCARB2.6    | 3.37E-22 | -0.69607 | 0.045 | 0.388 | 5.04E-18 | Tcell | SCARB2      |
| LCP2.14     | 4.91E-22 | 0.67181  | 0.309 | 0.111 | 7.34E-18 | Tcell | LCP2        |
| UCHL1.12    | 5.01E-22 | -0.85159 | 0.091 | 0.443 | 7.48E-18 | Tcell | UCHL1       |
| SCG5.11     | 5.74E-22 | -0.94998 | 0.018 | 0.334 | 8.57E-18 | Tcell | SCG5        |
| PLTP.11     | 6.10E-22 | -0.86021 | 0.109 | 0.477 | 9.11E-18 | Tcell | PLTP        |
| CD74.13     | 6.30E-22 | 0.400362 | 0.882 | 0.749 | 9.41E-18 | Tcell | CD74        |
| CREM.12     | 6.34E-22 | 0.827312 | 0.591 | 0.403 | 9.48E-18 | Tcell | CREM        |
| WRB.11      | 6.45E-22 | -0.7742  | 0.077 | 0.426 | 9.64E-18 | Tcell | WRB         |
| SLC25A4.1   | 6.64E-22 | -0.7371  | 0.077 | 0.433 | 9.92E-18 | Tcell | SLC25A4     |

|            |          |          |       |       |          |       |           |
|------------|----------|----------|-------|-------|----------|-------|-----------|
| ALDH2.10   | 7.05E-22 | -0.81813 | 0.045 | 0.377 | 1.05E-17 | Tcell | ALDH2     |
| CLIC4.13   | 7.83E-22 | -0.77908 | 0.018 | 0.338 | 1.17E-17 | Tcell | CLIC4     |
| CTNNA1.6   | 7.93E-22 | -0.66607 | 0.077 | 0.428 | 1.18E-17 | Tcell | CTNNA1    |
| LINC00461  | 8.06E-22 | -0.85001 | 0.014 | 0.326 | 1.20E-17 | Tcell | LINC00461 |
| ITM2B.9    | 8.10E-22 | 0.345514 | 0.818 | 0.799 | 1.21E-17 | Tcell | ITM2B     |
| SELL.10    | 9.80E-22 | 0.697403 | 0.155 | 0.035 | 1.46E-17 | Tcell | SELL      |
| KCNAB2.1C  | 1.03E-21 | 0.750786 | 0.236 | 0.073 | 1.53E-17 | Tcell | KCNAB2    |
| PFN2.10    | 1.26E-21 | -0.72862 | 0.086 | 0.441 | 1.89E-17 | Tcell | PFN2      |
| BASP1.12   | 1.32E-21 | -0.82594 | 0.05  | 0.379 | 1.97E-17 | Tcell | BASP1     |
| LGMN.12    | 1.44E-21 | -0.93097 | 0.036 | 0.357 | 2.14E-17 | Tcell | LGMN      |
| C16orf45.1 | 1.86E-21 | -0.75945 | 0.014 | 0.324 | 2.78E-17 | Tcell | C16orf45  |
| TSPAN3.12  | 1.93E-21 | -0.65732 | 0.1   | 0.466 | 2.89E-17 | Tcell | TSPAN3    |
| CBR1.10    | 1.94E-21 | -0.70678 | 0.123 | 0.483 | 2.89E-17 | Tcell | CBR1      |
| PEA15.7    | 2.24E-21 | -0.62993 | 0.095 | 0.45  | 3.34E-17 | Tcell | PEA15     |
| PSMB5.9    | 2.34E-21 | -0.68031 | 0.209 | 0.602 | 3.50E-17 | Tcell | PSMB5     |
| COTL1.12   | 2.64E-21 | 0.663419 | 0.627 | 0.507 | 3.94E-17 | Tcell | COTL1     |
| MYL6B.13   | 2.81E-21 | -0.7518  | 0.1   | 0.449 | 4.20E-17 | Tcell | MYL6B     |
| CD151.12   | 3.13E-21 | -0.7286  | 0.123 | 0.489 | 4.68E-17 | Tcell | CD151     |
| ACP5.12    | 5.04E-21 | 0.654791 | 0.177 | 0.045 | 7.54E-17 | Tcell | ACP5      |
| LRP1.6     | 5.06E-21 | -0.74937 | 0.036 | 0.356 | 7.56E-17 | Tcell | LRP1      |
| BNIP3L.7   | 5.62E-21 | -0.58099 | 0.205 | 0.607 | 8.40E-17 | Tcell | BNIP3L    |
| TMEM176B.6 | 9.7E-21  | -1.07977 | 0.041 | 0.358 | 1.04E-16 | Tcell | TMEM176B  |
| RAB13.11   | 7.52E-21 | -0.86901 | 0.055 | 0.378 | 1.12E-16 | Tcell | RAB13     |
| CCDC88A.1  | 7.93E-21 | -0.62828 | 0.082 | 0.423 | 1.19E-16 | Tcell | CCDC88A   |
| FMNL1.14   | 8.13E-21 | 0.70581  | 0.314 | 0.12  | 1.22E-16 | Tcell | FMNL1     |
| YBX3.7     | 8.51E-21 | -0.734   | 0.077 | 0.411 | 1.27E-16 | Tcell | YBX3      |
| ADAM9.11   | 8.55E-21 | -0.68772 | 0.023 | 0.336 | 1.28E-16 | Tcell | ADAM9     |
| ITGB2.14   | 8.88E-21 | 0.587546 | 0.564 | 0.319 | 1.33E-16 | Tcell | ITGB2     |
| ELAVL3.14  | 9.46E-21 | -0.8018  | 0.014 | 0.316 | 1.41E-16 | Tcell | ELAVL3    |
| BRI3.8     | 1.06E-20 | -0.6971  | 0.127 | 0.474 | 1.59E-16 | Tcell | BRI3      |
| TIMM8B.8   | 1.15E-20 | -0.58624 | 0.177 | 0.551 | 1.72E-16 | Tcell | TIMM8B    |
| NFIX.13    | 1.16E-20 | -0.74648 | 0.027 | 0.338 | 1.74E-16 | Tcell | NFIX      |
| NFIC.8     | 1.21E-20 | -0.69406 | 0.091 | 0.44  | 1.81E-16 | Tcell | NFIC      |
| CPVL.14    | 1.22E-20 | -1.04231 | 0.045 | 0.355 | 1.83E-16 | Tcell | CPVL      |
| GOLM1.13   | 1.29E-20 | -0.74601 | 0.018 | 0.321 | 1.93E-16 | Tcell | GOLM1     |
| CORO1C.9   | 1.30E-20 | -0.68093 | 0.055 | 0.379 | 1.95E-16 | Tcell | CORO1C    |
| CAMK2N1.1  | 1.31E-20 | -0.82763 | 0.018 | 0.322 | 1.96E-16 | Tcell | CAMK2N1   |
| CXCL16.12  | 1.33E-20 | -0.72848 | 0.109 | 0.46  | 1.98E-16 | Tcell | CXCL16    |
| TUBB2A.13  | 1.41E-20 | -0.74685 | 0.136 | 0.484 | 2.10E-16 | Tcell | TUBB2A    |
| NME1.12    | 1.54E-20 | -0.72325 | 0.205 | 0.575 | 2.30E-16 | Tcell | NME1      |
| SGCB.11    | 1.73E-20 | -0.74478 | 0.023 | 0.331 | 2.59E-16 | Tcell | SGCB      |
| COX7C.7    | 1.96E-20 | 0.270901 | 0.855 | 0.886 | 2.93E-16 | Tcell | COX7C     |
| DPYSL3.12  | 2.18E-20 | -0.75027 | 0.023 | 0.328 | 3.26E-16 | Tcell | DPYSL3    |
| RNF130.12  | 2.19E-20 | -0.63317 | 0.118 | 0.469 | 3.28E-16 | Tcell | RNF130    |
| FAM127A.9  | 2.47E-20 | -0.62978 | 0.114 | 0.466 | 3.70E-16 | Tcell | FAM127A   |
| EVI2B.14   | 2.81E-20 | 0.782361 | 0.418 | 0.199 | 4.21E-16 | Tcell | EVI2B     |
| TMEM205.1  | 2.90E-20 | -0.7218  | 0.15  | 0.502 | 4.33E-16 | Tcell | TMEM205   |
| BAALC.13   | 2.96E-20 | -0.77638 | 0.036 | 0.351 | 4.43E-16 | Tcell | BAALC     |
| LGALS3BP.3 | 5.3E-20  | -0.7155  | 0.109 | 0.456 | 5.27E-16 | Tcell | LGALS3BP  |
| PLP2.11    | 3.92E-20 | 0.731884 | 0.536 | 0.34  | 5.85E-16 | Tcell | PLP2      |
| LIMD2.7    | 9.02E-20 | 0.872528 | 0.436 | 0.245 | 1.35E-15 | Tcell | LIMD2     |

|            |          |          |       |       |          |       |          |
|------------|----------|----------|-------|-------|----------|-------|----------|
| PGRMC1.11  | 1.02E-19 | -0.63708 | 0.114 | 0.453 | 1.52E-15 | Tcell | PGRMC1   |
| PPP1R18.1  | 1.05E-19 | 0.779627 | 0.482 | 0.289 | 1.56E-15 | Tcell | PPP1R18  |
| SAT2.8     | 1.18E-19 | -0.56382 | 0.2   | 0.593 | 1.76E-15 | Tcell | SAT2     |
| CD59.9     | 1.33E-19 | -0.62571 | 0.182 | 0.56  | 1.99E-15 | Tcell | CD59     |
| MDK.13     | 1.37E-19 | -0.73766 | 0.145 | 0.497 | 2.05E-15 | Tcell | MDK      |
| MAP2.14    | 1.69E-19 | -0.73955 | 0.041 | 0.343 | 2.52E-15 | Tcell | MAP2     |
| MAGEF1.13  | 1.73E-19 | -0.65883 | 0.055 | 0.369 | 2.59E-15 | Tcell | MAGEF1   |
| BEX4.11    | 1.97E-19 | -0.73267 | 0.136 | 0.483 | 2.95E-15 | Tcell | BEX4     |
| DDR1.12    | 2.63E-19 | -0.69455 | 0.036 | 0.337 | 3.93E-15 | Tcell | DDR1     |
| CPE.13     | 3.30E-19 | -0.72322 | 0.073 | 0.396 | 4.92E-15 | Tcell | CPE      |
| RCN1.14    | 3.82E-19 | -0.65027 | 0.05  | 0.36  | 5.70E-15 | Tcell | RCN1     |
| HERPUD1.1  | 3.87E-19 | 0.537909 | 0.727 | 0.64  | 5.78E-15 | Tcell | HERPUD1  |
| FTL.14     | 3.91E-19 | 0.156422 | 0.995 | 0.994 | 5.85E-15 | Tcell | FTL      |
| SPARCL1.1  | 4.20E-19 | -0.97637 | 0.05  | 0.351 | 6.28E-15 | Tcell | SPARCL1  |
| G6PC3.6    | 4.27E-19 | -0.67025 | 0.045 | 0.353 | 6.38E-15 | Tcell | G6PC3    |
| BUB3.7     | 4.27E-19 | 0.943356 | 0.482 | 0.304 | 6.38E-15 | Tcell | BUB3     |
| ZFYVE28    | 4.28E-19 | 0.595958 | 0.136 | 0.031 | 6.39E-15 | Tcell | ZFYVE28  |
| IFNGR2.12  | 4.37E-19 | -0.63995 | 0.073 | 0.395 | 6.53E-15 | Tcell | IFNGR2   |
| ANAPC16.1  | 5.05E-19 | 0.588241 | 0.659 | 0.523 | 7.55E-15 | Tcell | ANAPC16  |
| CDH2.13    | 5.41E-19 | -0.69313 | 0.009 | 0.289 | 8.08E-15 | Tcell | CDH2     |
| SP100.12   | 5.91E-19 | 0.60505  | 0.5   | 0.283 | 8.83E-15 | Tcell | SP100    |
| PAFAH1B3.6 | 6.13E-19 | -0.64822 | 0.1   | 0.43  | 9.16E-15 | Tcell | PAFAH1B3 |
| BEX1.12    | 6.32E-19 | -0.82019 | 0.055 | 0.357 | 9.45E-15 | Tcell | BEX1     |
| SPTSSA.7   | 6.41E-19 | -0.66047 | 0.109 | 0.434 | 9.58E-15 | Tcell | SPTSSA   |
| CLNK       | 6.97E-19 | 0.256577 | 0.041 | 0.003 | 1.04E-14 | Tcell | CLNK     |
| RUFY3.11   | 7.02E-19 | -0.65278 | 0.023 | 0.311 | 1.05E-14 | Tcell | RUFY3    |
| GCH1       | 7.74E-19 | 0.589191 | 0.118 | 0.024 | 1.16E-14 | Tcell | GCH1     |
| GSN.13     | 7.94E-19 | -0.57657 | 0.159 | 0.516 | 1.19E-14 | Tcell | GSN      |
| DSTN.11    | 1.17E-18 | -0.62195 | 0.264 | 0.625 | 1.74E-14 | Tcell | DSTN     |
| CD68.14    | 1.26E-18 | -0.76455 | 0.127 | 0.447 | 1.88E-14 | Tcell | CD68     |
| APLP1.12   | 1.28E-18 | -0.76415 | 0.055 | 0.357 | 1.91E-14 | Tcell | APLP1    |
| STK10.12   | 1.29E-18 | 0.664168 | 0.214 | 0.069 | 1.93E-14 | Tcell | STK10    |
| CXADR.12   | 1.45E-18 | -0.72046 | 0.027 | 0.313 | 2.17E-14 | Tcell | CXADR    |
| NES.14     | 1.58E-18 | -0.85855 | 0.009 | 0.281 | 2.35E-14 | Tcell | NES      |
| ANXA11.13  | 1.72E-18 | 0.73133  | 0.409 | 0.212 | 2.58E-14 | Tcell | ANXA11   |
| TMEM204    | 1.96E-18 | 0.239562 | 0.041 | 0.003 | 2.92E-14 | Tcell | TMEM204  |
| PODXL2.13  | 1.99E-18 | -0.65341 | 0.027 | 0.313 | 2.97E-14 | Tcell | PODXL2   |
| TIMM13.5   | 2.04E-18 | -0.57317 | 0.236 | 0.598 | 3.05E-14 | Tcell | TIMM13   |
| NDUFV3.4   | 2.06E-18 | -0.58862 | 0.091 | 0.416 | 3.08E-14 | Tcell | NDUFV3   |
| RASGRP1.1  | 2.17E-18 | 0.818324 | 0.205 | 0.066 | 3.24E-14 | Tcell | RASGRP1  |
| GRINA.9    | 2.33E-18 | -0.5425  | 0.109 | 0.443 | 3.49E-14 | Tcell | GRINA    |
| SRSF7.5    | 2.41E-18 | 0.576955 | 0.668 | 0.589 | 3.60E-14 | Tcell | SRSF7    |
| TMEM9.10   | 2.55E-18 | -0.66271 | 0.064 | 0.373 | 3.81E-14 | Tcell | TMEM9    |
| FAM3C.13   | 2.66E-18 | -0.55268 | 0.114 | 0.443 | 3.97E-14 | Tcell | FAM3C    |
| YIPF3.9    | 2.79E-18 | -0.53926 | 0.141 | 0.489 | 4.17E-14 | Tcell | YIPF3    |
| GATM.9     | 3.03E-18 | -0.7025  | 0.059 | 0.358 | 4.52E-14 | Tcell | GATM     |
| SEZ6L2.11  | 3.15E-18 | -0.70901 | 0.009 | 0.278 | 4.70E-14 | Tcell | SEZ6L2   |
| METRN.14   | 3.24E-18 | -0.75724 | 0.023 | 0.299 | 4.84E-14 | Tcell | METRN    |
| OAZ1.10    | 3.36E-18 | 0.205003 | 0.882 | 0.927 | 5.02E-14 | Tcell | OAZ1     |
| NME4.11    | 3.70E-18 | -0.56896 | 0.073 | 0.388 | 5.53E-14 | Tcell | NME4     |
| IDH1.6     | 3.99E-18 | -0.55431 | 0.077 | 0.386 | 5.96E-14 | Tcell | IDH1     |



|           |          |          |       |       |          |       |               |
|-----------|----------|----------|-------|-------|----------|-------|---------------|
| LINC00152 | 4.54E-18 | 0.781696 | 0.445 | 0.255 | 6.79E-14 | Tcell | LINC00152     |
| SERPINB6  | 4.58E-18 | -0.58677 | 0.145 | 0.484 | 6.84E-14 | Tcell | SERPINB6      |
| CADM4     | 4.70E-18 | -0.66552 | 0.005 | 0.268 | 7.02E-14 | Tcell | CADM4         |
| GNG7      | 4.96E-18 | -0.79442 | 0.027 | 0.304 | 7.41E-14 | Tcell | GNG7          |
| PTMS      | 5.69E-18 | -0.54971 | 0.218 | 0.559 | 8.50E-14 | Tcell | PTMS          |
| TCEAL7    | 6.20E-18 | -0.75742 | 0.027 | 0.307 | 9.26E-14 | Tcell | TCEAL7        |
| RP3-395M2 | 6.25E-18 | 0.420836 | 0.073 | 0.01  | 9.34E-14 | Tcell | RP3-395M20.12 |
| S100A16   | 6.34E-18 | -1.04411 | 0.036 | 0.312 | 9.48E-14 | Tcell | S100A16       |
| ITGAV     | 6.35E-18 | -0.64001 | 0.014 | 0.283 | 9.49E-14 | Tcell | ITGAV         |
| ACTG1     | 7.23E-18 | 0.141703 | 0.927 | 0.949 | 1.08E-13 | Tcell | ACTG1         |
| COMT      | 7.35E-18 | -0.55114 | 0.2   | 0.554 | 1.10E-13 | Tcell | COMT          |
| PKIB      | 7.40E-18 | -0.79773 | 0.018 | 0.289 | 1.11E-13 | Tcell | PKIB          |
| NAGK      | 7.56E-18 | -0.58515 | 0.077 | 0.387 | 1.13E-13 | Tcell | NAGK          |
| BCL2      | 7.72E-18 | 0.725584 | 0.168 | 0.047 | 1.15E-13 | Tcell | BCL2          |
| C1orf122  | 7.79E-18 | -0.57505 | 0.15  | 0.495 | 1.16E-13 | Tcell | C1orf122      |
| CSRP2     | 8.39E-18 | -0.91511 | 0.027 | 0.307 | 1.25E-13 | Tcell | CSRP2         |
| STMN4     | 9.11E-18 | -0.98418 | 0.036 | 0.311 | 1.36E-13 | Tcell | STMN4         |
| ATP6VOB   | 9.69E-18 | -0.44392 | 0.418 | 0.805 | 1.45E-13 | Tcell | ATP6VOB       |
| GOLIM4    | 1.00E-17 | -0.62958 | 0.045 | 0.332 | 1.50E-13 | Tcell | GOLIM4        |
| TES       | 1.44E-17 | 0.690178 | 0.164 | 0.044 | 2.15E-13 | Tcell | TES           |
| ARF6      | 1.74E-17 | 0.784542 | 0.495 | 0.34  | 2.60E-13 | Tcell | ARF6          |
| NUPR1     | 1.98E-17 | -0.81055 | 0.045 | 0.329 | 2.96E-13 | Tcell | NUPR1         |
| PTOV1     | 2.00E-17 | -0.54036 | 0.118 | 0.445 | 2.98E-13 | Tcell | PTOV1         |
| PTTG1IP   | 2.11E-17 | -0.56108 | 0.132 | 0.462 | 3.15E-13 | Tcell | PTTG1IP       |
| CADM1     | 2.34E-17 | -0.65705 | 0.045 | 0.33  | 3.50E-13 | Tcell | CADM1         |
| HMGB2     | 2.56E-17 | 0.601439 | 0.632 | 0.492 | 3.83E-13 | Tcell | HMGB2         |
| ABHD12    | 2.63E-17 | -0.58056 | 0.082 | 0.387 | 3.93E-13 | Tcell | ABHD12        |
| CRYAB     | 2.68E-17 | -0.96746 | 0.191 | 0.505 | 4.01E-13 | Tcell | CRYAB         |
| PKIG      | 2.86E-17 | -0.68648 | 0.036 | 0.316 | 4.27E-13 | Tcell | PKIG          |
| JAKMIP1   | 3.08E-17 | 0.511905 | 0.127 | 0.03  | 4.60E-13 | Tcell | JAKMIP1       |
| EGFR      | 3.13E-17 | -0.77546 | 0.032 | 0.305 | 4.67E-13 | Tcell | EGFR          |
| HMGN1     | 3.20E-17 | 0.407047 | 0.7   | 0.664 | 4.78E-13 | Tcell | HMGN1         |
| POLD2     | 3.21E-17 | -0.59962 | 0.114 | 0.427 | 4.80E-13 | Tcell | POLD2         |
| ERCC1     | 3.38E-17 | -0.59584 | 0.15  | 0.478 | 5.05E-13 | Tcell | ERCC1         |
| ASNA1     | 3.41E-17 | -0.55655 | 0.182 | 0.526 | 5.10E-13 | Tcell | ASNA1         |
| EIF3E     | 3.45E-17 | 0.444105 | 0.695 | 0.646 | 5.16E-13 | Tcell | EIF3E         |
| EPB41L2   | 3.61E-17 | -0.72219 | 0.041 | 0.316 | 5.39E-13 | Tcell | EPB41L2       |
| RAB34     | 4.15E-17 | -0.71362 | 0.023 | 0.288 | 6.19E-13 | Tcell | RAB34         |
| CALU      | 4.22E-17 | -0.55123 | 0.1   | 0.409 | 6.30E-13 | Tcell | CALU          |
| IRS2      | 4.64E-17 | -0.61393 | 0.059 | 0.354 | 6.94E-13 | Tcell | IRS2          |
| MANBAL    | 5.02E-17 | -0.49111 | 0.05  | 0.34  | 7.51E-13 | Tcell | MANBAL        |
| NDUFS2    | 5.12E-17 | -0.48158 | 0.205 | 0.557 | 7.66E-13 | Tcell | NDUFS2        |
| NT5C3B    | 5.48E-17 | -0.56021 | 0.055 | 0.337 | 8.20E-13 | Tcell | NT5C3B        |
| RASSF4    | 5.49E-17 | -0.65496 | 0.05  | 0.335 | 8.20E-13 | Tcell | RASSF4        |
| TAX1BP3   | 5.79E-17 | -0.58424 | 0.086 | 0.387 | 8.66E-13 | Tcell | TAX1BP3       |
| CHD9      | 5.89E-17 | -0.54919 | 0.145 | 0.473 | 8.80E-13 | Tcell | CHD9          |
| DDAH2     | 6.20E-17 | -0.59081 | 0.164 | 0.495 | 9.26E-13 | Tcell | DDAH2         |
| FAM229B   | 6.21E-17 | -0.60525 | 0.027 | 0.297 | 9.28E-13 | Tcell | FAM229B       |
| OAZ2      | 6.61E-17 | -0.47202 | 0.168 | 0.512 | 9.87E-13 | Tcell | OAZ2          |
| ATAT1     | 6.66E-17 | -0.63655 | 0.027 | 0.294 | 9.95E-13 | Tcell | ATAT1         |
| CTSB      | 6.82E-17 | -0.5242  | 0.382 | 0.764 | 1.02E-12 | Tcell | CTSB          |

|           |          |          |       |       |          |       |          |
|-----------|----------|----------|-------|-------|----------|-------|----------|
| TSPAN7.1C | 6.86E-17 | -0.66983 | 0.041 | 0.315 | 1.03E-12 | Tcell | TSPAN7   |
| TM2D2.4   | 7.29E-17 | -0.64236 | 0.059 | 0.346 | 1.09E-12 | Tcell | TM2D2    |
| SPECC1.13 | 7.31E-17 | -0.59471 | 0.032 | 0.301 | 1.09E-12 | Tcell | SPECC1   |
| HOMER3.9  | 7.54E-17 | -0.61343 | 0     | 0.246 | 1.13E-12 | Tcell | HOMER3   |
| TPM3.12   | 7.59E-17 | 0.550185 | 0.641 | 0.557 | 1.13E-12 | Tcell | TPM3     |
| A2M.12    | 8.72E-17 | -0.64628 | 0.15  | 0.47  | 1.30E-12 | Tcell | A2M      |
| RNF13.9   | 9.13E-17 | -0.59621 | 0.159 | 0.487 | 1.36E-12 | Tcell | RNF13    |
| UBE2E1.6  | 9.15E-17 | -0.44284 | 0.127 | 0.457 | 1.37E-12 | Tcell | UBE2E1   |
| MEG3.11   | 1.06E-16 | -0.86235 | 0.041 | 0.31  | 1.58E-12 | Tcell | MEG3     |
| MSN.13    | 1.10E-16 | 0.746762 | 0.518 | 0.373 | 1.64E-12 | Tcell | MSN      |
| LAPTM4B.1 | 1.10E-16 | -0.57398 | 0.055 | 0.337 | 1.65E-12 | Tcell | LAPTM4B  |
| DOCK8.14  | 1.27E-16 | 0.683232 | 0.286 | 0.118 | 1.90E-12 | Tcell | DOCK8    |
| RGCC.11   | 1.32E-16 | 0.712136 | 0.441 | 0.246 | 1.98E-12 | Tcell | RGCC     |
| SCG3.14   | 1.39E-16 | -0.80259 | 0.018 | 0.271 | 2.08E-12 | Tcell | SCG3     |
| FKBP2.7   | 1.56E-16 | -0.61852 | 0.255 | 0.596 | 2.33E-12 | Tcell | FKBP2    |
| NPC2.13   | 1.69E-16 | -0.55686 | 0.35  | 0.698 | 2.52E-12 | Tcell | NPC2     |
| ATP6VOA1. | 1.81E-16 | -0.58942 | 0.027 | 0.29  | 2.70E-12 | Tcell | ATP6VOA1 |
| EMP3.13   | 1.81E-16 | 0.556258 | 0.595 | 0.446 | 2.70E-12 | Tcell | EMP3     |
| SUB1.10   | 1.81E-16 | 0.314453 | 0.755 | 0.756 | 2.71E-12 | Tcell | SUB1     |
| VIM.12    | 1.93E-16 | 0.366839 | 0.782 | 0.661 | 2.88E-12 | Tcell | VIM      |
| CD63.13   | 1.95E-16 | -0.50125 | 0.609 | 0.93  | 2.91E-12 | Tcell | CD63     |
| RAP1B.9   | 2.06E-16 | 0.739428 | 0.55  | 0.432 | 3.08E-12 | Tcell | RAP1B    |
| COPRS.9   | 2.17E-16 | -0.57918 | 0.064 | 0.339 | 3.24E-12 | Tcell | COPRS    |
| SPAG9.12  | 2.21E-16 | -0.55568 | 0.073 | 0.358 | 3.30E-12 | Tcell | SPAG9    |
| ARHGAP9.1 | 2.33E-16 | 0.619626 | 0.232 | 0.083 | 3.47E-12 | Tcell | ARHGAP9  |
| JAM2.14   | 2.39E-16 | -0.61464 | 0.009 | 0.257 | 3.57E-12 | Tcell | JAM2     |
| SPNS3.10  | 2.45E-16 | 0.466908 | 0.105 | 0.022 | 3.65E-12 | Tcell | SPNS3    |
| CCDC47.6  | 2.69E-16 | -0.52178 | 0.109 | 0.41  | 4.02E-12 | Tcell | CCDC47   |
| NSFL1C.6  | 2.84E-16 | -0.53831 | 0.105 | 0.407 | 4.24E-12 | Tcell | NSFL1C   |
| GAA.13    | 2.84E-16 | -0.66269 | 0.055 | 0.325 | 4.24E-12 | Tcell | GAA      |
| TMC8.12   | 2.91E-16 | 0.522369 | 0.15  | 0.04  | 4.35E-12 | Tcell | TMC8     |
| AIG1.6    | 3.07E-16 | -0.65647 | 0.059 | 0.339 | 4.58E-12 | Tcell | AIG1     |
| SMIM14.1C | 3.09E-16 | -0.6359  | 0.059 | 0.336 | 4.61E-12 | Tcell | SMIM14   |
| MAPT.12   | 3.14E-16 | -0.65719 | 0.032 | 0.29  | 4.69E-12 | Tcell | MAPT     |
| FAM127B.1 | 3.31E-16 | -0.65498 | 0.041 | 0.305 | 4.94E-12 | Tcell | FAM127B  |
| SCRG1.12  | 3.45E-16 | -0.72027 | 0.073 | 0.351 | 5.16E-12 | Tcell | SCRG1    |
| CRMP1.12  | 3.50E-16 | -0.69089 | 0.018 | 0.27  | 5.23E-12 | Tcell | CRMP1    |
| NCAM1.13  | 3.51E-16 | -0.6227  | 0.064 | 0.34  | 5.24E-12 | Tcell | NCAM1    |
| FMNL2.10  | 3.61E-16 | -0.58488 | 0.018 | 0.27  | 5.40E-12 | Tcell | FMNL2    |
| TTYH1.14  | 3.69E-16 | -0.80408 | 0.023 | 0.272 | 5.51E-12 | Tcell | TTYH1    |
| GPR132.1C | 3.70E-16 | 0.461943 | 0.123 | 0.029 | 5.53E-12 | Tcell | GPR132   |
| LSR       | 3.87E-16 | 0.470556 | 0.118 | 0.027 | 5.79E-12 | Tcell | LSR      |
| CRIP2.11  | 4.15E-16 | -0.5462  | 0.045 | 0.319 | 6.21E-12 | Tcell | CRIP2    |
| MLF2.12   | 4.37E-16 | -0.45713 | 0.259 | 0.616 | 6.53E-12 | Tcell | MLF2     |
| EVI2A.13  | 4.65E-16 | 0.563752 | 0.427 | 0.219 | 6.96E-12 | Tcell | EVI2A    |
| TIMP2.7   | 4.70E-16 | -0.54543 | 0.055 | 0.331 | 7.02E-12 | Tcell | TIMP2    |
| CD81.11   | 4.77E-16 | -0.53421 | 0.132 | 0.445 | 7.12E-12 | Tcell | CD81     |
| IGFBP2.12 | 5.89E-16 | -0.72323 | 0.095 | 0.379 | 8.80E-12 | Tcell | IGFBP2   |
| MAP3K13.9 | 6.06E-16 | -0.54464 | 0.1   | 0.399 | 9.06E-12 | Tcell | MAP3K13  |
| SRSF5.5   | 6.08E-16 | 0.419721 | 0.705 | 0.694 | 9.09E-12 | Tcell | SRSF5    |
| SCOC.10   | 6.40E-16 | -0.48302 | 0.109 | 0.42  | 9.56E-12 | Tcell | SCOC     |

|            |          |          |       |       |          |       |           |
|------------|----------|----------|-------|-------|----------|-------|-----------|
| TNFRSF12A  | 6.77E-16 | -0.74136 | 0.036 | 0.292 | 1.01E-11 | Tcell | TNFRSF12A |
| NEK6.10    | 6.98E-16 | -0.63123 | 0.036 | 0.294 | 1.04E-11 | Tcell | NEK6      |
| CTSF.10    | 7.14E-16 | -0.58005 | 0.023 | 0.274 | 1.07E-11 | Tcell | CTSF      |
| GSTP1.7    | 7.48E-16 | -0.51314 | 0.445 | 0.829 | 1.12E-11 | Tcell | GSTP1     |
| TMEM59L.1  | 7.55E-16 | -0.6086  | 0.018 | 0.263 | 1.13E-11 | Tcell | TMEM59L   |
| CFL2.11    | 7.63E-16 | -0.61817 | 0.059 | 0.333 | 1.14E-11 | Tcell | CFL2      |
| SLC22A17.8 | 8.12E-16 | -0.56209 | 0.032 | 0.289 | 1.21E-11 | Tcell | SLC22A17  |
| SRSF2.12   | 8.34E-16 | 0.468801 | 0.645 | 0.604 | 1.25E-11 | Tcell | SRSF2     |
| SCG2.13    | 8.75E-16 | -0.70719 | 0.018 | 0.267 | 1.31E-11 | Tcell | SCG2      |
| SPARC.10   | 8.97E-16 | -0.73868 | 0.1   | 0.389 | 1.34E-11 | Tcell | SPARC     |
| GCSH.13    | 9.20E-16 | -0.55629 | 0.073 | 0.352 | 1.37E-11 | Tcell | GCSH      |
| KIF1B.11   | 1.02E-15 | -0.46452 | 0.036 | 0.299 | 1.53E-11 | Tcell | KIF1B     |
| FZD3.11    | 1.08E-15 | -0.55029 | 0.027 | 0.281 | 1.62E-11 | Tcell | FZD3      |
| GPR68      | 1.09E-15 | 0.158785 | 0.036 | 0.003 | 1.63E-11 | Tcell | GPR68     |
| GSTA4.12   | 1.10E-15 | -0.50394 | 0.036 | 0.295 | 1.64E-11 | Tcell | GSTA4     |
| FIS1.8     | 1.13E-15 | -0.45596 | 0.277 | 0.645 | 1.69E-11 | Tcell | FIS1      |
| C21orf91.1 | 1.14E-15 | 0.423341 | 0.114 | 0.026 | 1.70E-11 | Tcell | C21orf91  |
| ETV5.10    | 1.18E-15 | -0.59166 | 0.018 | 0.263 | 1.76E-11 | Tcell | ETV5      |
| GSTM3.8    | 1.18E-15 | -0.59298 | 0.023 | 0.273 | 1.76E-11 | Tcell | GSTM3     |
| ALDH7A1.9  | 1.19E-15 | -0.57537 | 0.027 | 0.28  | 1.78E-11 | Tcell | ALDH7A1   |
| DNER.11    | 1.24E-15 | -0.70495 | 0.032 | 0.284 | 1.86E-11 | Tcell | DNER      |
| GPR65.14   | 1.26E-15 | 0.76322  | 0.295 | 0.13  | 1.88E-11 | Tcell | GPR65     |
| ABI2.12    | 1.30E-15 | -0.49982 | 0.082 | 0.367 | 1.94E-11 | Tcell | ABI2      |
| PPP2CB.13  | 1.34E-15 | -0.53722 | 0.041 | 0.301 | 2.01E-11 | Tcell | PPP2CB    |
| ERI3.10    | 1.60E-15 | -0.53707 | 0.091 | 0.374 | 2.39E-11 | Tcell | ERI3      |
| UBB.8      | 1.85E-15 | 0.180934 | 0.909 | 0.911 | 2.76E-11 | Tcell | UBB       |
| PCDH9.9    | 1.85E-15 | -0.73342 | 0.018 | 0.259 | 2.77E-11 | Tcell | PCDH9     |
| MEF2C.13   | 1.93E-15 | -0.71625 | 0.036 | 0.288 | 2.88E-11 | Tcell | MEF2C     |
| EPHX1.8    | 1.95E-15 | -0.64902 | 0.005 | 0.236 | 2.92E-11 | Tcell | EPHX1     |
| HEY1.12    | 1.98E-15 | -0.64177 | 0.014 | 0.251 | 2.96E-11 | Tcell | HEY1      |
| NREP.12    | 2.17E-15 | -0.58523 | 0.027 | 0.277 | 3.24E-11 | Tcell | NREP      |
| MUM1.12    | 2.25E-15 | -0.51876 | 0.086 | 0.369 | 3.36E-11 | Tcell | MUM1      |
| CD55.13    | 2.30E-15 | 0.710749 | 0.273 | 0.115 | 3.44E-11 | Tcell | CD55      |
| ENAH.13    | 2.39E-15 | -0.49757 | 0.023 | 0.269 | 3.58E-11 | Tcell | ENAH      |
| SHISA4.12  | 2.55E-15 | -0.58034 | 0.014 | 0.251 | 3.80E-11 | Tcell | SHISA4    |
| MAP1LC3A.2 | 6.3E-15  | -0.55448 | 0.086 | 0.37  | 3.93E-11 | Tcell | MAP1LC3A  |
| NAA20.6    | 2.64E-15 | -0.50707 | 0.182 | 0.502 | 3.95E-11 | Tcell | NAA20     |
| KLRF1      | 2.87E-15 | 0.42461  | 0.05  | 0.006 | 4.29E-11 | Tcell | KLRF1     |
| SOX11.13   | 2.91E-15 | -0.7104  | 0.032 | 0.277 | 4.35E-11 | Tcell | SOX11     |
| NUDT3.9    | 3.00E-15 | -0.54009 | 0.114 | 0.405 | 4.48E-11 | Tcell | NUDT3     |
| FAM210B.1  | 3.18E-15 | -0.49144 | 0.027 | 0.274 | 4.75E-11 | Tcell | FAM210B   |
| CAP1.12    | 3.48E-15 | 0.514121 | 0.632 | 0.591 | 5.20E-11 | Tcell | CAP1      |
| NDRG2.9    | 3.48E-15 | -0.73073 | 0.091 | 0.364 | 5.21E-11 | Tcell | NDRG2     |
| SLC39A3.1  | 3.59E-15 | -0.44901 | 0.068 | 0.343 | 5.36E-11 | Tcell | SLC39A3   |
| SOX9.13    | 3.59E-15 | -0.66475 | 0.032 | 0.276 | 5.37E-11 | Tcell | SOX9      |
| RAB10.5    | 3.88E-15 | -0.43587 | 0.173 | 0.502 | 5.80E-11 | Tcell | RAB10     |
| DBN1.13    | 3.91E-15 | -0.56882 | 0.055 | 0.316 | 5.84E-11 | Tcell | DBN1      |
| ATP6V1B2.4 | 4.01E-15 | -0.5239  | 0.123 | 0.414 | 5.99E-11 | Tcell | ATP6V1B2  |
| IGFBP5.11  | 4.13E-15 | -0.95144 | 0.032 | 0.273 | 6.18E-11 | Tcell | IGFBP5    |
| TCEA2.13   | 4.18E-15 | -0.47987 | 0.091 | 0.373 | 6.24E-11 | Tcell | TCEA2     |
| AKR1B1.9   | 4.19E-15 | -0.4317  | 0.273 | 0.632 | 6.26E-11 | Tcell | AKR1B1    |

|            |          |          |       |       |          |       |              |
|------------|----------|----------|-------|-------|----------|-------|--------------|
| KIF5C.12   | 4.36E-15 | -0.5699  | 0.027 | 0.272 | 6.52E-11 | Tcell | KIF5C        |
| MCL1.11    | 4.39E-15 | 0.496345 | 0.659 | 0.597 | 6.55E-11 | Tcell | MCL1         |
| GYPC.12    | 4.45E-15 | 0.639083 | 0.486 | 0.306 | 6.65E-11 | Tcell | GYPC         |
| BTF3L4.5   | 4.53E-15 | -0.48634 | 0.182 | 0.518 | 6.77E-11 | Tcell | BTF3L4       |
| RRAGA.4    | 4.65E-15 | -0.49055 | 0.105 | 0.394 | 6.95E-11 | Tcell | RRAGA        |
| GNB4.11    | 5.07E-15 | -0.61457 | 0.009 | 0.237 | 7.58E-11 | Tcell | GNB4         |
| COA3.8     | 5.07E-15 | -0.44781 | 0.173 | 0.482 | 7.58E-11 | Tcell | COA3         |
| LY86.14    | 5.18E-15 | -0.93614 | 0.05  | 0.297 | 7.73E-11 | Tcell | LY86         |
| TCEAL3.3   | 5.69E-15 | -0.54182 | 0.077 | 0.347 | 8.50E-11 | Tcell | TCEAL3       |
| SLC2A3.12  | 5.82E-15 | 0.639806 | 0.436 | 0.251 | 8.69E-11 | Tcell | SLC2A3       |
| SPTBN1.12  | 5.88E-15 | -0.51576 | 0.032 | 0.279 | 8.78E-11 | Tcell | SPTBN1       |
| CXXC5.14   | 6.02E-15 | -0.54409 | 0.105 | 0.385 | 9.00E-11 | Tcell | CXXC5        |
| SOD2.10    | 6.04E-15 | -0.65994 | 0.232 | 0.542 | 9.02E-11 | Tcell | SOD2         |
| S100A13.1  | 6.12E-15 | -0.80024 | 0.05  | 0.301 | 9.14E-11 | Tcell | S100A13      |
| COP8.12    | 6.17E-15 | -0.49948 | 0.168 | 0.475 | 9.23E-11 | Tcell | COP8         |
| TMEM161B   | 6.35E-15 | -0.64124 | 0.045 | 0.293 | 9.50E-11 | Tcell | TMEM161B-AS1 |
| YWHAG.10   | 6.67E-15 | -0.42706 | 0.105 | 0.396 | 9.97E-11 | Tcell | YWHAG        |
| HDLBP.7    | 6.81E-15 | -0.42626 | 0.068 | 0.341 | 1.02E-10 | Tcell | HDLBP        |
| GPC1.11    | 6.92E-15 | -0.68644 | 0.014 | 0.241 | 1.03E-10 | Tcell | GPC1         |
| TPST1.9    | 8.44E-15 | -0.58526 | 0.014 | 0.244 | 1.26E-10 | Tcell | TPST1        |
| TSTD1.7    | 8.48E-15 | 0.70725  | 0.364 | 0.194 | 1.27E-10 | Tcell | TSTD1        |
| HYAL2.13   | 8.61E-15 | -0.51289 | 0.005 | 0.227 | 1.29E-10 | Tcell | HYAL2        |
| BOD1.13    | 8.66E-15 | -0.47151 | 0.05  | 0.308 | 1.29E-10 | Tcell | BOD1         |
| GIMAP1.13  | 9.30E-15 | 0.621494 | 0.2   | 0.071 | 1.39E-10 | Tcell | GIMAP1       |
| RAB32.13   | 9.36E-15 | -0.52474 | 0.014 | 0.243 | 1.40E-10 | Tcell | RAB32        |
| NR4A2.14   | 9.40E-15 | 0.642907 | 0.436 | 0.248 | 1.40E-10 | Tcell | NR4A2        |
| CCDC106.1  | 9.44E-15 | -0.47911 | 0.009 | 0.236 | 1.41E-10 | Tcell | CCDC106      |
| CCDC112.1  | 9.46E-15 | -0.53533 | 0.027 | 0.265 | 1.41E-10 | Tcell | CCDC112      |
| C5orf24.1  | 1.04E-14 | -0.51346 | 0.05  | 0.301 | 1.55E-10 | Tcell | C5orf24      |
| FAM177A1.1 | 1.05E-14 | 0.798342 | 0.514 | 0.385 | 1.56E-10 | Tcell | FAM177A1     |
| TSPAN32.1  | 1.07E-14 | 0.441593 | 0.059 | 0.009 | 1.60E-10 | Tcell | TSPAN32      |
| MMP14.11   | 1.17E-14 | -0.63441 | 0.005 | 0.226 | 1.74E-10 | Tcell | MMP14        |
| TMEM208.5  | 1.24E-14 | -0.48057 | 0.168 | 0.473 | 1.86E-10 | Tcell | TMEM208      |
| NRP2.11    | 1.32E-14 | -0.58121 | 0.005 | 0.225 | 1.97E-10 | Tcell | NRP2         |
| ATP6AP1.1  | 1.36E-14 | -0.38216 | 0.177 | 0.499 | 2.03E-10 | Tcell | ATP6AP1      |
| EPN1.5     | 1.39E-14 | -0.46145 | 0.073 | 0.339 | 2.08E-10 | Tcell | EPN1         |
| DTNA.12    | 1.41E-14 | -0.65465 | 0.023 | 0.257 | 2.10E-10 | Tcell | DTNA         |
| MCTP2      | 1.54E-14 | 0.178242 | 0.036 | 0.003 | 2.30E-10 | Tcell | MCTP2        |
| PEBP1.12   | 1.56E-14 | -0.43729 | 0.518 | 0.809 | 2.32E-10 | Tcell | PEBP1        |
| CBLB.2     | 1.61E-14 | 0.840181 | 0.2   | 0.074 | 2.40E-10 | Tcell | CBLB         |
| CKLF.11    | 1.61E-14 | 0.579956 | 0.605 | 0.518 | 2.40E-10 | Tcell | CKLF         |
| MYH9.13    | 1.63E-14 | 0.702568 | 0.35  | 0.185 | 2.44E-10 | Tcell | MYH9         |
| MFF.8      | 1.85E-14 | -0.43998 | 0.182 | 0.495 | 2.76E-10 | Tcell | MFF          |
| KLHDC8A.1  | 1.85E-14 | -0.57802 | 0.023 | 0.255 | 2.76E-10 | Tcell | KLHDC8A      |
| LBH.13     | 1.85E-14 | 0.792403 | 0.309 | 0.15  | 2.77E-10 | Tcell | LBH          |
| CRLS1.9    | 2.01E-14 | -0.47779 | 0.045 | 0.288 | 3.01E-10 | Tcell | CRLS1        |
| FCGR1A.14  | 2.02E-14 | -0.9673  | 0.036 | 0.263 | 3.01E-10 | Tcell | FCGR1A       |
| CISH       | 2.11E-14 | 0.523095 | 0.109 | 0.026 | 3.16E-10 | Tcell | CISH         |
| MS4A6A.14  | 2.25E-14 | -0.79537 | 0.091 | 0.346 | 3.36E-10 | Tcell | MS4A6A       |
| FIBIN.13   | 2.25E-14 | -0.64341 | 0.009 | 0.231 | 3.37E-10 | Tcell | FIBIN        |
| SPATS2.12  | 2.35E-14 | -0.49161 | 0.027 | 0.263 | 3.51E-10 | Tcell | SPATS2       |

|            |          |          |       |       |          |       |          |
|------------|----------|----------|-------|-------|----------|-------|----------|
| REPIN1.13  | 2.41E-14 | -0.45623 | 0.036 | 0.279 | 3.60E-10 | Tcell | REPIN1   |
| LIMA1.13   | 2.53E-14 | -0.52094 | 0.064 | 0.323 | 3.78E-10 | Tcell | LIMA1    |
| MORN2.10   | 2.63E-14 | -0.56659 | 0.032 | 0.266 | 3.93E-10 | Tcell | MORN2    |
| PLD3.7     | 2.71E-14 | -0.43603 | 0.2   | 0.535 | 4.05E-10 | Tcell | PLD3     |
| ARHGAP21.2 | 2.77E-14 | -0.53353 | 0.023 | 0.254 | 4.13E-10 | Tcell | ARHGAP21 |
| SLC44A1.8  | 2.88E-14 | -0.53869 | 0.064 | 0.318 | 4.31E-10 | Tcell | SLC44A1  |
| RGS12.11   | 2.98E-14 | -0.56564 | 0.036 | 0.275 | 4.46E-10 | Tcell | RGS12    |
| SMOX.11    | 3.21E-14 | -0.61498 | 0.023 | 0.251 | 4.79E-10 | Tcell | SMOX     |
| ID4.12     | 3.24E-14 | -0.68161 | 0.005 | 0.219 | 4.84E-10 | Tcell | ID4      |
| TRAF1.1    | 3.27E-14 | 0.417694 | 0.1   | 0.022 | 4.89E-10 | Tcell | TRAF1    |
| KHDRBS3.1  | 3.35E-14 | -0.56565 | 0.005 | 0.219 | 5.00E-10 | Tcell | KHDRBS3  |
| TMED1.10   | 3.35E-14 | -0.56143 | 0.05  | 0.296 | 5.01E-10 | Tcell | TMED1    |
| TSPAN13.1  | 3.41E-14 | -0.64464 | 0.059 | 0.303 | 5.10E-10 | Tcell | TSPAN13  |
| SOCS6.8    | 3.73E-14 | -0.57509 | 0.014 | 0.234 | 5.57E-10 | Tcell | SOCS6    |
| ASPH.9     | 3.88E-14 | -0.46243 | 0.041 | 0.281 | 5.80E-10 | Tcell | ASPH     |
| TOMM7.7    | 4.08E-14 | 0.24298  | 0.841 | 0.852 | 6.10E-10 | Tcell | TOMM7    |
| FAM20C.11  | 4.09E-14 | -0.53546 | 0.009 | 0.227 | 6.11E-10 | Tcell | FAM20C   |
| AK1.7      | 4.23E-14 | -0.49193 | 0.077 | 0.34  | 6.32E-10 | Tcell | AK1      |
| AP1S1.11   | 4.51E-14 | -0.43834 | 0.173 | 0.473 | 6.74E-10 | Tcell | AP1S1    |
| YBX1.10    | 4.55E-14 | 0.235769 | 0.791 | 0.763 | 6.80E-10 | Tcell | YBX1     |
| ANAPC11.9  | 4.64E-14 | -0.49012 | 0.386 | 0.733 | 6.93E-10 | Tcell | ANAPC11  |
| ITGB8.12   | 4.69E-14 | -0.49626 | 0.018 | 0.244 | 7.00E-10 | Tcell | ITGB8    |
| CREB5.13   | 4.80E-14 | -0.59206 | 0.018 | 0.239 | 7.18E-10 | Tcell | CREB5    |
| ARL3.6     | 4.89E-14 | -0.44025 | 0.082 | 0.351 | 7.30E-10 | Tcell | ARL3     |
| SIRPA.11   | 4.96E-14 | -0.51295 | 0.023 | 0.248 | 7.41E-10 | Tcell | SIRPA    |
| C8orf33.1  | 5.48E-14 | -0.35123 | 0.068 | 0.323 | 8.19E-10 | Tcell | C8orf33  |
| SDCCAG8.9  | 5.63E-14 | -0.52732 | 0.077 | 0.334 | 8.41E-10 | Tcell | SDCCAG8  |
| CTTN.11    | 5.69E-14 | -0.52518 | 0.014 | 0.233 | 8.50E-10 | Tcell | CTTN     |
| FEZ2.9     | 5.81E-14 | -0.42429 | 0.155 | 0.454 | 8.69E-10 | Tcell | FEZ2     |
| APOC1.13   | 6.12E-14 | -0.66234 | 0.241 | 0.521 | 9.15E-10 | Tcell | APOC1    |
| FKBP10.12  | 6.30E-14 | -0.54982 | 0.005 | 0.216 | 9.42E-10 | Tcell | FKBP10   |
| MT1M.8     | 6.46E-14 | -0.70576 | 0.023 | 0.248 | 9.65E-10 | Tcell | MT1M     |
| IL13RA1.1  | 6.70E-14 | -0.63292 | 0.027 | 0.253 | 1.00E-09 | Tcell | IL13RA1  |
| H3F3A.5    | 6.99E-14 | 0.228885 | 0.814 | 0.746 | 1.04E-09 | Tcell | H3F3A    |
| IL18R1.1   | 6.99E-14 | 0.343191 | 0.064 | 0.01  | 1.05E-09 | Tcell | IL18R1   |
| PRCP.10    | 7.03E-14 | -0.4456  | 0.091 | 0.36  | 1.05E-09 | Tcell | PRCP     |
| MS4A4A.14  | 7.18E-14 | -0.87655 | 0.055 | 0.29  | 1.07E-09 | Tcell | MS4A4A   |
| CCND1.7    | 7.44E-14 | -0.6186  | 0.009 | 0.223 | 1.11E-09 | Tcell | CCND1    |
| SNRPD2.7   | 7.53E-14 | 0.296965 | 0.755 | 0.747 | 1.13E-09 | Tcell | SNRPD2   |
| SLIRP.5    | 7.69E-14 | -0.51782 | 0.305 | 0.627 | 1.15E-09 | Tcell | SLIRP    |
| PDRG1.10   | 7.86E-14 | -0.49604 | 0.036 | 0.272 | 1.17E-09 | Tcell | PDRG1    |
| TMEM173.1  | 7.90E-14 | 0.668995 | 0.277 | 0.123 | 1.18E-09 | Tcell | TMEM173  |
| PTPRS.14   | 8.06E-14 | -0.55098 | 0.032 | 0.262 | 1.20E-09 | Tcell | PTPRS    |
| PVRL2.10   | 8.36E-14 | -0.50241 | 0.023 | 0.247 | 1.25E-09 | Tcell | PVRL2    |
| LAMTOR2.1  | 8.39E-14 | -0.36121 | 0.264 | 0.593 | 1.25E-09 | Tcell | LAMTOR2  |
| ACSL3.7    | 8.41E-14 | -0.4115  | 0.082 | 0.346 | 1.26E-09 | Tcell | ACSL3    |
| MAFB.12    | 8.57E-14 | -0.68725 | 0.073 | 0.319 | 1.28E-09 | Tcell | MAFB     |
| UBE2E2.8   | 8.74E-14 | -0.59018 | 0.023 | 0.244 | 1.31E-09 | Tcell | UBE2E2   |
| CIB1.12    | 8.84E-14 | 0.541471 | 0.6   | 0.49  | 1.32E-09 | Tcell | CIB1     |
| SPOCD1.11  | 9.38E-14 | -0.86093 | 0.009 | 0.221 | 1.40E-09 | Tcell | SPOCD1   |
| RPAIN.11   | 9.52E-14 | -0.47443 | 0.186 | 0.491 | 1.42E-09 | Tcell | RPAIN    |

|            |          |          |       |       |          |       |          |
|------------|----------|----------|-------|-------|----------|-------|----------|
| ATP1B2.13  | 9.55E-14 | -0.55831 | 0.018 | 0.237 | 1.43E-09 | Tcell | ATP1B2   |
| BLVRB.10   | 1.02E-13 | -0.61092 | 0.114 | 0.379 | 1.53E-09 | Tcell | BLVRB    |
| EFEMP1.11  | 1.04E-13 | -1.06889 | 0.014 | 0.225 | 1.55E-09 | Tcell | EFEMP1   |
| CLTC.9     | 1.10E-13 | -0.46067 | 0.091 | 0.354 | 1.64E-09 | Tcell | CLTC     |
| SEC13.4    | 1.12E-13 | -0.42437 | 0.1   | 0.373 | 1.67E-09 | Tcell | SEC13    |
| SERPINE2.1 | 1.12E-13 | -0.524   | 0.055 | 0.298 | 1.68E-09 | Tcell | SERPINE2 |
| SLC35B1.7  | 1.13E-13 | -0.31874 | 0.114 | 0.396 | 1.69E-09 | Tcell | SLC35B1  |
| PLEKHB2.7  | 1.17E-13 | -0.40899 | 0.123 | 0.404 | 1.74E-09 | Tcell | PLEKHB2  |
| NPDC1.11   | 1.17E-13 | -0.50856 | 0.073 | 0.328 | 1.75E-09 | Tcell | NPDC1    |
| FCGR2A.14  | 1.19E-13 | -0.8229  | 0.059 | 0.293 | 1.78E-09 | Tcell | FCGR2A   |
| NRN1.7     | 1.22E-13 | -0.64738 | 0.032 | 0.258 | 1.82E-09 | Tcell | NRN1     |
| ACTN1.11   | 1.22E-13 | -0.53497 | 0.032 | 0.259 | 1.82E-09 | Tcell | ACTN1    |
| FHL1.14    | 1.23E-13 | -0.48322 | 0.091 | 0.362 | 1.84E-09 | Tcell | FHL1     |
| POU3F2.12  | 1.28E-13 | -0.56239 | 0.009 | 0.22  | 1.91E-09 | Tcell | POU3F2   |
| LHFP.13    | 1.28E-13 | -0.60937 | 0.018 | 0.236 | 1.92E-09 | Tcell | LHFP     |
| ANXA1.11   | 1.32E-13 | 0.49688  | 0.586 | 0.406 | 1.97E-09 | Tcell | ANXA1    |
| RCAN1.9    | 1.34E-13 | -0.69154 | 0.041 | 0.272 | 2.01E-09 | Tcell | RCAN1    |
| LYRM5.10   | 1.37E-13 | -0.53965 | 0.086 | 0.346 | 2.04E-09 | Tcell | LYRM5    |
| ARL8A.10   | 1.37E-13 | -0.43879 | 0.041 | 0.277 | 2.05E-09 | Tcell | ARL8A    |
| TXNDC17.1  | 1.44E-13 | -0.50668 | 0.218 | 0.531 | 2.15E-09 | Tcell | TXNDC17  |
| FERMT3.14  | 1.47E-13 | 0.562366 | 0.327 | 0.163 | 2.20E-09 | Tcell | FERMT3   |
| PHC2.6     | 1.47E-13 | -0.48544 | 0.045 | 0.281 | 2.20E-09 | Tcell | PHC2     |
| FNDC4.11   | 1.55E-13 | -0.4819  | 0     | 0.202 | 2.32E-09 | Tcell | FNDC4    |
| GAMT.11    | 1.60E-13 | -0.34711 | 0.055 | 0.304 | 2.39E-09 | Tcell | GAMT     |
| RND3.12    | 1.62E-13 | -0.6726  | 0.027 | 0.247 | 2.41E-09 | Tcell | RND3     |
| NRCAM.13   | 1.62E-13 | -0.51743 | 0.041 | 0.274 | 2.42E-09 | Tcell | NRCAM    |
| WAS.14     | 1.63E-13 | 0.566561 | 0.341 | 0.171 | 2.43E-09 | Tcell | WAS      |
| KCNQ2.13   | 1.67E-13 | -0.52884 | 0.009 | 0.219 | 2.50E-09 | Tcell | KCNQ2    |
| FGD3.7     | 1.74E-13 | 0.524298 | 0.132 | 0.038 | 2.60E-09 | Tcell | FGD3     |
| DBI.11     | 1.79E-13 | -0.47338 | 0.564 | 0.849 | 2.68E-09 | Tcell | DBI      |
| PLIN3.10   | 1.88E-13 | -0.49562 | 0.1   | 0.363 | 2.81E-09 | Tcell | PLIN3    |
| TAP1.8     | 1.92E-13 | 0.746457 | 0.395 | 0.251 | 2.87E-09 | Tcell | TAP1     |
| SERPINA1.1 | 1.93E-13 | -0.68395 | 0.064 | 0.304 | 2.88E-09 | Tcell | SERPINA1 |
| CLCN3.11   | 1.95E-13 | -0.41717 | 0.027 | 0.252 | 2.92E-09 | Tcell | CLCN3    |
| RAB1A.7    | 1.98E-13 | -0.42244 | 0.286 | 0.626 | 2.96E-09 | Tcell | RAB1A    |
| MAGED1.12  | 1.99E-13 | -0.45896 | 0.086 | 0.35  | 2.97E-09 | Tcell | MAGED1   |
| NDN.13     | 2.01E-13 | -0.50172 | 0     | 0.2   | 3.01E-09 | Tcell | NDN      |
| RTN4.12    | 2.02E-13 | -0.40639 | 0.391 | 0.706 | 3.02E-09 | Tcell | RTN4     |
| GRIA2.12   | 2.14E-13 | -0.55545 | 0.009 | 0.216 | 3.19E-09 | Tcell | GRIA2    |
| VAMP8.14   | 2.37E-13 | 0.442709 | 0.55  | 0.339 | 3.55E-09 | Tcell | VAMP8    |
| AKR1A1.1C  | 2.44E-13 | -0.50686 | 0.205 | 0.503 | 3.64E-09 | Tcell | AKR1A1   |
| HEPN1.11   | 2.46E-13 | -0.6347  | 0.005 | 0.208 | 3.68E-09 | Tcell | HEPN1    |
| ZNF101     | 2.62E-13 | 0.598318 | 0.132 | 0.038 | 3.91E-09 | Tcell | ZNF101   |
| MMP2.9     | 2.74E-13 | -0.56207 | 0.018 | 0.231 | 4.10E-09 | Tcell | MMP2     |
| MORF4L2.9  | 2.76E-13 | -0.36852 | 0.305 | 0.631 | 4.13E-09 | Tcell | MORF4L2  |
| CDO1.12    | 2.90E-13 | -0.55922 | 0.023 | 0.239 | 4.34E-09 | Tcell | CDO1     |
| TOP1.9     | 3.03E-13 | -0.42491 | 0.123 | 0.394 | 4.53E-09 | Tcell | TOP1     |
| TMEM98.11  | 3.10E-13 | -0.51983 | 0.023 | 0.239 | 4.64E-09 | Tcell | TMEM98   |
| PFDN1.2    | 3.14E-13 | -0.41205 | 0.159 | 0.453 | 4.69E-09 | Tcell | PFDN1    |
| EPN2.12    | 3.20E-13 | -0.4418  | 0.023 | 0.241 | 4.79E-09 | Tcell | EPN2     |
| BCAN.14    | 3.28E-13 | -0.75818 | 0.055 | 0.28  | 4.90E-09 | Tcell | BCAN     |

|              |           |           |        |        |           |       |                |
|--------------|-----------|-----------|--------|--------|-----------|-------|----------------|
| LAPTM4A. 9   | 3. 72E-13 | -0. 42184 | 0. 427 | 0. 779 | 5. 55E-09 | Tcell | LAPTM4A        |
| FJX1. 12     | 3. 75E-13 | -0. 55732 | 0. 005 | 0. 205 | 5. 60E-09 | Tcell | FJX1           |
| SLC39A1. 8   | 3. 76E-13 | -0. 44018 | 0. 123 | 0. 392 | 5. 62E-09 | Tcell | SLC39A1        |
| C1R. 14      | 3. 78E-13 | -0. 94437 | 0. 014 | 0. 219 | 5. 65E-09 | Tcell | C1R            |
| YPEL5. 6     | 3. 81E-13 | 0. 685921 | 0. 55  | 0. 45  | 5. 69E-09 | Tcell | YPEL5          |
| TNFRSF1A. 3. | 82E-13    | -0. 47347 | 0. 109 | 0. 377 | 5. 71E-09 | Tcell | TNFRSF1A       |
| TMEM176A. 3. | 96E-13    | -0. 81645 | 0. 023 | 0. 231 | 5. 91E-09 | Tcell | TMEM176A       |
| SYT11. 13    | 4. 04E-13 | -0. 47464 | 0. 118 | 0. 389 | 6. 03E-09 | Tcell | SYT11          |
| SIGIRR. 1C   | 4. 07E-13 | 0. 72201  | 0. 345 | 0. 193 | 6. 09E-09 | Tcell | SIGIRR         |
| ATP2A2. 8    | 4. 19E-13 | -0. 43183 | 0. 05  | 0. 283 | 6. 26E-09 | Tcell | ATP2A2         |
| FLYWCH2. 7   | 4. 44E-13 | -0. 4105  | 0. 073 | 0. 314 | 6. 63E-09 | Tcell | FLYWCH2        |
| CYFIP1. 12   | 4. 57E-13 | -0. 58819 | 0. 059 | 0. 287 | 6. 83E-09 | Tcell | CYFIP1         |
| FPR1. 14     | 4. 60E-13 | -0. 85024 | 0. 064 | 0. 289 | 6. 88E-09 | Tcell | FPR1           |
| BANF1. 5     | 4. 61E-13 | -0. 42346 | 0. 305 | 0. 668 | 6. 89E-09 | Tcell | BANF1          |
| PRKRA. 8     | 4. 70E-13 | -0. 38581 | 0. 1   | 0. 366 | 7. 02E-09 | Tcell | PRKRA          |
| F3. 12       | 4. 76E-13 | -0. 57538 | 0      | 0. 195 | 7. 11E-09 | Tcell | F3             |
| RP11-539L    | 4. 89E-13 | 0. 184008 | 0. 023 | 0. 001 | 7. 31E-09 | Tcell | RP11-539L10. 2 |
| PCBP4. 14    | 4. 96E-13 | -0. 47432 | 0. 036 | 0. 26  | 7. 41E-09 | Tcell | PCBP4          |
| C3. 13       | 5. 08E-13 | -0. 64417 | 0. 145 | 0. 406 | 7. 59E-09 | Tcell | C3             |
| FAIM2. 11    | 5. 11E-13 | -0. 61176 | 0      | 0. 195 | 7. 64E-09 | Tcell | FAIM2          |
| RNF24. 10    | 5. 20E-13 | -0. 46282 | 0. 032 | 0. 252 | 7. 77E-09 | Tcell | RNF24          |
| BCAT1. 12    | 5. 35E-13 | -0. 50357 | 0. 023 | 0. 235 | 7. 99E-09 | Tcell | BCAT1          |
| SEMA6A. 1C   | 5. 45E-13 | -0. 47445 | 0. 005 | 0. 203 | 8. 14E-09 | Tcell | SEMA6A         |
| LAMP2. 9     | 5. 48E-13 | -0. 49561 | 0. 186 | 0. 476 | 8. 18E-09 | Tcell | LAMP2          |
| RDH11. 5     | 5. 50E-13 | -0. 41988 | 0. 123 | 0. 393 | 8. 22E-09 | Tcell | RDH11          |
| GGH. 11      | 5. 55E-13 | -0. 50084 | 0. 041 | 0. 267 | 8. 29E-09 | Tcell | GGH            |
| TRIM2. 10    | 5. 63E-13 | -0. 49072 | 0. 018 | 0. 227 | 8. 41E-09 | Tcell | TRIM2          |
| SLC25A6. 8   | 5. 80E-13 | 0. 232564 | 0. 823 | 0. 858 | 8. 66E-09 | Tcell | SLC25A6        |
| GTF2I. 12    | 5. 89E-13 | -0. 44365 | 0. 15  | 0. 432 | 8. 80E-09 | Tcell | GTF2I          |
| C1QB. 14     | 5. 93E-13 | -0. 57952 | 0. 309 | 0. 575 | 8. 87E-09 | Tcell | C1QB           |
| EFEMP2. 9    | 5. 99E-13 | -0. 45357 | 0. 014 | 0. 218 | 8. 95E-09 | Tcell | EFEMP2         |
| C8orf4. 1C   | 6. 27E-13 | -0. 91654 | 0. 023 | 0. 232 | 9. 36E-09 | Tcell | C8orf4         |
| CRK. 8       | 6. 33E-13 | -0. 39372 | 0. 073 | 0. 321 | 9. 46E-09 | Tcell | CRK            |
| CHPT1. 10    | 6. 37E-13 | -0. 40452 | 0. 064 | 0. 308 | 9. 51E-09 | Tcell | CHPT1          |
| SCPEP1. 12   | 6. 49E-13 | -0. 55097 | 0. 1   | 0. 351 | 9. 69E-09 | Tcell | SCPEP1         |
| CNP. 10      | 6. 50E-13 | -0. 46598 | 0. 118 | 0. 382 | 9. 71E-09 | Tcell | CNP            |
| PBX1. 12     | 6. 69E-13 | -0. 48158 | 0. 014 | 0. 218 | 1. 00E-08 | Tcell | PBX1           |
| CCR5. 9      | 6. 77E-13 | 0. 426739 | 0. 1   | 0. 024 | 1. 01E-08 | Tcell | CCR5           |
| OBFC1. 6     | 6. 86E-13 | 0. 683701 | 0. 209 | 0. 084 | 1. 03E-08 | Tcell | OBFC1          |
| SMARCD3. 1   | 6. 88E-13 | -0. 41401 | 0. 023 | 0. 235 | 1. 03E-08 | Tcell | SMARCD3        |
| ABCA1. 8     | 7. 09E-13 | -0. 47787 | 0. 027 | 0. 243 | 1. 06E-08 | Tcell | ABCA1          |
| CD99. 8      | 7. 29E-13 | 0. 299569 | 0. 718 | 0. 636 | 1. 09E-08 | Tcell | CD99           |
| COL6A1. 13   | 7. 32E-13 | -0. 51627 | 0. 023 | 0. 233 | 1. 09E-08 | Tcell | COL6A1         |
| HSD17B12. 7. | 81E-13    | -0. 39863 | 0. 136 | 0. 419 | 1. 17E-08 | Tcell | HSD17B12       |
| TNFRSF1B. 8. | 02E-13    | 0. 577036 | 0. 35  | 0. 185 | 1. 20E-08 | Tcell | TNFRSF1B       |
| WLS. 10      | 8. 34E-13 | -0. 456   | 0. 014 | 0. 218 | 1. 25E-08 | Tcell | WLS            |
| TNFSF14. 1   | 8. 66E-13 | 0. 3665   | 0. 059 | 0. 01  | 1. 29E-08 | Tcell | TNFSF14        |
| HINT1. 7     | 8. 73E-13 | 0. 191365 | 0. 8   | 0. 828 | 1. 30E-08 | Tcell | HINT1          |
| HILPDA. 11   | 8. 83E-13 | -0. 726   | 0. 023 | 0. 231 | 1. 32E-08 | Tcell | HILPDA         |
| CPM. 11      | 9. 03E-13 | -0. 72001 | 0. 027 | 0. 239 | 1. 35E-08 | Tcell | CPM            |
| HADHB. 6     | 9. 16E-13 | -0. 4266  | 0. 177 | 0. 466 | 1. 37E-08 | Tcell | HADHB          |

|           |          |          |       |       |          |       |              |
|-----------|----------|----------|-------|-------|----------|-------|--------------|
| TTYH3.10  | 9.21E-13 | -0.5051  | 0.036 | 0.251 | 1.38E-08 | Tcell | TTYH3        |
| TCF12.13  | 9.28E-13 | -0.49878 | 0.059 | 0.288 | 1.39E-08 | Tcell | TCF12        |
| CENPV.13  | 9.35E-13 | -0.40939 | 0.041 | 0.259 | 1.40E-08 | Tcell | CENPV        |
| ETV1.14   | 9.44E-13 | -0.54586 | 0.032 | 0.248 | 1.41E-08 | Tcell | ETV1         |
| SORT1.9   | 1.01E-12 | -0.46617 | 0.023 | 0.233 | 1.51E-08 | Tcell | SORT1        |
| MAPK10.12 | 1.02E-12 | -0.51529 | 0.005 | 0.198 | 1.52E-08 | Tcell | MAPK10       |
| TREM2.14  | 1.02E-12 | -0.73568 | 0.114 | 0.355 | 1.52E-08 | Tcell | TREM2        |
| HIF1A.7   | 1.03E-12 | -0.36438 | 0.2   | 0.503 | 1.54E-08 | Tcell | HIF1A        |
| CREG1.13  | 1.04E-12 | -0.54931 | 0.068 | 0.301 | 1.55E-08 | Tcell | CREG1        |
| HMOX1.14  | 1.05E-12 | -0.69721 | 0.068 | 0.299 | 1.57E-08 | Tcell | HMOX1        |
| ALKBH2.12 | 1.10E-12 | -0.49605 | 0.005 | 0.199 | 1.65E-08 | Tcell | ALKBH2       |
| CLEC11A.1 | 1.11E-12 | -0.48433 | 0.027 | 0.236 | 1.66E-08 | Tcell | CLEC11A      |
| BCHE.11   | 1.11E-12 | -0.53043 | 0     | 0.19  | 1.67E-08 | Tcell | BCHE         |
| SNN.13    | 1.12E-12 | -0.50208 | 0.023 | 0.23  | 1.68E-08 | Tcell | SNN          |
| CNPY2.9   | 1.15E-12 | -0.38632 | 0.259 | 0.574 | 1.72E-08 | Tcell | CNPY2        |
| TIMMDC1.5 | 1.18E-12 | -0.47374 | 0.127 | 0.392 | 1.76E-08 | Tcell | TIMMDC1      |
| HEXB.13   | 1.24E-12 | -0.4109  | 0.136 | 0.411 | 1.85E-08 | Tcell | HEXB         |
| TSEN34.9  | 1.24E-12 | -0.41785 | 0.109 | 0.373 | 1.85E-08 | Tcell | TSEN34       |
| GDI1.13   | 1.25E-12 | -0.32985 | 0.195 | 0.491 | 1.87E-08 | Tcell | GDI1         |
| FAM181B.1 | 1.27E-12 | -0.52367 | 0.009 | 0.207 | 1.90E-08 | Tcell | FAM181B      |
| MYO10.13  | 1.28E-12 | -0.51204 | 0.005 | 0.198 | 1.91E-08 | Tcell | MYO10        |
| MS4A7.14  | 1.28E-12 | -0.81268 | 0.109 | 0.336 | 1.91E-08 | Tcell | MS4A7        |
| SUSD3.13  | 1.29E-12 | 0.549713 | 0.227 | 0.093 | 1.93E-08 | Tcell | SUSD3        |
| ISOC2.11  | 1.34E-12 | -0.46997 | 0.1   | 0.354 | 2.01E-08 | Tcell | ISOC2        |
| PTRF.14   | 1.38E-12 | -0.51466 | 0     | 0.189 | 2.06E-08 | Tcell | PTRF         |
| EZR.11    | 1.39E-12 | 0.716306 | 0.464 | 0.34  | 2.08E-08 | Tcell | EZR          |
| DSEL.14   | 1.44E-12 | -0.49218 | 0.023 | 0.229 | 2.15E-08 | Tcell | DSEL         |
| UROD.9    | 1.45E-12 | -0.48166 | 0.105 | 0.364 | 2.17E-08 | Tcell | UROD         |
| LARP6.11  | 1.48E-12 | -0.52556 | 0.005 | 0.196 | 2.22E-08 | Tcell | LARP6        |
| AHCYL1.11 | 1.49E-12 | -0.43828 | 0.086 | 0.332 | 2.23E-08 | Tcell | AHCYL1       |
| SRGAP1.9  | 1.52E-12 | -0.53232 | 0.023 | 0.229 | 2.27E-08 | Tcell | SRGAP1       |
| DTYMK.13  | 1.55E-12 | -0.43829 | 0.086 | 0.334 | 2.32E-08 | Tcell | DTYMK        |
| RP11-553L | 1.56E-12 | -0.44602 | 0.023 | 0.23  | 2.33E-08 | Tcell | RP11-553L6.5 |
| PTS.10    | 1.59E-12 | -0.43677 | 0.082 | 0.331 | 2.38E-08 | Tcell | PTS          |
| SV2A.9    | 1.60E-12 | -0.31092 | 0.009 | 0.205 | 2.38E-08 | Tcell | SV2A         |
| TNC.13    | 1.60E-12 | -0.62143 | 0.009 | 0.205 | 2.40E-08 | Tcell | TNC          |
| QDPR.9    | 1.66E-12 | -0.40781 | 0.105 | 0.365 | 2.49E-08 | Tcell | QDPR         |
| CETN2.11  | 1.70E-12 | -0.50628 | 0.082 | 0.327 | 2.54E-08 | Tcell | CETN2        |
| TRIM9.12  | 1.72E-12 | -0.4085  | 0.027 | 0.237 | 2.57E-08 | Tcell | TRIM9        |
| MLEC.8    | 1.88E-12 | -0.34337 | 0.132 | 0.406 | 2.82E-08 | Tcell | MLEC         |
| HRAS.12   | 1.89E-12 | -0.41201 | 0.064 | 0.298 | 2.83E-08 | Tcell | HRAS         |
| LINC00996 | 1.98E-12 | 0.161695 | 0.036 | 0.004 | 2.96E-08 | Tcell | LINC00996    |
| LMO4.14   | 1.99E-12 | -0.44201 | 0.195 | 0.483 | 2.97E-08 | Tcell | LMO4         |
| DOK5.12   | 2.10E-12 | -0.5187  | 0     | 0.186 | 3.14E-08 | Tcell | DOK5         |
| ARL2.9    | 2.10E-12 | -0.45704 | 0.164 | 0.444 | 3.14E-08 | Tcell | ARL2         |
| DYNC1LI2. | 2.12E-12 | -0.36393 | 0.095 | 0.349 | 3.17E-08 | Tcell | DYNC1LI2     |
| VEGFA.10  | 2.14E-12 | -0.55116 | 0.018 | 0.22  | 3.19E-08 | Tcell | VEGFA        |
| ZKSCAN1.1 | 2.15E-12 | -0.31688 | 0.077 | 0.321 | 3.21E-08 | Tcell | ZKSCAN1      |
| IFNAR1.9  | 2.18E-12 | -0.45362 | 0.064 | 0.294 | 3.26E-08 | Tcell | IFNAR1       |
| PLS3.12   | 2.20E-12 | -0.51684 | 0.023 | 0.225 | 3.29E-08 | Tcell | PLS3         |
| SCCPDH.7  | 2.21E-12 | -0.33736 | 0.114 | 0.382 | 3.30E-08 | Tcell | SCCPDH       |



|           |          |          |       |       |          |       |               |
|-----------|----------|----------|-------|-------|----------|-------|---------------|
| PSRC1.11  | 2.27E-12 | -0.51734 | 0.05  | 0.268 | 3.39E-08 | Tcell | PSRC1         |
| ARMCX1.11 | 2.31E-12 | -0.54297 | 0.018 | 0.217 | 3.45E-08 | Tcell | ARMCX1        |
| MPC1.8    | 2.41E-12 | -0.42208 | 0.195 | 0.493 | 3.59E-08 | Tcell | MPC1          |
| C3orf14.9 | 2.41E-12 | -0.50239 | 0.05  | 0.268 | 3.61E-08 | Tcell | C3orf14       |
| SSR3.12   | 2.43E-12 | -0.36633 | 0.232 | 0.532 | 3.63E-08 | Tcell | SSR3          |
| HNRNPA1L2 | 2.45E-12 | 0.719483 | 0.341 | 0.198 | 3.66E-08 | Tcell | HNRNPA1L2     |
| RUVBL2.9  | 2.49E-12 | -0.39474 | 0.082 | 0.322 | 3.73E-08 | Tcell | RUVBL2        |
| VCAN.9    | 2.51E-12 | -0.40673 | 0.036 | 0.25  | 3.76E-08 | Tcell | VCAN          |
| SLC11A1.1 | 2.55E-12 | -0.63429 | 0.077 | 0.31  | 3.80E-08 | Tcell | SLC11A1       |
| VKORC1.8  | 2.67E-12 | -0.38303 | 0.209 | 0.502 | 3.99E-08 | Tcell | VKORC1        |
| LRRC59.9  | 2.69E-12 | -0.40529 | 0.109 | 0.362 | 4.02E-08 | Tcell | LRRC59        |
| IMPDH2.1C | 2.71E-12 | -0.46459 | 0.15  | 0.422 | 4.05E-08 | Tcell | IMPDH2        |
| CDK4.7    | 2.71E-12 | -0.44539 | 0.205 | 0.489 | 4.05E-08 | Tcell | CDK4          |
| RP11-620J | 2.74E-12 | -0.53583 | 0.055 | 0.274 | 4.10E-08 | Tcell | RP11-620J15.3 |
| ACP2.7    | 2.80E-12 | -0.47054 | 0.036 | 0.247 | 4.19E-08 | Tcell | ACP2          |
| C20orf27. | 2.85E-12 | -0.39193 | 0.105 | 0.365 | 4.25E-08 | Tcell | C20orf27      |
| BAIAP2.8  | 2.85E-12 | -0.47558 | 0.009 | 0.201 | 4.26E-08 | Tcell | BAIAP2        |
| SEC63.5   | 2.94E-12 | -0.27209 | 0.123 | 0.393 | 4.39E-08 | Tcell | SEC63         |
| TTL7.11   | 2.94E-12 | -0.4553  | 0.032 | 0.241 | 4.40E-08 | Tcell | TTL7          |
| LEPROT.4  | 2.95E-12 | -0.34211 | 0.127 | 0.396 | 4.41E-08 | Tcell | LEPROT        |
| CLIP3.12  | 3.04E-12 | -0.47728 | 0.009 | 0.201 | 4.54E-08 | Tcell | CLIP3         |
| CD14.14   | 3.05E-12 | -0.61504 | 0.164 | 0.413 | 4.56E-08 | Tcell | CD14          |
| CYFIP2.1C | 3.13E-12 | 0.710196 | 0.241 | 0.111 | 4.68E-08 | Tcell | CYFIP2        |
| DFNA5.6   | 3.14E-12 | -0.54828 | 0.009 | 0.199 | 4.70E-08 | Tcell | DFNA5         |
| CADM2.11  | 3.14E-12 | -0.57493 | 0.005 | 0.192 | 4.70E-08 | Tcell | CADM2         |
| TMX2.5    | 3.19E-12 | -0.42005 | 0.132 | 0.403 | 4.77E-08 | Tcell | TMX2          |
| SERPINF1. | 3.25E-12 | -0.74772 | 0.027 | 0.228 | 4.85E-08 | Tcell | SERPINF1      |
| IFT43.10  | 3.25E-12 | -0.43209 | 0.045 | 0.261 | 4.85E-08 | Tcell | IFT43         |
| PHF14.12  | 3.31E-12 | -0.37938 | 0.155 | 0.428 | 4.95E-08 | Tcell | PHF14         |
| SASH3.14  | 3.35E-12 | 0.57375  | 0.195 | 0.076 | 5.00E-08 | Tcell | SASH3         |
| METTL7B.1 | 3.39E-12 | -0.68995 | 0.018 | 0.216 | 5.06E-08 | Tcell | METTL7B       |
| MSRA.11   | 3.39E-12 | -0.47102 | 0.045 | 0.26  | 5.07E-08 | Tcell | MSRA          |
| TMEM54.11 | 3.41E-12 | -0.42892 | 0.009 | 0.199 | 5.09E-08 | Tcell | TMEM54        |
| RRBP1.9   | 3.41E-12 | -0.38958 | 0.068 | 0.301 | 5.10E-08 | Tcell | RRBP1         |
| RAE1.9    | 3.46E-12 | -0.48617 | 0.055 | 0.272 | 5.17E-08 | Tcell | RAE1          |
| HES1.10   | 3.46E-12 | -0.61117 | 0.009 | 0.2   | 5.17E-08 | Tcell | HES1          |
| EIF4EBP1. | 3.49E-12 | -0.36236 | 0.155 | 0.432 | 5.21E-08 | Tcell | EIF4EBP1      |
| LARP1.7   | 3.53E-12 | -0.40447 | 0.041 | 0.256 | 5.27E-08 | Tcell | LARP1         |
| CYHR1.9   | 3.53E-12 | -0.31396 | 0.055 | 0.283 | 5.27E-08 | Tcell | CYHR1         |
| C11orf49. | 3.53E-12 | -0.43398 | 0.032 | 0.241 | 5.28E-08 | Tcell | C11orf49      |
| BAD.8     | 3.63E-12 | -0.39471 | 0.145 | 0.422 | 5.43E-08 | Tcell | BAD           |
| PRKCB.13  | 3.64E-12 | 0.530332 | 0.132 | 0.04  | 5.44E-08 | Tcell | PRKCB         |
| USP22.13  | 3.68E-12 | -0.33886 | 0.082 | 0.324 | 5.49E-08 | Tcell | USP22         |
| PSD3.12   | 3.68E-12 | -0.47528 | 0.009 | 0.198 | 5.50E-08 | Tcell | PSD3          |
| PIGF.10   | 3.72E-12 | -0.43924 | 0.064 | 0.292 | 5.56E-08 | Tcell | PIGF          |
| MEIS2.12  | 3.87E-12 | -0.57982 | 0.014 | 0.207 | 5.79E-08 | Tcell | MEIS2         |
| FCGR3A.14 | 3.90E-12 | -0.69962 | 0.114 | 0.346 | 5.83E-08 | Tcell | FCGR3A        |
| MCFD2.4   | 3.92E-12 | -0.39352 | 0.059 | 0.29  | 5.86E-08 | Tcell | MCFD2         |
| AKAP12.13 | 3.92E-12 | -0.55707 | 0.005 | 0.19  | 5.86E-08 | Tcell | AKAP12        |
| EDNRB.9   | 4.05E-12 | -0.5432  | 0.005 | 0.191 | 6.06E-08 | Tcell | EDNRB         |
| CCDC124.7 | 4.08E-12 | -0.41891 | 0.191 | 0.476 | 6.09E-08 | Tcell | CCDC124       |

|             |           |           |        |        |           |       |                |
|-------------|-----------|-----------|--------|--------|-----------|-------|----------------|
| CCL2. 7     | 4. 08E-12 | -0. 73134 | 0. 027 | 0. 23  | 6. 10E-08 | Tcell | CCL2           |
| SDSL. 11    | 4. 09E-12 | -0. 52679 | 0. 005 | 0. 191 | 6. 11E-08 | Tcell | SDSL           |
| EGR1. 10    | 4. 15E-12 | -0. 49529 | 0. 223 | 0. 501 | 6. 20E-08 | Tcell | EGR1           |
| CHCHD6. 9   | 4. 26E-12 | -0. 44428 | 0. 032 | 0. 239 | 6. 37E-08 | Tcell | CHCHD6         |
| TCTN1. 10   | 4. 32E-12 | -0. 43824 | 0. 018 | 0. 216 | 6. 45E-08 | Tcell | TCTN1          |
| ROB01. 11   | 4. 40E-12 | -0. 45089 | 0      | 0. 181 | 6. 58E-08 | Tcell | ROB01          |
| C1QA. 14    | 4. 41E-12 | -0. 57242 | 0. 277 | 0. 542 | 6. 60E-08 | Tcell | C1QA           |
| PLOD3. 10   | 4. 52E-12 | -0. 44237 | 0. 023 | 0. 222 | 6. 76E-08 | Tcell | PLOD3          |
| QTRT1. 10   | 4. 54E-12 | -0. 40681 | 0. 091 | 0. 335 | 6. 78E-08 | Tcell | QTRT1          |
| FAM92A1. 1  | 4. 69E-12 | -0. 46573 | 0. 014 | 0. 205 | 7. 00E-08 | Tcell | FAM92A1        |
| GABARAP. 1  | 4. 83E-12 | -0. 47584 | 0. 182 | 0. 466 | 7. 22E-08 | Tcell | GABARAP        |
| RASSF2. 5   | 5. 00E-12 | -0. 42204 | 0. 045 | 0. 262 | 7. 47E-08 | Tcell | RASSF2         |
| POLR2I. 7   | 5. 02E-12 | -0. 39969 | 0. 245 | 0. 558 | 7. 50E-08 | Tcell | POLR2I         |
| RP11-395G   | 5. 06E-12 | -0. 4934  | 0      | 0. 181 | 7. 56E-08 | Tcell | RP11-395G23. 3 |
| FNBP1L. 13  | 5. 16E-12 | -0. 47955 | 0. 005 | 0. 188 | 7. 72E-08 | Tcell | FNBP1L         |
| PNPLA8. 9   | 5. 20E-12 | -0. 32244 | 0. 105 | 0. 352 | 7. 78E-08 | Tcell | PNPLA8         |
| FARP1. 7    | 5. 22E-12 | -0. 44585 | 0. 005 | 0. 189 | 7. 80E-08 | Tcell | FARP1          |
| TSN. 9      | 5. 27E-12 | -0. 32592 | 0. 123 | 0. 382 | 7. 88E-08 | Tcell | TSN            |
| AIMP2. 8    | 5. 33E-12 | -0. 46298 | 0. 036 | 0. 244 | 7. 97E-08 | Tcell | AIMP2          |
| GBAS. 9     | 5. 38E-12 | -0. 36397 | 0. 136 | 0. 405 | 8. 04E-08 | Tcell | GBAS           |
| PEPD. 5     | 5. 41E-12 | -0. 43586 | 0. 159 | 0. 434 | 8. 08E-08 | Tcell | PEPD           |
| KDELR2. 7   | 5. 46E-12 | -0. 36185 | 0. 259 | 0. 574 | 8. 16E-08 | Tcell | KDELR2         |
| PSMG3. 11   | 5. 46E-12 | -0. 35555 | 0. 086 | 0. 332 | 8. 16E-08 | Tcell | PSMG3          |
| LARS. 10    | 5. 50E-12 | -0. 36761 | 0. 1   | 0. 346 | 8. 21E-08 | Tcell | LARS           |
| SUMO2. 9    | 5. 79E-12 | 0. 239179 | 0. 795 | 0. 822 | 8. 65E-08 | Tcell | SUMO2          |
| EMC6. 8     | 5. 80E-12 | -0. 34487 | 0. 155 | 0. 439 | 8. 67E-08 | Tcell | EMC6           |
| DYNC1H1. 1  | 5. 83E-12 | -0. 30011 | 0. 095 | 0. 342 | 8. 71E-08 | Tcell | DYNC1H1        |
| MYEF2. 12   | 5. 83E-12 | -0. 40659 | 0. 009 | 0. 197 | 8. 71E-08 | Tcell | MYEF2          |
| EIF4A2. 9   | 5. 87E-12 | 0. 395409 | 0. 727 | 0. 719 | 8. 77E-08 | Tcell | EIF4A2         |
| CCT6A. 8    | 5. 92E-12 | -0. 35236 | 0. 268 | 0. 58  | 8. 85E-08 | Tcell | CCT6A          |
| FERMT2. 11  | 5. 99E-12 | -0. 40197 | 0. 014 | 0. 206 | 8. 95E-08 | Tcell | FERMT2         |
| CANX. 4     | 6. 08E-12 | -0. 36894 | 0. 264 | 0. 579 | 9. 08E-08 | Tcell | CANX           |
| KLHL7. 11   | 6. 09E-12 | -0. 3706  | 0. 059 | 0. 283 | 9. 10E-08 | Tcell | KLHL7          |
| CBX1. 11    | 6. 34E-12 | -0. 30376 | 0. 114 | 0. 372 | 9. 47E-08 | Tcell | CBX1           |
| MPHOSPH6. 6 | 6. 38E-12 | -0. 42952 | 0. 073 | 0. 295 | 9. 53E-08 | Tcell | MPHOSPH6       |
| ENO1. 8     | 6. 41E-12 | 0. 198274 | 0. 791 | 0. 794 | 9. 58E-08 | Tcell | ENO1           |
| SPRED1. 9   | 6. 76E-12 | -0. 435   | 0. 014 | 0. 205 | 1. 01E-07 | Tcell | SPRED1         |
| PERP. 3     | 6. 91E-12 | 0. 545966 | 0. 118 | 0. 034 | 1. 03E-07 | Tcell | PERP           |
| RBFOX2. 12  | 6. 94E-12 | -0. 47905 | 0. 023 | 0. 22  | 1. 04E-07 | Tcell | RBFOX2         |
| CBX5. 12    | 7. 07E-12 | -0. 40822 | 0. 109 | 0. 349 | 1. 06E-07 | Tcell | CBX5           |
| LILRB4. 14  | 7. 14E-12 | -0. 7948  | 0. 055 | 0. 259 | 1. 07E-07 | Tcell | LILRB4         |
| SEPT2. 7    | 7. 19E-12 | -0. 40547 | 0. 277 | 0. 587 | 1. 07E-07 | Tcell | 2-Sep          |
| GNAQ. 6     | 7. 25E-12 | -0. 38057 | 0. 064 | 0. 291 | 1. 08E-07 | Tcell | GNAQ           |
| C1orf54. 1  | 7. 41E-12 | -0. 63897 | 0. 032 | 0. 229 | 1. 11E-07 | Tcell | C1orf54        |
| TMEM71. 5   | 7. 67E-12 | 0. 401954 | 0. 095 | 0. 024 | 1. 15E-07 | Tcell | TMEM71         |
| SRI. 11     | 7. 85E-12 | -0. 37846 | 0. 414 | 0. 735 | 1. 17E-07 | Tcell | SRI            |
| CSNK1E. 12  | 8. 16E-12 | -0. 37263 | 0. 077 | 0. 311 | 1. 22E-07 | Tcell | CSNK1E         |
| PCDH17. 12  | 8. 18E-12 | -0. 46108 | 0. 009 | 0. 195 | 1. 22E-07 | Tcell | PCDH17         |
| BCKDK. 12   | 8. 28E-12 | -0. 40359 | 0. 082 | 0. 318 | 1. 24E-07 | Tcell | BCKDK          |
| VPS35. 5    | 8. 60E-12 | -0. 3444  | 0. 159 | 0. 436 | 1. 29E-07 | Tcell | VPS35          |
| FUBP3. 8    | 8. 65E-12 | -0. 34158 | 0. 036 | 0. 244 | 1. 29E-07 | Tcell | FUBP3          |

|              |          |          |       |       |          |       |              |
|--------------|----------|----------|-------|-------|----------|-------|--------------|
| MAPK8IP1. 8. | 8.85E-12 | -0.44758 | 0.009 | 0.195 | 1.32E-07 | Tcell | MAPK8IP1     |
| OPTN. 11     | 8.93E-12 | 0.785566 | 0.264 | 0.133 | 1.33E-07 | Tcell | OPTN         |
| ATP6V1F. 9   | 8.97E-12 | -0.38316 | 0.45  | 0.808 | 1.34E-07 | Tcell | ATP6V1F      |
| MPZL1. 6     | 9.14E-12 | -0.38623 | 0.041 | 0.252 | 1.37E-07 | Tcell | MPZL1        |
| TMEM55A. 7   | 9.18E-12 | -0.39267 | 0.032 | 0.237 | 1.37E-07 | Tcell | TMEM55A      |
| SLC9A3R1. 9. | 25E-12   | 0.762653 | 0.282 | 0.148 | 1.38E-07 | Tcell | SLC9A3R1     |
| AREG. 14     | 9.72E-12 | 0.735988 | 0.173 | 0.063 | 1.45E-07 | Tcell | AREG         |
| STMN3. 12    | 1.02E-11 | -0.41388 | 0.077 | 0.311 | 1.53E-07 | Tcell | STMN3        |
| AXL. 13      | 1.04E-11 | -0.74124 | 0.005 | 0.184 | 1.55E-07 | Tcell | AXL          |
| THY1. 12     | 1.05E-11 | -0.36449 | 0.045 | 0.26  | 1.56E-07 | Tcell | THY1         |
| OLR1. 14     | 1.05E-11 | -0.70973 | 0.05  | 0.254 | 1.57E-07 | Tcell | OLR1         |
| CD276. 6     | 1.05E-11 | -0.36262 | 0.027 | 0.226 | 1.58E-07 | Tcell | CD276        |
| AKIP1. 5     | 1.07E-11 | -0.42168 | 0.068 | 0.291 | 1.60E-07 | Tcell | AKIP1        |
| MAGI1. 11    | 1.08E-11 | -0.48649 | 0.014 | 0.201 | 1.62E-07 | Tcell | MAGI1        |
| DAAM1. 9     | 1.13E-11 | -0.49619 | 0.041 | 0.245 | 1.68E-07 | Tcell | DAAM1        |
| FUCA2. 12    | 1.15E-11 | -0.46226 | 0.041 | 0.247 | 1.72E-07 | Tcell | FUCA2        |
| TM7SF2. 12   | 1.16E-11 | -0.4092  | 0.032 | 0.234 | 1.74E-07 | Tcell | TM7SF2       |
| CA2. 12      | 1.17E-11 | -0.70005 | 0.032 | 0.229 | 1.76E-07 | Tcell | CA2          |
| TJP1. 10     | 1.20E-11 | -0.41002 | 0.005 | 0.184 | 1.79E-07 | Tcell | TJP1         |
| TAGLN3. 12   | 1.21E-11 | -0.61457 | 0.009 | 0.191 | 1.80E-07 | Tcell | TAGLN3       |
| DENND1C. 1   | 1.21E-11 | 0.462921 | 0.114 | 0.032 | 1.81E-07 | Tcell | DENND1C      |
| SDC3. 8      | 1.21E-11 | -0.51405 | 0.014 | 0.199 | 1.81E-07 | Tcell | SDC3         |
| FIBP. 8      | 1.24E-11 | -0.32097 | 0.205 | 0.488 | 1.85E-07 | Tcell | FIBP         |
| RP11-51J9    | 1.24E-11 | 0.763359 | 0.273 | 0.138 | 1.85E-07 | Tcell | RP11-51J9. 5 |
| ZNF677. 9    | 1.25E-11 | -0.45096 | 0.014 | 0.201 | 1.86E-07 | Tcell | ZNF677       |
| PHB. 10      | 1.36E-11 | -0.43845 | 0.259 | 0.56  | 2.04E-07 | Tcell | PHB          |
| SEPT8. 13    | 1.38E-11 | -0.48516 | 0.014 | 0.199 | 2.06E-07 | Tcell | 8-Sep        |
| PRRX1. 12    | 1.40E-11 | -0.46392 | 0     | 0.174 | 2.10E-07 | Tcell | PRRX1        |
| SPP1. 11     | 1.43E-11 | -0.41027 | 0.568 | 0.859 | 2.13E-07 | Tcell | SPP1         |
| HCLS1. 14    | 1.45E-11 | 0.397322 | 0.482 | 0.287 | 2.16E-07 | Tcell | HCLS1        |
| SCRN1. 11    | 1.47E-11 | -0.39645 | 0.005 | 0.183 | 2.20E-07 | Tcell | SCRN1        |
| GPR34. 14    | 1.48E-11 | -0.81004 | 0.068 | 0.271 | 2.21E-07 | Tcell | GPR34        |
| WBSCR22. 1   | 1.57E-11 | -0.37062 | 0.205 | 0.499 | 2.35E-07 | Tcell | WBSCR22      |
| ACTR3. 7     | 1.58E-11 | 0.44718  | 0.582 | 0.559 | 2.36E-07 | Tcell | ACTR3        |
| GLUL. 10     | 1.58E-11 | -0.43323 | 0.45  | 0.793 | 2.37E-07 | Tcell | GLUL         |
| SPRY2. 11    | 1.62E-11 | -0.42163 | 0.027 | 0.222 | 2.42E-07 | Tcell | SPRY2        |
| CDC42EP4. 1. | 62E-11   | -0.50518 | 0.018 | 0.204 | 2.42E-07 | Tcell | CDC42EP4     |
| ARMCX6. 4    | 1.64E-11 | -0.40707 | 0.041 | 0.246 | 2.45E-07 | Tcell | ARMCX6       |
| SIRT2. 10    | 1.68E-11 | -0.38962 | 0.155 | 0.421 | 2.51E-07 | Tcell | SIRT2        |
| LYPD1. 11    | 1.70E-11 | -0.48925 | 0.014 | 0.199 | 2.54E-07 | Tcell | LYPD1        |
| HES6. 12     | 1.74E-11 | -0.53849 | 0.073 | 0.29  | 2.60E-07 | Tcell | HES6         |
| PRAF2. 11    | 1.80E-11 | -0.3365  | 0.077 | 0.306 | 2.70E-07 | Tcell | PRAF2        |
| CDK16. 8     | 1.81E-11 | -0.22403 | 0.036 | 0.239 | 2.71E-07 | Tcell | CDK16        |
| ZNHIT1. 4    | 1.89E-11 | -0.39606 | 0.332 | 0.657 | 2.82E-07 | Tcell | ZNHIT1       |
| ZNF462. 12   | 1.93E-11 | -0.47573 | 0.005 | 0.18  | 2.89E-07 | Tcell | ZNF462       |
| ARC. 10      | 2.04E-11 | -0.59549 | 0.023 | 0.211 | 3.04E-07 | Tcell | ARC          |
| FKBP9. 10    | 2.04E-11 | -0.41881 | 0.005 | 0.18  | 3.05E-07 | Tcell | FKBP9        |
| PLAUR. 14    | 2.04E-11 | -0.62789 | 0.141 | 0.371 | 3.05E-07 | Tcell | PLAUR        |
| SMAD1. 9     | 2.13E-11 | -0.41266 | 0.005 | 0.18  | 3.19E-07 | Tcell | SMAD1        |
| PPP1R14B. 2. | 21E-11   | -0.39477 | 0.109 | 0.349 | 3.31E-07 | Tcell | PPP1R14B     |
| PJA2. 12     | 2.23E-11 | -0.36753 | 0.1   | 0.34  | 3.33E-07 | Tcell | PJA2         |

|            |          |          |       |       |          |       |          |
|------------|----------|----------|-------|-------|----------|-------|----------|
| AES.13     | 2.24E-11 | 0.556733 | 0.509 | 0.408 | 3.35E-07 | Tcell | AES      |
| DCX.14     | 2.32E-11 | -0.59152 | 0.023 | 0.208 | 3.46E-07 | Tcell | DCX      |
| ASRGL1.12  | 2.32E-11 | -0.44951 | 0.018 | 0.204 | 3.47E-07 | Tcell | ASRGL1   |
| PALLD.9    | 2.32E-11 | -0.42929 | 0.018 | 0.201 | 3.47E-07 | Tcell | PALLD    |
| RNF180.13  | 2.33E-11 | -0.42836 | 0     | 0.171 | 3.48E-07 | Tcell | RNF180   |
| ITPA.5     | 2.34E-11 | -0.32044 | 0.15  | 0.409 | 3.50E-07 | Tcell | ITPA     |
| CARD16.12  | 2.38E-11 | 0.495268 | 0.386 | 0.226 | 3.56E-07 | Tcell | CARD16   |
| LDLRAD3.1  | 2.40E-11 | -0.41939 | 0.005 | 0.179 | 3.59E-07 | Tcell | LDLRAD3  |
| CMSS1.10   | 2.50E-11 | -0.17113 | 0.073 | 0.294 | 3.74E-07 | Tcell | CMSS1    |
| FAM200B.9  | 2.51E-11 | -0.24824 | 0.114 | 0.371 | 3.75E-07 | Tcell | FAM200B  |
| CRYL1.5    | 2.56E-11 | -0.23819 | 0.082 | 0.314 | 3.83E-07 | Tcell | CRYL1    |
| RAC1.7     | 2.57E-11 | -0.36276 | 0.486 | 0.747 | 3.85E-07 | Tcell | RAC1     |
| YWHAZ.4    | 2.58E-11 | 0.512536 | 0.582 | 0.534 | 3.85E-07 | Tcell | YWHAZ    |
| ADAM8.12   | 2.58E-11 | 0.439128 | 0.132 | 0.041 | 3.86E-07 | Tcell | ADAM8    |
| EMC10.7    | 2.73E-11 | -0.30224 | 0.177 | 0.455 | 4.08E-07 | Tcell | EMC10    |
| ING4.9     | 2.78E-11 | -0.41876 | 0.059 | 0.271 | 4.15E-07 | Tcell | ING4     |
| DNAJB1.7   | 2.80E-11 | 0.473636 | 0.655 | 0.609 | 4.18E-07 | Tcell | DNAJB1   |
| RAB20.12   | 2.81E-11 | -0.66127 | 0.045 | 0.24  | 4.20E-07 | Tcell | RAB20    |
| MIF.8      | 2.83E-11 | 0.340418 | 0.682 | 0.67  | 4.23E-07 | Tcell | MIF      |
| RASGRP2.8  | 2.88E-11 | 0.546387 | 0.145 | 0.05  | 4.30E-07 | Tcell | RASGRP2  |
| PEX10.9    | 2.92E-11 | -0.37844 | 0.014 | 0.196 | 4.36E-07 | Tcell | PEX10    |
| CKAP4.12   | 2.93E-11 | -0.33722 | 0.023 | 0.213 | 4.37E-07 | Tcell | CKAP4    |
| SMCHD1.11  | 2.98E-11 | 0.849243 | 0.314 | 0.185 | 4.45E-07 | Tcell | SMCHD1   |
| CHTOP.9    | 2.99E-11 | -0.37048 | 0.123 | 0.371 | 4.47E-07 | Tcell | CHTOP    |
| IFT57.11   | 3.12E-11 | -0.39852 | 0.045 | 0.251 | 4.66E-07 | Tcell | IFT57    |
| IP6K2.11   | 3.17E-11 | -0.38634 | 0.168 | 0.44  | 4.74E-07 | Tcell | IP6K2    |
| PGM2L1.11  | 3.22E-11 | -0.45006 | 0.05  | 0.259 | 4.81E-07 | Tcell | PGM2L1   |
| ANXA5.8    | 3.22E-11 | -0.42202 | 0.414 | 0.732 | 4.82E-07 | Tcell | ANXA5    |
| C5orf15.3  | 3.25E-11 | -0.37827 | 0.095 | 0.328 | 4.86E-07 | Tcell | C5orf15  |
| NR2F1.10   | 3.36E-11 | -0.39067 | 0     | 0.169 | 5.03E-07 | Tcell | NR2F1    |
| SMIM7.6    | 3.38E-11 | -0.36485 | 0.214 | 0.511 | 5.05E-07 | Tcell | SMIM7    |
| KIAA1715.3 | 3.42E-11 | -0.25693 | 0.05  | 0.259 | 5.10E-07 | Tcell | KIAA1715 |
| PTPN12.6   | 3.42E-11 | -0.38488 | 0.032 | 0.226 | 5.11E-07 | Tcell | PTPN12   |
| RASSF3.1C  | 3.43E-11 | 0.485809 | 0.127 | 0.04  | 5.12E-07 | Tcell | RASSF3   |
| POP7.11    | 3.44E-11 | -0.3226  | 0.145 | 0.399 | 5.14E-07 | Tcell | POP7     |
| STMN1.13   | 3.46E-11 | -0.40885 | 0.345 | 0.636 | 5.18E-07 | Tcell | STMN1    |
| ICAM2.13   | 3.48E-11 | 0.443526 | 0.114 | 0.033 | 5.20E-07 | Tcell | ICAM2    |
| MBOAT2.13  | 3.65E-11 | -0.41603 | 0.009 | 0.185 | 5.45E-07 | Tcell | MBOAT2   |
| NAMPT.13   | 3.73E-11 | -0.60583 | 0.195 | 0.442 | 5.58E-07 | Tcell | NAMPT    |
| CAPZA2.5   | 3.75E-11 | -0.36917 | 0.323 | 0.66  | 5.60E-07 | Tcell | CAPZA2   |
| APRT.10    | 3.81E-11 | 0.445306 | 0.6   | 0.53  | 5.70E-07 | Tcell | APRT     |
| CD302.12   | 3.81E-11 | -0.58887 | 0.023 | 0.208 | 5.70E-07 | Tcell | CD302    |
| MRC2.9     | 3.82E-11 | -0.40406 | 0.005 | 0.177 | 5.71E-07 | Tcell | MRC2     |
| MCOLN1.4   | 3.83E-11 | -0.38983 | 0.045 | 0.247 | 5.72E-07 | Tcell | MCOLN1   |
| HMGB3.13   | 3.91E-11 | -0.50938 | 0.073 | 0.283 | 5.84E-07 | Tcell | HMGB3    |
| THRA.10    | 3.93E-11 | -0.38975 | 0.041 | 0.243 | 5.88E-07 | Tcell | THRA     |
| HSD17B4.6  | 4.10E-11 | -0.46466 | 0.045 | 0.245 | 6.12E-07 | Tcell | HSD17B4  |
| NDUFS4.4   | 4.10E-11 | -0.38916 | 0.218 | 0.51  | 6.13E-07 | Tcell | NDUFS4   |
| EEA1.7     | 4.13E-11 | -0.36018 | 0.045 | 0.249 | 6.17E-07 | Tcell | EEA1     |
| PPP1R2.6   | 4.14E-11 | 0.722291 | 0.468 | 0.366 | 6.19E-07 | Tcell | PPP1R2   |
| PROX1.12   | 4.24E-11 | -0.44635 | 0     | 0.167 | 6.33E-07 | Tcell | PROX1    |

|             |           |           |        |        |           |       |               |
|-------------|-----------|-----------|--------|--------|-----------|-------|---------------|
| RP11-489E   | 4. 24E-11 | 0. 496409 | 0. 082 | 0. 019 | 6. 34E-07 | Tcell | RP11-489E7. 4 |
| ARHGFEF2. 1 | 4. 28E-11 | -0. 38055 | 0. 073 | 0. 293 | 6. 39E-07 | Tcell | ARHGFEF2      |
| BAZ2B. 9    | 4. 29E-11 | -0. 32599 | 0. 091 | 0. 325 | 6. 41E-07 | Tcell | BAZ2B         |
| ADORA3. 14  | 4. 29E-11 | -0. 70369 | 0. 064 | 0. 264 | 6. 42E-07 | Tcell | ADORA3        |
| RNASE6. 14  | 4. 30E-11 | -0. 75126 | 0. 077 | 0. 279 | 6. 43E-07 | Tcell | RNASE6        |
| DLGAP4. 1C  | 4. 43E-11 | -0. 35837 | 0. 073 | 0. 297 | 6. 62E-07 | Tcell | DLGAP4        |
| BICD1. 10   | 4. 48E-11 | -0. 38244 | 0. 023 | 0. 208 | 6. 70E-07 | Tcell | BICD1         |
| SERPING1. 4 | 5. 55E-11 | -0. 78722 | 0. 041 | 0. 238 | 6. 80E-07 | Tcell | SERPING1      |
| ILVBL. 7    | 4. 65E-11 | -0. 29371 | 0. 05  | 0. 255 | 6. 96E-07 | Tcell | ILVBL         |
| PPP1CA. 1C  | 4. 67E-11 | 0. 425178 | 0. 6   | 0. 571 | 6. 98E-07 | Tcell | PPP1CA        |
| HSD11B1L. 4 | 7. 4E-11  | -0. 34698 | 0. 023 | 0. 208 | 7. 08E-07 | Tcell | HSD11B1L      |
| MPDU1. 5    | 4. 82E-11 | -0. 39497 | 0. 095 | 0. 321 | 7. 20E-07 | Tcell | MPDU1         |
| TRIO. 10    | 4. 83E-11 | -0. 4115  | 0. 005 | 0. 175 | 7. 22E-07 | Tcell | TRIO          |
| BCAR1. 11   | 4. 84E-11 | -0. 4061  | 0. 005 | 0. 175 | 7. 23E-07 | Tcell | BCAR1         |
| NPL. 13     | 4. 98E-11 | -0. 67472 | 0. 023 | 0. 204 | 7. 44E-07 | Tcell | NPL           |
| LIMS1. 13   | 4. 99E-11 | -0. 47872 | 0. 186 | 0. 444 | 7. 46E-07 | Tcell | LIMS1         |
| TNFRSF21. 5 | 5. 05E-11 | -0. 43493 | 0      | 0. 166 | 7. 55E-07 | Tcell | TNFRSF21      |
| MBP. 8      | 5. 07E-11 | 0. 546816 | 0. 395 | 0. 235 | 7. 58E-07 | Tcell | MBP           |
| AK4. 11     | 5. 15E-11 | -0. 45597 | 0. 009 | 0. 183 | 7. 69E-07 | Tcell | AK4           |
| APOPT1. 7   | 5. 18E-11 | -0. 31106 | 0. 132 | 0. 386 | 7. 74E-07 | Tcell | APOPT1        |
| MEX3A. 12   | 5. 45E-11 | -0. 45998 | 0. 009 | 0. 181 | 8. 14E-07 | Tcell | MEX3A         |
| DUSP5. 4    | 5. 53E-11 | 0. 61908  | 0. 177 | 0. 071 | 8. 27E-07 | Tcell | DUSP5         |
| ELAVL4. 12  | 5. 63E-11 | -0. 66997 | 0. 009 | 0. 182 | 8. 42E-07 | Tcell | ELAVL4        |
| SMARCA4. 1  | 5. 67E-11 | -0. 28656 | 0. 123 | 0. 365 | 8. 48E-07 | Tcell | SMARCA4       |
| EMP1. 9     | 5. 79E-11 | -0. 55493 | 0. 009 | 0. 182 | 8. 65E-07 | Tcell | EMP1          |
| NCKAP1. 11  | 5. 79E-11 | -0. 32071 | 0. 014 | 0. 192 | 8. 65E-07 | Tcell | NCKAP1        |
| VAMP3. 10   | 5. 79E-11 | -0. 34475 | 0. 114 | 0. 353 | 8. 66E-07 | Tcell | VAMP3         |
| CLTA. 7     | 5. 85E-11 | -0. 35291 | 0. 318 | 0. 634 | 8. 75E-07 | Tcell | CLTA          |
| CSF1R. 14   | 5. 86E-11 | -0. 68702 | 0. 073 | 0. 272 | 8. 76E-07 | Tcell | CSF1R         |
| PTK2. 8     | 5. 94E-11 | -0. 44833 | 0. 009 | 0. 181 | 8. 88E-07 | Tcell | PTK2          |
| HENMT1. 11  | 6. 05E-11 | 0. 313282 | 0. 109 | 0. 031 | 9. 04E-07 | Tcell | HENMT1        |
| GPRC5B. 11  | 6. 10E-11 | -0. 40327 | 0. 032 | 0. 222 | 9. 11E-07 | Tcell | GPRC5B        |
| MTPN. 8     | 6. 15E-11 | -0. 27732 | 0. 168 | 0. 437 | 9. 20E-07 | Tcell | MTPN          |
| CHPF. 11    | 6. 18E-11 | -0. 34287 | 0. 055 | 0. 262 | 9. 23E-07 | Tcell | CHPF          |
| JAGN1. 7    | 6. 19E-11 | -0. 32572 | 0. 091 | 0. 324 | 9. 25E-07 | Tcell | JAGN1         |
| CSNK1A1. 9  | 6. 26E-11 | -0. 34364 | 0. 255 | 0. 564 | 9. 36E-07 | Tcell | CSNK1A1       |
| NFE2L1. 5   | 6. 40E-11 | -0. 38568 | 0. 014 | 0. 191 | 9. 56E-07 | Tcell | NFE2L1        |
| ZNF593. 8   | 6. 49E-11 | -0. 42726 | 0. 086 | 0. 306 | 9. 69E-07 | Tcell | ZNF593        |
| MSRB2. 9    | 6. 53E-11 | -0. 34731 | 0. 055 | 0. 259 | 9. 75E-07 | Tcell | MSRB2         |
| TROVE2. 11  | 6. 57E-11 | -0. 34303 | 0. 168 | 0. 438 | 9. 82E-07 | Tcell | TROVE2        |
| WDR41. 8    | 6. 63E-11 | -0. 41989 | 0. 036 | 0. 229 | 9. 90E-07 | Tcell | WDR41         |
| PYGL. 12    | 6. 81E-11 | -0. 5339  | 0. 018 | 0. 195 | 1. 02E-06 | Tcell | PYGL          |
| SPATS2L. 8  | 6. 92E-11 | -0. 41482 | 0. 105 | 0. 336 | 1. 03E-06 | Tcell | SPATS2L       |
| TRIP6. 12   | 7. 04E-11 | -0. 40348 | 0. 05  | 0. 253 | 1. 05E-06 | Tcell | TRIP6         |
| GNB1. 8     | 7. 23E-11 | -0. 27293 | 0. 15  | 0. 42  | 1. 08E-06 | Tcell | GNB1          |
| COL9A3. 13  | 7. 37E-11 | -0. 45307 | 0. 014 | 0. 189 | 1. 10E-06 | Tcell | COL9A3        |
| PHYHIPL. 1  | 7. 39E-11 | -0. 55645 | 0. 014 | 0. 188 | 1. 10E-06 | Tcell | PHYHIPL       |
| AAMP. 6     | 7. 41E-11 | -0. 3511  | 0. 168 | 0. 432 | 1. 11E-06 | Tcell | AAMP          |
| PAICS. 13   | 7. 43E-11 | -0. 34989 | 0. 086 | 0. 312 | 1. 11E-06 | Tcell | PAICS         |
| HDHD2. 7    | 7. 75E-11 | -0. 37943 | 0. 055 | 0. 261 | 1. 16E-06 | Tcell | HDHD2         |
| RSPRY1. 11  | 7. 76E-11 | -0. 35272 | 0. 05  | 0. 252 | 1. 16E-06 | Tcell | RSPRY1        |

|             |          |          |       |       |          |       |          |
|-------------|----------|----------|-------|-------|----------|-------|----------|
| NLN. 8      | 7.93E-11 | -0.37079 | 0.014 | 0.189 | 1.18E-06 | Tcell | NLN      |
| TMEM45A. 7  | 8.00E-11 | -0.56506 | 0.009 | 0.18  | 1.20E-06 | Tcell | TMEM45A  |
| UBE2M. 8    | 8.01E-11 | -0.41253 | 0.041 | 0.234 | 1.20E-06 | Tcell | UBE2M    |
| CYTH2. 12   | 8.01E-11 | -0.30998 | 0.109 | 0.346 | 1.20E-06 | Tcell | CYTH2    |
| GINM1. 5    | 8.16E-11 | -0.31869 | 0.082 | 0.301 | 1.22E-06 | Tcell | GINM1    |
| PSMD2. 9    | 8.32E-11 | -0.33902 | 0.191 | 0.466 | 1.24E-06 | Tcell | PSMD2    |
| SRPX. 11    | 8.44E-11 | -0.50199 | 0.009 | 0.18  | 1.26E-06 | Tcell | SRPX     |
| TUBB6. 10   | 8.48E-11 | -0.51697 | 0.014 | 0.187 | 1.27E-06 | Tcell | TUBB6    |
| EVI5. 7     | 8.49E-11 | -0.39345 | 0.014 | 0.188 | 1.27E-06 | Tcell | EVI5     |
| CISD2. 6    | 8.59E-11 | -0.33633 | 0.155 | 0.409 | 1.28E-06 | Tcell | CISD2    |
| METTL7A. 6  | 8.60E-11 | -0.53895 | 0.036 | 0.224 | 1.29E-06 | Tcell | METTL7A  |
| NF1. 7      | 8.72E-11 | -0.30941 | 0.036 | 0.227 | 1.30E-06 | Tcell | NF1      |
| STX7. 11    | 8.73E-11 | -0.38837 | 0.064 | 0.272 | 1.31E-06 | Tcell | STX7     |
| RGMA. 13    | 8.94E-11 | -0.4375  | 0.023 | 0.204 | 1.34E-06 | Tcell | RGMA     |
| CYBRD1. 6   | 8.96E-11 | -0.44735 | 0.009 | 0.179 | 1.34E-06 | Tcell | CYBRD1   |
| HNMT. 13    | 9.24E-11 | -0.63291 | 0.036 | 0.222 | 1.38E-06 | Tcell | HNMT     |
| C1orf21. 1  | 9.31E-11 | -0.39415 | 0.023 | 0.203 | 1.39E-06 | Tcell | C1orf21  |
| EXTL2. 11   | 9.49E-11 | -0.3879  | 0.005 | 0.171 | 1.42E-06 | Tcell | EXTL2    |
| IFT81. 11   | 9.51E-11 | -0.37556 | 0     | 0.162 | 1.42E-06 | Tcell | IFT81    |
| B3GALNT1. 9 | 9.74E-11 | -0.42386 | 0.014 | 0.187 | 1.46E-06 | Tcell | B3GALNT1 |
| NPAS3. 12   | 9.77E-11 | -0.40239 | 0     | 0.162 | 1.46E-06 | Tcell | NPAS3    |
| CYBB. 14    | 9.80E-11 | -0.70919 | 0.023 | 0.195 | 1.46E-06 | Tcell | CYBB     |
| PBXIP1. 7   | 9.94E-11 | 0.648269 | 0.259 | 0.132 | 1.49E-06 | Tcell | PBXIP1   |
| REEP2. 11   | 9.99E-11 | -0.26155 | 0.023 | 0.205 | 1.49E-06 | Tcell | REEP2    |
| CYB5D2. 8   | 1.02E-10 | -0.36353 | 0.041 | 0.237 | 1.52E-06 | Tcell | CYB5D2   |
| KLC1. 12    | 1.04E-10 | -0.34175 | 0.123 | 0.364 | 1.55E-06 | Tcell | KLC1     |
| SLC43A2. 1  | 1.05E-10 | -0.42555 | 0.05  | 0.249 | 1.56E-06 | Tcell | SLC43A2  |
| GTF2F2. 7   | 1.07E-10 | -0.37327 | 0.086 | 0.303 | 1.60E-06 | Tcell | GTF2F2   |
| IFT52. 11   | 1.07E-10 | -0.42788 | 0.059 | 0.26  | 1.60E-06 | Tcell | IFT52    |
| CBFB. 5     | 1.08E-10 | 0.798217 | 0.355 | 0.231 | 1.61E-06 | Tcell | CBFB     |
| IGFBP7. 11  | 1.08E-10 | -0.59827 | 0.073 | 0.273 | 1.62E-06 | Tcell | IGFBP7   |
| COPS6. 8    | 1.10E-10 | -0.37008 | 0.3   | 0.61  | 1.64E-06 | Tcell | COPS6    |
| MAP4K4. 1C  | 1.11E-10 | -0.3377  | 0.05  | 0.252 | 1.66E-06 | Tcell | MAP4K4   |
| MARCH1. 11  | 1.12E-10 | -0.53343 | 0.018 | 0.194 | 1.68E-06 | Tcell | 1-Mar    |
| YIF1B. 6    | 1.16E-10 | -0.32083 | 0.105 | 0.337 | 1.73E-06 | Tcell | YIF1B    |
| HMBS. 5     | 1.16E-10 | -0.41983 | 0.023 | 0.2   | 1.73E-06 | Tcell | HMBS     |
| NUCKS1. 9   | 1.18E-10 | -0.40737 | 0.318 | 0.642 | 1.76E-06 | Tcell | NUCKS1   |
| CEP170. 7   | 1.20E-10 | -0.29944 | 0.059 | 0.265 | 1.80E-06 | Tcell | CEP170   |
| CHD7. 11    | 1.21E-10 | -0.3215  | 0.077 | 0.293 | 1.81E-06 | Tcell | CHD7     |
| CBS. 12     | 1.21E-10 | -0.38283 | 0     | 0.16  | 1.81E-06 | Tcell | CBS      |
| TMEM14C. 1  | 1.21E-10 | -0.32707 | 0.291 | 0.597 | 1.81E-06 | Tcell | TMEM14C  |
| COA4. 7     | 1.24E-10 | -0.33486 | 0.141 | 0.391 | 1.85E-06 | Tcell | COA4     |
| C21orf33. 1 | 1.24E-10 | -0.33515 | 0.127 | 0.368 | 1.85E-06 | Tcell | C21orf33 |
| ZNF608. 9   | 1.24E-10 | -0.36841 | 0     | 0.16  | 1.86E-06 | Tcell | ZNF608   |
| TCEAL1. 9   | 1.26E-10 | -0.46133 | 0.059 | 0.259 | 1.88E-06 | Tcell | TCEAL1   |
| CSF2RA. 13  | 1.26E-10 | -0.69992 | 0.027 | 0.206 | 1.88E-06 | Tcell | CSF2RA   |
| OXR1. 10    | 1.26E-10 | -0.36816 | 0.055 | 0.255 | 1.88E-06 | Tcell | OXR1     |
| PPIC. 12    | 1.26E-10 | -0.40387 | 0.014 | 0.186 | 1.88E-06 | Tcell | PPIC     |
| CCNDBP1. 1  | 1.29E-10 | 0.726013 | 0.336 | 0.202 | 1.93E-06 | Tcell | CCNDBP1  |
| ZNF302. 12  | 1.30E-10 | -0.29218 | 0.091 | 0.319 | 1.95E-06 | Tcell | ZNF302   |
| DKK3. 11    | 1.33E-10 | -0.31049 | 0.023 | 0.203 | 1.98E-06 | Tcell | DKK3     |

|             |           |           |        |        |           |       |              |
|-------------|-----------|-----------|--------|--------|-----------|-------|--------------|
| UBE2D4. 5   | 1. 34E-10 | -0. 40925 | 0. 018 | 0. 193 | 2. 01E-06 | Tcell | UBE2D4       |
| FNDC3A. 6   | 1. 34E-10 | -0. 3526  | 0. 032 | 0. 218 | 2. 01E-06 | Tcell | FNDC3A       |
| FLOT1. 13   | 1. 35E-10 | -0. 35015 | 0. 227 | 0. 508 | 2. 01E-06 | Tcell | FLOT1        |
| ARF4. 6     | 1. 38E-10 | -0. 31057 | 0. 305 | 0. 628 | 2. 06E-06 | Tcell | ARF4         |
| OSBPL1A. 9  | 1. 38E-10 | -0. 36675 | 0. 018 | 0. 194 | 2. 07E-06 | Tcell | OSBPL1A      |
| UBE2R2. 9   | 1. 39E-10 | -0. 35198 | 0. 077 | 0. 29  | 2. 08E-06 | Tcell | UBE2R2       |
| UBA1. 5     | 1. 39E-10 | -0. 33789 | 0. 114 | 0. 346 | 2. 08E-06 | Tcell | UBA1         |
| DAG1. 9     | 1. 42E-10 | -0. 36416 | 0. 009 | 0. 176 | 2. 12E-06 | Tcell | DAG1         |
| EFHC1. 10   | 1. 44E-10 | -0. 40615 | 0. 027 | 0. 209 | 2. 16E-06 | Tcell | EFHC1        |
| CNRIP1. 11  | 1. 44E-10 | -0. 45893 | 0. 027 | 0. 208 | 2. 16E-06 | Tcell | CNRIP1       |
| GCA. 13     | 1. 46E-10 | -0. 52216 | 0. 091 | 0. 303 | 2. 19E-06 | Tcell | GCA          |
| NDUFA8. 2   | 1. 49E-10 | -0. 31268 | 0. 214 | 0. 496 | 2. 23E-06 | Tcell | NDUFA8       |
| SCD. 13     | 1. 52E-10 | -0. 47683 | 0. 032 | 0. 216 | 2. 27E-06 | Tcell | SCD          |
| PDZD11. 8   | 1. 56E-10 | -0. 31806 | 0. 123 | 0. 363 | 2. 34E-06 | Tcell | PDZD11       |
| AP1S2. 11   | 1. 58E-10 | -0. 3338  | 0. 223 | 0. 505 | 2. 36E-06 | Tcell | AP1S2        |
| LSAMP. 10   | 1. 58E-10 | -0. 51719 | 0. 009 | 0. 175 | 2. 37E-06 | Tcell | LSAMP        |
| RP11-14N7   | 1. 59E-10 | -0. 40087 | 0. 027 | 0. 208 | 2. 38E-06 | Tcell | RP11-14N7. 2 |
| NCBP2. 11   | 1. 62E-10 | -0. 33656 | 0. 177 | 0. 445 | 2. 41E-06 | Tcell | NCBP2        |
| SLAIN1. 12  | 1. 62E-10 | -0. 46013 | 0. 027 | 0. 206 | 2. 42E-06 | Tcell | SLAIN1       |
| HIBADH. 4   | 1. 64E-10 | -0. 38747 | 0. 041 | 0. 231 | 2. 45E-06 | Tcell | HIBADH       |
| KCTD12. 14  | 1. 66E-10 | -0. 49676 | 0. 05  | 0. 24  | 2. 47E-06 | Tcell | KCTD12       |
| ATP5G2. 7   | 1. 68E-10 | 0. 148665 | 0. 795 | 0. 871 | 2. 51E-06 | Tcell | ATP5G2       |
| NT5DC2. 1C  | 1. 68E-10 | -0. 36581 | 0. 005 | 0. 167 | 2. 51E-06 | Tcell | NT5DC2       |
| DCLK2. 13   | 1. 69E-10 | -0. 39899 | 0. 023 | 0. 199 | 2. 52E-06 | Tcell | DCLK2        |
| ASCL1. 12   | 1. 70E-10 | -0. 5384  | 0. 018 | 0. 189 | 2. 54E-06 | Tcell | ASCL1        |
| ALCAM. 10   | 1. 76E-10 | -0. 36328 | 0. 023 | 0. 199 | 2. 62E-06 | Tcell | ALCAM        |
| PCBD1. 7    | 1. 79E-10 | -0. 36311 | 0. 109 | 0. 335 | 2. 67E-06 | Tcell | PCBD1        |
| PPIA. 7     | 1. 79E-10 | 0. 14534  | 0. 809 | 0. 876 | 2. 68E-06 | Tcell | PPIA         |
| KNOP1. 11   | 1. 85E-10 | -0. 34335 | 0. 064 | 0. 263 | 2. 76E-06 | Tcell | KNOP1        |
| RND2. 9     | 1. 85E-10 | -0. 43597 | 0. 005 | 0. 166 | 2. 76E-06 | Tcell | RND2         |
| H1FO. 4     | 1. 87E-10 | -0. 56189 | 0. 068 | 0. 267 | 2. 80E-06 | Tcell | H1FO         |
| TUBG1. 11   | 1. 89E-10 | -0. 43876 | 0. 05  | 0. 237 | 2. 83E-06 | Tcell | TUBG1        |
| SH2D3A      | 1. 91E-10 | 0. 226842 | 0. 036 | 0. 005 | 2. 85E-06 | Tcell | SH2D3A       |
| SPAG16. 12  | 1. 92E-10 | -0. 35106 | 0. 082 | 0. 3   | 2. 86E-06 | Tcell | SPAG16       |
| TRIM44. 11  | 1. 95E-10 | -0. 35172 | 0. 077 | 0. 291 | 2. 92E-06 | Tcell | TRIM44       |
| TFPT. 10    | 2. 05E-10 | -0. 33507 | 0. 091 | 0. 312 | 3. 06E-06 | Tcell | TFPT         |
| NBPF1. 12   | 2. 06E-10 | -0. 33412 | 0. 045 | 0. 239 | 3. 07E-06 | Tcell | NBPF1        |
| CDC42BPA. 2 | 2. 06E-10 | -0. 37583 | 0. 014 | 0. 182 | 3. 08E-06 | Tcell | CDC42BPA     |
| TUBB. 12    | 2. 07E-10 | -0. 36437 | 0. 477 | 0. 776 | 3. 09E-06 | Tcell | TUBB         |
| KIF21A. 14  | 2. 07E-10 | -0. 36656 | 0. 091 | 0. 306 | 3. 09E-06 | Tcell | KIF21A       |
| SMARCA1. 1  | 2. 09E-10 | -0. 35439 | 0. 009 | 0. 174 | 3. 13E-06 | Tcell | SMARCA1      |
| DNTTIP1. 6  | 2. 10E-10 | -0. 35521 | 0. 105 | 0. 334 | 3. 15E-06 | Tcell | DNTTIP1      |
| TSEN54. 4   | 2. 13E-10 | 0. 722502 | 0. 232 | 0. 113 | 3. 18E-06 | Tcell | TSEN54       |
| NAT14. 10   | 2. 22E-10 | -0. 34511 | 0. 014 | 0. 183 | 3. 32E-06 | Tcell | NAT14        |
| RGS17. 10   | 2. 24E-10 | -0. 41427 | 0. 005 | 0. 165 | 3. 34E-06 | Tcell | RGS17        |
| YTHDF2. 1C  | 2. 25E-10 | -0. 36071 | 0. 182 | 0. 436 | 3. 36E-06 | Tcell | YTHDF2       |
| PAPSS1. 7   | 2. 28E-10 | -0. 37833 | 0. 086 | 0. 298 | 3. 41E-06 | Tcell | PAPSS1       |
| CRIP1. 6    | 2. 30E-10 | -0. 34723 | 0. 105 | 0. 331 | 3. 44E-06 | Tcell | CRIP1        |
| SEPP1. 10   | 2. 37E-10 | -0. 72001 | 0. 123 | 0. 333 | 3. 54E-06 | Tcell | SEPP1        |
| TOB1. 3     | 2. 37E-10 | 0. 838573 | 0. 368 | 0. 252 | 3. 54E-06 | Tcell | TOB1         |
| BHLHE41. 1  | 2. 42E-10 | -0. 50896 | 0. 032 | 0. 211 | 3. 61E-06 | Tcell | BHLHE41      |

|             |          |          |       |       |          |       |            |
|-------------|----------|----------|-------|-------|----------|-------|------------|
| HEPACAM. 1  | 2.45E-10 | -0.54093 | 0.014 | 0.181 | 3.65E-06 | Tcell | HEPACAM    |
| CHL1. 11    | 2.49E-10 | -0.41896 | 0     | 0.156 | 3.71E-06 | Tcell | CHL1       |
| DENND5A. 5  | 2.54E-10 | -0.37622 | 0.014 | 0.182 | 3.80E-06 | Tcell | DENND5A    |
| SNX27. 6    | 2.56E-10 | -0.27565 | 0.05  | 0.248 | 3.83E-06 | Tcell | SNX27      |
| PSMD3. 8    | 2.60E-10 | -0.27003 | 0.155 | 0.409 | 3.88E-06 | Tcell | PSMD3      |
| C17orf58. 2 | 2.61E-10 | -0.31196 | 0.018 | 0.189 | 3.90E-06 | Tcell | C17orf58   |
| CCDC50. 6   | 2.62E-10 | -0.31386 | 0.086 | 0.304 | 3.92E-06 | Tcell | CCDC50     |
| TIMM9. 2    | 2.65E-10 | -0.31034 | 0.073 | 0.281 | 3.96E-06 | Tcell | TIMM9      |
| GCAT. 12    | 2.69E-10 | -0.32946 | 0.005 | 0.164 | 4.02E-06 | Tcell | GCAT       |
| CREB3. 4    | 2.70E-10 | -0.29046 | 0.073 | 0.281 | 4.03E-06 | Tcell | CREB3      |
| IER2. 12    | 2.72E-10 | 0.382047 | 0.677 | 0.614 | 4.07E-06 | Tcell | IER2       |
| ALOX5AP. 1  | 2.74E-10 | 0.446892 | 0.568 | 0.396 | 4.09E-06 | Tcell | ALOX5AP    |
| NDRG4. 11   | 2.80E-10 | -0.40913 | 0.005 | 0.163 | 4.18E-06 | Tcell | NDRG4      |
| SOX8. 12    | 2.81E-10 | -0.47157 | 0.014 | 0.18  | 4.21E-06 | Tcell | SOX8       |
| MLF1. 10    | 2.83E-10 | -0.33912 | 0.05  | 0.245 | 4.23E-06 | Tcell | MLF1       |
| NCOR2. 7    | 2.87E-10 | -0.36912 | 0.045 | 0.234 | 4.29E-06 | Tcell | NCOR2      |
| DYRK4. 5    | 2.87E-10 | -0.37593 | 0.036 | 0.22  | 4.29E-06 | Tcell | DYRK4      |
| ZFHX4. 13   | 2.88E-10 | -0.35928 | 0     | 0.155 | 4.30E-06 | Tcell | ZFHX4      |
| EIF4E3. 1   | 2.89E-10 | 0.359867 | 0.082 | 0.02  | 4.32E-06 | Tcell | EIF4E3     |
| SEPN1. 11   | 2.97E-10 | -0.36258 | 0.032 | 0.213 | 4.44E-06 | Tcell | SEPN1      |
| IL1RAP. 9   | 2.98E-10 | -0.42055 | 0.005 | 0.163 | 4.45E-06 | Tcell | IL1RAP     |
| YIF1A. 9    | 2.99E-10 | -0.252   | 0.177 | 0.429 | 4.46E-06 | Tcell | YIF1A      |
| ARMCX3. 9   | 3.00E-10 | -0.31172 | 0.173 | 0.434 | 4.49E-06 | Tcell | ARMCX3     |
| PYCR1. 10   | 3.00E-10 | -0.35556 | 0.018 | 0.188 | 4.49E-06 | Tcell | PYCR1      |
| ANKRD44. 6  | 3.01E-10 | 0.591301 | 0.209 | 0.093 | 4.49E-06 | Tcell | ANKRD44    |
| NAALADL1. 3 | 3.10E-10 | 0.321977 | 0.073 | 0.017 | 4.63E-06 | Tcell | NAALADL1   |
| CTXN1. 12   | 3.10E-10 | -0.35536 | 0.005 | 0.162 | 4.64E-06 | Tcell | CTXN1      |
| CPEB4. 7    | 3.11E-10 | -0.32541 | 0.055 | 0.25  | 4.64E-06 | Tcell | CPEB4      |
| CCDC64. 1   | 3.12E-10 | 0.240534 | 0.041 | 0.006 | 4.66E-06 | Tcell | CCDC64     |
| ENC1. 13    | 3.15E-10 | -0.40046 | 0.041 | 0.228 | 4.71E-06 | Tcell | ENC1       |
| EBNA1BP2. 3 | 3.17E-10 | -0.35474 | 0.123 | 0.358 | 4.73E-06 | Tcell | EBNA1BP2   |
| GRIA3. 10   | 3.18E-10 | -0.36807 | 0.009 | 0.171 | 4.76E-06 | Tcell | GRIA3      |
| SLC7A7. 14  | 3.19E-10 | -0.6541  | 0.014 | 0.177 | 4.77E-06 | Tcell | SLC7A7     |
| CITED1. 13  | 3.20E-10 | -0.49086 | 0     | 0.154 | 4.78E-06 | Tcell | CITED1     |
| EMC8. 9     | 3.21E-10 | -0.29351 | 0.068 | 0.276 | 4.79E-06 | Tcell | EMC8       |
| DPM2. 5     | 3.24E-10 | -0.32613 | 0.118 | 0.351 | 4.84E-06 | Tcell | DPM2       |
| RASSF8-AS   | 3.28E-10 | -0.40109 | 0.005 | 0.163 | 4.91E-06 | Tcell | RASSF8-AS1 |
| SERPINH1. 3 | 3.31E-10 | -0.36145 | 0.032 | 0.212 | 4.95E-06 | Tcell | SERPINH1   |
| MTFR1L. 8   | 3.41E-10 | -0.26623 | 0.082 | 0.294 | 5.10E-06 | Tcell | MTFR1L     |
| CFDP1. 9    | 3.46E-10 | -0.36317 | 0.168 | 0.42  | 5.16E-06 | Tcell | CFDP1      |
| PLXDC2. 14  | 3.46E-10 | -0.63449 | 0.036 | 0.212 | 5.17E-06 | Tcell | PLXDC2     |
| NTMT1. 5    | 3.49E-10 | -0.35088 | 0.105 | 0.329 | 5.21E-06 | Tcell | NTMT1      |
| ENHO. 13    | 3.55E-10 | -0.36834 | 0     | 0.153 | 5.31E-06 | Tcell | ENHO       |
| OLIG1. 13   | 3.58E-10 | -0.65533 | 0.018 | 0.183 | 5.35E-06 | Tcell | OLIG1      |
| TAPBP. 12   | 3.59E-10 | 0.643408 | 0.441 | 0.341 | 5.37E-06 | Tcell | TAPBP      |
| SSBP2. 11   | 3.69E-10 | -0.35788 | 0.068 | 0.274 | 5.51E-06 | Tcell | SSBP2      |
| FAM174A. 7  | 3.74E-10 | -0.31953 | 0.041 | 0.226 | 5.59E-06 | Tcell | FAM174A    |
| ACAA1. 6    | 3.80E-10 | -0.25099 | 0.118 | 0.353 | 5.67E-06 | Tcell | ACAA1      |
| NT5DC1. 8   | 3.88E-10 | 0.452309 | 0.141 | 0.05  | 5.80E-06 | Tcell | NT5DC1     |
| MFSD1. 14   | 3.88E-10 | -0.37514 | 0.123 | 0.348 | 5.80E-06 | Tcell | MFSD1      |
| SNX7. 5     | 3.91E-10 | -0.40971 | 0.014 | 0.176 | 5.84E-06 | Tcell | SNX7       |



|            |          |          |       |       |          |       |               |
|------------|----------|----------|-------|-------|----------|-------|---------------|
| TRAP1.11   | 4.01E-10 | -0.29647 | 0.064 | 0.262 | 5.99E-06 | Tcell | TRAP1         |
| CLN8.10    | 4.02E-10 | -0.41839 | 0.073 | 0.272 | 6.00E-06 | Tcell | CLN8          |
| ABL2.12    | 4.07E-10 | -0.45731 | 0.073 | 0.272 | 6.08E-06 | Tcell | ABL2          |
| KIF9.11    | 4.07E-10 | -0.38907 | 0.014 | 0.178 | 6.08E-06 | Tcell | KIF9          |
| SNRNP25.9  | 4.10E-10 | -0.34202 | 0.123 | 0.354 | 6.12E-06 | Tcell | SNRNP25       |
| ZFHX3.8    | 4.10E-10 | -0.4606  | 0.027 | 0.199 | 6.13E-06 | Tcell | ZFHX3         |
| TRIM36.13  | 4.14E-10 | -0.39777 | 0.018 | 0.185 | 6.19E-06 | Tcell | TRIM36        |
| CAMSAP2.9  | 4.16E-10 | -0.35154 | 0     | 0.152 | 6.22E-06 | Tcell | CAMSAP2       |
| C1orf43.3  | 4.27E-10 | -0.32913 | 0.291 | 0.602 | 6.39E-06 | Tcell | C1orf43       |
| VSIG4.14   | 4.41E-10 | -0.67686 | 0.159 | 0.369 | 6.59E-06 | Tcell | VSIG4         |
| ARPC3.12   | 4.48E-10 | 0.23349  | 0.727 | 0.806 | 6.70E-06 | Tcell | ARPC3         |
| C21orf62.4 | 4.52E-10 | -0.45197 | 0.005 | 0.161 | 6.75E-06 | Tcell | C21orf62      |
| NQO2.7     | 4.52E-10 | -0.40371 | 0.064 | 0.256 | 6.76E-06 | Tcell | NQO2          |
| ZFAND2A.1  | 4.59E-10 | -0.44042 | 0.082 | 0.287 | 6.86E-06 | Tcell | ZFAND2A       |
| IFT20.3    | 4.65E-10 | -0.34836 | 0.118 | 0.348 | 6.94E-06 | Tcell | IFT20         |
| KLF7.9     | 4.67E-10 | -0.42275 | 0.032 | 0.209 | 6.97E-06 | Tcell | KLF7          |
| CYB5R1.7   | 4.74E-10 | -0.40209 | 0.064 | 0.262 | 7.08E-06 | Tcell | CYB5R1        |
| CTNND1.4   | 4.78E-10 | -0.33133 | 0.036 | 0.218 | 7.15E-06 | Tcell | CTNND1        |
| SLCO2B1.1  | 4.81E-10 | -0.65101 | 0.045 | 0.224 | 7.19E-06 | Tcell | SLCO2B1       |
| CECR5.9    | 4.82E-10 | -0.30381 | 0.059 | 0.255 | 7.20E-06 | Tcell | CECR5         |
| CSRNP1.14  | 4.90E-10 | 0.6411   | 0.318 | 0.188 | 7.33E-06 | Tcell | CSRNP1        |
| PGM3.7     | 4.98E-10 | -0.33347 | 0.014 | 0.177 | 7.44E-06 | Tcell | PGM3          |
| RAC3.13    | 4.98E-10 | -0.31348 | 0.018 | 0.186 | 7.45E-06 | Tcell | RAC3          |
| ABHD2.8    | 5.02E-10 | -0.29602 | 0.045 | 0.233 | 7.50E-06 | Tcell | ABHD2         |
| NDUFS3.5   | 5.12E-10 | -0.3229  | 0.218 | 0.495 | 7.65E-06 | Tcell | NDUFS3        |
| ZNF358.1C  | 5.18E-10 | -0.34697 | 0.009 | 0.168 | 7.75E-06 | Tcell | ZNF358        |
| CD86.14    | 5.25E-10 | -0.66836 | 0.041 | 0.217 | 7.85E-06 | Tcell | CD86          |
| CCDC28B.1  | 5.27E-10 | -0.3499  | 0.041 | 0.222 | 7.87E-06 | Tcell | CCDC28B       |
| SLC35B2.9  | 5.28E-10 | -0.30628 | 0.091 | 0.304 | 7.89E-06 | Tcell | SLC35B2       |
| PRDX2.12   | 5.32E-10 | -0.41202 | 0.455 | 0.706 | 7.95E-06 | Tcell | PRDX2         |
| COPS7A.4   | 5.39E-10 | -0.10755 | 0.073 | 0.28  | 8.05E-06 | Tcell | COPS7A        |
| SIAH1.10   | 5.46E-10 | -0.31288 | 0.045 | 0.232 | 8.16E-06 | Tcell | SIAH1         |
| CNOT6L.4   | 5.48E-10 | 0.789168 | 0.218 | 0.106 | 8.19E-06 | Tcell | CNOT6L        |
| PHF23.10   | 5.52E-10 | -0.2872  | 0.032 | 0.211 | 8.25E-06 | Tcell | PHF23         |
| NUBP2.9    | 5.63E-10 | -0.31481 | 0.145 | 0.386 | 8.41E-06 | Tcell | NUBP2         |
| AGT.12     | 5.65E-10 | -0.62674 | 0.045 | 0.223 | 8.44E-06 | Tcell | AGT           |
| PPME1.10   | 5.78E-10 | -0.34804 | 0.018 | 0.184 | 8.64E-06 | Tcell | PPME1         |
| FAM49A.9   | 5.83E-10 | -0.4852  | 0.014 | 0.174 | 8.72E-06 | Tcell | FAM49A        |
| TCEAL2.11  | 5.84E-10 | -0.5515  | 0.018 | 0.183 | 8.73E-06 | Tcell | TCEAL2        |
| ZBTB20.12  | 5.88E-10 | -0.29983 | 0.141 | 0.39  | 8.78E-06 | Tcell | ZBTB20        |
| ZC3H12A.1  | 5.92E-10 | 0.64851  | 0.177 | 0.074 | 8.85E-06 | Tcell | ZC3H12A       |
| RP11-347C  | 5.95E-10 | 0.250147 | 0.045 | 0.008 | 8.90E-06 | Tcell | RP11-347C12.1 |
| GUK1.6     | 5.96E-10 | 0.278172 | 0.7   | 0.703 | 8.91E-06 | Tcell | GUK1          |
| PEMT.10    | 6.03E-10 | -0.36515 | 0.036 | 0.216 | 9.01E-06 | Tcell | PEMT          |
| ZNF580.9   | 6.07E-10 | -0.16893 | 0.082 | 0.295 | 9.07E-06 | Tcell | ZNF580        |
| OLFML3.13  | 6.07E-10 | -0.64592 | 0.05  | 0.23  | 9.08E-06 | Tcell | OLFML3        |
| UNC50.5    | 6.14E-10 | -0.31279 | 0.127 | 0.359 | 9.17E-06 | Tcell | UNC50         |
| C11orf74.6 | 6.22E-10 | -0.41853 | 0.014 | 0.174 | 9.29E-06 | Tcell | C11orf74      |
| LYRM2.7    | 6.37E-10 | -0.3239  | 0.086 | 0.298 | 9.52E-06 | Tcell | LYRM2         |
| ALDH3A2.7  | 6.38E-10 | -0.36106 | 0.05  | 0.235 | 9.53E-06 | Tcell | ALDH3A2       |
| SUGP2.10   | 6.45E-10 | -0.34208 | 0.059 | 0.25  | 9.65E-06 | Tcell | SUGP2         |

|            |          |          |       |       |          |       |          |
|------------|----------|----------|-------|-------|----------|-------|----------|
| IFI30.14   | 6.56E-10 | -0.57941 | 0.045 | 0.223 | 9.80E-06 | Tcell | IFI30    |
| IGSF21.11  | 6.59E-10 | -0.56015 | 0.009 | 0.166 | 9.85E-06 | Tcell | IGSF21   |
| SDC2.9     | 6.62E-10 | -0.38797 | 0.027 | 0.195 | 9.89E-06 | Tcell | SDC2     |
| IFT27.10   | 6.66E-10 | -0.32585 | 0.064 | 0.26  | 9.96E-06 | Tcell | IFT27    |
| AIF1.14    | 6.69E-10 | -0.61649 | 0.205 | 0.415 | 1.00E-05 | Tcell | AIF1     |
| COQ9.9     | 6.81E-10 | -0.30899 | 0.055 | 0.246 | 1.02E-05 | Tcell | COQ9     |
| MTCH2.5    | 7.02E-10 | -0.29369 | 0.177 | 0.433 | 1.05E-05 | Tcell | MTCH2    |
| LAMTOR1.7  | 7.15E-10 | -0.37844 | 0.345 | 0.66  | 1.07E-05 | Tcell | LAMTOR1  |
| DPP6.10    | 7.20E-10 | -0.40919 | 0.009 | 0.164 | 1.08E-05 | Tcell | DPP6     |
| TRMT1.11   | 7.21E-10 | -0.467   | 0.068 | 0.261 | 1.08E-05 | Tcell | TRMT1    |
| SERINC1.5  | 7.31E-10 | -0.26136 | 0.164 | 0.423 | 1.09E-05 | Tcell | SERINC1  |
| POMGNT1.1  | 7.40E-10 | -0.29914 | 0.064 | 0.262 | 1.11E-05 | Tcell | POMGNT1  |
| HSPBP1.1C  | 7.45E-10 | -0.37161 | 0.086 | 0.291 | 1.11E-05 | Tcell | HSPBP1   |
| LRWD1.10   | 7.54E-10 | -0.34598 | 0.014 | 0.173 | 1.13E-05 | Tcell | LRWD1    |
| ZNF326.1C  | 7.63E-10 | -0.3316  | 0.059 | 0.251 | 1.14E-05 | Tcell | ZNF326   |
| TNPO2.10   | 7.63E-10 | -0.30496 | 0.018 | 0.182 | 1.14E-05 | Tcell | TNPO2    |
| MGST3.7    | 7.67E-10 | -0.32644 | 0.373 | 0.699 | 1.15E-05 | Tcell | MGST3    |
| RHOT1.8    | 7.82E-10 | -0.28575 | 0.059 | 0.252 | 1.17E-05 | Tcell | RHOT1    |
| ZDHHC4.9   | 7.84E-10 | -0.32154 | 0.127 | 0.359 | 1.17E-05 | Tcell | ZDHHC4   |
| RNF146.6   | 7.86E-10 | -0.366   | 0.064 | 0.259 | 1.18E-05 | Tcell | RNF146   |
| TRIAP1.1C  | 7.95E-10 | -0.33218 | 0.1   | 0.317 | 1.19E-05 | Tcell | TRIAP1   |
| FADS1.10   | 8.00E-10 | -0.31504 | 0.041 | 0.221 | 1.20E-05 | Tcell | FADS1    |
| AP2B1.11   | 8.04E-10 | -0.30262 | 0.114 | 0.345 | 1.20E-05 | Tcell | AP2B1    |
| MYO1F.14   | 8.04E-10 | 0.596276 | 0.318 | 0.181 | 1.20E-05 | Tcell | MYO1F    |
| GAS6.12    | 8.10E-10 | -0.48891 | 0.036 | 0.208 | 1.21E-05 | Tcell | GAS6     |
| PCGF2.12   | 8.12E-10 | -0.32286 | 0.009 | 0.165 | 1.21E-05 | Tcell | PCGF2    |
| MAPRE3.9   | 8.24E-10 | -0.35201 | 0.018 | 0.182 | 1.23E-05 | Tcell | MAPRE3   |
| SLC39A6.1  | 8.62E-10 | -0.25862 | 0.109 | 0.332 | 1.29E-05 | Tcell | SLC39A6  |
| SNTG1.11   | 8.68E-10 | -0.48882 | 0.005 | 0.156 | 1.30E-05 | Tcell | SNTG1    |
| DAP.9      | 8.72E-10 | -0.30173 | 0.077 | 0.28  | 1.30E-05 | Tcell | DAP      |
| MT1E.12    | 8.74E-10 | -0.44691 | 0.168 | 0.384 | 1.31E-05 | Tcell | MT1E     |
| WDR34.10   | 8.77E-10 | -0.36772 | 0.036 | 0.21  | 1.31E-05 | Tcell | WDR34    |
| TMEM132A.8 | 8.80E-10 | -0.3267  | 0     | 0.147 | 1.31E-05 | Tcell | TMEM132A |
| YKT6.8     | 8.81E-10 | -0.30637 | 0.055 | 0.242 | 1.32E-05 | Tcell | YKT6     |
| MTSS1.9    | 8.95E-10 | -0.43048 | 0.041 | 0.216 | 1.34E-05 | Tcell | MTSS1    |
| FAM84A.11  | 9.15E-10 | -0.37136 | 0     | 0.147 | 1.37E-05 | Tcell | FAM84A   |
| GAS1.14    | 9.15E-10 | -0.40203 | 0     | 0.147 | 1.37E-05 | Tcell | GAS1     |
| GAS2L1.1C  | 9.19E-10 | -0.34469 | 0.005 | 0.155 | 1.37E-05 | Tcell | GAS2L1   |
| UBAC1.7    | 9.54E-10 | -0.3204  | 0.041 | 0.221 | 1.43E-05 | Tcell | UBAC1    |
| COPS5.7    | 9.65E-10 | -0.2623  | 0.164 | 0.415 | 1.44E-05 | Tcell | COPS5    |
| PMEPA1.12  | 9.74E-10 | -0.40915 | 0.032 | 0.204 | 1.46E-05 | Tcell | PMEPA1   |
| PXDC1.7    | 1.00E-09 | -0.3579  | 0.005 | 0.155 | 1.50E-05 | Tcell | PXDC1    |
| ENDOV.8    | 1.03E-09 | -0.39126 | 0.045 | 0.224 | 1.54E-05 | Tcell | ENDOV    |
| CYC1.12    | 1.06E-09 | -0.27211 | 0.25  | 0.545 | 1.58E-05 | Tcell | CYC1     |
| NINJ1.14   | 1.07E-09 | -0.35577 | 0.205 | 0.456 | 1.60E-05 | Tcell | NINJ1    |
| LRRC8A.1C  | 1.07E-09 | -0.39375 | 0.014 | 0.171 | 1.60E-05 | Tcell | LRRC8A   |
| APOO.11    | 1.07E-09 | -0.35344 | 0.05  | 0.232 | 1.60E-05 | Tcell | APOO     |
| TTC3.12    | 1.08E-09 | -0.29752 | 0.245 | 0.521 | 1.62E-05 | Tcell | TTC3     |
| ARL1.6     | 1.10E-09 | -0.32772 | 0.1   | 0.318 | 1.64E-05 | Tcell | ARL1     |
| DERA.8     | 1.10E-09 | -0.33716 | 0.064 | 0.255 | 1.65E-05 | Tcell | DERA     |
| SMUG1.3    | 1.11E-09 | -0.4124  | 0.041 | 0.216 | 1.65E-05 | Tcell | SMUG1    |

|           |               |           |        |        |           |       |          |
|-----------|---------------|-----------|--------|--------|-----------|-------|----------|
| Clorf123. | 1. 11E-09     | -0. 34989 | 0. 127 | 0. 345 | 1. 66E-05 | Tcell | Clorf123 |
| PRMT1.    | 7. 1. 11E-09  | -0. 27955 | 0. 273 | 0. 559 | 1. 66E-05 | Tcell | PRMT1    |
| SRA1.     | 8. 1. 15E-09  | -0. 31765 | 0. 159 | 0. 403 | 1. 71E-05 | Tcell | SRA1     |
| MPV17.    | 3. 1. 15E-09  | -0. 21237 | 0. 123 | 0. 35  | 1. 71E-05 | Tcell | MPV17    |
| CLIP2.    | 11. 1. 16E-09 | -0. 3814  | 0. 018 | 0. 179 | 1. 73E-05 | Tcell | CLIP2    |
| SPATC1L.  | 1. 1. 17E-09  | -0. 21907 | 0. 027 | 0. 198 | 1. 74E-05 | Tcell | SPATC1L  |
| IFRD1.    | 9. 1. 17E-09  | -0. 2776  | 0. 214 | 0. 492 | 1. 74E-05 | Tcell | IFRD1    |
| JAG1.     | 11. 1. 17E-09 | -0. 35898 | 0. 009 | 0. 162 | 1. 76E-05 | Tcell | JAG1     |
| NDUFA5.   | 9. 1. 18E-09  | -0. 30069 | 0. 286 | 0. 582 | 1. 76E-05 | Tcell | NDUFA5   |
| YAE1D1.   | 1. 1. 19E-09  | -0. 38547 | 0. 009 | 0. 163 | 1. 78E-05 | Tcell | YAE1D1   |
| DUSP3.    | 7. 1. 19E-09  | -0. 36924 | 0. 018 | 0. 178 | 1. 78E-05 | Tcell | DUSP3    |
| ST5.      | 10. 1. 22E-09 | -0. 38099 | 0. 005 | 0. 154 | 1. 83E-05 | Tcell | ST5      |
| DCLK1.    | 9. 1. 24E-09  | -0. 36813 | 0. 005 | 0. 154 | 1. 86E-05 | Tcell | DCLK1    |
| SYT17.    | 8. 1. 28E-09  | -0. 33237 | 0. 009 | 0. 162 | 1. 91E-05 | Tcell | SYT17    |
| WDR45B.   | 7. 1. 31E-09  | -0. 24872 | 0. 164 | 0. 408 | 1. 96E-05 | Tcell | WDR45B   |
| HBEGF.    | 14. 1. 34E-09 | -0. 55575 | 0. 045 | 0. 219 | 2. 01E-05 | Tcell | HBEGF    |
| FAM65B.   | 1. 1. 35E-09  | 0. 426511 | 0. 109 | 0. 035 | 2. 02E-05 | Tcell | FAM65B   |
| UBE2D3.   | 11. 1. 38E-09 | 0. 26645  | 0. 682 | 0. 728 | 2. 07E-05 | Tcell | UBE2D3   |
| BCL7A.    | 11. 1. 43E-09 | -0. 39127 | 0. 005 | 0. 152 | 2. 14E-05 | Tcell | BCL7A    |
| TWF1.     | 7. 1. 45E-09  | -0. 25485 | 0. 073 | 0. 267 | 2. 16E-05 | Tcell | TWF1     |
| FDX1L.    | 6. 1. 49E-09  | -0. 31909 | 0. 068 | 0. 263 | 2. 23E-05 | Tcell | FDX1L    |
| CHN1.     | 13. 1. 51E-09 | -0. 28422 | 0. 041 | 0. 219 | 2. 26E-05 | Tcell | CHN1     |
| SIGLEC10. | 1. 1. 52E-09  | -0. 6307  | 0. 014 | 0. 165 | 2. 27E-05 | Tcell | SIGLEC10 |
| NR2F6.    | 10. 1. 54E-09 | -0. 31414 | 0      | 0. 144 | 2. 30E-05 | Tcell | NR2F6    |
| FCGR1B.   | 13. 1. 55E-09 | -0. 71264 | 0. 014 | 0. 166 | 2. 32E-05 | Tcell | FCGR1B   |
| GAL3ST4.  | 1. 1. 56E-09  | -0. 56117 | 0. 018 | 0. 174 | 2. 34E-05 | Tcell | GAL3ST4  |
| RB1.      | 13. 1. 57E-09 | -0. 41951 | 0. 105 | 0. 309 | 2. 34E-05 | Tcell | RB1      |
| LMO2.     | 7. 1. 57E-09  | -0. 3925  | 0. 014 | 0. 167 | 2. 35E-05 | Tcell | LMO2     |
| CLN5.     | 6. 1. 58E-09  | -0. 32165 | 0. 045 | 0. 224 | 2. 36E-05 | Tcell | CLN5     |
| RHEB.     | 8. 1. 59E-09  | -0. 3273  | 0. 341 | 0. 643 | 2. 37E-05 | Tcell | RHEB     |
| TSPAN6.   | 1. 1. 61E-09  | -0. 35131 | 0. 005 | 0. 152 | 2. 41E-05 | Tcell | TSPAN6   |
| ZFAND3.   | 6. 1. 65E-09  | -0. 29551 | 0. 077 | 0. 276 | 2. 47E-05 | Tcell | ZFAND3   |
| UBXN6.    | 7. 1. 66E-09  | -0. 25664 | 0. 091 | 0. 303 | 2. 47E-05 | Tcell | UBXN6    |
| RABEP1.   | 8. 1. 66E-09  | -0. 26565 | 0. 064 | 0. 256 | 2. 48E-05 | Tcell | RABEP1   |
| ZFR.      | 10. 1. 69E-09 | -0. 19451 | 0. 095 | 0. 309 | 2. 52E-05 | Tcell | ZFR      |
| JAM3.     | 10. 1. 69E-09 | -0. 36105 | 0. 005 | 0. 152 | 2. 52E-05 | Tcell | JAM3     |
| COQ7.     | 9. 1. 72E-09  | -0. 34623 | 0. 027 | 0. 19  | 2. 57E-05 | Tcell | COQ7     |
| ATP6AP2.  | 9. 1. 72E-09  | -0. 31956 | 0. 345 | 0. 662 | 2. 57E-05 | Tcell | ATP6AP2  |
| DEF8.     | 10. 1. 73E-09 | -0. 32324 | 0. 077 | 0. 274 | 2. 59E-05 | Tcell | DEF8     |
| FAM32A.   | 9. 1. 73E-09  | -0. 30169 | 0. 195 | 0. 457 | 2. 59E-05 | Tcell | FAM32A   |
| TGFBI.    | 14. 1. 74E-09 | -0. 63001 | 0. 041 | 0. 208 | 2. 60E-05 | Tcell | TGFBI    |
| PNMA1.    | 13. 1. 78E-09 | -0. 21354 | 0. 082 | 0. 287 | 2. 66E-05 | Tcell | PNMA1    |
| NELFE.    | 4. 1. 79E-09  | -0. 2999  | 0. 145 | 0. 381 | 2. 68E-05 | Tcell | NELFE    |
| DYNC2LI1. | 1. 1. 82E-09  | -0. 40958 | 0. 014 | 0. 167 | 2. 72E-05 | Tcell | DYNC2LI1 |
| TPGS1.    | 7. 1. 82E-09  | -0. 23673 | 0. 1   | 0. 314 | 2. 72E-05 | Tcell | TPGS1    |
| CYP27A1.  | 6. 1. 82E-09  | -0. 39583 | 0. 014 | 0. 167 | 2. 72E-05 | Tcell | CYP27A1  |
| HSPB1.    | 5. 1. 84E-09  | -0. 32406 | 0. 373 | 0. 66  | 2. 75E-05 | Tcell | HSPB1    |
| AP1G2.    | 11. 1. 85E-09 | 0. 465015 | 0. 136 | 0. 05  | 2. 76E-05 | Tcell | AP1G2    |
| JAK3.     | 7. 1. 85E-09  | 0. 411674 | 0. 091 | 0. 026 | 2. 76E-05 | Tcell | JAK3     |
| SFXN5.    | 10. 1. 86E-09 | -0. 38848 | 0. 027 | 0. 191 | 2. 77E-05 | Tcell | SFXN5    |
| GNG2.     | 9. 1. 91E-09  | 0. 669251 | 0. 3   | 0. 177 | 2. 85E-05 | Tcell | GNG2     |

|            |          |          |       |       |          |       |              |
|------------|----------|----------|-------|-------|----------|-------|--------------|
| NRSN2.11   | 1.91E-09 | -0.30884 | 0.014 | 0.167 | 2.85E-05 | Tcell | NRSN2        |
| ACBD6.9    | 1.91E-09 | -0.31115 | 0.082 | 0.281 | 2.85E-05 | Tcell | ACBD6        |
| MYLIP.11   | 1.93E-09 | 0.60569  | 0.245 | 0.127 | 2.88E-05 | Tcell | MYLIP        |
| BSG.10     | 1.93E-09 | -0.34768 | 0.459 | 0.747 | 2.89E-05 | Tcell | BSG          |
| CTSH.14    | 1.96E-09 | -0.45377 | 0.1   | 0.299 | 2.93E-05 | Tcell | CTSH         |
| C7orf55.1  | 1.98E-09 | -0.1431  | 0.177 | 0.428 | 2.95E-05 | Tcell | C7orf55      |
| TRAPPC4.7  | 2.03E-09 | -0.34891 | 0.195 | 0.449 | 3.03E-05 | Tcell | TRAPPC4      |
| CUX1.7     | 2.04E-09 | -0.33387 | 0.059 | 0.244 | 3.05E-05 | Tcell | CUX1         |
| ARL6IP1.8  | 2.05E-09 | -0.3213  | 0.427 | 0.748 | 3.07E-05 | Tcell | ARL6IP1      |
| HNRNPK.1C  | 2.07E-09 | 0.207866 | 0.745 | 0.79  | 3.09E-05 | Tcell | HNRNPK       |
| SCNM1.6    | 2.08E-09 | -0.27373 | 0.118 | 0.343 | 3.11E-05 | Tcell | SCNM1        |
| OSBPL6.8   | 2.09E-09 | -0.3068  | 0.009 | 0.159 | 3.12E-05 | Tcell | OSBPL6       |
| DDX49.9    | 2.09E-09 | -0.19193 | 0.077 | 0.278 | 3.12E-05 | Tcell | DDX49        |
| C1orf27.4  | 2.10E-09 | -0.3533  | 0.023 | 0.182 | 3.14E-05 | Tcell | C1orf27      |
| SGTA.9     | 2.17E-09 | -0.24088 | 0.105 | 0.32  | 3.24E-05 | Tcell | SGTA         |
| SRP14.7    | 2.19E-09 | 0.13811  | 0.795 | 0.868 | 3.28E-05 | Tcell | SRP14        |
| GGCT.10    | 2.22E-09 | -0.27843 | 0.155 | 0.391 | 3.31E-05 | Tcell | GGCT         |
| RAD51C.1C  | 2.22E-09 | -0.35033 | 0.077 | 0.27  | 3.31E-05 | Tcell | RAD51C       |
| NLRP1.12   | 2.23E-09 | -0.26667 | 0.118 | 0.343 | 3.33E-05 | Tcell | NLRP1        |
| TMEM147.3  | 2.25E-09 | -0.29966 | 0.305 | 0.601 | 3.37E-05 | Tcell | TMEM147      |
| CRNDE.9    | 2.26E-09 | -0.35227 | 0.023 | 0.182 | 3.38E-05 | Tcell | CRNDE        |
| FKBP3.7    | 2.28E-09 | -0.26756 | 0.214 | 0.482 | 3.41E-05 | Tcell | FKBP3        |
| ADAP2.14   | 2.29E-09 | -0.58317 | 0.027 | 0.187 | 3.43E-05 | Tcell | ADAP2        |
| RFC2.7     | 2.30E-09 | -0.37148 | 0.064 | 0.245 | 3.43E-05 | Tcell | RFC2         |
| CLDN12.14  | 2.30E-09 | -0.37751 | 0     | 0.141 | 3.44E-05 | Tcell | CLDN12       |
| CHKA.5     | 2.31E-09 | -0.30425 | 0.027 | 0.19  | 3.45E-05 | Tcell | CHKA         |
| NEU1.8     | 2.32E-09 | -0.28231 | 0.091 | 0.296 | 3.47E-05 | Tcell | NEU1         |
| TIMM44.8   | 2.32E-09 | -0.32879 | 0.073 | 0.266 | 3.47E-05 | Tcell | TIMM44       |
| ATP2B1.8   | 2.33E-09 | -0.32822 | 0.132 | 0.358 | 3.48E-05 | Tcell | ATP2B1       |
| SOGA1.12   | 2.35E-09 | -0.34787 | 0.009 | 0.158 | 3.52E-05 | Tcell | SOGA1        |
| C12orf75.2 | 2.37E-09 | 0.681997 | 0.309 | 0.191 | 3.54E-05 | Tcell | C12orf75     |
| BCAP29.7   | 2.39E-09 | -0.31599 | 0.109 | 0.321 | 3.57E-05 | Tcell | BCAP29       |
| ZEB2.8     | 2.40E-09 | -0.32802 | 0.1   | 0.307 | 3.59E-05 | Tcell | ZEB2         |
| OLIG2.13   | 2.43E-09 | -0.4696  | 0.023 | 0.181 | 3.63E-05 | Tcell | OLIG2        |
| C12orf76.2 | 2.44E-09 | -0.28535 | 0.073 | 0.27  | 3.64E-05 | Tcell | C12orf76     |
| NLGN1.12   | 2.46E-09 | -0.32877 | 0     | 0.14  | 3.67E-05 | Tcell | NLGN1        |
| RP11-792A  | 2.46E-09 | -0.37032 | 0.041 | 0.213 | 3.67E-05 | Tcell | RP11-792A8.4 |
| ZNF771.9   | 2.57E-09 | -0.30057 | 0.005 | 0.149 | 3.84E-05 | Tcell | ZNF771       |
| GPR137.8   | 2.57E-09 | -0.27893 | 0.041 | 0.212 | 3.85E-05 | Tcell | GPR137       |
| TXNDC12.9  | 2.59E-09 | -0.2331  | 0.191 | 0.437 | 3.87E-05 | Tcell | TXNDC12      |
| C1S.11     | 2.59E-09 | -0.66299 | 0.014 | 0.165 | 3.87E-05 | Tcell | C1S          |
| ACOT8.5    | 2.59E-09 | -0.3592  | 0.041 | 0.209 | 3.88E-05 | Tcell | ACOT8        |
| PLOD1.9    | 2.59E-09 | -0.39997 | 0.032 | 0.194 | 3.88E-05 | Tcell | PLOD1        |
| RPN1.8     | 2.61E-09 | -0.34833 | 0.177 | 0.414 | 3.90E-05 | Tcell | RPN1         |
| POU3F3.13  | 2.62E-09 | -0.34723 | 0.009 | 0.157 | 3.91E-05 | Tcell | POU3F3       |
| SALL1.10   | 2.62E-09 | -0.33569 | 0     | 0.14  | 3.91E-05 | Tcell | SALL1        |
| RP9.11     | 2.64E-09 | -0.30694 | 0.023 | 0.182 | 3.95E-05 | Tcell | RP9          |
| ZNF397.8   | 2.64E-09 | -0.34325 | 0.014 | 0.166 | 3.95E-05 | Tcell | ZNF397       |
| C5AR1.13   | 2.65E-09 | -0.59418 | 0.064 | 0.241 | 3.96E-05 | Tcell | C5AR1        |
| BBOX1.13   | 2.65E-09 | -0.47654 | 0     | 0.14  | 3.96E-05 | Tcell | BBOX1        |
| STEAP3.1C  | 2.69E-09 | -0.4469  | 0.014 | 0.164 | 4.02E-05 | Tcell | STEAP3       |

|             |          |          |       |       |          |       |           |
|-------------|----------|----------|-------|-------|----------|-------|-----------|
| RHOQ. 9     | 2.70E-09 | -0.34967 | 0.014 | 0.164 | 4.04E-05 | Tcell | RHOQ      |
| LRRFIP1. 1  | 2.71E-09 | 0.562527 | 0.455 | 0.352 | 4.04E-05 | Tcell | LRRFIP1   |
| MTFP1. 6    | 2.71E-09 | 0.594309 | 0.159 | 0.065 | 4.04E-05 | Tcell | MTFP1     |
| SEC61G. 12  | 2.72E-09 | -0.58256 | 0.627 | 0.802 | 4.07E-05 | Tcell | SEC61G    |
| DPYSL4. 14  | 2.73E-09 | -0.33354 | 0.009 | 0.157 | 4.07E-05 | Tcell | DPYSL4    |
| AZI2. 6     | 2.74E-09 | -0.29311 | 0.1   | 0.305 | 4.09E-05 | Tcell | AZI2      |
| CDC34. 12   | 2.74E-09 | -0.28491 | 0.055 | 0.238 | 4.09E-05 | Tcell | CDC34     |
| DPYSL5. 12  | 2.75E-09 | -0.32141 | 0.014 | 0.166 | 4.11E-05 | Tcell | DPYSL5    |
| UBE2F. 4    | 2.75E-09 | -0.31558 | 0.118 | 0.334 | 4.11E-05 | Tcell | UBE2F     |
| CDC42. 8    | 2.77E-09 | 0.334131 | 0.618 | 0.621 | 4.13E-05 | Tcell | CDC42     |
| LSM4. 9     | 2.77E-09 | -0.30001 | 0.273 | 0.566 | 4.15E-05 | Tcell | LSM4      |
| OBSL1. 11   | 2.79E-09 | -0.33921 | 0.005 | 0.149 | 4.17E-05 | Tcell | OBSL1     |
| COX4I1. 8   | 2.79E-09 | 0.165881 | 0.85  | 0.912 | 4.17E-05 | Tcell | COX4I1    |
| MPLKIP. 7   | 2.81E-09 | -0.25741 | 0.186 | 0.449 | 4.20E-05 | Tcell | MPLKIP    |
| RAB3IP. 10  | 2.83E-09 | -0.40339 | 0.068 | 0.25  | 4.23E-05 | Tcell | RAB3IP    |
| DHX29. 11   | 2.85E-09 | -0.2461  | 0.105 | 0.314 | 4.26E-05 | Tcell | DHX29     |
| ITGA7. 12   | 2.87E-09 | -0.31123 | 0     | 0.139 | 4.28E-05 | Tcell | ITGA7     |
| ILF2. 10    | 2.89E-09 | -0.24202 | 0.282 | 0.58  | 4.32E-05 | Tcell | ILF2      |
| AASDHPPT. 2 | 2.92E-09 | -0.26329 | 0.091 | 0.292 | 4.37E-05 | Tcell | AASDHPPT  |
| LINC00998   | 2.95E-09 | -0.2149  | 0.141 | 0.376 | 4.41E-05 | Tcell | LINC00998 |
| CLU. 12     | 2.98E-09 | -0.50184 | 0.564 | 0.786 | 4.45E-05 | Tcell | CLU       |
| PHGDH. 12   | 3.04E-09 | -0.44613 | 0.036 | 0.203 | 4.54E-05 | Tcell | PHGDH     |
| CDK5. 9     | 3.07E-09 | -0.29373 | 0.059 | 0.241 | 4.59E-05 | Tcell | CDK5      |
| ADAM17. 7   | 3.09E-09 | -0.27673 | 0.068 | 0.259 | 4.61E-05 | Tcell | ADAM17    |
| SRR. 11     | 3.09E-09 | -0.30745 | 0.009 | 0.157 | 4.62E-05 | Tcell | SRR       |
| GOLGA7. 4   | 3.15E-09 | -0.14725 | 0.2   | 0.469 | 4.70E-05 | Tcell | GOLGA7    |
| CA12. 13    | 3.18E-09 | -0.4052  | 0     | 0.139 | 4.75E-05 | Tcell | CA12      |
| B4GALT7. 5  | 3.21E-09 | -0.21791 | 0.041 | 0.213 | 4.80E-05 | Tcell | B4GALT7   |
| SLC8A1. 11  | 3.22E-09 | -0.41935 | 0.005 | 0.147 | 4.81E-05 | Tcell | SLC8A1    |
| PXMP2. 12   | 3.27E-09 | -0.30762 | 0.05  | 0.226 | 4.89E-05 | Tcell | PXMP2     |
| PLOD2. 10   | 3.35E-09 | -0.31594 | 0.014 | 0.165 | 5.01E-05 | Tcell | PLOD2     |
| FLI1. 14    | 3.37E-09 | 0.425313 | 0.136 | 0.05  | 5.03E-05 | Tcell | FLI1      |
| SMS. 7      | 3.38E-09 | -0.35436 | 0.295 | 0.578 | 5.05E-05 | Tcell | SMS       |
| ACSL5. 13   | 3.42E-09 | 0.360492 | 0.105 | 0.033 | 5.12E-05 | Tcell | ACSL5     |
| SUPT3H. 1   | 3.44E-09 | 0.557361 | 0.1   | 0.031 | 5.13E-05 | Tcell | SUPT3H    |
| WSB2. 12    | 3.49E-09 | -0.26494 | 0.05  | 0.227 | 5.21E-05 | Tcell | WSB2      |
| FOXG1. 12   | 3.50E-09 | -0.27404 | 0.009 | 0.156 | 5.23E-05 | Tcell | FOXG1     |
| ZSWIM7. 2   | 3.53E-09 | -0.12931 | 0.123 | 0.347 | 5.28E-05 | Tcell | ZSWIM7    |
| PPP1R16A. 3 | 3.54E-09 | -0.29091 | 0.018 | 0.172 | 5.29E-05 | Tcell | PPP1R16A  |
| GNS. 11     | 3.54E-09 | -0.34422 | 0.036 | 0.202 | 5.29E-05 | Tcell | GNS       |
| LINC00662   | 3.59E-09 | -0.40026 | 0.027 | 0.186 | 5.36E-05 | Tcell | LINC00662 |
| VWA1. 12    | 3.60E-09 | -0.34129 | 0.005 | 0.147 | 5.38E-05 | Tcell | VWA1      |
| IL2RA. 12   | 3.61E-09 | 0.446796 | 0.1   | 0.031 | 5.39E-05 | Tcell | IL2RA     |
| SEC61A1. 6  | 3.66E-09 | -0.25449 | 0.136 | 0.37  | 5.47E-05 | Tcell | SEC61A1   |
| MSI1. 12    | 3.71E-09 | -0.34445 | 0     | 0.138 | 5.54E-05 | Tcell | MSI1      |
| DLL3. 12    | 3.74E-09 | -0.56009 | 0.005 | 0.146 | 5.59E-05 | Tcell | DLL3      |
| MZT2A. 11   | 3.76E-09 | 0.625303 | 0.473 | 0.413 | 5.62E-05 | Tcell | MZT2A     |
| PRPSAP1. 1  | 3.79E-09 | -0.29315 | 0.105 | 0.31  | 5.66E-05 | Tcell | PRPSAP1   |
| BET1. 8     | 3.84E-09 | -0.36811 | 0.05  | 0.224 | 5.73E-05 | Tcell | BET1      |
| SLC39A7. 6  | 3.87E-09 | -0.24562 | 0.1   | 0.309 | 5.79E-05 | Tcell | SLC39A7   |
| NKIRAS2. 8  | 3.95E-09 | -0.15531 | 0.077 | 0.267 | 5.90E-05 | Tcell | NKIRAS2   |

|           |          |          |       |       |          |       |              |
|-----------|----------|----------|-------|-------|----------|-------|--------------|
| STOML2.7  | 3.96E-09 | -0.33719 | 0.182 | 0.426 | 5.91E-05 | Tcell | STOML2       |
| SGK1.14   | 3.97E-09 | -0.44417 | 0.209 | 0.441 | 5.94E-05 | Tcell | SGK1         |
| LIMCH1.9  | 4.01E-09 | -0.34862 | 0.009 | 0.155 | 5.99E-05 | Tcell | LIMCH1       |
| TMED10.7  | 4.03E-09 | -0.38852 | 0.336 | 0.618 | 6.02E-05 | Tcell | TMED10       |
| AKT1S1.7  | 4.08E-09 | -0.2118  | 0.059 | 0.243 | 6.09E-05 | Tcell | AKT1S1       |
| PDCD5.11  | 4.09E-09 | -0.35321 | 0.268 | 0.544 | 6.12E-05 | Tcell | PDCD5        |
| WWTR1.14  | 4.11E-09 | -0.37063 | 0.014 | 0.163 | 6.15E-05 | Tcell | WWTR1        |
| ANKIB1.12 | 4.12E-09 | -0.28263 | 0.041 | 0.211 | 6.15E-05 | Tcell | ANKIB1       |
| NTPCR.5   | 4.17E-09 | -0.33154 | 0.086 | 0.277 | 6.23E-05 | Tcell | NTPCR        |
| SMARCD1.1 | 4.17E-09 | -0.30571 | 0.045 | 0.218 | 6.23E-05 | Tcell | SMARCD1      |
| TSG101.4  | 4.20E-09 | -0.28081 | 0.182 | 0.422 | 6.28E-05 | Tcell | TSG101       |
| NNT-AS1.1 | 4.24E-09 | -0.32007 | 0.05  | 0.224 | 6.34E-05 | Tcell | NNT-AS1      |
| SESTD1.9  | 4.25E-09 | -0.35337 | 0.014 | 0.162 | 6.35E-05 | Tcell | SESTD1       |
| TRIM24.13 | 4.26E-09 | -0.30107 | 0.032 | 0.195 | 6.36E-05 | Tcell | TRIM24       |
| ODC1.13   | 4.27E-09 | -0.30436 | 0.168 | 0.398 | 6.39E-05 | Tcell | ODC1         |
| ROCK2.6   | 4.32E-09 | -0.30512 | 0.009 | 0.154 | 6.45E-05 | Tcell | ROCK2        |
| DCBLD2.12 | 4.32E-09 | -0.30917 | 0.005 | 0.146 | 6.45E-05 | Tcell | DCBLD2       |
| ARFIP2.7  | 4.36E-09 | -0.21399 | 0.064 | 0.247 | 6.52E-05 | Tcell | ARFIP2       |
| SUN1.10   | 4.41E-09 | -0.27839 | 0.041 | 0.211 | 6.60E-05 | Tcell | SUN1         |
| MFS12.11  | 4.42E-09 | -0.30487 | 0.032 | 0.194 | 6.61E-05 | Tcell | MFS12        |
| UFL1.2    | 4.43E-09 | -0.32178 | 0.045 | 0.214 | 6.62E-05 | Tcell | UFL1         |
| PWP1.7    | 4.46E-09 | -0.28767 | 0.1   | 0.307 | 6.66E-05 | Tcell | PWP1         |
| NFKBIZ.12 | 4.49E-09 | 0.563927 | 0.295 | 0.173 | 6.70E-05 | Tcell | NFKBIZ       |
| CHMP3.3   | 4.51E-09 | -0.24965 | 0.15  | 0.383 | 6.74E-05 | Tcell | CHMP3        |
| NNMT.11   | 4.52E-09 | -0.71013 | 0.014 | 0.161 | 6.75E-05 | Tcell | NNMT         |
| GPR137B.1 | 4.54E-09 | -0.30006 | 0.055 | 0.233 | 6.79E-05 | Tcell | GPR137B      |
| TNFSF10.1 | 4.55E-09 | 0.415694 | 0.173 | 0.072 | 6.79E-05 | Tcell | TNFSF10      |
| MRAS.9    | 4.55E-09 | -0.27369 | 0.018 | 0.171 | 6.79E-05 | Tcell | MRAS         |
| ENOPH1.12 | 4.56E-09 | -0.21165 | 0.159 | 0.393 | 6.81E-05 | Tcell | ENOPH1       |
| ZC2HC1A.1 | 4.56E-09 | -0.37838 | 0.045 | 0.214 | 6.82E-05 | Tcell | ZC2HC1A      |
| AHCY.9    | 4.59E-09 | -0.2745  | 0.095 | 0.298 | 6.86E-05 | Tcell | AHCY         |
| VPS25.6   | 4.59E-09 | -0.31265 | 0.123 | 0.334 | 6.86E-05 | Tcell | VPS25        |
| RP11-161M | 4.64E-09 | -0.41681 | 0.018 | 0.169 | 6.93E-05 | Tcell | RP11-161M6.2 |
| ZNF711.11 | 4.74E-09 | -0.37349 | 0.005 | 0.145 | 7.08E-05 | Tcell | ZNF711       |
| TUBA1C.1C | 4.74E-09 | -0.41557 | 0.159 | 0.384 | 7.09E-05 | Tcell | TUBA1C       |
| CIAPIN1.9 | 4.76E-09 | -0.3427  | 0.077 | 0.263 | 7.12E-05 | Tcell | CIAPIN1      |
| DCTN2.8   | 4.79E-09 | -0.34112 | 0.25  | 0.512 | 7.16E-05 | Tcell | DCTN2        |
| PABPN1.9  | 4.82E-09 | -0.15046 | 0.136 | 0.359 | 7.20E-05 | Tcell | PABPN1       |
| ALKBH4.1C | 4.95E-09 | -0.29591 | 0.036 | 0.201 | 7.40E-05 | Tcell | ALKBH4       |
| NAE1.10   | 4.96E-09 | -0.24936 | 0.127 | 0.344 | 7.41E-05 | Tcell | NAE1         |
| AK2.7     | 4.96E-09 | -0.39043 | 0.164 | 0.395 | 7.41E-05 | Tcell | AK2          |
| LST1.14   | 4.98E-09 | -0.51134 | 0.127 | 0.316 | 7.44E-05 | Tcell | LST1         |
| KDELRL1.5 | 4.98E-09 | -0.27432 | 0.227 | 0.498 | 7.45E-05 | Tcell | KDELRL1      |
| PSENN.1C  | 5.00E-09 | -0.37659 | 0.241 | 0.497 | 7.47E-05 | Tcell | PSENN        |
| LRRC4B.13 | 5.04E-09 | -0.30033 | 0     | 0.136 | 7.54E-05 | Tcell | LRRC4B       |
| USE1.10   | 5.11E-09 | -0.30867 | 0.118 | 0.334 | 7.64E-05 | Tcell | USE1         |
| LPL.8     | 5.12E-09 | -0.46993 | 0.014 | 0.161 | 7.65E-05 | Tcell | LPL          |
| MTMR9.9   | 5.14E-09 | -0.32558 | 0.032 | 0.192 | 7.69E-05 | Tcell | MTMR9        |
| AP4M1.11  | 5.16E-09 | -0.4122  | 0.036 | 0.196 | 7.72E-05 | Tcell | AP4M1        |
| TMEM206.1 | 5.22E-09 | -0.28874 | 0.055 | 0.234 | 7.79E-05 | Tcell | TMEM206      |
| SPG20.5   | 5.29E-09 | -0.29816 | 0.059 | 0.241 | 7.91E-05 | Tcell | SPG20        |

|             |           |           |        |        |                 |                  |
|-------------|-----------|-----------|--------|--------|-----------------|------------------|
| DTX3. 9     | 5. 33E-09 | -0. 37798 | 0. 073 | 0. 259 | 7. 97E-05 Tcell | DTX3             |
| MXRA7. 11   | 5. 34E-09 | -0. 27564 | 0. 018 | 0. 17  | 7. 99E-05 Tcell | MXRA7            |
| TM9SF4. 5   | 5. 37E-09 | -0. 3322  | 0. 032 | 0. 191 | 8. 03E-05 Tcell | TM9SF4           |
| CLK1. 7     | 5. 50E-09 | 0. 550823 | 0. 495 | 0. 421 | 8. 22E-05 Tcell | CLK1             |
| ERAL1. 8    | 5. 53E-09 | -0. 28062 | 0. 064 | 0. 244 | 8. 26E-05 Tcell | ERAL1            |
| TMC03. 5    | 5. 53E-09 | -0. 27686 | 0. 041 | 0. 207 | 8. 26E-05 Tcell | TMC03            |
| TAC01. 6    | 5. 57E-09 | -0. 29986 | 0. 023 | 0. 177 | 8. 32E-05 Tcell | TAC01            |
| TSPAN31. 9  | 5. 57E-09 | -0. 38329 | 0. 1   | 0. 299 | 8. 33E-05 Tcell | TSPAN31          |
| PTGS1. 13   | 5. 58E-09 | -0. 49623 | 0. 014 | 0. 159 | 8. 33E-05 Tcell | PTGS1            |
| NUDCD2. 9   | 5. 58E-09 | -0. 24162 | 0. 164 | 0. 405 | 8. 34E-05 Tcell | NUDCD2           |
| NLRC5. 1    | 5. 69E-09 | 0. 479716 | 0. 114 | 0. 039 | 8. 50E-05 Tcell | NLRC5            |
| AP1B1. 12   | 5. 73E-09 | -0. 35096 | 0. 077 | 0. 262 | 8. 56E-05 Tcell | AP1B1            |
| ATP6V1G2. 5 | 5. 79E-09 | -0. 37515 | 0. 009 | 0. 152 | 8. 66E-05 Tcell | ATP6V1G2         |
| PIPOX. 12   | 5. 81E-09 | -0. 33614 | 0      | 0. 135 | 8. 68E-05 Tcell | PIPOX            |
| MAGEH1. 12  | 5. 82E-09 | -0. 34459 | 0. 118 | 0. 321 | 8. 70E-05 Tcell | MAGEH1           |
| MAP9. 10    | 5. 83E-09 | -0. 32248 | 0. 032 | 0. 192 | 8. 71E-05 Tcell | MAP9             |
| PAIP1. 13   | 5. 84E-09 | -0. 20772 | 0. 159 | 0. 4   | 8. 73E-05 Tcell | PAIP1            |
| CTNND2. 11  | 5. 85E-09 | -0. 33514 | 0. 014 | 0. 16  | 8. 75E-05 Tcell | CTNND2           |
| TSPYL2. 6   | 5. 97E-09 | 0. 655663 | 0. 218 | 0. 111 | 8. 92E-05 Tcell | TSPYL2           |
| ADM. 12     | 6. 00E-09 | -0. 64004 | 0. 032 | 0. 188 | 8. 96E-05 Tcell | ADM              |
| WDR830S. 7  | 6. 00E-09 | -0. 36969 | 0. 441 | 0. 75  | 8. 97E-05 Tcell | WDR830S          |
| NRP1. 11    | 6. 03E-09 | -0. 33589 | 0. 018 | 0. 168 | 9. 01E-05 Tcell | NRP1             |
| CTDNEP1. 7  | 6. 16E-09 | -0. 22332 | 0. 109 | 0. 317 | 9. 20E-05 Tcell | CTDNEP1          |
| PLXNB2. 9   | 6. 17E-09 | -0. 33916 | 0. 014 | 0. 16  | 9. 22E-05 Tcell | PLXNB2           |
| BMP7. 14    | 6. 23E-09 | -0. 32205 | 0. 018 | 0. 169 | 9. 30E-05 Tcell | BMP7             |
| UBE2E3. 12  | 6. 26E-09 | -0. 30856 | 0. 218 | 0. 465 | 9. 35E-05 Tcell | UBE2E3           |
| TMOD1. 10   | 6. 26E-09 | -0. 41896 | 0. 014 | 0. 16  | 9. 35E-05 Tcell | TMOD1            |
| PLAU. 12    | 6. 30E-09 | -0. 45243 | 0. 018 | 0. 166 | 9. 41E-05 Tcell | PLAU             |
| AGPAT1. 6   | 6. 32E-09 | -0. 28084 | 0. 055 | 0. 23  | 9. 44E-05 Tcell | AGPAT1           |
| SLC25A36. 6 | 6. 41E-09 | -0. 28173 | 0. 082 | 0. 273 | 9. 58E-05 Tcell | SLC25A36         |
| LDLRAP1. 6  | 6. 45E-09 | 0. 562508 | 0. 141 | 0. 055 | 9. 64E-05 Tcell | LDLRAP1          |
| MTCH1. 6    | 6. 54E-09 | -0. 27603 | 0. 259 | 0. 539 | 9. 78E-05 Tcell | MTCH1            |
| SPNS1. 9    | 6. 56E-09 | -0. 23266 | 0. 095 | 0. 294 | 9. 81E-05 Tcell | SPNS1            |
| GIMAP6. 12  | 6. 57E-09 | 0. 547131 | 0. 118 | 0. 041 | 9. 82E-05 Tcell | GIMAP6           |
| GIMAP4. 14  | 6. 63E-09 | 0. 533447 | 0. 273 | 0. 147 | 9. 91E-05 Tcell | GIMAP4           |
| SAR1B. 6    | 6. 65E-09 | -0. 29297 | 0. 118 | 0. 326 | 9. 94E-05 Tcell | SAR1B            |
| GDE1. 6     | 6. 65E-09 | -0. 25956 | 0. 1   | 0. 303 | 9. 94E-05 Tcell | GDE1             |
| HOMER1. 12  | 6. 66E-09 | -0. 31338 | 0. 014 | 0. 159 | 9. 96E-05 Tcell | HOMER1           |
| GRHPR. 8    | 6. 68E-09 | -0. 2076  | 0. 164 | 0. 397 | 9. 98E-05 Tcell | GRHPR            |
| RP11-1094   | 6. 69E-09 | -0. 22585 | 0. 059 | 0. 238 | 1. 00E-04 Tcell | RP11-1094M14. 11 |
| PHF5A. 5    | 6. 81E-09 | -0. 26226 | 0. 123 | 0. 331 | 0. 000102 Tcell | PHF5A            |
| NUP62. 8    | 6. 92E-09 | -0. 32928 | 0. 064 | 0. 24  | 0. 000103 Tcell | NUP62            |
| ADA. 8      | 6. 94E-09 | 0. 653664 | 0. 191 | 0. 091 | 0. 000104 Tcell | ADA              |
| LYN. 14     | 7. 07E-09 | -0. 51551 | 0. 027 | 0. 177 | 0. 000106 Tcell | LYN              |
| OS9. 5      | 7. 11E-09 | -0. 31698 | 0. 277 | 0. 541 | 0. 000106 Tcell | OS9              |
| C8orf46. 1  | 7. 15E-09 | -0. 41689 | 0. 005 | 0. 142 | 0. 000107 Tcell | C8orf46          |
| ARHGEF3. 4  | 7. 27E-09 | 0. 686842 | 0. 209 | 0. 104 | 0. 000109 Tcell | ARHGEF3          |
| CTD-2336C   | 7. 32E-09 | -0. 30385 | 0. 055 | 0. 227 | 0. 000109 Tcell | CTD-233602. 1    |
| FAM110B. 1  | 7. 38E-09 | -0. 32833 | 0. 032 | 0. 189 | 0. 00011 Tcell  | FAM110B          |
| TMEM158. 1  | 7. 39E-09 | -0. 33335 | 0. 005 | 0. 142 | 0. 00011 Tcell  | TMEM158          |
| ANK2. 12    | 7. 45E-09 | -0. 29614 | 0. 018 | 0. 167 | 0. 000111 Tcell | ANK2             |

|            |          |          |       |       |          |       |           |
|------------|----------|----------|-------|-------|----------|-------|-----------|
| SPATA6.7   | 7.51E-09 | -0.31702 | 0.014 | 0.159 | 0.000112 | Tcell | SPATA6    |
| NKX2-2.12  | 7.54E-09 | -0.43394 | 0.009 | 0.15  | 0.000113 | Tcell | NKX2-2    |
| ALG5.3     | 7.71E-09 | -0.31476 | 0.15  | 0.37  | 0.000115 | Tcell | ALG5      |
| ENO2.10    | 7.77E-09 | -0.35899 | 0.095 | 0.288 | 0.000116 | Tcell | ENO2      |
| CHCHD3.9   | 7.89E-09 | -0.24779 | 0.15  | 0.373 | 0.000118 | Tcell | CHCHD3    |
| IPO5.9     | 7.91E-09 | -0.30622 | 0.05  | 0.219 | 0.000118 | Tcell | IPO5      |
| NUDT9.3    | 8.29E-09 | -0.33985 | 0.055 | 0.226 | 0.000124 | Tcell | NUDT9     |
| LHX2.12    | 8.30E-09 | -0.31814 | 0     | 0.132 | 0.000124 | Tcell | LHX2      |
| COLGALT1.8 | 8.31E-09 | -0.30855 | 0.036 | 0.195 | 0.000124 | Tcell | COLGALT1  |
| CYLD.9     | 8.33E-09 | 0.68042  | 0.277 | 0.162 | 0.000124 | Tcell | CYLD      |
| TMEM251.5  | 8.34E-09 | -0.27181 | 0.064 | 0.246 | 0.000125 | Tcell | TMEM251   |
| WDR60.11   | 8.39E-09 | -0.25036 | 0.059 | 0.235 | 0.000125 | Tcell | WDR60     |
| GPT2.12    | 8.47E-09 | -0.32265 | 0.009 | 0.15  | 0.000127 | Tcell | GPT2      |
| PRR7.12    | 8.57E-09 | -0.23655 | 0.032 | 0.191 | 0.000128 | Tcell | PRR7      |
| PTGR1.8    | 8.57E-09 | -0.38275 | 0.032 | 0.188 | 0.000128 | Tcell | PTGR1     |
| TMED5.11   | 8.66E-09 | -0.28039 | 0.109 | 0.31  | 0.000129 | Tcell | TMED5     |
| GARS.10    | 8.67E-09 | -0.30112 | 0.1   | 0.297 | 0.00013  | Tcell | GARS      |
| TPM2.10    | 8.70E-09 | -0.4078  | 0.018 | 0.165 | 0.00013  | Tcell | TPM2      |
| MEIS3.10   | 8.73E-09 | -0.32521 | 0     | 0.132 | 0.000131 | Tcell | MEIS3     |
| NAV1.10    | 8.74E-09 | -0.30705 | 0.018 | 0.165 | 0.000131 | Tcell | NAV1      |
| DHRS7B.5   | 8.82E-09 | -0.31826 | 0.032 | 0.189 | 0.000132 | Tcell | DHRS7B    |
| IPO9.10    | 8.85E-09 | -0.32752 | 0.059 | 0.235 | 0.000132 | Tcell | IPO9      |
| SLC31A2.1  | 8.86E-09 | -0.5161  | 0.036 | 0.195 | 0.000132 | Tcell | SLC31A2   |
| FOXP1.9    | 8.90E-09 | 0.614342 | 0.359 | 0.228 | 0.000133 | Tcell | FOXP1     |
| PIGU.9     | 8.95E-09 | -0.35188 | 0.023 | 0.174 | 0.000134 | Tcell | PIGU      |
| MRPS25.4   | 8.95E-09 | -0.19816 | 0.082 | 0.267 | 0.000134 | Tcell | MRPS25    |
| LHFPL2.12  | 9.02E-09 | -0.45995 | 0.018 | 0.163 | 0.000135 | Tcell | LHFPL2    |
| NCBP2-AS2  | 9.02E-09 | -0.18556 | 0.086 | 0.28  | 0.000135 | Tcell | NCBP2-AS2 |
| AP2S1.9    | 9.10E-09 | -0.22555 | 0.355 | 0.667 | 0.000136 | Tcell | AP2S1     |
| GNG12.10   | 9.14E-09 | -0.29505 | 0.005 | 0.14  | 0.000137 | Tcell | GNG12     |
| NAT9.7     | 9.19E-09 | -0.22204 | 0.041 | 0.206 | 0.000137 | Tcell | NAT9      |
| HES4.11    | 9.19E-09 | -0.31199 | 0.032 | 0.19  | 0.000137 | Tcell | HES4      |
| PIGT.6     | 9.46E-09 | -0.3456  | 0.177 | 0.402 | 0.000141 | Tcell | PIGT      |
| DUSP6.5    | 9.52E-09 | -0.2281  | 0.068 | 0.248 | 0.000142 | Tcell | DUSP6     |
| ZFYVE21.7  | 9.61E-09 | -0.29815 | 0.082 | 0.27  | 0.000144 | Tcell | ZFYVE21   |
| MDFIC.6    | 9.62E-09 | 0.571774 | 0.118 | 0.043 | 0.000144 | Tcell | MDFIC     |
| SMIM20.5   | 9.72E-09 | -0.25615 | 0.127 | 0.344 | 0.000145 | Tcell | SMIM20    |
| SCARA3.11  | 9.73E-09 | -0.29194 | 0.005 | 0.14  | 0.000145 | Tcell | SCARA3    |
| CTDSP2.8   | 9.73E-09 | -0.31799 | 0.091 | 0.28  | 0.000145 | Tcell | CTDSP2    |
| PRKCSH.7   | 9.81E-09 | -0.29162 | 0.195 | 0.435 | 0.000147 | Tcell | PRKCSH    |
| PDE4DIP.7  | 9.81E-09 | -0.27502 | 0.082 | 0.267 | 0.000147 | Tcell | PDE4DIP   |
| FUZ.7      | 9.93E-09 | -0.32255 | 0.018 | 0.164 | 0.000148 | Tcell | FUZ       |
| EFNA1.10   | 1.00E-08 | -0.46267 | 0     | 0.131 | 0.00015  | Tcell | EFNA1     |
| SWAP70.12  | 1.01E-08 | -0.29906 | 0.055 | 0.225 | 0.00015  | Tcell | SWAP70    |
| FRMD4A.11  | 1.01E-08 | -0.51733 | 0.036 | 0.191 | 0.000151 | Tcell | FRMD4A    |
| VMO1.13    | 1.02E-08 | -0.61506 | 0.018 | 0.162 | 0.000152 | Tcell | VMO1      |
| BMPR2.9    | 1.02E-08 | -0.28226 | 0.027 | 0.18  | 0.000153 | Tcell | BMPR2     |
| CHST2.11   | 1.03E-08 | -0.30526 | 0.005 | 0.138 | 0.000153 | Tcell | CHST2     |
| POLR3H.8   | 1.03E-08 | -0.3168  | 0.05  | 0.218 | 0.000154 | Tcell | POLR3H    |
| BTBD3.11   | 1.04E-08 | -0.28818 | 0.005 | 0.14  | 0.000155 | Tcell | BTBD3     |
| ZNF3.9     | 1.04E-08 | -0.34865 | 0.045 | 0.208 | 0.000156 | Tcell | ZNF3      |



|           |          |          |       |       |          |       |               |
|-----------|----------|----------|-------|-------|----------|-------|---------------|
| DCTN4.3   | 1.04E-08 | -0.32565 | 0.032 | 0.188 | 0.000156 | Tcell | DCTN4         |
| ATP6V1C1. | 1.05E-08 | -0.29255 | 0.068 | 0.247 | 0.000157 | Tcell | ATP6V1C1      |
| APOC2.13  | 1.06E-08 | -0.78026 | 0.041 | 0.192 | 0.000159 | Tcell | APOC2         |
| PLSCR1.12 | 1.07E-08 | -0.41905 | 0.155 | 0.363 | 0.000159 | Tcell | PLSCR1        |
| LTBP3.7   | 1.07E-08 | -0.22847 | 0.045 | 0.213 | 0.000161 | Tcell | LTBP3         |
| CERS1.10  | 1.08E-08 | -0.31614 | 0     | 0.13  | 0.000162 | Tcell | CERS1         |
| PAAF1.7   | 1.10E-08 | -0.23781 | 0.041 | 0.202 | 0.000164 | Tcell | PAAF1         |
| GPSM2.11  | 1.11E-08 | -0.29467 | 0.027 | 0.18  | 0.000165 | Tcell | GPSM2         |
| LINC00665 | 1.11E-08 | -0.27705 | 0.032 | 0.189 | 0.000165 | Tcell | LINC00665     |
| CES2.6    | 1.12E-08 | -0.30732 | 0.032 | 0.187 | 0.000167 | Tcell | CES2          |
| RP11-71N1 | 1.13E-08 | -0.36575 | 0.005 | 0.138 | 0.00017  | Tcell | RP11-71N10.1  |
| PSMC3.7   | 1.14E-08 | -0.24119 | 0.264 | 0.535 | 0.00017  | Tcell | PSMC3         |
| JKAMP.5   | 1.16E-08 | -0.26118 | 0.105 | 0.303 | 0.000174 | Tcell | JKAMP         |
| C12orf10. | 1.18E-08 | -0.31538 | 0.118 | 0.321 | 0.000176 | Tcell | C12orf10      |
| PLEKHB1.1 | 1.18E-08 | -0.44473 | 0.05  | 0.216 | 0.000177 | Tcell | PLEKHB1       |
| SUCLA2.8  | 1.19E-08 | -0.35    | 0.1   | 0.291 | 0.000177 | Tcell | SUCLA2        |
| LINC00657 | 1.20E-08 | -0.17876 | 0.123 | 0.336 | 0.000179 | Tcell | LINC00657     |
| STX12.4   | 1.20E-08 | -0.16467 | 0.168 | 0.412 | 0.000179 | Tcell | STX12         |
| MYH10.11  | 1.22E-08 | -0.31694 | 0.014 | 0.156 | 0.000182 | Tcell | MYH10         |
| ZDHHC9.11 | 1.22E-08 | -0.34705 | 0.023 | 0.17  | 0.000183 | Tcell | ZDHHC9        |
| DERL2.7   | 1.23E-08 | -0.21148 | 0.145 | 0.356 | 0.000184 | Tcell | DERL2         |
| NPTXR.11  | 1.23E-08 | -0.29721 | 0     | 0.13  | 0.000184 | Tcell | NPTXR         |
| TEAD1.9   | 1.23E-08 | -0.24525 | 0.009 | 0.147 | 0.000184 | Tcell | TEAD1         |
| SSFA2.9   | 1.24E-08 | -0.2454  | 0.032 | 0.189 | 0.000185 | Tcell | SSFA2         |
| THOP1.11  | 1.26E-08 | -0.19771 | 0.041 | 0.204 | 0.000189 | Tcell | THOP1         |
| AAK1.8    | 1.27E-08 | 0.745976 | 0.373 | 0.275 | 0.00019  | Tcell | AAK1          |
| KLHL4.11  | 1.28E-08 | -0.32528 | 0     | 0.129 | 0.000191 | Tcell | KLHL4         |
| LINC01003 | 1.28E-08 | -0.29464 | 0.036 | 0.195 | 0.000192 | Tcell | LINC01003     |
| ARHGEF12. | 1.29E-08 | -0.26445 | 0.018 | 0.163 | 0.000193 | Tcell | ARHGEF12      |
| DCTPP1.7  | 1.29E-08 | -0.30035 | 0.127 | 0.334 | 0.000193 | Tcell | DCTPP1        |
| RP11-332H | 1.29E-08 | -0.34901 | 0     | 0.129 | 0.000193 | Tcell | RP11-332H14.2 |
| SLC31A1.1 | 1.30E-08 | -0.38079 | 0.023 | 0.17  | 0.000194 | Tcell | SLC31A1       |
| SDR39U1.7 | 1.30E-08 | -0.36094 | 0.091 | 0.278 | 0.000194 | Tcell | SDR39U1       |
| ZNF414.12 | 1.33E-08 | -0.21676 | 0.032 | 0.188 | 0.000198 | Tcell | ZNF414        |
| PAK3.13   | 1.35E-08 | -0.41921 | 0.009 | 0.146 | 0.000201 | Tcell | PAK3          |
| RP3-525N1 | 1.35E-08 | -0.41642 | 0.014 | 0.153 | 0.000201 | Tcell | RP3-525N10.2  |
| HNRNPDL.8 | 1.37E-08 | 0.220544 | 0.732 | 0.799 | 0.000204 | Tcell | HNRNPDL       |
| NDUFB6.7  | 1.38E-08 | -0.31723 | 0.241 | 0.502 | 0.000206 | Tcell | NDUFB6        |
| TIMM17A.5 | 1.39E-08 | -0.328   | 0.159 | 0.38  | 0.000207 | Tcell | TIMM17A       |
| C20orf96. | 1.39E-08 | -0.32059 | 0.014 | 0.153 | 0.000208 | Tcell | C20orf96      |
| HDGF.8    | 1.39E-08 | -0.24386 | 0.086 | 0.277 | 0.000208 | Tcell | HDGF          |
| IQCK.8    | 1.40E-08 | -0.3311  | 0     | 0.129 | 0.000209 | Tcell | IQCK          |
| FBXO17.14 | 1.41E-08 | -0.27208 | 0.009 | 0.146 | 0.000211 | Tcell | FBXO17        |
| KCNMA1.1C | 1.43E-08 | -0.37742 | 0.009 | 0.145 | 0.000214 | Tcell | KCNMA1        |
| TPD52L2.1 | 1.45E-08 | -0.20101 | 0.123 | 0.328 | 0.000216 | Tcell | TPD52L2       |
| TMEM106B. | 1.46E-08 | -0.29926 | 0.127 | 0.334 | 0.000219 | Tcell | TMEM106B      |
| ZCCHC17.8 | 1.48E-08 | -0.20772 | 0.141 | 0.355 | 0.000221 | Tcell | ZCCHC17       |
| PGLS.9    | 1.48E-08 | -0.26407 | 0.25  | 0.515 | 0.000221 | Tcell | PGLS          |
| SLC35F1.1 | 1.49E-08 | -0.27718 | 0     | 0.128 | 0.000222 | Tcell | SLC35F1       |
| ROGDI.7   | 1.49E-08 | -0.28544 | 0.059 | 0.23  | 0.000223 | Tcell | ROGDI         |
| NNAT.13   | 1.53E-08 | -0.6942  | 0.045 | 0.198 | 0.000228 | Tcell | NNAT          |

|             |           |           |        |        |           |       |                |
|-------------|-----------|-----------|--------|--------|-----------|-------|----------------|
| MKKS. 8     | 1. 53E-08 | -0. 22336 | 0. 177 | 0. 408 | 0. 000229 | Tcell | MKKS           |
| GTF2H2. 1C  | 1. 54E-08 | -0. 22393 | 0. 032 | 0. 187 | 0. 000229 | Tcell | GTF2H2         |
| SMIM15. 5   | 1. 55E-08 | -0. 15418 | 0. 123 | 0. 336 | 0. 000232 | Tcell | SMIM15         |
| UQCC1. 8    | 1. 55E-08 | -0. 32305 | 0. 023 | 0. 168 | 0. 000232 | Tcell | UQCC1          |
| VPS41. 5    | 1. 55E-08 | -0. 31607 | 0. 045 | 0. 204 | 0. 000232 | Tcell | VPS41          |
| SNAP25. 12  | 1. 55E-08 | -0. 42216 | 0. 009 | 0. 145 | 0. 000232 | Tcell | SNAP25         |
| MRT04. 7    | 1. 56E-08 | -0. 31105 | 0. 073 | 0. 249 | 0. 000233 | Tcell | MRT04          |
| C11orf96. 1 | 1. 57E-08 | -0. 40652 | 0. 005 | 0. 137 | 0. 000235 | Tcell | C11orf96       |
| EIF1B. 10   | 1. 58E-08 | -0. 3289  | 0. 309 | 0. 593 | 0. 000236 | Tcell | EIF1B          |
| TAF9. 8     | 1. 59E-08 | -0. 25531 | 0. 236 | 0. 505 | 0. 000237 | Tcell | TAF9           |
| COQ2. 13    | 1. 59E-08 | -0. 36404 | 0. 032 | 0. 182 | 0. 000238 | Tcell | COQ2           |
| PILRA. 13   | 1. 62E-08 | -0. 56778 | 0. 023 | 0. 168 | 0. 000241 | Tcell | PILRA          |
| TCP1. 10    | 1. 62E-08 | -0. 28591 | 0. 255 | 0. 528 | 0. 000243 | Tcell | TCP1           |
| TNPO1. 4    | 1. 63E-08 | -0. 22247 | 0. 091 | 0. 281 | 0. 000243 | Tcell | TNPO1          |
| LAP3. 11    | 1. 65E-08 | -0. 3115  | 0. 245 | 0. 496 | 0. 000246 | Tcell | LAP3           |
| RFX4. 12    | 1. 65E-08 | -0. 38532 | 0. 014 | 0. 153 | 0. 000246 | Tcell | RFX4           |
| CTD-2020K   | 1. 68E-08 | 0. 307263 | 0. 082 | 0. 023 | 0. 000251 | Tcell | CTD-2020K17. 1 |
| HBD. 1      | 1. 68E-08 | 0. 203752 | 0. 014 | 0. 001 | 0. 000251 | Tcell | HBD            |
| USP11. 11   | 1. 68E-08 | -0. 25206 | 0. 141 | 0. 356 | 0. 000251 | Tcell | USP11          |
| TNFAIP1. 1  | 1. 69E-08 | -0. 27014 | 0. 027 | 0. 178 | 0. 000252 | Tcell | TNFAIP1        |
| ASAP1. 9    | 1. 69E-08 | -0. 22146 | 0. 059 | 0. 231 | 0. 000252 | Tcell | ASAP1          |
| OLA1. 7     | 1. 72E-08 | -0. 16277 | 0. 236 | 0. 493 | 0. 000256 | Tcell | OLA1           |
| IL12RB1. 1  | 1. 73E-08 | 0. 322271 | 0. 095 | 0. 03  | 0. 000259 | Tcell | IL12RB1        |
| TNKS. 13    | 1. 74E-08 | -0. 30882 | 0. 014 | 0. 151 | 0. 000259 | Tcell | TNKS           |
| TBL2. 4     | 1. 74E-08 | -0. 31347 | 0. 036 | 0. 192 | 0. 000261 | Tcell | TBL2           |
| SWI5. 10    | 1. 75E-08 | -0. 35492 | 0. 073 | 0. 249 | 0. 000262 | Tcell | SWI5           |
| NKAIN3. 13  | 1. 75E-08 | -0. 32362 | 0      | 0. 127 | 0. 000262 | Tcell | NKAIN3         |
| NMB. 12     | 1. 78E-08 | -0. 38699 | 0. 045 | 0. 205 | 0. 000266 | Tcell | NMB            |
| KIAA1033. 1 | 1. 79E-08 | -0. 31049 | 0. 068 | 0. 242 | 0. 000268 | Tcell | KIAA1033       |
| MAML2. 13   | 1. 80E-08 | -0. 27586 | 0. 041 | 0. 201 | 0. 000269 | Tcell | MAML2          |
| NOL3. 11    | 1. 81E-08 | -0. 32195 | 0. 023 | 0. 169 | 0. 000271 | Tcell | NOL3           |
| RP11-390E   | 1. 84E-08 | -0. 39697 | 0      | 0. 127 | 0. 000276 | Tcell | RP11-390E23. 6 |
| RAB4A. 7    | 1. 85E-08 | -0. 22841 | 0. 132 | 0. 345 | 0. 000276 | Tcell | RAB4A          |
| PSPH. 13    | 1. 85E-08 | -0. 31135 | 0. 018 | 0. 16  | 0. 000277 | Tcell | PSPH           |
| CCDC90B. 8  | 1. 86E-08 | -0. 27805 | 0. 177 | 0. 413 | 0. 000279 | Tcell | CCDC90B        |
| FKBP5. 13   | 1. 87E-08 | 0. 559306 | 0. 427 | 0. 314 | 0. 00028  | Tcell | FKBP5          |
| CLSTN1. 8   | 1. 90E-08 | -0. 24985 | 0. 095 | 0. 286 | 0. 000284 | Tcell | CLSTN1         |
| APBB1IP. 1  | 1. 92E-08 | 0. 469163 | 0. 277 | 0. 154 | 0. 000287 | Tcell | APBB1IP        |
| MIDN. 8     | 1. 92E-08 | -0. 23628 | 0. 182 | 0. 419 | 0. 000287 | Tcell | MIDN           |
| CNIH4. 10   | 1. 94E-08 | -0. 2994  | 0. 159 | 0. 378 | 0. 00029  | Tcell | CNIH4          |
| ARMC10. 1C  | 1. 99E-08 | -0. 23825 | 0. 105 | 0. 3   | 0. 000297 | Tcell | ARMC10         |
| FUNDC1. 8   | 1. 99E-08 | -0. 33258 | 0. 073 | 0. 249 | 0. 000297 | Tcell | FUNDC1         |
| TIMM22. 9   | 1. 99E-08 | -0. 27095 | 0. 073 | 0. 246 | 0. 000297 | Tcell | TIMM22         |
| AP006222. 2 | 2. 00E-08 | -0. 34577 | 0. 05  | 0. 214 | 0. 000299 | Tcell | AP006222. 2    |
| ZNF883. 11  | 2. 01E-08 | -0. 31919 | 0. 009 | 0. 143 | 0. 000301 | Tcell | ZNF883         |
| SOX6. 11    | 2. 02E-08 | -0. 32867 | 0. 009 | 0. 144 | 0. 000302 | Tcell | SOX6           |
| CMTM7. 13   | 2. 05E-08 | 0. 594098 | 0. 277 | 0. 162 | 0. 000307 | Tcell | CMTM7          |
| GSTK1. 11   | 2. 06E-08 | 0. 423144 | 0. 568 | 0. 529 | 0. 000308 | Tcell | GSTK1          |
| TMEM237. 1  | 2. 06E-08 | -0. 28167 | 0. 036 | 0. 189 | 0. 000308 | Tcell | TMEM237        |
| TANC2. 7    | 2. 06E-08 | -0. 26941 | 0. 036 | 0. 192 | 0. 000308 | Tcell | TANC2          |
| VMA21. 9    | 2. 06E-08 | -0. 21516 | 0. 136 | 0. 344 | 0. 000308 | Tcell | VMA21          |

|           |          |          |       |       |          |       |               |
|-----------|----------|----------|-------|-------|----------|-------|---------------|
| SUDS3.12  | 2.07E-08 | -0.22944 | 0.036 | 0.191 | 0.000309 | Tcell | SUDS3         |
| GPAA1.7   | 2.07E-08 | -0.18689 | 0.168 | 0.397 | 0.00031  | Tcell | GPAA1         |
| NRXN1.12  | 2.09E-08 | -0.47391 | 0.023 | 0.166 | 0.000312 | Tcell | NRXN1         |
| PRR13.10  | 2.09E-08 | 0.35352  | 0.591 | 0.542 | 0.000313 | Tcell | PRR13         |
| SIRT6.6   | 2.10E-08 | -0.29754 | 0.041 | 0.198 | 0.000314 | Tcell | SIRT6         |
| GBE1.9    | 2.13E-08 | -0.41857 | 0.036 | 0.188 | 0.000318 | Tcell | GBE1          |
| PDLIM5.6  | 2.13E-08 | -0.21355 | 0.055 | 0.223 | 0.000318 | Tcell | PDLIM5        |
| GPX4.7    | 2.13E-08 | -0.32163 | 0.545 | 0.848 | 0.000318 | Tcell | GPX4          |
| NDUFV1.6  | 2.16E-08 | -0.30527 | 0.232 | 0.484 | 0.000322 | Tcell | NDUFV1        |
| MGST2.13  | 2.17E-08 | -0.53002 | 0.086 | 0.257 | 0.000324 | Tcell | MGST2         |
| KCNF1.14  | 2.17E-08 | -0.3325  | 0     | 0.126 | 0.000325 | Tcell | KCNF1         |
| TMED7.4   | 2.18E-08 | -0.20342 | 0.086 | 0.274 | 0.000326 | Tcell | TMED7         |
| DPF1.11   | 2.18E-08 | -0.35358 | 0.009 | 0.143 | 0.000326 | Tcell | DPF1          |
| RP11-849I | 2.26E-08 | -0.36069 | 0.005 | 0.134 | 0.000337 | Tcell | RP11-849I19.1 |
| TMSB15A.1 | 2.26E-08 | -0.40163 | 0.032 | 0.181 | 0.000338 | Tcell | TMSB15A       |
| CINP.3    | 2.29E-08 | -0.32927 | 0.077 | 0.255 | 0.000342 | Tcell | CINP          |
| PIGX.11   | 2.31E-08 | -0.29175 | 0.077 | 0.256 | 0.000345 | Tcell | PIGX          |
| LY75.2    | 2.34E-08 | 0.33012  | 0.064 | 0.016 | 0.00035  | Tcell | LY75          |
| SPI1.14   | 2.36E-08 | -0.51209 | 0.077 | 0.242 | 0.000352 | Tcell | SPI1          |
| USMG5.10  | 2.38E-08 | 0.314372 | 0.605 | 0.62  | 0.000356 | Tcell | USMG5         |
| MVB12A.8  | 2.41E-08 | -0.27925 | 0.109 | 0.306 | 0.00036  | Tcell | MVB12A        |
| OSER1-AS1 | 2.41E-08 | -0.33739 | 0.005 | 0.134 | 0.00036  | Tcell | OSER1-AS1     |
| SGCE.10   | 2.44E-08 | -0.54521 | 0.014 | 0.149 | 0.000365 | Tcell | SGCE          |
| NDUFC1.7  | 2.47E-08 | -0.32071 | 0.286 | 0.557 | 0.00037  | Tcell | NDUFC1        |
| SAP30.9   | 2.49E-08 | -0.25439 | 0.068 | 0.243 | 0.000371 | Tcell | SAP30         |
| PCDHB16.1 | 2.50E-08 | -0.29178 | 0.009 | 0.142 | 0.000374 | Tcell | PCDHB16       |
| CPNE3.8   | 2.52E-08 | -0.25033 | 0.127 | 0.334 | 0.000377 | Tcell | CPNE3         |
| ASIC4.12  | 2.53E-08 | -0.48344 | 0.009 | 0.142 | 0.000378 | Tcell | ASIC4         |
| SP110.11  | 2.54E-08 | 0.582666 | 0.314 | 0.196 | 0.00038  | Tcell | SP110         |
| PBX4.1    | 2.63E-08 | 0.338083 | 0.073 | 0.02  | 0.000393 | Tcell | PBX4          |
| PGD.7     | 2.64E-08 | -0.26651 | 0.105 | 0.297 | 0.000395 | Tcell | PGD           |
| FOLR2.14  | 2.66E-08 | -0.75957 | 0.036 | 0.18  | 0.000398 | Tcell | FOLR2         |
| POSTN.12  | 2.67E-08 | -0.43568 | 0.005 | 0.132 | 0.000399 | Tcell | POSTN         |
| WSCD1.12  | 2.68E-08 | -0.30979 | 0.005 | 0.133 | 0.0004   | Tcell | WSCD1         |
| GRIA4.11  | 2.74E-08 | -0.35861 | 0.005 | 0.132 | 0.000409 | Tcell | GRIA4         |
| QSOX1.11  | 2.75E-08 | -0.25273 | 0.068 | 0.239 | 0.000411 | Tcell | QSOX1         |
| NSL1.8    | 2.75E-08 | -0.31865 | 0.141 | 0.351 | 0.000411 | Tcell | NSL1          |
| PNMA2.12  | 2.77E-08 | -0.32059 | 0.009 | 0.141 | 0.000413 | Tcell | PNMA2         |
| RNF141.7  | 2.80E-08 | -0.34052 | 0.055 | 0.217 | 0.000418 | Tcell | RNF141        |
| CNDP2.12  | 2.82E-08 | -0.31927 | 0.2   | 0.435 | 0.000422 | Tcell | CNDP2         |
| EIF3B.8   | 2.86E-08 | -0.2094  | 0.073 | 0.25  | 0.000427 | Tcell | EIF3B         |
| PSMC2.7   | 2.86E-08 | -0.27334 | 0.218 | 0.463 | 0.000427 | Tcell | PSMC2         |
| SUGT1.4   | 2.87E-08 | -0.27673 | 0.141 | 0.349 | 0.000429 | Tcell | SUGT1         |
| ECSIT.8   | 2.91E-08 | -0.27654 | 0.086 | 0.271 | 0.000434 | Tcell | ECSIT         |
| HOOK3.6   | 2.92E-08 | -0.14868 | 0.095 | 0.287 | 0.000436 | Tcell | HOOK3         |
| COMMD1.4  | 2.92E-08 | -0.26528 | 0.15  | 0.361 | 0.000437 | Tcell | COMMD1        |
| EGR2.10   | 2.94E-08 | -0.40029 | 0.041 | 0.195 | 0.000439 | Tcell | EGR2          |
| EMG1.5    | 2.99E-08 | -0.31636 | 0.068 | 0.238 | 0.000446 | Tcell | EMG1          |
| HINT3.7   | 3.00E-08 | -0.30204 | 0.045 | 0.201 | 0.000448 | Tcell | HINT3         |
| RAB2A.7   | 3.02E-08 | -0.25525 | 0.3   | 0.597 | 0.000452 | Tcell | RAB2A         |
| OGFRL1.12 | 3.03E-08 | -0.42026 | 0.036 | 0.184 | 0.000453 | Tcell | OGFRL1        |

|           |          |          |       |       |          |       |               |
|-----------|----------|----------|-------|-------|----------|-------|---------------|
| ICT1.6    | 3.09E-08 | -0.26385 | 0.068 | 0.24  | 0.000461 | Tcell | ICT1          |
| SNF8.11   | 3.10E-08 | -0.23151 | 0.209 | 0.464 | 0.000464 | Tcell | SNF8          |
| TMEM11.9  | 3.11E-08 | -0.27043 | 0.123 | 0.322 | 0.000465 | Tcell | TMEM11        |
| ATF7IP2.1 | 3.13E-08 | 0.383236 | 0.114 | 0.04  | 0.000468 | Tcell | ATF7IP2       |
| GPC2.14   | 3.14E-08 | -0.42416 | 0.027 | 0.171 | 0.000469 | Tcell | GPC2          |
| TRIM16.8  | 3.16E-08 | -0.27902 | 0.005 | 0.132 | 0.000473 | Tcell | TRIM16        |
| ANKRD17.1 | 3.18E-08 | -0.16616 | 0.055 | 0.22  | 0.000475 | Tcell | ANKRD17       |
| PTGES2.7  | 3.18E-08 | -0.21689 | 0.086 | 0.27  | 0.000475 | Tcell | PTGES2        |
| TRAF4.13  | 3.19E-08 | -0.23043 | 0.086 | 0.272 | 0.000477 | Tcell | TRAF4         |
| ASPHD1.9  | 3.20E-08 | -0.35118 | 0.009 | 0.14  | 0.000478 | Tcell | ASPHD1        |
| GTF2F1.3  | 3.22E-08 | -0.21745 | 0.095 | 0.286 | 0.000481 | Tcell | GTF2F1        |
| STAU1.9   | 3.22E-08 | -0.1722  | 0.145 | 0.37  | 0.000481 | Tcell | STAU1         |
| DPCD.8    | 3.23E-08 | -0.36373 | 0.023 | 0.164 | 0.000482 | Tcell | DPCD          |
| PURB.5    | 3.23E-08 | -0.29081 | 0.027 | 0.171 | 0.000482 | Tcell | PURB          |
| TP53I3.6  | 3.25E-08 | -0.33811 | 0.014 | 0.148 | 0.000486 | Tcell | TP53I3        |
| PFDN2.6   | 3.27E-08 | -0.18397 | 0.323 | 0.616 | 0.000489 | Tcell | PFDN2         |
| SPOP.10   | 3.31E-08 | -0.26663 | 0.114 | 0.312 | 0.000494 | Tcell | SPOP          |
| PASK.1    | 3.33E-08 | 0.379907 | 0.059 | 0.014 | 0.000498 | Tcell | PASK          |
| NMD3.3    | 3.33E-08 | -0.28143 | 0.055 | 0.218 | 0.000498 | Tcell | NMD3          |
| SCIN.14   | 3.35E-08 | -0.63097 | 0.018 | 0.153 | 0.0005   | Tcell | SCIN          |
| GLA.12    | 3.35E-08 | -0.43504 | 0.059 | 0.218 | 0.0005   | Tcell | GLA           |
| APMAP.6   | 3.36E-08 | -0.17609 | 0.25  | 0.523 | 0.000503 | Tcell | APMAP         |
| TSPAN12.1 | 3.37E-08 | -0.33093 | 0     | 0.123 | 0.000504 | Tcell | TSPAN12       |
| MLLT4.11  | 3.39E-08 | -0.26898 | 0.023 | 0.164 | 0.000506 | Tcell | MLLT4         |
| RP13-580F | 3.39E-08 | 0.144255 | 0.027 | 0.004 | 0.000507 | Tcell | RP13-580F15.2 |
| CSTF3.11  | 3.43E-08 | -0.19304 | 0.086 | 0.271 | 0.000513 | Tcell | CSTF3         |
| TMEM165.7 | 3.43E-08 | -0.21733 | 0.209 | 0.461 | 0.000513 | Tcell | TMEM165       |
| DHPS.10   | 3.44E-08 | -0.26525 | 0.209 | 0.451 | 0.000515 | Tcell | DHPS          |
| NETO2.10  | 3.44E-08 | -0.2234  | 0.023 | 0.164 | 0.000515 | Tcell | NETO2         |
| GNA12.3   | 3.45E-08 | -0.34247 | 0.009 | 0.139 | 0.000515 | Tcell | GNA12         |
| SERINC2.8 | 3.50E-08 | -0.29764 | 0     | 0.122 | 0.000523 | Tcell | SERINC2       |
| C6orf1.4  | 3.56E-08 | -0.24756 | 0.15  | 0.364 | 0.000532 | Tcell | C6orf1        |
| DNASE2.1C | 3.57E-08 | -0.23631 | 0.173 | 0.388 | 0.000533 | Tcell | DNASE2        |
| ANAPC13.1 | 3.57E-08 | -0.24825 | 0.141 | 0.358 | 0.000534 | Tcell | ANAPC13       |
| COMMD5.1  | 3.64E-08 | -0.16614 | 0.082 | 0.262 | 0.000543 | Tcell | COMMD5        |
| NIFK.10   | 3.67E-08 | -0.13183 | 0.141 | 0.352 | 0.000549 | Tcell | NIFK          |
| EXOSC4.5  | 3.68E-08 | -0.21383 | 0.077 | 0.255 | 0.00055  | Tcell | EXOSC4        |
| KXD1.8    | 3.71E-08 | -0.30513 | 0.218 | 0.453 | 0.000554 | Tcell | KXD1          |
| PYGB.8    | 3.75E-08 | -0.13816 | 0.05  | 0.214 | 0.00056  | Tcell | PYGB          |
| YBEY.6    | 3.86E-08 | -0.22623 | 0.059 | 0.224 | 0.000576 | Tcell | YBEY          |
| PDGFC.8   | 3.87E-08 | -0.28161 | 0     | 0.122 | 0.000578 | Tcell | PDGFC         |
| FGFR1.9   | 3.90E-08 | -0.20379 | 0.027 | 0.173 | 0.000583 | Tcell | FGFR1         |
| STARD4-AS | 3.97E-08 | -0.32096 | 0.005 | 0.129 | 0.000593 | Tcell | STARD4-AS1    |
| INSR.8    | 4.06E-08 | -0.34471 | 0.014 | 0.147 | 0.000606 | Tcell | INSR          |
| ANKRD10.2 | 4.08E-08 | -0.20568 | 0.114 | 0.31  | 0.00061  | Tcell | ANKRD10       |
| CAV1.12   | 4.10E-08 | -0.86545 | 0.005 | 0.129 | 0.000613 | Tcell | CAV1          |
| BTG2.10   | 4.11E-08 | 0.483844 | 0.523 | 0.466 | 0.000614 | Tcell | BTG2          |
| MAPRE1.7  | 4.12E-08 | -0.27652 | 0.227 | 0.482 | 0.000615 | Tcell | MAPRE1        |
| SLC1A2.1C | 4.12E-08 | -0.36485 | 0.009 | 0.138 | 0.000616 | Tcell | SLC1A2        |
| ZSCAN18.9 | 4.13E-08 | -0.24261 | 0.064 | 0.235 | 0.000617 | Tcell | ZSCAN18       |
| ATP6V1A.6 | 4.13E-08 | -0.24332 | 0.045 | 0.202 | 0.000618 | Tcell | ATP6V1A       |

|            |          |          |       |       |          |       |               |
|------------|----------|----------|-------|-------|----------|-------|---------------|
| FKBP4.9    | 4.13E-08 | -0.19783 | 0.123 | 0.325 | 0.000618 | Tcell | FKBP4         |
| CC2D1A.7   | 4.14E-08 | -0.13703 | 0.036 | 0.189 | 0.000619 | Tcell | CC2D1A        |
| RHBDD2.11  | 4.18E-08 | -0.22509 | 0.209 | 0.464 | 0.000625 | Tcell | RHBDD2        |
| GLT8D1.7   | 4.21E-08 | -0.14823 | 0.091 | 0.28  | 0.00063  | Tcell | GLT8D1        |
| NUP210.2   | 4.22E-08 | 0.535998 | 0.145 | 0.061 | 0.00063  | Tcell | NUP210        |
| BPHL.7     | 4.23E-08 | -0.31925 | 0.032 | 0.177 | 0.000632 | Tcell | BPHL          |
| PTDSS2.12  | 4.24E-08 | -0.24894 | 0.018 | 0.155 | 0.000634 | Tcell | PTDSS2        |
| CCT5.11    | 4.25E-08 | -0.16269 | 0.227 | 0.487 | 0.000635 | Tcell | CCT5          |
| TTC39B     | 4.29E-08 | 0.466727 | 0.082 | 0.025 | 0.000642 | Tcell | TTC39B        |
| HCFC1R1.6  | 4.31E-08 | -0.29246 | 0.105 | 0.286 | 0.000644 | Tcell | HCFC1R1       |
| WASL.10    | 4.32E-08 | -0.23347 | 0.036 | 0.186 | 0.000646 | Tcell | WASL          |
| FNIP2.8    | 4.39E-08 | -0.31079 | 0.045 | 0.198 | 0.000657 | Tcell | FNIP2         |
| FHL3.8     | 4.46E-08 | -0.29442 | 0.023 | 0.162 | 0.000667 | Tcell | FHL3          |
| HIP1.10    | 4.56E-08 | -0.28371 | 0.027 | 0.17  | 0.000682 | Tcell | HIP1          |
| RAMP2.11   | 4.59E-08 | -0.32276 | 0.009 | 0.138 | 0.000686 | Tcell | RAMP2         |
| PDIA4.7    | 4.63E-08 | -0.27824 | 0.218 | 0.466 | 0.000692 | Tcell | PDIA4         |
| YWHAH.12   | 4.66E-08 | -0.30094 | 0.309 | 0.57  | 0.000696 | Tcell | YWHAH         |
| IVD.6      | 4.67E-08 | -0.2569  | 0.045 | 0.202 | 0.000698 | Tcell | IVD           |
| EIF4G3.5   | 4.71E-08 | -0.26844 | 0.032 | 0.177 | 0.000704 | Tcell | EIF4G3        |
| BACE1.8    | 4.72E-08 | -0.3328  | 0     | 0.12  | 0.000706 | Tcell | BACE1         |
| ZCRB1.6    | 4.74E-08 | -0.32744 | 0.25  | 0.495 | 0.000709 | Tcell | ZCRB1         |
| ZNF24.9    | 4.78E-08 | -0.23129 | 0.109 | 0.304 | 0.000715 | Tcell | ZNF24         |
| TRADD.8    | 4.82E-08 | 0.620502 | 0.273 | 0.166 | 0.000721 | Tcell | TRADD         |
| TMED4.10   | 4.83E-08 | -0.23146 | 0.195 | 0.442 | 0.000722 | Tcell | TMED4         |
| RAB6A.9    | 4.85E-08 | -0.10483 | 0.168 | 0.398 | 0.000724 | Tcell | RAB6A         |
| TMEM38B.4  | 4.86E-08 | -0.33929 | 0.027 | 0.169 | 0.000726 | Tcell | TMEM38B       |
| PLEKHA4.1  | 4.88E-08 | -0.25138 | 0.005 | 0.129 | 0.000729 | Tcell | PLEKHA4       |
| NAV2.10    | 4.90E-08 | -0.32938 | 0     | 0.12  | 0.000733 | Tcell | NAV2          |
| SELPLG.12  | 4.91E-08 | 0.367038 | 0.236 | 0.119 | 0.000734 | Tcell | SELPLG        |
| PES1.7     | 4.96E-08 | -0.22093 | 0.041 | 0.195 | 0.000742 | Tcell | PES1          |
| CHD6.12    | 4.99E-08 | -0.22175 | 0.073 | 0.248 | 0.000746 | Tcell | CHD6          |
| MTHFD2L.8  | 5.00E-08 | -0.23272 | 0.05  | 0.209 | 0.000747 | Tcell | MTHFD2L       |
| PITPNA.8   | 5.02E-08 | -0.20484 | 0.036 | 0.184 | 0.000751 | Tcell | PITPNA        |
| CMBL.9     | 5.03E-08 | -0.2959  | 0.005 | 0.129 | 0.000751 | Tcell | CMBL          |
| TGFB1I1.1  | 5.03E-08 | -0.28639 | 0.005 | 0.129 | 0.000751 | Tcell | TGFB1I1       |
| TMSB15B.1  | 5.09E-08 | -0.3142  | 0.036 | 0.184 | 0.000761 | Tcell | TMSB15B       |
| RP11-796E  | 5.09E-08 | 0.561183 | 0.15  | 0.064 | 0.000761 | Tcell | RP11-796E2.4  |
| NUDT11.11  | 5.11E-08 | -0.33833 | 0.005 | 0.129 | 0.000764 | Tcell | NUDT11        |
| HLA-DMB.1  | 5.12E-08 | -0.59345 | 0.155 | 0.324 | 0.000765 | Tcell | HLA-DMB       |
| ERGIC1.4   | 5.17E-08 | -0.27679 | 0.105 | 0.293 | 0.000772 | Tcell | ERGIC1        |
| KIAA1191.5 | 5.23E-08 | -0.15984 | 0.086 | 0.268 | 0.000781 | Tcell | KIAA1191      |
| WDR1.9     | 5.31E-08 | 0.434036 | 0.477 | 0.413 | 0.000794 | Tcell | WDR1          |
| SYP.12     | 5.38E-08 | -0.38858 | 0.009 | 0.136 | 0.000804 | Tcell | SYP           |
| EXOC7.10   | 5.43E-08 | -0.11665 | 0.141 | 0.356 | 0.000811 | Tcell | EXOC7         |
| IER3.14    | 5.48E-08 | -0.57365 | 0.086 | 0.244 | 0.000819 | Tcell | IER3          |
| ZFPL1.7    | 5.52E-08 | -0.23629 | 0.068 | 0.238 | 0.000825 | Tcell | ZFPL1         |
| WEE1.10    | 5.56E-08 | -0.2666  | 0.018 | 0.152 | 0.000831 | Tcell | WEE1          |
| RP13-977J  | 5.63E-08 | 0.262838 | 0.045 | 0.009 | 0.000841 | Tcell | RP13-977J11.2 |
| KLHL8.4    | 5.64E-08 | -0.3182  | 0.009 | 0.135 | 0.000842 | Tcell | KLHL8         |
| ARL5A.6    | 5.75E-08 | -0.21967 | 0.259 | 0.522 | 0.00086  | Tcell | ARL5A         |
| ATN1.11    | 5.77E-08 | -0.20583 | 0.036 | 0.186 | 0.000862 | Tcell | ATN1          |

|             |           |           |        |        |           |        |               |
|-------------|-----------|-----------|--------|--------|-----------|--------|---------------|
| DEXI. 10    | 5. 78E-08 | -0. 19011 | 0. 05  | 0. 209 | 0. 000863 | Tcell1 | DEXI          |
| GANAB. 8    | 5. 78E-08 | -0. 20102 | 0. 095 | 0. 276 | 0. 000864 | Tcell1 | GANAB         |
| LYAR. 7     | 5. 80E-08 | 0. 79175  | 0. 277 | 0. 172 | 0. 000866 | Tcell1 | LYAR          |
| CKAP5. 12   | 5. 81E-08 | -0. 31608 | 0. 023 | 0. 159 | 0. 000868 | Tcell1 | CKAP5         |
| MNDA. 14    | 5. 84E-08 | -0. 55291 | 0. 036 | 0. 18  | 0. 000873 | Tcell1 | MNDA          |
| KCTD3. 7    | 5. 92E-08 | -0. 24529 | 0. 014 | 0. 145 | 0. 000885 | Tcell1 | KCTD3         |
| EMC4. 2     | 5. 94E-08 | -0. 15262 | 0. 236 | 0. 487 | 0. 000888 | Tcell1 | EMC4          |
| AARS. 3     | 5. 95E-08 | -0. 30627 | 0. 068 | 0. 234 | 0. 000889 | Tcell1 | AARS          |
| BUD31. 10   | 5. 96E-08 | -0. 30718 | 0. 355 | 0. 633 | 0. 00089  | Tcell1 | BUD31         |
| KEAP1. 8    | 5. 98E-08 | -0. 19044 | 0. 091 | 0. 275 | 0. 000893 | Tcell1 | KEAP1         |
| PCYOX1. 5   | 5. 98E-08 | -0. 27187 | 0. 036 | 0. 183 | 0. 000894 | Tcell1 | PCYOX1        |
| STARD3NL. 6 | 0. 1E-08  | -0. 19535 | 0. 177 | 0. 402 | 0. 000898 | Tcell1 | STARD3NL      |
| TOMM40. 11  | 6. 13E-08 | -0. 15113 | 0. 127 | 0. 331 | 0. 000916 | Tcell1 | TOMM40        |
| TMEM30A. 5  | 6. 22E-08 | -0. 13374 | 0. 132 | 0. 338 | 0. 000929 | Tcell1 | TMEM30A       |
| MBNL1. 11   | 6. 27E-08 | 0. 629237 | 0. 327 | 0. 222 | 0. 000937 | Tcell1 | MBNL1         |
| COA5. 6     | 6. 28E-08 | -0. 28961 | 0. 118 | 0. 309 | 0. 000938 | Tcell1 | COA5          |
| SH3GL1. 8   | 6. 31E-08 | -0. 23382 | 0. 077 | 0. 253 | 0. 000943 | Tcell1 | SH3GL1        |
| FCGBP. 13   | 6. 36E-08 | -0. 56692 | 0. 073 | 0. 232 | 0. 000951 | Tcell1 | FCGBP         |
| HOOK2. 9    | 6. 37E-08 | -0. 24756 | 0. 068 | 0. 238 | 0. 000952 | Tcell1 | HOOK2         |
| DDAH1. 11   | 6. 38E-08 | -0. 29135 | 0. 005 | 0. 127 | 0. 000953 | Tcell1 | DDAH1         |
| NDUFA10. 3  | 6. 45E-08 | -0. 13954 | 0. 2   | 0. 443 | 0. 000963 | Tcell1 | NDUFA10       |
| ACADM. 5    | 6. 45E-08 | -0. 30342 | 0. 136 | 0. 334 | 0. 000964 | Tcell1 | ACADM         |
| GTF3A. 8    | 6. 50E-08 | 0. 503831 | 0. 523 | 0. 504 | 0. 000971 | Tcell1 | GTF3A         |
| ARHGAP12. 6 | 5. 0E-08  | -0. 26527 | 0. 041 | 0. 192 | 0. 000972 | Tcell1 | ARHGAP12      |
| ABCF2. 9    | 6. 51E-08 | -0. 24285 | 0. 059 | 0. 218 | 0. 000973 | Tcell1 | ABCF2         |
| CYSTM1. 12  | 6. 55E-08 | -0. 23802 | 0. 127 | 0. 328 | 0. 000979 | Tcell1 | CYSTM1        |
| RP11-390F   | 6. 59E-08 | -0. 28636 | 0. 009 | 0. 135 | 0. 000984 | Tcell1 | RP11-390P2. 4 |
| PHACTR4. 8  | 6. 62E-08 | -0. 25597 | 0. 05  | 0. 205 | 0. 000989 | Tcell1 | PHACTR4       |
| WDR18. 10   | 6. 71E-08 | -0. 15256 | 0. 1   | 0. 289 | 0. 001002 | Tcell1 | WDR18         |
| GGT7. 8     | 6. 95E-08 | -0. 22372 | 0. 027 | 0. 168 | 0. 001038 | Tcell1 | GGT7          |
| SCAMP4. 9   | 7. 05E-08 | -0. 24543 | 0. 091 | 0. 272 | 0. 001054 | Tcell1 | SCAMP4        |
| CWC15. 5    | 7. 06E-08 | -0. 2466  | 0. 241 | 0. 492 | 0. 001054 | Tcell1 | CWC15         |
| CPXM1. 13   | 7. 06E-08 | -0. 29222 | 0. 005 | 0. 126 | 0. 001055 | Tcell1 | CPXM1         |
| CSNK2A1. 1  | 7. 07E-08 | -0. 22685 | 0. 123 | 0. 32  | 0. 001056 | Tcell1 | CSNK2A1       |
| MSR1. 14    | 7. 07E-08 | -0. 56876 | 0. 041 | 0. 183 | 0. 001057 | Tcell1 | MSR1          |
| PPP4R2. 6   | 7. 10E-08 | -0. 21598 | 0. 086 | 0. 265 | 0. 001061 | Tcell1 | PPP4R2        |
| SEMA6D. 14  | 7. 17E-08 | -0. 2778  | 0. 023 | 0. 159 | 0. 001072 | Tcell1 | SEMA6D        |
| G3BP2. 4    | 7. 20E-08 | 0. 724412 | 0. 364 | 0. 274 | 0. 001077 | Tcell1 | G3BP2         |
| RP11-345F   | 7. 21E-08 | -0. 24967 | 0. 027 | 0. 167 | 0. 001078 | Tcell1 | RP11-345P4. 9 |
| MYO6. 9     | 7. 22E-08 | -0. 215   | 0. 064 | 0. 228 | 0. 001078 | Tcell1 | MYO6          |
| SMARCB1. 1  | 7. 24E-08 | -0. 18145 | 0. 177 | 0. 418 | 0. 001081 | Tcell1 | SMARCB1       |
| TMEM199. 7  | 7. 39E-08 | -0. 31328 | 0. 077 | 0. 245 | 0. 001104 | Tcell1 | TMEM199       |
| ZNF704. 12  | 7. 41E-08 | -0. 31754 | 0. 005 | 0. 126 | 0. 001107 | Tcell1 | ZNF704        |
| IPO7. 7     | 7. 41E-08 | -0. 20908 | 0. 055 | 0. 214 | 0. 001107 | Tcell1 | IPO7          |
| MLC1. 11    | 7. 42E-08 | -0. 25604 | 0. 018 | 0. 151 | 0. 001109 | Tcell1 | MLC1          |
| SPAG7. 2    | 7. 46E-08 | -0. 26323 | 0. 241 | 0. 483 | 0. 001115 | Tcell1 | SPAG7         |
| NOC2L. 11   | 7. 55E-08 | -0. 17013 | 0. 123 | 0. 316 | 0. 001128 | Tcell1 | NOC2L         |
| ZNF664. 11  | 7. 57E-08 | -0. 2431  | 0. 018 | 0. 152 | 0. 001131 | Tcell1 | ZNF664        |
| SLC36A4. 8  | 7. 57E-08 | -0. 26741 | 0. 045 | 0. 196 | 0. 001131 | Tcell1 | SLC36A4       |
| NAP1L1. 6   | 7. 61E-08 | 0. 238747 | 0. 641 | 0. 675 | 0. 001138 | Tcell1 | NAP1L1        |
| SEZ6. 12    | 7. 64E-08 | -0. 3674  | 0. 014 | 0. 141 | 0. 001142 | Tcell1 | SEZ6          |

|               |          |          |       |       |          |       |             |
|---------------|----------|----------|-------|-------|----------|-------|-------------|
| PTPN6.14      | 7.64E-08 | 0.411294 | 0.282 | 0.16  | 0.001142 | Tcell | PTPN6       |
| DOCK4.9       | 7.90E-08 | -0.37579 | 0.027 | 0.164 | 0.001181 | Tcell | DOCK4       |
| PRADC1.11     | 7.96E-08 | -0.2788  | 0.064 | 0.219 | 0.00119  | Tcell | PRADC1      |
| APOD.11       | 7.97E-08 | -0.71689 | 0.027 | 0.163 | 0.001191 | Tcell | APOD        |
| APC2.11       | 8.00E-08 | -0.30098 | 0.018 | 0.15  | 0.001195 | Tcell | APC2        |
| RPF2.5        | 8.08E-08 | -0.29089 | 0.068 | 0.23  | 0.001207 | Tcell | RPF2        |
| AC004158.8    | 8.12E-08 | -0.33098 | 0.005 | 0.125 | 0.001214 | Tcell | AC004158.3  |
| SLC25A19.8    | 8.13E-08 | -0.40855 | 0.032 | 0.171 | 0.001215 | Tcell | SLC25A19    |
| VKORC1L1.8    | 8.35E-08 | -0.22297 | 0.009 | 0.134 | 0.001248 | Tcell | VKORC1L1    |
| RBBP7.10      | 8.44E-08 | -0.28795 | 0.195 | 0.429 | 0.001261 | Tcell | RBBP7       |
| RAP2A.4       | 8.55E-08 | -0.29646 | 0.009 | 0.134 | 0.001278 | Tcell | RAP2A       |
| PCMTD2.11     | 8.59E-08 | -0.13446 | 0.064 | 0.23  | 0.001284 | Tcell | PCMTD2      |
| WBP4.9        | 8.72E-08 | -0.25809 | 0.118 | 0.309 | 0.001303 | Tcell | WBP4        |
| ATF3.12       | 9.04E-08 | -0.32857 | 0.123 | 0.306 | 0.00135  | Tcell | ATF3        |
| ZNF439.12     | 9.07E-08 | -0.23727 | 0.018 | 0.15  | 0.001356 | Tcell | ZNF439      |
| ING2.8        | 9.22E-08 | -0.26964 | 0.055 | 0.209 | 0.001377 | Tcell | ING2        |
| MARCH9.11     | 9.24E-08 | -0.34915 | 0.023 | 0.157 | 0.001381 | Tcell | 9-Mar       |
| PDLIM7.1C     | 9.29E-08 | -0.22668 | 0.073 | 0.242 | 0.001388 | Tcell | PDLIM7      |
| FAM221A.1     | 9.30E-08 | -0.31998 | 0.036 | 0.18  | 0.00139  | Tcell | FAM221A     |
| FAM222B.8     | 9.35E-08 | -0.2503  | 0     | 0.115 | 0.001397 | Tcell | FAM222B     |
| BPGM.9        | 9.36E-08 | -0.31004 | 0.073 | 0.237 | 0.001398 | Tcell | BPGM        |
| ETFB.7        | 9.44E-08 | -0.18826 | 0.245 | 0.505 | 0.00141  | Tcell | ETFB        |
| ITSN1.5       | 9.53E-08 | -0.32877 | 0.018 | 0.148 | 0.001424 | Tcell | ITSN1       |
| YIPF6.7       | 9.57E-08 | -0.17804 | 0.118 | 0.317 | 0.001431 | Tcell | YIPF6       |
| FAM168B.8     | 9.61E-08 | -0.25599 | 0.027 | 0.165 | 0.001436 | Tcell | FAM168B     |
| SIPAI1L2.5    | 9.64E-08 | -0.3166  | 0.005 | 0.124 | 0.00144  | Tcell | SIPAI1L2    |
| KCNQ10T1.9    | 9.66E-08 | -0.25704 | 0.1   | 0.282 | 0.001443 | Tcell | KCNQ10T1    |
| ETS2.14       | 9.90E-08 | -0.4438  | 0.059 | 0.21  | 0.00148  | Tcell | ETS2        |
| ADORA1.1C     | 9.91E-08 | -0.24601 | 0.005 | 0.124 | 0.001482 | Tcell | ADORA1      |
| KIDINS220.9   | 9.99E-08 | -0.20251 | 0.091 | 0.272 | 0.001492 | Tcell | KIDINS220   |
| DNALI1.11     | 1.01E-07 | -0.30026 | 0     | 0.115 | 0.001505 | Tcell | DNALI1      |
| CERCAM.11     | 1.01E-07 | -0.29984 | 0.009 | 0.132 | 0.001512 | Tcell | CERCAM      |
| COLGALT2.1    | 1.01E-07 | -0.2438  | 0.014 | 0.141 | 0.001516 | Tcell | COLGALT2    |
| ENDOG.9       | 1.02E-07 | -0.17471 | 0.018 | 0.15  | 0.001523 | Tcell | ENDOG       |
| AEBP1.9       | 1.02E-07 | -0.39504 | 0.005 | 0.124 | 0.001524 | Tcell | AEBP1       |
| CTTNBP2NL.1   | 1.02E-07 | -0.29471 | 0.023 | 0.156 | 0.001525 | Tcell | CTTNBP2NL   |
| MRPS23.9      | 1.02E-07 | -0.17681 | 0.159 | 0.37  | 0.001529 | Tcell | MRPS23      |
| ATP5S.3       | 1.03E-07 | -0.32259 | 0.036 | 0.178 | 0.00154  | Tcell | ATP5S       |
| VBP1.10       | 1.03E-07 | -0.22149 | 0.245 | 0.492 | 0.001544 | Tcell | VBP1        |
| TKT.8         | 1.03E-07 | -0.26911 | 0.259 | 0.513 | 0.001546 | Tcell | TKT         |
| PPT1.11       | 1.04E-07 | -0.22488 | 0.3   | 0.561 | 0.001549 | Tcell | PPT1        |
| PDDC1.8       | 1.04E-07 | -0.2636  | 0.018 | 0.148 | 0.001557 | Tcell | PDDC1       |
| TREM1.13      | 1.04E-07 | -0.58    | 0.032 | 0.166 | 0.001558 | Tcell | TREM1       |
| DRAXIN.13     | 1.06E-07 | -0.28942 | 0.023 | 0.155 | 0.001582 | Tcell | DRAXIN      |
| CNTFR.11      | 1.06E-07 | -0.28498 | 0.009 | 0.132 | 0.001591 | Tcell | CNTFR       |
| ZNF385A.1     | 1.07E-07 | -0.33012 | 0.014 | 0.139 | 0.001602 | Tcell | ZNF385A     |
| FADS2.11      | 1.08E-07 | -0.29267 | 0.014 | 0.139 | 0.001608 | Tcell | FADS2       |
| RNASEH1-AS1.1 | 1.08E-07 | -0.22822 | 0.036 | 0.18  | 0.001609 | Tcell | RNASEH1-AS1 |
| LOXL1-AS1.1   | 1.08E-07 | 0.169308 | 0.036 | 0.006 | 0.001621 | Tcell | LOXL1-AS1   |
| LANCL2.12     | 1.09E-07 | -0.37327 | 0.023 | 0.155 | 0.001629 | Tcell | LANCL2      |
| RRAGD.6       | 1.11E-07 | -0.25525 | 0.009 | 0.132 | 0.001656 | Tcell | RRAGD       |

|           |          |          |       |       |          |       |           |
|-----------|----------|----------|-------|-------|----------|-------|-----------|
| STXBP1.9  | 1.11E-07 | -0.282   | 0.005 | 0.123 | 0.001664 | Tcell | STXBP1    |
| UBE2D2.1C | 1.11E-07 | 0.330034 | 0.582 | 0.588 | 0.001664 | Tcell | UBE2D2    |
| PSME2.10  | 1.12E-07 | 0.368591 | 0.577 | 0.557 | 0.001674 | Tcell | PSME2     |
| TSSC4.9   | 1.12E-07 | -0.13003 | 0.123 | 0.315 | 0.001676 | Tcell | TSSC4     |
| TCTEX1D2. | 1.12E-07 | -0.23468 | 0.068 | 0.23  | 0.00168  | Tcell | TCTEX1D2  |
| MAFG.6    | 1.13E-07 | -0.21735 | 0.041 | 0.187 | 0.001696 | Tcell | MAFG      |
| HNRNPAB.1 | 1.14E-07 | -0.212   | 0.173 | 0.401 | 0.001697 | Tcell | HNRNPAB   |
| STAMPB.9  | 1.14E-07 | -0.16999 | 0.091 | 0.269 | 0.001709 | Tcell | STAMPB    |
| TSPAN4.8  | 1.15E-07 | -0.3482  | 0.041 | 0.183 | 0.00172  | Tcell | TSPAN4    |
| DICER1.4  | 1.15E-07 | -0.19786 | 0.036 | 0.177 | 0.001721 | Tcell | DICER1    |
| GSTM4.8   | 1.15E-07 | -0.28282 | 0.055 | 0.208 | 0.001721 | Tcell | GSTM4     |
| PJA1.10   | 1.16E-07 | -0.27232 | 0.045 | 0.195 | 0.001738 | Tcell | PJA1      |
| CTTNBP2.1 | 1.17E-07 | -0.3667  | 0.014 | 0.139 | 0.001743 | Tcell | CTTNBP2   |
| ZNF738.12 | 1.20E-07 | -0.31782 | 0.018 | 0.146 | 0.001788 | Tcell | ZNF738    |
| HSPA13.12 | 1.20E-07 | -0.25249 | 0.05  | 0.203 | 0.001791 | Tcell | HSPA13    |
| MFGE8.10  | 1.21E-07 | -0.23677 | 0.045 | 0.193 | 0.001808 | Tcell | MFGE8     |
| ARHGEF40. | 1.21E-07 | -0.33875 | 0.009 | 0.131 | 0.001808 | Tcell | ARHGEF40  |
| KDSR.2    | 1.21E-07 | -0.23767 | 0.086 | 0.257 | 0.001815 | Tcell | KDSR      |
| ACSS3.11  | 1.23E-07 | -0.24369 | 0     | 0.114 | 0.001833 | Tcell | ACSS3     |
| CSTA.14   | 1.23E-07 | -0.3456  | 0.009 | 0.131 | 0.001842 | Tcell | CSTA      |
| TIMM10.7  | 1.24E-07 | -0.22363 | 0.155 | 0.358 | 0.001849 | Tcell | TIMM10    |
| FAHD1.6   | 1.24E-07 | -0.25595 | 0.036 | 0.178 | 0.001853 | Tcell | FAHD1     |
| CLPTM1.4  | 1.25E-07 | -0.18318 | 0.141 | 0.349 | 0.001872 | Tcell | CLPTM1    |
| APC.12    | 1.28E-07 | -0.2407  | 0.059 | 0.216 | 0.001907 | Tcell | APC       |
| CMPK1.6   | 1.28E-07 | 0.533722 | 0.459 | 0.415 | 0.001907 | Tcell | CMPK1     |
| ANKS3.9   | 1.28E-07 | -0.19388 | 0.032 | 0.171 | 0.001911 | Tcell | ANKS3     |
| WNK3.10   | 1.28E-07 | -0.2736  | 0.005 | 0.122 | 0.001918 | Tcell | WNK3      |
| CCDC43.7  | 1.28E-07 | -0.24944 | 0.05  | 0.202 | 0.001918 | Tcell | CCDC43    |
| SEZ6L.12  | 1.30E-07 | -0.36044 | 0.014 | 0.137 | 0.001936 | Tcell | SEZ6L     |
| CCT2.8    | 1.30E-07 | -0.31946 | 0.291 | 0.55  | 0.001946 | Tcell | CCT2      |
| TSMF.11   | 1.31E-07 | -0.32714 | 0.105 | 0.279 | 0.001954 | Tcell | TSMF      |
| COL4A2.1C | 1.31E-07 | -0.2194  | 0.009 | 0.131 | 0.001956 | Tcell | COL4A2    |
| C2orf80.1 | 1.33E-07 | -0.33872 | 0.005 | 0.121 | 0.001988 | Tcell | C2orf80   |
| KLRG1     | 1.34E-07 | 0.399713 | 0.095 | 0.033 | 0.001997 | Tcell | KLRG1     |
| GPATCH2L. | 1.35E-07 | -0.17049 | 0.064 | 0.226 | 0.00201  | Tcell | GPATCH2L  |
| PNKD.9    | 1.36E-07 | -0.13102 | 0.223 | 0.461 | 0.002027 | Tcell | PNKD      |
| PPAT.11   | 1.36E-07 | -0.25392 | 0.018 | 0.146 | 0.002029 | Tcell | PPAT      |
| RFTN2.12  | 1.36E-07 | -0.36572 | 0.009 | 0.13  | 0.002031 | Tcell | RFTN2     |
| PDAP1.10  | 1.36E-07 | -0.27279 | 0.282 | 0.54  | 0.002035 | Tcell | PDAP1     |
| AGAP1.11  | 1.38E-07 | -0.27166 | 0.005 | 0.122 | 0.002057 | Tcell | AGAP1     |
| ZNF385D.1 | 1.39E-07 | -0.27775 | 0     | 0.113 | 0.002074 | Tcell | ZNF385D   |
| TPSAB1.7  | 1.39E-07 | 0.41379  | 0.073 | 0.021 | 0.002082 | Tcell | TPSAB1    |
| NUP214.13 | 1.39E-07 | -0.37524 | 0.05  | 0.198 | 0.002084 | Tcell | NUP214    |
| CISD1.10  | 1.40E-07 | -0.32483 | 0.145 | 0.34  | 0.002092 | Tcell | CISD1     |
| BCAP31.8  | 1.40E-07 | -0.1798  | 0.332 | 0.624 | 0.002094 | Tcell | BCAP31    |
| CLEC7A.14 | 1.40E-07 | -0.52501 | 0.041 | 0.178 | 0.002096 | Tcell | CLEC7A    |
| PRTFDC1.9 | 1.41E-07 | -0.35434 | 0.014 | 0.137 | 0.002101 | Tcell | PRTFDC1   |
| RHOU.9    | 1.42E-07 | -0.37026 | 0.014 | 0.137 | 0.002117 | Tcell | RHOU      |
| LINC00667 | 1.42E-07 | -0.25221 | 0.077 | 0.247 | 0.002121 | Tcell | LINC00667 |
| UPF3B.10  | 1.43E-07 | -0.28194 | 0.086 | 0.254 | 0.002131 | Tcell | UPF3B     |
| CDC42EP1. | 1.44E-07 | -0.26733 | 0.009 | 0.13  | 0.002157 | Tcell | CDC42EP1  |



|           |          |          |       |       |          |       |           |
|-----------|----------|----------|-------|-------|----------|-------|-----------|
| NXPH1.13  | 1.45E-07 | -0.31183 | 0.014 | 0.138 | 0.002166 | Tcell | NXPH1     |
| TMOD2.6   | 1.46E-07 | -0.28286 | 0     | 0.112 | 0.002179 | Tcell | TMOD2     |
| H2AFY.10  | 1.46E-07 | -0.22213 | 0.323 | 0.613 | 0.002182 | Tcell | H2AFY     |
| TP53I13.1 | 1.47E-07 | -0.16936 | 0.077 | 0.248 | 0.00219  | Tcell | TP53I13   |
| ARHGAP24. | 1.49E-07 | -0.52365 | 0.023 | 0.151 | 0.00222  | Tcell | ARHGAP24  |
| KLF4.14   | 1.49E-07 | -0.42168 | 0.059 | 0.209 | 0.002221 | Tcell | KLF4      |
| BEND6.11  | 1.51E-07 | -0.23445 | 0.005 | 0.121 | 0.002251 | Tcell | BEND6     |
| HM13.5    | 1.51E-07 | -0.23465 | 0.232 | 0.479 | 0.002263 | Tcell | HM13      |
| FAM168A.7 | 1.52E-07 | -0.22137 | 0.009 | 0.129 | 0.002274 | Tcell | FAM168A   |
| ARF3.7    | 1.54E-07 | -0.1824  | 0.168 | 0.382 | 0.002299 | Tcell | ARF3      |
| ROMO1.7   | 1.54E-07 | -0.32519 | 0.323 | 0.6   | 0.002304 | Tcell | ROMO1     |
| FASTK.9   | 1.54E-07 | -0.18937 | 0.141 | 0.341 | 0.002306 | Tcell | FASTK     |
| TMEM63B.6 | 1.55E-07 | -0.20811 | 0.014 | 0.138 | 0.00231  | Tcell | TMEM63B   |
| ITFG1.8   | 1.56E-07 | -0.16393 | 0.145 | 0.352 | 0.002338 | Tcell | ITFG1     |
| MSRB1.6   | 1.58E-07 | -0.19189 | 0.064 | 0.223 | 0.002354 | Tcell | MSRB1     |
| TSR1.9    | 1.58E-07 | -0.21618 | 0.045 | 0.192 | 0.002358 | Tcell | TSR1      |
| CNIH3.11  | 1.58E-07 | -0.21073 | 0.032 | 0.171 | 0.002368 | Tcell | CNIH3     |
| EIF2AK4.7 | 1.59E-07 | -0.24984 | 0.041 | 0.184 | 0.002369 | Tcell | EIF2AK4   |
| TMEM178A. | 1.59E-07 | -0.2841  | 0.005 | 0.12  | 0.002375 | Tcell | TMEM178A  |
| GNAI3.6   | 1.59E-07 | -0.21459 | 0.177 | 0.397 | 0.002383 | Tcell | GNAI3     |
| MKLN1.8   | 1.60E-07 | -0.29192 | 0.073 | 0.233 | 0.002384 | Tcell | MKLN1     |
| ARL13B.9  | 1.60E-07 | -0.3192  | 0.018 | 0.145 | 0.002394 | Tcell | ARL13B    |
| TNFAIP6.1 | 1.61E-07 | -0.49462 | 0     | 0.112 | 0.002404 | Tcell | TNFAIP6   |
| TPM1.10   | 1.62E-07 | -0.18943 | 0.082 | 0.255 | 0.002418 | Tcell | TPM1      |
| ARHGAP4.1 | 1.62E-07 | 0.437753 | 0.218 | 0.114 | 0.002424 | Tcell | ARHGAP4   |
| CCT7.10   | 1.65E-07 | -0.25321 | 0.264 | 0.535 | 0.002459 | Tcell | CCT7      |
| PSMD14.1C | 1.65E-07 | -0.32384 | 0.232 | 0.472 | 0.002465 | Tcell | PSMD14    |
| CTBP2.1   | 1.66E-07 | -0.1997  | 0.018 | 0.146 | 0.002483 | Tcell | CTBP2     |
| RRAGC.4   | 1.67E-07 | -0.16006 | 0.082 | 0.25  | 0.002503 | Tcell | RRAGC     |
| ESF1.9    | 1.68E-07 | -0.20557 | 0.145 | 0.349 | 0.002507 | Tcell | ESF1      |
| IGSF6.14  | 1.68E-07 | -0.4761  | 0.027 | 0.156 | 0.002511 | Tcell | IGSF6     |
| LSM3.4    | 1.71E-07 | -0.24471 | 0.291 | 0.565 | 0.002554 | Tcell | LSM3      |
| TYRO3.11  | 1.71E-07 | -0.27987 | 0     | 0.111 | 0.002556 | Tcell | TYRO3     |
| TXNL4A.8  | 1.71E-07 | -0.19676 | 0.186 | 0.415 | 0.002557 | Tcell | TXNL4A    |
| C12orf43. | 1.71E-07 | -0.28643 | 0.027 | 0.159 | 0.002558 | Tcell | C12orf43  |
| DDX42.9   | 1.71E-07 | -0.22722 | 0.064 | 0.221 | 0.002562 | Tcell | DDX42     |
| ATG2A.3   | 1.72E-07 | 0.606699 | 0.159 | 0.074 | 0.002572 | Tcell | ATG2A     |
| CERS6.9   | 1.74E-07 | -0.27713 | 0.009 | 0.129 | 0.002601 | Tcell | CERS6     |
| ASB8.8    | 1.74E-07 | -0.21585 | 0.064 | 0.22  | 0.002606 | Tcell | ASB8      |
| NDUFS7.3  | 1.75E-07 | -0.27125 | 0.345 | 0.623 | 0.002618 | Tcell | NDUFS7    |
| EPS8.6    | 1.76E-07 | -0.34324 | 0.009 | 0.128 | 0.002624 | Tcell | EPS8      |
| C20orf194 | 1.76E-07 | -0.27802 | 0.014 | 0.137 | 0.002632 | Tcell | C20orf194 |
| CBY1.9    | 1.76E-07 | -0.22026 | 0.027 | 0.162 | 0.002634 | Tcell | CBY1      |
| MOCS2.9   | 1.77E-07 | -0.3038  | 0.095 | 0.266 | 0.002642 | Tcell | MOCS2     |
| PRPF19.4  | 1.77E-07 | -0.22946 | 0.086 | 0.257 | 0.002644 | Tcell | PRPF19    |
| MSANTD4.7 | 1.77E-07 | -0.2892  | 0.009 | 0.127 | 0.002651 | Tcell | MSANTD4   |
| DOLK.8    | 1.78E-07 | -0.26156 | 0.009 | 0.128 | 0.002666 | Tcell | DOLK      |
| METTL2B.6 | 1.79E-07 | -0.22235 | 0.05  | 0.201 | 0.002668 | Tcell | METTL2B   |
| SSR2.6    | 1.80E-07 | 0.21528  | 0.682 | 0.714 | 0.002684 | Tcell | SSR2      |
| PPIL1.9   | 1.80E-07 | -0.21881 | 0.05  | 0.197 | 0.002687 | Tcell | PPIL1     |
| MAPKAP1.6 | 1.80E-07 | -0.12833 | 0.082 | 0.253 | 0.002691 | Tcell | MAPKAP1   |

|           |          |          |       |       |          |       |              |
|-----------|----------|----------|-------|-------|----------|-------|--------------|
| CAMTA1.6  | 1.82E-07 | -0.18094 | 0.209 | 0.454 | 0.002722 | Tcell | CAMTA1       |
| ZNF205.7  | 1.84E-07 | -0.2639  | 0     | 0.111 | 0.002751 | Tcell | ZNF205       |
| RBM47.13  | 1.85E-07 | -0.37048 | 0.005 | 0.119 | 0.002767 | Tcell | RBM47        |
| TOLLIP.3  | 1.85E-07 | -0.2337  | 0.095 | 0.269 | 0.00277  | Tcell | TOLLIP       |
| RAB3A.12  | 1.88E-07 | -0.34047 | 0.032 | 0.166 | 0.002806 | Tcell | RAB3A        |
| RP4-665J2 | 1.88E-07 | -0.2786  | 0.009 | 0.128 | 0.002808 | Tcell | RP4-665J23.1 |
| OLFM1.12  | 1.90E-07 | -0.24352 | 0.023 | 0.153 | 0.002833 | Tcell | OLFM1        |
| SHD.12    | 1.90E-07 | -0.37334 | 0.009 | 0.128 | 0.002843 | Tcell | SHD          |
| NACC1.7   | 1.91E-07 | -0.15008 | 0.023 | 0.153 | 0.002855 | Tcell | NACC1        |
| MERTK.12  | 1.91E-07 | -0.44436 | 0.009 | 0.127 | 0.002861 | Tcell | MERTK        |
| PID1.9    | 1.92E-07 | -0.32287 | 0.005 | 0.119 | 0.002873 | Tcell | PID1         |
| TANC1.12  | 1.93E-07 | -0.25101 | 0     | 0.11  | 0.00289  | Tcell | TANC1        |
| SCO1.6    | 1.94E-07 | -0.21305 | 0.032 | 0.169 | 0.002898 | Tcell | SCO1         |
| SPG21.10  | 1.95E-07 | -0.2017  | 0.173 | 0.389 | 0.002921 | Tcell | SPG21        |
| TIMP3.10  | 1.97E-07 | -0.28878 | 0.009 | 0.128 | 0.002944 | Tcell | TIMP3        |
| TRIP11.3  | 2.00E-07 | -0.21108 | 0.045 | 0.192 | 0.002987 | Tcell | TRIP11       |
| TATDN3.3  | 2.02E-07 | -0.33255 | 0.027 | 0.156 | 0.003018 | Tcell | TATDN3       |
| ARSJ.12   | 2.03E-07 | -0.2675  | 0.009 | 0.127 | 0.003032 | Tcell | ARSJ         |
| TIA1.14   | 2.04E-07 | -0.11307 | 0.082 | 0.251 | 0.003055 | Tcell | TIA1         |
| FILIP1L.1 | 2.05E-07 | -0.24667 | 0.023 | 0.152 | 0.003065 | Tcell | FILIP1L      |
| IGF2BP3.1 | 2.06E-07 | -0.23887 | 0     | 0.11  | 0.003073 | Tcell | IGF2BP3      |
| HEXA.12   | 2.06E-07 | -0.23023 | 0.177 | 0.393 | 0.003083 | Tcell | HEXA         |
| FGD4.13   | 2.07E-07 | -0.4316  | 0.023 | 0.149 | 0.003094 | Tcell | FGD4         |
| RAB5C.8   | 2.07E-07 | -0.28859 | 0.364 | 0.658 | 0.003095 | Tcell | RAB5C        |
| APOA1BP.7 | 2.07E-07 | -0.16555 | 0.168 | 0.379 | 0.003096 | Tcell | APOA1BP      |
| COPS3.7   | 2.08E-07 | -0.23141 | 0.168 | 0.372 | 0.003113 | Tcell | COPS3        |
| SLC35A5.7 | 2.08E-07 | -0.26348 | 0.045 | 0.189 | 0.003115 | Tcell | SLC35A5      |
| LINC01094 | 2.10E-07 | -0.4941  | 0.027 | 0.156 | 0.003135 | Tcell | LINC01094    |
| AKAP11.7  | 2.10E-07 | -0.19873 | 0.023 | 0.152 | 0.003142 | Tcell | AKAP11       |
| GALNT2.7  | 2.10E-07 | -0.25881 | 0.082 | 0.247 | 0.003145 | Tcell | GALNT2       |
| IL17RC.7  | 2.11E-07 | -0.23653 | 0.005 | 0.119 | 0.003157 | Tcell | IL17RC       |
| SLC25A23. | 2.15E-07 | -0.20809 | 0.014 | 0.136 | 0.003207 | Tcell | SLC25A23     |
| TBXAS1.14 | 2.15E-07 | -0.47507 | 0.091 | 0.244 | 0.003209 | Tcell | TBXAS1       |
| ZHX1.11   | 2.15E-07 | -0.25032 | 0.059 | 0.212 | 0.003217 | Tcell | ZHX1         |
| DHRX.7    | 2.16E-07 | -0.16243 | 0.073 | 0.236 | 0.003231 | Tcell | DHRX         |
| PHLDB1.1C | 2.17E-07 | -0.21728 | 0.018 | 0.144 | 0.00324  | Tcell | PHLDB1       |
| NSRP1.6   | 2.20E-07 | -0.1544  | 0.15  | 0.36  | 0.003289 | Tcell | NSRP1        |
| RRP1.8    | 2.20E-07 | -0.15246 | 0.059 | 0.213 | 0.00329  | Tcell | RRP1         |
| UFSP2.3   | 2.21E-07 | -0.17129 | 0.064 | 0.219 | 0.003299 | Tcell | UFSP2        |
| RPP14.7   | 2.21E-07 | -0.22349 | 0.045 | 0.19  | 0.003307 | Tcell | RPP14        |
| COPS4.5   | 2.22E-07 | -0.23233 | 0.136 | 0.328 | 0.003313 | Tcell | COPS4        |
| LPIN1.7   | 2.22E-07 | 0.69096  | 0.232 | 0.135 | 0.003323 | Tcell | LPIN1        |
| LPCAT2.14 | 2.24E-07 | -0.41992 | 0.023 | 0.15  | 0.003345 | Tcell | LPCAT2       |
| HCK.14    | 2.26E-07 | -0.48176 | 0.036 | 0.17  | 0.003376 | Tcell | HCK          |
| POLDIP2.1 | 2.29E-07 | -0.21275 | 0.15  | 0.351 | 0.003426 | Tcell | POLDIP2      |
| NUDT16.14 | 2.30E-07 | -0.31196 | 0.068 | 0.222 | 0.003434 | Tcell | NUDT16       |
| DLX5.13   | 2.34E-07 | -0.60306 | 0.023 | 0.146 | 0.003491 | Tcell | DLX5         |
| CD38.2    | 2.34E-07 | 0.261115 | 0.068 | 0.019 | 0.003502 | Tcell | CD38         |
| PDGFRA.13 | 2.34E-07 | -0.31315 | 0.023 | 0.151 | 0.003504 | Tcell | PDGFRA       |
| FUCA1.11  | 2.35E-07 | -0.31422 | 0.068 | 0.223 | 0.003506 | Tcell | FUCA1        |
| THUMP3.8  | 2.35E-07 | -0.25605 | 0.05  | 0.196 | 0.003507 | Tcell | THUMP3       |

|            |          |          |       |       |          |       |            |
|------------|----------|----------|-------|-------|----------|-------|------------|
| SUN2.9     | 2.35E-07 | 0.561678 | 0.318 | 0.217 | 0.003517 | Tcell | SUN2       |
| VMP1.7     | 2.36E-07 | -0.20347 | 0.232 | 0.476 | 0.003531 | Tcell | VMP1       |
| CBR4.9     | 2.38E-07 | -0.20133 | 0.045 | 0.191 | 0.00355  | Tcell | CBR4       |
| ACSL1.13   | 2.40E-07 | -0.4748  | 0.082 | 0.23  | 0.003591 | Tcell | ACSL1      |
| SOX12.12   | 2.40E-07 | -0.23309 | 0.005 | 0.118 | 0.003593 | Tcell | SOX12      |
| NARS.4     | 2.41E-07 | -0.28347 | 0.214 | 0.441 | 0.003606 | Tcell | NARS       |
| OLFM2.10   | 2.42E-07 | -0.3098  | 0.05  | 0.194 | 0.003611 | Tcell | OLFM2      |
| NDUFS1.1C  | 2.43E-07 | -0.17565 | 0.086 | 0.258 | 0.003628 | Tcell | NDUFS1     |
| SEC11C.8   | 2.46E-07 | -0.2781  | 0.255 | 0.502 | 0.003673 | Tcell | SEC11C     |
| RTKN.12    | 2.50E-07 | -0.26742 | 0.036 | 0.173 | 0.003729 | Tcell | RTKN       |
| HHLA3.8    | 2.50E-07 | -0.34955 | 0.018 | 0.142 | 0.003731 | Tcell | HHLA3      |
| SH3RF1.9   | 2.50E-07 | -0.2537  | 0     | 0.109 | 0.003737 | Tcell | SH3RF1     |
| C8orf82.1  | 2.51E-07 | -0.21311 | 0.036 | 0.174 | 0.003745 | Tcell | C8orf82    |
| SLC35B4.8  | 2.51E-07 | -0.23578 | 0.05  | 0.194 | 0.003749 | Tcell | SLC35B4    |
| TRAPPC3.5  | 2.51E-07 | -0.23766 | 0.209 | 0.442 | 0.003758 | Tcell | TRAPPC3    |
| PTX3.11    | 2.53E-07 | -0.3252  | 0.005 | 0.117 | 0.003776 | Tcell | PTX3       |
| NIPA2.9    | 2.53E-07 | -0.17721 | 0.095 | 0.268 | 0.003788 | Tcell | NIPA2      |
| NUPL2.9    | 2.55E-07 | -0.25292 | 0.105 | 0.271 | 0.003816 | Tcell | NUPL2      |
| FKBP1B.7   | 2.56E-07 | -0.27537 | 0.009 | 0.124 | 0.003823 | Tcell | FKBP1B     |
| PPF1BP1.1  | 2.58E-07 | -0.23735 | 0.027 | 0.158 | 0.003855 | Tcell | PPF1BP1    |
| KHSRP.11   | 2.58E-07 | -0.1876  | 0.077 | 0.241 | 0.003859 | Tcell | KHSRP      |
| MBD3.7     | 2.59E-07 | -0.16985 | 0.032 | 0.166 | 0.003869 | Tcell | MBD3       |
| BFAR.3     | 2.60E-07 | -0.25932 | 0.073 | 0.231 | 0.003878 | Tcell | BFAR       |
| RBM39.7    | 2.60E-07 | 0.291727 | 0.618 | 0.655 | 0.003879 | Tcell | RBM39      |
| MGRN1.8    | 2.60E-07 | -0.19239 | 0.059 | 0.211 | 0.003886 | Tcell | MGRN1      |
| ERV3-1.13  | 2.61E-07 | -0.28075 | 0.095 | 0.264 | 0.003905 | Tcell | ERV3-1     |
| PGM1.9     | 2.63E-07 | -0.21674 | 0.086 | 0.254 | 0.003923 | Tcell | PGM1       |
| AC004540.2 | 2.66E-07 | -0.39415 | 0.009 | 0.125 | 0.003969 | Tcell | AC004540.4 |
| TERF2IP.1  | 2.71E-07 | 0.41174  | 0.55  | 0.517 | 0.004053 | Tcell | TERF2IP    |
| ZC3H15.6   | 2.72E-07 | -0.23066 | 0.259 | 0.508 | 0.004058 | Tcell | ZC3H15     |
| STMN2.14   | 2.73E-07 | -0.66905 | 0.055 | 0.189 | 0.004082 | Tcell | STMN2      |
| C4orf27.9  | 2.73E-07 | -0.16408 | 0.132 | 0.322 | 0.004086 | Tcell | C4orf27    |
| ANAPC10.4  | 2.75E-07 | -0.30005 | 0.041 | 0.179 | 0.004106 | Tcell | ANAPC10    |
| S100A9.14  | 2.75E-07 | -0.40881 | 0.077 | 0.227 | 0.00411  | Tcell | S100A9     |
| AQP4.11    | 2.79E-07 | -0.49327 | 0.036 | 0.168 | 0.004167 | Tcell | AQP4       |
| SSPN.6     | 2.79E-07 | -0.32872 | 0     | 0.108 | 0.004172 | Tcell | SSPN       |
| PIK3C2A.4  | 2.81E-07 | -0.17645 | 0.018 | 0.142 | 0.004198 | Tcell | PIK3C2A    |
| KCNMB4.1C  | 2.81E-07 | -0.26883 | 0.009 | 0.125 | 0.004199 | Tcell | KCNMB4     |
| HYI.6      | 2.83E-07 | -0.26178 | 0.018 | 0.141 | 0.004234 | Tcell | HYI        |
| CUEDC1.9   | 2.84E-07 | -0.23454 | 0.005 | 0.117 | 0.00425  | Tcell | CUEDC1     |
| DDX24.3    | 2.85E-07 | 0.49516  | 0.509 | 0.481 | 0.004257 | Tcell | DDX24      |
| TRUB2.7    | 2.86E-07 | -0.28606 | 0.064 | 0.215 | 0.004274 | Tcell | TRUB2      |
| TMEM128.6  | 2.87E-07 | -0.18012 | 0.114 | 0.295 | 0.004295 | Tcell | TMEM128    |
| GMFB.1     | 2.88E-07 | -0.22499 | 0.059 | 0.212 | 0.004299 | Tcell | GMFB       |
| ATP2C1.3   | 2.89E-07 | -0.27204 | 0.073 | 0.226 | 0.004314 | Tcell | ATP2C1     |
| HIST1H2AC  | 2.91E-07 | -0.43746 | 0.036 | 0.169 | 0.004341 | Tcell | HIST1H2AC  |
| CTNNA1.1   | 2.92E-07 | -0.24343 | 0.023 | 0.149 | 0.004367 | Tcell | CTNNA1     |
| EXTL3.9    | 2.93E-07 | -0.21688 | 0.014 | 0.134 | 0.00438  | Tcell | EXTL3      |
| NLGN4X.12  | 2.93E-07 | -0.25328 | 0     | 0.107 | 0.004381 | Tcell | NLGN4X     |
| NRIP1.7    | 2.94E-07 | -0.24556 | 0.009 | 0.125 | 0.004388 | Tcell | NRIP1      |
| CD163.14   | 2.96E-07 | -0.49254 | 0.114 | 0.279 | 0.004418 | Tcell | CD163      |

|            |          |          |       |       |          |       |           |
|------------|----------|----------|-------|-------|----------|-------|-----------|
| DAB2.13    | 2.96E-07 | -0.50796 | 0.027 | 0.152 | 0.004425 | Tcell | DAB2      |
| COL6A2.13  | 2.97E-07 | -0.32319 | 0.032 | 0.165 | 0.004441 | Tcell | COL6A2    |
| ZNF330.6   | 3.00E-07 | -0.29887 | 0.068 | 0.219 | 0.004483 | Tcell | ZNF330    |
| EIF6.5     | 3.01E-07 | -0.26277 | 0.273 | 0.526 | 0.004497 | Tcell | EIF6      |
| FUNDC2.6   | 3.01E-07 | -0.19481 | 0.186 | 0.407 | 0.004497 | Tcell | FUNDC2    |
| NDUF4F4.7  | 3.08E-07 | -0.23793 | 0.068 | 0.224 | 0.004602 | Tcell | NDUF4F4   |
| MCRS1.8    | 3.09E-07 | -0.18828 | 0.1   | 0.273 | 0.004616 | Tcell | MCRS1     |
| PDXK.12    | 3.12E-07 | -0.24141 | 0.114 | 0.288 | 0.004669 | Tcell | PDXK      |
| AKT1.4     | 3.15E-07 | -0.23093 | 0.023 | 0.149 | 0.004709 | Tcell | AKT1      |
| KLHL23.12  | 3.15E-07 | -0.2721  | 0.032 | 0.163 | 0.004711 | Tcell | KLHL23    |
| KLHDC10.6  | 3.15E-07 | -0.24966 | 0.014 | 0.132 | 0.004712 | Tcell | KLHDC10   |
| TNFRSF19.3 | 3.15E-07 | -0.22308 | 0     | 0.107 | 0.004714 | Tcell | TNFRSF19  |
| RAB5B.5    | 3.16E-07 | -0.13568 | 0.064 | 0.217 | 0.004728 | Tcell | RAB5B     |
| CAMK2B.1C  | 3.17E-07 | -0.29578 | 0.005 | 0.116 | 0.004741 | Tcell | CAMK2B    |
| PDK4.13    | 3.17E-07 | -0.52471 | 0.041 | 0.172 | 0.004741 | Tcell | PDK4      |
| DCTN1.8    | 3.18E-07 | -0.19468 | 0.064 | 0.219 | 0.00475  | Tcell | DCTN1     |
| HIST2H2BE  | 3.18E-07 | -0.2643  | 0.023 | 0.149 | 0.004752 | Tcell | HIST2H2BE |
| DVL3.8     | 3.18E-07 | -0.2087  | 0.027 | 0.156 | 0.004754 | Tcell | DVL3      |
| FSTL1.10   | 3.20E-07 | -0.22836 | 0.005 | 0.116 | 0.004777 | Tcell | FSTL1     |
| TPPP3.12   | 3.23E-07 | -0.36375 | 0.027 | 0.156 | 0.00482  | Tcell | TPPP3     |
| ZDHHC7.5   | 3.23E-07 | -0.23903 | 0.023 | 0.149 | 0.004824 | Tcell | ZDHHC7    |
| TPRA1.4    | 3.23E-07 | -0.22412 | 0.032 | 0.164 | 0.00483  | Tcell | TPRA1     |
| CEND1.9    | 3.24E-07 | -0.23085 | 0.018 | 0.141 | 0.004835 | Tcell | CEND1     |
| KCNE4.10   | 3.27E-07 | -0.25203 | 0     | 0.107 | 0.004889 | Tcell | KCNE4     |
| BEND5.10   | 3.37E-07 | -0.31192 | 0.018 | 0.139 | 0.005029 | Tcell | BEND5     |
| ARMCX2.8   | 3.40E-07 | -0.24993 | 0.023 | 0.149 | 0.005081 | Tcell | ARMCX2    |
| BLVRA.12   | 3.41E-07 | -0.35101 | 0.155 | 0.343 | 0.005098 | Tcell | BLVRA     |
| IRAK1.8    | 3.42E-07 | -0.31509 | 0.032 | 0.161 | 0.005106 | Tcell | IRAK1     |
| DCAKD.11   | 3.42E-07 | -0.21492 | 0.018 | 0.141 | 0.005111 | Tcell | DCAKD     |
| HDAC5.6    | 3.44E-07 | -0.17123 | 0.036 | 0.172 | 0.005143 | Tcell | HDAC5     |
| FBXO21.9   | 3.44E-07 | -0.11807 | 0.123 | 0.312 | 0.005148 | Tcell | FBXO21    |
| TRIB1.8    | 3.46E-07 | -0.41915 | 0.032 | 0.159 | 0.005174 | Tcell | TRIB1     |
| RNF166.1C  | 3.47E-07 | 0.666337 | 0.282 | 0.183 | 0.005189 | Tcell | RNF166    |
| DYNC1I2.8  | 3.47E-07 | -0.1551  | 0.227 | 0.474 | 0.005189 | Tcell | DYNC1I2   |
| CNIH2.13   | 3.51E-07 | -0.21731 | 0.014 | 0.132 | 0.005248 | Tcell | CNIH2     |
| ARL4A.3    | 3.52E-07 | -0.29586 | 0.177 | 0.378 | 0.005264 | Tcell | ARL4A     |
| RNF40.5    | 3.53E-07 | -0.22868 | 0.041 | 0.178 | 0.005269 | Tcell | RNF40     |
| KIF3B.12   | 3.53E-07 | -0.18963 | 0.014 | 0.132 | 0.005278 | Tcell | KIF3B     |
| PRKRIP1.1  | 3.56E-07 | -0.14512 | 0.082 | 0.244 | 0.005319 | Tcell | PRKRIP1   |
| PALM.10    | 3.56E-07 | -0.23883 | 0     | 0.106 | 0.005325 | Tcell | PALM      |
| ARL9.12    | 3.56E-07 | -0.24692 | 0     | 0.106 | 0.005325 | Tcell | ARL9      |
| SLC4A1AP.3 | 3.57E-07 | -0.24837 | 0.041 | 0.178 | 0.005333 | Tcell | SLC4A1AP  |
| POU2F1.9   | 3.61E-07 | -0.26795 | 0.032 | 0.163 | 0.005391 | Tcell | POU2F1    |
| CHST12.9   | 3.64E-07 | 0.696308 | 0.332 | 0.244 | 0.005436 | Tcell | CHST12    |
| APBB2.11   | 3.66E-07 | -0.28102 | 0.005 | 0.115 | 0.005465 | Tcell | APBB2     |
| TFG.7      | 3.66E-07 | -0.19279 | 0.191 | 0.412 | 0.005471 | Tcell | TFG       |
| TM4SF1.14  | 3.66E-07 | -0.32815 | 0.005 | 0.115 | 0.005472 | Tcell | TM4SF1    |
| ALG14.6    | 3.70E-07 | -0.31475 | 0.027 | 0.154 | 0.005534 | Tcell | ALG14     |
| ATP6V1D.4  | 3.71E-07 | -0.10217 | 0.168 | 0.374 | 0.005545 | Tcell | ATP6V1D   |
| NEIL2.10   | 3.74E-07 | -0.16199 | 0.055 | 0.201 | 0.005593 | Tcell | NEIL2     |
| RBMX2.6    | 3.77E-07 | -0.18329 | 0.077 | 0.238 | 0.005632 | Tcell | RBMX2     |

|            |          |          |       |       |          |       |               |
|------------|----------|----------|-------|-------|----------|-------|---------------|
| GLOD4.7    | 3.77E-07 | -0.19798 | 0.177 | 0.393 | 0.005632 | Tcell | GLOD4         |
| GDAP1.12   | 3.78E-07 | -0.33129 | 0.027 | 0.154 | 0.005653 | Tcell | GDAP1         |
| IDH3B.4    | 3.79E-07 | -0.15885 | 0.205 | 0.428 | 0.005656 | Tcell | IDH3B         |
| WDR13.5    | 3.85E-07 | -0.17985 | 0.109 | 0.289 | 0.005749 | Tcell | WDR13         |
| TCEAL5.11  | 3.85E-07 | -0.38997 | 0.009 | 0.123 | 0.005758 | Tcell | TCEAL5        |
| CSK.13     | 3.87E-07 | 0.566673 | 0.245 | 0.145 | 0.005789 | Tcell | CSK           |
| TMEM51.1C  | 3.90E-07 | -0.34182 | 0.009 | 0.121 | 0.005826 | Tcell | TMEM51        |
| ATF5.10    | 3.90E-07 | -0.33604 | 0.055 | 0.196 | 0.005827 | Tcell | ATF5          |
| FBXL12.2   | 3.92E-07 | -0.17785 | 0.027 | 0.156 | 0.00586  | Tcell | FBXL12        |
| C1QC.14    | 3.94E-07 | -0.39787 | 0.305 | 0.505 | 0.005892 | Tcell | C1QC          |
| SLC12A9.8  | 3.95E-07 | -0.2108  | 0.059 | 0.204 | 0.005896 | Tcell | SLC12A9       |
| INPP1.8    | 3.97E-07 | -0.25607 | 0.027 | 0.154 | 0.005926 | Tcell | INPP1         |
| PAK1IP1.8  | 3.97E-07 | -0.25103 | 0.068 | 0.218 | 0.005935 | Tcell | PAK1IP1       |
| TMEM19.8   | 3.99E-07 | -0.27157 | 0.027 | 0.155 | 0.00596  | Tcell | TMEM19        |
| MMP16.12   | 4.02E-07 | -0.2499  | 0     | 0.105 | 0.006014 | Tcell | MMP16         |
| MTX1.4     | 4.04E-07 | -0.26562 | 0.086 | 0.249 | 0.006037 | Tcell | MTX1          |
| UBTD1.8    | 4.05E-07 | -0.24469 | 0.005 | 0.114 | 0.006045 | Tcell | UBTD1         |
| GOLGA2.4   | 4.06E-07 | -0.21601 | 0.059 | 0.208 | 0.006065 | Tcell | GOLGA2        |
| ZNF428.14  | 4.06E-07 | -0.24095 | 0.291 | 0.549 | 0.006073 | Tcell | ZNF428        |
| ENDOD1.12  | 4.07E-07 | -0.26111 | 0.023 | 0.146 | 0.006078 | Tcell | ENDOD1        |
| NHSL1.5    | 4.07E-07 | -0.2938  | 0     | 0.105 | 0.006087 | Tcell | NHSL1         |
| LYZ.14     | 4.08E-07 | -0.401   | 0.064 | 0.209 | 0.006097 | Tcell | LYZ           |
| RRP15.6    | 4.08E-07 | -0.245   | 0.068 | 0.223 | 0.006101 | Tcell | RRP15         |
| RP11-410L  | 4.08E-07 | -0.24506 | 0.014 | 0.13  | 0.006102 | Tcell | RP11-410L14.2 |
| SNRNP27.8  | 4.09E-07 | -0.13715 | 0.155 | 0.356 | 0.006114 | Tcell | SNRNP27       |
| SLC2A5.14  | 4.11E-07 | -0.53885 | 0.041 | 0.173 | 0.006135 | Tcell | SLC2A5        |
| SLC27A1.8  | 4.14E-07 | -0.20045 | 0.032 | 0.162 | 0.006181 | Tcell | SLC27A1       |
| HIPK2.11   | 4.16E-07 | -0.16449 | 0.068 | 0.224 | 0.006209 | Tcell | HIPK2         |
| NTM.11     | 4.16E-07 | -0.41883 | 0.005 | 0.113 | 0.00621  | Tcell | NTM           |
| TMC6.14    | 4.20E-07 | 0.448278 | 0.209 | 0.109 | 0.006282 | Tcell | TMC6          |
| SLC25A33.4 | 4.21E-07 | -0.1601  | 0.068 | 0.221 | 0.006289 | Tcell | SLC25A33      |
| CHMP1A.6   | 4.22E-07 | -0.22177 | 0.105 | 0.277 | 0.006308 | Tcell | CHMP1A        |
| C14orf37.4 | 4.24E-07 | -0.28037 | 0.005 | 0.114 | 0.006332 | Tcell | C14orf37      |
| CAMLG.11   | 4.25E-07 | -0.22644 | 0.255 | 0.498 | 0.006354 | Tcell | CAMLG         |
| DUS3L.6    | 4.31E-07 | -0.24857 | 0.023 | 0.145 | 0.006439 | Tcell | DUS3L         |
| CAPN2.8    | 4.33E-07 | 0.634491 | 0.336 | 0.251 | 0.006467 | Tcell | CAPN2         |
| RARRES2.1  | 4.36E-07 | -0.57623 | 0.027 | 0.152 | 0.006514 | Tcell | RARRES2       |
| LAMA5.9    | 4.42E-07 | -0.1933  | 0.005 | 0.113 | 0.006601 | Tcell | LAMA5         |
| LAMC1.9    | 4.44E-07 | -0.20986 | 0     | 0.104 | 0.006628 | Tcell | LAMC1         |
| P4HA1.7    | 4.46E-07 | -0.23829 | 0.073 | 0.227 | 0.00666  | Tcell | P4HA1         |
| IRF2BPL.1  | 4.47E-07 | -0.19772 | 0.082 | 0.245 | 0.006676 | Tcell | IRF2BPL       |
| MTMR4.10   | 4.47E-07 | -0.20191 | 0.032 | 0.163 | 0.006678 | Tcell | MTMR4         |
| MTHFD1L.1  | 4.48E-07 | -0.28048 | 0.018 | 0.138 | 0.006688 | Tcell | MTHFD1L       |
| LHFPL3.14  | 4.48E-07 | -0.30678 | 0.009 | 0.122 | 0.006692 | Tcell | LHFPL3        |
| TBC1D9B.6  | 4.48E-07 | -0.22156 | 0.032 | 0.162 | 0.006694 | Tcell | TBC1D9B       |
| DZIP1.10   | 4.49E-07 | -0.21664 | 0     | 0.104 | 0.006709 | Tcell | DZIP1         |
| BID.9      | 4.49E-07 | -0.20199 | 0.164 | 0.36  | 0.006712 | Tcell | BID           |
| PINK1.8    | 4.51E-07 | -0.14488 | 0.059 | 0.21  | 0.006745 | Tcell | PINK1         |
| RIN2.8     | 4.53E-07 | -0.39717 | 0.014 | 0.128 | 0.006769 | Tcell | RIN2          |
| TMEM255A.4 | 4.54E-07 | -0.25328 | 0     | 0.104 | 0.006791 | Tcell | TMEM255A      |
| ZHX3.8     | 4.59E-07 | -0.24203 | 0.009 | 0.122 | 0.006855 | Tcell | ZHX3          |

|             |          |          |       |       |          |       |           |
|-------------|----------|----------|-------|-------|----------|-------|-----------|
| STRA13.6    | 4.59E-07 | -0.25807 | 0.227 | 0.455 | 0.006857 | Tcell | STRA13    |
| MAD2L2.11   | 4.65E-07 | -0.2298  | 0.186 | 0.396 | 0.006949 | Tcell | MAD2L2    |
| BZW2.9      | 4.66E-07 | -0.23564 | 0.105 | 0.273 | 0.006963 | Tcell | BZW2      |
| GLB1.11     | 4.68E-07 | -0.24075 | 0.086 | 0.248 | 0.00699  | Tcell | GLB1      |
| IFI27L1.1   | 4.70E-07 | -0.32006 | 0.05  | 0.188 | 0.007021 | Tcell | IFI27L1   |
| DIP2B.6     | 4.76E-07 | -0.26768 | 0.009 | 0.121 | 0.007108 | Tcell | DIP2B     |
| ZC3H14.9    | 4.80E-07 | -0.2497  | 0.059 | 0.206 | 0.007169 | Tcell | ZC3H14    |
| COL4A1.1C   | 4.80E-07 | -0.22344 | 0.005 | 0.113 | 0.007179 | Tcell | COL4A1    |
| GOLGA8B.5   | 4.82E-07 | 0.615627 | 0.118 | 0.049 | 0.007208 | Tcell | GOLGA8B   |
| TMEM9B.4    | 4.83E-07 | -0.21518 | 0.277 | 0.541 | 0.007212 | Tcell | TMEM9B    |
| GSTZ1.5     | 4.85E-07 | -0.30613 | 0.032 | 0.16  | 0.007246 | Tcell | GSTZ1     |
| SLC25A13.4  | 4.88E-07 | -0.29432 | 0.014 | 0.129 | 0.00729  | Tcell | SLC25A13  |
| PALD1.13    | 4.89E-07 | -0.42888 | 0     | 0.104 | 0.007304 | Tcell | PALD1     |
| KLF10.8     | 4.89E-07 | -0.26903 | 0.082 | 0.236 | 0.007305 | Tcell | KLF10     |
| VIMP.6      | 4.89E-07 | -0.19527 | 0.227 | 0.461 | 0.007308 | Tcell | VIMP      |
| BRD7.10     | 4.90E-07 | -0.1526  | 0.091 | 0.257 | 0.007323 | Tcell | BRD7      |
| LINC00511.4 | 4.93E-07 | -0.23904 | 0.009 | 0.121 | 0.007361 | Tcell | LINC00511 |
| CCDC130.8   | 4.93E-07 | -0.14893 | 0.073 | 0.231 | 0.007373 | Tcell | CCDC130   |
| PPP2R4.5    | 4.98E-07 | -0.23252 | 0.082 | 0.239 | 0.007438 | Tcell | PPP2R4    |
| TMEM167A.5  | 5.01E-07 | -0.2402  | 0.209 | 0.425 | 0.007493 | Tcell | TMEM167A  |
| RNF213.13   | 5.02E-07 | 0.561807 | 0.35  | 0.259 | 0.007502 | Tcell | RNF213    |
| HDAC2.12    | 5.07E-07 | -0.12665 | 0.223 | 0.452 | 0.007574 | Tcell | HDAC2     |
| C4orf32.2   | 5.10E-07 | 0.388936 | 0.059 | 0.016 | 0.007623 | Tcell | C4orf32   |
| SULF2.7     | 5.14E-07 | -0.19765 | 0.032 | 0.162 | 0.007676 | Tcell | SULF2     |
| IFRD2.5     | 5.21E-07 | -0.12151 | 0.064 | 0.211 | 0.007789 | Tcell | IFRD2     |
| TBC1D16.5   | 5.21E-07 | -0.29344 | 0.018 | 0.136 | 0.00779  | Tcell | TBC1D16   |
| SYNE2.13    | 5.23E-07 | 0.634066 | 0.268 | 0.172 | 0.007818 | Tcell | SYNE2     |
| TM6SF1.14   | 5.23E-07 | -0.56112 | 0.036 | 0.161 | 0.007821 | Tcell | TM6SF1    |
| KCTD6.5     | 5.23E-07 | -0.26649 | 0.009 | 0.119 | 0.007821 | Tcell | KCTD6     |
| ORAI2.8     | 5.23E-07 | -0.14235 | 0.105 | 0.28  | 0.007823 | Tcell | ORAI2     |
| MAP1S.4     | 5.25E-07 | -0.25132 | 0.041 | 0.174 | 0.007846 | Tcell | MAP1S     |
| JPX.2       | 5.28E-07 | -0.24368 | 0.095 | 0.26  | 0.007884 | Tcell | JPX       |
| EPDR1.8     | 5.31E-07 | -0.2231  | 0.014 | 0.129 | 0.007938 | Tcell | EPDR1     |
| TEX261.8    | 5.32E-07 | -0.19256 | 0.036 | 0.168 | 0.007945 | Tcell | TEX261    |
| TMEM218.6   | 5.32E-07 | -0.26024 | 0.073 | 0.224 | 0.007951 | Tcell | TMEM218   |
| TRPT1.5     | 5.36E-07 | -0.2076  | 0.073 | 0.226 | 0.008003 | Tcell | TRPT1     |
| CSF3R.13    | 5.42E-07 | -0.50962 | 0.032 | 0.155 | 0.008106 | Tcell | CSF3R     |
| MGST1.11    | 5.45E-07 | -0.83641 | 0.027 | 0.147 | 0.008142 | Tcell | MGST1     |
| TUSC2.8     | 5.45E-07 | -0.13094 | 0.141 | 0.339 | 0.008148 | Tcell | TUSC2     |
| RNASEH1.1   | 5.46E-07 | -0.22    | 0.077 | 0.232 | 0.008158 | Tcell | RNASEH1   |
| ATP5G1.4    | 5.48E-07 | -0.23741 | 0.341 | 0.623 | 0.008187 | Tcell | ATP5G1    |
| COX20.9     | 5.49E-07 | -0.19097 | 0.236 | 0.464 | 0.008204 | Tcell | COX20     |
| ALG3.6      | 5.52E-07 | -0.19821 | 0.077 | 0.235 | 0.008248 | Tcell | ALG3      |
| IMPAD1.7    | 5.55E-07 | -0.19516 | 0.05  | 0.189 | 0.008301 | Tcell | IMPAD1    |
| HMG20B.7    | 5.59E-07 | -0.12895 | 0.145 | 0.34  | 0.008358 | Tcell | HMG20B    |
| ACADVL.9    | 5.60E-07 | -0.17482 | 0.227 | 0.455 | 0.008364 | Tcell | ACADVL    |
| CDK19.6     | 5.60E-07 | -0.29462 | 0.014 | 0.128 | 0.008368 | Tcell | CDK19     |
| RNASEH2A.5  | 5.62E-07 | -0.28103 | 0.068 | 0.214 | 0.008399 | Tcell | RNASEH2A  |
| PHB2.4      | 5.66E-07 | -0.18633 | 0.209 | 0.447 | 0.008456 | Tcell | PHB2      |
| GOSR2.4     | 5.66E-07 | -0.27625 | 0.05  | 0.188 | 0.008461 | Tcell | GOSR2     |
| ZNF394.5    | 5.73E-07 | 0.632005 | 0.236 | 0.14  | 0.008557 | Tcell | ZNF394    |

|           |          |          |       |       |          |       |           |
|-----------|----------|----------|-------|-------|----------|-------|-----------|
| SEL1L.7   | 5.75E-07 | -0.23494 | 0.041 | 0.176 | 0.008586 | Tcell | SEL1L     |
| SNX24.4   | 5.78E-07 | -0.2569  | 0.014 | 0.128 | 0.008634 | Tcell | SNX24     |
| CORO2B.9  | 5.79E-07 | -0.24141 | 0     | 0.103 | 0.008655 | Tcell | CORO2B    |
| GDAP1L1.1 | 5.79E-07 | -0.37451 | 0     | 0.103 | 0.008655 | Tcell | GDAP1L1   |
| SNX21.7   | 5.82E-07 | -0.19973 | 0.009 | 0.12  | 0.008694 | Tcell | SNX21     |
| PPIF.11   | 5.84E-07 | -0.233   | 0.073 | 0.224 | 0.008724 | Tcell | PPIF      |
| PBX3.4    | 5.84E-07 | -0.23117 | 0.009 | 0.12  | 0.00873  | Tcell | PBX3      |
| IDI1.9    | 5.86E-07 | 0.598891 | 0.395 | 0.323 | 0.008752 | Tcell | IDI1      |
| DESI2.8   | 5.86E-07 | -0.19374 | 0.055 | 0.197 | 0.008763 | Tcell | DESI2     |
| FAM107B.8 | 5.88E-07 | 0.433711 | 0.218 | 0.12  | 0.00879  | Tcell | FAM107B   |
| ASPSCR1.6 | 5.89E-07 | -0.21216 | 0.082 | 0.239 | 0.008799 | Tcell | ASPSCR1   |
| DNAJB2.11 | 5.89E-07 | -0.21544 | 0.132 | 0.318 | 0.008803 | Tcell | DNAJB2    |
| RGS16.9   | 5.92E-07 | -0.20449 | 0.109 | 0.279 | 0.008853 | Tcell | RGS16     |
| PCSK7.7   | 5.96E-07 | 0.646536 | 0.364 | 0.28  | 0.008903 | Tcell | PCSK7     |
| DAPK3.10  | 5.96E-07 | -0.16477 | 0.082 | 0.242 | 0.008914 | Tcell | DAPK3     |
| CNKSR3.10 | 5.98E-07 | -0.22913 | 0.009 | 0.12  | 0.008939 | Tcell | CNKSR3    |
| SLC6A8.7  | 6.01E-07 | -0.29359 | 0.009 | 0.12  | 0.00898  | Tcell | SLC6A8    |
| APPBP2.9  | 6.04E-07 | -0.1698  | 0.064 | 0.212 | 0.009021 | Tcell | APPBP2    |
| CDCA7L.9  | 6.04E-07 | -0.28157 | 0.027 | 0.151 | 0.009021 | Tcell | CDCA7L    |
| ARL6IP5.8 | 6.07E-07 | 0.288756 | 0.627 | 0.651 | 0.009065 | Tcell | ARL6IP5   |
| OCIAD1.7  | 6.08E-07 | -0.22413 | 0.373 | 0.641 | 0.009086 | Tcell | OCIAD1    |
| FAM98A.8  | 6.14E-07 | -0.22159 | 0.023 | 0.144 | 0.00917  | Tcell | FAM98A    |
| INSM1.13  | 6.20E-07 | -0.29314 | 0.009 | 0.119 | 0.009267 | Tcell | INSM1     |
| PLD4.14   | 6.20E-07 | -0.47889 | 0.032 | 0.156 | 0.009271 | Tcell | PLD4      |
| C7orf50.8 | 6.29E-07 | -0.19004 | 0.264 | 0.512 | 0.009394 | Tcell | C7orf50   |
| MARCH2.11 | 6.29E-07 | -0.18931 | 0.077 | 0.236 | 0.009395 | Tcell | 2-Mar     |
| PRPSAP2.8 | 6.32E-07 | -0.17642 | 0.105 | 0.27  | 0.009448 | Tcell | PRPSAP2   |
| PHLDA3.8  | 6.35E-07 | -0.25271 | 0.041 | 0.173 | 0.00949  | Tcell | PHLDA3    |
| LUC7L.9   | 6.37E-07 | -0.14665 | 0.086 | 0.248 | 0.009512 | Tcell | LUC7L     |
| UQCC2.8   | 6.42E-07 | -0.21048 | 0.214 | 0.431 | 0.009595 | Tcell | UQCC2     |
| L3HYPDH.6 | 6.46E-07 | -0.23997 | 0.014 | 0.127 | 0.009658 | Tcell | L3HYPDH   |
| PLA2G5.12 | 6.47E-07 | -0.44695 | 0.005 | 0.111 | 0.009673 | Tcell | PLA2G5    |
| BTN3A2.6  | 6.48E-07 | 0.607275 | 0.241 | 0.145 | 0.009681 | Tcell | BTN3A2    |
| SLC48A1.8 | 6.49E-07 | -0.32598 | 0.018 | 0.135 | 0.009696 | Tcell | SLC48A1   |
| SESN3.6   | 6.49E-07 | -0.21584 | 0.027 | 0.152 | 0.009706 | Tcell | SESN3     |
| FASN.11   | 6.52E-07 | -0.22432 | 0.009 | 0.118 | 0.009746 | Tcell | FASN      |
| SH2B2.10  | 6.53E-07 | -0.24386 | 0.005 | 0.111 | 0.009753 | Tcell | SH2B2     |
| THAP9-AS1 | 6.54E-07 | -0.18772 | 0.073 | 0.224 | 0.009776 | Tcell | THAP9-AS1 |
| ACOT7.11  | 6.55E-07 | -0.22346 | 0.077 | 0.23  | 0.009789 | Tcell | ACOT7     |
| USP9X.4   | 6.69E-07 | -0.17236 | 0.059 | 0.204 | 0.010001 | Tcell | USP9X     |
| EFNB2.11  | 6.70E-07 | -0.20292 | 0     | 0.101 | 0.010008 | Tcell | EFNB2     |
| KATNBL1.8 | 6.76E-07 | -0.18471 | 0.091 | 0.254 | 0.010099 | Tcell | KATNBL1   |
| ELN.11    | 6.76E-07 | -0.35548 | 0.005 | 0.11  | 0.010099 | Tcell | ELN       |
| NRXN2.13  | 6.77E-07 | -0.2729  | 0.009 | 0.118 | 0.010112 | Tcell | NRXN2     |
| UNC119.9  | 6.78E-07 | -0.14493 | 0.068 | 0.22  | 0.010126 | Tcell | UNC119    |
| SAC3D1.12 | 6.81E-07 | -0.23654 | 0.041 | 0.172 | 0.010172 | Tcell | SAC3D1    |
| ANKRD46.1 | 6.84E-07 | -0.26896 | 0.032 | 0.159 | 0.010218 | Tcell | ANKRD46   |
| SMPDL3A.1 | 6.90E-07 | -0.29367 | 0.014 | 0.127 | 0.010312 | Tcell | SMPDL3A   |
| CROT.7    | 6.91E-07 | -0.25914 | 0.018 | 0.134 | 0.01032  | Tcell | CROT      |
| SH3PXD2B. | 6.93E-07 | -0.19675 | 0.009 | 0.119 | 0.010356 | Tcell | SH3PXD2B  |
| PIK3CD.9  | 6.94E-07 | 0.27412  | 0.086 | 0.029 | 0.010367 | Tcell | PIK3CD    |

|            |          |          |       |       |          |       |               |
|------------|----------|----------|-------|-------|----------|-------|---------------|
| FAM161A.8  | 6.94E-07 | -0.26988 | 0.005 | 0.11  | 0.010375 | Tcell | FAM161A       |
| SORBS3.1C  | 7.13E-07 | -0.13391 | 0.041 | 0.175 | 0.010662 | Tcell | SORBS3        |
| RNASE2.14  | 7.18E-07 | -0.4722  | 0.036 | 0.16  | 0.010725 | Tcell | RNASE2        |
| ZC3HC1.1C  | 7.19E-07 | -0.26539 | 0.014 | 0.127 | 0.010742 | Tcell | ZC3HC1        |
| ZYG11B.7   | 7.19E-07 | -0.22278 | 0.027 | 0.151 | 0.010748 | Tcell | ZYG11B        |
| GOS2.10    | 7.21E-07 | -0.50499 | 0.055 | 0.187 | 0.010769 | Tcell | GOS2          |
| CCDC137.8  | 7.33E-07 | -0.14999 | 0.059 | 0.205 | 0.010949 | Tcell | CCDC137       |
| SMAD5.9    | 7.35E-07 | -0.14041 | 0.041 | 0.173 | 0.010982 | Tcell | SMAD5         |
| CLASP2.13  | 7.39E-07 | -0.29656 | 0.059 | 0.199 | 0.011046 | Tcell | CLASP2        |
| RP11-472N  | 7.42E-07 | -0.33198 | 0.005 | 0.109 | 0.011093 | Tcell | RP11-472N13.3 |
| FYN.12     | 7.46E-07 | 0.696094 | 0.395 | 0.325 | 0.011149 | Tcell | FYN           |
| TIMM21.5   | 7.47E-07 | -0.26854 | 0.027 | 0.149 | 0.011159 | Tcell | TIMM21        |
| BABAM1.6   | 7.48E-07 | -0.2118  | 0.195 | 0.409 | 0.011174 | Tcell | BABAM1        |
| ATL1.9     | 7.49E-07 | -0.2984  | 0.009 | 0.118 | 0.011198 | Tcell | ATL1          |
| LPXN.13    | 7.50E-07 | 0.43427  | 0.205 | 0.108 | 0.011207 | Tcell | LPXN          |
| SRPRB.6    | 7.50E-07 | -0.12549 | 0.095 | 0.258 | 0.011213 | Tcell | SRPRB         |
| ENG.14     | 7.50E-07 | -0.41211 | 0.041 | 0.167 | 0.011215 | Tcell | ENG           |
| LDLRAD4.1  | 7.52E-07 | 0.529752 | 0.245 | 0.144 | 0.01124  | Tcell | LDLRAD4       |
| C5orf56.6  | 7.57E-07 | 0.638889 | 0.2   | 0.11  | 0.011312 | Tcell | C5orf56       |
| GPS1.10    | 7.62E-07 | -0.20168 | 0.141 | 0.328 | 0.011395 | Tcell | GPS1          |
| PSD4.6     | 7.65E-07 | 0.393755 | 0.086 | 0.03  | 0.011435 | Tcell | PSD4          |
| GABARAPL2  | 7.68E-07 | -0.19874 | 0.459 | 0.748 | 0.011477 | Tcell | GABARAPL2     |
| KAT5.4     | 7.71E-07 | -0.1527  | 0.091 | 0.254 | 0.011516 | Tcell | KAT5          |
| POMGNT2.1  | 7.75E-07 | -0.20474 | 0.023 | 0.143 | 0.011575 | Tcell | POMGNT2       |
| NENF.9     | 7.78E-07 | -0.17239 | 0.25  | 0.499 | 0.011631 | Tcell | NENF          |
| TTYH2.11   | 7.81E-07 | -0.29679 | 0.009 | 0.117 | 0.011678 | Tcell | TTYH2         |
| KDM4B.8    | 7.82E-07 | -0.22809 | 0.018 | 0.134 | 0.01168  | Tcell | KDM4B         |
| GNG4.13    | 7.86E-07 | -0.22843 | 0.009 | 0.118 | 0.011742 | Tcell | GNG4          |
| DCAF10.7   | 7.88E-07 | -0.21539 | 0.045 | 0.18  | 0.011779 | Tcell | DCAF10        |
| CDKN2AIPN  | 7.91E-07 | -0.23727 | 0.091 | 0.252 | 0.011814 | Tcell | CDKN2AIPNL    |
| MGLL.7     | 7.99E-07 | -0.31928 | 0.027 | 0.147 | 0.011945 | Tcell | MGLL          |
| PPIE.4     | 8.03E-07 | -0.15259 | 0.114 | 0.286 | 0.012006 | Tcell | PPIE          |
| C2.12      | 8.04E-07 | -0.48143 | 0.009 | 0.117 | 0.012021 | Tcell | C2            |
| DDX1.10    | 8.10E-07 | -0.22109 | 0.164 | 0.364 | 0.012099 | Tcell | DDX1          |
| C16orf58.8 | 8.14E-07 | -0.27152 | 0.009 | 0.117 | 0.01217  | Tcell | C16orf58      |
| ATPAF2.7   | 8.18E-07 | -0.21383 | 0.068 | 0.216 | 0.012231 | Tcell | ATPAF2        |
| ITGB2-AS1  | 8.25E-07 | 0.310365 | 0.082 | 0.027 | 0.012326 | Tcell | ITGB2-AS1     |
| TWSG1.5    | 8.25E-07 | -0.23933 | 0.036 | 0.165 | 0.012329 | Tcell | TWSG1         |
| TNFSF13B.8 | 8.25E-07 | -0.44361 | 0.068 | 0.206 | 0.012333 | Tcell | TNFSF13B      |
| TMEM198.9  | 8.29E-07 | -0.22766 | 0.009 | 0.117 | 0.012382 | Tcell | TMEM198       |
| TMEM70.1C  | 8.29E-07 | -0.26331 | 0.2   | 0.399 | 0.012384 | Tcell | TMEM70        |
| MED19.9    | 8.30E-07 | -0.11814 | 0.109 | 0.285 | 0.012401 | Tcell | MED19         |
| C6orf89.4  | 8.41E-07 | -0.15513 | 0.073 | 0.222 | 0.012564 | Tcell | C6orf89       |
| CDH11.12   | 8.43E-07 | -0.24474 | 0.009 | 0.117 | 0.0126   | Tcell | CDH11         |
| IL18.14    | 8.44E-07 | -0.52174 | 0.064 | 0.196 | 0.012612 | Tcell | IL18          |
| GPR183.14  | 8.46E-07 | 0.371028 | 0.409 | 0.288 | 0.012644 | Tcell | GPR183        |
| SAMD4B.9   | 8.49E-07 | -0.17055 | 0.073 | 0.226 | 0.012688 | Tcell | SAMD4B        |
| SKAP2.10   | 8.50E-07 | -0.31282 | 0.109 | 0.273 | 0.012705 | Tcell | SKAP2         |
| SPIRE1.6   | 8.53E-07 | -0.22856 | 0     | 0.1   | 0.012741 | Tcell | SPIRE1        |
| PIK3R3.11  | 8.57E-07 | -0.1878  | 0.018 | 0.134 | 0.012804 | Tcell | PIK3R3        |
| C9orf78.4  | 8.58E-07 | 0.564148 | 0.477 | 0.443 | 0.012816 | Tcell | C9orf78       |



|           |          |          |       |       |          |       |               |
|-----------|----------|----------|-------|-------|----------|-------|---------------|
| SFRP1.12  | 8.63E-07 | -0.22732 | 0     | 0.1   | 0.012896 | Tcell | SFRP1         |
| PFKM.8    | 8.63E-07 | -0.23223 | 0.05  | 0.186 | 0.012896 | Tcell | PFKM          |
| GPX3.13   | 8.64E-07 | -0.39612 | 0.032 | 0.155 | 0.012916 | Tcell | GPX3          |
| NAGA.12   | 8.69E-07 | -0.38114 | 0.055 | 0.187 | 0.012986 | Tcell | NAGA          |
| RALA.10   | 8.74E-07 | -0.21116 | 0.168 | 0.363 | 0.013068 | Tcell | RALA          |
| SLC11A2.6 | 8.81E-07 | -0.23461 | 0.041 | 0.171 | 0.013169 | Tcell | SLC11A2       |
| ELOVL2.13 | 8.84E-07 | -0.22713 | 0     | 0.099 | 0.01321  | Tcell | ELOVL2        |
| SNX8.8    | 8.88E-07 | -0.2432  | 0.027 | 0.149 | 0.013269 | Tcell | SNX8          |
| GNA11.8   | 8.91E-07 | -0.21888 | 0.005 | 0.108 | 0.013319 | Tcell | GNA11         |
| FSD1.12   | 8.94E-07 | -0.14319 | 0.032 | 0.157 | 0.01336  | Tcell | FSD1          |
| CHST10.11 | 8.94E-07 | -0.207   | 0.023 | 0.141 | 0.013366 | Tcell | CHST10        |
| NFU1.5    | 8.95E-07 | -0.23076 | 0.127 | 0.304 | 0.013378 | Tcell | NFU1          |
| CCS.6     | 8.98E-07 | -0.27288 | 0.1   | 0.263 | 0.013422 | Tcell | CCS           |
| STRN4.9   | 9.02E-07 | -0.18844 | 0.014 | 0.125 | 0.013474 | Tcell | STRN4         |
| AASS.10   | 9.10E-07 | -0.22454 | 0.009 | 0.117 | 0.013601 | Tcell | AASS          |
| PARP15    | 9.11E-07 | 0.188313 | 0.036 | 0.007 | 0.013607 | Tcell | PARP15        |
| HRSP12.8  | 9.15E-07 | -0.26022 | 0.059 | 0.201 | 0.013672 | Tcell | HRSP12        |
| FAM228B.8 | 9.23E-07 | -0.16957 | 0.068 | 0.218 | 0.013786 | Tcell | FAM228B       |
| LAMTOR3.3 | 9.28E-07 | -0.18502 | 0.1   | 0.263 | 0.013869 | Tcell | LAMTOR3       |
| C1QL1.12  | 9.34E-07 | -0.26782 | 0.009 | 0.116 | 0.013962 | Tcell | C1QL1         |
| SLC12A2.1 | 9.40E-07 | -0.30651 | 0.018 | 0.132 | 0.014048 | Tcell | SLC12A2       |
| PDLIM3.11 | 9.51E-07 | -0.35366 | 0.009 | 0.116 | 0.014209 | Tcell | PDLIM3        |
| EFS.10    | 9.60E-07 | -0.28346 | 0.005 | 0.108 | 0.014344 | Tcell | EFS           |
| PDGFA.8   | 9.62E-07 | -0.31017 | 0     | 0.099 | 0.014373 | Tcell | PDGFA         |
| BHLHE40.1 | 9.63E-07 | 0.552181 | 0.291 | 0.192 | 0.014397 | Tcell | BHLHE40       |
| MAGOHB.9  | 9.64E-07 | -0.17077 | 0.086 | 0.241 | 0.014401 | Tcell | MAGOHB        |
| BMI1.8    | 9.65E-07 | -0.1689  | 0.023 | 0.142 | 0.014419 | Tcell | BMI1          |
| LRRN3.11  | 9.66E-07 | -0.33247 | 0.009 | 0.115 | 0.014438 | Tcell | LRRN3         |
| TRIB2.14  | 9.77E-07 | -0.17966 | 0.105 | 0.266 | 0.014599 | Tcell | TRIB2         |
| EVA1B.9   | 9.79E-07 | -0.18772 | 0.014 | 0.125 | 0.014624 | Tcell | EVA1B         |
| RP11-192H | 9.83E-07 | -0.20882 | 0.009 | 0.116 | 0.014693 | Tcell | RP11-192H23.6 |
| ATP6V1E1. | 9.87E-07 | -0.1283  | 0.218 | 0.437 | 0.014744 | Tcell | ATP6V1E1      |
| ELOF1.10  | 9.87E-07 | -0.21603 | 0.214 | 0.427 | 0.01475  | Tcell | ELOF1         |
| EPB41L3.1 | 9.88E-07 | -0.41801 | 0.005 | 0.107 | 0.014763 | Tcell | EPB41L3       |
| GIPC1.9   | 9.90E-07 | -0.21942 | 0.105 | 0.271 | 0.014792 | Tcell | GIPC1         |
| KDM5B.12  | 9.91E-07 | -0.20012 | 0.036 | 0.164 | 0.014807 | Tcell | KDM5B         |
| KDM1A.11  | 9.93E-07 | -0.20824 | 0.064 | 0.206 | 0.01484  | Tcell | KDM1A         |
| TADA3.6   | 9.95E-07 | -0.26418 | 0.191 | 0.394 | 0.014869 | Tcell | TADA3         |
| IQCG.8    | 9.95E-07 | -0.28864 | 0.014 | 0.124 | 0.014876 | Tcell | IQCG          |
| TMEM25.1C | 1.00E-06 | -0.21029 | 0.014 | 0.124 | 0.014989 | Tcell | TMEM25        |
| C6orf120. | 1.02E-06 | -0.21197 | 0.023 | 0.14  | 0.01521  | Tcell | C6orf120      |
| SLC10A4.1 | 1.02E-06 | -0.20644 | 0     | 0.098 | 0.015264 | Tcell | SLC10A4       |
| ATXN2.9   | 1.04E-06 | -0.14982 | 0.073 | 0.225 | 0.015501 | Tcell | ATXN2         |
| RBM42.9   | 1.04E-06 | -0.17008 | 0.182 | 0.39  | 0.015512 | Tcell | RBM42         |
| TMCC1.9   | 1.05E-06 | -0.24    | 0.009 | 0.115 | 0.0157   | Tcell | TMCC1         |
| UGP2.8    | 1.05E-06 | 0.424545 | 0.495 | 0.46  | 0.015711 | Tcell | UGP2          |
| SLC26A11. | 1.06E-06 | -0.22275 | 0.005 | 0.107 | 0.015766 | Tcell | SLC26A11      |
| PEX13.3   | 1.06E-06 | -0.20786 | 0.041 | 0.172 | 0.015858 | Tcell | PEX13         |
| RASA2.5   | 1.06E-06 | 0.469638 | 0.155 | 0.074 | 0.015868 | Tcell | RASA2         |
| TMEM126A. | 1.07E-06 | -0.11855 | 0.145 | 0.332 | 0.01596  | Tcell | TMEM126A      |
| TMEM68.9  | 1.07E-06 | -0.24633 | 0.041 | 0.169 | 0.016026 | Tcell | TMEM68        |

|            |          |          |       |       |          |       |           |
|------------|----------|----------|-------|-------|----------|-------|-----------|
| NDUFA2.3   | 1.07E-06 | -0.28974 | 0.332 | 0.609 | 0.016057 | Tcell | NDUFA2    |
| SPATA33.1  | 1.08E-06 | -0.23347 | 0.027 | 0.148 | 0.016074 | Tcell | SPATA33   |
| EIF2B5.6   | 1.08E-06 | -0.20174 | 0.05  | 0.186 | 0.01617  | Tcell | EIF2B5    |
| HDAC6.4    | 1.08E-06 | -0.23975 | 0.009 | 0.116 | 0.01617  | Tcell | HDAC6     |
| CLCC1.2    | 1.09E-06 | -0.20995 | 0.023 | 0.14  | 0.016234 | Tcell | CLCC1     |
| ERBB2IP.9  | 1.09E-06 | -0.15174 | 0.073 | 0.224 | 0.016336 | Tcell | ERBB2IP   |
| EHBP1.10   | 1.09E-06 | -0.1993  | 0.041 | 0.169 | 0.016337 | Tcell | EHBP1     |
| HRH1.12    | 1.10E-06 | -0.27536 | 0     | 0.098 | 0.016407 | Tcell | HRH1      |
| MED8.2     | 1.12E-06 | -0.20004 | 0.077 | 0.227 | 0.016679 | Tcell | MED8      |
| POP4.3     | 1.12E-06 | -0.13319 | 0.105 | 0.268 | 0.016725 | Tcell | POP4      |
| ENY2.5     | 1.13E-06 | -0.15501 | 0.341 | 0.609 | 0.016889 | Tcell | ENY2      |
| VGLL4.11   | 1.13E-06 | -0.14583 | 0.136 | 0.321 | 0.016957 | Tcell | VGLL4     |
| B4GALNT1.1 | 1.14E-06 | -0.3556  | 0.027 | 0.145 | 0.016994 | Tcell | B4GALNT1  |
| DPF3.8     | 1.14E-06 | -0.24009 | 0.023 | 0.138 | 0.017035 | Tcell | DPF3      |
| AGPAT5.9   | 1.14E-06 | -0.20173 | 0.068 | 0.212 | 0.017044 | Tcell | AGPAT5    |
| MIR4458HG  | 1.15E-06 | -0.29928 | 0.036 | 0.162 | 0.017186 | Tcell | MIR4458HG |
| PRPF4.3    | 1.15E-06 | -0.24706 | 0.045 | 0.176 | 0.017229 | Tcell | PRPF4     |
| MECR.8     | 1.16E-06 | -0.19074 | 0.036 | 0.163 | 0.017354 | Tcell | MECR      |
| MMAB.8     | 1.16E-06 | -0.17828 | 0.059 | 0.2   | 0.017403 | Tcell | MMAB      |
| PARVA.10   | 1.17E-06 | -0.21051 | 0     | 0.097 | 0.017423 | Tcell | PARVA     |
| MID1IP1.6  | 1.17E-06 | -0.17951 | 0.105 | 0.264 | 0.017444 | Tcell | MID1IP1   |
| ABCD3.9    | 1.17E-06 | -0.18849 | 0.059 | 0.198 | 0.017445 | Tcell | ABCD3     |
| PGAP1.13   | 1.17E-06 | -0.1233  | 0.05  | 0.186 | 0.017446 | Tcell | PGAP1     |
| SPPL3.11   | 1.17E-06 | -0.22137 | 0.059 | 0.2   | 0.017463 | Tcell | SPPL3     |
| LINC00954  | 1.17E-06 | 0.191956 | 0.041 | 0.009 | 0.01749  | Tcell | LINC00954 |
| TALDO1.1C  | 1.18E-06 | -0.23339 | 0.336 | 0.602 | 0.017569 | Tcell | TALDO1    |
| METTL2A.9  | 1.18E-06 | -0.19201 | 0.036 | 0.161 | 0.0176   | Tcell | METTL2A   |
| PRMT5.11   | 1.18E-06 | -0.31099 | 0.032 | 0.153 | 0.017636 | Tcell | PRMT5     |
| PPP1R16B.1 | 1.19E-06 | 0.280783 | 0.055 | 0.014 | 0.017709 | Tcell | PPP1R16B  |
| ATP9A.11   | 1.19E-06 | -0.25203 | 0.009 | 0.114 | 0.017736 | Tcell | ATP9A     |
| COMMD4.4   | 1.19E-06 | -0.20525 | 0.132 | 0.308 | 0.017744 | Tcell | COMMD4    |
| FOXO3.8    | 1.19E-06 | -0.12167 | 0.105 | 0.275 | 0.017811 | Tcell | FOXO3     |
| GAD1.12    | 1.19E-06 | -0.2217  | 0.009 | 0.115 | 0.017847 | Tcell | GAD1      |
| DYNC1I1.1  | 1.20E-06 | -0.36811 | 0.005 | 0.106 | 0.017919 | Tcell | DYNC1I1   |
| CYB5R3.8   | 1.20E-06 | -0.14496 | 0.164 | 0.364 | 0.01793  | Tcell | CYB5R3    |
| DIRAS1.9   | 1.20E-06 | -0.20183 | 0.009 | 0.115 | 0.017982 | Tcell | DIRAS1    |
| ATCAY.11   | 1.21E-06 | -0.31487 | 0.014 | 0.123 | 0.018008 | Tcell | ATCAY     |
| CAPZB.13   | 1.21E-06 | 0.235694 | 0.645 | 0.703 | 0.018052 | Tcell | CAPZB     |
| LRRC4C.9   | 1.21E-06 | -0.30481 | 0     | 0.097 | 0.018062 | Tcell | LRRC4C    |
| USP46.11   | 1.21E-06 | -0.21332 | 0.023 | 0.139 | 0.018087 | Tcell | USP46     |
| TM2D1.2    | 1.21E-06 | -0.16418 | 0.182 | 0.391 | 0.018104 | Tcell | TM2D1     |
| EPHA1-AS1  | 1.21E-06 | 0.27289  | 0.064 | 0.019 | 0.01814  | Tcell | EPHA1-AS1 |
| CTSZ.14    | 1.22E-06 | -0.38465 | 0.109 | 0.259 | 0.018235 | Tcell | CTSZ      |
| DIAPH1.9   | 1.22E-06 | 0.645596 | 0.227 | 0.137 | 0.018246 | Tcell | DIAPH1    |
| E2F6.7     | 1.22E-06 | -0.21783 | 0.027 | 0.146 | 0.018283 | Tcell | E2F6      |
| THSD7A.12  | 1.23E-06 | -0.37094 | 0.027 | 0.145 | 0.018334 | Tcell | THSD7A    |
| NPEPPS.6   | 1.23E-06 | -0.14717 | 0.077 | 0.228 | 0.01845  | Tcell | NPEPPS    |
| TTC9B.13   | 1.24E-06 | -0.38262 | 0.014 | 0.122 | 0.018483 | Tcell | TTC9B     |
| CCDC82.7   | 1.24E-06 | -0.18247 | 0.109 | 0.275 | 0.018507 | Tcell | CCDC82    |
| ASAP2.10   | 1.25E-06 | -0.19829 | 0     | 0.097 | 0.018725 | Tcell | ASAP2     |
| C9orf142.1 | 1.25E-06 | 0.546663 | 0.427 | 0.375 | 0.018751 | Tcell | C9orf142  |

|             |           |           |        |        |           |       |            |
|-------------|-----------|-----------|--------|--------|-----------|-------|------------|
| SNX13. 2    | 1. 26E-06 | -0. 25047 | 0. 041 | 0. 169 | 0. 018889 | Tcell | SNX13      |
| PSMB8. 9    | 1. 27E-06 | 0. 434908 | 0. 464 | 0. 414 | 0. 018959 | Tcell | PSMB8      |
| UTP11L. 5   | 1. 28E-06 | -0. 19797 | 0. 123 | 0. 294 | 0. 01918  | Tcell | UTP11L     |
| HAMP. 14    | 1. 28E-06 | -0. 57195 | 0. 041 | 0. 163 | 0. 019184 | Tcell | HAMP       |
| MFSD3. 5    | 1. 30E-06 | -0. 23642 | 0. 014 | 0. 122 | 0. 019377 | Tcell | MFSD3      |
| PTGFRN. 8   | 1. 30E-06 | -0. 22026 | 0. 005 | 0. 106 | 0. 019485 | Tcell | PTGFRN     |
| DHX33. 9    | 1. 31E-06 | -0. 16448 | 0. 014 | 0. 123 | 0. 019517 | Tcell | DHX33      |
| NDUFC2. 5   | 1. 32E-06 | -0. 29141 | 0. 45  | 0. 758 | 0. 019727 | Tcell | NDUFC2     |
| FAM114A1. 1 | 1. 33E-06 | -0. 28636 | 0. 009 | 0. 114 | 0. 019814 | Tcell | FAM114A1   |
| GGPS1. 9    | 1. 34E-06 | -0. 19947 | 0. 136 | 0. 321 | 0. 019966 | Tcell | GGPS1      |
| B4GALT5. 1  | 1. 35E-06 | -0. 14148 | 0. 059 | 0. 199 | 0. 020154 | Tcell | B4GALT5    |
| LRP6. 12    | 1. 35E-06 | -0. 23335 | 0. 009 | 0. 114 | 0. 020196 | Tcell | LRP6       |
| COMMD3. 6   | 1. 36E-06 | -0. 20115 | 0. 164 | 0. 358 | 0. 020294 | Tcell | COMMD3     |
| CRTAP. 13   | 1. 36E-06 | -0. 2132  | 0. 086 | 0. 239 | 0. 020321 | Tcell | CRTAP      |
| DENND2A. 9  | 1. 36E-06 | -0. 23672 | 0      | 0. 096 | 0. 020366 | Tcell | DENND2A    |
| PRKAB1. 4   | 1. 36E-06 | -0. 24161 | 0. 036 | 0. 16  | 0. 020396 | Tcell | PRKAB1     |
| PSMD8. 5    | 1. 37E-06 | -0. 34753 | 0. 4   | 0. 678 | 0. 020514 | Tcell | PSMD8      |
| FBXW9. 7    | 1. 38E-06 | -0. 20442 | 0. 009 | 0. 114 | 0. 02065  | Tcell | FBXW9      |
| RIC3. 10    | 1. 39E-06 | -0. 18596 | 0. 082 | 0. 234 | 0. 020741 | Tcell | RIC3       |
| PREB. 6     | 1. 39E-06 | -0. 1715  | 0. 068 | 0. 212 | 0. 020772 | Tcell | PREB       |
| CDKN1B. 12  | 1. 39E-06 | 0. 68456  | 0. 332 | 0. 257 | 0. 020772 | Tcell | CDKN1B     |
| PAXIP1-AS   | 1. 39E-06 | -0. 19653 | 0. 036 | 0. 161 | 0. 020808 | Tcell | PAXIP1-AS1 |
| SFXN3. 6    | 1. 40E-06 | -0. 25583 | 0. 009 | 0. 114 | 0. 020862 | Tcell | SFXN3      |
| STAB1. 13   | 1. 41E-06 | -0. 45776 | 0. 041 | 0. 164 | 0. 021047 | Tcell | STAB1      |
| HLA-DMA. 1  | 1. 43E-06 | -0. 43251 | 0. 241 | 0. 411 | 0. 021365 | Tcell | HLA-DMA    |
| FAM57A. 8   | 1. 43E-06 | -0. 19705 | 0      | 0. 096 | 0. 021366 | Tcell | FAM57A     |
| NDP. 10     | 1. 43E-06 | -0. 25839 | 0. 009 | 0. 113 | 0. 021405 | Tcell | NDP        |
| ABHD8. 9    | 1. 44E-06 | -0. 1118  | 0. 027 | 0. 147 | 0. 021455 | Tcell | ABHD8      |
| ANAPC7. 1C  | 1. 45E-06 | -0. 21124 | 0. 045 | 0. 174 | 0. 021648 | Tcell | ANAPC7     |
| RTFDC1. 4   | 1. 46E-06 | -0. 11921 | 0. 291 | 0. 543 | 0. 02177  | Tcell | RTFDC1     |
| IL1B. 13    | 1. 46E-06 | -0. 49458 | 0. 086 | 0. 224 | 0. 021828 | Tcell | IL1B       |
| RUNDC1. 6   | 1. 49E-06 | -0. 22099 | 0. 023 | 0. 138 | 0. 022196 | Tcell | RUNDC1     |
| ABCE1. 7    | 1. 49E-06 | -0. 14409 | 0. 095 | 0. 253 | 0. 02224  | Tcell | ABCE1      |
| SPTAN1. 11  | 1. 49E-06 | -0. 14205 | 0. 1   | 0. 263 | 0. 022266 | Tcell | SPTAN1     |
| SLC35E3. 1  | 1. 51E-06 | -0. 39447 | 0. 059 | 0. 189 | 0. 022586 | Tcell | SLC35E3    |
| HSCB. 5     | 1. 52E-06 | -0. 23884 | 0. 045 | 0. 174 | 0. 022675 | Tcell | HSCB       |
| CYR61. 9    | 1. 52E-06 | -0. 45432 | 0. 045 | 0. 17  | 0. 022717 | Tcell | CYR61      |
| IGFBP3. 12  | 1. 52E-06 | -0. 44223 | 0. 064 | 0. 197 | 0. 02273  | Tcell | IGFBP3     |
| LGR4. 12    | 1. 52E-06 | -0. 19669 | 0. 005 | 0. 104 | 0. 022762 | Tcell | LGR4       |
| TMEM97. 11  | 1. 53E-06 | -0. 22042 | 0. 045 | 0. 174 | 0. 022807 | Tcell | TMEM97     |
| MTSS1L. 8   | 1. 54E-06 | -0. 23585 | 0      | 0. 095 | 0. 022959 | Tcell | MTSS1L     |
| CYB5A. 8    | 1. 55E-06 | -0. 23608 | 0. 159 | 0. 345 | 0. 023129 | Tcell | CYB5A      |
| RNF14. 6    | 1. 55E-06 | -0. 13839 | 0. 059 | 0. 197 | 0. 023229 | Tcell | RNF14      |
| CDC42BPB. 1 | 1. 56E-06 | -0. 1702  | 0. 014 | 0. 121 | 0. 023304 | Tcell | CDC42BPB   |
| WIZ. 8      | 1. 57E-06 | -0. 21114 | 0. 009 | 0. 113 | 0. 023523 | Tcell | WIZ        |
| DLD. 10     | 1. 59E-06 | -0. 17783 | 0. 155 | 0. 347 | 0. 023692 | Tcell | DLD        |
| PITPNA-AS   | 1. 60E-06 | -0. 16036 | 0. 059 | 0. 198 | 0. 023853 | Tcell | PITPNA-AS1 |
| PQLC2. 2    | 1. 60E-06 | -0. 18311 | 0. 014 | 0. 121 | 0. 023916 | Tcell | PQLC2      |
| POLR2G. 4   | 1. 60E-06 | -0. 24431 | 0. 309 | 0. 572 | 0. 02395  | Tcell | POLR2G     |
| SOBP. 11    | 1. 64E-06 | -0. 23561 | 0. 023 | 0. 136 | 0. 024579 | Tcell | SOBP       |
| MAGED2. 12  | 1. 65E-06 | -0. 18655 | 0. 273 | 0. 513 | 0. 02469  | Tcell | MAGED2     |

|           |          |          |       |       |          |       |           |
|-----------|----------|----------|-------|-------|----------|-------|-----------|
| MRFAP1.11 | 1.66E-06 | -0.24557 | 0.405 | 0.676 | 0.024745 | Tcell | MRFAP1    |
| PRDX3.11  | 1.66E-06 | -0.19089 | 0.255 | 0.471 | 0.024751 | Tcell | PRDX3     |
| SNX5.9    | 1.66E-06 | -0.22932 | 0.191 | 0.398 | 0.024775 | Tcell | SNX5      |
| AKAP6.9   | 1.66E-06 | -0.26352 | 0.005 | 0.104 | 0.024868 | Tcell | AKAP6     |
| TNFRSF10A | 1.66E-06 | 0.197662 | 0.036 | 0.007 | 0.024868 | Tcell | TNFRSF10A |
| PRKDC.10  | 1.67E-06 | -0.15843 | 0.123 | 0.295 | 0.024933 | Tcell | PRKDC     |
| KIF2A.13  | 1.67E-06 | -0.19056 | 0.086 | 0.238 | 0.025023 | Tcell | KIF2A     |
| CCPG1.6   | 1.69E-06 | -0.2474  | 0.073 | 0.215 | 0.025251 | Tcell | CCPG1     |
| SRGAP2.8  | 1.71E-06 | -0.19407 | 0.086 | 0.235 | 0.02553  | Tcell | SRGAP2    |
| RNF7.6    | 1.71E-06 | -0.26056 | 0.3   | 0.536 | 0.025539 | Tcell | RNF7      |
| TMEM132B  | 1.71E-06 | -0.21098 | 0.005 | 0.104 | 0.025546 | Tcell | TMEM132B  |
| STK25.12  | 1.72E-06 | -0.11625 | 0.127 | 0.306 | 0.025758 | Tcell | STK25     |
| MTIF3.7   | 1.76E-06 | -0.17793 | 0.159 | 0.349 | 0.02625  | Tcell | MTIF3     |
| BAZ1B.13  | 1.76E-06 | -0.14133 | 0.127 | 0.301 | 0.026277 | Tcell | BAZ1B     |
| AMFR.5    | 1.76E-06 | -0.19093 | 0.045 | 0.175 | 0.026349 | Tcell | AMFR      |
| BIN3.3    | 1.77E-06 | -0.2557  | 0.036 | 0.157 | 0.026404 | Tcell | BIN3      |
| CPNE4.10  | 1.77E-06 | -0.19638 | 0     | 0.094 | 0.026505 | Tcell | CPNE4     |
| BNIP3.11  | 1.78E-06 | -0.18802 | 0.073 | 0.218 | 0.026574 | Tcell | BNIP3     |
| PPP1R37.7 | 1.78E-06 | -0.18846 | 0.023 | 0.136 | 0.026608 | Tcell | PPP1R37   |
| SERP2.10  | 1.79E-06 | -0.22316 | 0.005 | 0.103 | 0.026695 | Tcell | SERP2     |
| MEF2A.13  | 1.79E-06 | -0.27146 | 0.077 | 0.218 | 0.026727 | Tcell | MEF2A     |
| HDAC9.8   | 1.80E-06 | -0.29275 | 0.018 | 0.128 | 0.026892 | Tcell | HDAC9     |
| PRUNE2.1C | 1.80E-06 | -0.37466 | 0.014 | 0.119 | 0.026955 | Tcell | PRUNE2    |
| PTPN11.6  | 1.81E-06 | -0.1888  | 0.032 | 0.15  | 0.026994 | Tcell | PTPN11    |
| TIMP4.8   | 1.82E-06 | -0.44428 | 0.005 | 0.103 | 0.027187 | Tcell | TIMP4     |
| SECISBP2  | 1.82E-06 | -0.10622 | 0.095 | 0.256 | 0.027256 | Tcell | SECISBP2  |
| DOCK7.5   | 1.83E-06 | -0.21439 | 0.018 | 0.128 | 0.027416 | Tcell | DOCK7     |
| C11orf24  | 1.86E-06 | -0.15092 | 0.027 | 0.145 | 0.027802 | Tcell | C11orf24  |
| DNAJB11.6 | 1.86E-06 | -0.15854 | 0.214 | 0.437 | 0.027861 | Tcell | DNAJB11   |
| UCHL3.8   | 1.87E-06 | -0.22425 | 0.095 | 0.25  | 0.027987 | Tcell | UCHL3     |
| BBS2.9    | 1.87E-06 | -0.17987 | 0.045 | 0.175 | 0.028012 | Tcell | BBS2      |
| ZFYVE16.5 | 1.88E-06 | -0.2138  | 0.045 | 0.174 | 0.02811  | Tcell | ZFYVE16   |
| C12orf45  | 1.89E-06 | -0.20934 | 0.05  | 0.181 | 0.028238 | Tcell | C12orf45  |
| ATP5J2.9  | 1.89E-06 | -0.33933 | 0.514 | 0.813 | 0.02828  | Tcell | ATP5J2    |
| DGKA.3    | 1.89E-06 | 0.383326 | 0.095 | 0.036 | 0.028305 | Tcell | DGKA      |
| PXDN.9    | 1.90E-06 | -0.21207 | 0.005 | 0.103 | 0.028427 | Tcell | PXDN      |
| RHBDD3.4  | 1.91E-06 | -0.18985 | 0.032 | 0.152 | 0.028504 | Tcell | RHBDD3    |
| FAHD2A.7  | 1.91E-06 | -0.15787 | 0.045 | 0.175 | 0.028507 | Tcell | FAHD2A    |
| PKN2.6    | 1.92E-06 | -0.19837 | 0.073 | 0.213 | 0.028645 | Tcell | PKN2      |
| RNF157.12 | 1.92E-06 | -0.18209 | 0.023 | 0.136 | 0.028694 | Tcell | RNF157    |
| LAMP5.11  | 1.92E-06 | -0.2394  | 0.009 | 0.111 | 0.028765 | Tcell | LAMP5     |
| DDX56.9   | 1.93E-06 | -0.17118 | 0.1   | 0.26  | 0.028785 | Tcell | DDX56     |
| DCTN3.7   | 1.94E-06 | -0.16946 | 0.282 | 0.521 | 0.028963 | Tcell | DCTN3     |
| SNRPC.5   | 1.95E-06 | -0.23885 | 0.273 | 0.516 | 0.029136 | Tcell | SNRPC     |
| CMTM5.10  | 1.96E-06 | -0.49625 | 0.005 | 0.101 | 0.029359 | Tcell | CMTM5     |
| NGDN.7    | 1.97E-06 | -0.1896  | 0.109 | 0.266 | 0.029369 | Tcell | NGDN      |
| PROS1.4   | 1.98E-06 | -0.24848 | 0     | 0.094 | 0.029515 | Tcell | PROS1     |
| SLC35G2.1 | 1.98E-06 | -0.27804 | 0.014 | 0.119 | 0.029555 | Tcell | SLC35G2   |
| DRAM2.12  | 1.98E-06 | -0.28887 | 0.164 | 0.339 | 0.029639 | Tcell | DRAM2     |
| S100A8.14 | 2.00E-06 | -0.50183 | 0.059 | 0.187 | 0.029844 | Tcell | S100A8    |
| LONRF2.7  | 2.00E-06 | -0.23044 | 0     | 0.094 | 0.02987  | Tcell | LONRF2    |

|             |           |           |        |        |           |       |           |
|-------------|-----------|-----------|--------|--------|-----------|-------|-----------|
| SNUPN. 6    | 2. 00E-06 | -0. 19063 | 0. 041 | 0. 165 | 0. 029909 | Tcell | SNUPN     |
| SLC4A4. 9   | 2. 02E-06 | -0. 27625 | 0. 009 | 0. 11  | 0. 030162 | Tcell | SLC4A4    |
| TBC1D12. 1  | 2. 02E-06 | -0. 31092 | 0. 009 | 0. 109 | 0. 030194 | Tcell | TBC1D12   |
| SETD9. 3    | 2. 02E-06 | -0. 27476 | 0. 023 | 0. 135 | 0. 030236 | Tcell | SETD9     |
| TMEM35. 11  | 2. 05E-06 | -0. 28922 | 0      | 0. 093 | 0. 030592 | Tcell | TMEM35    |
| FHIT. 7     | 2. 06E-06 | -0. 38794 | 0. 014 | 0. 118 | 0. 030744 | Tcell | FHIT      |
| SEPT10. 6   | 2. 06E-06 | -0. 21075 | 0. 014 | 0. 119 | 0. 030745 | Tcell | 10-Sep    |
| SEC22C. 8   | 2. 06E-06 | -0. 1505  | 0. 082 | 0. 23  | 0. 030761 | Tcell | SEC22C    |
| LSM14B. 7   | 2. 07E-06 | -0. 19735 | 0. 005 | 0. 102 | 0. 030978 | Tcell | LSM14B    |
| IMP4. 4     | 2. 07E-06 | -0. 12619 | 0. 168 | 0. 362 | 0. 030999 | Tcell | IMP4      |
| SLC16A1. 1  | 2. 08E-06 | -0. 17513 | 0. 086 | 0. 236 | 0. 031093 | Tcell | SLC16A1   |
| MIR210HG. 2 | 2. 10E-06 | -0. 26694 | 0      | 0. 093 | 0. 031331 | Tcell | MIR210HG  |
| FKBP7. 8    | 2. 10E-06 | -0. 31088 | 0      | 0. 093 | 0. 031331 | Tcell | FKBP7     |
| BCAM. 10    | 2. 10E-06 | -0. 17888 | 0. 009 | 0. 111 | 0. 031343 | Tcell | BCAM      |
| PET117. 6   | 2. 10E-06 | -0. 13446 | 0. 05  | 0. 182 | 0. 031386 | Tcell | PET117    |
| C3orf70. 1  | 2. 11E-06 | -0. 24071 | 0. 005 | 0. 102 | 0. 031473 | Tcell | C3orf70   |
| KIF3A. 8    | 2. 13E-06 | -0. 20305 | 0. 086 | 0. 237 | 0. 03179  | Tcell | KIF3A     |
| ANKS1B. 11  | 2. 14E-06 | -0. 37233 | 0. 009 | 0. 11  | 0. 031921 | Tcell | ANKS1B    |
| CAHM. 12    | 2. 15E-06 | -0. 24924 | 0      | 0. 093 | 0. 032088 | Tcell | CAHM      |
| LINC00632   | 2. 15E-06 | -0. 34246 | 0      | 0. 093 | 0. 032088 | Tcell | LINC00632 |
| DPM1. 7     | 2. 15E-06 | -0. 11008 | 0. 177 | 0. 382 | 0. 032178 | Tcell | DPM1      |
| NAIP. 12    | 2. 17E-06 | -0. 32315 | 0. 009 | 0. 11  | 0. 03245  | Tcell | NAIP      |
| TRMT6. 7    | 2. 17E-06 | -0. 11613 | 0. 05  | 0. 181 | 0. 032465 | Tcell | TRMT6     |
| STAT5A. 1C  | 2. 19E-06 | 0. 422184 | 0. 118 | 0. 051 | 0. 032723 | Tcell | STAT5A    |
| TBC1D17. 6  | 2. 20E-06 | -0. 2463  | 0. 036 | 0. 157 | 0. 032811 | Tcell | TBC1D17   |
| METAP1D. 1  | 2. 21E-06 | -0. 27494 | 0. 018 | 0. 126 | 0. 032975 | Tcell | METAP1D   |
| PCMT1. 6    | 2. 21E-06 | -0. 13779 | 0. 286 | 0. 545 | 0. 033033 | Tcell | PCMT1     |
| FBXL5       | 2. 24E-06 | -0. 1371  | 0. 118 | 0. 29  | 0. 033541 | Tcell | FBXL5     |
| NOP16. 8    | 2. 24E-06 | -0. 17445 | 0. 064 | 0. 201 | 0. 033545 | Tcell | NOP16     |
| SRD5A3. 7   | 2. 25E-06 | -0. 23699 | 0. 041 | 0. 165 | 0. 033561 | Tcell | SRD5A3    |
| DLX1. 13    | 2. 25E-06 | -0. 37149 | 0. 014 | 0. 117 | 0. 033688 | Tcell | DLX1      |
| CWC27. 10   | 2. 26E-06 | -0. 14344 | 0. 105 | 0. 267 | 0. 033784 | Tcell | CWC27     |
| TMX1. 7     | 2. 27E-06 | -0. 21462 | 0. 209 | 0. 406 | 0. 033901 | Tcell | TMX1      |
| FN1. 12     | 2. 27E-06 | -0. 30442 | 0. 036 | 0. 157 | 0. 03396  | Tcell | FN1       |
| TFE3. 5     | 2. 27E-06 | -0. 23348 | 0. 014 | 0. 118 | 0. 033963 | Tcell | TFE3      |
| FAM219A. 6  | 2. 28E-06 | -0. 22993 | 0      | 0. 093 | 0. 03406  | Tcell | FAM219A   |
| RHOJ. 10    | 2. 29E-06 | -0. 16834 | 0. 005 | 0. 102 | 0. 034186 | Tcell | RHOJ      |
| ROBO2. 13   | 2. 29E-06 | -0. 21296 | 0. 009 | 0. 109 | 0. 034244 | Tcell | ROBO2     |
| COMMD9. 8   | 2. 30E-06 | -0. 1734  | 0. 141 | 0. 313 | 0. 034334 | Tcell | COMMD9    |
| ECI1. 9     | 2. 30E-06 | -0. 1466  | 0. 073 | 0. 216 | 0. 034411 | Tcell | ECI1      |
| IGSF10. 7   | 2. 31E-06 | -0. 20298 | 0. 005 | 0. 101 | 0. 034456 | Tcell | IGSF10    |
| CEBPD. 10   | 2. 31E-06 | -0. 20499 | 0. 25  | 0. 463 | 0. 034539 | Tcell | CEBPD     |
| CASC4. 8    | 2. 32E-06 | -0. 1292  | 0. 077 | 0. 227 | 0. 034621 | Tcell | CASC4     |
| ZNF528. 9   | 2. 32E-06 | -0. 19536 | 0. 009 | 0. 11  | 0. 034636 | Tcell | ZNF528    |
| CASC15. 1C  | 2. 32E-06 | -0. 28668 | 0. 005 | 0. 101 | 0. 034683 | Tcell | CASC15    |
| HMG3. 9     | 2. 32E-06 | -0. 15516 | 0. 341 | 0. 614 | 0. 034735 | Tcell | HMG3      |
| MBOAT7. 11  | 2. 33E-06 | -0. 18856 | 0. 091 | 0. 246 | 0. 034857 | Tcell | MBOAT7    |
| ESD. 4      | 2. 34E-06 | -0. 21629 | 0. 255 | 0. 494 | 0. 034973 | Tcell | ESD       |
| STRAP. 8    | 2. 36E-06 | -0. 1783  | 0. 309 | 0. 558 | 0. 035245 | Tcell | STRAP     |
| MFSD2A. 7   | 2. 36E-06 | -0. 2849  | 0. 005 | 0. 1   | 0. 035288 | Tcell | MFSD2A    |
| SCAMP1. 1C  | 2. 38E-06 | -0. 12268 | 0. 073 | 0. 217 | 0. 035546 | Tcell | SCAMP1    |

|             |           |           |        |        |           |       |              |
|-------------|-----------|-----------|--------|--------|-----------|-------|--------------|
| TCN2. 9     | 2. 39E-06 | -0. 32499 | 0. 005 | 0. 101 | 0. 035766 | Tcell | TCN2         |
| VPS37A. 2   | 2. 40E-06 | -0. 13973 | 0. 068 | 0. 209 | 0. 035914 | Tcell | VPS37A       |
| SEPT7. 13   | 2. 41E-06 | 0. 216907 | 0. 668 | 0. 703 | 0. 035943 | Tcell | 7-Sep        |
| PURA. 10    | 2. 41E-06 | -0. 14443 | 0. 068 | 0. 211 | 0. 036025 | Tcell | PURA         |
| DNP1. 8     | 2. 42E-06 | -0. 17606 | 0. 182 | 0. 38  | 0. 036189 | Tcell | DNP1         |
| PTRH2. 3    | 2. 43E-06 | -0. 2922  | 0. 027 | 0. 14  | 0. 036267 | Tcell | PTRH2        |
| FAM212B. 1  | 2. 44E-06 | -0. 25414 | 0. 005 | 0. 101 | 0. 036435 | Tcell | FAM212B      |
| AGFG1. 5    | 2. 44E-06 | -0. 20568 | 0. 023 | 0. 134 | 0. 036463 | Tcell | AGFG1        |
| MCM7. 13    | 2. 45E-06 | -0. 25539 | 0. 105 | 0. 257 | 0. 036572 | Tcell | MCM7         |
| TCEB3. 6    | 2. 48E-06 | -0. 17428 | 0. 05  | 0. 178 | 0. 037045 | Tcell | TCEB3        |
| IMMP2L. 1C  | 2. 48E-06 | -0. 28286 | 0. 032 | 0. 147 | 0. 03708  | Tcell | IMMP2L       |
| CSRNP3. 11  | 2. 49E-06 | -0. 29802 | 0. 005 | 0. 101 | 0. 0372   | Tcell | CSRNP3       |
| TRAPPC2P1   | 2. 49E-06 | -0. 27385 | 0. 082 | 0. 227 | 0. 037215 | Tcell | TRAPPC2P1    |
| KLHL13. 13  | 2. 52E-06 | -0. 20812 | 0. 005 | 0. 101 | 0. 03764  | Tcell | KLHL13       |
| IMPACT. 4   | 2. 54E-06 | -0. 19403 | 0. 041 | 0. 164 | 0. 03803  | Tcell | IMPACT       |
| TMTC4. 9    | 2. 55E-06 | -0. 27638 | 0. 005 | 0. 1   | 0. 038116 | Tcell | TMTC4        |
| ATRN. 5     | 2. 55E-06 | -0. 14846 | 0. 018 | 0. 126 | 0. 038177 | Tcell | ATRN         |
| MTG2. 6     | 2. 57E-06 | -0. 17893 | 0. 032 | 0. 149 | 0. 038418 | Tcell | MTG2         |
| RP1-39G22   | 2. 57E-06 | -0. 22552 | 0. 023 | 0. 133 | 0. 038455 | Tcell | RP1-39G22. 7 |
| GTF2H5. 4   | 2. 59E-06 | -0. 14356 | 0. 2   | 0. 408 | 0. 038748 | Tcell | GTF2H5       |
| TEAD2. 12   | 2. 60E-06 | -0. 1929  | 0      | 0. 092 | 0. 03883  | Tcell | TEAD2        |
| CAMK2D. 11  | 2. 61E-06 | -0. 18637 | 0. 091 | 0. 246 | 0. 03899  | Tcell | CAMK2D       |
| PDLIM2. 9   | 2. 62E-06 | 0. 564642 | 0. 323 | 0. 239 | 0. 03909  | Tcell | PDLIM2       |
| MAOB. 11    | 2. 62E-06 | -0. 37217 | 0. 005 | 0. 1   | 0. 039119 | Tcell | MAOB         |
| PRRC2A. 8   | 2. 62E-06 | -0. 16762 | 0. 095 | 0. 246 | 0. 039164 | Tcell | PRRC2A       |
| RAB11B-AS   | 2. 62E-06 | -0. 14868 | 0. 023 | 0. 134 | 0. 039189 | Tcell | RAB11B-AS1   |
| SEPT4. 11   | 2. 63E-06 | -0. 39064 | 0. 023 | 0. 132 | 0. 039364 | Tcell | 4-Sep        |
| LRRC41. 3   | 2. 64E-06 | -0. 17748 | 0. 091 | 0. 244 | 0. 039461 | Tcell | LRRC41       |
| NFKB2. 12   | 2. 65E-06 | 0. 375779 | 0. 132 | 0. 059 | 0. 039564 | Tcell | NFKB2        |
| LRCH4. 10   | 2. 68E-06 | 0. 568364 | 0. 277 | 0. 187 | 0. 040039 | Tcell | LRCH4        |
| MSI2. 11    | 2. 71E-06 | -0. 17377 | 0. 145 | 0. 325 | 0. 040508 | Tcell | MSI2         |
| ANKRD12. 7  | 2. 72E-06 | 0. 531717 | 0. 464 | 0. 425 | 0. 040689 | Tcell | ANKRD12      |
| PRKCA. 8    | 2. 74E-06 | -0. 14956 | 0. 064 | 0. 201 | 0. 040954 | Tcell | PRKCA        |
| ACAP3. 12   | 2. 74E-06 | -0. 21783 | 0. 077 | 0. 218 | 0. 040962 | Tcell | ACAP3        |
| MPPED2. 11  | 2. 76E-06 | -0. 24431 | 0      | 0. 091 | 0. 041212 | Tcell | MPPED2       |
| PSMD7. 6    | 2. 76E-06 | -0. 2141  | 0. 264 | 0. 494 | 0. 041222 | Tcell | PSMD7        |
| KCNIP1. 1C  | 2. 76E-06 | -0. 26827 | 0. 005 | 0. 1   | 0. 04123  | Tcell | KCNIP1       |
| GPATCH11. 1 | 2. 77E-06 | -0. 21744 | 0. 027 | 0. 14  | 0. 041327 | Tcell | GPATCH11     |
| MESP1. 10   | 2. 78E-06 | -0. 16661 | 0. 023 | 0. 133 | 0. 041486 | Tcell | MESP1        |
| RCC2. 9     | 2. 79E-06 | -0. 24503 | 0. 05  | 0. 177 | 0. 041738 | Tcell | RCC2         |
| HN1. 9      | 2. 79E-06 | -0. 29118 | 0. 45  | 0. 679 | 0. 041765 | Tcell | HN1          |
| C19orf48. 1 | 2. 80E-06 | -0. 18087 | 0. 086 | 0. 23  | 0. 041786 | Tcell | C19orf48     |
| DDIT3. 9    | 2. 80E-06 | -0. 1428  | 0. 223 | 0. 432 | 0. 041793 | Tcell | DDIT3        |
| CMAS. 5     | 2. 81E-06 | -0. 18498 | 0. 109 | 0. 27  | 0. 04202  | Tcell | CMAS         |
| SLC40A1. 1  | 2. 82E-06 | -0. 24679 | 0. 027 | 0. 141 | 0. 042125 | Tcell | SLC40A1      |
| VASH1. 8    | 2. 82E-06 | -0. 29956 | 0. 023 | 0. 132 | 0. 042126 | Tcell | VASH1        |
| RUNDC3A. 1  | 2. 82E-06 | -0. 29664 | 0. 005 | 0. 099 | 0. 042137 | Tcell | RUNDC3A      |
| ZMIZ1. 5    | 2. 82E-06 | -0. 24285 | 0. 027 | 0. 141 | 0. 042187 | Tcell | ZMIZ1        |
| SAP30BP. 4  | 2. 83E-06 | -0. 21301 | 0. 173 | 0. 365 | 0. 042277 | Tcell | SAP30BP      |
| TMEM18. 6   | 2. 84E-06 | -0. 3101  | 0. 073 | 0. 21  | 0. 042397 | Tcell | TMEM18       |
| VPS16. 6    | 2. 84E-06 | -0. 21157 | 0. 05  | 0. 177 | 0. 042401 | Tcell | VPS16        |

|             |           |           |        |        |           |       |          |
|-------------|-----------|-----------|--------|--------|-----------|-------|----------|
| LDHB. 9     | 2. 85E-06 | 0. 150122 | 0. 718 | 0. 78  | 0. 042569 | Tcell | LDHB     |
| SYNDIG1. 1  | 2. 86E-06 | -0. 33417 | 0      | 0. 091 | 0. 042709 | Tcell | SYNDIG1  |
| PHF20L1. 1  | 2. 87E-06 | -0. 1023  | 0. 132 | 0. 311 | 0. 042956 | Tcell | PHF20L1  |
| SEC14L2. 9  | 2. 88E-06 | -0. 12218 | 0. 014 | 0. 117 | 0. 04307  | Tcell | SEC14L2  |
| MUL1. 4     | 2. 89E-06 | -0. 19934 | 0. 041 | 0. 163 | 0. 04326  | Tcell | MUL1     |
| MTX2. 8     | 2. 90E-06 | -0. 20697 | 0. 15  | 0. 325 | 0. 043383 | Tcell | MTX2     |
| VASP. 13    | 2. 93E-06 | 0. 585384 | 0. 323 | 0. 238 | 0. 043813 | Tcell | VASP     |
| ZNF579. 9   | 2. 94E-06 | -0. 19864 | 0. 014 | 0. 116 | 0. 043986 | Tcell | ZNF579   |
| NARFL. 6    | 2. 95E-06 | -0. 20039 | 0. 032 | 0. 147 | 0. 044013 | Tcell | NARFL    |
| AVIL. 10    | 2. 96E-06 | -0. 29152 | 0      | 0. 091 | 0. 044261 | Tcell | AVIL     |
| PAK1. 11    | 2. 97E-06 | -0. 31005 | 0. 05  | 0. 172 | 0. 04431  | Tcell | PAK1     |
| ARMC6. 8    | 2. 98E-06 | -0. 1773  | 0. 041 | 0. 163 | 0. 044558 | Tcell | ARMC6    |
| AIF1L. 12   | 3. 00E-06 | -0. 3363  | 0. 014 | 0. 115 | 0. 044861 | Tcell | AIF1L    |
| COASY. 2    | 3. 01E-06 | -0. 17932 | 0. 064 | 0. 197 | 0. 044938 | Tcell | COASY    |
| LRRC42. 8   | 3. 01E-06 | -0. 24482 | 0. 032 | 0. 146 | 0. 044998 | Tcell | LRRC42   |
| SRP72. 7    | 3. 02E-06 | -0. 196   | 0. 241 | 0. 462 | 0. 045164 | Tcell | SRP72    |
| POGK. 7     | 3. 04E-06 | -0. 1841  | 0. 023 | 0. 132 | 0. 045474 | Tcell | POGK     |
| ACAD8. 7    | 3. 04E-06 | -0. 14903 | 0. 055 | 0. 185 | 0. 045496 | Tcell | ACAD8    |
| ZNF703. 6   | 3. 05E-06 | -0. 26214 | 0. 005 | 0. 099 | 0. 04555  | Tcell | ZNF703   |
| EGR3. 6     | 3. 06E-06 | -0. 39066 | 0. 009 | 0. 106 | 0. 04573  | Tcell | EGR3     |
| EFTUD2. 7   | 3. 07E-06 | -0. 18159 | 0. 077 | 0. 218 | 0. 045809 | Tcell | EFTUD2   |
| VSTM2A. 11  | 3. 07E-06 | -0. 51334 | 0. 009 | 0. 107 | 0. 04582  | Tcell | VSTM2A   |
| ZNF576. 6   | 3. 07E-06 | -0. 24653 | 0. 027 | 0. 139 | 0. 045927 | Tcell | ZNF576   |
| ADRB2. 12   | 3. 08E-06 | 0. 368832 | 0. 109 | 0. 045 | 0. 046027 | Tcell | ADRB2    |
| CARKD. 8    | 3. 08E-06 | -0. 24809 | 0. 023 | 0. 132 | 0. 046079 | Tcell | CARKD    |
| ARV1. 8     | 3. 09E-06 | -0. 23108 | 0. 055 | 0. 181 | 0. 046177 | Tcell | ARV1     |
| TMEM100. 1  | 3. 11E-06 | -0. 36699 | 0      | 0. 09  | 0. 046416 | Tcell | TMEM100  |
| IL6ST. 12   | 3. 11E-06 | -0. 13464 | 0. 1   | 0. 257 | 0. 046464 | Tcell | IL6ST    |
| ZNF638. 9   | 3. 11E-06 | -0. 13369 | 0. 1   | 0. 254 | 0. 046485 | Tcell | ZNF638   |
| ZIC1. 11    | 3. 11E-06 | -0. 22342 | 0. 014 | 0. 116 | 0. 046502 | Tcell | ZIC1     |
| MZT2B. 10   | 3. 11E-06 | 0. 326972 | 0. 564 | 0. 594 | 0. 046513 | Tcell | MZT2B    |
| POLR3GL. 6  | 3. 13E-06 | 0. 579009 | 0. 414 | 0. 349 | 0. 046705 | Tcell | POLR3GL  |
| FGL2. 14    | 3. 13E-06 | -0. 41012 | 0. 055 | 0. 179 | 0. 046811 | Tcell | FGL2     |
| KIAA0930. 3 | 3. 14E-06 | -0. 24381 | 0. 032 | 0. 147 | 0. 046878 | Tcell | KIAA0930 |
| BECN1. 6    | 3. 14E-06 | -0. 17855 | 0. 086 | 0. 233 | 0. 046898 | Tcell | BECN1    |
| POMT1. 9    | 3. 14E-06 | -0. 21069 | 0. 027 | 0. 139 | 0. 04698  | Tcell | POMT1    |
| CEP41. 6    | 3. 15E-06 | -0. 25613 | 0. 036 | 0. 153 | 0. 047084 | Tcell | CEP41    |
| DGCR6. 6    | 3. 15E-06 | -0. 18359 | 0. 036 | 0. 156 | 0. 047116 | Tcell | DGCR6    |
| CCDC34. 1C  | 3. 16E-06 | -0. 19603 | 0. 045 | 0. 169 | 0. 047271 | Tcell | CCDC34   |
| EHD1. 8     | 3. 17E-06 | 0. 569098 | 0. 205 | 0. 12  | 0. 047327 | Tcell | EHD1     |
| GNAI1. 11   | 3. 17E-06 | -0. 28448 | 0. 009 | 0. 107 | 0. 047415 | Tcell | GNAI1    |
| POP5. 6     | 3. 18E-06 | -0. 21998 | 0. 132 | 0. 299 | 0. 047539 | Tcell | POP5     |
| FZD7. 11    | 3. 19E-06 | -0. 1891  | 0. 005 | 0. 099 | 0. 047609 | Tcell | FZD7     |
| ZCCHC3. 1C  | 3. 19E-06 | -0. 17448 | 0. 009 | 0. 108 | 0. 047639 | Tcell | ZCCHC3   |
| CDKN1C. 1C  | 3. 24E-06 | -0. 27592 | 0. 014 | 0. 116 | 0. 048489 | Tcell | CDKN1C   |
| TMEM14A. 9  | 3. 26E-06 | -0. 16768 | 0. 15  | 0. 327 | 0. 048777 | Tcell | TMEM14A  |
| SLC39A13. 3 | 3. 27E-06 | -0. 23772 | 0. 027 | 0. 138 | 0. 048817 | Tcell | SLC39A13 |
| GIMAP2. 12  | 3. 27E-06 | 0. 427081 | 0. 155 | 0. 075 | 0. 048904 | Tcell | GIMAP2   |
| MCUR1. 9    | 3. 31E-06 | -0. 13086 | 0. 105 | 0. 265 | 0. 049458 | Tcell | MCUR1    |
| SLC35A2. 4  | 3. 31E-06 | -0. 24097 | 0. 045 | 0. 169 | 0. 049523 | Tcell | SLC35A2  |
| NBR1. 3     | 3. 32E-06 | -0. 16316 | 0. 059 | 0. 192 | 0. 049609 | Tcell | NBR1     |

|               |           |           |        |        |           |       |               |
|---------------|-----------|-----------|--------|--------|-----------|-------|---------------|
| CPSF4. 8      | 3. 34E-06 | -0. 19347 | 0. 064 | 0. 198 | 0. 049972 | Tcell | CPSF4         |
| ADAL. 3       | 3. 35E-06 | -0. 19247 | 0. 014 | 0. 116 | 0. 050026 | Tcell | ADAL          |
| ENTPD6. 6     | 3. 37E-06 | -0. 11868 | 0. 064 | 0. 201 | 0. 050434 | Tcell | ENTPD6        |
| SSBP3. 10     | 3. 40E-06 | -0. 24891 | 0. 023 | 0. 13  | 0. 050868 | Tcell | SSBP3         |
| MRS2. 3       | 3. 42E-06 | -0. 18386 | 0. 041 | 0. 162 | 0. 051047 | Tcell | MRS2          |
| ASNS. 14      | 3. 42E-06 | -0. 27348 | 0. 055 | 0. 179 | 0. 051178 | Tcell | ASNS          |
| RSRC1. 4      | 3. 44E-06 | -0. 16007 | 0. 132 | 0. 308 | 0. 051398 | Tcell | RSRC1         |
| LPAR2. 3      | 3. 45E-06 | 0. 381902 | 0. 086 | 0. 032 | 0. 051512 | Tcell | LPAR2         |
| MAGI2. 11     | 3. 45E-06 | -0. 2537  | 0. 009 | 0. 107 | 0. 051522 | Tcell | MAGI2         |
| MCC. 9        | 3. 48E-06 | -0. 16141 | 0. 018 | 0. 124 | 0. 052035 | Tcell | MCC           |
| CARHSP1. 1    | 3. 49E-06 | -0. 21244 | 0. 214 | 0. 427 | 0. 052177 | Tcell | CARHSP1       |
| TBCC. 12      | 3. 54E-06 | 0. 624238 | 0. 305 | 0. 22  | 0. 052931 | Tcell | TBCC          |
| SPRED2. 6     | 3. 56E-06 | -0. 18216 | 0. 014 | 0. 115 | 0. 053138 | Tcell | SPRED2        |
| SON. 5        | 3. 56E-06 | 0. 251872 | 0. 659 | 0. 712 | 0. 053229 | Tcell | SON           |
| ATP6VOD1. 3   | 3. 59E-06 | -0. 20155 | 0. 291 | 0. 514 | 0. 053625 | Tcell | ATP6VOD1      |
| DHRS4L2. 7    | 3. 60E-06 | -0. 16564 | 0. 109 | 0. 265 | 0. 05383  | Tcell | DHRS4L2       |
| CLUAP1. 1C    | 3. 62E-06 | -0. 17158 | 0. 045 | 0. 17  | 0. 054132 | Tcell | CLUAP1        |
| RP11-552D4. 1 | 3. 63E-06 | -0. 47345 | 0. 018 | 0. 122 | 0. 054208 | Tcell | RP11-552D4. 1 |
| LIN7C. 1      | 3. 63E-06 | -0. 2495  | 0. 018 | 0. 122 | 0. 054212 | Tcell | LIN7C         |
| CCNH. 7       | 3. 63E-06 | 0. 508045 | 0. 459 | 0. 41  | 0. 054281 | Tcell | CCNH          |
| DTD1. 13      | 3. 64E-06 | -0. 16673 | 0. 195 | 0. 395 | 0. 054414 | Tcell | DTD1          |
| ZNF43. 12     | 3. 65E-06 | -0. 16171 | 0. 027 | 0. 139 | 0. 054496 | Tcell | ZNF43         |
| SNAP29. 8     | 3. 65E-06 | -0. 19642 | 0. 086 | 0. 228 | 0. 054501 | Tcell | SNAP29        |
| PDCD6IP. 2    | 3. 67E-06 | -0. 19255 | 0. 127 | 0. 292 | 0. 054842 | Tcell | PDCD6IP       |
| LTV1. 4       | 3. 67E-06 | -0. 23369 | 0. 059 | 0. 188 | 0. 054848 | Tcell | LTV1          |
| GPN3. 3       | 3. 68E-06 | -0. 26483 | 0. 105 | 0. 256 | 0. 054937 | Tcell | GPN3          |
| TTC1. 5       | 3. 69E-06 | -0. 1577  | 0. 186 | 0. 377 | 0. 055212 | Tcell | TTC1          |
| WDFY3. 3      | 3. 71E-06 | -0. 24229 | 0      | 0. 089 | 0. 055465 | Tcell | WDFY3         |
| SSX2IP. 5     | 3. 71E-06 | -0. 16887 | 0. 005 | 0. 098 | 0. 055486 | Tcell | SSX2IP        |
| RBM10. 9      | 3. 76E-06 | -0. 15075 | 0. 068 | 0. 205 | 0. 056169 | Tcell | RBM10         |
| CYTL1. 13     | 3. 76E-06 | -0. 49007 | 0. 014 | 0. 112 | 0. 05622  | Tcell | CYTL1         |
| FARSA. 8      | 3. 79E-06 | -0. 17802 | 0. 145 | 0. 323 | 0. 056585 | Tcell | FARSA         |
| COPG1. 3      | 3. 79E-06 | -0. 14986 | 0. 086 | 0. 233 | 0. 056628 | Tcell | COPG1         |
| AFG3L2. 4     | 3. 81E-06 | -0. 16025 | 0. 073 | 0. 21  | 0. 056912 | Tcell | AFG3L2        |
| PNMAL1. 12    | 3. 83E-06 | -0. 21885 | 0. 005 | 0. 098 | 0. 057204 | Tcell | PNMAL1        |
| FAM127C. 3    | 3. 84E-06 | -0. 25827 | 0. 009 | 0. 106 | 0. 057394 | Tcell | FAM127C       |
| ELL2. 12      | 3. 86E-06 | -0. 31429 | 0. 064 | 0. 195 | 0. 057705 | Tcell | ELL2          |
| DENND5B. 1    | 3. 87E-06 | -0. 22845 | 0. 005 | 0. 097 | 0. 057906 | Tcell | DENND5B       |
| TMEM5. 10     | 3. 88E-06 | -0. 21818 | 0. 073 | 0. 211 | 0. 057971 | Tcell | TMEM5         |
| JAKMIP2. 9    | 3. 89E-06 | -0. 21048 | 0. 036 | 0. 153 | 0. 058139 | Tcell | JAKMIP2       |
| DNAJC15. 1    | 3. 92E-06 | -0. 22127 | 0. 195 | 0. 394 | 0. 058603 | Tcell | DNAJC15       |
| ABHD11. 4     | 3. 93E-06 | -0. 29074 | 0. 05  | 0. 171 | 0. 058706 | Tcell | ABHD11        |
| SNAPC3. 8     | 3. 95E-06 | -0. 19903 | 0. 027 | 0. 138 | 0. 058989 | Tcell | SNAPC3        |
| SCAMP5. 1C    | 3. 96E-06 | -0. 19472 | 0. 005 | 0. 098 | 0. 059115 | Tcell | SCAMP5        |
| B3GNT5. 12    | 3. 96E-06 | -0. 30655 | 0. 032 | 0. 143 | 0. 059122 | Tcell | B3GNT5        |
| LINC00094     | 3. 97E-06 | -0. 15807 | 0. 023 | 0. 131 | 0. 05939  | Tcell | LINC00094     |
| POGZ. 10      | 3. 98E-06 | -0. 16591 | 0. 073 | 0. 213 | 0. 059408 | Tcell | POGZ          |
| SRM. 12       | 3. 98E-06 | -0. 13604 | 0. 173 | 0. 368 | 0. 059513 | Tcell | SRM           |
| ID1. 9        | 4. 02E-06 | -0. 18957 | 0. 018 | 0. 123 | 0. 060069 | Tcell | ID1           |
| ARFIP1. 2     | 4. 03E-06 | -0. 23444 | 0. 045 | 0. 165 | 0. 060251 | Tcell | ARFIP1        |
| PHACTR1. 1    | 4. 03E-06 | -0. 45491 | 0. 018 | 0. 119 | 0. 060278 | Tcell | PHACTR1       |



|            |          |          |       |       |          |       |          |
|------------|----------|----------|-------|-------|----------|-------|----------|
| FAM195A.9  | 4.07E-06 | -0.10331 | 0.1   | 0.257 | 0.060831 | Tcell | FAM195A  |
| CTSO.2     | 4.07E-06 | -0.21032 | 0.014 | 0.114 | 0.060873 | Tcell | CTSO     |
| BOC.10     | 4.13E-06 | -0.18937 | 0     | 0.088 | 0.06171  | Tcell | BOC      |
| ZNF91.9    | 4.14E-06 | -0.16023 | 0.073 | 0.212 | 0.061875 | Tcell | ZNF91    |
| DYNC1LI1.4 | 4.14E-06 | -0.13122 | 0.114 | 0.27  | 0.061885 | Tcell | DYNC1LI1 |
| SIL1.10    | 4.16E-06 | -0.19322 | 0.105 | 0.257 | 0.062226 | Tcell | SIL1     |
| HLTF.12    | 4.17E-06 | -0.17171 | 0.05  | 0.176 | 0.062292 | Tcell | HLTF     |
| TRMT61A.4  | 4.19E-06 | -0.22791 | 0.023 | 0.129 | 0.062581 | Tcell | TRMT61A  |
| LAMB2.8    | 4.22E-06 | -0.22001 | 0.005 | 0.097 | 0.063121 | Tcell | LAMB2    |
| DLC1.9     | 4.23E-06 | -0.23238 | 0     | 0.088 | 0.063189 | Tcell | DLC1     |
| TMUB2.5    | 4.23E-06 | -0.16318 | 0.105 | 0.262 | 0.063204 | Tcell | TMUB2    |
| SEMA5A.9   | 4.23E-06 | -0.20045 | 0.009 | 0.106 | 0.063249 | Tcell | SEMA5A   |
| PDHB.5     | 4.24E-06 | -0.16962 | 0.177 | 0.366 | 0.06333  | Tcell | PDHB     |
| HS2ST1.12  | 4.25E-06 | -0.15654 | 0.05  | 0.177 | 0.063546 | Tcell | HS2ST1   |
| DPH3.5     | 4.28E-06 | -0.24265 | 0.077 | 0.216 | 0.063927 | Tcell | DPH3     |
| CDK2AP1.6  | 4.28E-06 | -0.1907  | 0.009 | 0.106 | 0.064028 | Tcell | CDK2AP1  |
| GNPTG.6    | 4.32E-06 | -0.1505  | 0.105 | 0.261 | 0.06451  | Tcell | GNPTG    |
| GPNMB.13   | 4.32E-06 | -0.43914 | 0.073 | 0.203 | 0.06459  | Tcell | GPNMB    |
| KCTD20.5   | 4.32E-06 | -0.18201 | 0.059 | 0.19  | 0.064601 | Tcell | KCTD20   |
| SIPA1L1.6  | 4.37E-06 | -0.12547 | 0.045 | 0.167 | 0.065355 | Tcell | SIPA1L1  |
| MPDZ.9     | 4.38E-06 | -0.20309 | 0     | 0.088 | 0.065474 | Tcell | MPDZ     |
| MSTO1.4    | 4.38E-06 | -0.207   | 0     | 0.088 | 0.065474 | Tcell | MSTO1    |
| NDUF6F6.1  | 4.41E-06 | -0.1247  | 0.055 | 0.183 | 0.065905 | Tcell | NDUF6F6  |
| CHCHD5.4   | 4.41E-06 | -0.18843 | 0.182 | 0.376 | 0.065972 | Tcell | CHCHD5   |
| PMPCB.9    | 4.42E-06 | -0.19346 | 0.168 | 0.347 | 0.066001 | Tcell | PMPCB    |
| DIXDC1.9   | 4.43E-06 | -0.23177 | 0.005 | 0.097 | 0.066239 | Tcell | DIXDC1   |
| ZNF626.9   | 4.46E-06 | -0.18846 | 0.032 | 0.145 | 0.066617 | Tcell | ZNF626   |
| KLHL42.12  | 4.46E-06 | -0.15645 | 0.041 | 0.161 | 0.066721 | Tcell | KLHL42   |
| RGL1.6     | 4.49E-06 | -0.24794 | 0     | 0.088 | 0.067043 | Tcell | RGL1     |
| KIF1A.10   | 4.52E-06 | -0.30323 | 0.023 | 0.128 | 0.067475 | Tcell | KIF1A    |
| PLA2G15.1  | 4.53E-06 | -0.34129 | 0.032 | 0.14  | 0.067655 | Tcell | PLA2G15  |
| C16orf62.4 | 4.55E-06 | -0.27018 | 0.036 | 0.15  | 0.067949 | Tcell | C16orf62 |
| PUM1.7     | 4.56E-06 | -0.11745 | 0.091 | 0.24  | 0.068177 | Tcell | PUM1     |
| CIC.4      | 4.59E-06 | -0.18776 | 0.018 | 0.121 | 0.068531 | Tcell | CIC      |
| NDUFB2.7   | 4.59E-06 | -0.27889 | 0.527 | 0.814 | 0.068574 | Tcell | NDUFB2   |
| DUSP14.9   | 4.59E-06 | -0.1716  | 0.055 | 0.182 | 0.068633 | Tcell | DUSP14   |
| TAOK1.9    | 4.62E-06 | -0.11097 | 0.105 | 0.262 | 0.068991 | Tcell | TAOK1    |
| NCSTN.4    | 4.63E-06 | -0.22439 | 0.105 | 0.256 | 0.069137 | Tcell | NCSTN    |
| R3HCC1.9   | 4.64E-06 | -0.14816 | 0.123 | 0.289 | 0.069396 | Tcell | R3HCC1   |
| SAMD4A.4   | 4.65E-06 | -0.22919 | 0     | 0.087 | 0.069466 | Tcell | SAMD4A   |
| LY96.13    | 4.66E-06 | -0.27548 | 0.086 | 0.225 | 0.069603 | Tcell | LY96     |
| ZNF561.5   | 4.66E-06 | -0.23045 | 0.014 | 0.113 | 0.0697   | Tcell | ZNF561   |
| FAM171B.1  | 4.68E-06 | -0.19673 | 0.014 | 0.113 | 0.069986 | Tcell | FAM171B  |
| LRRC47.11  | 4.69E-06 | -0.11606 | 0.077 | 0.219 | 0.070134 | Tcell | LRRC47   |
| MEGF8.3    | 4.70E-06 | -0.21998 | 0     | 0.087 | 0.070293 | Tcell | MEGF8    |
| SLPI.11    | 4.71E-06 | -0.93266 | 0.041 | 0.152 | 0.070358 | Tcell | SLPI     |
| DHRS11.1C  | 4.72E-06 | -0.17472 | 0.009 | 0.104 | 0.07058  | Tcell | DHRS11   |
| ERF.10     | 4.73E-06 | -0.18926 | 0.055 | 0.179 | 0.070672 | Tcell | ERF      |
| SVIP.7     | 4.73E-06 | 0.586418 | 0.259 | 0.168 | 0.070736 | Tcell | SVIP     |
| WIPI1.10   | 4.74E-06 | -0.25067 | 0.059 | 0.188 | 0.070772 | Tcell | WIPI1    |
| ANO6.5     | 4.74E-06 | -0.2107  | 0.009 | 0.105 | 0.070826 | Tcell | ANO6     |

|           |          |          |       |       |          |       |           |
|-----------|----------|----------|-------|-------|----------|-------|-----------|
| METTL1.9  | 4.75E-06 | -0.29177 | 0.036 | 0.149 | 0.070973 | Tcell | METTL1    |
| ZBTB43.4  | 4.79E-06 | -0.20259 | 0.036 | 0.152 | 0.071534 | Tcell | ZBTB43    |
| SNCAIP.13 | 4.87E-06 | -0.21227 | 0     | 0.087 | 0.072832 | Tcell | SNCAIP    |
| RIMKLB.1C | 4.90E-06 | -0.11179 | 0.036 | 0.153 | 0.073225 | Tcell | RIMKLB    |
| PQLC1.8   | 4.90E-06 | -0.21657 | 0.027 | 0.136 | 0.07327  | Tcell | PQLC1     |
| MFNG.12   | 4.94E-06 | 0.394807 | 0.218 | 0.125 | 0.073873 | Tcell | MFNG      |
| NDUFB5.3  | 4.94E-06 | -0.16665 | 0.314 | 0.566 | 0.073879 | Tcell | NDUFB5    |
| ILF3-AS1. | 4.95E-06 | -0.10358 | 0.141 | 0.313 | 0.073923 | Tcell | ILF3-AS1  |
| FGF14.11  | 4.99E-06 | -0.21425 | 0     | 0.087 | 0.074575 | Tcell | FGF14     |
| ARNT2.13  | 5.00E-06 | -0.14834 | 0.014 | 0.113 | 0.074769 | Tcell | ARNT2     |
| THSD1.8   | 5.01E-06 | -0.15135 | 0.005 | 0.096 | 0.074916 | Tcell | THSD1     |
| GUSB.10   | 5.02E-06 | -0.21959 | 0.118 | 0.275 | 0.074977 | Tcell | GUSB      |
| HIBCH.7   | 5.03E-06 | -0.13244 | 0.095 | 0.247 | 0.075153 | Tcell | HIBCH     |
| NACC2.9   | 5.04E-06 | -0.18672 | 0.009 | 0.104 | 0.075339 | Tcell | NACC2     |
| YIPF2.4   | 5.05E-06 | -0.27038 | 0.018 | 0.12  | 0.075453 | Tcell | YIPF2     |
| TSKU.9    | 5.05E-06 | -0.18104 | 0     | 0.087 | 0.075462 | Tcell | TSKU      |
| TUBG2.7   | 5.08E-06 | -0.24321 | 0.014 | 0.112 | 0.075938 | Tcell | TUBG2     |
| FGF1.11   | 5.10E-06 | -0.25904 | 0.005 | 0.096 | 0.076185 | Tcell | FGF1      |
| TFDP2.7   | 5.10E-06 | -0.16604 | 0.077 | 0.215 | 0.076267 | Tcell | TFDP2     |
| C2orf76.4 | 5.12E-06 | -0.2174  | 0.045 | 0.166 | 0.076473 | Tcell | C2orf76   |
| HOTAIRM1. | 5.12E-06 | -0.30183 | 0.059 | 0.184 | 0.076554 | Tcell | HOTAIRM1  |
| IQCE.7    | 5.14E-06 | -0.20495 | 0.018 | 0.12  | 0.076831 | Tcell | IQCE      |
| CIZ1.8    | 5.16E-06 | -0.10295 | 0.055 | 0.182 | 0.077085 | Tcell | CIZ1      |
| KIF3C.10  | 5.16E-06 | -0.21579 | 0.009 | 0.104 | 0.077179 | Tcell | KIF3C     |
| COX16.5   | 5.17E-06 | -0.19143 | 0.273 | 0.505 | 0.077261 | Tcell | COX16     |
| PKD1.6    | 5.18E-06 | -0.17828 | 0.018 | 0.12  | 0.07743  | Tcell | PKD1      |
| RAB30-AS1 | 5.20E-06 | -0.21112 | 0.036 | 0.15  | 0.077784 | Tcell | RAB30-AS1 |
| HOXA7.11  | 5.23E-06 | -0.31906 | 0.009 | 0.103 | 0.078142 | Tcell | HOXA7     |
| FAM131A.5 | 5.24E-06 | -0.18171 | 0.023 | 0.128 | 0.078266 | Tcell | FAM131A   |
| KIAA1549. | 5.25E-06 | -0.21926 | 0.005 | 0.095 | 0.078433 | Tcell | KIAA1549  |
| TCF7L2.6  | 5.25E-06 | -0.20986 | 0.005 | 0.095 | 0.078454 | Tcell | TCF7L2    |
| NME7.12   | 5.26E-06 | -0.24508 | 0.045 | 0.163 | 0.078577 | Tcell | NME7      |
| NAB2.6    | 5.30E-06 | -0.17575 | 0.032 | 0.144 | 0.079197 | Tcell | NAB2      |
| EHMT2.11  | 5.33E-06 | -0.13862 | 0.068 | 0.203 | 0.079668 | Tcell | EHMT2     |
| BAG5.10   | 5.34E-06 | -0.14232 | 0.059 | 0.187 | 0.079748 | Tcell | BAG5      |
| SH3KBP1.1 | 5.34E-06 | 0.541824 | 0.323 | 0.239 | 0.079801 | Tcell | SH3KBP1   |
| LIFR.11   | 5.35E-06 | -0.20019 | 0.014 | 0.111 | 0.079949 | Tcell | LIFR      |
| DCUN1D5.7 | 5.35E-06 | -0.1907  | 0.127 | 0.29  | 0.080016 | Tcell | DCUN1D5   |
| DHTKD1.5  | 5.40E-06 | -0.23542 | 0.023 | 0.127 | 0.080646 | Tcell | DHTKD1    |
| U2AF2.7   | 5.40E-06 | -0.11304 | 0.105 | 0.26  | 0.08073  | Tcell | U2AF2     |
| NKIRAS1.5 | 5.41E-06 | -0.22737 | 0.009 | 0.104 | 0.080858 | Tcell | NKIRAS1   |
| DUSP15.9  | 5.44E-06 | -0.18337 | 0.005 | 0.095 | 0.081352 | Tcell | DUSP15    |
| RGMB.11   | 5.45E-06 | -0.30319 | 0.027 | 0.134 | 0.081396 | Tcell | RGMB      |
| MTUS1.7   | 5.51E-06 | -0.30285 | 0.036 | 0.149 | 0.082276 | Tcell | MTUS1     |
| NEK1.10   | 5.51E-06 | -0.18476 | 0.023 | 0.128 | 0.082299 | Tcell | NEK1      |
| SERP1.9   | 5.51E-06 | 0.353945 | 0.577 | 0.604 | 0.082301 | Tcell | SERP1     |
| PSAT1.13  | 5.54E-06 | -0.12058 | 0.073 | 0.206 | 0.082755 | Tcell | PSAT1     |
| CCP110.1C | 5.55E-06 | -0.25055 | 0.023 | 0.126 | 0.082881 | Tcell | CCP110    |
| GAS7.4    | 5.55E-06 | -0.25879 | 0.014 | 0.112 | 0.082915 | Tcell | GAS7      |
| DMD.6     | 5.55E-06 | -0.22811 | 0     | 0.086 | 0.082943 | Tcell | DMD       |
| CELF2.14  | 5.56E-06 | 0.490438 | 0.436 | 0.382 | 0.083099 | Tcell | CELF2     |

|             |           |           |        |        |           |       |              |
|-------------|-----------|-----------|--------|--------|-----------|-------|--------------|
| UBE2W. 5    | 5. 57E-06 | -0. 21943 | 0. 077 | 0. 216 | 0. 083232 | Tcell | UBE2W        |
| MLKL. 9     | 5. 57E-06 | 0. 257317 | 0. 077 | 0. 027 | 0. 083285 | Tcell | MLKL         |
| LAMB1. 8    | 5. 58E-06 | -0. 18385 | 0. 009 | 0. 103 | 0. 083321 | Tcell | LAMB1        |
| TTL. 6      | 5. 60E-06 | -0. 21168 | 0. 018 | 0. 12  | 0. 083632 | Tcell | TTL          |
| GALNT11. 8  | 5. 61E-06 | -0. 14455 | 0. 086 | 0. 229 | 0. 083774 | Tcell | GALNT11      |
| GPR162. 1C  | 5. 62E-06 | -0. 16783 | 0. 009 | 0. 104 | 0. 083933 | Tcell | GPR162       |
| CDK5R1. 1C  | 5. 65E-06 | -0. 2542  | 0. 005 | 0. 095 | 0. 084472 | Tcell | CDK5R1       |
| FAM104B. 5  | 5. 73E-06 | -0. 18739 | 0. 064 | 0. 193 | 0. 085594 | Tcell | FAM104B      |
| TULP3. 9    | 5. 76E-06 | -0. 17536 | 0. 023 | 0. 127 | 0. 086114 | Tcell | TULP3        |
| PTPN13. 1C  | 5. 77E-06 | -0. 18932 | 0. 005 | 0. 095 | 0. 086213 | Tcell | PTPN13       |
| TRAPPC12. 5 | 5. 80E-06 | -0. 17136 | 0. 068 | 0. 2   | 0. 086744 | Tcell | TRAPPC12     |
| ZNF92. 11   | 5. 82E-06 | -0. 26836 | 0. 036 | 0. 148 | 0. 086942 | Tcell | ZNF92        |
| SYPL1. 7    | 5. 83E-06 | -0. 2312  | 0. 214 | 0. 41  | 0. 087078 | Tcell | SYPL1        |
| CELF4. 11   | 5. 83E-06 | -0. 34721 | 0. 005 | 0. 094 | 0. 087108 | Tcell | CELF4        |
| CTC-524C5   | 5. 84E-06 | -0. 16816 | 0. 018 | 0. 12  | 0. 08725  | Tcell | CTC-524C5. 2 |
| FABP5. 10   | 5. 84E-06 | -0. 62895 | 0. 227 | 0. 395 | 0. 087302 | Tcell | FABP5        |
| RABGGTB. 5  | 5. 86E-06 | -0. 1365  | 0. 127 | 0. 294 | 0. 087604 | Tcell | RABGGTB      |
| CACNG7. 9   | 5. 89E-06 | -0. 18177 | 0      | 0. 086 | 0. 087987 | Tcell | CACNG7       |
| PIM3. 11    | 5. 89E-06 | 0. 615976 | 0. 273 | 0. 189 | 0. 088005 | Tcell | PIM3         |
| ZNF226. 9   | 5. 90E-06 | -0. 25701 | 0. 073 | 0. 206 | 0. 08817  | Tcell | ZNF226       |
| SOX21. 9    | 5. 90E-06 | -0. 16838 | 0. 005 | 0. 095 | 0. 088228 | Tcell | SOX21        |
| CITED2. 9   | 5. 92E-06 | 0. 591678 | 0. 405 | 0. 351 | 0. 088471 | Tcell | CITED2       |
| PRDX1. 11   | 5. 93E-06 | -0. 28766 | 0. 55  | 0. 813 | 0. 088629 | Tcell | PRDX1        |
| EXOSC7. 2   | 5. 94E-06 | -0. 24127 | 0. 091 | 0. 232 | 0. 08872  | Tcell | EXOSC7       |
| GFOD2. 8    | 5. 95E-06 | -0. 22951 | 0. 027 | 0. 134 | 0. 088891 | Tcell | GFOD2        |
| EXOSC8. 12  | 5. 96E-06 | -0. 22868 | 0. 132 | 0. 292 | 0. 089003 | Tcell | EXOSC8       |
| RMND1. 5    | 5. 98E-06 | -0. 2361  | 0. 009 | 0. 103 | 0. 0893   | Tcell | RMND1        |
| UBN2. 8     | 5. 99E-06 | -0. 22749 | 0. 014 | 0. 111 | 0. 089476 | Tcell | UBN2         |
| MMP24-AS1   | 6. 00E-06 | -0. 14254 | 0. 145 | 0. 315 | 0. 089699 | Tcell | MMP24-AS1    |
| GSPT2. 10   | 6. 01E-06 | -0. 16548 | 0. 036 | 0. 151 | 0. 089791 | Tcell | GSPT2        |
| RING1. 3    | 6. 02E-06 | -0. 12255 | 0. 109 | 0. 265 | 0. 089921 | Tcell | RING1        |
| TRMU. 6     | 6. 02E-06 | -0. 19852 | 0. 027 | 0. 134 | 0. 089959 | Tcell | TRMU         |
| RTN2. 9     | 6. 03E-06 | -0. 31461 | 0      | 0. 086 | 0. 090088 | Tcell | RTN2         |
| NDUF5. 6    | 6. 04E-06 | -0. 12917 | 0. 027 | 0. 136 | 0. 090318 | Tcell | NDUF5        |
| RAD23A. 7   | 6. 08E-06 | -0. 23602 | 0. 318 | 0. 571 | 0. 090891 | Tcell | RAD23A       |
| FAM96A. 11  | 6. 11E-06 | -0. 16829 | 0. 177 | 0. 36  | 0. 091363 | Tcell | FAM96A       |
| C10orf11. 6 | 6. 15E-06 | -0. 32329 | 0. 009 | 0. 103 | 0. 091934 | Tcell | C10orf11     |
| RIT1. 10    | 6. 19E-06 | -0. 15031 | 0. 077 | 0. 216 | 0. 092532 | Tcell | RIT1         |
| STK3. 2     | 6. 20E-06 | -0. 22456 | 0. 014 | 0. 111 | 0. 092611 | Tcell | STK3         |
| ZMYND8. 1C  | 6. 21E-06 | -0. 11565 | 0. 073 | 0. 21  | 0. 092777 | Tcell | ZMYND8       |
| LCMT1. 4    | 6. 24E-06 | -0. 16995 | 0. 109 | 0. 265 | 0. 093291 | Tcell | LCMT1        |
| CACUL1. 7   | 6. 25E-06 | -0. 14308 | 0. 073 | 0. 208 | 0. 093441 | Tcell | CACUL1       |
| SMARCC1. 1  | 6. 30E-06 | -0. 12015 | 0. 105 | 0. 257 | 0. 094175 | Tcell | SMARCC1      |
| ZNF521. 8   | 6. 32E-06 | -0. 19097 | 0      | 0. 085 | 0. 094441 | Tcell | ZNF521       |
| ATRAID. 5   | 6. 34E-06 | -0. 13285 | 0. 355 | 0. 616 | 0. 094743 | Tcell | ATRAID       |
| EIF2B2. 4   | 6. 37E-06 | -0. 26829 | 0. 055 | 0. 176 | 0. 095207 | Tcell | EIF2B2       |
| DYNLRB1. 5  | 6. 41E-06 | -0. 2485  | 0. 405 | 0. 67  | 0. 095834 | Tcell | DYNLRB1      |
| ERN1. 2     | 6. 42E-06 | 0. 49458  | 0. 118 | 0. 053 | 0. 095905 | Tcell | ERN1         |
| HSDL1. 11   | 6. 44E-06 | -0. 23392 | 0. 027 | 0. 133 | 0. 096283 | Tcell | HSDL1        |
| TMEM60. 8   | 6. 46E-06 | -0. 14551 | 0. 1   | 0. 25  | 0. 096518 | Tcell | TMEM60       |
| UBQLN1. 6   | 6. 46E-06 | -0. 10578 | 0. 123 | 0. 285 | 0. 096589 | Tcell | UBQLN1       |

|              |           |           |        |        |           |       |          |
|--------------|-----------|-----------|--------|--------|-----------|-------|----------|
| HLA-DPB1. 6. | 6. 47E-06 | 0. 271572 | 0. 595 | 0. 492 | 0. 096746 | Tcell | HLA-DPB1 |
| POLR2H. 1C   | 6. 49E-06 | -0. 11375 | 0. 15  | 0. 326 | 0. 096944 | Tcell | POLR2H   |
| PIH1D1. 5    | 6. 50E-06 | -0. 14615 | 0. 195 | 0. 393 | 0. 097106 | Tcell | PIH1D1   |
| PAFAH1B2. 6. | 6. 52E-06 | -0. 11042 | 0. 15  | 0. 329 | 0. 097443 | Tcell | PAFAH1B2 |
| STOX2. 11    | 6. 58E-06 | -0. 20027 | 0. 005 | 0. 094 | 0. 098292 | Tcell | STOX2    |
| CADM3. 10    | 6. 59E-06 | -0. 37927 | 0. 009 | 0. 102 | 0. 09847  | Tcell | CADM3    |
| CIR1. 6      | 6. 59E-06 | -0. 15894 | 0. 159 | 0. 332 | 0. 098544 | Tcell | CIR1     |
| COMMD10. 6   | 6. 60E-06 | -0. 15117 | 0. 086 | 0. 228 | 0. 098668 | Tcell | COMMD10  |
| C1orf53. 7   | 6. 62E-06 | -0. 23104 | 0      | 0. 085 | 0. 099002 | Tcell | C1orf53  |
| TMEM69. 4    | 6. 63E-06 | -0. 17908 | 0. 05  | 0. 171 | 0. 099055 | Tcell | TMEM69   |
| KANK1. 9     | 6. 66E-06 | -0. 2367  | 0. 005 | 0. 094 | 0. 099481 | Tcell | KANK1    |
| ZMAT5. 5     | 6. 68E-06 | -0. 21651 | 0. 095 | 0. 238 | 0. 099822 | Tcell | ZMAT5    |
| CAMK1. 10    | 6. 72E-06 | -0. 1775  | 0. 086 | 0. 228 | 0. 10047  | Tcell | CAMK1    |
| CSPG5. 12    | 6. 73E-06 | -0. 28922 | 0. 014 | 0. 11  | 0. 10055  | Tcell | CSPG5    |
| TIMM50. 5    | 6. 73E-06 | -0. 1213  | 0. 141 | 0. 314 | 0. 100603 | Tcell | TIMM50   |
| HS6ST1. 7    | 6. 76E-06 | -0. 19601 | 0. 014 | 0. 11  | 0. 100958 | Tcell | HS6ST1   |
| CHMP4B. 1C   | 6. 78E-06 | -0. 17245 | 0. 241 | 0. 458 | 0. 101322 | Tcell | CHMP4B   |
| BRD8. 9      | 6. 81E-06 | -0. 12431 | 0. 045 | 0. 164 | 0. 1017   | Tcell | BRD8     |
| TMEM57. 8    | 6. 82E-06 | -0. 18877 | 0. 055 | 0. 177 | 0. 101907 | Tcell | TMEM57   |
| NLGN2. 10    | 6. 83E-06 | -0. 19209 | 0. 005 | 0. 093 | 0. 10208  | Tcell | NLGN2    |
| SNX14. 5     | 6. 86E-06 | -0. 19019 | 0. 077 | 0. 213 | 0. 102541 | Tcell | SNX14    |
| FEM1C. 7     | 6. 87E-06 | -0. 18832 | 0. 032 | 0. 142 | 0. 102608 | Tcell | FEM1C    |
| ALYREF. 12   | 6. 88E-06 | -0. 16281 | 0. 036 | 0. 148 | 0. 102786 | Tcell | ALYREF   |
| ADAM15. 6    | 6. 88E-06 | -0. 22372 | 0. 018 | 0. 117 | 0. 102801 | Tcell | ADAM15   |
| SLFN13. 1    | 6. 89E-06 | 0. 168477 | 0. 041 | 0. 01  | 0. 102977 | Tcell | SLFN13   |
| LGALS9. 14   | 6. 92E-06 | -0. 4392  | 0. 109 | 0. 243 | 0. 103425 | Tcell | LGALS9   |
| NBPF10. 7    | 6. 95E-06 | -0. 12629 | 0. 036 | 0. 147 | 0. 103894 | Tcell | NBPF10   |
| MDM2. 8      | 6. 96E-06 | -0. 26826 | 0. 077 | 0. 209 | 0. 103991 | Tcell | MDM2     |
| ARL4D. 11    | 6. 98E-06 | -0. 17137 | 0. 05  | 0. 171 | 0. 104355 | Tcell | ARL4D    |
| MILR1. 13    | 6. 99E-06 | -0. 4397  | 0. 009 | 0. 1   | 0. 104513 | Tcell | MILR1    |
| RGS10. 14    | 7. 04E-06 | 0. 325859 | 0. 459 | 0. 34  | 0. 105169 | Tcell | RGS10    |
| AUP1. 8      | 7. 04E-06 | -0. 18217 | 0. 286 | 0. 527 | 0. 105248 | Tcell | AUP1     |
| CRAT. 6      | 7. 07E-06 | -0. 18744 | 0. 045 | 0. 162 | 0. 105708 | Tcell | CRAT     |
| ZCCHC24. 9   | 7. 13E-06 | -0. 2661  | 0. 009 | 0. 101 | 0. 1065   | Tcell | ZCCHC24  |
| PMVK. 3      | 7. 14E-06 | -0. 14988 | 0. 236 | 0. 441 | 0. 106733 | Tcell | PMVK     |
| USP6NL. 7    | 7. 19E-06 | -0. 23545 | 0      | 0. 084 | 0. 107514 | Tcell | USP6NL   |
| DIRAS3. 11   | 7. 20E-06 | -0. 37482 | 0. 023 | 0. 125 | 0. 107582 | Tcell | DIRAS3   |
| CCDC136. 9   | 7. 20E-06 | -0. 25445 | 0. 005 | 0. 093 | 0. 107641 | Tcell | CCDC136  |
| CRYZ. 11     | 7. 28E-06 | -0. 22592 | 0. 023 | 0. 125 | 0. 108831 | Tcell | CRYZ     |
| PGK1. 10     | 7. 29E-06 | 0. 15929  | 0. 695 | 0. 755 | 0. 108868 | Tcell | PGK1     |
| FAM217B. 1   | 7. 32E-06 | -0. 14747 | 0. 041 | 0. 157 | 0. 109317 | Tcell | FAM217B  |
| RINL         | 7. 36E-06 | 0. 399128 | 0. 105 | 0. 044 | 0. 110015 | Tcell | RINL     |
| MSC. 1       | 7. 40E-06 | 0. 174373 | 0. 032 | 0. 007 | 0. 110639 | Tcell | MSC      |
| ASTN1. 7     | 7. 42E-06 | -0. 17707 | 0. 005 | 0. 093 | 0. 110939 | Tcell | ASTN1    |
| SLC29A4. 9   | 7. 45E-06 | -0. 2178  | 0      | 0. 084 | 0. 11138  | Tcell | SLC29A4  |
| KAT7. 8      | 7. 47E-06 | -0. 15893 | 0. 036 | 0. 15  | 0. 111639 | Tcell | KAT7     |
| ANKRA2. 5    | 7. 47E-06 | -0. 19527 | 0. 036 | 0. 149 | 0. 111698 | Tcell | ANKRA2   |
| TCEAL8. 3    | 7. 49E-06 | -0. 21234 | 0. 241 | 0. 446 | 0. 111856 | Tcell | TCEAL8   |
| FOXRED1. 5   | 7. 53E-06 | -0. 22664 | 0. 014 | 0. 108 | 0. 112557 | Tcell | FOXRED1  |
| ABCC3. 7     | 7. 56E-06 | -0. 30492 | 0. 009 | 0. 101 | 0. 113043 | Tcell | ABCC3    |
| POLR2E. 7    | 7. 63E-06 | -0. 18105 | 0. 295 | 0. 539 | 0. 114081 | Tcell | POLR2E   |

|            |           |           |        |        |           |       |                |
|------------|-----------|-----------|--------|--------|-----------|-------|----------------|
| RBFA. 5    | 7. 63E-06 | -0. 19647 | 0. 05  | 0. 17  | 0. 114094 | Tcell | RBFA           |
| CDIPT. 3   | 7. 68E-06 | -0. 14966 | 0. 127 | 0. 289 | 0. 114787 | Tcell | CDIPT          |
| APOLD1. 6  | 7. 69E-06 | 0. 424217 | 0. 109 | 0. 047 | 0. 114887 | Tcell | APOLD1         |
| NTN1. 8    | 7. 72E-06 | -0. 1776  | 0      | 0. 084 | 0. 115383 | Tcell | NTN1           |
| PCOLCE2. 6 | 7. 72E-06 | -0. 26169 | 0      | 0. 084 | 0. 115383 | Tcell | PCOLCE2        |
| NADK2. 6   | 7. 72E-06 | -0. 17985 | 0. 009 | 0. 101 | 0. 115422 | Tcell | NADK2          |
| DEGS1. 4   | 7. 73E-06 | -0. 1272  | 0. 236 | 0. 464 | 0. 115561 | Tcell | DEGS1          |
| CELF5. 13  | 7. 74E-06 | -0. 29738 | 0. 005 | 0. 092 | 0. 115714 | Tcell | CELF5          |
| NSMCE1. 4  | 7. 82E-06 | -0. 12558 | 0. 214 | 0. 408 | 0. 116869 | Tcell | NSMCE1         |
| NAPEPLD. 8 | 7. 84E-06 | -0. 23351 | 0. 009 | 0. 101 | 0. 11718  | Tcell | NAPEPLD        |
| AGPAT3. 7  | 7. 84E-06 | -0. 15174 | 0. 027 | 0. 132 | 0. 117191 | Tcell | AGPAT3         |
| E4F1. 3    | 7. 85E-06 | -0. 18076 | 0. 018 | 0. 117 | 0. 117281 | Tcell | E4F1           |
| LINC00844  | 7. 87E-06 | -0. 37246 | 0. 014 | 0. 108 | 0. 117546 | Tcell | LINC00844      |
| RP11-195F  | 7. 87E-06 | -0. 27343 | 0. 005 | 0. 092 | 0. 117656 | Tcell | RP11-195F19. 5 |
| ELMOD1. 11 | 7. 90E-06 | -0. 17032 | 0      | 0. 084 | 0. 11813  | Tcell | ELMOD1         |
| UTP14C. 5  | 7. 90E-06 | -0. 18634 | 0      | 0. 084 | 0. 11813  | Tcell | UTP14C         |
| PFDN6. 5   | 7. 94E-06 | -0. 17625 | 0. 177 | 0. 356 | 0. 118715 | Tcell | PFDN6          |
| THEMIS2. 1 | 8. 08E-06 | -0. 36571 | 0. 109 | 0. 244 | 0. 120719 | Tcell | THEMIS2        |
| RNF8. 8    | 8. 14E-06 | -0. 15983 | 0. 05  | 0. 169 | 0. 121692 | Tcell | RNF8           |
| VTA1. 3    | 8. 15E-06 | -0. 1496  | 0. 059 | 0. 186 | 0. 121736 | Tcell | VTA1           |
| MDH1. 5    | 8. 21E-06 | -0. 23623 | 0. 309 | 0. 555 | 0. 122632 | Tcell | MDH1           |
| SPHK1. 11  | 8. 21E-06 | -0. 23842 | 0. 014 | 0. 108 | 0. 122741 | Tcell | SPHK1          |
| TGFBR1. 12 | 8. 23E-06 | -0. 30598 | 0. 05  | 0. 164 | 0. 123011 | Tcell | TGFBR1         |
| C9orf72. 1 | 8. 30E-06 | -0. 26052 | 0. 041 | 0. 153 | 0. 124082 | Tcell | C9orf72        |
| NIPSNAP3A  | 8. 38E-06 | -0. 20513 | 0. 073 | 0. 202 | 0. 125184 | Tcell | NIPSNAP3A      |
| ABHD14B. 9 | 8. 46E-06 | 0. 55317  | 0. 264 | 0. 177 | 0. 126428 | Tcell | ABHD14B        |
| WVOX. 4    | 8. 48E-06 | -0. 2379  | 0. 009 | 0. 1   | 0. 126733 | Tcell | WVOX           |
| TRMT10C. 9 | 8. 51E-06 | -0. 10179 | 0. 105 | 0. 252 | 0. 127102 | Tcell | TRMT10C        |
| ACER3. 12  | 8. 52E-06 | -0. 17694 | 0. 064 | 0. 187 | 0. 1273   | Tcell | ACER3          |
| RASGEF1A   | 8. 54E-06 | 0. 130033 | 0. 023 | 0. 004 | 0. 127639 | Tcell | RASGEF1A       |
| ZNF814. 8  | 8. 60E-06 | -0. 2076  | 0. 023 | 0. 124 | 0. 12848  | Tcell | ZNF814         |
| GNB2. 11   | 8. 61E-06 | -0. 20058 | 0. 323 | 0. 574 | 0. 128607 | Tcell | GNB2           |
| ITGA3. 11  | 8. 63E-06 | -0. 18758 | 0. 009 | 0. 1   | 0. 129033 | Tcell | ITGA3          |
| ATPAF1. 11 | 8. 66E-06 | -0. 11015 | 0. 095 | 0. 243 | 0. 12945  | Tcell | ATPAF1         |
| EHD2. 11   | 8. 68E-06 | -0. 18396 | 0      | 0. 083 | 0. 129783 | Tcell | EHD2           |
| ATG4D. 8   | 8. 70E-06 | -0. 1419  | 0. 045 | 0. 163 | 0. 129999 | Tcell | ATG4D          |
| MIR22HG. 1 | 8. 73E-06 | -0. 33287 | 0. 018 | 0. 115 | 0. 130429 | Tcell | MIR22HG        |
| DYNLL1. 8  | 8. 74E-06 | -0. 29612 | 0. 609 | 0. 84  | 0. 13062  | Tcell | DYNLL1         |
| SDHB. 6    | 8. 75E-06 | -0. 15112 | 0. 223 | 0. 428 | 0. 130775 | Tcell | SDHB           |
| SLC4A3. 8  | 8. 75E-06 | -0. 1894  | 0. 005 | 0. 092 | 0. 130811 | Tcell | SLC4A3         |
| NR2C2AP. 1 | 8. 76E-06 | -0. 23642 | 0. 05  | 0. 168 | 0. 13088  | Tcell | NR2C2AP        |
| NUFIP1. 8  | 8. 78E-06 | -0. 15924 | 0. 018 | 0. 117 | 0. 13128  | Tcell | NUFIP1         |
| REV1. 7    | 8. 85E-06 | -0. 14217 | 0. 05  | 0. 17  | 0. 132295 | Tcell | REV1           |
| B3GAT1. 9  | 8. 94E-06 | -0. 26539 | 0. 005 | 0. 091 | 0. 133569 | Tcell | B3GAT1         |
| FAM216A. 8 | 8. 99E-06 | -0. 13729 | 0. 023 | 0. 124 | 0. 13436  | Tcell | FAM216A        |
| CD99L2. 6  | 9. 04E-06 | -0. 17118 | 0. 027 | 0. 132 | 0. 135041 | Tcell | CD99L2         |
| SIAE. 7    | 9. 08E-06 | -0. 2256  | 0. 005 | 0. 091 | 0. 135647 | Tcell | SIAE           |
| TNFSF8. 2  | 9. 08E-06 | 0. 141379 | 0. 036 | 0. 008 | 0. 135679 | Tcell | TNFSF8         |
| APBB1. 9   | 9. 14E-06 | -0. 12948 | 0. 064 | 0. 192 | 0. 136649 | Tcell | APBB1          |
| REEP1. 12  | 9. 21E-06 | -0. 23067 | 0      | 0. 082 | 0. 137637 | Tcell | REEP1          |
| TXNL1. 5   | 9. 22E-06 | -0. 13887 | 0. 255 | 0. 476 | 0. 13782  | Tcell | TXNL1          |

|            |           |           |        |        |           |       |               |
|------------|-----------|-----------|--------|--------|-----------|-------|---------------|
| APPL2. 1   | 9. 25E-06 | -0. 1585  | 0. 059 | 0. 183 | 0. 138191 | Tcell | APPL2         |
| RENBP. 13  | 9. 29E-06 | -0. 34774 | 0. 032 | 0. 137 | 0. 138768 | Tcell | RENBP         |
| LONRF1. 9  | 9. 32E-06 | -0. 17484 | 0. 009 | 0. 1   | 0. 139273 | Tcell | LONRF1        |
| PREPL. 9   | 9. 33E-06 | -0. 14047 | 0. 064 | 0. 191 | 0. 139493 | Tcell | PREPL         |
| METTL22. 6 | 9. 34E-06 | -0. 26901 | 0. 005 | 0. 091 | 0. 139598 | Tcell | METTL22       |
| PADI2. 12  | 9. 38E-06 | -0. 34725 | 0. 032 | 0. 137 | 0. 140146 | Tcell | PADI2         |
| ARMC1. 10  | 9. 41E-06 | -0. 13464 | 0. 114 | 0. 267 | 0. 140572 | Tcell | ARMC1         |
| GART. 7    | 9. 41E-06 | -0. 21345 | 0. 073 | 0. 202 | 0. 140604 | Tcell | GART          |
| ARPC5L. 1C | 9. 42E-06 | 0. 557725 | 0. 405 | 0. 369 | 0. 140825 | Tcell | ARPC5L        |
| ATP13A3. 8 | 9. 43E-06 | -0. 21462 | 0. 041 | 0. 152 | 0. 140969 | Tcell | ATP13A3       |
| TESC. 4    | 9. 44E-06 | 0. 328006 | 0. 095 | 0. 039 | 0. 141015 | Tcell | TESC          |
| B3GALT6. 8 | 9. 48E-06 | -0. 10441 | 0. 032 | 0. 14  | 0. 141735 | Tcell | B3GALT6       |
| SLC52A2. 7 | 9. 50E-06 | -0. 1139  | 0. 123 | 0. 283 | 0. 141981 | Tcell | SLC52A2       |
| PPFIA3. 1C | 9. 53E-06 | -0. 17139 | 0. 005 | 0. 091 | 0. 142363 | Tcell | PPFIA3        |
| LARP1B. 7  | 9. 55E-06 | -0. 20959 | 0. 023 | 0. 122 | 0. 142682 | Tcell | LARP1B        |
| UBTD2. 10  | 9. 57E-06 | -0. 18683 | 0. 014 | 0. 107 | 0. 142985 | Tcell | UBTD2         |
| LRRN1. 11  | 9. 58E-06 | -0. 22802 | 0. 014 | 0. 108 | 0. 143232 | Tcell | LRRN1         |
| ATP1A3. 12 | 9. 60E-06 | -0. 31537 | 0. 023 | 0. 122 | 0. 143469 | Tcell | ATP1A3        |
| ZNF22. 11  | 9. 60E-06 | -0. 10397 | 0. 123 | 0. 278 | 0. 143491 | Tcell | ZNF22         |
| ROM1. 11   | 9. 61E-06 | -0. 26153 | 0. 018 | 0. 115 | 0. 143565 | Tcell | ROM1          |
| CD33. 14   | 9. 65E-06 | -0. 39332 | 0. 023 | 0. 122 | 0. 144233 | Tcell | CD33          |
| NOVA2. 7   | 9. 65E-06 | -0. 20239 | 0      | 0. 082 | 0. 144257 | Tcell | NOVA2         |
| EMC9. 6    | 9. 69E-06 | -0. 22264 | 0. 059 | 0. 179 | 0. 144839 | Tcell | EMC9          |
| IER5L. 5   | 9. 70E-06 | -0. 19319 | 0. 009 | 0. 099 | 0. 145024 | Tcell | IER5L         |
| ACBD3. 5   | 9. 77E-06 | -0. 12634 | 0. 055 | 0. 177 | 0. 145995 | Tcell | ACBD3         |
| GADD45G. 1 | 9. 78E-06 | -0. 27926 | 0. 114 | 0. 258 | 0. 146109 | Tcell | GADD45G       |
| CFD. 13    | 9. 79E-06 | -0. 37472 | 0. 045 | 0. 158 | 0. 14623  | Tcell | CFD           |
| PRKACA. 5  | 9. 82E-06 | -0. 19384 | 0. 041 | 0. 152 | 0. 146726 | Tcell | PRKACA        |
| CCDC25. 1C | 9. 82E-06 | -0. 11908 | 0. 136 | 0. 3   | 0. 146779 | Tcell | CCDC25        |
| SEPT11. 12 | 9. 83E-06 | -0. 12426 | 0. 136 | 0. 306 | 0. 146828 | Tcell | 11-Sep        |
| GALK1. 10  | 9. 83E-06 | -0. 22777 | 0. 077 | 0. 207 | 0. 146899 | Tcell | GALK1         |
| PAQR4. 12  | 9. 83E-06 | -0. 22206 | 0. 05  | 0. 166 | 0. 146905 | Tcell | PAQR4         |
| GALE. 4    | 9. 84E-06 | -0. 21891 | 0. 045 | 0. 158 | 0. 14698  | Tcell | GALE          |
| LYPLAL1. 3 | 9. 84E-06 | -0. 17625 | 0. 095 | 0. 239 | 0. 14705  | Tcell | LYPLAL1       |
| IGF2BP2. 1 | 9. 88E-06 | -0. 1909  | 0      | 0. 082 | 0. 147684 | Tcell | IGF2BP2       |
| ZNF117. 7  | 9. 92E-06 | -0. 23122 | 0. 014 | 0. 107 | 0. 148237 | Tcell | ZNF117        |
| CBWD1. 4   | 9. 95E-06 | -0. 14757 | 0. 082 | 0. 216 | 0. 148655 | Tcell | CBWD1         |
| ZC3H7B. 4  | 9. 95E-06 | -0. 15392 | 0. 014 | 0. 108 | 0. 148754 | Tcell | ZC3H7B        |
| NSG1. 12   | 1. 00E-05 | -0. 32481 | 0. 059 | 0. 178 | 0. 14982  | Tcell | NSG1          |
| ZSWIM6. 4  | 1. 01E-05 | -0. 20839 | 0. 027 | 0. 131 | 0. 150371 | Tcell | ZSWIM6        |
| VPS9D1     | 1. 01E-05 | -0. 20479 | 0. 005 | 0. 091 | 0. 150901 | Tcell | VPS9D1        |
| MPC2. 8    | 1. 01E-05 | -0. 20839 | 0. 341 | 0. 586 | 0. 150955 | Tcell | MPC2          |
| MGP. 12    | 1. 01E-05 | -0. 8187  | 0. 014 | 0. 105 | 0. 151373 | Tcell | MGP           |
| RP11-936I  | 1. 01E-05 | 0. 230823 | 0. 032 | 0. 007 | 0. 151455 | Tcell | RP11-936I5. 1 |
| SPIN1. 6   | 1. 02E-05 | -0. 1241  | 0. 05  | 0. 169 | 0. 15186  | Tcell | SPIN1         |
| CACNB4. 6  | 1. 02E-05 | -0. 22437 | 0. 005 | 0. 09  | 0. 151895 | Tcell | CACNB4        |
| SECISBP2L  | 1. 02E-05 | -0. 11508 | 0. 055 | 0. 176 | 0. 152281 | Tcell | SECISBP2L     |
| POR. 5     | 1. 02E-05 | -0. 18229 | 0. 118 | 0. 268 | 0. 152365 | Tcell | POR           |
| BCS1L. 8   | 1. 02E-05 | -0. 18492 | 0. 05  | 0. 168 | 0. 152844 | Tcell | BCS1L         |
| PDHA1. 7   | 1. 02E-05 | -0. 14936 | 0. 141 | 0. 306 | 0. 153004 | Tcell | PDHA1         |
| KIAA0232.  | 1. 03E-05 | -0. 14927 | 0. 041 | 0. 154 | 0. 154098 | Tcell | KIAA0232      |

|           |          |          |       |       |          |       |              |
|-----------|----------|----------|-------|-------|----------|-------|--------------|
| ILDR2.11  | 1.04E-05 | -0.1593  | 0     | 0.082 | 0.154781 | Tcell | ILDR2        |
| RP11-505K | 1.04E-05 | -0.18124 | 0     | 0.082 | 0.154781 | Tcell | RP11-505K9.1 |
| NCAN.9    | 1.04E-05 | -0.28969 | 0     | 0.082 | 0.154781 | Tcell | NCAN         |
| SLC37A4.4 | 1.04E-05 | -0.21448 | 0.023 | 0.123 | 0.155418 | Tcell | SLC37A4      |
| TUBA1B.9  | 1.04E-05 | -0.26448 | 0.659 | 0.9   | 0.156021 | Tcell | TUBA1B       |
| AP2A2.11  | 1.05E-05 | -0.12304 | 0.105 | 0.254 | 0.156199 | Tcell | AP2A2        |
| MGARP.8   | 1.05E-05 | -0.16696 | 0     | 0.081 | 0.156608 | Tcell | MGARP        |
| CPT1C.9   | 1.05E-05 | -0.21781 | 0.014 | 0.107 | 0.156938 | Tcell | CPT1C        |
| PTBP2.11  | 1.05E-05 | -0.20752 | 0.014 | 0.107 | 0.157378 | Tcell | PTBP2        |
| CCZ1B.10  | 1.06E-05 | -0.15014 | 0.041 | 0.153 | 0.158094 | Tcell | CCZ1B        |
| EML1.5    | 1.06E-05 | -0.20525 | 0     | 0.081 | 0.158456 | Tcell | EML1         |
| SLC16A3.1 | 1.06E-05 | -0.28343 | 0.168 | 0.323 | 0.159059 | Tcell | SLC16A3      |
| PTCD3.10  | 1.07E-05 | -0.1335  | 0.091 | 0.232 | 0.160084 | Tcell | PTCD3        |
| VAX2.12   | 1.07E-05 | -0.20071 | 0     | 0.081 | 0.160325 | Tcell | VAX2         |
| STT3A.2   | 1.08E-05 | -0.14008 | 0.05  | 0.168 | 0.160704 | Tcell | STT3A        |
| PDCD7.9   | 1.08E-05 | -0.14388 | 0.086 | 0.223 | 0.160768 | Tcell | PDCD7        |
| JOSD2.11  | 1.08E-05 | -0.11157 | 0.164 | 0.338 | 0.161551 | Tcell | JOSD2        |
| ZNF181.8  | 1.08E-05 | -0.19885 | 0.009 | 0.099 | 0.16171  | Tcell | ZNF181       |
| SRPK2.10  | 1.08E-05 | -0.14664 | 0.214 | 0.414 | 0.161765 | Tcell | SRPK2        |
| SOX5.11   | 1.08E-05 | -0.19966 | 0.005 | 0.09  | 0.162084 | Tcell | SOX5         |
| EMC3.3    | 1.10E-05 | -0.1732  | 0.245 | 0.453 | 0.163821 | Tcell | EMC3         |
| HSPD1.11  | 1.10E-05 | -0.19937 | 0.359 | 0.619 | 0.164118 | Tcell | HSPD1        |
| LINC00526 | 1.10E-05 | -0.20804 | 0     | 0.081 | 0.164129 | Tcell | LINC00526    |
| TMEM186.5 | 1.10E-05 | -0.19865 | 0.009 | 0.099 | 0.164519 | Tcell | TMEM186      |
| CCDC181.9 | 1.11E-05 | -0.23609 | 0     | 0.081 | 0.166065 | Tcell | CCDC181      |
| AC004540. | 1.11E-05 | -0.25817 | 0     | 0.081 | 0.166065 | Tcell | AC004540.5   |
| TMEM53.8  | 1.12E-05 | -0.17494 | 0.014 | 0.107 | 0.166917 | Tcell | TMEM53       |
| ZFP91.3   | 1.12E-05 | -0.16292 | 0.032 | 0.137 | 0.167226 | Tcell | ZFP91        |
| THYN1.9   | 1.12E-05 | -0.10175 | 0.209 | 0.41  | 0.167591 | Tcell | THYN1        |
| ILF3.10   | 1.13E-05 | -0.10887 | 0.209 | 0.415 | 0.168368 | Tcell | ILF3         |
| TXNRD1.8  | 1.13E-05 | -0.10377 | 0.095 | 0.24  | 0.168854 | Tcell | TXNRD1       |
| EBI3.13   | 1.14E-05 | -0.38005 | 0.009 | 0.098 | 0.170124 | Tcell | EBI3         |
| ACAT2.11  | 1.14E-05 | -0.14378 | 0.127 | 0.281 | 0.170919 | Tcell | ACAT2        |
| REEP3.9   | 1.15E-05 | -0.11778 | 0.1   | 0.247 | 0.171353 | Tcell | REEP3        |
| RILP.12   | 1.15E-05 | -0.26129 | 0.014 | 0.105 | 0.171996 | Tcell | RILP         |
| UNC13D.1C | 1.16E-05 | 0.286057 | 0.109 | 0.047 | 0.17359  | Tcell | UNC13D       |
| MTURN.7   | 1.16E-05 | -0.24403 | 0     | 0.081 | 0.174036 | Tcell | MTURN        |
| HARS.8    | 1.17E-05 | -0.1893  | 0.127 | 0.284 | 0.175214 | Tcell | HARS         |
| BOLA1.6   | 1.18E-05 | -0.17808 | 0.041 | 0.153 | 0.17602  | Tcell | BOLA1        |
| BAG6.4    | 1.18E-05 | -0.10371 | 0.159 | 0.334 | 0.176113 | Tcell | BAG6         |
| MTFR1.3   | 1.18E-05 | -0.19604 | 0.009 | 0.098 | 0.176293 | Tcell | MTFR1        |
| TMEM136.8 | 1.18E-05 | -0.16757 | 0.005 | 0.089 | 0.176309 | Tcell | TMEM136      |
| CACFD1.9  | 1.18E-05 | -0.20847 | 0.005 | 0.089 | 0.176652 | Tcell | CACFD1       |
| VEZT.8    | 1.19E-05 | -0.11833 | 0.091 | 0.229 | 0.177106 | Tcell | VEZT         |
| CHRN1.9   | 1.19E-05 | -0.23652 | 0.041 | 0.151 | 0.177192 | Tcell | CHRN1        |
| REXO4.6   | 1.19E-05 | -0.15647 | 0.068 | 0.193 | 0.177941 | Tcell | REXO4        |
| CBLN4.14  | 1.19E-05 | -0.23692 | 0     | 0.08  | 0.178162 | Tcell | CBLN4        |
| HS3ST1.11 | 1.19E-05 | -0.31503 | 0.005 | 0.089 | 0.178181 | Tcell | HS3ST1       |
| RMND5B.7  | 1.19E-05 | -0.15307 | 0.05  | 0.166 | 0.178352 | Tcell | RMND5B       |
| KLHL5.6   | 1.20E-05 | -0.18889 | 0.055 | 0.172 | 0.178973 | Tcell | KLHL5        |
| MAP6.8    | 1.20E-05 | -0.16735 | 0.009 | 0.098 | 0.179303 | Tcell | MAP6         |

|             |           |           |        |        |           |       |             |
|-------------|-----------|-----------|--------|--------|-----------|-------|-------------|
| MCF2L. 9    | 1. 20E-05 | -0. 26083 | 0. 009 | 0. 097 | 0. 180033 | Tcell | MCF2L       |
| UCK1. 5     | 1. 21E-05 | -0. 1234  | 0. 064 | 0. 187 | 0. 180473 | Tcell | UCK1        |
| CNTLN. 3    | 1. 21E-05 | -0. 2062  | 0. 014 | 0. 106 | 0. 180623 | Tcell | CNTLN       |
| SLC26A2. 2  | 1. 21E-05 | -0. 20003 | 0. 014 | 0. 106 | 0. 181136 | Tcell | SLC26A2     |
| EMC2. 3     | 1. 22E-05 | -0. 15635 | 0. 091 | 0. 225 | 0. 18204  | Tcell | EMC2        |
| PARP2. 9    | 1. 22E-05 | -0. 21826 | 0. 018 | 0. 113 | 0. 182341 | Tcell | PARP2       |
| ST3GAL1. 1  | 1. 23E-05 | 0. 420068 | 0. 182 | 0. 101 | 0. 183417 | Tcell | ST3GAL1     |
| FIGN. 11    | 1. 23E-05 | -0. 17353 | 0. 005 | 0. 089 | 0. 183675 | Tcell | FIGN        |
| AGAP2-AS1   | 1. 24E-05 | -0. 31813 | 0. 009 | 0. 097 | 0. 185443 | Tcell | AGAP2-AS1   |
| SLC9A3R2. 1 | 1. 24E-05 | -0. 16516 | 0. 018 | 0. 114 | 0. 185875 | Tcell | SLC9A3R2    |
| ST3GAL6. 1  | 1. 25E-05 | -0. 32299 | 0. 018 | 0. 113 | 0. 186359 | Tcell | ST3GAL6     |
| KALRN. 9    | 1. 26E-05 | -0. 20717 | 0. 009 | 0. 097 | 0. 188093 | Tcell | KALRN       |
| TIMM17B. 2  | 1. 26E-05 | -0. 1687  | 0. 168 | 0. 345 | 0. 188487 | Tcell | TIMM17B     |
| PAX6. 10    | 1. 26E-05 | -0. 18016 | 0      | 0. 08  | 0. 188907 | Tcell | PAX6        |
| MEOX2. 12   | 1. 26E-05 | -0. 22309 | 0      | 0. 08  | 0. 188907 | Tcell | MEOX2       |
| ARID5A. 1C  | 1. 26E-05 | 0. 502331 | 0. 364 | 0. 288 | 0. 189022 | Tcell | ARID5A      |
| CCDC88B. 6  | 1. 27E-05 | 0. 45197  | 0. 155 | 0. 08  | 0. 189061 | Tcell | CCDC88B     |
| POLR2L. 5   | 1. 27E-05 | 0. 183629 | 0. 645 | 0. 689 | 0. 18922  | Tcell | POLR2L      |
| CTSC. 14    | 1. 27E-05 | 0. 302034 | 0. 468 | 0. 382 | 0. 189922 | Tcell | CTSC        |
| FAM3A. 3    | 1. 27E-05 | -0. 16742 | 0. 086 | 0. 223 | 0. 190135 | Tcell | FAM3A       |
| C16orf91. 1 | 1. 27E-05 | -0. 2229  | 0. 073 | 0. 198 | 0. 190374 | Tcell | C16orf91    |
| LRRC37B. 7  | 1. 27E-05 | -0. 12615 | 0. 018 | 0. 114 | 0. 190423 | Tcell | LRRC37B     |
| TMEM177. 7  | 1. 28E-05 | -0. 20604 | 0      | 0. 08  | 0. 191131 | Tcell | TMEM177     |
| RNF5. 7     | 1. 29E-05 | -0. 13274 | 0. 2   | 0. 394 | 0. 192061 | Tcell | RNF5        |
| EEF1E1. 6   | 1. 29E-05 | -0. 19257 | 0. 155 | 0. 318 | 0. 193295 | Tcell | EEF1E1      |
| MPP5. 7     | 1. 29E-05 | -0. 19018 | 0. 009 | 0. 097 | 0. 193336 | Tcell | MPP5        |
| CCDC57. 13  | 1. 30E-05 | 0. 503147 | 0. 186 | 0. 106 | 0. 194303 | Tcell | CCDC57      |
| SYBU. 10    | 1. 32E-05 | -0. 21065 | 0. 005 | 0. 088 | 0. 196703 | Tcell | SYBU        |
| THAP3. 8    | 1. 33E-05 | -0. 17176 | 0. 032 | 0. 137 | 0. 198818 | Tcell | THAP3       |
| AC004951. 1 | 1. 34E-05 | -0. 14577 | 0. 045 | 0. 158 | 0. 199627 | Tcell | AC004951. 6 |
| NOL12. 5    | 1. 34E-05 | -0. 17274 | 0. 086 | 0. 223 | 0. 199873 | Tcell | NOL12       |
| AASDH. 7    | 1. 34E-05 | -0. 16461 | 0. 05  | 0. 166 | 0. 200449 | Tcell | AASDH       |
| DNAL1. 4    | 1. 34E-05 | -0. 13377 | 0. 014 | 0. 105 | 0. 200547 | Tcell | DNAL1       |
| GADD45GIP1  | 1. 34E-05 | -0. 22463 | 0. 332 | 0. 567 | 0. 20075  | Tcell | GADD45GIP1  |
| MUT. 7      | 1. 35E-05 | -0. 14894 | 0. 045 | 0. 159 | 0. 201262 | Tcell | MUT         |
| TOPORS-AS1  | 1. 35E-05 | 0. 598008 | 0. 227 | 0. 146 | 0. 201455 | Tcell | TOPORS-AS1  |
| COMMD2. 8   | 1. 36E-05 | -0. 14041 | 0. 132 | 0. 292 | 0. 202534 | Tcell | COMMD2      |
| EXOG. 11    | 1. 36E-05 | -0. 15694 | 0. 045 | 0. 158 | 0. 202812 | Tcell | EXOG        |
| HIGD2A. 1C  | 1. 36E-05 | 0. 261679 | 0. 605 | 0. 619 | 0. 203276 | Tcell | HIGD2A      |
| ZNF436. 8   | 1. 37E-05 | -0. 16235 | 0      | 0. 079 | 0. 205034 | Tcell | ZNF436      |
| CEP63. 7    | 1. 37E-05 | -0. 15929 | 0. 059 | 0. 18  | 0. 205162 | Tcell | CEP63       |
| PGPEP1. 6   | 1. 37E-05 | -0. 20171 | 0. 032 | 0. 136 | 0. 205203 | Tcell | PGPEP1      |
| RAB14. 5    | 1. 38E-05 | -0. 14836 | 0. 218 | 0. 42  | 0. 206779 | Tcell | RAB14       |
| KLHDC8B. 7  | 1. 38E-05 | -0. 15239 | 0. 014 | 0. 105 | 0. 20694  | Tcell | KLHDC8B     |
| WASF1. 9    | 1. 39E-05 | -0. 22808 | 0. 009 | 0. 096 | 0. 207161 | Tcell | WASF1       |
| CXXC4. 11   | 1. 40E-05 | -0. 2148  | 0      | 0. 079 | 0. 209887 | Tcell | CXXC4       |
| TMEM150A. 1 | 1. 42E-05 | -0. 19477 | 0. 041 | 0. 151 | 0. 211833 | Tcell | TMEM150A    |
| STK19. 4    | 1. 42E-05 | -0. 17406 | 0. 027 | 0. 128 | 0. 212228 | Tcell | STK19       |
| EYA2. 5     | 1. 42E-05 | -0. 18408 | 0      | 0. 079 | 0. 212356 | Tcell | EYA2        |
| TMEM67. 9   | 1. 43E-05 | -0. 14636 | 0. 009 | 0. 097 | 0. 213111 | Tcell | TMEM67      |
| RBPJ. 9     | 1. 43E-05 | -0. 12322 | 0. 245 | 0. 473 | 0. 213556 | Tcell | RBPJ        |



|            |          |          |       |       |          |       |               |
|------------|----------|----------|-------|-------|----------|-------|---------------|
| NDUFB7.7   | 1.43E-05 | -0.26433 | 0.459 | 0.725 | 0.213744 | Tcell | NDUFB7        |
| LSM1.6     | 1.43E-05 | -0.21084 | 0.25  | 0.46  | 0.214232 | Tcell | LSM1          |
| ALOX5.14   | 1.44E-05 | -0.36524 | 0.036 | 0.14  | 0.214681 | Tcell | ALOX5         |
| FAM135A.3  | 1.44E-05 | -0.23694 | 0.005 | 0.088 | 0.21526  | Tcell | FAM135A       |
| TRAF5.2    | 1.44E-05 | 0.378599 | 0.118 | 0.055 | 0.215431 | Tcell | TRAF5         |
| TMEM245.5  | 1.45E-05 | -0.17078 | 0.032 | 0.135 | 0.2171   | Tcell | TMEM245       |
| RP11-798M  | 1.46E-05 | -0.17732 | 0.041 | 0.151 | 0.218024 | Tcell | RP11-798M19.6 |
| LMBR1.9    | 1.47E-05 | -0.19051 | 0.018 | 0.112 | 0.219846 | Tcell | LMBR1         |
| ADAMTS9.1  | 1.47E-05 | -0.18159 | 0     | 0.079 | 0.219936 | Tcell | ADAMTS9       |
| ICMT.6     | 1.48E-05 | -0.17445 | 0.032 | 0.135 | 0.220672 | Tcell | ICMT          |
| FAM192A.8  | 1.49E-05 | -0.13388 | 0.177 | 0.361 | 0.222009 | Tcell | FAM192A       |
| NCOA4.13   | 1.49E-05 | -0.18192 | 0.118 | 0.265 | 0.222518 | Tcell | NCOA4         |
| LSM10.3    | 1.50E-05 | -0.11913 | 0.218 | 0.416 | 0.223851 | Tcell | LSM10         |
| ZNF768.6   | 1.50E-05 | -0.17077 | 0.009 | 0.096 | 0.224877 | Tcell | ZNF768        |
| KLHL35.12  | 1.51E-05 | -0.34701 | 0.009 | 0.095 | 0.22607  | Tcell | KLHL35        |
| MOB3B.8    | 1.52E-05 | -0.2556  | 0.009 | 0.095 | 0.227295 | Tcell | MOB3B         |
| IL23A.1    | 1.53E-05 | 0.205605 | 0.036 | 0.009 | 0.228571 | Tcell | IL23A         |
| CLASRP.3   | 1.53E-05 | -0.12145 | 0.041 | 0.151 | 0.228921 | Tcell | CLASRP        |
| C19orf43.1 | 1.54E-05 | 0.223706 | 0.614 | 0.674 | 0.230224 | Tcell | C19orf43      |
| LRRTM2.12  | 1.54E-05 | -0.19212 | 0.014 | 0.104 | 0.23051  | Tcell | LRRTM2        |
| LINC00493  | 1.56E-05 | -0.19207 | 0.305 | 0.534 | 0.232962 | Tcell | LINC00493     |
| ADNP.12    | 1.56E-05 | -0.12042 | 0.068 | 0.195 | 0.233776 | Tcell | ADNP          |
| ABHD6.4    | 1.56E-05 | -0.1999  | 0.014 | 0.104 | 0.233795 | Tcell | ABHD6         |
| MINA.2     | 1.57E-05 | -0.18924 | 0.032 | 0.135 | 0.234202 | Tcell | MINA          |
| CMTM6.14   | 1.57E-05 | -0.1483  | 0.227 | 0.429 | 0.234568 | Tcell | CMTM6         |
| DLX2.13    | 1.57E-05 | -0.3471  | 0.018 | 0.11  | 0.234638 | Tcell | DLX2          |
| SNHG10.8   | 1.57E-05 | -0.20704 | 0.009 | 0.095 | 0.234946 | Tcell | SNHG10        |
| FAXC.11    | 1.57E-05 | -0.21938 | 0.005 | 0.087 | 0.235311 | Tcell | FAXC          |
| MARS.6     | 1.57E-05 | -0.11119 | 0.077 | 0.208 | 0.235363 | Tcell | MARS          |
| MAPK7.10   | 1.58E-05 | -0.17902 | 0.027 | 0.127 | 0.235752 | Tcell | MAPK7         |
| RRP9.7     | 1.58E-05 | -0.11726 | 0.045 | 0.159 | 0.235903 | Tcell | RRP9          |
| TMEM192.4  | 1.58E-05 | -0.20961 | 0.068 | 0.192 | 0.236677 | Tcell | TMEM192       |
| ZSCAN21.9  | 1.59E-05 | -0.21374 | 0.014 | 0.104 | 0.237167 | Tcell | ZSCAN21       |
| CLCN7.4    | 1.59E-05 | -0.14067 | 0.045 | 0.157 | 0.237168 | Tcell | CLCN7         |
| TMEM223.4  | 1.59E-05 | -0.13817 | 0.091 | 0.227 | 0.237457 | Tcell | TMEM223       |
| CASD1.9    | 1.60E-05 | -0.21803 | 0     | 0.078 | 0.238682 | Tcell | CASD1         |
| GADD45B.1  | 1.60E-05 | -0.27627 | 0.309 | 0.494 | 0.238769 | Tcell | GADD45B       |
| ACAT1.6    | 1.60E-05 | -0.1783  | 0.186 | 0.37  | 0.239447 | Tcell | ACAT1         |
| SH3BP4.5   | 1.62E-05 | -0.20252 | 0     | 0.078 | 0.241486 | Tcell | SH3BP4        |
| ZNF516.4   | 1.63E-05 | -0.18096 | 0.009 | 0.096 | 0.243233 | Tcell | ZNF516        |
| YTHDF1.6   | 1.65E-05 | -0.16729 | 0.064 | 0.185 | 0.245943 | Tcell | YTHDF1        |
| PTK7.8     | 1.65E-05 | -0.15766 | 0.009 | 0.095 | 0.246288 | Tcell | PTK7          |
| MITF.11    | 1.65E-05 | -0.25463 | 0.009 | 0.095 | 0.246619 | Tcell | MITF          |
| LMAN1.8    | 1.65E-05 | -0.16616 | 0.164 | 0.332 | 0.246818 | Tcell | LMAN1         |
| RMDN3.6    | 1.66E-05 | -0.1206  | 0.1   | 0.243 | 0.24735  | Tcell | RMDN3         |
| C9orf9.9   | 1.66E-05 | -0.188   | 0.018 | 0.112 | 0.247414 | Tcell | C9orf9        |
| UBR4.5     | 1.66E-05 | -0.22151 | 0.041 | 0.147 | 0.24838  | Tcell | UBR4          |
| PCCB.5     | 1.67E-05 | -0.16537 | 0.059 | 0.176 | 0.248824 | Tcell | PCCB          |
| P2RY13.12  | 1.67E-05 | -0.43963 | 0.005 | 0.086 | 0.249763 | Tcell | P2RY13        |
| ACTL6B.11  | 1.67E-05 | -0.29927 | 0     | 0.078 | 0.250095 | Tcell | ACTL6B        |
| TRIM28.1C  | 1.68E-05 | -0.16479 | 0.109 | 0.252 | 0.251603 | Tcell | TRIM28        |

|           |          |          |       |       |          |       |           |
|-----------|----------|----------|-------|-------|----------|-------|-----------|
| RUFY2.12  | 1.69E-05 | -0.10592 | 0.041 | 0.151 | 0.251819 | Tcell | RUFY2     |
| C12orf73. | 1.69E-05 | -0.15518 | 0.045 | 0.156 | 0.252478 | Tcell | C12orf73  |
| HOXD11.9  | 1.69E-05 | -0.16158 | 0     | 0.078 | 0.253032 | Tcell | HOXD11    |
| FAM171A1. | 1.69E-05 | -0.19129 | 0     | 0.078 | 0.253032 | Tcell | FAM171A1  |
| SYT1.13   | 1.69E-05 | -0.35087 | 0.014 | 0.101 | 0.253222 | Tcell | SYT1      |
| ATG4B.4   | 1.69E-05 | -0.16098 | 0.127 | 0.279 | 0.253282 | Tcell | ATG4B     |
| FER.5     | 1.70E-05 | -0.17752 | 0.009 | 0.095 | 0.25437  | Tcell | FER       |
| RIPK2.12  | 1.71E-05 | -0.24159 | 0.055 | 0.17  | 0.254848 | Tcell | RIPK2     |
| FANCL.8   | 1.71E-05 | -0.28636 | 0.041 | 0.145 | 0.254892 | Tcell | FANCL     |
| ASH2L.6   | 1.71E-05 | -0.1795  | 0.059 | 0.179 | 0.255112 | Tcell | ASH2L     |
| QSER1.10  | 1.73E-05 | -0.10992 | 0.023 | 0.12  | 0.258197 | Tcell | QSER1     |
| DMRTA2.8  | 1.73E-05 | -0.16535 | 0     | 0.078 | 0.259008 | Tcell | DMRTA2    |
| SEC31A.2  | 1.74E-05 | -0.10878 | 0.091 | 0.23  | 0.25936  | Tcell | SEC31A    |
| CIAO1.6   | 1.75E-05 | -0.10636 | 0.105 | 0.245 | 0.260793 | Tcell | CIAO1     |
| EMP2.7    | 1.75E-05 | -0.30272 | 0.018 | 0.11  | 0.260819 | Tcell | EMP2      |
| LMNA.10   | 1.75E-05 | -0.11622 | 0.214 | 0.42  | 0.261935 | Tcell | LMNA      |
| PHLPP1.12 | 1.76E-05 | -0.23312 | 0.005 | 0.086 | 0.262695 | Tcell | PHLPP1    |
| SQLE.11   | 1.77E-05 | -0.1021  | 0.109 | 0.251 | 0.263763 | Tcell | SQLE      |
| WDR77.4   | 1.77E-05 | -0.19244 | 0.082 | 0.212 | 0.264084 | Tcell | WDR77     |
| OSMR.11   | 1.77E-05 | -0.16151 | 0.005 | 0.086 | 0.264406 | Tcell | OSMR      |
| RIT2.10   | 1.77E-05 | -0.32933 | 0     | 0.078 | 0.265124 | Tcell | RIT2      |
| OPA3.2    | 1.78E-05 | -0.16925 | 0.018 | 0.111 | 0.266728 | Tcell | OPA3      |
| NSMF.7    | 1.80E-05 | -0.16958 | 0.023 | 0.118 | 0.269562 | Tcell | NSMF      |
| NKAIN4.9  | 1.81E-05 | -0.31407 | 0.014 | 0.103 | 0.270475 | Tcell | NKAIN4    |
| ARHGAP32. | 1.81E-05 | -0.19969 | 0.005 | 0.086 | 0.270965 | Tcell | ARHGAP32  |
| C3AR1.14  | 1.82E-05 | -0.32079 | 0.109 | 0.241 | 0.271606 | Tcell | C3AR1     |
| TTC14.4   | 1.82E-05 | -0.14435 | 0.123 | 0.272 | 0.272688 | Tcell | TTC14     |
| RNASEH2C. | 1.84E-05 | -0.18614 | 0.195 | 0.377 | 0.275267 | Tcell | RNASEH2C  |
| FAM57B.12 | 1.85E-05 | -0.25459 | 0.009 | 0.094 | 0.276655 | Tcell | FAM57B    |
| TGFB1.13  | 1.85E-05 | 0.490249 | 0.323 | 0.243 | 0.276909 | Tcell | TGFB1     |
| KDM3B.3   | 1.86E-05 | -0.20563 | 0.018 | 0.111 | 0.277593 | Tcell | KDM3B     |
| PSEN1.4   | 1.86E-05 | -0.21845 | 0.064 | 0.181 | 0.277999 | Tcell | PSEN1     |
| PITX1.10  | 1.86E-05 | -0.12677 | 0.005 | 0.086 | 0.27851  | Tcell | PITX1     |
| SORBS1.9  | 1.87E-05 | -0.16644 | 0.009 | 0.094 | 0.279353 | Tcell | SORBS1    |
| COA6.7    | 1.87E-05 | -0.14605 | 0.127 | 0.279 | 0.27987  | Tcell | COA6      |
| CEP89.9   | 1.90E-05 | -0.15225 | 0.032 | 0.132 | 0.283992 | Tcell | CEP89     |
| CASP4.12  | 1.91E-05 | 0.458912 | 0.314 | 0.226 | 0.285741 | Tcell | CASP4     |
| DCHS1.10  | 1.91E-05 | -0.1673  | 0.005 | 0.086 | 0.285823 | Tcell | DCHS1     |
| ACTR3B.10 | 1.91E-05 | -0.18935 | 0.018 | 0.109 | 0.286155 | Tcell | ACTR3B    |
| PSMB6.3   | 1.93E-05 | -0.29168 | 0.432 | 0.701 | 0.288549 | Tcell | PSMB6     |
| TK2.5     | 1.93E-05 | -0.19384 | 0.027 | 0.126 | 0.288824 | Tcell | TK2       |
| GM2A.11   | 1.94E-05 | -0.27889 | 0.041 | 0.145 | 0.289615 | Tcell | GM2A      |
| ARHGAP25. | 1.94E-05 | 0.403417 | 0.132 | 0.065 | 0.289772 | Tcell | ARHGAP25  |
| ZNF532.8  | 1.94E-05 | -0.16121 | 0.009 | 0.094 | 0.289827 | Tcell | ZNF532    |
| SCRN3.7   | 1.95E-05 | -0.12857 | 0.014 | 0.103 | 0.290683 | Tcell | SCRN3     |
| MPHOSPH10 | 1.95E-05 | -0.12672 | 0.1   | 0.24  | 0.291161 | Tcell | MPHOSPH10 |
| CHST7.10  | 1.96E-05 | -0.14039 | 0.018 | 0.111 | 0.293385 | Tcell | CHST7     |
| RPS6KL1.1 | 1.98E-05 | -0.19873 | 0.014 | 0.102 | 0.29518  | Tcell | RPS6KL1   |
| C17orf80. | 1.98E-05 | -0.17571 | 0.005 | 0.086 | 0.295195 | Tcell | C17orf80  |
| FGFBP3.9  | 1.99E-05 | -0.17544 | 0.014 | 0.102 | 0.297719 | Tcell | FGFBP3    |
| PBRM1.10  | 1.99E-05 | -0.14675 | 0.105 | 0.242 | 0.297904 | Tcell | PBRM1     |

|             |           |           |        |        |           |       |                |
|-------------|-----------|-----------|--------|--------|-----------|-------|----------------|
| MSL1. 5     | 2. 00E-05 | -0. 15709 | 0. 05  | 0. 16  | 0. 298804 | Tcell | MSL1           |
| MBIP. 10    | 2. 02E-05 | -0. 20755 | 0. 064 | 0. 182 | 0. 302212 | Tcell | MBIP           |
| B9D1. 8     | 2. 02E-05 | -0. 1976  | 0. 014 | 0. 102 | 0. 302527 | Tcell | B9D1           |
| SEPT9. 8    | 2. 03E-05 | 0. 5244   | 0. 386 | 0. 34  | 0. 303392 | Tcell | 9-Sep          |
| SMAP2. 11   | 2. 03E-05 | 0. 48132  | 0. 318 | 0. 235 | 0. 303907 | Tcell | SMAP2          |
| CELSR2. 9   | 2. 04E-05 | -0. 11563 | 0. 009 | 0. 094 | 0. 304727 | Tcell | CELSR2         |
| CSE1L. 11   | 2. 05E-05 | -0. 11676 | 0. 091 | 0. 225 | 0. 305705 | Tcell | CSE1L          |
| KBTBD6. 9   | 2. 05E-05 | -0. 15026 | 0. 032 | 0. 133 | 0. 306803 | Tcell | KBTBD6         |
| RP11-448A   | 2. 06E-05 | -0. 19624 | 0. 009 | 0. 094 | 0. 307994 | Tcell | RP11-448A19. 1 |
| SLC12A5. 9  | 2. 06E-05 | -0. 27525 | 0. 009 | 0. 094 | 0. 308462 | Tcell | SLC12A5        |
| DYX1C1. 1   | 2. 06E-05 | -0. 22535 | 0      | 0. 076 | 0. 308512 | Tcell | DYX1C1         |
| HYOU1. 5    | 2. 08E-05 | -0. 10659 | 0. 036 | 0. 141 | 0. 310266 | Tcell | HYOU1          |
| GEMIN7. 4   | 2. 08E-05 | -0. 16094 | 0. 05  | 0. 162 | 0. 311077 | Tcell | GEMIN7         |
| PLEKHH3. 7  | 2. 09E-05 | -0. 15215 | 0. 005 | 0. 085 | 0. 31197  | Tcell | PLEKHH3        |
| KIAA0895L   | 2. 10E-05 | -0. 20403 | 0. 009 | 0. 093 | 0. 314031 | Tcell | KIAA0895L      |
| HMG2. 5     | 2. 11E-05 | 0. 163107 | 0. 632 | 0. 631 | 0. 314584 | Tcell | HMG2           |
| BEX2. 12    | 2. 11E-05 | -0. 24961 | 0. 118 | 0. 26  | 0. 314869 | Tcell | BEX2           |
| EPHB2. 5    | 2. 12E-05 | -0. 16165 | 0. 005 | 0. 085 | 0. 316502 | Tcell | EPHB2          |
| HNRNPH2. 5  | 2. 12E-05 | -0. 19209 | 0. 214 | 0. 404 | 0. 317427 | Tcell | HNRNPH2        |
| EIF2B3. 3   | 2. 14E-05 | -0. 15365 | 0. 059 | 0. 175 | 0. 319057 | Tcell | EIF2B3         |
| UBAP2L. 4   | 2. 14E-05 | -0. 10403 | 0. 086 | 0. 219 | 0. 319082 | Tcell | UBAP2L         |
| YES1. 8     | 2. 14E-05 | -0. 15839 | 0. 032 | 0. 132 | 0. 319163 | Tcell | YES1           |
| FAM172A. 8  | 2. 14E-05 | -0. 1218  | 0. 073 | 0. 198 | 0. 319419 | Tcell | FAM172A        |
| MIER2. 3    | 2. 16E-05 | -0. 16175 | 0. 018 | 0. 11  | 0. 322424 | Tcell | MIER2          |
| SMAD4. 6    | 2. 16E-05 | -0. 18787 | 0. 027 | 0. 124 | 0. 322783 | Tcell | SMAD4          |
| FAM103A1. 2 | 2. 16E-05 | -0. 16645 | 0. 105 | 0. 245 | 0. 323212 | Tcell | FAM103A1       |
| LMO1. 12    | 2. 16E-05 | -0. 27264 | 0      | 0. 076 | 0. 323225 | Tcell | LMO1           |
| MIB1. 4     | 2. 18E-05 | -0. 15276 | 0. 009 | 0. 093 | 0. 325819 | Tcell | MIB1           |
| DFFA. 7     | 2. 18E-05 | -0. 1543  | 0. 091 | 0. 222 | 0. 325859 | Tcell | DFFA           |
| CRTC1. 2    | 2. 19E-05 | -0. 15589 | 0. 009 | 0. 093 | 0. 327103 | Tcell | CRTC1          |
| MSM01. 8    | 2. 19E-05 | -0. 17032 | 0. 077 | 0. 203 | 0. 327122 | Tcell | MSM01          |
| C14orf132   | 2. 20E-05 | -0. 28359 | 0. 009 | 0. 093 | 0. 328293 | Tcell | C14orf132      |
| CEBPA. 13   | 2. 20E-05 | -0. 35965 | 0. 018 | 0. 106 | 0. 328791 | Tcell | CEBPA          |
| YIPF5. 6    | 2. 20E-05 | -0. 10581 | 0. 118 | 0. 264 | 0. 328944 | Tcell | YIPF5          |
| SNX12. 2    | 2. 22E-05 | -0. 19007 | 0. 032 | 0. 132 | 0. 331178 | Tcell | SNX12          |
| ARSD. 2     | 2. 22E-05 | -0. 23924 | 0. 009 | 0. 092 | 0. 331494 | Tcell | ARSD           |
| CEBPG. 3    | 2. 22E-05 | -0. 13528 | 0. 109 | 0. 251 | 0. 331932 | Tcell | CEBPG          |
| PIP5K1C. 3  | 2. 22E-05 | -0. 13235 | 0. 018 | 0. 11  | 0. 331991 | Tcell | PIP5K1C        |
| UPF1. 2     | 2. 23E-05 | -0. 19967 | 0. 009 | 0. 093 | 0. 332817 | Tcell | UPF1           |
| NTRK2. 9    | 2. 24E-05 | -0. 3857  | 0. 027 | 0. 122 | 0. 334928 | Tcell | NTRK2          |
| AMER2. 10   | 2. 27E-05 | -0. 31306 | 0. 023 | 0. 116 | 0. 339722 | Tcell | AMER2          |
| C19orf52. 2 | 2. 27E-05 | -0. 13551 | 0. 059 | 0. 176 | 0. 339857 | Tcell | C19orf52       |
| ANGPTL2. 8  | 2. 28E-05 | -0. 22435 | 0. 014 | 0. 101 | 0. 341062 | Tcell | ANGPTL2        |
| WDR3. 4     | 2. 29E-05 | -0. 18126 | 0. 014 | 0. 101 | 0. 342704 | Tcell | WDR3           |
| GNL2. 6     | 2. 30E-05 | -0. 20428 | 0. 082 | 0. 209 | 0. 344243 | Tcell | GNL2           |
| TAF9B. 10   | 2. 31E-05 | -0. 15843 | 0. 041 | 0. 146 | 0. 344547 | Tcell | TAF9B          |
| MACROD1. 7  | 2. 31E-05 | -0. 17122 | 0. 027 | 0. 124 | 0. 345467 | Tcell | MACROD1        |
| RFXANK. 8   | 2. 32E-05 | -0. 14182 | 0. 159 | 0. 328 | 0. 346332 | Tcell | RFXANK         |
| AFMID. 7    | 2. 34E-05 | -0. 31433 | 0. 018 | 0. 107 | 0. 350421 | Tcell | AFMID          |
| LRRC17. 1C  | 2. 35E-05 | -0. 22344 | 0      | 0. 075 | 0. 350663 | Tcell | LRRC17         |
| IKBIP. 11   | 2. 35E-05 | -0. 25725 | 0. 1   | 0. 229 | 0. 351189 | Tcell | IKBIP          |

|            |          |          |       |       |          |       |           |
|------------|----------|----------|-------|-------|----------|-------|-----------|
| LRRCC1.9   | 2.35E-05 | -0.21571 | 0.036 | 0.137 | 0.351273 | Tcell | LRRCC1    |
| GLDN.13    | 2.35E-05 | -0.36633 | 0.014 | 0.098 | 0.351863 | Tcell | GLDN      |
| ATP6V1H.5  | 2.37E-05 | -0.11601 | 0.159 | 0.326 | 0.354518 | Tcell | ATP6V1H   |
| ELAC1.1    | 2.39E-05 | -0.18574 | 0.027 | 0.124 | 0.356435 | Tcell | ELAC1     |
| MEA1.5     | 2.39E-05 | -0.14314 | 0.232 | 0.437 | 0.357562 | Tcell | MEA1      |
| ABR.9      | 2.40E-05 | -0.15897 | 0.041 | 0.147 | 0.358921 | Tcell | ABR       |
| MPND.4     | 2.41E-05 | -0.15952 | 0.009 | 0.092 | 0.359834 | Tcell | MPND      |
| FUS.6      | 2.42E-05 | 0.290518 | 0.591 | 0.644 | 0.361404 | Tcell | FUS       |
| TPGS2.7    | 2.43E-05 | -0.14257 | 0.173 | 0.342 | 0.362483 | Tcell | TPGS2     |
| CHMP2A.7   | 2.43E-05 | -0.25877 | 0.409 | 0.66  | 0.363031 | Tcell | CHMP2A    |
| GPR155.1C  | 2.44E-05 | -0.13865 | 0.068 | 0.189 | 0.365128 | Tcell | GPR155    |
| RGS6.10    | 2.45E-05 | -0.2065  | 0.009 | 0.092 | 0.366853 | Tcell | RGS6      |
| PANK3.4    | 2.46E-05 | -0.18881 | 0.023 | 0.116 | 0.367688 | Tcell | PANK3     |
| RCHY1.8    | 2.47E-05 | -0.19981 | 0.077 | 0.202 | 0.36927  | Tcell | RCHY1     |
| ATXN7L3B.2 | 2.47E-05 | -0.13005 | 0.064 | 0.183 | 0.369575 | Tcell | ATXN7L3B  |
| TMEM156.1  | 2.49E-05 | 0.383454 | 0.118 | 0.055 | 0.371536 | Tcell | TMEM156   |
| SLC23A2.4  | 2.49E-05 | -0.12942 | 0.018 | 0.109 | 0.372104 | Tcell | SLC23A2   |
| SUPT4H1.6  | 2.50E-05 | -0.13196 | 0.277 | 0.499 | 0.373485 | Tcell | SUPT4H1   |
| PATL2      | 2.50E-05 | 0.197154 | 0.036 | 0.009 | 0.373832 | Tcell | PATL2     |
| MICU3.9    | 2.51E-05 | -0.21941 | 0.005 | 0.084 | 0.374868 | Tcell | MICU3     |
| KPNB1.12   | 2.51E-05 | -0.12071 | 0.241 | 0.452 | 0.375581 | Tcell | KPNB1     |
| TMEM119.1  | 2.52E-05 | -0.37402 | 0.018 | 0.107 | 0.375941 | Tcell | TMEM119   |
| ZMAT2.4    | 2.52E-05 | -0.16372 | 0.232 | 0.424 | 0.376429 | Tcell | ZMAT2     |
| REEP6.2    | 2.52E-05 | -0.16343 | 0.005 | 0.084 | 0.377131 | Tcell | REEP6     |
| RAB40B.11  | 2.55E-05 | -0.17009 | 0.032 | 0.132 | 0.38159  | Tcell | RAB40B    |
| GCLM.7     | 2.56E-05 | -0.15064 | 0.05  | 0.16  | 0.381906 | Tcell | GCLM      |
| TMEM129.6  | 2.56E-05 | -0.14267 | 0.059 | 0.174 | 0.382059 | Tcell | TMEM129   |
| DDX39A.9   | 2.57E-05 | -0.15623 | 0.209 | 0.396 | 0.383419 | Tcell | DDX39A    |
| C17orf10C  | 2.57E-05 | -0.15639 | 0.009 | 0.092 | 0.383973 | Tcell | C17orf100 |
| YTHDF3.2   | 2.57E-05 | -0.14694 | 0.036 | 0.138 | 0.383997 | Tcell | YTHDF3    |
| DLG4.5     | 2.58E-05 | -0.19238 | 0     | 0.075 | 0.384854 | Tcell | DLG4      |
| LRFN4.6    | 2.61E-05 | -0.15004 | 0     | 0.075 | 0.389353 | Tcell | LRFN4     |
| TNKS1BP1.2 | 2.61E-05 | -0.16495 | 0     | 0.075 | 0.389353 | Tcell | TNKS1BP1  |
| CCDC14.11  | 2.61E-05 | -0.1544  | 0.095 | 0.229 | 0.389492 | Tcell | CCDC14    |
| ZNF426.9   | 2.61E-05 | -0.21704 | 0.023 | 0.114 | 0.390146 | Tcell | ZNF426    |
| NTHL1.8    | 2.61E-05 | -0.1137  | 0.068 | 0.19  | 0.390471 | Tcell | NTHL1     |
| IFITM10.8  | 2.61E-05 | -0.27739 | 0.032 | 0.127 | 0.390684 | Tcell | IFITM10   |
| EPS15L1.8  | 2.63E-05 | -0.13059 | 0.055 | 0.168 | 0.392291 | Tcell | EPS15L1   |
| RRAS.6     | 2.64E-05 | -0.18812 | 0.018 | 0.108 | 0.394574 | Tcell | RRAS      |
| TARS.7     | 2.64E-05 | -0.14253 | 0.095 | 0.229 | 0.394812 | Tcell | TARS      |
| APH1B.10   | 2.64E-05 | -0.27511 | 0.032 | 0.129 | 0.395197 | Tcell | APH1B     |
| LRRFIP2.7  | 2.65E-05 | -0.13551 | 0.068 | 0.19  | 0.395815 | Tcell | LRRFIP2   |
| FLCN.7     | 2.65E-05 | -0.1794  | 0.036 | 0.138 | 0.395839 | Tcell | FLCN      |
| EPHA4.11   | 2.65E-05 | -0.19515 | 0.005 | 0.083 | 0.396065 | Tcell | EPHA4     |
| PIANP.10   | 2.65E-05 | -0.15781 | 0.005 | 0.083 | 0.396424 | Tcell | PIANP     |
| DNAJC12.4  | 2.65E-05 | -0.25779 | 0.005 | 0.083 | 0.396445 | Tcell | DNAJC12   |
| SLC4A1     | 2.67E-05 | 0.125158 | 0.014 | 0.002 | 0.398262 | Tcell | SLC4A1    |
| TRIM16L.5  | 2.67E-05 | -0.17589 | 0     | 0.074 | 0.398509 | Tcell | TRIM16L   |
| NLGN3.12   | 2.68E-05 | -0.15937 | 0.023 | 0.115 | 0.400807 | Tcell | NLGN3     |
| CEP78.11   | 2.68E-05 | -0.16938 | 0.023 | 0.115 | 0.40091  | Tcell | CEP78     |
| DSTYK.6    | 2.71E-05 | -0.2082  | 0.027 | 0.122 | 0.404495 | Tcell | DSTYK     |

|           |          |          |       |       |          |       |               |
|-----------|----------|----------|-------|-------|----------|-------|---------------|
| CTNNBIP1. | 2.72E-05 | -0.1048  | 0.086 | 0.217 | 0.406471 | Tcell | CTNNBIP1      |
| DNM1.8    | 2.73E-05 | -0.14942 | 0     | 0.074 | 0.407878 | Tcell | DNM1          |
| CTA-29F11 | 2.74E-05 | -0.11444 | 0.077 | 0.203 | 0.408826 | Tcell | CTA-29F11.1   |
| ACTR10.6  | 2.74E-05 | -0.17577 | 0.186 | 0.363 | 0.409586 | Tcell | ACTR10        |
| TRIP10.5  | 2.75E-05 | -0.14233 | 0.014 | 0.1   | 0.410714 | Tcell | TRIP10        |
| RBL2.2    | 2.75E-05 | 0.567129 | 0.205 | 0.128 | 0.411251 | Tcell | RBL2          |
| RCOR3.2   | 2.76E-05 | -0.16252 | 0.032 | 0.13  | 0.412256 | Tcell | RCOR3         |
| RYK.6     | 2.77E-05 | -0.15049 | 0.009 | 0.092 | 0.413599 | Tcell | RYK           |
| DNAL4.5   | 2.77E-05 | -0.17758 | 0.032 | 0.13  | 0.414467 | Tcell | DNAL4         |
| SATB2.6   | 2.79E-05 | -0.15327 | 0     | 0.074 | 0.417465 | Tcell | SATB2         |
| LONP1.6   | 2.80E-05 | -0.12057 | 0.082 | 0.207 | 0.419066 | Tcell | LONP1         |
| ZNF667.8  | 2.81E-05 | -0.18641 | 0.005 | 0.083 | 0.420459 | Tcell | ZNF667        |
| DMXL2.7   | 2.82E-05 | -0.22295 | 0.005 | 0.083 | 0.421972 | Tcell | DMXL2         |
| ACSS2.2   | 2.84E-05 | -0.1683  | 0.005 | 0.083 | 0.423853 | Tcell | ACSS2         |
| PTPRD.11  | 2.86E-05 | -0.26268 | 0     | 0.074 | 0.427275 | Tcell | PTPRD         |
| NAPG.1    | 2.87E-05 | -0.11302 | 0.05  | 0.16  | 0.429262 | Tcell | NAPG          |
| FIG4.3    | 2.87E-05 | -0.21352 | 0.018 | 0.107 | 0.429637 | Tcell | FIG4          |
| FCGR2B.14 | 2.89E-05 | -0.44944 | 0.045 | 0.146 | 0.431522 | Tcell | FCGR2B        |
| SMCO4.14  | 2.89E-05 | -0.28536 | 0.036 | 0.134 | 0.432361 | Tcell | SMCO4         |
| NUMBL.9   | 2.90E-05 | -0.16964 | 0.009 | 0.091 | 0.433036 | Tcell | NUMBL         |
| SLC29A1.1 | 2.90E-05 | -0.37108 | 0.041 | 0.139 | 0.433256 | Tcell | SLC29A1       |
| CHAMP1.8  | 2.90E-05 | -0.13118 | 0.032 | 0.13  | 0.433342 | Tcell | CHAMP1        |
| MIR181A1H | 2.90E-05 | -0.21976 | 0.023 | 0.114 | 0.433533 | Tcell | MIR181A1HG    |
| RP11-834C | 2.90E-05 | -0.32128 | 0.014 | 0.098 | 0.43364  | Tcell | RP11-834C11.4 |
| C6orf203. | 2.92E-05 | -0.12589 | 0.055 | 0.168 | 0.436521 | Tcell | C6orf203      |
| CACNA1A.1 | 2.92E-05 | -0.32156 | 0.014 | 0.097 | 0.437024 | Tcell | CACNA1A       |
| BRINP2.9  | 2.93E-05 | -0.18084 | 0     | 0.074 | 0.437314 | Tcell | BRINP2        |
| DNAJA1.6  | 2.94E-05 | 0.334787 | 0.586 | 0.629 | 0.438889 | Tcell | DNAJA1        |
| C16orf72. | 2.94E-05 | -0.18185 | 0.032 | 0.129 | 0.439105 | Tcell | C16orf72      |
| BBIP1.6   | 2.96E-05 | -0.15768 | 0.064 | 0.18  | 0.442901 | Tcell | BBIP1         |
| AMOTL2.9  | 2.96E-05 | -0.24101 | 0.005 | 0.082 | 0.443043 | Tcell | AMOTL2        |
| GTF3C6.6  | 2.97E-05 | -0.16682 | 0.286 | 0.518 | 0.443398 | Tcell | GTF3C6        |
| ZNF649.11 | 2.98E-05 | -0.145   | 0.009 | 0.091 | 0.445838 | Tcell | ZNF649        |
| PLEC.11   | 2.99E-05 | -0.14039 | 0.068 | 0.189 | 0.446176 | Tcell | PLEC          |
| CCDC80.11 | 3.00E-05 | -0.24504 | 0.023 | 0.114 | 0.448274 | Tcell | CCDC80        |
| TTI1.8    | 3.01E-05 | -0.18424 | 0.014 | 0.098 | 0.449161 | Tcell | TTI1          |
| EDEM2.8   | 3.01E-05 | -0.15275 | 0.105 | 0.243 | 0.450318 | Tcell | EDEM2         |
| PEX11G.4  | 3.03E-05 | -0.18267 | 0     | 0.074 | 0.452811 | Tcell | PEX11G        |
| HPGDS.13  | 3.03E-05 | -0.37386 | 0.009 | 0.091 | 0.453162 | Tcell | HPGDS         |
| AC009506. | 3.04E-05 | -0.22936 | 0.005 | 0.082 | 0.453757 | Tcell | AC009506.1    |
| CRY1.7    | 3.05E-05 | -0.14444 | 0.036 | 0.138 | 0.456304 | Tcell | CRY1          |
| RP4-728D4 | 3.06E-05 | 0.337564 | 0.05  | 0.015 | 0.457928 | Tcell | RP4-728D4.2   |
| ENKUR.10  | 3.07E-05 | -0.23366 | 0     | 0.073 | 0.458096 | Tcell | ENKUR         |
| MARCH3.7  | 3.08E-05 | -0.27231 | 0.018 | 0.106 | 0.46018  | Tcell | 3-Mar         |
| RNF170.5  | 3.08E-05 | -0.163   | 0.055 | 0.167 | 0.461011 | Tcell | RNF170        |
| SYMPK.8   | 3.09E-05 | -0.16039 | 0.095 | 0.225 | 0.461791 | Tcell | SYMPK         |
| SLC20A2.6 | 3.09E-05 | -0.19425 | 0.023 | 0.114 | 0.462042 | Tcell | SLC20A2       |
| COL22A1.1 | 3.10E-05 | -0.15628 | 0     | 0.073 | 0.463443 | Tcell | COL22A1       |
| SCN3B.9   | 3.10E-05 | -0.26721 | 0     | 0.073 | 0.463443 | Tcell | SCN3B         |
| RABEPK.9  | 3.11E-05 | -0.13417 | 0.077 | 0.202 | 0.464688 | Tcell | RABEPK        |
| CCDC86.2  | 3.11E-05 | -0.15459 | 0.018 | 0.107 | 0.464913 | Tcell | CCDC86        |

|           |          |          |       |       |          |       |            |
|-----------|----------|----------|-------|-------|----------|-------|------------|
| PHPT1.4   | 3.12E-05 | -0.26505 | 0.409 | 0.656 | 0.465779 | Tcell | PHPT1      |
| HEXIM2.4  | 3.13E-05 | -0.187   | 0.005 | 0.082 | 0.467246 | Tcell | HEXIM2     |
| NRBP2.9   | 3.13E-05 | -0.109   | 0.027 | 0.123 | 0.467252 | Tcell | NRBP2      |
| SMIM4.8   | 3.14E-05 | -0.12293 | 0.123 | 0.27  | 0.46861  | Tcell | SMIM4      |
| P4HA2.8   | 3.17E-05 | -0.16901 | 0.005 | 0.082 | 0.473732 | Tcell | P4HA2      |
| SCN3A.11  | 3.17E-05 | -0.22844 | 0     | 0.073 | 0.474322 | Tcell | SCN3A      |
| FBXO11.9  | 3.19E-05 | -0.13631 | 0.082 | 0.208 | 0.477307 | Tcell | FBXO11     |
| C9orf3.11 | 3.22E-05 | -0.21471 | 0.018 | 0.106 | 0.481942 | Tcell | C9orf3     |
| TSPAN2    | 3.23E-05 | 0.14389  | 0.027 | 0.006 | 0.482408 | Tcell | TSPAN2     |
| AC091729. | 3.26E-05 | -0.16863 | 0.005 | 0.082 | 0.487181 | Tcell | AC091729.9 |
| VTI1B.6   | 3.28E-05 | -0.10073 | 0.177 | 0.35  | 0.490391 | Tcell | VTI1B      |
| POMT2.5   | 3.29E-05 | -0.16807 | 0     | 0.073 | 0.491118 | Tcell | POMT2      |
| NANS.12   | 3.30E-05 | -0.16387 | 0.195 | 0.363 | 0.492806 | Tcell | NANS       |
| FBP1.14   | 3.31E-05 | -0.33603 | 0.027 | 0.119 | 0.49464  | Tcell | FBP1       |
| SYNM.9    | 3.32E-05 | -0.15081 | 0     | 0.073 | 0.496846 | Tcell | SYNM       |
| KAZN.9    | 3.32E-05 | -0.19224 | 0     | 0.073 | 0.496846 | Tcell | KAZN       |
| ANAPC15.7 | 3.33E-05 | -0.10636 | 0.123 | 0.264 | 0.49699  | Tcell | ANAPC15    |
| H2AFY2.6  | 3.33E-05 | -0.17065 | 0.018 | 0.105 | 0.497436 | Tcell | H2AFY2     |
| ARL10.9   | 3.35E-05 | -0.15075 | 0.009 | 0.09  | 0.50034  | Tcell | ARL10      |
| LAGE3.6   | 3.35E-05 | -0.13845 | 0.209 | 0.402 | 0.500526 | Tcell | LAGE3      |
| SPRYD7.3  | 3.35E-05 | -0.15105 | 0.064 | 0.178 | 0.500903 | Tcell | SPRYD7     |
| PCBP2.7   | 3.35E-05 | 0.278862 | 0.605 | 0.664 | 0.501363 | Tcell | PCBP2      |
| RPS6KA2.5 | 3.36E-05 | -0.1961  | 0.023 | 0.113 | 0.501769 | Tcell | RPS6KA2    |
| TIPRL.7   | 3.37E-05 | -0.12862 | 0.127 | 0.268 | 0.503699 | Tcell | TIPRL      |
| UNC93B1.1 | 3.38E-05 | -0.19091 | 0.082 | 0.203 | 0.504715 | Tcell | UNC93B1    |
| FAM200A.8 | 3.38E-05 | -0.19837 | 0.014 | 0.098 | 0.505418 | Tcell | FAM200A    |
| TMEM108.7 | 3.39E-05 | -0.15767 | 0.005 | 0.082 | 0.506165 | Tcell | TMEM108    |
| TMEM106C. | 3.39E-05 | -0.12267 | 0.123 | 0.269 | 0.506759 | Tcell | TMEM106C   |
| SNHG8.8   | 3.39E-05 | 0.373242 | 0.486 | 0.468 | 0.507055 | Tcell | SNHG8      |
| DPY19L3.6 | 3.40E-05 | -0.1583  | 0.009 | 0.09  | 0.50801  | Tcell | DPY19L3    |
| NECAP1.1C | 3.40E-05 | -0.15275 | 0.077 | 0.201 | 0.508757 | Tcell | NECAP1     |
| KIAA0226L | 3.42E-05 | -0.27108 | 0.014 | 0.097 | 0.511229 | Tcell | KIAA0226L  |
| INTS10.6  | 3.43E-05 | -0.10028 | 0.145 | 0.305 | 0.512877 | Tcell | INTS10     |
| ADD2.11   | 3.44E-05 | -0.18764 | 0.009 | 0.09  | 0.513599 | Tcell | ADD2       |
| EXOSC5.2  | 3.45E-05 | -0.22471 | 0.068 | 0.183 | 0.516096 | Tcell | EXOSC5     |
| PLAT.10   | 3.46E-05 | -0.20168 | 0.027 | 0.121 | 0.517766 | Tcell | PLAT       |
| GPATCH4.6 | 3.47E-05 | -0.10317 | 0.073 | 0.195 | 0.51837  | Tcell | GPATCH4    |
| TMEM47.11 | 3.47E-05 | -0.15248 | 0.005 | 0.081 | 0.518678 | Tcell | TMEM47     |
| TRAK1.3   | 3.47E-05 | -0.15697 | 0.014 | 0.098 | 0.518842 | Tcell | TRAK1      |
| KCNMB1.13 | 3.48E-05 | -0.34357 | 0.018 | 0.104 | 0.520211 | Tcell | KCNMB1     |
| PHF6.9    | 3.50E-05 | -0.10908 | 0.059 | 0.172 | 0.522416 | Tcell | PHF6       |
| MTRNR2L1. | 3.51E-05 | -0.38582 | 0.082 | 0.195 | 0.524682 | Tcell | MTRNR2L1   |
| AK3.4     | 3.51E-05 | -0.11955 | 0.105 | 0.24  | 0.524704 | Tcell | AK3        |
| STYXL1.6  | 3.52E-05 | -0.19528 | 0.032 | 0.128 | 0.525308 | Tcell | STYXL1     |
| OPHN1.10  | 3.52E-05 | -0.22204 | 0     | 0.072 | 0.526495 | Tcell | OPHN1      |
| ZBED3.9   | 3.53E-05 | -0.15513 | 0.009 | 0.09  | 0.527489 | Tcell | ZBED3      |
| UBE2Q1.5  | 3.57E-05 | -0.14043 | 0.055 | 0.163 | 0.533651 | Tcell | UBE2Q1     |
| PDP1.8    | 3.58E-05 | -0.15513 | 0.032 | 0.128 | 0.534656 | Tcell | PDP1       |
| FAM133B.6 | 3.58E-05 | -0.17178 | 0.264 | 0.475 | 0.534936 | Tcell | FAM133B    |
| HMBOX1.11 | 3.58E-05 | -0.1164  | 0.073 | 0.195 | 0.535108 | Tcell | HMBOX1     |
| MTMR11.7  | 3.61E-05 | -0.20165 | 0     | 0.072 | 0.538839 | Tcell | MTMR11     |

|           |          |          |       |       |          |       |               |
|-----------|----------|----------|-------|-------|----------|-------|---------------|
| NUAK1.6   | 3.61E-05 | -0.21444 | 0     | 0.072 | 0.538839 | Tcell | NUAK1         |
| HPS4.6    | 3.62E-05 | -0.1497  | 0.068 | 0.185 | 0.54082  | Tcell | HPS4          |
| BRD2.5    | 3.62E-05 | 0.439105 | 0.464 | 0.453 | 0.541037 | Tcell | BRD2          |
| AHNAK.7   | 3.63E-05 | 0.614953 | 0.191 | 0.117 | 0.542079 | Tcell | AHNAK         |
| DUSP26.1C | 3.63E-05 | -0.29289 | 0.009 | 0.089 | 0.5429   | Tcell | DUSP26        |
| CXCL14.9  | 3.63E-05 | -0.16975 | 0.041 | 0.143 | 0.543073 | Tcell | CXCL14        |
| ZADH2.4   | 3.64E-05 | -0.16897 | 0.018 | 0.105 | 0.543831 | Tcell | ZADH2         |
| UBE2A.5   | 3.64E-05 | -0.12606 | 0.227 | 0.426 | 0.544456 | Tcell | UBE2A         |
| PTAFR.14  | 3.65E-05 | -0.32599 | 0.032 | 0.127 | 0.546004 | Tcell | PTAFR         |
| PEX19.1   | 3.66E-05 | -0.1365  | 0.059 | 0.171 | 0.546958 | Tcell | PEX19         |
| CX3CR1.13 | 3.67E-05 | -0.40965 | 0.018 | 0.103 | 0.548331 | Tcell | CX3CR1        |
| MSANTD3.8 | 3.68E-05 | -0.19116 | 0.009 | 0.089 | 0.549918 | Tcell | MSANTD3       |
| DDR GK1.7 | 3.68E-05 | -0.12264 | 0.223 | 0.421 | 0.549968 | Tcell | DDR GK1       |
| TSC22D2.7 | 3.69E-05 | -0.16069 | 0.05  | 0.159 | 0.5513   | Tcell | TSC22D2       |
| EPB41L1.9 | 3.70E-05 | -0.1518  | 0.009 | 0.089 | 0.552352 | Tcell | EPB41L1       |
| MDFI.11   | 3.74E-05 | -0.20543 | 0.009 | 0.089 | 0.559267 | Tcell | MDFI          |
| CHMP5.3   | 3.74E-05 | -0.13958 | 0.314 | 0.536 | 0.559382 | Tcell | CHMP5         |
| FAM60A.8  | 3.76E-05 | -0.13779 | 0.064 | 0.177 | 0.56162  | Tcell | FAM60A        |
| NOS1AP.1C | 3.76E-05 | -0.18057 | 0.005 | 0.081 | 0.562379 | Tcell | NOS1AP        |
| LZIC.4    | 3.81E-05 | -0.16613 | 0.068 | 0.184 | 0.569636 | Tcell | LZIC          |
| GJA1.7    | 3.82E-05 | -0.32037 | 0.005 | 0.08  | 0.57135  | Tcell | GJA1          |
| ICAM1.10  | 3.83E-05 | -0.22958 | 0.059 | 0.166 | 0.572096 | Tcell | ICAM1         |
| DECR1.7   | 3.84E-05 | -0.13205 | 0.223 | 0.416 | 0.573467 | Tcell | DECR1         |
| DDX54.6   | 3.84E-05 | -0.10093 | 0.077 | 0.201 | 0.573974 | Tcell | DDX54         |
| PCDHB2.1C | 3.86E-05 | -0.15139 | 0.005 | 0.081 | 0.576253 | Tcell | PCDHB2        |
| SMAD9.9   | 3.87E-05 | -0.20875 | 0     | 0.072 | 0.577618 | Tcell | SMAD9         |
| LINC01102 | 3.87E-05 | -0.25644 | 0     | 0.072 | 0.577618 | Tcell | LINC01102     |
| ASNSD1.1C | 3.88E-05 | -0.10513 | 0.127 | 0.274 | 0.579942 | Tcell | ASNSD1        |
| FAM46A.1C | 3.89E-05 | -0.15036 | 0.077 | 0.198 | 0.581076 | Tcell | FAM46A        |
| BEST3.11  | 3.91E-05 | -0.29417 | 0.009 | 0.089 | 0.584717 | Tcell | BEST3         |
| ORAI3.10  | 3.92E-05 | -0.14333 | 0.041 | 0.143 | 0.585973 | Tcell | ORAI3         |
| PDE12.1   | 3.92E-05 | -0.20467 | 0.023 | 0.111 | 0.586274 | Tcell | PDE12         |
| MAP4K5.9  | 3.93E-05 | -0.13845 | 0.05  | 0.157 | 0.586916 | Tcell | MAP4K5        |
| ZNF254.9  | 3.94E-05 | -0.10365 | 0.041 | 0.143 | 0.58825  | Tcell | ZNF254        |
| ZBTB8A.1C | 3.96E-05 | -0.15412 | 0.018 | 0.105 | 0.591367 | Tcell | ZBTB8A        |
| FCER1G.14 | 3.96E-05 | -0.31695 | 0.282 | 0.445 | 0.5915   | Tcell | FCER1G        |
| SLC25A18. | 3.99E-05 | -0.22818 | 0.009 | 0.089 | 0.596327 | Tcell | SLC25A18      |
| MDGA1.8   | 4.00E-05 | -0.12993 | 0     | 0.071 | 0.598032 | Tcell | MDGA1         |
| SDCCAG3.5 | 4.00E-05 | -0.1413  | 0.014 | 0.097 | 0.598425 | Tcell | SDCCAG3       |
| ZMYM4.6   | 4.01E-05 | -0.10539 | 0.032 | 0.127 | 0.599504 | Tcell | ZMYM4         |
| RP11-262H | 4.02E-05 | -0.12468 | 0.027 | 0.12  | 0.600759 | Tcell | RP11-262H14.4 |
| MLH1.6    | 4.02E-05 | -0.20402 | 0.05  | 0.155 | 0.60124  | Tcell | MLH1          |
| NIT2.4    | 4.02E-05 | -0.18787 | 0.1   | 0.231 | 0.601253 | Tcell | NIT2          |
| RASSF8.8  | 4.03E-05 | -0.11772 | 0.009 | 0.089 | 0.602864 | Tcell | RASSF8        |
| SYDE1.8   | 4.05E-05 | -0.1392  | 0     | 0.071 | 0.604994 | Tcell | SYDE1         |
| EPRS.8    | 4.07E-05 | -0.14496 | 0.145 | 0.297 | 0.608561 | Tcell | EPRS          |
| APIP.10   | 4.07E-05 | -0.2178  | 0.105 | 0.236 | 0.608567 | Tcell | APIP          |
| SASH1.8   | 4.10E-05 | -0.19293 | 0     | 0.071 | 0.612036 | Tcell | SASH1         |
| NDUFAF2.7 | 4.16E-05 | -0.16299 | 0.127 | 0.275 | 0.621533 | Tcell | NDUFAF2       |
| CPNE2.12  | 4.16E-05 | -0.1442  | 0.064 | 0.18  | 0.622071 | Tcell | CPNE2         |
| PEG10.10  | 4.18E-05 | -0.27009 | 0.018 | 0.104 | 0.62428  | Tcell | PEG10         |

|           |    |         |          |          |       |          |          |              |         |
|-----------|----|---------|----------|----------|-------|----------|----------|--------------|---------|
| Clorf109. | 4. | 1.9E-05 | -0.18163 | 0.036    | 0.134 | 0.625516 | Tcell    | Clorf109     |         |
| CDH4.     | 11 | 4.      | 2.0E-05  | -0.16865 | 0.009 | 0.088    | 0.627339 | Tcell        | CDH4    |
| SRD5A1.   | 6  | 4.      | 2.0E-05  | -0.13152 | 0.023 | 0.112    | 0.628213 | Tcell        | SRD5A1  |
| TMEM179B. | 4. | 2.1E-05 | -0.10629 | 0.223    | 0.417 | 0.62856  | Tcell    | TMEM179B     |         |
| NCF2.     | 14 | 4.      | 2.4E-05  | -0.32234 | 0.018 | 0.103    | 0.633059 | Tcell        | NCF2    |
| NFASC.    | 10 | 4.      | 2.4E-05  | -0.22913 | 0.018 | 0.104    | 0.633827 | Tcell        | NFASC   |
| PTPRO.    | 10 | 4.      | 2.8E-05  | -0.24935 | 0.005 | 0.08     | 0.639564 | Tcell        | PTPRO   |
| TTC28.    | 10 | 4.      | 2.9E-05  | -0.11651 | 0.014 | 0.097    | 0.64092  | Tcell        | TTC28   |
| ETV4.     | 11 | 4.      | 2.9E-05  | -0.17687 | 0.005 | 0.08     | 0.641467 | Tcell        | ETV4    |
| GGCX.     | 2  | 4.      | 3.2E-05  | -0.12399 | 0.064 | 0.177    | 0.645422 | Tcell        | GGCX    |
| MAPKAPK5- | 4. | 3.4E-05 | -0.12377 | 0.095    | 0.226 | 0.648215 | Tcell    | MAPKAPK5-AS1 |         |
| ARMC9.    | 5  | 4.      | 3.4E-05  | -0.18838 | 0     | 0.071    | 0.648484 | Tcell        | ARMC9   |
| PCDHB10.  | 1  | 4.      | 3.4E-05  | -0.21645 | 0.018 | 0.104    | 0.649063 | Tcell        | PCDHB10 |
| PRPF38B.  | 8  | 4.      | 3.6E-05  | 0.474186 | 0.455 | 0.434    | 0.650923 | Tcell        | PRPF38B |
| SIGLEC9.  | 1  | 4.      | 3.6E-05  | -0.32757 | 0.014 | 0.094    | 0.651124 | Tcell        | SIGLEC9 |
| AGPAT4.   | 7  | 4.      | 3.6E-05  | -0.15875 | 0.018 | 0.104    | 0.651809 | Tcell        | AGPAT4  |
| MEIS1.    | 11 | 4.      | 3.7E-05  | -0.13702 | 0.009 | 0.088    | 0.653405 | Tcell        | MEIS1   |
| CREBL2.   | 11 | 4.      | 3.8E-05  | -0.12627 | 0.073 | 0.191    | 0.654507 | Tcell        | CREBL2  |
| TMEM145.  | 9  | 4.      | 3.9E-05  | -0.19683 | 0     | 0.071    | 0.656028 | Tcell        | TMEM145 |
| IDH3G.    | 7  | 4.      | 4.0E-05  | -0.17383 | 0.223 | 0.406    | 0.656954 | Tcell        | IDH3G   |
| SNAPC2.   | 7  | 4.      | 4.0E-05  | -0.12068 | 0.082 | 0.206    | 0.657571 | Tcell        | SNAPC2  |
| NQO1.     | 10 | 4.      | 4.2E-05  | -0.22899 | 0.023 | 0.11     | 0.660774 | Tcell        | NQO1    |
| ATF2.     | 3  | 4.      | 4.3E-05  | -0.14339 | 0.055 | 0.162    | 0.661502 | Tcell        | ATF2    |
| COPZ1.    | 6  | 4.      | 4.3E-05  | -0.1739  | 0.277 | 0.489    | 0.661877 | Tcell        | COPZ1   |
| PMM1.     | 8  | 4.      | 4.7E-05  | -0.15958 | 0.105 | 0.236    | 0.668431 | Tcell        | PMM1    |
| ORAI1.    | 9  | 4.      | 4.8E-05  | 0.588568 | 0.195 | 0.124    | 0.669903 | Tcell        | ORAI1   |
| LMF1.     | 2  | 4.      | 4.9E-05  | -0.20357 | 0.018 | 0.104    | 0.671341 | Tcell        | LMF1    |
| PHACTR3.  | 1  | 4.      | 4.9E-05  | -0.25842 | 0.005 | 0.079    | 0.671345 | Tcell        | PHACTR3 |
| ZNF300.   | 11 | 4.      | 4.9E-05  | -0.19542 | 0     | 0.071    | 0.671377 | Tcell        | ZNF300  |
| ELOVL1.   | 8  | 4.      | 5.0E-05  | -0.28066 | 0.105 | 0.233    | 0.672802 | Tcell        | ELOVL1  |
| GLIS3.    | 6  | 4.      | 5.1E-05  | -0.16659 | 0.005 | 0.079    | 0.674086 | Tcell        | GLIS3   |
| PTPRE.    | 10 | 4.      | 5.3E-05  | -0.15182 | 0.132 | 0.272    | 0.676324 | Tcell        | PTPRE   |
| BCAT2.    | 5  | 4.      | 5.3E-05  | -0.2002  | 0.041 | 0.14     | 0.67641  | Tcell        | BCAT2   |
| BTK.      | 14 | 4.      | 5.5E-05  | -0.31144 | 0.009 | 0.087    | 0.679625 | Tcell        | BTK     |
| SCML1.    | 8  | 4.      | 5.5E-05  | -0.27086 | 0.014 | 0.095    | 0.680508 | Tcell        | SCML1   |
| ZNF584.   | 6  | 4.      | 5.5E-05  | -0.14701 | 0.009 | 0.088    | 0.680514 | Tcell        | ZNF584  |
| EIF3K.    | 11 | 4.      | 5.7E-05  | 0.198856 | 0.677 | 0.76     | 0.683153 | Tcell        | EIF3K   |
| PLD2.     | 7  | 4.      | 5.9E-05  | -0.21533 | 0.009 | 0.087    | 0.686265 | Tcell        | PLD2    |
| ZNF629.   | 4  | 4.      | 6.0E-05  | -0.16187 | 0     | 0.07     | 0.687082 | Tcell        | ZNF629  |
| IGF1R.    | 8  | 4.      | 6.0E-05  | -0.1955  | 0     | 0.07     | 0.687082 | Tcell        | IGF1R   |
| AMPD2.    | 8  | 4.      | 6.0E-05  | -0.2     | 0.05  | 0.154    | 0.687761 | Tcell        | AMPD2   |
| PRPF31.   | 8  | 4.      | 6.1E-05  | -0.17844 | 0.209 | 0.395    | 0.6895   | Tcell        | PRPF31  |
| C5orf42.  | 8  | 4.      | 6.2E-05  | -0.15353 | 0.014 | 0.095    | 0.689688 | Tcell        | C5orf42 |
| CDK18.    | 8  | 4.      | 6.3E-05  | -0.28501 | 0.005 | 0.079    | 0.692023 | Tcell        | CDK18   |
| STK11.    | 4  | 4.      | 6.5E-05  | -0.10522 | 0.014 | 0.096    | 0.694253 | Tcell        | STK11   |
| HSDL2.    | 5  | 4.      | 6.5E-05  | -0.1263  | 0.055 | 0.162    | 0.695176 | Tcell        | HSDL2   |
| CCAR1.    | 6  | 4.      | 6.5E-05  | -0.12065 | 0.114 | 0.253    | 0.695319 | Tcell        | CCAR1   |
| YRDC.     | 8  | 4.      | 6.6E-05  | -0.11866 | 0.055 | 0.163    | 0.696065 | Tcell        | YRDC    |
| GNPDA2.   | 8  | 4.      | 6.6E-05  | -0.15383 | 0.032 | 0.126    | 0.69616  | Tcell        | GNPDA2  |
| ATP5I.    | 5  | 4.      | 6.8E-05  | 0.143967 | 0.691 | 0.753    | 0.698907 | Tcell        | ATP5I   |
| CLPB.     | 3  | 4.      | 6.8E-05  | -0.19528 | 0.014 | 0.095    | 0.699926 | Tcell        | CLPB    |



|            |          |          |       |       |          |       |           |
|------------|----------|----------|-------|-------|----------|-------|-----------|
| INTS3.3    | 4.75E-05 | -0.14644 | 0.023 | 0.111 | 0.709257 | Tcell | INTS3     |
| SSR1.10    | 4.76E-05 | -0.12608 | 0.264 | 0.472 | 0.711002 | Tcell | SSR1      |
| ACYP2.9    | 4.76E-05 | -0.10518 | 0.155 | 0.315 | 0.712049 | Tcell | ACYP2     |
| STOML1.5   | 4.80E-05 | -0.23344 | 0.018 | 0.102 | 0.716793 | Tcell | STOML1    |
| PRPF8.5    | 4.80E-05 | -0.10205 | 0.118 | 0.259 | 0.718019 | Tcell | PRPF8     |
| WHSC1.10   | 4.81E-05 | -0.13017 | 0.05  | 0.155 | 0.71839  | Tcell | WHSC1     |
| MON1A.8    | 4.81E-05 | -0.12478 | 0.009 | 0.088 | 0.719399 | Tcell | MON1A     |
| RUNX2.9    | 4.81E-05 | 0.282965 | 0.073 | 0.028 | 0.719531 | Tcell | RUNX2     |
| ACACA.5    | 4.82E-05 | -0.16596 | 0.014 | 0.095 | 0.719792 | Tcell | ACACA     |
| CD164.12   | 4.84E-05 | 0.30349  | 0.505 | 0.49  | 0.722727 | Tcell | CD164     |
| EXD2.5     | 4.84E-05 | -0.13334 | 0.014 | 0.096 | 0.723751 | Tcell | EXD2      |
| ROB03.5    | 4.85E-05 | -0.2269  | 0.027 | 0.118 | 0.724577 | Tcell | ROB03     |
| LYPLA1.8   | 4.89E-05 | -0.10763 | 0.223 | 0.41  | 0.730114 | Tcell | LYPLA1    |
| KIAA1429.4 | 4.90E-05 | -0.16876 | 0.023 | 0.111 | 0.732657 | Tcell | KIAA1429  |
| LANCL1.9   | 4.91E-05 | -0.19563 | 0.027 | 0.119 | 0.73442  | Tcell | LANCL1    |
| RAB11B.8   | 4.93E-05 | -0.14955 | 0.295 | 0.508 | 0.736104 | Tcell | RAB11B    |
| PACSIN2.1  | 4.94E-05 | -0.15443 | 0.064 | 0.176 | 0.73833  | Tcell | PACSIN2   |
| TCTA.4     | 4.94E-05 | -0.1229  | 0.055 | 0.163 | 0.7386   | Tcell | TCTA      |
| RBBP9.6    | 4.94E-05 | -0.10922 | 0.014 | 0.096 | 0.738855 | Tcell | RBBP9     |
| TRIM47.12  | 4.95E-05 | -0.15772 | 0.068 | 0.182 | 0.73923  | Tcell | TRIM47    |
| MAPK3.6    | 4.96E-05 | -0.14768 | 0.086 | 0.209 | 0.74137  | Tcell | MAPK3     |
| ALG8.5     | 4.96E-05 | -0.1223  | 0.068 | 0.181 | 0.741533 | Tcell | ALG8      |
| FAH.12     | 4.97E-05 | -0.26595 | 0.055 | 0.16  | 0.742082 | Tcell | FAH       |
| CDH6.9     | 4.99E-05 | -0.14909 | 0     | 0.07  | 0.744969 | Tcell | CDH6      |
| LRRC24.8   | 4.99E-05 | -0.17532 | 0     | 0.07  | 0.744969 | Tcell | LRRC24    |
| N6AMT2.8   | 4.99E-05 | -0.10545 | 0.036 | 0.134 | 0.746352 | Tcell | N6AMT2    |
| CNPY1.12   | 5.03E-05 | -0.18887 | 0.005 | 0.079 | 0.751941 | Tcell | CNPY1     |
| GLDC.9     | 5.04E-05 | -0.16405 | 0     | 0.07  | 0.753623 | Tcell | GLDC      |
| RNPEP.12   | 5.05E-05 | -0.1765  | 0.1   | 0.226 | 0.75472  | Tcell | RNPEP     |
| B4GALT2.8  | 5.05E-05 | -0.16627 | 0.005 | 0.078 | 0.754973 | Tcell | B4GALT2   |
| CCT4.7     | 5.06E-05 | -0.14183 | 0.323 | 0.565 | 0.755789 | Tcell | CCT4      |
| CH25H.10   | 5.09E-05 | -0.42374 | 0.05  | 0.149 | 0.760173 | Tcell | CH25H     |
| C4orf48.9  | 5.09E-05 | -0.19784 | 0.323 | 0.529 | 0.760701 | Tcell | C4orf48   |
| LINC00847  | 5.13E-05 | -0.20141 | 0.023 | 0.11  | 0.767363 | Tcell | LINC00847 |
| LINC00116  | 5.14E-05 | -0.15159 | 0.195 | 0.368 | 0.768677 | Tcell | LINC00116 |
| SAV1.2     | 5.14E-05 | -0.13644 | 0.018 | 0.103 | 0.768793 | Tcell | SAV1      |
| CCNY.8     | 5.17E-05 | -0.16877 | 0.023 | 0.11  | 0.772706 | Tcell | CCNY      |
| AGTRAP.1C  | 5.18E-05 | -0.2319  | 0.141 | 0.284 | 0.773466 | Tcell | AGTRAP    |
| DACT3.9    | 5.21E-05 | -0.22063 | 0.005 | 0.078 | 0.778659 | Tcell | DACT3     |
| PHYH.4     | 5.21E-05 | -0.12951 | 0.059 | 0.169 | 0.7792   | Tcell | PHYH      |
| SAA1.11    | 5.22E-05 | -0.95608 | 0.032 | 0.12  | 0.779468 | Tcell | SAA1      |
| STK33.10   | 5.22E-05 | -0.15783 | 0     | 0.069 | 0.78019  | Tcell | STK33     |
| VEGFB.6    | 5.24E-05 | -0.18434 | 0.045 | 0.146 | 0.783028 | Tcell | VEGFB     |
| FAM69C.12  | 5.26E-05 | -0.1325  | 0.005 | 0.078 | 0.786208 | Tcell | FAM69C    |
| H2AFV.11   | 5.27E-05 | 0.338567 | 0.509 | 0.522 | 0.7869   | Tcell | H2AFV     |
| GTF2IRD2.5 | 5.28E-05 | -0.17536 | 0.027 | 0.118 | 0.789709 | Tcell | GTF2IRD2  |
| PPOX.5     | 5.29E-05 | -0.13745 | 0.023 | 0.111 | 0.79023  | Tcell | PPOX      |
| IFT46.8    | 5.31E-05 | -0.14775 | 0.023 | 0.111 | 0.793764 | Tcell | IFT46     |
| SRFBP1.4   | 5.32E-05 | -0.12    | 0.068 | 0.183 | 0.795297 | Tcell | SRFBP1    |
| PKIA.13    | 5.33E-05 | -0.22861 | 0.014 | 0.095 | 0.796874 | Tcell | PKIA      |
| PLL.11     | 5.34E-05 | -0.35202 | 0     | 0.069 | 0.798414 | Tcell | PLL       |

|           |          |          |       |       |          |       |            |
|-----------|----------|----------|-------|-------|----------|-------|------------|
| DBNDD1.9  | 5.40E-05 | -0.16142 | 0     | 0.069 | 0.807684 | Tcell | DBNDD1     |
| CCDC102B. | 5.44E-05 | -0.16224 | 0.018 | 0.102 | 0.812926 | Tcell | CCDC102B   |
| LACTB2.6  | 5.44E-05 | -0.25658 | 0.05  | 0.153 | 0.813353 | Tcell | LACTB2     |
| AAMDC.10  | 5.45E-05 | -0.22882 | 0.086 | 0.208 | 0.81397  | Tcell | AAMDC      |
| LPCAT1.7  | 5.45E-05 | -0.10049 | 0.068 | 0.184 | 0.814927 | Tcell | LPCAT1     |
| PLXNA1.4  | 5.45E-05 | -0.138   | 0.009 | 0.087 | 0.815011 | Tcell | PLXNA1     |
| ACO07405. | 5.47E-05 | -0.15754 | 0     | 0.069 | 0.81706  | Tcell | ACO07405.6 |
| PCDH10.1C | 5.47E-05 | -0.16968 | 0     | 0.069 | 0.81706  | Tcell | PCDH10     |
| RABGAP1.8 | 5.47E-05 | -0.10158 | 0.032 | 0.126 | 0.817495 | Tcell | RABGAP1    |
| LTF.11    | 5.47E-05 | -0.71487 | 0.055 | 0.153 | 0.817967 | Tcell | LTF        |
| PEF1.6    | 5.47E-05 | -0.13127 | 0.164 | 0.322 | 0.818052 | Tcell | PEF1       |
| UBALD1.8  | 5.52E-05 | -0.10419 | 0.059 | 0.169 | 0.82483  | Tcell | UBALD1     |
| FREM2.9   | 5.53E-05 | -0.12575 | 0     | 0.069 | 0.826544 | Tcell | FREM2      |
| RABL2A.6  | 5.56E-05 | -0.19882 | 0.005 | 0.078 | 0.830454 | Tcell | RABL2A     |
| FRYL.13   | 5.59E-05 | -0.10331 | 0.073 | 0.19  | 0.835313 | Tcell | FRYL       |
| ADAM28.13 | 5.59E-05 | -0.35743 | 0.045 | 0.143 | 0.836095 | Tcell | ADAM28     |
| MIEN1.4   | 5.64E-05 | -0.20277 | 0.282 | 0.488 | 0.842126 | Tcell | MIEN1      |
| MMADHC.4  | 5.67E-05 | -0.15854 | 0.245 | 0.439 | 0.847809 | Tcell | MMADHC     |
| AKAP7.11  | 5.68E-05 | -0.13358 | 0.077 | 0.197 | 0.849043 | Tcell | AKAP7      |
| ANG.9     | 5.70E-05 | -0.32098 | 0.009 | 0.085 | 0.851446 | Tcell | ANG        |
| MFN2.1    | 5.71E-05 | -0.14624 | 0.023 | 0.11  | 0.853283 | Tcell | MFN2       |
| FAM131B.9 | 5.76E-05 | -0.18933 | 0.005 | 0.077 | 0.860541 | Tcell | FAM131B    |
| ZNF512.9  | 5.76E-05 | -0.13499 | 0.032 | 0.125 | 0.860614 | Tcell | ZNF512     |
| ERLIN2.3  | 5.76E-05 | -0.16597 | 0.032 | 0.125 | 0.860904 | Tcell | ERLIN2     |
| HSD17B14. | 5.80E-05 | -0.26447 | 0.014 | 0.093 | 0.867345 | Tcell | HSD17B14   |
| SLC35D2.7 | 5.83E-05 | -0.11979 | 0.018 | 0.102 | 0.871066 | Tcell | SLC35D2    |
| MIS18A.8  | 5.85E-05 | -0.23441 | 0.023 | 0.108 | 0.873713 | Tcell | MIS18A     |
| GPR37L1.1 | 5.86E-05 | -0.30655 | 0.009 | 0.086 | 0.876353 | Tcell | GPR37L1    |
| ZNF559.1C | 5.88E-05 | -0.15315 | 0.045 | 0.147 | 0.877989 | Tcell | ZNF559     |
| BATF3.7   | 5.89E-05 | -0.15423 | 0.014 | 0.094 | 0.880792 | Tcell | BATF3      |
| AMDHD2.9  | 5.90E-05 | -0.14702 | 0.032 | 0.125 | 0.882394 | Tcell | AMDHD2     |
| C9orf116. | 5.91E-05 | -0.13047 | 0.005 | 0.077 | 0.882703 | Tcell | C9orf116   |
| ZBTB1.6   | 5.93E-05 | 0.592299 | 0.236 | 0.163 | 0.886234 | Tcell | ZBTB1      |
| WSB1.8    | 5.95E-05 | -0.16881 | 0.395 | 0.657 | 0.888594 | Tcell | WSB1       |
| FBX08.3   | 5.96E-05 | -0.15133 | 0.045 | 0.146 | 0.891311 | Tcell | FBX08      |
| BOK.13    | 5.99E-05 | -0.1433  | 0.005 | 0.077 | 0.89473  | Tcell | BOK        |
| ANKRD35.7 | 5.99E-05 | -0.14865 | 0.041 | 0.139 | 0.895239 | Tcell | ANKRD35    |
| C16orf13. | 6.00E-05 | -0.11679 | 0.255 | 0.464 | 0.89592  | Tcell | C16orf13   |
| KIAA1958. | 6.00E-05 | -0.15802 | 0     | 0.068 | 0.896058 | Tcell | KIAA1958   |
| WASF3.7   | 6.01E-05 | -0.174   | 0.005 | 0.077 | 0.898723 | Tcell | WASF3      |
| AGBL5.6   | 6.02E-05 | -0.16056 | 0.009 | 0.085 | 0.899033 | Tcell | AGBL5      |
| IPO13.6   | 6.03E-05 | -0.19837 | 0.023 | 0.109 | 0.901721 | Tcell | IPO13      |
| ST3GAL4.9 | 6.07E-05 | -0.14401 | 0.032 | 0.124 | 0.906853 | Tcell | ST3GAL4    |
| GRAP      | 6.08E-05 | 0.181564 | 0.036 | 0.009 | 0.908259 | Tcell | GRAP       |
| FAM189B.3 | 6.09E-05 | -0.14034 | 0.018 | 0.102 | 0.909524 | Tcell | FAM189B    |
| PPP1R12A. | 6.09E-05 | 0.584357 | 0.395 | 0.359 | 0.910735 | Tcell | PPP1R12A   |
| SYK.14    | 6.10E-05 | -0.31889 | 0.023 | 0.107 | 0.911443 | Tcell | SYK        |
| GSS.8     | 6.11E-05 | -0.1082  | 0.109 | 0.243 | 0.913164 | Tcell | GSS        |
| PDE4B.9   | 6.12E-05 | 0.474153 | 0.345 | 0.275 | 0.914251 | Tcell | PDE4B      |
| CETN3.7   | 6.12E-05 | -0.24462 | 0.05  | 0.148 | 0.914953 | Tcell | CETN3      |
| TUBGCP4.8 | 6.13E-05 | -0.15337 | 0.032 | 0.125 | 0.916054 | Tcell | TUBGCP4    |

|             |           |           |        |        |           |       |           |
|-------------|-----------|-----------|--------|--------|-----------|-------|-----------|
| MNT. 3      | 6. 16E-05 | -0. 15625 | 0. 014 | 0. 094 | 0. 920623 | Tcell | MNT       |
| MVD. 4      | 6. 26E-05 | -0. 13272 | 0. 068 | 0. 18  | 0. 936002 | Tcell | MVD       |
| ICA1L. 8    | 6. 29E-05 | -0. 13779 | 0. 018 | 0. 101 | 0. 940124 | Tcell | ICA1L     |
| SMG6. 6     | 6. 29E-05 | -0. 13124 | 0. 032 | 0. 124 | 0. 940597 | Tcell | SMG6      |
| DPY30. 10   | 6. 34E-05 | -0. 12319 | 0. 286 | 0. 499 | 0. 946955 | Tcell | DPY30     |
| PLCD3. 8    | 6. 35E-05 | -0. 13294 | 0      | 0. 068 | 0. 949228 | Tcell | PLCD3     |
| SLC22A23. 6 | 6. 35E-05 | -0. 17067 | 0      | 0. 068 | 0. 949228 | Tcell | SLC22A23  |
| TGFB2. 8    | 6. 35E-05 | -0. 19341 | 0      | 0. 068 | 0. 949228 | Tcell | TGFB2     |
| BRSK1. 8    | 6. 38E-05 | -0. 16978 | 0. 009 | 0. 085 | 0. 95354  | Tcell | BRSK1     |
| FAF1. 5     | 6. 40E-05 | -0. 13622 | 0. 059 | 0. 167 | 0. 956005 | Tcell | FAF1      |
| TMED9. 6    | 6. 47E-05 | -0. 16479 | 0. 436 | 0. 694 | 0. 966482 | Tcell | TMED9     |
| ATG10. 3    | 6. 47E-05 | -0. 19422 | 0. 045 | 0. 144 | 0. 96652  | Tcell | ATG10     |
| CTNS. 4     | 6. 56E-05 | -0. 13467 | 0. 009 | 0. 085 | 0. 980927 | Tcell | CTNS      |
| CDIP1. 5    | 6. 58E-05 | -0. 13204 | 0. 073 | 0. 189 | 0. 982935 | Tcell | CDIP1     |
| P2RX4. 13   | 6. 58E-05 | -0. 2153  | 0. 068 | 0. 179 | 0. 983203 | Tcell | P2RX4     |
| SCRIB. 4    | 6. 60E-05 | -0. 17655 | 0. 014 | 0. 092 | 0. 98609  | Tcell | SCRIB     |
| EIF5A. 6    | 6. 64E-05 | 0. 312102 | 0. 505 | 0. 527 | 0. 992722 | Tcell | EIF5A     |
| DCAF13. 9   | 6. 65E-05 | -0. 1408  | 0. 164 | 0. 321 | 0. 993852 | Tcell | DCAF13    |
| CHDH. 6     | 6. 65E-05 | -0. 17145 | 0      | 0. 068 | 0. 994005 | Tcell | CHDH      |
| F13A1. 11   | 6. 66E-05 | -0. 4174  | 0. 059 | 0. 161 | 0. 995578 | Tcell | F13A1     |
| SCO2. 11    | 6. 66E-05 | -0. 15762 | 0. 091 | 0. 214 | 0. 995628 | Tcell | SCO2      |
| N4BP2L1. 6  | 6. 67E-05 | 0. 504633 | 0. 232 | 0. 156 | 0. 99743  | Tcell | N4BP2L1   |
| FAT1. 9     | 6. 73E-05 | -0. 13364 | 0      | 0. 068 | 1         | Tcell | FAT1      |
| KCNH2. 10   | 6. 73E-05 | -0. 21238 | 0      | 0. 068 | 1         | Tcell | KCNH2     |
| FAM210A. 7  | 6. 74E-05 | -0. 20199 | 0. 045 | 0. 143 | 1         | Tcell | FAM210A   |
| AGAP3. 8    | 6. 74E-05 | -0. 14934 | 0. 018 | 0. 101 | 1         | Tcell | AGAP3     |
| CCSAP. 7    | 6. 74E-05 | -0. 13656 | 0. 018 | 0. 101 | 1         | Tcell | CCSAP     |
| PTPRF. 10   | 6. 76E-05 | -0. 11078 | 0. 027 | 0. 117 | 1         | Tcell | PTPRF     |
| MFI2-AS1. 6 | 6. 76E-05 | -0. 15369 | 0. 005 | 0. 076 | 1         | Tcell | MFI2-AS1  |
| DDX19A. 3   | 6. 77E-05 | -0. 11944 | 0. 055 | 0. 16  | 1         | Tcell | DDX19A    |
| SUCLG1. 7   | 6. 78E-05 | -0. 10071 | 0. 241 | 0. 44  | 1         | Tcell | SUCLG1    |
| KANK2. 7    | 6. 81E-05 | -0. 16333 | 0. 014 | 0. 093 | 1         | Tcell | KANK2     |
| OSBP. 3     | 6. 84E-05 | -0. 17244 | 0. 014 | 0. 092 | 1         | Tcell | OSBP      |
| TNFAIP2. 1  | 6. 92E-05 | -0. 267   | 0. 005 | 0. 076 | 1         | Tcell | TNFAIP2   |
| MED27. 7    | 6. 93E-05 | -0. 14098 | 0. 05  | 0. 153 | 1         | Tcell | MED27     |
| ABHD17C. 8  | 6. 97E-05 | -0. 10141 | 0. 009 | 0. 085 | 1         | Tcell | ABHD17C   |
| ADIPOR2. 5  | 6. 98E-05 | -0. 14516 | 0. 05  | 0. 152 | 1         | Tcell | ADIPOR2   |
| TRIM22. 11  | 7. 05E-05 | 0. 50778  | 0. 209 | 0. 133 | 1         | Tcell | TRIM22    |
| ERRFI1. 8   | 7. 05E-05 | -0. 11352 | 0. 05  | 0. 154 | 1         | Tcell | ERRFI1    |
| RBM28. 9    | 7. 07E-05 | -0. 13646 | 0. 059 | 0. 165 | 1         | Tcell | RBM28     |
| FOXRED2. 5  | 7. 07E-05 | -0. 11695 | 0. 009 | 0. 084 | 1         | Tcell | FOXRED2   |
| FCHO2. 6    | 7. 19E-05 | -0. 21503 | 0. 005 | 0. 076 | 1         | Tcell | FCHO2     |
| FAM181A. 9  | 7. 21E-05 | -0. 2447  | 0      | 0. 067 | 1         | Tcell | FAM181A   |
| ANKFY1. 3   | 7. 27E-05 | -0. 12032 | 0. 041 | 0. 137 | 1         | Tcell | ANKFY1    |
| OSCP1. 6    | 7. 29E-05 | -0. 16593 | 0      | 0. 067 | 1         | Tcell | OSCP1     |
| TMEM127. 1  | 7. 31E-05 | -0. 15589 | 0. 05  | 0. 151 | 1         | Tcell | TMEM127   |
| APITD1. 8   | 7. 31E-05 | -0. 19367 | 0. 009 | 0. 083 | 1         | Tcell | APITD1    |
| PGRMC2. 7   | 7. 32E-05 | -0. 12483 | 0. 1   | 0. 228 | 1         | Tcell | PGRMC2    |
| MTRNR2L1C   | 7. 32E-05 | -0. 5519  | 0. 005 | 0. 075 | 1         | Tcell | MTRNR2L10 |
| SGOL2. 12   | 7. 34E-05 | -0. 24111 | 0. 014 | 0. 091 | 1         | Tcell | SGOL2     |
| C2orf49     | 7. 36E-05 | -0. 17655 | 0. 023 | 0. 107 | 1         | Tcell | C2orf49   |

|           |          |          |       |       |         |               |
|-----------|----------|----------|-------|-------|---------|---------------|
| PLXNA3.6  | 7.38E-05 | -0.20234 | 0     | 0.067 | 1 Tcell | PLXNA3        |
| GS1-124K5 | 7.40E-05 | -0.1591  | 0.027 | 0.115 | 1 Tcell | GS1-124K5.4   |
| ANTXR1.8  | 7.44E-05 | -0.15972 | 0.014 | 0.092 | 1 Tcell | ANTXR1        |
| TEFM.2    | 7.47E-05 | -0.15461 | 0.027 | 0.115 | 1 Tcell | TEFM          |
| NARS2.4   | 7.51E-05 | -0.10504 | 0.027 | 0.116 | 1 Tcell | NARS2         |
| SNX29.8   | 7.51E-05 | -0.20664 | 0.023 | 0.107 | 1 Tcell | SNX29         |
| MAFG-AS1. | 7.55E-05 | -0.12311 | 0     | 0.067 | 1 Tcell | MAFG-AS1      |
| SIK3.8    | 7.55E-05 | -0.13008 | 0.023 | 0.108 | 1 Tcell | SIK3          |
| GMPR.5    | 7.59E-05 | -0.17407 | 0.009 | 0.083 | 1 Tcell | GMPR          |
| DKC1.7    | 7.61E-05 | -0.10192 | 0.127 | 0.268 | 1 Tcell | DKC1          |
| RGL2.4    | 7.67E-05 | -0.14516 | 0.086 | 0.207 | 1 Tcell | RGL2          |
| EPAS1.9   | 7.68E-05 | -0.22221 | 0.023 | 0.106 | 1 Tcell | EPAS1         |
| FAM129B.1 | 7.70E-05 | -0.19348 | 0.005 | 0.075 | 1 Tcell | FAM129B       |
| PRDX5.9   | 7.72E-05 | -0.21657 | 0.491 | 0.747 | 1 Tcell | PRDX5         |
| EFNB3.9   | 7.73E-05 | -0.16136 | 0.005 | 0.075 | 1 Tcell | EFNB3         |
| COL16A1.1 | 7.80E-05 | -0.16414 | 0.005 | 0.075 | 1 Tcell | COL16A1       |
| AKAP1.6   | 7.82E-05 | -0.11034 | 0.032 | 0.124 | 1 Tcell | AKAP1         |
| RP11-83A2 | 7.82E-05 | -0.16508 | 0.041 | 0.137 | 1 Tcell | RP11-83A24.2  |
| PROSER1.5 | 7.83E-05 | -0.16061 | 0.005 | 0.075 | 1 Tcell | PROSER1       |
| ZNF493.9  | 7.84E-05 | -0.11466 | 0.055 | 0.16  | 1 Tcell | ZNF493        |
| GSDMD.13  | 7.85E-05 | 0.410195 | 0.264 | 0.183 | 1 Tcell | GSDMD         |
| MAP6D1.8  | 7.86E-05 | -0.1764  | 0.009 | 0.084 | 1 Tcell | MAP6D1        |
| RNF20.5   | 7.90E-05 | -0.17132 | 0.05  | 0.15  | 1 Tcell | RNF20         |
| RIN1.9    | 7.90E-05 | -0.14831 | 0.009 | 0.083 | 1 Tcell | RIN1          |
| NCKAP5.3  | 7.91E-05 | -0.21154 | 0     | 0.066 | 1 Tcell | NCKAP5        |
| PTPRN.9   | 7.92E-05 | -0.22983 | 0.005 | 0.075 | 1 Tcell | PTPRN         |
| CEPT1.3   | 7.94E-05 | -0.13771 | 0.055 | 0.157 | 1 Tcell | CEPT1         |
| MAP2K4.4  | 7.94E-05 | -0.14725 | 0.018 | 0.099 | 1 Tcell | MAP2K4        |
| TIMM8A.4  | 7.95E-05 | -0.11836 | 0.018 | 0.099 | 1 Tcell | TIMM8A        |
| PTK2B.10  | 7.98E-05 | 0.544244 | 0.2   | 0.126 | 1 Tcell | PTK2B         |
| SLC38A5   | 8.00E-05 | 0.172055 | 0.036 | 0.01  | 1 Tcell | SLC38A5       |
| PTPRA.11  | 8.00E-05 | -0.1077  | 0.182 | 0.357 | 1 Tcell | PTPRA         |
| PIN4.5    | 8.01E-05 | -0.15038 | 0.236 | 0.421 | 1 Tcell | PIN4          |
| LINC-PINT | 8.05E-05 | 0.464091 | 0.177 | 0.105 | 1 Tcell | LINC-PINT     |
| ACSBG1.8  | 8.06E-05 | -0.12714 | 0.005 | 0.075 | 1 Tcell | ACSBG1        |
| CAB39L.7  | 8.08E-05 | -0.12453 | 0.005 | 0.075 | 1 Tcell | CAB39L        |
| HMOX2.9   | 8.10E-05 | 0.491547 | 0.35  | 0.294 | 1 Tcell | HMOX2         |
| RCBTB2.1C | 8.12E-05 | -0.10561 | 0.045 | 0.144 | 1 Tcell | RCBTB2        |
| RP11-421L | 8.15E-05 | -0.20459 | 0.009 | 0.083 | 1 Tcell | RP11-421L21.3 |
| TBC1D7.4  | 8.16E-05 | -0.13529 | 0.059 | 0.164 | 1 Tcell | TBC1D7        |
| DRAM1.9   | 8.25E-05 | -0.20323 | 0.005 | 0.075 | 1 Tcell | DRAM1         |
| ST14.14   | 8.27E-05 | -0.28587 | 0.005 | 0.074 | 1 Tcell | ST14          |
| MSX1.10   | 8.28E-05 | -0.15876 | 0     | 0.066 | 1 Tcell | MSX1          |
| TMEM121.1 | 8.30E-05 | -0.11859 | 0.023 | 0.107 | 1 Tcell | TMEM121       |
| OSCAR.14  | 8.34E-05 | -0.27927 | 0.005 | 0.074 | 1 Tcell | OSCAR         |
| IGSF8.10  | 8.36E-05 | -0.12176 | 0.091 | 0.215 | 1 Tcell | IGSF8         |
| ARAP3.8   | 8.37E-05 | -0.15781 | 0     | 0.066 | 1 Tcell | ARAP3         |
| CRISPLD1. | 8.38E-05 | -0.16935 | 0.014 | 0.091 | 1 Tcell | CRISPLD1      |
| SMPD4.5   | 8.39E-05 | -0.15061 | 0.023 | 0.106 | 1 Tcell | SMPD4         |
| AP5S1.5   | 8.42E-05 | -0.10912 | 0.018 | 0.099 | 1 Tcell | AP5S1         |
| NEDD4L.9  | 8.44E-05 | -0.18527 | 0.027 | 0.114 | 1 Tcell | NEDD4L        |

|           |          |          |       |       |         |               |
|-----------|----------|----------|-------|-------|---------|---------------|
| CCDC127   | 8.46E-05 | -0.18501 | 0.036 | 0.128 | 1 Tcell | CCDC127       |
| SMIM8.3   | 8.47E-05 | -0.12756 | 0.023 | 0.107 | 1 Tcell | SMIM8         |
| LOXL3.4   | 8.47E-05 | -0.2176  | 0.005 | 0.075 | 1 Tcell | LOXL3         |
| PPP4R1.5  | 8.50E-05 | -0.12308 | 0.027 | 0.114 | 1 Tcell | PPP4R1        |
| UGGT2.2   | 8.56E-05 | -0.17206 | 0.014 | 0.091 | 1 Tcell | UGGT2         |
| KLHDC9.9  | 8.64E-05 | -0.17211 | 0.005 | 0.074 | 1 Tcell | KLHDC9        |
| PSMB10.11 | 8.66E-05 | 0.430042 | 0.327 | 0.254 | 1 Tcell | PSMB10        |
| SAMD9.4   | 8.66E-05 | 0.3711   | 0.141 | 0.076 | 1 Tcell | SAMD9         |
| DBX2.11   | 8.67E-05 | -0.13974 | 0     | 0.066 | 1 Tcell | DBX2          |
| SOX21-AS1 | 8.67E-05 | -0.14044 | 0     | 0.066 | 1 Tcell | SOX21-AS1     |
| ZNF583.8  | 8.72E-05 | -0.1339  | 0.023 | 0.107 | 1 Tcell | ZNF583        |
| OTUD6B.9  | 8.74E-05 | -0.13281 | 0.032 | 0.121 | 1 Tcell | OTUD6B        |
| TFB1M.2   | 8.76E-05 | -0.19341 | 0.018 | 0.098 | 1 Tcell | TFB1M         |
| KCTD1.10  | 8.77E-05 | -0.15385 | 0     | 0.066 | 1 Tcell | KCTD1         |
| EID2B.9   | 8.79E-05 | -0.1506  | 0.014 | 0.091 | 1 Tcell | EID2B         |
| RP11-563K | 8.87E-05 | -0.1751  | 0     | 0.065 | 1 Tcell | RP11-563K23.1 |
| SAMD14.9  | 8.87E-05 | -0.17615 | 0     | 0.065 | 1 Tcell | SAMD14        |
| INPP5D.14 | 8.90E-05 | 0.320205 | 0.155 | 0.084 | 1 Tcell | INPP5D        |
| EFCAB2.5  | 8.92E-05 | -0.1262  | 0.018 | 0.099 | 1 Tcell | EFCAB2        |
| PGAM4.1   | 8.93E-05 | 0.143751 | 0.032 | 0.008 | 1 Tcell | PGAM4         |
| CACNG8.7  | 8.94E-05 | -0.15004 | 0.005 | 0.074 | 1 Tcell | CACNG8        |
| EPHA3.12  | 8.96E-05 | -0.10598 | 0.005 | 0.074 | 1 Tcell | EPHA3         |
| ARL2BP.9  | 8.97E-05 | -0.10814 | 0.218 | 0.409 | 1 Tcell | ARL2BP        |
| ASGR1.10  | 9.00E-05 | -0.21994 | 0.005 | 0.074 | 1 Tcell | ASGR1         |
| ARL6IP4.9 | 9.01E-05 | 0.248089 | 0.577 | 0.625 | 1 Tcell | ARL6IP4       |
| ATXN10.8  | 9.02E-05 | -0.12143 | 0.236 | 0.425 | 1 Tcell | ATXN10        |
| SLC2A10.7 | 9.07E-05 | -0.13229 | 0     | 0.065 | 1 Tcell | SLC2A10       |
| RRAGB.7   | 9.12E-05 | -0.17693 | 0.027 | 0.113 | 1 Tcell | RRAGB         |
| LSM5.9    | 9.12E-05 | -0.17366 | 0.286 | 0.511 | 1 Tcell | LSM5          |
| GPR37.7   | 9.17E-05 | -0.30034 | 0.005 | 0.074 | 1 Tcell | GPR37         |
| CHST3.9   | 9.18E-05 | -0.1289  | 0     | 0.065 | 1 Tcell | CHST3         |
| ACO1.2    | 9.18E-05 | -0.14845 | 0.018 | 0.098 | 1 Tcell | ACO1          |
| FRG1.2    | 9.24E-05 | -0.12029 | 0.168 | 0.323 | 1 Tcell | FRG1          |
| PSMD6.8   | 9.24E-05 | -0.10248 | 0.186 | 0.353 | 1 Tcell | PSMD6         |
| SPA17.10  | 9.24E-05 | -0.2101  | 0.009 | 0.082 | 1 Tcell | SPA17         |
| METAP2.4  | 9.25E-05 | -0.14734 | 0.273 | 0.474 | 1 Tcell | METAP2        |
| BARD1.10  | 9.32E-05 | -0.13353 | 0.05  | 0.148 | 1 Tcell | BARD1         |
| DHX32.3   | 9.32E-05 | -0.14287 | 0.009 | 0.082 | 1 Tcell | DHX32         |
| ESRRA.3   | 9.35E-05 | -0.1545  | 0.023 | 0.105 | 1 Tcell | ESRRA         |
| ZNF334.8  | 9.36E-05 | -0.16213 | 0.005 | 0.074 | 1 Tcell | ZNF334        |
| CDR2L.7   | 9.39E-05 | -0.15493 | 0     | 0.065 | 1 Tcell | CDR2L         |
| EN1.9     | 9.39E-05 | -0.18539 | 0     | 0.065 | 1 Tcell | EN1           |
| RAB21.7   | 9.42E-05 | -0.10462 | 0.086 | 0.206 | 1 Tcell | RAB21         |
| GOLGA5.3  | 9.47E-05 | -0.12476 | 0.05  | 0.15  | 1 Tcell | GOLGA5        |
| WARS.9    | 9.48E-05 | -0.16449 | 0.086 | 0.204 | 1 Tcell | WARS          |
| ISG15.11  | 9.49E-05 | 0.551014 | 0.4   | 0.356 | 1 Tcell | ISG15         |
| PDCD2L.7  | 9.49E-05 | -0.10059 | 0.023 | 0.106 | 1 Tcell | PDCD2L        |
| EMID1.9   | 9.49E-05 | -0.15784 | 0.005 | 0.074 | 1 Tcell | EMID1         |
| GMPPA.5   | 9.55E-05 | -0.21453 | 0.059 | 0.161 | 1 Tcell | GMPPA         |
| ADRM1.4   | 9.57E-05 | -0.15644 | 0.305 | 0.513 | 1 Tcell | ADRM1         |
| TLCD1.9   | 9.60E-05 | -0.10909 | 0.009 | 0.082 | 1 Tcell | TLCD1         |

|           |          |          |       |       |         |               |
|-----------|----------|----------|-------|-------|---------|---------------|
| DIRC2.2   | 9.61E-05 | -0.12207 | 0.009 | 0.082 | 1 Tcell | DIRC2         |
| RGN.10    | 9.61E-05 | -0.21742 | 0.005 | 0.074 | 1 Tcell | RGN           |
| LAIR1.14  | 9.74E-05 | -0.30422 | 0.118 | 0.233 | 1 Tcell | LAIR1         |
| NPC1.4    | 9.75E-05 | -0.16245 | 0.023 | 0.106 | 1 Tcell | NPC1          |
| NDUFAF1.2 | 9.77E-05 | -0.15847 | 0.068 | 0.177 | 1 Tcell | NDUFAF1       |
| BMP2K.10  | 9.83E-05 | -0.25284 | 0.032 | 0.118 | 1 Tcell | BMP2K         |
| HEBP1.9   | 9.92E-05 | -0.14983 | 0.077 | 0.191 | 1 Tcell | HEBP1         |
| ZNF503.5  | 9.95E-05 | -0.19204 | 0.023 | 0.105 | 1 Tcell | ZNF503        |
| SHOX2.9   | 9.95E-05 | -0.13399 | 0     | 0.065 | 1 Tcell | SHOX2         |
| ALKBH3.2  | 9.96E-05 | -0.13726 | 0.05  | 0.149 | 1 Tcell | ALKBH3        |
| RRM2B.4   | 0.0001   | -0.20479 | 0.023 | 0.105 | 1 Tcell | RRM2B         |
| LGALS3.11 | 0.000102 | -0.41759 | 0.332 | 0.484 | 1 Tcell | LGALS3        |
| SKA2.12   | 0.000102 | -0.14964 | 0.159 | 0.309 | 1 Tcell | SKA2          |
| POLR2J.9  | 0.000102 | -0.22359 | 0.409 | 0.648 | 1 Tcell | POLR2J        |
| ABCD4.7   | 0.000103 | -0.10612 | 0.123 | 0.259 | 1 Tcell | ABCD4         |
| NUP160.8  | 0.000103 | -0.12481 | 0.059 | 0.164 | 1 Tcell | NUP160        |
| RP11-379H | 0.000103 | -0.14495 | 0.005 | 0.073 | 1 Tcell | RP11-379H18.1 |
| VPS37C    | 0.000103 | -0.11623 | 0.009 | 0.082 | 1 Tcell | VPS37C        |
| CTU2.8    | 0.000104 | -0.11937 | 0.041 | 0.135 | 1 Tcell | CTU2          |
| DNM3.10   | 0.000104 | -0.20489 | 0.014 | 0.089 | 1 Tcell | DNM3          |
| C15orf40. | 0.000104 | -0.11271 | 0.059 | 0.163 | 1 Tcell | C15orf40      |
| HADH.6    | 0.000105 | -0.1927  | 0.091 | 0.21  | 1 Tcell | HADH          |
| RCBTB1.6  | 0.000105 | -0.18118 | 0.005 | 0.073 | 1 Tcell | RCBTB1        |
| DIRAS2.11 | 0.000105 | -0.16926 | 0     | 0.064 | 1 Tcell | DIRAS2        |
| OSTF1.12  | 0.000106 | 0.377386 | 0.364 | 0.29  | 1 Tcell | OSTF1         |
| MMGT1.1   | 0.000106 | -0.16952 | 0.027 | 0.112 | 1 Tcell | MMGT1         |
| ZNF322.9  | 0.000106 | -0.1041  | 0.041 | 0.135 | 1 Tcell | ZNF322        |
| ZNF133.4  | 0.000107 | -0.1713  | 0.009 | 0.081 | 1 Tcell | ZNF133        |
| FBX030.1  | 0.000107 | -0.16181 | 0     | 0.064 | 1 Tcell | FBX030        |
| TMEM37.9  | 0.000108 | -0.28762 | 0     | 0.064 | 1 Tcell | TMEM37        |
| CD93.14   | 0.000108 | -0.30016 | 0.005 | 0.072 | 1 Tcell | CD93          |
| CDC23.7   | 0.000108 | -0.10982 | 0.036 | 0.127 | 1 Tcell | CDC23         |
| SBK1.12   | 0.000108 | -0.18119 | 0.005 | 0.073 | 1 Tcell | SBK1          |
| ZNF232.1C | 0.000108 | -0.14814 | 0.009 | 0.081 | 1 Tcell | ZNF232        |
| TYMS.11   | 0.000109 | -0.10296 | 0.059 | 0.163 | 1 Tcell | TYMS          |
| GPX8.12   | 0.000109 | -0.14924 | 0     | 0.064 | 1 Tcell | GPX8          |
| GPR107.2  | 0.000109 | -0.11602 | 0.023 | 0.104 | 1 Tcell | GPR107        |
| MAP4K3.3  | 0.00011  | -0.10637 | 0.009 | 0.081 | 1 Tcell | MAP4K3        |
| NBEAL2    | 0.00011  | 0.337816 | 0.05  | 0.016 | 1 Tcell | NBEAL2        |
| HS3ST3B1. | 0.00011  | 0.323254 | 0.091 | 0.04  | 1 Tcell | HS3ST3B1      |
| INO80C.6  | 0.00011  | -0.15405 | 0.064 | 0.167 | 1 Tcell | INO80C        |
| UNC119B.7 | 0.00011  | -0.14532 | 0     | 0.064 | 1 Tcell | UNC119B       |
| SCAF1.9   | 0.00011  | -0.10237 | 0.055 | 0.155 | 1 Tcell | SCAF1         |
| PSMB7.7   | 0.000111 | -0.14997 | 0.391 | 0.645 | 1 Tcell | PSMB7         |
| SLC2A8.7  | 0.000111 | -0.12676 | 0.045 | 0.141 | 1 Tcell | SLC2A8        |
| IGDCC3.13 | 0.000112 | -0.14318 | 0     | 0.064 | 1 Tcell | IGDCC3        |
| ANKMY2.8  | 0.000112 | -0.12601 | 0.032 | 0.119 | 1 Tcell | ANKMY2        |
| ZNF793.9  | 0.000112 | -0.12109 | 0.027 | 0.112 | 1 Tcell | ZNF793        |
| UBE2C.14  | 0.000113 | -0.28767 | 0.032 | 0.118 | 1 Tcell | UBE2C         |
| CYB561.8  | 0.000113 | -0.13214 | 0.009 | 0.081 | 1 Tcell | CYB561        |
| NANOS3.9  | 0.000113 | -0.142   | 0     | 0.064 | 1 Tcell | NANOS3        |

|           |          |          |       |       |         |              |
|-----------|----------|----------|-------|-------|---------|--------------|
| CD200.9   | 0.000113 | -0.16954 | 0.027 | 0.111 | 1 Tcell | CD200        |
| ELOVL4.9  | 0.000113 | -0.14847 | 0.009 | 0.081 | 1 Tcell | ELOVL4       |
| DUS4L.9   | 0.000114 | -0.14681 | 0.009 | 0.081 | 1 Tcell | DUS4L        |
| VSIG10.4  | 0.000114 | -0.17122 | 0     | 0.064 | 1 Tcell | VSIG10       |
| ELAVL2.13 | 0.000114 | -0.18746 | 0.009 | 0.081 | 1 Tcell | ELAVL2       |
| CDKN2A.8  | 0.000115 | 0.310749 | 0.177 | 0.101 | 1 Tcell | CDKN2A       |
| ZP3.5     | 0.000115 | -0.18565 | 0.005 | 0.072 | 1 Tcell | ZP3          |
| SUPT7L.4  | 0.000115 | 0.129259 | 0.077 | 0.192 | 1 Tcell | SUPT7L       |
| ATAD3A.7  | 0.000115 | -0.11036 | 0.055 | 0.153 | 1 Tcell | ATAD3A       |
| STX18.2   | 0.000115 | -0.15307 | 0.059 | 0.161 | 1 Tcell | STX18        |
| ITGA2.10  | 0.000115 | -0.14629 | 0     | 0.063 | 1 Tcell | ITGA2        |
| SAMD1.5   | 0.000116 | -0.14937 | 0.023 | 0.104 | 1 Tcell | SAMD1        |
| PIGZ.6    | 0.000117 | -0.13637 | 0     | 0.063 | 1 Tcell | PIGZ         |
| FBXO2.1   | 0.000117 | 0.259748 | 0.045 | 0.014 | 1 Tcell | FBXO2        |
| TUSC1.9   | 0.000117 | -0.19664 | 0.009 | 0.08  | 1 Tcell | TUSC1        |
| SP140L.1C | 0.000118 | 0.41028  | 0.141 | 0.077 | 1 Tcell | SP140L       |
| CARM1.1   | 0.000118 | -0.17783 | 0.009 | 0.08  | 1 Tcell | CARM1        |
| LAMA4.9   | 0.000118 | -0.16171 | 0.005 | 0.072 | 1 Tcell | LAMA4        |
| TTC8.4    | 0.000119 | -0.17618 | 0.014 | 0.088 | 1 Tcell | TTC8         |
| MTRNR2L8. | 0.000119 | -0.41402 | 0.086 | 0.193 | 1 Tcell | MTRNR2L8     |
| CREB3L1.7 | 0.000122 | -0.12256 | 0     | 0.063 | 1 Tcell | CREB3L1      |
| C11orf1.6 | 0.000122 | -0.22422 | 0.05  | 0.146 | 1 Tcell | C11orf1      |
| MOSPD2.5  | 0.000123 | -0.16418 | 0.027 | 0.111 | 1 Tcell | MOSPD2       |
| SCN1B.9   | 0.000123 | -0.21923 | 0.005 | 0.072 | 1 Tcell | SCN1B        |
| STK32B.8  | 0.000124 | -0.14953 | 0     | 0.063 | 1 Tcell | STK32B       |
| SH2B3.12  | 0.000124 | -0.19225 | 0.027 | 0.11  | 1 Tcell | SH2B3        |
| CC2D2A.2  | 0.000124 | -0.19845 | 0.005 | 0.072 | 1 Tcell | CC2D2A       |
| ST3GAL3.1 | 0.000125 | -0.15208 | 0.014 | 0.088 | 1 Tcell | ST3GAL3      |
| PIGW.2    | 0.000125 | -0.15087 | 0     | 0.063 | 1 Tcell | PIGW         |
| PSMC3IP.1 | 0.000127 | -0.16994 | 0.005 | 0.072 | 1 Tcell | PSMC3IP      |
| NDST1.6   | 0.000127 | -0.12426 | 0.014 | 0.088 | 1 Tcell | NDST1        |
| RSPH3.1   | 0.000128 | -0.15839 | 0.009 | 0.08  | 1 Tcell | RSPH3        |
| IGF1.12   | 0.000128 | -0.30171 | 0     | 0.063 | 1 Tcell | IGF1         |
| GDF15.11  | 0.000128 | -0.30469 | 0.005 | 0.071 | 1 Tcell | GDF15        |
| MAT2B.3   | 0.000129 | 0.545561 | 0.268 | 0.197 | 1 Tcell | MAT2B        |
| CAPZA1.11 | 0.00013  | 0.489274 | 0.405 | 0.392 | 1 Tcell | CAPZA1       |
| MX2.14    | 0.00013  | 0.377469 | 0.123 | 0.063 | 1 Tcell | MX2          |
| ZFP82.10  | 0.00013  | -0.14607 | 0.027 | 0.111 | 1 Tcell | ZFP82        |
| STX4.9    | 0.00013  | -0.16245 | 0.168 | 0.317 | 1 Tcell | STX4         |
| PFKL.8    | 0.000131 | -0.10284 | 0.195 | 0.366 | 1 Tcell | PFKL         |
| HNRNPUL1. | 0.000131 | 0.539365 | 0.405 | 0.383 | 1 Tcell | HNRNPUL1     |
| GLRX2.5   | 0.000131 | -0.18292 | 0.064 | 0.165 | 1 Tcell | GLRX2        |
| ZNF600.1  | 0.000131 | 0.245862 | 0.05  | 0.017 | 1 Tcell | ZNF600       |
| SSR4.8    | 0.000132 | 0.133601 | 0.682 | 0.764 | 1 Tcell | SSR4         |
| DHFR.10   | 0.000133 | -0.14783 | 0.055 | 0.153 | 1 Tcell | DHFR         |
| LINC00969 | 0.000133 | -0.10647 | 0.114 | 0.246 | 1 Tcell | LINC00969    |
| RP3-428L1 | 0.000134 | -0.1291  | 0.005 | 0.071 | 1 Tcell | RP3-428L16.2 |
| CDK14.8   | 0.000134 | -0.15915 | 0.009 | 0.08  | 1 Tcell | CDK14        |
| NUDT6.3   | 0.000135 | -0.19405 | 0.005 | 0.071 | 1 Tcell | NUDT6        |
| PPP1R14A. | 0.000135 | -0.35148 | 0.027 | 0.108 | 1 Tcell | PPP1R14A     |
| GOLT1B.8  | 0.000135 | -0.16411 | 0.114 | 0.24  | 1 Tcell | GOLT1B       |

|            |          |          |       |       |         |             |
|------------|----------|----------|-------|-------|---------|-------------|
| APOL3. 4   | 0.000136 | 0.308886 | 0.082 | 0.035 | 1 Tcell | APOL3       |
| PC. 1      | 0.000136 | -0.17871 | 0.005 | 0.071 | 1 Tcell | PC          |
| MAST2. 5   | 0.000136 | -0.16225 | 0.005 | 0.071 | 1 Tcell | MAST2       |
| RBAK-RBAK  | 0.000137 | -0.14184 | 0.023 | 0.103 | 1 Tcell | RBAK-RBAKDN |
| GBA. 7     | 0.000137 | -0.15623 | 0.041 | 0.132 | 1 Tcell | GBA         |
| HDHD3. 4   | 0.000138 | -0.14168 | 0.027 | 0.111 | 1 Tcell | HDHD3       |
| DLX6-AS1.  | 0.000139 | -0.46917 | 0.045 | 0.132 | 1 Tcell | DLX6-AS1    |
| BTN3A1. 2  | 0.000139 | 0.448035 | 0.132 | 0.071 | 1 Tcell | BTN3A1      |
| NDUFA1. 7  | 0.00014  | 0.169649 | 0.632 | 0.725 | 1 Tcell | NDUFA1      |
| MAPK12. 6  | 0.000141 | -0.11337 | 0.005 | 0.071 | 1 Tcell | MAPK12      |
| TMEFF2. 12 | 0.000142 | -0.23167 | 0.009 | 0.079 | 1 Tcell | TMEFF2      |
| C14orf1. 9 | 0.000142 | -0.16713 | 0.15  | 0.295 | 1 Tcell | C14orf1     |
| RDH10. 13  | 0.000142 | -0.18635 | 0.014 | 0.087 | 1 Tcell | RDH10       |
| POMZP3. 9  | 0.000142 | -0.12096 | 0.014 | 0.088 | 1 Tcell | POMZP3      |
| GPRC5C. 5  | 0.000142 | -0.19356 | 0.005 | 0.071 | 1 Tcell | GPRC5C      |
| CIB2. 9    | 0.000143 | -0.11941 | 0.009 | 0.079 | 1 Tcell | CIB2        |
| LILRA2. 14 | 0.000143 | -0.3451  | 0.014 | 0.085 | 1 Tcell | LILRA2      |
| RASAL2. 3  | 0.000143 | -0.15545 | 0.009 | 0.079 | 1 Tcell | RASAL2      |
| HSPA9. 6   | 0.000144 | -0.10651 | 0.291 | 0.491 | 1 Tcell | HSPA9       |
| RAI14. 5   | 0.000144 | -0.17912 | 0.005 | 0.07  | 1 Tcell | RAI14       |
| LOXL1. 10  | 0.000144 | -0.11775 | 0.009 | 0.079 | 1 Tcell | LOXL1       |
| HINFP. 2   | 0.000144 | -0.15148 | 0.018 | 0.094 | 1 Tcell | HINFP       |
| BAMBI. 11  | 0.000145 | -0.13238 | 0.005 | 0.071 | 1 Tcell | BAMBI       |
| GNAZ. 8    | 0.000145 | -0.17587 | 0     | 0.062 | 1 Tcell | GNAZ        |
| KLHL2. 4   | 0.000146 | -0.17048 | 0.014 | 0.086 | 1 Tcell | KLHL2       |
| PDHX. 8    | 0.000147 | -0.11799 | 0.068 | 0.173 | 1 Tcell | PDHX        |
| VGf. 8     | 0.000147 | -0.22897 | 0.005 | 0.07  | 1 Tcell | VGf         |
| SNRPA. 7   | 0.000148 | -0.10552 | 0.123 | 0.255 | 1 Tcell | SNRPA       |
| MT1G. 10   | 0.000149 | -0.15206 | 0.041 | 0.129 | 1 Tcell | MT1G        |
| LRRC27. 4  | 0.000149 | -0.13493 | 0.014 | 0.087 | 1 Tcell | LRRC27      |
| IL10. 14   | 0.000149 | -0.35771 | 0.027 | 0.108 | 1 Tcell | IL10        |
| PACSIN3. 9 | 0.000149 | -0.10331 | 0.005 | 0.07  | 1 Tcell | PACSIN3     |
| TMEM41B. 5 | 0.000149 | 0.120448 | 0.068 | 0.178 | 1 Tcell | TMEM41B     |
| TRPM3. 8   | 0.00015  | -0.14296 | 0.005 | 0.07  | 1 Tcell | TRPM3       |
| PRKD2. 2   | 0.00015  | 0.451679 | 0.141 | 0.079 | 1 Tcell | PRKD2       |
| KIF5A. 11  | 0.000151 | -0.20954 | 0.036 | 0.123 | 1 Tcell | KIF5A       |
| SLC15A3. 1 | 0.000151 | -0.25453 | 0.005 | 0.07  | 1 Tcell | SLC15A3     |
| INTU. 4    | 0.000151 | -0.13966 | 0.005 | 0.07  | 1 Tcell | INTU        |
| RAPGEF2. 3 | 0.000152 | -0.18935 | 0.005 | 0.07  | 1 Tcell | RAPGEF2     |
| NOTCH3. 7  | 0.000152 | -0.12415 | 0     | 0.061 | 1 Tcell | NOTCH3      |
| DAPP1. 12  | 0.000152 | 0.338346 | 0.068 | 0.027 | 1 Tcell | DAPP1       |
| IARS. 9    | 0.000153 | -0.10473 | 0.095 | 0.213 | 1 Tcell | IARS        |
| TCAIM. 2   | 0.000153 | -0.13498 | 0.045 | 0.138 | 1 Tcell | TCAIM       |
| ACVR2A. 5  | 0.000156 | -0.1381  | 0.005 | 0.07  | 1 Tcell | ACVR2A      |
| PLEKHH2. 8 | 0.000156 | -0.14587 | 0.005 | 0.07  | 1 Tcell | PLEKHH2     |
| ZUFSP. 3   | 0.000156 | -0.16028 | 0.014 | 0.086 | 1 Tcell | ZUFSP       |
| DNAJC25. 3 | 0.000156 | -0.16617 | 0.014 | 0.086 | 1 Tcell | DNAJC25     |
| DCUN1D4. 7 | 0.000156 | -0.14447 | 0.023 | 0.101 | 1 Tcell | DCUN1D4     |
| LLGL1. 10  | 0.000157 | -0.15176 | 0.023 | 0.101 | 1 Tcell | LLGL1       |
| GAPT. 14   | 0.000157 | -0.27947 | 0     | 0.061 | 1 Tcell | GAPT        |
| FMN2. 9    | 0.000158 | -0.14312 | 0.005 | 0.07  | 1 Tcell | FMN2        |



|            |          |          |       |       |         |               |
|------------|----------|----------|-------|-------|---------|---------------|
| PIK3R1.11  | 0.000158 | 0.518004 | 0.355 | 0.306 | 1 Tcell | PIK3R1        |
| OLFML2B.1  | 0.000158 | -0.30963 | 0.005 | 0.069 | 1 Tcell | OLFML2B       |
| RTN1.6     | 0.000159 | -0.17784 | 0.05  | 0.145 | 1 Tcell | RTN1          |
| PSMC4.4    | 0.00016  | -0.1638  | 0.291 | 0.498 | 1 Tcell | PSMC4         |
| GAS2L3.9   | 0.000161 | -0.15871 | 0.005 | 0.07  | 1 Tcell | GAS2L3        |
| SFI1.1     | 0.000161 | 0.40531  | 0.109 | 0.055 | 1 Tcell | SFI1          |
| HOXA10.13  | 0.000161 | -0.1593  | 0.009 | 0.078 | 1 Tcell | HOXA10        |
| JPH4.10    | 0.000161 | -0.21403 | 0     | 0.061 | 1 Tcell | JPH4          |
| FAM126A.5  | 0.000161 | -0.10434 | 0.045 | 0.138 | 1 Tcell | FAM126A       |
| NFAT5.4    | 0.000162 | -0.12066 | 0.045 | 0.138 | 1 Tcell | NFAT5         |
| FAM65A.3   | 0.000162 | -0.14158 | 0.023 | 0.101 | 1 Tcell | FAM65A        |
| LTC4S.14   | 0.000162 | -0.29896 | 0.073 | 0.17  | 1 Tcell | LTC4S         |
| CAST.11    | 0.000163 | 0.481532 | 0.359 | 0.317 | 1 Tcell | CAST          |
| SLC39A10.0 | 0.000163 | -0.10947 | 0.059 | 0.159 | 1 Tcell | SLC39A10      |
| CTB-113I2  | 0.000163 | -0.13406 | 0     | 0.061 | 1 Tcell | CTB-113I20.2  |
| NRSN1.9    | 0.000163 | -0.17137 | 0     | 0.061 | 1 Tcell | NRSN1         |
| RMI1.5     | 0.000163 | -0.17918 | 0     | 0.061 | 1 Tcell | RMI1          |
| RP11-395A  | 0.000163 | -0.14258 | 0.009 | 0.078 | 1 Tcell | RP11-395A13.2 |
| SCARB1.7   | 0.000164 | -0.1295  | 0.027 | 0.109 | 1 Tcell | SCARB1        |
| NRDE2.4    | 0.000164 | -0.22788 | 0.023 | 0.1   | 1 Tcell | NRDE2         |
| MED9.7     | 0.000164 | -0.12034 | 0.018 | 0.094 | 1 Tcell | MED9          |
| FAM26F.14  | 0.000165 | -0.25949 | 0.068 | 0.169 | 1 Tcell | FAM26F        |
| TTF1.7     | 0.000165 | -0.12716 | 0.091 | 0.205 | 1 Tcell | TTF1          |
| FAM219B.5  | 0.000166 | -0.1356  | 0.055 | 0.151 | 1 Tcell | FAM219B       |
| YTHDF3-AS  | 0.000167 | -0.15227 | 0     | 0.061 | 1 Tcell | YTHDF3-AS1    |
| HPCA.10    | 0.000167 | -0.20381 | 0     | 0.061 | 1 Tcell | HPCA          |
| LRP12.6    | 0.000167 | -0.11432 | 0.018 | 0.094 | 1 Tcell | LRP12         |
| ZNF582-AS  | 0.000168 | -0.21384 | 0.009 | 0.078 | 1 Tcell | ZNF582-AS1    |
| C17orf51.0 | 0.000168 | -0.15787 | 0.005 | 0.069 | 1 Tcell | C17orf51      |
| LILRB1.14  | 0.000168 | -0.2221  | 0.018 | 0.093 | 1 Tcell | LILRB1        |
| MPP2.9     | 0.000168 | -0.15458 | 0     | 0.061 | 1 Tcell | MPP2          |
| PEX7.2     | 0.000169 | -0.14335 | 0.014 | 0.085 | 1 Tcell | PEX7          |
| NIF3L1.5   | 0.00017  | -0.17998 | 0.036 | 0.122 | 1 Tcell | NIF3L1        |
| PSMD10.2   | 0.000171 | -0.12542 | 0.073 | 0.179 | 1 Tcell | PSMD10        |
| RETSAT.4   | 0.000172 | -0.11207 | 0.014 | 0.086 | 1 Tcell | RETSAT        |
| SNX2.13    | 0.000172 | -0.10109 | 0.236 | 0.413 | 1 Tcell | SNX2          |
| PARD3.8    | 0.000172 | -0.11272 | 0     | 0.06  | 1 Tcell | PARD3         |
| GLRB.9     | 0.000172 | -0.14154 | 0     | 0.06  | 1 Tcell | GLRB          |
| PVR.5      | 0.000174 | -0.14803 | 0.005 | 0.069 | 1 Tcell | PVR           |
| MON1B.2    | 0.000174 | -0.14552 | 0.027 | 0.108 | 1 Tcell | MON1B         |
| PM20D2.5   | 0.000174 | -0.11544 | 0.014 | 0.086 | 1 Tcell | PM20D2        |
| GAL3ST3.1  | 0.000174 | -0.13845 | 0     | 0.06  | 1 Tcell | GAL3ST3       |
| PELI1.9    | 0.000175 | -0.144   | 0.095 | 0.211 | 1 Tcell | PELI1         |
| SMARCAD1.0 | 0.000176 | -0.12339 | 0.027 | 0.109 | 1 Tcell | SMARCAD1      |
| SPRY4.8    | 0.000176 | -0.15404 | 0.005 | 0.069 | 1 Tcell | SPRY4         |
| MYLK.9     | 0.000176 | -0.25795 | 0     | 0.06  | 1 Tcell | MYLK          |
| JRKL.5     | 0.000177 | -0.14531 | 0.009 | 0.077 | 1 Tcell | JRKL          |
| LSG1.9     | 0.000177 | -0.14818 | 0.041 | 0.13  | 1 Tcell | LSG1          |
| NLK.6      | 0.000177 | -0.12108 | 0.009 | 0.078 | 1 Tcell | NLK           |
| UNC5B.11   | 0.000178 | -0.2339  | 0.014 | 0.085 | 1 Tcell | UNC5B         |
| NR4A3.13   | 0.00018  | -0.30188 | 0.059 | 0.153 | 1 Tcell | NR4A3         |

|            |          |          |       |       |         |               |
|------------|----------|----------|-------|-------|---------|---------------|
| GSG1L. 9   | 0.00018  | -0.20429 | 0     | 0.06  | 1 Tcell | GSG1L         |
| PRKAG1. 2  | 0.000182 | -0.12481 | 0.155 | 0.297 | 1 Tcell | PRKAG1        |
| CARD8. 11  | 0.000182 | 0.499194 | 0.218 | 0.147 | 1 Tcell | CARD8         |
| CHSY1. 4   | 0.000182 | -0.15864 | 0.018 | 0.093 | 1 Tcell | CHSY1         |
| MARC1. 10  | 0.000183 | -0.13406 | 0     | 0.06  | 1 Tcell | 1-Mar         |
| C1D. 4     | 0.000183 | -0.11155 | 0.164 | 0.312 | 1 Tcell | C1D           |
| RLIM. 2    | 0.000183 | -0.15937 | 0.027 | 0.108 | 1 Tcell | RLIM          |
| ST7. 5     | 0.000183 | -0.13523 | 0.027 | 0.107 | 1 Tcell | ST7           |
| LIPA. 12   | 0.000183 | -0.17629 | 0.195 | 0.337 | 1 Tcell | LIPA          |
| OTUD1. 11  | 0.000183 | -0.27238 | 0.023 | 0.1   | 1 Tcell | OTUD1         |
| NT5C3A. 11 | 0.000184 | -0.11473 | 0.155 | 0.297 | 1 Tcell | NT5C3A        |
| RP11-126K  | 0.000185 | -0.16224 | 0.018 | 0.093 | 1 Tcell | RP11-126K1. 6 |
| LPCAT3. 3  | 0.000185 | -0.16505 | 0.055 | 0.15  | 1 Tcell | LPCAT3        |
| ZNF227. 6  | 0.000186 | -0.14031 | 0.023 | 0.1   | 1 Tcell | ZNF227        |
| SOWAHC. 7  | 0.000186 | -0.14237 | 0.005 | 0.069 | 1 Tcell | SOWAHC        |
| CHST8. 10  | 0.000187 | -0.13351 | 0.005 | 0.069 | 1 Tcell | CHST8         |
| MCHR1. 10  | 0.000187 | -0.12298 | 0     | 0.06  | 1 Tcell | MCHR1         |
| LRP4. 10   | 0.000187 | -0.17268 | 0     | 0.06  | 1 Tcell | LRP4          |
| GRAMD3. 12 | 0.000187 | -0.13189 | 0.05  | 0.142 | 1 Tcell | GRAMD3        |
| COBL. 8    | 0.000187 | -0.16921 | 0.005 | 0.069 | 1 Tcell | COBL          |
| CHN2. 8    | 0.000187 | -0.25131 | 0.023 | 0.099 | 1 Tcell | CHN2          |
| KIF13A. 3  | 0.000189 | -0.14651 | 0     | 0.06  | 1 Tcell | KIF13A        |
| NAP1L5. 9  | 0.00019  | -0.14918 | 0.045 | 0.136 | 1 Tcell | NAP1L5        |
| PWWP2A. 9  | 0.00019  | -0.13106 | 0.041 | 0.128 | 1 Tcell | PWWP2A        |
| TOX3. 11   | 0.00019  | -0.22218 | 0.005 | 0.068 | 1 Tcell | TOX3          |
| MIR497HG.  | 0.000191 | -0.19936 | 0.005 | 0.068 | 1 Tcell | MIR497HG      |
| CD47. 8    | 0.000191 | 0.450046 | 0.4   | 0.384 | 1 Tcell | CD47          |
| IGSF11. 1C | 0.000191 | -0.152   | 0.005 | 0.068 | 1 Tcell | IGSF11        |
| PUS3. 8    | 0.000191 | -0.12444 | 0.032 | 0.115 | 1 Tcell | PUS3          |
| P2RX7. 4   | 0.000192 | -0.23272 | 0.014 | 0.084 | 1 Tcell | P2RX7         |
| HSD3B7. 9  | 0.000192 | -0.17537 | 0.009 | 0.076 | 1 Tcell | HSD3B7        |
| CCDC159. 4 | 0.000192 | -0.12808 | 0.055 | 0.151 | 1 Tcell | CCDC159       |
| MARK1. 9   | 0.000192 | -0.12524 | 0.005 | 0.068 | 1 Tcell | MARK1         |
| NSUN5. 5   | 0.000192 | -0.1041  | 0.105 | 0.225 | 1 Tcell | NSUN5         |
| AC007246.  | 0.000193 | -0.13621 | 0.027 | 0.108 | 1 Tcell | AC007246. 3   |
| WNT5A. 11  | 0.000193 | -0.21557 | 0     | 0.06  | 1 Tcell | WNT5A         |
| CHURC1. 7  | 0.000194 | 0.422834 | 0.418 | 0.4   | 1 Tcell | CHURC1        |
| KLC4. 4    | 0.000194 | -0.15225 | 0.014 | 0.085 | 1 Tcell | KLC4          |
| SPIN2B. 8  | 0.000196 | -0.12781 | 0.027 | 0.108 | 1 Tcell | SPIN2B        |
| USB1. 6    | 0.000196 | -0.1073  | 0.109 | 0.232 | 1 Tcell | USB1          |
| OAF. 4     | 0.000196 | -0.10644 | 0.005 | 0.068 | 1 Tcell | OAF           |
| C3orf38. 2 | 0.000197 | -0.14191 | 0.077 | 0.184 | 1 Tcell | C3orf38       |
| FAM69B. 7  | 0.000198 | -0.1139  | 0     | 0.059 | 1 Tcell | FAM69B        |
| CBR3. 9    | 0.000198 | -0.12281 | 0.027 | 0.107 | 1 Tcell | CBR3          |
| SPINT2. 14 | 0.000198 | -0.21538 | 0.105 | 0.219 | 1 Tcell | SPINT2        |
| XPO5. 2    | 0.000198 | -0.14637 | 0.009 | 0.076 | 1 Tcell | XPO5          |
| CSPP1. 7   | 0.000199 | -0.10142 | 0.027 | 0.107 | 1 Tcell | CSPP1         |
| CHD8. 1    | 0.000199 | -0.15084 | 0.027 | 0.107 | 1 Tcell | CHD8          |
| SLC25A17.  | 0.000199 | -0.11132 | 0.059 | 0.159 | 1 Tcell | SLC25A17      |
| KLHL18. 3  | 0.0002   | -0.17826 | 0.036 | 0.12  | 1 Tcell | KLHL18        |
| ATL3. 8    | 0.0002   | -0.14886 | 0.05  | 0.139 | 1 Tcell | ATL3          |

|           |          |          |       |       |         |               |
|-----------|----------|----------|-------|-------|---------|---------------|
| ZFP1.7    | 0.000202 | -0.15272 | 0.005 | 0.068 | 1 Tcell | ZFP1          |
| RP11-698N | 0.000202 | -0.16636 | 0     | 0.059 | 1 Tcell | RP11-698N11.2 |
| ARPC4.13  | 0.000203 | 0.349908 | 0.495 | 0.514 | 1 Tcell | ARPC4         |
| MAEA.5    | 0.000203 | -0.12243 | 0.114 | 0.237 | 1 Tcell | MAEA          |
| GPX1.14   | 0.000203 | -0.2254  | 0.564 | 0.818 | 1 Tcell | GPX1          |
| MAPK8.6   | 0.000204 | -0.10482 | 0.023 | 0.1   | 1 Tcell | MAPK8         |
| SLC25A22. | 0.000205 | -0.10009 | 0.032 | 0.115 | 1 Tcell | SLC25A22      |
| DSCAM.9   | 0.000206 | -0.21152 | 0.009 | 0.076 | 1 Tcell | DSCAM         |
| MKS1.6    | 0.000208 | -0.1361  | 0.018 | 0.092 | 1 Tcell | MKS1          |
| ANO10.1   | 0.000208 | -0.13968 | 0.005 | 0.068 | 1 Tcell | ANO10         |
| ETV6.6    | 0.000209 | -0.16427 | 0.055 | 0.149 | 1 Tcell | ETV6          |
| HCCS.5    | 0.000209 | -0.14642 | 0.068 | 0.169 | 1 Tcell | HCCS          |
| TSPO.13   | 0.00021  | 0.310958 | 0.564 | 0.595 | 1 Tcell | TSPO          |
| EIF3J-AS1 | 0.00021  | -0.12338 | 0.041 | 0.129 | 1 Tcell | EIF3J-AS1     |
| UACA.4    | 0.00021  | -0.15059 | 0.005 | 0.068 | 1 Tcell | UACA          |
| GPALPP1.6 | 0.000211 | -0.11703 | 0.036 | 0.122 | 1 Tcell | GPALPP1       |
| TET1.11   | 0.000211 | -0.10747 | 0.014 | 0.084 | 1 Tcell | TET1          |
| NCOA5.4   | 0.000211 | -0.16527 | 0.014 | 0.083 | 1 Tcell | NCOA5         |
| IRAK3.14  | 0.000211 | -0.28771 | 0.009 | 0.075 | 1 Tcell | IRAK3         |
| FAM220A.3 | 0.000212 | -0.11364 | 0.009 | 0.076 | 1 Tcell | FAM220A       |
| GORAB.9   | 0.000213 | -0.10711 | 0.009 | 0.076 | 1 Tcell | GORAB         |
| CARS2.3   | 0.000214 | -0.10527 | 0.045 | 0.136 | 1 Tcell | CARS2         |
| MLH3.6    | 0.000214 | -0.13764 | 0.027 | 0.107 | 1 Tcell | MLH3          |
| MNS1.9    | 0.000216 | -0.1109  | 0.009 | 0.076 | 1 Tcell | MNS1          |
| CCDC144A. | 0.000216 | -0.16235 | 0.014 | 0.083 | 1 Tcell | CCDC144A      |
| CEP70.9   | 0.000217 | -0.15616 | 0.023 | 0.099 | 1 Tcell | CEP70         |
| DYRK1B.4  | 0.000217 | -0.12843 | 0.005 | 0.068 | 1 Tcell | DYRK1B        |
| KIFC3.4   | 0.000219 | -0.1727  | 0.027 | 0.106 | 1 Tcell | KIFC3         |
| ZBTB17.5  | 0.000219 | -0.11671 | 0.032 | 0.113 | 1 Tcell | ZBTB17        |
| ITPK1.3   | 0.000219 | -0.15342 | 0.05  | 0.14  | 1 Tcell | ITPK1         |
| GPR84.14  | 0.000219 | -0.28255 | 0.009 | 0.075 | 1 Tcell | GPR84         |
| DSE.14    | 0.000219 | -0.26192 | 0.05  | 0.139 | 1 Tcell | DSE           |
| SS18L1.7  | 0.00022  | -0.1263  | 0.018 | 0.091 | 1 Tcell | SS18L1        |
| SPATA7.1  | 0.00022  | -0.18185 | 0.009 | 0.076 | 1 Tcell | SPATA7        |
| SETD6.7   | 0.00022  | -0.13278 | 0.018 | 0.092 | 1 Tcell | SETD6         |
| VWA5A.5   | 0.00022  | -0.17838 | 0.018 | 0.091 | 1 Tcell | VWA5A         |
| POLR2F.9  | 0.000221 | -0.12934 | 0.341 | 0.546 | 1 Tcell | POLR2F        |
| SNRPB.9   | 0.000221 | 0.213247 | 0.541 | 0.578 | 1 Tcell | SNRPB         |
| RPGRIP1L. | 0.000224 | -0.14998 | 0     | 0.058 | 1 Tcell | RPGRIP1L      |
| ABCA8.10  | 0.000225 | -0.2133  | 0.009 | 0.076 | 1 Tcell | ABCA8         |
| RBM48.5   | 0.000225 | -0.10951 | 0.018 | 0.091 | 1 Tcell | RBM48         |
| SHC4.8    | 0.000227 | -0.14169 | 0     | 0.058 | 1 Tcell | SHC4          |
| BTBD2.4   | 0.000227 | -0.11293 | 0.023 | 0.099 | 1 Tcell | BTBD2         |
| GAB2.6    | 0.000228 | -0.20474 | 0.005 | 0.067 | 1 Tcell | GAB2          |
| RAPH1.4   | 0.000228 | -0.13185 | 0.005 | 0.067 | 1 Tcell | RAPH1         |
| EYA4.8    | 0.000229 | -0.10355 | 0     | 0.058 | 1 Tcell | EYA4          |
| PIKFYVE.2 | 0.00023  | -0.11581 | 0.014 | 0.084 | 1 Tcell | PIKFYVE       |
| RNF2.5    | 0.000232 | -0.12251 | 0.055 | 0.148 | 1 Tcell | RNF2          |
| PKD2.1    | 0.000233 | -0.12053 | 0.014 | 0.084 | 1 Tcell | PKD2          |
| NAB1.8    | 0.000233 | -0.14129 | 0.041 | 0.127 | 1 Tcell | NAB1          |
| CDK6.11   | 0.000233 | -0.12458 | 0.095 | 0.207 | 1 Tcell | CDK6          |

|           |          |          |       |       |         |              |
|-----------|----------|----------|-------|-------|---------|--------------|
| PLCB3.3   | 0.000235 | -0.14134 | 0     | 0.058 | 1 Tcell | PLCB3        |
| LCORL.4   | 0.000235 | -0.11025 | 0.023 | 0.099 | 1 Tcell | LCORL        |
| ERP29.9   | 0.000237 | 0.277615 | 0.564 | 0.612 | 1 Tcell | ERP29        |
| SIX1.10   | 0.000237 | -0.15474 | 0     | 0.058 | 1 Tcell | SIX1         |
| PDZRN3.9  | 0.000237 | -0.16668 | 0     | 0.058 | 1 Tcell | PDZRN3       |
| PLEKHM1.4 | 0.000238 | -0.12901 | 0.009 | 0.075 | 1 Tcell | PLEKHM1      |
| C1orf198. | 0.000238 | -0.17124 | 0.027 | 0.106 | 1 Tcell | C1orf198     |
| METTL6.2  | 0.000239 | -0.13654 | 0.027 | 0.106 | 1 Tcell | METTL6       |
| CTA-445C9 | 0.00024  | -0.14891 | 0     | 0.058 | 1 Tcell | CTA-445C9.14 |
| RGS9      | 0.000241 | 0.138543 | 0.027 | 0.007 | 1 Tcell | RGS9         |
| XXYLT1.11 | 0.000242 | -0.10581 | 0.041 | 0.128 | 1 Tcell | XXYLT1       |
| ANGPTL4.9 | 0.000242 | -0.36475 | 0.027 | 0.103 | 1 Tcell | ANGPTL4      |
| ALS2.4    | 0.000243 | -0.13723 | 0     | 0.058 | 1 Tcell | ALS2         |
| LRRC16A.5 | 0.000244 | -0.11095 | 0.009 | 0.075 | 1 Tcell | LRRC16A      |
| RNH1.8    | 0.000245 | -0.19042 | 0.327 | 0.542 | 1 Tcell | RNH1         |
| RPRD1B.1  | 0.000245 | -0.10278 | 0.023 | 0.099 | 1 Tcell | RPRD1B       |
| ADAMTS6.9 | 0.000246 | -0.11651 | 0.005 | 0.067 | 1 Tcell | ADAMTS6      |
| C19orf70. | 0.000246 | -0.18673 | 0.368 | 0.582 | 1 Tcell | C19orf70     |
| NACAD.9   | 0.000246 | -0.1442  | 0.018 | 0.09  | 1 Tcell | NACAD        |
| IP6K1.6   | 0.000247 | -0.14854 | 0.059 | 0.153 | 1 Tcell | IP6K1        |
| ARHGEF25. | 0.000247 | -0.16652 | 0.005 | 0.066 | 1 Tcell | ARHGEF25     |
| CPQ.11    | 0.000247 | -0.23487 | 0.077 | 0.18  | 1 Tcell | CPQ          |
| MBTPS1.2  | 0.000248 | -0.10263 | 0.073 | 0.175 | 1 Tcell | MBTPS1       |
| ABHD4.1   | 0.000248 | -0.16327 | 0.005 | 0.066 | 1 Tcell | ABHD4        |
| AZGP1.9   | 0.000248 | -0.28391 | 0     | 0.058 | 1 Tcell | AZGP1        |
| TRIOBP.6  | 0.000249 | -0.13798 | 0.018 | 0.09  | 1 Tcell | TRIOBP       |
| PRKD3.6   | 0.000249 | -0.10613 | 0.055 | 0.148 | 1 Tcell | PRKD3        |
| DNAJC16.2 | 0.00025  | -0.15011 | 0.009 | 0.074 | 1 Tcell | DNAJC16      |
| NOL4.10   | 0.000252 | -0.14669 | 0.005 | 0.066 | 1 Tcell | NOL4         |
| FAT3.10   | 0.000254 | -0.12777 | 0     | 0.057 | 1 Tcell | FAT3         |
| ITGB5.9   | 0.000254 | -0.22344 | 0     | 0.057 | 1 Tcell | ITGB5        |
| UMPS.8    | 0.000254 | -0.11902 | 0.045 | 0.135 | 1 Tcell | UMPS         |
| SUMF2.3   | 0.000255 | -0.10117 | 0.191 | 0.346 | 1 Tcell | SUMF2        |
| LIAS.2    | 0.000255 | -0.1914  | 0.027 | 0.104 | 1 Tcell | LIAS         |
| NDUFA6.7  | 0.000256 | -0.15869 | 0.35  | 0.576 | 1 Tcell | NDUFA6       |
| LIMK1.5   | 0.000256 | -0.16939 | 0.05  | 0.139 | 1 Tcell | LIMK1        |
| ANKRD22.1 | 0.000256 | -0.27961 | 0.005 | 0.066 | 1 Tcell | ANKRD22      |
| SPOCK1.12 | 0.000257 | -0.23303 | 0.014 | 0.082 | 1 Tcell | SPOCK1       |
| GPSM1.9   | 0.000257 | -0.15524 | 0.009 | 0.074 | 1 Tcell | GPSM1        |
| TMEM178B. | 0.000257 | -0.14742 | 0     | 0.057 | 1 Tcell | TMEM178B     |
| ITPRIPL2. | 0.000259 | -0.13779 | 0.009 | 0.075 | 1 Tcell | ITPRIPL2     |
| ZNF48.9   | 0.000261 | -0.10535 | 0.023 | 0.098 | 1 Tcell | ZNF48        |
| GPRASP2.9 | 0.000261 | -0.12311 | 0.005 | 0.066 | 1 Tcell | GPRASP2      |
| ADSSL1.7  | 0.000264 | -0.18573 | 0.014 | 0.082 | 1 Tcell | ADSSL1       |
| ST20.3    | 0.000266 | -0.131   | 0.032 | 0.112 | 1 Tcell | ST20         |
| UTP3.2    | 0.000267 | -0.15073 | 0.05  | 0.139 | 1 Tcell | UTP3         |
| GZF1.4    | 0.000267 | -0.13324 | 0.027 | 0.105 | 1 Tcell | GZF1         |
| HDAC11.4  | 0.000268 | -0.20636 | 0.005 | 0.066 | 1 Tcell | HDAC11       |
| PEG3.8    | 0.000269 | -0.16274 | 0.005 | 0.066 | 1 Tcell | PEG3         |
| HSD17B1.5 | 0.000269 | -0.11502 | 0     | 0.057 | 1 Tcell | HSD17B1      |
| TBCK.5    | 0.00027  | -0.12253 | 0.014 | 0.082 | 1 Tcell | TBCK         |

|             |          |          |       |       |         |            |
|-------------|----------|----------|-------|-------|---------|------------|
| EFNB1. 8    | 0.00027  | -0.14713 | 0.023 | 0.097 | 1 Tcell | EFNB1      |
| MYL5. 5     | 0.000272 | -0.13284 | 0.023 | 0.097 | 1 Tcell | MYL5       |
| HOXA3. 12   | 0.000272 | -0.188   | 0     | 0.057 | 1 Tcell | HOXA3      |
| FAM213B. 4  | 0.000273 | -0.11375 | 0.018 | 0.09  | 1 Tcell | FAM213B    |
| STK38L. 7   | 0.000274 | -0.20535 | 0.059 | 0.152 | 1 Tcell | STK38L     |
| COPG2. 9    | 0.000275 | -0.14346 | 0.036 | 0.119 | 1 Tcell | COPG2      |
| RFX2. 6     | 0.000277 | -0.1655  | 0.023 | 0.097 | 1 Tcell | RFX2       |
| FAM214B. 5  | 0.000277 | -0.11396 | 0.036 | 0.12  | 1 Tcell | FAM214B    |
| SCFD2. 5    | 0.000278 | -0.12192 | 0.018 | 0.089 | 1 Tcell | SCFD2      |
| FAM206A. 1  | 0.000279 | -0.13961 | 0.005 | 0.066 | 1 Tcell | FAM206A    |
| BRE. 4      | 0.00028  | -0.11253 | 0.109 | 0.228 | 1 Tcell | BRE        |
| SLC16A10. 0 | 0.000281 | -0.31726 | 0.018 | 0.088 | 1 Tcell | SLC16A10   |
| MGAT1. 12   | 0.000281 | -0.12091 | 0.205 | 0.361 | 1 Tcell | MGAT1      |
| NOTCH1. 8   | 0.000281 | -0.11646 | 0.032 | 0.112 | 1 Tcell | NOTCH1     |
| PTPN4. 10   | 0.000283 | 0.557991 | 0.164 | 0.101 | 1 Tcell | PTPN4      |
| NUDT12. 2   | 0.000284 | -0.14561 | 0.005 | 0.065 | 1 Tcell | NUDT12     |
| SLC4A2. 3   | 0.000285 | -0.11943 | 0.055 | 0.148 | 1 Tcell | SLC4A2     |
| PTPRG. 8    | 0.000286 | -0.12534 | 0.009 | 0.074 | 1 Tcell | PTPRG      |
| NEK3. 3     | 0.000286 | -0.17472 | 0.005 | 0.065 | 1 Tcell | NEK3       |
| TMEM107. 7  | 0.000286 | -0.10808 | 0.105 | 0.22  | 1 Tcell | TMEM107    |
| ZNF395. 5   | 0.000287 | -0.17223 | 0.005 | 0.065 | 1 Tcell | ZNF395     |
| FGFRL1. 5   | 0.000288 | -0.10745 | 0     | 0.057 | 1 Tcell | FGFRL1     |
| CASK. 5     | 0.000289 | -0.11693 | 0.041 | 0.125 | 1 Tcell | CASK       |
| CXCL2. 11   | 0.00029  | -0.37412 | 0.018 | 0.088 | 1 Tcell | CXCL2      |
| PIP4K2C. 8  | 0.000291 | -0.1785  | 0.032 | 0.111 | 1 Tcell | PIP4K2C    |
| TSEN2. 9    | 0.000291 | -0.11428 | 0.018 | 0.09  | 1 Tcell | TSEN2      |
| NIM1K. 8    | 0.000295 | -0.14505 | 0.005 | 0.065 | 1 Tcell | NIM1K      |
| CLEC5A. 13  | 0.000298 | -0.33792 | 0.027 | 0.101 | 1 Tcell | CLEC5A     |
| MANF. 7     | 0.000299 | -0.1345  | 0.264 | 0.454 | 1 Tcell | MANF       |
| HEY2. 8     | 0.000301 | -0.11666 | 0.005 | 0.065 | 1 Tcell | HEY2       |
| STK32A. 7   | 0.000301 | -0.11718 | 0     | 0.056 | 1 Tcell | STK32A     |
| EBF4. 7     | 0.000301 | -0.11873 | 0     | 0.056 | 1 Tcell | EBF4       |
| CLDN10. 1C  | 0.000301 | -0.3079  | 0     | 0.056 | 1 Tcell | CLDN10     |
| ENKD1. 5    | 0.000302 | -0.1123  | 0.005 | 0.065 | 1 Tcell | ENKD1      |
| CA11. 2     | 0.000303 | -0.17479 | 0.027 | 0.103 | 1 Tcell | CA11       |
| GUCD1. 5    | 0.000305 | -0.12325 | 0.041 | 0.124 | 1 Tcell | GUCD1      |
| CCER2. 12   | 0.000305 | -0.21278 | 0     | 0.056 | 1 Tcell | CCER2      |
| SH3GLB1. 9  | 0.000305 | -0.10347 | 0.25  | 0.433 | 1 Tcell | SH3GLB1    |
| NAP1L3. 9   | 0.000306 | -0.16588 | 0.027 | 0.103 | 1 Tcell | NAP1L3     |
| CHGB. 9     | 0.000307 | -0.21196 | 0.018 | 0.089 | 1 Tcell | CHGB       |
| CCDC24. 2   | 0.000308 | -0.153   | 0     | 0.056 | 1 Tcell | CCDC24     |
| CA8. 12     | 0.000308 | -0.22758 | 0     | 0.056 | 1 Tcell | CA8        |
| SLC7A5. 12  | 0.000309 | 0.570591 | 0.209 | 0.137 | 1 Tcell | SLC7A5     |
| LINC0091C   | 0.000311 | -0.1879  | 0.014 | 0.08  | 1 Tcell | LINC00910  |
| CCNB1IP1. 0 | 0.000311 | -0.14346 | 0.068 | 0.167 | 1 Tcell | CCNB1IP1   |
| BAIAP2-AS   | 0.000312 | -0.11573 | 0.005 | 0.065 | 1 Tcell | BAIAP2-AS1 |
| TMEM17. 3   | 0.000312 | -0.13803 | 0     | 0.056 | 1 Tcell | TMEM17     |
| ADAM22. 1C  | 0.000313 | -0.17794 | 0.005 | 0.064 | 1 Tcell | ADAM22     |
| PCNXL4. 3   | 0.000314 | -0.12397 | 0.041 | 0.125 | 1 Tcell | PCNXL4     |
| KPTN. 3     | 0.000314 | -0.12602 | 0.014 | 0.081 | 1 Tcell | KPTN       |
| ALDH1L1. 1  | 0.000315 | -0.23321 | 0.005 | 0.065 | 1 Tcell | ALDH1L1    |

|             |          |          |       |       |         |              |
|-------------|----------|----------|-------|-------|---------|--------------|
| RAB3GAP1.   | 0.000315 | -0.10873 | 0.05  | 0.139 | 1 Tcell | RAB3GAP1     |
| MFAP3L.9    | 0.000316 | -0.13394 | 0     | 0.056 | 1 Tcell | MFAP3L       |
| EVA1C.9     | 0.000317 | -0.14472 | 0.009 | 0.073 | 1 Tcell | EVA1C        |
| UCK2.4      | 0.000317 | -0.13279 | 0.018 | 0.088 | 1 Tcell | UCK2         |
| TP53INP2.   | 0.000317 | -0.13204 | 0.023 | 0.096 | 1 Tcell | TP53INP2     |
| GMNN.11     | 0.000317 | -0.15641 | 0.077 | 0.178 | 1 Tcell | GMNN         |
| CPSF3.6     | 0.000318 | -0.16714 | 0.077 | 0.178 | 1 Tcell | CPSF3        |
| SEC22A.3    | 0.000318 | -0.17997 | 0.027 | 0.103 | 1 Tcell | SEC22A       |
| RNF41.5     | 0.000319 | -0.11379 | 0.068 | 0.168 | 1 Tcell | RNF41        |
| SNX9.11     | 0.000322 | -0.15402 | 0.086 | 0.191 | 1 Tcell | SNX9         |
| PGAP2.5     | 0.000322 | -0.1084  | 0.036 | 0.118 | 1 Tcell | PGAP2        |
| CLCN4.9     | 0.000323 | -0.16216 | 0     | 0.056 | 1 Tcell | CLCN4        |
| TBL3.1      | 0.000324 | -0.13514 | 0.041 | 0.124 | 1 Tcell | TBL3         |
| FAM101B     | 0.000325 | 0.319225 | 0.073 | 0.032 | 1 Tcell | FAM101B      |
| NEU4.10     | 0.000325 | -0.23676 | 0.005 | 0.064 | 1 Tcell | NEU4         |
| GFAP.9      | 0.000328 | -0.28169 | 0.209 | 0.352 | 1 Tcell | GFAP         |
| SAMD8.5     | 0.000328 | -0.13127 | 0.055 | 0.145 | 1 Tcell | SAMD8        |
| PLEKHA8.5   | 0.000331 | -0.13698 | 0.005 | 0.064 | 1 Tcell | PLEKHA8      |
| MMP15.9     | 0.000331 | -0.10851 | 0.005 | 0.064 | 1 Tcell | MMP15        |
| PPP1R9A.1   | 0.000331 | -0.19328 | 0.009 | 0.072 | 1 Tcell | PPP1R9A      |
| TENM1.8     | 0.000331 | -0.12697 | 0.009 | 0.073 | 1 Tcell | TENM1        |
| ODF3B.13    | 0.000332 | -0.21327 | 0.023 | 0.095 | 1 Tcell | ODF3B        |
| RAB40C.3    | 0.000333 | -0.12089 | 0.014 | 0.081 | 1 Tcell | RAB40C       |
| N6AMT1.3    | 0.000334 | -0.13454 | 0.005 | 0.064 | 1 Tcell | N6AMT1       |
| KRR1.4      | 0.000335 | -0.12083 | 0.114 | 0.234 | 1 Tcell | KRR1         |
| PRPF40B.1   | 0.000335 | -0.15234 | 0.005 | 0.064 | 1 Tcell | PRPF40B      |
| SDHC.7      | 0.000335 | -0.14687 | 0.345 | 0.561 | 1 Tcell | SDHC         |
| BTN2A2.2    | 0.000335 | -0.14329 | 0.009 | 0.072 | 1 Tcell | BTN2A2       |
| ITPRIPL1    | 0.000335 | 0.171547 | 0.041 | 0.013 | 1 Tcell | ITPRIPL1     |
| DLL1.8      | 0.000339 | -0.20583 | 0.009 | 0.072 | 1 Tcell | DLL1         |
| LRRC8B.4    | 0.00034  | -0.14964 | 0.018 | 0.088 | 1 Tcell | LRRC8B       |
| YJEFN3.7    | 0.000341 | -0.12578 | 0.005 | 0.064 | 1 Tcell | YJEFN3       |
| DHRS7.12    | 0.000343 | -0.1731  | 0.355 | 0.56  | 1 Tcell | DHRS7        |
| SPRYD4.2    | 0.000343 | -0.15747 | 0.009 | 0.072 | 1 Tcell | SPRYD4       |
| ZNF268.9    | 0.000345 | -0.10872 | 0.036 | 0.118 | 1 Tcell | ZNF268       |
| SQRDL.14    | 0.000345 | 0.380121 | 0.232 | 0.159 | 1 Tcell | SQRDL        |
| PGBD1.8     | 0.000345 | -0.11399 | 0.009 | 0.072 | 1 Tcell | PGBD1        |
| IQSEC2.4    | 0.000346 | -0.18597 | 0     | 0.055 | 1 Tcell | IQSEC2       |
| PSMD1.8     | 0.000349 | -0.11058 | 0.177 | 0.325 | 1 Tcell | PSMD1        |
| RAB7A.5     | 0.00035  | -0.17758 | 0.414 | 0.663 | 1 Tcell | RAB7A        |
| CIPC.2      | 0.000353 | -0.16337 | 0.014 | 0.08  | 1 Tcell | CIPC         |
| KCNJ16.1C   | 0.000354 | -0.12896 | 0     | 0.055 | 1 Tcell | KCNJ16       |
| PRKCZ.11    | 0.000354 | -0.14976 | 0.027 | 0.102 | 1 Tcell | PRKCZ        |
| PCDHB7.1C   | 0.000354 | -0.1686  | 0.009 | 0.072 | 1 Tcell | PCDHB7       |
| LY6H.12     | 0.000354 | -0.25919 | 0.018 | 0.087 | 1 Tcell | LY6H         |
| RP11-799D.4 | 0.000355 | 0.117547 | 0.023 | 0.005 | 1 Tcell | RP11-799D4.4 |
| C7orf73.8   | 0.000356 | -0.16545 | 0.341 | 0.559 | 1 Tcell | C7orf73      |
| SNAPC1.8    | 0.000358 | -0.16362 | 0.086 | 0.19  | 1 Tcell | SNAPC1       |
| HOXC9.13    | 0.000358 | -0.21999 | 0.018 | 0.087 | 1 Tcell | HOXC9        |
| LGALSL.1C   | 0.00036  | -0.14229 | 0.005 | 0.064 | 1 Tcell | LGALSL       |
| PDE9A.8     | 0.00036  | -0.16284 | 0.009 | 0.072 | 1 Tcell | PDE9A        |

|            |          |          |       |       |         |               |
|------------|----------|----------|-------|-------|---------|---------------|
| GALM. 12   | 0.000362 | 0.43324  | 0.191 | 0.123 | 1 Tcell | GALM          |
| NME2. 3    | 0.000363 | -0.11714 | 0.018 | 0.087 | 1 Tcell | NME2          |
| TMEM144. 9 | 0.000363 | -0.37592 | 0.014 | 0.079 | 1 Tcell | TMEM144       |
| PACS2. 6   | 0.000364 | -0.17723 | 0.05  | 0.136 | 1 Tcell | PACS2         |
| USP30-AS1  | 0.000366 | 0.220364 | 0.041 | 0.013 | 1 Tcell | USP30-AS1     |
| SPEG. 8    | 0.000366 | -0.12378 | 0.009 | 0.071 | 1 Tcell | SPEG          |
| RP11-81A2  | 0.000366 | -0.11765 | 0     | 0.055 | 1 Tcell | RP11-81A22. 5 |
| TBC1D9. 9  | 0.000366 | -0.1785  | 0     | 0.055 | 1 Tcell | TBC1D9        |
| TNFRSF11E  | 0.000366 | -0.21427 | 0     | 0.055 | 1 Tcell | TNFRSF11B     |
| NAPB. 5    | 0.000367 | -0.15183 | 0.014 | 0.08  | 1 Tcell | NAPB          |
| ST13. 2    | 0.000367 | -0.17248 | 0.4   | 0.655 | 1 Tcell | ST13          |
| NDUFB3. 6  | 0.000368 | -0.10179 | 0.323 | 0.558 | 1 Tcell | NDUFB3        |
| NT5E. 8    | 0.000369 | -0.16925 | 0.005 | 0.063 | 1 Tcell | NT5E          |
| NUDCD1. 6  | 0.000369 | -0.13938 | 0.027 | 0.102 | 1 Tcell | NUDCD1        |
| TMEM170B.  | 0.00037  | -0.1357  | 0     | 0.055 | 1 Tcell | TMEM170B      |
| SEC16A. 3  | 0.000371 | -0.1174  | 0.036 | 0.117 | 1 Tcell | SEC16A        |
| RBM41. 5   | 0.000372 | -0.13318 | 0.018 | 0.088 | 1 Tcell | RBM41         |
| IFT74. 2   | 0.000372 | -0.16946 | 0.014 | 0.079 | 1 Tcell | IFT74         |
| TECPR2. 4  | 0.000373 | -0.14485 | 0.005 | 0.063 | 1 Tcell | TECPR2        |
| FBLN1. 12  | 0.000375 | -0.22737 | 0.018 | 0.087 | 1 Tcell | FBLN1         |
| TLN2. 6    | 0.000376 | -0.11204 | 0.023 | 0.095 | 1 Tcell | TLN2          |
| GTF2H2C. 6 | 0.000377 | -0.11159 | 0.018 | 0.088 | 1 Tcell | GTF2H2C       |
| KYNU. 14   | 0.000377 | -0.29214 | 0.018 | 0.085 | 1 Tcell | KYNU          |
| LILRB2. 14 | 0.000378 | -0.25405 | 0     | 0.054 | 1 Tcell | LILRB2        |
| WDYHV1. 4  | 0.00038  | -0.15595 | 0.041 | 0.123 | 1 Tcell | WDYHV1        |
| TBCB. 8    | 0.000381 | -0.18867 | 0.427 | 0.662 | 1 Tcell | TBCB          |
| DNAJC18. 9 | 0.000384 | -0.11851 | 0.041 | 0.124 | 1 Tcell | DNAJC18       |
| AC018816.  | 0.000384 | 0.167506 | 0.041 | 0.013 | 1 Tcell | AC018816. 3   |
| BCL2A1. 14 | 0.000385 | -0.30411 | 0.068 | 0.159 | 1 Tcell | BCL2A1        |
| SOX15. 10  | 0.000386 | -0.19267 | 0.009 | 0.071 | 1 Tcell | SOX15         |
| MTHFR. 6   | 0.000389 | -0.16202 | 0.014 | 0.079 | 1 Tcell | MTHFR         |
| MTF1. 3    | 0.000389 | -0.10732 | 0.032 | 0.11  | 1 Tcell | MTF1          |
| UBE3B. 1   | 0.000391 | -0.11272 | 0.032 | 0.109 | 1 Tcell | UBE3B         |
| PRAM1. 12  | 0.000392 | -0.24613 | 0     | 0.054 | 1 Tcell | PRAM1         |
| PRKAR1B. 9 | 0.000393 | -0.14806 | 0.045 | 0.129 | 1 Tcell | PRKAR1B       |
| PODXL. 7   | 0.000395 | -0.1162  | 0.009 | 0.071 | 1 Tcell | PODXL         |
| SH3BP1. 13 | 0.000395 | 0.366692 | 0.177 | 0.111 | 1 Tcell | SH3BP1        |
| GTF2IRD1.  | 0.000396 | -0.15971 | 0.014 | 0.079 | 1 Tcell | GTF2IRD1      |
| HSPA2. 9   | 0.000399 | -0.3255  | 0.045 | 0.126 | 1 Tcell | HSPA2         |
| REEP4. 12  | 0.000399 | -0.1345  | 0.073 | 0.169 | 1 Tcell | REEP4         |
| SLC16A4. 5 | 0.0004   | -0.10857 | 0.005 | 0.063 | 1 Tcell | SLC16A4       |
| VAV1. 14   | 0.0004   | 0.353243 | 0.132 | 0.073 | 1 Tcell | VAV1          |
| FICD. 3    | 0.000401 | -0.1366  | 0.014 | 0.079 | 1 Tcell | FICD          |
| RC3H1. 2   | 0.000402 | -0.12965 | 0.027 | 0.102 | 1 Tcell | RC3H1         |
| HS1BP3. 2  | 0.000404 | -0.16126 | 0.023 | 0.094 | 1 Tcell | HS1BP3        |
| LACTB. 14  | 0.000406 | -0.14056 | 0.073 | 0.168 | 1 Tcell | LACTB         |
| PCNA. 10   | 0.000409 | -0.1011  | 0.173 | 0.318 | 1 Tcell | PCNA          |
| GNL3. 7    | 0.000411 | -0.10379 | 0.195 | 0.348 | 1 Tcell | GNL3          |
| IQCB1. 3   | 0.000412 | -0.1039  | 0.041 | 0.123 | 1 Tcell | IQCB1         |
| GK. 10     | 0.000412 | -0.24473 | 0.055 | 0.14  | 1 Tcell | GK            |
| AC074289.  | 0.000415 | -0.27683 | 0.005 | 0.062 | 1 Tcell | AC074289. 1   |

|            |          |          |       |       |         |                 |
|------------|----------|----------|-------|-------|---------|-----------------|
| HIST1H1C.  | 0.000415 | -0.25873 | 0.091 | 0.19  | 1 Tcell | HIST1H1C        |
| MED12L. 4  | 0.000419 | -0.12155 | 0.005 | 0.062 | 1 Tcell | MED12L          |
| ETAA1. 2   | 0.000419 | -0.13245 | 0     | 0.054 | 1 Tcell | ETAA1           |
| DPP4. 11   | 0.00042  | 0.464803 | 0.132 | 0.077 | 1 Tcell | DPP4            |
| ARG2. 8    | 0.000424 | -0.22646 | 0.027 | 0.101 | 1 Tcell | ARG2            |
| ZDHHC14. 4 | 0.000424 | -0.17519 | 0.014 | 0.078 | 1 Tcell | ZDHHC14         |
| RIMKLA. 5  | 0.000424 | -0.10848 | 0     | 0.054 | 1 Tcell | RIMKLA          |
| ICK. 7     | 0.000424 | -0.12793 | 0.018 | 0.086 | 1 Tcell | ICK             |
| ACOX2. 5   | 0.000429 | -0.12009 | 0     | 0.053 | 1 Tcell | ACOX2           |
| CYP2U1. 2  | 0.000429 | -0.13086 | 0     | 0.053 | 1 Tcell | CYP2U1          |
| SEC62. 8   | 0.00043  | -0.18116 | 0.445 | 0.696 | 1 Tcell | SEC62           |
| HAS2. 8    | 0.000434 | -0.16414 | 0     | 0.053 | 1 Tcell | HAS2            |
| C19orf81.  | 0.000434 | -0.18475 | 0     | 0.053 | 1 Tcell | C19orf81        |
| PRKAR2B. 1 | 0.000435 | -0.17587 | 0.009 | 0.07  | 1 Tcell | PRKAR2B         |
| SLC7A6OS.  | 0.000436 | -0.14114 | 0.05  | 0.136 | 1 Tcell | SLC7A6OS        |
| ITGAX. 13  | 0.000436 | -0.27034 | 0.023 | 0.092 | 1 Tcell | ITGAX           |
| SLC46A1. 4 | 0.000436 | -0.15127 | 0.005 | 0.062 | 1 Tcell | SLC46A1         |
| SMIM18. 12 | 0.000437 | -0.1919  | 0.005 | 0.062 | 1 Tcell | SMIM18          |
| ZNF25. 4   | 0.000438 | -0.10385 | 0.014 | 0.078 | 1 Tcell | ZNF25           |
| ARHGEF10L  | 0.000438 | -0.13876 | 0.005 | 0.062 | 1 Tcell | ARHGEF10L       |
| ZFYVE19. 5 | 0.000439 | -0.12228 | 0.032 | 0.108 | 1 Tcell | ZFYVE19         |
| SEMA4B. 4  | 0.000439 | -0.11705 | 0     | 0.053 | 1 Tcell | SEMA4B          |
| ARHGAP23.  | 0.000439 | -0.14773 | 0     | 0.053 | 1 Tcell | ARHGAP23        |
| MZF1. 5    | 0.000439 | -0.12979 | 0.023 | 0.093 | 1 Tcell | MZF1            |
| METTL21A.  | 0.000439 | -0.11083 | 0.082 | 0.185 | 1 Tcell | METTL21A        |
| CLUH. 2    | 0.000439 | -0.12104 | 0.009 | 0.07  | 1 Tcell | CLUH            |
| NUDT1. 7   | 0.00044  | -0.11759 | 0.205 | 0.353 | 1 Tcell | NUDT1           |
| GOLGA3. 1  | 0.000442 | -0.1219  | 0.041 | 0.122 | 1 Tcell | GOLGA3          |
| ZNF273. 12 | 0.000443 | -0.15338 | 0.018 | 0.086 | 1 Tcell | ZNF273          |
| TRMT5. 4   | 0.000443 | -0.18309 | 0.009 | 0.07  | 1 Tcell | TRMT5           |
| ELP3. 1    | 0.000443 | -0.12749 | 0.036 | 0.115 | 1 Tcell | ELP3            |
| APBB3. 3   | 0.000444 | -0.16865 | 0.018 | 0.086 | 1 Tcell | APBB3           |
| KMT2B. 2   | 0.000444 | -0.13657 | 0.009 | 0.07  | 1 Tcell | KMT2B           |
| PROCR. 12  | 0.000445 | -0.20014 | 0.009 | 0.07  | 1 Tcell | PROCR           |
| NPHP1. 7   | 0.000447 | -0.11706 | 0.009 | 0.07  | 1 Tcell | NPHP1           |
| THEM4. 5   | 0.000448 | 0.38525  | 0.132 | 0.075 | 1 Tcell | THEM4           |
| TEAD4. 8   | 0.000449 | -0.10202 | 0     | 0.053 | 1 Tcell | TEAD4           |
| BIN1. 12   | 0.000449 | 0.371681 | 0.414 | 0.36  | 1 Tcell | BIN1            |
| CD320. 12  | 0.00045  | -0.10396 | 0.173 | 0.321 | 1 Tcell | CD320           |
| NAGLU. 2   | 0.000451 | -0.11609 | 0.018 | 0.085 | 1 Tcell | NAGLU           |
| PDIA3. 11  | 0.000452 | 0.276323 | 0.541 | 0.584 | 1 Tcell | PDIA3           |
| TMEM39B. 4 | 0.000455 | -0.11119 | 0.045 | 0.129 | 1 Tcell | TMEM39B         |
| TRABD2A. 1 | 0.000456 | 0.197169 | 0.036 | 0.011 | 1 Tcell | TRABD2A         |
| VDAC3. 9   | 0.000458 | -0.16827 | 0.282 | 0.468 | 1 Tcell | VDAC3           |
| FAM160A2.  | 0.000459 | -0.10258 | 0.036 | 0.115 | 1 Tcell | FAM160A2        |
| BTBD17. 11 | 0.000459 | -0.18594 | 0     | 0.053 | 1 Tcell | BTBD17          |
| DNAJC14. 1 | 0.000461 | -0.11514 | 0.027 | 0.101 | 1 Tcell | DNAJC14         |
| EDF1. 5    | 0.000461 | 0.132652 | 0.677 | 0.788 | 1 Tcell | EDF1            |
| CD83. 13   | 0.000464 | -0.3204  | 0.182 | 0.297 | 1 Tcell | CD83            |
| RP11-1275  | 0.000464 | -0.1819  | 0.005 | 0.061 | 1 Tcell | RP11-1275H24. 1 |
| OSGEPL1. 6 | 0.000467 | -0.15441 | 0.009 | 0.069 | 1 Tcell | OSGEPL1         |



|             |          |          |       |       |         |                |
|-------------|----------|----------|-------|-------|---------|----------------|
| PPP1R14C.   | 0.000468 | -0.11005 | 0.005 | 0.062 | 1 Tcell | PPP1R14C       |
| TECR. 9     | 0.000469 | -0.14937 | 0.341 | 0.546 | 1 Tcell | TECR           |
| SEMA3E. 6   | 0.00047  | -0.12468 | 0     | 0.053 | 1 Tcell | SEMA3E         |
| GPC4. 5     | 0.00047  | -0.1256  | 0     | 0.053 | 1 Tcell | GPC4           |
| DOCK1. 5    | 0.00047  | -0.13    | 0     | 0.053 | 1 Tcell | DOCK1          |
| FAM129A. 9  | 0.000472 | 0.529528 | 0.2   | 0.139 | 1 Tcell | FAM129A        |
| CFI. 8      | 0.000473 | -0.16335 | 0.005 | 0.062 | 1 Tcell | CFI            |
| LRRTM3. 7   | 0.000475 | -0.10461 | 0     | 0.053 | 1 Tcell | LRRTM3         |
| AADAT. 8    | 0.000475 | -0.1205  | 0     | 0.053 | 1 Tcell | AADAT          |
| ZBTB18. 6   | 0.000475 | -0.15472 | 0     | 0.053 | 1 Tcell | ZBTB18         |
| KCNJ10. 9   | 0.000475 | -0.19364 | 0     | 0.053 | 1 Tcell | KCNJ10         |
| CRBN. 2     | 0.000478 | 0.127735 | 0.15  | 0.288 | 1 Tcell | CRBN           |
| FAM13A. 5   | 0.000478 | -0.17257 | 0.027 | 0.1   | 1 Tcell | FAM13A         |
| TAPT1-AS1   | 0.000482 | -0.13638 | 0.005 | 0.061 | 1 Tcell | TAPT1-AS1      |
| PEX26. 3    | 0.000482 | -0.10538 | 0.036 | 0.115 | 1 Tcell | PEX26          |
| ST8SIA1. 9  | 0.000485 | -0.10925 | 0.023 | 0.093 | 1 Tcell | ST8SIA1        |
| RP11-119E   | 0.000485 | -0.13139 | 0.005 | 0.061 | 1 Tcell | RP11-119B16. 2 |
| PLXND1. 1C  | 0.000486 | -0.15528 | 0.027 | 0.1   | 1 Tcell | PLXND1         |
| ARHGDI1A. 6 | 0.000487 | 0.249891 | 0.518 | 0.565 | 1 Tcell | ARHGDI1A       |
| DLG5. 8     | 0.00049  | -0.1297  | 0.014 | 0.077 | 1 Tcell | DLG5           |
| TRAPPC6A.   | 0.000491 | 0.536273 | 0.314 | 0.258 | 1 Tcell | TRAPPC6A       |
| ABCA3. 9    | 0.000492 | -0.1067  | 0.014 | 0.077 | 1 Tcell | ABCA3          |
| RPP38. 4    | 0.000494 | -0.11631 | 0.05  | 0.134 | 1 Tcell | RPP38          |
| RWDD2A. 2   | 0.000495 | -0.13466 | 0.009 | 0.069 | 1 Tcell | RWDD2A         |
| HMGN5. 5    | 0.000496 | -0.1649  | 0.023 | 0.092 | 1 Tcell | HMGN5          |
| LRP3. 3     | 0.000497 | -0.1164  | 0.005 | 0.061 | 1 Tcell | LRP3           |
| RHBDF1. 6   | 0.000497 | -0.10772 | 0     | 0.052 | 1 Tcell | RHBDF1         |
| OCIAD2. 13  | 0.000498 | 0.127758 | 0.464 | 0.386 | 1 Tcell | OCIAD2         |
| KDELR3. 6   | 0.000499 | -0.13188 | 0.005 | 0.061 | 1 Tcell | KDELR3         |
| NXT2. 5     | 0.000502 | -0.14332 | 0.018 | 0.084 | 1 Tcell | NXT2           |
| PSMB2. 6    | 0.000502 | -0.18196 | 0.35  | 0.578 | 1 Tcell | PSMB2          |
| HAP1. 8     | 0.000503 | -0.15086 | 0.009 | 0.069 | 1 Tcell | HAP1           |
| CENPW. 10   | 0.000504 | -0.20045 | 0.041 | 0.119 | 1 Tcell | CENPW          |
| CDK10. 4    | 0.000505 | -0.17671 | 0.073 | 0.165 | 1 Tcell | CDK10          |
| VPS37D. 9   | 0.000507 | -0.13091 | 0.005 | 0.061 | 1 Tcell | VPS37D         |
| ALDH4A1. 3  | 0.000508 | -0.12042 | 0     | 0.052 | 1 Tcell | ALDH4A1        |
| PCNXL2. 4   | 0.000509 | -0.12663 | 0.018 | 0.085 | 1 Tcell | PCNXL2         |
| AKAP13. 12  | 0.000509 | 0.433657 | 0.368 | 0.324 | 1 Tcell | AKAP13         |
| HNRNPU-AS   | 0.000509 | -0.10777 | 0.027 | 0.1   | 1 Tcell | HNRNPU-AS1     |
| CENPB. 4    | 0.000509 | -0.12901 | 0.032 | 0.107 | 1 Tcell | CENPB          |
| HMG20A. 1   | 0.00051  | -0.10585 | 0.032 | 0.107 | 1 Tcell | HMG20A         |
| RP1-79C4.   | 0.000514 | -0.10769 | 0     | 0.052 | 1 Tcell | RP1-79C4. 4    |
| PARVG. 14   | 0.000515 | 0.327896 | 0.236 | 0.16  | 1 Tcell | PARVG          |
| CENPQ. 5    | 0.000516 | -0.10333 | 0.027 | 0.1   | 1 Tcell | CENPQ          |
| ITGA5. 10   | 0.000516 | -0.13312 | 0.018 | 0.085 | 1 Tcell | ITGA5          |
| C5orf30. 9  | 0.000517 | -0.16034 | 0.014 | 0.077 | 1 Tcell | C5orf30        |
| PPP2R3B. 5  | 0.000517 | -0.13285 | 0.009 | 0.069 | 1 Tcell | PPP2R3B        |
| FAM20A. 13  | 0.000517 | -0.21782 | 0.005 | 0.061 | 1 Tcell | FAM20A         |
| SFT2D1. 13  | 0.000517 | -0.16899 | 0.314 | 0.505 | 1 Tcell | SFT2D1         |
| HARS2. 2    | 0.000518 | -0.1434  | 0.018 | 0.084 | 1 Tcell | HARS2          |
| PEX5. 5     | 0.000521 | -0.14275 | 0.023 | 0.092 | 1 Tcell | PEX5           |

|            |          |          |       |       |         |                 |
|------------|----------|----------|-------|-------|---------|-----------------|
| CRB1. 8    | 0.000524 | -0.19348 | 0.009 | 0.068 | 1 Tcell | CRB1            |
| ADK. 5     | 0.000525 | -0.11327 | 0.073 | 0.167 | 1 Tcell | ADK             |
| SLC25A25.  | 0.000525 | -0.11837 | 0.073 | 0.167 | 1 Tcell | SLC25A25        |
| ARHGAP20.  | 0.000526 | -0.11641 | 0.005 | 0.061 | 1 Tcell | ARHGAP20        |
| THBS4. 7   | 0.000526 | -0.12249 | 0     | 0.052 | 1 Tcell | THBS4           |
| CA14. 11   | 0.000526 | -0.19706 | 0     | 0.052 | 1 Tcell | CA14            |
| USP40. 1   | 0.000526 | -0.13701 | 0.014 | 0.077 | 1 Tcell | USP40           |
| CLHC1. 6   | 0.000529 | -0.1094  | 0.009 | 0.069 | 1 Tcell | CLHC1           |
| EVI5L. 4   | 0.00053  | -0.12401 | 0.005 | 0.061 | 1 Tcell | EVI5L           |
| RP11-277F  | 0.000531 | -0.16592 | 0.009 | 0.068 | 1 Tcell | RP11-277P12. 20 |
| HVCN1. 11  | 0.000531 | -0.22946 | 0.027 | 0.098 | 1 Tcell | HVCN1           |
| BLNK. 12   | 0.000531 | -0.2875  | 0.009 | 0.068 | 1 Tcell | BLNK            |
| PRKD1. 7   | 0.000532 | -0.11113 | 0     | 0.052 | 1 Tcell | PRKD1           |
| ZFP37. 7   | 0.000532 | -0.14155 | 0     | 0.052 | 1 Tcell | ZFP37           |
| STX1A. 7   | 0.000533 | -0.18547 | 0.009 | 0.069 | 1 Tcell | STX1A           |
| PCDH1. 8   | 0.000534 | -0.11813 | 0.005 | 0.061 | 1 Tcell | PCDH1           |
| SEPT3. 10  | 0.000538 | -0.1691  | 0.009 | 0.068 | 1 Tcell | 3-Sep           |
| GPR161. 1C | 0.000539 | -0.12869 | 0.018 | 0.084 | 1 Tcell | GPR161          |
| WDR25. 5   | 0.000543 | -0.11364 | 0.027 | 0.099 | 1 Tcell | WDR25           |
| RNF165. 11 | 0.000546 | -0.1434  | 0.009 | 0.069 | 1 Tcell | RNF165          |
| MAN2A2. 4  | 0.000547 | -0.12549 | 0.014 | 0.077 | 1 Tcell | MAN2A2          |
| QARS. 11   | 0.000549 | -0.11066 | 0.155 | 0.285 | 1 Tcell | QARS            |
| RNF121. 1  | 0.000549 | -0.10877 | 0.032 | 0.107 | 1 Tcell | RNF121          |
| TTLL1. 7   | 0.000556 | -0.10168 | 0.023 | 0.092 | 1 Tcell | TTLL1           |
| YWHAB. 5   | 0.000558 | 0.166544 | 0.609 | 0.704 | 1 Tcell | YWHAB           |
| ARHGAP22.  | 0.000558 | -0.24212 | 0.014 | 0.076 | 1 Tcell | ARHGAP22        |
| REL. 14    | 0.000559 | 0.39539  | 0.355 | 0.297 | 1 Tcell | REL             |
| ARHGAP33.  | 0.00056  | -0.15727 | 0.018 | 0.083 | 1 Tcell | ARHGAP33        |
| ZNF446. 6  | 0.000561 | -0.11647 | 0.014 | 0.076 | 1 Tcell | ZNF446          |
| ZNF530. 7  | 0.000562 | -0.11541 | 0.005 | 0.06  | 1 Tcell | ZNF530          |
| EIF4ENIF1  | 0.000562 | -0.12299 | 0.009 | 0.068 | 1 Tcell | EIF4ENIF1       |
| NCAM2. 9   | 0.000563 | -0.19177 | 0.009 | 0.068 | 1 Tcell | NCAM2           |
| LTBP1. 8   | 0.000563 | -0.1112  | 0     | 0.051 | 1 Tcell | LTBP1           |
| PHLDA2. 6  | 0.000563 | -0.1594  | 0     | 0.051 | 1 Tcell | PHLDA2          |
| ZNF621     | 0.000567 | -0.12332 | 0.005 | 0.06  | 1 Tcell | ZNF621          |
| TLE2. 12   | 0.000567 | -0.11378 | 0.023 | 0.092 | 1 Tcell | TLE2            |
| RBM14. 9   | 0.000568 | -0.11694 | 0.091 | 0.193 | 1 Tcell | RBM14           |
| NUP43. 3   | 0.000568 | -0.10149 | 0.018 | 0.084 | 1 Tcell | NUP43           |
| RPP40. 8   | 0.000568 | -0.12105 | 0.041 | 0.12  | 1 Tcell | RPP40           |
| VIPR2. 12  | 0.000569 | -0.20888 | 0.018 | 0.084 | 1 Tcell | VIPR2           |
| THBS3. 3   | 0.000571 | -0.11964 | 0.005 | 0.06  | 1 Tcell | THBS3           |
| FARP2. 2   | 0.000572 | -0.15264 | 0.009 | 0.068 | 1 Tcell | FARP2           |
| RCN3. 2    | 0.000574 | -0.15989 | 0.005 | 0.06  | 1 Tcell | RCN3            |
| LCA5. 5    | 0.000576 | -0.12364 | 0     | 0.051 | 1 Tcell | LCA5            |
| TMEM38A. 5 | 0.000576 | -0.1499  | 0     | 0.051 | 1 Tcell | TMEM38A         |
| SYT6. 6    | 0.000576 | -0.16904 | 0     | 0.051 | 1 Tcell | SYT6            |
| CRLF3. 8   | 0.000578 | 0.471522 | 0.173 | 0.112 | 1 Tcell | CRLF3           |
| FAM96B. 5  | 0.000581 | -0.1621  | 0.423 | 0.662 | 1 Tcell | FAM96B          |
| VAV2. 3    | 0.000583 | -0.12128 | 0     | 0.051 | 1 Tcell | VAV2            |
| CTSK. 7    | 0.000583 | -0.16752 | 0     | 0.051 | 1 Tcell | CTSK            |
| ATG4C. 7   | 0.000586 | -0.14705 | 0.055 | 0.14  | 1 Tcell | ATG4C           |

|            |          |          |       |       |         |              |
|------------|----------|----------|-------|-------|---------|--------------|
| SPSB4.12   | 0.000587 | -0.11091 | 0.005 | 0.06  | 1 Tcell | SPSB4        |
| BCAR3.2    | 0.000589 | -0.14541 | 0     | 0.051 | 1 Tcell | BCAR3        |
| HIPK3.5    | 0.000592 | -0.14157 | 0.023 | 0.091 | 1 Tcell | HIPK3        |
| ITGB1.10   | 0.000595 | 0.415828 | 0.395 | 0.385 | 1 Tcell | ITGB1        |
| NUDT10.9   | 0.000596 | -0.15461 | 0     | 0.051 | 1 Tcell | NUDT10       |
| CREB3L4.3  | 0.000596 | -0.17559 | 0     | 0.051 | 1 Tcell | CREB3L4      |
| TYW1.6     | 0.000596 | -0.10264 | 0.041 | 0.121 | 1 Tcell | TYW1         |
| ABCB7.1    | 0.000598 | -0.14801 | 0.036 | 0.112 | 1 Tcell | ABCB7        |
| PLXNC1.12  | 0.000598 | -0.19706 | 0.009 | 0.067 | 1 Tcell | PLXNC1       |
| SIGLEC7.1  | 0.0006   | -0.21453 | 0.014 | 0.075 | 1 Tcell | SIGLEC7      |
| AGO1.5     | 0.0006   | -0.11483 | 0.023 | 0.091 | 1 Tcell | AGO1         |
| ZNF496.3   | 0.000601 | -0.108   | 0.005 | 0.06  | 1 Tcell | ZNF496       |
| EMC1.4     | 0.000606 | -0.12891 | 0.05  | 0.133 | 1 Tcell | EMC1         |
| LYRM9.6    | 0.000607 | -0.12174 | 0.077 | 0.175 | 1 Tcell | LYRM9        |
| KHK.3      | 0.00061  | -0.15883 | 0.018 | 0.083 | 1 Tcell | KHK          |
| ERBB4.8    | 0.000616 | -0.17719 | 0.005 | 0.059 | 1 Tcell | ERBB4        |
| NAT8L.6    | 0.000617 | -0.12532 | 0     | 0.051 | 1 Tcell | NAT8L        |
| ZBTB45.2   | 0.00062  | -0.12842 | 0.005 | 0.059 | 1 Tcell | ZBTB45       |
| TPCN1.9    | 0.000623 | -0.1345  | 0.023 | 0.091 | 1 Tcell | TPCN1        |
| ZNF660.3   | 0.000624 | -0.11945 | 0     | 0.051 | 1 Tcell | ZNF660       |
| FERMT1.9   | 0.000624 | -0.19103 | 0     | 0.051 | 1 Tcell | FERMT1       |
| RP11-305L  | 0.000629 | 0.128669 | 0.032 | 0.009 | 1 Tcell | RP11-305L7.3 |
| COL9A2.6   | 0.00063  | -0.18003 | 0.023 | 0.09  | 1 Tcell | COL9A2       |
| ZNF213.1   | 0.000631 | -0.11586 | 0     | 0.051 | 1 Tcell | ZNF213       |
| PCGF1.3    | 0.000633 | -0.21476 | 0.027 | 0.096 | 1 Tcell | PCGF1        |
| PRMT3.6    | 0.000633 | -0.11625 | 0.023 | 0.091 | 1 Tcell | PRMT3        |
| ZNF197.3   | 0.000634 | -0.14339 | 0.009 | 0.067 | 1 Tcell | ZNF197       |
| ABCA2.13   | 0.000634 | -0.21418 | 0.027 | 0.097 | 1 Tcell | ABCA2        |
| NDUFB9.5   | 0.000636 | -0.19071 | 0.445 | 0.693 | 1 Tcell | NDUFB9       |
| TNFRSF14.0 | 0.000636 | 0.402652 | 0.177 | 0.114 | 1 Tcell | TNFRSF14     |
| ZNF625.5   | 0.000638 | -0.12236 | 0     | 0.05  | 1 Tcell | ZNF625       |
| ANKRD13B.0 | 0.000638 | -0.12554 | 0     | 0.05  | 1 Tcell | ANKRD13B     |
| UGT8.10    | 0.000638 | -0.25189 | 0     | 0.05  | 1 Tcell | UGT8         |
| VAMP2.10   | 0.000638 | 0.273371 | 0.577 | 0.624 | 1 Tcell | VAMP2        |
| POT1.4     | 0.00064  | -0.14834 | 0.018 | 0.083 | 1 Tcell | POT1         |
| BAX.11     | 0.000641 | 0.366787 | 0.514 | 0.567 | 1 Tcell | BAX          |
| USP37.4    | 0.000642 | -0.13856 | 0.009 | 0.067 | 1 Tcell | USP37        |
| SMG7.2     | 0.000645 | -0.10845 | 0.027 | 0.097 | 1 Tcell | SMG7         |
| ZNF714.8   | 0.000647 | -0.15192 | 0.032 | 0.104 | 1 Tcell | ZNF714       |
| MPP1.14    | 0.000647 | -0.11431 | 0.1   | 0.202 | 1 Tcell | MPP1         |
| NTRK3.8    | 0.000655 | -0.15012 | 0.009 | 0.067 | 1 Tcell | NTRK3        |
| CHTF8.3    | 0.000656 | -0.10494 | 0.082 | 0.18  | 1 Tcell | CHTF8        |
| WRN.1      | 0.000659 | -0.10721 | 0.005 | 0.059 | 1 Tcell | WRN          |
| RAB23.4    | 0.00066  | -0.1092  | 0     | 0.05  | 1 Tcell | RAB23        |
| GJB2.9     | 0.00066  | -0.1861  | 0     | 0.05  | 1 Tcell | GJB2         |
| FOXK2.2    | 0.000661 | -0.11841 | 0.018 | 0.083 | 1 Tcell | FOXK2        |
| NUCB1.13   | 0.000661 | -0.12585 | 0.268 | 0.448 | 1 Tcell | NUCB1        |
| SUMF1.6    | 0.000663 | -0.11368 | 0.055 | 0.139 | 1 Tcell | SUMF1        |
| GID4       | 0.000664 | -0.11691 | 0.005 | 0.059 | 1 Tcell | GID4         |
| IGFBP4.7   | 0.000665 | -0.16197 | 0.009 | 0.067 | 1 Tcell | IGFBP4       |
| TET2.5     | 0.000672 | -0.13331 | 0.023 | 0.089 | 1 Tcell | TET2         |

|             |          |          |       |       |         |                |
|-------------|----------|----------|-------|-------|---------|----------------|
| SLX4IP. 4   | 0.000673 | -0.12924 | 0.005 | 0.059 | 1 Tcell | SLX4IP         |
| ADAM23. 6   | 0.000675 | -0.10952 | 0     | 0.05  | 1 Tcell | ADAM23         |
| NOP56. 9    | 0.000678 | -0.11178 | 0.245 | 0.417 | 1 Tcell | NOP56          |
| DOK3. 13    | 0.000679 | -0.19296 | 0.009 | 0.066 | 1 Tcell | DOK3           |
| SREBF1. 6   | 0.000679 | -0.14914 | 0.041 | 0.118 | 1 Tcell | SREBF1         |
| TRMT11. 7   | 0.00068  | -0.12732 | 0.041 | 0.118 | 1 Tcell | TRMT11         |
| GNG3. 10    | 0.000681 | -0.16452 | 0.014 | 0.075 | 1 Tcell | GNG3           |
| MRRF. 2     | 0.000683 | -0.18195 | 0.027 | 0.096 | 1 Tcell | MRRF           |
| PPARA. 1    | 0.000684 | -0.12906 | 0.005 | 0.059 | 1 Tcell | PPARA          |
| ALDOC. 8    | 0.000685 | -0.20082 | 0.068 | 0.157 | 1 Tcell | ALDOC          |
| HNRNPA0. 1  | 0.000687 | 0.248432 | 0.573 | 0.643 | 1 Tcell | HNRNPA0        |
| SRPX2. 10   | 0.000688 | -0.14998 | 0.005 | 0.059 | 1 Tcell | SRPX2          |
| SLC39A14. 0 | 0.000689 | -0.18131 | 0.027 | 0.096 | 1 Tcell | SLC39A14       |
| C16orf46. 0 | 0.000691 | -0.11364 | 0     | 0.05  | 1 Tcell | C16orf46       |
| ITPKC. 2    | 0.000691 | -0.12011 | 0     | 0.05  | 1 Tcell | ITPKC          |
| NME5. 7     | 0.000691 | -0.12174 | 0     | 0.05  | 1 Tcell | NME5           |
| RP11-452F   | 0.000691 | -0.1875  | 0.05  | 0.128 | 1 Tcell | RP11-452F19. 3 |
| ZNF219. 4   | 0.000693 | -0.15468 | 0.009 | 0.067 | 1 Tcell | ZNF219         |
| C1orf162. 0 | 0.000694 | -0.30365 | 0.218 | 0.324 | 1 Tcell | C1orf162       |
| TGFBR3      | 0.000696 | 0.201512 | 0.036 | 0.012 | 1 Tcell | TGFBR3         |
| FEN1. 7     | 0.000696 | -0.14189 | 0.055 | 0.138 | 1 Tcell | FEN1           |
| FLRT3. 8    | 0.000697 | -0.10778 | 0.005 | 0.059 | 1 Tcell | FLRT3          |
| SHB. 4      | 0.000697 | -0.12001 | 0.005 | 0.058 | 1 Tcell | SHB            |
| TRAF3IP2. 0 | 0.000698 | -0.11853 | 0.027 | 0.097 | 1 Tcell | TRAF3IP2       |
| CHRNA9. 8   | 0.000698 | -0.12813 | 0     | 0.05  | 1 Tcell | CHRNA9         |
| MAPK8IP3. 0 | 0.000699 | -0.10983 | 0.023 | 0.09  | 1 Tcell | MAPK8IP3       |
| ABCC5. 3    | 0.000701 | -0.13511 | 0.045 | 0.123 | 1 Tcell | ABCC5          |
| FAXDC2. 8   | 0.000701 | -0.15392 | 0.005 | 0.059 | 1 Tcell | FAXDC2         |
| NMI. 12     | 0.000703 | 0.461879 | 0.245 | 0.181 | 1 Tcell | NMI            |
| EP400. 5    | 0.000703 | -0.11117 | 0.041 | 0.118 | 1 Tcell | EP400          |
| QPRT. 6     | 0.000705 | -0.18355 | 0.041 | 0.116 | 1 Tcell | QPRT           |
| HHEX. 14    | 0.000705 | -0.20424 | 0.005 | 0.059 | 1 Tcell | HHEX           |
| RNF182. 9   | 0.000706 | -0.12784 | 0     | 0.05  | 1 Tcell | RNF182         |
| TOM1L1. 8   | 0.00071  | -0.10176 | 0.005 | 0.058 | 1 Tcell | TOM1L1         |
| MOK. 3      | 0.000712 | -0.12148 | 0.009 | 0.067 | 1 Tcell | MOK            |
| TNS3. 11    | 0.000713 | -0.18704 | 0.014 | 0.074 | 1 Tcell | TNS3           |
| PLXNA2. 4   | 0.000714 | -0.1476  | 0     | 0.05  | 1 Tcell | PLXNA2         |
| STARD13. 3  | 0.000714 | -0.15506 | 0     | 0.05  | 1 Tcell | STARD13        |
| RP11-573D   | 0.000717 | 0.257872 | 0.032 | 0.009 | 1 Tcell | RP11-573D15. 2 |
| SPDL1. 7    | 0.000718 | -0.13998 | 0.009 | 0.066 | 1 Tcell | SPDL1          |
| ZKSCAN5. 8  | 0.000721 | -0.11023 | 0.009 | 0.067 | 1 Tcell | ZKSCAN5        |
| ARF1. 9     | 0.000728 | 0.171411 | 0.595 | 0.696 | 1 Tcell | ARF1           |
| AP001055. 0 | 0.000731 | -0.25656 | 0.018 | 0.081 | 1 Tcell | AP001055. 6    |
| RP11-783K   | 0.000731 | -0.16187 | 0     | 0.049 | 1 Tcell | RP11-783K16. 5 |
| AC113189. 0 | 0.000731 | -0.14064 | 0.009 | 0.066 | 1 Tcell | AC113189. 5    |
| SEMA4C. 4   | 0.000735 | -0.13586 | 0.027 | 0.096 | 1 Tcell | SEMA4C         |
| LUZP2. 8    | 0.000739 | -0.1712  | 0     | 0.049 | 1 Tcell | LUZP2          |
| CNOT6. 4    | 0.000743 | -0.11115 | 0.014 | 0.074 | 1 Tcell | CNOT6          |
| FPGT. 1     | 0.000743 | -0.15298 | 0.014 | 0.074 | 1 Tcell | FPGT           |
| ASB13. 1    | 0.000745 | -0.12154 | 0.005 | 0.058 | 1 Tcell | ASB13          |
| CAP2. 8     | 0.000747 | -0.146   | 0.005 | 0.058 | 1 Tcell | CAP2           |

|           |          |          |       |       |         |               |
|-----------|----------|----------|-------|-------|---------|---------------|
| PDLIM4.8  | 0.000748 | -0.2247  | 0.014 | 0.074 | 1 Tcell | PDLIM4        |
| FPR3.14   | 0.000748 | -0.22239 | 0.005 | 0.057 | 1 Tcell | FPR3          |
| SIK2.2    | 0.000749 | -0.13367 | 0.005 | 0.058 | 1 Tcell | SIK2          |
| TACC2.8   | 0.000749 | -0.1211  | 0.005 | 0.058 | 1 Tcell | TACC2         |
| PHLDA1.9  | 0.000755 | -0.15106 | 0.241 | 0.398 | 1 Tcell | PHLDA1        |
| AMH.10    | 0.000755 | -0.11315 | 0.005 | 0.058 | 1 Tcell | AMH           |
| DLX6.13   | 0.000756 | -0.19687 | 0.005 | 0.058 | 1 Tcell | DLX6          |
| VLDLR.3   | 0.000756 | -0.11235 | 0     | 0.049 | 1 Tcell | VLDLR         |
| LMLN.2    | 0.000756 | -0.11306 | 0     | 0.049 | 1 Tcell | LMLN          |
| RP11-159E | 0.000756 | -0.11749 | 0     | 0.049 | 1 Tcell | RP11-159D12.2 |
| MPP6.10   | 0.000758 | -0.10323 | 0.014 | 0.074 | 1 Tcell | MPP6          |
| DENND3.14 | 0.000759 | -0.25918 | 0.032 | 0.102 | 1 Tcell | DENND3        |
| VANGL2.9  | 0.00076  | -0.1055  | 0.014 | 0.074 | 1 Tcell | VANGL2        |
| DDR2.8    | 0.000762 | -0.13792 | 0.005 | 0.058 | 1 Tcell | DDR2          |
| DGKG.6    | 0.000765 | -0.13394 | 0     | 0.049 | 1 Tcell | DGKG          |
| TRIM25.8  | 0.000766 | -0.1208  | 0.023 | 0.089 | 1 Tcell | TRIM25        |
| SERPINE1. | 0.000766 | -0.31677 | 0.032 | 0.101 | 1 Tcell | SERPINE1      |
| GAR1.9    | 0.000767 | -0.10366 | 0.091 | 0.192 | 1 Tcell | GAR1          |
| CABIN1.6  | 0.000767 | 0.488121 | 0.191 | 0.132 | 1 Tcell | CABIN1        |
| RIOK1.4   | 0.000767 | -0.13207 | 0.068 | 0.158 | 1 Tcell | RIOK1         |
| PTPRK.9   | 0.000769 | -0.18159 | 0.005 | 0.058 | 1 Tcell | PTPRK         |
| PCTP.7    | 0.00077  | -0.17445 | 0.014 | 0.074 | 1 Tcell | PCTP          |
| MARK4.8   | 0.000776 | -0.11676 | 0.014 | 0.074 | 1 Tcell | MARK4         |
| USP19.1   | 0.000778 | -0.11418 | 0.014 | 0.074 | 1 Tcell | USP19         |
| GRB10.9   | 0.00078  | -0.10798 | 0.014 | 0.074 | 1 Tcell | GRB10         |
| SDC1.8    | 0.000782 | -0.10601 | 0     | 0.049 | 1 Tcell | SDC1          |
| IL4I1.11  | 0.000782 | -0.1564  | 0.009 | 0.066 | 1 Tcell | IL4I1         |
| EML4.4    | 0.000783 | 0.576661 | 0.245 | 0.19  | 1 Tcell | EML4          |
| SRRM3.11  | 0.000787 | -0.19002 | 0.014 | 0.073 | 1 Tcell | SRRM3         |
| UBIAD1.3  | 0.000791 | -0.12607 | 0.032 | 0.103 | 1 Tcell | UBIAD1        |
| CCDC8.7   | 0.000791 | -0.10839 | 0     | 0.049 | 1 Tcell | CCDC8         |
| KAT8.4    | 0.000793 | -0.10255 | 0.082 | 0.178 | 1 Tcell | KAT8          |
| LRRC25.14 | 0.000794 | -0.24595 | 0.027 | 0.093 | 1 Tcell | LRRC25        |
| C17orf97. | 0.000795 | -0.11391 | 0.005 | 0.058 | 1 Tcell | C17orf97      |
| METTL21B. | 0.000798 | -0.12723 | 0.009 | 0.066 | 1 Tcell | METTL21B      |
| MDP1.2    | 0.000798 | -0.15057 | 0.041 | 0.116 | 1 Tcell | MDP1          |
| PIR.6     | 0.0008   | -0.16511 | 0.005 | 0.057 | 1 Tcell | PIR           |
| GRIA1.4   | 0.0008   | -0.10421 | 0     | 0.049 | 1 Tcell | GRIA1         |
| C16orf87. | 0.000801 | 0.122939 | 0.1   | 0.207 | 1 Tcell | C16orf87      |
| AAED1.10  | 0.000801 | -0.11309 | 0.086 | 0.183 | 1 Tcell | AAED1         |
| LRRC28.3  | 0.000802 | -0.1361  | 0.027 | 0.095 | 1 Tcell | LRRC28        |
| PDE8B.6   | 0.000809 | -0.10856 | 0     | 0.049 | 1 Tcell | PDE8B         |
| KCNJ2.2   | 0.000809 | -0.15265 | 0     | 0.049 | 1 Tcell | KCNJ2         |
| DAGLB.9   | 0.00081  | -0.12909 | 0.045 | 0.122 | 1 Tcell | DAGLB         |
| DRAP1.3   | 0.000815 | 0.201858 | 0.586 | 0.676 | 1 Tcell | DRAP1         |
| HSD17B10. | 0.000815 | -0.12814 | 0.305 | 0.499 | 1 Tcell | HSD17B10      |
| NIT1.2    | 0.000818 | -0.11457 | 0.077 | 0.172 | 1 Tcell | NIT1          |
| ZNF853.1C | 0.000818 | -0.10451 | 0     | 0.049 | 1 Tcell | ZNF853        |
| LRP11.3   | 0.000818 | -0.10833 | 0     | 0.049 | 1 Tcell | LRP11         |
| PPIL6.9   | 0.000818 | -0.13861 | 0     | 0.049 | 1 Tcell | PPIL6         |
| IGLON5.9  | 0.000818 | -0.16876 | 0     | 0.049 | 1 Tcell | IGLON5        |

|            |          |          |       |       |         |              |
|------------|----------|----------|-------|-------|---------|--------------|
| TRAF3IP2-  | 0.000822 | -0.12164 | 0.018 | 0.081 | 1 Tcell | TRAF3IP2-AS1 |
| PCDH8.6    | 0.000828 | -0.12339 | 0     | 0.048 | 1 Tcell | PCDH8        |
| CHI3L2.9   | 0.000833 | -0.62216 | 0.095 | 0.182 | 1 Tcell | CHI3L2       |
| LZTS2.5    | 0.000837 | -0.10958 | 0.018 | 0.081 | 1 Tcell | LZTS2        |
| SLC16A9.8  | 0.000837 | -0.10768 | 0     | 0.048 | 1 Tcell | SLC16A9      |
| STAC3.14   | 0.00084  | -0.20776 | 0.018 | 0.08  | 1 Tcell | STAC3        |
| DUSP28.3   | 0.000843 | -0.10131 | 0.023 | 0.088 | 1 Tcell | DUSP28       |
| FAM19A5.9  | 0.000847 | -0.14114 | 0     | 0.048 | 1 Tcell | FAM19A5      |
| NDUFAF3.6  | 0.000847 | -0.10539 | 0.314 | 0.521 | 1 Tcell | NDUFAF3      |
| FAM105A.1  | 0.000849 | -0.27616 | 0.077 | 0.164 | 1 Tcell | FAM105A      |
| SPRY1.12   | 0.000864 | -0.12548 | 0.123 | 0.235 | 1 Tcell | SPRY1        |
| ZNF454.8   | 0.000866 | -0.11974 | 0     | 0.048 | 1 Tcell | ZNF454       |
| CCDC149.1  | 0.000866 | -0.13411 | 0     | 0.048 | 1 Tcell | CCDC149      |
| ID3.11     | 0.000866 | -0.20426 | 0.15  | 0.266 | 1 Tcell | ID3          |
| SLC1A5.12  | 0.000871 | 0.397946 | 0.2   | 0.137 | 1 Tcell | SLC1A5       |
| BDNF-AS.9  | 0.000876 | -0.1033  | 0.009 | 0.065 | 1 Tcell | BDNF-AS      |
| TTC23.1    | 0.000876 | -0.11057 | 0     | 0.048 | 1 Tcell | TTC23        |
| TMEM79.4   | 0.000877 | -0.11873 | 0.005 | 0.057 | 1 Tcell | TMEM79       |
| NFKBIE.11  | 0.000879 | -0.13235 | 0.055 | 0.135 | 1 Tcell | NFKBIE       |
| IREB2.4    | 0.000885 | -0.11704 | 0.068 | 0.157 | 1 Tcell | IREB2        |
| PPP5D1.3   | 0.000886 | -0.14326 | 0     | 0.048 | 1 Tcell | PPP5D1       |
| MCM3AP.1   | 0.000887 | -0.106   | 0.036 | 0.11  | 1 Tcell | MCM3AP       |
| TMEM255B.0 | 0.000888 | -0.27191 | 0.005 | 0.056 | 1 Tcell | TMEM255B     |
| PHF1.7     | 0.00089  | 0.631968 | 0.223 | 0.168 | 1 Tcell | PHF1         |
| VPS18.3    | 0.000892 | -0.13427 | 0.018 | 0.08  | 1 Tcell | VPS18        |
| ZNF287.1   | 0.000896 | -0.11755 | 0.005 | 0.057 | 1 Tcell | ZNF287       |
| EEPDI.9    | 0.0009   | -0.15716 | 0.014 | 0.073 | 1 Tcell | EEPDI        |
| ZNF573.7   | 0.000901 | -0.13311 | 0.009 | 0.065 | 1 Tcell | ZNF573       |
| WFS1.1     | 0.000904 | -0.13824 | 0.005 | 0.057 | 1 Tcell | WFS1         |
| TLR7.11    | 0.000905 | -0.18543 | 0.005 | 0.057 | 1 Tcell | TLR7         |
| PLSCR4.6   | 0.000906 | -0.12968 | 0     | 0.048 | 1 Tcell | PLSCR4       |
| TXNDC16.4  | 0.000913 | -0.1227  | 0.005 | 0.057 | 1 Tcell | TXNDC16      |
| THAP8.2    | 0.000915 | -0.11155 | 0.018 | 0.08  | 1 Tcell | THAP8        |
| CARD11.11  | 0.000922 | 0.170511 | 0.064 | 0.027 | 1 Tcell | CARD11       |
| RABGGTA.2  | 0.000926 | -0.11393 | 0.05  | 0.13  | 1 Tcell | RABGGTA      |
| C17orf96.0 | 0.000932 | -0.10515 | 0.005 | 0.056 | 1 Tcell | C17orf96     |
| IKBKE.12   | 0.000935 | 0.321547 | 0.105 | 0.056 | 1 Tcell | IKBKE        |
| CRIM1.7    | 0.000937 | -0.10973 | 0.009 | 0.064 | 1 Tcell | CRIM1        |
| TRAF6.1    | 0.000942 | -0.12519 | 0.009 | 0.064 | 1 Tcell | TRAF6        |
| ARVCF.10   | 0.000944 | -0.11467 | 0.005 | 0.056 | 1 Tcell | ARVCF        |
| MVB12B.9   | 0.000952 | -0.1494  | 0.032 | 0.101 | 1 Tcell | MVB12B       |
| DMTN.1     | 0.000953 | 0.316602 | 0.05  | 0.019 | 1 Tcell | DMTN         |
| SNX18.8    | 0.000956 | -0.14298 | 0.041 | 0.114 | 1 Tcell | SNX18        |
| LINC01023  | 0.000963 | -0.1168  | 0.009 | 0.064 | 1 Tcell | LINC01023    |
| ANLN.13    | 0.000963 | -0.24917 | 0.009 | 0.063 | 1 Tcell | ANLN         |
| HEATR6.1   | 0.000967 | -0.11515 | 0.009 | 0.064 | 1 Tcell | HEATR6       |
| LAMTOR5.6  | 0.000969 | -0.20991 | 0.459 | 0.696 | 1 Tcell | LAMTOR5      |
| NXPH4.8    | 0.000981 | -0.15907 | 0.009 | 0.064 | 1 Tcell | NXPH4        |
| EPHB3.4    | 0.000981 | -0.11647 | 0     | 0.047 | 1 Tcell | EPHB3        |
| SIGLEC8.1  | 0.000986 | -0.25274 | 0.018 | 0.079 | 1 Tcell | SIGLEC8      |
| TTL4.4     | 0.000989 | -0.11542 | 0.014 | 0.072 | 1 Tcell | TTL4         |

|            |          |          |       |       |         |                |
|------------|----------|----------|-------|-------|---------|----------------|
| CDC14B. 5  | 0.000991 | -0.11316 | 0.009 | 0.064 | 1 Tcell | CDC14B         |
| TNR. 10    | 0.000993 | -0.20381 | 0.005 | 0.056 | 1 Tcell | TNR            |
| MMD. 9     | 0.000996 | -0.11639 | 0.132 | 0.247 | 1 Tcell | MMD            |
| JDP2. 13   | 0.000998 | -0.11611 | 0.014 | 0.072 | 1 Tcell | JDP2           |
| LEMD1. 7   | 0.001003 | -0.14422 | 0     | 0.047 | 1 Tcell | LEMD1          |
| LMCD1. 9   | 0.001008 | -0.11211 | 0.023 | 0.087 | 1 Tcell | LMCD1          |
| BAK1. 6    | 0.001008 | 0.440271 | 0.173 | 0.115 | 1 Tcell | BAK1           |
| GRK6. 7    | 0.001009 | 0.455324 | 0.191 | 0.134 | 1 Tcell | GRK6           |
| COMTD1. 8  | 0.00101  | 0.299605 | 0.109 | 0.059 | 1 Tcell | COMTD1         |
| ANP32B. 12 | 0.001011 | 0.384228 | 0.432 | 0.45  | 1 Tcell | ANP32B         |
| GRID2. 6   | 0.001015 | -0.13813 | 0     | 0.047 | 1 Tcell | GRID2          |
| EGLN3. 7   | 0.001015 | -0.16801 | 0.009 | 0.064 | 1 Tcell | EGLN3          |
| HRK. 8     | 0.001016 | -0.15545 | 0.009 | 0.064 | 1 Tcell | HRK            |
| COA7. 4    | 0.001021 | -0.11176 | 0.009 | 0.064 | 1 Tcell | COA7           |
| TMBIM1. 11 | 0.001021 | -0.12292 | 0.132 | 0.246 | 1 Tcell | TMBIM1         |
| ABCA7. 1   | 0.001021 | 0.232592 | 0.041 | 0.014 | 1 Tcell | ABCA7          |
| RHOC. 10   | 0.001022 | -0.20841 | 0.35  | 0.536 | 1 Tcell | RHOC           |
| MAL. 11    | 0.001024 | 0.205136 | 0.082 | 0.039 | 1 Tcell | MAL            |
| RP11-11N9  | 0.001024 | -0.21207 | 0.005 | 0.055 | 1 Tcell | RP11-11N9. 4   |
| ZNF627. 7  | 0.001024 | -0.14114 | 0.018 | 0.078 | 1 Tcell | ZNF627         |
| ARHGEF9. 9 | 0.001025 | -0.11693 | 0.045 | 0.121 | 1 Tcell | ARHGEF9        |
| AFAP1. 9   | 0.001029 | -0.10798 | 0.023 | 0.086 | 1 Tcell | AFAP1          |
| PHTF2. 5   | 0.001035 | 0.394268 | 0.145 | 0.09  | 1 Tcell | PHTF2          |
| MEX3B. 10  | 0.001035 | -0.1233  | 0.009 | 0.064 | 1 Tcell | MEX3B          |
| CTB-5506.  | 0.001038 | -0.12355 | 0     | 0.047 | 1 Tcell | CTB-5506. 12   |
| RCOR2. 9   | 0.001038 | -0.14153 | 0     | 0.047 | 1 Tcell | RCOR2          |
| AC116366.  | 0.001045 | 0.141656 | 0.023 | 0.006 | 1 Tcell | AC116366. 6    |
| IFT80. 7   | 0.001048 | -0.10259 | 0.014 | 0.072 | 1 Tcell | IFT80          |
| TRAF3IP1   | 0.00105  | -0.10393 | 0     | 0.047 | 1 Tcell | TRAF3IP1       |
| KDM4C. 1   | 0.001054 | 0.323644 | 0.082 | 0.04  | 1 Tcell | KDM4C          |
| BPNT1. 5   | 0.001059 | -0.11278 | 0.036 | 0.108 | 1 Tcell | BPNT1          |
| RP11-486G  | 0.001062 | -0.12904 | 0     | 0.047 | 1 Tcell | RP11-486G15. 2 |
| GATS. 8    | 0.001065 | -0.10848 | 0.009 | 0.064 | 1 Tcell | GATS           |
| PLCH2. 1   | 0.001071 | 0.136224 | 0.032 | 0.01  | 1 Tcell | PLCH2          |
| LRRC1. 10  | 0.001077 | -0.11956 | 0.014 | 0.071 | 1 Tcell | LRRC1          |
| ACVR1B. 4  | 0.00108  | -0.10752 | 0.023 | 0.086 | 1 Tcell | ACVR1B         |
| TMC01. 6   | 0.00108  | -0.18873 | 0.377 | 0.579 | 1 Tcell | TMC01          |
| RASL11B. 1 | 0.001086 | -0.20991 | 0.005 | 0.055 | 1 Tcell | RASL11B        |
| CD300LF. 1 | 0.001086 | -0.19172 | 0     | 0.046 | 1 Tcell | CD300LF        |
| SLC19A1. 4 | 0.001086 | -0.12646 | 0.014 | 0.071 | 1 Tcell | SLC19A1        |
| ICA1. 7    | 0.001087 | -0.12565 | 0.041 | 0.115 | 1 Tcell | ICA1           |
| RNF144B. 1 | 0.001091 | -0.17868 | 0.032 | 0.1   | 1 Tcell | RNF144B        |
| THAP2. 4   | 0.001098 | -0.14763 | 0.05  | 0.128 | 1 Tcell | THAP2          |
| C6orf52. 4 | 0.001098 | -0.1176  | 0     | 0.046 | 1 Tcell | C6orf52        |
| PRSS23. 11 | 0.0011   | -0.14321 | 0.018 | 0.079 | 1 Tcell | PRSS23         |
| SLC17A5. 9 | 0.001105 | -0.16406 | 0.036 | 0.107 | 1 Tcell | SLC17A5        |
| ATP6V1G1.  | 0.001107 | 0.176958 | 0.673 | 0.756 | 1 Tcell | ATP6V1G1       |
| ATP6AP1L.  | 0.001111 | -0.1466  | 0     | 0.046 | 1 Tcell | ATP6AP1L       |
| MFAP4. 8   | 0.001115 | -0.14413 | 0.005 | 0.055 | 1 Tcell | MFAP4          |
| HK2. 10    | 0.00112  | -0.12399 | 0.023 | 0.086 | 1 Tcell | HK2            |
| PITPNC1. 8 | 0.001126 | 0.50743  | 0.177 | 0.122 | 1 Tcell | PITPNC1        |

|           |          |          |       |       |         |             |
|-----------|----------|----------|-------|-------|---------|-------------|
| RP11-15A1 | 0.001128 | -0.11445 | 0.005 | 0.055 | 1 Tcell | RP11-15A1.3 |
| MIEF2.4   | 0.001128 | -0.10534 | 0.009 | 0.063 | 1 Tcell | MIEF2       |
| ZNF85.6   | 0.00113  | -0.10668 | 0.023 | 0.086 | 1 Tcell | ZNF85       |
| RRNAD1.1  | 0.001139 | -0.10075 | 0.036 | 0.107 | 1 Tcell | RRNAD1      |
| TLR2.14   | 0.00114  | -0.18219 | 0.041 | 0.112 | 1 Tcell | TLR2        |
| APTX.4    | 0.001145 | -0.10052 | 0.059 | 0.14  | 1 Tcell | APTX        |
| CTDSPL    | 0.001149 | -0.10974 | 0     | 0.046 | 1 Tcell | CTDSPL      |
| BBS10.4   | 0.001152 | -0.10995 | 0.005 | 0.055 | 1 Tcell | BBS10       |
| TGFBRAP1. | 0.001156 | -0.1433  | 0.009 | 0.062 | 1 Tcell | TGFBRAP1    |
| SORD.4    | 0.001159 | -0.11593 | 0.027 | 0.093 | 1 Tcell | SORD        |
| NANP.1    | 0.001162 | -0.10917 | 0.005 | 0.055 | 1 Tcell | NANP        |
| TRO.6     | 0.001163 | -0.10554 | 0.009 | 0.063 | 1 Tcell | TRO         |
| NCALD.10  | 0.001165 | -0.16256 | 0.05  | 0.126 | 1 Tcell | NCALD       |
| JTB.6     | 0.001172 | 0.275203 | 0.541 | 0.611 | 1 Tcell | JTB         |
| SPOPL.3   | 0.001172 | -0.12894 | 0.005 | 0.055 | 1 Tcell | SPOPL       |
| ZNF134.2  | 0.001175 | -0.10658 | 0.018 | 0.078 | 1 Tcell | ZNF134      |
| B4GALNT4. | 0.001175 | -0.11293 | 0     | 0.046 | 1 Tcell | B4GALNT4    |
| GRIK3.9   | 0.001189 | -0.11303 | 0     | 0.046 | 1 Tcell | GRIK3       |
| NR2F2.9   | 0.001189 | -0.15666 | 0     | 0.046 | 1 Tcell | NR2F2       |
| ZNF296    | 0.001191 | 0.187526 | 0.032 | 0.01  | 1 Tcell | ZNF296      |
| TMEM154.2 | 0.001192 | 0.327269 | 0.1   | 0.053 | 1 Tcell | TMEM154     |
| SNX30.4   | 0.001195 | -0.13108 | 0.009 | 0.063 | 1 Tcell | SNX30       |
| TTC33.1   | 0.001197 | -0.12389 | 0.009 | 0.062 | 1 Tcell | TTC33       |
| PCNXL3    | 0.001202 | -0.11176 | 0.005 | 0.054 | 1 Tcell | PCNXL3      |
| HELB      | 0.00121  | 0.213539 | 0.045 | 0.017 | 1 Tcell | HELB        |
| TFPI.8    | 0.001223 | -0.11103 | 0.005 | 0.054 | 1 Tcell | TFPI        |
| VPS33B.1  | 0.001227 | -0.10229 | 0.009 | 0.062 | 1 Tcell | VPS33B      |
| CAMSAP1.4 | 0.00123  | -0.10344 | 0.023 | 0.085 | 1 Tcell | CAMSAP1     |
| CIRBP.9   | 0.001234 | 0.10994  | 0.777 | 0.867 | 1 Tcell | CIRBP       |
| ZNF253.9  | 0.001246 | -0.12765 | 0.023 | 0.084 | 1 Tcell | ZNF253      |
| SLC8B1.13 | 0.001246 | -0.13714 | 0.032 | 0.099 | 1 Tcell | SLC8B1      |
| ACOT13.4  | 0.001247 | -0.1058  | 0.114 | 0.22  | 1 Tcell | ACOT13      |
| ITPR2.12  | 0.001252 | -0.10938 | 0.055 | 0.133 | 1 Tcell | ITPR2       |
| WDFY2.5   | 0.001252 | -0.11313 | 0.023 | 0.085 | 1 Tcell | WDFY2       |
| C4orf36   | 0.001258 | -0.14048 | 0     | 0.045 | 1 Tcell | C4orf36     |
| TEX30.8   | 0.00126  | -0.10497 | 0.077 | 0.167 | 1 Tcell | TEX30       |
| GLIPR2.12 | 0.00126  | 0.413975 | 0.314 | 0.268 | 1 Tcell | GLIPR2      |
| TMEM104.3 | 0.001261 | -0.10217 | 0.009 | 0.062 | 1 Tcell | TMEM104     |
| ARHGEF10. | 0.001265 | -0.14944 | 0.014 | 0.07  | 1 Tcell | ARHGEF10    |
| CAD.4     | 0.001268 | -0.1083  | 0.005 | 0.054 | 1 Tcell | CAD         |
| MKRN3.8   | 0.001272 | -0.13432 | 0     | 0.045 | 1 Tcell | MKRN3       |
| MOB1B.4   | 0.001275 | -0.11401 | 0.014 | 0.07  | 1 Tcell | MOB1B       |
| CNPY3.13  | 0.001282 | -0.14063 | 0.264 | 0.415 | 1 Tcell | CNPY3       |
| PEX11B.4  | 0.001284 | -0.11944 | 0.055 | 0.134 | 1 Tcell | PEX11B      |
| IRF8.14   | 0.00129  | -0.25147 | 0.077 | 0.16  | 1 Tcell | IRF8        |
| PLXNA4.1C | 0.001299 | -0.1006  | 0.018 | 0.077 | 1 Tcell | PLXNA4      |
| RGL3.3    | 0.001301 | -0.10458 | 0     | 0.045 | 1 Tcell | RGL3        |
| IL1RN.12  | 0.001306 | -0.25714 | 0.018 | 0.076 | 1 Tcell | IL1RN       |
| SSBP1.7   | 0.001307 | -0.17706 | 0.423 | 0.643 | 1 Tcell | SSBP1       |
| ISCU.8    | 0.001308 | 0.260512 | 0.527 | 0.567 | 1 Tcell | ISCU        |
| AC092669. | 0.001313 | 0.11569  | 0.018 | 0.004 | 1 Tcell | AC092669.3  |



|           |          |          |       |       |         |               |
|-----------|----------|----------|-------|-------|---------|---------------|
| TBC1D10A. | 0.001318 | 0.448096 | 0.123 | 0.073 | 1 Tcell | TBC1D10A      |
| WDR47.5   | 0.001319 | -0.10591 | 0.036 | 0.105 | 1 Tcell | WDR47         |
| XPNPEP3.1 | 0.001324 | -0.10623 | 0.032 | 0.099 | 1 Tcell | XPNPEP3       |
| PEX12.4   | 0.001325 | -0.12565 | 0.005 | 0.053 | 1 Tcell | PEX12         |
| PI3.9     | 0.001326 | -0.36487 | 0.005 | 0.053 | 1 Tcell | PI3           |
| CSMD2.3   | 0.001331 | -0.13178 | 0     | 0.045 | 1 Tcell | CSMD2         |
| FZD1.2    | 0.001331 | -0.13378 | 0     | 0.045 | 1 Tcell | FZD1          |
| CRB2.10   | 0.001331 | -0.16594 | 0     | 0.045 | 1 Tcell | CRB2          |
| CEP97.9   | 0.001333 | -0.1176  | 0.018 | 0.077 | 1 Tcell | CEP97         |
| FN3K.4    | 0.001333 | -0.11288 | 0.023 | 0.084 | 1 Tcell | FN3K          |
| IVNS1ABP. | 0.001346 | 0.407946 | 0.286 | 0.237 | 1 Tcell | IVNS1ABP      |
| GALNT3.1  | 0.00136  | 0.122242 | 0.023 | 0.006 | 1 Tcell | GALNT3        |
| TMEM65    | 0.001361 | -0.12437 | 0     | 0.045 | 1 Tcell | TMEM65        |
| AC002456. | 0.001361 | -0.15633 | 0     | 0.045 | 1 Tcell | AC002456.2    |
| CLIC2.10  | 0.001361 | -0.19203 | 0     | 0.045 | 1 Tcell | CLIC2         |
| CD3EAP.1  | 0.001365 | -0.15442 | 0.032 | 0.098 | 1 Tcell | CD3EAP        |
| EFCAB11.4 | 0.001366 | -0.13085 | 0.009 | 0.061 | 1 Tcell | EFCAB11       |
| HOXA5.9   | 0.001366 | -0.116   | 0.009 | 0.061 | 1 Tcell | HOXA5         |
| NCEH1.10  | 0.001372 | -0.11257 | 0.014 | 0.069 | 1 Tcell | NCEH1         |
| FAR1.4    | 0.001375 | -0.12805 | 0.059 | 0.139 | 1 Tcell | FAR1          |
| TMEM117.1 | 0.001377 | -0.1072  | 0     | 0.045 | 1 Tcell | TMEM117       |
| CEP57L1.9 | 0.001384 | -0.10785 | 0.041 | 0.112 | 1 Tcell | CEP57L1       |
| LRRK2.9   | 0.001389 | -0.16328 | 0.009 | 0.061 | 1 Tcell | LRRK2         |
| ARRDC4.4  | 0.00139  | -0.10635 | 0.014 | 0.069 | 1 Tcell | ARRDC4        |
| RECQL5.1  | 0.00139  | -0.11094 | 0.005 | 0.053 | 1 Tcell | RECQL5        |
| UBAP2.2   | 0.001392 | -0.10771 | 0.027 | 0.092 | 1 Tcell | UBAP2         |
| CTD-2020K | 0.001394 | 0.182907 | 0.036 | 0.012 | 1 Tcell | CTD-2020K17.4 |
| FH.8      | 0.001401 | -0.12465 | 0.123 | 0.228 | 1 Tcell | FH            |
| C8orf44.2 | 0.001403 | -0.10612 | 0.009 | 0.061 | 1 Tcell | C8orf44       |
| EFNA3.8   | 0.001406 | -0.16453 | 0.009 | 0.061 | 1 Tcell | EFNA3         |
| SLC6A9.4  | 0.001408 | -0.1437  | 0     | 0.044 | 1 Tcell | SLC6A9        |
| B9D2.4    | 0.001414 | -0.11601 | 0.023 | 0.084 | 1 Tcell | B9D2          |
| HID1.7    | 0.001415 | -0.11131 | 0.005 | 0.053 | 1 Tcell | HID1          |
| GPS2.1    | 0.001421 | -0.10087 | 0.064 | 0.146 | 1 Tcell | GPS2          |
| RP3-460G2 | 0.001422 | -0.30406 | 0.009 | 0.061 | 1 Tcell | RP3-460G2.2   |
| THAP10.2  | 0.001424 | -0.11503 | 0     | 0.044 | 1 Tcell | THAP10        |
| SCIMP.14  | 0.001424 | -0.19224 | 0.023 | 0.084 | 1 Tcell | SCIMP         |
| AMPD3.11  | 0.001427 | -0.18021 | 0.005 | 0.053 | 1 Tcell | AMPD3         |
| DNAJC6.6  | 0.001439 | -0.12804 | 0.005 | 0.053 | 1 Tcell | DNAJC6        |
| MGAT5.5   | 0.00144  | -0.12003 | 0.014 | 0.069 | 1 Tcell | MGAT5         |
| CDKN1A.11 | 0.001443 | -0.15894 | 0.186 | 0.31  | 1 Tcell | CDKN1A        |
| GNAO1.9   | 0.001443 | -0.12149 | 0.027 | 0.092 | 1 Tcell | GNAO1         |
| EIF3I.5   | 0.001446 | -0.16259 | 0.382 | 0.606 | 1 Tcell | EIF3I         |
| ATXN3.4   | 0.001456 | -0.13655 | 0.073 | 0.158 | 1 Tcell | ATXN3         |
| THBD.13   | 0.001456 | -0.24782 | 0.032 | 0.095 | 1 Tcell | THBD          |
| COQ3.6    | 0.001461 | -0.10211 | 0.014 | 0.069 | 1 Tcell | COQ3          |
| RAP1A.12  | 0.001472 | 0.285315 | 0.495 | 0.516 | 1 Tcell | RAP1A         |
| ASIC1.8   | 0.00148  | -0.10985 | 0.005 | 0.053 | 1 Tcell | ASIC1         |
| ZNF844.3  | 0.00148  | -0.12558 | 0.018 | 0.076 | 1 Tcell | ZNF844        |
| PCOLCE.9  | 0.00149  | -0.20747 | 0.023 | 0.082 | 1 Tcell | PCOLCE        |
| FAM160B2. | 0.001501 | -0.11696 | 0.018 | 0.076 | 1 Tcell | FAM160B2      |

|           |          |          |       |       |         |              |
|-----------|----------|----------|-------|-------|---------|--------------|
| GEMIN8.2  | 0.001504 | -0.12653 | 0.018 | 0.076 | 1 Tcell | GEMIN8       |
| DSCC1.8   | 0.001506 | -0.11507 | 0.009 | 0.061 | 1 Tcell | DSCC1        |
| NFATC3.2  | 0.001513 | 0.517331 | 0.2   | 0.145 | 1 Tcell | NFATC3       |
| USP31.6   | 0.001514 | -0.12886 | 0.005 | 0.052 | 1 Tcell | USP31        |
| HLA-DOA.1 | 0.00152  | -0.22328 | 0.032 | 0.095 | 1 Tcell | HLA-DOA      |
| SPR.3     | 0.001542 | -0.11652 | 0.018 | 0.076 | 1 Tcell | SPR          |
| TNFAIP8L2 | 0.001548 | -0.1415  | 0.032 | 0.096 | 1 Tcell | TNFAIP8L2    |
| TTC38.5   | 0.001549 | -0.14637 | 0.027 | 0.09  | 1 Tcell | TTC38        |
| ZNF473.1  | 0.001559 | -0.11714 | 0     | 0.044 | 1 Tcell | ZNF473       |
| PTGR2.2   | 0.001566 | -0.11388 | 0.018 | 0.076 | 1 Tcell | PTGR2        |
| CNBP.6    | 0.00157  | 0.167525 | 0.65  | 0.75  | 1 Tcell | CNBP         |
| IRF5.14   | 0.001574 | -0.21432 | 0.009 | 0.06  | 1 Tcell | IRF5         |
| ZBTB6     | 0.001577 | -0.10773 | 0     | 0.043 | 1 Tcell | ZBTB6        |
| C11orf95. | 0.001577 | -0.1137  | 0     | 0.043 | 1 Tcell | C11orf95     |
| RPRM.12   | 0.001584 | -0.20099 | 0.014 | 0.068 | 1 Tcell | RPRM         |
| PCSK5.3   | 0.001586 | -0.11533 | 0.009 | 0.06  | 1 Tcell | PCSK5        |
| FGF14-AS2 | 0.001594 | -0.10481 | 0.005 | 0.052 | 1 Tcell | FGF14-AS2    |
| ST8SIA5.8 | 0.001595 | -0.1266  | 0     | 0.043 | 1 Tcell | ST8SIA5      |
| ANXA4.11  | 0.0016   | -0.13929 | 0.1   | 0.196 | 1 Tcell | ANXA4        |
| MANBA.13  | 0.001605 | -0.19408 | 0.05  | 0.122 | 1 Tcell | MANBA        |
| C11orf31. | 0.00161  | -0.18958 | 0.441 | 0.672 | 1 Tcell | C11orf31     |
| KITLG.6   | 0.001613 | -0.10897 | 0     | 0.043 | 1 Tcell | KITLG        |
| TMCC1-AS1 | 0.001613 | -0.13357 | 0     | 0.043 | 1 Tcell | TMCC1-AS1    |
| PLA2G7.11 | 0.001621 | -0.18585 | 0.005 | 0.052 | 1 Tcell | PLA2G7       |
| KIAA1586. | 0.001634 | -0.10085 | 0.045 | 0.116 | 1 Tcell | KIAA1586     |
| LAMTOR4.6 | 0.001639 | -0.16706 | 0.527 | 0.769 | 1 Tcell | LAMTOR4      |
| SDS.14    | 0.001645 | -0.26864 | 0.009 | 0.06  | 1 Tcell | SDS          |
| MAPK8IP2. | 0.001649 | -0.12476 | 0     | 0.043 | 1 Tcell | MAPK8IP2     |
| FLNB.4    | 0.00165  | -0.10519 | 0.005 | 0.052 | 1 Tcell | FLNB         |
| SLC4A8.7  | 0.001651 | -0.10637 | 0.018 | 0.075 | 1 Tcell | SLC4A8       |
| TMEM260.2 | 0.001657 | -0.11032 | 0.018 | 0.075 | 1 Tcell | TMEM260      |
| VDAC1.6   | 0.001659 | -0.16359 | 0.409 | 0.635 | 1 Tcell | VDAC1        |
| FSD1L.5   | 0.00166  | -0.13217 | 0.005 | 0.051 | 1 Tcell | FSD1L        |
| CTD-2015H | 0.001668 | -0.1241  | 0     | 0.043 | 1 Tcell | CTD-2015H6.3 |
| PAQR8.9   | 0.001675 | -0.1349  | 0.032 | 0.097 | 1 Tcell | PAQR8        |
| ZNF16.5   | 0.00168  | -0.12373 | 0.014 | 0.068 | 1 Tcell | ZNF16        |
| FGF9.12   | 0.001684 | -0.17109 | 0.005 | 0.051 | 1 Tcell | FGF9         |
| NMT1.4    | 0.001689 | 0.113095 | 0.145 | 0.27  | 1 Tcell | NMT1         |
| THAP6.2   | 0.00169  | -0.11109 | 0.023 | 0.083 | 1 Tcell | THAP6        |
| CENPJ.8   | 0.001694 | -0.15096 | 0.014 | 0.067 | 1 Tcell | CENPJ        |
| TLDC1.1   | 0.001696 | -0.14375 | 0.005 | 0.051 | 1 Tcell | TLDC1        |
| OXSM.2    | 0.001701 | -0.1087  | 0.023 | 0.082 | 1 Tcell | OXSM         |
| DAPK1.6   | 0.001723 | -0.12669 | 0.009 | 0.06  | 1 Tcell | DAPK1        |
| EZH2.13   | 0.001724 | -0.13592 | 0.073 | 0.155 | 1 Tcell | EZH2         |
| PCCA.1    | 0.001725 | -0.11956 | 0.023 | 0.082 | 1 Tcell | PCCA         |
| ACOT2.1   | 0.001727 | -0.13691 | 0.014 | 0.067 | 1 Tcell | ACOT2        |
| PLEKHM2.4 | 0.001727 | -0.10733 | 0.036 | 0.103 | 1 Tcell | PLEKHM2      |
| PDIK1L.3  | 0.001743 | -0.13462 | 0.009 | 0.059 | 1 Tcell | PDIK1L       |
| CPLX1.9   | 0.001745 | -0.156   | 0     | 0.043 | 1 Tcell | CPLX1        |
| GNPTAB.6  | 0.001753 | 0.580973 | 0.209 | 0.155 | 1 Tcell | GNPTAB       |
| CASP1.12  | 0.001753 | 0.294432 | 0.286 | 0.225 | 1 Tcell | CASP1        |

|                   |           |           |        |         |          |               |
|-------------------|-----------|-----------|--------|---------|----------|---------------|
| HPS5. 6           | 0. 001757 | -0. 1308  | 0. 045 | 0. 115  | 1 Tcell  | HPS5          |
| TSHZ1. 8          | 0. 001759 | -0. 11743 | 0. 018 | 0. 075  | 1 Tcell  | TSHZ1         |
| EIF4B. 7          | 0. 00176  | 0. 428017 | 0. 382 | 0. 378  | 1 Tcell  | EIF4B         |
| ARPP21. 8         | 0. 001763 | -0. 15301 | 0. 005 | 0. 051  | 1 Tcell  | ARPP21        |
| RNF217. 1         | 0. 001765 | -0. 1042  | 0      | 0. 043  | 1 Tcell  | RNF217        |
| EFHD1. 8          | 0. 001768 | -0. 23585 | 0. 009 | 0. 059  | 1 Tcell  | EFHD1         |
| MMP19. 9          | 0. 001775 | -0. 20403 | 0. 009 | 0. 059  | 1 Tcell  | MMP19         |
| NUDC. 7           | 0. 001796 | -0. 13537 | 0. 364 | 0. 584  | 1 Tcell  | NUDC          |
| AURKAIP1. 0. 0018 | -0. 16645 | 0. 391    | 0. 61  | 1 Tcell | AURKAIP1 |               |
| GPN2. 2           | 0. 001802 | -0. 1096  | 0. 045 | 0. 116  | 1 Tcell  | GPN2          |
| RP11-412D9. 4     | 0. 001805 | -0. 11949 | 0      | 0. 042  | 1 Tcell  | RP11-412D9. 4 |
| AC018647. 3       | 0. 001805 | -0. 22819 | 0      | 0. 042  | 1 Tcell  | AC018647. 3   |
| LIN7A. 6          | 0. 001826 | -0. 10134 | 0      | 0. 042  | 1 Tcell  | LIN7A         |
| CHADL. 8          | 0. 001826 | -0. 19171 | 0      | 0. 042  | 1 Tcell  | CHADL         |
| CLCN6. 2          | 0. 001837 | -0. 14187 | 0. 014 | 0. 067  | 1 Tcell  | CLCN6         |
| MATN2. 9          | 0. 00184  | -0. 10533 | 0. 014 | 0. 067  | 1 Tcell  | MATN2         |
| CRYBB1. 12        | 0. 001847 | -0. 21066 | 0      | 0. 042  | 1 Tcell  | CRYBB1        |
| NBEA. 5           | 0. 001857 | -0. 14679 | 0. 005 | 0. 05   | 1 Tcell  | NBEA          |
| BANP. 4           | 0. 001859 | -0. 12432 | 0. 023 | 0. 081  | 1 Tcell  | BANP          |
| ECM1. 6           | 0. 001868 | -0. 12766 | 0      | 0. 042  | 1 Tcell  | ECM1          |
| HIST1H2BD. 3      | 0. 001868 | -0. 14358 | 0      | 0. 042  | 1 Tcell  | HIST1H2BD     |
| CTNNA2. 9         | 0. 001869 | -0. 16313 | 0. 009 | 0. 059  | 1 Tcell  | CTNNA2        |
| BCL6. 4           | 0. 001871 | -0. 11798 | 0. 055 | 0. 129  | 1 Tcell  | BCL6          |
| PIK3R2. 3         | 0. 001882 | -0. 12221 | 0. 005 | 0. 051  | 1 Tcell  | PIK3R2        |
| MICB. 1           | 0. 001888 | 0. 188268 | 0. 05  | 0. 02   | 1 Tcell  | MICB          |
| RHOBTB1. 1        | 0. 001889 | -0. 10751 | 0      | 0. 042  | 1 Tcell  | RHOBTB1       |
| STC2. 7           | 0. 001889 | -0. 18087 | 0      | 0. 042  | 1 Tcell  | STC2          |
| RP11-69E11. 4     | 0. 001901 | -0. 13147 | 0. 014 | 0. 067  | 1 Tcell  | RP11-69E11. 4 |
| TMEM169. 9        | 0. 00191  | -0. 10491 | 0. 009 | 0. 059  | 1 Tcell  | TMEM169       |
| SNRNP35. 5        | 0. 001912 | 0. 124672 | 0. 1   | 0. 198  | 1 Tcell  | SNRNP35       |
| DLEU7. 13         | 0. 001913 | -0. 2097  | 0. 005 | 0. 051  | 1 Tcell  | DLEU7         |
| NKX2-5. 9         | 0. 001915 | -0. 18888 | 0. 014 | 0. 065  | 1 Tcell  | NKX2-5        |
| PIGK. 3           | 0. 001916 | -0. 14681 | 0. 073 | 0. 153  | 1 Tcell  | PIGK          |
| LDOC1. 11         | 0. 001923 | -0. 14735 | 0. 027 | 0. 089  | 1 Tcell  | LDOC1         |
| MID1. 7           | 0. 001924 | -0. 11318 | 0. 005 | 0. 051  | 1 Tcell  | MID1          |
| SH3TC1. 13        | 0. 001926 | -0. 16882 | 0. 023 | 0. 081  | 1 Tcell  | SH3TC1        |
| PXK. 5            | 0. 001934 | -0. 10017 | 0. 064 | 0. 141  | 1 Tcell  | PXK           |
| PEX11A. 2         | 0. 001941 | -0. 10803 | 0. 009 | 0. 059  | 1 Tcell  | PEX11A        |
| RNASE1. 11        | 0. 001946 | -0. 42057 | 0. 091 | 0. 171  | 1 Tcell  | RNASE1        |
| PHF11. 12         | 0. 001949 | 0. 450077 | 0. 195 | 0. 141  | 1 Tcell  | PHF11         |
| GPC6. 6           | 0. 001954 | -0. 13424 | 0      | 0. 042  | 1 Tcell  | GPC6          |
| DNAJC3-AS1. 1     | 0. 001969 | -0. 11962 | 0. 005 | 0. 051  | 1 Tcell  | DNAJC3-AS1    |
| SUSD4. 8          | 0. 001976 | -0. 13674 | 0      | 0. 042  | 1 Tcell  | SUSD4         |
| PDE3B. 4          | 0. 001978 | 0. 339262 | 0. 077 | 0. 038  | 1 Tcell  | PDE3B         |
| YEATS4. 11        | 0. 00198  | -0. 11496 | 0. 145 | 0. 253  | 1 Tcell  | YEATS4        |
| CDC42EP3. 3       | 0. 001994 | 0. 434523 | 0. 177 | 0. 123  | 1 Tcell  | CDC42EP3      |
| SALL3. 7          | 0. 001999 | -0. 10234 | 0      | 0. 042  | 1 Tcell  | SALL3         |
| TP53TG1. 7        | 0. 002001 | -0. 12691 | 0. 105 | 0. 199  | 1 Tcell  | TP53TG1       |
| CMKLR1. 12        | 0. 002001 | -0. 18815 | 0. 005 | 0. 05   | 1 Tcell  | CMKLR1        |
| ZNF140. 7         | 0. 002012 | -0. 10995 | 0. 041 | 0. 108  | 1 Tcell  | ZNF140        |
| STAT6. 14         | 0. 002016 | 0. 264399 | 0. 095 | 0. 051  | 1 Tcell  | STAT6         |

|           |          |          |       |       |         |              |
|-----------|----------|----------|-------|-------|---------|--------------|
| HOXA2.12  | 0.00202  | -0.16784 | 0.018 | 0.073 | 1 Tcell | HOXA2        |
| EPB41L4A. | 0.002021 | -0.10044 | 0     | 0.042 | 1 Tcell | EPB41L4A     |
| ARID3A.5  | 0.002029 | -0.11628 | 0.045 | 0.116 | 1 Tcell | ARID3A       |
| HSPA4L.9  | 0.00203  | -0.11133 | 0.018 | 0.074 | 1 Tcell | HSPA4L       |
| ZNF471.3  | 0.002044 | -0.10499 | 0     | 0.041 | 1 Tcell | ZNF471       |
| ANKRD50.5 | 0.002096 | -0.10924 | 0.005 | 0.05  | 1 Tcell | ANKRD50      |
| SP9.10    | 0.002115 | -0.15513 | 0     | 0.041 | 1 Tcell | SP9          |
| FNTB.6    | 0.002128 | -0.12449 | 0.027 | 0.087 | 1 Tcell | FNTB         |
| OMG.10    | 0.00213  | -0.18585 | 0.023 | 0.081 | 1 Tcell | OMG          |
| ALDH3B1.1 | 0.002135 | -0.18437 | 0.018 | 0.072 | 1 Tcell | ALDH3B1      |
| YPEL4.6   | 0.002139 | -0.1523  | 0     | 0.041 | 1 Tcell | YPEL4        |
| NDUFS8.5  | 0.00214  | -0.17353 | 0.4   | 0.613 | 1 Tcell | NDUFS8       |
| TOX.10    | 0.002147 | 0.39042  | 0.136 | 0.086 | 1 Tcell | TOX          |
| CENPP.5   | 0.002158 | -0.14336 | 0.005 | 0.049 | 1 Tcell | CENPP        |
| DAPK2.1   | 0.002167 | 0.269539 | 0.041 | 0.015 | 1 Tcell | DAPK2        |
| ZMYND15.9 | 0.002167 | -0.12632 | 0.009 | 0.058 | 1 Tcell | ZMYND15      |
| EPB41L5.4 | 0.002169 | -0.11089 | 0.005 | 0.05  | 1 Tcell | EPB41L5      |
| ZFP28.1   | 0.002187 | -0.10886 | 0     | 0.041 | 1 Tcell | ZFP28        |
| CD163L1.4 | 0.002187 | -0.14689 | 0     | 0.041 | 1 Tcell | CD163L1      |
| SEP15.7   | 0.0022   | -0.18648 | 0.441 | 0.661 | 1 Tcell | 15-Sep       |
| ADD3.7    | 0.002203 | 0.394522 | 0.186 | 0.131 | 1 Tcell | ADD3         |
| MFSD6.6   | 0.002212 | -0.13144 | 0.014 | 0.065 | 1 Tcell | MFSD6        |
| FBXO16.4  | 0.002212 | -0.11902 | 0     | 0.041 | 1 Tcell | FBXO16       |
| IL6.6     | 0.002212 | -0.20136 | 0     | 0.041 | 1 Tcell | IL6          |
| RHOBTB2.2 | 0.002231 | -0.10258 | 0.005 | 0.05  | 1 Tcell | RHOBTB2      |
| SRF.1     | 0.002235 | -0.11258 | 0.023 | 0.08  | 1 Tcell | SRF          |
| FZD2.2    | 0.002237 | -0.10007 | 0     | 0.041 | 1 Tcell | FZD2         |
| NRG2.7    | 0.002237 | -0.10575 | 0     | 0.041 | 1 Tcell | NRG2         |
| THRB.2    | 0.002237 | -0.10753 | 0     | 0.041 | 1 Tcell | THRB         |
| MBTPS2.1  | 0.002246 | -0.11145 | 0.018 | 0.073 | 1 Tcell | MBTPS2       |
| SGPP1.9   | 0.002249 | -0.12562 | 0.023 | 0.08  | 1 Tcell | SGPP1        |
| LHPP.9    | 0.002264 | -0.24176 | 0.041 | 0.106 | 1 Tcell | LHPP         |
| SQSTM1.9  | 0.002269 | -0.11784 | 0.341 | 0.527 | 1 Tcell | SQSTM1       |
| RSBN1.11  | 0.002271 | 0.550694 | 0.259 | 0.216 | 1 Tcell | RSBN1        |
| ZNF234.2  | 0.002274 | -0.10103 | 0.009 | 0.057 | 1 Tcell | ZNF234       |
| SIK1.12   | 0.002278 | 0.324725 | 0.155 | 0.099 | 1 Tcell | SIK1         |
| UNC80.6   | 0.002288 | -0.10152 | 0     | 0.041 | 1 Tcell | UNC80        |
| PFAS.1    | 0.002288 | -0.10456 | 0     | 0.041 | 1 Tcell | PFAS         |
| RP4-798A1 | 0.002288 | -0.11499 | 0     | 0.041 | 1 Tcell | RP4-798A10.7 |
| MASP1.8   | 0.002288 | -0.15744 | 0     | 0.041 | 1 Tcell | MASP1        |
| PRKAG2-AS | 0.002293 | -0.13075 | 0.055 | 0.126 | 1 Tcell | PRKAG2-AS1   |
| SERPINB9. | 0.002301 | 0.346704 | 0.209 | 0.145 | 1 Tcell | SERPINB9     |
| LITAF.14  | 0.002302 | 0.323694 | 0.468 | 0.459 | 1 Tcell | LITAF        |
| IL17RA.14 | 0.002308 | -0.12002 | 0.05  | 0.12  | 1 Tcell | IL17RA       |
| TUBB4A.13 | 0.002324 | -0.24232 | 0.05  | 0.119 | 1 Tcell | TUBB4A       |
| TSPAN15.1 | 0.002344 | -0.17913 | 0.023 | 0.079 | 1 Tcell | TSPAN15      |
| C1QTNF4.1 | 0.002345 | -0.12534 | 0.009 | 0.057 | 1 Tcell | C1QTNF4      |
| SNAI2.7   | 0.002367 | -0.10059 | 0     | 0.04  | 1 Tcell | SNAI2        |
| CDCA7.11  | 0.002375 | -0.15034 | 0.055 | 0.124 | 1 Tcell | CDCA7        |
| C10orf10. | 0.002379 | -0.37959 | 0.032 | 0.092 | 1 Tcell | C10orf10     |
| USP15.7   | 0.002392 | 0.435263 | 0.286 | 0.242 | 1 Tcell | USP15        |

|           |          |          |       |       |         |               |
|-----------|----------|----------|-------|-------|---------|---------------|
| ZNF501.2  | 0.002394 | -0.12039 | 0     | 0.04  | 1 Tcell | ZNF501        |
| SMIM10.4  | 0.002397 | -0.12329 | 0.005 | 0.049 | 1 Tcell | SMIM10        |
| INF2.7    | 0.002402 | -0.12333 | 0.027 | 0.087 | 1 Tcell | INF2          |
| RIN3.14   | 0.002405 | -0.21605 | 0.05  | 0.116 | 1 Tcell | RIN3          |
| JAK1.7    | 0.002414 | 0.529267 | 0.286 | 0.252 | 1 Tcell | JAK1          |
| TRABD.13  | 0.002437 | 0.428626 | 0.3   | 0.258 | 1 Tcell | TRABD         |
| MSL2.1    | 0.002442 | 0.439796 | 0.109 | 0.064 | 1 Tcell | MSL2          |
| BRSK2.6   | 0.002449 | -0.11025 | 0     | 0.04  | 1 Tcell | BRSK2         |
| MLXIPL.1C | 0.002449 | -0.19532 | 0     | 0.04  | 1 Tcell | MLXIPL        |
| PGAM2.10  | 0.002458 | -0.17879 | 0.005 | 0.049 | 1 Tcell | PGAM2         |
| ULK2.4    | 0.002461 | -0.10753 | 0.014 | 0.064 | 1 Tcell | ULK2          |
| KLF15.6   | 0.002477 | -0.12115 | 0     | 0.04  | 1 Tcell | KLF15         |
| UBXN1.8   | 0.002488 | 0.235357 | 0.555 | 0.622 | 1 Tcell | UBXN1         |
| ZBTB25.2  | 0.002488 | 0.393858 | 0.136 | 0.087 | 1 Tcell | ZBTB25        |
| TSR3.9    | 0.002519 | 0.12145  | 0.155 | 0.278 | 1 Tcell | TSR3          |
| FGF12.9   | 0.002525 | -0.15704 | 0.005 | 0.049 | 1 Tcell | FGF12         |
| GALNT15.9 | 0.002533 | -0.20983 | 0     | 0.04  | 1 Tcell | GALNT15       |
| DLG2.6    | 0.002534 | -0.11301 | 0.005 | 0.049 | 1 Tcell | DLG2          |
| TTC26.7   | 0.002545 | -0.11913 | 0.005 | 0.049 | 1 Tcell | TTC26         |
| ZNF83.6   | 0.002554 | 0.115656 | 0.1   | 0.199 | 1 Tcell | ZNF83         |
| NSDHL     | 0.002569 | -0.1192  | 0.041 | 0.106 | 1 Tcell | NSDHL         |
| RP11-556E | 0.002579 | -0.23483 | 0.009 | 0.056 | 1 Tcell | RP11-556E13.1 |
| ANKRD6.4  | 0.00258  | -0.10106 | 0.005 | 0.048 | 1 Tcell | ANKRD6        |
| GLB1L     | 0.002591 | -0.12405 | 0     | 0.04  | 1 Tcell | GLB1L         |
| SHMT1.8   | 0.002592 | -0.13533 | 0.05  | 0.119 | 1 Tcell | SHMT1         |
| MXD1.8    | 0.002597 | -0.16743 | 0.059 | 0.13  | 1 Tcell | MXD1          |
| C14orf2.6 | 0.0026   | 0.148399 | 0.573 | 0.656 | 1 Tcell | C14orf2       |
| KIAA1211L | 0.002601 | -0.10142 | 0.009 | 0.056 | 1 Tcell | KIAA1211L     |
| ZNF618.6  | 0.002603 | -0.14022 | 0.005 | 0.048 | 1 Tcell | ZNF618        |
| CLDN15.7  | 0.002603 | -0.10509 | 0.014 | 0.064 | 1 Tcell | CLDN15        |
| HIST3H2A  | 0.002607 | 0.14436  | 0.023 | 0.006 | 1 Tcell | HIST3H2A      |
| FGFR2.9   | 0.002614 | -0.18057 | 0.005 | 0.048 | 1 Tcell | FGFR2         |
| DCLRE1B.4 | 0.002623 | -0.12067 | 0.009 | 0.056 | 1 Tcell | DCLRE1B       |
| GPR153.3  | 0.00265  | -0.10407 | 0     | 0.039 | 1 Tcell | GPR153        |
| ADCY2.4   | 0.00265  | -0.10942 | 0     | 0.039 | 1 Tcell | ADCY2         |
| USP54.7   | 0.002651 | -0.14542 | 0.005 | 0.048 | 1 Tcell | USP54         |
| NEK11.6   | 0.002657 | -0.1139  | 0.005 | 0.048 | 1 Tcell | NEK11         |
| ICOSLG.13 | 0.00266  | -0.16077 | 0.032 | 0.092 | 1 Tcell | ICOSLG        |
| FAS.5     | 0.002661 | 0.27069  | 0.114 | 0.066 | 1 Tcell | FAS           |
| UCP2.12   | 0.002669 | 0.342799 | 0.327 | 0.271 | 1 Tcell | UCP2          |
| HLA-DQA1. | 0.00267  | -0.27028 | 0.209 | 0.308 | 1 Tcell | HLA-DQA1      |
| RGS11.7   | 0.002682 | -0.10962 | 0.005 | 0.048 | 1 Tcell | RGS11         |
| AC011043. | 0.002685 | -0.11128 | 0.014 | 0.064 | 1 Tcell | AC011043.1    |
| TPRG1     | 0.002686 | 0.204027 | 0.036 | 0.013 | 1 Tcell | TPRG1         |
| GCNT1.2   | 0.002689 | 0.203632 | 0.055 | 0.024 | 1 Tcell | GCNT1         |
| GSE1.11   | 0.002706 | -0.11486 | 0.032 | 0.092 | 1 Tcell | GSE1          |
| RP11-115C | 0.002711 | 0.169512 | 0.027 | 0.086 | 1 Tcell | RP11-115C21.2 |
| ATP1A2.1C | 0.002719 | -0.24828 | 0.014 | 0.063 | 1 Tcell | ATP1A2        |
| GNG5.10   | 0.00272  | -0.22588 | 0.464 | 0.648 | 1 Tcell | GNG5          |
| CAMK1D.9  | 0.002726 | -0.10203 | 0.045 | 0.112 | 1 Tcell | CAMK1D        |
| ZNF713.5  | 0.002727 | -0.12631 | 0.005 | 0.048 | 1 Tcell | ZNF713        |

|           |          |          |       |       |         |               |
|-----------|----------|----------|-------|-------|---------|---------------|
| ZGLP1.3   | 0.002752 | -0.14516 | 0.005 | 0.048 | 1 Tcell | ZGLP1         |
| RANGAP1.7 | 0.002781 | -0.14033 | 0.041 | 0.104 | 1 Tcell | RANGAP1       |
| CASP9.5   | 0.002791 | -0.12559 | 0.027 | 0.085 | 1 Tcell | CASP9         |
| ACTR3C    | 0.002793 | 0.174081 | 0.027 | 0.008 | 1 Tcell | ACTR3C        |
| RXRA.8    | 0.0028   | -0.12913 | 0.036 | 0.097 | 1 Tcell | RXRA          |
| PDZRN4.8  | 0.002836 | -0.15076 | 0     | 0.039 | 1 Tcell | PDZRN4        |
| FABP6.10  | 0.002836 | -0.15169 | 0     | 0.039 | 1 Tcell | FABP6         |
| ZNF846.11 | 0.002843 | -0.11703 | 0.018 | 0.071 | 1 Tcell | ZNF846        |
| GEM.6     | 0.002844 | -0.17748 | 0.036 | 0.098 | 1 Tcell | GEM           |
| TMEM220.9 | 0.002858 | -0.14864 | 0.018 | 0.07  | 1 Tcell | TMEM220       |
| RAB3C.8   | 0.002868 | -0.13435 | 0     | 0.039 | 1 Tcell | RAB3C         |
| CTB-61M7. | 0.002868 | -0.20153 | 0     | 0.039 | 1 Tcell | CTB-61M7.2    |
| DIEXF     | 0.002869 | -0.1043  | 0.014 | 0.063 | 1 Tcell | DIEXF         |
| PARP10.7  | 0.002881 | 0.349762 | 0.136 | 0.086 | 1 Tcell | PARP10        |
| RAPGEF1.1 | 0.002883 | -0.14329 | 0.05  | 0.118 | 1 Tcell | RAPGEF1       |
| NAA38.6   | 0.002895 | -0.10416 | 0.3   | 0.475 | 1 Tcell | NAA38         |
| MROH8.3   | 0.002901 | -0.13521 | 0     | 0.039 | 1 Tcell | MROH8         |
| PACRGL.2  | 0.002918 | -0.11436 | 0.018 | 0.071 | 1 Tcell | PACRGL        |
| TTC21A.1  | 0.002934 | -0.10799 | 0     | 0.039 | 1 Tcell | TTC21A        |
| MAPK13.9  | 0.002946 | 0.264187 | 0.064 | 0.03  | 1 Tcell | MAPK13        |
| CARD9.14  | 0.002949 | -0.18519 | 0.018 | 0.07  | 1 Tcell | CARD9         |
| DLEC1     | 0.002956 | 0.138652 | 0.018 | 0.004 | 1 Tcell | DLEC1         |
| COR01B.12 | 0.002968 | 0.534151 | 0.368 | 0.361 | 1 Tcell | COR01B        |
| NDUFS6.6  | 0.003005 | -0.10416 | 0.414 | 0.632 | 1 Tcell | NDUFS6        |
| PCDHB14.6 | 0.003012 | -0.11466 | 0.009 | 0.055 | 1 Tcell | PCDHB14       |
| TTC7B.1   | 0.003035 | -0.11205 | 0     | 0.038 | 1 Tcell | TTC7B         |
| PTGS2.13  | 0.003067 | -0.19389 | 0.014 | 0.062 | 1 Tcell | PTGS2         |
| NR6A1.1   | 0.003069 | -0.10864 | 0     | 0.038 | 1 Tcell | NR6A1         |
| EPOR.8    | 0.003088 | -0.10815 | 0.018 | 0.07  | 1 Tcell | EPOR          |
| RACGAP1.7 | 0.003091 | -0.1532  | 0.027 | 0.084 | 1 Tcell | RACGAP1       |
| PLEK.14   | 0.003093 | -0.18603 | 0.095 | 0.177 | 1 Tcell | PLEK          |
| LTBR.14   | 0.003123 | -0.19607 | 0.036 | 0.096 | 1 Tcell | LTBR          |
| ATPIF1.4  | 0.003137 | 0.165235 | 0.555 | 0.624 | 1 Tcell | ATPIF1        |
| OSTC.10   | 0.003142 | -0.12617 | 0.323 | 0.507 | 1 Tcell | OSTC          |
| EEF2K.3   | 0.003164 | -0.10427 | 0.005 | 0.047 | 1 Tcell | EEF2K         |
| CLEC4A.14 | 0.003187 | -0.17163 | 0.014 | 0.062 | 1 Tcell | CLEC4A        |
| SYN1.4    | 0.003211 | -0.11684 | 0     | 0.038 | 1 Tcell | SYN1          |
| NECAB1.8  | 0.003211 | -0.17636 | 0     | 0.038 | 1 Tcell | NECAB1        |
| TRIP13.4  | 0.003214 | -0.10356 | 0.005 | 0.047 | 1 Tcell | TRIP13        |
| PPFIA2.8  | 0.003227 | -0.14767 | 0.005 | 0.046 | 1 Tcell | PPFIA2        |
| SPG7.4    | 0.003237 | 0.105345 | 0.132 | 0.243 | 1 Tcell | SPG7          |
| HOXB7.6   | 0.003246 | -0.18603 | 0.014 | 0.062 | 1 Tcell | HOXB7         |
| FAM124A.5 | 0.003247 | -0.12995 | 0     | 0.038 | 1 Tcell | FAM124A       |
| SLC32A1.1 | 0.003247 | -0.15284 | 0     | 0.038 | 1 Tcell | SLC32A1       |
| RBAK      | 0.003253 | -0.10226 | 0.005 | 0.046 | 1 Tcell | RBAK          |
| FSTL3.1   | 0.003256 | -0.11232 | 0.005 | 0.047 | 1 Tcell | FSTL3         |
| RP11-295G | 0.003271 | -0.1014  | 0.005 | 0.047 | 1 Tcell | RP11-295G20.2 |
| EPHB1.8   | 0.003278 | -0.10826 | 0.005 | 0.047 | 1 Tcell | EPHB1         |
| LNX1.9    | 0.003281 | -0.10724 | 0.018 | 0.07  | 1 Tcell | LNX1          |
| CTD-2350C | 0.003284 | -0.10412 | 0     | 0.038 | 1 Tcell | CTD-2350C19.2 |
| ASCL2.13  | 0.003284 | -0.15215 | 0     | 0.038 | 1 Tcell | ASCL2         |

|             |          |          |       |       |         |               |
|-------------|----------|----------|-------|-------|---------|---------------|
| PBK. 14     | 0.003289 | -0.25034 | 0.023 | 0.074 | 1 Tcell | PBK           |
| RHBDF2. 14  | 0.003296 | -0.1304  | 0.095 | 0.179 | 1 Tcell | RHBDF2        |
| PAQR7. 1    | 0.003318 | -0.12606 | 0.005 | 0.046 | 1 Tcell | PAQR7         |
| RP3-522D1   | 0.003321 | -0.14846 | 0     | 0.038 | 1 Tcell | RP3-522D1. 1  |
| PLAC8. 13   | 0.003323 | 0.41201  | 0.114 | 0.067 | 1 Tcell | PLAC8         |
| PSMA2. 8    | 0.003341 | -0.41664 | 0.014 | 0.062 | 1 Tcell | PSMA2         |
| ST6GAL2. 8  | 0.003359 | -0.11584 | 0     | 0.038 | 1 Tcell | ST6GAL2       |
| RP11-536K   | 0.003359 | -0.21378 | 0     | 0.038 | 1 Tcell | RP11-536K7. 3 |
| KCTD15. 6   | 0.003367 | -0.10205 | 0.005 | 0.046 | 1 Tcell | KCTD15        |
| ATP5D. 13   | 0.003369 | 0.163174 | 0.55  | 0.615 | 1 Tcell | ATP5D         |
| TMEM109. 1  | 0.003375 | 0.436277 | 0.255 | 0.204 | 1 Tcell | TMEM109       |
| MAST1. 4    | 0.003384 | -0.10475 | 0.005 | 0.046 | 1 Tcell | MAST1         |
| ARIH1. 1    | 0.003396 | -0.10929 | 0.036 | 0.097 | 1 Tcell | ARIH1         |
| FAM198B. 1  | 0.003407 | -0.18463 | 0.014 | 0.062 | 1 Tcell | FAM198B       |
| NDUFA12. 5  | 0.003425 | -0.11159 | 0.35  | 0.562 | 1 Tcell | NDUFA12       |
| RBP7. 7     | 0.003427 | -0.20504 | 0.005 | 0.046 | 1 Tcell | RBP7          |
| NR1H3. 3    | 0.003443 | -0.13346 | 0.009 | 0.054 | 1 Tcell | NR1H3         |
| TLR5. 11    | 0.003449 | -0.2002  | 0.005 | 0.046 | 1 Tcell | TLR5          |
| DLGAP1. 7   | 0.003471 | -0.10507 | 0.005 | 0.046 | 1 Tcell | DLGAP1        |
| GAL. 7      | 0.003475 | -0.15984 | 0     | 0.037 | 1 Tcell | GAL           |
| NHP2. 8     | 0.003488 | -0.11662 | 0.377 | 0.584 | 1 Tcell | NHP2          |
| TP73. 1     | 0.003491 | 0.409203 | 0.064 | 0.031 | 1 Tcell | TP73          |
| LRRC4. 5    | 0.003504 | -0.13556 | 0.005 | 0.046 | 1 Tcell | LRRC4         |
| CYB5D1. 3   | 0.003509 | -0.11281 | 0.009 | 0.054 | 1 Tcell | CYB5D1        |
| NYAP1. 6    | 0.003514 | -0.11657 | 0     | 0.037 | 1 Tcell | NYAP1         |
| CDC42EP2. 0 | 0.003514 | -0.13005 | 0     | 0.037 | 1 Tcell | CDC42EP2      |
| PACRG. 5    | 0.003514 | -0.13305 | 0     | 0.037 | 1 Tcell | PACRG         |
| CD180. 13   | 0.003514 | -0.15215 | 0     | 0.037 | 1 Tcell | CD180         |
| SERTAD3. 3  | 0.003517 | -0.10769 | 0.091 | 0.175 | 1 Tcell | SERTAD3       |
| ATOH8. 5    | 0.003521 | -0.12378 | 0.009 | 0.054 | 1 Tcell | ATOH8         |
| NDC1. 3     | 0.003528 | -0.12744 | 0.014 | 0.061 | 1 Tcell | NDC1          |
| GUCY1A2. 6  | 0.003554 | -0.10293 | 0     | 0.037 | 1 Tcell | GUCY1A2       |
| TFAP2A. 1C  | 0.003554 | -0.12918 | 0     | 0.037 | 1 Tcell | TFAP2A        |
| TBCA. 9     | 0.003561 | -0.1671  | 0.505 | 0.714 | 1 Tcell | TBCA          |
| ADARB1      | 0.003562 | 0.195154 | 0.059 | 0.027 | 1 Tcell | ADARB1        |
| EDC3        | 0.003573 | -0.10575 | 0.023 | 0.076 | 1 Tcell | EDC3          |
| MBOAT1      | 0.003589 | 0.207424 | 0.055 | 0.024 | 1 Tcell | MBOAT1        |
| ALPK1. 7    | 0.003595 | -0.14264 | 0     | 0.037 | 1 Tcell | ALPK1         |
| EGFL7. 3    | 0.003595 | -0.15366 | 0     | 0.037 | 1 Tcell | EGFL7         |
| ERI2. 3     | 0.003597 | -0.1181  | 0.009 | 0.053 | 1 Tcell | ERI2          |
| NME6. 4     | 0.003602 | -0.14137 | 0.045 | 0.11  | 1 Tcell | NME6          |
| FGD2. 13    | 0.003623 | -0.12158 | 0.014 | 0.062 | 1 Tcell | FGD2          |
| AP2M1. 3    | 0.003627 | -0.14701 | 0.486 | 0.716 | 1 Tcell | AP2M1         |
| PLBD1. 14   | 0.003659 | -0.15169 | 0.036 | 0.095 | 1 Tcell | PLBD1         |
| CDC42SE1.   | 0.00367  | 0.510253 | 0.332 | 0.303 | 1 Tcell | CDC42SE1      |
| CCDC40      | 0.003677 | -0.1009  | 0     | 0.037 | 1 Tcell | CCDC40        |
| PSORS1C1.   | 0.003677 | -0.13737 | 0     | 0.037 | 1 Tcell | PSORS1C1      |
| DOPEY1. 1   | 0.003677 | -0.10178 | 0.005 | 0.046 | 1 Tcell | DOPEY1        |
| IMPA2. 7    | 0.003712 | -0.13196 | 0.014 | 0.061 | 1 Tcell | IMPA2         |
| HSPB6. 8    | 0.003717 | -0.12233 | 0.014 | 0.061 | 1 Tcell | HSPB6         |
| TAF7. 12    | 0.00372  | -0.10432 | 0.345 | 0.557 | 1 Tcell | TAF7          |

|            |           |           |        |        |         |                |
|------------|-----------|-----------|--------|--------|---------|----------------|
| ENPP2. 8   | 0. 003734 | -0. 2378  | 0. 005 | 0. 045 | 1 Tcell | ENPP2          |
| FAM102A. 9 | 0. 003747 | 0. 419614 | 0. 145 | 0. 097 | 1 Tcell | FAM102A        |
| IL10RB-AS  | 0. 003748 | -0. 18806 | 0. 005 | 0. 045 | 1 Tcell | IL10RB-AS1     |
| RAB9B. 7   | 0. 003762 | -0. 11619 | 0. 009 | 0. 053 | 1 Tcell | RAB9B          |
| TMEM150C.  | 0. 003771 | -0. 11225 | 0. 005 | 0. 045 | 1 Tcell | TMEM150C       |
| CTC-250I1  | 0. 003771 | 0. 294066 | 0. 055 | 0. 025 | 1 Tcell | CTC-250I14. 6  |
| ADRBK2. 9  | 0. 003776 | -0. 10247 | 0. 009 | 0. 054 | 1 Tcell | ADRBK2         |
| SAA2. 10   | 0. 003841 | -0. 59083 | 0. 009 | 0. 053 | 1 Tcell | SAA2           |
| RP1-223E5  | 0. 003847 | -0. 10206 | 0      | 0. 037 | 1 Tcell | RP1-223E5. 4   |
| SNCA. 14   | 0. 003859 | -0. 20659 | 0. 073 | 0. 145 | 1 Tcell | SNCA           |
| ZNF124. 5  | 0. 003889 | -0. 14923 | 0. 014 | 0. 061 | 1 Tcell | ZNF124         |
| PHOSPHO2.  | 0. 003917 | -0. 13533 | 0. 005 | 0. 045 | 1 Tcell | PHOSPHO2       |
| TYROBP. 14 | 0. 003918 | -0. 17894 | 0. 336 | 0. 462 | 1 Tcell | TYROBP         |
| IL27RA. 6  | 0. 003929 | 0. 345568 | 0. 095 | 0. 055 | 1 Tcell | IL27RA         |
| RPN2. 4    | 0. 003932 | -0. 15735 | 0. 414 | 0. 628 | 1 Tcell | RPN2           |
| LINGO1. 7  | 0. 003934 | -0. 11513 | 0      | 0. 036 | 1 Tcell | LINGO1         |
| TPRN. 1    | 0. 003934 | -0. 12224 | 0      | 0. 036 | 1 Tcell | TPRN           |
| RNF122. 2  | 0. 003934 | -0. 1465  | 0      | 0. 036 | 1 Tcell | RNF122         |
| FCHSD2. 4  | 0. 003944 | -0. 12821 | 0. 027 | 0. 082 | 1 Tcell | FCHSD2         |
| SLC38A1. 1 | 0. 003978 | 0. 477615 | 0. 191 | 0. 14  | 1 Tcell | SLC38A1        |
| BMPER. 4   | 0. 003979 | -0. 10509 | 0      | 0. 036 | 1 Tcell | BMPER          |
| KCND2. 6   | 0. 003979 | -0. 10994 | 0      | 0. 036 | 1 Tcell | KCND2          |
| TCEAL6. 8  | 0. 003979 | -0. 15639 | 0      | 0. 036 | 1 Tcell | TCEAL6         |
| KCNN2. 7   | 0. 004024 | -0. 10062 | 0      | 0. 036 | 1 Tcell | KCNN2          |
| TMEM243. 7 | 0. 004025 | 0. 346984 | 0. 255 | 0. 201 | 1 Tcell | TMEM243        |
| MYBPC1. 8  | 0. 004032 | -0. 16434 | 0. 005 | 0. 045 | 1 Tcell | MYBPC1         |
| APCDD1. 3  | 0. 00407  | -0. 11672 | 0      | 0. 036 | 1 Tcell | APCDD1         |
| SHFM1. 8   | 0. 004076 | -0. 17226 | 0. 482 | 0. 727 | 1 Tcell | SHFM1          |
| IPMK. 3    | 0. 004097 | -0. 11248 | 0. 005 | 0. 045 | 1 Tcell | IPMK           |
| NXN. 6     | 0. 004116 | -0. 11899 | 0      | 0. 036 | 1 Tcell | NXN            |
| GNG10. 6   | 0. 004118 | -0. 19293 | 0. 023 | 0. 074 | 1 Tcell | GNG10          |
| SDCBP2. 5  | 0. 004124 | -0. 10075 | 0. 005 | 0. 045 | 1 Tcell | SDCBP2         |
| TRIQQ. 4   | 0. 004137 | -0. 13952 | 0. 014 | 0. 06  | 1 Tcell | TRIQQ          |
| DISP1. 3   | 0. 00421  | -0. 13817 | 0      | 0. 036 | 1 Tcell | DISP1          |
| ZC3H18. 8  | 0. 004216 | 0. 10866  | 0. 077 | 0. 158 | 1 Tcell | ZC3H18         |
| RP11-315A  | 0. 004258 | -0. 11356 | 0      | 0. 036 | 1 Tcell | RP11-315A16. 1 |
| EIF3H. 8   | 0. 004273 | 0. 194143 | 0. 582 | 0. 67  | 1 Tcell | EIF3H          |
| GALNT13. 9 | 0. 004274 | -0. 12813 | 0. 005 | 0. 045 | 1 Tcell | GALNT13        |
| DDT. 6     | 0. 004305 | -0. 10433 | 0. 336 | 0. 526 | 1 Tcell | DDT            |
| CAV2. 6    | 0. 004328 | -0. 13581 | 0. 005 | 0. 044 | 1 Tcell | CAV2           |
| ZSCAN5A. 1 | 0. 004333 | -0. 10424 | 0. 009 | 0. 052 | 1 Tcell | ZSCAN5A        |
| ZNF529. 5  | 0. 004339 | -0. 11807 | 0. 014 | 0. 06  | 1 Tcell | ZNF529         |
| MARCO. 10  | 0. 004368 | -0. 26056 | 0. 014 | 0. 06  | 1 Tcell | MARCO          |
| HARBI1. 1  | 0. 00437  | -0. 10774 | 0. 005 | 0. 044 | 1 Tcell | HARBI1         |
| RTTN. 2    | 0. 004386 | -0. 10861 | 0. 005 | 0. 044 | 1 Tcell | RTTN           |
| FBXO36     | 0. 004405 | -0. 11318 | 0      | 0. 036 | 1 Tcell | FBXO36         |
| PDE6B. 2   | 0. 004411 | -0. 12931 | 0. 009 | 0. 052 | 1 Tcell | PDE6B          |
| PTTG1. 12  | 0. 004421 | 0. 403081 | 0. 277 | 0. 229 | 1 Tcell | PTTG1          |
| CAPN3. 11  | 0. 004435 | -0. 28241 | 0. 005 | 0. 044 | 1 Tcell | CAPN3          |
| ONECUT2. 9 | 0. 004458 | -0. 1236  | 0. 005 | 0. 044 | 1 Tcell | ONECUT2        |
| ANGEL1. 2  | 0. 004479 | -0. 1318  | 0. 005 | 0. 044 | 1 Tcell | ANGEL1         |



|           |          |          |       |       |         |               |
|-----------|----------|----------|-------|-------|---------|---------------|
| TMBIM4.1C | 0.00449  | -0.30645 | 0.014 | 0.06  | 1 Tcell | TMBIM4        |
| ME3.1     | 0.004502 | -0.11185 | 0.005 | 0.044 | 1 Tcell | ME3           |
| ZNF582    | 0.004539 | -0.11978 | 0.005 | 0.044 | 1 Tcell | ZNF582        |
| SH3RF3.2  | 0.004557 | -0.12637 | 0     | 0.035 | 1 Tcell | SH3RF3        |
| PDE7A.6   | 0.004559 | 0.373942 | 0.127 | 0.081 | 1 Tcell | PDE7A         |
| TOP2A.13  | 0.004569 | -0.19056 | 0.032 | 0.087 | 1 Tcell | TOP2A         |
| GNAS.13   | 0.004591 | -0.12339 | 0.441 | 0.651 | 1 Tcell | GNAS          |
| CELF3.12  | 0.004597 | -0.1365  | 0.018 | 0.067 | 1 Tcell | CELF3         |
| NDUFA11.4 | 0.0046   | -0.10173 | 0.518 | 0.745 | 1 Tcell | NDUFA11       |
| TVP23A.4  | 0.004608 | -0.15162 | 0     | 0.035 | 1 Tcell | TVP23A        |
| IQGAP2.8  | 0.004625 | 0.546223 | 0.195 | 0.148 | 1 Tcell | IQGAP2        |
| PSAP.11   | 0.004645 | -0.16244 | 0.591 | 0.823 | 1 Tcell | PSAP          |
| MALT1.9   | 0.004661 | 0.347509 | 0.118 | 0.073 | 1 Tcell | MALT1         |
| DCK.10    | 0.00472  | 0.401592 | 0.305 | 0.265 | 1 Tcell | DCK           |
| CD72.11   | 0.004739 | -0.15464 | 0.009 | 0.051 | 1 Tcell | CD72          |
| BIRC5.14  | 0.004771 | -0.18862 | 0.045 | 0.106 | 1 Tcell | BIRC5         |
| CLEC4E.12 | 0.004815 | -0.24691 | 0.014 | 0.059 | 1 Tcell | CLEC4E        |
| NDUFA7.1C | 0.004819 | -0.33872 | 0.005 | 0.043 | 1 Tcell | NDUFA7        |
| AC005618. | 0.004821 | -0.1301  | 0.005 | 0.043 | 1 Tcell | AC005618.6    |
| SMOC1.8   | 0.004821 | -0.1531  | 0     | 0.035 | 1 Tcell | SMOC1         |
| TAL1.9    | 0.004821 | -0.17634 | 0     | 0.035 | 1 Tcell | TAL1          |
| RUNX1T1.6 | 0.004876 | -0.10155 | 0     | 0.035 | 1 Tcell | RUNX1T1       |
| DNASE1L1. | 0.004882 | -0.13556 | 0.023 | 0.073 | 1 Tcell | DNASE1L1      |
| PLP1.11   | 0.004887 | -0.3011  | 0.095 | 0.172 | 1 Tcell | PLP1          |
| ZNF35.4   | 0.004901 | -0.10457 | 0.014 | 0.059 | 1 Tcell | ZNF35         |
| CADPS.8   | 0.004913 | -0.16947 | 0.005 | 0.043 | 1 Tcell | CADPS         |
| MUC12.5   | 0.004941 | -0.16078 | 0.005 | 0.043 | 1 Tcell | MUC12         |
| RAPGEF5.9 | 0.004955 | -0.20878 | 0.005 | 0.043 | 1 Tcell | RAPGEF5       |
| LACC1.8   | 0.004988 | -0.13592 | 0     | 0.035 | 1 Tcell | LACC1         |
| AC015691. | 0.00499  | 0.151969 | 0.014 | 0.003 | 1 Tcell | AC015691.13   |
| ZNF536.9  | 0.005002 | -0.12578 | 0.005 | 0.043 | 1 Tcell | ZNF536        |
| SORBS2.1C | 0.005033 | -0.11848 | 0.009 | 0.051 | 1 Tcell | SORBS2        |
| INA.8     | 0.005039 | -0.13393 | 0.005 | 0.043 | 1 Tcell | INA           |
| LINC00237 | 0.005044 | -0.10326 | 0     | 0.035 | 1 Tcell | LINC00237     |
| RP11-403I | 0.005044 | -0.20462 | 0     | 0.035 | 1 Tcell | RP11-403I13.5 |
| VCAM1.10  | 0.005057 | -0.15447 | 0.023 | 0.073 | 1 Tcell | VCAM1         |
| CXCL12.9  | 0.005139 | -0.19926 | 0.005 | 0.043 | 1 Tcell | CXCL12        |
| POC5.3    | 0.005152 | -0.11469 | 0.009 | 0.051 | 1 Tcell | POC5          |
| AEN.3     | 0.005159 | 0.393795 | 0.132 | 0.086 | 1 Tcell | AEN           |
| RP11-455F | 0.00516  | -0.10225 | 0     | 0.034 | 1 Tcell | RP11-455F5.3  |
| HOXC8.8   | 0.00516  | -0.1283  | 0     | 0.034 | 1 Tcell | HOXC8         |
| CTA-293F1 | 0.00516  | -0.13511 | 0     | 0.034 | 1 Tcell | CTA-293F17.1  |
| PRR11.6   | 0.005164 | -0.10041 | 0.018 | 0.065 | 1 Tcell | PRR11         |
| PI4K2A.9  | 0.005192 | -0.10525 | 0.018 | 0.066 | 1 Tcell | PI4K2A        |
| LAT2.14   | 0.005226 | -0.23764 | 0.127 | 0.204 | 1 Tcell | LAT2          |
| ANKH.8    | 0.005258 | -0.10159 | 0.077 | 0.15  | 1 Tcell | ANKH          |
| CDCP1.10  | 0.005278 | -0.145   | 0     | 0.034 | 1 Tcell | CDCP1         |
| COLEC12.5 | 0.005278 | -0.14515 | 0     | 0.034 | 1 Tcell | COLEC12       |
| CCNI.9    | 0.005281 | 0.175875 | 0.623 | 0.707 | 1 Tcell | CCNI          |
| SULT1A1.1 | 0.005297 | -0.1888  | 0.009 | 0.05  | 1 Tcell | SULT1A1       |
| NUP37.7   | 0.005299 | -0.11263 | 0.064 | 0.132 | 1 Tcell | NUP37         |

|           |          |          |       |       |         |               |
|-----------|----------|----------|-------|-------|---------|---------------|
| PLB1.12   | 0.005304 | -0.14207 | 0.005 | 0.043 | 1 Tcell | PLB1          |
| POLR2C.1C | 0.005317 | 0.148027 | 0.214 | 0.352 | 1 Tcell | POLR2C        |
| PCL0.4    | 0.005338 | -0.10745 | 0     | 0.034 | 1 Tcell | PCL0          |
| RNF175.2  | 0.005338 | -0.11824 | 0     | 0.034 | 1 Tcell | RNF175        |
| GBGT1.13  | 0.005367 | -0.1419  | 0.009 | 0.051 | 1 Tcell | GBGT1         |
| NFATC1.7  | 0.005374 | 0.287751 | 0.091 | 0.052 | 1 Tcell | NFATC1        |
| KCNQ3.6   | 0.005376 | -0.17337 | 0.005 | 0.042 | 1 Tcell | KCNQ3         |
| EEF1G.5   | 0.005394 | 0.369613 | 0.15  | 0.102 | 1 Tcell | EEF1G         |
| CXorf21.1 | 0.005401 | -0.2554  | 0.027 | 0.077 | 1 Tcell | CXorf21       |
| PGM2.10   | 0.005415 | -0.11605 | 0.077 | 0.15  | 1 Tcell | PGM2          |
| TMEM219.1 | 0.005433 | -0.10065 | 0.377 | 0.564 | 1 Tcell | TMEM219       |
| A1BG.6    | 0.005489 | 0.138121 | 0.177 | 0.301 | 1 Tcell | A1BG          |
| DENND1B.6 | 0.005518 | 0.447101 | 0.136 | 0.091 | 1 Tcell | DENND1B       |
| CHST9.4   | 0.005522 | -0.10736 | 0     | 0.034 | 1 Tcell | CHST9         |
| ADPRH.8   | 0.005522 | -0.12897 | 0     | 0.034 | 1 Tcell | ADPRH         |
| TMEM230.3 | 0.005525 | -0.1741  | 0.418 | 0.62  | 1 Tcell | TMEM230       |
| RAB3IL1.9 | 0.005585 | -0.13814 | 0     | 0.034 | 1 Tcell | RAB3IL1       |
| NMNAT3.1  | 0.005588 | -0.12783 | 0.005 | 0.042 | 1 Tcell | NMNAT3        |
| AKIRIN2.1 | 0.00559  | 0.418373 | 0.377 | 0.381 | 1 Tcell | AKIRIN2       |
| SC5D.6    | 0.005602 | 0.568503 | 0.218 | 0.172 | 1 Tcell | SC5D          |
| P2RY6.12  | 0.005648 | -0.13778 | 0     | 0.034 | 1 Tcell | P2RY6         |
| UBE2T.13  | 0.005724 | -0.17362 | 0.064 | 0.128 | 1 Tcell | UBE2T         |
| PIFO.10   | 0.00573  | -0.18317 | 0.009 | 0.05  | 1 Tcell | PIFO          |
| UHRF1BP1  | 0.005758 | -0.11114 | 0.005 | 0.042 | 1 Tcell | UHRF1BP1      |
| ULK1      | 0.005774 | -0.10262 | 0.009 | 0.05  | 1 Tcell | ULK1          |
| ARHGAP5-A | 0.005777 | -0.11369 | 0     | 0.034 | 1 Tcell | ARHGAP5-AS1   |
| ERCC8     | 0.00579  | -0.10348 | 0.018 | 0.065 | 1 Tcell | ERCC8         |
| SLMAP.4   | 0.005815 | 0.129097 | 0.059 | 0.128 | 1 Tcell | SLMAP         |
| ZNF445.2  | 0.005833 | -0.13557 | 0.018 | 0.065 | 1 Tcell | ZNF445        |
| TFEC.14   | 0.005846 | -0.18674 | 0.014 | 0.057 | 1 Tcell | TFEC          |
| NEDD8.6   | 0.005853 | 0.134729 | 0.641 | 0.747 | 1 Tcell | NEDD8         |
| USP53.13  | 0.005873 | -0.179   | 0.073 | 0.142 | 1 Tcell | USP53         |
| ACSM5.9   | 0.00591  | -0.17042 | 0     | 0.033 | 1 Tcell | ACSM5         |
| VAMP5.9   | 0.005912 | -0.25015 | 0.277 | 0.399 | 1 Tcell | VAMP5         |
| FAM64A.14 | 0.005937 | -0.19314 | 0.023 | 0.07  | 1 Tcell | FAM64A        |
| FKBP8.6   | 0.005942 | 0.244368 | 0.55  | 0.648 | 1 Tcell | FKBP8         |
| MED16.7   | 0.005957 | 0.1344   | 0.082 | 0.16  | 1 Tcell | MED16         |
| SLC05A1.9 | 0.006066 | -0.10742 | 0.005 | 0.042 | 1 Tcell | SLC05A1       |
| PSD2.7    | 0.0061   | -0.11194 | 0.005 | 0.042 | 1 Tcell | PSD2          |
| HLX.7     | 0.006108 | -0.14721 | 0.005 | 0.041 | 1 Tcell | HLX           |
| ZNF415.3  | 0.006113 | -0.10932 | 0     | 0.033 | 1 Tcell | ZNF415        |
| TTC5.3    | 0.006135 | -0.11138 | 0.041 | 0.098 | 1 Tcell | TTC5          |
| KIF20B.1C | 0.00614  | 0.31223  | 0.132 | 0.086 | 1 Tcell | KIF20B        |
| CPED1.11  | 0.006183 | -0.14341 | 0     | 0.033 | 1 Tcell | CPED1         |
| RP11-480C | 0.00621  | -0.24561 | 0.009 | 0.049 | 1 Tcell | RP11-480C22.1 |
| HEATR3.1  | 0.006223 | -0.10593 | 0.014 | 0.057 | 1 Tcell | HEATR3        |
| RPH3A.7   | 0.006253 | -0.12023 | 0     | 0.033 | 1 Tcell | RPH3A         |
| HLA-DRB5. | 0.006275 | -0.22195 | 0.3   | 0.402 | 1 Tcell | HLA-DRB5      |
| FABP3.8   | 0.00629  | -0.16609 | 0.009 | 0.049 | 1 Tcell | FABP3         |
| ZNF785    | 0.006313 | -0.10549 | 0.009 | 0.049 | 1 Tcell | ZNF785        |
| APLN.7    | 0.006396 | -0.13387 | 0     | 0.033 | 1 Tcell | APLN          |

|             |           |           |        |        |         |                |
|-------------|-----------|-----------|--------|--------|---------|----------------|
| RP2. 10     | 0. 006418 | -0. 10477 | 0. 027 | 0. 078 | 1 Tcell | RP2            |
| CDK1. 11    | 0. 006438 | -0. 16562 | 0. 041 | 0. 097 | 1 Tcell | CDK1           |
| EIF3D. 8    | 0. 006455 | 0. 314247 | 0. 445 | 0. 477 | 1 Tcell | EIF3D          |
| ZNF565      | 0. 006469 | -0. 10093 | 0      | 0. 033 | 1 Tcell | ZNF565         |
| EMILIN3. 8  | 0. 006469 | -0. 10203 | 0      | 0. 033 | 1 Tcell | EMILIN3        |
| FRY. 1      | 0. 006469 | -0. 10732 | 0      | 0. 033 | 1 Tcell | FRY            |
| VILL        | 0. 006481 | 0. 234183 | 0. 041 | 0. 017 | 1 Tcell | VILL           |
| TMEM246. 9  | 0. 006513 | -0. 13097 | 0. 009 | 0. 049 | 1 Tcell | TMEM246        |
| GRIK2. 3    | 0. 006543 | -0. 10748 | 0      | 0. 033 | 1 Tcell | GRIK2          |
| PLEKHH1. 7  | 0. 006543 | -0. 14392 | 0      | 0. 033 | 1 Tcell | PLEKHH1        |
| GPD1. 11    | 0. 006592 | -0. 16854 | 0. 009 | 0. 049 | 1 Tcell | GPD1           |
| RBM4. 10    | 0. 006603 | 0. 16919  | 0. 123 | 0. 222 | 1 Tcell | RBM4           |
| C19orf38. 0 | 0. 006663 | -0. 18236 | 0. 009 | 0. 049 | 1 Tcell | C19orf38       |
| CCDC151. 9  | 0. 006645 | -0. 1452  | 0. 018 | 0. 064 | 1 Tcell | CCDC151        |
| FRMD3. 8    | 0. 006677 | -0. 10539 | 0. 014 | 0. 056 | 1 Tcell | FRMD3          |
| CD300C. 14  | 0. 006758 | -0. 22993 | 0. 023 | 0. 069 | 1 Tcell | CD300C         |
| CA10. 8     | 0. 006769 | -0. 13228 | 0      | 0. 032 | 1 Tcell | CA10           |
| NCAPD3. 3   | 0. 006811 | -0. 11053 | 0. 032 | 0. 084 | 1 Tcell | NCAPD3         |
| IL13RA2. 1  | 0. 006836 | -0. 2063  | 0. 014 | 0. 056 | 1 Tcell | IL13RA2        |
| C5orf38. 5  | 0. 006846 | -0. 10737 | 0      | 0. 032 | 1 Tcell | C5orf38        |
| ADAMTS4. 7  | 0. 006846 | -0. 16348 | 0      | 0. 032 | 1 Tcell | ADAMTS4        |
| APOBEC3F    | 0. 006885 | 0. 258667 | 0. 05  | 0. 023 | 1 Tcell | APOBEC3F       |
| LILRB3. 9   | 0. 006923 | -0. 14446 | 0. 005 | 0. 041 | 1 Tcell | LILRB3         |
| OTOA. 11    | 0. 006924 | -0. 13693 | 0      | 0. 032 | 1 Tcell | OTOA           |
| CA9. 8      | 0. 006932 | -0. 1543  | 0. 005 | 0. 041 | 1 Tcell | CA9            |
| ARX. 9      | 0. 006981 | -0. 12771 | 0. 005 | 0. 04  | 1 Tcell | ARX            |
| RP11-480C   | 0. 007003 | -0. 10842 | 0      | 0. 032 | 1 Tcell | RP11-480C16. 1 |
| GPR89A. 3   | 0. 007013 | -0. 10251 | 0. 064 | 0. 129 | 1 Tcell | GPR89A         |
| KDM7A. 4    | 0. 007016 | -0. 10433 | 0. 018 | 0. 063 | 1 Tcell | KDM7A          |
| MARVELD1. 0 | 0. 007033 | -0. 10269 | 0. 005 | 0. 04  | 1 Tcell | MARVELD1       |
| LMO3. 9     | 0. 007051 | -0. 12513 | 0. 032 | 0. 084 | 1 Tcell | LMO3           |
| INHBB. 4    | 0. 007082 | -0. 10054 | 0      | 0. 032 | 1 Tcell | INHBB          |
| SPAG4. 8    | 0. 007106 | -0. 15741 | 0. 009 | 0. 048 | 1 Tcell | SPAG4          |
| NDRG3. 8    | 0. 007181 | 0. 12496  | 0. 095 | 0. 179 | 1 Tcell | NDRG3          |
| UBALD2. 8   | 0. 007207 | 0. 438463 | 0. 286 | 0. 259 | 1 Tcell | UBALD2         |
| COL4A5. 5   | 0. 007245 | -0. 10605 | 0      | 0. 032 | 1 Tcell | COL4A5         |
| FAM195B. 4  | 0. 007291 | -0. 28857 | 0. 023 | 0. 069 | 1 Tcell | FAM195B        |
| RP5-1065J   | 0. 007303 | -0. 10674 | 0. 009 | 0. 048 | 1 Tcell | RP5-1065J22. 8 |
| ST18. 8     | 0. 007308 | -0. 15508 | 0. 005 | 0. 04  | 1 Tcell | ST18           |
| CACNA2D3. 0 | 0. 007327 | -0. 12681 | 0      | 0. 032 | 1 Tcell | CACNA2D3       |
| MOG. 11     | 0. 007327 | -0. 25034 | 0      | 0. 032 | 1 Tcell | MOG            |
| SNCB. 4     | 0. 007411 | -0. 10811 | 0      | 0. 032 | 1 Tcell | SNCB           |
| UQCR11. 9   | 0. 007425 | -0. 25016 | 0. 055 | 0. 116 | 1 Tcell | UQCR11         |
| CPPED1. 14  | 0. 007433 | -0. 17651 | 0. 023 | 0. 068 | 1 Tcell | CPPED1         |
| RP11-110G   | 0. 007433 | -0. 10585 | 0. 005 | 0. 04  | 1 Tcell | RP11-110G21. 1 |
| KLK6. 10    | 0. 007495 | -0. 26582 | 0      | 0. 032 | 1 Tcell | KLK6           |
| TMEM52B. 1  | 0. 007502 | -0. 17822 | 0. 009 | 0. 048 | 1 Tcell | TMEM52B        |
| SRCIN1. 9   | 0. 00758  | -0. 13799 | 0      | 0. 031 | 1 Tcell | SRCIN1         |
| MED15. 5    | 0. 007585 | 0. 427948 | 0. 186 | 0. 142 | 1 Tcell | MED15          |
| TRIM59. 3   | 0. 00766  | 0. 200489 | 0. 05  | 0. 023 | 1 Tcell | TRIM59         |
| C4orf47. 3  | 0. 007667 | -0. 10893 | 0      | 0. 031 | 1 Tcell | C4orf47        |

|            |          |          |       |       |         |              |
|------------|----------|----------|-------|-------|---------|--------------|
| CLVS1.7    | 0.007667 | -0.11712 | 0     | 0.031 | 1 Tcell | CLVS1        |
| FAM177B.9  | 0.007667 | -0.16056 | 0     | 0.031 | 1 Tcell | FAM177B      |
| SEC61B.5   | 0.007667 | 0.117331 | 0.645 | 0.738 | 1 Tcell | SEC61B       |
| HOPX.13    | 0.007708 | 0.300124 | 0.345 | 0.281 | 1 Tcell | HOPX         |
| OFD1.4     | 0.007716 | 0.449452 | 0.3   | 0.274 | 1 Tcell | OFD1         |
| NFATC2.11  | 0.007753 | 0.444298 | 0.082 | 0.046 | 1 Tcell | NFATC2       |
| AC002467.0 | 0.007754 | -0.10404 | 0     | 0.031 | 1 Tcell | AC002467.7   |
| FAM107A.4  | 0.007777 | -0.14322 | 0.009 | 0.048 | 1 Tcell | FAM107A      |
| MAFK.2     | 0.007784 | -0.10936 | 0.005 | 0.04  | 1 Tcell | MAFK         |
| MCM3AP-AS  | 0.007842 | -0.10701 | 0     | 0.031 | 1 Tcell | MCM3AP-AS1   |
| CTNNBL1.5  | 0.007862 | 0.147543 | 0.182 | 0.299 | 1 Tcell | CTNNBL1      |
| HSP90B1.8  | 0.007868 | -0.13646 | 0.459 | 0.662 | 1 Tcell | HSP90B1      |
| FBL.9      | 0.007897 | 0.382338 | 0.382 | 0.378 | 1 Tcell | FBL          |
| C9orf16.7  | 0.007902 | 0.241421 | 0.523 | 0.583 | 1 Tcell | C9orf16      |
| CACNA2D1.0 | 0.007932 | -0.10376 | 0     | 0.031 | 1 Tcell | CACNA2D1     |
| FAM71E1.1  | 0.007932 | -0.10529 | 0     | 0.031 | 1 Tcell | FAM71E1      |
| MAP7.8     | 0.007981 | -0.17808 | 0.005 | 0.04  | 1 Tcell | MAP7         |
| DAPL1.4    | 0.007989 | -0.14685 | 0.014 | 0.055 | 1 Tcell | DAPL1        |
| MYT1.10    | 0.008012 | -0.10315 | 0.005 | 0.04  | 1 Tcell | MYT1         |
| WFDC2.5    | 0.008022 | -0.10658 | 0     | 0.031 | 1 Tcell | WFDC2        |
| SNAPC5.4   | 0.008033 | 0.197068 | 0.123 | 0.213 | 1 Tcell | SNAPC5       |
| NUB1.5     | 0.008058 | 0.12035  | 0.15  | 0.255 | 1 Tcell | NUB1         |
| SFMBT1.3   | 0.008091 | 0.337466 | 0.109 | 0.068 | 1 Tcell | SFMBT1       |
| RP11-108M  | 0.008118 | -0.10682 | 0.045 | 0.103 | 1 Tcell | RP11-108M9.4 |
| DOCK2.14   | 0.008138 | 0.203731 | 0.123 | 0.076 | 1 Tcell | DOCK2        |
| PINLYP.5   | 0.008231 | -0.14164 | 0.014 | 0.054 | 1 Tcell | PINLYP       |
| RP11-89K1  | 0.008298 | 0.137465 | 0.018 | 0.005 | 1 Tcell | RP11-89K11.1 |
| LINC00882  | 0.0083   | -0.12742 | 0     | 0.031 | 1 Tcell | LINC00882    |
| KCNK6.11   | 0.008303 | 0.237519 | 0.073 | 0.039 | 1 Tcell | KCNK6        |
| AGFG2.2    | 0.008325 | 0.251846 | 0.073 | 0.039 | 1 Tcell | AGFG2        |
| LHX1.7     | 0.008394 | -0.11984 | 0     | 0.031 | 1 Tcell | LHX1         |
| TRIB3.10   | 0.008403 | -0.12958 | 0.027 | 0.075 | 1 Tcell | TRIB3        |
| NP1PB11    | 0.008424 | 0.147257 | 0.027 | 0.01  | 1 Tcell | NP1PB11      |
| TRIM38.11  | 0.008452 | 0.279949 | 0.145 | 0.097 | 1 Tcell | TRIM38       |
| CCBL1.2    | 0.008459 | -0.10706 | 0.014 | 0.054 | 1 Tcell | CCBL1        |
| TMTC3.5    | 0.008516 | 0.106216 | 0.036 | 0.091 | 1 Tcell | TMTC3        |
| EIF3L.6    | 0.008557 | 0.225734 | 0.527 | 0.608 | 1 Tcell | EIF3L        |
| ELP5.9     | 0.008564 | 0.130951 | 0.164 | 0.269 | 1 Tcell | ELP5         |
| N4BP2L2.3  | 0.008565 | 0.339227 | 0.459 | 0.517 | 1 Tcell | N4BP2L2      |
| PDGFB.11   | 0.008567 | -0.19145 | 0.009 | 0.046 | 1 Tcell | PDGFB        |
| C6orf141.0 | 0.008587 | -0.1226  | 0     | 0.03  | 1 Tcell | C6orf141     |
| NLRP3.13   | 0.008712 | -0.13555 | 0.036 | 0.088 | 1 Tcell | NLRP3        |
| ZCCHC9.2   | 0.008724 | 0.101577 | 0.082 | 0.157 | 1 Tcell | ZCCHC9       |
| USP20.1    | 0.008748 | 0.294207 | 0.082 | 0.047 | 1 Tcell | USP20        |
| ZNF804A.5  | 0.00884  | -0.11369 | 0.005 | 0.039 | 1 Tcell | ZNF804A      |
| NACA2.5    | 0.00887  | 0.324841 | 0.218 | 0.167 | 1 Tcell | NACA2        |
| CMYA5.4    | 0.008884 | -0.10164 | 0     | 0.03  | 1 Tcell | CMYA5        |
| LPAR5.12   | 0.008907 | -0.20932 | 0.05  | 0.105 | 1 Tcell | LPAR5        |
| LTB4R.10   | 0.008966 | 0.250121 | 0.064 | 0.033 | 1 Tcell | LTB4R        |
| NEUROD2.6  | 0.008985 | -0.13351 | 0     | 0.03  | 1 Tcell | NEUROD2      |
| IGFBP7-AS  | 0.009088 | -0.10113 | 0     | 0.03  | 1 Tcell | IGFBP7-AS1   |

|            |          |          |       |       |         |                |
|------------|----------|----------|-------|-------|---------|----------------|
| FAM222A. 6 | 0.009088 | -0.1078  | 0     | 0.03  | 1 Tcell | FAM222A        |
| CD1D. 12   | 0.009091 | -0.185   | 0.005 | 0.038 | 1 Tcell | CD1D           |
| GLIPR1L2.  | 0.00912  | -0.12329 | 0.005 | 0.039 | 1 Tcell | GLIPR1L2       |
| DENR. 9    | 0.009162 | 0.109684 | 0.195 | 0.323 | 1 Tcell | DENR           |
| ERBB3. 9   | 0.009171 | -0.15718 | 0.005 | 0.038 | 1 Tcell | ERBB3          |
| NCOR1. 12  | 0.009187 | 0.298166 | 0.432 | 0.465 | 1 Tcell | NCOR1          |
| RP3-508I1  | 0.009191 | -0.10171 | 0     | 0.03  | 1 Tcell | RP3-508I15. 14 |
| EPC1. 7    | 0.009263 | 0.540483 | 0.309 | 0.291 | 1 Tcell | EPC1           |
| SNRPN. 11  | 0.009378 | -0.28962 | 0.045 | 0.099 | 1 Tcell | SNRPN          |
| GPR85. 2   | 0.009402 | -0.10991 | 0     | 0.03  | 1 Tcell | GPR85          |
| MMP7. 8    | 0.009402 | -0.23918 | 0     | 0.03  | 1 Tcell | MMP7           |
| TF. 11     | 0.009483 | -0.24902 | 0.027 | 0.074 | 1 Tcell | TF             |
| ATP5F1. 5  | 0.009534 | -0.11764 | 0.423 | 0.648 | 1 Tcell | ATP5F1         |
| PSIP1. 11  | 0.009586 | 0.367961 | 0.377 | 0.384 | 1 Tcell | PSIP1          |
| RGS18. 14  | 0.009593 | -0.15738 | 0.014 | 0.053 | 1 Tcell | RGS18          |
| MAG. 11    | 0.009595 | -0.34249 | 0.005 | 0.038 | 1 Tcell | MAG            |
| PLA2G2A. 7 | 0.009596 | -0.40522 | 0.005 | 0.038 | 1 Tcell | PLA2G2A        |
| ORMDL3. 8  | 0.009702 | 0.501387 | 0.168 | 0.126 | 1 Tcell | ORMDL3         |
| RBM38. 9   | 0.009704 | 0.460774 | 0.177 | 0.135 | 1 Tcell | RBM38          |
| TFAP2B. 9  | 0.009728 | -0.10761 | 0     | 0.03  | 1 Tcell | TFAP2B         |
| ATP1B1. 11 | 0.009751 | -0.1419  | 0.15  | 0.236 | 1 Tcell | ATP1B1         |
| RP5-1177M  | 0.009781 | -0.1579  | 0.009 | 0.046 | 1 Tcell | RP5-1177M21. 1 |
| BLOC1S1. 8 | 0.0098   | -0.11911 | 0.427 | 0.652 | 1 Tcell | BLOC1S1        |
| KIAA1324L  | 0.009839 | -0.10889 | 0     | 0.029 | 1 Tcell | KIAA1324L      |
| AP005530.  | 0.009839 | -0.14511 | 0     | 0.029 | 1 Tcell | AP005530. 2    |
| IL15. 11   | 0.009849 | -0.15251 | 0.005 | 0.038 | 1 Tcell | IL15           |
| CCDC170. 6 | 0.009875 | -0.10207 | 0.009 | 0.046 | 1 Tcell | CCDC170        |
| LOX. 9     | 0.009901 | -0.1712  | 0.009 | 0.046 | 1 Tcell | LOX            |
| CCNE2. 10  | 0.00996  | -0.14946 | 0.018 | 0.059 | 1 Tcell | CCNE2          |
| MYT1L. 12  | 0.009972 | -0.15302 | 0.018 | 0.059 | 1 Tcell | MYT1L          |
| ZDHHC24. 8 | 0.009977 | 0.134506 | 0.105 | 0.189 | 1 Tcell | ZDHHC24        |
