# Supplementary material for: A Novel Molecular Classification Method for Glioblastoma Based on Tumor Cell Differentiation Trajectories
Source: Hindawi journal article supplement (doi:10.1155/2023/2826815), 2023-02-22
Supplement: f4 [file 2826815.f4.pdf]

|    | p_val    | avg_logFC | pct.1 | pct.2 | p_val_adj | cluster   | gene   |
|----|----------|-----------|-------|-------|-----------|-----------|--------|
| 1  | 3.18E-68 | 0.96734   | 0.963 | 0.996 | 4.75E-64  | Undiff-G2 | MALAT1 |
| 2  | 1.52E-62 | 1.570013  | 0.941 | 0.8   | 2.27E-58  | Undiff-G2 | SEC61G |
| 3  | 6.76E-62 | 1.151372  | 0.956 | 0.994 | 1.01E-57  | Undiff-G2 | FTL    |
| 4  | 7.71E-62 | 1.582528  | 0.934 | 0.785 | 1.15E-57  | Undiff-G2 | MT2A   |
| 5  | 7.86E-62 | 1.868105  | 0.89  | 0.524 | 1.17E-57  | Undiff-G2 | CHI3L1 |
| 6  | 1.35E-61 | 1.048791  | 0.971 | 0.997 | 2.02E-57  | Undiff-G2 | TMSB4X |
| 7  | 3.08E-60 | 1.039806  | 0.971 | 0.993 | 4.60E-56  | Undiff-G2 | ACTB   |
| 8  | 1.13E-55 | 1.201921  | 0.934 | 0.986 | 1.69E-51  | Undiff-G2 | GAPDH  |
| 9  | 1.95E-53 | 1.414593  | 0.904 | 0.784 | 2.91E-49  | Undiff-G2 | CLU    |
| 10 | 5.81E-49 | 1.007381  | 0.919 | 0.971 | 8.69E-45  | Undiff-G2 | B2M    |
| 11 | 2.09E-46 | 1.144315  | 0.897 | 0.966 | 3.12E-42  | Undiff-G2 | TMSB10 |
| 12 | 4.82E-42 | 1.137912  | 0.868 | 0.827 | 7.20E-38  | Undiff-G2 | EEF1A1 |
| 13 | 3.82E-41 | 1.807194  | 0.794 | 0.578 | 5.71E-37  | Undiff-G2 | MT1X   |
| 14 | 4.99E-34 | 1.902137  | 0.463 | 0.144 | 7.46E-30  | Undiff-G2 | SLPI   |
| 15 | 2.56E-33 | 1.905187  | 0.5   | 0.175 | 3.83E-29  | Undiff-G2 | CHI3L2 |
| 16 | 2.62E-33 | 0.988373  | 0.846 | 0.95  | 3.92E-29  | Undiff-G2 | ACTG1  |
| 17 | 1.91E-30 | 1.741473  | 0.699 | 0.483 | 2.86E-26  | Undiff-G2 | LGALS3 |
| 18 | 3.44E-30 | 1.620559  | 0.39  | 0.11  | 5.15E-26  | Undiff-G2 | UQCRI1 |
| 19 | 6.87E-27 | 1.804149  | 0.426 | 0.146 | 1.03E-22  | Undiff-G2 | LTF    |
| 20 | 4.55E-25 | 1.015052  | 0.794 | 0.976 | 6.80E-21  | Undiff-G2 | EIF1   |
| 21 | 1.80E-22 | 1.470588  | 0.699 | 0.623 | 2.68E-18  | Undiff-G2 | TIMP1  |
| 22 | 1.26E-21 | 1.596021  | 0.243 | 0.058 | 1.89E-17  | Undiff-G2 | PSMA2  |
| 23 | 2.46E-21 | 1.041132  | 0.757 | 0.927 | 3.67E-17  | Undiff-G2 | CD63   |
| 24 | 6.96E-20 | 1.880217  | 0.346 | 0.123 | 1.04E-15  | Undiff-G2 | CAV1   |
| 25 | 8.75E-20 | 0.877461  | 0.772 | 0.97  | 1.31E-15  | Undiff-G2 | PTMA   |
| 26 | 8.92E-20 | 1.241972  | 0.706 | 0.769 | 1.33E-15  | Undiff-G2 | LDHA   |
| 27 | 2.24E-19 | 1.007235  | 0.743 | 0.898 | 3.35E-15  | Undiff-G2 | HLA-A  |
| 28 | 1.12E-18 | 0.826089  | 0.75  | 0.974 | 1.67E-14  | Undiff-G2 | H3F3B  |
| 29 | 2.38E-18 | 1.638391  | 0.331 | 0.115 | 3.56E-14  | Undiff-G2 | SAA1   |
| 30 | 1.32E-14 | 1.55218   | 0.279 | 0.1   | 1.97E-10  | Undiff-G2 | MGP    |
| 31 | 2.32E-14 | 0.955488  | 0.713 | 0.961 | 3.47E-10  | Undiff-G2 | FAU    |
| 32 | 4.28E-14 | 0.446973  | 0.176 | 0.648 | 6.40E-10  | Undiff-G2 | SSBP1  |
| 33 | 5.19E-14 | 1.21842   | 0.654 | 0.707 | 7.75E-10  | Undiff-G2 | LGALS1 |
| 34 | 7.65E-14 | 0.898326  | 0.713 | 0.954 | 1.14E-09  | Undiff-G2 | UBC    |
| 35 | 4.58E-13 | 1.007962  | 0.684 | 0.855 | 6.84E-09  | Undiff-G2 | HLA-B  |
| 36 | 1.19E-12 | 1.279445  | 0.625 | 0.647 | 1.78E-08  | Undiff-G2 | S100A6 |
| 37 | 4.99E-12 | 0.466987  | 0.147 | 0.556 | 7.46E-08  | Undiff-G2 | PRDX4  |
| 38 | 1.18E-11 | 0.471388  | 0.191 | 0.637 | 1.76E-07  | Undiff-G2 | BUD31  |
| 39 | 2.64E-11 | 0.463518  | 0.132 | 0.509 | 3.94E-07  | Undiff-G2 | GTF2A2 |
| 40 | 3.24E-11 | 0.451624  | 0.199 | 0.64  | 4.84E-07  | Undiff-G2 | VDAC1  |
| 41 | 3.81E-11 | 0.850448  | 0.691 | 0.946 | 5.69E-07  | Undiff-G2 | GNB2L1 |
| 42 | 1.06E-10 | 0.431865  | 0.176 | 0.584 | 1.58E-06  | Undiff-G2 | TMC01  |
| 43 | 1.32E-10 | 1.362557  | 0.551 | 0.5   | 1.98E-06  | Undiff-G2 | CRYAB  |
| 44 | 1.83E-10 | 0.839705  | 0.691 | 0.956 | 2.74E-06  | Undiff-G2 | TPT1   |
| 45 | 6.59E-10 | 0.438353  | 0.272 | 0.771 | 9.84E-06  | Undiff-G2 | SSR4   |
| 46 | 6.91E-10 | 0.443128  | 0.162 | 0.535 | 1.03E-05  | Undiff-G2 | SSR3   |
| 47 | 8.57E-10 | 0.493424  | 0.199 | 0.597 | 1.28E-05  | Undiff-G2 | EIF2S2 |
| 48 | 8.96E-10 | 0.478106  | 0.243 | 0.697 | 1.34E-05  | Undiff-G2 | TMED9  |
| 49 | 9.05E-10 | 0.535739  | 0.206 | 0.629 | 1.35E-05  | Undiff-G2 | ARF4   |
| 50 | 1.03E-09 | 0.560827  | 0.199 | 0.6   | 1.54E-05  | Undiff-G2 | NDUFV2 |

|     |           |           |        |        |           |                      |
|-----|-----------|-----------|--------|--------|-----------|----------------------|
| 51  | 1. 21E-09 | 0. 48655  | 0. 176 | 0. 55  | 1. 81E-05 | Undiff-G2EIF4H       |
| 52  | 1. 30E-09 | 0. 646888 | 0. 206 | 0. 628 | 1. 94E-05 | Undiff-G2RAB1A       |
| 53  | 1. 30E-09 | 0. 474135 | 0. 257 | 0. 733 | 1. 95E-05 | Undiff-G2PSMB1       |
| 54  | 1. 81E-09 | 0. 503189 | 0. 199 | 0. 6   | 2. 71E-05 | Undiff-G2TMEM14C     |
| 55  | 2. 58E-09 | 0. 495831 | 0. 176 | 0. 547 | 3. 86E-05 | Undiff-G2BZW1        |
| 56  | 3. 32E-09 | 0. 864881 | 0. 676 | 0. 945 | 4. 96E-05 | Undiff-G2MYL6        |
| 57  | 3. 97E-09 | 0. 43496  | 0. 088 | 0. 374 | 5. 93E-05 | Undiff-G2PPHLN1      |
| 58  | 5. 38E-09 | 0. 44364  | 0. 272 | 0. 738 | 8. 03E-05 | Undiff-G2SRSF3       |
| 59  | 8. 38E-09 | 0. 442988 | 0. 265 | 0. 719 | 0. 000125 | Undiff-G2SON         |
| 60  | 9. 68E-09 | 0. 529315 | 0. 162 | 0. 511 | 0. 000145 | Undiff-G2PGAM1       |
| 61  | 1. 09E-08 | 0. 505041 | 0. 191 | 0. 568 | 0. 000163 | Undiff-G2ARPC1A      |
| 62  | 1. 09E-08 | 0. 478971 | 0. 243 | 0. 67  | 0. 000163 | Undiff-G2BANF1       |
| 63  | 1. 24E-08 | 0. 466716 | 0. 206 | 0. 585 | 0. 000185 | Undiff-G2ERGIC3      |
| 64  | 1. 28E-08 | 0. 455267 | 0. 125 | 0. 429 | 0. 000192 | Undiff-G2IAH1        |
| 65  | 1. 45E-08 | 0. 485456 | 0. 272 | 0. 738 | 0. 000217 | Undiff-G2SPCS2       |
| 66  | 1. 78E-08 | 0. 4642   | 0. 243 | 0. 675 | 0. 000266 | Undiff-G2TXN         |
| 67  | 1. 86E-08 | 0. 452849 | 0. 287 | 0. 779 | 0. 000278 | Undiff-G2COX8A       |
| 68  | 2. 06E-08 | 0. 534617 | 0. 118 | 0. 412 | 0. 000308 | Undiff-G2MESDC2      |
| 69  | 2. 09E-08 | 0. 437947 | 0. 147 | 0. 469 | 0. 000313 | Undiff-G2RBP1        |
| 70  | 2. 19E-08 | 0. 472933 | 0. 162 | 0. 492 | 0. 000327 | Undiff-G2MED10       |
| 71  | 2. 89E-08 | 0. 489477 | 0. 14  | 0. 446 | 0. 000432 | Undiff-G2TMED4       |
| 72  | 3. 16E-08 | 0. 456685 | 0. 096 | 0. 368 | 0. 000472 | Undiff-G2ACTR10      |
| 73  | 3. 16E-08 | 0. 449699 | 0. 213 | 0. 594 | 0. 000472 | Undiff-G2SAT2        |
| 74  | 3. 28E-08 | 0. 472693 | 0. 096 | 0. 368 | 0. 000489 | Undiff-G2PDZD11      |
| 75  | 3. 88E-08 | 0. 519438 | 0. 176 | 0. 514 | 0. 000581 | Undiff-G2SMIM7       |
| 76  | 5. 30E-08 | 1. 475265 | 0. 287 | 0. 155 | 0. 000792 | Undiff-G2ACO09501. 4 |
| 77  | 5. 37E-08 | 0. 447784 | 0. 118 | 0. 398 | 0. 000802 | Undiff-G2HBB         |
| 78  | 5. 37E-08 | 1. 598935 | 0. 206 | 0. 088 | 0. 000802 | Undiff-G2C10orf10    |
| 79  | 5. 55E-08 | 0. 547893 | 0. 14  | 0. 442 | 0. 000829 | Undiff-G2IP6K2       |
| 80  | 6. 04E-08 | 0. 437249 | 0. 309 | 0. 806 | 0. 000902 | Undiff-G2HNRNPDL     |
| 81  | 6. 70E-08 | 0. 978281 | 0. 632 | 0. 842 | 0. 001001 | Undiff-G2FOS         |
| 82  | 6. 72E-08 | 0. 553674 | 0. 199 | 0. 564 | 0. 001005 | Undiff-G2C7orf73     |
| 83  | 7. 44E-08 | 1. 357529 | 0. 272 | 0. 141 | 0. 001112 | Undiff-G2MGST1       |
| 84  | 7. 59E-08 | 0. 453983 | 0. 176 | 0. 511 | 0. 001135 | Undiff-G2OSTC        |
| 85  | 7. 60E-08 | 0. 462456 | 0. 14  | 0. 439 | 0. 001136 | Undiff-G2PRKCSH      |
| 86  | 7. 82E-08 | 0. 495424 | 0. 294 | 0. 756 | 0. 001169 | Undiff-G2CNBP        |
| 87  | 8. 05E-08 | 0. 525092 | 0. 206 | 0. 562 | 0. 001202 | Undiff-G2TAF7        |
| 88  | 8. 60E-08 | 1. 032002 | 0. 64  | 0. 855 | 0. 001285 | Undiff-G2SPP1        |
| 89  | 8. 66E-08 | 0. 497953 | 0. 25  | 0. 66  | 0. 001295 | Undiff-G2PHPT1       |
| 90  | 8. 70E-08 | 0. 994072 | 0. 632 | 0. 848 | 0. 0013   | Undiff-G2DBI         |
| 91  | 9. 55E-08 | 0. 481174 | 0. 118 | 0. 397 | 0. 001427 | Undiff-G2GGCT        |
| 92  | 1. 13E-07 | 0. 529598 | 0. 272 | 0. 723 | 0. 001688 | Undiff-G2ERH         |
| 93  | 1. 16E-07 | 1. 51517  | 0. 456 | 0. 384 | 0. 001727 | Undiff-G2MT1E        |
| 94  | 1. 21E-07 | 0. 537876 | 0. 14  | 0. 435 | 0. 001809 | Undiff-G2DDIT3       |
| 95  | 1. 24E-07 | 0. 495386 | 0. 294 | 0. 768 | 0. 001854 | Undiff-G2ATP6VOE1    |
| 96  | 1. 31E-07 | 0. 500133 | 0. 162 | 0. 474 | 0. 001956 | Undiff-G2SNHG8       |
| 97  | 1. 70E-07 | 0. 516132 | 0. 221 | 0. 595 | 0. 002535 | Undiff-G2SLC3A2      |
| 98  | 1. 83E-07 | 0. 485048 | 0. 118 | 0. 387 | 0. 002731 | Undiff-G2SCCPDH      |
| 99  | 1. 86E-07 | 0. 44797  | 0. 11  | 0. 373 | 0. 002781 | Undiff-G2ILK         |
| 100 | 1. 95E-07 | 0. 571385 | 0. 265 | 0. 682 | 0. 002915 | Undiff-G2PSMD8       |
| 101 | 2. 00E-07 | 0. 45353  | 0. 279 | 0. 714 | 0. 002987 | Undiff-G2TRMT112     |

|     |          |          |       |       |          |                        |
|-----|----------|----------|-------|-------|----------|------------------------|
| 102 | 2.30E-07 | 0.513667 | 0.081 | 0.319 | 0.003441 | Undiff-G2C14orf119     |
| 103 | 2.58E-07 | 0.59299  | 0.206 | 0.561 | 0.003857 | Undiff-G2NDUFC1        |
| 104 | 2.64E-07 | 0.509799 | 0.199 | 0.542 | 0.003948 | Undiff-G2RHOC          |
| 105 | 3.12E-07 | 0.514136 | 0.132 | 0.413 | 0.004663 | Undiff-G2SYPL1         |
| 106 | 3.28E-07 | 0.444462 | 0.081 | 0.313 | 0.004901 | Undiff-G2CHMP2B        |
| 107 | 3.31E-07 | 0.73666  | 0.169 | 0.478 | 0.004953 | Undiff-G2COPS8         |
| 108 | 3.42E-07 | 0.571703 | 0.199 | 0.546 | 0.005108 | Undiff-G2C12orf57      |
| 109 | 3.57E-07 | 0.53249  | 0.147 | 0.437 | 0.005329 | Undiff-G2SPTSSA        |
| 110 | 3.68E-07 | 1.550234 | 0.375 | 0.271 | 0.005493 | Undiff-G2IGFBP5        |
| 111 | 3.86E-07 | 0.607233 | 0.228 | 0.591 | 0.005767 | Undiff-G2REEP5         |
| 112 | 4.03E-07 | 0.530973 | 0.169 | 0.481 | 0.006028 | Undiff-G2UBE2L6        |
| 113 | 4.42E-07 | 1.12086  | 0.125 | 0.042 | 0.006598 | Undiff-G2NDUFA7        |
| 114 | 5.01E-07 | 0.436188 | 0.074 | 0.295 | 0.007493 | Undiff-G2RRP7A         |
| 115 | 5.07E-07 | 0.57229  | 0.235 | 0.618 | 0.007574 | Undiff-G2SBDS          |
| 116 | 6.23E-07 | 0.532983 | 0.176 | 0.481 | 0.009306 | Undiff-G2NAA38         |
| 117 | 7.00E-07 | 0.469953 | 0.096 | 0.329 | 0.010467 | Undiff-G2ARL16         |
| 118 | 7.09E-07 | 0.496462 | 0.066 | 0.279 | 0.010591 | Undiff-G2NDUFAF2       |
| 119 | 7.14E-07 | 0.60091  | 0.287 | 0.712 | 0.010671 | Undiff-G2PSMB3         |
| 120 | 7.52E-07 | 1.273923 | 0.14  | 0.051 | 0.011238 | Undiff-G2CTD-2090I13.1 |
| 121 | 7.81E-07 | 0.468594 | 0.257 | 0.653 | 0.011676 | Undiff-G2GNG5          |
| 122 | 8.71E-07 | 0.54419  | 0.132 | 0.398 | 0.013017 | Undiff-G2ZNF667-AS1    |
| 123 | 9.94E-07 | 0.46394  | 0.059 | 0.262 | 0.014852 | Undiff-G2BRX1          |
| 124 | 9.94E-07 | 0.711063 | 0.14  | 0.413 | 0.01486  | Undiff-G2CALU          |
| 125 | 1.15E-06 | 0.469674 | 0.103 | 0.336 | 0.017219 | Undiff-G2PTS           |
| 126 | 1.15E-06 | 0.483021 | 0.066 | 0.274 | 0.01723  | Undiff-G2TWISTNB       |
| 127 | 1.29E-06 | 0.540446 | 0.015 | 0.001 | 0.019211 | Undiff-G2HBD           |
| 128 | 1.34E-06 | 0.493251 | 0.14  | 0.406 | 0.020098 | Undiff-G2FAM162A       |
| 129 | 1.40E-06 | 0.469215 | 0.096 | 0.323 | 0.020978 | Undiff-G2CFLAR         |
| 130 | 1.42E-06 | 0.455475 | 0.331 | 0.819 | 0.021192 | Undiff-G2NDUFS5        |
| 131 | 1.56E-06 | 0.579723 | 0.191 | 0.504 | 0.023263 | Undiff-G2TMEM205       |
| 132 | 1.70E-06 | 1.043231 | 0.596 | 0.775 | 0.025466 | Undiff-G2PKM           |
| 133 | 2.24E-06 | 0.467949 | 0.066 | 0.266 | 0.033408 | Undiff-G2YIPF5         |
| 134 | 2.61E-06 | 0.525549 | 0.294 | 0.708 | 0.038943 | Undiff-G2FKBP1A        |
| 135 | 2.91E-06 | 0.701844 | 0.132 | 0.386 | 0.04346  | Undiff-G2FBL           |
| 136 | 3.04E-06 | 0.44739  | 0.309 | 0.737 | 0.045503 | Undiff-G2SRI           |
| 137 | 3.09E-06 | 0.509287 | 0.103 | 0.326 | 0.046175 | Undiff-G2COX11         |
| 138 | 3.12E-06 | 0.496919 | 0.081 | 0.288 | 0.046554 | Undiff-G2TMEM222       |
| 139 | 3.12E-06 | 0.470158 | 0.331 | 0.809 | 0.046596 | Undiff-G2PSMA7         |
| 140 | 3.24E-06 | 0.454069 | 0.169 | 0.453 | 0.04837  | Undiff-G2TXNIP         |
| 141 | 3.29E-06 | 1.431919 | 0.456 | 0.437 | 0.049217 | Undiff-G2NAMPT         |
| 142 | 3.32E-06 | 0.708343 | 0.221 | 0.549 | 0.049655 | Undiff-G2PDCD5         |
| 143 | 3.84E-06 | 0.533105 | 0.081 | 0.287 | 0.057347 | Undiff-G2AGTRAP        |
| 144 | 3.89E-06 | 0.695091 | 0.265 | 0.656 | 0.058117 | Undiff-G2PDIA6         |
| 145 | 4.39E-06 | 0.469547 | 0.059 | 0.245 | 0.065579 | Undiff-G2NUP62         |
| 146 | 4.71E-06 | 0.555242 | 0.257 | 0.627 | 0.070452 | Undiff-G2DSTN          |
| 147 | 5.19E-06 | 0.515026 | 0.074 | 0.27  | 0.077498 | Undiff-G2POP4          |
| 148 | 5.50E-06 | 0.471359 | 0.074 | 0.268 | 0.082224 | Undiff-G2CDC26         |
| 149 | 6.52E-06 | 1.145296 | 0.103 | 0.034 | 0.09745  | Undiff-G2SMIM3         |
| 150 | 6.53E-06 | 0.504382 | 0.074 | 0.267 | 0.097621 | Undiff-G2CCND3         |
| 151 | 6.96E-06 | 1.0659   | 0.551 | 0.66  | 0.104073 | Undiff-G2S100A11       |
| 152 | 7.59E-06 | 0.458319 | 0.331 | 0.779 | 0.113428 | Undiff-G2TUBB          |

|     |          |          |       |       |          |                   |
|-----|----------|----------|-------|-------|----------|-------------------|
| 153 | 7.63E-06 | 0.447741 | 0.346 | 0.815 | 0.113954 | Undiff-G2PRDX1    |
| 154 | 9.09E-06 | 0.48369  | 0.081 | 0.275 | 0.135856 | Undiff-G2LLPH     |
| 155 | 9.23E-06 | 1.46613  | 0.228 | 0.126 | 0.137926 | Undiff-G2MT1G     |
| 156 | 9.83E-06 | 0.611813 | 0.11  | 0.33  | 0.14692  | Undiff-G2CADM1    |
| 157 | 1.01E-05 | 0.483114 | 0.088 | 0.289 | 0.15088  | Undiff-G2ZFAND2A  |
| 158 | 1.06E-05 | 0.647857 | 0.169 | 0.431 | 0.158083 | Undiff-G2POLD2    |
| 159 | 1.07E-05 | 0.545399 | 0.147 | 0.395 | 0.16042  | Undiff-G2IFI16    |
| 160 | 1.09E-05 | 0.570204 | 0.132 | 0.364 | 0.16234  | Undiff-G2UROD     |
| 161 | 1.10E-05 | 0.504923 | 0.331 | 0.788 | 0.164633 | Undiff-G2OST4     |
| 162 | 1.15E-05 | 0.443857 | 0.081 | 0.274 | 0.172339 | Undiff-G2CCNG1    |
| 163 | 1.25E-05 | 0.461797 | 0.11  | 0.325 | 0.187026 | Undiff-G2REXO2    |
| 164 | 1.44E-05 | 0.447829 | 0.059 | 0.229 | 0.215457 | Undiff-G2PPP1R8   |
| 165 | 1.57E-05 | 1.477478 | 0.191 | 0.097 | 0.234029 | Undiff-G2SNRPN    |
| 166 | 1.59E-05 | 0.516748 | 0.338 | 0.817 | 0.237558 | Undiff-G2NDUFB2   |
| 167 | 1.68E-05 | 1.231347 | 0.485 | 0.497 | 0.251516 | Undiff-G2MT3      |
| 168 | 1.78E-05 | 0.514125 | 0.184 | 0.457 | 0.265891 | Undiff-G2LGALS3BP |
| 169 | 1.82E-05 | 0.458344 | 0.375 | 0.874 | 0.271766 | Undiff-G2SRP14    |
| 170 | 1.88E-05 | 1.359648 | 0.316 | 0.221 | 0.28048  | Undiff-G2EFEMP1   |
| 171 | 1.90E-05 | 1.012919 | 0.537 | 0.625 | 0.283776 | Undiff-G2GPM6B    |
| 172 | 1.91E-05 | 0.514841 | 0.096 | 0.291 | 0.285892 | Undiff-G2COPB1    |
| 173 | 2.25E-05 | 1.399513 | 0.309 | 0.217 | 0.335513 | Undiff-G2C1R      |
| 174 | 2.69E-05 | 0.459956 | 0.066 | 0.237 | 0.402674 | Undiff-G2CTTN     |
| 175 | 3.12E-05 | 0.483217 | 0.096 | 0.288 | 0.466746 | Undiff-G2SP100    |
| 176 | 3.19E-05 | 0.466121 | 0.059 | 0.221 | 0.476701 | Undiff-G2PEMT     |
| 177 | 3.40E-05 | 0.702677 | 0.294 | 0.7   | 0.508785 | Undiff-G2MGST3    |
| 178 | 3.45E-05 | 0.732883 | 0.213 | 0.511 | 0.515915 | Undiff-G2WBP5     |
| 179 | 3.58E-05 | 0.551826 | 0.331 | 0.779 | 0.53555  | Undiff-G2LAPTM4A  |
| 180 | 3.61E-05 | 0.53961  | 0.125 | 0.336 | 0.539579 | Undiff-G2USE1     |
| 181 | 4.30E-05 | 0.623928 | 0.331 | 0.765 | 0.642215 | Undiff-G2RAN      |
| 182 | 4.36E-05 | 0.798681 | 0.184 | 0.45  | 0.651635 | Undiff-G2PSMA3    |
| 183 | 4.60E-05 | 1.447837 | 0.125 | 0.052 | 0.688117 | Undiff-G2PI3      |
| 184 | 4.66E-05 | 0.503214 | 0.051 | 0.204 | 0.696191 | Undiff-G2RCHY1    |
| 185 | 4.87E-05 | 0.476357 | 0.184 | 0.444 | 0.727175 | Undiff-G2RGS2     |
| 186 | 4.92E-05 | 0.933837 | 0.596 | 0.85  | 0.735043 | Undiff-G2ALDOA    |
| 187 | 5.00E-05 | 0.729406 | 0.162 | 0.398 | 0.747159 | Undiff-G2AK2      |
| 188 | 5.44E-05 | 0.431725 | 0.037 | 0.176 | 0.812301 | Undiff-G2C11orf74 |
| 189 | 5.53E-05 | 0.610043 | 0.103 | 0.291 | 0.826343 | Undiff-G2ENO2     |
| 190 | 5.53E-05 | 1.230685 | 0.316 | 0.23  | 0.826729 | Undiff-G2SERPING1 |
| 191 | 5.64E-05 | 0.488032 | 0.081 | 0.251 | 0.8434   | Undiff-G2FUNDC1   |
| 192 | 5.85E-05 | 0.44095  | 0.103 | 0.288 | 0.87353  | Undiff-G2GADD45A  |
| 193 | 6.07E-05 | 0.69293  | 0.088 | 0.264 | 0.907018 | Undiff-G2IFT43    |
| 194 | 6.57E-05 | 0.432015 | 0.044 | 0.185 | 0.981549 | Undiff-G2NUP54    |
| 195 | 7.62E-05 | 0.852782 | 0.154 | 0.386 | 1        | Undiff-G2DNAJB9   |
| 196 | 7.63E-05 | 0.457004 | 0.081 | 0.248 | 1        | Undiff-G2SRSF10   |
| 197 | 8.94E-05 | 0.491015 | 0.125 | 0.321 | 1        | Undiff-G2ZNF302   |
| 198 | 8.95E-05 | 1.197481 | 0.485 | 0.549 | 1        | Undiff-G2S100A10  |
| 199 | 0.000105 | 0.56968  | 0.029 | 0.005 | 1        | Undiff-G2ASB3     |
| 200 | 0.000122 | 0.482701 | 0.382 | 0.876 | 1        | Undiff-G2NPM1     |
| 201 | 0.000147 | 0.452356 | 0.059 | 0.2   | 1        | Undiff-G2DDX6     |
| 202 | 0.000159 | 0.47826  | 0.066 | 0.215 | 1        | Undiff-G2PIGH     |
| 203 | 0.000167 | 0.44526  | 0.037 | 0.163 | 1        | Undiff-G2GSTZ1    |

|     |          |          |       |       |                          |
|-----|----------|----------|-------|-------|--------------------------|
| 204 | 0.000173 | 0.97517  | 0.081 | 0.029 | 1 Undiff-G2MT1A          |
| 205 | 0.000174 | 1.055101 | 0.118 | 0.05  | 1 Undiff-G2SAA2          |
| 206 | 0.000186 | 0.508447 | 0.206 | 0.468 | 1 Undiff-G2A2M           |
| 207 | 0.000196 | 0.46738  | 0.074 | 0.224 | 1 Undiff-G2PPP2R2B       |
| 208 | 0.000202 | 0.780337 | 0.294 | 0.654 | 1 Undiff-G2C4orf3        |
| 209 | 0.00024  | 0.59837  | 0.081 | 0.234 | 1 Undiff-G2NIT2          |
| 210 | 0.000241 | 0.562095 | 0.338 | 0.75  | 1 Undiff-G2BSG           |
| 211 | 0.000248 | 0.905654 | 0.515 | 0.623 | 1 Undiff-G2PTN           |
| 212 | 0.000275 | 0.488989 | 0.051 | 0.182 | 1 Undiff-G2ARV1          |
| 213 | 0.000286 | 1.028668 | 0.125 | 0.057 | 1 Undiff-G2TMBIM4        |
| 214 | 0.000289 | 0.581826 | 0.037 | 0.008 | 1 Undiff-G2RP11-284F21.8 |
| 215 | 0.000323 | 0.495641 | 0.25  | 0.535 | 1 Undiff-G2S100B         |
| 216 | 0.000334 | 0.471594 | 0.044 | 0.167 | 1 Undiff-G2GPATCH2       |
| 217 | 0.000373 | 0.46771  | 0.029 | 0.006 | 1 Undiff-G2RP11-242D8.1  |
| 218 | 0.000375 | 0.659977 | 0.287 | 0.621 | 1 Undiff-G2TMED10        |
| 219 | 0.000394 | 0.776364 | 0.228 | 0.499 | 1 Undiff-G2PSENE1        |
| 220 | 0.00043  | 0.609634 | 0.029 | 0.006 | 1 Undiff-G2SERPINA3      |
| 221 | 0.000507 | 0.530641 | 0.044 | 0.162 | 1 Undiff-G2PIAS1         |
| 222 | 0.000565 | 0.614961 | 0.206 | 0.436 | 1 Undiff-G2PMP22         |
| 223 | 0.000577 | 0.787331 | 0.154 | 0.352 | 1 Undiff-G2PLP2          |
| 224 | 0.000579 | 0.781306 | 0.037 | 0.009 | 1 Undiff-G2PAGR1         |
| 225 | 0.000582 | 0.499682 | 0.059 | 0.185 | 1 Undiff-G2ARL14EP       |
| 226 | 0.000632 | 0.601021 | 0.059 | 0.184 | 1 Undiff-G2C1orf27       |
| 227 | 0.000639 | 0.807586 | 0.147 | 0.336 | 1 Undiff-G2LMAN1         |
| 228 | 0.000649 | 0.775557 | 0.096 | 0.247 | 1 Undiff-G2RBM7          |
| 229 | 0.000676 | 0.703218 | 0.213 | 0.465 | 1 Undiff-G2GABARAP       |
| 230 | 0.000684 | 0.954468 | 0.147 | 0.078 | 1 Undiff-G2ATXN8OS       |
| 231 | 0.000694 | 1.10144  | 0.441 | 0.473 | 1 Undiff-G2GAP43         |
| 232 | 0.000736 | 0.649184 | 0.338 | 0.75  | 1 Undiff-G2PRDX5         |
| 233 | 0.000809 | 0.443555 | 0.11  | 0.264 | 1 Undiff-G2H1FO          |
| 234 | 0.000862 | 1.022042 | 0.096 | 0.042 | 1 Undiff-G2CADPS         |
| 235 | 0.000876 | 0.513447 | 0.044 | 0.155 | 1 Undiff-G2UBXN2B        |
| 236 | 0.000906 | 0.689787 | 0.353 | 0.751 | 1 Undiff-G2WDR83OS       |
| 237 | 0.000985 | 0.511397 | 0.044 | 0.153 | 1 Undiff-G2TIMM21        |
| 238 | 0.001031 | 0.805611 | 0.051 | 0.016 | 1 Undiff-G2LINCO0869     |
| 239 | 0.001068 | 0.798832 | 0.176 | 0.38  | 1 Undiff-G2BLVRB         |
| 240 | 0.001147 | 0.851578 | 0.088 | 0.037 | 1 Undiff-G2IER3IP1       |
| 241 | 0.001219 | 0.578469 | 0.243 | 0.501 | 1 Undiff-G2MDK           |
| 242 | 0.001231 | 0.600456 | 0.228 | 0.477 | 1 Undiff-G2CNN3          |
| 243 | 0.001464 | 0.498907 | 0.404 | 0.89  | 1 Undiff-G2PFDN5         |
| 244 | 0.001573 | 0.48509  | 0.037 | 0.134 | 1 Undiff-G2ZNF720        |
| 245 | 0.001582 | 0.488951 | 0.066 | 0.184 | 1 Undiff-G2EMP1          |
| 246 | 0.001586 | 1.459877 | 0.25  | 0.186 | 1 Undiff-G2ADM           |
| 247 | 0.00164  | 0.65181  | 0.074 | 0.196 | 1 Undiff-G2HIST1H1C      |
| 248 | 0.001716 | 0.660022 | 0.074 | 0.195 | 1 Undiff-G2MYADM         |
| 249 | 0.001745 | 0.651475 | 0.14  | 0.31  | 1 Undiff-G2MT1F          |
| 250 | 0.001869 | 0.630238 | 0.081 | 0.205 | 1 Undiff-G2ARMC8         |
| 251 | 0.001884 | 0.903242 | 0.574 | 0.871 | 1 Undiff-G2TPI1          |
| 252 | 0.002099 | 0.663083 | 0.331 | 0.7   | 1 Undiff-G2CALR          |
| 253 | 0.002353 | 0.555326 | 0.096 | 0.227 | 1 Undiff-G2PSMA6         |
| 254 | 0.002423 | 0.49515  | 0.066 | 0.176 | 1 Undiff-G2NIP7          |

|     |          |          |       |       |   |                      |
|-----|----------|----------|-------|-------|---|----------------------|
| 255 | 0.002436 | 0.598925 | 0.257 | 0.522 | 1 | Undiff-G2TAGLN2      |
| 256 | 0.00245  | 0.954513 | 0.132 | 0.073 | 1 | Undiff-G2MTRNR2L10   |
| 257 | 0.002526 | 0.768067 | 0.11  | 0.252 | 1 | Undiff-G2SMOX        |
| 258 | 0.002534 | 0.448777 | 0.044 | 0.141 | 1 | Undiff-G2SLC2A1      |
| 259 | 0.00254  | 0.564852 | 0.066 | 0.178 | 1 | Undiff-G2PIGU        |
| 260 | 0.002676 | 0.584625 | 0.059 | 0.165 | 1 | Undiff-G2GMPPA       |
| 261 | 0.00276  | 0.639641 | 0.338 | 0.691 | 1 | Undiff-G2C19orf53    |
| 262 | 0.002861 | 1.556732 | 0.279 | 0.23  | 1 | Undiff-G2HILPDA      |
| 263 | 0.003015 | 0.605754 | 0.096 | 0.222 | 1 | Undiff-G2VEGFA       |
| 264 | 0.003039 | 0.528988 | 0.404 | 0.893 | 1 | Undiff-G2COX7C       |
| 265 | 0.003094 | 0.488102 | 0.397 | 0.858 | 1 | Undiff-G2TMA7        |
| 266 | 0.003138 | 0.465345 | 0.074 | 0.185 | 1 | Undiff-G2AK4         |
| 267 | 0.003291 | 0.561326 | 0.059 | 0.161 | 1 | Undiff-G2C1orf174    |
| 268 | 0.003337 | 0.886335 | 0.118 | 0.261 | 1 | Undiff-G2UPP1        |
| 269 | 0.003435 | 0.577553 | 0.397 | 0.853 | 1 | Undiff-G2COX6B1      |
| 270 | 0.003577 | 0.543103 | 0.066 | 0.17  | 1 | Undiff-G2TIPARP      |
| 271 | 0.003696 | 0.481487 | 0.029 | 0.111 | 1 | Undiff-G2ZFYVE19     |
| 272 | 0.003868 | 0.835886 | 0.5   | 0.627 | 1 | Undiff-G2HLA-DRA     |
| 273 | 0.004049 | 0.454296 | 0.022 | 0.005 | 1 | Undiff-G2ZNF8        |
| 274 | 0.004146 | 0.771112 | 0.191 | 0.388 | 1 | Undiff-G2GLRX        |
| 275 | 0.004149 | 0.809222 | 0.154 | 0.32  | 1 | Undiff-G2SERTAD1     |
| 276 | 0.004492 | 0.453896 | 0.044 | 0.133 | 1 | Undiff-G2ZNF429      |
| 277 | 0.004581 | 0.477408 | 0.022 | 0.005 | 1 | Undiff-G2APOBEC3A    |
| 278 | 0.004672 | 0.52586  | 0.088 | 0.203 | 1 | Undiff-G2HES1        |
| 279 | 0.004961 | 0.523302 | 0.044 | 0.131 | 1 | Undiff-G2CREBRF      |
| 280 | 0.005021 | 0.742699 | 0.11  | 0.241 | 1 | Undiff-G2LHFP        |
| 281 | 0.005186 | 0.502036 | 0.015 | 0.002 | 1 | Undiff-G2SEC14L4     |
| 282 | 0.005186 | 0.487738 | 0.015 | 0.002 | 1 | Undiff-G2CCL26       |
| 283 | 0.005231 | 1.150411 | 0.382 | 0.389 | 1 | Undiff-G2FABP5       |
| 284 | 0.005518 | 0.81965  | 0.228 | 0.455 | 1 | Undiff-G2EMP3        |
| 285 | 0.005762 | 0.432024 | 0.272 | 0.529 | 1 | Undiff-G2HLA-DRB1    |
| 286 | 0.005793 | 0.872435 | 0.051 | 0.019 | 1 | Undiff-G2TSLP        |
| 287 | 0.005904 | 0.952301 | 0.191 | 0.378 | 1 | Undiff-G2RAB13       |
| 288 | 0.006112 | 0.544442 | 0.404 | 0.828 | 1 | Undiff-G2GSTP1       |
| 289 | 0.006149 | 0.45282  | 0.037 | 0.117 | 1 | Undiff-G2DNALI1      |
| 290 | 0.006163 | 0.682754 | 0.066 | 0.165 | 1 | Undiff-G2STEAP3      |
| 291 | 0.007086 | 0.575372 | 0.404 | 0.849 | 1 | Undiff-G2GPX4        |
| 292 | 0.007128 | 0.511313 | 0.426 | 0.917 | 1 | Undiff-G2COX4I1      |
| 293 | 0.007426 | 0.905308 | 0.331 | 0.662 | 1 | Undiff-G2HSPA5       |
| 294 | 0.00752  | 0.442689 | 0.044 | 0.126 | 1 | Undiff-G2IQCG        |
| 295 | 0.008208 | 0.495884 | 0.169 | 0.328 | 1 | Undiff-G2SEPP1       |
| 296 | 0.008746 | 0.553552 | 0.051 | 0.136 | 1 | Undiff-G2PIK3R3      |
| 297 | 0.008866 | 0.558678 | 0.029 | 0.1   | 1 | Undiff-G2HRH1        |
| 298 | 0.009422 | 0.511391 | 0.022 | 0.005 | 1 | Undiff-G2GS1-18A18.2 |
| 299 | 0.009658 | 0.801232 | 0.096 | 0.206 | 1 | Undiff-G2INSIG2      |
| 300 | 0.00994  | 0.443731 | 0.213 | 0.396 | 1 | Undiff-G2HLA-DRB5    |
| 301 | 0        | 1.951144 | 0.433 | 0.057 | 0 | Ac-G SAA1            |
| 302 | 0        | 1.733389 | 0.496 | 0.083 | 0 | Ac-G LTF             |
| 303 | 0        | 1.732148 | 0.488 | 0.083 | 0 | Ac-G SLPI            |
| 304 | 0        | 1.72185  | 0.577 | 0.06  | 0 | Ac-G MGST1           |
| 305 | 0        | 1.719219 | 0.592 | 0.1   | 0 | Ac-G CHI3L2          |

|     |       |          |       |       |       |      |          |
|-----|-------|----------|-------|-------|-------|------|----------|
| 306 | 0     | 1.681798 | 0.423 | 0.041 | 0     | Ac-G | MGP      |
| 307 | 0     | 1.55461  | 0.614 | 0.157 | 0     | Ac-G | C8orf4   |
| 308 | 0     | 1.537289 | 0.23  | 0.017 | 0     | Ac-G | SAA2     |
| 309 | 0     | 1.523599 | 0.577 | 0.154 | 0     | Ac-G | EFEMP1   |
| 310 | 0     | 1.495285 | 0.582 | 0.148 | 0     | Ac-G | C1R      |
| 311 | 0     | 1.474012 | 0.845 | 0.468 | 0     | Ac-G | CHI3L1   |
| 312 | 0     | 1.452206 | 0.489 | 0.056 | 0     | Ac-G | CAV1     |
| 313 | 0     | 1.392692 | 0.483 | 0.102 | 0     | Ac-G | C1S      |
| 314 | 0     | 1.353045 | 0.548 | 0.17  | 0     | Ac-G | SERPING1 |
| 315 | 0     | 1.284982 | 0.461 | 0.089 | 0     | Ac-G | RARRES2  |
| 316 | 0     | 1.225577 | 0.831 | 0.437 | 0     | Ac-G | CRYAB    |
| 317 | 0     | 1.17355  | 0.844 | 0.53  | 0     | Ac-G | MT1X     |
| 318 | 0     | 1.122243 | 0.786 | 0.428 | 0     | Ac-G | LGALS3   |
| 319 | 0     | 1.068348 | 0.858 | 0.579 | 0     | Ac-G | TIMP1    |
| 320 | 0     | 1.049687 | 0.969 | 0.75  | 0     | Ac-G | CLU      |
| 321 | 0     | 0.939207 | 0.959 | 0.771 | 0     | Ac-G | SEC61G   |
| 322 | 0     | 0.923746 | 0.948 | 0.756 | 0     | Ac-G | MT2A     |
| 323 | 0     | 0.553032 | 0.986 | 0.985 | 0     | Ac-G | GAPDH    |
| 324 | 0     | 0.517055 | 0.99  | 0.995 | 0     | Ac-G | FTL      |
| 325 | ##### | 1.101967 | 0.433 | 0.119 | ##### | Ac-G | CYR61    |
| 326 | ##### | 0.558845 | 0.975 | 0.944 | ##### | Ac-G | ACTG1    |
| 327 | ##### | 0.940465 | 0.84  | 0.609 | ##### | Ac-G | S100A6   |
| 328 | ##### | 0.728259 | 0.246 | 0.03  | ##### | Ac-G | BGN      |
| 329 | ##### | 0.863553 | 0.316 | 0.058 | ##### | Ac-G | CADM3    |
| 330 | ##### | 1.046715 | 0.754 | 0.496 | ##### | Ac-G | SOD2     |
| 331 | ##### | 0.491035 | 0.992 | 0.993 | ##### | Ac-G | ACTB     |
| 332 | ##### | 0.975015 | 0.645 | 0.335 | ##### | Ac-G | MT1E     |
| 333 | ##### | 1.189215 | 0.392 | 0.115 | ##### | Ac-G | NNMT     |
| 334 | ##### | 0.71238  | 0.212 | 0.025 | ##### | Ac-G | IL13RA2  |
| 335 | ##### | 0.543031 | 0.175 | 0.014 | ##### | Ac-G | CA9      |
| 336 | ##### | 0.976151 | 0.64  | 0.336 | ##### | Ac-G | CD44     |
| 337 | ##### | 0.407009 | 0.996 | 0.995 | ##### | Ac-G | MALAT1   |
| 338 | ##### | 0.818112 | 0.333 | 0.079 | ##### | Ac-G | NTRK2    |
| 339 | ##### | 1.169778 | 0.645 | 0.345 | ##### | Ac-G | OCIAD2   |
| 340 | ##### | 0.870361 | 0.692 | 0.351 | ##### | Ac-G | ANXA1    |
| 341 | ##### | 0.973283 | 0.683 | 0.39  | ##### | Ac-G | NAMPT    |
| 342 | ##### | 0.655687 | 0.193 | 0.021 | ##### | Ac-G | PIFO     |
| 343 | ##### | 0.759485 | 0.257 | 0.045 | ##### | Ac-G | PRSS23   |
| 344 | ##### | 1.085875 | 0.474 | 0.176 | ##### | Ac-G | SPOCD1   |
| 345 | ##### | 0.841974 | 0.741 | 0.511 | ##### | Ac-G | S100A10  |
| 346 | ##### | 0.68007  | 0.249 | 0.043 | ##### | Ac-G | SYTL2    |
| 347 | ##### | 0.971292 | 0.275 | 0.054 | ##### | Ac-G | C10orf10 |
| 348 | ##### | 0.938156 | 0.586 | 0.262 | ##### | Ac-G | S100A16  |
| 349 | ##### | 0.639084 | 0.871 | 0.755 | ##### | Ac-G | PKM      |
| 350 | ##### | 0.544979 | 0.165 | 0.015 | ##### | Ac-G | HSPB8    |
| 351 | ##### | 0.95238  | 0.713 | 0.427 | ##### | Ac-G | GAP43    |
| 352 | ##### | 0.638818 | 0.854 | 0.752 | ##### | Ac-G | LDHA     |
| 353 | ##### | 0.484181 | 0.877 | 0.842 | ##### | Ac-G | ALDOA    |
| 354 | ##### | 0.511878 | 0.132 | 0.008 | ##### | Ac-G | CP       |
| 355 | ##### | 1.101504 | 0.228 | 0.04  | ##### | Ac-G | TAGLN    |
| 356 | ##### | 0.972731 | 0.615 | 0.348 | ##### | Ac-G | SPARC    |

|     |       |          |       |       |       |      |            |
|-----|-------|----------|-------|-------|-------|------|------------|
| 357 | ##### | 0.845846 | 0.296 | 0.069 | ##### | Ac-G | VSTM2A     |
| 358 | ##### | 1.0161   | 0.573 | 0.308 | ##### | Ac-G | SPARCL1    |
| 359 | ##### | 1.119242 | 0.549 | 0.263 | ##### | Ac-G | CSRP2      |
| 360 | ##### | 0.538918 | 0.941 | 0.922 | ##### | Ac-G | CD63       |
| 361 | ##### | 0.999002 | 0.505 | 0.227 | ##### | Ac-G | IGFBP5     |
| 362 | ##### | 0.971667 | 0.475 | 0.206 | ##### | Ac-G | MT1M       |
| 363 | ##### | 0.645381 | 0.268 | 0.063 | ##### | Ac-G | SLC39A14   |
| 364 | ##### | 0.716826 | 0.823 | 0.586 | ##### | Ac-G | GPM6B      |
| 365 | ##### | 0.495999 | 0.899 | 0.86  | ##### | Ac-G | SKP1       |
| 366 | ##### | 0.782006 | 0.78  | 0.6   | ##### | Ac-G | PRDX6      |
| 367 | ##### | 0.786778 | 0.722 | 0.454 | ##### | Ac-G | MT3        |
| 368 | ##### | 0.582778 | 0.153 | 0.017 | ##### | Ac-G | GALNT15    |
| 369 | ##### | 0.707301 | 0.682 | 0.435 | ##### | Ac-G | CNN3       |
| 370 | ##### | 0.472724 | 0.972 | 0.964 | ##### | Ac-G | TMSB10     |
| 371 | ##### | 0.85305  | 0.333 | 0.106 | ##### | Ac-G | CXCL14     |
| 372 | ##### | 0.915347 | 0.11  | 0.007 | ##### | Ac-G | HP         |
| 373 | ##### | 0.609317 | 0.229 | 0.049 | ##### | Ac-G | GJA1       |
| 374 | ##### | 0.571688 | 0.187 | 0.031 | ##### | Ac-G | AZGP1      |
| 375 | ##### | 0.761237 | 0.296 | 0.09  | ##### | Ac-G | AEBP1      |
| 376 | ##### | 0.939371 | 0.301 | 0.091 | ##### | Ac-G | DIRAS3     |
| 377 | ##### | 0.9598   | 0.621 | 0.379 | ##### | Ac-G | RAMP1      |
| 378 | ##### | 0.414165 | 0.968 | 0.971 | ##### | Ac-G | B2M        |
| 379 | ##### | 0.772486 | 0.295 | 0.091 | ##### | Ac-G | SH3BGR     |
| 380 | ##### | 0.93499  | 0.424 | 0.194 | ##### | Ac-G | HILPDA     |
| 381 | ##### | 0.720836 | 0.809 | 0.586 | ##### | Ac-G | PTN        |
| 382 | ##### | 0.44513  | 0.878 | 0.865 | ##### | Ac-G | TPI1       |
| 383 | ##### | 0.76241  | 0.206 | 0.047 | ##### | Ac-G | VCAM1      |
| 384 | ##### | 0.652109 | 0.307 | 0.1   | ##### | Ac-G | RASD1      |
| 385 | ##### | 0.638924 | 0.737 | 0.534 | ##### | Ac-G | CD9        |
| 386 | ##### | 0.716141 | 0.533 | 0.284 | ##### | Ac-G | NUPR1      |
| 387 | ##### | 0.719474 | 0.254 | 0.071 | ##### | Ac-G | ANGPTL4    |
| 388 | ##### | 1.108547 | 0.136 | 0.019 | ##### | Ac-G | PLA2G2A    |
| 389 | ##### | 0.759873 | 0.141 | 0.021 | ##### | Ac-G | CA3        |
| 390 | ##### | 0.589052 | 0.128 | 0.017 | ##### | Ac-G | FOLR1      |
| 391 | ##### | 0.727923 | 0.323 | 0.112 | ##### | Ac-G | SGCE       |
| 392 | ##### | 0.634179 | 0.203 | 0.048 | ##### | Ac-G | PDLIM4     |
| 393 | ##### | 0.704121 | 0.657 | 0.471 | ##### | Ac-G | TMEM205    |
| 394 | ##### | 0.723546 | 0.586 | 0.396 | ##### | Ac-G | CALD1      |
| 395 | ##### | 0.862644 | 0.335 | 0.122 | ##### | Ac-G | AC009501.4 |
| 396 | ##### | 1.247798 | 0.332 | 0.134 | ##### | Ac-G | SLN        |
| 397 | ##### | 0.541461 | 0.245 | 0.073 | ##### | Ac-G | IL32       |
| 398 | ##### | 0.456388 | 0.853 | 0.787 | ##### | Ac-G | ENO1       |
| 399 | ##### | 0.53171  | 0.801 | 0.689 | ##### | Ac-G | LGALS1     |
| 400 | ##### | 0.440239 | 0.761 | 0.649 | ##### | Ac-G | VIM        |
| 401 | ##### | 0.683814 | 0.696 | 0.483 | ##### | Ac-G | ANXA2      |
| 402 | ##### | 0.424715 | 0.906 | 0.895 | ##### | Ac-G | NDUFA4     |
| 403 | ##### | 0.771171 | 0.497 | 0.289 | ##### | Ac-G | REXO2      |
| 404 | ##### | 0.491689 | 0.173 | 0.04  | ##### | Ac-G | CFI        |
| 405 | ##### | 0.72195  | 0.343 | 0.148 | ##### | Ac-G | TMEM45A    |
| 406 | ##### | 0.43463  | 0.136 | 0.024 | ##### | Ac-G | CLCF1      |
| 407 | ##### | 0.389964 | 0.086 | 0.007 | ##### | Ac-G | TSLP       |

|     |          |          |       |       |          |      |         |
|-----|----------|----------|-------|-------|----------|------|---------|
| 408 | #####    | 0.432341 | 0.921 | 0.946 | #####    | Ac-G | MYL6    |
| 409 | #####    | 0.947428 | 0.519 | 0.316 | #####    | Ac-G | GFAP    |
| 410 | #####    | 0.710248 | 0.234 | 0.073 | #####    | Ac-G | MAOB    |
| 411 | #####    | 0.650498 | 0.318 | 0.123 | #####    | Ac-G | GBP1    |
| 412 | #####    | 0.403534 | 0.109 | 0.014 | #####    | Ac-G | MT1A    |
| 413 | #####    | 0.395074 | 0.837 | 0.841 | #####    | Ac-G | TMBIM6  |
| 414 | #####    | 0.943505 | 0.156 | 0.033 | #####    | Ac-G | PI3     |
| 415 | #####    | 0.603033 | 0.671 | 0.49  | #####    | Ac-G | TAGLN2  |
| 416 | #####    | 0.674428 | 0.333 | 0.14  | #####    | Ac-G | MYC     |
| 417 | #####    | 0.468021 | 0.8   | 0.751 | #####    | Ac-G | SOD1    |
| 418 | #####    | 0.577356 | 0.258 | 0.089 | #####    | Ac-G | PDLIM3  |
| 419 | #####    | 0.6715   | 0.305 | 0.125 | #####    | Ac-G | FBXO32  |
| 420 | #####    | 0.421086 | 0.102 | 0.013 | #####    | Ac-G | ASS1    |
| 421 | #####    | 0.714525 | 0.348 | 0.156 | #####    | Ac-G | ADM     |
| 422 | #####    | 0.568055 | 0.176 | 0.045 | #####    | Ac-G | IGFBP6  |
| 423 | #####    | 0.556133 | 0.78  | 0.624 | 2.65E-99 | Ac-G | NGFRAP1 |
| 424 | #####    | 0.769393 | 0.416 | 0.228 | 3.65E-99 | Ac-G | NRN1    |
| 425 | #####    | 0.784143 | 0.415 | 0.228 | 8.66E-97 | Ac-G | DTNA    |
| 426 | #####    | 0.404976 | 0.992 | 0.997 | 2.93E-96 | Ac-G | TMSB4X  |
| 427 | #####    | 0.679506 | 0.489 | 0.299 | 1.01E-95 | Ac-G | CYSTM1  |
| 428 | #####    | 0.583124 | 0.746 | 0.622 | 1.17E-95 | Ac-G | CD99    |
| 429 | 2.18E-99 | 0.426008 | 0.082 | 0.008 | 3.25E-95 | Ac-G | PRKCG   |
| 430 | 3.38E-99 | 0.516836 | 0.137 | 0.028 | 5.04E-95 | Ac-G | FRZB    |
| 431 | 3.05E-97 | 0.574312 | 0.648 | 0.481 | 4.55E-93 | Ac-G | WBP5    |
| 432 | 5.01E-96 | 0.726655 | 0.474 | 0.296 | 7.49E-92 | Ac-G | CETN2   |
| 433 | 9.23E-94 | 0.49089  | 0.135 | 0.029 | 1.38E-89 | Ac-G | LOX     |
| 434 | 6.48E-92 | 0.563238 | 0.266 | 0.1   | 9.68E-88 | Ac-G | MT1G    |
| 435 | 1.12E-91 | 0.552326 | 0.606 | 0.423 | 1.68E-87 | Ac-G | EMP3    |
| 436 | 5.55E-91 | 0.778213 | 0.452 | 0.272 | 8.29E-87 | Ac-G | S100A13 |
| 437 | 4.18E-90 | 0.456728 | 0.781 | 0.738 | 6.25E-86 | Ac-G | PRDX5   |
| 438 | 5.03E-90 | 0.728371 | 0.236 | 0.087 | 7.52E-86 | Ac-G | TNFAIP6 |
| 439 | 1.16E-89 | 0.508743 | 0.812 | 0.781 | 1.74E-85 | Ac-G | GLUL    |
| 440 | 6.54E-89 | 0.608833 | 0.1   | 0.016 | 9.78E-85 | Ac-G | MMP7    |
| 441 | 6.72E-87 | 0.448333 | 0.791 | 0.721 | 1.00E-82 | Ac-G | SRI     |
| 442 | 1.19E-86 | 0.412485 | 0.801 | 0.769 | 1.78E-82 | Ac-G | LAPTM4A |
| 443 | 2.09E-85 | 0.453237 | 0.698 | 0.598 | 3.12E-81 | Ac-G | SBDS    |
| 444 | 2.22E-85 | 0.735307 | 0.546 | 0.375 | 3.31E-81 | Ac-G | VAMP5   |
| 445 | 5.01E-84 | 0.69698  | 0.218 | 0.079 | 7.49E-80 | Ac-G | TIMP4   |
| 446 | 1.45E-83 | 0.482179 | 0.313 | 0.13  | 2.16E-79 | Ac-G | APOD    |
| 447 | 2.03E-83 | 0.427634 | 0.772 | 0.751 | 3.04E-79 | Ac-G | PGK1    |
| 448 | 4.47E-83 | 0.779686 | 0.345 | 0.182 | 6.68E-79 | Ac-G | TNC     |
| 449 | 4.52E-83 | 0.577855 | 0.324 | 0.156 | 6.75E-79 | Ac-G | EMP1    |
| 450 | 7.66E-83 | 0.575511 | 0.312 | 0.143 | 1.14E-78 | Ac-G | NDRG1   |
| 451 | 2.14E-82 | 0.420782 | 0.16  | 0.045 | 3.20E-78 | Ac-G | EGLN3   |
| 452 | 4.97E-82 | 0.486535 | 0.862 | 0.843 | 7.43E-78 | Ac-G | DBI     |
| 453 | 5.10E-82 | 0.41509  | 0.842 | 0.856 | 7.62E-78 | Ac-G | TOMM7   |
| 454 | 5.44E-82 | 0.810448 | 0.366 | 0.198 | 8.13E-78 | Ac-G | AGT     |
| 455 | 4.49E-81 | 0.394174 | 0.846 | 0.83  | 6.71E-77 | Ac-G | UBL5    |
| 456 | 5.72E-80 | 0.716913 | 0.61  | 0.486 | 8.54E-76 | Ac-G | IFITM3  |
| 457 | 2.55E-79 | 0.477495 | 0.656 | 0.539 | 3.81E-75 | Ac-G | TAF7    |
| 458 | 5.93E-79 | 0.433625 | 0.773 | 0.717 | 8.87E-75 | Ac-G | SHFM1   |

|     |          |          |       |       |          |      |            |
|-----|----------|----------|-------|-------|----------|------|------------|
| 459 | 8.89E-79 | 0.418719 | 0.105 | 0.021 | 1.33E-74 | Ac-G | PCSK1      |
| 460 | 3.12E-78 | 0.742401 | 0.389 | 0.215 | 4.66E-74 | Ac-G | RARRES3    |
| 461 | 5.80E-78 | 0.508489 | 0.212 | 0.076 | 8.66E-74 | Ac-G | GEM        |
| 462 | 1.77E-77 | 0.490953 | 0.218 | 0.084 | 2.64E-73 | Ac-G | EPAS1      |
| 463 | 1.72E-73 | 0.505905 | 0.672 | 0.514 | 2.58E-69 | Ac-G | MAP1B      |
| 464 | 4.51E-73 | 0.587359 | 0.495 | 0.294 | 6.74E-69 | Ac-G | SEPP1      |
| 465 | 8.10E-73 | 0.618207 | 0.347 | 0.196 | 1.21E-68 | Ac-G | VEGFA      |
| 466 | 8.12E-73 | 0.600636 | 0.421 | 0.26  | 1.21E-68 | Ac-G | GADD45A    |
| 467 | 1.03E-72 | 0.41041  | 0.74  | 0.687 | 1.54E-68 | Ac-G | LAMTOR5    |
| 468 | 1.24E-72 | 0.398835 | 0.821 | 0.824 | 1.86E-68 | Ac-G | GSTP1      |
| 469 | 2.08E-72 | 0.562122 | 0.212 | 0.08  | 3.10E-68 | Ac-G | SERPINE1   |
| 470 | 2.65E-70 | 0.5548   | 0.316 | 0.162 | 3.96E-66 | Ac-G | GBE1       |
| 471 | 7.20E-70 | 0.528178 | 0.262 | 0.12  | 1.08E-65 | Ac-G | BDH2       |
| 472 | 7.74E-70 | 0.546629 | 0.472 | 0.312 | 1.16E-65 | Ac-G | CLIC4      |
| 473 | 1.04E-69 | 0.565312 | 0.365 | 0.215 | 1.55E-65 | Ac-G | SLC16A1    |
| 474 | 1.45E-69 | 0.452242 | 0.159 | 0.05  | 2.17E-65 | Ac-G | FAS        |
| 475 | 2.34E-67 | 0.562413 | 0.281 | 0.144 | 3.50E-63 | Ac-G | PLOD2      |
| 476 | 2.51E-67 | 0.536826 | 0.515 | 0.372 | 3.75E-63 | Ac-G | ZNF667-AS1 |
| 477 | 3.06E-67 | 0.451584 | 0.187 | 0.07  | 4.58E-63 | Ac-G | RDH10      |
| 478 | 9.28E-67 | 0.457577 | 0.717 | 0.661 | 1.39E-62 | Ac-G | TXN        |
| 479 | 1.54E-66 | 0.669829 | 0.288 | 0.144 | 2.30E-62 | Ac-G | AQP4       |
| 480 | 1.93E-66 | 0.575196 | 0.475 | 0.326 | 2.88E-62 | Ac-G | PLP2       |
| 481 | 7.45E-66 | 0.539994 | 0.253 | 0.12  | 1.11E-61 | Ac-G | SPOCK2     |
| 482 | 8.48E-66 | 0.406374 | 0.748 | 0.702 | 1.27E-61 | Ac-G | TRMT112    |
| 483 | 1.24E-65 | 0.588141 | 0.341 | 0.182 | 1.86E-61 | Ac-G | GBP2       |
| 484 | 8.16E-65 | 0.432628 | 0.694 | 0.651 | 1.22E-60 | Ac-G | HSPA5      |
| 485 | 3.72E-64 | 0.622741 | 0.31  | 0.172 | 5.56E-60 | Ac-G | AKAP12     |
| 486 | 9.96E-64 | 0.42088  | 0.705 | 0.607 | 1.49E-59 | Ac-G | DSTN       |
| 487 | 1.39E-63 | 0.539296 | 0.618 | 0.462 | 2.07E-59 | Ac-G | GADD45B    |
| 488 | 1.52E-63 | 0.632401 | 0.51  | 0.406 | 2.28E-59 | Ac-G | ITM2C      |
| 489 | 1.74E-63 | 0.404877 | 0.841 | 0.84  | 2.59E-59 | Ac-G | FOS        |
| 490 | 1.92E-63 | 0.549702 | 0.246 | 0.119 | 2.87E-59 | Ac-G | CA12       |
| 491 | 3.27E-63 | 0.505167 | 0.2   | 0.081 | 4.89E-59 | Ac-G | ABCC3      |
| 492 | 3.61E-62 | 1.024593 | 0.513 | 0.366 | 5.40E-58 | Ac-G | FABP5      |
| 493 | 2.52E-61 | 0.470148 | 0.631 | 0.52  | 3.77E-57 | Ac-G | RHOC       |
| 494 | 5.57E-61 | 0.448369 | 0.774 | 0.692 | 8.32E-57 | Ac-G | PRDX2      |
| 495 | 8.45E-61 | 0.490381 | 0.529 | 0.387 | 1.26E-56 | Ac-G | SYPL1      |
| 496 | 5.50E-60 | 0.432019 | 0.685 | 0.653 | 8.22E-56 | Ac-G | HSPB1      |
| 497 | 2.56E-57 | 0.414844 | 0.695 | 0.62  | 3.83E-53 | Ac-G | BUD31      |
| 498 | 4.00E-57 | 0.542842 | 0.498 | 0.354 | 5.98E-53 | Ac-G | BLVRB      |
| 499 | 9.32E-57 | 0.408631 | 0.051 | 0.006 | 1.39E-52 | Ac-G | OSR1       |
| 500 | 1.56E-56 | 0.53886  | 0.367 | 0.228 | 2.33E-52 | Ac-G | SMOX       |
| 501 | 5.04E-56 | 0.489171 | 0.135 | 0.045 | 7.54E-52 | Ac-G | SRPX2      |
| 502 | 9.74E-56 | 0.577527 | 0.14  | 0.045 | 1.46E-51 | Ac-G | PSMA2      |
| 503 | 6.90E-55 | 0.656481 | 0.543 | 0.438 | 1.03E-50 | Ac-G | PDPN       |
| 504 | 1.68E-54 | 0.663755 | 0.204 | 0.091 | 2.52E-50 | Ac-G | PLA2G5     |
| 505 | 1.77E-54 | 0.512829 | 0.53  | 0.415 | 2.64E-50 | Ac-G | SPTSSA     |
| 506 | 1.88E-54 | 0.498763 | 0.351 | 0.223 | 2.81E-50 | Ac-G | TPST1      |
| 507 | 6.52E-54 | 0.43409  | 0.7   | 0.651 | 9.74E-50 | Ac-G | CHMP2A     |
| 508 | 1.16E-53 | 0.498764 | 0.621 | 0.538 | 1.73E-49 | Ac-G | PRDX4      |
| 509 | 7.93E-53 | 0.534259 | 0.363 | 0.231 | 1.18E-48 | Ac-G | IFT57      |

|     |          |          |       |       |          |      |          |
|-----|----------|----------|-------|-------|----------|------|----------|
| 510 | 3.47E-52 | 0.513639 | 0.539 | 0.438 | 5.18E-48 | Ac-G | PON2     |
| 511 | 1.19E-51 | 0.576559 | 0.426 | 0.296 | 1.77E-47 | Ac-G | PKIG     |
| 512 | 4.64E-51 | 0.529765 | 0.335 | 0.202 | 6.94E-47 | Ac-G | BET1     |
| 513 | 1.91E-50 | 0.492409 | 0.425 | 0.296 | 2.85E-46 | Ac-G | ARL1     |
| 514 | 9.73E-50 | 0.681664 | 0.212 | 0.095 | 1.45E-45 | Ac-G | UQCR11   |
| 515 | 1.48E-49 | 0.45192  | 0.572 | 0.472 | 2.21E-45 | Ac-G | MED10    |
| 516 | 6.16E-49 | 0.396921 | 0.773 | 0.741 | 9.20E-45 | Ac-G | WDR830S  |
| 517 | 6.46E-49 | 0.498816 | 0.258 | 0.136 | 9.65E-45 | Ac-G | FN1      |
| 518 | 4.46E-48 | 0.395846 | 0.212 | 0.098 | 6.66E-44 | Ac-G | PRUNE2   |
| 519 | 2.57E-47 | 0.400993 | 0.287 | 0.16  | 3.85E-43 | Ac-G | SRPX     |
| 520 | 6.78E-47 | 0.525914 | 0.358 | 0.234 | 1.01E-42 | Ac-G | TRIP6    |
| 521 | 1.12E-46 | 0.504384 | 0.408 | 0.288 | 1.68E-42 | Ac-G | MT1F     |
| 522 | 1.29E-46 | 0.467591 | 0.22  | 0.11  | 1.93E-42 | Ac-G | EFNA1    |
| 523 | 1.62E-46 | 0.482412 | 0.342 | 0.216 | 2.42E-42 | Ac-G | COL6A1   |
| 524 | 4.76E-46 | 0.470323 | 0.098 | 0.029 | 7.12E-42 | Ac-G | FBLN5    |
| 525 | 5.20E-46 | 0.458248 | 0.103 | 0.031 | 7.77E-42 | Ac-G | NDUFA7   |
| 526 | 7.58E-46 | 0.836436 | 0.366 | 0.251 | 1.13E-41 | Ac-G | ID3      |
| 527 | 8.67E-46 | 0.502402 | 0.269 | 0.152 | 1.30E-41 | Ac-G | TMEM38B  |
| 528 | 1.18E-45 | 0.776928 | 0.366 | 0.254 | 1.76E-41 | Ac-G | RCAN1    |
| 529 | 1.68E-45 | 0.467542 | 0.231 | 0.122 | 2.51E-41 | Ac-G | SLC2A1   |
| 530 | 3.09E-45 | 0.491705 | 0.167 | 0.07  | 4.62E-41 | Ac-G | CXCL2    |
| 531 | 3.80E-45 | 0.87789  | 0.328 | 0.211 | 5.68E-41 | Ac-G | CCL2     |
| 532 | 7.11E-45 | 0.450173 | 0.184 | 0.086 | 1.06E-40 | Ac-G | SDC4     |
| 533 | 1.40E-44 | 0.441766 | 0.148 | 0.061 | 2.09E-40 | Ac-G | TRIB3    |
| 534 | 1.53E-43 | 0.476221 | 0.135 | 0.053 | 2.29E-39 | Ac-G | FAM181A  |
| 535 | 9.49E-43 | 0.427946 | 0.285 | 0.173 | 1.42E-38 | Ac-G | PTRF     |
| 536 | 7.98E-42 | 0.444805 | 0.617 | 0.528 | 1.19E-37 | Ac-G | C12orf57 |
| 537 | 1.40E-41 | 0.634222 | 0.254 | 0.138 | 2.10E-37 | Ac-G | F13A1    |
| 538 | 3.47E-41 | 0.514482 | 0.196 | 0.1   | 5.18E-37 | Ac-G | ROM1     |
| 539 | 4.62E-41 | 0.439802 | 0.488 | 0.395 | 6.90E-37 | Ac-G | CALU     |
| 540 | 9.03E-40 | 0.477711 | 0.271 | 0.149 | 1.35E-35 | Ac-G | PTGDS    |
| 541 | 1.56E-39 | 0.401504 | 0.624 | 0.545 | 2.32E-35 | Ac-G | POLR2I   |
| 542 | 2.27E-39 | 0.476729 | 0.509 | 0.413 | 3.39E-35 | Ac-G | POLD2    |
| 543 | 3.14E-39 | 0.505391 | 0.566 | 0.472 | 4.69E-35 | Ac-G | CD151    |
| 544 | 4.76E-39 | 0.595789 | 0.115 | 0.044 | 7.11E-35 | Ac-G | CLDN10   |
| 545 | 5.89E-39 | 0.460821 | 0.587 | 0.52  | 8.81E-35 | Ac-G | SSR3     |
| 546 | 1.52E-38 | 0.517312 | 0.334 | 0.22  | 2.27E-34 | Ac-G | CD01     |
| 547 | 3.12E-38 | 0.448962 | 0.691 | 0.653 | 4.66E-34 | Ac-G | S100A11  |
| 548 | 1.29E-37 | 0.432459 | 0.601 | 0.534 | 1.92E-33 | Ac-G | PDCD5    |
| 549 | 8.81E-36 | 0.438327 | 0.489 | 0.373 | 1.32E-31 | Ac-G | IFI16    |
| 550 | 1.17E-35 | 0.552142 | 0.274 | 0.174 | 1.75E-31 | Ac-G | TUBB6    |
| 551 | 1.91E-35 | 0.463286 | 0.304 | 0.203 | 2.85E-31 | Ac-G | FKBP10   |
| 552 | 2.37E-35 | 0.406379 | 0.541 | 0.462 | 3.55E-31 | Ac-G | COPS8    |
| 553 | 8.04E-35 | 0.45619  | 0.346 | 0.245 | 1.20E-30 | Ac-G | ACTN1    |
| 554 | 2.48E-34 | 0.394716 | 0.228 | 0.13  | 3.71E-30 | Ac-G | IMMP2L   |
| 555 | 1.73E-33 | 0.424528 | 0.082 | 0.026 | 2.58E-29 | Ac-G | SMIM3    |
| 556 | 2.34E-33 | 0.537756 | 0.358 | 0.259 | 3.49E-29 | Ac-G | SSBP2    |
| 557 | 2.48E-33 | 0.4086   | 0.492 | 0.406 | 3.70E-29 | Ac-G | IMPDH2   |
| 558 | 7.64E-33 | 0.431744 | 0.19  | 0.101 | 1.14E-28 | Ac-G | EMP2     |
| 559 | 1.10E-32 | 0.407945 | 0.534 | 0.422 | 1.65E-28 | Ac-G | UCHL1    |
| 560 | 1.29E-32 | 0.559599 | 0.171 | 0.086 | 1.92E-28 | Ac-G | APOL2    |

|     |          |          |       |       |          |      |          |
|-----|----------|----------|-------|-------|----------|------|----------|
| 561 | 3.43E-32 | 0.421772 | 0.262 | 0.169 | 5.13E-28 | Ac-G | AK4      |
| 562 | 4.42E-32 | 0.550903 | 0.583 | 0.482 | 6.61E-28 | Ac-G | MDK      |
| 563 | 5.43E-32 | 0.42045  | 0.467 | 0.367 | 8.12E-28 | Ac-G | DNAJB9   |
| 564 | 7.90E-32 | 0.431628 | 0.135 | 0.062 | 1.18E-27 | Ac-G | GDF15    |
| 565 | 9.72E-31 | 0.393781 | 0.098 | 0.038 | 1.45E-26 | Ac-G | PGAM2    |
| 566 | 1.97E-30 | 0.42671  | 0.585 | 0.552 | 2.94E-26 | Ac-G | CD59     |
| 567 | 2.24E-30 | 0.53721  | 0.449 | 0.362 | 3.35E-26 | Ac-G | RAB13    |
| 568 | 2.96E-30 | 0.672958 | 0.211 | 0.128 | 4.43E-26 | Ac-G | BBOX1    |
| 569 | 6.12E-30 | 0.575415 | 0.266 | 0.175 | 9.14E-26 | Ac-G | PPIC     |
| 570 | 7.56E-30 | 0.395082 | 0.164 | 0.087 | 1.13E-25 | Ac-G | HRH1     |
| 571 | 1.18E-29 | 0.567547 | 0.434 | 0.343 | 1.76E-25 | Ac-G | PMP2     |
| 572 | 1.49E-29 | 0.402404 | 0.366 | 0.274 | 2.22E-25 | Ac-G | ENO2     |
| 573 | 1.93E-29 | 0.401772 | 0.115 | 0.047 | 2.89E-25 | Ac-G | TMBIM4   |
| 574 | 1.09E-28 | 0.435135 | 0.395 | 0.298 | 1.63E-24 | Ac-G | TSPAN7   |
| 575 | 2.10E-28 | 0.453541 | 0.473 | 0.389 | 3.14E-24 | Ac-G | FAM162A  |
| 576 | 7.69E-27 | 0.41125  | 0.399 | 0.302 | 1.15E-22 | Ac-G | SERTAD1  |
| 577 | 5.72E-25 | 0.401484 | 0.609 | 0.573 | 8.55E-21 | Ac-G | PSMB2    |
| 578 | 2.03E-24 | 0.506994 | 0.178 | 0.108 | 3.04E-20 | Ac-G | PTX3     |
| 579 | 6.97E-24 | 0.39731  | 0.457 | 0.384 | 1.04E-19 | Ac-G | AK2      |
| 580 | 1.22E-23 | 0.457945 | 0.158 | 0.087 | 1.83E-19 | Ac-G | SNRPN    |
| 581 | 1.87E-23 | 0.398309 | 0.428 | 0.361 | 2.80E-19 | Ac-G | TMEM9    |
| 582 | 3.53E-23 | 0.426713 | 0.253 | 0.177 | 5.27E-19 | Ac-G | DOK5     |
| 583 | 1.08E-22 | 0.507027 | 0.269 | 0.19  | 1.61E-18 | Ac-G | IGFBP3   |
| 584 | 1.75E-22 | 0.42741  | 0.254 | 0.177 | 2.62E-18 | Ac-G | UAP1     |
| 585 | 3.22E-22 | 0.403318 | 0.231 | 0.155 | 4.82E-18 | Ac-G | TWSG1    |
| 586 | 8.01E-22 | 0.396643 | 0.509 | 0.443 | 1.20E-17 | Ac-G | LGALS3BP |
| 587 | 2.00E-21 | 0.39076  | 0.425 | 0.349 | 2.99E-17 | Ac-G | UROD     |
| 588 | 7.06E-20 | 0.457723 | 0.44  | 0.385 | 1.06E-15 | Ac-G | GGCT     |
| 589 | 4.62E-19 | 0.396137 | 0.209 | 0.142 | 6.90E-15 | Ac-G | RFX4     |
| 590 | 7.72E-19 | 0.391932 | 0.239 | 0.17  | 1.15E-14 | Ac-G | KIF9     |
| 591 | 4.50E-18 | 0.46215  | 0.393 | 0.333 | 6.73E-14 | Ac-G | CISD1    |
| 592 | 6.02E-18 | 0.498134 | 0.34  | 0.274 | 9.00E-14 | Ac-G | AGTRAP   |
| 593 | 6.42E-18 | 0.416959 | 0.22  | 0.153 | 9.60E-14 | Ac-G | STEAP3   |
| 594 | 1.13E-15 | 0.410281 | 0.27  | 0.213 | 1.69E-11 | Ac-G | EFEMP2   |
| 595 | 1.92E-15 | 0.449784 | 0.377 | 0.325 | 2.88E-11 | Ac-G | AHCYL1   |
| 596 | 1.04E-14 | 0.415112 | 0.497 | 0.473 | 1.55E-10 | Ac-G | UBE2L6   |
| 597 | 1.17E-14 | 0.393103 | 0.262 | 0.199 | 1.75E-10 | Ac-G | HEPN1    |
| 598 | 1.49E-14 | 0.466731 | 0.479 | 0.462 | 2.23E-10 | Ac-G | A2M      |
| 599 | 4.03E-14 | 0.408256 | 0.344 | 0.289 | 6.02E-10 | Ac-G | TMED1    |
| 600 | 2.34E-09 | 0.393554 | 0.372 | 0.338 | 3.50E-05 | Ac-G | BLVRA    |
| 601 | #####    | 0.534464 | 0.991 | 0.996 | #####    | CSCL | MALAT1   |
| 602 | #####    | 0.585858 | 0.991 | 0.985 | #####    | CSCL | GAPDH    |
| 603 | #####    | 0.931288 | 0.827 | 0.611 | #####    | CSCL | PTN      |
| 604 | #####    | 1.203533 | 0.752 | 0.484 | #####    | CSCL | MT3      |
| 605 | #####    | 0.535905 | 0.916 | 0.944 | #####    | CSCL | GNB2L1   |
| 606 | #####    | 0.732344 | 0.867 | 0.845 | #####    | CSCL | DBI      |
| 607 | #####    | 0.399031 | 0.977 | 0.998 | #####    | CSCL | TMSB4X   |
| 608 | #####    | 0.419022 | 0.92  | 0.951 | #####    | CSCL | ACTG1    |
| 609 | #####    | 0.5114   | 0.946 | 0.972 | #####    | CSCL | B2M      |
| 610 | #####    | 0.803682 | 0.848 | 0.784 | #####    | CSCL | MT2A     |
| 611 | #####    | 0.391846 | 0.911 | 0.974 | #####    | CSCL | H3F3B    |

|     |          |          |       |       |          |      |           |
|-----|----------|----------|-------|-------|----------|------|-----------|
| 612 | #####    | 0.405399 | 0.956 | 0.996 | #####    | CSCL | FTL       |
| 613 | #####    | 0.550039 | 0.864 | 0.808 | #####    | CSCL | TUBA1A    |
| 614 | #####    | 0.720171 | 0.794 | 0.615 | #####    | CSCL | GPM6B     |
| 615 | #####    | 0.694528 | 0.838 | 0.782 | 5.58E-98 | CSCL | CLU       |
| 616 | 2.99E-97 | 0.766753 | 0.845 | 0.799 | 4.47E-93 | CSCL | SEC61G    |
| 617 | 2.31E-96 | 0.463644 | 0.892 | 0.961 | 3.46E-92 | CSCL | FAU       |
| 618 | 8.58E-95 | 0.504169 | 0.857 | 0.898 | 1.28E-90 | CSCL | NDUFA4    |
| 619 | 2.76E-91 | 0.759138 | 0.771 | 0.643 | 4.12E-87 | CSCL | NGFRAP1   |
| 620 | 6.47E-89 | 0.376295 | 0.895 | 0.971 | 9.67E-85 | CSCL | PTMA      |
| 621 | 6.15E-88 | 0.52101  | 0.866 | 0.928 | 9.19E-84 | CSCL | CD63      |
| 622 | 1.27E-87 | 0.282721 | 0.934 | 0.996 | 1.89E-83 | CSCL | ACTB      |
| 623 | 9.75E-87 | 0.584649 | 0.82  | 0.828 | 1.46E-82 | CSCL | EEF1A1    |
| 624 | 4.64E-84 | 0.367202 | 0.899 | 0.978 | 6.94E-80 | CSCL | EIF1      |
| 625 | 3.40E-79 | 0.710163 | 0.757 | 0.731 | 5.09E-75 | CSCL | SRI       |
| 626 | 7.71E-79 | 0.386061 | 0.862 | 0.955 | 1.15E-74 | CSCL | UBC       |
| 627 | 3.74E-77 | 0.398881 | 0.899 | 0.969 | 5.59E-73 | CSCL | TMSB10    |
| 628 | 4.79E-74 | 0.41007  | 0.873 | 0.957 | 7.17E-70 | CSCL | TPT1      |
| 629 | 3.10E-67 | 0.505422 | 0.798 | 0.87  | 4.64E-63 | CSCL | SKP1      |
| 630 | 8.08E-67 | 0.91756  | 0.613 | 0.408 | 1.21E-62 | CSCL | RAMP1     |
| 631 | 4.23E-66 | 0.315293 | 0.857 | 0.955 | 6.32E-62 | CSCL | CFL1      |
| 632 | 7.02E-66 | 0.659523 | 0.75  | 0.783 | 1.05E-61 | CSCL | LDHB      |
| 633 | 1.48E-64 | 0.889858 | 0.658 | 0.535 | 2.21E-60 | CSCL | C1orf61   |
| 634 | 5.81E-64 | 0.422095 | 0.799 | 0.894 | 8.69E-60 | CSCL | HSP90AA1  |
| 635 | 6.10E-58 | 0.449801 | 0.791 | 0.881 | 9.12E-54 | CSCL | PPIA      |
| 636 | 6.84E-57 | 0.639133 | 0.716 | 0.705 | 1.02E-52 | CSCL | PRDX2     |
| 637 | 1.90E-56 | 0.853621 | 0.312 | 0.103 | 2.85E-52 | CSCL | UQCR11    |
| 638 | 1.03E-51 | 0.770278 | 0.66  | 0.562 | 1.53E-47 | CSCL | CD9       |
| 639 | 9.91E-51 | 0.461887 | 0.766 | 0.873 | 1.48E-46 | CSCL | TPI1      |
| 640 | 2.17E-50 | 0.401488 | 0.789 | 0.902 | 3.25E-46 | CSCL | HLA-A     |
| 641 | 3.81E-50 | 0.408869 | 0.78  | 0.905 | 5.70E-46 | CSCL | BTF3      |
| 642 | 6.40E-49 | 0.430028 | 0.77  | 0.893 | 9.56E-45 | CSCL | COX7C     |
| 643 | 1.26E-46 | 0.887268 | 0.613 | 0.527 | 1.88E-42 | CSCL | S100B     |
| 644 | 5.77E-46 | 0.295106 | 0.815 | 0.939 | 8.62E-42 | CSCL | CALM2     |
| 645 | 9.67E-46 | 0.730048 | 0.157 | 0.037 | 1.45E-41 | CSCL | NDUFA7    |
| 646 | 2.33E-45 | 0.457064 | 0.742 | 0.853 | 3.48E-41 | CSCL | ALDOA     |
| 647 | 3.42E-44 | 0.530228 | 0.724 | 0.818 | 5.10E-40 | CSCL | NDUFS5    |
| 648 | 5.78E-44 | 0.350148 | 0.785 | 0.933 | 8.63E-40 | CSCL | NACA      |
| 649 | 1.28E-43 | 0.301151 | 0.815 | 0.949 | 1.92E-39 | CSCL | MYL6      |
| 650 | 2.01E-43 | 0.334062 | 0.77  | 0.887 | 3.00E-39 | CSCL | CHCHD2    |
| 651 | 1.43E-41 | 0.389467 | 0.742 | 0.873 | 2.14E-37 | CSCL | CIRBP     |
| 652 | 1.52E-41 | 0.376019 | 0.742 | 0.874 | 2.26E-37 | CSCL | HSPA8     |
| 653 | 1.77E-41 | 0.377711 | 0.766 | 0.919 | 2.64E-37 | CSCL | COX4I1    |
| 654 | 1.76E-39 | 0.313413 | 0.768 | 0.919 | 2.63E-35 | CSCL | UBB       |
| 655 | 2.10E-37 | 0.362505 | 0.742 | 0.886 | 3.14E-33 | CSCL | HNRNPA1   |
| 656 | 4.96E-37 | 0.364639 | 0.717 | 0.854 | 7.41E-33 | CSCL | HNRNPA2B1 |
| 657 | 1.82E-36 | 0.437603 | 0.712 | 0.839 | 2.72E-32 | CSCL | COX6C     |
| 658 | 1.31E-35 | 0.6562   | 0.607 | 0.587 | 1.96E-31 | CSCL | CKB       |
| 659 | 1.03E-33 | 0.43863  | 0.684 | 0.753 | 1.54E-29 | CSCL | H3F3A     |
| 660 | 1.11E-33 | 0.878584 | 0.445 | 0.301 | 1.66E-29 | CSCL | MEG3      |
| 661 | 8.09E-33 | 0.481943 | 0.696 | 0.802 | 1.21E-28 | CSCL | ENO1      |
| 662 | 6.97E-32 | 0.852972 | 0.237 | 0.099 | 1.04E-27 | CSCL | VSTM2A    |

|     |          |          |       |       |          |      |           |
|-----|----------|----------|-------|-------|----------|------|-----------|
| 663 | 4.26E-30 | 0.42018  | 0.688 | 0.812 | 6.36E-26 | CSCL | PEBP1     |
| 664 | 2.69E-29 | 0.795019 | 0.525 | 0.465 | 4.02E-25 | CSCL | FXYD6     |
| 665 | 2.37E-28 | 0.328831 | 0.728 | 0.87  | 3.54E-24 | CSCL | HMGB1     |
| 666 | 8.79E-28 | 0.440589 | 0.688 | 0.856 | 1.31E-23 | CSCL | COX6B1    |
| 667 | 1.07E-27 | 0.958165 | 0.485 | 0.384 | 1.59E-23 | CSCL | FABP5     |
| 668 | 1.56E-27 | 0.400924 | 0.686 | 0.837 | 2.33E-23 | CSCL | HINT1     |
| 669 | 7.11E-27 | 0.587584 | 0.62  | 0.624 | 1.06E-22 | CSCL | TIMP1     |
| 670 | 7.86E-27 | 0.421579 | 0.684 | 0.84  | 1.17E-22 | CSCL | UBL5      |
| 671 | 4.47E-26 | 0.346957 | 0.695 | 0.845 | 6.68E-22 | CSCL | DYNLL1    |
| 672 | 2.20E-25 | 0.565031 | 0.182 | 0.068 | 3.29E-21 | CSCL | MTRNR2L10 |
| 673 | 3.37E-25 | 0.387712 | 0.695 | 0.862 | 5.04E-21 | CSCL | TOMM7     |
| 674 | 3.84E-25 | 0.350132 | 0.681 | 0.855 | 5.73E-21 | CSCL | COX6A1    |
| 675 | 7.50E-25 | 0.560255 | 0.159 | 0.055 | 1.12E-20 | CSCL | PSMA2     |
| 676 | 8.12E-25 | 0.32639  | 0.696 | 0.857 | 1.21E-20 | CSCL | COX5B     |
| 677 | 3.46E-24 | 0.623725 | 0.56  | 0.497 | 5.18E-20 | CSCL | CRYAB     |
| 678 | 8.80E-24 | 0.433553 | 0.635 | 0.751 | 1.32E-19 | CSCL | BSG       |
| 679 | 2.23E-21 | 0.329459 | 0.716 | 0.86  | 3.33E-17 | CSCL | HLA-B     |
| 680 | 3.51E-21 | 0.669189 | 0.576 | 0.58  | 5.24E-17 | CSCL | MT1X      |
| 681 | 4.69E-21 | 0.503778 | 0.621 | 0.735 | 7.01E-17 | CSCL | ANXA5     |
| 682 | 5.74E-21 | 0.342064 | 0.691 | 0.88  | 8.58E-17 | CSCL | ATP5G2    |
| 683 | 1.29E-20 | 0.759901 | 0.461 | 0.388 | 1.92E-16 | CSCL | FABP7     |
| 684 | 4.07E-20 | 0.540815 | 0.108 | 0.034 | 6.08E-16 | CSCL | IER3IP1   |
| 685 | 5.75E-20 | 0.420486 | 0.665 | 0.817 | 8.60E-16 | CSCL | PRDX1     |
| 686 | 3.39E-19 | 0.307062 | 0.695 | 0.894 | 5.07E-15 | CSCL | PFDN5     |
| 687 | 6.35E-19 | 0.36346  | 0.634 | 0.799 | 9.50E-15 | CSCL | HNRNPK    |
| 688 | 6.13E-18 | 0.38293  | 0.642 | 0.78  | 9.17E-14 | CSCL | PKM       |
| 689 | 1.36E-17 | 0.392613 | 0.639 | 0.82  | 2.04E-13 | CSCL | NDUFB2    |
| 690 | 1.42E-17 | 0.323072 | 0.674 | 0.862 | 2.12E-13 | CSCL | TMA7      |
| 691 | 1.47E-17 | 0.284391 | 0.686 | 0.879 | 2.19E-13 | CSCL | NPM1      |
| 692 | 2.17E-17 | 0.48999  | 0.134 | 0.052 | 3.24E-13 | CSCL | NDUFB8    |
| 693 | 3.57E-17 | 0.378868 | 0.62  | 0.767 | 5.33E-13 | CSCL | SUB1      |
| 694 | 4.15E-17 | 0.371941 | 0.653 | 0.832 | 6.20E-13 | CSCL | GSTP1     |
| 695 | 5.52E-17 | 0.382331 | 0.632 | 0.782 | 8.24E-13 | CSCL | NDUFA13   |
| 696 | 1.56E-16 | 0.915411 | 0.354 | 0.278 | 2.33E-12 | CSCL | BCAN      |
| 697 | 2.12E-16 | 0.447474 | 0.611 | 0.776 | 3.18E-12 | CSCL | PARK7     |
| 698 | 5.67E-16 | 0.465121 | 0.595 | 0.712 | 8.47E-12 | CSCL | 7-Sep     |
| 699 | 6.71E-16 | 0.636283 | 0.501 | 0.485 | 1.00E-11 | CSCL | LGALS3    |
| 700 | 9.06E-16 | 0.482856 | 0.606 | 0.758 | 1.35E-11 | CSCL | SNRNP2    |
| 701 | 1.25E-15 | 0.415978 | 0.166 | 0.074 | 1.87E-11 | CSCL | ATXN80S   |
| 702 | 2.60E-15 | 0.444635 | 0.604 | 0.767 | 3.89E-11 | CSCL | SOD1      |
| 703 | 2.83E-15 | 0.347847 | 0.644 | 0.841 | 4.24E-11 | CSCL | EEF2      |
| 704 | 4.01E-15 | 0.336051 | 0.667 | 0.848 | 6.00E-11 | CSCL | FOS       |
| 705 | 4.08E-15 | 0.363066 | 0.63  | 0.81  | 6.10E-11 | CSCL | UQCRCQ    |
| 706 | 1.55E-14 | 0.62064  | 0.255 | 0.154 | 2.32E-10 | CSCL | APOD      |
| 707 | 1.97E-14 | 0.689475 | 0.475 | 0.474 | 2.95E-10 | CSCL | TSC22D4   |
| 708 | 2.57E-14 | 0.492673 | 0.482 | 0.486 | 3.84E-10 | CSCL | NOVA1     |
| 709 | 4.92E-14 | 0.674577 | 0.421 | 0.391 | 7.35E-10 | CSCL | PTPRZ1    |
| 710 | 5.54E-14 | 0.3878   | 0.553 | 0.561 | 8.27E-10 | CSCL | TUBB2B    |
| 711 | 6.59E-14 | 0.664568 | 0.18  | 0.094 | 9.85E-10 | CSCL | SNRPN     |
| 712 | 1.10E-13 | 0.508646 | 0.574 | 0.65  | 1.65E-09 | CSCL | S100A6    |
| 713 | 3.10E-13 | 0.373118 | 0.054 | 0.015 | 4.63E-09 | CSCL | LINC00869 |

|     |          |          |       |       |          |      |          |
|-----|----------|----------|-------|-------|----------|------|----------|
| 714 | 8.10E-13 | 0.447901 | 0.581 | 0.731 | 1.21E-08 | CSCL | NDUFB7   |
| 715 | 2.46E-12 | 0.419007 | 0.588 | 0.671 | 3.67E-08 | CSCL | VIM      |
| 716 | 2.49E-12 | 0.727419 | 0.363 | 0.312 | 3.72E-08 | CSCL | S100A16  |
| 717 | 2.71E-12 | 0.301383 | 0.642 | 0.833 | 4.04E-08 | CSCL | SUMO2    |
| 718 | 3.67E-12 | 0.383867 | 0.6   | 0.782 | 5.48E-08 | CSCL | COPE     |
| 719 | 3.91E-12 | 0.330855 | 0.621 | 0.819 | 5.84E-08 | CSCL | ATP5J2   |
| 720 | 1.67E-11 | 0.449656 | 0.616 | 0.798 | 2.49E-07 | CSCL | CST3     |
| 721 | 2.61E-11 | 0.29275  | 0.64  | 0.813 | 3.90E-07 | CSCL | HLA-C    |
| 722 | 2.65E-11 | 0.734191 | 0.384 | 0.353 | 3.96E-07 | CSCL | BEX1     |
| 723 | 1.01E-10 | 0.30186  | 0.623 | 0.836 | 1.52E-06 | CSCL | TCEB2    |
| 724 | 1.15E-10 | 0.28448  | 0.079 | 0.201 | 1.71E-06 | CSCL | HBA2     |
| 725 | 4.71E-10 | 0.594657 | 0.471 | 0.521 | 7.04E-06 | CSCL | TAGLN2   |
| 726 | 1.01E-09 | 0.415556 | 0.562 | 0.722 | 1.51E-05 | CSCL | TBCA     |
| 727 | 1.05E-09 | 0.715695 | 0.394 | 0.381 | 1.56E-05 | CSCL | IGFBP2   |
| 728 | 1.13E-09 | 0.380901 | 0.597 | 0.784 | 1.69E-05 | CSCL | CALM1    |
| 729 | 1.19E-09 | 0.27749  | 0.63  | 0.873 | 1.79E-05 | CSCL | ATP5L    |
| 730 | 1.22E-09 | 0.347665 | 0.586 | 0.788 | 1.83E-05 | CSCL | ATP5B    |
| 731 | 1.48E-09 | 0.61748  | 0.403 | 0.391 | 2.21E-05 | CSCL | SPARC    |
| 732 | 1.75E-09 | 0.46567  | 0.471 | 0.512 | 2.62E-05 | CSCL | GPM6A    |
| 733 | 1.83E-09 | 0.37938  | 0.579 | 0.769 | 2.74E-05 | CSCL | RAN      |
| 734 | 1.12E-08 | 0.578951 | 0.122 | 0.065 | 0.000167 | CSCL | FAM195B  |
| 735 | 1.15E-08 | 0.519399 | 0.492 | 0.551 | 0.000172 | CSCL | S100A10  |
| 736 | 1.54E-08 | 0.594054 | 0.373 | 0.349 | 0.000231 | CSCL | SPARCL1  |
| 737 | 1.79E-08 | 0.293612 | 0.19  | 0.373 | 0.000268 | CSCL | PDZD11   |
| 738 | 5.87E-08 | 0.546598 | 0.112 | 0.06  | 0.000877 | CSCL | ALDH1L1  |
| 739 | 6.82E-08 | 0.318106 | 0.175 | 0.339 | 0.001019 | CSCL | RFXANK   |
| 740 | 7.19E-08 | 0.295098 | 0.162 | 0.316 | 0.001074 | CSCL | KIF21A   |
| 741 | 9.53E-08 | 0.455162 | 0.459 | 0.521 | 0.001425 | CSCL | TSC22D1  |
| 742 | 1.05E-07 | 0.570267 | 0.063 | 0.027 | 0.00157  | CSCL | C6orf15  |
| 743 | 1.91E-07 | 0.317454 | 0.175 | 0.332 | 0.002853 | CSCL | PEF1     |
| 744 | 2.66E-07 | 0.640203 | 0.321 | 0.289 | 0.00398  | CSCL | HOPX     |
| 745 | 2.99E-07 | 0.280239 | 0.194 | 0.363 | 0.004469 | CSCL | ISOC2    |
| 746 | 3.04E-07 | 0.741308 | 0.307 | 0.27  | 0.004546 | CSCL | IGFBP5   |
| 747 | 3.49E-07 | 0.285041 | 0.194 | 0.36  | 0.005218 | CSCL | WDR61    |
| 748 | 3.96E-07 | 0.290442 | 0.244 | 0.451 | 0.005912 | CSCL | SUCLG1   |
| 749 | 4.40E-07 | 0.287713 | 0.131 | 0.257 | 0.006579 | CSCL | SHISA4   |
| 750 | 6.00E-07 | 0.363992 | 0.558 | 0.764 | 0.008961 | CSCL | ATP5J    |
| 751 | 6.70E-07 | 0.294685 | 0.147 | 0.278 | 0.010015 | CSCL | GSTM3    |
| 752 | 9.70E-07 | 0.31755  | 0.094 | 0.049 | 0.014496 | CSCL | NHSL2    |
| 753 | 1.04E-06 | 0.314293 | 0.145 | 0.276 | 0.015534 | CSCL | TRIB2    |
| 754 | 1.11E-06 | 0.289445 | 0.188 | 0.349 | 0.016592 | CSCL | MANBAL   |
| 755 | 1.11E-06 | 0.359794 | 0.047 | 0.019 | 0.016659 | CSCL | PRKCG    |
| 756 | 1.25E-06 | 0.353638 | 0.571 | 0.771 | 0.018705 | CSCL | EIF3K    |
| 757 | 1.36E-06 | 0.347503 | 0.569 | 0.794 | 0.020283 | CSCL | UQCRH    |
| 758 | 1.61E-06 | 0.784953 | 0.157 | 0.107 | 0.024108 | CSCL | PLA2G5   |
| 759 | 1.72E-06 | 0.300546 | 0.243 | 0.44  | 0.025761 | CSCL | PAFAH1B3 |
| 760 | 1.76E-06 | 0.307437 | 0.161 | 0.298 | 0.026291 | CSCL | TRIM44   |
| 761 | 1.90E-06 | 0.400963 | 0.532 | 0.706 | 0.028446 | CSCL | HNRNPC   |
| 762 | 2.34E-06 | 0.311757 | 0.176 | 0.323 | 0.035026 | CSCL | PAICS    |
| 763 | 2.67E-06 | 0.321464 | 0.239 | 0.429 | 0.039975 | CSCL | IMPDH2   |
| 764 | 2.84E-06 | 0.309835 | 0.099 | 0.197 | 0.042439 | CSCL | ARHGAP12 |

|     |          |          |       |       |          |      |           |
|-----|----------|----------|-------|-------|----------|------|-----------|
| 765 | 2.96E-06 | 0.389256 | 0.447 | 0.474 | 0.044297 | CSCL | GAP43     |
| 766 | 3.11E-06 | 0.493085 | 0.243 | 0.189 | 0.046545 | CSCL | MTRNR2L8  |
| 767 | 3.15E-06 | 0.594188 | 0.38  | 0.385 | 0.047099 | CSCL | MT1E      |
| 768 | 4.18E-06 | 0.365104 | 0.55  | 0.739 | 0.062492 | CSCL | ANAPC11   |
| 769 | 4.29E-06 | 0.495251 | 0.195 | 0.14  | 0.06413  | CSCL | MGST1     |
| 770 | 5.47E-06 | 0.651348 | 0.101 | 0.06  | 0.081735 | CSCL | ATP1A2    |
| 771 | 6.28E-06 | 0.366579 | 0.208 | 0.368 | 0.093891 | CSCL | ISG15     |
| 772 | 6.74E-06 | 0.411617 | 0.534 | 0.695 | 0.10071  | CSCL | C19orf53  |
| 773 | 7.32E-06 | 0.318222 | 0.169 | 0.305 | 0.109415 | CSCL | C14orf1   |
| 774 | 7.92E-06 | 0.519296 | 0.202 | 0.145 | 0.118402 | CSCL | SLPI      |
| 775 | 7.96E-06 | 0.579309 | 0.127 | 0.082 | 0.118891 | CSCL | GPR37L1   |
| 776 | 8.11E-06 | 0.279535 | 0.141 | 0.256 | 0.121214 | CSCL | VCAN      |
| 777 | 8.50E-06 | 0.296824 | 0.068 | 0.033 | 0.126991 | CSCL | SMIM3     |
| 778 | 8.80E-06 | 0.29054  | 0.106 | 0.203 | 0.131433 | CSCL | ZEB1      |
| 779 | 9.20E-06 | 0.28485  | 0.288 | 0.509 | 0.137447 | CSCL | CAMLG     |
| 780 | 1.11E-05 | 0.336943 | 0.553 | 0.761 | 0.166306 | CSCL | CNBP      |
| 781 | 1.12E-05 | 0.281065 | 0.237 | 0.416 | 0.166812 | CSCL | PNN       |
| 782 | 1.20E-05 | 0.573758 | 0.257 | 0.216 | 0.178819 | CSCL | C1R       |
| 783 | 1.63E-05 | 0.343922 | 0.557 | 0.758 | 0.243775 | CSCL | NEDD8     |
| 784 | 1.82E-05 | 0.283037 | 0.237 | 0.411 | 0.271354 | CSCL | FAM162A   |
| 785 | 1.89E-05 | 0.329566 | 0.26  | 0.458 | 0.283018 | CSCL | PEA15     |
| 786 | 2.42E-05 | 0.349438 | 0.105 | 0.195 | 0.361183 | CSCL | LINC00665 |
| 787 | 2.91E-05 | 0.319356 | 0.115 | 0.21  | 0.434161 | CSCL | RGMA      |
| 788 | 3.10E-05 | 0.375794 | 0.19  | 0.332 | 0.462952 | CSCL | C16orf45  |
| 789 | 3.21E-05 | 0.484249 | 0.475 | 0.531 | 0.480346 | CSCL | CHI3L1    |
| 790 | 4.11E-05 | 0.291107 | 0.309 | 0.544 | 0.614472 | CSCL | RWDD1     |
| 791 | 4.12E-05 | 0.467838 | 0.497 | 0.659 | 0.615803 | CSCL | GNAS      |
| 792 | 4.59E-05 | 0.292686 | 0.079 | 0.152 | 0.68566  | CSCL | FBX017    |
| 793 | 5.31E-05 | 0.686125 | 0.202 | 0.165 | 0.793967 | CSCL | AQP4      |
| 794 | 5.91E-05 | 0.387784 | 0.176 | 0.304 | 0.883907 | CSCL | FAM229B   |
| 795 | 7.05E-05 | 0.338676 | 0.195 | 0.332 | 1        | CSCL | CETN2     |
| 796 | 7.72E-05 | 0.312841 | 0.148 | 0.257 | 1        | CSCL | HEY1      |
| 797 | 8.27E-05 | 0.638482 | 0.262 | 0.229 | 1        | CSCL | C8orf4    |
| 798 | 8.33E-05 | 0.285967 | 0.579 | 0.778 | 1        | CSCL | LDHA      |
| 799 | 9.17E-05 | 0.278667 | 0.098 | 0.178 | 1        | CSCL | RNF180    |
| 800 | 9.21E-05 | 0.279423 | 0.22  | 0.371 | 1        | CSCL | FHL1      |
| 801 | 9.83E-05 | 0.296007 | 0.279 | 0.472 | 1        | CSCL | PNKD      |
| 802 | 9.95E-05 | 0.385035 | 0.545 | 0.757 | 1        | CSCL | WDR830S   |
| 803 | 0.000109 | 0.379031 | 0.168 | 0.285 | 1        | CSCL | SDR39U1   |
| 804 | 0.000112 | 0.277504 | 0.297 | 0.509 | 1        | CSCL | PSMC4     |
| 805 | 0.000115 | 0.501089 | 0.344 | 0.358 | 1        | CSCL | PMP2      |
| 806 | 0.000126 | 0.303324 | 0.117 | 0.204 | 1        | CSCL | FAM46A    |
| 807 | 0.000135 | 0.296232 | 0.209 | 0.353 | 1        | CSCL | POLR2J3   |
| 808 | 0.000136 | 0.341829 | 0.194 | 0.327 | 1        | CSCL | DCAF13    |
| 809 | 0.000139 | 0.609706 | 0.342 | 0.358 | 1        | CSCL | NDRG2     |
| 810 | 0.000146 | 0.511629 | 0.059 | 0.032 | 1        | CSCL | MIR7-3HG  |
| 811 | 0.000147 | 0.411776 | 0.237 | 0.196 | 1        | CSCL | MTRNR2L12 |
| 812 | 0.000149 | 0.350608 | 0.251 | 0.417 | 1        | CSCL | IFI6      |
| 813 | 0.000155 | 0.583428 | 0.365 | 0.394 | 1        | CSCL | OCIAD2    |
| 814 | 0.000157 | 0.625172 | 0.188 | 0.153 | 1        | CSCL | ALDOC     |
| 815 | 0.000159 | 0.283932 | 0.108 | 0.19  | 1        | CSCL | LINC00662 |

|     |          |          |       |       |   |      |             |
|-----|----------|----------|-------|-------|---|------|-------------|
| 816 | 0.000171 | 0.300795 | 0.264 | 0.442 | 1 | CSCL | SPTSSA      |
| 817 | 0.000185 | 0.514396 | 0.346 | 0.349 | 1 | CSCL | GFAP        |
| 818 | 0.000189 | 0.347769 | 0.124 | 0.214 | 1 | CSCL | RP11-14N7.2 |
| 819 | 0.000228 | 0.292189 | 0.096 | 0.17  | 1 | CSCL | RND2        |
| 820 | 0.000239 | 0.285699 | 0.253 | 0.424 | 1 | CSCL | RHOBTB3     |
| 821 | 0.000254 | 0.367023 | 0.206 | 0.343 | 1 | CSCL | QTRT1       |
| 822 | 0.000265 | 0.323964 | 0.532 | 0.72  | 1 | CSCL | EID1        |
| 823 | 0.000266 | 0.306129 | 0.541 | 0.756 | 1 | CSCL | GABARAPL2   |
| 824 | 0.000277 | 0.321168 | 0.176 | 0.291 | 1 | CSCL | GADD45A     |
| 825 | 0.000309 | 0.426026 | 0.372 | 0.381 | 1 | CSCL | ZNF90       |
| 826 | 0.000312 | 0.294624 | 0.073 | 0.135 | 1 | CSCL | KLHL4       |
| 827 | 0.000339 | 0.434654 | 0.096 | 0.063 | 1 | CSCL | BGN         |
| 828 | 0.000347 | 0.314446 | 0.08  | 0.144 | 1 | CSCL | BCAT2       |
| 829 | 0.000348 | 0.421094 | 0.433 | 0.49  | 1 | CSCL | GADD45B     |
| 830 | 0.000356 | 0.437996 | 0.417 | 0.477 | 1 | CSCL | CNN3        |
| 831 | 0.000366 | 0.363497 | 0.195 | 0.323 | 1 | CSCL | PKIG        |
| 832 | 0.000398 | 0.310312 | 0.147 | 0.244 | 1 | CSCL | TRIM9       |
| 833 | 0.000398 | 0.302305 | 0.192 | 0.313 | 1 | CSCL | MT1F        |
| 834 | 0.000403 | 0.289995 | 0.332 | 0.572 | 1 | CSCL | SDHC        |
| 835 | 0.000409 | 0.339747 | 0.052 | 0.028 | 1 | CSCL | MT1A        |
| 836 | 0.000416 | 0.308407 | 0.291 | 0.487 | 1 | CSCL | UBE2L6      |
| 837 | 0.000446 | 0.449317 | 0.162 | 0.123 | 1 | CSCL | CAV1        |
| 838 | 0.000483 | 0.357743 | 0.126 | 0.211 | 1 | CSCL | C1orf21     |
| 839 | 0.000484 | 0.351057 | 0.215 | 0.356 | 1 | CSCL | MAGED1      |
| 840 | 0.000501 | 0.29473  | 0.538 | 0.742 | 1 | CSCL | HSPE1       |
| 841 | 0.000505 | 0.401429 | 0.126 | 0.209 | 1 | CSCL | CDC42EP4    |
| 842 | 0.000519 | 0.294361 | 0.15  | 0.247 | 1 | CSCL | CREB5       |
| 843 | 0.000532 | 0.354042 | 0.209 | 0.34  | 1 | CSCL | USE1        |
| 844 | 0.000611 | 0.736383 | 0.277 | 0.276 | 1 | CSCL | TTYH1       |
| 845 | 0.000615 | 0.286437 | 0.066 | 0.121 | 1 | CSCL | CAMK2B      |
| 846 | 0.000627 | 0.319178 | 0.264 | 0.438 | 1 | CSCL | C7orf55     |
| 847 | 0.000653 | 0.386638 | 0.12  | 0.201 | 1 | CSCL | PCDH17      |
| 848 | 0.00068  | 0.306587 | 0.129 | 0.212 | 1 | CSCL | TNC         |
| 849 | 0.00068  | 0.303063 | 0.173 | 0.277 | 1 | CSCL | RCAN1       |
| 850 | 0.000687 | 0.33226  | 0.119 | 0.197 | 1 | CSCL | COL9A3      |
| 851 | 0.000702 | 0.367239 | 0.157 | 0.257 | 1 | CSCL | ETV1        |
| 852 | 0.000717 | 0.458616 | 0.49  | 0.667 | 1 | CSCL | CHMP2A      |
| 853 | 0.000808 | 0.336035 | 0.131 | 0.215 | 1 | CSCL | EFHC1       |
| 854 | 0.000874 | 0.368618 | 0.302 | 0.51  | 1 | CSCL | HSD17B10    |
| 855 | 0.00103  | 0.369403 | 0.489 | 0.636 | 1 | CSCL | PRDX6       |
| 856 | 0.001031 | 0.576123 | 0.209 | 0.183 | 1 | CSCL | OLIG1       |
| 857 | 0.001162 | 0.343933 | 0.124 | 0.202 | 1 | CSCL | MYO10       |
| 858 | 0.001187 | 0.643522 | 0.272 | 0.269 | 1 | CSCL | SCG3        |
| 859 | 0.001252 | 0.337166 | 0.337 | 0.574 | 1 | CSCL | NDUFA12     |
| 860 | 0.001349 | 0.365738 | 0.155 | 0.249 | 1 | CSCL | CD82        |
| 861 | 0.001513 | 0.428733 | 0.19  | 0.304 | 1 | CSCL | TMED1       |
| 862 | 0.001656 | 0.329341 | 0.049 | 0.028 | 1 | CSCL | NPPA        |
| 863 | 0.001683 | 0.300082 | 0.532 | 0.756 | 1 | CSCL | PRDX5       |
| 864 | 0.00178  | 0.298675 | 0.087 | 0.145 | 1 | CSCL | HHLA3       |
| 865 | 0.001872 | 0.31715  | 0.175 | 0.274 | 1 | CSCL | SCG2        |
| 866 | 0.001895 | 0.354838 | 0.243 | 0.382 | 1 | CSCL | RAB13       |

|      |          |          |       |       |   |       |          |
|------|----------|----------|-------|-------|---|-------|----------|
| 867  | 0.001912 | 0.294062 | 0.077 | 0.131 | 1 | CSCL  | DDAH1    |
| 868  | 0.002069 | 0.339565 | 0.101 | 0.165 | 1 | CSCL  | EXOG     |
| 869  | 0.002299 | 0.370844 | 0.215 | 0.339 | 1 | CSCL  | AHCYL1   |
| 870  | 0.002398 | 0.496428 | 0.133 | 0.212 | 1 | CSCL  | NMB      |
| 871  | 0.002416 | 0.285368 | 0.337 | 0.555 | 1 | CSCL  | PDCD5    |
| 872  | 0.002489 | 0.347992 | 0.129 | 0.203 | 1 | CSCL  | U2AF1L4  |
| 873  | 0.002597 | 0.357005 | 0.045 | 0.026 | 1 | CSCL  | PPP1R1C  |
| 874  | 0.002854 | 0.313904 | 0.171 | 0.266 | 1 | CSCL  | THY1     |
| 875  | 0.002892 | 0.361098 | 0.129 | 0.204 | 1 | CSCL  | HRSP12   |
| 876  | 0.002952 | 0.479182 | 0.403 | 0.487 | 1 | CSCL  | BST2     |
| 877  | 0.002975 | 0.386594 | 0.239 | 0.379 | 1 | CSCL  | TMEM9    |
| 878  | 0.003522 | 0.455898 | 0.176 | 0.148 | 1 | CSCL  | RARRES2  |
| 879  | 0.003658 | 0.299341 | 0.29  | 0.468 | 1 | CSCL  | ATP6VOE2 |
| 880  | 0.003897 | 0.322052 | 0.209 | 0.326 | 1 | CSCL  | CRIP2    |
| 881  | 0.003904 | 0.294535 | 0.152 | 0.235 | 1 | CSCL  | DSEL     |
| 882  | 0.00393  | 0.312639 | 0.157 | 0.243 | 1 | CSCL  | ATP1B2   |
| 883  | 0.003974 | 0.289513 | 0.534 | 0.768 | 1 | CSCL  | ATP6V1G1 |
| 884  | 0.004087 | 0.472012 | 0.115 | 0.088 | 1 | CSCL  | TMEM100  |
| 885  | 0.00415  | 0.302011 | 0.044 | 0.025 | 1 | CSCL  | C2orf74  |
| 886  | 0.004293 | 0.279368 | 0.101 | 0.159 | 1 | CSCL  | TPPP3    |
| 887  | 0.004344 | 0.33367  | 0.302 | 0.492 | 1 | CSCL  | FKBP3    |
| 888  | 0.005079 | 0.313479 | 0.483 | 0.65  | 1 | CSCL  | CD99     |
| 889  | 0.005213 | 0.41943  | 0.131 | 0.101 | 1 | CSCL  | MGP      |
| 890  | 0.005366 | 0.29481  | 0.105 | 0.163 | 1 | CSCL  | LPL      |
| 891  | 0.005494 | 0.440817 | 0.365 | 0.44  | 1 | CSCL  | SOX2     |
| 892  | 0.005544 | 0.31997  | 0.277 | 0.436 | 1 | CSCL  | POLD2    |
| 893  | 0.005851 | 0.312921 | 0.515 | 0.737 | 1 | CSCL  | SHFM1    |
| 894  | 0.006232 | 0.434933 | 0.475 | 0.657 | 1 | CSCL  | POLR2J   |
| 895  | 0.006294 | 0.476123 | 0.155 | 0.234 | 1 | CSCL  | HILPDA   |
| 896  | 0.006501 | 0.333954 | 0.108 | 0.168 | 1 | CSCL  | DPP6     |
| 897  | 0.007071 | 0.312982 | 0.066 | 0.109 | 1 | CSCL  | RDH5     |
| 898  | 0.007875 | 0.513831 | 0.382 | 0.458 | 1 | CSCL  | PON2     |
| 899  | 0.008246 | 0.304088 | 0.08  | 0.127 | 1 | CSCL  | EPSTI1   |
| 900  | 0.008583 | 0.366798 | 0.323 | 0.52  | 1 | CSCL  | SMIM7    |
| 2101 | 0        | 2.036785 | 0.838 | 0.043 | 0 | Neo-G | DLX6-AS1 |
| 2102 | 0        | 2.013176 | 0.984 | 0.089 | 0 | Neo-G | STMN2    |
| 2103 | 0        | 1.84312  | 0.865 | 0.056 | 0 | Neo-G | DLX5     |
| 2104 | 0        | 1.805289 | 0.87  | 0.113 | 0 | Neo-G | NNAT     |
| 2105 | 0        | 1.631422 | 0.879 | 0.091 | 0 | Neo-G | NSG1     |
| 2106 | 0        | 1.531945 | 0.869 | 0.094 | 0 | Neo-G | ELAVL4   |
| 2107 | 0        | 1.52202  | 0.848 | 0.11  | 0 | Neo-G | TAGLN3   |
| 2108 | 0        | 1.498095 | 0.962 | 0.228 | 0 | Neo-G | STMN4    |
| 2109 | 0        | 1.474861 | 0.814 | 0.134 | 0 | Neo-G | DCX      |
| 2110 | 0        | 1.440814 | 0.866 | 0.207 | 0 | Neo-G | SOX11    |
| 2111 | 0        | 1.419427 | 0.634 | 0.045 | 0 | Neo-G | DLX2     |
| 2112 | 0        | 1.395417 | 0.951 | 0.317 | 0 | Neo-G | NFIB     |
| 2113 | 0        | 1.376866 | 0.671 | 0.08  | 0 | Neo-G | THSD7A   |
| 2114 | 0        | 1.363376 | 0.632 | 0.028 | 0 | Neo-G | KLHL35   |
| 2115 | 0        | 1.353701 | 0.6   | 0.031 | 0 | Neo-G | CELF4    |
| 2116 | 0        | 1.349263 | 0.86  | 0.198 | 0 | Neo-G | CRMP1    |
| 2117 | 0        | 1.346341 | 0.609 | 0.038 | 0 | Neo-G | SYT1     |

|      |   |          |       |       |         |              |
|------|---|----------|-------|-------|---------|--------------|
| 2118 | 0 | 1.332681 | 0.998 | 0.387 | 0 Neo-G | SOX4         |
| 2119 | 0 | 1.311801 | 0.61  | 0.056 | 0 Neo-G | DLX1         |
| 2120 | 0 | 1.302745 | 0.692 | 0.148 | 0 Neo-G | MEIS2        |
| 2121 | 0 | 1.298242 | 0.686 | 0.051 | 0 Neo-G | TTC9B        |
| 2122 | 0 | 1.281421 | 0.71  | 0.104 | 0 Neo-G | GPC2         |
| 2123 | 0 | 1.263259 | 0.697 | 0.1   | 0 Neo-G | RAB3A        |
| 2124 | 0 | 1.248092 | 0.987 | 0.396 | 0 Neo-G | MLLT11       |
| 2125 | 0 | 1.246254 | 0.877 | 0.231 | 0 Neo-G | TSPAN13      |
| 2126 | 0 | 1.210203 | 0.854 | 0.251 | 0 Neo-G | DBN1         |
| 2127 | 0 | 1.20051  | 0.523 | 0.032 | 0 Neo-G | LY6H         |
| 2128 | 0 | 1.191546 | 0.638 | 0.084 | 0 Neo-G | PAK3         |
| 2129 | 0 | 1.179335 | 0.706 | 0.162 | 0 Neo-G | RBFOX2       |
| 2130 | 0 | 1.177647 | 0.761 | 0.234 | 0 Neo-G | TMEM161B-AS1 |
| 2131 | 0 | 1.166218 | 0.647 | 0.094 | 0 Neo-G | LBH          |
| 2132 | 0 | 1.160803 | 0.78  | 0.235 | 0 Neo-G | ATAT1        |
| 2133 | 0 | 1.148643 | 0.647 | 0.112 | 0 Neo-G | MIAT         |
| 2134 | 0 | 1.141015 | 0.657 | 0.13  | 0 Neo-G | TMSB15A      |
| 2135 | 0 | 1.13985  | 0.651 | 0.104 | 0 Neo-G | NRXN1        |
| 2136 | 0 | 1.12608  | 0.982 | 0.424 | 0 Neo-G | TUBB2A       |
| 2137 | 0 | 1.125582 | 0.595 | 0.12  | 0 Neo-G | ARL4D        |
| 2138 | 0 | 1.124502 | 0.559 | 0.048 | 0 Neo-G | DYNC1I1      |
| 2139 | 0 | 1.124377 | 0.746 | 0.219 | 0 Neo-G | KIF5C        |
| 2140 | 0 | 1.123346 | 0.976 | 0.362 | 0 Neo-G | PCSKIN       |
| 2141 | 0 | 1.119244 | 0.691 | 0.191 | 0 Neo-G | RND3         |
| 2142 | 0 | 1.109209 | 0.745 | 0.26  | 0 Neo-G | CXADR        |
| 2143 | 0 | 1.1064   | 0.801 | 0.257 | 0 Neo-G | PODXL2       |
| 2144 | 0 | 1.105799 | 0.581 | 0.065 | 0 Neo-G | ATP1A3       |
| 2145 | 0 | 1.10416  | 0.816 | 0.256 | 0 Neo-G | ELAVL3       |
| 2146 | 0 | 1.09535  | 0.899 | 0.293 | 0 Neo-G | APLP1        |
| 2147 | 0 | 1.091609 | 0.511 | 0.024 | 0 Neo-G | ACTL6B       |
| 2148 | 0 | 1.084699 | 0.742 | 0.223 | 0 Neo-G | NREP         |
| 2149 | 0 | 1.084521 | 0.77  | 0.222 | 0 Neo-G | DNER         |
| 2150 | 0 | 1.078245 | 0.626 | 0.085 | 0 Neo-G | SNAP25       |
| 2151 | 0 | 1.075965 | 0.791 | 0.233 | 0 Neo-G | GSTA4        |
| 2152 | 0 | 1.07498  | 0.826 | 0.203 | 0 Neo-G | SCG3         |
| 2153 | 0 | 1.065927 | 0.52  | 0.039 | 0 Neo-G | CELF5        |
| 2154 | 0 | 1.06415  | 1     | 0.497 | 0 Neo-G | MARCKSL1     |
| 2155 | 0 | 1.064108 | 0.969 | 0.468 | 0 Neo-G | TERF2IP      |
| 2156 | 0 | 1.062935 | 0.678 | 0.155 | 0 Neo-G | ZC2HC1A      |
| 2157 | 0 | 1.058102 | 0.531 | 0.092 | 0 Neo-G | ASIC4        |
| 2158 | 0 | 1.057604 | 0.964 | 0.377 | 0 Neo-G | UCHL1        |
| 2159 | 0 | 1.055144 | 0.446 | 0.012 | 0 Neo-G | MYT1L        |
| 2160 | 0 | 1.054799 | 0.587 | 0.14  | 0 Neo-G | FNBP1L       |
| 2161 | 0 | 1.013201 | 0.676 | 0.119 | 0 Neo-G | TCEAL2       |
| 2162 | 0 | 1.01251  | 0.777 | 0.194 | 0 Neo-G | BEX2         |
| 2163 | 0 | 1.007124 | 0.958 | 0.477 | 0 Neo-G | TCF4         |
| 2164 | 0 | 1.003805 | 0.753 | 0.231 | 0 Neo-G | MAPT         |
| 2165 | 0 | 0.994147 | 0.406 | 0.033 | 0 Neo-G | GNG3         |
| 2166 | 0 | 0.98651  | 0.991 | 0.485 | 0 Neo-G | MAP1B        |
| 2167 | 0 | 0.986113 | 0.999 | 0.508 | 0 Neo-G | TUBB2B       |
| 2168 | 0 | 0.970242 | 0.468 | 0.087 | 0 Neo-G | CDCA7        |

|      |   |          |       |       |         |            |
|------|---|----------|-------|-------|---------|------------|
| 2169 | 0 | 0.968506 | 0.796 | 0.291 | 0 Neo-G | MAP2       |
| 2170 | 0 | 0.967204 | 0.449 | 0.034 | 0 Neo-G | ELAVL2     |
| 2171 | 0 | 0.964395 | 0.462 | 0.049 | 0 Neo-G | PKIA       |
| 2172 | 0 | 0.964245 | 0.464 | 0.068 | 0 Neo-G | CD200      |
| 2173 | 0 | 0.963158 | 0.564 | 0.136 | 0 Neo-G | MEX3A      |
| 2174 | 0 | 0.955319 | 0.435 | 0.021 | 0 Neo-G | CELF3      |
| 2175 | 0 | 0.952956 | 0.352 | 0.032 | 0 Neo-G | RPRM       |
| 2176 | 0 | 0.950512 | 0.709 | 0.281 | 0 Neo-G | LINC00461  |
| 2177 | 0 | 0.941165 | 0.46  | 0.056 | 0 Neo-G | CSRNP3     |
| 2178 | 0 | 0.939037 | 0.43  | 0.043 | 0 Neo-G | HOXC9      |
| 2179 | 0 | 0.931032 | 0.422 | 0.029 | 0 Neo-G | SCN3B      |
| 2180 | 0 | 0.918934 | 0.46  | 0.057 | 0 Neo-G | GDAP1L1    |
| 2181 | 0 | 0.918516 | 0.415 | 0.048 | 0 Neo-G | DUSP26     |
| 2182 | 0 | 0.917867 | 0.853 | 0.295 | 0 Neo-G | BEX1       |
| 2183 | 0 | 0.914987 | 0.513 | 0.072 | 0 Neo-G | TCEAL5     |
| 2184 | 0 | 0.913251 | 0.751 | 0.254 | 0 Neo-G | TCEAL7     |
| 2185 | 0 | 0.912929 | 0.999 | 0.593 | 0 Neo-G | STMN1      |
| 2186 | 0 | 0.907663 | 0.935 | 0.472 | 0 Neo-G | TTC3       |
| 2187 | 0 | 0.906824 | 0.471 | 0.081 | 0 Neo-G | AC004540.4 |
| 2188 | 0 | 0.89981  | 0.491 | 0.091 | 0 Neo-G | SYP        |
| 2189 | 0 | 0.896494 | 0.773 | 0.316 | 0 Neo-G | KLC1       |
| 2190 | 0 | 0.892563 | 0.346 | 0.021 | 0 Neo-G | DLX6       |
| 2191 | 0 | 0.887991 | 0.475 | 0.078 | 0 Neo-G | ATCAY      |
| 2192 | 0 | 0.887119 | 0.925 | 0.411 | 0 Neo-G | RBP1       |
| 2193 | 0 | 0.884832 | 0.519 | 0.095 | 0 Neo-G | SLC38A1    |
| 2194 | 0 | 0.883453 | 0.98  | 0.454 | 0 Neo-G | GPM6A      |
| 2195 | 0 | 0.873553 | 0.419 | 0.055 | 0 Neo-G | CDK5R1     |
| 2196 | 0 | 0.873036 | 0.368 | 0.034 | 0 Neo-G | LINC01102  |
| 2197 | 0 | 0.857557 | 0.316 | 0.003 | 0 Neo-G | SLC32A1    |
| 2198 | 0 | 0.849555 | 0.393 | 0.033 | 0 Neo-G | SRRM3      |
| 2199 | 0 | 0.84664  | 0.677 | 0.203 | 0 Neo-G | GADD45G    |
| 2200 | 0 | 0.845424 | 0.433 | 0.07  | 0 Neo-G | KLRC2      |
| 2201 | 0 | 0.827248 | 0.394 | 0.057 | 0 Neo-G | FAM57B     |
| 2202 | 0 | 0.820525 | 0.808 | 0.383 | 0 Neo-G | PHF14      |
| 2203 | 0 | 0.817549 | 0.41  | 0.048 | 0 Neo-G | CHGB       |
| 2204 | 0 | 0.811694 | 0.412 | 0.063 | 0 Neo-G | HOXA7      |
| 2205 | 0 | 0.808522 | 0.392 | 0.056 | 0 Neo-G | TMEM35     |
| 2206 | 0 | 0.797997 | 0.361 | 0.035 | 0 Neo-G | VGFB       |
| 2207 | 0 | 0.78914  | 0.86  | 0.419 | 0 Neo-G | UBE2E3     |
| 2208 | 0 | 0.787276 | 0.813 | 0.385 | 0 Neo-G | PAFAH1B3   |
| 2209 | 0 | 0.784308 | 0.408 | 0.06  | 0 Neo-G | RUNDC3A    |
| 2210 | 0 | 0.781135 | 0.286 | 0.008 | 0 Neo-G | PDZRN4     |
| 2211 | 0 | 0.778392 | 0.286 | 0.011 | 0 Neo-G | SP9        |
| 2212 | 0 | 0.775686 | 0.375 | 0.057 | 0 Neo-G | LINC00632  |
| 2213 | 0 | 0.774961 | 0.339 | 0.035 | 0 Neo-G | STX1A      |
| 2214 | 0 | 0.774121 | 0.288 | 0.008 | 0 Neo-G | FABP6      |
| 2215 | 0 | 0.773727 | 0.357 | 0.05  | 0 Neo-G | REEP1      |
| 2216 | 0 | 0.769982 | 0.342 | 0.027 | 0 Neo-G | SMIM18     |
| 2217 | 0 | 0.762788 | 0.915 | 0.414 | 0 Neo-G | FXYD6      |
| 2218 | 0 | 0.761964 | 0.822 | 0.41  | 0 Neo-G | HDAC2      |
| 2219 | 0 | 0.760268 | 0.389 | 0.06  | 0 Neo-G | BEX5       |

|      |       |          |       |       |             |          |
|------|-------|----------|-------|-------|-------------|----------|
| 2220 | 0     | 0.754897 | 0.306 | 0.01  | 0 Neo-G     | INA      |
| 2221 | 0     | 0.75444  | 0.333 | 0.042 | 0 Neo-G     | SBK1     |
| 2222 | 0     | 0.752338 | 0.951 | 0.511 | 0 Neo-G     | PTMS     |
| 2223 | 0     | 0.746101 | 0.266 | 0.012 | 0 Neo-G     | ARX      |
| 2224 | 0     | 0.72699  | 0.295 | 0.013 | 0 Neo-G     | SYT5     |
| 2225 | 0     | 0.723262 | 0.328 | 0.041 | 0 Neo-G     | HOXA2    |
| 2226 | 0     | 0.70756  | 0.288 | 0.03  | 0 Neo-G     | ERBB4    |
| 2227 | 0     | 0.705614 | 0.298 | 0.028 | 0 Neo-G     | C1QTNF4  |
| 2228 | 0     | 0.694725 | 0.98  | 0.608 | 0 Neo-G     | YWHAQ    |
| 2229 | 0     | 0.681648 | 0.291 | 0.017 | 0 Neo-G     | PAK7     |
| 2230 | 0     | 0.67675  | 0.987 | 0.656 | 0 Neo-G     | BTG1     |
| 2231 | 0     | 0.674915 | 0.285 | 0.022 | 0 Neo-G     | SORBS2   |
| 2232 | 0     | 0.67461  | 0.258 | 0.015 | 0 Neo-G     | SLC05A1  |
| 2233 | 0     | 0.671556 | 0.276 | 0.023 | 0 Neo-G     | FGF9     |
| 2234 | 0     | 0.662602 | 0.93  | 0.469 | 0 Neo-G     | TSC22D1  |
| 2235 | 0     | 0.66029  | 0.966 | 0.559 | 0 Neo-G     | MARCKS   |
| 2236 | 0     | 0.636318 | 0.248 | 0.018 | 0 Neo-G     | KIAA1107 |
| 2237 | 0     | 0.635392 | 0.227 | 0.007 | 0 Neo-G     | SRRM4    |
| 2238 | 0     | 0.622219 | 0.984 | 0.642 | 0 Neo-G     | HN1      |
| 2239 | ##### | 0.736789 | 0.349 | 0.049 | ##### Neo-G | SPOCK1   |
| 2240 | ##### | 0.87457  | 0.721 | 0.293 | ##### Neo-G | NFIX     |
| 2241 | ##### | 0.602961 | 0.241 | 0.019 | ##### Neo-G | ONECUT2  |
| 2242 | ##### | 0.655235 | 0.278 | 0.029 | ##### Neo-G | HOXA3    |
| 2243 | ##### | 0.77154  | 0.815 | 0.345 | ##### Neo-G | CPE      |
| 2244 | ##### | 0.716444 | 0.342 | 0.048 | ##### Neo-G | NCAN     |
| 2245 | ##### | 0.808581 | 0.481 | 0.107 | ##### Neo-G | NKX2-2   |
| 2246 | ##### | 0.675857 | 0.284 | 0.032 | ##### Neo-G | EFNA3    |
| 2247 | ##### | 0.73104  | 0.302 | 0.039 | ##### Neo-G | INADL    |
| 2248 | ##### | 0.795031 | 0.732 | 0.331 | ##### Neo-G | CBX1     |
| 2249 | ##### | 0.88337  | 0.59  | 0.193 | ##### Neo-G | KIF3A    |
| 2250 | ##### | 0.702129 | 0.87  | 0.466 | ##### Neo-G | FSCN1    |
| 2251 | ##### | 0.779458 | 0.379 | 0.068 | ##### Neo-G | NAP1L3   |
| 2252 | ##### | 0.732775 | 0.326 | 0.045 | ##### Neo-G | RIT2     |
| 2253 | ##### | 0.653216 | 0.889 | 0.5   | ##### Neo-G | KMT2E    |
| 2254 | ##### | 0.782551 | 0.749 | 0.352 | ##### Neo-G | YWHAG    |
| 2255 | ##### | 0.637578 | 0.888 | 0.509 | ##### Neo-G | ZNF428   |
| 2256 | ##### | 0.818352 | 0.7   | 0.284 | ##### Neo-G | DPYSL3   |
| 2257 | ##### | 0.825135 | 0.582 | 0.186 | ##### Neo-G | SNN      |
| 2258 | ##### | 0.866175 | 0.529 | 0.156 | ##### Neo-G | MAPK10   |
| 2259 | ##### | 0.783285 | 0.47  | 0.114 | ##### Neo-G | GDAP1    |
| 2260 | ##### | 0.660203 | 0.301 | 0.042 | ##### Neo-G | PRKAR2B  |
| 2261 | ##### | 0.804789 | 0.528 | 0.139 | ##### Neo-G | HOTAIRM1 |
| 2262 | ##### | 0.802952 | 0.518 | 0.142 | ##### Neo-G | CCNG2    |
| 2263 | ##### | 0.718745 | 0.771 | 0.373 | ##### Neo-G | SRPK2    |
| 2264 | ##### | 0.713178 | 0.426 | 0.09  | ##### Neo-G | KIF1A    |
| 2265 | ##### | 0.607864 | 0.876 | 0.521 | ##### Neo-G | CBX3     |
| 2266 | ##### | 0.786746 | 0.625 | 0.22  | ##### Neo-G | ERV3-1   |
| 2267 | ##### | 0.752204 | 0.43  | 0.091 | ##### Neo-G | SHD      |
| 2268 | ##### | 0.653196 | 0.791 | 0.389 | ##### Neo-G | SLC25A4  |
| 2269 | ##### | 0.760785 | 0.747 | 0.371 | ##### Neo-G | MKRN1    |
| 2270 | ##### | 0.822874 | 0.6   | 0.216 | ##### Neo-G | KLHDC8A  |

|      |       |          |       |       |       |       |           |
|------|-------|----------|-------|-------|-------|-------|-----------|
| 2271 | ##### | 0.760659 | 0.704 | 0.297 | ##### | Neo-G | NCAM1     |
| 2272 | ##### | 0.805567 | 0.628 | 0.241 | ##### | Neo-G | KLHL7     |
| 2273 | ##### | 0.765522 | 0.695 | 0.278 | ##### | Neo-G | CAMK2N1   |
| 2274 | ##### | 0.794087 | 0.65  | 0.269 | ##### | Neo-G | RUFY3     |
| 2275 | ##### | 0.663944 | 0.822 | 0.394 | ##### | Neo-G | PFN2      |
| 2276 | ##### | 0.618336 | 0.271 | 0.035 | ##### | Neo-G | HOXA5     |
| 2277 | ##### | 0.783634 | 0.715 | 0.339 | ##### | Neo-G | WHSC1L1   |
| 2278 | ##### | 0.774702 | 0.307 | 0.051 | ##### | Neo-G | PLXNA4    |
| 2279 | ##### | 0.795541 | 0.645 | 0.252 | ##### | Neo-G | CHD7      |
| 2280 | ##### | 0.797133 | 0.47  | 0.13  | ##### | Neo-G | KLHL23    |
| 2281 | ##### | 0.729841 | 0.733 | 0.35  | ##### | Neo-G | PSIP1     |
| 2282 | ##### | 0.776363 | 0.577 | 0.204 | ##### | Neo-G | DAAM1     |
| 2283 | ##### | 0.759463 | 0.651 | 0.268 | ##### | Neo-G | KIF21A    |
| 2284 | ##### | 0.729713 | 0.676 | 0.279 | ##### | Neo-G | MAGEH1    |
| 2285 | ##### | 0.764945 | 0.465 | 0.129 | ##### | Neo-G | ZNF821    |
| 2286 | ##### | 0.721707 | 0.711 | 0.331 | ##### | Neo-G | MAP1LC3A  |
| 2287 | ##### | 0.642349 | 0.797 | 0.455 | ##### | Neo-G | KHDRBS1   |
| 2288 | ##### | 0.679843 | 0.776 | 0.414 | ##### | Neo-G | AKAP9     |
| 2289 | ##### | 0.774319 | 0.439 | 0.118 | ##### | Neo-G | BCL7A     |
| 2290 | ##### | 0.673499 | 0.765 | 0.411 | ##### | Neo-G | ATRX      |
| 2291 | ##### | 0.78399  | 0.448 | 0.126 | ##### | Neo-G | NDRG4     |
| 2292 | ##### | 0.838446 | 0.412 | 0.099 | ##### | Neo-G | RGMB      |
| 2293 | ##### | 0.755552 | 0.426 | 0.111 | ##### | Neo-G | ZNF711    |
| 2294 | ##### | 0.632915 | 0.695 | 0.286 | ##### | Neo-G | SCG5      |
| 2295 | ##### | 0.601918 | 0.157 | 0.009 | ##### | Neo-G | NHLH1     |
| 2296 | ##### | 0.813282 | 0.487 | 0.153 | ##### | Neo-G | TMSB15B   |
| 2297 | ##### | 0.722259 | 0.35  | 0.072 | ##### | Neo-G | PCDHB10   |
| 2298 | ##### | 0.692016 | 0.7   | 0.319 | ##### | Neo-G | RSBN1L    |
| 2299 | ##### | 0.730503 | 0.602 | 0.23  | ##### | Neo-G | C3orf14   |
| 2300 | ##### | 0.79201  | 0.627 | 0.27  | ##### | Neo-G | MYCBP2    |
| 2301 | ##### | 0.757115 | 0.716 | 0.345 | ##### | Neo-G | NFIA      |
| 2302 | ##### | 0.69534  | 0.38  | 0.086 | ##### | Neo-G | NRXN2     |
| 2303 | ##### | 0.780553 | 0.583 | 0.227 | ##### | Neo-G | CCDC112   |
| 2304 | ##### | 0.65231  | 0.246 | 0.031 | ##### | Neo-G | CA8       |
| 2305 | ##### | 0.640986 | 0.769 | 0.406 | ##### | Neo-G | PTOV1     |
| 2306 | ##### | 0.679263 | 0.278 | 0.045 | ##### | Neo-G | 3-Sep     |
| 2307 | ##### | 0.702325 | 0.687 | 0.304 | ##### | Neo-G | NLRP1     |
| 2308 | ##### | 0.604964 | 0.806 | 0.433 | ##### | Neo-G | RCN2      |
| 2309 | ##### | 0.735306 | 0.557 | 0.202 | ##### | Neo-G | THRA      |
| 2310 | ##### | 0.696011 | 0.476 | 0.143 | ##### | Neo-G | ASNS      |
| 2311 | ##### | 0.629947 | 0.327 | 0.062 | ##### | Neo-G | C14orf132 |
| 2312 | ##### | 0.7077   | 0.653 | 0.292 | ##### | Neo-G | NPDC1     |
| 2313 | ##### | 0.70334  | 0.616 | 0.247 | ##### | Neo-G | HMGB3     |
| 2314 | ##### | 0.707599 | 0.309 | 0.062 | ##### | Neo-G | TOX       |
| 2315 | ##### | 0.685658 | 0.555 | 0.2   | ##### | Neo-G | CD01      |
| 2316 | ##### | 0.737264 | 0.591 | 0.243 | ##### | Neo-G | SEZ6L2    |
| 2317 | ##### | 0.757098 | 0.442 | 0.133 | ##### | Neo-G | CDKN2D    |
| 2318 | ##### | 0.724567 | 0.463 | 0.147 | ##### | Neo-G | MAPRE3    |
| 2319 | ##### | 0.751661 | 0.513 | 0.179 | ##### | Neo-G | GRIA2     |
| 2320 | ##### | 0.663514 | 0.32  | 0.066 | ##### | Neo-G | GSE1      |
| 2321 | ##### | 0.645798 | 0.307 | 0.062 | ##### | Neo-G | FAXC      |

|      |       |          |       |       |       |       |              |
|------|-------|----------|-------|-------|-------|-------|--------------|
| 2322 | ##### | 0.655317 | 0.712 | 0.353 | ##### | Neo-G | ZBTB20       |
| 2323 | ##### | 0.711587 | 0.592 | 0.257 | ##### | Neo-G | BLCAP        |
| 2324 | ##### | 0.70064  | 0.256 | 0.042 | ##### | Neo-G | NXPH4        |
| 2325 | ##### | 0.63581  | 0.313 | 0.065 | ##### | Neo-G | CCDC136      |
| 2326 | ##### | 0.781459 | 0.519 | 0.198 | ##### | Neo-G | ACOT7        |
| 2327 | ##### | 0.654127 | 0.262 | 0.044 | ##### | Neo-G | TOX3         |
| 2328 | ##### | 0.666702 | 0.384 | 0.103 | ##### | Neo-G | HSDL1        |
| 2329 | ##### | 0.746767 | 0.414 | 0.12  | ##### | Neo-G | RP3-525N10.2 |
| 2330 | ##### | 0.93179  | 0.504 | 0.198 | ##### | Neo-G | ENC1         |
| 2331 | ##### | 0.756241 | 0.566 | 0.228 | ##### | Neo-G | CENPV        |
| 2332 | ##### | 0.717384 | 0.489 | 0.169 | ##### | Neo-G | MAGI1        |
| 2333 | ##### | 0.658417 | 0.335 | 0.074 | ##### | Neo-G | PEG10        |
| 2334 | ##### | 0.64923  | 0.551 | 0.198 | ##### | Neo-G | ATP1B1       |
| 2335 | ##### | 0.622994 | 0.35  | 0.085 | ##### | Neo-G | NEDD4L       |
| 2336 | ##### | 0.695981 | 0.513 | 0.189 | ##### | Neo-G | TBCC         |
| 2337 | ##### | 0.642521 | 0.876 | 0.439 | ##### | Neo-G | NOVA1        |
| 2338 | ##### | 0.62378  | 0.516 | 0.174 | ##### | Neo-G | PTPRN2       |
| 2339 | ##### | 0.697228 | 0.467 | 0.162 | ##### | Neo-G | PJA1         |
| 2340 | ##### | 0.651335 | 0.313 | 0.071 | ##### | Neo-G | KIAA1549     |
| 2341 | ##### | 0.698265 | 0.39  | 0.107 | ##### | Neo-G | PLK2         |
| 2342 | ##### | 0.6996   | 0.493 | 0.173 | ##### | Neo-G | KLF7         |
| 2343 | ##### | 0.623496 | 0.574 | 0.236 | ##### | Neo-G | BZW2         |
| 2344 | ##### | 0.716583 | 0.353 | 0.093 | ##### | Neo-G | INSM1        |
| 2345 | ##### | 0.686342 | 0.561 | 0.236 | ##### | Neo-G | KIDINS220    |
| 2346 | ##### | 0.805528 | 0.621 | 0.345 | ##### | Neo-G | BASP1        |
| 2347 | ##### | 0.619694 | 0.416 | 0.112 | ##### | Neo-G | DLL3         |
| 2348 | ##### | 0.639304 | 0.276 | 0.056 | ##### | Neo-G | TIAM2        |
| 2349 | ##### | 0.665716 | 0.356 | 0.096 | ##### | Neo-G | STXBP1       |
| 2350 | ##### | 0.639076 | 0.417 | 0.127 | ##### | Neo-G | ANKRD46      |
| 2351 | ##### | 0.720826 | 0.503 | 0.176 | ##### | Neo-G | ARC          |
| 2352 | ##### | 0.623632 | 0.639 | 0.314 | ##### | Neo-G | DYNC1LI2     |
| 2353 | ##### | 0.626723 | 0.65  | 0.335 | ##### | Neo-G | SMARCA4      |
| 2354 | ##### | 0.763698 | 0.393 | 0.122 | ##### | Neo-G | ATP6V1G2     |
| 2355 | ##### | 0.638968 | 0.691 | 0.356 | ##### | Neo-G | H1FX         |
| 2356 | ##### | 0.600677 | 0.774 | 0.449 | ##### | Neo-G | LMO4         |
| 2357 | ##### | 0.696475 | 0.357 | 0.102 | ##### | Neo-G | STARD4-AS1   |
| 2358 | ##### | 0.628496 | 0.606 | 0.289 | ##### | Neo-G | GOLM1        |
| 2359 | ##### | 0.650952 | 0.475 | 0.166 | ##### | Neo-G | CLASP2       |
| 2360 | ##### | 0.695395 | 0.441 | 0.157 | ##### | Neo-G | TRIM36       |
| 2361 | ##### | 0.647782 | 0.581 | 0.266 | ##### | Neo-G | NT5C3A       |
| 2362 | ##### | 0.643501 | 0.39  | 0.116 | ##### | Neo-G | SRGAP3       |
| 2363 | ##### | 0.637451 | 0.376 | 0.112 | ##### | Neo-G | BEND5        |
| 2364 | ##### | 0.680615 | 0.396 | 0.129 | ##### | Neo-G | MYH10        |
| 2365 | ##### | 0.608249 | 0.241 | 0.044 | ##### | Neo-G | NKX2-5       |
| 2366 | ##### | 0.653733 | 0.572 | 0.244 | ##### | Neo-G | KCNQ10T1     |
| 2367 | ##### | 0.6206   | 0.483 | 0.181 | ##### | Neo-G | ARMCX1       |
| 2368 | ##### | 0.633085 | 0.692 | 0.348 | ##### | Neo-G | ARL4C        |
| 2369 | ##### | 0.628352 | 0.665 | 0.353 | ##### | Neo-G | CXXC5        |
| 2370 | ##### | 0.61521  | 0.291 | 0.07  | ##### | Neo-G | STOX2        |
| 2371 | ##### | 0.612858 | 0.38  | 0.119 | ##### | Neo-G | DPF1         |
| 2372 | ##### | 0.647933 | 0.463 | 0.178 | ##### | Neo-G | ZNF3         |

|      |          |          |       |       |          |       |               |
|------|----------|----------|-------|-------|----------|-------|---------------|
| 2373 | #####    | 0.60615  | 0.605 | 0.307 | #####    | Neo-G | MAP4          |
| 2374 | #####    | 0.64082  | 0.582 | 0.281 | #####    | Neo-G | CSNK1E        |
| 2375 | #####    | 0.671704 | 0.523 | 0.233 | #####    | Neo-G | TMEM59L       |
| 2376 | #####    | 0.629923 | 0.229 | 0.044 | #####    | Neo-G | HRK           |
| 2377 | #####    | 0.683947 | 0.386 | 0.12  | #####    | Neo-G | B4GALNT1      |
| 2378 | #####    | 0.663569 | 0.485 | 0.203 | #####    | Neo-G | ZSCAN18       |
| 2379 | #####    | 0.640928 | 0.471 | 0.19  | #####    | Neo-G | RSBN1         |
| 2380 | #####    | 0.631916 | 0.518 | 0.234 | #####    | Neo-G | SPATS2        |
| 2381 | #####    | 0.652338 | 0.541 | 0.259 | #####    | Neo-G | PNMA1         |
| 2382 | #####    | 0.655894 | 0.531 | 0.248 | #####    | Neo-G | BRD3          |
| 2383 | #####    | 0.650475 | 0.518 | 0.234 | #####    | Neo-G | CEP170        |
| 2384 | #####    | 0.651428 | 0.448 | 0.18  | #####    | Neo-G | KDM1A         |
| 2385 | #####    | 0.610021 | 0.297 | 0.078 | #####    | Neo-G | RPS6KL1       |
| 2386 | #####    | 0.634983 | 0.407 | 0.144 | #####    | Neo-G | LSAMP         |
| 2387 | #####    | 0.604758 | 0.442 | 0.177 | #####    | Neo-G | KIFAP3        |
| 2388 | #####    | 0.654055 | 0.375 | 0.134 | #####    | Neo-G | DPYSL4        |
| 2389 | #####    | 0.64868  | 0.475 | 0.214 | #####    | Neo-G | KIF2A         |
| 2390 | #####    | 0.6173   | 0.426 | 0.173 | #####    | Neo-G | DCLK2         |
| 2391 | #####    | 0.610603 | 0.526 | 0.238 | #####    | Neo-G | SCG2          |
| 2392 | #####    | 0.644769 | 0.346 | 0.113 | #####    | Neo-G | C11orf96      |
| 2393 | #####    | 0.633378 | 0.406 | 0.162 | #####    | Neo-G | PGAP1         |
| 2394 | #####    | 0.691215 | 0.412 | 0.177 | #####    | Neo-G | NDN           |
| 2395 | #####    | 0.607768 | 0.379 | 0.143 | #####    | Neo-G | PPP2R5B       |
| 2396 | #####    | 0.644371 | 0.499 | 0.236 | #####    | Neo-G | PTPRS         |
| 2397 | #####    | 0.613884 | 0.363 | 0.145 | #####    | Neo-G | PROX1         |
| 2398 | #####    | 0.669719 | 0.382 | 0.163 | #####    | Neo-G | ROBO1         |
| 2399 | 3.18E-90 | 0.640941 | 0.285 | 0.103 | 4.75E-86 | Neo-G | KIF5A         |
| 2400 | 5.60E-70 | 0.749753 | 0.45  | 0.291 | 8.37E-66 | Neo-G | MEG3          |
| 3001 | 0        | 1.332915 | 0.667 | 0.109 | 0        | Opc-G | DLL3          |
| 3002 | 0        | 1.294482 | 0.792 | 0.26  | 0        | Opc-G | HES6          |
| 3003 | 0        | 1.099339 | 0.498 | 0.075 | 0        | Opc-G | NKAIN4        |
| 3004 | 0        | 0.948055 | 0.449 | 0.058 | 0        | Opc-G | VIPR2         |
| 3005 | 0        | 0.944096 | 0.418 | 0.048 | 0        | Opc-G | DLL1          |
| 3006 | #####    | 1.082536 | 0.659 | 0.157 | #####    | Opc-G | ASCL1         |
| 3007 | #####    | 0.7006   | 0.26  | 0.016 | #####    | Opc-G | CA10          |
| 3008 | #####    | 1.226304 | 0.62  | 0.154 | #####    | Opc-G | OLIG2         |
| 3009 | #####    | 0.622862 | 0.252 | 0.016 | #####    | Opc-G | RP11-676J15.1 |
| 3010 | #####    | 0.890027 | 0.44  | 0.066 | #####    | Opc-G | TMEM100       |
| 3011 | #####    | 0.852667 | 0.361 | 0.043 | #####    | Opc-G | NEU4          |
| 3012 | #####    | 1.160528 | 0.616 | 0.155 | #####    | Opc-G | OLIG1         |
| 3013 | #####    | 0.958427 | 0.515 | 0.101 | #####    | Opc-G | SHD           |
| 3014 | #####    | 1.171555 | 0.728 | 0.252 | #####    | Opc-G | BCAN          |
| 3015 | #####    | 1.052566 | 0.591 | 0.153 | #####    | Opc-G | SOX8          |
| 3016 | #####    | 0.991498 | 0.552 | 0.126 | #####    | Opc-G | GLCCI1        |
| 3017 | #####    | 0.787634 | 0.319 | 0.037 | #####    | Opc-G | TNR           |
| 3018 | #####    | 0.810718 | 0.919 | 0.437 | #####    | Opc-G | FXVD6         |
| 3019 | #####    | 0.806628 | 0.916 | 0.457 | #####    | Opc-G | NOVA1         |
| 3020 | #####    | 0.878588 | 0.519 | 0.113 | #####    | Opc-G | ASIC4         |
| 3021 | #####    | 1.012628 | 0.745 | 0.306 | #####    | Opc-G | CCND2         |
| 3022 | #####    | 0.923505 | 0.393 | 0.068 | #####    | Opc-G | BEST3         |
| 3023 | #####    | 0.8574   | 0.79  | 0.374 | #####    | Opc-G | SCD5          |

|      |       |          |       |       |       |       |               |
|------|-------|----------|-------|-------|-------|-------|---------------|
| 3024 | ##### | 0.758019 | 0.918 | 0.526 | ##### | Opc-G | MARCKSL1      |
| 3025 | ##### | 0.822986 | 0.807 | 0.364 | ##### | Opc-G | PTPRZ1        |
| 3026 | ##### | 0.988087 | 0.529 | 0.145 | ##### | Opc-G | RP11-161M6.2  |
| 3027 | ##### | 0.960608 | 0.607 | 0.206 | ##### | Opc-G | DSEL          |
| 3028 | ##### | 0.736194 | 0.276 | 0.035 | ##### | Opc-G | FERMT1        |
| 3029 | ##### | 0.868622 | 0.861 | 0.424 | ##### | Opc-G | SOX4          |
| 3030 | ##### | 0.66912  | 0.288 | 0.039 | ##### | Opc-G | CCER2         |
| 3031 | ##### | 0.981601 | 0.635 | 0.226 | ##### | Opc-G | RAB3IP        |
| 3032 | ##### | 0.829561 | 0.418 | 0.09  | ##### | Opc-G | CSPG5         |
| 3033 | ##### | 0.707863 | 0.382 | 0.077 | ##### | Opc-G | CACNA1A       |
| 3034 | ##### | 0.741058 | 0.438 | 0.106 | ##### | Opc-G | RFTN2         |
| 3035 | ##### | 0.867046 | 0.444 | 0.116 | ##### | Opc-G | RP11-849I19.1 |
| 3036 | ##### | 0.497095 | 0.163 | 0.012 | ##### | Opc-G | GSX1          |
| 3037 | ##### | 0.631278 | 0.963 | 0.534 | ##### | Opc-G | TUBB2B        |
| 3038 | ##### | 0.581508 | 0.19  | 0.018 | ##### | Opc-G | NPPA          |
| 3039 | ##### | 0.77087  | 0.728 | 0.279 | ##### | Opc-G | MEG3          |
| 3040 | ##### | 0.616332 | 0.907 | 0.483 | ##### | Opc-G | GPM6A         |
| 3041 | ##### | 0.890564 | 0.408 | 0.103 | ##### | Opc-G | LHFPL3        |
| 3042 | ##### | 0.47218  | 0.977 | 0.716 | ##### | Opc-G | SRI           |
| 3043 | ##### | 0.616089 | 0.886 | 0.508 | ##### | Opc-G | S100B         |
| 3044 | ##### | 0.754293 | 0.741 | 0.37  | ##### | Opc-G | MEST          |
| 3045 | ##### | 0.592352 | 0.38  | 0.08  | ##### | Opc-G | CMTM5         |
| 3046 | ##### | 0.65842  | 0.858 | 0.432 | ##### | Opc-G | MLLT11        |
| 3047 | ##### | 0.764856 | 0.704 | 0.324 | ##### | Opc-G | SCRG1         |
| 3048 | ##### | 0.68052  | 0.421 | 0.102 | ##### | Opc-G | AC004540.4    |
| 3049 | ##### | 0.72732  | 0.317 | 0.061 | ##### | Opc-G | FXD7          |
| 3050 | ##### | 0.711239 | 0.385 | 0.09  | ##### | Opc-G | KLRC2         |
| 3051 | ##### | 0.670919 | 0.794 | 0.416 | ##### | Opc-G | PFN2          |
| 3052 | ##### | 0.583381 | 0.94  | 0.564 | ##### | Opc-G | CKB           |
| 3053 | ##### | 0.725486 | 0.367 | 0.089 | ##### | Opc-G | LRRN1         |
| 3054 | ##### | 0.704314 | 0.254 | 0.041 | ##### | Opc-G | RASL11B       |
| 3055 | ##### | 0.749427 | 0.671 | 0.316 | ##### | Opc-G | LAPTM4B       |
| 3056 | ##### | 0.755686 | 0.631 | 0.245 | ##### | Opc-G | SCG3          |
| 3057 | ##### | 0.624329 | 0.875 | 0.519 | ##### | Opc-G | C1orf61       |
| 3058 | ##### | 0.795877 | 0.343 | 0.079 | ##### | Opc-G | AGAP2-AS1     |
| 3059 | ##### | 0.723735 | 0.683 | 0.322 | ##### | Opc-G | MAP2          |
| 3060 | ##### | 0.65293  | 0.527 | 0.153 | ##### | Opc-G | ELAVL4        |
| 3061 | ##### | 0.666529 | 0.733 | 0.394 | ##### | Opc-G | RHOBTB3       |
| 3062 | ##### | 0.771193 | 0.588 | 0.242 | ##### | Opc-G | CENPV         |
| 3063 | ##### | 0.702518 | 0.728 | 0.329 | ##### | Opc-G | BEX1          |
| 3064 | ##### | 0.773769 | 0.353 | 0.085 | ##### | Opc-G | CDKN2A        |
| 3065 | ##### | 0.683819 | 0.483 | 0.147 | ##### | Opc-G | GPC2          |
| 3066 | ##### | 0.523306 | 0.169 | 0.019 | ##### | Opc-G | AC114730.3    |
| 3067 | ##### | 0.629943 | 0.293 | 0.061 | ##### | Opc-G | LMO1          |
| 3068 | ##### | 0.959492 | 0.535 | 0.233 | ##### | Opc-G | ETV1          |
| 3069 | ##### | 0.611602 | 0.268 | 0.053 | ##### | Opc-G | ARHGEF25      |
| 3070 | ##### | 0.695149 | 0.639 | 0.293 | ##### | Opc-G | PODXL2        |
| 3071 | ##### | 0.680635 | 0.467 | 0.142 | ##### | Opc-G | NRXN1         |
| 3072 | ##### | 0.444729 | 0.202 | 0.029 | ##### | Opc-G | MASP1         |
| 3073 | ##### | 0.599067 | 0.757 | 0.407 | ##### | Opc-G | C7orf55       |
| 3074 | ##### | 0.713118 | 0.625 | 0.277 | ##### | Opc-G | SERPINE2      |

|      |          |          |       |       |          |       |                |
|------|----------|----------|-------|-------|----------|-------|----------------|
| 3075 | #####    | 0.539099 | 0.242 | 0.044 | #####    | Opc-G | AGAP2          |
| 3076 | #####    | 0.514798 | 0.843 | 0.474 | #####    | Opc-G | MDK            |
| 3077 | #####    | 0.53016  | 0.301 | 0.064 | #####    | Opc-G | OMG            |
| 3078 | #####    | 0.639426 | 0.789 | 0.478 | #####    | Opc-G | EGR1           |
| 3079 | #####    | 0.593105 | 0.788 | 0.413 | #####    | Opc-G | SOX2           |
| 3080 | #####    | 0.621037 | 0.786 | 0.403 | #####    | Opc-G | PCSK1N         |
| 3081 | #####    | 0.497669 | 0.181 | 0.024 | #####    | Opc-G | SMOC1          |
| 3082 | #####    | 0.655142 | 0.607 | 0.246 | #####    | Opc-G | CRMP1          |
| 3083 | #####    | 0.819859 | 0.409 | 0.131 | #####    | Opc-G | B4GALNT1       |
| 3084 | #####    | 0.688641 | 0.602 | 0.274 | #####    | Opc-G | CHD7           |
| 3085 | #####    | 0.619614 | 0.359 | 0.094 | #####    | Opc-G | NTM            |
| 3086 | #####    | 0.577517 | 0.279 | 0.062 | #####    | Opc-G | DSCAM          |
| 3087 | #####    | 0.595379 | 0.74  | 0.407 | #####    | Opc-G | PHF14          |
| 3088 | #####    | 0.512569 | 0.866 | 0.495 | #####    | Opc-G | TSC22D1        |
| 3089 | #####    | 0.532169 | 0.208 | 0.034 | #####    | Opc-G | RP5-1177M21.1  |
| 3090 | #####    | 0.757595 | 0.507 | 0.191 | #####    | Opc-G | ARC            |
| 3091 | #####    | 0.895928 | 0.534 | 0.238 | #####    | Opc-G | DTX3           |
| 3092 | #####    | 0.610054 | 0.381 | 0.108 | #####    | Opc-G | IFITM10        |
| 3093 | #####    | 0.70747  | 0.497 | 0.19  | #####    | Opc-G | FAM181B        |
| 3094 | #####    | 0.524485 | 0.286 | 0.063 | #####    | Opc-G | HOXA10         |
| 3095 | #####    | 0.518773 | 0.224 | 0.04  | #####    | Opc-G | BTBD17         |
| 3096 | #####    | 0.621537 | 0.724 | 0.362 | #####    | Opc-G | NFIB           |
| 3097 | #####    | 0.613334 | 0.653 | 0.284 | #####    | Opc-G | STMN4          |
| 3098 | #####    | 0.449521 | 0.199 | 0.034 | 1.63E-98 | Opc-G | ZDHHC22        |
| 3099 | #####    | 0.57437  | 0.254 | 0.055 | 3.67E-98 | Opc-G | RP11-277P12.20 |
| 3100 | #####    | 0.653339 | 0.591 | 0.256 | 4.84E-98 | Opc-G | SOX11          |
| 3101 | #####    | 0.924781 | 0.393 | 0.138 | 7.92E-98 | Opc-G | PDGFRA         |
| 3102 | #####    | 0.552736 | 0.782 | 0.453 | 1.77E-97 | Opc-G | TSC22D4        |
| 3103 | #####    | 0.654019 | 0.576 | 0.259 | 2.42E-97 | Opc-G | KCNQ10T1       |
| 3104 | #####    | 0.52949  | 0.789 | 0.416 | 6.45E-97 | Opc-G | UCHL1          |
| 3105 | #####    | 0.700781 | 0.348 | 0.107 | 1.00E-96 | Opc-G | C1QL1          |
| 3106 | #####    | 0.57591  | 0.323 | 0.085 | 3.56E-96 | Opc-G | GDAP1L1        |
| 3107 | #####    | 0.572752 | 0.365 | 0.104 | 7.06E-96 | Opc-G | ATP1A3         |
| 3108 | #####    | 0.649354 | 0.66  | 0.384 | 7.66E-96 | Opc-G | ODC1           |
| 3109 | #####    | 0.504537 | 0.278 | 0.064 | 7.74E-96 | Opc-G | PHACTR3        |
| 3110 | #####    | 0.572021 | 0.408 | 0.129 | 9.56E-96 | Opc-G | NKX2-2         |
| 3111 | 3.26E-99 | 0.59628  | 0.622 | 0.293 | 4.88E-95 | Opc-G | TSPAN7         |
| 3112 | 4.23E-99 | 0.430648 | 0.183 | 0.029 | 6.32E-95 | Opc-G | MYT1           |
| 3113 | 1.02E-98 | 0.426716 | 0.182 | 0.029 | 1.52E-94 | Opc-G | CNTN1          |
| 3114 | 1.60E-98 | 0.620546 | 0.614 | 0.296 | 2.39E-94 | Opc-G | DBN1           |
| 3115 | 1.48E-96 | 0.464162 | 0.795 | 0.531 | 2.22E-92 | Opc-G | POLR2F         |
| 3116 | 2.27E-96 | 0.56384  | 0.692 | 0.364 | 3.39E-92 | Opc-G | NFIA           |
| 3117 | 3.40E-96 | 0.658041 | 0.56  | 0.233 | 5.09E-92 | Opc-G | GADD45G        |
| 3118 | 1.51E-95 | 0.638982 | 0.774 | 0.535 | 2.25E-91 | Opc-G | CCT2           |
| 3119 | 2.42E-95 | 0.627609 | 0.535 | 0.243 | 3.62E-91 | Opc-G | THY1           |
| 3120 | 3.32E-95 | 0.644851 | 0.49  | 0.205 | 4.96E-91 | Opc-G | KCNQ2          |
| 3121 | 2.51E-93 | 0.846748 | 0.389 | 0.142 | 3.75E-89 | Opc-G | 9-Mar          |
| 3122 | 3.82E-93 | 0.667484 | 0.478 | 0.204 | 5.71E-89 | Opc-G | ACAP3          |
| 3123 | 8.73E-92 | 0.438317 | 0.228 | 0.048 | 1.30E-87 | Opc-G | JPH4           |
| 3124 | 9.85E-92 | 0.57176  | 0.309 | 0.09  | 1.47E-87 | Opc-G | FAM212B        |
| 3125 | 3.68E-90 | 0.562384 | 0.633 | 0.321 | 5.49E-86 | Opc-G | NCAM1          |

|      |          |          |       |       |          |       |          |
|------|----------|----------|-------|-------|----------|-------|----------|
| 3126 | 4.40E-90 | 0.560099 | 0.627 | 0.331 | 6.58E-86 | Opc-G | MAGED1   |
| 3127 | 7.97E-90 | 0.567541 | 0.675 | 0.372 | 1.19E-85 | Opc-G | ZBTB20   |
| 3128 | 9.01E-90 | 0.568783 | 0.316 | 0.093 | 1.35E-85 | Opc-G | NELL2    |
| 3129 | 1.14E-89 | 0.601104 | 0.452 | 0.172 | 1.70E-85 | Opc-G | CADM2    |
| 3130 | 1.45E-89 | 0.628469 | 0.365 | 0.123 | 2.16E-85 | Opc-G | SEZ6L    |
| 3131 | 1.85E-89 | 0.586775 | 0.34  | 0.109 | 2.77E-85 | Opc-G | TSPAN12  |
| 3132 | 3.90E-89 | 0.712384 | 0.697 | 0.477 | 5.83E-85 | Opc-G | CDK4     |
| 3133 | 1.07E-88 | 0.535083 | 0.741 | 0.493 | 1.60E-84 | Opc-G | FSCN1    |
| 3134 | 7.91E-88 | 0.462327 | 0.252 | 0.059 | 1.18E-83 | Opc-G | HOXA2    |
| 3135 | 1.21E-87 | 0.691024 | 0.522 | 0.26  | 1.81E-83 | Opc-G | TRAF4    |
| 3136 | 2.05E-87 | 0.424152 | 0.835 | 0.587 | 3.07E-83 | Opc-G | MARCKS   |
| 3137 | 2.50E-87 | 0.471963 | 0.27  | 0.069 | 3.73E-83 | Opc-G | AMOTL2   |
| 3138 | 4.57E-87 | 0.708928 | 0.365 | 0.125 | 6.82E-83 | Opc-G | MBD6     |
| 3139 | 7.13E-87 | 0.497855 | 0.732 | 0.448 | 1.07E-82 | Opc-G | UBE2E3   |
| 3140 | 3.59E-86 | 0.441722 | 0.394 | 0.129 | 5.37E-82 | Opc-G | SGCE     |
| 3141 | 4.57E-86 | 0.60029  | 0.42  | 0.163 | 6.83E-82 | Opc-G | CLIP2    |
| 3142 | 2.04E-85 | 0.605251 | 0.6   | 0.289 | 3.04E-81 | Opc-G | EGFR     |
| 3143 | 2.18E-85 | 0.553227 | 0.551 | 0.236 | 3.25E-81 | Opc-G | BEX2     |
| 3144 | 2.41E-85 | 0.488742 | 0.239 | 0.055 | 3.61E-81 | Opc-G | TOX3     |
| 3145 | 6.47E-85 | 0.555411 | 0.575 | 0.273 | 9.67E-81 | Opc-G | GSTA4    |
| 3146 | 2.30E-84 | 0.615494 | 0.548 | 0.273 | 3.44E-80 | Opc-G | SLC22A17 |
| 3147 | 2.50E-84 | 0.640296 | 0.412 | 0.164 | 3.74E-80 | Opc-G | ZNF462   |
| 3148 | 4.85E-84 | 0.552677 | 0.28  | 0.078 | 7.25E-80 | Opc-G | AVIL     |
| 3149 | 4.80E-83 | 0.46796  | 0.264 | 0.067 | 7.17E-79 | Opc-G | NCAN     |
| 3150 | 5.91E-83 | 0.653825 | 0.352 | 0.123 | 8.84E-79 | Opc-G | NXPH1    |
| 3151 | 5.05E-82 | 0.423245 | 0.781 | 0.544 | 7.54E-78 | Opc-G | CBX3     |
| 3152 | 1.84E-81 | 0.597831 | 0.58  | 0.316 | 2.74E-77 | Opc-G | SGCB     |
| 3153 | 4.34E-81 | 0.513655 | 0.663 | 0.337 | 6.49E-77 | Opc-G | NDRG2    |
| 3154 | 1.71E-80 | 0.617127 | 0.336 | 0.115 | 2.56E-76 | Opc-G | TNK2     |
| 3155 | 8.57E-80 | 0.51382  | 0.307 | 0.092 | 1.28E-75 | Opc-G | RAB33A   |
| 3156 | 1.12E-79 | 0.586722 | 0.576 | 0.303 | 1.67E-75 | Opc-G | CRIP2    |
| 3157 | 2.33E-79 | 0.473025 | 0.701 | 0.45  | 3.48E-75 | Opc-G | TSPAN3   |
| 3158 | 3.50E-79 | 0.559774 | 0.433 | 0.169 | 5.24E-75 | Opc-G | PHYHIPL  |
| 3159 | 5.28E-79 | 0.57573  | 0.417 | 0.166 | 7.89E-75 | Opc-G | MEX3A    |
| 3160 | 9.94E-79 | 0.474414 | 0.23  | 0.056 | 1.49E-74 | Opc-G | CRB1     |
| 3161 | 1.12E-78 | 0.543053 | 0.27  | 0.078 | 1.68E-74 | Opc-G | MDFI     |
| 3162 | 1.20E-78 | 0.577864 | 0.562 | 0.296 | 1.80E-74 | Opc-G | CSNK1E   |
| 3163 | 7.34E-78 | 0.625439 | 0.355 | 0.13  | 1.10E-73 | Opc-G | SOX6     |
| 3164 | 9.43E-78 | 0.61351  | 0.452 | 0.167 | 1.41E-73 | Opc-G | STMN2    |
| 3165 | 4.85E-77 | 0.580657 | 0.562 | 0.29  | 7.25E-73 | Opc-G | PIK3R1   |
| 3166 | 9.13E-77 | 0.543511 | 0.586 | 0.303 | 1.36E-72 | Opc-G | MAGEH1   |
| 3167 | 1.02E-76 | 0.670489 | 0.36  | 0.136 | 1.52E-72 | Opc-G | METTL1   |
| 3168 | 1.47E-76 | 0.511854 | 0.671 | 0.398 | 2.20E-72 | Opc-G | SRPK2    |
| 3169 | 4.36E-76 | 0.70207  | 0.509 | 0.264 | 6.51E-72 | Opc-G | TSFM     |
| 3170 | 5.14E-76 | 0.575303 | 0.38  | 0.147 | 7.69E-72 | Opc-G | ABAT     |
| 3171 | 1.06E-74 | 0.550677 | 0.228 | 0.059 | 1.58E-70 | Opc-G | LNX1     |
| 3172 | 1.09E-74 | 0.592216 | 0.321 | 0.109 | 1.62E-70 | Opc-G | KIF5A    |
| 3173 | 1.19E-74 | 0.590053 | 0.45  | 0.199 | 1.77E-70 | Opc-G | GRIA2    |
| 3174 | 1.51E-74 | 0.553737 | 0.509 | 0.253 | 2.25E-70 | Opc-G | CADM4    |
| 3175 | 4.35E-74 | 0.475498 | 0.252 | 0.069 | 6.50E-70 | Opc-G | XRCC6BP1 |
| 3176 | 7.97E-74 | 0.512144 | 0.481 | 0.216 | 1.19E-69 | Opc-G | RIC3     |

|      |          |          |       |       |          |       |               |
|------|----------|----------|-------|-------|----------|-------|---------------|
| 3177 | 1.29E-73 | 0.570091 | 0.591 | 0.322 | 1.92E-69 | Opc-G | NFIX          |
| 3178 | 1.37E-73 | 0.572529 | 0.511 | 0.246 | 2.05E-69 | Opc-G | MCM7          |
| 3179 | 1.48E-73 | 0.427778 | 0.772 | 0.526 | 2.22E-69 | Opc-G | KMT2E         |
| 3180 | 1.87E-73 | 0.765921 | 0.452 | 0.215 | 2.80E-69 | Opc-G | NUP107        |
| 3181 | 3.57E-73 | 0.493722 | 0.426 | 0.164 | 5.34E-69 | Opc-G | HOTAIRM1      |
| 3182 | 4.87E-73 | 0.458532 | 0.244 | 0.067 | 7.28E-69 | Opc-G | CXXC4         |
| 3183 | 1.34E-72 | 0.496599 | 0.587 | 0.281 | 2.01E-68 | Opc-G | TSPAN13       |
| 3184 | 1.98E-72 | 0.522327 | 0.347 | 0.122 | 2.96E-68 | Opc-G | CTTNBP2       |
| 3185 | 1.99E-72 | 0.544266 | 0.421 | 0.162 | 2.97E-68 | Opc-G | TCEAL2        |
| 3186 | 4.09E-72 | 0.522557 | 0.336 | 0.121 | 6.11E-68 | Opc-G | CNTFR         |
| 3187 | 1.61E-71 | 0.587716 | 0.429 | 0.188 | 2.40E-67 | Opc-G | MAGI1         |
| 3188 | 3.10E-71 | 0.475319 | 0.291 | 0.093 | 4.63E-67 | Opc-G | MAGI2         |
| 3189 | 8.09E-71 | 0.536278 | 0.247 | 0.071 | 1.21E-66 | Opc-G | AC009506.1    |
| 3190 | 1.10E-70 | 0.490936 | 0.401 | 0.153 | 1.64E-66 | Opc-G | MIAT          |
| 3191 | 1.16E-70 | 0.556849 | 0.41  | 0.175 | 1.73E-66 | Opc-G | BCHE          |
| 3192 | 3.37E-70 | 0.430662 | 0.74  | 0.475 | 5.04E-66 | Opc-G | RPAIN         |
| 3193 | 7.27E-70 | 0.488257 | 0.263 | 0.081 | 1.09E-65 | Opc-G | ANTXR1        |
| 3194 | 8.00E-70 | 0.432645 | 0.218 | 0.057 | 1.20E-65 | Opc-G | NTRK3         |
| 3195 | 1.58E-69 | 0.671646 | 0.495 | 0.258 | 2.36E-65 | Opc-G | RP11-620J15.3 |
| 3196 | 2.26E-69 | 0.636462 | 0.297 | 0.102 | 3.37E-65 | Opc-G | FRS2          |
| 3197 | 2.47E-69 | 0.523344 | 0.529 | 0.275 | 3.69E-65 | Opc-G | TCF12         |
| 3198 | 3.01E-69 | 0.690389 | 0.405 | 0.176 | 4.50E-65 | Opc-G | SLC35E3       |
| 3199 | 5.14E-68 | 0.549528 | 0.335 | 0.128 | 7.68E-64 | Opc-G | PCDHB16       |
| 3200 | 1.62E-67 | 0.522772 | 0.412 | 0.176 | 2.42E-63 | Opc-G | ST3GAL5       |
| 3201 | 4.97E-67 | 0.501547 | 0.343 | 0.126 | 7.42E-63 | Opc-G | C8orf46       |
| 3202 | 5.61E-67 | 0.529301 | 0.429 | 0.193 | 8.38E-63 | Opc-G | ZNF3          |
| 3203 | 6.65E-67 | 0.540633 | 0.356 | 0.137 | 9.94E-63 | Opc-G | RP3-525N10.2  |
| 3204 | 4.84E-65 | 0.525669 | 0.412 | 0.171 | 7.23E-61 | Opc-G | TMSB15A       |
| 3205 | 5.98E-65 | 0.566301 | 0.537 | 0.312 | 8.93E-61 | Opc-G | LIMA1         |
| 3206 | 6.87E-65 | 0.530448 | 0.469 | 0.225 | 1.03E-60 | Opc-G | THRA          |
| 3207 | 1.27E-64 | 0.468663 | 0.578 | 0.313 | 1.90E-60 | Opc-G | SCG5          |
| 3208 | 4.11E-64 | 0.533689 | 0.441 | 0.209 | 6.15E-60 | Opc-G | HIPK2         |
| 3209 | 5.04E-64 | 0.482629 | 0.235 | 0.069 | 7.53E-60 | Opc-G | CNPY1         |
| 3210 | 9.73E-64 | 0.497294 | 0.548 | 0.318 | 1.45E-59 | Opc-G | FYN           |
| 3211 | 2.14E-63 | 0.46963  | 0.274 | 0.09  | 3.19E-59 | Opc-G | RPS6KL1       |
| 3212 | 4.28E-63 | 0.579793 | 0.663 | 0.501 | 6.40E-59 | Opc-G | DCTN2         |
| 3213 | 4.46E-63 | 0.476141 | 0.544 | 0.263 | 6.66E-59 | Opc-G | DNER          |
| 3214 | 5.22E-63 | 0.426005 | 0.193 | 0.049 | 7.80E-59 | Opc-G | SIX1          |
| 3215 | 5.92E-63 | 0.52863  | 0.308 | 0.113 | 8.85E-59 | Opc-G | METAP1D       |
| 3216 | 8.12E-63 | 0.422741 | 0.688 | 0.432 | 1.21E-58 | Opc-G | MYL6B         |
| 3217 | 9.10E-63 | 0.677685 | 0.499 | 0.282 | 1.36E-58 | Opc-G | TSPAN31       |
| 3218 | 9.78E-63 | 0.468984 | 0.56  | 0.324 | 1.46E-58 | Opc-G | DDR1          |
| 3219 | 1.26E-62 | 0.60251  | 0.416 | 0.195 | 1.89E-58 | Opc-G | CDK6          |
| 3220 | 1.68E-62 | 0.48804  | 0.444 | 0.19  | 2.51E-58 | Opc-G | DCX           |
| 3221 | 1.31E-61 | 0.481102 | 0.57  | 0.31  | 1.95E-57 | Opc-G | LINC00461     |
| 3222 | 3.67E-61 | 0.623439 | 0.327 | 0.129 | 5.48E-57 | Opc-G | SEZ6          |
| 3223 | 5.92E-61 | 0.561474 | 0.325 | 0.125 | 8.84E-57 | Opc-G | C11orf96      |
| 3224 | 1.36E-60 | 0.509358 | 0.478 | 0.248 | 2.03E-56 | Opc-G | PCBP4         |
| 3225 | 3.00E-60 | 0.565826 | 0.319 | 0.12  | 4.48E-56 | Opc-G | RGMB          |
| 3226 | 1.64E-59 | 0.528388 | 0.482 | 0.264 | 2.45E-55 | Opc-G | REPIN1        |
| 3227 | 2.99E-59 | 0.43334  | 0.25  | 0.076 | 4.47E-55 | Opc-G | DUSP26        |

|      |          |          |       |       |          |       |            |
|------|----------|----------|-------|-------|----------|-------|------------|
| 3228 | 5.36E-59 | 0.471221 | 0.414 | 0.174 | 8.01E-55 | Opc-G | TAGLN3     |
| 3229 | 5.84E-59 | 0.496469 | 0.608 | 0.377 | 8.73E-55 | Opc-G | H1FX       |
| 3230 | 2.39E-58 | 0.460927 | 0.583 | 0.345 | 3.57E-54 | Opc-G | RSBN1L     |
| 3231 | 3.57E-58 | 0.509558 | 0.272 | 0.098 | 5.33E-54 | Opc-G | TMEM121    |
| 3232 | 9.54E-58 | 0.511391 | 0.24  | 0.078 | 1.43E-53 | Opc-G | FAM84B     |
| 3233 | 3.58E-57 | 0.432889 | 0.228 | 0.07  | 5.35E-53 | Opc-G | AC004540.5 |
| 3234 | 4.35E-57 | 0.480862 | 0.36  | 0.153 | 6.51E-53 | Opc-G | KLHL23     |
| 3235 | 1.30E-56 | 0.425175 | 0.635 | 0.402 | 1.95E-52 | Opc-G | AES        |
| 3236 | 3.50E-56 | 0.512371 | 0.275 | 0.099 | 5.23E-52 | Opc-G | PIP4K2C    |
| 3237 | 6.80E-56 | 0.456235 | 0.335 | 0.13  | 1.02E-51 | Opc-G | PAK3       |
| 3238 | 7.28E-56 | 0.427681 | 0.165 | 0.04  | 1.09E-51 | Opc-G | FGF12      |
| 3239 | 1.34E-55 | 0.42366  | 0.659 | 0.439 | 2.00E-51 | Opc-G | PGRMC1     |
| 3240 | 1.74E-55 | 0.465702 | 0.214 | 0.065 | 2.59E-51 | Opc-G | LRRC17     |
| 3241 | 3.67E-55 | 0.445234 | 0.623 | 0.406 | 5.48E-51 | Opc-G | MIDN       |
| 3242 | 8.69E-55 | 0.464803 | 0.28  | 0.105 | 1.30E-50 | Opc-G | APBB2      |
| 3243 | 1.20E-54 | 0.566086 | 0.493 | 0.29  | 1.79E-50 | Opc-G | FIP1L1     |
| 3244 | 1.28E-54 | 0.508731 | 0.348 | 0.153 | 1.91E-50 | Opc-G | DPP6       |
| 3245 | 4.31E-54 | 0.537312 | 0.454 | 0.238 | 6.44E-50 | Opc-G | HEY1       |
| 3246 | 1.05E-53 | 0.66288  | 0.444 | 0.245 | 1.57E-49 | Opc-G | YEATS4     |
| 3247 | 2.07E-53 | 0.478124 | 0.489 | 0.268 | 3.10E-49 | Opc-G | KLHL7      |
| 3248 | 2.33E-52 | 0.536227 | 0.378 | 0.184 | 3.49E-48 | Opc-G | LINC01003  |
| 3249 | 3.84E-52 | 0.47278  | 0.503 | 0.272 | 5.74E-48 | Opc-G | MAPT       |
| 3250 | 1.10E-51 | 0.488522 | 0.465 | 0.25  | 1.64E-47 | Opc-G | TMEM59L    |
| 3251 | 1.54E-51 | 0.525687 | 0.378 | 0.186 | 2.30E-47 | Opc-G | ZEB1       |
| 3252 | 1.55E-51 | 0.482201 | 0.258 | 0.097 | 2.32E-47 | Opc-G | MMP16      |
| 3253 | 1.55E-51 | 0.425645 | 0.291 | 0.109 | 2.32E-47 | Opc-G | ATCAY      |
| 3254 | 3.82E-51 | 0.533874 | 0.347 | 0.16  | 5.71E-47 | Opc-G | BMP7       |
| 3255 | 5.96E-50 | 0.439083 | 0.171 | 0.046 | 8.90E-46 | Opc-G | CA8        |
| 3256 | 4.42E-49 | 0.429042 | 0.477 | 0.259 | 6.60E-45 | Opc-G | BZW2       |
| 3257 | 1.09E-48 | 0.625242 | 0.388 | 0.2   | 1.63E-44 | Opc-G | MDM2       |
| 3258 | 1.80E-48 | 0.550233 | 0.3   | 0.131 | 2.69E-44 | Opc-G | USP46      |
| 3259 | 3.40E-48 | 0.428727 | 0.286 | 0.114 | 5.08E-44 | Opc-G | NCALD      |
| 3260 | 3.60E-48 | 0.428296 | 0.437 | 0.23  | 5.38E-44 | Opc-G | TMEM98     |
| 3261 | 4.69E-48 | 0.483794 | 0.398 | 0.205 | 7.02E-44 | Opc-G | PBX1       |
| 3262 | 5.42E-48 | 0.423178 | 0.519 | 0.31  | 8.10E-44 | Opc-G | GOLM1      |
| 3263 | 5.60E-48 | 0.456626 | 0.38  | 0.184 | 8.37E-44 | Opc-G | MAPK10     |
| 3264 | 7.63E-48 | 0.436944 | 0.483 | 0.265 | 1.14E-43 | Opc-G | NREP       |
| 3265 | 1.09E-47 | 0.606667 | 0.39  | 0.181 | 1.63E-43 | Opc-G | NNAT       |
| 3266 | 2.94E-46 | 0.427445 | 0.465 | 0.25  | 4.39E-42 | Opc-G | ERV3-1     |
| 3267 | 4.95E-46 | 0.425984 | 0.493 | 0.279 | 7.40E-42 | Opc-G | ATAT1      |
| 3268 | 9.49E-46 | 0.48444  | 0.444 | 0.231 | 1.42E-41 | Opc-G | RND3       |
| 3269 | 1.16E-45 | 0.440446 | 0.459 | 0.262 | 1.74E-41 | Opc-G | NRCAM      |
| 3270 | 3.02E-45 | 0.459566 | 0.279 | 0.108 | 4.51E-41 | Opc-G | TTC9B      |
| 3271 | 3.46E-45 | 0.49685  | 0.222 | 0.077 | 5.17E-41 | Opc-G | FBLN1      |
| 3272 | 7.07E-45 | 0.448058 | 0.547 | 0.339 | 1.06E-40 | Opc-G | BAALC      |
| 3273 | 9.55E-45 | 0.435823 | 0.327 | 0.147 | 1.43E-40 | Opc-G | SNTG1      |
| 3274 | 1.45E-44 | 0.470402 | 0.288 | 0.126 | 2.16E-40 | Opc-G | WSCD1      |
| 3275 | 3.26E-44 | 0.49652  | 0.649 | 0.529 | 4.88E-40 | Opc-G | OS9        |
| 3276 | 3.37E-44 | 0.481901 | 0.365 | 0.187 | 5.04E-40 | Opc-G | MYO10      |
| 3277 | 5.43E-44 | 0.613045 | 0.438 | 0.269 | 8.12E-40 | Opc-G | CTDSP2     |
| 3278 | 2.14E-42 | 0.444993 | 0.351 | 0.171 | 3.19E-38 | Opc-G | SYNE2      |

|      |           |           |        |        |           |         |                |
|------|-----------|-----------|--------|--------|-----------|---------|----------------|
| 3279 | 3. 20E-41 | 0. 422757 | 0. 268 | 0. 114 | 4. 78E-37 | Opc-G   | AC004158. 3    |
| 3280 | 3. 90E-41 | 0. 444143 | 0. 274 | 0. 12  | 5. 82E-37 | Opc-G   | CPXM1          |
| 3281 | 4. 35E-41 | 0. 431575 | 0. 499 | 0. 289 | 6. 50E-37 | Opc-G   | METR           |
| 3282 | 4. 59E-41 | 0. 430152 | 0. 384 | 0. 178 | 6. 86E-37 | Opc-G   | MTRNR2L1       |
| 3283 | 4. 88E-41 | 0. 43011  | 0. 499 | 0. 312 | 7. 30E-37 | Opc-G   | BAZ2B          |
| 3284 | 5. 57E-41 | 0. 461073 | 0. 444 | 0. 252 | 8. 32E-37 | Opc-G   | PTPRS          |
| 3285 | 7. 64E-41 | 0. 441781 | 0. 17  | 0. 055 | 1. 14E-36 | Opc-G   | RP11-698N11. 2 |
| 3286 | 9. 30E-41 | 0. 422782 | 0. 405 | 0. 223 | 1. 39E-36 | Opc-G   | MKLN1          |
| 3287 | 1. 54E-40 | 0. 44226  | 0. 254 | 0. 107 | 2. 30E-36 | Opc-G   | ZIC1           |
| 3288 | 9. 63E-39 | 0. 430639 | 0. 254 | 0. 109 | 1. 44E-34 | Opc-G   | NLGN3          |
| 3289 | 1. 38E-37 | 0. 43253  | 0. 437 | 0. 259 | 2. 06E-33 | Opc-G   | TRIB2          |
| 3290 | 2. 22E-37 | 0. 430536 | 0. 402 | 0. 235 | 3. 32E-33 | Opc-G   | ITGB8          |
| 3291 | 3. 01E-37 | 0. 442151 | 0. 446 | 0. 263 | 4. 49E-33 | Opc-G   | KIF5C          |
| 3292 | 6. 37E-36 | 0. 429977 | 0. 321 | 0. 167 | 9. 52E-32 | Opc-G   | BCAR1          |
| 3293 | 1. 31E-35 | 0. 433854 | 0. 254 | 0. 112 | 1. 96E-31 | Opc-G   | INSM1          |
| 3294 | 2. 67E-35 | 0. 46852  | 0. 38  | 0. 221 | 3. 99E-31 | Opc-G   | RP11-553L6. 5  |
| 3295 | 9. 06E-35 | 0. 43242  | 0. 319 | 0. 165 | 1. 35E-30 | Opc-G   | RTKN           |
| 3296 | 2. 30E-34 | 0. 438054 | 0. 393 | 0. 232 | 3. 43E-30 | Opc-G   | CREB5          |
| 3297 | 7. 28E-34 | 0. 441803 | 0. 307 | 0. 157 | 1. 09E-29 | Opc-G   | AASDH          |
| 3298 | 1. 12E-33 | 0. 463482 | 0. 284 | 0. 14  | 1. 67E-29 | Opc-G   | APC2           |
| 3299 | 8. 19E-28 | 0. 439915 | 0. 396 | 0. 258 | 1. 22E-23 | Opc-G   | POLR2B         |
| 3300 | 2. 19E-24 | 0. 425425 | 0. 179 | 0. 079 | 3. 27E-20 | Opc-G   | CASP9          |
| 3301 | 0         | 1. 293274 | 0. 958 | 0. 183 | 0         | Class-G | HOPX           |
| 3302 | 0         | 1. 251146 | 0. 739 | 0. 04  | 0         | Class-G | POSTN          |
| 3303 | 0         | 1. 17982  | 0. 951 | 0. 178 | 0         | Class-G | NES            |
| 3304 | 0         | 1. 156994 | 0. 863 | 0. 12  | 0         | Class-G | ID4            |
| 3305 | 0         | 1. 114532 | 0. 935 | 0. 175 | 0         | Class-G | SOX9           |
| 3306 | 0         | 1. 091745 | 0. 882 | 0. 143 | 0         | Class-G | GPC1           |
| 3307 | 0         | 1. 085898 | 0. 811 | 0. 061 | 0         | Class-G | SEMA6D         |
| 3308 | 0         | 1. 083739 | 0. 988 | 0. 295 | 0         | Class-G | FABP7          |
| 3309 | 0         | 1. 067891 | 0. 716 | 0. 037 | 0         | Class-G | KCNF1          |
| 3310 | 0         | 1. 065348 | 0. 787 | 0. 072 | 0         | Class-G | TPM2           |
| 3311 | 0         | 1. 003196 | 0. 796 | 0. 097 | 0         | Class-G | COL9A3         |
| 3312 | 0         | 0. 995161 | 0. 979 | 0. 286 | 0         | Class-G | IGFBP2         |
| 3313 | 0         | 0. 987681 | 0. 717 | 0. 12  | 0         | Class-G | IGFBP3         |
| 3314 | 0         | 0. 983265 | 0. 798 | 0. 114 | 0         | Class-G | FJX1           |
| 3315 | 0         | 0. 968769 | 0. 877 | 0. 179 | 0         | Class-G | IGFBP7         |
| 3316 | 0         | 0. 968194 | 0. 859 | 0. 122 | 0         | Class-G | POU3F2         |
| 3317 | 0         | 0. 966813 | 0. 866 | 0. 181 | 0         | Class-G | TTYH1          |
| 3318 | 0         | 0. 953681 | 0. 943 | 0. 2   | 0         | Class-G | METR           |
| 3319 | 0         | 0. 933045 | 0. 902 | 0. 133 | 0         | Class-G | ATP1B2         |
| 3320 | 0         | 0. 917326 | 0. 947 | 0. 206 | 0         | Class-G | EGFR           |
| 3321 | 0         | 0. 914434 | 0. 885 | 0. 137 | 0         | Class-G | SPRY1          |
| 3322 | 0         | 0. 911692 | 0. 83  | 0. 102 | 0         | Class-G | LYPD1          |
| 3323 | 0         | 0. 901653 | 0. 735 | 0. 097 | 0         | Class-G | RP11-395G23. 3 |
| 3324 | 0         | 0. 895986 | 0. 814 | 0. 108 | 0         | Class-G | RGMA           |
| 3325 | 0         | 0. 89292  | 0. 741 | 0. 077 | 0         | Class-G | WWTR1          |
| 3326 | 0         | 0. 890984 | 0. 768 | 0. 068 | 0         | Class-G | NPAS3          |
| 3327 | 0         | 0. 886199 | 0. 711 | 0. 083 | 0         | Class-G | COL6A2         |
| 3328 | 0         | 0. 885679 | 0. 776 | 0. 106 | 0         | Class-G | F3             |
| 3329 | 0         | 0. 885435 | 0. 846 | 0. 206 | 0         | Class-G | TNFRSF12A      |

|      |   |          |       |       |           |          |
|------|---|----------|-------|-------|-----------|----------|
| 3330 | 0 | 0.860511 | 0.794 | 0.077 | 0 Class-G | CNIH3    |
| 3331 | 0 | 0.857127 | 0.886 | 0.129 | 0 Class-G | FIBIN    |
| 3332 | 0 | 0.846681 | 0.734 | 0.124 | 0 Class-G | PMEPA1   |
| 3333 | 0 | 0.834972 | 0.733 | 0.107 | 0 Class-G | EDNRB    |
| 3334 | 0 | 0.8333   | 0.837 | 0.139 | 0 Class-G | COL6A1   |
| 3335 | 0 | 0.831694 | 0.72  | 0.074 | 0 Class-G | SOCS2    |
| 3336 | 0 | 0.829905 | 0.687 | 0.073 | 0 Class-G | CITED1   |
| 3337 | 0 | 0.82629  | 0.87  | 0.172 | 0 Class-G | SCG2     |
| 3338 | 0 | 0.815405 | 0.84  | 0.127 | 0 Class-G | SPRY2    |
| 3339 | 0 | 0.802805 | 0.62  | 0.061 | 0 Class-G | LHX2     |
| 3340 | 0 | 0.801911 | 0.944 | 0.315 | 0 Class-G | PHLDA1   |
| 3341 | 0 | 0.801681 | 0.69  | 0.065 | 0 Class-G | FAM84A   |
| 3342 | 0 | 0.796015 | 0.665 | 0.047 | 0 Class-G | ARSJ     |
| 3343 | 0 | 0.792379 | 0.892 | 0.17  | 0 Class-G | TRIB2    |
| 3344 | 0 | 0.791625 | 0.953 | 0.262 | 0 Class-G | PMP2     |
| 3345 | 0 | 0.78891  | 0.972 | 0.299 | 0 Class-G | PTPRZ1   |
| 3346 | 0 | 0.779748 | 0.733 | 0.076 | 0 Class-G | JAG1     |
| 3347 | 0 | 0.775746 | 0.859 | 0.153 | 0 Class-G | CAMK2D   |
| 3348 | 0 | 0.775453 | 0.922 | 0.211 | 0 Class-G | MAP2K2   |
| 3349 | 0 | 0.774586 | 0.776 | 0.102 | 0 Class-G | PRR7     |
| 3350 | 0 | 0.773001 | 0.699 | 0.055 | 0 Class-G | ITGA7    |
| 3351 | 0 | 0.771254 | 0.722 | 0.099 | 0 Class-G | SMAD1    |
| 3352 | 0 | 0.764836 | 0.665 | 0.064 | 0 Class-G | TMEM158  |
| 3353 | 0 | 0.763235 | 0.841 | 0.143 | 0 Class-G | LHFP     |
| 3354 | 0 | 0.761202 | 0.902 | 0.194 | 0 Class-G | CDH2     |
| 3355 | 0 | 0.760181 | 0.625 | 0.075 | 0 Class-G | DCBLD2   |
| 3356 | 0 | 0.756989 | 0.737 | 0.084 | 0 Class-G | MXRA7    |
| 3357 | 0 | 0.747    | 0.672 | 0.051 | 0 Class-G | COL4A2   |
| 3358 | 0 | 0.744698 | 0.944 | 0.268 | 0 Class-G | PTPRA    |
| 3359 | 0 | 0.744023 | 0.865 | 0.206 | 0 Class-G | NEK6     |
| 3360 | 0 | 0.742215 | 0.84  | 0.119 | 0 Class-G | METTL7B  |
| 3361 | 0 | 0.742212 | 0.453 | 0.022 | 0 Class-G | CBLN4    |
| 3362 | 0 | 0.739113 | 0.698 | 0.131 | 0 Class-G | FAM181B  |
| 3363 | 0 | 0.729898 | 0.882 | 0.195 | 0 Class-G | RAB34    |
| 3364 | 0 | 0.7296   | 0.788 | 0.112 | 0 Class-G | SEMA6A   |
| 3365 | 0 | 0.727998 | 0.75  | 0.116 | 0 Class-G | B4GALT5  |
| 3366 | 0 | 0.72587  | 0.639 | 0.088 | 0 Class-G | C21orf62 |
| 3367 | 0 | 0.725629 | 0.674 | 0.075 | 0 Class-G | CHL1     |
| 3368 | 0 | 0.725506 | 0.609 | 0.039 | 0 Class-G | COL4A1   |
| 3369 | 0 | 0.722535 | 0.922 | 0.235 | 0 Class-G | NPDC1    |
| 3370 | 0 | 0.720947 | 0.939 | 0.261 | 0 Class-G | GCSH     |
| 3371 | 0 | 0.712006 | 0.686 | 0.09  | 0 Class-G | RFFL     |
| 3372 | 0 | 0.711619 | 0.628 | 0.064 | 0 Class-G | CHST2    |
| 3373 | 0 | 0.711137 | 0.816 | 0.147 | 0 Class-G | CCDC106  |
| 3374 | 0 | 0.704713 | 0.726 | 0.087 | 0 Class-G | TLE1     |
| 3375 | 0 | 0.703961 | 0.803 | 0.12  | 0 Class-G | SERPINH1 |
| 3376 | 0 | 0.703107 | 0.814 | 0.134 | 0 Class-G | PLS3     |
| 3377 | 0 | 0.696781 | 0.545 | 0.032 | 0 Class-G | FZD7     |
| 3378 | 0 | 0.694443 | 0.915 | 0.25  | 0 Class-G | PJA2     |
| 3379 | 0 | 0.690338 | 0.791 | 0.165 | 0 Class-G | HEY1     |
| 3380 | 0 | 0.688168 | 0.634 | 0.057 | 0 Class-G | PIPOX    |

|      |            |       |       |           |           |
|------|------------|-------|-------|-----------|-----------|
| 3381 | 0 0.686906 | 0.927 | 0.232 | 0 Class-G | MSI2      |
| 3382 | 0 0.686871 | 0.702 | 0.1   | 0 Class-G | DHCR7     |
| 3383 | 0 0.685707 | 0.981 | 0.349 | 0 Class-G | SOX2      |
| 3384 | 0 0.680749 | 0.651 | 0.122 | 0 Class-G | HES4      |
| 3385 | 0 0.673406 | 0.839 | 0.179 | 0 Class-G | TSPAN5    |
| 3386 | 0 0.673096 | 0.56  | 0.036 | 0 Class-G | LGR4      |
| 3387 | 0 0.669974 | 0.865 | 0.208 | 0 Class-G | ZNF580    |
| 3388 | 0 0.667047 | 0.682 | 0.132 | 0 Class-G | NMB       |
| 3389 | 0 0.665458 | 0.921 | 0.261 | 0 Class-G | BAALC     |
| 3390 | 0 0.665056 | 0.802 | 0.154 | 0 Class-G | EPN2      |
| 3391 | 0 0.662487 | 0.944 | 0.213 | 0 Class-G | S100A16   |
| 3392 | 0 0.662388 | 0.575 | 0.083 | 0 Class-G | GAS1      |
| 3393 | 0 0.660336 | 0.744 | 0.132 | 0 Class-G | SEPNI     |
| 3394 | 0 0.66022  | 0.756 | 0.136 | 0 Class-G | KHDRBS3   |
| 3395 | 0 0.66     | 0.496 | 0.049 | 0 Class-G | SLC4A4    |
| 3396 | 0 0.659286 | 0.824 | 0.145 | 0 Class-G | TRIM9     |
| 3397 | 0 0.658854 | 0.688 | 0.095 | 0 Class-G | PRRX1     |
| 3398 | 0 0.655596 | 0.85  | 0.223 | 0 Class-G | CHPT1     |
| 3399 | 0 0.644175 | 0.646 | 0.083 | 0 Class-G | SACS      |
| 3400 | 0 0.644073 | 0.8   | 0.17  | 0 Class-G | KLHDC8A   |
| 3401 | 0 0.643968 | 0.918 | 0.289 | 0 Class-G | TCEA2     |
| 3402 | 0 0.643333 | 0.717 | 0.095 | 0 Class-G | MRC2      |
| 3403 | 0 0.641362 | 0.8   | 0.126 | 0 Class-G | FKBP10    |
| 3404 | 0 0.640595 | 0.907 | 0.255 | 0 Class-G | NLRP1     |
| 3405 | 0 0.640012 | 0.64  | 0.075 | 0 Class-G | MLC1      |
| 3406 | 0 0.639277 | 0.747 | 0.1   | 0 Class-G | PPIC      |
| 3407 | 0 0.639097 | 0.521 | 0.03  | 0 Class-G | CPNE4     |
| 3408 | 0 0.63758  | 0.717 | 0.144 | 0 Class-G | KCNQ2     |
| 3409 | 0 0.633461 | 0.638 | 0.091 | 0 Class-G | CTXN1     |
| 3410 | 0 0.631903 | 0.805 | 0.17  | 0 Class-G | FLNA      |
| 3411 | 0 0.625101 | 0.519 | 0.039 | 0 Class-G | EFNB2     |
| 3412 | 0 0.624884 | 0.66  | 0.084 | 0 Class-G | OSBPL6    |
| 3413 | 0 0.619908 | 0.799 | 0.156 | 0 Class-G | ITGB8     |
| 3414 | 0 0.617794 | 0.993 | 0.405 | 0 Class-G | NOVA1     |
| 3415 | 0 0.617605 | 0.847 | 0.233 | 0 Class-G | MMP24-AS1 |
| 3416 | 0 0.61699  | 0.898 | 0.234 | 0 Class-G | LIMA1     |
| 3417 | 0 0.616663 | 0.984 | 0.392 | 0 Class-G | CNN3      |
| 3418 | 0 0.61652  | 0.77  | 0.133 | 0 Class-G | WLS       |
| 3419 | 0 0.615838 | 0.745 | 0.138 | 0 Class-G | EFEMP2    |
| 3420 | 0 0.613047 | 0.914 | 0.298 | 0 Class-G | DST       |
| 3421 | 0 0.61184  | 0.582 | 0.042 | 0 Class-G | ACSS3     |
| 3422 | 0 0.611621 | 0.728 | 0.128 | 0 Class-G | BICD1     |
| 3423 | 0 0.609234 | 0.582 | 0.061 | 0 Class-G | NPTXR     |
| 3424 | 0 0.608536 | 0.602 | 0.065 | 0 Class-G | DPF3      |
| 3425 | 0 0.607114 | 0.44  | 0.075 | 0 Class-G | ID1       |
| 3426 | 0 0.60652  | 0.606 | 0.112 | 0 Class-G | SRPX      |
| 3427 | 0 0.60613  | 0.695 | 0.107 | 0 Class-G | TJP1      |
| 3428 | 0 0.605558 | 0.569 | 0.058 | 0 Class-G | EVA1B     |
| 3429 | 0 0.603942 | 0.907 | 0.271 | 0 Class-G | GATM      |
| 3430 | 0 0.603884 | 0.458 | 0.017 | 0 Class-G | EPHA3     |
| 3431 | 0 0.602097 | 0.637 | 0.082 | 0 Class-G | ZFHX4     |

|      |   |          |       |       |           |              |
|------|---|----------|-------|-------|-----------|--------------|
| 3432 | 0 | 0.601285 | 0.777 | 0.197 | 0 Class-G | FAM210B      |
| 3433 | 0 | 0.598784 | 0.589 | 0.067 | 0 Class-G | RP11-71N10.1 |
| 3434 | 0 | 0.597384 | 0.908 | 0.232 | 0 Class-G | CD320        |
| 3435 | 0 | 0.596365 | 0.862 | 0.214 | 0 Class-G | RRBP1        |
| 3436 | 0 | 0.596016 | 0.737 | 0.153 | 0 Class-G | TM7SF2       |
| 3437 | 0 | 0.591924 | 0.357 | 0.028 | 0 Class-G | RP3-428L16.2 |
| 3438 | 0 | 0.590822 | 0.676 | 0.094 | 0 Class-G | GRIA3        |
| 3439 | 0 | 0.589933 | 0.626 | 0.117 | 0 Class-G | HMGCS1       |
| 3440 | 0 | 0.589372 | 0.889 | 0.262 | 0 Class-G | 9-Sep        |
| 3441 | 0 | 0.587413 | 0.838 | 0.195 | 0 Class-G | FZD3         |
| 3442 | 0 | 0.587307 | 0.585 | 0.057 | 0 Class-G | PLEKHA4      |
| 3443 | 0 | 0.586065 | 0.8   | 0.179 | 0 Class-G | CHPF         |
| 3444 | 0 | 0.585784 | 0.727 | 0.126 | 0 Class-G | FERMT2       |
| 3445 | 0 | 0.585362 | 0.763 | 0.151 | 0 Class-G | TLK1         |
| 3446 | 0 | 0.58275  | 0.585 | 0.102 | 0 Class-G | LMO2         |
| 3447 | 0 | 0.578949 | 0.859 | 0.271 | 0 Class-G | PPP1R14B     |
| 3448 | 0 | 0.578876 | 0.841 | 0.157 | 0 Class-G | ETV1         |
| 3449 | 0 | 0.576806 | 0.616 | 0.102 | 0 Class-G | EHBP1        |
| 3450 | 0 | 0.576284 | 0.828 | 0.189 | 0 Class-G | SSBP4        |
| 3451 | 0 | 0.575741 | 0.672 | 0.134 | 0 Class-G | RNF19A       |
| 3452 | 0 | 0.573492 | 0.708 | 0.108 | 0 Class-G | PTRF         |
| 3453 | 0 | 0.573445 | 0.697 | 0.104 | 0 Class-G | NAT14        |
| 3454 | 0 | 0.572657 | 0.86  | 0.227 | 0 Class-G | STMN3        |
| 3455 | 0 | 0.572225 | 0.591 | 0.07  | 0 Class-G | BTBD3        |
| 3456 | 0 | 0.572198 | 0.47  | 0.021 | 0 Class-G | PDGFD        |
| 3457 | 0 | 0.571266 | 0.716 | 0.126 | 0 Class-G | SPRED1       |
| 3458 | 0 | 0.569951 | 0.767 | 0.158 | 0 Class-G | ABHD17A      |
| 3459 | 0 | 0.569413 | 0.608 | 0.093 | 0 Class-G | HOMER1       |
| 3460 | 0 | 0.567637 | 0.841 | 0.239 | 0 Class-G | CAMK2N1      |
| 3461 | 0 | 0.567394 | 0.669 | 0.102 | 0 Class-G | DAG1         |
| 3462 | 0 | 0.565163 | 0.683 | 0.129 | 0 Class-G | PRKCA        |
| 3463 | 0 | 0.563416 | 0.508 | 0.04  | 0 Class-G | SFRP1        |
| 3464 | 0 | 0.562061 | 0.868 | 0.257 | 0 Class-G | COPRS        |
| 3465 | 0 | 0.561826 | 0.829 | 0.204 | 0 Class-G | TCF12        |
| 3466 | 0 | 0.561737 | 0.626 | 0.115 | 0 Class-G | ROBO1        |
| 3467 | 0 | 0.560661 | 0.91  | 0.247 | 0 Class-G | DDR1         |
| 3468 | 0 | 0.559555 | 0.65  | 0.127 | 0 Class-G | AKAP7        |
| 3469 | 0 | 0.559349 | 0.658 | 0.132 | 0 Class-G | MSMO1        |
| 3470 | 0 | 0.558458 | 0.497 | 0.053 | 0 Class-G | ZNF385D      |
| 3471 | 0 | 0.557838 | 0.886 | 0.244 | 0 Class-G | FYN          |
| 3472 | 0 | 0.556671 | 0.487 | 0.042 | 0 Class-G | ELOVL2       |
| 3473 | 0 | 0.555416 | 0.469 | 0.045 | 0 Class-G | FGFBP3       |
| 3474 | 0 | 0.554016 | 0.87  | 0.236 | 0 Class-G | VGLL4        |
| 3475 | 0 | 0.553862 | 0.88  | 0.29  | 0 Class-G | MAP1LC3A     |
| 3476 | 0 | 0.551751 | 0.726 | 0.15  | 0 Class-G | HYAL2        |
| 3477 | 0 | 0.551154 | 0.713 | 0.17  | 0 Class-G | PDLIM7       |
| 3478 | 0 | 0.55019  | 0.472 | 0.023 | 0 Class-G | TLCD1        |
| 3479 | 0 | 0.54916  | 0.789 | 0.188 | 0 Class-G | FMNL2        |
| 3480 | 0 | 0.548695 | 0.716 | 0.126 | 0 Class-G | REEP2        |
| 3481 | 0 | 0.548478 | 0.931 | 0.347 | 0 Class-G | C17orf89     |
| 3482 | 0 | 0.547205 | 0.699 | 0.125 | 0 Class-G | TMEM54       |

|      |   |          |       |       |           |          |
|------|---|----------|-------|-------|-----------|----------|
| 3483 | 0 | 0.547108 | 0.83  | 0.224 | 0 Class-G | SLC35B2  |
| 3484 | 0 | 0.547006 | 0.715 | 0.146 | 0 Class-G | AGT      |
| 3485 | 0 | 0.546114 | 0.802 | 0.243 | 0 Class-G | CTDNEP1  |
| 3486 | 0 | 0.545503 | 0.515 | 0.079 | 0 Class-G | SLC1A2   |
| 3487 | 0 | 0.54489  | 0.843 | 0.217 | 0 Class-G | SPECC1   |
| 3488 | 0 | 0.544734 | 0.535 | 0.072 | 0 Class-G | WSCD1    |
| 3489 | 0 | 0.544215 | 0.931 | 0.299 | 0 Class-G | CXXC5    |
| 3490 | 0 | 0.544126 | 0.848 | 0.246 | 0 Class-G | ECI2     |
| 3491 | 0 | 0.543886 | 0.729 | 0.147 | 0 Class-G | OGFOD3   |
| 3492 | 0 | 0.543213 | 0.71  | 0.15  | 0 Class-G | NRP2     |
| 3493 | 0 | 0.54241  | 0.775 | 0.174 | 0 Class-G | SH3GL1   |
| 3494 | 0 | 0.541961 | 0.626 | 0.113 | 0 Class-G | TRIM47   |
| 3495 | 0 | 0.541797 | 0.818 | 0.172 | 0 Class-G | PCDH9    |
| 3496 | 0 | 0.541778 | 0.756 | 0.12  | 0 Class-G | TNC      |
| 3497 | 0 | 0.539709 | 0.645 | 0.106 | 0 Class-G | LDLRAD3  |
| 3498 | 0 | 0.539389 | 0.823 | 0.22  | 0 Class-G | PPP2CB   |
| 3499 | 0 | 0.538647 | 0.836 | 0.224 | 0 Class-G | KIF21A   |
| 3500 | 0 | 0.537896 | 0.496 | 0.048 | 0 Class-G | KCNE4    |
| 3501 | 0 | 0.537382 | 0.785 | 0.172 | 0 Class-G | RBMS1    |
| 3502 | 0 | 0.536798 | 0.603 | 0.1   | 0 Class-G | NETO2    |
| 3503 | 0 | 0.533951 | 0.578 | 0.068 | 0 Class-G | SLC25A23 |
| 3504 | 0 | 0.533802 | 0.592 | 0.073 | 0 Class-G | COLGALT2 |
| 3505 | 0 | 0.533772 | 0.649 | 0.115 | 0 Class-G | DOK5     |
| 3506 | 0 | 0.532608 | 0.811 | 0.206 | 0 Class-G | CRLS1    |
| 3507 | 0 | 0.531555 | 0.848 | 0.224 | 0 Class-G | 11-Sep   |
| 3508 | 0 | 0.528411 | 0.874 | 0.261 | 0 Class-G | SLC39A3  |
| 3509 | 0 | 0.527789 | 0.567 | 0.092 | 0 Class-G | WEE1     |
| 3510 | 0 | 0.525798 | 0.86  | 0.281 | 0 Class-G | ATP2B1   |
| 3511 | 0 | 0.52561  | 0.485 | 0.044 | 0 Class-G | IGSF10   |
| 3512 | 0 | 0.525176 | 0.635 | 0.093 | 0 Class-G | GCAT     |
| 3513 | 0 | 0.524886 | 0.517 | 0.038 | 0 Class-G | RHOJ     |
| 3514 | 0 | 0.523652 | 0.912 | 0.276 | 0 Class-G | FHL1     |
| 3515 | 0 | 0.523277 | 0.856 | 0.243 | 0 Class-G | MACF1    |
| 3516 | 0 | 0.522936 | 0.93  | 0.304 | 0 Class-G | SYT11    |
| 3517 | 0 | 0.522314 | 0.809 | 0.188 | 0 Class-G | GIPC1    |
| 3518 | 0 | 0.519796 | 0.475 | 0.047 | 0 Class-G | TMEM132B |
| 3519 | 0 | 0.519377 | 0.447 | 0.042 | 0 Class-G | SOX21    |
| 3520 | 0 | 0.519317 | 0.732 | 0.159 | 0 Class-G | BCAT1    |
| 3521 | 0 | 0.518625 | 0.658 | 0.131 | 0 Class-G | DKK3     |
| 3522 | 0 | 0.51742  | 0.498 | 0.052 | 0 Class-G | CHST7    |
| 3523 | 0 | 0.517402 | 0.783 | 0.196 | 0 Class-G | TRAF4    |
| 3524 | 0 | 0.517225 | 0.554 | 0.065 | 0 Class-G | CERS1    |
| 3525 | 0 | 0.516516 | 0.703 | 0.149 | 0 Class-G | HEBP2    |
| 3526 | 0 | 0.515022 | 0.412 | 0.038 | 0 Class-G | LMCD1    |
| 3527 | 0 | 0.514973 | 0.579 | 0.092 | 0 Class-G | HIVEP3   |
| 3528 | 0 | 0.513914 | 0.835 | 0.218 | 0 Class-G | C5orf24  |
| 3529 | 0 | 0.51382  | 0.773 | 0.177 | 0 Class-G | OXMLD1   |
| 3530 | 0 | 0.513641 | 0.483 | 0.053 | 0 Class-G | SLC35F2  |
| 3531 | 0 | 0.512981 | 0.583 | 0.074 | 0 Class-G | GNG12    |
| 3532 | 0 | 0.512593 | 0.515 | 0.053 | 0 Class-G | LAMA5    |
| 3533 | 0 | 0.512275 | 0.893 | 0.292 | 0 Class-G | TSEN34   |

|      |   |          |       |       |           |          |
|------|---|----------|-------|-------|-----------|----------|
| 3534 | 0 | 0.512202 | 0.668 | 0.125 | 0 Class-G | SPATC1L  |
| 3535 | 0 | 0.511877 | 0.634 | 0.124 | 0 Class-G | AKAP12   |
| 3536 | 0 | 0.51186  | 0.579 | 0.078 | 0 Class-G | DMWD     |
| 3537 | 0 | 0.510888 | 0.497 | 0.045 | 0 Class-G | LAMC1    |
| 3538 | 0 | 0.505183 | 0.46  | 0.04  | 0 Class-G | THSD1    |
| 3539 | 0 | 0.504692 | 0.48  | 0.068 | 0 Class-G | SERINC2  |
| 3540 | 0 | 0.50443  | 0.733 | 0.168 | 0 Class-G | HOMER3   |
| 3541 | 0 | 0.504186 | 0.76  | 0.181 | 0 Class-G | ACTN1    |
| 3542 | 0 | 0.5039   | 0.592 | 0.078 | 0 Class-G | VWA1     |
| 3543 | 0 | 0.503573 | 0.491 | 0.048 | 0 Class-G | TNFRSF19 |
| 3544 | 0 | 0.503538 | 0.446 | 0.034 | 0 Class-G | PITX1    |
| 3545 | 0 | 0.503478 | 0.566 | 0.08  | 0 Class-G | TNIK     |
| 3546 | 0 | 0.502812 | 0.413 | 0.029 | 0 Class-G | LOXL1    |
| 3547 | 0 | 0.502282 | 0.867 | 0.235 | 0 Class-G | GOLM1    |
| 3548 | 0 | 0.502098 | 0.579 | 0.082 | 0 Class-G | TEAD1    |
| 3549 | 0 | 0.501668 | 0.826 | 0.224 | 0 Class-G | GAMT     |
| 3550 | 0 | 0.501323 | 0.949 | 0.359 | 0 Class-G | NFIC     |
| 3551 | 0 | 0.501154 | 0.768 | 0.191 | 0 Class-G | ENAH     |
| 3552 | 0 | 0.500092 | 0.412 | 0.022 | 0 Class-G | ACSBG1   |
| 3553 | 0 | 0.500048 | 0.763 | 0.17  | 0 Class-G | REEP3    |
| 3554 | 0 | 0.499974 | 0.441 | 0.029 | 0 Class-G | ELMOD1   |
| 3555 | 0 | 0.499341 | 0.577 | 0.084 | 0 Class-G | TMEM131  |
| 3556 | 0 | 0.494976 | 0.712 | 0.152 | 0 Class-G | CASC4    |
| 3557 | 0 | 0.494715 | 0.69  | 0.125 | 0 Class-G | CERS4    |
| 3558 | 0 | 0.493517 | 0.699 | 0.146 | 0 Class-G | CHN1     |
| 3559 | 0 | 0.493169 | 0.743 | 0.166 | 0 Class-G | RAB22A   |
| 3560 | 0 | 0.491924 | 0.58  | 0.092 | 0 Class-G | FOXG1    |
| 3561 | 0 | 0.491924 | 0.683 | 0.132 | 0 Class-G | SV2A     |
| 3562 | 0 | 0.491454 | 0.878 | 0.259 | 0 Class-G | NELFCD   |
| 3563 | 0 | 0.491037 | 0.549 | 0.106 | 0 Class-G | AQP4     |
| 3564 | 0 | 0.490872 | 0.814 | 0.219 | 0 Class-G | KIF1B    |
| 3565 | 0 | 0.490242 | 0.741 | 0.177 | 0 Class-G | SQLE     |
| 3566 | 0 | 0.490063 | 0.865 | 0.239 | 0 Class-G | C16orf45 |
| 3567 | 0 | 0.490044 | 0.43  | 0.032 | 0 Class-G | ILDR2    |
| 3568 | 0 | 0.489354 | 0.857 | 0.273 | 0 Class-G | POLDIP2  |
| 3569 | 0 | 0.48922  | 0.767 | 0.177 | 0 Class-G | TMEM203  |
| 3570 | 0 | 0.487749 | 0.74  | 0.175 | 0 Class-G | TP53I13  |
| 3571 | 0 | 0.486552 | 0.6   | 0.095 | 0 Class-G | PCYT2    |
| 3572 | 0 | 0.485508 | 0.714 | 0.141 | 0 Class-G | ECI1     |
| 3573 | 0 | 0.484661 | 0.554 | 0.08  | 0 Class-G | SCARA3   |
| 3574 | 0 | 0.483326 | 0.511 | 0.062 | 0 Class-G | BEND6    |
| 3575 | 0 | 0.482943 | 0.572 | 0.086 | 0 Class-G | ZNF771   |
| 3576 | 0 | 0.482811 | 0.84  | 0.269 | 0 Class-G | ACSL3    |
| 3577 | 0 | 0.481161 | 0.8   | 0.197 | 0 Class-G | SPTBN1   |
| 3578 | 0 | 0.480846 | 0.503 | 0.062 | 0 Class-G | CNKSR3   |
| 3579 | 0 | 0.480695 | 0.797 | 0.186 | 0 Class-G | PSRC1    |
| 3580 | 0 | 0.480567 | 0.423 | 0.024 | 0 Class-G | FAM69C   |
| 3581 | 0 | 0.478872 | 0.654 | 0.132 | 0 Class-G | REST     |
| 3582 | 0 | 0.478655 | 0.737 | 0.17  | 0 Class-G | MAPK1    |
| 3583 | 0 | 0.477744 | 0.391 | 0.021 | 0 Class-G | TRPM3    |
| 3584 | 0 | 0.476198 | 0.553 | 0.103 | 0 Class-G | IL1RAP   |

|      |       |          |       |       |       |           |            |
|------|-------|----------|-------|-------|-------|-----------|------------|
| 3585 | 0     | 0.475407 | 0.786 | 0.202 | 0     | Class-G   | TSR3       |
| 3586 | 0     | 0.475287 | 0.398 | 0.028 | 0     | Class-G   | ADAMTS9    |
| 3587 | 0     | 0.47513  | 0.745 | 0.185 | 0     | Class-G   | PCBP4      |
| 3588 | 0     | 0.474918 | 0.642 | 0.11  | 0     | Class-G   | AK4        |
| 3589 | 0     | 0.474678 | 0.664 | 0.127 | 0     | Class-G   | CDC25B     |
| 3590 | 0     | 0.474576 | 0.611 | 0.1   | 0     | Class-G   | NRSN2      |
| 3591 | 0     | 0.474122 | 0.433 | 0.032 | 0     | Class-G   | ABHD17C    |
| 3592 | ##### | 0.496671 | 0.985 | 0.501 | ##### | Class-G   | GADD45GIP1 |
| 3593 | ##### | 0.53084  | 0.992 | 0.615 | ##### | Class-G   | VIM        |
| 3594 | ##### | 0.501837 | 0.572 | 0.146 | ##### | Class-G   | CDC42EP4   |
| 3595 | ##### | 0.492882 | 0.913 | 0.31  | ##### | Class-G   | MEST       |
| 3596 | ##### | 0.489693 | 0.905 | 0.303 | ##### | Class-G   | CHCHD10    |
| 3597 | ##### | 0.539089 | 0.995 | 0.523 | ##### | Class-G   | CKB        |
| 3598 | ##### | 0.477474 | 0.9   | 0.331 | ##### | Class-G   | SDF4       |
| 3599 | ##### | 0.473765 | 0.964 | 0.439 | ##### | Class-G   | PPP1CB     |
| 3600 | ##### | 0.507437 | 0.901 | 0.351 | ##### | Class-G   | PCSKIN     |
| 3601 | 0     | 1.700525 | 0.833 | 0.076 | 0     | Undiff-G1 | UBE2C      |
| 3602 | 0     | 1.636268 | 0.785 | 0.046 | 0     | Undiff-G1 | TOP2A      |
| 3603 | 0     | 1.566521 | 0.802 | 0.031 | 0     | Undiff-G1 | PBK        |
| 3604 | 0     | 1.564516 | 0.772 | 0.063 | 0     | Undiff-G1 | CENPF      |
| 3605 | 0     | 1.549912 | 0.814 | 0.064 | 0     | Undiff-G1 | NUSAP1     |
| 3606 | 0     | 1.537733 | 0.809 | 0.065 | 0     | Undiff-G1 | BIRC5      |
| 3607 | 0     | 1.437942 | 0.717 | 0.033 | 0     | Undiff-G1 | FAM64A     |
| 3608 | 0     | 1.391973 | 0.835 | 0.087 | 0     | Undiff-G1 | UBE2T      |
| 3609 | 0     | 1.386021 | 0.831 | 0.196 | 0     | Undiff-G1 | PTTG1      |
| 3610 | 0     | 1.331772 | 0.69  | 0.049 | 0     | Undiff-G1 | TPX2       |
| 3611 | 0     | 1.302954 | 0.665 | 0.06  | 0     | Undiff-G1 | CDKN3      |
| 3612 | 0     | 1.296543 | 0.717 | 0.062 | 0     | Undiff-G1 | CDK1       |
| 3613 | 0     | 1.270329 | 0.859 | 0.174 | 0     | Undiff-G1 | SMC4       |
| 3614 | 0     | 1.269536 | 0.769 | 0.082 | 0     | Undiff-G1 | KIAA0101   |
| 3615 | 0     | 1.263597 | 0.814 | 0.089 | 0     | Undiff-G1 | MAD2L1     |
| 3616 | 0     | 1.24089  | 0.599 | 0.061 | 0     | Undiff-G1 | CCNB1      |
| 3617 | 0     | 1.22959  | 0.772 | 0.068 | 0     | Undiff-G1 | CENPU      |
| 3618 | 0     | 1.221984 | 0.647 | 0.031 | 0     | Undiff-G1 | RRM2       |
| 3619 | 0     | 1.220349 | 0.702 | 0.052 | 0     | Undiff-G1 | PRC1       |
| 3620 | 0     | 1.215538 | 0.669 | 0.027 | 0     | Undiff-G1 | NUF2       |
| 3621 | 0     | 1.21053  | 0.802 | 0.125 | 0     | Undiff-G1 | TYMS       |
| 3622 | 0     | 1.208959 | 0.543 | 0.04  | 0     | Undiff-G1 | CDC20      |
| 3623 | 0     | 1.199131 | 0.698 | 0.021 | 0     | Undiff-G1 | SGOL1      |
| 3624 | 0     | 1.178352 | 0.637 | 0.031 | 0     | Undiff-G1 | MKI67      |
| 3625 | 0     | 1.142594 | 0.56  | 0.033 | 0     | Undiff-G1 | CCNB2      |
| 3626 | 0     | 1.110852 | 0.62  | 0.03  | 0     | Undiff-G1 | SPC25      |
| 3627 | 0     | 1.102844 | 0.58  | 0.019 | 0     | Undiff-G1 | AURKB      |
| 3628 | 0     | 1.098732 | 0.633 | 0.059 | 0     | Undiff-G1 | SGOL2      |
| 3629 | 0     | 1.087681 | 0.601 | 0.026 | 0     | Undiff-G1 | CCNA2      |
| 3630 | 0     | 1.086637 | 0.783 | 0.188 | 0     | Undiff-G1 | H2AFX      |
| 3631 | 0     | 1.084694 | 0.71  | 0.066 | 0     | Undiff-G1 | CENPK      |
| 3632 | 0     | 1.079895 | 0.614 | 0.027 | 0     | Undiff-G1 | GTSE1      |
| 3633 | 0     | 1.065784 | 0.7   | 0.06  | 0     | Undiff-G1 | ZWINT      |
| 3634 | 0     | 1.059761 | 0.711 | 0.139 | 0     | Undiff-G1 | CKAP2      |
| 3635 | 0     | 1.054636 | 0.535 | 0.02  | 0     | Undiff-G1 | ASPM       |

|      |   |          |       |       |                     |
|------|---|----------|-------|-------|---------------------|
| 3636 | 0 | 1.053543 | 0.517 | 0.029 | 0 Undiff-G1CENPE    |
| 3637 | 0 | 1.028114 | 0.504 | 0.024 | 0 Undiff-G1CENPA    |
| 3638 | 0 | 1.016791 | 0.509 | 0.026 | 0 Undiff-G1CDCA3    |
| 3639 | 0 | 1.014309 | 0.574 | 0.016 | 0 Undiff-G1CKAP2L   |
| 3640 | 0 | 1.004231 | 0.458 | 0.032 | 0 Undiff-G1PLK1     |
| 3641 | 0 | 1.001006 | 0.502 | 0.054 | 0 Undiff-G1AURKA    |
| 3642 | 0 | 0.998239 | 0.78  | 0.168 | 0 Undiff-G1SMC2     |
| 3643 | 0 | 0.997062 | 0.59  | 0.033 | 0 Undiff-G1MXD3     |
| 3644 | 0 | 0.988768 | 0.525 | 0.013 | 0 Undiff-G1HJURP    |
| 3645 | 0 | 0.984292 | 0.53  | 0.02  | 0 Undiff-G1NDC80    |
| 3646 | 0 | 0.979663 | 0.696 | 0.139 | 0 Undiff-G1CCDC34   |
| 3647 | 0 | 0.969703 | 0.977 | 0.467 | 0 Undiff-G1HMGB2    |
| 3648 | 0 | 0.966338 | 0.636 | 0.058 | 0 Undiff-G1CENPN    |
| 3649 | 0 | 0.962576 | 0.593 | 0.029 | 0 Undiff-G1KIFC1    |
| 3650 | 0 | 0.961921 | 0.615 | 0.045 | 0 Undiff-G1CENPM    |
| 3651 | 0 | 0.958703 | 0.641 | 0.061 | 0 Undiff-G1ORC6     |
| 3652 | 0 | 0.95605  | 0.71  | 0.094 | 0 Undiff-G1CENPH    |
| 3653 | 0 | 0.952443 | 0.707 | 0.118 | 0 Undiff-G1LMNB1    |
| 3654 | 0 | 0.928867 | 0.774 | 0.18  | 0 Undiff-G1RNASEH2A |
| 3655 | 0 | 0.924233 | 0.573 | 0.034 | 0 Undiff-G1ASF1B    |
| 3656 | 0 | 0.923401 | 0.822 | 0.231 | 0 Undiff-G1GGH      |
| 3657 | 0 | 0.898022 | 0.568 | 0.023 | 0 Undiff-G1FOXM1    |
| 3658 | 0 | 0.894503 | 0.66  | 0.125 | 0 Undiff-G1DHFR     |
| 3659 | 0 | 0.892731 | 0.456 | 0.015 | 0 Undiff-G1CDCA8    |
| 3660 | 0 | 0.884782 | 0.512 | 0.023 | 0 Undiff-G1ECT2     |
| 3661 | 0 | 0.881941 | 0.496 | 0.018 | 0 Undiff-G1KIF2C    |
| 3662 | 0 | 0.879939 | 0.688 | 0.124 | 0 Undiff-G1EZH2     |
| 3663 | 0 | 0.879919 | 0.573 | 0.055 | 0 Undiff-G1RACGAP1  |
| 3664 | 0 | 0.879663 | 0.552 | 0.073 | 0 Undiff-G1FBX05    |
| 3665 | 0 | 0.879594 | 0.517 | 0.024 | 0 Undiff-G1SPC24    |
| 3666 | 0 | 0.878242 | 0.541 | 0.077 | 0 Undiff-G1GINS2    |
| 3667 | 0 | 0.86921  | 0.57  | 0.049 | 0 Undiff-G1TACC3    |
| 3668 | 0 | 0.861651 | 0.491 | 0.024 | 0 Undiff-G1MYBL2    |
| 3669 | 0 | 0.859018 | 0.611 | 0.094 | 0 Undiff-G1DBF4     |
| 3670 | 0 | 0.853572 | 0.523 | 0.021 | 0 Undiff-G1CDCA5    |
| 3671 | 0 | 0.839085 | 0.506 | 0.016 | 0 Undiff-G1NCAPG    |
| 3672 | 0 | 0.838983 | 0.515 | 0.021 | 0 Undiff-G1MELK     |
| 3673 | 0 | 0.836514 | 0.43  | 0.012 | 0 Undiff-G1DLGAP5   |
| 3674 | 0 | 0.825999 | 0.731 | 0.164 | 0 Undiff-G1TMPO     |
| 3675 | 0 | 0.823353 | 0.436 | 0.022 | 0 Undiff-G1TROAP    |
| 3676 | 0 | 0.815057 | 0.615 | 0.092 | 0 Undiff-G1CENPW    |
| 3677 | 0 | 0.812116 | 0.475 | 0.042 | 0 Undiff-G1CLSPN    |
| 3678 | 0 | 0.809589 | 0.53  | 0.042 | 0 Undiff-G1RAD51AP1 |
| 3679 | 0 | 0.808186 | 0.456 | 0.017 | 0 Undiff-G1KIF23    |
| 3680 | 0 | 0.801397 | 0.405 | 0.012 | 0 Undiff-G1NEK2     |
| 3681 | 0 | 0.798718 | 0.595 | 0.113 | 0 Undiff-G1FEN1     |
| 3682 | 0 | 0.797722 | 0.4   | 0.015 | 0 Undiff-G1FAM83D   |
| 3683 | 0 | 0.797409 | 0.533 | 0.047 | 0 Undiff-G1TK1      |
| 3684 | 0 | 0.793725 | 0.469 | 0.041 | 0 Undiff-G1CDT1     |
| 3685 | 0 | 0.792431 | 0.52  | 0.054 | 0 Undiff-G1ATAD2    |
| 3686 | 0 | 0.79236  | 0.516 | 0.029 | 0 Undiff-G1C21orf58 |

|      |            |       |       |                      |
|------|------------|-------|-------|----------------------|
| 3687 | 0 0.783095 | 0.421 | 0.018 | 0 Undiff-G1BUB1      |
| 3688 | 0 0.772596 | 0.494 | 0.034 | 0 Undiff-G1POC1A     |
| 3689 | 0 0.76792  | 0.462 | 0.021 | 0 Undiff-G1SPAG5     |
| 3690 | 0 0.759601 | 0.47  | 0.057 | 0 Undiff-G1KNSTRN    |
| 3691 | 0 0.758233 | 0.462 | 0.013 | 0 Undiff-G1ESCO2     |
| 3692 | 0 0.748606 | 0.537 | 0.065 | 0 Undiff-G1RFC3      |
| 3693 | 0 0.747749 | 0.52  | 0.067 | 0 Undiff-G1CDCA4     |
| 3694 | 0 0.73479  | 0.462 | 0.021 | 0 Undiff-G1PKMYT1    |
| 3695 | 0 0.724209 | 0.394 | 0.019 | 0 Undiff-G1HMMR      |
| 3696 | 0 0.721852 | 0.422 | 0.014 | 0 Undiff-G1NCAPH     |
| 3697 | 0 0.716676 | 0.414 | 0.015 | 0 Undiff-G1DEPDC1    |
| 3698 | 0 0.703523 | 0.46  | 0.044 | 0 Undiff-G1PRR11     |
| 3699 | 0 0.69936  | 0.423 | 0.021 | 0 Undiff-G1OIP5      |
| 3700 | 0 0.699136 | 0.507 | 0.069 | 0 Undiff-G1CHAF1A    |
| 3701 | 0 0.696231 | 0.414 | 0.014 | 0 Undiff-G1KIF4A     |
| 3702 | 0 0.695725 | 0.383 | 0.04  | 0 Undiff-G1E2F1      |
| 3703 | 0 0.692611 | 0.456 | 0.024 | 0 Undiff-G1MND1      |
| 3704 | 0 0.691218 | 0.428 | 0.013 | 0 Undiff-G1KIF15     |
| 3705 | 0 0.684356 | 0.463 | 0.051 | 0 Undiff-G1PSMC3IP   |
| 3706 | 0 0.683751 | 0.467 | 0.03  | 0 Undiff-G1SHCBP1    |
| 3707 | 0 0.681693 | 0.401 | 0.018 | 0 Undiff-G1ARHGAP11A |
| 3708 | 0 0.659667 | 0.51  | 0.08  | 0 Undiff-G1DSN1      |
| 3709 | 0 0.658648 | 0.399 | 0.023 | 0 Undiff-G1XRCC2     |
| 3710 | 0 0.65861  | 0.388 | 0.018 | 0 Undiff-G1CDC45     |
| 3711 | 0 0.654558 | 0.453 | 0.057 | 0 Undiff-G1MNS1      |
| 3712 | 0 0.654532 | 0.39  | 0.012 | 0 Undiff-G1CDCA2     |
| 3713 | 0 0.653511 | 0.386 | 0.036 | 0 Undiff-G1SAPCD2    |
| 3714 | 0 0.648198 | 0.381 | 0.011 | 0 Undiff-G1SKA1      |
| 3715 | 0 0.646411 | 0.283 | 0.011 | 0 Undiff-G1NMU       |
| 3716 | 0 0.638715 | 0.453 | 0.026 | 0 Undiff-G1TRIP13    |
| 3717 | 0 0.638444 | 0.457 | 0.058 | 0 Undiff-G1ATAD5     |
| 3718 | 0 0.636714 | 0.419 | 0.015 | 0 Undiff-G1SKA3      |
| 3719 | 0 0.633151 | 0.451 | 0.06  | 0 Undiff-G1CHEK1     |
| 3720 | 0 0.632286 | 0.342 | 0.008 | 0 Undiff-G1KIF20A    |
| 3721 | 0 0.632253 | 0.423 | 0.027 | 0 Undiff-G1FANCI     |
| 3722 | 0 0.631059 | 0.406 | 0.031 | 0 Undiff-G1KIAA1524  |
| 3723 | 0 0.609479 | 0.306 | 0.01  | 0 Undiff-G1TTK       |
| 3724 | 0 0.597614 | 0.367 | 0.017 | 0 Undiff-G1DEPDC1B   |
| 3725 | 0 0.595747 | 0.41  | 0.038 | 0 Undiff-G1GINS1     |
| 3726 | 0 0.594809 | 0.385 | 0.012 | 0 Undiff-G1CASC5     |
| 3727 | 0 0.592886 | 0.443 | 0.042 | 0 Undiff-G1NCAPG2    |
| 3728 | 0 0.590666 | 0.375 | 0.016 | 0 Undiff-G1RTKN2     |
| 3729 | 0 0.582112 | 0.354 | 0.012 | 0 Undiff-G1KIF14     |
| 3730 | 0 0.580354 | 0.372 | 0.034 | 0 Undiff-G1TCF19     |
| 3731 | 0 0.567485 | 0.399 | 0.044 | 0 Undiff-G1TIMELESS  |
| 3732 | 0 0.553433 | 0.377 | 0.028 | 0 Undiff-G1PARPBP    |
| 3733 | 0 0.552457 | 0.356 | 0.023 | 0 Undiff-G1ARHGAP11B |
| 3734 | 0 0.547519 | 0.415 | 0.04  | 0 Undiff-G1BRCA1     |
| 3735 | 0 0.543326 | 0.354 | 0.031 | 0 Undiff-G1C16orf59  |
| 3736 | 0 0.543237 | 0.301 | 0.006 | 0 Undiff-G1CDC25C    |
| 3737 | 0 0.538082 | 0.341 | 0.016 | 0 Undiff-G1DIAPH3    |

|      |       |          |       |       |       |                   |
|------|-------|----------|-------|-------|-------|-------------------|
| 3738 | 0     | 0.52985  | 0.337 | 0.021 | 0     | Undiff-G1CCNF     |
| 3739 | 0     | 0.514292 | 0.325 | 0.009 | 0     | Undiff-G1BUB1B    |
| 3740 | 0     | 0.512049 | 0.306 | 0.022 | 0     | Undiff-G1CDC6     |
| 3741 | 0     | 0.508389 | 0.264 | 0.014 | 0     | Undiff-G1DTL      |
| 3742 | 0     | 0.500521 | 0.34  | 0.031 | 0     | Undiff-G1BRCA2    |
| 3743 | 0     | 0.49826  | 0.319 | 0.023 | 0     | Undiff-G1FANCD2   |
| 3744 | 0     | 0.497519 | 0.348 | 0.029 | 0     | Undiff-G1CENPO    |
| 3745 | 0     | 0.490208 | 0.283 | 0.015 | 0     | Undiff-G1RAD51    |
| 3746 | ##### | 0.509456 | 0.269 | 0.018 | ##### | Undiff-G1HIST1H1D |
| 3747 | ##### | 0.732507 | 0.67  | 0.15  | ##### | Undiff-G1GMNN     |
| 3748 | ##### | 0.530059 | 0.379 | 0.044 | ##### | Undiff-G1FANCA    |
| 3749 | ##### | 0.598512 | 0.46  | 0.067 | ##### | Undiff-G1LRR1     |
| 3750 | ##### | 0.91654  | 0.823 | 0.247 | ##### | Undiff-G1HMGB3    |
| 3751 | ##### | 0.483528 | 0.4   | 0.049 | ##### | Undiff-G1C14orf80 |
| 3752 | ##### | 0.878551 | 0.842 | 0.301 | ##### | Undiff-G1DTYMK    |
| 3753 | ##### | 0.693276 | 0.48  | 0.077 | ##### | Undiff-G1MCM4     |
| 3754 | ##### | 0.535278 | 0.386 | 0.047 | ##### | Undiff-G1SPDL1    |
| 3755 | ##### | 0.506751 | 0.251 | 0.017 | ##### | Undiff-G1FAM111B  |
| 3756 | ##### | 0.643149 | 0.432 | 0.061 | ##### | Undiff-G1CEP135   |
| 3757 | ##### | 0.592708 | 0.454 | 0.065 | ##### | Undiff-G1KIF20B   |
| 3758 | ##### | 1.086426 | 0.812 | 0.319 | ##### | Undiff-G1UBE2S    |
| 3759 | ##### | 0.605857 | 0.504 | 0.085 | ##### | Undiff-G1MIS18A   |
| 3760 | ##### | 0.648612 | 0.521 | 0.096 | ##### | Undiff-G1LMNB2    |
| 3761 | ##### | 0.521233 | 0.32  | 0.032 | ##### | Undiff-G1APOLD1   |
| 3762 | ##### | 0.499909 | 0.417 | 0.058 | ##### | Undiff-G1ZWILCH   |
| 3763 | ##### | 0.628186 | 0.381 | 0.049 | ##### | Undiff-G1HELLS    |
| 3764 | ##### | 0.759191 | 0.643 | 0.154 | ##### | Undiff-G1CRNDE    |
| 3765 | ##### | 0.718805 | 0.61  | 0.133 | ##### | Undiff-G1RFC4     |
| 3766 | ##### | 0.572274 | 0.349 | 0.041 | ##### | Undiff-G1WDR76    |
| 3767 | ##### | 0.702587 | 0.583 | 0.124 | ##### | Undiff-G1BARD1    |
| 3768 | ##### | 0.672415 | 0.579 | 0.121 | ##### | Undiff-G1ITGB3BP  |
| 3769 | ##### | 0.78368  | 0.677 | 0.183 | ##### | Undiff-G1WDR34    |
| 3770 | ##### | 0.534255 | 0.433 | 0.066 | ##### | Undiff-G1HAUS8    |
| 3771 | ##### | 0.864156 | 0.738 | 0.233 | ##### | Undiff-G1CKS1B    |
| 3772 | ##### | 0.638628 | 0.541 | 0.108 | ##### | Undiff-G1PHF19    |
| 3773 | ##### | 0.586879 | 0.472 | 0.081 | ##### | Undiff-G1VRK1     |
| 3774 | ##### | 0.575464 | 0.37  | 0.051 | ##### | Undiff-G1MCM2     |
| 3775 | ##### | 0.646358 | 0.679 | 0.17  | ##### | Undiff-G1KIF22    |
| 3776 | ##### | 1.039777 | 0.851 | 0.402 | ##### | Undiff-G1HIST1H4C |
| 3777 | ##### | 0.769346 | 0.704 | 0.203 | ##### | Undiff-G1C19orf48 |
| 3778 | ##### | 0.570697 | 0.416 | 0.068 | ##### | Undiff-G1CDK2     |
| 3779 | ##### | 0.693603 | 0.667 | 0.175 | ##### | Undiff-G1ASRGL1   |
| 3780 | ##### | 0.714075 | 0.673 | 0.173 | ##### | Undiff-G1PHGDH    |
| 3781 | ##### | 0.645579 | 0.596 | 0.143 | ##### | Undiff-G1TEX30    |
| 3782 | ##### | 0.86181  | 0.846 | 0.339 | ##### | Undiff-G1CKS2     |
| 3783 | ##### | 0.685411 | 0.635 | 0.154 | ##### | Undiff-G1TMSB15A  |
| 3784 | ##### | 0.684982 | 0.626 | 0.162 | ##### | Undiff-G1RRM1     |
| 3785 | ##### | 0.627189 | 0.599 | 0.151 | ##### | Undiff-G1TMEM97   |
| 3786 | ##### | 0.835056 | 0.725 | 0.229 | ##### | Undiff-G1MCM7     |
| 3787 | ##### | 0.507593 | 0.414 | 0.072 | ##### | Undiff-G1RFC5     |
| 3788 | ##### | 0.68987  | 0.594 | 0.153 | ##### | Undiff-G1GPSM2    |

|      |       |          |       |       |       |                   |
|------|-------|----------|-------|-------|-------|-------------------|
| 3789 | ##### | 0.628324 | 0.599 | 0.155 | ##### | Undiff-G1ACYP1    |
| 3790 | ##### | 0.794704 | 0.783 | 0.29  | ##### | Undiff-G1PCNA     |
| 3791 | ##### | 0.545749 | 0.581 | 0.14  | ##### | Undiff-G1DNAJC9   |
| 3792 | ##### | 0.776558 | 0.714 | 0.243 | ##### | Undiff-G1ANP32E   |
| 3793 | ##### | 0.606992 | 0.595 | 0.152 | ##### | Undiff-G1SYNE2    |
| 3794 | ##### | 0.547223 | 0.98  | 0.725 | ##### | Undiff-G1H2AFZ    |
| 3795 | ##### | 0.813303 | 0.737 | 0.258 | ##### | Undiff-G1CDKN2C   |
| 3796 | ##### | 0.580199 | 0.549 | 0.133 | ##### | Undiff-G1WHSC1    |
| 3797 | ##### | 0.720245 | 0.87  | 0.441 | ##### | Undiff-G1DEK      |
| 3798 | ##### | 0.579262 | 0.468 | 0.098 | ##### | Undiff-G1GNG4     |
| 3799 | ##### | 0.500607 | 0.368 | 0.063 | ##### | Undiff-G1PAX6     |
| 3800 | ##### | 0.565718 | 0.611 | 0.164 | ##### | Undiff-G1TMEM237  |
| 3801 | ##### | 0.830141 | 0.752 | 0.26  | ##### | Undiff-G1HES6     |
| 3802 | ##### | 0.694601 | 0.925 | 0.5   | ##### | Undiff-G1H2AFV    |
| 3803 | ##### | 0.718741 | 0.706 | 0.231 | ##### | Undiff-G1MZT1     |
| 3804 | ##### | 0.547891 | 0.285 | 0.038 | ##### | Undiff-G1PIF1     |
| 3805 | ##### | 0.719115 | 0.594 | 0.159 | ##### | Undiff-G1ASCL1    |
| 3806 | ##### | 0.649428 | 0.706 | 0.235 | ##### | Undiff-G1USP1     |
| 3807 | ##### | 0.487521 | 0.353 | 0.058 | ##### | Undiff-G1LIG1     |
| 3808 | ##### | 0.590776 | 0.527 | 0.129 | ##### | Undiff-G1CDCA7L   |
| 3809 | ##### | 0.679349 | 0.707 | 0.232 | ##### | Undiff-G1CENPV    |
| 3810 | ##### | 0.515046 | 0.451 | 0.093 | ##### | Undiff-G1FAM111A  |
| 3811 | ##### | 0.640708 | 0.509 | 0.124 | ##### | Undiff-G1MCM3     |
| 3812 | ##### | 0.50986  | 0.525 | 0.129 | ##### | Undiff-G1MGME1    |
| 3813 | ##### | 0.633135 | 0.702 | 0.244 | ##### | Undiff-G1TMEM106C |
| 3814 | ##### | 0.571588 | 0.546 | 0.146 | ##### | Undiff-G1NT5DC2   |
| 3815 | ##### | 0.626454 | 0.842 | 0.323 | ##### | Undiff-G1NUDT1    |
| 3816 | ##### | 0.577176 | 0.586 | 0.159 | ##### | Undiff-G1TMSB15B  |
| 3817 | ##### | 0.574057 | 0.6   | 0.174 | ##### | Undiff-G1RHN01    |
| 3818 | ##### | 0.783922 | 0.795 | 0.331 | ##### | Undiff-G1KPNA2    |
| 3819 | ##### | 0.696497 | 0.505 | 0.129 | ##### | Undiff-G1PDGFRA   |
| 3820 | ##### | 0.737652 | 0.568 | 0.174 | ##### | Undiff-G1CDC25B   |
| 3821 | ##### | 0.561149 | 0.52  | 0.134 | ##### | Undiff-G1DRAXIN   |
| 3822 | ##### | 0.535504 | 0.302 | 0.047 | ##### | Undiff-G1CCNE2    |
| 3823 | ##### | 0.685295 | 0.735 | 0.284 | ##### | Undiff-G1SKA2     |
| 3824 | ##### | 0.593502 | 0.647 | 0.212 | ##### | Undiff-G1TUBG1    |
| 3825 | ##### | 0.516731 | 0.51  | 0.132 | ##### | Undiff-G1WEE1     |
| 3826 | ##### | 0.604147 | 0.806 | 0.317 | ##### | Undiff-G1RPA3     |
| 3827 | ##### | 0.676894 | 0.702 | 0.25  | ##### | Undiff-G1SAE1     |
| 3828 | ##### | 0.639499 | 0.638 | 0.202 | ##### | Undiff-G1DSEL     |
| 3829 | ##### | 0.689435 | 0.658 | 0.222 | ##### | Undiff-G1ETV1     |
| 3830 | ##### | 0.557893 | 0.528 | 0.146 | ##### | Undiff-G1BMP7     |
| 3831 | ##### | 0.642005 | 0.806 | 0.341 | ##### | Undiff-G1RAD21    |
| 3832 | ##### | 0.653073 | 0.71  | 0.264 | ##### | Undiff-G1DNMT1    |
| 3833 | ##### | 0.517004 | 0.531 | 0.146 | ##### | Undiff-G1HIRIP3   |
| 3834 | ##### | 0.481787 | 0.491 | 0.126 | ##### | Undiff-G1ZNF738   |
| 3835 | ##### | 0.673829 | 0.895 | 0.403 | ##### | Undiff-G1SOX2     |
| 3836 | ##### | 0.558298 | 0.527 | 0.153 | ##### | Undiff-G1SAC3D1   |
| 3837 | ##### | 0.549418 | 0.62  | 0.202 | ##### | Undiff-G1CSE1L    |
| 3838 | ##### | 0.563561 | 0.536 | 0.158 | ##### | Undiff-G1EMC9     |
| 3839 | ##### | 0.541812 | 0.494 | 0.138 | ##### | Undiff-G1CKAP5    |

|      |          |          |       |       |          |                        |
|------|----------|----------|-------|-------|----------|------------------------|
| 3840 | #####    | 0.515916 | 0.627 | 0.207 | #####    | Undiff-G1CCDC14        |
| 3841 | #####    | 0.558481 | 0.51  | 0.141 | #####    | Undiff-G1CDKN2D        |
| 3842 | #####    | 0.596637 | 0.819 | 0.369 | #####    | Undiff-G1MAD2L2        |
| 3843 | #####    | 0.648669 | 0.817 | 0.36  | #####    | Undiff-G1PSIP1         |
| 3844 | #####    | 0.618803 | 0.968 | 0.56  | #####    | Undiff-G1CKB           |
| 3845 | #####    | 0.700219 | 0.723 | 0.279 | #####    | Undiff-G1EGFR          |
| 3846 | #####    | 0.640119 | 0.806 | 0.372 | #####    | Undiff-G1ODC1          |
| 3847 | #####    | 0.557597 | 0.602 | 0.204 | #####    | Undiff-G1PXMP2         |
| 3848 | #####    | 0.5765   | 0.995 | 0.61  | #####    | Undiff-G1STMN1         |
| 3849 | #####    | 0.484538 | 0.493 | 0.139 | #####    | Undiff-G1SOGA1         |
| 3850 | #####    | 0.54489  | 0.337 | 0.068 | #####    | Undiff-G1FBLN1         |
| 3851 | #####    | 0.609079 | 0.931 | 0.558 | #####    | Undiff-G1RANBP1        |
| 3852 | #####    | 0.596415 | 0.463 | 0.128 | #####    | Undiff-G1GAS1          |
| 3853 | #####    | 0.543718 | 0.767 | 0.322 | #####    | Undiff-G1CBX5          |
| 3854 | #####    | 0.525198 | 0.904 | 0.541 | #####    | Undiff-G1LSM4          |
| 3855 | #####    | 0.593928 | 0.591 | 0.197 | #####    | Undiff-G1POU3F2        |
| 3856 | #####    | 0.603929 | 0.841 | 0.359 | #####    | Undiff-G1PTPRZ1        |
| 3857 | #####    | 0.487518 | 0.533 | 0.166 | #####    | Undiff-G1RAC3          |
| 3858 | #####    | 0.506905 | 0.49  | 0.146 | #####    | Undiff-G1NETO2         |
| 3859 | #####    | 0.47921  | 0.452 | 0.133 | #####    | Undiff-G1ALYREF        |
| 3860 | #####    | 0.592468 | 0.872 | 0.471 | #####    | Undiff-G1TUBB4B        |
| 3861 | #####    | 0.535127 | 0.884 | 0.617 | #####    | Undiff-G1HMG2          |
| 3862 | #####    | 0.680889 | 0.579 | 0.204 | #####    | Undiff-G1NUP107        |
| 3863 | #####    | 0.615974 | 0.819 | 0.35  | #####    | Undiff-G1IGFBP2        |
| 3864 | #####    | 0.564347 | 0.552 | 0.185 | #####    | Undiff-G1FAM181B       |
| 3865 | #####    | 0.635051 | 0.441 | 0.127 | #####    | Undiff-G1B4GALNT1      |
| 3866 | #####    | 0.500041 | 0.674 | 0.261 | #####    | Undiff-G1ARL6IP6       |
| 3867 | #####    | 0.4873   | 0.88  | 0.486 | #####    | Undiff-G1LSM5          |
| 3868 | #####    | 0.51151  | 0.501 | 0.16  | #####    | Undiff-G1OLIG2         |
| 3869 | #####    | 0.599615 | 0.651 | 0.255 | #####    | Undiff-G1BCAN          |
| 3870 | #####    | 0.516506 | 0.728 | 0.304 | #####    | Undiff-G1SGCB          |
| 3871 | #####    | 0.511475 | 0.694 | 0.288 | #####    | Undiff-G1PAICS         |
| 3872 | #####    | 0.515784 | 0.749 | 0.334 | #####    | Undiff-G1SSRP1         |
| 3873 | #####    | 0.502501 | 0.815 | 0.387 | #####    | Undiff-G1NASP          |
| 3874 | #####    | 0.48859  | 0.605 | 0.224 | #####    | Undiff-G1RFC2          |
| 3875 | #####    | 0.496503 | 0.774 | 0.35  | #####    | Undiff-G1BTG3          |
| 3876 | #####    | 0.547876 | 0.819 | 0.435 | #####    | Undiff-G1DUT           |
| 3877 | #####    | 0.504323 | 0.381 | 0.105 | #####    | Undiff-G1TSPAN12       |
| 3878 | #####    | 0.677225 | 0.599 | 0.233 | #####    | Undiff-G1YEATS4        |
| 3879 | #####    | 0.509317 | 0.826 | 0.386 | #####    | Undiff-G1RHOBTB3       |
| 3880 | #####    | 0.51699  | 0.786 | 0.37  | #####    | Undiff-G1DDX39A        |
| 3881 | #####    | 0.560381 | 0.307 | 0.072 | #####    | Undiff-G1BEST3         |
| 3882 | #####    | 0.489423 | 0.828 | 0.402 | #####    | Undiff-G1PAFAH1B3      |
| 3883 | #####    | 0.58752  | 0.612 | 0.248 | #####    | Undiff-G1RP11-620J15.3 |
| 3884 | #####    | 0.527217 | 0.705 | 0.306 | #####    | Undiff-G1CCND2         |
| 3885 | #####    | 0.490138 | 0.778 | 0.395 | #####    | Undiff-G1HNRNPD        |
| 3886 | #####    | 0.4953   | 0.616 | 0.256 | #####    | Undiff-G1HDGF          |
| 3887 | #####    | 0.490252 | 0.973 | 0.531 | 3.55E-99 | Undiff-G1TUBB2B        |
| 3888 | 8.57E-99 | 0.498269 | 0.772 | 0.366 | 1.28E-94 | Undiff-G1MEST          |
| 3889 | 1.18E-98 | 0.511066 | 0.749 | 0.365 | 1.77E-94 | Undiff-G1H1FX          |
| 3890 | 1.59E-98 | 0.496979 | 0.902 | 0.436 | 2.38E-94 | Undiff-G1FXD6          |

|      |          |          |       |       |          |                    |
|------|----------|----------|-------|-------|----------|--------------------|
| 3891 | 5.08E-98 | 0.484511 | 0.591 | 0.247 | 7.59E-94 | Undiff-G1PSRC1     |
| 3892 | 1.58E-97 | 0.488499 | 0.638 | 0.28  | 2.36E-93 | Undiff-G1GLRX5     |
| 3893 | 3.88E-96 | 0.502495 | 0.637 | 0.259 | 5.80E-92 | Undiff-G1NES       |
| 3894 | 8.23E-94 | 0.507169 | 0.348 | 0.106 | 1.23E-89 | Undiff-G1LHFPL3    |
| 3895 | 2.04E-93 | 0.51115  | 0.612 | 0.256 | 3.05E-89 | Undiff-G1SOX9      |
| 3896 | 1.68E-91 | 0.564621 | 0.837 | 0.466 | 2.51E-87 | Undiff-G1CDK4      |
| 3897 | 1.56E-89 | 0.520197 | 0.752 | 0.365 | 2.33E-85 | Undiff-G1FABP7     |
| 3898 | 2.23E-86 | 0.497433 | 0.486 | 0.189 | 3.33E-82 | Undiff-G1CDK6      |
| 3899 | 5.63E-64 | 0.481188 | 0.428 | 0.176 | 8.41E-60 | Undiff-G1COL9A3    |
| 3900 | 1.28E-60 | 0.48787  | 0.258 | 0.084 | 1.91E-56 | Undiff-G1AGAP2-AS1 |
