# Supplementary material for: A Novel Molecular Classification Method for Glioblastoma Based on Tumor Cell Differentiation Trajectories
Source: Hindawi journal article supplement (doi:10.1155/2023/2826815), 2023-02-22
Supplement: f5 [file 2826815.f5.pdf]

|          | p_val | avg_logFC | pct.1 | pct.2 | p_val_adj |
|----------|-------|-----------|-------|-------|-----------|
| C4orf48  | 0     | 0.94689   | 0.916 | 0.084 | 0         |
| RALY     | 0     | 0.908995  | 0.887 | 0.074 | 0         |
| PHLDA1   | 0     | 0.879545  | 0.92  | 0.126 | 0         |
| NEK6     | 0     | 0.821559  | 0.835 | 0.067 | 0         |
| SOX9     | 0     | 0.813803  | 0.911 | 0.118 | 0         |
| TOP1     | 0     | 0.767065  | 0.859 | 0.068 | 0         |
| C17orf89 | 0     | 0.762968  | 0.907 | 0.092 | 0         |
| CHCHD10  | 0     | 0.756375  | 0.882 | 0.082 | 0         |
| SDF4     | 0     | 0.750932  | 0.875 | 0.085 | 0         |
| RRBP1    | 0     | 0.725679  | 0.838 | 0.075 | 0         |
| C20orf24 | 0     | 0.721349  | 0.884 | 0.092 | 0         |
| COPRS    | 0     | 0.712443  | 0.838 | 0.072 | 0         |
| PTPRA    | 0     | 0.706394  | 0.926 | 0.111 | 0         |
| MAP2K2   | 0     | 0.701282  | 0.893 | 0.096 | 0         |
| CCDC85B  | 0     | 0.697618  | 0.86  | 0.084 | 0         |
| NES      | 0     | 0.684629  | 0.934 | 0.15  | 0         |
| TMEM160  | 0     | 0.682269  | 0.876 | 0.084 | 0         |
| GAMT     | 0     | 0.680506  | 0.8   | 0.048 | 0         |
| EMC6     | 0     | 0.680415  | 0.89  | 0.101 | 0         |
| DST      | 0     | 0.677544  | 0.891 | 0.123 | 0         |
| AP1S2    | 0     | 0.671544  | 0.916 | 0.135 | 0         |
| LAMP1    | 0     | 0.667056  | 0.898 | 0.109 | 0         |
| TNFRSF1A | 0     | 0.660833  | 0.811 | 0.075 | 0         |
| PPM1G    | 0     | 0.650596  | 0.84  | 0.077 | 0         |
| TCEA2    | 0     | 0.647917  | 0.895 | 0.123 | 0         |
| POLDIP2  | 0     | 0.646073  | 0.83  | 0.077 | 0         |
| NPDC1    | 0     | 0.64445   | 0.901 | 0.115 | 0         |
| MARCKS   | 0     | 0.640488  | 0.948 | 0.188 | 0         |
| CHMP4B   | 0     | 0.638451  | 0.894 | 0.128 | 0         |
| ABHD12   | 0     | 0.634406  | 0.815 | 0.067 | 0         |
| METRNL   | 0     | 0.632235  | 0.92  | 0.142 | 0         |
| KTN1     | 0     | 0.629153  | 0.921 | 0.14  | 0         |
| MAP1LC3A | 0     | 0.624823  | 0.848 | 0.108 | 0         |
| PTMS     | 0     | 0.618609  | 0.957 | 0.21  | 0         |
| ARGLU1   | 0     | 0.616264  | 0.906 | 0.128 | 0         |
| TSEN34   | 0     | 0.615371  | 0.866 | 0.092 | 0         |
| RBCK1    | 0     | 0.613127  | 0.789 | 0.063 | 0         |
| CDH2     | 0     | 0.612578  | 0.881 | 0.104 | 0         |
| ZNF580   | 0     | 0.609738  | 0.836 | 0.077 | 0         |
| RAB34    | 0     | 0.601055  | 0.86  | 0.099 | 0         |
| KIF5B    | 0     | 0.597016  | 0.887 | 0.118 | 0         |
| FEZ2     | 0     | 0.596134  | 0.856 | 0.096 | 0         |
| DDX17    | 0     | 0.596055  | 0.835 | 0.096 | 0         |
| GNAI2    | 0     | 0.59593   | 0.85  | 0.091 | 0         |
| RCN2     | 0     | 0.591929  | 0.935 | 0.149 | 0         |
| SLC39A3  | 0     | 0.585726  | 0.843 | 0.082 | 0         |
| RDX      | 0     | 0.58169   | 0.935 | 0.161 | 0         |
| PAIP1    | 0     | 0.5802    | 0.848 | 0.091 | 0         |
| NME3     | 0     | 0.579605  | 0.879 | 0.121 | 0         |
| STUB1    | 0     | 0.57941   | 0.878 | 0.103 | 0         |

|          |   |          |       |       |   |
|----------|---|----------|-------|-------|---|
| TMEM165  | 0 | 0.575328 | 0.818 | 0.089 | 0 |
| COMMD7   | 0 | 0.575207 | 0.824 | 0.079 | 0 |
| SNX5     | 0 | 0.573514 | 0.863 | 0.104 | 0 |
| TPM4     | 0 | 0.573456 | 0.884 | 0.149 | 0 |
| NCOR1    | 0 | 0.571673 | 0.913 | 0.14  | 0 |
| STAU1    | 0 | 0.568799 | 0.831 | 0.082 | 0 |
| SPRY1    | 0 | 0.5683   | 0.86  | 0.125 | 0 |
| VGLL4    | 0 | 0.56805  | 0.844 | 0.097 | 0 |
| QKI      | 0 | 0.561681 | 0.933 | 0.15  | 0 |
| CD47     | 0 | 0.561186 | 0.807 | 0.074 | 0 |
| UBE2S    | 0 | 0.55993  | 0.799 | 0.068 | 0 |
| TSPAN5   | 0 | 0.557108 | 0.815 | 0.082 | 0 |
| MTDH     | 0 | 0.556817 | 0.926 | 0.166 | 0 |
| NLRP1    | 0 | 0.55657  | 0.888 | 0.128 | 0 |
| SCAND1   | 0 | 0.552163 | 0.939 | 0.183 | 0 |
| MLEC     | 0 | 0.551603 | 0.858 | 0.087 | 0 |
| HNRNPD   | 0 | 0.548238 | 0.82  | 0.084 | 0 |
| PGLS     | 0 | 0.54658  | 0.903 | 0.133 | 0 |
| C19orf24 | 0 | 0.546402 | 0.833 | 0.082 | 0 |
| PJA2     | 0 | 0.54578  | 0.891 | 0.121 | 0 |
| UBE2J2   | 0 | 0.544085 | 0.776 | 0.062 | 0 |
| AP2B1    | 0 | 0.539473 | 0.812 | 0.085 | 0 |
| SRSF9    | 0 | 0.534587 | 0.947 | 0.169 | 0 |
| SMARCA4  | 0 | 0.53322  | 0.849 | 0.099 | 0 |
| SKA2     | 0 | 0.531933 | 0.795 | 0.072 | 0 |
| ADAM9    | 0 | 0.531653 | 0.826 | 0.087 | 0 |
| DTD1     | 0 | 0.52634  | 0.815 | 0.097 | 0 |
| CAMK2D   | 0 | 0.526159 | 0.835 | 0.099 | 0 |
| C20orf27 | 0 | 0.523391 | 0.79  | 0.087 | 0 |
| NAA10    | 0 | 0.520418 | 0.828 | 0.085 | 0 |
| CD320    | 0 | 0.519273 | 0.892 | 0.113 | 0 |
| BPTF     | 0 | 0.51783  | 0.79  | 0.07  | 0 |
| SMARCB1  | 0 | 0.515842 | 0.849 | 0.103 | 0 |
| STMN3    | 0 | 0.511763 | 0.835 | 0.111 | 0 |
| NME4     | 0 | 0.509348 | 0.831 | 0.104 | 0 |
| SSBP4    | 0 | 0.507173 | 0.801 | 0.074 | 0 |
| TMEM259  | 0 | 0.501737 | 0.813 | 0.091 | 0 |
| GCSH     | 0 | 0.49898  | 0.913 | 0.125 | 0 |
| LHFP     | 0 | 0.491539 | 0.821 | 0.101 | 0 |
| NDFIP1   | 0 | 0.489116 | 0.955 | 0.183 | 0 |
| GATM     | 0 | 0.487409 | 0.901 | 0.145 | 0 |
| C6orf62  | 0 | 0.487166 | 0.822 | 0.096 | 0 |
| HMG20B   | 0 | 0.486523 | 0.827 | 0.099 | 0 |
| BRI3     | 0 | 0.484115 | 0.857 | 0.125 | 0 |
| DEK      | 0 | 0.472616 | 0.819 | 0.091 | 0 |
| HIST1H4C | 0 | 0.469767 | 0.825 | 0.113 | 0 |
| ETV1     | 0 | 0.468323 | 0.818 | 0.094 | 0 |
| PTOV1    | 0 | 0.46741  | 0.902 | 0.14  | 0 |
| ATP1B2   | 0 | 0.46603  | 0.885 | 0.15  | 0 |
| RER1     | 0 | 0.465832 | 0.888 | 0.128 | 0 |
| RAB31    | 0 | 0.465392 | 0.875 | 0.137 | 0 |

|          |            |       |       |   |
|----------|------------|-------|-------|---|
| FYN      | 0 0.465018 | 0.862 | 0.118 | 0 |
| AKR7A2   | 0 0.463739 | 0.752 | 0.062 | 0 |
| MTCH1    | 0 0.460237 | 0.905 | 0.14  | 0 |
| DDR1     | 0 0.454443 | 0.892 | 0.135 | 0 |
| AP3D1    | 0 0.454111 | 0.804 | 0.094 | 0 |
| GNB1     | 0 0.453005 | 0.85  | 0.106 | 0 |
| TTC3     | 0 0.451712 | 0.918 | 0.171 | 0 |
| SLC25A39 | 0 0.450653 | 0.797 | 0.085 | 0 |
| CCDC88A  | 0 0.450557 | 0.778 | 0.082 | 0 |
| P4HB     | 0 0.448651 | 0.939 | 0.19  | 0 |
| MACF1    | 0 0.445263 | 0.832 | 0.115 | 0 |
| SRSF2    | 0 0.444678 | 0.935 | 0.183 | 0 |
| PRELID1  | 0 0.444035 | 0.921 | 0.162 | 0 |
| NFIC     | 0 0.443449 | 0.925 | 0.166 | 0 |
| HP1BP3   | 0 0.442485 | 0.874 | 0.126 | 0 |
| NELFCD   | 0 0.440037 | 0.853 | 0.118 | 0 |
| RTF1     | 0 0.439689 | 0.832 | 0.111 | 0 |
| SYT11    | 0 0.43835  | 0.914 | 0.15  | 0 |
| SERPINH1 | 0 0.432462 | 0.772 | 0.08  | 0 |
| SNF8     | 0 0.431954 | 0.835 | 0.113 | 0 |
| C1QBP    | 0 0.431616 | 0.929 | 0.176 | 0 |
| CSNK2A1  | 0 0.431094 | 0.778 | 0.082 | 0 |
| DUT      | 0 0.429893 | 0.869 | 0.12  | 0 |
| DNPH1    | 0 0.429576 | 0.853 | 0.113 | 0 |
| GSPT1    | 0 0.428057 | 0.756 | 0.072 | 0 |
| MZT2B    | 0 0.427926 | 0.938 | 0.203 | 0 |
| PFDN4    | 0 0.427331 | 0.787 | 0.085 | 0 |
| GTF3A    | 0 0.426012 | 0.853 | 0.108 | 0 |
| ATP2B1   | 0 0.424446 | 0.837 | 0.13  | 0 |
| GRINA    | 0 0.424267 | 0.778 | 0.084 | 0 |
| PTP4A2   | 0 0.422892 | 0.908 | 0.164 | 0 |
| RTN4     | 0 0.420051 | 0.955 | 0.236 | 0 |
| 9-Sep    | 0 0.419242 | 0.863 | 0.13  | 0 |
| ENOPH1   | 0 0.412559 | 0.834 | 0.096 | 0 |
| FSCN1    | 0 0.410674 | 0.835 | 0.123 | 0 |
| CLTC     | 0 0.409743 | 0.79  | 0.099 | 0 |
| DGCR6L   | 0 0.406739 | 0.815 | 0.096 | 0 |
| CNP      | 0 0.406243 | 0.855 | 0.108 | 0 |
| PRAF2    | 0 0.40583  | 0.793 | 0.094 | 0 |
| CTSA     | 0 0.397244 | 0.833 | 0.097 | 0 |
| ECI2     | 0 0.397081 | 0.821 | 0.125 | 0 |
| EIF3J    | 0 0.393447 | 0.817 | 0.097 | 0 |
| DPYSL3   | 0 0.39343  | 0.809 | 0.118 | 0 |
| MATR3    | 0 0.392612 | 0.89  | 0.138 | 0 |
| CLTB     | 0 0.392262 | 0.843 | 0.108 | 0 |
| PPP1CB   | 0 0.391775 | 0.942 | 0.21  | 0 |
| DLGAP4   | 0 0.390681 | 0.747 | 0.075 | 0 |
| DPP7     | 0 0.389867 | 0.828 | 0.116 | 0 |
| AHCY     | 0 0.389744 | 0.775 | 0.091 | 0 |
| C19orf60 | 0 0.389549 | 0.863 | 0.132 | 0 |
| PYURF    | 0 0.38918  | 0.922 | 0.168 | 0 |

|           |   |          |       |       |   |
|-----------|---|----------|-------|-------|---|
| CSNK1A1   | 0 | 0.388665 | 0.948 | 0.203 | 0 |
| BRD4      | 0 | 0.388449 | 0.799 | 0.092 | 0 |
| GIPC1     | 0 | 0.387065 | 0.783 | 0.097 | 0 |
| APLP2     | 0 | 0.386658 | 0.95  | 0.198 | 0 |
| EPN1      | 0 | 0.386033 | 0.77  | 0.082 | 0 |
| LINC00657 | 0 | 0.382182 | 0.838 | 0.109 | 0 |
| UBE2D2    | 0 | 0.380946 | 0.941 | 0.178 | 0 |
| C9orf16   | 0 | 0.380263 | 0.91  | 0.2   | 0 |
| PGRMC1    | 0 | 0.380003 | 0.794 | 0.103 | 0 |
| PIGT      | 0 | 0.379894 | 0.847 | 0.116 | 0 |
| MTPN      | 0 | 0.378322 | 0.825 | 0.089 | 0 |
| TRIB2     | 0 | 0.377434 | 0.871 | 0.135 | 0 |
| MAD2L2    | 0 | 0.377083 | 0.841 | 0.121 | 0 |
| METTL9    | 0 | 0.376449 | 0.853 | 0.12  | 0 |
| JTB       | 0 | 0.375819 | 0.936 | 0.183 | 0 |
| HINT2     | 0 | 0.37449  | 0.772 | 0.092 | 0 |
| SRRM2     | 0 | 0.373084 | 0.917 | 0.176 | 0 |
| HNRNPM    | 0 | 0.371085 | 0.875 | 0.138 | 0 |
| SLC25A11  | 0 | 0.37058  | 0.834 | 0.113 | 0 |
| ARL6IP4   | 0 | 0.369061 | 0.938 | 0.209 | 0 |
| GADD45GIF | 0 | 0.366284 | 0.965 | 0.272 | 0 |
| SRSF4     | 0 | 0.36316  | 0.769 | 0.087 | 0 |
| LYPLA1    | 0 | 0.362056 | 0.854 | 0.116 | 0 |
| DDAH2     | 0 | 0.361193 | 0.791 | 0.118 | 0 |
| SPATS2L   | 0 | 0.359409 | 0.824 | 0.12  | 0 |
| GRHPR     | 0 | 0.359124 | 0.843 | 0.118 | 0 |
| ZNF428    | 0 | 0.358908 | 0.967 | 0.232 | 0 |
| GBAS      | 0 | 0.358186 | 0.774 | 0.091 | 0 |
| TTC19     | 0 | 0.357514 | 0.807 | 0.106 | 0 |
| SNRNP70   | 0 | 0.357376 | 0.861 | 0.138 | 0 |
| SH3GLB1   | 0 | 0.357367 | 0.809 | 0.125 | 0 |
| IRS2      | 0 | 0.357043 | 0.828 | 0.132 | 0 |
| LAGE3     | 0 | 0.355432 | 0.81  | 0.108 | 0 |
| MVB12A    | 0 | 0.35354  | 0.791 | 0.115 | 0 |
| C1orf122  | 0 | 0.352152 | 0.941 | 0.217 | 0 |
| LAPTM4B   | 0 | 0.351864 | 0.838 | 0.12  | 0 |
| SSNA1     | 0 | 0.351735 | 0.832 | 0.115 | 0 |
| C19orf43  | 0 | 0.351398 | 0.964 | 0.248 | 0 |
| ABI2      | 0 | 0.347642 | 0.87  | 0.145 | 0 |
| RNF187    | 0 | 0.347435 | 0.869 | 0.138 | 0 |
| YWHAB     | 0 | 0.34706  | 0.966 | 0.268 | 0 |
| GNB2      | 0 | 0.344558 | 0.916 | 0.19  | 0 |
| ALKBH7    | 0 | 0.342223 | 0.911 | 0.162 | 0 |
| ITPA      | 0 | 0.341847 | 0.851 | 0.13  | 0 |
| ESF1      | 0 | 0.340282 | 0.825 | 0.118 | 0 |
| KPNB1     | 0 | 0.339652 | 0.825 | 0.128 | 0 |
| DDRGK1    | 0 | 0.338012 | 0.866 | 0.144 | 0 |
| MAF1      | 0 | 0.336505 | 0.765 | 0.099 | 0 |
| KRT10     | 0 | 0.336244 | 0.925 | 0.209 | 0 |
| CCDC47    | 0 | 0.335466 | 0.812 | 0.12  | 0 |
| MPG       | 0 | 0.334484 | 0.806 | 0.101 | 0 |

|          |   |          |       |       |   |
|----------|---|----------|-------|-------|---|
| HMG1     | 0 | 0.33185  | 0.926 | 0.214 | 0 |
| KDELR2   | 0 | 0.330704 | 0.879 | 0.147 | 0 |
| NENF     | 0 | 0.329706 | 0.907 | 0.171 | 0 |
| SPG21    | 0 | 0.328537 | 0.758 | 0.077 | 0 |
| APMAP    | 0 | 0.32826  | 0.856 | 0.121 | 0 |
| MUM1     | 0 | 0.324479 | 0.841 | 0.137 | 0 |
| CMPK1    | 0 | 0.324252 | 0.771 | 0.096 | 0 |
| TXNL4A   | 0 | 0.32411  | 0.862 | 0.126 | 0 |
| FEZ1     | 0 | 0.322941 | 0.945 | 0.212 | 0 |
| GOLM1    | 0 | 0.322633 | 0.852 | 0.128 | 0 |
| EGFR     | 0 | 0.322543 | 0.929 | 0.215 | 0 |
| TUBB2A   | 0 | 0.32226  | 0.929 | 0.236 | 0 |
| KHDRBS1  | 0 | 0.320351 | 0.844 | 0.135 | 0 |
| EXOC7    | 0 | 0.318157 | 0.778 | 0.104 | 0 |
| HIF1A    | 0 | 0.316309 | 0.883 | 0.144 | 0 |
| EI24     | 0 | 0.313952 | 0.88  | 0.149 | 0 |
| SOX2     | 0 | 0.313884 | 0.969 | 0.287 | 0 |
| CALM3    | 0 | 0.313875 | 0.898 | 0.164 | 0 |
| CXXC5    | 0 | 0.311541 | 0.909 | 0.186 | 0 |
| H2AFY    | 0 | 0.311209 | 0.91  | 0.179 | 0 |
| COX16    | 0 | 0.309994 | 0.879 | 0.156 | 0 |
| UBXN6    | 0 | 0.309799 | 0.749 | 0.087 | 0 |
| PTTG1IP  | 0 | 0.309546 | 0.845 | 0.138 | 0 |
| ARHGDI1A | 0 | 0.309368 | 0.905 | 0.168 | 0 |
| PPP4C    | 0 | 0.309314 | 0.893 | 0.176 | 0 |
| FHL1     | 0 | 0.308125 | 0.897 | 0.171 | 0 |
| CLPTM1   | 0 | 0.307722 | 0.772 | 0.097 | 0 |
| LSM2     | 0 | 0.306405 | 0.842 | 0.128 | 0 |
| FLOT1    | 0 | 0.303854 | 0.878 | 0.157 | 0 |
| ELAVL1   | 0 | 0.303693 | 0.767 | 0.104 | 0 |
| PPP1CC   | 0 | 0.302779 | 0.873 | 0.147 | 0 |
| C16orf13 | 0 | 0.302316 | 0.879 | 0.152 | 0 |
| PARP1    | 0 | 0.299967 | 0.874 | 0.138 | 0 |
| SRM      | 0 | 0.299379 | 0.861 | 0.133 | 0 |
| GTF2I    | 0 | 0.298862 | 0.876 | 0.162 | 0 |
| UBE2I    | 0 | 0.297669 | 0.887 | 0.162 | 0 |
| DNTTIP1  | 0 | 0.296596 | 0.774 | 0.108 | 0 |
| ARL5A    | 0 | 0.296578 | 0.828 | 0.128 | 0 |
| TOMM40   | 0 | 0.296225 | 0.775 | 0.103 | 0 |
| SQSTM1   | 0 | 0.295495 | 0.902 | 0.2   | 0 |
| HDAC2    | 0 | 0.29501  | 0.766 | 0.099 | 0 |
| THRAP3   | 0 | 0.293566 | 0.831 | 0.13  | 0 |
| C21orf59 | 0 | 0.291774 | 0.74  | 0.089 | 0 |
| CCNI     | 0 | 0.290271 | 0.961 | 0.28  | 0 |
| NFE2L2   | 0 | 0.289829 | 0.84  | 0.142 | 0 |
| ACADVL   | 0 | 0.28968  | 0.856 | 0.138 | 0 |
| B3GAT3   | 0 | 0.288664 | 0.823 | 0.132 | 0 |
| PRPF40A  | 0 | 0.288077 | 0.821 | 0.123 | 0 |
| ARID4B   | 0 | 0.287893 | 0.772 | 0.113 | 0 |
| RNH1     | 0 | 0.287186 | 0.881 | 0.188 | 0 |
| LSM14A   | 0 | 0.287014 | 0.823 | 0.126 | 0 |

|          |   |          |       |       |   |
|----------|---|----------|-------|-------|---|
| PRKAR1A  | 0 | 0.286011 | 0.846 | 0.142 | 0 |
| CAMTA1   | 0 | 0.285977 | 0.895 | 0.156 | 0 |
| ZNF593   | 0 | 0.284622 | 0.784 | 0.096 | 0 |
| GPS1     | 0 | 0.283819 | 0.74  | 0.094 | 0 |
| ATP6AP1  | 0 | 0.282931 | 0.847 | 0.137 | 0 |
| SFT2D1   | 0 | 0.28227  | 0.838 | 0.137 | 0 |
| TPR      | 0 | 0.282019 | 0.822 | 0.126 | 0 |
| TERF2IP  | 0 | 0.280544 | 0.849 | 0.145 | 0 |
| GRN      | 0 | 0.279793 | 0.847 | 0.161 | 0 |
| SFPQ     | 0 | 0.27834  | 0.906 | 0.188 | 0 |
| LMO4     | 0 | 0.278148 | 0.939 | 0.231 | 0 |
| NUTF2    | 0 | 0.276216 | 0.831 | 0.115 | 0 |
| MARCKSL1 | 0 | 0.275166 | 0.972 | 0.297 | 0 |
| NOP56    | 0 | 0.27429  | 0.854 | 0.14  | 0 |
| 11-Sep   | 0 | 0.273596 | 0.826 | 0.133 | 0 |
| DDT      | 0 | 0.27357  | 0.913 | 0.191 | 0 |
| TIMM10   | 0 | 0.272716 | 0.774 | 0.106 | 0 |
| ILF3     | 0 | 0.271543 | 0.843 | 0.144 | 0 |
| SPTBN1   | 0 | 0.269961 | 0.784 | 0.118 | 0 |
| NSA2     | 0 | 0.269006 | 0.8   | 0.113 | 0 |
| PFN1     | 0 | 0.26862  | 0.98  | 0.362 | 0 |
| SERPINB6 | 0 | 0.268271 | 0.822 | 0.13  | 0 |
| RAB10    | 0 | 0.267523 | 0.875 | 0.142 | 0 |
| PDIA3    | 0 | 0.2665   | 0.899 | 0.183 | 0 |
| ERLEC1   | 0 | 0.263945 | 0.813 | 0.123 | 0 |
| COMT     | 0 | 0.263072 | 0.939 | 0.203 | 0 |
| BRD2     | 0 | 0.263006 | 0.776 | 0.118 | 0 |
| UBE2E3   | 0 | 0.262881 | 0.836 | 0.144 | 0 |
| PIN1     | 0 | 0.259665 | 0.947 | 0.221 | 0 |
| WDR45B   | 0 | 0.25933  | 0.843 | 0.137 | 0 |
| IDS      | 0 | 0.258042 | 0.829 | 0.166 | 0 |
| VAMP3    | 0 | 0.257385 | 0.731 | 0.085 | 0 |
| MKKS     | 0 | 0.255319 | 0.838 | 0.152 | 0 |
| CHD9     | 0 | 0.255073 | 0.851 | 0.145 | 0 |
| TADA3    | 0 | 0.24907  | 0.832 | 0.147 | 0 |
| SLC39A1  | 0 | 0.247728 | 0.759 | 0.104 | 0 |
| PRPF6    | 0 | 0.247645 | 0.793 | 0.109 | 0 |
| XRN2     | 0 | 0.247007 | 0.847 | 0.135 | 0 |
| UBE2L3   | 0 | 0.243663 | 0.907 | 0.169 | 0 |
| ATRX     | 0 | 0.242464 | 0.796 | 0.142 | 0 |
| MZT2A    | 0 | 0.242222 | 0.794 | 0.128 | 0 |
| ECHS1    | 0 | 0.241537 | 0.812 | 0.121 | 0 |
| NOVA1    | 0 | 0.240399 | 0.985 | 0.393 | 0 |
| CLPP     | 0 | 0.239647 | 0.883 | 0.156 | 0 |
| MAP1LC3B | 0 | 0.238235 | 0.854 | 0.152 | 0 |
| HDLBP    | 0 | 0.237639 | 0.747 | 0.104 | 0 |
| DHX36    | 0 | 0.236377 | 0.82  | 0.132 | 0 |
| SERP1    | 0 | 0.23599  | 0.875 | 0.168 | 0 |
| NAP1L4   | 0 | 0.234881 | 0.827 | 0.132 | 0 |
| FIBIN    | 0 | 0.23436  | 0.872 | 0.174 | 0 |
| NOL7     | 0 | 0.232979 | 0.799 | 0.125 | 0 |

|          |   |          |       |       |   |
|----------|---|----------|-------|-------|---|
| RAD23B   | 0 | 0.232089 | 0.782 | 0.109 | 0 |
| STOML2   | 0 | 0.230888 | 0.863 | 0.156 | 0 |
| ATP5D    | 0 | 0.229676 | 0.967 | 0.294 | 0 |
| TSPAN3   | 0 | 0.228186 | 0.935 | 0.2   | 0 |
| PRRC2C   | 0 | 0.227475 | 0.869 | 0.154 | 0 |
| SF1      | 0 | 0.226986 | 0.854 | 0.156 | 0 |
| BAALC    | 0 | 0.226612 | 0.904 | 0.207 | 0 |
| RNF114   | 0 | 0.22565  | 0.836 | 0.133 | 0 |
| MAGEF1   | 0 | 0.225191 | 0.831 | 0.147 | 0 |
| BBX      | 0 | 0.224521 | 0.847 | 0.138 | 0 |
| BTG1     | 0 | 0.222629 | 0.914 | 0.239 | 0 |
| SGTA     | 0 | 0.221008 | 0.737 | 0.097 | 0 |
| LIMA1    | 0 | 0.220638 | 0.872 | 0.176 | 0 |
| LMNA     | 0 | 0.220479 | 0.853 | 0.174 | 0 |
| PLEKHJ1  | 0 | 0.219772 | 0.818 | 0.14  | 0 |
| FAM3C    | 0 | 0.21896  | 0.86  | 0.169 | 0 |
| ATP6V0E2 | 0 | 0.217908 | 0.951 | 0.234 | 0 |
| PTPRZ1   | 0 | 0.21671  | 0.969 | 0.342 | 0 |
| RHOBTB3  | 0 | 0.214417 | 0.897 | 0.197 | 0 |
| EIF4G2   | 0 | 0.213554 | 0.955 | 0.284 | 0 |
| GGNBP2   | 0 | 0.213424 | 0.742 | 0.111 | 0 |
| RTFDC1   | 0 | 0.21318  | 0.909 | 0.183 | 0 |
| LSM4     | 0 | 0.212012 | 0.926 | 0.243 | 0 |
| SCAF11   | 0 | 0.211719 | 0.769 | 0.113 | 0 |
| APP      | 0 | 0.209258 | 0.964 | 0.268 | 0 |
| CLTA     | 0 | 0.209201 | 0.917 | 0.197 | 0 |
| SCD5     | 0 | 0.208276 | 0.855 | 0.188 | 0 |
| ARPP19   | 0 | 0.207206 | 0.787 | 0.125 | 0 |
| FARSA    | 0 | 0.207069 | 0.755 | 0.118 | 0 |
| YBX3     | 0 | 0.206757 | 0.845 | 0.186 | 0 |
| DCXR     | 0 | 0.206398 | 0.867 | 0.176 | 0 |
| ACTN4    | 0 | 0.201986 | 0.82  | 0.157 | 0 |
| SAP30BP  | 0 | 0.201214 | 0.764 | 0.115 | 0 |
| EIF3F    | 0 | 0.201149 | 0.91  | 0.193 | 0 |
| APOA1BP  | 0 | 0.201147 | 0.805 | 0.123 | 0 |
| DNAJB11  | 0 | 0.200425 | 0.745 | 0.106 | 0 |
| SET      | 0 | 0.200045 | 0.931 | 0.224 | 0 |
| STX10    | 0 | 0.198678 | 0.8   | 0.125 | 0 |
| DYNC1I2  | 0 | 0.197253 | 0.85  | 0.159 | 0 |
| LYRM2    | 0 | 0.189561 | 0.733 | 0.106 | 0 |
| CYC1     | 0 | 0.189384 | 0.925 | 0.203 | 0 |
| WDR1     | 0 | 0.189158 | 0.752 | 0.126 | 0 |
| RPS19BP1 | 0 | 0.188859 | 0.902 | 0.19  | 0 |
| GLTSCR2  | 0 | 0.188355 | 0.878 | 0.162 | 0 |
| SDF2     | 0 | 0.188268 | 0.782 | 0.116 | 0 |
| CBX3     | 0 | 0.185875 | 0.884 | 0.195 | 0 |
| ATG3     | 0 | 0.185661 | 0.737 | 0.091 | 0 |
| SMARCE1  | 0 | 0.1852   | 0.742 | 0.12  | 0 |
| PRKRA    | 0 | 0.184146 | 0.764 | 0.132 | 0 |
| TMEM9B   | 0 | 0.183234 | 0.89  | 0.188 | 0 |
| PCBP1    | 0 | 0.180529 | 0.884 | 0.169 | 0 |

|          |   |          |       |       |   |
|----------|---|----------|-------|-------|---|
| TCEA1    | 0 | 0.180225 | 0.93  | 0.234 | 0 |
| DNASE2   | 0 | 0.179852 | 0.766 | 0.128 | 0 |
| GTF2F2   | 0 | 0.179094 | 0.758 | 0.121 | 0 |
| PDCD6    | 0 | 0.178806 | 0.902 | 0.193 | 0 |
| PRPF31   | 0 | 0.178702 | 0.859 | 0.171 | 0 |
| VCP      | 0 | 0.178339 | 0.773 | 0.13  | 0 |
| PSMD11   | 0 | 0.177124 | 0.761 | 0.116 | 0 |
| TCF4     | 0 | 0.177092 | 0.942 | 0.274 | 0 |
| NUDT5    | 0 | 0.176121 | 0.68  | 0.075 | 0 |
| ITM2B    | 0 | 0.175381 | 0.979 | 0.32  | 0 |
| SNRPB    | 0 | 0.174437 | 0.928 | 0.234 | 0 |
| ZSWIM7   | 0 | 0.173422 | 0.758 | 0.113 | 0 |
| CNDP2    | 0 | 0.173402 | 0.769 | 0.118 | 0 |
| ERI3     | 0 | 0.172567 | 0.78  | 0.13  | 0 |
| NCL      | 0 | 0.171545 | 0.914 | 0.205 | 0 |
| NSFL1C   | 0 | 0.171254 | 0.811 | 0.138 | 0 |
| DDA1     | 0 | 0.171088 | 0.765 | 0.121 | 0 |
| MAPRE1   | 0 | 0.169121 | 0.854 | 0.152 | 0 |
| BAD      | 0 | 0.168264 | 0.86  | 0.169 | 0 |
| ZNF207   | 0 | 0.168039 | 0.806 | 0.137 | 0 |
| C8orf59  | 0 | 0.167353 | 0.818 | 0.132 | 0 |
| ARF3     | 0 | 0.166493 | 0.766 | 0.12  | 0 |
| AES      | 0 | 0.166113 | 0.864 | 0.179 | 0 |
| MIDN     | 0 | 0.163891 | 0.764 | 0.144 | 0 |
| LARS     | 0 | 0.163492 | 0.758 | 0.125 | 0 |
| SDF2L1   | 0 | 0.162785 | 0.748 | 0.108 | 0 |
| HNRNPU   | 0 | 0.159496 | 0.894 | 0.191 | 0 |
| GLO1     | 0 | 0.158266 | 0.846 | 0.156 | 0 |
| PSMF1    | 0 | 0.157408 | 0.849 | 0.144 | 0 |
| UBA2     | 0 | 0.157185 | 0.731 | 0.113 | 0 |
| ATXN10   | 0 | 0.157128 | 0.745 | 0.116 | 0 |
| RSF1     | 0 | 0.156421 | 0.78  | 0.133 | 0 |
| G6PC3    | 0 | 0.156103 | 0.797 | 0.149 | 0 |
| SF3B1    | 0 | 0.155721 | 0.753 | 0.121 | 0 |
| PABPN1   | 0 | 0.155444 | 0.802 | 0.138 | 0 |
| HNRNPF   | 0 | 0.155069 | 0.855 | 0.164 | 0 |
| ZNF706   | 0 | 0.15391  | 0.913 | 0.243 | 0 |
| FAM127A  | 0 | 0.153823 | 0.886 | 0.2   | 0 |
| U2AF1    | 0 | 0.152453 | 0.923 | 0.227 | 0 |
| TFG      | 0 | 0.152433 | 0.813 | 0.162 | 0 |
| TXN2     | 0 | 0.151914 | 0.837 | 0.15  | 0 |
| APRT     | 0 | 0.150318 | 0.859 | 0.195 | 0 |
| CCDC124  | 0 | 0.150188 | 0.897 | 0.2   | 0 |
| YBX1     | 0 | 0.149673 | 0.976 | 0.407 | 0 |
| AUP1     | 0 | 0.147998 | 0.837 | 0.164 | 0 |
| ZBTB20   | 0 | 0.147771 | 0.844 | 0.186 | 0 |
| GUK1     | 0 | 0.147739 | 0.969 | 0.323 | 0 |
| YWHAQ    | 0 | 0.147211 | 0.969 | 0.304 | 0 |
| SNX3     | 0 | 0.144505 | 0.986 | 0.344 | 0 |
| ITM2C    | 0 | 0.144057 | 0.849 | 0.183 | 0 |
| AURKAIP1 | 0 | 0.14376  | 0.957 | 0.27  | 0 |



|           |   |          |       |       |   |
|-----------|---|----------|-------|-------|---|
| RAB6A     | 0 | 0.143127 | 0.751 | 0.13  | 0 |
| RCN1      | 0 | 0.142415 | 0.844 | 0.174 | 0 |
| ISCU      | 0 | 0.141197 | 0.831 | 0.164 | 0 |
| PPP1CA    | 0 | 0.141033 | 0.88  | 0.198 | 0 |
| CRIP2     | 0 | 0.139327 | 0.823 | 0.174 | 0 |
| ADRM1     | 0 | 0.1387   | 0.877 | 0.197 | 0 |
| PPP2CA    | 0 | 0.138531 | 0.837 | 0.152 | 0 |
| FAM192A   | 0 | 0.138471 | 0.742 | 0.115 | 0 |
| CANX      | 0 | 0.138361 | 0.941 | 0.244 | 0 |
| DDX49     | 0 | 0.137751 | 0.727 | 0.116 | 0 |
| TRIM9     | 0 | 0.137077 | 0.805 | 0.162 | 0 |
| SNX17     | 0 | 0.136251 | 0.818 | 0.159 | 0 |
| CTNNA1    | 0 | 0.136132 | 0.817 | 0.162 | 0 |
| COX5A     | 0 | 0.134844 | 0.947 | 0.244 | 0 |
| RAB14     | 0 | 0.13393  | 0.797 | 0.132 | 0 |
| SSR1      | 0 | 0.133577 | 0.809 | 0.152 | 0 |
| MAPK1IP1L | 0 | 0.132291 | 0.79  | 0.138 | 0 |
| BOLA3     | 0 | 0.132035 | 0.749 | 0.125 | 0 |
| EWSR1     | 0 | 0.130118 | 0.806 | 0.142 | 0 |
| SCCPDH    | 0 | 0.12935  | 0.78  | 0.14  | 0 |
| RPN2      | 0 | 0.129165 | 0.953 | 0.268 | 0 |
| RAC1      | 0 | 0.128765 | 0.973 | 0.364 | 0 |
| UBA1      | 0 | 0.128513 | 0.717 | 0.12  | 0 |
| CHURC1    | 0 | 0.127168 | 0.751 | 0.13  | 0 |
| SLC35B1   | 0 | 0.127014 | 0.831 | 0.169 | 0 |
| MEST      | 0 | 0.12506  | 0.898 | 0.248 | 0 |
| MSI2      | 0 | 0.124276 | 0.905 | 0.239 | 0 |
| CCDC167   | 0 | 0.123715 | 0.747 | 0.125 | 0 |
| FIBP      | 0 | 0.121955 | 0.88  | 0.203 | 0 |
| FLYWCH2   | 0 | 0.120408 | 0.734 | 0.123 | 0 |
| HNRNPA0   | 0 | 0.119939 | 0.925 | 0.219 | 0 |
| NOP10     | 0 | 0.119605 | 0.905 | 0.248 | 0 |
| KLHDC3    | 0 | 0.119244 | 0.712 | 0.108 | 0 |
| NDUFAF3   | 0 | 0.118997 | 0.831 | 0.164 | 0 |
| C7orf50   | 0 | 0.1168   | 0.848 | 0.178 | 0 |
| DNAJC7    | 0 | 0.116505 | 0.817 | 0.156 | 0 |
| WASF2     | 0 | 0.116127 | 0.81  | 0.152 | 0 |
| SRA1      | 0 | 0.115613 | 0.804 | 0.138 | 0 |
| RNF167    | 0 | 0.115346 | 0.843 | 0.174 | 0 |
| RAP1B     | 0 | 0.115022 | 0.815 | 0.15  | 0 |
| RAB11B    | 0 | 0.114387 | 0.876 | 0.198 | 0 |
| DPM2      | 0 | 0.114221 | 0.735 | 0.116 | 0 |
| FAM200B   | 0 | 0.113551 | 0.796 | 0.137 | 0 |
| XRCC5     | 0 | 0.11011  | 0.85  | 0.181 | 0 |
| USP16     | 0 | 0.109965 | 0.748 | 0.12  | 0 |
| ANP32A    | 0 | 0.109837 | 0.731 | 0.111 | 0 |
| RAB9A     | 0 | 0.108226 | 0.752 | 0.118 | 0 |
| TOMM22    | 0 | 0.107007 | 0.825 | 0.144 | 0 |
| PHB2      | 0 | 0.107006 | 0.813 | 0.147 | 0 |
| IGFBP2    | 0 | 0.105229 | 0.96  | 0.378 | 0 |
| N4BP2L2   | 0 | 0.105047 | 0.894 | 0.221 | 0 |

|          |   |          |       |       |   |
|----------|---|----------|-------|-------|---|
| PSMD2    | 0 | 0.104285 | 0.816 | 0.152 | 0 |
| UQCRFS1  | 0 | 0.103818 | 0.93  | 0.227 | 0 |
| VAPA     | 0 | 0.103327 | 0.948 | 0.262 | 0 |
| C16orf45 | 0 | 0.10086  | 0.84  | 0.173 | 0 |
| DECR1    | 0 | -0.1001  | 0.763 | 0.193 | 0 |
| YIPF3    | 0 | -0.10069 | 0.907 | 0.251 | 0 |
| IK       | 0 | -0.10087 | 0.698 | 0.152 | 0 |
| POLR2H   | 0 | -0.10118 | 0.652 | 0.128 | 0 |
| PMP22    | 0 | -0.10178 | 0.933 | 0.354 | 0 |
| DCTN2    | 0 | -0.10253 | 0.822 | 0.203 | 0 |
| PAPOLA   | 0 | -0.10276 | 0.852 | 0.195 | 0 |
| HSPB11   | 0 | -0.10294 | 0.671 | 0.126 | 0 |
| MESDC2   | 0 | -0.10301 | 0.803 | 0.19  | 0 |
| TRIAP1   | 0 | -0.10312 | 0.709 | 0.13  | 0 |
| EIF2S2   | 0 | -0.10442 | 0.949 | 0.338 | 0 |
| RBX1     | 0 | -0.10537 | 0.946 | 0.318 | 0 |
| COA1     | 0 | -0.10545 | 0.718 | 0.166 | 0 |
| TRAPPC2L | 0 | -0.10559 | 0.755 | 0.173 | 0 |
| TAF9     | 0 | -0.1057  | 0.872 | 0.217 | 0 |
| VPS25    | 0 | -0.10675 | 0.693 | 0.133 | 0 |
| TRAM1    | 0 | -0.1071  | 0.731 | 0.154 | 0 |
| CCT5     | 0 | -0.1077  | 0.775 | 0.188 | 0 |
| TUBA1C   | 0 | -0.10791 | 0.729 | 0.179 | 0 |
| UBXN1    | 0 | -0.1084  | 0.878 | 0.253 | 0 |
| DDX5     | 0 | -0.1087  | 0.983 | 0.47  | 0 |
| TMEM50A  | 0 | -0.10873 | 0.878 | 0.236 | 0 |
| C1orf123 | 0 | -0.10882 | 0.708 | 0.147 | 0 |
| IAH1     | 0 | -0.10961 | 0.785 | 0.185 | 0 |
| TMEM11   | 0 | -0.10962 | 0.665 | 0.123 | 0 |
| PDHB     | 0 | -0.10996 | 0.726 | 0.169 | 0 |
| DDX24    | 0 | -0.11041 | 0.817 | 0.186 | 0 |
| RAB7A    | 0 | -0.11191 | 0.938 | 0.289 | 0 |
| VAMP5    | 0 | -0.11245 | 0.823 | 0.227 | 0 |
| NDUFA8   | 0 | -0.11274 | 0.88  | 0.232 | 0 |
| TEX264   | 0 | -0.11336 | 0.769 | 0.178 | 0 |
| ARL2     | 0 | -0.11371 | 0.72  | 0.147 | 0 |
| TMEM14B  | 0 | -0.11414 | 0.819 | 0.214 | 0 |
| CHCHD5   | 0 | -0.11417 | 0.755 | 0.174 | 0 |
| DCTN3    | 0 | -0.11471 | 0.839 | 0.205 | 0 |
| TMX2     | 0 | -0.11546 | 0.767 | 0.178 | 0 |
| SPAG7    | 0 | -0.11819 | 0.855 | 0.236 | 0 |
| PET100   | 0 | -0.11823 | 0.88  | 0.265 | 0 |
| SEC11C   | 0 | -0.11837 | 0.83  | 0.214 | 0 |
| CNIH4    | 0 | -0.11848 | 0.709 | 0.162 | 0 |
| PAFAH1B3 | 0 | -0.11869 | 0.852 | 0.224 | 0 |
| GGPS1    | 0 | -0.11952 | 0.699 | 0.152 | 0 |
| POLR2E   | 0 | -0.11987 | 0.911 | 0.27  | 0 |
| SRSF5    | 0 | -0.12087 | 0.911 | 0.292 | 0 |
| CLNS1A   | 0 | -0.12164 | 0.853 | 0.224 | 0 |
| RTN3     | 0 | -0.12256 | 0.923 | 0.318 | 0 |
| ASNA1    | 0 | -0.12256 | 0.925 | 0.282 | 0 |

|         |   |          |       |       |   |
|---------|---|----------|-------|-------|---|
| FAM32A  | 0 | -0.12518 | 0.861 | 0.226 | 0 |
| LAMTOR2 | 0 | -0.12519 | 0.909 | 0.26  | 0 |
| ROMO1   | 0 | -0.12559 | 0.932 | 0.368 | 0 |
| EIF5    | 0 | -0.12631 | 0.943 | 0.328 | 0 |
| ISOC2   | 0 | -0.12815 | 0.793 | 0.197 | 0 |
| DCTPP1  | 0 | -0.12982 | 0.684 | 0.142 | 0 |
| C14orf2 | 0 | -0.13057 | 0.966 | 0.39  | 0 |
| MEA1    | 0 | -0.13111 | 0.817 | 0.197 | 0 |
| WSB1    | 0 | -0.1312  | 0.91  | 0.311 | 0 |
| TCP1    | 0 | -0.13159 | 0.808 | 0.207 | 0 |
| WBP2    | 0 | -0.1316  | 0.807 | 0.214 | 0 |
| CAPZB   | 0 | -0.13166 | 0.897 | 0.272 | 0 |
| PSMC6   | 0 | -0.13214 | 0.727 | 0.183 | 0 |
| ASAH1   | 0 | -0.13274 | 0.831 | 0.229 | 0 |
| SUPT4H1 | 0 | -0.13294 | 0.813 | 0.188 | 0 |
| POLR2J3 | 0 | -0.13398 | 0.78  | 0.203 | 0 |
| ATP6V1D | 0 | -0.13544 | 0.72  | 0.14  | 0 |
| PPIG    | 0 | -0.13548 | 0.835 | 0.203 | 0 |
| UGP2    | 0 | -0.13565 | 0.774 | 0.198 | 0 |
| NSL1    | 0 | -0.13577 | 0.66  | 0.145 | 0 |
| DCTN6   | 0 | -0.13594 | 0.786 | 0.193 | 0 |
| PDIA6   | 0 | -0.13618 | 0.955 | 0.34  | 0 |
| EIF4H   | 0 | -0.13707 | 0.883 | 0.251 | 0 |
| TMEM208 | 0 | -0.13792 | 0.835 | 0.215 | 0 |
| CD151   | 0 | -0.13806 | 0.936 | 0.338 | 0 |
| NME1    | 0 | -0.14001 | 0.952 | 0.369 | 0 |
| SNRPC   | 0 | -0.14006 | 0.868 | 0.207 | 0 |
| STX8    | 0 | -0.14067 | 0.671 | 0.142 | 0 |
| TM2D1   | 0 | -0.1407  | 0.787 | 0.21  | 0 |
| FUS     | 0 | -0.14116 | 0.937 | 0.33  | 0 |
| CCT6A   | 0 | -0.14169 | 0.876 | 0.27  | 0 |
| DNAJC15 | 0 | -0.14376 | 0.695 | 0.144 | 0 |
| CHCHD3  | 0 | -0.1443  | 0.715 | 0.161 | 0 |
| SEC13   | 0 | -0.14565 | 0.704 | 0.149 | 0 |
| FDPS    | 0 | -0.14567 | 0.841 | 0.231 | 0 |
| C7orf55 | 0 | -0.14624 | 0.878 | 0.246 | 0 |
| GOLGA7  | 0 | -0.14711 | 0.852 | 0.222 | 0 |
| PA2G4   | 0 | -0.14859 | 0.872 | 0.236 | 0 |
| C9orf78 | 0 | -0.14953 | 0.753 | 0.171 | 0 |
| MLLT11  | 0 | -0.15002 | 0.794 | 0.227 | 0 |
| PSMA4   | 0 | -0.15004 | 0.881 | 0.258 | 0 |
| PNKD    | 0 | -0.15238 | 0.891 | 0.26  | 0 |
| SPARC   | 0 | -0.1534  | 0.951 | 0.374 | 0 |
| CACYBP  | 0 | -0.15362 | 0.79  | 0.191 | 0 |
| C1orf43 | 0 | -0.15364 | 0.936 | 0.316 | 0 |
| PDZD11  | 0 | -0.15494 | 0.783 | 0.2   | 0 |
| RPN1    | 0 | -0.1551  | 0.662 | 0.145 | 0 |
| PRKCSH  | 0 | -0.15651 | 0.786 | 0.224 | 0 |
| TIMMDC1 | 0 | -0.15693 | 0.78  | 0.195 | 0 |
| RBBP7   | 0 | -0.15699 | 0.821 | 0.224 | 0 |
| SLIRP   | 0 | -0.15841 | 0.955 | 0.378 | 0 |

|           |   |          |       |       |   |
|-----------|---|----------|-------|-------|---|
| GTF2A2    | 0 | -0.15973 | 0.865 | 0.234 | 0 |
| CCDC12    | 0 | -0.16017 | 0.756 | 0.203 | 0 |
| PSMB4     | 0 | -0.16072 | 0.805 | 0.209 | 0 |
| LMAN2     | 0 | -0.16079 | 0.917 | 0.292 | 0 |
| VPS29     | 0 | -0.16114 | 0.81  | 0.207 | 0 |
| QTRT1     | 0 | -0.16218 | 0.772 | 0.21  | 0 |
| EIF1AX    | 0 | -0.16358 | 0.907 | 0.277 | 0 |
| TALDO1    | 0 | -0.16427 | 0.812 | 0.21  | 0 |
| DPM1      | 0 | -0.16576 | 0.766 | 0.181 | 0 |
| GGCT      | 0 | -0.16656 | 0.767 | 0.193 | 0 |
| NIFK      | 0 | -0.16689 | 0.739 | 0.173 | 0 |
| SRP19     | 0 | -0.1678  | 0.711 | 0.156 | 0 |
| RSRC2     | 0 | -0.16844 | 0.823 | 0.195 | 0 |
| MMADHC    | 0 | -0.16893 | 0.743 | 0.176 | 0 |
| ATOX1     | 0 | -0.1717  | 0.94  | 0.335 | 0 |
| PEF1      | 0 | -0.17192 | 0.706 | 0.157 | 0 |
| DERL2     | 0 | -0.17395 | 0.69  | 0.142 | 0 |
| S100A16   | 0 | -0.17442 | 0.934 | 0.376 | 0 |
| GPX1      | 0 | -0.17462 | 0.956 | 0.379 | 0 |
| BTF3L4    | 0 | -0.17487 | 0.814 | 0.207 | 0 |
| AP2S1     | 0 | -0.17535 | 0.928 | 0.321 | 0 |
| UQCRC2    | 0 | -0.17664 | 0.806 | 0.207 | 0 |
| NDUFS8    | 0 | -0.1767  | 0.944 | 0.335 | 0 |
| NUCKS1    | 0 | -0.17707 | 0.964 | 0.364 | 0 |
| PSMB8     | 0 | -0.17783 | 0.8   | 0.207 | 0 |
| CALD1     | 0 | -0.1799  | 0.897 | 0.294 | 0 |
| ERCC1     | 0 | -0.1822  | 0.807 | 0.217 | 0 |
| CWC15     | 0 | -0.18261 | 0.846 | 0.212 | 0 |
| EIF3G     | 0 | -0.18282 | 0.948 | 0.359 | 0 |
| TMEM256   | 0 | -0.18314 | 0.725 | 0.169 | 0 |
| ILF3-AS1  | 0 | -0.18399 | 0.699 | 0.178 | 0 |
| MPHOSPH8  | 0 | -0.18513 | 0.732 | 0.164 | 0 |
| METAP2    | 0 | -0.18558 | 0.866 | 0.256 | 0 |
| CYB5B     | 0 | -0.18638 | 0.659 | 0.147 | 0 |
| RHEB      | 0 | -0.18642 | 0.927 | 0.318 | 0 |
| SRRM1     | 0 | -0.18694 | 0.829 | 0.221 | 0 |
| MPLKIP    | 0 | -0.188   | 0.813 | 0.203 | 0 |
| PSMC1     | 0 | -0.18877 | 0.795 | 0.207 | 0 |
| TXNDC12   | 0 | -0.18936 | 0.723 | 0.183 | 0 |
| SF3B5     | 0 | -0.19019 | 0.915 | 0.304 | 0 |
| PPA1      | 0 | -0.19084 | 0.684 | 0.164 | 0 |
| ZDHHC4    | 0 | -0.19161 | 0.72  | 0.168 | 0 |
| UQCR10    | 0 | -0.19408 | 0.96  | 0.426 | 0 |
| TMED1     | 0 | -0.19435 | 0.769 | 0.195 | 0 |
| BCAP31    | 0 | -0.19443 | 0.9   | 0.263 | 0 |
| ATP5H     | 0 | -0.19611 | 0.942 | 0.345 | 0 |
| AP2M1     | 0 | -0.19809 | 0.955 | 0.415 | 0 |
| LINC00493 | 0 | -0.19869 | 0.913 | 0.28  | 0 |
| PABPC1    | 0 | -0.19894 | 0.889 | 0.316 | 0 |
| POLR2L    | 0 | -0.19937 | 0.971 | 0.421 | 0 |
| ZFP36L1   | 0 | -0.19951 | 0.813 | 0.275 | 0 |

|           |   |          |       |       |   |
|-----------|---|----------|-------|-------|---|
| POLR1D    | 0 | -0.1996  | 0.681 | 0.142 | 0 |
| MPC2      | 0 | -0.20079 | 0.818 | 0.234 | 0 |
| DDX18     | 0 | -0.20163 | 0.815 | 0.227 | 0 |
| CCT7      | 0 | -0.20209 | 0.873 | 0.27  | 0 |
| C14orf119 | 0 | -0.20235 | 0.635 | 0.126 | 0 |
| MOB4      | 0 | -0.20408 | 0.706 | 0.171 | 0 |
| TIMM17A   | 0 | -0.20416 | 0.736 | 0.152 | 0 |
| RNF7      | 0 | -0.20547 | 0.872 | 0.275 | 0 |
| FXVD6     | 0 | -0.20551 | 0.965 | 0.424 | 0 |
| FAM103A1  | 0 | -0.20563 | 0.614 | 0.118 | 0 |
| FIS1      | 0 | -0.20574 | 0.94  | 0.335 | 0 |
| VDAC3     | 0 | -0.20584 | 0.706 | 0.188 | 0 |
| CST3      | 0 | -0.20685 | 0.996 | 0.569 | 0 |
| SRSF7     | 0 | -0.20744 | 0.872 | 0.267 | 0 |
| DNAJC8    | 0 | -0.20868 | 0.867 | 0.25  | 0 |
| MED4      | 0 | -0.20912 | 0.736 | 0.179 | 0 |
| EID1      | 0 | -0.21074 | 0.98  | 0.485 | 0 |
| HAX1      | 0 | -0.21146 | 0.819 | 0.224 | 0 |
| DYNLRB1   | 0 | -0.21222 | 0.963 | 0.414 | 0 |
| POLD2     | 0 | -0.21288 | 0.866 | 0.275 | 0 |
| NDUFB5    | 0 | -0.21349 | 0.896 | 0.299 | 0 |
| VBP1      | 0 | -0.21367 | 0.841 | 0.236 | 0 |
| ZCRB1     | 0 | -0.21402 | 0.879 | 0.25  | 0 |
| SNRPD1    | 0 | -0.21478 | 0.901 | 0.279 | 0 |
| PNISR     | 0 | -0.21502 | 0.938 | 0.357 | 0 |
| POLR2G    | 0 | -0.21566 | 0.901 | 0.303 | 0 |
| LSM5      | 0 | -0.21579 | 0.835 | 0.219 | 0 |
| PCMT1     | 0 | -0.21623 | 0.848 | 0.231 | 0 |
| TRA2B     | 0 | -0.21658 | 0.836 | 0.248 | 0 |
| SUMO1     | 0 | -0.2166  | 0.935 | 0.34  | 0 |
| CCNL1     | 0 | -0.2168  | 0.724 | 0.203 | 0 |
| BZW1      | 0 | -0.21717 | 0.89  | 0.277 | 0 |
| PEA15     | 0 | -0.22008 | 0.827 | 0.253 | 0 |
| AHSA1     | 0 | -0.22098 | 0.667 | 0.159 | 0 |
| LRPAP1    | 0 | -0.22228 | 0.867 | 0.287 | 0 |
| EIF5B     | 0 | -0.22255 | 0.841 | 0.241 | 0 |
| CALM1     | 0 | -0.22264 | 0.99  | 0.537 | 0 |
| HSPB1     | 0 | -0.22455 | 0.942 | 0.393 | 0 |
| EMP3      | 0 | -0.2247  | 0.801 | 0.256 | 0 |
| TRAPPC4   | 0 | -0.22516 | 0.787 | 0.195 | 0 |
| SNRPD3    | 0 | -0.22535 | 0.8   | 0.215 | 0 |
| VKORC1    | 0 | -0.22582 | 0.806 | 0.219 | 0 |
| PSMC3     | 0 | -0.22615 | 0.876 | 0.294 | 0 |
| SNRPB2    | 0 | -0.22779 | 0.918 | 0.325 | 0 |
| TMEM14C   | 0 | -0.22832 | 0.867 | 0.251 | 0 |
| LSM3      | 0 | -0.23043 | 0.878 | 0.27  | 0 |
| RHOC      | 0 | -0.23088 | 0.961 | 0.407 | 0 |
| PSAP      | 0 | -0.23138 | 0.965 | 0.4   | 0 |
| LSM1      | 0 | -0.23183 | 0.812 | 0.229 | 0 |
| ALG5      | 0 | -0.23207 | 0.67  | 0.159 | 0 |
| AKR1A1    | 0 | -0.23251 | 0.722 | 0.181 | 0 |

|          |   |          |       |       |   |
|----------|---|----------|-------|-------|---|
| NSMCE1   | 0 | -0.23258 | 0.739 | 0.198 | 0 |
| COX8A    | 0 | -0.23285 | 0.981 | 0.499 | 0 |
| ARPC1A   | 0 | -0.23379 | 0.903 | 0.303 | 0 |
| NDUFA11  | 0 | -0.23435 | 0.978 | 0.475 | 0 |
| DHPS     | 0 | -0.23982 | 0.798 | 0.236 | 0 |
| GNG5     | 0 | -0.2402  | 0.972 | 0.467 | 0 |
| DNAJC19  | 0 | -0.24022 | 0.762 | 0.215 | 0 |
| C11orf58 | 0 | -0.2409  | 0.954 | 0.398 | 0 |
| EMC3     | 0 | -0.24091 | 0.777 | 0.215 | 0 |
| NDUFV2   | 0 | -0.2414  | 0.916 | 0.32  | 0 |
| FAM133B  | 0 | -0.24144 | 0.786 | 0.207 | 0 |
| PSMA3    | 0 | -0.24189 | 0.774 | 0.205 | 0 |
| THYN1    | 0 | -0.24194 | 0.822 | 0.25  | 0 |
| TBCB     | 0 | -0.24245 | 0.971 | 0.417 | 0 |
| UBE2V2   | 0 | -0.24262 | 0.866 | 0.244 | 0 |
| UFC1     | 0 | -0.24276 | 0.898 | 0.28  | 0 |
| RNF181   | 0 | -0.24337 | 0.839 | 0.238 | 0 |
| COA3     | 0 | -0.24396 | 0.836 | 0.253 | 0 |
| TCEAL8   | 0 | -0.24645 | 0.742 | 0.207 | 0 |
| ACTR10   | 0 | -0.24678 | 0.677 | 0.159 | 0 |
| TCEB1    | 0 | -0.24693 | 0.913 | 0.313 | 0 |
| TRAPPC1  | 0 | -0.24707 | 0.878 | 0.304 | 0 |
| UROD     | 0 | -0.25011 | 0.649 | 0.157 | 0 |
| NDUFA9   | 0 | -0.25048 | 0.698 | 0.191 | 0 |
| CUTA     | 0 | -0.25117 | 0.958 | 0.386 | 0 |
| CCT3     | 0 | -0.25276 | 0.91  | 0.333 | 0 |
| PSMD7    | 0 | -0.25279 | 0.832 | 0.234 | 0 |
| SUB1     | 0 | -0.25311 | 0.993 | 0.576 | 0 |
| ARPC3    | 0 | -0.25366 | 0.948 | 0.39  | 0 |
| PIN4     | 0 | -0.2538  | 0.824 | 0.227 | 0 |
| NHP2     | 0 | -0.25439 | 0.938 | 0.345 | 0 |
| BLOC1S1  | 0 | -0.25464 | 0.908 | 0.32  | 0 |
| C19orf70 | 0 | -0.25534 | 0.949 | 0.395 | 0 |
| ATP6V0B  | 0 | -0.25601 | 0.955 | 0.39  | 0 |
| SH3BGRL  | 0 | -0.25757 | 0.838 | 0.265 | 0 |
| PLP2     | 0 | -0.25892 | 0.687 | 0.179 | 0 |
| PRMT1    | 0 | -0.26015 | 0.924 | 0.34  | 0 |
| ESD      | 0 | -0.26019 | 0.852 | 0.243 | 0 |
| FAM96B   | 0 | -0.26083 | 0.938 | 0.368 | 0 |
| ATPIF1   | 0 | -0.26099 | 0.928 | 0.35  | 0 |
| CIB1     | 0 | -0.26154 | 0.791 | 0.229 | 0 |
| ATP5G3   | 0 | -0.26343 | 0.963 | 0.441 | 0 |
| CHMP5    | 0 | -0.26389 | 0.774 | 0.229 | 0 |
| CLDND1   | 0 | -0.26453 | 0.73  | 0.197 | 0 |
| COPZ1    | 0 | -0.26475 | 0.792 | 0.229 | 0 |
| SELT     | 0 | -0.26534 | 0.925 | 0.32  | 0 |
| PDPN     | 0 | -0.26735 | 0.874 | 0.316 | 0 |
| NUDC     | 0 | -0.26825 | 0.92  | 0.326 | 0 |
| MEAF6    | 0 | -0.26884 | 0.804 | 0.229 | 0 |
| DARS     | 0 | -0.27022 | 0.721 | 0.19  | 0 |
| UBE2B    | 0 | -0.27142 | 0.764 | 0.203 | 0 |

|          |   |          |       |       |   |
|----------|---|----------|-------|-------|---|
| CAPZA2   | 0 | -0.27214 | 0.887 | 0.306 | 0 |
| NDUFB3   | 0 | -0.27236 | 0.908 | 0.299 | 0 |
| ILF2     | 0 | -0.27242 | 0.868 | 0.292 | 0 |
| SUCLG1   | 0 | -0.27292 | 0.772 | 0.219 | 0 |
| MYEOV2   | 0 | -0.27297 | 0.949 | 0.395 | 0 |
| EIF3I    | 0 | -0.27517 | 0.926 | 0.345 | 0 |
| 15-Sep   | 0 | -0.27577 | 0.943 | 0.366 | 0 |
| C7orf73  | 0 | -0.27712 | 0.889 | 0.318 | 0 |
| FKBP3    | 0 | -0.2778  | 0.874 | 0.282 | 0 |
| DAZAP2   | 0 | -0.27801 | 0.843 | 0.255 | 0 |
| CCT4     | 0 | -0.27801 | 0.828 | 0.262 | 0 |
| S100A13  | 0 | -0.27869 | 0.781 | 0.239 | 0 |
| DGUOK    | 0 | -0.28116 | 0.84  | 0.253 | 0 |
| PSMA7    | 0 | -0.28337 | 0.982 | 0.573 | 0 |
| PSMG2    | 0 | -0.28351 | 0.698 | 0.176 | 0 |
| MAGED2   | 0 | -0.28517 | 0.819 | 0.277 | 0 |
| RNF5     | 0 | -0.28572 | 0.63  | 0.152 | 0 |
| PRDX3    | 0 | -0.28768 | 0.715 | 0.2   | 0 |
| COX14    | 0 | -0.28818 | 0.767 | 0.198 | 0 |
| COX17    | 0 | -0.28845 | 0.827 | 0.248 | 0 |
| PSMD14   | 0 | -0.28972 | 0.806 | 0.231 | 0 |
| CD99     | 0 | -0.29053 | 0.97  | 0.496 | 0 |
| NDUFS2   | 0 | -0.29075 | 0.872 | 0.309 | 0 |
| HSPD1    | 0 | -0.29143 | 0.929 | 0.345 | 0 |
| KMT2E    | 0 | -0.29251 | 0.828 | 0.256 | 0 |
| SNRPE    | 0 | -0.29327 | 0.923 | 0.34  | 0 |
| NDUFB9   | 0 | -0.29356 | 0.967 | 0.417 | 0 |
| POLR2C   | 0 | -0.29888 | 0.655 | 0.178 | 0 |
| ENY2     | 0 | -0.29908 | 0.875 | 0.299 | 0 |
| TMEM9    | 0 | -0.29908 | 0.783 | 0.229 | 0 |
| NAP1L1   | 0 | -0.29947 | 0.931 | 0.378 | 0 |
| TSG101   | 0 | -0.30056 | 0.687 | 0.191 | 0 |
| RSL1D1   | 0 | -0.30112 | 0.792 | 0.217 | 0 |
| HSD17B10 | 0 | -0.30221 | 0.865 | 0.277 | 0 |
| FCGRT    | 0 | -0.30405 | 0.665 | 0.183 | 0 |
| ATP5G1   | 0 | -0.30418 | 0.947 | 0.364 | 0 |
| SNRPF    | 0 | -0.30436 | 0.873 | 0.289 | 0 |
| ATF4     | 0 | -0.30555 | 0.856 | 0.279 | 0 |
| VDAC1    | 0 | -0.30582 | 0.96  | 0.39  | 0 |
| GPX4     | 0 | -0.30641 | 0.986 | 0.598 | 0 |
| HSP90B1  | 0 | -0.30654 | 0.925 | 0.366 | 0 |
| CFDP1    | 0 | -0.30998 | 0.793 | 0.227 | 0 |
| RABAC1   | 0 | -0.31048 | 0.979 | 0.436 | 0 |
| OSTC     | 0 | -0.31141 | 0.818 | 0.253 | 0 |
| SRP9     | 0 | -0.31187 | 0.975 | 0.453 | 0 |
| RHOA     | 0 | -0.31194 | 0.963 | 0.398 | 0 |
| PRR13    | 0 | -0.31228 | 0.78  | 0.214 | 0 |
| RAB11A   | 0 | -0.31378 | 0.793 | 0.224 | 0 |
| MED28    | 0 | -0.31398 | 0.641 | 0.159 | 0 |
| CD59     | 0 | -0.31471 | 0.871 | 0.292 | 0 |
| PCNP     | 0 | -0.31633 | 0.882 | 0.306 | 0 |

|          |   |          |       |       |   |
|----------|---|----------|-------|-------|---|
| MORF4L2  | 0 | -0.3184  | 0.929 | 0.366 | 0 |
| MAGOH    | 0 | -0.31849 | 0.683 | 0.174 | 0 |
| CTSB     | 0 | -0.32047 | 0.911 | 0.374 | 0 |
| MORF4L1  | 0 | -0.32054 | 0.965 | 0.446 | 0 |
| SLC25A3  | 0 | -0.32177 | 0.952 | 0.438 | 0 |
| CSNK2B   | 0 | -0.32336 | 0.885 | 0.309 | 0 |
| MRFAP1   | 0 | -0.32412 | 0.955 | 0.415 | 0 |
| COX7A2   | 0 | -0.32555 | 0.985 | 0.561 | 0 |
| UBE2D3   | 0 | -0.32595 | 0.933 | 0.354 | 0 |
| RWDD1    | 0 | -0.32633 | 0.853 | 0.284 | 0 |
| POMP     | 0 | -0.32663 | 0.952 | 0.417 | 0 |
| XRCC6    | 0 | -0.32691 | 0.822 | 0.285 | 0 |
| SH3BGRL3 | 0 | -0.32862 | 0.948 | 0.462 | 0 |
| GPI      | 0 | -0.32943 | 0.71  | 0.229 | 0 |
| NDUFC1   | 0 | -0.32982 | 0.922 | 0.366 | 0 |
| NDUFB11  | 0 | -0.3313  | 0.967 | 0.434 | 0 |
| VPS28    | 0 | -0.33131 | 0.893 | 0.308 | 0 |
| HSPA9    | 0 | -0.33356 | 0.813 | 0.289 | 0 |
| FTH1     | 0 | -0.33374 | 0.997 | 0.757 | 0 |
| EEF2     | 0 | -0.33444 | 0.993 | 0.632 | 0 |
| TUBB     | 0 | -0.33504 | 0.967 | 0.523 | 0 |
| GHITM    | 0 | -0.33507 | 0.726 | 0.215 | 0 |
| SNRPG    | 0 | -0.33643 | 0.958 | 0.419 | 0 |
| BRK1     | 0 | -0.33715 | 0.978 | 0.496 | 0 |
| NDUFB6   | 0 | -0.33789 | 0.751 | 0.219 | 0 |
| UBE2L6   | 0 | -0.33829 | 0.841 | 0.277 | 0 |
| GSTK1    | 0 | -0.34157 | 0.849 | 0.279 | 0 |
| WDR61    | 0 | -0.34186 | 0.69  | 0.191 | 0 |
| MED10    | 0 | -0.34324 | 0.828 | 0.258 | 0 |
| COMMD1   | 0 | -0.34342 | 0.591 | 0.161 | 0 |
| NDUFB1   | 0 | -0.34436 | 0.923 | 0.378 | 0 |
| KRTCAP2  | 0 | -0.34466 | 0.804 | 0.291 | 0 |
| DNAJA1   | 0 | -0.34471 | 0.785 | 0.255 | 0 |
| WRB      | 0 | -0.34527 | 0.744 | 0.219 | 0 |
| PAIP2    | 0 | -0.34536 | 0.886 | 0.337 | 0 |
| NEAT1    | 0 | -0.3461  | 0.969 | 0.629 | 0 |
| POLR3GL  | 0 | -0.34775 | 0.653 | 0.174 | 0 |
| PSMB9    | 0 | -0.34788 | 0.75  | 0.207 | 0 |
| SRSF3    | 0 | -0.3487  | 0.95  | 0.414 | 0 |
| TCEAL4   | 0 | -0.34905 | 0.91  | 0.357 | 0 |
| SPTSSA   | 0 | -0.34953 | 0.855 | 0.289 | 0 |
| C6orf48  | 0 | -0.35059 | 0.924 | 0.366 | 0 |
| DPY30    | 0 | -0.35212 | 0.809 | 0.256 | 0 |
| PRDX4    | 0 | -0.35299 | 0.896 | 0.337 | 0 |
| REEP5    | 0 | -0.35419 | 0.844 | 0.277 | 0 |
| ARL6IP5  | 0 | -0.35533 | 0.885 | 0.321 | 0 |
| VDAC2    | 0 | -0.35569 | 0.91  | 0.356 | 0 |
| ERP29    | 0 | -0.35606 | 0.875 | 0.308 | 0 |
| PSMB6    | 0 | -0.35649 | 0.952 | 0.448 | 0 |
| EEF1B2   | 0 | -0.35708 | 0.93  | 0.403 | 0 |
| SIVA1    | 0 | -0.35996 | 0.824 | 0.27  | 0 |



|           |   |          |       |       |   |
|-----------|---|----------|-------|-------|---|
| SEC62     | 0 | -0.36071 | 0.948 | 0.386 | 0 |
| OCIAD1    | 0 | -0.36113 | 0.933 | 0.393 | 0 |
| TOMM20    | 0 | -0.36343 | 0.856 | 0.28  | 0 |
| MDH2      | 0 | -0.36605 | 0.946 | 0.415 | 0 |
| AK2       | 0 | -0.36608 | 0.78  | 0.212 | 0 |
| ACP1      | 0 | -0.36703 | 0.824 | 0.263 | 0 |
| CSTB      | 0 | -0.36803 | 0.935 | 0.391 | 0 |
| FKBP2     | 0 | -0.36815 | 0.938 | 0.386 | 0 |
| HSPE1     | 0 | -0.36843 | 0.982 | 0.526 | 0 |
| COPS6     | 0 | -0.36904 | 0.909 | 0.368 | 0 |
| TXNL1     | 0 | -0.3703  | 0.791 | 0.241 | 0 |
| SRP14     | 0 | -0.37095 | 0.991 | 0.61  | 0 |
| PHPT1     | 0 | -0.37127 | 0.968 | 0.46  | 0 |
| EAPP      | 0 | -0.37288 | 0.668 | 0.188 | 0 |
| YPEL5     | 0 | -0.37314 | 0.629 | 0.179 | 0 |
| SON       | 0 | -0.3735  | 0.957 | 0.39  | 0 |
| CCT2      | 0 | -0.37396 | 0.864 | 0.328 | 0 |
| SEPW1     | 0 | -0.37684 | 0.968 | 0.467 | 0 |
| TMEM205   | 0 | -0.37819 | 0.926 | 0.39  | 0 |
| RBM8A     | 0 | -0.3791  | 0.902 | 0.352 | 0 |
| C14orf166 | 0 | -0.37932 | 0.887 | 0.335 | 0 |
| PSMA1     | 0 | -0.37945 | 0.897 | 0.362 | 0 |
| NDUFB4    | 0 | -0.3798  | 0.956 | 0.444 | 0 |
| CAMLG     | 0 | -0.3821  | 0.825 | 0.27  | 0 |
| EDF1      | 0 | -0.38219 | 0.977 | 0.52  | 0 |
| OST4      | 0 | -0.38489 | 0.967 | 0.511 | 0 |
| ATP5I     | 0 | -0.38495 | 0.972 | 0.521 | 0 |
| RAB1A     | 0 | -0.38668 | 0.859 | 0.284 | 0 |
| SSR3      | 0 | -0.3874  | 0.807 | 0.238 | 0 |
| GABARAPL2 | 0 | -0.38798 | 0.988 | 0.497 | 0 |
| LAP3      | 0 | -0.38845 | 0.79  | 0.287 | 0 |
| SSBP1     | 0 | -0.38958 | 0.908 | 0.349 | 0 |
| UXT       | 0 | -0.39005 | 0.815 | 0.27  | 0 |
| ATP5E     | 0 | -0.39039 | 0.992 | 0.735 | 0 |
| BSG       | 0 | -0.39054 | 0.993 | 0.597 | 0 |
| ARL6IP1   | 0 | -0.391   | 0.92  | 0.4   | 0 |
| ANAPC11   | 0 | -0.39209 | 0.974 | 0.544 | 0 |
| PSMC4     | 0 | -0.39327 | 0.837 | 0.308 | 0 |
| SAT2      | 0 | -0.39339 | 0.914 | 0.369 | 0 |
| TECR      | 0 | -0.3935  | 0.941 | 0.407 | 0 |
| AP1S1     | 0 | -0.3944  | 0.798 | 0.268 | 0 |
| NDUFB7    | 0 | -0.39509 | 0.987 | 0.579 | 0 |
| IFITM3    | 0 | -0.39536 | 0.908 | 0.395 | 0 |
| HIGD2A    | 0 | -0.39708 | 0.929 | 0.386 | 0 |
| HMG2      | 0 | -0.39734 | 0.947 | 0.477 | 0 |
| SARS      | 0 | -0.39991 | 0.806 | 0.287 | 0 |
| ARF1      | 0 | -0.39991 | 0.916 | 0.378 | 0 |
| SYPL1     | 0 | -0.40112 | 0.689 | 0.212 | 0 |
| TMC01     | 0 | -0.40231 | 0.901 | 0.35  | 0 |
| NDUFA12   | 0 | -0.40442 | 0.913 | 0.32  | 0 |
| WBSR22    | 0 | -0.40551 | 0.774 | 0.267 | 0 |

|          |   |          |       |       |   |
|----------|---|----------|-------|-------|---|
| ATP5A1   | 0 | -0.4069  | 0.963 | 0.45  | 0 |
| PRDX5    | 0 | -0.40715 | 0.979 | 0.518 | 0 |
| HLA-C    | 0 | -0.4078  | 0.988 | 0.631 | 0 |
| C4orf3   | 0 | -0.40978 | 0.928 | 0.376 | 0 |
| EIF4A1   | 0 | -0.41126 | 0.988 | 0.574 | 0 |
| PSMD8    | 0 | -0.41542 | 0.958 | 0.479 | 0 |
| SDHC     | 0 | -0.41683 | 0.898 | 0.345 | 0 |
| USE1     | 0 | -0.4177  | 0.693 | 0.217 | 0 |
| HSP90AB1 | 0 | -0.41836 | 0.988 | 0.573 | 0 |
| SUMO2    | 0 | -0.41916 | 0.983 | 0.605 | 0 |
| CETN2    | 0 | -0.42018 | 0.644 | 0.203 | 0 |
| MDH1     | 0 | -0.42187 | 0.825 | 0.308 | 0 |
| COX7A2L  | 0 | -0.42242 | 0.879 | 0.342 | 0 |
| STMN1    | 0 | -0.42251 | 0.907 | 0.388 | 0 |
| TBCA     | 0 | -0.423   | 0.985 | 0.581 | 0 |
| ANAPC16  | 0 | -0.4245  | 0.764 | 0.231 | 0 |
| EIF3H    | 0 | -0.42532 | 0.882 | 0.333 | 0 |
| NDUFA6   | 0 | -0.42559 | 0.932 | 0.403 | 0 |
| TMED9    | 0 | -0.4258  | 0.961 | 0.456 | 0 |
| PSMB1    | 0 | -0.42841 | 0.958 | 0.444 | 0 |
| CCT8     | 0 | -0.42875 | 0.77  | 0.275 | 0 |
| NDUFA1   | 0 | -0.42898 | 0.962 | 0.47  | 0 |
| PSMB3    | 0 | -0.43425 | 0.935 | 0.434 | 0 |
| PSMB7    | 0 | -0.43431 | 0.932 | 0.409 | 0 |
| APEX1    | 0 | -0.43484 | 0.822 | 0.303 | 0 |
| COPS8    | 0 | -0.435   | 0.832 | 0.27  | 0 |
| MYL12B   | 0 | -0.43505 | 0.936 | 0.424 | 0 |
| PRDX6    | 0 | -0.4351  | 0.952 | 0.504 | 0 |
| FUNDC2   | 0 | -0.43594 | 0.66  | 0.209 | 0 |
| HSBP1    | 0 | -0.43669 | 0.963 | 0.455 | 0 |
| SMIM7    | 0 | -0.43695 | 0.889 | 0.342 | 0 |
| BCAS2    | 0 | -0.43855 | 0.646 | 0.221 | 0 |
| GPM6B    | 0 | -0.43921 | 0.998 | 0.725 | 0 |
| NDUFS4   | 0 | -0.43986 | 0.873 | 0.318 | 0 |
| PSMB2    | 0 | -0.44027 | 0.909 | 0.362 | 0 |
| DNAJB6   | 0 | -0.4403  | 0.901 | 0.361 | 0 |
| SERF2    | 0 | -0.44084 | 0.988 | 0.691 | 0 |
| BNIP3L   | 0 | -0.44242 | 0.845 | 0.303 | 0 |
| EIF3E    | 0 | -0.4426  | 0.897 | 0.357 | 0 |
| SSR4     | 0 | -0.44502 | 0.971 | 0.482 | 0 |
| NDUFC2   | 0 | -0.44897 | 0.97  | 0.477 | 0 |
| SSR2     | 0 | -0.44978 | 0.951 | 0.443 | 0 |
| ZNHIT1   | 0 | -0.45069 | 0.95  | 0.446 | 0 |
| ATP5J    | 0 | -0.45107 | 0.98  | 0.535 | 0 |
| SEC11A   | 0 | -0.45207 | 0.905 | 0.342 | 0 |
| ATRAID   | 0 | -0.45208 | 0.919 | 0.385 | 0 |
| SBDS     | 0 | -0.45254 | 0.931 | 0.393 | 0 |
| PSMB5    | 0 | -0.45487 | 0.939 | 0.424 | 0 |
| SYF2     | 0 | -0.45504 | 0.797 | 0.267 | 0 |
| PTGES3   | 0 | -0.45505 | 0.961 | 0.474 | 0 |
| BANF1    | 0 | -0.45578 | 0.957 | 0.45  | 0 |

|           |   |          |       |       |   |
|-----------|---|----------|-------|-------|---|
| COX6C     | 0 | -0.4561  | 0.995 | 0.66  | 0 |
| H3F3A     | 0 | -0.45693 | 0.965 | 0.65  | 0 |
| NEDD8     | 0 | -0.45792 | 0.967 | 0.533 | 0 |
| COMMD6    | 0 | -0.45888 | 0.958 | 0.489 | 0 |
| ECH1      | 0 | -0.4605  | 0.903 | 0.376 | 0 |
| PDCD5     | 0 | -0.46056 | 0.909 | 0.368 | 0 |
| NDUFA13   | 0 | -0.46285 | 0.988 | 0.593 | 0 |
| SEC61B    | 0 | -0.46343 | 0.966 | 0.503 | 0 |
| TCEB2     | 0 | -0.4638  | 0.982 | 0.626 | 0 |
| ATP5B     | 0 | -0.46396 | 0.982 | 0.557 | 0 |
| TXN       | 0 | -0.46459 | 0.952 | 0.46  | 0 |
| TMED10    | 0 | -0.46976 | 0.93  | 0.417 | 0 |
| POLR2I    | 0 | -0.47248 | 0.933 | 0.402 | 0 |
| PFDN2     | 0 | -0.47288 | 0.9   | 0.352 | 0 |
| SSB       | 0 | -0.4743  | 0.878 | 0.354 | 0 |
| PPIB      | 0 | -0.47752 | 0.968 | 0.477 | 0 |
| PSME2     | 0 | -0.47837 | 0.847 | 0.332 | 0 |
| TUBA1A    | 0 | -0.48056 | 0.999 | 0.768 | 0 |
| IP6K2     | 0 | -0.48131 | 0.806 | 0.304 | 0 |
| C19orf53  | 0 | -0.48148 | 0.979 | 0.571 | 0 |
| SLC25A6   | 0 | -0.48286 | 0.985 | 0.632 | 0 |
| LAPTM4A   | 0 | -0.48557 | 0.958 | 0.482 | 0 |
| PSENN     | 0 | -0.48685 | 0.797 | 0.306 | 0 |
| HNRNPA2B1 | 0 | -0.48731 | 0.995 | 0.663 | 0 |
| IMPDH2    | 0 | -0.48921 | 0.704 | 0.255 | 0 |
| COX5B     | 0 | -0.48976 | 0.995 | 0.682 | 0 |
| POLR2J    | 0 | -0.49098 | 0.959 | 0.458 | 0 |
| MT1E      | 0 | -0.49701 | 0.863 | 0.417 | 0 |
| LAMTOR4   | 0 | -0.49762 | 0.964 | 0.48  | 0 |
| ZNF667-AS | 0 | -0.49805 | 0.859 | 0.326 | 0 |
| SLC3A2    | 0 | -0.49868 | 0.889 | 0.386 | 0 |
| TMEM258   | 0 | -0.50211 | 0.957 | 0.48  | 0 |
| PSME1     | 0 | -0.50256 | 0.88  | 0.364 | 0 |
| EIF3M     | 0 | -0.50345 | 0.781 | 0.308 | 0 |
| TUBA1B    | 0 | -0.50386 | 0.99  | 0.701 | 0 |
| UQCRQ     | 0 | -0.50396 | 0.985 | 0.622 | 0 |
| PKM       | 0 | -0.50465 | 0.982 | 0.658 | 0 |
| SLC25A5   | 0 | -0.50606 | 0.941 | 0.484 | 0 |
| ATP50     | 0 | -0.50859 | 0.967 | 0.499 | 0 |
| SNHG8     | 0 | -0.51131 | 0.699 | 0.243 | 0 |
| ZFAS1     | 0 | -0.5127  | 0.955 | 0.526 | 0 |
| HNRNPK    | 0 | -0.5174  | 0.987 | 0.598 | 0 |
| SDCBP     | 0 | -0.5178  | 0.914 | 0.438 | 0 |
| ATP5F1    | 0 | -0.52266 | 0.917 | 0.403 | 0 |
| COPE      | 0 | -0.52342 | 0.983 | 0.631 | 0 |
| HMGB1     | 0 | -0.52659 | 0.997 | 0.691 | 0 |
| ATP5J2    | 0 | -0.52702 | 0.985 | 0.591 | 0 |
| COX6A1    | 0 | -0.53117 | 0.994 | 0.656 | 0 |
| HNRNPD    | 0 | -0.5317  | 0.977 | 0.544 | 0 |
| PARK7     | 0 | -0.53768 | 0.98  | 0.603 | 0 |
| HSPA5     | 0 | -0.54132 | 0.905 | 0.422 | 0 |

|          |   |          |       |       |   |
|----------|---|----------|-------|-------|---|
| LAMTOR5  | 0 | -0.54148 | 0.97  | 0.537 | 0 |
| ARF4     | 0 | -0.54399 | 0.854 | 0.371 | 0 |
| CHMP2A   | 0 | -0.54471 | 0.96  | 0.48  | 0 |
| PEBP1    | 0 | -0.5451  | 0.996 | 0.656 | 0 |
| HNRNPA1  | 0 | -0.5453  | 0.994 | 0.696 | 0 |
| C12orf57 | 0 | -0.54728 | 0.906 | 0.412 | 0 |
| ATP6V1G1 | 0 | -0.5475  | 0.967 | 0.526 | 0 |
| EIF4A2   | 0 | -0.54781 | 0.944 | 0.491 | 0 |
| SELK     | 0 | -0.55009 | 0.945 | 0.446 | 0 |
| ERH      | 0 | -0.55031 | 0.961 | 0.509 | 0 |
| TMA7     | 0 | -0.55466 | 0.99  | 0.703 | 0 |
| TAGLN2   | 0 | -0.55629 | 0.936 | 0.497 | 0 |
| EEF1D    | 0 | -0.56624 | 0.983 | 0.583 | 0 |
| PRDX1    | 0 | -0.56629 | 0.983 | 0.614 | 0 |
| ATP5EP2  | 0 | -0.56801 | 0.713 | 0.301 | 0 |
| ATP6V1F  | 0 | -0.56822 | 0.958 | 0.492 | 0 |
| SHFM1    | 0 | -0.57162 | 0.963 | 0.528 | 0 |
| CIRBP    | 0 | -0.5729  | 0.997 | 0.718 | 0 |
| PTN      | 0 | -0.57295 | 0.997 | 0.776 | 0 |
| SPCS1    | 0 | -0.5762  | 0.952 | 0.497 | 0 |
| HINT1    | 0 | -0.5765  | 0.989 | 0.694 | 0 |
| CYCS     | 0 | -0.57656 | 0.968 | 0.504 | 0 |
| H2AFZ    | 0 | -0.57786 | 0.932 | 0.497 | 0 |
| TMEM59   | 0 | -0.57805 | 0.94  | 0.48  | 0 |
| S100A11  | 0 | -0.57853 | 0.798 | 0.378 | 0 |
| CFL1     | 0 | -0.57922 | 0.998 | 0.798 | 0 |
| NAA38    | 0 | -0.57932 | 0.708 | 0.272 | 0 |
| NDUFB2   | 0 | -0.57987 | 0.984 | 0.586 | 0 |
| UQCRH    | 0 | -0.58056 | 0.974 | 0.588 | 0 |
| PRDX2    | 0 | -0.58203 | 0.988 | 0.68  | 0 |
| FBL      | 0 | -0.58245 | 0.658 | 0.243 | 0 |
| ATP5G2   | 0 | -0.58425 | 0.992 | 0.651 | 0 |
| BUD31    | 0 | -0.586   | 0.919 | 0.439 | 0 |
| OAZ1     | 0 | -0.58691 | 0.996 | 0.754 | 0 |
| CHCHD2   | 0 | -0.58784 | 0.997 | 0.747 | 0 |
| BLVRB    | 0 | -0.58858 | 0.643 | 0.212 | 0 |
| HNRNPC   | 0 | -0.58919 | 0.969 | 0.538 | 0 |
| FAM162A  | 0 | -0.59042 | 0.724 | 0.282 | 0 |
| 7-Sep    | 0 | -0.59078 | 0.96  | 0.59  | 0 |
| MYL6     | 0 | -0.59116 | 0.997 | 0.793 | 0 |
| NDUFS5   | 0 | -0.59401 | 0.989 | 0.685 | 0 |
| ATP6VOE1 | 0 | -0.59532 | 0.948 | 0.492 | 0 |
| TAF7     | 0 | -0.59739 | 0.895 | 0.436 | 0 |
| HLA-A    | 0 | -0.59884 | 0.995 | 0.798 | 0 |
| TMBIM6   | 0 | -0.60828 | 0.989 | 0.626 | 0 |
| GABARAP  | 0 | -0.60961 | 0.618 | 0.244 | 0 |
| DYNLL1   | 0 | -0.61831 | 0.989 | 0.706 | 0 |
| WBP5     | 0 | -0.61951 | 0.872 | 0.385 | 0 |
| TRMT112  | 0 | -0.62088 | 0.945 | 0.497 | 0 |
| EIF1B    | 0 | -0.62456 | 0.816 | 0.347 | 0 |
| SPCS2    | 0 | -0.62833 | 0.961 | 0.528 | 0 |

|          |   |          |       |       |   |
|----------|---|----------|-------|-------|---|
| TMSB4X   | 0 | -0.63166 | 0.999 | 0.973 | 0 |
| ATP5L    | 0 | -0.63196 | 0.987 | 0.639 | 0 |
| GSTP1    | 0 | -0.63697 | 0.989 | 0.644 | 0 |
| UBB      | 0 | -0.63785 | 0.995 | 0.779 | 0 |
| SRI      | 0 | -0.63823 | 0.988 | 0.687 | 0 |
| UBL5     | 0 | -0.63898 | 0.989 | 0.733 | 0 |
| HLA-B    | 0 | -0.63905 | 0.989 | 0.713 | 0 |
| RAN      | 0 | -0.64187 | 0.971 | 0.588 | 0 |
| DAD1     | 0 | -0.64354 | 0.933 | 0.482 | 0 |
| HSPA8    | 0 | -0.65054 | 0.99  | 0.716 | 0 |
| SAT1     | 0 | -0.65542 | 0.911 | 0.501 | 0 |
| NDUFA5   | 0 | -0.65668 | 0.877 | 0.436 | 0 |
| ANXA5    | 0 | -0.65673 | 0.983 | 0.68  | 0 |
| ACTB     | 0 | -0.66232 | 1     | 0.92  | 0 |
| COX6B1   | 0 | -0.6647  | 0.992 | 0.708 | 0 |
| PFDN5    | 0 | -0.66616 | 0.986 | 0.685 | 0 |
| NGFRAP1  | 0 | -0.66716 | 0.99  | 0.699 | 0 |
| ENO1     | 0 | -0.66776 | 0.987 | 0.764 | 0 |
| CALM2    | 0 | -0.67512 | 0.999 | 0.769 | 0 |
| PPIA     | 0 | -0.67617 | 0.991 | 0.747 | 0 |
| LGALS3   | 0 | -0.6801  | 0.936 | 0.583 | 0 |
| ACTG1    | 0 | -0.6843  | 0.999 | 0.909 | 0 |
| COX7C    | 0 | -0.68652 | 0.996 | 0.718 | 0 |
| EIF3K    | 0 | -0.69167 | 0.955 | 0.552 | 0 |
| S100A6   | 0 | -0.69239 | 0.933 | 0.605 | 0 |
| SNRPD2   | 0 | -0.69374 | 0.974 | 0.597 | 0 |
| TPI1     | 0 | -0.69461 | 0.995 | 0.786 | 0 |
| NDUFA4   | 0 | -0.69712 | 0.999 | 0.821 | 0 |
| NPC2     | 0 | -0.69776 | 0.762 | 0.345 | 0 |
| H3F3B    | 0 | -0.70141 | 0.999 | 0.889 | 0 |
| ALDOA    | 0 | -0.7021  | 0.995 | 0.805 | 0 |
| CD63     | 0 | -0.70365 | 0.997 | 0.856 | 0 |
| CLU      | 0 | -0.70786 | 0.997 | 0.896 | 0 |
| SOD1     | 0 | -0.70823 | 0.971 | 0.624 | 0 |
| MALAT1   | 0 | -0.70884 | 1     | 0.979 | 0 |
| HSP90AA1 | 0 | -0.71007 | 0.995 | 0.754 | 0 |
| TIMP1    | 0 | -0.71793 | 0.973 | 0.68  | 0 |
| TOMM7    | 0 | -0.72301 | 0.99  | 0.696 | 0 |
| WDR83OS  | 0 | -0.72497 | 0.97  | 0.6   | 0 |
| NRN1     | 0 | -0.73986 | 0.627 | 0.26  | 0 |
| DBI      | 0 | -0.74685 | 0.998 | 0.817 | 0 |
| S100A10  | 0 | -0.75367 | 0.885 | 0.533 | 0 |
| CNBP     | 0 | -0.75476 | 0.959 | 0.583 | 0 |
| SEC61G   | 0 | -0.75795 | 0.994 | 0.935 | 0 |
| MGST3    | 0 | -0.76452 | 0.894 | 0.468 | 0 |
| NACA     | 0 | -0.76804 | 0.996 | 0.797 | 0 |
| B2M      | 0 | -0.76848 | 0.998 | 0.947 | 0 |
| LDHB     | 0 | -0.77481 | 0.985 | 0.706 | 0 |
| BTF3     | 0 | -0.77743 | 0.993 | 0.774 | 0 |
| EEF1A1   | 0 | -0.77982 | 0.973 | 0.851 | 0 |
| NPM1     | 0 | -0.78135 | 0.983 | 0.715 | 0 |

|         |           |          |       |       |                       |
|---------|-----------|----------|-------|-------|-----------------------|
| LDHA    | 0         | -0.78699 | 0.951 | 0.66  | 0                     |
| SAP18   | 0         | -0.78906 | 0.958 | 0.576 | 0                     |
| TMSB10  | 0         | -0.79156 | 0.996 | 0.918 | 0                     |
| COX4I1  | 0         | -0.79545 | 0.996 | 0.764 | 0                     |
| SKP1    | 0         | -0.80438 | 0.998 | 0.791 | 0                     |
| GNB2L1  | 0         | -0.80506 | 1     | 0.906 | 0                     |
| PGK1    | 0         | -0.83173 | 0.917 | 0.545 | 0                     |
| TPT1    | 0         | -0.84126 | 0.994 | 0.889 | 0                     |
| GLUL    | 0         | -0.87036 | 0.895 | 0.535 | 0                     |
| DNAJB1  | 0         | -0.87871 | 0.813 | 0.443 | 0                     |
| PTMA    | 0         | -0.88478 | 0.998 | 0.887 | 0                     |
| GAPDH   | 0         | -0.90062 | 1     | 0.99  | 0                     |
| FAU     | 0         | -0.92283 | 0.997 | 0.903 | 0                     |
| EIF1    | 0         | -0.93958 | 0.999 | 0.918 | 0                     |
| MT3     | 0         | -0.96443 | 0.954 | 0.802 | 0                     |
| FTL     | 0         | -0.96775 | 0.999 | 0.974 | 0                     |
| UBC     | 0         | -0.97475 | 0.992 | 0.86  | 0                     |
| MT2A    | 0         | -1.05598 | 0.998 | 0.944 | 0                     |
| NBEAL1  | 0         | -1.12888 | 0.747 | 0.494 | 0                     |
| MT1X    | 0         | -1.16144 | 0.933 | 0.634 | 0                     |
| FOS     | 0         | -1.25756 | 0.8   | 0.704 | 0                     |
| CRYAB   | 0         | -1.29072 | 0.745 | 0.617 | 0                     |
| ACSL3   | 4.9406564 | 0.562234 | 0.816 | 0.084 | 7.38331701145159e-320 |
| FZD3    | 4.9406564 | 0.523167 | 0.81  | 0.094 | 7.38331701145159e-320 |
| PHF14   | 4.9406564 | 0.299718 | 0.809 | 0.13  | 7.38331701145159e-320 |
| PSMD12  | 4.9406564 | 0.210047 | 0.745 | 0.109 | 7.38331701145159e-320 |
| CNOT7   | 4.9406564 | 0.159511 | 0.69  | 0.094 | 7.38331701145159e-320 |
| ARPC5L  | 9.8813129 | 0.532493 | 0.778 | 0.07  | 1.47666340229032e-319 |
| DTNA    | 9.8813129 | -0.30873 | 0.704 | 0.198 | 1.47666340229032e-319 |
| DCAF7   | 1.4821969 | 0.253821 | 0.723 | 0.089 | 2.21499510343548e-319 |
| ANKRD12 | 1.4821969 | -0.21536 | 0.683 | 0.185 | 2.21499510343548e-319 |
| PCSK1N  | 1.9762625 | 0.872106 | 0.878 | 0.113 | 2.95332680458064e-319 |
| DENR    | 3.4584595 | 0.289714 | 0.734 | 0.089 | 5.16832190801611e-319 |
| JUNB    | 3.4584595 | -0.30009 | 0.879 | 0.374 | 5.16832190801611e-319 |
| HSPBP1  | 4.9406564 | 0.334179 | 0.762 | 0.094 | 7.38331701145159e-319 |
| C5orf24 | 6.9169190 | 0.595874 | 0.807 | 0.072 | 1.03366438160322e-318 |
| ITGB1   | 7.9050503 | 0.724345 | 0.82  | 0.079 | 1.18133072183225e-318 |
| BLOC1S2 | 1.0375378 | -0.10119 | 0.626 | 0.121 | 1.55049657240483e-318 |
| NRBP1   | 1.5810100 | 0.301553 | 0.733 | 0.089 | 2.36266144366451e-318 |
| SYAP1   | 2.5691413 | 0.140359 | 0.702 | 0.103 | 3.83932484595483e-318 |
| RNF10   | 3.4090529 | 0.270693 | 0.753 | 0.101 | 5.0944887379016e-318  |
| AGTRAP  | 4.6442170 | -0.2074  | 0.596 | 0.121 | 6.94031799076449e-318 |
| TSSC4   | 4.8418433 | 0.118689 | 0.711 | 0.111 | 7.23565067122256e-318 |
| ODC1    | 5.8299746 | 0.529293 | 0.821 | 0.103 | 8.71231407351287e-318 |
| YY1     | 6.8675124 | 0.433227 | 0.752 | 0.077 | 1.02628106459177e-317 |
| UFM1    | 9.7330932 | -0.1383  | 0.658 | 0.144 | 1.45451345125596e-317 |
| FKBP10  | 1.3438585 | 0.31098  | 0.774 | 0.115 | 2.00826222711483e-317 |
| USP22   | 1.4920782 | 0.455872 | 0.766 | 0.08  | 2.22976173745838e-317 |
| CSNK1D  | 1.6748825 | 0.384835 | 0.749 | 0.085 | 2.50294446688209e-317 |
| IFRD1   | 2.7667676 | -0.33011 | 0.676 | 0.209 | 4.13465752641289e-317 |
| METTL23 | 4.0068723 | 0.500916 | 0.769 | 0.077 | 5.98787009628724e-317 |

|           |           |          |       |       |                       |
|-----------|-----------|----------|-------|-------|-----------------------|
| SPRY2     | 4.1106261 | 0.576714 | 0.81  | 0.087 | 6.14291975352772e-317 |
| CAPNS1    | 4.3576589 | 0.451227 | 0.761 | 0.082 | 6.5120856041003e-317  |
| HNRNPUL1  | 5.2815617 | 0.175035 | 0.717 | 0.099 | 7.89276588524175e-317 |
| SLC39A6   | 6.2153458 | 0.36585  | 0.766 | 0.092 | 9.2882128004061e-317  |
| DTYMK     | 1.0355615 | 0.322348 | 0.734 | 0.084 | 1.54754324560025e-316 |
| SEC63     | 1.5938557 | 0.207005 | 0.718 | 0.092 | 2.38185806789428e-316 |
| COA5      | 1.8962239 | 0.126045 | 0.719 | 0.115 | 2.83371706899512e-316 |
| COMMD3    | 2.8675570 | -0.10986 | 0.624 | 0.128 | 4.2852771934465e-316  |
| AKIRIN1   | 4.0819703 | 0.418863 | 0.769 | 0.084 | 6.1000965148613e-316  |
| TCF12     | 4.4861160 | 0.428415 | 0.806 | 0.101 | 6.70405184639804e-316 |
| SETD5     | 5.8808633 | 0.394279 | 0.796 | 0.096 | 8.78836223873083e-316 |
| PTBP1     | 6.0226602 | 0.262277 | 0.721 | 0.089 | 9.00026343695949e-316 |
| DCAF13    | 6.2598117 | -0.26996 | 0.626 | 0.161 | 9.35466265350916e-316 |
| PPP2CB    | 1.2453912 | 0.603153 | 0.796 | 0.079 | 1.8611127190766e-315  |
| TIMM9     | 1.9801657 | -0.23686 | 0.587 | 0.121 | 2.95915962501968e-315 |
| LINC00461 | 5.7979097 | 0.312246 | 0.815 | 0.135 | 8.66439634610855e-315 |
| CBX1      | 5.8661896 | 0.159964 | 0.692 | 0.096 | 8.76643378720681e-315 |
| TPGS2     | 8.0899791 | 0.132849 | 0.671 | 0.097 | 1.20896647740612e-314 |
| EIF4A3    | 9.8038434 | 0.311919 | 0.751 | 0.092 | 1.46508636121636e-314 |
| TUSC2     | 1.0099739 | 0.390924 | 0.739 | 0.074 | 1.50930504679795e-314 |
| CPNE3     | 2.0577142 | 0.142387 | 0.717 | 0.118 | 3.07504816883143e-314 |
| TPD52L2   | 2.1554651 | 0.200004 | 0.689 | 0.087 | 3.221127095903e-314   |
| SYNCRIP   | 2.5035541 | 0.281837 | 0.749 | 0.096 | 3.74131131262781e-314 |
| TM2D3     | 3.1128309 | -0.33744 | 0.632 | 0.166 | 4.651814583163e-314   |
| RALBP1    | 5.5965582 | 0.299742 | 0.714 | 0.079 | 8.36349664462386e-314 |
| KIF21A    | 6.7542676 | 0.251429 | 0.82  | 0.144 | 1.00935776366982e-313 |
| RBM17     | 7.9079109 | 0.630555 | 0.766 | 0.048 | 1.18175821588722e-313 |
| TPGS1     | 1.0827735 | 0.458655 | 0.753 | 0.065 | 1.61809674629828e-313 |
| BCLAF1    | 1.0923588 | 0.386469 | 0.779 | 0.101 | 1.6324211196322e-313  |
| SURF4     | 1.7543549 | 0.256848 | 0.742 | 0.099 | 2.62170807433809e-313 |
| CCDC59    | 3.7830917 | -0.18877 | 0.597 | 0.118 | 5.65345235056565e-313 |
| PSMC2     | 3.8723575 | -0.19072 | 0.723 | 0.195 | 5.78685116900176e-313 |
| SERINC3   | 4.9799119 | 0.392174 | 0.781 | 0.103 | 7.44198041843438e-313 |
| SNHG7     | 5.0591976 | 0.354776 | 0.8   | 0.113 | 7.56046493650735e-313 |
| ZNF24     | 5.7348857 | -0.19812 | 0.634 | 0.152 | 8.57021327764707e-313 |
| NARF      | 7.4278026 | 0.304597 | 0.739 | 0.097 | 1.11001083282844e-312 |
| PTRHD1    | 1.0952914 | 0.138399 | 0.683 | 0.097 | 1.63680356127752e-312 |
| HNRNPAB   | 1.5194666 | 0.459422 | 0.766 | 0.077 | 2.27069100764502e-312 |
| PAFAH1B1  | 1.7485439 | 0.536275 | 0.783 | 0.07  | 2.6130241122019e-312  |
| FAM50A    | 3.9205048 | 0.426105 | 0.778 | 0.099 | 5.85880247927639e-312 |
| SREK1IP1  | 4.0010001 | -0.12999 | 0.616 | 0.121 | 5.97909458102011e-312 |
| SPOP      | 4.5334195 | 0.124853 | 0.689 | 0.106 | 6.77474223379346e-312 |
| ECSIT     | 4.5436023 | -0.11793 | 0.66  | 0.138 | 6.78995939782041e-312 |
| ACBD6     | 7.6751232 | 0.252719 | 0.685 | 0.07  | 1.14697041832397e-311 |
| REXO2     | 8.3398471 | -0.35918 | 0.64  | 0.186 | 1.24630675411008e-311 |
| JAGN1     | 1.0365018 | 0.116533 | 0.689 | 0.108 | 1.54894841634392e-311 |
| LYPD1     | 1.7069733 | 0.567708 | 0.807 | 0.084 | 2.55090103053389e-311 |
| NUDT16L1  | 2.1641313 | 0.265174 | 0.724 | 0.085 | 3.23407794338996e-311 |
| SDHD      | 2.8955576 | -0.29506 | 0.638 | 0.178 | 4.3271213156774e-311  |
| OCIAD2    | 2.9485360 | -0.40766 | 0.839 | 0.376 | 4.4062923212752e-311  |
| CRK       | 3.7663044 | 0.473701 | 0.772 | 0.084 | 5.62836543415722e-311 |

|           |           |          |       |       |                       |
|-----------|-----------|----------|-------|-------|-----------------------|
| ADD1      | 7.1519947 | 0.165056 | 0.703 | 0.096 | 1.06879410205393e-310 |
| DPYSL2    | 8.0849589 | 0.271876 | 0.772 | 0.115 | 1.20821626373291e-310 |
| CYB5R3    | 1.0271913 | 0.261709 | 0.727 | 0.099 | 1.53503479613198e-310 |
| WDR18     | 1.8701334 | 0.454993 | 0.742 | 0.062 | 2.79472743974896e-310 |
| CDC26     | 1.9606831 | -0.18097 | 0.575 | 0.106 | 2.93004492829023e-310 |
| KEAP1     | 2.0996259 | 0.42749  | 0.76  | 0.079 | 3.13768101390253e-310 |
| VPS35     | 2.5076290 | 0.104989 | 0.709 | 0.109 | 3.74740078602615e-310 |
| ACAA1     | 3.1825869 | 0.417225 | 0.747 | 0.074 | 4.75605788841655e-310 |
| RAB13     | 6.5052129 | -0.45911 | 0.712 | 0.246 | 9.72139016733037e-310 |
| SHISA5    | 6.9559391 | 0.149205 | 0.683 | 0.108 | 0.00E+00              |
| GRSF1     | 7.3692166 | 0.219549 | 0.69  | 0.089 | 0.00E+00              |
| SPP1      | 9.0230685 | -1.13996 | 0.765 | 0.638 | 0.00E+00              |
| SCG5      | 2.0049826 | -0.40918 | 0.68  | 0.236 | 0.00E+00              |
| SCNM1     | 2.2941541 | -0.15697 | 0.653 | 0.149 | 0.00E+00              |
| BID       | 2.9646652 | 0.205488 | 0.715 | 0.101 | 0.00E+00              |
| HLA-E     | 3.8519746 | -0.19535 | 0.815 | 0.248 | 0.00E+00              |
| SOD2      | 7.1818174 | -0.96026 | 0.629 | 0.328 | 0.00E+00              |
| PPP1R14B  | 1.0544112 | 0.726637 | 0.828 | 0.085 | 0.00E+00              |
| ENO2      | 1.5043621 | -0.53081 | 0.558 | 0.191 | #####                 |
| HNRNPH2   | 1.7508589 | -0.20164 | 0.668 | 0.178 | #####                 |
| FAM104A   | 1.9652411 | 0.315062 | 0.676 | 0.063 | #####                 |
| TMEM134   | 3.5379555 | 0.474761 | 0.757 | 0.079 | #####                 |
| CRLS1     | 4.0349338 | 0.63771  | 0.78  | 0.056 | #####                 |
| IDH1      | 4.3719530 | 0.160892 | 0.749 | 0.128 | #####                 |
| JOSD2     | 5.2100126 | 0.460708 | 0.76  | 0.082 | #####                 |
| C12orf76  | 5.4215826 | 0.105689 | 0.696 | 0.111 | #####                 |
| MDK       | 2.3487949 | 0.154934 | 0.91  | 0.304 | #####                 |
| CTSL      | 4.1767860 | -0.352   | 0.668 | 0.217 | #####                 |
| UBL3      | 4.3735220 | 0.355213 | 0.758 | 0.091 | #####                 |
| CCDC28B   | 7.1734727 | 0.124694 | 0.67  | 0.096 | #####                 |
| NFIX      | 7.3994046 | 0.487928 | 0.8   | 0.099 | #####                 |
| USP8      | 1.3045217 | 0.179523 | 0.674 | 0.085 | #####                 |
| A1BG      | 1.3829981 | 0.40654  | 0.742 | 0.089 | #####                 |
| ISG15     | 1.5254659 | -0.20136 | 0.737 | 0.188 | #####                 |
| RBM42     | 2.0378651 | 0.287298 | 0.771 | 0.115 | #####                 |
| SUGT1     | 2.0718382 | -0.12927 | 0.626 | 0.133 | #####                 |
| RAB4A     | 2.4120994 | 0.364167 | 0.75  | 0.091 | #####                 |
| DDX39A    | 2.9300232 | -0.39003 | 0.616 | 0.195 | #####                 |
| SSRP1     | 3.3899737 | 0.348847 | 0.749 | 0.092 | #####                 |
| GLRX5     | 3.8109780 | 0.478755 | 0.735 | 0.055 | #####                 |
| DYNC1H1   | 5.5652342 | 0.261934 | 0.752 | 0.108 | #####                 |
| ACTR2     | 5.9579757 | 0.403677 | 0.733 | 0.077 | #####                 |
| PCNA      | 7.5433128 | -0.13741 | 0.635 | 0.126 | #####                 |
| LRRC59    | 7.6420560 | 0.480884 | 0.761 | 0.068 | #####                 |
| MAP2      | 0.00E+00  | 0.411857 | 0.81  | 0.115 | #####                 |
| MMP24-AS1 | 0.00E+00  | 0.857653 | 0.812 | 0.053 | #####                 |
| PQBP1     | 0.00E+00  | -0.22099 | 0.628 | 0.15  | #####                 |
| ATF6B     | 0.00E+00  | 0.207611 | 0.757 | 0.128 | #####                 |
| PRKDC     | 0.00E+00  | 0.272747 | 0.709 | 0.08  | #####                 |
| COPS7A    | 0.00E+00  | 0.143827 | 0.659 | 0.092 | #####                 |
| CNIH1     | 0.00E+00  | -0.33787 | 0.652 | 0.193 | #####                 |



|          |          |          |       |       |       |
|----------|----------|----------|-------|-------|-------|
| CHPT1    | 0.00E+00 | 0.620297 | 0.823 | 0.092 | ##### |
| GOLGA4   | 0.00E+00 | 0.1333   | 0.686 | 0.109 | ##### |
| YIF1B    | 0.00E+00 | 0.207767 | 0.716 | 0.103 | ##### |
| CXCL16   | 0.00E+00 | 0.353122 | 0.709 | 0.062 | ##### |
| DHRS7    | 0.00E+00 | -0.24433 | 0.652 | 0.173 | ##### |
| SMIM12   | 0.00E+00 | 0.231392 | 0.669 | 0.074 | ##### |
| SLC35B2  | 0.00E+00 | 0.746415 | 0.806 | 0.06  | ##### |
| FAM96A   | 0.00E+00 | -0.22417 | 0.58  | 0.135 | ##### |
| CYTH2    | 0.00E+00 | 0.268334 | 0.706 | 0.085 | ##### |
| PRPSAP1  | 0.00E+00 | 0.479037 | 0.749 | 0.075 | ##### |
| PMP2     | #####    | 0.313239 | 0.941 | 0.294 | ##### |
| PMF1     | #####    | -0.13064 | 0.633 | 0.132 | ##### |
| NUDT3    | #####    | 0.318575 | 0.733 | 0.087 | ##### |
| SPECC1   | #####    | 0.726562 | 0.824 | 0.068 | ##### |
| TAF12    | #####    | -0.2801  | 0.587 | 0.152 | ##### |
| IDI1     | #####    | 0.470634 | 0.757 | 0.072 | ##### |
| PSMD3    | #####    | 0.387959 | 0.747 | 0.091 | ##### |
| SPAG16   | #####    | -0.16829 | 0.639 | 0.152 | ##### |
| YWHAH    | #####    | 0.42875  | 0.756 | 0.084 | ##### |
| POU3F2   | #####    | 0.808174 | 0.829 | 0.067 | ##### |
| SCARB2   | #####    | 0.380505 | 0.728 | 0.08  | ##### |
| SMIM20   | #####    | -0.10882 | 0.622 | 0.123 | ##### |
| TMEM203  | #####    | 0.470205 | 0.742 | 0.06  | ##### |
| EPN2     | #####    | 0.47743  | 0.786 | 0.08  | ##### |
| ZFR      | #####    | 0.248048 | 0.753 | 0.113 | ##### |
| SLTM     | #####    | 0.184259 | 0.704 | 0.092 | ##### |
| PPP1R12A | #####    | 0.297248 | 0.759 | 0.109 | ##### |
| C9orf142 | #####    | 0.443661 | 0.745 | 0.068 | ##### |
| HERPUD1  | #####    | -0.59546 | 0.648 | 0.263 | ##### |
| CYB5D2   | #####    | 0.277787 | 0.698 | 0.085 | ##### |
| NUCB2    | #####    | -0.23335 | 0.604 | 0.147 | ##### |
| TNRC6B   | #####    | 0.471074 | 0.816 | 0.113 | ##### |
| DYNC1LI2 | #####    | 0.18252  | 0.708 | 0.097 | ##### |
| RNF13    | #####    | -0.12498 | 0.701 | 0.174 | ##### |
| ZRANB2   | #####    | 0.138476 | 0.732 | 0.13  | ##### |
| PRPF38B  | #####    | 0.143899 | 0.715 | 0.123 | ##### |
| PSRC1    | #####    | 0.273911 | 0.778 | 0.128 | ##### |
| C19orf25 | #####    | 0.4506   | 0.76  | 0.08  | ##### |
| CLIC4    | #####    | 0.137055 | 0.789 | 0.176 | ##### |
| ZFAND3   | #####    | 0.442493 | 0.704 | 0.053 | ##### |
| HDGF     | #####    | 0.271722 | 0.68  | 0.068 | ##### |
| FAM213A  | #####    | -0.19116 | 0.674 | 0.174 | ##### |
| COQ9     | #####    | 0.113528 | 0.671 | 0.101 | ##### |
| CAPZA1   | #####    | 0.475922 | 0.74  | 0.065 | ##### |
| NDUFAB2  | #####    | -0.25618 | 0.575 | 0.128 | ##### |
| ZYX      | #####    | 0.437124 | 0.803 | 0.115 | ##### |
| ZFAND5   | #####    | 0.171698 | 0.726 | 0.125 | ##### |
| CCZ1     | #####    | 0.229571 | 0.727 | 0.111 | ##### |
| GSTO1    | #####    | -0.3598  | 0.576 | 0.15  | ##### |
| RFC1     | #####    | 0.289841 | 0.681 | 0.068 | ##### |
| GPAA1    | #####    | 0.59183  | 0.779 | 0.067 | ##### |

|          |       |          |       |       |       |
|----------|-------|----------|-------|-------|-------|
| GPC1     | ##### | 0.840744 | 0.848 | 0.099 | ##### |
| SPAG9    | ##### | 0.535343 | 0.799 | 0.096 | ##### |
| SEZ6L2   | ##### | 0.27908  | 0.714 | 0.108 | ##### |
| P4HTM    | ##### | 0.430347 | 0.752 | 0.084 | ##### |
| CCDC25   | ##### | -0.1656  | 0.587 | 0.115 | ##### |
| TUBB4B   | ##### | -0.10713 | 0.717 | 0.19  | ##### |
| SHISA4   | ##### | 0.150266 | 0.72  | 0.116 | ##### |
| PDCD2    | ##### | 0.399322 | 0.695 | 0.058 | ##### |
| CNIH3    | ##### | 0.589579 | 0.766 | 0.062 | ##### |
| KLC1     | ##### | 0.324225 | 0.756 | 0.104 | ##### |
| EIF4EBP1 | ##### | -0.10473 | 0.689 | 0.164 | ##### |
| IDH2     | ##### | 0.405586 | 0.784 | 0.103 | ##### |
| PNRC1    | ##### | 0.18186  | 0.752 | 0.137 | ##### |
| TRAF4    | ##### | 0.613966 | 0.761 | 0.051 | ##### |
| WIPI2    | ##### | 0.371537 | 0.743 | 0.089 | ##### |
| TAPBP    | ##### | 0.33249  | 0.715 | 0.08  | ##### |
| CAPRIN1  | ##### | 0.481056 | 0.746 | 0.07  | ##### |
| MTFR1L   | ##### | 0.198238 | 0.682 | 0.092 | ##### |
| KIF1B    | ##### | 0.449734 | 0.8   | 0.115 | ##### |
| S100B    | ##### | -0.84312 | 0.836 | 0.545 | ##### |
| TSR3     | ##### | 0.636615 | 0.759 | 0.051 | ##### |
| DCUN1D5  | ##### | 0.196095 | 0.659 | 0.084 | ##### |
| PRCC     | ##### | 0.172673 | 0.668 | 0.091 | ##### |
| VTI1B    | ##### | 0.315751 | 0.692 | 0.085 | ##### |
| CEBPB    | ##### | 0.249751 | 0.796 | 0.145 | ##### |
| C8orf33  | ##### | 0.129416 | 0.69  | 0.108 | ##### |
| NRBF2    | ##### | 0.448733 | 0.741 | 0.074 | ##### |
| TNC      | ##### | 0.103581 | 0.736 | 0.142 | ##### |
| TIMM22   | ##### | 0.29752  | 0.686 | 0.068 | ##### |
| SH3GL1   | ##### | 0.507547 | 0.745 | 0.063 | ##### |
| SEMA6A   | ##### | 0.543642 | 0.762 | 0.067 | ##### |
| ACYP2    | ##### | -0.13239 | 0.669 | 0.161 | ##### |
| WDR13    | ##### | 0.113096 | 0.693 | 0.121 | ##### |
| FABP7    | ##### | 0.111784 | 0.98  | 0.472 | ##### |
| PTPMT1   | ##### | 0.417447 | 0.711 | 0.063 | ##### |
| RAE1     | ##### | 0.176255 | 0.658 | 0.082 | ##### |
| CTDNEP1  | ##### | 0.857421 | 0.77  | 0.038 | ##### |
| GRB2     | ##### | 0.52097  | 0.741 | 0.065 | ##### |
| PLEKHB2  | ##### | 0.230999 | 0.676 | 0.085 | ##### |
| PHF20    | ##### | 0.233444 | 0.689 | 0.092 | ##### |
| FDFT1    | ##### | 0.222413 | 0.738 | 0.109 | ##### |
| UCHL1    | ##### | -0.62154 | 0.669 | 0.32  | ##### |
| SEPHS2   | ##### | 0.432961 | 0.716 | 0.068 | ##### |
| IFT57    | ##### | -0.12137 | 0.625 | 0.14  | ##### |
| YIPF4    | ##### | 0.215125 | 0.693 | 0.103 | ##### |
| ANP32B   | ##### | 0.232443 | 0.717 | 0.104 | ##### |
| COL6A1   | ##### | 0.556799 | 0.806 | 0.104 | ##### |
| SNRPA1   | ##### | -0.28644 | 0.566 | 0.13  | ##### |
| NTPCR    | ##### | -0.13047 | 0.62  | 0.125 | ##### |
| EMC10    | ##### | 0.276646 | 0.77  | 0.123 | ##### |
| ABHD17A  | ##### | 0.648555 | 0.735 | 0.041 | ##### |

|           |       |          |       |       |       |
|-----------|-------|----------|-------|-------|-------|
| LINC00152 | ##### | -0.10484 | 0.689 | 0.168 | ##### |
| CHD4      | ##### | 0.386463 | 0.715 | 0.074 | ##### |
| CHPF      | ##### | 0.371189 | 0.774 | 0.111 | ##### |
| CAMK2N1   | ##### | 0.504388 | 0.817 | 0.12  | ##### |
| MED31     | ##### | 0.103974 | 0.621 | 0.08  | ##### |
| OSER1     | ##### | -0.33453 | 0.54  | 0.125 | ##### |
| TFPT      | ##### | 0.437732 | 0.723 | 0.079 | ##### |
| CCDC106   | ##### | 0.739326 | 0.786 | 0.051 | ##### |
| IGBP1     | ##### | -0.1528  | 0.619 | 0.132 | ##### |
| SCG2      | ##### | 0.32285  | 0.843 | 0.181 | ##### |
| WLS       | ##### | 0.373047 | 0.752 | 0.094 | ##### |
| NXT1      | ##### | 0.314927 | 0.682 | 0.072 | ##### |
| C22orf39  | ##### | 0.405803 | 0.692 | 0.062 | ##### |
| KHDRBS3   | ##### | 0.369579 | 0.731 | 0.085 | ##### |
| APPBP2    | ##### | 0.112895 | 0.595 | 0.068 | ##### |
| MAP7D1    | ##### | 0.605281 | 0.734 | 0.041 | ##### |
| VMA21     | ##### | 0.294535 | 0.66  | 0.058 | ##### |
| NT5C      | ##### | 0.451873 | 0.741 | 0.077 | ##### |
| POMGNT1   | ##### | 0.520363 | 0.748 | 0.06  | ##### |
| CPE       | ##### | 0.212612 | 0.825 | 0.185 | ##### |
| HAGH      | ##### | 0.4973   | 0.734 | 0.065 | ##### |
| SMIM14    | ##### | -0.31417 | 0.562 | 0.147 | ##### |
| IFNGR2    | ##### | 0.441759 | 0.727 | 0.074 | ##### |
| EBPL      | ##### | 0.448947 | 0.712 | 0.063 | ##### |
| BRD7      | ##### | 0.486104 | 0.705 | 0.051 | ##### |
| GID8      | ##### | 0.304141 | 0.651 | 0.053 | ##### |
| SERINC1   | ##### | -0.1008  | 0.652 | 0.147 | ##### |
| PKIB      | ##### | 0.231418 | 0.745 | 0.125 | ##### |
| SCAMP3    | ##### | -0.14624 | 0.606 | 0.121 | ##### |
| SMARCA5   | ##### | 0.574444 | 0.756 | 0.063 | ##### |
| TAF1D     | ##### | -0.19384 | 0.605 | 0.15  | ##### |
| ISCA2     | ##### | 0.184724 | 0.65  | 0.092 | ##### |
| PIGF      | ##### | -0.21098 | 0.57  | 0.133 | ##### |
| UBE2M     | ##### | 0.495902 | 0.685 | 0.044 | ##### |
| BCAT1     | ##### | 0.213685 | 0.713 | 0.109 | ##### |
| ALKBH5    | ##### | 0.619567 | 0.768 | 0.065 | ##### |
| NUDT22    | ##### | 0.167637 | 0.626 | 0.07  | ##### |
| ARL1      | ##### | -0.20267 | 0.614 | 0.157 | ##### |
| CREM      | ##### | 0.29788  | 0.67  | 0.068 | ##### |
| CHMP2B    | ##### | -0.11753 | 0.57  | 0.089 | ##### |
| NT5C3B    | ##### | 0.570439 | 0.755 | 0.07  | ##### |
| FLNA      | ##### | 0.729419 | 0.78  | 0.056 | ##### |
| LSM6      | ##### | -0.27639 | 0.591 | 0.157 | ##### |
| SDR39U1   | ##### | -0.24119 | 0.595 | 0.147 | ##### |
| SLC35C2   | ##### | 0.34144  | 0.704 | 0.084 | ##### |
| ADAR      | ##### | 0.319521 | 0.723 | 0.085 | ##### |
| SUGP2     | ##### | 0.14827  | 0.663 | 0.097 | ##### |
| RPA3      | ##### | -0.41733 | 0.535 | 0.152 | ##### |
| Clorf61   | ##### | -0.36285 | 0.968 | 0.585 | ##### |
| HMOX2     | ##### | -0.18331 | 0.569 | 0.113 | ##### |
| PPP2R2A   | ##### | -0.11241 | 0.585 | 0.121 | ##### |

|          |       |          |       |       |       |
|----------|-------|----------|-------|-------|-------|
| ZKSCAN1  | ##### | 0.212156 | 0.687 | 0.092 | ##### |
| MXRA7    | ##### | 0.535498 | 0.712 | 0.055 | ##### |
| TLK1     | ##### | 0.521401 | 0.742 | 0.062 | ##### |
| GNAI3    | ##### | 0.120225 | 0.673 | 0.103 | ##### |
| RAB22A   | ##### | 0.500312 | 0.714 | 0.05  | ##### |
| GLRX3    | ##### | -0.16712 | 0.541 | 0.099 | ##### |
| POLD4    | ##### | 0.185442 | 0.687 | 0.108 | ##### |
| LGALS1   | ##### | -0.32512 | 0.953 | 0.598 | ##### |
| CDS2     | ##### | 0.444482 | 0.706 | 0.062 | ##### |
| FNTA     | ##### | 0.334196 | 0.715 | 0.084 | ##### |
| ASH1L    | ##### | 0.163298 | 0.693 | 0.111 | ##### |
| STARD7   | ##### | 0.286641 | 0.699 | 0.085 | ##### |
| CBX5     | ##### | 0.157402 | 0.712 | 0.116 | ##### |
| FERMT2   | ##### | 0.366389 | 0.708 | 0.074 | ##### |
| CCND2    | ##### | 0.177978 | 0.751 | 0.133 | ##### |
| TWF1     | ##### | 0.2261   | 0.666 | 0.082 | ##### |
| CCDC53   | ##### | -0.24069 | 0.565 | 0.132 | ##### |
| TMEM183A | ##### | 0.398433 | 0.707 | 0.07  | ##### |
| PNMA1    | ##### | 0.517533 | 0.743 | 0.07  | ##### |
| PLS3     | ##### | 0.617974 | 0.788 | 0.079 | ##### |
| ZFAND2A  | ##### | -0.57543 | 0.467 | 0.147 | ##### |
| NAT14    | ##### | 0.433612 | 0.678 | 0.05  | ##### |
| WDR33    | ##### | -0.11855 | 0.579 | 0.099 | ##### |
| ARL4A    | ##### | -0.30875 | 0.73  | 0.255 | ##### |
| CCDC107  | ##### | 0.231481 | 0.693 | 0.099 | ##### |
| RPA2     | ##### | -0.28762 | 0.55  | 0.144 | ##### |
| GADD45A  | ##### | -0.20682 | 0.745 | 0.222 | ##### |
| MARK3    | ##### | 0.346513 | 0.717 | 0.089 | ##### |
| OXLD1    | ##### | 0.58362  | 0.743 | 0.062 | ##### |
| ABCF1    | ##### | 0.322755 | 0.671 | 0.065 | ##### |
| NECAP2   | ##### | -0.10972 | 0.591 | 0.096 | ##### |
| REEP3    | ##### | 0.679899 | 0.736 | 0.032 | ##### |
| CHCHD1   | ##### | 0.10638  | 0.571 | 0.058 | ##### |
| IFT52    | ##### | 0.208405 | 0.623 | 0.07  | ##### |
| MT1F     | ##### | -0.13461 | 0.673 | 0.174 | ##### |
| BOD1     | ##### | 0.344935 | 0.704 | 0.077 | ##### |
| RNF11    | ##### | 0.327014 | 0.684 | 0.068 | ##### |
| CMC1     | ##### | 0.111927 | 0.632 | 0.094 | ##### |
| PFKL     | ##### | 0.328745 | 0.699 | 0.082 | ##### |
| MFSD10   | ##### | 0.459023 | 0.7   | 0.056 | ##### |
| OS9      | ##### | -0.1622  | 0.751 | 0.207 | ##### |
| HEY1     | ##### | 0.33735  | 0.774 | 0.123 | ##### |
| EIF2AK2  | ##### | 0.277059 | 0.671 | 0.075 | ##### |
| C17orf62 | ##### | 0.619108 | 0.763 | 0.072 | ##### |
| CORO1B   | ##### | 0.43775  | 0.678 | 0.053 | ##### |
| GINM1    | ##### | 0.422258 | 0.701 | 0.065 | ##### |
| FAM136A  | ##### | 0.140504 | 0.616 | 0.077 | ##### |
| KNOP1    | ##### | 0.201167 | 0.658 | 0.085 | ##### |
| SERTAD1  | ##### | -0.7286  | 0.507 | 0.217 | ##### |
| TAOK3    | ##### | 0.170323 | 0.715 | 0.123 | ##### |
| UFSP2    | ##### | -0.21574 | 0.525 | 0.109 | ##### |

|          |       |          |       |       |       |
|----------|-------|----------|-------|-------|-------|
| RALA     | ##### | 0.107995 | 0.645 | 0.089 | ##### |
| PRPF4B   | ##### | 0.374578 | 0.698 | 0.075 | ##### |
| CAPN2    | ##### | 0.353043 | 0.701 | 0.08  | ##### |
| ITGB8    | ##### | 0.582647 | 0.778 | 0.072 | ##### |
| NEMF     | ##### | 0.180304 | 0.667 | 0.094 | ##### |
| SRSF6    | ##### | 0.356811 | 0.704 | 0.074 | ##### |
| BRIX1    | ##### | -0.33844 | 0.536 | 0.138 | ##### |
| RUFY3    | ##### | 0.272944 | 0.693 | 0.094 | ##### |
| EIF4G1   | ##### | 0.220193 | 0.636 | 0.08  | ##### |
| RBMS1    | ##### | 0.621675 | 0.759 | 0.06  | ##### |
| TMEM123  | ##### | 0.380112 | 0.72  | 0.085 | ##### |
| NAMPT    | ##### | -1.01942 | 0.475 | 0.311 | ##### |
| CSTF3    | ##### | 0.132302 | 0.652 | 0.097 | ##### |
| ATP1B3   | ##### | 0.355249 | 0.714 | 0.084 | ##### |
| ITFG1    | ##### | 0.374303 | 0.708 | 0.079 | ##### |
| BRMS1    | ##### | 0.251589 | 0.653 | 0.08  | ##### |
| RAD21    | ##### | 0.11515  | 0.658 | 0.109 | ##### |
| TRIP6    | ##### | 0.129104 | 0.668 | 0.12  | ##### |
| DHX29    | ##### | 0.195593 | 0.675 | 0.084 | ##### |
| CCDC109B | ##### | 0.833655 | 0.799 | 0.06  | ##### |
| ASNSD1   | ##### | -0.25404 | 0.516 | 0.121 | ##### |
| ECI1     | ##### | 0.514337 | 0.683 | 0.038 | ##### |
| PTRF     | ##### | 0.215281 | 0.677 | 0.082 | ##### |
| 6-Mar    | ##### | 0.295194 | 0.736 | 0.104 | ##### |
| WTAP     | ##### | 0.157792 | 0.704 | 0.118 | ##### |
| AMD1     | ##### | -0.21032 | 0.579 | 0.142 | ##### |
| PPIC     | ##### | 0.600006 | 0.73  | 0.051 | ##### |
| ADSL     | ##### | 0.173307 | 0.616 | 0.072 | ##### |
| SMIM19   | ##### | 0.164158 | 0.614 | 0.082 | ##### |
| HOPX     | ##### | 0.319299 | 0.947 | 0.349 | ##### |
| CAST     | ##### | 0.194392 | 0.672 | 0.092 | ##### |
| DNAJB2   | ##### | 0.181499 | 0.686 | 0.099 | ##### |
| LLPH     | ##### | 0.11456  | 0.6   | 0.074 | ##### |
| SLC39A7  | ##### | 0.131234 | 0.666 | 0.101 | ##### |
| RGMA     | ##### | 0.395506 | 0.794 | 0.123 | ##### |
| PMPCB    | ##### | -0.35822 | 0.572 | 0.171 | ##### |
| GLG1     | ##### | 0.410487 | 0.712 | 0.072 | ##### |
| YAF2     | ##### | -0.17707 | 0.644 | 0.161 | ##### |
| TAOK1    | ##### | 0.505773 | 0.723 | 0.065 | ##### |
| CCDC130  | ##### | 0.261771 | 0.644 | 0.075 | ##### |
| ADIPOR1  | ##### | 0.547742 | 0.721 | 0.05  | ##### |
| HMGB2    | ##### | -0.59591 | 0.568 | 0.219 | ##### |
| KLHDC8A  | ##### | 0.456389 | 0.781 | 0.101 | ##### |
| IGFBP7   | ##### | 0.208134 | 0.853 | 0.219 | ##### |
| IL6ST    | ##### | 0.483381 | 0.706 | 0.056 | ##### |
| GSS      | ##### | 0.407932 | 0.665 | 0.056 | ##### |
| SEMA6D   | ##### | 1.009025 | 0.781 | 0.026 | ##### |
| ANKRD11  | ##### | 0.33422  | 0.712 | 0.089 | ##### |
| GTF2F1   | ##### | 0.146686 | 0.652 | 0.092 | ##### |
| PSIP1    | ##### | 0.304655 | 0.728 | 0.103 | ##### |
| CLSTN1   | ##### | 0.206764 | 0.694 | 0.103 | ##### |

|           |       |          |       |       |       |
|-----------|-------|----------|-------|-------|-------|
| ERAL1     | ##### | 0.13395  | 0.597 | 0.084 | ##### |
| TIMM44    | ##### | 0.266197 | 0.705 | 0.106 | ##### |
| HRAS      | ##### | 0.63115  | 0.731 | 0.046 | ##### |
| RNF126    | ##### | 0.540288 | 0.715 | 0.053 | ##### |
| CMTM6     | ##### | 0.169094 | 0.629 | 0.074 | ##### |
| POLR3H    | ##### | 0.32017  | 0.643 | 0.06  | ##### |
| TSNAX     | ##### | -0.11534 | 0.583 | 0.109 | ##### |
| AKT1S1    | ##### | 0.372359 | 0.691 | 0.067 | ##### |
| LEPROTL1  | ##### | 0.277904 | 0.684 | 0.087 | ##### |
| FRG1      | ##### | -0.17456 | 0.545 | 0.111 | ##### |
| GSTM3     | ##### | -0.21882 | 0.552 | 0.125 | ##### |
| PPP4R2    | ##### | 0.236173 | 0.61  | 0.062 | ##### |
| PCM1      | ##### | 0.326713 | 0.698 | 0.085 | ##### |
| PEMT      | ##### | 0.179636 | 0.641 | 0.085 | ##### |
| H1FX      | ##### | 0.565481 | 0.769 | 0.079 | ##### |
| TIMP2     | ##### | 0.473532 | 0.714 | 0.063 | ##### |
| TPM1      | ##### | 0.361321 | 0.712 | 0.089 | ##### |
| COPS4     | ##### | -0.23964 | 0.558 | 0.137 | ##### |
| MPDU1     | ##### | 0.187124 | 0.638 | 0.085 | ##### |
| JMJD1C    | ##### | 0.538716 | 0.732 | 0.062 | ##### |
| MLST8     | ##### | 0.262578 | 0.63  | 0.063 | ##### |
| RP11-1094 | ##### | 0.138085 | 0.631 | 0.084 | ##### |
| EIF2AK1   | ##### | 0.454716 | 0.707 | 0.063 | ##### |
| NCBP2-AS2 | ##### | 0.594671 | 0.73  | 0.055 | ##### |
| STK17A    | ##### | 0.44042  | 0.724 | 0.077 | ##### |
| OSBPL8    | ##### | 0.520076 | 0.702 | 0.053 | ##### |
| GPRC5B    | ##### | 0.258086 | 0.689 | 0.094 | ##### |
| ENAH      | ##### | 0.601956 | 0.738 | 0.056 | ##### |
| RIC8A     | ##### | 0.181855 | 0.624 | 0.075 | ##### |
| SURF1     | ##### | 0.556043 | 0.73  | 0.06  | ##### |
| CHI3L1    | ##### | -1.00744 | 0.833 | 0.583 | ##### |
| NUDT21    | ##### | -0.19501 | 0.493 | 0.092 | ##### |
| ZMAT5     | ##### | 0.137646 | 0.585 | 0.065 | ##### |
| REEP2     | ##### | 0.475323 | 0.691 | 0.048 | ##### |
| PSMD6     | ##### | -0.1473  | 0.6   | 0.133 | ##### |
| DDIT3     | ##### | -0.4259  | 0.642 | 0.222 | ##### |
| SCAMP4    | ##### | 0.321673 | 0.68  | 0.077 | ##### |
| SMIM4     | ##### | 0.136896 | 0.629 | 0.092 | ##### |
| GANAB     | ##### | 0.387447 | 0.683 | 0.068 | ##### |
| IER2      | ##### | -0.21776 | 0.735 | 0.234 | ##### |
| ACTN1     | ##### | 0.529083 | 0.737 | 0.074 | ##### |
| ZFYVE21   | ##### | 0.172815 | 0.724 | 0.12  | ##### |
| UBE2K     | ##### | 0.206119 | 0.611 | 0.067 | ##### |
| BNIP3     | ##### | -0.41511 | 0.557 | 0.161 | ##### |
| ABCD4     | ##### | 0.191631 | 0.636 | 0.084 | ##### |
| CDC34     | ##### | 0.34327  | 0.657 | 0.068 | ##### |
| COQ4      | ##### | 0.215118 | 0.651 | 0.089 | ##### |
| ADI1      | ##### | 0.187966 | 0.645 | 0.089 | ##### |
| MBOAT7    | ##### | 0.55436  | 0.687 | 0.038 | ##### |
| CTSF      | ##### | 0.235059 | 0.661 | 0.077 | ##### |
| ARHGAP21  | ##### | 0.390756 | 0.719 | 0.085 | ##### |

|          |       |          |       |       |       |
|----------|-------|----------|-------|-------|-------|
| PGD      | ##### | 0.20696  | 0.627 | 0.072 | ##### |
| ID4      | ##### | 0.915176 | 0.833 | 0.085 | ##### |
| TCTEX1D2 | ##### | -0.18391 | 0.526 | 0.109 | ##### |
| WDR41    | ##### | -0.15867 | 0.557 | 0.116 | ##### |
| DUSP14   | ##### | 0.136904 | 0.548 | 0.053 | ##### |
| AKAP8L   | ##### | 0.315043 | 0.67  | 0.07  | ##### |
| GORASP2  | ##### | 0.172168 | 0.617 | 0.072 | ##### |
| MCRS1    | ##### | 0.29148  | 0.658 | 0.074 | ##### |
| MAP4     | ##### | 0.166166 | 0.665 | 0.108 | ##### |
| BCL7C    | ##### | 0.62465  | 0.701 | 0.036 | ##### |
| ITGAV    | ##### | 0.717414 | 0.749 | 0.046 | ##### |
| CCNH     | ##### | -0.21062 | 0.542 | 0.13  | ##### |
| TAF11    | ##### | 0.126757 | 0.582 | 0.075 | ##### |
| DEF8     | ##### | 0.275708 | 0.63  | 0.065 | ##### |
| NPAS3    | ##### | 0.611119 | 0.747 | 0.06  | ##### |
| MSN      | ##### | 0.293403 | 0.681 | 0.084 | ##### |
| FMNL2    | ##### | 0.921519 | 0.762 | 0.026 | ##### |
| SCFD1    | ##### | -0.25342 | 0.531 | 0.125 | ##### |
| CHCHD6   | ##### | 0.15815  | 0.582 | 0.07  | ##### |
| ACOT8    | ##### | 0.153574 | 0.592 | 0.067 | ##### |
| ICT1     | ##### | 0.328012 | 0.632 | 0.056 | ##### |
| C11orf49 | ##### | 0.155695 | 0.629 | 0.085 | ##### |
| CSNK1E   | ##### | 0.27889  | 0.694 | 0.103 | ##### |
| GLT8D1   | ##### | 0.332492 | 0.677 | 0.075 | ##### |
| NRCAM    | ##### | 0.305638 | 0.713 | 0.108 | ##### |
| TTYH1    | ##### | 0.162066 | 0.86  | 0.243 | ##### |
| TMED3    | ##### | 0.383413 | 0.67  | 0.067 | ##### |
| PAK2     | ##### | 0.474334 | 0.707 | 0.068 | ##### |
| CDKN2C   | ##### | -0.43484 | 0.624 | 0.224 | ##### |
| FGD5-AS1 | ##### | 0.369954 | 0.66  | 0.06  | ##### |
| RMDN3    | ##### | 0.352941 | 0.654 | 0.065 | ##### |
| TMEM248  | ##### | 0.230727 | 0.607 | 0.058 | ##### |
| ARF6     | ##### | 0.184405 | 0.645 | 0.089 | ##### |
| ZNF148   | ##### | 0.277433 | 0.645 | 0.063 | ##### |
| HARS     | ##### | 0.154834 | 0.627 | 0.091 | ##### |
| DLD      | ##### | -0.16358 | 0.6   | 0.145 | ##### |
| SEC14L1  | ##### | 0.170786 | 0.702 | 0.108 | ##### |
| FYTTD1   | ##### | 0.197197 | 0.608 | 0.062 | ##### |
| UBE3A    | ##### | 0.509196 | 0.704 | 0.062 | ##### |
| SPNS1    | ##### | 0.626508 | 0.722 | 0.046 | ##### |
| NAA50    | ##### | 0.176553 | 0.6   | 0.074 | ##### |
| CCDC82   | ##### | 0.240032 | 0.647 | 0.079 | ##### |
| PIGX     | ##### | 0.442627 | 0.691 | 0.062 | ##### |
| PTP4A1   | ##### | 0.372319 | 0.698 | 0.079 | ##### |
| CCS      | ##### | -0.14445 | 0.544 | 0.113 | ##### |
| TM7SF2   | ##### | 0.627378 | 0.722 | 0.048 | ##### |
| KLHDC2   | ##### | 0.338172 | 0.661 | 0.063 | ##### |
| CHN1     | ##### | 0.249255 | 0.679 | 0.084 | ##### |
| TMEM141  | ##### | 0.164896 | 0.576 | 0.063 | ##### |
| ARPC1B   | ##### | 0.304255 | 0.677 | 0.089 | ##### |
| DNPEP    | ##### | 0.301998 | 0.636 | 0.067 | ##### |

|         |       |          |       |       |       |
|---------|-------|----------|-------|-------|-------|
| TGOLN2  | ##### | 0.305601 | 0.635 | 0.07  | ##### |
| CD9     | ##### | -1.21728 | 0.672 | 0.66  | ##### |
| DHCR7   | ##### | 0.37353  | 0.682 | 0.068 | ##### |
| FAM49B  | ##### | 0.329705 | 0.646 | 0.062 | ##### |
| SEC23B  | ##### | 0.336863 | 0.66  | 0.062 | ##### |
| RBBP6   | ##### | 0.322811 | 0.677 | 0.079 | ##### |
| G3BP1   | ##### | 0.128454 | 0.651 | 0.109 | ##### |
| UBE2F   | ##### | 0.161602 | 0.594 | 0.072 | ##### |
| MLF1    | ##### | -0.14053 | 0.541 | 0.106 | ##### |
| MSRB1   | ##### | 0.170834 | 0.57  | 0.067 | ##### |
| OGFR    | ##### | 0.619359 | 0.727 | 0.044 | ##### |
| EMC8    | ##### | 0.347921 | 0.637 | 0.056 | ##### |
| THOC2   | ##### | 0.183445 | 0.655 | 0.099 | ##### |
| MCUR1   | ##### | 0.536417 | 0.682 | 0.048 | ##### |
| HEXB    | ##### | 0.342599 | 0.668 | 0.07  | ##### |
| CYHR1   | ##### | 0.255785 | 0.667 | 0.089 | ##### |
| ZFP36L2 | ##### | 0.103435 | 0.8   | 0.214 | ##### |
| DAP     | ##### | 0.497345 | 0.661 | 0.041 | ##### |
| TMEM54  | ##### | 0.491959 | 0.67  | 0.044 | ##### |
| SMOX    | ##### | -0.15099 | 0.608 | 0.138 | ##### |
| SV2A    | ##### | 0.389237 | 0.653 | 0.06  | ##### |
| DDX27   | ##### | 0.294766 | 0.638 | 0.068 | ##### |
| ARL8A   | ##### | 0.270411 | 0.609 | 0.065 | ##### |
| PARL    | ##### | 0.147762 | 0.586 | 0.072 | ##### |
| SPATS2  | ##### | 0.17442  | 0.623 | 0.089 | ##### |
| JUND    | ##### | 0.103286 | 0.687 | 0.135 | ##### |
| LARP1   | ##### | 0.341675 | 0.646 | 0.063 | ##### |
| ALDH9A1 | ##### | -0.12019 | 0.608 | 0.133 | ##### |
| HSPH1   | ##### | 0.102395 | 0.604 | 0.084 | ##### |
| CHD6    | ##### | 0.247216 | 0.634 | 0.07  | ##### |
| DFFA    | ##### | 0.165901 | 0.583 | 0.067 | ##### |
| TMEM251 | ##### | 0.270568 | 0.603 | 0.056 | ##### |
| CELF1   | ##### | 0.301822 | 0.638 | 0.065 | ##### |
| AFF4    | ##### | 0.28034  | 0.673 | 0.096 | ##### |
| SEPN1   | ##### | 0.600865 | 0.715 | 0.051 | ##### |
| TMEM30A | ##### | 0.332866 | 0.687 | 0.087 | ##### |
| MRC2    | ##### | 0.627431 | 0.697 | 0.034 | ##### |
| COTL1   | ##### | 0.241005 | 0.655 | 0.077 | ##### |
| EFEMP2  | ##### | 0.655348 | 0.717 | 0.048 | ##### |
| OXR1    | ##### | 0.360163 | 0.648 | 0.062 | ##### |
| EIF3A   | ##### | 0.272003 | 0.635 | 0.072 | ##### |
| ANAPC13 | ##### | -0.34721 | 0.542 | 0.15  | ##### |
| ZDHHC12 | ##### | 0.302235 | 0.575 | 0.044 | ##### |
| TSTA3   | ##### | 0.12363  | 0.588 | 0.072 | ##### |
| GSN     | ##### | -0.10776 | 0.596 | 0.126 | ##### |
| MTHFD2L | ##### | 0.343583 | 0.641 | 0.065 | ##### |
| IFI27L2 | ##### | -0.45614 | 0.616 | 0.239 | ##### |
| WDR34   | ##### | 0.191947 | 0.587 | 0.065 | ##### |
| PXMP2   | ##### | 0.291748 | 0.625 | 0.058 | ##### |
| DHRS4L2 | ##### | 0.233142 | 0.607 | 0.068 | ##### |
| AKIRIN2 | ##### | 0.361986 | 0.675 | 0.072 | ##### |



|           |       |          |       |       |       |
|-----------|-------|----------|-------|-------|-------|
| SLC22A17  | ##### | 0.403471 | 0.68  | 0.068 | ##### |
| PTGES2    | ##### | 0.414361 | 0.655 | 0.053 | ##### |
| WHSC1L1   | ##### | 0.585625 | 0.725 | 0.058 | ##### |
| LSM12     | ##### | 0.64673  | 0.712 | 0.038 | ##### |
| TCTN1     | ##### | 0.129648 | 0.588 | 0.082 | ##### |
| MPST      | ##### | 0.541557 | 0.688 | 0.044 | ##### |
| DHX9      | ##### | 0.159907 | 0.598 | 0.075 | ##### |
| CDKN2AIPN | ##### | 0.144814 | 0.585 | 0.079 | ##### |
| URI1      | ##### | 0.443823 | 0.659 | 0.051 | ##### |
| HILPDA    | ##### | -1.03558 | 0.364 | 0.193 | ##### |
| JAG1      | ##### | 0.447961 | 0.707 | 0.072 | ##### |
| SLC44A1   | ##### | 0.270305 | 0.689 | 0.094 | ##### |
| SHARPIN   | ##### | 0.403967 | 0.642 | 0.05  | ##### |
| B4GALT5   | ##### | 0.590583 | 0.719 | 0.056 | ##### |
| NEIL2     | ##### | 0.128499 | 0.576 | 0.072 | ##### |
| POP4      | ##### | -0.15435 | 0.532 | 0.108 | ##### |
| C19orf66  | ##### | 0.353835 | 0.668 | 0.07  | ##### |
| PRR7      | ##### | 0.859265 | 0.749 | 0.027 | ##### |
| LIMS1     | ##### | 0.411582 | 0.73  | 0.104 | ##### |
| PON2      | ##### | -0.34944 | 0.797 | 0.342 | ##### |
| PCBP4     | ##### | 0.640902 | 0.719 | 0.051 | ##### |
| SMAP1     | ##### | 0.379171 | 0.645 | 0.053 | ##### |
| ARL4C     | ##### | 0.572844 | 0.749 | 0.085 | ##### |
| TTC14     | ##### | 0.141114 | 0.612 | 0.091 | ##### |
| BICD1     | ##### | 0.613216 | 0.709 | 0.044 | ##### |
| MAPK1     | ##### | 0.656918 | 0.712 | 0.043 | ##### |
| NPM3      | ##### | -0.18161 | 0.469 | 0.092 | ##### |
| SURF2     | ##### | 0.139186 | 0.567 | 0.065 | ##### |
| DOK5      | ##### | 0.199196 | 0.628 | 0.08  | ##### |
| LINC00665 | ##### | -0.20721 | 0.525 | 0.126 | ##### |
| TAF15     | ##### | 0.141838 | 0.597 | 0.072 | ##### |
| KIAA1715  | ##### | 0.240754 | 0.624 | 0.08  | ##### |
| UBE2G2    | ##### | 0.155796 | 0.591 | 0.07  | ##### |
| CD44      | ##### | -0.3432  | 0.636 | 0.231 | ##### |
| TGIF1     | ##### | 0.144784 | 0.667 | 0.118 | ##### |
| HSPA4     | ##### | 0.168949 | 0.586 | 0.065 | ##### |
| NR1H2     | ##### | 0.334107 | 0.67  | 0.074 | ##### |
| EGLN2     | ##### | 0.530197 | 0.692 | 0.053 | ##### |
| NMT1      | ##### | 0.469622 | 0.699 | 0.072 | ##### |
| DCTD      | ##### | 0.170622 | 0.586 | 0.075 | ##### |
| RSPRY1    | ##### | 0.151386 | 0.6   | 0.075 | ##### |
| PITHD1    | ##### | 0.313878 | 0.634 | 0.068 | ##### |
| HDAC1     | ##### | 0.284968 | 0.586 | 0.048 | ##### |
| NUFIP2    | ##### | 0.505091 | 0.659 | 0.041 | ##### |
| SDC3      | ##### | -0.18404 | 0.614 | 0.15  | ##### |
| SRSF10    | ##### | -0.42764 | 0.477 | 0.149 | ##### |
| VAPB      | ##### | 0.373049 | 0.614 | 0.046 | ##### |
| TPM2      | ##### | 0.797308 | 0.755 | 0.056 | ##### |
| FJX1      | ##### | 0.806142 | 0.771 | 0.062 | ##### |
| TXNDC9    | ##### | 0.135994 | 0.538 | 0.058 | ##### |
| ABHD14A   | ##### | 0.40579  | 0.642 | 0.05  | ##### |

|           |       |          |       |       |       |
|-----------|-------|----------|-------|-------|-------|
| ATP6V0A1  | ##### | -0.16162 | 0.515 | 0.115 | ##### |
| ZSCAN16-A | ##### | 0.19649  | 0.618 | 0.084 | ##### |
| NGDN      | ##### | -0.43099 | 0.504 | 0.147 | ##### |
| NUPR1     | ##### | -0.77347 | 0.516 | 0.234 | ##### |
| ELOVL5    | ##### | 0.467659 | 0.686 | 0.062 | ##### |
| TNFRSF12A | ##### | 0.612616 | 0.818 | 0.142 | ##### |
| CHMP1A    | ##### | 0.20256  | 0.579 | 0.062 | ##### |
| ZNF644    | ##### | 0.27702  | 0.654 | 0.079 | ##### |
| PSMD9     | ##### | -0.32495 | 0.499 | 0.138 | ##### |
| ABHD2     | ##### | 0.418423 | 0.69  | 0.072 | ##### |
| EBP       | ##### | 0.142731 | 0.579 | 0.07  | ##### |
| PHF20L1   | ##### | 0.449336 | 0.68  | 0.063 | ##### |
| MOCS2     | ##### | -0.10575 | 0.582 | 0.135 | ##### |
| MOSPD3    | ##### | 0.147784 | 0.579 | 0.079 | ##### |
| ACAT1     | ##### | -0.40588 | 0.547 | 0.186 | ##### |
| TMUB2     | ##### | 0.13861  | 0.569 | 0.072 | ##### |
| ELAVL3    | ##### | 0.349546 | 0.677 | 0.085 | ##### |
| GCAT      | ##### | 0.363545 | 0.61  | 0.044 | ##### |
| ARFRP1    | ##### | 0.309598 | 0.622 | 0.056 | ##### |
| HOMER3    | ##### | 0.667553 | 0.704 | 0.039 | ##### |
| TCEAL7    | ##### | -0.21362 | 0.542 | 0.121 | ##### |
| OGFOD3    | ##### | 0.698149 | 0.701 | 0.031 | ##### |
| DNMT1     | ##### | 0.351488 | 0.645 | 0.06  | ##### |
| ETV5      | ##### | 0.36368  | 0.641 | 0.056 | ##### |
| IFNAR1    | ##### | 0.224608 | 0.599 | 0.07  | ##### |
| UBE2H     | ##### | 0.288339 | 0.635 | 0.068 | ##### |
| EMG1      | ##### | -0.18861 | 0.473 | 0.091 | ##### |
| FUNDC1    | ##### | -0.25891 | 0.503 | 0.118 | ##### |
| RBM6      | ##### | 0.251785 | 0.651 | 0.084 | ##### |
| PPCS      | ##### | -0.18513 | 0.515 | 0.115 | ##### |
| VPS4A     | ##### | 0.277776 | 0.633 | 0.072 | ##### |
| SQLE      | ##### | 0.561168 | 0.725 | 0.065 | ##### |
| SNAP29    | ##### | 0.206373 | 0.559 | 0.055 | ##### |
| LPP       | ##### | 0.422926 | 0.647 | 0.055 | ##### |
| TUBG1     | ##### | 0.24252  | 0.563 | 0.05  | ##### |
| PDCD7     | ##### | 0.275017 | 0.595 | 0.053 | ##### |
| RTCB      | ##### | 0.283877 | 0.624 | 0.062 | ##### |
| BAG6      | ##### | 0.332496 | 0.636 | 0.065 | ##### |
| MAX       | ##### | -0.10243 | 0.514 | 0.094 | ##### |
| EXOSC8    | ##### | -0.25201 | 0.514 | 0.13  | ##### |
| AATF      | ##### | 0.180279 | 0.583 | 0.07  | ##### |
| RING1     | ##### | 0.24475  | 0.597 | 0.065 | ##### |
| TLE1      | ##### | 0.513897 | 0.702 | 0.06  | ##### |
| SLBP      | ##### | 0.264459 | 0.62  | 0.07  | ##### |
| F3        | ##### | 0.510529 | 0.762 | 0.108 | ##### |
| DAG1      | ##### | 0.429588 | 0.651 | 0.048 | ##### |
| XPO1      | ##### | 0.175752 | 0.582 | 0.072 | ##### |
| FAM210B   | ##### | 0.872672 | 0.749 | 0.039 | ##### |
| TMEM199   | ##### | 0.203228 | 0.584 | 0.065 | ##### |
| ACP2      | ##### | 0.10405  | 0.547 | 0.074 | ##### |
| RASSF2    | ##### | 0.425198 | 0.682 | 0.067 | ##### |

|          |       |          |       |       |       |
|----------|-------|----------|-------|-------|-------|
| SMARCD3  | ##### | 0.385033 | 0.664 | 0.067 | ##### |
| ARMC10   | ##### | 0.372603 | 0.651 | 0.06  | ##### |
| TJP1     | ##### | 0.518016 | 0.668 | 0.043 | ##### |
| CTTN     | ##### | 0.232423 | 0.652 | 0.079 | ##### |
| NREP     | ##### | 0.341398 | 0.653 | 0.072 | ##### |
| CCNL2    | ##### | 0.331328 | 0.692 | 0.087 | ##### |
| PAFAH1B2 | ##### | 0.430008 | 0.675 | 0.06  | ##### |
| FBX07    | ##### | 0.378241 | 0.614 | 0.044 | ##### |
| STK25    | ##### | 0.529464 | 0.687 | 0.051 | ##### |
| YIPF5    | ##### | -0.19263 | 0.51  | 0.106 | ##### |
| RRP15    | ##### | 0.108607 | 0.557 | 0.056 | ##### |
| C1R      | ##### | -0.73145 | 0.513 | 0.251 | ##### |
| PDCD10   | ##### | 0.108391 | 0.548 | 0.065 | ##### |
| CCDC115  | ##### | -0.1923  | 0.485 | 0.106 | ##### |
| MAZ      | ##### | 0.43301  | 0.642 | 0.051 | ##### |
| MAPKAP1  | ##### | 0.39422  | 0.642 | 0.058 | ##### |
| PYGB     | ##### | 0.335475 | 0.644 | 0.065 | ##### |
| SAFB2    | ##### | 0.322637 | 0.685 | 0.089 | ##### |
| SLC35A4  | ##### | 0.216737 | 0.561 | 0.048 | ##### |
| CMTM3    | ##### | 0.570905 | 0.694 | 0.05  | ##### |
| HSD11B1L | ##### | 0.376401 | 0.641 | 0.056 | ##### |
| TAP1     | ##### | 0.140928 | 0.693 | 0.116 | ##### |
| BBOX1    | ##### | -0.1269  | 0.548 | 0.115 | ##### |
| FKBP4    | ##### | 0.212713 | 0.623 | 0.082 | ##### |
| HSF1     | ##### | 0.256699 | 0.606 | 0.063 | ##### |
| YME1L1   | ##### | 0.210445 | 0.573 | 0.056 | ##### |
| SLC25A37 | ##### | -0.11445 | 0.576 | 0.138 | ##### |
| EDEM2    | ##### | 0.153816 | 0.57  | 0.07  | ##### |
| RABL6    | ##### | 0.545273 | 0.657 | 0.032 | ##### |
| SPATC1L  | ##### | 0.501575 | 0.639 | 0.039 | ##### |
| STX4     | ##### | -0.13016 | 0.513 | 0.106 | ##### |
| APPL1    | ##### | 0.330008 | 0.622 | 0.058 | ##### |
| DMAP1    | ##### | -0.10704 | 0.535 | 0.101 | ##### |
| BLOC1S4  | ##### | 0.483548 | 0.647 | 0.039 | ##### |
| CERS4    | ##### | 0.546067 | 0.676 | 0.041 | ##### |
| SLC16A1  | ##### | -0.2346  | 0.53  | 0.132 | ##### |
| RABEP1   | ##### | 0.615918 | 0.677 | 0.032 | ##### |
| DEAF1    | ##### | 0.385407 | 0.64  | 0.055 | ##### |
| CRYL1    | ##### | 0.238479 | 0.612 | 0.074 | ##### |
| TDG      | ##### | 0.173282 | 0.609 | 0.085 | ##### |
| TP53I13  | ##### | 0.734083 | 0.711 | 0.034 | ##### |
| LRRFIP1  | ##### | 0.158812 | 0.596 | 0.079 | ##### |
| EEA1     | ##### | 0.396328 | 0.626 | 0.055 | ##### |
| IQGAP1   | ##### | 0.217155 | 0.602 | 0.065 | ##### |
| FAM89B   | ##### | 0.642524 | 0.679 | 0.029 | ##### |
| SLC52A2  | ##### | 0.575767 | 0.686 | 0.048 | ##### |
| MED11    | ##### | 0.243485 | 0.59  | 0.063 | ##### |
| ZNF226   | ##### | -0.1646  | 0.504 | 0.109 | ##### |
| EXOSC4   | ##### | 0.412804 | 0.638 | 0.05  | ##### |
| HMGAI    | ##### | 0.661345 | 0.718 | 0.053 | ##### |
| CHD2     | ##### | 0.154203 | 0.573 | 0.075 | ##### |

|           |       |          |       |       |       |
|-----------|-------|----------|-------|-------|-------|
| RNF145    | ##### | 0.472038 | 0.686 | 0.067 | ##### |
| MT1M      | ##### | -0.53393 | 0.617 | 0.241 | ##### |
| GON4L     | ##### | 0.110959 | 0.551 | 0.068 | ##### |
| COR01C    | ##### | -0.10151 | 0.612 | 0.154 | ##### |
| APLP1     | ##### | 0.338155 | 0.676 | 0.089 | ##### |
| RNF24     | ##### | 0.376283 | 0.651 | 0.067 | ##### |
| ATAT1     | ##### | 0.393496 | 0.64  | 0.058 | ##### |
| TSEN15    | ##### | 0.116888 | 0.552 | 0.067 | ##### |
| SORT1     | ##### | 0.370917 | 0.621 | 0.048 | ##### |
| NEU1      | ##### | 0.200205 | 0.585 | 0.063 | ##### |
| TSC22D4   | ##### | -0.50691 | 0.82  | 0.421 | ##### |
| FAM92A1   | ##### | 0.273084 | 0.582 | 0.055 | ##### |
| LYPLA2    | ##### | 0.159671 | 0.532 | 0.06  | ##### |
| GRIA3     | ##### | 0.339843 | 0.658 | 0.074 | ##### |
| HOOK3     | ##### | 0.220374 | 0.589 | 0.065 | ##### |
| RANBP3    | ##### | 0.218472 | 0.552 | 0.055 | ##### |
| ARHGAP12  | ##### | 0.174393 | 0.583 | 0.067 | ##### |
| MMAB      | ##### | 0.163075 | 0.58  | 0.077 | ##### |
| EIF3B     | ##### | 0.228066 | 0.581 | 0.065 | ##### |
| ADPRHL2   | ##### | 0.240744 | 0.609 | 0.068 | ##### |
| PRPF8     | ##### | 0.216358 | 0.597 | 0.079 | ##### |
| ASPH      | ##### | 0.293053 | 0.646 | 0.074 | ##### |
| CASC4     | ##### | 0.573689 | 0.685 | 0.046 | ##### |
| RAMP1     | ##### | -0.72412 | 0.803 | 0.538 | ##### |
| DDX42     | ##### | 0.302615 | 0.584 | 0.053 | ##### |
| COL9A3    | ##### | 0.514776 | 0.772 | 0.109 | ##### |
| ATP2A2    | ##### | 0.197158 | 0.617 | 0.092 | ##### |
| GOLIM4    | ##### | 0.420366 | 0.733 | 0.101 | ##### |
| PRRX1     | ##### | 0.439935 | 0.665 | 0.063 | ##### |
| SLC25A1   | ##### | 0.371601 | 0.629 | 0.053 | ##### |
| FUBP3     | ##### | 0.334386 | 0.654 | 0.065 | ##### |
| DAPK3     | ##### | 0.398898 | 0.66  | 0.067 | ##### |
| MAN1B1    | ##### | 0.287698 | 0.61  | 0.056 | ##### |
| TMEM98    | ##### | 0.416627 | 0.633 | 0.062 | ##### |
| NTHL1     | ##### | 0.113854 | 0.544 | 0.072 | ##### |
| ABT1      | ##### | -0.11519 | 0.492 | 0.089 | ##### |
| G6PD      | ##### | 0.401236 | 0.617 | 0.044 | ##### |
| ACIN1     | ##### | 0.170825 | 0.601 | 0.079 | ##### |
| MAP1A     | ##### | 0.220355 | 0.606 | 0.07  | ##### |
| CKAP4     | ##### | 0.422628 | 0.65  | 0.067 | ##### |
| THY1      | ##### | 0.226317 | 0.635 | 0.091 | ##### |
| CLCN3     | ##### | 0.277595 | 0.635 | 0.077 | ##### |
| CD74      | ##### | -1.50382 | 0.444 | 0.629 | ##### |
| LINC01003 | ##### | 0.419133 | 0.623 | 0.044 | ##### |
| TSSC1     | ##### | 0.166485 | 0.547 | 0.063 | ##### |
| RP11-345J | ##### | 0.402993 | 0.6   | 0.038 | ##### |
| NDFIP2    | ##### | 0.148291 | 0.567 | 0.074 | ##### |
| LRIF1     | ##### | -0.17623 | 0.465 | 0.091 | ##### |
| ACAT2     | ##### | 0.350859 | 0.645 | 0.068 | ##### |
| PRPF19    | ##### | 0.146308 | 0.546 | 0.065 | ##### |
| KCNQ2     | ##### | 0.627593 | 0.693 | 0.058 | ##### |

|          |       |          |       |       |       |
|----------|-------|----------|-------|-------|-------|
| TRIM28   | ##### | 0.174657 | 0.6   | 0.087 | ##### |
| THAP7    | ##### | 0.150324 | 0.568 | 0.074 | ##### |
| MAN1A2   | ##### | 0.395974 | 0.623 | 0.046 | ##### |
| FAM173A  | ##### | 0.451102 | 0.654 | 0.055 | ##### |
| ENDOV    | ##### | 0.173685 | 0.595 | 0.079 | ##### |
| TACC1    | ##### | 0.505219 | 0.665 | 0.05  | ##### |
| SPTAN1   | ##### | 0.223345 | 0.635 | 0.091 | ##### |
| HEBP2    | ##### | 0.710471 | 0.674 | 0.024 | ##### |
| DHX30    | ##### | 0.401029 | 0.655 | 0.062 | ##### |
| A2M      | ##### | -0.45386 | 0.532 | 0.171 | ##### |
| BLVRA    | ##### | -0.49651 | 0.474 | 0.162 | ##### |
| ITGA7    | ##### | 0.605831 | 0.677 | 0.039 | ##### |
| FTSJ2    | ##### | -0.10236 | 0.475 | 0.089 | ##### |
| RNF213   | ##### | 0.397607 | 0.633 | 0.051 | ##### |
| ATXN2    | ##### | 0.202363 | 0.582 | 0.07  | ##### |
| DUSP6    | ##### | 0.21979  | 0.639 | 0.092 | ##### |
| AZI2     | ##### | -0.10765 | 0.503 | 0.087 | ##### |
| UBE2G1   | ##### | 0.314387 | 0.589 | 0.051 | ##### |
| WNK1     | ##### | 0.252119 | 0.568 | 0.055 | ##### |
| ATPAF2   | ##### | 0.31399  | 0.588 | 0.051 | ##### |
| NDUFS1   | ##### | 0.353796 | 0.604 | 0.051 | ##### |
| JKAMP    | ##### | 0.303339 | 0.604 | 0.067 | ##### |
| PPP2R5C  | ##### | 0.148    | 0.546 | 0.063 | ##### |
| INTS10   | ##### | 0.180616 | 0.61  | 0.085 | ##### |
| ZNF32    | ##### | 0.252098 | 0.555 | 0.046 | ##### |
| HYAL2    | ##### | 0.716271 | 0.695 | 0.031 | ##### |
| RNF130   | ##### | 0.554721 | 0.677 | 0.048 | ##### |
| KATNBL1  | ##### | 0.33517  | 0.583 | 0.043 | ##### |
| DDX52    | ##### | 0.438286 | 0.646 | 0.053 | ##### |
| NMRAL1   | ##### | -0.20811 | 0.472 | 0.106 | ##### |
| SRP68    | ##### | 0.193156 | 0.557 | 0.062 | ##### |
| TINF2    | ##### | 0.243692 | 0.578 | 0.056 | ##### |
| APBA2    | ##### | 0.400746 | 0.652 | 0.065 | ##### |
| IFT27    | ##### | 0.366275 | 0.616 | 0.055 | ##### |
| GOSR1    | ##### | 0.133384 | 0.58  | 0.084 | ##### |
| PHF23    | ##### | 0.393356 | 0.625 | 0.058 | ##### |
| UTP18    | ##### | 0.16496  | 0.565 | 0.068 | ##### |
| TPP1     | ##### | 0.134519 | 0.549 | 0.075 | ##### |
| RAD50    | ##### | 0.166558 | 0.582 | 0.085 | ##### |
| CRELD2   | ##### | 0.613778 | 0.667 | 0.034 | ##### |
| COMMD10  | ##### | -0.22284 | 0.488 | 0.108 | ##### |
| KRR1     | ##### | 0.191447 | 0.565 | 0.06  | ##### |
| NOL12    | ##### | 0.146081 | 0.539 | 0.062 | ##### |
| SRPRB    | ##### | 0.172325 | 0.588 | 0.065 | ##### |
| TNPO1    | ##### | 0.280453 | 0.633 | 0.08  | ##### |
| TMEM170A | ##### | 0.2239   | 0.595 | 0.074 | ##### |
| PRKAR2A  | ##### | 0.238598 | 0.577 | 0.07  | ##### |
| CADM4    | ##### | 0.454996 | 0.677 | 0.062 | ##### |
| C8orf4   | ##### | -0.97115 | 0.443 | 0.265 | ##### |
| YTHDF1   | ##### | 0.368036 | 0.578 | 0.039 | ##### |
| PPIL1    | ##### | -0.11342 | 0.44  | 0.07  | ##### |

|           |       |          |       |       |       |
|-----------|-------|----------|-------|-------|-------|
| SOX4      | ##### | 0.250519 | 0.84  | 0.231 | ##### |
| ANP32E    | ##### | 0.166612 | 0.598 | 0.075 | ##### |
| COL4A2    | ##### | 0.517139 | 0.647 | 0.039 | ##### |
| BCKDK     | ##### | 0.409742 | 0.633 | 0.06  | ##### |
| DBN1      | ##### | 0.510829 | 0.668 | 0.053 | ##### |
| MFGE8     | ##### | 0.347525 | 0.623 | 0.062 | ##### |
| TAF10     | ##### | 0.616259 | 0.652 | 0.027 | ##### |
| SFXN5     | ##### | 0.112165 | 0.575 | 0.087 | ##### |
| VPS26B    | ##### | 0.359969 | 0.585 | 0.046 | ##### |
| CDC25B    | ##### | 0.321293 | 0.639 | 0.074 | ##### |
| PSMG1     | ##### | -0.11365 | 0.475 | 0.085 | ##### |
| EFTUD2    | ##### | 0.425583 | 0.638 | 0.051 | ##### |
| CDV3      | ##### | 0.528102 | 0.647 | 0.039 | ##### |
| EMD       | ##### | 0.291902 | 0.616 | 0.068 | ##### |
| LONP1     | ##### | 0.328938 | 0.611 | 0.055 | ##### |
| GSTA4     | ##### | -0.19344 | 0.522 | 0.128 | ##### |
| NIPA2     | ##### | 0.328899 | 0.602 | 0.051 | ##### |
| FLOT2     | ##### | 0.210819 | 0.522 | 0.044 | ##### |
| COPA      | ##### | 0.202429 | 0.625 | 0.089 | ##### |
| PHIP      | ##### | 0.183662 | 0.582 | 0.077 | ##### |
| PBDC1     | ##### | -0.24382 | 0.475 | 0.103 | ##### |
| YTHDC1    | ##### | 0.266528 | 0.603 | 0.065 | ##### |
| SNX27     | ##### | 0.393602 | 0.612 | 0.05  | ##### |
| GALNT2    | ##### | 0.452906 | 0.639 | 0.051 | ##### |
| SPCS3     | ##### | 0.2475   | 0.562 | 0.056 | ##### |
| FAM134A   | ##### | 0.433918 | 0.663 | 0.067 | ##### |
| C7orf55-L | ##### | 0.159589 | 0.602 | 0.087 | ##### |
| PDCD6IP   | ##### | 0.139306 | 0.571 | 0.082 | ##### |
| PDLIM7    | ##### | 0.722284 | 0.692 | 0.041 | ##### |
| TMEM223   | ##### | 0.285344 | 0.589 | 0.058 | ##### |
| MRT04     | ##### | 0.114824 | 0.563 | 0.075 | ##### |
| SOCS2     | ##### | 0.601123 | 0.701 | 0.06  | ##### |
| MAP2K1    | ##### | 0.176903 | 0.529 | 0.053 | ##### |
| CC2D1A    | ##### | 0.331087 | 0.594 | 0.05  | ##### |
| FAM63B    | ##### | 0.283852 | 0.583 | 0.062 | ##### |
| CIA01     | ##### | 0.286622 | 0.569 | 0.05  | ##### |
| GOPC      | ##### | 0.135906 | 0.565 | 0.08  | ##### |
| GDE1      | ##### | 0.352777 | 0.594 | 0.043 | ##### |
| ACLY      | ##### | 0.478623 | 0.638 | 0.048 | ##### |
| ASPSCR1   | ##### | 0.423935 | 0.641 | 0.056 | ##### |
| PROSC     | ##### | 0.186244 | 0.56  | 0.063 | ##### |
| GPR137    | ##### | 0.392043 | 0.604 | 0.041 | ##### |
| TPD52     | ##### | -0.19058 | 0.499 | 0.113 | ##### |
| ABCE1     | ##### | 0.184922 | 0.573 | 0.068 | ##### |
| WDR45     | ##### | -0.1204  | 0.504 | 0.097 | ##### |
| NOP58     | ##### | -0.28758 | 0.482 | 0.121 | ##### |
| TWISTNB   | ##### | -0.15494 | 0.504 | 0.085 | ##### |
| NF1       | ##### | 0.340624 | 0.604 | 0.056 | ##### |
| MAML2     | ##### | 0.476781 | 0.642 | 0.05  | ##### |
| BSDC1     | ##### | 0.143286 | 0.615 | 0.096 | ##### |
| SNAPC2    | ##### | 0.316041 | 0.589 | 0.053 | ##### |

|           |       |          |       |       |       |
|-----------|-------|----------|-------|-------|-------|
| BIRC2     | ##### | 0.249059 | 0.591 | 0.065 | ##### |
| WAC       | ##### | 0.447817 | 0.629 | 0.05  | ##### |
| OARD1     | ##### | -0.18186 | 0.467 | 0.096 | ##### |
| LARP6     | ##### | 0.454702 | 0.617 | 0.043 | ##### |
| TSR1      | ##### | 0.184755 | 0.528 | 0.056 | ##### |
| ELP5      | ##### | 0.337164 | 0.606 | 0.06  | ##### |
| CDIPT     | ##### | 0.275528 | 0.607 | 0.07  | ##### |
| TXNIP     | ##### | -0.12578 | 0.622 | 0.169 | ##### |
| BAG1      | ##### | 0.114398 | 0.57  | 0.077 | ##### |
| ID2       | ##### | -0.67366 | 0.624 | 0.323 | ##### |
| TMEM158   | ##### | 0.475743 | 0.639 | 0.051 | ##### |
| ERGIC1    | ##### | 0.114074 | 0.613 | 0.103 | ##### |
| XIAP      | ##### | 0.310733 | 0.586 | 0.055 | ##### |
| WSB2      | ##### | 0.371377 | 0.598 | 0.044 | ##### |
| STK4      | ##### | 0.114424 | 0.544 | 0.07  | ##### |
| KPNA3     | ##### | 0.222716 | 0.545 | 0.055 | ##### |
| FDX1      | ##### | 0.508438 | 0.644 | 0.043 | ##### |
| PRRC2A    | ##### | 0.443739 | 0.633 | 0.053 | ##### |
| MLC1      | ##### | 0.334293 | 0.619 | 0.068 | ##### |
| IVD       | ##### | 0.270472 | 0.578 | 0.056 | ##### |
| WIPF2     | ##### | 0.298962 | 0.56  | 0.044 | ##### |
| TMEM59L   | ##### | 0.212933 | 0.663 | 0.113 | ##### |
| PODXL2    | ##### | 0.577411 | 0.695 | 0.06  | ##### |
| ZCCHC11   | ##### | 0.163518 | 0.563 | 0.07  | ##### |
| WDR82     | ##### | 0.180047 | 0.553 | 0.068 | ##### |
| AGGF1     | ##### | 0.3668   | 0.613 | 0.055 | ##### |
| UBE2J1    | ##### | 0.542127 | 0.677 | 0.055 | ##### |
| ZNF302    | ##### | -0.17427 | 0.596 | 0.173 | ##### |
| TLL7      | ##### | 0.191519 | 0.611 | 0.096 | ##### |
| BAZ1A     | ##### | 0.353428 | 0.623 | 0.074 | ##### |
| SUPT16H   | ##### | -0.23026 | 0.481 | 0.106 | ##### |
| CECR5     | ##### | 0.529477 | 0.633 | 0.038 | ##### |
| PDXK      | ##### | 0.122121 | 0.528 | 0.065 | ##### |
| TWF2      | ##### | 0.18412  | 0.569 | 0.068 | ##### |
| SOCS6     | ##### | 0.339692 | 0.613 | 0.058 | ##### |
| EZR       | ##### | 0.223483 | 0.573 | 0.068 | ##### |
| PPP2R4    | ##### | 0.268769 | 0.581 | 0.063 | ##### |
| NBPF1     | ##### | 0.513896 | 0.641 | 0.039 | ##### |
| EPB41L4A- | ##### | -0.3472  | 0.472 | 0.123 | ##### |
| ZNF106    | ##### | 0.240568 | 0.566 | 0.062 | ##### |
| GTPBP6    | ##### | 0.288387 | 0.58  | 0.051 | ##### |
| YARS      | ##### | -0.16006 | 0.478 | 0.096 | ##### |
| TMEM161B- | ##### | -0.10554 | 0.544 | 0.12  | ##### |
| NKIRAS2   | ##### | 0.169704 | 0.556 | 0.065 | ##### |
| NUDT1     | ##### | -0.39933 | 0.468 | 0.128 | ##### |
| SUPT5H    | ##### | 0.127201 | 0.553 | 0.082 | ##### |
| BET1      | ##### | -0.34671 | 0.421 | 0.13  | ##### |
| LYPLAL1   | ##### | -0.14454 | 0.466 | 0.092 | ##### |
| SLC25A36  | ##### | 0.273898 | 0.59  | 0.07  | ##### |
| ZNF830    | ##### | -0.13583 | 0.454 | 0.077 | ##### |
| FAM195A   | ##### | 0.358834 | 0.598 | 0.051 | ##### |

|           |       |          |       |       |       |
|-----------|-------|----------|-------|-------|-------|
| CDK16     | ##### | 0.408693 | 0.626 | 0.06  | ##### |
| AKIP1     | ##### | 0.210493 | 0.569 | 0.07  | ##### |
| GGA1      | ##### | 0.141652 | 0.545 | 0.077 | ##### |
| TM9SF2    | ##### | 0.269016 | 0.59  | 0.065 | ##### |
| YKT6      | ##### | 0.121852 | 0.535 | 0.068 | ##### |
| KHSRP     | ##### | 0.491117 | 0.636 | 0.043 | ##### |
| DUSP12    | ##### | -0.17146 | 0.462 | 0.096 | ##### |
| RCAN1     | ##### | -0.1917  | 0.619 | 0.173 | ##### |
| C6orf89   | ##### | 0.217447 | 0.52  | 0.048 | ##### |
| SAFB      | ##### | 0.265751 | 0.601 | 0.068 | ##### |
| WWTR1     | ##### | 0.869762 | 0.712 | 0.032 | ##### |
| ARRDC3    | ##### | 0.160831 | 0.576 | 0.087 | ##### |
| ORAI2     | ##### | 0.400773 | 0.633 | 0.063 | ##### |
| RTN1      | ##### | -0.49388 | 0.339 | 0.096 | ##### |
| UBTF      | ##### | 0.311126 | 0.582 | 0.051 | ##### |
| PKN1      | ##### | 0.562692 | 0.655 | 0.038 | ##### |
| UBALD2    | ##### | 0.32438  | 0.629 | 0.07  | ##### |
| DDX41     | ##### | 0.25704  | 0.554 | 0.051 | ##### |
| DCAF8     | ##### | 0.224155 | 0.561 | 0.062 | ##### |
| MYO9B     | ##### | 0.259337 | 0.612 | 0.077 | ##### |
| GCC2      | ##### | 0.144147 | 0.525 | 0.067 | ##### |
| STAT1     | ##### | 0.194658 | 0.634 | 0.091 | ##### |
| MLX       | ##### | 0.198621 | 0.569 | 0.074 | ##### |
| RPF2      | ##### | -0.11876 | 0.477 | 0.087 | ##### |
| HDAC3     | ##### | 0.218148 | 0.551 | 0.062 | ##### |
| ANKIB1    | ##### | 0.239338 | 0.535 | 0.044 | ##### |
| GOLT1B    | ##### | -0.24602 | 0.424 | 0.084 | ##### |
| C16orf91  | ##### | 0.124799 | 0.475 | 0.046 | ##### |
| RBMX2     | ##### | -0.13431 | 0.494 | 0.104 | ##### |
| NQO2      | ##### | 0.160125 | 0.52  | 0.055 | ##### |
| PIPOX     | ##### | 0.262577 | 0.617 | 0.075 | ##### |
| CCDC14    | ##### | 0.173549 | 0.558 | 0.067 | ##### |
| RHOG      | ##### | 0.142046 | 0.493 | 0.05  | ##### |
| THAP9-AS1 | ##### | -0.10686 | 0.487 | 0.08  | ##### |
| MEG3      | ##### | -0.66955 | 0.629 | 0.378 | ##### |
| USF2      | ##### | 0.312316 | 0.622 | 0.068 | ##### |
| SLC25A33  | ##### | 0.405391 | 0.597 | 0.043 | ##### |
| RFK       | ##### | 0.270539 | 0.561 | 0.053 | ##### |
| THOP1     | ##### | 0.425061 | 0.578 | 0.032 | ##### |
| SIL1      | ##### | 0.104556 | 0.54  | 0.08  | ##### |
| SHMT2     | ##### | -0.23487 | 0.508 | 0.126 | ##### |
| HAT1      | ##### | -0.19514 | 0.499 | 0.115 | ##### |
| MSM01     | ##### | 0.346938 | 0.649 | 0.075 | ##### |
| FNDC4     | ##### | 0.529188 | 0.62  | 0.034 | ##### |
| ARSJ      | ##### | 0.45419  | 0.639 | 0.058 | ##### |
| CCDC50    | ##### | 0.326413 | 0.577 | 0.044 | ##### |
| DERL1     | ##### | -0.10024 | 0.5   | 0.099 | ##### |
| FAM174A   | ##### | 0.227331 | 0.565 | 0.062 | ##### |
| TM9SF4    | ##### | 0.176342 | 0.54  | 0.065 | ##### |
| NRP2      | ##### | 0.619202 | 0.681 | 0.05  | ##### |
| ERP44     | ##### | -0.12838 | 0.51  | 0.111 | ##### |



|           |       |          |       |       |       |
|-----------|-------|----------|-------|-------|-------|
| RPRD1A    | ##### | 0.131842 | 0.534 | 0.067 | ##### |
| DEXI      | ##### | 0.492547 | 0.617 | 0.034 | ##### |
| BAZ1B     | ##### | 0.528241 | 0.655 | 0.044 | ##### |
| EIF2B1    | ##### | 0.192349 | 0.58  | 0.077 | ##### |
| SF3A2     | ##### | 0.37183  | 0.619 | 0.063 | ##### |
| CDK5      | ##### | 0.13131  | 0.515 | 0.058 | ##### |
| ZNF292    | ##### | 0.366497 | 0.598 | 0.055 | ##### |
| SUPT6H    | ##### | 0.309973 | 0.54  | 0.043 | ##### |
| GNL1      | ##### | 0.408237 | 0.613 | 0.05  | ##### |
| RAB4B     | ##### | 0.101957 | 0.538 | 0.068 | ##### |
| 7-Mar     | ##### | 0.134353 | 0.516 | 0.063 | ##### |
| PMEPA1    | ##### | 0.975494 | 0.706 | 0.026 | ##### |
| ALDH3A2   | ##### | 0.286951 | 0.634 | 0.082 | ##### |
| AK3       | ##### | 0.129023 | 0.532 | 0.068 | ##### |
| RBM27     | ##### | 0.403058 | 0.596 | 0.043 | ##### |
| LRRC41    | ##### | 0.110122 | 0.545 | 0.084 | ##### |
| SPRED1    | ##### | 0.741111 | 0.687 | 0.027 | ##### |
| PLOD1     | ##### | 0.246636 | 0.544 | 0.06  | ##### |
| STRADB    | ##### | 0.555048 | 0.641 | 0.034 | ##### |
| RP11-620J | ##### | -0.37405 | 0.475 | 0.142 | ##### |
| RPUSD3    | ##### | 0.195658 | 0.52  | 0.051 | ##### |
| CCM2      | ##### | 0.262455 | 0.566 | 0.058 | ##### |
| SLC30A9   | ##### | 0.321629 | 0.591 | 0.056 | ##### |
| ZFHX4     | ##### | 0.451695 | 0.62  | 0.048 | ##### |
| WDR46     | ##### | 0.174069 | 0.533 | 0.056 | ##### |
| CGGBP1    | ##### | 0.168083 | 0.558 | 0.065 | ##### |
| CAND1     | ##### | 0.12587  | 0.528 | 0.074 | ##### |
| IMPAD1    | ##### | 0.275743 | 0.543 | 0.044 | ##### |
| PHC2      | ##### | 0.291226 | 0.564 | 0.053 | ##### |
| ZNF90     | ##### | -1.51354 | 0.272 | 0.427 | ##### |
| SLC25A23  | ##### | 0.357464 | 0.557 | 0.041 | ##### |
| MAGEH1    | ##### | -0.15934 | 0.525 | 0.123 | ##### |
| GNAQ      | ##### | 0.295372 | 0.557 | 0.044 | ##### |
| G3BP2     | ##### | 0.19907  | 0.526 | 0.048 | ##### |
| RIT1      | ##### | 0.204383 | 0.532 | 0.048 | ##### |
| DHRX      | ##### | 0.322486 | 0.573 | 0.051 | ##### |
| NIPBL     | ##### | 0.208479 | 0.532 | 0.056 | ##### |
| HMBS      | ##### | 0.347952 | 0.581 | 0.043 | ##### |
| RWDD4     | ##### | 0.240784 | 0.55  | 0.06  | ##### |
| SMAD1     | ##### | 0.732637 | 0.696 | 0.046 | ##### |
| POSTN     | ##### | 0.900508 | 0.714 | 0.046 | ##### |
| LRP10     | ##### | 0.196248 | 0.56  | 0.07  | ##### |
| IPO5      | ##### | 0.274778 | 0.561 | 0.055 | ##### |
| RND2      | ##### | 0.184462 | 0.547 | 0.063 | ##### |
| AAMDC     | ##### | -0.32035 | 0.411 | 0.097 | ##### |
| ELOVL1    | ##### | 0.175014 | 0.534 | 0.06  | ##### |
| TRPT1     | ##### | 0.222151 | 0.576 | 0.074 | ##### |
| 8-Sep     | ##### | 0.222551 | 0.568 | 0.065 | ##### |
| FADS1     | ##### | 0.289085 | 0.573 | 0.058 | ##### |
| TSPAN7    | ##### | -0.37413 | 0.614 | 0.234 | ##### |
| TRIM69    | ##### | 0.210668 | 0.553 | 0.063 | ##### |

|           |       |          |       |       |       |
|-----------|-------|----------|-------|-------|-------|
| RP11-553L | ##### | 0.337019 | 0.619 | 0.072 | ##### |
| CHD1      | ##### | 0.435731 | 0.632 | 0.06  | ##### |
| CEBPD     | ##### | -0.23365 | 0.697 | 0.251 | ##### |
| UBAP2L    | ##### | 0.100663 | 0.512 | 0.067 | ##### |
| U2AF2     | ##### | 0.377112 | 0.605 | 0.053 | ##### |
| TMX4      | ##### | 0.517683 | 0.635 | 0.043 | ##### |
| BLOC1S6   | ##### | 0.195712 | 0.503 | 0.044 | ##### |
| PPP1R10   | ##### | 0.123345 | 0.515 | 0.063 | ##### |
| KLF6      | ##### | -0.56015 | 0.55  | 0.255 | ##### |
| TRAP1     | ##### | 0.373014 | 0.605 | 0.051 | ##### |
| CD276     | ##### | 0.390949 | 0.583 | 0.046 | ##### |
| GLTP      | ##### | 0.103754 | 0.529 | 0.067 | ##### |
| KLHL7     | ##### | 0.140939 | 0.519 | 0.067 | ##### |
| CHL1      | ##### | 0.661886 | 0.649 | 0.034 | ##### |
| NHLRC3    | ##### | -0.12756 | 0.489 | 0.104 | ##### |
| CRBN      | ##### | -0.18405 | 0.532 | 0.125 | ##### |
| BCAP29    | ##### | -0.20998 | 0.548 | 0.149 | ##### |
| C15orf40  | ##### | -0.16015 | 0.411 | 0.075 | ##### |
| PANK2     | ##### | 0.427417 | 0.598 | 0.043 | ##### |
| GNPTG     | ##### | 0.272086 | 0.55  | 0.05  | ##### |
| DAXX      | ##### | 0.258943 | 0.536 | 0.051 | ##### |
| BTG2      | ##### | -0.52676 | 0.54  | 0.226 | ##### |
| TMEM33    | ##### | 0.343383 | 0.589 | 0.055 | ##### |
| TCEAL1    | ##### | -0.13227 | 0.489 | 0.106 | ##### |
| LINC00662 | ##### | -0.2269  | 0.447 | 0.103 | ##### |
| AC010642. | ##### | 0.203235 | 0.528 | 0.051 | ##### |
| PDLIM5    | ##### | 0.41551  | 0.604 | 0.048 | ##### |
| PRRC2B    | ##### | 0.391029 | 0.594 | 0.044 | ##### |
| GPX7      | ##### | 0.135707 | 0.513 | 0.06  | ##### |
| KIF5C     | ##### | 0.543896 | 0.634 | 0.043 | ##### |
| ROCK1     | ##### | 0.331367 | 0.576 | 0.051 | ##### |
| USP10     | ##### | 0.205493 | 0.535 | 0.055 | ##### |
| TMCO3     | ##### | 0.17653  | 0.512 | 0.051 | ##### |
| NDN       | ##### | 0.594783 | 0.626 | 0.026 | ##### |
| CPNE2     | ##### | 0.138501 | 0.572 | 0.074 | ##### |
| COIL      | ##### | 0.113948 | 0.5   | 0.058 | ##### |
| ALG3      | ##### | 0.251229 | 0.533 | 0.048 | ##### |
| SBN01     | ##### | 0.203553 | 0.557 | 0.072 | ##### |
| TP53RK    | ##### | 0.446135 | 0.594 | 0.038 | ##### |
| PREX1     | ##### | 0.233891 | 0.534 | 0.046 | ##### |
| FAM84A    | ##### | 0.54417  | 0.663 | 0.055 | ##### |
| COMMD2    | ##### | 0.108743 | 0.561 | 0.085 | ##### |
| MIF4GD    | ##### | 0.121114 | 0.494 | 0.055 | ##### |
| FARSB     | ##### | -0.20711 | 0.452 | 0.109 | ##### |
| DNAJC3    | ##### | 0.191422 | 0.576 | 0.072 | ##### |
| SERPINE2  | ##### | 0.281232 | 0.716 | 0.13  | ##### |
| FN3KRP    | ##### | 0.142099 | 0.502 | 0.06  | ##### |
| PCMTD2    | ##### | 0.408543 | 0.619 | 0.055 | ##### |
| SIRT7     | ##### | 0.419921 | 0.587 | 0.039 | ##### |
| CISD3     | ##### | 0.502277 | 0.574 | 0.022 | ##### |
| LTBP3     | ##### | 0.587349 | 0.642 | 0.032 | ##### |

|          |       |          |       |       |       |
|----------|-------|----------|-------|-------|-------|
| DPF2     | ##### | 0.179103 | 0.557 | 0.07  | ##### |
| SCRN1    | ##### | 0.217058 | 0.575 | 0.074 | ##### |
| ANKRD17  | ##### | 0.336068 | 0.568 | 0.046 | ##### |
| CITED1   | ##### | 0.356636 | 0.663 | 0.089 | ##### |
| PES1     | ##### | 0.273559 | 0.509 | 0.036 | ##### |
| EDNRB    | ##### | 0.73164  | 0.717 | 0.062 | ##### |
| CKS2     | ##### | -0.25584 | 0.447 | 0.115 | ##### |
| TMEM107  | ##### | -0.17166 | 0.406 | 0.084 | ##### |
| TMEM45A  | ##### | -0.71168 | 0.352 | 0.149 | ##### |
| FGFR1    | ##### | 0.173171 | 0.541 | 0.062 | ##### |
| BECN1    | ##### | 0.304475 | 0.538 | 0.041 | ##### |
| NCSTN    | ##### | 0.139327 | 0.578 | 0.087 | ##### |
| ERBB2IP  | ##### | 0.605557 | 0.663 | 0.043 | ##### |
| PSD3     | ##### | 0.474786 | 0.627 | 0.046 | ##### |
| GPATCH4  | ##### | 0.135897 | 0.512 | 0.063 | ##### |
| KCNF1    | ##### | 0.954261 | 0.684 | 0.019 | ##### |
| LENG8    | ##### | 0.351677 | 0.616 | 0.068 | ##### |
| NFYC     | ##### | -0.24271 | 0.422 | 0.101 | ##### |
| CCDC137  | ##### | 0.56131  | 0.628 | 0.034 | ##### |
| EXOG     | ##### | -0.11236 | 0.432 | 0.079 | ##### |
| PTRH1    | ##### | 0.377795 | 0.544 | 0.031 | ##### |
| TM7SF3   | ##### | 0.395681 | 0.586 | 0.044 | ##### |
| FBXW5    | ##### | 0.42854  | 0.63  | 0.062 | ##### |
| SCD      | ##### | 0.169142 | 0.576 | 0.079 | ##### |
| ARFIP2   | ##### | 0.221156 | 0.564 | 0.075 | ##### |
| TMBIM1   | ##### | -0.1279  | 0.412 | 0.07  | ##### |
| LITAF    | ##### | -0.53246 | 0.44  | 0.171 | ##### |
| STAG2    | ##### | 0.228992 | 0.56  | 0.065 | ##### |
| BRE      | ##### | -0.22229 | 0.413 | 0.092 | ##### |
| REPIN1   | ##### | 0.463173 | 0.622 | 0.046 | ##### |
| SMPD1    | ##### | 0.618407 | 0.652 | 0.034 | ##### |
| AKAP13   | ##### | 0.238935 | 0.589 | 0.072 | ##### |
| COPS2    | ##### | 0.139085 | 0.466 | 0.051 | ##### |
| AIMP2    | ##### | -0.15998 | 0.454 | 0.096 | ##### |
| C3orf14  | ##### | -0.3141  | 0.439 | 0.123 | ##### |
| PYCR1    | ##### | 0.32418  | 0.582 | 0.058 | ##### |
| DKK3     | ##### | 0.427291 | 0.647 | 0.065 | ##### |
| AGPAT1   | ##### | 0.317166 | 0.579 | 0.056 | ##### |
| SIPA1L1  | ##### | 0.289234 | 0.529 | 0.043 | ##### |
| SMARCD1  | ##### | 0.378445 | 0.574 | 0.044 | ##### |
| RFFL     | ##### | 0.742754 | 0.657 | 0.027 | ##### |
| GALNT11  | ##### | 0.201713 | 0.532 | 0.06  | ##### |
| USB1     | ##### | 0.18062  | 0.488 | 0.05  | ##### |
| PSME3    | ##### | 0.196587 | 0.509 | 0.051 | ##### |
| RNF34    | ##### | 0.106074 | 0.497 | 0.06  | ##### |
| BEX1     | ##### | -0.79161 | 0.529 | 0.345 | ##### |
| RAB32    | ##### | 0.592177 | 0.592 | 0.015 | ##### |
| RAB21    | ##### | 0.33341  | 0.528 | 0.036 | ##### |
| KPNA6    | ##### | 0.210755 | 0.545 | 0.06  | ##### |
| CTNNBIP1 | ##### | 0.506226 | 0.587 | 0.026 | ##### |
| MYCBP2   | ##### | 0.422338 | 0.582 | 0.039 | ##### |

|           |       |          |       |       |       |
|-----------|-------|----------|-------|-------|-------|
| PAK1IP1   | ##### | -0.17809 | 0.437 | 0.089 | ##### |
| FAM228B   | ##### | 0.145443 | 0.497 | 0.058 | ##### |
| DNAJB9    | ##### | -0.99226 | 0.412 | 0.256 | ##### |
| NSD1      | ##### | 0.162061 | 0.513 | 0.065 | ##### |
| ZEB1      | ##### | 0.290395 | 0.594 | 0.068 | ##### |
| OSBPL6    | ##### | 0.574192 | 0.641 | 0.032 | ##### |
| ARHGAP5   | ##### | 0.202486 | 0.551 | 0.07  | ##### |
| HMGXB4    | ##### | 0.234016 | 0.511 | 0.048 | ##### |
| STIM2     | ##### | 0.409416 | 0.584 | 0.043 | ##### |
| RP11-395G | ##### | 0.87294  | 0.704 | 0.039 | ##### |
| RBM26     | ##### | 0.41186  | 0.592 | 0.039 | ##### |
| TMUB1     | ##### | 0.4599   | 0.602 | 0.039 | ##### |
| UBAC1     | ##### | 0.359596 | 0.529 | 0.029 | ##### |
| BAZ2B     | ##### | 0.294613 | 0.62  | 0.08  | ##### |
| NCOA4     | ##### | 0.159021 | 0.491 | 0.048 | ##### |
| SEC31A    | ##### | 0.136143 | 0.518 | 0.07  | ##### |
| GAA       | ##### | 0.350512 | 0.571 | 0.05  | ##### |
| PSMG4     | ##### | 0.351062 | 0.566 | 0.051 | ##### |
| PET117    | ##### | 0.225193 | 0.524 | 0.056 | ##### |
| UBE2D1    | ##### | 0.39289  | 0.549 | 0.031 | ##### |
| HAUS1     | ##### | -0.13884 | 0.441 | 0.084 | ##### |
| ARHGEF12  | ##### | 0.258366 | 0.524 | 0.046 | ##### |
| CFLAR     | ##### | -0.22857 | 0.468 | 0.113 | ##### |
| MITD1     | ##### | -0.14195 | 0.475 | 0.104 | ##### |
| SSFA2     | ##### | 0.26949  | 0.577 | 0.058 | ##### |
| C19orf48  | ##### | 0.121196 | 0.542 | 0.079 | ##### |
| TRPC4AP   | ##### | 0.443115 | 0.602 | 0.043 | ##### |
| DNM1L     | ##### | 0.152711 | 0.523 | 0.072 | ##### |
| SNX4      | ##### | 0.135975 | 0.498 | 0.065 | ##### |
| ABRACL    | ##### | 0.381649 | 0.556 | 0.032 | ##### |
| CERS2     | ##### | 0.231338 | 0.52  | 0.048 | ##### |
| TBC1D20   | ##### | 0.431786 | 0.591 | 0.039 | ##### |
| TMEM87A   | ##### | 0.250623 | 0.542 | 0.055 | ##### |
| HECTD1    | ##### | 0.355129 | 0.555 | 0.041 | ##### |
| PRKRIP1   | ##### | 0.225362 | 0.531 | 0.058 | ##### |
| CXADR     | ##### | 0.582435 | 0.661 | 0.055 | ##### |
| FAM120A   | ##### | 0.444468 | 0.572 | 0.031 | ##### |
| PPIH      | ##### | -0.1708  | 0.397 | 0.07  | ##### |
| TACO1     | ##### | 0.503537 | 0.592 | 0.031 | ##### |
| ASB8      | ##### | -0.12872 | 0.431 | 0.082 | ##### |
| PAAF1     | ##### | -0.24909 | 0.439 | 0.111 | ##### |
| UBAC2     | ##### | 0.103485 | 0.493 | 0.063 | ##### |
| UBE2R2    | ##### | 0.369098 | 0.538 | 0.034 | ##### |
| KDM5A     | ##### | 0.246053 | 0.547 | 0.056 | ##### |
| CRYZL1    | ##### | -0.17962 | 0.459 | 0.109 | ##### |
| TSPAN31   | ##### | -0.13881 | 0.503 | 0.115 | ##### |
| CSRP1     | ##### | 0.332596 | 0.537 | 0.034 | ##### |
| NCKAP1    | ##### | 0.451126 | 0.611 | 0.05  | ##### |
| CDC5L     | ##### | 0.247872 | 0.539 | 0.055 | ##### |
| TOLLIP    | ##### | 0.30191  | 0.554 | 0.053 | ##### |
| HMG3      | ##### | -0.11391 | 0.453 | 0.087 | ##### |

|           |       |          |       |       |       |
|-----------|-------|----------|-------|-------|-------|
| RPP25L    | ##### | 0.21335  | 0.518 | 0.048 | ##### |
| PGRMC2    | ##### | 0.133254 | 0.497 | 0.056 | ##### |
| SDHAF1    | ##### | 0.19138  | 0.478 | 0.041 | ##### |
| FAM172A   | ##### | 0.176556 | 0.512 | 0.062 | ##### |
| BDP1      | ##### | 0.185255 | 0.523 | 0.058 | ##### |
| RPA1      | ##### | 0.192855 | 0.526 | 0.053 | ##### |
| HRSF12    | ##### | -0.18314 | 0.452 | 0.103 | ##### |
| C18orf21  | ##### | 0.235593 | 0.486 | 0.036 | ##### |
| RNF19A    | ##### | 0.568124 | 0.646 | 0.046 | ##### |
| TOR1AIP2  | ##### | 0.336056 | 0.597 | 0.063 | ##### |
| FAM207A   | ##### | 0.344451 | 0.535 | 0.036 | ##### |
| PCYOX1    | ##### | 0.25388  | 0.516 | 0.051 | ##### |
| ERF       | ##### | 0.188983 | 0.555 | 0.068 | ##### |
| PLSCR1    | ##### | -0.24488 | 0.459 | 0.118 | ##### |
| TMEM115   | ##### | 0.252964 | 0.546 | 0.056 | ##### |
| KCMF1     | ##### | 0.327    | 0.52  | 0.036 | ##### |
| LINC00969 | ##### | -0.19756 | 0.434 | 0.096 | ##### |
| VEGFA     | ##### | -0.43283 | 0.464 | 0.157 | ##### |
| ACTR1A    | ##### | 0.126993 | 0.471 | 0.05  | ##### |
| CLIP1     | ##### | 0.117467 | 0.529 | 0.077 | ##### |
| C6orf226  | ##### | 0.461787 | 0.59  | 0.038 | ##### |
| 2-Mar     | ##### | 0.466549 | 0.563 | 0.026 | ##### |
| ZMYND8    | ##### | 0.191397 | 0.548 | 0.072 | ##### |
| SDAD1     | ##### | 0.194254 | 0.514 | 0.05  | ##### |
| KDSR      | ##### | 0.250397 | 0.545 | 0.063 | ##### |
| WDR60     | ##### | 0.108331 | 0.526 | 0.077 | ##### |
| RAB3GAP2  | ##### | 0.214516 | 0.535 | 0.062 | ##### |
| NINJ1     | ##### | 0.310385 | 0.556 | 0.053 | ##### |
| AZIN1     | ##### | 0.129341 | 0.554 | 0.089 | ##### |
| LDLRAD3   | ##### | 0.530339 | 0.626 | 0.041 | ##### |
| TNRC6A    | ##### | 0.174216 | 0.538 | 0.072 | ##### |
| GSTM4     | ##### | 0.127204 | 0.507 | 0.068 | ##### |
| F2R       | ##### | 0.250517 | 0.55  | 0.058 | ##### |
| MRAS      | ##### | 0.343295 | 0.531 | 0.034 | ##### |
| IFRD2     | ##### | 0.248268 | 0.567 | 0.072 | ##### |
| COL6A2    | ##### | 0.76971  | 0.684 | 0.053 | ##### |
| HGS       | ##### | 0.373435 | 0.556 | 0.043 | ##### |
| CUX1      | ##### | 0.346441 | 0.564 | 0.051 | ##### |
| MTHFD1    | ##### | 0.110109 | 0.516 | 0.079 | ##### |
| BAIAP2    | ##### | 0.360624 | 0.6   | 0.062 | ##### |
| GOT2      | ##### | 0.194723 | 0.484 | 0.048 | ##### |
| TSMF      | ##### | -0.15616 | 0.487 | 0.108 | ##### |
| RNF180    | ##### | 0.204463 | 0.573 | 0.08  | ##### |
| UBE2Q1    | ##### | 0.324521 | 0.512 | 0.032 | ##### |
| RNASEH1   | ##### | 0.324427 | 0.54  | 0.043 | ##### |
| RHOT1     | ##### | 0.507182 | 0.605 | 0.039 | ##### |
| SCPEP1    | ##### | -0.10233 | 0.424 | 0.074 | ##### |
| PTCD3     | ##### | 0.290032 | 0.544 | 0.051 | ##### |
| TRIM2     | ##### | 0.261541 | 0.559 | 0.06  | ##### |
| POLR2B    | ##### | 0.172528 | 0.512 | 0.053 | ##### |
| IGFBP5    | ##### | -0.84504 | 0.58  | 0.361 | ##### |

|           |       |          |       |       |       |
|-----------|-------|----------|-------|-------|-------|
| CELF2     | ##### | 0.277152 | 0.583 | 0.068 | ##### |
| PLEKHA4   | ##### | 0.322555 | 0.566 | 0.051 | ##### |
| MPHOSPH1C | ##### | -0.10927 | 0.468 | 0.085 | ##### |
| ENDOG     | ##### | 0.221577 | 0.477 | 0.043 | ##### |
| PEX10     | ##### | 0.479456 | 0.6   | 0.039 | ##### |
| SUN1      | ##### | -0.2173  | 0.432 | 0.111 | ##### |
| RAF1      | ##### | 0.315562 | 0.571 | 0.056 | ##### |
| AGO3      | ##### | 0.104214 | 0.477 | 0.06  | ##### |
| FNDC3A    | ##### | 0.377523 | 0.567 | 0.048 | ##### |
| ATG4B     | ##### | 0.234477 | 0.552 | 0.06  | ##### |
| ARL14EP   | ##### | -0.15774 | 0.411 | 0.077 | ##### |
| PHYH      | ##### | 0.188965 | 0.491 | 0.05  | ##### |
| ASAP1     | ##### | 0.419021 | 0.586 | 0.044 | ##### |
| UROS      | ##### | 0.53718  | 0.597 | 0.029 | ##### |
| DGKZ      | ##### | 0.435155 | 0.595 | 0.046 | ##### |
| PRKCA     | ##### | 0.771471 | 0.659 | 0.024 | ##### |
| NMB       | ##### | 0.100752 | 0.664 | 0.133 | ##### |
| TRIP11    | ##### | 0.350617 | 0.558 | 0.05  | ##### |
| INO80E    | ##### | 0.348105 | 0.557 | 0.046 | ##### |
| FNBP4     | ##### | 0.304417 | 0.571 | 0.063 | ##### |
| PTPN1     | ##### | 0.524243 | 0.577 | 0.024 | ##### |
| ACOT13    | ##### | -0.10024 | 0.453 | 0.072 | ##### |
| SPG7      | ##### | 0.222654 | 0.536 | 0.053 | ##### |
| NRSN2     | ##### | 0.539753 | 0.586 | 0.024 | ##### |
| GNB4      | ##### | 0.335376 | 0.519 | 0.034 | ##### |
| APEH      | ##### | 0.267054 | 0.494 | 0.034 | ##### |
| FBX09     | ##### | 0.422015 | 0.577 | 0.038 | ##### |
| SLC35E1   | ##### | 0.18351  | 0.461 | 0.046 | ##### |
| MECR      | ##### | 0.238727 | 0.498 | 0.044 | ##### |
| AKAP7     | ##### | 0.40578  | 0.627 | 0.072 | ##### |
| EIF2B5    | ##### | 0.163122 | 0.475 | 0.048 | ##### |
| TMEM101   | ##### | 0.206487 | 0.495 | 0.051 | ##### |
| PUM1      | ##### | 0.248851 | 0.55  | 0.053 | ##### |
| DNM2      | ##### | 0.243065 | 0.509 | 0.048 | ##### |
| BCL7B     | ##### | 0.198275 | 0.522 | 0.062 | ##### |
| POLE3     | ##### | -0.11876 | 0.423 | 0.074 | ##### |
| C21orf62  | ##### | 0.495237 | 0.619 | 0.06  | ##### |
| REST      | ##### | 0.558181 | 0.63  | 0.043 | ##### |
| CBY1      | ##### | 0.110669 | 0.471 | 0.05  | ##### |
| RBM10     | ##### | 0.171851 | 0.488 | 0.051 | ##### |
| TOR1A     | ##### | 0.258954 | 0.509 | 0.05  | ##### |
| ING2      | ##### | 0.100997 | 0.435 | 0.044 | ##### |
| GNG12     | ##### | 0.353653 | 0.564 | 0.043 | ##### |
| ABI1      | ##### | 0.204104 | 0.48  | 0.041 | ##### |
| CAMK1     | ##### | 0.549044 | 0.61  | 0.039 | ##### |
| PPP2R5E   | ##### | 0.415502 | 0.561 | 0.038 | ##### |
| CLN5      | ##### | 0.252224 | 0.516 | 0.046 | ##### |
| PLA2G12A  | ##### | 0.2422   | 0.558 | 0.068 | ##### |
| ALKBH4    | ##### | 0.137223 | 0.486 | 0.06  | ##### |
| MYEF2     | ##### | 0.482772 | 0.607 | 0.041 | ##### |
| CTNND1    | ##### | 0.232544 | 0.515 | 0.051 | ##### |

|           |       |          |       |       |       |
|-----------|-------|----------|-------|-------|-------|
| PLEKHA3   | ##### | 0.356803 | 0.557 | 0.041 | ##### |
| TBL1XR1   | ##### | 0.311894 | 0.564 | 0.056 | ##### |
| DESI2     | ##### | 0.44933  | 0.585 | 0.036 | ##### |
| C1orf50   | ##### | 0.151403 | 0.49  | 0.053 | ##### |
| HIBADH    | ##### | 0.267218 | 0.524 | 0.051 | ##### |
| USP48     | ##### | 0.218794 | 0.529 | 0.056 | ##### |
| TMEM161A  | ##### | 0.129567 | 0.512 | 0.062 | ##### |
| CTBP1     | ##### | 0.308609 | 0.531 | 0.043 | ##### |
| SUPT20H   | ##### | 0.257593 | 0.532 | 0.055 | ##### |
| NR3C1     | ##### | 0.169754 | 0.535 | 0.072 | ##### |
| CCNG1     | ##### | -0.31627 | 0.404 | 0.113 | ##### |
| SLC44A2   | ##### | 0.230079 | 0.561 | 0.07  | ##### |
| C1orf35   | ##### | 0.319145 | 0.548 | 0.05  | ##### |
| SPARCL1   | ##### | -0.25307 | 0.758 | 0.332 | ##### |
| CRELD1    | ##### | 0.164051 | 0.488 | 0.053 | ##### |
| WASL      | ##### | 0.210376 | 0.51  | 0.058 | ##### |
| ZNF524    | ##### | 0.418433 | 0.55  | 0.029 | ##### |
| CBX6      | ##### | 0.542605 | 0.664 | 0.063 | ##### |
| SUCLG2    | ##### | 0.165655 | 0.529 | 0.067 | ##### |
| CHD7      | ##### | 0.209688 | 0.566 | 0.077 | ##### |
| UPF3B     | ##### | -0.2094  | 0.419 | 0.096 | ##### |
| SMARCC2   | ##### | 0.160963 | 0.541 | 0.08  | ##### |
| RNASEH1-A | ##### | 0.270556 | 0.517 | 0.048 | ##### |
| ABCD3     | ##### | 0.330564 | 0.561 | 0.05  | ##### |
| MAP9      | ##### | 0.262229 | 0.544 | 0.065 | ##### |
| TMEM60    | ##### | -0.10196 | 0.426 | 0.07  | ##### |
| USP5      | ##### | 0.15377  | 0.494 | 0.056 | ##### |
| USP14     | ##### | 0.256711 | 0.526 | 0.051 | ##### |
| TOP2B     | ##### | 0.367458 | 0.547 | 0.039 | ##### |
| STX16     | ##### | 0.179007 | 0.516 | 0.063 | ##### |
| ANAPC10   | ##### | -0.11415 | 0.403 | 0.075 | ##### |
| ZNF511    | ##### | 0.363434 | 0.518 | 0.031 | ##### |
| IRF2BPL   | ##### | 0.356545 | 0.581 | 0.055 | ##### |
| FAM3A     | ##### | 0.360278 | 0.544 | 0.041 | ##### |
| CHP1      | ##### | 0.250469 | 0.528 | 0.051 | ##### |
| EPC1      | ##### | 0.400261 | 0.573 | 0.043 | ##### |
| DCLK2     | ##### | 0.259102 | 0.553 | 0.063 | ##### |
| MYO6      | ##### | 0.20199  | 0.576 | 0.084 | ##### |
| GRAMD1A   | ##### | 0.353194 | 0.572 | 0.055 | ##### |
| PTTG1     | ##### | 0.107123 | 0.489 | 0.062 | ##### |
| HMGCS1    | ##### | 0.441492 | 0.616 | 0.056 | ##### |
| CDC40     | ##### | 0.142668 | 0.453 | 0.044 | ##### |
| SCYL1     | ##### | 0.36728  | 0.535 | 0.039 | ##### |
| PI4KB     | ##### | 0.105879 | 0.527 | 0.074 | ##### |
| PRKACB    | ##### | 0.195671 | 0.495 | 0.056 | ##### |
| RIOK3     | ##### | 0.191965 | 0.483 | 0.05  | ##### |
| BHLHE40   | ##### | -0.20189 | 0.405 | 0.062 | ##### |
| FAM181B   | ##### | 0.717373 | 0.673 | 0.053 | ##### |
| SORBS3    | ##### | 0.31963  | 0.532 | 0.041 | ##### |
| DSEL      | ##### | 0.209653 | 0.574 | 0.084 | ##### |
| SCO2      | ##### | 0.361533 | 0.488 | 0.021 | ##### |

|           |       |          |       |       |       |
|-----------|-------|----------|-------|-------|-------|
| MAEA      | ##### | 0.206719 | 0.502 | 0.056 | ##### |
| DHRS7B    | ##### | 0.107672 | 0.471 | 0.063 | ##### |
| KIF2A     | ##### | 0.446668 | 0.57  | 0.034 | ##### |
| TRIM27    | ##### | 0.252628 | 0.499 | 0.046 | ##### |
| EXTL2     | ##### | 0.222233 | 0.495 | 0.046 | ##### |
| LRRC58    | ##### | 0.315806 | 0.545 | 0.048 | ##### |
| EHBP1     | ##### | 0.506383 | 0.593 | 0.041 | ##### |
| GPR137B   | ##### | 0.280632 | 0.525 | 0.044 | ##### |
| ZDHHC24   | ##### | 0.44301  | 0.533 | 0.022 | ##### |
| ACTR6     | ##### | 0.125718 | 0.483 | 0.056 | ##### |
| UBL4A     | ##### | 0.233079 | 0.504 | 0.041 | ##### |
| TOX4      | ##### | -0.23474 | 0.461 | 0.123 | ##### |
| PDDC1     | ##### | 0.170654 | 0.479 | 0.055 | ##### |
| MAPK3     | ##### | 0.113535 | 0.468 | 0.056 | ##### |
| UBXN2A    | ##### | 0.244354 | 0.495 | 0.046 | ##### |
| CCDC174   | ##### | -0.14726 | 0.414 | 0.077 | ##### |
| TGFB111   | ##### | 0.266498 | 0.515 | 0.046 | ##### |
| CTDSP2    | ##### | 0.272261 | 0.569 | 0.068 | ##### |
| HPS4      | ##### | 0.183538 | 0.494 | 0.058 | ##### |
| GPATCH2L  | ##### | 0.28842  | 0.541 | 0.06  | ##### |
| SMARCC1   | ##### | 0.49897  | 0.588 | 0.032 | ##### |
| IWS1      | ##### | 0.18069  | 0.481 | 0.044 | ##### |
| GSK3A     | ##### | 0.301512 | 0.541 | 0.05  | ##### |
| NLN       | ##### | 0.41676  | 0.553 | 0.036 | ##### |
| IPO9      | ##### | 0.179155 | 0.559 | 0.082 | ##### |
| SUPT7L    | ##### | 0.108611 | 0.466 | 0.058 | ##### |
| RARS2     | ##### | 0.183659 | 0.477 | 0.046 | ##### |
| HS2ST1    | ##### | 0.44742  | 0.569 | 0.038 | ##### |
| HEXIM1    | ##### | 0.305539 | 0.537 | 0.05  | ##### |
| PURA      | ##### | 0.317118 | 0.541 | 0.05  | ##### |
| IARS2     | ##### | 0.23701  | 0.484 | 0.044 | ##### |
| NACC1     | ##### | 0.322154 | 0.523 | 0.039 | ##### |
| NR2C2AP   | ##### | -0.12413 | 0.426 | 0.08  | ##### |
| TRAPPC2P1 | ##### | -0.44888 | 0.377 | 0.13  | ##### |
| GLIPR1    | ##### | 0.157139 | 0.504 | 0.056 | ##### |
| CHIC2     | ##### | 0.294259 | 0.52  | 0.044 | ##### |
| BRD3      | ##### | 0.382537 | 0.604 | 0.06  | ##### |
| RB1CC1    | ##### | 0.422252 | 0.582 | 0.05  | ##### |
| IFI35     | ##### | -0.15587 | 0.438 | 0.094 | ##### |
| TXNRD1    | ##### | 0.309244 | 0.54  | 0.048 | ##### |
| SIKE1     | ##### | 0.100177 | 0.459 | 0.06  | ##### |
| RNFT1     | ##### | 0.390695 | 0.53  | 0.032 | ##### |
| CD82      | ##### | -0.15467 | 0.528 | 0.128 | ##### |
| SCARA3    | ##### | 0.254605 | 0.538 | 0.06  | ##### |
| ARMC1     | ##### | 0.179728 | 0.502 | 0.062 | ##### |
| MOAP1     | ##### | 0.103462 | 0.464 | 0.058 | ##### |
| ZNF358    | ##### | 0.431315 | 0.554 | 0.031 | ##### |
| UQCC1     | ##### | 0.182303 | 0.499 | 0.055 | ##### |
| EPHX1     | ##### | 0.318969 | 0.563 | 0.053 | ##### |
| STARD3    | ##### | 0.319089 | 0.541 | 0.05  | ##### |
| PLOD3     | ##### | 0.154699 | 0.509 | 0.058 | ##### |



|           |       |          |       |       |       |
|-----------|-------|----------|-------|-------|-------|
| TRIM37    | ##### | 0.346308 | 0.497 | 0.026 | ##### |
| TMEM132A  | ##### | 0.37602  | 0.539 | 0.038 | ##### |
| NCOR2     | ##### | 0.326681 | 0.53  | 0.044 | ##### |
| MAGT1     | ##### | 0.15112  | 0.487 | 0.055 | ##### |
| BEX4      | ##### | -0.7039  | 0.439 | 0.251 | ##### |
| RRP1      | ##### | 0.195727 | 0.511 | 0.062 | ##### |
| KANSL1-AS | ##### | 0.304757 | 0.516 | 0.043 | ##### |
| IST1      | ##### | 0.138157 | 0.507 | 0.063 | ##### |
| C15orf61  | ##### | 0.167269 | 0.453 | 0.043 | ##### |
| PLEKH01   | ##### | 0.399058 | 0.556 | 0.041 | ##### |
| EBAG9     | ##### | 0.149431 | 0.482 | 0.051 | ##### |
| HOMER1    | ##### | 0.507722 | 0.581 | 0.031 | ##### |
| PBX1      | ##### | 0.25499  | 0.565 | 0.075 | ##### |
| SENP6     | ##### | 0.321444 | 0.522 | 0.043 | ##### |
| B4GALT7   | ##### | 0.421027 | 0.538 | 0.029 | ##### |
| EPS15L1   | ##### | 0.181315 | 0.469 | 0.046 | ##### |
| TOB1      | ##### | 0.102054 | 0.498 | 0.067 | ##### |
| TMEM189   | ##### | 0.54008  | 0.567 | 0.019 | ##### |
| IGFBP3    | ##### | 0.662563 | 0.684 | 0.082 | ##### |
| CSAD      | ##### | 0.433641 | 0.554 | 0.034 | ##### |
| ARID1A    | ##### | 0.233191 | 0.515 | 0.058 | ##### |
| SECISBP2L | ##### | 0.261959 | 0.469 | 0.032 | ##### |
| KLF3      | ##### | 0.331742 | 0.519 | 0.043 | ##### |
| KRAS      | ##### | 0.309264 | 0.522 | 0.044 | ##### |
| DPCD      | ##### | -0.16548 | 0.384 | 0.062 | ##### |
| SMAD5     | ##### | 0.112437 | 0.463 | 0.058 | ##### |
| ENTPD6    | ##### | 0.452201 | 0.573 | 0.039 | ##### |
| TLN1      | ##### | 0.37335  | 0.561 | 0.046 | ##### |
| ZFAND2B   | ##### | 0.165721 | 0.491 | 0.058 | ##### |
| C7orf49   | ##### | 0.220717 | 0.479 | 0.043 | ##### |
| CGRRF1    | ##### | -0.17828 | 0.379 | 0.077 | ##### |
| RELA      | ##### | 0.215932 | 0.473 | 0.041 | ##### |
| SMC3      | ##### | 0.192804 | 0.515 | 0.063 | ##### |
| ASXL1     | ##### | 0.244876 | 0.49  | 0.05  | ##### |
| SYNRG     | ##### | 0.320129 | 0.511 | 0.031 | ##### |
| SAMM50    | ##### | 0.225051 | 0.48  | 0.043 | ##### |
| BFAR      | ##### | 0.194223 | 0.491 | 0.053 | ##### |
| CEP57     | ##### | 0.142831 | 0.478 | 0.062 | ##### |
| DSCR3     | ##### | -0.22085 | 0.333 | 0.065 | ##### |
| RPS6KB2   | ##### | 0.15566  | 0.494 | 0.065 | ##### |
| SPPL3     | ##### | 0.232465 | 0.489 | 0.046 | ##### |
| PTPRE     | ##### | 0.438286 | 0.558 | 0.032 | ##### |
| HES4      | ##### | 0.680964 | 0.635 | 0.039 | ##### |
| ZNF91     | ##### | 0.190299 | 0.496 | 0.063 | ##### |
| CSE1L     | ##### | 0.279058 | 0.506 | 0.039 | ##### |
| ENC1      | ##### | 0.694752 | 0.638 | 0.039 | ##### |
| CUL5      | ##### | 0.455011 | 0.548 | 0.027 | ##### |
| ACSS3     | ##### | 0.425339 | 0.556 | 0.038 | ##### |
| SIRT6     | ##### | 0.19267  | 0.496 | 0.056 | ##### |
| MGAT2     | ##### | 0.189157 | 0.455 | 0.041 | ##### |
| IPO7      | ##### | 0.320147 | 0.528 | 0.043 | ##### |

|           |       |          |       |       |       |
|-----------|-------|----------|-------|-------|-------|
| DYNC2LI1  | ##### | -0.15885 | 0.392 | 0.08  | ##### |
| KMT2A     | ##### | 0.332702 | 0.533 | 0.044 | ##### |
| COLGALT2  | ##### | 0.454318 | 0.569 | 0.036 | ##### |
| FOXG1     | ##### | 0.385645 | 0.559 | 0.048 | ##### |
| KMT2C     | ##### | 0.208524 | 0.535 | 0.074 | ##### |
| VPS51     | ##### | 0.255756 | 0.535 | 0.058 | ##### |
| SUZ12     | ##### | 0.478058 | 0.551 | 0.026 | ##### |
| CREB1     | ##### | 0.172384 | 0.472 | 0.053 | ##### |
| TTPAL     | ##### | 0.116456 | 0.425 | 0.044 | ##### |
| CCSER2    | ##### | 0.181026 | 0.469 | 0.044 | ##### |
| MAPK8IP1  | ##### | 0.191975 | 0.516 | 0.058 | ##### |
| TFAM      | ##### | 0.250851 | 0.487 | 0.043 | ##### |
| ELP2      | ##### | -0.23303 | 0.405 | 0.103 | ##### |
| NAA15     | ##### | 0.113697 | 0.471 | 0.062 | ##### |
| CENPV     | ##### | 0.661186 | 0.626 | 0.038 | ##### |
| NCLN      | ##### | 0.334828 | 0.498 | 0.029 | ##### |
| MICU2     | ##### | 0.153159 | 0.481 | 0.055 | ##### |
| EXOSC1    | ##### | -0.10608 | 0.359 | 0.058 | ##### |
| DAZAP1    | ##### | 0.219465 | 0.488 | 0.05  | ##### |
| PTPRS     | ##### | 0.512199 | 0.657 | 0.068 | ##### |
| TUBGCP2   | ##### | 0.305967 | 0.5   | 0.029 | ##### |
| SLC30A5   | ##### | 0.285074 | 0.519 | 0.044 | ##### |
| TRIM47    | ##### | 0.430502 | 0.603 | 0.058 | ##### |
| GTF2H2    | ##### | 0.171115 | 0.492 | 0.063 | ##### |
| CIZ1      | ##### | 0.235841 | 0.496 | 0.05  | ##### |
| CTD-2336C | ##### | 0.310065 | 0.51  | 0.038 | ##### |
| ERV3-1    | ##### | -0.27166 | 0.405 | 0.113 | ##### |
| OXA1L     | ##### | -0.33406 | 0.421 | 0.123 | ##### |
| ATP6V1C1  | ##### | 0.117829 | 0.471 | 0.062 | ##### |
| RERE      | ##### | 0.22097  | 0.508 | 0.058 | ##### |
| GLRX      | ##### | -0.62183 | 0.331 | 0.132 | ##### |
| TMED7     | ##### | 0.321489 | 0.57  | 0.065 | ##### |
| AFG3L2    | ##### | 0.343798 | 0.521 | 0.038 | ##### |
| RRP7A     | ##### | 0.128919 | 0.457 | 0.044 | ##### |
| KIAA1033  | ##### | 0.1864   | 0.488 | 0.055 | ##### |
| NT5DC2    | ##### | 0.430508 | 0.539 | 0.031 | ##### |
| NDUF6     | ##### | 0.221277 | 0.456 | 0.034 | ##### |
| ATF6      | ##### | 0.287706 | 0.497 | 0.044 | ##### |
| MTA1      | ##### | 0.39488  | 0.581 | 0.055 | ##### |
| AC093673. | ##### | 0.271938 | 0.542 | 0.067 | ##### |
| FAM53C    | ##### | -0.2535  | 0.37  | 0.096 | ##### |
| NDRG4     | ##### | 0.103519 | 0.455 | 0.058 | ##### |
| ANK2      | ##### | 0.449599 | 0.57  | 0.041 | ##### |
| ARMC8     | ##### | -0.31192 | 0.371 | 0.092 | ##### |
| CHMP6     | ##### | 0.360738 | 0.524 | 0.034 | ##### |
| USP34     | ##### | 0.397425 | 0.553 | 0.046 | ##### |
| RNF170    | ##### | 0.114548 | 0.44  | 0.05  | ##### |
| GGH       | ##### | 0.163987 | 0.538 | 0.077 | ##### |
| SECISBP2  | ##### | 0.165834 | 0.531 | 0.079 | ##### |
| KDM1A     | ##### | 0.198983 | 0.452 | 0.036 | ##### |
| FABP5     | ##### | -1.68383 | 0.292 | 0.501 | ##### |

|           |       |          |       |       |       |
|-----------|-------|----------|-------|-------|-------|
| PIGS      | ##### | 0.374701 | 0.523 | 0.038 | ##### |
| FBXW2     | ##### | 0.312036 | 0.514 | 0.043 | ##### |
| IRF2      | ##### | -0.10209 | 0.42  | 0.085 | ##### |
| CDC42BPA  | ##### | 0.134238 | 0.491 | 0.065 | ##### |
| CBS       | ##### | 0.197989 | 0.55  | 0.079 | ##### |
| STK16     | ##### | 0.167176 | 0.434 | 0.041 | ##### |
| U2AF1L4   | ##### | -0.36576 | 0.422 | 0.14  | ##### |
| MED21     | ##### | -0.13328 | 0.415 | 0.084 | ##### |
| TMEM206   | ##### | 0.319141 | 0.527 | 0.044 | ##### |
| PDE4B     | ##### | 0.201973 | 0.572 | 0.087 | ##### |
| PDHX      | ##### | 0.155825 | 0.44  | 0.043 | ##### |
| CAT       | ##### | -0.13259 | 0.411 | 0.085 | ##### |
| EMP1      | ##### | -0.22915 | 0.538 | 0.178 | ##### |
| PPP6C     | ##### | 0.157672 | 0.49  | 0.058 | ##### |
| JAK1      | ##### | 0.377741 | 0.538 | 0.039 | ##### |
| TTYH3     | ##### | 0.413925 | 0.564 | 0.046 | ##### |
| PAM       | ##### | 0.482017 | 0.562 | 0.031 | ##### |
| RHOJ      | ##### | 0.288015 | 0.502 | 0.034 | ##### |
| RIC3      | ##### | -0.59208 | 0.422 | 0.185 | ##### |
| KCTD20    | ##### | 0.236677 | 0.477 | 0.043 | ##### |
| COQ5      | ##### | 0.115468 | 0.449 | 0.051 | ##### |
| TMEM41B   | ##### | 0.128934 | 0.462 | 0.058 | ##### |
| COL4A1    | ##### | 0.574103 | 0.587 | 0.027 | ##### |
| PKN2      | ##### | 0.323594 | 0.538 | 0.044 | ##### |
| ACOT7     | ##### | 0.205895 | 0.464 | 0.039 | ##### |
| N6AMT2    | ##### | -0.13402 | 0.353 | 0.06  | ##### |
| RRAGC     | ##### | 0.106221 | 0.447 | 0.053 | ##### |
| SNX21     | ##### | 0.326446 | 0.491 | 0.024 | ##### |
| MED13     | ##### | 0.27441  | 0.491 | 0.041 | ##### |
| RITA1     | ##### | 0.110189 | 0.405 | 0.038 | ##### |
| PHACTR4   | ##### | 0.107645 | 0.46  | 0.063 | ##### |
| DPF3      | ##### | 0.514905 | 0.585 | 0.039 | ##### |
| NFE2L1    | ##### | 0.259769 | 0.488 | 0.043 | ##### |
| RNF115    | ##### | 0.26183  | 0.529 | 0.056 | ##### |
| ZNF638    | ##### | 0.2233   | 0.517 | 0.065 | ##### |
| KIAA0319L | ##### | 0.148555 | 0.458 | 0.05  | ##### |
| SPOCD1    | ##### | 0.124526 | 0.646 | 0.166 | ##### |
| GGT7      | ##### | 0.437581 | 0.559 | 0.036 | ##### |
| PTPN12    | ##### | 0.253944 | 0.494 | 0.046 | ##### |
| ZNF131    | ##### | 0.180972 | 0.49  | 0.058 | ##### |
| DNAJB14   | ##### | 0.178588 | 0.463 | 0.048 | ##### |
| SRR       | ##### | 0.15897  | 0.437 | 0.044 | ##### |
| MBD3      | ##### | 0.422189 | 0.54  | 0.032 | ##### |
| VOPP1     | ##### | 0.114549 | 0.462 | 0.06  | ##### |
| ENDOD1    | ##### | 0.406955 | 0.547 | 0.038 | ##### |
| DNAJC4    | ##### | 0.257731 | 0.479 | 0.039 | ##### |
| RBM23     | ##### | -0.24691 | 0.424 | 0.121 | ##### |
| PPP1R15A  | ##### | -0.36708 | 0.495 | 0.179 | ##### |
| SACS      | ##### | 0.732543 | 0.619 | 0.017 | ##### |
| CCDC66    | ##### | 0.50876  | 0.584 | 0.036 | ##### |
| GTF2E2    | ##### | 0.421583 | 0.529 | 0.031 | ##### |

|          |       |          |       |       |       |
|----------|-------|----------|-------|-------|-------|
| TNFAIP1  | ##### | 0.508115 | 0.572 | 0.032 | ##### |
| FUCA2    | ##### | 0.17988  | 0.462 | 0.046 | ##### |
| GMPPA    | ##### | -0.10375 | 0.37  | 0.067 | ##### |
| PREPL    | ##### | 0.111857 | 0.472 | 0.07  | ##### |
| UNC119   | ##### | 0.40844  | 0.532 | 0.031 | ##### |
| Clorf27  | ##### | -0.2014  | 0.392 | 0.077 | ##### |
| HSCB     | ##### | 0.116165 | 0.417 | 0.039 | ##### |
| DR1      | ##### | 0.215198 | 0.494 | 0.053 | ##### |
| RBM4     | ##### | 0.205582 | 0.493 | 0.048 | ##### |
| SLC27A5  | ##### | -0.31201 | 0.352 | 0.092 | ##### |
| GALNT1   | ##### | 0.666286 | 0.592 | 0.015 | ##### |
| PINK1    | ##### | 0.163827 | 0.52  | 0.067 | ##### |
| EVI5     | ##### | 0.433887 | 0.53  | 0.026 | ##### |
| ALDH6A1  | ##### | 0.216405 | 0.548 | 0.077 | ##### |
| TMEM181  | ##### | 0.467361 | 0.537 | 0.022 | ##### |
| ACAD8    | ##### | 0.259694 | 0.512 | 0.048 | ##### |
| RIF1     | ##### | 0.300435 | 0.49  | 0.034 | ##### |
| DLG1     | ##### | 0.366806 | 0.56  | 0.058 | ##### |
| OSTM1    | ##### | 0.210195 | 0.444 | 0.034 | ##### |
| ADNP     | ##### | 0.372837 | 0.535 | 0.039 | ##### |
| CRNDE    | ##### | 0.240526 | 0.523 | 0.062 | ##### |
| UHMK1    | ##### | 0.33307  | 0.496 | 0.031 | ##### |
| SNX1     | ##### | 0.150913 | 0.454 | 0.048 | ##### |
| ARHGEF2  | ##### | 0.111412 | 0.555 | 0.106 | ##### |
| CRYZ     | ##### | -0.14088 | 0.365 | 0.07  | ##### |
| CRCP     | ##### | 0.107134 | 0.436 | 0.053 | ##### |
| KIAA0907 | ##### | -0.11327 | 0.413 | 0.089 | ##### |
| C1S      | ##### | -0.60473 | 0.349 | 0.15  | ##### |
| IDH3A    | ##### | 0.124995 | 0.44  | 0.046 | ##### |
| RRP8     | ##### | 0.135437 | 0.406 | 0.038 | ##### |
| ZNF83    | ##### | 0.308895 | 0.547 | 0.06  | ##### |
| SHKBP1   | ##### | 0.458477 | 0.53  | 0.021 | ##### |
| MAPK10   | ##### | 0.171104 | 0.456 | 0.051 | ##### |
| TMEM218  | ##### | 0.225652 | 0.482 | 0.048 | ##### |
| MBOAT2   | ##### | 0.101906 | 0.525 | 0.082 | ##### |
| ZNF414   | ##### | 0.50872  | 0.576 | 0.029 | ##### |
| CD01     | ##### | -0.33731 | 0.412 | 0.121 | ##### |
| PHLDA3   | ##### | 0.20142  | 0.505 | 0.06  | ##### |
| PPFIA1   | ##### | 0.359686 | 0.518 | 0.041 | ##### |
| KLHL4    | ##### | 0.170191 | 0.522 | 0.068 | ##### |
| CLINT1   | ##### | 0.248368 | 0.474 | 0.039 | ##### |
| TRAPPC6A | ##### | -0.14689 | 0.436 | 0.094 | ##### |
| STT3B    | ##### | 0.246677 | 0.481 | 0.05  | ##### |
| VCAN     | ##### | 0.189435 | 0.51  | 0.06  | ##### |
| TRAF7    | ##### | 0.311334 | 0.487 | 0.036 | ##### |
| FAM134B  | ##### | 0.36271  | 0.534 | 0.043 | ##### |
| NFKBIL1  | ##### | 0.259615 | 0.498 | 0.05  | ##### |
| SLC4A1AP | ##### | 0.133123 | 0.428 | 0.039 | ##### |
| CUL3     | ##### | 0.265306 | 0.469 | 0.041 | ##### |
| RDH14    | ##### | 0.106411 | 0.433 | 0.056 | ##### |
| SCRG1    | ##### | -0.17026 | 0.59  | 0.19  | ##### |

|           |       |          |       |       |       |
|-----------|-------|----------|-------|-------|-------|
| BTBD3     | ##### | 0.520873 | 0.573 | 0.031 | ##### |
| SFSWAP    | ##### | 0.177744 | 0.434 | 0.038 | ##### |
| CLEC11A   | ##### | 0.42433  | 0.563 | 0.048 | ##### |
| VPS37B    | ##### | 0.285634 | 0.511 | 0.046 | ##### |
| FAHD2A    | ##### | 0.116171 | 0.425 | 0.05  | ##### |
| TEAD1     | ##### | 0.521192 | 0.557 | 0.026 | ##### |
| PABPC4    | ##### | 0.267745 | 0.51  | 0.048 | ##### |
| POR       | ##### | 0.129099 | 0.506 | 0.084 | ##### |
| REXO4     | ##### | 0.263444 | 0.488 | 0.043 | ##### |
| PALLD     | ##### | 0.494053 | 0.557 | 0.036 | ##### |
| CHST2     | ##### | 0.710445 | 0.601 | 0.017 | ##### |
| TNP02     | ##### | 0.176844 | 0.497 | 0.063 | ##### |
| SMAD2     | ##### | 0.204016 | 0.453 | 0.043 | ##### |
| CERS1     | ##### | 0.313496 | 0.541 | 0.053 | ##### |
| ZNF771    | ##### | 0.482907 | 0.55  | 0.027 | ##### |
| PPFIBP1   | ##### | 0.305548 | 0.484 | 0.034 | ##### |
| SALL1     | ##### | 0.347491 | 0.507 | 0.039 | ##### |
| NEDD9     | ##### | 0.154597 | 0.537 | 0.089 | ##### |
| PGAP1     | ##### | 0.236709 | 0.472 | 0.044 | ##### |
| STXBP3    | ##### | 0.138402 | 0.46  | 0.055 | ##### |
| RFX4      | ##### | -0.19431 | 0.447 | 0.125 | ##### |
| TMX3      | ##### | 0.163394 | 0.437 | 0.046 | ##### |
| EIF1AY    | ##### | 0.599945 | 0.564 | 0.019 | ##### |
| FHL3      | ##### | 0.238848 | 0.459 | 0.034 | ##### |
| DTNBP1    | ##### | 0.172681 | 0.427 | 0.041 | ##### |
| ZNF664    | ##### | 0.18016  | 0.418 | 0.036 | ##### |
| POLDIP3   | ##### | 0.219369 | 0.466 | 0.036 | ##### |
| VWA1      | ##### | 0.570174 | 0.574 | 0.024 | ##### |
| GALK1     | ##### | 0.481522 | 0.563 | 0.036 | ##### |
| RBFOX2    | ##### | 0.249968 | 0.462 | 0.041 | ##### |
| UBE2Q2    | ##### | 0.404146 | 0.538 | 0.039 | ##### |
| RP11-51J9 | ##### | -0.32428 | 0.332 | 0.08  | ##### |
| BROX      | ##### | 0.385288 | 0.541 | 0.039 | ##### |
| WEE1      | ##### | 0.36229  | 0.549 | 0.051 | ##### |
| DNAJC5    | ##### | 0.452359 | 0.539 | 0.029 | ##### |
| ACBD5     | ##### | 0.39182  | 0.531 | 0.038 | ##### |
| CTNNB1    | ##### | 0.369806 | 0.62  | 0.082 | ##### |
| SEC14L2   | ##### | 0.217647 | 0.497 | 0.051 | ##### |
| ARL8B     | ##### | 0.18863  | 0.437 | 0.039 | ##### |
| AKT2      | ##### | 0.12999  | 0.518 | 0.077 | ##### |
| PRR14     | ##### | 0.234837 | 0.483 | 0.048 | ##### |
| GPN3      | ##### | -0.14834 | 0.398 | 0.08  | ##### |
| RBM38     | ##### | 0.198711 | 0.487 | 0.056 | ##### |
| TEN1      | ##### | 0.582092 | 0.547 | 0.01  | ##### |
| RP11-345F | ##### | 0.284321 | 0.509 | 0.05  | ##### |
| RNF40     | ##### | 0.268613 | 0.484 | 0.043 | ##### |
| INSIG2    | ##### | -0.35028 | 0.345 | 0.097 | ##### |
| MVP       | ##### | 0.230087 | 0.471 | 0.044 | ##### |
| GRWD1     | ##### | 0.168012 | 0.434 | 0.039 | ##### |
| PTRH2     | ##### | -0.20477 | 0.317 | 0.063 | ##### |
| SCRN2     | ##### | 0.123522 | 0.453 | 0.058 | ##### |

|           |       |          |       |       |       |
|-----------|-------|----------|-------|-------|-------|
| DALRD3    | ##### | 0.341448 | 0.474 | 0.027 | ##### |
| PKD2      | ##### | 0.238097 | 0.449 | 0.038 | ##### |
| ARRB2     | ##### | 0.108841 | 0.426 | 0.044 | ##### |
| FSD1      | ##### | 0.211534 | 0.458 | 0.044 | ##### |
| ZSCAN18   | ##### | 0.138688 | 0.456 | 0.056 | ##### |
| CTNND2    | ##### | 0.141328 | 0.491 | 0.067 | ##### |
| KCTD5     | ##### | 0.205987 | 0.456 | 0.046 | ##### |
| SIGMAR1   | ##### | 0.287231 | 0.483 | 0.036 | ##### |
| PPP3CA    | ##### | 0.369601 | 0.561 | 0.055 | ##### |
| PLOD2     | ##### | 0.246266 | 0.515 | 0.06  | ##### |
| TMEM38B   | ##### | -0.3102  | 0.32  | 0.087 | ##### |
| MGAT1     | ##### | 0.290686 | 0.482 | 0.036 | ##### |
| ZNF444    | ##### | 0.231193 | 0.473 | 0.039 | ##### |
| R3HDM4    | ##### | 0.445034 | 0.555 | 0.036 | ##### |
| PRADC1    | ##### | 0.34472  | 0.5   | 0.038 | ##### |
| ARHGEF26  | ##### | 0.147899 | 0.478 | 0.062 | ##### |
| ZNF576    | ##### | -0.13301 | 0.387 | 0.08  | ##### |
| C19orf52  | ##### | 0.417006 | 0.519 | 0.026 | ##### |
| PSMA6     | ##### | -0.49562 | 0.345 | 0.14  | ##### |
| ZHX1      | ##### | 0.350583 | 0.543 | 0.048 | ##### |
| PCYT2     | ##### | 0.615078 | 0.58  | 0.019 | ##### |
| PCED1A    | ##### | 0.303986 | 0.467 | 0.029 | ##### |
| SNAP23    | ##### | 0.148055 | 0.458 | 0.053 | ##### |
| CTA-29F11 | ##### | -0.23897 | 0.362 | 0.072 | ##### |
| CRTAP     | ##### | 0.220974 | 0.478 | 0.048 | ##### |
| KCTD3     | ##### | 0.241514 | 0.458 | 0.038 | ##### |
| TANC2     | ##### | 0.48116  | 0.559 | 0.031 | ##### |
| ACBD3     | ##### | 0.185271 | 0.438 | 0.041 | ##### |
| CHRN1     | ##### | -0.12088 | 0.393 | 0.079 | ##### |
| VEZF1     | ##### | 0.322625 | 0.526 | 0.05  | ##### |
| TCEB3     | ##### | 0.209784 | 0.44  | 0.038 | ##### |
| TMEM129   | ##### | 0.362863 | 0.542 | 0.044 | ##### |
| FAM120AOS | ##### | 0.191606 | 0.433 | 0.036 | ##### |
| GAR1      | ##### | 0.164011 | 0.451 | 0.041 | ##### |
| NIP7      | ##### | -0.10302 | 0.374 | 0.058 | ##### |
| FARP1     | ##### | 0.313292 | 0.499 | 0.038 | ##### |
| SYT17     | ##### | 0.308445 | 0.517 | 0.046 | ##### |
| CAPN1     | ##### | 0.193262 | 0.478 | 0.06  | ##### |
| MTRNR2L12 | ##### | -1.154   | 0.239 | 0.263 | ##### |
| ADAM10    | ##### | 0.224971 | 0.428 | 0.036 | ##### |
| SUCO      | ##### | 0.221658 | 0.46  | 0.041 | ##### |
| TRMT61A   | ##### | 0.114963 | 0.398 | 0.041 | ##### |
| NPTXR     | ##### | 0.582931 | 0.561 | 0.021 | ##### |
| ZDHHC9    | ##### | 0.1462   | 0.425 | 0.044 | ##### |
| HHLA3     | ##### | -0.22212 | 0.327 | 0.072 | ##### |
| ALYREF    | ##### | 0.523215 | 0.538 | 0.019 | ##### |
| LUZP1     | ##### | 0.246536 | 0.485 | 0.05  | ##### |
| SAP30     | ##### | 0.376831 | 0.49  | 0.029 | ##### |
| C11orf1   | ##### | -0.33715 | 0.289 | 0.075 | ##### |
| ADPGK     | ##### | 0.185579 | 0.441 | 0.043 | ##### |
| MFS12     | ##### | 0.545703 | 0.554 | 0.021 | ##### |

|           |       |          |       |       |       |
|-----------|-------|----------|-------|-------|-------|
| PPIL3     | ##### | 0.229331 | 0.462 | 0.043 | ##### |
| WDR83     | ##### | 0.190602 | 0.468 | 0.05  | ##### |
| CTXN1     | ##### | 0.800351 | 0.607 | 0.01  | ##### |
| IBTK      | ##### | 0.176911 | 0.424 | 0.043 | ##### |
| GTF2B     | ##### | -0.25178 | 0.365 | 0.096 | ##### |
| TNIP2     | ##### | 0.279193 | 0.436 | 0.024 | ##### |
| CS        | ##### | 0.246754 | 0.431 | 0.027 | ##### |
| PCGF2     | ##### | 0.339305 | 0.499 | 0.032 | ##### |
| DNAJC10   | ##### | 0.283861 | 0.486 | 0.044 | ##### |
| LIMD2     | ##### | 0.602063 | 0.545 | 0.012 | ##### |
| ROCK2     | ##### | 0.398238 | 0.509 | 0.029 | ##### |
| MGEA5     | ##### | 0.107551 | 0.458 | 0.068 | ##### |
| PCIF1     | ##### | 0.201996 | 0.441 | 0.041 | ##### |
| APC       | ##### | 0.466003 | 0.553 | 0.038 | ##### |
| ATN1      | ##### | 0.382314 | 0.519 | 0.039 | ##### |
| GATAD1    | ##### | 0.264992 | 0.508 | 0.062 | ##### |
| SNTG1     | ##### | -0.45983 | 0.357 | 0.142 | ##### |
| DVL2      | ##### | 0.377244 | 0.523 | 0.043 | ##### |
| CLPTM1L   | ##### | 0.429117 | 0.515 | 0.027 | ##### |
| PHF3      | ##### | 0.223329 | 0.485 | 0.051 | ##### |
| DNAJA3    | ##### | 0.121169 | 0.434 | 0.046 | ##### |
| FOXO3     | ##### | 0.181902 | 0.499 | 0.067 | ##### |
| USO1      | ##### | 0.117969 | 0.44  | 0.062 | ##### |
| MSRA      | ##### | -0.3053  | 0.377 | 0.109 | ##### |
| VPS16     | ##### | 0.320865 | 0.48  | 0.029 | ##### |
| NME7      | ##### | -0.1884  | 0.371 | 0.082 | ##### |
| KIDINS22C | ##### | 0.235898 | 0.503 | 0.062 | ##### |
| CERS5     | ##### | 0.104863 | 0.467 | 0.068 | ##### |
| DUSP4     | ##### | 0.237268 | 0.519 | 0.063 | ##### |
| NETO2     | ##### | 0.601945 | 0.579 | 0.024 | ##### |
| C20orf96  | ##### | 0.329092 | 0.479 | 0.029 | ##### |
| TM9SF3    | ##### | 0.379759 | 0.503 | 0.031 | ##### |
| ARCN1     | ##### | 0.28561  | 0.46  | 0.027 | ##### |
| RBM4B     | ##### | 0.109162 | 0.447 | 0.06  | ##### |
| LRRC47    | ##### | 0.259518 | 0.507 | 0.051 | ##### |
| SLC36A4   | ##### | 0.180972 | 0.458 | 0.05  | ##### |
| MTRNR2L8  | ##### | -1.23756 | 0.222 | 0.289 | ##### |
| CCDC112   | ##### | 0.4927   | 0.533 | 0.022 | ##### |
| TMEM80    | ##### | 0.307792 | 0.49  | 0.041 | ##### |
| API5      | ##### | 0.177014 | 0.487 | 0.055 | ##### |
| DCAF11    | ##### | 0.218049 | 0.462 | 0.046 | ##### |
| GAPVD1    | ##### | 0.122497 | 0.404 | 0.034 | ##### |
| MOB2      | ##### | 0.132485 | 0.423 | 0.048 | ##### |
| ATXN3     | ##### | -0.29602 | 0.324 | 0.091 | ##### |
| BAZ2A     | ##### | 0.198955 | 0.468 | 0.055 | ##### |
| VPS13C    | ##### | 0.201058 | 0.437 | 0.043 | ##### |
| DKAKD     | ##### | 0.300794 | 0.46  | 0.027 | ##### |
| TMF1      | ##### | 0.146655 | 0.439 | 0.046 | ##### |
| ECHDC2    | ##### | 0.305015 | 0.522 | 0.056 | ##### |
| GPBP1L1   | ##### | 0.202781 | 0.462 | 0.05  | ##### |
| ROGDI     | ##### | 0.401283 | 0.493 | 0.024 | ##### |

|           |       |          |       |       |       |
|-----------|-------|----------|-------|-------|-------|
| ASCC2     | ##### | 0.193244 | 0.443 | 0.043 | ##### |
| MPZL1     | ##### | 0.187446 | 0.439 | 0.041 | ##### |
| MBIP      | ##### | -0.19451 | 0.36  | 0.072 | ##### |
| AMFR      | ##### | 0.237659 | 0.471 | 0.043 | ##### |
| MUS81     | ##### | 0.247107 | 0.462 | 0.043 | ##### |
| PITPNA    | ##### | 0.593428 | 0.555 | 0.017 | ##### |
| LRWD1     | ##### | 0.246678 | 0.448 | 0.032 | ##### |
| TTF1      | ##### | 0.166329 | 0.456 | 0.056 | ##### |
| WIZ       | ##### | 0.180508 | 0.406 | 0.029 | ##### |
| PNKP      | ##### | 0.20641  | 0.458 | 0.051 | ##### |
| GNS       | ##### | 0.206313 | 0.446 | 0.043 | ##### |
| YPEL3     | ##### | 0.134206 | 0.464 | 0.07  | ##### |
| C16orf87  | ##### | 0.103585 | 0.417 | 0.05  | ##### |
| TXLNA     | ##### | 0.291357 | 0.452 | 0.029 | ##### |
| SNRNP35   | ##### | -0.13222 | 0.377 | 0.079 | ##### |
| RAB3IP    | ##### | -0.14399 | 0.523 | 0.164 | ##### |
| QSOX1     | ##### | 0.247394 | 0.475 | 0.041 | ##### |
| SLC35A5   | ##### | 0.166577 | 0.439 | 0.044 | ##### |
| PPP1R18   | ##### | 0.207228 | 0.436 | 0.036 | ##### |
| ALKBH3    | ##### | -0.15087 | 0.299 | 0.056 | ##### |
| ZDHHC3    | ##### | 0.236829 | 0.439 | 0.029 | ##### |
| MGRN1     | ##### | 0.388538 | 0.529 | 0.039 | ##### |
| BEST1     | ##### | -0.32534 | 0.336 | 0.074 | ##### |
| TMEM131   | ##### | 0.552473 | 0.559 | 0.024 | ##### |
| SHC1      | ##### | 0.236054 | 0.44  | 0.034 | ##### |
| NR2F1     | ##### | 0.405668 | 0.532 | 0.041 | ##### |
| CHTF8     | ##### | 0.209027 | 0.403 | 0.026 | ##### |
| MTMR2     | ##### | 0.365171 | 0.474 | 0.024 | ##### |
| PGM3      | ##### | 0.187352 | 0.458 | 0.053 | ##### |
| RMDN1     | ##### | 0.187671 | 0.437 | 0.043 | ##### |
| EIF2AK4   | ##### | 0.415767 | 0.508 | 0.027 | ##### |
| RP11-390F | ##### | 0.303501 | 0.484 | 0.039 | ##### |
| PRKAA1    | ##### | 0.272533 | 0.464 | 0.039 | ##### |
| PBRM1     | ##### | 0.239208 | 0.47  | 0.05  | ##### |
| DOLK      | ##### | 0.108261 | 0.4   | 0.048 | ##### |
| HIVEP3    | ##### | 0.53379  | 0.549 | 0.027 | ##### |
| HNRNPUL2  | ##### | 0.1899   | 0.402 | 0.027 | ##### |
| PFKM      | ##### | 0.233002 | 0.489 | 0.053 | ##### |
| DIMT1     | ##### | 0.195335 | 0.447 | 0.051 | ##### |
| TRADD     | ##### | 0.270976 | 0.415 | 0.022 | ##### |
| INO80C    | ##### | 0.170553 | 0.399 | 0.029 | ##### |
| EFCAB14   | ##### | 0.403765 | 0.503 | 0.029 | ##### |
| ZHX3      | ##### | 0.123044 | 0.459 | 0.062 | ##### |
| DUSP3     | ##### | 0.180314 | 0.468 | 0.056 | ##### |
| PPM1B     | ##### | 0.104491 | 0.505 | 0.087 | ##### |
| CCPG1     | ##### | 0.19002  | 0.465 | 0.055 | ##### |
| CEP350    | ##### | 0.258489 | 0.45  | 0.036 | ##### |
| CLK1      | ##### | -0.39281 | 0.439 | 0.173 | ##### |
| TRIM24    | ##### | 0.459638 | 0.535 | 0.032 | ##### |
| ROB01     | ##### | 0.856886 | 0.601 | 0.007 | ##### |
| C12orf73  | ##### | 0.142908 | 0.427 | 0.041 | ##### |



|           |       |          |       |       |       |
|-----------|-------|----------|-------|-------|-------|
| ANAPC7    | ##### | 0.140877 | 0.441 | 0.051 | ##### |
| TP53TG1   | ##### | -0.26347 | 0.359 | 0.094 | ##### |
| FZD7      | ##### | 0.592626 | 0.523 | 0.012 | ##### |
| TRMT1     | ##### | 0.140554 | 0.493 | 0.074 | ##### |
| MTRF1L    | ##### | 0.480118 | 0.548 | 0.031 | ##### |
| HERC2     | ##### | 0.267009 | 0.493 | 0.053 | ##### |
| NR2F6     | ##### | 0.449853 | 0.51  | 0.024 | ##### |
| IQGAP2    | ##### | 0.385002 | 0.509 | 0.038 | ##### |
| BNIP2     | ##### | 0.366679 | 0.484 | 0.029 | ##### |
| TPST1     | ##### | 0.255398 | 0.504 | 0.055 | ##### |
| NFS1      | ##### | 0.301951 | 0.452 | 0.026 | ##### |
| DCTN4     | ##### | 0.16874  | 0.439 | 0.048 | ##### |
| CTNNAL1   | ##### | 0.102015 | 0.406 | 0.051 | ##### |
| HEPN1     | ##### | 0.114507 | 0.628 | 0.14  | ##### |
| SOGA1     | ##### | 0.285603 | 0.478 | 0.043 | ##### |
| ZNF608    | ##### | 0.406086 | 0.53  | 0.038 | ##### |
| CEP290    | ##### | 0.224727 | 0.466 | 0.051 | ##### |
| MDM4      | ##### | 0.153602 | 0.52  | 0.082 | ##### |
| DPP8      | ##### | 0.195369 | 0.44  | 0.039 | ##### |
| RBFA      | ##### | 0.223821 | 0.445 | 0.039 | ##### |
| UBA5      | ##### | 0.178493 | 0.419 | 0.036 | ##### |
| AP4M1     | ##### | -0.18543 | 0.396 | 0.103 | ##### |
| LETM1     | ##### | 0.38918  | 0.524 | 0.039 | ##### |
| PVRL2     | ##### | 0.359104 | 0.504 | 0.038 | ##### |
| RRP9      | ##### | 0.107908 | 0.423 | 0.043 | ##### |
| RNF14     | ##### | 0.262236 | 0.453 | 0.041 | ##### |
| CDC16     | ##### | 0.2818   | 0.46  | 0.034 | ##### |
| LHX2      | ##### | 0.781426 | 0.59  | 0.017 | ##### |
| HCFC1R1   | ##### | -0.19513 | 0.406 | 0.094 | ##### |
| RAC3      | ##### | 0.587724 | 0.548 | 0.019 | ##### |
| WSCD1     | ##### | 0.247948 | 0.522 | 0.07  | ##### |
| TFDP1     | ##### | 0.349047 | 0.477 | 0.027 | ##### |
| TNIP1     | ##### | 0.250186 | 0.452 | 0.034 | ##### |
| ACTR1B    | ##### | 0.157254 | 0.442 | 0.051 | ##### |
| CANT1     | ##### | 0.307266 | 0.482 | 0.036 | ##### |
| MIER1     | ##### | 0.238085 | 0.461 | 0.038 | ##### |
| EGR1      | ##### | -0.64569 | 0.517 | 0.304 | ##### |
| ATXN7L3B  | ##### | 0.12384  | 0.417 | 0.048 | ##### |
| NDRG3     | ##### | 0.303925 | 0.477 | 0.038 | ##### |
| RARRES3   | ##### | -0.68729 | 0.377 | 0.176 | ##### |
| ST6GALNAC | ##### | 0.128385 | 0.41  | 0.043 | ##### |
| BST2      | ##### | -0.91311 | 0.557 | 0.426 | ##### |
| HTRA2     | ##### | 0.164028 | 0.449 | 0.05  | ##### |
| EXOC5     | ##### | 0.216495 | 0.443 | 0.039 | ##### |
| LMO2      | ##### | 0.420145 | 0.572 | 0.065 | ##### |
| LTV1      | ##### | 0.145957 | 0.405 | 0.034 | ##### |
| GAS2L1    | ##### | 0.423849 | 0.522 | 0.034 | ##### |
| KPNA4     | ##### | 0.261973 | 0.433 | 0.029 | ##### |
| HELZ      | ##### | 0.246189 | 0.477 | 0.051 | ##### |
| APIP      | ##### | -0.10843 | 0.359 | 0.065 | ##### |
| RCHY1     | ##### | -0.24329 | 0.364 | 0.085 | ##### |

|          |       |          |       |       |       |
|----------|-------|----------|-------|-------|-------|
| KAT7     | ##### | 0.206133 | 0.43  | 0.038 | ##### |
| SLC27A1  | ##### | 0.216483 | 0.495 | 0.055 | ##### |
| HBS1L    | ##### | 0.174886 | 0.425 | 0.044 | ##### |
| ELM02    | ##### | 0.113724 | 0.374 | 0.036 | ##### |
| IFI16    | ##### | -0.46173 | 0.434 | 0.193 | ##### |
| ZBTB7A   | ##### | 0.37922  | 0.504 | 0.032 | ##### |
| ATXN2L   | ##### | 0.18554  | 0.439 | 0.043 | ##### |
| DPH5     | ##### | -0.10165 | 0.358 | 0.065 | ##### |
| BCAR1    | ##### | 0.233261 | 0.441 | 0.041 | ##### |
| PNPLA2   | ##### | 0.397079 | 0.504 | 0.032 | ##### |
| KLHL42   | ##### | 0.186108 | 0.452 | 0.051 | ##### |
| CEP164   | ##### | 0.214605 | 0.429 | 0.034 | ##### |
| RPAP2    | ##### | 0.207647 | 0.449 | 0.05  | ##### |
| B3GALT6  | ##### | 0.408422 | 0.507 | 0.029 | ##### |
| EIF4G3   | ##### | 0.233888 | 0.465 | 0.043 | ##### |
| GFER     | ##### | 0.403949 | 0.493 | 0.024 | ##### |
| METTL2A  | ##### | 0.235037 | 0.439 | 0.036 | ##### |
| MPRIP    | ##### | 0.186374 | 0.422 | 0.041 | ##### |
| ADAM17   | ##### | 0.474905 | 0.551 | 0.038 | ##### |
| MTMR4    | ##### | 0.299119 | 0.453 | 0.026 | ##### |
| DMWD     | ##### | 0.53873  | 0.559 | 0.029 | ##### |
| RGS17    | ##### | 0.351562 | 0.504 | 0.044 | ##### |
| WARS     | ##### | -0.13491 | 0.483 | 0.108 | ##### |
| DGCR6    | ##### | 0.263686 | 0.495 | 0.048 | ##### |
| MAFG     | ##### | 0.274353 | 0.485 | 0.039 | ##### |
| TMEM97   | ##### | 0.196854 | 0.438 | 0.039 | ##### |
| GOLGB1   | ##### | 0.205843 | 0.474 | 0.053 | ##### |
| SLC2A4RG | ##### | 0.324689 | 0.467 | 0.032 | ##### |
| RFC2     | ##### | -0.201   | 0.362 | 0.082 | ##### |
| HSPA14   | ##### | 0.120939 | 0.359 | 0.034 | ##### |
| KIFAP3   | ##### | 0.250754 | 0.451 | 0.039 | ##### |
| SMARCA1  | ##### | 0.196635 | 0.425 | 0.038 | ##### |
| DTWD1    | ##### | 0.234678 | 0.41  | 0.026 | ##### |
| RNF26    | ##### | 0.203159 | 0.423 | 0.034 | ##### |
| PHLDB1   | ##### | 0.109172 | 0.383 | 0.041 | ##### |
| NPRL3    | ##### | 0.223659 | 0.46  | 0.053 | ##### |
| UXS1     | ##### | 0.325132 | 0.466 | 0.031 | ##### |
| NADK     | ##### | 0.361949 | 0.483 | 0.026 | ##### |
| BLMH     | ##### | 0.231472 | 0.444 | 0.038 | ##### |
| OSBPL2   | ##### | 0.161145 | 0.396 | 0.032 | ##### |
| APBB1    | ##### | 0.244528 | 0.449 | 0.039 | ##### |
| RAB8B    | ##### | 0.125961 | 0.4   | 0.039 | ##### |
| MTG2     | ##### | 0.369793 | 0.468 | 0.024 | ##### |
| NFKBIA   | ##### | -0.20063 | 0.506 | 0.149 | ##### |
| BMS1     | ##### | 0.13332  | 0.395 | 0.036 | ##### |
| FAF1     | ##### | 0.21425  | 0.443 | 0.039 | ##### |
| SNAPC1   | ##### | -0.11633 | 0.354 | 0.058 | ##### |
| TARBP2   | ##### | 0.248763 | 0.418 | 0.029 | ##### |
| PQLC3    | ##### | 0.338678 | 0.458 | 0.027 | ##### |
| THAP11   | ##### | 0.426966 | 0.513 | 0.029 | ##### |
| IFT81    | ##### | 0.28871  | 0.463 | 0.036 | ##### |

|         |       |          |       |       |       |
|---------|-------|----------|-------|-------|-------|
| HSPA13  | ##### | -0.14219 | 0.401 | 0.085 | ##### |
| NOL8    | ##### | 0.273517 | 0.484 | 0.048 | ##### |
| FAM219B | ##### | 0.224087 | 0.447 | 0.043 | ##### |
| LRRFIP2 | ##### | 0.208388 | 0.434 | 0.034 | ##### |
| BCAN    | ##### | -0.12293 | 0.692 | 0.248 | ##### |
| DRAM2   | ##### | -0.16489 | 0.38  | 0.08  | ##### |
| BMP7    | ##### | 0.244936 | 0.518 | 0.063 | ##### |
| TMEM18  | ##### | -0.14681 | 0.377 | 0.079 | ##### |
| NOTCH2  | ##### | 0.451806 | 0.504 | 0.022 | ##### |
| FNBP1   | ##### | 0.384929 | 0.52  | 0.041 | ##### |
| TSC22D3 | ##### | -0.33848 | 0.401 | 0.125 | ##### |
| FNDC3B  | ##### | 0.354322 | 0.491 | 0.031 | ##### |
| GSK3B   | ##### | 0.223594 | 0.442 | 0.043 | ##### |
| LYSMD2  | ##### | 0.278696 | 0.449 | 0.031 | ##### |
| ABCF2   | ##### | 0.146402 | 0.462 | 0.06  | ##### |
| USP39   | ##### | 0.189419 | 0.417 | 0.036 | ##### |
| DDX54   | ##### | 0.25906  | 0.483 | 0.046 | ##### |
| FAM222B | ##### | 0.266481 | 0.411 | 0.026 | ##### |
| FAIM2   | ##### | -0.16347 | 0.378 | 0.085 | ##### |
| CASP6   | ##### | 0.297058 | 0.44  | 0.029 | ##### |
| CRNKL1  | ##### | 0.282671 | 0.425 | 0.024 | ##### |
| FAHD1   | ##### | 0.184536 | 0.432 | 0.044 | ##### |
| TTC37   | ##### | 0.382481 | 0.504 | 0.038 | ##### |
| UBE2D4  | ##### | 0.127217 | 0.431 | 0.048 | ##### |
| EML4    | ##### | 0.213455 | 0.43  | 0.036 | ##### |
| FAM104B | ##### | 0.258553 | 0.457 | 0.039 | ##### |
| SDSL    | ##### | 0.232323 | 0.432 | 0.034 | ##### |
| FUZ     | ##### | 0.153357 | 0.434 | 0.048 | ##### |
| SCO1    | ##### | 0.41629  | 0.492 | 0.026 | ##### |
| USP9X   | ##### | 0.289007 | 0.466 | 0.038 | ##### |
| CEP170  | ##### | 0.331378 | 0.482 | 0.036 | ##### |
| DNAAF2  | ##### | 0.250405 | 0.428 | 0.031 | ##### |
| RMND5B  | ##### | 0.13901  | 0.39  | 0.036 | ##### |
| DCBLD2  | ##### | 0.796608 | 0.597 | 0.021 | ##### |
| ZNFX1   | ##### | 0.104752 | 0.395 | 0.048 | ##### |
| DDX19B  | ##### | 0.167858 | 0.398 | 0.039 | ##### |
| GTF2H3  | ##### | 0.193062 | 0.43  | 0.041 | ##### |
| SMCHD1  | ##### | 0.364992 | 0.479 | 0.029 | ##### |
| RNF157  | ##### | 0.229809 | 0.46  | 0.044 | ##### |
| BOLA1   | ##### | 0.178468 | 0.405 | 0.034 | ##### |
| BRWD1   | ##### | 0.352726 | 0.508 | 0.039 | ##### |
| LONP2   | ##### | 0.192658 | 0.485 | 0.065 | ##### |
| PHKB    | ##### | 0.201253 | 0.443 | 0.048 | ##### |
| TUG1    | ##### | 0.365971 | 0.472 | 0.027 | ##### |
| ANKS3   | ##### | 0.256282 | 0.465 | 0.048 | ##### |
| NF2     | ##### | 0.310875 | 0.443 | 0.026 | ##### |
| DCAF5   | ##### | 0.107004 | 0.371 | 0.038 | ##### |
| HGSNAT  | ##### | 0.307717 | 0.472 | 0.032 | ##### |
| BASP1   | ##### | 0.682196 | 0.564 | 0.019 | ##### |
| RNF139  | ##### | 0.358261 | 0.491 | 0.034 | ##### |
| TNIK    | ##### | 0.521345 | 0.549 | 0.032 | ##### |

|          |       |          |       |       |       |
|----------|-------|----------|-------|-------|-------|
| TSTD1    | ##### | -0.23877 | 0.39  | 0.111 | ##### |
| C11orf74 | ##### | 0.110031 | 0.389 | 0.036 | ##### |
| TSPYL1   | ##### | 0.247172 | 0.455 | 0.041 | ##### |
| PLEC     | ##### | 0.272157 | 0.441 | 0.036 | ##### |
| RNF8     | ##### | 0.249618 | 0.422 | 0.031 | ##### |
| SAC3D1   | ##### | 0.290744 | 0.437 | 0.026 | ##### |
| MAT2B    | ##### | -0.24615 | 0.319 | 0.079 | ##### |
| XPOT     | ##### | 0.134459 | 0.457 | 0.063 | ##### |
| CSNK1G2  | ##### | 0.5006   | 0.509 | 0.015 | ##### |
| ARHGEF6  | ##### | 0.339287 | 0.451 | 0.024 | ##### |
| DYNLL2   | ##### | 0.269265 | 0.442 | 0.034 | ##### |
| TIPIN    | ##### | -0.48877 | 0.245 | 0.08  | ##### |
| ARL13B   | ##### | -0.17093 | 0.326 | 0.055 | ##### |
| SNX7     | ##### | 0.206107 | 0.454 | 0.05  | ##### |
| VASP     | ##### | 0.241652 | 0.418 | 0.027 | ##### |
| ATXN1    | ##### | 0.218903 | 0.428 | 0.039 | ##### |
| ELAC2    | ##### | 0.249537 | 0.43  | 0.031 | ##### |
| FRA10AC1 | ##### | 0.287135 | 0.445 | 0.027 | ##### |
| XXYLT1   | ##### | 0.151813 | 0.387 | 0.027 | ##### |
| C8orf82  | ##### | 0.397446 | 0.496 | 0.031 | ##### |
| HIST1H1C | ##### | -0.37191 | 0.336 | 0.082 | ##### |
| FBXW9    | ##### | 0.295028 | 0.418 | 0.026 | ##### |
| LIX1L    | ##### | 0.335878 | 0.436 | 0.021 | ##### |
| RNASEH2B | ##### | 0.197069 | 0.422 | 0.039 | ##### |
| FKBP9    | ##### | 0.342665 | 0.522 | 0.051 | ##### |
| SLAIN1   | ##### | 0.523129 | 0.518 | 0.019 | ##### |
| OCEL1    | ##### | 0.145971 | 0.399 | 0.039 | ##### |
| FEM1C    | ##### | 0.140629 | 0.421 | 0.05  | ##### |
| EXOSC5   | ##### | -0.32637 | 0.345 | 0.104 | ##### |
| OSBPL1A  | ##### | 0.247169 | 0.474 | 0.044 | ##### |
| SPOCK2   | ##### | 0.257252 | 0.49  | 0.053 | ##### |
| ABHD14B  | ##### | 0.200857 | 0.415 | 0.036 | ##### |
| SRRD     | ##### | 0.369458 | 0.44  | 0.014 | ##### |
| HLTF     | ##### | 0.231919 | 0.43  | 0.031 | ##### |
| PPAT     | ##### | 0.408046 | 0.475 | 0.022 | ##### |
| VAT1     | ##### | 0.261528 | 0.434 | 0.034 | ##### |
| CEND1    | ##### | 0.111264 | 0.461 | 0.067 | ##### |
| HNRNPLL  | ##### | 0.108328 | 0.396 | 0.041 | ##### |
| DNAJC1   | ##### | 0.247477 | 0.436 | 0.039 | ##### |
| RGL2     | ##### | 0.22003  | 0.453 | 0.05  | ##### |
| ADORA1   | ##### | 0.18055  | 0.474 | 0.062 | ##### |
| IGSF8    | ##### | 0.234638 | 0.497 | 0.06  | ##### |
| MRS2     | ##### | 0.124075 | 0.415 | 0.046 | ##### |
| CTDSP1   | ##### | 0.215855 | 0.459 | 0.051 | ##### |
| CARS2    | ##### | 0.267967 | 0.406 | 0.024 | ##### |
| RGS6     | ##### | 0.149825 | 0.45  | 0.056 | ##### |
| TPST2    | ##### | 0.218737 | 0.43  | 0.034 | ##### |
| BCAS4    | ##### | -0.15714 | 0.283 | 0.051 | ##### |
| MAPK6    | ##### | 0.205129 | 0.456 | 0.053 | ##### |
| BCAM     | ##### | 0.257656 | 0.437 | 0.034 | ##### |
| LAMA5    | ##### | 0.453734 | 0.496 | 0.022 | ##### |

|           |       |          |       |       |       |
|-----------|-------|----------|-------|-------|-------|
| ARMCX1    | ##### | -0.26363 | 0.348 | 0.092 | ##### |
| DFNA5     | ##### | -0.14835 | 0.32  | 0.068 | ##### |
| GTPBP8    | ##### | -0.15149 | 0.273 | 0.044 | ##### |
| BTBD10    | ##### | 0.248322 | 0.409 | 0.031 | ##### |
| ARFGAP1   | ##### | 0.201427 | 0.43  | 0.046 | ##### |
| CES2      | ##### | 0.422269 | 0.484 | 0.022 | ##### |
| PIP5K1A   | ##### | 0.133247 | 0.395 | 0.043 | ##### |
| DNAL4     | ##### | 0.279741 | 0.427 | 0.029 | ##### |
| ANXA6     | ##### | 0.166603 | 0.409 | 0.043 | ##### |
| RRS1      | ##### | 0.227591 | 0.421 | 0.032 | ##### |
| ZNF330    | ##### | -0.35229 | 0.318 | 0.091 | ##### |
| RSAD1     | ##### | 0.337828 | 0.467 | 0.029 | ##### |
| CDK6      | ##### | 0.193442 | 0.509 | 0.075 | ##### |
| ATRN      | ##### | 0.410355 | 0.468 | 0.012 | ##### |
| C1QB      | ##### | -0.91259 | 0.281 | 0.246 | ##### |
| CPD       | ##### | 0.336697 | 0.472 | 0.032 | ##### |
| POMGNT2   | ##### | 0.190116 | 0.412 | 0.038 | ##### |
| DPYSL5    | ##### | 0.407173 | 0.489 | 0.029 | ##### |
| SGK1      | ##### | -0.14659 | 0.393 | 0.091 | ##### |
| EXTL3     | ##### | 0.341    | 0.478 | 0.032 | ##### |
| OGFOD1    | ##### | 0.14523  | 0.4   | 0.034 | ##### |
| LASP1     | ##### | 0.1287   | 0.4   | 0.044 | ##### |
| ACAP3     | ##### | 0.24597  | 0.483 | 0.058 | ##### |
| NCOA6     | ##### | 0.392735 | 0.476 | 0.026 | ##### |
| E2F6      | ##### | 0.302734 | 0.442 | 0.027 | ##### |
| COMMD8    | ##### | -0.19302 | 0.337 | 0.082 | ##### |
| LMF2      | ##### | 0.258643 | 0.462 | 0.044 | ##### |
| RBM14     | ##### | 0.205654 | 0.408 | 0.034 | ##### |
| MFSD1     | ##### | 0.150928 | 0.402 | 0.044 | ##### |
| ZC3H11A   | ##### | 0.179923 | 0.433 | 0.048 | ##### |
| CAMSAP2   | ##### | 0.272116 | 0.448 | 0.034 | ##### |
| SERTAD3   | ##### | -0.27543 | 0.325 | 0.079 | ##### |
| ZNF506    | ##### | 0.17359  | 0.403 | 0.038 | ##### |
| TCF3      | ##### | 0.342081 | 0.449 | 0.024 | ##### |
| SGSM3     | ##### | 0.221962 | 0.466 | 0.055 | ##### |
| EPB41L2   | ##### | 0.385002 | 0.482 | 0.031 | ##### |
| UBE2Z     | ##### | 0.214056 | 0.421 | 0.041 | ##### |
| DOHH      | ##### | 0.3477   | 0.471 | 0.031 | ##### |
| C17orf58  | ##### | 0.413846 | 0.481 | 0.027 | ##### |
| MVD       | ##### | 0.260123 | 0.458 | 0.036 | ##### |
| TPMT      | ##### | -0.19461 | 0.297 | 0.06  | ##### |
| TCERG1    | ##### | 0.188428 | 0.429 | 0.048 | ##### |
| TOMM34    | ##### | 0.153371 | 0.385 | 0.032 | ##### |
| PXDC1     | ##### | 0.321797 | 0.458 | 0.032 | ##### |
| MAP2K7    | ##### | 0.277724 | 0.459 | 0.043 | ##### |
| SLC35E2B  | ##### | 0.280898 | 0.446 | 0.038 | ##### |
| CTC-444N2 | ##### | 0.114076 | 0.427 | 0.065 | ##### |
| SC5D      | ##### | -0.1145  | 0.393 | 0.079 | ##### |
| RP9       | ##### | 0.104744 | 0.401 | 0.051 | ##### |
| DZIP1     | ##### | 0.277159 | 0.434 | 0.034 | ##### |
| ATP2C1    | ##### | 0.204773 | 0.409 | 0.038 | ##### |

|          |       |          |       |       |       |
|----------|-------|----------|-------|-------|-------|
| AKAP11   | ##### | 0.274051 | 0.422 | 0.026 | ##### |
| DDX6     | ##### | -0.25446 | 0.344 | 0.08  | ##### |
| FBXO11   | ##### | 0.162122 | 0.399 | 0.041 | ##### |
| SNX14    | ##### | 0.166969 | 0.414 | 0.043 | ##### |
| MTMR14   | ##### | 0.2488   | 0.432 | 0.036 | ##### |
| FBXW11   | ##### | 0.410254 | 0.487 | 0.026 | ##### |
| ZNF430   | ##### | -0.2004  | 0.339 | 0.084 | ##### |
| CDC42SE2 | ##### | 0.173118 | 0.4   | 0.039 | ##### |
| GAS1     | ##### | 0.376606 | 0.553 | 0.067 | ##### |
| C21orf2  | ##### | 0.338554 | 0.479 | 0.039 | ##### |
| HSD17B11 | ##### | -0.32993 | 0.332 | 0.097 | ##### |
| SUDS3    | ##### | 0.450341 | 0.512 | 0.029 | ##### |
| ATG4D    | ##### | 0.34882  | 0.459 | 0.027 | ##### |
| PHYKPL   | ##### | 0.230234 | 0.446 | 0.046 | ##### |
| DDX23    | ##### | 0.157817 | 0.384 | 0.036 | ##### |
| RNASET2  | ##### | 0.283399 | 0.466 | 0.043 | ##### |
| ANKFY1   | ##### | 0.211    | 0.385 | 0.024 | ##### |
| SP3      | ##### | 0.160338 | 0.416 | 0.05  | ##### |
| PPAN     | ##### | 0.119423 | 0.408 | 0.051 | ##### |
| TRIM16   | ##### | 0.271288 | 0.415 | 0.026 | ##### |
| SNTA1    | ##### | 0.234982 | 0.392 | 0.021 | ##### |
| HCCS     | ##### | 0.124291 | 0.378 | 0.036 | ##### |
| TPRA1    | ##### | 0.310409 | 0.438 | 0.026 | ##### |
| WAC-AS1  | ##### | 0.10946  | 0.37  | 0.038 | ##### |
| CHST7    | ##### | 0.383114 | 0.485 | 0.029 | ##### |
| SPATA6   | ##### | 0.362115 | 0.52  | 0.051 | ##### |
| SREBF2   | ##### | 0.347707 | 0.452 | 0.027 | ##### |
| TAF9B    | ##### | 0.138802 | 0.386 | 0.039 | ##### |
| CPNE4    | ##### | 0.579638 | 0.5   | 0.01  | ##### |
| OBSL1    | ##### | 0.165191 | 0.458 | 0.07  | ##### |
| SIGIRR   | ##### | 0.458624 | 0.469 | 0.017 | ##### |
| CASP3    | ##### | 0.198288 | 0.439 | 0.051 | ##### |
| CEP63    | ##### | 0.232835 | 0.406 | 0.027 | ##### |
| TSPAN17  | ##### | 0.290758 | 0.421 | 0.027 | ##### |
| NUDT16   | ##### | 0.134818 | 0.384 | 0.038 | ##### |
| NNMT     | ##### | -0.37836 | 0.408 | 0.13  | ##### |
| TLK2     | ##### | 0.209388 | 0.377 | 0.022 | ##### |
| ITGB3BP  | ##### | -0.12443 | 0.319 | 0.058 | ##### |
| GLRX2    | ##### | 0.218689 | 0.409 | 0.032 | ##### |
| SEL1L    | ##### | 0.13147  | 0.386 | 0.034 | ##### |
| LGR4     | ##### | 0.684898 | 0.541 | 0.007 | ##### |
| C19orf12 | ##### | 0.259858 | 0.422 | 0.031 | ##### |
| CSNK1G3  | ##### | 0.312979 | 0.438 | 0.026 | ##### |
| SPRED2   | ##### | 0.279678 | 0.443 | 0.036 | ##### |
| GRIA2    | ##### | 0.159656 | 0.499 | 0.084 | ##### |
| NDUFAF5  | ##### | 0.193818 | 0.396 | 0.032 | ##### |
| CDH11    | ##### | 0.167319 | 0.407 | 0.044 | ##### |
| KCNE4    | ##### | 0.326032 | 0.477 | 0.041 | ##### |
| SLC35F1  | ##### | 0.402256 | 0.497 | 0.031 | ##### |
| GBE1     | ##### | -0.25217 | 0.326 | 0.082 | ##### |
| SRFBP1   | ##### | 0.194195 | 0.417 | 0.043 | ##### |

|           |       |          |       |       |       |
|-----------|-------|----------|-------|-------|-------|
| TRIP12    | ##### | 0.322937 | 0.434 | 0.021 | ##### |
| GCLM      | ##### | 0.15296  | 0.438 | 0.055 | ##### |
| TBC1D7    | ##### | 0.126928 | 0.379 | 0.039 | ##### |
| SMC5      | ##### | 0.226095 | 0.439 | 0.039 | ##### |
| MBTPS1    | ##### | 0.209391 | 0.395 | 0.036 | ##### |
| RP11-386G | ##### | -0.33213 | 0.252 | 0.068 | ##### |
| MED16     | ##### | 0.426496 | 0.49  | 0.024 | ##### |
| ANKRD54   | ##### | 0.213643 | 0.407 | 0.031 | ##### |
| ST3GAL4   | ##### | 0.211889 | 0.41  | 0.031 | ##### |
| DUS1L     | ##### | 0.433519 | 0.483 | 0.019 | ##### |
| CHCHD7    | ##### | -0.24448 | 0.313 | 0.077 | ##### |
| TNRC6C    | ##### | 0.15843  | 0.394 | 0.038 | ##### |
| NARFL     | ##### | 0.118714 | 0.388 | 0.048 | ##### |
| SLMAP     | ##### | 0.116202 | 0.365 | 0.041 | ##### |
| PAXBP1    | ##### | 0.460899 | 0.516 | 0.032 | ##### |
| EVA1B     | ##### | 0.68693  | 0.543 | 0.005 | ##### |
| HDDC3     | ##### | 0.123184 | 0.38  | 0.048 | ##### |
| SIAH1     | ##### | 0.141047 | 0.408 | 0.051 | ##### |
| C9orf114  | ##### | 0.108516 | 0.394 | 0.044 | ##### |
| WDR43     | ##### | 0.208621 | 0.435 | 0.046 | ##### |
| NTAN1     | ##### | 0.391397 | 0.469 | 0.022 | ##### |
| DIS3      | ##### | -0.10123 | 0.336 | 0.051 | ##### |
| PRKACA    | ##### | 0.327298 | 0.422 | 0.021 | ##### |
| ACO09501. | ##### | -0.91916 | 0.201 | 0.185 | ##### |
| TMEM237   | ##### | 0.157155 | 0.429 | 0.051 | ##### |
| RAB11B-AS | ##### | 0.334149 | 0.444 | 0.024 | ##### |
| KANSL1    | ##### | 0.278148 | 0.437 | 0.036 | ##### |
| AQP4      | ##### | -0.16603 | 0.55  | 0.193 | ##### |
| FAF2      | ##### | 0.246879 | 0.441 | 0.046 | ##### |
| GMNN      | ##### | -0.14211 | 0.359 | 0.08  | ##### |
| FADS3     | ##### | 0.167987 | 0.398 | 0.041 | ##### |
| SYNGR2    | ##### | 0.394983 | 0.45  | 0.019 | ##### |
| PICALM    | ##### | 0.279991 | 0.44  | 0.031 | ##### |
| UCKL1     | ##### | 0.307765 | 0.449 | 0.032 | ##### |
| AP3B1     | ##### | 0.276661 | 0.432 | 0.031 | ##### |
| GALE      | ##### | 0.170747 | 0.39  | 0.038 | ##### |
| ASMTL     | ##### | 0.153547 | 0.405 | 0.041 | ##### |
| BPHL      | ##### | 0.134984 | 0.386 | 0.041 | ##### |
| CBR4      | ##### | 0.36261  | 0.463 | 0.031 | ##### |
| FAM118B   | ##### | 0.169418 | 0.379 | 0.031 | ##### |
| ZNF322    | ##### | 0.314143 | 0.419 | 0.021 | ##### |
| ZBED5     | ##### | 0.174931 | 0.392 | 0.031 | ##### |
| TSKU      | ##### | 0.158426 | 0.361 | 0.024 | ##### |
| SART1     | ##### | 0.356184 | 0.449 | 0.024 | ##### |
| PGP       | ##### | 0.510682 | 0.519 | 0.019 | ##### |
| ZNF544    | ##### | -0.13321 | 0.333 | 0.07  | ##### |
| PSPC1     | ##### | 0.184062 | 0.411 | 0.043 | ##### |
| TRABD     | ##### | 0.403065 | 0.465 | 0.019 | ##### |
| BMPR2     | ##### | 0.292308 | 0.438 | 0.031 | ##### |
| SLC35F6   | ##### | 0.404709 | 0.482 | 0.029 | ##### |
| ACOX1     | ##### | 0.477352 | 0.481 | 0.014 | ##### |

|          |       |          |       |       |       |
|----------|-------|----------|-------|-------|-------|
| PIK3C2A  | ##### | 0.284911 | 0.451 | 0.036 | ##### |
| UBALD1   | ##### | 0.356224 | 0.451 | 0.027 | ##### |
| PPP1R37  | ##### | 0.179142 | 0.395 | 0.036 | ##### |
| REV3L    | ##### | 0.169455 | 0.46  | 0.063 | ##### |
| BRD9     | ##### | 0.291197 | 0.446 | 0.036 | ##### |
| RBM15B   | ##### | 0.378429 | 0.444 | 0.019 | ##### |
| ZNF688   | ##### | 0.280465 | 0.431 | 0.031 | ##### |
| DHFR     | ##### | 0.271971 | 0.415 | 0.026 | ##### |
| LYST     | ##### | 0.318908 | 0.461 | 0.036 | ##### |
| MLH1     | ##### | -0.1054  | 0.3   | 0.05  | ##### |
| PDS5B    | ##### | 0.237656 | 0.443 | 0.046 | ##### |
| NIPSNAP1 | ##### | 0.357152 | 0.44  | 0.022 | ##### |
| L3HYPDH  | ##### | 0.456878 | 0.491 | 0.022 | ##### |
| PGPEP1   | ##### | 0.22793  | 0.428 | 0.039 | ##### |
| INTS12   | ##### | -0.19245 | 0.335 | 0.084 | ##### |
| PTPN9    | ##### | 0.195749 | 0.4   | 0.032 | ##### |
| ANKRD13D | ##### | 0.212071 | 0.393 | 0.031 | ##### |
| Clorf174 | ##### | 0.107369 | 0.353 | 0.031 | ##### |
| YES1     | ##### | 0.340354 | 0.466 | 0.032 | ##### |
| PARVA    | ##### | 0.177685 | 0.374 | 0.029 | ##### |
| JAKMIP2  | ##### | 0.254193 | 0.448 | 0.041 | ##### |
| MCC      | ##### | 0.362074 | 0.484 | 0.032 | ##### |
| STRN3    | ##### | 0.202908 | 0.412 | 0.032 | ##### |
| GLYR1    | ##### | 0.177457 | 0.408 | 0.041 | ##### |
| RRP36    | ##### | 0.576174 | 0.5   | 0.007 | ##### |
| BIRC6    | ##### | 0.107296 | 0.376 | 0.046 | ##### |
| ADO      | ##### | 0.261565 | 0.43  | 0.031 | ##### |
| TOR3A    | ##### | 0.155847 | 0.384 | 0.036 | ##### |
| SETX     | ##### | 0.307991 | 0.434 | 0.027 | ##### |
| CDIP1    | ##### | 0.174278 | 0.408 | 0.046 | ##### |
| POFUT1   | ##### | 0.333095 | 0.447 | 0.029 | ##### |
| ZNF12    | ##### | 0.106877 | 0.335 | 0.038 | ##### |
| BTBD1    | ##### | 0.270092 | 0.422 | 0.031 | ##### |
| PREB     | ##### | 0.248599 | 0.443 | 0.039 | ##### |
| LAMC1    | ##### | 0.428747 | 0.48  | 0.024 | ##### |
| LRIG1    | ##### | 0.13324  | 0.392 | 0.048 | ##### |
| NIT1     | ##### | 0.110657 | 0.387 | 0.043 | ##### |
| EHMT2    | ##### | 0.306866 | 0.476 | 0.046 | ##### |
| APOE     | ##### | -0.12482 | 0.693 | 0.263 | ##### |
| FAM217B  | ##### | 0.346485 | 0.444 | 0.027 | ##### |
| CITED2   | ##### | -0.10721 | 0.378 | 0.084 | ##### |
| GRIPAP1  | ##### | 0.203351 | 0.441 | 0.051 | ##### |
| SH3BP5   | ##### | 0.580141 | 0.504 | 0.015 | ##### |
| RHBDD3   | ##### | 0.266588 | 0.425 | 0.036 | ##### |
| ORAI1    | ##### | 0.443078 | 0.463 | 0.014 | ##### |
| SLC38A2  | ##### | -0.28023 | 0.351 | 0.113 | ##### |
| ZNF37A   | ##### | 0.283053 | 0.41  | 0.024 | ##### |
| ADSS     | ##### | 0.143214 | 0.398 | 0.044 | ##### |
| QRICH1   | ##### | 0.128854 | 0.357 | 0.034 | ##### |
| SH2B1    | ##### | 0.206413 | 0.399 | 0.038 | ##### |
| CRAT     | ##### | 0.340332 | 0.446 | 0.026 | ##### |



|          |       |          |       |       |       |
|----------|-------|----------|-------|-------|-------|
| NPLOC4   | ##### | 0.230658 | 0.398 | 0.027 | ##### |
| PITPNB   | ##### | 0.173568 | 0.408 | 0.044 | ##### |
| MDP1     | ##### | -0.10041 | 0.277 | 0.05  | ##### |
| EFNA1    | ##### | -0.45232 | 0.28  | 0.111 | ##### |
| FAM210A  | ##### | 0.108774 | 0.339 | 0.031 | ##### |
| ETNK1    | ##### | 0.281995 | 0.456 | 0.043 | ##### |
| EPDR1    | ##### | 0.25653  | 0.426 | 0.034 | ##### |
| ZMYM2    | ##### | 0.229754 | 0.425 | 0.039 | ##### |
| WIP11    | ##### | 0.152142 | 0.383 | 0.038 | ##### |
| IQCK     | ##### | 0.110965 | 0.411 | 0.051 | ##### |
| MIEF1    | ##### | 0.205874 | 0.43  | 0.048 | ##### |
| ZMYM4    | ##### | 0.294085 | 0.408 | 0.024 | ##### |
| POLR2M   | ##### | 0.323793 | 0.449 | 0.031 | ##### |
| NQO1     | ##### | 0.113179 | 0.361 | 0.036 | ##### |
| FBX018   | ##### | 0.268459 | 0.408 | 0.026 | ##### |
| HUWE1    | ##### | 0.24302  | 0.432 | 0.041 | ##### |
| TMEM63B  | ##### | 0.325406 | 0.437 | 0.024 | ##### |
| CASK     | ##### | 0.10608  | 0.361 | 0.044 | ##### |
| ELMOD3   | ##### | 0.191693 | 0.399 | 0.039 | ##### |
| DAAM1    | ##### | 0.240746 | 0.471 | 0.065 | ##### |
| GSKIP    | ##### | 0.115935 | 0.355 | 0.034 | ##### |
| TRIM13   | ##### | 0.189715 | 0.449 | 0.063 | ##### |
| ELOVL2   | ##### | 0.366328 | 0.475 | 0.036 | ##### |
| PLA2G5   | ##### | -0.5039  | 0.381 | 0.159 | ##### |
| FKBP5    | ##### | -0.38098 | 0.367 | 0.137 | ##### |
| NECAP1   | ##### | -0.1823  | 0.342 | 0.084 | ##### |
| SCAMP1   | ##### | 0.134202 | 0.408 | 0.055 | ##### |
| ARHGAP35 | ##### | 0.398825 | 0.465 | 0.024 | ##### |
| CYP27A1  | ##### | 0.133199 | 0.375 | 0.038 | ##### |
| SLC25A38 | ##### | -0.1842  | 0.299 | 0.053 | ##### |
| MCOLN1   | ##### | 0.275697 | 0.438 | 0.041 | ##### |
| CDK12    | ##### | 0.256663 | 0.41  | 0.029 | ##### |
| YRDC     | ##### | 0.16781  | 0.393 | 0.043 | ##### |
| MIA3     | ##### | 0.224569 | 0.433 | 0.044 | ##### |
| MMP2     | ##### | 0.384003 | 0.49  | 0.038 | ##### |
| MPI      | ##### | -0.12427 | 0.28  | 0.048 | ##### |
| SCAF1    | ##### | 0.345241 | 0.433 | 0.021 | ##### |
| NADSYN1  | ##### | 0.132814 | 0.357 | 0.026 | ##### |
| H2AFJ    | ##### | 0.43757  | 0.454 | 0.014 | ##### |
| RUFY1    | ##### | 0.124528 | 0.378 | 0.039 | ##### |
| MIB2     | ##### | 0.29334  | 0.457 | 0.036 | ##### |
| FBX032   | ##### | -0.37696 | 0.335 | 0.116 | ##### |
| PROX1    | ##### | 0.301262 | 0.458 | 0.039 | ##### |
| RNPEP    | ##### | 0.252327 | 0.398 | 0.027 | ##### |
| FRYL     | ##### | 0.425971 | 0.488 | 0.031 | ##### |
| NOTCH2NL | ##### | 0.457689 | 0.506 | 0.029 | ##### |
| PELP1    | ##### | 0.191243 | 0.373 | 0.024 | ##### |
| CCNB1IP1 | ##### | -0.29155 | 0.336 | 0.106 | ##### |
| PLXNB2   | ##### | 0.293917 | 0.409 | 0.024 | ##### |
| SLC38A10 | ##### | 0.135964 | 0.39  | 0.043 | ##### |
| TLCD1    | ##### | 0.420566 | 0.459 | 0.017 | ##### |

|           |       |          |       |       |       |
|-----------|-------|----------|-------|-------|-------|
| MYADM     | ##### | -0.17678 | 0.314 | 0.062 | ##### |
| BATF3     | ##### | 0.242635 | 0.389 | 0.022 | ##### |
| ENOSF1    | ##### | 0.505924 | 0.468 | 0.009 | ##### |
| PURB      | ##### | 0.148753 | 0.39  | 0.043 | ##### |
| PRPS1     | ##### | -0.18619 | 0.349 | 0.079 | ##### |
| SULF2     | ##### | 0.422659 | 0.479 | 0.032 | ##### |
| CMBL      | ##### | 0.109408 | 0.373 | 0.038 | ##### |
| VARS      | ##### | 0.163007 | 0.36  | 0.027 | ##### |
| PNPLA6    | ##### | 0.250449 | 0.404 | 0.031 | ##### |
| KPNA1     | ##### | 0.221106 | 0.399 | 0.031 | ##### |
| PTPN13    | ##### | 0.26441  | 0.402 | 0.024 | ##### |
| ANKLE2    | ##### | 0.248914 | 0.422 | 0.036 | ##### |
| RP11-410L | ##### | 0.295379 | 0.441 | 0.036 | ##### |
| CKAP5     | ##### | 0.241256 | 0.378 | 0.024 | ##### |
| SP100     | ##### | -0.58327 | 0.249 | 0.13  | ##### |
| PDGFC     | ##### | 0.331284 | 0.455 | 0.034 | ##### |
| DESI1     | ##### | 0.383023 | 0.452 | 0.022 | ##### |
| LINC00094 | ##### | 0.259526 | 0.405 | 0.027 | ##### |
| ENHO      | ##### | 0.452988 | 0.487 | 0.029 | ##### |
| ZNF579    | ##### | 0.322861 | 0.426 | 0.024 | ##### |
| MSL1      | ##### | 0.120995 | 0.382 | 0.048 | ##### |
| BTBD7     | ##### | 0.171571 | 0.371 | 0.034 | ##### |
| LYAR      | ##### | -0.10876 | 0.289 | 0.051 | ##### |
| PDPK1     | ##### | 0.314629 | 0.444 | 0.026 | ##### |
| EPM2AIP1  | ##### | 0.146971 | 0.412 | 0.053 | ##### |
| GABARAPL1 | ##### | -0.21416 | 0.352 | 0.091 | ##### |
| ICMT      | ##### | 0.325423 | 0.424 | 0.021 | ##### |
| ARFIP1    | ##### | 0.12524  | 0.375 | 0.046 | ##### |
| DENND5A   | ##### | 0.185483 | 0.403 | 0.039 | ##### |
| DVL3      | ##### | 0.307889 | 0.451 | 0.038 | ##### |
| RANBP2    | ##### | 0.227399 | 0.397 | 0.029 | ##### |
| RGS16     | ##### | -0.2992  | 0.442 | 0.14  | ##### |
| RPP14     | ##### | 0.228154 | 0.42  | 0.036 | ##### |
| MEIS3     | ##### | 0.251209 | 0.378 | 0.026 | ##### |
| ANKRD40   | ##### | 0.36745  | 0.472 | 0.034 | ##### |
| CHKA      | ##### | 0.132941 | 0.392 | 0.041 | ##### |
| TBCC      | ##### | 0.138475 | 0.381 | 0.039 | ##### |
| DPH7      | ##### | 0.289284 | 0.429 | 0.034 | ##### |
| ZNF43     | ##### | 0.171047 | 0.394 | 0.041 | ##### |
| NAB2      | ##### | 0.286083 | 0.435 | 0.034 | ##### |
| JAM3      | ##### | 0.190332 | 0.409 | 0.041 | ##### |
| UBE2W     | ##### | 0.227085 | 0.426 | 0.043 | ##### |
| SCYL2     | ##### | 0.301124 | 0.414 | 0.026 | ##### |
| THAP1     | ##### | -0.10289 | 0.313 | 0.051 | ##### |
| LIPA      | ##### | 0.238414 | 0.443 | 0.044 | ##### |
| PARP9     | ##### | 0.243805 | 0.446 | 0.044 | ##### |
| KCTD6     | ##### | 0.194858 | 0.37  | 0.027 | ##### |
| UBLCP1    | ##### | 0.287684 | 0.413 | 0.026 | ##### |
| MGARP     | ##### | 0.245509 | 0.384 | 0.027 | ##### |
| CNOT8     | ##### | 0.103008 | 0.342 | 0.032 | ##### |
| SFRP1     | ##### | 0.529817 | 0.487 | 0.014 | ##### |

|           |       |          |       |       |       |
|-----------|-------|----------|-------|-------|-------|
| MAPKAPK5  | ##### | 0.398747 | 0.474 | 0.031 | ##### |
| NUDT2     | ##### | 0.298785 | 0.424 | 0.026 | ##### |
| GCA       | ##### | -0.40143 | 0.275 | 0.096 | ##### |
| ZNF721    | ##### | 0.133216 | 0.372 | 0.043 | ##### |
| DHCR24    | ##### | 0.350631 | 0.419 | 0.021 | ##### |
| ZNF439    | ##### | 0.278734 | 0.421 | 0.031 | ##### |
| TFDP2     | ##### | 0.201805 | 0.411 | 0.034 | ##### |
| ZMYND11   | ##### | 0.414275 | 0.458 | 0.019 | ##### |
| USP3      | ##### | 0.173877 | 0.384 | 0.034 | ##### |
| IQCG      | ##### | -0.18693 | 0.3   | 0.058 | ##### |
| SLC9A3R2  | ##### | 0.244345 | 0.393 | 0.027 | ##### |
| PDS5A     | ##### | 0.187841 | 0.37  | 0.031 | ##### |
| TMOD3     | ##### | 0.242322 | 0.391 | 0.027 | ##### |
| EIF3J-AS1 | ##### | 0.158257 | 0.377 | 0.038 | ##### |
| RPIA      | ##### | 0.138232 | 0.362 | 0.036 | ##### |
| PAPD4     | ##### | 0.186499 | 0.398 | 0.039 | ##### |
| RNF220    | ##### | 0.135312 | 0.351 | 0.032 | ##### |
| ATF2      | ##### | -0.10064 | 0.319 | 0.062 | ##### |
| ZC3HAV1   | ##### | 0.22857  | 0.396 | 0.032 | ##### |
| SLC25A17  | ##### | 0.162402 | 0.388 | 0.036 | ##### |
| PTAR1     | ##### | 0.338085 | 0.443 | 0.029 | ##### |
| UBAP1     | ##### | 0.102607 | 0.38  | 0.039 | ##### |
| MSRB2     | ##### | 0.290918 | 0.434 | 0.032 | ##### |
| GMPS      | ##### | 0.37126  | 0.447 | 0.024 | ##### |
| COX19     | ##### | 0.146906 | 0.398 | 0.05  | ##### |
| FAM179B   | ##### | 0.125179 | 0.367 | 0.036 | ##### |
| TBC1D9B   | ##### | 0.145591 | 0.382 | 0.041 | ##### |
| ZNF462    | ##### | 0.200436 | 0.443 | 0.05  | ##### |
| TRAPPC12  | ##### | 0.262018 | 0.437 | 0.039 | ##### |
| MBNL1     | ##### | 0.297132 | 0.42  | 0.031 | ##### |
| DCTN1     | ##### | 0.175728 | 0.407 | 0.044 | ##### |
| CXCR4     | ##### | -0.21203 | 0.403 | 0.106 | ##### |
| TAF13     | ##### | 0.351235 | 0.427 | 0.022 | ##### |
| CERCAM    | ##### | 0.275354 | 0.402 | 0.026 | ##### |
| TLE4      | ##### | 0.281671 | 0.441 | 0.043 | ##### |
| EVL       | ##### | 0.198943 | 0.433 | 0.055 | ##### |
| SDC2      | ##### | 0.170539 | 0.411 | 0.046 | ##### |
| WRAP73    | ##### | 0.23141  | 0.392 | 0.036 | ##### |
| TNFRSF21  | ##### | 0.44241  | 0.486 | 0.029 | ##### |
| DRAXIN    | ##### | 0.22066  | 0.399 | 0.036 | ##### |
| ZNF800    | ##### | 0.255414 | 0.434 | 0.041 | ##### |
| SOX11     | ##### | 0.228735 | 0.48  | 0.068 | ##### |
| ZCCHC3    | ##### | 0.252982 | 0.364 | 0.017 | ##### |
| IMPACT    | ##### | 0.157691 | 0.374 | 0.038 | ##### |
| XPC       | ##### | 0.107589 | 0.371 | 0.048 | ##### |
| GOLGA5    | ##### | 0.117204 | 0.375 | 0.041 | ##### |
| CNOT3     | ##### | 0.391679 | 0.462 | 0.024 | ##### |
| MRGBP     | ##### | 0.539467 | 0.507 | 0.015 | ##### |
| CPSF2     | ##### | 0.213955 | 0.374 | 0.032 | ##### |
| EGLN1     | ##### | 0.18731  | 0.419 | 0.048 | ##### |
| LTA4H     | ##### | -0.24156 | 0.305 | 0.077 | ##### |

|           |       |          |       |       |       |
|-----------|-------|----------|-------|-------|-------|
| LRCH3     | ##### | 0.131313 | 0.349 | 0.036 | ##### |
| USP33     | ##### | 0.178565 | 0.396 | 0.041 | ##### |
| ZNF827    | ##### | 0.263599 | 0.407 | 0.034 | ##### |
| ATP6V1A   | ##### | 0.308722 | 0.431 | 0.031 | ##### |
| BTN3A2    | ##### | -0.20461 | 0.378 | 0.099 | ##### |
| EFNB2     | ##### | 0.630826 | 0.499 | 0.007 | ##### |
| MAP3K2    | ##### | 0.310411 | 0.424 | 0.031 | ##### |
| KANSL2    | ##### | -0.13404 | 0.316 | 0.07  | ##### |
| ILDR2     | ##### | 0.332436 | 0.417 | 0.024 | ##### |
| POLR1C    | ##### | -0.23374 | 0.291 | 0.072 | ##### |
| R3HDM2    | ##### | 0.536443 | 0.508 | 0.021 | ##### |
| CASP4     | ##### | -0.25726 | 0.285 | 0.077 | ##### |
| DDX19A    | ##### | 0.131508 | 0.382 | 0.038 | ##### |
| STK19     | ##### | 0.206314 | 0.367 | 0.029 | ##### |
| FAM168B   | ##### | 0.270296 | 0.416 | 0.032 | ##### |
| STX18     | ##### | 0.105329 | 0.353 | 0.038 | ##### |
| RUSC1     | ##### | 0.226091 | 0.361 | 0.021 | ##### |
| MED24     | ##### | 0.147208 | 0.373 | 0.036 | ##### |
| SRD5A1    | ##### | 0.196298 | 0.331 | 0.017 | ##### |
| GADD45B   | ##### | -1.28606 | 0.356 | 0.462 | ##### |
| RB1       | ##### | 0.296606 | 0.439 | 0.038 | ##### |
| EXT2      | ##### | 0.325615 | 0.434 | 0.029 | ##### |
| LETMD1    | ##### | -0.1912  | 0.283 | 0.07  | ##### |
| TMEM69    | ##### | -0.22545 | 0.296 | 0.08  | ##### |
| AC004951. | ##### | 0.289015 | 0.41  | 0.027 | ##### |
| AP5M1     | ##### | 0.174059 | 0.371 | 0.041 | ##### |
| ASPHD1    | ##### | 0.241879 | 0.416 | 0.039 | ##### |
| COLGALT1  | ##### | 0.198908 | 0.402 | 0.039 | ##### |
| MAP7D3    | ##### | 0.171172 | 0.387 | 0.038 | ##### |
| HBP1      | ##### | -0.27314 | 0.335 | 0.097 | ##### |
| CDK5RAP1  | ##### | 0.261174 | 0.407 | 0.032 | ##### |
| SEPP1     | ##### | -0.98002 | 0.347 | 0.337 | ##### |
| CDKN1B    | ##### | 0.131343 | 0.421 | 0.062 | ##### |
| AAGAB     | ##### | 0.103361 | 0.316 | 0.027 | ##### |
| EXOSC3    | ##### | 0.206287 | 0.378 | 0.029 | ##### |
| NCOA1     | ##### | 0.268313 | 0.419 | 0.038 | ##### |
| PITPNC1   | ##### | 0.468092 | 0.463 | 0.019 | ##### |
| LAMB1     | ##### | 0.226655 | 0.382 | 0.027 | ##### |
| NMI       | ##### | -0.28983 | 0.302 | 0.084 | ##### |
| RAP1GDS1  | ##### | 0.102516 | 0.367 | 0.036 | ##### |
| TMEM192   | ##### | -0.10693 | 0.311 | 0.072 | ##### |
| CHST10    | ##### | 0.249434 | 0.424 | 0.041 | ##### |
| PSEN1     | ##### | 0.141518 | 0.358 | 0.039 | ##### |
| INSIG1    | ##### | 0.119903 | 0.411 | 0.056 | ##### |
| SLC50A1   | ##### | 0.147088 | 0.341 | 0.031 | ##### |
| PUM2      | ##### | 0.184418 | 0.383 | 0.039 | ##### |
| PYGL      | ##### | -0.23319 | 0.294 | 0.072 | ##### |
| PTGFRN    | ##### | 0.204335 | 0.387 | 0.032 | ##### |
| SMG6      | ##### | 0.317701 | 0.421 | 0.029 | ##### |
| CMTR2     | ##### | -0.117   | 0.296 | 0.062 | ##### |
| RGS19     | ##### | 0.403365 | 0.448 | 0.017 | ##### |

|           |       |          |       |       |       |
|-----------|-------|----------|-------|-------|-------|
| SRGAP1    | ##### | 0.151475 | 0.41  | 0.051 | ##### |
| TEX261    | ##### | 0.243003 | 0.401 | 0.032 | ##### |
| PARP14    | ##### | 0.1282   | 0.384 | 0.043 | ##### |
| ZNF426    | ##### | -0.13584 | 0.297 | 0.062 | ##### |
| E2F4      | ##### | 0.258106 | 0.407 | 0.031 | ##### |
| BMI1      | ##### | 0.299835 | 0.392 | 0.019 | ##### |
| PLCG1     | ##### | 0.183015 | 0.374 | 0.036 | ##### |
| KCTD17    | ##### | 0.23359  | 0.374 | 0.024 | ##### |
| ANO6      | ##### | 0.159545 | 0.337 | 0.024 | ##### |
| RAB35     | ##### | 0.15858  | 0.349 | 0.031 | ##### |
| CLDN12    | ##### | -0.11032 | 0.354 | 0.08  | ##### |
| FPGS      | ##### | 0.257201 | 0.391 | 0.024 | ##### |
| CABIN1    | ##### | 0.196789 | 0.372 | 0.032 | ##### |
| MAP1S     | ##### | 0.29163  | 0.398 | 0.021 | ##### |
| GATAD2B   | ##### | 0.135512 | 0.378 | 0.044 | ##### |
| SMG1      | ##### | 0.191817 | 0.37  | 0.036 | ##### |
| TNFRSF19  | ##### | 0.45587  | 0.479 | 0.026 | ##### |
| WNK3      | ##### | 0.126966 | 0.383 | 0.039 | ##### |
| IGSF10    | ##### | 0.408916 | 0.466 | 0.029 | ##### |
| LIMCH1    | ##### | 0.153202 | 0.425 | 0.056 | ##### |
| TBL2      | ##### | 0.183355 | 0.399 | 0.044 | ##### |
| NLGN1     | ##### | 0.323005 | 0.443 | 0.039 | ##### |
| HABP4     | ##### | 0.30007  | 0.408 | 0.026 | ##### |
| HMBOX1    | ##### | -0.24056 | 0.327 | 0.092 | ##### |
| SLC25A29  | ##### | 0.375312 | 0.45  | 0.027 | ##### |
| LEO1      | ##### | 0.115232 | 0.381 | 0.046 | ##### |
| TBC1D23   | ##### | 0.172709 | 0.389 | 0.041 | ##### |
| SLC39A10  | ##### | 0.202729 | 0.39  | 0.034 | ##### |
| CASC3     | ##### | 0.18756  | 0.405 | 0.046 | ##### |
| PTDSS2    | ##### | 0.458862 | 0.477 | 0.021 | ##### |
| SKIL      | ##### | 0.230165 | 0.415 | 0.036 | ##### |
| ATMIN     | ##### | 0.199975 | 0.336 | 0.017 | ##### |
| CTU2      | ##### | 0.185948 | 0.365 | 0.029 | ##### |
| FGFBP3    | ##### | 0.485551 | 0.455 | 0.015 | ##### |
| PHF12     | ##### | 0.121966 | 0.347 | 0.036 | ##### |
| FAM216A   | ##### | 0.154906 | 0.347 | 0.031 | ##### |
| BEND6     | ##### | 0.585768 | 0.496 | 0.007 | ##### |
| C6orf47   | ##### | 0.249517 | 0.369 | 0.019 | ##### |
| GPR155    | ##### | 0.195053 | 0.395 | 0.044 | ##### |
| TPT1-AS1  | ##### | 0.12767  | 0.357 | 0.039 | ##### |
| HDAC5     | ##### | 0.229491 | 0.402 | 0.038 | ##### |
| TMEM132B  | ##### | 0.431426 | 0.464 | 0.029 | ##### |
| MTIF2     | ##### | 0.168855 | 0.35  | 0.026 | ##### |
| SLC2A1    | ##### | -0.16577 | 0.321 | 0.065 | ##### |
| LINC00685 | ##### | 0.126653 | 0.376 | 0.055 | ##### |
| ATP9A     | ##### | 0.149337 | 0.323 | 0.029 | ##### |
| CNIH2     | ##### | 0.574127 | 0.49  | 0.012 | ##### |
| FTSJ3     | ##### | 0.244438 | 0.395 | 0.027 | ##### |
| SLC4A7    | ##### | 0.378705 | 0.472 | 0.039 | ##### |
| IL17RC    | ##### | 0.379076 | 0.445 | 0.022 | ##### |
| SNX13     | ##### | -0.20527 | 0.297 | 0.07  | ##### |

|           |       |          |       |       |       |
|-----------|-------|----------|-------|-------|-------|
| IL10RB    | ##### | 0.241234 | 0.388 | 0.029 | ##### |
| WDR26     | ##### | 0.212912 | 0.395 | 0.038 | ##### |
| KDM4B     | ##### | 0.111069 | 0.347 | 0.041 | ##### |
| CREBBP    | ##### | 0.184494 | 0.376 | 0.032 | ##### |
| DPY19L1   | ##### | 0.179723 | 0.395 | 0.043 | ##### |
| KIN       | ##### | 0.185672 | 0.359 | 0.027 | ##### |
| MOB3A     | ##### | 0.210132 | 0.377 | 0.029 | ##### |
| DCAF10    | ##### | 0.264508 | 0.41  | 0.031 | ##### |
| STK40     | ##### | 0.177821 | 0.361 | 0.031 | ##### |
| IFNAR2    | ##### | 0.536021 | 0.488 | 0.014 | ##### |
| RP4-665J2 | ##### | 0.294509 | 0.428 | 0.038 | ##### |
| FNBP1L    | ##### | 0.305341 | 0.427 | 0.034 | ##### |
| ASAP2     | ##### | 0.254616 | 0.374 | 0.022 | ##### |
| GUSB      | ##### | -0.22223 | 0.312 | 0.087 | ##### |
| SOX12     | ##### | 0.455803 | 0.449 | 0.014 | ##### |
| GPCPD1    | ##### | 0.388896 | 0.437 | 0.022 | ##### |
| CCDC102B  | ##### | 0.125157 | 0.404 | 0.056 | ##### |
| AHI1      | ##### | 0.202445 | 0.422 | 0.055 | ##### |
| CDK10     | ##### | -0.15992 | 0.328 | 0.084 | ##### |
| VPS53     | ##### | 0.261571 | 0.409 | 0.034 | ##### |
| RECQL     | ##### | 0.142706 | 0.344 | 0.034 | ##### |
| C2orf69   | ##### | 0.239715 | 0.404 | 0.038 | ##### |
| HLA-DRA   | ##### | -1.36153 | 0.271 | 0.426 | ##### |
| RUNX1     | ##### | 0.408355 | 0.46  | 0.031 | ##### |
| SRGAP2    | ##### | 0.348623 | 0.436 | 0.029 | ##### |
| KANK2     | ##### | 0.131671 | 0.365 | 0.038 | ##### |
| SLC4A4    | ##### | 0.101238 | 0.501 | 0.101 | ##### |
| HN1L      | ##### | 0.18883  | 0.359 | 0.029 | ##### |
| RRAGD     | ##### | 0.327883 | 0.407 | 0.022 | ##### |
| R3HDM1    | ##### | 0.170189 | 0.365 | 0.034 | ##### |
| OLIG2     | ##### | 0.124814 | 0.46  | 0.082 | ##### |
| SYNC      | ##### | 0.198614 | 0.405 | 0.038 | ##### |
| MBD1      | ##### | 0.17563  | 0.377 | 0.041 | ##### |
| RPP38     | ##### | 0.292633 | 0.39  | 0.019 | ##### |
| CTR9      | ##### | 0.142214 | 0.358 | 0.029 | ##### |
| SOX6      | ##### | 0.286957 | 0.424 | 0.039 | ##### |
| RP11-390E | ##### | -0.15778 | 0.289 | 0.067 | ##### |
| DDAH1     | ##### | 0.137081 | 0.428 | 0.062 | ##### |
| SEPHS1    | ##### | 0.156867 | 0.318 | 0.022 | ##### |
| TRIM36    | ##### | 0.325637 | 0.408 | 0.026 | ##### |
| PTPN18    | ##### | 0.183499 | 0.343 | 0.026 | ##### |
| SLC12A9   | ##### | 0.266568 | 0.384 | 0.024 | ##### |
| SNX9      | ##### | 0.23658  | 0.377 | 0.026 | ##### |
| HELZ2     | ##### | 0.122115 | 0.38  | 0.05  | ##### |
| NAV1      | ##### | 0.296014 | 0.409 | 0.031 | ##### |
| RNF113A   | ##### | -0.11031 | 0.28  | 0.05  | ##### |
| RP11-505K | ##### | 0.239536 | 0.346 | 0.017 | ##### |
| VAMP7     | ##### | 0.127752 | 0.33  | 0.032 | ##### |
| AKT1      | ##### | 0.192668 | 0.389 | 0.038 | ##### |
| OPTN      | ##### | 0.178651 | 0.362 | 0.031 | ##### |
| GAN       | ##### | 0.268732 | 0.434 | 0.05  | ##### |

|          |       |          |       |       |       |
|----------|-------|----------|-------|-------|-------|
| TSC2     | ##### | 0.106642 | 0.353 | 0.046 | ##### |
| RRAS     | ##### | 0.3716   | 0.4   | 0.015 | ##### |
| CLCC1    | ##### | 0.183113 | 0.371 | 0.032 | ##### |
| APC2     | ##### | 0.317608 | 0.451 | 0.041 | ##### |
| ZNF385D  | ##### | 0.559375 | 0.478 | 0.017 | ##### |
| STK3     | ##### | -0.12552 | 0.279 | 0.056 | ##### |
| LDLR     | ##### | 0.16976  | 0.401 | 0.043 | ##### |
| POU3F3   | ##### | 0.192107 | 0.375 | 0.038 | ##### |
| CLN8     | ##### | -0.17477 | 0.285 | 0.063 | ##### |
| IL1RAP   | ##### | 0.604765 | 0.531 | 0.036 | ##### |
| C6orf120 | ##### | 0.414753 | 0.441 | 0.015 | ##### |
| ITGA3    | ##### | 0.338232 | 0.414 | 0.026 | ##### |
| DCLK1    | ##### | 0.42004  | 0.46  | 0.031 | ##### |
| LAMB2    | ##### | 0.17435  | 0.376 | 0.036 | ##### |
| EID2     | ##### | 0.203262 | 0.33  | 0.019 | ##### |
| RALGAPA2 | ##### | 0.265209 | 0.38  | 0.027 | ##### |
| OTUD5    | ##### | 0.18966  | 0.35  | 0.024 | ##### |
| TSPAN4   | ##### | 0.34204  | 0.412 | 0.022 | ##### |
| TOB2     | ##### | 0.245449 | 0.426 | 0.043 | ##### |
| SLC35F2  | ##### | 0.498665 | 0.465 | 0.017 | ##### |
| OAT      | ##### | -0.38754 | 0.294 | 0.104 | ##### |
| SMARCAD1 | ##### | 0.110424 | 0.299 | 0.026 | ##### |
| MLLT6    | ##### | 0.181426 | 0.345 | 0.032 | ##### |
| ADCK4    | ##### | 0.174871 | 0.381 | 0.041 | ##### |
| ANKRD35  | ##### | 0.334106 | 0.406 | 0.017 | ##### |
| ZNF770   | ##### | 0.260353 | 0.387 | 0.026 | ##### |
| NOL10    | ##### | 0.183826 | 0.367 | 0.031 | ##### |
| RANBP9   | ##### | 0.220639 | 0.379 | 0.032 | ##### |
| DHRS11   | ##### | 0.475008 | 0.448 | 0.01  | ##### |
| POM121   | ##### | 0.1316   | 0.346 | 0.036 | ##### |
| ADIPOR2  | ##### | 0.122541 | 0.349 | 0.036 | ##### |
| SGSM2    | ##### | 0.262582 | 0.387 | 0.029 | ##### |
| DIAPH1   | ##### | 0.298297 | 0.4   | 0.022 | ##### |
| NFAT5    | ##### | 0.128633 | 0.353 | 0.043 | ##### |
| XAB2     | ##### | 0.135237 | 0.403 | 0.056 | ##### |
| POU2F1   | ##### | 0.174138 | 0.371 | 0.034 | ##### |
| C11orf68 | ##### | 0.257298 | 0.377 | 0.021 | ##### |
| 9-Mar    | ##### | 0.147312 | 0.371 | 0.039 | ##### |
| NUS1     | ##### | 0.12446  | 0.362 | 0.039 | ##### |
| SYNE2    | ##### | 0.111783 | 0.346 | 0.044 | ##### |
| PSEN2    | ##### | 0.223211 | 0.361 | 0.024 | ##### |
| UGDH     | ##### | -0.11704 | 0.283 | 0.06  | ##### |
| KIF3B    | ##### | 0.498729 | 0.463 | 0.012 | ##### |
| FKBP1B   | ##### | 0.313781 | 0.377 | 0.012 | ##### |
| SPPL2A   | ##### | 0.151031 | 0.354 | 0.038 | ##### |
| SLC35F5  | ##### | 0.167459 | 0.364 | 0.034 | ##### |
| PQLC2    | ##### | 0.232937 | 0.371 | 0.027 | ##### |
| TGFB1    | ##### | 0.577177 | 0.485 | 0.009 | ##### |
| FAM69C   | ##### | 0.394847 | 0.412 | 0.014 | ##### |
| SLC25A25 | ##### | 0.159523 | 0.389 | 0.046 | ##### |
| FSTL1    | ##### | 0.373297 | 0.426 | 0.022 | ##### |

|          |       |          |       |       |       |
|----------|-------|----------|-------|-------|-------|
| PHF19    | ##### | -0.10476 | 0.329 | 0.065 | ##### |
| THAP4    | ##### | 0.356013 | 0.412 | 0.019 | ##### |
| TFE3     | ##### | 0.123539 | 0.316 | 0.027 | ##### |
| MESP1    | ##### | 0.458903 | 0.471 | 0.021 | ##### |
| SF3B3    | ##### | 0.122695 | 0.379 | 0.053 | ##### |
| DGCR2    | ##### | 0.178232 | 0.384 | 0.044 | ##### |
| CACNG8   | ##### | 0.201626 | 0.349 | 0.024 | ##### |
| STMN4    | ##### | -0.18383 | 0.422 | 0.132 | ##### |
| CLK4     | ##### | -0.14712 | 0.314 | 0.079 | ##### |
| KLHDC10  | ##### | 0.19792  | 0.361 | 0.034 | ##### |
| SUMF1    | ##### | 0.18309  | 0.33  | 0.026 | ##### |
| CLASP1   | ##### | 0.327205 | 0.434 | 0.038 | ##### |
| TNKS     | ##### | 0.373797 | 0.433 | 0.026 | ##### |
| UBR5     | ##### | 0.152667 | 0.343 | 0.032 | ##### |
| IER5     | ##### | 0.11074  | 0.355 | 0.039 | ##### |
| CCNDBP1  | ##### | 0.148733 | 0.34  | 0.032 | ##### |
| NELFB    | ##### | 0.354441 | 0.423 | 0.022 | ##### |
| LPIN2    | ##### | 0.249243 | 0.352 | 0.015 | ##### |
| PDXDC1   | ##### | 0.154763 | 0.356 | 0.034 | ##### |
| UBE20    | ##### | 0.306913 | 0.402 | 0.026 | ##### |
| SMC6     | ##### | 0.273068 | 0.392 | 0.029 | ##### |
| CDC27    | ##### | 0.372122 | 0.412 | 0.017 | ##### |
| TMEM184B | ##### | 0.201188 | 0.375 | 0.032 | ##### |
| ZNF160   | ##### | 0.198956 | 0.36  | 0.032 | ##### |
| FAM110B  | ##### | 0.233924 | 0.403 | 0.038 | ##### |
| YIPF2    | ##### | -0.17068 | 0.261 | 0.06  | ##### |
| SLC26A11 | ##### | 0.248164 | 0.361 | 0.022 | ##### |
| MXD4     | ##### | 0.400393 | 0.431 | 0.019 | ##### |
| HSPA1B   | ##### | -0.66248 | 0.417 | 0.222 | ##### |
| SDCCAG3  | ##### | 0.168723 | 0.326 | 0.024 | ##### |
| KDM5B    | ##### | 0.347574 | 0.422 | 0.027 | ##### |
| KCTD12   | ##### | 0.157527 | 0.344 | 0.029 | ##### |
| BCL2L12  | ##### | 0.263108 | 0.374 | 0.019 | ##### |
| RIN1     | ##### | 0.224805 | 0.372 | 0.027 | ##### |
| GTF3C1   | ##### | 0.168412 | 0.333 | 0.026 | ##### |
| SENP2    | ##### | 0.109389 | 0.322 | 0.032 | ##### |
| CYP20A1  | ##### | -0.27004 | 0.288 | 0.084 | ##### |
| RSBN1    | ##### | 0.244808 | 0.403 | 0.034 | ##### |
| RXRΒ     | ##### | 0.143237 | 0.345 | 0.031 | ##### |
| C1QA     | ##### | -0.62605 | 0.267 | 0.161 | ##### |
| ATM      | ##### | 0.164129 | 0.378 | 0.046 | ##### |
| KIAA2013 | ##### | 0.411512 | 0.432 | 0.019 | ##### |
| ZFP91    | ##### | 0.224925 | 0.348 | 0.021 | ##### |
| GAK      | ##### | 0.173602 | 0.342 | 0.027 | ##### |
| OSGEP    | ##### | -0.16381 | 0.324 | 0.075 | ##### |
| SCG3     | ##### | -0.48601 | 0.43  | 0.207 | ##### |
| AP5S1    | ##### | 0.222236 | 0.37  | 0.026 | ##### |
| HSPA1A   | ##### | -0.24462 | 0.494 | 0.157 | ##### |
| C16orf72 | ##### | 0.202229 | 0.343 | 0.022 | ##### |
| DID01    | ##### | 0.533981 | 0.49  | 0.017 | ##### |
| ZNRF1    | ##### | 0.466731 | 0.43  | 0.009 | ##### |



|           |       |          |       |       |       |
|-----------|-------|----------|-------|-------|-------|
| SRRT      | ##### | 0.138485 | 0.374 | 0.048 | ##### |
| CCDC58    | ##### | 0.348354 | 0.425 | 0.026 | ##### |
| ANXA1     | ##### | -1.14261 | 0.277 | 0.323 | ##### |
| MAU2      | ##### | 0.150735 | 0.362 | 0.038 | ##### |
| NUBP1     | ##### | 0.243675 | 0.399 | 0.034 | ##### |
| DOCK7     | ##### | 0.24625  | 0.401 | 0.038 | ##### |
| BOD1L1    | ##### | 0.112626 | 0.322 | 0.038 | ##### |
| IGF2BP3   | ##### | 0.305812 | 0.393 | 0.022 | ##### |
| SCAP      | ##### | 0.308619 | 0.402 | 0.024 | ##### |
| RBM12     | ##### | 0.145906 | 0.322 | 0.031 | ##### |
| MRI1      | ##### | 0.256738 | 0.392 | 0.031 | ##### |
| MGAT4B    | ##### | 0.455099 | 0.422 | 0.005 | ##### |
| CDC42EP1  | ##### | 0.493596 | 0.466 | 0.021 | ##### |
| TPPP3     | ##### | -0.26557 | 0.32  | 0.082 | ##### |
| GALNS     | ##### | 0.376491 | 0.422 | 0.021 | ##### |
| NTN1      | ##### | 0.348331 | 0.395 | 0.019 | ##### |
| SLC30A7   | ##### | 0.265344 | 0.387 | 0.027 | ##### |
| FBXL3     | ##### | 0.144755 | 0.362 | 0.041 | ##### |
| CDC42BPB  | ##### | 0.329194 | 0.384 | 0.015 | ##### |
| RP11-798M | ##### | -0.21296 | 0.267 | 0.067 | ##### |
| ZNF451    | ##### | 0.134824 | 0.361 | 0.039 | ##### |
| MAPRE3    | ##### | 0.145661 | 0.347 | 0.034 | ##### |
| ST6GALNAC | ##### | 0.212495 | 0.368 | 0.024 | ##### |
| AIFM1     | ##### | 0.187756 | 0.338 | 0.022 | ##### |
| LIPE-AS1  | ##### | 0.267781 | 0.376 | 0.024 | ##### |
| SRPK1     | ##### | 0.122439 | 0.349 | 0.031 | ##### |
| AGPAT3    | ##### | 0.304654 | 0.391 | 0.022 | ##### |
| MMD       | ##### | 0.307013 | 0.362 | 0.012 | ##### |
| FZR1      | ##### | 0.328329 | 0.427 | 0.031 | ##### |
| HIPK2     | ##### | 0.196836 | 0.384 | 0.039 | ##### |
| ABCA1     | ##### | 0.448899 | 0.503 | 0.055 | ##### |
| FAM208A   | ##### | 0.397059 | 0.418 | 0.017 | ##### |
| VPS26A    | ##### | -0.10306 | 0.294 | 0.06  | ##### |
| B9D1      | ##### | 0.117382 | 0.338 | 0.034 | ##### |
| LRRC4B    | ##### | 0.395408 | 0.421 | 0.015 | ##### |
| ZNF720    | ##### | 0.127428 | 0.349 | 0.039 | ##### |
| REV1      | ##### | 0.161394 | 0.374 | 0.039 | ##### |
| ITPR2     | ##### | 0.205884 | 0.346 | 0.026 | ##### |
| FLII      | ##### | 0.24528  | 0.373 | 0.022 | ##### |
| PRMT5     | ##### | -0.17296 | 0.32  | 0.082 | ##### |
| ARNT2     | ##### | 0.349147 | 0.41  | 0.017 | ##### |
| RFT1      | ##### | 0.167762 | 0.335 | 0.026 | ##### |
| UNC93B1   | ##### | 0.179238 | 0.329 | 0.021 | ##### |
| PRRT2     | ##### | 0.144022 | 0.325 | 0.032 | ##### |
| NFATC2IP  | ##### | 0.220425 | 0.365 | 0.027 | ##### |
| CTB-3102C | ##### | 0.307443 | 0.398 | 0.026 | ##### |
| BPNT1     | ##### | -0.11858 | 0.258 | 0.051 | ##### |
| SLC6A8    | ##### | 0.117765 | 0.332 | 0.034 | ##### |
| ADM       | ##### | -0.89718 | 0.253 | 0.152 | ##### |
| STOM      | ##### | -0.20577 | 0.25  | 0.06  | ##### |
| PPM1A     | ##### | 0.31749  | 0.394 | 0.019 | ##### |

|           |       |          |       |       |       |
|-----------|-------|----------|-------|-------|-------|
| NUFIP1    | ##### | -0.10365 | 0.278 | 0.043 | ##### |
| SMC2      | ##### | 0.178342 | 0.332 | 0.026 | ##### |
| TBCD      | ##### | 0.291555 | 0.374 | 0.017 | ##### |
| ASTN1     | ##### | 0.282503 | 0.392 | 0.027 | ##### |
| UBQLN2    | ##### | 0.312127 | 0.415 | 0.029 | ##### |
| CAPG      | ##### | -0.19211 | 0.295 | 0.084 | ##### |
| CDYL      | ##### | 0.534932 | 0.453 | 0.005 | ##### |
| HINT3     | ##### | 0.156382 | 0.374 | 0.044 | ##### |
| RAD17     | ##### | 0.114794 | 0.319 | 0.026 | ##### |
| IREB2     | ##### | 0.323344 | 0.403 | 0.024 | ##### |
| CHPF2     | ##### | 0.18678  | 0.351 | 0.032 | ##### |
| TYMS      | ##### | 0.217682 | 0.372 | 0.032 | ##### |
| DHX33     | ##### | 0.216074 | 0.361 | 0.026 | ##### |
| SIRPA     | ##### | 0.439255 | 0.46  | 0.026 | ##### |
| DHX40     | ##### | 0.392725 | 0.43  | 0.021 | ##### |
| HIST1H2AC | ##### | -0.20017 | 0.329 | 0.082 | ##### |
| PCGF5     | ##### | 0.101226 | 0.36  | 0.043 | ##### |
| ZNF639    | ##### | 0.296119 | 0.383 | 0.021 | ##### |
| GNA12     | ##### | 0.216457 | 0.387 | 0.039 | ##### |
| SPATA13   | ##### | 0.23155  | 0.392 | 0.039 | ##### |
| ESCO1     | ##### | 0.235767 | 0.362 | 0.024 | ##### |
| FBX03     | ##### | 0.20251  | 0.381 | 0.041 | ##### |
| ATF1      | ##### | -0.13359 | 0.268 | 0.053 | ##### |
| RPS6KB1   | ##### | 0.240564 | 0.371 | 0.022 | ##### |
| RPS6KA3   | ##### | 0.200577 | 0.336 | 0.026 | ##### |
| NRP1      | ##### | 0.335697 | 0.388 | 0.021 | ##### |
| SMAD4     | ##### | 0.251975 | 0.37  | 0.029 | ##### |
| STK39     | ##### | 0.31966  | 0.388 | 0.019 | ##### |
| C11orf24  | ##### | 0.2433   | 0.358 | 0.024 | ##### |
| TMSB15B   | ##### | 0.177753 | 0.357 | 0.032 | ##### |
| CTCF      | ##### | 0.326382 | 0.386 | 0.015 | ##### |
| FADD      | ##### | 0.429656 | 0.424 | 0.012 | ##### |
| NBN       | ##### | 0.258141 | 0.38  | 0.027 | ##### |
| SAP30L    | ##### | 0.264148 | 0.342 | 0.014 | ##### |
| RFWD2     | ##### | 0.256213 | 0.374 | 0.024 | ##### |
| RNF20     | ##### | 0.126584 | 0.339 | 0.038 | ##### |
| KIAA0232  | ##### | 0.34892  | 0.41  | 0.021 | ##### |
| HAGHL     | ##### | 0.214141 | 0.34  | 0.024 | ##### |
| TULP3     | ##### | 0.116837 | 0.35  | 0.044 | ##### |
| YY1AP1    | ##### | 0.150708 | 0.357 | 0.031 | ##### |
| PUS7L     | ##### | 0.14614  | 0.358 | 0.036 | ##### |
| EIF2B4    | ##### | 0.162287 | 0.37  | 0.039 | ##### |
| GPT2      | ##### | 0.157818 | 0.38  | 0.048 | ##### |
| PTPN11    | ##### | 0.287952 | 0.398 | 0.031 | ##### |
| RUFY2     | ##### | 0.338278 | 0.4   | 0.024 | ##### |
| TMEM243   | ##### | -0.35272 | 0.26  | 0.092 | ##### |
| SNTB2     | ##### | 0.16193  | 0.316 | 0.026 | ##### |
| MYL5      | ##### | 0.186754 | 0.324 | 0.024 | ##### |
| ZFAND1    | ##### | -0.13571 | 0.28  | 0.067 | ##### |
| PQLC1     | ##### | 0.289415 | 0.362 | 0.017 | ##### |
| PPP1R35   | ##### | 0.371829 | 0.427 | 0.026 | ##### |

|          |       |          |       |       |       |
|----------|-------|----------|-------|-------|-------|
| XRRA1    | ##### | 0.228583 | 0.395 | 0.041 | ##### |
| PTX3     | ##### | 0.392759 | 0.433 | 0.029 | ##### |
| PFKFB3   | ##### | 0.195387 | 0.401 | 0.053 | ##### |
| CNPY4    | ##### | 0.130634 | 0.318 | 0.031 | ##### |
| PDGFRA   | ##### | 0.636313 | 0.478 | 0.012 | ##### |
| ADAL     | ##### | 0.305908 | 0.392 | 0.021 | ##### |
| AGAP1    | ##### | 0.14896  | 0.337 | 0.032 | ##### |
| CNKSR3   | ##### | 0.563554 | 0.489 | 0.019 | ##### |
| AGFG1    | ##### | 0.271843 | 0.358 | 0.019 | ##### |
| CHERP    | ##### | 0.253271 | 0.376 | 0.029 | ##### |
| IMMP2L   | ##### | -0.14748 | 0.269 | 0.058 | ##### |
| ABCB8    | ##### | 0.200446 | 0.341 | 0.026 | ##### |
| DIRAS3   | ##### | -0.57085 | 0.327 | 0.162 | ##### |
| PHGDH    | ##### | -0.32615 | 0.393 | 0.145 | ##### |
| FAIM     | ##### | 0.212948 | 0.37  | 0.036 | ##### |
| CKAP2    | ##### | 0.265765 | 0.352 | 0.019 | ##### |
| LEMD2    | ##### | 0.296408 | 0.393 | 0.026 | ##### |
| VAC14    | ##### | 0.259212 | 0.358 | 0.017 | ##### |
| SLC25A46 | ##### | 0.11211  | 0.341 | 0.041 | ##### |
| STEAP3   | ##### | 0.179276 | 0.39  | 0.05  | ##### |
| RBM28    | ##### | 0.130121 | 0.354 | 0.039 | ##### |
| WDR12    | ##### | 0.177225 | 0.363 | 0.038 | ##### |
| SH3RF1   | ##### | 0.192687 | 0.355 | 0.032 | ##### |
| FAM129A  | ##### | 0.369731 | 0.409 | 0.024 | ##### |
| SIAH2    | ##### | 0.271424 | 0.378 | 0.026 | ##### |
| MED15    | ##### | 0.21142  | 0.367 | 0.034 | ##### |
| OPA1     | ##### | 0.232502 | 0.336 | 0.019 | ##### |
| MCM7     | ##### | -0.1169  | 0.334 | 0.079 | ##### |
| ZNF880   | ##### | 0.151276 | 0.37  | 0.046 | ##### |
| TOM1L2   | ##### | 0.19551  | 0.353 | 0.032 | ##### |
| DLC1     | ##### | 0.11218  | 0.357 | 0.046 | ##### |
| RNF2     | ##### | 0.275615 | 0.378 | 0.024 | ##### |
| ATG13    | ##### | 0.10972  | 0.295 | 0.024 | ##### |
| LAMP5    | ##### | 0.367313 | 0.412 | 0.022 | ##### |
| 5-Mar    | ##### | 0.160755 | 0.358 | 0.032 | ##### |
| GATAD2A  | ##### | 0.387836 | 0.412 | 0.015 | ##### |
| HK1      | ##### | 0.106542 | 0.342 | 0.041 | ##### |
| TCAIM    | ##### | 0.122485 | 0.298 | 0.026 | ##### |
| MEX3A    | ##### | 0.210626 | 0.36  | 0.034 | ##### |
| FBRS     | ##### | 0.102184 | 0.292 | 0.029 | ##### |
| LSS      | ##### | 0.10549  | 0.347 | 0.043 | ##### |
| ZNF7     | ##### | 0.108027 | 0.339 | 0.05  | ##### |
| SOX21    | ##### | 0.373531 | 0.431 | 0.031 | ##### |
| TRPM3    | ##### | 0.1793   | 0.369 | 0.038 | ##### |
| LRPPRC   | ##### | 0.291593 | 0.408 | 0.032 | ##### |
| ACAP2    | ##### | 0.192111 | 0.354 | 0.031 | ##### |
| PAK4     | ##### | 0.12847  | 0.32  | 0.031 | ##### |
| SPIN1    | ##### | 0.221202 | 0.368 | 0.032 | ##### |
| CD68     | ##### | -0.45098 | 0.219 | 0.089 | ##### |
| GPS2     | ##### | 0.131658 | 0.336 | 0.041 | ##### |
| NECAB3   | ##### | 0.363102 | 0.401 | 0.017 | ##### |

|          |       |          |       |       |       |
|----------|-------|----------|-------|-------|-------|
| IRAK1    | ##### | 0.174463 | 0.333 | 0.024 | ##### |
| MAP4K5   | ##### | 0.191466 | 0.357 | 0.034 | ##### |
| ATP13A1  | ##### | 0.29913  | 0.414 | 0.034 | ##### |
| ZC3H18   | ##### | 0.326417 | 0.384 | 0.017 | ##### |
| FUCA1    | ##### | 0.337976 | 0.386 | 0.017 | ##### |
| FAM126A  | ##### | 0.16345  | 0.355 | 0.038 | ##### |
| HCFC1    | ##### | 0.261199 | 0.357 | 0.022 | ##### |
| H2AFX    | ##### | 0.273165 | 0.377 | 0.024 | ##### |
| NBPF10   | ##### | 0.564862 | 0.484 | 0.017 | ##### |
| WHSC1    | ##### | 0.138348 | 0.332 | 0.038 | ##### |
| TXLNG    | ##### | -0.1083  | 0.266 | 0.043 | ##### |
| PDE4DIP  | ##### | -0.33636 | 0.377 | 0.147 | ##### |
| KCNMA1   | ##### | 0.106369 | 0.316 | 0.026 | ##### |
| EMC1     | ##### | 0.178044 | 0.349 | 0.036 | ##### |
| STX17    | ##### | 0.186676 | 0.348 | 0.029 | ##### |
| TANC1    | ##### | 0.336477 | 0.399 | 0.026 | ##### |
| DNAJC21  | ##### | 0.276567 | 0.361 | 0.017 | ##### |
| UBR4     | ##### | 0.191268 | 0.359 | 0.038 | ##### |
| NNT      | ##### | 0.112415 | 0.344 | 0.041 | ##### |
| CDK11A   | ##### | 0.172427 | 0.378 | 0.051 | ##### |
| GBP2     | ##### | -0.40192 | 0.273 | 0.094 | ##### |
| RHOQ     | ##### | 0.502712 | 0.451 | 0.014 | ##### |
| B3GALNT1 | ##### | 0.232051 | 0.389 | 0.038 | ##### |
| BOC      | ##### | 0.356724 | 0.399 | 0.019 | ##### |
| SAMD8    | ##### | 0.233116 | 0.381 | 0.032 | ##### |
| OPA3     | ##### | 0.126026 | 0.288 | 0.027 | ##### |
| LRRC37B  | ##### | 0.199648 | 0.343 | 0.029 | ##### |
| SETD3    | ##### | 0.206598 | 0.33  | 0.026 | ##### |
| DCAF6    | ##### | 0.19212  | 0.341 | 0.031 | ##### |
| LBR      | ##### | 0.11721  | 0.347 | 0.053 | ##### |
| RPP21    | ##### | -0.18958 | 0.244 | 0.058 | ##### |
| HS6ST1   | ##### | 0.391943 | 0.405 | 0.021 | ##### |
| PIAS2    | ##### | 0.165585 | 0.33  | 0.027 | ##### |
| MLLT4    | ##### | 0.27178  | 0.37  | 0.024 | ##### |
| SLC35B4  | ##### | 0.144361 | 0.348 | 0.041 | ##### |
| MACROD1  | ##### | 0.299613 | 0.37  | 0.021 | ##### |
| PTK2B    | ##### | 0.151611 | 0.33  | 0.029 | ##### |
| DPYSL4   | ##### | 0.352681 | 0.395 | 0.021 | ##### |
| ZFHX3    | ##### | 0.274323 | 0.376 | 0.026 | ##### |
| CHAMP1   | ##### | 0.306391 | 0.362 | 0.014 | ##### |
| C5orf28  | ##### | -0.1266  | 0.283 | 0.07  | ##### |
| SMYD2    | ##### | 0.107851 | 0.358 | 0.044 | ##### |
| RIOK1    | ##### | -0.106   | 0.264 | 0.046 | ##### |
| TNFSF12  | ##### | 0.104897 | 0.314 | 0.031 | ##### |
| SLC4A2   | ##### | 0.202113 | 0.346 | 0.029 | ##### |
| POM121C  | ##### | 0.136045 | 0.319 | 0.034 | ##### |
| ZNF280D  | ##### | 0.176559 | 0.314 | 0.021 | ##### |
| LIMK1    | ##### | 0.144786 | 0.318 | 0.032 | ##### |
| DDIT4    | ##### | -0.56069 | 0.405 | 0.198 | ##### |
| UBN1     | ##### | 0.411114 | 0.418 | 0.017 | ##### |
| METTL16  | ##### | 0.156953 | 0.316 | 0.027 | ##### |

|           |       |          |       |       |       |
|-----------|-------|----------|-------|-------|-------|
| EHMT1     | ##### | 0.22354  | 0.349 | 0.027 | ##### |
| ATF3      | ##### | -0.44269 | 0.318 | 0.13  | ##### |
| PPP2R5A   | ##### | 0.280311 | 0.384 | 0.026 | ##### |
| TEAD2     | ##### | 0.323704 | 0.365 | 0.014 | ##### |
| ANKRD26   | ##### | 0.252075 | 0.362 | 0.026 | ##### |
| SNRPN     | ##### | -1.15234 | 0.142 | 0.202 | ##### |
| UTP23     | ##### | 0.108655 | 0.317 | 0.032 | ##### |
| ZFP36     | ##### | -1.06303 | 0.384 | 0.431 | ##### |
| DNAJC30   | ##### | 0.157446 | 0.354 | 0.041 | ##### |
| ATAD3A    | ##### | 0.287653 | 0.397 | 0.031 | ##### |
| KIF22     | ##### | -0.33462 | 0.258 | 0.084 | ##### |
| ADCK3     | ##### | 0.165881 | 0.349 | 0.039 | ##### |
| C20orf194 | ##### | 0.195758 | 0.35  | 0.036 | ##### |
| RNMTL1    | ##### | 0.30899  | 0.372 | 0.019 | ##### |
| ZFP64     | ##### | 0.15505  | 0.273 | 0.015 | ##### |
| THOC3     | ##### | 0.278115 | 0.379 | 0.027 | ##### |
| CCDC6     | ##### | 0.275311 | 0.357 | 0.017 | ##### |
| GS1-124K5 | ##### | -0.1281  | 0.264 | 0.051 | ##### |
| PACS2     | ##### | 0.119002 | 0.294 | 0.026 | ##### |
| TRIP10    | ##### | 0.11968  | 0.308 | 0.034 | ##### |
| ZNF521    | ##### | 0.140519 | 0.315 | 0.026 | ##### |
| B4GALT4   | ##### | 0.124722 | 0.313 | 0.029 | ##### |
| DPP9      | ##### | 0.146089 | 0.335 | 0.032 | ##### |
| ARHGEF1   | ##### | 0.161553 | 0.374 | 0.05  | ##### |
| AC004158. | ##### | 0.123582 | 0.33  | 0.036 | ##### |
| KLHL20    | ##### | 0.159433 | 0.348 | 0.036 | ##### |
| PRPF18    | ##### | 0.151878 | 0.313 | 0.027 | ##### |
| KLHL5     | ##### | 0.35101  | 0.393 | 0.015 | ##### |
| ACSBG1    | ##### | 0.228274 | 0.4   | 0.043 | ##### |
| Clorf56   | ##### | 0.117387 | 0.394 | 0.056 | ##### |
| THSD1     | ##### | 0.464133 | 0.444 | 0.021 | ##### |
| RILPL2    | ##### | 0.167576 | 0.306 | 0.021 | ##### |
| REEP6     | ##### | 0.272837 | 0.351 | 0.019 | ##### |
| PHF21A    | ##### | 0.159239 | 0.321 | 0.026 | ##### |
| LSM14B    | ##### | 0.250693 | 0.348 | 0.019 | ##### |
| SOX8      | ##### | 0.189796 | 0.367 | 0.039 | ##### |
| TCF7L2    | ##### | 0.238812 | 0.352 | 0.022 | ##### |
| PCDHB16   | ##### | 0.275639 | 0.388 | 0.034 | ##### |
| RALGAPB   | ##### | 0.40041  | 0.406 | 0.012 | ##### |
| SLC12A2   | ##### | 0.170594 | 0.361 | 0.039 | ##### |
| PXDN      | ##### | 0.182607 | 0.348 | 0.027 | ##### |
| TMEM198   | ##### | 0.271833 | 0.368 | 0.024 | ##### |
| HMGXB3    | ##### | 0.274723 | 0.37  | 0.026 | ##### |
| CTBP2     | ##### | 0.137075 | 0.324 | 0.031 | ##### |
| MAP3K11   | ##### | 0.195512 | 0.341 | 0.031 | ##### |
| CXCL14    | ##### | -0.3167  | 0.327 | 0.113 | ##### |
| SPEN      | ##### | 0.204245 | 0.351 | 0.034 | ##### |
| NRBP2     | ##### | 0.399328 | 0.428 | 0.024 | ##### |
| CDCA7L    | ##### | -0.10127 | 0.313 | 0.065 | ##### |
| KDM4A     | ##### | 0.142509 | 0.305 | 0.029 | ##### |
| PEX26     | ##### | 0.141869 | 0.317 | 0.034 | ##### |

|           |       |          |       |       |       |
|-----------|-------|----------|-------|-------|-------|
| DHRS13    | ##### | 0.349968 | 0.387 | 0.019 | ##### |
| NCAPH2    | ##### | 0.121248 | 0.291 | 0.027 | ##### |
| NOC4L     | ##### | 0.244858 | 0.351 | 0.024 | ##### |
| PSMB10    | ##### | -0.13924 | 0.302 | 0.075 | ##### |
| XPO6      | ##### | 0.153302 | 0.316 | 0.022 | ##### |
| BAP1      | ##### | 0.171074 | 0.335 | 0.034 | ##### |
| ZNF577    | ##### | 0.176437 | 0.327 | 0.026 | ##### |
| PHF11     | ##### | 0.134703 | 0.285 | 0.021 | ##### |
| HEXDC     | ##### | 0.286813 | 0.349 | 0.015 | ##### |
| PIAS4     | ##### | 0.222464 | 0.348 | 0.024 | ##### |
| IRF1      | ##### | -0.40076 | 0.345 | 0.138 | ##### |
| VEGFB     | ##### | 0.209597 | 0.352 | 0.029 | ##### |
| SH3PXD2B  | ##### | 0.457005 | 0.427 | 0.014 | ##### |
| APBB2     | ##### | -0.10269 | 0.279 | 0.056 | ##### |
| PDGFD     | ##### | 0.565015 | 0.455 | 0.007 | ##### |
| MEN1      | ##### | 0.220105 | 0.34  | 0.022 | ##### |
| ZYG11B    | ##### | 0.271407 | 0.376 | 0.026 | ##### |
| PRKAB1    | ##### | 0.125709 | 0.312 | 0.032 | ##### |
| ZNF528    | ##### | 0.154649 | 0.33  | 0.029 | ##### |
| UBTD2     | ##### | 0.148651 | 0.291 | 0.017 | ##### |
| EML3      | ##### | 0.316594 | 0.367 | 0.015 | ##### |
| DENND5B   | ##### | 0.149613 | 0.293 | 0.019 | ##### |
| PACSIN2   | ##### | 0.1869   | 0.353 | 0.036 | ##### |
| BHLHE41   | ##### | 0.241727 | 0.393 | 0.048 | ##### |
| SLC20A1   | ##### | 0.301046 | 0.393 | 0.027 | ##### |
| VHL       | ##### | 0.276514 | 0.371 | 0.026 | ##### |
| ABHD17C   | ##### | 0.453117 | 0.418 | 0.012 | ##### |
| SLC9A3R1  | ##### | 0.291013 | 0.368 | 0.022 | ##### |
| FAM102A   | ##### | 0.144059 | 0.294 | 0.026 | ##### |
| AHSA2     | ##### | 0.139179 | 0.334 | 0.039 | ##### |
| LY96      | ##### | 0.156787 | 0.327 | 0.026 | ##### |
| SLC25A22  | ##### | 0.100959 | 0.3   | 0.031 | ##### |
| GPATCH11  | ##### | 0.204833 | 0.326 | 0.024 | ##### |
| NSMCE4A   | ##### | 0.161167 | 0.311 | 0.022 | ##### |
| CD99L2    | ##### | 0.161068 | 0.328 | 0.027 | ##### |
| CNOT11    | ##### | 0.303526 | 0.349 | 0.012 | ##### |
| BNIP1     | ##### | -0.17963 | 0.267 | 0.051 | ##### |
| MIER2     | ##### | 0.112775 | 0.314 | 0.034 | ##### |
| PIK3C3    | ##### | 0.176276 | 0.31  | 0.024 | ##### |
| ZNF821    | ##### | 0.143771 | 0.302 | 0.027 | ##### |
| PXN       | ##### | 0.361937 | 0.401 | 0.026 | ##### |
| EDEM3     | ##### | 0.19205  | 0.345 | 0.031 | ##### |
| METAP1D   | ##### | -0.10201 | 0.29  | 0.065 | ##### |
| SORBS1    | ##### | 0.374963 | 0.391 | 0.019 | ##### |
| SS18      | ##### | -0.20983 | 0.22  | 0.06  | ##### |
| NISCH     | ##### | 0.146158 | 0.317 | 0.032 | ##### |
| HTT       | ##### | 0.203028 | 0.318 | 0.022 | ##### |
| ZFP90     | ##### | 0.227003 | 0.331 | 0.026 | ##### |
| Clorf216  | ##### | 0.169083 | 0.324 | 0.029 | ##### |
| SNAPC3    | ##### | 0.11566  | 0.345 | 0.039 | ##### |
| RP11-66N1 | ##### | 0.147775 | 0.324 | 0.029 | ##### |

|           |       |          |       |       |       |
|-----------|-------|----------|-------|-------|-------|
| CDK2AP1   | ##### | 0.269291 | 0.341 | 0.015 | ##### |
| MCAT      | ##### | 0.36149  | 0.381 | 0.014 | ##### |
| TMEM175   | ##### | 0.217437 | 0.355 | 0.032 | ##### |
| ABHD13    | ##### | 0.177225 | 0.317 | 0.022 | ##### |
| PCOLCE2   | ##### | -0.24077 | 0.21  | 0.056 | ##### |
| FECH      | ##### | 0.185922 | 0.309 | 0.019 | ##### |
| STRN4     | ##### | 0.256081 | 0.339 | 0.019 | ##### |
| PALM      | ##### | 0.234526 | 0.338 | 0.024 | ##### |
| TMEM184C  | ##### | 0.139359 | 0.286 | 0.022 | ##### |
| RP11-111M | ##### | -0.10411 | 0.264 | 0.053 | ##### |
| SLC33A1   | ##### | 0.140346 | 0.31  | 0.031 | ##### |
| CWC22     | ##### | 0.112787 | 0.291 | 0.026 | ##### |
| ZNF561    | ##### | 0.159714 | 0.323 | 0.034 | ##### |
| SERINC2   | ##### | 0.662241 | 0.463 | 0.005 | ##### |
| KAT2A     | ##### | 0.238514 | 0.434 | 0.062 | ##### |
| TASP1     | ##### | 0.202658 | 0.318 | 0.024 | ##### |
| SLC4A3    | ##### | 0.211848 | 0.336 | 0.026 | ##### |
| SOBP      | ##### | 0.205771 | 0.361 | 0.034 | ##### |
| GNA11     | ##### | 0.257219 | 0.356 | 0.024 | ##### |
| KIAA0355  | ##### | 0.106014 | 0.344 | 0.051 | ##### |
| CACNG7    | ##### | 0.19884  | 0.322 | 0.026 | ##### |
| POLRMT    | ##### | 0.289508 | 0.405 | 0.039 | ##### |
| STX6      | ##### | 0.201338 | 0.339 | 0.029 | ##### |
| SLC39A13  | ##### | 0.290996 | 0.378 | 0.026 | ##### |
| ACAA2     | ##### | -0.30272 | 0.231 | 0.072 | ##### |
| KCTD13    | ##### | 0.230954 | 0.346 | 0.026 | ##### |
| RABL2B    | ##### | 0.146535 | 0.307 | 0.031 | ##### |
| FAM57A    | ##### | 0.324612 | 0.371 | 0.017 | ##### |
| ARMC7     | ##### | 0.156212 | 0.276 | 0.014 | ##### |
| ZNF281    | ##### | 0.132928 | 0.317 | 0.036 | ##### |
| SLC23A2   | ##### | 0.222233 | 0.332 | 0.024 | ##### |
| RABGAP1   | ##### | 0.216744 | 0.329 | 0.021 | ##### |
| DENND2A   | ##### | 0.168848 | 0.354 | 0.034 | ##### |
| OSMR      | ##### | 0.193615 | 0.332 | 0.027 | ##### |
| NACA2     | ##### | -0.99465 | 0.133 | 0.171 | ##### |
| SEH1L     | ##### | 0.12442  | 0.299 | 0.029 | ##### |
| PARD6A    | ##### | 0.14303  | 0.276 | 0.017 | ##### |
| RRP1B     | ##### | 0.367556 | 0.387 | 0.015 | ##### |
| POLR2D    | ##### | 0.116178 | 0.314 | 0.031 | ##### |
| SIK3      | ##### | 0.267489 | 0.351 | 0.019 | ##### |
| ASCC3     | ##### | 0.193398 | 0.33  | 0.029 | ##### |
| QRSL1     | ##### | 0.2015   | 0.324 | 0.022 | ##### |
| ELMOD1    | ##### | 0.471368 | 0.428 | 0.014 | ##### |
| RBM33     | ##### | 0.146889 | 0.328 | 0.029 | ##### |
| FTO       | ##### | 0.220088 | 0.339 | 0.024 | ##### |
| KDM2A     | ##### | 0.109136 | 0.301 | 0.027 | ##### |
| SATB2     | ##### | 0.166126 | 0.317 | 0.027 | ##### |
| PIP4K2B   | ##### | 0.194778 | 0.329 | 0.027 | ##### |
| ZNF121    | ##### | 0.174847 | 0.314 | 0.026 | ##### |
| ACACA     | ##### | 0.267233 | 0.324 | 0.014 | ##### |
| NACC2     | ##### | 0.396299 | 0.383 | 0.01  | ##### |

|           |       |          |       |       |       |
|-----------|-------|----------|-------|-------|-------|
| COL4A3BP  | ##### | 0.116579 | 0.32  | 0.036 | ##### |
| RP5-940J5 | ##### | -0.72114 | 0.195 | 0.133 | ##### |
| FAM168A   | ##### | 0.453913 | 0.431 | 0.017 | ##### |
| KCNMB4    | ##### | 0.287162 | 0.358 | 0.021 | ##### |
| LPGAT1    | ##### | 0.15449  | 0.299 | 0.021 | ##### |
| ITCH      | ##### | 0.163508 | 0.308 | 0.029 | ##### |
| FOXP1     | ##### | -0.90594 | 0.185 | 0.209 | ##### |
| AGRN      | ##### | 0.216088 | 0.329 | 0.026 | ##### |
| FAM58A    | ##### | 0.345258 | 0.374 | 0.014 | ##### |
| TRIM65    | ##### | 0.13285  | 0.269 | 0.019 | ##### |
| PPP4R1    | ##### | 0.130187 | 0.264 | 0.019 | ##### |
| MTHFD2    | ##### | -0.40003 | 0.27  | 0.111 | ##### |
| ASH2L     | ##### | 0.153135 | 0.333 | 0.032 | ##### |
| ALG2      | ##### | 0.243457 | 0.357 | 0.026 | ##### |
| FER       | ##### | 0.214974 | 0.319 | 0.019 | ##### |
| BACE1     | ##### | 0.128543 | 0.291 | 0.027 | ##### |
| CIC       | ##### | 0.194407 | 0.345 | 0.034 | ##### |
| SAMD1     | ##### | 0.244264 | 0.345 | 0.022 | ##### |
| IKBKB     | ##### | 0.135814 | 0.277 | 0.021 | ##### |
| MAP2K3    | ##### | 0.507582 | 0.432 | 0.012 | ##### |
| TBK1      | ##### | 0.180103 | 0.324 | 0.029 | ##### |
| MAPK7     | ##### | 0.228874 | 0.327 | 0.017 | ##### |
| PDP1      | ##### | 0.397257 | 0.398 | 0.024 | ##### |
| PRR3      | ##### | 0.128726 | 0.263 | 0.017 | ##### |
| ANKRD39   | ##### | 0.268207 | 0.356 | 0.027 | ##### |
| GRK6      | ##### | 0.212404 | 0.317 | 0.019 | ##### |
| HEXIM2    | ##### | 0.110067 | 0.282 | 0.026 | ##### |
| RUNDC1    | ##### | 0.21137  | 0.336 | 0.026 | ##### |
| ZNF652    | ##### | 0.189992 | 0.342 | 0.032 | ##### |
| SPIN2B    | ##### | 0.1485   | 0.309 | 0.026 | ##### |
| CEP104    | ##### | 0.251827 | 0.34  | 0.022 | ##### |
| ARFGEF1   | ##### | 0.473315 | 0.415 | 0.009 | ##### |
| TMEM255A  | ##### | 0.203765 | 0.352 | 0.034 | ##### |
| PCYT1A    | ##### | 0.129568 | 0.32  | 0.032 | ##### |
| C9orf116  | ##### | 0.22629  | 0.302 | 0.014 | ##### |
| CCDC80    | ##### | -0.14552 | 0.403 | 0.12  | ##### |
| C5orf51   | ##### | 0.236958 | 0.31  | 0.012 | ##### |
| PTK7      | ##### | 0.310102 | 0.363 | 0.019 | ##### |
| TP53I3    | ##### | 0.276683 | 0.354 | 0.022 | ##### |
| SDC4      | ##### | -0.12271 | 0.254 | 0.041 | ##### |
| PRKRIR    | ##### | 0.272955 | 0.333 | 0.017 | ##### |
| RPUSD1    | ##### | 0.242037 | 0.326 | 0.021 | ##### |
| ISYNA1    | ##### | 0.185235 | 0.308 | 0.024 | ##### |
| RAB3GAP1  | ##### | 0.103608 | 0.285 | 0.027 | ##### |
| EP400     | ##### | 0.178734 | 0.308 | 0.024 | ##### |
| CAPRIN2   | ##### | 0.381913 | 0.406 | 0.024 | ##### |
| CERS6     | ##### | 0.124381 | 0.256 | 0.015 | ##### |
| PPP2R5B   | ##### | 0.282435 | 0.388 | 0.029 | ##### |
| SESN3     | ##### | 0.305794 | 0.373 | 0.021 | ##### |
| BARD1     | ##### | 0.235413 | 0.351 | 0.026 | ##### |
| UBXN11    | ##### | -0.23435 | 0.247 | 0.079 | ##### |



|           |       |          |       |       |       |
|-----------|-------|----------|-------|-------|-------|
| PANK3     | ##### | 0.188432 | 0.32  | 0.021 | ##### |
| TMEM178A  | ##### | 0.15704  | 0.33  | 0.031 | ##### |
| FAR1      | ##### | 0.150969 | 0.305 | 0.022 | ##### |
| DDX39B    | ##### | 0.154717 | 0.28  | 0.021 | ##### |
| IVNS1ABP  | ##### | 0.215827 | 0.343 | 0.026 | ##### |
| SENP5     | ##### | 0.209946 | 0.335 | 0.027 | ##### |
| AFTPH     | ##### | 0.11428  | 0.298 | 0.031 | ##### |
| ANKRD52   | ##### | 0.152509 | 0.277 | 0.019 | ##### |
| IRF7      | ##### | 0.225459 | 0.335 | 0.026 | ##### |
| SLC10A4   | ##### | 0.424321 | 0.396 | 0.014 | ##### |
| YDJC      | ##### | 0.317553 | 0.374 | 0.021 | ##### |
| ADA       | ##### | 0.389322 | 0.371 | 0.009 | ##### |
| ST8SIA1   | ##### | 0.315168 | 0.389 | 0.029 | ##### |
| SLC43A2   | ##### | 0.216968 | 0.339 | 0.031 | ##### |
| TMEM245   | ##### | 0.108237 | 0.314 | 0.044 | ##### |
| INPPL1    | ##### | 0.360425 | 0.374 | 0.014 | ##### |
| DIRAS1    | ##### | 0.124817 | 0.322 | 0.038 | ##### |
| ASCL1     | ##### | 0.169249 | 0.394 | 0.062 | ##### |
| AAED1     | ##### | 0.266862 | 0.358 | 0.022 | ##### |
| ECE1      | ##### | -0.14368 | 0.248 | 0.062 | ##### |
| YTHDF3    | ##### | 0.141654 | 0.293 | 0.029 | ##### |
| NSMF      | ##### | 0.214494 | 0.335 | 0.027 | ##### |
| SLN       | ##### | -0.20959 | 0.435 | 0.13  | ##### |
| NPHP3     | ##### | 0.179221 | 0.332 | 0.038 | ##### |
| KLHL8     | ##### | 0.104452 | 0.31  | 0.041 | ##### |
| NLGN4X    | ##### | 0.191752 | 0.349 | 0.036 | ##### |
| AC007246. | ##### | 0.215985 | 0.334 | 0.029 | ##### |
| TSPAN12   | ##### | 0.102113 | 0.357 | 0.053 | ##### |
| CUEDC1    | ##### | 0.274913 | 0.33  | 0.015 | ##### |
| TOR2A     | ##### | 0.117984 | 0.283 | 0.027 | ##### |
| CACUL1    | ##### | 0.264124 | 0.355 | 0.026 | ##### |
| SMURF2    | ##### | 0.206764 | 0.322 | 0.026 | ##### |
| DCK       | ##### | 0.384048 | 0.395 | 0.015 | ##### |
| QSER1     | ##### | 0.301492 | 0.351 | 0.015 | ##### |
| SEZ6L     | ##### | 0.155941 | 0.402 | 0.067 | ##### |
| DUS3L     | ##### | 0.132385 | 0.318 | 0.039 | ##### |
| FGF1      | ##### | 0.12237  | 0.354 | 0.046 | ##### |
| LACTB2    | ##### | -0.12898 | 0.286 | 0.056 | ##### |
| CTD-3184A | ##### | 0.417888 | 0.403 | 0.012 | ##### |
| TCHP      | ##### | 0.12681  | 0.307 | 0.034 | ##### |
| PITX1     | ##### | 0.512569 | 0.428 | 0.009 | ##### |
| ERC1      | ##### | 0.181012 | 0.317 | 0.027 | ##### |
| FGGY      | ##### | -0.2295  | 0.194 | 0.048 | ##### |
| RP11-539L | ##### | -0.18862 | 0.22  | 0.048 | ##### |
| PUSL1     | ##### | 0.37888  | 0.378 | 0.01  | ##### |
| RBBP9     | ##### | 0.344164 | 0.367 | 0.012 | ##### |
| XPR1      | ##### | 0.14493  | 0.307 | 0.027 | ##### |
| TK2       | ##### | 0.187977 | 0.317 | 0.021 | ##### |
| ABHD8     | ##### | 0.347258 | 0.383 | 0.019 | ##### |
| CUL2      | ##### | 0.215361 | 0.306 | 0.019 | ##### |
| SSX2IP    | ##### | 0.40061  | 0.386 | 0.01  | ##### |

|          |       |          |       |       |       |
|----------|-------|----------|-------|-------|-------|
| GSPT2    | ##### | 0.313064 | 0.371 | 0.022 | ##### |
| CASP1    | ##### | -0.29313 | 0.262 | 0.08  | ##### |
| YLPM1    | ##### | 0.122917 | 0.285 | 0.027 | ##### |
| RFTN1    | ##### | 0.422756 | 0.396 | 0.014 | ##### |
| CYR61    | ##### | -0.57138 | 0.308 | 0.168 | ##### |
| TMEM209  | ##### | 0.231679 | 0.323 | 0.019 | ##### |
| UQCR11   | ##### | -1.97324 | 0.012 | 0.369 | ##### |
| SMARCD2  | ##### | 0.149289 | 0.271 | 0.014 | ##### |
| ATL3     | ##### | 0.194578 | 0.299 | 0.017 | ##### |
| EFR3A    | ##### | 0.343279 | 0.375 | 0.015 | ##### |
| POGLUT1  | ##### | 0.218671 | 0.324 | 0.021 | ##### |
| UBTD1    | ##### | 0.330091 | 0.373 | 0.019 | ##### |
| PIGQ     | ##### | 0.187078 | 0.3   | 0.021 | ##### |
| H2AFY2   | ##### | 0.439743 | 0.389 | 0.003 | ##### |
| METTL13  | ##### | 0.153101 | 0.301 | 0.027 | ##### |
| PIAS3    | ##### | 0.107777 | 0.27  | 0.024 | ##### |
| ROB02    | ##### | 0.343542 | 0.385 | 0.022 | ##### |
| ARL9     | ##### | 0.442661 | 0.393 | 0.012 | ##### |
| OSBP     | ##### | 0.12828  | 0.269 | 0.019 | ##### |
| PPFIA3   | ##### | 0.229895 | 0.321 | 0.019 | ##### |
| PEX14    | ##### | 0.103512 | 0.275 | 0.027 | ##### |
| TRIM16L  | ##### | 0.171321 | 0.27  | 0.014 | ##### |
| ZNF260   | ##### | 0.25551  | 0.329 | 0.015 | ##### |
| COQ2     | ##### | 0.239266 | 0.303 | 0.012 | ##### |
| SNX12    | ##### | 0.104872 | 0.297 | 0.031 | ##### |
| SAV1     | ##### | 0.137559 | 0.276 | 0.024 | ##### |
| ENKUR    | ##### | -0.21605 | 0.255 | 0.075 | ##### |
| SLC2A3   | ##### | -0.38023 | 0.238 | 0.096 | ##### |
| EPHA3    | ##### | 0.61319  | 0.442 | 0.002 | ##### |
| RNF185   | ##### | 0.138793 | 0.277 | 0.022 | ##### |
| WBSCR16  | ##### | 0.224029 | 0.32  | 0.021 | ##### |
| CREG1    | ##### | 0.288397 | 0.336 | 0.015 | ##### |
| TMEM136  | ##### | 0.113243 | 0.284 | 0.026 | ##### |
| COG2     | ##### | 0.159364 | 0.313 | 0.029 | ##### |
| TEFM     | ##### | 0.155563 | 0.303 | 0.026 | ##### |
| FAM131A  | ##### | 0.208963 | 0.335 | 0.029 | ##### |
| ZC3H7A   | ##### | 0.224074 | 0.317 | 0.022 | ##### |
| CDC37L1  | ##### | -0.13087 | 0.226 | 0.05  | ##### |
| CCDC92   | ##### | 0.158342 | 0.291 | 0.022 | ##### |
| ETV6     | ##### | 0.234999 | 0.345 | 0.026 | ##### |
| CCND1    | ##### | 0.106232 | 0.378 | 0.063 | ##### |
| ANKZF1   | ##### | 0.111361 | 0.327 | 0.043 | ##### |
| FAM122A  | ##### | 0.148219 | 0.29  | 0.024 | ##### |
| TRMU     | ##### | 0.182231 | 0.33  | 0.032 | ##### |
| CHST11   | ##### | 0.163992 | 0.315 | 0.027 | ##### |
| C16orf52 | ##### | 0.247012 | 0.313 | 0.017 | ##### |
| MFS3     | ##### | 0.354916 | 0.375 | 0.014 | ##### |
| CCZ1B    | ##### | 0.242797 | 0.326 | 0.021 | ##### |
| AP1G1    | ##### | 0.198199 | 0.321 | 0.021 | ##### |
| FOSL2    | ##### | 0.325596 | 0.401 | 0.038 | ##### |
| EGR2     | ##### | 0.161345 | 0.361 | 0.05  | ##### |

|         |       |          |       |       |       |
|---------|-------|----------|-------|-------|-------|
| CEP85L  | ##### | 0.133097 | 0.306 | 0.029 | ##### |
| CYB5R4  | ##### | 0.269265 | 0.33  | 0.014 | ##### |
| SLC35D2 | ##### | 0.361214 | 0.369 | 0.01  | ##### |
| LRRC23  | ##### | 0.201006 | 0.313 | 0.021 | ##### |
| PPP6R3  | ##### | 0.132715 | 0.309 | 0.034 | ##### |
| NCK2    | ##### | 0.462149 | 0.394 | 0.005 | ##### |
| TTYH2   | ##### | 0.413696 | 0.385 | 0.01  | ##### |
| SIPA1L2 | ##### | 0.235214 | 0.348 | 0.027 | ##### |
| FOXJ3   | ##### | 0.225291 | 0.333 | 0.027 | ##### |
| F8A1    | ##### | 0.441939 | 0.414 | 0.014 | ##### |
| CTSC    | ##### | -0.25202 | 0.235 | 0.068 | ##### |
| DUSP15  | ##### | 0.450741 | 0.403 | 0.009 | ##### |
| GLI4    | ##### | 0.122526 | 0.292 | 0.029 | ##### |
| AKAP1   | ##### | 0.132207 | 0.296 | 0.027 | ##### |
| MAK16   | ##### | 0.140888 | 0.266 | 0.017 | ##### |
| SETD2   | ##### | 0.297408 | 0.36  | 0.022 | ##### |
| UBE4A   | ##### | 0.288289 | 0.347 | 0.021 | ##### |
| REPS1   | ##### | 0.292167 | 0.365 | 0.024 | ##### |
| HERC4   | ##### | 0.183156 | 0.318 | 0.031 | ##### |
| OGDH    | ##### | 0.100138 | 0.279 | 0.027 | ##### |
| SLAIN2  | ##### | 0.330687 | 0.349 | 0.01  | ##### |
| ATP13A2 | ##### | 0.261143 | 0.365 | 0.027 | ##### |
| MKS1    | ##### | 0.135788 | 0.292 | 0.026 | ##### |
| NBAS    | ##### | 0.213215 | 0.31  | 0.015 | ##### |
| WIPF1   | ##### | 0.243993 | 0.339 | 0.024 | ##### |
| OTUD6B  | ##### | 0.161483 | 0.311 | 0.031 | ##### |
| BIVM    | ##### | 0.212107 | 0.305 | 0.017 | ##### |
| SMAP2   | ##### | 0.148024 | 0.272 | 0.019 | ##### |
| PPP6R2  | ##### | 0.339525 | 0.376 | 0.017 | ##### |
| EFEMP1  | ##### | -0.49407 | 0.387 | 0.193 | ##### |
| MLLT10  | ##### | 0.154571 | 0.292 | 0.022 | ##### |
| GMPR    | ##### | 0.127431 | 0.308 | 0.036 | ##### |
| LRRCC1  | ##### | 0.174936 | 0.32  | 0.027 | ##### |
| COG1    | ##### | 0.16698  | 0.292 | 0.026 | ##### |
| MYNN    | ##### | -0.18534 | 0.203 | 0.044 | ##### |
| TYRO3   | ##### | 0.364203 | 0.386 | 0.022 | ##### |
| SH3KBP1 | ##### | 0.166756 | 0.319 | 0.029 | ##### |
| NXPH1   | ##### | 0.255675 | 0.376 | 0.041 | ##### |
| CBLN4   | ##### | 0.450536 | 0.443 | 0.043 | ##### |
| FAM189B | ##### | 0.154524 | 0.292 | 0.024 | ##### |
| FBLIM1  | ##### | -0.14521 | 0.241 | 0.063 | ##### |
| SSBP3   | ##### | 0.172571 | 0.312 | 0.029 | ##### |
| KRI1    | ##### | 0.199132 | 0.301 | 0.021 | ##### |
| FADS2   | ##### | 0.358052 | 0.388 | 0.022 | ##### |
| USP7    | ##### | 0.223295 | 0.313 | 0.021 | ##### |
| ST3GAL2 | ##### | 0.216168 | 0.316 | 0.024 | ##### |
| GIT1    | ##### | 0.230582 | 0.308 | 0.014 | ##### |
| CDK13   | ##### | 0.150938 | 0.292 | 0.026 | ##### |
| CWF19L2 | ##### | 0.104099 | 0.317 | 0.041 | ##### |
| CNOT1   | ##### | 0.146473 | 0.298 | 0.027 | ##### |
| HPCAL1  | ##### | 0.253641 | 0.317 | 0.014 | ##### |

|           |       |          |       |       |       |
|-----------|-------|----------|-------|-------|-------|
| TLL1      | ##### | 0.139148 | 0.283 | 0.021 | ##### |
| PRKD3     | ##### | 0.210483 | 0.34  | 0.034 | ##### |
| SMAGP     | ##### | 0.124341 | 0.261 | 0.019 | ##### |
| POMT1     | ##### | 0.18996  | 0.354 | 0.041 | ##### |
| PARVB     | ##### | 0.225171 | 0.303 | 0.015 | ##### |
| SYDE1     | ##### | 0.167652 | 0.294 | 0.021 | ##### |
| SLC22A18  | ##### | 0.17856  | 0.302 | 0.021 | ##### |
| AGPAT2    | ##### | 0.461858 | 0.413 | 0.012 | ##### |
| RIMKLB    | ##### | 0.255115 | 0.35  | 0.027 | ##### |
| NAA35     | ##### | 0.183195 | 0.31  | 0.026 | ##### |
| JOSD1     | ##### | 0.334286 | 0.368 | 0.019 | ##### |
| SKI       | ##### | 0.189069 | 0.316 | 0.029 | ##### |
| ATG10     | ##### | 0.147583 | 0.302 | 0.027 | ##### |
| VCL       | ##### | 0.282802 | 0.345 | 0.021 | ##### |
| DBX2      | ##### | 0.219107 | 0.348 | 0.034 | ##### |
| C2orf68   | ##### | 0.143679 | 0.29  | 0.026 | ##### |
| ANGEL2    | ##### | 0.111302 | 0.293 | 0.029 | ##### |
| NRIP1     | ##### | 0.436334 | 0.389 | 0.01  | ##### |
| FAM221A   | ##### | -0.39865 | 0.264 | 0.108 | ##### |
| ZNF263    | ##### | 0.116768 | 0.275 | 0.026 | ##### |
| VAMP4     | ##### | -0.17624 | 0.229 | 0.063 | ##### |
| BEX2      | ##### | -0.83352 | 0.222 | 0.197 | ##### |
| CSTF2T    | ##### | 0.163009 | 0.282 | 0.017 | ##### |
| TSEN54    | ##### | 0.135035 | 0.291 | 0.026 | ##### |
| TREX1     | ##### | 0.235359 | 0.332 | 0.021 | ##### |
| CENPB     | ##### | 0.248399 | 0.318 | 0.014 | ##### |
| FUT8      | ##### | 0.230794 | 0.314 | 0.019 | ##### |
| SLC40A1   | ##### | 0.265685 | 0.326 | 0.015 | ##### |
| HPRT1     | ##### | -0.26253 | 0.201 | 0.063 | ##### |
| HS6ST2    | ##### | 0.364055 | 0.352 | 0.009 | ##### |
| GNPNAT1   | ##### | 0.212248 | 0.314 | 0.017 | ##### |
| AUTS2     | ##### | 0.305562 | 0.346 | 0.019 | ##### |
| IER5L     | ##### | 0.253366 | 0.337 | 0.024 | ##### |
| HERPUD2   | ##### | 0.213034 | 0.327 | 0.024 | ##### |
| LRRC27    | ##### | 0.140345 | 0.263 | 0.017 | ##### |
| PXN-AS1   | ##### | 0.12486  | 0.254 | 0.019 | ##### |
| ZCCHC7    | ##### | 0.165841 | 0.314 | 0.031 | ##### |
| CORO2B    | ##### | 0.380293 | 0.387 | 0.019 | ##### |
| MED1      | ##### | 0.220167 | 0.313 | 0.019 | ##### |
| PIGK      | ##### | -0.12488 | 0.253 | 0.056 | ##### |
| NOTCH3    | ##### | 0.237097 | 0.318 | 0.019 | ##### |
| NCOA3     | ##### | 0.289401 | 0.345 | 0.021 | ##### |
| LHFPL3    | ##### | 0.227603 | 0.328 | 0.026 | ##### |
| CRKL      | ##### | 0.181781 | 0.323 | 0.029 | ##### |
| STK32A    | ##### | 0.122021 | 0.272 | 0.022 | ##### |
| FAM199X   | ##### | 0.27866  | 0.345 | 0.019 | ##### |
| TRAFD1    | ##### | 0.115088 | 0.292 | 0.031 | ##### |
| RP11-262H | ##### | 0.183505 | 0.32  | 0.027 | ##### |
| EXD2      | ##### | 0.199624 | 0.304 | 0.024 | ##### |
| GTF2A1    | ##### | 0.182096 | 0.311 | 0.026 | ##### |
| ZNF217    | ##### | 0.269944 | 0.323 | 0.014 | ##### |

|           |       |          |       |       |       |
|-----------|-------|----------|-------|-------|-------|
| KLHDC8B   | ##### | 0.102295 | 0.263 | 0.022 | ##### |
| FGF14     | ##### | 0.168434 | 0.308 | 0.029 | ##### |
| MYH10     | ##### | 0.164024 | 0.323 | 0.034 | ##### |
| PACSIN3   | ##### | 0.254478 | 0.315 | 0.015 | ##### |
| ZFP14     | ##### | 0.119105 | 0.277 | 0.027 | ##### |
| EIF4EBP2  | ##### | 0.1096   | 0.27  | 0.027 | ##### |
| WRNIP1    | ##### | 0.24369  | 0.305 | 0.012 | ##### |
| CMIP      | ##### | 0.102514 | 0.274 | 0.026 | ##### |
| LIN7B     | ##### | 0.261655 | 0.335 | 0.022 | ##### |
| TRPS1     | ##### | 0.222027 | 0.343 | 0.031 | ##### |
| ENTPD3-AS | ##### | -0.13306 | 0.179 | 0.034 | ##### |
| IGF2R     | ##### | 0.22088  | 0.301 | 0.017 | ##### |
| MAN1C1    | ##### | 0.256913 | 0.316 | 0.014 | ##### |
| FEM1B     | ##### | 0.155967 | 0.285 | 0.026 | ##### |
| MAPK12    | ##### | 0.300088 | 0.314 | 0.009 | ##### |
| C17orf10C | ##### | 0.330041 | 0.339 | 0.01  | ##### |
| STX2      | ##### | 0.25397  | 0.317 | 0.015 | ##### |
| PHF10     | ##### | 0.104682 | 0.251 | 0.022 | ##### |
| SPG11     | ##### | 0.137443 | 0.286 | 0.026 | ##### |
| ATP13A3   | ##### | 0.304808 | 0.343 | 0.015 | ##### |
| ZNF354A   | ##### | 0.125372 | 0.273 | 0.021 | ##### |
| SMCR5     | ##### | 0.14008  | 0.257 | 0.021 | ##### |
| NAB1      | ##### | 0.26721  | 0.324 | 0.017 | ##### |
| PBX3      | ##### | 0.187365 | 0.289 | 0.019 | ##### |
| MGST2     | ##### | -0.12467 | 0.232 | 0.046 | ##### |
| MOGS      | ##### | 0.230478 | 0.322 | 0.022 | ##### |
| SLC35A2   | ##### | 0.277689 | 0.358 | 0.027 | ##### |
| FASN      | ##### | 0.430145 | 0.395 | 0.012 | ##### |
| TMEM108   | ##### | 0.202292 | 0.317 | 0.027 | ##### |
| SYNM      | ##### | 0.315736 | 0.355 | 0.017 | ##### |
| SPHK2     | ##### | 0.145341 | 0.31  | 0.034 | ##### |
| KIAA1109  | ##### | 0.16969  | 0.293 | 0.022 | ##### |
| NOC3L     | ##### | 0.126787 | 0.263 | 0.019 | ##### |
| CRTC3     | ##### | 0.227132 | 0.311 | 0.021 | ##### |
| RHBDF1    | ##### | 0.136372 | 0.263 | 0.014 | ##### |
| SHPRH     | ##### | 0.152268 | 0.296 | 0.026 | ##### |
| SFT2D2    | ##### | 0.256085 | 0.314 | 0.017 | ##### |
| RYK       | ##### | 0.194044 | 0.286 | 0.015 | ##### |
| ELK1      | ##### | 0.198301 | 0.278 | 0.012 | ##### |
| MSI1      | ##### | 0.257917 | 0.383 | 0.041 | ##### |
| ORAI3     | ##### | 0.157754 | 0.278 | 0.019 | ##### |
| TMOD2     | ##### | 0.225517 | 0.322 | 0.024 | ##### |
| CAB39     | ##### | 0.236907 | 0.332 | 0.024 | ##### |
| PGS1      | ##### | 0.243929 | 0.316 | 0.021 | ##### |
| CRTC1     | ##### | 0.103292 | 0.277 | 0.027 | ##### |
| SOCS4     | ##### | 0.145339 | 0.262 | 0.019 | ##### |
| GPR107    | ##### | 0.150466 | 0.281 | 0.021 | ##### |
| NFKBIE    | ##### | 0.157307 | 0.26  | 0.014 | ##### |
| MPP5      | ##### | 0.247843 | 0.305 | 0.014 | ##### |
| SESTD1    | ##### | 0.103992 | 0.283 | 0.026 | ##### |
| ZNF136    | ##### | -0.2103  | 0.217 | 0.048 | ##### |

|           |       |          |       |       |       |
|-----------|-------|----------|-------|-------|-------|
| DPP4      | ##### | 0.45194  | 0.385 | 0.005 | ##### |
| ETV4      | ##### | 0.145462 | 0.342 | 0.039 | ##### |
| TMEM214   | ##### | 0.169079 | 0.293 | 0.022 | ##### |
| FAM213B   | ##### | 0.150278 | 0.286 | 0.027 | ##### |
| CBFA2T2   | ##### | 0.247425 | 0.331 | 0.027 | ##### |
| SPA17     | ##### | -0.17933 | 0.193 | 0.044 | ##### |
| NDE1      | ##### | 0.120406 | 0.283 | 0.026 | ##### |
| USP46     | ##### | 0.302517 | 0.334 | 0.014 | ##### |
| TMEM121   | ##### | 0.266354 | 0.329 | 0.019 | ##### |
| DMRTA2    | ##### | 0.244661 | 0.341 | 0.029 | ##### |
| WDR70     | ##### | 0.115968 | 0.281 | 0.029 | ##### |
| MYH9      | ##### | 0.261261 | 0.324 | 0.019 | ##### |
| HINFP     | ##### | -0.14594 | 0.226 | 0.055 | ##### |
| CLCN7     | ##### | 0.40431  | 0.382 | 0.012 | ##### |
| PLEKHF2   | ##### | 0.127452 | 0.273 | 0.022 | ##### |
| CTU1      | ##### | 0.200478 | 0.304 | 0.021 | ##### |
| MAP2K4    | ##### | 0.195939 | 0.291 | 0.021 | ##### |
| ABCF3     | ##### | 0.203477 | 0.325 | 0.022 | ##### |
| QTRTD1    | ##### | 0.107275 | 0.274 | 0.024 | ##### |
| RGS3      | ##### | 0.270438 | 0.332 | 0.019 | ##### |
| ISG20     | ##### | -0.48923 | 0.19  | 0.096 | ##### |
| CBWD1     | ##### | -0.28526 | 0.227 | 0.087 | ##### |
| EHD2      | ##### | 0.289679 | 0.352 | 0.022 | ##### |
| CELSR2    | ##### | 0.260675 | 0.323 | 0.017 | ##### |
| ZBTB4     | ##### | 0.220932 | 0.321 | 0.022 | ##### |
| CTC-524C5 | ##### | 0.253775 | 0.304 | 0.012 | ##### |
| NLGN2     | ##### | 0.176011 | 0.279 | 0.017 | ##### |
| C6orf136  | ##### | 0.120149 | 0.269 | 0.022 | ##### |
| HMGCR     | ##### | 0.208325 | 0.338 | 0.032 | ##### |
| SEMA5A    | ##### | 0.124752 | 0.362 | 0.055 | ##### |
| FAM98B    | ##### | 0.129697 | 0.274 | 0.022 | ##### |
| TRIM4     | ##### | 0.20341  | 0.315 | 0.029 | ##### |
| DEDD      | ##### | 0.209769 | 0.3   | 0.021 | ##### |
| APTX      | ##### | 0.150678 | 0.296 | 0.027 | ##### |
| C9orf69   | ##### | 0.28704  | 0.324 | 0.012 | ##### |
| SNX10     | ##### | 0.37946  | 0.37  | 0.019 | ##### |
| CCDC71    | ##### | 0.205006 | 0.279 | 0.014 | ##### |
| CDKN2D    | ##### | 0.133441 | 0.285 | 0.027 | ##### |
| NPEPL1    | ##### | 0.100169 | 0.3   | 0.039 | ##### |
| PAQR4     | ##### | 0.284939 | 0.329 | 0.015 | ##### |
| H6PD      | ##### | 0.131365 | 0.275 | 0.021 | ##### |
| KATNB1    | ##### | 0.251814 | 0.33  | 0.024 | ##### |
| ANKRD9    | ##### | 0.270847 | 0.302 | 0.009 | ##### |
| TULP4     | ##### | 0.21546  | 0.308 | 0.021 | ##### |
| CASP7     | ##### | 0.158333 | 0.296 | 0.027 | ##### |
| CIB2      | ##### | 0.395664 | 0.355 | 0.003 | ##### |
| KIAA0100  | ##### | 0.195307 | 0.276 | 0.014 | ##### |
| SLC5A6    | ##### | 0.147161 | 0.295 | 0.029 | ##### |
| SH3BGR    | ##### | -0.37172 | 0.199 | 0.075 | ##### |
| LONRF2    | ##### | 0.363135 | 0.38  | 0.029 | ##### |
| FAM160A2  | ##### | 0.258358 | 0.328 | 0.024 | ##### |

|           |       |          |       |       |       |
|-----------|-------|----------|-------|-------|-------|
| ESRRA     | ##### | 0.195763 | 0.3   | 0.022 | ##### |
| ZFYVE19   | ##### | 0.200809 | 0.285 | 0.015 | ##### |
| TNKS1BP1  | ##### | 0.196875 | 0.296 | 0.017 | ##### |
| SIRT3     | ##### | 0.150614 | 0.301 | 0.034 | ##### |
| GOT1      | ##### | -0.33155 | 0.191 | 0.068 | ##### |
| TBC1D10B  | ##### | 0.209499 | 0.287 | 0.014 | ##### |
| CUL4A     | ##### | 0.281155 | 0.342 | 0.022 | ##### |
| RIOK2     | ##### | -0.10055 | 0.223 | 0.044 | ##### |
| GPSM2     | ##### | 0.126424 | 0.361 | 0.058 | ##### |
| PRKCI     | ##### | 0.219591 | 0.299 | 0.015 | ##### |
| PLXNA1    | ##### | 0.265824 | 0.317 | 0.017 | ##### |
| LACTB     | ##### | 0.121108 | 0.25  | 0.019 | ##### |
| UBFD1     | ##### | 0.223053 | 0.303 | 0.019 | ##### |
| DLEU1     | ##### | 0.153512 | 0.285 | 0.022 | ##### |
| TBC1D16   | ##### | 0.249194 | 0.312 | 0.017 | ##### |
| DUSP1     | ##### | -0.682   | 0.343 | 0.243 | ##### |
| DPH6      | ##### | 0.118363 | 0.289 | 0.031 | ##### |
| USP32     | ##### | 0.122712 | 0.262 | 0.024 | ##### |
| E4F1      | ##### | 0.148308 | 0.289 | 0.024 | ##### |
| MIR210HG  | ##### | 0.134014 | 0.304 | 0.038 | ##### |
| DNM1      | ##### | 0.248953 | 0.301 | 0.012 | ##### |
| LSAMP     | ##### | -0.31285 | 0.288 | 0.113 | ##### |
| ZC3H6     | ##### | 0.160163 | 0.288 | 0.029 | ##### |
| LMCD1     | ##### | 0.500609 | 0.402 | 0.015 | ##### |
| ZNF205    | ##### | 0.22176  | 0.31  | 0.019 | ##### |
| HCG18     | ##### | 0.241127 | 0.301 | 0.014 | ##### |
| CDK9      | ##### | 0.155595 | 0.283 | 0.024 | ##### |
| ZBED1     | ##### | 0.198412 | 0.299 | 0.019 | ##### |
| HPS3      | ##### | 0.161673 | 0.28  | 0.021 | ##### |
| EYA4      | ##### | 0.267421 | 0.309 | 0.012 | ##### |
| LINC00511 | ##### | 0.227123 | 0.349 | 0.032 | ##### |
| CDH6      | ##### | 0.27014  | 0.349 | 0.026 | ##### |
| LZTS1     | ##### | 0.108775 | 0.247 | 0.021 | ##### |
| SPIRE1    | ##### | 0.215428 | 0.323 | 0.026 | ##### |
| ABHD11    | ##### | 0.194919 | 0.323 | 0.032 | ##### |
| TMTC3     | ##### | 0.300834 | 0.339 | 0.017 | ##### |
| RASSF1    | ##### | -0.10493 | 0.229 | 0.043 | ##### |
| ZNF568    | ##### | -0.18536 | 0.217 | 0.055 | ##### |
| DMTF1     | ##### | 0.155004 | 0.311 | 0.036 | ##### |
| GLA       | ##### | -0.12468 | 0.209 | 0.046 | ##### |
| LRP6      | ##### | 0.212283 | 0.301 | 0.021 | ##### |
| TOMM70A   | ##### | 0.290229 | 0.323 | 0.014 | ##### |
| CTDSPL2   | ##### | 0.147285 | 0.292 | 0.021 | ##### |
| RP11-294J | ##### | 0.256649 | 0.348 | 0.031 | ##### |
| C5orf42   | ##### | 0.189647 | 0.303 | 0.026 | ##### |
| GNB5      | ##### | 0.324026 | 0.351 | 0.017 | ##### |
| SRD5A3    | ##### | 0.181738 | 0.293 | 0.021 | ##### |
| MFSD5     | ##### | 0.284066 | 0.307 | 0.009 | ##### |
| MPHOSPH9  | ##### | 0.100046 | 0.288 | 0.038 | ##### |
| IPO13     | ##### | 0.148843 | 0.255 | 0.019 | ##### |
| HMG20A    | ##### | 0.152565 | 0.286 | 0.024 | ##### |

|           |       |          |       |       |       |
|-----------|-------|----------|-------|-------|-------|
| RP13-1032 | ##### | 0.271524 | 0.294 | 0.01  | ##### |
| MIR22HG   | ##### | -0.23033 | 0.181 | 0.039 | ##### |
| PIP5K1C   | ##### | 0.184477 | 0.295 | 0.024 | ##### |
| ZFHX4-AS1 | ##### | 0.101113 | 0.242 | 0.024 | ##### |
| TMEM185A  | ##### | 0.155968 | 0.263 | 0.019 | ##### |
| NUMBL     | ##### | 0.323465 | 0.349 | 0.015 | ##### |
| TEAD4     | ##### | 0.152306 | 0.255 | 0.015 | ##### |
| GDAP1     | ##### | -0.2935  | 0.231 | 0.068 | ##### |
| BYSL      | ##### | 0.148459 | 0.267 | 0.017 | ##### |
| GCFC2     | ##### | 0.191655 | 0.293 | 0.021 | ##### |
| RAB40B    | ##### | 0.233301 | 0.286 | 0.012 | ##### |
| SIN3B     | ##### | 0.116037 | 0.283 | 0.032 | ##### |
| SLC38A6   | ##### | -0.10373 | 0.207 | 0.039 | ##### |
| RNPEPL1   | ##### | 0.236814 | 0.301 | 0.017 | ##### |
| DXO       | ##### | 0.17009  | 0.305 | 0.029 | ##### |
| GIT2      | ##### | 0.158098 | 0.275 | 0.022 | ##### |
| RASSF8    | ##### | 0.280827 | 0.342 | 0.024 | ##### |
| ACSF3     | ##### | 0.182733 | 0.299 | 0.027 | ##### |
| CHST3     | ##### | 0.254053 | 0.298 | 0.012 | ##### |
| ZFC3H1    | ##### | 0.218363 | 0.305 | 0.019 | ##### |
| POGK      | ##### | 0.332295 | 0.337 | 0.01  | ##### |
| PLEKHH3   | ##### | 0.188076 | 0.291 | 0.019 | ##### |
| GPR162    | ##### | 0.182762 | 0.3   | 0.022 | ##### |
| METTL3    | ##### | -0.10407 | 0.282 | 0.067 | ##### |
| FAM76B    | ##### | 0.221903 | 0.301 | 0.019 | ##### |
| MCM3AP    | ##### | 0.181333 | 0.298 | 0.022 | ##### |
| NADK2     | ##### | 0.269069 | 0.337 | 0.022 | ##### |
| PCOLCE    | ##### | -0.13586 | 0.204 | 0.041 | ##### |
| HOMER2    | ##### | 0.110826 | 0.253 | 0.019 | ##### |
| KDM2B     | ##### | 0.214517 | 0.291 | 0.015 | ##### |
| CBL       | ##### | 0.20466  | 0.286 | 0.017 | ##### |
| EEF1G     | ##### | -0.33612 | 0.15  | 0.063 | ##### |
| ABHD5     | ##### | -0.1885  | 0.19  | 0.044 | ##### |
| BCL7A     | ##### | 0.239249 | 0.307 | 0.019 | ##### |
| LOXL1     | ##### | 0.512293 | 0.398 | 0.005 | ##### |
| ABHD3     | ##### | 0.17042  | 0.315 | 0.032 | ##### |
| MAP6      | ##### | 0.285473 | 0.309 | 0.009 | ##### |
| CEP78     | ##### | 0.191226 | 0.275 | 0.015 | ##### |
| AEBP1     | ##### | -0.1531  | 0.241 | 0.058 | ##### |
| ACOX2     | ##### | 0.131493 | 0.24  | 0.014 | ##### |
| ZDHHC7    | ##### | 0.232856 | 0.313 | 0.024 | ##### |
| EPAS1     | ##### | -0.13253 | 0.263 | 0.058 | ##### |
| NIN       | ##### | 0.202891 | 0.289 | 0.019 | ##### |
| ANKRD13C  | ##### | 0.180733 | 0.295 | 0.026 | ##### |
| ZBTB22    | ##### | 0.159276 | 0.273 | 0.019 | ##### |
| RP11-698N | ##### | -0.17336 | 0.217 | 0.05  | ##### |
| GPALPP1   | ##### | 0.15576  | 0.302 | 0.034 | ##### |
| NUP88     | ##### | 0.187788 | 0.288 | 0.019 | ##### |
| KAT8      | ##### | 0.111636 | 0.286 | 0.038 | ##### |
| RASGRP1   | ##### | 0.345741 | 0.339 | 0.012 | ##### |
| DPY19L4   | ##### | 0.124141 | 0.273 | 0.026 | ##### |



|           |       |          |       |       |       |
|-----------|-------|----------|-------|-------|-------|
| APBA3     | ##### | 0.117268 | 0.275 | 0.027 | ##### |
| DCAF15    | ##### | 0.195445 | 0.294 | 0.021 | ##### |
| ASNS      | ##### | -0.25996 | 0.259 | 0.085 | ##### |
| STXBP1    | ##### | 0.109326 | 0.257 | 0.029 | ##### |
| RP11-421L | ##### | -0.11718 | 0.199 | 0.036 | ##### |
| ELOVL6    | ##### | 0.282762 | 0.314 | 0.014 | ##### |
| RFNG      | ##### | 0.199993 | 0.306 | 0.026 | ##### |
| ACSS2     | ##### | 0.213506 | 0.273 | 0.014 | ##### |
| KLHL12    | ##### | 0.128048 | 0.254 | 0.021 | ##### |
| STK32C    | ##### | 0.148768 | 0.277 | 0.017 | ##### |
| SNHG10    | ##### | 0.130911 | 0.285 | 0.029 | ##### |
| POLR3E    | ##### | 0.152954 | 0.279 | 0.026 | ##### |
| IRF2BP1   | ##### | 0.30143  | 0.333 | 0.017 | ##### |
| GAB1      | ##### | 0.221341 | 0.316 | 0.026 | ##### |
| PACS1     | ##### | 0.156952 | 0.265 | 0.019 | ##### |
| CALCOCO1  | ##### | 0.140297 | 0.307 | 0.039 | ##### |
| KDM5C     | ##### | 0.191698 | 0.299 | 0.024 | ##### |
| IKBKG     | ##### | 0.267479 | 0.325 | 0.019 | ##### |
| ATP6V0A2  | ##### | 0.210795 | 0.276 | 0.014 | ##### |
| TP53BP2   | ##### | 0.126    | 0.294 | 0.036 | ##### |
| MEX3C     | ##### | 0.242865 | 0.327 | 0.027 | ##### |
| FN1       | ##### | -0.14432 | 0.255 | 0.055 | ##### |
| BBS7      | ##### | 0.152513 | 0.267 | 0.022 | ##### |
| PARN      | ##### | 0.132905 | 0.268 | 0.024 | ##### |
| KLF13     | ##### | 0.223278 | 0.302 | 0.021 | ##### |
| ITSN2     | ##### | 0.274425 | 0.318 | 0.014 | ##### |
| RP11-161M | ##### | 0.190237 | 0.313 | 0.027 | ##### |
| MYBBP1A   | ##### | 0.147796 | 0.253 | 0.019 | ##### |
| CCNY      | ##### | 0.188809 | 0.272 | 0.015 | ##### |
| TP53BP1   | ##### | 0.257745 | 0.315 | 0.019 | ##### |
| INTS3     | ##### | 0.235942 | 0.334 | 0.031 | ##### |
| SUN2      | ##### | 0.154681 | 0.302 | 0.032 | ##### |
| RPGRIP1L  | ##### | -0.11752 | 0.19  | 0.029 | ##### |
| MEIS1     | ##### | 0.128654 | 0.297 | 0.034 | ##### |
| MAP2K5    | ##### | 0.213788 | 0.285 | 0.015 | ##### |
| KLHL13    | ##### | 0.315574 | 0.321 | 0.009 | ##### |
| ITPK1     | ##### | 0.140606 | 0.302 | 0.034 | ##### |
| MTFMT     | ##### | 0.228087 | 0.286 | 0.014 | ##### |
| TRIM25    | ##### | 0.23315  | 0.294 | 0.017 | ##### |
| TAF2      | ##### | 0.125863 | 0.248 | 0.022 | ##### |
| INPP5K    | ##### | 0.15798  | 0.27  | 0.019 | ##### |
| ZNF768    | ##### | 0.26092  | 0.304 | 0.015 | ##### |
| CTBS      | ##### | 0.26238  | 0.313 | 0.017 | ##### |
| CHST8     | ##### | 0.281495 | 0.33  | 0.021 | ##### |
| IL13RA1   | ##### | 0.339016 | 0.332 | 0.009 | ##### |
| AKAP17A   | ##### | 0.281751 | 0.324 | 0.017 | ##### |
| CREB3L1   | ##### | 0.275008 | 0.302 | 0.012 | ##### |
| VPS33A    | ##### | 0.137264 | 0.266 | 0.022 | ##### |
| HOXD11    | ##### | 0.197081 | 0.291 | 0.019 | ##### |
| RBL2      | ##### | 0.142412 | 0.293 | 0.031 | ##### |
| SLC2A8    | ##### | 0.256807 | 0.312 | 0.015 | ##### |

|           |       |          |       |       |          |
|-----------|-------|----------|-------|-------|----------|
| PLK3      | ##### | 0.132088 | 0.295 | 0.043 | #####    |
| ADCK2     | ##### | 0.236489 | 0.305 | 0.015 | #####    |
| CPT2      | ##### | 0.1453   | 0.278 | 0.027 | #####    |
| PCGF3     | ##### | 0.179358 | 0.264 | 0.017 | #####    |
| DIP2B     | ##### | 0.219804 | 0.291 | 0.019 | #####    |
| DHODH     | ##### | -0.13752 | 0.211 | 0.038 | #####    |
| LINC00936 | ##### | 0.117226 | 0.26  | 0.026 | #####    |
| EPB41L1   | ##### | 0.317582 | 0.317 | 0.009 | #####    |
| PRRT3     | ##### | 0.138482 | 0.233 | 0.014 | #####    |
| NKAIN3    | ##### | 0.38724  | 0.364 | 0.019 | #####    |
| SLC35E3   | ##### | -0.15289 | 0.261 | 0.072 | #####    |
| SPATA2L   | ##### | 0.184581 | 0.277 | 0.019 | #####    |
| CPXM1     | ##### | 0.326946 | 0.339 | 0.019 | #####    |
| IRF9      | ##### | -0.23323 | 0.244 | 0.068 | #####    |
| B4GALT2   | ##### | 0.13594  | 0.25  | 0.021 | #####    |
| TFB1M     | ##### | 0.153983 | 0.252 | 0.017 | #####    |
| RP11-25K1 | ##### | 0.311722 | 0.327 | 0.014 | #####    |
| TTI1      | ##### | 0.152812 | 0.267 | 0.022 | #####    |
| ZNF692    | ##### | 0.121961 | 0.277 | 0.032 | #####    |
| LPCAT1    | ##### | 0.216732 | 0.336 | 0.038 | #####    |
| UPF1      | ##### | 0.182202 | 0.272 | 0.017 | #####    |
| PMS1      | ##### | 0.137822 | 0.286 | 0.027 | #####    |
| RRN3      | ##### | -0.13245 | 0.227 | 0.055 | #####    |
| ID1       | ##### | 0.610181 | 0.424 | 0.027 | #####    |
| PML       | ##### | 0.137745 | 0.268 | 0.022 | #####    |
| SLC35A3   | ##### | 0.104398 | 0.275 | 0.034 | #####    |
| C7orf26   | ##### | 0.162331 | 0.276 | 0.022 | #####    |
| SCRIB     | ##### | 0.205164 | 0.303 | 0.024 | #####    |
| PRPS2     | ##### | 0.171147 | 0.263 | 0.015 | #####    |
| STAM      | ##### | 0.119153 | 0.235 | 0.015 | #####    |
| COL22A1   | ##### | 0.40031  | 0.355 | 0.014 | #####    |
| FAM161A   | ##### | 0.114928 | 0.26  | 0.026 | #####    |
| EVA1C     | ##### | 0.174209 | 0.288 | 0.024 | #####    |
| N4BP2     | ##### | 0.181883 | 0.286 | 0.022 | #####    |
| HAUS2     | ##### | 0.217665 | 0.266 | 0.01  | 1.18E-99 |
| TMEM47    | ##### | 0.174446 | 0.292 | 0.026 | 1.19E-99 |
| NBL1      | ##### | 0.379519 | 0.358 | 0.012 | 1.20E-99 |
| ULK3      | ##### | 0.190616 | 0.313 | 0.031 | 1.31E-99 |
| ALG12     | ##### | 0.225541 | 0.276 | 0.014 | 2.08E-99 |
| B9D2      | ##### | 0.101611 | 0.242 | 0.024 | 2.35E-99 |
| ZNF667    | ##### | -0.12665 | 0.208 | 0.055 | 2.87E-99 |
| CACNB4    | ##### | 0.182961 | 0.272 | 0.015 | 2.97E-99 |
| GALC      | ##### | 0.152275 | 0.263 | 0.021 | 3.09E-99 |
| LRRC4C    | ##### | -0.22524 | 0.2   | 0.056 | 4.12E-99 |
| LPIN1     | ##### | 0.108285 | 0.273 | 0.034 | 4.22E-99 |
| SLC39A9   | ##### | 0.226302 | 0.273 | 0.014 | 4.53E-99 |
| DOK1      | ##### | 0.224036 | 0.285 | 0.017 | 5.42E-99 |
| NUDT15    | ##### | -0.11149 | 0.207 | 0.041 | 7.38E-99 |
| PWWP2A    | ##### | 0.13978  | 0.277 | 0.029 | 8.41E-99 |
| SAYS1     | ##### | 0.16366  | 0.261 | 0.017 | 8.52E-99 |
| FAM120C   | ##### | 0.138974 | 0.232 | 0.014 | 1.05E-98 |

|          |       |          |       |       |          |
|----------|-------|----------|-------|-------|----------|
| TMEM57   | ##### | 0.249084 | 0.305 | 0.021 | 1.07E-98 |
| MDGA1    | ##### | 0.418186 | 0.358 | 0.003 | 1.08E-98 |
| MSANTD3  | ##### | 0.160883 | 0.258 | 0.021 | 1.21E-98 |
| BTBD2    | ##### | 0.276584 | 0.312 | 0.015 | 1.21E-98 |
| EPS15    | ##### | 0.225138 | 0.313 | 0.026 | 1.30E-98 |
| CTNS     | ##### | 0.116393 | 0.228 | 0.014 | 1.31E-98 |
| LIMD1    | ##### | 0.213787 | 0.283 | 0.021 | 1.38E-98 |
| GSG1L    | ##### | -0.17476 | 0.211 | 0.05  | 1.66E-98 |
| ZNF704   | ##### | 0.191774 | 0.302 | 0.031 | 1.76E-98 |
| GJC1     | ##### | 0.1807   | 0.254 | 0.017 | 1.80E-98 |
| DCLRE1C  | ##### | 0.208271 | 0.308 | 0.021 | 1.81E-98 |
| CRADD    | ##### | 0.194176 | 0.283 | 0.021 | 1.91E-98 |
| SMG7     | ##### | 0.191363 | 0.269 | 0.017 | 1.98E-98 |
| ALG1     | ##### | 0.171073 | 0.261 | 0.017 | 2.14E-98 |
| ELP3     | ##### | 0.103909 | 0.257 | 0.026 | 2.56E-98 |
| FIGN     | ##### | 0.199121 | 0.295 | 0.027 | 3.00E-98 |
| VPS8     | ##### | 0.161144 | 0.267 | 0.022 | 3.03E-98 |
| SERPING1 | ##### | -1.16966 | 0.113 | 0.186 | 3.48E-98 |
| BRF1     | ##### | 0.141609 | 0.269 | 0.022 | 3.55E-98 |
| DCHS1    | ##### | 0.232672 | 0.289 | 0.014 | 3.60E-98 |
| IFI44    | ##### | -0.18707 | 0.249 | 0.07  | 4.63E-98 |
| UBQLN4   | ##### | 0.117656 | 0.256 | 0.024 | 4.72E-98 |
| CUL4B    | ##### | 0.12228  | 0.245 | 0.017 | 4.93E-98 |
| TM4SF1   | ##### | 0.122895 | 0.278 | 0.027 | 5.61E-98 |
| BIN1     | ##### | 0.288086 | 0.327 | 0.017 | 7.38E-98 |
| LDOC1L   | ##### | 0.256542 | 0.295 | 0.012 | 7.39E-98 |
| MF12-AS1 | ##### | 0.14925  | 0.25  | 0.017 | 7.43E-98 |
| LRRC16A  | ##### | 0.35738  | 0.359 | 0.019 | 7.69E-98 |
| NOA1     | ##### | 0.255773 | 0.294 | 0.012 | 7.80E-98 |
| FAM134C  | ##### | 0.104916 | 0.258 | 0.029 | 8.57E-98 |
| ABR      | ##### | 0.190777 | 0.307 | 0.032 | 8.95E-98 |
| MEOX2    | ##### | -0.11883 | 0.28  | 0.072 | 9.13E-98 |
| GFAP     | ##### | -0.80527 | 0.356 | 0.304 | 9.92E-98 |
| DNAJB4   | ##### | -0.18856 | 0.182 | 0.048 | 9.98E-98 |
| MFN1     | ##### | 0.124109 | 0.262 | 0.017 | 9.98E-98 |
| TNFAIP6  | ##### | -0.58385 | 0.232 | 0.123 | 1.08E-97 |
| SOX5     | ##### | 0.156227 | 0.261 | 0.022 | 1.09E-97 |
| SLC2A10  | ##### | 0.258713 | 0.298 | 0.014 | 1.20E-97 |
| ANKRD37  | ##### | -0.10022 | 0.204 | 0.038 | 1.20E-97 |
| KIF3C    | ##### | 0.144349 | 0.262 | 0.026 | 1.38E-97 |
| PHYHIPL  | ##### | -0.32311 | 0.321 | 0.15  | 1.41E-97 |
| MIB1     | ##### | 0.196518 | 0.279 | 0.017 | 1.43E-97 |
| KLC2     | ##### | 0.306654 | 0.323 | 0.015 | 1.73E-97 |
| EPHA4    | ##### | 0.231575 | 0.296 | 0.022 | 1.80E-97 |
| FXN      | ##### | 0.207377 | 0.272 | 0.014 | 2.23E-97 |
| TYK2     | ##### | 0.222118 | 0.323 | 0.036 | 2.91E-97 |
| KLHL36   | ##### | 0.191229 | 0.255 | 0.012 | 3.14E-97 |
| LONRF1   | ##### | 0.2745   | 0.309 | 0.015 | 3.77E-97 |
| GZF1     | ##### | 0.165348 | 0.251 | 0.015 | 3.95E-97 |
| TAB2     | ##### | 0.254587 | 0.294 | 0.012 | 3.96E-97 |
| GLS      | ##### | 0.26969  | 0.312 | 0.019 | 4.12E-97 |

|           |          |          |       |       |          |
|-----------|----------|----------|-------|-------|----------|
| FBXW7     | #####    | 0.258776 | 0.316 | 0.021 | 4.22E-97 |
| MICALL2   | #####    | 0.104519 | 0.241 | 0.022 | 4.33E-97 |
| RALGAPA1  | #####    | 0.186035 | 0.295 | 0.026 | 4.54E-97 |
| RRAS2     | #####    | 0.19476  | 0.266 | 0.015 | 4.69E-97 |
| TSPAN14   | #####    | 0.23649  | 0.288 | 0.015 | 5.16E-97 |
| NAA16     | #####    | 0.157608 | 0.279 | 0.027 | 5.72E-97 |
| WDR59     | #####    | 0.188266 | 0.285 | 0.024 | 5.84E-97 |
| METTL6    | #####    | 0.151929 | 0.273 | 0.024 | 6.48E-97 |
| MYC       | #####    | -0.53465 | 0.227 | 0.126 | 6.55E-97 |
| ZNF516    | #####    | 0.110238 | 0.265 | 0.031 | 7.60E-97 |
| TYW5      | #####    | -0.12019 | 0.2   | 0.053 | 8.20E-97 |
| 4-Sep     | #####    | 0.341817 | 0.324 | 0.01  | 9.18E-97 |
| ELK4      | #####    | 0.208021 | 0.282 | 0.019 | 1.27E-96 |
| RCE1      | #####    | 0.199985 | 0.288 | 0.024 | 1.39E-96 |
| ADAM19    | #####    | 0.359387 | 0.351 | 0.019 | 1.41E-96 |
| NDRG2     | #####    | -0.68704 | 0.415 | 0.326 | 1.47E-96 |
| MIS18A    | #####    | -0.10738 | 0.178 | 0.038 | 1.55E-96 |
| ZNF337    | #####    | 0.168771 | 0.25  | 0.015 | 1.62E-96 |
| RASA1     | #####    | 0.244231 | 0.301 | 0.019 | 1.63E-96 |
| FBXL15    | #####    | 0.207912 | 0.296 | 0.021 | 1.98E-96 |
| C12orf75  | #####    | 0.447512 | 0.364 | 0.003 | 2.63E-96 |
| CHSY1     | #####    | 0.170359 | 0.251 | 0.015 | 2.72E-96 |
| RP11-472N | #####    | 0.302988 | 0.302 | 0.012 | 2.77E-96 |
| DIS3L     | #####    | 0.22243  | 0.276 | 0.014 | 2.81E-96 |
| SIDT2     | #####    | -0.15012 | 0.184 | 0.039 | 2.81E-96 |
| NOP2      | #####    | 0.104083 | 0.251 | 0.022 | 2.84E-96 |
| TUBGCP4   | #####    | 0.18272  | 0.303 | 0.032 | 4.41E-96 |
| UBXN7     | #####    | 0.141146 | 0.263 | 0.026 | 4.72E-96 |
| TMOD1     | #####    | -0.17348 | 0.362 | 0.123 | 5.43E-96 |
| MTHFD1L   | #####    | 0.230206 | 0.272 | 0.009 | 5.74E-96 |
| ZNF672    | #####    | 0.340166 | 0.348 | 0.017 | 5.89E-96 |
| ADAT1     | #####    | 0.122184 | 0.249 | 0.019 | 6.62E-96 |
| LMBR1     | #####    | 0.22467  | 0.286 | 0.017 | 6.94E-96 |
| ARNTL     | #####    | 0.266819 | 0.314 | 0.019 | 7.08E-96 |
| TENM1     | #####    | 0.158679 | 0.287 | 0.029 | 7.38E-96 |
| ZNF48     | #####    | 0.260467 | 0.287 | 0.01  | 7.79E-96 |
| CTSO      | #####    | 0.190251 | 0.275 | 0.019 | 8.12E-96 |
| GNA13     | #####    | 0.139577 | 0.242 | 0.019 | 9.30E-96 |
| PTEN      | #####    | 0.106976 | 0.224 | 0.017 | 9.90E-96 |
| TTL       | #####    | 0.115645 | 0.252 | 0.029 | 1.06E-95 |
| RP11-140K | #####    | 0.105434 | 0.225 | 0.019 | 1.21E-95 |
| TBC1D1    | #####    | 0.156554 | 0.251 | 0.017 | 1.24E-95 |
| DHX16     | 1.09E-99 | 0.150421 | 0.257 | 0.019 | 1.63E-95 |
| YTHDC2    | 1.19E-99 | 0.193138 | 0.279 | 0.019 | 1.78E-95 |
| RBBP5     | 1.22E-99 | 0.10105  | 0.272 | 0.038 | 1.82E-95 |
| SPRY4     | 1.61E-99 | 0.130518 | 0.299 | 0.036 | 2.41E-95 |
| BTN2A1    | 2.07E-99 | 0.170614 | 0.279 | 0.024 | 3.09E-95 |
| CDH4      | 2.40E-99 | 0.309312 | 0.324 | 0.017 | 3.58E-95 |
| VCAM1     | 2.77E-99 | -0.34266 | 0.203 | 0.051 | 4.14E-95 |
| RRAGB     | 3.28E-99 | 0.145138 | 0.272 | 0.026 | 4.90E-95 |
| POMT2     | 3.32E-99 | 0.144588 | 0.255 | 0.022 | 4.96E-95 |

|           |          |          |       |       |          |
|-----------|----------|----------|-------|-------|----------|
| D2HGDH    | 3.38E-99 | 0.253456 | 0.293 | 0.015 | 5.05E-95 |
| ARID1B    | 3.79E-99 | 0.25064  | 0.293 | 0.015 | 5.66E-95 |
| ACTR8     | 4.70E-99 | 0.105529 | 0.234 | 0.024 | 7.02E-95 |
| TXNRD2    | 5.54E-99 | 0.353469 | 0.34  | 0.012 | 8.28E-95 |
| FRMD8     | 5.67E-99 | 0.238443 | 0.303 | 0.022 | 8.47E-95 |
| FAM69B    | 6.27E-99 | 0.202581 | 0.252 | 0.009 | 9.36E-95 |
| OTUD4     | 6.41E-99 | 0.362746 | 0.329 | 0.007 | 9.57E-95 |
| NAPEPLD   | 6.56E-99 | 0.11169  | 0.247 | 0.024 | 9.80E-95 |
| MTF1      | 7.02E-99 | 0.114254 | 0.255 | 0.026 | 1.05E-94 |
| NAGLU     | 8.82E-99 | 0.168626 | 0.246 | 0.017 | 1.32E-94 |
| CCDC22    | 1.28E-98 | 0.266749 | 0.307 | 0.019 | 1.91E-94 |
| RAB40C    | 1.31E-98 | 0.109616 | 0.242 | 0.024 | 1.96E-94 |
| PHTF1     | 1.39E-98 | 0.333379 | 0.326 | 0.012 | 2.08E-94 |
| SHROOM3   | 1.44E-98 | 0.110265 | 0.225 | 0.015 | 2.15E-94 |
| FLYWCH1   | 1.52E-98 | 0.156558 | 0.256 | 0.021 | 2.27E-94 |
| PHLPP1    | 1.74E-98 | 0.101981 | 0.267 | 0.029 | 2.60E-94 |
| SSH2      | 2.32E-98 | 0.162967 | 0.27  | 0.022 | 3.46E-94 |
| GAD1      | 2.74E-98 | 0.419108 | 0.372 | 0.024 | 4.09E-94 |
| ACTR3B    | 2.92E-98 | 0.188823 | 0.277 | 0.022 | 4.36E-94 |
| MAP3K4    | 3.11E-98 | 0.360176 | 0.334 | 0.009 | 4.65E-94 |
| ATF7IP    | 3.33E-98 | 0.116028 | 0.247 | 0.024 | 4.98E-94 |
| AC093323. | 3.54E-98 | 0.25861  | 0.289 | 0.014 | 5.29E-94 |
| NME6      | 3.66E-98 | -0.28246 | 0.163 | 0.05  | 5.47E-94 |
| PRR14L    | 3.67E-98 | 0.268826 | 0.288 | 0.01  | 5.48E-94 |
| NMNAT1    | 3.68E-98 | 0.148709 | 0.251 | 0.021 | 5.50E-94 |
| ATP11A    | 4.60E-98 | 0.242782 | 0.273 | 0.01  | 6.88E-94 |
| LLGL1     | 4.82E-98 | 0.232075 | 0.288 | 0.017 | 7.20E-94 |
| EFS       | 4.82E-98 | 0.150599 | 0.272 | 0.024 | 7.20E-94 |
| ZNF599    | 5.27E-98 | 0.132056 | 0.264 | 0.027 | 7.87E-94 |
| MCMBP     | 5.49E-98 | 0.136851 | 0.25  | 0.021 | 8.20E-94 |
| MYO19     | 5.56E-98 | 0.13031  | 0.228 | 0.015 | 8.31E-94 |
| HEG1      | 6.11E-98 | 0.247035 | 0.282 | 0.012 | 9.13E-94 |
| KLHL23    | 6.33E-98 | 0.241805 | 0.291 | 0.015 | 9.46E-94 |
| EXD3      | 6.60E-98 | 0.145471 | 0.257 | 0.024 | 9.87E-94 |
| STAG1     | 7.83E-98 | 0.106831 | 0.256 | 0.029 | 1.17E-93 |
| TFCP2     | 8.00E-98 | 0.247621 | 0.299 | 0.019 | 1.20E-93 |
| NANOS3    | 8.65E-98 | 0.15218  | 0.241 | 0.015 | 1.29E-93 |
| NUDT14    | 9.36E-98 | 0.225129 | 0.275 | 0.014 | 1.40E-93 |
| MINK1     | 9.40E-98 | 0.151916 | 0.255 | 0.021 | 1.40E-93 |
| WDR5      | 9.62E-98 | 0.165261 | 0.269 | 0.024 | 1.44E-93 |
| UEVLD     | 1.07E-97 | 0.138622 | 0.239 | 0.017 | 1.60E-93 |
| SH3BP2    | 1.23E-97 | 0.135429 | 0.242 | 0.019 | 1.85E-93 |
| MVK       | 1.24E-97 | 0.14855  | 0.264 | 0.021 | 1.85E-93 |
| MCEE      | 1.25E-97 | -0.14342 | 0.204 | 0.046 | 1.87E-93 |
| ATP2B4    | 1.54E-97 | 0.14176  | 0.255 | 0.022 | 2.30E-93 |
| PEX7      | 1.59E-97 | 0.163625 | 0.246 | 0.015 | 2.37E-93 |
| IMPDH1    | 1.60E-97 | 0.310737 | 0.316 | 0.012 | 2.39E-93 |
| FAM91A1   | 1.70E-97 | 0.286613 | 0.305 | 0.012 | 2.53E-93 |
| NUDT19    | 1.79E-97 | 0.14049  | 0.266 | 0.022 | 2.67E-93 |
| GBA2      | 1.86E-97 | 0.113029 | 0.258 | 0.026 | 2.78E-93 |
| RABEP2    | 1.92E-97 | 0.23342  | 0.291 | 0.017 | 2.87E-93 |

|           |          |          |       |       |          |
|-----------|----------|----------|-------|-------|----------|
| LRP12     | 1.93E-97 | 0.147471 | 0.244 | 0.019 | 2.89E-93 |
| NDRG1     | 1.98E-97 | -0.91124 | 0.145 | 0.138 | 2.95E-93 |
| TUBE1     | 2.22E-97 | -0.12347 | 0.197 | 0.041 | 3.32E-93 |
| PNMAL1    | 2.30E-97 | 0.204981 | 0.269 | 0.014 | 3.44E-93 |
| LMBR1L    | 2.65E-97 | 0.167397 | 0.276 | 0.026 | 3.97E-93 |
| CSRP2BP   | 2.70E-97 | 0.162521 | 0.25  | 0.017 | 4.03E-93 |
| ARL10     | 2.86E-97 | 0.146997 | 0.253 | 0.022 | 4.28E-93 |
| IZUM04    | 3.04E-97 | 0.164675 | 0.283 | 0.026 | 4.54E-93 |
| ZFX       | 3.53E-97 | 0.100107 | 0.263 | 0.029 | 5.28E-93 |
| PEX11G    | 3.78E-97 | 0.249899 | 0.272 | 0.01  | 5.66E-93 |
| STYXL1    | 3.88E-97 | -0.21254 | 0.153 | 0.043 | 5.80E-93 |
| MMGT1     | 4.25E-97 | 0.125227 | 0.249 | 0.021 | 6.35E-93 |
| RP11-448A | 4.37E-97 | 0.149833 | 0.289 | 0.034 | 6.52E-93 |
| ZNF649    | 4.84E-97 | 0.227693 | 0.267 | 0.012 | 7.23E-93 |
| ALKBH6    | 5.81E-97 | 0.193421 | 0.288 | 0.026 | 8.69E-93 |
| NCDN      | 7.97E-97 | 0.20393  | 0.27  | 0.014 | 1.19E-92 |
| KDM3A     | 9.05E-97 | 0.143356 | 0.253 | 0.026 | 1.35E-92 |
| STRBP     | 9.57E-97 | 0.313657 | 0.309 | 0.007 | 1.43E-92 |
| L3MBTL2   | 1.14E-96 | 0.21481  | 0.273 | 0.015 | 1.71E-92 |
| LRRC8D    | 1.17E-96 | 0.199092 | 0.253 | 0.012 | 1.75E-92 |
| SLC35C1   | 1.21E-96 | 0.13357  | 0.216 | 0.012 | 1.81E-92 |
| ARAP3     | 1.27E-96 | 0.174401 | 0.251 | 0.015 | 1.89E-92 |
| ZNF277    | 1.32E-96 | -0.12934 | 0.239 | 0.055 | 1.98E-92 |
| ANKRD46   | 1.46E-96 | -0.16343 | 0.209 | 0.056 | 2.18E-92 |
| TNKS2     | 1.56E-96 | 0.197304 | 0.274 | 0.017 | 2.33E-92 |
| P4HA2     | 1.58E-96 | 0.150092 | 0.25  | 0.021 | 2.36E-92 |
| STK11     | 1.65E-96 | 0.275343 | 0.304 | 0.017 | 2.47E-92 |
| DHX38     | 1.66E-96 | 0.195923 | 0.268 | 0.017 | 2.49E-92 |
| ZCCHC24   | 1.80E-96 | 0.118448 | 0.247 | 0.024 | 2.69E-92 |
| ZBED3     | 1.82E-96 | 0.215255 | 0.273 | 0.017 | 2.73E-92 |
| RDH13     | 1.90E-96 | 0.143523 | 0.248 | 0.026 | 2.85E-92 |
| GUCD1     | 1.92E-96 | 0.267415 | 0.307 | 0.015 | 2.87E-92 |
| UCK2      | 1.97E-96 | 0.134154 | 0.248 | 0.022 | 2.94E-92 |
| CCDC93    | 2.07E-96 | 0.108588 | 0.256 | 0.029 | 3.10E-92 |
| TICAM1    | 2.07E-96 | 0.134451 | 0.238 | 0.015 | 3.10E-92 |
| MDFI      | 2.13E-96 | 0.232901 | 0.277 | 0.015 | 3.18E-92 |
| SLC37A4   | 2.29E-96 | 0.180333 | 0.267 | 0.017 | 3.42E-92 |
| TEL02     | 2.50E-96 | 0.247064 | 0.301 | 0.021 | 3.74E-92 |
| ZSCAN9    | 2.94E-96 | -0.11984 | 0.169 | 0.027 | 4.39E-92 |
| HLA-DRB1  | 2.96E-96 | -1.01081 | 0.201 | 0.255 | 4.42E-92 |
| CNR1      | 3.50E-96 | 0.186406 | 0.293 | 0.029 | 5.24E-92 |
| C16orf58  | 3.64E-96 | 0.12865  | 0.259 | 0.024 | 5.44E-92 |
| C1QC      | 3.65E-96 | -0.58954 | 0.19  | 0.125 | 5.45E-92 |
| UHL5      | 3.74E-96 | 0.130369 | 0.253 | 0.029 | 5.58E-92 |
| SGPL1     | 4.36E-96 | 0.187231 | 0.267 | 0.019 | 6.51E-92 |
| MARK2     | 4.43E-96 | 0.237045 | 0.279 | 0.014 | 6.61E-92 |
| SYCE1L    | 4.45E-96 | 0.325    | 0.311 | 0.01  | 6.65E-92 |
| TBCK      | 4.46E-96 | 0.164687 | 0.242 | 0.019 | 6.67E-92 |
| NUP50     | 5.99E-96 | 0.214953 | 0.263 | 0.012 | 8.96E-92 |
| OAF       | 6.41E-96 | 0.301654 | 0.313 | 0.014 | 9.58E-92 |
| N4BP2L1   | 6.74E-96 | -0.16525 | 0.219 | 0.056 | 1.01E-91 |

|           |          |          |       |       |          |
|-----------|----------|----------|-------|-------|----------|
| NUDT8     | 7.45E-96 | 0.275181 | 0.286 | 0.01  | 1.11E-91 |
| MYPOP     | 7.66E-96 | 0.141845 | 0.255 | 0.022 | 1.14E-91 |
| LINC00526 | 9.37E-96 | 0.155298 | 0.245 | 0.017 | 1.40E-91 |
| TET1      | 1.00E-95 | 0.405018 | 0.346 | 0.009 | 1.50E-91 |
| PKD2      | 1.09E-95 | 0.198822 | 0.255 | 0.015 | 1.63E-91 |
| SLC35E4   | 1.09E-95 | 0.237072 | 0.255 | 0.005 | 1.63E-91 |
| CLUH      | 1.21E-95 | 0.153112 | 0.223 | 0.01  | 1.81E-91 |
| INO80     | 1.25E-95 | 0.110718 | 0.222 | 0.019 | 1.86E-91 |
| FOSB      | 1.47E-95 | -0.62291 | 0.215 | 0.154 | 2.20E-91 |
| AGPS      | 1.64E-95 | 0.125024 | 0.223 | 0.014 | 2.45E-91 |
| ZNHIT6    | 1.66E-95 | 0.138799 | 0.251 | 0.022 | 2.48E-91 |
| MSH6      | 1.73E-95 | 0.164003 | 0.255 | 0.019 | 2.58E-91 |
| SPAST     | 1.73E-95 | 0.282521 | 0.293 | 0.01  | 2.59E-91 |
| C1QL1     | 1.78E-95 | 0.373832 | 0.345 | 0.022 | 2.65E-91 |
| PWAR6     | 1.86E-95 | 0.140038 | 0.241 | 0.019 | 2.78E-91 |
| HUS1      | 2.04E-95 | -0.14422 | 0.191 | 0.043 | 3.05E-91 |
| AMDHD2    | 2.10E-95 | 0.21765  | 0.272 | 0.015 | 3.13E-91 |
| MPND      | 2.30E-95 | 0.357861 | 0.32  | 0.003 | 3.44E-91 |
| SETD7     | 2.53E-95 | 0.114877 | 0.244 | 0.026 | 3.78E-91 |
| ZBTB44    | 2.59E-95 | 0.15375  | 0.251 | 0.022 | 3.87E-91 |
| KIAA1429  | 2.75E-95 | 0.100871 | 0.238 | 0.024 | 4.11E-91 |
| HLA-DPA1  | 2.84E-95 | -1.04592 | 0.215 | 0.27  | 4.24E-91 |
| TMPO      | 3.13E-95 | 0.138319 | 0.258 | 0.026 | 4.68E-91 |
| STK24     | 3.21E-95 | 0.126485 | 0.234 | 0.015 | 4.79E-91 |
| FOXRED2   | 3.84E-95 | 0.23063  | 0.27  | 0.012 | 5.74E-91 |
| PABPC1L   | 4.53E-95 | 0.166488 | 0.28  | 0.026 | 6.77E-91 |
| SHOX2     | 4.92E-95 | 0.254226 | 0.277 | 0.01  | 7.35E-91 |
| TEX2      | 5.27E-95 | 0.207934 | 0.27  | 0.017 | 7.87E-91 |
| PAX6      | 5.89E-95 | 0.181105 | 0.288 | 0.026 | 8.81E-91 |
| DIABLO    | 6.62E-95 | -0.15987 | 0.161 | 0.038 | 9.89E-91 |
| NOTCH1    | 7.03E-95 | 0.244852 | 0.305 | 0.024 | 1.05E-90 |
| INSR      | 7.19E-95 | 0.105718 | 0.286 | 0.043 | 1.07E-90 |
| ZNF609    | 7.95E-95 | 0.181297 | 0.249 | 0.015 | 1.19E-90 |
| PTCD1     | 7.97E-95 | -0.1966  | 0.164 | 0.046 | 1.19E-90 |
| ETFDH     | 8.23E-95 | -0.2143  | 0.197 | 0.063 | 1.23E-90 |
| MEGF8     | 8.40E-95 | 0.184443 | 0.293 | 0.031 | 1.25E-90 |
| FAM171A1  | 9.88E-95 | 0.195472 | 0.25  | 0.012 | 1.48E-90 |
| APITD1    | 1.04E-94 | 0.121556 | 0.237 | 0.019 | 1.55E-90 |
| MAPK8IP3  | 1.26E-94 | 0.149194 | 0.241 | 0.017 | 1.88E-90 |
| BAIAP2-AS | 1.27E-94 | 0.20967  | 0.263 | 0.014 | 1.89E-90 |
| STARD4-AS | 1.28E-94 | 0.354005 | 0.336 | 0.019 | 1.92E-90 |
| MTFR1     | 1.41E-94 | 0.21137  | 0.257 | 0.012 | 2.10E-90 |
| RP11-212F | 1.56E-94 | 0.146261 | 0.234 | 0.019 | 2.33E-90 |
| DTX3L     | 2.15E-94 | 0.103033 | 0.219 | 0.015 | 3.21E-90 |
| RAB3D     | 2.62E-94 | 0.144843 | 0.223 | 0.017 | 3.92E-90 |
| BCKDHB    | 2.89E-94 | 0.155184 | 0.248 | 0.022 | 4.31E-90 |
| NMT2      | 2.96E-94 | 0.117595 | 0.234 | 0.021 | 4.43E-90 |
| FBX05     | 3.33E-94 | 0.120789 | 0.225 | 0.012 | 4.97E-90 |
| MMP16     | 3.33E-94 | 0.372896 | 0.331 | 0.01  | 4.98E-90 |
| MAPKAPK3  | 3.48E-94 | 0.294185 | 0.294 | 0.007 | 5.20E-90 |
| RP11-379H | 3.99E-94 | 0.139738 | 0.242 | 0.019 | 5.96E-90 |

|           |          |          |       |       |          |
|-----------|----------|----------|-------|-------|----------|
| ORC5      | 4.28E-94 | -0.18193 | 0.169 | 0.036 | 6.40E-90 |
| RAD54L2   | 4.39E-94 | 0.170363 | 0.263 | 0.021 | 6.56E-90 |
| GTPBP3    | 4.92E-94 | 0.104135 | 0.275 | 0.038 | 7.35E-90 |
| C1GALT1   | 5.18E-94 | 0.244395 | 0.305 | 0.022 | 7.74E-90 |
| DCX       | 5.35E-94 | 0.398387 | 0.343 | 0.021 | 8.00E-90 |
| CPNE5     | 5.75E-94 | 0.250262 | 0.277 | 0.014 | 8.60E-90 |
| WDR36     | 6.46E-94 | 0.130921 | 0.214 | 0.017 | 9.65E-90 |
| SLC48A1   | 8.09E-94 | 0.171564 | 0.264 | 0.021 | 1.21E-89 |
| COPG2     | 8.97E-94 | 0.163806 | 0.245 | 0.014 | 1.34E-89 |
| HDAC9     | 9.33E-94 | 0.113752 | 0.236 | 0.026 | 1.39E-89 |
| N6AMT1    | 9.43E-94 | 0.159515 | 0.232 | 0.012 | 1.41E-89 |
| CACFD1    | 9.53E-94 | 0.154238 | 0.229 | 0.014 | 1.42E-89 |
| CLN6      | 1.07E-93 | 0.121074 | 0.235 | 0.022 | 1.60E-89 |
| MFN2      | 1.16E-93 | 0.16038  | 0.262 | 0.022 | 1.73E-89 |
| MON1A     | 1.29E-93 | 0.166044 | 0.244 | 0.015 | 1.93E-89 |
| SETDB1    | 1.37E-93 | -0.11475 | 0.16  | 0.032 | 2.04E-89 |
| ZNF532    | 1.46E-93 | 0.273344 | 0.293 | 0.014 | 2.18E-89 |
| FAM181A   | 1.63E-93 | -0.18711 | 0.208 | 0.056 | 2.44E-89 |
| CCP110    | 1.64E-93 | -0.12431 | 0.187 | 0.05  | 2.45E-89 |
| SH3GLB2   | 1.97E-93 | 0.331126 | 0.315 | 0.01  | 2.94E-89 |
| ZNF232    | 2.00E-93 | 0.119684 | 0.216 | 0.015 | 2.98E-89 |
| LMNB2     | 2.00E-93 | 0.280734 | 0.293 | 0.012 | 3.00E-89 |
| CLYBL     | 2.08E-93 | -0.14006 | 0.156 | 0.034 | 3.10E-89 |
| PI4KA     | 2.64E-93 | 0.204328 | 0.258 | 0.012 | 3.95E-89 |
| KLF10     | 2.73E-93 | -0.18228 | 0.225 | 0.068 | 4.08E-89 |
| GBP1      | 2.89E-93 | -0.61043 | 0.296 | 0.168 | 4.32E-89 |
| JMY       | 3.03E-93 | 0.323411 | 0.317 | 0.015 | 4.52E-89 |
| LMF1      | 3.37E-93 | 0.219488 | 0.277 | 0.017 | 5.03E-89 |
| WDR55     | 3.50E-93 | 0.129519 | 0.234 | 0.017 | 5.22E-89 |
| RP11-126K | 3.55E-93 | 0.14426  | 0.238 | 0.019 | 5.30E-89 |
| MYO1C     | 3.99E-93 | 0.223603 | 0.279 | 0.021 | 5.96E-89 |
| GLIS3     | 4.11E-93 | 0.265493 | 0.294 | 0.017 | 6.14E-89 |
| MPDZ      | 4.13E-93 | 0.23063  | 0.274 | 0.014 | 6.18E-89 |
| ZNF362    | 4.53E-93 | 0.211174 | 0.261 | 0.015 | 6.76E-89 |
| C10orf10  | 4.61E-93 | -0.84224 | 0.113 | 0.106 | 6.89E-89 |
| TMCC1     | 5.50E-93 | 0.380142 | 0.331 | 0.007 | 8.21E-89 |
| C9orf85   | 7.91E-93 | 0.166433 | 0.238 | 0.012 | 1.18E-88 |
| BOLA2B    | 8.03E-93 | -0.16767 | 0.167 | 0.039 | 1.20E-88 |
| GALNT10   | 8.88E-93 | 0.125721 | 0.251 | 0.026 | 1.33E-88 |
| CAPN7     | 8.99E-93 | 0.169264 | 0.262 | 0.022 | 1.34E-88 |
| IGF2BP2   | 9.08E-93 | 0.234947 | 0.301 | 0.026 | 1.36E-88 |
| GNB1L     | 1.03E-92 | 0.112656 | 0.226 | 0.019 | 1.54E-88 |
| ADAMTS6   | 1.28E-92 | 0.266506 | 0.298 | 0.019 | 1.91E-88 |
| PCDH19    | 1.44E-92 | 0.227908 | 0.257 | 0.009 | 2.15E-88 |
| CBX4      | 1.58E-92 | 0.110086 | 0.238 | 0.026 | 2.36E-88 |
| GPX3      | 1.86E-92 | -0.10398 | 0.193 | 0.036 | 2.77E-88 |
| CEP57L1   | 1.97E-92 | 0.214754 | 0.279 | 0.019 | 2.94E-88 |
| DGCR8     | 2.07E-92 | 0.133363 | 0.243 | 0.024 | 3.10E-88 |
| NRDE2     | 2.25E-92 | -0.14038 | 0.198 | 0.046 | 3.36E-88 |
| CSPG5     | 2.44E-92 | -0.13096 | 0.315 | 0.094 | 3.65E-88 |
| DIP2C     | 2.97E-92 | 0.115022 | 0.22  | 0.019 | 4.43E-88 |



|           |          |          |       |       |          |
|-----------|----------|----------|-------|-------|----------|
| RFX5      | 3.10E-92 | 0.13885  | 0.23  | 0.019 | 4.63E-88 |
| SARNP     | 3.12E-92 | -0.29344 | 0.172 | 0.063 | 4.66E-88 |
| CDKN1A    | 3.21E-92 | -0.49552 | 0.248 | 0.135 | 4.80E-88 |
| ABHD6     | 4.66E-92 | 0.166588 | 0.245 | 0.017 | 6.96E-88 |
| DDX3Y     | 4.67E-92 | 0.184006 | 0.234 | 0.01  | 6.98E-88 |
| VWA5A     | 5.20E-92 | -0.16564 | 0.187 | 0.053 | 7.77E-88 |
| PCDH10    | 5.41E-92 | 0.188124 | 0.255 | 0.019 | 8.09E-88 |
| PTPN14    | 8.42E-92 | 0.208214 | 0.275 | 0.021 | 1.26E-87 |
| ASUN      | 9.32E-92 | 0.153336 | 0.255 | 0.022 | 1.39E-87 |
| DCBLD1    | 1.01E-91 | 0.165657 | 0.264 | 0.022 | 1.51E-87 |
| MAPK14    | 1.15E-91 | 0.256952 | 0.283 | 0.014 | 1.72E-87 |
| HBB       | 1.34E-91 | -1.0457  | 0.219 | 0.226 | 2.00E-87 |
| KIF1C     | 1.38E-91 | 0.170433 | 0.245 | 0.017 | 2.06E-87 |
| FAM208B   | 1.49E-91 | 0.309515 | 0.285 | 0.003 | 2.23E-87 |
| ARSA      | 1.55E-91 | 0.167204 | 0.244 | 0.015 | 2.31E-87 |
| NSUN2     | 1.60E-91 | 0.229497 | 0.283 | 0.017 | 2.39E-87 |
| TYW1      | 1.71E-91 | 0.117159 | 0.244 | 0.022 | 2.56E-87 |
| RIC8B     | 1.77E-91 | 0.107575 | 0.243 | 0.027 | 2.65E-87 |
| 1-Sep     | 2.18E-91 | 0.186925 | 0.252 | 0.017 | 3.26E-87 |
| ELK3      | 2.20E-91 | 0.169713 | 0.237 | 0.012 | 3.28E-87 |
| H1FO      | 2.34E-91 | -0.16549 | 0.294 | 0.104 | 3.50E-87 |
| ZNF436    | 2.35E-91 | 0.408641 | 0.347 | 0.014 | 3.51E-87 |
| RWDD2B    | 2.64E-91 | 0.15984  | 0.242 | 0.015 | 3.95E-87 |
| CAPN5     | 2.64E-91 | 0.14213  | 0.239 | 0.022 | 3.95E-87 |
| TRAF6     | 2.75E-91 | 0.101002 | 0.218 | 0.015 | 4.11E-87 |
| SEC16A    | 3.26E-91 | 0.230084 | 0.283 | 0.021 | 4.86E-87 |
| PSKH1     | 3.44E-91 | 0.193388 | 0.231 | 0.007 | 5.14E-87 |
| TAF3      | 3.86E-91 | 0.174873 | 0.256 | 0.019 | 5.76E-87 |
| THAP2     | 4.85E-91 | 0.137462 | 0.247 | 0.022 | 7.25E-87 |
| MAP4K3    | 4.89E-91 | 0.250331 | 0.276 | 0.012 | 7.31E-87 |
| CNTFR     | 5.36E-91 | 0.228857 | 0.287 | 0.024 | 8.01E-87 |
| FN3K      | 6.08E-91 | 0.152017 | 0.251 | 0.024 | 9.08E-87 |
| NUP35     | 6.66E-91 | -0.12017 | 0.19  | 0.043 | 9.96E-87 |
| ZNF587    | 6.95E-91 | 0.138893 | 0.25  | 0.026 | 1.04E-86 |
| TOM1L1    | 8.10E-91 | 0.209712 | 0.254 | 0.012 | 1.21E-86 |
| CNOT6     | 8.15E-91 | 0.110344 | 0.201 | 0.012 | 1.22E-86 |
| KBTBD2    | 8.57E-91 | 0.126788 | 0.236 | 0.019 | 1.28E-86 |
| RPRD1B    | 9.73E-91 | 0.206062 | 0.26  | 0.015 | 1.45E-86 |
| TMEM39B   | 1.18E-90 | 0.115468 | 0.247 | 0.024 | 1.77E-86 |
| ARRDC1    | 1.35E-90 | 0.147716 | 0.245 | 0.019 | 2.02E-86 |
| UTP14C    | 1.36E-90 | 0.209684 | 0.258 | 0.014 | 2.04E-86 |
| CTTNBP2NL | 1.43E-90 | 0.248931 | 0.283 | 0.015 | 2.14E-86 |
| ZNF584    | 1.64E-90 | 0.263468 | 0.288 | 0.01  | 2.46E-86 |
| TOP1MT    | 1.81E-90 | 0.165206 | 0.229 | 0.01  | 2.70E-86 |
| PM20D2    | 2.05E-90 | 0.275587 | 0.29  | 0.01  | 3.07E-86 |
| PROS1     | 2.47E-90 | 0.179693 | 0.242 | 0.012 | 3.69E-86 |
| C17orf80  | 2.52E-90 | 0.213328 | 0.269 | 0.017 | 3.76E-86 |
| 10-Sep    | 2.52E-90 | 0.185369 | 0.258 | 0.019 | 3.77E-86 |
| ODF2      | 2.72E-90 | 0.180325 | 0.274 | 0.024 | 4.07E-86 |
| RP5-1085F | 3.12E-90 | 0.162027 | 0.234 | 0.015 | 4.67E-86 |
| ZNF16     | 3.26E-90 | -0.10403 | 0.178 | 0.036 | 4.88E-86 |

|           |          |          |       |       |          |
|-----------|----------|----------|-------|-------|----------|
| COL16A1   | 3.54E-90 | 0.176289 | 0.326 | 0.046 | 5.29E-86 |
| FAM8A1    | 3.65E-90 | 0.109402 | 0.229 | 0.021 | 5.46E-86 |
| PRMT6     | 4.42E-90 | 0.172017 | 0.265 | 0.021 | 6.60E-86 |
| MAD1L1    | 4.64E-90 | 0.158966 | 0.241 | 0.019 | 6.94E-86 |
| ASB16-AS1 | 4.66E-90 | 0.208844 | 0.244 | 0.01  | 6.96E-86 |
| SLC7A1    | 4.92E-90 | 0.103744 | 0.227 | 0.022 | 7.35E-86 |
| AGBL5     | 5.73E-90 | 0.323008 | 0.298 | 0.005 | 8.56E-86 |
| MESDC1    | 5.96E-90 | 0.231212 | 0.261 | 0.01  | 8.91E-86 |
| FREM2     | 6.96E-90 | 0.435723 | 0.345 | 0.005 | 1.04E-85 |
| SAMD4A    | 7.36E-90 | 0.159759 | 0.264 | 0.026 | 1.10E-85 |
| PI4K2B    | 7.49E-90 | 0.167844 | 0.244 | 0.015 | 1.12E-85 |
| ZNF605    | 8.88E-90 | -0.18566 | 0.172 | 0.06  | 1.33E-85 |
| FGFRL1    | 9.02E-90 | 0.254776 | 0.272 | 0.01  | 1.35E-85 |
| TAZ       | 1.03E-89 | 0.183328 | 0.268 | 0.021 | 1.54E-85 |
| TBC1D22A  | 1.09E-89 | 0.195089 | 0.225 | 0.007 | 1.62E-85 |
| RP3-428L1 | 1.09E-89 | 0.643094 | 0.34  | 0     | 1.63E-85 |
| RNF169    | 1.12E-89 | 0.207371 | 0.25  | 0.012 | 1.68E-85 |
| ZNF582-AS | 1.15E-89 | -0.40257 | 0.133 | 0.063 | 1.71E-85 |
| LHFPL2    | 1.19E-89 | 0.112727 | 0.221 | 0.015 | 1.78E-85 |
| PTP4A3    | 1.86E-89 | 0.219346 | 0.288 | 0.026 | 2.78E-85 |
| METTL7A   | 1.87E-89 | -0.289   | 0.308 | 0.132 | 2.80E-85 |
| SP1       | 1.92E-89 | 0.153726 | 0.242 | 0.019 | 2.88E-85 |
| TTC28     | 2.00E-89 | 0.287912 | 0.298 | 0.015 | 2.98E-85 |
| TAGLN3    | 2.12E-89 | -0.15467 | 0.203 | 0.055 | 3.17E-85 |
| LZTS2     | 2.37E-89 | 0.146793 | 0.228 | 0.015 | 3.55E-85 |
| RNF111    | 2.81E-89 | 0.217682 | 0.247 | 0.009 | 4.20E-85 |
| SYP       | 3.08E-89 | -0.16518 | 0.196 | 0.058 | 4.61E-85 |
| TECPR1    | 3.62E-89 | 0.272595 | 0.283 | 0.012 | 5.42E-85 |
| JRKL      | 3.70E-89 | 0.158715 | 0.259 | 0.021 | 5.52E-85 |
| CTB-113I2 | 4.26E-89 | 0.187045 | 0.235 | 0.009 | 6.37E-85 |
| PPP2R3B   | 4.76E-89 | 0.170798 | 0.226 | 0.007 | 7.11E-85 |
| SLC22A23  | 5.31E-89 | 0.189092 | 0.238 | 0.012 | 7.94E-85 |
| USP38     | 5.46E-89 | 0.101298 | 0.206 | 0.017 | 8.17E-85 |
| PLXNA3    | 5.47E-89 | -0.11633 | 0.171 | 0.036 | 8.17E-85 |
| HDAC10    | 5.62E-89 | 0.258891 | 0.261 | 0.005 | 8.40E-85 |
| ATXN1L    | 6.65E-89 | 0.145863 | 0.213 | 0.012 | 9.93E-85 |
| PPP1R9B   | 6.67E-89 | 0.28361  | 0.284 | 0.01  | 9.96E-85 |
| PCNX      | 6.90E-89 | 0.120526 | 0.228 | 0.022 | 1.03E-84 |
| SPATA20   | 7.00E-89 | 0.14417  | 0.247 | 0.022 | 1.05E-84 |
| CNKSR2    | 7.60E-89 | 0.223946 | 0.26  | 0.015 | 1.14E-84 |
| TRAK1     | 7.60E-89 | 0.163203 | 0.25  | 0.021 | 1.14E-84 |
| PLEKHA2   | 7.89E-89 | 0.139884 | 0.249 | 0.026 | 1.18E-84 |
| MYO1E     | 7.90E-89 | 0.133063 | 0.21  | 0.009 | 1.18E-84 |
| DBNDD1    | 8.16E-89 | 0.206872 | 0.247 | 0.014 | 1.22E-84 |
| PLCB1     | 8.22E-89 | 0.204723 | 0.248 | 0.014 | 1.23E-84 |
| B3GALT1   | 9.84E-89 | 0.178476 | 0.247 | 0.017 | 1.47E-84 |
| PLAU      | 1.00E-88 | 0.384604 | 0.327 | 0.017 | 1.49E-84 |
| MTR       | 1.13E-88 | 0.170564 | 0.255 | 0.019 | 1.69E-84 |
| BCAS3     | 1.22E-88 | 0.143871 | 0.214 | 0.01  | 1.82E-84 |
| NLK       | 1.47E-88 | 0.270027 | 0.279 | 0.01  | 2.19E-84 |
| DHX8      | 1.72E-88 | 0.326556 | 0.307 | 0.009 | 2.57E-84 |

|          |          |          |       |       |          |
|----------|----------|----------|-------|-------|----------|
| TRIM56   | 1.78E-88 | -0.33421 | 0.159 | 0.055 | 2.66E-84 |
| RBBP8    | 1.78E-88 | 0.142561 | 0.206 | 0.01  | 2.66E-84 |
| ZBTB10   | 1.95E-88 | 0.118926 | 0.225 | 0.019 | 2.91E-84 |
| ERCC6L2  | 2.41E-88 | 0.16634  | 0.245 | 0.017 | 3.60E-84 |
| GMDS     | 2.54E-88 | 0.147994 | 0.233 | 0.017 | 3.80E-84 |
| CREBRF   | 3.00E-88 | -0.25514 | 0.168 | 0.036 | 4.48E-84 |
| ICAM3    | 3.21E-88 | 0.431212 | 0.336 | 0     | 4.80E-84 |
| RNF168   | 3.62E-88 | 0.181231 | 0.261 | 0.021 | 5.42E-84 |
| FAT1     | 3.69E-88 | 0.292154 | 0.291 | 0.012 | 5.52E-84 |
| RPS6KA2  | 3.88E-88 | 0.133247 | 0.259 | 0.032 | 5.80E-84 |
| PORCN    | 4.00E-88 | 0.214656 | 0.267 | 0.015 | 5.98E-84 |
| TMEM216  | 4.18E-88 | -0.13435 | 0.178 | 0.041 | 6.24E-84 |
| ZNF513   | 4.18E-88 | 0.117177 | 0.219 | 0.019 | 6.25E-84 |
| EMID1    | 4.23E-88 | 0.274761 | 0.279 | 0.014 | 6.32E-84 |
| CRIM1    | 4.71E-88 | 0.156974 | 0.246 | 0.017 | 7.04E-84 |
| NHSL1    | 4.76E-88 | 0.142572 | 0.255 | 0.027 | 7.11E-84 |
| PDIA5    | 5.30E-88 | 0.188993 | 0.232 | 0.012 | 7.93E-84 |
| DNAJC14  | 5.37E-88 | 0.100614 | 0.214 | 0.021 | 8.03E-84 |
| CAHM     | 6.20E-88 | 0.221681 | 0.259 | 0.012 | 9.27E-84 |
| KIAA2026 | 6.41E-88 | 0.102648 | 0.236 | 0.027 | 9.58E-84 |
| MCHR1    | 6.56E-88 | 0.356255 | 0.303 | 0.01  | 9.81E-84 |
| MAP3K1   | 9.81E-88 | 0.269521 | 0.293 | 0.019 | 1.47E-83 |
| AP5Z1    | 1.20E-87 | 0.175458 | 0.258 | 0.021 | 1.79E-83 |
| RHOU     | 1.38E-87 | 0.125343 | 0.289 | 0.05  | 2.07E-83 |
| FRMD3    | 1.63E-87 | -0.39185 | 0.144 | 0.072 | 2.44E-83 |
| EZH2     | 1.94E-87 | 0.101856 | 0.223 | 0.022 | 2.90E-83 |
| ACAD9    | 2.96E-87 | 0.116629 | 0.227 | 0.021 | 4.43E-83 |
| PAG1     | 3.04E-87 | 0.106133 | 0.241 | 0.027 | 4.54E-83 |
| ZNHIT2   | 3.69E-87 | 0.159633 | 0.253 | 0.019 | 5.51E-83 |
| FAM78B   | 4.11E-87 | 0.109971 | 0.178 | 0.007 | 6.14E-83 |
| FAM219A  | 4.60E-87 | 0.141154 | 0.229 | 0.017 | 6.88E-83 |
| IL32     | 5.10E-87 | -0.13828 | 0.184 | 0.032 | 7.62E-83 |
| TMEM8B   | 5.57E-87 | 0.163162 | 0.224 | 0.01  | 8.32E-83 |
| PCGF1    | 5.78E-87 | -0.12861 | 0.173 | 0.038 | 8.64E-83 |
| ANAPC2   | 7.14E-87 | 0.242937 | 0.29  | 0.021 | 1.07E-82 |
| CAPN10   | 8.74E-87 | 0.150565 | 0.242 | 0.021 | 1.31E-82 |
| N4BP1    | 8.87E-87 | 0.200816 | 0.241 | 0.012 | 1.33E-82 |
| TESK1    | 8.93E-87 | 0.179843 | 0.234 | 0.012 | 1.33E-82 |
| ZSWIM6   | 9.15E-87 | 0.298282 | 0.296 | 0.012 | 1.37E-82 |
| TAF6L    | 9.73E-87 | 0.263327 | 0.273 | 0.012 | 1.45E-82 |
| NOMO1    | 1.03E-86 | 0.194799 | 0.256 | 0.017 | 1.54E-82 |
| CRISPLD1 | 1.63E-86 | 0.135001 | 0.241 | 0.022 | 2.43E-82 |
| CHRAC1   | 1.69E-86 | 0.140887 | 0.241 | 0.021 | 2.52E-82 |
| NXT2     | 1.87E-86 | 0.140846 | 0.226 | 0.017 | 2.80E-82 |
| CHI3L2   | 2.33E-86 | -1.57272 | 0.069 | 0.193 | 3.48E-82 |
| ZNF174   | 2.35E-86 | 0.121547 | 0.207 | 0.014 | 3.51E-82 |
| PAN3     | 2.75E-86 | 0.151797 | 0.245 | 0.027 | 4.11E-82 |
| MED12L   | 3.16E-86 | 0.295889 | 0.294 | 0.014 | 4.72E-82 |
| DYRK1B   | 3.18E-86 | 0.148447 | 0.228 | 0.017 | 4.75E-82 |
| NRM      | 3.18E-86 | 0.101805 | 0.191 | 0.01  | 4.75E-82 |
| LRRRC14  | 3.25E-86 | 0.130542 | 0.231 | 0.021 | 4.86E-82 |

|           |          |          |       |       |          |
|-----------|----------|----------|-------|-------|----------|
| TDRD3     | 3.30E-86 | 0.172015 | 0.253 | 0.021 | 4.93E-82 |
| FANCF     | 3.38E-86 | 0.10892  | 0.231 | 0.022 | 5.06E-82 |
| SERINC5   | 3.60E-86 | 0.186484 | 0.236 | 0.014 | 5.38E-82 |
| ANXA11    | 3.70E-86 | 0.246891 | 0.263 | 0.009 | 5.53E-82 |
| COL5A2    | 4.02E-86 | 0.321596 | 0.297 | 0.012 | 6.01E-82 |
| C22orf29  | 4.73E-86 | 0.124477 | 0.215 | 0.015 | 7.07E-82 |
| DGAT1     | 4.90E-86 | 0.240911 | 0.261 | 0.009 | 7.32E-82 |
| NEO1      | 5.51E-86 | 0.165047 | 0.224 | 0.012 | 8.24E-82 |
| VPS13A    | 5.65E-86 | 0.166204 | 0.229 | 0.015 | 8.44E-82 |
| TRIOBP    | 6.52E-86 | 0.260821 | 0.258 | 0.007 | 9.74E-82 |
| PPP2R2D   | 6.53E-86 | 0.253389 | 0.251 | 0.005 | 9.76E-82 |
| GOLGA8A   | 6.58E-86 | 0.217906 | 0.257 | 0.014 | 9.84E-82 |
| CA11      | 8.04E-86 | 0.130957 | 0.272 | 0.039 | 1.20E-81 |
| TP53INP2  | 8.27E-86 | 0.184513 | 0.231 | 0.01  | 1.24E-81 |
| IQCE      | 8.94E-86 | 0.229668 | 0.27  | 0.017 | 1.34E-81 |
| E2F5      | 1.08E-85 | 0.35035  | 0.299 | 0.002 | 1.61E-81 |
| DOT1L     | 1.17E-85 | 0.212821 | 0.26  | 0.017 | 1.74E-81 |
| KTI12     | 1.54E-85 | 0.217607 | 0.264 | 0.014 | 2.30E-81 |
| TRIM14    | 1.62E-85 | 0.176928 | 0.238 | 0.015 | 2.42E-81 |
| NFKBIZ    | 1.65E-85 | -0.11421 | 0.21  | 0.058 | 2.47E-81 |
| ASXL2     | 1.71E-85 | 0.213354 | 0.254 | 0.014 | 2.55E-81 |
| MSH2      | 1.88E-85 | 0.144569 | 0.236 | 0.021 | 2.81E-81 |
| COG5      | 1.92E-85 | 0.113975 | 0.233 | 0.024 | 2.87E-81 |
| AC091729. | 2.15E-85 | 0.210344 | 0.259 | 0.017 | 3.21E-81 |
| BACH1     | 2.16E-85 | 0.103971 | 0.207 | 0.021 | 3.23E-81 |
| UTRN      | 2.29E-85 | 0.181251 | 0.255 | 0.021 | 3.43E-81 |
| CTPS1     | 2.34E-85 | 0.100484 | 0.229 | 0.022 | 3.49E-81 |
| OBFC1     | 2.63E-85 | 0.177209 | 0.218 | 0.007 | 3.93E-81 |
| ZNF334    | 2.90E-85 | 0.148374 | 0.229 | 0.019 | 4.33E-81 |
| SLC16A3   | 3.24E-85 | 0.332215 | 0.308 | 0.022 | 4.84E-81 |
| ICK       | 3.26E-85 | 0.126403 | 0.211 | 0.015 | 4.87E-81 |
| SLC38A7   | 3.38E-85 | 0.121612 | 0.229 | 0.022 | 5.05E-81 |
| MEMO1     | 3.42E-85 | 0.13598  | 0.227 | 0.022 | 5.12E-81 |
| FAM214B   | 3.46E-85 | 0.315448 | 0.29  | 0.007 | 5.17E-81 |
| FBXL17    | 3.65E-85 | 0.273931 | 0.272 | 0.009 | 5.46E-81 |
| ABCA3     | 3.70E-85 | 0.142281 | 0.239 | 0.021 | 5.53E-81 |
| ZNF395    | 4.20E-85 | -0.12675 | 0.153 | 0.032 | 6.28E-81 |
| DDHD1     | 5.27E-85 | 0.120763 | 0.231 | 0.022 | 7.88E-81 |
| ZNF512B   | 5.41E-85 | 0.321309 | 0.302 | 0.01  | 8.09E-81 |
| PLCD3     | 5.57E-85 | 0.366442 | 0.309 | 0.007 | 8.32E-81 |
| GUF1      | 6.03E-85 | 0.219502 | 0.258 | 0.012 | 9.01E-81 |
| RMND5A    | 6.39E-85 | 0.13665  | 0.244 | 0.029 | 9.54E-81 |
| ARSD      | 6.49E-85 | 0.106248 | 0.214 | 0.022 | 9.70E-81 |
| TAOK2     | 6.50E-85 | 0.252317 | 0.264 | 0.01  | 9.71E-81 |
| SEC24B    | 6.62E-85 | 0.1476   | 0.22  | 0.012 | 9.89E-81 |
| EPC2      | 7.40E-85 | 0.134412 | 0.219 | 0.021 | 1.11E-80 |
| ALCAM     | 7.97E-85 | 0.275333 | 0.286 | 0.019 | 1.19E-80 |
| UBE3C     | 9.01E-85 | 0.189906 | 0.26  | 0.022 | 1.35E-80 |
| NR2C1     | 1.06E-84 | 0.152873 | 0.233 | 0.017 | 1.59E-80 |
| VPS9D1    | 1.15E-84 | 0.104554 | 0.214 | 0.015 | 1.72E-80 |
| PYG02     | 1.21E-84 | 0.145584 | 0.22  | 0.015 | 1.80E-80 |

|           |          |          |       |       |          |
|-----------|----------|----------|-------|-------|----------|
| CAAP1     | 1.37E-84 | 0.159356 | 0.217 | 0.012 | 2.04E-80 |
| FILIP1L   | 1.49E-84 | 0.370391 | 0.311 | 0.014 | 2.23E-80 |
| ZDHHHC15  | 1.62E-84 | 0.187161 | 0.229 | 0.01  | 2.42E-80 |
| KIAA0930  | 1.64E-84 | 0.150084 | 0.209 | 0.01  | 2.46E-80 |
| RYBP      | 1.77E-84 | 0.1392   | 0.219 | 0.017 | 2.65E-80 |
| ESYT1     | 1.89E-84 | 0.135297 | 0.219 | 0.019 | 2.83E-80 |
| WDR3      | 1.90E-84 | 0.219189 | 0.26  | 0.017 | 2.84E-80 |
| FAT3      | 2.07E-84 | 0.174775 | 0.255 | 0.022 | 3.09E-80 |
| C3orf70   | 2.41E-84 | 0.217979 | 0.273 | 0.022 | 3.61E-80 |
| TIMP4     | 2.48E-84 | -0.28457 | 0.265 | 0.099 | 3.70E-80 |
| NR1D1     | 2.68E-84 | -0.23801 | 0.151 | 0.041 | 4.01E-80 |
| SNCAIP    | 2.74E-84 | 0.18107  | 0.264 | 0.024 | 4.09E-80 |
| TBL1X     | 3.02E-84 | 0.175101 | 0.231 | 0.009 | 4.52E-80 |
| MSH3      | 3.10E-84 | 0.342123 | 0.29  | 0.005 | 4.63E-80 |
| KATNAL1   | 3.40E-84 | 0.256913 | 0.272 | 0.012 | 5.08E-80 |
| ZNF714    | 3.88E-84 | -0.14422 | 0.188 | 0.058 | 5.79E-80 |
| ST3GAL3   | 3.97E-84 | 0.201985 | 0.244 | 0.012 | 5.93E-80 |
| PLEKHG1   | 4.05E-84 | 0.284069 | 0.279 | 0.009 | 6.06E-80 |
| SRCAP     | 4.41E-84 | 0.220727 | 0.251 | 0.012 | 6.59E-80 |
| PARD3     | 4.53E-84 | 0.25732  | 0.265 | 0.009 | 6.77E-80 |
| TMEM8A    | 4.84E-84 | 0.200913 | 0.242 | 0.01  | 7.23E-80 |
| LRFN4     | 5.99E-84 | 0.290716 | 0.284 | 0.005 | 8.96E-80 |
| PCNXL2    | 6.51E-84 | 0.145826 | 0.241 | 0.021 | 9.73E-80 |
| RP11-115C | 6.70E-84 | 0.162696 | 0.238 | 0.019 | 1.00E-79 |
| PODXL     | 6.74E-84 | 0.263282 | 0.26  | 0.01  | 1.01E-79 |
| RNF166    | 7.15E-84 | 0.128639 | 0.234 | 0.024 | 1.07E-79 |
| TGIF2     | 7.23E-84 | 0.352267 | 0.31  | 0.005 | 1.08E-79 |
| TMEM19    | 1.03E-83 | 0.184502 | 0.256 | 0.019 | 1.54E-79 |
| MOSPD2    | 1.05E-83 | 0.122444 | 0.217 | 0.019 | 1.58E-79 |
| GALNT7    | 1.26E-83 | 0.218645 | 0.249 | 0.014 | 1.89E-79 |
| ZDHHHC21  | 1.51E-83 | 0.216556 | 0.253 | 0.012 | 2.26E-79 |
| MAPK11    | 1.69E-83 | 0.197073 | 0.238 | 0.012 | 2.53E-79 |
| RBM19     | 1.74E-83 | 0.148716 | 0.221 | 0.015 | 2.59E-79 |
| MAN2A2    | 1.80E-83 | 0.107575 | 0.197 | 0.014 | 2.69E-79 |
| TYMP      | 1.91E-83 | 0.126099 | 0.215 | 0.019 | 2.85E-79 |
| NEK8      | 1.91E-83 | 0.148462 | 0.212 | 0.012 | 2.86E-79 |
| STARD10   | 2.07E-83 | 0.121611 | 0.217 | 0.017 | 3.09E-79 |
| ENTHD2    | 2.11E-83 | 0.10498  | 0.206 | 0.019 | 3.16E-79 |
| SASH1     | 2.86E-83 | 0.106258 | 0.233 | 0.027 | 4.28E-79 |
| VSTM2A    | 3.08E-83 | -1.14898 | 0.102 | 0.258 | 4.61E-79 |
| RAD51D    | 3.23E-83 | 0.109248 | 0.21  | 0.017 | 4.82E-79 |
| DIRC2     | 3.24E-83 | 0.167005 | 0.219 | 0.012 | 4.84E-79 |
| EMP2      | 3.24E-83 | -0.25461 | 0.165 | 0.053 | 4.85E-79 |
| HAUS8     | 3.33E-83 | -0.11466 | 0.152 | 0.027 | 4.97E-79 |
| KIAA0430  | 3.71E-83 | 0.124796 | 0.226 | 0.024 | 5.55E-79 |
| RP1-79C4. | 4.03E-83 | 0.179057 | 0.232 | 0.014 | 6.02E-79 |
| ANKMY2    | 4.20E-83 | -0.20306 | 0.174 | 0.05  | 6.28E-79 |
| SERPINE1  | 4.38E-83 | -0.59393 | 0.146 | 0.091 | 6.54E-79 |
| PIANP     | 4.89E-83 | 0.282544 | 0.276 | 0.01  | 7.31E-79 |
| SLC35D1   | 6.00E-83 | 0.183164 | 0.229 | 0.012 | 8.97E-79 |
| EML1      | 6.26E-83 | 0.288095 | 0.275 | 0.009 | 9.35E-79 |

|           |          |          |       |       |          |
|-----------|----------|----------|-------|-------|----------|
| PPP1R14C  | 6.47E-83 | 0.166061 | 0.233 | 0.015 | 9.66E-79 |
| XIST      | 7.03E-83 | -0.76303 | 0.178 | 0.202 | 1.05E-78 |
| CNOT6L    | 7.24E-83 | 0.180958 | 0.234 | 0.015 | 1.08E-78 |
| MIAT      | 7.65E-83 | 0.101849 | 0.269 | 0.044 | 1.14E-78 |
| SRGAP3    | 8.13E-83 | 0.122574 | 0.244 | 0.031 | 1.21E-78 |
| EEFSEC    | 8.68E-83 | 0.167522 | 0.216 | 0.01  | 1.30E-78 |
| NR1D2     | 9.03E-83 | 0.151312 | 0.226 | 0.017 | 1.35E-78 |
| SOX21-AS1 | 9.26E-83 | 0.239442 | 0.279 | 0.022 | 1.38E-78 |
| EYA2      | 9.45E-83 | 0.209188 | 0.272 | 0.024 | 1.41E-78 |
| TMEM260   | 1.26E-82 | 0.213023 | 0.248 | 0.014 | 1.88E-78 |
| UBR3      | 1.69E-82 | 0.121337 | 0.209 | 0.017 | 2.53E-78 |
| ENKD1     | 1.93E-82 | 0.141008 | 0.21  | 0.015 | 2.89E-78 |
| PRKD2     | 1.98E-82 | 0.141133 | 0.221 | 0.014 | 2.96E-78 |
| VPS11     | 2.02E-82 | 0.163972 | 0.236 | 0.019 | 3.02E-78 |
| APOL2     | 2.10E-82 | -0.24936 | 0.204 | 0.062 | 3.14E-78 |
| C18orf8   | 2.43E-82 | 0.166439 | 0.254 | 0.021 | 3.62E-78 |
| POLG      | 4.21E-82 | 0.196282 | 0.238 | 0.012 | 6.28E-78 |
| EP300     | 4.50E-82 | 0.122172 | 0.206 | 0.015 | 6.73E-78 |
| TMEM104   | 4.74E-82 | 0.105982 | 0.199 | 0.015 | 7.08E-78 |
| NAA30     | 4.78E-82 | 0.163944 | 0.227 | 0.014 | 7.15E-78 |
| TRAPPC11  | 5.11E-82 | 0.159384 | 0.223 | 0.014 | 7.63E-78 |
| HEY2      | 5.22E-82 | 0.256658 | 0.269 | 0.014 | 7.80E-78 |
| RP11-977G | 5.28E-82 | 0.237299 | 0.25  | 0.01  | 7.89E-78 |
| TMTC4     | 7.46E-82 | 0.10084  | 0.22  | 0.026 | 1.11E-77 |
| FKBP7     | 7.96E-82 | -0.18865 | 0.144 | 0.039 | 1.19E-77 |
| TTL4      | 9.35E-82 | 0.106101 | 0.219 | 0.024 | 1.40E-77 |
| SCAMP5    | 9.77E-82 | 0.208151 | 0.248 | 0.014 | 1.46E-77 |
| FBXO28    | 1.04E-81 | 0.159747 | 0.217 | 0.014 | 1.55E-77 |
| PARP4     | 1.04E-81 | 0.154848 | 0.205 | 0.01  | 1.55E-77 |
| PDSS2     | 1.29E-81 | 0.117222 | 0.223 | 0.021 | 1.92E-77 |
| COG8      | 1.75E-81 | 0.145715 | 0.234 | 0.024 | 2.62E-77 |
| HECTD4    | 2.01E-81 | 0.111828 | 0.208 | 0.022 | 3.00E-77 |
| ZNF708    | 2.43E-81 | 0.155723 | 0.241 | 0.024 | 3.64E-77 |
| XPNPEP3   | 2.53E-81 | 0.124688 | 0.227 | 0.022 | 3.78E-77 |
| SHC4      | 2.75E-81 | 0.20481  | 0.24  | 0.014 | 4.11E-77 |
| FAM135A   | 2.80E-81 | 0.103051 | 0.207 | 0.021 | 4.18E-77 |
| RP11-400F | 3.27E-81 | 0.284203 | 0.27  | 0.007 | 4.88E-77 |
| FBN2      | 3.37E-81 | 0.224719 | 0.245 | 0.012 | 5.04E-77 |
| CD302     | 3.66E-81 | 0.155652 | 0.219 | 0.014 | 5.47E-77 |
| IRGQ      | 3.74E-81 | 0.179479 | 0.241 | 0.017 | 5.60E-77 |
| YTHDF3-AS | 4.33E-81 | 0.182598 | 0.228 | 0.01  | 6.47E-77 |
| MT1G      | 4.55E-81 | -0.84138 | 0.122 | 0.126 | 6.79E-77 |
| MAFG-AS1  | 4.58E-81 | 0.324729 | 0.294 | 0.007 | 6.84E-77 |
| WDR75     | 4.97E-81 | 0.109446 | 0.235 | 0.029 | 7.43E-77 |
| PLD2      | 5.50E-81 | 0.122524 | 0.191 | 0.01  | 8.22E-77 |
| ZNF606    | 6.19E-81 | 0.145653 | 0.241 | 0.024 | 9.24E-77 |
| ZNF431    | 6.22E-81 | -0.17023 | 0.144 | 0.05  | 9.30E-77 |
| RGAG4     | 6.81E-81 | 0.274529 | 0.267 | 0.009 | 1.02E-76 |
| THBS3     | 7.60E-81 | 0.15116  | 0.217 | 0.015 | 1.14E-76 |
| AP4S1     | 8.01E-81 | -0.15835 | 0.118 | 0.024 | 1.20E-76 |
| PLAUR     | 8.81E-81 | -0.43349 | 0.135 | 0.068 | 1.32E-76 |

|           |          |          |       |       |          |
|-----------|----------|----------|-------|-------|----------|
| CAMSAP1   | 1.02E-80 | 0.101358 | 0.176 | 0.01  | 1.53E-76 |
| ZNF668    | 1.12E-80 | 0.203017 | 0.228 | 0.01  | 1.68E-76 |
| LZTFL1    | 1.13E-80 | -0.2066  | 0.153 | 0.051 | 1.68E-76 |
| PLCE1     | 1.17E-80 | 0.104299 | 0.216 | 0.022 | 1.75E-76 |
| SETD6     | 1.21E-80 | 0.146993 | 0.233 | 0.022 | 1.81E-76 |
| MAPK9     | 1.79E-80 | 0.14687  | 0.209 | 0.014 | 2.67E-76 |
| ZNF211    | 2.09E-80 | -0.1582  | 0.18  | 0.039 | 3.13E-76 |
| STYX      | 2.71E-80 | 0.152326 | 0.212 | 0.01  | 4.05E-76 |
| UBE2E2    | 2.82E-80 | -0.18498 | 0.178 | 0.055 | 4.22E-76 |
| TBC1D25   | 3.05E-80 | 0.116115 | 0.201 | 0.017 | 4.56E-76 |
| KDELR3    | 3.90E-80 | 0.250178 | 0.262 | 0.012 | 5.83E-76 |
| RP11-849I | 3.97E-80 | 0.206774 | 0.285 | 0.032 | 5.94E-76 |
| HSD17B1   | 4.56E-80 | 0.267175 | 0.254 | 0.005 | 6.82E-76 |
| CPEB2     | 4.75E-80 | 0.117677 | 0.204 | 0.019 | 7.10E-76 |
| CDK19     | 6.19E-80 | 0.130999 | 0.222 | 0.021 | 9.25E-76 |
| SLC16A4   | 6.55E-80 | 0.200524 | 0.239 | 0.014 | 9.78E-76 |
| TAB1      | 6.86E-80 | 0.14132  | 0.244 | 0.029 | 1.02E-75 |
| B3GNT5    | 7.40E-80 | 0.235427 | 0.251 | 0.01  | 1.11E-75 |
| TARBP1    | 7.71E-80 | 0.139103 | 0.217 | 0.017 | 1.15E-75 |
| ZNRF3     | 8.54E-80 | 0.213513 | 0.228 | 0.009 | 1.28E-75 |
| THEM6     | 9.59E-80 | 0.164488 | 0.229 | 0.015 | 1.43E-75 |
| HYI       | 9.75E-80 | 0.139177 | 0.238 | 0.026 | 1.46E-75 |
| CSK       | 1.06E-79 | 0.1678   | 0.204 | 0.007 | 1.58E-75 |
| DHX57     | 1.19E-79 | 0.125465 | 0.217 | 0.024 | 1.78E-75 |
| POLR1A    | 1.26E-79 | 0.115232 | 0.189 | 0.012 | 1.88E-75 |
| EFNB3     | 1.35E-79 | 0.183956 | 0.222 | 0.009 | 2.01E-75 |
| KLHDC9    | 1.37E-79 | 0.148593 | 0.228 | 0.019 | 2.04E-75 |
| CTH       | 1.45E-79 | -0.19904 | 0.156 | 0.043 | 2.16E-75 |
| PTPN23    | 1.45E-79 | 0.147427 | 0.208 | 0.01  | 2.17E-75 |
| DYRK1A    | 1.65E-79 | 0.143942 | 0.21  | 0.014 | 2.47E-75 |
| ZNF33A    | 2.09E-79 | 0.11151  | 0.197 | 0.015 | 3.12E-75 |
| FAM171B   | 2.43E-79 | 0.11327  | 0.232 | 0.027 | 3.63E-75 |
| PDE4A     | 2.57E-79 | 0.126016 | 0.209 | 0.017 | 3.83E-75 |
| RPTOR     | 2.79E-79 | 0.114981 | 0.19  | 0.015 | 4.18E-75 |
| MARK4     | 2.95E-79 | 0.14563  | 0.216 | 0.017 | 4.41E-75 |
| TMEM176B  | 2.99E-79 | -0.53026 | 0.171 | 0.101 | 4.47E-75 |
| ASPHD2    | 3.07E-79 | 0.250872 | 0.255 | 0.007 | 4.59E-75 |
| MORC3     | 3.61E-79 | 0.148891 | 0.201 | 0.014 | 5.39E-75 |
| NPB       | 3.95E-79 | 0.233613 | 0.236 | 0.007 | 5.90E-75 |
| ZDHHC16   | 4.84E-79 | 0.328156 | 0.291 | 0.005 | 7.24E-75 |
| SLC11A1   | 5.15E-79 | -0.21857 | 0.12  | 0.043 | 7.70E-75 |
| NAGPA     | 5.50E-79 | 0.256213 | 0.266 | 0.012 | 8.22E-75 |
| USP42     | 6.56E-79 | 0.207112 | 0.241 | 0.014 | 9.80E-75 |
| CTC-338M1 | 7.94E-79 | -0.13887 | 0.172 | 0.039 | 1.19E-74 |
| SLC43A3   | 8.53E-79 | -0.14407 | 0.157 | 0.036 | 1.27E-74 |
| NOVA2     | 8.73E-79 | 0.129601 | 0.202 | 0.015 | 1.30E-74 |
| MYO5A     | 9.73E-79 | 0.313615 | 0.289 | 0.009 | 1.45E-74 |
| MTRNR2L1C | 1.03E-78 | -1.19501 | 0.024 | 0.209 | 1.53E-74 |
| TRAF2     | 1.13E-78 | 0.135823 | 0.203 | 0.012 | 1.69E-74 |
| HSF2      | 1.18E-78 | -0.16764 | 0.15  | 0.038 | 1.76E-74 |
| ANGPTL2   | 1.22E-78 | -0.28422 | 0.183 | 0.084 | 1.82E-74 |

|         |           |           |        |        |           |
|---------|-----------|-----------|--------|--------|-----------|
| DDHD2   | 1. 30E-78 | 0. 175922 | 0. 238 | 0. 021 | 1. 94E-74 |
| ARFGEF2 | 1. 31E-78 | 0. 192257 | 0. 221 | 0. 007 | 1. 96E-74 |
| RNF103  | 1. 34E-78 | 0. 12596  | 0. 211 | 0. 021 | 2. 00E-74 |
| AMOTL1  | 1. 41E-78 | 0. 225261 | 0. 24  | 0. 009 | 2. 11E-74 |
| RELB    | 1. 44E-78 | 0. 323001 | 0. 273 | 0. 002 | 2. 15E-74 |
| CHRNA9  | 1. 45E-78 | 0. 194594 | 0. 247 | 0. 019 | 2. 17E-74 |
| FAM76A  | 1. 47E-78 | 0. 178052 | 0. 246 | 0. 022 | 2. 20E-74 |
| SLC2A13 | 1. 60E-78 | 0. 258964 | 0. 272 | 0. 019 | 2. 40E-74 |
| PRKAR1B | 1. 66E-78 | 0. 137877 | 0. 238 | 0. 022 | 2. 48E-74 |
| NOP14   | 1. 67E-78 | 0. 222921 | 0. 239 | 0. 01  | 2. 49E-74 |
| 6-Sep   | 1. 92E-78 | 0. 283176 | 0. 261 | 0. 005 | 2. 87E-74 |
| TRIM22  | 2. 04E-78 | -0. 15617 | 0. 185 | 0. 053 | 3. 05E-74 |
| MED13L  | 2. 11E-78 | 0. 139749 | 0. 226 | 0. 024 | 3. 15E-74 |
| ITGA5   | 2. 23E-78 | -0. 13376 | 0. 146 | 0. 034 | 3. 33E-74 |
| GTF3C4  | 2. 25E-78 | 0. 166442 | 0. 21  | 0. 012 | 3. 36E-74 |
| RC3H2   | 2. 67E-78 | 0. 279931 | 0. 257 | 0. 005 | 3. 98E-74 |
| PTPN4   | 2. 76E-78 | 0. 175917 | 0. 236 | 0. 019 | 4. 12E-74 |
| DHRS12  | 3. 27E-78 | 0. 183387 | 0. 222 | 0. 012 | 4. 89E-74 |
| ANTXR1  | 4. 56E-78 | 0. 154572 | 0. 222 | 0. 017 | 6. 81E-74 |
| TJAP1   | 4. 89E-78 | 0. 105396 | 0. 202 | 0. 015 | 7. 31E-74 |
| TSPYL2  | 5. 20E-78 | -0. 15699 | 0. 14  | 0. 029 | 7. 78E-74 |
| SERAC1  | 6. 45E-78 | -0. 27851 | 0. 125 | 0. 027 | 9. 64E-74 |
| CENPQ   | 6. 52E-78 | 0. 126058 | 0. 215 | 0. 017 | 9. 74E-74 |
| SPATA2  | 7. 34E-78 | 0. 124864 | 0. 193 | 0. 007 | 1. 10E-73 |
| KCNJ16  | 7. 49E-78 | 0. 20037  | 0. 244 | 0. 019 | 1. 12E-73 |
| INSM1   | 7. 74E-78 | 0. 246417 | 0. 248 | 0. 012 | 1. 16E-73 |
| TRIM7   | 8. 15E-78 | 0. 204134 | 0. 223 | 0. 005 | 1. 22E-73 |
| NME2    | 8. 86E-78 | 0. 2373   | 0. 241 | 0. 007 | 1. 32E-73 |
| RFX1    | 9. 06E-78 | 0. 245894 | 0. 261 | 0. 012 | 1. 35E-73 |
| FRMD5   | 1. 05E-77 | 0. 312394 | 0. 273 | 0. 003 | 1. 57E-73 |
| MFAP3L  | 1. 13E-77 | 0. 165354 | 0. 213 | 0. 01  | 1. 69E-73 |
| MINPP1  | 1. 21E-77 | 0. 147306 | 0. 24  | 0. 026 | 1. 80E-73 |
| THOC5   | 1. 23E-77 | 0. 133723 | 0. 201 | 0. 017 | 1. 84E-73 |
| VAV3    | 1. 33E-77 | 0. 195328 | 0. 256 | 0. 026 | 1. 99E-73 |
| CBWD5   | 1. 45E-77 | 0. 106058 | 0. 223 | 0. 026 | 2. 17E-73 |
| BOK     | 1. 82E-77 | 0. 376866 | 0. 3   | 0      | 2. 71E-73 |
| APOC1   | 2. 16E-77 | -0. 57892 | 0. 168 | 0. 128 | 3. 23E-73 |
| POT1    | 2. 41E-77 | -0. 14565 | 0. 153 | 0. 041 | 3. 61E-73 |
| PHACTR2 | 2. 79E-77 | 0. 361484 | 0. 292 | 0. 002 | 4. 17E-73 |
| ZZEF1   | 2. 99E-77 | 0. 220236 | 0. 239 | 0. 012 | 4. 47E-73 |
| CD2AP   | 3. 25E-77 | 0. 178405 | 0. 223 | 0. 012 | 4. 86E-73 |
| UTP14A  | 3. 34E-77 | 0. 151812 | 0. 213 | 0. 014 | 5. 00E-73 |
| SMG5    | 3. 55E-77 | 0. 115188 | 0. 219 | 0. 022 | 5. 31E-73 |
| ARC     | 3. 63E-77 | -0. 24203 | 0. 314 | 0. 14  | 5. 42E-73 |
| SS18L1  | 3. 96E-77 | 0. 288051 | 0. 263 | 0. 007 | 5. 92E-73 |
| FAM195B | 4. 66E-77 | -0. 93474 | 0. 083 | 0. 147 | 6. 96E-73 |
| TTBK2   | 4. 90E-77 | 0. 120489 | 0. 198 | 0. 017 | 7. 32E-73 |
| ANGPTL1 | 5. 05E-77 | 0. 13676  | 0. 198 | 0. 012 | 7. 54E-73 |
| BRINP2  | 5. 07E-77 | 0. 346094 | 0. 28  | 0. 01  | 7. 58E-73 |
| ADAM15  | 6. 84E-77 | 0. 116364 | 0. 215 | 0. 022 | 1. 02E-72 |
| CBX8    | 7. 96E-77 | 0. 155583 | 0. 217 | 0. 017 | 1. 19E-72 |



|           |          |          |       |       |          |
|-----------|----------|----------|-------|-------|----------|
| HOXD-AS2  | 1.09E-76 | 0.152571 | 0.191 | 0.007 | 1.63E-72 |
| CHST14    | 1.10E-76 | 0.334212 | 0.291 | 0.007 | 1.64E-72 |
| ZMYM3     | 1.33E-76 | 0.186237 | 0.228 | 0.015 | 1.99E-72 |
| RDH10     | 1.40E-76 | 0.204864 | 0.266 | 0.029 | 2.09E-72 |
| SHC3      | 1.44E-76 | 0.15347  | 0.214 | 0.017 | 2.15E-72 |
| GKAP1     | 1.46E-76 | 0.127292 | 0.21  | 0.019 | 2.19E-72 |
| MIR4458HG | 1.50E-76 | -0.57852 | 0.196 | 0.183 | 2.24E-72 |
| ALKBH1    | 1.58E-76 | -0.13317 | 0.125 | 0.027 | 2.36E-72 |
| CDK17     | 1.74E-76 | 0.214625 | 0.261 | 0.024 | 2.61E-72 |
| AEBP2     | 2.02E-76 | 0.237962 | 0.254 | 0.014 | 3.01E-72 |
| PCSK5     | 2.14E-76 | 0.111038 | 0.22  | 0.026 | 3.20E-72 |
| OSGEPL1   | 2.27E-76 | -0.1073  | 0.135 | 0.031 | 3.40E-72 |
| PIGZ      | 2.44E-76 | 0.243343 | 0.238 | 0.005 | 3.65E-72 |
| FGF2      | 2.45E-76 | 0.141036 | 0.2   | 0.01  | 3.65E-72 |
| UBE4B     | 3.07E-76 | 0.154671 | 0.236 | 0.022 | 4.59E-72 |
| ZNF25     | 3.18E-76 | 0.151587 | 0.225 | 0.019 | 4.75E-72 |
| RP11-81A2 | 3.44E-76 | 0.223366 | 0.23  | 0.007 | 5.13E-72 |
| SEC61A2   | 3.72E-76 | 0.140458 | 0.215 | 0.014 | 5.56E-72 |
| RNF38     | 3.81E-76 | 0.148595 | 0.201 | 0.01  | 5.69E-72 |
| TSC22D2   | 3.87E-76 | 0.100841 | 0.201 | 0.021 | 5.79E-72 |
| OSGIN2    | 4.09E-76 | 0.154678 | 0.206 | 0.012 | 6.11E-72 |
| ATXN7     | 4.37E-76 | 0.188572 | 0.247 | 0.019 | 6.53E-72 |
| SCMH1     | 4.37E-76 | 0.144571 | 0.213 | 0.015 | 6.53E-72 |
| PLK2      | 4.65E-76 | -0.10729 | 0.157 | 0.032 | 6.95E-72 |
| MLYCD     | 4.81E-76 | 0.124589 | 0.189 | 0.012 | 7.19E-72 |
| IPO8      | 6.38E-76 | 0.133503 | 0.21  | 0.019 | 9.53E-72 |
| MSTO1     | 7.24E-76 | 0.209691 | 0.24  | 0.014 | 1.08E-71 |
| FASTKD3   | 7.88E-76 | 0.166386 | 0.217 | 0.014 | 1.18E-71 |
| ZNF558    | 8.08E-76 | 0.241415 | 0.253 | 0.014 | 1.21E-71 |
| SLC41A1   | 1.15E-75 | 0.112975 | 0.21  | 0.021 | 1.73E-71 |
| SLC25A44  | 1.39E-75 | 0.201394 | 0.223 | 0.009 | 2.07E-71 |
| UBE2C     | 1.39E-75 | 0.15456  | 0.2   | 0.01  | 2.08E-71 |
| VPS39     | 2.26E-75 | 0.151845 | 0.203 | 0.014 | 3.38E-71 |
| PAQR3     | 2.83E-75 | 0.220495 | 0.233 | 0.01  | 4.23E-71 |
| LARP4B    | 3.63E-75 | 0.193966 | 0.224 | 0.009 | 5.43E-71 |
| ARID2     | 3.79E-75 | 0.105651 | 0.225 | 0.029 | 5.66E-71 |
| ZNF787    | 4.74E-75 | 0.305105 | 0.272 | 0.003 | 7.09E-71 |
| VAX2      | 5.35E-75 | 0.12953  | 0.187 | 0.01  | 8.00E-71 |
| DNAJC3-AS | 6.35E-75 | -0.11676 | 0.13  | 0.032 | 9.48E-71 |
| ZBTB25    | 6.46E-75 | 0.184439 | 0.221 | 0.012 | 9.66E-71 |
| RALGDS    | 6.58E-75 | 0.147764 | 0.242 | 0.027 | 9.83E-71 |
| COA7      | 6.85E-75 | -0.20553 | 0.132 | 0.036 | 1.02E-70 |
| TTC26     | 6.95E-75 | -0.19294 | 0.103 | 0.029 | 1.04E-70 |
| COPZ2     | 7.25E-75 | 0.146723 | 0.193 | 0.01  | 1.08E-70 |
| PIGG      | 7.84E-75 | 0.18913  | 0.225 | 0.014 | 1.17E-70 |
| SOS1      | 8.27E-75 | 0.142047 | 0.214 | 0.019 | 1.24E-70 |
| PXMP4     | 8.39E-75 | 0.121175 | 0.181 | 0.01  | 1.25E-70 |
| BCL3      | 9.12E-75 | 0.154731 | 0.2   | 0.01  | 1.36E-70 |
| LRRTM3    | 9.16E-75 | 0.308035 | 0.258 | 0.005 | 1.37E-70 |
| NID1      | 9.69E-75 | 0.26453  | 0.254 | 0.007 | 1.45E-70 |
| THAP6     | 1.05E-74 | 0.116208 | 0.198 | 0.015 | 1.57E-70 |

|           |          |          |       |       |          |
|-----------|----------|----------|-------|-------|----------|
| F12       | 1.08E-74 | 0.347734 | 0.288 | 0.009 | 1.61E-70 |
| SOS2      | 1.34E-74 | 0.249776 | 0.247 | 0.01  | 2.01E-70 |
| STAT5B    | 1.43E-74 | 0.100128 | 0.193 | 0.017 | 2.13E-70 |
| PRMT7     | 1.51E-74 | 0.105092 | 0.22  | 0.027 | 2.26E-70 |
| DDX28     | 1.73E-74 | 0.110769 | 0.198 | 0.019 | 2.59E-70 |
| TLN2      | 2.94E-74 | 0.129668 | 0.207 | 0.017 | 4.40E-70 |
| ERAP2     | 3.33E-74 | 0.145337 | 0.244 | 0.031 | 4.97E-70 |
| ZNF598    | 3.39E-74 | 0.20579  | 0.21  | 0.005 | 5.06E-70 |
| FAM193A   | 3.45E-74 | 0.155887 | 0.219 | 0.017 | 5.16E-70 |
| SPHK1     | 4.60E-74 | 0.363087 | 0.283 | 0.005 | 6.87E-70 |
| SLC16A2   | 4.60E-74 | 0.191604 | 0.218 | 0.01  | 6.88E-70 |
| KAZN      | 4.67E-74 | 0.117236 | 0.211 | 0.019 | 6.98E-70 |
| PLEKHH2   | 4.88E-74 | 0.233729 | 0.25  | 0.017 | 7.29E-70 |
| XAF1      | 5.20E-74 | -0.26961 | 0.241 | 0.097 | 7.77E-70 |
| ZMYND19   | 6.96E-74 | 0.220907 | 0.223 | 0.003 | 1.04E-69 |
| HIST2H2AC | 6.96E-74 | 0.142498 | 0.179 | 0.005 | 1.04E-69 |
| C9orf3    | 8.13E-74 | -0.3712  | 0.135 | 0.07  | 1.22E-69 |
| NR2E1     | 8.75E-74 | 0.257181 | 0.242 | 0.007 | 1.31E-69 |
| ZNF629    | 9.14E-74 | 0.239357 | 0.243 | 0.01  | 1.37E-69 |
| RRM2B     | 9.23E-74 | 0.10378  | 0.197 | 0.022 | 1.38E-69 |
| TRAPPC2   | 1.05E-73 | 0.124368 | 0.212 | 0.022 | 1.58E-69 |
| TOX       | 1.16E-73 | 0.21741  | 0.238 | 0.012 | 1.74E-69 |
| AGO2      | 1.22E-73 | 0.114594 | 0.181 | 0.01  | 1.82E-69 |
| ITGA6     | 1.23E-73 | 0.143606 | 0.19  | 0.009 | 1.84E-69 |
| LRTOMT    | 1.38E-73 | 0.116545 | 0.203 | 0.015 | 2.07E-69 |
| DHRS3     | 1.45E-73 | -0.2586  | 0.16  | 0.055 | 2.17E-69 |
| TLE2      | 1.51E-73 | 0.200713 | 0.261 | 0.027 | 2.26E-69 |
| JMJD4     | 1.52E-73 | 0.104118 | 0.184 | 0.015 | 2.28E-69 |
| RCOR1     | 1.53E-73 | 0.144516 | 0.2   | 0.014 | 2.29E-69 |
| LRRC45    | 1.72E-73 | 0.283621 | 0.269 | 0.009 | 2.57E-69 |
| PIGO      | 2.21E-73 | 0.122789 | 0.206 | 0.017 | 3.30E-69 |
| PPP3CB    | 2.22E-73 | 0.132685 | 0.211 | 0.021 | 3.32E-69 |
| FBXO45    | 2.29E-73 | 0.160142 | 0.191 | 0.007 | 3.42E-69 |
| SNHG12    | 2.43E-73 | -0.26202 | 0.123 | 0.044 | 3.63E-69 |
| FLRT3     | 2.47E-73 | 0.121445 | 0.223 | 0.026 | 3.69E-69 |
| RNFT2     | 2.78E-73 | 0.176224 | 0.191 | 0.005 | 4.15E-69 |
| YPEL1     | 3.12E-73 | 0.29137  | 0.266 | 0.009 | 4.66E-69 |
| KIAA1958  | 3.38E-73 | 0.177811 | 0.229 | 0.019 | 5.05E-69 |
| MAML1     | 3.51E-73 | 0.171053 | 0.206 | 0.01  | 5.24E-69 |
| RAB11FIP2 | 3.57E-73 | 0.14773  | 0.181 | 0.007 | 5.33E-69 |
| WDFY3     | 3.57E-73 | 0.157276 | 0.204 | 0.015 | 5.34E-69 |
| CXorf23   | 4.38E-73 | 0.121037 | 0.181 | 0.01  | 6.54E-69 |
| SRSF12    | 4.67E-73 | 0.173585 | 0.209 | 0.01  | 6.98E-69 |
| PRUNE2    | 5.24E-73 | -0.26483 | 0.187 | 0.08  | 7.82E-69 |
| MGST1     | 6.58E-73 | -1.34737 | 0.041 | 0.188 | 9.84E-69 |
| CTHRC1    | 7.54E-73 | 0.432003 | 0.29  | 0.003 | 1.13E-68 |
| PDLIM3    | 8.11E-73 | -0.37488 | 0.185 | 0.103 | 1.21E-68 |
| SLC30A1   | 8.20E-73 | 0.239561 | 0.236 | 0.005 | 1.22E-68 |
| DUSP5     | 9.17E-73 | 0.146927 | 0.198 | 0.012 | 1.37E-68 |
| IFT80     | 9.63E-73 | 0.142351 | 0.21  | 0.022 | 1.44E-68 |
| CLOCK     | 9.66E-73 | 0.206364 | 0.25  | 0.024 | 1.44E-68 |

|          |          |          |       |       |          |
|----------|----------|----------|-------|-------|----------|
| NAT10    | 1.02E-72 | 0.170401 | 0.216 | 0.017 | 1.53E-68 |
| EHD1     | 1.04E-72 | 0.184084 | 0.234 | 0.019 | 1.55E-68 |
| ALDOC    | 1.17E-72 | -0.46511 | 0.276 | 0.183 | 1.75E-68 |
| MMP15    | 1.31E-72 | 0.253563 | 0.237 | 0.005 | 1.96E-68 |
| VCPIP1   | 1.61E-72 | 0.27075  | 0.251 | 0.007 | 2.40E-68 |
| SGTB     | 1.62E-72 | 0.181746 | 0.222 | 0.015 | 2.42E-68 |
| FAM120B  | 2.01E-72 | 0.139836 | 0.203 | 0.012 | 3.00E-68 |
| SLC25A32 | 2.14E-72 | 0.12652  | 0.197 | 0.015 | 3.19E-68 |
| HMOX1    | 2.37E-72 | -0.38868 | 0.13  | 0.051 | 3.55E-68 |
| MNS1     | 2.64E-72 | 0.164255 | 0.209 | 0.014 | 3.94E-68 |
| WWP1     | 2.68E-72 | 0.175498 | 0.206 | 0.01  | 4.00E-68 |
| TRIM5    | 3.15E-72 | 0.100704 | 0.166 | 0.01  | 4.71E-68 |
| ALAD     | 3.16E-72 | 0.119901 | 0.198 | 0.014 | 4.72E-68 |
| ARHGAP17 | 3.27E-72 | 0.187636 | 0.204 | 0.007 | 4.88E-68 |
| LRRN2    | 3.29E-72 | 0.260064 | 0.244 | 0.009 | 4.92E-68 |
| PRDM4    | 3.42E-72 | 0.161502 | 0.206 | 0.012 | 5.11E-68 |
| NAAA     | 4.11E-72 | 0.216396 | 0.219 | 0.005 | 6.14E-68 |
| OSBPL10  | 4.22E-72 | 0.228662 | 0.216 | 0.003 | 6.30E-68 |
| TAF1C    | 4.58E-72 | 0.15489  | 0.212 | 0.015 | 6.84E-68 |
| PIK3CA   | 4.58E-72 | 0.139211 | 0.207 | 0.019 | 6.84E-68 |
| SYBU     | 4.68E-72 | 0.224577 | 0.258 | 0.024 | 6.99E-68 |
| CCDC57   | 6.17E-72 | 0.121664 | 0.175 | 0.009 | 9.23E-68 |
| C5orf63  | 6.23E-72 | -0.10528 | 0.147 | 0.032 | 9.31E-68 |
| LPCAT4   | 6.25E-72 | 0.209356 | 0.218 | 0.007 | 9.33E-68 |
| KLF16    | 6.96E-72 | 0.144971 | 0.187 | 0.01  | 1.04E-67 |
| KAT2B    | 7.44E-72 | 0.115958 | 0.202 | 0.015 | 1.11E-67 |
| CMTR1    | 7.68E-72 | 0.102584 | 0.188 | 0.017 | 1.15E-67 |
| ZNF445   | 8.97E-72 | -0.13145 | 0.125 | 0.036 | 1.34E-67 |
| ATXN7L3  | 1.01E-71 | 0.143609 | 0.181 | 0.009 | 1.51E-67 |
| ZC3H4    | 1.03E-71 | 0.232842 | 0.252 | 0.019 | 1.55E-67 |
| DNAJC16  | 1.10E-71 | 0.206622 | 0.236 | 0.012 | 1.64E-67 |
| KIAA1328 | 1.14E-71 | -0.12484 | 0.128 | 0.032 | 1.70E-67 |
| POFUT2   | 1.19E-71 | 0.137607 | 0.2   | 0.015 | 1.77E-67 |
| AP3M2    | 1.23E-71 | 0.170776 | 0.217 | 0.01  | 1.84E-67 |
| TADA2A   | 1.31E-71 | 0.169878 | 0.207 | 0.01  | 1.96E-67 |
| BMPR1A   | 1.35E-71 | 0.119341 | 0.204 | 0.019 | 2.01E-67 |
| RGL3     | 1.89E-71 | 0.139059 | 0.194 | 0.012 | 2.82E-67 |
| TTL3     | 1.92E-71 | 0.124751 | 0.195 | 0.015 | 2.87E-67 |
| ZNF775   | 1.94E-71 | 0.270136 | 0.247 | 0.007 | 2.90E-67 |
| NMRK1    | 2.15E-71 | -0.12984 | 0.148 | 0.034 | 3.21E-67 |
| DONSON   | 2.17E-71 | 0.211244 | 0.214 | 0.005 | 3.24E-67 |
| CERK     | 2.39E-71 | 0.222602 | 0.229 | 0.007 | 3.57E-67 |
| C3       | 2.72E-71 | -1.03845 | 0.077 | 0.168 | 4.07E-67 |
| VPS18    | 2.75E-71 | 0.138038 | 0.197 | 0.012 | 4.11E-67 |
| THBS4    | 2.97E-71 | 0.176394 | 0.219 | 0.015 | 4.44E-67 |
| GTPBP1   | 3.00E-71 | 0.150462 | 0.2   | 0.015 | 4.48E-67 |
| AHCTF1   | 3.03E-71 | 0.138055 | 0.211 | 0.019 | 4.53E-67 |
| SMIM13   | 3.20E-71 | 0.233955 | 0.236 | 0.01  | 4.78E-67 |
| GID4     | 3.21E-71 | 0.108887 | 0.169 | 0.009 | 4.80E-67 |
| UNC119B  | 3.33E-71 | 0.158962 | 0.212 | 0.014 | 4.97E-67 |
| NCBP1    | 3.55E-71 | 0.179487 | 0.202 | 0.007 | 5.30E-67 |

|           |          |          |       |       |          |
|-----------|----------|----------|-------|-------|----------|
| ZBTB45    | 4.03E-71 | 0.111137 | 0.182 | 0.012 | 6.02E-67 |
| NCS1      | 4.84E-71 | 0.130382 | 0.18  | 0.01  | 7.23E-67 |
| ZNF234    | 4.92E-71 | 0.158487 | 0.196 | 0.01  | 7.35E-67 |
| ABCA2     | 5.26E-71 | 0.211123 | 0.245 | 0.017 | 7.85E-67 |
| RAP2B     | 5.97E-71 | 0.231796 | 0.236 | 0.01  | 8.92E-67 |
| PTPRN2    | 6.34E-71 | -0.44371 | 0.163 | 0.092 | 9.48E-67 |
| SSH1      | 6.35E-71 | 0.132476 | 0.187 | 0.012 | 9.49E-67 |
| MSANTD2   | 7.87E-71 | 0.108844 | 0.178 | 0.014 | 1.18E-66 |
| PGBD1     | 8.24E-71 | 0.158192 | 0.196 | 0.01  | 1.23E-66 |
| RPS6KA4   | 8.52E-71 | 0.242129 | 0.236 | 0.009 | 1.27E-66 |
| CARD16    | 9.12E-71 | -0.39844 | 0.225 | 0.116 | 1.36E-66 |
| COX18     | 1.18E-70 | 0.108024 | 0.195 | 0.019 | 1.77E-66 |
| ALS2      | 1.20E-70 | 0.134761 | 0.178 | 0.009 | 1.80E-66 |
| MTMR3     | 1.25E-70 | 0.136644 | 0.197 | 0.014 | 1.87E-66 |
| GORASP1   | 1.35E-70 | 0.122442 | 0.215 | 0.026 | 2.01E-66 |
| ZNF320    | 1.57E-70 | 0.135115 | 0.173 | 0.007 | 2.35E-66 |
| PPP1R12C  | 1.60E-70 | 0.231281 | 0.238 | 0.012 | 2.39E-66 |
| MAN2A1    | 2.07E-70 | 0.193777 | 0.213 | 0.01  | 3.09E-66 |
| EPSTI1    | 2.23E-70 | -0.49239 | 0.095 | 0.056 | 3.33E-66 |
| FKTN      | 2.39E-70 | 0.161172 | 0.197 | 0.01  | 3.58E-66 |
| FAM111A   | 2.44E-70 | 0.100888 | 0.185 | 0.017 | 3.64E-66 |
| PIP4K2A   | 2.60E-70 | 0.153265 | 0.207 | 0.015 | 3.89E-66 |
| ETV2      | 2.80E-70 | 0.113935 | 0.165 | 0.005 | 4.19E-66 |
| NEK11     | 3.43E-70 | -0.10096 | 0.116 | 0.026 | 5.13E-66 |
| PCDH8     | 3.77E-70 | 0.104974 | 0.181 | 0.014 | 5.63E-66 |
| SLPI      | 4.17E-70 | -1.67134 | 0.033 | 0.209 | 6.23E-66 |
| SENP7     | 4.17E-70 | 0.143323 | 0.207 | 0.019 | 6.24E-66 |
| C14orf37  | 4.24E-70 | 0.225171 | 0.227 | 0.01  | 6.33E-66 |
| C14orf79  | 4.34E-70 | 0.119396 | 0.173 | 0.01  | 6.49E-66 |
| ITGA2     | 5.33E-70 | 0.358355 | 0.267 | 0.007 | 7.96E-66 |
| TARSL2    | 5.38E-70 | 0.215076 | 0.254 | 0.026 | 8.04E-66 |
| PRKCZ     | 5.67E-70 | 0.136716 | 0.197 | 0.015 | 8.47E-66 |
| RNF44     | 6.14E-70 | 0.150936 | 0.198 | 0.014 | 9.18E-66 |
| CCNYL1    | 6.17E-70 | 0.11276  | 0.166 | 0.012 | 9.22E-66 |
| SHB       | 7.17E-70 | 0.213374 | 0.22  | 0.009 | 1.07E-65 |
| RGS2      | 7.80E-70 | -0.86399 | 0.103 | 0.13  | 1.17E-65 |
| SIX5      | 8.12E-70 | 0.13966  | 0.182 | 0.007 | 1.21E-65 |
| SGSH      | 8.97E-70 | 0.164341 | 0.203 | 0.012 | 1.34E-65 |
| DIXDC1    | 9.18E-70 | 0.224636 | 0.22  | 0.007 | 1.37E-65 |
| MVB12B    | 9.93E-70 | 0.102102 | 0.178 | 0.014 | 1.48E-65 |
| BMP1      | 1.05E-69 | 0.124802 | 0.18  | 0.012 | 1.57E-65 |
| RP11-119E | 1.23E-69 | 0.13339  | 0.191 | 0.014 | 1.84E-65 |
| ADNP2     | 1.24E-69 | 0.131015 | 0.182 | 0.01  | 1.85E-65 |
| C12orf4   | 1.38E-69 | 0.111069 | 0.201 | 0.021 | 2.06E-65 |
| RAB6B     | 1.62E-69 | 0.128265 | 0.181 | 0.012 | 2.42E-65 |
| RAB30     | 1.68E-69 | 0.181879 | 0.209 | 0.012 | 2.52E-65 |
| AFAP1     | 1.71E-69 | 0.19664  | 0.216 | 0.012 | 2.55E-65 |
| SLC25A20  | 2.04E-69 | -0.14976 | 0.118 | 0.027 | 3.06E-65 |
| PHRF1     | 2.20E-69 | 0.212714 | 0.22  | 0.009 | 3.29E-65 |
| MORC4     | 2.78E-69 | 0.178413 | 0.219 | 0.014 | 4.15E-65 |
| UTP20     | 2.81E-69 | 0.182759 | 0.203 | 0.009 | 4.21E-65 |

|           |          |          |       |       |          |
|-----------|----------|----------|-------|-------|----------|
| RBAK-RBAK | 2.94E-69 | -0.15754 | 0.156 | 0.046 | 4.39E-65 |
| GABBR1    | 2.98E-69 | 0.122709 | 0.203 | 0.021 | 4.45E-65 |
| RFX3      | 3.19E-69 | 0.22199  | 0.225 | 0.012 | 4.77E-65 |
| ETAA1     | 3.50E-69 | 0.160535 | 0.191 | 0.009 | 5.23E-65 |
| TGFB2     | 3.86E-69 | 0.103487 | 0.207 | 0.026 | 5.76E-65 |
| PLP1      | 3.91E-69 | -0.16314 | 0.209 | 0.058 | 5.85E-65 |
| TBC1D24   | 4.07E-69 | 0.190123 | 0.196 | 0.005 | 6.08E-65 |
| PTPRG     | 4.51E-69 | 0.155594 | 0.217 | 0.019 | 6.73E-65 |
| ZNF35     | 4.76E-69 | 0.100043 | 0.157 | 0.009 | 7.11E-65 |
| ABLIM1    | 5.20E-69 | 0.116762 | 0.197 | 0.019 | 7.76E-65 |
| TRIM23    | 6.56E-69 | 0.108483 | 0.178 | 0.017 | 9.80E-65 |
| PCBD2     | 7.25E-69 | 0.198241 | 0.214 | 0.01  | 1.08E-64 |
| DICER1-AS | 7.29E-69 | -0.14802 | 0.12  | 0.027 | 1.09E-64 |
| KMT2E-AS1 | 7.75E-69 | -0.16691 | 0.156 | 0.039 | 1.16E-64 |
| ATXN80S   | 8.36E-69 | -1.29445 | 0.008 | 0.215 | 1.25E-64 |
| PTBP3     | 1.20E-68 | 0.147618 | 0.197 | 0.014 | 1.79E-64 |
| ICAM1     | 1.27E-68 | -0.11105 | 0.189 | 0.046 | 1.90E-64 |
| EID2B     | 1.34E-68 | 0.120468 | 0.217 | 0.024 | 2.00E-64 |
| ZNF865    | 1.36E-68 | 0.220071 | 0.227 | 0.01  | 2.03E-64 |
| LIG3      | 1.47E-68 | 0.124302 | 0.192 | 0.017 | 2.19E-64 |
| KHK       | 1.50E-68 | 0.15783  | 0.207 | 0.015 | 2.25E-64 |
| CAV1      | 1.54E-68 | -1.4076  | 0.048 | 0.212 | 2.30E-64 |
| PDCD4     | 1.60E-68 | -0.13865 | 0.141 | 0.038 | 2.39E-64 |
| SYTL2     | 1.77E-68 | -0.29998 | 0.119 | 0.058 | 2.65E-64 |
| TRIM11    | 1.79E-68 | 0.114337 | 0.183 | 0.015 | 2.67E-64 |
| STRN      | 1.79E-68 | 0.140466 | 0.172 | 0.007 | 2.68E-64 |
| PRMT3     | 1.82E-68 | 0.163598 | 0.217 | 0.019 | 2.72E-64 |
| TOPBP1    | 1.89E-68 | 0.19238  | 0.219 | 0.012 | 2.82E-64 |
| C1QTNF6   | 2.16E-68 | 0.172617 | 0.186 | 0.007 | 3.23E-64 |
| BCL9      | 2.17E-68 | 0.135641 | 0.178 | 0.01  | 3.25E-64 |
| TSTD3     | 2.29E-68 | 0.12987  | 0.178 | 0.009 | 3.43E-64 |
| MAD2L1    | 2.38E-68 | -0.14105 | 0.115 | 0.027 | 3.55E-64 |
| IFFO1     | 2.55E-68 | 0.200661 | 0.236 | 0.022 | 3.81E-64 |
| NPW       | 2.58E-68 | 0.148332 | 0.184 | 0.009 | 3.85E-64 |
| ENOX2     | 3.44E-68 | 0.118523 | 0.175 | 0.01  | 5.15E-64 |
| TMEM64    | 3.45E-68 | 0.165799 | 0.208 | 0.017 | 5.16E-64 |
| AUH       | 3.83E-68 | 0.109607 | 0.173 | 0.014 | 5.72E-64 |
| HAS2      | 4.18E-68 | 0.10132  | 0.193 | 0.017 | 6.24E-64 |
| MAPK8     | 4.41E-68 | 0.214105 | 0.214 | 0.005 | 6.58E-64 |
| SESN2     | 4.43E-68 | -0.11233 | 0.137 | 0.036 | 6.61E-64 |
| EXOC6B    | 5.13E-68 | 0.104918 | 0.163 | 0.01  | 7.67E-64 |
| SPICE1    | 5.17E-68 | -0.19937 | 0.111 | 0.027 | 7.73E-64 |
| TRIM52    | 5.59E-68 | 0.115172 | 0.187 | 0.015 | 8.36E-64 |
| RILP      | 5.61E-68 | 0.254917 | 0.234 | 0.005 | 8.38E-64 |
| SLC29A4   | 6.11E-68 | 0.121578 | 0.19  | 0.015 | 9.13E-64 |
| TBC1D13   | 6.60E-68 | 0.141864 | 0.181 | 0.009 | 9.86E-64 |
| CHDH      | 9.59E-68 | 0.113439 | 0.209 | 0.024 | 1.43E-63 |
| TRRAP     | 9.88E-68 | 0.170694 | 0.2   | 0.012 | 1.48E-63 |
| NUP133    | 9.91E-68 | 0.148925 | 0.217 | 0.022 | 1.48E-63 |
| PATZ1     | 1.04E-67 | 0.22798  | 0.229 | 0.01  | 1.55E-63 |
| NDST1     | 1.15E-67 | 0.273938 | 0.248 | 0.005 | 1.72E-63 |

|           |          |          |       |       |          |
|-----------|----------|----------|-------|-------|----------|
| TYROBP    | 1.30E-67 | -0.47638 | 0.137 | 0.092 | 1.94E-63 |
| C17orf51  | 1.59E-67 | 0.187091 | 0.201 | 0.01  | 2.37E-63 |
| ADAM12    | 1.71E-67 | 0.219332 | 0.216 | 0.01  | 2.55E-63 |
| RIPK1     | 2.17E-67 | 0.10583  | 0.178 | 0.017 | 3.24E-63 |
| DUS4L     | 2.18E-67 | 0.100025 | 0.178 | 0.015 | 3.26E-63 |
| SLX4IP    | 2.51E-67 | 0.158202 | 0.188 | 0.01  | 3.76E-63 |
| ACO1      | 2.54E-67 | 0.104394 | 0.196 | 0.019 | 3.80E-63 |
| KIF13A    | 2.64E-67 | 0.124718 | 0.168 | 0.009 | 3.94E-63 |
| GRIA1     | 2.97E-67 | 0.268735 | 0.239 | 0.01  | 4.43E-63 |
| ALDH5A1   | 3.04E-67 | 0.214959 | 0.218 | 0.009 | 4.54E-63 |
| KCTD1     | 3.10E-67 | 0.141873 | 0.19  | 0.014 | 4.64E-63 |
| FAM206A   | 3.12E-67 | 0.126934 | 0.188 | 0.01  | 4.67E-63 |
| CD200     | 3.41E-67 | 0.123569 | 0.181 | 0.012 | 5.09E-63 |
| PCDHB2    | 3.48E-67 | 0.271369 | 0.248 | 0.012 | 5.20E-63 |
| LTBP1     | 3.50E-67 | 0.276097 | 0.234 | 0.007 | 5.22E-63 |
| USP13     | 3.64E-67 | 0.160878 | 0.203 | 0.017 | 5.44E-63 |
| AC159540. | 3.74E-67 | 0.115158 | 0.221 | 0.032 | 5.58E-63 |
| ZNF703    | 3.91E-67 | 0.186807 | 0.209 | 0.012 | 5.84E-63 |
| SMO       | 4.36E-67 | 0.174821 | 0.19  | 0.007 | 6.51E-63 |
| TUBD1     | 4.40E-67 | 0.123575 | 0.204 | 0.022 | 6.57E-63 |
| LINC00339 | 4.65E-67 | -0.11194 | 0.122 | 0.024 | 6.94E-63 |
| HERC1     | 6.50E-67 | 0.138524 | 0.193 | 0.012 | 9.71E-63 |
| SNAP25    | 7.18E-67 | -0.60412 | 0.095 | 0.101 | 1.07E-62 |
| HEATR6    | 7.71E-67 | 0.130724 | 0.182 | 0.01  | 1.15E-62 |
| ABHD10    | 8.38E-67 | 0.112907 | 0.175 | 0.014 | 1.25E-62 |
| SRF       | 1.21E-66 | 0.167511 | 0.2   | 0.012 | 1.81E-62 |
| LRRRC24   | 1.24E-66 | 0.10371  | 0.162 | 0.01  | 1.86E-62 |
| C3orf58   | 1.44E-66 | 0.184666 | 0.213 | 0.015 | 2.15E-62 |
| CBX2      | 1.55E-66 | 0.123548 | 0.18  | 0.012 | 2.32E-62 |
| FAM173B   | 1.68E-66 | 0.129764 | 0.18  | 0.012 | 2.52E-62 |
| ANO10     | 1.73E-66 | 0.104961 | 0.162 | 0.009 | 2.58E-62 |
| DOCK10    | 2.07E-66 | 0.2227   | 0.22  | 0.01  | 3.10E-62 |
| NCKIPSD   | 2.64E-66 | 0.169791 | 0.194 | 0.007 | 3.94E-62 |
| TMEM37    | 2.73E-66 | -0.15035 | 0.08  | 0.022 | 4.07E-62 |
| E2F3      | 3.26E-66 | 0.2278   | 0.22  | 0.007 | 4.86E-62 |
| CENPK     | 3.61E-66 | 0.145772 | 0.18  | 0.01  | 5.39E-62 |
| SREBF1    | 4.02E-66 | 0.155003 | 0.204 | 0.019 | 6.00E-62 |
| RAI1      | 4.05E-66 | 0.234075 | 0.214 | 0.003 | 6.05E-62 |
| AP006621. | 4.05E-66 | 0.13895  | 0.182 | 0.014 | 6.05E-62 |
| CREB3L2   | 4.66E-66 | 0.147757 | 0.205 | 0.019 | 6.97E-62 |
| KLF12     | 4.84E-66 | 0.152193 | 0.201 | 0.021 | 7.24E-62 |
| DDB2      | 5.18E-66 | -0.18392 | 0.134 | 0.039 | 7.73E-62 |
| HLA-DPB1  | 6.41E-66 | -0.74492 | 0.149 | 0.162 | 9.59E-62 |
| HBA2      | 7.02E-66 | -0.86296 | 0.131 | 0.097 | 1.05E-61 |
| PDZD8     | 7.54E-66 | 0.109098 | 0.189 | 0.019 | 1.13E-61 |
| FAM86C1   | 7.75E-66 | 0.104292 | 0.158 | 0.009 | 1.16E-61 |
| HARS2     | 8.04E-66 | 0.138134 | 0.19  | 0.014 | 1.20E-61 |
| ACVR2A    | 8.20E-66 | 0.210574 | 0.204 | 0.005 | 1.23E-61 |
| RGS20     | 8.21E-66 | 0.160624 | 0.192 | 0.012 | 1.23E-61 |
| PCYOX1L   | 8.91E-66 | 0.155604 | 0.2   | 0.012 | 1.33E-61 |
| SARM1     | 9.25E-66 | 0.211576 | 0.212 | 0.009 | 1.38E-61 |

|           |          |          |       |       |          |
|-----------|----------|----------|-------|-------|----------|
| ZSCAN30   | 1.03E-65 | 0.162166 | 0.191 | 0.009 | 1.54E-61 |
| SMPDL3A   | 1.11E-65 | 0.230895 | 0.232 | 0.012 | 1.66E-61 |
| PPTC7     | 1.24E-65 | 0.170728 | 0.194 | 0.009 | 1.86E-61 |
| USP19     | 1.32E-65 | 0.131026 | 0.187 | 0.014 | 1.97E-61 |
| ZNF34     | 1.43E-65 | -0.19038 | 0.11  | 0.031 | 2.13E-61 |
| CTD-3065J | 1.49E-65 | 0.157346 | 0.178 | 0.005 | 2.23E-61 |
| TXNDC11   | 2.01E-65 | 0.110391 | 0.18  | 0.015 | 3.01E-61 |
| ALDH16A1  | 2.21E-65 | 0.179002 | 0.205 | 0.014 | 3.30E-61 |
| MED18     | 2.75E-65 | 0.13498  | 0.173 | 0.007 | 4.11E-61 |
| NUDT12    | 2.84E-65 | 0.17214  | 0.205 | 0.012 | 4.24E-61 |
| AVEN      | 3.66E-65 | 0.14042  | 0.172 | 0.005 | 5.47E-61 |
| UBE2T     | 4.05E-65 | 0.14793  | 0.174 | 0.007 | 6.06E-61 |
| FBX033    | 5.17E-65 | 0.10833  | 0.165 | 0.01  | 7.72E-61 |
| SPTLC2    | 5.26E-65 | 0.182887 | 0.199 | 0.01  | 7.87E-61 |
| C16orf46  | 5.29E-65 | 0.109425 | 0.171 | 0.012 | 7.90E-61 |
| CAD       | 5.59E-65 | 0.144184 | 0.171 | 0.007 | 8.35E-61 |
| FBXL6     | 5.68E-65 | 0.175396 | 0.197 | 0.012 | 8.49E-61 |
| NEDD1     | 5.81E-65 | 0.161892 | 0.19  | 0.01  | 8.68E-61 |
| MIPEP     | 6.35E-65 | 0.124194 | 0.19  | 0.012 | 9.50E-61 |
| SH2B2     | 6.39E-65 | 0.214836 | 0.221 | 0.014 | 9.55E-61 |
| LINC00672 | 6.65E-65 | -0.13248 | 0.104 | 0.021 | 9.94E-61 |
| TRAPPC10  | 6.99E-65 | 0.211092 | 0.21  | 0.007 | 1.04E-60 |
| PLXNA4    | 7.12E-65 | 0.152768 | 0.194 | 0.015 | 1.06E-60 |
| RETSAT    | 7.61E-65 | 0.233887 | 0.231 | 0.009 | 1.14E-60 |
| GNL3L     | 8.27E-65 | 0.101512 | 0.179 | 0.017 | 1.24E-60 |
| CXorf56   | 8.59E-65 | 0.141059 | 0.185 | 0.01  | 1.28E-60 |
| IFIT2     | 8.78E-65 | -0.11994 | 0.152 | 0.032 | 1.31E-60 |
| RBM12B    | 9.47E-65 | 0.191525 | 0.206 | 0.01  | 1.42E-60 |
| RGMB      | 9.99E-65 | -0.14821 | 0.151 | 0.053 | 1.49E-60 |
| ITPRIPL2  | 1.19E-64 | 0.200319 | 0.198 | 0.007 | 1.77E-60 |
| FUT11     | 1.19E-64 | 0.190749 | 0.195 | 0.007 | 1.78E-60 |
| DROSHA    | 1.47E-64 | 0.155665 | 0.201 | 0.014 | 2.20E-60 |
| KIAA1211L | 1.58E-64 | 0.240476 | 0.222 | 0.007 | 2.37E-60 |
| GYS1      | 1.65E-64 | 0.143768 | 0.187 | 0.012 | 2.47E-60 |
| FCER1G    | 1.87E-64 | -0.25993 | 0.144 | 0.063 | 2.79E-60 |
| TTC23     | 1.93E-64 | 0.151912 | 0.187 | 0.012 | 2.89E-60 |
| KIFC2     | 2.04E-64 | 0.168754 | 0.201 | 0.014 | 3.05E-60 |
| FBLN7     | 2.16E-64 | 0.183175 | 0.194 | 0.007 | 3.23E-60 |
| FAM160B2  | 2.17E-64 | 0.129677 | 0.179 | 0.015 | 3.24E-60 |
| AGAP3     | 2.23E-64 | 0.160262 | 0.188 | 0.009 | 3.34E-60 |
| KLHL2     | 2.35E-64 | 0.161538 | 0.188 | 0.01  | 3.51E-60 |
| NIPAL3    | 2.68E-64 | 0.165916 | 0.185 | 0.009 | 4.00E-60 |
| RP11-395A | 2.73E-64 | 0.245766 | 0.22  | 0.003 | 4.08E-60 |
| TAPBPL    | 2.76E-64 | -0.11012 | 0.176 | 0.041 | 4.12E-60 |
| MOXD1     | 2.78E-64 | 0.30771  | 0.231 | 0.005 | 4.16E-60 |
| PRICKLE2  | 2.95E-64 | 0.187587 | 0.193 | 0.007 | 4.40E-60 |
| HAUS7     | 3.06E-64 | -0.13787 | 0.124 | 0.034 | 4.58E-60 |
| ZNF318    | 4.05E-64 | 0.120253 | 0.174 | 0.01  | 6.06E-60 |
| EXOSC6    | 4.85E-64 | 0.106191 | 0.168 | 0.012 | 7.24E-60 |
| ZC3H3     | 5.22E-64 | 0.165294 | 0.187 | 0.009 | 7.80E-60 |
| SEMA3E    | 5.41E-64 | 0.271887 | 0.233 | 0.014 | 8.09E-60 |

|           |          |          |       |       |          |
|-----------|----------|----------|-------|-------|----------|
| RHPN2     | 5.79E-64 | -0.12161 | 0.129 | 0.031 | 8.65E-60 |
| MARK1     | 5.90E-64 | 0.266615 | 0.244 | 0.012 | 8.81E-60 |
| KLHL9     | 5.96E-64 | 0.226057 | 0.216 | 0.009 | 8.91E-60 |
| TM9SF1    | 6.01E-64 | 0.137098 | 0.179 | 0.01  | 8.98E-60 |
| IFIT3     | 6.26E-64 | -0.11675 | 0.193 | 0.051 | 9.36E-60 |
| PINLYP    | 6.49E-64 | -0.21116 | 0.109 | 0.036 | 9.69E-60 |
| LCORL     | 6.79E-64 | 0.175676 | 0.196 | 0.009 | 1.01E-59 |
| PARP11    | 6.87E-64 | 0.174219 | 0.194 | 0.01  | 1.03E-59 |
| SLC2A6    | 7.30E-64 | 0.167503 | 0.179 | 0.005 | 1.09E-59 |
| QPRT      | 7.35E-64 | -0.24175 | 0.122 | 0.044 | 1.10E-59 |
| ACSF2     | 1.28E-63 | 0.133907 | 0.164 | 0.007 | 1.92E-59 |
| FAHD2B    | 1.31E-63 | 0.15602  | 0.197 | 0.014 | 1.95E-59 |
| LRP5      | 1.33E-63 | 0.14587  | 0.185 | 0.01  | 1.98E-59 |
| PRKD1     | 1.36E-63 | 0.170982 | 0.206 | 0.014 | 2.03E-59 |
| PPARA     | 1.37E-63 | 0.152528 | 0.176 | 0.009 | 2.05E-59 |
| TNFRSF11E | 1.40E-63 | -0.12702 | 0.118 | 0.031 | 2.08E-59 |
| SLC19A1   | 1.53E-63 | 0.139409 | 0.168 | 0.007 | 2.29E-59 |
| PITRM1    | 1.66E-63 | 0.11082  | 0.168 | 0.01  | 2.47E-59 |
| EBF4      | 1.68E-63 | 0.223129 | 0.216 | 0.007 | 2.51E-59 |
| RIMKLA    | 1.88E-63 | 0.193933 | 0.207 | 0.01  | 2.81E-59 |
| RP11-538F | 1.88E-63 | 0.114231 | 0.188 | 0.019 | 2.81E-59 |
| SGK223    | 2.33E-63 | 0.292444 | 0.241 | 0.003 | 3.48E-59 |
| ARHGAP5-A | 2.37E-63 | -0.11495 | 0.097 | 0.021 | 3.54E-59 |
| CENPBD1   | 2.56E-63 | 0.104419 | 0.157 | 0.01  | 3.83E-59 |
| XKR4      | 2.57E-63 | -0.12614 | 0.115 | 0.036 | 3.85E-59 |
| SIRT5     | 3.39E-63 | 0.107008 | 0.18  | 0.019 | 5.06E-59 |
| CACTIN    | 3.40E-63 | 0.231582 | 0.219 | 0.005 | 5.08E-59 |
| ARHGAP20  | 3.80E-63 | 0.282409 | 0.239 | 0.009 | 5.68E-59 |
| PIEZ01    | 3.97E-63 | 0.170658 | 0.188 | 0.009 | 5.93E-59 |
| CRLF3     | 4.76E-63 | 0.167459 | 0.195 | 0.012 | 7.11E-59 |
| GLRB      | 5.16E-63 | 0.12071  | 0.188 | 0.017 | 7.71E-59 |
| LOX       | 5.71E-63 | -0.29023 | 0.081 | 0.032 | 8.54E-59 |
| PUS1      | 5.77E-63 | 0.117173 | 0.182 | 0.015 | 8.62E-59 |
| ACVR1     | 6.22E-63 | 0.157271 | 0.176 | 0.007 | 9.30E-59 |
| MTG1      | 6.78E-63 | 0.135115 | 0.17  | 0.009 | 1.01E-58 |
| TMEM87B   | 7.11E-63 | 0.109583 | 0.16  | 0.01  | 1.06E-58 |
| LRIG2     | 8.32E-63 | 0.145857 | 0.193 | 0.014 | 1.24E-58 |
| HNRNPU-AS | 9.49E-63 | 0.109665 | 0.19  | 0.022 | 1.42E-58 |
| MEX3D     | 9.64E-63 | 0.198774 | 0.196 | 0.005 | 1.44E-58 |
| PTGS1     | 1.30E-62 | 0.17564  | 0.201 | 0.012 | 1.94E-58 |
| HIP1R     | 1.55E-62 | 0.112141 | 0.212 | 0.029 | 2.32E-58 |
| PCDHGA10  | 1.87E-62 | 0.199326 | 0.204 | 0.007 | 2.79E-58 |
| PANK4     | 2.32E-62 | 0.107238 | 0.181 | 0.019 | 3.47E-58 |
| PREP      | 2.65E-62 | 0.156546 | 0.175 | 0.007 | 3.97E-58 |
| C11orf96  | 3.06E-62 | 0.101835 | 0.223 | 0.034 | 4.58E-58 |
| PHF13     | 3.22E-62 | 0.108103 | 0.165 | 0.012 | 4.82E-58 |
| TRAM2     | 3.47E-62 | 0.139887 | 0.179 | 0.01  | 5.19E-58 |
| STK35     | 3.68E-62 | 0.146535 | 0.181 | 0.007 | 5.50E-58 |
| DUS2      | 4.65E-62 | 0.144164 | 0.182 | 0.01  | 6.95E-58 |
| FAM175A   | 4.67E-62 | 0.101582 | 0.166 | 0.015 | 6.98E-58 |
| SELO      | 4.72E-62 | 0.174898 | 0.176 | 0.003 | 7.06E-58 |



|           |          |          |       |       |          |
|-----------|----------|----------|-------|-------|----------|
| 1-Mar     | 4.78E-62 | 0.180376 | 0.194 | 0.009 | 7.15E-58 |
| CHAF1A    | 4.95E-62 | 0.149198 | 0.198 | 0.019 | 7.40E-58 |
| TNFRSF10E | 5.20E-62 | -0.21755 | 0.116 | 0.038 | 7.78E-58 |
| TGFBR2    | 5.69E-62 | 0.16847  | 0.184 | 0.007 | 8.50E-58 |
| GPSM1     | 5.70E-62 | 0.146545 | 0.18  | 0.01  | 8.52E-58 |
| FGF14-AS2 | 5.74E-62 | 0.14376  | 0.18  | 0.01  | 8.58E-58 |
| UBASH3B   | 5.76E-62 | 0.277324 | 0.236 | 0.003 | 8.61E-58 |
| SLC4A8    | 6.51E-62 | 0.161716 | 0.21  | 0.021 | 9.73E-58 |
| MIR497HG  | 8.78E-62 | -0.28559 | 0.131 | 0.056 | 1.31E-57 |
| TACC2     | 1.14E-61 | 0.101202 | 0.175 | 0.015 | 1.70E-57 |
| ACBD4     | 1.15E-61 | 0.15198  | 0.178 | 0.01  | 1.72E-57 |
| LIMK2     | 1.19E-61 | 0.170411 | 0.186 | 0.007 | 1.78E-57 |
| LRRN1     | 1.22E-61 | 0.17335  | 0.209 | 0.015 | 1.83E-57 |
| TUBGCP3   | 1.28E-61 | 0.108599 | 0.184 | 0.021 | 1.91E-57 |
| FIZ1      | 1.32E-61 | 0.130191 | 0.153 | 0.003 | 1.98E-57 |
| KLHL25    | 1.60E-61 | 0.215938 | 0.199 | 0.005 | 2.39E-57 |
| GEMIN4    | 1.95E-61 | 0.123088 | 0.157 | 0.007 | 2.91E-57 |
| GPR75-ASE | 2.06E-61 | 0.206306 | 0.219 | 0.015 | 3.08E-57 |
| USP40     | 2.26E-61 | 0.173266 | 0.191 | 0.009 | 3.37E-57 |
| RNF208    | 2.31E-61 | 0.192386 | 0.194 | 0.007 | 3.45E-57 |
| GAL3ST3   | 2.73E-61 | 0.194163 | 0.187 | 0.005 | 4.08E-57 |
| FAN1      | 2.77E-61 | 0.101251 | 0.166 | 0.015 | 4.14E-57 |
| SPSB4     | 2.79E-61 | 0.227839 | 0.214 | 0.007 | 4.18E-57 |
| LBH       | 3.32E-61 | -0.14801 | 0.114 | 0.039 | 4.95E-57 |
| ARHGEF18  | 5.37E-61 | 0.149795 | 0.193 | 0.014 | 8.02E-57 |
| GPATCH3   | 5.61E-61 | 0.175591 | 0.186 | 0.007 | 8.39E-57 |
| TBX2      | 6.01E-61 | 0.260541 | 0.227 | 0.01  | 8.98E-57 |
| LRRC3B    | 6.15E-61 | 0.264925 | 0.204 | 0.003 | 9.20E-57 |
| ABHD17B   | 6.28E-61 | 0.138651 | 0.19  | 0.014 | 9.38E-57 |
| MAFF      | 6.46E-61 | -0.16787 | 0.136 | 0.048 | 9.65E-57 |
| SEC24A    | 6.79E-61 | 0.177528 | 0.195 | 0.01  | 1.01E-56 |
| AGO1      | 6.86E-61 | 0.237992 | 0.212 | 0.005 | 1.02E-56 |
| DCAF4     | 9.07E-61 | 0.120712 | 0.153 | 0.005 | 1.36E-56 |
| FBN1      | 1.01E-60 | 0.122371 | 0.153 | 0.005 | 1.51E-56 |
| PDE8B     | 1.12E-60 | 0.197622 | 0.205 | 0.012 | 1.67E-56 |
| ZSCAN2    | 1.13E-60 | -0.11469 | 0.075 | 0.022 | 1.70E-56 |
| PHC1      | 1.14E-60 | 0.196948 | 0.209 | 0.014 | 1.70E-56 |
| GNG10     | 1.14E-60 | -0.13346 | 0.089 | 0.027 | 1.71E-56 |
| UBR1      | 1.19E-60 | 0.224338 | 0.22  | 0.012 | 1.79E-56 |
| 2-Mar     | 1.20E-60 | 0.125915 | 0.176 | 0.012 | 1.80E-56 |
| GEM       | 1.52E-60 | -0.40423 | 0.103 | 0.053 | 2.27E-56 |
| SLC16A1-A | 1.75E-60 | -0.2161  | 0.107 | 0.041 | 2.62E-56 |
| MT01      | 1.80E-60 | -0.10868 | 0.122 | 0.029 | 2.68E-56 |
| ZNF273    | 1.83E-60 | -0.21814 | 0.115 | 0.046 | 2.73E-56 |
| GPR37L1   | 2.15E-60 | -0.15618 | 0.272 | 0.121 | 3.21E-56 |
| HSDL1     | 2.35E-60 | 0.202664 | 0.206 | 0.009 | 3.51E-56 |
| TET2      | 3.35E-60 | 0.112533 | 0.169 | 0.015 | 5.01E-56 |
| ZSCAN5A   | 3.78E-60 | -0.11874 | 0.112 | 0.029 | 5.64E-56 |
| MCPH1     | 3.78E-60 | 0.132673 | 0.17  | 0.014 | 5.65E-56 |
| LMLN      | 4.76E-60 | 0.122559 | 0.162 | 0.007 | 7.12E-56 |
| REX01     | 5.64E-60 | 0.223495 | 0.218 | 0.009 | 8.43E-56 |

|           |          |          |       |       |          |
|-----------|----------|----------|-------|-------|----------|
| STK38     | 5.85E-60 | 0.106932 | 0.159 | 0.01  | 8.75E-56 |
| MDC1      | 6.64E-60 | 0.12684  | 0.174 | 0.014 | 9.92E-56 |
| CLCF1     | 6.72E-60 | -0.22789 | 0.085 | 0.026 | 1.00E-55 |
| KANSL3    | 6.94E-60 | 0.105782 | 0.156 | 0.014 | 1.04E-55 |
| RPS6KL1   | 7.08E-60 | 0.111675 | 0.175 | 0.012 | 1.06E-55 |
| VLDLR     | 7.69E-60 | 0.102529 | 0.147 | 0.009 | 1.15E-55 |
| NPAS1     | 8.04E-60 | 0.145361 | 0.162 | 0.005 | 1.20E-55 |
| EMILIN1   | 8.50E-60 | 0.166267 | 0.186 | 0.01  | 1.27E-55 |
| ZNF496    | 8.84E-60 | 0.172156 | 0.187 | 0.007 | 1.32E-55 |
| CEP97     | 8.91E-60 | 0.105329 | 0.162 | 0.012 | 1.33E-55 |
| RAB2B     | 1.20E-59 | 0.122871 | 0.169 | 0.014 | 1.80E-55 |
| PROSER1   | 1.24E-59 | 0.192245 | 0.196 | 0.009 | 1.85E-55 |
| PLIN2     | 1.24E-59 | -0.84665 | 0.086 | 0.108 | 1.85E-55 |
| MTA2      | 1.27E-59 | 0.172999 | 0.173 | 0.003 | 1.90E-55 |
| PER1      | 1.29E-59 | -0.13501 | 0.171 | 0.056 | 1.93E-55 |
| VSIG10    | 1.55E-59 | 0.148925 | 0.193 | 0.017 | 2.31E-55 |
| ALDH18A1  | 1.61E-59 | 0.122087 | 0.17  | 0.01  | 2.40E-55 |
| NT5E      | 1.63E-59 | 0.119114 | 0.173 | 0.014 | 2.44E-55 |
| DOCK1     | 2.27E-59 | 0.132279 | 0.175 | 0.014 | 3.39E-55 |
| EMILIN2   | 2.35E-59 | 0.131551 | 0.162 | 0.009 | 3.51E-55 |
| MORN4     | 2.93E-59 | 0.139168 | 0.174 | 0.01  | 4.38E-55 |
| ULK2      | 3.36E-59 | 0.187562 | 0.188 | 0.007 | 5.02E-55 |
| SLC46A1   | 3.98E-59 | 0.125574 | 0.157 | 0.007 | 5.95E-55 |
| S1PR3     | 4.23E-59 | -0.1518  | 0.116 | 0.038 | 6.32E-55 |
| HLA-DMA   | 4.33E-59 | -0.64701 | 0.104 | 0.111 | 6.48E-55 |
| HTATIP2   | 4.96E-59 | 0.307285 | 0.235 | 0     | 7.41E-55 |
| ZNF248    | 5.06E-59 | 0.118787 | 0.162 | 0.014 | 7.56E-55 |
| B3GNTL1   | 5.45E-59 | 0.191416 | 0.18  | 0.002 | 8.14E-55 |
| SLK       | 5.76E-59 | 0.135477 | 0.173 | 0.012 | 8.61E-55 |
| CMTM8     | 6.14E-59 | 0.291926 | 0.241 | 0.002 | 9.18E-55 |
| MFHAS1    | 6.18E-59 | 0.124051 | 0.165 | 0.009 | 9.24E-55 |
| PRSS23    | 6.71E-59 | -0.15733 | 0.122 | 0.036 | 1.00E-54 |
| P2RY1     | 7.07E-59 | 0.237454 | 0.222 | 0.012 | 1.06E-54 |
| FBXO34    | 7.34E-59 | 0.15114  | 0.185 | 0.017 | 1.10E-54 |
| TAF4      | 7.53E-59 | 0.1149   | 0.143 | 0.005 | 1.13E-54 |
| FAM129B   | 8.03E-59 | 0.19955  | 0.199 | 0.012 | 1.20E-54 |
| SEL1L3    | 8.37E-59 | 0.216571 | 0.198 | 0.007 | 1.25E-54 |
| PSMA2     | 8.98E-59 | -1.291   | 0.011 | 0.205 | 1.34E-54 |
| SLC47A1   | 9.23E-59 | 0.116219 | 0.158 | 0.012 | 1.38E-54 |
| FAM69A    | 1.12E-58 | 0.218152 | 0.2   | 0.005 | 1.67E-54 |
| CGREF1    | 1.39E-58 | 0.105409 | 0.164 | 0.012 | 2.07E-54 |
| CTD-2017C | 1.57E-58 | 0.122995 | 0.161 | 0.009 | 2.35E-54 |
| STON2     | 1.71E-58 | 0.173662 | 0.178 | 0.007 | 2.56E-54 |
| KCTD2     | 1.73E-58 | 0.194964 | 0.193 | 0.005 | 2.59E-54 |
| HSPA4L    | 1.92E-58 | -0.1378  | 0.133 | 0.038 | 2.86E-54 |
| ZNF557    | 2.14E-58 | -0.13902 | 0.094 | 0.031 | 3.20E-54 |
| CCDC152   | 2.17E-58 | -0.24104 | 0.097 | 0.039 | 3.25E-54 |
| SDCBP2    | 2.22E-58 | -0.12578 | 0.127 | 0.031 | 3.31E-54 |
| ZNF592    | 2.50E-58 | 0.131647 | 0.172 | 0.014 | 3.73E-54 |
| FAM13A    | 2.63E-58 | -0.11454 | 0.126 | 0.027 | 3.93E-54 |
| CENPC     | 2.91E-58 | 0.118391 | 0.179 | 0.021 | 4.35E-54 |

|          |          |          |       |       |          |
|----------|----------|----------|-------|-------|----------|
| UVRAG    | 4.32E-58 | 0.134595 | 0.171 | 0.014 | 6.46E-54 |
| TAGLN    | 4.42E-58 | -0.58516 | 0.077 | 0.051 | 6.60E-54 |
| VAV2     | 4.45E-58 | 0.175945 | 0.176 | 0.005 | 6.65E-54 |
| ABTB1    | 4.63E-58 | -0.13837 | 0.11  | 0.032 | 6.92E-54 |
| SCARF2   | 4.86E-58 | 0.199226 | 0.193 | 0.005 | 7.26E-54 |
| CYB561D1 | 4.90E-58 | -0.1504  | 0.092 | 0.022 | 7.33E-54 |
| SEMA4B   | 5.32E-58 | 0.125727 | 0.172 | 0.014 | 7.94E-54 |
| C9orf72  | 5.93E-58 | -0.14812 | 0.126 | 0.039 | 8.87E-54 |
| PDCD11   | 6.82E-58 | 0.110012 | 0.16  | 0.01  | 1.02E-53 |
| CD83     | 7.37E-58 | -0.12454 | 0.125 | 0.026 | 1.10E-53 |
| CCDC102A | 7.45E-58 | 0.201127 | 0.198 | 0.005 | 1.11E-53 |
| MANEA    | 7.91E-58 | 0.284753 | 0.231 | 0.002 | 1.18E-53 |
| MAST3    | 1.15E-57 | 0.121047 | 0.162 | 0.009 | 1.71E-53 |
| GRIK1    | 1.19E-57 | 0.202911 | 0.184 | 0.007 | 1.78E-53 |
| CDKN3    | 1.33E-57 | 0.105491 | 0.141 | 0.005 | 1.99E-53 |
| C22orf46 | 1.44E-57 | -0.1315  | 0.097 | 0.029 | 2.15E-53 |
| DHX32    | 1.48E-57 | 0.255793 | 0.224 | 0.005 | 2.21E-53 |
| VASH1    | 1.56E-57 | 0.104753 | 0.163 | 0.014 | 2.34E-53 |
| CCL3     | 1.83E-57 | -0.34969 | 0.141 | 0.085 | 2.74E-53 |
| INTS2    | 1.99E-57 | 0.184967 | 0.184 | 0.005 | 2.97E-53 |
| PLCB3    | 2.07E-57 | 0.154678 | 0.187 | 0.015 | 3.09E-53 |
| C8orf44  | 2.30E-57 | 0.153313 | 0.183 | 0.012 | 3.44E-53 |
| IFI27    | 2.45E-57 | -0.49067 | 0.189 | 0.111 | 3.66E-53 |
| ARHGEF10 | 2.63E-57 | -0.11191 | 0.115 | 0.029 | 3.94E-53 |
| BLOC1S3  | 2.65E-57 | 0.137139 | 0.165 | 0.009 | 3.95E-53 |
| OGFRL1   | 2.67E-57 | 0.245096 | 0.214 | 0.003 | 3.99E-53 |
| OSBP2    | 2.85E-57 | 0.111619 | 0.153 | 0.01  | 4.26E-53 |
| THRB     | 2.90E-57 | 0.134843 | 0.156 | 0.007 | 4.33E-53 |
| SMYD5    | 4.21E-57 | 0.121118 | 0.169 | 0.014 | 6.29E-53 |
| PSORS1C1 | 4.46E-57 | -0.10417 | 0.151 | 0.036 | 6.67E-53 |
| AMMECR1  | 4.52E-57 | 0.17575  | 0.191 | 0.009 | 6.76E-53 |
| MAMLD1   | 5.83E-57 | 0.151277 | 0.169 | 0.009 | 8.71E-53 |
| SAMD10   | 5.95E-57 | 0.216524 | 0.197 | 0.005 | 8.90E-53 |
| CCDC157  | 6.06E-57 | 0.198561 | 0.184 | 0.003 | 9.05E-53 |
| KIF5A    | 7.41E-57 | 0.176484 | 0.203 | 0.017 | 1.11E-52 |
| TMEM116  | 7.55E-57 | -0.10621 | 0.119 | 0.031 | 1.13E-52 |
| HLA-DRB5 | 8.07E-57 | -0.84463 | 0.089 | 0.125 | 1.21E-52 |
| NCOA2    | 8.32E-57 | 0.107175 | 0.149 | 0.01  | 1.24E-52 |
| CTSS     | 1.12E-56 | -0.18395 | 0.115 | 0.036 | 1.68E-52 |
| FKRP     | 1.40E-56 | 0.119462 | 0.167 | 0.014 | 2.09E-52 |
| ARL5B    | 1.52E-56 | 0.198224 | 0.187 | 0.005 | 2.27E-52 |
| IGDCC3   | 1.79E-56 | 0.280196 | 0.226 | 0.003 | 2.68E-52 |
| NDUFA7   | 1.84E-56 | -1.10372 | 0.011 | 0.179 | 2.74E-52 |
| STOX2    | 1.93E-56 | 0.210166 | 0.194 | 0.005 | 2.89E-52 |
| APOM     | 2.08E-56 | -0.13415 | 0.108 | 0.032 | 3.11E-52 |
| TGFBR1   | 2.09E-56 | 0.151339 | 0.173 | 0.012 | 3.13E-52 |
| ACAD10   | 2.27E-56 | 0.162992 | 0.188 | 0.012 | 3.40E-52 |
| KIAA1549 | 2.92E-56 | 0.156616 | 0.166 | 0.009 | 4.36E-52 |
| ATP1B1   | 3.01E-56 | -0.21207 | 0.14  | 0.05  | 4.50E-52 |
| CCDC117  | 3.07E-56 | 0.112921 | 0.139 | 0.005 | 4.59E-52 |
| C1RL     | 3.42E-56 | -0.1946  | 0.094 | 0.034 | 5.12E-52 |

|           |          |          |       |       |          |
|-----------|----------|----------|-------|-------|----------|
| LIN37     | 3.95E-56 | -0.21605 | 0.084 | 0.027 | 5.90E-52 |
| PCDHGC3   | 4.67E-56 | 0.171992 | 0.174 | 0.005 | 6.98E-52 |
| OAS1      | 4.71E-56 | -0.34172 | 0.19  | 0.101 | 7.03E-52 |
| HPCA      | 4.75E-56 | -0.12439 | 0.1   | 0.029 | 7.09E-52 |
| TLL12     | 5.19E-56 | 0.194613 | 0.187 | 0.007 | 7.75E-52 |
| IFI44L    | 6.05E-56 | -0.38245 | 0.201 | 0.111 | 9.05E-52 |
| EPHB2     | 6.16E-56 | 0.158165 | 0.173 | 0.01  | 9.21E-52 |
| CPT1A     | 6.24E-56 | 0.184801 | 0.191 | 0.01  | 9.32E-52 |
| ZNF687    | 8.03E-56 | 0.175448 | 0.178 | 0.007 | 1.20E-51 |
| SRGN      | 9.37E-56 | -0.66814 | 0.099 | 0.138 | 1.40E-51 |
| MAP3K7CL  | 1.06E-55 | -0.11769 | 0.105 | 0.021 | 1.59E-51 |
| PPIL6     | 1.12E-55 | -0.10859 | 0.102 | 0.024 | 1.68E-51 |
| FBXO30    | 1.38E-55 | 0.168422 | 0.169 | 0.003 | 2.06E-51 |
| NUP153    | 1.47E-55 | 0.103011 | 0.153 | 0.012 | 2.20E-51 |
| IL11RA    | 1.55E-55 | 0.166297 | 0.179 | 0.012 | 2.32E-51 |
| RP11-195F | 1.59E-55 | -0.18618 | 0.127 | 0.044 | 2.37E-51 |
| SFT2D3    | 1.65E-55 | 0.186985 | 0.181 | 0.003 | 2.46E-51 |
| DYRK2     | 1.72E-55 | 0.10332  | 0.146 | 0.012 | 2.56E-51 |
| ANKRD16   | 1.96E-55 | 0.254114 | 0.218 | 0.002 | 2.93E-51 |
| FXVD5     | 2.09E-55 | -0.45393 | 0.096 | 0.065 | 3.12E-51 |
| OLFML3    | 2.09E-55 | 0.168969 | 0.182 | 0.012 | 3.12E-51 |
| EVI5L     | 2.63E-55 | 0.163702 | 0.169 | 0.007 | 3.92E-51 |
| LINC0091C | 2.91E-55 | 0.104573 | 0.154 | 0.012 | 4.35E-51 |
| HIPK3     | 3.42E-55 | 0.137649 | 0.171 | 0.012 | 5.11E-51 |
| ADD2      | 3.52E-55 | 0.168886 | 0.175 | 0.009 | 5.26E-51 |
| ALDH1L1   | 3.66E-55 | -0.43466 | 0.159 | 0.12  | 5.48E-51 |
| NR1H3     | 3.89E-55 | -0.12038 | 0.09  | 0.021 | 5.82E-51 |
| TTC33     | 3.91E-55 | -0.17329 | 0.108 | 0.034 | 5.85E-51 |
| SIPA1     | 4.90E-55 | 0.262479 | 0.219 | 0.003 | 7.32E-51 |
| TXLNB     | 8.67E-55 | 0.178776 | 0.175 | 0.007 | 1.30E-50 |
| ZNF853    | 8.88E-55 | 0.163309 | 0.166 | 0.007 | 1.33E-50 |
| GBP3      | 9.21E-55 | -0.252   | 0.152 | 0.06  | 1.38E-50 |
| EPHB3     | 9.34E-55 | 0.100227 | 0.142 | 0.009 | 1.40E-50 |
| FURIN     | 1.02E-54 | 0.109015 | 0.141 | 0.009 | 1.53E-50 |
| NPL       | 1.14E-54 | -0.10164 | 0.13  | 0.038 | 1.70E-50 |
| ZNF548    | 1.29E-54 | -0.1873  | 0.095 | 0.034 | 1.93E-50 |
| HRASLS    | 1.30E-54 | 0.117643 | 0.157 | 0.009 | 1.94E-50 |
| ICA1      | 1.39E-54 | 0.150328 | 0.159 | 0.005 | 2.08E-50 |
| CDR2L     | 1.50E-54 | 0.191157 | 0.186 | 0.005 | 2.24E-50 |
| BAMBI     | 1.51E-54 | 0.219366 | 0.185 | 0.005 | 2.25E-50 |
| TOP3B     | 1.64E-54 | 0.106455 | 0.146 | 0.012 | 2.44E-50 |
| ELOVL4    | 1.68E-54 | 0.158274 | 0.171 | 0.009 | 2.51E-50 |
| LINC-PINT | 1.69E-54 | -0.13267 | 0.152 | 0.051 | 2.52E-50 |
| CUL9      | 2.43E-54 | 0.125867 | 0.149 | 0.005 | 3.63E-50 |
| PAPD5     | 2.91E-54 | 0.127746 | 0.165 | 0.01  | 4.36E-50 |
| DSN1      | 2.96E-54 | 0.223831 | 0.194 | 0.007 | 4.42E-50 |
| ATCAY     | 3.21E-54 | -0.10459 | 0.122 | 0.032 | 4.79E-50 |
| C14orf93  | 3.46E-54 | -0.12009 | 0.095 | 0.024 | 5.18E-50 |
| PLEKHM1   | 3.57E-54 | 0.185318 | 0.185 | 0.007 | 5.34E-50 |
| CTDSPL    | 3.72E-54 | 0.105303 | 0.138 | 0.007 | 5.56E-50 |
| PIBF1     | 3.93E-54 | 0.139968 | 0.175 | 0.017 | 5.87E-50 |

|           |          |          |       |       |          |
|-----------|----------|----------|-------|-------|----------|
| CIQTNF3   | 4.10E-54 | -0.1644  | 0.107 | 0.029 | 6.12E-50 |
| LTPB4     | 4.88E-54 | 0.103109 | 0.153 | 0.015 | 7.29E-50 |
| SNX29     | 8.45E-54 | 0.105167 | 0.151 | 0.012 | 1.26E-49 |
| KIAA1549L | 9.06E-54 | 0.16371  | 0.166 | 0.007 | 1.35E-49 |
| SLC45A1   | 9.65E-54 | 0.169851 | 0.169 | 0.007 | 1.44E-49 |
| EPT1      | 1.00E-53 | 0.133491 | 0.146 | 0.005 | 1.50E-49 |
| ATP5L2    | 1.04E-53 | -0.4582  | 0.083 | 0.067 | 1.56E-49 |
| USP30     | 1.05E-53 | 0.110382 | 0.146 | 0.01  | 1.56E-49 |
| GDF15     | 1.20E-53 | -0.33965 | 0.195 | 0.096 | 1.79E-49 |
| FAXC      | 1.39E-53 | 0.108379 | 0.152 | 0.012 | 2.08E-49 |
| MANSC1    | 1.47E-53 | 0.107361 | 0.146 | 0.01  | 2.19E-49 |
| PC        | 1.92E-53 | 0.145916 | 0.176 | 0.012 | 2.87E-49 |
| SLC25A24  | 1.93E-53 | 0.175118 | 0.174 | 0.007 | 2.89E-49 |
| MFAP3     | 2.14E-53 | 0.179009 | 0.175 | 0.005 | 3.20E-49 |
| CSTF2     | 2.22E-53 | 0.107998 | 0.147 | 0.01  | 3.32E-49 |
| CNGA3     | 2.44E-53 | 0.114263 | 0.153 | 0.012 | 3.64E-49 |
| IQSEC1    | 2.66E-53 | 0.150233 | 0.163 | 0.005 | 3.98E-49 |
| CDK18     | 2.87E-53 | -0.14251 | 0.146 | 0.048 | 4.28E-49 |
| ZBTB33    | 2.98E-53 | 0.119328 | 0.159 | 0.014 | 4.46E-49 |
| KIAA1456  | 3.24E-53 | 0.236892 | 0.197 | 0.005 | 4.84E-49 |
| SOX15     | 3.82E-53 | -0.25312 | 0.114 | 0.051 | 5.71E-49 |
| MFS6      | 4.76E-53 | 0.138873 | 0.159 | 0.009 | 7.12E-49 |
| LTF       | 7.53E-53 | -1.4235  | 0.011 | 0.162 | 1.12E-48 |
| IGDCC4    | 9.10E-53 | 0.244823 | 0.206 | 0.003 | 1.36E-48 |
| NPAS2     | 9.62E-53 | 0.177162 | 0.181 | 0.01  | 1.44E-48 |
| C2CD2     | 1.02E-52 | 0.112178 | 0.137 | 0.007 | 1.52E-48 |
| ITPKC     | 1.50E-52 | 0.194769 | 0.176 | 0.003 | 2.24E-48 |
| GPNMB     | 1.52E-52 | -0.31415 | 0.083 | 0.044 | 2.27E-48 |
| RP5-1136G | 1.72E-52 | 0.118972 | 0.132 | 0.003 | 2.57E-48 |
| GDPD1     | 2.16E-52 | 0.212747 | 0.189 | 0.005 | 3.23E-48 |
| ZNF689    | 3.05E-52 | 0.173907 | 0.189 | 0.015 | 4.55E-48 |
| LCA5      | 3.40E-52 | 0.140982 | 0.15  | 0.007 | 5.08E-48 |
| EGLN3     | 3.48E-52 | -0.25821 | 0.078 | 0.036 | 5.21E-48 |
| ZNF346    | 4.13E-52 | 0.126706 | 0.157 | 0.01  | 6.17E-48 |
| PCNXL3    | 4.41E-52 | 0.155084 | 0.153 | 0.003 | 6.59E-48 |
| CYBA      | 4.67E-52 | -0.16034 | 0.112 | 0.036 | 6.97E-48 |
| SYNJ1     | 4.99E-52 | 0.123905 | 0.153 | 0.009 | 7.46E-48 |
| ENTPD5    | 5.12E-52 | 0.137567 | 0.164 | 0.01  | 7.66E-48 |
| PEX12     | 6.19E-52 | 0.174421 | 0.173 | 0.007 | 9.25E-48 |
| SLC27A4   | 6.35E-52 | 0.163869 | 0.157 | 0.002 | 9.49E-48 |
| SBNO2     | 6.60E-52 | 0.146773 | 0.166 | 0.01  | 9.87E-48 |
| LAYN      | 7.28E-52 | 0.266097 | 0.209 | 0.002 | 1.09E-47 |
| INO80B    | 7.74E-52 | 0.201277 | 0.189 | 0.009 | 1.16E-47 |
| CACNA1A   | 8.69E-52 | -0.25234 | 0.083 | 0.05  | 1.30E-47 |
| ZNF74     | 9.19E-52 | 0.107246 | 0.145 | 0.012 | 1.37E-47 |
| WIPF3     | 9.32E-52 | 0.220629 | 0.19  | 0.007 | 1.39E-47 |
| HNMT      | 9.34E-52 | -0.11021 | 0.123 | 0.031 | 1.40E-47 |
| LMO3      | 9.34E-52 | -0.24329 | 0.132 | 0.068 | 1.40E-47 |
| DENND4B   | 9.78E-52 | 0.142437 | 0.154 | 0.007 | 1.46E-47 |
| RP11-315A | 1.03E-51 | -0.15374 | 0.089 | 0.027 | 1.54E-47 |
| PYCARD    | 1.21E-51 | 0.14952  | 0.163 | 0.012 | 1.80E-47 |

|           |           |           |        |        |           |
|-----------|-----------|-----------|--------|--------|-----------|
| RAB24     | 1. 29E-51 | 0. 101275 | 0. 135 | 0. 007 | 1. 93E-47 |
| RP11-455F | 1. 50E-51 | -0. 13431 | 0. 086 | 0. 024 | 2. 24E-47 |
| WBP1L     | 1. 56E-51 | 0. 109721 | 0. 157 | 0. 014 | 2. 33E-47 |
| NLE1      | 1. 58E-51 | 0. 197193 | 0. 187 | 0. 005 | 2. 35E-47 |
| TRIM3     | 1. 58E-51 | 0. 111117 | 0. 145 | 0. 01  | 2. 36E-47 |
| Clorf159  | 2. 26E-51 | 0. 123195 | 0. 136 | 0. 003 | 3. 37E-47 |
| DDX20     | 2. 40E-51 | 0. 159617 | 0. 165 | 0. 007 | 3. 59E-47 |
| SFRP4     | 3. 74E-51 | -0. 12822 | 0. 138 | 0. 039 | 5. 60E-47 |
| TUBGCP5   | 4. 06E-51 | 0. 163271 | 0. 169 | 0. 007 | 6. 07E-47 |
| ADORA2B   | 4. 24E-51 | 0. 17884  | 0. 172 | 0. 005 | 6. 34E-47 |
| PDE7A     | 4. 43E-51 | 0. 114052 | 0. 143 | 0. 007 | 6. 62E-47 |
| CDK8      | 4. 57E-51 | 0. 155635 | 0. 167 | 0. 007 | 6. 83E-47 |
| BRPF1     | 5. 12E-51 | 0. 103722 | 0. 138 | 0. 009 | 7. 65E-47 |
| SLC39A11  | 6. 08E-51 | 0. 169401 | 0. 165 | 0. 003 | 9. 09E-47 |
| CXXC4     | 7. 30E-51 | 0. 16152  | 0. 165 | 0. 009 | 1. 09E-46 |
| GK        | 8. 20E-51 | 0. 103927 | 0. 144 | 0. 01  | 1. 23E-46 |
| FBLN5     | 8. 52E-51 | -0. 15744 | 0. 101 | 0. 029 | 1. 27E-46 |
| CHN2      | 9. 72E-51 | 0. 108953 | 0. 135 | 0. 009 | 1. 45E-46 |
| GPR161    | 1. 21E-50 | 0. 211877 | 0. 19  | 0. 005 | 1. 82E-46 |
| SYNJ2     | 1. 23E-50 | 0. 153301 | 0. 169 | 0. 01  | 1. 83E-46 |
| WRN       | 1. 24E-50 | 0. 116564 | 0. 138 | 0. 007 | 1. 85E-46 |
| PI3       | 1. 40E-50 | -0. 63518 | 0. 07  | 0. 043 | 2. 09E-46 |
| PNRC2     | 1. 49E-50 | -0. 42301 | 0. 07  | 0. 046 | 2. 23E-46 |
| FRMD4B    | 1. 55E-50 | -0. 12623 | 0. 118 | 0. 034 | 2. 32E-46 |
| ZNF747    | 1. 64E-50 | 0. 120653 | 0. 138 | 0. 005 | 2. 45E-46 |
| RP11-182L | 2. 29E-50 | 0. 170615 | 0. 171 | 0. 009 | 3. 42E-46 |
| APOD      | 2. 50E-50 | -1. 06923 | 0. 078 | 0. 207 | 3. 74E-46 |
| XYLT2     | 2. 74E-50 | 0. 171125 | 0. 171 | 0. 01  | 4. 10E-46 |
| NAT8L     | 3. 01E-50 | 0. 133551 | 0. 156 | 0. 01  | 4. 50E-46 |
| TRIM8     | 3. 61E-50 | 0. 26782  | 0. 206 | 0. 002 | 5. 40E-46 |
| IPPK      | 3. 80E-50 | 0. 118924 | 0. 153 | 0. 012 | 5. 67E-46 |
| AQR       | 3. 82E-50 | 0. 13246  | 0. 157 | 0. 01  | 5. 71E-46 |
| MDFIC     | 3. 93E-50 | 0. 131882 | 0. 141 | 0. 003 | 5. 88E-46 |
| RP11-490M | 4. 36E-50 | 0. 137652 | 0. 153 | 0. 009 | 6. 52E-46 |
| FBXL19    | 4. 60E-50 | 0. 113164 | 0. 134 | 0. 005 | 6. 87E-46 |
| RP11-544A | 5. 21E-50 | 0. 104125 | 0. 206 | 0. 041 | 7. 79E-46 |
| EHBP1L1   | 6. 17E-50 | 0. 135784 | 0. 14  | 0. 002 | 9. 22E-46 |
| PTGDS     | 6. 22E-50 | -0. 72225 | 0. 122 | 0. 12  | 9. 29E-46 |
| CYP2U1    | 6. 72E-50 | 0. 13579  | 0. 15  | 0. 009 | 1. 00E-45 |
| ZNF717    | 7. 08E-50 | 0. 108887 | 0. 125 | 0. 003 | 1. 06E-45 |
| OXTR      | 7. 71E-50 | 0. 257933 | 0. 205 | 0. 014 | 1. 15E-45 |
| TMC7      | 8. 37E-50 | 0. 120719 | 0. 146 | 0. 009 | 1. 25E-45 |
| ZNF682    | 9. 23E-50 | 0. 103392 | 0. 154 | 0. 012 | 1. 38E-45 |
| STK32B    | 9. 65E-50 | 0. 254877 | 0. 205 | 0. 005 | 1. 44E-45 |
| MCM4      | 1. 04E-49 | 0. 184312 | 0. 178 | 0. 01  | 1. 56E-45 |
| PARG      | 1. 20E-49 | 0. 120513 | 0. 137 | 0. 005 | 1. 80E-45 |
| TTY15     | 1. 24E-49 | 0. 138202 | 0. 146 | 0. 005 | 1. 85E-45 |
| PCDHB14   | 1. 41E-49 | -0. 10943 | 0. 152 | 0. 053 | 2. 11E-45 |
| MOB1B     | 1. 49E-49 | 0. 18418  | 0. 167 | 0. 003 | 2. 22E-45 |
| FBRSL1    | 1. 76E-49 | 0. 131149 | 0. 149 | 0. 005 | 2. 63E-45 |
| ZNF574    | 1. 82E-49 | 0. 185896 | 0. 184 | 0. 012 | 2. 72E-45 |

|           |          |          |       |       |          |
|-----------|----------|----------|-------|-------|----------|
| B3GNT9    | 2.18E-49 | 0.172928 | 0.172 | 0.005 | 3.26E-45 |
| EXT1      | 2.43E-49 | 0.171564 | 0.169 | 0.005 | 3.64E-45 |
| WDR44     | 2.44E-49 | 0.102327 | 0.129 | 0.007 | 3.65E-45 |
| ZDHHC14   | 2.59E-49 | 0.117643 | 0.153 | 0.01  | 3.87E-45 |
| TCFL5     | 2.70E-49 | 0.177547 | 0.172 | 0.005 | 4.03E-45 |
| SLC22A4   | 3.79E-49 | 0.285177 | 0.209 | 0.002 | 5.66E-45 |
| SH3BP1    | 4.00E-49 | 0.166541 | 0.163 | 0.005 | 5.97E-45 |
| PDLIM4    | 4.59E-49 | -0.25316 | 0.144 | 0.068 | 6.87E-45 |
| INF2      | 4.87E-49 | 0.120824 | 0.15  | 0.012 | 7.27E-45 |
| PPP2R5D   | 6.48E-49 | 0.178621 | 0.176 | 0.007 | 9.68E-45 |
| MAEL      | 6.65E-49 | 0.165922 | 0.165 | 0.007 | 9.94E-45 |
| MGP       | 9.23E-49 | -1.28723 | 0.024 | 0.128 | 1.38E-44 |
| VPS54     | 1.01E-48 | 0.124623 | 0.141 | 0.007 | 1.51E-44 |
| FAM86B1   | 1.20E-48 | 0.155112 | 0.159 | 0.009 | 1.79E-44 |
| CYP3A5    | 1.24E-48 | 0.132031 | 0.153 | 0.01  | 1.85E-44 |
| ZNF615    | 1.26E-48 | 0.116842 | 0.143 | 0.01  | 1.88E-44 |
| TMEM63A   | 1.36E-48 | 0.101887 | 0.154 | 0.017 | 2.03E-44 |
| HAUS6     | 1.50E-48 | 0.131038 | 0.155 | 0.01  | 2.24E-44 |
| ATP1A2    | 1.51E-48 | -0.2404  | 0.2   | 0.113 | 2.26E-44 |
| AIF1      | 1.53E-48 | -0.20287 | 0.09  | 0.039 | 2.29E-44 |
| PLEKHF1   | 2.18E-48 | 0.131514 | 0.16  | 0.012 | 3.26E-44 |
| TRIM26    | 2.43E-48 | 0.139005 | 0.156 | 0.01  | 3.63E-44 |
| B3GNT2    | 2.51E-48 | 0.218366 | 0.179 | 0.007 | 3.75E-44 |
| MMS19     | 2.68E-48 | 0.16811  | 0.172 | 0.01  | 4.00E-44 |
| LPAR1     | 2.81E-48 | 0.101927 | 0.122 | 0.005 | 4.20E-44 |
| GPD1L     | 2.88E-48 | 0.176167 | 0.16  | 0.003 | 4.30E-44 |
| MED23     | 3.74E-48 | 0.134148 | 0.155 | 0.012 | 5.59E-44 |
| RP11-73E1 | 4.12E-48 | 0.137981 | 0.143 | 0.007 | 6.16E-44 |
| C11orf71  | 4.32E-48 | -0.14759 | 0.081 | 0.026 | 6.45E-44 |
| AC002456  | 4.57E-48 | -0.14727 | 0.108 | 0.031 | 6.82E-44 |
| ANGPT2    | 4.97E-48 | -0.23758 | 0.103 | 0.043 | 7.43E-44 |
| ZNF653    | 5.24E-48 | 0.112178 | 0.129 | 0.005 | 7.83E-44 |
| ERAP1     | 5.51E-48 | 0.134379 | 0.159 | 0.01  | 8.24E-44 |
| SCYL3     | 5.96E-48 | 0.107336 | 0.138 | 0.01  | 8.91E-44 |
| OTP       | 6.05E-48 | 0.260541 | 0.199 | 0.002 | 9.04E-44 |
| PANX1     | 6.55E-48 | 0.121114 | 0.143 | 0.009 | 9.79E-44 |
| CACNB3    | 7.30E-48 | 0.143039 | 0.153 | 0.009 | 1.09E-43 |
| KDM1B     | 9.37E-48 | 0.137037 | 0.149 | 0.007 | 1.40E-43 |
| SHROOM1   | 1.05E-47 | 0.182026 | 0.168 | 0.007 | 1.57E-43 |
| MAF       | 1.06E-47 | -0.31934 | 0.084 | 0.048 | 1.59E-43 |
| SLC8B1    | 1.23E-47 | 0.117089 | 0.151 | 0.012 | 1.83E-43 |
| TMEM176A  | 1.24E-47 | -0.30699 | 0.113 | 0.056 | 1.85E-43 |
| MAGI3     | 1.26E-47 | 0.229389 | 0.193 | 0.003 | 1.88E-43 |
| LIN7A     | 1.26E-47 | 0.209651 | 0.186 | 0.007 | 1.88E-43 |
| MBP       | 1.30E-47 | -0.67773 | 0.06  | 0.07  | 1.94E-43 |
| SDC1      | 1.40E-47 | 0.147793 | 0.154 | 0.007 | 2.09E-43 |
| IL17RB    | 1.46E-47 | -0.17858 | 0.107 | 0.041 | 2.18E-43 |
| NR2F2     | 1.71E-47 | -0.17578 | 0.107 | 0.044 | 2.55E-43 |
| GSR       | 1.74E-47 | 0.141398 | 0.135 | 0.002 | 2.60E-43 |
| GPAM      | 1.76E-47 | 0.133294 | 0.147 | 0.005 | 2.63E-43 |
| MPP2      | 1.83E-47 | 0.159438 | 0.155 | 0.005 | 2.74E-43 |

|           |          |          |       |       |          |
|-----------|----------|----------|-------|-------|----------|
| LINC01137 | 1.95E-47 | 0.146885 | 0.147 | 0.005 | 2.92E-43 |
| TMEM117   | 1.97E-47 | 0.10694  | 0.129 | 0.005 | 2.94E-43 |
| FUOM      | 2.05E-47 | 0.13784  | 0.14  | 0.003 | 3.06E-43 |
| KIAA1551  | 2.24E-47 | 0.111467 | 0.139 | 0.009 | 3.34E-43 |
| C9orf40   | 2.39E-47 | 0.14125  | 0.142 | 0.003 | 3.57E-43 |
| CEP135    | 2.40E-47 | 0.133015 | 0.151 | 0.009 | 3.59E-43 |
| ALKBH8    | 2.76E-47 | 0.190219 | 0.173 | 0.005 | 4.13E-43 |
| AHNAK2    | 3.38E-47 | 0.253479 | 0.191 | 0.007 | 5.05E-43 |
| ZNF143    | 3.61E-47 | 0.160255 | 0.162 | 0.007 | 5.40E-43 |
| ENGASE    | 4.44E-47 | 0.137892 | 0.154 | 0.009 | 6.64E-43 |
| DTNB      | 4.44E-47 | 0.240006 | 0.191 | 0     | 6.64E-43 |
| VAR52     | 5.86E-47 | 0.154683 | 0.163 | 0.012 | 8.75E-43 |
| CTD-2587M | 6.29E-47 | 0.105019 | 0.116 | 0.002 | 9.39E-43 |
| PEX6      | 6.30E-47 | 0.124533 | 0.156 | 0.015 | 9.42E-43 |
| ADAM23    | 6.33E-47 | 0.175777 | 0.171 | 0.009 | 9.45E-43 |
| MORC2     | 7.08E-47 | 0.154093 | 0.152 | 0.005 | 1.06E-42 |
| PGAM5     | 8.66E-47 | 0.19775  | 0.172 | 0.003 | 1.29E-42 |
| FAM43A    | 9.10E-47 | 0.266064 | 0.19  | 0     | 1.36E-42 |
| RASAL2    | 9.24E-47 | 0.141262 | 0.144 | 0.005 | 1.38E-42 |
| PAXIP1    | 1.18E-46 | -0.1082  | 0.098 | 0.021 | 1.76E-42 |
| CRB2      | 1.41E-46 | 0.213819 | 0.175 | 0.01  | 2.10E-42 |
| LAPTM5    | 1.51E-46 | -0.3893  | 0.088 | 0.063 | 2.26E-42 |
| KLF15     | 1.94E-46 | -0.11163 | 0.121 | 0.043 | 2.90E-42 |
| RCBTB1    | 2.00E-46 | 0.124666 | 0.146 | 0.009 | 3.00E-42 |
| EPOR      | 2.20E-46 | 0.139813 | 0.15  | 0.009 | 3.28E-42 |
| CLCN2     | 2.28E-46 | 0.117946 | 0.135 | 0.007 | 3.41E-42 |
| RASD1     | 2.44E-46 | -0.53084 | 0.127 | 0.121 | 3.65E-42 |
| IL27RA    | 2.62E-46 | 0.131812 | 0.144 | 0.007 | 3.91E-42 |
| SEMA3A    | 2.66E-46 | 0.240059 | 0.188 | 0     | 3.98E-42 |
| YJEFN3    | 2.68E-46 | 0.18702  | 0.172 | 0.007 | 4.01E-42 |
| FHL2      | 2.75E-46 | 0.201519 | 0.182 | 0.012 | 4.12E-42 |
| RHPN1     | 3.11E-46 | 0.165779 | 0.156 | 0.003 | 4.64E-42 |
| ZFP1      | 3.13E-46 | 0.151722 | 0.152 | 0.007 | 4.67E-42 |
| GLIS2     | 3.14E-46 | 0.100031 | 0.122 | 0.005 | 4.69E-42 |
| CLDN10    | 3.83E-46 | -0.33068 | 0.113 | 0.053 | 5.73E-42 |
| DZANK1    | 4.37E-46 | 0.143976 | 0.143 | 0.005 | 6.53E-42 |
| SCAF8     | 4.69E-46 | 0.209354 | 0.178 | 0.007 | 7.01E-42 |
| SNAI2     | 5.24E-46 | 0.157863 | 0.151 | 0.007 | 7.83E-42 |
| DIO2      | 5.59E-46 | -0.21272 | 0.13  | 0.056 | 8.36E-42 |
| TAPT1-AS1 | 5.73E-46 | 0.218067 | 0.18  | 0.003 | 8.56E-42 |
| FAS       | 7.68E-46 | -0.2643  | 0.076 | 0.034 | 1.15E-41 |
| SLC9A1    | 8.95E-46 | 0.117957 | 0.134 | 0.005 | 1.34E-41 |
| SVIP      | 9.23E-46 | 0.279701 | 0.181 | 0.007 | 1.38E-41 |
| SH3BP5L   | 9.46E-46 | 0.126228 | 0.14  | 0.009 | 1.41E-41 |
| ELL2      | 1.03E-45 | -0.22327 | 0.086 | 0.043 | 1.53E-41 |
| CHRDL1    | 1.04E-45 | 0.140317 | 0.135 | 0.002 | 1.55E-41 |
| GSTCD     | 1.22E-45 | 0.100159 | 0.127 | 0.007 | 1.82E-41 |
| NDUFB8    | 1.30E-45 | -1.09171 | 0.009 | 0.164 | 1.95E-41 |
| SIX1      | 1.51E-45 | 0.11013  | 0.133 | 0.007 | 2.25E-41 |
| ANKS1A    | 1.71E-45 | 0.145213 | 0.143 | 0.005 | 2.56E-41 |
| RAB33A    | 1.81E-45 | -0.28558 | 0.067 | 0.031 | 2.71E-41 |



|           |          |          |       |       |          |
|-----------|----------|----------|-------|-------|----------|
| ZFP30     | 2.03E-45 | 0.137225 | 0.143 | 0.007 | 3.04E-41 |
| C7orf43   | 2.17E-45 | 0.15408  | 0.145 | 0.003 | 3.24E-41 |
| SYNGR3    | 2.21E-45 | 0.137663 | 0.136 | 0.003 | 3.30E-41 |
| KIF1A     | 2.52E-45 | -0.14159 | 0.103 | 0.038 | 3.77E-41 |
| ZBTB41    | 2.58E-45 | 0.103691 | 0.128 | 0.007 | 3.85E-41 |
| PIFO      | 2.63E-45 | -0.50545 | 0.062 | 0.062 | 3.93E-41 |
| B4GALNT4  | 3.19E-45 | 0.118624 | 0.132 | 0.005 | 4.76E-41 |
| WWC2      | 3.23E-45 | 0.125684 | 0.143 | 0.01  | 4.83E-41 |
| LRP8      | 3.30E-45 | 0.102017 | 0.127 | 0.007 | 4.93E-41 |
| CHKB      | 3.54E-45 | 0.116279 | 0.123 | 0.003 | 5.29E-41 |
| ZDHHC1    | 3.77E-45 | 0.198932 | 0.173 | 0.002 | 5.64E-41 |
| PRIM1     | 3.89E-45 | 0.112488 | 0.147 | 0.012 | 5.81E-41 |
| DENND1B   | 4.12E-45 | 0.134856 | 0.147 | 0.007 | 6.16E-41 |
| EPS8L1    | 4.20E-45 | 0.250907 | 0.182 | 0.002 | 6.28E-41 |
| ARHGAP18  | 4.37E-45 | -0.11164 | 0.108 | 0.027 | 6.53E-41 |
| ST6GALNAC | 5.15E-45 | 0.173595 | 0.15  | 0.005 | 7.69E-41 |
| SLC16A9   | 5.34E-45 | 0.159693 | 0.149 | 0.003 | 7.99E-41 |
| MUC12     | 5.43E-45 | -0.28118 | 0.082 | 0.038 | 8.11E-41 |
| WWC3      | 8.59E-45 | 0.10731  | 0.133 | 0.007 | 1.28E-40 |
| AREL1     | 8.85E-45 | 0.167292 | 0.152 | 0.003 | 1.32E-40 |
| PITPNM1   | 9.40E-45 | 0.219074 | 0.182 | 0     | 1.40E-40 |
| IER3IP1   | 1.05E-44 | -1.04094 | 0.005 | 0.132 | 1.56E-40 |
| USP53     | 1.09E-44 | 0.100329 | 0.137 | 0.012 | 1.63E-40 |
| UTP15     | 1.14E-44 | 0.111864 | 0.138 | 0.01  | 1.70E-40 |
| TMEM164   | 1.14E-44 | 0.120107 | 0.13  | 0.005 | 1.70E-40 |
| ABCC10    | 1.19E-44 | 0.110554 | 0.137 | 0.01  | 1.78E-40 |
| STX1A     | 1.35E-44 | -0.12694 | 0.063 | 0.021 | 2.02E-40 |
| STK11IP   | 1.70E-44 | 0.101633 | 0.122 | 0.009 | 2.54E-40 |
| SBF1      | 2.29E-44 | 0.164079 | 0.155 | 0.003 | 3.42E-40 |
| NIPA1     | 3.23E-44 | 0.117234 | 0.133 | 0.007 | 4.83E-40 |
| NR4A1     | 3.40E-44 | -0.34649 | 0.087 | 0.058 | 5.08E-40 |
| RP4-639F2 | 3.49E-44 | 0.152878 | 0.152 | 0.005 | 5.22E-40 |
| SHC2      | 3.59E-44 | 0.123303 | 0.14  | 0.009 | 5.36E-40 |
| TUBA4A    | 3.92E-44 | -0.32412 | 0.07  | 0.034 | 5.85E-40 |
| ZNF660    | 4.09E-44 | 0.138957 | 0.15  | 0.007 | 6.11E-40 |
| AMH       | 4.87E-44 | 0.167489 | 0.154 | 0.005 | 7.28E-40 |
| TPX2      | 4.92E-44 | 0.115611 | 0.129 | 0.005 | 7.36E-40 |
| KLHDC4    | 6.18E-44 | 0.164398 | 0.154 | 0.005 | 9.24E-40 |
| TAF1A     | 6.39E-44 | -0.17611 | 0.075 | 0.022 | 9.55E-40 |
| ATAD2     | 7.05E-44 | 0.133227 | 0.134 | 0.005 | 1.05E-39 |
| GJB2      | 7.15E-44 | 0.217481 | 0.171 | 0.01  | 1.07E-39 |
| MSL2      | 7.69E-44 | 0.11597  | 0.128 | 0.007 | 1.15E-39 |
| GJA1      | 8.28E-44 | -0.37834 | 0.141 | 0.099 | 1.24E-39 |
| ZFYVE9    | 8.78E-44 | 0.129471 | 0.147 | 0.012 | 1.31E-39 |
| ASB13     | 9.30E-44 | 0.197815 | 0.17  | 0.003 | 1.39E-39 |
| LRFN3     | 9.92E-44 | 0.134925 | 0.138 | 0.007 | 1.48E-39 |
| AC079922. | 1.07E-43 | 0.108632 | 0.119 | 0.005 | 1.60E-39 |
| SPAG1     | 1.18E-43 | 0.151733 | 0.143 | 0.003 | 1.77E-39 |
| EFNA4     | 1.26E-43 | 0.125975 | 0.133 | 0.003 | 1.89E-39 |
| ZNF628    | 1.70E-43 | 0.102271 | 0.127 | 0.009 | 2.55E-39 |
| GALNT18   | 1.80E-43 | 0.102083 | 0.119 | 0.007 | 2.69E-39 |

|          |          |          |       |       |          |
|----------|----------|----------|-------|-------|----------|
| ALMS1    | 1.94E-43 | 0.106152 | 0.143 | 0.014 | 2.90E-39 |
| BEST3    | 1.96E-43 | -0.16762 | 0.118 | 0.044 | 2.93E-39 |
| TRAF3IP1 | 2.34E-43 | 0.12541  | 0.133 | 0.007 | 3.49E-39 |
| IKZF4    | 2.56E-43 | 0.117377 | 0.13  | 0.005 | 3.83E-39 |
| PPP1R14A | 2.75E-43 | -0.20206 | 0.1   | 0.041 | 4.10E-39 |
| WWP2     | 3.13E-43 | 0.113921 | 0.133 | 0.009 | 4.68E-39 |
| KDM5D    | 3.25E-43 | 0.211524 | 0.176 | 0     | 4.85E-39 |
| SPAG4    | 3.58E-43 | -0.22744 | 0.055 | 0.019 | 5.35E-39 |
| NCAPD2   | 3.93E-43 | 0.121255 | 0.123 | 0.005 | 5.88E-39 |
| TPCN1    | 3.94E-43 | 0.12044  | 0.15  | 0.015 | 5.89E-39 |
| PFKFB4   | 4.29E-43 | -0.12159 | 0.068 | 0.019 | 6.42E-39 |
| OPN3     | 4.57E-43 | 0.102071 | 0.121 | 0.005 | 6.83E-39 |
| IFIT1    | 5.25E-43 | -0.11409 | 0.118 | 0.032 | 7.85E-39 |
| SQRDL    | 5.54E-43 | -0.13506 | 0.072 | 0.022 | 8.27E-39 |
| ZNF837   | 5.92E-43 | 0.122747 | 0.134 | 0.007 | 8.85E-39 |
| RASSF7   | 6.05E-43 | 0.192334 | 0.163 | 0.002 | 9.04E-39 |
| HVCN1    | 6.35E-43 | -0.14283 | 0.087 | 0.029 | 9.48E-39 |
| GRIK3    | 7.31E-43 | 0.143892 | 0.143 | 0.009 | 1.09E-38 |
| DDX31    | 7.72E-43 | 0.139381 | 0.143 | 0.007 | 1.15E-38 |
| C16orf70 | 8.53E-43 | 0.107121 | 0.124 | 0.005 | 1.27E-38 |
| PTCH1    | 1.42E-42 | 0.138984 | 0.139 | 0.009 | 2.12E-38 |
| GAS2L3   | 1.42E-42 | 0.20382  | 0.162 | 0.003 | 2.13E-38 |
| BBS10    | 1.53E-42 | 0.19024  | 0.156 | 0.003 | 2.28E-38 |
| RAB26    | 1.65E-42 | 0.117686 | 0.122 | 0.003 | 2.47E-38 |
| DVL1     | 1.81E-42 | 0.145152 | 0.14  | 0.003 | 2.70E-38 |
| TMEM145  | 2.63E-42 | 0.100212 | 0.157 | 0.021 | 3.93E-38 |
| SPATA5L1 | 3.38E-42 | 0.133003 | 0.143 | 0.01  | 5.06E-38 |
| RUNDC3A  | 3.44E-42 | -0.12811 | 0.083 | 0.031 | 5.14E-38 |
| ASAP3    | 3.52E-42 | 0.156056 | 0.144 | 0.003 | 5.26E-38 |
| MMP11    | 3.83E-42 | 0.236809 | 0.172 | 0     | 5.72E-38 |
| ANTXR2   | 4.77E-42 | 0.108351 | 0.116 | 0.003 | 7.12E-38 |
| PRKX     | 5.15E-42 | 0.148441 | 0.134 | 0.003 | 7.70E-38 |
| NHSL2    | 5.48E-42 | -0.88366 | 0.008 | 0.115 | 8.18E-38 |
| BANP     | 6.37E-42 | 0.170657 | 0.153 | 0.005 | 9.52E-38 |
| RBM47    | 8.84E-42 | 0.131182 | 0.143 | 0.01  | 1.32E-37 |
| MTRNR2L1 | 8.85E-42 | -0.86461 | 0.059 | 0.174 | 1.32E-37 |
| TRAPPC8  | 8.92E-42 | 0.199028 | 0.169 | 0.003 | 1.33E-37 |
| TNS1     | 9.06E-42 | -0.12046 | 0.084 | 0.027 | 1.35E-37 |
| DNMBP    | 1.08E-41 | 0.119713 | 0.127 | 0.005 | 1.61E-37 |
| AADAT    | 1.52E-41 | 0.16597  | 0.148 | 0.002 | 2.28E-37 |
| CACHD1   | 1.56E-41 | 0.100993 | 0.13  | 0.009 | 2.34E-37 |
| SPDL1    | 1.58E-41 | 0.108468 | 0.122 | 0.007 | 2.36E-37 |
| EMX2     | 1.84E-41 | -0.14124 | 0.079 | 0.034 | 2.75E-37 |
| RTTN     | 2.14E-41 | 0.132521 | 0.14  | 0.01  | 3.20E-37 |
| TMEM220  | 2.26E-41 | 0.132403 | 0.123 | 0.002 | 3.37E-37 |
| KIAA1919 | 2.84E-41 | 0.101041 | 0.118 | 0.007 | 4.24E-37 |
| LDLRAP1  | 4.46E-41 | 0.148739 | 0.143 | 0.003 | 6.66E-37 |
| BTN3A3   | 5.67E-41 | 0.117675 | 0.134 | 0.01  | 8.47E-37 |
| LIPE     | 5.76E-41 | 0.103315 | 0.122 | 0.003 | 8.61E-37 |
| MBTD1    | 5.96E-41 | 0.170317 | 0.147 | 0.003 | 8.91E-37 |
| ANKRD13B | 6.96E-41 | 0.147271 | 0.138 | 0.005 | 1.04E-36 |

|           |           |           |        |        |           |
|-----------|-----------|-----------|--------|--------|-----------|
| RBL1      | 7. 81E-41 | 0. 139011 | 0. 135 | 0. 005 | 1. 17E-36 |
| GADD45G   | 7. 92E-41 | -0. 27585 | 0. 127 | 0. 075 | 1. 18E-36 |
| RFWD3     | 9. 95E-41 | 0. 115086 | 0. 134 | 0. 01  | 1. 49E-36 |
| CCL4      | 1. 17E-40 | -0. 26724 | 0. 11  | 0. 063 | 1. 75E-36 |
| RP11-22P6 | 1. 58E-40 | -0. 10535 | 0. 081 | 0. 022 | 2. 36E-36 |
| AQP11     | 1. 73E-40 | 0. 125064 | 0. 128 | 0. 003 | 2. 58E-36 |
| TCF20     | 1. 77E-40 | 0. 113001 | 0. 131 | 0. 009 | 2. 65E-36 |
| RP11-680F | 1. 81E-40 | 0. 2125   | 0. 165 | 0      | 2. 71E-36 |
| FBX046    | 2. 19E-40 | 0. 159012 | 0. 141 | 0. 002 | 3. 27E-36 |
| CEP112    | 2. 35E-40 | 0. 168098 | 0. 151 | 0. 005 | 3. 51E-36 |
| IRAK1BP1  | 2. 53E-40 | 0. 103559 | 0. 119 | 0. 005 | 3. 78E-36 |
| SAA1      | 2. 59E-40 | -1. 36561 | 0. 016 | 0. 121 | 3. 87E-36 |
| IL33      | 3. 13E-40 | 0. 181583 | 0. 143 | 0. 005 | 4. 67E-36 |
| MCF2L     | 4. 65E-40 | 0. 110326 | 0. 134 | 0. 012 | 6. 95E-36 |
| ZBED4     | 4. 97E-40 | 0. 102078 | 0. 118 | 0. 007 | 7. 42E-36 |
| PREX2     | 5. 75E-40 | 0. 110106 | 0. 118 | 0. 005 | 8. 59E-36 |
| MAPKBP1   | 5. 76E-40 | 0. 120709 | 0. 119 | 0. 002 | 8. 61E-36 |
| TMEM201   | 5. 78E-40 | 0. 186311 | 0. 158 | 0. 005 | 8. 64E-36 |
| PPP1R3D   | 7. 18E-40 | 0. 118687 | 0. 127 | 0. 009 | 1. 07E-35 |
| EPB41L4A  | 7. 25E-40 | 0. 125497 | 0. 124 | 0. 005 | 1. 08E-35 |
| THEM4     | 8. 96E-40 | 0. 107062 | 0. 123 | 0. 009 | 1. 34E-35 |
| MCF2L-AS1 | 9. 97E-40 | 0. 128598 | 0. 123 | 0. 002 | 1. 49E-35 |
| CCDC149   | 1. 10E-39 | 0. 104931 | 0. 112 | 0. 003 | 1. 64E-35 |
| TMEM91    | 1. 10E-39 | 0. 133801 | 0. 131 | 0. 005 | 1. 65E-35 |
| KITLG     | 1. 18E-39 | 0. 125453 | 0. 132 | 0. 007 | 1. 76E-35 |
| MFAP4     | 1. 19E-39 | -0. 11436 | 0. 102 | 0. 026 | 1. 77E-35 |
| IL1B      | 1. 45E-39 | -0. 1505  | 0. 078 | 0. 031 | 2. 16E-35 |
| PGAM2     | 1. 62E-39 | -0. 21999 | 0. 074 | 0. 027 | 2. 42E-35 |
| AHCYL2    | 1. 83E-39 | 0. 171018 | 0. 153 | 0. 01  | 2. 73E-35 |
| STXBP4    | 2. 27E-39 | 0. 125914 | 0. 121 | 0. 003 | 3. 39E-35 |
| EPG5      | 2. 76E-39 | 0. 103676 | 0. 126 | 0. 01  | 4. 12E-35 |
| FLNB      | 3. 53E-39 | 0. 129785 | 0. 123 | 0. 002 | 5. 28E-35 |
| ZBTB16    | 4. 01E-39 | -0. 46748 | 0. 102 | 0. 101 | 5. 99E-35 |
| CTD-2325M | 5. 27E-39 | 0. 122744 | 0. 124 | 0. 005 | 7. 88E-35 |
| PAPD7     | 5. 68E-39 | 0. 120583 | 0. 115 | 0. 002 | 8. 49E-35 |
| APAF1     | 8. 40E-39 | 0. 101914 | 0. 116 | 0. 007 | 1. 25E-34 |
| TCEAL2    | 1. 01E-38 | -0. 7658  | 0. 057 | 0. 137 | 1. 51E-34 |
| NEK3      | 1. 04E-38 | 0. 113885 | 0. 124 | 0. 007 | 1. 55E-34 |
| MORN3     | 1. 19E-38 | -0. 1735  | 0. 052 | 0. 021 | 1. 77E-34 |
| RP11-375N | 1. 44E-38 | 0. 158045 | 0. 138 | 0. 005 | 2. 16E-34 |
| HOXD9     | 1. 87E-38 | 0. 13244  | 0. 131 | 0. 003 | 2. 79E-34 |
| WDR89     | 1. 93E-38 | 0. 136701 | 0. 135 | 0. 005 | 2. 88E-34 |
| CTD-3131K | 2. 04E-38 | -0. 16684 | 0. 07  | 0. 021 | 3. 04E-34 |
| PARD3B    | 2. 15E-38 | 0. 143536 | 0. 128 | 0. 003 | 3. 22E-34 |
| PARP8     | 2. 30E-38 | 0. 124443 | 0. 119 | 0. 003 | 3. 44E-34 |
| SLC25A43  | 2. 42E-38 | 0. 106095 | 0. 124 | 0. 009 | 3. 61E-34 |
| CD14      | 2. 44E-38 | -0. 40456 | 0. 08  | 0. 074 | 3. 65E-34 |
| SYNDIG1   | 2. 66E-38 | 0. 161672 | 0. 135 | 0. 005 | 3. 98E-34 |
| ATAD2B    | 3. 16E-38 | 0. 138168 | 0. 128 | 0. 005 | 4. 72E-34 |
| NKX2-2    | 4. 05E-38 | -0. 11533 | 0. 127 | 0. 048 | 6. 05E-34 |
| SLC7A5    | 4. 08E-38 | -0. 14999 | 0. 087 | 0. 038 | 6. 10E-34 |

|           |          |          |       |       |          |
|-----------|----------|----------|-------|-------|----------|
| CRABP2    | 5.83E-38 | -0.27021 | 0.054 | 0.034 | 8.72E-34 |
| GAL3ST4   | 5.97E-38 | -0.16754 | 0.071 | 0.032 | 8.92E-34 |
| RGS1      | 7.09E-38 | -0.39921 | 0.093 | 0.085 | 1.06E-33 |
| TMEM65    | 7.83E-38 | 0.144763 | 0.133 | 0.005 | 1.17E-33 |
| FBXW8     | 9.20E-38 | 0.103011 | 0.115 | 0.007 | 1.37E-33 |
| CMTM7     | 9.45E-38 | 0.21462  | 0.154 | 0     | 1.41E-33 |
| KSR1      | 1.04E-37 | 0.131183 | 0.125 | 0.005 | 1.55E-33 |
| PIF1      | 1.21E-37 | 0.142814 | 0.133 | 0.003 | 1.81E-33 |
| PDE9A     | 1.23E-37 | 0.109972 | 0.141 | 0.017 | 1.83E-33 |
| RARRES2   | 1.32E-37 | -0.8308  | 0.061 | 0.133 | 1.97E-33 |
| RIN2      | 1.34E-37 | 0.156813 | 0.153 | 0.01  | 2.00E-33 |
| REEP1     | 1.53E-37 | 0.124242 | 0.122 | 0.005 | 2.29E-33 |
| OSBPL5    | 1.76E-37 | 0.144817 | 0.137 | 0.007 | 2.62E-33 |
| FHIT      | 1.88E-37 | -0.24996 | 0.073 | 0.038 | 2.80E-33 |
| FGFR3     | 2.04E-37 | 0.109166 | 0.143 | 0.021 | 3.05E-33 |
| RP11-15A1 | 2.05E-37 | 0.164969 | 0.15  | 0.012 | 3.07E-33 |
| WDR86     | 2.07E-37 | 0.141096 | 0.13  | 0.003 | 3.09E-33 |
| UBE2V1    | 2.16E-37 | 0.180989 | 0.152 | 0.003 | 3.23E-33 |
| PLLP      | 2.19E-37 | -0.23448 | 0.124 | 0.056 | 3.27E-33 |
| SOD3      | 3.05E-37 | 0.232245 | 0.143 | 0.002 | 4.55E-33 |
| NRXN1     | 3.12E-37 | -0.16142 | 0.106 | 0.043 | 4.67E-33 |
| CTD-2090I | 4.11E-37 | -0.76275 | 0.008 | 0.089 | 6.15E-33 |
| SNIP1     | 4.38E-37 | 0.112109 | 0.121 | 0.009 | 6.54E-33 |
| CELSR1    | 4.60E-37 | 0.124407 | 0.125 | 0.003 | 6.88E-33 |
| PAQR7     | 4.85E-37 | 0.119769 | 0.124 | 0.007 | 7.25E-33 |
| MAST4     | 5.06E-37 | -0.20049 | 0.105 | 0.051 | 7.56E-33 |
| SLC30A6   | 5.78E-37 | 0.138391 | 0.131 | 0.005 | 8.64E-33 |
| CTPS2     | 6.21E-37 | 0.106728 | 0.117 | 0.007 | 9.28E-33 |
| ATAD5     | 6.29E-37 | 0.109595 | 0.128 | 0.01  | 9.40E-33 |
| AGAP2-AS1 | 7.57E-37 | 0.101113 | 0.14  | 0.017 | 1.13E-32 |
| DSCC1     | 1.58E-36 | 0.115828 | 0.128 | 0.009 | 2.36E-32 |
| CTC-444N2 | 1.92E-36 | 0.11202  | 0.115 | 0.003 | 2.87E-32 |
| HSPA2     | 1.99E-36 | -0.44697 | 0.086 | 0.08  | 2.97E-32 |
| STAG3     | 2.05E-36 | -0.24211 | 0.05  | 0.038 | 3.06E-32 |
| RCAN3     | 2.11E-36 | 0.191642 | 0.149 | 0     | 3.15E-32 |
| THAP7-AS1 | 2.87E-36 | 0.13719  | 0.127 | 0.003 | 4.28E-32 |
| ZNF625    | 3.05E-36 | 0.123573 | 0.131 | 0.009 | 4.56E-32 |
| EFNA2     | 3.09E-36 | 0.184362 | 0.145 | 0.003 | 4.62E-32 |
| PARD6B    | 3.13E-36 | 0.106294 | 0.119 | 0.009 | 4.67E-32 |
| PAQR8     | 3.25E-36 | 0.106474 | 0.134 | 0.015 | 4.86E-32 |
| C2CD4A    | 4.19E-36 | 0.252328 | 0.148 | 0     | 6.26E-32 |
| NUAK1     | 4.85E-36 | 0.127436 | 0.118 | 0.003 | 7.25E-32 |
| DOPEY2    | 5.09E-36 | 0.105683 | 0.118 | 0.009 | 7.61E-32 |
| S100A9    | 5.12E-36 | -0.14802 | 0.064 | 0.026 | 7.65E-32 |
| H3F3C     | 6.20E-36 | -0.54133 | 0.029 | 0.079 | 9.27E-32 |
| IDUA      | 9.31E-36 | 0.140249 | 0.13  | 0.005 | 1.39E-31 |
| CACNG4    | 1.05E-35 | 0.115754 | 0.115 | 0.007 | 1.57E-31 |
| TMEM170B  | 1.17E-35 | 0.187605 | 0.146 | 0     | 1.75E-31 |
| NSG1      | 1.18E-35 | -0.27167 | 0.092 | 0.051 | 1.76E-31 |
| GFOD1     | 1.28E-35 | 0.150433 | 0.138 | 0.007 | 1.91E-31 |
| NTRK2     | 1.85E-35 | -0.45688 | 0.122 | 0.116 | 2.76E-31 |

|           |          |          |       |       |          |
|-----------|----------|----------|-------|-------|----------|
| TIMELESS  | 1.99E-35 | 0.126393 | 0.123 | 0.005 | 2.97E-31 |
| FOLR1     | 2.51E-35 | -0.19516 | 0.049 | 0.021 | 3.75E-31 |
| TBC1D12   | 2.60E-35 | 0.193457 | 0.149 | 0.002 | 3.89E-31 |
| GLIPR1L2  | 2.63E-35 | -0.12407 | 0.072 | 0.019 | 3.93E-31 |
| ACO23590. | 2.72E-35 | -0.1438  | 0.068 | 0.029 | 4.07E-31 |
| CTB-5506. | 3.28E-35 | 0.195168 | 0.144 | 0     | 4.91E-31 |
| SMAD3     | 3.60E-35 | 0.117051 | 0.113 | 0.005 | 5.38E-31 |
| SGCE      | 4.91E-35 | -0.70879 | 0.054 | 0.12  | 7.34E-31 |
| ALOX5AP   | 5.55E-35 | -0.41538 | 0.061 | 0.067 | 8.30E-31 |
| KCNN2     | 6.44E-35 | 0.107533 | 0.113 | 0.009 | 9.62E-31 |
| RNF217    | 6.51E-35 | 0.187832 | 0.143 | 0     | 9.73E-31 |
| CHGB      | 6.60E-35 | -0.18076 | 0.071 | 0.031 | 9.86E-31 |
| AC004540. | 7.20E-35 | -0.10302 | 0.093 | 0.032 | 1.08E-30 |
| SGMS1     | 8.51E-35 | 0.15679  | 0.136 | 0.005 | 1.27E-30 |
| DAB2IP    | 9.03E-35 | 0.126498 | 0.121 | 0.005 | 1.35E-30 |
| ZNF441    | 9.87E-35 | 0.107731 | 0.119 | 0.009 | 1.47E-30 |
| ARG2      | 1.12E-34 | -0.19883 | 0.048 | 0.022 | 1.67E-30 |
| SCHIP1    | 1.22E-34 | 0.127816 | 0.125 | 0.009 | 1.82E-30 |
| MAP3K3    | 1.52E-34 | 0.140352 | 0.125 | 0.002 | 2.27E-30 |
| PCSK1     | 1.83E-34 | -0.10051 | 0.078 | 0.022 | 2.73E-30 |
| SCN1B     | 2.01E-34 | 0.144934 | 0.13  | 0.002 | 3.01E-30 |
| C19orf47  | 2.24E-34 | 0.108228 | 0.111 | 0.007 | 3.34E-30 |
| KHDC1     | 2.93E-34 | -0.12286 | 0.09  | 0.032 | 4.38E-30 |
| PKP4      | 3.26E-34 | 0.116003 | 0.112 | 0.003 | 4.87E-30 |
| TRAM2-AS1 | 4.39E-34 | 0.127186 | 0.118 | 0.003 | 6.57E-30 |
| PPM1L     | 4.53E-34 | 0.146643 | 0.125 | 0.002 | 6.77E-30 |
| MAP3K5    | 5.19E-34 | 0.104397 | 0.105 | 0.003 | 7.76E-30 |
| TTC21A    | 5.64E-34 | 0.114978 | 0.126 | 0.01  | 8.43E-30 |
| BMP2K     | 5.68E-34 | 0.129289 | 0.124 | 0.007 | 8.49E-30 |
| FOXP4     | 5.82E-34 | 0.150649 | 0.132 | 0.002 | 8.70E-30 |
| B3GAT2    | 5.96E-34 | 0.166288 | 0.139 | 0.007 | 8.90E-30 |
| CMTM4     | 6.87E-34 | 0.166857 | 0.136 | 0.002 | 1.03E-29 |
| C6orf15   | 7.55E-34 | -0.28701 | 0.118 | 0.067 | 1.13E-29 |
| KIAA1161  | 7.90E-34 | 0.109897 | 0.102 | 0.002 | 1.18E-29 |
| PLEKHA8   | 9.49E-34 | 0.145244 | 0.131 | 0.005 | 1.42E-29 |
| ANGPTL4   | 1.01E-33 | -0.55732 | 0.054 | 0.074 | 1.51E-29 |
| MAFB      | 1.11E-33 | -0.35229 | 0.061 | 0.053 | 1.66E-29 |
| RP11-479J | 1.22E-33 | -0.11795 | 0.048 | 0.017 | 1.83E-29 |
| PRKAG2-AS | 1.55E-33 | -0.19667 | 0.072 | 0.039 | 2.32E-29 |
| DCAF17    | 1.63E-33 | 0.13375  | 0.115 | 0.002 | 2.44E-29 |
| GIMAP2    | 1.81E-33 | -0.15433 | 0.054 | 0.019 | 2.71E-29 |
| MRM1      | 1.97E-33 | 0.17098  | 0.137 | 0     | 2.95E-29 |
| RP13-270F | 1.98E-33 | 0.103398 | 0.1   | 0.002 | 2.95E-29 |
| PTGES     | 2.08E-33 | -0.16153 | 0.04  | 0.017 | 3.11E-29 |
| FCH02     | 2.66E-33 | 0.114141 | 0.115 | 0.007 | 3.98E-29 |
| KCNJ8     | 3.12E-33 | 0.104797 | 0.099 | 0.002 | 4.66E-29 |
| SLC1A4    | 3.15E-33 | 0.133503 | 0.118 | 0.003 | 4.71E-29 |
| RIT2      | 3.19E-33 | -0.51122 | 0.057 | 0.072 | 4.77E-29 |
| RP11-152N | 3.23E-33 | -0.11657 | 0.053 | 0.015 | 4.83E-29 |
| RENBP     | 3.65E-33 | -0.25489 | 0.062 | 0.038 | 5.46E-29 |
| ARHGAP23  | 4.12E-33 | 0.182623 | 0.149 | 0.005 | 6.15E-29 |

|           |          |          |       |       |          |
|-----------|----------|----------|-------|-------|----------|
| SALL3     | 5.34E-33 | 0.106859 | 0.101 | 0.003 | 7.98E-29 |
| C2        | 5.72E-33 | -0.29041 | 0.04  | 0.034 | 8.54E-29 |
| KIFC1     | 6.21E-33 | -0.10607 | 0.046 | 0.012 | 9.28E-29 |
| CDC6      | 6.35E-33 | -0.13068 | 0.052 | 0.012 | 9.49E-29 |
| USP21     | 8.31E-33 | 0.103215 | 0.112 | 0.009 | 1.24E-28 |
| ZC3H12A   | 9.12E-33 | -0.25535 | 0.048 | 0.026 | 1.36E-28 |
| LA16c-431 | 9.64E-33 | -0.1013  | 0.052 | 0.021 | 1.44E-28 |
| PAOX      | 9.92E-33 | 0.162036 | 0.135 | 0.002 | 1.48E-28 |
| GOS2      | 1.09E-32 | -0.46036 | 0.08  | 0.068 | 1.63E-28 |
| TMCC3     | 1.19E-32 | 0.133092 | 0.109 | 0.002 | 1.78E-28 |
| SLC04A1   | 1.36E-32 | -0.18707 | 0.045 | 0.024 | 2.04E-28 |
| HEATR3    | 1.39E-32 | 0.108931 | 0.105 | 0.003 | 2.07E-28 |
| CTD-3185F | 1.45E-32 | 0.123421 | 0.119 | 0.003 | 2.17E-28 |
| NLRC5     | 1.47E-32 | 0.104354 | 0.112 | 0.009 | 2.20E-28 |
| NEURL4    | 1.57E-32 | 0.133919 | 0.116 | 0.002 | 2.35E-28 |
| TNFAIP3   | 1.96E-32 | -0.22667 | 0.055 | 0.027 | 2.93E-28 |
| PPP1R1C   | 2.43E-32 | -0.25091 | 0.084 | 0.046 | 3.63E-28 |
| BRCA1     | 2.59E-32 | 0.100515 | 0.106 | 0.007 | 3.86E-28 |
| VAMP8     | 3.10E-32 | -0.10818 | 0.069 | 0.022 | 4.63E-28 |
| KLF4      | 3.31E-32 | -0.18869 | 0.086 | 0.043 | 4.94E-28 |
| CLDND2    | 4.25E-32 | 0.131692 | 0.119 | 0.005 | 6.36E-28 |
| SLC38A1   | 4.30E-32 | -0.22306 | 0.086 | 0.055 | 6.43E-28 |
| ARSB      | 4.82E-32 | 0.133082 | 0.118 | 0.003 | 7.20E-28 |
| LRP11     | 4.83E-32 | 0.136615 | 0.125 | 0.005 | 7.22E-28 |
| PSPN      | 5.20E-32 | 0.111862 | 0.103 | 0.002 | 7.77E-28 |
| RELT      | 5.75E-32 | 0.125996 | 0.112 | 0.003 | 8.59E-28 |
| ARRDC4    | 6.07E-32 | 0.10454  | 0.106 | 0.007 | 9.07E-28 |
| FGF7      | 7.32E-32 | -0.33622 | 0.042 | 0.044 | 1.09E-27 |
| LDOC1     | 7.57E-32 | -0.26057 | 0.075 | 0.055 | 1.13E-27 |
| IPO9-AS1  | 8.13E-32 | 0.140738 | 0.122 | 0.003 | 1.21E-27 |
| GRAMD1C   | 8.44E-32 | 0.172489 | 0.138 | 0.009 | 1.26E-27 |
| ABHD15    | 8.82E-32 | 0.103958 | 0.106 | 0.005 | 1.32E-27 |
| ZBTB9     | 9.73E-32 | 0.105391 | 0.097 | 0.002 | 1.45E-27 |
| CYB5R2    | 1.12E-31 | -0.13722 | 0.065 | 0.024 | 1.68E-27 |
| PDK3      | 1.16E-31 | 0.100352 | 0.099 | 0.003 | 1.73E-27 |
| ARHGDIB   | 1.35E-31 | -0.18415 | 0.06  | 0.031 | 2.01E-27 |
| RPH3A     | 1.37E-31 | -0.10748 | 0.091 | 0.038 | 2.05E-27 |
| HID1      | 1.49E-31 | 0.119611 | 0.107 | 0.002 | 2.23E-27 |
| AMMECR1L  | 1.56E-31 | 0.101283 | 0.107 | 0.007 | 2.33E-27 |
| ZNF415    | 1.64E-31 | -0.15425 | 0.056 | 0.022 | 2.46E-27 |
| USP2      | 1.91E-31 | 0.102361 | 0.109 | 0.009 | 2.85E-27 |
| BEX5      | 2.35E-31 | -0.69992 | 0.026 | 0.094 | 3.52E-27 |
| BIRC3     | 2.42E-31 | -0.28956 | 0.061 | 0.021 | 3.62E-27 |
| ASIC4     | 2.45E-31 | -0.195   | 0.111 | 0.06  | 3.67E-27 |
| HCST      | 2.83E-31 | -0.10918 | 0.048 | 0.019 | 4.23E-27 |
| RP11-314A | 3.20E-31 | 0.133999 | 0.116 | 0.002 | 4.78E-27 |
| F13A1     | 3.27E-31 | -0.83258 | 0.014 | 0.094 | 4.89E-27 |
| RP1-122K4 | 3.49E-31 | -0.11069 | 0.033 | 0.012 | 5.22E-27 |
| HMGA2     | 3.69E-31 | 0.217417 | 0.135 | 0.005 | 5.51E-27 |
| RP3-402G1 | 3.77E-31 | 0.135915 | 0.123 | 0.005 | 5.63E-27 |
| MAP1LC3B2 | 4.98E-31 | -0.13963 | 0.066 | 0.029 | 7.43E-27 |

|           |          |          |       |       |          |
|-----------|----------|----------|-------|-------|----------|
| RP11-127E | 5.08E-31 | 0.111276 | 0.106 | 0.005 | 7.59E-27 |
| SCML1     | 7.27E-31 | -0.21016 | 0.071 | 0.041 | 1.09E-26 |
| KIAA0040  | 7.94E-31 | -0.16336 | 0.072 | 0.032 | 1.19E-26 |
| SHQ1      | 1.15E-30 | 0.128882 | 0.113 | 0.002 | 1.72E-26 |
| C4orf47   | 1.17E-30 | -0.13488 | 0.056 | 0.021 | 1.75E-26 |
| SMPD2     | 1.58E-30 | 0.114274 | 0.113 | 0.005 | 2.36E-26 |
| RP11-499F | 1.69E-30 | 0.143103 | 0.119 | 0.003 | 2.53E-26 |
| SMURF1    | 1.83E-30 | 0.115935 | 0.108 | 0.003 | 2.74E-26 |
| MAP3K10   | 2.32E-30 | 0.134685 | 0.12  | 0.005 | 3.47E-26 |
| TEAD3     | 2.51E-30 | 0.141634 | 0.124 | 0.002 | 3.75E-26 |
| CNN2      | 3.01E-30 | 0.108768 | 0.105 | 0.005 | 4.50E-26 |
| BGN       | 3.15E-30 | -0.69034 | 0.03  | 0.082 | 4.71E-26 |
| UNC13B    | 3.37E-30 | 0.121458 | 0.107 | 0.003 | 5.03E-26 |
| SLC25A45  | 4.34E-30 | -0.10286 | 0.052 | 0.019 | 6.49E-26 |
| HECA      | 4.95E-30 | 0.104566 | 0.102 | 0.005 | 7.39E-26 |
| ACTA2     | 5.69E-30 | -0.10239 | 0.068 | 0.017 | 8.50E-26 |
| ZNF575    | 5.73E-30 | 0.106627 | 0.102 | 0.003 | 8.56E-26 |
| S100A4    | 7.28E-30 | -0.2936  | 0.055 | 0.032 | 1.09E-25 |
| ZNF280B   | 7.77E-30 | 0.113834 | 0.112 | 0.009 | 1.16E-25 |
| SMIM3     | 1.01E-29 | -0.94053 | 0.006 | 0.106 | 1.51E-25 |
| RP11-420L | 1.12E-29 | 0.119284 | 0.102 | 0.002 | 1.68E-25 |
| MT1A      | 1.34E-29 | -0.53326 | 0.023 | 0.067 | 2.01E-25 |
| NKAIN4    | 1.60E-29 | -0.1498  | 0.102 | 0.038 | 2.40E-25 |
| NDUFA4L2  | 1.81E-29 | -0.37747 | 0.046 | 0.043 | 2.71E-25 |
| LINC00882 | 1.92E-29 | -0.20428 | 0.051 | 0.024 | 2.87E-25 |
| C19orf44  | 2.54E-29 | 0.150507 | 0.124 | 0.003 | 3.79E-25 |
| CMYA5     | 3.68E-29 | -0.1414  | 0.079 | 0.029 | 5.50E-25 |
| ZWINT     | 4.11E-29 | 0.110711 | 0.097 | 0.002 | 6.14E-25 |
| SLC26A6   | 4.94E-29 | 0.138915 | 0.116 | 0.002 | 7.39E-25 |
| XKR6      | 5.80E-29 | 0.10916  | 0.103 | 0.005 | 8.67E-25 |
| TCEAL5    | 6.15E-29 | -0.55125 | 0.043 | 0.07  | 9.19E-25 |
| GPR137C   | 6.73E-29 | 0.105988 | 0.1   | 0.005 | 1.01E-24 |
| EID3      | 6.80E-29 | -0.15623 | 0.052 | 0.022 | 1.02E-24 |
| MGAT5     | 7.77E-29 | 0.110933 | 0.106 | 0.003 | 1.16E-24 |
| SLC38A9   | 9.87E-29 | 0.134852 | 0.116 | 0.005 | 1.47E-24 |
| MYO1F     | 1.14E-28 | -0.15162 | 0.049 | 0.021 | 1.70E-24 |
| FOXD1     | 1.51E-28 | 0.145716 | 0.118 | 0.002 | 2.26E-24 |
| RTP4      | 1.66E-28 | -0.1531  | 0.055 | 0.019 | 2.48E-24 |
| DOK4      | 1.68E-28 | 0.106114 | 0.101 | 0.003 | 2.50E-24 |
| MARVELD1  | 1.87E-28 | 0.148519 | 0.117 | 0     | 2.79E-24 |
| ZNF84     | 2.17E-28 | -0.16102 | 0.034 | 0.022 | 3.24E-24 |
| PIM1      | 2.27E-28 | -0.21186 | 0.064 | 0.034 | 3.39E-24 |
| ANKS1B    | 2.81E-28 | -0.18017 | 0.066 | 0.031 | 4.21E-24 |
| PRDM5     | 3.24E-28 | 0.131258 | 0.104 | 0.002 | 4.84E-24 |
| GBP4      | 3.62E-28 | -0.22602 | 0.113 | 0.062 | 5.41E-24 |
| LST1      | 4.61E-28 | -0.1505  | 0.058 | 0.021 | 6.89E-24 |
| TMBIM4    | 5.08E-28 | -0.80029 | 0.007 | 0.101 | 7.59E-24 |
| PTPRN     | 6.22E-28 | -0.26733 | 0.062 | 0.044 | 9.30E-24 |
| MYH7B     | 6.29E-28 | -0.13586 | 0.032 | 0.021 | 9.39E-24 |
| RORB      | 7.40E-28 | -0.18479 | 0.046 | 0.031 | 1.11E-23 |
| FKBP1C    | 7.96E-28 | -0.12108 | 0.038 | 0.012 | 1.19E-23 |

|           |          |          |       |       |          |
|-----------|----------|----------|-------|-------|----------|
| CEACAM1   | 8.97E-28 | -0.11129 | 0.054 | 0.021 | 1.34E-23 |
| PALB2     | 9.89E-28 | 0.14156  | 0.114 | 0     | 1.48E-23 |
| ATP11C    | 1.03E-27 | 0.112296 | 0.102 | 0.003 | 1.54E-23 |
| PHLDB3    | 1.14E-27 | 0.140618 | 0.114 | 0.002 | 1.70E-23 |
| PPP1R3C   | 1.22E-27 | -0.17163 | 0.051 | 0.022 | 1.82E-23 |
| ZNF442    | 1.28E-27 | -0.12258 | 0.042 | 0.014 | 1.92E-23 |
| LUZP2     | 1.75E-27 | 0.167215 | 0.118 | 0.015 | 2.62E-23 |
| ZNF180    | 2.13E-27 | 0.112395 | 0.106 | 0.005 | 3.18E-23 |
| AF127936. | 2.68E-27 | 0.13898  | 0.112 | 0     | 4.01E-23 |
| C21orf58  | 2.74E-27 | 0.109698 | 0.102 | 0.003 | 4.10E-23 |
| MS4A7     | 2.77E-27 | -0.19238 | 0.049 | 0.031 | 4.14E-23 |
| OCRL      | 3.02E-27 | 0.132799 | 0.112 | 0.002 | 4.51E-23 |
| SP4       | 4.25E-27 | 0.106546 | 0.106 | 0.009 | 6.35E-23 |
| LGALS9    | 5.20E-27 | -0.10752 | 0.068 | 0.022 | 7.77E-23 |
| GDPD2     | 6.55E-27 | 0.131147 | 0.109 | 0.005 | 9.78E-23 |
| RP1-43E13 | 1.01E-26 | -0.17351 | 0.042 | 0.022 | 1.52E-22 |
| SGPP1     | 1.16E-26 | 0.12977  | 0.104 | 0.002 | 1.74E-22 |
| HERC6     | 1.47E-26 | 0.117539 | 0.097 | 0.003 | 2.20E-22 |
| CCNO      | 1.48E-26 | 0.138662 | 0.117 | 0.002 | 2.22E-22 |
| ZFY       | 1.63E-26 | 0.116614 | 0.102 | 0.002 | 2.43E-22 |
| GRB14     | 1.80E-26 | 0.136806 | 0.108 | 0.002 | 2.69E-22 |
| LINC01114 | 2.18E-26 | -0.20353 | 0.048 | 0.031 | 3.25E-22 |
| ZBTB47    | 2.74E-26 | 0.13401  | 0.105 | 0.002 | 4.10E-22 |
| CHML      | 3.19E-26 | 0.113302 | 0.097 | 0.002 | 4.76E-22 |
| C5AR1     | 3.21E-26 | -0.19297 | 0.039 | 0.024 | 4.80E-22 |
| LRFN1     | 3.35E-26 | 0.111249 | 0.104 | 0.007 | 5.00E-22 |
| KIAA1614  | 3.39E-26 | 0.12548  | 0.106 | 0.003 | 5.06E-22 |
| ZNF154    | 4.42E-26 | -0.11065 | 0.045 | 0.019 | 6.60E-22 |
| HOTAIRM1  | 4.46E-26 | -0.29074 | 0.084 | 0.063 | 6.67E-22 |
| FAM71E1   | 4.60E-26 | -0.18692 | 0.047 | 0.022 | 6.87E-22 |
| RSPH1     | 8.75E-26 | -0.28479 | 0.039 | 0.034 | 1.31E-21 |
| MIR181A2H | 1.01E-25 | 0.103846 | 0.09  | 0.003 | 1.50E-21 |
| COL28A1   | 1.03E-25 | 0.176688 | 0.116 | 0.012 | 1.53E-21 |
| ZNF365    | 1.30E-25 | 0.10842  | 0.098 | 0.003 | 1.94E-21 |
| LINC00115 | 1.30E-25 | -0.22907 | 0.043 | 0.027 | 1.94E-21 |
| MGMT      | 1.32E-25 | -0.35885 | 0.039 | 0.051 | 1.97E-21 |
| BTAF1     | 1.53E-25 | 0.110439 | 0.099 | 0.005 | 2.29E-21 |
| ZNF784    | 1.57E-25 | 0.115632 | 0.099 | 0.003 | 2.35E-21 |
| ELM01     | 1.78E-25 | -0.45178 | 0.041 | 0.07  | 2.66E-21 |
| IL6       | 2.68E-25 | -0.17099 | 0.034 | 0.015 | 4.01E-21 |
| ERICH2    | 2.75E-25 | 0.101982 | 0.09  | 0.002 | 4.11E-21 |
| GUCY1A2   | 3.68E-25 | 0.140686 | 0.109 | 0.009 | 5.50E-21 |
| WFDC2     | 3.76E-25 | -0.15821 | 0.039 | 0.017 | 5.62E-21 |
| POPDC3    | 3.85E-25 | 0.144172 | 0.103 | 0     | 5.75E-21 |
| RN7SL832F | 3.95E-25 | -0.11043 | 0.038 | 0.017 | 5.90E-21 |
| RP11-49I1 | 3.99E-25 | -0.12665 | 0.034 | 0.014 | 5.96E-21 |
| GDAP1L1   | 5.71E-25 | -0.27275 | 0.053 | 0.044 | 8.53E-21 |
| CYB5RL    | 8.32E-25 | 0.110845 | 0.096 | 0.002 | 1.24E-20 |
| SYTL4     | 9.84E-25 | -0.1261  | 0.055 | 0.027 | 1.47E-20 |
| AZGP1     | 1.05E-24 | -0.35982 | 0.063 | 0.053 | 1.57E-20 |
| NMNAT3    | 1.07E-24 | -0.1721  | 0.057 | 0.031 | 1.60E-20 |



|           |          |          |       |       |          |
|-----------|----------|----------|-------|-------|----------|
| CRISPLD2  | 1.08E-24 | -0.16302 | 0.061 | 0.027 | 1.61E-20 |
| ADCY8     | 1.30E-24 | -0.16809 | 0.048 | 0.017 | 1.94E-20 |
| HLA-DQA1  | 1.59E-24 | -0.45181 | 0.03  | 0.044 | 2.38E-20 |
| AIFM2     | 2.25E-24 | 0.118995 | 0.105 | 0.003 | 3.36E-20 |
| NTM       | 2.50E-24 | -0.15901 | 0.092 | 0.051 | 3.73E-20 |
| HLA-DQB1  | 3.49E-24 | -0.19986 | 0.048 | 0.036 | 5.21E-20 |
| CTNNA2    | 5.69E-24 | -0.21562 | 0.048 | 0.039 | 8.50E-20 |
| HOXC10    | 5.75E-24 | -0.15413 | 0.06  | 0.039 | 8.60E-20 |
| ZNF286B   | 5.95E-24 | 0.113925 | 0.097 | 0.003 | 8.89E-20 |
| GRID2     | 8.09E-24 | 0.139066 | 0.106 | 0.003 | 1.21E-19 |
| WDR81     | 8.87E-24 | 0.105873 | 0.094 | 0.003 | 1.33E-19 |
| C7orf61   | 9.24E-24 | -0.15585 | 0.052 | 0.027 | 1.38E-19 |
| DAPL1     | 1.03E-23 | -0.16251 | 0.052 | 0.024 | 1.54E-19 |
| HSD17B14  | 1.25E-23 | -0.16137 | 0.062 | 0.031 | 1.87E-19 |
| CDKN2B-AS | 1.26E-23 | 0.106195 | 0.093 | 0.002 | 1.88E-19 |
| SLC6A6    | 1.43E-23 | -0.30857 | 0.026 | 0.034 | 2.13E-19 |
| TMEM100   | 1.45E-23 | -0.30043 | 0.083 | 0.062 | 2.16E-19 |
| GAL       | 1.73E-23 | 0.141697 | 0.096 | 0.005 | 2.58E-19 |
| AC084219. | 2.05E-23 | -0.11443 | 0.04  | 0.024 | 3.06E-19 |
| HSPA6     | 2.92E-23 | -0.71834 | 0.019 | 0.056 | 4.36E-19 |
| ABCC4     | 3.83E-23 | 0.118884 | 0.095 | 0     | 5.73E-19 |
| STEAP1    | 5.28E-23 | -0.30991 | 0.046 | 0.038 | 7.89E-19 |
| TUBB4A    | 7.34E-23 | -0.18273 | 0.049 | 0.024 | 1.10E-18 |
| EFHD1     | 8.37E-23 | -0.14972 | 0.047 | 0.027 | 1.25E-18 |
| TREM2     | 1.07E-22 | -0.2847  | 0.039 | 0.039 | 1.60E-18 |
| DPYD      | 1.24E-22 | -0.217   | 0.04  | 0.027 | 1.86E-18 |
| SNX25     | 1.42E-22 | 0.1189   | 0.093 | 0     | 2.12E-18 |
| CADM3     | 1.45E-22 | -0.44542 | 0.024 | 0.048 | 2.16E-18 |
| CDH13     | 1.85E-22 | -0.35009 | 0.046 | 0.051 | 2.76E-18 |
| CHSY3     | 1.97E-22 | 0.112906 | 0.092 | 0     | 2.94E-18 |
| BBS5      | 1.97E-22 | 0.115933 | 0.092 | 0     | 2.94E-18 |
| LRRC69    | 2.01E-22 | -0.16682 | 0.04  | 0.021 | 3.01E-18 |
| RP11-658F | 2.72E-22 | 0.121444 | 0.092 | 0     | 4.07E-18 |
| CIT       | 3.09E-22 | -0.1316  | 0.036 | 0.017 | 4.62E-18 |
| FBXL2     | 3.43E-22 | -0.10151 | 0.032 | 0.014 | 5.12E-18 |
| CLEC2D    | 3.44E-22 | -0.1746  | 0.028 | 0.024 | 5.13E-18 |
| TBCEL     | 4.67E-22 | 0.118398 | 0.097 | 0.002 | 6.98E-18 |
| RP11-834C | 5.07E-22 | -0.25397 | 0.041 | 0.038 | 7.57E-18 |
| IFI30     | 5.30E-22 | -0.17381 | 0.033 | 0.021 | 7.91E-18 |
| GNG11     | 6.46E-22 | -0.39554 | 0.046 | 0.043 | 9.66E-18 |
| ZNF665    | 8.71E-22 | -0.15839 | 0.036 | 0.027 | 1.30E-17 |
| IGSF21    | 9.82E-22 | -0.21879 | 0.048 | 0.036 | 1.47E-17 |
| TRIQQ     | 1.30E-21 | -0.10655 | 0.042 | 0.017 | 1.94E-17 |
| RP1-17K7. | 1.93E-21 | -0.50119 | 0.01  | 0.068 | 2.89E-17 |
| PRKCE     | 2.67E-21 | 0.113923 | 0.087 | 0     | 3.98E-17 |
| HOXA7     | 4.04E-21 | -0.21195 | 0.061 | 0.043 | 6.03E-17 |
| FAM107A   | 5.40E-21 | -0.11452 | 0.068 | 0.029 | 8.07E-17 |
| HAS3      | 6.90E-21 | 0.106275 | 0.075 | 0.002 | 1.03E-16 |
| TF        | 6.99E-21 | -0.12039 | 0.029 | 0.015 | 1.04E-16 |
| FCGR2A    | 9.56E-21 | -0.15984 | 0.039 | 0.024 | 1.43E-16 |
| ZNF107    | 1.00E-20 | 0.105325 | 0.08  | 0.002 | 1.50E-16 |

|           |          |          |       |       |          |
|-----------|----------|----------|-------|-------|----------|
| FZD5      | 1.05E-20 | 0.105559 | 0.086 | 0.002 | 1.57E-16 |
| TMEM144   | 2.41E-20 | -0.14938 | 0.025 | 0.015 | 3.60E-16 |
| ETV7      | 2.48E-20 | -0.1337  | 0.043 | 0.017 | 3.70E-16 |
| RIIAD1    | 2.54E-20 | -0.10668 | 0.031 | 0.012 | 3.80E-16 |
| CXCL2     | 2.68E-20 | -0.34266 | 0.027 | 0.031 | 4.00E-16 |
| ACOT11    | 3.01E-20 | -0.14079 | 0.044 | 0.021 | 4.49E-16 |
| SPOCK1    | 3.03E-20 | -0.10134 | 0.064 | 0.031 | 4.52E-16 |
| ELAVL4    | 4.67E-20 | -0.40335 | 0.028 | 0.06  | 6.98E-16 |
| PRKCG     | 5.52E-20 | -0.52812 | 0.007 | 0.056 | 8.25E-16 |
| TSLP      | 6.30E-20 | -0.15436 | 0.019 | 0.012 | 9.41E-16 |
| ANG       | 6.37E-20 | -0.39231 | 0.026 | 0.034 | 9.52E-16 |
| CD37      | 6.52E-20 | -0.16023 | 0.027 | 0.024 | 9.74E-16 |
| LINC00869 | 6.68E-20 | -0.55247 | 0.004 | 0.058 | 9.98E-16 |
| RNASE1    | 7.02E-20 | -0.3231  | 0.037 | 0.041 | 1.05E-15 |
| OMG       | 7.91E-20 | -0.18284 | 0.051 | 0.036 | 1.18E-15 |
| VSIG4     | 9.13E-20 | -0.2765  | 0.039 | 0.038 | 1.36E-15 |
| MICALL1   | 9.45E-20 | 0.100958 | 0.081 | 0     | 1.41E-15 |
| HLA-DMB   | 1.00E-19 | -0.10595 | 0.043 | 0.017 | 1.49E-15 |
| PTPRK     | 1.06E-19 | -0.14768 | 0.039 | 0.026 | 1.59E-15 |
| MIR7-3HG  | 1.22E-19 | -0.65139 | 0.003 | 0.06  | 1.82E-15 |
| RPS6KA5   | 1.22E-19 | -0.18232 | 0.035 | 0.027 | 1.83E-15 |
| HIST1H4E  | 1.68E-19 | -0.35016 | 0.025 | 0.024 | 2.51E-15 |
| SSTR2     | 2.56E-19 | -0.12676 | 0.033 | 0.017 | 3.82E-15 |
| RP11-138I | 2.58E-19 | -0.2232  | 0.026 | 0.022 | 3.85E-15 |
| RP3-460G2 | 3.08E-19 | -0.4895  | 0.024 | 0.067 | 4.61E-15 |
| CD70      | 3.44E-19 | -0.25714 | 0.023 | 0.017 | 5.14E-15 |
| DGKQ      | 3.44E-19 | 0.104319 | 0.078 | 0     | 5.14E-15 |
| MASTL     | 3.44E-19 | 0.104524 | 0.078 | 0     | 5.14E-15 |
| OSR2      | 3.44E-19 | -0.14252 | 0.041 | 0.019 | 5.15E-15 |
| VGF       | 3.72E-19 | -0.13995 | 0.068 | 0.038 | 5.56E-15 |
| AGMO      | 4.81E-19 | -0.1483  | 0.034 | 0.021 | 7.19E-15 |
| CA3       | 5.49E-19 | -0.37206 | 0.026 | 0.029 | 8.20E-15 |
| DUOX1     | 8.06E-19 | 0.117503 | 0.082 | 0.002 | 1.20E-14 |
| SKAP2     | 8.70E-19 | -0.43047 | 0.034 | 0.07  | 1.30E-14 |
| LEPR      | 9.06E-19 | 0.100119 | 0.077 | 0     | 1.35E-14 |
| SGIP1     | 9.15E-19 | -0.13292 | 0.059 | 0.031 | 1.37E-14 |
| MAOA      | 9.20E-19 | -0.18074 | 0.037 | 0.021 | 1.38E-14 |
| PPM1N     | 9.36E-19 | -0.17439 | 0.029 | 0.024 | 1.40E-14 |
| ELFN1     | 1.25E-18 | 0.110126 | 0.076 | 0     | 1.87E-14 |
| MAMSTR    | 1.25E-18 | 0.102498 | 0.076 | 0     | 1.87E-14 |
| C14orf132 | 1.67E-18 | -0.18143 | 0.051 | 0.041 | 2.49E-14 |
| NR2F2-AS1 | 2.06E-18 | -0.11853 | 0.032 | 0.021 | 3.07E-14 |
| ATP1A3    | 2.14E-18 | -0.12759 | 0.051 | 0.032 | 3.20E-14 |
| LPP-AS2   | 2.98E-18 | 0.102163 | 0.082 | 0.002 | 4.45E-14 |
| DISP2     | 3.31E-18 | -0.13201 | 0.017 | 0.015 | 4.95E-14 |
| LAIR1     | 7.13E-18 | -0.13312 | 0.032 | 0.026 | 1.07E-13 |
| CH25H     | 8.25E-18 | -0.3937  | 0.017 | 0.036 | 1.23E-13 |
| IGFLR1    | 9.32E-18 | -0.1958  | 0.023 | 0.026 | 1.39E-13 |
| IL6R      | 1.03E-17 | -0.13202 | 0.024 | 0.024 | 1.54E-13 |
| FGF22     | 1.62E-17 | -0.12059 | 0.026 | 0.015 | 2.42E-13 |
| MASP1     | 2.16E-17 | -0.20588 | 0.039 | 0.036 | 3.23E-13 |

|           |          |          |       |       |          |
|-----------|----------|----------|-------|-------|----------|
| SERPINB1  | 2.39E-17 | -0.44434 | 0.02  | 0.039 | 3.57E-13 |
| TREM1     | 4.66E-17 | -0.54453 | 0.008 | 0.05  | 6.96E-13 |
| CLEC2B    | 4.73E-17 | -0.35121 | 0.029 | 0.038 | 7.06E-13 |
| TNFSF10   | 5.49E-17 | -0.13913 | 0.035 | 0.019 | 8.21E-13 |
| CA9       | 6.10E-17 | -0.31396 | 0.027 | 0.043 | 9.12E-13 |
| PLA2G2A   | 6.48E-17 | -0.44288 | 0.03  | 0.034 | 9.68E-13 |
| APLN      | 9.97E-17 | -0.18959 | 0.025 | 0.019 | 1.49E-12 |
| FCGBP     | 1.13E-16 | -0.2423  | 0.029 | 0.038 | 1.69E-12 |
| SAA2      | 1.16E-16 | -0.79735 | 0.007 | 0.048 | 1.73E-12 |
| GDPGP1    | 1.33E-16 | -0.11005 | 0.018 | 0.01  | 1.98E-12 |
| RP5-821D1 | 1.60E-16 | -0.10879 | 0.029 | 0.01  | 2.39E-12 |
| ESRRG     | 1.67E-16 | -0.1336  | 0.031 | 0.019 | 2.49E-12 |
| HIF3A     | 1.78E-16 | -0.11198 | 0.048 | 0.026 | 2.66E-12 |
| ANLN      | 1.89E-16 | -0.11658 | 0.027 | 0.012 | 2.82E-12 |
| TNFSF13B  | 2.40E-16 | -0.18574 | 0.036 | 0.026 | 3.58E-12 |
| C2orf74   | 2.75E-16 | -0.37512 | 0.018 | 0.036 | 4.11E-12 |
| RP11-46H1 | 3.30E-16 | -0.35588 | 0.01  | 0.048 | 4.93E-12 |
| CSF1R     | 3.65E-16 | -0.13132 | 0.027 | 0.022 | 5.45E-12 |
| STK17B    | 4.04E-16 | -0.13077 | 0.032 | 0.021 | 6.03E-12 |
| DUSP23    | 4.55E-16 | -0.24389 | 0.036 | 0.032 | 6.80E-12 |
| AC005618. | 4.83E-16 | -0.16982 | 0.034 | 0.029 | 7.22E-12 |
| FABP3     | 5.32E-16 | -0.30804 | 0.029 | 0.022 | 7.95E-12 |
| PEG10     | 5.52E-16 | -0.35502 | 0.037 | 0.051 | 8.25E-12 |
| GPR19     | 6.30E-16 | -0.14044 | 0.036 | 0.021 | 9.42E-12 |
| FRZB      | 6.39E-16 | -0.12664 | 0.032 | 0.012 | 9.55E-12 |
| SELPLG    | 7.34E-16 | -0.14684 | 0.025 | 0.017 | 1.10E-11 |
| UNC79     | 7.87E-16 | -0.14606 | 0.019 | 0.019 | 1.18E-11 |
| PRRG1     | 1.18E-15 | -0.11849 | 0.029 | 0.012 | 1.76E-11 |
| AC114730. | 1.85E-15 | -0.10163 | 0.051 | 0.022 | 2.76E-11 |
| RND1      | 2.30E-15 | -0.12151 | 0.042 | 0.026 | 3.43E-11 |
| AKNAD1    | 2.41E-15 | -0.11271 | 0.027 | 0.015 | 3.60E-11 |
| TGFBR3    | 2.66E-15 | -0.14478 | 0.018 | 0.012 | 3.98E-11 |
| ASS1      | 3.75E-15 | -0.19351 | 0.025 | 0.021 | 5.60E-11 |
| C8orf48   | 4.13E-15 | -0.10221 | 0.021 | 0.01  | 6.18E-11 |
| HPS1      | 4.23E-15 | -0.17193 | 0.025 | 0.026 | 6.32E-11 |
| FAM198B   | 7.00E-15 | -0.15769 | 0.021 | 0.017 | 1.05E-10 |
| ALDH1L1-A | 1.02E-14 | -0.11079 | 0.037 | 0.022 | 1.52E-10 |
| ENTPD1    | 1.26E-14 | -0.1629  | 0.023 | 0.021 | 1.89E-10 |
| SNX15     | 2.50E-14 | -0.11792 | 0.018 | 0.015 | 3.74E-10 |
| SLC7A11   | 4.89E-14 | -0.1253  | 0.03  | 0.027 | 7.31E-10 |
| ADHFE1    | 5.67E-14 | -0.10921 | 0.031 | 0.017 | 8.48E-10 |
| GPR183    | 6.19E-14 | -0.17064 | 0.02  | 0.022 | 9.24E-10 |
| CMTM5     | 7.74E-14 | -0.2888  | 0.038 | 0.048 | 1.16E-09 |
| SERPINA1  | 9.55E-14 | -0.42282 | 0.026 | 0.039 | 1.43E-09 |
| KB-1980E6 | 1.48E-13 | -0.11398 | 0.025 | 0.014 | 2.22E-09 |
| CTD-2020K | 1.54E-13 | -0.16416 | 0.015 | 0.024 | 2.31E-09 |
| RP11-727F | 1.85E-13 | -0.10856 | 0.029 | 0.017 | 2.76E-09 |
| CXCL3     | 2.79E-13 | -0.44722 | 0.012 | 0.034 | 4.17E-09 |
| MS4A6A    | 2.90E-13 | -0.13503 | 0.029 | 0.022 | 4.34E-09 |
| HIST1H2BN | 3.08E-13 | -0.14221 | 0.017 | 0.014 | 4.60E-09 |
| RNF144B   | 4.52E-13 | -0.22407 | 0.012 | 0.021 | 6.75E-09 |

|           |          |          |       |       |          |
|-----------|----------|----------|-------|-------|----------|
| Clorf194  | 4.67E-13 | -0.19615 | 0.014 | 0.017 | 6.98E-09 |
| DGCR5     | 4.71E-13 | -0.11676 | 0.026 | 0.021 | 7.04E-09 |
| TSIX      | 5.59E-13 | -0.20445 | 0.018 | 0.029 | 8.35E-09 |
| KCNJ3     | 5.62E-13 | -0.36523 | 0.007 | 0.043 | 8.40E-09 |
| HSD11B1   | 6.14E-13 | -0.17992 | 0.015 | 0.014 | 9.18E-09 |
| APOL4     | 6.32E-13 | -0.15349 | 0.027 | 0.019 | 9.45E-09 |
| PNPLA4    | 7.29E-13 | -0.29902 | 0.012 | 0.029 | 1.09E-08 |
| RPP25     | 9.87E-13 | -0.17768 | 0.009 | 0.012 | 1.47E-08 |
| HSD17B6   | 1.03E-12 | -0.1034  | 0.041 | 0.021 | 1.54E-08 |
| MMP7      | 1.09E-12 | -0.31668 | 0.015 | 0.026 | 1.63E-08 |
| HOXB7     | 1.18E-12 | -0.1641  | 0.026 | 0.021 | 1.76E-08 |
| SCN3B     | 1.20E-12 | -0.16959 | 0.029 | 0.029 | 1.79E-08 |
| CD163     | 1.44E-12 | -0.1753  | 0.023 | 0.024 | 2.14E-08 |
| RP11-1143 | 2.14E-12 | -0.16412 | 0.023 | 0.017 | 3.20E-08 |
| NAA60     | 2.47E-12 | -0.37271 | 0.008 | 0.036 | 3.70E-08 |
| MORN5     | 2.78E-12 | -0.13719 | 0.015 | 0.012 | 4.15E-08 |
| PGAM4     | 3.54E-12 | -0.15465 | 0.011 | 0.01  | 5.30E-08 |
| AC010987. | 3.69E-12 | -0.12451 | 0.012 | 0.009 | 5.51E-08 |
| CCER2     | 3.73E-12 | -0.20411 | 0.026 | 0.034 | 5.57E-08 |
| NPTX1     | 4.34E-12 | -0.27242 | 0.007 | 0.021 | 6.49E-08 |
| CCBE1     | 4.99E-12 | -0.22259 | 0.007 | 0.026 | 7.45E-08 |
| GNG3      | 5.18E-12 | -0.16782 | 0.031 | 0.021 | 7.75E-08 |
| CADPS     | 5.54E-12 | -0.23351 | 0.018 | 0.027 | 8.28E-08 |
| RPRM      | 5.84E-12 | -0.13107 | 0.024 | 0.019 | 8.72E-08 |
| STC2      | 5.94E-12 | -0.16958 | 0.032 | 0.031 | 8.87E-08 |
| ABHD1     | 7.90E-12 | -0.20285 | 0.012 | 0.019 | 1.18E-07 |
| IL1R1     | 8.65E-12 | -0.11157 | 0.016 | 0.012 | 1.29E-07 |
| PAIP2B    | 1.07E-11 | -0.11424 | 0.015 | 0.01  | 1.60E-07 |
| TFR2      | 1.15E-11 | -0.16093 | 0.015 | 0.019 | 1.72E-07 |
| PAWR      | 1.17E-11 | -0.14134 | 0.016 | 0.017 | 1.75E-07 |
| RP11-284F | 1.21E-11 | -0.27356 | 0.002 | 0.034 | 1.81E-07 |
| GALNT15   | 1.37E-11 | -0.18365 | 0.02  | 0.027 | 2.05E-07 |
| MTRNR2L3  | 1.50E-11 | -0.18902 | 0.014 | 0.026 | 2.25E-07 |
| CPPED1    | 1.65E-11 | -0.11988 | 0.012 | 0.012 | 2.47E-07 |
| CCL5      | 2.29E-11 | -0.1578  | 0.017 | 0.015 | 3.42E-07 |
| FAM218A   | 2.67E-11 | -0.11702 | 0.026 | 0.01  | 3.99E-07 |
| SLC5A3    | 2.78E-11 | -0.16308 | 0.007 | 0.017 | 4.16E-07 |
| TTC9B     | 2.87E-11 | -0.11214 | 0.046 | 0.029 | 4.29E-07 |
| GREM1     | 3.94E-11 | -0.29127 | 0.002 | 0.034 | 5.89E-07 |
| BCL2L15   | 6.51E-11 | -0.2432  | 0.006 | 0.026 | 9.72E-07 |
| FXYD1     | 6.66E-11 | -0.15729 | 0.029 | 0.026 | 9.95E-07 |
| AC114803. | 7.33E-11 | -0.14322 | 0.011 | 0.015 | 1.10E-06 |
| RP11-1246 | 7.96E-11 | -0.15532 | 0.018 | 0.014 | 1.19E-06 |
| NUDT7     | 8.01E-11 | -0.14813 | 0.022 | 0.019 | 1.20E-06 |
| LRRC61    | 8.63E-11 | -0.11042 | 0.02  | 0.014 | 1.29E-06 |
| FCGR1A    | 9.79E-11 | -0.14963 | 0.013 | 0.014 | 1.46E-06 |
| RNASE4    | 1.00E-10 | -0.29026 | 0.005 | 0.027 | 1.50E-06 |
| ARHGAP24  | 1.21E-10 | -0.22815 | 0.014 | 0.031 | 1.80E-06 |
| ACTL6B    | 1.33E-10 | -0.22702 | 0.012 | 0.031 | 1.99E-06 |
| SRRM3     | 1.33E-10 | -0.10074 | 0.034 | 0.022 | 1.99E-06 |
| AC015936. | 1.46E-10 | -0.11085 | 0.023 | 0.019 | 2.18E-06 |

|           |          |          |       |       |          |
|-----------|----------|----------|-------|-------|----------|
| C11orf70  | 2.15E-10 | -0.17748 | 0.014 | 0.019 | 3.21E-06 |
| EPHB6     | 3.00E-10 | -0.125   | 0.014 | 0.017 | 4.48E-06 |
| DMKN      | 3.37E-10 | -0.17899 | 0.007 | 0.021 | 5.03E-06 |
| TCEAL6    | 5.88E-10 | -0.2827  | 0.015 | 0.027 | 8.78E-06 |
| HSPB8     | 6.94E-10 | -0.15952 | 0.017 | 0.021 | 1.04E-05 |
| ASPA      | 7.06E-10 | -0.14608 | 0.012 | 0.015 | 1.06E-05 |
| IL13RA2   | 7.31E-10 | -0.25598 | 0.017 | 0.032 | 1.09E-05 |
| AC006946. | 7.80E-10 | -0.15942 | 0.01  | 0.014 | 1.17E-05 |
| ZNF600    | 9.84E-10 | -0.10726 | 0.015 | 0.012 | 1.47E-05 |
| RP5-1177M | 1.15E-09 | -0.16415 | 0.011 | 0.026 | 1.71E-05 |
| TSHZ2     | 1.29E-09 | -0.29481 | 0.014 | 0.034 | 1.93E-05 |
| RP11-299L | 1.76E-09 | -0.11794 | 0.011 | 0.015 | 2.63E-05 |
| FAM132B   | 1.87E-09 | -0.1177  | 0.011 | 0.014 | 2.79E-05 |
| FGF12     | 2.13E-09 | -0.10364 | 0.034 | 0.024 | 3.19E-05 |
| S100A1    | 4.07E-09 | -0.26712 | 0.009 | 0.017 | 6.08E-05 |
| SYT4      | 4.18E-09 | -0.16118 | 0.005 | 0.015 | 6.25E-05 |
| C16orf89  | 4.58E-09 | -0.10069 | 0.011 | 0.009 | 6.85E-05 |
| FXYP7     | 4.60E-09 | -0.1178  | 0.04  | 0.032 | 6.87E-05 |
| RP11-437L | 4.79E-09 | -0.10832 | 0.012 | 0.012 | 7.16E-05 |
| STMN2     | 7.39E-09 | -0.32621 | 0.027 | 0.053 | 0.00011  |
| LRAT      | 8.20E-09 | -0.10556 | 0.015 | 0.012 | 0.000123 |
| KRBOX1    | 8.46E-09 | -0.31878 | 0.002 | 0.032 | 0.000126 |
| DHRS4-AS1 | 1.07E-08 | -0.26645 | 0.001 | 0.027 | 0.000159 |
| CDIPT-AS1 | 1.18E-08 | -0.228   | 0.009 | 0.021 | 0.000177 |
| KLHL35    | 1.27E-08 | -0.15941 | 0.008 | 0.017 | 0.00019  |
| RP11-11N9 | 1.48E-08 | -0.22556 | 0.012 | 0.019 | 0.000222 |
| COLEC12   | 1.65E-08 | -0.17158 | 0.007 | 0.019 | 0.000247 |
| CLDN11    | 1.87E-08 | -0.19099 | 0.009 | 0.014 | 0.00028  |
| FPR1      | 1.89E-08 | -0.24123 | 0.01  | 0.029 | 0.000282 |
| CCL26     | 1.95E-08 | -0.16189 | 0.007 | 0.005 | 0.000291 |
| IGF2      | 1.95E-08 | -0.29427 | 0.007 | 0.019 | 0.000291 |
| DEPTOR    | 2.08E-08 | -0.13741 | 0.009 | 0.009 | 0.000311 |
| SELENBP1  | 2.10E-08 | -0.19076 | 0.012 | 0.015 | 0.000314 |
| NPPA      | 2.16E-08 | -0.30692 | 0.008 | 0.032 | 0.000323 |
| RBFOX3    | 2.65E-08 | -0.18177 | 0.002 | 0.019 | 0.000395 |
| LRRC2     | 2.83E-08 | -0.2001  | 0.002 | 0.024 | 0.000424 |
| NNAT      | 3.31E-08 | -0.31777 | 0.03  | 0.053 | 0.000495 |
| PHACTR3   | 3.42E-08 | -0.12848 | 0.019 | 0.021 | 0.000511 |
| DYNLRB2   | 3.49E-08 | -0.15994 | 0.007 | 0.015 | 0.000522 |
| NEGR1     | 3.83E-08 | -0.17836 | 0.005 | 0.022 | 0.000572 |
| HLA-DQA2  | 4.08E-08 | -0.29654 | 0.001 | 0.021 | 0.000609 |
| ZC2HC1C   | 4.75E-08 | -0.10108 | 0.008 | 0.012 | 0.000711 |
| LINC00632 | 5.47E-08 | -0.11456 | 0.018 | 0.019 | 0.000818 |
| CHST6     | 5.79E-08 | -0.10392 | 0.007 | 0.007 | 0.000866 |
| GPR89B    | 7.12E-08 | -0.21271 | 0.001 | 0.021 | 0.001064 |
| SLIT1     | 7.89E-08 | -0.14159 | 0.007 | 0.014 | 0.001179 |
| CDKN2A    | 8.55E-08 | -0.27181 | 0.012 | 0.024 | 0.001278 |
| C5AR2     | 8.73E-08 | -0.19326 | 0.002 | 0.019 | 0.001305 |
| TMEM232   | 9.88E-08 | -0.11931 | 0.01  | 0.009 | 0.001476 |
| SULT1C2   | 1.17E-07 | -0.11571 | 0.004 | 0.014 | 0.001752 |
| MSMP      | 1.20E-07 | -0.10837 | 0.019 | 0.01  | 0.001798 |

|           |          |          |       |       |          |
|-----------|----------|----------|-------|-------|----------|
| MUC20     | 1.34E-07 | -0.1193  | 0.015 | 0.015 | 0.001999 |
| PRPH      | 1.41E-07 | -0.10635 | 0.01  | 0.012 | 0.002106 |
| C12orf54  | 1.49E-07 | -0.1674  | 0.003 | 0.019 | 0.002229 |
| HOXA4     | 1.52E-07 | -0.14688 | 0.008 | 0.012 | 0.002274 |
| SLC7A8    | 1.62E-07 | -0.14255 | 0.009 | 0.021 | 0.002419 |
| LUC7L2    | 1.73E-07 | -0.24698 | 0.004 | 0.027 | 0.002581 |
| SYNP02L   | 1.85E-07 | -0.16116 | 0.008 | 0.021 | 0.002762 |
| HOXB-AS1  | 2.20E-07 | -0.16486 | 0.01  | 0.019 | 0.003284 |
| TNR       | 3.14E-07 | -0.10681 | 0.046 | 0.036 | 0.004688 |
| ASB3      | 3.19E-07 | -0.25424 | 0.001 | 0.021 | 0.004764 |
| EVI2A     | 3.22E-07 | -0.18633 | 0.01  | 0.024 | 0.004814 |
| HSPB2     | 3.26E-07 | -0.15399 | 0.005 | 0.015 | 0.004875 |
| MYCBPAP   | 4.55E-07 | -0.11311 | 0.012 | 0.014 | 0.006793 |
| LCP1      | 5.79E-07 | -0.14082 | 0.008 | 0.007 | 0.008646 |
| CRIP1     | 6.02E-07 | -0.17412 | 0.005 | 0.012 | 0.008999 |
| NPPC      | 6.89E-07 | -0.12517 | 0.011 | 0.015 | 0.010296 |
| CLN3      | 8.41E-07 | -0.22816 | 0.005 | 0.022 | 0.012567 |
| EIF4EBP3  | 8.46E-07 | -0.16471 | 0.001 | 0.021 | 0.012645 |
| CHIT1     | 9.10E-07 | -0.21414 | 0.004 | 0.014 | 0.013605 |
| SDS       | 9.25E-07 | -0.12057 | 0.008 | 0.01  | 0.01382  |
| ACE       | 1.06E-06 | -0.10133 | 0.007 | 0.01  | 0.01591  |
| FCGR2B    | 1.08E-06 | -0.12163 | 0.007 | 0.012 | 0.016106 |
| RCSD1     | 1.16E-06 | -0.12221 | 0.007 | 0.014 | 0.017325 |
| RNU12     | 1.32E-06 | -0.11039 | 0.007 | 0.012 | 0.019773 |
| OSR1      | 1.55E-06 | -0.14202 | 0.005 | 0.01  | 0.023108 |
| PATL2     | 1.63E-06 | -0.11746 | 0.005 | 0.012 | 0.024309 |
| SCN9A     | 1.64E-06 | -0.13939 | 0.011 | 0.017 | 0.024439 |
| HOXA-AS2  | 1.71E-06 | -0.19621 | 0.011 | 0.022 | 0.025611 |
| MYO15A    | 1.76E-06 | -0.12244 | 0.005 | 0.014 | 0.026241 |
| RAB3C     | 1.89E-06 | -0.16875 | 0.008 | 0.021 | 0.028226 |
| MYCNOS    | 3.41E-06 | -0.12481 | 0.006 | 0.012 | 0.050948 |
| THBS1     | 3.91E-06 | -0.14043 | 0.01  | 0.015 | 0.058363 |
| DDIT4L    | 4.31E-06 | -0.2161  | 0.002 | 0.019 | 0.064462 |
| CCL4L2    | 4.44E-06 | -0.16446 | 0.003 | 0.017 | 0.066373 |
| CRABP1    | 5.70E-06 | -0.18876 | 0.002 | 0.012 | 0.085126 |
| ZNF8      | 6.02E-06 | -0.17636 | 0     | 0.014 | 0.089998 |
| SCNN1A    | 6.65E-06 | -0.16778 | 0.015 | 0.029 | 0.09931  |
| HP        | 8.55E-06 | -0.28859 | 0.001 | 0.015 | 0.127772 |
| PCP4      | 9.03E-06 | -0.17842 | 0.007 | 0.014 | 0.134956 |
| HIST1H2BG | 9.59E-06 | -0.14176 | 0.001 | 0.012 | 0.143288 |
| CA5A      | 9.63E-06 | -0.14533 | 0.001 | 0.015 | 0.143853 |
| C8orf34   | 9.90E-06 | -0.1008  | 0.004 | 0.012 | 0.148009 |
| AL592528. | 1.10E-05 | -0.12459 | 0.005 | 0.009 | 0.164506 |
| GPRC5A    | 1.10E-05 | -0.1715  | 0.001 | 0.015 | 0.165115 |
| RP11-383M | 1.17E-05 | -0.11617 | 0.002 | 0.012 | 0.175004 |
| RAMP3     | 1.45E-05 | -0.13672 | 0.009 | 0.014 | 0.21657  |
| GLRA3     | 1.46E-05 | -0.14045 | 0.002 | 0.015 | 0.217573 |
| FOLR2     | 1.56E-05 | -0.11176 | 0.008 | 0.009 | 0.232569 |
| THTPA     | 1.57E-05 | -0.16095 | 0.008 | 0.015 | 0.233934 |
| SLC16A10  | 1.57E-05 | -0.10807 | 0.005 | 0.012 | 0.234953 |
| RP11-242C | 1.69E-05 | -0.15284 | 0.005 | 0.015 | 0.251851 |

|           |          |          |       |       |          |
|-----------|----------|----------|-------|-------|----------|
| MYH14     | 1.70E-05 | -0.14163 | 0.004 | 0.012 | 0.253872 |
| RP11-306G | 2.05E-05 | -0.15176 | 0.001 | 0.015 | 0.306171 |
| GNLY      | 2.12E-05 | -0.16086 | 0.004 | 0.012 | 0.317173 |
| SLC16A7   | 2.36E-05 | -0.10392 | 0.005 | 0.01  | 0.351936 |
| RP11-469H | 2.87E-05 | -0.11698 | 0.007 | 0.009 | 0.429157 |
| CNDP1     | 3.55E-05 | -0.10156 | 0.005 | 0.007 | 0.530885 |
| GS1-18A18 | 3.63E-05 | -0.19259 | 0.015 | 0.015 | 0.54266  |
| TRIM72    | 4.34E-05 | -0.14851 | 0.001 | 0.017 | 0.648195 |
| CAMP      | 4.72E-05 | -0.16934 | 0.001 | 0.009 | 0.704869 |
| HCG11     | 6.22E-05 | -0.13455 | 0.004 | 0.01  | 0.930194 |
| SERPINA3  | 7.97E-05 | -0.14542 | 0.001 | 0.012 | 1        |
| AC015849  | 8.31E-05 | -0.11657 | 0.004 | 0.012 | 1        |
| C8orf22   | 8.57E-05 | -0.14807 | 0.001 | 0.012 | 1        |
| MARCO     | 8.72E-05 | -0.15533 | 0.001 | 0.014 | 1        |
| EDN1      | 0.000128 | -0.11651 | 0.005 | 0.009 | 1        |
| LINC00637 | 0.000152 | -0.10119 | 0.002 | 0.01  | 1        |
| NAP1L6    | 0.000154 | -0.10839 | 0.004 | 0.01  | 1        |
| LINC01138 | 0.000168 | -0.11329 | 0.003 | 0.01  | 1        |
| NPFFR1    | 0.000211 | -0.10043 | 0.003 | 0.007 | 1        |
| FAM180A   | 0.000218 | -0.13509 | 0.003 | 0.01  | 1        |
| PDZK1IP1  | 0.000236 | -0.15437 | 0.003 | 0.009 | 1        |
| PLCG2     | 0.000266 | -0.16482 | 0.004 | 0.015 | 1        |
| C8orf86   | 0.000308 | -0.11953 | 0.001 | 0.009 | 1        |
| LINC0032C | 0.000364 | -0.12865 | 0.004 | 0.012 | 1        |
| SAA4      | 0.000502 | -0.1016  | 0.002 | 0.005 | 1        |
| RP11-495F | 0.000523 | -0.12423 | 0.001 | 0.009 | 1        |
| CTD-2369F | 0.000538 | -0.12417 | 0.002 | 0.012 | 1        |
| CNR2      | 0.000544 | -0.10059 | 0.002 | 0.01  | 1        |
| RP11-522E | 0.00079  | -0.11287 | 0.001 | 0.009 | 1        |
| SLITRK4   | 0.000801 | -0.11208 | 0.001 | 0.01  | 1        |
| COL1A2    | 0.000873 | -0.10728 | 0.002 | 0.009 | 1        |
| GJC3      | 0.001011 | -0.13077 | 0.005 | 0.014 | 1        |
| PLEKHG4B  | 0.001127 | -0.10397 | 0.001 | 0.01  | 1        |
| WIF1      | 0.001146 | -0.15026 | 0.001 | 0.007 | 1        |
| BCAS1     | 0.001191 | -0.11636 | 0.011 | 0.015 | 1        |
| CCL3L3    | 0.00128  | -0.11029 | 0.001 | 0.01  | 1        |
| HIST2H2BF | 0.001494 | -0.11505 | 0.004 | 0.007 | 1        |
| RP11-89N1 | 0.001795 | -0.11466 | 0     | 0.007 | 1        |
| CSMD3     | 0.002466 | -0.13384 | 0.007 | 0.012 | 1        |
| HIST3H2A  | 0.002769 | -0.11547 | 0.002 | 0.009 | 1        |
| ACSM5     | 0.00355  | -0.12088 | 0.004 | 0.01  | 1        |
| MSC       | 0.004182 | -0.17509 | 0.002 | 0.005 | 1        |
| STC1      | 0.006632 | -0.11024 | 0.001 | 0.005 | 1        |
| FAM110C   | 0.009747 | -0.15034 | 0.001 | 0.007 | 1        |
| RP11-264E | 0.034333 | -0.10051 | 0     | 0.003 | 1        |
