# Supplementary material for: A Novel Molecular Classification Method for Glioblastoma Based on Tumor Cell Differentiation Trajectories
Source: Hindawi journal article supplement (doi:10.1155/2023/2826815), 2023-02-22
Supplement: f6 [file 2826815.f6.pdf]

|          | p_val     | avg_logFC | pct.1 | pct.2 | p_val_adj             |
|----------|-----------|-----------|-------|-------|-----------------------|
| SEC61G   | 4.1828271 | -1.47794  | 0.791 | 0.935 | 6.25081696417212e-311 |
| MT2A     | #####     | -1.62515  | 0.605 | 0.944 | #####                 |
| GAPDH    | #####     | -0.83641  | 0.996 | 0.99  | #####                 |
| CLU      | #####     | -1.47282  | 0.648 | 0.896 | #####                 |
| B2M      | #####     | -0.99892  | 0.951 | 0.947 | #####                 |
| CD63     | #####     | -1.04021  | 0.862 | 0.856 | #####                 |
| FTL      | #####     | -0.79598  | 0.982 | 0.974 | #####                 |
| TPI1     | #####     | -0.84174  | 0.839 | 0.786 | #####                 |
| MT3      | #####     | -1.39239  | 0.568 | 0.802 | #####                 |
| EIF1     | #####     | -0.70466  | 0.983 | 0.918 | #####                 |
| HES6     | #####     | 1.424899  | 0.875 | 0.097 | #####                 |
| ENO1     | #####     | -0.94373  | 0.757 | 0.764 | #####                 |
| TMSB4X   | #####     | -0.64681  | 0.99  | 0.973 | #####                 |
| NDUFB2   | #####     | -0.40612  | 0.87  | 0.586 | #####                 |
| PCSK1N   | #####     | 1.123635  | 0.85  | 0.113 | #####                 |
| HLA-A    | #####     | -1.16139  | 0.654 | 0.798 | #####                 |
| PTN      | #####     | -0.79343  | 0.843 | 0.776 | #####                 |
| FAU      | #####     | -0.67224  | 0.979 | 0.903 | #####                 |
| SKP1     | #####     | -0.57578  | 0.952 | 0.791 | #####                 |
| DLL3     | #####     | 1.706159  | 0.765 | 0.029 | #####                 |
| ALDOA    | #####     | -1.01299  | 0.745 | 0.805 | #####                 |
| UBL5     | #####     | -0.73364  | 0.845 | 0.733 | #####                 |
| MYL6     | #####     | -0.57629  | 0.941 | 0.793 | #####                 |
| ITM2B    | #####     | 0.330185  | 0.905 | 0.32  | #####                 |
| SOX4     | #####     | 1.114038  | 0.954 | 0.231 | #####                 |
| OAZ1     | #####     | -0.59881  | 0.9   | 0.754 | #####                 |
| HLA-B    | #####     | -1.1153   | 0.629 | 0.713 | #####                 |
| TIMP1    | #####     | -1.81897  | 0.295 | 0.68  | #####                 |
| PARK7    | #####     | -0.51828  | 0.837 | 0.603 | #####                 |
| TMSB10   | #####     | -0.6681   | 0.969 | 0.918 | #####                 |
| MARCKS   | #####     | 0.96631   | 0.902 | 0.188 | #####                 |
| ATP5E    | #####     | -0.52395  | 0.913 | 0.735 | #####                 |
| NDUFA4   | #####     | -0.45828  | 0.977 | 0.821 | #####                 |
| UBC      | #####     | -0.57038  | 0.973 | 0.86  | #####                 |
| PRDX2    | #####     | -0.40599  | 0.94  | 0.68  | #####                 |
| UQCRQ    | #####     | -0.38897  | 0.892 | 0.622 | #####                 |
| SNRPD2   | #####     | -0.56191  | 0.836 | 0.597 | #####                 |
| HN1      | #####     | 0.376282  | 0.873 | 0.287 | #####                 |
| HSBP1    | #####     | -0.24742  | 0.831 | 0.455 | #####                 |
| NDUFS5   | #####     | -0.49909  | 0.909 | 0.685 | #####                 |
| PEBP1    | #####     | -0.41126  | 0.925 | 0.656 | #####                 |
| TPT1     | #####     | -0.64928  | 0.96  | 0.889 | #####                 |
| HNRNPA0  | #####     | 0.557526  | 0.843 | 0.219 | #####                 |
| COX7C    | #####     | -0.42971  | 0.947 | 0.718 | #####                 |
| MARCKSL1 | #####     | 0.853373  | 0.969 | 0.297 | #####                 |
| ACTG1    | #####     | -0.51759  | 0.99  | 0.909 | #####                 |
| MLLT11   | #####     | 0.656032  | 0.874 | 0.227 | #####                 |
| RAC1     | #####     | 0.479773  | 0.953 | 0.364 | #####                 |
| LAMTOR4  | #####     | -0.28677  | 0.821 | 0.48  | #####                 |
| PRDX1    | #####     | -0.49472  | 0.86  | 0.614 | #####                 |

|         |       |          |       |       |       |
|---------|-------|----------|-------|-------|-------|
| COX6A1  | ##### | -0.31397 | 0.94  | 0.656 | ##### |
| MALAT1  | ##### | -0.42968 | 0.997 | 0.979 | ##### |
| COX6C   | ##### | -0.33101 | 0.935 | 0.66  | ##### |
| GNB2L1  | ##### | -0.56162 | 0.987 | 0.906 | ##### |
| SERF2   | ##### | -0.56947 | 0.87  | 0.691 | ##### |
| CD9     | ##### | -1.27319 | 0.472 | 0.66  | ##### |
| COX6B1  | ##### | -0.57486 | 0.884 | 0.708 | ##### |
| ATP5J2  | ##### | -0.21561 | 0.925 | 0.591 | ##### |
| GSTP1   | ##### | -0.46965 | 0.871 | 0.644 | ##### |
| DYNLL1  | ##### | -0.5044  | 0.901 | 0.706 | ##### |
| CIRBP   | ##### | -0.36984 | 0.943 | 0.718 | ##### |
| TCEB2   | ##### | -0.34002 | 0.91  | 0.626 | ##### |
| MYEOV2  | ##### | -0.16552 | 0.793 | 0.395 | ##### |
| BTG1    | ##### | 0.673151 | 0.884 | 0.239 | ##### |
| BTF3    | ##### | -0.48942 | 0.957 | 0.774 | ##### |
| COX4I1  | ##### | -0.56671 | 0.923 | 0.764 | ##### |
| TOMM7   | ##### | -0.47987 | 0.914 | 0.696 | ##### |
| NPM1    | ##### | -0.42506 | 0.94  | 0.715 | ##### |
| CST3    | ##### | -0.45438 | 0.861 | 0.569 | ##### |
| TMBIM6  | ##### | -0.58233 | 0.823 | 0.626 | ##### |
| HINT1   | ##### | -0.51483 | 0.899 | 0.694 | ##### |
| BRK1    | ##### | -0.33522 | 0.813 | 0.496 | ##### |
| CYCS    | ##### | -0.36764 | 0.814 | 0.504 | ##### |
| GPM6B   | ##### | -0.43087 | 0.93  | 0.725 | ##### |
| CD74    | ##### | -1.06885 | 0.586 | 0.629 | ##### |
| TMA7    | ##### | -0.51057 | 0.887 | 0.703 | ##### |
| NGFRAP1 | ##### | -0.39164 | 0.952 | 0.699 | ##### |
| BSG     | ##### | -0.36064 | 0.874 | 0.597 | ##### |
| VIM     | ##### | -1.55302 | 0.333 | 0.641 | ##### |
| ATP5L   | ##### | -0.4529  | 0.883 | 0.639 | ##### |
| SUMO2   | ##### | -0.2012  | 0.939 | 0.605 | ##### |
| SRP9    | ##### | -0.25666 | 0.792 | 0.453 | ##### |
| ANAPC11 | ##### | -0.4151  | 0.827 | 0.544 | ##### |
| PFN2    | ##### | 0.676881 | 0.852 | 0.209 | ##### |
| H2AFZ   | ##### | -0.28006 | 0.848 | 0.497 | ##### |
| ERH     | ##### | -0.27463 | 0.858 | 0.509 | ##### |
| DBI     | ##### | -0.53646 | 0.966 | 0.817 | ##### |
| SSR2    | ##### | -0.17014 | 0.831 | 0.443 | ##### |
| PFDN5   | ##### | -0.48585 | 0.9   | 0.685 | ##### |
| YBX1    | ##### | 0.303536 | 0.941 | 0.407 | ##### |
| COX5B   | ##### | -0.32904 | 0.931 | 0.682 | ##### |
| RTN4    | ##### | 0.754204 | 0.888 | 0.236 | ##### |
| CFL1    | ##### | -0.35727 | 0.986 | 0.798 | ##### |
| COPE    | ##### | -0.66657 | 0.745 | 0.631 | ##### |
| ATP5G3  | ##### | -0.11171 | 0.857 | 0.441 | ##### |
| PKM     | ##### | -0.90328 | 0.668 | 0.658 | ##### |
| POLR2J  | ##### | -0.28302 | 0.797 | 0.458 | ##### |
| HSPA8   | ##### | -0.35009 | 0.945 | 0.716 | ##### |
| NDUFA13 | ##### | -0.42077 | 0.836 | 0.593 | ##### |
| CALM1   | ##### | -0.17743 | 0.908 | 0.537 | ##### |
| NACA    | ##### | -0.4628  | 0.966 | 0.797 | ##### |

|           |       |          |       |       |       |
|-----------|-------|----------|-------|-------|-------|
| CBX3      | ##### | 0.716347 | 0.836 | 0.195 | ##### |
| EDF1      | ##### | -0.32651 | 0.831 | 0.52  | ##### |
| SOD1      | ##### | -0.67695 | 0.763 | 0.624 | ##### |
| RAN       | ##### | -0.39731 | 0.865 | 0.588 | ##### |
| H3F3B     | ##### | -0.42652 | 0.995 | 0.889 | ##### |
| HLA-C     | ##### | -1.16202 | 0.506 | 0.631 | ##### |
| SRP14     | ##### | -0.17649 | 0.958 | 0.61  | ##### |
| PPIA      | ##### | -0.42088 | 0.943 | 0.747 | ##### |
| SPCS2     | ##### | -0.51481 | 0.763 | 0.528 | ##### |
| HMGB1     | ##### | -0.31998 | 0.961 | 0.691 | ##### |
| SPCS1     | ##### | -0.53614 | 0.73  | 0.497 | ##### |
| UQCRH     | ##### | -0.45358 | 0.84  | 0.588 | ##### |
| C1QBP     | ##### | 0.513845 | 0.766 | 0.176 | ##### |
| EIF3K     | ##### | -0.50872 | 0.779 | 0.552 | ##### |
| ATP50     | ##### | -0.2756  | 0.839 | 0.499 | ##### |
| COX7A2    | ##### | -0.20535 | 0.908 | 0.561 | ##### |
| NDUFB7    | ##### | -0.51113 | 0.806 | 0.579 | ##### |
| YWHAQ     | ##### | 0.438483 | 0.878 | 0.304 | ##### |
| CCNI      | ##### | 0.447208 | 0.861 | 0.28  | ##### |
| LDHA      | ##### | -1.17467 | 0.553 | 0.66  | ##### |
| COMMD6    | ##### | -0.35132 | 0.802 | 0.489 | ##### |
| ATP5J     | ##### | -0.3539  | 0.835 | 0.535 | ##### |
| DNAJB6    | ##### | 0.159922 | 0.857 | 0.361 | ##### |
| HMG1      | ##### | 0.522027 | 0.798 | 0.214 | ##### |
| ANXA5     | ##### | -0.94857 | 0.646 | 0.68  | ##### |
| CRYAB     | ##### | -1.38644 | 0.454 | 0.617 | ##### |
| KMT2E     | ##### | 0.357274 | 0.817 | 0.256 | ##### |
| GABARAPL2 | ##### | -0.31898 | 0.814 | 0.497 | ##### |
| POLR2L    | ##### | -0.35628 | 0.717 | 0.421 | ##### |
| NDUFC2    | ##### | -0.28077 | 0.815 | 0.477 | ##### |
| LDHB      | ##### | -0.34466 | 0.958 | 0.706 | ##### |
| OST4      | ##### | -0.28769 | 0.834 | 0.511 | ##### |
| WDR830S   | ##### | -0.68078 | 0.758 | 0.6   | ##### |
| PGK1      | ##### | -0.81105 | 0.657 | 0.545 | ##### |
| FIS1      | ##### | 0.146909 | 0.823 | 0.335 | ##### |
| ZNHIT1    | ##### | -0.23254 | 0.797 | 0.446 | ##### |
| STMN1     | ##### | 0.398424 | 0.948 | 0.388 | ##### |
| SEC61B    | ##### | -0.48914 | 0.754 | 0.503 | ##### |
| UBE2E3    | ##### | 0.689043 | 0.743 | 0.144 | ##### |
| ATP5G2    | ##### | -0.38493 | 0.9   | 0.651 | ##### |
| SAP18     | ##### | -0.57937 | 0.782 | 0.576 | ##### |
| COX8A     | ##### | -0.33033 | 0.808 | 0.499 | ##### |
| BUD31     | ##### | -0.25668 | 0.792 | 0.439 | ##### |
| HNRNPA2B1 | ##### | -0.18615 | 0.954 | 0.663 | ##### |
| MT1X      | ##### | -1.4105  | 0.476 | 0.634 | ##### |
| ATP5B     | ##### | -0.2652  | 0.874 | 0.557 | ##### |
| POLR2F    | ##### | 0.45949  | 0.828 | 0.248 | ##### |
| ATP6V1G1  | ##### | -0.36653 | 0.824 | 0.526 | ##### |
| PHF14     | ##### | 0.86069  | 0.772 | 0.13  | ##### |
| PSMB6     | ##### | -0.29828 | 0.791 | 0.448 | ##### |
| CNPY2     | ##### | 0.212741 | 0.792 | 0.287 | ##### |

|          |       |          |       |       |       |
|----------|-------|----------|-------|-------|-------|
| EID1     | ##### | -0.14835 | 0.86  | 0.485 | ##### |
| RBM39    | ##### | -0.15034 | 0.745 | 0.34  | ##### |
| SEC62    | ##### | -0.10458 | 0.797 | 0.386 | ##### |
| SLC25A3  | ##### | -0.12564 | 0.834 | 0.438 | ##### |
| NEAT1    | ##### | -1.18589 | 0.446 | 0.629 | ##### |
| EIF4A2   | ##### | -0.16363 | 0.853 | 0.491 | ##### |
| ATP6V1F  | ##### | -0.29884 | 0.819 | 0.492 | ##### |
| SPP1     | ##### | -0.76742 | 0.774 | 0.638 | ##### |
| SRSF9    | ##### | 0.538496 | 0.75  | 0.169 | ##### |
| BANF1    | ##### | -0.42909 | 0.714 | 0.45  | ##### |
| CHI3L1   | ##### | -2.36837 | 0.126 | 0.583 | ##### |
| C12orf57 | ##### | -0.30565 | 0.735 | 0.412 | ##### |
| PSMB1    | ##### | -0.30822 | 0.791 | 0.444 | ##### |
| DBN1     | ##### | 1.123508 | 0.689 | 0.053 | ##### |
| GPX1     | ##### | -0.13893 | 0.775 | 0.379 | ##### |
| EEF2     | ##### | -0.20644 | 0.935 | 0.632 | ##### |
| CRMP1    | ##### | 0.930397 | 0.653 | 0.062 | ##### |
| GPM6A    | ##### | 0.335073 | 0.908 | 0.374 | ##### |
| TSC22D1  | ##### | 0.226797 | 0.883 | 0.391 | ##### |
| MIF      | ##### | 0.108556 | 0.774 | 0.299 | ##### |
| AP2M1    | ##### | -0.19779 | 0.77  | 0.415 | ##### |
| UQCR10   | ##### | -0.17316 | 0.806 | 0.426 | ##### |
| LGALS3   | ##### | -2.0123  | 0.161 | 0.583 | ##### |
| TTC3     | ##### | 0.743094 | 0.792 | 0.171 | ##### |
| CHMP2A   | ##### | -0.52496 | 0.709 | 0.48  | ##### |
| ASCL1    | ##### | 1.159226 | 0.698 | 0.062 | ##### |
| 2-Sep    | ##### | 0.296606 | 0.796 | 0.27  | ##### |
| PPIB     | ##### | -0.49809 | 0.731 | 0.477 | ##### |
| PFDN2    | ##### | -0.25171 | 0.711 | 0.352 | ##### |
| GLUL     | ##### | -0.98994 | 0.577 | 0.535 | ##### |
| ATP5I    | ##### | -0.26927 | 0.822 | 0.521 | ##### |
| ZNF428   | ##### | 0.480724 | 0.802 | 0.232 | ##### |
| CNBP     | ##### | -0.46556 | 0.824 | 0.583 | ##### |
| UCHL1    | ##### | 0.147314 | 0.787 | 0.32  | ##### |
| HNRNPC   | ##### | -0.40347 | 0.808 | 0.538 | ##### |
| SELK     | ##### | -0.33497 | 0.766 | 0.446 | ##### |
| C19orf53 | ##### | -0.75812 | 0.691 | 0.571 | ##### |
| RPAIN    | ##### | 0.339026 | 0.753 | 0.219 | ##### |
| S100B    | ##### | -0.29708 | 0.85  | 0.545 | ##### |
| NDUFA1   | ##### | -0.53135 | 0.678 | 0.47  | ##### |
| SOX2     | ##### | 0.389057 | 0.824 | 0.287 | ##### |
| U2AF1    | ##### | 0.38262  | 0.774 | 0.227 | ##### |
| PCBP1    | ##### | 0.550206 | 0.745 | 0.169 | ##### |
| ARF5     | ##### | 0.495365 | 0.72  | 0.176 | ##### |
| LAMTOR5  | ##### | -0.61339 | 0.713 | 0.537 | ##### |
| CALM2    | ##### | -0.34438 | 0.969 | 0.769 | ##### |
| FSCN1    | ##### | 1.032846 | 0.775 | 0.123 | ##### |
| ILF2     | ##### | 0.139521 | 0.769 | 0.292 | ##### |
| SSR4     | ##### | -0.24321 | 0.832 | 0.482 | ##### |
| SHFM1    | ##### | -0.29076 | 0.848 | 0.528 | ##### |
| PTGES3   | ##### | -0.33511 | 0.771 | 0.474 | ##### |

|          |       |          |       |       |       |
|----------|-------|----------|-------|-------|-------|
| OCIAD1   | ##### | -0.11041 | 0.766 | 0.393 | ##### |
| CCT6A    | ##### | 0.317328 | 0.796 | 0.27  | ##### |
| SNRPG    | ##### | -0.27367 | 0.743 | 0.419 | ##### |
| TRMT112  | ##### | -0.66481 | 0.657 | 0.497 | ##### |
| VDAC2    | ##### | -0.20977 | 0.698 | 0.356 | ##### |
| WBP5     | ##### | -0.3359  | 0.71  | 0.385 | ##### |
| MDK      | ##### | 0.352421 | 0.831 | 0.304 | ##### |
| TMEM59   | ##### | -0.36841 | 0.765 | 0.48  | ##### |
| XRCC5    | ##### | 0.514532 | 0.744 | 0.181 | ##### |
| DDX5     | ##### | 0.160632 | 0.93  | 0.47  | ##### |
| S100A6   | ##### | -1.25223 | 0.468 | 0.605 | ##### |
| C19orf43 | ##### | 0.404855 | 0.8   | 0.248 | ##### |
| RTN3     | ##### | 0.388614 | 0.867 | 0.318 | ##### |
| EEF1B2   | ##### | -0.15091 | 0.784 | 0.403 | ##### |
| NDUFA11  | ##### | -0.2606  | 0.804 | 0.475 | ##### |
| EIF3L    | ##### | 0.42651  | 0.756 | 0.215 | ##### |
| SSBP1    | ##### | -0.10564 | 0.745 | 0.349 | ##### |
| TMEM258  | ##### | -0.39898 | 0.744 | 0.48  | ##### |
| GNAS     | ##### | -0.2487  | 0.802 | 0.462 | ##### |
| YWHAB    | ##### | 0.334215 | 0.801 | 0.268 | ##### |
| TBCA     | ##### | -0.36702 | 0.843 | 0.581 | ##### |
| C7orf73  | ##### | -0.19988 | 0.651 | 0.318 | ##### |
| ROM01    | ##### | -0.20115 | 0.707 | 0.368 | ##### |
| NDFIP1   | ##### | 0.550371 | 0.749 | 0.183 | ##### |
| SBDS     | ##### | -0.23721 | 0.741 | 0.393 | ##### |
| FXVD6    | ##### | 0.217708 | 0.919 | 0.424 | ##### |
| SEPW1    | ##### | -0.30312 | 0.776 | 0.467 | ##### |
| PSMB5    | ##### | -0.28201 | 0.748 | 0.424 | ##### |
| DNAJA1   | ##### | 0.190869 | 0.737 | 0.255 | ##### |
| C11orf58 | ##### | -0.16791 | 0.759 | 0.398 | ##### |
| C7orf55  | ##### | 0.197604 | 0.732 | 0.246 | ##### |
| GLTSCR2  | ##### | 0.526718 | 0.718 | 0.162 | ##### |
| CCND2    | ##### | 0.943397 | 0.767 | 0.133 | ##### |
| GPX4     | ##### | -0.48807 | 0.808 | 0.598 | ##### |
| HNRNPK   | ##### | -0.14719 | 0.925 | 0.598 | ##### |
| ZFAS1    | ##### | -0.43019 | 0.791 | 0.526 | ##### |
| VAMP2    | ##### | 0.18453  | 0.834 | 0.347 | ##### |
| RAB1A    | ##### | -0.13301 | 0.684 | 0.284 | ##### |
| MAP2     | ##### | 0.890981 | 0.731 | 0.115 | ##### |
| SCD5     | ##### | 0.764773 | 0.798 | 0.188 | ##### |
| UQCRB    | ##### | 0.287955 | 0.81  | 0.275 | ##### |
| UBE2D3   | ##### | -0.23408 | 0.7   | 0.354 | ##### |
| 7-Sep    | ##### | -0.33995 | 0.831 | 0.59  | ##### |
| CHCHD2   | ##### | -0.29839 | 0.961 | 0.747 | ##### |
| SLC25A5  | ##### | -0.49078 | 0.692 | 0.484 | ##### |
| POMP     | ##### | -0.39036 | 0.714 | 0.417 | ##### |
| MORF4L1  | ##### | -0.4376  | 0.7   | 0.446 | ##### |
| SRSF2    | ##### | 0.543999 | 0.748 | 0.183 | ##### |
| MFF      | ##### | 0.341753 | 0.713 | 0.197 | ##### |
| PSMB3    | ##### | -0.5605  | 0.658 | 0.434 | ##### |
| EIF4H    | ##### | 0.154576 | 0.718 | 0.251 | ##### |

|          |       |          |       |       |       |
|----------|-------|----------|-------|-------|-------|
| NDUFB9   | ##### | -0.10023 | 0.814 | 0.417 | ##### |
| MZT2B    | ##### | 0.532159 | 0.765 | 0.203 | ##### |
| HDAC2    | ##### | 0.715841 | 0.663 | 0.099 | ##### |
| TERF2IP  | ##### | 0.710292 | 0.74  | 0.145 | ##### |
| EEF1D    | ##### | -0.25867 | 0.899 | 0.583 | ##### |
| ARF4     | ##### | -0.30937 | 0.684 | 0.371 | ##### |
| EIF1B    | ##### | -0.12319 | 0.732 | 0.347 | ##### |
| PODXL2   | ##### | 1.145704 | 0.679 | 0.06  | ##### |
| DAD1     | ##### | -0.45934 | 0.731 | 0.482 | ##### |
| NDUFA5   | ##### | -0.23822 | 0.759 | 0.436 | ##### |
| LAPTM4A  | ##### | -0.45557 | 0.713 | 0.482 | ##### |
| SNRPE    | ##### | -0.12465 | 0.713 | 0.34  | ##### |
| UBE2I    | ##### | 0.540598 | 0.713 | 0.162 | ##### |
| LAPTM4B  | ##### | 0.747335 | 0.7   | 0.12  | ##### |
| ATP6VOE1 | ##### | -0.76133 | 0.609 | 0.492 | ##### |
| SLC25A6  | ##### | -0.15889 | 0.941 | 0.632 | ##### |
| NOVA1    | ##### | 0.50703  | 0.94  | 0.393 | ##### |
| FTH1     | ##### | -0.27759 | 0.98  | 0.757 | ##### |
| ATRAID   | ##### | -0.32592 | 0.675 | 0.385 | ##### |
| WSB1     | ##### | 0.192557 | 0.788 | 0.311 | ##### |
| SCAND1   | ##### | 0.534592 | 0.737 | 0.183 | ##### |
| CUTA     | ##### | -0.14067 | 0.757 | 0.386 | ##### |
| RAB7A    | ##### | -0.15279 | 0.642 | 0.289 | ##### |
| DYNLRB1  | ##### | -0.33559 | 0.706 | 0.414 | ##### |
| TCP1     | ##### | 0.229629 | 0.681 | 0.207 | ##### |
| GNB2     | ##### | 0.537946 | 0.743 | 0.19  | ##### |
| NEDD8    | ##### | -0.45778 | 0.761 | 0.533 | ##### |
| RHOA     | ##### | -0.36794 | 0.684 | 0.398 | ##### |
| C7orf50  | ##### | 0.492941 | 0.7   | 0.178 | ##### |
| SET      | ##### | 0.342905 | 0.736 | 0.224 | ##### |
| NFIB     | ##### | 0.817377 | 0.77  | 0.162 | ##### |
| SFPQ     | ##### | 0.582201 | 0.748 | 0.188 | ##### |
| PRDX5    | ##### | -0.47375 | 0.732 | 0.518 | ##### |
| PDIA6    | ##### | -0.20321 | 0.697 | 0.34  | ##### |
| PGRMC1   | ##### | 0.804713 | 0.679 | 0.103 | ##### |
| PDAP1    | ##### | 0.207323 | 0.728 | 0.253 | ##### |
| NBEAL1   | ##### | -0.71901 | 0.597 | 0.494 | ##### |
| CALM3    | ##### | 0.543409 | 0.713 | 0.164 | ##### |
| NDUFA3   | ##### | -0.19074 | 0.689 | 0.374 | ##### |
| KHDRBS1  | ##### | 0.628925 | 0.683 | 0.135 | ##### |
| UBB      | ##### | -0.38783 | 0.923 | 0.779 | ##### |
| SCRG1    | ##### | 0.620814 | 0.752 | 0.19  | ##### |
| SLIRP    | ##### | -0.16787 | 0.723 | 0.378 | ##### |
| PSMB7    | ##### | -0.16791 | 0.763 | 0.409 | ##### |
| EIF4G2   | ##### | 0.210487 | 0.761 | 0.284 | ##### |
| ODC1     | ##### | 1.008491 | 0.715 | 0.103 | ##### |
| SOX8     | ##### | 1.283096 | 0.636 | 0.039 | ##### |
| HIST1H4C | ##### | 0.693708 | 0.664 | 0.113 | ##### |
| NDUFB3   | ##### | -0.3481  | 0.564 | 0.299 | ##### |
| FKBP1A   | ##### | -0.25013 | 0.676 | 0.359 | ##### |
| PSMD8    | ##### | -0.38649 | 0.74  | 0.479 | ##### |

|           |       |          |       |       |       |
|-----------|-------|----------|-------|-------|-------|
| SRI       | ##### | -0.16206 | 0.975 | 0.687 | ##### |
| ACTB      | ##### | -0.41927 | 0.995 | 0.92  | ##### |
| PCBP2     | ##### | 0.174656 | 0.762 | 0.296 | ##### |
| SSB       | ##### | -0.16184 | 0.717 | 0.354 | ##### |
| TUBA1B    | ##### | -0.36992 | 0.912 | 0.701 | ##### |
| SH3BGRL3  | ##### | -0.73718 | 0.585 | 0.462 | ##### |
| PRELID1   | ##### | 0.387781 | 0.667 | 0.162 | ##### |
| APP       | ##### | 0.130662 | 0.714 | 0.268 | ##### |
| APEX1     | ##### | 0.188362 | 0.782 | 0.303 | ##### |
| ATP5A1    | ##### | -0.35589 | 0.715 | 0.45  | ##### |
| UBE2D2    | ##### | 0.377271 | 0.674 | 0.178 | ##### |
| SRSF5     | ##### | 0.150537 | 0.749 | 0.292 | ##### |
| TMED9     | ##### | -0.51341 | 0.685 | 0.456 | ##### |
| RHOBTB3   | ##### | 0.558313 | 0.75  | 0.197 | ##### |
| IGFBP2    | ##### | -0.40788 | 0.629 | 0.378 | ##### |
| PSMA7     | ##### | -0.29187 | 0.86  | 0.573 | ##### |
| NDUFS6    | ##### | -0.16008 | 0.701 | 0.35  | ##### |
| C4orf3    | ##### | -0.5893  | 0.566 | 0.376 | ##### |
| ARF1      | ##### | -0.33699 | 0.646 | 0.378 | ##### |
| HNRNPM    | ##### | 0.674052 | 0.704 | 0.138 | ##### |
| RABAC1    | ##### | -0.34669 | 0.714 | 0.436 | ##### |
| TCF4      | ##### | 0.440208 | 0.806 | 0.274 | ##### |
| OLIG2     | ##### | 1.182324 | 0.694 | 0.082 | ##### |
| C14orf2   | ##### | -0.20008 | 0.732 | 0.39  | ##### |
| MGST3     | ##### | -0.61414 | 0.623 | 0.468 | ##### |
| 15-Sep    | ##### | -0.48494 | 0.579 | 0.366 | ##### |
| ATP6VOB   | ##### | -0.20245 | 0.735 | 0.39  | ##### |
| RBMX      | ##### | 0.268179 | 0.739 | 0.258 | ##### |
| ATXN10    | ##### | 0.476578 | 0.609 | 0.116 | ##### |
| CNN3      | ##### | -0.52543 | 0.583 | 0.403 | ##### |
| SF3B5     | ##### | -0.18511 | 0.645 | 0.304 | ##### |
| RBM8A     | ##### | -0.25975 | 0.674 | 0.352 | ##### |
| RAB2A     | ##### | 0.314037 | 0.737 | 0.227 | ##### |
| RCN2      | ##### | 0.655123 | 0.715 | 0.149 | ##### |
| PHPT1     | ##### | -0.64083 | 0.618 | 0.46  | ##### |
| CSNK1A1   | ##### | 0.257727 | 0.654 | 0.203 | ##### |
| ATP6VOE2  | ##### | 0.208013 | 0.691 | 0.234 | ##### |
| ATP5F1    | ##### | -0.42327 | 0.644 | 0.403 | ##### |
| RP11-161M | ##### | 1.345257 | 0.605 | 0.027 | ##### |
| H2AFV     | ##### | 0.356996 | 0.67  | 0.183 | ##### |
| RNPS1     | ##### | 0.264298 | 0.711 | 0.234 | ##### |
| FAM96B    | ##### | -0.18877 | 0.709 | 0.368 | ##### |
| KRT10     | ##### | 0.350467 | 0.7   | 0.209 | ##### |
| ATP5G1    | ##### | -0.19435 | 0.706 | 0.364 | ##### |
| PRDX6     | ##### | -1.0526  | 0.443 | 0.504 | ##### |
| MYL12B    | ##### | -0.55268 | 0.629 | 0.424 | ##### |
| EIF3F     | ##### | 0.418293 | 0.706 | 0.193 | ##### |
| TXN       | ##### | -0.46226 | 0.679 | 0.46  | ##### |
| SHD       | ##### | 1.131676 | 0.571 | 0.026 | ##### |
| NDUFA12   | ##### | -0.39008 | 0.592 | 0.32  | ##### |
| RBPJ      | ##### | 0.692199 | 0.654 | 0.109 | ##### |

|          |       |          |       |       |       |
|----------|-------|----------|-------|-------|-------|
| NDUFB1   | ##### | -0.36266 | 0.618 | 0.378 | ##### |
| BTF3L4   | ##### | 0.166007 | 0.644 | 0.207 | ##### |
| PYURF    | ##### | 0.332779 | 0.642 | 0.168 | ##### |
| H2AFY    | ##### | 0.510558 | 0.707 | 0.179 | ##### |
| ATP5H    | ##### | -0.37961 | 0.618 | 0.345 | ##### |
| RAB5C    | ##### | -0.1547  | 0.618 | 0.267 | ##### |
| HNRNPU   | ##### | 0.270116 | 0.641 | 0.191 | ##### |
| PUF60    | ##### | 0.228732 | 0.723 | 0.251 | ##### |
| SRPK2    | ##### | 0.657675 | 0.688 | 0.137 | ##### |
| GNG5     | ##### | -0.79746 | 0.518 | 0.467 | ##### |
| POLR2I   | ##### | -0.52933 | 0.596 | 0.402 | ##### |
| TIMM13   | ##### | -0.17669 | 0.728 | 0.379 | ##### |
| PTMA     | ##### | -0.37866 | 0.993 | 0.887 | ##### |
| DCTN3    | ##### | 0.12708  | 0.631 | 0.205 | ##### |
| BLOC1S1  | ##### | -0.19514 | 0.65  | 0.32  | ##### |
| PTMS     | ##### | 0.640651 | 0.795 | 0.21  | ##### |
| ATF4     | ##### | -0.13278 | 0.628 | 0.279 | ##### |
| PSAP     | ##### | -0.34537 | 0.679 | 0.4   | ##### |
| CSNK2B   | ##### | -0.24268 | 0.618 | 0.309 | ##### |
| GLCCI1   | ##### | 1.132062 | 0.61  | 0.043 | ##### |
| CENPV    | ##### | 1.149942 | 0.606 | 0.038 | ##### |
| MKRN1    | ##### | 0.591864 | 0.599 | 0.094 | ##### |
| PABPC1   | ##### | 0.280261 | 0.818 | 0.316 | ##### |
| IER2     | ##### | 0.674967 | 0.817 | 0.234 | ##### |
| DDX18    | ##### | 0.147889 | 0.671 | 0.227 | ##### |
| TUBB2B   | ##### | 0.327094 | 0.951 | 0.472 | ##### |
| AKR1B1   | ##### | 0.342513 | 0.65  | 0.174 | ##### |
| SAT1     | ##### | -0.90826 | 0.54  | 0.501 | ##### |
| STRAP    | ##### | 0.151107 | 0.719 | 0.27  | ##### |
| DSTN     | ##### | -0.22865 | 0.7   | 0.376 | ##### |
| TBCB     | ##### | -0.18862 | 0.757 | 0.417 | ##### |
| TSPAN3   | ##### | 0.357399 | 0.674 | 0.2   | ##### |
| CHD7     | ##### | 0.95552  | 0.654 | 0.077 | ##### |
| NDUFA6   | ##### | -0.49292 | 0.602 | 0.403 | ##### |
| HSP90AA1 | ##### | -0.20865 | 0.978 | 0.754 | ##### |
| DSEL     | ##### | 0.96623  | 0.654 | 0.084 | ##### |
| SNRPB2   | ##### | -0.30308 | 0.623 | 0.325 | ##### |
| COX7B    | ##### | -0.17359 | 0.658 | 0.32  | ##### |
| SELT     | ##### | -0.2611  | 0.609 | 0.32  | ##### |
| EIF5B    | ##### | 0.126093 | 0.671 | 0.241 | ##### |
| TAF7     | ##### | -0.31793 | 0.726 | 0.436 | ##### |
| ERGIC3   | ##### | -0.12865 | 0.672 | 0.318 | ##### |
| KDEL2    | ##### | 0.477811 | 0.638 | 0.147 | ##### |
| HNRNPAB  | ##### | 0.748663 | 0.598 | 0.077 | ##### |
| CYC1     | ##### | 0.275067 | 0.681 | 0.203 | ##### |
| PRMT1    | ##### | -0.14305 | 0.693 | 0.34  | ##### |
| ZC3H15   | ##### | 0.254882 | 0.642 | 0.179 | ##### |
| PPP2R1A  | ##### | 0.17686  | 0.681 | 0.238 | ##### |
| TUBB     | ##### | 0.14527  | 0.953 | 0.523 | ##### |
| CLTA     | ##### | 0.283782 | 0.667 | 0.197 | ##### |
| PAIP2    | ##### | -0.17309 | 0.662 | 0.337 | ##### |



|           |       |          |       |       |       |
|-----------|-------|----------|-------|-------|-------|
| MORF4L2   | ##### | -0.18822 | 0.691 | 0.366 | ##### |
| CAMLG     | ##### | -0.13632 | 0.618 | 0.27  | ##### |
| SRRM2     | ##### | 0.548135 | 0.713 | 0.176 | ##### |
| LMO4      | ##### | 0.328797 | 0.707 | 0.231 | ##### |
| ZNF90     | ##### | -0.84348 | 0.456 | 0.427 | ##### |
| RSF1      | ##### | 0.522301 | 0.646 | 0.133 | ##### |
| SAT2      | ##### | -0.36705 | 0.649 | 0.369 | ##### |
| PHB       | ##### | -0.21344 | 0.631 | 0.318 | ##### |
| NCL       | ##### | 0.262646 | 0.667 | 0.205 | ##### |
| GTF3C6    | ##### | 0.198357 | 0.629 | 0.195 | ##### |
| COX7A2L   | ##### | -0.31616 | 0.624 | 0.342 | ##### |
| MATR3     | ##### | 0.593429 | 0.659 | 0.138 | ##### |
| TSPAN13   | ##### | 0.897505 | 0.609 | 0.07  | ##### |
| RAB10     | ##### | 0.258264 | 0.56  | 0.142 | ##### |
| ARPC3     | ##### | -0.27013 | 0.683 | 0.39  | ##### |
| RBP1      | ##### | 0.149325 | 0.717 | 0.284 | ##### |
| PDCD5     | ##### | -0.41923 | 0.616 | 0.368 | ##### |
| MAGED1    | ##### | 0.359545 | 0.614 | 0.156 | ##### |
| MEST      | ##### | 0.449626 | 0.756 | 0.248 | ##### |
| NFIA      | ##### | 0.338341 | 0.689 | 0.221 | ##### |
| PARP1     | ##### | 0.387185 | 0.601 | 0.138 | ##### |
| HNRNPA1   | ##### | -0.14148 | 0.971 | 0.696 | ##### |
| PAFAH1B3  | ##### | 0.128544 | 0.636 | 0.224 | ##### |
| PTOV1     | ##### | 0.553008 | 0.655 | 0.14  | ##### |
| ACP1      | ##### | -0.19074 | 0.573 | 0.263 | ##### |
| EMC10     | ##### | 0.508165 | 0.612 | 0.123 | ##### |
| CCT5      | ##### | 0.157584 | 0.603 | 0.188 | ##### |
| VDAC1     | ##### | -0.48008 | 0.59  | 0.39  | ##### |
| YWHAG     | ##### | 0.441526 | 0.563 | 0.111 | ##### |
| SOX11     | ##### | 1.09694  | 0.641 | 0.068 | ##### |
| SMDT1     | ##### | 0.288183 | 0.694 | 0.219 | ##### |
| RHOB      | ##### | 0.366453 | 0.762 | 0.268 | ##### |
| SF1       | ##### | 0.449437 | 0.648 | 0.156 | ##### |
| QKI       | ##### | 0.520637 | 0.649 | 0.15  | ##### |
| MTDH      | ##### | 0.601574 | 0.705 | 0.166 | ##### |
| IP6K2     | ##### | -0.16126 | 0.637 | 0.304 | ##### |
| MAD2L2    | ##### | 0.522673 | 0.603 | 0.121 | ##### |
| TOMM22    | ##### | 0.245562 | 0.571 | 0.144 | ##### |
| DPY30     | ##### | -0.14583 | 0.576 | 0.256 | ##### |
| C14orf166 | ##### | -0.30366 | 0.614 | 0.335 | ##### |
| H1FX      | ##### | 0.945792 | 0.636 | 0.079 | ##### |
| NUCKS1    | ##### | -0.21937 | 0.67  | 0.364 | ##### |
| HSP90B1   | ##### | -0.37878 | 0.62  | 0.366 | ##### |
| AP2S1     | ##### | -0.30768 | 0.59  | 0.321 | ##### |
| CALR      | ##### | -0.25795 | 0.684 | 0.393 | ##### |
| HNRNPA3   | ##### | 0.119189 | 0.661 | 0.239 | ##### |
| TCEB1     | ##### | -0.16266 | 0.668 | 0.313 | ##### |
| HNRNPR    | ##### | 0.185055 | 0.635 | 0.214 | ##### |
| SLC3A2    | ##### | -0.55406 | 0.56  | 0.386 | ##### |
| EIF3I     | ##### | -0.25559 | 0.64  | 0.345 | ##### |
| NAA38     | ##### | -0.29164 | 0.533 | 0.272 | ##### |

|          |       |          |       |       |       |
|----------|-------|----------|-------|-------|-------|
| NDUFS8   | ##### | -0.29294 | 0.62  | 0.335 | ##### |
| TRAF4    | ##### | 0.897461 | 0.554 | 0.051 | ##### |
| NDUFC1   | ##### | -0.55041 | 0.537 | 0.366 | ##### |
| SMARCB1  | ##### | 0.646045 | 0.606 | 0.103 | ##### |
| RAMP1    | ##### | -0.57548 | 0.657 | 0.538 | ##### |
| C9orf16  | ##### | 0.235687 | 0.633 | 0.2   | ##### |
| EIF3G    | ##### | -0.21883 | 0.662 | 0.359 | ##### |
| NUDC     | ##### | -0.31739 | 0.588 | 0.326 | ##### |
| EMC4     | ##### | 0.149816 | 0.599 | 0.186 | ##### |
| HLA-DRA  | ##### | -1.1982  | 0.33  | 0.426 | ##### |
| S100A10  | ##### | -1.6887  | 0.164 | 0.533 | ##### |
| SNF8     | ##### | 0.596826 | 0.611 | 0.113 | ##### |
| UFC1     | ##### | -0.18492 | 0.59  | 0.28  | ##### |
| EEF1A1   | ##### | -0.81949 | 0.684 | 0.851 | ##### |
| FAM213A  | ##### | 0.168979 | 0.563 | 0.174 | ##### |
| MIDN     | ##### | 0.607868 | 0.653 | 0.144 | ##### |
| ZNF207   | ##### | 0.290268 | 0.562 | 0.137 | ##### |
| GTF2A2   | ##### | -0.23836 | 0.512 | 0.234 | ##### |
| GPC2     | ##### | 1.13689  | 0.544 | 0.022 | ##### |
| SDHC     | ##### | -0.58956 | 0.485 | 0.345 | ##### |
| BLVRA    | ##### | 0.119546 | 0.547 | 0.162 | ##### |
| YWHAH    | ##### | 0.776016 | 0.601 | 0.084 | ##### |
| NOP10    | ##### | -0.12443 | 0.554 | 0.248 | ##### |
| PPA1     | ##### | 0.218612 | 0.589 | 0.164 | ##### |
| MDH1     | ##### | -0.26097 | 0.579 | 0.308 | ##### |
| RAB11B   | ##### | 0.22501  | 0.614 | 0.198 | ##### |
| UBXN4    | ##### | 0.124972 | 0.638 | 0.222 | ##### |
| AP1S1    | ##### | -0.12687 | 0.594 | 0.268 | ##### |
| SDCBP    | ##### | -0.52105 | 0.603 | 0.438 | ##### |
| NCAM1    | ##### | 0.607619 | 0.651 | 0.138 | ##### |
| NONO     | ##### | 0.275477 | 0.615 | 0.183 | ##### |
| NDUFB4   | ##### | -0.4281  | 0.664 | 0.444 | ##### |
| COX16    | ##### | 0.34855  | 0.598 | 0.156 | ##### |
| SEC11A   | ##### | -0.69447 | 0.455 | 0.342 | ##### |
| EIF2S2   | ##### | -0.40811 | 0.577 | 0.338 | ##### |
| ARHGDI1A | ##### | 0.105329 | 0.541 | 0.168 | ##### |
| NRXN1    | ##### | 0.929085 | 0.537 | 0.043 | ##### |
| TMED10   | ##### | -0.6534  | 0.532 | 0.417 | ##### |
| TMEM160  | ##### | 0.688747 | 0.581 | 0.084 | ##### |
| CAPZB    | ##### | -0.19209 | 0.568 | 0.272 | ##### |
| NKAIN4   | ##### | 1.113968 | 0.549 | 0.038 | ##### |
| FABP5    | ##### | -1.38765 | 0.336 | 0.501 | ##### |
| HSPA5    | ##### | -0.61017 | 0.594 | 0.422 | ##### |
| NAP1L1   | ##### | -0.30331 | 0.649 | 0.378 | ##### |
| PIK3R1   | ##### | 0.783907 | 0.601 | 0.087 | ##### |
| UBXN1    | ##### | 0.167169 | 0.692 | 0.253 | ##### |
| PSMC5    | ##### | -0.11266 | 0.593 | 0.263 | ##### |
| STMN4    | ##### | 0.807485 | 0.674 | 0.132 | ##### |
| CSDE1    | ##### | 0.18882  | 0.645 | 0.222 | ##### |
| TOMM20   | ##### | -0.3609  | 0.537 | 0.28  | ##### |
| ELAVL4   | ##### | 0.930968 | 0.577 | 0.06  | ##### |

|           |       |          |       |       |       |
|-----------|-------|----------|-------|-------|-------|
| EWSR1     | ##### | 0.414253 | 0.599 | 0.142 | ##### |
| FKBP8     | ##### | -0.21603 | 0.625 | 0.33  | ##### |
| SNRNP70   | ##### | 0.541644 | 0.628 | 0.138 | ##### |
| ZBTB20    | ##### | 0.495687 | 0.691 | 0.186 | ##### |
| RSRC2     | ##### | 0.110799 | 0.606 | 0.195 | ##### |
| PPP2CA    | ##### | 0.321853 | 0.589 | 0.152 | ##### |
| FAM127A   | ##### | 0.245686 | 0.628 | 0.2   | ##### |
| PPM1G     | ##### | 0.775596 | 0.589 | 0.077 | ##### |
| OLA1      | ##### | 0.14207  | 0.601 | 0.203 | ##### |
| MEAF6     | ##### | -0.17027 | 0.52  | 0.229 | ##### |
| ARL5A     | ##### | 0.532507 | 0.615 | 0.128 | ##### |
| HIGD2A    | ##### | -0.5531  | 0.545 | 0.386 | ##### |
| YTHDF2    | ##### | 0.251014 | 0.573 | 0.159 | ##### |
| TMEM230   | ##### | -0.29331 | 0.627 | 0.361 | ##### |
| CWC15     | ##### | -0.13516 | 0.525 | 0.212 | ##### |
| GDI1      | ##### | 0.197764 | 0.657 | 0.227 | ##### |
| VIPR2     | ##### | 1.196027 | 0.512 | 0.012 | ##### |
| NCBP2     | ##### | 0.194838 | 0.607 | 0.195 | ##### |
| CCDC88A   | ##### | 0.717325 | 0.572 | 0.082 | ##### |
| EGR1      | ##### | 0.451638 | 0.813 | 0.304 | ##### |
| GSTA4     | ##### | 0.475633 | 0.592 | 0.128 | ##### |
| NDUFA2    | ##### | -0.19094 | 0.59  | 0.291 | ##### |
| NDUFS4    | ##### | -0.403   | 0.546 | 0.318 | ##### |
| NAP1L4    | ##### | 0.386024 | 0.571 | 0.132 | ##### |
| COPS8     | ##### | -0.20817 | 0.597 | 0.27  | ##### |
| PDPN      | ##### | -0.49792 | 0.48  | 0.316 | ##### |
| ASNA1     | ##### | -0.3558  | 0.511 | 0.282 | ##### |
| LGALS1    | ##### | -1.14651 | 0.428 | 0.598 | ##### |
| SYT11     | ##### | 0.322712 | 0.57  | 0.15  | ##### |
| ENY2      | ##### | -0.15167 | 0.623 | 0.299 | ##### |
| BZW1      | ##### | -0.11812 | 0.599 | 0.277 | ##### |
| RSBN1L    | ##### | 0.629319 | 0.612 | 0.113 | ##### |
| DHX36     | ##### | 0.431948 | 0.585 | 0.132 | ##### |
| TECR      | ##### | -0.96471 | 0.382 | 0.407 | ##### |
| ZKSCAN1   | ##### | 0.563688 | 0.557 | 0.092 | ##### |
| JTB       | ##### | 0.319849 | 0.636 | 0.183 | ##### |
| THY1      | ##### | 0.64973  | 0.56  | 0.091 | ##### |
| GADD45G   | ##### | 1.075979 | 0.622 | 0.075 | ##### |
| KCNQ10T1  | ##### | 0.754068 | 0.641 | 0.111 | ##### |
| SF3B2     | ##### | 0.106994 | 0.597 | 0.214 | ##### |
| DRAP1     | ##### | -0.33391 | 0.605 | 0.362 | ##### |
| ZCRB1     | ##### | -0.33817 | 0.505 | 0.25  | ##### |
| LSM3      | ##### | -0.1684  | 0.584 | 0.27  | ##### |
| NDUFS2    | ##### | -0.16444 | 0.602 | 0.309 | ##### |
| LINC00493 | ##### | -0.35356 | 0.546 | 0.28  | ##### |
| CDC37     | ##### | -0.15766 | 0.538 | 0.248 | ##### |
| METTL9    | ##### | 0.431418 | 0.568 | 0.12  | ##### |
| GAP43     | ##### | -0.91363 | 0.433 | 0.443 | ##### |
| ARL2BP    | ##### | 0.239535 | 0.545 | 0.149 | ##### |
| CALD1     | ##### | -0.10325 | 0.623 | 0.294 | ##### |
| C1orf61   | ##### | -0.19835 | 0.869 | 0.585 | ##### |

|           |       |          |       |       |       |
|-----------|-------|----------|-------|-------|-------|
| TRA2B     | ##### | 0.171981 | 0.67  | 0.248 | ##### |
| PSMA1     | ##### | -0.3606  | 0.594 | 0.362 | ##### |
| FKBP3     | ##### | -0.23606 | 0.558 | 0.282 | ##### |
| TUBB2A    | ##### | 0.155512 | 0.629 | 0.236 | ##### |
| KIF5B     | ##### | 0.594214 | 0.61  | 0.118 | ##### |
| HSD17B10  | ##### | -0.21841 | 0.567 | 0.277 | ##### |
| FEZ1      | ##### | 0.19965  | 0.616 | 0.212 | ##### |
| NDUFS7    | ##### | -0.25546 | 0.605 | 0.32  | ##### |
| PHB2      | ##### | 0.238221 | 0.551 | 0.147 | ##### |
| NDUFV2    | ##### | -0.3264  | 0.564 | 0.32  | ##### |
| PSMB2     | ##### | -0.41247 | 0.585 | 0.362 | ##### |
| PNRC1     | ##### | 0.415387 | 0.575 | 0.137 | ##### |
| PON2      | ##### | -0.30676 | 0.579 | 0.342 | ##### |
| CTSB      | ##### | -0.73267 | 0.454 | 0.374 | ##### |
| HSPA9     | ##### | -0.3665  | 0.501 | 0.289 | ##### |
| LAMTOR1   | ##### | -0.13476 | 0.616 | 0.289 | ##### |
| TCEAL7    | ##### | 0.325103 | 0.537 | 0.121 | ##### |
| SLC22A17  | ##### | 0.844227 | 0.568 | 0.068 | ##### |
| PDCD6     | ##### | 0.165429 | 0.584 | 0.193 | ##### |
| MAGEH1    | ##### | 0.589992 | 0.616 | 0.123 | ##### |
| ZNF667-AS | ##### | -0.40209 | 0.546 | 0.326 | ##### |
| SRP72     | ##### | 0.492978 | 0.62  | 0.144 | ##### |
| HNRNPD    | ##### | 0.643373 | 0.546 | 0.084 | ##### |
| AES       | ##### | 0.359487 | 0.631 | 0.179 | ##### |
| ATPIF1    | ##### | -0.38756 | 0.56  | 0.35  | ##### |
| POLR2E    | ##### | -0.14327 | 0.571 | 0.27  | ##### |
| ARL6IP4   | ##### | 0.140088 | 0.593 | 0.209 | ##### |
| POLR2G    | ##### | -0.15438 | 0.612 | 0.303 | ##### |
| PRPF40A   | ##### | 0.450763 | 0.573 | 0.123 | ##### |
| C4orf48   | ##### | 0.737766 | 0.571 | 0.084 | ##### |
| SMS       | ##### | -0.45516 | 0.466 | 0.296 | ##### |
| LUC7L3    | ##### | 0.239074 | 0.681 | 0.234 | ##### |
| MCM7      | ##### | 0.749505 | 0.56  | 0.079 | ##### |
| FAM3C     | ##### | 0.370844 | 0.597 | 0.169 | ##### |
| COA3      | ##### | -0.15204 | 0.553 | 0.253 | ##### |
| CHD9      | ##### | 0.430312 | 0.594 | 0.145 | ##### |
| ESD       | ##### | -0.29982 | 0.495 | 0.243 | ##### |
| PCNP      | ##### | -0.27119 | 0.56  | 0.306 | ##### |
| UBE2L3    | ##### | 0.145356 | 0.55  | 0.169 | ##### |
| PSMC2     | ##### | 0.121045 | 0.577 | 0.195 | ##### |
| ECH1      | ##### | -0.53037 | 0.529 | 0.376 | ##### |
| SRM       | ##### | 0.371055 | 0.558 | 0.133 | ##### |
| PRDX4     | ##### | -0.34569 | 0.572 | 0.337 | ##### |
| SRSF11    | ##### | 0.143956 | 0.638 | 0.238 | ##### |
| FYN       | ##### | 0.553504 | 0.583 | 0.118 | ##### |
| SMIM7     | ##### | -0.48946 | 0.531 | 0.342 | ##### |
| HNRNPH3   | ##### | 0.373256 | 0.575 | 0.14  | ##### |
| OLIG1     | ##### | 1.057916 | 0.668 | 0.113 | ##### |
| KLHL7     | ##### | 0.704404 | 0.52  | 0.067 | ##### |
| TMC01     | ##### | -0.33655 | 0.597 | 0.35  | ##### |
| KRTCAP2   | ##### | -0.30088 | 0.514 | 0.291 | ##### |

|           |       |          |       |       |          |
|-----------|-------|----------|-------|-------|----------|
| LSM4      | ##### | 0.140065 | 0.637 | 0.243 | #####    |
| NASP      | ##### | 0.333929 | 0.536 | 0.13  | #####    |
| PSMA4     | ##### | -0.15456 | 0.555 | 0.258 | #####    |
| AKAP9     | ##### | 0.52291  | 0.631 | 0.147 | #####    |
| MED10     | ##### | -0.31071 | 0.508 | 0.258 | #####    |
| PSMD2     | ##### | 0.135815 | 0.514 | 0.152 | #####    |
| ATP1B3    | ##### | 0.643075 | 0.547 | 0.084 | #####    |
| ORMDL1    | ##### | 0.116475 | 0.559 | 0.185 | #####    |
| SERPINE2  | ##### | 0.631274 | 0.625 | 0.13  | #####    |
| ARMCX3    | ##### | 0.198742 | 0.577 | 0.186 | #####    |
| TSC22D4   | ##### | -0.14091 | 0.735 | 0.421 | #####    |
| JUN       | ##### | 0.138198 | 0.813 | 0.405 | #####    |
| NDUFB5    | ##### | -0.18829 | 0.581 | 0.299 | #####    |
| DTD1      | ##### | 0.612314 | 0.566 | 0.097 | #####    |
| SCG3      | ##### | 0.294918 | 0.64  | 0.207 | #####    |
| FAM181B   | ##### | 0.853975 | 0.527 | 0.053 | #####    |
| KTN1      | ##### | 0.452379 | 0.594 | 0.14  | #####    |
| RBM25     | ##### | 0.343732 | 0.568 | 0.138 | #####    |
| LSM2      | ##### | 0.213448 | 0.502 | 0.128 | #####    |
| PCMT1     | ##### | -0.15332 | 0.538 | 0.231 | #####    |
| LSM1      | ##### | -0.11471 | 0.541 | 0.229 | #####    |
| NFIX      | ##### | 0.797221 | 0.611 | 0.099 | #####    |
| DEK       | ##### | 0.520264 | 0.519 | 0.091 | #####    |
| RDX       | ##### | 0.386689 | 0.597 | 0.161 | #####    |
| CBX1      | ##### | 0.495039 | 0.529 | 0.096 | #####    |
| GBAS      | ##### | 0.439985 | 0.505 | 0.091 | #####    |
| C19orf70  | ##### | -0.63051 | 0.503 | 0.395 | #####    |
| MCL1      | ##### | 0.170454 | 0.586 | 0.203 | #####    |
| HMGB3     | ##### | 0.440391 | 0.49  | 0.087 | 1.37E-99 |
| CSTB      | ##### | -0.55794 | 0.532 | 0.391 | 1.67E-99 |
| LINC00461 | ##### | 0.353891 | 0.547 | 0.135 | 2.11E-99 |
| SCP2      | ##### | -0.11655 | 0.588 | 0.277 | 2.19E-99 |
| POP7      | ##### | 0.289231 | 0.538 | 0.135 | 2.47E-99 |
| DNAJC8    | ##### | -0.12549 | 0.57  | 0.25  | 2.47E-99 |
| C16orf45  | ##### | 0.132613 | 0.538 | 0.173 | 3.69E-99 |
| TRAPPC1   | ##### | -0.439   | 0.473 | 0.304 | 4.46E-99 |
| TTYH1     | ##### | -0.44373 | 0.417 | 0.243 | 5.89E-99 |
| MTCH1     | ##### | 0.293781 | 0.545 | 0.14  | 6.23E-99 |
| BCAS2     | ##### | -0.14729 | 0.505 | 0.221 | 6.27E-99 |
| DCX       | ##### | 1.083829 | 0.495 | 0.021 | 1.00E-98 |
| ENOPH1    | ##### | 0.415377 | 0.502 | 0.096 | 1.07E-98 |
| CBX5      | ##### | 0.50265  | 0.571 | 0.116 | 1.17E-98 |
| CADM4     | ##### | 0.774928 | 0.531 | 0.062 | 1.46E-98 |
| CLTB      | ##### | 0.384722 | 0.502 | 0.108 | 1.77E-98 |
| TCF12     | ##### | 0.56092  | 0.553 | 0.101 | 1.83E-98 |
| SMARCA4   | ##### | 0.627512 | 0.571 | 0.099 | 1.83E-98 |
| BNIP3L    | ##### | -0.28502 | 0.571 | 0.303 | 1.84E-98 |
| GADD45B   | ##### | -1.18909 | 0.326 | 0.462 | 1.99E-98 |
| CACYBP    | ##### | 0.146919 | 0.572 | 0.191 | 2.19E-98 |
| TMEM14B   | ##### | -0.1254  | 0.507 | 0.214 | 2.32E-98 |
| ATAT1     | ##### | 0.721    | 0.507 | 0.058 | 2.55E-98 |

|          |          |          |       |       |          |
|----------|----------|----------|-------|-------|----------|
| TAGLN2   | #####    | -1.5807  | 0.14  | 0.497 | 2.66E-98 |
| TMEM14C  | #####    | -0.26663 | 0.512 | 0.251 | 2.84E-98 |
| RDH11    | #####    | 0.278254 | 0.549 | 0.147 | 3.61E-98 |
| NREP     | #####    | 0.620148 | 0.503 | 0.072 | 4.01E-98 |
| PSMD7    | #####    | -0.23543 | 0.505 | 0.234 | 1.03E-97 |
| YIPF3    | #####    | -0.16763 | 0.534 | 0.251 | 1.21E-97 |
| USMG5    | #####    | -0.14861 | 0.554 | 0.26  | 1.41E-97 |
| APMAP    | #####    | 0.362662 | 0.534 | 0.121 | 1.66E-97 |
| STUB1    | #####    | 0.531913 | 0.554 | 0.103 | 1.75E-97 |
| CPE      | #####    | 0.161368 | 0.557 | 0.185 | 1.94E-97 |
| C1orf43  | #####    | -0.2704  | 0.572 | 0.316 | 2.30E-97 |
| C17orf89 | #####    | 0.517867 | 0.523 | 0.092 | 3.00E-97 |
| RWDD1    | #####    | -0.29614 | 0.52  | 0.284 | 3.29E-97 |
| HMG2     | #####    | -0.55199 | 0.559 | 0.477 | 7.90E-97 |
| MAP1LC3B | #####    | 0.371762 | 0.581 | 0.152 | 9.69E-97 |
| TMEM147  | #####    | -0.15086 | 0.611 | 0.311 | 1.66E-96 |
| PPP1CB   | #####    | -0.11061 | 0.503 | 0.21  | 2.12E-96 |
| PNN      | #####    | 0.202101 | 0.585 | 0.193 | 2.44E-96 |
| PSMC3    | #####    | -0.12499 | 0.593 | 0.294 | 4.38E-96 |
| RHOC     | #####    | -0.79452 | 0.424 | 0.407 | 4.47E-96 |
| ATRX     | #####    | 0.465892 | 0.586 | 0.142 | 5.51E-96 |
| CNP      | #####    | 0.41352  | 0.512 | 0.108 | 6.13E-96 |
| PRRC2C   | #####    | 0.223657 | 0.538 | 0.154 | 7.40E-96 |
| CLK1     | #####    | 0.477096 | 0.649 | 0.173 | 7.90E-96 |
| DNAJC7   | #####    | 0.311621 | 0.572 | 0.156 | 1.06E-95 |
| MINOS1   | #####    | -0.3666  | 0.49  | 0.27  | 1.07E-95 |
| ARL4C    | #####    | 0.684595 | 0.542 | 0.085 | 1.44E-95 |
| ASIC4    | 1.28E-99 | 0.950622 | 0.549 | 0.06  | 1.91E-95 |
| PPP1R14B | 1.62E-99 | 0.70936  | 0.555 | 0.085 | 2.43E-95 |
| PAPOLA   | 1.73E-99 | -0.10816 | 0.499 | 0.195 | 2.59E-95 |
| KPNB1    | 3.06E-99 | 0.44259  | 0.551 | 0.128 | 4.57E-95 |
| DYNC1LI2 | 3.12E-99 | 0.479294 | 0.521 | 0.097 | 4.66E-95 |
| SMARCE1  | 4.62E-99 | 0.411298 | 0.533 | 0.12  | 6.90E-95 |
| GOLGA7   | 7.05E-99 | -0.25276 | 0.462 | 0.222 | 1.05E-94 |
| PPP1CA   | 8.20E-99 | -0.13166 | 0.462 | 0.198 | 1.23E-94 |
| AUP1     | 9.77E-99 | 0.238175 | 0.553 | 0.164 | 1.46E-94 |
| BZW2     | 1.01E-98 | 0.552375 | 0.493 | 0.079 | 1.51E-94 |
| SIVA1    | 1.07E-98 | -0.48897 | 0.437 | 0.27  | 1.59E-94 |
| EIF6     | 1.10E-98 | -0.13897 | 0.531 | 0.243 | 1.64E-94 |
| LMAN2    | 1.40E-98 | -0.3524  | 0.516 | 0.292 | 2.09E-94 |
| HADHA    | 1.87E-98 | 0.26495  | 0.515 | 0.135 | 2.79E-94 |
| PSIP1    | 2.43E-98 | 0.610029 | 0.563 | 0.103 | 3.63E-94 |
| BCAN     | 4.29E-98 | 0.575562 | 0.745 | 0.248 | 6.41E-94 |
| REPIN1   | 4.71E-98 | 0.824713 | 0.501 | 0.046 | 7.04E-94 |
| SYF2     | 5.01E-98 | -0.25265 | 0.529 | 0.267 | 7.49E-94 |
| RALY     | 5.29E-98 | 0.632736 | 0.511 | 0.074 | 7.91E-94 |
| CD99     | 7.30E-98 | -0.94987 | 0.398 | 0.496 | 1.09E-93 |
| BASP1    | 8.89E-98 | 1.145019 | 0.481 | 0.019 | 1.33E-93 |
| KCNQ2    | 1.02E-97 | 0.722937 | 0.498 | 0.058 | 1.52E-93 |
| GTF3A    | 1.25E-97 | 0.280971 | 0.469 | 0.108 | 1.87E-93 |
| PSMC4    | 1.91E-97 | -0.38287 | 0.498 | 0.308 | 2.85E-93 |

|          |          |          |       |       |          |
|----------|----------|----------|-------|-------|----------|
| CHMP5    | 2.02E-97 | -0.10445 | 0.508 | 0.229 | 3.02E-93 |
| DDAH2    | 2.47E-97 | 0.326453 | 0.499 | 0.118 | 3.69E-93 |
| GOLM1    | 2.66E-97 | 0.282759 | 0.508 | 0.128 | 3.97E-93 |
| PPP1CC   | 2.73E-97 | 0.310632 | 0.538 | 0.147 | 4.07E-93 |
| POLD2    | 3.07E-97 | -0.17638 | 0.554 | 0.275 | 4.59E-93 |
| DDR1     | 3.78E-97 | 0.449395 | 0.559 | 0.135 | 5.65E-93 |
| CCZ1     | 6.51E-97 | 0.517456 | 0.538 | 0.111 | 9.73E-93 |
| LHFPL3   | 8.81E-97 | 0.988575 | 0.458 | 0.026 | 1.32E-92 |
| SPARC    | 9.45E-97 | -1.00768 | 0.311 | 0.374 | 1.41E-92 |
| COA1     | 1.76E-96 | 0.156119 | 0.523 | 0.166 | 2.63E-92 |
| SERP1    | 2.36E-96 | 0.300574 | 0.568 | 0.168 | 3.53E-92 |
| TMEM50A  | 2.57E-96 | -0.29451 | 0.462 | 0.236 | 3.85E-92 |
| OAZ2     | 2.58E-96 | -0.21269 | 0.453 | 0.214 | 3.85E-92 |
| CCT8     | 2.99E-96 | -0.15897 | 0.562 | 0.275 | 4.46E-92 |
| METAP2   | 5.16E-96 | -0.21335 | 0.523 | 0.256 | 7.71E-92 |
| TUBB4B   | 5.27E-96 | 0.138363 | 0.553 | 0.19  | 7.87E-92 |
| WIPI2    | 8.20E-96 | 0.590124 | 0.531 | 0.089 | 1.23E-91 |
| TMED4    | 8.20E-96 | 0.196133 | 0.566 | 0.188 | 1.23E-91 |
| BTG2     | 2.23E-95 | 0.140758 | 0.598 | 0.226 | 3.33E-91 |
| TMSB15A  | 2.24E-95 | 0.811487 | 0.434 | 0.026 | 3.35E-91 |
| TMEM165  | 2.50E-95 | 0.888954 | 0.586 | 0.089 | 3.74E-91 |
| RTF1     | 2.90E-95 | 0.593536 | 0.57  | 0.111 | 4.33E-91 |
| CSNK1E   | 3.60E-95 | 0.732278 | 0.581 | 0.103 | 5.38E-91 |
| MTPN     | 4.19E-95 | 0.335932 | 0.462 | 0.089 | 6.26E-91 |
| BCAP31   | 4.34E-95 | -0.2952  | 0.501 | 0.263 | 6.49E-91 |
| BAZ2B    | 4.57E-95 | 0.795058 | 0.557 | 0.08  | 6.82E-91 |
| PEA15    | 6.36E-95 | -0.30406 | 0.464 | 0.253 | 9.50E-91 |
| STAT3    | 6.45E-95 | 0.278684 | 0.571 | 0.178 | 9.64E-91 |
| BRD2     | 7.11E-95 | 0.425985 | 0.525 | 0.118 | 1.06E-90 |
| PCBP4    | 1.08E-94 | 0.763978 | 0.49  | 0.051 | 1.61E-90 |
| TSN      | 1.12E-94 | 0.240627 | 0.515 | 0.137 | 1.67E-90 |
| DNAJB9   | 1.13E-94 | -0.519   | 0.46  | 0.256 | 1.70E-90 |
| B4GALNT1 | 1.25E-94 | 1.209952 | 0.477 | 0.022 | 1.86E-90 |
| HIPK2    | 1.55E-94 | 0.848894 | 0.477 | 0.039 | 2.31E-90 |
| ARPC5    | 1.84E-94 | -0.25448 | 0.515 | 0.268 | 2.75E-90 |
| EIF3M    | 2.07E-94 | -0.27624 | 0.547 | 0.308 | 3.09E-90 |
| NME4     | 2.28E-94 | 0.4422   | 0.506 | 0.104 | 3.40E-90 |
| CCDC167  | 2.63E-94 | 0.276804 | 0.495 | 0.125 | 3.92E-90 |
| MUM1     | 2.73E-94 | 0.457443 | 0.568 | 0.137 | 4.07E-90 |
| RAB31    | 2.91E-94 | 0.433437 | 0.553 | 0.137 | 4.35E-90 |
| EIF3D    | 4.31E-94 | 0.149648 | 0.523 | 0.174 | 6.44E-90 |
| ID2      | 4.58E-94 | -0.34755 | 0.553 | 0.323 | 6.84E-90 |
| ATOX1    | 4.94E-94 | -0.48467 | 0.493 | 0.335 | 7.38E-90 |
| ZFAND5   | 6.11E-94 | 0.427297 | 0.536 | 0.125 | 9.13E-90 |
| TXN2     | 6.32E-94 | 0.199857 | 0.518 | 0.15  | 9.44E-90 |
| EI24     | 6.85E-94 | 0.217548 | 0.514 | 0.149 | 1.02E-89 |
| TPRKB    | 7.05E-94 | 0.288535 | 0.45  | 0.094 | 1.05E-89 |
| TXNDC17  | 9.19E-94 | -0.5529  | 0.428 | 0.308 | 1.37E-89 |
| YIPF4    | 9.56E-94 | 0.520765 | 0.519 | 0.103 | 1.43E-89 |
| NUBP2    | 9.76E-94 | 0.201734 | 0.492 | 0.142 | 1.46E-89 |
| ATP6VOD1 | 1.50E-93 | 0.173735 | 0.485 | 0.135 | 2.24E-89 |

|           |          |          |       |       |          |
|-----------|----------|----------|-------|-------|----------|
| PDGFRA    | 1.59E-93 | 1.31667  | 0.454 | 0.012 | 2.37E-89 |
| SARS      | 2.10E-93 | -0.47463 | 0.458 | 0.287 | 3.14E-89 |
| PTPRZ1    | 2.67E-93 | 0.313672 | 0.785 | 0.342 | 3.98E-89 |
| TXNL1     | 2.69E-93 | -0.33408 | 0.471 | 0.241 | 4.02E-89 |
| SPAG7     | 4.35E-93 | -0.20141 | 0.476 | 0.236 | 6.50E-89 |
| TMEM205   | 4.50E-93 | -0.93699 | 0.338 | 0.39  | 6.73E-89 |
| GFAP      | 6.51E-93 | -0.49437 | 0.475 | 0.304 | 9.73E-89 |
| FOS       | 6.60E-93 | -0.37654 | 0.86  | 0.704 | 9.86E-89 |
| MPC2      | 8.14E-93 | -0.15801 | 0.49  | 0.234 | 1.22E-88 |
| CDKN2A    | 8.15E-93 | 0.90527  | 0.404 | 0.024 | 1.22E-88 |
| MEX3A     | 1.23E-92 | 0.792855 | 0.451 | 0.034 | 1.84E-88 |
| FHL1      | 1.25E-92 | 0.146414 | 0.518 | 0.171 | 1.86E-88 |
| GPBP1     | 1.78E-92 | 0.11316  | 0.521 | 0.176 | 2.66E-88 |
| CXXC5     | 1.96E-92 | 0.146546 | 0.54  | 0.186 | 2.93E-88 |
| ACAP3     | 2.48E-92 | 0.892533 | 0.524 | 0.058 | 3.71E-88 |
| CFDP1     | 2.98E-92 | -0.25675 | 0.462 | 0.227 | 4.46E-88 |
| ERV3-1    | 3.05E-92 | 0.383213 | 0.497 | 0.113 | 4.56E-88 |
| CDKN2C    | 3.34E-92 | -0.19794 | 0.468 | 0.224 | 5.00E-88 |
| SGCB      | 5.05E-92 | 0.403142 | 0.598 | 0.169 | 7.55E-88 |
| COPS5     | 7.09E-92 | 0.154426 | 0.508 | 0.159 | 1.06E-87 |
| HSPB1     | 9.59E-92 | -0.16038 | 0.688 | 0.393 | 1.43E-87 |
| ILF3      | 1.33E-91 | 0.309775 | 0.536 | 0.144 | 1.99E-87 |
| DLL1      | 1.34E-91 | 1.085273 | 0.464 | 0.021 | 2.01E-87 |
| LAMTOR2   | 1.38E-91 | -0.32739 | 0.477 | 0.26  | 2.06E-87 |
| EGFR      | 1.53E-91 | 0.19331  | 0.606 | 0.215 | 2.28E-87 |
| RFTN2     | 1.80E-91 | 0.76176  | 0.459 | 0.039 | 2.69E-87 |
| IGFBP5    | 1.83E-91 | -0.9007  | 0.377 | 0.361 | 2.74E-87 |
| PNKD      | 1.98E-91 | -0.1575  | 0.545 | 0.26  | 2.95E-87 |
| UQCRC1    | 2.20E-91 | -0.10815 | 0.481 | 0.207 | 3.29E-87 |
| TMEM98    | 2.35E-91 | 0.601232 | 0.458 | 0.062 | 3.51E-87 |
| MPV17     | 2.50E-91 | 0.111034 | 0.437 | 0.125 | 3.73E-87 |
| EIF4EBP1  | 4.99E-91 | 0.187068 | 0.524 | 0.164 | 7.45E-87 |
| NDRG2     | 5.10E-91 | -0.18002 | 0.598 | 0.326 | 7.62E-87 |
| DNAJB11   | 6.97E-91 | 0.274384 | 0.459 | 0.106 | 1.04E-86 |
| PPT1      | 7.11E-91 | 0.10934  | 0.495 | 0.162 | 1.06E-86 |
| UXT       | 7.77E-91 | -0.31024 | 0.486 | 0.27  | 1.16E-86 |
| RP11-849I | 8.85E-91 | 0.961585 | 0.471 | 0.032 | 1.32E-86 |
| DDX46     | 1.04E-90 | 0.143952 | 0.516 | 0.161 | 1.56E-86 |
| STARD3NL  | 1.37E-90 | 0.301792 | 0.499 | 0.135 | 2.05E-86 |
| LIMA1     | 1.45E-90 | 0.307578 | 0.56  | 0.176 | 2.16E-86 |
| ZFP36     | 1.66E-90 | -1.05619 | 0.316 | 0.431 | 2.48E-86 |
| CHID1     | 1.95E-90 | -0.23341 | 0.456 | 0.231 | 2.92E-86 |
| ZFAND2A   | 2.26E-90 | -0.16386 | 0.391 | 0.147 | 3.38E-86 |
| ETV1      | 2.26E-90 | 0.985502 | 0.584 | 0.094 | 3.38E-86 |
| VCP       | 3.29E-90 | 0.258709 | 0.49  | 0.13  | 4.92E-86 |
| SIRT2     | 3.58E-90 | 0.265774 | 0.557 | 0.171 | 5.35E-86 |
| C16orf13  | 3.68E-90 | 0.218139 | 0.508 | 0.152 | 5.49E-86 |
| XRN2      | 3.74E-90 | 0.155926 | 0.468 | 0.135 | 5.59E-86 |
| TSG101    | 5.09E-90 | -0.14576 | 0.445 | 0.191 | 7.60E-86 |
| TCEA2     | 6.81E-90 | 0.415795 | 0.525 | 0.123 | 1.02E-85 |
| KIF5C     | 1.72E-89 | 0.856352 | 0.477 | 0.043 | 2.57E-85 |



|           |          |          |       |       |          |
|-----------|----------|----------|-------|-------|----------|
| RNF7      | 1.88E-89 | -0.3321  | 0.484 | 0.275 | 2.81E-85 |
| MT1E      | 2.11E-89 | -1.54083 | 0.151 | 0.417 | 3.15E-85 |
| PABPN1    | 2.17E-89 | 0.236186 | 0.495 | 0.138 | 3.24E-85 |
| SYNCRIP   | 2.21E-89 | 0.341095 | 0.458 | 0.096 | 3.31E-85 |
| TERF1     | 2.50E-89 | 0.274064 | 0.455 | 0.111 | 3.74E-85 |
| DNER      | 2.64E-89 | 0.629956 | 0.541 | 0.104 | 3.94E-85 |
| ANAPC5    | 3.56E-89 | 0.131187 | 0.467 | 0.145 | 5.32E-85 |
| CNOT7     | 3.65E-89 | 0.376466 | 0.467 | 0.094 | 5.46E-85 |
| REEP5     | 4.11E-89 | -0.41506 | 0.468 | 0.277 | 6.14E-85 |
| SNHG8     | 4.38E-89 | -0.25005 | 0.507 | 0.243 | 6.55E-85 |
| TMEM208   | 4.44E-89 | -0.21623 | 0.446 | 0.215 | 6.64E-85 |
| SEC63     | 4.45E-89 | 0.342773 | 0.45  | 0.092 | 6.65E-85 |
| UBE2S     | 4.46E-89 | 0.464541 | 0.441 | 0.068 | 6.67E-85 |
| UBA2      | 4.73E-89 | 0.21099  | 0.445 | 0.113 | 7.07E-85 |
| MAGOH     | 5.02E-89 | -0.19137 | 0.42  | 0.174 | 7.50E-85 |
| PSME2     | 5.58E-89 | -0.75858 | 0.372 | 0.332 | 8.33E-85 |
| NT5C3B    | 6.39E-89 | 0.707992 | 0.498 | 0.07  | 9.55E-85 |
| HNRNPUL1  | 6.60E-89 | 0.315856 | 0.45  | 0.099 | 9.86E-85 |
| CPSF6     | 7.86E-89 | 0.605315 | 0.527 | 0.099 | 1.17E-84 |
| CD151     | 9.01E-89 | -0.72684 | 0.38  | 0.338 | 1.35E-84 |
| ITM2C     | 9.74E-89 | 0.255084 | 0.554 | 0.183 | 1.46E-84 |
| ERP29     | 1.68E-88 | -0.40667 | 0.482 | 0.308 | 2.51E-84 |
| AKIRIN2   | 1.80E-88 | 0.635337 | 0.492 | 0.072 | 2.68E-84 |
| HNRNPH1   | 1.85E-88 | 0.26258  | 0.571 | 0.193 | 2.76E-84 |
| MEA1      | 2.02E-88 | -0.31038 | 0.403 | 0.197 | 3.02E-84 |
| DDX17     | 2.09E-88 | 0.560093 | 0.512 | 0.096 | 3.12E-84 |
| SUMO3     | 2.16E-88 | 0.331112 | 0.424 | 0.084 | 3.23E-84 |
| RAB3IP    | 2.90E-88 | 0.766629 | 0.662 | 0.164 | 4.34E-84 |
| C7orf55-L | 2.95E-88 | 0.546764 | 0.494 | 0.087 | 4.41E-84 |
| ATP5EP2   | 3.54E-88 | -0.57553 | 0.377 | 0.301 | 5.29E-84 |
| PAIP1     | 5.19E-88 | 0.527639 | 0.499 | 0.091 | 7.75E-84 |
| NOC2L     | 5.19E-88 | 0.236428 | 0.447 | 0.111 | 7.75E-84 |
| KDELR1    | 5.55E-88 | -0.10022 | 0.495 | 0.224 | 8.29E-84 |
| EIF4E     | 9.76E-88 | -0.1839  | 0.447 | 0.195 | 1.46E-83 |
| APH1A     | 1.08E-87 | -0.1012  | 0.468 | 0.21  | 1.61E-83 |
| VPS29     | 1.08E-87 | -0.24415 | 0.43  | 0.207 | 1.62E-83 |
| PSMD11    | 1.40E-87 | 0.193449 | 0.447 | 0.116 | 2.09E-83 |
| UBE2B     | 2.22E-87 | -0.25643 | 0.428 | 0.203 | 3.32E-83 |
| GCSH      | 2.81E-87 | 0.101896 | 0.427 | 0.125 | 4.20E-83 |
| RNF181    | 3.24E-87 | -0.33503 | 0.45  | 0.238 | 4.84E-83 |
| NCOR1     | 3.75E-87 | 0.365716 | 0.537 | 0.14  | 5.61E-83 |
| YPEL5     | 3.97E-87 | -0.16862 | 0.42  | 0.179 | 5.94E-83 |
| GNAI2     | 5.14E-87 | 0.451003 | 0.467 | 0.091 | 7.68E-83 |
| NDUFAF3   | 5.28E-87 | 0.183021 | 0.518 | 0.164 | 7.89E-83 |
| PSMG3     | 6.04E-87 | 0.200437 | 0.449 | 0.118 | 9.02E-83 |
| MAP4K4    | 6.11E-87 | 0.469146 | 0.414 | 0.065 | 9.13E-83 |
| S100A11   | 6.29E-87 | -1.59027 | 0.137 | 0.378 | 9.41E-83 |
| KXD1      | 6.73E-87 | -0.31225 | 0.441 | 0.244 | 1.01E-82 |
| ZEB2      | 7.31E-87 | 0.57263  | 0.446 | 0.065 | 1.09E-82 |
| PRPF38B   | 7.54E-87 | 0.436958 | 0.515 | 0.123 | 1.13E-82 |
| MIAT      | 9.04E-87 | 0.767771 | 0.454 | 0.044 | 1.35E-82 |

|           |          |          |       |       |          |
|-----------|----------|----------|-------|-------|----------|
| DEGS1     | 9.33E-87 | 0.196041 | 0.492 | 0.14  | 1.39E-82 |
| EMC6      | 1.46E-86 | 0.402091 | 0.477 | 0.101 | 2.18E-82 |
| TOP1      | 1.51E-86 | 0.61208  | 0.472 | 0.068 | 2.26E-82 |
| CCNL1     | 1.63E-86 | 0.12053  | 0.541 | 0.203 | 2.44E-82 |
| RALA      | 1.66E-86 | 0.350936 | 0.449 | 0.089 | 2.47E-82 |
| ACO04540. | 1.99E-86 | 0.89615  | 0.453 | 0.032 | 2.98E-82 |
| HOTAIRM1  | 2.50E-86 | 0.570961 | 0.437 | 0.063 | 3.74E-82 |
| ANP32B    | 2.67E-86 | 0.473812 | 0.502 | 0.104 | 3.98E-82 |
| RAD23A    | 2.90E-86 | -0.2908  | 0.499 | 0.292 | 4.33E-82 |
| KLC1      | 2.91E-86 | 0.450875 | 0.492 | 0.104 | 4.35E-82 |
| FDPS      | 3.13E-86 | -0.3072  | 0.432 | 0.231 | 4.68E-82 |
| EIF4A3    | 3.78E-86 | 0.293683 | 0.434 | 0.092 | 5.65E-82 |
| DYNC1I2   | 4.86E-86 | 0.288273 | 0.521 | 0.159 | 7.27E-82 |
| PSMB4     | 5.24E-86 | -0.29907 | 0.399 | 0.209 | 7.84E-82 |
| NUTF2     | 5.26E-86 | 0.225351 | 0.454 | 0.115 | 7.86E-82 |
| ISCU      | 5.73E-86 | 0.158476 | 0.495 | 0.164 | 8.56E-82 |
| PNMA1     | 6.81E-86 | 0.605614 | 0.472 | 0.07  | 1.02E-81 |
| DLGAP4    | 7.18E-86 | 0.297618 | 0.399 | 0.075 | 1.07E-81 |
| C1D       | 9.22E-86 | 0.212736 | 0.397 | 0.087 | 1.38E-81 |
| LAMP1     | 1.13E-85 | 0.390601 | 0.49  | 0.109 | 1.69E-81 |
| SRSF1     | 1.26E-85 | 0.126586 | 0.475 | 0.156 | 1.88E-81 |
| PGLS      | 1.52E-85 | 0.311037 | 0.498 | 0.133 | 2.28E-81 |
| RAB6A     | 1.53E-85 | 0.245585 | 0.479 | 0.13  | 2.29E-81 |
| WHSC1L1   | 1.55E-85 | 0.82746  | 0.501 | 0.058 | 2.31E-81 |
| ZNF3      | 1.98E-85 | 0.692056 | 0.468 | 0.058 | 2.95E-81 |
| HSPA1A    | 2.03E-85 | 0.763814 | 0.638 | 0.157 | 3.03E-81 |
| VIMP      | 2.12E-85 | -0.31881 | 0.372 | 0.195 | 3.17E-81 |
| NLRP1     | 2.16E-85 | 0.253974 | 0.467 | 0.128 | 3.22E-81 |
| MZT2A     | 2.84E-85 | 0.320141 | 0.489 | 0.128 | 4.24E-81 |
| SDHB      | 2.89E-85 | -0.12143 | 0.401 | 0.156 | 4.32E-81 |
| C1orf122  | 3.24E-85 | 0.132498 | 0.563 | 0.217 | 4.84E-81 |
| RAB14     | 3.28E-85 | 0.158407 | 0.454 | 0.132 | 4.90E-81 |
| TRA2A     | 3.36E-85 | 0.349549 | 0.493 | 0.121 | 5.03E-81 |
| YIPF6     | 3.49E-85 | 0.264559 | 0.476 | 0.115 | 5.22E-81 |
| OSTC      | 3.97E-85 | -0.48935 | 0.388 | 0.253 | 5.94E-81 |
| SF3B1     | 4.04E-85 | 0.404571 | 0.514 | 0.121 | 6.03E-81 |
| POLR2H    | 5.68E-85 | 0.141532 | 0.436 | 0.128 | 8.49E-81 |
| ARGLU1    | 5.78E-85 | 0.440555 | 0.525 | 0.128 | 8.64E-81 |
| DTX3      | 7.42E-85 | 1.067844 | 0.575 | 0.087 | 1.11E-80 |
| PTPRA     | 7.96E-85 | 0.230099 | 0.44  | 0.111 | 1.19E-80 |
| C20orf24  | 9.03E-85 | 0.462837 | 0.48  | 0.092 | 1.35E-80 |
| METTL5    | 9.47E-85 | 0.127741 | 0.43  | 0.125 | 1.42E-80 |
| BRI3      | 9.79E-85 | 0.137879 | 0.432 | 0.125 | 1.46E-80 |
| BBX       | 9.88E-85 | 0.180886 | 0.469 | 0.138 | 1.48E-80 |
| MAF1      | 1.08E-84 | 0.531308 | 0.503 | 0.099 | 1.62E-80 |
| PSMA3     | 1.22E-84 | -0.15619 | 0.462 | 0.205 | 1.83E-80 |
| CCDC85B   | 1.26E-84 | 0.467423 | 0.464 | 0.084 | 1.89E-80 |
| SNRPD3    | 1.46E-84 | -0.2382  | 0.437 | 0.215 | 2.18E-80 |
| ARL6IP5   | 1.63E-84 | -0.23496 | 0.571 | 0.321 | 2.43E-80 |
| MMP2      | 1.69E-84 | 0.689476 | 0.414 | 0.038 | 2.52E-80 |
| GRHPR     | 2.07E-84 | 0.349144 | 0.482 | 0.118 | 3.10E-80 |

|           |          |          |       |       |          |
|-----------|----------|----------|-------|-------|----------|
| NAE1      | 2.24E-84 | 0.317946 | 0.499 | 0.13  | 3.34E-80 |
| PPHLN1    | 2.25E-84 | 0.139729 | 0.411 | 0.106 | 3.36E-80 |
| TXNL4A    | 2.27E-84 | 0.139793 | 0.437 | 0.126 | 3.40E-80 |
| C8orf33   | 2.48E-84 | 0.32531  | 0.468 | 0.108 | 3.70E-80 |
| OCIAD2    | 2.90E-84 | -1.54726 | 0.116 | 0.376 | 4.34E-80 |
| HIGD1A    | 3.40E-84 | -0.14004 | 0.449 | 0.2   | 5.08E-80 |
| BTG3      | 4.12E-84 | 0.189668 | 0.451 | 0.132 | 6.16E-80 |
| BPTF      | 9.85E-84 | 0.483049 | 0.433 | 0.07  | 1.47E-79 |
| EPB41L4A- | 1.10E-83 | 0.1597   | 0.451 | 0.123 | 1.64E-79 |
| PGAM1     | 1.40E-83 | -0.35575 | 0.397 | 0.222 | 2.10E-79 |
| HERPUD1   | 1.58E-83 | -0.31567 | 0.477 | 0.263 | 2.37E-79 |
| DBNL      | 1.86E-83 | 0.350868 | 0.459 | 0.104 | 2.78E-79 |
| TSFM      | 2.77E-83 | 0.71352  | 0.54  | 0.108 | 4.14E-79 |
| DNAJB1    | 3.01E-83 | -0.36494 | 0.661 | 0.443 | 4.49E-79 |
| LEPROTL1  | 3.31E-83 | 0.494361 | 0.472 | 0.087 | 4.95E-79 |
| DCTN2     | 4.98E-83 | 0.682611 | 0.685 | 0.203 | 7.45E-79 |
| THYN1     | 5.93E-83 | -0.24474 | 0.463 | 0.25  | 8.85E-79 |
| IFI27L2   | 7.09E-83 | -0.13554 | 0.497 | 0.239 | 1.06E-78 |
| SCARB2    | 8.05E-83 | 0.433985 | 0.438 | 0.08  | 1.20E-78 |
| TMEM100   | 9.81E-83 | 0.706974 | 0.464 | 0.062 | 1.47E-78 |
| DPYSL2    | 1.38E-82 | 0.310291 | 0.467 | 0.115 | 2.06E-78 |
| CITED2    | 1.42E-82 | 0.486293 | 0.456 | 0.084 | 2.12E-78 |
| MAPT      | 1.61E-82 | 0.361517 | 0.514 | 0.135 | 2.40E-78 |
| WDR61     | 1.92E-82 | -0.40239 | 0.334 | 0.191 | 2.88E-78 |
| APLP1     | 1.93E-82 | 0.663922 | 0.51  | 0.089 | 2.89E-78 |
| HNRNPH2   | 1.99E-82 | -0.10394 | 0.421 | 0.178 | 2.97E-78 |
| ELAVL3    | 2.67E-82 | 0.685689 | 0.506 | 0.085 | 3.99E-78 |
| ARID4B    | 3.37E-82 | 0.417638 | 0.49  | 0.113 | 5.04E-78 |
| COTL1     | 3.85E-82 | 0.320691 | 0.388 | 0.077 | 5.75E-78 |
| PTP4A1    | 4.28E-82 | 0.592621 | 0.479 | 0.079 | 6.40E-78 |
| BAG1      | 5.39E-82 | 0.408063 | 0.425 | 0.077 | 8.06E-78 |
| IFITM3    | 6.03E-82 | -1.74028 | 0.066 | 0.395 | 9.01E-78 |
| RUFY3     | 6.15E-82 | 0.46544  | 0.469 | 0.094 | 9.19E-78 |
| FABP7     | 7.26E-82 | -0.55281 | 0.534 | 0.472 | 1.09E-77 |
| MAGI1     | 7.57E-82 | 0.601797 | 0.464 | 0.074 | 1.13E-77 |
| RBFOX2    | 8.12E-82 | 0.696933 | 0.419 | 0.041 | 1.21E-77 |
| LRRN1     | 8.56E-82 | 0.863642 | 0.39  | 0.015 | 1.28E-77 |
| MANBAL    | 9.13E-82 | -0.11924 | 0.42  | 0.179 | 1.36E-77 |
| ABI2      | 9.24E-82 | 0.228139 | 0.475 | 0.145 | 1.38E-77 |
| PSMD3     | 1.19E-81 | 0.494027 | 0.473 | 0.091 | 1.78E-77 |
| HAX1      | 1.66E-81 | -0.37104 | 0.401 | 0.224 | 2.48E-77 |
| RBBP7     | 1.93E-81 | -0.19796 | 0.443 | 0.224 | 2.88E-77 |
| ENSA      | 2.01E-81 | -0.34354 | 0.388 | 0.217 | 3.00E-77 |
| TPR       | 2.09E-81 | 0.260344 | 0.467 | 0.126 | 3.13E-77 |
| ARHGEF2   | 2.24E-81 | 0.465772 | 0.488 | 0.106 | 3.35E-77 |
| NSA2      | 2.29E-81 | 0.17582  | 0.424 | 0.113 | 3.42E-77 |
| ZNF462    | 2.39E-81 | 0.749551 | 0.45  | 0.05  | 3.58E-77 |
| COX17     | 2.57E-81 | -0.4523  | 0.381 | 0.248 | 3.83E-77 |
| MBP       | 2.95E-81 | 0.226926 | 0.365 | 0.07  | 4.42E-77 |
| MAT2A     | 2.96E-81 | 0.328461 | 0.473 | 0.121 | 4.43E-77 |
| NDUFA8    | 4.75E-81 | -0.22952 | 0.455 | 0.232 | 7.10E-77 |

|          |          |          |       |       |          |
|----------|----------|----------|-------|-------|----------|
| TAGLN3   | 4.78E-81 | 0.674134 | 0.441 | 0.055 | 7.14E-77 |
| DLD      | 5.44E-81 | 0.123293 | 0.45  | 0.145 | 8.13E-77 |
| CMTM6    | 5.75E-81 | 0.259965 | 0.369 | 0.074 | 8.60E-77 |
| GABARAP  | 5.90E-81 | -0.48351 | 0.369 | 0.244 | 8.81E-77 |
| FKBP2    | 6.53E-81 | -0.79876 | 0.388 | 0.386 | 9.75E-77 |
| ADI1     | 6.60E-81 | 0.3658   | 0.424 | 0.089 | 9.87E-77 |
| PDZD11   | 6.72E-81 | -0.36002 | 0.358 | 0.2   | 1.00E-76 |
| RAB11A   | 7.25E-81 | -0.453   | 0.371 | 0.224 | 1.08E-76 |
| CLIP2    | 7.69E-81 | 0.646501 | 0.427 | 0.05  | 1.15E-76 |
| LARS     | 1.02E-80 | 0.136693 | 0.425 | 0.125 | 1.52E-76 |
| PSME1    | 1.04E-80 | -0.84005 | 0.345 | 0.364 | 1.55E-76 |
| RNF145   | 1.19E-80 | 0.64843  | 0.466 | 0.067 | 1.78E-76 |
| CRIP1    | 1.21E-80 | 0.212221 | 0.45  | 0.128 | 1.80E-76 |
| GRINA    | 1.41E-80 | 0.530261 | 0.463 | 0.084 | 2.11E-76 |
| MAP1LC3A | 1.65E-80 | 0.244553 | 0.42  | 0.108 | 2.47E-76 |
| GTF2I    | 1.65E-80 | 0.537458 | 0.583 | 0.162 | 2.47E-76 |
| NOP56    | 1.75E-80 | 0.182716 | 0.463 | 0.14  | 2.62E-76 |
| CHCHD5   | 1.77E-80 | -0.28476 | 0.345 | 0.174 | 2.64E-76 |
| NOSIP    | 1.79E-80 | -0.2461  | 0.404 | 0.202 | 2.67E-76 |
| NSFL1C   | 2.37E-80 | 0.112697 | 0.438 | 0.138 | 3.54E-76 |
| SLC25A11 | 2.90E-80 | 0.207035 | 0.428 | 0.113 | 4.33E-76 |
| NPC2     | 3.27E-80 | -1.06355 | 0.269 | 0.345 | 4.88E-76 |
| VDAC3    | 5.08E-80 | 0.152252 | 0.52  | 0.188 | 7.59E-76 |
| HMGB2    | 5.65E-80 | -0.27023 | 0.447 | 0.219 | 8.44E-76 |
| MPC1     | 6.42E-80 | -0.46454 | 0.388 | 0.253 | 9.60E-76 |
| TRIB2    | 6.59E-80 | 0.138336 | 0.43  | 0.135 | 9.85E-76 |
| HEY1     | 6.99E-80 | 0.256485 | 0.441 | 0.123 | 1.04E-75 |
| ELOF1    | 7.78E-80 | -0.29046 | 0.424 | 0.229 | 1.16E-75 |
| MAPK10   | 1.02E-79 | 0.573119 | 0.407 | 0.051 | 1.53E-75 |
| CADM2    | 1.21E-79 | 0.682377 | 0.475 | 0.072 | 1.81E-75 |
| KLHL23   | 1.69E-79 | 0.804503 | 0.386 | 0.015 | 2.53E-75 |
| TM2D3    | 1.70E-79 | -0.22581 | 0.38  | 0.166 | 2.54E-75 |
| MOSPD3   | 1.73E-79 | 0.349864 | 0.398 | 0.079 | 2.59E-75 |
| KLHDC2   | 1.74E-79 | 0.509722 | 0.428 | 0.063 | 2.61E-75 |
| KLHDC3   | 1.83E-79 | 0.114631 | 0.388 | 0.108 | 2.73E-75 |
| FEZ2     | 1.97E-79 | 0.495771 | 0.481 | 0.096 | 2.94E-75 |
| GNB1     | 2.43E-79 | 0.308619 | 0.446 | 0.106 | 3.63E-75 |
| NRCAM    | 2.48E-79 | 0.472811 | 0.481 | 0.108 | 3.71E-75 |
| UQCC2    | 2.57E-79 | -0.1557  | 0.412 | 0.173 | 3.84E-75 |
| CYB5R3   | 2.58E-79 | 0.298544 | 0.421 | 0.099 | 3.85E-75 |
| RND3     | 2.61E-79 | 0.821994 | 0.489 | 0.067 | 3.90E-75 |
| DPM1     | 2.71E-79 | -0.25356 | 0.378 | 0.181 | 4.05E-75 |
| ACTR10   | 2.89E-79 | -0.15352 | 0.399 | 0.159 | 4.32E-75 |
| SPTSSA   | 2.95E-79 | -0.56052 | 0.382 | 0.289 | 4.41E-75 |
| HP1BP3   | 2.98E-79 | 0.301562 | 0.472 | 0.126 | 4.45E-75 |
| LYPLA1   | 3.29E-79 | 0.197812 | 0.428 | 0.116 | 4.91E-75 |
| CDK4     | 3.93E-79 | 0.664525 | 0.733 | 0.25  | 5.87E-75 |
| ZDHHC4   | 4.13E-79 | -0.20004 | 0.375 | 0.168 | 6.17E-75 |
| TMEM106B | 4.15E-79 | 0.352293 | 0.475 | 0.12  | 6.21E-75 |
| FIP1L1   | 4.45E-79 | 0.508756 | 0.503 | 0.111 | 6.65E-75 |
| TNRC6B   | 4.62E-79 | 0.485532 | 0.501 | 0.113 | 6.91E-75 |

|          |          |          |       |       |          |
|----------|----------|----------|-------|-------|----------|
| MTSS1    | 5.43E-79 | 0.799625 | 0.389 | 0.021 | 8.11E-75 |
| ERCC1    | 5.56E-79 | -0.14772 | 0.467 | 0.217 | 8.31E-75 |
| GSTK1    | 5.61E-79 | -0.60231 | 0.363 | 0.279 | 8.38E-75 |
| SLC1A3   | 5.69E-79 | -0.78649 | 0.293 | 0.289 | 8.51E-75 |
| ZNHIT3   | 5.82E-79 | 0.161799 | 0.454 | 0.135 | 8.70E-75 |
| MSI2     | 6.72E-79 | -0.25765 | 0.427 | 0.239 | 1.00E-74 |
| LRPAP1   | 6.96E-79 | -0.37443 | 0.44  | 0.287 | 1.04E-74 |
| EIF2AK1  | 7.11E-79 | 0.568773 | 0.432 | 0.063 | 1.06E-74 |
| C14orf1  | 7.79E-79 | -0.23647 | 0.33  | 0.154 | 1.16E-74 |
| PPP4C    | 8.28E-79 | 0.124821 | 0.484 | 0.176 | 1.24E-74 |
| 9-Mar    | 1.02E-78 | 1.013476 | 0.442 | 0.039 | 1.52E-74 |
| TMEM123  | 1.15E-78 | 0.521909 | 0.455 | 0.085 | 1.72E-74 |
| CSPG5    | 1.27E-78 | 0.322634 | 0.411 | 0.094 | 1.90E-74 |
| CRIP2    | 1.72E-78 | 0.327994 | 0.549 | 0.174 | 2.57E-74 |
| WBP2     | 1.85E-78 | -0.26704 | 0.401 | 0.214 | 2.76E-74 |
| TXNIP    | 2.53E-78 | 0.318999 | 0.537 | 0.169 | 3.78E-74 |
| UBE2L6   | 2.57E-78 | -0.67341 | 0.325 | 0.277 | 3.84E-74 |
| DHX9     | 2.94E-78 | 0.369131 | 0.402 | 0.075 | 4.40E-74 |
| NT5C3A   | 3.13E-78 | 0.373926 | 0.416 | 0.08  | 4.68E-74 |
| CD59     | 3.87E-78 | -0.77652 | 0.303 | 0.292 | 5.78E-74 |
| THRA     | 3.96E-78 | 0.616088 | 0.473 | 0.08  | 5.91E-74 |
| SNRNP200 | 4.10E-78 | 0.335459 | 0.424 | 0.091 | 6.12E-74 |
| S100A16  | 4.30E-78 | -1.57811 | 0.073 | 0.376 | 6.42E-74 |
| BST2     | 5.06E-78 | -1.69722 | 0.055 | 0.426 | 7.57E-74 |
| PLEKHB2  | 6.42E-78 | 0.293166 | 0.391 | 0.085 | 9.59E-74 |
| DTYMK    | 6.44E-78 | 0.321452 | 0.407 | 0.084 | 9.63E-74 |
| SRSF6    | 9.19E-78 | 0.513643 | 0.442 | 0.074 | 1.37E-73 |
| GGCT     | 1.15E-77 | -0.26725 | 0.377 | 0.193 | 1.72E-73 |
| EAPP     | 1.22E-77 | -0.13448 | 0.434 | 0.188 | 1.82E-73 |
| NEU4     | 1.26E-77 | 1.010755 | 0.401 | 0.017 | 1.88E-73 |
| BABAM1   | 1.28E-77 | -0.18335 | 0.391 | 0.19  | 1.92E-73 |
| SIAH1    | 1.31E-77 | 0.699093 | 0.442 | 0.051 | 1.96E-73 |
| DAZAP2   | 1.34E-77 | -0.48699 | 0.376 | 0.255 | 2.00E-73 |
| MKLN1    | 1.60E-77 | 0.427603 | 0.438 | 0.082 | 2.39E-73 |
| ZFAND6   | 1.71E-77 | -0.43101 | 0.355 | 0.221 | 2.55E-73 |
| TRAPPC4  | 1.79E-77 | -0.23055 | 0.41  | 0.195 | 2.67E-73 |
| USP22    | 1.87E-77 | 0.397215 | 0.411 | 0.08  | 2.79E-73 |
| EXOC7    | 2.00E-77 | 0.34706  | 0.44  | 0.104 | 2.99E-73 |
| EIF4B    | 2.15E-77 | 0.268389 | 0.424 | 0.101 | 3.22E-73 |
| BCL7B    | 2.93E-77 | 0.534133 | 0.417 | 0.062 | 4.38E-73 |
| NAMPT    | 2.97E-77 | -1.22827 | 0.177 | 0.311 | 4.44E-73 |
| PTPRS    | 3.37E-77 | 0.7524   | 0.477 | 0.068 | 5.04E-73 |
| SSR3     | 3.48E-77 | -0.70179 | 0.304 | 0.238 | 5.21E-73 |
| MAP7D1   | 3.63E-77 | 0.55076  | 0.381 | 0.041 | 5.43E-73 |
| SLC39A6  | 3.89E-77 | 0.370397 | 0.429 | 0.092 | 5.81E-73 |
| RPA3     | 3.93E-77 | -0.19896 | 0.355 | 0.152 | 5.88E-73 |
| CYTH2    | 4.27E-77 | 0.308917 | 0.399 | 0.085 | 6.38E-73 |
| KARS     | 5.98E-77 | 0.229198 | 0.438 | 0.121 | 8.94E-73 |
| MED4     | 7.07E-77 | -0.1756  | 0.399 | 0.179 | 1.06E-72 |
| PHIP     | 8.31E-77 | 0.503727 | 0.438 | 0.077 | 1.24E-72 |
| PRKCSH   | 8.98E-77 | -0.18005 | 0.44  | 0.224 | 1.34E-72 |

|           |          |          |       |       |          |
|-----------|----------|----------|-------|-------|----------|
| CCT2      | 9.81E-77 | 0.415551 | 0.778 | 0.328 | 1.47E-72 |
| NOL7      | 1.15E-76 | 0.159745 | 0.436 | 0.125 | 1.71E-72 |
| DNAJC19   | 1.15E-76 | -0.2054  | 0.421 | 0.215 | 1.72E-72 |
| GRB2      | 1.16E-76 | 0.474015 | 0.41  | 0.065 | 1.73E-72 |
| OS9       | 1.16E-76 | 0.711404 | 0.685 | 0.207 | 1.73E-72 |
| HILPDA    | 1.24E-76 | -0.79268 | 0.268 | 0.193 | 1.85E-72 |
| GRIA2     | 1.48E-76 | 0.65991  | 0.489 | 0.084 | 2.21E-72 |
| NARS      | 1.50E-76 | -0.18426 | 0.407 | 0.188 | 2.25E-72 |
| FBL       | 1.58E-76 | -0.4174  | 0.412 | 0.243 | 2.36E-72 |
| KLRC2     | 1.67E-76 | 1.040003 | 0.408 | 0.019 | 2.49E-72 |
| RP11-14N7 | 2.06E-76 | 0.133495 | 0.364 | 0.096 | 3.08E-72 |
| NRN1      | 2.46E-76 | -0.84761 | 0.291 | 0.26  | 3.68E-72 |
| HMGA1     | 4.25E-76 | 0.420311 | 0.367 | 0.053 | 6.36E-72 |
| SOD2      | 4.40E-76 | -1.36662 | 0.19  | 0.328 | 6.57E-72 |
| CKS2      | 4.73E-76 | 0.314576 | 0.449 | 0.115 | 7.07E-72 |
| CDH2      | 4.74E-76 | 0.325275 | 0.437 | 0.104 | 7.08E-72 |
| TIA1      | 6.85E-76 | 0.411774 | 0.425 | 0.084 | 1.02E-71 |
| CHD4      | 7.71E-76 | 0.43009  | 0.406 | 0.074 | 1.15E-71 |
| IFITM10   | 8.13E-76 | 0.902631 | 0.402 | 0.022 | 1.21E-71 |
| FLOT1     | 8.81E-76 | -0.10633 | 0.39  | 0.157 | 1.32E-71 |
| MPDU1     | 9.00E-76 | 0.37037  | 0.41  | 0.085 | 1.34E-71 |
| THSD7A    | 9.49E-76 | 0.788217 | 0.375 | 0.021 | 1.42E-71 |
| ITPA      | 1.02E-75 | 0.192539 | 0.442 | 0.13  | 1.53E-71 |
| PRPF6     | 1.15E-75 | 0.209229 | 0.417 | 0.109 | 1.72E-71 |
| COX14     | 1.20E-75 | -0.41701 | 0.343 | 0.198 | 1.79E-71 |
| MPST      | 1.25E-75 | 0.708739 | 0.42  | 0.044 | 1.87E-71 |
| ST3GAL5   | 1.81E-75 | 0.577427 | 0.412 | 0.056 | 2.71E-71 |
| METRNL    | 1.89E-75 | 0.332553 | 0.495 | 0.142 | 2.82E-71 |
| 6-Mar     | 1.95E-75 | 0.396389 | 0.456 | 0.104 | 2.91E-71 |
| NSRP1     | 2.45E-75 | -0.10339 | 0.384 | 0.15  | 3.66E-71 |
| HSPH1     | 3.35E-75 | 0.40387  | 0.416 | 0.084 | 5.01E-71 |
| KMT2C     | 3.52E-75 | 0.545282 | 0.437 | 0.074 | 5.26E-71 |
| APOPT1    | 3.86E-75 | -0.17667 | 0.382 | 0.176 | 5.77E-71 |
| HSPA1B    | 4.74E-75 | 0.21371  | 0.571 | 0.222 | 7.09E-71 |
| PSMA5     | 5.30E-75 | -0.19945 | 0.378 | 0.176 | 7.92E-71 |
| STMN2     | 5.55E-75 | 1.15094  | 0.476 | 0.053 | 8.30E-71 |
| FBXO21    | 6.47E-75 | 0.356676 | 0.477 | 0.123 | 9.66E-71 |
| C19orf60  | 7.97E-75 | 0.14726  | 0.428 | 0.132 | 1.19E-70 |
| VCAN      | 9.26E-75 | 0.638704 | 0.428 | 0.06  | 1.38E-70 |
| VGLL4     | 1.05E-74 | 0.379008 | 0.433 | 0.097 | 1.57E-70 |
| DNAJC2    | 1.05E-74 | 0.254388 | 0.401 | 0.101 | 1.57E-70 |
| EMC7      | 1.11E-74 | -0.15597 | 0.398 | 0.176 | 1.66E-70 |
| DPYSL3    | 1.20E-74 | 0.30068  | 0.446 | 0.118 | 1.80E-70 |
| MAGEF1    | 1.31E-74 | 0.18292  | 0.454 | 0.147 | 1.96E-70 |
| SKA2      | 1.50E-74 | 0.357926 | 0.385 | 0.072 | 2.25E-70 |
| NKX2-2    | 1.54E-74 | 0.652746 | 0.415 | 0.048 | 2.31E-70 |
| CHMP3     | 2.25E-74 | 0.125986 | 0.394 | 0.121 | 3.36E-70 |
| LINC01003 | 2.26E-74 | 0.566982 | 0.382 | 0.044 | 3.38E-70 |
| SMARCA5   | 2.72E-74 | 0.55436  | 0.42  | 0.063 | 4.06E-70 |
| AK1       | 2.83E-74 | 0.296128 | 0.436 | 0.115 | 4.23E-70 |
| ARPC4     | 3.00E-74 | -0.16651 | 0.372 | 0.159 | 4.48E-70 |

|           |          |          |       |       |          |
|-----------|----------|----------|-------|-------|----------|
| ZNF326    | 3.01E-74 | 0.332682 | 0.384 | 0.077 | 4.49E-70 |
| CAP1      | 3.32E-74 | -0.1806  | 0.39  | 0.169 | 4.95E-70 |
| NKTR      | 4.02E-74 | 0.156479 | 0.441 | 0.149 | 6.01E-70 |
| TSPAN31   | 5.39E-74 | 0.789771 | 0.544 | 0.115 | 8.05E-70 |
| RP11-620J | 5.71E-74 | 0.496084 | 0.524 | 0.142 | 8.54E-70 |
| RBM23     | 7.16E-74 | 0.133185 | 0.395 | 0.121 | 1.07E-69 |
| CTDSP2    | 7.66E-74 | 0.951468 | 0.493 | 0.068 | 1.15E-69 |
| ENAH      | 8.03E-74 | 0.51554  | 0.394 | 0.056 | 1.20E-69 |
| CACNA1A   | 8.78E-74 | 0.738782 | 0.427 | 0.05  | 1.31E-69 |
| STK25     | 8.99E-74 | 0.638986 | 0.416 | 0.051 | 1.34E-69 |
| SMARCC1   | 8.99E-74 | 0.707287 | 0.394 | 0.032 | 1.34E-69 |
| MDM2      | 1.24E-73 | 0.872701 | 0.44  | 0.053 | 1.86E-69 |
| POLR2B    | 1.34E-73 | 0.727429 | 0.432 | 0.053 | 2.00E-69 |
| ZNF821    | 1.73E-73 | 0.623423 | 0.36  | 0.027 | 2.59E-69 |
| TKT       | 1.76E-73 | -0.17066 | 0.411 | 0.202 | 2.63E-69 |
| SEZ6L     | 1.76E-73 | 0.447507 | 0.384 | 0.067 | 2.63E-69 |
| NAA10     | 1.88E-73 | 0.399032 | 0.43  | 0.085 | 2.81E-69 |
| CNOT4     | 1.90E-73 | 0.39692  | 0.416 | 0.08  | 2.84E-69 |
| SSRP1     | 1.95E-73 | 0.391282 | 0.434 | 0.092 | 2.91E-69 |
| UGP2      | 2.00E-73 | -0.41395 | 0.316 | 0.198 | 2.99E-69 |
| STMN3     | 2.02E-73 | 0.414397 | 0.466 | 0.111 | 3.03E-69 |
| ARL4A     | 2.08E-73 | -0.54566 | 0.339 | 0.255 | 3.11E-69 |
| SEC13     | 2.32E-73 | -0.13158 | 0.375 | 0.149 | 3.47E-69 |
| MBD6      | 2.40E-73 | 1.01326  | 0.417 | 0.029 | 3.59E-69 |
| LSM14A    | 2.67E-73 | 0.204993 | 0.432 | 0.126 | 4.00E-69 |
| SNX6      | 2.78E-73 | -0.13528 | 0.378 | 0.159 | 4.16E-69 |
| AFF4      | 2.80E-73 | 0.543075 | 0.472 | 0.096 | 4.18E-69 |
| SLC39A3   | 2.81E-73 | 0.318092 | 0.39  | 0.082 | 4.20E-69 |
| USP16     | 2.82E-73 | 0.12708  | 0.404 | 0.12  | 4.21E-69 |
| ACTR2     | 3.18E-73 | 0.363339 | 0.39  | 0.077 | 4.76E-69 |
| YEATS4    | 3.27E-73 | 0.764123 | 0.468 | 0.077 | 4.89E-69 |
| MIEN1     | 3.77E-73 | -0.16115 | 0.454 | 0.229 | 5.64E-69 |
| IDH2      | 3.93E-73 | 0.344756 | 0.433 | 0.103 | 5.87E-69 |
| PMVK      | 4.45E-73 | -0.17392 | 0.38  | 0.179 | 6.65E-69 |
| ARPP19    | 4.93E-73 | 0.192137 | 0.425 | 0.125 | 7.36E-69 |
| BCHE      | 5.04E-73 | 0.203776 | 0.397 | 0.109 | 7.53E-69 |
| CORO1C    | 5.28E-73 | 0.328187 | 0.511 | 0.154 | 7.89E-69 |
| NDUFA9    | 5.46E-73 | -0.10041 | 0.429 | 0.191 | 8.16E-69 |
| CIR1      | 5.56E-73 | 0.235007 | 0.408 | 0.101 | 8.30E-69 |
| ZNF677    | 5.76E-73 | 0.385655 | 0.363 | 0.055 | 8.60E-69 |
| UBE2R2    | 6.20E-73 | 0.604704 | 0.364 | 0.034 | 9.27E-69 |
| GARS      | 6.44E-73 | 0.369456 | 0.401 | 0.087 | 9.63E-69 |
| ITFG1     | 6.56E-73 | 0.448351 | 0.415 | 0.079 | 9.81E-69 |
| MTX2      | 7.63E-73 | 0.28285  | 0.424 | 0.111 | 1.14E-68 |
| ZFP36L1   | 8.49E-73 | -0.40573 | 0.403 | 0.275 | 1.27E-68 |
| ERI3      | 9.06E-73 | 0.218718 | 0.445 | 0.13  | 1.35E-68 |
| TWISTNB   | 9.38E-73 | 0.118016 | 0.372 | 0.085 | 1.40E-68 |
| GSPT1     | 1.01E-72 | 0.371825 | 0.388 | 0.072 | 1.50E-68 |
| BAZ1A     | 1.03E-72 | 0.687037 | 0.464 | 0.074 | 1.55E-68 |
| PAICS     | 1.10E-72 | 0.121227 | 0.437 | 0.145 | 1.64E-68 |
| BEST3     | 1.15E-72 | 0.86839  | 0.425 | 0.044 | 1.72E-68 |

|           |          |          |       |       |          |
|-----------|----------|----------|-------|-------|----------|
| ZC3H13    | 1.16E-72 | 0.175974 | 0.377 | 0.092 | 1.74E-68 |
| TMEM59L   | 1.33E-72 | 0.363008 | 0.453 | 0.113 | 1.99E-68 |
| GPAA1     | 1.49E-72 | 0.578982 | 0.427 | 0.067 | 2.22E-68 |
| PEPD      | 1.70E-72 | -0.14068 | 0.39  | 0.171 | 2.54E-68 |
| C12orf10  | 1.72E-72 | -0.11495 | 0.341 | 0.123 | 2.58E-68 |
| RBM42     | 1.80E-72 | 0.282397 | 0.434 | 0.115 | 2.70E-68 |
| AGAP2-AS1 | 2.28E-72 | 1.081369 | 0.389 | 0.017 | 3.41E-68 |
| ANXA6     | 2.46E-72 | 0.541696 | 0.363 | 0.043 | 3.68E-68 |
| CKLF      | 2.55E-72 | -0.24998 | 0.337 | 0.159 | 3.82E-68 |
| TNK2      | 2.87E-72 | 0.764675 | 0.372 | 0.027 | 4.29E-68 |
| PSENNEN   | 2.87E-72 | -0.69677 | 0.32  | 0.306 | 4.29E-68 |
| CD320     | 3.46E-72 | 0.25115  | 0.424 | 0.113 | 5.16E-68 |
| GPS1      | 3.98E-72 | 0.246089 | 0.39  | 0.094 | 5.94E-68 |
| BPGM      | 4.02E-72 | 0.246188 | 0.373 | 0.085 | 6.00E-68 |
| PRAF2     | 4.42E-72 | 0.325065 | 0.411 | 0.094 | 6.61E-68 |
| BCLAF1    | 6.25E-72 | 0.433091 | 0.455 | 0.101 | 9.34E-68 |
| GLO1      | 8.43E-72 | -0.1126  | 0.372 | 0.156 | 1.26E-67 |
| PNPLA8    | 8.71E-72 | 0.212601 | 0.388 | 0.109 | 1.30E-67 |
| AKIRIN1   | 1.08E-71 | 0.320517 | 0.39  | 0.084 | 1.62E-67 |
| PDHB      | 1.09E-71 | -0.14875 | 0.38  | 0.169 | 1.63E-67 |
| ANKRD12   | 1.63E-71 | -0.1307  | 0.406 | 0.185 | 2.44E-67 |
| VPS35     | 1.69E-71 | 0.212871 | 0.421 | 0.109 | 2.53E-67 |
| CCDC115   | 2.10E-71 | 0.12033  | 0.367 | 0.106 | 3.13E-67 |
| YY1       | 2.21E-71 | 0.354145 | 0.385 | 0.077 | 3.30E-67 |
| TIMM50    | 2.35E-71 | 0.251263 | 0.432 | 0.116 | 3.51E-67 |
| CNTFR     | 2.55E-71 | 0.724735 | 0.372 | 0.024 | 3.81E-67 |
| TTC19     | 2.57E-71 | 0.21583  | 0.407 | 0.106 | 3.84E-67 |
| PPM1B     | 3.04E-71 | 0.440827 | 0.429 | 0.087 | 4.54E-67 |
| ITGB8     | 3.27E-71 | 0.505141 | 0.416 | 0.072 | 4.89E-67 |
| RPA2      | 3.77E-71 | -0.2327  | 0.302 | 0.144 | 5.63E-67 |
| POLR2C    | 3.83E-71 | -0.14563 | 0.402 | 0.178 | 5.73E-67 |
| EMC3      | 4.90E-71 | -0.26795 | 0.408 | 0.215 | 7.33E-67 |
| CDK6      | 4.92E-71 | 0.632637 | 0.443 | 0.075 | 7.35E-67 |
| IDH1      | 5.44E-71 | 0.111053 | 0.394 | 0.128 | 8.13E-67 |
| PRKAR1A   | 6.71E-71 | 0.128523 | 0.421 | 0.142 | 1.00E-66 |
| NARF      | 6.77E-71 | 0.148379 | 0.372 | 0.097 | 1.01E-66 |
| DUT       | 8.03E-71 | 0.143498 | 0.398 | 0.12  | 1.20E-66 |
| DECR1     | 8.73E-71 | 0.113859 | 0.49  | 0.193 | 1.30E-66 |
| SETD5     | 8.75E-71 | 0.373894 | 0.433 | 0.096 | 1.31E-66 |
| GTF2H5    | 1.01E-70 | -0.22248 | 0.341 | 0.154 | 1.52E-66 |
| RNF167    | 1.13E-70 | -0.17584 | 0.388 | 0.174 | 1.68E-66 |
| NUP107    | 1.23E-70 | 0.924003 | 0.518 | 0.091 | 1.84E-66 |
| VPS51     | 1.34E-70 | 0.477986 | 0.382 | 0.058 | 2.01E-66 |
| ING3      | 1.40E-70 | 0.412504 | 0.349 | 0.053 | 2.09E-66 |
| WDR18     | 1.64E-70 | 0.316758 | 0.347 | 0.062 | 2.44E-66 |
| HAT1      | 1.65E-70 | 0.115264 | 0.385 | 0.115 | 2.47E-66 |
| ZEB1      | 1.68E-70 | 0.54334  | 0.42  | 0.068 | 2.51E-66 |
| GHITM     | 1.77E-70 | -0.37027 | 0.365 | 0.215 | 2.65E-66 |
| ARFGAP2   | 1.83E-70 | 0.27315  | 0.391 | 0.092 | 2.74E-66 |
| HTATSF1   | 1.86E-70 | 0.35211  | 0.381 | 0.075 | 2.78E-66 |
| NUPL2     | 2.29E-70 | 0.360018 | 0.421 | 0.099 | 3.43E-66 |



|           |          |          |       |       |          |
|-----------|----------|----------|-------|-------|----------|
| ETFB      | 2.84E-70 | -0.3057  | 0.381 | 0.212 | 4.25E-66 |
| CADM1     | 3.17E-70 | 0.18576  | 0.395 | 0.103 | 4.73E-66 |
| SDF4      | 4.00E-70 | 0.365351 | 0.404 | 0.085 | 5.98E-66 |
| YIF1A     | 4.20E-70 | -0.22562 | 0.398 | 0.212 | 6.28E-66 |
| ALG5      | 4.62E-70 | -0.24787 | 0.329 | 0.159 | 6.90E-66 |
| DPM3      | 4.69E-70 | -0.18539 | 0.368 | 0.178 | 7.01E-66 |
| NUDCD2    | 4.80E-70 | -0.15398 | 0.386 | 0.178 | 7.17E-66 |
| ZFP36L2   | 5.62E-70 | -0.12091 | 0.424 | 0.214 | 8.40E-66 |
| GLRX5     | 5.75E-70 | 0.530859 | 0.393 | 0.055 | 8.59E-66 |
| CCDC47    | 6.21E-70 | 0.182354 | 0.411 | 0.12  | 9.28E-66 |
| PSMG2     | 6.43E-70 | -0.30751 | 0.338 | 0.176 | 9.60E-66 |
| RAD21     | 6.60E-70 | 0.297516 | 0.425 | 0.109 | 9.86E-66 |
| PFDN4     | 7.35E-70 | 0.351532 | 0.399 | 0.085 | 1.10E-65 |
| ELAVL1    | 8.02E-70 | 0.286143 | 0.412 | 0.104 | 1.20E-65 |
| ISOC2     | 9.80E-70 | -0.45204 | 0.299 | 0.197 | 1.46E-65 |
| RUVBL1    | 9.81E-70 | 0.222592 | 0.356 | 0.085 | 1.47E-65 |
| UBE2H     | 1.03E-69 | 0.378771 | 0.373 | 0.068 | 1.54E-65 |
| C6orf62   | 1.08E-69 | 0.289387 | 0.399 | 0.096 | 1.61E-65 |
| PLP1      | 1.17E-69 | 0.724234 | 0.425 | 0.058 | 1.75E-65 |
| SEPP1     | 1.26E-69 | -1.11939 | 0.179 | 0.337 | 1.88E-65 |
| PRKRA     | 1.28E-69 | 0.174953 | 0.424 | 0.132 | 1.91E-65 |
| NGDN      | 1.39E-69 | -0.11671 | 0.381 | 0.147 | 2.08E-65 |
| NINJ1     | 1.45E-69 | 0.474109 | 0.362 | 0.053 | 2.17E-65 |
| ATG12     | 1.58E-69 | 0.104333 | 0.385 | 0.121 | 2.36E-65 |
| STARD7    | 1.96E-69 | 0.30563  | 0.38  | 0.085 | 2.93E-65 |
| RAF1      | 2.21E-69 | 0.56105  | 0.397 | 0.056 | 3.31E-65 |
| F2R       | 2.33E-69 | 0.298301 | 0.326 | 0.058 | 3.48E-65 |
| BOD1      | 2.40E-69 | 0.461216 | 0.415 | 0.077 | 3.58E-65 |
| LAP3      | 2.58E-69 | -0.67572 | 0.312 | 0.287 | 3.86E-65 |
| ZCCHC17   | 2.86E-69 | 0.117824 | 0.373 | 0.115 | 4.28E-65 |
| PDCD2     | 2.93E-69 | 0.290525 | 0.334 | 0.058 | 4.38E-65 |
| LITAF     | 3.02E-69 | -0.47045 | 0.273 | 0.171 | 4.52E-65 |
| SRSF4     | 3.32E-69 | 0.268201 | 0.384 | 0.087 | 4.96E-65 |
| SOX9      | 3.48E-69 | 0.22818  | 0.406 | 0.118 | 5.20E-65 |
| METTL1    | 3.62E-69 | 0.668676 | 0.391 | 0.05  | 5.41E-65 |
| FAM110B   | 4.08E-69 | 0.689584 | 0.386 | 0.038 | 6.10E-65 |
| ATP6V1D   | 4.40E-69 | -0.21381 | 0.346 | 0.14  | 6.58E-65 |
| DYNC1H1   | 6.73E-69 | 0.338161 | 0.43  | 0.108 | 1.01E-64 |
| SPARCL1   | 7.07E-69 | -0.44615 | 0.459 | 0.332 | 1.06E-64 |
| PELI1     | 7.27E-69 | 0.648681 | 0.347 | 0.027 | 1.09E-64 |
| UBE2J2    | 7.78E-69 | 0.329386 | 0.349 | 0.062 | 1.16E-64 |
| EXOC1     | 7.99E-69 | 0.651024 | 0.419 | 0.062 | 1.19E-64 |
| ESF1      | 8.66E-69 | 0.136429 | 0.388 | 0.118 | 1.29E-64 |
| ATP1A3    | 9.02E-69 | 0.793377 | 0.391 | 0.032 | 1.35E-64 |
| CLDND1    | 9.36E-69 | -0.21796 | 0.391 | 0.197 | 1.40E-64 |
| ACAT1     | 9.46E-69 | -0.24389 | 0.354 | 0.186 | 1.41E-64 |
| CHIC2     | 9.84E-69 | 0.659335 | 0.38  | 0.044 | 1.47E-64 |
| LINC00116 | 1.18E-68 | -0.17414 | 0.351 | 0.166 | 1.77E-64 |
| U2SURP    | 1.22E-68 | 0.162573 | 0.41  | 0.123 | 1.83E-64 |
| SCAF11    | 1.23E-68 | 0.185225 | 0.407 | 0.113 | 1.83E-64 |
| RP3-525N1 | 1.27E-68 | 0.546974 | 0.382 | 0.055 | 1.89E-64 |

|           |          |          |       |       |          |
|-----------|----------|----------|-------|-------|----------|
| ANAPC16   | 1.42E-68 | -0.62325 | 0.306 | 0.231 | 2.12E-64 |
| FKBP4     | 1.48E-68 | 0.274381 | 0.367 | 0.082 | 2.22E-64 |
| NAA20     | 1.53E-68 | -0.33673 | 0.378 | 0.209 | 2.29E-64 |
| KDM1A     | 1.56E-68 | 0.487584 | 0.334 | 0.036 | 2.33E-64 |
| HOXA10    | 1.61E-68 | 0.782806 | 0.329 | 0.007 | 2.41E-64 |
| ING4      | 1.63E-68 | 0.280191 | 0.388 | 0.096 | 2.43E-64 |
| TPGS2     | 1.66E-68 | 0.129088 | 0.352 | 0.097 | 2.48E-64 |
| PIGT      | 1.76E-68 | -0.11065 | 0.311 | 0.116 | 2.63E-64 |
| CLIP3     | 1.86E-68 | 0.194354 | 0.346 | 0.079 | 2.78E-64 |
| BAZ1B     | 1.87E-68 | 0.655853 | 0.395 | 0.044 | 2.79E-64 |
| ARL2      | 1.93E-68 | -0.21439 | 0.336 | 0.147 | 2.89E-64 |
| CUEDC2    | 2.14E-68 | 0.158962 | 0.459 | 0.161 | 3.19E-64 |
| SAP30BP   | 2.54E-68 | 0.112164 | 0.376 | 0.115 | 3.80E-64 |
| TMEM167A  | 3.00E-68 | -0.12994 | 0.352 | 0.15  | 4.48E-64 |
| CFL2      | 3.20E-68 | -0.22351 | 0.368 | 0.178 | 4.79E-64 |
| CAPRIN1   | 3.43E-68 | 0.495708 | 0.41  | 0.07  | 5.12E-64 |
| RAB33A    | 3.59E-68 | 0.508475 | 0.32  | 0.031 | 5.36E-64 |
| AKAP8L    | 4.01E-68 | 0.351492 | 0.373 | 0.07  | 5.99E-64 |
| ATF6B     | 4.03E-68 | 0.276356 | 0.443 | 0.128 | 6.02E-64 |
| AP2B1     | 4.17E-68 | 0.322025 | 0.382 | 0.085 | 6.24E-64 |
| C21orf59  | 4.78E-68 | 0.19795  | 0.352 | 0.089 | 7.14E-64 |
| IMMT      | 4.81E-68 | 0.107335 | 0.334 | 0.085 | 7.19E-64 |
| PIP4K2C   | 6.49E-68 | 0.73947  | 0.316 | 0.014 | 9.69E-64 |
| STOML2    | 6.55E-68 | -0.1065  | 0.363 | 0.156 | 9.78E-64 |
| COA5      | 8.01E-68 | 0.118436 | 0.378 | 0.115 | 1.20E-63 |
| LSM10     | 8.38E-68 | -0.35485 | 0.313 | 0.173 | 1.25E-63 |
| SMARCD3   | 9.85E-68 | 0.417921 | 0.373 | 0.067 | 1.47E-63 |
| FAM212B   | 1.08E-67 | 0.53659  | 0.339 | 0.038 | 1.61E-63 |
| COMMD7    | 1.27E-67 | 0.384591 | 0.389 | 0.079 | 1.90E-63 |
| ITGB1BP1  | 1.40E-67 | -0.17204 | 0.365 | 0.168 | 2.08E-63 |
| ACAA1     | 1.43E-67 | 0.324814 | 0.365 | 0.074 | 2.13E-63 |
| KLF6      | 1.56E-67 | -0.44627 | 0.356 | 0.255 | 2.33E-63 |
| PAFAH1B2  | 1.74E-67 | 0.475823 | 0.385 | 0.06  | 2.60E-63 |
| HNRNPA1L2 | 1.79E-67 | 0.398214 | 0.352 | 0.055 | 2.68E-63 |
| CREB1     | 1.93E-67 | 0.473705 | 0.358 | 0.053 | 2.89E-63 |
| SLC44A1   | 1.94E-67 | 0.500683 | 0.445 | 0.094 | 2.90E-63 |
| SOX6      | 2.38E-67 | 0.758099 | 0.385 | 0.039 | 3.56E-63 |
| BOLA3     | 2.77E-67 | -0.11313 | 0.313 | 0.125 | 4.14E-63 |
| TIMM17A   | 3.35E-67 | -0.28725 | 0.328 | 0.152 | 5.00E-63 |
| RTCB      | 4.49E-67 | 0.394333 | 0.364 | 0.062 | 6.71E-63 |
| ARC       | 4.70E-67 | 0.506861 | 0.512 | 0.14  | 7.02E-63 |
| APBA2     | 5.05E-67 | 0.436843 | 0.368 | 0.065 | 7.54E-63 |
| FLAD1     | 5.10E-67 | 0.213081 | 0.342 | 0.077 | 7.62E-63 |
| PLEKHJ1   | 5.22E-67 | 0.102753 | 0.41  | 0.14  | 7.80E-63 |
| PSMD1     | 5.51E-67 | 0.175992 | 0.364 | 0.099 | 8.23E-63 |
| DDIT3     | 5.78E-67 | 0.209269 | 0.564 | 0.222 | 8.65E-63 |
| POLE4     | 6.15E-67 | 0.142959 | 0.312 | 0.077 | 9.18E-63 |
| DDX56     | 6.46E-67 | 0.183695 | 0.345 | 0.087 | 9.65E-63 |
| ZNF22     | 7.33E-67 | 0.252551 | 0.397 | 0.104 | 1.10E-62 |
| NELFCD    | 7.48E-67 | 0.192114 | 0.402 | 0.118 | 1.12E-62 |
| GGNBP2    | 7.85E-67 | 0.196758 | 0.391 | 0.111 | 1.17E-62 |

|           |          |          |       |       |          |
|-----------|----------|----------|-------|-------|----------|
| AKR1A1    | 8.89E-67 | -0.21651 | 0.373 | 0.181 | 1.33E-62 |
| KIDINS22C | 9.17E-67 | 0.571065 | 0.402 | 0.062 | 1.37E-62 |
| SMIM15    | 9.83E-67 | -0.14863 | 0.296 | 0.132 | 1.47E-62 |
| C1QL1     | 1.09E-66 | 0.860855 | 0.363 | 0.022 | 1.63E-62 |
| TRIM13    | 1.13E-66 | 0.5739   | 0.404 | 0.063 | 1.69E-62 |
| FZD3      | 1.20E-66 | 0.370553 | 0.408 | 0.094 | 1.80E-62 |
| SNHG9     | 1.33E-66 | -0.18522 | 0.346 | 0.185 | 1.99E-62 |
| TMEM9     | 1.42E-66 | -0.34728 | 0.372 | 0.229 | 2.12E-62 |
| ABAT      | 1.44E-66 | 0.506148 | 0.381 | 0.062 | 2.16E-62 |
| SPOP      | 1.50E-66 | 0.141579 | 0.362 | 0.106 | 2.24E-62 |
| PARL      | 1.70E-66 | 0.339065 | 0.364 | 0.072 | 2.55E-62 |
| PRCC      | 1.89E-66 | 0.170971 | 0.351 | 0.091 | 2.83E-62 |
| GLTP      | 1.98E-66 | 0.334413 | 0.358 | 0.067 | 2.96E-62 |
| CMTM5     | 2.03E-66 | 0.709324 | 0.395 | 0.048 | 3.04E-62 |
| RGS16     | 2.11E-66 | -0.1836  | 0.333 | 0.14  | 3.15E-62 |
| UBQLN2    | 2.22E-66 | 0.648483 | 0.354 | 0.029 | 3.32E-62 |
| STAU1     | 3.06E-66 | 0.276072 | 0.365 | 0.082 | 4.58E-62 |
| MAP4      | 3.37E-66 | 0.220669 | 0.384 | 0.108 | 5.03E-62 |
| PRKDC     | 3.53E-66 | 0.243269 | 0.356 | 0.08  | 5.27E-62 |
| JUND      | 4.34E-66 | 0.196683 | 0.415 | 0.135 | 6.48E-62 |
| PPP1R11   | 4.80E-66 | -0.13683 | 0.324 | 0.13  | 7.17E-62 |
| TSPAN12   | 5.01E-66 | 0.417166 | 0.342 | 0.053 | 7.48E-62 |
| SF3A3     | 5.16E-66 | 0.117056 | 0.313 | 0.07  | 7.71E-62 |
| ECSIT     | 5.58E-66 | -0.11724 | 0.338 | 0.138 | 8.34E-62 |
| IMPDH2    | 5.76E-66 | -0.41656 | 0.378 | 0.255 | 8.60E-62 |
| C1QB      | 5.87E-66 | -0.43193 | 0.346 | 0.246 | 8.77E-62 |
| NCOR2     | 5.99E-66 | 0.563514 | 0.356 | 0.044 | 8.96E-62 |
| PTP4A2    | 6.42E-66 | -0.16208 | 0.354 | 0.164 | 9.59E-62 |
| RAD23B    | 7.73E-66 | 0.206714 | 0.402 | 0.109 | 1.16E-61 |
| TSEN34    | 7.82E-66 | 0.208925 | 0.36  | 0.092 | 1.17E-61 |
| CIAPIN1   | 8.38E-66 | 0.321462 | 0.368 | 0.077 | 1.25E-61 |
| ALDH7A1   | 8.43E-66 | -0.19288 | 0.362 | 0.179 | 1.26E-61 |
| PTPMT1    | 1.01E-65 | 0.302827 | 0.328 | 0.063 | 1.51E-61 |
| MOAP1     | 1.02E-65 | 0.416732 | 0.356 | 0.058 | 1.52E-61 |
| HOPX      | 1.03E-65 | -1.46481 | 0.082 | 0.349 | 1.53E-61 |
| TCEAL2    | 1.14E-65 | 0.132069 | 0.403 | 0.137 | 1.71E-61 |
| EIF3J     | 1.18E-65 | 0.142084 | 0.35  | 0.097 | 1.77E-61 |
| TOMM40    | 1.26E-65 | 0.157017 | 0.369 | 0.103 | 1.88E-61 |
| GNG2      | 1.27E-65 | 0.548206 | 0.343 | 0.038 | 1.90E-61 |
| NTM       | 1.29E-65 | 0.674292 | 0.393 | 0.051 | 1.93E-61 |
| CMPK1     | 1.43E-65 | 0.270729 | 0.389 | 0.096 | 2.14E-61 |
| PIN4      | 1.45E-65 | -0.34447 | 0.378 | 0.227 | 2.16E-61 |
| HSF1      | 1.52E-65 | 0.398243 | 0.364 | 0.063 | 2.27E-61 |
| SLC25A39  | 1.71E-65 | 0.102914 | 0.319 | 0.085 | 2.55E-61 |
| NRBP1     | 1.73E-65 | 0.166857 | 0.341 | 0.089 | 2.58E-61 |
| PPP1R10   | 1.85E-65 | 0.412535 | 0.36  | 0.063 | 2.77E-61 |
| FNTA      | 1.92E-65 | 0.35778  | 0.385 | 0.084 | 2.87E-61 |
| ZSCAN18   | 2.10E-65 | 0.490343 | 0.371 | 0.056 | 3.15E-61 |
| CDC34     | 2.15E-65 | 0.374587 | 0.363 | 0.068 | 3.22E-61 |
| BAD       | 2.21E-65 | -0.15193 | 0.358 | 0.169 | 3.31E-61 |
| EZR       | 2.22E-65 | 0.517132 | 0.386 | 0.068 | 3.32E-61 |

|          |          |          |       |       |          |
|----------|----------|----------|-------|-------|----------|
| CLSTN1   | 2.33E-65 | 0.148117 | 0.358 | 0.103 | 3.49E-61 |
| SLC35E3  | 2.38E-65 | 0.860109 | 0.454 | 0.072 | 3.56E-61 |
| TM2D1    | 2.40E-65 | -0.28916 | 0.365 | 0.21  | 3.59E-61 |
| FAM49B   | 3.32E-65 | 0.456838 | 0.373 | 0.062 | 4.96E-61 |
| ZNF92    | 3.51E-65 | 0.51512  | 0.354 | 0.046 | 5.24E-61 |
| LRP1     | 3.62E-65 | -0.22591 | 0.311 | 0.152 | 5.41E-61 |
| PRNP     | 4.34E-65 | -0.13621 | 0.391 | 0.188 | 6.49E-61 |
| CLIC1    | 4.53E-65 | -1.08014 | 0.172 | 0.297 | 6.78E-61 |
| MLEC     | 4.83E-65 | 0.301937 | 0.377 | 0.087 | 7.22E-61 |
| GDE1     | 5.00E-65 | 0.308606 | 0.293 | 0.043 | 7.47E-61 |
| PRPSAP2  | 5.15E-65 | 0.241702 | 0.354 | 0.085 | 7.70E-61 |
| YTHDC1   | 5.69E-65 | 0.43421  | 0.377 | 0.065 | 8.50E-61 |
| PBX1     | 6.06E-65 | 0.505256 | 0.406 | 0.075 | 9.05E-61 |
| PMP22    | 6.07E-65 | -1.27528 | 0.133 | 0.354 | 9.07E-61 |
| DDB1     | 6.18E-65 | 0.230388 | 0.356 | 0.08  | 9.23E-61 |
| SDHD     | 6.42E-65 | -0.26782 | 0.334 | 0.178 | 9.59E-61 |
| PAPSS1   | 6.80E-65 | 0.296046 | 0.373 | 0.087 | 1.02E-60 |
| BRD3     | 7.03E-65 | 0.599779 | 0.403 | 0.06  | 1.05E-60 |
| SQSTM1   | 7.39E-65 | -0.32139 | 0.346 | 0.2   | 1.10E-60 |
| MRPS23   | 7.64E-65 | -0.15242 | 0.338 | 0.149 | 1.14E-60 |
| TOP2B    | 8.24E-65 | 0.623421 | 0.363 | 0.039 | 1.23E-60 |
| CCDC112  | 8.46E-65 | 0.713246 | 0.338 | 0.022 | 1.26E-60 |
| UBE2F    | 8.86E-65 | 0.281498 | 0.345 | 0.072 | 1.32E-60 |
| PCMTD2   | 8.91E-65 | 0.598344 | 0.39  | 0.055 | 1.33E-60 |
| USE1     | 9.20E-65 | -0.3667  | 0.365 | 0.217 | 1.37E-60 |
| FAM89B   | 9.90E-65 | 0.527455 | 0.322 | 0.029 | 1.48E-60 |
| ARID4A   | 1.01E-64 | 0.408663 | 0.416 | 0.092 | 1.50E-60 |
| ZNF680   | 1.03E-64 | 0.34109  | 0.347 | 0.07  | 1.54E-60 |
| MPHOSPH6 | 1.24E-64 | 0.184026 | 0.35  | 0.089 | 1.86E-60 |
| VEZT     | 1.48E-64 | 0.220184 | 0.338 | 0.082 | 2.21E-60 |
| EIF3B    | 1.96E-64 | 0.384125 | 0.355 | 0.065 | 2.92E-60 |
| KIF5A    | 2.39E-64 | 0.930306 | 0.358 | 0.017 | 3.57E-60 |
| SPAG9    | 2.39E-64 | 0.490988 | 0.44  | 0.096 | 3.57E-60 |
| C8orf46  | 2.40E-64 | 0.5016   | 0.33  | 0.041 | 3.59E-60 |
| RSPRY1   | 2.49E-64 | 0.203258 | 0.326 | 0.075 | 3.72E-60 |
| SYNE2    | 2.60E-64 | 0.617522 | 0.375 | 0.044 | 3.88E-60 |
| ARMC10   | 2.81E-64 | 0.423355 | 0.365 | 0.06  | 4.20E-60 |
| ARMC1    | 2.88E-64 | 0.505715 | 0.377 | 0.062 | 4.31E-60 |
| PHLDA1   | 3.23E-64 | 0.268629 | 0.427 | 0.126 | 4.82E-60 |
| UQCR11   | 3.84E-64 | -1.72985 | 0.03  | 0.369 | 5.74E-60 |
| JMJD1C   | 4.03E-64 | 0.535584 | 0.384 | 0.062 | 6.02E-60 |
| SPSB3    | 4.96E-64 | 0.388311 | 0.39  | 0.085 | 7.42E-60 |
| TRAPPC3  | 4.97E-64 | -0.45559 | 0.302 | 0.203 | 7.42E-60 |
| KIF1B    | 5.31E-64 | 0.2903   | 0.41  | 0.115 | 7.94E-60 |
| GRSF1    | 6.35E-64 | 0.192285 | 0.349 | 0.089 | 9.49E-60 |
| RGCC     | 6.75E-64 | 0.381015 | 0.372 | 0.075 | 1.01E-59 |
| DGCR6L   | 9.09E-64 | 0.169129 | 0.352 | 0.096 | 1.36E-59 |
| CECR5    | 1.01E-63 | 0.63673  | 0.358 | 0.038 | 1.52E-59 |
| NXPH1    | 1.06E-63 | 0.724428 | 0.376 | 0.041 | 1.59E-59 |
| PRR13    | 1.09E-63 | -0.7117  | 0.244 | 0.214 | 1.63E-59 |
| NXT1     | 1.14E-63 | 0.251429 | 0.334 | 0.072 | 1.70E-59 |

|           |          |          |       |       |          |
|-----------|----------|----------|-------|-------|----------|
| KPNA2     | 1.16E-63 | 0.25768  | 0.346 | 0.08  | 1.74E-59 |
| CISD2     | 1.25E-63 | -0.12301 | 0.329 | 0.137 | 1.87E-59 |
| GNAI3     | 1.36E-63 | 0.150414 | 0.356 | 0.103 | 2.03E-59 |
| ASRGL1    | 1.43E-63 | 0.546262 | 0.341 | 0.038 | 2.13E-59 |
| GPATCH8   | 1.43E-63 | 0.183142 | 0.389 | 0.116 | 2.14E-59 |
| DCAF7     | 1.53E-63 | 0.193365 | 0.351 | 0.089 | 2.29E-59 |
| PAK2      | 1.58E-63 | 0.455006 | 0.375 | 0.068 | 2.36E-59 |
| RBM6      | 1.62E-63 | 0.457747 | 0.412 | 0.084 | 2.42E-59 |
| CNIH1     | 1.72E-63 | -0.33371 | 0.337 | 0.193 | 2.57E-59 |
| TRAPPC2L  | 1.79E-63 | -0.20864 | 0.356 | 0.173 | 2.68E-59 |
| PRKRIP1   | 1.98E-63 | 0.47894  | 0.363 | 0.058 | 2.96E-59 |
| BCAR1     | 2.27E-63 | 0.537443 | 0.341 | 0.041 | 3.39E-59 |
| RP11-1094 | 2.36E-63 | 0.142839 | 0.326 | 0.084 | 3.52E-59 |
| GABARAPL1 | 2.82E-63 | 0.144064 | 0.338 | 0.091 | 4.22E-59 |
| LYRM5     | 3.00E-63 | -0.11752 | 0.364 | 0.166 | 4.48E-59 |
| USP46     | 3.06E-63 | 0.820702 | 0.326 | 0.014 | 4.57E-59 |
| CREB5     | 3.25E-63 | 0.169718 | 0.391 | 0.128 | 4.85E-59 |
| SLTM      | 3.56E-63 | 0.138757 | 0.351 | 0.092 | 5.32E-59 |
| H3F3A     | 3.91E-63 | -0.43092 | 0.676 | 0.65  | 5.84E-59 |
| NSMCE1    | 3.94E-63 | -0.18813 | 0.378 | 0.198 | 5.88E-59 |
| CLASP2    | 4.24E-63 | 0.600675 | 0.36  | 0.043 | 6.34E-59 |
| MAP1A     | 4.43E-63 | 0.450178 | 0.382 | 0.07  | 6.63E-59 |
| MRFAP1L1  | 4.45E-63 | 0.291984 | 0.322 | 0.065 | 6.64E-59 |
| PCDHB16   | 4.47E-63 | 0.636463 | 0.352 | 0.034 | 6.68E-59 |
| TMEM87A   | 4.85E-63 | 0.441993 | 0.347 | 0.055 | 7.25E-59 |
| CCND1     | 5.04E-63 | 0.548646 | 0.381 | 0.063 | 7.54E-59 |
| QTRT1     | 5.56E-63 | -0.22928 | 0.38  | 0.21  | 8.31E-59 |
| TMSB15B   | 5.69E-63 | 0.55156  | 0.328 | 0.032 | 8.51E-59 |
| GPI       | 6.98E-63 | -0.58803 | 0.265 | 0.229 | 1.04E-58 |
| MTF2      | 7.09E-63 | 0.281376 | 0.325 | 0.068 | 1.06E-58 |
| RBM17     | 7.46E-63 | 0.507975 | 0.346 | 0.048 | 1.11E-58 |
| MYO10     | 7.96E-63 | 0.179585 | 0.377 | 0.109 | 1.19E-58 |
| ILF3-AS1  | 8.05E-63 | -0.11951 | 0.389 | 0.178 | 1.20E-58 |
| NUCB1     | 9.37E-63 | -0.16813 | 0.365 | 0.178 | 1.40E-58 |
| ARL8A     | 1.06E-62 | 0.368297 | 0.346 | 0.065 | 1.58E-58 |
| DCTPP1    | 1.10E-62 | -0.13942 | 0.332 | 0.142 | 1.65E-58 |
| NTMT1     | 1.12E-62 | -0.11761 | 0.299 | 0.113 | 1.67E-58 |
| IRF2BPL   | 1.17E-62 | 0.450123 | 0.355 | 0.055 | 1.75E-58 |
| SNHG7     | 1.25E-62 | 0.191793 | 0.382 | 0.113 | 1.87E-58 |
| TMEM161B  | 1.33E-62 | 0.150681 | 0.378 | 0.12  | 1.99E-58 |
| CUX1      | 1.80E-62 | 0.499343 | 0.354 | 0.051 | 2.69E-58 |
| PSMC1     | 2.30E-62 | -0.43705 | 0.322 | 0.207 | 3.44E-58 |
| ELOVL5    | 2.47E-62 | 0.383816 | 0.343 | 0.062 | 3.69E-58 |
| C7orf26   | 2.86E-62 | 0.573691 | 0.312 | 0.022 | 4.27E-58 |
| C16orf87  | 3.25E-62 | 0.440779 | 0.338 | 0.05  | 4.86E-58 |
| TSSC1     | 3.44E-62 | 0.28216  | 0.313 | 0.063 | 5.14E-58 |
| ECHS1     | 3.50E-62 | -0.1002  | 0.315 | 0.121 | 5.23E-58 |
| ARMCX1    | 4.34E-62 | 0.178071 | 0.355 | 0.092 | 6.49E-58 |
| SMARCD1   | 4.41E-62 | 0.482791 | 0.332 | 0.044 | 6.59E-58 |
| ZNF24     | 4.67E-62 | -0.17645 | 0.33  | 0.152 | 6.98E-58 |
| EIF1AY    | 4.73E-62 | 0.761738 | 0.336 | 0.019 | 7.07E-58 |

|          |          |          |       |       |          |
|----------|----------|----------|-------|-------|----------|
| ARPC5L   | 4.74E-62 | 0.292021 | 0.338 | 0.07  | 7.08E-58 |
| DARS     | 4.86E-62 | -0.3104  | 0.341 | 0.19  | 7.26E-58 |
| UBL3     | 5.07E-62 | 0.158396 | 0.337 | 0.091 | 7.58E-58 |
| POLDIP2  | 5.11E-62 | 0.367021 | 0.369 | 0.077 | 7.64E-58 |
| ZMIZ1    | 5.95E-62 | 0.518207 | 0.285 | 0.017 | 8.89E-58 |
| SKAP2    | 6.08E-62 | 0.243062 | 0.313 | 0.07  | 9.08E-58 |
| TMX1     | 6.14E-62 | -0.25869 | 0.32  | 0.181 | 9.18E-58 |
| ALKBH7   | 6.24E-62 | -0.13259 | 0.354 | 0.162 | 9.33E-58 |
| TGOLN2   | 6.45E-62 | 0.310468 | 0.334 | 0.07  | 9.64E-58 |
| SRSF10   | 6.60E-62 | -0.15888 | 0.339 | 0.149 | 9.87E-58 |
| IFT52    | 8.65E-62 | 0.200843 | 0.3   | 0.07  | 1.29E-57 |
| KRIT1    | 8.86E-62 | 0.210158 | 0.333 | 0.075 | 1.32E-57 |
| RFC1     | 1.08E-61 | 0.161082 | 0.299 | 0.068 | 1.62E-57 |
| CLPP     | 1.14E-61 | -0.11322 | 0.351 | 0.156 | 1.70E-57 |
| EPC1     | 1.34E-61 | 0.562983 | 0.358 | 0.043 | 2.00E-57 |
| NEMF     | 1.35E-61 | 0.290371 | 0.382 | 0.094 | 2.02E-57 |
| PAK3     | 1.60E-61 | 0.734584 | 0.356 | 0.031 | 2.40E-57 |
| MED19    | 1.72E-61 | 0.140292 | 0.324 | 0.084 | 2.57E-57 |
| KRCC1    | 1.73E-61 | 0.277858 | 0.338 | 0.077 | 2.59E-57 |
| NDUFS1   | 2.00E-61 | 0.393841 | 0.321 | 0.051 | 2.99E-57 |
| CMSS1    | 3.03E-61 | 0.118508 | 0.349 | 0.109 | 4.53E-57 |
| GORASP2  | 3.06E-61 | 0.187071 | 0.313 | 0.072 | 4.57E-57 |
| RAB9A    | 3.11E-61 | -0.12961 | 0.3   | 0.118 | 4.65E-57 |
| BRIX1    | 3.29E-61 | -0.17784 | 0.322 | 0.138 | 4.92E-57 |
| ATP6V1H  | 3.33E-61 | 0.164044 | 0.354 | 0.092 | 4.97E-57 |
| RNF11    | 3.42E-61 | 0.247917 | 0.324 | 0.068 | 5.12E-57 |
| HNRNPL   | 3.66E-61 | 0.30877  | 0.398 | 0.099 | 5.48E-57 |
| SURF1    | 4.15E-61 | 0.451452 | 0.36  | 0.06  | 6.21E-57 |
| TBPL1    | 4.37E-61 | 0.227808 | 0.282 | 0.055 | 6.52E-57 |
| UBE2E2   | 4.53E-61 | 0.475537 | 0.354 | 0.055 | 6.77E-57 |
| CTTNBP2  | 4.61E-61 | 0.732888 | 0.371 | 0.038 | 6.90E-57 |
| TAOK3    | 4.68E-61 | 0.240353 | 0.41  | 0.123 | 6.99E-57 |
| SRRT     | 4.73E-61 | 0.547729 | 0.359 | 0.048 | 7.07E-57 |
| PHGDH    | 5.57E-61 | -0.12112 | 0.326 | 0.145 | 8.32E-57 |
| CHMP1A   | 5.81E-61 | 0.242742 | 0.307 | 0.062 | 8.68E-57 |
| DDX39A   | 6.07E-61 | -0.19667 | 0.375 | 0.195 | 9.08E-57 |
| WDR6     | 6.36E-61 | 0.208015 | 0.356 | 0.099 | 9.51E-57 |
| DST      | 6.92E-61 | 0.311621 | 0.425 | 0.123 | 1.03E-56 |
| LGALS3BP | 9.55E-61 | -0.76029 | 0.259 | 0.289 | 1.43E-56 |
| DENR     | 9.95E-61 | 0.130509 | 0.325 | 0.089 | 1.49E-56 |
| NPDC1    | 1.09E-60 | 0.296425 | 0.415 | 0.115 | 1.62E-56 |
| CSNK2A1  | 1.11E-60 | 0.29207  | 0.35  | 0.082 | 1.66E-56 |
| ZNF711   | 1.12E-60 | 0.579872 | 0.337 | 0.034 | 1.68E-56 |
| SLC16A1  | 1.15E-60 | -0.16289 | 0.306 | 0.132 | 1.72E-56 |
| ALKBH4   | 1.17E-60 | 0.344466 | 0.324 | 0.06  | 1.75E-56 |
| AMOTL2   | 1.17E-60 | 0.550799 | 0.291 | 0.017 | 1.76E-56 |
| CHMP4B   | 1.18E-60 | 0.159981 | 0.394 | 0.128 | 1.77E-56 |
| TMEM219  | 1.40E-60 | -0.27792 | 0.338 | 0.188 | 2.09E-56 |
| AVIL     | 1.44E-60 | 0.667723 | 0.324 | 0.026 | 2.16E-56 |
| IFI16    | 1.57E-60 | -0.39916 | 0.3   | 0.193 | 2.34E-56 |
| DNAJC15  | 1.58E-60 | -0.40168 | 0.256 | 0.144 | 2.37E-56 |

|          |           |           |        |        |           |
|----------|-----------|-----------|--------|--------|-----------|
| PSPC1    | 1. 61E-60 | 0. 448032 | 0. 317 | 0. 043 | 2. 41E-56 |
| LSM6     | 1. 67E-60 | -0. 16831 | 0. 326 | 0. 157 | 2. 50E-56 |
| SMARCC2  | 1. 77E-60 | 0. 449708 | 0. 394 | 0. 08  | 2. 65E-56 |
| ZNF580   | 1. 91E-60 | 0. 114644 | 0. 293 | 0. 077 | 2. 85E-56 |
| PEF1     | 1. 97E-60 | -0. 29688 | 0. 289 | 0. 157 | 2. 95E-56 |
| FUBP1    | 1. 99E-60 | 0. 318265 | 0. 328 | 0. 063 | 2. 97E-56 |
| ARL6IP6  | 2. 25E-60 | 0. 212363 | 0. 347 | 0. 094 | 3. 37E-56 |
| COMMD2   | 2. 26E-60 | 0. 384953 | 0. 39  | 0. 085 | 3. 37E-56 |
| C21orf33 | 2. 55E-60 | -0. 12598 | 0. 324 | 0. 142 | 3. 81E-56 |
| TAF6     | 2. 57E-60 | 0. 160256 | 0. 293 | 0. 067 | 3. 84E-56 |
| SNRPA    | 2. 64E-60 | 0. 25918  | 0. 332 | 0. 074 | 3. 95E-56 |
| HTRA1    | 2. 71E-60 | -0. 28332 | 0. 368 | 0. 221 | 4. 05E-56 |
| GOLIM4   | 2. 98E-60 | 0. 388161 | 0. 406 | 0. 101 | 4. 46E-56 |
| FXR1     | 3. 00E-60 | 0. 15903  | 0. 359 | 0. 109 | 4. 49E-56 |
| EZH2     | 3. 03E-60 | 0. 607964 | 0. 319 | 0. 022 | 4. 53E-56 |
| TMEM248  | 3. 26E-60 | 0. 166549 | 0. 283 | 0. 058 | 4. 88E-56 |
| ACIN1    | 3. 27E-60 | 0. 292267 | 0. 351 | 0. 079 | 4. 88E-56 |
| ACTR1A   | 3. 31E-60 | 0. 392608 | 0. 32  | 0. 05  | 4. 95E-56 |
| HOXA2    | 3. 31E-60 | 0. 723513 | 0. 285 | 0. 003 | 4. 95E-56 |
| TMEM206  | 3. 37E-60 | 0. 506271 | 0. 336 | 0. 044 | 5. 04E-56 |
| PPP1R15A | 3. 52E-60 | -0. 21986 | 0. 329 | 0. 179 | 5. 25E-56 |
| ILKAP    | 3. 52E-60 | 0. 375353 | 0. 336 | 0. 056 | 5. 26E-56 |
| CAPNS1   | 3. 65E-60 | 0. 227955 | 0. 334 | 0. 082 | 5. 45E-56 |
| ASF1A    | 3. 70E-60 | 0. 299929 | 0. 347 | 0. 084 | 5. 53E-56 |
| ALCAM    | 3. 78E-60 | 0. 785057 | 0. 334 | 0. 019 | 5. 64E-56 |
| KNOP1    | 3. 81E-60 | 0. 224383 | 0. 343 | 0. 085 | 5. 69E-56 |
| YBX3     | 4. 13E-60 | -0. 25825 | 0. 319 | 0. 186 | 6. 17E-56 |
| MT1M     | 4. 35E-60 | -0. 81589 | 0. 241 | 0. 241 | 6. 50E-56 |
| OXR1     | 4. 66E-60 | 0. 310625 | 0. 317 | 0. 062 | 6. 96E-56 |
| AAK1     | 5. 54E-60 | 0. 345936 | 0. 371 | 0. 089 | 8. 28E-56 |
| G6PC3    | 8. 45E-60 | -0. 17017 | 0. 317 | 0. 149 | 1. 26E-55 |
| DDIT4    | 9. 60E-60 | -0. 27591 | 0. 375 | 0. 198 | 1. 43E-55 |
| PHF20L1  | 9. 70E-60 | 0. 548642 | 0. 382 | 0. 063 | 1. 45E-55 |
| TPM3     | 9. 86E-60 | -0. 30794 | 0. 338 | 0. 197 | 1. 47E-55 |
| SPATS2   | 1. 01E-59 | 0. 346497 | 0. 371 | 0. 089 | 1. 50E-55 |
| PTBP1    | 1. 02E-59 | 0. 125651 | 0. 317 | 0. 089 | 1. 53E-55 |
| TUSC2    | 1. 08E-59 | 0. 251501 | 0. 33  | 0. 074 | 1. 62E-55 |
| AMD1     | 1. 10E-59 | -0. 16649 | 0. 312 | 0. 142 | 1. 64E-55 |
| MAML2    | 1. 14E-59 | 0. 482157 | 0. 338 | 0. 05  | 1. 70E-55 |
| C9orf142 | 1. 26E-59 | 0. 311352 | 0. 334 | 0. 068 | 1. 88E-55 |
| HSD17B12 | 1. 33E-59 | -0. 19774 | 0. 345 | 0. 181 | 1. 99E-55 |
| RASL11B  | 1. 61E-59 | 0. 939669 | 0. 304 | 0. 007 | 2. 41E-55 |
| ATCAY    | 1. 70E-59 | 0. 527823 | 0. 313 | 0. 032 | 2. 54E-55 |
| SLC35B2  | 1. 73E-59 | 0. 418447 | 0. 345 | 0. 06  | 2. 58E-55 |
| TXNDC12  | 1. 79E-59 | -0. 34045 | 0. 312 | 0. 183 | 2. 68E-55 |
| ORC4     | 1. 86E-59 | 0. 28382  | 0. 302 | 0. 058 | 2. 79E-55 |
| FNDC4    | 2. 47E-59 | 0. 437666 | 0. 296 | 0. 034 | 3. 70E-55 |
| PPP2R5E  | 2. 55E-59 | 0. 489318 | 0. 316 | 0. 038 | 3. 80E-55 |
| MDFI     | 2. 94E-59 | 0. 644406 | 0. 29  | 0. 015 | 4. 40E-55 |
| HIP1     | 3. 05E-59 | 0. 231317 | 0. 332 | 0. 082 | 4. 55E-55 |
| DPP6     | 3. 08E-59 | 0. 297991 | 0. 343 | 0. 082 | 4. 60E-55 |

|           |          |          |       |       |          |
|-----------|----------|----------|-------|-------|----------|
| ATP2A2    | 3.17E-59 | 0.247599 | 0.35  | 0.092 | 4.74E-55 |
| BMP7      | 4.01E-59 | 0.465666 | 0.363 | 0.063 | 5.99E-55 |
| MAFB      | 4.06E-59 | 0.289884 | 0.289 | 0.053 | 6.07E-55 |
| CTDNEP1   | 4.23E-59 | 0.408323 | 0.295 | 0.038 | 6.32E-55 |
| CBR4      | 4.46E-59 | 0.665971 | 0.339 | 0.031 | 6.67E-55 |
| METTL2B   | 4.60E-59 | 0.264297 | 0.294 | 0.053 | 6.87E-55 |
| JKAMP     | 4.76E-59 | 0.461086 | 0.359 | 0.067 | 7.11E-55 |
| DYNC1LI1  | 4.79E-59 | 0.230963 | 0.333 | 0.077 | 7.16E-55 |
| EBNA1BP2  | 4.87E-59 | -0.23687 | 0.312 | 0.156 | 7.28E-55 |
| PFKL      | 5.22E-59 | 0.152352 | 0.309 | 0.082 | 7.80E-55 |
| RBM5      | 6.08E-59 | 0.274101 | 0.377 | 0.096 | 9.09E-55 |
| LRRC59    | 6.65E-59 | 0.272181 | 0.341 | 0.068 | 9.95E-55 |
| ACADVL    | 6.75E-59 | -0.14851 | 0.308 | 0.138 | 1.01E-54 |
| NDUFAF2   | 6.89E-59 | -0.15814 | 0.303 | 0.128 | 1.03E-54 |
| TIMMDC1   | 7.15E-59 | -0.31598 | 0.32  | 0.195 | 1.07E-54 |
| RPS6KL1   | 7.44E-59 | 0.647636 | 0.294 | 0.012 | 1.11E-54 |
| DHRX      | 7.90E-59 | 0.469368 | 0.336 | 0.051 | 1.18E-54 |
| VPS37B    | 8.09E-59 | 0.475467 | 0.332 | 0.046 | 1.21E-54 |
| G3BP2     | 8.85E-59 | 0.278485 | 0.283 | 0.048 | 1.32E-54 |
| CCL3      | 9.16E-59 | 0.257592 | 0.345 | 0.085 | 1.37E-54 |
| FOXO3     | 1.12E-58 | 0.342857 | 0.332 | 0.067 | 1.68E-54 |
| BCL7A     | 1.33E-58 | 0.638024 | 0.307 | 0.019 | 1.99E-54 |
| VEZF1     | 1.52E-58 | 0.459089 | 0.338 | 0.05  | 2.27E-54 |
| PITHD1    | 1.70E-58 | 0.304671 | 0.329 | 0.068 | 2.54E-54 |
| TM2D2     | 1.71E-58 | -0.10956 | 0.299 | 0.128 | 2.56E-54 |
| VKORC1    | 1.88E-58 | -0.42295 | 0.336 | 0.219 | 2.81E-54 |
| DPYSL4    | 2.09E-58 | 0.567296 | 0.298 | 0.021 | 3.12E-54 |
| GDAP1L1   | 2.16E-58 | 0.54762  | 0.337 | 0.044 | 3.23E-54 |
| ZIC1      | 2.19E-58 | 0.285001 | 0.282 | 0.053 | 3.27E-54 |
| SDF2L1    | 2.22E-58 | -0.23557 | 0.254 | 0.108 | 3.32E-54 |
| 7-Mar     | 2.23E-58 | 0.309826 | 0.315 | 0.063 | 3.33E-54 |
| TM4SF1    | 2.28E-58 | 0.470617 | 0.278 | 0.027 | 3.40E-54 |
| RP11-553L | 2.97E-58 | 0.577184 | 0.397 | 0.072 | 4.44E-54 |
| TUBB4A    | 3.26E-58 | 0.48069  | 0.283 | 0.024 | 4.88E-54 |
| HMOX2     | 3.27E-58 | -0.22966 | 0.256 | 0.113 | 4.89E-54 |
| PPP1R12A  | 3.35E-58 | 0.209662 | 0.372 | 0.109 | 5.00E-54 |
| RCC2      | 3.42E-58 | 0.263555 | 0.248 | 0.032 | 5.11E-54 |
| CDC5L     | 3.49E-58 | 0.407583 | 0.334 | 0.055 | 5.21E-54 |
| TPGS1     | 3.91E-58 | 0.35028  | 0.342 | 0.065 | 5.85E-54 |
| G3BP1     | 3.92E-58 | 0.115382 | 0.337 | 0.109 | 5.85E-54 |
| BRWD1     | 4.22E-58 | 0.54746  | 0.336 | 0.039 | 6.30E-54 |
| CCDC107   | 4.63E-58 | 0.18639  | 0.35  | 0.099 | 6.92E-54 |
| PGD       | 4.88E-58 | 0.23339  | 0.313 | 0.072 | 7.30E-54 |
| GRAMD1A   | 5.19E-58 | 0.519541 | 0.358 | 0.055 | 7.76E-54 |
| ARHGEF25  | 5.32E-58 | 0.692688 | 0.293 | 0.014 | 7.95E-54 |
| ZNF292    | 6.37E-58 | 0.530301 | 0.358 | 0.055 | 9.51E-54 |
| RFXANK    | 6.43E-58 | -0.53921 | 0.252 | 0.183 | 9.62E-54 |
| NUDT4     | 6.55E-58 | 0.141117 | 0.267 | 0.055 | 9.79E-54 |
| COPS4     | 6.59E-58 | -0.11303 | 0.319 | 0.137 | 9.85E-54 |
| TNRC6C    | 6.92E-58 | 0.395656 | 0.289 | 0.038 | 1.03E-53 |
| DNAAF2    | 7.23E-58 | 0.466268 | 0.291 | 0.031 | 1.08E-53 |



|          |          |          |       |       |          |
|----------|----------|----------|-------|-------|----------|
| CDCA7L   | 7.46E-58 | 0.262187 | 0.313 | 0.065 | 1.11E-53 |
| MED28    | 8.65E-58 | -0.22419 | 0.332 | 0.159 | 1.29E-53 |
| PDRG1    | 9.10E-58 | -0.14077 | 0.274 | 0.108 | 1.36E-53 |
| TIMP2    | 1.01E-57 | 0.364409 | 0.334 | 0.063 | 1.51E-53 |
| NSL1     | 1.03E-57 | -0.14377 | 0.321 | 0.145 | 1.55E-53 |
| COX19    | 1.10E-57 | 0.453565 | 0.322 | 0.05  | 1.65E-53 |
| SNN      | 1.11E-57 | 0.48537  | 0.338 | 0.051 | 1.65E-53 |
| DCP1A    | 1.39E-57 | 0.298356 | 0.326 | 0.065 | 2.08E-53 |
| NUDT3    | 1.46E-57 | 0.258374 | 0.352 | 0.087 | 2.18E-53 |
| RBM4     | 1.51E-57 | 0.501884 | 0.337 | 0.048 | 2.26E-53 |
| ZNF638   | 1.53E-57 | 0.527593 | 0.377 | 0.065 | 2.28E-53 |
| MED30    | 1.53E-57 | 0.458434 | 0.341 | 0.058 | 2.29E-53 |
| AP3S1    | 1.61E-57 | -0.10839 | 0.329 | 0.14  | 2.41E-53 |
| GGPS1    | 1.72E-57 | -0.20179 | 0.316 | 0.152 | 2.56E-53 |
| YKT6     | 1.81E-57 | 0.15037  | 0.283 | 0.068 | 2.70E-53 |
| APOA1BP  | 2.02E-57 | 0.119798 | 0.368 | 0.123 | 3.02E-53 |
| TTC1     | 2.17E-57 | -0.21214 | 0.303 | 0.144 | 3.24E-53 |
| PHYHIPL  | 2.18E-57 | 0.179301 | 0.421 | 0.15  | 3.26E-53 |
| ORAI2    | 2.20E-57 | 0.409428 | 0.337 | 0.063 | 3.29E-53 |
| ZNF655   | 2.24E-57 | 0.340477 | 0.337 | 0.067 | 3.34E-53 |
| PPP2CB   | 2.48E-57 | 0.301629 | 0.334 | 0.079 | 3.71E-53 |
| CA10     | 2.60E-57 | 0.741863 | 0.285 | 0.009 | 3.89E-53 |
| LRRC4C   | 2.70E-57 | 0.199637 | 0.268 | 0.056 | 4.03E-53 |
| ZNF146   | 3.23E-57 | 0.227408 | 0.336 | 0.089 | 4.82E-53 |
| KMT2A    | 3.27E-57 | 0.519137 | 0.333 | 0.044 | 4.89E-53 |
| SND1     | 3.70E-57 | 0.224439 | 0.282 | 0.058 | 5.54E-53 |
| YBEY     | 3.78E-57 | 0.106328 | 0.307 | 0.084 | 5.65E-53 |
| C22orf39 | 4.01E-57 | 0.29515  | 0.307 | 0.062 | 5.99E-53 |
| PRR4     | 4.81E-57 | 0.319916 | 0.346 | 0.074 | 7.19E-53 |
| ANXA1    | 4.87E-57 | -1.4069  | 0.077 | 0.323 | 7.28E-53 |
| RP9      | 5.53E-57 | 0.421774 | 0.321 | 0.051 | 8.26E-53 |
| VOPP1    | 5.91E-57 | 0.184685 | 0.269 | 0.06  | 8.83E-53 |
| SPTAN1   | 5.93E-57 | 0.269025 | 0.35  | 0.091 | 8.87E-53 |
| CPXM1    | 6.35E-57 | 0.666892 | 0.307 | 0.019 | 9.49E-53 |
| MARK3    | 6.41E-57 | 0.295887 | 0.36  | 0.089 | 9.58E-53 |
| RBM22    | 6.51E-57 | 0.151368 | 0.346 | 0.103 | 9.72E-53 |
| DHX29    | 6.54E-57 | 0.170688 | 0.337 | 0.084 | 9.77E-53 |
| AGAP2    | 6.79E-57 | 0.749946 | 0.274 | 0.002 | 1.01E-52 |
| EIF2B1   | 6.80E-57 | 0.376145 | 0.363 | 0.077 | 1.02E-52 |
| TAF15    | 7.19E-57 | 0.173449 | 0.304 | 0.072 | 1.07E-52 |
| GAMT     | 7.56E-57 | 0.226322 | 0.272 | 0.048 | 1.13E-52 |
| IWS1     | 7.85E-57 | 0.375479 | 0.304 | 0.044 | 1.17E-52 |
| TRAP1    | 9.23E-57 | 0.447738 | 0.329 | 0.051 | 1.38E-52 |
| ZNF791   | 9.38E-57 | 0.161112 | 0.381 | 0.128 | 1.40E-52 |
| ZNF131   | 9.39E-57 | 0.402993 | 0.329 | 0.058 | 1.40E-52 |
| TM9SF2   | 1.01E-56 | 0.306316 | 0.315 | 0.065 | 1.51E-52 |
| DCLK2    | 1.01E-56 | 0.268669 | 0.306 | 0.063 | 1.51E-52 |
| TBCC     | 1.09E-56 | 0.518067 | 0.325 | 0.039 | 1.62E-52 |
| FAM60A   | 1.17E-56 | 0.449056 | 0.32  | 0.046 | 1.75E-52 |
| TMEM45A  | 1.25E-56 | -0.56231 | 0.226 | 0.149 | 1.87E-52 |
| R3HCC1   | 1.34E-56 | 0.18568  | 0.33  | 0.089 | 2.01E-52 |

|           |          |          |       |       |          |
|-----------|----------|----------|-------|-------|----------|
| TMEM256   | 1.37E-56 | -0.17546 | 0.345 | 0.169 | 2.05E-52 |
| TMEM259   | 1.40E-56 | 0.290517 | 0.359 | 0.091 | 2.09E-52 |
| RPN1      | 1.56E-56 | -0.20322 | 0.299 | 0.145 | 2.34E-52 |
| MAGI2     | 1.62E-56 | 0.540591 | 0.315 | 0.032 | 2.42E-52 |
| BRD7      | 1.77E-56 | 0.381591 | 0.312 | 0.051 | 2.65E-52 |
| C11orf96  | 1.83E-56 | 0.700183 | 0.338 | 0.034 | 2.74E-52 |
| LRWD1     | 1.86E-56 | 0.299916 | 0.25  | 0.032 | 2.78E-52 |
| ZNF75A    | 1.92E-56 | 0.323303 | 0.334 | 0.072 | 2.87E-52 |
| HBB       | 2.09E-56 | -0.76483 | 0.303 | 0.226 | 3.12E-52 |
| RGS2      | 2.12E-56 | -0.17802 | 0.307 | 0.13  | 3.17E-52 |
| C14orf119 | 2.18E-56 | -0.23118 | 0.272 | 0.126 | 3.26E-52 |
| NSUN5     | 2.18E-56 | 0.157219 | 0.286 | 0.072 | 3.26E-52 |
| PTGES2    | 2.36E-56 | 0.375625 | 0.319 | 0.053 | 3.53E-52 |
| SEZ6      | 2.44E-56 | 0.706454 | 0.369 | 0.05  | 3.64E-52 |
| C5orf24   | 2.46E-56 | 0.312794 | 0.336 | 0.072 | 3.67E-52 |
| UROD      | 2.66E-56 | -0.31054 | 0.29  | 0.157 | 3.98E-52 |
| NKIRAS2   | 2.97E-56 | 0.258835 | 0.307 | 0.065 | 4.44E-52 |
| RP11-676J | 3.33E-56 | 0.745632 | 0.287 | 0.005 | 4.97E-52 |
| CELF1     | 3.40E-56 | 0.263674 | 0.306 | 0.065 | 5.08E-52 |
| TCEAL5    | 4.28E-56 | 0.101389 | 0.276 | 0.07  | 6.40E-52 |
| CHD6      | 4.46E-56 | 0.289122 | 0.324 | 0.07  | 6.67E-52 |
| FYTTD1    | 4.70E-56 | 0.134831 | 0.273 | 0.062 | 7.03E-52 |
| CUL1      | 4.88E-56 | 0.1717   | 0.285 | 0.068 | 7.29E-52 |
| RARRES2   | 5.35E-56 | -0.18353 | 0.293 | 0.133 | 7.99E-52 |
| ADSL      | 5.87E-56 | 0.134477 | 0.287 | 0.072 | 8.77E-52 |
| IPO9      | 6.58E-56 | 0.277299 | 0.343 | 0.082 | 9.83E-52 |
| TMEM179B  | 7.84E-56 | -0.31305 | 0.274 | 0.15  | 1.17E-51 |
| ABCD4     | 8.05E-56 | 0.175623 | 0.315 | 0.084 | 1.20E-51 |
| BAG6      | 8.87E-56 | 0.345803 | 0.332 | 0.065 | 1.33E-51 |
| HAGH      | 8.88E-56 | 0.437393 | 0.347 | 0.065 | 1.33E-51 |
| SAFB      | 1.07E-55 | 0.35141  | 0.336 | 0.068 | 1.59E-51 |
| DSCAM     | 1.07E-55 | 0.518411 | 0.304 | 0.034 | 1.60E-51 |
| NUCB2     | 1.13E-55 | -0.23311 | 0.286 | 0.147 | 1.69E-51 |
| APRT      | 1.24E-55 | -0.19243 | 0.362 | 0.195 | 1.85E-51 |
| C1QA      | 1.28E-55 | -0.27053 | 0.281 | 0.161 | 1.91E-51 |
| TIMM9     | 1.55E-55 | -0.1638  | 0.291 | 0.121 | 2.32E-51 |
| ZC2HC1A   | 1.59E-55 | 0.446613 | 0.322 | 0.055 | 2.37E-51 |
| STX10     | 1.59E-55 | -0.1308  | 0.291 | 0.125 | 2.38E-51 |
| WDR1      | 1.62E-55 | -0.12026 | 0.294 | 0.126 | 2.43E-51 |
| CDKN1B    | 1.94E-55 | 0.362296 | 0.328 | 0.062 | 2.90E-51 |
| HLA-DPA1  | 2.05E-55 | -1.03884 | 0.176 | 0.27  | 3.06E-51 |
| PLRG1     | 2.11E-55 | 0.172945 | 0.277 | 0.063 | 3.16E-51 |
| OMG       | 2.28E-55 | 0.590344 | 0.315 | 0.036 | 3.41E-51 |
| CDC42EP4  | 2.38E-55 | -0.34173 | 0.234 | 0.132 | 3.56E-51 |
| VPS4A     | 2.42E-55 | 0.271431 | 0.325 | 0.072 | 3.62E-51 |
| HOXB2     | 2.51E-55 | 0.662769 | 0.278 | 0.009 | 3.75E-51 |
| ALDH9A1   | 2.62E-55 | -0.14151 | 0.308 | 0.133 | 3.92E-51 |
| SATB1     | 2.72E-55 | 0.582274 | 0.306 | 0.026 | 4.07E-51 |
| GDAP1     | 2.73E-55 | 0.158769 | 0.295 | 0.068 | 4.07E-51 |
| BID       | 2.75E-55 | 0.132388 | 0.333 | 0.101 | 4.11E-51 |
| PAQR4     | 2.78E-55 | 0.581709 | 0.274 | 0.015 | 4.15E-51 |

|           |          |          |       |       |          |
|-----------|----------|----------|-------|-------|----------|
| TAF11     | 3.03E-55 | 0.187238 | 0.303 | 0.075 | 4.53E-51 |
| VMP1      | 3.05E-55 | -0.46682 | 0.294 | 0.215 | 4.55E-51 |
| TRIM24    | 3.20E-55 | 0.500509 | 0.303 | 0.032 | 4.78E-51 |
| GRN       | 3.24E-55 | -0.19053 | 0.309 | 0.161 | 4.84E-51 |
| CRK       | 3.41E-55 | 0.283816 | 0.345 | 0.084 | 5.09E-51 |
| RTKN      | 3.47E-55 | 0.223351 | 0.317 | 0.082 | 5.19E-51 |
| SPG7      | 3.86E-55 | 0.320508 | 0.302 | 0.053 | 5.76E-51 |
| NOA1      | 3.90E-55 | 0.648833 | 0.274 | 0.012 | 5.83E-51 |
| KIF2A     | 4.05E-55 | 0.527081 | 0.304 | 0.034 | 6.05E-51 |
| DLX5      | 4.17E-55 | 1.023906 | 0.316 | 0.015 | 6.23E-51 |
| NCAN      | 4.27E-55 | 0.617173 | 0.285 | 0.017 | 6.37E-51 |
| RNF216    | 4.62E-55 | 0.167649 | 0.322 | 0.097 | 6.91E-51 |
| WDR82     | 4.92E-55 | 0.242539 | 0.295 | 0.068 | 7.35E-51 |
| EBPL      | 4.93E-55 | 0.44201  | 0.347 | 0.063 | 7.37E-51 |
| TSR3      | 4.96E-55 | 0.494241 | 0.338 | 0.051 | 7.42E-51 |
| HSPBP1    | 5.00E-55 | 0.127885 | 0.322 | 0.094 | 7.47E-51 |
| XRCC6BP1  | 5.25E-55 | 0.644233 | 0.283 | 0.015 | 7.85E-51 |
| SAFB2     | 5.42E-55 | 0.357874 | 0.371 | 0.089 | 8.10E-51 |
| UPF3B     | 5.46E-55 | 0.148391 | 0.333 | 0.096 | 8.16E-51 |
| C8orf4    | 5.50E-55 | -1.0958  | 0.165 | 0.265 | 8.21E-51 |
| SNRPA1    | 5.83E-55 | -0.20128 | 0.295 | 0.13  | 8.71E-51 |
| NNAT      | 6.02E-55 | 1.093375 | 0.401 | 0.053 | 9.00E-51 |
| MPHOSPH1C | 6.16E-55 | 0.178747 | 0.337 | 0.085 | 9.21E-51 |
| HMG20B    | 6.42E-55 | 0.146055 | 0.33  | 0.099 | 9.59E-51 |
| APBB2     | 6.42E-55 | 0.232718 | 0.274 | 0.056 | 9.60E-51 |
| TRMT10C   | 6.50E-55 | 0.208355 | 0.312 | 0.079 | 9.72E-51 |
| RRP7A     | 7.13E-55 | 0.31423  | 0.287 | 0.044 | 1.07E-50 |
| NACA2     | 7.34E-55 | -0.60257 | 0.208 | 0.171 | 1.10E-50 |
| DCTN1     | 7.35E-55 | 0.449618 | 0.319 | 0.044 | 1.10E-50 |
| NUB1      | 8.13E-55 | 0.297766 | 0.308 | 0.06  | 1.22E-50 |
| PDCL3     | 8.36E-55 | 0.106838 | 0.313 | 0.096 | 1.25E-50 |
| SMAP1     | 8.54E-55 | 0.309191 | 0.295 | 0.053 | 1.28E-50 |
| RB1CC1    | 8.57E-55 | 0.555713 | 0.342 | 0.05  | 1.28E-50 |
| EPRS      | 9.16E-55 | 0.124237 | 0.347 | 0.118 | 1.37E-50 |
| PDCD7     | 9.76E-55 | 0.304925 | 0.296 | 0.053 | 1.46E-50 |
| GATM      | 1.10E-54 | -0.17337 | 0.299 | 0.145 | 1.65E-50 |
| GPN1      | 1.15E-54 | 0.173945 | 0.277 | 0.058 | 1.71E-50 |
| HNRNPLL   | 1.22E-54 | 0.258164 | 0.257 | 0.041 | 1.82E-50 |
| C18orf32  | 1.25E-54 | 0.136238 | 0.272 | 0.067 | 1.87E-50 |
| TPST1     | 1.25E-54 | 0.332131 | 0.298 | 0.055 | 1.88E-50 |
| REV3L     | 1.43E-54 | 0.508683 | 0.358 | 0.063 | 2.14E-50 |
| TRAM1     | 1.48E-54 | -0.28607 | 0.295 | 0.154 | 2.22E-50 |
| PLEKH01   | 1.50E-54 | 0.366649 | 0.285 | 0.041 | 2.24E-50 |
| PHACTR3   | 1.53E-54 | 0.567171 | 0.285 | 0.021 | 2.29E-50 |
| EPN2      | 1.61E-54 | 0.166559 | 0.307 | 0.08  | 2.40E-50 |
| UBTF      | 1.76E-54 | 0.388515 | 0.312 | 0.051 | 2.63E-50 |
| SESTD1    | 1.90E-54 | 0.367782 | 0.25  | 0.026 | 2.85E-50 |
| PRPSAP1   | 1.92E-54 | 0.256341 | 0.321 | 0.075 | 2.88E-50 |
| SCFD1     | 2.12E-54 | -0.12157 | 0.299 | 0.125 | 3.17E-50 |
| AMZ2      | 2.51E-54 | -0.28937 | 0.307 | 0.178 | 3.75E-50 |
| CNDP2     | 2.62E-54 | -0.18374 | 0.263 | 0.118 | 3.92E-50 |

|           |          |          |       |       |          |
|-----------|----------|----------|-------|-------|----------|
| OSER1     | 2.65E-54 | -0.21524 | 0.289 | 0.125 | 3.95E-50 |
| CDKN2AIP  | 2.99E-54 | 0.312598 | 0.239 | 0.026 | 4.47E-50 |
| AHCY      | 3.03E-54 | 0.123516 | 0.309 | 0.091 | 4.53E-50 |
| RICTOR    | 3.08E-54 | 0.556579 | 0.358 | 0.058 | 4.60E-50 |
| POU3F3    | 3.19E-54 | 0.415193 | 0.285 | 0.038 | 4.77E-50 |
| RNF187    | 3.27E-54 | 0.12417  | 0.382 | 0.138 | 4.89E-50 |
| UBE2A     | 3.29E-54 | -0.29051 | 0.3   | 0.169 | 4.92E-50 |
| FERMT1    | 3.56E-54 | 0.845491 | 0.313 | 0.019 | 5.32E-50 |
| LANCL2    | 3.61E-54 | 0.125164 | 0.291 | 0.079 | 5.39E-50 |
| POU3F2    | 3.76E-54 | 0.287245 | 0.315 | 0.067 | 5.61E-50 |
| RAP1A     | 4.39E-54 | -0.24922 | 0.294 | 0.147 | 6.56E-50 |
| SLC37A3   | 4.41E-54 | 0.434281 | 0.291 | 0.038 | 6.59E-50 |
| ARRDC3    | 4.81E-54 | 0.241237 | 0.324 | 0.087 | 7.19E-50 |
| RSBN1     | 5.03E-54 | 0.477911 | 0.302 | 0.034 | 7.52E-50 |
| IGFBP7    | 5.26E-54 | -1.06089 | 0.131 | 0.219 | 7.86E-50 |
| UBXN2A    | 6.13E-54 | 0.332138 | 0.274 | 0.046 | 9.15E-50 |
| HOOK3     | 6.40E-54 | 0.322207 | 0.317 | 0.065 | 9.57E-50 |
| URM1      | 6.85E-54 | -0.22731 | 0.299 | 0.159 | 1.02E-49 |
| FBX011    | 7.89E-54 | 0.4628   | 0.307 | 0.041 | 1.18E-49 |
| SF3A2     | 8.02E-54 | 0.359355 | 0.322 | 0.063 | 1.20E-49 |
| FDX1L     | 8.12E-54 | -0.12001 | 0.272 | 0.116 | 1.21E-49 |
| Clorf35   | 8.57E-54 | 0.443205 | 0.319 | 0.05  | 1.28E-49 |
| HLA-DRB1  | 9.29E-54 | -1.03863 | 0.148 | 0.255 | 1.39E-49 |
| CNIH4     | 1.01E-53 | -0.17318 | 0.324 | 0.162 | 1.50E-49 |
| AZIN1     | 1.12E-53 | 0.350083 | 0.362 | 0.089 | 1.67E-49 |
| LRRC47    | 1.21E-53 | 0.369402 | 0.309 | 0.051 | 1.81E-49 |
| FBX07     | 1.36E-53 | 0.318045 | 0.277 | 0.044 | 2.03E-49 |
| LBR       | 1.40E-53 | 0.495968 | 0.334 | 0.053 | 2.09E-49 |
| TNR       | 1.40E-53 | 0.691778 | 0.332 | 0.036 | 2.10E-49 |
| RIF1      | 1.53E-53 | 0.358896 | 0.261 | 0.034 | 2.29E-49 |
| FRS2      | 1.59E-53 | 0.774442 | 0.322 | 0.029 | 2.38E-49 |
| TIMM22    | 1.63E-53 | 0.227775 | 0.308 | 0.068 | 2.44E-49 |
| RNF130    | 1.78E-53 | 0.569956 | 0.337 | 0.048 | 2.67E-49 |
| CSRP2     | 1.92E-53 | -0.87635 | 0.174 | 0.232 | 2.87E-49 |
| RAB13     | 1.94E-53 | -0.90979 | 0.204 | 0.246 | 2.90E-49 |
| TXNDC9    | 2.11E-53 | 0.223363 | 0.281 | 0.058 | 3.16E-49 |
| PTCD3     | 2.16E-53 | 0.458529 | 0.325 | 0.051 | 3.22E-49 |
| MIR4458HG | 2.16E-53 | -0.3912  | 0.273 | 0.183 | 3.23E-49 |
| ACAT2     | 2.28E-53 | 0.114712 | 0.263 | 0.068 | 3.41E-49 |
| CXADR     | 2.37E-53 | 0.482051 | 0.328 | 0.055 | 3.54E-49 |
| CEP170    | 2.51E-53 | 0.48636  | 0.302 | 0.036 | 3.75E-49 |
| ANKIB1    | 2.51E-53 | 0.174947 | 0.239 | 0.044 | 3.75E-49 |
| CCNG2     | 2.58E-53 | 0.629015 | 0.308 | 0.027 | 3.86E-49 |
| ARID1A    | 2.70E-53 | 0.335917 | 0.308 | 0.058 | 4.03E-49 |
| CXXC4     | 3.05E-53 | 0.595281 | 0.261 | 0.009 | 4.56E-49 |
| NELL2     | 3.20E-53 | 0.522654 | 0.312 | 0.041 | 4.79E-49 |
| PCSK7     | 3.62E-53 | 0.185742 | 0.368 | 0.123 | 5.41E-49 |
| ATP1A1    | 4.02E-53 | -0.20183 | 0.336 | 0.183 | 6.01E-49 |
| HRAS      | 4.61E-53 | 0.412583 | 0.303 | 0.046 | 6.89E-49 |
| CDK5      | 4.90E-53 | 0.247354 | 0.289 | 0.058 | 7.33E-49 |
| ACOT7     | 5.68E-53 | 0.384944 | 0.276 | 0.039 | 8.49E-49 |

|           |          |          |       |       |          |
|-----------|----------|----------|-------|-------|----------|
| SYPL1     | 5.91E-53 | -0.6639  | 0.237 | 0.212 | 8.84E-49 |
| IFT20     | 6.08E-53 | -0.20332 | 0.296 | 0.154 | 9.09E-49 |
| NSD1      | 6.46E-53 | 0.338812 | 0.311 | 0.065 | 9.66E-49 |
| CDK5RAP3  | 7.12E-53 | -0.13365 | 0.328 | 0.162 | 1.06E-48 |
| HEPACAM   | 7.28E-53 | -0.19609 | 0.286 | 0.142 | 1.09E-48 |
| DCUN1D5   | 8.10E-53 | 0.14613  | 0.303 | 0.084 | 1.21E-48 |
| CRLS1     | 8.16E-53 | 0.444999 | 0.328 | 0.056 | 1.22E-48 |
| PGAP1     | 8.46E-53 | 0.360469 | 0.278 | 0.044 | 1.26E-48 |
| UBE3A     | 8.47E-53 | 0.410195 | 0.329 | 0.062 | 1.27E-48 |
| CORO7     | 8.48E-53 | 0.529709 | 0.256 | 0.014 | 1.27E-48 |
| HTRA2     | 9.07E-53 | 0.461222 | 0.321 | 0.05  | 1.35E-48 |
| LBH       | 9.91E-53 | 0.470946 | 0.293 | 0.039 | 1.48E-48 |
| BSDC1     | 1.07E-52 | 0.168811 | 0.325 | 0.096 | 1.59E-48 |
| ATIC      | 1.09E-52 | 0.26049  | 0.3   | 0.065 | 1.63E-48 |
| PKIG      | 1.11E-52 | -0.33134 | 0.294 | 0.183 | 1.65E-48 |
| DNAJA2    | 1.16E-52 | 0.12338  | 0.316 | 0.099 | 1.73E-48 |
| CPM       | 1.25E-52 | 0.856553 | 0.306 | 0.019 | 1.86E-48 |
| TM7SF2    | 1.46E-52 | 0.335508 | 0.285 | 0.048 | 2.18E-48 |
| MEIS2     | 1.49E-52 | 0.391413 | 0.307 | 0.053 | 2.22E-48 |
| WDR60     | 1.63E-52 | 0.358042 | 0.352 | 0.077 | 2.44E-48 |
| NSG1      | 1.74E-52 | 0.483355 | 0.308 | 0.051 | 2.60E-48 |
| MMP16     | 1.90E-52 | 0.719293 | 0.282 | 0.01  | 2.85E-48 |
| SLC38A1   | 1.97E-52 | 0.327032 | 0.286 | 0.055 | 2.94E-48 |
| KIAA1715  | 2.10E-52 | 0.19199  | 0.296 | 0.08  | 3.15E-48 |
| AIF1L     | 2.24E-52 | -0.14713 | 0.228 | 0.089 | 3.35E-48 |
| ANKS1B    | 2.51E-52 | 0.350123 | 0.243 | 0.031 | 3.74E-48 |
| MARS      | 2.52E-52 | 0.205386 | 0.309 | 0.082 | 3.76E-48 |
| ACSL3     | 2.62E-52 | 0.103731 | 0.291 | 0.084 | 3.92E-48 |
| ZFAND3    | 2.69E-52 | 0.128169 | 0.241 | 0.053 | 4.01E-48 |
| ACYP2     | 2.95E-52 | -0.22824 | 0.291 | 0.161 | 4.40E-48 |
| FGD5-AS1  | 3.22E-52 | 0.252982 | 0.277 | 0.06  | 4.81E-48 |
| ACO04158. | 3.40E-52 | 0.479087 | 0.291 | 0.036 | 5.08E-48 |
| TMEM121   | 3.72E-52 | 0.622336 | 0.285 | 0.019 | 5.56E-48 |
| TMPO      | 3.77E-52 | 0.515535 | 0.283 | 0.026 | 5.63E-48 |
| DRAXIN    | 4.00E-52 | 0.393112 | 0.273 | 0.036 | 5.98E-48 |
| TTC14     | 4.07E-52 | 0.161314 | 0.311 | 0.091 | 6.08E-48 |
| DYNLL2    | 4.18E-52 | 0.397212 | 0.27  | 0.034 | 6.25E-48 |
| MLLT4     | 5.78E-52 | 0.629966 | 0.298 | 0.024 | 8.64E-48 |
| BLOC1S6   | 5.98E-52 | 0.249995 | 0.255 | 0.044 | 8.94E-48 |
| ZNF281    | 6.39E-52 | 0.484785 | 0.289 | 0.036 | 9.55E-48 |
| CHST11    | 7.05E-52 | 0.368447 | 0.243 | 0.027 | 1.05E-47 |
| LMNA      | 7.51E-52 | -0.19589 | 0.319 | 0.174 | 1.12E-47 |
| FOXP1     | 8.73E-52 | -0.5843  | 0.224 | 0.209 | 1.30E-47 |
| ABCF1     | 9.65E-52 | 0.195632 | 0.282 | 0.065 | 1.44E-47 |
| MRT04     | 9.70E-52 | 0.216748 | 0.308 | 0.075 | 1.45E-47 |
| DDX52     | 1.03E-51 | 0.405809 | 0.313 | 0.053 | 1.54E-47 |
| RBBP6     | 1.07E-51 | 0.365511 | 0.349 | 0.079 | 1.60E-47 |
| BCS1L     | 1.13E-51 | 0.277654 | 0.273 | 0.051 | 1.70E-47 |
| GTF2IRD2E | 1.27E-51 | 0.361212 | 0.286 | 0.046 | 1.90E-47 |
| ANTXR1    | 1.36E-51 | 0.586159 | 0.277 | 0.017 | 2.03E-47 |
| HMBX1     | 1.38E-51 | 0.143014 | 0.316 | 0.092 | 2.07E-47 |

|           |          |          |       |       |          |
|-----------|----------|----------|-------|-------|----------|
| ZNF91     | 1.43E-51 | 0.382794 | 0.322 | 0.063 | 2.14E-47 |
| PLGRKT    | 1.59E-51 | 0.132657 | 0.26  | 0.065 | 2.38E-47 |
| THOC2     | 1.67E-51 | 0.235631 | 0.342 | 0.099 | 2.50E-47 |
| TSNAX     | 1.72E-51 | -0.11976 | 0.277 | 0.109 | 2.57E-47 |
| TMEM183A  | 1.82E-51 | 0.145683 | 0.272 | 0.07  | 2.72E-47 |
| PCNA      | 1.91E-51 | -0.11344 | 0.293 | 0.126 | 2.85E-47 |
| DNMT1     | 1.94E-51 | 0.30725  | 0.298 | 0.06  | 2.90E-47 |
| SMIM14    | 1.98E-51 | -0.33537 | 0.263 | 0.147 | 2.96E-47 |
| ARIH2     | 2.17E-51 | 0.161722 | 0.285 | 0.074 | 3.24E-47 |
| NRXN2     | 2.17E-51 | 0.47575  | 0.302 | 0.039 | 3.24E-47 |
| SDHAF2    | 2.19E-51 | 0.162373 | 0.293 | 0.074 | 3.28E-47 |
| MYEF2     | 2.43E-51 | 0.441524 | 0.299 | 0.041 | 3.64E-47 |
| IFNGR2    | 2.45E-51 | 0.108495 | 0.272 | 0.074 | 3.66E-47 |
| 1-Mar     | 2.63E-51 | 0.673626 | 0.272 | 0.01  | 3.92E-47 |
| SLC39A7   | 2.99E-51 | 0.105876 | 0.329 | 0.101 | 4.46E-47 |
| LARP7     | 3.04E-51 | 0.116829 | 0.343 | 0.123 | 4.54E-47 |
| EPM2AIP1  | 3.05E-51 | 0.403618 | 0.308 | 0.053 | 4.56E-47 |
| ATG4B     | 3.10E-51 | 0.335314 | 0.313 | 0.06  | 4.64E-47 |
| SDC3      | 3.12E-51 | -0.54408 | 0.198 | 0.15  | 4.66E-47 |
| DDX41     | 3.16E-51 | 0.17284  | 0.246 | 0.051 | 4.72E-47 |
| H1FO      | 3.30E-51 | 0.455327 | 0.41  | 0.104 | 4.93E-47 |
| FUBP3     | 3.43E-51 | 0.264296 | 0.306 | 0.065 | 5.12E-47 |
| INSM1     | 3.57E-51 | 0.703057 | 0.277 | 0.012 | 5.34E-47 |
| XPO1      | 3.60E-51 | 0.206847 | 0.295 | 0.072 | 5.38E-47 |
| GLRX3     | 3.84E-51 | -0.1884  | 0.242 | 0.099 | 5.74E-47 |
| WSCD1     | 3.86E-51 | 0.244684 | 0.291 | 0.07  | 5.76E-47 |
| TMEM30A   | 4.33E-51 | 0.31453  | 0.343 | 0.087 | 6.47E-47 |
| MTRNR2L8  | 4.72E-51 | -1.22689 | 0.082 | 0.289 | 7.05E-47 |
| ECI2      | 5.24E-51 | -0.18403 | 0.267 | 0.125 | 7.83E-47 |
| PRDX3     | 5.26E-51 | -0.36596 | 0.309 | 0.2   | 7.87E-47 |
| EXOSC4    | 5.84E-51 | 0.491461 | 0.319 | 0.05  | 8.73E-47 |
| LAMP2     | 5.97E-51 | -0.47689 | 0.259 | 0.198 | 8.92E-47 |
| GOPC      | 6.30E-51 | 0.323556 | 0.341 | 0.08  | 9.41E-47 |
| VPS41     | 6.84E-51 | 0.17386  | 0.247 | 0.053 | 1.02E-46 |
| LUC7L     | 8.10E-51 | 0.224785 | 0.309 | 0.079 | 1.21E-46 |
| TRIM33    | 8.16E-51 | 0.271202 | 0.254 | 0.044 | 1.22E-46 |
| LMO1      | 8.20E-51 | 0.713    | 0.3   | 0.022 | 1.23E-46 |
| TAX1BP3   | 8.86E-51 | -0.11282 | 0.283 | 0.116 | 1.32E-46 |
| PCM1      | 8.97E-51 | 0.255304 | 0.329 | 0.085 | 1.34E-46 |
| RP11-792A | 1.00E-50 | 0.167256 | 0.311 | 0.091 | 1.50E-46 |
| AASDH     | 1.09E-50 | 0.445434 | 0.32  | 0.056 | 1.64E-46 |
| SEZ6L2    | 1.16E-50 | 0.253708 | 0.351 | 0.108 | 1.73E-46 |
| KCTD5     | 1.16E-50 | 0.347563 | 0.28  | 0.046 | 1.74E-46 |
| IFT27     | 1.19E-50 | 0.367104 | 0.3   | 0.055 | 1.78E-46 |
| RNF24     | 1.26E-50 | 0.246556 | 0.295 | 0.067 | 1.88E-46 |
| FAM210B   | 1.38E-50 | 0.639687 | 0.324 | 0.039 | 2.07E-46 |
| CCDC50    | 1.42E-50 | 0.333688 | 0.281 | 0.044 | 2.12E-46 |
| SUCLA2    | 1.44E-50 | -0.12537 | 0.283 | 0.13  | 2.16E-46 |
| NT5C      | 1.63E-50 | 0.282648 | 0.32  | 0.077 | 2.43E-46 |
| BIN1      | 1.63E-50 | 0.609424 | 0.28  | 0.017 | 2.44E-46 |
| PAFAH1B1  | 1.94E-50 | 0.277034 | 0.317 | 0.07  | 2.90E-46 |

|           |          |          |       |       |          |
|-----------|----------|----------|-------|-------|----------|
| ANKRD17   | 2.03E-50 | 0.34101  | 0.276 | 0.046 | 3.04E-46 |
| COPA      | 2.11E-50 | 0.209569 | 0.316 | 0.089 | 3.15E-46 |
| MORN2     | 2.13E-50 | -0.21435 | 0.241 | 0.111 | 3.18E-46 |
| TFDP2     | 2.17E-50 | 0.405772 | 0.269 | 0.034 | 3.25E-46 |
| ATP6V1B2  | 2.25E-50 | 0.163646 | 0.302 | 0.087 | 3.36E-46 |
| C19orf25  | 2.32E-50 | 0.234331 | 0.311 | 0.08  | 3.47E-46 |
| SNX22     | 2.35E-50 | 0.5764   | 0.241 | 0.01  | 3.51E-46 |
| CCDC14    | 2.39E-50 | 0.286261 | 0.307 | 0.067 | 3.56E-46 |
| GNAQ      | 2.75E-50 | 0.201386 | 0.239 | 0.044 | 4.10E-46 |
| ING2      | 2.88E-50 | 0.254412 | 0.246 | 0.044 | 4.31E-46 |
| SURF2     | 3.09E-50 | 0.130401 | 0.265 | 0.065 | 4.62E-46 |
| UBE2G2    | 3.10E-50 | 0.201964 | 0.293 | 0.07  | 4.63E-46 |
| CPNE1     | 3.25E-50 | -0.14945 | 0.276 | 0.13  | 4.86E-46 |
| TEX264    | 3.43E-50 | -0.34935 | 0.283 | 0.178 | 5.13E-46 |
| NCALD     | 3.48E-50 | 0.291235 | 0.283 | 0.062 | 5.20E-46 |
| LNX1      | 3.70E-50 | 0.741493 | 0.267 | 0.01  | 5.53E-46 |
| NFU1      | 4.03E-50 | 0.108083 | 0.304 | 0.101 | 6.02E-46 |
| CELF5     | 4.27E-50 | 0.675066 | 0.261 | 0.005 | 6.38E-46 |
| MESDC2    | 4.31E-50 | -0.605   | 0.221 | 0.19  | 6.44E-46 |
| SPECC1    | 4.32E-50 | 0.413542 | 0.337 | 0.068 | 6.45E-46 |
| MAD1L1    | 4.66E-50 | 0.566896 | 0.272 | 0.019 | 6.97E-46 |
| FADS1     | 4.75E-50 | 0.288524 | 0.286 | 0.058 | 7.10E-46 |
| SECISBP2  | 4.99E-50 | 0.373949 | 0.343 | 0.079 | 7.45E-46 |
| PEG10     | 5.01E-50 | 0.193338 | 0.248 | 0.051 | 7.49E-46 |
| CBWD1     | 5.88E-50 | 0.11064  | 0.282 | 0.087 | 8.79E-46 |
| NUP160    | 6.25E-50 | 0.25879  | 0.257 | 0.05  | 9.34E-46 |
| KPNA3     | 6.73E-50 | 0.147079 | 0.242 | 0.055 | 1.01E-45 |
| HARS      | 7.61E-50 | 0.182429 | 0.313 | 0.091 | 1.14E-45 |
| KLF7      | 7.64E-50 | 0.377311 | 0.286 | 0.05  | 1.14E-45 |
| TMEM33    | 7.71E-50 | 0.26831  | 0.277 | 0.055 | 1.15E-45 |
| USF2      | 8.30E-50 | 0.209954 | 0.282 | 0.068 | 1.24E-45 |
| TTYH3     | 8.75E-50 | 0.370952 | 0.286 | 0.046 | 1.31E-45 |
| CCM2      | 1.03E-49 | 0.203525 | 0.267 | 0.058 | 1.55E-45 |
| RBM10     | 1.10E-49 | 0.263018 | 0.265 | 0.051 | 1.64E-45 |
| LMBR1L    | 1.13E-49 | 0.572487 | 0.289 | 0.026 | 1.69E-45 |
| FAM162A   | 1.25E-49 | -0.92081 | 0.199 | 0.282 | 1.87E-45 |
| RNASEH1   | 1.37E-49 | 0.392477 | 0.285 | 0.043 | 2.05E-45 |
| RING1     | 1.39E-49 | 0.183015 | 0.273 | 0.065 | 2.07E-45 |
| RABL6     | 1.43E-49 | 0.377987 | 0.257 | 0.032 | 2.14E-45 |
| CCDC53    | 1.48E-49 | -0.18406 | 0.277 | 0.132 | 2.21E-45 |
| BLOC1S4   | 1.66E-49 | 0.381137 | 0.276 | 0.039 | 2.48E-45 |
| HYAL2     | 1.82E-49 | 0.475412 | 0.281 | 0.031 | 2.72E-45 |
| COQ7      | 1.83E-49 | 0.298826 | 0.277 | 0.056 | 2.73E-45 |
| USP10     | 1.99E-49 | 0.244132 | 0.272 | 0.055 | 2.98E-45 |
| MYCBP2    | 2.00E-49 | 0.406503 | 0.276 | 0.039 | 2.99E-45 |
| AC004951. | 2.16E-49 | 0.461156 | 0.268 | 0.027 | 3.23E-45 |
| SREK1     | 2.26E-49 | -0.13148 | 0.307 | 0.144 | 3.38E-45 |
| ZC3H8     | 2.58E-49 | 0.401839 | 0.272 | 0.038 | 3.85E-45 |
| SRP68     | 2.92E-49 | 0.139837 | 0.252 | 0.062 | 4.36E-45 |
| CCL4      | 3.04E-49 | 0.286532 | 0.302 | 0.063 | 4.54E-45 |
| CPEB4     | 3.04E-49 | 0.201078 | 0.278 | 0.072 | 4.55E-45 |

|           |          |          |       |       |          |
|-----------|----------|----------|-------|-------|----------|
| FAM134A   | 3.05E-49 | 0.392198 | 0.328 | 0.067 | 4.56E-45 |
| TIPIN     | 3.07E-49 | -0.23155 | 0.204 | 0.08  | 4.58E-45 |
| NUDT11    | 3.21E-49 | 0.28657  | 0.248 | 0.038 | 4.80E-45 |
| AATF      | 3.34E-49 | 0.280781 | 0.307 | 0.07  | 4.99E-45 |
| TRIM9     | 3.50E-49 | -0.18627 | 0.3   | 0.162 | 5.23E-45 |
| PCGF2     | 3.54E-49 | 0.411356 | 0.27  | 0.032 | 5.29E-45 |
| 11-Sep    | 3.72E-49 | -0.19923 | 0.27  | 0.133 | 5.56E-45 |
| CCER2     | 3.74E-49 | 0.563565 | 0.298 | 0.034 | 5.58E-45 |
| ACBD6     | 4.25E-49 | 0.128468 | 0.269 | 0.07  | 6.35E-45 |
| SERTAD1   | 4.77E-49 | -0.86948 | 0.187 | 0.217 | 7.12E-45 |
| RP11-332H | 5.70E-49 | 0.365221 | 0.257 | 0.036 | 8.52E-45 |
| PJA1      | 5.71E-49 | 0.340864 | 0.286 | 0.051 | 8.53E-45 |
| KHSRP     | 6.10E-49 | 0.344197 | 0.269 | 0.043 | 9.11E-45 |
| C19orf48  | 6.58E-49 | 0.217787 | 0.307 | 0.079 | 9.83E-45 |
| NABP2     | 6.74E-49 | -0.25366 | 0.254 | 0.132 | 1.01E-44 |
| PSMD9     | 6.85E-49 | -0.30864 | 0.243 | 0.138 | 1.02E-44 |
| MLST8     | 7.39E-49 | 0.186452 | 0.267 | 0.063 | 1.10E-44 |
| ALDH2     | 8.67E-49 | 0.353925 | 0.32  | 0.072 | 1.30E-44 |
| C1R       | 8.70E-49 | -1.3973  | 0.029 | 0.251 | 1.30E-44 |
| ALKBH2    | 8.71E-49 | 0.107688 | 0.289 | 0.085 | 1.30E-44 |
| LIMD2     | 9.15E-49 | 0.500948 | 0.233 | 0.012 | 1.37E-44 |
| CTSL      | 1.08E-48 | -0.67366 | 0.205 | 0.217 | 1.61E-44 |
| KATNBL1   | 1.16E-48 | 0.273783 | 0.254 | 0.043 | 1.73E-44 |
| MXD4      | 1.28E-48 | 0.575123 | 0.27  | 0.019 | 1.91E-44 |
| DHX15     | 1.31E-48 | 0.239316 | 0.3   | 0.075 | 1.95E-44 |
| WDR46     | 1.33E-48 | 0.145567 | 0.247 | 0.056 | 1.99E-44 |
| UBE2G1    | 1.42E-48 | 0.276551 | 0.267 | 0.051 | 2.12E-44 |
| LRRTM2    | 1.42E-48 | 0.279898 | 0.23  | 0.034 | 2.12E-44 |
| TANK      | 1.49E-48 | -0.23578 | 0.237 | 0.128 | 2.22E-44 |
| ALKBH5    | 1.50E-48 | 0.223498 | 0.283 | 0.065 | 2.24E-44 |
| CISD1     | 1.56E-48 | -0.29083 | 0.281 | 0.162 | 2.33E-44 |
| PJA2      | 1.66E-48 | -0.21971 | 0.248 | 0.121 | 2.48E-44 |
| U2AF2     | 1.87E-48 | 0.31131  | 0.281 | 0.053 | 2.80E-44 |
| CETN2     | 1.95E-48 | -0.68445 | 0.202 | 0.203 | 2.92E-44 |
| EMC8      | 1.98E-48 | 0.275233 | 0.277 | 0.056 | 2.95E-44 |
| TMUB1     | 2.14E-48 | 0.406726 | 0.278 | 0.039 | 3.20E-44 |
| MTMR9     | 2.17E-48 | 0.384411 | 0.287 | 0.05  | 3.24E-44 |
| ZNF32     | 2.22E-48 | 0.233739 | 0.244 | 0.046 | 3.32E-44 |
| B3GAT3    | 2.24E-48 | -0.1519  | 0.289 | 0.132 | 3.34E-44 |
| TMEM54    | 2.29E-48 | 0.194808 | 0.231 | 0.044 | 3.42E-44 |
| BRD9      | 2.44E-48 | 0.416488 | 0.274 | 0.036 | 3.65E-44 |
| GNPTG     | 2.46E-48 | 0.402145 | 0.291 | 0.05  | 3.67E-44 |
| NKAIN3    | 2.46E-48 | 0.504439 | 0.254 | 0.019 | 3.68E-44 |
| RP11-277F | 2.83E-48 | 0.640876 | 0.27  | 0.017 | 4.22E-44 |
| FXYD7     | 3.03E-48 | 0.728191 | 0.306 | 0.032 | 4.53E-44 |
| LRRC17    | 3.13E-48 | 0.256045 | 0.224 | 0.039 | 4.67E-44 |
| APOD      | 3.24E-48 | -0.18821 | 0.364 | 0.207 | 4.84E-44 |
| PTBP2     | 3.86E-48 | 0.460076 | 0.252 | 0.017 | 5.77E-44 |
| CPSF4     | 4.00E-48 | 0.253027 | 0.268 | 0.058 | 5.98E-44 |
| CASC15    | 4.24E-48 | 0.522901 | 0.263 | 0.024 | 6.34E-44 |
| TOX3      | 4.64E-48 | 0.625165 | 0.265 | 0.015 | 6.94E-44 |



|           |          |          |       |       |          |
|-----------|----------|----------|-------|-------|----------|
| PLOD3     | 4.66E-48 | 0.14314  | 0.251 | 0.058 | 6.97E-44 |
| RMND5B    | 4.69E-48 | 0.208329 | 0.215 | 0.036 | 7.01E-44 |
| H2AFX     | 4.83E-48 | 0.473541 | 0.257 | 0.024 | 7.21E-44 |
| EMP3      | 4.97E-48 | -1.18705 | 0.078 | 0.256 | 7.43E-44 |
| ENHO      | 5.19E-48 | 0.554572 | 0.283 | 0.029 | 7.75E-44 |
| PSMB9     | 5.50E-48 | -0.81944 | 0.172 | 0.207 | 8.21E-44 |
| DNPH1     | 5.60E-48 | 0.102389 | 0.319 | 0.113 | 8.37E-44 |
| CELF2     | 6.05E-48 | 0.399877 | 0.33  | 0.068 | 9.05E-44 |
| UBE2D4    | 6.40E-48 | 0.192065 | 0.243 | 0.048 | 9.56E-44 |
| NCBP2-AS2 | 7.26E-48 | 0.514265 | 0.332 | 0.055 | 1.08E-43 |
| ADAR      | 7.88E-48 | 0.152555 | 0.299 | 0.085 | 1.18E-43 |
| KIAA1549  | 8.39E-48 | 0.5801   | 0.248 | 0.009 | 1.25E-43 |
| LONP2     | 9.43E-48 | 0.386663 | 0.319 | 0.065 | 1.41E-43 |
| CHST12    | 9.94E-48 | 0.183788 | 0.317 | 0.094 | 1.49E-43 |
| BTBD17    | 1.03E-47 | 0.594028 | 0.239 | 0.01  | 1.54E-43 |
| PRPF8     | 1.04E-47 | 0.194008 | 0.29  | 0.079 | 1.55E-43 |
| RNF139    | 1.09E-47 | 0.531913 | 0.29  | 0.034 | 1.62E-43 |
| BMPR2     | 1.22E-47 | 0.459164 | 0.27  | 0.031 | 1.83E-43 |
| IGSF21    | 1.25E-47 | 0.487776 | 0.276 | 0.036 | 1.87E-43 |
| TRIM36    | 1.28E-47 | 0.486271 | 0.259 | 0.026 | 1.92E-43 |
| FANCL     | 1.56E-47 | 0.258798 | 0.256 | 0.044 | 2.33E-43 |
| CD164     | 1.74E-47 | -0.56623 | 0.213 | 0.197 | 2.60E-43 |
| ZBED5     | 1.75E-47 | 0.375044 | 0.252 | 0.031 | 2.61E-43 |
| DYNC1I1   | 1.78E-47 | 0.717377 | 0.25  | 0.007 | 2.67E-43 |
| MPPED2    | 1.85E-47 | 0.466805 | 0.222 | 0.009 | 2.77E-43 |
| MCRS1     | 1.87E-47 | 0.264918 | 0.302 | 0.074 | 2.79E-43 |
| DFFA      | 1.94E-47 | 0.125492 | 0.257 | 0.067 | 2.90E-43 |
| MED17     | 2.01E-47 | 0.239639 | 0.268 | 0.056 | 3.01E-43 |
| EBAG9     | 2.46E-47 | 0.251895 | 0.257 | 0.051 | 3.68E-43 |
| NIN       | 2.55E-47 | 0.504152 | 0.25  | 0.019 | 3.81E-43 |
| LINC00665 | 2.56E-47 | -0.30793 | 0.212 | 0.126 | 3.83E-43 |
| ABCF2     | 2.57E-47 | 0.30647  | 0.29  | 0.06  | 3.84E-43 |
| RAD50     | 2.75E-47 | 0.162897 | 0.286 | 0.085 | 4.11E-43 |
| CHD2      | 2.90E-47 | 0.11209  | 0.259 | 0.075 | 4.33E-43 |
| ZNF195    | 2.90E-47 | 0.40961  | 0.278 | 0.043 | 4.34E-43 |
| TSPYL1    | 2.92E-47 | 0.346162 | 0.261 | 0.041 | 4.36E-43 |
| KDM6B     | 3.14E-47 | 0.484714 | 0.255 | 0.024 | 4.69E-43 |
| RQCD1     | 3.22E-47 | 0.205311 | 0.237 | 0.046 | 4.81E-43 |
| CYR61     | 3.37E-47 | -0.81523 | 0.122 | 0.168 | 5.04E-43 |
| WASF2     | 3.58E-47 | -0.31174 | 0.264 | 0.152 | 5.35E-43 |
| RAB8A     | 3.59E-47 | -0.20831 | 0.233 | 0.108 | 5.36E-43 |
| PAAF1     | 3.75E-47 | -0.12648 | 0.252 | 0.111 | 5.60E-43 |
| MLX       | 3.95E-47 | 0.139147 | 0.263 | 0.074 | 5.90E-43 |
| ACTN4     | 4.25E-47 | -0.19415 | 0.296 | 0.157 | 6.36E-43 |
| PSME3     | 4.31E-47 | 0.211492 | 0.241 | 0.051 | 6.45E-43 |
| PPP4R2    | 4.41E-47 | 0.212161 | 0.273 | 0.062 | 6.59E-43 |
| GPANK1    | 4.43E-47 | 0.111645 | 0.246 | 0.062 | 6.62E-43 |
| ZMYM2     | 4.51E-47 | 0.417853 | 0.277 | 0.039 | 6.74E-43 |
| RAC3      | 4.53E-47 | 0.573222 | 0.263 | 0.019 | 6.78E-43 |
| TSPAN14   | 4.83E-47 | 0.483103 | 0.237 | 0.015 | 7.21E-43 |
| USP47     | 5.05E-47 | 0.159941 | 0.289 | 0.077 | 7.54E-43 |

|          |          |          |       |       |          |
|----------|----------|----------|-------|-------|----------|
| AK2      | 5.32E-47 | -0.65735 | 0.254 | 0.212 | 7.96E-43 |
| ROCK1    | 5.44E-47 | 0.284498 | 0.27  | 0.051 | 8.13E-43 |
| RNF126   | 5.86E-47 | 0.391678 | 0.296 | 0.053 | 8.76E-43 |
| NLGN3    | 6.05E-47 | 0.225643 | 0.25  | 0.05  | 9.05E-43 |
| EFEMP1   | 6.45E-47 | -0.73056 | 0.181 | 0.193 | 9.63E-43 |
| CHMP2B   | 6.46E-47 | -0.17471 | 0.234 | 0.089 | 9.65E-43 |
| NTHL1    | 6.54E-47 | 0.105969 | 0.248 | 0.072 | 9.77E-43 |
| SLAIN1   | 6.68E-47 | 0.521139 | 0.252 | 0.019 | 9.98E-43 |
| PCDH9    | 6.75E-47 | -0.66566 | 0.19  | 0.195 | 1.01E-42 |
| TRIM2    | 7.44E-47 | 0.276677 | 0.281 | 0.06  | 1.11E-42 |
| CIAO1    | 8.63E-47 | 0.234143 | 0.25  | 0.05  | 1.29E-42 |
| AKAP7    | 8.72E-47 | 0.257381 | 0.295 | 0.072 | 1.30E-42 |
| NTRK3    | 9.18E-47 | 0.299734 | 0.228 | 0.029 | 1.37E-42 |
| SMOX     | 9.57E-47 | -0.384   | 0.222 | 0.138 | 1.43E-42 |
| TMEM222  | 1.01E-46 | -0.17059 | 0.269 | 0.125 | 1.51E-42 |
| TNPO1    | 1.15E-46 | 0.159633 | 0.286 | 0.08  | 1.72E-42 |
| DRG1     | 1.15E-46 | 0.1932   | 0.282 | 0.07  | 1.72E-42 |
| EHMT2    | 1.17E-46 | 0.548527 | 0.319 | 0.046 | 1.74E-42 |
| HMGXB4   | 1.18E-46 | 0.265388 | 0.255 | 0.048 | 1.77E-42 |
| COPB1    | 1.21E-46 | -0.18791 | 0.242 | 0.113 | 1.80E-42 |
| GOLT1B   | 1.27E-46 | -0.24575 | 0.2   | 0.084 | 1.90E-42 |
| DEF8     | 1.34E-46 | 0.152723 | 0.257 | 0.065 | 2.01E-42 |
| TDG      | 1.36E-46 | 0.168517 | 0.298 | 0.085 | 2.03E-42 |
| GGA1     | 1.38E-46 | 0.215153 | 0.289 | 0.077 | 2.06E-42 |
| TP53I3   | 1.42E-46 | 0.509713 | 0.259 | 0.022 | 2.12E-42 |
| PID1     | 1.43E-46 | 0.448239 | 0.267 | 0.034 | 2.14E-42 |
| CDC42SE1 | 1.47E-46 | 0.180291 | 0.295 | 0.082 | 2.20E-42 |
| WDR77    | 1.53E-46 | 0.191026 | 0.238 | 0.05  | 2.29E-42 |
| ZCCHC11  | 1.66E-46 | 0.147956 | 0.268 | 0.07  | 2.47E-42 |
| KHDRBS3  | 1.67E-46 | 0.118307 | 0.287 | 0.085 | 2.49E-42 |
| RBM15B   | 1.77E-46 | 0.529132 | 0.252 | 0.019 | 2.64E-42 |
| SRGAP1   | 1.89E-46 | 0.19901  | 0.239 | 0.051 | 2.83E-42 |
| MYL12A   | 1.94E-46 | -0.62978 | 0.189 | 0.152 | 2.90E-42 |
| PHF20    | 2.04E-46 | 0.121506 | 0.296 | 0.092 | 3.05E-42 |
| DPF2     | 2.06E-46 | 0.181258 | 0.281 | 0.07  | 3.07E-42 |
| TRIM28   | 2.08E-46 | 0.164159 | 0.291 | 0.087 | 3.10E-42 |
| MT1F     | 2.20E-46 | -0.41835 | 0.238 | 0.174 | 3.29E-42 |
| PKIB     | 2.34E-46 | -0.40448 | 0.195 | 0.125 | 3.50E-42 |
| ATG3     | 2.40E-46 | -0.11124 | 0.234 | 0.091 | 3.58E-42 |
| GGH      | 2.42E-46 | 0.209036 | 0.29  | 0.077 | 3.62E-42 |
| IFT43    | 2.69E-46 | -0.14776 | 0.26  | 0.123 | 4.01E-42 |
| TLK1     | 2.74E-46 | 0.235432 | 0.272 | 0.062 | 4.09E-42 |
| SHARPIN  | 2.90E-46 | 0.33498  | 0.269 | 0.05  | 4.33E-42 |
| METAP1D  | 3.06E-46 | 0.357137 | 0.308 | 0.065 | 4.57E-42 |
| ABRACL   | 3.14E-46 | 0.212398 | 0.222 | 0.032 | 4.69E-42 |
| C16orf91 | 3.15E-46 | 0.257227 | 0.247 | 0.046 | 4.71E-42 |
| PNPT1    | 3.17E-46 | 0.238443 | 0.286 | 0.072 | 4.74E-42 |
| ZBTB1    | 3.30E-46 | 0.247164 | 0.221 | 0.034 | 4.93E-42 |
| FAM126B  | 3.37E-46 | 0.190635 | 0.234 | 0.048 | 5.03E-42 |
| GLYR1    | 3.43E-46 | 0.286307 | 0.244 | 0.041 | 5.13E-42 |
| LRRC4B   | 3.47E-46 | 0.466963 | 0.237 | 0.015 | 5.19E-42 |

|           |          |          |       |       |          |
|-----------|----------|----------|-------|-------|----------|
| KAT7      | 3.59E-46 | 0.347086 | 0.252 | 0.038 | 5.36E-42 |
| CYHR1     | 3.74E-46 | 0.284391 | 0.325 | 0.089 | 5.59E-42 |
| PRKAG1    | 3.82E-46 | 0.141241 | 0.3   | 0.094 | 5.71E-42 |
| RNASEH1-A | 3.90E-46 | 0.293433 | 0.255 | 0.048 | 5.82E-42 |
| DERL2     | 3.91E-46 | -0.43356 | 0.226 | 0.142 | 5.84E-42 |
| TRAPPC2P1 | 3.92E-46 | -0.32476 | 0.226 | 0.13  | 5.86E-42 |
| FAM50A    | 4.01E-46 | 0.141267 | 0.304 | 0.099 | 5.99E-42 |
| MTIF3     | 4.59E-46 | -0.20651 | 0.246 | 0.12  | 6.86E-42 |
| EXOC4     | 4.77E-46 | 0.23438  | 0.259 | 0.05  | 7.13E-42 |
| ARMC8     | 4.93E-46 | -0.11623 | 0.244 | 0.092 | 7.36E-42 |
| COPRS     | 5.26E-46 | 0.193152 | 0.276 | 0.072 | 7.86E-42 |
| SAMM50    | 5.33E-46 | 0.329307 | 0.254 | 0.043 | 7.96E-42 |
| YIF1B     | 5.42E-46 | -0.11259 | 0.231 | 0.103 | 8.10E-42 |
| HOXA7     | 5.54E-46 | 0.325075 | 0.255 | 0.043 | 8.27E-42 |
| REXO2     | 5.61E-46 | -0.74725 | 0.174 | 0.186 | 8.38E-42 |
| RNF146    | 5.79E-46 | 0.132211 | 0.278 | 0.082 | 8.66E-42 |
| PXMP2     | 5.89E-46 | 0.174743 | 0.248 | 0.058 | 8.81E-42 |
| BEND5     | 6.18E-46 | 0.219359 | 0.251 | 0.05  | 9.23E-42 |
| SMIM19    | 6.50E-46 | 0.15279  | 0.278 | 0.082 | 9.71E-42 |
| RERE      | 6.85E-46 | 0.264894 | 0.269 | 0.058 | 1.02E-41 |
| PCDHB10   | 7.46E-46 | 0.510874 | 0.238 | 0.015 | 1.12E-41 |
| PLIN3     | 7.93E-46 | -0.58683 | 0.192 | 0.183 | 1.19E-41 |
| MEIS3     | 9.35E-46 | 0.31693  | 0.215 | 0.026 | 1.40E-41 |
| MICU2     | 9.87E-46 | 0.189334 | 0.244 | 0.055 | 1.47E-41 |
| GART      | 1.03E-45 | 0.241508 | 0.263 | 0.056 | 1.54E-41 |
| MFGES     | 1.04E-45 | 0.114635 | 0.234 | 0.062 | 1.56E-41 |
| AIG1      | 1.11E-45 | -0.29193 | 0.216 | 0.12  | 1.65E-41 |
| DHX30     | 1.15E-45 | 0.313514 | 0.29  | 0.062 | 1.71E-41 |
| ANKRD46   | 1.22E-45 | 0.346716 | 0.287 | 0.056 | 1.82E-41 |
| UCP2      | 1.28E-45 | 0.402717 | 0.211 | 0.017 | 1.91E-41 |
| CIB1      | 1.37E-45 | -0.8837  | 0.15  | 0.229 | 2.05E-41 |
| AC004540. | 1.43E-45 | 0.598415 | 0.242 | 0.012 | 2.14E-41 |
| NECAP2    | 1.51E-45 | -0.23044 | 0.23  | 0.096 | 2.25E-41 |
| AK3       | 1.52E-45 | 0.120489 | 0.251 | 0.068 | 2.28E-41 |
| CD47      | 1.80E-45 | 0.119316 | 0.257 | 0.074 | 2.68E-41 |
| TINF2     | 1.87E-45 | 0.106118 | 0.229 | 0.056 | 2.80E-41 |
| RTCA      | 1.91E-45 | 0.103794 | 0.248 | 0.07  | 2.85E-41 |
| SCAMP3    | 1.93E-45 | -0.22688 | 0.251 | 0.121 | 2.88E-41 |
| SHISA4    | 1.93E-45 | -0.11875 | 0.255 | 0.116 | 2.88E-41 |
| EIF2AK2   | 1.97E-45 | 0.184923 | 0.283 | 0.075 | 2.94E-41 |
| APPL1     | 2.03E-45 | 0.198338 | 0.25  | 0.058 | 3.04E-41 |
| LINC00511 | 2.06E-45 | 0.463443 | 0.269 | 0.032 | 3.08E-41 |
| CYB5B     | 2.35E-45 | -0.36898 | 0.231 | 0.147 | 3.51E-41 |
| TAF12     | 2.40E-45 | -0.3895  | 0.228 | 0.152 | 3.59E-41 |
| CCAR1     | 2.56E-45 | 0.265187 | 0.291 | 0.067 | 3.83E-41 |
| CD44      | 2.60E-45 | -1.3729  | 0.025 | 0.231 | 3.89E-41 |
| HLA-E     | 2.61E-45 | -0.98095 | 0.14  | 0.248 | 3.89E-41 |
| CNOT8     | 2.98E-45 | 0.243988 | 0.215 | 0.032 | 4.45E-41 |
| TOPORS    | 2.99E-45 | 0.409155 | 0.247 | 0.031 | 4.47E-41 |
| CEBPD     | 3.22E-45 | -0.60641 | 0.241 | 0.251 | 4.82E-41 |
| TTC9B     | 3.33E-45 | 0.650548 | 0.286 | 0.029 | 4.97E-41 |

|           |          |          |       |       |          |
|-----------|----------|----------|-------|-------|----------|
| MAPK8IP1  | 3.33E-45 | 0.202373 | 0.256 | 0.058 | 4.97E-41 |
| ZHX1      | 3.39E-45 | 0.404237 | 0.287 | 0.048 | 5.07E-41 |
| ZNF883    | 3.58E-45 | 0.221654 | 0.23  | 0.044 | 5.34E-41 |
| SLC39A1   | 3.60E-45 | -0.12652 | 0.239 | 0.104 | 5.38E-41 |
| ZNF738    | 3.91E-45 | 0.166097 | 0.237 | 0.056 | 5.84E-41 |
| POLR3GL   | 3.91E-45 | -0.49003 | 0.237 | 0.174 | 5.84E-41 |
| RGMB      | 3.92E-45 | 0.591954 | 0.32  | 0.053 | 5.86E-41 |
| MCFD2     | 4.09E-45 | -0.13669 | 0.242 | 0.099 | 6.11E-41 |
| ZNF254    | 4.09E-45 | 0.284519 | 0.238 | 0.041 | 6.12E-41 |
| UFM1      | 4.25E-45 | -0.25414 | 0.267 | 0.144 | 6.36E-41 |
| MNAT1     | 4.26E-45 | 0.252414 | 0.287 | 0.067 | 6.37E-41 |
| PRPF19    | 4.33E-45 | 0.194904 | 0.265 | 0.065 | 6.47E-41 |
| SBN01     | 4.39E-45 | 0.263401 | 0.291 | 0.072 | 6.56E-41 |
| C2orf68   | 4.44E-45 | 0.393192 | 0.235 | 0.026 | 6.63E-41 |
| DUSP26    | 4.86E-45 | 0.638029 | 0.273 | 0.024 | 7.26E-41 |
| TOR1A     | 4.96E-45 | 0.248974 | 0.247 | 0.05  | 7.41E-41 |
| C7orf49   | 5.01E-45 | 0.218351 | 0.226 | 0.043 | 7.48E-41 |
| NUP62     | 6.13E-45 | 0.18945  | 0.264 | 0.063 | 9.17E-41 |
| EIF2B4    | 6.52E-45 | 0.400791 | 0.268 | 0.039 | 9.74E-41 |
| SLC52A2   | 6.56E-45 | 0.415621 | 0.285 | 0.048 | 9.81E-41 |
| PDE6D     | 8.01E-45 | 0.352291 | 0.273 | 0.05  | 1.20E-40 |
| OLFM1     | 8.05E-45 | 0.334151 | 0.285 | 0.06  | 1.20E-40 |
| CHERP     | 8.11E-45 | 0.429318 | 0.254 | 0.029 | 1.21E-40 |
| BLOC1S2   | 8.89E-45 | -0.18041 | 0.251 | 0.121 | 1.33E-40 |
| METTL21A  | 9.56E-45 | 0.209078 | 0.247 | 0.048 | 1.43E-40 |
| TMEM50B   | 1.00E-44 | -0.23696 | 0.242 | 0.137 | 1.50E-40 |
| SYT17     | 1.05E-44 | 0.301493 | 0.255 | 0.046 | 1.57E-40 |
| ACO09506. | 1.08E-44 | 0.556688 | 0.257 | 0.024 | 1.62E-40 |
| ZBED1     | 1.09E-44 | 0.447152 | 0.231 | 0.019 | 1.63E-40 |
| C2orf80   | 1.13E-44 | 0.265183 | 0.239 | 0.046 | 1.70E-40 |
| TOB1      | 1.15E-44 | 0.133742 | 0.256 | 0.067 | 1.72E-40 |
| GADD45A   | 1.20E-44 | -0.86757 | 0.166 | 0.222 | 1.79E-40 |
| CGGBP1    | 1.23E-44 | 0.122816 | 0.25  | 0.065 | 1.84E-40 |
| FBXL3     | 1.28E-44 | 0.300366 | 0.242 | 0.041 | 1.92E-40 |
| ELP2      | 1.38E-44 | -0.15956 | 0.229 | 0.103 | 2.06E-40 |
| SMIM20    | 1.50E-44 | -0.25598 | 0.238 | 0.123 | 2.24E-40 |
| POMGNT1   | 1.53E-44 | 0.217307 | 0.267 | 0.06  | 2.28E-40 |
| SMC6      | 1.55E-44 | 0.502505 | 0.264 | 0.029 | 2.32E-40 |
| TMEM97    | 1.64E-44 | 0.312656 | 0.239 | 0.039 | 2.45E-40 |
| EFS       | 1.66E-44 | 0.532947 | 0.263 | 0.024 | 2.48E-40 |
| ABCE1     | 1.79E-44 | 0.142768 | 0.259 | 0.068 | 2.68E-40 |
| DNTTIP2   | 2.00E-44 | 0.236317 | 0.28  | 0.07  | 2.99E-40 |
| ENO2      | 2.10E-44 | -0.52784 | 0.244 | 0.191 | 3.14E-40 |
| CYFIP2    | 2.11E-44 | 0.360477 | 0.225 | 0.027 | 3.15E-40 |
| RASSF2    | 2.11E-44 | 0.19271  | 0.265 | 0.067 | 3.15E-40 |
| VPS26B    | 2.15E-44 | 0.308515 | 0.251 | 0.046 | 3.21E-40 |
| COR01B    | 2.25E-44 | 0.229601 | 0.251 | 0.053 | 3.36E-40 |
| MTX1      | 2.26E-44 | -0.27219 | 0.181 | 0.082 | 3.37E-40 |
| GNG4      | 2.39E-44 | 0.267761 | 0.221 | 0.034 | 3.57E-40 |
| NR3C1     | 2.62E-44 | 0.31804  | 0.299 | 0.072 | 3.91E-40 |
| UBA3      | 2.86E-44 | 0.159386 | 0.273 | 0.079 | 4.28E-40 |

|          |          |          |       |       |          |
|----------|----------|----------|-------|-------|----------|
| ARHGEF7  | 2.91E-44 | 0.294477 | 0.26  | 0.053 | 4.36E-40 |
| POGZ     | 2.99E-44 | 0.138748 | 0.268 | 0.074 | 4.46E-40 |
| SNAP25   | 2.99E-44 | -0.12913 | 0.22  | 0.101 | 4.47E-40 |
| GLT8D1   | 3.09E-44 | 0.124059 | 0.264 | 0.075 | 4.62E-40 |
| RBCK1    | 3.28E-44 | 0.137541 | 0.247 | 0.063 | 4.90E-40 |
| TMEM55B  | 3.33E-44 | 0.290274 | 0.248 | 0.044 | 4.97E-40 |
| FRYL     | 3.41E-44 | 0.566051 | 0.283 | 0.031 | 5.10E-40 |
| PRRC2B   | 3.53E-44 | 0.330773 | 0.257 | 0.044 | 5.27E-40 |
| RABEPK   | 3.58E-44 | -0.14005 | 0.199 | 0.077 | 5.34E-40 |
| CUL3     | 3.59E-44 | 0.38015  | 0.256 | 0.041 | 5.37E-40 |
| MEX3B    | 3.77E-44 | 0.553944 | 0.218 | 0.005 | 5.64E-40 |
| FLYWCH2  | 4.36E-44 | -0.11132 | 0.268 | 0.123 | 6.51E-40 |
| YARS     | 4.38E-44 | -0.2481  | 0.203 | 0.096 | 6.54E-40 |
| CIQC     | 4.57E-44 | -0.26853 | 0.226 | 0.125 | 6.83E-40 |
| TOMM5    | 4.83E-44 | -0.10511 | 0.166 | 0.053 | 7.22E-40 |
| RNF165   | 5.61E-44 | 0.478319 | 0.23  | 0.015 | 8.39E-40 |
| FCGRT    | 5.67E-44 | -0.7129  | 0.163 | 0.183 | 8.47E-40 |
| MED24    | 5.71E-44 | 0.315473 | 0.241 | 0.036 | 8.53E-40 |
| ACTR6    | 5.76E-44 | 0.246497 | 0.257 | 0.056 | 8.61E-40 |
| FOXN3    | 6.31E-44 | 0.227996 | 0.251 | 0.056 | 9.43E-40 |
| HOXB7    | 6.44E-44 | 0.357314 | 0.209 | 0.021 | 9.63E-40 |
| SLC30A9  | 6.45E-44 | 0.30368  | 0.273 | 0.056 | 9.63E-40 |
| SWI5     | 6.56E-44 | -0.33051 | 0.192 | 0.103 | 9.80E-40 |
| SEPHS2   | 6.77E-44 | 0.147563 | 0.251 | 0.068 | 1.01E-39 |
| VTI1B    | 7.39E-44 | 0.198962 | 0.289 | 0.085 | 1.10E-39 |
| DFNA5    | 7.41E-44 | 0.102364 | 0.242 | 0.068 | 1.11E-39 |
| PHC2     | 7.42E-44 | 0.217375 | 0.244 | 0.053 | 1.11E-39 |
| SRPRB    | 7.57E-44 | 0.137732 | 0.264 | 0.065 | 1.13E-39 |
| SMOC1    | 7.60E-44 | 0.798396 | 0.22  | 0.002 | 1.14E-39 |
| EIF3A    | 8.13E-44 | 0.240229 | 0.286 | 0.072 | 1.21E-39 |
| ASAP1    | 8.25E-44 | 0.40561  | 0.277 | 0.044 | 1.23E-39 |
| KCNH2    | 8.47E-44 | 0.439399 | 0.225 | 0.017 | 1.27E-39 |
| PBRM1    | 8.73E-44 | 0.37686  | 0.278 | 0.05  | 1.30E-39 |
| MOB3B    | 8.93E-44 | 0.517135 | 0.242 | 0.017 | 1.33E-39 |
| BRE      | 9.66E-44 | -0.18608 | 0.202 | 0.092 | 1.44E-39 |
| GOSR1    | 9.84E-44 | 0.105178 | 0.269 | 0.084 | 1.47E-39 |
| PABPC4   | 1.02E-43 | 0.26709  | 0.252 | 0.048 | 1.53E-39 |
| CSRNP3   | 1.16E-43 | 0.53589  | 0.229 | 0.012 | 1.73E-39 |
| CLCN3    | 1.20E-43 | 0.204206 | 0.283 | 0.077 | 1.80E-39 |
| GOT2     | 1.24E-43 | 0.263317 | 0.242 | 0.048 | 1.85E-39 |
| PSMA6    | 1.35E-43 | -0.32326 | 0.228 | 0.14  | 2.02E-39 |
| RAB18    | 1.37E-43 | -0.11192 | 0.298 | 0.147 | 2.05E-39 |
| SLBP     | 1.40E-43 | 0.228922 | 0.281 | 0.07  | 2.10E-39 |
| SUPT5H   | 1.43E-43 | 0.183476 | 0.283 | 0.082 | 2.14E-39 |
| ID3      | 1.64E-43 | -0.56495 | 0.177 | 0.126 | 2.45E-39 |
| PUM1     | 1.85E-43 | 0.287704 | 0.276 | 0.053 | 2.76E-39 |
| SERPINB6 | 1.90E-43 | -0.18318 | 0.26  | 0.13  | 2.83E-39 |
| PRDM2    | 2.01E-43 | 0.298409 | 0.229 | 0.034 | 3.00E-39 |
| FAM96A   | 2.01E-43 | -0.3162  | 0.225 | 0.135 | 3.00E-39 |
| LRIF1    | 2.08E-43 | -0.1194  | 0.231 | 0.091 | 3.11E-39 |
| GTF2IRD2 | 2.19E-43 | 0.28328  | 0.242 | 0.048 | 3.28E-39 |

|          |          |          |       |       |          |
|----------|----------|----------|-------|-------|----------|
| CCDC136  | 2.50E-43 | 0.348349 | 0.216 | 0.021 | 3.74E-39 |
| TMEM35   | 2.55E-43 | 0.458379 | 0.241 | 0.024 | 3.81E-39 |
| TMA16    | 2.65E-43 | 0.143584 | 0.256 | 0.072 | 3.96E-39 |
| POM121   | 2.68E-43 | 0.307815 | 0.234 | 0.036 | 4.00E-39 |
| SPATC1L  | 3.39E-43 | 0.323052 | 0.246 | 0.039 | 5.07E-39 |
| ZNF277   | 3.50E-43 | 0.259049 | 0.264 | 0.055 | 5.23E-39 |
| PFKM     | 3.53E-43 | 0.318131 | 0.27  | 0.053 | 5.28E-39 |
| CTNNB1   | 3.81E-43 | 0.302914 | 0.313 | 0.082 | 5.70E-39 |
| GNAI1    | 3.82E-43 | 0.5883   | 0.222 | 0.005 | 5.71E-39 |
| ZNF138   | 4.04E-43 | 0.46445  | 0.28  | 0.041 | 6.04E-39 |
| INTS10   | 4.08E-43 | 0.113058 | 0.269 | 0.085 | 6.10E-39 |
| CAV1     | 4.54E-43 | -1.35658 | 0.057 | 0.212 | 6.78E-39 |
| LRP6     | 4.95E-43 | 0.463989 | 0.237 | 0.021 | 7.40E-39 |
| BFAR     | 5.14E-43 | 0.264467 | 0.257 | 0.053 | 7.68E-39 |
| APC      | 5.34E-43 | 0.482173 | 0.274 | 0.038 | 7.99E-39 |
| ANXA2    | 5.37E-43 | -1.24855 | 0.098 | 0.287 | 8.03E-39 |
| TRIM27   | 5.72E-43 | 0.291719 | 0.244 | 0.046 | 8.55E-39 |
| NUPR1    | 5.79E-43 | -1.25309 | 0.086 | 0.234 | 8.66E-39 |
| LMNB1    | 5.89E-43 | 0.442174 | 0.229 | 0.021 | 8.80E-39 |
| GLG1     | 6.19E-43 | 0.107175 | 0.248 | 0.072 | 9.25E-39 |
| FNBP4    | 6.21E-43 | 0.31054  | 0.282 | 0.063 | 9.28E-39 |
| UGDH     | 6.42E-43 | 0.179327 | 0.242 | 0.06  | 9.60E-39 |
| PPP1R8   | 6.48E-43 | -0.15752 | 0.189 | 0.068 | 9.68E-39 |
| IRF1     | 6.51E-43 | -0.11217 | 0.286 | 0.138 | 9.73E-39 |
| NUDCD3   | 6.94E-43 | 0.246861 | 0.27  | 0.065 | 1.04E-38 |
| FMNL2    | 6.94E-43 | 0.560798 | 0.264 | 0.026 | 1.04E-38 |
| PLTP     | 7.17E-43 | -0.78112 | 0.131 | 0.19  | 1.07E-38 |
| ANAPC7   | 7.45E-43 | 0.163489 | 0.222 | 0.051 | 1.11E-38 |
| CRELD2   | 7.64E-43 | 0.386565 | 0.246 | 0.034 | 1.14E-38 |
| PES1     | 7.82E-43 | 0.264092 | 0.221 | 0.036 | 1.17E-38 |
| RAP1B    | 8.04E-43 | -0.4904  | 0.19  | 0.15  | 1.20E-38 |
| 8-Sep    | 8.27E-43 | 0.217597 | 0.264 | 0.065 | 1.24E-38 |
| DLX2     | 8.44E-43 | 0.707719 | 0.25  | 0.014 | 1.26E-38 |
| CMTM3    | 9.29E-43 | 0.293962 | 0.255 | 0.05  | 1.39E-38 |
| TANC2    | 9.70E-43 | 0.404405 | 0.254 | 0.031 | 1.45E-38 |
| SCNM1    | 9.92E-43 | -0.22698 | 0.27  | 0.149 | 1.48E-38 |
| SAR1A    | 1.02E-42 | -0.1197  | 0.217 | 0.087 | 1.53E-38 |
| CLIC4    | 1.03E-42 | -0.36179 | 0.254 | 0.176 | 1.54E-38 |
| BET1     | 1.03E-42 | -0.24991 | 0.222 | 0.13  | 1.54E-38 |
| NIPSNAP1 | 1.03E-42 | 0.423868 | 0.229 | 0.022 | 1.54E-38 |
| C17orf62 | 1.07E-42 | 0.190361 | 0.265 | 0.072 | 1.61E-38 |
| ILK      | 1.08E-42 | -0.58807 | 0.183 | 0.154 | 1.61E-38 |
| CSTF2T   | 1.11E-42 | 0.327393 | 0.198 | 0.017 | 1.66E-38 |
| CTSA     | 1.15E-42 | -0.26943 | 0.213 | 0.097 | 1.73E-38 |
| CAHM     | 1.16E-42 | 0.521022 | 0.224 | 0.012 | 1.74E-38 |
| CTNNBIP1 | 1.21E-42 | 0.315008 | 0.213 | 0.026 | 1.81E-38 |
| RBM14    | 1.22E-42 | 0.292332 | 0.226 | 0.034 | 1.82E-38 |
| PPP1R14A | 1.26E-42 | 0.381823 | 0.247 | 0.041 | 1.88E-38 |
| CNPY1    | 1.34E-42 | 0.528145 | 0.246 | 0.021 | 2.01E-38 |
| SIAH2    | 1.36E-42 | 0.489907 | 0.254 | 0.026 | 2.03E-38 |
| SLC12A9  | 1.46E-42 | 0.377533 | 0.221 | 0.024 | 2.18E-38 |

|           |           |           |        |        |           |
|-----------|-----------|-----------|--------|--------|-----------|
| SERP2     | 1. 61E-42 | 0. 445632 | 0. 231 | 0. 021 | 2. 40E-38 |
| TRMT61B   | 1. 63E-42 | 0. 128068 | 0. 238 | 0. 06  | 2. 43E-38 |
| ELAVL2    | 1. 66E-42 | 0. 509681 | 0. 212 | 0. 005 | 2. 47E-38 |
| TMED1     | 1. 68E-42 | -0. 66577 | 0. 187 | 0. 195 | 2. 51E-38 |
| FAM173A   | 1. 68E-42 | 0. 323631 | 0. 273 | 0. 055 | 2. 51E-38 |
| VMA21     | 1. 69E-42 | 0. 106479 | 0. 226 | 0. 058 | 2. 52E-38 |
| EVL       | 1. 74E-42 | 0. 45466  | 0. 302 | 0. 055 | 2. 60E-38 |
| PILRB     | 1. 88E-42 | 0. 245264 | 0. 261 | 0. 06  | 2. 82E-38 |
| HLA-DPB1  | 2. 05E-42 | -0. 65131 | 0. 155 | 0. 162 | 3. 07E-38 |
| GOS2      | 2. 06E-42 | -0. 14741 | 0. 186 | 0. 068 | 3. 08E-38 |
| POP4      | 2. 08E-42 | -0. 15865 | 0. 237 | 0. 108 | 3. 10E-38 |
| CHORDC1   | 2. 09E-42 | 0. 114674 | 0. 228 | 0. 06  | 3. 12E-38 |
| NMRAL1    | 2. 10E-42 | -0. 26145 | 0. 203 | 0. 106 | 3. 14E-38 |
| PYCR1     | 2. 14E-42 | 0. 336683 | 0. 281 | 0. 058 | 3. 20E-38 |
| LTV1      | 2. 19E-42 | 0. 22184  | 0. 208 | 0. 034 | 3. 27E-38 |
| PRRC2A    | 2. 22E-42 | 0. 385423 | 0. 278 | 0. 053 | 3. 32E-38 |
| MGRN1     | 2. 23E-42 | 0. 389787 | 0. 264 | 0. 039 | 3. 33E-38 |
| DUSP10    | 2. 56E-42 | 0. 273307 | 0. 27  | 0. 063 | 3. 82E-38 |
| METTL21B  | 2. 56E-42 | 0. 322621 | 0. 194 | 0. 017 | 3. 83E-38 |
| USP42     | 2. 57E-42 | 0. 519203 | 0. 234 | 0. 014 | 3. 84E-38 |
| YAE1D1    | 2. 96E-42 | 0. 355208 | 0. 281 | 0. 06  | 4. 43E-38 |
| PGM2L1    | 3. 11E-42 | -0. 26934 | 0. 264 | 0. 159 | 4. 64E-38 |
| MTHFD2L   | 3. 27E-42 | 0. 200892 | 0. 251 | 0. 065 | 4. 88E-38 |
| SMC3      | 3. 42E-42 | 0. 418987 | 0. 308 | 0. 063 | 5. 11E-38 |
| IPO5      | 3. 47E-42 | 0. 21408  | 0. 242 | 0. 055 | 5. 19E-38 |
| PPAT      | 3. 57E-42 | 0. 458368 | 0. 23  | 0. 022 | 5. 33E-38 |
| PHKB      | 3. 77E-42 | 0. 244705 | 0. 229 | 0. 048 | 5. 63E-38 |
| HECTD1    | 3. 98E-42 | 0. 367991 | 0. 256 | 0. 041 | 5. 94E-38 |
| MIF4GD    | 4. 00E-42 | 0. 15465  | 0. 224 | 0. 055 | 5. 97E-38 |
| KDM5A     | 4. 08E-42 | 0. 295818 | 0. 27  | 0. 056 | 6. 10E-38 |
| PHACTR4   | 4. 17E-42 | 0. 228162 | 0. 263 | 0. 063 | 6. 22E-38 |
| APBB1     | 4. 24E-42 | 0. 300108 | 0. 231 | 0. 039 | 6. 33E-38 |
| NF1       | 4. 26E-42 | 0. 289623 | 0. 263 | 0. 056 | 6. 37E-38 |
| TMEM203   | 4. 45E-42 | 0. 138825 | 0. 241 | 0. 06  | 6. 65E-38 |
| HIP1R     | 4. 70E-42 | 0. 514274 | 0. 267 | 0. 029 | 7. 03E-38 |
| APC2      | 4. 78E-42 | 0. 468386 | 0. 272 | 0. 041 | 7. 15E-38 |
| TSR2      | 5. 21E-42 | 0. 153619 | 0. 278 | 0. 085 | 7. 78E-38 |
| SYT1      | 6. 34E-42 | 0. 568706 | 0. 222 | 0. 009 | 9. 48E-38 |
| MTMR4     | 6. 35E-42 | 0. 316812 | 0. 213 | 0. 026 | 9. 48E-38 |
| WNK1      | 6. 76E-42 | 0. 163689 | 0. 23  | 0. 055 | 1. 01E-37 |
| PRADC1    | 7. 08E-42 | 0. 260912 | 0. 218 | 0. 038 | 1. 06E-37 |
| B4GALT3   | 7. 12E-42 | 0. 165599 | 0. 243 | 0. 062 | 1. 06E-37 |
| ZCCHC10   | 7. 36E-42 | 0. 153314 | 0. 27  | 0. 082 | 1. 10E-37 |
| SNX1      | 8. 27E-42 | 0. 167163 | 0. 222 | 0. 048 | 1. 24E-37 |
| ECI1      | 8. 53E-42 | 0. 200497 | 0. 211 | 0. 038 | 1. 28E-37 |
| NLGN2     | 8. 68E-42 | 0. 41086  | 0. 211 | 0. 017 | 1. 30E-37 |
| LINC00844 | 8. 79E-42 | 0. 3488   | 0. 269 | 0. 056 | 1. 31E-37 |
| VARS      | 9. 59E-42 | 0. 311899 | 0. 215 | 0. 027 | 1. 43E-37 |
| HDAC3     | 9. 70E-42 | 0. 189241 | 0. 247 | 0. 062 | 1. 45E-37 |
| MRPS25    | 9. 86E-42 | -0. 1251  | 0. 222 | 0. 096 | 1. 47E-37 |
| CPSF3     | 1. 07E-41 | 0. 297086 | 0. 237 | 0. 038 | 1. 60E-37 |

|           |          |          |       |       |          |
|-----------|----------|----------|-------|-------|----------|
| REC8      | 1.09E-41 | 0.421452 | 0.22  | 0.021 | 1.64E-37 |
| MDM4      | 1.11E-41 | 0.281666 | 0.311 | 0.082 | 1.66E-37 |
| MPZL1     | 1.16E-41 | 0.373487 | 0.259 | 0.041 | 1.73E-37 |
| IRF2BP2   | 1.27E-41 | 0.141269 | 0.302 | 0.108 | 1.90E-37 |
| CCS       | 1.29E-41 | -0.21333 | 0.22  | 0.113 | 1.92E-37 |
| DDA1      | 1.37E-41 | -0.19998 | 0.233 | 0.121 | 2.05E-37 |
| NBPF1     | 1.38E-41 | 0.257513 | 0.228 | 0.039 | 2.06E-37 |
| FDFT1     | 1.48E-41 | -0.10205 | 0.248 | 0.109 | 2.21E-37 |
| GTPBP6    | 1.53E-41 | 0.108745 | 0.218 | 0.051 | 2.29E-37 |
| GRIA3     | 1.59E-41 | 0.178029 | 0.267 | 0.074 | 2.38E-37 |
| CAPZA1    | 1.73E-41 | 0.11717  | 0.235 | 0.065 | 2.58E-37 |
| PTPRD     | 1.74E-41 | 0.548291 | 0.22  | 0.009 | 2.60E-37 |
| CNPPD1    | 1.78E-41 | 0.209082 | 0.237 | 0.05  | 2.66E-37 |
| PKIA      | 1.96E-41 | 0.431035 | 0.218 | 0.017 | 2.93E-37 |
| CHTF8     | 1.96E-41 | 0.232392 | 0.191 | 0.026 | 2.93E-37 |
| ZNF493    | 2.01E-41 | 0.225378 | 0.255 | 0.06  | 3.00E-37 |
| ABHD12    | 2.12E-41 | 0.149323 | 0.256 | 0.067 | 3.17E-37 |
| SNRPN     | 2.12E-41 | -1.02697 | 0.095 | 0.202 | 3.17E-37 |
| SCAMP1    | 2.48E-41 | 0.27385  | 0.255 | 0.055 | 3.70E-37 |
| FAHD2A    | 2.57E-41 | 0.191693 | 0.225 | 0.05  | 3.85E-37 |
| VAMP5     | 2.67E-41 | -1.24002 | 0.06  | 0.227 | 3.99E-37 |
| LDLRAD3   | 2.73E-41 | 0.351936 | 0.25  | 0.041 | 4.08E-37 |
| ROGDI     | 2.80E-41 | 0.281161 | 0.2   | 0.024 | 4.18E-37 |
| EXOSC7    | 2.81E-41 | 0.20077  | 0.246 | 0.056 | 4.21E-37 |
| UBAP2L    | 2.97E-41 | 0.112797 | 0.234 | 0.067 | 4.44E-37 |
| SCN3A     | 3.21E-41 | 0.604232 | 0.242 | 0.014 | 4.80E-37 |
| SYMPK     | 3.33E-41 | -0.21913 | 0.231 | 0.13  | 4.98E-37 |
| RBM28     | 3.35E-41 | 0.381154 | 0.259 | 0.039 | 5.01E-37 |
| NAT14     | 3.57E-41 | 0.125693 | 0.209 | 0.05  | 5.33E-37 |
| ZNF43     | 3.67E-41 | 0.230194 | 0.216 | 0.041 | 5.48E-37 |
| FUNDC1    | 3.83E-41 | -0.15624 | 0.252 | 0.118 | 5.72E-37 |
| LRCH3     | 4.03E-41 | 0.356962 | 0.235 | 0.036 | 6.02E-37 |
| PLEKHA3   | 4.64E-41 | 0.37125  | 0.255 | 0.041 | 6.93E-37 |
| XPA       | 4.65E-41 | 0.157417 | 0.231 | 0.058 | 6.95E-37 |
| TXNRD1    | 4.71E-41 | 0.279446 | 0.241 | 0.048 | 7.04E-37 |
| GPATCH4   | 4.94E-41 | 0.175952 | 0.248 | 0.063 | 7.39E-37 |
| OXA1L     | 5.68E-41 | -0.25484 | 0.235 | 0.123 | 8.49E-37 |
| NFYB      | 5.81E-41 | -0.13349 | 0.185 | 0.074 | 8.68E-37 |
| PDE4DIP   | 5.92E-41 | -0.33571 | 0.229 | 0.147 | 8.85E-37 |
| TFAP2B    | 6.26E-41 | 0.5646   | 0.192 | 0     | 9.36E-37 |
| POLR2A    | 6.29E-41 | 0.104742 | 0.211 | 0.048 | 9.39E-37 |
| ZMAT3     | 6.32E-41 | 0.116236 | 0.243 | 0.074 | 9.45E-37 |
| PAF1      | 6.46E-41 | 0.109847 | 0.218 | 0.056 | 9.65E-37 |
| SIX1      | 6.74E-41 | 0.519359 | 0.205 | 0.007 | 1.01E-36 |
| SZRD1     | 6.86E-41 | -0.26492 | 0.182 | 0.085 | 1.03E-36 |
| FIBIN     | 7.48E-41 | -0.39373 | 0.234 | 0.174 | 1.12E-36 |
| S100A13   | 7.58E-41 | -1.16786 | 0.074 | 0.239 | 1.13E-36 |
| LINC01116 | 7.80E-41 | 0.3418   | 0.247 | 0.043 | 1.17E-36 |
| FJX1      | 7.80E-41 | 0.127271 | 0.233 | 0.062 | 1.17E-36 |
| TRPC4AP   | 8.20E-41 | 0.287542 | 0.238 | 0.043 | 1.23E-36 |
| M6PR      | 8.45E-41 | -0.1265  | 0.221 | 0.091 | 1.26E-36 |



|           |          |          |       |       |          |
|-----------|----------|----------|-------|-------|----------|
| ARL9      | 8.56E-41 | 0.55408  | 0.222 | 0.012 | 1.28E-36 |
| EXOC5     | 8.74E-41 | 0.273048 | 0.222 | 0.039 | 1.31E-36 |
| NIPBL     | 8.85E-41 | 0.19374  | 0.233 | 0.056 | 1.32E-36 |
| ARRB2     | 9.69E-41 | 0.215275 | 0.225 | 0.044 | 1.45E-36 |
| GPR155    | 9.71E-41 | 0.323235 | 0.243 | 0.044 | 1.45E-36 |
| FDX1      | 9.81E-41 | 0.368811 | 0.257 | 0.043 | 1.47E-36 |
| SLC35B4   | 1.07E-40 | 0.414766 | 0.263 | 0.041 | 1.59E-36 |
| C3        | 1.15E-40 | -0.78242 | 0.134 | 0.168 | 1.72E-36 |
| ATP1B1    | 1.22E-40 | 0.209534 | 0.231 | 0.05  | 1.82E-36 |
| SYNC      | 1.22E-40 | 0.303198 | 0.237 | 0.038 | 1.82E-36 |
| HOXC9     | 1.27E-40 | 0.542621 | 0.212 | 0.005 | 1.90E-36 |
| WDR13     | 1.28E-40 | -0.14432 | 0.241 | 0.121 | 1.91E-36 |
| DRG2      | 1.31E-40 | -0.13245 | 0.182 | 0.077 | 1.96E-36 |
| EMG1      | 1.39E-40 | -0.25968 | 0.182 | 0.091 | 2.07E-36 |
| SUN2      | 1.48E-40 | 0.421648 | 0.246 | 0.032 | 2.21E-36 |
| GPATCH2L  | 1.49E-40 | 0.302979 | 0.269 | 0.06  | 2.23E-36 |
| A2M       | 1.64E-40 | -0.96636 | 0.101 | 0.171 | 2.46E-36 |
| COA6      | 1.69E-40 | -0.14607 | 0.213 | 0.087 | 2.53E-36 |
| WSB2      | 1.74E-40 | 0.171587 | 0.211 | 0.044 | 2.60E-36 |
| CTNNAL1   | 1.77E-40 | 0.161422 | 0.217 | 0.051 | 2.64E-36 |
| NMT2      | 1.81E-40 | 0.44822  | 0.225 | 0.021 | 2.71E-36 |
| ZDHHC22   | 1.84E-40 | 0.404299 | 0.216 | 0.019 | 2.74E-36 |
| BUB3      | 1.85E-40 | 0.15398  | 0.286 | 0.094 | 2.76E-36 |
| BECN1     | 1.90E-40 | 0.145064 | 0.194 | 0.041 | 2.84E-36 |
| TMED3     | 1.94E-40 | 0.118113 | 0.234 | 0.067 | 2.90E-36 |
| COQ10B    | 1.95E-40 | -0.10635 | 0.224 | 0.096 | 2.92E-36 |
| WASL      | 1.99E-40 | 0.178237 | 0.229 | 0.058 | 2.98E-36 |
| UBLCP1    | 2.01E-40 | 0.321195 | 0.207 | 0.026 | 3.01E-36 |
| TOLLIP    | 2.05E-40 | 0.22828  | 0.235 | 0.053 | 3.07E-36 |
| NPRL3     | 2.12E-40 | 0.345101 | 0.267 | 0.053 | 3.16E-36 |
| PBDC1     | 2.31E-40 | -0.27104 | 0.202 | 0.103 | 3.46E-36 |
| ATP2C1    | 2.33E-40 | 0.27386  | 0.216 | 0.038 | 3.48E-36 |
| FAM84B    | 2.44E-40 | 0.369806 | 0.254 | 0.046 | 3.64E-36 |
| SPNS1     | 2.45E-40 | 0.349556 | 0.259 | 0.046 | 3.66E-36 |
| DGCR2     | 2.55E-40 | 0.417986 | 0.269 | 0.044 | 3.81E-36 |
| MYT1      | 3.03E-40 | 0.59408  | 0.209 | 0.005 | 4.52E-36 |
| MFNG      | 3.11E-40 | 0.5404   | 0.221 | 0.012 | 4.64E-36 |
| PAXIP1-AS | 3.13E-40 | 0.27133  | 0.243 | 0.051 | 4.67E-36 |
| ARHGAP12  | 3.24E-40 | 0.156224 | 0.248 | 0.067 | 4.84E-36 |
| SP3       | 3.30E-40 | 0.329899 | 0.259 | 0.05  | 4.93E-36 |
| RAB4A     | 3.31E-40 | 0.112216 | 0.273 | 0.091 | 4.94E-36 |
| CERS6     | 3.45E-40 | 0.297334 | 0.178 | 0.015 | 5.16E-36 |
| SLC43A2   | 3.51E-40 | 0.391444 | 0.234 | 0.031 | 5.25E-36 |
| GSTO1     | 3.52E-40 | -0.56829 | 0.178 | 0.15  | 5.26E-36 |
| FARP1     | 3.71E-40 | 0.242608 | 0.218 | 0.038 | 5.55E-36 |
| RUNDC3A   | 3.78E-40 | 0.364711 | 0.221 | 0.031 | 5.64E-36 |
| CDC26     | 3.90E-40 | -0.44457 | 0.165 | 0.106 | 5.83E-36 |
| USP5      | 4.04E-40 | 0.188526 | 0.241 | 0.056 | 6.04E-36 |
| EYA1      | 4.22E-40 | 0.506127 | 0.202 | 0.005 | 6.31E-36 |
| CNRIP1    | 4.36E-40 | 0.343036 | 0.256 | 0.05  | 6.52E-36 |
| ZMYND8    | 4.41E-40 | 0.167988 | 0.256 | 0.072 | 6.59E-36 |

|           |          |          |       |       |          |
|-----------|----------|----------|-------|-------|----------|
| RMDN3     | 5.29E-40 | 0.110665 | 0.23  | 0.065 | 7.91E-36 |
| KIF3A     | 5.41E-40 | 0.257446 | 0.267 | 0.067 | 8.08E-36 |
| SUPT20H   | 5.52E-40 | 0.234646 | 0.243 | 0.055 | 8.25E-36 |
| JPH4      | 5.76E-40 | 0.536241 | 0.229 | 0.014 | 8.60E-36 |
| COQ9      | 6.08E-40 | -0.13687 | 0.222 | 0.101 | 9.09E-36 |
| ZNF714    | 6.19E-40 | 0.280575 | 0.257 | 0.058 | 9.26E-36 |
| ARID5B    | 6.55E-40 | -0.29216 | 0.231 | 0.132 | 9.79E-36 |
| ANGPTL2   | 6.68E-40 | 0.154006 | 0.265 | 0.084 | 9.99E-36 |
| RXR8      | 7.23E-40 | 0.252309 | 0.205 | 0.031 | 1.08E-35 |
| CHI3L2    | 7.46E-40 | -1.64774 | 0.014 | 0.193 | 1.11E-35 |
| SLPI      | 7.82E-40 | -1.6837  | 0.018 | 0.209 | 1.17E-35 |
| TP53      | 8.99E-40 | 0.273948 | 0.208 | 0.031 | 1.34E-35 |
| SF3B3     | 9.02E-40 | 0.302458 | 0.252 | 0.053 | 1.35E-35 |
| CTCF      | 9.29E-40 | 0.450867 | 0.216 | 0.015 | 1.39E-35 |
| SALL3     | 9.32E-40 | 0.429626 | 0.183 | 0.003 | 1.39E-35 |
| OSBPL8    | 9.40E-40 | 0.171701 | 0.222 | 0.053 | 1.40E-35 |
| SLC25A36  | 1.07E-39 | 0.311841 | 0.283 | 0.07  | 1.60E-35 |
| CCNG1     | 1.10E-39 | -0.25525 | 0.198 | 0.113 | 1.64E-35 |
| CCNB1IP1  | 1.10E-39 | -0.14141 | 0.216 | 0.106 | 1.64E-35 |
| GMCL1     | 1.13E-39 | 0.356189 | 0.238 | 0.038 | 1.69E-35 |
| LYRM7     | 1.16E-39 | 0.224193 | 0.281 | 0.084 | 1.73E-35 |
| C3orf70   | 1.18E-39 | 0.406903 | 0.215 | 0.022 | 1.77E-35 |
| EEA1      | 1.20E-39 | 0.109036 | 0.209 | 0.055 | 1.80E-35 |
| CYB5A     | 1.23E-39 | -0.30042 | 0.211 | 0.126 | 1.84E-35 |
| PREB      | 1.27E-39 | 0.361097 | 0.251 | 0.039 | 1.90E-35 |
| CMC2      | 1.27E-39 | -0.19719 | 0.222 | 0.104 | 1.90E-35 |
| PRKAR1B   | 1.28E-39 | 0.429834 | 0.226 | 0.022 | 1.92E-35 |
| NCKAP5L   | 1.31E-39 | 0.24752  | 0.192 | 0.029 | 1.96E-35 |
| RABGGTB   | 1.41E-39 | 0.118165 | 0.257 | 0.077 | 2.10E-35 |
| ADAM22    | 1.62E-39 | 0.436038 | 0.208 | 0.015 | 2.42E-35 |
| NAA15     | 1.72E-39 | 0.191912 | 0.248 | 0.062 | 2.57E-35 |
| SPPL3     | 1.75E-39 | 0.311763 | 0.244 | 0.046 | 2.61E-35 |
| ABT1      | 1.77E-39 | -0.1629  | 0.203 | 0.089 | 2.65E-35 |
| LINC00632 | 1.89E-39 | 0.5291   | 0.229 | 0.019 | 2.82E-35 |
| ELN       | 1.92E-39 | 0.105152 | 0.207 | 0.055 | 2.86E-35 |
| BDP1      | 1.92E-39 | 0.236329 | 0.254 | 0.058 | 2.87E-35 |
| SART1     | 2.03E-39 | 0.390229 | 0.22  | 0.024 | 3.03E-35 |
| RHOT1     | 2.26E-39 | 0.32578  | 0.238 | 0.039 | 3.38E-35 |
| GALNT11   | 2.40E-39 | 0.106347 | 0.22  | 0.06  | 3.59E-35 |
| GPSM2     | 2.41E-39 | 0.381977 | 0.287 | 0.058 | 3.61E-35 |
| BRD8      | 2.52E-39 | 0.107396 | 0.209 | 0.053 | 3.77E-35 |
| RNF41     | 2.53E-39 | 0.241813 | 0.205 | 0.036 | 3.78E-35 |
| SRGAP3    | 2.59E-39 | 0.42233  | 0.239 | 0.031 | 3.88E-35 |
| CSE1L     | 2.72E-39 | 0.279192 | 0.229 | 0.039 | 4.06E-35 |
| TRIO      | 2.73E-39 | -0.30553 | 0.215 | 0.128 | 4.08E-35 |
| ME2       | 2.86E-39 | 0.188025 | 0.202 | 0.039 | 4.28E-35 |
| MTRNR2L12 | 2.92E-39 | -1.00959 | 0.117 | 0.263 | 4.36E-35 |
| RPP14     | 3.03E-39 | 0.2907   | 0.224 | 0.036 | 4.53E-35 |
| UFSP2     | 3.07E-39 | -0.19798 | 0.23  | 0.109 | 4.59E-35 |
| COMMD5    | 3.14E-39 | -0.17704 | 0.213 | 0.096 | 4.69E-35 |
| RP11-390E | 3.18E-39 | 0.174491 | 0.244 | 0.067 | 4.76E-35 |

|           |           |           |        |        |           |
|-----------|-----------|-----------|--------|--------|-----------|
| ATF3      | 3. 22E-39 | -0. 44888 | 0. 174 | 0. 13  | 4. 82E-35 |
| CCDC66    | 3. 37E-39 | 0. 396279 | 0. 246 | 0. 036 | 5. 04E-35 |
| TMEM106C  | 3. 38E-39 | -0. 23344 | 0. 189 | 0. 087 | 5. 06E-35 |
| RBM4B     | 3. 43E-39 | 0. 213462 | 0. 25  | 0. 06  | 5. 12E-35 |
| APOO      | 3. 44E-39 | -0. 25127 | 0. 182 | 0. 097 | 5. 15E-35 |
| PIK3R3    | 3. 54E-39 | 0. 162729 | 0. 212 | 0. 043 | 5. 29E-35 |
| PPP1R9A   | 3. 79E-39 | 0. 586772 | 0. 224 | 0. 01  | 5. 67E-35 |
| SCFD2     | 3. 80E-39 | 0. 406479 | 0. 216 | 0. 024 | 5. 68E-35 |
| FOXN2     | 4. 03E-39 | 0. 290185 | 0. 211 | 0. 031 | 6. 02E-35 |
| RPF1      | 4. 07E-39 | -0. 12233 | 0. 241 | 0. 109 | 6. 09E-35 |
| OAT       | 4. 09E-39 | -0. 18652 | 0. 22  | 0. 104 | 6. 11E-35 |
| ZBTB17    | 4. 10E-39 | 0. 261553 | 0. 195 | 0. 027 | 6. 12E-35 |
| ZNF397    | 4. 17E-39 | 0. 131472 | 0. 226 | 0. 062 | 6. 24E-35 |
| ZSCAN21   | 4. 21E-39 | 0. 351615 | 0. 202 | 0. 021 | 6. 29E-35 |
| SUZ12     | 4. 40E-39 | 0. 375236 | 0. 217 | 0. 026 | 6. 57E-35 |
| GATAD1    | 4. 56E-39 | 0. 31339  | 0. 268 | 0. 062 | 6. 81E-35 |
| RNF220    | 4. 99E-39 | 0. 218401 | 0. 198 | 0. 032 | 7. 46E-35 |
| IST1      | 5. 76E-39 | 0. 150602 | 0. 244 | 0. 063 | 8. 61E-35 |
| ZNF148    | 6. 22E-39 | 0. 125981 | 0. 238 | 0. 063 | 9. 29E-35 |
| RWDD4     | 6. 26E-39 | 0. 204724 | 0. 241 | 0. 06  | 9. 35E-35 |
| SAP30     | 6. 43E-39 | 0. 39121  | 0. 218 | 0. 029 | 9. 61E-35 |
| TMEM218   | 7. 33E-39 | 0. 275704 | 0. 239 | 0. 048 | 1. 10E-34 |
| ARFRP1    | 7. 67E-39 | 0. 121247 | 0. 228 | 0. 056 | 1. 15E-34 |
| RSU1      | 7. 86E-39 | -0. 17956 | 0. 194 | 0. 085 | 1. 18E-34 |
| TGS1      | 7. 92E-39 | 0. 161132 | 0. 213 | 0. 046 | 1. 18E-34 |
| THAP9-AS1 | 8. 01E-39 | -0. 15208 | 0. 208 | 0. 08  | 1. 20E-34 |
| RNASEH2B  | 8. 18E-39 | 0. 386667 | 0. 243 | 0. 039 | 1. 22E-34 |
| PIGU      | 8. 38E-39 | -0. 11242 | 0. 178 | 0. 067 | 1. 25E-34 |
| RPA1      | 8. 68E-39 | 0. 118914 | 0. 215 | 0. 053 | 1. 30E-34 |
| CRCP      | 8. 86E-39 | 0. 113871 | 0. 205 | 0. 053 | 1. 32E-34 |
| CNPY3     | 9. 65E-39 | 0. 180427 | 0. 234 | 0. 06  | 1. 44E-34 |
| E2F4      | 1. 03E-38 | 0. 310788 | 0. 218 | 0. 031 | 1. 54E-34 |
| ARHGEF9   | 1. 07E-38 | 0. 287419 | 0. 215 | 0. 038 | 1. 60E-34 |
| KPNA4     | 1. 11E-38 | 0. 208141 | 0. 185 | 0. 029 | 1. 66E-34 |
| PTPN12    | 1. 12E-38 | 0. 204568 | 0. 218 | 0. 046 | 1. 67E-34 |
| TNPO3     | 1. 15E-38 | 0. 301573 | 0. 228 | 0. 039 | 1. 72E-34 |
| UBE2Q2    | 1. 16E-38 | 0. 344116 | 0. 241 | 0. 039 | 1. 73E-34 |
| MIR181A1H | 1. 22E-38 | 0. 389914 | 0. 209 | 0. 019 | 1. 82E-34 |
| BCL2L1    | 1. 24E-38 | -0. 36933 | 0. 161 | 0. 113 | 1. 85E-34 |
| DAAM1     | 1. 25E-38 | 0. 473121 | 0. 309 | 0. 065 | 1. 87E-34 |
| SCAMP4    | 1. 25E-38 | 0. 114424 | 0. 25  | 0. 077 | 1. 87E-34 |
| GOLGA2    | 1. 26E-38 | -0. 14791 | 0. 186 | 0. 08  | 1. 89E-34 |
| IFT57     | 1. 36E-38 | -0. 42768 | 0. 186 | 0. 14  | 2. 03E-34 |
| SERPING1  | 1. 39E-38 | -1. 15896 | 0. 057 | 0. 186 | 2. 08E-34 |
| ISG20L2   | 1. 45E-38 | 0. 15891  | 0. 23  | 0. 055 | 2. 17E-34 |
| CEP68     | 1. 56E-38 | 0. 269082 | 0. 244 | 0. 055 | 2. 32E-34 |
| RGMA      | 1. 59E-38 | -0. 20821 | 0. 231 | 0. 123 | 2. 37E-34 |
| NLGN1     | 1. 60E-38 | 0. 436847 | 0. 254 | 0. 039 | 2. 39E-34 |
| SCAMP5    | 1. 65E-38 | 0. 458438 | 0. 212 | 0. 014 | 2. 47E-34 |
| PDCL      | 1. 81E-38 | 0. 128748 | 0. 218 | 0. 055 | 2. 70E-34 |
| ZNF439    | 1. 93E-38 | 0. 368568 | 0. 229 | 0. 031 | 2. 88E-34 |

|          |           |           |        |        |           |
|----------|-----------|-----------|--------|--------|-----------|
| RFK      | 2. 01E-38 | 0. 19622  | 0. 226 | 0. 053 | 3. 00E-34 |
| C6orf1   | 2. 12E-38 | -0. 43886 | 0. 177 | 0. 135 | 3. 17E-34 |
| TMEM57   | 2. 15E-38 | 0. 55234  | 0. 242 | 0. 021 | 3. 22E-34 |
| EFNA1    | 2. 25E-38 | -0. 29894 | 0. 187 | 0. 111 | 3. 36E-34 |
| PCDHB7   | 2. 31E-38 | 0. 504103 | 0. 226 | 0. 015 | 3. 45E-34 |
| LMAN1    | 2. 35E-38 | -0. 4446  | 0. 182 | 0. 123 | 3. 52E-34 |
| TRAF7    | 2. 37E-38 | 0. 181508 | 0. 192 | 0. 036 | 3. 54E-34 |
| KPNA6    | 2. 38E-38 | 0. 21228  | 0. 252 | 0. 06  | 3. 56E-34 |
| DDX27    | 2. 41E-38 | 0. 140028 | 0. 242 | 0. 068 | 3. 60E-34 |
| ZCCHC24  | 2. 52E-38 | 0. 288702 | 0. 191 | 0. 024 | 3. 77E-34 |
| BRAT1    | 2. 58E-38 | 0. 205867 | 0. 239 | 0. 058 | 3. 86E-34 |
| DTNA     | 2. 68E-38 | -0. 81485 | 0. 147 | 0. 198 | 4. 00E-34 |
| STAG2    | 2. 68E-38 | 0. 140293 | 0. 233 | 0. 065 | 4. 00E-34 |
| ADD2     | 2. 77E-38 | 0. 445193 | 0. 199 | 0. 009 | 4. 14E-34 |
| PPP2R4   | 2. 93E-38 | 0. 136342 | 0. 229 | 0. 063 | 4. 38E-34 |
| DPF1     | 2. 94E-38 | 0. 262865 | 0. 26  | 0. 06  | 4. 39E-34 |
| MAPRE3   | 2. 99E-38 | 0. 315332 | 0. 222 | 0. 034 | 4. 46E-34 |
| MFS10    | 3. 03E-38 | 0. 169657 | 0. 225 | 0. 056 | 4. 52E-34 |
| GANAB    | 3. 15E-38 | 0. 14222  | 0. 239 | 0. 068 | 4. 70E-34 |
| PPP2R5C  | 3. 34E-38 | 0. 10661  | 0. 228 | 0. 063 | 4. 99E-34 |
| PN01     | 3. 44E-38 | 0. 144703 | 0. 228 | 0. 06  | 5. 15E-34 |
| JAM3     | 3. 54E-38 | 0. 270042 | 0. 222 | 0. 041 | 5. 29E-34 |
| ING5     | 3. 61E-38 | 0. 307209 | 0. 205 | 0. 027 | 5. 40E-34 |
| NDUFAF6  | 3. 65E-38 | 0. 24398  | 0. 2   | 0. 034 | 5. 45E-34 |
| SMIM4    | 3. 68E-38 | -0. 20369 | 0. 183 | 0. 092 | 5. 50E-34 |
| ZFP82    | 3. 69E-38 | 0. 223793 | 0. 187 | 0. 032 | 5. 51E-34 |
| ORMDL3   | 3. 71E-38 | 0. 215237 | 0. 2   | 0. 039 | 5. 55E-34 |
| LPCAT1   | 3. 74E-38 | 0. 440234 | 0. 25  | 0. 038 | 5. 59E-34 |
| WDR45    | 3. 94E-38 | -0. 19592 | 0. 205 | 0. 097 | 5. 89E-34 |
| SAR1B    | 3. 95E-38 | -0. 21523 | 0. 222 | 0. 116 | 5. 90E-34 |
| TXNDC15  | 4. 12E-38 | -0. 13417 | 0. 237 | 0. 12  | 6. 15E-34 |
| C14orf37 | 4. 15E-38 | 0. 538496 | 0. 213 | 0. 01  | 6. 20E-34 |
| USB1     | 4. 22E-38 | 0. 119558 | 0. 196 | 0. 05  | 6. 30E-34 |
| CHD3     | 4. 49E-38 | 0. 399576 | 0. 199 | 0. 014 | 6. 70E-34 |
| MOCS2    | 4. 50E-38 | -0. 19819 | 0. 241 | 0. 135 | 6. 73E-34 |
| CA2      | 4. 84E-38 | -1. 17035 | 0. 035 | 0. 231 | 7. 23E-34 |
| TRAPPC12 | 4. 86E-38 | 0. 325805 | 0. 233 | 0. 039 | 7. 26E-34 |
| PPP3CA   | 5. 24E-38 | 0. 246146 | 0. 244 | 0. 055 | 7. 83E-34 |
| SQLE     | 5. 29E-38 | 0. 360208 | 0. 282 | 0. 065 | 7. 90E-34 |
| XIAP     | 5. 48E-38 | 0. 115952 | 0. 208 | 0. 055 | 8. 19E-34 |
| DAP      | 5. 73E-38 | 0. 114678 | 0. 181 | 0. 041 | 8. 57E-34 |
| CNTN1    | 5. 83E-38 | 0. 530837 | 0. 202 | 0. 009 | 8. 72E-34 |
| DUSP6    | 5. 88E-38 | -0. 17697 | 0. 19  | 0. 092 | 8. 78E-34 |
| NUFIP2   | 6. 24E-38 | 0. 147221 | 0. 192 | 0. 041 | 9. 32E-34 |
| KBTBD6   | 6. 41E-38 | 0. 23004  | 0. 196 | 0. 031 | 9. 57E-34 |
| HEXA     | 6. 61E-38 | -0. 28137 | 0. 204 | 0. 12  | 9. 88E-34 |
| SLC9A3R1 | 6. 94E-38 | 0. 567097 | 0. 238 | 0. 022 | 1. 04E-33 |
| CCDC126  | 7. 16E-38 | 0. 382653 | 0. 228 | 0. 032 | 1. 07E-33 |
| ZNF512   | 7. 35E-38 | 0. 286093 | 0. 216 | 0. 034 | 1. 10E-33 |
| ZNF775   | 7. 91E-38 | 0. 516298 | 0. 204 | 0. 007 | 1. 18E-33 |
| ATP2B1   | 8. 10E-38 | -0. 21642 | 0. 233 | 0. 13  | 1. 21E-33 |

|           |          |          |       |       |          |
|-----------|----------|----------|-------|-------|----------|
| MAP2K7    | 8.12E-38 | 0.345964 | 0.244 | 0.043 | 1.21E-33 |
| IVNS1ABP  | 8.15E-38 | 0.415561 | 0.222 | 0.026 | 1.22E-33 |
| SCYL1     | 8.24E-38 | 0.237697 | 0.209 | 0.039 | 1.23E-33 |
| RRP1      | 8.32E-38 | 0.145323 | 0.229 | 0.062 | 1.24E-33 |
| ADIPOR1   | 8.48E-38 | 0.234586 | 0.234 | 0.05  | 1.27E-33 |
| RNF44     | 8.67E-38 | 0.529748 | 0.216 | 0.014 | 1.30E-33 |
| ZNF394    | 8.84E-38 | 0.236961 | 0.194 | 0.031 | 1.32E-33 |
| TUBG1     | 8.85E-38 | 0.158031 | 0.213 | 0.05  | 1.32E-33 |
| MED29     | 9.70E-38 | -0.15755 | 0.207 | 0.096 | 1.45E-33 |
| DNM3      | 1.04E-37 | 0.512324 | 0.212 | 0.012 | 1.55E-33 |
| RND2      | 1.12E-37 | 0.133615 | 0.226 | 0.063 | 1.67E-33 |
| RP11-262H | 1.17E-37 | 0.383861 | 0.221 | 0.027 | 1.74E-33 |
| SKIL      | 1.19E-37 | 0.314937 | 0.23  | 0.036 | 1.77E-33 |
| SLC29A4   | 1.20E-37 | 0.43739  | 0.207 | 0.015 | 1.79E-33 |
| ABHD14A   | 1.25E-37 | 0.192188 | 0.22  | 0.05  | 1.87E-33 |
| RCAN1     | 1.34E-37 | -0.61397 | 0.17  | 0.173 | 2.00E-33 |
| RBM27     | 1.40E-37 | 0.21259  | 0.212 | 0.043 | 2.10E-33 |
| NBR1      | 1.41E-37 | 0.124859 | 0.215 | 0.056 | 2.10E-33 |
| MSH6      | 1.46E-37 | 0.321257 | 0.19  | 0.019 | 2.19E-33 |
| VPS45     | 1.52E-37 | 0.166704 | 0.22  | 0.051 | 2.27E-33 |
| MASP1     | 1.55E-37 | 0.258988 | 0.203 | 0.036 | 2.31E-33 |
| ARMCX6    | 1.57E-37 | -0.22587 | 0.191 | 0.089 | 2.34E-33 |
| PLIN2     | 1.60E-37 | -0.59326 | 0.14  | 0.108 | 2.39E-33 |
| EFNB1     | 1.64E-37 | 0.378688 | 0.192 | 0.015 | 2.45E-33 |
| UBALD2    | 1.79E-37 | 0.156191 | 0.242 | 0.07  | 2.67E-33 |
| NUDT5     | 1.81E-37 | -0.1097  | 0.195 | 0.075 | 2.71E-33 |
| MAD2L1BP  | 1.83E-37 | 0.132467 | 0.204 | 0.044 | 2.73E-33 |
| STRIP1    | 1.85E-37 | 0.287754 | 0.182 | 0.022 | 2.77E-33 |
| STARD4-AS | 1.85E-37 | 0.515166 | 0.231 | 0.019 | 2.77E-33 |
| ZNF268    | 1.87E-37 | 0.288445 | 0.213 | 0.036 | 2.80E-33 |
| UCK1      | 1.91E-37 | 0.109063 | 0.216 | 0.058 | 2.86E-33 |
| AKT1S1    | 1.99E-37 | 0.104189 | 0.23  | 0.067 | 2.98E-33 |
| CD276     | 2.03E-37 | 0.168515 | 0.205 | 0.046 | 3.03E-33 |
| ATXN7L3B  | 2.12E-37 | 0.135163 | 0.202 | 0.048 | 3.17E-33 |
| PPP2R2B   | 2.23E-37 | -0.35315 | 0.229 | 0.15  | 3.34E-33 |
| PPA2      | 2.44E-37 | -0.20284 | 0.212 | 0.113 | 3.65E-33 |
| SOBP      | 2.52E-37 | 0.353004 | 0.226 | 0.034 | 3.76E-33 |
| MGEA5     | 2.55E-37 | 0.246009 | 0.26  | 0.068 | 3.81E-33 |
| NUP35     | 2.60E-37 | 0.14488  | 0.191 | 0.043 | 3.88E-33 |
| SNX4      | 2.61E-37 | 0.16644  | 0.231 | 0.065 | 3.90E-33 |
| RHOT2     | 2.69E-37 | 0.193209 | 0.261 | 0.075 | 4.02E-33 |
| MGST1     | 2.75E-37 | -1.33012 | 0.027 | 0.188 | 4.11E-33 |
| ELP5      | 2.78E-37 | 0.183796 | 0.23  | 0.06  | 4.15E-33 |
| PPCS      | 3.13E-37 | -0.48678 | 0.143 | 0.115 | 4.68E-33 |
| C11orf74  | 3.17E-37 | 0.112379 | 0.172 | 0.036 | 4.73E-33 |
| INSIG2    | 3.18E-37 | -0.24803 | 0.189 | 0.097 | 4.76E-33 |
| FSD1      | 3.20E-37 | 0.257765 | 0.222 | 0.044 | 4.79E-33 |
| KDM5B     | 3.21E-37 | 0.402074 | 0.224 | 0.027 | 4.80E-33 |
| PTK2      | 3.34E-37 | 0.155618 | 0.229 | 0.058 | 4.99E-33 |
| MMD       | 3.39E-37 | 0.316671 | 0.17  | 0.012 | 5.07E-33 |
| CHST10    | 3.51E-37 | 0.275314 | 0.222 | 0.041 | 5.24E-33 |

|           |          |          |       |       |          |
|-----------|----------|----------|-------|-------|----------|
| GNG7      | 3.77E-37 | -0.52321 | 0.153 | 0.14  | 5.63E-33 |
| MYH10     | 3.78E-37 | 0.410573 | 0.242 | 0.034 | 5.65E-33 |
| EXOSC5    | 3.82E-37 | -0.19927 | 0.204 | 0.104 | 5.71E-33 |
| ZFPL1     | 4.01E-37 | -0.15708 | 0.203 | 0.091 | 6.00E-33 |
| ADNP      | 4.13E-37 | 0.281879 | 0.222 | 0.039 | 6.17E-33 |
| SFSWAP    | 4.22E-37 | 0.211378 | 0.202 | 0.038 | 6.30E-33 |
| MCM5      | 4.26E-37 | 0.305205 | 0.173 | 0.019 | 6.36E-33 |
| SKIV2L2   | 4.48E-37 | 0.186685 | 0.233 | 0.06  | 6.69E-33 |
| FAM174A   | 4.49E-37 | 0.132353 | 0.218 | 0.062 | 6.70E-33 |
| CDIP1     | 4.70E-37 | 0.270271 | 0.221 | 0.046 | 7.02E-33 |
| NME7      | 5.64E-37 | -0.15204 | 0.181 | 0.082 | 8.42E-33 |
| NTPCR     | 5.76E-37 | -0.15714 | 0.254 | 0.125 | 8.61E-33 |
| MITD1     | 6.30E-37 | -0.15494 | 0.218 | 0.104 | 9.42E-33 |
| KRAS      | 6.38E-37 | 0.347878 | 0.243 | 0.044 | 9.53E-33 |
| CYSTM1    | 6.42E-37 | -0.96385 | 0.096 | 0.191 | 9.60E-33 |
| PTGDS     | 6.64E-37 | -0.31664 | 0.221 | 0.12  | 9.92E-33 |
| WDR70     | 7.70E-37 | 0.350456 | 0.218 | 0.029 | 1.15E-32 |
| POR       | 7.71E-37 | 0.213477 | 0.272 | 0.084 | 1.15E-32 |
| RP11-345F | 8.03E-37 | 0.255694 | 0.233 | 0.05  | 1.20E-32 |
| MAP4K5    | 8.04E-37 | 0.338402 | 0.22  | 0.034 | 1.20E-32 |
| CRB1      | 8.79E-37 | 0.551806 | 0.247 | 0.026 | 1.31E-32 |
| SMC2      | 8.85E-37 | 0.324278 | 0.194 | 0.026 | 1.32E-32 |
| CRNDE     | 9.23E-37 | 0.179377 | 0.231 | 0.062 | 1.38E-32 |
| RIMKLB    | 9.95E-37 | 0.381812 | 0.218 | 0.027 | 1.49E-32 |
| BIRC6     | 1.02E-36 | 0.234212 | 0.217 | 0.046 | 1.52E-32 |
| GATAD2B   | 1.14E-36 | 0.272683 | 0.23  | 0.044 | 1.71E-32 |
| COMMD10   | 1.15E-36 | -0.4251  | 0.152 | 0.108 | 1.72E-32 |
| FADS2     | 1.16E-36 | 0.483199 | 0.228 | 0.022 | 1.73E-32 |
| CCSER2    | 1.18E-36 | 0.180348 | 0.207 | 0.044 | 1.76E-32 |
| IGF2BP3   | 1.19E-36 | 0.269318 | 0.181 | 0.022 | 1.77E-32 |
| NETO2     | 1.24E-36 | 0.372814 | 0.207 | 0.024 | 1.85E-32 |
| EXTL2     | 1.32E-36 | 0.133333 | 0.194 | 0.046 | 1.97E-32 |
| TCERG1    | 1.33E-36 | 0.404788 | 0.264 | 0.048 | 1.99E-32 |
| C2orf69   | 1.38E-36 | 0.375847 | 0.238 | 0.038 | 2.06E-32 |
| EFHC1     | 1.44E-36 | -0.25957 | 0.202 | 0.116 | 2.16E-32 |
| CCAR2     | 1.61E-36 | 0.262872 | 0.209 | 0.034 | 2.40E-32 |
| ICA1      | 1.62E-36 | 0.463281 | 0.186 | 0.005 | 2.41E-32 |
| ATL1      | 1.64E-36 | 0.230974 | 0.194 | 0.034 | 2.44E-32 |
| DNM1L     | 1.72E-36 | 0.123428 | 0.235 | 0.072 | 2.58E-32 |
| ACTR1B    | 1.75E-36 | 0.149593 | 0.205 | 0.051 | 2.62E-32 |
| SRGN      | 2.03E-36 | -0.22696 | 0.224 | 0.138 | 3.03E-32 |
| MBTPS1    | 2.06E-36 | 0.250875 | 0.199 | 0.036 | 3.08E-32 |
| PSMB8     | 2.11E-36 | -0.73999 | 0.166 | 0.207 | 3.15E-32 |
| DEAF1     | 2.15E-36 | 0.171567 | 0.224 | 0.055 | 3.21E-32 |
| EIF4G3    | 2.17E-36 | 0.284396 | 0.233 | 0.043 | 3.24E-32 |
| FTX       | 2.18E-36 | 0.317681 | 0.226 | 0.041 | 3.26E-32 |
| PPP6C     | 2.31E-36 | 0.197468 | 0.237 | 0.058 | 3.45E-32 |
| RFC4      | 2.36E-36 | 0.292196 | 0.224 | 0.043 | 3.52E-32 |
| REEP2     | 2.40E-36 | 0.148821 | 0.205 | 0.048 | 3.59E-32 |
| CASC3     | 2.42E-36 | 0.366939 | 0.254 | 0.046 | 3.62E-32 |
| CHD1      | 2.52E-36 | 0.171752 | 0.222 | 0.06  | 3.76E-32 |

|           |          |          |       |       |          |
|-----------|----------|----------|-------|-------|----------|
| COL9A2    | 2.61E-36 | 0.443813 | 0.209 | 0.021 | 3.91E-32 |
| TBL1XR1   | 2.71E-36 | 0.20749  | 0.231 | 0.056 | 4.05E-32 |
| TYROBP    | 2.78E-36 | -0.15401 | 0.196 | 0.092 | 4.16E-32 |
| PROX1     | 2.86E-36 | 0.234222 | 0.208 | 0.039 | 4.27E-32 |
| TAF10     | 2.91E-36 | 0.211176 | 0.182 | 0.027 | 4.34E-32 |
| B4GALT7   | 2.92E-36 | 0.227883 | 0.186 | 0.029 | 4.36E-32 |
| SNX27     | 2.96E-36 | 0.132971 | 0.198 | 0.05  | 4.42E-32 |
| CS        | 2.99E-36 | 0.177092 | 0.169 | 0.027 | 4.47E-32 |
| PIGX      | 3.19E-36 | 0.211959 | 0.246 | 0.062 | 4.77E-32 |
| ASPH      | 3.24E-36 | 0.107048 | 0.237 | 0.074 | 4.84E-32 |
| GTF2H2    | 3.34E-36 | 0.143462 | 0.221 | 0.063 | 4.99E-32 |
| BLVRB     | 3.40E-36 | -1.16264 | 0.068 | 0.212 | 5.07E-32 |
| POMGNT2   | 3.55E-36 | 0.206574 | 0.196 | 0.038 | 5.31E-32 |
| SEMA5A    | 3.68E-36 | 0.102569 | 0.208 | 0.055 | 5.50E-32 |
| DHX33     | 3.69E-36 | 0.345995 | 0.207 | 0.026 | 5.51E-32 |
| CALCOCO1  | 3.69E-36 | 0.268794 | 0.213 | 0.039 | 5.52E-32 |
| STX6      | 4.32E-36 | 0.366725 | 0.217 | 0.029 | 6.46E-32 |
| MED27     | 4.55E-36 | 0.228495 | 0.203 | 0.036 | 6.81E-32 |
| PCSK2     | 4.66E-36 | 0.60088  | 0.17  | 0     | 6.97E-32 |
| B3GALT2   | 4.74E-36 | 0.413345 | 0.179 | 0.009 | 7.09E-32 |
| SH3BP4    | 5.05E-36 | 0.301662 | 0.199 | 0.027 | 7.55E-32 |
| PURA      | 5.13E-36 | 0.260001 | 0.23  | 0.05  | 7.66E-32 |
| ETHE1     | 5.16E-36 | -0.35473 | 0.155 | 0.104 | 7.71E-32 |
| TJP1      | 5.28E-36 | 0.113149 | 0.189 | 0.043 | 7.90E-32 |
| NOTCH1    | 5.32E-36 | 0.412055 | 0.217 | 0.024 | 7.95E-32 |
| C14orf132 | 5.36E-36 | 0.409253 | 0.241 | 0.041 | 8.01E-32 |
| PURB      | 5.39E-36 | 0.257886 | 0.217 | 0.043 | 8.05E-32 |
| NOL10     | 5.82E-36 | 0.258889 | 0.195 | 0.031 | 8.70E-32 |
| SRPX      | 5.91E-36 | -0.99464 | 0.061 | 0.171 | 8.83E-32 |
| HLTF      | 6.08E-36 | 0.337056 | 0.212 | 0.031 | 9.09E-32 |
| LPIN1     | 6.58E-36 | 0.392298 | 0.23  | 0.034 | 9.83E-32 |
| CDC40     | 6.80E-36 | 0.183312 | 0.207 | 0.044 | 1.02E-31 |
| TOR3A     | 7.42E-36 | 0.194625 | 0.191 | 0.036 | 1.11E-31 |
| STX5      | 7.44E-36 | -0.12942 | 0.215 | 0.091 | 1.11E-31 |
| GPT2      | 7.80E-36 | 0.177799 | 0.2   | 0.048 | 1.17E-31 |
| AAMDC     | 8.85E-36 | -0.44116 | 0.138 | 0.097 | 1.32E-31 |
| MIA3      | 9.07E-36 | 0.273435 | 0.224 | 0.044 | 1.36E-31 |
| WDR41     | 9.46E-36 | -0.39221 | 0.168 | 0.116 | 1.41E-31 |
| VSTM2A    | 9.53E-36 | -0.96898 | 0.095 | 0.258 | 1.42E-31 |
| GSK3B     | 9.91E-36 | 0.31332  | 0.229 | 0.043 | 1.48E-31 |
| GNL1      | 9.93E-36 | 0.307527 | 0.247 | 0.05  | 1.48E-31 |
| DR1       | 1.01E-35 | 0.181998 | 0.221 | 0.053 | 1.51E-31 |
| GSX1      | 1.02E-35 | 0.559388 | 0.177 | 0.002 | 1.52E-31 |
| 5-Mar     | 1.05E-35 | 0.30804  | 0.218 | 0.032 | 1.57E-31 |
| ZC3H11A   | 1.08E-35 | 0.157589 | 0.205 | 0.048 | 1.61E-31 |
| FAIM      | 1.17E-35 | 0.289395 | 0.208 | 0.036 | 1.74E-31 |
| MSI1      | 1.18E-35 | 0.348935 | 0.239 | 0.041 | 1.76E-31 |
| NMB       | 1.22E-35 | -0.82786 | 0.088 | 0.133 | 1.83E-31 |
| AGT       | 1.29E-35 | -0.91292 | 0.095 | 0.193 | 1.93E-31 |
| GAS1      | 1.32E-35 | 0.144229 | 0.225 | 0.067 | 1.97E-31 |
| SPATS2L   | 1.33E-35 | -0.36764 | 0.179 | 0.12  | 1.98E-31 |

|           |           |           |        |        |           |
|-----------|-----------|-----------|--------|--------|-----------|
| TMEM237   | 1. 34E-35 | 0. 273687 | 0. 238 | 0. 051 | 2. 01E-31 |
| PDLIM5    | 1. 37E-35 | 0. 220265 | 0. 216 | 0. 048 | 2. 04E-31 |
| SMIM18    | 1. 45E-35 | 0. 511749 | 0. 178 | 0. 003 | 2. 17E-31 |
| CKAP4     | 1. 47E-35 | 0. 239366 | 0. 252 | 0. 067 | 2. 20E-31 |
| UGT8      | 1. 48E-35 | 0. 460106 | 0. 172 | 0. 003 | 2. 21E-31 |
| ARFIP2    | 1. 48E-35 | 0. 144786 | 0. 241 | 0. 075 | 2. 21E-31 |
| CBX6      | 1. 55E-35 | 0. 390566 | 0. 282 | 0. 063 | 2. 32E-31 |
| ANKH      | 1. 56E-35 | 0. 254729 | 0. 17  | 0. 021 | 2. 33E-31 |
| IDS       | 1. 62E-35 | -0. 55814 | 0. 153 | 0. 166 | 2. 42E-31 |
| LRRC58    | 1. 76E-35 | 0. 218508 | 0. 218 | 0. 048 | 2. 63E-31 |
| SPEN      | 1. 79E-35 | 0. 338389 | 0. 218 | 0. 034 | 2. 67E-31 |
| ENC1      | 1. 82E-35 | 0. 387785 | 0. 228 | 0. 039 | 2. 72E-31 |
| TEAD2     | 1. 84E-35 | 0. 330445 | 0. 17  | 0. 014 | 2. 75E-31 |
| WASF1     | 1. 86E-35 | 0. 335115 | 0. 177 | 0. 015 | 2. 78E-31 |
| ABHD17B   | 1. 90E-35 | 0. 472864 | 0. 205 | 0. 014 | 2. 85E-31 |
| ZFYVE21   | 1. 97E-35 | -0. 30517 | 0. 192 | 0. 12  | 2. 95E-31 |
| CTBP1     | 2. 07E-35 | 0. 206286 | 0. 204 | 0. 043 | 3. 10E-31 |
| NAV2      | 2. 11E-35 | 0. 215524 | 0. 248 | 0. 07  | 3. 15E-31 |
| BPHL      | 2. 22E-35 | 0. 248397 | 0. 211 | 0. 041 | 3. 32E-31 |
| PRPF4B    | 2. 23E-35 | 0. 12749  | 0. 244 | 0. 075 | 3. 34E-31 |
| SOX5      | 2. 41E-35 | 0. 306433 | 0. 186 | 0. 022 | 3. 59E-31 |
| TAF9B     | 2. 42E-35 | 0. 179916 | 0. 187 | 0. 039 | 3. 61E-31 |
| ARL1      | 2. 50E-35 | -0. 41917 | 0. 198 | 0. 157 | 3. 73E-31 |
| CDKN1C    | 2. 56E-35 | 0. 483516 | 0. 204 | 0. 017 | 3. 82E-31 |
| MID1IP1   | 2. 59E-35 | 0. 243132 | 0. 247 | 0. 065 | 3. 86E-31 |
| ZNF414    | 2. 61E-35 | 0. 389994 | 0. 225 | 0. 029 | 3. 90E-31 |
| HINT3     | 2. 65E-35 | 0. 268531 | 0. 22  | 0. 044 | 3. 95E-31 |
| KLF10     | 2. 80E-35 | 0. 20277  | 0. 241 | 0. 068 | 4. 18E-31 |
| TCTEX1D2  | 2. 85E-35 | -0. 27519 | 0. 183 | 0. 109 | 4. 27E-31 |
| PSMD5-AS1 | 2. 93E-35 | 0. 133054 | 0. 237 | 0. 072 | 4. 38E-31 |
| GYG1      | 2. 95E-35 | -0. 13767 | 0. 161 | 0. 068 | 4. 42E-31 |
| UBE2M     | 3. 10E-35 | 0. 125459 | 0. 182 | 0. 044 | 4. 63E-31 |
| KANSL1    | 3. 24E-35 | 0. 306081 | 0. 215 | 0. 036 | 4. 85E-31 |
| POU4F1    | 3. 30E-35 | 0. 506409 | 0. 166 | 0      | 4. 93E-31 |
| DDX19B    | 3. 32E-35 | 0. 220287 | 0. 195 | 0. 039 | 4. 96E-31 |
| FNBP1L    | 3. 63E-35 | 0. 335733 | 0. 215 | 0. 034 | 5. 42E-31 |
| RNF115    | 3. 94E-35 | 0. 237239 | 0. 239 | 0. 056 | 5. 89E-31 |
| RP11-1275 | 3. 99E-35 | 0. 510375 | 0. 199 | 0. 009 | 5. 96E-31 |
| RAD1      | 4. 44E-35 | 0. 157806 | 0. 228 | 0. 065 | 6. 64E-31 |
| ZC3H18    | 4. 80E-35 | 0. 366038 | 0. 191 | 0. 017 | 7. 17E-31 |
| SPOCD1    | 4. 97E-35 | -1. 14507 | 0. 008 | 0. 166 | 7. 43E-31 |
| ZNF451    | 5. 03E-35 | 0. 211101 | 0. 202 | 0. 039 | 7. 51E-31 |
| MAEA      | 5. 46E-35 | 0. 178143 | 0. 217 | 0. 056 | 8. 16E-31 |
| USP39     | 5. 92E-35 | 0. 212373 | 0. 191 | 0. 036 | 8. 85E-31 |
| PPM1A     | 6. 62E-35 | 0. 354273 | 0. 191 | 0. 019 | 9. 89E-31 |
| KLHL9     | 6. 74E-35 | 0. 441939 | 0. 191 | 0. 009 | 1. 01E-30 |
| ARL14EP   | 7. 03E-35 | -0. 17029 | 0. 178 | 0. 077 | 1. 05E-30 |
| B3GALNT1  | 7. 04E-35 | 0. 250518 | 0. 203 | 0. 038 | 1. 05E-30 |
| FAM20C    | 7. 14E-35 | -0. 29614 | 0. 153 | 0. 091 | 1. 07E-30 |
| LHFP      | 7. 17E-35 | -0. 25743 | 0. 181 | 0. 101 | 1. 07E-30 |
| MED31     | 7. 40E-35 | -0. 11974 | 0. 194 | 0. 08  | 1. 11E-30 |



|           |          |          |       |       |          |
|-----------|----------|----------|-------|-------|----------|
| HOXA9     | 7.74E-35 | 0.464329 | 0.179 | 0.003 | 1.16E-30 |
| ETF1      | 7.98E-35 | -0.20504 | 0.192 | 0.094 | 1.19E-30 |
| TMEM178A  | 8.02E-35 | 0.100196 | 0.159 | 0.031 | 1.20E-30 |
| HBA2      | 8.09E-35 | -0.68716 | 0.159 | 0.097 | 1.21E-30 |
| DNAJA3    | 8.25E-35 | 0.133272 | 0.196 | 0.046 | 1.23E-30 |
| RALBP1    | 8.28E-35 | -0.16214 | 0.173 | 0.079 | 1.24E-30 |
| SIRT7     | 8.37E-35 | 0.269547 | 0.213 | 0.039 | 1.25E-30 |
| MTRNR2L1C | 8.40E-35 | -1.11034 | 0.025 | 0.209 | 1.25E-30 |
| PLA2G16   | 9.02E-35 | -0.70172 | 0.156 | 0.168 | 1.35E-30 |
| FKBP10    | 9.03E-35 | -0.13901 | 0.216 | 0.115 | 1.35E-30 |
| INPP1     | 9.11E-35 | 0.196677 | 0.203 | 0.043 | 1.36E-30 |
| GFER      | 9.36E-35 | 0.304558 | 0.194 | 0.024 | 1.40E-30 |
| POU2F1    | 9.59E-35 | 0.299151 | 0.209 | 0.034 | 1.43E-30 |
| ATN1      | 9.91E-35 | 0.259711 | 0.207 | 0.039 | 1.48E-30 |
| TTC32     | 1.03E-34 | 0.132092 | 0.202 | 0.051 | 1.54E-30 |
| RPF2      | 1.05E-34 | -0.10168 | 0.213 | 0.087 | 1.56E-30 |
| TLE3      | 1.12E-34 | 0.430308 | 0.213 | 0.022 | 1.68E-30 |
| MOB2      | 1.17E-34 | 0.110945 | 0.183 | 0.048 | 1.75E-30 |
| ASCC2     | 1.20E-34 | 0.21078  | 0.204 | 0.043 | 1.79E-30 |
| LTA4H     | 1.31E-34 | -0.12394 | 0.181 | 0.077 | 1.96E-30 |
| FERMT2    | 1.35E-34 | -0.10958 | 0.179 | 0.074 | 2.01E-30 |
| DDX23     | 1.39E-34 | 0.195385 | 0.185 | 0.036 | 2.08E-30 |
| TMEM243   | 1.40E-34 | -0.22817 | 0.174 | 0.092 | 2.09E-30 |
| CHAMP1    | 1.58E-34 | 0.351524 | 0.174 | 0.014 | 2.37E-30 |
| NCKAP1    | 1.66E-34 | 0.320532 | 0.242 | 0.05  | 2.48E-30 |
| TAOK1     | 1.69E-34 | 0.174146 | 0.239 | 0.065 | 2.53E-30 |
| VPS36     | 1.74E-34 | 0.122241 | 0.204 | 0.058 | 2.61E-30 |
| VASH1     | 1.76E-34 | 0.392122 | 0.186 | 0.014 | 2.62E-30 |
| HDAC9     | 1.86E-34 | 0.339417 | 0.199 | 0.026 | 2.78E-30 |
| ZC3H7A    | 1.86E-34 | 0.379833 | 0.199 | 0.022 | 2.79E-30 |
| CRISPLD1  | 1.87E-34 | 0.316213 | 0.179 | 0.022 | 2.79E-30 |
| PSD3      | 1.90E-34 | 0.231822 | 0.218 | 0.046 | 2.83E-30 |
| RABEP1    | 1.93E-34 | 0.285612 | 0.2   | 0.032 | 2.89E-30 |
| VAMP3     | 2.11E-34 | -0.31233 | 0.142 | 0.085 | 3.15E-30 |
| SMARCA1   | 2.19E-34 | 0.19653  | 0.191 | 0.038 | 3.27E-30 |
| LY6E      | 2.30E-34 | 0.166575 | 0.3   | 0.118 | 3.44E-30 |
| DDX42     | 2.40E-34 | 0.180717 | 0.212 | 0.053 | 3.59E-30 |
| RHOU      | 2.50E-34 | 0.40784  | 0.251 | 0.05  | 3.74E-30 |
| LTBP3     | 2.53E-34 | 0.338548 | 0.216 | 0.032 | 3.78E-30 |
| NPM3      | 2.69E-34 | -0.3069  | 0.153 | 0.092 | 4.02E-30 |
| WSCR16    | 3.03E-34 | 0.290519 | 0.185 | 0.021 | 4.53E-30 |
| GAR1      | 3.06E-34 | 0.154476 | 0.192 | 0.041 | 4.58E-30 |
| EIF2S3    | 3.44E-34 | -0.10866 | 0.209 | 0.091 | 5.14E-30 |
| DMTF1     | 3.47E-34 | 0.323724 | 0.217 | 0.036 | 5.18E-30 |
| POLDIP3   | 3.60E-34 | 0.211146 | 0.198 | 0.036 | 5.38E-30 |
| DAZAP1    | 3.63E-34 | 0.157505 | 0.202 | 0.05  | 5.42E-30 |
| CARKD     | 4.02E-34 | 0.359102 | 0.211 | 0.029 | 6.01E-30 |
| ZFHX4     | 4.11E-34 | 0.205228 | 0.204 | 0.048 | 6.14E-30 |
| COQ5      | 4.12E-34 | 0.156702 | 0.205 | 0.051 | 6.15E-30 |
| PLP2      | 4.24E-34 | -0.96499 | 0.083 | 0.179 | 6.34E-30 |
| CDK2AP2   | 4.27E-34 | -0.36803 | 0.165 | 0.111 | 6.38E-30 |

|           |          |          |       |       |          |
|-----------|----------|----------|-------|-------|----------|
| TUG1      | 4.57E-34 | 0.36433  | 0.207 | 0.027 | 6.84E-30 |
| LANCL1    | 4.59E-34 | 0.257525 | 0.183 | 0.027 | 6.86E-30 |
| ASIC1     | 4.67E-34 | 0.383066 | 0.183 | 0.015 | 6.99E-30 |
| TECPR1    | 4.83E-34 | 0.447495 | 0.19  | 0.012 | 7.22E-30 |
| MCF2L     | 4.88E-34 | 0.447078 | 0.199 | 0.012 | 7.29E-30 |
| RPAP2     | 5.10E-34 | 0.263924 | 0.22  | 0.05  | 7.62E-30 |
| ARHGAP21  | 5.94E-34 | 0.123733 | 0.251 | 0.085 | 8.88E-30 |
| SDHAF1    | 6.34E-34 | 0.167585 | 0.187 | 0.041 | 9.47E-30 |
| ROB01     | 6.41E-34 | 0.477286 | 0.19  | 0.007 | 9.58E-30 |
| COPG2     | 6.44E-34 | 0.314739 | 0.164 | 0.014 | 9.63E-30 |
| KRBOX4    | 7.05E-34 | 0.192524 | 0.178 | 0.032 | 1.05E-29 |
| NIT2      | 7.25E-34 | -0.12543 | 0.173 | 0.077 | 1.08E-29 |
| EN1       | 7.43E-34 | 0.401925 | 0.204 | 0.019 | 1.11E-29 |
| PITX2     | 7.86E-34 | 0.43978  | 0.187 | 0.009 | 1.17E-29 |
| KAT6A     | 7.90E-34 | 0.235843 | 0.204 | 0.043 | 1.18E-29 |
| FAM103A1  | 7.92E-34 | -0.43438 | 0.178 | 0.118 | 1.18E-29 |
| ACAD8     | 7.92E-34 | 0.137289 | 0.192 | 0.048 | 1.18E-29 |
| DDX6      | 7.99E-34 | -0.1006  | 0.209 | 0.08  | 1.19E-29 |
| ACO09501. | 8.47E-34 | -0.89709 | 0.078 | 0.185 | 1.27E-29 |
| TENM3     | 8.50E-34 | 0.437446 | 0.16  | 0     | 1.27E-29 |
| MEF2C     | 9.69E-34 | 0.161424 | 0.179 | 0.039 | 1.45E-29 |
| RBM26     | 9.74E-34 | 0.271965 | 0.216 | 0.039 | 1.46E-29 |
| SULF2     | 1.02E-33 | 0.399129 | 0.22  | 0.032 | 1.52E-29 |
| TMEM69    | 1.02E-33 | -0.1007  | 0.183 | 0.08  | 1.52E-29 |
| FOXK1     | 1.05E-33 | 0.140127 | 0.179 | 0.043 | 1.57E-29 |
| PPIF      | 1.06E-33 | 0.212812 | 0.177 | 0.027 | 1.58E-29 |
| SRPK1     | 1.07E-33 | 0.265829 | 0.202 | 0.031 | 1.60E-29 |
| CPNE2     | 1.09E-33 | -0.23596 | 0.151 | 0.074 | 1.63E-29 |
| PTRH1     | 1.15E-33 | 0.144268 | 0.161 | 0.031 | 1.73E-29 |
| METTTL2A  | 1.29E-33 | 0.153449 | 0.177 | 0.036 | 1.93E-29 |
| THOP1     | 1.29E-33 | 0.165762 | 0.176 | 0.032 | 1.93E-29 |
| SPCS3     | 1.33E-33 | 0.123476 | 0.203 | 0.056 | 1.99E-29 |
| BEST1     | 1.38E-33 | -0.33291 | 0.148 | 0.074 | 2.06E-29 |
| LGMN      | 1.40E-33 | -0.34397 | 0.156 | 0.096 | 2.09E-29 |
| USP8      | 1.42E-33 | -0.19665 | 0.176 | 0.085 | 2.13E-29 |
| HSDL1     | 1.45E-33 | 0.479506 | 0.187 | 0.009 | 2.16E-29 |
| DCAF10    | 1.62E-33 | 0.303391 | 0.203 | 0.031 | 2.42E-29 |
| PELP1     | 1.63E-33 | 0.193973 | 0.164 | 0.024 | 2.43E-29 |
| PXDN      | 1.63E-33 | 0.210744 | 0.178 | 0.027 | 2.44E-29 |
| PMM1      | 1.63E-33 | -0.1807  | 0.186 | 0.087 | 2.44E-29 |
| UBE2J1    | 1.66E-33 | 0.235765 | 0.228 | 0.055 | 2.48E-29 |
| UBA5      | 1.67E-33 | 0.136171 | 0.17  | 0.036 | 2.49E-29 |
| MCOLN1    | 1.70E-33 | 0.237013 | 0.196 | 0.041 | 2.55E-29 |
| GLRX      | 1.73E-33 | -0.62769 | 0.137 | 0.132 | 2.58E-29 |
| GSK3A     | 1.79E-33 | 0.227558 | 0.222 | 0.05  | 2.67E-29 |
| NOC4L     | 1.86E-33 | 0.312819 | 0.189 | 0.024 | 2.77E-29 |
| C6orf47   | 1.97E-33 | 0.212994 | 0.156 | 0.019 | 2.94E-29 |
| MAPK6     | 2.05E-33 | 0.147401 | 0.205 | 0.053 | 3.06E-29 |
| CYFIP1    | 2.06E-33 | -0.12375 | 0.156 | 0.056 | 3.07E-29 |
| TSPYL4    | 2.13E-33 | 0.133497 | 0.147 | 0.022 | 3.18E-29 |
| DLX1      | 2.15E-33 | 0.607576 | 0.2   | 0.012 | 3.21E-29 |

|           |          |          |       |       |          |
|-----------|----------|----------|-------|-------|----------|
| SENP2     | 2.16E-33 | 0.234155 | 0.189 | 0.032 | 3.23E-29 |
| COMMD8    | 2.34E-33 | -0.14271 | 0.173 | 0.082 | 3.49E-29 |
| CASP2     | 2.46E-33 | 0.248218 | 0.172 | 0.021 | 3.67E-29 |
| PAG1      | 2.55E-33 | 0.241053 | 0.177 | 0.027 | 3.81E-29 |
| KIF1A     | 2.57E-33 | 0.192838 | 0.185 | 0.038 | 3.84E-29 |
| POLR3K    | 2.65E-33 | -0.17532 | 0.166 | 0.079 | 3.96E-29 |
| FBLN1     | 2.68E-33 | 0.518455 | 0.228 | 0.032 | 4.00E-29 |
| IPO7      | 2.79E-33 | 0.188153 | 0.199 | 0.043 | 4.17E-29 |
| ZBTB8A    | 2.83E-33 | 0.174444 | 0.187 | 0.043 | 4.23E-29 |
| SIRT6     | 2.84E-33 | 0.119312 | 0.202 | 0.056 | 4.24E-29 |
| AGPAT1    | 3.09E-33 | 0.184469 | 0.221 | 0.056 | 4.61E-29 |
| DOLPP1    | 3.27E-33 | 0.151744 | 0.164 | 0.031 | 4.89E-29 |
| NPPA      | 3.65E-33 | 0.37806  | 0.208 | 0.032 | 5.45E-29 |
| INO80E    | 3.65E-33 | 0.278791 | 0.215 | 0.046 | 5.45E-29 |
| TMEM55A   | 3.70E-33 | -0.13644 | 0.189 | 0.087 | 5.52E-29 |
| RP11-212F | 3.83E-33 | 0.376949 | 0.187 | 0.019 | 5.73E-29 |
| TIPRL     | 3.98E-33 | -0.13091 | 0.183 | 0.082 | 5.94E-29 |
| NAV1      | 3.98E-33 | 0.237386 | 0.181 | 0.031 | 5.95E-29 |
| RP11-488C | 3.99E-33 | 0.3838   | 0.19  | 0.017 | 5.96E-29 |
| GEMIN6    | 4.08E-33 | 0.161152 | 0.194 | 0.048 | 6.09E-29 |
| GCA       | 4.13E-33 | -0.31045 | 0.152 | 0.096 | 6.17E-29 |
| ACLY      | 4.24E-33 | 0.223507 | 0.205 | 0.048 | 6.33E-29 |
| UBN2      | 4.29E-33 | 0.219199 | 0.173 | 0.031 | 6.41E-29 |
| POMZP3    | 4.71E-33 | 0.402026 | 0.185 | 0.012 | 7.04E-29 |
| SYNRG     | 4.96E-33 | 0.135311 | 0.169 | 0.031 | 7.41E-29 |
| UTP23     | 5.09E-33 | 0.299507 | 0.196 | 0.032 | 7.61E-29 |
| TMEFF2    | 5.10E-33 | 0.565164 | 0.194 | 0.009 | 7.62E-29 |
| RRM1      | 5.47E-33 | 0.24744  | 0.218 | 0.048 | 8.17E-29 |
| DGKB      | 5.49E-33 | 0.459944 | 0.177 | 0.009 | 8.21E-29 |
| SCAMP2    | 5.52E-33 | -0.20601 | 0.173 | 0.089 | 8.26E-29 |
| AMER2     | 5.55E-33 | 0.311051 | 0.209 | 0.038 | 8.29E-29 |
| CKS1B     | 5.80E-33 | -0.2076  | 0.144 | 0.07  | 8.67E-29 |
| PEX10     | 5.82E-33 | 0.254318 | 0.203 | 0.039 | 8.70E-29 |
| RP11-472N | 5.86E-33 | 0.27056  | 0.144 | 0.012 | 8.76E-29 |
| ZNF330    | 6.09E-33 | -0.27613 | 0.172 | 0.091 | 9.10E-29 |
| ZNF664    | 6.11E-33 | 0.178456 | 0.178 | 0.036 | 9.13E-29 |
| SUDS3     | 6.27E-33 | 0.408458 | 0.22  | 0.029 | 9.37E-29 |
| WDR54     | 6.41E-33 | -0.35731 | 0.172 | 0.125 | 9.58E-29 |
| ZNF444    | 6.55E-33 | 0.152976 | 0.187 | 0.039 | 9.79E-29 |
| SLC25A13  | 7.07E-33 | 0.289606 | 0.192 | 0.031 | 1.06E-28 |
| DBF4      | 7.24E-33 | 0.26694  | 0.172 | 0.019 | 1.08E-28 |
| SHMT2     | 7.29E-33 | -0.37434 | 0.179 | 0.126 | 1.09E-28 |
| PDPK1     | 7.49E-33 | 0.316435 | 0.198 | 0.026 | 1.12E-28 |
| AP2A2     | 7.53E-33 | 0.138129 | 0.208 | 0.06  | 1.13E-28 |
| HMBS      | 7.65E-33 | 0.162423 | 0.192 | 0.043 | 1.14E-28 |
| NCOA1     | 7.68E-33 | 0.27172  | 0.199 | 0.038 | 1.15E-28 |
| FAM200A   | 7.71E-33 | 0.281832 | 0.181 | 0.024 | 1.15E-28 |
| PCCB      | 7.87E-33 | 0.137336 | 0.213 | 0.063 | 1.18E-28 |
| RRAGC     | 7.97E-33 | 0.105262 | 0.195 | 0.053 | 1.19E-28 |
| VANGL2    | 8.05E-33 | 0.197954 | 0.159 | 0.024 | 1.20E-28 |
| CCZ1B     | 8.26E-33 | 0.433947 | 0.196 | 0.021 | 1.23E-28 |

|           |          |          |       |       |          |
|-----------|----------|----------|-------|-------|----------|
| ITGAV     | 8.40E-33 | 0.189339 | 0.202 | 0.046 | 1.26E-28 |
| CLOCK     | 8.46E-33 | 0.608636 | 0.234 | 0.024 | 1.26E-28 |
| LRP4      | 9.87E-33 | 0.284726 | 0.17  | 0.021 | 1.47E-28 |
| FAM46A    | 1.00E-32 | -0.10687 | 0.23  | 0.115 | 1.50E-28 |
| EGLN2     | 1.03E-32 | 0.177174 | 0.211 | 0.053 | 1.54E-28 |
| TULP4     | 1.14E-32 | 0.300146 | 0.181 | 0.021 | 1.71E-28 |
| CDC16     | 1.18E-32 | 0.207334 | 0.178 | 0.034 | 1.77E-28 |
| GSPT2     | 1.21E-32 | 0.338349 | 0.187 | 0.022 | 1.82E-28 |
| BCL7C     | 1.22E-32 | 0.193621 | 0.182 | 0.036 | 1.83E-28 |
| TRIM37    | 1.24E-32 | 0.10754  | 0.144 | 0.026 | 1.85E-28 |
| CDIPT     | 1.27E-32 | 0.21037  | 0.246 | 0.07  | 1.90E-28 |
| ZNF800    | 1.34E-32 | 0.224151 | 0.207 | 0.041 | 2.00E-28 |
| ZC3H6     | 1.34E-32 | 0.450926 | 0.217 | 0.029 | 2.01E-28 |
| TMEM199   | 1.39E-32 | 0.149972 | 0.224 | 0.065 | 2.07E-28 |
| IARS2     | 1.40E-32 | 0.156326 | 0.185 | 0.044 | 2.09E-28 |
| DOK5      | 1.42E-32 | -0.31804 | 0.142 | 0.08  | 2.12E-28 |
| RAB22A    | 1.44E-32 | 0.12476  | 0.195 | 0.05  | 2.16E-28 |
| TCF7      | 1.45E-32 | 0.238383 | 0.218 | 0.05  | 2.16E-28 |
| USP14     | 1.55E-32 | 0.161901 | 0.207 | 0.051 | 2.32E-28 |
| THOC3     | 1.67E-32 | 0.204976 | 0.168 | 0.027 | 2.49E-28 |
| TGIF1     | 1.67E-32 | -0.22124 | 0.199 | 0.118 | 2.50E-28 |
| TOB2      | 1.72E-32 | 0.344667 | 0.231 | 0.043 | 2.57E-28 |
| TMED7     | 1.74E-32 | 0.271664 | 0.25  | 0.065 | 2.61E-28 |
| FAHD1     | 1.76E-32 | 0.242271 | 0.205 | 0.044 | 2.63E-28 |
| FAM127B   | 1.76E-32 | -0.28885 | 0.205 | 0.144 | 2.64E-28 |
| HEBP2     | 1.80E-32 | 0.238869 | 0.169 | 0.024 | 2.68E-28 |
| KCMF1     | 1.89E-32 | 0.190933 | 0.181 | 0.036 | 2.82E-28 |
| PXDC1     | 1.94E-32 | 0.241035 | 0.186 | 0.032 | 2.90E-28 |
| PSMA2     | 2.01E-32 | -1.20952 | 0.018 | 0.205 | 3.01E-28 |
| ACBD3     | 2.05E-32 | 0.138031 | 0.179 | 0.041 | 3.06E-28 |
| CTXN1     | 2.06E-32 | 0.490254 | 0.192 | 0.01  | 3.08E-28 |
| FAM207A   | 2.18E-32 | 0.2099   | 0.183 | 0.036 | 3.25E-28 |
| CHGB      | 2.19E-32 | 0.284457 | 0.186 | 0.031 | 3.27E-28 |
| ATXN80S   | 2.34E-32 | -1.15147 | 0.023 | 0.215 | 3.50E-28 |
| CUL5      | 2.35E-32 | 0.379056 | 0.204 | 0.027 | 3.52E-28 |
| TM7SF3    | 2.59E-32 | 0.120055 | 0.181 | 0.044 | 3.86E-28 |
| ZNF219    | 2.68E-32 | 0.322731 | 0.186 | 0.022 | 4.01E-28 |
| CAT       | 2.91E-32 | -0.1087  | 0.189 | 0.085 | 4.35E-28 |
| PALLD     | 2.98E-32 | 0.266612 | 0.194 | 0.036 | 4.45E-28 |
| LRPPRC    | 3.00E-32 | 0.36324  | 0.216 | 0.032 | 4.49E-28 |
| PUS3      | 3.23E-32 | 0.251558 | 0.176 | 0.027 | 4.83E-28 |
| CENPT     | 3.36E-32 | 0.244076 | 0.237 | 0.062 | 5.02E-28 |
| RPUSD1    | 3.38E-32 | 0.295814 | 0.17  | 0.021 | 5.05E-28 |
| UBTD2     | 3.40E-32 | 0.233267 | 0.152 | 0.017 | 5.08E-28 |
| RP11-315A | 3.49E-32 | 0.162406 | 0.152 | 0.027 | 5.22E-28 |
| HERPUD2   | 3.68E-32 | 0.315887 | 0.189 | 0.024 | 5.50E-28 |
| HIBADH    | 3.73E-32 | 0.147101 | 0.189 | 0.051 | 5.58E-28 |
| WAC       | 3.77E-32 | 0.263491 | 0.222 | 0.05  | 5.63E-28 |
| AQP4      | 3.86E-32 | -1.00267 | 0.059 | 0.193 | 5.76E-28 |
| RGS3      | 3.91E-32 | 0.275594 | 0.165 | 0.019 | 5.85E-28 |
| RP11-51J9 | 3.98E-32 | -0.17498 | 0.176 | 0.08  | 5.95E-28 |

|           |          |          |       |       |          |
|-----------|----------|----------|-------|-------|----------|
| BLMH      | 4.19E-32 | 0.174731 | 0.181 | 0.038 | 6.26E-28 |
| CFLAR     | 4.34E-32 | -0.3228  | 0.179 | 0.113 | 6.49E-28 |
| MLF1      | 4.39E-32 | -0.4004  | 0.146 | 0.106 | 6.57E-28 |
| QRICH1    | 4.42E-32 | 0.181213 | 0.173 | 0.034 | 6.60E-28 |
| TMEM38B   | 4.43E-32 | -0.37937 | 0.12  | 0.087 | 6.61E-28 |
| TLE2      | 4.45E-32 | 0.346398 | 0.2   | 0.027 | 6.66E-28 |
| FKBP7     | 4.57E-32 | 0.189098 | 0.187 | 0.039 | 6.83E-28 |
| MOB1A     | 4.64E-32 | -0.11164 | 0.166 | 0.07  | 6.93E-28 |
| MSN       | 4.75E-32 | -0.11948 | 0.178 | 0.084 | 7.09E-28 |
| RBAK-RBAK | 4.88E-32 | 0.147514 | 0.19  | 0.046 | 7.29E-28 |
| SSH2      | 5.13E-32 | 0.383859 | 0.194 | 0.022 | 7.67E-28 |
| ZNF503    | 5.29E-32 | 0.313286 | 0.195 | 0.031 | 7.91E-28 |
| DENND2A   | 5.60E-32 | 0.169376 | 0.178 | 0.034 | 8.36E-28 |
| LTF       | 6.00E-32 | -1.41414 | 0.012 | 0.162 | 8.96E-28 |
| FAM3A     | 6.11E-32 | 0.17885  | 0.182 | 0.041 | 9.13E-28 |
| RAB1B     | 6.23E-32 | -0.19471 | 0.148 | 0.077 | 9.30E-28 |
| PLA2G12A  | 6.75E-32 | 0.124762 | 0.218 | 0.068 | 1.01E-27 |
| ZDHHC3    | 6.91E-32 | 0.124106 | 0.16  | 0.029 | 1.03E-27 |
| UBE2D1    | 6.92E-32 | 0.224957 | 0.173 | 0.031 | 1.03E-27 |
| RRP1B     | 7.28E-32 | 0.361375 | 0.178 | 0.015 | 1.09E-27 |
| NUP93     | 7.30E-32 | 0.115109 | 0.183 | 0.046 | 1.09E-27 |
| CES2      | 7.53E-32 | 0.337425 | 0.183 | 0.022 | 1.12E-27 |
| BNIP2     | 7.62E-32 | 0.291111 | 0.187 | 0.029 | 1.14E-27 |
| RCHY1     | 7.66E-32 | -0.13548 | 0.19  | 0.085 | 1.14E-27 |
| DENND5A   | 8.12E-32 | 0.207992 | 0.194 | 0.039 | 1.21E-27 |
| MAPRE2    | 8.28E-32 | 0.19234  | 0.181 | 0.034 | 1.24E-27 |
| C12orf43  | 8.69E-32 | 0.161712 | 0.187 | 0.046 | 1.30E-27 |
| KIAA1143  | 8.69E-32 | -0.13438 | 0.147 | 0.06  | 1.30E-27 |
| CAND1     | 8.79E-32 | 0.141986 | 0.225 | 0.074 | 1.31E-27 |
| KCTD17    | 8.80E-32 | 0.235027 | 0.166 | 0.024 | 1.32E-27 |
| RBM33     | 9.20E-32 | 0.250888 | 0.189 | 0.029 | 1.37E-27 |
| PRKD3     | 9.26E-32 | 0.319008 | 0.207 | 0.034 | 1.38E-27 |
| RP5-1177M | 9.28E-32 | 0.547529 | 0.218 | 0.026 | 1.39E-27 |
| CAB39     | 9.42E-32 | 0.337265 | 0.192 | 0.024 | 1.41E-27 |
| DDX54     | 9.71E-32 | 0.129456 | 0.186 | 0.046 | 1.45E-27 |
| SLC25A17  | 1.01E-31 | 0.235147 | 0.192 | 0.036 | 1.50E-27 |
| RRS1      | 1.05E-31 | 0.136634 | 0.16  | 0.032 | 1.57E-27 |
| RP5-940J5 | 1.06E-31 | -0.76275 | 0.083 | 0.133 | 1.59E-27 |
| GTF3C2    | 1.12E-31 | 0.161907 | 0.156 | 0.026 | 1.67E-27 |
| KDM7A     | 1.13E-31 | 0.309351 | 0.143 | 0.005 | 1.69E-27 |
| MAP3K1    | 1.16E-31 | 0.336947 | 0.181 | 0.019 | 1.73E-27 |
| KLHL13    | 1.18E-31 | 0.336123 | 0.156 | 0.009 | 1.76E-27 |
| SORBS3    | 1.19E-31 | 0.162802 | 0.187 | 0.041 | 1.78E-27 |
| TEX261    | 1.27E-31 | 0.249907 | 0.185 | 0.032 | 1.90E-27 |
| BAMBI     | 1.30E-31 | 0.424198 | 0.161 | 0.005 | 1.94E-27 |
| RP11-386G | 1.32E-31 | -0.28984 | 0.124 | 0.068 | 1.98E-27 |
| COL9A3    | 1.33E-31 | -0.26247 | 0.186 | 0.109 | 1.99E-27 |
| HPCAL1    | 1.35E-31 | 0.259454 | 0.148 | 0.014 | 2.02E-27 |
| TAPBP     | 1.37E-31 | -0.15327 | 0.168 | 0.08  | 2.04E-27 |
| TUSC1     | 1.48E-31 | 0.371192 | 0.156 | 0.003 | 2.21E-27 |
| ABHD6     | 1.62E-31 | 0.418471 | 0.185 | 0.017 | 2.42E-27 |

|          |          |          |       |       |          |
|----------|----------|----------|-------|-------|----------|
| DEDD2    | 1.63E-31 | 0.146118 | 0.169 | 0.036 | 2.43E-27 |
| LIMS1    | 1.65E-31 | -0.15932 | 0.194 | 0.104 | 2.47E-27 |
| ZNF226   | 1.75E-31 | -0.38174 | 0.151 | 0.109 | 2.62E-27 |
| METTL7B  | 1.75E-31 | -1.19107 | 0.034 | 0.231 | 2.62E-27 |
| FAM171B  | 1.80E-31 | 0.345089 | 0.198 | 0.027 | 2.68E-27 |
| PPIL3    | 1.80E-31 | 0.167162 | 0.189 | 0.043 | 2.69E-27 |
| BYSL     | 1.81E-31 | 0.246496 | 0.156 | 0.017 | 2.70E-27 |
| WDR12    | 2.05E-31 | 0.351902 | 0.216 | 0.038 | 3.07E-27 |
| RFX4     | 2.09E-31 | -0.26039 | 0.187 | 0.125 | 3.13E-27 |
| PIGC     | 2.14E-31 | -0.16212 | 0.169 | 0.072 | 3.19E-27 |
| HSPB11   | 2.19E-31 | -0.36279 | 0.19  | 0.126 | 3.28E-27 |
| NVL      | 2.20E-31 | 0.218632 | 0.174 | 0.031 | 3.28E-27 |
| ALDOC    | 2.24E-31 | -0.60196 | 0.153 | 0.183 | 3.35E-27 |
| STK16    | 2.51E-31 | 0.117576 | 0.168 | 0.041 | 3.75E-27 |
| HSD11B1L | 2.52E-31 | 0.193066 | 0.217 | 0.056 | 3.76E-27 |
| WDR43    | 2.56E-31 | 0.289114 | 0.224 | 0.046 | 3.82E-27 |
| C1orf27  | 2.58E-31 | -0.18383 | 0.178 | 0.077 | 3.85E-27 |
| TPPP3    | 2.61E-31 | -0.1885  | 0.169 | 0.082 | 3.90E-27 |
| C1orf21  | 2.67E-31 | -0.39342 | 0.179 | 0.133 | 3.99E-27 |
| GPC1     | 2.68E-31 | -0.14867 | 0.195 | 0.099 | 4.01E-27 |
| STOX2    | 2.68E-31 | 0.41239  | 0.164 | 0.005 | 4.01E-27 |
| CHMP7    | 2.74E-31 | 0.17322  | 0.194 | 0.046 | 4.09E-27 |
| SYP      | 2.75E-31 | 0.24799  | 0.228 | 0.058 | 4.11E-27 |
| SLC39A10 | 2.77E-31 | 0.205869 | 0.179 | 0.034 | 4.14E-27 |
| JARID2   | 2.77E-31 | 0.111834 | 0.172 | 0.039 | 4.15E-27 |
| CTU2     | 2.79E-31 | 0.191382 | 0.169 | 0.029 | 4.16E-27 |
| URGCP    | 2.81E-31 | 0.23761  | 0.178 | 0.027 | 4.20E-27 |
| SCG2     | 2.84E-31 | -0.67636 | 0.139 | 0.181 | 4.25E-27 |
| CEP63    | 2.86E-31 | 0.256763 | 0.178 | 0.027 | 4.27E-27 |
| KBTBD7   | 2.99E-31 | 0.270904 | 0.166 | 0.022 | 4.46E-27 |
| GALNT13  | 3.18E-31 | 0.510055 | 0.186 | 0.012 | 4.76E-27 |
| RPIA     | 3.33E-31 | 0.204737 | 0.182 | 0.036 | 4.98E-27 |
| MTA1     | 3.43E-31 | 0.301375 | 0.237 | 0.055 | 5.13E-27 |
| IGSF8    | 3.61E-31 | 0.172719 | 0.22  | 0.06  | 5.39E-27 |
| NDUFAF1  | 3.72E-31 | 0.140686 | 0.186 | 0.048 | 5.56E-27 |
| NUDT10   | 3.80E-31 | 0.334267 | 0.178 | 0.015 | 5.68E-27 |
| MEIS1    | 3.91E-31 | 0.210883 | 0.179 | 0.034 | 5.85E-27 |
| RAB3GAP1 | 3.92E-31 | 0.224678 | 0.168 | 0.027 | 5.86E-27 |
| SMPD1    | 3.93E-31 | 0.340917 | 0.211 | 0.034 | 5.88E-27 |
| PRKCZ    | 3.99E-31 | 0.331966 | 0.169 | 0.015 | 5.96E-27 |
| FAM168B  | 4.05E-31 | 0.318919 | 0.204 | 0.032 | 6.05E-27 |
| GRID2    | 4.21E-31 | 0.483134 | 0.169 | 0.003 | 6.29E-27 |
| NAPEPLD  | 4.25E-31 | 0.296518 | 0.176 | 0.024 | 6.36E-27 |
| ANKRD39  | 4.27E-31 | 0.367128 | 0.198 | 0.027 | 6.38E-27 |
| B3GAT2   | 4.61E-31 | 0.493085 | 0.179 | 0.007 | 6.89E-27 |
| PRTFDC1  | 4.67E-31 | 0.212532 | 0.208 | 0.053 | 6.98E-27 |
| ZMIZ2    | 4.85E-31 | 0.3021   | 0.172 | 0.021 | 7.24E-27 |
| TBC1D14  | 4.89E-31 | 0.244286 | 0.192 | 0.038 | 7.30E-27 |
| SOX12    | 4.97E-31 | 0.361181 | 0.169 | 0.014 | 7.43E-27 |
| CHCHD7   | 5.14E-31 | -0.1389  | 0.169 | 0.077 | 7.68E-27 |
| MYC      | 5.24E-31 | -0.42758 | 0.163 | 0.126 | 7.83E-27 |

|           |          |          |       |       |          |
|-----------|----------|----------|-------|-------|----------|
| RAB28     | 5.35E-31 | -0.11129 | 0.165 | 0.072 | 7.99E-27 |
| DDX39B    | 5.42E-31 | 0.199235 | 0.147 | 0.021 | 8.10E-27 |
| SSBP2     | 5.47E-31 | -0.54782 | 0.15  | 0.161 | 8.17E-27 |
| ALDH6A1   | 5.64E-31 | 0.146554 | 0.233 | 0.077 | 8.42E-27 |
| STYXL1    | 5.75E-31 | 0.158548 | 0.179 | 0.043 | 8.60E-27 |
| LINC00685 | 6.00E-31 | 0.230382 | 0.213 | 0.055 | 8.96E-27 |
| RNASET2   | 6.02E-31 | 0.25963  | 0.208 | 0.043 | 9.00E-27 |
| POLK      | 6.08E-31 | 0.140578 | 0.198 | 0.053 | 9.09E-27 |
| PGP       | 6.26E-31 | 0.380431 | 0.194 | 0.019 | 9.35E-27 |
| CCDC93    | 6.30E-31 | 0.314224 | 0.194 | 0.029 | 9.42E-27 |
| NAP1L5    | 6.77E-31 | 0.203792 | 0.209 | 0.051 | 1.01E-26 |
| SLC25A37  | 6.82E-31 | -0.42072 | 0.155 | 0.138 | 1.02E-26 |
| SERTAD2   | 6.90E-31 | 0.154119 | 0.174 | 0.036 | 1.03E-26 |
| RFXAP     | 7.11E-31 | 0.260457 | 0.163 | 0.019 | 1.06E-26 |
| CENPH     | 7.32E-31 | 0.308482 | 0.161 | 0.017 | 1.09E-26 |
| ADAM17    | 7.68E-31 | 0.373362 | 0.218 | 0.038 | 1.15E-26 |
| CWF19L2   | 7.99E-31 | 0.213014 | 0.194 | 0.041 | 1.19E-26 |
| KIAA2026  | 8.08E-31 | 0.360275 | 0.196 | 0.027 | 1.21E-26 |
| HBS1L     | 8.22E-31 | 0.175325 | 0.183 | 0.044 | 1.23E-26 |
| BNIP3     | 8.22E-31 | -0.80777 | 0.118 | 0.161 | 1.23E-26 |
| FBXO3     | 8.45E-31 | 0.277559 | 0.203 | 0.041 | 1.26E-26 |
| PCF11     | 9.35E-31 | 0.149955 | 0.215 | 0.06  | 1.40E-26 |
| PTPN4     | 9.80E-31 | 0.383012 | 0.19  | 0.019 | 1.46E-26 |
| TP53TG1   | 1.08E-30 | -0.2949  | 0.15  | 0.094 | 1.61E-26 |
| SYS1      | 1.08E-30 | -0.42205 | 0.124 | 0.091 | 1.62E-26 |
| PYCR2     | 1.10E-30 | -0.24284 | 0.16  | 0.087 | 1.65E-26 |
| CLASRP    | 1.11E-30 | 0.147029 | 0.186 | 0.043 | 1.67E-26 |
| ASPSCR1   | 1.14E-30 | 0.249172 | 0.228 | 0.056 | 1.70E-26 |
| WHSC1     | 1.15E-30 | 0.296462 | 0.205 | 0.038 | 1.72E-26 |
| UBAC1     | 1.24E-30 | 0.183581 | 0.161 | 0.029 | 1.86E-26 |
| PRPS1     | 1.30E-30 | -0.22828 | 0.152 | 0.079 | 1.94E-26 |
| REST      | 1.31E-30 | 0.277471 | 0.209 | 0.043 | 1.96E-26 |
| RAB21     | 1.32E-30 | 0.178921 | 0.17  | 0.036 | 1.97E-26 |
| AIDA      | 1.32E-30 | -0.21596 | 0.148 | 0.075 | 1.98E-26 |
| ZNF649    | 1.35E-30 | 0.314598 | 0.159 | 0.012 | 2.01E-26 |
| GAL3ST4   | 1.35E-30 | 0.206157 | 0.165 | 0.032 | 2.02E-26 |
| DUSP11    | 1.42E-30 | 0.120249 | 0.196 | 0.05  | 2.11E-26 |
| SMIM8     | 1.42E-30 | 0.179218 | 0.159 | 0.027 | 2.12E-26 |
| NUBP1     | 1.45E-30 | 0.273247 | 0.191 | 0.034 | 2.16E-26 |
| SESN3     | 1.47E-30 | 0.282708 | 0.17  | 0.021 | 2.19E-26 |
| CHMP6     | 1.48E-30 | 0.151067 | 0.168 | 0.034 | 2.22E-26 |
| ZNF12     | 1.49E-30 | 0.191877 | 0.174 | 0.038 | 2.23E-26 |
| BRINP2    | 1.58E-30 | 0.47281  | 0.178 | 0.01  | 2.36E-26 |
| SPRY2     | 1.58E-30 | -0.13949 | 0.174 | 0.087 | 2.37E-26 |
| KLHL24    | 1.67E-30 | 0.146871 | 0.198 | 0.055 | 2.49E-26 |
| AKAP13    | 1.72E-30 | -0.10568 | 0.163 | 0.072 | 2.56E-26 |
| APIP      | 1.75E-30 | -0.14344 | 0.15  | 0.065 | 2.61E-26 |
| NFYC      | 1.80E-30 | -0.21327 | 0.181 | 0.101 | 2.70E-26 |
| PLXNB1    | 1.90E-30 | 0.153757 | 0.161 | 0.029 | 2.84E-26 |
| TMEM68    | 1.93E-30 | 0.191441 | 0.199 | 0.053 | 2.89E-26 |
| RP11-571M | 1.95E-30 | 0.329354 | 0.152 | 0.007 | 2.91E-26 |

|         |          |          |       |       |          |
|---------|----------|----------|-------|-------|----------|
| MED8    | 1.95E-30 | -0.18941 | 0.173 | 0.085 | 2.92E-26 |
| IFI6    | 1.98E-30 | -0.28581 | 0.282 | 0.198 | 2.96E-26 |
| VAX2    | 2.00E-30 | 0.308427 | 0.15  | 0.01  | 3.00E-26 |
| EMP1    | 2.02E-30 | -1.02841 | 0.021 | 0.178 | 3.02E-26 |
| TSTD1   | 2.04E-30 | -0.5708  | 0.105 | 0.111 | 3.04E-26 |
| ERCC3   | 2.07E-30 | 0.197562 | 0.176 | 0.038 | 3.09E-26 |
| NISCH   | 2.17E-30 | 0.192719 | 0.168 | 0.032 | 3.24E-26 |
| SIGMAR1 | 2.23E-30 | 0.202638 | 0.179 | 0.036 | 3.33E-26 |
| RARA    | 2.23E-30 | 0.309247 | 0.157 | 0.014 | 3.33E-26 |
| KIFAP3  | 2.24E-30 | 0.239597 | 0.187 | 0.039 | 3.35E-26 |
| TRMT2A  | 2.30E-30 | -0.15662 | 0.146 | 0.063 | 3.43E-26 |
| LYPLAL1 | 2.38E-30 | -0.15183 | 0.185 | 0.092 | 3.55E-26 |
| ATP1B2  | 2.39E-30 | -0.49951 | 0.152 | 0.15  | 3.57E-26 |
| FAXC    | 2.45E-30 | 0.451439 | 0.182 | 0.012 | 3.66E-26 |
| ISY1    | 2.49E-30 | 0.120299 | 0.186 | 0.05  | 3.72E-26 |
| N6AMT2  | 2.49E-30 | -0.16154 | 0.133 | 0.06  | 3.72E-26 |
| FAM98A  | 2.53E-30 | 0.169629 | 0.179 | 0.041 | 3.78E-26 |
| DUSP14  | 2.53E-30 | -0.18024 | 0.126 | 0.053 | 3.78E-26 |
| TYMS    | 2.62E-30 | 0.209258 | 0.168 | 0.032 | 3.91E-26 |
| CEP57   | 2.74E-30 | 0.138654 | 0.208 | 0.062 | 4.10E-26 |
| HDAC5   | 2.77E-30 | 0.22854  | 0.189 | 0.038 | 4.13E-26 |
| WARS    | 2.78E-30 | -0.58715 | 0.1   | 0.108 | 4.16E-26 |
| KDM4B   | 2.83E-30 | 0.212938 | 0.19  | 0.041 | 4.23E-26 |
| UXS1    | 2.94E-30 | 0.227458 | 0.172 | 0.031 | 4.39E-26 |
| ANXA7   | 2.98E-30 | -0.23433 | 0.183 | 0.109 | 4.46E-26 |
| DESI2   | 3.00E-30 | 0.178274 | 0.178 | 0.036 | 4.48E-26 |
| DSCR3   | 3.19E-30 | -0.21327 | 0.14  | 0.065 | 4.77E-26 |
| CEBPB   | 3.25E-30 | -0.66263 | 0.104 | 0.145 | 4.85E-26 |
| BROX    | 3.30E-30 | 0.131394 | 0.17  | 0.039 | 4.94E-26 |
| REV1    | 3.32E-30 | 0.233412 | 0.194 | 0.039 | 4.96E-26 |
| REL     | 3.37E-30 | 0.162729 | 0.187 | 0.044 | 5.03E-26 |
| OGFR    | 3.43E-30 | 0.248215 | 0.211 | 0.044 | 5.12E-26 |
| TANC1   | 3.53E-30 | 0.347253 | 0.189 | 0.026 | 5.27E-26 |
| DLX6    | 3.64E-30 | 0.439759 | 0.143 | 0     | 5.44E-26 |
| SCAF1   | 3.69E-30 | 0.238992 | 0.156 | 0.021 | 5.51E-26 |
| KDSR    | 3.78E-30 | 0.153204 | 0.212 | 0.063 | 5.65E-26 |
| CHCHD10 | 4.14E-30 | -0.14204 | 0.174 | 0.082 | 6.19E-26 |
| RCOR2   | 4.15E-30 | 0.476148 | 0.155 | 0.003 | 6.21E-26 |
| KCTD20  | 4.33E-30 | 0.101081 | 0.169 | 0.043 | 6.47E-26 |
| ZNF354A | 4.40E-30 | 0.185785 | 0.15  | 0.021 | 6.58E-26 |
| CKAP2   | 4.42E-30 | 0.293764 | 0.16  | 0.019 | 6.60E-26 |
| FBXO25  | 4.47E-30 | 0.176592 | 0.161 | 0.029 | 6.69E-26 |
| USP9X   | 4.52E-30 | 0.249286 | 0.191 | 0.038 | 6.76E-26 |
| SERINC2 | 4.82E-30 | 0.364898 | 0.163 | 0.005 | 7.20E-26 |
| AKAP12  | 5.05E-30 | -0.58209 | 0.111 | 0.115 | 7.55E-26 |
| REXO4   | 5.14E-30 | 0.206816 | 0.194 | 0.043 | 7.68E-26 |
| EML4    | 5.52E-30 | 0.20083  | 0.178 | 0.036 | 8.25E-26 |
| CCDC94  | 5.60E-30 | 0.138311 | 0.19  | 0.053 | 8.37E-26 |
| DUOX1   | 5.63E-30 | 0.428199 | 0.156 | 0.002 | 8.41E-26 |
| COL20A1 | 5.68E-30 | 0.472479 | 0.165 | 0.007 | 8.49E-26 |
| RBFA    | 5.93E-30 | 0.119692 | 0.164 | 0.039 | 8.86E-26 |



|          |          |          |       |       |          |
|----------|----------|----------|-------|-------|----------|
| STRN4    | 5.97E-30 | 0.289241 | 0.165 | 0.019 | 8.92E-26 |
| CACUL1   | 6.04E-30 | 0.373843 | 0.194 | 0.026 | 9.02E-26 |
| ARPC1B   | 6.05E-30 | -0.18495 | 0.172 | 0.089 | 9.05E-26 |
| UBALD1   | 6.21E-30 | 0.269377 | 0.179 | 0.027 | 9.28E-26 |
| TMCC1    | 6.46E-30 | 0.440187 | 0.168 | 0.007 | 9.65E-26 |
| MICAL1   | 6.89E-30 | 0.376699 | 0.161 | 0.009 | 1.03E-25 |
| CC2D1A   | 7.04E-30 | 0.165324 | 0.195 | 0.05  | 1.05E-25 |
| DNAJC18  | 7.16E-30 | 0.185173 | 0.177 | 0.038 | 1.07E-25 |
| LETM1    | 7.69E-30 | 0.240353 | 0.196 | 0.039 | 1.15E-25 |
| PPP1R35  | 8.20E-30 | 0.414361 | 0.205 | 0.026 | 1.23E-25 |
| C12orf73 | 8.27E-30 | 0.164237 | 0.181 | 0.041 | 1.24E-25 |
| AUTS2    | 8.58E-30 | 0.306011 | 0.166 | 0.019 | 1.28E-25 |
| MLXIP    | 8.64E-30 | 0.201468 | 0.195 | 0.046 | 1.29E-25 |
| AFG3L2   | 9.12E-30 | 0.166041 | 0.174 | 0.038 | 1.36E-25 |
| TUBGCP4  | 9.38E-30 | 0.261644 | 0.191 | 0.032 | 1.40E-25 |
| RAP2A    | 9.70E-30 | 0.296608 | 0.179 | 0.027 | 1.45E-25 |
| SEC23A   | 1.04E-29 | -0.14159 | 0.173 | 0.085 | 1.55E-25 |
| FAM122A  | 1.09E-29 | 0.211927 | 0.156 | 0.024 | 1.63E-25 |
| SMC1A    | 1.13E-29 | 0.158291 | 0.198 | 0.051 | 1.69E-25 |
| LYRM9    | 1.14E-29 | -0.11686 | 0.156 | 0.072 | 1.71E-25 |
| GPCPD1   | 1.17E-29 | 0.285577 | 0.172 | 0.022 | 1.75E-25 |
| TBC1D7   | 1.18E-29 | 0.167893 | 0.174 | 0.039 | 1.76E-25 |
| CYP20A1  | 1.25E-29 | -0.13084 | 0.181 | 0.084 | 1.86E-25 |
| GBP1     | 1.28E-29 | -1.1837  | 0.022 | 0.168 | 1.91E-25 |
| PSEN1    | 1.30E-29 | 0.200038 | 0.179 | 0.039 | 1.94E-25 |
| CDK16    | 1.31E-29 | 0.107405 | 0.19  | 0.06  | 1.96E-25 |
| SSBP3    | 1.45E-29 | 0.242853 | 0.172 | 0.029 | 2.17E-25 |
| GRIK3    | 1.47E-29 | 0.314241 | 0.15  | 0.009 | 2.20E-25 |
| DPH7     | 1.48E-29 | 0.247334 | 0.183 | 0.034 | 2.21E-25 |
| FGF9     | 1.52E-29 | 0.463647 | 0.172 | 0.01  | 2.27E-25 |
| CHP1     | 1.54E-29 | -0.10939 | 0.139 | 0.051 | 2.31E-25 |
| PPP6R2   | 1.58E-29 | 0.409386 | 0.187 | 0.017 | 2.37E-25 |
| CYTH1    | 1.59E-29 | 0.372676 | 0.166 | 0.012 | 2.38E-25 |
| CASP3    | 1.65E-29 | 0.162125 | 0.186 | 0.051 | 2.47E-25 |
| KCND2    | 1.76E-29 | 0.282986 | 0.144 | 0.01  | 2.63E-25 |
| SCAP     | 1.83E-29 | 0.302154 | 0.178 | 0.024 | 2.74E-25 |
| RHBDD3   | 1.84E-29 | 0.239345 | 0.186 | 0.036 | 2.75E-25 |
| YRDC     | 1.87E-29 | 0.272724 | 0.203 | 0.043 | 2.79E-25 |
| ZNF704   | 1.95E-29 | 0.342026 | 0.195 | 0.031 | 2.91E-25 |
| ZBTB16   | 1.95E-29 | 0.203018 | 0.27  | 0.101 | 2.91E-25 |
| NR2C2AP  | 1.97E-29 | -0.2396  | 0.144 | 0.08  | 2.95E-25 |
| RRP9     | 2.01E-29 | 0.168947 | 0.195 | 0.043 | 3.00E-25 |
| YLPM1    | 2.05E-29 | 0.263529 | 0.172 | 0.027 | 3.07E-25 |
| RGS1     | 2.10E-29 | -0.1599  | 0.166 | 0.085 | 3.14E-25 |
| TTC17    | 2.13E-29 | 0.146311 | 0.211 | 0.062 | 3.18E-25 |
| TMED5    | 2.13E-29 | -0.31197 | 0.152 | 0.091 | 3.19E-25 |
| NMD3     | 2.18E-29 | -0.1137  | 0.202 | 0.106 | 3.25E-25 |
| ZNF721   | 2.19E-29 | 0.196648 | 0.186 | 0.043 | 3.28E-25 |
| IRF3     | 2.24E-29 | -0.31525 | 0.157 | 0.109 | 3.34E-25 |
| GPSM1    | 2.25E-29 | 0.350397 | 0.159 | 0.01  | 3.37E-25 |
| HIST1H1C | 2.26E-29 | -0.35186 | 0.143 | 0.082 | 3.37E-25 |

|          |          |          |       |       |          |
|----------|----------|----------|-------|-------|----------|
| CTPS1    | 2.33E-29 | 0.240201 | 0.161 | 0.022 | 3.47E-25 |
| LYPD1    | 2.49E-29 | -0.3992  | 0.116 | 0.084 | 3.72E-25 |
| KLHL35   | 2.73E-29 | 0.362993 | 0.168 | 0.017 | 4.08E-25 |
| SRRM3    | 2.89E-29 | 0.430906 | 0.191 | 0.022 | 4.33E-25 |
| FTSJ3    | 2.91E-29 | 0.211077 | 0.165 | 0.027 | 4.35E-25 |
| NEIL2    | 2.97E-29 | -0.10001 | 0.166 | 0.072 | 4.44E-25 |
| ACOT13   | 3.00E-29 | -0.20235 | 0.159 | 0.072 | 4.48E-25 |
| RARRES3  | 3.00E-29 | -1.14582 | 0.03  | 0.176 | 4.48E-25 |
| POM121C  | 3.30E-29 | 0.265857 | 0.186 | 0.034 | 4.93E-25 |
| SRR      | 3.32E-29 | 0.111397 | 0.169 | 0.044 | 4.96E-25 |
| ELM01    | 3.36E-29 | 0.128581 | 0.208 | 0.07  | 5.02E-25 |
| THUMPD1  | 3.46E-29 | 0.145987 | 0.196 | 0.053 | 5.17E-25 |
| ATP9A    | 3.56E-29 | 0.242424 | 0.165 | 0.029 | 5.32E-25 |
| SLC30A5  | 3.59E-29 | 0.201883 | 0.198 | 0.044 | 5.37E-25 |
| GATS     | 3.77E-29 | 0.342719 | 0.17  | 0.015 | 5.64E-25 |
| BCL11A   | 3.78E-29 | 0.344241 | 0.146 | 0.005 | 5.65E-25 |
| MTRNR2L1 | 3.89E-29 | 0.313393 | 0.381 | 0.174 | 5.81E-25 |
| ZNF827   | 3.99E-29 | 0.327106 | 0.198 | 0.034 | 5.96E-25 |
| HCFC1    | 3.99E-29 | 0.28418  | 0.168 | 0.022 | 5.97E-25 |
| USP7     | 4.17E-29 | 0.361084 | 0.178 | 0.021 | 6.23E-25 |
| URI1     | 4.17E-29 | 0.218171 | 0.204 | 0.051 | 6.23E-25 |
| KLHL42   | 4.33E-29 | 0.133512 | 0.191 | 0.051 | 6.47E-25 |
| HPS4     | 4.79E-29 | 0.112442 | 0.191 | 0.058 | 7.16E-25 |
| DOHH     | 4.94E-29 | 0.285964 | 0.185 | 0.031 | 7.39E-25 |
| ANKRD54  | 5.14E-29 | 0.251023 | 0.181 | 0.031 | 7.68E-25 |
| LRRC4    | 5.17E-29 | 0.419671 | 0.147 | 0.002 | 7.73E-25 |
| DYNLT3   | 5.20E-29 | -0.50754 | 0.103 | 0.097 | 7.77E-25 |
| DPYSL5   | 5.33E-29 | 0.167807 | 0.156 | 0.029 | 7.97E-25 |
| KLF12    | 5.48E-29 | 0.382917 | 0.187 | 0.021 | 8.20E-25 |
| DHFR     | 5.75E-29 | 0.151645 | 0.148 | 0.026 | 8.59E-25 |
| RAMP2    | 5.90E-29 | 0.168742 | 0.183 | 0.05  | 8.82E-25 |
| ADM      | 6.03E-29 | -1.18629 | 0.046 | 0.152 | 9.00E-25 |
| TNFRSF21 | 6.43E-29 | 0.316953 | 0.187 | 0.029 | 9.61E-25 |
| KDM2A    | 6.53E-29 | 0.161171 | 0.157 | 0.027 | 9.76E-25 |
| FKBP5    | 6.67E-29 | -0.21991 | 0.213 | 0.137 | 9.97E-25 |
| TUBA1C   | 6.68E-29 | -0.73516 | 0.129 | 0.179 | 9.98E-25 |
| AP5Z1    | 6.73E-29 | 0.311173 | 0.173 | 0.021 | 1.01E-24 |
| LENG8    | 7.00E-29 | 0.102398 | 0.203 | 0.068 | 1.05E-24 |
| U2AF1L4  | 7.22E-29 | -0.45237 | 0.16  | 0.14  | 1.08E-24 |
| EIF2B5   | 7.34E-29 | 0.106288 | 0.174 | 0.048 | 1.10E-24 |
| PEX5     | 7.35E-29 | 0.195005 | 0.147 | 0.022 | 1.10E-24 |
| IMPAD1   | 7.50E-29 | 0.152188 | 0.181 | 0.044 | 1.12E-24 |
| TFPT     | 7.56E-29 | -0.1487  | 0.161 | 0.079 | 1.13E-24 |
| VEGFA    | 7.74E-29 | -0.84647 | 0.077 | 0.157 | 1.16E-24 |
| MAFF     | 7.74E-29 | 0.277923 | 0.209 | 0.048 | 1.16E-24 |
| CDKN1A   | 8.22E-29 | -0.68513 | 0.094 | 0.135 | 1.23E-24 |
| ANKRD36  | 8.64E-29 | 0.204696 | 0.217 | 0.06  | 1.29E-24 |
| TMEM101  | 8.82E-29 | 0.140542 | 0.189 | 0.051 | 1.32E-24 |
| CEP41    | 8.85E-29 | 0.22267  | 0.174 | 0.034 | 1.32E-24 |
| ZNF85    | 9.40E-29 | 0.174063 | 0.134 | 0.017 | 1.41E-24 |
| ST6GAL2  | 9.87E-29 | 0.438599 | 0.165 | 0.007 | 1.47E-24 |

|           |          |          |       |       |          |
|-----------|----------|----------|-------|-------|----------|
| SNAPC5    | 9.97E-29 | -0.10375 | 0.146 | 0.062 | 1.49E-24 |
| RGL2      | 1.01E-28 | 0.140974 | 0.182 | 0.05  | 1.50E-24 |
| SC5D      | 1.04E-28 | -0.16423 | 0.16  | 0.079 | 1.55E-24 |
| LENG1     | 1.04E-28 | -0.22527 | 0.159 | 0.08  | 1.55E-24 |
| MAZ       | 1.14E-28 | 0.193821 | 0.196 | 0.051 | 1.70E-24 |
| RFWD2     | 1.14E-28 | 0.248845 | 0.161 | 0.024 | 1.70E-24 |
| FAM45A    | 1.15E-28 | 0.150035 | 0.182 | 0.044 | 1.72E-24 |
| NUDT22    | 1.17E-28 | -0.17794 | 0.146 | 0.07  | 1.75E-24 |
| AKTIP     | 1.18E-28 | -0.10198 | 0.16  | 0.065 | 1.77E-24 |
| TRABD     | 1.22E-28 | 0.272899 | 0.159 | 0.019 | 1.82E-24 |
| HERC2     | 1.24E-28 | 0.271427 | 0.218 | 0.053 | 1.85E-24 |
| SLAIN2    | 1.29E-28 | 0.329265 | 0.15  | 0.01  | 1.92E-24 |
| UNC119    | 1.33E-28 | 0.129021 | 0.155 | 0.031 | 1.99E-24 |
| GALNT1    | 1.34E-28 | 0.329604 | 0.163 | 0.015 | 2.01E-24 |
| CDK2AP1   | 1.36E-28 | 0.312659 | 0.16  | 0.015 | 2.03E-24 |
| IP6K1     | 1.37E-28 | 0.108057 | 0.183 | 0.05  | 2.04E-24 |
| CPT1C     | 1.40E-28 | 0.139381 | 0.187 | 0.051 | 2.10E-24 |
| FKBP14    | 1.48E-28 | 0.137079 | 0.14  | 0.024 | 2.22E-24 |
| DVL2      | 1.54E-28 | 0.29324  | 0.205 | 0.043 | 2.30E-24 |
| DEXI      | 1.58E-28 | 0.230645 | 0.181 | 0.034 | 2.37E-24 |
| NFKBIL1   | 1.59E-28 | 0.253263 | 0.211 | 0.05  | 2.38E-24 |
| SLC20A1   | 1.66E-28 | 0.154745 | 0.152 | 0.027 | 2.48E-24 |
| TOR1AIP2  | 1.89E-28 | 0.121357 | 0.204 | 0.063 | 2.82E-24 |
| HYI       | 1.95E-28 | 0.331009 | 0.183 | 0.026 | 2.91E-24 |
| GLIPR2    | 1.96E-28 | -0.49593 | 0.129 | 0.111 | 2.93E-24 |
| PHLDB1    | 2.06E-28 | 0.210889 | 0.183 | 0.041 | 3.07E-24 |
| DYRK4     | 2.08E-28 | -0.20911 | 0.156 | 0.082 | 3.11E-24 |
| NEDD4L    | 2.18E-28 | 0.332694 | 0.169 | 0.017 | 3.26E-24 |
| RP11-126K | 2.21E-28 | 0.246097 | 0.152 | 0.019 | 3.30E-24 |
| UROS      | 2.24E-28 | 0.293444 | 0.182 | 0.029 | 3.35E-24 |
| SH2B2     | 2.37E-28 | 0.35019  | 0.166 | 0.014 | 3.54E-24 |
| CHPF2     | 2.41E-28 | 0.207364 | 0.169 | 0.032 | 3.60E-24 |
| BAP1      | 2.48E-28 | 0.221295 | 0.173 | 0.034 | 3.70E-24 |
| ZNF766    | 2.52E-28 | 0.187312 | 0.169 | 0.036 | 3.77E-24 |
| CSNK1G3   | 2.64E-28 | 0.238934 | 0.165 | 0.026 | 3.95E-24 |
| TSC2      | 2.64E-28 | 0.160746 | 0.182 | 0.046 | 3.95E-24 |
| RDH14     | 2.65E-28 | 0.190096 | 0.207 | 0.056 | 3.95E-24 |
| SLC35F1   | 2.69E-28 | 0.217132 | 0.173 | 0.031 | 4.02E-24 |
| MAPK1     | 2.79E-28 | 0.184972 | 0.176 | 0.043 | 4.17E-24 |
| HOMER3    | 2.80E-28 | 0.121776 | 0.157 | 0.039 | 4.18E-24 |
| OGFOD3    | 2.82E-28 | 0.203816 | 0.166 | 0.031 | 4.22E-24 |
| C1orf131  | 2.85E-28 | -0.11181 | 0.179 | 0.087 | 4.25E-24 |
| SMG1      | 2.85E-28 | 0.233695 | 0.179 | 0.036 | 4.26E-24 |
| FAM217B   | 2.89E-28 | 0.287659 | 0.174 | 0.027 | 4.32E-24 |
| NOL4      | 3.03E-28 | 0.328523 | 0.152 | 0.009 | 4.53E-24 |
| TMX4      | 3.05E-28 | 0.305828 | 0.209 | 0.043 | 4.56E-24 |
| FEN1      | 3.68E-28 | 0.231418 | 0.147 | 0.021 | 5.51E-24 |
| C1S       | 3.71E-28 | -1.05193 | 0.021 | 0.15  | 5.54E-24 |
| ACOX1     | 3.79E-28 | 0.276976 | 0.146 | 0.014 | 5.66E-24 |
| TLE1      | 3.93E-28 | 0.117185 | 0.192 | 0.06  | 5.87E-24 |
| POLR2D    | 3.96E-28 | 0.166932 | 0.164 | 0.031 | 5.92E-24 |

|           |          |          |       |       |          |
|-----------|----------|----------|-------|-------|----------|
| HOXB4     | 3.98E-28 | 0.332884 | 0.137 | 0.005 | 5.94E-24 |
| ATP1A2    | 4.24E-28 | -0.71433 | 0.069 | 0.113 | 6.33E-24 |
| MCUR1     | 4.30E-28 | 0.124705 | 0.176 | 0.048 | 6.42E-24 |
| TMOD1     | 4.84E-28 | -0.53163 | 0.127 | 0.123 | 7.23E-24 |
| RP11-182L | 4.97E-28 | 0.361404 | 0.159 | 0.009 | 7.42E-24 |
| EXTL3     | 5.02E-28 | 0.132912 | 0.156 | 0.032 | 7.50E-24 |
| CA8       | 5.19E-28 | 0.562049 | 0.181 | 0.014 | 7.75E-24 |
| PSMG1     | 5.19E-28 | -0.20861 | 0.16  | 0.085 | 7.75E-24 |
| ANKS3     | 5.24E-28 | 0.243102 | 0.2   | 0.048 | 7.83E-24 |
| MCM6      | 5.24E-28 | 0.2331   | 0.14  | 0.015 | 7.83E-24 |
| NR2F1     | 5.26E-28 | 0.202387 | 0.178 | 0.041 | 7.86E-24 |
| PLAT      | 5.45E-28 | -0.21524 | 0.157 | 0.085 | 8.14E-24 |
| ZFH3      | 5.46E-28 | 0.15977  | 0.144 | 0.026 | 8.16E-24 |
| TTF1      | 5.51E-28 | 0.242562 | 0.221 | 0.056 | 8.24E-24 |
| ZNF566    | 5.54E-28 | 0.104734 | 0.185 | 0.06  | 8.28E-24 |
| CLN5      | 5.85E-28 | 0.127466 | 0.177 | 0.046 | 8.75E-24 |
| HOXB8     | 5.90E-28 | 0.383992 | 0.133 | 0     | 8.82E-24 |
| CBX2      | 5.97E-28 | 0.356868 | 0.159 | 0.012 | 8.93E-24 |
| SLC25A29  | 6.21E-28 | 0.289017 | 0.177 | 0.027 | 9.27E-24 |
| PNMAL1    | 6.60E-28 | 0.25042  | 0.142 | 0.014 | 9.86E-24 |
| PSMG4     | 6.72E-28 | 0.160808 | 0.189 | 0.051 | 1.00E-23 |
| AAAS      | 6.78E-28 | 0.105318 | 0.225 | 0.08  | 1.01E-23 |
| CASD1     | 6.83E-28 | 0.325573 | 0.157 | 0.015 | 1.02E-23 |
| SGSM3     | 6.85E-28 | 0.205144 | 0.208 | 0.055 | 1.02E-23 |
| ZNF286A   | 6.86E-28 | 0.268208 | 0.143 | 0.014 | 1.03E-23 |
| RMND5A    | 7.00E-28 | 0.308116 | 0.182 | 0.029 | 1.05E-23 |
| LINC00599 | 8.06E-28 | 0.378347 | 0.14  | 0.003 | 1.21E-23 |
| GCFC2     | 8.50E-28 | 0.269942 | 0.157 | 0.021 | 1.27E-23 |
| RANGRF    | 8.60E-28 | -0.17229 | 0.153 | 0.074 | 1.28E-23 |
| CTBP2     | 8.87E-28 | 0.14325  | 0.155 | 0.031 | 1.33E-23 |
| SEC14L1   | 9.02E-28 | -0.41515 | 0.14  | 0.108 | 1.35E-23 |
| HGSNAT    | 9.47E-28 | 0.249947 | 0.176 | 0.032 | 1.42E-23 |
| SMPD4     | 9.48E-28 | 0.144685 | 0.135 | 0.019 | 1.42E-23 |
| CASC4     | 9.91E-28 | 0.166207 | 0.187 | 0.046 | 1.48E-23 |
| TSHZ1     | 1.01E-27 | 0.18142  | 0.126 | 0.014 | 1.51E-23 |
| HGS       | 1.01E-27 | 0.224065 | 0.187 | 0.043 | 1.52E-23 |
| CWC22     | 1.04E-27 | 0.139755 | 0.138 | 0.026 | 1.56E-23 |
| TM9SF3    | 1.06E-27 | 0.289039 | 0.182 | 0.031 | 1.59E-23 |
| ZNF358    | 1.11E-27 | 0.257884 | 0.177 | 0.031 | 1.65E-23 |
| AP5M1     | 1.12E-27 | 0.201041 | 0.177 | 0.041 | 1.67E-23 |
| MSH2      | 1.13E-27 | 0.290813 | 0.165 | 0.021 | 1.68E-23 |
| HCG18     | 1.13E-27 | 0.302769 | 0.15  | 0.014 | 1.69E-23 |
| NDP       | 1.16E-27 | -0.10854 | 0.137 | 0.058 | 1.73E-23 |
| CERS4     | 1.17E-27 | 0.18395  | 0.178 | 0.041 | 1.75E-23 |
| FBXW11    | 1.19E-27 | 0.291182 | 0.173 | 0.026 | 1.77E-23 |
| ZNF789    | 1.19E-27 | 0.287184 | 0.147 | 0.014 | 1.78E-23 |
| RANBP2    | 1.20E-27 | 0.164265 | 0.155 | 0.029 | 1.79E-23 |
| PTDSS2    | 1.21E-27 | 0.36505  | 0.181 | 0.021 | 1.80E-23 |
| LSM12     | 1.26E-27 | 0.134858 | 0.17  | 0.038 | 1.89E-23 |
| LARP1     | 1.27E-27 | 0.122246 | 0.199 | 0.063 | 1.90E-23 |
| CD68      | 1.29E-27 | -0.41675 | 0.112 | 0.089 | 1.92E-23 |

|           |          |          |       |       |          |
|-----------|----------|----------|-------|-------|----------|
| VHL       | 1.37E-27 | 0.280764 | 0.172 | 0.026 | 2.05E-23 |
| VPS16     | 1.38E-27 | 0.153793 | 0.153 | 0.029 | 2.06E-23 |
| TMEM198   | 1.43E-27 | 0.256533 | 0.161 | 0.024 | 2.13E-23 |
| NDUFA7    | 1.44E-27 | -1.01704 | 0.02  | 0.179 | 2.15E-23 |
| BAZ2A     | 1.48E-27 | 0.155046 | 0.192 | 0.055 | 2.21E-23 |
| RBM48     | 1.54E-27 | 0.260131 | 0.163 | 0.022 | 2.30E-23 |
| MAD2L1    | 1.57E-27 | 0.146295 | 0.143 | 0.027 | 2.35E-23 |
| GINS2     | 1.59E-27 | 0.281684 | 0.165 | 0.026 | 2.37E-23 |
| PICALM    | 1.62E-27 | 0.139506 | 0.152 | 0.031 | 2.42E-23 |
| IRS2      | 1.67E-27 | -0.34701 | 0.181 | 0.132 | 2.49E-23 |
| ANKFY1    | 1.68E-27 | 0.113537 | 0.131 | 0.024 | 2.52E-23 |
| AP006222. | 1.71E-27 | -0.3411  | 0.117 | 0.08  | 2.55E-23 |
| AKAP17A   | 1.73E-27 | 0.339752 | 0.168 | 0.017 | 2.58E-23 |
| ZNF300    | 1.74E-27 | 0.363861 | 0.16  | 0.01  | 2.60E-23 |
| MLC1      | 1.76E-27 | -0.14657 | 0.139 | 0.068 | 2.63E-23 |
| CASK      | 1.78E-27 | 0.167707 | 0.176 | 0.044 | 2.66E-23 |
| RP11-71N1 | 1.83E-27 | -0.45963 | 0.124 | 0.123 | 2.74E-23 |
| AGAP3     | 1.92E-27 | 0.326792 | 0.143 | 0.009 | 2.86E-23 |
| SH3KBP1   | 1.92E-27 | 0.160355 | 0.151 | 0.029 | 2.88E-23 |
| ASH2L     | 1.94E-27 | 0.253721 | 0.176 | 0.032 | 2.90E-23 |
| MMP24-AS1 | 2.08E-27 | 0.105533 | 0.178 | 0.053 | 3.10E-23 |
| POLR3D    | 2.08E-27 | 0.241627 | 0.183 | 0.038 | 3.11E-23 |
| LINGO1    | 2.17E-27 | 0.350288 | 0.148 | 0.012 | 3.24E-23 |
| ETFDH     | 2.32E-27 | 0.125603 | 0.204 | 0.063 | 3.46E-23 |
| ZP3       | 2.42E-27 | 0.193633 | 0.137 | 0.021 | 3.62E-23 |
| CHRAC1    | 2.44E-27 | 0.268255 | 0.155 | 0.021 | 3.65E-23 |
| ZFP14     | 2.46E-27 | 0.232175 | 0.16  | 0.027 | 3.67E-23 |
| INTS4     | 2.50E-27 | 0.162857 | 0.139 | 0.022 | 3.73E-23 |
| CAMSAP2   | 2.53E-27 | 0.203825 | 0.173 | 0.034 | 3.78E-23 |
| AKAP1     | 2.57E-27 | 0.195033 | 0.152 | 0.027 | 3.83E-23 |
| NRSN2     | 2.60E-27 | 0.175724 | 0.146 | 0.024 | 3.88E-23 |
| NFATC2IP  | 2.64E-27 | 0.244552 | 0.163 | 0.027 | 3.95E-23 |
| SENP6     | 2.66E-27 | 0.284694 | 0.195 | 0.043 | 3.98E-23 |
| ARNT2     | 2.69E-27 | 0.324626 | 0.165 | 0.017 | 4.03E-23 |
| ALG8      | 2.71E-27 | -0.15543 | 0.124 | 0.055 | 4.05E-23 |
| UBE2W     | 2.82E-27 | 0.173093 | 0.177 | 0.043 | 4.21E-23 |
| PDE9A     | 2.86E-27 | 0.444813 | 0.185 | 0.017 | 4.28E-23 |
| FAF2      | 2.86E-27 | 0.277259 | 0.205 | 0.046 | 4.28E-23 |
| TMEM5     | 2.90E-27 | -0.13162 | 0.157 | 0.08  | 4.34E-23 |
| FRMD4A    | 2.95E-27 | 0.320063 | 0.166 | 0.024 | 4.41E-23 |
| DDX19A    | 3.15E-27 | 0.1577   | 0.172 | 0.038 | 4.71E-23 |
| ANKRD13D  | 3.27E-27 | 0.19657  | 0.159 | 0.031 | 4.88E-23 |
| TPMT      | 3.38E-27 | -0.22865 | 0.122 | 0.06  | 5.05E-23 |
| GGT7      | 3.38E-27 | 0.21254  | 0.174 | 0.036 | 5.05E-23 |
| RBMXL1    | 3.39E-27 | 0.166899 | 0.177 | 0.043 | 5.06E-23 |
| AMN1      | 3.40E-27 | 0.157156 | 0.142 | 0.027 | 5.08E-23 |
| ARMCX5    | 3.43E-27 | 0.170912 | 0.137 | 0.019 | 5.12E-23 |
| SLN       | 3.49E-27 | -1.23554 | 0.008 | 0.13  | 5.21E-23 |
| AFF3      | 3.63E-27 | 0.4516   | 0.156 | 0.007 | 5.42E-23 |
| PLEKHH2   | 3.66E-27 | 0.383521 | 0.172 | 0.017 | 5.47E-23 |
| GPATCH11  | 3.70E-27 | 0.347399 | 0.174 | 0.024 | 5.53E-23 |

|           |          |          |       |       |          |
|-----------|----------|----------|-------|-------|----------|
| NAB1      | 3.82E-27 | 0.267668 | 0.148 | 0.017 | 5.71E-23 |
| ARVCF     | 4.06E-27 | 0.219339 | 0.124 | 0.009 | 6.07E-23 |
| ZNF639    | 4.12E-27 | 0.350989 | 0.17  | 0.021 | 6.15E-23 |
| TJAP1     | 4.12E-27 | 0.271315 | 0.151 | 0.015 | 6.16E-23 |
| ROCK2     | 4.15E-27 | 0.164232 | 0.152 | 0.029 | 6.21E-23 |
| TYW1      | 4.17E-27 | 0.289513 | 0.166 | 0.022 | 6.24E-23 |
| CD200     | 4.20E-27 | 0.210128 | 0.127 | 0.012 | 6.27E-23 |
| SECISBP2L | 4.29E-27 | 0.113864 | 0.146 | 0.032 | 6.41E-23 |
| HSPA2     | 4.34E-27 | 0.185876 | 0.229 | 0.08  | 6.48E-23 |
| RPP38     | 4.45E-27 | 0.247712 | 0.148 | 0.019 | 6.65E-23 |
| TBL2      | 4.65E-27 | 0.233284 | 0.189 | 0.044 | 6.95E-23 |
| IGLON5    | 4.77E-27 | 0.381015 | 0.146 | 0.003 | 7.12E-23 |
| SAC3D1    | 4.88E-27 | 0.187708 | 0.153 | 0.026 | 7.29E-23 |
| TNPO2     | 4.99E-27 | 0.116182 | 0.202 | 0.063 | 7.46E-23 |
| CDKAL1    | 5.22E-27 | 0.22008  | 0.135 | 0.017 | 7.79E-23 |
| STXBP1    | 5.26E-27 | 0.205967 | 0.155 | 0.029 | 7.86E-23 |
| AC114730. | 5.37E-27 | 0.393083 | 0.17  | 0.022 | 8.03E-23 |
| CAMSAP1   | 5.82E-27 | 0.257366 | 0.127 | 0.01  | 8.70E-23 |
| CDC42SE2  | 5.94E-27 | 0.132631 | 0.157 | 0.039 | 8.87E-23 |
| CDK10     | 6.12E-27 | -0.14248 | 0.161 | 0.084 | 9.14E-23 |
| MGP       | 6.13E-27 | -1.29342 | 0.016 | 0.128 | 9.16E-23 |
| ELMOD3    | 6.14E-27 | 0.164078 | 0.169 | 0.039 | 9.18E-23 |
| ITFG2     | 6.14E-27 | 0.195411 | 0.157 | 0.027 | 9.18E-23 |
| SPRY1     | 6.23E-27 | -0.5335  | 0.108 | 0.125 | 9.31E-23 |
| THAP4     | 6.28E-27 | 0.316821 | 0.161 | 0.019 | 9.39E-23 |
| ATG4D     | 6.31E-27 | 0.246825 | 0.165 | 0.027 | 9.43E-23 |
| NF2       | 6.59E-27 | 0.170265 | 0.147 | 0.026 | 9.84E-23 |
| PTPN2     | 6.60E-27 | -0.10997 | 0.142 | 0.065 | 9.87E-23 |
| RAB35     | 6.67E-27 | 0.238455 | 0.169 | 0.031 | 9.97E-23 |
| ZNF274    | 6.69E-27 | 0.261865 | 0.168 | 0.029 | 1.00E-22 |
| POGK      | 6.84E-27 | 0.352533 | 0.151 | 0.01  | 1.02E-22 |
| EPHB3     | 6.92E-27 | 0.203945 | 0.116 | 0.009 | 1.03E-22 |
| TMEM181   | 7.09E-27 | 0.244542 | 0.155 | 0.022 | 1.06E-22 |
| RPRM      | 7.25E-27 | 0.263342 | 0.148 | 0.019 | 1.08E-22 |
| EHD1      | 7.41E-27 | 0.364788 | 0.176 | 0.019 | 1.11E-22 |
| CBX4      | 7.77E-27 | 0.29547  | 0.169 | 0.026 | 1.16E-22 |
| EFHD2     | 7.81E-27 | 0.262497 | 0.202 | 0.051 | 1.17E-22 |
| MAPKAPK5  | 7.89E-27 | 0.355787 | 0.192 | 0.031 | 1.18E-22 |
| DPF3      | 7.98E-27 | 0.206006 | 0.177 | 0.039 | 1.19E-22 |
| PCYOX1    | 8.13E-27 | 0.116582 | 0.176 | 0.051 | 1.22E-22 |
| CDV3      | 8.46E-27 | 0.242708 | 0.183 | 0.039 | 1.26E-22 |
| CLINT1    | 9.56E-27 | 0.1134   | 0.159 | 0.039 | 1.43E-22 |
| ZNF7      | 9.65E-27 | 0.285812 | 0.212 | 0.05  | 1.44E-22 |
| LUZP2     | 9.73E-27 | 0.369642 | 0.16  | 0.015 | 1.45E-22 |
| TRAPPC6B  | 9.90E-27 | 0.115916 | 0.155 | 0.038 | 1.48E-22 |
| LMBR1     | 1.01E-26 | 0.3677   | 0.166 | 0.017 | 1.51E-22 |
| ARHGEF1   | 1.02E-26 | 0.12975  | 0.174 | 0.05  | 1.52E-22 |
| PWWP2A    | 1.02E-26 | 0.267948 | 0.17  | 0.029 | 1.52E-22 |
| MTMR14    | 1.04E-26 | 0.1437   | 0.156 | 0.036 | 1.55E-22 |
| KIF3C     | 1.06E-26 | 0.239661 | 0.152 | 0.026 | 1.58E-22 |
| TMEM132A  | 1.12E-26 | 0.107201 | 0.15  | 0.038 | 1.68E-22 |

|         |          |          |       |       |          |
|---------|----------|----------|-------|-------|----------|
| NLN     | 1.15E-26 | 0.196398 | 0.166 | 0.036 | 1.71E-22 |
| NHSL1   | 1.16E-26 | 0.2245   | 0.159 | 0.027 | 1.73E-22 |
| ANKZF1  | 1.17E-26 | 0.122272 | 0.164 | 0.043 | 1.75E-22 |
| PDXDC1  | 1.18E-26 | 0.210844 | 0.172 | 0.034 | 1.76E-22 |
| FNIP2   | 1.19E-26 | 0.19128  | 0.173 | 0.041 | 1.77E-22 |
| GRIPAP1 | 1.28E-26 | 0.208754 | 0.2   | 0.051 | 1.91E-22 |
| CDH11   | 1.32E-26 | 0.139141 | 0.168 | 0.044 | 1.97E-22 |
| BCAT1   | 1.34E-26 | -0.52305 | 0.1   | 0.109 | 2.00E-22 |
| API5    | 1.36E-26 | 0.111076 | 0.189 | 0.055 | 2.03E-22 |
| CDK5R1  | 1.37E-26 | 0.309402 | 0.146 | 0.012 | 2.04E-22 |
| TCF3    | 1.38E-26 | 0.212373 | 0.152 | 0.024 | 2.07E-22 |
| FAM57B  | 1.41E-26 | 0.437774 | 0.185 | 0.024 | 2.11E-22 |
| VPS53   | 1.50E-26 | 0.206002 | 0.172 | 0.034 | 2.24E-22 |
| KDM4A   | 1.50E-26 | 0.178869 | 0.153 | 0.029 | 2.24E-22 |
| ASXL1   | 1.52E-26 | 0.236859 | 0.194 | 0.05  | 2.27E-22 |
| KCNIP1  | 1.53E-26 | -0.38964 | 0.108 | 0.082 | 2.28E-22 |
| EEF1G   | 1.53E-26 | -0.13582 | 0.131 | 0.063 | 2.29E-22 |
| MCAT    | 1.54E-26 | 0.386954 | 0.161 | 0.014 | 2.31E-22 |
| NOM1    | 1.63E-26 | 0.22968  | 0.159 | 0.027 | 2.44E-22 |
| PMEPA1  | 1.65E-26 | 0.183608 | 0.148 | 0.026 | 2.46E-22 |
| AASS    | 1.65E-26 | 0.173359 | 0.202 | 0.062 | 2.47E-22 |
| DCK     | 1.68E-26 | 0.365608 | 0.165 | 0.015 | 2.52E-22 |
| CSPG4   | 1.71E-26 | 0.319764 | 0.144 | 0.009 | 2.55E-22 |
| 3-Sep   | 1.76E-26 | 0.173208 | 0.124 | 0.015 | 2.63E-22 |
| AGPS    | 1.79E-26 | 0.262835 | 0.14  | 0.014 | 2.68E-22 |
| TIMM21  | 1.79E-26 | -0.12894 | 0.125 | 0.043 | 2.68E-22 |
| NSMCE4A | 1.80E-26 | 0.189994 | 0.142 | 0.022 | 2.69E-22 |
| TFRC    | 1.92E-26 | -0.15408 | 0.125 | 0.056 | 2.87E-22 |
| NCK1    | 1.96E-26 | -0.26157 | 0.153 | 0.094 | 2.93E-22 |
| WRAP73  | 1.98E-26 | 0.153277 | 0.152 | 0.036 | 2.96E-22 |
| SOCS3   | 2.01E-26 | -0.41432 | 0.152 | 0.132 | 3.01E-22 |
| LEO1    | 2.07E-26 | 0.103183 | 0.172 | 0.046 | 3.09E-22 |
| ZNF786  | 2.07E-26 | 0.240825 | 0.147 | 0.021 | 3.10E-22 |
| TOMM70A | 2.11E-26 | 0.284311 | 0.146 | 0.014 | 3.16E-22 |
| TNFAIP6 | 2.12E-26 | -0.76997 | 0.079 | 0.123 | 3.17E-22 |
| UGGT1   | 2.26E-26 | 0.188516 | 0.146 | 0.026 | 3.37E-22 |
| COL6A1  | 2.37E-26 | -0.32329 | 0.143 | 0.104 | 3.55E-22 |
| COASY   | 2.39E-26 | -0.16903 | 0.146 | 0.077 | 3.57E-22 |
| NKD1    | 2.52E-26 | 0.395328 | 0.134 | 0.002 | 3.77E-22 |
| AP1B1   | 2.63E-26 | 0.167794 | 0.164 | 0.038 | 3.93E-22 |
| CSAD    | 2.68E-26 | 0.206196 | 0.165 | 0.034 | 4.01E-22 |
| DNAJC11 | 2.71E-26 | 0.150733 | 0.152 | 0.034 | 4.04E-22 |
| PPP4R1  | 2.72E-26 | 0.138155 | 0.117 | 0.019 | 4.07E-22 |
| GSN     | 2.80E-26 | -0.66628 | 0.092 | 0.126 | 4.19E-22 |
| DACT3   | 2.82E-26 | 0.277367 | 0.151 | 0.017 | 4.21E-22 |
| PMS1    | 2.83E-26 | 0.127771 | 0.143 | 0.027 | 4.24E-22 |
| ATAD1   | 2.84E-26 | 0.17121  | 0.173 | 0.044 | 4.24E-22 |
| STARD3  | 2.88E-26 | 0.180089 | 0.191 | 0.05  | 4.31E-22 |
| AK4     | 2.92E-26 | -0.47804 | 0.101 | 0.089 | 4.36E-22 |
| ZNF263  | 3.13E-26 | 0.252939 | 0.161 | 0.026 | 4.67E-22 |
| ATF6    | 3.19E-26 | 0.198428 | 0.179 | 0.044 | 4.77E-22 |

|           |          |          |       |       |          |
|-----------|----------|----------|-------|-------|----------|
| ZNF212    | 3.26E-26 | 0.150105 | 0.138 | 0.024 | 4.87E-22 |
| PCDHB2    | 3.34E-26 | 0.353901 | 0.163 | 0.012 | 4.99E-22 |
| CARS      | 3.42E-26 | -0.19661 | 0.16  | 0.087 | 5.12E-22 |
| TIAM2     | 3.46E-26 | 0.121349 | 0.126 | 0.022 | 5.17E-22 |
| PUS7L     | 3.52E-26 | 0.201462 | 0.174 | 0.036 | 5.27E-22 |
| TRIM4     | 3.68E-26 | 0.265132 | 0.17  | 0.029 | 5.49E-22 |
| LINC01102 | 3.70E-26 | 0.29301  | 0.15  | 0.015 | 5.53E-22 |
| ELF2      | 3.74E-26 | 0.224117 | 0.19  | 0.041 | 5.58E-22 |
| RNFT1     | 3.76E-26 | 0.149541 | 0.148 | 0.032 | 5.62E-22 |
| STX16     | 3.93E-26 | 0.107163 | 0.196 | 0.063 | 5.87E-22 |
| SYNE1     | 3.95E-26 | 0.111904 | 0.159 | 0.034 | 5.90E-22 |
| E2F6      | 3.98E-26 | 0.168706 | 0.144 | 0.027 | 5.95E-22 |
| EDEM2     | 4.35E-26 | -0.17079 | 0.14  | 0.07  | 6.50E-22 |
| FNDC3A    | 4.51E-26 | 0.113093 | 0.165 | 0.048 | 6.74E-22 |
| SMAP2     | 4.58E-26 | 0.214096 | 0.139 | 0.019 | 6.84E-22 |
| GIGYF1    | 4.72E-26 | 0.319111 | 0.186 | 0.032 | 7.05E-22 |
| GSKIP     | 4.87E-26 | 0.133613 | 0.152 | 0.034 | 7.28E-22 |
| ZNF100    | 4.90E-26 | 0.215931 | 0.147 | 0.021 | 7.32E-22 |
| FUT8      | 5.18E-26 | 0.236909 | 0.138 | 0.019 | 7.75E-22 |
| GLI4      | 5.58E-26 | 0.246978 | 0.164 | 0.029 | 8.35E-22 |
| RAB40B    | 5.73E-26 | 0.276096 | 0.135 | 0.012 | 8.56E-22 |
| MTSS1L    | 5.76E-26 | 0.106596 | 0.168 | 0.05  | 8.61E-22 |
| NT5DC2    | 5.81E-26 | 0.150696 | 0.146 | 0.031 | 8.68E-22 |
| DNAJC30   | 6.14E-26 | 0.275945 | 0.194 | 0.041 | 9.17E-22 |
| EGLN1     | 6.14E-26 | 0.102152 | 0.17  | 0.048 | 9.17E-22 |
| OSER1-AS1 | 6.37E-26 | 0.194974 | 0.172 | 0.036 | 9.52E-22 |
| NCAPH2    | 6.58E-26 | 0.109275 | 0.129 | 0.027 | 9.84E-22 |
| VAC14     | 6.60E-26 | 0.198256 | 0.134 | 0.017 | 9.87E-22 |
| FAM104B   | 6.74E-26 | 0.178584 | 0.168 | 0.039 | 1.01E-21 |
| RBM7      | 6.85E-26 | -0.31335 | 0.139 | 0.091 | 1.02E-21 |
| TNKS      | 6.85E-26 | 0.34886  | 0.178 | 0.026 | 1.02E-21 |
| ANKLE2    | 7.03E-26 | 0.255988 | 0.182 | 0.036 | 1.05E-21 |
| DMWD      | 7.08E-26 | 0.341314 | 0.187 | 0.029 | 1.06E-21 |
| DLX6-AS1  | 7.65E-26 | 0.596199 | 0.16  | 0.01  | 1.14E-21 |
| SSSCA1    | 7.65E-26 | -0.1446  | 0.116 | 0.048 | 1.14E-21 |
| DNAJB14   | 7.73E-26 | 0.141037 | 0.178 | 0.048 | 1.16E-21 |
| C17orf58  | 7.85E-26 | 0.329969 | 0.174 | 0.027 | 1.17E-21 |
| ANKRD35   | 8.39E-26 | 0.189937 | 0.134 | 0.017 | 1.25E-21 |
| ABCG1     | 8.50E-26 | 0.368091 | 0.147 | 0.009 | 1.27E-21 |
| ZNF253    | 8.97E-26 | 0.287531 | 0.151 | 0.019 | 1.34E-21 |
| ORC6      | 9.30E-26 | 0.375337 | 0.144 | 0.01  | 1.39E-21 |
| NAA16     | 9.67E-26 | 0.151092 | 0.142 | 0.027 | 1.45E-21 |
| ARHGAP1   | 9.69E-26 | 0.101699 | 0.172 | 0.053 | 1.45E-21 |
| CTR9      | 9.96E-26 | 0.148412 | 0.153 | 0.029 | 1.49E-21 |
| HOXA5     | 1.00E-25 | 0.25864  | 0.137 | 0.014 | 1.49E-21 |
| R3HDM4    | 1.00E-25 | 0.206401 | 0.173 | 0.036 | 1.50E-21 |
| CYB5R1    | 1.01E-25 | -0.29015 | 0.151 | 0.096 | 1.51E-21 |
| CCDC137   | 1.04E-25 | 0.233215 | 0.172 | 0.034 | 1.56E-21 |
| C12orf45  | 1.06E-25 | -0.12228 | 0.142 | 0.063 | 1.59E-21 |
| PKN2      | 1.06E-25 | 0.114642 | 0.169 | 0.044 | 1.59E-21 |
| EHMT1     | 1.10E-25 | 0.214782 | 0.156 | 0.027 | 1.65E-21 |



|           |          |          |       |       |          |
|-----------|----------|----------|-------|-------|----------|
| TRAFD1    | 1.14E-25 | 0.164565 | 0.15  | 0.031 | 1.70E-21 |
| SRD5A3    | 1.17E-25 | 0.237865 | 0.144 | 0.021 | 1.75E-21 |
| CACFD1    | 1.18E-25 | 0.216811 | 0.127 | 0.014 | 1.76E-21 |
| CTSK      | 1.21E-25 | 0.182285 | 0.124 | 0.014 | 1.81E-21 |
| TNFRSF12A | 1.23E-25 | -0.81727 | 0.06  | 0.142 | 1.83E-21 |
| OXLD1     | 1.24E-25 | 0.101943 | 0.191 | 0.062 | 1.86E-21 |
| SNCAIP    | 1.24E-25 | 0.3153   | 0.17  | 0.024 | 1.86E-21 |
| PAK7      | 1.26E-25 | 0.372645 | 0.144 | 0.005 | 1.88E-21 |
| ST5       | 1.31E-25 | -0.25657 | 0.129 | 0.072 | 1.95E-21 |
| REEP1     | 1.32E-25 | 0.336888 | 0.137 | 0.005 | 1.98E-21 |
| MIEF1     | 1.33E-25 | 0.156503 | 0.178 | 0.048 | 1.99E-21 |
| RSAD1     | 1.33E-25 | 0.1699   | 0.151 | 0.029 | 1.99E-21 |
| RNF2      | 1.34E-25 | 0.284209 | 0.164 | 0.024 | 2.00E-21 |
| ZNF140    | 1.37E-25 | 0.217666 | 0.152 | 0.026 | 2.05E-21 |
| SLC25A25  | 1.39E-25 | 0.105175 | 0.165 | 0.046 | 2.07E-21 |
| STAT1     | 1.39E-25 | -0.25565 | 0.147 | 0.091 | 2.08E-21 |
| FARS2     | 1.44E-25 | -0.10755 | 0.116 | 0.038 | 2.15E-21 |
| GPKOW     | 1.50E-25 | 0.106223 | 0.151 | 0.038 | 2.25E-21 |
| BTBD10    | 1.54E-25 | 0.134089 | 0.138 | 0.031 | 2.30E-21 |
| LRRCC1    | 1.54E-25 | 0.176945 | 0.147 | 0.027 | 2.30E-21 |
| C11orf54  | 1.59E-25 | 0.160594 | 0.147 | 0.029 | 2.37E-21 |
| ARPP21    | 1.59E-25 | 0.352473 | 0.147 | 0.014 | 2.38E-21 |
| ZNF544    | 1.63E-25 | -0.19173 | 0.134 | 0.07  | 2.43E-21 |
| DENND5B   | 1.64E-25 | 0.109263 | 0.113 | 0.019 | 2.45E-21 |
| OR4N2     | 1.72E-25 | 0.460038 | 0.121 | 0     | 2.57E-21 |
| GPR82     | 1.75E-25 | 0.286143 | 0.169 | 0.027 | 2.61E-21 |
| C1QTNF4   | 1.83E-25 | 0.311656 | 0.143 | 0.01  | 2.74E-21 |
| SNX14     | 1.86E-25 | 0.116561 | 0.164 | 0.043 | 2.79E-21 |
| USP15     | 1.87E-25 | 0.322961 | 0.229 | 0.06  | 2.79E-21 |
| PNPLA2    | 1.91E-25 | 0.204403 | 0.164 | 0.032 | 2.85E-21 |
| PIGS      | 1.95E-25 | 0.178974 | 0.163 | 0.038 | 2.92E-21 |
| CREBBP    | 2.04E-25 | 0.132333 | 0.147 | 0.032 | 3.04E-21 |
| ZCCHC3    | 2.09E-25 | 0.182656 | 0.129 | 0.017 | 3.12E-21 |
| STX18     | 2.10E-25 | 0.129442 | 0.155 | 0.038 | 3.13E-21 |
| CNOT11    | 2.12E-25 | 0.254555 | 0.131 | 0.012 | 3.16E-21 |
| BMI1      | 2.12E-25 | 0.227695 | 0.143 | 0.019 | 3.16E-21 |
| NDRG1     | 2.12E-25 | -0.93425 | 0.061 | 0.138 | 3.16E-21 |
| USP33     | 2.12E-25 | 0.18699  | 0.174 | 0.041 | 3.17E-21 |
| CNOT1     | 2.27E-25 | 0.187299 | 0.15  | 0.027 | 3.38E-21 |
| CEP350    | 2.27E-25 | 0.150586 | 0.155 | 0.036 | 3.39E-21 |
| GSE1      | 2.39E-25 | 0.406969 | 0.164 | 0.017 | 3.57E-21 |
| SFXN5     | 2.42E-25 | -0.30711 | 0.126 | 0.087 | 3.62E-21 |
| DGCR6     | 2.46E-25 | 0.1035   | 0.169 | 0.048 | 3.67E-21 |
| RNF14     | 2.48E-25 | 0.163107 | 0.164 | 0.041 | 3.71E-21 |
| CASP6     | 2.50E-25 | 0.144519 | 0.131 | 0.029 | 3.73E-21 |
| SAAL1     | 2.72E-25 | 0.107448 | 0.151 | 0.039 | 4.06E-21 |
| PCDH15    | 2.72E-25 | 0.444534 | 0.134 | 0.003 | 4.07E-21 |
| ZNF276    | 2.73E-25 | 0.197745 | 0.15  | 0.027 | 4.09E-21 |
| ARID1B    | 2.84E-25 | 0.33737  | 0.155 | 0.015 | 4.24E-21 |
| SMAD1     | 2.87E-25 | 0.193517 | 0.178 | 0.046 | 4.30E-21 |
| TMEM169   | 3.02E-25 | 0.282196 | 0.146 | 0.015 | 4.51E-21 |

|          |          |          |       |       |          |
|----------|----------|----------|-------|-------|----------|
| TPD52    | 3.09E-25 | -0.34607 | 0.153 | 0.113 | 4.62E-21 |
| KLHL20   | 3.21E-25 | 0.230938 | 0.173 | 0.036 | 4.80E-21 |
| PLEKHB1  | 3.26E-25 | -0.27309 | 0.143 | 0.094 | 4.87E-21 |
| NELFB    | 3.31E-25 | 0.273439 | 0.163 | 0.022 | 4.95E-21 |
| APTX     | 3.38E-25 | 0.246448 | 0.157 | 0.027 | 5.05E-21 |
| ITSN2    | 3.64E-25 | 0.309102 | 0.146 | 0.014 | 5.43E-21 |
| SMAD9    | 3.67E-25 | 0.226667 | 0.118 | 0.009 | 5.48E-21 |
| NDRG3    | 3.67E-25 | 0.184608 | 0.165 | 0.038 | 5.49E-21 |
| PTGR1    | 3.73E-25 | -0.28037 | 0.1   | 0.065 | 5.57E-21 |
| UBN1     | 4.43E-25 | 0.342624 | 0.16  | 0.017 | 6.61E-21 |
| METTTL7A | 4.57E-25 | -0.36188 | 0.164 | 0.132 | 6.83E-21 |
| KAT6B    | 4.69E-25 | 0.292992 | 0.182 | 0.032 | 7.01E-21 |
| SPHK2    | 4.80E-25 | 0.247126 | 0.172 | 0.034 | 7.17E-21 |
| GPR108   | 4.84E-25 | -0.20208 | 0.151 | 0.087 | 7.23E-21 |
| CNTLN    | 4.97E-25 | 0.187373 | 0.142 | 0.024 | 7.42E-21 |
| IREB2    | 5.24E-25 | 0.27108  | 0.161 | 0.024 | 7.83E-21 |
| AGPAT5   | 5.30E-25 | -0.2298  | 0.151 | 0.091 | 7.92E-21 |
| R3HDM1   | 5.32E-25 | 0.119788 | 0.144 | 0.034 | 7.96E-21 |
| CDH13    | 5.43E-25 | 0.144809 | 0.179 | 0.051 | 8.11E-21 |
| CAMKMT   | 5.54E-25 | 0.370109 | 0.159 | 0.019 | 8.28E-21 |
| CMIP     | 5.61E-25 | 0.142829 | 0.138 | 0.026 | 8.38E-21 |
| PDZD4    | 5.70E-25 | 0.210992 | 0.117 | 0.01  | 8.52E-21 |
| C1orf216 | 5.71E-25 | 0.234584 | 0.161 | 0.029 | 8.53E-21 |
| PITPNB   | 5.87E-25 | 0.117063 | 0.166 | 0.044 | 8.76E-21 |
| HOXA3    | 5.89E-25 | 0.272773 | 0.131 | 0.01  | 8.80E-21 |
| PTTG1    | 5.91E-25 | -0.16257 | 0.126 | 0.062 | 8.83E-21 |
| WDR26    | 6.04E-25 | 0.126784 | 0.153 | 0.038 | 9.03E-21 |
| RNF168   | 6.12E-25 | 0.277014 | 0.157 | 0.021 | 9.15E-21 |
| DIRAS3   | 6.17E-25 | -0.96866 | 0.035 | 0.162 | 9.21E-21 |
| STT3B    | 6.21E-25 | 0.198782 | 0.185 | 0.05  | 9.27E-21 |
| CTNNA2   | 6.40E-25 | 0.173699 | 0.161 | 0.039 | 9.57E-21 |
| DIP2B    | 6.51E-25 | 0.270096 | 0.147 | 0.019 | 9.73E-21 |
| BOLA1    | 6.53E-25 | 0.163381 | 0.15  | 0.034 | 9.76E-21 |
| RAB3A    | 6.64E-25 | 0.196972 | 0.169 | 0.043 | 9.92E-21 |
| PPP2R5B  | 6.92E-25 | 0.259193 | 0.172 | 0.029 | 1.03E-20 |
| MECP2    | 6.97E-25 | -0.11408 | 0.144 | 0.065 | 1.04E-20 |
| SLC30A7  | 6.99E-25 | 0.169489 | 0.144 | 0.027 | 1.04E-20 |
| CLEC11A  | 7.05E-25 | 0.354104 | 0.211 | 0.048 | 1.05E-20 |
| CEP95    | 7.14E-25 | 0.204048 | 0.168 | 0.034 | 1.07E-20 |
| YPEL3    | 7.20E-25 | 0.284942 | 0.229 | 0.07  | 1.08E-20 |
| SVIP     | 7.27E-25 | 0.245247 | 0.12  | 0.007 | 1.09E-20 |
| OTUD5    | 7.27E-25 | 0.125484 | 0.13  | 0.024 | 1.09E-20 |
| MIOS     | 7.28E-25 | 0.180542 | 0.131 | 0.021 | 1.09E-20 |
| ANAPC10  | 7.42E-25 | -0.21371 | 0.134 | 0.075 | 1.11E-20 |
| NNMT     | 7.54E-25 | -1.04893 | 0.027 | 0.13  | 1.13E-20 |
| TCEB3    | 7.76E-25 | 0.160044 | 0.16  | 0.038 | 1.16E-20 |
| C8orf82  | 7.81E-25 | 0.298296 | 0.173 | 0.031 | 1.17E-20 |
| SPIN1    | 7.86E-25 | 0.157379 | 0.151 | 0.032 | 1.17E-20 |
| CHRDL1   | 7.99E-25 | 0.254959 | 0.107 | 0.002 | 1.19E-20 |
| EID2     | 8.19E-25 | 0.192327 | 0.131 | 0.019 | 1.22E-20 |
| EPHB1    | 8.88E-25 | 0.331675 | 0.139 | 0.009 | 1.33E-20 |

|           |          |          |       |       |          |
|-----------|----------|----------|-------|-------|----------|
| PCOLCE2   | 9.24E-25 | -0.1924  | 0.108 | 0.056 | 1.38E-20 |
| STRADB    | 1.01E-24 | 0.286861 | 0.178 | 0.034 | 1.51E-20 |
| RNF8      | 1.02E-24 | 0.106794 | 0.137 | 0.031 | 1.53E-20 |
| WLS       | 1.06E-24 | -0.14483 | 0.174 | 0.094 | 1.59E-20 |
| B3GAT1    | 1.07E-24 | 0.1164   | 0.129 | 0.026 | 1.60E-20 |
| RALGDS    | 1.07E-24 | 0.340357 | 0.177 | 0.027 | 1.60E-20 |
| RNF20     | 1.10E-24 | 0.191693 | 0.166 | 0.038 | 1.64E-20 |
| POLD4     | 1.12E-24 | -0.40976 | 0.124 | 0.108 | 1.67E-20 |
| KAZN      | 1.14E-24 | 0.169311 | 0.127 | 0.019 | 1.70E-20 |
| EIF3J-AS1 | 1.14E-24 | 0.137509 | 0.152 | 0.038 | 1.71E-20 |
| NR2F6     | 1.18E-24 | 0.237666 | 0.15  | 0.024 | 1.76E-20 |
| LMAN2L    | 1.20E-24 | 0.13546  | 0.143 | 0.034 | 1.79E-20 |
| MSRB2     | 1.22E-24 | 0.412465 | 0.191 | 0.032 | 1.82E-20 |
| PRR3      | 1.23E-24 | 0.172557 | 0.122 | 0.017 | 1.83E-20 |
| SEMA4C    | 1.28E-24 | 0.250723 | 0.134 | 0.015 | 1.92E-20 |
| MSX1      | 1.35E-24 | 0.169033 | 0.137 | 0.024 | 2.01E-20 |
| PHYKPL    | 1.35E-24 | 0.14724  | 0.166 | 0.046 | 2.02E-20 |
| XAB2      | 1.41E-24 | 0.136693 | 0.185 | 0.056 | 2.10E-20 |
| ACTR3B    | 1.43E-24 | 0.240116 | 0.148 | 0.022 | 2.13E-20 |
| LIPT1     | 1.49E-24 | 0.128182 | 0.114 | 0.017 | 2.23E-20 |
| CASP9     | 1.53E-24 | 0.538238 | 0.19  | 0.026 | 2.28E-20 |
| RAB11B-AS | 1.63E-24 | 0.217009 | 0.147 | 0.024 | 2.43E-20 |
| SPAST     | 1.68E-24 | 0.360492 | 0.146 | 0.01  | 2.51E-20 |
| PRKCA     | 1.69E-24 | 0.259218 | 0.156 | 0.024 | 2.52E-20 |
| C15orf40  | 1.70E-24 | -0.28705 | 0.121 | 0.075 | 2.54E-20 |
| MVB12B    | 1.79E-24 | 0.221615 | 0.127 | 0.014 | 2.68E-20 |
| SLC1A2    | 1.84E-24 | -0.33797 | 0.143 | 0.103 | 2.75E-20 |
| MED16     | 1.86E-24 | 0.241325 | 0.155 | 0.024 | 2.78E-20 |
| SLC38A7   | 1.88E-24 | 0.283955 | 0.161 | 0.022 | 2.82E-20 |
| PRPF3     | 1.93E-24 | 0.10288  | 0.13  | 0.029 | 2.88E-20 |
| EXT2      | 1.93E-24 | 0.228863 | 0.156 | 0.029 | 2.89E-20 |
| MFAP1     | 2.01E-24 | -0.10621 | 0.143 | 0.067 | 3.00E-20 |
| CCL2      | 2.06E-24 | -0.90793 | 0.039 | 0.08  | 3.08E-20 |
| GTPBP1    | 2.07E-24 | 0.307734 | 0.147 | 0.015 | 3.09E-20 |
| DCPS      | 2.07E-24 | -0.19046 | 0.127 | 0.063 | 3.10E-20 |
| TMEM132B  | 2.17E-24 | 0.26044  | 0.164 | 0.029 | 3.24E-20 |
| TFB2M     | 2.17E-24 | 0.169767 | 0.126 | 0.019 | 3.24E-20 |
| NANS      | 2.17E-24 | -0.17512 | 0.152 | 0.082 | 3.25E-20 |
| PTPN18    | 2.20E-24 | 0.178336 | 0.138 | 0.026 | 3.29E-20 |
| GMPS      | 2.20E-24 | 0.23945  | 0.151 | 0.024 | 3.29E-20 |
| GMPR2     | 2.28E-24 | -0.13818 | 0.159 | 0.08  | 3.41E-20 |
| D2HGDH    | 2.31E-24 | 0.335097 | 0.151 | 0.015 | 3.45E-20 |
| PRKAG2    | 2.35E-24 | 0.384477 | 0.164 | 0.019 | 3.51E-20 |
| CITED1    | 2.46E-24 | -0.53845 | 0.072 | 0.089 | 3.67E-20 |
| OBSL1     | 2.50E-24 | 0.113294 | 0.192 | 0.07  | 3.73E-20 |
| P2RX7     | 2.52E-24 | 0.270307 | 0.139 | 0.014 | 3.76E-20 |
| IMPDH1    | 2.53E-24 | 0.267242 | 0.137 | 0.012 | 3.77E-20 |
| DCHS1     | 2.81E-24 | 0.203505 | 0.126 | 0.014 | 4.20E-20 |
| AC113189  | 2.82E-24 | 0.163268 | 0.135 | 0.027 | 4.22E-20 |
| CAP2      | 3.07E-24 | 0.16473  | 0.107 | 0.009 | 4.59E-20 |
| LINC00152 | 3.07E-24 | -0.98285 | 0.031 | 0.168 | 4.59E-20 |

|          |          |          |       |       |          |
|----------|----------|----------|-------|-------|----------|
| BCR      | 3.14E-24 | 0.327277 | 0.159 | 0.024 | 4.70E-20 |
| WDR47    | 3.18E-24 | 0.218877 | 0.134 | 0.019 | 4.75E-20 |
| TCTN1    | 3.33E-24 | -0.10563 | 0.157 | 0.082 | 4.98E-20 |
| PATZ1    | 3.35E-24 | 0.339176 | 0.146 | 0.01  | 5.00E-20 |
| CDKL3    | 3.40E-24 | 0.125317 | 0.137 | 0.031 | 5.08E-20 |
| SORBS2   | 3.43E-24 | 0.293021 | 0.121 | 0.007 | 5.12E-20 |
| SARNP    | 3.55E-24 | -0.1259  | 0.137 | 0.063 | 5.31E-20 |
| ARL13B   | 3.58E-24 | -0.30085 | 0.098 | 0.055 | 5.35E-20 |
| TEAD1    | 3.58E-24 | 0.262061 | 0.156 | 0.026 | 5.35E-20 |
| PLSCR1   | 3.60E-24 | -0.65329 | 0.073 | 0.118 | 5.39E-20 |
| TFAP2A   | 3.64E-24 | 0.366978 | 0.127 | 0.002 | 5.44E-20 |
| GLB1     | 3.68E-24 | -0.18871 | 0.144 | 0.079 | 5.50E-20 |
| KDM2B    | 3.81E-24 | 0.262357 | 0.138 | 0.015 | 5.70E-20 |
| ZBTB10   | 3.81E-24 | 0.264341 | 0.146 | 0.019 | 5.70E-20 |
| MEN1     | 3.92E-24 | 0.15852  | 0.135 | 0.022 | 5.86E-20 |
| ZCCHC7   | 3.98E-24 | 0.25258  | 0.166 | 0.031 | 5.95E-20 |
| FBXW7    | 4.05E-24 | 0.351149 | 0.168 | 0.021 | 6.05E-20 |
| DHX57    | 4.05E-24 | 0.357979 | 0.173 | 0.024 | 6.05E-20 |
| YY1AP1   | 4.11E-24 | 0.11084  | 0.146 | 0.031 | 6.14E-20 |
| TNFAIP1  | 4.18E-24 | 0.204349 | 0.161 | 0.032 | 6.25E-20 |
| ZFPM2    | 4.19E-24 | 0.460668 | 0.139 | 0.005 | 6.26E-20 |
| SEC22C   | 4.30E-24 | -0.12891 | 0.155 | 0.068 | 6.42E-20 |
| ADAM9    | 4.31E-24 | -0.13747 | 0.163 | 0.087 | 6.44E-20 |
| ABHD11   | 4.50E-24 | 0.268781 | 0.17  | 0.032 | 6.73E-20 |
| AGTRAP   | 4.69E-24 | -0.8004  | 0.052 | 0.121 | 7.00E-20 |
| DUS3L    | 4.71E-24 | 0.161184 | 0.161 | 0.039 | 7.04E-20 |
| SPRTN    | 4.80E-24 | 0.106622 | 0.152 | 0.038 | 7.17E-20 |
| DCLK1    | 4.82E-24 | 0.149495 | 0.143 | 0.031 | 7.20E-20 |
| NSUN6    | 4.87E-24 | 0.303724 | 0.164 | 0.024 | 7.28E-20 |
| RCBTB2   | 4.99E-24 | 0.218267 | 0.142 | 0.022 | 7.45E-20 |
| UBXN7    | 5.00E-24 | 0.252637 | 0.159 | 0.026 | 7.48E-20 |
| BARD1    | 5.16E-24 | 0.235207 | 0.15  | 0.026 | 7.70E-20 |
| C19orf52 | 5.49E-24 | 0.186765 | 0.139 | 0.026 | 8.21E-20 |
| RHOG     | 6.07E-24 | -0.15721 | 0.108 | 0.05  | 9.07E-20 |
| PREP     | 6.33E-24 | 0.319939 | 0.133 | 0.007 | 9.47E-20 |
| CACNG7   | 6.34E-24 | 0.214768 | 0.15  | 0.026 | 9.47E-20 |
| ATAD3A   | 6.41E-24 | 0.253306 | 0.17  | 0.031 | 9.58E-20 |
| F3       | 6.85E-24 | -0.42445 | 0.113 | 0.108 | 1.02E-19 |
| MED1     | 6.90E-24 | 0.220861 | 0.139 | 0.019 | 1.03E-19 |
| LRRC8B   | 7.04E-24 | 0.164326 | 0.121 | 0.017 | 1.05E-19 |
| RNF219   | 7.06E-24 | 0.167647 | 0.137 | 0.027 | 1.06E-19 |
| FTO      | 7.30E-24 | 0.224675 | 0.146 | 0.024 | 1.09E-19 |
| C7orf43  | 7.39E-24 | 0.278978 | 0.117 | 0.003 | 1.10E-19 |
| TP53RK   | 7.47E-24 | 0.1378   | 0.155 | 0.038 | 1.12E-19 |
| PIGP     | 7.83E-24 | -0.10948 | 0.134 | 0.06  | 1.17E-19 |
| GPATCH2  | 7.91E-24 | -0.13604 | 0.143 | 0.062 | 1.18E-19 |
| C7orf60  | 7.95E-24 | 0.154478 | 0.126 | 0.017 | 1.19E-19 |
| RAD17    | 8.04E-24 | 0.111197 | 0.131 | 0.026 | 1.20E-19 |
| CCNDBP1  | 8.63E-24 | 0.137739 | 0.139 | 0.032 | 1.29E-19 |
| GABBR1   | 8.64E-24 | 0.310417 | 0.153 | 0.021 | 1.29E-19 |
| CLIP1    | 8.81E-24 | -0.21592 | 0.129 | 0.077 | 1.32E-19 |

|          |          |          |       |       |          |
|----------|----------|----------|-------|-------|----------|
| NOM01    | 9.04E-24 | 0.223064 | 0.131 | 0.017 | 1.35E-19 |
| COG5     | 9.06E-24 | 0.186143 | 0.139 | 0.024 | 1.35E-19 |
| GAK      | 9.07E-24 | 0.127384 | 0.13  | 0.027 | 1.35E-19 |
| PIGM     | 9.66E-24 | 0.136118 | 0.135 | 0.029 | 1.44E-19 |
| DDAH1    | 9.95E-24 | -0.1655  | 0.121 | 0.062 | 1.49E-19 |
| CDCA7    | 1.05E-23 | 0.200216 | 0.16  | 0.038 | 1.58E-19 |
| ATF7     | 1.06E-23 | -0.20279 | 0.099 | 0.044 | 1.59E-19 |
| CAST     | 1.06E-23 | -0.34943 | 0.126 | 0.092 | 1.59E-19 |
| GPR89A   | 1.06E-23 | 0.106954 | 0.152 | 0.046 | 1.59E-19 |
| KIF22    | 1.14E-23 | -0.18735 | 0.157 | 0.084 | 1.71E-19 |
| SAA1     | 1.17E-23 | -1.37276 | 0.01  | 0.121 | 1.75E-19 |
| HLA-DMA  | 1.18E-23 | -0.53549 | 0.098 | 0.111 | 1.76E-19 |
| TMEM80   | 1.18E-23 | 0.12616  | 0.151 | 0.041 | 1.76E-19 |
| ZNF362   | 1.26E-23 | 0.200503 | 0.124 | 0.015 | 1.88E-19 |
| ETNK1    | 1.31E-23 | 0.197002 | 0.173 | 0.043 | 1.96E-19 |
| ST6GAL1  | 1.34E-23 | 0.342885 | 0.131 | 0.005 | 2.01E-19 |
| POMT1    | 1.36E-23 | 0.21623  | 0.176 | 0.041 | 2.03E-19 |
| PLA2G5   | 1.39E-23 | -1.06795 | 0.018 | 0.159 | 2.08E-19 |
| TRIM16   | 1.41E-23 | 0.141577 | 0.127 | 0.026 | 2.11E-19 |
| TFAM     | 1.46E-23 | 0.101288 | 0.151 | 0.043 | 2.18E-19 |
| CRNKL1   | 1.50E-23 | 0.111359 | 0.117 | 0.024 | 2.24E-19 |
| TMEM184B | 1.56E-23 | 0.1886   | 0.159 | 0.032 | 2.33E-19 |
| ZBTB7A   | 1.68E-23 | 0.16019  | 0.151 | 0.032 | 2.52E-19 |
| TSEN2    | 1.78E-23 | 0.167351 | 0.166 | 0.043 | 2.66E-19 |
| C11orf1  | 1.85E-23 | -0.40511 | 0.088 | 0.075 | 2.76E-19 |
| BRF1     | 1.89E-23 | 0.211849 | 0.143 | 0.022 | 2.82E-19 |
| TRIM69   | 1.95E-23 | -0.17869 | 0.116 | 0.063 | 2.92E-19 |
| ZNF205   | 1.97E-23 | 0.286403 | 0.151 | 0.019 | 2.94E-19 |
| CEP135   | 2.04E-23 | 0.352644 | 0.135 | 0.009 | 3.05E-19 |
| NSUN2    | 2.08E-23 | 0.31496  | 0.152 | 0.017 | 3.10E-19 |
| TP53I13  | 2.11E-23 | 0.235515 | 0.164 | 0.034 | 3.15E-19 |
| FLNA     | 2.15E-23 | 0.103856 | 0.172 | 0.056 | 3.21E-19 |
| TARBP2   | 2.17E-23 | 0.106209 | 0.127 | 0.029 | 3.24E-19 |
| MCM4     | 2.19E-23 | 0.360343 | 0.144 | 0.01  | 3.28E-19 |
| DAGLB    | 2.26E-23 | 0.294894 | 0.139 | 0.012 | 3.38E-19 |
| ZNF583   | 2.35E-23 | 0.122255 | 0.129 | 0.026 | 3.51E-19 |
| CERK     | 2.40E-23 | 0.314997 | 0.131 | 0.007 | 3.58E-19 |
| TCAIM    | 2.48E-23 | 0.116503 | 0.124 | 0.026 | 3.70E-19 |
| PDE7A    | 2.52E-23 | 0.285487 | 0.121 | 0.007 | 3.77E-19 |
| MSL1     | 2.57E-23 | 0.149546 | 0.172 | 0.048 | 3.83E-19 |
| C16orf72 | 2.62E-23 | 0.139332 | 0.124 | 0.022 | 3.91E-19 |
| MLLT3    | 2.66E-23 | 0.185244 | 0.134 | 0.024 | 3.97E-19 |
| PAXBP1   | 2.69E-23 | 0.271848 | 0.17  | 0.032 | 4.03E-19 |
| DVL3     | 2.70E-23 | 0.246907 | 0.177 | 0.038 | 4.04E-19 |
| SLC2A6   | 2.71E-23 | 0.23441  | 0.109 | 0.005 | 4.05E-19 |
| NR2F2    | 2.72E-23 | -0.10292 | 0.109 | 0.044 | 4.07E-19 |
| NUP88    | 2.83E-23 | 0.210012 | 0.134 | 0.019 | 4.23E-19 |
| FAM19A5  | 2.87E-23 | 0.300506 | 0.144 | 0.017 | 4.29E-19 |
| KLHDC10  | 2.96E-23 | 0.145845 | 0.146 | 0.034 | 4.43E-19 |
| SCD      | 3.10E-23 | -0.29392 | 0.125 | 0.079 | 4.64E-19 |
| MICU1    | 3.11E-23 | 0.143707 | 0.137 | 0.031 | 4.65E-19 |

|           |          |          |       |       |          |
|-----------|----------|----------|-------|-------|----------|
| TTC37     | 3.12E-23 | 0.223377 | 0.166 | 0.038 | 4.67E-19 |
| TM9SF4    | 3.18E-23 | -0.10989 | 0.137 | 0.065 | 4.76E-19 |
| BIVM      | 3.19E-23 | 0.211306 | 0.126 | 0.017 | 4.77E-19 |
| HOXB3     | 3.20E-23 | 0.281467 | 0.129 | 0.009 | 4.78E-19 |
| CRKL      | 3.27E-23 | 0.125208 | 0.138 | 0.029 | 4.88E-19 |
| NCK2      | 3.40E-23 | 0.294269 | 0.117 | 0.005 | 5.09E-19 |
| FBXL15    | 3.45E-23 | 0.327226 | 0.159 | 0.021 | 5.16E-19 |
| GRK4      | 3.50E-23 | 0.246613 | 0.15  | 0.024 | 5.23E-19 |
| OPHN1     | 3.52E-23 | 0.407602 | 0.182 | 0.029 | 5.26E-19 |
| ABCB8     | 3.58E-23 | 0.156869 | 0.134 | 0.026 | 5.35E-19 |
| GPS2      | 3.68E-23 | 0.191539 | 0.161 | 0.041 | 5.50E-19 |
| TTL       | 3.69E-23 | 0.208359 | 0.148 | 0.029 | 5.51E-19 |
| AGAP1     | 3.72E-23 | 0.103751 | 0.134 | 0.032 | 5.55E-19 |
| MAF       | 3.72E-23 | -0.19003 | 0.095 | 0.048 | 5.56E-19 |
| ZADH2     | 3.76E-23 | 0.118768 | 0.117 | 0.021 | 5.62E-19 |
| MTRF1L    | 3.78E-23 | 0.22545  | 0.157 | 0.031 | 5.65E-19 |
| SMCR5     | 3.79E-23 | 0.165245 | 0.12  | 0.021 | 5.67E-19 |
| LIPE-AS1  | 3.81E-23 | 0.176925 | 0.133 | 0.024 | 5.70E-19 |
| USP34     | 3.82E-23 | 0.296754 | 0.195 | 0.046 | 5.71E-19 |
| PTCH1     | 3.88E-23 | 0.363932 | 0.139 | 0.009 | 5.80E-19 |
| ZSCAN16   | 3.94E-23 | 0.223778 | 0.14  | 0.024 | 5.89E-19 |
| RP11-798M | 3.94E-23 | -0.21763 | 0.116 | 0.067 | 5.89E-19 |
| FGF12     | 3.95E-23 | 0.443787 | 0.17  | 0.024 | 5.91E-19 |
| TPT1-AS1  | 3.97E-23 | 0.199552 | 0.165 | 0.039 | 5.94E-19 |
| KLF13     | 4.00E-23 | 0.285263 | 0.147 | 0.021 | 5.98E-19 |
| EPHA4     | 4.08E-23 | 0.225215 | 0.137 | 0.022 | 6.10E-19 |
| GPR1      | 4.26E-23 | 0.344488 | 0.118 | 0.002 | 6.36E-19 |
| SRGAP2    | 4.31E-23 | 0.2103   | 0.153 | 0.029 | 6.44E-19 |
| SCO2      | 4.37E-23 | 0.122089 | 0.116 | 0.021 | 6.53E-19 |
| TIMP4     | 4.44E-23 | -0.60669 | 0.068 | 0.099 | 6.63E-19 |
| AFTPH     | 4.60E-23 | 0.137117 | 0.138 | 0.031 | 6.88E-19 |
| ITGB1     | 4.61E-23 | -0.27049 | 0.126 | 0.079 | 6.88E-19 |
| FBXO32    | 4.67E-23 | -0.52564 | 0.107 | 0.116 | 6.97E-19 |
| ID4       | 4.71E-23 | -0.18211 | 0.146 | 0.085 | 7.04E-19 |
| SLITRK1   | 4.75E-23 | 0.290817 | 0.109 | 0     | 7.10E-19 |
| TMEM107   | 4.90E-23 | -0.31429 | 0.113 | 0.084 | 7.32E-19 |
| FLYWCH1   | 5.38E-23 | 0.170151 | 0.126 | 0.021 | 8.05E-19 |
| THAP11    | 5.71E-23 | 0.247143 | 0.159 | 0.029 | 8.53E-19 |
| B4GALT5   | 5.79E-23 | -0.13423 | 0.116 | 0.056 | 8.66E-19 |
| ZFP91     | 5.86E-23 | 0.151282 | 0.124 | 0.021 | 8.76E-19 |
| FIGN      | 5.91E-23 | 0.178075 | 0.14  | 0.027 | 8.83E-19 |
| FXYD5     | 5.95E-23 | -0.25519 | 0.109 | 0.065 | 8.90E-19 |
| RAD54L2   | 5.98E-23 | 0.300713 | 0.152 | 0.021 | 8.94E-19 |
| HUWE1     | 6.23E-23 | 0.266435 | 0.183 | 0.041 | 9.32E-19 |
| ZFP90     | 6.35E-23 | 0.248502 | 0.146 | 0.026 | 9.49E-19 |
| XKR4      | 6.41E-23 | 0.107704 | 0.131 | 0.036 | 9.58E-19 |
| KCTD13    | 6.45E-23 | 0.217521 | 0.138 | 0.026 | 9.63E-19 |
| POLM      | 6.58E-23 | 0.17594  | 0.138 | 0.027 | 9.83E-19 |
| ZBED3     | 6.62E-23 | 0.306316 | 0.146 | 0.017 | 9.90E-19 |
| TRIP12    | 7.00E-23 | 0.169741 | 0.13  | 0.021 | 1.05E-18 |
| LRRRC37B  | 7.32E-23 | 0.119793 | 0.135 | 0.029 | 1.09E-18 |

|           |          |          |       |       |          |
|-----------|----------|----------|-------|-------|----------|
| SAMD14    | 7.78E-23 | 0.232635 | 0.118 | 0.01  | 1.16E-18 |
| TRAPPC2   | 7.87E-23 | 0.256732 | 0.143 | 0.022 | 1.18E-18 |
| HELZ      | 8.26E-23 | 0.156931 | 0.178 | 0.051 | 1.23E-18 |
| NOL8      | 8.30E-23 | 0.133124 | 0.168 | 0.048 | 1.24E-18 |
| RP11-410L | 8.48E-23 | 0.210422 | 0.155 | 0.036 | 1.27E-18 |
| NAA35     | 8.51E-23 | 0.19162  | 0.139 | 0.026 | 1.27E-18 |
| YTHDF3    | 8.84E-23 | 0.201383 | 0.143 | 0.029 | 1.32E-18 |
| HHLA3     | 8.89E-23 | -0.40295 | 0.074 | 0.072 | 1.33E-18 |
| MTG2      | 8.98E-23 | 0.131445 | 0.125 | 0.024 | 1.34E-18 |
| CDK11A    | 9.05E-23 | 0.204733 | 0.185 | 0.051 | 1.35E-18 |
| ZNF37A    | 9.33E-23 | 0.258815 | 0.146 | 0.024 | 1.39E-18 |
| ALG14     | 9.75E-23 | 0.100349 | 0.179 | 0.062 | 1.46E-18 |
| C19orf12  | 9.76E-23 | 0.127287 | 0.133 | 0.031 | 1.46E-18 |
| UCKL1     | 9.87E-23 | 0.153672 | 0.144 | 0.032 | 1.47E-18 |
| FAM195B   | 1.00E-22 | -0.84495 | 0.048 | 0.147 | 1.50E-18 |
| HOOK2     | 1.02E-22 | -0.19434 | 0.17  | 0.101 | 1.52E-18 |
| CTSC      | 1.02E-22 | -0.35061 | 0.082 | 0.068 | 1.52E-18 |
| PHLDA3    | 1.04E-22 | -0.16586 | 0.114 | 0.06  | 1.55E-18 |
| EPB41L2   | 1.06E-22 | 0.177203 | 0.146 | 0.031 | 1.58E-18 |
| TMEM161A  | 1.06E-22 | -0.18006 | 0.121 | 0.062 | 1.59E-18 |
| UIMC1     | 1.10E-22 | 0.130258 | 0.137 | 0.031 | 1.65E-18 |
| RBM12     | 1.11E-22 | 0.129487 | 0.134 | 0.031 | 1.66E-18 |
| ALKBH3    | 1.13E-22 | -0.14349 | 0.116 | 0.056 | 1.68E-18 |
| ZNF770    | 1.13E-22 | 0.143623 | 0.129 | 0.026 | 1.69E-18 |
| NARS2     | 1.16E-22 | 0.181492 | 0.143 | 0.031 | 1.73E-18 |
| MAPK7     | 1.22E-22 | 0.161601 | 0.121 | 0.017 | 1.82E-18 |
| TTPAL     | 1.23E-22 | -0.11266 | 0.104 | 0.044 | 1.83E-18 |
| NAP1L3    | 1.24E-22 | 0.270861 | 0.15  | 0.022 | 1.85E-18 |
| TOPORS-AS | 1.27E-22 | -0.10593 | 0.109 | 0.046 | 1.89E-18 |
| UBQLN4    | 1.30E-22 | 0.139265 | 0.127 | 0.024 | 1.94E-18 |
| C12orf75  | 1.30E-22 | 0.302437 | 0.12  | 0.003 | 1.95E-18 |
| TAC01     | 1.31E-22 | 0.181085 | 0.148 | 0.031 | 1.95E-18 |
| RIT2      | 1.32E-22 | -0.48784 | 0.06  | 0.072 | 1.97E-18 |
| NQO2      | 1.33E-22 | -0.16454 | 0.109 | 0.055 | 1.99E-18 |
| LRRC1     | 1.39E-22 | 0.231108 | 0.13  | 0.019 | 2.08E-18 |
| PTRH2     | 1.44E-22 | -0.18607 | 0.125 | 0.063 | 2.15E-18 |
| SBK1      | 1.45E-22 | 0.356508 | 0.138 | 0.01  | 2.17E-18 |
| XIST      | 1.46E-22 | -0.83521 | 0.083 | 0.202 | 2.18E-18 |
| THAP3     | 1.47E-22 | -0.12238 | 0.12  | 0.043 | 2.20E-18 |
| TTC28     | 1.49E-22 | 0.342875 | 0.15  | 0.015 | 2.23E-18 |
| AFAP1L2   | 1.55E-22 | 0.238669 | 0.101 | 0.002 | 2.31E-18 |
| ATP13A2   | 1.56E-22 | 0.185053 | 0.147 | 0.027 | 2.33E-18 |
| SRFBP1    | 1.58E-22 | 0.129488 | 0.152 | 0.043 | 2.36E-18 |
| PARP2     | 1.58E-22 | 0.184604 | 0.164 | 0.041 | 2.37E-18 |
| C5orf30   | 1.64E-22 | 0.108103 | 0.122 | 0.027 | 2.45E-18 |
| WDR73     | 1.65E-22 | -0.12418 | 0.131 | 0.065 | 2.47E-18 |
| GRIK2     | 1.68E-22 | 0.300042 | 0.138 | 0.014 | 2.50E-18 |
| POLR2M    | 1.69E-22 | 0.168685 | 0.143 | 0.031 | 2.53E-18 |
| CAPN10    | 1.70E-22 | 0.26505  | 0.144 | 0.021 | 2.54E-18 |
| RRP36     | 1.75E-22 | 0.306691 | 0.121 | 0.007 | 2.61E-18 |
| YIPF1     | 1.82E-22 | -0.304   | 0.1   | 0.067 | 2.71E-18 |

|           |           |           |        |        |           |
|-----------|-----------|-----------|--------|--------|-----------|
| ZNF582-AS | 1. 83E-22 | -0. 30917 | 0. 088 | 0. 063 | 2. 73E-18 |
| ATXN2L    | 1. 83E-22 | 0. 122274 | 0. 159 | 0. 043 | 2. 74E-18 |
| MBD3      | 1. 89E-22 | 0. 200995 | 0. 152 | 0. 032 | 2. 82E-18 |
| SLC35F6   | 1. 95E-22 | 0. 181054 | 0. 146 | 0. 029 | 2. 92E-18 |
| KBTBD2    | 1. 96E-22 | 0. 229474 | 0. 138 | 0. 019 | 2. 93E-18 |
| SCAF4     | 1. 98E-22 | 0. 126179 | 0. 159 | 0. 048 | 2. 96E-18 |
| NSDHL     | 1. 98E-22 | -0. 20174 | 0. 083 | 0. 038 | 2. 97E-18 |
| ALDH18A1  | 1. 99E-22 | 0. 262021 | 0. 122 | 0. 01  | 2. 98E-18 |
| RPUSD4    | 2. 30E-22 | 0. 127237 | 0. 122 | 0. 022 | 3. 44E-18 |
| OTUD6B    | 2. 36E-22 | 0. 24201  | 0. 156 | 0. 031 | 3. 53E-18 |
| MMGT1     | 2. 68E-22 | 0. 129011 | 0. 118 | 0. 021 | 4. 01E-18 |
| NLGN4X    | 2. 70E-22 | 0. 122727 | 0. 142 | 0. 036 | 4. 04E-18 |
| CERS5     | 2. 72E-22 | 0. 114986 | 0. 191 | 0. 068 | 4. 07E-18 |
| ATG13     | 2. 87E-22 | 0. 13     | 0. 122 | 0. 024 | 4. 29E-18 |
| EXOC3     | 2. 89E-22 | 0. 117961 | 0. 124 | 0. 026 | 4. 32E-18 |
| ZNF260    | 2. 94E-22 | 0. 184623 | 0. 117 | 0. 015 | 4. 39E-18 |
| LIAS      | 2. 95E-22 | 0. 182332 | 0. 127 | 0. 019 | 4. 41E-18 |
| GBE1      | 3. 04E-22 | -0. 20709 | 0. 142 | 0. 082 | 4. 54E-18 |
| CENPU     | 3. 09E-22 | 0. 276867 | 0. 118 | 0. 009 | 4. 61E-18 |
| MEOX2     | 3. 09E-22 | -0. 2177  | 0. 12  | 0. 072 | 4. 62E-18 |
| SERTAD3   | 3. 14E-22 | -0. 27916 | 0. 131 | 0. 079 | 4. 69E-18 |
| RP11-1114 | 3. 27E-22 | 0. 184777 | 0. 148 | 0. 031 | 4. 89E-18 |
| DCUN1D4   | 3. 32E-22 | 0. 181647 | 0. 146 | 0. 032 | 4. 95E-18 |
| SMURF2    | 3. 39E-22 | 0. 202753 | 0. 139 | 0. 026 | 5. 07E-18 |
| SHPRH     | 3. 40E-22 | 0. 17324  | 0. 135 | 0. 026 | 5. 08E-18 |
| C5orf28   | 3. 41E-22 | -0. 17553 | 0. 113 | 0. 07  | 5. 09E-18 |
| RNF166    | 3. 56E-22 | 0. 249343 | 0. 148 | 0. 024 | 5. 32E-18 |
| NDUFB8    | 3. 68E-22 | -0. 96803 | 0. 021 | 0. 164 | 5. 51E-18 |
| GTF2IRD1  | 3. 72E-22 | 0. 118371 | 0. 13  | 0. 029 | 5. 56E-18 |
| ISG15     | 4. 13E-22 | -0. 54962 | 0. 164 | 0. 188 | 6. 17E-18 |
| PAX3      | 4. 24E-22 | 0. 283211 | 0. 116 | 0. 003 | 6. 34E-18 |
| MXD1      | 4. 24E-22 | 0. 257071 | 0. 148 | 0. 019 | 6. 34E-18 |
| PEX26     | 4. 38E-22 | 0. 159907 | 0. 143 | 0. 034 | 6. 55E-18 |
| ATP2B4    | 4. 43E-22 | 0. 244116 | 0. 143 | 0. 022 | 6. 62E-18 |
| RP11-398K | 4. 50E-22 | 0. 130543 | 0. 118 | 0. 022 | 6. 72E-18 |
| CBFA2T2   | 4. 69E-22 | 0. 252856 | 0. 152 | 0. 027 | 7. 00E-18 |
| AGK       | 4. 82E-22 | 0. 12312  | 0. 13  | 0. 029 | 7. 21E-18 |
| MOGS      | 4. 91E-22 | 0. 194421 | 0. 134 | 0. 022 | 7. 34E-18 |
| MAT2B     | 4. 92E-22 | -0. 17128 | 0. 146 | 0. 079 | 7. 35E-18 |
| TSC22D2   | 4. 95E-22 | 0. 18193  | 0. 131 | 0. 021 | 7. 40E-18 |
| SLC41A3   | 5. 04E-22 | -0. 12796 | 0. 122 | 0. 058 | 7. 53E-18 |
| PLK2      | 5. 20E-22 | 0. 158498 | 0. 146 | 0. 032 | 7. 77E-18 |
| EGR3      | 5. 32E-22 | 0. 259438 | 0. 125 | 0. 014 | 7. 95E-18 |
| VWA9      | 5. 43E-22 | -0. 10794 | 0. 12  | 0. 053 | 8. 12E-18 |
| CUEDC1    | 5. 44E-22 | 0. 168431 | 0. 116 | 0. 015 | 8. 14E-18 |
| ARHGAP35  | 5. 46E-22 | 0. 1718   | 0. 134 | 0. 024 | 8. 17E-18 |
| RALGAPA1  | 5. 49E-22 | 0. 238575 | 0. 147 | 0. 026 | 8. 20E-18 |
| DCLRE1C   | 5. 56E-22 | 0. 26015  | 0. 15  | 0. 021 | 8. 30E-18 |
| INSR      | 5. 65E-22 | 0. 175234 | 0. 16  | 0. 043 | 8. 44E-18 |
| RCBTB1    | 5. 66E-22 | 0. 250495 | 0. 118 | 0. 009 | 8. 47E-18 |
| OPA1      | 5. 73E-22 | 0. 155016 | 0. 114 | 0. 019 | 8. 56E-18 |



|           |          |          |       |       |          |
|-----------|----------|----------|-------|-------|----------|
| TMEM39B   | 5.74E-22 | 0.179073 | 0.134 | 0.024 | 8.58E-18 |
| XPC       | 5.89E-22 | 0.104704 | 0.153 | 0.048 | 8.80E-18 |
| ROBO2     | 5.93E-22 | 0.246069 | 0.143 | 0.022 | 8.87E-18 |
| LAPTM5    | 5.98E-22 | -0.20365 | 0.111 | 0.063 | 8.94E-18 |
| MAP1S     | 6.13E-22 | 0.136315 | 0.117 | 0.021 | 9.16E-18 |
| PRR14     | 6.48E-22 | 0.162744 | 0.169 | 0.048 | 9.69E-18 |
| STX4      | 6.70E-22 | -0.38773 | 0.12  | 0.106 | 1.00E-17 |
| TAP1      | 6.77E-22 | -0.48592 | 0.114 | 0.116 | 1.01E-17 |
| DYNC2LI1  | 6.84E-22 | -0.14863 | 0.15  | 0.08  | 1.02E-17 |
| MT1G      | 6.96E-22 | -0.87367 | 0.048 | 0.126 | 1.04E-17 |
| ADAT1     | 7.00E-22 | 0.206431 | 0.129 | 0.019 | 1.05E-17 |
| PRKAR2B   | 7.34E-22 | 0.303093 | 0.124 | 0.007 | 1.10E-17 |
| CNIH2     | 7.45E-22 | 0.391411 | 0.14  | 0.012 | 1.11E-17 |
| CDK5RAP1  | 8.04E-22 | 0.154823 | 0.138 | 0.032 | 1.20E-17 |
| SH2B1     | 8.05E-22 | 0.158298 | 0.144 | 0.038 | 1.20E-17 |
| ILVBL     | 8.58E-22 | -0.37838 | 0.111 | 0.097 | 1.28E-17 |
| TRMT5     | 8.62E-22 | 0.136804 | 0.121 | 0.024 | 1.29E-17 |
| ZNF398    | 8.70E-22 | 0.112558 | 0.105 | 0.017 | 1.30E-17 |
| EPHB2     | 8.92E-22 | 0.326666 | 0.135 | 0.01  | 1.33E-17 |
| METTL15   | 8.95E-22 | -0.10509 | 0.108 | 0.05  | 1.34E-17 |
| CSRNP1    | 9.00E-22 | 0.132943 | 0.127 | 0.027 | 1.34E-17 |
| CAMK1     | 9.07E-22 | -0.10924 | 0.103 | 0.039 | 1.36E-17 |
| ERRFI1    | 9.36E-22 | -0.42887 | 0.094 | 0.089 | 1.40E-17 |
| NHSL2     | 9.58E-22 | -0.87514 | 0.005 | 0.115 | 1.43E-17 |
| ZNF669    | 9.61E-22 | 0.238613 | 0.137 | 0.022 | 1.44E-17 |
| KIAA0895L | 9.71E-22 | 0.13821  | 0.127 | 0.026 | 1.45E-17 |
| ARRDC4    | 9.73E-22 | 0.328853 | 0.129 | 0.007 | 1.45E-17 |
| SLC26A10  | 9.80E-22 | 0.26278  | 0.121 | 0.01  | 1.47E-17 |
| COLGALT2  | 1.00E-21 | 0.197667 | 0.155 | 0.036 | 1.49E-17 |
| KCTD16    | 1.01E-21 | 0.265134 | 0.103 | 0.003 | 1.51E-17 |
| NROB1     | 1.01E-21 | 0.230923 | 0.098 | 0.002 | 1.51E-17 |
| TBC1D17   | 1.04E-21 | 0.152011 | 0.174 | 0.051 | 1.56E-17 |
| ARL15     | 1.04E-21 | 0.270239 | 0.113 | 0.005 | 1.56E-17 |
| ZNF581    | 1.10E-21 | -0.21966 | 0.12  | 0.067 | 1.65E-17 |
| ZNF573    | 1.11E-21 | 0.150663 | 0.133 | 0.029 | 1.66E-17 |
| FNBP1     | 1.17E-21 | 0.125421 | 0.15  | 0.041 | 1.74E-17 |
| AGO1      | 1.20E-21 | 0.328947 | 0.122 | 0.005 | 1.79E-17 |
| CNOT6     | 1.20E-21 | 0.118775 | 0.095 | 0.012 | 1.79E-17 |
| CACNG4    | 1.21E-21 | 0.281945 | 0.117 | 0.007 | 1.81E-17 |
| TMEM209   | 1.22E-21 | 0.151075 | 0.117 | 0.019 | 1.82E-17 |
| PAK1      | 1.22E-21 | 0.141363 | 0.116 | 0.019 | 1.82E-17 |
| KLHL4     | 1.24E-21 | -0.21055 | 0.118 | 0.068 | 1.85E-17 |
| C10orf10  | 1.25E-21 | -0.97242 | 0.013 | 0.106 | 1.87E-17 |
| MTMR2     | 1.25E-21 | 0.145952 | 0.124 | 0.024 | 1.87E-17 |
| CPD       | 1.27E-21 | 0.102186 | 0.133 | 0.032 | 1.90E-17 |
| SNRK      | 1.29E-21 | 0.287216 | 0.148 | 0.022 | 1.93E-17 |
| PIK3C3    | 1.30E-21 | 0.141885 | 0.12  | 0.024 | 1.95E-17 |
| ZC4H2     | 1.34E-21 | 0.341659 | 0.122 | 0.005 | 2.00E-17 |
| INPP5K    | 1.35E-21 | 0.190398 | 0.121 | 0.019 | 2.01E-17 |
| COQ6      | 1.35E-21 | 0.122947 | 0.139 | 0.034 | 2.02E-17 |
| ING1      | 1.37E-21 | 0.112287 | 0.131 | 0.034 | 2.05E-17 |

|         |          |          |       |       |          |
|---------|----------|----------|-------|-------|----------|
| TRO     | 1.38E-21 | 0.13141  | 0.111 | 0.017 | 2.07E-17 |
| NFX1    | 1.46E-21 | 0.227322 | 0.14  | 0.024 | 2.19E-17 |
| CAMK2D  | 1.53E-21 | -0.32742 | 0.127 | 0.099 | 2.28E-17 |
| IFNAR2  | 1.57E-21 | 0.335975 | 0.143 | 0.014 | 2.35E-17 |
| QRSL1   | 1.65E-21 | 0.202816 | 0.133 | 0.022 | 2.46E-17 |
| ZNF117  | 1.68E-21 | 0.251646 | 0.146 | 0.026 | 2.51E-17 |
| YES1    | 1.69E-21 | 0.132338 | 0.139 | 0.032 | 2.53E-17 |
| SPIN2B  | 1.70E-21 | 0.108569 | 0.122 | 0.026 | 2.53E-17 |
| ZNF74   | 1.72E-21 | 0.262803 | 0.127 | 0.012 | 2.57E-17 |
| TEL02   | 1.73E-21 | 0.271089 | 0.143 | 0.021 | 2.59E-17 |
| LRRC8D  | 1.79E-21 | 0.230397 | 0.117 | 0.012 | 2.68E-17 |
| SENP5   | 1.80E-21 | 0.144522 | 0.13  | 0.027 | 2.69E-17 |
| CEP78   | 1.84E-21 | 0.148089 | 0.109 | 0.015 | 2.74E-17 |
| SOX15   | 1.86E-21 | -0.1313  | 0.105 | 0.051 | 2.78E-17 |
| INTS1   | 1.88E-21 | 0.173625 | 0.125 | 0.021 | 2.81E-17 |
| TRMU    | 1.88E-21 | 0.280461 | 0.166 | 0.032 | 2.81E-17 |
| ZMYND11 | 1.88E-21 | 0.222524 | 0.13  | 0.019 | 2.81E-17 |
| TMEM141 | 1.90E-21 | -0.27961 | 0.099 | 0.063 | 2.84E-17 |
| VRK1    | 1.98E-21 | 0.141471 | 0.126 | 0.026 | 2.96E-17 |
| ZNF232  | 2.01E-21 | 0.241368 | 0.125 | 0.015 | 3.00E-17 |
| FAM189B | 2.14E-21 | 0.15262  | 0.127 | 0.024 | 3.19E-17 |
| RTN1    | 2.16E-21 | -0.14711 | 0.165 | 0.096 | 3.23E-17 |
| ZNF280D | 2.22E-21 | 0.149862 | 0.12  | 0.021 | 3.32E-17 |
| TRIM41  | 2.26E-21 | 0.18802  | 0.14  | 0.029 | 3.38E-17 |
| PKN1    | 2.27E-21 | 0.195983 | 0.16  | 0.038 | 3.39E-17 |
| CREG1   | 2.29E-21 | 0.236203 | 0.125 | 0.015 | 3.42E-17 |
| ANP32E  | 2.34E-21 | -0.15999 | 0.148 | 0.075 | 3.50E-17 |
| ATP10B  | 2.41E-21 | 0.303997 | 0.111 | 0.003 | 3.60E-17 |
| AQP1    | 2.46E-21 | 0.206127 | 0.113 | 0.012 | 3.68E-17 |
| SLITRK2 | 2.47E-21 | 0.288547 | 0.12  | 0.007 | 3.68E-17 |
| NAA30   | 2.58E-21 | 0.255826 | 0.126 | 0.014 | 3.85E-17 |
| XPR1    | 2.59E-21 | 0.126193 | 0.126 | 0.027 | 3.87E-17 |
| DNAJC5  | 2.61E-21 | 0.21484  | 0.148 | 0.029 | 3.90E-17 |
| IRF2    | 2.68E-21 | -0.25714 | 0.124 | 0.085 | 4.00E-17 |
| FAM131B | 2.68E-21 | 0.195301 | 0.133 | 0.021 | 4.00E-17 |
| VPS9D1  | 2.71E-21 | 0.159783 | 0.114 | 0.015 | 4.05E-17 |
| CREBZF  | 2.74E-21 | 0.171307 | 0.164 | 0.044 | 4.10E-17 |
| THUMP2  | 2.80E-21 | 0.216226 | 0.143 | 0.026 | 4.18E-17 |
| RHN01   | 2.86E-21 | -0.17187 | 0.114 | 0.06  | 4.28E-17 |
| PRMT6   | 2.88E-21 | 0.228327 | 0.139 | 0.021 | 4.31E-17 |
| RNMTL1  | 2.89E-21 | 0.27238  | 0.137 | 0.019 | 4.31E-17 |
| ELAC1   | 3.07E-21 | -0.1086  | 0.104 | 0.043 | 4.59E-17 |
| NMI     | 3.12E-21 | -0.50379 | 0.074 | 0.084 | 4.66E-17 |
| GNA12   | 3.17E-21 | 0.14886  | 0.147 | 0.039 | 4.74E-17 |
| STAM    | 3.28E-21 | 0.181796 | 0.114 | 0.015 | 4.90E-17 |
| STRBP   | 3.38E-21 | 0.301125 | 0.12  | 0.007 | 5.05E-17 |
| PIGQ    | 3.42E-21 | 0.161443 | 0.12  | 0.021 | 5.10E-17 |
| MICAL3  | 3.49E-21 | 0.155801 | 0.121 | 0.024 | 5.22E-17 |
| HTT     | 3.57E-21 | 0.136028 | 0.116 | 0.022 | 5.33E-17 |
| RND1    | 3.61E-21 | 0.18567  | 0.129 | 0.026 | 5.40E-17 |
| ZFYVE16 | 3.65E-21 | 0.129741 | 0.164 | 0.053 | 5.45E-17 |

|           |          |          |       |       |          |
|-----------|----------|----------|-------|-------|----------|
| ZCCHC9    | 3.81E-21 | -0.19481 | 0.121 | 0.067 | 5.70E-17 |
| RCL1      | 3.83E-21 | 0.101631 | 0.094 | 0.01  | 5.72E-17 |
| DHX38     | 3.86E-21 | 0.20235  | 0.122 | 0.017 | 5.77E-17 |
| JAZF1     | 3.90E-21 | 0.192419 | 0.12  | 0.015 | 5.83E-17 |
| ARID5A    | 3.94E-21 | -0.24684 | 0.129 | 0.079 | 5.88E-17 |
| HLA-DRB5  | 4.09E-21 | -0.90577 | 0.036 | 0.125 | 6.11E-17 |
| RNFT2     | 4.18E-21 | 0.240779 | 0.101 | 0.005 | 6.25E-17 |
| ZNF652    | 4.29E-21 | 0.137301 | 0.14  | 0.032 | 6.42E-17 |
| 2-Mar     | 4.33E-21 | 0.108447 | 0.12  | 0.026 | 6.47E-17 |
| TRPS1     | 4.35E-21 | 0.236235 | 0.153 | 0.031 | 6.50E-17 |
| LRRTM1    | 4.44E-21 | 0.306397 | 0.117 | 0.003 | 6.64E-17 |
| MICU3     | 4.45E-21 | 0.263724 | 0.133 | 0.017 | 6.65E-17 |
| DIAPH1    | 4.49E-21 | 0.234017 | 0.138 | 0.022 | 6.71E-17 |
| IQCE      | 4.72E-21 | 0.245004 | 0.129 | 0.017 | 7.06E-17 |
| REEP3     | 4.72E-21 | 0.107092 | 0.135 | 0.032 | 7.06E-17 |
| TPRA1     | 4.78E-21 | 0.175352 | 0.133 | 0.026 | 7.14E-17 |
| CNOT3     | 4.78E-21 | 0.207274 | 0.14  | 0.024 | 7.14E-17 |
| CKAP5     | 5.08E-21 | 0.104415 | 0.111 | 0.024 | 7.60E-17 |
| PCGF3     | 5.27E-21 | 0.16762  | 0.109 | 0.017 | 7.87E-17 |
| PARN      | 5.32E-21 | 0.147109 | 0.122 | 0.024 | 7.95E-17 |
| ARL4D     | 5.36E-21 | 0.142248 | 0.17  | 0.051 | 8.01E-17 |
| AHDC1     | 5.52E-21 | 0.108956 | 0.153 | 0.046 | 8.26E-17 |
| GABPB1    | 5.69E-21 | 0.113002 | 0.109 | 0.019 | 8.50E-17 |
| ZNF804A   | 5.85E-21 | 0.344826 | 0.109 | 0.002 | 8.74E-17 |
| C11orf24  | 5.89E-21 | 0.143746 | 0.121 | 0.024 | 8.80E-17 |
| IGDCC3    | 5.95E-21 | 0.331796 | 0.118 | 0.003 | 8.89E-17 |
| BTN2A1    | 5.95E-21 | 0.181883 | 0.13  | 0.024 | 8.89E-17 |
| CCDC142   | 5.99E-21 | 0.303473 | 0.146 | 0.019 | 8.94E-17 |
| SNX8      | 6.03E-21 | 0.169956 | 0.137 | 0.029 | 9.01E-17 |
| ELP3      | 6.27E-21 | 0.196633 | 0.139 | 0.026 | 9.36E-17 |
| CBWD5     | 6.77E-21 | 0.156521 | 0.126 | 0.026 | 1.01E-16 |
| RNF38     | 6.81E-21 | 0.288702 | 0.122 | 0.01  | 1.02E-16 |
| SLC10A4   | 7.05E-21 | 0.270456 | 0.127 | 0.014 | 1.05E-16 |
| ATP13A1   | 7.11E-21 | 0.228995 | 0.16  | 0.034 | 1.06E-16 |
| FBX028    | 7.21E-21 | 0.29338  | 0.13  | 0.014 | 1.08E-16 |
| RAB34     | 7.40E-21 | -0.64326 | 0.062 | 0.099 | 1.11E-16 |
| PPM1D     | 7.56E-21 | 0.141025 | 0.117 | 0.021 | 1.13E-16 |
| CDK12     | 7.63E-21 | 0.163336 | 0.135 | 0.029 | 1.14E-16 |
| CTC-524C5 | 7.85E-21 | 0.201766 | 0.109 | 0.012 | 1.17E-16 |
| NFATC3    | 8.09E-21 | 0.186867 | 0.146 | 0.031 | 1.21E-16 |
| ANTXR2    | 8.24E-21 | 0.243354 | 0.099 | 0.003 | 1.23E-16 |
| SLC16A9   | 8.25E-21 | 0.296256 | 0.108 | 0.003 | 1.23E-16 |
| PUM2      | 8.28E-21 | 0.207959 | 0.16  | 0.039 | 1.24E-16 |
| AC093673. | 8.29E-21 | -0.2036  | 0.1   | 0.067 | 1.24E-16 |
| MBNL1     | 8.45E-21 | 0.108406 | 0.125 | 0.031 | 1.26E-16 |
| RP11-395A | 8.54E-21 | 0.261981 | 0.107 | 0.003 | 1.28E-16 |
| FAM58A    | 8.75E-21 | 0.277374 | 0.127 | 0.014 | 1.31E-16 |
| PXK       | 8.87E-21 | 0.211261 | 0.135 | 0.024 | 1.33E-16 |
| LHX2      | 8.93E-21 | 0.159332 | 0.112 | 0.017 | 1.33E-16 |
| AC016700. | 9.01E-21 | 0.322461 | 0.121 | 0.01  | 1.35E-16 |
| HECTD4    | 9.03E-21 | 0.221599 | 0.131 | 0.022 | 1.35E-16 |

|           |          |          |       |       |          |
|-----------|----------|----------|-------|-------|----------|
| KIAA1429  | 9.03E-21 | 0.312358 | 0.15  | 0.024 | 1.35E-16 |
| GCNT2     | 9.29E-21 | 0.278547 | 0.109 | 0.003 | 1.39E-16 |
| TLL1      | 9.34E-21 | 0.145013 | 0.114 | 0.021 | 1.40E-16 |
| LACTB2    | 9.63E-21 | -0.16271 | 0.117 | 0.056 | 1.44E-16 |
| PGS1      | 1.02E-20 | 0.1946   | 0.124 | 0.021 | 1.52E-16 |
| FCER1G    | 1.03E-20 | -0.10508 | 0.125 | 0.063 | 1.54E-16 |
| SPSB4     | 1.03E-20 | 0.31103  | 0.124 | 0.007 | 1.54E-16 |
| ZKSCAN5   | 1.04E-20 | 0.221974 | 0.116 | 0.012 | 1.56E-16 |
| FBX044    | 1.06E-20 | -0.11934 | 0.118 | 0.06  | 1.59E-16 |
| CYP3A5    | 1.11E-20 | 0.327771 | 0.13  | 0.01  | 1.65E-16 |
| MCMBP     | 1.15E-20 | 0.183874 | 0.122 | 0.021 | 1.72E-16 |
| GPR17     | 1.16E-20 | 0.402197 | 0.112 | 0.003 | 1.73E-16 |
| RP11-231C | 1.16E-20 | 0.317426 | 0.111 | 0.005 | 1.73E-16 |
| TP53INP2  | 1.17E-20 | 0.174523 | 0.101 | 0.01  | 1.74E-16 |
| SART3     | 1.22E-20 | 0.19502  | 0.15  | 0.032 | 1.82E-16 |
| ABCC5     | 1.22E-20 | 0.220066 | 0.155 | 0.034 | 1.83E-16 |
| RINT1     | 1.22E-20 | 0.138378 | 0.131 | 0.032 | 1.83E-16 |
| TNC       | 1.26E-20 | -0.857   | 0.036 | 0.142 | 1.88E-16 |
| TRRAP     | 1.27E-20 | 0.235893 | 0.118 | 0.012 | 1.90E-16 |
| MAFG      | 1.27E-20 | 0.12586  | 0.153 | 0.039 | 1.90E-16 |
| ZNF682    | 1.29E-20 | 0.263867 | 0.125 | 0.012 | 1.93E-16 |
| GRAMD3    | 1.35E-20 | -0.14759 | 0.138 | 0.082 | 2.01E-16 |
| E4F1      | 1.35E-20 | 0.17206  | 0.129 | 0.024 | 2.02E-16 |
| MINA      | 1.36E-20 | -0.10715 | 0.104 | 0.046 | 2.03E-16 |
| GPR162    | 1.37E-20 | 0.247889 | 0.139 | 0.022 | 2.04E-16 |
| JAG1      | 1.37E-20 | -0.14445 | 0.134 | 0.072 | 2.04E-16 |
| FASN      | 1.41E-20 | 0.302769 | 0.13  | 0.012 | 2.10E-16 |
| FAM161A   | 1.51E-20 | 0.254607 | 0.143 | 0.026 | 2.25E-16 |
| CA14      | 1.55E-20 | 0.179457 | 0.118 | 0.024 | 2.32E-16 |
| CALCRL    | 1.68E-20 | 0.372391 | 0.134 | 0.01  | 2.51E-16 |
| PDS5A     | 1.72E-20 | 0.112848 | 0.127 | 0.031 | 2.57E-16 |
| ZNF121    | 1.74E-20 | 0.190885 | 0.133 | 0.026 | 2.59E-16 |
| PIAS4     | 1.79E-20 | 0.171719 | 0.129 | 0.024 | 2.68E-16 |
| FIGNL1    | 1.83E-20 | 0.152453 | 0.1   | 0.012 | 2.73E-16 |
| NUDT2     | 1.85E-20 | 0.159665 | 0.13  | 0.026 | 2.76E-16 |
| TRIM26    | 1.90E-20 | 0.301162 | 0.126 | 0.01  | 2.85E-16 |
| HN1L      | 1.97E-20 | 0.145203 | 0.129 | 0.029 | 2.94E-16 |
| DDX50     | 1.97E-20 | 0.101074 | 0.135 | 0.039 | 2.94E-16 |
| CCNT2     | 1.99E-20 | 0.177837 | 0.134 | 0.027 | 2.97E-16 |
| EPS8      | 2.18E-20 | 0.160198 | 0.13  | 0.029 | 3.26E-16 |
| ELMSAN1   | 2.24E-20 | 0.120577 | 0.127 | 0.027 | 3.34E-16 |
| RNF150    | 2.38E-20 | 0.275157 | 0.099 | 0.002 | 3.55E-16 |
| HOXC-AS1  | 2.50E-20 | 0.217671 | 0.113 | 0.012 | 3.74E-16 |
| MKRN3     | 2.52E-20 | 0.161927 | 0.129 | 0.027 | 3.76E-16 |
| ZNF579    | 2.52E-20 | 0.199218 | 0.135 | 0.024 | 3.77E-16 |
| CELF3     | 2.53E-20 | 0.315645 | 0.117 | 0.007 | 3.79E-16 |
| ZDHHC12   | 2.54E-20 | -0.14335 | 0.092 | 0.044 | 3.80E-16 |
| ZYG11B    | 2.56E-20 | 0.212408 | 0.14  | 0.026 | 3.82E-16 |
| RB1       | 2.60E-20 | 0.115461 | 0.137 | 0.038 | 3.89E-16 |
| NME6      | 2.63E-20 | -0.15488 | 0.107 | 0.05  | 3.93E-16 |
| PGM5      | 2.64E-20 | 0.271115 | 0.1   | 0.002 | 3.94E-16 |

|           |          |          |       |       |          |
|-----------|----------|----------|-------|-------|----------|
| TRIP11    | 2.64E-20 | 0.12238  | 0.156 | 0.05  | 3.95E-16 |
| KATNB1    | 2.66E-20 | 0.261938 | 0.146 | 0.024 | 3.97E-16 |
| SLC2A3    | 2.66E-20 | -0.37102 | 0.105 | 0.096 | 3.98E-16 |
| CD14      | 2.69E-20 | -0.22048 | 0.108 | 0.074 | 4.02E-16 |
| MSM01     | 2.77E-20 | -0.21081 | 0.125 | 0.075 | 4.14E-16 |
| ZNF692    | 2.79E-20 | 0.161669 | 0.135 | 0.032 | 4.17E-16 |
| CDC42BPB  | 2.82E-20 | 0.153367 | 0.104 | 0.015 | 4.21E-16 |
| CRLF3     | 2.86E-20 | 0.2636   | 0.122 | 0.012 | 4.27E-16 |
| DDX3Y     | 2.87E-20 | 0.234546 | 0.114 | 0.01  | 4.29E-16 |
| RNF25     | 2.96E-20 | 0.170571 | 0.124 | 0.024 | 4.43E-16 |
| KLHL22    | 2.99E-20 | 0.170248 | 0.125 | 0.022 | 4.47E-16 |
| MAP3K11   | 2.99E-20 | 0.187341 | 0.143 | 0.031 | 4.47E-16 |
| GNAO1     | 3.00E-20 | 0.218776 | 0.131 | 0.024 | 4.49E-16 |
| RASSF4    | 3.01E-20 | -0.26325 | 0.147 | 0.101 | 4.49E-16 |
| EFNA2     | 3.03E-20 | 0.30411  | 0.113 | 0.003 | 4.53E-16 |
| MARK2     | 3.24E-20 | 0.248521 | 0.124 | 0.014 | 4.84E-16 |
| SPRYD7    | 3.26E-20 | -0.18189 | 0.117 | 0.067 | 4.86E-16 |
| AKT1      | 3.30E-20 | 0.204257 | 0.157 | 0.038 | 4.93E-16 |
| BRAP      | 3.33E-20 | 0.138151 | 0.124 | 0.026 | 4.98E-16 |
| GTF2E2    | 3.39E-20 | 0.196875 | 0.14  | 0.031 | 5.06E-16 |
| TTY15     | 3.44E-20 | 0.300895 | 0.111 | 0.005 | 5.14E-16 |
| ZNF384    | 3.58E-20 | 0.211584 | 0.109 | 0.01  | 5.35E-16 |
| NSMAF     | 3.60E-20 | 0.137488 | 0.109 | 0.019 | 5.38E-16 |
| DHCR7     | 3.78E-20 | -0.41107 | 0.075 | 0.068 | 5.65E-16 |
| EXOSC3    | 3.85E-20 | 0.142796 | 0.129 | 0.029 | 5.75E-16 |
| ELOVL4    | 4.00E-20 | 0.264766 | 0.114 | 0.009 | 5.98E-16 |
| C6orf226  | 4.02E-20 | 0.108427 | 0.131 | 0.038 | 6.01E-16 |
| SKIV2L    | 4.05E-20 | 0.101254 | 0.105 | 0.021 | 6.06E-16 |
| RAB3GAP2  | 4.07E-20 | -0.13821 | 0.12  | 0.062 | 6.09E-16 |
| CTTNBP2NL | 4.18E-20 | 0.193668 | 0.118 | 0.015 | 6.25E-16 |
| KLHL12    | 4.24E-20 | 0.140375 | 0.112 | 0.021 | 6.34E-16 |
| ACO05618. | 4.25E-20 | 0.154461 | 0.127 | 0.029 | 6.35E-16 |
| CRAT      | 4.32E-20 | 0.154708 | 0.127 | 0.026 | 6.46E-16 |
| PINX1     | 4.32E-20 | 0.236513 | 0.129 | 0.021 | 6.46E-16 |
| ZNF433    | 4.33E-20 | 0.163145 | 0.096 | 0.01  | 6.47E-16 |
| HMGCL     | 4.39E-20 | -0.28301 | 0.13  | 0.103 | 6.56E-16 |
| GDPD1     | 4.72E-20 | 0.325547 | 0.117 | 0.005 | 7.06E-16 |
| ARL10     | 4.85E-20 | 0.169101 | 0.121 | 0.022 | 7.25E-16 |
| CHRNA1    | 4.86E-20 | -0.26532 | 0.111 | 0.079 | 7.26E-16 |
| SCO1      | 4.89E-20 | 0.163402 | 0.126 | 0.026 | 7.31E-16 |
| FAM107B   | 4.99E-20 | 0.281054 | 0.12  | 0.012 | 7.45E-16 |
| BOD1L1    | 5.12E-20 | 0.124017 | 0.137 | 0.038 | 7.65E-16 |
| PPP3CC    | 5.15E-20 | 0.174681 | 0.148 | 0.038 | 7.70E-16 |
| CDT1      | 5.24E-20 | 0.16807  | 0.099 | 0.012 | 7.83E-16 |
| PIANP     | 5.26E-20 | 0.32278  | 0.126 | 0.01  | 7.86E-16 |
| MKNK2     | 5.30E-20 | -0.12469 | 0.122 | 0.062 | 7.91E-16 |
| ZFP62     | 5.79E-20 | 0.155634 | 0.117 | 0.022 | 8.65E-16 |
| CBWD2     | 5.88E-20 | -0.17045 | 0.105 | 0.055 | 8.78E-16 |
| ATP5L2    | 5.96E-20 | -0.25635 | 0.101 | 0.067 | 8.91E-16 |
| DXO       | 6.02E-20 | 0.159654 | 0.13  | 0.029 | 9.00E-16 |
| ZBTB18    | 6.23E-20 | 0.31559  | 0.116 | 0.007 | 9.31E-16 |

|           |          |          |       |       |          |
|-----------|----------|----------|-------|-------|----------|
| TRIP6     | 6.30E-20 | -0.47048 | 0.096 | 0.12  | 9.42E-16 |
| C4orf46   | 6.51E-20 | 0.138338 | 0.101 | 0.015 | 9.73E-16 |
| UBE2Z     | 6.54E-20 | 0.103565 | 0.138 | 0.041 | 9.77E-16 |
| ABCF3     | 6.58E-20 | 0.216036 | 0.135 | 0.022 | 9.84E-16 |
| EEFSEC    | 6.74E-20 | 0.2615   | 0.111 | 0.01  | 1.01E-15 |
| TSEN54    | 6.78E-20 | 0.142617 | 0.124 | 0.026 | 1.01E-15 |
| TIMM10B   | 6.81E-20 | -0.19563 | 0.113 | 0.068 | 1.02E-15 |
| C14orf80  | 6.83E-20 | 0.265126 | 0.105 | 0.007 | 1.02E-15 |
| GTF3C3    | 6.88E-20 | 0.161809 | 0.12  | 0.021 | 1.03E-15 |
| LDLRAD4   | 7.01E-20 | 0.199856 | 0.113 | 0.014 | 1.05E-15 |
| RFC3      | 7.24E-20 | 0.145809 | 0.099 | 0.014 | 1.08E-15 |
| CADM3     | 7.61E-20 | -0.24787 | 0.082 | 0.048 | 1.14E-15 |
| DDX55     | 8.01E-20 | 0.131495 | 0.142 | 0.036 | 1.20E-15 |
| CSK       | 8.03E-20 | 0.176044 | 0.096 | 0.007 | 1.20E-15 |
| PRKRIR    | 8.11E-20 | 0.148096 | 0.108 | 0.017 | 1.21E-15 |
| BBS2      | 9.12E-20 | -0.1131  | 0.164 | 0.097 | 1.36E-15 |
| TMEM178B  | 9.34E-20 | 0.245835 | 0.117 | 0.012 | 1.40E-15 |
| SAMD8     | 9.49E-20 | 0.155843 | 0.142 | 0.032 | 1.42E-15 |
| COG8      | 9.50E-20 | 0.2436   | 0.137 | 0.024 | 1.42E-15 |
| GPR161    | 9.59E-20 | 0.306652 | 0.117 | 0.005 | 1.43E-15 |
| GOT1      | 9.83E-20 | -0.31639 | 0.091 | 0.068 | 1.47E-15 |
| CDC42EP1  | 9.90E-20 | 0.1655   | 0.121 | 0.021 | 1.48E-15 |
| AGFG1     | 1.01E-19 | 0.167189 | 0.114 | 0.019 | 1.51E-15 |
| MTURN     | 1.02E-19 | 0.236257 | 0.109 | 0.009 | 1.52E-15 |
| DEDD      | 1.03E-19 | 0.124084 | 0.108 | 0.021 | 1.54E-15 |
| FAM109A   | 1.04E-19 | 0.181526 | 0.098 | 0.009 | 1.56E-15 |
| RP11-115C | 1.04E-19 | 0.238085 | 0.126 | 0.019 | 1.56E-15 |
| NOVA2     | 1.08E-19 | 0.200777 | 0.114 | 0.015 | 1.61E-15 |
| WRNIP1    | 1.12E-19 | 0.184362 | 0.108 | 0.012 | 1.67E-15 |
| FAM84A    | 1.23E-19 | -0.10951 | 0.114 | 0.055 | 1.83E-15 |
| DNALI1    | 1.23E-19 | -0.14196 | 0.088 | 0.039 | 1.83E-15 |
| PEX1      | 1.24E-19 | 0.116041 | 0.088 | 0.012 | 1.85E-15 |
| XPO7      | 1.24E-19 | 0.158854 | 0.111 | 0.019 | 1.86E-15 |
| ATOX8     | 1.25E-19 | 0.384876 | 0.138 | 0.014 | 1.86E-15 |
| C3orf17   | 1.29E-19 | -0.18979 | 0.103 | 0.058 | 1.93E-15 |
| CXCR4     | 1.30E-19 | -0.66313 | 0.064 | 0.106 | 1.94E-15 |
| PPWD1     | 1.30E-19 | 0.109453 | 0.126 | 0.032 | 1.95E-15 |
| HOXC6     | 1.32E-19 | 0.158306 | 0.091 | 0.009 | 1.97E-15 |
| CDH10     | 1.36E-19 | 0.284013 | 0.118 | 0.01  | 2.04E-15 |
| C21orf2   | 1.38E-19 | 0.113623 | 0.137 | 0.039 | 2.07E-15 |
| ARID2     | 1.39E-19 | 0.201022 | 0.14  | 0.029 | 2.08E-15 |
| ACVR1B    | 1.41E-19 | 0.21567  | 0.107 | 0.01  | 2.11E-15 |
| AKAP11    | 1.41E-19 | 0.112223 | 0.118 | 0.026 | 2.11E-15 |
| PXN-AS1   | 1.44E-19 | 0.143239 | 0.109 | 0.019 | 2.16E-15 |
| ELFN1     | 1.46E-19 | 0.246578 | 0.092 | 0     | 2.19E-15 |
| ERBB2IP   | 1.50E-19 | 0.136813 | 0.151 | 0.043 | 2.24E-15 |
| C5orf38   | 1.54E-19 | 0.322745 | 0.12  | 0.009 | 2.29E-15 |
| NBN       | 1.56E-19 | 0.148294 | 0.122 | 0.027 | 2.33E-15 |
| RNF103    | 1.59E-19 | 0.296575 | 0.14  | 0.021 | 2.38E-15 |
| LETMD1    | 1.67E-19 | -0.14111 | 0.126 | 0.07  | 2.50E-15 |
| MSANTD4   | 1.67E-19 | -0.16743 | 0.103 | 0.051 | 2.50E-15 |

|           |          |          |       |       |          |
|-----------|----------|----------|-------|-------|----------|
| LCORL     | 1.72E-19 | 0.246154 | 0.111 | 0.009 | 2.57E-15 |
| ZNF514    | 1.73E-19 | 0.117448 | 0.113 | 0.024 | 2.58E-15 |
| VWA1      | 1.81E-19 | 0.133265 | 0.114 | 0.024 | 2.70E-15 |
| CHEK1     | 1.81E-19 | 0.104218 | 0.09  | 0.014 | 2.71E-15 |
| ZNF703    | 1.86E-19 | 0.138339 | 0.096 | 0.012 | 2.78E-15 |
| RP11-660L | 1.89E-19 | -0.14675 | 0.118 | 0.055 | 2.82E-15 |
| MTHFS     | 1.89E-19 | -0.18255 | 0.095 | 0.058 | 2.83E-15 |
| ZNF282    | 1.94E-19 | 0.161052 | 0.098 | 0.01  | 2.90E-15 |
| MEMO1     | 1.97E-19 | 0.205745 | 0.126 | 0.022 | 2.94E-15 |
| MTAP      | 1.98E-19 | 0.176764 | 0.121 | 0.022 | 2.96E-15 |
| PHF21A    | 2.01E-19 | 0.156763 | 0.127 | 0.026 | 3.00E-15 |
| CAAP1     | 2.02E-19 | 0.120294 | 0.088 | 0.012 | 3.02E-15 |
| TBC1D24   | 2.05E-19 | 0.22098  | 0.095 | 0.005 | 3.06E-15 |
| AFAP1     | 2.07E-19 | 0.263155 | 0.121 | 0.012 | 3.09E-15 |
| CDK19     | 2.07E-19 | 0.241944 | 0.134 | 0.021 | 3.09E-15 |
| PDS5B     | 2.07E-19 | 0.125202 | 0.151 | 0.046 | 3.10E-15 |
| GTDC1     | 2.10E-19 | 0.172946 | 0.116 | 0.021 | 3.13E-15 |
| CHADL     | 2.10E-19 | 0.299511 | 0.117 | 0.007 | 3.14E-15 |
| CLDN10    | 2.16E-19 | -0.34005 | 0.079 | 0.053 | 3.22E-15 |
| CDKN2D    | 2.21E-19 | 0.175375 | 0.13  | 0.027 | 3.30E-15 |
| ATXN3     | 2.23E-19 | -0.251   | 0.133 | 0.091 | 3.34E-15 |
| SRBD1     | 2.32E-19 | 0.143869 | 0.092 | 0.01  | 3.46E-15 |
| MAP3K2    | 2.32E-19 | 0.11977  | 0.124 | 0.031 | 3.46E-15 |
| CTB-3102C | 2.35E-19 | 0.198007 | 0.129 | 0.026 | 3.51E-15 |
| HPCA      | 2.37E-19 | 0.170333 | 0.125 | 0.029 | 3.53E-15 |
| GPR75-ASE | 2.38E-19 | 0.311667 | 0.134 | 0.015 | 3.55E-15 |
| DZIP3     | 2.41E-19 | 0.16666  | 0.13  | 0.029 | 3.59E-15 |
| KIF9      | 2.45E-19 | -0.29278 | 0.105 | 0.082 | 3.66E-15 |
| JAK1      | 2.57E-19 | 0.121797 | 0.14  | 0.039 | 3.84E-15 |
| TRAPPC11  | 2.57E-19 | 0.15451  | 0.104 | 0.014 | 3.85E-15 |
| SNX12     | 2.66E-19 | 0.133434 | 0.129 | 0.031 | 3.97E-15 |
| IVD       | 2.67E-19 | -0.10618 | 0.117 | 0.056 | 3.98E-15 |
| HOXC11    | 2.70E-19 | 0.25483  | 0.091 | 0     | 4.04E-15 |
| PRKX      | 2.83E-19 | 0.257356 | 0.101 | 0.003 | 4.22E-15 |
| TMEM145   | 2.84E-19 | 0.200712 | 0.127 | 0.021 | 4.24E-15 |
| TSPAN11   | 2.89E-19 | 0.159755 | 0.09  | 0.009 | 4.32E-15 |
| C7orf61   | 2.93E-19 | 0.193292 | 0.126 | 0.027 | 4.38E-15 |
| NDUFAF7   | 2.98E-19 | 0.183455 | 0.127 | 0.026 | 4.45E-15 |
| PLAUR     | 3.08E-19 | -0.38211 | 0.078 | 0.068 | 4.61E-15 |
| MAN1B1    | 3.10E-19 | -0.12836 | 0.124 | 0.056 | 4.63E-15 |
| GMPPA     | 3.16E-19 | -0.32668 | 0.079 | 0.067 | 4.72E-15 |
| NUP50     | 3.16E-19 | 0.220957 | 0.113 | 0.012 | 4.72E-15 |
| TTY14     | 3.18E-19 | 0.246303 | 0.096 | 0.003 | 4.75E-15 |
| ZNF519    | 3.19E-19 | 0.171294 | 0.098 | 0.01  | 4.76E-15 |
| IRF2BP1   | 3.32E-19 | 0.218511 | 0.124 | 0.017 | 4.97E-15 |
| MBD1      | 3.52E-19 | 0.143373 | 0.146 | 0.041 | 5.25E-15 |
| SLC35A3   | 3.54E-19 | 0.112796 | 0.131 | 0.034 | 5.29E-15 |
| FAM98B    | 3.55E-19 | 0.163578 | 0.121 | 0.022 | 5.31E-15 |
| ZNF420    | 3.63E-19 | 0.139177 | 0.143 | 0.039 | 5.42E-15 |
| TOM1      | 3.66E-19 | 0.116421 | 0.121 | 0.027 | 5.47E-15 |
| CDC73     | 3.67E-19 | -0.18887 | 0.118 | 0.07  | 5.48E-15 |

|           |          |          |       |       |          |
|-----------|----------|----------|-------|-------|----------|
| ZNF197    | 3.69E-19 | 0.121839 | 0.105 | 0.021 | 5.51E-15 |
| FAM134C   | 3.84E-19 | 0.147991 | 0.127 | 0.029 | 5.74E-15 |
| RC3H1     | 3.86E-19 | 0.113643 | 0.109 | 0.022 | 5.77E-15 |
| MLLT10    | 3.91E-19 | 0.170139 | 0.118 | 0.022 | 5.84E-15 |
| ARHGEF26  | 3.96E-19 | -0.18413 | 0.107 | 0.062 | 5.92E-15 |
| CPLX1     | 3.97E-19 | 0.380409 | 0.131 | 0.014 | 5.93E-15 |
| TMEM175   | 4.09E-19 | 0.206001 | 0.143 | 0.032 | 6.11E-15 |
| ZNF713    | 4.32E-19 | 0.221734 | 0.108 | 0.01  | 6.45E-15 |
| VAT1      | 4.32E-19 | 0.122129 | 0.129 | 0.034 | 6.46E-15 |
| CRTC3     | 4.38E-19 | 0.152621 | 0.111 | 0.021 | 6.54E-15 |
| CUL4A     | 4.40E-19 | 0.267758 | 0.139 | 0.022 | 6.58E-15 |
| KLHL8     | 4.41E-19 | 0.102238 | 0.134 | 0.041 | 6.58E-15 |
| ORC3      | 4.52E-19 | 0.105271 | 0.113 | 0.024 | 6.76E-15 |
| RUNDC1    | 4.62E-19 | 0.151365 | 0.124 | 0.026 | 6.90E-15 |
| DUS4L     | 4.87E-19 | 0.19394  | 0.107 | 0.015 | 7.28E-15 |
| ZNF143    | 4.90E-19 | 0.274416 | 0.111 | 0.007 | 7.33E-15 |
| CRY1      | 5.07E-19 | -0.13281 | 0.121 | 0.062 | 7.57E-15 |
| NCOA5     | 5.15E-19 | 0.109565 | 0.103 | 0.017 | 7.69E-15 |
| ZDHHC6    | 5.23E-19 | -0.15098 | 0.1   | 0.051 | 7.82E-15 |
| GTF2H2C   | 5.27E-19 | 0.129131 | 0.124 | 0.029 | 7.88E-15 |
| VPS37D    | 5.31E-19 | 0.291265 | 0.12  | 0.009 | 7.94E-15 |
| AC084219. | 5.32E-19 | 0.126792 | 0.111 | 0.024 | 7.95E-15 |
| UBE4A     | 5.36E-19 | 0.178945 | 0.118 | 0.021 | 8.01E-15 |
| CDK17     | 5.51E-19 | 0.241179 | 0.138 | 0.024 | 8.24E-15 |
| RASAL2    | 5.59E-19 | 0.246323 | 0.1   | 0.005 | 8.35E-15 |
| MAPK8     | 5.70E-19 | 0.243025 | 0.099 | 0.005 | 8.52E-15 |
| SNAPC1    | 6.21E-19 | -0.12269 | 0.131 | 0.058 | 9.28E-15 |
| PRMT7     | 6.28E-19 | 0.192857 | 0.134 | 0.027 | 9.38E-15 |
| SRRD      | 6.76E-19 | 0.183784 | 0.104 | 0.014 | 1.01E-14 |
| TTC5      | 6.76E-19 | 0.190584 | 0.133 | 0.029 | 1.01E-14 |
| MCM2      | 7.06E-19 | 0.210781 | 0.107 | 0.012 | 1.06E-14 |
| PITPNA    | 7.09E-19 | 0.204669 | 0.12  | 0.017 | 1.06E-14 |
| ENTPD4    | 7.16E-19 | 0.115065 | 0.107 | 0.021 | 1.07E-14 |
| VCPKMT    | 7.39E-19 | 0.238994 | 0.118 | 0.015 | 1.10E-14 |
| PI4KA     | 7.45E-19 | 0.150097 | 0.098 | 0.012 | 1.11E-14 |
| POLR1C    | 7.50E-19 | -0.15234 | 0.133 | 0.072 | 1.12E-14 |
| LMF1      | 7.66E-19 | 0.232919 | 0.122 | 0.017 | 1.14E-14 |
| ZNF107    | 7.92E-19 | 0.27512  | 0.099 | 0.002 | 1.18E-14 |
| PTPN1     | 7.94E-19 | 0.138528 | 0.114 | 0.024 | 1.19E-14 |
| AGPAT4    | 8.10E-19 | 0.105848 | 0.103 | 0.022 | 1.21E-14 |
| DNASE2    | 8.12E-19 | -0.45354 | 0.122 | 0.128 | 1.21E-14 |
| KAT8      | 8.14E-19 | 0.184971 | 0.144 | 0.038 | 1.22E-14 |
| FAM220A   | 8.21E-19 | 0.23635  | 0.112 | 0.012 | 1.23E-14 |
| LDOC1L    | 8.23E-19 | 0.236951 | 0.113 | 0.012 | 1.23E-14 |
| RP11-448A | 8.54E-19 | 0.248465 | 0.153 | 0.034 | 1.28E-14 |
| ATG14     | 8.86E-19 | 0.127343 | 0.107 | 0.019 | 1.32E-14 |
| GPALPP1   | 8.86E-19 | 0.214267 | 0.15  | 0.034 | 1.32E-14 |
| MYLIP     | 9.12E-19 | 0.193102 | 0.118 | 0.021 | 1.36E-14 |
| FAM216A   | 9.32E-19 | 0.156683 | 0.126 | 0.031 | 1.39E-14 |
| TOP1MT    | 9.37E-19 | 0.180231 | 0.095 | 0.01  | 1.40E-14 |
| HYPK      | 9.90E-19 | 0.135143 | 0.108 | 0.019 | 1.48E-14 |



|           |          |          |       |       |          |
|-----------|----------|----------|-------|-------|----------|
| C17orf96  | 9.97E-19 | 0.160483 | 0.095 | 0.01  | 1.49E-14 |
| KIAA1211  | 1.01E-18 | 0.29529  | 0.107 | 0.003 | 1.50E-14 |
| MYO5A     | 1.02E-18 | 0.289889 | 0.12  | 0.009 | 1.53E-14 |
| ACVR2A    | 1.06E-18 | 0.178441 | 0.088 | 0.005 | 1.58E-14 |
| TCF7L1    | 1.06E-18 | 0.164071 | 0.095 | 0.009 | 1.59E-14 |
| FLOT2     | 1.08E-18 | -0.12225 | 0.098 | 0.044 | 1.61E-14 |
| ULK3      | 1.11E-18 | 0.165803 | 0.137 | 0.031 | 1.66E-14 |
| ZNF708    | 1.11E-18 | 0.18202  | 0.122 | 0.024 | 1.67E-14 |
| ZDHHC21   | 1.16E-18 | 0.209208 | 0.109 | 0.012 | 1.73E-14 |
| ATF7IP    | 1.16E-18 | 0.216518 | 0.127 | 0.024 | 1.74E-14 |
| SP100     | 1.19E-18 | -0.76152 | 0.038 | 0.13  | 1.78E-14 |
| PSD2      | 1.23E-18 | 0.191016 | 0.118 | 0.021 | 1.84E-14 |
| B3GALNT2  | 1.26E-18 | 0.132827 | 0.127 | 0.032 | 1.89E-14 |
| DMD       | 1.27E-18 | -0.13435 | 0.1   | 0.048 | 1.90E-14 |
| ATF1      | 1.28E-18 | -0.18129 | 0.096 | 0.053 | 1.91E-14 |
| SYT6      | 1.29E-18 | 0.179449 | 0.094 | 0.009 | 1.94E-14 |
| CCDC80    | 1.30E-18 | -0.68335 | 0.051 | 0.12  | 1.94E-14 |
| MED13L    | 1.33E-18 | 0.212122 | 0.127 | 0.024 | 1.99E-14 |
| BGN       | 1.36E-18 | -0.51948 | 0.068 | 0.082 | 2.03E-14 |
| PSRC1     | 1.39E-18 | -0.45267 | 0.116 | 0.128 | 2.08E-14 |
| FBXO22    | 1.39E-18 | -0.22088 | 0.107 | 0.063 | 2.08E-14 |
| ZBTB44    | 1.42E-18 | 0.24505  | 0.13  | 0.022 | 2.12E-14 |
| SCAI      | 1.44E-18 | 0.18693  | 0.125 | 0.024 | 2.15E-14 |
| HIRIP3    | 1.46E-18 | 0.113881 | 0.146 | 0.044 | 2.18E-14 |
| NOLC1     | 1.53E-18 | 0.126866 | 0.135 | 0.036 | 2.28E-14 |
| KIN       | 1.53E-18 | 0.151813 | 0.122 | 0.027 | 2.28E-14 |
| JADE1     | 1.56E-18 | 0.246126 | 0.155 | 0.036 | 2.34E-14 |
| MTFR1     | 1.66E-18 | 0.227377 | 0.105 | 0.012 | 2.48E-14 |
| COG1      | 1.72E-18 | 0.130267 | 0.113 | 0.026 | 2.57E-14 |
| IER3IP1   | 1.78E-18 | -0.92057 | 0.016 | 0.132 | 2.66E-14 |
| MPI       | 1.80E-18 | -0.17139 | 0.096 | 0.048 | 2.70E-14 |
| UGCG      | 1.83E-18 | -0.15874 | 0.091 | 0.048 | 2.74E-14 |
| DOCK10    | 1.87E-18 | 0.320673 | 0.12  | 0.01  | 2.79E-14 |
| SETD2     | 1.88E-18 | 0.205335 | 0.125 | 0.022 | 2.81E-14 |
| RABGAP1   | 1.93E-18 | 0.169825 | 0.117 | 0.021 | 2.88E-14 |
| F13A1     | 2.00E-18 | -0.83785 | 0.01  | 0.094 | 2.98E-14 |
| RMI1      | 2.02E-18 | 0.103755 | 0.092 | 0.017 | 3.02E-14 |
| ANAPC2    | 2.06E-18 | 0.261978 | 0.134 | 0.021 | 3.07E-14 |
| PSMB10    | 2.10E-18 | -0.17272 | 0.118 | 0.075 | 3.13E-14 |
| ZCCHC8    | 2.11E-18 | 0.11851  | 0.101 | 0.019 | 3.15E-14 |
| PREX1     | 2.12E-18 | -0.33751 | 0.059 | 0.046 | 3.17E-14 |
| NIPSNAP3A | 2.13E-18 | -0.21797 | 0.079 | 0.044 | 3.18E-14 |
| PPP1R15B  | 2.14E-18 | 0.184204 | 0.124 | 0.024 | 3.19E-14 |
| SEMA6B    | 2.16E-18 | 0.233909 | 0.104 | 0.009 | 3.23E-14 |
| ZNRF1     | 2.17E-18 | 0.182585 | 0.091 | 0.009 | 3.25E-14 |
| C1GALT1   | 2.18E-18 | 0.238958 | 0.135 | 0.022 | 3.26E-14 |
| FEM1C     | 2.19E-18 | -0.15694 | 0.095 | 0.05  | 3.27E-14 |
| NXN       | 2.20E-18 | 0.316133 | 0.1   | 0.002 | 3.28E-14 |
| ACHE      | 2.21E-18 | 0.202204 | 0.129 | 0.024 | 3.30E-14 |
| HIST1H2AC | 2.22E-18 | -0.20486 | 0.137 | 0.082 | 3.31E-14 |
| METTL13   | 2.26E-18 | 0.12265  | 0.118 | 0.027 | 3.38E-14 |

|           |          |          |       |       |          |
|-----------|----------|----------|-------|-------|----------|
| POLR1A    | 2.28E-18 | 0.168171 | 0.1   | 0.012 | 3.41E-14 |
| DID01     | 2.31E-18 | 0.310503 | 0.138 | 0.017 | 3.45E-14 |
| ALOX5AP   | 2.32E-18 | -0.19754 | 0.103 | 0.067 | 3.47E-14 |
| TIGD1     | 2.51E-18 | 0.19637  | 0.111 | 0.015 | 3.75E-14 |
| PPP3R1    | 2.52E-18 | 0.108212 | 0.1   | 0.017 | 3.76E-14 |
| RAB2B     | 2.55E-18 | 0.195696 | 0.108 | 0.014 | 3.81E-14 |
| SREBF2    | 2.65E-18 | 0.148867 | 0.121 | 0.027 | 3.96E-14 |
| CXCL16    | 2.82E-18 | -0.31171 | 0.088 | 0.062 | 4.22E-14 |
| CHGA      | 2.83E-18 | 0.334794 | 0.099 | 0.002 | 4.23E-14 |
| WNT5A     | 2.83E-18 | 0.225263 | 0.086 | 0.002 | 4.23E-14 |
| ARHGAP33  | 2.93E-18 | 0.25267  | 0.114 | 0.012 | 4.37E-14 |
| FAM208A   | 2.93E-18 | 0.200068 | 0.112 | 0.017 | 4.38E-14 |
| BTN3A2    | 2.93E-18 | -0.62304 | 0.048 | 0.099 | 4.38E-14 |
| POLR3A    | 2.99E-18 | 0.140716 | 0.103 | 0.014 | 4.47E-14 |
| SLC5A6    | 3.11E-18 | 0.104476 | 0.117 | 0.029 | 4.64E-14 |
| ASXL3     | 3.13E-18 | 0.305464 | 0.086 | 0     | 4.67E-14 |
| PDP1      | 3.15E-18 | 0.142836 | 0.111 | 0.024 | 4.70E-14 |
| AP3M2     | 3.18E-18 | 0.223246 | 0.108 | 0.01  | 4.75E-14 |
| TMEM196   | 3.18E-18 | 0.254677 | 0.1   | 0.003 | 4.75E-14 |
| RDH5      | 3.19E-18 | -0.25079 | 0.09  | 0.062 | 4.77E-14 |
| AGRN      | 3.35E-18 | 0.112397 | 0.111 | 0.026 | 5.00E-14 |
| COQ2      | 3.36E-18 | 0.162818 | 0.098 | 0.012 | 5.03E-14 |
| WDYHV1    | 3.46E-18 | -0.13048 | 0.091 | 0.041 | 5.17E-14 |
| FXN       | 3.46E-18 | 0.175225 | 0.103 | 0.014 | 5.18E-14 |
| CACNB4    | 3.51E-18 | 0.158604 | 0.105 | 0.015 | 5.25E-14 |
| C16orf58  | 3.55E-18 | 0.169589 | 0.122 | 0.024 | 5.31E-14 |
| DNAJC3    | 3.56E-18 | -0.21469 | 0.122 | 0.072 | 5.32E-14 |
| ZNF513    | 3.57E-18 | 0.161127 | 0.112 | 0.019 | 5.33E-14 |
| C17orf49  | 3.59E-18 | -0.13017 | 0.107 | 0.058 | 5.36E-14 |
| LRRC23    | 3.59E-18 | 0.117347 | 0.105 | 0.021 | 5.36E-14 |
| TPP1      | 3.59E-18 | -0.23572 | 0.108 | 0.075 | 5.37E-14 |
| CDH24     | 3.67E-18 | 0.265895 | 0.088 | 0.002 | 5.49E-14 |
| EPHB6     | 3.70E-18 | 0.227229 | 0.113 | 0.017 | 5.53E-14 |
| PTPRF     | 3.75E-18 | -0.17292 | 0.103 | 0.063 | 5.61E-14 |
| NOVA1-AS1 | 3.80E-18 | 0.204082 | 0.099 | 0.01  | 5.68E-14 |
| MAPK3     | 4.04E-18 | -0.10898 | 0.113 | 0.056 | 6.03E-14 |
| CELF4     | 4.10E-18 | 0.207347 | 0.108 | 0.012 | 6.13E-14 |
| TMEM176B  | 4.11E-18 | -0.57709 | 0.068 | 0.101 | 6.14E-14 |
| JMY       | 4.14E-18 | 0.212698 | 0.114 | 0.015 | 6.19E-14 |
| SETD9     | 4.15E-18 | -0.1297  | 0.101 | 0.051 | 6.21E-14 |
| ST3GAL2   | 4.20E-18 | 0.151793 | 0.117 | 0.024 | 6.27E-14 |
| MLH3      | 4.25E-18 | 0.129853 | 0.129 | 0.032 | 6.36E-14 |
| LINC-PINT | 4.29E-18 | 0.142736 | 0.156 | 0.051 | 6.42E-14 |
| IPO13     | 4.38E-18 | 0.1576   | 0.107 | 0.019 | 6.54E-14 |
| ZNF688    | 4.41E-18 | 0.184629 | 0.134 | 0.031 | 6.59E-14 |
| CAV2      | 4.43E-18 | 0.21184  | 0.113 | 0.015 | 6.62E-14 |
| CDC25B    | 4.45E-18 | -0.27366 | 0.098 | 0.074 | 6.65E-14 |
| DNASE1    | 4.54E-18 | 0.1666   | 0.125 | 0.026 | 6.79E-14 |
| UPP1      | 4.60E-18 | -0.5156  | 0.061 | 0.063 | 6.88E-14 |
| MAP2K5    | 4.67E-18 | 0.187021 | 0.108 | 0.015 | 6.97E-14 |
| GNG11     | 4.73E-18 | -0.26334 | 0.081 | 0.043 | 7.07E-14 |

|           |          |          |       |       |          |
|-----------|----------|----------|-------|-------|----------|
| ZFP1      | 4.87E-18 | 0.307527 | 0.111 | 0.007 | 7.28E-14 |
| CCNE2     | 4.95E-18 | 0.334673 | 0.122 | 0.012 | 7.40E-14 |
| ZNF576    | 5.00E-18 | -0.34281 | 0.095 | 0.08  | 7.47E-14 |
| SPR       | 5.05E-18 | 0.173058 | 0.094 | 0.009 | 7.55E-14 |
| PEX11B    | 5.09E-18 | -0.15592 | 0.096 | 0.046 | 7.60E-14 |
| DHX40     | 5.13E-18 | 0.223401 | 0.126 | 0.021 | 7.66E-14 |
| TRIP4     | 5.14E-18 | 0.110519 | 0.111 | 0.027 | 7.68E-14 |
| SNX10     | 5.16E-18 | 0.134522 | 0.105 | 0.019 | 7.71E-14 |
| MAK16     | 5.18E-18 | 0.135755 | 0.098 | 0.017 | 7.74E-14 |
| KDM3B     | 5.24E-18 | 0.141807 | 0.116 | 0.024 | 7.84E-14 |
| HES1      | 5.39E-18 | -0.62289 | 0.061 | 0.104 | 8.05E-14 |
| CDK13     | 5.42E-18 | 0.138737 | 0.111 | 0.026 | 8.09E-14 |
| HSPA6     | 5.45E-18 | -0.36065 | 0.087 | 0.056 | 8.14E-14 |
| ASAH2B    | 5.76E-18 | 0.240298 | 0.085 | 0     | 8.61E-14 |
| SLC30A3   | 5.76E-18 | 0.225261 | 0.085 | 0     | 8.61E-14 |
| SYBU      | 5.88E-18 | 0.266469 | 0.138 | 0.024 | 8.78E-14 |
| NEURL1B   | 5.95E-18 | 0.238415 | 0.09  | 0.002 | 8.88E-14 |
| KLHL18    | 5.95E-18 | 0.103071 | 0.109 | 0.026 | 8.89E-14 |
| UBE3C     | 5.96E-18 | 0.196258 | 0.124 | 0.022 | 8.91E-14 |
| ZNF674-AS | 6.21E-18 | 0.103394 | 0.094 | 0.019 | 9.27E-14 |
| BANP      | 6.23E-18 | 0.281916 | 0.104 | 0.005 | 9.31E-14 |
| SMAD4     | 6.44E-18 | 0.146762 | 0.121 | 0.029 | 9.62E-14 |
| PHTF2     | 6.45E-18 | 0.168921 | 0.091 | 0.009 | 9.63E-14 |
| KCNJ10    | 6.47E-18 | 0.228874 | 0.114 | 0.014 | 9.67E-14 |
| ACO1      | 6.60E-18 | 0.175136 | 0.114 | 0.019 | 9.86E-14 |
| C12orf29  | 6.70E-18 | -0.10734 | 0.113 | 0.053 | 1.00E-13 |
| ARAF      | 6.82E-18 | -0.15295 | 0.12  | 0.07  | 1.02E-13 |
| KAT2B     | 6.84E-18 | 0.106314 | 0.094 | 0.015 | 1.02E-13 |
| ZNF71     | 7.29E-18 | 0.140401 | 0.101 | 0.017 | 1.09E-13 |
| GAL3ST3   | 7.35E-18 | 0.248691 | 0.096 | 0.005 | 1.10E-13 |
| PCDH19    | 7.44E-18 | 0.213124 | 0.096 | 0.009 | 1.11E-13 |
| CACNA2D1  | 7.87E-18 | 0.287301 | 0.098 | 0.003 | 1.18E-13 |
| NCOA6     | 7.89E-18 | 0.141173 | 0.116 | 0.026 | 1.18E-13 |
| SNHG10    | 7.94E-18 | 0.150978 | 0.125 | 0.029 | 1.19E-13 |
| AHI1      | 8.10E-18 | 0.136295 | 0.159 | 0.055 | 1.21E-13 |
| DIS3L     | 8.19E-18 | 0.107552 | 0.086 | 0.014 | 1.22E-13 |
| N4BP2     | 8.60E-18 | 0.144368 | 0.112 | 0.022 | 1.29E-13 |
| C20orf96  | 8.63E-18 | 0.11349  | 0.117 | 0.029 | 1.29E-13 |
| USF1      | 8.70E-18 | 0.299678 | 0.116 | 0.014 | 1.30E-13 |
| C14orf142 | 8.74E-18 | -0.21786 | 0.082 | 0.053 | 1.31E-13 |
| CREM      | 9.45E-18 | -0.17879 | 0.116 | 0.068 | 1.41E-13 |
| C1orf53   | 9.58E-18 | -0.12485 | 0.069 | 0.032 | 1.43E-13 |
| ZHX3      | 1.00E-17 | -0.13292 | 0.116 | 0.062 | 1.50E-13 |
| PELO      | 1.01E-17 | -0.14256 | 0.085 | 0.032 | 1.51E-13 |
| MMAB      | 1.10E-17 | -0.27248 | 0.101 | 0.077 | 1.64E-13 |
| LPAR6     | 1.10E-17 | -0.13929 | 0.087 | 0.046 | 1.65E-13 |
| CLEC2B    | 1.11E-17 | -0.18687 | 0.079 | 0.038 | 1.66E-13 |
| BEX5      | 1.13E-17 | -0.43617 | 0.082 | 0.094 | 1.69E-13 |
| SCRN3     | 1.19E-17 | 0.138232 | 0.13  | 0.032 | 1.77E-13 |
| KDM5C     | 1.23E-17 | 0.151395 | 0.117 | 0.024 | 1.83E-13 |
| PTPRK     | 1.25E-17 | 0.147087 | 0.117 | 0.026 | 1.87E-13 |

|           |          |          |       |       |          |
|-----------|----------|----------|-------|-------|----------|
| TAF2      | 1.25E-17 | 0.179188 | 0.113 | 0.022 | 1.87E-13 |
| ZNF322    | 1.27E-17 | 0.137915 | 0.109 | 0.021 | 1.90E-13 |
| NSMF      | 1.29E-17 | 0.15816  | 0.122 | 0.027 | 1.93E-13 |
| RP11-166C | 1.32E-17 | 0.193929 | 0.104 | 0.012 | 1.97E-13 |
| CXCL14    | 1.33E-17 | -0.80672 | 0.018 | 0.113 | 1.99E-13 |
| DNAJC14   | 1.39E-17 | 0.141142 | 0.109 | 0.021 | 2.08E-13 |
| IFI27     | 1.40E-17 | -0.8868  | 0.022 | 0.111 | 2.09E-13 |
| GUCD1     | 1.41E-17 | 0.254279 | 0.12  | 0.015 | 2.11E-13 |
| MLLT6     | 1.55E-17 | 0.133401 | 0.125 | 0.032 | 2.31E-13 |
| ANKRD13B  | 1.58E-17 | 0.282319 | 0.103 | 0.005 | 2.37E-13 |
| SLC11A1   | 1.63E-17 | -0.12166 | 0.078 | 0.043 | 2.44E-13 |
| KIRREL3   | 1.65E-17 | 0.261309 | 0.104 | 0.007 | 2.46E-13 |
| NT5E      | 1.69E-17 | 0.125331 | 0.094 | 0.014 | 2.53E-13 |
| POLR3E    | 1.69E-17 | 0.105781 | 0.104 | 0.026 | 2.53E-13 |
| TEN1      | 1.71E-17 | 0.185495 | 0.094 | 0.01  | 2.56E-13 |
| C2orf49   | 1.75E-17 | -0.14813 | 0.09  | 0.043 | 2.61E-13 |
| RASD1     | 1.78E-17 | -0.2131  | 0.161 | 0.121 | 2.66E-13 |
| IFT81     | 1.80E-17 | 0.136579 | 0.131 | 0.036 | 2.69E-13 |
| SCMH1     | 1.91E-17 | 0.140359 | 0.099 | 0.015 | 2.85E-13 |
| GSX2      | 1.95E-17 | 0.287904 | 0.082 | 0     | 2.92E-13 |
| LNX1-AS1  | 1.95E-17 | 0.287536 | 0.082 | 0     | 2.92E-13 |
| TAPT1-AS1 | 2.01E-17 | 0.335661 | 0.101 | 0.003 | 3.01E-13 |
| BCAT2     | 2.02E-17 | -0.39755 | 0.09  | 0.084 | 3.01E-13 |
| FAM219A   | 2.05E-17 | 0.109544 | 0.094 | 0.017 | 3.06E-13 |
| OPCML     | 2.12E-17 | 0.21173  | 0.091 | 0.007 | 3.16E-13 |
| SENP7     | 2.12E-17 | 0.272908 | 0.13  | 0.019 | 3.17E-13 |
| NEDD1     | 2.17E-17 | 0.180435 | 0.096 | 0.01  | 3.24E-13 |
| MATN2     | 2.17E-17 | -0.11016 | 0.095 | 0.043 | 3.24E-13 |
| CENPQ     | 2.19E-17 | 0.118756 | 0.099 | 0.017 | 3.28E-13 |
| ASTN1     | 2.20E-17 | 0.118287 | 0.114 | 0.027 | 3.29E-13 |
| LEMD2     | 2.25E-17 | 0.155666 | 0.121 | 0.026 | 3.37E-13 |
| CLCN7     | 2.27E-17 | 0.269893 | 0.114 | 0.012 | 3.40E-13 |
| ZNF174    | 2.33E-17 | 0.146272 | 0.095 | 0.014 | 3.49E-13 |
| ZBTB2     | 2.35E-17 | 0.247014 | 0.125 | 0.021 | 3.51E-13 |
| TGFBR1    | 2.35E-17 | 0.283892 | 0.118 | 0.012 | 3.51E-13 |
| PDXK      | 2.35E-17 | -0.2167  | 0.109 | 0.065 | 3.51E-13 |
| GBP2      | 2.37E-17 | -0.76471 | 0.016 | 0.094 | 3.54E-13 |
| MON1B     | 2.48E-17 | 0.116934 | 0.107 | 0.022 | 3.70E-13 |
| STAG1     | 2.49E-17 | 0.177204 | 0.129 | 0.029 | 3.72E-13 |
| SNX24     | 2.49E-17 | -0.25118 | 0.068 | 0.044 | 3.72E-13 |
| SLC8A3    | 2.50E-17 | 0.281317 | 0.086 | 0.002 | 3.73E-13 |
| CORO2B    | 2.50E-17 | 0.122833 | 0.101 | 0.019 | 3.74E-13 |
| ZNF136    | 2.54E-17 | -0.20612 | 0.092 | 0.048 | 3.80E-13 |
| ALAD      | 2.58E-17 | 0.147141 | 0.099 | 0.014 | 3.85E-13 |
| GCLC      | 2.63E-17 | 0.133047 | 0.092 | 0.015 | 3.92E-13 |
| CTD-2017C | 2.65E-17 | 0.197176 | 0.094 | 0.009 | 3.96E-13 |
| MORC3     | 2.72E-17 | 0.210853 | 0.105 | 0.014 | 4.07E-13 |
| TUBGCP3   | 2.73E-17 | 0.235305 | 0.125 | 0.021 | 4.08E-13 |
| NPHP3     | 2.78E-17 | 0.133818 | 0.133 | 0.038 | 4.15E-13 |
| ST7L      | 2.79E-17 | -0.11277 | 0.087 | 0.039 | 4.18E-13 |
| UHL5      | 2.82E-17 | 0.182184 | 0.129 | 0.029 | 4.22E-13 |

|           |          |          |       |       |          |
|-----------|----------|----------|-------|-------|----------|
| KRI1      | 2.86E-17 | 0.152237 | 0.105 | 0.021 | 4.27E-13 |
| HERC1     | 2.87E-17 | 0.203296 | 0.103 | 0.012 | 4.29E-13 |
| CCDC159   | 2.89E-17 | -0.2245  | 0.105 | 0.075 | 4.32E-13 |
| GFM2      | 2.91E-17 | 0.125691 | 0.108 | 0.022 | 4.35E-13 |
| FBX09     | 2.91E-17 | 0.140156 | 0.137 | 0.038 | 4.35E-13 |
| SETBP1    | 2.93E-17 | 0.108527 | 0.1   | 0.022 | 4.37E-13 |
| L3MBTL2   | 2.96E-17 | 0.195783 | 0.107 | 0.015 | 4.42E-13 |
| L1CAM     | 3.00E-17 | 0.310936 | 0.1   | 0.007 | 4.48E-13 |
| TYRO3     | 3.05E-17 | 0.217734 | 0.124 | 0.022 | 4.55E-13 |
| FAM155A   | 3.13E-17 | 0.240241 | 0.094 | 0.003 | 4.68E-13 |
| ZNF200    | 3.20E-17 | 0.177156 | 0.094 | 0.01  | 4.78E-13 |
| LEAP2     | 3.34E-17 | 0.148872 | 0.109 | 0.021 | 4.99E-13 |
| BTBD2     | 3.43E-17 | 0.208023 | 0.107 | 0.015 | 5.12E-13 |
| LRCH4     | 3.45E-17 | 0.137366 | 0.144 | 0.043 | 5.16E-13 |
| MIB1      | 3.64E-17 | 0.117176 | 0.099 | 0.017 | 5.43E-13 |
| PLOD2     | 3.65E-17 | -0.17301 | 0.098 | 0.06  | 5.45E-13 |
| HELLS     | 3.74E-17 | 0.21511  | 0.108 | 0.015 | 5.59E-13 |
| RP11-108M | 3.86E-17 | 0.180288 | 0.096 | 0.01  | 5.76E-13 |
| DNAJB5    | 3.97E-17 | 0.165819 | 0.095 | 0.012 | 5.94E-13 |
| SCNN1A    | 3.97E-17 | 0.432661 | 0.152 | 0.029 | 5.94E-13 |
| ZNF781    | 3.98E-17 | 0.24158  | 0.107 | 0.012 | 5.94E-13 |
| OAS1      | 4.03E-17 | -0.78299 | 0.025 | 0.101 | 6.02E-13 |
| CCDC88C   | 4.28E-17 | 0.191383 | 0.086 | 0.005 | 6.39E-13 |
| CALCOCO2  | 4.54E-17 | -0.14605 | 0.116 | 0.063 | 6.78E-13 |
| TNFRSF1A  | 4.55E-17 | -0.29455 | 0.09  | 0.075 | 6.80E-13 |
| RAB24     | 4.76E-17 | 0.17247  | 0.088 | 0.007 | 7.12E-13 |
| C5orf45   | 4.83E-17 | -0.20047 | 0.122 | 0.074 | 7.22E-13 |
| UBR5      | 4.83E-17 | 0.125665 | 0.121 | 0.032 | 7.22E-13 |
| RBM12B    | 4.85E-17 | 0.252377 | 0.109 | 0.01  | 7.25E-13 |
| UBR3      | 4.88E-17 | 0.204547 | 0.108 | 0.017 | 7.29E-13 |
| ATXN1L    | 5.18E-17 | 0.148021 | 0.091 | 0.012 | 7.74E-13 |
| AGO2      | 5.22E-17 | 0.197321 | 0.098 | 0.01  | 7.81E-13 |
| SCPEP1    | 5.25E-17 | -0.37131 | 0.085 | 0.074 | 7.85E-13 |
| FAM76B    | 5.35E-17 | 0.21753  | 0.117 | 0.019 | 7.99E-13 |
| ZHX2      | 5.39E-17 | 0.208798 | 0.116 | 0.019 | 8.05E-13 |
| SH3BGR    | 5.51E-17 | -0.34243 | 0.086 | 0.075 | 8.23E-13 |
| POLB      | 5.55E-17 | 0.185886 | 0.112 | 0.021 | 8.30E-13 |
| FOXRED2   | 5.59E-17 | 0.197287 | 0.1   | 0.012 | 8.35E-13 |
| SHKBP1    | 5.75E-17 | 0.186532 | 0.113 | 0.021 | 8.60E-13 |
| SLC4A7    | 5.98E-17 | 0.118411 | 0.134 | 0.039 | 8.93E-13 |
| COL11A1   | 6.00E-17 | 0.122931 | 0.078 | 0.009 | 8.97E-13 |
| LINC00526 | 6.14E-17 | 0.201486 | 0.109 | 0.017 | 9.18E-13 |
| NCBP1     | 6.22E-17 | 0.166489 | 0.087 | 0.007 | 9.30E-13 |
| NTN4      | 6.22E-17 | 0.26398  | 0.105 | 0.007 | 9.30E-13 |
| RBBP5     | 6.36E-17 | 0.137049 | 0.133 | 0.038 | 9.50E-13 |
| CENPK     | 6.55E-17 | 0.216338 | 0.096 | 0.01  | 9.79E-13 |
| CRTAC1    | 6.59E-17 | 0.279874 | 0.079 | 0     | 9.86E-13 |
| WDR92     | 6.61E-17 | 0.161572 | 0.113 | 0.024 | 9.88E-13 |
| ASB16-AS1 | 6.62E-17 | 0.184854 | 0.094 | 0.01  | 9.90E-13 |
| DENND1B   | 6.68E-17 | 0.214484 | 0.098 | 0.007 | 9.98E-13 |
| STRIP2    | 6.75E-17 | 0.187711 | 0.075 | 0.002 | 1.01E-12 |

|           |          |          |       |       |          |
|-----------|----------|----------|-------|-------|----------|
| TRIM11    | 6.77E-17 | 0.202892 | 0.109 | 0.015 | 1.01E-12 |
| DAPL1     | 6.77E-17 | 0.247674 | 0.12  | 0.024 | 1.01E-12 |
| TTC27     | 7.04E-17 | 0.129129 | 0.103 | 0.021 | 1.05E-12 |
| FASTKD5   | 7.05E-17 | 0.112995 | 0.122 | 0.034 | 1.05E-12 |
| MFSD3     | 7.06E-17 | 0.310897 | 0.118 | 0.014 | 1.05E-12 |
| CARF      | 7.14E-17 | 0.105741 | 0.111 | 0.027 | 1.07E-12 |
| THAP2     | 7.24E-17 | 0.176757 | 0.116 | 0.022 | 1.08E-12 |
| SMO       | 7.66E-17 | 0.220816 | 0.094 | 0.007 | 1.14E-12 |
| UBR4      | 7.73E-17 | 0.161789 | 0.134 | 0.038 | 1.15E-12 |
| MFN2      | 7.90E-17 | 0.108179 | 0.101 | 0.022 | 1.18E-12 |
| SERAC1    | 8.14E-17 | -0.25327 | 0.065 | 0.027 | 1.22E-12 |
| B4GALT2   | 8.34E-17 | 0.11276  | 0.098 | 0.021 | 1.25E-12 |
| PLEKHH3   | 8.49E-17 | 0.112879 | 0.1   | 0.019 | 1.27E-12 |
| DTD2      | 8.91E-17 | 0.226845 | 0.114 | 0.019 | 1.33E-12 |
| FARP2     | 9.29E-17 | 0.115053 | 0.098 | 0.017 | 1.39E-12 |
| ANKRD44   | 9.44E-17 | 0.236671 | 0.113 | 0.017 | 1.41E-12 |
| ASXL2     | 9.51E-17 | 0.230672 | 0.109 | 0.014 | 1.42E-12 |
| SLC25A44  | 9.58E-17 | 0.179914 | 0.091 | 0.009 | 1.43E-12 |
| TBC1D16   | 9.69E-17 | 0.187659 | 0.108 | 0.017 | 1.45E-12 |
| CCDC34    | 1.01E-16 | -0.15918 | 0.096 | 0.051 | 1.51E-12 |
| TMEM185B  | 1.01E-16 | 0.149397 | 0.091 | 0.012 | 1.51E-12 |
| C9orf85   | 1.02E-16 | 0.149885 | 0.09  | 0.012 | 1.52E-12 |
| LPAR4     | 1.02E-16 | 0.216202 | 0.085 | 0.003 | 1.53E-12 |
| GULP1     | 1.03E-16 | 0.154445 | 0.079 | 0.005 | 1.54E-12 |
| SACS      | 1.04E-16 | 0.259482 | 0.12  | 0.017 | 1.56E-12 |
| DCBLD1    | 1.09E-16 | 0.148446 | 0.113 | 0.022 | 1.63E-12 |
| LLGL1     | 1.11E-16 | 0.144816 | 0.1   | 0.017 | 1.66E-12 |
| ICK       | 1.11E-16 | 0.153604 | 0.096 | 0.015 | 1.66E-12 |
| CTD-2090I | 1.14E-16 | -0.70996 | 0.016 | 0.089 | 1.70E-12 |
| GSTM4     | 1.16E-16 | -0.28183 | 0.081 | 0.068 | 1.73E-12 |
| TBCD      | 1.16E-16 | 0.14811  | 0.101 | 0.017 | 1.74E-12 |
| MMP14     | 1.18E-16 | -0.31447 | 0.066 | 0.056 | 1.77E-12 |
| COG2      | 1.19E-16 | 0.128885 | 0.116 | 0.029 | 1.78E-12 |
| TBX5      | 1.21E-16 | 0.211067 | 0.078 | 0     | 1.81E-12 |
| STX2      | 1.21E-16 | 0.179832 | 0.103 | 0.015 | 1.81E-12 |
| PTPN11    | 1.21E-16 | 0.174793 | 0.131 | 0.031 | 1.82E-12 |
| MARK4     | 1.25E-16 | 0.209414 | 0.113 | 0.017 | 1.87E-12 |
| ZNF454    | 1.26E-16 | 0.203469 | 0.081 | 0.003 | 1.88E-12 |
| ORAOV1    | 1.26E-16 | 0.105637 | 0.099 | 0.021 | 1.88E-12 |
| PYGL      | 1.27E-16 | -0.4737  | 0.053 | 0.072 | 1.89E-12 |
| TXNRD2    | 1.29E-16 | 0.250338 | 0.111 | 0.012 | 1.93E-12 |
| NBAS      | 1.31E-16 | 0.157783 | 0.096 | 0.015 | 1.96E-12 |
| GPRASP2   | 1.32E-16 | 0.239925 | 0.105 | 0.01  | 1.97E-12 |
| BBOX1     | 1.33E-16 | -0.75894 | 0.027 | 0.115 | 1.98E-12 |
| ZNF184    | 1.42E-16 | 0.199069 | 0.085 | 0.005 | 2.13E-12 |
| HIST1H4J  | 1.48E-16 | 0.144347 | 0.085 | 0.007 | 2.21E-12 |
| GSG1L     | 1.49E-16 | -0.10586 | 0.1   | 0.05  | 2.23E-12 |
| RRP8      | 1.52E-16 | -0.12769 | 0.078 | 0.038 | 2.27E-12 |
| PGAM2     | 1.59E-16 | -0.11594 | 0.066 | 0.027 | 2.38E-12 |
| HAUS2     | 1.60E-16 | 0.133554 | 0.081 | 0.01  | 2.40E-12 |
| ACTL6B    | 1.62E-16 | 0.121074 | 0.108 | 0.031 | 2.43E-12 |

|          |          |          |       |       |          |
|----------|----------|----------|-------|-------|----------|
| SERPINE1 | 1.63E-16 | -0.80967 | 0.008 | 0.091 | 2.43E-12 |
| FBXL18   | 1.63E-16 | 0.180907 | 0.094 | 0.012 | 2.44E-12 |
| AP1G1    | 1.65E-16 | 0.13764  | 0.109 | 0.021 | 2.46E-12 |
| ATG10    | 1.66E-16 | 0.12443  | 0.109 | 0.027 | 2.48E-12 |
| MESP1    | 1.67E-16 | 0.255526 | 0.127 | 0.021 | 2.49E-12 |
| CASP1    | 1.72E-16 | -0.68851 | 0.009 | 0.08  | 2.57E-12 |
| RGP1     | 1.77E-16 | 0.164079 | 0.117 | 0.024 | 2.65E-12 |
| SMYD5    | 1.78E-16 | 0.190825 | 0.104 | 0.014 | 2.66E-12 |
| PVRL1    | 1.80E-16 | 0.215835 | 0.107 | 0.014 | 2.69E-12 |
| CARD16   | 1.82E-16 | -0.80205 | 0.023 | 0.116 | 2.73E-12 |
| NRBF2    | 1.87E-16 | -0.30519 | 0.1   | 0.074 | 2.80E-12 |
| BOC      | 1.91E-16 | 0.244666 | 0.114 | 0.019 | 2.85E-12 |
| RNF182   | 1.91E-16 | 0.231636 | 0.09  | 0.003 | 2.86E-12 |
| TACC2    | 1.93E-16 | 0.169729 | 0.101 | 0.015 | 2.88E-12 |
| PCMTD1   | 1.95E-16 | 0.200061 | 0.138 | 0.034 | 2.91E-12 |
| SERGEF   | 1.99E-16 | -0.14512 | 0.09  | 0.044 | 2.97E-12 |
| PWP2     | 1.99E-16 | 0.163092 | 0.12  | 0.027 | 2.97E-12 |
| TMTC4    | 2.00E-16 | 0.123479 | 0.109 | 0.026 | 2.98E-12 |
| SBF1     | 2.02E-16 | 0.259203 | 0.09  | 0.003 | 3.02E-12 |
| SMIM3    | 2.03E-16 | -0.8936  | 0.009 | 0.106 | 3.04E-12 |
| TGFB1I1  | 2.05E-16 | -0.15259 | 0.086 | 0.046 | 3.06E-12 |
| TMEM184C | 2.06E-16 | 0.110821 | 0.101 | 0.022 | 3.07E-12 |
| PRDM8    | 2.06E-16 | 0.252451 | 0.088 | 0.002 | 3.08E-12 |
| ITGB3BP  | 2.08E-16 | -0.2119  | 0.094 | 0.058 | 3.11E-12 |
| MFS12    | 2.18E-16 | 0.101885 | 0.096 | 0.021 | 3.25E-12 |
| DTNB     | 2.22E-16 | 0.225531 | 0.077 | 0     | 3.32E-12 |
| NPTXR    | 2.26E-16 | 0.151842 | 0.105 | 0.021 | 3.38E-12 |
| RANGAP1  | 2.27E-16 | 0.125897 | 0.087 | 0.014 | 3.40E-12 |
| TRAK1    | 2.37E-16 | 0.155492 | 0.109 | 0.021 | 3.54E-12 |
| HDAC4    | 2.40E-16 | 0.286929 | 0.101 | 0.007 | 3.59E-12 |
| PRKCI    | 2.44E-16 | 0.11391  | 0.094 | 0.015 | 3.65E-12 |
| TFAP4    | 2.46E-16 | 0.182713 | 0.1   | 0.012 | 3.67E-12 |
| GCLM     | 2.47E-16 | -0.21661 | 0.081 | 0.055 | 3.68E-12 |
| AADAT    | 2.54E-16 | 0.248359 | 0.086 | 0.002 | 3.79E-12 |
| SLC12A5  | 2.56E-16 | 0.209222 | 0.094 | 0.01  | 3.82E-12 |
| UHRF2    | 2.58E-16 | 0.156169 | 0.088 | 0.01  | 3.85E-12 |
| FRA10AC1 | 2.59E-16 | 0.112296 | 0.112 | 0.027 | 3.88E-12 |
| SORT1    | 2.66E-16 | -0.17128 | 0.09  | 0.048 | 3.97E-12 |
| MEGF11   | 2.67E-16 | 0.216713 | 0.099 | 0.01  | 3.99E-12 |
| ZNF620   | 2.69E-16 | 0.159666 | 0.095 | 0.014 | 4.03E-12 |
| PEAK1    | 2.70E-16 | -0.12072 | 0.066 | 0.026 | 4.03E-12 |
| HRASLS   | 2.70E-16 | 0.295014 | 0.099 | 0.009 | 4.04E-12 |
| EPC2     | 2.83E-16 | 0.193078 | 0.112 | 0.021 | 4.23E-12 |
| MFS5     | 2.83E-16 | 0.194763 | 0.086 | 0.009 | 4.23E-12 |
| DLG2     | 2.88E-16 | 0.202787 | 0.096 | 0.009 | 4.31E-12 |
| FBRSL1   | 3.43E-16 | 0.259668 | 0.092 | 0.005 | 5.12E-12 |
| PISD     | 3.43E-16 | 0.155134 | 0.107 | 0.017 | 5.13E-12 |
| IFIT5    | 3.48E-16 | 0.129269 | 0.111 | 0.026 | 5.21E-12 |
| PUSL1    | 3.71E-16 | 0.215245 | 0.098 | 0.01  | 5.55E-12 |
| GFPT1    | 3.89E-16 | 0.233012 | 0.112 | 0.015 | 5.81E-12 |
| ANGEL1   | 3.90E-16 | 0.139411 | 0.092 | 0.015 | 5.83E-12 |

|           |          |          |       |       |          |
|-----------|----------|----------|-------|-------|----------|
| MTPAP     | 3.92E-16 | 0.157707 | 0.105 | 0.017 | 5.86E-12 |
| FZR1      | 4.00E-16 | 0.152666 | 0.125 | 0.031 | 5.98E-12 |
| ZNF236    | 4.01E-16 | 0.239247 | 0.109 | 0.015 | 5.99E-12 |
| ZNF746    | 4.02E-16 | 0.150894 | 0.1   | 0.017 | 6.01E-12 |
| TPM2      | 4.04E-16 | -0.31233 | 0.066 | 0.056 | 6.04E-12 |
| TMOD2     | 4.06E-16 | 0.117811 | 0.104 | 0.024 | 6.07E-12 |
| NFE2L3    | 4.08E-16 | 0.222462 | 0.075 | 0     | 6.10E-12 |
| ZNF134    | 4.12E-16 | 0.103755 | 0.101 | 0.022 | 6.15E-12 |
| ACOT9     | 4.31E-16 | -0.16291 | 0.086 | 0.048 | 6.44E-12 |
| TERF2     | 4.33E-16 | 0.105697 | 0.092 | 0.017 | 6.48E-12 |
| RP11-713F | 4.34E-16 | 0.17624  | 0.101 | 0.015 | 6.48E-12 |
| FAM222A   | 4.37E-16 | 0.252363 | 0.087 | 0.003 | 6.53E-12 |
| NEDD9     | 4.39E-16 | -0.29921 | 0.105 | 0.089 | 6.56E-12 |
| PITPNC1   | 4.43E-16 | 0.174433 | 0.104 | 0.019 | 6.62E-12 |
| ZNF532    | 4.43E-16 | 0.170161 | 0.1   | 0.014 | 6.62E-12 |
| ATG16L1   | 4.45E-16 | 0.114581 | 0.081 | 0.01  | 6.65E-12 |
| ONECUT2   | 4.49E-16 | 0.238191 | 0.09  | 0.005 | 6.71E-12 |
| QSER1     | 4.55E-16 | 0.16608  | 0.099 | 0.015 | 6.80E-12 |
| AGBL5     | 4.61E-16 | 0.226842 | 0.088 | 0.005 | 6.89E-12 |
| FBX033    | 4.87E-16 | 0.150411 | 0.088 | 0.01  | 7.28E-12 |
| GAB1      | 5.07E-16 | 0.111526 | 0.109 | 0.026 | 7.58E-12 |
| CDK8      | 5.24E-16 | 0.265325 | 0.098 | 0.007 | 7.83E-12 |
| LRP12     | 5.33E-16 | 0.154619 | 0.1   | 0.019 | 7.96E-12 |
| INHBB     | 5.39E-16 | 0.168413 | 0.113 | 0.022 | 8.05E-12 |
| TAF3      | 5.45E-16 | 0.176288 | 0.111 | 0.019 | 8.14E-12 |
| SLC27A5   | 5.49E-16 | -0.42696 | 0.088 | 0.092 | 8.20E-12 |
| CLASP1    | 5.52E-16 | 0.181071 | 0.139 | 0.038 | 8.25E-12 |
| MAPK8IP2  | 5.88E-16 | 0.188077 | 0.087 | 0.01  | 8.79E-12 |
| TMEM150A  | 5.90E-16 | -0.11997 | 0.09  | 0.046 | 8.81E-12 |
| PCOLCE    | 5.95E-16 | -0.16946 | 0.075 | 0.041 | 8.90E-12 |
| GPATCH3   | 6.06E-16 | 0.188868 | 0.088 | 0.007 | 9.06E-12 |
| BCL11B    | 6.09E-16 | 0.252776 | 0.092 | 0.007 | 9.10E-12 |
| DACT1     | 6.16E-16 | 0.291172 | 0.104 | 0.007 | 9.21E-12 |
| MAP1LC3B2 | 6.18E-16 | 0.115211 | 0.107 | 0.029 | 9.23E-12 |
| ERCC5     | 6.21E-16 | 0.204634 | 0.104 | 0.015 | 9.27E-12 |
| USP49     | 6.32E-16 | 0.204103 | 0.086 | 0.007 | 9.45E-12 |
| NDST1     | 7.01E-16 | 0.224019 | 0.094 | 0.005 | 1.05E-11 |
| WDR76     | 7.03E-16 | 0.228196 | 0.086 | 0.005 | 1.05E-11 |
| XAF1      | 7.33E-16 | -0.72687 | 0.018 | 0.097 | 1.10E-11 |
| UBE2T     | 7.40E-16 | 0.232604 | 0.088 | 0.007 | 1.11E-11 |
| TMEM42    | 7.44E-16 | -0.15175 | 0.096 | 0.053 | 1.11E-11 |
| ZNF331    | 7.47E-16 | -0.10606 | 0.104 | 0.05  | 1.12E-11 |
| DNAJA4    | 7.53E-16 | 0.25155  | 0.098 | 0.007 | 1.12E-11 |
| LRRC24    | 7.73E-16 | 0.179147 | 0.087 | 0.01  | 1.16E-11 |
| SOWAHC    | 7.89E-16 | 0.11388  | 0.098 | 0.021 | 1.18E-11 |
| MBNL2     | 8.20E-16 | 0.107772 | 0.09  | 0.017 | 1.23E-11 |
| METTL14   | 8.31E-16 | 0.131298 | 0.111 | 0.027 | 1.24E-11 |
| PIK3IP1   | 8.66E-16 | 0.180396 | 0.113 | 0.022 | 1.29E-11 |
| DGCR8     | 8.89E-16 | 0.137992 | 0.107 | 0.024 | 1.33E-11 |
| TIPARP    | 8.94E-16 | -0.14191 | 0.1   | 0.05  | 1.34E-11 |
| RCE1      | 8.97E-16 | 0.201266 | 0.12  | 0.024 | 1.34E-11 |



|           |          |          |       |       |          |
|-----------|----------|----------|-------|-------|----------|
| FAM118A   | 9.42E-16 | 0.178511 | 0.1   | 0.017 | 1.41E-11 |
| PAQR6     | 9.52E-16 | 0.122346 | 0.109 | 0.027 | 1.42E-11 |
| INTS8     | 9.88E-16 | 0.201023 | 0.105 | 0.017 | 1.48E-11 |
| NCKAP5    | 1.01E-15 | 0.224574 | 0.107 | 0.014 | 1.50E-11 |
| HEBP1     | 1.01E-15 | -0.22391 | 0.07  | 0.043 | 1.50E-11 |
| WDR25     | 1.05E-15 | -0.19521 | 0.062 | 0.034 | 1.57E-11 |
| SGPL1     | 1.07E-15 | 0.144667 | 0.1   | 0.019 | 1.61E-11 |
| ETS2      | 1.09E-15 | 0.114041 | 0.092 | 0.019 | 1.63E-11 |
| EMILIN3   | 1.11E-15 | 0.165133 | 0.099 | 0.019 | 1.67E-11 |
| ADAMTS10  | 1.17E-15 | 0.191099 | 0.082 | 0.005 | 1.75E-11 |
| MSH3      | 1.19E-15 | 0.176771 | 0.079 | 0.005 | 1.78E-11 |
| COL9A1    | 1.19E-15 | 0.160336 | 0.072 | 0.003 | 1.78E-11 |
| SETD6     | 1.22E-15 | 0.257487 | 0.127 | 0.022 | 1.83E-11 |
| B4GALNT4  | 1.24E-15 | 0.226975 | 0.085 | 0.005 | 1.85E-11 |
| GAD1      | 1.30E-15 | 0.135262 | 0.108 | 0.024 | 1.95E-11 |
| NPY       | 1.34E-15 | 0.367108 | 0.094 | 0.005 | 2.00E-11 |
| DCTN5     | 1.34E-15 | -0.1101  | 0.072 | 0.034 | 2.00E-11 |
| SLC4A4    | 1.38E-15 | -0.69544 | 0.021 | 0.101 | 2.06E-11 |
| C16orf52  | 1.40E-15 | 0.161102 | 0.098 | 0.017 | 2.09E-11 |
| TARSL2    | 1.42E-15 | 0.23398  | 0.13  | 0.026 | 2.12E-11 |
| RP11-127E | 1.46E-15 | 0.173691 | 0.091 | 0.012 | 2.18E-11 |
| VPS8      | 1.54E-15 | 0.164196 | 0.107 | 0.022 | 2.30E-11 |
| MFN1      | 1.56E-15 | 0.137349 | 0.099 | 0.017 | 2.33E-11 |
| ZNF423    | 1.58E-15 | 0.252856 | 0.086 | 0.003 | 2.36E-11 |
| PLOD1     | 1.58E-15 | -0.18441 | 0.087 | 0.06  | 2.36E-11 |
| SLC37A1   | 1.60E-15 | 0.191655 | 0.09  | 0.007 | 2.39E-11 |
| CDK9      | 1.60E-15 | 0.170079 | 0.114 | 0.024 | 2.40E-11 |
| TMEM2     | 1.60E-15 | 0.290003 | 0.107 | 0.01  | 2.40E-11 |
| KIAA2013  | 1.65E-15 | 0.187095 | 0.105 | 0.019 | 2.47E-11 |
| XPOT      | 1.66E-15 | -0.16352 | 0.101 | 0.063 | 2.48E-11 |
| ACTN1     | 1.67E-15 | -0.26852 | 0.096 | 0.074 | 2.49E-11 |
| NBPF10    | 1.67E-15 | 0.288106 | 0.124 | 0.017 | 2.50E-11 |
| SETD3     | 1.68E-15 | 0.116361 | 0.104 | 0.026 | 2.51E-11 |
| PDLIM4    | 1.69E-15 | -0.45332 | 0.043 | 0.068 | 2.52E-11 |
| RYBP      | 1.73E-15 | 0.134443 | 0.095 | 0.017 | 2.58E-11 |
| DSN1      | 1.76E-15 | 0.251095 | 0.094 | 0.007 | 2.64E-11 |
| MAPK8IP3  | 1.77E-15 | 0.142456 | 0.098 | 0.017 | 2.65E-11 |
| LRP5      | 1.78E-15 | 0.142088 | 0.085 | 0.01  | 2.67E-11 |
| ISG20     | 1.79E-15 | -0.68829 | 0.018 | 0.096 | 2.67E-11 |
| CPVL      | 1.85E-15 | -0.1098  | 0.087 | 0.046 | 2.77E-11 |
| ACACA     | 1.87E-15 | 0.175453 | 0.092 | 0.014 | 2.80E-11 |
| RIC8B     | 1.87E-15 | 0.110785 | 0.108 | 0.027 | 2.80E-11 |
| MON2      | 1.89E-15 | 0.175208 | 0.129 | 0.034 | 2.82E-11 |
| ZNF250    | 1.95E-15 | 0.120363 | 0.101 | 0.024 | 2.91E-11 |
| CHFR      | 1.95E-15 | -0.11751 | 0.092 | 0.053 | 2.92E-11 |
| THAP6     | 1.99E-15 | 0.145081 | 0.09  | 0.015 | 2.98E-11 |
| UTP14C    | 2.03E-15 | 0.145574 | 0.092 | 0.014 | 3.04E-11 |
| KIAA0196  | 2.06E-15 | 0.15336  | 0.113 | 0.026 | 3.08E-11 |
| DESI1     | 2.10E-15 | 0.138903 | 0.105 | 0.022 | 3.13E-11 |
| MPDZ      | 2.23E-15 | 0.213003 | 0.103 | 0.014 | 3.33E-11 |
| PPP2R3B   | 2.34E-15 | 0.133859 | 0.078 | 0.007 | 3.50E-11 |

|          |          |          |       |       |          |
|----------|----------|----------|-------|-------|----------|
| IGFBP3   | 2.37E-15 | -0.8421  | 0.016 | 0.082 | 3.54E-11 |
| ICA1L    | 2.39E-15 | 0.153306 | 0.134 | 0.041 | 3.58E-11 |
| CDC27    | 2.42E-15 | 0.18496  | 0.101 | 0.017 | 3.62E-11 |
| NR2C1    | 2.44E-15 | 0.148208 | 0.098 | 0.017 | 3.64E-11 |
| LRIG1    | 2.58E-15 | -0.12589 | 0.086 | 0.048 | 3.85E-11 |
| LPL      | 2.68E-15 | -0.58645 | 0.059 | 0.113 | 4.01E-11 |
| GTPBP8   | 2.74E-15 | -0.2241  | 0.074 | 0.044 | 4.09E-11 |
| TMEM179  | 2.79E-15 | 0.23665  | 0.083 | 0.002 | 4.17E-11 |
| FKBP11   | 2.79E-15 | -0.21591 | 0.079 | 0.048 | 4.17E-11 |
| SERPINH1 | 2.81E-15 | -0.40542 | 0.078 | 0.08  | 4.19E-11 |
| S100BPB  | 2.82E-15 | -0.11939 | 0.085 | 0.043 | 4.21E-11 |
| ALYREF   | 2.83E-15 | 0.224509 | 0.111 | 0.019 | 4.22E-11 |
| TNRC18   | 2.95E-15 | 0.19082  | 0.104 | 0.017 | 4.41E-11 |
| GATAD2A  | 3.03E-15 | 0.20114  | 0.101 | 0.015 | 4.53E-11 |
| PRDM4    | 3.10E-15 | 0.18996  | 0.098 | 0.012 | 4.63E-11 |
| SMCHD1   | 3.12E-15 | 0.124762 | 0.112 | 0.029 | 4.66E-11 |
| SFT2D3   | 3.17E-15 | 0.248304 | 0.086 | 0.003 | 4.73E-11 |
| TTC8     | 3.22E-15 | -0.18086 | 0.074 | 0.044 | 4.81E-11 |
| CNOT6L   | 3.27E-15 | 0.214782 | 0.104 | 0.015 | 4.89E-11 |
| PRR7     | 3.27E-15 | 0.190515 | 0.122 | 0.027 | 4.89E-11 |
| RAP2B    | 3.29E-15 | 0.196595 | 0.094 | 0.01  | 4.91E-11 |
| EPSTI1   | 3.33E-15 | -0.28166 | 0.082 | 0.056 | 4.98E-11 |
| SS18L1   | 3.33E-15 | 0.233799 | 0.092 | 0.007 | 4.98E-11 |
| SULT1C4  | 3.51E-15 | 0.134455 | 0.075 | 0.009 | 5.25E-11 |
| PPP2R5D  | 3.54E-15 | 0.243075 | 0.096 | 0.007 | 5.30E-11 |
| UST      | 3.58E-15 | 0.149508 | 0.072 | 0.005 | 5.35E-11 |
| RAPGEF2  | 3.58E-15 | 0.162448 | 0.074 | 0.005 | 5.35E-11 |
| WRN      | 3.66E-15 | 0.140583 | 0.073 | 0.007 | 5.46E-11 |
| KIAA0930 | 3.66E-15 | 0.147753 | 0.082 | 0.01  | 5.47E-11 |
| PIBF1    | 3.77E-15 | 0.293462 | 0.121 | 0.017 | 5.63E-11 |
| FAM171A1 | 3.78E-15 | 0.158918 | 0.087 | 0.012 | 5.65E-11 |
| PROSER1  | 3.78E-15 | 0.242209 | 0.098 | 0.009 | 5.65E-11 |
| STK32B   | 3.79E-15 | 0.318142 | 0.096 | 0.005 | 5.67E-11 |
| TRIM8    | 3.85E-15 | 0.247654 | 0.083 | 0.002 | 5.75E-11 |
| DOLK     | 3.90E-15 | -0.12703 | 0.086 | 0.048 | 5.83E-11 |
| LMNB2    | 3.94E-15 | 0.165585 | 0.091 | 0.012 | 5.89E-11 |
| SAV1     | 3.97E-15 | 0.124076 | 0.104 | 0.024 | 5.93E-11 |
| IL17D    | 3.97E-15 | 0.111154 | 0.075 | 0.01  | 5.94E-11 |
| ADNP2    | 3.99E-15 | 0.153773 | 0.086 | 0.01  | 5.96E-11 |
| WDR3     | 4.03E-15 | 0.261362 | 0.114 | 0.017 | 6.02E-11 |
| PHC1     | 4.07E-15 | 0.264937 | 0.112 | 0.014 | 6.08E-11 |
| PSMC3IP  | 4.08E-15 | 0.187251 | 0.086 | 0.009 | 6.09E-11 |
| HOTAIR   | 4.19E-15 | 0.176232 | 0.087 | 0.009 | 6.26E-11 |
| 1-Mar    | 4.21E-15 | 0.228236 | 0.094 | 0.009 | 6.29E-11 |
| CAPN7    | 4.21E-15 | 0.186678 | 0.112 | 0.022 | 6.30E-11 |
| FASTKD2  | 4.34E-15 | 0.135139 | 0.117 | 0.029 | 6.48E-11 |
| HPRT1    | 4.41E-15 | -0.2085  | 0.092 | 0.063 | 6.59E-11 |
| CPSF1    | 4.42E-15 | 0.131819 | 0.105 | 0.026 | 6.60E-11 |
| WDR86    | 4.44E-15 | 0.254563 | 0.086 | 0.003 | 6.63E-11 |
| GNA11    | 4.57E-15 | 0.112308 | 0.1   | 0.024 | 6.83E-11 |
| SLC7A6   | 4.61E-15 | 0.139609 | 0.094 | 0.015 | 6.89E-11 |

|           |          |          |       |       |          |
|-----------|----------|----------|-------|-------|----------|
| ZDHC14    | 4.63E-15 | 0.139716 | 0.081 | 0.01  | 6.92E-11 |
| SLC2A1    | 4.73E-15 | -0.31937 | 0.087 | 0.065 | 7.08E-11 |
| FAM110A   | 4.77E-15 | 0.213969 | 0.088 | 0.009 | 7.13E-11 |
| PGM2      | 5.08E-15 | -0.13116 | 0.082 | 0.041 | 7.59E-11 |
| TSTD2     | 5.36E-15 | 0.157991 | 0.101 | 0.021 | 8.00E-11 |
| CDYL      | 5.39E-15 | 0.180474 | 0.079 | 0.005 | 8.06E-11 |
| MAU2      | 5.51E-15 | 0.108741 | 0.125 | 0.038 | 8.23E-11 |
| PROM1     | 5.54E-15 | 0.269736 | 0.092 | 0.005 | 8.28E-11 |
| TEFM      | 5.75E-15 | 0.102424 | 0.101 | 0.026 | 8.59E-11 |
| SIL1      | 6.06E-15 | -0.24161 | 0.107 | 0.08  | 9.06E-11 |
| METTL6    | 6.17E-15 | 0.109283 | 0.1   | 0.024 | 9.22E-11 |
| RP11-379H | 6.22E-15 | 0.146606 | 0.098 | 0.019 | 9.29E-11 |
| MESDC1    | 6.29E-15 | 0.199057 | 0.092 | 0.01  | 9.40E-11 |
| IRGQ      | 6.42E-15 | 0.201032 | 0.107 | 0.017 | 9.60E-11 |
| TTI2      | 6.47E-15 | 0.104095 | 0.094 | 0.021 | 9.66E-11 |
| ZC3H3     | 6.48E-15 | 0.192138 | 0.087 | 0.009 | 9.69E-11 |
| GPNMB     | 6.76E-15 | -0.25232 | 0.059 | 0.044 | 1.01E-10 |
| DHX16     | 6.87E-15 | 0.115338 | 0.096 | 0.019 | 1.03E-10 |
| C6orf120  | 7.14E-15 | 0.119981 | 0.088 | 0.015 | 1.07E-10 |
| CENPW     | 7.15E-15 | 0.106048 | 0.077 | 0.012 | 1.07E-10 |
| HSDL2     | 7.20E-15 | -0.33531 | 0.057 | 0.051 | 1.08E-10 |
| BMPR1A    | 7.32E-15 | 0.11696  | 0.094 | 0.019 | 1.09E-10 |
| ZWILCH    | 7.33E-15 | 0.137986 | 0.077 | 0.009 | 1.10E-10 |
| PPFIA2    | 7.39E-15 | 0.238773 | 0.096 | 0.009 | 1.10E-10 |
| HOXB5     | 7.41E-15 | 0.220994 | 0.079 | 0.002 | 1.11E-10 |
| GNB1L     | 7.49E-15 | 0.146755 | 0.098 | 0.019 | 1.12E-10 |
| ADAL      | 7.95E-15 | 0.126763 | 0.1   | 0.021 | 1.19E-10 |
| TFDP1     | 7.95E-15 | 0.103204 | 0.103 | 0.027 | 1.19E-10 |
| CCDC22    | 8.01E-15 | 0.204226 | 0.109 | 0.019 | 1.20E-10 |
| ZNF536    | 8.14E-15 | 0.183329 | 0.07  | 0.002 | 1.22E-10 |
| CARS2     | 8.43E-15 | 0.100341 | 0.095 | 0.024 | 1.26E-10 |
| DDHD1     | 8.47E-15 | 0.124482 | 0.098 | 0.022 | 1.27E-10 |
| PPP1R16A  | 8.55E-15 | -0.11144 | 0.12  | 0.07  | 1.28E-10 |
| WDR5      | 8.74E-15 | 0.124733 | 0.103 | 0.024 | 1.31E-10 |
| RFX5      | 8.80E-15 | 0.12498  | 0.09  | 0.019 | 1.31E-10 |
| FASTKD1   | 8.91E-15 | 0.146102 | 0.103 | 0.021 | 1.33E-10 |
| ZNF675    | 9.22E-15 | 0.125908 | 0.091 | 0.017 | 1.38E-10 |
| LINC01117 | 9.43E-15 | 0.245265 | 0.087 | 0.005 | 1.41E-10 |
| ANKRD13A  | 9.44E-15 | 0.230471 | 0.113 | 0.019 | 1.41E-10 |
| ARID3A    | 9.50E-15 | 0.127712 | 0.103 | 0.026 | 1.42E-10 |
| LHX1      | 9.71E-15 | 0.313187 | 0.098 | 0.009 | 1.45E-10 |
| TAF1C     | 1.01E-14 | 0.167312 | 0.096 | 0.015 | 1.51E-10 |
| GAS2L1    | 1.03E-14 | 0.27795  | 0.139 | 0.034 | 1.54E-10 |
| IQCK      | 1.05E-14 | -0.10385 | 0.103 | 0.051 | 1.56E-10 |
| MYCN      | 1.05E-14 | 0.300162 | 0.098 | 0.007 | 1.57E-10 |
| TAZ       | 1.08E-14 | 0.172992 | 0.107 | 0.021 | 1.62E-10 |
| ASUN      | 1.10E-14 | 0.17757  | 0.108 | 0.022 | 1.65E-10 |
| C19orf68  | 1.15E-14 | 0.162172 | 0.081 | 0.007 | 1.72E-10 |
| LOXL1     | 1.15E-14 | 0.213688 | 0.086 | 0.005 | 1.72E-10 |
| ZNF222    | 1.17E-14 | 0.122244 | 0.087 | 0.015 | 1.75E-10 |
| ZNF500    | 1.18E-14 | 0.117527 | 0.094 | 0.019 | 1.77E-10 |

|           |           |           |        |        |           |
|-----------|-----------|-----------|--------|--------|-----------|
| H2AFY2    | 1. 21E-14 | 0. 207386 | 0. 075 | 0. 003 | 1. 81E-10 |
| TTC21B    | 1. 25E-14 | 0. 243164 | 0. 09  | 0. 007 | 1. 87E-10 |
| GPR19     | 1. 27E-14 | 0. 111281 | 0. 094 | 0. 021 | 1. 90E-10 |
| MMS22L    | 1. 28E-14 | 0. 113768 | 0. 099 | 0. 024 | 1. 92E-10 |
| CLHC1     | 1. 29E-14 | 0. 23123  | 0. 12  | 0. 024 | 1. 93E-10 |
| CA12      | 1. 30E-14 | -0. 58532 | 0. 018 | 0. 07  | 1. 94E-10 |
| PLAA      | 1. 30E-14 | 0. 106705 | 0. 077 | 0. 012 | 1. 95E-10 |
| RP13-1032 | 1. 31E-14 | 0. 1591   | 0. 079 | 0. 01  | 1. 96E-10 |
| MTA2      | 1. 35E-14 | 0. 180178 | 0. 072 | 0. 003 | 2. 02E-10 |
| GNB5      | 1. 39E-14 | 0. 217967 | 0. 107 | 0. 017 | 2. 08E-10 |
| LRP10     | 1. 40E-14 | -0. 26004 | 0. 085 | 0. 07  | 2. 09E-10 |
| SETMAR    | 1. 52E-14 | 0. 163935 | 0. 088 | 0. 014 | 2. 28E-10 |
| EBF1      | 1. 54E-14 | 0. 234513 | 0. 068 | 0      | 2. 30E-10 |
| HOXA10-AS | 1. 54E-14 | 0. 20906  | 0. 068 | 0      | 2. 30E-10 |
| CENPJ     | 1. 59E-14 | 0. 14214  | 0. 088 | 0. 015 | 2. 38E-10 |
| DGAT1     | 1. 64E-14 | 0. 203838 | 0. 087 | 0. 009 | 2. 45E-10 |
| ALDH1L1   | 1. 68E-14 | -0. 6429  | 0. 048 | 0. 12  | 2. 51E-10 |
| CSTF2     | 1. 74E-14 | 0. 195958 | 0. 09  | 0. 01  | 2. 59E-10 |
| GDF15     | 1. 74E-14 | -0. 75282 | 0. 018 | 0. 096 | 2. 60E-10 |
| FOXRED1   | 1. 79E-14 | 0. 138959 | 0. 105 | 0. 026 | 2. 67E-10 |
| EPHX1     | 1. 80E-14 | -0. 14031 | 0. 095 | 0. 053 | 2. 69E-10 |
| TMCC3     | 1. 80E-14 | 0. 175377 | 0. 068 | 0. 002 | 2. 69E-10 |
| MGAT4A    | 1. 86E-14 | 0. 129469 | 0. 098 | 0. 022 | 2. 78E-10 |
| FAM69B    | 1. 93E-14 | 0. 123695 | 0. 073 | 0. 009 | 2. 88E-10 |
| HEXDC     | 1. 94E-14 | 0. 183022 | 0. 094 | 0. 015 | 2. 90E-10 |
| DROSHA    | 1. 94E-14 | 0. 188792 | 0. 103 | 0. 014 | 2. 91E-10 |
| PHTF1     | 1. 96E-14 | 0. 233147 | 0. 1   | 0. 012 | 2. 93E-10 |
| CYP27B1   | 2. 03E-14 | 0. 196483 | 0. 081 | 0. 003 | 3. 04E-10 |
| SPRED1    | 2. 04E-14 | 0. 104901 | 0. 107 | 0. 027 | 3. 05E-10 |
| CUL2      | 2. 19E-14 | 0. 12638  | 0. 088 | 0. 019 | 3. 27E-10 |
| AC093323. | 2. 22E-14 | 0. 188046 | 0. 095 | 0. 014 | 3. 32E-10 |
| GIT1      | 2. 25E-14 | 0. 112813 | 0. 082 | 0. 014 | 3. 36E-10 |
| HAUS6     | 2. 32E-14 | 0. 162234 | 0. 087 | 0. 01  | 3. 47E-10 |
| EIF1AD    | 2. 34E-14 | -0. 10121 | 0. 085 | 0. 043 | 3. 49E-10 |
| FBLIM1    | 2. 50E-14 | -0. 23463 | 0. 073 | 0. 063 | 3. 74E-10 |
| THOC5     | 2. 52E-14 | 0. 184835 | 0. 1   | 0. 017 | 3. 76E-10 |
| ATAD2B    | 2. 74E-14 | 0. 20426  | 0. 082 | 0. 005 | 4. 10E-10 |
| PRUNE2    | 2. 75E-14 | -0. 28072 | 0. 09  | 0. 08  | 4. 10E-10 |
| XRRA1     | 2. 93E-14 | 0. 1654   | 0. 135 | 0. 041 | 4. 38E-10 |
| ZFP37     | 2. 95E-14 | 0. 140443 | 0. 087 | 0. 015 | 4. 40E-10 |
| TTC26     | 2. 97E-14 | -0. 16595 | 0. 052 | 0. 029 | 4. 44E-10 |
| RIN2      | 3. 01E-14 | 0. 247669 | 0. 101 | 0. 01  | 4. 49E-10 |
| YPEL1     | 3. 14E-14 | 0. 253857 | 0. 098 | 0. 009 | 4. 70E-10 |
| DPCD      | 3. 15E-14 | -0. 37791 | 0. 073 | 0. 062 | 4. 70E-10 |
| P4HA1     | 3. 15E-14 | -0. 44227 | 0. 062 | 0. 082 | 4. 71E-10 |
| NCAM2     | 3. 17E-14 | 0. 114423 | 0. 105 | 0. 027 | 4. 74E-10 |
| KCTD12    | 3. 27E-14 | -0. 17242 | 0. 056 | 0. 029 | 4. 89E-10 |
| ZNF736    | 3. 42E-14 | 0. 102888 | 0. 088 | 0. 021 | 5. 11E-10 |
| C17orf10C | 3. 54E-14 | 0. 216852 | 0. 09  | 0. 01  | 5. 29E-10 |
| TGFBRAP1  | 3. 58E-14 | 0. 122319 | 0. 077 | 0. 012 | 5. 36E-10 |
| PTPRO     | 3. 59E-14 | 0. 200118 | 0. 088 | 0. 007 | 5. 36E-10 |

|           |          |          |       |       |          |
|-----------|----------|----------|-------|-------|----------|
| KLC2      | 3.62E-14 | 0.172528 | 0.095 | 0.015 | 5.41E-10 |
| SERINC5   | 3.79E-14 | 0.190471 | 0.091 | 0.014 | 5.66E-10 |
| UBFD1     | 3.79E-14 | 0.1172   | 0.088 | 0.019 | 5.66E-10 |
| TYW5      | 3.79E-14 | -0.10482 | 0.091 | 0.053 | 5.67E-10 |
| EPB41     | 4.01E-14 | 0.254575 | 0.086 | 0.005 | 5.99E-10 |
| SLC27A1   | 4.08E-14 | -0.3515  | 0.052 | 0.055 | 6.09E-10 |
| TRIM52    | 4.25E-14 | 0.1058   | 0.083 | 0.015 | 6.36E-10 |
| OXSM      | 4.31E-14 | -0.10818 | 0.068 | 0.027 | 6.44E-10 |
| PANK3     | 4.45E-14 | 0.103608 | 0.094 | 0.021 | 6.65E-10 |
| FRMD3     | 4.49E-14 | -0.58611 | 0.005 | 0.072 | 6.72E-10 |
| SRSF12    | 4.52E-14 | 0.19075  | 0.086 | 0.01  | 6.75E-10 |
| R3HDM2    | 4.52E-14 | 0.260155 | 0.116 | 0.021 | 6.76E-10 |
| LINC00237 | 4.71E-14 | 0.160967 | 0.078 | 0.007 | 7.04E-10 |
| ERBB3     | 4.72E-14 | 0.253171 | 0.087 | 0.007 | 7.05E-10 |
| PNRC2     | 4.80E-14 | -0.27248 | 0.07  | 0.046 | 7.17E-10 |
| HECW1     | 4.88E-14 | 0.223016 | 0.081 | 0.003 | 7.30E-10 |
| C17orf51  | 4.96E-14 | 0.216465 | 0.092 | 0.01  | 7.41E-10 |
| LAMA5     | 4.98E-14 | 0.12494  | 0.095 | 0.022 | 7.44E-10 |
| TENM2     | 4.99E-14 | 0.123009 | 0.062 | 0.003 | 7.46E-10 |
| SYNDIG1   | 5.00E-14 | 0.197864 | 0.081 | 0.005 | 7.47E-10 |
| ATP6VOA2  | 5.14E-14 | 0.192061 | 0.092 | 0.014 | 7.68E-10 |
| SLC16A14  | 5.15E-14 | 0.177267 | 0.065 | 0     | 7.70E-10 |
| RAB8B     | 5.23E-14 | -0.13118 | 0.079 | 0.039 | 7.81E-10 |
| SUOX      | 5.34E-14 | 0.152079 | 0.085 | 0.014 | 7.99E-10 |
| GBA       | 5.35E-14 | -0.14907 | 0.064 | 0.032 | 7.99E-10 |
| BRSK2     | 5.36E-14 | 0.253776 | 0.092 | 0.007 | 8.01E-10 |
| PRIM2     | 5.51E-14 | 0.183051 | 0.073 | 0.003 | 8.24E-10 |
| ZNF346    | 5.53E-14 | 0.213853 | 0.092 | 0.01  | 8.26E-10 |
| EIF2AK4   | 5.54E-14 | 0.103926 | 0.103 | 0.027 | 8.28E-10 |
| H3F3C     | 5.97E-14 | -0.4305  | 0.046 | 0.079 | 8.92E-10 |
| SOS1      | 6.00E-14 | 0.175286 | 0.101 | 0.019 | 8.96E-10 |
| INO80B    | 6.03E-14 | 0.228085 | 0.094 | 0.009 | 9.02E-10 |
| ZSWIM6    | 6.15E-14 | 0.233258 | 0.1   | 0.012 | 9.18E-10 |
| CYB5R4    | 6.24E-14 | 0.170465 | 0.09  | 0.014 | 9.33E-10 |
| FAM212B-A | 6.34E-14 | 0.237656 | 0.085 | 0.007 | 9.48E-10 |
| NR4A2     | 6.39E-14 | 0.143536 | 0.087 | 0.014 | 9.55E-10 |
| ZNF609    | 6.43E-14 | 0.146828 | 0.09  | 0.015 | 9.61E-10 |
| TTI1      | 6.47E-14 | 0.15738  | 0.101 | 0.022 | 9.67E-10 |
| LZTR1     | 6.66E-14 | 0.140652 | 0.086 | 0.014 | 9.95E-10 |
| FLCN      | 6.69E-14 | -0.15378 | 0.096 | 0.056 | 1.00E-09 |
| UBE4B     | 7.00E-14 | 0.242067 | 0.116 | 0.022 | 1.05E-09 |
| TREM2     | 7.19E-14 | -0.1185  | 0.074 | 0.039 | 1.07E-09 |
| MAP2K4    | 7.30E-14 | 0.15938  | 0.099 | 0.021 | 1.09E-09 |
| DHX8      | 7.33E-14 | 0.216095 | 0.09  | 0.009 | 1.10E-09 |
| SMG7      | 7.38E-14 | 0.153206 | 0.092 | 0.017 | 1.10E-09 |
| RRAGB     | 7.40E-14 | 0.101953 | 0.098 | 0.026 | 1.11E-09 |
| FLII      | 7.56E-14 | 0.106766 | 0.096 | 0.022 | 1.13E-09 |
| SLC39A13  | 7.61E-14 | 0.181445 | 0.113 | 0.026 | 1.14E-09 |
| SIPA1L1   | 7.67E-14 | -0.16907 | 0.07  | 0.043 | 1.15E-09 |
| KTI12     | 7.77E-14 | 0.175701 | 0.092 | 0.014 | 1.16E-09 |
| GPR37L1   | 7.84E-14 | -0.46339 | 0.096 | 0.121 | 1.17E-09 |

|           |          |          |       |       |          |
|-----------|----------|----------|-------|-------|----------|
| MAST1     | 7.99E-14 | 0.186662 | 0.088 | 0.012 | 1.19E-09 |
| EN2       | 8.04E-14 | 0.234845 | 0.074 | 0.002 | 1.20E-09 |
| PAN3      | 8.13E-14 | 0.136866 | 0.105 | 0.027 | 1.22E-09 |
| AC002454. | 8.17E-14 | 0.125889 | 0.073 | 0.012 | 1.22E-09 |
| ETV6      | 8.34E-14 | 0.144369 | 0.108 | 0.026 | 1.25E-09 |
| HK1       | 8.60E-14 | -0.10183 | 0.081 | 0.041 | 1.29E-09 |
| SCRIB     | 8.63E-14 | 0.200664 | 0.112 | 0.024 | 1.29E-09 |
| ZNF48     | 8.67E-14 | 0.182632 | 0.085 | 0.01  | 1.30E-09 |
| CTPS2     | 9.02E-14 | 0.167437 | 0.078 | 0.007 | 1.35E-09 |
| ZNF598    | 9.12E-14 | 0.155583 | 0.072 | 0.005 | 1.36E-09 |
| RP3-428L1 | 9.41E-14 | 0.174908 | 0.064 | 0     | 1.41E-09 |
| FN1       | 9.43E-14 | -0.3261  | 0.066 | 0.055 | 1.41E-09 |
| ANKRD6    | 9.61E-14 | 0.229882 | 0.095 | 0.012 | 1.44E-09 |
| EMID1     | 1.00E-13 | 0.172453 | 0.088 | 0.014 | 1.50E-09 |
| ZNF668    | 1.01E-13 | 0.215377 | 0.09  | 0.01  | 1.51E-09 |
| FANCA     | 1.01E-13 | 0.16849  | 0.078 | 0.009 | 1.51E-09 |
| POLR3C    | 1.01E-13 | 0.131594 | 0.092 | 0.019 | 1.51E-09 |
| ZNF853    | 1.04E-13 | 0.164507 | 0.077 | 0.007 | 1.55E-09 |
| GCC1      | 1.06E-13 | 0.227197 | 0.101 | 0.014 | 1.58E-09 |
| FAM120B   | 1.07E-13 | 0.128556 | 0.083 | 0.012 | 1.60E-09 |
| EXD2      | 1.08E-13 | 0.143889 | 0.103 | 0.024 | 1.61E-09 |
| DSCAML1   | 1.10E-13 | 0.22658  | 0.085 | 0.005 | 1.65E-09 |
| AC074289. | 1.13E-13 | 0.203795 | 0.075 | 0.005 | 1.69E-09 |
| NME2      | 1.13E-13 | 0.189091 | 0.078 | 0.007 | 1.69E-09 |
| PRKD2     | 1.14E-13 | 0.107442 | 0.081 | 0.014 | 1.70E-09 |
| NACAD     | 1.14E-13 | 0.147632 | 0.103 | 0.026 | 1.71E-09 |
| PIK3CA    | 1.16E-13 | 0.191541 | 0.1   | 0.019 | 1.73E-09 |
| HDAC11    | 1.17E-13 | 0.125347 | 0.07  | 0.009 | 1.75E-09 |
| C16orf59  | 1.18E-13 | 0.182738 | 0.077 | 0.003 | 1.77E-09 |
| STK38     | 1.19E-13 | 0.12884  | 0.074 | 0.01  | 1.78E-09 |
| RAI1      | 1.21E-13 | 0.233887 | 0.077 | 0.003 | 1.81E-09 |
| ZNF320    | 1.26E-13 | 0.134068 | 0.069 | 0.007 | 1.88E-09 |
| ELOVL6    | 1.26E-13 | 0.151522 | 0.087 | 0.014 | 1.89E-09 |
| INTS9     | 1.27E-13 | 0.111006 | 0.066 | 0.007 | 1.90E-09 |
| PPIC      | 1.32E-13 | -0.19331 | 0.077 | 0.051 | 1.97E-09 |
| MYADM     | 1.33E-13 | -0.37408 | 0.066 | 0.062 | 1.99E-09 |
| ST3GAL4   | 1.35E-13 | -0.1433  | 0.059 | 0.031 | 2.01E-09 |
| TNFRSF10E | 1.36E-13 | -0.20008 | 0.065 | 0.038 | 2.03E-09 |
| OGFRL1    | 1.38E-13 | 0.230099 | 0.079 | 0.003 | 2.06E-09 |
| PHOSPHO2  | 1.38E-13 | 0.165649 | 0.087 | 0.014 | 2.07E-09 |
| CEP97     | 1.39E-13 | 0.161774 | 0.083 | 0.012 | 2.08E-09 |
| HMOX1     | 1.42E-13 | -0.45083 | 0.044 | 0.051 | 2.12E-09 |
| KIAA1614  | 1.42E-13 | 0.227038 | 0.081 | 0.003 | 2.12E-09 |
| PC        | 1.44E-13 | 0.159968 | 0.086 | 0.012 | 2.16E-09 |
| GPHN      | 1.45E-13 | 0.149858 | 0.108 | 0.026 | 2.17E-09 |
| ELOVL1    | 1.47E-13 | -0.34645 | 0.059 | 0.06  | 2.19E-09 |
| AGA       | 1.50E-13 | -0.19238 | 0.081 | 0.055 | 2.24E-09 |
| FXVD1     | 1.52E-13 | 0.18518  | 0.103 | 0.026 | 2.28E-09 |
| NBL1      | 1.54E-13 | 0.213345 | 0.096 | 0.012 | 2.30E-09 |
| STAT5B    | 1.54E-13 | 0.110919 | 0.087 | 0.017 | 2.30E-09 |
| FLVCR1    | 1.56E-13 | 0.104514 | 0.092 | 0.021 | 2.34E-09 |

|           |          |          |       |       |          |
|-----------|----------|----------|-------|-------|----------|
| GJA1      | 1.57E-13 | -0.57703 | 0.051 | 0.099 | 2.34E-09 |
| DBR1      | 1.61E-13 | 0.151581 | 0.095 | 0.017 | 2.41E-09 |
| RP11-436K | 1.63E-13 | 0.240368 | 0.086 | 0.007 | 2.43E-09 |
| DUSP8     | 1.67E-13 | 0.178914 | 0.075 | 0.005 | 2.49E-09 |
| C2orf42   | 1.68E-13 | 0.15338  | 0.082 | 0.012 | 2.51E-09 |
| CRYZ      | 1.69E-13 | -0.36434 | 0.069 | 0.07  | 2.52E-09 |
| MMP15     | 1.69E-13 | 0.187613 | 0.074 | 0.005 | 2.52E-09 |
| LRRN2     | 1.69E-13 | 0.160604 | 0.079 | 0.009 | 2.53E-09 |
| ENTPD3-AS | 1.71E-13 | -0.13282 | 0.062 | 0.034 | 2.55E-09 |
| KDM5D     | 1.72E-13 | 0.256218 | 0.062 | 0     | 2.57E-09 |
| AMPH      | 1.72E-13 | 0.167662 | 0.062 | 0     | 2.57E-09 |
| ZNF345    | 1.74E-13 | 0.114295 | 0.075 | 0.014 | 2.61E-09 |
| SLC2A8    | 1.79E-13 | 0.132097 | 0.086 | 0.015 | 2.67E-09 |
| ZNF771    | 1.80E-13 | 0.103728 | 0.1   | 0.027 | 2.69E-09 |
| NLGN4Y    | 1.84E-13 | 0.168935 | 0.073 | 0.003 | 2.75E-09 |
| RBBP9     | 1.87E-13 | 0.142578 | 0.083 | 0.012 | 2.79E-09 |
| YDJC      | 1.88E-13 | 0.201041 | 0.107 | 0.021 | 2.81E-09 |
| LCLAT1    | 1.91E-13 | 0.107102 | 0.069 | 0.009 | 2.86E-09 |
| MANSC1    | 1.93E-13 | 0.133059 | 0.075 | 0.01  | 2.88E-09 |
| TMEM19    | 1.98E-13 | 0.185067 | 0.1   | 0.019 | 2.95E-09 |
| XRCC2     | 1.99E-13 | 0.227339 | 0.074 | 0.002 | 2.97E-09 |
| ABHD5     | 1.99E-13 | -0.24866 | 0.064 | 0.044 | 2.98E-09 |
| CCDC121   | 2.13E-13 | 0.118809 | 0.065 | 0.007 | 3.19E-09 |
| HHIP-AS1  | 2.14E-13 | 0.168632 | 0.07  | 0.003 | 3.20E-09 |
| ATAD2     | 2.14E-13 | 0.179783 | 0.075 | 0.005 | 3.20E-09 |
| GUF1      | 2.16E-13 | 0.141509 | 0.083 | 0.012 | 3.23E-09 |
| CACNB3    | 2.17E-13 | 0.174404 | 0.083 | 0.009 | 3.24E-09 |
| KCTD15    | 2.18E-13 | 0.123714 | 0.086 | 0.017 | 3.25E-09 |
| MBTPS2    | 2.18E-13 | 0.159083 | 0.094 | 0.019 | 3.26E-09 |
| SCLT1     | 2.20E-13 | 0.110942 | 0.068 | 0.007 | 3.29E-09 |
| TOPBP1    | 2.21E-13 | 0.236832 | 0.096 | 0.012 | 3.30E-09 |
| SLC25A32  | 2.26E-13 | 0.165445 | 0.092 | 0.015 | 3.37E-09 |
| SFT2D2    | 2.26E-13 | 0.103878 | 0.081 | 0.017 | 3.38E-09 |
| METAP1    | 2.32E-13 | -0.10204 | 0.07  | 0.029 | 3.47E-09 |
| ACAD10    | 2.33E-13 | 0.194485 | 0.092 | 0.012 | 3.48E-09 |
| LIPE      | 2.34E-13 | 0.153632 | 0.068 | 0.003 | 3.50E-09 |
| UTP14A    | 2.42E-13 | 0.113364 | 0.079 | 0.014 | 3.61E-09 |
| C17orf80  | 2.43E-13 | 0.157348 | 0.098 | 0.017 | 3.62E-09 |
| IFI44L    | 2.46E-13 | -0.71713 | 0.036 | 0.111 | 3.68E-09 |
| RASA1     | 2.47E-13 | 0.118379 | 0.088 | 0.019 | 3.70E-09 |
| PFKP      | 2.50E-13 | -0.19042 | 0.094 | 0.062 | 3.73E-09 |
| SPTBN2    | 2.55E-13 | 0.17547  | 0.081 | 0.007 | 3.80E-09 |
| HOXD3     | 2.58E-13 | 0.226938 | 0.073 | 0.002 | 3.86E-09 |
| MGST2     | 2.59E-13 | -0.26104 | 0.059 | 0.046 | 3.87E-09 |
| TAPT1     | 2.61E-13 | 0.152229 | 0.085 | 0.015 | 3.90E-09 |
| SLC37A4   | 2.74E-13 | 0.151979 | 0.091 | 0.017 | 4.09E-09 |
| CTD-2339F | 2.79E-13 | 0.336603 | 0.073 | 0.002 | 4.17E-09 |
| GPD2      | 2.89E-13 | 0.10531  | 0.085 | 0.019 | 4.31E-09 |
| TRUB1     | 2.93E-13 | 0.144412 | 0.086 | 0.014 | 4.39E-09 |
| SWAP70    | 3.01E-13 | -0.27214 | 0.07  | 0.051 | 4.50E-09 |
| NKAIN1    | 3.13E-13 | 0.19439  | 0.061 | 0     | 4.68E-09 |

|           |          |          |       |       |          |
|-----------|----------|----------|-------|-------|----------|
| INA       | 3.13E-13 | 0.191736 | 0.061 | 0     | 4.68E-09 |
| AC073283. | 3.14E-13 | 0.162364 | 0.077 | 0.01  | 4.69E-09 |
| RP11-111F | 3.17E-13 | 0.131797 | 0.079 | 0.01  | 4.73E-09 |
| ZIK1      | 3.27E-13 | 0.200393 | 0.092 | 0.014 | 4.88E-09 |
| SOX10     | 3.28E-13 | 0.164886 | 0.066 | 0.005 | 4.90E-09 |
| ADCK2     | 3.30E-13 | 0.10008  | 0.083 | 0.015 | 4.93E-09 |
| GPATCH1   | 3.39E-13 | 0.127615 | 0.098 | 0.022 | 5.07E-09 |
| REPS1     | 3.40E-13 | 0.104438 | 0.096 | 0.024 | 5.08E-09 |
| NEUROD1   | 3.45E-13 | 0.148626 | 0.074 | 0.009 | 5.16E-09 |
| KCNMB2    | 3.52E-13 | 0.151583 | 0.079 | 0.012 | 5.26E-09 |
| DUSP4     | 3.52E-13 | -0.32076 | 0.062 | 0.063 | 5.27E-09 |
| ZNHIT6    | 3.53E-13 | 0.110818 | 0.094 | 0.022 | 5.28E-09 |
| SLC27A3   | 3.62E-13 | -0.2346  | 0.07  | 0.05  | 5.42E-09 |
| POLG      | 3.63E-13 | 0.152483 | 0.085 | 0.012 | 5.42E-09 |
| HNRNPU-AS | 3.64E-13 | 0.171755 | 0.104 | 0.022 | 5.44E-09 |
| GZF1      | 3.65E-13 | 0.167965 | 0.09  | 0.015 | 5.46E-09 |
| IFI35     | 3.65E-13 | -0.65727 | 0.018 | 0.094 | 5.46E-09 |
| PM20D2    | 3.73E-13 | 0.126119 | 0.078 | 0.01  | 5.57E-09 |
| WDR59     | 3.73E-13 | 0.189592 | 0.109 | 0.024 | 5.58E-09 |
| TFCP2     | 3.80E-13 | 0.158266 | 0.096 | 0.019 | 5.68E-09 |
| GKAP1     | 3.97E-13 | 0.129197 | 0.088 | 0.019 | 5.94E-09 |
| IL17RB    | 3.97E-13 | -0.18461 | 0.062 | 0.041 | 5.94E-09 |
| NEK6      | 4.00E-13 | -0.37715 | 0.061 | 0.067 | 5.98E-09 |
| GBP4      | 4.10E-13 | -0.37407 | 0.055 | 0.062 | 6.12E-09 |
| E2F3      | 4.13E-13 | 0.183237 | 0.079 | 0.007 | 6.17E-09 |
| PIPOX     | 4.33E-13 | -0.36269 | 0.074 | 0.075 | 6.48E-09 |
| RP1-17K7. | 4.36E-13 | -0.3884  | 0.04  | 0.068 | 6.52E-09 |
| ZDBF2     | 4.47E-13 | 0.129541 | 0.065 | 0.005 | 6.68E-09 |
| ZDHHC15   | 4.57E-13 | 0.110783 | 0.07  | 0.01  | 6.82E-09 |
| CSMD1     | 4.61E-13 | 0.160891 | 0.07  | 0.005 | 6.90E-09 |
| C11orf95  | 4.67E-13 | 0.212703 | 0.088 | 0.01  | 6.98E-09 |
| ZBTB11    | 4.69E-13 | 0.104013 | 0.072 | 0.01  | 7.00E-09 |
| FBXO30    | 4.72E-13 | 0.133042 | 0.064 | 0.003 | 7.05E-09 |
| YTHDC2    | 4.76E-13 | 0.155137 | 0.095 | 0.019 | 7.11E-09 |
| SUCLG2    | 4.79E-13 | -0.32629 | 0.066 | 0.067 | 7.16E-09 |
| KANSL1-AS | 4.81E-13 | -0.15731 | 0.065 | 0.043 | 7.19E-09 |
| LRFN4     | 4.82E-13 | 0.16146  | 0.075 | 0.005 | 7.20E-09 |
| MSANTD3   | 4.89E-13 | 0.167676 | 0.098 | 0.021 | 7.31E-09 |
| CNKS3     | 4.96E-13 | 0.226704 | 0.109 | 0.019 | 7.41E-09 |
| MPND      | 5.20E-13 | 0.162788 | 0.068 | 0.003 | 7.76E-09 |
| NEO1      | 5.50E-13 | 0.100573 | 0.074 | 0.012 | 8.22E-09 |
| EPB41L4A  | 5.60E-13 | 0.162449 | 0.07  | 0.005 | 8.37E-09 |
| ARSD      | 5.61E-13 | 0.123963 | 0.091 | 0.022 | 8.39E-09 |
| USP37     | 5.67E-13 | 0.148461 | 0.085 | 0.014 | 8.47E-09 |
| ACTR8     | 5.71E-13 | 0.136409 | 0.096 | 0.024 | 8.53E-09 |
| NUP133    | 5.81E-13 | 0.110709 | 0.095 | 0.022 | 8.68E-09 |
| MAML1     | 5.90E-13 | 0.156622 | 0.079 | 0.01  | 8.82E-09 |
| STAT2     | 5.90E-13 | -0.14099 | 0.087 | 0.055 | 8.82E-09 |
| SEMA6C    | 6.09E-13 | 0.178848 | 0.073 | 0.003 | 9.10E-09 |
| CEP104    | 6.13E-13 | 0.105493 | 0.088 | 0.022 | 9.16E-09 |
| MLYCD     | 6.35E-13 | 0.171124 | 0.083 | 0.012 | 9.49E-09 |



|           |          |          |       |       |          |
|-----------|----------|----------|-------|-------|----------|
| OTUD4     | 6.36E-13 | 0.14092  | 0.072 | 0.007 | 9.50E-09 |
| DIP2C     | 6.38E-13 | 0.164598 | 0.094 | 0.019 | 9.53E-09 |
| BMP1      | 6.79E-13 | 0.165767 | 0.083 | 0.012 | 1.02E-08 |
| RRBP1     | 6.98E-13 | -0.27553 | 0.081 | 0.075 | 1.04E-08 |
| COCH      | 7.10E-13 | 0.101429 | 0.074 | 0.014 | 1.06E-08 |
| DDX28     | 7.23E-13 | 0.145851 | 0.094 | 0.019 | 1.08E-08 |
| RP11-259K | 7.31E-13 | 0.243799 | 0.079 | 0.005 | 1.09E-08 |
| DES       | 7.44E-13 | 0.241284 | 0.107 | 0.019 | 1.11E-08 |
| IFFO1     | 7.48E-13 | 0.120134 | 0.091 | 0.022 | 1.12E-08 |
| SOS2      | 7.54E-13 | 0.157317 | 0.081 | 0.01  | 1.13E-08 |
| RAB3B     | 7.68E-13 | 0.164798 | 0.075 | 0.009 | 1.15E-08 |
| TMBIM1    | 8.01E-13 | -0.55344 | 0.029 | 0.07  | 1.20E-08 |
| ZC3H4     | 8.01E-13 | 0.199131 | 0.103 | 0.019 | 1.20E-08 |
| PLEKHA2   | 8.14E-13 | 0.136487 | 0.103 | 0.026 | 1.22E-08 |
| GLIS2     | 8.16E-13 | 0.138707 | 0.064 | 0.005 | 1.22E-08 |
| PANK4     | 8.22E-13 | 0.123109 | 0.088 | 0.019 | 1.23E-08 |
| ABHD10    | 8.54E-13 | 0.102072 | 0.074 | 0.014 | 1.28E-08 |
| ERBB4     | 8.72E-13 | 0.138268 | 0.075 | 0.009 | 1.30E-08 |
| EMILIN2   | 9.07E-13 | 0.10688  | 0.068 | 0.009 | 1.36E-08 |
| ALG1      | 9.14E-13 | 0.151789 | 0.087 | 0.017 | 1.37E-08 |
| MFI2-AS1  | 9.25E-13 | 0.109065 | 0.082 | 0.017 | 1.38E-08 |
| ALG12     | 9.35E-13 | 0.110819 | 0.075 | 0.014 | 1.40E-08 |
| JMJD4     | 9.53E-13 | 0.113774 | 0.083 | 0.015 | 1.42E-08 |
| GPD1      | 9.54E-13 | 0.306141 | 0.086 | 0.009 | 1.43E-08 |
| ZFHX2     | 9.63E-13 | 0.19761  | 0.064 | 0.002 | 1.44E-08 |
| GTF3C4    | 1.02E-12 | 0.183135 | 0.085 | 0.012 | 1.52E-08 |
| AQR       | 1.05E-12 | 0.196787 | 0.085 | 0.01  | 1.57E-08 |
| PDLIM1    | 1.06E-12 | -0.14463 | 0.061 | 0.029 | 1.58E-08 |
| SCARA3    | 1.07E-12 | -0.20055 | 0.082 | 0.06  | 1.60E-08 |
| KIF3B     | 1.07E-12 | 0.200422 | 0.088 | 0.012 | 1.60E-08 |
| PHF19     | 1.10E-12 | -0.34872 | 0.064 | 0.065 | 1.65E-08 |
| PIP5K1C   | 1.11E-12 | 0.109613 | 0.094 | 0.024 | 1.66E-08 |
| TIMP3     | 1.12E-12 | -0.54453 | 0.053 | 0.103 | 1.67E-08 |
| ATRNL1    | 1.15E-12 | 0.220773 | 0.082 | 0.007 | 1.72E-08 |
| PTPRG     | 1.16E-12 | 0.213918 | 0.103 | 0.019 | 1.73E-08 |
| MANEA     | 1.16E-12 | 0.226196 | 0.07  | 0.002 | 1.73E-08 |
| KIAA0232  | 1.17E-12 | 0.179355 | 0.099 | 0.021 | 1.75E-08 |
| NEK3      | 1.18E-12 | 0.221541 | 0.082 | 0.007 | 1.76E-08 |
| IRF9      | 1.19E-12 | -0.22252 | 0.099 | 0.068 | 1.77E-08 |
| ABCA5     | 1.20E-12 | -0.10084 | 0.073 | 0.036 | 1.80E-08 |
| USP19     | 1.20E-12 | 0.169868 | 0.086 | 0.014 | 1.80E-08 |
| ZDHHC7    | 1.24E-12 | 0.197439 | 0.108 | 0.024 | 1.85E-08 |
| SARM1     | 1.28E-12 | 0.232724 | 0.086 | 0.009 | 1.91E-08 |
| GLS       | 1.29E-12 | 0.215259 | 0.101 | 0.019 | 1.93E-08 |
| MSL2      | 1.34E-12 | 0.196589 | 0.079 | 0.007 | 2.01E-08 |
| PRIM1     | 1.38E-12 | 0.216613 | 0.09  | 0.012 | 2.06E-08 |
| CAPG      | 1.39E-12 | -0.33177 | 0.074 | 0.084 | 2.08E-08 |
| ZDHHC16   | 1.42E-12 | 0.23037  | 0.079 | 0.005 | 2.12E-08 |
| DUSP3     | 1.44E-12 | -0.18835 | 0.083 | 0.056 | 2.15E-08 |
| FAM19A2   | 1.46E-12 | 0.157916 | 0.069 | 0.005 | 2.18E-08 |
| FAM193A   | 1.47E-12 | 0.123499 | 0.085 | 0.017 | 2.20E-08 |

|           |          |          |       |       |          |
|-----------|----------|----------|-------|-------|----------|
| CCDC117   | 1.49E-12 | 0.169963 | 0.07  | 0.005 | 2.23E-08 |
| MAP4K3    | 1.50E-12 | 0.159968 | 0.083 | 0.012 | 2.24E-08 |
| COLGALT1  | 1.51E-12 | -0.12349 | 0.073 | 0.039 | 2.26E-08 |
| CTA-384D8 | 1.52E-12 | 0.142654 | 0.06  | 0.002 | 2.27E-08 |
| RC3H2     | 1.57E-12 | 0.201196 | 0.073 | 0.005 | 2.35E-08 |
| BCL9      | 1.64E-12 | 0.109948 | 0.073 | 0.01  | 2.45E-08 |
| SHF       | 1.71E-12 | 0.122296 | 0.075 | 0.012 | 2.55E-08 |
| HOXD8     | 1.72E-12 | 0.203665 | 0.07  | 0.002 | 2.58E-08 |
| ZNF829    | 1.76E-12 | 0.134564 | 0.07  | 0.009 | 2.62E-08 |
| MT1A      | 1.80E-12 | -0.55016 | 0.007 | 0.067 | 2.69E-08 |
| PGBD1     | 1.83E-12 | 0.188682 | 0.082 | 0.01  | 2.74E-08 |
| GLRB      | 1.84E-12 | 0.159363 | 0.091 | 0.017 | 2.74E-08 |
| ATP13A3   | 1.89E-12 | 0.136472 | 0.086 | 0.015 | 2.83E-08 |
| APOL2     | 1.92E-12 | -0.47351 | 0.039 | 0.062 | 2.88E-08 |
| CLGN      | 1.95E-12 | 0.157528 | 0.072 | 0.009 | 2.92E-08 |
| ZNF34     | 2.00E-12 | -0.12158 | 0.066 | 0.031 | 2.99E-08 |
| PTGR2     | 2.00E-12 | 0.150147 | 0.087 | 0.019 | 2.99E-08 |
| NUMBL     | 2.07E-12 | 0.133963 | 0.085 | 0.015 | 3.09E-08 |
| SLC20A2   | 2.08E-12 | -0.28475 | 0.07  | 0.065 | 3.10E-08 |
| ABCA3     | 2.09E-12 | 0.108425 | 0.09  | 0.021 | 3.13E-08 |
| MAPK9     | 2.14E-12 | 0.152687 | 0.083 | 0.014 | 3.20E-08 |
| FAM181A   | 2.18E-12 | -0.37633 | 0.048 | 0.056 | 3.25E-08 |
| AMDHD2    | 2.18E-12 | 0.11385  | 0.081 | 0.015 | 3.25E-08 |
| SMYD4     | 2.22E-12 | -0.11039 | 0.088 | 0.053 | 3.31E-08 |
| TOMM40L   | 2.37E-12 | 0.101526 | 0.073 | 0.014 | 3.54E-08 |
| RP11-445F | 2.37E-12 | 0.24374  | 0.078 | 0.009 | 3.55E-08 |
| SOX21-AS1 | 2.38E-12 | 0.177714 | 0.103 | 0.022 | 3.55E-08 |
| WDR75     | 2.39E-12 | 0.144691 | 0.109 | 0.029 | 3.58E-08 |
| MEF2A     | 2.49E-12 | -0.14053 | 0.072 | 0.041 | 3.73E-08 |
| GYPE      | 2.57E-12 | -0.41702 | 0.035 | 0.053 | 3.84E-08 |
| FOXD1     | 2.58E-12 | 0.216951 | 0.069 | 0.002 | 3.85E-08 |
| NAT16     | 2.64E-12 | 0.196556 | 0.073 | 0.005 | 3.95E-08 |
| ZNF667    | 2.70E-12 | -0.10142 | 0.095 | 0.055 | 4.03E-08 |
| BRPF1     | 2.72E-12 | 0.222005 | 0.083 | 0.009 | 4.07E-08 |
| CTIF      | 2.73E-12 | 0.106194 | 0.068 | 0.01  | 4.08E-08 |
| MAST4     | 2.93E-12 | -0.19589 | 0.073 | 0.051 | 4.38E-08 |
| DLEU1     | 2.94E-12 | 0.100264 | 0.087 | 0.022 | 4.39E-08 |
| RNF122    | 2.94E-12 | 0.215186 | 0.066 | 0.002 | 4.39E-08 |
| MTHFSD    | 2.97E-12 | 0.121897 | 0.077 | 0.014 | 4.43E-08 |
| BRAF      | 3.01E-12 | 0.131259 | 0.091 | 0.021 | 4.49E-08 |
| SLC39A9   | 3.03E-12 | 0.143201 | 0.078 | 0.014 | 4.52E-08 |
| ODF2      | 3.13E-12 | 0.107334 | 0.095 | 0.024 | 4.67E-08 |
| C9orf9    | 3.32E-12 | -0.16093 | 0.074 | 0.05  | 4.97E-08 |
| 4-Sep     | 3.36E-12 | 0.149661 | 0.075 | 0.01  | 5.02E-08 |
| MAGT1     | 3.42E-12 | -0.27765 | 0.062 | 0.055 | 5.11E-08 |
| SIK1      | 3.44E-12 | 0.136149 | 0.072 | 0.01  | 5.15E-08 |
| CBX8      | 3.50E-12 | 0.143187 | 0.087 | 0.017 | 5.22E-08 |
| CEP57L1   | 3.51E-12 | 0.140352 | 0.09  | 0.019 | 5.25E-08 |
| CSRP1     | 3.55E-12 | -0.23342 | 0.051 | 0.034 | 5.30E-08 |
| TMBIM4    | 3.59E-12 | -0.70203 | 0.017 | 0.101 | 5.36E-08 |
| ME3       | 3.62E-12 | 0.182521 | 0.07  | 0.005 | 5.40E-08 |

|           |          |          |       |       |          |
|-----------|----------|----------|-------|-------|----------|
| PTRF      | 3.62E-12 | -0.61994 | 0.034 | 0.082 | 5.41E-08 |
| MFS6      | 3.69E-12 | 0.148454 | 0.073 | 0.009 | 5.52E-08 |
| RP11-400F | 3.72E-12 | 0.165636 | 0.074 | 0.007 | 5.56E-08 |
| DGKG      | 3.79E-12 | 0.194422 | 0.101 | 0.024 | 5.66E-08 |
| RP11-725F | 3.82E-12 | 0.187762 | 0.062 | 0.003 | 5.70E-08 |
| CBLB      | 3.86E-12 | 0.125612 | 0.088 | 0.021 | 5.77E-08 |
| SLC05A1   | 3.89E-12 | 0.1959   | 0.073 | 0.005 | 5.81E-08 |
| PHRF1     | 3.93E-12 | 0.181974 | 0.078 | 0.009 | 5.88E-08 |
| TBC1D10B  | 3.95E-12 | 0.106218 | 0.07  | 0.014 | 5.90E-08 |
| TLL12     | 3.97E-12 | 0.17611  | 0.074 | 0.007 | 5.93E-08 |
| SLC24A3   | 3.99E-12 | 0.151604 | 0.077 | 0.01  | 5.97E-08 |
| CECR6     | 4.05E-12 | 0.206084 | 0.068 | 0.003 | 6.05E-08 |
| ZDHHC13   | 4.08E-12 | 0.106817 | 0.075 | 0.015 | 6.09E-08 |
| AUH       | 4.12E-12 | 0.105217 | 0.073 | 0.014 | 6.15E-08 |
| FBXL17    | 4.15E-12 | 0.175676 | 0.075 | 0.009 | 6.20E-08 |
| ST3GAL3   | 4.24E-12 | 0.136986 | 0.075 | 0.012 | 6.34E-08 |
| VCPIP1    | 4.42E-12 | 0.209562 | 0.079 | 0.007 | 6.60E-08 |
| GRB14     | 4.43E-12 | 0.175443 | 0.066 | 0.002 | 6.61E-08 |
| SMPD3     | 4.50E-12 | 0.158422 | 0.062 | 0.003 | 6.72E-08 |
| ZNF569    | 4.59E-12 | 0.128238 | 0.082 | 0.015 | 6.86E-08 |
| TUBB6     | 4.70E-12 | -0.53684 | 0.021 | 0.068 | 7.02E-08 |
| NOS1AP    | 4.92E-12 | -0.25234 | 0.051 | 0.036 | 7.35E-08 |
| TMEM246   | 4.95E-12 | 0.267428 | 0.079 | 0.005 | 7.40E-08 |
| FAM160B2  | 4.98E-12 | 0.180254 | 0.088 | 0.015 | 7.45E-08 |
| SEC24B    | 5.00E-12 | 0.139762 | 0.074 | 0.012 | 7.48E-08 |
| AKAP6     | 5.06E-12 | -0.14692 | 0.085 | 0.053 | 7.56E-08 |
| HID1      | 5.11E-12 | 0.201758 | 0.064 | 0.002 | 7.64E-08 |
| RHOJ      | 5.12E-12 | -0.15609 | 0.068 | 0.034 | 7.65E-08 |
| HDAC10    | 5.12E-12 | 0.12527  | 0.062 | 0.005 | 7.66E-08 |
| DDHD2     | 5.14E-12 | 0.199574 | 0.1   | 0.021 | 7.68E-08 |
| SENP3     | 5.36E-12 | 0.129529 | 0.073 | 0.01  | 8.00E-08 |
| FAM89A    | 5.39E-12 | 0.145085 | 0.061 | 0.003 | 8.06E-08 |
| USP40     | 5.48E-12 | 0.16547  | 0.073 | 0.009 | 8.18E-08 |
| GALNS     | 5.53E-12 | 0.166991 | 0.096 | 0.021 | 8.26E-08 |
| PKP4      | 5.53E-12 | 0.189714 | 0.068 | 0.003 | 8.27E-08 |
| SNX29     | 5.55E-12 | 0.182448 | 0.086 | 0.012 | 8.29E-08 |
| ANXA4     | 5.57E-12 | -0.27557 | 0.073 | 0.06  | 8.32E-08 |
| ZNF286B   | 5.63E-12 | 0.190519 | 0.073 | 0.003 | 8.41E-08 |
| DDX20     | 5.63E-12 | 0.139908 | 0.066 | 0.007 | 8.42E-08 |
| SOCS2     | 5.77E-12 | -0.18363 | 0.079 | 0.06  | 8.62E-08 |
| XPNPEP3   | 5.94E-12 | 0.133697 | 0.095 | 0.022 | 8.88E-08 |
| LIN52     | 5.97E-12 | 0.117346 | 0.075 | 0.014 | 8.92E-08 |
| C9orf64   | 6.16E-12 | 0.123963 | 0.087 | 0.021 | 9.21E-08 |
| RFX3      | 6.22E-12 | 0.172003 | 0.082 | 0.012 | 9.29E-08 |
| ZNF496    | 6.29E-12 | 0.166478 | 0.072 | 0.007 | 9.41E-08 |
| TMEM170B  | 6.30E-12 | 0.17249  | 0.055 | 0     | 9.42E-08 |
| CDH8      | 6.30E-12 | 0.158944 | 0.055 | 0     | 9.42E-08 |
| TUT1      | 6.41E-12 | 0.157477 | 0.082 | 0.014 | 9.58E-08 |
| AC091729  | 6.66E-12 | 0.195037 | 0.092 | 0.017 | 9.96E-08 |
| CCDC152   | 6.77E-12 | -0.10485 | 0.072 | 0.039 | 1.01E-07 |
| PQLC1     | 6.82E-12 | 0.12858  | 0.082 | 0.017 | 1.02E-07 |

|           |          |          |       |       |          |
|-----------|----------|----------|-------|-------|----------|
| GPR137C   | 6.91E-12 | 0.203868 | 0.074 | 0.005 | 1.03E-07 |
| ZNF574    | 7.02E-12 | 0.248757 | 0.095 | 0.012 | 1.05E-07 |
| AP4S1     | 7.06E-12 | -0.13438 | 0.052 | 0.024 | 1.05E-07 |
| RBM38     | 7.13E-12 | -0.11347 | 0.094 | 0.056 | 1.07E-07 |
| PIGG      | 7.27E-12 | 0.161942 | 0.085 | 0.014 | 1.09E-07 |
| CXorf56   | 7.31E-12 | 0.114373 | 0.07  | 0.01  | 1.09E-07 |
| ZBED6     | 7.42E-12 | 0.117459 | 0.086 | 0.021 | 1.11E-07 |
| UTP20     | 7.51E-12 | 0.145106 | 0.069 | 0.009 | 1.12E-07 |
| SP4       | 7.58E-12 | 0.194452 | 0.083 | 0.009 | 1.13E-07 |
| FCHSD2    | 7.59E-12 | 0.115221 | 0.082 | 0.017 | 1.13E-07 |
| ZBTB25    | 7.84E-12 | 0.129859 | 0.074 | 0.012 | 1.17E-07 |
| CSPP1     | 8.00E-12 | 0.110695 | 0.109 | 0.038 | 1.20E-07 |
| PPP1R9B   | 8.08E-12 | 0.200682 | 0.083 | 0.01  | 1.21E-07 |
| KIF13A    | 8.23E-12 | 0.176645 | 0.073 | 0.009 | 1.23E-07 |
| EVI5L     | 8.31E-12 | 0.179732 | 0.072 | 0.007 | 1.24E-07 |
| FDXR      | 8.40E-12 | -0.12427 | 0.059 | 0.034 | 1.25E-07 |
| KLHDC4    | 8.83E-12 | 0.239023 | 0.075 | 0.005 | 1.32E-07 |
| MON1A     | 9.02E-12 | 0.123635 | 0.081 | 0.015 | 1.35E-07 |
| CLEC16A   | 9.15E-12 | 0.139178 | 0.07  | 0.009 | 1.37E-07 |
| CHAC2     | 9.25E-12 | 0.106884 | 0.059 | 0.007 | 1.38E-07 |
| IL11RA    | 9.25E-12 | 0.158112 | 0.077 | 0.012 | 1.38E-07 |
| RALGAPB   | 9.34E-12 | 0.149965 | 0.078 | 0.012 | 1.40E-07 |
| SAA2      | 9.59E-12 | -0.8236  | 0     | 0.048 | 1.43E-07 |
| YPEL4     | 9.88E-12 | 0.212088 | 0.074 | 0.007 | 1.48E-07 |
| POLRMT    | 9.88E-12 | 0.103368 | 0.113 | 0.039 | 1.48E-07 |
| RUFY2     | 9.97E-12 | 0.135966 | 0.092 | 0.024 | 1.49E-07 |
| FAM117B   | 1.00E-11 | 0.162782 | 0.074 | 0.009 | 1.50E-07 |
| SLC38A6   | 1.01E-11 | -0.1746  | 0.06  | 0.039 | 1.51E-07 |
| RP11-127E | 1.01E-11 | 0.125614 | 0.064 | 0.005 | 1.52E-07 |
| MBTD1     | 1.04E-11 | 0.183348 | 0.068 | 0.003 | 1.56E-07 |
| MAP6      | 1.05E-11 | 0.151101 | 0.069 | 0.009 | 1.56E-07 |
| FADD      | 1.05E-11 | 0.171837 | 0.081 | 0.012 | 1.57E-07 |
| CTH       | 1.06E-11 | -0.2605  | 0.052 | 0.043 | 1.58E-07 |
| FAM208B   | 1.10E-11 | 0.154231 | 0.061 | 0.003 | 1.64E-07 |
| YIPF2     | 1.11E-11 | -0.25095 | 0.073 | 0.06  | 1.65E-07 |
| TADA2A    | 1.13E-11 | 0.124817 | 0.072 | 0.01  | 1.69E-07 |
| MCPH1     | 1.13E-11 | 0.205616 | 0.09  | 0.014 | 1.69E-07 |
| GPR153    | 1.14E-11 | 0.185809 | 0.064 | 0.003 | 1.70E-07 |
| TIMELESS  | 1.16E-11 | 0.178971 | 0.072 | 0.005 | 1.74E-07 |
| PIM1      | 1.19E-11 | -0.10065 | 0.072 | 0.034 | 1.77E-07 |
| CLSTN3    | 1.21E-11 | 0.118257 | 0.083 | 0.019 | 1.81E-07 |
| BAIAP2    | 1.21E-11 | -0.10323 | 0.107 | 0.062 | 1.81E-07 |
| SGK3      | 1.31E-11 | 0.130447 | 0.064 | 0.005 | 1.95E-07 |
| SLC35D2   | 1.32E-11 | 0.147398 | 0.074 | 0.01  | 1.97E-07 |
| USP13     | 1.32E-11 | 0.171941 | 0.09  | 0.017 | 1.97E-07 |
| ZNF672    | 1.32E-11 | 0.209273 | 0.099 | 0.017 | 1.97E-07 |
| DDB2      | 1.35E-11 | -0.19877 | 0.053 | 0.039 | 2.02E-07 |
| DHRS11    | 1.36E-11 | 0.106104 | 0.068 | 0.01  | 2.03E-07 |
| VAMP4     | 1.38E-11 | -0.20444 | 0.083 | 0.063 | 2.07E-07 |
| KALRN     | 1.39E-11 | -0.22218 | 0.06  | 0.046 | 2.08E-07 |
| TMEM158   | 1.41E-11 | -0.31578 | 0.048 | 0.051 | 2.11E-07 |

|           |          |          |       |       |          |
|-----------|----------|----------|-------|-------|----------|
| USP36     | 1.45E-11 | -0.13119 | 0.073 | 0.043 | 2.17E-07 |
| TFB1M     | 1.46E-11 | 0.127309 | 0.081 | 0.017 | 2.18E-07 |
| RP11-73E1 | 1.48E-11 | 0.217095 | 0.075 | 0.007 | 2.22E-07 |
| ARL5B     | 1.51E-11 | 0.1884   | 0.072 | 0.005 | 2.25E-07 |
| ZKSCAN8   | 1.52E-11 | 0.125529 | 0.069 | 0.009 | 2.26E-07 |
| FHOD3     | 1.61E-11 | 0.161244 | 0.064 | 0.003 | 2.41E-07 |
| SEC16A    | 1.62E-11 | 0.164541 | 0.095 | 0.021 | 2.42E-07 |
| RAB9B     | 1.67E-11 | 0.181111 | 0.083 | 0.014 | 2.49E-07 |
| BEND6     | 1.68E-11 | 0.146139 | 0.069 | 0.007 | 2.50E-07 |
| NACC2     | 1.70E-11 | 0.121418 | 0.068 | 0.01  | 2.54E-07 |
| MOB1B     | 1.70E-11 | 0.126764 | 0.059 | 0.003 | 2.54E-07 |
| MYCL      | 1.73E-11 | 0.152638 | 0.062 | 0.003 | 2.58E-07 |
| POU2F2    | 1.75E-11 | 0.196279 | 0.077 | 0.009 | 2.62E-07 |
| ZBTB38    | 1.76E-11 | -0.25788 | 0.061 | 0.055 | 2.63E-07 |
| BCDIN3D   | 1.82E-11 | 0.146327 | 0.074 | 0.012 | 2.71E-07 |
| KIF20B    | 1.82E-11 | 0.110504 | 0.07  | 0.012 | 2.73E-07 |
| NCKIPSD   | 1.84E-11 | 0.139344 | 0.064 | 0.007 | 2.75E-07 |
| RNF112    | 1.91E-11 | 0.172213 | 0.066 | 0.003 | 2.86E-07 |
| RP11-356C | 1.95E-11 | 0.172791 | 0.075 | 0.007 | 2.91E-07 |
| SMYD2     | 1.99E-11 | -0.10611 | 0.083 | 0.044 | 2.98E-07 |
| EBF4      | 2.04E-11 | 0.157564 | 0.072 | 0.007 | 3.05E-07 |
| GAB2      | 2.05E-11 | 0.117747 | 0.072 | 0.012 | 3.06E-07 |
| NCAPG2    | 2.06E-11 | 0.105492 | 0.074 | 0.015 | 3.08E-07 |
| SIX6      | 2.09E-11 | 0.156919 | 0.052 | 0     | 3.12E-07 |
| ABTB1     | 2.11E-11 | -0.13303 | 0.056 | 0.032 | 3.15E-07 |
| TMEM53    | 2.12E-11 | -0.29318 | 0.043 | 0.048 | 3.17E-07 |
| LL22NC03- | 2.15E-11 | 0.171403 | 0.082 | 0.01  | 3.21E-07 |
| ANKRD26   | 2.16E-11 | 0.114476 | 0.092 | 0.026 | 3.23E-07 |
| SS18      | 2.19E-11 | -0.31321 | 0.052 | 0.06  | 3.27E-07 |
| RP4-798A1 | 2.23E-11 | 0.145441 | 0.081 | 0.015 | 3.34E-07 |
| RTN2      | 2.26E-11 | 0.184422 | 0.069 | 0.007 | 3.38E-07 |
| MCAM      | 2.30E-11 | 0.105237 | 0.075 | 0.015 | 3.44E-07 |
| SEC61A2   | 2.32E-11 | 0.142698 | 0.079 | 0.014 | 3.46E-07 |
| GPR85     | 2.34E-11 | 0.111606 | 0.055 | 0.003 | 3.50E-07 |
| ARHGAP17  | 2.36E-11 | 0.146748 | 0.066 | 0.007 | 3.52E-07 |
| EPB41L5   | 2.38E-11 | 0.142706 | 0.066 | 0.007 | 3.55E-07 |
| SREBF1    | 2.38E-11 | 0.222074 | 0.098 | 0.019 | 3.56E-07 |
| DPAGT1    | 2.45E-11 | -0.22719 | 0.064 | 0.05  | 3.67E-07 |
| ANGPTL4   | 2.46E-11 | -0.60525 | 0.016 | 0.074 | 3.68E-07 |
| CCDC58    | 2.47E-11 | 0.179103 | 0.104 | 0.026 | 3.69E-07 |
| LIN7B     | 2.48E-11 | 0.112403 | 0.086 | 0.022 | 3.71E-07 |
| IQCG      | 2.54E-11 | -0.35532 | 0.057 | 0.058 | 3.79E-07 |
| GFOD1     | 2.59E-11 | 0.233669 | 0.079 | 0.007 | 3.88E-07 |
| PCNX      | 2.60E-11 | 0.136866 | 0.09  | 0.022 | 3.88E-07 |
| MARK1     | 2.61E-11 | 0.203817 | 0.088 | 0.012 | 3.90E-07 |
| AREL1     | 2.61E-11 | 0.168486 | 0.064 | 0.003 | 3.90E-07 |
| CTSS      | 2.62E-11 | -0.2319  | 0.046 | 0.036 | 3.91E-07 |
| 5-Sep     | 2.69E-11 | 0.18484  | 0.072 | 0.005 | 4.03E-07 |
| ZNF605    | 2.76E-11 | -0.13647 | 0.085 | 0.06  | 4.12E-07 |
| DIXDC1    | 2.79E-11 | 0.192882 | 0.072 | 0.007 | 4.17E-07 |
| MEX3D     | 2.80E-11 | 0.142455 | 0.064 | 0.005 | 4.18E-07 |

|           |          |          |       |       |          |
|-----------|----------|----------|-------|-------|----------|
| ATP8A1    | 2.82E-11 | 0.185192 | 0.06  | 0.002 | 4.21E-07 |
| TMEM67    | 2.92E-11 | -0.21244 | 0.056 | 0.039 | 4.36E-07 |
| EFCAB7    | 2.93E-11 | 0.162013 | 0.095 | 0.022 | 4.38E-07 |
| PRMT3     | 2.94E-11 | 0.191505 | 0.096 | 0.019 | 4.40E-07 |
| ATG2A     | 2.95E-11 | 0.122244 | 0.074 | 0.015 | 4.41E-07 |
| LIMK2     | 3.15E-11 | 0.166919 | 0.07  | 0.007 | 4.70E-07 |
| ZNF628    | 3.18E-11 | 0.131273 | 0.069 | 0.009 | 4.75E-07 |
| PLEKHA5   | 3.21E-11 | 0.175219 | 0.085 | 0.017 | 4.79E-07 |
| TP53BP1   | 3.22E-11 | 0.167274 | 0.091 | 0.019 | 4.81E-07 |
| ELP4      | 3.23E-11 | -0.17132 | 0.065 | 0.041 | 4.82E-07 |
| MORC2     | 3.25E-11 | 0.175808 | 0.07  | 0.005 | 4.86E-07 |
| ERCC6L2   | 3.27E-11 | 0.140031 | 0.085 | 0.017 | 4.89E-07 |
| GNL3L     | 3.38E-11 | 0.109852 | 0.079 | 0.017 | 5.05E-07 |
| CYBRD1    | 3.41E-11 | -0.32493 | 0.06  | 0.063 | 5.10E-07 |
| SLC2A13   | 3.58E-11 | 0.175377 | 0.094 | 0.019 | 5.35E-07 |
| UBE20     | 3.60E-11 | 0.172857 | 0.101 | 0.026 | 5.38E-07 |
| MORC2-AS1 | 3.62E-11 | 0.123113 | 0.07  | 0.012 | 5.41E-07 |
| RGL1      | 3.64E-11 | -0.11249 | 0.052 | 0.022 | 5.44E-07 |
| SLC35G2   | 3.64E-11 | -0.29204 | 0.073 | 0.068 | 5.44E-07 |
| RHPN1     | 3.72E-11 | 0.187781 | 0.064 | 0.003 | 5.56E-07 |
| E2F1      | 3.74E-11 | 0.130665 | 0.073 | 0.012 | 5.59E-07 |
| ARFGEF1   | 3.74E-11 | 0.164716 | 0.072 | 0.009 | 5.59E-07 |
| RNF213    | 3.74E-11 | -0.16337 | 0.081 | 0.051 | 5.59E-07 |
| BMP2      | 3.76E-11 | 0.222149 | 0.072 | 0.005 | 5.61E-07 |
| EVI2A     | 3.78E-11 | 0.300088 | 0.108 | 0.024 | 5.64E-07 |
| MYT1L     | 3.80E-11 | 0.163173 | 0.051 | 0     | 5.68E-07 |
| OPN3      | 3.86E-11 | 0.124328 | 0.061 | 0.005 | 5.77E-07 |
| F8A1      | 3.96E-11 | 0.19342  | 0.088 | 0.014 | 5.92E-07 |
| MCM3AP    | 4.07E-11 | 0.10449  | 0.09  | 0.022 | 6.08E-07 |
| UNC13D    | 4.11E-11 | 0.108654 | 0.056 | 0.005 | 6.15E-07 |
| GRIN2B    | 4.42E-11 | 0.151561 | 0.06  | 0.002 | 6.61E-07 |
| ZNF614    | 4.47E-11 | 0.112871 | 0.077 | 0.017 | 6.68E-07 |
| PRR14L    | 4.50E-11 | 0.134824 | 0.07  | 0.01  | 6.73E-07 |
| STC2      | 4.52E-11 | 0.252471 | 0.113 | 0.031 | 6.76E-07 |
| LCOR      | 4.55E-11 | 0.107757 | 0.072 | 0.015 | 6.80E-07 |
| UCK2      | 4.58E-11 | 0.104156 | 0.087 | 0.022 | 6.85E-07 |
| COL4A4    | 4.61E-11 | 0.167484 | 0.062 | 0.003 | 6.90E-07 |
| CASP4     | 4.67E-11 | -0.56528 | 0.016 | 0.077 | 6.98E-07 |
| LONRF1    | 4.76E-11 | 0.184887 | 0.085 | 0.015 | 7.12E-07 |
| AP3B2     | 4.99E-11 | 0.128282 | 0.06  | 0.005 | 7.46E-07 |
| TBCK      | 5.01E-11 | 0.143701 | 0.085 | 0.019 | 7.48E-07 |
| TDRD3     | 5.01E-11 | 0.111828 | 0.085 | 0.021 | 7.48E-07 |
| WDR36     | 5.02E-11 | 0.128991 | 0.079 | 0.017 | 7.50E-07 |
| VASH2     | 5.02E-11 | 0.135836 | 0.056 | 0.003 | 7.50E-07 |
| PCDH11X   | 5.03E-11 | 0.223254 | 0.081 | 0.01  | 7.52E-07 |
| OTP       | 5.25E-11 | 0.220357 | 0.062 | 0.002 | 7.85E-07 |
| DBP       | 5.31E-11 | -0.11009 | 0.06  | 0.029 | 7.93E-07 |
| STK3      | 5.45E-11 | -0.29178 | 0.057 | 0.056 | 8.14E-07 |
| RP11-401F | 5.45E-11 | 0.150324 | 0.056 | 0.002 | 8.14E-07 |
| ZWINT     | 5.55E-11 | 0.189464 | 0.059 | 0.002 | 8.30E-07 |
| SLC25A24  | 5.58E-11 | 0.134979 | 0.064 | 0.007 | 8.33E-07 |

|           |          |          |       |       |          |
|-----------|----------|----------|-------|-------|----------|
| CHST14    | 5.58E-11 | 0.188857 | 0.075 | 0.007 | 8.33E-07 |
| SAMD10    | 5.58E-11 | 0.187341 | 0.066 | 0.005 | 8.35E-07 |
| GOLGA3    | 5.66E-11 | -0.18689 | 0.083 | 0.051 | 8.45E-07 |
| GNG12     | 5.75E-11 | -0.22092 | 0.059 | 0.043 | 8.59E-07 |
| GREB1     | 6.10E-11 | 0.205704 | 0.07  | 0.005 | 9.12E-07 |
| SOAT1     | 6.16E-11 | -0.10788 | 0.062 | 0.032 | 9.21E-07 |
| FBX04     | 6.35E-11 | -0.1952  | 0.059 | 0.046 | 9.49E-07 |
| MAP3K4    | 6.44E-11 | 0.17422  | 0.074 | 0.009 | 9.62E-07 |
| GNE       | 6.45E-11 | 0.119597 | 0.064 | 0.009 | 9.64E-07 |
| KANSL3    | 6.55E-11 | 0.137228 | 0.077 | 0.014 | 9.79E-07 |
| STOM      | 6.78E-11 | -0.43392 | 0.034 | 0.06  | 1.01E-06 |
| PLCXD1    | 6.81E-11 | 0.123611 | 0.069 | 0.01  | 1.02E-06 |
| NMNAT2    | 6.90E-11 | 0.187844 | 0.049 | 0     | 1.03E-06 |
| RP11-658F | 6.90E-11 | 0.151822 | 0.049 | 0     | 1.03E-06 |
| SCRT2     | 6.90E-11 | 0.173772 | 0.049 | 0     | 1.03E-06 |
| FA2H      | 6.90E-11 | 0.136654 | 0.049 | 0     | 1.03E-06 |
| NOM03     | 6.93E-11 | 0.161838 | 0.061 | 0.003 | 1.04E-06 |
| BHLHE40   | 6.95E-11 | -0.69864 | 0.014 | 0.062 | 1.04E-06 |
| TUBD1     | 6.95E-11 | 0.155725 | 0.092 | 0.022 | 1.04E-06 |
| ZNF621    | 7.18E-11 | 0.109935 | 0.073 | 0.014 | 1.07E-06 |
| DUS2      | 7.35E-11 | 0.161779 | 0.074 | 0.01  | 1.10E-06 |
| CELSR3    | 7.49E-11 | 0.174412 | 0.066 | 0.007 | 1.12E-06 |
| ID1       | 7.50E-11 | 0.12489  | 0.094 | 0.027 | 1.12E-06 |
| TRIM56    | 7.54E-11 | -0.41485 | 0.043 | 0.055 | 1.13E-06 |
| C21orf62  | 7.54E-11 | -0.35301 | 0.055 | 0.06  | 1.13E-06 |
| LINC00643 | 7.59E-11 | 0.183175 | 0.074 | 0.01  | 1.13E-06 |
| ALDH16A1  | 7.65E-11 | 0.113938 | 0.073 | 0.014 | 1.14E-06 |
| SEC14L2   | 7.77E-11 | -0.14626 | 0.087 | 0.051 | 1.16E-06 |
| CD58      | 7.98E-11 | -0.29322 | 0.048 | 0.048 | 1.19E-06 |
| ADORA1    | 8.03E-11 | -0.36274 | 0.038 | 0.062 | 1.20E-06 |
| AGO4      | 8.11E-11 | 0.187372 | 0.068 | 0.005 | 1.21E-06 |
| MPV17L    | 8.46E-11 | -0.14979 | 0.061 | 0.038 | 1.26E-06 |
| RP11-138A | 8.57E-11 | 0.209682 | 0.125 | 0.039 | 1.28E-06 |
| TAF5L     | 8.70E-11 | 0.120211 | 0.061 | 0.007 | 1.30E-06 |
| AK9       | 8.77E-11 | 0.154849 | 0.061 | 0.005 | 1.31E-06 |
| FAM173B   | 8.78E-11 | 0.141    | 0.074 | 0.012 | 1.31E-06 |
| NRBP2     | 8.84E-11 | 0.149123 | 0.092 | 0.024 | 1.32E-06 |
| WASF3     | 8.84E-11 | -0.25769 | 0.053 | 0.048 | 1.32E-06 |
| SCML1     | 9.08E-11 | -0.15455 | 0.062 | 0.041 | 1.36E-06 |
| TMEM255A  | 9.08E-11 | -0.10961 | 0.062 | 0.034 | 1.36E-06 |
| EGR2      | 9.18E-11 | -0.15337 | 0.073 | 0.05  | 1.37E-06 |
| OCEL1     | 9.24E-11 | -0.17756 | 0.056 | 0.039 | 1.38E-06 |
| PLEKHA8   | 9.30E-11 | 0.165502 | 0.07  | 0.005 | 1.39E-06 |
| DGKI      | 9.34E-11 | 0.139027 | 0.066 | 0.009 | 1.40E-06 |
| PAPD5     | 9.45E-11 | 0.168657 | 0.077 | 0.01  | 1.41E-06 |
| EEF1A2    | 9.58E-11 | 0.160849 | 0.066 | 0.009 | 1.43E-06 |
| SLC9B2    | 9.79E-11 | 0.120843 | 0.07  | 0.012 | 1.46E-06 |
| ZMYND19   | 9.91E-11 | 0.116192 | 0.053 | 0.003 | 1.48E-06 |
| TP53INP1  | 9.93E-11 | 0.192944 | 0.065 | 0.003 | 1.48E-06 |
| CYP2U1    | 9.94E-11 | 0.138532 | 0.065 | 0.009 | 1.49E-06 |
| AHCYL2    | 1.01E-10 | 0.163193 | 0.077 | 0.01  | 1.50E-06 |

|           |          |          |       |       |          |
|-----------|----------|----------|-------|-------|----------|
| TNFSF12   | 1.01E-10 | -0.12574 | 0.059 | 0.031 | 1.51E-06 |
| ST8SIA1   | 1.02E-10 | 0.101624 | 0.092 | 0.029 | 1.52E-06 |
| SRF       | 1.03E-10 | 0.158768 | 0.078 | 0.012 | 1.54E-06 |
| SOX1      | 1.04E-10 | 0.141673 | 0.065 | 0.009 | 1.56E-06 |
| PDCD11    | 1.05E-10 | 0.105212 | 0.065 | 0.01  | 1.58E-06 |
| PGAM5     | 1.07E-10 | 0.158953 | 0.062 | 0.003 | 1.60E-06 |
| POFUT2    | 1.08E-10 | 0.113268 | 0.074 | 0.015 | 1.61E-06 |
| PPTC7     | 1.08E-10 | 0.102106 | 0.064 | 0.009 | 1.62E-06 |
| PGAP2     | 1.11E-10 | -0.12184 | 0.078 | 0.044 | 1.66E-06 |
| RP4-635E1 | 1.11E-10 | 0.187705 | 0.086 | 0.015 | 1.66E-06 |
| LRRK2     | 1.13E-10 | 0.149672 | 0.075 | 0.012 | 1.69E-06 |
| CERS1     | 1.13E-10 | -0.15523 | 0.079 | 0.053 | 1.70E-06 |
| CAND2     | 1.15E-10 | 0.200867 | 0.074 | 0.007 | 1.72E-06 |
| PAQR3     | 1.15E-10 | 0.138444 | 0.07  | 0.01  | 1.72E-06 |
| FGD3      | 1.15E-10 | 0.117485 | 0.053 | 0.002 | 1.72E-06 |
| VPS39     | 1.20E-10 | 0.117233 | 0.07  | 0.014 | 1.79E-06 |
| PTPRN     | 1.21E-10 | -0.10384 | 0.074 | 0.044 | 1.81E-06 |
| C17orf97  | 1.23E-10 | 0.143247 | 0.081 | 0.017 | 1.84E-06 |
| CAMK2B    | 1.24E-10 | -0.43816 | 0.046 | 0.072 | 1.86E-06 |
| ZKSCAN7   | 1.25E-10 | 0.155241 | 0.048 | 0     | 1.88E-06 |
| DEPDC7    | 1.25E-10 | 0.152785 | 0.048 | 0     | 1.88E-06 |
| SUPV3L1   | 1.26E-10 | 0.160579 | 0.068 | 0.007 | 1.88E-06 |
| CLSPN     | 1.31E-10 | 0.152769 | 0.066 | 0.009 | 1.96E-06 |
| GEM       | 1.32E-10 | -0.40742 | 0.042 | 0.053 | 1.97E-06 |
| ZNF35     | 1.37E-10 | 0.104197 | 0.06  | 0.009 | 2.04E-06 |
| PCDHB14   | 1.37E-10 | -0.2195  | 0.064 | 0.053 | 2.04E-06 |
| LIN37     | 1.39E-10 | -0.19204 | 0.043 | 0.027 | 2.08E-06 |
| INF2      | 1.43E-10 | 0.129436 | 0.072 | 0.012 | 2.14E-06 |
| TCF20     | 1.46E-10 | 0.21725  | 0.078 | 0.009 | 2.19E-06 |
| TMEM220   | 1.52E-10 | 0.103269 | 0.048 | 0.002 | 2.27E-06 |
| SLC27A4   | 1.53E-10 | 0.120743 | 0.049 | 0.002 | 2.29E-06 |
| TMEM176A  | 1.57E-10 | -0.35649 | 0.046 | 0.056 | 2.34E-06 |
| RP1-223E5 | 1.57E-10 | 0.184614 | 0.07  | 0.009 | 2.35E-06 |
| CTS0      | 1.61E-10 | 0.146636 | 0.083 | 0.019 | 2.41E-06 |
| PHKG2     | 1.65E-10 | -0.12639 | 0.074 | 0.044 | 2.46E-06 |
| ZNF507    | 1.67E-10 | 0.109414 | 0.07  | 0.014 | 2.49E-06 |
| CCDC102B  | 1.68E-10 | -0.16005 | 0.082 | 0.056 | 2.51E-06 |
| 10-Sep    | 1.70E-10 | 0.119509 | 0.081 | 0.019 | 2.54E-06 |
| SLC19A1   | 1.70E-10 | 0.111116 | 0.057 | 0.007 | 2.54E-06 |
| RP1-40E16 | 1.71E-10 | 0.159048 | 0.059 | 0.002 | 2.55E-06 |
| HIC2      | 1.71E-10 | 0.185251 | 0.069 | 0.005 | 2.55E-06 |
| MAPT-AS1  | 1.74E-10 | 0.233241 | 0.086 | 0.015 | 2.61E-06 |
| PHF13     | 1.77E-10 | 0.115374 | 0.069 | 0.012 | 2.65E-06 |
| ZNF529    | 1.77E-10 | 0.236556 | 0.085 | 0.012 | 2.65E-06 |
| NFKBIZ    | 1.77E-10 | -0.19592 | 0.07  | 0.058 | 2.65E-06 |
| AEBP2     | 1.81E-10 | 0.124615 | 0.074 | 0.014 | 2.71E-06 |
| RP11-69E1 | 1.84E-10 | 0.184492 | 0.072 | 0.009 | 2.75E-06 |
| NOP14     | 1.84E-10 | 0.139572 | 0.07  | 0.01  | 2.75E-06 |
| TXNDC11   | 1.88E-10 | 0.106238 | 0.074 | 0.015 | 2.81E-06 |
| USP20     | 1.88E-10 | 0.142524 | 0.075 | 0.012 | 2.81E-06 |
| KIAA1324L | 1.93E-10 | 0.131193 | 0.049 | 0.002 | 2.88E-06 |



|           |          |          |       |       |          |
|-----------|----------|----------|-------|-------|----------|
| RBL1      | 2.00E-10 | 0.14786  | 0.062 | 0.005 | 2.99E-06 |
| VCAM1     | 2.01E-10 | -0.67269 | 0.001 | 0.051 | 3.01E-06 |
| EID2B     | 2.02E-10 | 0.121797 | 0.092 | 0.024 | 3.02E-06 |
| TMEM260   | 2.06E-10 | 0.127048 | 0.074 | 0.014 | 3.08E-06 |
| NACC1     | 2.10E-10 | -0.11152 | 0.07  | 0.039 | 3.13E-06 |
| MIR181A2H | 2.13E-10 | 0.160792 | 0.061 | 0.003 | 3.18E-06 |
| PCP4      | 2.17E-10 | 0.113131 | 0.064 | 0.014 | 3.25E-06 |
| PNPLA4    | 2.21E-10 | -0.18904 | 0.043 | 0.029 | 3.31E-06 |
| LRIG2     | 2.25E-10 | 0.134453 | 0.077 | 0.014 | 3.37E-06 |
| RAI2      | 2.28E-10 | 0.143402 | 0.047 | 0     | 3.41E-06 |
| VSTM2B    | 2.28E-10 | 0.151368 | 0.047 | 0     | 3.41E-06 |
| TAGLN     | 2.32E-10 | -0.65215 | 0.014 | 0.051 | 3.47E-06 |
| CNIH3     | 2.38E-10 | -0.36687 | 0.047 | 0.062 | 3.55E-06 |
| RP11-637A | 2.39E-10 | 0.138677 | 0.055 | 0.003 | 3.57E-06 |
| USPL1     | 2.45E-10 | 0.117787 | 0.074 | 0.017 | 3.66E-06 |
| LRP1B     | 2.45E-10 | 0.12033  | 0.07  | 0.012 | 3.67E-06 |
| ZNF615    | 2.46E-10 | 0.177401 | 0.073 | 0.01  | 3.67E-06 |
| MXRA7     | 2.55E-10 | -0.26589 | 0.06  | 0.055 | 3.81E-06 |
| NEK9      | 2.55E-10 | 0.137032 | 0.079 | 0.017 | 3.82E-06 |
| BCAS4     | 2.66E-10 | -0.37047 | 0.039 | 0.051 | 3.97E-06 |
| GNS       | 2.67E-10 | -0.15678 | 0.064 | 0.043 | 3.99E-06 |
| TUB       | 2.69E-10 | 0.144182 | 0.055 | 0.002 | 4.02E-06 |
| CXorf23   | 2.71E-10 | 0.132257 | 0.064 | 0.01  | 4.05E-06 |
| MRGBP     | 2.72E-10 | 0.163665 | 0.085 | 0.015 | 4.06E-06 |
| HAUS8     | 2.73E-10 | -0.10595 | 0.057 | 0.027 | 4.08E-06 |
| VPS54     | 2.82E-10 | 0.134845 | 0.064 | 0.007 | 4.22E-06 |
| C6orf15   | 2.89E-10 | -0.65395 | 0.008 | 0.067 | 4.32E-06 |
| ZNFX1     | 3.01E-10 | -0.15171 | 0.073 | 0.048 | 4.49E-06 |
| SFI1      | 3.06E-10 | 0.135551 | 0.068 | 0.01  | 4.57E-06 |
| FKTN      | 3.17E-10 | 0.127717 | 0.066 | 0.01  | 4.73E-06 |
| DLC1      | 3.18E-10 | -0.27789 | 0.044 | 0.046 | 4.76E-06 |
| ECE1      | 3.30E-10 | -0.32068 | 0.046 | 0.062 | 4.94E-06 |
| PLEKHG2   | 3.33E-10 | 0.102739 | 0.062 | 0.012 | 4.98E-06 |
| PCYT2     | 3.37E-10 | 0.131129 | 0.082 | 0.019 | 5.04E-06 |
| SIDT2     | 3.39E-10 | -0.22265 | 0.049 | 0.039 | 5.07E-06 |
| USP30     | 3.40E-10 | 0.127692 | 0.068 | 0.01  | 5.09E-06 |
| CDK5RAP2  | 3.43E-10 | -0.12716 | 0.06  | 0.032 | 5.13E-06 |
| KITLG     | 3.46E-10 | 0.170694 | 0.066 | 0.007 | 5.18E-06 |
| ITM2A     | 3.55E-10 | 0.30905  | 0.075 | 0.009 | 5.31E-06 |
| TRIP10    | 3.61E-10 | -0.10493 | 0.057 | 0.034 | 5.39E-06 |
| DCAF17    | 3.77E-10 | 0.157619 | 0.053 | 0.002 | 5.64E-06 |
| RP11-536C | 3.78E-10 | 0.163869 | 0.049 | 0.002 | 5.64E-06 |
| SRCAP     | 3.78E-10 | 0.12421  | 0.069 | 0.012 | 5.65E-06 |
| PTP4A3    | 3.79E-10 | 0.138715 | 0.09  | 0.026 | 5.66E-06 |
| CNTRL     | 3.80E-10 | 0.135208 | 0.095 | 0.026 | 5.68E-06 |
| CCDC30    | 3.86E-10 | -0.1638  | 0.039 | 0.027 | 5.77E-06 |
| RAPGEF4   | 3.94E-10 | 0.198314 | 0.066 | 0.005 | 5.88E-06 |
| PHF1      | 3.96E-10 | -0.11227 | 0.081 | 0.051 | 5.91E-06 |
| ZNF211    | 4.03E-10 | -0.20803 | 0.064 | 0.039 | 6.02E-06 |
| PUS1      | 4.12E-10 | 0.113295 | 0.075 | 0.015 | 6.16E-06 |
| FANCE     | 4.14E-10 | 0.122723 | 0.046 | 0     | 6.19E-06 |

|           |          |          |       |       |          |
|-----------|----------|----------|-------|-------|----------|
| LINC00574 | 4.14E-10 | 0.149438 | 0.046 | 0     | 6.19E-06 |
| SIX4      | 4.14E-10 | 0.147522 | 0.046 | 0     | 6.19E-06 |
| DUSP9     | 4.14E-10 | 0.212573 | 0.046 | 0     | 6.19E-06 |
| RP11-119E | 4.17E-10 | 0.15427  | 0.075 | 0.014 | 6.23E-06 |
| CREB3L2   | 4.30E-10 | 0.104232 | 0.077 | 0.019 | 6.42E-06 |
| VIM-AS1   | 4.34E-10 | -0.201   | 0.035 | 0.024 | 6.48E-06 |
| DHRS3     | 4.37E-10 | -0.50454 | 0.01  | 0.055 | 6.53E-06 |
| MSANTD2   | 4.42E-10 | 0.114769 | 0.07  | 0.014 | 6.60E-06 |
| ADAMTS6   | 4.51E-10 | 0.101319 | 0.074 | 0.019 | 6.74E-06 |
| SLC12A4   | 4.55E-10 | -0.10021 | 0.046 | 0.021 | 6.80E-06 |
| C2orf74   | 4.66E-10 | -0.30356 | 0.033 | 0.036 | 6.96E-06 |
| KIAA1147  | 4.74E-10 | 0.13644  | 0.075 | 0.015 | 7.09E-06 |
| RFX1      | 4.79E-10 | 0.145674 | 0.075 | 0.012 | 7.16E-06 |
| TBC1D12   | 4.86E-10 | 0.188125 | 0.057 | 0.002 | 7.26E-06 |
| ZNF865    | 4.86E-10 | 0.105466 | 0.065 | 0.01  | 7.26E-06 |
| SCRT1     | 4.92E-10 | 0.185207 | 0.064 | 0.005 | 7.35E-06 |
| PLS3      | 4.97E-10 | -0.3504  | 0.061 | 0.079 | 7.42E-06 |
| RP11-499F | 5.07E-10 | 0.172304 | 0.061 | 0.003 | 7.57E-06 |
| LRRTM3    | 5.14E-10 | 0.118891 | 0.056 | 0.005 | 7.68E-06 |
| ZNF678    | 5.31E-10 | 0.169542 | 0.072 | 0.009 | 7.94E-06 |
| MKL2      | 5.48E-10 | -0.14169 | 0.049 | 0.027 | 8.19E-06 |
| ZZEF1     | 5.55E-10 | 0.12272  | 0.069 | 0.012 | 8.30E-06 |
| CTD-2035E | 5.57E-10 | 0.183685 | 0.07  | 0.007 | 8.33E-06 |
| JOSD1     | 5.58E-10 | 0.172444 | 0.088 | 0.019 | 8.34E-06 |
| RALGPS1   | 5.70E-10 | 0.131435 | 0.07  | 0.012 | 8.51E-06 |
| CDK5R2    | 5.75E-10 | 0.163651 | 0.059 | 0.007 | 8.60E-06 |
| TTC13     | 5.78E-10 | 0.122429 | 0.062 | 0.009 | 8.64E-06 |
| ATAD5     | 5.80E-10 | 0.162433 | 0.073 | 0.01  | 8.66E-06 |
| CHKB      | 5.80E-10 | 0.153752 | 0.055 | 0.003 | 8.67E-06 |
| RFNG      | 5.97E-10 | 0.128379 | 0.091 | 0.026 | 8.92E-06 |
| VWCE      | 6.03E-10 | 0.133839 | 0.064 | 0.009 | 9.00E-06 |
| SH3BP5L   | 6.03E-10 | 0.116459 | 0.062 | 0.009 | 9.02E-06 |
| GUCY1A2   | 6.66E-10 | 0.20403  | 0.074 | 0.009 | 9.95E-06 |
| TMEM17    | 6.76E-10 | 0.126891 | 0.065 | 0.012 | 1.01E-05 |
| TTBK2     | 6.85E-10 | 0.115442 | 0.075 | 0.017 | 1.02E-05 |
| SP110     | 6.91E-10 | -0.17139 | 0.064 | 0.048 | 1.03E-05 |
| PPP2R2D   | 6.98E-10 | 0.140386 | 0.056 | 0.005 | 1.04E-05 |
| IQGAP1    | 7.45E-10 | -0.49728 | 0.022 | 0.065 | 1.11E-05 |
| STEAP3    | 7.47E-10 | -0.26561 | 0.049 | 0.05  | 1.12E-05 |
| GMIP      | 7.52E-10 | 0.142108 | 0.044 | 0     | 1.12E-05 |
| PRKCE     | 7.52E-10 | 0.138859 | 0.044 | 0     | 1.12E-05 |
| DRP2      | 7.52E-10 | 0.153135 | 0.044 | 0     | 1.12E-05 |
| MAPK14    | 7.86E-10 | 0.134965 | 0.073 | 0.014 | 1.18E-05 |
| MIR7-3HG  | 7.87E-10 | -0.51357 | 0.029 | 0.06  | 1.18E-05 |
| OGFOD2    | 7.95E-10 | -0.11513 | 0.052 | 0.027 | 1.19E-05 |
| RGR       | 7.96E-10 | 0.20157  | 0.062 | 0.007 | 1.19E-05 |
| SDC1      | 8.00E-10 | 0.145033 | 0.062 | 0.007 | 1.20E-05 |
| HOXD10    | 8.02E-10 | 0.109984 | 0.065 | 0.01  | 1.20E-05 |
| TAF6L     | 8.12E-10 | 0.137895 | 0.07  | 0.012 | 1.21E-05 |
| USP9Y     | 8.24E-10 | 0.157069 | 0.055 | 0.003 | 1.23E-05 |
| EP400NL   | 8.27E-10 | 0.108476 | 0.059 | 0.009 | 1.24E-05 |

|           |          |          |       |       |          |
|-----------|----------|----------|-------|-------|----------|
| TBKBP1    | 8.33E-10 | 0.112603 | 0.062 | 0.009 | 1.24E-05 |
| CHML      | 8.39E-10 | 0.134802 | 0.053 | 0.002 | 1.25E-05 |
| PARP11    | 8.49E-10 | 0.142785 | 0.069 | 0.01  | 1.27E-05 |
| NLE1      | 8.55E-10 | 0.147813 | 0.061 | 0.005 | 1.28E-05 |
| EPT1      | 8.64E-10 | 0.129048 | 0.057 | 0.005 | 1.29E-05 |
| NEURL4    | 8.77E-10 | 0.149848 | 0.052 | 0.002 | 1.31E-05 |
| FAM91A1   | 8.83E-10 | 0.163014 | 0.073 | 0.012 | 1.32E-05 |
| NADSYN1   | 9.16E-10 | -0.11768 | 0.056 | 0.026 | 1.37E-05 |
| PDGFA     | 9.20E-10 | -0.21015 | 0.072 | 0.058 | 1.37E-05 |
| CDC45     | 9.27E-10 | 0.114463 | 0.046 | 0.002 | 1.39E-05 |
| SLC30A1   | 9.47E-10 | 0.152982 | 0.059 | 0.005 | 1.41E-05 |
| TMPRSS5   | 9.49E-10 | 0.143476 | 0.069 | 0.012 | 1.42E-05 |
| ZBTB33    | 9.90E-10 | 0.150443 | 0.075 | 0.014 | 1.48E-05 |
| SPATA6    | 1.02E-09 | -0.14992 | 0.072 | 0.051 | 1.53E-05 |
| NCS1      | 1.03E-09 | 0.128857 | 0.064 | 0.01  | 1.53E-05 |
| TRIM22    | 1.03E-09 | -0.32022 | 0.042 | 0.053 | 1.54E-05 |
| ZNF724P   | 1.03E-09 | 0.170823 | 0.068 | 0.007 | 1.54E-05 |
| NAA40     | 1.05E-09 | 0.114074 | 0.074 | 0.019 | 1.57E-05 |
| SFXN3     | 1.07E-09 | -0.19655 | 0.059 | 0.043 | 1.60E-05 |
| BBS10     | 1.08E-09 | 0.152801 | 0.055 | 0.003 | 1.61E-05 |
| AKT3      | 1.08E-09 | 0.100153 | 0.075 | 0.021 | 1.62E-05 |
| ACSF3     | 1.11E-09 | 0.110153 | 0.088 | 0.027 | 1.67E-05 |
| LIN9      | 1.12E-09 | 0.138556 | 0.061 | 0.005 | 1.68E-05 |
| NMRK1     | 1.14E-09 | -0.11421 | 0.065 | 0.034 | 1.70E-05 |
| CABP1     | 1.14E-09 | 0.105404 | 0.052 | 0.005 | 1.70E-05 |
| PCDH7     | 1.14E-09 | 0.123348 | 0.047 | 0.002 | 1.71E-05 |
| TRAPPC10  | 1.27E-09 | 0.128235 | 0.06  | 0.007 | 1.90E-05 |
| SPEG      | 1.28E-09 | -0.11617 | 0.064 | 0.036 | 1.91E-05 |
| PPP3CB    | 1.29E-09 | 0.163076 | 0.087 | 0.021 | 1.92E-05 |
| NEK7      | 1.30E-09 | 0.133651 | 0.081 | 0.019 | 1.94E-05 |
| PLEKHM1   | 1.31E-09 | 0.153401 | 0.065 | 0.007 | 1.96E-05 |
| LSS       | 1.32E-09 | -0.19674 | 0.053 | 0.043 | 1.97E-05 |
| RP11-588G | 1.32E-09 | 0.152003 | 0.051 | 0.002 | 1.97E-05 |
| TMPO-AS1  | 1.33E-09 | 0.208803 | 0.053 | 0.002 | 1.99E-05 |
| TSPAN33   | 1.36E-09 | 0.133833 | 0.043 | 0     | 2.04E-05 |
| BACH2     | 1.36E-09 | 0.131685 | 0.043 | 0     | 2.04E-05 |
| ZNF625    | 1.37E-09 | 0.170492 | 0.072 | 0.009 | 2.04E-05 |
| CHAF1A    | 1.43E-09 | 0.122106 | 0.079 | 0.019 | 2.14E-05 |
| WWP2      | 1.43E-09 | 0.15553  | 0.068 | 0.009 | 2.14E-05 |
| ZNF610    | 1.47E-09 | 0.1414   | 0.051 | 0.002 | 2.19E-05 |
| GRAMD4    | 1.51E-09 | 0.144741 | 0.065 | 0.009 | 2.26E-05 |
| SULF1     | 1.60E-09 | 0.178656 | 0.062 | 0.007 | 2.39E-05 |
| ACO09948. | 1.63E-09 | 0.145767 | 0.061 | 0.007 | 2.44E-05 |
| YJEFN3    | 1.64E-09 | 0.150083 | 0.065 | 0.007 | 2.45E-05 |
| VWA5A     | 1.65E-09 | -0.27733 | 0.042 | 0.053 | 2.47E-05 |
| SH3GLB2   | 1.73E-09 | 0.166312 | 0.07  | 0.01  | 2.58E-05 |
| TCEAL6    | 1.75E-09 | -0.13061 | 0.049 | 0.027 | 2.61E-05 |
| TXNDC16   | 1.76E-09 | 0.102097 | 0.064 | 0.012 | 2.63E-05 |
| EBLN2     | 1.77E-09 | 0.144434 | 0.069 | 0.012 | 2.65E-05 |
| UBXN11    | 1.81E-09 | -0.40991 | 0.038 | 0.079 | 2.71E-05 |
| PPM1L     | 1.84E-09 | 0.132612 | 0.051 | 0.002 | 2.75E-05 |

|           |          |          |       |       |          |
|-----------|----------|----------|-------|-------|----------|
| RAB11FIP2 | 1.87E-09 | 0.119562 | 0.053 | 0.007 | 2.80E-05 |
| CCDC28A   | 1.88E-09 | -0.15065 | 0.061 | 0.039 | 2.81E-05 |
| DIO2      | 1.89E-09 | -0.49165 | 0.017 | 0.056 | 2.83E-05 |
| MST01     | 1.94E-09 | 0.125882 | 0.072 | 0.014 | 2.90E-05 |
| LMO2      | 2.03E-09 | -0.40478 | 0.029 | 0.065 | 3.04E-05 |
| TPST2     | 2.12E-09 | -0.20068 | 0.049 | 0.034 | 3.16E-05 |
| SPTLC2    | 2.18E-09 | 0.156067 | 0.066 | 0.01  | 3.26E-05 |
| TAOK2     | 2.22E-09 | 0.127979 | 0.064 | 0.01  | 3.31E-05 |
| MTHFR     | 2.35E-09 | 0.11556  | 0.074 | 0.017 | 3.52E-05 |
| SGMS1     | 2.41E-09 | 0.183938 | 0.064 | 0.005 | 3.60E-05 |
| CCNJ      | 2.42E-09 | 0.12762  | 0.052 | 0.003 | 3.61E-05 |
| C16orf70  | 2.43E-09 | 0.128982 | 0.055 | 0.005 | 3.63E-05 |
| MANEAL    | 2.43E-09 | 0.108865 | 0.062 | 0.01  | 3.64E-05 |
| ATP6VOE2- | 2.44E-09 | 0.113951 | 0.052 | 0.005 | 3.65E-05 |
| ZNF367    | 2.48E-09 | 0.149389 | 0.042 | 0     | 3.70E-05 |
| FOXP2     | 2.54E-09 | 0.114403 | 0.051 | 0.003 | 3.80E-05 |
| SNHG15    | 2.55E-09 | -0.36325 | 0.068 | 0.075 | 3.81E-05 |
| MAL       | 2.57E-09 | 0.108232 | 0.046 | 0.002 | 3.85E-05 |
| C15orf41  | 2.61E-09 | 0.121386 | 0.061 | 0.01  | 3.90E-05 |
| S100A9    | 2.63E-09 | -0.11739 | 0.042 | 0.026 | 3.93E-05 |
| DLGAP1-AS | 2.69E-09 | -0.11335 | 0.049 | 0.029 | 4.02E-05 |
| UTY       | 2.73E-09 | 0.173509 | 0.053 | 0.002 | 4.08E-05 |
| POLR1B    | 2.78E-09 | 0.149043 | 0.069 | 0.01  | 4.16E-05 |
| MBLAC1    | 2.85E-09 | 0.181666 | 0.052 | 0.002 | 4.25E-05 |
| RP11-357K | 2.87E-09 | 0.132925 | 0.053 | 0.007 | 4.29E-05 |
| ATXN7     | 2.90E-09 | 0.168958 | 0.086 | 0.019 | 4.33E-05 |
| RAB30     | 2.93E-09 | 0.126987 | 0.066 | 0.012 | 4.38E-05 |
| AMMECR1L  | 2.93E-09 | 0.162505 | 0.064 | 0.007 | 4.38E-05 |
| ECHDC2    | 2.98E-09 | -0.28475 | 0.039 | 0.056 | 4.45E-05 |
| RP11-195F | 2.98E-09 | -0.18109 | 0.061 | 0.044 | 4.46E-05 |
| RASL10A   | 2.98E-09 | 0.265496 | 0.082 | 0.015 | 4.46E-05 |
| NANOS1    | 3.00E-09 | 0.143585 | 0.051 | 0.005 | 4.49E-05 |
| PEX6      | 3.06E-09 | 0.16397  | 0.078 | 0.015 | 4.57E-05 |
| ZCCHC14   | 3.07E-09 | 0.109069 | 0.057 | 0.007 | 4.59E-05 |
| SEMA7A    | 3.10E-09 | 0.110856 | 0.052 | 0.005 | 4.64E-05 |
| UBR1      | 3.21E-09 | 0.149849 | 0.073 | 0.012 | 4.80E-05 |
| EFHD1     | 3.30E-09 | 0.160029 | 0.091 | 0.027 | 4.93E-05 |
| PARP8     | 3.30E-09 | 0.137664 | 0.052 | 0.003 | 4.93E-05 |
| SMURF1    | 3.35E-09 | 0.133882 | 0.055 | 0.003 | 5.01E-05 |
| CACTIN    | 3.36E-09 | 0.129882 | 0.056 | 0.005 | 5.03E-05 |
| TEF       | 3.37E-09 | 0.147767 | 0.055 | 0.003 | 5.03E-05 |
| DPY19L1   | 3.38E-09 | -0.17585 | 0.056 | 0.043 | 5.06E-05 |
| RAD51AP1  | 3.41E-09 | 0.101934 | 0.052 | 0.007 | 5.09E-05 |
| PSMG3-AS1 | 3.47E-09 | 0.12354  | 0.065 | 0.012 | 5.19E-05 |
| EMP2      | 3.54E-09 | -0.37239 | 0.036 | 0.053 | 5.29E-05 |
| CPQ       | 3.55E-09 | -0.26726 | 0.043 | 0.051 | 5.31E-05 |
| FYB       | 3.64E-09 | 0.171294 | 0.057 | 0.005 | 5.44E-05 |
| FNDC3B    | 3.65E-09 | -0.12332 | 0.057 | 0.031 | 5.45E-05 |
| MGAT4B    | 3.70E-09 | 0.105241 | 0.048 | 0.005 | 5.52E-05 |
| MAP2K3    | 3.82E-09 | 0.113097 | 0.065 | 0.012 | 5.70E-05 |
| ASGR1     | 3.90E-09 | 0.116483 | 0.061 | 0.009 | 5.83E-05 |

|           |          |          |       |       |          |
|-----------|----------|----------|-------|-------|----------|
| CITF22-92 | 3.98E-09 | 0.238368 | 0.059 | 0.003 | 5.95E-05 |
| KCTD2     | 4.08E-09 | 0.100016 | 0.052 | 0.005 | 6.09E-05 |
| MFAP3     | 4.16E-09 | 0.164147 | 0.06  | 0.005 | 6.22E-05 |
| PHF21B    | 4.22E-09 | 0.163832 | 0.072 | 0.012 | 6.30E-05 |
| ANKRD53   | 4.49E-09 | 0.130359 | 0.04  | 0     | 6.71E-05 |
| RP11-473I | 4.51E-09 | 0.116991 | 0.064 | 0.012 | 6.74E-05 |
| MFSD2A    | 4.62E-09 | -0.18959 | 0.051 | 0.038 | 6.91E-05 |
| RASGRP2   | 4.66E-09 | 0.13537  | 0.049 | 0.002 | 6.97E-05 |
| IKZF4     | 4.70E-09 | 0.160235 | 0.059 | 0.005 | 7.03E-05 |
| LINC01122 | 4.77E-09 | 0.12069  | 0.057 | 0.009 | 7.13E-05 |
| AGTPBP1   | 4.80E-09 | 0.144742 | 0.052 | 0.002 | 7.17E-05 |
| RP11-110G | 4.82E-09 | 0.115205 | 0.052 | 0.005 | 7.20E-05 |
| KCTD1     | 4.86E-09 | 0.110019 | 0.066 | 0.014 | 7.27E-05 |
| HOXD1     | 4.89E-09 | 0.132359 | 0.051 | 0.002 | 7.30E-05 |
| GLIPR1    | 4.97E-09 | -0.53872 | 0.017 | 0.056 | 7.43E-05 |
| PLCL1     | 5.02E-09 | 0.177361 | 0.056 | 0.003 | 7.51E-05 |
| KIAA1328  | 5.07E-09 | -0.1019  | 0.059 | 0.032 | 7.58E-05 |
| HEATR3    | 5.08E-09 | 0.115394 | 0.051 | 0.003 | 7.59E-05 |
| MACROD1   | 5.24E-09 | 0.12077  | 0.077 | 0.021 | 7.84E-05 |
| ELOVL2    | 5.35E-09 | -0.16555 | 0.051 | 0.036 | 8.00E-05 |
| ZFP30     | 5.41E-09 | 0.105715 | 0.055 | 0.007 | 8.08E-05 |
| CXorf40A  | 5.42E-09 | -0.11827 | 0.057 | 0.034 | 8.09E-05 |
| RP11-11N9 | 5.44E-09 | -0.12008 | 0.038 | 0.019 | 8.12E-05 |
| HELZ2     | 5.48E-09 | -0.14872 | 0.07  | 0.05  | 8.19E-05 |
| C12orf4   | 5.54E-09 | 0.110876 | 0.078 | 0.021 | 8.28E-05 |
| PBXIP1    | 5.74E-09 | -0.40823 | 0.03  | 0.062 | 8.57E-05 |
| PPP1R1C   | 5.82E-09 | -0.26073 | 0.049 | 0.046 | 8.70E-05 |
| HOXD9     | 5.83E-09 | 0.110999 | 0.051 | 0.003 | 8.71E-05 |
| AC005076. | 5.84E-09 | 0.112543 | 0.059 | 0.01  | 8.73E-05 |
| NINL      | 5.91E-09 | 0.146207 | 0.061 | 0.005 | 8.84E-05 |
| SDCCAG3   | 5.95E-09 | -0.10313 | 0.044 | 0.024 | 8.90E-05 |
| NFXL1     | 6.07E-09 | 0.100606 | 0.066 | 0.014 | 9.07E-05 |
| FGF7      | 6.22E-09 | -0.2945  | 0.031 | 0.044 | 9.30E-05 |
| ZNF611    | 6.24E-09 | 0.130986 | 0.072 | 0.015 | 9.32E-05 |
| CDR2L     | 6.31E-09 | 0.146162 | 0.057 | 0.005 | 9.42E-05 |
| TNFSF13B  | 6.36E-09 | -0.15111 | 0.039 | 0.026 | 9.50E-05 |
| TFE3      | 6.40E-09 | -0.1136  | 0.048 | 0.027 | 9.56E-05 |
| CHRNA5    | 6.60E-09 | 0.118559 | 0.051 | 0.003 | 9.86E-05 |
| WDFY3     | 6.84E-09 | 0.11164  | 0.068 | 0.015 | 0.000102 |
| C1orf159  | 6.96E-09 | 0.115884 | 0.046 | 0.003 | 0.000104 |
| CLSTN2    | 7.07E-09 | 0.113574 | 0.057 | 0.009 | 0.000106 |
| TNFRSF11E | 7.21E-09 | -0.13699 | 0.048 | 0.031 | 0.000108 |
| HDDC3     | 7.29E-09 | -0.12643 | 0.068 | 0.048 | 0.000109 |
| CENPC     | 7.47E-09 | 0.148046 | 0.083 | 0.021 | 0.000112 |
| ZNF334    | 7.51E-09 | 0.16221  | 0.079 | 0.019 | 0.000112 |
| TRIM23    | 7.58E-09 | 0.137662 | 0.073 | 0.017 | 0.000113 |
| UTP15     | 7.86E-09 | 0.115436 | 0.061 | 0.01  | 0.000117 |
| NAGA      | 7.94E-09 | -0.1148  | 0.038 | 0.021 | 0.000119 |
| ZNF512B   | 8.01E-09 | 0.154975 | 0.069 | 0.01  | 0.00012  |
| LPAR2     | 8.15E-09 | 0.118651 | 0.039 | 0     | 0.000122 |
| SEMA3A    | 8.15E-09 | 0.110289 | 0.039 | 0     | 0.000122 |

|           |          |          |       |       |          |
|-----------|----------|----------|-------|-------|----------|
| MYOT      | 8.15E-09 | 0.13616  | 0.039 | 0     | 0.000122 |
| TUFT1     | 8.15E-09 | 0.126513 | 0.039 | 0     | 0.000122 |
| ZFP69B    | 8.15E-09 | 0.117443 | 0.039 | 0     | 0.000122 |
| TET1      | 8.24E-09 | 0.157878 | 0.064 | 0.009 | 0.000123 |
| POLE2     | 8.28E-09 | 0.148464 | 0.059 | 0.007 | 0.000124 |
| KIF19     | 8.46E-09 | 0.205127 | 0.049 | 0.002 | 0.000126 |
| PIFO      | 8.48E-09 | -0.53419 | 0.009 | 0.062 | 0.000127 |
| SPATA5L1  | 8.50E-09 | 0.164907 | 0.069 | 0.01  | 0.000127 |
| KDELC2    | 8.51E-09 | -0.14441 | 0.042 | 0.026 | 0.000127 |
| COX18     | 8.61E-09 | 0.10508  | 0.074 | 0.019 | 0.000129 |
| PDE6A     | 8.69E-09 | 0.112949 | 0.052 | 0.005 | 0.00013  |
| HRH1      | 8.97E-09 | -0.43388 | 0.005 | 0.048 | 0.000134 |
| DLGAP1    | 9.35E-09 | 0.153328 | 0.047 | 0.002 | 0.00014  |
| FBX045    | 9.35E-09 | 0.102873 | 0.052 | 0.007 | 0.00014  |
| ACVR2B    | 9.35E-09 | 0.135014 | 0.059 | 0.007 | 0.00014  |
| SDC2      | 9.36E-09 | -0.26151 | 0.047 | 0.046 | 0.00014  |
| CDKN2B    | 9.36E-09 | 0.106558 | 0.07  | 0.017 | 0.00014  |
| BHLHB9    | 9.47E-09 | 0.127736 | 0.052 | 0.005 | 0.000141 |
| ADAMTS9   | 9.56E-09 | -0.42835 | 0.016 | 0.053 | 0.000143 |
| BCL9L     | 9.93E-09 | 0.122681 | 0.055 | 0.007 | 0.000148 |
| ROM1      | 9.98E-09 | -0.38994 | 0.026 | 0.056 | 0.000149 |
| CPLX2     | 1.00E-08 | 0.143076 | 0.047 | 0.002 | 0.00015  |
| SLC44A5   | 1.05E-08 | 0.111356 | 0.048 | 0.003 | 0.000157 |
| PCNXL2    | 1.05E-08 | 0.137499 | 0.081 | 0.021 | 0.000157 |
| SLC35A2   | 1.06E-08 | 0.11889  | 0.087 | 0.027 | 0.000158 |
| SEC24D    | 1.06E-08 | -0.18907 | 0.038 | 0.031 | 0.000158 |
| ZNF395    | 1.11E-08 | -0.1591  | 0.048 | 0.032 | 0.000166 |
| UVRAG     | 1.13E-08 | 0.159948 | 0.073 | 0.014 | 0.000169 |
| PIGZ      | 1.15E-08 | 0.109076 | 0.049 | 0.005 | 0.000172 |
| SCYL3     | 1.15E-08 | 0.129257 | 0.062 | 0.01  | 0.000172 |
| LIFR-AS1  | 1.16E-08 | 0.171452 | 0.068 | 0.012 | 0.000174 |
| SEMA5B    | 1.16E-08 | 0.136961 | 0.056 | 0.007 | 0.000174 |
| ZNF660    | 1.17E-08 | 0.131654 | 0.06  | 0.007 | 0.000174 |
| CTD-3184A | 1.17E-08 | 0.156152 | 0.069 | 0.012 | 0.000175 |
| RAPGEF1   | 1.19E-08 | -0.1784  | 0.038 | 0.026 | 0.000178 |
| ZBED4     | 1.26E-08 | 0.134811 | 0.057 | 0.007 | 0.000188 |
| GBP3      | 1.30E-08 | -0.51092 | 0.009 | 0.06  | 0.000195 |
| DYRK2     | 1.33E-08 | 0.123977 | 0.064 | 0.012 | 0.000199 |
| COL6A2    | 1.35E-08 | -0.3866  | 0.021 | 0.053 | 0.000201 |
| LDLR      | 1.35E-08 | -0.32644 | 0.031 | 0.043 | 0.000202 |
| SNX32     | 1.41E-08 | 0.151297 | 0.056 | 0.005 | 0.00021  |
| SPDL1     | 1.41E-08 | 0.120562 | 0.056 | 0.007 | 0.000211 |
| PINLYP    | 1.41E-08 | -0.22944 | 0.04  | 0.036 | 0.000211 |
| KLHL2     | 1.42E-08 | 0.100871 | 0.059 | 0.01  | 0.000213 |
| HDHD3     | 1.48E-08 | -0.18637 | 0.047 | 0.039 | 0.000221 |
| NYAP1     | 1.48E-08 | 0.127926 | 0.038 | 0     | 0.000221 |
| RP11-342K | 1.48E-08 | 0.136228 | 0.038 | 0     | 0.000221 |
| TPRN      | 1.48E-08 | 0.118248 | 0.038 | 0     | 0.000221 |
| FUT9      | 1.48E-08 | 0.113691 | 0.038 | 0     | 0.000221 |
| CNNM3     | 1.48E-08 | 0.126723 | 0.038 | 0     | 0.000221 |
| EZH1      | 1.49E-08 | -0.19354 | 0.055 | 0.044 | 0.000223 |

|           |          |          |       |       |          |
|-----------|----------|----------|-------|-------|----------|
| RP11-15A1 | 1.54E-08 | 0.123327 | 0.066 | 0.012 | 0.00023  |
| CENPBD1   | 1.61E-08 | 0.107447 | 0.056 | 0.01  | 0.00024  |
| HCFC2     | 1.62E-08 | -0.17506 | 0.036 | 0.027 | 0.000242 |
| RBAK      | 1.64E-08 | 0.105044 | 0.065 | 0.014 | 0.000245 |
| ANKHD1    | 1.66E-08 | 0.141701 | 0.081 | 0.022 | 0.000248 |
| CCDC149   | 1.69E-08 | 0.112329 | 0.044 | 0.003 | 0.000252 |
| UBL7-AS1  | 1.75E-08 | 0.112013 | 0.057 | 0.009 | 0.000262 |
| UNKL      | 1.77E-08 | 0.167039 | 0.07  | 0.012 | 0.000264 |
| MYBPC1    | 1.84E-08 | -0.3963  | 0.01  | 0.039 | 0.000275 |
| FCGR3A    | 1.95E-08 | 0.138675 | 0.061 | 0.01  | 0.000292 |
| VPS13B    | 1.96E-08 | 0.107615 | 0.066 | 0.017 | 0.000292 |
| KCNJ3     | 1.99E-08 | -0.20112 | 0.049 | 0.043 | 0.000297 |
| LINC00324 | 2.04E-08 | 0.157406 | 0.048 | 0.002 | 0.000305 |
| DOK4      | 2.06E-08 | 0.156297 | 0.052 | 0.003 | 0.000308 |
| DSCC1     | 2.12E-08 | 0.181538 | 0.065 | 0.009 | 0.000317 |
| BOLA2B    | 2.12E-08 | -0.22825 | 0.044 | 0.039 | 0.000318 |
| PCDHB5    | 2.24E-08 | 0.202687 | 0.053 | 0.003 | 0.000334 |
| SERPINB1  | 2.25E-08 | -0.4227  | 0.02  | 0.039 | 0.000336 |
| NRG1      | 2.25E-08 | 0.181994 | 0.062 | 0.007 | 0.000336 |
| TMEM150C  | 2.31E-08 | 0.11218  | 0.044 | 0.003 | 0.000345 |
| RFWD3     | 2.37E-08 | 0.112492 | 0.06  | 0.01  | 0.000355 |
| DMXL2     | 2.52E-08 | 0.111579 | 0.073 | 0.019 | 0.000377 |
| LINC00869 | 2.56E-08 | -0.50829 | 0.008 | 0.058 | 0.000383 |
| NQO1      | 2.57E-08 | -0.32068 | 0.021 | 0.036 | 0.000384 |
| MAP7D3    | 2.58E-08 | -0.16654 | 0.052 | 0.038 | 0.000385 |
| PANX1     | 2.67E-08 | 0.144639 | 0.059 | 0.009 | 0.0004   |
| FAM149A   | 2.68E-08 | 0.148615 | 0.036 | 0     | 0.0004   |
| WNK2      | 2.68E-08 | 0.103685 | 0.036 | 0     | 0.0004   |
| TIGD3     | 2.68E-08 | 0.105525 | 0.036 | 0     | 0.0004   |
| AC006994  | 2.68E-08 | 0.103474 | 0.036 | 0     | 0.0004   |
| ZNF699    | 2.70E-08 | 0.165594 | 0.056 | 0.005 | 0.000403 |
| S100A4    | 2.73E-08 | -0.23526 | 0.04  | 0.032 | 0.000408 |
| DUSP15    | 2.76E-08 | 0.120775 | 0.057 | 0.009 | 0.000412 |
| NDUFA4L2  | 2.86E-08 | -0.2978  | 0.038 | 0.043 | 0.000427 |
| ACVR1     | 2.88E-08 | 0.12193  | 0.052 | 0.007 | 0.000431 |
| DAPK1     | 2.91E-08 | 0.110389 | 0.046 | 0.003 | 0.000435 |
| CYP27C1   | 2.96E-08 | 0.15486  | 0.052 | 0.005 | 0.000443 |
| BDH2      | 2.97E-08 | -0.41464 | 0.026 | 0.063 | 0.000444 |
| PLD6      | 3.01E-08 | 0.141226 | 0.047 | 0.002 | 0.00045  |
| ZNF787    | 3.03E-08 | 0.136558 | 0.049 | 0.003 | 0.000453 |
| IPPK      | 3.25E-08 | 0.103387 | 0.061 | 0.012 | 0.000486 |
| IQSEC1    | 3.34E-08 | 0.102552 | 0.047 | 0.005 | 0.000499 |
| SLC16A1-A | 3.39E-08 | -0.27486 | 0.031 | 0.041 | 0.000507 |
| ARSJ      | 3.48E-08 | -0.42855 | 0.008 | 0.058 | 0.000521 |
| ZBTB37    | 3.49E-08 | 0.128134 | 0.07  | 0.015 | 0.000521 |
| TGIF2     | 3.59E-08 | 0.144368 | 0.055 | 0.005 | 0.000536 |
| CTHRC1    | 3.64E-08 | 0.13364  | 0.049 | 0.003 | 0.000543 |
| ENKUR     | 3.67E-08 | -0.41737 | 0.036 | 0.075 | 0.000548 |
| ZNF629    | 3.80E-08 | 0.114893 | 0.06  | 0.01  | 0.000568 |
| PTCHD2    | 3.93E-08 | 0.136531 | 0.051 | 0.005 | 0.000587 |
| SMN2      | 3.96E-08 | 0.10096  | 0.057 | 0.01  | 0.000591 |

|           |          |          |       |       |          |
|-----------|----------|----------|-------|-------|----------|
| PRKCG     | 3.98E-08 | -0.49251 | 0.008 | 0.056 | 0.000594 |
| GPX3      | 4.04E-08 | -0.33861 | 0.017 | 0.036 | 0.000604 |
| KCNN2     | 4.08E-08 | 0.119574 | 0.055 | 0.009 | 0.00061  |
| VARS2     | 4.19E-08 | 0.126357 | 0.064 | 0.012 | 0.000626 |
| BCAS1     | 4.45E-08 | 0.195686 | 0.072 | 0.015 | 0.000665 |
| ZNF415    | 4.50E-08 | -0.12337 | 0.042 | 0.022 | 0.000672 |
| PI3       | 4.54E-08 | -0.71016 | 0.007 | 0.043 | 0.000678 |
| HR        | 4.57E-08 | 0.152897 | 0.048 | 0.003 | 0.000683 |
| GAS7      | 4.62E-08 | -0.22784 | 0.049 | 0.044 | 0.00069  |
| PLCL2     | 4.81E-08 | 0.122658 | 0.046 | 0.002 | 0.000719 |
| LZTFL1    | 4.85E-08 | -0.23816 | 0.051 | 0.051 | 0.000725 |
| ACKR3     | 4.86E-08 | 0.107709 | 0.035 | 0     | 0.000726 |
| AL645728. | 4.86E-08 | 0.126019 | 0.035 | 0     | 0.000726 |
| NAP1L2    | 4.86E-08 | 0.13647  | 0.035 | 0     | 0.000726 |
| CACNG2    | 4.86E-08 | 0.152418 | 0.035 | 0     | 0.000726 |
| RP11-867G | 4.86E-08 | 0.114623 | 0.035 | 0     | 0.000726 |
| SNAP91    | 4.86E-08 | 0.146051 | 0.035 | 0     | 0.000726 |
| LTBP4     | 4.88E-08 | 0.19159  | 0.074 | 0.015 | 0.000729 |
| SSPN      | 4.92E-08 | -0.17066 | 0.055 | 0.044 | 0.000735 |
| ZCCHC6    | 4.93E-08 | -0.10025 | 0.051 | 0.032 | 0.000736 |
| ZNF618    | 4.99E-08 | 0.123835 | 0.046 | 0.002 | 0.000746 |
| MIR22HG   | 5.05E-08 | -0.3429  | 0.033 | 0.039 | 0.000755 |
| FBX034    | 5.13E-08 | 0.133788 | 0.073 | 0.017 | 0.000766 |
| C19orf47  | 5.22E-08 | 0.117144 | 0.053 | 0.007 | 0.00078  |
| GABRB3    | 5.32E-08 | 0.147034 | 0.052 | 0.005 | 0.000795 |
| GOLGA8A   | 5.41E-08 | 0.124172 | 0.065 | 0.014 | 0.000808 |
| PAN2      | 5.48E-08 | 0.11073  | 0.069 | 0.019 | 0.000819 |
| EGLN3     | 5.52E-08 | -0.27055 | 0.027 | 0.036 | 0.000825 |
| CTC-239J1 | 5.57E-08 | 0.166761 | 0.048 | 0.003 | 0.000832 |
| ZNF687    | 5.59E-08 | 0.118991 | 0.052 | 0.007 | 0.000835 |
| TMOD3     | 5.64E-08 | -0.10032 | 0.048 | 0.027 | 0.000843 |
| SPA17     | 5.65E-08 | -0.20844 | 0.052 | 0.044 | 0.000844 |
| SLC38A9   | 5.71E-08 | 0.181446 | 0.056 | 0.005 | 0.000853 |
| LRRC45    | 5.81E-08 | 0.150085 | 0.062 | 0.009 | 0.000869 |
| ZSCAN5A   | 5.82E-08 | -0.14676 | 0.039 | 0.029 | 0.000869 |
| ANGPT2    | 6.05E-08 | -0.24345 | 0.047 | 0.043 | 0.000905 |
| ADAM23    | 6.21E-08 | 0.170184 | 0.062 | 0.009 | 0.000928 |
| EYA3      | 6.29E-08 | -0.122   | 0.043 | 0.024 | 0.000941 |
| MINPP1    | 6.30E-08 | 0.113504 | 0.082 | 0.026 | 0.000941 |
| NRP2      | 6.55E-08 | -0.31168 | 0.033 | 0.05  | 0.000979 |
| PTK2B     | 6.75E-08 | -0.2562  | 0.026 | 0.029 | 0.001009 |
| ZNF784    | 6.98E-08 | 0.132175 | 0.049 | 0.003 | 0.001043 |
| PKMYT1    | 7.20E-08 | 0.134777 | 0.046 | 0.002 | 0.001076 |
| FBXL6     | 7.27E-08 | 0.119523 | 0.061 | 0.012 | 0.001086 |
| ASB13     | 7.31E-08 | 0.139145 | 0.049 | 0.003 | 0.001092 |
| U73166.2  | 7.35E-08 | 0.173191 | 0.062 | 0.009 | 0.001099 |
| PQLC3     | 7.36E-08 | -0.13506 | 0.039 | 0.027 | 0.0011   |
| PLEKHG3   | 7.52E-08 | 0.116266 | 0.052 | 0.005 | 0.001124 |
| FGGY      | 7.56E-08 | -0.30804 | 0.038 | 0.048 | 0.001129 |
| RP11-118F | 7.70E-08 | 0.173132 | 0.051 | 0.005 | 0.001151 |
| GNG10     | 7.71E-08 | -0.13433 | 0.038 | 0.027 | 0.001152 |



|           |          |          |       |       |          |
|-----------|----------|----------|-------|-------|----------|
| SCAF8     | 7.71E-08 | 0.138319 | 0.057 | 0.007 | 0.001153 |
| ENOX1     | 7.83E-08 | 0.117115 | 0.044 | 0.002 | 0.00117  |
| SLC30A6   | 7.89E-08 | 0.158351 | 0.053 | 0.005 | 0.001179 |
| LRRC20    | 8.24E-08 | 0.118279 | 0.059 | 0.012 | 0.001232 |
| SIM2      | 8.28E-08 | 0.148249 | 0.046 | 0.002 | 0.001237 |
| IL32      | 8.29E-08 | -0.40443 | 0.012 | 0.032 | 0.001238 |
| REX01     | 8.47E-08 | 0.161042 | 0.062 | 0.009 | 0.001266 |
| ZNF696    | 8.57E-08 | 0.110001 | 0.051 | 0.007 | 0.00128  |
| B3GNT7    | 8.81E-08 | 0.105015 | 0.034 | 0     | 0.001316 |
| MATN4     | 8.81E-08 | 0.141473 | 0.034 | 0     | 0.001316 |
| GS1-124K5 | 8.81E-08 | 0.121973 | 0.034 | 0     | 0.001316 |
| FGD6      | 8.81E-08 | 0.102958 | 0.034 | 0     | 0.001316 |
| AZGP1     | 9.05E-08 | -0.37941 | 0.031 | 0.053 | 0.001352 |
| TM9SF1    | 9.07E-08 | 0.100313 | 0.056 | 0.01  | 0.001356 |
| ZFY       | 9.14E-08 | 0.125812 | 0.044 | 0.002 | 0.001365 |
| SYTL2     | 9.14E-08 | -0.32899 | 0.038 | 0.058 | 0.001366 |
| RP3-460G2 | 9.31E-08 | -0.38782 | 0.035 | 0.067 | 0.001391 |
| RP11-727F | 9.39E-08 | 0.10193  | 0.053 | 0.009 | 0.001404 |
| LRP8      | 9.54E-08 | 0.101028 | 0.048 | 0.007 | 0.001426 |
| ZNF768    | 9.85E-08 | 0.102134 | 0.062 | 0.015 | 0.001472 |
| TREM1     | 1.02E-07 | -0.48398 | 0.018 | 0.05  | 0.001518 |
| LZTS1     | 1.02E-07 | -0.16391 | 0.026 | 0.021 | 0.001522 |
| LYST      | 1.07E-07 | -0.15114 | 0.046 | 0.036 | 0.0016   |
| C1QTNF3   | 1.08E-07 | -0.28228 | 0.023 | 0.029 | 0.001616 |
| APOM      | 1.09E-07 | -0.11513 | 0.048 | 0.032 | 0.001636 |
| CXCL2     | 1.10E-07 | -0.36705 | 0.01  | 0.031 | 0.001643 |
| TRIP13    | 1.14E-07 | 0.125905 | 0.049 | 0.005 | 0.001705 |
| SP9       | 1.17E-07 | 0.132462 | 0.042 | 0.002 | 0.001749 |
| RP11-46H1 | 1.23E-07 | -0.35459 | 0.005 | 0.048 | 0.00184  |
| EPAS1     | 1.26E-07 | -0.43406 | 0.023 | 0.058 | 0.001881 |
| MAGI3     | 1.28E-07 | 0.134242 | 0.049 | 0.003 | 0.00191  |
| HLA-DQA1  | 1.34E-07 | -0.446   | 0.016 | 0.044 | 0.001996 |
| NAAA      | 1.34E-07 | 0.11736  | 0.047 | 0.005 | 0.002004 |
| RHPN2     | 1.36E-07 | -0.27541 | 0.018 | 0.031 | 0.002029 |
| ARSK      | 1.36E-07 | -0.12561 | 0.04  | 0.027 | 0.002031 |
| PFKFB3    | 1.41E-07 | -0.16536 | 0.061 | 0.053 | 0.002112 |
| NRF1      | 1.43E-07 | 0.119285 | 0.043 | 0.002 | 0.002132 |
| CTD-3138E | 1.46E-07 | -0.23621 | 0.025 | 0.027 | 0.002175 |
| SIAE      | 1.52E-07 | -0.16266 | 0.042 | 0.036 | 0.002266 |
| ARHGAP22  | 1.57E-07 | 0.125686 | 0.043 | 0.002 | 0.00234  |
| PPP1R1B   | 1.60E-07 | 0.101595 | 0.033 | 0     | 0.002385 |
| VSTM2L    | 1.60E-07 | 0.151556 | 0.033 | 0     | 0.002385 |
| HTATIP2   | 1.60E-07 | 0.107601 | 0.033 | 0     | 0.002385 |
| TAPBPL    | 1.60E-07 | -0.27127 | 0.039 | 0.041 | 0.002396 |
| TRAPPC8   | 1.65E-07 | 0.124314 | 0.048 | 0.003 | 0.002467 |
| HSF2BP    | 1.69E-07 | 0.13875  | 0.04  | 0.002 | 0.002521 |
| NKX2-5    | 1.74E-07 | 0.105354 | 0.064 | 0.021 | 0.002607 |
| C10orf2   | 1.78E-07 | 0.12091  | 0.048 | 0.005 | 0.002659 |
| FAM107A   | 1.79E-07 | -0.20528 | 0.033 | 0.029 | 0.00267  |
| GMPR      | 1.83E-07 | -0.2017  | 0.034 | 0.036 | 0.002728 |
| STK10     | 1.87E-07 | 0.104346 | 0.047 | 0.005 | 0.002802 |

|           |          |          |       |       |          |
|-----------|----------|----------|-------|-------|----------|
| CEP250    | 1.89E-07 | -0.20987 | 0.034 | 0.032 | 0.002825 |
| RP11-480C | 2.00E-07 | 0.118552 | 0.057 | 0.01  | 0.002996 |
| PRSS27    | 2.01E-07 | 0.11355  | 0.046 | 0.005 | 0.003009 |
| AC023590. | 2.07E-07 | -0.12054 | 0.042 | 0.029 | 0.003096 |
| KIF13B    | 2.09E-07 | -0.12012 | 0.038 | 0.019 | 0.003129 |
| SLC25A18  | 2.12E-07 | -0.21627 | 0.069 | 0.062 | 0.003168 |
| TTC9      | 2.15E-07 | 0.105392 | 0.043 | 0.003 | 0.003208 |
| COL4A3    | 2.30E-07 | 0.119441 | 0.048 | 0.005 | 0.003431 |
| NFASC     | 2.30E-07 | -0.18806 | 0.061 | 0.05  | 0.003438 |
| RIMS1     | 2.32E-07 | 0.109712 | 0.046 | 0.003 | 0.003461 |
| HBEGF     | 2.35E-07 | -0.10298 | 0.06  | 0.039 | 0.003514 |
| LRCH2     | 2.43E-07 | 0.116796 | 0.047 | 0.005 | 0.003629 |
| PIAS3     | 2.43E-07 | -0.11016 | 0.04  | 0.024 | 0.003629 |
| FRS3      | 2.44E-07 | 0.135687 | 0.042 | 0.002 | 0.003654 |
| NR1D1     | 2.50E-07 | -0.40093 | 0.016 | 0.041 | 0.003731 |
| BAHD1     | 2.54E-07 | 0.108229 | 0.049 | 0.007 | 0.003789 |
| HARS2     | 2.68E-07 | 0.103525 | 0.06  | 0.014 | 0.004005 |
| CDC6      | 2.80E-07 | -0.10431 | 0.031 | 0.012 | 0.004188 |
| RALYL     | 2.89E-07 | 0.13117  | 0.031 | 0     | 0.004323 |
| KIAA0922  | 2.94E-07 | 0.117944 | 0.047 | 0.005 | 0.004401 |
| NFKB1     | 3.01E-07 | -0.13368 | 0.036 | 0.022 | 0.004505 |
| OPTN      | 3.19E-07 | -0.13003 | 0.047 | 0.031 | 0.004766 |
| RPH3A     | 3.20E-07 | -0.13764 | 0.049 | 0.038 | 0.004784 |
| LAMA4     | 3.28E-07 | -0.29206 | 0.025 | 0.038 | 0.004902 |
| RASGEF1C  | 3.37E-07 | 0.10503  | 0.035 | 0.002 | 0.005042 |
| RNASE1    | 3.54E-07 | -0.23526 | 0.044 | 0.041 | 0.005297 |
| LCA5      | 3.75E-07 | 0.129336 | 0.049 | 0.007 | 0.005605 |
| BHLHE41   | 4.20E-07 | -0.32793 | 0.012 | 0.048 | 0.006277 |
| URB2      | 4.21E-07 | 0.116149 | 0.048 | 0.007 | 0.006299 |
| ZNF684    | 4.34E-07 | 0.141503 | 0.062 | 0.014 | 0.006487 |
| ELL2      | 4.43E-07 | -0.19968 | 0.044 | 0.043 | 0.006623 |
| NUAK1     | 4.54E-07 | 0.131656 | 0.043 | 0.003 | 0.006782 |
| CXCL3     | 4.66E-07 | -0.44691 | 0.01  | 0.034 | 0.006959 |
| MPP2      | 4.66E-07 | 0.100748 | 0.046 | 0.005 | 0.006968 |
| ATP11C    | 4.75E-07 | 0.17566  | 0.047 | 0.003 | 0.007094 |
| FCHO2     | 4.91E-07 | 0.10425  | 0.049 | 0.007 | 0.007341 |
| PLA2G2A   | 4.96E-07 | -0.50621 | 0.005 | 0.034 | 0.007419 |
| SERPINA1  | 5.02E-07 | -0.38138 | 0.033 | 0.039 | 0.007503 |
| KLHL32    | 5.24E-07 | 0.130237 | 0.03  | 0     | 0.007836 |
| KIF26A    | 5.24E-07 | 0.125458 | 0.03  | 0     | 0.007836 |
| RIPPLY2   | 5.29E-07 | 0.138    | 0.052 | 0.009 | 0.007902 |
| FREM2     | 5.36E-07 | 0.101591 | 0.047 | 0.005 | 0.008015 |
| ZFP28     | 5.56E-07 | 0.105963 | 0.051 | 0.009 | 0.008311 |
| ZNF248    | 5.68E-07 | 0.151965 | 0.064 | 0.014 | 0.008487 |
| SGPP1     | 5.75E-07 | 0.115001 | 0.039 | 0.002 | 0.008594 |
| THEM4     | 5.78E-07 | 0.129823 | 0.053 | 0.009 | 0.008632 |
| GSDMD     | 5.89E-07 | -0.39915 | 0.016 | 0.048 | 0.008809 |
| ZNF141    | 5.92E-07 | 0.126362 | 0.055 | 0.009 | 0.008845 |
| TSPAN15   | 6.03E-07 | 0.113955 | 0.039 | 0.002 | 0.009009 |
| RHOF      | 6.19E-07 | 0.130159 | 0.052 | 0.007 | 0.009252 |
| ANKAR     | 6.42E-07 | 0.115746 | 0.048 | 0.007 | 0.009589 |

|           |          |          |       |       |          |
|-----------|----------|----------|-------|-------|----------|
| RP11-214N | 6.85E-07 | 0.153471 | 0.044 | 0.003 | 0.010236 |
| OSTF1     | 6.93E-07 | -0.13302 | 0.036 | 0.022 | 0.010361 |
| SDC4      | 7.34E-07 | -0.44614 | 0.007 | 0.041 | 0.01097  |
| XKR8      | 7.73E-07 | -0.149   | 0.033 | 0.027 | 0.011551 |
| CH25H     | 7.78E-07 | -0.37432 | 0.014 | 0.036 | 0.011632 |
| CHST9     | 7.98E-07 | 0.131332 | 0.07  | 0.022 | 0.011918 |
| FGF1      | 8.19E-07 | -0.40049 | 0.013 | 0.046 | 0.012236 |
| RGS6      | 8.20E-07 | -0.4144  | 0.014 | 0.056 | 0.012247 |
| ZBTB5     | 8.20E-07 | 0.134537 | 0.043 | 0.003 | 0.012253 |
| IGDCC4    | 8.22E-07 | 0.104133 | 0.043 | 0.003 | 0.012277 |
| ATXN7L1   | 8.23E-07 | 0.101505 | 0.047 | 0.005 | 0.012304 |
| IPO9-AS1  | 8.46E-07 | 0.116905 | 0.043 | 0.003 | 0.012648 |
| IL1RAPL1  | 8.49E-07 | 0.114065 | 0.038 | 0.002 | 0.012693 |
| S1PR3     | 8.57E-07 | -0.23188 | 0.026 | 0.038 | 0.0128   |
| LOX       | 8.58E-07 | -0.3888  | 0.003 | 0.032 | 0.012826 |
| CLCF1     | 8.71E-07 | -0.33275 | 0     | 0.026 | 0.013014 |
| MMP7      | 8.71E-07 | -0.35165 | 0     | 0.026 | 0.013014 |
| PRSS23    | 8.77E-07 | -0.28582 | 0.02  | 0.036 | 0.013107 |
| CTA-292E1 | 9.23E-07 | 0.123489 | 0.046 | 0.005 | 0.013791 |
| SNIP1     | 9.24E-07 | 0.104869 | 0.051 | 0.009 | 0.013816 |
| KANK2     | 9.43E-07 | -0.22074 | 0.04  | 0.038 | 0.014094 |
| RP3-508I1 | 9.49E-07 | -0.33517 | 0.009 | 0.041 | 0.014178 |
| PURG      | 9.50E-07 | 0.101472 | 0.029 | 0     | 0.014204 |
| CTD-2162K | 9.50E-07 | 0.116101 | 0.029 | 0     | 0.014204 |
| PIK3C2B   | 9.58E-07 | 0.122296 | 0.046 | 0.005 | 0.014317 |
| RILPL2    | 9.65E-07 | -0.13371 | 0.03  | 0.021 | 0.014425 |
| HLA-DQB1  | 9.95E-07 | -0.17315 | 0.035 | 0.036 | 0.014875 |
| IGSF9B    | 1.00E-06 | 0.160102 | 0.044 | 0.003 | 0.014992 |
| AC002456. | 1.01E-06 | -0.17642 | 0.039 | 0.031 | 0.015052 |
| RFX2      | 1.01E-06 | -0.12846 | 0.057 | 0.039 | 0.015064 |
| CD163     | 1.01E-06 | -0.12841 | 0.033 | 0.024 | 0.015075 |
| IRAK1BP1  | 1.04E-06 | 0.121689 | 0.044 | 0.005 | 0.015532 |
| RUSC2     | 1.04E-06 | 0.109421 | 0.046 | 0.005 | 0.015547 |
| FSD1L     | 1.06E-06 | 0.105584 | 0.047 | 0.007 | 0.015889 |
| MGAT5     | 1.07E-06 | 0.114964 | 0.043 | 0.003 | 0.015993 |
| MAOB      | 1.10E-06 | -0.17956 | 0.046 | 0.044 | 0.016417 |
| ATXN7L2   | 1.12E-06 | 0.14229  | 0.044 | 0.003 | 0.016696 |
| SWSAP1    | 1.23E-06 | -0.12727 | 0.036 | 0.024 | 0.018456 |
| PHLDB3    | 1.25E-06 | 0.138099 | 0.039 | 0.002 | 0.018662 |
| TRIB1     | 1.27E-06 | -0.10505 | 0.046 | 0.031 | 0.019026 |
| RP11-490M | 1.29E-06 | 0.110057 | 0.049 | 0.009 | 0.019326 |
| SLC1A4    | 1.30E-06 | 0.163031 | 0.043 | 0.003 | 0.019498 |
| IBA57     | 1.34E-06 | 0.114952 | 0.053 | 0.01  | 0.019967 |
| LRFN3     | 1.37E-06 | 0.107881 | 0.047 | 0.007 | 0.020472 |
| CTGF      | 1.38E-06 | 0.162026 | 0.055 | 0.01  | 0.020582 |
| ANG       | 1.39E-06 | -0.32183 | 0.03  | 0.034 | 0.020779 |
| LINC01152 | 1.40E-06 | -0.10125 | 0.025 | 0.014 | 0.020912 |
| RARRES1   | 1.42E-06 | 0.109658 | 0.034 | 0.002 | 0.02119  |
| FABP6     | 1.42E-06 | 0.158333 | 0.046 | 0.005 | 0.0212   |
| PPP1R3F   | 1.46E-06 | 0.131091 | 0.047 | 0.005 | 0.021762 |
| CLYBL     | 1.48E-06 | -0.25489 | 0.026 | 0.034 | 0.02208  |

|           |          |          |       |       |          |
|-----------|----------|----------|-------|-------|----------|
| FAM71E1   | 1.49E-06 | -0.16775 | 0.029 | 0.022 | 0.022327 |
| OLR1      | 1.52E-06 | 0.115309 | 0.043 | 0.005 | 0.02271  |
| LRRRC26   | 1.53E-06 | 0.102136 | 0.044 | 0.007 | 0.022891 |
| C2        | 1.55E-06 | -0.33662 | 0.005 | 0.034 | 0.023203 |
| CDK18     | 1.61E-06 | -0.23482 | 0.046 | 0.048 | 0.024095 |
| CYB561D1  | 1.63E-06 | -0.17627 | 0.027 | 0.022 | 0.024329 |
| NR1H3     | 1.63E-06 | -0.13035 | 0.031 | 0.021 | 0.024338 |
| ATP6V1B1  | 1.65E-06 | 0.13282  | 0.048 | 0.005 | 0.024602 |
| HOXA6     | 1.72E-06 | 0.104305 | 0.027 | 0     | 0.02575  |
| LINC00339 | 1.74E-06 | -0.15661 | 0.031 | 0.024 | 0.026035 |
| MUC12     | 1.77E-06 | -0.28973 | 0.029 | 0.038 | 0.026415 |
| WIP11     | 1.78E-06 | -0.21428 | 0.034 | 0.038 | 0.026582 |
| ZFP41     | 1.79E-06 | 0.139055 | 0.042 | 0.003 | 0.026687 |
| TET3      | 1.80E-06 | 0.139091 | 0.051 | 0.007 | 0.026905 |
| TMEM241   | 1.82E-06 | 0.114161 | 0.042 | 0.003 | 0.027272 |
| ABCA8     | 1.92E-06 | -0.38011 | 0.012 | 0.053 | 0.028642 |
| FBX046    | 1.95E-06 | 0.102774 | 0.035 | 0.002 | 0.029069 |
| AC093901. | 1.98E-06 | 0.126561 | 0.043 | 0.003 | 0.029545 |
| KIAA0556  | 2.01E-06 | 0.140713 | 0.038 | 0.002 | 0.030036 |
| AC068535. | 2.03E-06 | 0.112492 | 0.056 | 0.014 | 0.030379 |
| IGFBP6    | 2.06E-06 | -0.11598 | 0.035 | 0.022 | 0.030782 |
| ATE1      | 2.09E-06 | 0.100575 | 0.047 | 0.009 | 0.031187 |
| SHC1      | 2.12E-06 | -0.25181 | 0.029 | 0.034 | 0.031723 |
| SPOCK2    | 2.16E-06 | -0.35546 | 0.022 | 0.053 | 0.032303 |
| CDCA5     | 2.20E-06 | 0.100242 | 0.036 | 0.003 | 0.032837 |
| SAMD9L    | 2.23E-06 | -0.36779 | 0.01  | 0.031 | 0.033317 |
| GUCY1B3   | 2.28E-06 | 0.14304  | 0.043 | 0.003 | 0.034067 |
| MRC2      | 2.33E-06 | -0.28576 | 0.021 | 0.034 | 0.03487  |
| FAH       | 2.41E-06 | -0.3588  | 0.014 | 0.036 | 0.036077 |
| TRIB3     | 2.42E-06 | -0.29053 | 0.027 | 0.044 | 0.036133 |
| SLC10A3   | 2.46E-06 | -0.12946 | 0.03  | 0.022 | 0.03677  |
| CBLN4     | 2.46E-06 | -0.3522  | 0.007 | 0.043 | 0.036833 |
| C22orf46  | 2.48E-06 | -0.10505 | 0.044 | 0.029 | 0.037128 |
| OXNAD1    | 2.51E-06 | -0.121   | 0.03  | 0.021 | 0.037446 |
| HUNK      | 2.55E-06 | 0.121108 | 0.036 | 0.002 | 0.038112 |
| RUNX1T1   | 2.55E-06 | 0.146013 | 0.053 | 0.01  | 0.038162 |
| PRCD      | 2.63E-06 | 0.131675 | 0.048 | 0.009 | 0.039308 |
| SRPX2     | 2.69E-06 | -0.3239  | 0.001 | 0.032 | 0.040126 |
| F12       | 2.69E-06 | 0.123446 | 0.051 | 0.009 | 0.040242 |
| ANKRD16   | 2.74E-06 | 0.104813 | 0.036 | 0.002 | 0.041006 |
| NAA60     | 2.85E-06 | -0.3749  | 0.003 | 0.036 | 0.04258  |
| PLCB1     | 3.03E-06 | 0.16694  | 0.06  | 0.014 | 0.045294 |
| LINC01023 | 3.10E-06 | -0.13856 | 0.046 | 0.027 | 0.046284 |
| RP11-138I | 3.11E-06 | -0.14595 | 0.031 | 0.022 | 0.046454 |
| ARHGEF11  | 3.20E-06 | 0.135792 | 0.048 | 0.007 | 0.047863 |
| ARAP2     | 3.30E-06 | -0.14785 | 0.038 | 0.031 | 0.049338 |
| LAMA2     | 3.30E-06 | -0.23737 | 0.001 | 0.031 | 0.049368 |
| TMEM216   | 3.35E-06 | -0.25813 | 0.03  | 0.041 | 0.050109 |
| KANSL1L   | 3.36E-06 | 0.110054 | 0.043 | 0.005 | 0.050161 |
| LGALS9    | 3.37E-06 | -0.14434 | 0.031 | 0.022 | 0.05035  |
| ZNF180    | 3.38E-06 | 0.120276 | 0.046 | 0.005 | 0.050581 |

|           |          |          |       |       |          |
|-----------|----------|----------|-------|-------|----------|
| TRAPPC12- | 3.41E-06 | 0.108532 | 0.036 | 0.002 | 0.050911 |
| C5AR1     | 3.44E-06 | -0.16055 | 0.027 | 0.024 | 0.051441 |
| RALGPS2   | 3.44E-06 | 0.10111  | 0.039 | 0.003 | 0.051479 |
| HAP1      | 3.49E-06 | -0.28073 | 0.02  | 0.05  | 0.052195 |
| PPP5D1    | 3.53E-06 | -0.1001  | 0.038 | 0.024 | 0.052747 |
| NCOA2     | 3.54E-06 | 0.101322 | 0.049 | 0.01  | 0.052901 |
| LIMS2     | 3.63E-06 | 0.107861 | 0.035 | 0.002 | 0.054281 |
| LRFN1     | 3.66E-06 | 0.125212 | 0.049 | 0.007 | 0.054732 |
| CAPS      | 3.76E-06 | -0.17819 | 0.033 | 0.027 | 0.05615  |
| PPP1R3B   | 3.76E-06 | -0.1426  | 0.035 | 0.021 | 0.056209 |
| TMED8     | 3.87E-06 | -0.10143 | 0.033 | 0.024 | 0.057873 |
| FCGBP     | 4.15E-06 | -0.11426 | 0.051 | 0.038 | 0.06201  |
| ZEB2-AS1  | 4.16E-06 | 0.122893 | 0.051 | 0.01  | 0.062124 |
| ALKBH8    | 4.27E-06 | 0.106823 | 0.043 | 0.005 | 0.063756 |
| CDK20     | 4.33E-06 | -0.11258 | 0.04  | 0.027 | 0.064674 |
| GIMAP2    | 4.45E-06 | -0.17553 | 0.021 | 0.019 | 0.066511 |
| THSD4     | 4.56E-06 | -0.12439 | 0.047 | 0.032 | 0.068168 |
| TMEM201   | 4.65E-06 | 0.119257 | 0.044 | 0.005 | 0.069563 |
| FAM124A   | 4.69E-06 | 0.10287  | 0.044 | 0.007 | 0.070149 |
| MTMR11    | 4.88E-06 | -0.3912  | 0.007 | 0.036 | 0.07287  |
| MED23     | 5.02E-06 | 0.120074 | 0.056 | 0.012 | 0.075067 |
| ADAMTS9-A | 5.05E-06 | -0.15874 | 0     | 0.022 | 0.075479 |
| CLN3      | 5.05E-06 | -0.24668 | 0     | 0.022 | 0.075479 |
| IQGAP2    | 5.09E-06 | -0.14653 | 0.044 | 0.038 | 0.076    |
| KCNMB3    | 5.21E-06 | 0.10236  | 0.036 | 0.003 | 0.077842 |
| ZBTB21    | 5.42E-06 | -0.16953 | 0.034 | 0.031 | 0.080969 |
| TPTEP1    | 5.49E-06 | 0.30708  | 0.046 | 0.005 | 0.082058 |
| MSTN      | 5.53E-06 | 0.119679 | 0.039 | 0.005 | 0.082595 |
| HMG3-AS1  | 5.67E-06 | 0.102404 | 0.025 | 0     | 0.084685 |
| PDE10A    | 5.67E-06 | 0.111026 | 0.025 | 0     | 0.084685 |
| ANKRD42   | 5.68E-06 | -0.18967 | 0.025 | 0.021 | 0.084885 |
| RORA      | 5.75E-06 | -0.10016 | 0.064 | 0.041 | 0.085972 |
| GALM      | 6.06E-06 | -0.19316 | 0.038 | 0.036 | 0.090618 |
| PCGF5     | 6.11E-06 | -0.24214 | 0.04  | 0.043 | 0.091242 |
| ZNF689    | 6.22E-06 | 0.130119 | 0.061 | 0.015 | 0.092982 |
| IFIT2     | 6.23E-06 | -0.23712 | 0.034 | 0.032 | 0.093098 |
| SDSL      | 6.28E-06 | -0.18052 | 0.035 | 0.034 | 0.093838 |
| SFRP4     | 6.29E-06 | -0.27309 | 0.029 | 0.039 | 0.094028 |
| TTN-AS1   | 6.42E-06 | 0.112777 | 0.039 | 0.003 | 0.095867 |
| GPRC5C    | 6.51E-06 | -0.33966 | 0.025 | 0.046 | 0.097228 |
| KISS1     | 6.68E-06 | 0.194461 | 0.035 | 0.002 | 0.099827 |
| TMCC2     | 6.69E-06 | 0.156181 | 0.04  | 0.003 | 0.100016 |
| USP6NL    | 6.75E-06 | -0.13946 | 0.036 | 0.034 | 0.100912 |
| NEK11     | 7.08E-06 | -0.14552 | 0.029 | 0.026 | 0.105874 |
| RP11-347F | 7.24E-06 | 0.154993 | 0.057 | 0.012 | 0.108231 |
| RP11-191L | 7.33E-06 | 0.121538 | 0.048 | 0.01  | 0.109542 |
| ARHGAP23  | 7.75E-06 | 0.102575 | 0.044 | 0.005 | 0.115858 |
| PARP14    | 7.79E-06 | -0.32542 | 0.014 | 0.043 | 0.116373 |
| USP21     | 7.99E-06 | 0.147261 | 0.051 | 0.009 | 0.11934  |
| ARHGAP26  | 8.09E-06 | -0.24017 | 0.023 | 0.031 | 0.120922 |
| RUNX1     | 8.18E-06 | -0.16487 | 0.026 | 0.031 | 0.122192 |

|           |          |          |       |       |          |
|-----------|----------|----------|-------|-------|----------|
| ZNF84     | 8.25E-06 | -0.11556 | 0.027 | 0.022 | 0.123273 |
| DDR2      | 8.27E-06 | -0.123   | 0.03  | 0.021 | 0.123593 |
| ZNF25     | 8.50E-06 | 0.145133 | 0.066 | 0.019 | 0.127095 |
| ICAM1     | 8.51E-06 | -0.34203 | 0.022 | 0.046 | 0.127122 |
| DDX31     | 8.57E-06 | 0.109426 | 0.046 | 0.007 | 0.128024 |
| POSTN     | 8.69E-06 | -0.40471 | 0.013 | 0.046 | 0.129804 |
| ULK1      | 8.71E-06 | 0.126033 | 0.057 | 0.014 | 0.130196 |
| TIFA      | 8.78E-06 | -0.17354 | 0.02  | 0.019 | 0.131136 |
| SMIM13    | 8.83E-06 | 0.120399 | 0.051 | 0.01  | 0.131881 |
| FOXP4     | 9.10E-06 | 0.108195 | 0.034 | 0.002 | 0.135925 |
| TMSB4Y    | 9.55E-06 | 0.111503 | 0.034 | 0.002 | 0.142706 |
| RP11-263K | 9.62E-06 | -0.29501 | 0.016 | 0.038 | 0.143836 |
| C1RL      | 9.72E-06 | -0.29714 | 0.007 | 0.034 | 0.145263 |
| RENBP     | 9.76E-06 | -0.25407 | 0.029 | 0.038 | 0.145916 |
| REPS2     | 1.03E-05 | 0.121977 | 0.023 | 0     | 0.153652 |
| AMH       | 1.06E-05 | 0.118452 | 0.042 | 0.005 | 0.15804  |
| ARHGAP5-A | 1.08E-05 | -0.11706 | 0.031 | 0.021 | 0.160733 |
| SYDE1     | 1.10E-05 | -0.10424 | 0.034 | 0.021 | 0.163905 |
| SLC04A1   | 1.10E-05 | -0.18137 | 0.022 | 0.024 | 0.163943 |
| RSPH1     | 1.10E-05 | -0.32357 | 0.003 | 0.034 | 0.164155 |
| ITPR2     | 1.11E-05 | -0.22572 | 0.018 | 0.026 | 0.166258 |
| GPR158    | 1.11E-05 | 0.11215  | 0.056 | 0.015 | 0.166625 |
| RP13-188A | 1.15E-05 | 0.113685 | 0.047 | 0.009 | 0.172221 |
| COL4A2    | 1.15E-05 | -0.31916 | 0.013 | 0.039 | 0.172273 |
| DDX25     | 1.20E-05 | 0.117727 | 0.048 | 0.01  | 0.179706 |
| DMKN      | 1.22E-05 | -0.19062 | 0     | 0.021 | 0.182033 |
| FRAT2     | 1.23E-05 | 0.108535 | 0.051 | 0.012 | 0.184329 |
| CRABP2    | 1.26E-05 | -0.2977  | 0.014 | 0.034 | 0.187989 |
| PCSK5     | 1.28E-05 | -0.10469 | 0.034 | 0.026 | 0.190733 |
| DHCR24    | 1.30E-05 | -0.14073 | 0.025 | 0.021 | 0.193755 |
| UACA      | 1.35E-05 | -0.11503 | 0.027 | 0.019 | 0.202129 |
| MMP17     | 1.37E-05 | 0.107015 | 0.033 | 0.002 | 0.204587 |
| SORL1     | 1.37E-05 | -0.15798 | 0.046 | 0.046 | 0.205045 |
| FBLN5     | 1.50E-05 | -0.21478 | 0.027 | 0.029 | 0.223476 |
| ITGA7     | 1.54E-05 | -0.19177 | 0.036 | 0.039 | 0.229875 |
| HCN3      | 1.65E-05 | 0.119904 | 0.036 | 0.003 | 0.245972 |
| MIR210HG  | 1.65E-05 | -0.21624 | 0.025 | 0.038 | 0.24709  |
| ABHD14B   | 1.69E-05 | -0.18826 | 0.038 | 0.036 | 0.252622 |
| RP3-402G1 | 1.72E-05 | 0.109343 | 0.042 | 0.005 | 0.257274 |
| IFIT3     | 1.77E-05 | -0.23076 | 0.051 | 0.051 | 0.263871 |
| ITGA5     | 1.78E-05 | -0.28264 | 0.013 | 0.034 | 0.265363 |
| FAM114A1  | 1.83E-05 | -0.24174 | 0.021 | 0.029 | 0.273649 |
| TNFAIP3   | 1.85E-05 | -0.19845 | 0.03  | 0.027 | 0.276103 |
| HVCN1     | 1.85E-05 | -0.22649 | 0.017 | 0.029 | 0.27712  |
| GAD2      | 1.87E-05 | 0.114349 | 0.022 | 0     | 0.27892  |
| HLA-DQA2  | 1.89E-05 | -0.28432 | 0.007 | 0.021 | 0.281827 |
| RP11-5301 | 1.90E-05 | -0.11219 | 0.027 | 0.014 | 0.284133 |
| SERPINF2  | 1.94E-05 | 0.140722 | 0.033 | 0.002 | 0.289499 |
| RPGRIP1L  | 2.00E-05 | -0.17491 | 0.042 | 0.029 | 0.298821 |
| SELENBP1  | 2.01E-05 | -0.17394 | 0.016 | 0.015 | 0.300258 |
| AFAP1L1   | 2.05E-05 | -0.1704  | 0.025 | 0.027 | 0.306511 |

|           |          |          |       |       |          |
|-----------|----------|----------|-------|-------|----------|
| RP11-390F | 2.06E-05 | -0.21873 | 0.034 | 0.039 | 0.307148 |
| INTU      | 2.07E-05 | -0.1677  | 0.033 | 0.034 | 0.30888  |
| ACSS3     | 2.17E-05 | -0.25837 | 0.014 | 0.038 | 0.323887 |
| ARHGAP24  | 2.28E-05 | 0.103648 | 0.072 | 0.031 | 0.340631 |
| ADCK5     | 2.29E-05 | 0.107653 | 0.048 | 0.01  | 0.341828 |
| CNR1      | 2.37E-05 | -0.17649 | 0.025 | 0.029 | 0.354191 |
| ADCY8     | 2.40E-05 | -0.15103 | 0.027 | 0.017 | 0.358377 |
| ZDHHC2    | 2.44E-05 | 0.13582  | 0.053 | 0.012 | 0.364499 |
| SYT16     | 2.53E-05 | 0.105577 | 0.033 | 0.003 | 0.377377 |
| PLEKHA4   | 2.58E-05 | -0.32337 | 0.026 | 0.051 | 0.385836 |
| SIGIRR    | 2.72E-05 | -0.12198 | 0.023 | 0.017 | 0.406036 |
| IL13RA2   | 2.74E-05 | -0.2386  | 0.021 | 0.032 | 0.409521 |
| RDH10     | 2.75E-05 | -0.19742 | 0.02  | 0.029 | 0.411279 |
| C6orf141  | 2.94E-05 | -0.20143 | 0     | 0.019 | 0.439619 |
| TMEM231   | 3.00E-05 | -0.15258 | 0.034 | 0.032 | 0.448117 |
| ENTPD1    | 3.06E-05 | -0.13489 | 0.023 | 0.021 | 0.457584 |
| DPYD      | 3.10E-05 | -0.20632 | 0.022 | 0.027 | 0.463544 |
| CA3       | 3.16E-05 | -0.39891 | 0.007 | 0.029 | 0.472234 |
| S100A1    | 3.18E-05 | -0.14433 | 0.027 | 0.017 | 0.474762 |
| KLHL15    | 3.24E-05 | 0.102459 | 0.031 | 0.002 | 0.483946 |
| RP11-849H | 3.33E-05 | 0.108686 | 0.04  | 0.007 | 0.497035 |
| KCNE4     | 3.35E-05 | -0.22716 | 0.033 | 0.041 | 0.500905 |
| HSD17B8   | 3.37E-05 | -0.2628  | 0.022 | 0.036 | 0.503797 |
| LRRTM4    | 3.49E-05 | 0.102432 | 0.034 | 0.003 | 0.521872 |
| HIVEP3    | 3.52E-05 | -0.11731 | 0.034 | 0.027 | 0.525511 |
| ARHGAP18  | 3.56E-05 | -0.26588 | 0.013 | 0.027 | 0.532629 |
| SLC31A2   | 3.57E-05 | -0.1293  | 0.027 | 0.019 | 0.53317  |
| TNFRSF14  | 3.59E-05 | -0.17333 | 0.023 | 0.024 | 0.535746 |
| PHKA2     | 3.66E-05 | 0.129646 | 0.043 | 0.007 | 0.547648 |
| LCAT      | 3.67E-05 | -0.17937 | 0.023 | 0.022 | 0.548851 |
| FAM122C   | 3.71E-05 | 0.124301 | 0.04  | 0.005 | 0.55423  |
| FAS       | 3.82E-05 | -0.34124 | 0.008 | 0.034 | 0.570362 |
| MROH1     | 3.86E-05 | -0.10844 | 0.021 | 0.015 | 0.577439 |
| FRMD4B    | 3.99E-05 | -0.25386 | 0.02  | 0.034 | 0.595604 |
| ZNF441    | 4.12E-05 | 0.106701 | 0.044 | 0.009 | 0.615236 |
| ETV4      | 4.12E-05 | -0.30505 | 0.021 | 0.039 | 0.615289 |
| ZNF665    | 4.17E-05 | -0.15473 | 0.022 | 0.027 | 0.623168 |
| TUBA4A    | 4.19E-05 | -0.37967 | 0.013 | 0.034 | 0.62644  |
| DDX60L    | 4.20E-05 | -0.10062 | 0.026 | 0.015 | 0.62739  |
| RP11-498F | 4.24E-05 | 0.103027 | 0.035 | 0.003 | 0.634161 |
| SNTA1     | 4.78E-05 | -0.18193 | 0.021 | 0.021 | 0.713732 |
| HACE1     | 4.93E-05 | 0.127827 | 0.042 | 0.007 | 0.736483 |
| XXbac-BPG | 5.27E-05 | -0.14289 | 0.018 | 0.017 | 0.786876 |
| PEX11A    | 5.38E-05 | -0.15741 | 0.021 | 0.022 | 0.804548 |
| PNPO      | 5.47E-05 | -0.10846 | 0.023 | 0.017 | 0.817901 |
| RP1-313I6 | 5.57E-05 | -0.13114 | 0.026 | 0.021 | 0.832314 |
| PDZD2     | 5.82E-05 | -0.19272 | 0.034 | 0.039 | 0.869218 |
| PLSCR4    | 6.07E-05 | -0.18683 | 0.016 | 0.026 | 0.906811 |
| SLC6A6    | 6.26E-05 | -0.2677  | 0.018 | 0.034 | 0.934849 |
| EVA1C     | 6.66E-05 | -0.1582  | 0.026 | 0.024 | 0.99578  |
| PTGES     | 7.12E-05 | -0.21348 | 0     | 0.017 | 1        |

|           |          |          |       |       |   |
|-----------|----------|----------|-------|-------|---|
| RP11-479J | 7.12E-05 | -0.17293 | 0     | 0.017 | 1 |
| UNC93B1   | 7.16E-05 | -0.19526 | 0.016 | 0.021 | 1 |
| KCNMA1    | 7.23E-05 | -0.22643 | 0.025 | 0.026 | 1 |
| RAB20     | 7.50E-05 | -0.17631 | 0.022 | 0.027 | 1 |
| WWTR1     | 7.52E-05 | -0.20892 | 0.021 | 0.032 | 1 |
| PTX3      | 7.71E-05 | -0.24781 | 0.01  | 0.029 | 1 |
| RP11-355E | 7.88E-05 | 0.107936 | 0.036 | 0.005 | 1 |
| BIRC3     | 7.99E-05 | -0.38714 | 0.009 | 0.021 | 1 |
| TMEM144   | 8.00E-05 | -0.11425 | 0.021 | 0.015 | 1 |
| PTHLH     | 8.03E-05 | -0.25345 | 0.007 | 0.032 | 1 |
| ZNF546    | 8.05E-05 | 0.103451 | 0.038 | 0.005 | 1 |
| RP11-468E | 8.12E-05 | -0.11837 | 0.035 | 0.027 | 1 |
| LGI1      | 8.37E-05 | -0.12211 | 0.031 | 0.027 | 1 |
| KIAA1107  | 8.41E-05 | 0.101381 | 0.039 | 0.007 | 1 |
| LINC00115 | 8.46E-05 | -0.19829 | 0.029 | 0.027 | 1 |
| ZC3H12A   | 8.59E-05 | -0.28864 | 0.01  | 0.026 | 1 |
| FPGT      | 8.64E-05 | -0.17072 | 0.03  | 0.027 | 1 |
| PPIL6     | 8.67E-05 | -0.16618 | 0.022 | 0.024 | 1 |
| DUSP23    | 8.71E-05 | -0.24149 | 0.021 | 0.032 | 1 |
| SERF1A    | 9.02E-05 | -0.11024 | 0.02  | 0.017 | 1 |
| PDE8A     | 9.02E-05 | -0.20694 | 0.014 | 0.031 | 1 |
| CLDND2    | 9.11E-05 | 0.105917 | 0.036 | 0.005 | 1 |
| GALNT15   | 9.12E-05 | -0.21313 | 0.007 | 0.027 | 1 |
| CA9       | 9.12E-05 | -0.31015 | 0.012 | 0.043 | 1 |
| HCST      | 9.28E-05 | -0.10453 | 0.022 | 0.019 | 1 |
| SPTSSB    | 9.40E-05 | -0.28071 | 0.003 | 0.026 | 1 |
| KCNN3     | 9.43E-05 | -0.12554 | 0.017 | 0.014 | 1 |
| MAP3K10   | 9.43E-05 | 0.105931 | 0.038 | 0.005 | 1 |
| BATF3     | 9.82E-05 | -0.27154 | 0.007 | 0.022 | 1 |
| PHYHD1    | 0.0001   | 0.115888 | 0.04  | 0.009 | 1 |
| ITGA3     | 0.000101 | -0.22206 | 0.009 | 0.026 | 1 |
| C1orf54   | 0.000103 | -0.30832 | 0.008 | 0.032 | 1 |
| ACSBG1    | 0.000104 | -0.30539 | 0.013 | 0.043 | 1 |
| HIST1H4E  | 0.000105 | -0.29672 | 0.021 | 0.024 | 1 |
| ITPKB     | 0.000106 | -0.23318 | 0.008 | 0.024 | 1 |
| ZNF700    | 0.000106 | -0.12042 | 0.026 | 0.026 | 1 |
| COL16A1   | 0.000114 | -0.27378 | 0.022 | 0.046 | 1 |
| RNASE4    | 0.000115 | -0.27549 | 0.007 | 0.027 | 1 |
| CSF1      | 0.000116 | -0.25291 | 0.027 | 0.039 | 1 |
| TMEM37    | 0.000116 | -0.23602 | 0.004 | 0.022 | 1 |
| SCN2A     | 0.000118 | 0.102021 | 0.034 | 0.005 | 1 |
| H6PD      | 0.00012  | -0.12553 | 0.027 | 0.021 | 1 |
| KRBOX1    | 0.000124 | -0.289   | 0.004 | 0.032 | 1 |
| CLDN5     | 0.000124 | -0.18085 | 0.023 | 0.024 | 1 |
| SLC16A3   | 0.000133 | -0.1178  | 0.026 | 0.022 | 1 |
| MYCBP     | 0.000137 | -0.1135  | 0.03  | 0.022 | 1 |
| MGARP     | 0.000139 | -0.17031 | 0.02  | 0.027 | 1 |
| KIAA0040  | 0.000139 | -0.24746 | 0.014 | 0.032 | 1 |
| AHNAK     | 0.000144 | -0.19877 | 0.018 | 0.021 | 1 |
| FKBP1C    | 0.000146 | -0.12282 | 0.017 | 0.012 | 1 |
| IFI30     | 0.000147 | -0.20962 | 0.009 | 0.021 | 1 |



|           |          |          |       |       |   |
|-----------|----------|----------|-------|-------|---|
| LUC7L2    | 0.000149 | -0.24675 | 0.003 | 0.027 | 1 |
| GREM1     | 0.000151 | -0.25934 | 0.008 | 0.034 | 1 |
| XKR6      | 0.000151 | 0.100577 | 0.035 | 0.005 | 1 |
| PPP1R3C   | 0.000157 | -0.20177 | 0.017 | 0.022 | 1 |
| NMNAT3    | 0.000159 | -0.19027 | 0.025 | 0.031 | 1 |
| SLC6A9    | 0.000159 | -0.18294 | 0.023 | 0.029 | 1 |
| NPTX1     | 0.000163 | -0.26224 | 0.007 | 0.021 | 1 |
| SELPLG    | 0.000164 | -0.11019 | 0.022 | 0.017 | 1 |
| APOL6     | 0.000167 | -0.296   | 0.008 | 0.031 | 1 |
| GPRC5A    | 0.000173 | -0.17472 | 0     | 0.015 | 1 |
| RP11-306G | 0.000173 | -0.15374 | 0     | 0.015 | 1 |
| CA5A      | 0.000173 | -0.14831 | 0     | 0.015 | 1 |
| TRPM3     | 0.000178 | -0.28472 | 0.016 | 0.038 | 1 |
| AC007405. | 0.000182 | -0.20166 | 0.017 | 0.024 | 1 |
| BLM       | 0.000191 | -0.17681 | 0.043 | 0.05  | 1 |
| WNT3      | 0.000195 | -0.18212 | 0.018 | 0.022 | 1 |
| RP11-1143 | 0.000195 | -0.10203 | 0.029 | 0.017 | 1 |
| PPARD     | 0.000201 | -0.1072  | 0.036 | 0.027 | 1 |
| DMRTA2    | 0.00022  | -0.12323 | 0.031 | 0.029 | 1 |
| DHX32     | 0.000221 | 0.100474 | 0.035 | 0.005 | 1 |
| SRRM4     | 0.000221 | 0.113845 | 0.031 | 0.003 | 1 |
| SPICE1    | 0.000224 | -0.29047 | 0.014 | 0.027 | 1 |
| STEAP1    | 0.000224 | -0.3383  | 0.01  | 0.038 | 1 |
| ZFYVE9    | 0.000226 | 0.102337 | 0.046 | 0.012 | 1 |
| RTP4      | 0.000238 | -0.22627 | 0.01  | 0.019 | 1 |
| WDFY2     | 0.000238 | -0.13393 | 0.03  | 0.026 | 1 |
| APLN      | 0.000252 | -0.23433 | 0.001 | 0.019 | 1 |
| CCDC88B   | 0.000255 | -0.1635  | 0.02  | 0.022 | 1 |
| MVP       | 0.000255 | -0.29182 | 0.022 | 0.044 | 1 |
| CRISPLD2  | 0.000258 | -0.18391 | 0.027 | 0.027 | 1 |
| RP5-1068E | 0.000263 | -0.10444 | 0.03  | 0.021 | 1 |
| PTCHD1    | 0.000266 | -0.22952 | 0.001 | 0.021 | 1 |
| PCDH1     | 0.000268 | -0.15454 | 0.035 | 0.032 | 1 |
| RMRP      | 0.000269 | 0.104864 | 0.027 | 0.003 | 1 |
| LGR6      | 0.000272 | -0.237   | 0.004 | 0.026 | 1 |
| HES7      | 0.000272 | 0.101061 | 0.026 | 0.002 | 1 |
| SPAG4     | 0.000274 | -0.28504 | 0.005 | 0.019 | 1 |
| TSHR      | 0.000284 | 0.169739 | 0.026 | 0.002 | 1 |
| EID3      | 0.000284 | -0.15353 | 0.023 | 0.022 | 1 |
| OAS3      | 0.000285 | -0.20154 | 0.017 | 0.024 | 1 |
| CTC-479C5 | 0.000286 | -0.12317 | 0.021 | 0.021 | 1 |
| CCL5      | 0.000286 | -0.12644 | 0.021 | 0.015 | 1 |
| RAB32     | 0.000289 | -0.11371 | 0.022 | 0.015 | 1 |
| SLC7A11   | 0.000301 | -0.16485 | 0.008 | 0.027 | 1 |
| DBX2      | 0.000303 | -0.24424 | 0.012 | 0.034 | 1 |
| RP11-783K | 0.000317 | -0.21058 | 0.014 | 0.022 | 1 |
| LINC00882 | 0.00033  | -0.20963 | 0.018 | 0.024 | 1 |
| GLIPR1L2  | 0.000331 | -0.12724 | 0.027 | 0.019 | 1 |
| SLC39A14  | 0.000343 | -0.25139 | 0.021 | 0.038 | 1 |
| CD163L1   | 0.000349 | 0.104964 | 0.042 | 0.01  | 1 |
| SDCBP2    | 0.00035  | -0.25693 | 0.016 | 0.031 | 1 |

|           |          |          |       |       |   |
|-----------|----------|----------|-------|-------|---|
| KCNF1     | 0.000362 | -0.11448 | 0.023 | 0.019 | 1 |
| DMRTA1    | 0.000382 | -0.15629 | 0.001 | 0.022 | 1 |
| FAM129A   | 0.000384 | -0.2121  | 0.007 | 0.024 | 1 |
| PGAM4     | 0.000401 | -0.14959 | 0.009 | 0.01  | 1 |
| TFR2      | 0.000403 | -0.13404 | 0.017 | 0.019 | 1 |
| TSLP      | 0.000417 | -0.15198 | 0.01  | 0.012 | 1 |
| CFH       | 0.00042  | -0.13758 | 0     | 0.014 | 1 |
| ADAMTS3   | 0.00042  | -0.13878 | 0     | 0.014 | 1 |
| ADAM19    | 0.000422 | -0.17697 | 0.013 | 0.019 | 1 |
| RPGR      | 0.000431 | -0.12738 | 0.026 | 0.022 | 1 |
| SYTL4     | 0.000433 | -0.12407 | 0.026 | 0.027 | 1 |
| ANO6      | 0.000435 | -0.15074 | 0.026 | 0.024 | 1 |
| OSR2      | 0.000435 | -0.15106 | 0.02  | 0.019 | 1 |
| PPP2R5A   | 0.000436 | -0.14086 | 0.026 | 0.026 | 1 |
| BCAR3     | 0.00046  | -0.2506  | 0.008 | 0.031 | 1 |
| GPX8      | 0.000463 | -0.29721 | 0.004 | 0.027 | 1 |
| DUSP18    | 0.00048  | -0.10472 | 0.026 | 0.026 | 1 |
| PSORS1C1  | 0.000488 | -0.30471 | 0.01  | 0.036 | 1 |
| EIF4EBP3  | 0.00049  | -0.16355 | 0.001 | 0.021 | 1 |
| CLEC2D    | 0.000497 | -0.17805 | 0.012 | 0.024 | 1 |
| ABHD1     | 0.000516 | -0.21706 | 0.003 | 0.019 | 1 |
| RP11-284F | 0.000534 | -0.22897 | 0.01  | 0.034 | 1 |
| MAP3K7CL  | 0.000542 | -0.21593 | 0.014 | 0.021 | 1 |
| SLC39A8   | 0.000551 | -0.1351  | 0.013 | 0.015 | 1 |
| CACNG8    | 0.000568 | -0.15854 | 0.023 | 0.024 | 1 |
| FOLR1     | 0.00057  | -0.25737 | 0.003 | 0.021 | 1 |
| ENDOD1    | 0.000583 | -0.16882 | 0.034 | 0.038 | 1 |
| LY96      | 0.000586 | -0.23258 | 0.016 | 0.026 | 1 |
| CYB561    | 0.000626 | -0.1679  | 0.022 | 0.026 | 1 |
| B9D2      | 0.00063  | -0.10018 | 0.027 | 0.024 | 1 |
| FPR1      | 0.000651 | -0.19104 | 0.02  | 0.029 | 1 |
| FOSL2     | 0.000654 | -0.15864 | 0.031 | 0.038 | 1 |
| NPHP1     | 0.000654 | -0.17765 | 0.018 | 0.026 | 1 |
| Clorf226  | 0.000658 | -0.21679 | 0.018 | 0.027 | 1 |
| APOBEC3G  | 0.000683 | -0.20904 | 0.016 | 0.029 | 1 |
| CCDC163P  | 0.000693 | -0.12857 | 0.021 | 0.021 | 1 |
| CHRM3     | 0.000714 | -0.19474 | 0.012 | 0.022 | 1 |
| IFITM2    | 0.000742 | -0.26722 | 0.022 | 0.039 | 1 |
| CASP7     | 0.00081  | -0.20378 | 0.014 | 0.027 | 1 |
| ACP6      | 0.000815 | -0.11529 | 0.026 | 0.024 | 1 |
| DDIT4L    | 0.000825 | -0.2168  | 0.003 | 0.019 | 1 |
| SLC25A45  | 0.000826 | -0.10458 | 0.021 | 0.019 | 1 |
| CHST8     | 0.000873 | -0.15967 | 0.021 | 0.021 | 1 |
| SLC39A4   | 0.000878 | -0.12245 | 0.018 | 0.017 | 1 |
| Clorf194  | 0.00089  | -0.2123  | 0.003 | 0.017 | 1 |
| CCBE1     | 0.000905 | -0.20455 | 0.007 | 0.026 | 1 |
| HP        | 0.000907 | -0.291   | 0.001 | 0.015 | 1 |
| HSD17B6   | 0.000994 | -0.13855 | 0.018 | 0.021 | 1 |
| IL1R1     | 0.001026 | -0.13147 | 0     | 0.012 | 1 |
| MYBPH     | 0.001026 | -0.11772 | 0     | 0.012 | 1 |
| RP1-122K4 | 0.001026 | -0.15002 | 0     | 0.012 | 1 |

|           |          |          |       |       |   |
|-----------|----------|----------|-------|-------|---|
| NPNT      | 0.001088 | -0.23078 | 0.008 | 0.024 | 1 |
| BAG3      | 0.001097 | -0.13337 | 0.02  | 0.027 | 1 |
| ANGPTL1   | 0.001113 | -0.103   | 0.017 | 0.012 | 1 |
| RIN1      | 0.00114  | -0.23856 | 0.005 | 0.027 | 1 |
| FAM69C    | 0.001145 | -0.13066 | 0.012 | 0.014 | 1 |
| PHF11     | 0.001172 | -0.17412 | 0.013 | 0.021 | 1 |
| AGMO      | 0.001172 | -0.13638 | 0.02  | 0.021 | 1 |
| PIR       | 0.001262 | -0.18048 | 0.01  | 0.021 | 1 |
| ARSG      | 0.001323 | -0.14277 | 0.022 | 0.024 | 1 |
| BCL2L12   | 0.001333 | -0.15177 | 0.018 | 0.019 | 1 |
| IL1RAP    | 0.001339 | -0.16907 | 0.012 | 0.036 | 1 |
| RHBDF1    | 0.001342 | -0.15178 | 0.013 | 0.014 | 1 |
| HOMER2    | 0.001386 | -0.14654 | 0.02  | 0.019 | 1 |
| COLEC12   | 0.001503 | -0.17476 | 0.001 | 0.019 | 1 |
| FAXDC2    | 0.001504 | -0.1129  | 0.033 | 0.029 | 1 |
| OSBPL3    | 0.001513 | -0.18395 | 0.016 | 0.024 | 1 |
| PCSK1     | 0.001526 | -0.2053  | 0.005 | 0.022 | 1 |
| COL4A1    | 0.001555 | -0.18597 | 0.017 | 0.027 | 1 |
| ASS1      | 0.00159  | -0.129   | 0.025 | 0.021 | 1 |
| SHROOM3   | 0.001607 | -0.17976 | 0.005 | 0.015 | 1 |
| MORN3     | 0.001614 | -0.21932 | 0.005 | 0.021 | 1 |
| MIR155HG  | 0.001621 | -0.19613 | 0.001 | 0.019 | 1 |
| PPM1N     | 0.001731 | -0.18899 | 0.008 | 0.024 | 1 |
| LOXL2     | 0.001743 | -0.12398 | 0.01  | 0.019 | 1 |
| CD70      | 0.001782 | -0.28376 | 0.003 | 0.017 | 1 |
| LAMB2     | 0.001791 | -0.25254 | 0.014 | 0.036 | 1 |
| PLA2G6    | 0.00186  | 0.104506 | 0.039 | 0.01  | 1 |
| CMYA5     | 0.001864 | -0.25797 | 0.008 | 0.029 | 1 |
| TFCP2L1   | 0.001914 | -0.19277 | 0.001 | 0.017 | 1 |
| STX3      | 0.001965 | -0.12316 | 0.02  | 0.021 | 1 |
| NOTCH3    | 0.001992 | -0.16091 | 0.009 | 0.019 | 1 |
| ZNF442    | 0.002017 | -0.12032 | 0.017 | 0.014 | 1 |
| STK33     | 0.002067 | -0.13565 | 0.036 | 0.034 | 1 |
| ASB3      | 0.002158 | -0.24026 | 0.003 | 0.021 | 1 |
| IL6       | 0.002293 | -0.21725 | 0.001 | 0.015 | 1 |
| IGFLR1    | 0.002371 | -0.18336 | 0.01  | 0.026 | 1 |
| CTSH      | 0.002376 | -0.14941 | 0.02  | 0.026 | 1 |
| PARVB     | 0.002379 | -0.10724 | 0.016 | 0.015 | 1 |
| SLC5A3    | 0.002403 | -0.1647  | 0.001 | 0.017 | 1 |
| SNX15     | 0.00241  | -0.10027 | 0.014 | 0.015 | 1 |
| LFNG      | 0.002449 | -0.15625 | 0.021 | 0.026 | 1 |
| CNR2      | 0.00252  | -0.10516 | 0     | 0.01  | 1 |
| CCL3L3    | 0.00252  | -0.11233 | 0     | 0.01  | 1 |
| LINC00637 | 0.00252  | -0.10367 | 0     | 0.01  | 1 |
| MT1H      | 0.00252  | -0.10778 | 0     | 0.01  | 1 |
| MLLT1     | 0.00252  | -0.10004 | 0     | 0.01  | 1 |
| MAOA      | 0.002526 | -0.21809 | 0.009 | 0.021 | 1 |
| AP001258. | 0.002533 | -0.10936 | 0.016 | 0.014 | 1 |
| RCS1      | 0.002537 | -0.10439 | 0.012 | 0.014 | 1 |
| PFKFB4    | 0.002541 | -0.16713 | 0.013 | 0.019 | 1 |
| KCTD14    | 0.002572 | -0.13057 | 0.008 | 0.01  | 1 |

|           |          |          |       |       |   |
|-----------|----------|----------|-------|-------|---|
| ACAP1     | 0.002671 | -0.13901 | 0.01  | 0.017 | 1 |
| TLCD1     | 0.002738 | -0.13688 | 0.017 | 0.017 | 1 |
| APOLD1    | 0.002741 | -0.10886 | 0.023 | 0.026 | 1 |
| TSIX      | 0.002762 | -0.19599 | 0.009 | 0.029 | 1 |
| HPS1      | 0.002784 | -0.17707 | 0.01  | 0.026 | 1 |
| CTD-2020K | 0.002833 | -0.14422 | 0.013 | 0.024 | 1 |
| LHFPL2    | 0.002924 | -0.12898 | 0.016 | 0.015 | 1 |
| CTD-3131K | 0.002924 | -0.18415 | 0.02  | 0.021 | 1 |
| GNG3      | 0.002937 | -0.1042  | 0.027 | 0.021 | 1 |
| CDIPT-AS1 | 0.003076 | -0.2258  | 0.003 | 0.021 | 1 |
| AC007161. | 0.003088 | 0.104745 | 0.027 | 0.005 | 1 |
| C5AR2     | 0.003127 | -0.18127 | 0.004 | 0.019 | 1 |
| ALDH1L1-A | 0.003133 | -0.15726 | 0.012 | 0.022 | 1 |
| IZUMO4    | 0.003169 | -0.18685 | 0.013 | 0.026 | 1 |
| PARP9     | 0.003197 | -0.21326 | 0.031 | 0.044 | 1 |
| BCL2L15   | 0.003255 | -0.20454 | 0.01  | 0.026 | 1 |
| LRRC2     | 0.003515 | -0.15346 | 0.013 | 0.024 | 1 |
| ACOT11    | 0.003532 | -0.18345 | 0.01  | 0.021 | 1 |
| SULT1C2   | 0.003644 | -0.11939 | 0.001 | 0.014 | 1 |
| C11orf71  | 0.00367  | -0.19263 | 0.013 | 0.026 | 1 |
| METTL25   | 0.003714 | -0.12535 | 0.012 | 0.014 | 1 |
| MOV10     | 0.003741 | -0.1278  | 0.022 | 0.026 | 1 |
| SP140L    | 0.003744 | -0.19874 | 0.013 | 0.031 | 1 |
| TRAF6     | 0.003823 | -0.10843 | 0.02  | 0.015 | 1 |
| MX1       | 0.003825 | -0.19827 | 0.022 | 0.032 | 1 |
| CNTNAP3B  | 0.003856 | -0.12024 | 0.017 | 0.022 | 1 |
| MTFP1     | 0.004036 | -0.22908 | 0.017 | 0.029 | 1 |
| EYA4      | 0.004038 | -0.10079 | 0.014 | 0.012 | 1 |
| FZD7      | 0.004078 | -0.16426 | 0.004 | 0.012 | 1 |
| HSD3B7    | 0.004302 | -0.19821 | 0.007 | 0.022 | 1 |
| NOS2      | 0.004375 | -0.20835 | 0.007 | 0.019 | 1 |
| FABP3     | 0.004446 | -0.31898 | 0.008 | 0.022 | 1 |
| ABCC3     | 0.004478 | -0.18859 | 0.013 | 0.031 | 1 |
| DNAH9     | 0.004479 | -0.16814 | 0.005 | 0.021 | 1 |
| KRT7      | 0.004509 | -0.26391 | 0.007 | 0.026 | 1 |
| SCN9A     | 0.004614 | -0.1055  | 0.017 | 0.017 | 1 |
| SDS       | 0.004769 | -0.11372 | 0.009 | 0.01  | 1 |
| DHRS4-AS1 | 0.004912 | -0.2257  | 0.007 | 0.027 | 1 |
| P4HA2     | 0.00509  | -0.16565 | 0.007 | 0.021 | 1 |
| RP11-315I | 0.005297 | -0.10835 | 0.01  | 0.01  | 1 |
| RP11-49I1 | 0.005318 | -0.17189 | 0.003 | 0.014 | 1 |
| MAFG-AS1  | 0.005456 | 0.103294 | 0.03  | 0.007 | 1 |
| CALHM2    | 0.005523 | -0.14971 | 0.005 | 0.019 | 1 |
| SLC22A18  | 0.005558 | -0.15956 | 0.016 | 0.021 | 1 |
| CHIT1     | 0.005682 | -0.20294 | 0.005 | 0.014 | 1 |
| MTRNR2L3  | 0.005688 | -0.17778 | 0.007 | 0.026 | 1 |
| HSPB8     | 0.005811 | -0.16918 | 0.008 | 0.021 | 1 |
| HSD11B1   | 0.005987 | -0.1968  | 0.001 | 0.014 | 1 |
| C12orf54  | 0.006154 | -0.15294 | 0.005 | 0.019 | 1 |
| C8orf86   | 0.006239 | -0.12011 | 0     | 0.009 | 1 |
| RP11-522E | 0.006239 | -0.11366 | 0     | 0.009 | 1 |

|           |          |          |       |       |   |
|-----------|----------|----------|-------|-------|---|
| AC010987. | 0.006239 | -0.13974 | 0     | 0.009 | 1 |
| C16orf89  | 0.006239 | -0.11763 | 0     | 0.009 | 1 |
| COL5A1    | 0.006239 | -0.10566 | 0     | 0.009 | 1 |
| RP11-495F | 0.006239 | -0.12494 | 0     | 0.009 | 1 |
| PDZK1IP1  | 0.006239 | -0.15785 | 0     | 0.009 | 1 |
| AL592528. | 0.006239 | -0.13233 | 0     | 0.009 | 1 |
| TLR3      | 0.006239 | -0.11461 | 0     | 0.009 | 1 |
| MUC1      | 0.006239 | -0.10112 | 0     | 0.009 | 1 |
| FGF22     | 0.006305 | -0.14117 | 0.007 | 0.015 | 1 |
| TRIM72    | 0.006454 | -0.14358 | 0.003 | 0.017 | 1 |
| LYN       | 0.006484 | -0.13487 | 0.017 | 0.017 | 1 |
| CFI       | 0.006759 | -0.13234 | 0.003 | 0.015 | 1 |
| ITGB4     | 0.006818 | -0.17259 | 0.013 | 0.021 | 1 |
| PARP10    | 0.006837 | -0.10353 | 0.023 | 0.019 | 1 |
| ADSSL1    | 0.006996 | -0.15515 | 0.012 | 0.021 | 1 |
| IRAK2     | 0.007014 | -0.15025 | 0.014 | 0.019 | 1 |
| MSMP      | 0.007046 | -0.10451 | 0.013 | 0.01  | 1 |
| FGFR3     | 0.007117 | -0.14274 | 0.014 | 0.021 | 1 |
| SQRDL     | 0.007154 | -0.18953 | 0.01  | 0.022 | 1 |
| CHRNA9    | 0.007154 | -0.19083 | 0.004 | 0.019 | 1 |
| TMCO4     | 0.007273 | -0.12943 | 0.001 | 0.015 | 1 |
| ABCB9     | 0.007407 | -0.11688 | 0.016 | 0.019 | 1 |
| AXL       | 0.00761  | -0.16403 | 0.012 | 0.024 | 1 |
| ASPA      | 0.007745 | -0.15871 | 0.003 | 0.015 | 1 |
| OSMR      | 0.007747 | -0.17124 | 0.012 | 0.027 | 1 |
| CRIP1     | 0.00776  | -0.12629 | 0.013 | 0.012 | 1 |
| SYNPO2L   | 0.008393 | -0.11141 | 0.017 | 0.021 | 1 |
| MORN5     | 0.008661 | -0.15791 | 0.001 | 0.012 | 1 |
| COL18A1   | 0.008851 | -0.1704  | 0.012 | 0.022 | 1 |
| ETV7      | 0.009159 | -0.19162 | 0.003 | 0.017 | 1 |
| PCDH9-AS1 | 0.009173 | -0.10167 | 0.013 | 0.017 | 1 |
| RASSF8    | 0.009305 | -0.1344  | 0.016 | 0.024 | 1 |
| MICALL2   | 0.009375 | -0.1119  | 0.022 | 0.022 | 1 |
| ACTA2     | 0.009427 | -0.1828  | 0.008 | 0.017 | 1 |
| HLA-F     | 0.009805 | -0.16216 | 0.01  | 0.021 | 1 |
| GPR89B    | 0.009892 | -0.1818  | 0.007 | 0.021 | 1 |
| MAN1C1    | 0.010184 | -0.12618 | 0.008 | 0.014 | 1 |
| FAM198B   | 0.010235 | -0.15991 | 0.009 | 0.017 | 1 |
| ZNF8      | 0.010397 | -0.16957 | 0.001 | 0.014 | 1 |
| FCGR2A    | 0.010538 | -0.15549 | 0.016 | 0.024 | 1 |
| RAMP3     | 0.010628 | -0.102   | 0.016 | 0.014 | 1 |
| HERC5     | 0.010781 | -0.10382 | 0.025 | 0.022 | 1 |
| ZDHHC23   | 0.010929 | -0.1453  | 0.009 | 0.015 | 1 |
| AC114803. | 0.011151 | -0.14751 | 0.003 | 0.015 | 1 |
| THBS1     | 0.011418 | -0.12704 | 0.01  | 0.015 | 1 |
| C4orf47   | 0.011438 | -0.12574 | 0.018 | 0.021 | 1 |
| AMT       | 0.011559 | -0.1265  | 0.012 | 0.014 | 1 |
| FLT3LG    | 0.011652 | -0.12342 | 0.016 | 0.021 | 1 |
| IL6R      | 0.012136 | -0.12195 | 0.012 | 0.024 | 1 |
| SPATA17   | 0.012221 | -0.15901 | 0.004 | 0.014 | 1 |
| SERPINA3  | 0.012316 | -0.1448  | 0.001 | 0.012 | 1 |

|           |          |          |       |       |   |
|-----------|----------|----------|-------|-------|---|
| RNF144B   | 0.012484 | -0.19844 | 0.008 | 0.021 | 1 |
| POLN      | 0.012556 | -0.10423 | 0.013 | 0.014 | 1 |
| PPARGC1A  | 0.012838 | -0.12584 | 0.005 | 0.014 | 1 |
| ZNF556    | 0.013692 | -0.11524 | 0.001 | 0.012 | 1 |
| CHST2     | 0.014039 | -0.1156  | 0.014 | 0.017 | 1 |
| MARVELD3  | 0.014193 | -0.17502 | 0.008 | 0.024 | 1 |
| MPZ       | 0.014281 | -0.11681 | 0.008 | 0.01  | 1 |
| SSTR2     | 0.014344 | -0.13342 | 0.01  | 0.017 | 1 |
| PLCG2     | 0.014702 | -0.16896 | 0.003 | 0.015 | 1 |
| PHLDA2    | 0.014856 | -0.15192 | 0.005 | 0.019 | 1 |
| HSPB2     | 0.014901 | -0.14662 | 0.004 | 0.015 | 1 |
| WIF1      | 0.01562  | -0.15102 | 0     | 0.007 | 1 |
| FAM110C   | 0.01562  | -0.15259 | 0     | 0.007 | 1 |
| RP11-383M | 0.015701 | -0.11525 | 0.001 | 0.012 | 1 |
| EHD2      | 0.015751 | -0.14782 | 0.012 | 0.022 | 1 |
| AC006946. | 0.015781 | -0.16165 | 0.001 | 0.014 | 1 |
| GJC3      | 0.016073 | -0.14094 | 0.003 | 0.014 | 1 |
| YAP1      | 0.016667 | -0.13388 | 0.003 | 0.015 | 1 |
| SLIT1     | 0.016984 | -0.11385 | 0.01  | 0.014 | 1 |
| ERAP2     | 0.017127 | -0.15125 | 0.016 | 0.031 | 1 |
| CCL4L2    | 0.017136 | -0.1527  | 0.004 | 0.017 | 1 |
| VWA3B     | 0.018034 | -0.15811 | 0.013 | 0.029 | 1 |
| HYKK      | 0.018177 | -0.10459 | 0.001 | 0.012 | 1 |
| IGF2      | 0.018199 | -0.24355 | 0.009 | 0.019 | 1 |
| OTX1      | 0.018442 | -0.10788 | 0.01  | 0.015 | 1 |
| ARHGEF4   | 0.018461 | -0.11194 | 0.016 | 0.019 | 1 |
| SLC44A3   | 0.019996 | -0.15041 | 0.005 | 0.014 | 1 |
| THTPA     | 0.020257 | -0.16882 | 0.003 | 0.015 | 1 |
| SCN7A     | 0.020269 | -0.10622 | 0.001 | 0.012 | 1 |
| RIIAD1    | 0.020577 | -0.12508 | 0.008 | 0.012 | 1 |
| WWC1      | 0.020604 | -0.1197  | 0.003 | 0.014 | 1 |
| C8orf34   | 0.020732 | -0.10194 | 0.001 | 0.012 | 1 |
| EPHA1-AS1 | 0.020765 | -0.11345 | 0.009 | 0.009 | 1 |
| SPRED3    | 0.020903 | -0.11296 | 0.007 | 0.01  | 1 |
| CALB1     | 0.021555 | -0.13424 | 0.005 | 0.012 | 1 |
| ACOX2     | 0.022897 | -0.12187 | 0.01  | 0.014 | 1 |
| RP3-325F2 | 0.022915 | -0.11286 | 0.004 | 0.014 | 1 |
| RGL3      | 0.023104 | -0.10824 | 0.003 | 0.012 | 1 |
| TMEM232   | 0.023428 | -0.1105  | 0.008 | 0.009 | 1 |
| CLMN      | 0.023527 | -0.13332 | 0.007 | 0.021 | 1 |
| COL23A1   | 0.02395  | -0.14079 | 0.004 | 0.015 | 1 |
| GS1-18A18 | 0.024083 | -0.23468 | 0.005 | 0.015 | 1 |
| COL22A1   | 0.024267 | -0.11796 | 0.007 | 0.014 | 1 |
| HIST1H2BG | 0.024382 | -0.12982 | 0.004 | 0.012 | 1 |
| BATF2     | 0.024739 | -0.18115 | 0.007 | 0.024 | 1 |
| RNASEK-C1 | 0.02503  | -0.10056 | 0.001 | 0.012 | 1 |
| TNFSF10   | 0.026563 | -0.16936 | 0.005 | 0.019 | 1 |
| PROCR     | 0.026932 | -0.13518 | 0.003 | 0.012 | 1 |
| ZNF264    | 0.028235 | -0.11014 | 0.012 | 0.017 | 1 |
| USP6      | 0.028294 | -0.10345 | 0.003 | 0.012 | 1 |
| CD34      | 0.028935 | -0.10452 | 0.001 | 0.01  | 1 |

|           |          |          |       |       |   |
|-----------|----------|----------|-------|-------|---|
| TNFAIP2   | 0.029124 | -0.12757 | 0.004 | 0.01  | 1 |
| MYLK      | 0.029417 | -0.12856 | 0.007 | 0.012 | 1 |
| TGFBR3    | 0.030674 | -0.14089 | 0.007 | 0.012 | 1 |
| LINC01138 | 0.030719 | -0.11536 | 0.001 | 0.01  | 1 |
| SMIM10    | 0.031135 | -0.12838 | 0.01  | 0.014 | 1 |
| ADCY2     | 0.031851 | -0.1295  | 0.013 | 0.022 | 1 |
| TNXB      | 0.0323   | -0.10852 | 0.007 | 0.015 | 1 |
| GDPGP1    | 0.032679 | -0.12435 | 0.003 | 0.01  | 1 |
| GBP7      | 0.033012 | -0.1003  | 0.001 | 0.012 | 1 |
| RGS20     | 0.03342  | -0.10297 | 0.001 | 0.012 | 1 |
| MILR1     | 0.033888 | -0.10334 | 0.005 | 0.009 | 1 |
| PLAU      | 0.034254 | -0.10355 | 0.01  | 0.017 | 1 |
| AC015936  | 0.034591 | -0.12885 | 0.008 | 0.019 | 1 |
| SLC6A11   | 0.035084 | -0.1328  | 0.009 | 0.014 | 1 |
| RP11-326C | 0.035444 | -0.11094 | 0.003 | 0.014 | 1 |
| RASGRP1   | 0.036462 | -0.10794 | 0.005 | 0.012 | 1 |
| RP11-244H | 0.037675 | -0.10579 | 0.003 | 0.012 | 1 |
| OAS2      | 0.038129 | -0.12367 | 0.004 | 0.01  | 1 |
| FAM180A   | 0.038346 | -0.13773 | 0.001 | 0.01  | 1 |
| ZNF600    | 0.038362 | -0.11432 | 0.007 | 0.012 | 1 |
| ATP13A4   | 0.038829 | -0.10142 | 0.013 | 0.014 | 1 |
| RP11-1246 | 0.03891  | -0.15164 | 0.009 | 0.014 | 1 |
| TRIM38    | 0.038936 | -0.13089 | 0.005 | 0.017 | 1 |
| ALDH3B1   | 0.03959  | -0.10507 | 0.009 | 0.014 | 1 |
| HIST1H2BF | 0.03979  | -0.10678 | 0     | 0.005 | 1 |
| SAA4      | 0.03979  | -0.10498 | 0     | 0.005 | 1 |
| CCL26     | 0.03979  | -0.17007 | 0     | 0.005 | 1 |
| SLC7A8    | 0.039938 | -0.12114 | 0.008 | 0.021 | 1 |
| CHST6     | 0.041626 | -0.10617 | 0.004 | 0.007 | 1 |
| NEBL      | 0.042214 | -0.1151  | 0.012 | 0.021 | 1 |
| CAMP      | 0.042685 | -0.16552 | 0.001 | 0.009 | 1 |
| RP11-242E | 0.043728 | -0.13658 | 0.007 | 0.015 | 1 |
| CYB5R2    | 0.043731 | -0.17101 | 0.009 | 0.024 | 1 |
| RP11-160C | 0.044392 | -0.11451 | 0.004 | 0.01  | 1 |
| SYNM      | 0.045153 | -0.13213 | 0.007 | 0.017 | 1 |
| DCN       | 0.045171 | -0.10853 | 0.001 | 0.01  | 1 |
| SYT4      | 0.045319 | -0.13778 | 0.005 | 0.015 | 1 |
| NPTX2     | 0.046023 | -0.10322 | 0.009 | 0.014 | 1 |
| C11orf70  | 0.047577 | -0.11105 | 0.016 | 0.019 | 1 |
| PTPRT     | 0.048064 | -0.11254 | 0.008 | 0.01  | 1 |
| LSR       | 0.049636 | -0.10554 | 0.012 | 0.017 | 1 |
| TMEM71    | 0.050099 | -0.1157  | 0.001 | 0.01  | 1 |
| MET       | 0.050989 | -0.11058 | 0.007 | 0.009 | 1 |
| DYNLRB2   | 0.051478 | -0.14177 | 0.005 | 0.015 | 1 |
| MSC       | 0.051888 | -0.17707 | 0.003 | 0.005 | 1 |
| TEAD4     | 0.052368 | -0.13386 | 0.004 | 0.015 | 1 |
| C1QTNF9B- | 0.052504 | -0.11992 | 0.004 | 0.014 | 1 |
| SLFN12    | 0.054466 | -0.10109 | 0.003 | 0.012 | 1 |
| LRRC69    | 0.054577 | -0.15232 | 0.016 | 0.021 | 1 |
| MMP9      | 0.058526 | -0.116   | 0.001 | 0.009 | 1 |
| GJB2      | 0.061127 | -0.107   | 0.005 | 0.01  | 1 |

|           |          |          |       |       |   |
|-----------|----------|----------|-------|-------|---|
| CAPS2     | 0.063388 | -0.14034 | 0.005 | 0.015 | 1 |
| RRAS      | 0.064453 | -0.11837 | 0.008 | 0.015 | 1 |
| MARCO     | 0.068936 | -0.131   | 0.007 | 0.014 | 1 |
| RP11-367J | 0.07232  | -0.11195 | 0.004 | 0.01  | 1 |
| INCA1     | 0.075918 | -0.13546 | 0.003 | 0.01  | 1 |
| ALG1L     | 0.077822 | -0.11062 | 0.007 | 0.009 | 1 |
| ACSM5     | 0.080542 | -0.10043 | 0.009 | 0.01  | 1 |
| PAXIP1-AS | 0.080975 | -0.11841 | 0.001 | 0.009 | 1 |
| GGACT     | 0.08255  | -0.10127 | 0.001 | 0.009 | 1 |
| C8orf48   | 0.083735 | -0.1046  | 0.007 | 0.01  | 1 |
| OGDHL     | 0.085364 | -0.10495 | 0.003 | 0.01  | 1 |
| ECM2      | 0.087193 | -0.11359 | 0.004 | 0.014 | 1 |
| RP11-437L | 0.090381 | -0.11028 | 0.004 | 0.012 | 1 |
| ADAMTS18  | 0.09644  | -0.10592 | 0.005 | 0.017 | 1 |
| MMP19     | 0.097888 | -0.10983 | 0.004 | 0.012 | 1 |
| PTGS1     | 0.102442 | -0.1023  | 0.008 | 0.012 | 1 |
| CTD-2369F | 0.103894 | -0.10549 | 0.003 | 0.012 | 1 |
| RP11-264E | 0.104413 | -0.10051 | 0     | 0.003 | 1 |
| GNLY      | 0.111798 | -0.12874 | 0.007 | 0.012 | 1 |
| RP11-745C | 0.114287 | -0.11563 | 0.005 | 0.01  | 1 |
| MYO1E     | 0.115591 | -0.10275 | 0.008 | 0.009 | 1 |
| RP11-395E | 0.11621  | -0.10326 | 0.012 | 0.017 | 1 |
| HCG11     | 0.124546 | -0.11766 | 0.005 | 0.01  | 1 |
| MYCBPAP   | 0.137402 | -0.10023 | 0.008 | 0.014 | 1 |
| AQP3      | 0.146252 | -0.11093 | 0.001 | 0.005 | 1 |
| GPR158-AS | 0.208199 | -0.10695 | 0.005 | 0.01  | 1 |
