# Supplementary material for: A Novel Molecular Classification Method for Glioblastoma Based on Tumor Cell Differentiation Trajectories
Source: Hindawi journal article supplement (doi:10.1155/2023/2826815), 2023-02-22
Supplement: f7 [file 2826815.f7.pdf]

|          | p_val     | avg_logFC | pct.1 | pct.2 | p_val_adj             |
|----------|-----------|-----------|-------|-------|-----------------------|
| STMN2    | 0         | 1.64234   | 0.984 | 0.221 | 0                     |
| STMN4    | 0         | 1.292063  | 0.962 | 0.373 | 0                     |
| TERF2IP  | 0         | 0.937158  | 0.969 | 0.719 | 0                     |
| MAP1B    | 0         | 0.765441  | 0.991 | 0.836 | 0                     |
| HMGB2    | 0         | -1.36915  | 0.351 | 0.977 | 0                     |
| PBK      | 0         | -1.60435  | 0.019 | 0.802 | 0                     |
| BIRC5    | 0         | -1.71183  | 0.021 | 0.809 | 0                     |
| NUSAP1   | 0         | -1.73776  | 0.013 | 0.814 | 0                     |
| UBE2C    | 0         | -1.85455  | 0.031 | 0.833 | 0                     |
| NSG1     | 1.9762625 | 1.446257  | 0.879 | 0.196 | 2.95332680458064e-319 |
| DLX6-AS1 | 5.9475622 | 1.864895  | 0.838 | 0.114 | 8.88803701838542e-316 |
| MLLT11   | 1.2117454 | 0.794433  | 0.987 | 0.798 | 1.81083233022862e-315 |
| TOP2A    | 4.5236551 | -1.67298  | 0.028 | 0.785 | 6.76015028905105e-314 |
| KIAA0101 | #####     | -1.49875  | 0.029 | 0.769 | #####                 |
| FAM64A   | #####     | -1.49392  | 0.009 | 0.717 | #####                 |
| SOX4     | #####     | 0.718099  | 0.998 | 0.832 | #####                 |
| TYMS     | #####     | -1.38656  | 0.053 | 0.802 | #####                 |
| PTTG1    | #####     | -1.68926  | 0.084 | 0.831 | #####                 |
| UCHL1    | #####     | 0.889604  | 0.964 | 0.673 | #####                 |
| CDK1     | #####     | -1.46781  | 0.015 | 0.717 | #####                 |
| CENPF    | #####     | -1.62524  | 0.046 | 0.772 | #####                 |
| SGOL1    | #####     | -1.23885  | 0.009 | 0.698 | #####                 |
| MARCKSL1 | #####     | 0.514496  | 1     | 0.906 | #####                 |
| BTG1     | #####     | 0.714529  | 0.987 | 0.831 | #####                 |
| ZWINT    | #####     | -1.22822  | 0.013 | 0.7   | #####                 |
| CENPK    | #####     | -1.20863  | 0.02  | 0.71  | #####                 |
| TPX2     | #####     | -1.42371  | 0.016 | 0.69  | #####                 |
| NUF2     | #####     | -1.26439  | 0.01  | 0.669 | #####                 |
| RRM2     | #####     | -1.33703  | 0.005 | 0.647 | #####                 |
| APLP1    | #####     | 0.882779  | 0.899 | 0.633 | #####                 |
| DLX5     | #####     | 1.470843  | 0.865 | 0.185 | #####                 |
| SMC4     | #####     | -1.3207   | 0.134 | 0.859 | #####                 |
| TUBB2A   | #####     | 0.633212  | 0.982 | 0.83  | #####                 |
| CENPU    | #####     | -1.22857  | 0.069 | 0.772 | #####                 |
| MKI67    | #####     | -1.26706  | 0.009 | 0.637 | #####                 |
| GTSE1    | #####     | -1.15186  | 0.005 | 0.614 | #####                 |
| CENPM    | #####     | -1.09107  | 0.006 | 0.615 | #####                 |
| PRC1     | #####     | -1.26903  | 0.04  | 0.702 | #####                 |
| NFIB     | #####     | 0.715717  | 0.951 | 0.79  | #####                 |
| DCX      | #####     | 1.040833  | 0.814 | 0.388 | #####                 |
| ATAT1    | #####     | 0.903085  | 0.78  | 0.494 | #####                 |
| TCF4     | #####     | 0.566894  | 0.958 | 0.864 | #####                 |
| CXADR    | #####     | 1.025294  | 0.745 | 0.42  | #####                 |
| TTC3     | #####     | 0.618766  | 0.935 | 0.805 | #####                 |
| CCNA2    | #####     | -1.14021  | 0.009 | 0.601 | #####                 |
| CENPN    | #####     | -1.09087  | 0.02  | 0.636 | #####                 |
| KIFC1    | #####     | -1.04037  | 0.007 | 0.593 | #####                 |
| MAD2L1   | #####     | -1.18601  | 0.124 | 0.814 | #####                 |
| UBE2T    | #####     | -1.22998  | 0.148 | 0.835 | #####                 |
| CRMP1    | #####     | 0.878048  | 0.86  | 0.515 | #####                 |

|           |       |          |       |       |       |
|-----------|-------|----------|-------|-------|-------|
| AURKB     | ##### | -1.15409 | 0.005 | 0.58  | ##### |
| CDKN3     | ##### | -1.36462 | 0.036 | 0.665 | ##### |
| ASF1B     | ##### | -1.02179 | 0.004 | 0.573 | ##### |
| NNAT      | ##### | 1.24769  | 0.87  | 0.264 | ##### |
| TAGLN3    | ##### | 1.082745 | 0.848 | 0.349 | ##### |
| RAB3A     | ##### | 1.258699 | 0.697 | 0.143 | ##### |
| CCNB2     | ##### | -1.24818 | 0.005 | 0.56  | ##### |
| CKAP2L    | ##### | -1.03177 | 0.009 | 0.574 | ##### |
| PCSK1N    | ##### | 0.638168 | 0.976 | 0.784 | ##### |
| MT2A      | ##### | -1.34831 | 0.381 | 0.889 | ##### |
| MT3       | ##### | -1.49646 | 0.122 | 0.768 | ##### |
| FOXM1     | ##### | -0.94193 | 0.009 | 0.568 | ##### |
| SGOL2     | ##### | -1.15022 | 0.035 | 0.633 | ##### |
| TACC3     | ##### | -1.00228 | 0.013 | 0.57  | ##### |
| TUBB2B    | ##### | 0.372839 | 0.999 | 0.973 | ##### |
| PHF19     | ##### | -0.94605 | 0.006 | 0.541 | ##### |
| KIF5C     | ##### | 0.83087  | 0.746 | 0.499 | ##### |
| ELAVL4    | ##### | 1.020084 | 0.869 | 0.312 | ##### |
| RNASEH2A  | ##### | -1.09402 | 0.13  | 0.774 | ##### |
| NDC80     | ##### | -1.03031 | 0.005 | 0.53  | ##### |
| CDC20     | ##### | -1.30284 | 0.009 | 0.543 | ##### |
| HJURP     | ##### | -1.00906 | 0.005 | 0.525 | ##### |
| ASPM      | ##### | -1.09217 | 0.007 | 0.535 | ##### |
| GPM6A     | ##### | 0.536311 | 0.98  | 0.865 | ##### |
| MELK      | ##### | -0.88858 | 0.003 | 0.515 | ##### |
| GNG5      | ##### | -1.21296 | 0.174 | 0.798 | ##### |
| MXD3      | ##### | -1.01446 | 0.027 | 0.59  | ##### |
| H2AFX     | ##### | -1.12881 | 0.159 | 0.783 | ##### |
| PHGDH     | ##### | -1.0924  | 0.067 | 0.673 | ##### |
| KLHL35    | ##### | 1.360516 | 0.632 | 0.046 | ##### |
| SOX11     | ##### | 0.794897 | 0.866 | 0.628 | ##### |
| TK1       | ##### | -0.96864 | 0.01  | 0.533 | ##### |
| TSPAN13   | ##### | 0.839907 | 0.877 | 0.51  | ##### |
| GSTA4     | ##### | 0.816356 | 0.791 | 0.504 | ##### |
| CCNB1     | ##### | -1.33287 | 0.035 | 0.599 | ##### |
| CENPA     | ##### | -1.08396 | 0.004 | 0.504 | ##### |
| DNAJB6    | ##### | 0.522489 | 0.961 | 0.848 | ##### |
| TMEM161B- | ##### | 0.856265 | 0.761 | 0.489 | ##### |
| RAD51AP1  | ##### | -0.91229 | 0.012 | 0.53  | ##### |
| NCAPG     | ##### | -0.86674 | 0.006 | 0.506 | ##### |
| CDCA5     | ##### | -0.87568 | 0.012 | 0.523 | ##### |
| BASP1     | ##### | 0.74221  | 0.621 | 0.491 | ##### |
| ECT2      | ##### | -0.92105 | 0.009 | 0.512 | ##### |
| MYBL2     | ##### | -0.91277 | 0.004 | 0.491 | ##### |
| GMNN      | ##### | -0.9226  | 0.079 | 0.67  | ##### |
| KIF2C     | ##### | -0.91697 | 0.005 | 0.496 | ##### |
| SPC25     | ##### | -1.05093 | 0.05  | 0.62  | ##### |
| MAPT      | ##### | 0.891141 | 0.753 | 0.384 | ##### |
| RTN4      | ##### | 0.436712 | 0.984 | 0.888 | ##### |
| DBN1      | ##### | 0.690735 | 0.854 | 0.644 | ##### |
| SMC2      | ##### | -0.99644 | 0.158 | 0.78  | ##### |

|           |       |          |       |       |       |
|-----------|-------|----------|-------|-------|-------|
| TUBA1A    | ##### | 0.329015 | 1     | 0.989 | ##### |
| POC1A     | ##### | -0.84596 | 0.007 | 0.494 | ##### |
| EGFR      | ##### | -1.22162 | 0.126 | 0.723 | ##### |
| CELF4     | ##### | 1.255118 | 0.6   | 0.09  | ##### |
| ORC6      | ##### | -0.93062 | 0.069 | 0.641 | ##### |
| BEX2      | ##### | 1.09693  | 0.777 | 0.263 | ##### |
| DHFR      | ##### | -0.96941 | 0.082 | 0.66  | ##### |
| AKAP9     | ##### | 0.68262  | 0.776 | 0.605 | ##### |
| SPC24     | ##### | -0.88374 | 0.018 | 0.517 | ##### |
| RBFOX2    | ##### | 0.877425 | 0.706 | 0.39  | ##### |
| ESCO2     | ##### | -0.78751 | 0.004 | 0.462 | ##### |
| MEIS2     | ##### | 0.918963 | 0.692 | 0.404 | ##### |
| C4orf48   | ##### | 0.657978 | 0.831 | 0.641 | ##### |
| SPAG5     | ##### | -0.81651 | 0.005 | 0.462 | ##### |
| SHCBP1    | ##### | -0.76485 | 0.006 | 0.467 | ##### |
| CKS2      | ##### | -1.07227 | 0.298 | 0.846 | ##### |
| CKS1B     | ##### | -1.09918 | 0.159 | 0.738 | ##### |
| CENPH     | ##### | -0.85622 | 0.124 | 0.71  | ##### |
| CDCA3     | ##### | -1.04117 | 0.02  | 0.509 | ##### |
| KIF23     | ##### | -0.84549 | 0.005 | 0.456 | ##### |
| SLC1A3    | ##### | -1.04131 | 0.056 | 0.595 | ##### |
| SPARC     | ##### | -1.06485 | 0.068 | 0.616 | ##### |
| CENPW     | ##### | -0.89854 | 0.068 | 0.615 | ##### |
| MAGED2    | ##### | 0.626973 | 0.841 | 0.683 | ##### |
| VAMP2     | ##### | 0.489721 | 0.931 | 0.844 | ##### |
| C21orf58  | ##### | -0.76215 | 0.027 | 0.516 | ##### |
| AURKA     | ##### | -1.09481 | 0.02  | 0.502 | ##### |
| MEG3      | ##### | 0.586716 | 0.45  | 0.528 | ##### |
| CENPE     | ##### | -1.06776 | 0.026 | 0.517 | ##### |
| MIS18BP1  | ##### | -0.80703 | 0.016 | 0.486 | ##### |
| LBH       | ##### | 1.09063  | 0.647 | 0.18  | ##### |
| CDCA8     | ##### | -0.91533 | 0.008 | 0.456 | ##### |
| FAM111A   | ##### | -0.79901 | 0.008 | 0.451 | ##### |
| ELAVL3    | ##### | 0.6749   | 0.816 | 0.605 | ##### |
| DTYMK     | ##### | -0.91142 | 0.284 | 0.842 | ##### |
| PLK1      | ##### | -1.07257 | 0.01  | 0.458 | ##### |
| TROAP     | ##### | -0.8771  | 0.005 | 0.436 | ##### |
| PTPRZ1    | ##### | -0.97177 | 0.295 | 0.841 | ##### |
| LINC00461 | ##### | 0.627497 | 0.709 | 0.612 | ##### |
| YWHAG     | ##### | 0.603485 | 0.749 | 0.6   | ##### |
| GATM      | ##### | -0.85797 | 0.037 | 0.53  | ##### |
| C19orf48  | ##### | -0.91501 | 0.135 | 0.704 | ##### |
| PKMYT1    | ##### | -0.75198 | 0.013 | 0.462 | ##### |
| H2AFZ     | ##### | -0.50788 | 0.863 | 0.98  | ##### |
| DEPDC1    | ##### | -0.74931 | 0.002 | 0.414 | ##### |
| RAB2A     | ##### | 0.536536 | 0.9   | 0.775 | ##### |
| PMP22     | ##### | -1.08319 | 0.05  | 0.557 | ##### |
| SKA3      | ##### | -0.66707 | 0.003 | 0.419 | ##### |
| RAMP1     | ##### | -0.96354 | 0.145 | 0.709 | ##### |
| DLX2      | ##### | 1.200331 | 0.634 | 0.131 | ##### |
| OIP5      | ##### | -0.73427 | 0.005 | 0.423 | ##### |

|           |       |          |       |       |       |
|-----------|-------|----------|-------|-------|-------|
| KLC1      | ##### | 0.664256 | 0.773 | 0.584 | ##### |
| LY6H      | ##### | 1.223622 | 0.523 | 0.038 | ##### |
| ATAD2     | ##### | -0.82117 | 0.036 | 0.52  | ##### |
| ARL4D     | ##### | 0.994634 | 0.595 | 0.257 | ##### |
| KMT2E     | ##### | 0.532799 | 0.889 | 0.767 | ##### |
| NEK2      | ##### | -0.83004 | 0.002 | 0.405 | ##### |
| FANCI     | ##### | -0.68364 | 0.006 | 0.423 | ##### |
| DLGAP5    | ##### | -0.85155 | 0.007 | 0.43  | ##### |
| BLCAP     | ##### | 0.736947 | 0.592 | 0.384 | ##### |
| MYCBP2    | ##### | 0.791302 | 0.627 | 0.391 | ##### |
| NREP      | ##### | 0.610307 | 0.742 | 0.585 | ##### |
| THSD7A    | ##### | 1.031787 | 0.671 | 0.249 | ##### |
| VIM       | ##### | -1.24187 | 0.326 | 0.722 | ##### |
| MIAT      | ##### | 1.034338 | 0.647 | 0.209 | ##### |
| KIF15     | ##### | -0.70504 | 0.008 | 0.428 | ##### |
| BUB1      | ##### | -0.8084  | 0.006 | 0.421 | ##### |
| ZFP36L1   | ##### | -0.99564 | 0.084 | 0.609 | ##### |
| MKRN1     | ##### | 0.573391 | 0.747 | 0.631 | ##### |
| TTYH1     | ##### | -1.02807 | 0.064 | 0.573 | ##### |
| TCEAL7    | ##### | 0.771812 | 0.751 | 0.498 | ##### |
| TRIP13    | ##### | -0.66812 | 0.016 | 0.453 | ##### |
| EIF4G2    | ##### | 0.426528 | 0.921 | 0.849 | ##### |
| CDT1      | ##### | -0.83391 | 0.021 | 0.469 | ##### |
| DNER      | ##### | 0.835835 | 0.77  | 0.432 | ##### |
| SPARCL1   | ##### | -1.07429 | 0.084 | 0.604 | ##### |
| ARHGAP11A | ##### | -0.7228  | 0.003 | 0.401 | ##### |
| PODXL2    | ##### | 0.585834 | 0.801 | 0.641 | ##### |
| PCNA      | ##### | -0.98872 | 0.231 | 0.783 | ##### |
| PRR11     | ##### | -0.75565 | 0.021 | 0.46  | ##### |
| DBF4      | ##### | -0.87143 | 0.091 | 0.611 | ##### |
| PAK3      | ##### | 0.961355 | 0.638 | 0.233 | ##### |
| MND1      | ##### | -0.71364 | 0.02  | 0.456 | ##### |
| HOPX      | ##### | -1.39147 | 0.039 | 0.465 | ##### |
| RACGAP1   | ##### | -0.84884 | 0.071 | 0.573 | ##### |
| IGFBP7    | ##### | -1.18105 | 0.044 | 0.516 | ##### |
| SKA1      | ##### | -0.67306 | 0.001 | 0.381 | ##### |
| KIF4A     | ##### | -0.70758 | 0.008 | 0.414 | ##### |
| RUFY3     | ##### | 0.66186  | 0.65  | 0.469 | ##### |
| CSRP2     | ##### | -0.93917 | 0.13  | 0.668 | ##### |
| NCAPH     | ##### | -0.72877 | 0.01  | 0.422 | ##### |
| WEE1      | ##### | -0.70159 | 0.044 | 0.51  | ##### |
| SCG5      | ##### | 0.894399 | 0.695 | 0.322 | ##### |
| CCDC34    | ##### | -0.90199 | 0.152 | 0.696 | ##### |
| ANP32E    | ##### | -0.94051 | 0.169 | 0.714 | ##### |
| CDCA4     | ##### | -0.78394 | 0.048 | 0.52  | ##### |
| LRR1      | ##### | -0.73624 | 0.024 | 0.46  | ##### |
| TTC9B     | ##### | 1.018368 | 0.686 | 0.153 | ##### |
| CDC45     | ##### | -0.69836 | 0.003 | 0.388 | ##### |
| MNS1      | ##### | -0.70629 | 0.024 | 0.453 | ##### |
| CASC5     | ##### | -0.6193  | 0.003 | 0.385 | ##### |
| ATRX      | ##### | 0.537532 | 0.765 | 0.657 | ##### |

|          |       |          |       |       |       |
|----------|-------|----------|-------|-------|-------|
| TUBA1B   | ##### | -0.45072 | 0.954 | 1     | ##### |
| NDFIP1   | ##### | 0.458152 | 0.853 | 0.781 | ##### |
| MGME1    | ##### | -0.69656 | 0.056 | 0.525 | ##### |
| SYT1     | ##### | 1.120764 | 0.609 | 0.126 | ##### |
| CRNDE    | ##### | -0.68734 | 0.134 | 0.643 | ##### |
| ITGB3BP  | ##### | -0.75152 | 0.083 | 0.579 | ##### |
| HMMR     | ##### | -0.77255 | 0.005 | 0.394 | ##### |
| MAP1LC3B | ##### | 0.539605 | 0.78  | 0.664 | ##### |
| CDCA2    | ##### | -0.66289 | 0.005 | 0.39  | ##### |
| DDAH2    | ##### | 0.546029 | 0.781 | 0.673 | ##### |
| DSN1     | ##### | -0.72905 | 0.049 | 0.51  | ##### |
| CDC25B   | ##### | -0.95106 | 0.076 | 0.568 | ##### |
| TUBB6    | ##### | -0.81764 | 0.013 | 0.42  | ##### |
| CDK2     | ##### | -0.70272 | 0.014 | 0.416 | ##### |
| REST     | ##### | -0.66913 | 0.016 | 0.425 | ##### |
| DLX1     | ##### | 1.016993 | 0.61  | 0.201 | ##### |
| OLIG1    | ##### | -0.97056 | 0.033 | 0.474 | ##### |
| RBP1     | ##### | 0.481018 | 0.925 | 0.832 | ##### |
| FNBP1L   | ##### | 0.747573 | 0.587 | 0.348 | ##### |
| PON2     | ##### | -0.90035 | 0.154 | 0.684 | ##### |
| ETV1     | ##### | -0.91953 | 0.136 | 0.658 | ##### |
| RPA3     | ##### | -0.82907 | 0.266 | 0.806 | ##### |
| METTL7B  | ##### | -0.89075 | 0.004 | 0.374 | ##### |
| PMP2     | ##### | -1.00876 | 0.162 | 0.677 | ##### |
| FBX05    | ##### | -0.85004 | 0.072 | 0.552 | ##### |
| CHAF1A   | ##### | -0.7171  | 0.053 | 0.507 | ##### |
| PDGFRA   | ##### | -0.90148 | 0.05  | 0.505 | ##### |
| FAM83D   | ##### | -0.80311 | 0.011 | 0.4   | ##### |
| ATP6V1G1 | ##### | 0.446715 | 0.927 | 0.84  | ##### |
| EDNRB    | ##### | -0.76699 | 0.012 | 0.401 | ##### |
| ZC2HC1A  | ##### | 0.806654 | 0.678 | 0.335 | ##### |
| BCAN     | ##### | -1.11323 | 0.142 | 0.651 | ##### |
| CD9      | ##### | -0.96267 | 0.112 | 0.615 | ##### |
| PAICS    | ##### | -0.80639 | 0.17  | 0.694 | ##### |
| DBI      | ##### | -0.655   | 0.696 | 0.957 | ##### |
| S100A16  | ##### | -1.08588 | 0.041 | 0.48  | ##### |
| SLC25A4  | ##### | 0.529256 | 0.791 | 0.662 | ##### |
| NDUFA5   | ##### | 0.450509 | 0.864 | 0.788 | ##### |
| CKAP2    | ##### | -0.88894 | 0.186 | 0.711 | ##### |
| CLSPN    | ##### | -0.81795 | 0.039 | 0.475 | ##### |
| ZFP36L2  | ##### | -0.79982 | 0.113 | 0.61  | ##### |
| RFC3     | ##### | -0.70507 | 0.074 | 0.537 | ##### |
| RAB34    | ##### | -0.79673 | 0.021 | 0.426 | ##### |
| ANKRD12  | ##### | 0.55826  | 0.633 | 0.522 | ##### |
| TMX1     | ##### | -0.65007 | 0.131 | 0.619 | ##### |
| COMMD4   | ##### | -0.6936  | 0.138 | 0.637 | ##### |
| GINS1    | ##### | -0.60816 | 0.02  | 0.41  | ##### |
| MFGE8    | ##### | -0.65676 | 0.06  | 0.504 | ##### |
| GPC2     | ##### | 0.836099 | 0.71  | 0.354 | ##### |
| KIF20A   | ##### | -0.65255 | 0.001 | 0.342 | ##### |
| CKLF     | ##### | -0.76429 | 0.236 | 0.762 | ##### |

|           |       |          |       |       |       |
|-----------|-------|----------|-------|-------|-------|
| BMP7      | ##### | -0.6502  | 0.079 | 0.528 | ##### |
| RAB13     | ##### | -0.83997 | 0.061 | 0.51  | ##### |
| SCG3      | ##### | 0.684942 | 0.826 | 0.494 | ##### |
| CCNI      | ##### | 0.390384 | 0.959 | 0.872 | ##### |
| SERPINH1  | ##### | -0.61022 | 0.018 | 0.391 | ##### |
| MAP2      | ##### | 0.46344  | 0.796 | 0.712 | ##### |
| MAP1LC3A  | ##### | 0.535023 | 0.711 | 0.583 | ##### |
| GINS2     | ##### | -0.86425 | 0.078 | 0.541 | ##### |
| MYT1L     | ##### | 1.028082 | 0.446 | 0.025 | ##### |
| PHF14     | ##### | 0.44934  | 0.808 | 0.76  | ##### |
| TPM2      | ##### | -0.8598  | 0.016 | 0.395 | ##### |
| HAUS8     | ##### | -0.6229  | 0.034 | 0.433 | ##### |
| BEX1      | ##### | 0.626786 | 0.853 | 0.578 | ##### |
| RAB1A     | ##### | 0.435945 | 0.8   | 0.735 | ##### |
| KIF3A     | ##### | 0.717179 | 0.59  | 0.358 | ##### |
| BRCA1     | ##### | -0.58884 | 0.025 | 0.415 | ##### |
| NDN       | ##### | 0.575293 | 0.412 | 0.33  | ##### |
| WDR34     | ##### | -0.71861 | 0.173 | 0.677 | ##### |
| RTN3      | ##### | 0.40322  | 0.913 | 0.851 | ##### |
| PDPN      | ##### | -0.67309 | 0.176 | 0.662 | ##### |
| ARHGAP11E | ##### | -0.61104 | 0.006 | 0.356 | ##### |
| ANXA5     | ##### | -0.80557 | 0.343 | 0.837 | ##### |
| BCL2L12   | ##### | -0.63764 | 0.012 | 0.372 | ##### |
| SERINC1   | ##### | 0.576063 | 0.625 | 0.491 | ##### |
| HTRA1     | ##### | -0.80637 | 0.128 | 0.61  | ##### |
| CENPQ     | ##### | -0.55432 | 0.035 | 0.425 | ##### |
| DEK       | ##### | -0.69983 | 0.463 | 0.87  | ##### |
| RAB6A     | ##### | 0.481279 | 0.625 | 0.568 | ##### |
| DPYSL3    | ##### | 0.584414 | 0.7   | 0.578 | ##### |
| MT1E      | ##### | -0.91172 | 0.055 | 0.483 | ##### |
| MAGEH1    | ##### | 0.666398 | 0.676 | 0.463 | ##### |
| SNX5      | ##### | -0.80171 | 0.137 | 0.622 | ##### |
| MT1M      | ##### | -0.70718 | 0.046 | 0.458 | ##### |
| KIF14     | ##### | -0.58908 | 0.009 | 0.354 | ##### |
| SPRY2     | ##### | -0.7743  | 0.045 | 0.458 | ##### |
| JAM2      | ##### | -0.5333  | 0.104 | 0.528 | ##### |
| MCM3      | ##### | -0.76957 | 0.071 | 0.509 | ##### |
| METRN     | ##### | -0.78149 | 0.161 | 0.652 | ##### |
| PSMB9     | ##### | -0.78576 | 0.056 | 0.472 | ##### |
| DNAJB9    | ##### | 0.769441 | 0.643 | 0.323 | ##### |
| DIAPH3    | ##### | -0.56487 | 0.005 | 0.341 | ##### |
| CD200     | ##### | 0.871243 | 0.464 | 0.146 | ##### |
| LGALS1    | ##### | -0.9348  | 0.408 | 0.767 | ##### |
| RTKN2     | ##### | -0.58529 | 0.016 | 0.375 | ##### |
| ENC1      | ##### | 0.489302 | 0.504 | 0.52  | ##### |
| IFITM3    | ##### | -0.8381  | 0.029 | 0.416 | ##### |
| HEPN1     | ##### | -0.69104 | 0.015 | 0.374 | ##### |
| ANLN      | ##### | -0.55993 | 0.016 | 0.37  | ##### |
| MAP4      | ##### | 0.538404 | 0.605 | 0.51  | ##### |
| CAMLG     | ##### | 0.410865 | 0.701 | 0.683 | ##### |
| DSEL      | ##### | -0.74871 | 0.156 | 0.638 | ##### |

|          |       |          |       |       |       |
|----------|-------|----------|-------|-------|-------|
| CEP135   | ##### | -0.68814 | 0.038 | 0.432 | ##### |
| ACTL6B   | ##### | 0.978531 | 0.511 | 0.078 | ##### |
| E2F1     | ##### | -0.74556 | 0.018 | 0.383 | ##### |
| FEN1     | ##### | -0.76116 | 0.125 | 0.595 | ##### |
| DDX5     | ##### | 0.319507 | 0.98  | 0.919 | ##### |
| SNN      | ##### | 0.647239 | 0.582 | 0.39  | ##### |
| KIF20B   | ##### | -0.66708 | 0.051 | 0.454 | ##### |
| OLIG2    | ##### | -0.83105 | 0.071 | 0.501 | ##### |
| NCAPD2   | ##### | -0.53981 | 0.016 | 0.365 | ##### |
| ID2      | ##### | 0.601004 | 0.747 | 0.595 | ##### |
| CHMP5    | ##### | 0.447412 | 0.706 | 0.647 | ##### |
| ARSJ     | ##### | -0.49673 | 0.002 | 0.315 | ##### |
| RND3     | ##### | 0.821311 | 0.691 | 0.395 | ##### |
| CDC42    | ##### | 0.427407 | 0.804 | 0.73  | ##### |
| SNAP25   | ##### | 0.870704 | 0.626 | 0.219 | ##### |
| BUB1B    | ##### | -0.5204  | 0.005 | 0.325 | ##### |
| HMGB1    | ##### | -0.33816 | 0.958 | 0.991 | ##### |
| BRCA2    | ##### | -0.56772 | 0.009 | 0.34  | ##### |
| C14orf80 | ##### | -0.47062 | 0.04  | 0.4   | ##### |
| SPRY1    | ##### | -0.84767 | 0.045 | 0.443 | ##### |
| PTRF     | ##### | -0.56948 | 0.009 | 0.336 | ##### |
| COL4A2   | ##### | -0.55758 | 0.009 | 0.342 | ##### |
| IFRD1    | ##### | 0.498438 | 0.736 | 0.626 | ##### |
| TCF19    | ##### | -0.61853 | 0.019 | 0.372 | ##### |
| GAS1     | ##### | -0.77524 | 0.055 | 0.463 | ##### |
| MRC2     | ##### | -0.44652 | 0.003 | 0.312 | ##### |
| RSF1     | ##### | 0.388992 | 0.672 | 0.677 | ##### |
| BNIP3L   | ##### | 0.528018 | 0.761 | 0.663 | ##### |
| KIF22    | ##### | -0.60103 | 0.207 | 0.679 | ##### |
| LMNB2    | ##### | -0.54698 | 0.102 | 0.521 | ##### |
| KLF7     | ##### | 0.775687 | 0.493 | 0.24  | ##### |
| YWHAQ    | ##### | 0.305622 | 0.98  | 0.916 | ##### |
| SNRPB    | ##### | -0.63291 | 0.535 | 0.894 | ##### |
| TLE1     | ##### | -0.56368 | 0.035 | 0.401 | ##### |
| RGMA     | ##### | -0.64323 | 0.053 | 0.448 | ##### |
| TEX30    | ##### | -0.62868 | 0.143 | 0.596 | ##### |
| VRK1     | ##### | -0.62476 | 0.067 | 0.472 | ##### |
| WLS      | ##### | -0.5953  | 0.042 | 0.417 | ##### |
| DUT      | ##### | -0.73074 | 0.353 | 0.819 | ##### |
| POSTN    | ##### | -0.78342 | 0.007 | 0.327 | ##### |
| FKBP10   | ##### | -0.54081 | 0.049 | 0.423 | ##### |
| PAX6     | ##### | -0.5387  | 0.025 | 0.368 | ##### |
| TIMELESS | ##### | -0.5616  | 0.035 | 0.399 | ##### |
| ANP32B   | ##### | -0.67257 | 0.327 | 0.81  | ##### |
| PSAT1    | ##### | -0.67302 | 0.082 | 0.5   | ##### |
| AK1      | ##### | 0.5108   | 0.628 | 0.54  | ##### |
| F3       | ##### | -0.66162 | 0.026 | 0.384 | ##### |
| PDGFC    | ##### | -0.49722 | 0.012 | 0.336 | ##### |
| NCAPG2   | ##### | -0.54082 | 0.057 | 0.443 | ##### |
| KNSTRN   | ##### | -0.73215 | 0.064 | 0.47  | ##### |
| BEX4     | ##### | 0.719979 | 0.738 | 0.409 | ##### |

|           |       |          |       |       |          |
|-----------|-------|----------|-------|-------|----------|
| IP6K2     | ##### | 0.441075 | 0.751 | 0.688 | #####    |
| BARD1     | ##### | -0.57491 | 0.143 | 0.583 | #####    |
| DYNC1I1   | ##### | 0.94786  | 0.559 | 0.128 | #####    |
| WWTR1     | ##### | -0.56378 | 0.01  | 0.336 | #####    |
| SAPCD2    | ##### | -0.66724 | 0.027 | 0.386 | #####    |
| CDC25C    | ##### | -0.55054 | 0.002 | 0.301 | #####    |
| UBE2V2    | ##### | 0.371637 | 0.805 | 0.775 | #####    |
| KIDINS22C | ##### | 0.613708 | 0.561 | 0.389 | #####    |
| CCDC112   | ##### | 0.531747 | 0.583 | 0.477 | #####    |
| CEP55     | ##### | -0.50154 | 0.004 | 0.304 | #####    |
| SCARA3    | ##### | -0.47914 | 0.057 | 0.421 | #####    |
| ARMCX3    | ##### | 0.514317 | 0.658 | 0.551 | #####    |
| ID3       | ##### | -0.79684 | 0.057 | 0.454 | #####    |
| TMEM97    | ##### | -0.56899 | 0.156 | 0.599 | #####    |
| MALAT1    | ##### | 0.231161 | 0.998 | 0.988 | #####    |
| MLC1      | ##### | -0.53436 | 0.008 | 0.321 | #####    |
| TTK       | ##### | -0.62637 | 0.004 | 0.306 | #####    |
| GABARAPL2 | ##### | 0.365526 | 0.914 | 0.857 | 1.31E-99 |
| S100A13   | ##### | -0.78885 | 0.035 | 0.402 | 1.32E-99 |
| CDC6      | ##### | -0.56025 | 0.005 | 0.306 | 1.83E-99 |
| ZFAND5    | ##### | 0.462883 | 0.662 | 0.59  | 2.92E-99 |
| ATP6VOB   | ##### | 0.372558 | 0.888 | 0.828 | 3.26E-99 |
| IKBIP     | ##### | -0.53133 | 0.101 | 0.502 | 3.51E-99 |
| TJP1      | ##### | -0.41482 | 0.07  | 0.428 | 6.94E-99 |
| TP53I13   | ##### | -0.58124 | 0.098 | 0.507 | 7.25E-99 |
| NDE1      | ##### | -0.50834 | 0.017 | 0.347 | 7.51E-99 |
| TNFRSF1A  | ##### | -0.59847 | 0.055 | 0.432 | 1.04E-98 |
| DNAJC9    | ##### | -0.51006 | 0.155 | 0.581 | 1.56E-98 |
| PARPBP    | ##### | -0.54592 | 0.028 | 0.377 | 2.83E-98 |
| PLIN3     | ##### | -0.7309  | 0.06  | 0.453 | 3.85E-98 |
| PLD3      | ##### | 0.372835 | 0.608 | 0.6   | 4.00E-98 |
| EIF4A2    | ##### | 0.353759 | 0.892 | 0.847 | 4.36E-98 |
| NMB       | ##### | -0.69326 | 0.035 | 0.398 | 5.91E-98 |
| NFIC      | ##### | -0.70883 | 0.282 | 0.753 | 6.30E-98 |
| ITGB8     | ##### | -0.5019  | 0.106 | 0.505 | 6.57E-98 |
| CPE       | ##### | 0.522387 | 0.815 | 0.663 | 8.28E-98 |
| CELF3     | ##### | 0.89167  | 0.435 | 0.047 | 1.07E-97 |
| LINC00152 | ##### | -0.67061 | 0.029 | 0.38  | 1.16E-97 |
| TMSB10    | ##### | 0.281468 | 0.998 | 0.974 | 1.48E-97 |
| ALYREF    | ##### | -0.51564 | 0.075 | 0.452 | 1.50E-97 |
| TIMP2     | ##### | -0.48784 | 0.104 | 0.496 | 2.30E-97 |
| COQ2      | ##### | -0.45244 | 0.068 | 0.43  | 2.31E-97 |
| EIF1AY    | ##### | -0.39997 | 0.093 | 0.449 | 2.93E-97 |
| HES1      | ##### | -0.66833 | 0.016 | 0.343 | 3.35E-97 |
| XRCC2     | ##### | -0.61328 | 0.037 | 0.399 | 3.76E-97 |
| CLTB      | ##### | 0.44471  | 0.684 | 0.619 | 6.04E-97 |
| REEP3     | ##### | -0.53198 | 0.058 | 0.425 | 6.83E-97 |
| RBBP8     | ##### | -0.52669 | 0.027 | 0.367 | 7.60E-97 |
| RSBN1L    | ##### | 0.473747 | 0.7   | 0.611 | 1.34E-96 |
| RPA1      | ##### | -0.43274 | 0.173 | 0.579 | 1.66E-96 |
| TSPAN12   | ##### | -0.68332 | 0.031 | 0.381 | 1.70E-96 |



|          |          |          |       |       |          |
|----------|----------|----------|-------|-------|----------|
| MCM4     | #####    | -0.64646 | 0.079 | 0.48  | 2.29E-96 |
| KIF18B   | #####    | -0.452   | 0.004 | 0.295 | 3.40E-96 |
| ATP1B1   | #####    | 0.746073 | 0.551 | 0.296 | 3.83E-96 |
| YTHDF2   | #####    | 0.367911 | 0.699 | 0.683 | 3.99E-96 |
| MCM10    | #####    | -0.47471 | 0.003 | 0.29  | 7.21E-96 |
| RAD51    | #####    | -0.53026 | 0.002 | 0.283 | 8.57E-96 |
| AHCY     | #####    | -0.59257 | 0.152 | 0.586 | 1.07E-95 |
| LGALS3   | #####    | -0.92982 | 0.073 | 0.47  | 1.10E-95 |
| KIAA1524 | #####    | -0.59696 | 0.042 | 0.406 | 1.32E-95 |
| MTPN     | 1.03E-99 | 0.336525 | 0.651 | 0.653 | 1.54E-95 |
| TCEAL4   | 1.18E-99 | 0.471177 | 0.823 | 0.728 | 1.77E-95 |
| CDKN2C   | 1.24E-99 | -0.68599 | 0.272 | 0.737 | 1.85E-95 |
| TNFAIP6  | 1.49E-99 | -0.73796 | 0.004 | 0.294 | 2.23E-95 |
| DEPDC1B  | 1.84E-99 | -0.5454  | 0.029 | 0.367 | 2.75E-95 |
| RNASEH2C | 1.96E-99 | -0.58767 | 0.168 | 0.605 | 2.92E-95 |
| STMN1    | 2.42E-99 | 0.240227 | 0.999 | 0.995 | 3.62E-95 |
| SAT2     | 3.46E-99 | 0.396019 | 0.727 | 0.689 | 5.17E-95 |
| NR3C1    | 3.56E-99 | -0.4569  | 0.072 | 0.432 | 5.32E-95 |
| TNC      | 3.68E-99 | -0.55061 | 0.021 | 0.344 | 5.49E-95 |
| ARID4B   | 4.40E-99 | 0.447051 | 0.665 | 0.599 | 6.57E-95 |
| BSDC1    | 9.37E-99 | 0.487732 | 0.501 | 0.425 | 1.40E-94 |
| CENPO    | 9.89E-99 | -0.49609 | 0.023 | 0.348 | 1.48E-94 |
| CD82     | 1.22E-98 | -0.72467 | 0.049 | 0.42  | 1.83E-94 |
| GNG12    | 3.04E-98 | -0.43872 | 0.016 | 0.325 | 4.54E-94 |
| ATP6V1H  | 6.05E-98 | 0.595501 | 0.55  | 0.398 | 9.05E-94 |
| SCN3B    | 7.33E-98 | 0.914945 | 0.422 | 0.047 | 1.09E-93 |
| MCM5     | 7.52E-98 | -0.70602 | 0.035 | 0.388 | 1.12E-93 |
| VAMP5    | 8.50E-98 | -0.64674 | 0.045 | 0.405 | 1.27E-93 |
| MIS18A   | 1.75E-97 | -0.54704 | 0.104 | 0.504 | 2.62E-93 |
| HERPUD1  | 2.03E-97 | 0.549227 | 0.638 | 0.494 | 3.03E-93 |
| HSP90AB1 | 2.34E-97 | 0.285802 | 0.98  | 0.933 | 3.50E-93 |
| COL6A2   | 3.59E-97 | -0.63051 | 0.016 | 0.332 | 5.37E-93 |
| FANCA    | 8.36E-97 | -0.52915 | 0.037 | 0.379 | 1.25E-92 |
| FANCD2   | 9.57E-97 | -0.54059 | 0.012 | 0.319 | 1.43E-92 |
| TMPO     | 1.23E-96 | -0.55698 | 0.276 | 0.731 | 1.84E-92 |
| COL4A1   | 1.70E-96 | -0.47318 | 0.004 | 0.286 | 2.55E-92 |
| TXN      | 2.15E-96 | 0.390355 | 0.888 | 0.817 | 3.21E-92 |
| CTNNAL1  | 2.58E-96 | -0.52534 | 0.071 | 0.433 | 3.85E-92 |
| TSC22D1  | 2.63E-96 | 0.346544 | 0.93  | 0.854 | 3.94E-92 |
| SPDL1    | 2.87E-96 | -0.53558 | 0.04  | 0.386 | 4.28E-92 |
| PTBP1    | 3.41E-96 | -0.50764 | 0.224 | 0.659 | 5.09E-92 |
| PRDX6    | 5.57E-96 | -0.77082 | 0.304 | 0.751 | 8.32E-92 |
| REEP4    | 6.91E-96 | -0.55411 | 0.044 | 0.391 | 1.03E-91 |
| SPOCD1   | 1.61E-95 | -0.65331 | 0.008 | 0.301 | 2.41E-91 |
| CLIC1    | 1.64E-95 | -0.88476 | 0.194 | 0.631 | 2.46E-91 |
| RAB11B   | 3.06E-95 | 0.37166  | 0.764 | 0.73  | 4.58E-91 |
| CITED2   | 6.92E-95 | 0.737436 | 0.636 | 0.365 | 1.03E-90 |
| ELOVL2   | 7.34E-95 | -0.50259 | 0.015 | 0.321 | 1.10E-90 |
| WDR76    | 1.16E-94 | -0.61142 | 0.024 | 0.349 | 1.73E-90 |
| ZWILCH   | 1.41E-94 | -0.46144 | 0.068 | 0.417 | 2.11E-90 |
| FSCN1    | 1.43E-94 | 0.397215 | 0.87  | 0.774 | 2.13E-90 |

|          |          |          |       |       |          |
|----------|----------|----------|-------|-------|----------|
| RBMS1    | 2.19E-94 | -0.58103 | 0.04  | 0.39  | 3.27E-90 |
| SEZ6L2   | 2.60E-94 | 0.536382 | 0.591 | 0.473 | 3.88E-90 |
| SIVA1    | 3.47E-94 | -0.65234 | 0.305 | 0.762 | 5.19E-90 |
| SLC39A1  | 3.65E-94 | -0.47319 | 0.15  | 0.552 | 5.46E-90 |
| PRMT2    | 3.98E-94 | 0.409203 | 0.617 | 0.584 | 5.94E-90 |
| EMP3     | 4.11E-94 | -0.75393 | 0.067 | 0.447 | 6.14E-90 |
| BCAS2    | 6.27E-94 | 0.441221 | 0.686 | 0.602 | 9.36E-90 |
| WHSC1L1  | 6.67E-94 | 0.432884 | 0.715 | 0.664 | 9.97E-90 |
| 6-Mar    | 8.71E-94 | 0.43547  | 0.596 | 0.551 | 1.30E-89 |
| NLRP1    | 8.91E-94 | 0.453898 | 0.687 | 0.6   | 1.33E-89 |
| MCM8     | 9.01E-94 | -0.43286 | 0.016 | 0.312 | 1.35E-89 |
| HAT1     | 1.15E-93 | -0.55335 | 0.244 | 0.684 | 1.72E-89 |
| ZFHX4    | 1.21E-93 | -0.28622 | 0.071 | 0.365 | 1.81E-89 |
| CD01     | 1.50E-93 | 0.589235 | 0.555 | 0.407 | 2.24E-89 |
| NPDC1    | 1.69E-93 | 0.442628 | 0.653 | 0.567 | 2.53E-89 |
| TMEM237  | 2.10E-93 | -0.41823 | 0.207 | 0.611 | 3.14E-89 |
| PIPOX    | 2.79E-93 | -0.56803 | 0.02  | 0.332 | 4.16E-89 |
| TMEM106C | 3.27E-93 | -0.66197 | 0.249 | 0.702 | 4.89E-89 |
| CREB5    | 3.54E-93 | -0.48204 | 0.128 | 0.511 | 5.29E-89 |
| RMDN3    | 3.61E-93 | -0.45931 | 0.093 | 0.459 | 5.39E-89 |
| ATP6VOD1 | 4.24E-93 | 0.422982 | 0.619 | 0.569 | 6.33E-89 |
| SPSB3    | 5.67E-93 | 0.516389 | 0.537 | 0.422 | 8.48E-89 |
| YPEL5    | 6.68E-93 | 0.574269 | 0.562 | 0.401 | 9.99E-89 |
| CBR3     | 7.88E-93 | -0.47896 | 0.053 | 0.388 | 1.18E-88 |
| HMGXB4   | 1.02E-92 | -0.45081 | 0.192 | 0.596 | 1.53E-88 |
| IL6ST    | 1.08E-92 | -0.41964 | 0.079 | 0.428 | 1.61E-88 |
| LMNB1    | 1.24E-92 | -0.60222 | 0.259 | 0.707 | 1.86E-88 |
| FIBIN    | 1.24E-92 | -0.6355  | 0.056 | 0.406 | 1.86E-88 |
| SOX21    | 2.53E-92 | -0.41518 | 0.007 | 0.283 | 3.78E-88 |
| GRB2     | 2.67E-92 | 0.339734 | 0.585 | 0.59  | 3.98E-88 |
| NOTCH1   | 2.68E-92 | -0.47088 | 0.025 | 0.332 | 4.01E-88 |
| CALU     | 3.55E-92 | -0.56828 | 0.298 | 0.747 | 5.31E-88 |
| LYPD1    | 3.59E-92 | -0.41035 | 0.064 | 0.385 | 5.36E-88 |
| ARF4     | 5.47E-92 | 0.37411  | 0.797 | 0.764 | 8.18E-88 |
| CELF5    | 6.68E-92 | 0.835956 | 0.52  | 0.151 | 9.98E-88 |
| PLP2     | 6.84E-92 | -0.6778  | 0.09  | 0.478 | 1.02E-87 |
| CMTM3    | 7.34E-92 | -0.39009 | 0.108 | 0.457 | 1.10E-87 |
| NCAPH2   | 8.50E-92 | -0.45423 | 0.1   | 0.469 | 1.27E-87 |
| HELLS    | 8.90E-92 | -0.62545 | 0.042 | 0.381 | 1.33E-87 |
| PPA1     | 1.00E-91 | 0.423269 | 0.663 | 0.599 | 1.49E-87 |
| SRPK2    | 1.30E-91 | 0.359534 | 0.771 | 0.725 | 1.94E-87 |
| MAPRE3   | 2.08E-91 | 0.67111  | 0.463 | 0.235 | 3.10E-87 |
| SPRED1   | 2.27E-91 | -0.4701  | 0.03  | 0.344 | 3.40E-87 |
| KIF18A   | 2.67E-91 | -0.43078 | 0.01  | 0.291 | 4.00E-87 |
| VAMP3    | 2.81E-91 | -0.46969 | 0.075 | 0.426 | 4.20E-87 |
| SYF2     | 2.86E-91 | 0.316471 | 0.617 | 0.64  | 4.28E-87 |
| RFC4     | 4.56E-91 | -0.59031 | 0.182 | 0.61  | 6.81E-87 |
| RRBP1    | 4.95E-91 | -0.603   | 0.068 | 0.432 | 7.40E-87 |
| WASF2    | 1.08E-90 | -0.58612 | 0.13  | 0.532 | 1.61E-86 |
| CDC42EP1 | 1.09E-90 | -0.39034 | 0.017 | 0.299 | 1.62E-86 |
| SLAIN1   | 1.24E-90 | 0.48108  | 0.441 | 0.378 | 1.86E-86 |

|           |          |          |       |       |          |
|-----------|----------|----------|-------|-------|----------|
| ADAM9     | 2.55E-90 | -0.47709 | 0.102 | 0.467 | 3.80E-86 |
| TGIF1     | 2.63E-90 | -0.62461 | 0.118 | 0.516 | 3.94E-86 |
| CEP170    | 2.65E-90 | 0.475843 | 0.518 | 0.433 | 3.95E-86 |
| ATAD5     | 2.86E-90 | -0.52134 | 0.089 | 0.457 | 4.27E-86 |
| NOTCH2    | 3.00E-90 | -0.43158 | 0.013 | 0.296 | 4.49E-86 |
| EMC9      | 4.18E-90 | -0.55876 | 0.139 | 0.536 | 6.25E-86 |
| CHEK1     | 4.50E-90 | -0.57583 | 0.079 | 0.451 | 6.72E-86 |
| PNRC1     | 4.86E-90 | 0.540738 | 0.645 | 0.514 | 7.27E-86 |
| RB1CC1    | 6.10E-90 | 0.453914 | 0.513 | 0.448 | 9.11E-86 |
| NCBP2     | 6.14E-90 | 0.291825 | 0.654 | 0.689 | 9.18E-86 |
| KLHL7     | 6.75E-90 | 0.468491 | 0.628 | 0.528 | 1.01E-85 |
| AP1S1     | 9.34E-90 | 0.37783  | 0.731 | 0.695 | 1.40E-85 |
| PKIB      | 1.15E-89 | -0.64753 | 0.063 | 0.425 | 1.72E-85 |
| GTF2I     | 1.15E-89 | 0.270246 | 0.639 | 0.686 | 1.72E-85 |
| PPIC      | 1.23E-89 | -0.43354 | 0.023 | 0.322 | 1.84E-85 |
| ZSCAN18   | 1.60E-89 | 0.552511 | 0.485 | 0.347 | 2.40E-85 |
| TMED5     | 1.84E-89 | -0.40668 | 0.096 | 0.44  | 2.74E-85 |
| KIF11     | 2.09E-89 | -0.45897 | 0.008 | 0.281 | 3.12E-85 |
| DGCR6L    | 2.65E-89 | -0.41036 | 0.2   | 0.589 | 3.96E-85 |
| APP       | 2.95E-89 | 0.425247 | 0.872 | 0.786 | 4.41E-85 |
| RAB32     | 2.97E-89 | -0.35478 | 0.023 | 0.298 | 4.43E-85 |
| PSRC1     | 3.17E-89 | -0.69336 | 0.167 | 0.591 | 4.74E-85 |
| SLC32A1   | 3.28E-89 | 0.850516 | 0.316 | 0.007 | 4.91E-85 |
| LMBR1L    | 3.72E-89 | 0.623084 | 0.424 | 0.251 | 5.56E-85 |
| WDR62     | 4.24E-89 | -0.47395 | 0.009 | 0.29  | 6.34E-85 |
| RP11-390F | 4.63E-89 | -0.36602 | 0.016 | 0.283 | 6.92E-85 |
| MTX2      | 4.93E-89 | 0.423902 | 0.604 | 0.551 | 7.37E-85 |
| EPB41L2   | 5.81E-89 | -0.46073 | 0.068 | 0.41  | 8.68E-85 |
| SPATA6    | 6.33E-89 | -0.43062 | 0.024 | 0.32  | 9.46E-85 |
| ARMCX1    | 7.45E-89 | 0.704201 | 0.483 | 0.24  | 1.11E-84 |
| CLK1      | 7.90E-89 | 0.580959 | 0.705 | 0.501 | 1.18E-84 |
| CCDC18    | 8.52E-89 | -0.54013 | 0.042 | 0.377 | 1.27E-84 |
| H2AFV     | 2.00E-88 | -0.53466 | 0.625 | 0.925 | 2.98E-84 |
| NFIX      | 2.24E-88 | 0.416707 | 0.721 | 0.674 | 3.35E-84 |
| ABHD3     | 2.24E-88 | -0.52544 | 0.071 | 0.422 | 3.35E-84 |
| PRRX1     | 2.26E-88 | -0.45439 | 0.058 | 0.381 | 3.38E-84 |
| MPST      | 2.40E-88 | -0.2942  | 0.22  | 0.58  | 3.59E-84 |
| RCC1      | 2.78E-88 | -0.49267 | 0.057 | 0.399 | 4.16E-84 |
| UBE2B     | 3.02E-88 | 0.279446 | 0.578 | 0.631 | 4.51E-84 |
| HN1       | 3.56E-88 | 0.283918 | 0.984 | 0.914 | 5.33E-84 |
| WIPI2     | 4.04E-88 | 0.304843 | 0.572 | 0.614 | 6.03E-84 |
| NT5DC2    | 4.90E-88 | -0.43411 | 0.164 | 0.546 | 7.32E-84 |
| RRAGA     | 5.30E-88 | 0.446981 | 0.589 | 0.51  | 7.92E-84 |
| POU3F2    | 5.30E-88 | -0.56512 | 0.181 | 0.591 | 7.93E-84 |
| ECI1      | 6.70E-88 | -0.47466 | 0.134 | 0.512 | 1.00E-83 |
| GGH       | 9.49E-88 | -0.56719 | 0.389 | 0.822 | 1.42E-83 |
| JAG1      | 1.09E-87 | -0.5405  | 0.049 | 0.383 | 1.63E-83 |
| ZDHH12    | 1.17E-87 | -0.42431 | 0.037 | 0.346 | 1.75E-83 |
| MYO10     | 1.21E-87 | -0.57608 | 0.079 | 0.443 | 1.81E-83 |
| TMEM59L   | 1.24E-87 | 0.496212 | 0.523 | 0.438 | 1.86E-83 |
| TLK1      | 1.24E-87 | -0.51645 | 0.13  | 0.52  | 1.86E-83 |

|           |           |           |        |        |           |
|-----------|-----------|-----------|--------|--------|-----------|
| WSCD1     | 1. 27E-87 | -0. 51235 | 0. 03  | 0. 341 | 1. 89E-83 |
| NUDT1     | 1. 45E-87 | -0. 51972 | 0. 415 | 0. 842 | 2. 16E-83 |
| RP11-71N1 | 1. 51E-87 | -0. 49145 | 0. 014 | 0. 3   | 2. 26E-83 |
| ATP1A3    | 1. 54E-87 | 0. 785255 | 0. 581 | 0. 219 | 2. 29E-83 |
| SORBS3    | 2. 00E-87 | -0. 40584 | 0. 079 | 0. 416 | 2. 99E-83 |
| RFC5      | 2. 20E-87 | -0. 50245 | 0. 068 | 0. 414 | 3. 28E-83 |
| NCAM1     | 2. 75E-87 | 0. 355561 | 0. 704 | 0. 686 | 4. 11E-83 |
| BRD3      | 3. 45E-87 | 0. 408885 | 0. 531 | 0. 494 | 5. 15E-83 |
| ERV3-1    | 3. 62E-87 | 0. 57526  | 0. 625 | 0. 446 | 5. 41E-83 |
| MARCKS    | 5. 10E-87 | 0. 322744 | 0. 966 | 0. 87  | 7. 63E-83 |
| APOLD1    | 5. 47E-87 | -0. 56157 | 0. 021 | 0. 32  | 8. 18E-83 |
| RAB18     | 5. 54E-87 | 0. 293481 | 0. 456 | 0. 502 | 8. 28E-83 |
| ANP32A    | 5. 78E-87 | -0. 4417  | 0. 244 | 0. 651 | 8. 64E-83 |
| PTPRN2    | 6. 92E-87 | 0. 7436   | 0. 516 | 0. 231 | 1. 03E-82 |
| NDRG4     | 7. 36E-87 | 0. 721738 | 0. 448 | 0. 183 | 1. 10E-82 |
| AGTRAP    | 7. 51E-87 | -0. 4198  | 0. 02  | 0. 309 | 1. 12E-82 |
| WBP11     | 8. 65E-87 | -0. 17258 | 0. 28  | 0. 593 | 1. 29E-82 |
| HIST2H2AC | 9. 34E-87 | -0. 48813 | 0. 017 | 0. 304 | 1. 40E-82 |
| TMEM106B  | 9. 99E-87 | 0. 4154   | 0. 526 | 0. 493 | 1. 49E-82 |
| CDK5R1    | 1. 22E-86 | 0. 731272 | 0. 419 | 0. 153 | 1. 82E-82 |
| TAX1BP1   | 1. 22E-86 | 0. 318808 | 0. 687 | 0. 691 | 1. 83E-82 |
| DYNC1LI2  | 1. 31E-86 | 0. 392555 | 0. 639 | 0. 59  | 1. 96E-82 |
| MCM2      | 1. 43E-86 | -0. 58515 | 0. 042 | 0. 37  | 2. 14E-82 |
| MOB4      | 1. 65E-86 | 0. 267644 | 0. 56  | 0. 622 | 2. 47E-82 |
| TBCC      | 1. 71E-86 | 0. 554621 | 0. 513 | 0. 368 | 2. 55E-82 |
| ASAH1     | 1. 74E-86 | 0. 338606 | 0. 61  | 0. 64  | 2. 59E-82 |
| PLK4      | 1. 84E-86 | -0. 41771 | 0. 005 | 0. 26  | 2. 76E-82 |
| SEPN1     | 1. 98E-86 | -0. 42273 | 0. 071 | 0. 4   | 2. 96E-82 |
| EXO1      | 1. 99E-86 | -0. 41673 | 0. 001 | 0. 242 | 2. 98E-82 |
| DHRS7     | 2. 31E-86 | 0. 470393 | 0. 584 | 0. 523 | 3. 45E-82 |
| GCAT      | 2. 37E-86 | -0. 46707 | 0. 077 | 0. 426 | 3. 54E-82 |
| TAGLN2    | 2. 50E-86 | -0. 91734 | 0. 14  | 0. 544 | 3. 73E-82 |
| CDCA7L    | 2. 84E-86 | -0. 53941 | 0. 14  | 0. 527 | 4. 25E-82 |
| ACTN4     | 3. 41E-86 | -0. 47369 | 0. 183 | 0. 575 | 5. 09E-82 |
| ACSS3     | 3. 55E-86 | -0. 409   | 0. 002 | 0. 248 | 5. 30E-82 |
| SPINT2    | 3. 75E-86 | 0. 817973 | 0. 346 | 0. 037 | 5. 61E-82 |
| DTL       | 4. 00E-86 | -0. 53554 | 0. 005 | 0. 264 | 5. 98E-82 |
| MAPK10    | 4. 01E-86 | 0. 636494 | 0. 529 | 0. 33  | 5. 99E-82 |
| CAMK2N1   | 4. 94E-86 | 0. 569164 | 0. 695 | 0. 499 | 7. 38E-82 |
| SLC16A1   | 5. 03E-86 | -0. 47433 | 0. 112 | 0. 479 | 7. 52E-82 |
| MZT1      | 6. 22E-86 | -0. 61039 | 0. 273 | 0. 706 | 9. 29E-82 |
| NPAS3     | 7. 49E-86 | -0. 45178 | 0. 028 | 0. 321 | 1. 12E-81 |
| TMEM14A   | 7. 62E-86 | 0. 492236 | 0. 577 | 0. 475 | 1. 14E-81 |
| ATP6VOA1  | 7. 80E-86 | 0. 550906 | 0. 486 | 0. 356 | 1. 17E-81 |
| CA2       | 8. 12E-86 | -0. 57229 | 0. 013 | 0. 296 | 1. 21E-81 |
| CEP152    | 9. 85E-86 | -0. 42886 | 0. 005 | 0. 26  | 1. 47E-81 |
| EVA1B     | 1. 13E-85 | -0. 34478 | 0. 009 | 0. 259 | 1. 69E-81 |
| LUC7L3    | 1. 15E-85 | 0. 308493 | 0. 786 | 0. 794 | 1. 72E-81 |
| POLE4     | 1. 52E-85 | -0. 52972 | 0. 107 | 0. 477 | 2. 28E-81 |
| CD99      | 1. 64E-85 | -0. 6734  | 0. 241 | 0. 674 | 2. 45E-81 |
| RANGAP1   | 1. 72E-85 | -0. 39152 | 0. 071 | 0. 39  | 2. 56E-81 |

|          |           |           |        |        |           |
|----------|-----------|-----------|--------|--------|-----------|
| FBL      | 1. 86E-85 | -0. 47589 | 0. 24  | 0. 646 | 2. 78E-81 |
| BOLA3    | 1. 97E-85 | -0. 47472 | 0. 21  | 0. 61  | 2. 95E-81 |
| TMEM54   | 2. 36E-85 | -0. 37312 | 0. 172 | 0. 531 | 3. 53E-81 |
| MAPK1    | 2. 42E-85 | -0. 38697 | 0. 104 | 0. 441 | 3. 61E-81 |
| TCF12    | 2. 62E-85 | -0. 49272 | 0. 214 | 0. 615 | 3. 92E-81 |
| MVB12A   | 2. 77E-85 | -0. 4043  | 0. 17  | 0. 541 | 4. 14E-81 |
| PPP2R5B  | 3. 09E-85 | 0. 571217 | 0. 379 | 0. 232 | 4. 62E-81 |
| HSD11B1L | 3. 72E-85 | 0. 458565 | 0. 388 | 0. 332 | 5. 56E-81 |
| KIFAP3   | 3. 98E-85 | 0. 600973 | 0. 442 | 0. 26  | 5. 94E-81 |
| LHX2     | 4. 27E-85 | -0. 50397 | 0. 076 | 0. 42  | 6. 38E-81 |
| PKM      | 5. 30E-85 | -0. 59259 | 0. 571 | 0. 878 | 7. 92E-81 |
| RAD54L   | 7. 89E-85 | -0. 38683 | 0      | 0. 231 | 1. 18E-80 |
| DPM3     | 9. 60E-85 | -0. 3276  | 0. 181 | 0. 535 | 1. 43E-80 |
| DCXR     | 9. 83E-85 | -0. 5919  | 0. 317 | 0. 751 | 1. 47E-80 |
| STX12    | 1. 55E-84 | 0. 439219 | 0. 54  | 0. 477 | 2. 31E-80 |
| SYP      | 2. 40E-84 | 0. 76996  | 0. 491 | 0. 198 | 3. 59E-80 |
| RHN01    | 3. 45E-84 | -0. 56881 | 0. 189 | 0. 6   | 5. 15E-80 |
| KIAA1715 | 3. 87E-84 | 0. 300595 | 0. 397 | 0. 477 | 5. 79E-80 |
| TMEM189  | 4. 87E-84 | -0. 36581 | 0. 066 | 0. 375 | 7. 27E-80 |
| PAK2     | 5. 80E-84 | 0. 251069 | 0. 476 | 0. 549 | 8. 67E-80 |
| RHOJ     | 6. 84E-84 | -0. 38957 | 0. 005 | 0. 258 | 1. 02E-79 |
| VPS28    | 7. 87E-84 | 0. 366934 | 0. 793 | 0. 746 | 1. 18E-79 |
| SLC2A4RG | 8. 23E-84 | -0. 47798 | 0. 049 | 0. 375 | 1. 23E-79 |
| HDAC1    | 8. 86E-84 | -0. 36167 | 0. 095 | 0. 416 | 1. 32E-79 |
| PNMA1    | 1. 21E-83 | 0. 351146 | 0. 541 | 0. 544 | 1. 80E-79 |
| PSMC3IP  | 1. 38E-83 | -0. 50425 | 0. 105 | 0. 463 | 2. 06E-79 |
| CAPZA2   | 1. 42E-83 | 0. 280173 | 0. 806 | 0. 816 | 2. 13E-79 |
| DLGAP4   | 1. 53E-83 | 0. 367774 | 0. 5   | 0. 479 | 2. 28E-79 |
| CNIH4    | 1. 57E-83 | -0. 5502  | 0. 242 | 0. 658 | 2. 34E-79 |
| GJC1     | 2. 79E-83 | -0. 38658 | 0. 025 | 0. 306 | 4. 17E-79 |
| TMEM123  | 3. 03E-83 | -0. 31166 | 0. 215 | 0. 563 | 4. 53E-79 |
| C7orf49  | 3. 11E-83 | -0. 3667  | 0. 121 | 0. 457 | 4. 65E-79 |
| H2AFJ    | 3. 75E-83 | -0. 42239 | 0. 029 | 0. 311 | 5. 60E-79 |
| EIF1B    | 4. 08E-83 | 0. 323269 | 0. 799 | 0. 78  | 6. 10E-79 |
| CBX1     | 4. 45E-83 | 0. 27917  | 0. 732 | 0. 752 | 6. 64E-79 |
| UBE2E3   | 5. 63E-83 | 0. 339873 | 0. 86  | 0. 811 | 8. 41E-79 |
| KDM5B    | 6. 41E-83 | 0. 512685 | 0. 353 | 0. 257 | 9. 58E-79 |
| NUDT5    | 9. 30E-83 | -0. 37594 | 0. 15  | 0. 499 | 1. 39E-78 |
| GRINA    | 9. 65E-83 | 0. 344072 | 0. 462 | 0. 499 | 1. 44E-78 |
| ENOSF1   | 1. 03E-82 | -0. 3235  | 0. 012 | 0. 264 | 1. 54E-78 |
| RPAIN    | 1. 13E-82 | 0. 32019  | 0. 816 | 0. 799 | 1. 68E-78 |
| TSC22D4  | 1. 27E-82 | -0. 54937 | 0. 263 | 0. 672 | 1. 89E-78 |
| TM4SF1   | 1. 27E-82 | -0. 54231 | 0. 029 | 0. 332 | 1. 90E-78 |
| NCAPD3   | 1. 46E-82 | -0. 4209  | 0. 057 | 0. 37  | 2. 18E-78 |
| TCEAL5   | 1. 51E-82 | 0. 804106 | 0. 513 | 0. 154 | 2. 25E-78 |
| MBD3     | 1. 57E-82 | -0. 31722 | 0. 096 | 0. 404 | 2. 35E-78 |
| CIB1     | 1. 67E-82 | -0. 51005 | 0. 129 | 0. 501 | 2. 50E-78 |
| HDLBP    | 1. 70E-82 | -0. 29727 | 0. 222 | 0. 569 | 2. 54E-78 |
| TUBB4B   | 1. 80E-82 | -0. 64511 | 0. 524 | 0. 872 | 2. 69E-78 |
| HIST1H1D | 1. 92E-82 | -0. 54671 | 0. 009 | 0. 269 | 2. 87E-78 |
| HS2ST1   | 2. 24E-82 | -0. 41323 | 0. 065 | 0. 383 | 3. 35E-78 |

|           |          |          |       |       |          |
|-----------|----------|----------|-------|-------|----------|
| UBC       | 2.38E-82 | 0.231703 | 0.991 | 0.97  | 3.55E-78 |
| GL01      | 2.43E-82 | -0.53326 | 0.306 | 0.732 | 3.63E-78 |
| ASIC4     | 2.59E-82 | 0.85905  | 0.531 | 0.215 | 3.87E-78 |
| CD47      | 3.29E-82 | -0.49243 | 0.204 | 0.602 | 4.91E-78 |
| MPHOSPH8  | 3.80E-82 | 0.39475  | 0.588 | 0.553 | 5.67E-78 |
| SALL1     | 4.04E-82 | -0.39992 | 0.033 | 0.316 | 6.04E-78 |
| STX1A     | 6.17E-82 | 0.775903 | 0.339 | 0.058 | 9.21E-78 |
| PTGR1     | 6.86E-82 | -0.44871 | 0.036 | 0.337 | 1.03E-77 |
| RNASEH2B  | 7.19E-82 | -0.4216  | 0.232 | 0.621 | 1.08E-77 |
| IQGAP2    | 8.67E-82 | -0.36449 | 0.016 | 0.267 | 1.30E-77 |
| NEK6      | 9.04E-82 | -0.69521 | 0.071 | 0.422 | 1.35E-77 |
| DHX36     | 1.12E-81 | 0.247128 | 0.611 | 0.677 | 1.67E-77 |
| GPSM2     | 1.15E-81 | -0.58142 | 0.189 | 0.594 | 1.72E-77 |
| PJA1      | 1.22E-81 | 0.505375 | 0.467 | 0.353 | 1.82E-77 |
| SNRPD3    | 1.24E-81 | -0.45493 | 0.313 | 0.719 | 1.85E-77 |
| TMEM98    | 1.24E-81 | -0.34706 | 0.238 | 0.606 | 1.85E-77 |
| DCPS      | 1.33E-81 | -0.40673 | 0.082 | 0.402 | 1.99E-77 |
| LGR4      | 1.37E-81 | -0.3778  | 0.013 | 0.273 | 2.04E-77 |
| KDM1A     | 1.70E-81 | 0.344556 | 0.448 | 0.463 | 2.54E-77 |
| FAM96A    | 1.77E-81 | -0.39014 | 0.136 | 0.48  | 2.65E-77 |
| BBOX1     | 1.80E-81 | -0.42389 | 0.005 | 0.248 | 2.70E-77 |
| CTSA      | 1.84E-81 | -0.50083 | 0.131 | 0.499 | 2.75E-77 |
| TMEM251   | 1.87E-81 | -0.28007 | 0.148 | 0.462 | 2.80E-77 |
| CAMK2D    | 2.14E-81 | -0.46311 | 0.101 | 0.446 | 3.19E-77 |
| ZNF292    | 2.22E-81 | 0.353226 | 0.468 | 0.477 | 3.31E-77 |
| ITGA7     | 2.50E-81 | -0.37297 | 0.035 | 0.317 | 3.74E-77 |
| MAGT1     | 2.51E-81 | -0.396   | 0.02  | 0.295 | 3.75E-77 |
| CSNK1E    | 3.03E-81 | 0.396458 | 0.582 | 0.568 | 4.52E-77 |
| EMP2      | 3.05E-81 | -0.4938  | 0.029 | 0.321 | 4.55E-77 |
| IQGAP1    | 3.16E-81 | -0.38405 | 0.034 | 0.316 | 4.72E-77 |
| PEBP1     | 3.16E-81 | 0.262568 | 0.98  | 0.932 | 4.72E-77 |
| DNAJA1    | 3.18E-81 | 0.351132 | 0.861 | 0.796 | 4.76E-77 |
| DNPH1     | 3.44E-81 | -0.39136 | 0.151 | 0.496 | 5.14E-77 |
| SH3BP5    | 3.58E-81 | 0.47214  | 0.331 | 0.251 | 5.36E-77 |
| CCDC28B   | 4.64E-81 | 0.467687 | 0.408 | 0.347 | 6.94E-77 |
| TRIOBP    | 4.89E-81 | -0.33859 | 0.032 | 0.299 | 7.30E-77 |
| BRD7      | 5.39E-81 | -0.32016 | 0.24  | 0.596 | 8.06E-77 |
| NDUFS2    | 6.02E-81 | 0.320212 | 0.716 | 0.694 | 8.99E-77 |
| EME1      | 6.80E-81 | -0.38471 | 0.009 | 0.265 | 1.02E-76 |
| ACYP1     | 6.87E-81 | -0.40981 | 0.222 | 0.599 | 1.03E-76 |
| SUZ12     | 8.66E-81 | -0.43032 | 0.149 | 0.51  | 1.29E-76 |
| CD81      | 8.81E-81 | -0.12953 | 0.163 | 0.422 | 1.32E-76 |
| COLGALT2  | 9.25E-81 | -0.40032 | 0.048 | 0.344 | 1.38E-76 |
| WRB       | 9.36E-81 | 0.351417 | 0.676 | 0.665 | 1.40E-76 |
| UBE2D1    | 1.02E-80 | 0.298757 | 0.324 | 0.378 | 1.52E-76 |
| RNF11     | 1.21E-80 | 0.453748 | 0.515 | 0.441 | 1.81E-76 |
| BZW2      | 1.27E-80 | 0.532829 | 0.574 | 0.4   | 1.90E-76 |
| ZKSCAN1   | 1.33E-80 | 0.351577 | 0.508 | 0.504 | 1.98E-76 |
| TNFRSF12A | 1.34E-80 | -0.89058 | 0.079 | 0.425 | 2.00E-76 |
| TGFB1     | 1.67E-80 | -0.32504 | 0.013 | 0.265 | 2.50E-76 |
| HOTAIRM1  | 2.02E-80 | 0.791376 | 0.528 | 0.225 | 3.02E-76 |

|           |          |          |       |       |          |
|-----------|----------|----------|-------|-------|----------|
| COL9A3    | 2.25E-80 | -0.78835 | 0.076 | 0.428 | 3.36E-76 |
| AK2       | 2.59E-80 | -0.41781 | 0.2   | 0.57  | 3.87E-76 |
| RNFT1     | 2.65E-80 | -0.28402 | 0.089 | 0.373 | 3.96E-76 |
| MPLKIP    | 2.73E-80 | 0.334936 | 0.671 | 0.673 | 4.08E-76 |
| ZNF524    | 2.79E-80 | -0.3588  | 0.038 | 0.32  | 4.17E-76 |
| RSBN1     | 2.85E-80 | 0.45882  | 0.471 | 0.391 | 4.26E-76 |
| SMIM4     | 3.67E-80 | -0.38928 | 0.112 | 0.443 | 5.49E-76 |
| UFD1L     | 4.02E-80 | -0.45026 | 0.227 | 0.616 | 6.01E-76 |
| TRIP6     | 4.09E-80 | -0.4176  | 0.049 | 0.347 | 6.10E-76 |
| STRAP     | 4.09E-80 | 0.292727 | 0.811 | 0.794 | 6.11E-76 |
| RFK       | 4.36E-80 | 0.305596 | 0.391 | 0.42  | 6.51E-76 |
| PREX1     | 4.54E-80 | -0.37537 | 0.019 | 0.283 | 6.78E-76 |
| BOD1      | 4.58E-80 | 0.246055 | 0.539 | 0.606 | 6.85E-76 |
| PSMB8     | 4.73E-80 | -0.53568 | 0.121 | 0.478 | 7.07E-76 |
| STAT1     | 4.94E-80 | -0.49808 | 0.086 | 0.428 | 7.38E-76 |
| BEX5      | 5.35E-80 | 0.880673 | 0.389 | 0.051 | 8.00E-76 |
| RALA      | 5.36E-80 | 0.260513 | 0.574 | 0.63  | 8.01E-76 |
| CCNF      | 5.45E-80 | -0.47198 | 0.038 | 0.337 | 8.15E-76 |
| DAAM1     | 5.99E-80 | 0.524238 | 0.577 | 0.432 | 8.95E-76 |
| DPYSL2    | 6.64E-80 | 0.296345 | 0.593 | 0.611 | 9.92E-76 |
| TRIM9     | 7.33E-80 | -0.4955  | 0.104 | 0.454 | 1.10E-75 |
| THOP1     | 7.91E-80 | -0.37712 | 0.178 | 0.535 | 1.18E-75 |
| COMMD3    | 8.27E-80 | 0.345548 | 0.478 | 0.494 | 1.24E-75 |
| NSL1      | 9.97E-80 | -0.32543 | 0.263 | 0.627 | 1.49E-75 |
| FABP7     | 1.02E-79 | -0.7117  | 0.459 | 0.752 | 1.53E-75 |
| EMP1      | 1.18E-79 | -0.59878 | 0.014 | 0.283 | 1.76E-75 |
| PAIP2     | 1.49E-79 | 0.303835 | 0.77  | 0.764 | 2.23E-75 |
| B2M       | 1.58E-79 | -0.48294 | 0.853 | 0.968 | 2.36E-75 |
| RFFL      | 1.64E-79 | -0.45931 | 0.047 | 0.354 | 2.45E-75 |
| TXNDC12   | 1.72E-79 | -0.44136 | 0.241 | 0.633 | 2.56E-75 |
| HDAC2     | 1.76E-79 | 0.317931 | 0.822 | 0.789 | 2.64E-75 |
| RASSF2    | 1.77E-79 | -0.34092 | 0.087 | 0.391 | 2.64E-75 |
| SNHG9     | 2.03E-79 | -0.31734 | 0.207 | 0.551 | 3.03E-75 |
| FLNA      | 2.07E-79 | -0.47019 | 0.106 | 0.449 | 3.09E-75 |
| CHMP1A    | 2.26E-79 | 0.150394 | 0.345 | 0.484 | 3.37E-75 |
| PLXNB2    | 2.39E-79 | -0.2521  | 0.058 | 0.317 | 3.58E-75 |
| APC       | 2.43E-79 | 0.448055 | 0.422 | 0.357 | 3.63E-75 |
| DCTN6     | 2.54E-79 | 0.265183 | 0.544 | 0.616 | 3.79E-75 |
| CELF1     | 2.98E-79 | 0.304164 | 0.464 | 0.493 | 4.45E-75 |
| CCDC90B   | 3.26E-79 | 0.358809 | 0.632 | 0.609 | 4.88E-75 |
| LINC00116 | 3.29E-79 | -0.29273 | 0.227 | 0.567 | 4.91E-75 |
| DUSP1     | 3.45E-79 | 0.59128  | 0.745 | 0.48  | 5.15E-75 |
| MAP7D3    | 4.47E-79 | -0.34    | 0.006 | 0.249 | 6.67E-75 |
| LHFP      | 4.91E-79 | -0.49439 | 0.145 | 0.51  | 7.34E-75 |
| CHCHD5    | 5.02E-79 | -0.28991 | 0.26  | 0.606 | 7.50E-75 |
| MEAF6     | 5.58E-79 | 0.267357 | 0.642 | 0.688 | 8.34E-75 |
| CHGB      | 5.99E-79 | 0.807147 | 0.41  | 0.085 | 8.95E-75 |
| RNF24     | 6.10E-79 | 0.361031 | 0.469 | 0.464 | 9.12E-75 |
| FAM111B   | 6.63E-79 | -0.5314  | 0.006 | 0.251 | 9.91E-75 |
| NME4      | 6.91E-79 | -0.43673 | 0.296 | 0.695 | 1.03E-74 |
| 10-Sep    | 8.09E-79 | -0.35505 | 0.069 | 0.365 | 1.21E-74 |

|          |          |          |       |       |          |
|----------|----------|----------|-------|-------|----------|
| GAS2L1   | 8.85E-79 | -0.34146 | 0.068 | 0.359 | 1.32E-74 |
| KIF2A    | 9.41E-79 | 0.355671 | 0.475 | 0.483 | 1.41E-74 |
| PIF1     | 1.02E-78 | -0.60414 | 0.016 | 0.285 | 1.52E-74 |
| HSDL2    | 1.11E-78 | -0.42455 | 0.038 | 0.333 | 1.66E-74 |
| ARF5     | 1.27E-78 | 0.311896 | 0.739 | 0.738 | 1.90E-74 |
| PLSCR1   | 1.30E-78 | -0.42877 | 0.05  | 0.351 | 1.94E-74 |
| CPNE4    | 1.31E-78 | -0.40042 | 0.009 | 0.259 | 1.96E-74 |
| GRAMD1A  | 1.31E-78 | 0.375447 | 0.446 | 0.425 | 1.96E-74 |
| YWHAZ    | 1.41E-78 | 0.309254 | 0.722 | 0.707 | 2.11E-74 |
| CUTA     | 1.41E-78 | 0.316299 | 0.854 | 0.814 | 2.11E-74 |
| TIMP1    | 1.55E-78 | -0.85567 | 0.272 | 0.628 | 2.31E-74 |
| RBM38    | 1.82E-78 | -0.32394 | 0.063 | 0.344 | 2.72E-74 |
| C22orf39 | 2.23E-78 | -0.301   | 0.215 | 0.553 | 3.33E-74 |
| ZMAT2    | 2.42E-78 | 0.310547 | 0.54  | 0.575 | 3.61E-74 |
| SPOCK1   | 2.47E-78 | 0.828425 | 0.349 | 0.04  | 3.69E-74 |
| CHPT1    | 2.50E-78 | -0.49362 | 0.163 | 0.536 | 3.73E-74 |
| TMEM141  | 3.09E-78 | -0.35327 | 0.072 | 0.367 | 4.62E-74 |
| SYDE1    | 3.26E-78 | -0.30465 | 0.005 | 0.231 | 4.88E-74 |
| PGP      | 3.34E-78 | -0.31242 | 0.236 | 0.583 | 5.00E-74 |
| TSG101   | 4.30E-78 | 0.353138 | 0.579 | 0.558 | 6.43E-74 |
| FZD7     | 4.94E-78 | -0.36115 | 0.004 | 0.237 | 7.39E-74 |
| SEC61G   | 5.42E-78 | -0.58037 | 0.819 | 0.923 | 8.11E-74 |
| PSMD3    | 5.55E-78 | 0.224087 | 0.586 | 0.658 | 8.29E-74 |
| TMEM158  | 6.70E-78 | -0.53594 | 0.039 | 0.342 | 1.00E-73 |
| ILD2     | 6.78E-78 | -0.31768 | 0.008 | 0.249 | 1.01E-73 |
| ELOVL5   | 7.83E-78 | -0.3437  | 0.241 | 0.6   | 1.17E-73 |
| NT5C3A   | 8.27E-78 | 0.303397 | 0.581 | 0.602 | 1.24E-73 |
| KHSRP    | 1.09E-77 | -0.26499 | 0.218 | 0.542 | 1.63E-73 |
| NT5C3B   | 1.26E-77 | 0.208937 | 0.574 | 0.652 | 1.88E-73 |
| IER2     | 1.30E-77 | 0.394594 | 0.899 | 0.778 | 1.94E-73 |
| NKIRAS2  | 1.31E-77 | 0.192272 | 0.391 | 0.5   | 1.96E-73 |
| GOLM1    | 1.39E-77 | 0.249421 | 0.606 | 0.657 | 2.08E-73 |
| ITFG1    | 1.43E-77 | 0.305435 | 0.524 | 0.553 | 2.13E-73 |
| STAG2    | 2.05E-77 | -0.32429 | 0.148 | 0.472 | 3.06E-73 |
| SDHD     | 2.15E-77 | -0.27659 | 0.218 | 0.549 | 3.21E-73 |
| MOSPD3   | 2.26E-77 | 0.376093 | 0.473 | 0.454 | 3.38E-73 |
| AKAP12   | 2.40E-77 | -0.46357 | 0.086 | 0.414 | 3.59E-73 |
| VPS35    | 2.69E-77 | 0.309138 | 0.592 | 0.611 | 4.01E-73 |
| ETV4     | 2.69E-77 | -0.41249 | 0.015 | 0.274 | 4.03E-73 |
| HIST1H1C | 2.71E-77 | -0.50618 | 0.049 | 0.344 | 4.06E-73 |
| NRM      | 2.72E-77 | -0.38231 | 0.044 | 0.325 | 4.07E-73 |
| XPO1     | 2.91E-77 | -0.34837 | 0.248 | 0.611 | 4.34E-73 |
| LPL      | 2.96E-77 | -0.4348  | 0.008 | 0.251 | 4.42E-73 |
| ASXL1    | 3.08E-77 | -0.2265  | 0.142 | 0.426 | 4.61E-73 |
| MXRA7    | 3.25E-77 | -0.3387  | 0.054 | 0.331 | 4.85E-73 |
| RAB9A    | 3.69E-77 | -0.23833 | 0.171 | 0.475 | 5.51E-73 |
| SRPX     | 3.76E-77 | -0.71264 | 0.038 | 0.342 | 5.61E-73 |
| PAFAH1B2 | 3.98E-77 | 0.226271 | 0.478 | 0.546 | 5.94E-73 |
| NIPA2    | 4.05E-77 | -0.33869 | 0.173 | 0.512 | 6.05E-73 |
| CMAS     | 4.28E-77 | 0.303839 | 0.401 | 0.432 | 6.39E-73 |
| SNX1     | 5.48E-77 | -0.29104 | 0.065 | 0.337 | 8.19E-73 |



|          |          |          |       |       |          |
|----------|----------|----------|-------|-------|----------|
| KATNBL1  | 5.61E-77 | -0.15921 | 0.202 | 0.472 | 8.38E-73 |
| GNG3     | 6.36E-77 | 0.863351 | 0.406 | 0.069 | 9.50E-73 |
| CMC2     | 6.39E-77 | -0.3905  | 0.318 | 0.705 | 9.55E-73 |
| SLC44A2  | 6.56E-77 | -0.33769 | 0.139 | 0.459 | 9.80E-73 |
| NRXN1    | 6.68E-77 | 0.689449 | 0.651 | 0.326 | 9.98E-73 |
| RANGRF   | 7.36E-77 | -0.39542 | 0.119 | 0.449 | 1.10E-72 |
| SS18L2   | 7.37E-77 | 0.190818 | 0.419 | 0.53  | 1.10E-72 |
| EBAG9    | 7.49E-77 | 0.365093 | 0.423 | 0.428 | 1.12E-72 |
| C16orf59 | 7.67E-77 | -0.47148 | 0.049 | 0.354 | 1.15E-72 |
| FAM127A  | 7.96E-77 | 0.324917 | 0.65  | 0.681 | 1.19E-72 |
| C12orf75 | 1.06E-76 | -0.45552 | 0.146 | 0.501 | 1.59E-72 |
| DUSP26   | 1.10E-76 | 0.865556 | 0.415 | 0.091 | 1.64E-72 |
| RFXANK   | 1.15E-76 | -0.41855 | 0.142 | 0.486 | 1.71E-72 |
| DAG1     | 1.16E-76 | -0.38172 | 0.093 | 0.407 | 1.74E-72 |
| SUCLG2   | 1.17E-76 | -0.40027 | 0.023 | 0.284 | 1.75E-72 |
| PRADC1   | 1.33E-76 | -0.29807 | 0.207 | 0.536 | 1.99E-72 |
| TLN1     | 1.34E-76 | -0.30605 | 0.06  | 0.335 | 2.00E-72 |
| SH3GL1   | 1.41E-76 | -0.35773 | 0.17  | 0.51  | 2.10E-72 |
| YBX3     | 1.47E-76 | -0.51132 | 0.207 | 0.594 | 2.20E-72 |
| AP3S1    | 1.64E-76 | 0.253125 | 0.543 | 0.605 | 2.45E-72 |
| DGUOK    | 1.99E-76 | 0.255347 | 0.735 | 0.767 | 2.97E-72 |
| ITGAV    | 2.02E-76 | -0.40357 | 0.09  | 0.406 | 3.02E-72 |
| PROX1    | 2.07E-76 | 0.446813 | 0.363 | 0.314 | 3.10E-72 |
| NCKAP1   | 2.10E-76 | -0.11759 | 0.211 | 0.467 | 3.13E-72 |
| ADSL     | 2.28E-76 | -0.2278  | 0.186 | 0.481 | 3.41E-72 |
| ZNHIT3   | 2.36E-76 | 0.276965 | 0.543 | 0.596 | 3.52E-72 |
| SNRPA    | 2.39E-76 | -0.34312 | 0.225 | 0.574 | 3.57E-72 |
| FBXO11   | 2.61E-76 | 0.41781  | 0.397 | 0.349 | 3.90E-72 |
| NETO2    | 2.63E-76 | -0.46285 | 0.136 | 0.49  | 3.94E-72 |
| MAP7D1   | 2.78E-76 | 0.305061 | 0.479 | 0.509 | 4.15E-72 |
| MTA1     | 2.83E-76 | -0.11228 | 0.189 | 0.438 | 4.24E-72 |
| TNFRSF19 | 2.84E-76 | -0.34629 | 0.023 | 0.28  | 4.24E-72 |
| SEC63    | 2.98E-76 | 0.259405 | 0.551 | 0.609 | 4.46E-72 |
| GNB4     | 3.19E-76 | -0.31514 | 0.085 | 0.375 | 4.76E-72 |
| PRCP     | 3.54E-76 | -0.46494 | 0.218 | 0.598 | 5.30E-72 |
| NOTCH2NL | 3.56E-76 | -0.38419 | 0.033 | 0.304 | 5.33E-72 |
| ERI1     | 4.23E-76 | -0.34233 | 0.057 | 0.343 | 6.31E-72 |
| HEPACAM  | 5.10E-76 | -0.54262 | 0.022 | 0.295 | 7.63E-72 |
| PDCD6    | 5.17E-76 | 0.211476 | 0.631 | 0.717 | 7.73E-72 |
| ORC4     | 5.49E-76 | 0.423342 | 0.465 | 0.404 | 8.20E-72 |
| CRYZL1   | 5.74E-76 | 0.493908 | 0.432 | 0.333 | 8.58E-72 |
| QKI      | 5.76E-76 | -0.46178 | 0.334 | 0.737 | 8.60E-72 |
| IFI6     | 5.87E-76 | -0.63452 | 0.137 | 0.502 | 8.78E-72 |
| MIS12    | 6.35E-76 | -0.38175 | 0.092 | 0.402 | 9.50E-72 |
| ING4     | 7.06E-76 | 0.494383 | 0.511 | 0.386 | 1.06E-71 |
| CENPL    | 8.05E-76 | -0.39801 | 0.031 | 0.304 | 1.20E-71 |
| TCEAL2   | 8.50E-76 | 0.687055 | 0.676 | 0.309 | 1.27E-71 |
| AAK1     | 8.94E-76 | 0.262533 | 0.402 | 0.457 | 1.34E-71 |
| TCP1     | 9.08E-76 | 0.241488 | 0.805 | 0.822 | 1.36E-71 |
| CFL1     | 1.08E-75 | 0.199261 | 0.998 | 0.964 | 1.61E-71 |
| DNAJC1   | 1.15E-75 | -0.33641 | 0.072 | 0.357 | 1.72E-71 |

|          |           |           |        |        |           |
|----------|-----------|-----------|--------|--------|-----------|
| TOX      | 1. 16E-75 | 0. 62073  | 0. 309 | 0. 138 | 1. 73E-71 |
| EZH2     | 1. 17E-75 | -0. 44049 | 0. 297 | 0. 688 | 1. 76E-71 |
| SCOC     | 1. 19E-75 | 0. 285398 | 0. 605 | 0. 643 | 1. 78E-71 |
| MTHFD1   | 1. 19E-75 | -0. 48136 | 0. 11  | 0. 451 | 1. 78E-71 |
| ISCA1    | 1. 21E-75 | 0. 248893 | 0. 4   | 0. 468 | 1. 81E-71 |
| NUP37    | 1. 22E-75 | -0. 36491 | 0. 067 | 0. 359 | 1. 82E-71 |
| THRA     | 1. 43E-75 | 0. 540724 | 0. 557 | 0. 386 | 2. 14E-71 |
| PRPSAP2  | 1. 50E-75 | 0. 315834 | 0. 478 | 0. 494 | 2. 24E-71 |
| MLST8    | 1. 57E-75 | -0. 13486 | 0. 222 | 0. 488 | 2. 35E-71 |
| YIPF4    | 1. 71E-75 | 0. 201176 | 0. 467 | 0. 565 | 2. 56E-71 |
| FUCA2    | 1. 75E-75 | -0. 26908 | 0. 081 | 0. 347 | 2. 61E-71 |
| LAMC1    | 1. 84E-75 | -0. 30191 | 0. 016 | 0. 253 | 2. 74E-71 |
| SFT2D1   | 1. 86E-75 | -0. 34288 | 0. 23  | 0. 584 | 2. 78E-71 |
| TOP2B    | 1. 87E-75 | 0. 335436 | 0. 427 | 0. 432 | 2. 79E-71 |
| MTMR9    | 2. 01E-75 | 0. 420955 | 0. 405 | 0. 356 | 3. 01E-71 |
| COX7A2L  | 2. 21E-75 | 0. 352886 | 0. 755 | 0. 712 | 3. 30E-71 |
| FAM46A   | 2. 42E-75 | -0. 24067 | 0. 11  | 0. 378 | 3. 62E-71 |
| CSRNP3   | 2. 53E-75 | 0. 734701 | 0. 46  | 0. 162 | 3. 79E-71 |
| IPO7     | 3. 00E-75 | -0. 25857 | 0. 156 | 0. 458 | 4. 49E-71 |
| PLXNA4   | 3. 29E-75 | 0. 723136 | 0. 307 | 0. 096 | 4. 91E-71 |
| MEX3A    | 3. 46E-75 | 0. 461874 | 0. 564 | 0. 465 | 5. 18E-71 |
| SEC11A   | 3. 54E-75 | -0. 51337 | 0. 313 | 0. 716 | 5. 29E-71 |
| MT1X     | 3. 93E-75 | -0. 64662 | 0. 216 | 0. 614 | 5. 88E-71 |
| IGFBP2   | 4. 51E-75 | -0. 63235 | 0. 465 | 0. 819 | 6. 73E-71 |
| SLC25A36 | 4. 64E-75 | 0. 388238 | 0. 436 | 0. 405 | 6. 93E-71 |
| SF3A2    | 4. 77E-75 | -0. 2625  | 0. 269 | 0. 6   | 7. 13E-71 |
| KLHL4    | 4. 95E-75 | -0. 40891 | 0. 032 | 0. 306 | 7. 40E-71 |
| CNOT7    | 5. 55E-75 | 0. 226281 | 0. 548 | 0. 637 | 8. 29E-71 |
| MAML2    | 6. 44E-75 | -0. 33876 | 0. 104 | 0. 407 | 9. 62E-71 |
| NOL12    | 6. 48E-75 | -0. 11098 | 0. 209 | 0. 467 | 9. 69E-71 |
| G6PC3    | 7. 01E-75 | -0. 26691 | 0. 24  | 0. 56  | 1. 05E-70 |
| C9orf78  | 7. 17E-75 | 0. 169886 | 0. 539 | 0. 652 | 1. 07E-70 |
| CSDE1    | 8. 36E-75 | 0. 25015  | 0. 763 | 0. 774 | 1. 25E-70 |
| TMEM256  | 9. 54E-75 | -0. 30494 | 0. 237 | 0. 577 | 1. 43E-70 |
| FBXO21   | 1. 01E-74 | 0. 372215 | 0. 561 | 0. 521 | 1. 51E-70 |
| DHRS7B   | 1. 21E-74 | -0. 22429 | 0. 134 | 0. 412 | 1. 81E-70 |
| TMED1    | 1. 35E-74 | -0. 42154 | 0. 126 | 0. 46  | 2. 02E-70 |
| EFNB2    | 1. 39E-74 | -0. 33579 | 0. 015 | 0. 262 | 2. 08E-70 |
| PEX2     | 1. 59E-74 | -0. 2732  | 0. 17  | 0. 478 | 2. 37E-70 |
| NRGN     | 1. 65E-74 | -0. 31945 | 0. 016 | 0. 252 | 2. 46E-70 |
| BTF3L4   | 1. 75E-74 | 0. 275153 | 0. 67  | 0. 694 | 2. 61E-70 |
| SDF2L1   | 1. 77E-74 | -0. 59653 | 0. 149 | 0. 519 | 2. 64E-70 |
| ETV5     | 1. 98E-74 | -0. 30015 | 0. 145 | 0. 456 | 2. 96E-70 |
| CTNNA1   | 2. 13E-74 | 0. 204791 | 0. 463 | 0. 558 | 3. 18E-70 |
| PPIH     | 2. 28E-74 | -0. 41224 | 0. 177 | 0. 528 | 3. 41E-70 |
| FIS1     | 2. 32E-74 | 0. 322506 | 0. 796 | 0. 788 | 3. 46E-70 |
| ANKRD13D | 2. 50E-74 | 0. 382925 | 0. 321 | 0. 295 | 3. 73E-70 |
| ENO1     | 2. 83E-74 | -0. 55818 | 0. 599 | 0. 895 | 4. 23E-70 |
| KIF1B    | 3. 81E-74 | 0. 15442  | 0. 41  | 0. 549 | 5. 70E-70 |
| TTC14    | 4. 15E-74 | 0. 253741 | 0. 337 | 0. 411 | 6. 20E-70 |
| TRAPPC4  | 4. 26E-74 | 0. 307171 | 0. 625 | 0. 62  | 6. 37E-70 |

|           |          |          |       |       |          |
|-----------|----------|----------|-------|-------|----------|
| PCDH17    | 4.71E-74 | -0.4238  | 0.119 | 0.451 | 7.04E-70 |
| TRABD     | 5.49E-74 | -0.22571 | 0.112 | 0.377 | 8.21E-70 |
| GINM1     | 5.55E-74 | -0.2926  | 0.175 | 0.491 | 8.30E-70 |
| ALCAM     | 5.60E-74 | -0.27556 | 0.066 | 0.32  | 8.37E-70 |
| ROB01     | 6.14E-74 | 0.314324 | 0.382 | 0.433 | 9.17E-70 |
| EIF4A1    | 7.28E-74 | 0.246102 | 0.977 | 0.937 | 1.09E-69 |
| NCLN      | 7.40E-74 | -0.20744 | 0.094 | 0.349 | 1.11E-69 |
| MTHFD2L   | 8.09E-74 | -0.2416  | 0.148 | 0.433 | 1.21E-69 |
| FERMT2    | 8.96E-74 | -0.30864 | 0.138 | 0.444 | 1.34E-69 |
| LIMS1     | 1.02E-73 | -0.42391 | 0.162 | 0.509 | 1.52E-69 |
| POLA2     | 1.24E-73 | -0.40695 | 0.029 | 0.295 | 1.86E-69 |
| FUBP3     | 1.27E-73 | -0.22509 | 0.169 | 0.457 | 1.90E-69 |
| UFM1      | 1.34E-73 | 0.223791 | 0.39  | 0.474 | 2.01E-69 |
| ZC3H13    | 1.38E-73 | 0.340612 | 0.501 | 0.502 | 2.07E-69 |
| SYPL1     | 1.46E-73 | -0.32891 | 0.174 | 0.494 | 2.18E-69 |
| UBE2S     | 1.56E-73 | -0.63687 | 0.554 | 0.812 | 2.33E-69 |
| CLIC4     | 1.85E-73 | -0.451   | 0.221 | 0.589 | 2.77E-69 |
| GPM6B     | 2.17E-73 | -0.43722 | 0.764 | 0.937 | 3.24E-69 |
| GPATCH8   | 2.39E-73 | 0.245433 | 0.463 | 0.533 | 3.58E-69 |
| NCOR2     | 2.42E-73 | -0.18188 | 0.157 | 0.419 | 3.62E-69 |
| C1QL1     | 2.49E-73 | -0.38562 | 0.071 | 0.357 | 3.72E-69 |
| SSFA2     | 2.62E-73 | -0.37873 | 0.073 | 0.369 | 3.92E-69 |
| NES       | 2.84E-73 | -0.68627 | 0.249 | 0.637 | 4.25E-69 |
| GABARAPL1 | 3.41E-73 | 0.640004 | 0.45  | 0.22  | 5.09E-69 |
| MOB1A     | 3.50E-73 | -0.29122 | 0.139 | 0.44  | 5.23E-69 |
| TMEM206   | 3.67E-73 | 0.200476 | 0.311 | 0.41  | 5.48E-69 |
| ANXA2     | 3.81E-73 | -0.89784 | 0.128 | 0.477 | 5.69E-69 |
| SYT5      | 4.05E-73 | 0.721449 | 0.295 | 0.021 | 6.05E-69 |
| ISCA2     | 4.07E-73 | -0.28233 | 0.171 | 0.478 | 6.09E-69 |
| APOBEC3B  | 4.31E-73 | -0.40028 | 0.018 | 0.259 | 6.44E-69 |
| DNASE2    | 4.60E-73 | -0.2986  | 0.1   | 0.384 | 6.88E-69 |
| TUBG1     | 4.73E-73 | -0.43726 | 0.265 | 0.647 | 7.07E-69 |
| CASC4     | 4.95E-73 | -0.24179 | 0.148 | 0.436 | 7.40E-69 |
| TRAF7     | 5.06E-73 | -0.29192 | 0.115 | 0.407 | 7.56E-69 |
| DDX1      | 5.42E-73 | 0.168839 | 0.487 | 0.601 | 8.10E-69 |
| UBQLN2    | 7.07E-73 | 0.426006 | 0.421 | 0.363 | 1.06E-68 |
| NFE2L2    | 7.65E-73 | -0.26944 | 0.277 | 0.606 | 1.14E-68 |
| CADM1     | 8.33E-73 | 0.352538 | 0.47  | 0.477 | 1.24E-68 |
| RNF26     | 8.59E-73 | -0.37794 | 0.12  | 0.437 | 1.28E-68 |
| RMI2      | 1.03E-72 | -0.44178 | 0.013 | 0.258 | 1.53E-68 |
| DAZAP1    | 1.09E-72 | -0.33377 | 0.213 | 0.551 | 1.62E-68 |
| COMT      | 1.10E-72 | -0.27439 | 0.325 | 0.668 | 1.64E-68 |
| CBFB      | 1.17E-72 | -0.3455  | 0.141 | 0.459 | 1.75E-68 |
| TRIM28    | 1.34E-72 | -0.26135 | 0.257 | 0.583 | 2.01E-68 |
| DDX39A    | 1.39E-72 | -0.5815  | 0.389 | 0.786 | 2.08E-68 |
| ARL8A     | 1.42E-72 | 0.320403 | 0.405 | 0.427 | 2.12E-68 |
| TRIM2     | 1.44E-72 | 0.332071 | 0.407 | 0.412 | 2.15E-68 |
| SMARCE1   | 1.50E-72 | 0.232069 | 0.594 | 0.652 | 2.24E-68 |
| AKR7A2    | 1.77E-72 | -0.30969 | 0.218 | 0.548 | 2.64E-68 |
| ERF       | 2.00E-72 | -0.34914 | 0.06  | 0.332 | 2.98E-68 |
| GSK3B     | 2.13E-72 | 0.436257 | 0.377 | 0.317 | 3.18E-68 |

|           |          |          |       |       |          |
|-----------|----------|----------|-------|-------|----------|
| PKIA      | 2.28E-72 | 0.7449   | 0.462 | 0.162 | 3.40E-68 |
| PHF20L1   | 2.43E-72 | 0.256941 | 0.462 | 0.526 | 3.63E-68 |
| MMS22L    | 2.50E-72 | -0.46345 | 0.046 | 0.333 | 3.74E-68 |
| AIF1L     | 2.65E-72 | -0.64994 | 0.028 | 0.304 | 3.96E-68 |
| CCDC47    | 2.73E-72 | -0.32667 | 0.291 | 0.643 | 4.07E-68 |
| DNMT1     | 2.78E-72 | -0.50154 | 0.315 | 0.71  | 4.16E-68 |
| SDC1      | 3.06E-72 | -0.34257 | 0.027 | 0.268 | 4.58E-68 |
| ARHGAP21  | 3.26E-72 | -0.25479 | 0.173 | 0.469 | 4.87E-68 |
| HNRNPA0   | 3.38E-72 | 0.259451 | 0.928 | 0.894 | 5.05E-68 |
| MATR3     | 3.39E-72 | 0.295072 | 0.78  | 0.764 | 5.06E-68 |
| YIPF3     | 3.40E-72 | 0.253828 | 0.617 | 0.652 | 5.09E-68 |
| NTAN1     | 3.50E-72 | -0.16619 | 0.13  | 0.377 | 5.24E-68 |
| AKIP1     | 3.57E-72 | 0.110418 | 0.31  | 0.456 | 5.33E-68 |
| UBXN2A    | 3.79E-72 | -0.19301 | 0.194 | 0.473 | 5.67E-68 |
| EXOC7     | 3.93E-72 | 0.291993 | 0.527 | 0.548 | 5.87E-68 |
| LMF2      | 3.93E-72 | -0.35286 | 0.098 | 0.399 | 5.88E-68 |
| ANKIB1    | 4.34E-72 | 0.288293 | 0.335 | 0.365 | 6.48E-68 |
| RNF10     | 4.37E-72 | 0.225854 | 0.441 | 0.51  | 6.53E-68 |
| ZNF91     | 4.73E-72 | 0.392568 | 0.416 | 0.38  | 7.07E-68 |
| IPO5      | 4.75E-72 | -0.26252 | 0.194 | 0.502 | 7.10E-68 |
| N4BP2L2   | 5.37E-72 | 0.182866 | 0.56  | 0.657 | 8.02E-68 |
| BORA      | 5.64E-72 | -0.41532 | 0.005 | 0.228 | 8.43E-68 |
| SPECC1    | 5.79E-72 | -0.39439 | 0.251 | 0.616 | 8.65E-68 |
| DHRX      | 5.81E-72 | -0.21491 | 0.201 | 0.493 | 8.69E-68 |
| RAB31     | 6.11E-72 | -0.332   | 0.253 | 0.6   | 9.14E-68 |
| TMEM57    | 6.64E-72 | 0.487507 | 0.396 | 0.291 | 9.92E-68 |
| EXOSC8    | 7.36E-72 | -0.37053 | 0.324 | 0.691 | 1.10E-67 |
| MED11     | 7.46E-72 | -0.13614 | 0.137 | 0.369 | 1.12E-67 |
| NMU       | 7.94E-72 | -0.60432 | 0.021 | 0.283 | 1.19E-67 |
| ZNF821    | 8.04E-72 | 0.57653  | 0.465 | 0.288 | 1.20E-67 |
| LINC00998 | 8.05E-72 | -0.30672 | 0.223 | 0.553 | 1.20E-67 |
| EMC10     | 8.17E-72 | 0.234967 | 0.607 | 0.659 | 1.22E-67 |
| SPTSSA    | 9.62E-72 | -0.47092 | 0.253 | 0.631 | 1.44E-67 |
| U2SURP    | 9.86E-72 | 0.193601 | 0.54  | 0.628 | 1.47E-67 |
| RNF213    | 1.02E-71 | -0.31006 | 0.037 | 0.285 | 1.52E-67 |
| PPP2R5C   | 1.04E-71 | -0.31241 | 0.183 | 0.499 | 1.55E-67 |
| ZNF511    | 1.05E-71 | -0.26129 | 0.085 | 0.343 | 1.57E-67 |
| RFC1      | 1.08E-71 | -0.31476 | 0.244 | 0.584 | 1.62E-67 |
| GNAI3     | 1.16E-71 | 0.238788 | 0.511 | 0.573 | 1.74E-67 |
| OLA1      | 1.29E-71 | 0.243809 | 0.752 | 0.784 | 1.93E-67 |
| SKP1      | 1.36E-71 | 0.229687 | 0.973 | 0.936 | 2.04E-67 |
| PSMA3     | 1.38E-71 | -0.20561 | 0.372 | 0.691 | 2.06E-67 |
| DNAJB2    | 1.56E-71 | 0.268315 | 0.425 | 0.477 | 2.33E-67 |
| SZRD1     | 1.63E-71 | -0.24575 | 0.15  | 0.428 | 2.44E-67 |
| RFWD3     | 2.00E-71 | -0.39214 | 0.028 | 0.285 | 2.98E-67 |
| FRG1      | 2.18E-71 | 0.194995 | 0.413 | 0.504 | 3.25E-67 |
| PLOD1     | 2.18E-71 | -0.23109 | 0.062 | 0.302 | 3.26E-67 |
| NUP50     | 2.50E-71 | -0.35574 | 0.071 | 0.359 | 3.73E-67 |
| ZNF638    | 2.77E-71 | 0.235748 | 0.372 | 0.443 | 4.14E-67 |
| CSE1L     | 2.91E-71 | -0.38552 | 0.259 | 0.62  | 4.36E-67 |
| CALCOCO2  | 2.96E-71 | -0.20297 | 0.064 | 0.296 | 4.43E-67 |

|           |          |          |       |       |          |
|-----------|----------|----------|-------|-------|----------|
| PITPNA-AS | 3.33E-71 | -0.19884 | 0.176 | 0.454 | 4.98E-67 |
| NFIA      | 3.53E-71 | 0.279475 | 0.716 | 0.757 | 5.27E-67 |
| ARHGAP5   | 3.93E-71 | -0.24544 | 0.101 | 0.363 | 5.87E-67 |
| SORT1     | 3.97E-71 | -0.27583 | 0.117 | 0.401 | 5.93E-67 |
| TMEM134   | 4.32E-71 | -0.23488 | 0.155 | 0.432 | 6.46E-67 |
| ARX       | 4.43E-71 | 0.741648 | 0.266 | 0.02  | 6.62E-67 |
| CENPP     | 4.92E-71 | -0.44038 | 0.024 | 0.28  | 7.36E-67 |
| BAG6      | 5.04E-71 | 0.168344 | 0.43  | 0.535 | 7.54E-67 |
| RABL6     | 5.07E-71 | -0.20869 | 0.242 | 0.533 | 7.57E-67 |
| ZCCHC11   | 5.25E-71 | 0.193398 | 0.338 | 0.437 | 7.85E-67 |
| ABHD2     | 5.96E-71 | -0.40478 | 0.091 | 0.4   | 8.91E-67 |
| IFI27L1   | 6.35E-71 | -0.25789 | 0.171 | 0.464 | 9.49E-67 |
| VGF       | 6.50E-71 | 0.74741  | 0.361 | 0.079 | 9.71E-67 |
| LAMP2     | 6.50E-71 | -0.40846 | 0.152 | 0.486 | 9.72E-67 |
| FSTL1     | 7.02E-71 | -0.34488 | 0.027 | 0.277 | 1.05E-66 |
| BAZ1A     | 7.03E-71 | -0.15156 | 0.293 | 0.577 | 1.05E-66 |
| CERS2     | 7.64E-71 | -0.2541  | 0.087 | 0.349 | 1.14E-66 |
| SPCS3     | 7.80E-71 | -0.28181 | 0.154 | 0.451 | 1.17E-66 |
| KLHDC2    | 7.91E-71 | 0.167966 | 0.392 | 0.517 | 1.18E-66 |
| HIST1H4C  | 8.06E-71 | -0.5992  | 0.668 | 0.851 | 1.20E-66 |
| NAPA      | 8.38E-71 | 0.185419 | 0.43  | 0.527 | 1.25E-66 |
| C8orf4    | 9.06E-71 | -0.50754 | 0.031 | 0.298 | 1.35E-66 |
| DAP       | 9.44E-71 | -0.28428 | 0.181 | 0.491 | 1.41E-66 |
| SPOP      | 1.00E-70 | 0.252635 | 0.43  | 0.483 | 1.50E-66 |
| BLOC1S4   | 1.00E-70 | 0.186319 | 0.324 | 0.433 | 1.50E-66 |
| TEN1      | 1.02E-70 | -0.23749 | 0.069 | 0.316 | 1.53E-66 |
| POLE3     | 1.07E-70 | -0.31767 | 0.215 | 0.541 | 1.60E-66 |
| SV2A      | 1.10E-70 | 0.253154 | 0.371 | 0.423 | 1.64E-66 |
| GSS       | 1.16E-70 | -0.33787 | 0.167 | 0.486 | 1.74E-66 |
| LEPROTL1  | 1.20E-70 | 0.139645 | 0.454 | 0.586 | 1.80E-66 |
| FAM207A   | 1.21E-70 | -0.25207 | 0.086 | 0.347 | 1.82E-66 |
| PNISR     | 1.27E-70 | 0.286238 | 0.84  | 0.83  | 1.90E-66 |
| AKR1B1    | 1.31E-70 | 0.257327 | 0.731 | 0.748 | 1.96E-66 |
| ATP1B2    | 1.33E-70 | -0.50914 | 0.078 | 0.394 | 1.98E-66 |
| TRAIP     | 1.44E-70 | -0.33735 | 0.035 | 0.289 | 2.15E-66 |
| GINS4     | 1.49E-70 | -0.37294 | 0.026 | 0.273 | 2.22E-66 |
| RNF130    | 1.64E-70 | -0.2268  | 0.214 | 0.507 | 2.46E-66 |
| CD58      | 1.79E-70 | -0.37113 | 0.018 | 0.259 | 2.68E-66 |
| PNPLA8    | 1.94E-70 | 0.344231 | 0.541 | 0.511 | 2.91E-66 |
| MYO9B     | 1.98E-70 | -0.16239 | 0.148 | 0.391 | 2.95E-66 |
| RHBDD2    | 2.04E-70 | 0.270531 | 0.67  | 0.694 | 3.05E-66 |
| IRF2BP2   | 2.04E-70 | 0.360958 | 0.404 | 0.385 | 3.05E-66 |
| NT5C      | 2.16E-70 | -0.18228 | 0.209 | 0.485 | 3.22E-66 |
| WDR54     | 2.32E-70 | -0.31576 | 0.211 | 0.533 | 3.47E-66 |
| MAP4K4    | 2.33E-70 | 0.227797 | 0.391 | 0.478 | 3.48E-66 |
| FREM2     | 2.36E-70 | -0.29376 | 0.009 | 0.227 | 3.53E-66 |
| PLK2      | 2.57E-70 | 0.757471 | 0.39  | 0.147 | 3.84E-66 |
| DNM1L     | 2.61E-70 | 0.258649 | 0.371 | 0.415 | 3.89E-66 |
| KCNF1     | 2.67E-70 | -0.52611 | 0.03  | 0.301 | 3.99E-66 |
| DESI2     | 2.82E-70 | -0.32792 | 0.152 | 0.464 | 4.21E-66 |
| OSBPL8    | 2.92E-70 | 0.224242 | 0.452 | 0.515 | 4.37E-66 |

|          |          |          |       |       |          |
|----------|----------|----------|-------|-------|----------|
| CUL5     | 3.34E-70 | 0.171816 | 0.299 | 0.406 | 5.00E-66 |
| C6orf62  | 3.37E-70 | 0.184542 | 0.5   | 0.595 | 5.04E-66 |
| SPP1     | 3.65E-70 | 0.375626 | 0.874 | 0.753 | 5.45E-66 |
| IARS     | 3.78E-70 | -0.27249 | 0.156 | 0.452 | 5.65E-66 |
| TOMM5    | 3.85E-70 | -0.23429 | 0.134 | 0.407 | 5.75E-66 |
| VCP      | 3.95E-70 | 0.30055  | 0.606 | 0.601 | 5.90E-66 |
| YME1L1   | 4.02E-70 | -0.17507 | 0.137 | 0.389 | 6.01E-66 |
| DYNLL2   | 4.06E-70 | 0.122604 | 0.342 | 0.47  | 6.06E-66 |
| GID8     | 4.24E-70 | -0.2228  | 0.15  | 0.422 | 6.34E-66 |
| MAPK8IP1 | 4.41E-70 | 0.413926 | 0.35  | 0.293 | 6.59E-66 |
| ZEB1     | 4.41E-70 | -0.44081 | 0.163 | 0.509 | 6.59E-66 |
| OTUB1    | 4.66E-70 | 0.216286 | 0.425 | 0.511 | 6.97E-66 |
| RNF139   | 4.95E-70 | 0.342796 | 0.379 | 0.39  | 7.40E-66 |
| AASDHPPT | 5.11E-70 | 0.270338 | 0.428 | 0.468 | 7.64E-66 |
| MGST3    | 5.40E-70 | 0.273789 | 0.782 | 0.783 | 8.07E-66 |
| PPFIBP1  | 5.50E-70 | 0.43636  | 0.302 | 0.242 | 8.22E-66 |
| CDK16    | 6.34E-70 | -0.19106 | 0.249 | 0.536 | 9.48E-66 |
| STARD7   | 7.12E-70 | -0.31167 | 0.24  | 0.574 | 1.06E-65 |
| EFNA3    | 7.58E-70 | 0.708848 | 0.284 | 0.033 | 1.13E-65 |
| EIF3J    | 7.65E-70 | -0.2993  | 0.265 | 0.594 | 1.14E-65 |
| CEBPB    | 7.69E-70 | -0.52279 | 0.092 | 0.414 | 1.15E-65 |
| ERICH1   | 7.74E-70 | 0.484137 | 0.345 | 0.289 | 1.16E-65 |
| C3orf14  | 9.00E-70 | 0.465729 | 0.602 | 0.478 | 1.34E-65 |
| VEGFA    | 9.60E-70 | -0.42678 | 0.046 | 0.32  | 1.43E-65 |
| TACC1    | 9.76E-70 | -0.38492 | 0.18  | 0.514 | 1.46E-65 |
| CXCL16   | 9.77E-70 | -0.35366 | 0.101 | 0.39  | 1.46E-65 |
| PPP1R15A | 1.07E-69 | 0.51654  | 0.556 | 0.407 | 1.60E-65 |
| U2AF2    | 1.12E-69 | -0.20023 | 0.236 | 0.527 | 1.68E-65 |
| SARS     | 1.19E-69 | 0.261526 | 0.559 | 0.591 | 1.78E-65 |
| CHD7     | 1.28E-69 | 0.394359 | 0.645 | 0.585 | 1.91E-65 |
| PRRC2B   | 1.35E-69 | 0.255338 | 0.338 | 0.396 | 2.01E-65 |
| HNRNPH2  | 1.40E-69 | 0.30187  | 0.48  | 0.491 | 2.09E-65 |
| PLA2G16  | 1.50E-69 | -0.20083 | 0.121 | 0.374 | 2.24E-65 |
| CNIH3    | 1.52E-69 | -0.47587 | 0.055 | 0.348 | 2.28E-65 |
| CNIH1    | 1.53E-69 | -0.30095 | 0.214 | 0.537 | 2.29E-65 |
| CTDSP1   | 1.54E-69 | -0.29345 | 0.034 | 0.27  | 2.30E-65 |
| GRN      | 1.55E-69 | -0.28909 | 0.211 | 0.523 | 2.31E-65 |
| VMA21    | 1.58E-69 | -0.16316 | 0.239 | 0.507 | 2.37E-65 |
| CELF2    | 1.64E-69 | 0.109698 | 0.332 | 0.472 | 2.45E-65 |
| MTFR2    | 1.77E-69 | -0.38258 | 0.002 | 0.205 | 2.64E-65 |
| GDI1     | 1.83E-69 | 0.229472 | 0.761 | 0.79  | 2.73E-65 |
| G3BP2    | 1.97E-69 | 0.336218 | 0.418 | 0.406 | 2.95E-65 |
| KMT2A    | 2.23E-69 | 0.223552 | 0.445 | 0.517 | 3.33E-65 |
| KIAA1143 | 2.26E-69 | -0.22886 | 0.146 | 0.415 | 3.38E-65 |
| FTL      | 2.30E-69 | 0.19224  | 1     | 0.981 | 3.43E-65 |
| ILVBL    | 2.41E-69 | -0.38087 | 0.16  | 0.484 | 3.60E-65 |
| CHST2    | 2.60E-69 | -0.35704 | 0.03  | 0.284 | 3.88E-65 |
| ENDOV    | 2.76E-69 | 0.228822 | 0.319 | 0.404 | 4.13E-65 |
| CLN6     | 2.85E-69 | -0.37386 | 0.053 | 0.323 | 4.26E-65 |
| DUSP6    | 2.91E-69 | -0.47795 | 0.108 | 0.435 | 4.35E-65 |
| FAM120A  | 3.55E-69 | -0.32462 | 0.068 | 0.342 | 5.31E-65 |

|           |          |          |       |       |          |
|-----------|----------|----------|-------|-------|----------|
| MRFAP1L1  | 3.68E-69 | 0.310607 | 0.368 | 0.39  | 5.50E-65 |
| SLC39A6   | 3.97E-69 | 0.176262 | 0.535 | 0.626 | 5.94E-65 |
| OGFOD3    | 4.19E-69 | -0.24941 | 0.137 | 0.409 | 6.27E-65 |
| HNRNPUL2  | 4.53E-69 | -0.31432 | 0.099 | 0.386 | 6.78E-65 |
| SFXN5     | 4.81E-69 | -0.28353 | 0.102 | 0.375 | 7.19E-65 |
| CMTM6     | 5.03E-69 | -0.25012 | 0.24  | 0.549 | 7.52E-65 |
| PFDN4     | 5.16E-69 | 0.23324  | 0.547 | 0.604 | 7.72E-65 |
| ATF6B     | 5.19E-69 | 0.163929 | 0.46  | 0.581 | 7.76E-65 |
| RUNDC3A   | 5.38E-69 | 0.710793 | 0.408 | 0.114 | 8.04E-65 |
| IL1RAP    | 5.38E-69 | -0.36182 | 0.016 | 0.249 | 8.05E-65 |
| HN1L      | 5.38E-69 | -0.16242 | 0.178 | 0.435 | 8.05E-65 |
| GPRC5B    | 5.58E-69 | -0.25659 | 0.122 | 0.391 | 8.33E-65 |
| ALDH2     | 6.40E-69 | 0.541809 | 0.461 | 0.3   | 9.57E-65 |
| R3HCC1    | 6.73E-69 | 0.178732 | 0.412 | 0.509 | 1.01E-64 |
| AGT       | 6.75E-69 | -0.54813 | 0.046 | 0.326 | 1.01E-64 |
| PYCR2     | 7.03E-69 | -0.34531 | 0.107 | 0.402 | 1.05E-64 |
| HADHB     | 7.03E-69 | -0.29075 | 0.304 | 0.637 | 1.05E-64 |
| M6PR      | 7.17E-69 | -0.18115 | 0.172 | 0.427 | 1.07E-64 |
| LINC01102 | 7.21E-69 | 0.770776 | 0.368 | 0.098 | 1.08E-64 |
| NABP2     | 7.29E-69 | -0.32594 | 0.238 | 0.573 | 1.09E-64 |
| SRRM3     | 7.64E-69 | 0.75984  | 0.393 | 0.072 | 1.14E-64 |
| FKBP4     | 8.19E-69 | 0.284552 | 0.528 | 0.552 | 1.22E-64 |
| HOOK3     | 8.27E-69 | 0.214418 | 0.374 | 0.464 | 1.24E-64 |
| EEF1D     | 1.04E-68 | -0.48339 | 0.64  | 0.911 | 1.55E-64 |
| GPN3      | 1.09E-68 | -0.12966 | 0.227 | 0.474 | 1.63E-64 |
| FNDC4     | 1.11E-68 | 0.20252  | 0.295 | 0.393 | 1.65E-64 |
| CTTN      | 1.15E-68 | 0.151536 | 0.304 | 0.411 | 1.72E-64 |
| KRAS      | 1.24E-68 | 0.274593 | 0.395 | 0.433 | 1.86E-64 |
| DOK5      | 1.37E-68 | -0.12245 | 0.116 | 0.33  | 2.05E-64 |
| DCUN1D5   | 1.42E-68 | 0.12569  | 0.389 | 0.514 | 2.12E-64 |
| SOGA1     | 1.43E-68 | -0.29077 | 0.187 | 0.493 | 2.14E-64 |
| TGFB1I1   | 1.69E-68 | -0.2773  | 0.04  | 0.277 | 2.53E-64 |
| DPP4      | 1.71E-68 | -0.24577 | 0.003 | 0.204 | 2.56E-64 |
| PMF1      | 1.82E-68 | -0.30842 | 0.249 | 0.578 | 2.71E-64 |
| RP11-472N | 1.99E-68 | -0.34375 | 0.005 | 0.216 | 2.97E-64 |
| USP22     | 2.00E-68 | 0.16416  | 0.481 | 0.593 | 2.99E-64 |
| AP2A1     | 2.01E-68 | -0.10644 | 0.23  | 0.467 | 3.01E-64 |
| PLA2G12A  | 2.06E-68 | 0.318134 | 0.401 | 0.401 | 3.07E-64 |
| CREM      | 2.09E-68 | -0.47197 | 0.101 | 0.415 | 3.12E-64 |
| TSSC1     | 2.32E-68 | 0.250436 | 0.408 | 0.468 | 3.47E-64 |
| PEX10     | 2.36E-68 | -0.16281 | 0.135 | 0.377 | 3.53E-64 |
| ORAI1     | 2.61E-68 | -0.28021 | 0.022 | 0.247 | 3.89E-64 |
| NUFIP2    | 2.64E-68 | -0.19844 | 0.153 | 0.411 | 3.95E-64 |
| TTC19     | 2.69E-68 | 0.187256 | 0.506 | 0.594 | 4.02E-64 |
| COPA      | 2.71E-68 | 0.223564 | 0.381 | 0.462 | 4.06E-64 |
| EMD       | 2.80E-68 | -0.21284 | 0.24  | 0.526 | 4.18E-64 |
| SLN       | 2.81E-68 | -0.61607 | 0.005 | 0.221 | 4.20E-64 |
| ZNF367    | 3.00E-68 | -0.44427 | 0.01  | 0.238 | 4.49E-64 |
| TTL7      | 3.01E-68 | 0.197241 | 0.373 | 0.464 | 4.50E-64 |
| FAM49B    | 3.17E-68 | 0.324707 | 0.533 | 0.527 | 4.74E-64 |
| PANK2     | 3.35E-68 | -0.24978 | 0.137 | 0.411 | 5.01E-64 |

|          |          |          |       |       |          |
|----------|----------|----------|-------|-------|----------|
| SPAG9    | 3.40E-68 | 0.143854 | 0.494 | 0.623 | 5.08E-64 |
| TAF10    | 3.69E-68 | -0.22387 | 0.143 | 0.41  | 5.52E-64 |
| GGCT     | 3.80E-68 | -0.4057  | 0.329 | 0.699 | 5.68E-64 |
| PHC2     | 3.92E-68 | -0.10336 | 0.228 | 0.467 | 5.87E-64 |
| GTPBP6   | 4.10E-68 | -0.20317 | 0.146 | 0.409 | 6.12E-64 |
| TIMM10   | 4.41E-68 | -0.45595 | 0.256 | 0.628 | 6.59E-64 |
| SEPHS2   | 4.77E-68 | 0.23338  | 0.364 | 0.43  | 7.13E-64 |
| RBM18    | 4.80E-68 | 0.276101 | 0.304 | 0.332 | 7.17E-64 |
| SLC38A1  | 4.96E-68 | 0.661419 | 0.519 | 0.223 | 7.41E-64 |
| EPC1     | 5.32E-68 | 0.140713 | 0.367 | 0.485 | 7.95E-64 |
| NEDD1    | 5.58E-68 | -0.31944 | 0.052 | 0.309 | 8.34E-64 |
| PDRG1    | 6.20E-68 | 0.183679 | 0.394 | 0.493 | 9.27E-64 |
| FABP6    | 6.41E-68 | 0.740103 | 0.288 | 0.026 | 9.57E-64 |
| ATP6V1F  | 6.92E-68 | 0.283046 | 0.88  | 0.852 | 1.03E-63 |
| CUX1     | 7.05E-68 | -0.10741 | 0.24  | 0.491 | 1.05E-63 |
| SSX2IP   | 7.05E-68 | -0.23447 | 0.053 | 0.288 | 1.05E-63 |
| BLM      | 7.07E-68 | -0.35029 | 0.017 | 0.246 | 1.06E-63 |
| ELAVL1   | 7.35E-68 | -0.3319  | 0.313 | 0.664 | 1.10E-63 |
| C21orf62 | 7.51E-68 | -0.472   | 0.039 | 0.311 | 1.12E-63 |
| TMEM107  | 8.43E-68 | -0.31221 | 0.149 | 0.449 | 1.26E-63 |
| ARF6     | 8.51E-68 | -0.23802 | 0.245 | 0.547 | 1.27E-63 |
| SMIM14   | 8.82E-68 | 0.328394 | 0.489 | 0.485 | 1.32E-63 |
| TANC1    | 8.86E-68 | -0.31953 | 0.023 | 0.253 | 1.32E-63 |
| ALDH7A1  | 8.90E-68 | -0.32123 | 0.263 | 0.598 | 1.33E-63 |
| TLE4     | 9.49E-68 | -0.33222 | 0.038 | 0.284 | 1.42E-63 |
| CPNE3    | 9.55E-68 | 0.307439 | 0.449 | 0.459 | 1.43E-63 |
| RPP25L   | 9.62E-68 | -0.28501 | 0.037 | 0.274 | 1.44E-63 |
| CNPY3    | 9.75E-68 | -0.20831 | 0.195 | 0.481 | 1.46E-63 |
| TACO1    | 1.03E-67 | -0.2332  | 0.102 | 0.351 | 1.54E-63 |
| PTP4A1   | 1.05E-67 | 0.185317 | 0.576 | 0.663 | 1.57E-63 |
| SCAMP2   | 1.11E-67 | -0.24252 | 0.097 | 0.356 | 1.66E-63 |
| COMMD9   | 1.15E-67 | 0.359384 | 0.357 | 0.348 | 1.72E-63 |
| DPM2     | 1.22E-67 | -0.24391 | 0.306 | 0.622 | 1.82E-63 |
| POFUT1   | 1.30E-67 | -0.31635 | 0.041 | 0.291 | 1.95E-63 |
| GANAB    | 1.34E-67 | -0.27893 | 0.226 | 0.537 | 2.00E-63 |
| CDK5RAP2 | 1.35E-67 | -0.34913 | 0.085 | 0.363 | 2.02E-63 |
| RHOA     | 1.42E-67 | -0.48012 | 0.498 | 0.857 | 2.12E-63 |
| GDAP1L1  | 1.42E-67 | 0.769435 | 0.46  | 0.14  | 2.13E-63 |
| PPP2R3C  | 1.61E-67 | -0.26094 | 0.26  | 0.572 | 2.41E-63 |
| GRSF1    | 1.67E-67 | 0.139245 | 0.405 | 0.528 | 2.49E-63 |
| ZNF43    | 1.85E-67 | -0.26798 | 0.155 | 0.44  | 2.77E-63 |
| RBM6     | 1.89E-67 | 0.270245 | 0.474 | 0.507 | 2.82E-63 |
| MED10    | 2.07E-67 | 0.248718 | 0.635 | 0.67  | 3.09E-63 |
| KMT2C    | 2.19E-67 | 0.193687 | 0.358 | 0.454 | 3.27E-63 |
| COX19    | 2.23E-67 | 0.285861 | 0.375 | 0.404 | 3.33E-63 |
| LIG1     | 2.24E-67 | -0.46611 | 0.062 | 0.353 | 3.34E-63 |
| LYRM2    | 2.27E-67 | -0.28291 | 0.255 | 0.57  | 3.39E-63 |
| FIGN     | 2.72E-67 | -0.32821 | 0.027 | 0.262 | 4.07E-63 |
| ARL6IP5  | 2.75E-67 | 0.336582 | 0.59  | 0.565 | 4.11E-63 |
| EIF3D    | 2.79E-67 | -0.17416 | 0.355 | 0.652 | 4.17E-63 |
| ARID4A   | 2.86E-67 | 0.365009 | 0.493 | 0.465 | 4.28E-63 |



|           |          |          |       |       |          |
|-----------|----------|----------|-------|-------|----------|
| ALG3      | 2.90E-67 | -0.22152 | 0.091 | 0.338 | 4.34E-63 |
| POLD4     | 2.93E-67 | -0.12122 | 0.102 | 0.31  | 4.39E-63 |
| PLEKHB2   | 3.21E-67 | 0.130345 | 0.431 | 0.546 | 4.79E-63 |
| ARAF      | 3.25E-67 | -0.24713 | 0.08  | 0.326 | 4.85E-63 |
| SEC31A    | 3.78E-67 | 0.129272 | 0.223 | 0.333 | 5.64E-63 |
| IK        | 3.79E-67 | 0.195144 | 0.499 | 0.584 | 5.67E-63 |
| SLC4A2    | 4.03E-67 | -0.28222 | 0.053 | 0.304 | 6.02E-63 |
| FAM181B   | 4.07E-67 | -0.50568 | 0.196 | 0.552 | 6.07E-63 |
| NAP1L3    | 4.17E-67 | 0.720317 | 0.379 | 0.105 | 6.23E-63 |
| TXN2      | 4.19E-67 | -0.12858 | 0.38  | 0.66  | 6.26E-63 |
| DNAJA2    | 4.35E-67 | 0.206313 | 0.411 | 0.48  | 6.51E-63 |
| PRKDC     | 4.60E-67 | -0.315   | 0.291 | 0.63  | 6.87E-63 |
| UBQLN1    | 4.63E-67 | 0.215981 | 0.379 | 0.451 | 6.92E-63 |
| AC010642. | 4.80E-67 | -0.10539 | 0.191 | 0.426 | 7.17E-63 |
| ITGB1BP1  | 4.96E-67 | -0.37185 | 0.317 | 0.678 | 7.41E-63 |
| STK17A    | 4.97E-67 | -0.35625 | 0.185 | 0.507 | 7.42E-63 |
| NAGK      | 5.25E-67 | 0.12549  | 0.374 | 0.51  | 7.84E-63 |
| UBE2H     | 6.44E-67 | 0.412353 | 0.438 | 0.375 | 9.62E-63 |
| CHD4      | 6.65E-67 | 0.188488 | 0.452 | 0.544 | 9.94E-63 |
| HDGF      | 6.71E-67 | -0.47485 | 0.247 | 0.616 | 1.00E-62 |
| IRF3      | 7.16E-67 | -0.26983 | 0.126 | 0.402 | 1.07E-62 |
| GSPT2     | 8.84E-67 | 0.48242  | 0.334 | 0.24  | 1.32E-62 |
| THAP7     | 9.37E-67 | -0.23753 | 0.161 | 0.438 | 1.40E-62 |
| CNOT4     | 9.43E-67 | 0.329578 | 0.455 | 0.459 | 1.41E-62 |
| MAZ       | 9.55E-67 | -0.3333  | 0.233 | 0.563 | 1.43E-62 |
| ASH1L     | 9.81E-67 | 0.181333 | 0.396 | 0.484 | 1.47E-62 |
| OXR1      | 1.22E-66 | 0.220239 | 0.33  | 0.409 | 1.82E-62 |
| AGPAT2    | 1.24E-66 | -0.25625 | 0.018 | 0.222 | 1.85E-62 |
| ZNF530    | 1.26E-66 | -0.34088 | 0.041 | 0.289 | 1.88E-62 |
| ARF3      | 1.31E-66 | 0.183837 | 0.414 | 0.515 | 1.95E-62 |
| HADH      | 1.33E-66 | -0.27293 | 0.17  | 0.462 | 1.98E-62 |
| ATXN7L3B  | 1.35E-66 | 0.345311 | 0.339 | 0.326 | 2.02E-62 |
| SLU7      | 1.38E-66 | 0.36961  | 0.43  | 0.407 | 2.07E-62 |
| CHCHD10   | 1.45E-66 | -0.43293 | 0.124 | 0.441 | 2.16E-62 |
| USP47     | 1.45E-66 | 0.274708 | 0.402 | 0.435 | 2.16E-62 |
| DYNC1H1   | 1.60E-66 | 0.280313 | 0.482 | 0.526 | 2.39E-62 |
| PSMD2     | 1.64E-66 | 0.207014 | 0.664 | 0.715 | 2.45E-62 |
| IDH2      | 1.93E-66 | -0.43829 | 0.331 | 0.705 | 2.89E-62 |
| EPHX1     | 1.94E-66 | -0.17424 | 0.121 | 0.354 | 2.90E-62 |
| CLCN3     | 2.03E-66 | 0.185193 | 0.342 | 0.433 | 3.03E-62 |
| CCZ1      | 2.06E-66 | 0.176612 | 0.525 | 0.61  | 3.07E-62 |
| SEC62     | 2.08E-66 | 0.29622  | 0.84  | 0.802 | 3.11E-62 |
| VDAC3     | 2.14E-66 | 0.315854 | 0.769 | 0.737 | 3.19E-62 |
| KRI1      | 2.43E-66 | -0.26902 | 0.054 | 0.296 | 3.63E-62 |
| MAP9      | 2.45E-66 | 0.373982 | 0.34  | 0.31  | 3.67E-62 |
| DYNC1LI1  | 2.47E-66 | 0.398113 | 0.48  | 0.416 | 3.69E-62 |
| SIRPA     | 3.00E-66 | -0.24516 | 0.03  | 0.251 | 4.49E-62 |
| C12orf76  | 3.14E-66 | 0.259596 | 0.353 | 0.391 | 4.69E-62 |
| CLASP2    | 3.39E-66 | 0.530865 | 0.475 | 0.32  | 5.07E-62 |
| CCDC115   | 3.43E-66 | 0.477889 | 0.45  | 0.359 | 5.12E-62 |
| METTL7A   | 3.61E-66 | -0.51323 | 0.04  | 0.304 | 5.40E-62 |

|          |          |          |       |       |          |
|----------|----------|----------|-------|-------|----------|
| ABRACL   | 3.72E-66 | 0.319483 | 0.351 | 0.372 | 5.56E-62 |
| SWI5     | 3.86E-66 | -0.21154 | 0.14  | 0.401 | 5.78E-62 |
| NDUFB1   | 3.87E-66 | -0.40288 | 0.422 | 0.79  | 5.78E-62 |
| SRP19    | 3.93E-66 | 0.133007 | 0.465 | 0.593 | 5.87E-62 |
| CHST7    | 4.07E-66 | -0.31999 | 0.01  | 0.228 | 6.08E-62 |
| RHOG     | 4.27E-66 | -0.24563 | 0.075 | 0.32  | 6.38E-62 |
| ACTL6A   | 4.50E-66 | -0.2728  | 0.258 | 0.572 | 6.72E-62 |
| PKN1     | 4.70E-66 | -0.21884 | 0.171 | 0.442 | 7.03E-62 |
| NOC2L    | 5.66E-66 | 0.130226 | 0.424 | 0.563 | 8.46E-62 |
| GNL1     | 5.75E-66 | -0.19575 | 0.249 | 0.528 | 8.59E-62 |
| CCDC12   | 5.75E-66 | 0.191599 | 0.549 | 0.651 | 8.59E-62 |
| MAF1     | 5.90E-66 | 0.210081 | 0.552 | 0.622 | 8.82E-62 |
| 8-Sep    | 6.12E-66 | -0.28067 | 0.118 | 0.393 | 9.14E-62 |
| PAFAH1B1 | 6.76E-66 | 0.172585 | 0.471 | 0.562 | 1.01E-61 |
| DONSON   | 6.85E-66 | -0.33412 | 0.051 | 0.307 | 1.02E-61 |
| CTBP1    | 7.35E-66 | 0.120644 | 0.279 | 0.402 | 1.10E-61 |
| HSDL1    | 7.45E-66 | 0.522377 | 0.384 | 0.238 | 1.11E-61 |
| COA6     | 7.52E-66 | -0.21701 | 0.198 | 0.477 | 1.12E-61 |
| WTAP     | 7.65E-66 | 0.160391 | 0.537 | 0.635 | 1.14E-61 |
| SLC22A17 | 8.37E-66 | 0.286641 | 0.492 | 0.544 | 1.25E-61 |
| ACTN1    | 8.70E-66 | -0.37075 | 0.112 | 0.405 | 1.30E-61 |
| MAGOH    | 9.06E-66 | -0.13071 | 0.372 | 0.647 | 1.35E-61 |
| DDX24    | 9.11E-66 | 0.259204 | 0.575 | 0.615 | 1.36E-61 |
| GALNT2   | 9.28E-66 | -0.23825 | 0.091 | 0.34  | 1.39E-61 |
| IFNAR2   | 1.04E-65 | -0.15278 | 0.127 | 0.36  | 1.56E-61 |
| PLEKHA4  | 1.11E-65 | -0.3149  | 0.015 | 0.235 | 1.66E-61 |
| COA4     | 1.37E-65 | -0.22281 | 0.329 | 0.635 | 2.05E-61 |
| FAM129A  | 1.42E-65 | -0.30212 | 0.007 | 0.214 | 2.13E-61 |
| ZRANB2   | 1.45E-65 | 0.132093 | 0.381 | 0.501 | 2.17E-61 |
| RRP7A    | 1.49E-65 | -0.23189 | 0.24  | 0.537 | 2.22E-61 |
| TRAF3IP2 | 1.58E-65 | -0.38404 | 0.034 | 0.28  | 2.36E-61 |
| MOAP1    | 1.63E-65 | 0.400334 | 0.375 | 0.332 | 2.43E-61 |
| CDK5     | 1.70E-65 | 0.227138 | 0.357 | 0.426 | 2.54E-61 |
| RAD51C   | 1.74E-65 | -0.32495 | 0.286 | 0.621 | 2.60E-61 |
| INA      | 1.79E-65 | 0.700218 | 0.306 | 0.035 | 2.67E-61 |
| ALG8     | 1.82E-65 | -0.28149 | 0.093 | 0.357 | 2.72E-61 |
| PLEKHA3  | 1.89E-65 | 0.200349 | 0.328 | 0.417 | 2.82E-61 |
| MMADHC   | 1.91E-65 | 0.235615 | 0.566 | 0.623 | 2.86E-61 |
| UBR7     | 1.98E-65 | -0.39558 | 0.068 | 0.34  | 2.96E-61 |
| NRBF2    | 2.02E-65 | -0.34407 | 0.112 | 0.398 | 3.01E-61 |
| FBLN7    | 2.02E-65 | -0.31239 | 0.013 | 0.225 | 3.02E-61 |
| SMARCC2  | 2.07E-65 | 0.258018 | 0.448 | 0.488 | 3.09E-61 |
| ATAD3A   | 2.15E-65 | -0.18706 | 0.149 | 0.399 | 3.21E-61 |
| SAE1     | 2.22E-65 | -0.53335 | 0.322 | 0.702 | 3.32E-61 |
| POU2F1   | 2.42E-65 | 0.435238 | 0.35  | 0.293 | 3.62E-61 |
| TFAM     | 2.61E-65 | -0.20737 | 0.15  | 0.41  | 3.91E-61 |
| CFDP1    | 2.97E-65 | 0.119415 | 0.571 | 0.715 | 4.44E-61 |
| TMED4    | 3.04E-65 | 0.231961 | 0.615 | 0.657 | 4.55E-61 |
| CYBRD1   | 3.29E-65 | -0.28858 | 0.028 | 0.251 | 4.91E-61 |
| NSRP1    | 3.60E-65 | -0.27578 | 0.321 | 0.638 | 5.37E-61 |
| CISD3    | 3.62E-65 | -0.27403 | 0.071 | 0.315 | 5.40E-61 |

|          |          |          |       |       |          |
|----------|----------|----------|-------|-------|----------|
| ATP6V1G2 | 3.62E-65 | 0.643449 | 0.393 | 0.215 | 5.41E-61 |
| FOXRED2  | 3.74E-65 | -0.30218 | 0.051 | 0.296 | 5.59E-61 |
| CCNL2    | 3.96E-65 | 0.274338 | 0.383 | 0.42  | 5.92E-61 |
| NFYB     | 4.01E-65 | -0.24462 | 0.178 | 0.46  | 5.99E-61 |
| KHDRBS3  | 4.27E-65 | -0.21607 | 0.189 | 0.462 | 6.38E-61 |
| ARHGEF6  | 4.33E-65 | -0.29542 | 0.009 | 0.217 | 6.47E-61 |
| AFF4     | 4.73E-65 | 0.207889 | 0.441 | 0.526 | 7.06E-61 |
| BCLAF1   | 4.75E-65 | 0.154121 | 0.525 | 0.627 | 7.10E-61 |
| PLTP     | 4.97E-65 | -0.41558 | 0.092 | 0.385 | 7.43E-61 |
| LRRCC1   | 5.26E-65 | -0.38736 | 0.108 | 0.405 | 7.87E-61 |
| CHN1     | 5.30E-65 | -0.11445 | 0.299 | 0.556 | 7.93E-61 |
| MYCBP    | 5.71E-65 | -0.27362 | 0.008 | 0.212 | 8.53E-61 |
| TFDP1    | 5.97E-65 | -0.33319 | 0.172 | 0.483 | 8.92E-61 |
| PUM1     | 6.52E-65 | 0.21221  | 0.312 | 0.375 | 9.75E-61 |
| TRIM36   | 6.70E-65 | 0.285019 | 0.441 | 0.467 | 1.00E-60 |
| MGAT2    | 7.08E-65 | -0.20945 | 0.119 | 0.369 | 1.06E-60 |
| RBM4B    | 7.12E-65 | 0.36421  | 0.357 | 0.333 | 1.06E-60 |
| FDXR     | 7.17E-65 | -0.24234 | 0.07  | 0.309 | 1.07E-60 |
| RRP36    | 7.25E-65 | -0.12829 | 0.124 | 0.343 | 1.08E-60 |
| MGRN1    | 7.39E-65 | 0.222226 | 0.255 | 0.325 | 1.11E-60 |
| MAT2A    | 7.80E-65 | -0.14895 | 0.334 | 0.606 | 1.17E-60 |
| SDC4     | 7.94E-65 | -0.30337 | 0.004 | 0.2   | 1.19E-60 |
| ATP6V1D  | 8.03E-65 | 0.200269 | 0.433 | 0.526 | 1.20E-60 |
| ID1      | 8.06E-65 | -0.3711  | 0.048 | 0.298 | 1.20E-60 |
| MPV17    | 8.31E-65 | -0.15176 | 0.275 | 0.542 | 1.24E-60 |
| INADL    | 8.72E-65 | 0.685211 | 0.302 | 0.081 | 1.30E-60 |
| RPRM     | 9.58E-65 | 0.832653 | 0.352 | 0.078 | 1.43E-60 |
| USP8     | 9.60E-65 | -0.21961 | 0.132 | 0.389 | 1.43E-60 |
| FEZ1     | 9.81E-65 | 0.22933  | 0.758 | 0.784 | 1.47E-60 |
| BCL7A    | 1.01E-64 | 0.529491 | 0.439 | 0.289 | 1.51E-60 |
| PFKP     | 1.03E-64 | -0.20539 | 0.065 | 0.291 | 1.54E-60 |
| EFEMP2   | 1.12E-64 | -0.19607 | 0.184 | 0.443 | 1.67E-60 |
| OAZ2     | 1.24E-64 | 0.167702 | 0.573 | 0.651 | 1.85E-60 |
| PRKCSH   | 1.24E-64 | -0.35556 | 0.335 | 0.684 | 1.86E-60 |
| C17orf58 | 1.37E-64 | 0.136205 | 0.305 | 0.427 | 2.05E-60 |
| KCNQ2    | 1.39E-64 | -0.16881 | 0.251 | 0.521 | 2.08E-60 |
| PSMG2    | 1.42E-64 | -0.16793 | 0.339 | 0.621 | 2.12E-60 |
| TSPAN4   | 1.56E-64 | -0.23935 | 0.064 | 0.299 | 2.33E-60 |
| TIMM50   | 1.56E-64 | -0.30967 | 0.252 | 0.572 | 2.34E-60 |
| DNAJC7   | 1.65E-64 | 0.168571 | 0.606 | 0.696 | 2.46E-60 |
| PITX1    | 1.73E-64 | -0.20519 | 0.032 | 0.232 | 2.58E-60 |
| MLX      | 1.78E-64 | 0.162678 | 0.32  | 0.433 | 2.66E-60 |
| ACOT7    | 1.80E-64 | 0.36475  | 0.519 | 0.514 | 2.69E-60 |
| RERE     | 1.88E-64 | 0.270486 | 0.353 | 0.393 | 2.81E-60 |
| TMEM170A | 1.88E-64 | -0.2475  | 0.15  | 0.42  | 2.81E-60 |
| MED4     | 1.88E-64 | 0.14423  | 0.484 | 0.601 | 2.82E-60 |
| RBCK1    | 1.89E-64 | -0.20332 | 0.244 | 0.528 | 2.82E-60 |
| EVL      | 2.04E-64 | 0.388296 | 0.351 | 0.333 | 3.05E-60 |
| FNDC3B   | 2.09E-64 | -0.25459 | 0.03  | 0.251 | 3.12E-60 |
| BCL7C    | 2.32E-64 | -0.44122 | 0.222 | 0.574 | 3.47E-60 |
| SDHAF2   | 2.44E-64 | 0.147818 | 0.307 | 0.423 | 3.65E-60 |

|          |          |          |       |       |          |
|----------|----------|----------|-------|-------|----------|
| CHMP1B   | 2.44E-64 | 0.356265 | 0.449 | 0.401 | 3.65E-60 |
| PRR14    | 2.48E-64 | 0.1121   | 0.239 | 0.364 | 3.71E-60 |
| VOPP1    | 2.57E-64 | 0.13292  | 0.36  | 0.48  | 3.83E-60 |
| TSEN15   | 2.61E-64 | -0.16846 | 0.235 | 0.499 | 3.90E-60 |
| CRLS1    | 2.62E-64 | -0.22903 | 0.238 | 0.531 | 3.91E-60 |
| CHEK2    | 2.65E-64 | -0.3553  | 0.01  | 0.221 | 3.96E-60 |
| SRGAP1   | 2.65E-64 | 0.502737 | 0.404 | 0.281 | 3.96E-60 |
| AUTS2    | 2.71E-64 | 0.343741 | 0.266 | 0.283 | 4.05E-60 |
| CD44     | 2.82E-64 | -0.41575 | 0.036 | 0.285 | 4.21E-60 |
| EBPL     | 2.86E-64 | 0.217645 | 0.428 | 0.517 | 4.27E-60 |
| TMUB2    | 2.89E-64 | 0.157815 | 0.319 | 0.419 | 4.32E-60 |
| CCNG2    | 2.97E-64 | 0.524469 | 0.518 | 0.356 | 4.43E-60 |
| PARL     | 3.04E-64 | 0.125882 | 0.364 | 0.496 | 4.54E-60 |
| CYB5D2   | 3.12E-64 | -0.12368 | 0.197 | 0.433 | 4.67E-60 |
| C8orf88  | 3.13E-64 | -0.2804  | 0.009 | 0.214 | 4.68E-60 |
| GLOD4    | 3.28E-64 | 0.14689  | 0.558 | 0.673 | 4.91E-60 |
| TM2D2    | 3.36E-64 | 0.314003 | 0.375 | 0.405 | 5.03E-60 |
| FBXW2    | 3.46E-64 | -0.22839 | 0.131 | 0.39  | 5.17E-60 |
| DMRTA2   | 3.74E-64 | -0.28728 | 0.015 | 0.227 | 5.59E-60 |
| CITED1   | 3.87E-64 | -0.43925 | 0.057 | 0.333 | 5.78E-60 |
| TMEM87A  | 4.10E-64 | -0.12729 | 0.225 | 0.468 | 6.12E-60 |
| IDI1     | 4.30E-64 | -0.28335 | 0.207 | 0.507 | 6.42E-60 |
| ATXN10   | 4.75E-64 | 0.232694 | 0.648 | 0.7   | 7.10E-60 |
| HDDC2    | 5.12E-64 | 0.128539 | 0.477 | 0.614 | 7.65E-60 |
| PSMD13   | 5.29E-64 | 0.184128 | 0.504 | 0.59  | 7.90E-60 |
| RPN1     | 6.19E-64 | -0.15531 | 0.307 | 0.578 | 9.25E-60 |
| CTDSPL2  | 6.21E-64 | -0.30269 | 0.082 | 0.347 | 9.27E-60 |
| TGIF2    | 6.23E-64 | -0.30721 | 0.008 | 0.209 | 9.31E-60 |
| CTNNBL1  | 6.31E-64 | -0.1796  | 0.288 | 0.565 | 9.43E-60 |
| PTS      | 6.66E-64 | 0.266725 | 0.546 | 0.564 | 9.95E-60 |
| EFTUD2   | 7.08E-64 | -0.16291 | 0.171 | 0.414 | 1.06E-59 |
| AKAP8L   | 7.54E-64 | 0.174281 | 0.346 | 0.438 | 1.13E-59 |
| C4orf27  | 7.56E-64 | 0.17174  | 0.556 | 0.649 | 1.13E-59 |
| MPHOSPH9 | 7.65E-64 | -0.27519 | 0.131 | 0.4   | 1.14E-59 |
| MORC4    | 8.17E-64 | -0.36561 | 0.012 | 0.226 | 1.22E-59 |
| MASTL    | 8.34E-64 | -0.41182 | 0.009 | 0.22  | 1.25E-59 |
| SEN6     | 8.49E-64 | 0.122037 | 0.257 | 0.375 | 1.27E-59 |
| UBA1     | 8.81E-64 | 0.120066 | 0.393 | 0.52  | 1.32E-59 |
| ICMT     | 9.34E-64 | -0.32391 | 0.065 | 0.325 | 1.40E-59 |
| PPP2R1A  | 9.49E-64 | 0.226507 | 0.743 | 0.764 | 1.42E-59 |
| BTBD3    | 9.53E-64 | -0.26097 | 0.051 | 0.285 | 1.42E-59 |
| ZBTB20   | 9.62E-64 | 0.267099 | 0.712 | 0.731 | 1.44E-59 |
| UQCC2    | 9.73E-64 | -0.46684 | 0.322 | 0.694 | 1.45E-59 |
| SMARCA5  | 1.06E-63 | 0.141957 | 0.501 | 0.619 | 1.58E-59 |
| CAST     | 1.09E-63 | -0.34282 | 0.082 | 0.356 | 1.63E-59 |
| BCKDK    | 1.11E-63 | -0.13661 | 0.212 | 0.451 | 1.66E-59 |
| SIL1     | 1.13E-63 | -0.16491 | 0.079 | 0.29  | 1.69E-59 |
| DHRS11   | 1.19E-63 | -0.22086 | 0.061 | 0.285 | 1.78E-59 |
| CCND1    | 1.21E-63 | -0.36375 | 0.104 | 0.379 | 1.80E-59 |
| TWSG1    | 1.22E-63 | -0.22296 | 0.07  | 0.302 | 1.82E-59 |
| NELFE    | 1.25E-63 | -0.31308 | 0.342 | 0.681 | 1.87E-59 |

|          |           |           |        |        |           |
|----------|-----------|-----------|--------|--------|-----------|
| COMMD2   | 1. 30E-63 | 0. 224538 | 0. 472 | 0. 532 | 1. 94E-59 |
| COX11    | 1. 33E-63 | 0. 141137 | 0. 378 | 0. 496 | 1. 98E-59 |
| USP11    | 1. 33E-63 | 0. 275737 | 0. 622 | 0. 617 | 1. 99E-59 |
| CNP      | 1. 39E-63 | -0. 30901 | 0. 329 | 0. 665 | 2. 08E-59 |
| DLD      | 1. 43E-63 | 0. 300861 | 0. 496 | 0. 5   | 2. 13E-59 |
| ANKRD9   | 1. 48E-63 | -0. 31062 | 0. 013 | 0. 228 | 2. 22E-59 |
| SEC11C   | 1. 48E-63 | 0. 202729 | 0. 631 | 0. 679 | 2. 22E-59 |
| SOX9     | 1. 51E-63 | -0. 62258 | 0. 243 | 0. 612 | 2. 26E-59 |
| WBP4     | 1. 53E-63 | 0. 113919 | 0. 379 | 0. 519 | 2. 28E-59 |
| SBN01    | 1. 59E-63 | 0. 181829 | 0. 416 | 0. 505 | 2. 38E-59 |
| RB1      | 1. 61E-63 | -0. 18683 | 0. 114 | 0. 349 | 2. 40E-59 |
| BOC      | 1. 63E-63 | -0. 22293 | 0. 03  | 0. 228 | 2. 44E-59 |
| NOL3     | 1. 75E-63 | 0. 563457 | 0. 269 | 0. 156 | 2. 61E-59 |
| TMEM255A | 1. 85E-63 | -0. 21007 | 0. 027 | 0. 223 | 2. 76E-59 |
| LHFPL3   | 1. 98E-63 | -0. 63261 | 0. 06  | 0. 348 | 2. 96E-59 |
| TAP1     | 2. 02E-63 | -0. 46247 | 0. 096 | 0. 388 | 3. 03E-59 |
| H3F3B    | 2. 12E-63 | 0. 1674   | 1      | 0. 981 | 3. 18E-59 |
| PTPRE    | 2. 25E-63 | -0. 2196  | 0. 047 | 0. 262 | 3. 36E-59 |
| ERAL1    | 2. 31E-63 | -0. 11639 | 0. 259 | 0. 5   | 3. 45E-59 |
| RBPJ     | 2. 44E-63 | 0. 29582  | 0. 61  | 0. 605 | 3. 65E-59 |
| CEP78    | 2. 58E-63 | -0. 25103 | 0. 157 | 0. 43  | 3. 85E-59 |
| CNOT2    | 2. 77E-63 | 0. 170319 | 0. 362 | 0. 464 | 4. 15E-59 |
| TYRO3    | 2. 78E-63 | -0. 2994  | 0. 038 | 0. 272 | 4. 15E-59 |
| PXMP2    | 2. 78E-63 | -0. 32617 | 0. 273 | 0. 602 | 4. 15E-59 |
| MSN      | 2. 81E-63 | -0. 12337 | 0. 185 | 0. 416 | 4. 20E-59 |
| PTAR1    | 3. 07E-63 | -0. 27585 | 0. 063 | 0. 306 | 4. 59E-59 |
| SPATS2L  | 3. 31E-63 | -0. 52574 | 0. 192 | 0. 546 | 4. 94E-59 |
| CCDC14   | 3. 50E-63 | -0. 19388 | 0. 336 | 0. 627 | 5. 23E-59 |
| FOPNL    | 3. 54E-63 | -0. 22861 | 0. 161 | 0. 433 | 5. 29E-59 |
| AGPAT5   | 3. 60E-63 | -0. 30415 | 0. 123 | 0. 402 | 5. 38E-59 |
| ERBB2IP  | 3. 62E-63 | -0. 19424 | 0. 135 | 0. 378 | 5. 41E-59 |
| PRDX5    | 3. 68E-63 | 0. 322914 | 0. 863 | 0. 799 | 5. 50E-59 |
| NMT1     | 3. 74E-63 | -0. 3156  | 0. 146 | 0. 436 | 5. 59E-59 |
| DHCR24   | 3. 78E-63 | -0. 32043 | 0. 009 | 0. 217 | 5. 64E-59 |
| TUSC2    | 3. 83E-63 | 0. 14689  | 0. 422 | 0. 532 | 5. 72E-59 |
| DTD1     | 3. 87E-63 | 0. 312435 | 0. 697 | 0. 673 | 5. 78E-59 |
| DNM2     | 3. 91E-63 | -0. 20999 | 0. 119 | 0. 365 | 5. 84E-59 |
| HIF1A    | 3. 95E-63 | -0. 38758 | 0. 305 | 0. 657 | 5. 90E-59 |
| FRYL     | 4. 14E-63 | -0. 129   | 0. 174 | 0. 409 | 6. 18E-59 |
| TMEM126B | 4. 16E-63 | -0. 16565 | 0. 251 | 0. 515 | 6. 22E-59 |
| FUZ      | 4. 33E-63 | -0. 32258 | 0. 119 | 0. 4   | 6. 47E-59 |
| SAFB     | 4. 42E-63 | 0. 15214  | 0. 42  | 0. 528 | 6. 61E-59 |
| RRM1     | 4. 74E-63 | -0. 41782 | 0. 273 | 0. 626 | 7. 09E-59 |
| PDLIM5   | 4. 80E-63 | -0. 20013 | 0. 156 | 0. 41  | 7. 17E-59 |
| PRKRIP1  | 4. 95E-63 | 0. 139801 | 0. 346 | 0. 467 | 7. 40E-59 |
| SAFB2    | 4. 98E-63 | 0. 134915 | 0. 432 | 0. 554 | 7. 45E-59 |
| LPP      | 5. 14E-63 | -0. 30587 | 0. 072 | 0. 327 | 7. 68E-59 |
| CLPTM1L  | 5. 19E-63 | -0. 17966 | 0. 089 | 0. 311 | 7. 76E-59 |
| CDS2     | 5. 25E-63 | -0. 10204 | 0. 171 | 0. 386 | 7. 84E-59 |
| SNRPA1   | 5. 55E-63 | -0. 16866 | 0. 317 | 0. 593 | 8. 30E-59 |
| FTH1     | 5. 60E-63 | 0. 169555 | 1      | 0. 981 | 8. 37E-59 |

|          |          |          |       |       |          |
|----------|----------|----------|-------|-------|----------|
| SHMT1    | 5.61E-63 | -0.23576 | 0.048 | 0.268 | 8.38E-59 |
| PLOD2    | 6.68E-63 | -0.31752 | 0.052 | 0.299 | 9.98E-59 |
| GPR108   | 6.75E-63 | -0.17605 | 0.11  | 0.34  | 1.01E-58 |
| TCF3     | 6.77E-63 | -0.16571 | 0.118 | 0.342 | 1.01E-58 |
| ENAH     | 6.95E-63 | 0.189745 | 0.493 | 0.578 | 1.04E-58 |
| VEZT     | 7.06E-63 | 0.298598 | 0.361 | 0.394 | 1.06E-58 |
| RSU1     | 7.57E-63 | -0.13532 | 0.105 | 0.317 | 1.13E-58 |
| MPDU1    | 7.58E-63 | -0.14161 | 0.302 | 0.564 | 1.13E-58 |
| ARIH2    | 7.61E-63 | 0.101698 | 0.319 | 0.447 | 1.14E-58 |
| STIL     | 7.72E-63 | -0.32429 | 0.003 | 0.195 | 1.15E-58 |
| ATXN2L   | 7.73E-63 | -0.10016 | 0.152 | 0.359 | 1.16E-58 |
| ADD1     | 8.08E-63 | 0.142568 | 0.362 | 0.478 | 1.21E-58 |
| SERINC3  | 8.15E-63 | 0.165295 | 0.411 | 0.501 | 1.22E-58 |
| ATPAF2   | 8.34E-63 | -0.12213 | 0.132 | 0.344 | 1.25E-58 |
| ATXN2    | 8.76E-63 | 0.175291 | 0.284 | 0.369 | 1.31E-58 |
| THOC3    | 8.93E-63 | -0.11246 | 0.181 | 0.401 | 1.33E-58 |
| HIRIP3   | 9.01E-63 | -0.4022  | 0.2   | 0.531 | 1.35E-58 |
| DUSP4    | 9.74E-63 | -0.35533 | 0.046 | 0.295 | 1.46E-58 |
| TDG      | 9.84E-63 | 0.251145 | 0.422 | 0.459 | 1.47E-58 |
| ASNSD1   | 1.02E-62 | 0.159378 | 0.417 | 0.519 | 1.53E-58 |
| LSM1     | 1.04E-62 | 0.201529 | 0.57  | 0.66  | 1.56E-58 |
| C12orf10 | 1.05E-62 | 0.178096 | 0.371 | 0.46  | 1.56E-58 |
| TMA16    | 1.09E-62 | -0.23274 | 0.134 | 0.391 | 1.62E-58 |
| NUB1     | 1.09E-62 | 0.275387 | 0.345 | 0.379 | 1.63E-58 |
| ASPH     | 1.14E-62 | -0.24265 | 0.249 | 0.542 | 1.71E-58 |
| FAM89B   | 1.14E-62 | 0.205192 | 0.394 | 0.468 | 1.71E-58 |
| DYNC1I2  | 1.19E-62 | 0.194784 | 0.612 | 0.667 | 1.78E-58 |
| SCD      | 1.19E-62 | -0.31789 | 0.043 | 0.284 | 1.78E-58 |
| VWA1     | 1.19E-62 | -0.27335 | 0.039 | 0.263 | 1.78E-58 |
| VAPB     | 1.25E-62 | -0.25376 | 0.166 | 0.442 | 1.86E-58 |
| ATP2A2   | 1.28E-62 | -0.12858 | 0.247 | 0.496 | 1.92E-58 |
| FAM177A1 | 1.32E-62 | 0.137467 | 0.451 | 0.583 | 1.98E-58 |
| IFT27    | 1.33E-62 | 0.124569 | 0.324 | 0.458 | 1.99E-58 |
| ATP6AP2  | 1.36E-62 | 0.234722 | 0.676 | 0.714 | 2.04E-58 |
| MYH10    | 1.40E-62 | 0.314284 | 0.396 | 0.389 | 2.09E-58 |
| CYTH2    | 1.44E-62 | 0.234785 | 0.596 | 0.635 | 2.15E-58 |
| CDV3     | 1.46E-62 | -0.23221 | 0.159 | 0.423 | 2.18E-58 |
| TIMM17A  | 1.58E-62 | 0.106122 | 0.43  | 0.567 | 2.36E-58 |
| CAND1    | 1.62E-62 | 0.242131 | 0.357 | 0.419 | 2.42E-58 |
| BRMS1    | 1.67E-62 | -0.11219 | 0.266 | 0.509 | 2.50E-58 |
| PGAP1    | 1.76E-62 | 0.250208 | 0.406 | 0.449 | 2.64E-58 |
| CCNH     | 1.80E-62 | 0.264533 | 0.493 | 0.536 | 2.69E-58 |
| RECQL    | 1.88E-62 | -0.2461  | 0.118 | 0.373 | 2.81E-58 |
| SLC30A9  | 2.02E-62 | 0.182119 | 0.375 | 0.462 | 3.01E-58 |
| THUMP3   | 2.04E-62 | -0.26662 | 0.135 | 0.406 | 3.05E-58 |
| PRRC2A   | 2.23E-62 | -0.1541  | 0.25  | 0.506 | 3.33E-58 |
| MAPKAP1  | 2.28E-62 | -0.17785 | 0.188 | 0.443 | 3.40E-58 |
| NUDT4    | 2.37E-62 | -0.25293 | 0.148 | 0.416 | 3.54E-58 |
| FZR1     | 2.50E-62 | -0.2838  | 0.118 | 0.386 | 3.73E-58 |
| GRHPR    | 2.61E-62 | -0.26954 | 0.302 | 0.612 | 3.91E-58 |
| CST3     | 2.62E-62 | -0.51121 | 0.705 | 0.925 | 3.92E-58 |

|          |          |          |       |       |          |
|----------|----------|----------|-------|-------|----------|
| ABHD12   | 2.67E-62 | -0.42019 | 0.235 | 0.58  | 3.99E-58 |
| UBL3     | 2.70E-62 | -0.1242  | 0.236 | 0.475 | 4.03E-58 |
| MEOX2    | 2.72E-62 | -0.36948 | 0.035 | 0.273 | 4.07E-58 |
| CEBPD    | 2.75E-62 | -0.58215 | 0.095 | 0.396 | 4.11E-58 |
| ADA      | 2.82E-62 | -0.29325 | 0.005 | 0.196 | 4.22E-58 |
| KANK2    | 2.85E-62 | -0.32694 | 0.013 | 0.221 | 4.27E-58 |
| BRIX1    | 2.91E-62 | -0.24456 | 0.261 | 0.552 | 4.35E-58 |
| ATP6V1B2 | 2.99E-62 | 0.327457 | 0.427 | 0.419 | 4.47E-58 |
| NKTR     | 3.10E-62 | 0.19393  | 0.497 | 0.581 | 4.63E-58 |
| CMSS1    | 3.15E-62 | -0.14182 | 0.34  | 0.602 | 4.71E-58 |
| DERL2    | 3.26E-62 | -0.13515 | 0.255 | 0.507 | 4.87E-58 |
| SP9      | 3.27E-62 | 0.721358 | 0.286 | 0.041 | 4.89E-58 |
| RBM4     | 3.29E-62 | 0.247235 | 0.383 | 0.432 | 4.92E-58 |
| DCLK1    | 3.32E-62 | 0.464604 | 0.314 | 0.216 | 4.96E-58 |
| IFNAR1   | 3.38E-62 | -0.2417  | 0.178 | 0.454 | 5.06E-58 |
| SLC9A3R1 | 3.42E-62 | -0.24422 | 0.076 | 0.309 | 5.10E-58 |
| CBY1     | 3.53E-62 | -0.14991 | 0.148 | 0.375 | 5.27E-58 |
| ASNS     | 3.69E-62 | 0.519659 | 0.476 | 0.299 | 5.51E-58 |
| MIF4GD   | 3.69E-62 | -0.3413  | 0.101 | 0.378 | 5.52E-58 |
| RPA2     | 3.87E-62 | -0.32626 | 0.305 | 0.635 | 5.79E-58 |
| REPIN1   | 3.96E-62 | 0.152805 | 0.387 | 0.493 | 5.92E-58 |
| KIF1A    | 4.26E-62 | 0.656063 | 0.426 | 0.175 | 6.37E-58 |
| ACTR10   | 4.48E-62 | 0.217344 | 0.466 | 0.536 | 6.69E-58 |
| CRIP2    | 4.52E-62 | 0.229838 | 0.502 | 0.604 | 6.76E-58 |
| HIGD1A   | 4.63E-62 | -0.36138 | 0.297 | 0.636 | 6.92E-58 |
| NR1H2    | 4.90E-62 | -0.12654 | 0.166 | 0.389 | 7.33E-58 |
| GOLGA4   | 4.97E-62 | 0.128905 | 0.369 | 0.48  | 7.43E-58 |
| GON4L    | 5.10E-62 | 0.175427 | 0.266 | 0.358 | 7.62E-58 |
| GSTO1    | 5.27E-62 | -0.35765 | 0.153 | 0.452 | 7.88E-58 |
| PRKAR1A  | 5.35E-62 | 0.156252 | 0.539 | 0.627 | 7.99E-58 |
| MNAT1    | 5.38E-62 | -0.13141 | 0.183 | 0.415 | 8.04E-58 |
| CCZ1B    | 5.47E-62 | 0.315171 | 0.295 | 0.301 | 8.18E-58 |
| CCDC88A  | 5.56E-62 | 0.188871 | 0.627 | 0.701 | 8.31E-58 |
| CXXC5    | 5.95E-62 | 0.281755 | 0.665 | 0.68  | 8.89E-58 |
| SLC20A1  | 6.00E-62 | -0.3791  | 0.112 | 0.4   | 8.96E-58 |
| MAPKAPK5 | 6.27E-62 | 0.326124 | 0.335 | 0.344 | 9.37E-58 |
| TBPL1    | 6.58E-62 | 0.369802 | 0.398 | 0.363 | 9.83E-58 |
| GSTZ1    | 6.83E-62 | -0.22986 | 0.068 | 0.286 | 1.02E-57 |
| PSME1    | 6.97E-62 | -0.39736 | 0.285 | 0.627 | 1.04E-57 |
| ARHGAP12 | 7.13E-62 | -0.30368 | 0.079 | 0.333 | 1.07E-57 |
| GNB1     | 7.73E-62 | 0.126745 | 0.547 | 0.664 | 1.16E-57 |
| CHD2     | 7.84E-62 | 0.17208  | 0.306 | 0.4   | 1.17E-57 |
| GNA11    | 8.89E-62 | -0.1185  | 0.093 | 0.29  | 1.33E-57 |
| SP3      | 9.17E-62 | 0.214735 | 0.357 | 0.433 | 1.37E-57 |
| CHMP4A   | 9.35E-62 | -0.17098 | 0.328 | 0.604 | 1.40E-57 |
| SF3B1    | 9.58E-62 | 0.170701 | 0.562 | 0.654 | 1.43E-57 |
| ZNF428   | 9.83E-62 | 0.240941 | 0.888 | 0.868 | 1.47E-57 |
| KDM5A    | 1.04E-61 | 0.221083 | 0.316 | 0.38  | 1.55E-57 |
| RUVBL2   | 1.04E-61 | -0.35343 | 0.335 | 0.675 | 1.55E-57 |
| BNIP2    | 1.08E-61 | -0.18696 | 0.134 | 0.37  | 1.61E-57 |
| IFRD2    | 1.11E-61 | -0.23759 | 0.126 | 0.383 | 1.66E-57 |

|           |          |          |       |       |          |
|-----------|----------|----------|-------|-------|----------|
| MPZL1     | 1.12E-61 | 0.306844 | 0.333 | 0.344 | 1.68E-57 |
| TSN       | 1.13E-61 | 0.20393  | 0.58  | 0.643 | 1.69E-57 |
| ENO2      | 1.22E-61 | 0.397773 | 0.574 | 0.472 | 1.82E-57 |
| TAPBP     | 1.22E-61 | -0.2187  | 0.146 | 0.399 | 1.82E-57 |
| RSPRY1    | 1.23E-61 | 0.170474 | 0.367 | 0.462 | 1.83E-57 |
| MCUR1     | 1.24E-61 | -0.34005 | 0.205 | 0.519 | 1.85E-57 |
| CDYL      | 1.25E-61 | -0.2588  | 0.045 | 0.268 | 1.87E-57 |
| PPP2R4    | 1.27E-61 | -0.12989 | 0.181 | 0.411 | 1.90E-57 |
| SNX21     | 1.33E-61 | -0.24791 | 0.061 | 0.291 | 1.98E-57 |
| RPE       | 1.40E-61 | -0.1802  | 0.092 | 0.31  | 2.08E-57 |
| B3GALNT1  | 1.44E-61 | 0.370839 | 0.391 | 0.341 | 2.16E-57 |
| GHITM     | 1.52E-61 | 0.147535 | 0.464 | 0.577 | 2.28E-57 |
| CNOT1     | 1.53E-61 | -0.13429 | 0.121 | 0.341 | 2.28E-57 |
| MED16     | 1.54E-61 | -0.12004 | 0.122 | 0.333 | 2.29E-57 |
| CTDSP2    | 1.63E-61 | -0.40434 | 0.181 | 0.495 | 2.43E-57 |
| ARL16     | 1.67E-61 | 0.146664 | 0.461 | 0.573 | 2.50E-57 |
| WSB1      | 1.71E-61 | 0.295291 | 0.803 | 0.775 | 2.56E-57 |
| BAZ2A     | 1.76E-61 | 0.201714 | 0.243 | 0.31  | 2.63E-57 |
| SCRN1     | 1.78E-61 | -0.23723 | 0.101 | 0.347 | 2.65E-57 |
| NUDT16L1  | 1.79E-61 | 0.10926  | 0.335 | 0.462 | 2.67E-57 |
| PPP1R2    | 1.82E-61 | 0.227606 | 0.437 | 0.491 | 2.72E-57 |
| SPATS2    | 1.82E-61 | 0.207207 | 0.518 | 0.584 | 2.72E-57 |
| NUP62     | 1.83E-61 | -0.14248 | 0.271 | 0.526 | 2.74E-57 |
| LRRC58    | 1.88E-61 | -0.10058 | 0.196 | 0.411 | 2.81E-57 |
| BCAT1     | 1.91E-61 | -0.3626  | 0.118 | 0.402 | 2.85E-57 |
| PAFAH1B3  | 2.00E-61 | 0.219506 | 0.813 | 0.828 | 2.98E-57 |
| MRAS      | 2.07E-61 | 0.151971 | 0.214 | 0.31  | 3.09E-57 |
| FN3KRP    | 2.19E-61 | -0.20965 | 0.207 | 0.473 | 3.27E-57 |
| ARL1      | 2.28E-61 | -0.17169 | 0.201 | 0.454 | 3.41E-57 |
| PQBP1     | 2.34E-61 | 0.169197 | 0.397 | 0.494 | 3.50E-57 |
| C14orf142 | 2.36E-61 | -0.26666 | 0.079 | 0.325 | 3.52E-57 |
| MXD4      | 2.56E-61 | 0.510761 | 0.269 | 0.157 | 3.83E-57 |
| MYH9      | 2.61E-61 | -0.2484  | 0.027 | 0.231 | 3.90E-57 |
| UBE2R2    | 2.68E-61 | 0.143716 | 0.405 | 0.515 | 4.00E-57 |
| DNAAF2    | 2.68E-61 | 0.279225 | 0.277 | 0.315 | 4.01E-57 |
| SLAH2     | 2.74E-61 | 0.246601 | 0.34  | 0.388 | 4.10E-57 |
| DPYSL4    | 2.78E-61 | 0.309083 | 0.375 | 0.383 | 4.16E-57 |
| MAEA      | 2.80E-61 | 0.197542 | 0.311 | 0.385 | 4.18E-57 |
| PHF6      | 2.92E-61 | 0.213098 | 0.305 | 0.377 | 4.36E-57 |
| NPRL3     | 2.92E-61 | 0.117276 | 0.231 | 0.352 | 4.36E-57 |
| SIPA1L1   | 2.94E-61 | -0.17131 | 0.084 | 0.298 | 4.40E-57 |
| CRELD2    | 3.10E-61 | -0.2009  | 0.203 | 0.467 | 4.64E-57 |
| MESDC2    | 3.22E-61 | -0.36393 | 0.203 | 0.523 | 4.82E-57 |
| OSBPL6    | 3.38E-61 | -0.18198 | 0.148 | 0.388 | 5.05E-57 |
| TXLNA     | 3.49E-61 | -0.23143 | 0.086 | 0.325 | 5.21E-57 |
| STT3B     | 3.51E-61 | -0.16552 | 0.151 | 0.385 | 5.24E-57 |
| ITGA2     | 3.56E-61 | -0.3418  | 0.005 | 0.2   | 5.32E-57 |
| RNF126    | 3.66E-61 | -0.10574 | 0.341 | 0.589 | 5.47E-57 |
| TMEM259   | 3.90E-61 | -0.16414 | 0.294 | 0.559 | 5.83E-57 |
| SUMF2     | 4.05E-61 | -0.1455  | 0.277 | 0.533 | 6.05E-57 |
| KEAP1     | 4.12E-61 | -0.32154 | 0.211 | 0.52  | 6.15E-57 |



|           |          |          |       |       |          |
|-----------|----------|----------|-------|-------|----------|
| TM2D3     | 4.16E-61 | 0.368498 | 0.452 | 0.417 | 6.21E-57 |
| YTHDF1    | 4.29E-61 | -0.16325 | 0.151 | 0.389 | 6.41E-57 |
| SLC35A4   | 4.34E-61 | -0.22159 | 0.129 | 0.38  | 6.49E-57 |
| CSTF1     | 4.54E-61 | -0.23351 | 0.089 | 0.331 | 6.79E-57 |
| RGS6      | 4.62E-61 | -0.28419 | 0.004 | 0.19  | 6.91E-57 |
| FKBP5     | 4.89E-61 | -0.36452 | 0.085 | 0.347 | 7.30E-57 |
| CYHR1     | 4.93E-61 | 0.137076 | 0.279 | 0.4   | 7.37E-57 |
| AAMDC     | 4.98E-61 | -0.42584 | 0.067 | 0.335 | 7.45E-57 |
| SDHB      | 5.23E-61 | -0.17787 | 0.314 | 0.589 | 7.81E-57 |
| QSER1     | 5.26E-61 | -0.11566 | 0.148 | 0.359 | 7.87E-57 |
| PCBP4     | 5.50E-61 | 0.175028 | 0.409 | 0.512 | 8.22E-57 |
| MPHOSPH6  | 5.65E-61 | 0.150568 | 0.357 | 0.468 | 8.45E-57 |
| WHSC1     | 5.66E-61 | -0.2424  | 0.255 | 0.549 | 8.46E-57 |
| CNTRL     | 5.74E-61 | -0.27281 | 0.087 | 0.34  | 8.58E-57 |
| SPNS1     | 5.93E-61 | 0.120824 | 0.309 | 0.423 | 8.86E-57 |
| RRAGD     | 5.93E-61 | -0.25785 | 0.057 | 0.29  | 8.86E-57 |
| ITGAE     | 6.11E-61 | -0.36768 | 0.358 | 0.707 | 9.14E-57 |
| HRAS      | 6.21E-61 | 0.1744   | 0.497 | 0.583 | 9.29E-57 |
| NACC1     | 6.36E-61 | -0.2345  | 0.074 | 0.305 | 9.51E-57 |
| APPL1     | 6.50E-61 | -0.15067 | 0.261 | 0.516 | 9.72E-57 |
| ELP6      | 6.54E-61 | -0.17767 | 0.216 | 0.473 | 9.78E-57 |
| GPBP1     | 6.57E-61 | 0.193473 | 0.631 | 0.693 | 9.82E-57 |
| MGEA5     | 6.68E-61 | 0.352412 | 0.364 | 0.335 | 9.98E-57 |
| SOCS6     | 6.76E-61 | -0.2768  | 0.09  | 0.341 | 1.01E-56 |
| UBXN6     | 6.81E-61 | 0.100884 | 0.288 | 0.419 | 1.02E-56 |
| RBBP7     | 7.23E-61 | -0.41586 | 0.408 | 0.768 | 1.08E-56 |
| LMNA      | 7.58E-61 | -0.60738 | 0.219 | 0.578 | 1.13E-56 |
| ZNF667-AS | 7.87E-61 | 0.219761 | 0.621 | 0.672 | 1.18E-56 |
| BCL7B     | 8.57E-61 | 0.1177   | 0.452 | 0.58  | 1.28E-56 |
| PTGFRN    | 8.66E-61 | -0.31426 | 0.027 | 0.253 | 1.29E-56 |
| CWC27     | 8.69E-61 | 0.186445 | 0.4   | 0.49  | 1.30E-56 |
| PRR13     | 8.77E-61 | -0.32086 | 0.224 | 0.53  | 1.31E-56 |
| SNAP23    | 8.85E-61 | -0.32039 | 0.039 | 0.274 | 1.32E-56 |
| PDHX      | 8.86E-61 | 0.20248  | 0.201 | 0.253 | 1.32E-56 |
| COQ10B    | 9.13E-61 | 0.232713 | 0.302 | 0.351 | 1.36E-56 |
| APOA1BP   | 1.00E-60 | -0.30029 | 0.308 | 0.631 | 1.50E-56 |
| CNOT3     | 1.05E-60 | -0.1271  | 0.159 | 0.378 | 1.58E-56 |
| LAMA5     | 1.10E-60 | -0.16152 | 0.063 | 0.259 | 1.64E-56 |
| POLR2A    | 1.12E-60 | -0.11225 | 0.193 | 0.417 | 1.68E-56 |
| RPF1      | 1.13E-60 | -0.21084 | 0.185 | 0.448 | 1.69E-56 |
| RNF187    | 1.16E-60 | 0.305839 | 0.543 | 0.568 | 1.73E-56 |
| ATP6AP1   | 1.18E-60 | 0.206222 | 0.487 | 0.565 | 1.76E-56 |
| FAM32A    | 1.19E-60 | 0.199083 | 0.618 | 0.684 | 1.78E-56 |
| ZBTB7A    | 1.27E-60 | -0.1018  | 0.13  | 0.328 | 1.90E-56 |
| FAM92A1   | 1.37E-60 | 0.203423 | 0.368 | 0.446 | 2.05E-56 |
| ARMC1     | 1.40E-60 | 0.167795 | 0.447 | 0.552 | 2.09E-56 |
| DDX21     | 1.46E-60 | -0.12489 | 0.176 | 0.402 | 2.19E-56 |
| FYTTD1    | 1.52E-60 | 0.102989 | 0.352 | 0.484 | 2.27E-56 |
| NECAP2    | 1.59E-60 | -0.16446 | 0.154 | 0.39  | 2.38E-56 |
| TWF1      | 1.62E-60 | -0.11522 | 0.244 | 0.47  | 2.43E-56 |
| DCTN1     | 1.67E-60 | 0.259128 | 0.334 | 0.365 | 2.50E-56 |

|          |          |          |       |       |          |
|----------|----------|----------|-------|-------|----------|
| RAB1B    | 1.77E-60 | -0.14458 | 0.148 | 0.373 | 2.65E-56 |
| TBL1XR1  | 1.82E-60 | 0.115858 | 0.333 | 0.452 | 2.72E-56 |
| DCP2     | 1.88E-60 | -0.2912  | 0.124 | 0.394 | 2.80E-56 |
| DCP1A    | 2.13E-60 | 0.331583 | 0.378 | 0.372 | 3.18E-56 |
| NECAP1   | 2.15E-60 | 0.478476 | 0.412 | 0.295 | 3.21E-56 |
| ZNF738   | 2.18E-60 | -0.21605 | 0.218 | 0.491 | 3.26E-56 |
| PNKD     | 2.24E-60 | -0.24361 | 0.411 | 0.726 | 3.34E-56 |
| TCF25    | 2.35E-60 | 0.149234 | 0.617 | 0.725 | 3.51E-56 |
| BCAP29   | 2.37E-60 | -0.22133 | 0.29  | 0.574 | 3.54E-56 |
| FSD1     | 2.38E-60 | 0.196623 | 0.313 | 0.381 | 3.55E-56 |
| CKAP5    | 2.44E-60 | -0.40309 | 0.174 | 0.494 | 3.64E-56 |
| ARHGEF26 | 2.47E-60 | -0.34649 | 0.054 | 0.3   | 3.69E-56 |
| UBXN1    | 2.51E-60 | 0.234071 | 0.687 | 0.723 | 3.75E-56 |
| MAFG     | 2.55E-60 | 0.12284  | 0.215 | 0.336 | 3.81E-56 |
| ARID5A   | 2.89E-60 | -0.22482 | 0.101 | 0.337 | 4.32E-56 |
| TMEM128  | 2.96E-60 | 0.134279 | 0.355 | 0.464 | 4.42E-56 |
| ROGDI    | 3.00E-60 | 0.338231 | 0.302 | 0.281 | 4.48E-56 |
| MAGED1   | 3.03E-60 | 0.208261 | 0.584 | 0.635 | 4.52E-56 |
| ILK      | 3.04E-60 | -0.27566 | 0.202 | 0.49  | 4.54E-56 |
| VGLL4    | 3.04E-60 | -0.11448 | 0.332 | 0.58  | 4.55E-56 |
| DYNLT1   | 3.33E-60 | 0.272726 | 0.871 | 0.838 | 4.98E-56 |
| STAU2    | 3.49E-60 | 0.392034 | 0.317 | 0.265 | 5.22E-56 |
| RFC2     | 3.52E-60 | -0.48852 | 0.252 | 0.605 | 5.25E-56 |
| DNTTIP2  | 3.58E-60 | 0.229165 | 0.372 | 0.43  | 5.34E-56 |
| APBB2    | 3.64E-60 | -0.38731 | 0.072 | 0.337 | 5.44E-56 |
| PRPF40A  | 3.67E-60 | 0.106074 | 0.588 | 0.721 | 5.49E-56 |
| EXOC5    | 3.80E-60 | -0.13642 | 0.185 | 0.415 | 5.68E-56 |
| GSTM3    | 3.97E-60 | 0.328644 | 0.467 | 0.442 | 5.94E-56 |
| HNRNPUL1 | 4.00E-60 | -0.28924 | 0.401 | 0.725 | 5.97E-56 |
| ADAM17   | 4.07E-60 | -0.1391  | 0.159 | 0.386 | 6.08E-56 |
| SNAPIN   | 4.15E-60 | -0.17129 | 0.349 | 0.626 | 6.20E-56 |
| ZC3H15   | 4.19E-60 | 0.235004 | 0.694 | 0.726 | 6.26E-56 |
| CHMP7    | 4.34E-60 | 0.334656 | 0.318 | 0.3   | 6.48E-56 |
| WDR5     | 4.40E-60 | -0.10866 | 0.124 | 0.322 | 6.58E-56 |
| BUB3     | 4.55E-60 | -0.40703 | 0.302 | 0.648 | 6.81E-56 |
| GALNT1   | 4.89E-60 | -0.22194 | 0.122 | 0.369 | 7.30E-56 |
| COA3     | 4.92E-60 | 0.17652  | 0.596 | 0.691 | 7.36E-56 |
| APC2     | 4.92E-60 | 0.557961 | 0.306 | 0.163 | 7.36E-56 |
| CAPRIN2  | 5.08E-60 | -0.20144 | 0.058 | 0.268 | 7.58E-56 |
| ACTR3    | 5.16E-60 | 0.214207 | 0.665 | 0.7   | 7.71E-56 |
| 6-Sep    | 5.22E-60 | 0.472939 | 0.218 | 0.101 | 7.81E-56 |
| ALDH6A1  | 5.60E-60 | -0.2392  | 0.104 | 0.347 | 8.37E-56 |
| PDZRN4   | 5.71E-60 | 0.70339  | 0.286 | 0.035 | 8.53E-56 |
| NRBP1    | 5.78E-60 | -0.10333 | 0.324 | 0.56  | 8.63E-56 |
| WDR82    | 5.78E-60 | 0.253092 | 0.429 | 0.453 | 8.64E-56 |
| ATCAY    | 5.79E-60 | 0.622585 | 0.475 | 0.221 | 8.65E-56 |
| DPP7     | 5.91E-60 | -0.23206 | 0.227 | 0.502 | 8.84E-56 |
| HMOX2    | 6.02E-60 | 0.22055  | 0.324 | 0.39  | 9.00E-56 |
| YWHAH    | 6.28E-60 | 0.260118 | 0.809 | 0.81  | 9.39E-56 |
| RUNX1    | 6.33E-60 | -0.28023 | 0.017 | 0.225 | 9.45E-56 |
| HSPA14   | 6.40E-60 | -0.24163 | 0.101 | 0.347 | 9.56E-56 |

|           |          |          |       |       |          |
|-----------|----------|----------|-------|-------|----------|
| TRMU      | 6.49E-60 | -0.14316 | 0.13  | 0.353 | 9.69E-56 |
| MAP2K7    | 6.55E-60 | 0.16585  | 0.262 | 0.354 | 9.78E-56 |
| 7-Mar     | 6.55E-60 | 0.114779 | 0.334 | 0.457 | 9.79E-56 |
| ENDOD1    | 6.60E-60 | -0.30148 | 0.024 | 0.241 | 9.87E-56 |
| Clorf123  | 6.66E-60 | -0.17863 | 0.342 | 0.619 | 9.96E-56 |
| DERL1     | 6.78E-60 | 0.23508  | 0.357 | 0.409 | 1.01E-55 |
| RHOT2     | 6.82E-60 | 0.135777 | 0.313 | 0.421 | 1.02E-55 |
| URM1      | 6.92E-60 | -0.11992 | 0.266 | 0.507 | 1.03E-55 |
| MAPK1IP1L | 7.13E-60 | -0.21388 | 0.328 | 0.616 | 1.07E-55 |
| FAM120AOS | 7.22E-60 | -0.24989 | 0.117 | 0.374 | 1.08E-55 |
| PREPL     | 7.77E-60 | 0.227195 | 0.25  | 0.305 | 1.16E-55 |
| HGSNAT    | 8.18E-60 | 0.329765 | 0.295 | 0.3   | 1.22E-55 |
| METTL4    | 8.50E-60 | -0.14801 | 0.06  | 0.248 | 1.27E-55 |
| SMARCD1   | 8.55E-60 | 0.106382 | 0.326 | 0.456 | 1.28E-55 |
| PTTG1IP   | 8.76E-60 | 0.157551 | 0.452 | 0.546 | 1.31E-55 |
| RBM25     | 8.80E-60 | 0.14673  | 0.576 | 0.69  | 1.31E-55 |
| ANKRD46   | 9.23E-60 | 0.537124 | 0.417 | 0.252 | 1.38E-55 |
| TM7SF3    | 9.56E-60 | -0.21592 | 0.192 | 0.458 | 1.43E-55 |
| ZFYVE21   | 9.58E-60 | -0.24807 | 0.138 | 0.393 | 1.43E-55 |
| MAP3K13   | 9.85E-60 | 0.157778 | 0.541 | 0.633 | 1.47E-55 |
| UNC119    | 9.91E-60 | 0.153214 | 0.272 | 0.367 | 1.48E-55 |
| ARFGAP2   | 1.01E-59 | 0.269507 | 0.423 | 0.454 | 1.51E-55 |
| DAXX      | 1.02E-59 | -0.25499 | 0.179 | 0.452 | 1.52E-55 |
| STARD3NL  | 1.02E-59 | 0.195792 | 0.59  | 0.647 | 1.53E-55 |
| FAT1      | 1.03E-59 | -0.23666 | 0.011 | 0.194 | 1.53E-55 |
| PLAT      | 1.05E-59 | -0.38875 | 0.031 | 0.268 | 1.57E-55 |
| RGMB      | 1.06E-59 | 0.675636 | 0.412 | 0.22  | 1.58E-55 |
| CFLAR     | 1.11E-59 | -0.28019 | 0.123 | 0.383 | 1.67E-55 |
| TMEM5     | 1.13E-59 | 0.254968 | 0.288 | 0.325 | 1.69E-55 |
| SKA2      | 1.16E-59 | -0.49562 | 0.37  | 0.735 | 1.74E-55 |
| EIF3H     | 1.19E-59 | 0.276704 | 0.754 | 0.765 | 1.78E-55 |
| HLA-E     | 1.20E-59 | -0.67109 | 0.135 | 0.462 | 1.80E-55 |
| HTATSF1   | 1.34E-59 | 0.21458  | 0.474 | 0.531 | 2.01E-55 |
| TSPYL1    | 1.37E-59 | 0.314937 | 0.347 | 0.332 | 2.05E-55 |
| SPTAN1    | 1.37E-59 | 0.289594 | 0.428 | 0.438 | 2.05E-55 |
| SRGAP3    | 1.39E-59 | 0.626217 | 0.39  | 0.181 | 2.08E-55 |
| FAM57A    | 1.40E-59 | -0.20476 | 0.049 | 0.258 | 2.10E-55 |
| DCAF15    | 1.44E-59 | -0.23532 | 0.095 | 0.331 | 2.15E-55 |
| CD276     | 1.51E-59 | -0.17711 | 0.166 | 0.407 | 2.26E-55 |
| E2F6      | 1.54E-59 | -0.15298 | 0.108 | 0.32  | 2.30E-55 |
| ELOVL1    | 1.64E-59 | -0.32059 | 0.049 | 0.29  | 2.46E-55 |
| GALNT11   | 1.69E-59 | 0.297263 | 0.374 | 0.367 | 2.53E-55 |
| C1QTNF4   | 1.74E-59 | 0.666154 | 0.298 | 0.054 | 2.60E-55 |
| DR1       | 1.75E-59 | -0.1481  | 0.236 | 0.48  | 2.61E-55 |
| TPM1      | 1.75E-59 | -0.26902 | 0.187 | 0.467 | 2.62E-55 |
| SFRP1     | 1.79E-59 | -0.3441  | 0.031 | 0.259 | 2.67E-55 |
| PRDX3     | 1.88E-59 | -0.2101  | 0.295 | 0.573 | 2.80E-55 |
| SLC25A33  | 1.93E-59 | -0.11954 | 0.206 | 0.431 | 2.88E-55 |
| DLG1      | 1.94E-59 | -0.22088 | 0.082 | 0.311 | 2.90E-55 |
| TUBB4A    | 2.02E-59 | 0.692961 | 0.386 | 0.101 | 3.01E-55 |
| TRIM24    | 2.05E-59 | 0.13433  | 0.339 | 0.451 | 3.06E-55 |

|           |          |          |       |       |          |
|-----------|----------|----------|-------|-------|----------|
| MBOAT7    | 2.12E-59 | -0.30928 | 0.126 | 0.398 | 3.17E-55 |
| DNAJC15   | 2.13E-59 | -0.24687 | 0.243 | 0.526 | 3.18E-55 |
| CDH11     | 2.20E-59 | -0.26879 | 0.046 | 0.263 | 3.28E-55 |
| PITPNC1   | 2.20E-59 | -0.20002 | 0.078 | 0.296 | 3.28E-55 |
| DPY19L1   | 2.20E-59 | -0.24665 | 0.02  | 0.214 | 3.29E-55 |
| FLAD1     | 2.21E-59 | 0.230943 | 0.334 | 0.389 | 3.30E-55 |
| RAB5A     | 2.29E-59 | 0.219721 | 0.529 | 0.584 | 3.42E-55 |
| CDKN1B    | 2.30E-59 | 0.173138 | 0.452 | 0.536 | 3.44E-55 |
| EXTL3     | 2.32E-59 | -0.16264 | 0.101 | 0.315 | 3.47E-55 |
| AKT1S1    | 2.33E-59 | -0.14394 | 0.179 | 0.406 | 3.48E-55 |
| TMEM9B    | 2.35E-59 | 0.119048 | 0.523 | 0.642 | 3.52E-55 |
| RGS19     | 2.36E-59 | -0.29865 | 0.051 | 0.288 | 3.52E-55 |
| UBL7-AS1  | 2.40E-59 | -0.30787 | 0.03  | 0.251 | 3.59E-55 |
| GDAP1     | 2.42E-59 | 0.608752 | 0.47  | 0.221 | 3.62E-55 |
| GNAQ      | 2.49E-59 | 0.212438 | 0.388 | 0.437 | 3.73E-55 |
| MIDN      | 2.55E-59 | 0.243187 | 0.6   | 0.643 | 3.80E-55 |
| SHMT2     | 2.57E-59 | -0.41001 | 0.118 | 0.411 | 3.84E-55 |
| LENG1     | 2.63E-59 | -0.28676 | 0.121 | 0.381 | 3.93E-55 |
| RP11-553L | 2.71E-59 | 0.199824 | 0.389 | 0.475 | 4.04E-55 |
| SAR1B     | 2.80E-59 | -0.16389 | 0.221 | 0.469 | 4.18E-55 |
| NTPCR     | 2.82E-59 | -0.19151 | 0.182 | 0.435 | 4.21E-55 |
| USP34     | 2.85E-59 | 0.126824 | 0.254 | 0.36  | 4.25E-55 |
| STAMPB    | 2.86E-59 | -0.13435 | 0.252 | 0.494 | 4.28E-55 |
| COL22A1   | 2.88E-59 | -0.251   | 0.002 | 0.175 | 4.31E-55 |
| TMX3      | 2.93E-59 | -0.20422 | 0.091 | 0.319 | 4.38E-55 |
| KLHDC8A   | 2.97E-59 | 0.319374 | 0.6   | 0.567 | 4.44E-55 |
| TP53RK    | 3.09E-59 | -0.14544 | 0.154 | 0.377 | 4.62E-55 |
| ATP6V1A   | 3.26E-59 | 0.429975 | 0.328 | 0.231 | 4.87E-55 |
| TMEM138   | 3.29E-59 | -0.18258 | 0.12  | 0.346 | 4.92E-55 |
| ABHD17A   | 3.31E-59 | -0.26725 | 0.155 | 0.422 | 4.95E-55 |
| CD164     | 3.33E-59 | -0.30112 | 0.211 | 0.505 | 4.97E-55 |
| SMC1A     | 3.36E-59 | -0.26753 | 0.241 | 0.533 | 5.02E-55 |
| RPAP2     | 3.51E-59 | 0.281127 | 0.316 | 0.335 | 5.25E-55 |
| PPME1     | 3.82E-59 | 0.140805 | 0.288 | 0.39  | 5.71E-55 |
| SIGMAR1   | 4.15E-59 | -0.25182 | 0.138 | 0.401 | 6.20E-55 |
| ADD3      | 4.17E-59 | -0.31232 | 0.036 | 0.259 | 6.22E-55 |
| NTHL1     | 4.47E-59 | -0.20372 | 0.186 | 0.441 | 6.68E-55 |
| MRGBP     | 4.49E-59 | -0.15408 | 0.126 | 0.346 | 6.71E-55 |
| RALY      | 4.79E-59 | -0.42527 | 0.443 | 0.798 | 7.15E-55 |
| GRIA3     | 4.79E-59 | -0.22451 | 0.115 | 0.358 | 7.16E-55 |
| REEP1     | 5.29E-59 | 0.588834 | 0.357 | 0.148 | 7.90E-55 |
| CHCHD6    | 5.59E-59 | 0.183877 | 0.328 | 0.415 | 8.36E-55 |
| HARS      | 5.65E-59 | 0.213834 | 0.401 | 0.459 | 8.44E-55 |
| UQCRC2    | 5.75E-59 | 0.26314  | 0.584 | 0.595 | 8.59E-55 |
| ANAPC16   | 5.95E-59 | -0.21672 | 0.275 | 0.552 | 8.90E-55 |
| LSM4      | 6.13E-59 | -0.41505 | 0.668 | 0.904 | 9.16E-55 |
| VPS26B    | 6.28E-59 | 0.186187 | 0.367 | 0.438 | 9.39E-55 |
| SMAD5     | 6.46E-59 | -0.26903 | 0.126 | 0.388 | 9.66E-55 |
| NDUF4F4   | 6.52E-59 | 0.291883 | 0.324 | 0.338 | 9.74E-55 |
| XPOT      | 6.56E-59 | -0.15851 | 0.103 | 0.315 | 9.81E-55 |
| OSTC      | 6.81E-59 | -0.27579 | 0.339 | 0.651 | 1.02E-54 |

|           |          |          |       |       |          |
|-----------|----------|----------|-------|-------|----------|
| EAPP      | 7.40E-59 | 0.240137 | 0.42  | 0.488 | 1.11E-54 |
| FAM122B   | 7.59E-59 | -0.31548 | 0.062 | 0.305 | 1.13E-54 |
| POLDIP3   | 7.62E-59 | -0.1162  | 0.192 | 0.416 | 1.14E-54 |
| DERA      | 7.63E-59 | -0.31381 | 0.16  | 0.443 | 1.14E-54 |
| HMBS      | 7.88E-59 | -0.11193 | 0.167 | 0.379 | 1.18E-54 |
| PRPF19    | 7.96E-59 | -0.20028 | 0.212 | 0.473 | 1.19E-54 |
| PSMC2     | 8.06E-59 | 0.149196 | 0.569 | 0.658 | 1.21E-54 |
| SLC25A23  | 8.39E-59 | -0.1337  | 0.071 | 0.262 | 1.25E-54 |
| GSDMD     | 8.46E-59 | -0.25188 | 0.008 | 0.198 | 1.26E-54 |
| YIF1B     | 8.46E-59 | -0.1245  | 0.276 | 0.517 | 1.26E-54 |
| PPT1      | 8.56E-59 | -0.26236 | 0.306 | 0.614 | 1.28E-54 |
| WNK1      | 8.62E-59 | -0.10932 | 0.248 | 0.473 | 1.29E-54 |
| PAK4      | 8.79E-59 | -0.29733 | 0.101 | 0.36  | 1.31E-54 |
| PFKL      | 8.88E-59 | -0.138   | 0.267 | 0.51  | 1.33E-54 |
| KIAA2013  | 9.07E-59 | -0.1378  | 0.074 | 0.265 | 1.35E-54 |
| BRWD1     | 9.97E-59 | 0.325543 | 0.407 | 0.388 | 1.49E-54 |
| GOSR1     | 9.98E-59 | 0.155417 | 0.37  | 0.465 | 1.49E-54 |
| PPAT      | 1.01E-58 | -0.43464 | 0.113 | 0.411 | 1.51E-54 |
| PRTFDC1   | 1.03E-58 | -0.27248 | 0.124 | 0.38  | 1.53E-54 |
| PFDN1     | 1.05E-58 | 0.150844 | 0.544 | 0.633 | 1.56E-54 |
| NELFB     | 1.05E-58 | -0.10947 | 0.141 | 0.351 | 1.57E-54 |
| C5orf24   | 1.06E-58 | -0.19623 | 0.293 | 0.569 | 1.58E-54 |
| TNPO2     | 1.07E-58 | -0.10398 | 0.203 | 0.42  | 1.60E-54 |
| WDR60     | 1.09E-58 | 0.310968 | 0.397 | 0.4   | 1.62E-54 |
| SDC3      | 1.10E-58 | -0.23236 | 0.106 | 0.348 | 1.64E-54 |
| PPP2R2A   | 1.11E-58 | 0.160105 | 0.41  | 0.51  | 1.66E-54 |
| NUDCD2    | 1.12E-58 | -0.39661 | 0.345 | 0.695 | 1.67E-54 |
| PRKCA     | 1.12E-58 | -0.11232 | 0.167 | 0.377 | 1.67E-54 |
| CTSD      | 1.15E-58 | -0.1081  | 0.342 | 0.588 | 1.71E-54 |
| YPEL1     | 1.15E-58 | 0.114504 | 0.181 | 0.293 | 1.72E-54 |
| CIAPIN1   | 1.16E-58 | 0.107551 | 0.381 | 0.51  | 1.74E-54 |
| HCCS      | 1.22E-58 | -0.21733 | 0.088 | 0.312 | 1.82E-54 |
| SSR3      | 1.23E-58 | -0.35262 | 0.299 | 0.628 | 1.84E-54 |
| TRPT1     | 1.32E-58 | -0.23619 | 0.154 | 0.41  | 1.97E-54 |
| GLT8D1    | 1.32E-58 | -0.14462 | 0.282 | 0.532 | 1.98E-54 |
| TMEM199   | 1.38E-58 | 0.112708 | 0.298 | 0.422 | 2.06E-54 |
| CRCP      | 1.54E-58 | 0.263954 | 0.307 | 0.332 | 2.31E-54 |
| ZSCAN16-A | 1.55E-58 | -0.29595 | 0.162 | 0.441 | 2.31E-54 |
| MTFR1L    | 1.57E-58 | 0.181565 | 0.376 | 0.451 | 2.34E-54 |
| AP2A2     | 1.60E-58 | 0.260416 | 0.307 | 0.336 | 2.39E-54 |
| POLR2D    | 1.63E-58 | -0.21339 | 0.152 | 0.401 | 2.43E-54 |
| LDLR      | 1.64E-58 | -0.34245 | 0.015 | 0.222 | 2.45E-54 |
| SNX14     | 1.65E-58 | 0.183655 | 0.282 | 0.356 | 2.47E-54 |
| TTC1      | 1.67E-58 | 0.140314 | 0.375 | 0.483 | 2.49E-54 |
| TRNAU1AP  | 1.67E-58 | 0.295279 | 0.32  | 0.336 | 2.50E-54 |
| RSL1D1    | 1.69E-58 | 0.12115  | 0.537 | 0.658 | 2.53E-54 |
| TMEM209   | 1.83E-58 | -0.24019 | 0.087 | 0.32  | 2.74E-54 |
| CEP57L1   | 1.88E-58 | -0.19858 | 0.13  | 0.364 | 2.81E-54 |
| TMEM179B  | 1.89E-58 | -0.26608 | 0.207 | 0.49  | 2.83E-54 |
| FAM127B   | 1.89E-58 | 0.368642 | 0.43  | 0.385 | 2.83E-54 |
| RAD18     | 1.92E-58 | -0.36699 | 0.041 | 0.28  | 2.87E-54 |

|         |          |          |       |       |          |
|---------|----------|----------|-------|-------|----------|
| PSME2   | 1.93E-58 | -0.52195 | 0.367 | 0.727 | 2.88E-54 |
| ENOPH1  | 1.96E-58 | -0.22051 | 0.43  | 0.731 | 2.93E-54 |
| STXBP1  | 1.96E-58 | 0.503413 | 0.356 | 0.22  | 2.94E-54 |
| ZNF32   | 2.00E-58 | 0.159995 | 0.266 | 0.365 | 2.99E-54 |
| ENHO    | 2.12E-58 | 0.121231 | 0.271 | 0.391 | 3.16E-54 |
| INTS10  | 2.17E-58 | 0.10091  | 0.322 | 0.451 | 3.25E-54 |
| ZNF106  | 2.18E-58 | -0.17044 | 0.148 | 0.377 | 3.26E-54 |
| ASAP2   | 2.18E-58 | -0.2215  | 0.089 | 0.32  | 3.26E-54 |
| ACOT9   | 2.22E-58 | -0.16512 | 0.056 | 0.251 | 3.32E-54 |
| EXOSC10 | 2.23E-58 | -0.24306 | 0.096 | 0.332 | 3.34E-54 |
| COPS5   | 2.27E-58 | 0.117661 | 0.526 | 0.66  | 3.40E-54 |
| TARS    | 2.30E-58 | -0.10833 | 0.201 | 0.422 | 3.43E-54 |
| ZC3HAV1 | 2.37E-58 | -0.29088 | 0.035 | 0.253 | 3.54E-54 |
| Clorf52 | 2.47E-58 | 0.220515 | 0.416 | 0.465 | 3.70E-54 |
| JOSD2   | 2.49E-58 | -0.11471 | 0.214 | 0.438 | 3.73E-54 |
| NPEPPS  | 2.58E-58 | 0.229873 | 0.324 | 0.369 | 3.85E-54 |
| DDB1    | 2.62E-58 | 0.146282 | 0.393 | 0.486 | 3.92E-54 |
| PHF23   | 2.67E-58 | 0.144057 | 0.265 | 0.359 | 3.99E-54 |
| PARP9   | 2.80E-58 | -0.29665 | 0.008 | 0.194 | 4.18E-54 |
| SNTA1   | 2.84E-58 | -0.24117 | 0.016 | 0.212 | 4.24E-54 |
| C6orf1  | 2.86E-58 | 0.157988 | 0.324 | 0.43  | 4.28E-54 |
| PWP1    | 2.88E-58 | 0.196438 | 0.43  | 0.494 | 4.30E-54 |
| NXP4    | 2.92E-58 | 0.619749 | 0.256 | 0.117 | 4.36E-54 |
| NQO1    | 2.93E-58 | -0.27453 | 0.019 | 0.22  | 4.38E-54 |
| DBNL    | 2.95E-58 | 0.128968 | 0.434 | 0.547 | 4.41E-54 |
| KIF9    | 3.03E-58 | -0.25519 | 0.102 | 0.348 | 4.53E-54 |
| SF3B3   | 3.03E-58 | -0.1526  | 0.218 | 0.459 | 4.53E-54 |
| ADPGK   | 3.04E-58 | -0.14223 | 0.104 | 0.31  | 4.54E-54 |
| E2F8    | 3.06E-58 | -0.30322 | 0.001 | 0.17  | 4.57E-54 |
| STX10   | 3.09E-58 | -0.2916  | 0.276 | 0.58  | 4.62E-54 |
| CYB5B   | 3.09E-58 | -0.15821 | 0.291 | 0.548 | 4.62E-54 |
| TMSB15B | 3.25E-58 | 0.161996 | 0.487 | 0.586 | 4.86E-54 |
| RBM17   | 3.36E-58 | -0.16562 | 0.347 | 0.62  | 5.03E-54 |
| NBPF10  | 3.46E-58 | -0.3177  | 0.037 | 0.264 | 5.17E-54 |
| DCLRE1C | 3.48E-58 | -0.21459 | 0.147 | 0.395 | 5.21E-54 |
| LONP1   | 3.78E-58 | -0.10064 | 0.185 | 0.4   | 5.65E-54 |
| MZT2A   | 3.97E-58 | -0.22032 | 0.45  | 0.756 | 5.93E-54 |
| HAUS1   | 4.03E-58 | -0.3314  | 0.245 | 0.552 | 6.03E-54 |
| SLC35B4 | 4.06E-58 | 0.354409 | 0.369 | 0.338 | 6.07E-54 |
| BEND5   | 4.16E-58 | 0.411125 | 0.376 | 0.309 | 6.21E-54 |
| EPN2    | 4.61E-58 | -0.15187 | 0.223 | 0.462 | 6.89E-54 |
| FAM229B | 4.67E-58 | 0.234725 | 0.456 | 0.515 | 6.98E-54 |
| KCNE4   | 4.70E-58 | -0.2539  | 0.033 | 0.238 | 7.03E-54 |
| SEMA6D  | 4.89E-58 | -0.4099  | 0.079 | 0.352 | 7.30E-54 |
| CPSF2   | 4.95E-58 | -0.19779 | 0.056 | 0.263 | 7.40E-54 |
| LZIC    | 5.01E-58 | -0.20001 | 0.124 | 0.362 | 7.49E-54 |
| ELAVL2  | 5.75E-58 | 0.666525 | 0.449 | 0.165 | 8.59E-54 |
| DEXI    | 5.85E-58 | 0.230549 | 0.284 | 0.332 | 8.74E-54 |
| METTL9  | 6.24E-58 | 0.26275  | 0.708 | 0.714 | 9.33E-54 |
| CMC1    | 6.52E-58 | -0.22738 | 0.179 | 0.44  | 9.75E-54 |
| NUDT3   | 6.61E-58 | 0.104254 | 0.463 | 0.583 | 9.88E-54 |

|           |          |          |       |       |          |
|-----------|----------|----------|-------|-------|----------|
| CCHCR1    | 7.00E-58 | -0.23064 | 0.064 | 0.284 | 1.05E-53 |
| ANAPC13   | 7.01E-58 | 0.278671 | 0.529 | 0.525 | 1.05E-53 |
| AKT1      | 7.21E-58 | -0.1296  | 0.1   | 0.296 | 1.08E-53 |
| MUM1      | 7.60E-58 | 0.187508 | 0.513 | 0.59  | 1.14E-53 |
| DCLK2     | 7.75E-58 | 0.372121 | 0.426 | 0.378 | 1.16E-53 |
| HEXA      | 8.50E-58 | -0.13952 | 0.162 | 0.375 | 1.27E-53 |
| SIK3      | 8.52E-58 | -0.22225 | 0.038 | 0.241 | 1.27E-53 |
| OXLD1     | 9.06E-58 | -0.24542 | 0.159 | 0.42  | 1.35E-53 |
| STARD4-AS | 9.10E-58 | 0.47527  | 0.357 | 0.249 | 1.36E-53 |
| GOLIM4    | 9.41E-58 | -0.33691 | 0.27  | 0.59  | 1.41E-53 |
| MLLT4     | 9.62E-58 | 0.314986 | 0.334 | 0.348 | 1.44E-53 |
| CHAMP1    | 9.91E-58 | -0.19578 | 0.122 | 0.356 | 1.48E-53 |
| EFCAB11   | 1.01E-57 | -0.31201 | 0.022 | 0.232 | 1.50E-53 |
| WDR6      | 1.04E-57 | 0.365542 | 0.369 | 0.335 | 1.55E-53 |
| TECR      | 1.05E-57 | -0.53558 | 0.396 | 0.747 | 1.56E-53 |
| NQO2      | 1.05E-57 | 0.116927 | 0.262 | 0.388 | 1.56E-53 |
| RAP1A     | 1.06E-57 | -0.20661 | 0.239 | 0.5   | 1.59E-53 |
| STK39     | 1.15E-57 | -0.22205 | 0.052 | 0.258 | 1.71E-53 |
| KDELR1    | 1.15E-57 | -0.25206 | 0.391 | 0.698 | 1.72E-53 |
| SOCS2     | 1.19E-57 | -0.41324 | 0.093 | 0.36  | 1.77E-53 |
| BLVRA     | 1.22E-57 | 0.302625 | 0.549 | 0.558 | 1.83E-53 |
| PLEKHB1   | 1.27E-57 | -0.33334 | 0.059 | 0.302 | 1.90E-53 |
| LRP10     | 1.38E-57 | -0.26197 | 0.047 | 0.265 | 2.07E-53 |
| GIPC1     | 1.43E-57 | -0.24592 | 0.217 | 0.491 | 2.14E-53 |
| UACA      | 1.45E-57 | -0.23435 | 0.014 | 0.2   | 2.16E-53 |
| DEAF1     | 1.46E-57 | 0.162518 | 0.318 | 0.41  | 2.18E-53 |
| EZR       | 1.52E-57 | 0.151922 | 0.452 | 0.562 | 2.28E-53 |
| G3BP1     | 1.55E-57 | -0.19981 | 0.266 | 0.533 | 2.32E-53 |
| NUDT21    | 1.63E-57 | -0.10939 | 0.221 | 0.442 | 2.43E-53 |
| UBE2A     | 1.65E-57 | -0.1186  | 0.34  | 0.583 | 2.46E-53 |
| CCT8      | 1.68E-57 | 0.173704 | 0.684 | 0.738 | 2.52E-53 |
| SF3A1     | 1.72E-57 | -0.20844 | 0.112 | 0.343 | 2.58E-53 |
| JADE1     | 1.90E-57 | -0.30966 | 0.14  | 0.409 | 2.85E-53 |
| JOSD1     | 1.91E-57 | -0.11141 | 0.088 | 0.274 | 2.85E-53 |
| ZNF131    | 2.00E-57 | 0.235271 | 0.402 | 0.454 | 2.99E-53 |
| BPHL      | 2.00E-57 | 0.357742 | 0.323 | 0.3   | 2.99E-53 |
| ZNF791    | 2.06E-57 | 0.291823 | 0.415 | 0.432 | 3.07E-53 |
| HOOK2     | 2.09E-57 | 0.302323 | 0.339 | 0.356 | 3.13E-53 |
| RNMT      | 2.25E-57 | 0.226028 | 0.364 | 0.406 | 3.37E-53 |
| ARHGEF2   | 2.26E-57 | 0.132623 | 0.385 | 0.504 | 3.38E-53 |
| SEPHS1    | 2.37E-57 | -0.2264  | 0.077 | 0.301 | 3.53E-53 |
| BDP1      | 2.40E-57 | 0.188422 | 0.383 | 0.459 | 3.59E-53 |
| LSAMP     | 2.45E-57 | 0.532394 | 0.407 | 0.257 | 3.66E-53 |
| RP3-525N1 | 2.49E-57 | 0.563464 | 0.414 | 0.27  | 3.72E-53 |
| TAF12     | 2.62E-57 | -0.20798 | 0.266 | 0.537 | 3.92E-53 |
| NEMF      | 2.78E-57 | 0.140961 | 0.368 | 0.481 | 4.16E-53 |
| ABHD17C   | 2.79E-57 | -0.22166 | 0.02  | 0.207 | 4.17E-53 |
| SYT11     | 2.96E-57 | 0.188877 | 0.576 | 0.647 | 4.42E-53 |
| DNTTIP1   | 2.97E-57 | -0.24027 | 0.294 | 0.584 | 4.44E-53 |
| IVD       | 3.07E-57 | -0.19829 | 0.079 | 0.295 | 4.59E-53 |
| ARID5B    | 3.11E-57 | 0.175568 | 0.257 | 0.344 | 4.64E-53 |

|           |          |          |       |       |          |
|-----------|----------|----------|-------|-------|----------|
| TMSB15A   | 3.17E-57 | 0.315382 | 0.657 | 0.635 | 4.74E-53 |
| KHDRBS1   | 3.22E-57 | 0.173876 | 0.797 | 0.84  | 4.80E-53 |
| PIK3R3    | 3.27E-57 | 0.334431 | 0.352 | 0.331 | 4.89E-53 |
| MSRA      | 3.40E-57 | 0.262898 | 0.408 | 0.446 | 5.07E-53 |
| RTF1      | 3.52E-57 | 0.162017 | 0.621 | 0.712 | 5.26E-53 |
| UBTD1     | 3.54E-57 | -0.24371 | 0.016 | 0.202 | 5.29E-53 |
| ZNF302    | 3.62E-57 | 0.148529 | 0.471 | 0.568 | 5.41E-53 |
| ZNF580    | 3.63E-57 | -0.22092 | 0.247 | 0.522 | 5.42E-53 |
| UBE2G1    | 3.77E-57 | 0.19191  | 0.354 | 0.431 | 5.64E-53 |
| AP1S2     | 3.79E-57 | 0.266668 | 0.708 | 0.723 | 5.67E-53 |
| HINT2     | 3.97E-57 | -0.43014 | 0.266 | 0.606 | 5.93E-53 |
| TNIP2     | 4.19E-57 | -0.17539 | 0.084 | 0.291 | 6.26E-53 |
| ABCD3     | 4.19E-57 | -0.20459 | 0.187 | 0.438 | 6.26E-53 |
| MEIS3     | 4.20E-57 | 0.447144 | 0.314 | 0.226 | 6.27E-53 |
| SMAD1     | 4.42E-57 | -0.21326 | 0.159 | 0.411 | 6.60E-53 |
| JAGN1     | 4.52E-57 | -0.10074 | 0.279 | 0.509 | 6.75E-53 |
| TIMM9     | 4.67E-57 | -0.16918 | 0.237 | 0.486 | 6.97E-53 |
| LDLRAD3   | 4.76E-57 | -0.13505 | 0.147 | 0.359 | 7.11E-53 |
| COLGALT1  | 4.86E-57 | -0.12711 | 0.08  | 0.264 | 7.27E-53 |
| RP11-698N | 4.90E-57 | -0.32493 | 0.006 | 0.193 | 7.33E-53 |
| DCBLD2    | 4.91E-57 | -0.34819 | 0.079 | 0.338 | 7.33E-53 |
| C11orf96  | 5.08E-57 | 0.409683 | 0.346 | 0.306 | 7.60E-53 |
| STT3A     | 5.63E-57 | -0.1082  | 0.125 | 0.317 | 8.42E-53 |
| EPN1      | 5.73E-57 | -0.17738 | 0.299 | 0.558 | 8.57E-53 |
| SAC3D1    | 5.81E-57 | -0.29652 | 0.233 | 0.527 | 8.68E-53 |
| HOXC9     | 5.90E-57 | 0.691814 | 0.43  | 0.151 | 8.82E-53 |
| HLTF      | 5.95E-57 | 0.118381 | 0.291 | 0.406 | 8.89E-53 |
| APBB1     | 6.06E-57 | 0.299352 | 0.328 | 0.322 | 9.05E-53 |
| PET117    | 6.22E-57 | -0.1037  | 0.149 | 0.353 | 9.29E-53 |
| FBXL5     | 6.23E-57 | 0.106643 | 0.315 | 0.436 | 9.31E-53 |
| ACLY      | 6.27E-57 | -0.10474 | 0.19  | 0.401 | 9.37E-53 |
| NXT1      | 6.87E-57 | 0.10199  | 0.444 | 0.573 | 1.03E-52 |
| EPM2AIP1  | 7.18E-57 | 0.242005 | 0.332 | 0.372 | 1.07E-52 |
| NME3      | 7.29E-57 | 0.116838 | 0.358 | 0.478 | 1.09E-52 |
| LSM14A    | 7.30E-57 | -0.19423 | 0.401 | 0.681 | 1.09E-52 |
| NUDT2     | 7.51E-57 | -0.13228 | 0.139 | 0.352 | 1.12E-52 |
| NIFK      | 7.79E-57 | -0.10048 | 0.361 | 0.599 | 1.16E-52 |
| MIEN1     | 8.10E-57 | 0.212137 | 0.583 | 0.642 | 1.21E-52 |
| SSR1      | 8.21E-57 | -0.15072 | 0.35  | 0.601 | 1.23E-52 |
| GCLM      | 8.23E-57 | -0.13516 | 0.119 | 0.325 | 1.23E-52 |
| PARP14    | 8.43E-57 | -0.25859 | 0.003 | 0.177 | 1.26E-52 |
| KIAA1191  | 8.46E-57 | 0.176704 | 0.378 | 0.46  | 1.26E-52 |
| C16orf87  | 8.56E-57 | 0.113362 | 0.329 | 0.453 | 1.28E-52 |
| SUPT4H1   | 8.84E-57 | 0.109156 | 0.489 | 0.614 | 1.32E-52 |
| VTA1      | 8.90E-57 | 0.127501 | 0.252 | 0.356 | 1.33E-52 |
| CEP112    | 1.02E-56 | -0.24592 | 0.015 | 0.207 | 1.53E-52 |
| CADM4     | 1.06E-56 | 0.188954 | 0.445 | 0.517 | 1.58E-52 |
| COL6A1    | 1.06E-56 | -0.39166 | 0.119 | 0.402 | 1.59E-52 |
| PTOV1     | 1.15E-56 | 0.219519 | 0.769 | 0.789 | 1.72E-52 |
| CHAF1B    | 1.16E-56 | -0.35733 | 0.023 | 0.237 | 1.73E-52 |
| YIPF6     | 1.22E-56 | 0.152719 | 0.377 | 0.486 | 1.83E-52 |



|          |           |           |        |        |           |
|----------|-----------|-----------|--------|--------|-----------|
| SCCPDH   | 1. 27E-56 | -0. 22753 | 0. 368 | 0. 659 | 1. 90E-52 |
| CUL1     | 1. 31E-56 | 0. 245887 | 0. 386 | 0. 417 | 1. 96E-52 |
| PBRM1    | 1. 33E-56 | 0. 205009 | 0. 436 | 0. 486 | 1. 98E-52 |
| SPG20    | 1. 48E-56 | -0. 27036 | 0. 13  | 0. 386 | 2. 21E-52 |
| ZCCHC24  | 1. 49E-56 | -0. 29665 | 0. 006 | 0. 185 | 2. 22E-52 |
| DFFA     | 1. 59E-56 | -0. 16005 | 0. 176 | 0. 404 | 2. 37E-52 |
| ACTR1A   | 1. 65E-56 | 0. 262622 | 0. 399 | 0. 414 | 2. 46E-52 |
| GLIPR1   | 1. 70E-56 | -0. 30766 | 0. 042 | 0. 262 | 2. 54E-52 |
| MLEC     | 1. 79E-56 | -0. 20611 | 0. 364 | 0. 648 | 2. 68E-52 |
| TAF11    | 1. 88E-56 | 0. 182326 | 0. 405 | 0. 486 | 2. 82E-52 |
| EI24     | 1. 89E-56 | 0. 122966 | 0. 643 | 0. 737 | 2. 82E-52 |
| EXOSC3   | 1. 96E-56 | -0. 19269 | 0. 132 | 0. 363 | 2. 92E-52 |
| AES      | 2. 00E-56 | 0. 204848 | 0. 686 | 0. 749 | 2. 98E-52 |
| UBE2Q1   | 2. 00E-56 | -0. 10994 | 0. 124 | 0. 315 | 2. 98E-52 |
| TMEM60   | 2. 07E-56 | -0. 15712 | 0. 24  | 0. 484 | 3. 09E-52 |
| ELN      | 2. 15E-56 | -0. 31957 | 0. 098 | 0. 344 | 3. 21E-52 |
| ING5     | 2. 35E-56 | -0. 14784 | 0. 118 | 0. 33  | 3. 51E-52 |
| YTHDC1   | 2. 41E-56 | 0. 19755  | 0. 467 | 0. 53  | 3. 60E-52 |
| BAG1     | 2. 47E-56 | 0. 302115 | 0. 437 | 0. 43  | 3. 70E-52 |
| SNW1     | 2. 48E-56 | -0. 12127 | 0. 344 | 0. 59  | 3. 71E-52 |
| CCDC137  | 2. 51E-56 | -0. 24105 | 0. 17  | 0. 43  | 3. 75E-52 |
| COA1     | 2. 56E-56 | -0. 18312 | 0. 435 | 0. 719 | 3. 83E-52 |
| NFATC2IP | 2. 68E-56 | -0. 19245 | 0. 159 | 0. 396 | 4. 01E-52 |
| HPCAL1   | 2. 74E-56 | 0. 440362 | 0. 328 | 0. 238 | 4. 09E-52 |
| PTPRS    | 2. 87E-56 | 0. 277431 | 0. 499 | 0. 542 | 4. 29E-52 |
| TRIM44   | 2. 96E-56 | 0. 143462 | 0. 39  | 0. 493 | 4. 42E-52 |
| MED17    | 3. 13E-56 | 0. 349653 | 0. 366 | 0. 325 | 4. 68E-52 |
| ZCCHC9   | 3. 17E-56 | -0. 18345 | 0. 064 | 0. 262 | 4. 74E-52 |
| C19orf52 | 3. 20E-56 | -0. 14698 | 0. 161 | 0. 38  | 4. 78E-52 |
| CRAT     | 3. 23E-56 | -0. 15913 | 0. 142 | 0. 362 | 4. 82E-52 |
| FAM84A   | 3. 26E-56 | -0. 33861 | 0. 071 | 0. 319 | 4. 88E-52 |
| TAF7     | 3. 27E-56 | 0. 181483 | 0. 754 | 0. 794 | 4. 88E-52 |
| EWSR1    | 3. 29E-56 | -0. 14532 | 0. 518 | 0. 786 | 4. 91E-52 |
| RNF146   | 3. 43E-56 | 0. 365261 | 0. 39  | 0. 348 | 5. 13E-52 |
| ASCL1    | 3. 52E-56 | -0. 30036 | 0. 295 | 0. 594 | 5. 26E-52 |
| NUDT22   | 3. 53E-56 | -0. 2006  | 0. 131 | 0. 362 | 5. 27E-52 |
| ZDHHC24  | 3. 54E-56 | -0. 21936 | 0. 055 | 0. 263 | 5. 29E-52 |
| CNRIP1   | 3. 55E-56 | 0. 314415 | 0. 427 | 0. 431 | 5. 31E-52 |
| VIMP     | 3. 56E-56 | -0. 23827 | 0. 319 | 0. 611 | 5. 32E-52 |
| GARS     | 3. 60E-56 | 0. 254841 | 0. 478 | 0. 495 | 5. 38E-52 |
| EIF2S1   | 3. 73E-56 | -0. 10377 | 0. 329 | 0. 568 | 5. 57E-52 |
| APITD1   | 3. 87E-56 | -0. 28296 | 0. 045 | 0. 264 | 5. 78E-52 |
| POU3F3   | 3. 92E-56 | 0. 267941 | 0. 338 | 0. 365 | 5. 86E-52 |
| ARL6IP6  | 3. 97E-56 | -0. 23765 | 0. 377 | 0. 674 | 5. 93E-52 |
| CHCHD3   | 3. 98E-56 | -0. 26296 | 0. 409 | 0. 716 | 5. 95E-52 |
| HMG20B   | 4. 28E-56 | -0. 31413 | 0. 251 | 0. 556 | 6. 39E-52 |
| ZNF714   | 4. 31E-56 | -0. 29458 | 0. 109 | 0. 353 | 6. 45E-52 |
| SHISA4   | 4. 40E-56 | 0. 118372 | 0. 257 | 0. 368 | 6. 57E-52 |
| ORAI2    | 4. 43E-56 | 0. 175942 | 0. 357 | 0. 436 | 6. 62E-52 |
| PPM1A    | 4. 45E-56 | 0. 178634 | 0. 236 | 0. 316 | 6. 66E-52 |
| SRRM1    | 4. 46E-56 | 0. 12999  | 0. 609 | 0. 715 | 6. 66E-52 |

|           |          |          |       |       |          |
|-----------|----------|----------|-------|-------|----------|
| SCAF11    | 4.47E-56 | -0.14607 | 0.332 | 0.585 | 6.67E-52 |
| NSA2      | 4.55E-56 | -0.16432 | 0.334 | 0.598 | 6.79E-52 |
| PDLIM1    | 4.56E-56 | -0.27966 | 0.024 | 0.23  | 6.81E-52 |
| PAM       | 4.68E-56 | -0.16506 | 0.085 | 0.286 | 6.99E-52 |
| FLOT2     | 4.76E-56 | -0.14165 | 0.101 | 0.304 | 7.12E-52 |
| REXO4     | 4.94E-56 | 0.126423 | 0.246 | 0.349 | 7.37E-52 |
| PXDC1     | 5.08E-56 | -0.167   | 0.079 | 0.279 | 7.60E-52 |
| LIMA1     | 5.24E-56 | -0.29786 | 0.372 | 0.689 | 7.84E-52 |
| SCO1      | 5.31E-56 | -0.12524 | 0.134 | 0.337 | 7.93E-52 |
| MRPS25    | 5.32E-56 | -0.10027 | 0.196 | 0.407 | 7.95E-52 |
| SYNE2     | 5.48E-56 | -0.1398  | 0.345 | 0.595 | 8.19E-52 |
| COPS4     | 5.53E-56 | 0.275219 | 0.482 | 0.48  | 8.26E-52 |
| SRSF10    | 5.80E-56 | -0.27727 | 0.283 | 0.573 | 8.67E-52 |
| FADS1     | 5.90E-56 | -0.18129 | 0.225 | 0.477 | 8.81E-52 |
| NSD1      | 5.99E-56 | 0.163903 | 0.332 | 0.419 | 8.95E-52 |
| RUNDC1    | 6.27E-56 | 0.341686 | 0.269 | 0.23  | 9.37E-52 |
| NEAT1     | 6.35E-56 | -0.62327 | 0.328 | 0.669 | 9.49E-52 |
| NSFL1C    | 6.35E-56 | 0.19863  | 0.537 | 0.604 | 9.50E-52 |
| ZC3H14    | 6.41E-56 | -0.13919 | 0.194 | 0.42  | 9.57E-52 |
| G6PD      | 6.47E-56 | -0.22375 | 0.121 | 0.359 | 9.67E-52 |
| NOTCH3    | 6.49E-56 | -0.22981 | 0.002 | 0.17  | 9.70E-52 |
| CHRA1     | 6.52E-56 | -0.27437 | 0.085 | 0.319 | 9.75E-52 |
| IGFBP4    | 6.93E-56 | -0.35586 | 0.017 | 0.219 | 1.04E-51 |
| H2AFY2    | 6.93E-56 | -0.15001 | 0.045 | 0.217 | 1.04E-51 |
| PRKRIR    | 6.96E-56 | -0.14675 | 0.087 | 0.28  | 1.04E-51 |
| MFS12     | 7.48E-56 | -0.23028 | 0.074 | 0.296 | 1.12E-51 |
| FAM134A   | 7.98E-56 | 0.121466 | 0.39  | 0.504 | 1.19E-51 |
| RNF157    | 8.01E-56 | -0.12024 | 0.164 | 0.374 | 1.20E-51 |
| CPNE2     | 8.05E-56 | -0.4394  | 0.108 | 0.391 | 1.20E-51 |
| FAM57B    | 8.44E-56 | 0.629073 | 0.394 | 0.157 | 1.26E-51 |
| IRAK1     | 8.54E-56 | -0.24927 | 0.06  | 0.279 | 1.28E-51 |
| PHF1      | 8.58E-56 | -0.15448 | 0.133 | 0.348 | 1.28E-51 |
| EFNB3     | 8.64E-56 | 0.512551 | 0.247 | 0.099 | 1.29E-51 |
| HAUS2     | 8.71E-56 | -0.25168 | 0.052 | 0.268 | 1.30E-51 |
| ARL2      | 8.80E-56 | -0.23183 | 0.307 | 0.591 | 1.31E-51 |
| PYCR1     | 9.36E-56 | -0.17725 | 0.185 | 0.421 | 1.40E-51 |
| ST3GAL4   | 9.41E-56 | -0.26669 | 0.099 | 0.335 | 1.41E-51 |
| TOPORS-AS | 1.01E-55 | -0.16338 | 0.075 | 0.269 | 1.51E-51 |
| FAM228B   | 1.05E-55 | 0.312453 | 0.349 | 0.344 | 1.56E-51 |
| STXBP3    | 1.06E-55 | -0.32705 | 0.053 | 0.285 | 1.58E-51 |
| ACYP2     | 1.10E-55 | 0.128686 | 0.29  | 0.411 | 1.64E-51 |
| IGSF8     | 1.13E-55 | 0.403048 | 0.317 | 0.256 | 1.69E-51 |
| ISOC2     | 1.14E-55 | -0.35394 | 0.21  | 0.512 | 1.70E-51 |
| CCDC25    | 1.20E-55 | -0.11101 | 0.304 | 0.537 | 1.79E-51 |
| FARSA     | 1.21E-55 | -0.19826 | 0.286 | 0.553 | 1.80E-51 |
| CDC42EP3  | 1.23E-55 | 0.575462 | 0.348 | 0.158 | 1.83E-51 |
| SRGAP2    | 1.25E-55 | -0.26177 | 0.112 | 0.358 | 1.87E-51 |
| SMARCA4   | 1.26E-55 | 0.13096  | 0.65  | 0.748 | 1.88E-51 |
| HSPH1     | 1.37E-55 | 0.120855 | 0.5   | 0.61  | 2.05E-51 |
| NAT14     | 1.39E-55 | -0.18957 | 0.159 | 0.394 | 2.08E-51 |
| CIZ1      | 1.41E-55 | -0.18704 | 0.158 | 0.395 | 2.11E-51 |

|           |          |          |       |       |          |
|-----------|----------|----------|-------|-------|----------|
| RP11-798M | 1.42E-55 | -0.15184 | 0.132 | 0.34  | 2.13E-51 |
| GOLGB1    | 1.45E-55 | 0.277356 | 0.303 | 0.319 | 2.16E-51 |
| GADD45G   | 1.45E-55 | 0.580907 | 0.677 | 0.364 | 2.17E-51 |
| TMEM18    | 1.45E-55 | -0.27932 | 0.147 | 0.409 | 2.17E-51 |
| ZBTB38    | 1.46E-55 | 0.359168 | 0.266 | 0.219 | 2.18E-51 |
| DDT       | 1.49E-55 | -0.31138 | 0.397 | 0.721 | 2.22E-51 |
| RNF114    | 1.56E-55 | -0.3334  | 0.311 | 0.631 | 2.33E-51 |
| POP5      | 1.57E-55 | -0.15635 | 0.278 | 0.523 | 2.35E-51 |
| LAP3      | 1.58E-55 | -0.37606 | 0.223 | 0.528 | 2.36E-51 |
| NUP85     | 1.62E-55 | -0.28948 | 0.086 | 0.33  | 2.42E-51 |
| CD2BP2    | 1.73E-55 | 0.109917 | 0.329 | 0.457 | 2.59E-51 |
| KIF3B     | 1.75E-55 | 0.175053 | 0.189 | 0.251 | 2.61E-51 |
| PCYT2     | 1.83E-55 | -0.1225  | 0.112 | 0.307 | 2.74E-51 |
| RFT1      | 1.87E-55 | -0.23398 | 0.068 | 0.285 | 2.79E-51 |
| DNAJC3    | 1.91E-55 | -0.13392 | 0.17  | 0.383 | 2.85E-51 |
| RAMP2     | 1.93E-55 | 0.413894 | 0.302 | 0.264 | 2.89E-51 |
| FAM103A1  | 2.06E-55 | -0.22078 | 0.17  | 0.411 | 3.08E-51 |
| E2F5      | 2.21E-55 | -0.14243 | 0.027 | 0.193 | 3.31E-51 |
| TM9SF3    | 2.23E-55 | -0.16893 | 0.108 | 0.319 | 3.33E-51 |
| CAPN2     | 2.28E-55 | -0.18905 | 0.2   | 0.442 | 3.41E-51 |
| NDC1      | 2.44E-55 | -0.28605 | 0.032 | 0.242 | 3.65E-51 |
| A1BG      | 2.48E-55 | -0.19227 | 0.167 | 0.401 | 3.71E-51 |
| GMPPA     | 2.58E-55 | -0.12421 | 0.093 | 0.28  | 3.85E-51 |
| SNX4      | 2.63E-55 | 0.301715 | 0.345 | 0.346 | 3.93E-51 |
| PRAF2     | 2.69E-55 | 0.163803 | 0.426 | 0.522 | 4.01E-51 |
| KXD1      | 2.79E-55 | -0.35047 | 0.322 | 0.652 | 4.17E-51 |
| CTXN1     | 2.93E-55 | 0.185964 | 0.277 | 0.349 | 4.38E-51 |
| HRK       | 2.93E-55 | 0.590104 | 0.229 | 0.084 | 4.39E-51 |
| SEC22C    | 2.96E-55 | -0.20314 | 0.207 | 0.458 | 4.43E-51 |
| CIR1      | 3.02E-55 | 0.247043 | 0.399 | 0.426 | 4.51E-51 |
| PNN       | 3.03E-55 | -0.17343 | 0.447 | 0.72  | 4.53E-51 |
| MSI2      | 3.07E-55 | -0.32148 | 0.306 | 0.619 | 4.59E-51 |
| MACROD1   | 3.45E-55 | -0.17505 | 0.099 | 0.307 | 5.16E-51 |
| COPS7A    | 3.54E-55 | -0.12794 | 0.215 | 0.441 | 5.28E-51 |
| NTN1      | 3.80E-55 | -0.18319 | 0.033 | 0.212 | 5.67E-51 |
| USP13     | 3.92E-55 | -0.24344 | 0.071 | 0.295 | 5.86E-51 |
| CLPTM1    | 4.14E-55 | -0.24138 | 0.279 | 0.562 | 6.19E-51 |
| IDH3G     | 4.53E-55 | 0.127285 | 0.416 | 0.537 | 6.77E-51 |
| CLIP3     | 4.64E-55 | 0.499327 | 0.368 | 0.244 | 6.94E-51 |
| HCFC1R1   | 5.13E-55 | 0.47484  | 0.452 | 0.337 | 7.66E-51 |
| DID01     | 5.16E-55 | -0.13245 | 0.13  | 0.338 | 7.71E-51 |
| ALKBH2    | 5.40E-55 | -0.20305 | 0.176 | 0.422 | 8.07E-51 |
| SASS6     | 5.45E-55 | -0.24513 | 0.058 | 0.274 | 8.15E-51 |
| AP3B1     | 5.48E-55 | -0.23192 | 0.09  | 0.314 | 8.18E-51 |
| AK4       | 5.53E-55 | -0.39551 | 0.053 | 0.298 | 8.26E-51 |
| CAPNS1    | 5.66E-55 | -0.1698  | 0.247 | 0.499 | 8.45E-51 |
| TMEM70    | 5.78E-55 | 0.224602 | 0.425 | 0.479 | 8.64E-51 |
| CHST12    | 6.26E-55 | 0.299917 | 0.386 | 0.389 | 9.35E-51 |
| LYAR      | 6.35E-55 | -0.14673 | 0.157 | 0.377 | 9.49E-51 |
| MAGOHB    | 6.37E-55 | -0.26253 | 0.296 | 0.583 | 9.52E-51 |
| NEURL1B   | 6.52E-55 | -0.34928 | 0.03  | 0.246 | 9.74E-51 |

|           |          |          |       |       |          |
|-----------|----------|----------|-------|-------|----------|
| PAK7      | 6.89E-55 | 0.623864 | 0.291 | 0.046 | 1.03E-50 |
| RP11-25K1 | 7.08E-55 | 0.442485 | 0.255 | 0.189 | 1.06E-50 |
| RNF4      | 7.28E-55 | -0.19099 | 0.167 | 0.406 | 1.09E-50 |
| KRR1      | 7.39E-55 | -0.15995 | 0.21  | 0.447 | 1.10E-50 |
| PEMT      | 7.74E-55 | -0.16698 | 0.185 | 0.417 | 1.16E-50 |
| NUCKS1    | 7.76E-55 | -0.38537 | 0.73  | 0.94  | 1.16E-50 |
| RRAS      | 8.03E-55 | -0.19899 | 0.003 | 0.156 | 1.20E-50 |
| APH1A     | 8.29E-55 | -0.24628 | 0.407 | 0.707 | 1.24E-50 |
| HEY1      | 8.36E-55 | -0.42883 | 0.229 | 0.549 | 1.25E-50 |
| SIAH1     | 8.66E-55 | 0.274731 | 0.445 | 0.47  | 1.29E-50 |
| ZNF3      | 8.92E-55 | 0.349138 | 0.463 | 0.425 | 1.33E-50 |
| C1orf174  | 9.10E-55 | -0.15562 | 0.137 | 0.351 | 1.36E-50 |
| CTSF      | 9.37E-55 | 0.215113 | 0.334 | 0.389 | 1.40E-50 |
| MBNL1     | 9.75E-55 | -0.23678 | 0.083 | 0.31  | 1.46E-50 |
| ODF2L     | 9.82E-55 | 0.430466 | 0.34  | 0.254 | 1.47E-50 |
| RBM42     | 1.00E-54 | -0.1967  | 0.392 | 0.669 | 1.49E-50 |
| SUPT16H   | 1.05E-54 | -0.18791 | 0.299 | 0.559 | 1.57E-50 |
| YRDC      | 1.10E-54 | 0.197814 | 0.252 | 0.32  | 1.64E-50 |
| TM7SF2    | 1.16E-54 | 0.394454 | 0.334 | 0.281 | 1.73E-50 |
| HINT3     | 1.17E-54 | 0.212991 | 0.305 | 0.351 | 1.76E-50 |
| HLA-B     | 1.20E-54 | -0.64823 | 0.482 | 0.796 | 1.79E-50 |
| HSPB11    | 1.24E-54 | -0.27835 | 0.32  | 0.619 | 1.85E-50 |
| BRD4      | 1.25E-54 | -0.13951 | 0.324 | 0.575 | 1.86E-50 |
| CHTF18    | 1.34E-54 | -0.27531 | 0.051 | 0.272 | 2.00E-50 |
| PRPF38A   | 1.36E-54 | -0.11443 | 0.306 | 0.541 | 2.03E-50 |
| GRIA2     | 1.36E-54 | 0.43403  | 0.513 | 0.407 | 2.03E-50 |
| NAA38     | 1.39E-54 | -0.26029 | 0.449 | 0.757 | 2.08E-50 |
| CANT1     | 1.42E-54 | -0.13936 | 0.177 | 0.393 | 2.11E-50 |
| GPBP1L1   | 1.42E-54 | -0.17943 | 0.103 | 0.309 | 2.12E-50 |
| WIZ       | 1.45E-54 | -0.12359 | 0.095 | 0.281 | 2.17E-50 |
| PDIA4     | 1.51E-54 | -0.26643 | 0.403 | 0.707 | 2.26E-50 |
| RUFY2     | 1.56E-54 | 0.330152 | 0.287 | 0.263 | 2.32E-50 |
| SUCLG1    | 1.56E-54 | 0.117872 | 0.528 | 0.648 | 2.33E-50 |
| QDPR      | 1.56E-54 | -0.12782 | 0.301 | 0.538 | 2.33E-50 |
| TRMT61A   | 1.60E-54 | -0.21722 | 0.063 | 0.274 | 2.39E-50 |
| SLC25A1   | 1.67E-54 | -0.25416 | 0.142 | 0.391 | 2.49E-50 |
| SLC35B2   | 1.71E-54 | -0.22254 | 0.315 | 0.594 | 2.56E-50 |
| PAPOLA    | 1.74E-54 | -0.2132  | 0.434 | 0.72  | 2.60E-50 |
| ARHGEF12  | 1.76E-54 | 0.114219 | 0.203 | 0.3   | 2.62E-50 |
| PDE4DIP   | 1.80E-54 | 0.528142 | 0.416 | 0.231 | 2.69E-50 |
| UBA6      | 1.92E-54 | 0.163555 | 0.246 | 0.328 | 2.88E-50 |
| RDH14     | 1.94E-54 | 0.117518 | 0.239 | 0.347 | 2.90E-50 |
| FAM104B   | 1.95E-54 | -0.23434 | 0.142 | 0.388 | 2.91E-50 |
| ACBD5     | 2.01E-54 | -0.24298 | 0.055 | 0.267 | 3.00E-50 |
| EXOSC6    | 2.01E-54 | -0.22545 | 0.022 | 0.204 | 3.01E-50 |
| COMMD1    | 2.09E-54 | 0.17473  | 0.384 | 0.484 | 3.13E-50 |
| RNF145    | 2.11E-54 | 0.123661 | 0.521 | 0.627 | 3.15E-50 |
| ERCC1     | 2.19E-54 | -0.215   | 0.351 | 0.631 | 3.28E-50 |
| GPAA1     | 2.32E-54 | -0.16674 | 0.399 | 0.665 | 3.46E-50 |
| TMEM9     | 2.38E-54 | 0.142147 | 0.456 | 0.547 | 3.56E-50 |
| DTWD1     | 2.38E-54 | -0.14128 | 0.075 | 0.26  | 3.56E-50 |

|           |          |          |       |       |          |
|-----------|----------|----------|-------|-------|----------|
| FAM104A   | 2.39E-54 | -0.12948 | 0.259 | 0.486 | 3.58E-50 |
| ATP1B3    | 2.39E-54 | 0.163025 | 0.641 | 0.717 | 3.58E-50 |
| CCDC107   | 2.41E-54 | 0.147745 | 0.452 | 0.557 | 3.60E-50 |
| RP4-665J2 | 2.48E-54 | 0.298338 | 0.153 | 0.19  | 3.71E-50 |
| NIF3L1    | 2.49E-54 | -0.26221 | 0.115 | 0.359 | 3.71E-50 |
| ATG12     | 2.54E-54 | 0.115364 | 0.418 | 0.535 | 3.80E-50 |
| SYNGR2    | 2.67E-54 | -0.12487 | 0.051 | 0.219 | 3.98E-50 |
| GPI       | 2.70E-54 | -0.18389 | 0.209 | 0.451 | 4.03E-50 |
| FNDC3A    | 2.76E-54 | -0.12321 | 0.145 | 0.346 | 4.12E-50 |
| WRAP73    | 2.78E-54 | -0.13819 | 0.112 | 0.311 | 4.16E-50 |
| C9orf142  | 2.82E-54 | -0.19816 | 0.398 | 0.683 | 4.22E-50 |
| CASP6     | 2.95E-54 | 0.21772  | 0.254 | 0.311 | 4.42E-50 |
| RCC2      | 3.00E-54 | -0.17391 | 0.133 | 0.354 | 4.49E-50 |
| SAP30L    | 3.02E-54 | -0.30817 | 0.06  | 0.294 | 4.52E-50 |
| TRIP10    | 3.13E-54 | -0.23428 | 0.019 | 0.204 | 4.67E-50 |
| ZCCHC10   | 3.45E-54 | 0.174282 | 0.294 | 0.368 | 5.16E-50 |
| MYEF2     | 3.54E-54 | -0.12587 | 0.26  | 0.488 | 5.28E-50 |
| COMMD10   | 3.61E-54 | -0.12584 | 0.146 | 0.353 | 5.39E-50 |
| MTF2      | 3.67E-54 | 0.250022 | 0.439 | 0.472 | 5.49E-50 |
| SECISBP2  | 3.76E-54 | 0.309489 | 0.372 | 0.364 | 5.62E-50 |
| CDIPT     | 3.92E-54 | 0.242006 | 0.361 | 0.396 | 5.86E-50 |
| ZNF90     | 3.96E-54 | -0.31435 | 0.169 | 0.435 | 5.92E-50 |
| TIMM23    | 4.05E-54 | -0.10438 | 0.109 | 0.296 | 6.06E-50 |
| STMN3     | 4.05E-54 | 0.110847 | 0.563 | 0.675 | 6.06E-50 |
| LMCD1     | 4.08E-54 | -0.26128 | 0.008 | 0.186 | 6.09E-50 |
| SMC5      | 4.15E-54 | -0.15037 | 0.172 | 0.388 | 6.20E-50 |
| DDX41     | 4.23E-54 | 0.117478 | 0.283 | 0.388 | 6.32E-50 |
| TMEM101   | 4.44E-54 | -0.16903 | 0.098 | 0.305 | 6.64E-50 |
| TMEM38B   | 4.56E-54 | -0.25973 | 0.08  | 0.309 | 6.81E-50 |
| MPC2      | 4.76E-54 | 0.100513 | 0.581 | 0.698 | 7.11E-50 |
| CORO2B    | 4.86E-54 | -0.24208 | 0.054 | 0.264 | 7.27E-50 |
| FAM72D    | 4.88E-54 | -0.26602 | 0.002 | 0.163 | 7.30E-50 |
| A2M       | 5.04E-54 | -0.35142 | 0.079 | 0.326 | 7.53E-50 |
| RBM15B    | 5.16E-54 | 0.132091 | 0.272 | 0.359 | 7.70E-50 |
| SF1       | 5.35E-54 | 0.153239 | 0.675 | 0.753 | 8.00E-50 |
| CMIP      | 5.37E-54 | 0.498086 | 0.296 | 0.174 | 8.02E-50 |
| PIGP      | 5.44E-54 | -0.13117 | 0.095 | 0.289 | 8.13E-50 |
| MGAT1     | 5.61E-54 | -0.16883 | 0.126 | 0.344 | 8.38E-50 |
| RIF1      | 5.72E-54 | -0.1455  | 0.284 | 0.522 | 8.54E-50 |
| NR2F6     | 6.24E-54 | 0.133112 | 0.214 | 0.311 | 9.32E-50 |
| ENDOG     | 6.38E-54 | 0.151553 | 0.203 | 0.293 | 9.53E-50 |
| PURA      | 6.41E-54 | 0.119668 | 0.279 | 0.379 | 9.58E-50 |
| DDX11     | 6.53E-54 | -0.29705 | 0.033 | 0.24  | 9.76E-50 |
| HSBP1     | 6.55E-54 | 0.228216 | 0.892 | 0.874 | 9.79E-50 |
| ZNF397    | 6.57E-54 | 0.302372 | 0.282 | 0.272 | 9.82E-50 |
| CHL1      | 7.58E-54 | -0.29595 | 0.084 | 0.323 | 1.13E-49 |
| HERC2     | 7.77E-54 | -0.12632 | 0.174 | 0.385 | 1.16E-49 |
| RAB10     | 8.02E-54 | 0.11237  | 0.579 | 0.688 | 1.20E-49 |
| LRRC61    | 8.29E-54 | 0.617839 | 0.281 | 0.043 | 1.24E-49 |
| ZNF711    | 8.62E-54 | 0.426412 | 0.426 | 0.322 | 1.29E-49 |
| PRPS2     | 8.73E-54 | -0.27977 | 0.046 | 0.264 | 1.30E-49 |

|           |          |          |       |       |          |
|-----------|----------|----------|-------|-------|----------|
| RNASEH1-A | 8.75E-54 | 0.125307 | 0.241 | 0.36  | 1.31E-49 |
| ZMYM2     | 9.38E-54 | 0.312942 | 0.269 | 0.264 | 1.40E-49 |
| ITM2C     | 9.38E-54 | -0.19082 | 0.374 | 0.646 | 1.40E-49 |
| DHX29     | 9.39E-54 | 0.172072 | 0.434 | 0.516 | 1.40E-49 |
| CS        | 9.60E-54 | -0.19432 | 0.123 | 0.349 | 1.43E-49 |
| SRSF1     | 9.81E-54 | -0.12167 | 0.493 | 0.743 | 1.47E-49 |
| PIGS      | 9.85E-54 | -0.12025 | 0.117 | 0.31  | 1.47E-49 |
| DLX6      | 9.99E-54 | 0.717843 | 0.346 | 0.086 | 1.49E-49 |
| TNRC6C    | 1.01E-53 | 0.254542 | 0.323 | 0.347 | 1.51E-49 |
| IL17RC    | 1.03E-53 | -0.19415 | 0.025 | 0.204 | 1.54E-49 |
| LCORL     | 1.04E-53 | -0.13138 | 0.104 | 0.296 | 1.55E-49 |
| STAG1     | 1.09E-53 | -0.16857 | 0.132 | 0.346 | 1.63E-49 |
| PIGT      | 1.10E-53 | -0.33817 | 0.277 | 0.586 | 1.64E-49 |
| MCC       | 1.12E-53 | -0.20111 | 0.076 | 0.283 | 1.67E-49 |
| TBCD      | 1.13E-53 | -0.10313 | 0.141 | 0.336 | 1.69E-49 |
| FUNDC1    | 1.15E-53 | 0.166291 | 0.304 | 0.393 | 1.71E-49 |
| KAT7      | 1.18E-53 | -0.25865 | 0.113 | 0.356 | 1.76E-49 |
| FNBP1     | 1.24E-53 | 0.153017 | 0.225 | 0.305 | 1.85E-49 |
| GTF2B     | 1.24E-53 | 0.367908 | 0.362 | 0.302 | 1.85E-49 |
| CPD       | 1.32E-53 | -0.10989 | 0.096 | 0.275 | 1.97E-49 |
| SEC14L1   | 1.33E-53 | -0.26501 | 0.152 | 0.404 | 1.98E-49 |
| ROCK2     | 1.34E-53 | -0.11353 | 0.139 | 0.341 | 2.01E-49 |
| USE1      | 1.36E-53 | 0.114628 | 0.357 | 0.479 | 2.03E-49 |
| ZMAT3     | 1.41E-53 | -0.27074 | 0.092 | 0.325 | 2.10E-49 |
| POLD2     | 1.47E-53 | -0.33931 | 0.448 | 0.775 | 2.20E-49 |
| DESI1     | 1.52E-53 | -0.16355 | 0.065 | 0.252 | 2.27E-49 |
| NHLRC3    | 1.56E-53 | 0.158512 | 0.357 | 0.448 | 2.33E-49 |
| SAP30     | 1.59E-53 | -0.28608 | 0.249 | 0.535 | 2.38E-49 |
| TMOD3     | 1.60E-53 | -0.14781 | 0.062 | 0.246 | 2.38E-49 |
| TAF1D     | 1.62E-53 | 0.147762 | 0.328 | 0.422 | 2.42E-49 |
| CCDC150   | 1.64E-53 | -0.28798 | 0.009 | 0.188 | 2.45E-49 |
| PRPF6     | 1.72E-53 | 0.103079 | 0.472 | 0.598 | 2.57E-49 |
| FAM212B   | 1.92E-53 | -0.16725 | 0.101 | 0.304 | 2.87E-49 |
| CTCF      | 1.98E-53 | -0.12385 | 0.227 | 0.443 | 2.96E-49 |
| CIB2      | 1.98E-53 | -0.23877 | 0.058 | 0.27  | 2.96E-49 |
| AQP4      | 2.00E-53 | -0.51835 | 0.015 | 0.211 | 2.99E-49 |
| ACTB      | 2.05E-53 | 0.138511 | 1     | 0.996 | 3.06E-49 |
| SNRNP40   | 2.05E-53 | -0.24174 | 0.352 | 0.64  | 3.06E-49 |
| HMG2      | 2.05E-53 | -0.503   | 0.63  | 0.884 | 3.07E-49 |
| KAT5      | 2.07E-53 | 0.250631 | 0.339 | 0.363 | 3.09E-49 |
| CLDND1    | 2.11E-53 | -0.13437 | 0.357 | 0.602 | 3.16E-49 |
| E2F7      | 2.15E-53 | -0.21836 | 0.001 | 0.153 | 3.22E-49 |
| RHOQ      | 2.20E-53 | -0.14705 | 0.049 | 0.226 | 3.29E-49 |
| CCDC106   | 2.22E-53 | -0.24268 | 0.162 | 0.412 | 3.32E-49 |
| KDELR3    | 2.24E-53 | -0.18509 | 0     | 0.148 | 3.34E-49 |
| GPX7      | 2.27E-53 | -0.24033 | 0.125 | 0.364 | 3.40E-49 |
| FAM173A   | 2.31E-53 | 0.17918  | 0.312 | 0.386 | 3.45E-49 |
| BCAR1     | 2.36E-53 | 0.164442 | 0.281 | 0.359 | 3.52E-49 |
| CDCA7     | 2.42E-53 | 0.511597 | 0.468 | 0.331 | 3.62E-49 |
| IFI35     | 2.49E-53 | -0.27741 | 0.016 | 0.204 | 3.72E-49 |
| PKN2      | 2.53E-53 | -0.1219  | 0.189 | 0.4   | 3.78E-49 |

|          |          |          |       |       |          |
|----------|----------|----------|-------|-------|----------|
| TMEM131  | 2.59E-53 | -0.18691 | 0.093 | 0.301 | 3.87E-49 |
| C1R      | 2.61E-53 | -0.43193 | 0.021 | 0.227 | 3.90E-49 |
| BROX     | 2.65E-53 | -0.16333 | 0.138 | 0.348 | 3.95E-49 |
| DIMT1    | 2.73E-53 | -0.14646 | 0.132 | 0.335 | 4.07E-49 |
| PPP1R11  | 2.83E-53 | 0.193692 | 0.407 | 0.467 | 4.22E-49 |
| OSTM1    | 2.96E-53 | 0.125575 | 0.243 | 0.333 | 4.42E-49 |
| PDPK1    | 3.05E-53 | 0.140331 | 0.278 | 0.373 | 4.55E-49 |
| TSNAX    | 3.13E-53 | 0.190287 | 0.367 | 0.435 | 4.67E-49 |
| HSPBP1   | 3.18E-53 | -0.11086 | 0.315 | 0.542 | 4.75E-49 |
| SPIN1    | 3.18E-53 | 0.231219 | 0.28  | 0.312 | 4.75E-49 |
| TEAD1    | 3.25E-53 | -0.16862 | 0.14  | 0.36  | 4.86E-49 |
| IMMP1L   | 3.39E-53 | -0.10457 | 0.311 | 0.536 | 5.07E-49 |
| C11orf49 | 3.62E-53 | 0.118531 | 0.321 | 0.428 | 5.41E-49 |
| ODF2     | 3.62E-53 | -0.34442 | 0.137 | 0.405 | 5.41E-49 |
| SUV39H2  | 3.77E-53 | -0.27158 | 0.051 | 0.265 | 5.63E-49 |
| BMPR2    | 3.82E-53 | 0.245745 | 0.285 | 0.314 | 5.71E-49 |
| CAPZA1   | 3.94E-53 | -0.1165  | 0.295 | 0.521 | 5.89E-49 |
| VPS4B    | 3.97E-53 | 0.103716 | 0.242 | 0.349 | 5.93E-49 |
| COTL1    | 4.06E-53 | 0.255255 | 0.542 | 0.554 | 6.06E-49 |
| C11orf24 | 4.17E-53 | -0.20173 | 0.078 | 0.285 | 6.23E-49 |
| MAP2K1   | 4.24E-53 | -0.2432  | 0.119 | 0.359 | 6.33E-49 |
| DUSP12   | 4.34E-53 | 0.225393 | 0.388 | 0.433 | 6.48E-49 |
| ASB8     | 4.42E-53 | 0.34973  | 0.374 | 0.326 | 6.61E-49 |
| DLST     | 4.46E-53 | -0.10618 | 0.108 | 0.29  | 6.67E-49 |
| SDF4     | 4.52E-53 | -0.2469  | 0.341 | 0.633 | 6.75E-49 |
| KIAA1107 | 4.55E-53 | 0.62208  | 0.248 | 0.03  | 6.80E-49 |
| DMWD     | 4.58E-53 | -0.10593 | 0.132 | 0.325 | 6.85E-49 |
| TDP1     | 4.61E-53 | -0.24218 | 0.043 | 0.242 | 6.89E-49 |
| AIMP1    | 4.65E-53 | -0.12583 | 0.302 | 0.538 | 6.94E-49 |
| TBC1D9B  | 4.82E-53 | -0.1144  | 0.079 | 0.256 | 7.20E-49 |
| C5orf34  | 4.88E-53 | -0.35931 | 0.01  | 0.191 | 7.29E-49 |
| NUP93    | 4.96E-53 | -0.18574 | 0.181 | 0.415 | 7.42E-49 |
| SHC1     | 5.08E-53 | -0.22086 | 0.02  | 0.202 | 7.59E-49 |
| SACS     | 5.69E-53 | -0.20821 | 0.136 | 0.364 | 8.51E-49 |
| TNRC6A   | 5.71E-53 | 0.167126 | 0.278 | 0.353 | 8.53E-49 |
| DDAH1    | 5.81E-53 | -0.2572  | 0.097 | 0.331 | 8.69E-49 |
| WDR41    | 6.18E-53 | -0.20855 | 0.168 | 0.404 | 9.24E-49 |
| DDOST    | 6.21E-53 | -0.13391 | 0.386 | 0.632 | 9.28E-49 |
| BPGM     | 6.47E-53 | 0.236826 | 0.427 | 0.457 | 9.67E-49 |
| PLAU     | 6.51E-53 | -0.37062 | 0.014 | 0.206 | 9.73E-49 |
| TRMT10C  | 6.79E-53 | 0.173349 | 0.361 | 0.442 | 1.01E-48 |
| NAA10    | 6.84E-53 | -0.17781 | 0.413 | 0.683 | 1.02E-48 |
| SNAPC1   | 6.86E-53 | -0.29298 | 0.097 | 0.337 | 1.03E-48 |
| FANCG    | 7.45E-53 | -0.28795 | 0.077 | 0.311 | 1.11E-48 |
| LUC7L    | 7.84E-53 | 0.120502 | 0.361 | 0.472 | 1.17E-48 |
| SCLT1    | 8.26E-53 | -0.27193 | 0.06  | 0.283 | 1.23E-48 |
| TLCD1    | 8.32E-53 | -0.2471  | 0.001 | 0.156 | 1.24E-48 |
| CERS4    | 8.61E-53 | -0.13175 | 0.111 | 0.302 | 1.29E-48 |
| MTHFD1L  | 8.92E-53 | -0.15839 | 0.046 | 0.22  | 1.33E-48 |
| RBM5     | 9.14E-53 | 0.276035 | 0.43  | 0.435 | 1.37E-48 |
| 3-Sep    | 9.59E-53 | 0.543546 | 0.278 | 0.138 | 1.43E-48 |

|           |          |          |       |       |          |
|-----------|----------|----------|-------|-------|----------|
| GLRX      | 9.72E-53 | 0.519366 | 0.357 | 0.204 | 1.45E-48 |
| PRKACA    | 1.07E-52 | -0.16237 | 0.104 | 0.307 | 1.60E-48 |
| SNHG7     | 1.10E-52 | -0.13634 | 0.326 | 0.56  | 1.65E-48 |
| GEMIN6    | 1.19E-52 | -0.20498 | 0.129 | 0.356 | 1.78E-48 |
| UXT       | 1.20E-52 | -0.11116 | 0.438 | 0.684 | 1.79E-48 |
| IFNGR2    | 1.22E-52 | -0.11992 | 0.276 | 0.501 | 1.82E-48 |
| MEPCE     | 1.24E-52 | -0.18914 | 0.091 | 0.302 | 1.85E-48 |
| NCOA1     | 1.29E-52 | 0.157123 | 0.208 | 0.293 | 1.92E-48 |
| LMO2      | 1.30E-52 | -0.30624 | 0.027 | 0.228 | 1.95E-48 |
| LINC00969 | 1.30E-52 | 0.214778 | 0.354 | 0.4   | 1.95E-48 |
| GIGYF2    | 1.32E-52 | 0.152902 | 0.235 | 0.311 | 1.97E-48 |
| PPP1R12C  | 1.32E-52 | -0.12488 | 0.043 | 0.207 | 1.98E-48 |
| PRIM2     | 1.34E-52 | -0.35793 | 0.042 | 0.262 | 2.00E-48 |
| GNG2      | 1.41E-52 | 0.460048 | 0.421 | 0.305 | 2.11E-48 |
| PPP2R3B   | 1.52E-52 | -0.20734 | 0.059 | 0.258 | 2.28E-48 |
| NFATC3    | 1.52E-52 | -0.1151  | 0.123 | 0.317 | 2.28E-48 |
| RAB22A    | 1.61E-52 | -0.18879 | 0.199 | 0.441 | 2.40E-48 |
| BTG3      | 1.66E-52 | -0.28573 | 0.464 | 0.774 | 2.48E-48 |
| EYA2      | 1.68E-52 | -0.23507 | 0.032 | 0.227 | 2.52E-48 |
| VAT1      | 1.73E-52 | 0.388548 | 0.262 | 0.205 | 2.58E-48 |
| L3HYPDH   | 1.78E-52 | -0.24487 | 0.017 | 0.2   | 2.67E-48 |
| EHMT2     | 1.82E-52 | 0.238298 | 0.35  | 0.391 | 2.72E-48 |
| RPIA      | 1.83E-52 | 0.123365 | 0.225 | 0.317 | 2.73E-48 |
| TMF1      | 1.83E-52 | 0.208288 | 0.278 | 0.323 | 2.74E-48 |
| TMEM248   | 1.83E-52 | -0.13578 | 0.203 | 0.425 | 2.74E-48 |
| CCS       | 1.85E-52 | 0.163446 | 0.206 | 0.286 | 2.76E-48 |
| KBTBD2    | 1.90E-52 | -0.20244 | 0.122 | 0.343 | 2.84E-48 |
| TRA2A     | 1.93E-52 | 0.195839 | 0.488 | 0.543 | 2.89E-48 |
| DTNA      | 1.94E-52 | -0.25902 | 0.12  | 0.358 | 2.89E-48 |
| NRCAM     | 1.94E-52 | -0.12827 | 0.332 | 0.574 | 2.90E-48 |
| SREK1     | 1.99E-52 | -0.12457 | 0.335 | 0.568 | 2.97E-48 |
| FBXO3     | 2.11E-52 | 0.277744 | 0.302 | 0.3   | 3.15E-48 |
| ZBTB80S   | 2.25E-52 | -0.20013 | 0.244 | 0.499 | 3.36E-48 |
| RNF5      | 2.29E-52 | 0.108513 | 0.547 | 0.659 | 3.42E-48 |
| CABIN1    | 2.31E-52 | -0.15557 | 0.067 | 0.256 | 3.45E-48 |
| PUF60     | 2.35E-52 | 0.202856 | 0.726 | 0.763 | 3.51E-48 |
| BHLHE40   | 2.52E-52 | -0.23731 | 0.011 | 0.179 | 3.77E-48 |
| UBE2M     | 2.60E-52 | -0.16668 | 0.22  | 0.453 | 3.89E-48 |
| USP1      | 2.74E-52 | -0.35327 | 0.378 | 0.706 | 4.10E-48 |
| PET100    | 2.88E-52 | -0.13388 | 0.46  | 0.71  | 4.30E-48 |
| LINC00662 | 2.92E-52 | 0.328451 | 0.311 | 0.3   | 4.37E-48 |
| FAM174A   | 2.94E-52 | 0.210413 | 0.25  | 0.306 | 4.40E-48 |
| POLD3     | 2.99E-52 | -0.37827 | 0.094 | 0.354 | 4.47E-48 |
| CTNND1    | 3.25E-52 | 0.126535 | 0.223 | 0.312 | 4.86E-48 |
| ATP6V1C1  | 3.38E-52 | 0.110572 | 0.207 | 0.31  | 5.05E-48 |
| XIST      | 3.39E-52 | 0.730378 | 0.434 | 0.146 | 5.06E-48 |
| RRS1      | 3.45E-52 | -0.10939 | 0.085 | 0.258 | 5.16E-48 |
| SPSB4     | 3.50E-52 | -0.15883 | 0.058 | 0.242 | 5.23E-48 |
| RAB14     | 3.59E-52 | 0.155098 | 0.521 | 0.6   | 5.36E-48 |
| LYPLA2    | 3.60E-52 | 0.103017 | 0.214 | 0.315 | 5.38E-48 |
| ERI2      | 3.66E-52 | -0.21063 | 0.026 | 0.201 | 5.48E-48 |



|           |          |          |       |       |          |
|-----------|----------|----------|-------|-------|----------|
| MPP5      | 3.67E-52 | -0.21967 | 0.028 | 0.211 | 5.48E-48 |
| METTL23   | 3.70E-52 | -0.18773 | 0.261 | 0.514 | 5.52E-48 |
| TNFAIP8L1 | 3.90E-52 | -0.36341 | 0.038 | 0.258 | 5.83E-48 |
| TRMT1     | 3.91E-52 | -0.11125 | 0.133 | 0.321 | 5.85E-48 |
| PSENE1    | 3.96E-52 | -0.10826 | 0.345 | 0.575 | 5.92E-48 |
| ZMYND11   | 4.01E-52 | -0.1285  | 0.121 | 0.314 | 6.00E-48 |
| PDE4B     | 4.10E-52 | -0.26735 | 0.107 | 0.338 | 6.12E-48 |
| PAPSS1    | 4.10E-52 | 0.341715 | 0.452 | 0.409 | 6.13E-48 |
| SRPK1     | 4.21E-52 | 0.123732 | 0.318 | 0.426 | 6.30E-48 |
| CNPY2     | 4.31E-52 | 0.20765  | 0.731 | 0.767 | 6.44E-48 |
| ATP5SL    | 4.33E-52 | -0.13687 | 0.215 | 0.435 | 6.47E-48 |
| CDKN1A    | 4.38E-52 | -0.39237 | 0.088 | 0.332 | 6.54E-48 |
| LRPAP1    | 4.55E-52 | -0.23367 | 0.364 | 0.649 | 6.80E-48 |
| GRK6      | 4.58E-52 | -0.14301 | 0.144 | 0.352 | 6.84E-48 |
| DHRS4L2   | 4.58E-52 | -0.1545  | 0.119 | 0.319 | 6.84E-48 |
| SUGP2     | 4.59E-52 | -0.22534 | 0.322 | 0.596 | 6.86E-48 |
| GRIPAP1   | 4.63E-52 | 0.180777 | 0.237 | 0.299 | 6.92E-48 |
| BCAM      | 4.91E-52 | -0.22782 | 0.035 | 0.223 | 7.34E-48 |
| MSI1      | 5.00E-52 | 0.2214   | 0.263 | 0.307 | 7.47E-48 |
| FUT8      | 5.05E-52 | -0.13681 | 0.09  | 0.277 | 7.55E-48 |
| RASSF8    | 5.42E-52 | -0.24899 | 0.016 | 0.199 | 8.09E-48 |
| UBE2E1    | 5.79E-52 | -0.11258 | 0.394 | 0.626 | 8.66E-48 |
| ASRGL1    | 5.99E-52 | -0.19146 | 0.396 | 0.667 | 8.95E-48 |
| LYRM7     | 6.02E-52 | 0.161863 | 0.324 | 0.395 | 8.99E-48 |
| OSER1     | 6.20E-52 | 0.221648 | 0.375 | 0.419 | 9.26E-48 |
| HIST1H1B  | 6.62E-52 | -0.30214 | 0.002 | 0.162 | 9.90E-48 |
| C1orf21   | 6.64E-52 | -0.15575 | 0.208 | 0.438 | 9.92E-48 |
| MED24     | 6.67E-52 | 0.187359 | 0.279 | 0.331 | 9.97E-48 |
| PPIL1     | 6.89E-52 | -0.1483  | 0.205 | 0.427 | 1.03E-47 |
| SPPL2A    | 6.97E-52 | -0.27385 | 0.044 | 0.248 | 1.04E-47 |
| DKC1      | 7.17E-52 | -0.15942 | 0.299 | 0.542 | 1.07E-47 |
| DKK3      | 7.63E-52 | 0.124019 | 0.3   | 0.4   | 1.14E-47 |
| FAIM2     | 7.65E-52 | 0.469777 | 0.383 | 0.26  | 1.14E-47 |
| ACTR6     | 7.94E-52 | 0.30415  | 0.393 | 0.372 | 1.19E-47 |
| TOLLIP    | 8.02E-52 | 0.1703   | 0.288 | 0.36  | 1.20E-47 |
| MFAP1     | 8.24E-52 | -0.20775 | 0.134 | 0.363 | 1.23E-47 |
| GAS2L3    | 8.65E-52 | -0.33076 | 0.098 | 0.347 | 1.29E-47 |
| CIT       | 8.66E-52 | -0.26034 | 0.036 | 0.236 | 1.29E-47 |
| RECQL4    | 8.83E-52 | -0.33445 | 0.026 | 0.232 | 1.32E-47 |
| C7orf26   | 8.84E-52 | 0.29995  | 0.321 | 0.309 | 1.32E-47 |
| MOCS2     | 9.14E-52 | -0.23542 | 0.225 | 0.48  | 1.37E-47 |
| PPM1B     | 9.30E-52 | 0.115116 | 0.423 | 0.533 | 1.39E-47 |
| WIPF1     | 9.64E-52 | -0.20626 | 0.049 | 0.246 | 1.44E-47 |
| GMPS      | 9.72E-52 | -0.17695 | 0.17  | 0.398 | 1.45E-47 |
| UNK       | 9.79E-52 | -0.17308 | 0.101 | 0.301 | 1.46E-47 |
| NUP54     | 1.04E-51 | -0.10146 | 0.209 | 0.414 | 1.55E-47 |
| MED19     | 1.06E-51 | 0.217716 | 0.481 | 0.517 | 1.58E-47 |
| TMED10    | 1.09E-51 | -0.24247 | 0.382 | 0.674 | 1.63E-47 |
| MCL1      | 1.14E-51 | 0.198505 | 0.57  | 0.631 | 1.71E-47 |
| MIR7-3HG  | 1.18E-51 | 0.631234 | 0.215 | 0.011 | 1.76E-47 |
| INPPL1    | 1.18E-51 | -0.1676  | 0.016 | 0.172 | 1.76E-47 |

|           |          |          |       |       |          |
|-----------|----------|----------|-------|-------|----------|
| RAB8B     | 1.18E-51 | -0.20567 | 0.048 | 0.241 | 1.77E-47 |
| FZD3      | 1.23E-51 | 0.110584 | 0.466 | 0.577 | 1.84E-47 |
| SH2B1     | 1.23E-51 | 0.169589 | 0.195 | 0.257 | 1.84E-47 |
| BLOC1S2   | 1.25E-51 | 0.124083 | 0.346 | 0.438 | 1.87E-47 |
| EBP       | 1.29E-51 | -0.13279 | 0.233 | 0.458 | 1.93E-47 |
| C8orf59   | 1.29E-51 | -0.21385 | 0.364 | 0.646 | 1.93E-47 |
| ELF2      | 1.32E-51 | 0.168141 | 0.244 | 0.311 | 1.97E-47 |
| SH3PXD2B  | 1.36E-51 | -0.16937 | 0.042 | 0.221 | 2.03E-47 |
| KCNQ10T1  | 1.37E-51 | 0.466791 | 0.572 | 0.426 | 2.04E-47 |
| ANXA7     | 1.44E-51 | -0.21323 | 0.138 | 0.36  | 2.15E-47 |
| POLR3K    | 1.46E-51 | -0.15743 | 0.233 | 0.463 | 2.19E-47 |
| PRR4      | 1.48E-51 | 0.243711 | 0.406 | 0.441 | 2.21E-47 |
| ATP6V1E1  | 1.49E-51 | 0.135269 | 0.411 | 0.527 | 2.23E-47 |
| MSRB1     | 1.56E-51 | -0.10018 | 0.173 | 0.363 | 2.33E-47 |
| EFCAB14   | 1.57E-51 | -0.19359 | 0.071 | 0.269 | 2.34E-47 |
| ANAPC10   | 1.57E-51 | -0.11633 | 0.141 | 0.337 | 2.35E-47 |
| TROVE2    | 1.57E-51 | 0.113547 | 0.588 | 0.685 | 2.35E-47 |
| TMEM55A   | 1.57E-51 | 0.181806 | 0.253 | 0.319 | 2.35E-47 |
| CCDC6     | 1.58E-51 | -0.10397 | 0.053 | 0.21  | 2.36E-47 |
| MMP14     | 1.60E-51 | -0.23789 | 0.042 | 0.228 | 2.40E-47 |
| IARS2     | 1.62E-51 | -0.11166 | 0.178 | 0.378 | 2.41E-47 |
| RP11-111M | 1.62E-51 | -0.24604 | 0.068 | 0.277 | 2.42E-47 |
| DRAM2     | 1.63E-51 | -0.11042 | 0.146 | 0.34  | 2.44E-47 |
| IFI27L2   | 1.76E-51 | 0.146742 | 0.39  | 0.507 | 2.63E-47 |
| TTF2      | 1.83E-51 | -0.25465 | 0.038 | 0.236 | 2.73E-47 |
| METTL12   | 1.91E-51 | -0.23279 | 0.076 | 0.288 | 2.85E-47 |
| ZNF195    | 1.93E-51 | 0.360905 | 0.325 | 0.274 | 2.88E-47 |
| HNRNPF    | 1.97E-51 | -0.38294 | 0.374 | 0.705 | 2.94E-47 |
| CHORDC1   | 2.00E-51 | 0.180556 | 0.259 | 0.32  | 2.99E-47 |
| CARD8     | 2.03E-51 | -0.23142 | 0.044 | 0.237 | 3.03E-47 |
| NUDCD3    | 2.03E-51 | 0.315052 | 0.332 | 0.317 | 3.04E-47 |
| CDC27     | 2.04E-51 | -0.18055 | 0.154 | 0.37  | 3.04E-47 |
| NAA50     | 2.08E-51 | -0.10182 | 0.269 | 0.477 | 3.10E-47 |
| KIAA0232  | 2.11E-51 | 0.286596 | 0.254 | 0.247 | 3.15E-47 |
| UTRN      | 2.13E-51 | -0.24241 | 0.01  | 0.185 | 3.18E-47 |
| PRKRA     | 2.16E-51 | 0.147352 | 0.496 | 0.594 | 3.22E-47 |
| CHAC2     | 2.46E-51 | -0.29942 | 0.018 | 0.21  | 3.68E-47 |
| HIST1H2BH | 2.51E-51 | -0.34926 | 0.009 | 0.184 | 3.75E-47 |
| ACBD3     | 2.61E-51 | 0.149245 | 0.211 | 0.288 | 3.91E-47 |
| UBE2W     | 2.64E-51 | 0.103322 | 0.201 | 0.305 | 3.95E-47 |
| CCDC15    | 2.69E-51 | -0.3102  | 0.03  | 0.232 | 4.03E-47 |
| ADAM10    | 2.73E-51 | -0.12675 | 0.069 | 0.242 | 4.07E-47 |
| TPST1     | 2.86E-51 | 0.176131 | 0.342 | 0.401 | 4.28E-47 |
| ABI1      | 2.89E-51 | -0.17014 | 0.097 | 0.296 | 4.32E-47 |
| TRADD     | 3.10E-51 | -0.1311  | 0.03  | 0.183 | 4.63E-47 |
| NACC2     | 3.19E-51 | -0.22573 | 0.024 | 0.207 | 4.77E-47 |
| CXXC1     | 3.24E-51 | -0.13995 | 0.174 | 0.384 | 4.85E-47 |
| TMEM161A  | 3.26E-51 | -0.16537 | 0.097 | 0.295 | 4.87E-47 |
| COPS8     | 3.32E-51 | 0.121224 | 0.664 | 0.767 | 4.96E-47 |
| SNX17     | 3.33E-51 | -0.12747 | 0.376 | 0.619 | 4.97E-47 |
| JAKMIP2   | 3.33E-51 | 0.307194 | 0.288 | 0.274 | 4.98E-47 |

|           |          |          |       |       |          |
|-----------|----------|----------|-------|-------|----------|
| SBK1      | 3.35E-51 | 0.577914 | 0.333 | 0.14  | 5.01E-47 |
| BTG2      | 3.37E-51 | 0.360304 | 0.511 | 0.449 | 5.04E-47 |
| WRAP53    | 3.44E-51 | -0.2004  | 0.093 | 0.304 | 5.14E-47 |
| EPB41L4A- | 3.55E-51 | 0.331015 | 0.39  | 0.37  | 5.30E-47 |
| SH3GLB1   | 3.68E-51 | -0.15426 | 0.321 | 0.564 | 5.49E-47 |
| CBS       | 3.73E-51 | -0.22839 | 0.137 | 0.37  | 5.57E-47 |
| CBR1      | 3.88E-51 | -0.13769 | 0.422 | 0.677 | 5.80E-47 |
| PCNXL4    | 4.09E-51 | -0.11736 | 0.103 | 0.285 | 6.11E-47 |
| IGSF21    | 4.12E-51 | 0.685032 | 0.414 | 0.141 | 6.15E-47 |
| PGM2L1    | 4.13E-51 | 0.378822 | 0.495 | 0.427 | 6.17E-47 |
| FXYD6     | 4.13E-51 | 0.193316 | 0.915 | 0.902 | 6.17E-47 |
| KIF21A    | 4.22E-51 | 0.245396 | 0.651 | 0.652 | 6.31E-47 |
| FEZ2      | 4.35E-51 | 0.181259 | 0.539 | 0.604 | 6.49E-47 |
| NDUFB6    | 4.38E-51 | 0.104597 | 0.624 | 0.731 | 6.55E-47 |
| FOXO3     | 4.50E-51 | 0.246152 | 0.364 | 0.381 | 6.72E-47 |
| SNX7      | 4.55E-51 | -0.16959 | 0.126 | 0.335 | 6.80E-47 |
| BHLHE41   | 4.58E-51 | -0.27691 | 0.006 | 0.173 | 6.85E-47 |
| CETN2     | 4.63E-51 | 0.253857 | 0.384 | 0.409 | 6.92E-47 |
| C9orf114  | 4.81E-51 | -0.22937 | 0.086 | 0.302 | 7.19E-47 |
| KLHL24    | 5.03E-51 | 0.543216 | 0.315 | 0.146 | 7.52E-47 |
| PTMS      | 5.05E-51 | 0.267091 | 0.951 | 0.856 | 7.55E-47 |
| B4GALT3   | 5.36E-51 | 0.139377 | 0.29  | 0.37  | 8.02E-47 |
| CAMTA1    | 5.36E-51 | -0.36028 | 0.382 | 0.707 | 8.02E-47 |
| PGD       | 5.45E-51 | -0.14928 | 0.239 | 0.469 | 8.14E-47 |
| HMGCL     | 5.71E-51 | -0.13784 | 0.096 | 0.284 | 8.53E-47 |
| TIAM2     | 5.94E-51 | 0.57995  | 0.276 | 0.105 | 8.88E-47 |
| BAD       | 6.10E-51 | 0.114204 | 0.52  | 0.626 | 9.12E-47 |
| HSPA13    | 6.20E-51 | 0.107332 | 0.285 | 0.402 | 9.26E-47 |
| ZNF771    | 6.22E-51 | -0.20782 | 0.128 | 0.353 | 9.29E-47 |
| CHST14    | 7.09E-51 | -0.21866 | 0.025 | 0.205 | 1.06E-46 |
| SMAD2     | 7.18E-51 | -0.12724 | 0.149 | 0.352 | 1.07E-46 |
| NUP88     | 7.41E-51 | -0.13713 | 0.159 | 0.365 | 1.11E-46 |
| FGFR1     | 7.44E-51 | -0.11621 | 0.164 | 0.363 | 1.11E-46 |
| SCPEP1    | 7.49E-51 | -0.10053 | 0.053 | 0.207 | 1.12E-46 |
| ARL13B    | 7.64E-51 | -0.21122 | 0.127 | 0.351 | 1.14E-46 |
| PDXK      | 7.72E-51 | -0.10952 | 0.154 | 0.347 | 1.15E-46 |
| GRWD1     | 7.78E-51 | -0.13058 | 0.122 | 0.317 | 1.16E-46 |
| ARMC6     | 8.54E-51 | -0.14542 | 0.172 | 0.384 | 1.28E-46 |
| LSM2      | 8.67E-51 | -0.26033 | 0.439 | 0.743 | 1.30E-46 |
| PSMD9     | 8.80E-51 | -0.14385 | 0.189 | 0.399 | 1.32E-46 |
| SPHK1     | 8.84E-51 | -0.25608 | 0.006 | 0.173 | 1.32E-46 |
| S100A11   | 9.06E-51 | -0.5612  | 0.165 | 0.474 | 1.35E-46 |
| ZFP90     | 9.14E-51 | 0.254685 | 0.247 | 0.277 | 1.37E-46 |
| DPP8      | 9.38E-51 | -0.11119 | 0.101 | 0.28  | 1.40E-46 |
| LOXL1     | 9.54E-51 | -0.22418 | 0.01  | 0.178 | 1.43E-46 |
| RP11-849I | 9.77E-51 | -0.37507 | 0.138 | 0.407 | 1.46E-46 |
| ATRAID    | 9.78E-51 | -0.16151 | 0.525 | 0.79  | 1.46E-46 |
| WDHD1     | 9.90E-51 | -0.3132  | 0.024 | 0.216 | 1.48E-46 |
| POLR1E    | 1.03E-50 | -0.1172  | 0.104 | 0.284 | 1.55E-46 |
| PARP2     | 1.05E-50 | -0.27712 | 0.142 | 0.391 | 1.57E-46 |
| RNF8      | 1.06E-50 | 0.115892 | 0.233 | 0.322 | 1.58E-46 |

|          |          |          |       |       |          |
|----------|----------|----------|-------|-------|----------|
| C7orf73  | 1.06E-50 | 0.184048 | 0.695 | 0.746 | 1.58E-46 |
| SETD9    | 1.08E-50 | -0.16963 | 0.079 | 0.272 | 1.61E-46 |
| CHST3    | 1.09E-50 | -0.18905 | 0.012 | 0.174 | 1.62E-46 |
| C18orf32 | 1.10E-50 | 0.144483 | 0.24  | 0.315 | 1.64E-46 |
| NNT      | 1.14E-50 | -0.20793 | 0.124 | 0.341 | 1.70E-46 |
| AKAP17A  | 1.15E-50 | 0.157932 | 0.235 | 0.302 | 1.72E-46 |
| F8A1     | 1.16E-50 | -0.12844 | 0.106 | 0.294 | 1.73E-46 |
| GPR155   | 1.16E-50 | 0.430869 | 0.298 | 0.212 | 1.74E-46 |
| CYFIP1   | 1.18E-50 | -0.25987 | 0.072 | 0.288 | 1.77E-46 |
| GAMT     | 1.20E-50 | -0.26838 | 0.279 | 0.562 | 1.80E-46 |
| NLGN1    | 1.22E-50 | -0.1038  | 0.181 | 0.377 | 1.83E-46 |
| GGPS1    | 1.30E-50 | 0.13348  | 0.406 | 0.502 | 1.94E-46 |
| FDPS     | 1.31E-50 | -0.2982  | 0.426 | 0.73  | 1.95E-46 |
| PDDC1    | 1.31E-50 | -0.1123  | 0.124 | 0.31  | 1.96E-46 |
| UBE2J1   | 1.35E-50 | -0.13556 | 0.207 | 0.425 | 2.02E-46 |
| YES1     | 1.35E-50 | -0.11109 | 0.132 | 0.316 | 2.02E-46 |
| C1orf109 | 1.44E-50 | -0.17628 | 0.115 | 0.325 | 2.15E-46 |
| TRAPPC12 | 1.49E-50 | 0.200701 | 0.244 | 0.295 | 2.22E-46 |
| GNPTAB   | 1.52E-50 | 0.357697 | 0.211 | 0.168 | 2.27E-46 |
| S100PBP  | 1.55E-50 | -0.12224 | 0.072 | 0.243 | 2.32E-46 |
| XIAP     | 1.58E-50 | -0.15234 | 0.173 | 0.385 | 2.37E-46 |
| MAD2L2   | 1.60E-50 | -0.33006 | 0.502 | 0.819 | 2.40E-46 |
| SRA1     | 1.73E-50 | -0.2257  | 0.313 | 0.588 | 2.59E-46 |
| LIMD1    | 1.79E-50 | -0.21931 | 0.031 | 0.214 | 2.67E-46 |
| PTK7     | 1.92E-50 | -0.10774 | 0.083 | 0.256 | 2.87E-46 |
| SUPT6H   | 1.99E-50 | -0.13332 | 0.107 | 0.293 | 2.97E-46 |
| HIST1H1E | 2.00E-50 | -0.25701 | 0.014 | 0.188 | 2.98E-46 |
| BABAM1   | 2.01E-50 | -0.1853  | 0.383 | 0.647 | 3.00E-46 |
| PAK1IP1  | 2.05E-50 | 0.155448 | 0.28  | 0.368 | 3.06E-46 |
| ECHDC2   | 2.08E-50 | -0.23676 | 0.065 | 0.272 | 3.11E-46 |
| ITSN1    | 2.11E-50 | 0.386155 | 0.302 | 0.226 | 3.15E-46 |
| POU2F2   | 2.11E-50 | 0.620253 | 0.276 | 0.063 | 3.16E-46 |
| ARF1     | 2.12E-50 | 0.134829 | 0.739 | 0.804 | 3.17E-46 |
| GFOD2    | 2.16E-50 | 0.348296 | 0.3   | 0.254 | 3.22E-46 |
| CYB561D2 | 2.17E-50 | -0.10153 | 0.124 | 0.306 | 3.24E-46 |
| GEMIN2   | 2.24E-50 | -0.1654  | 0.105 | 0.304 | 3.35E-46 |
| PPFIA1   | 2.26E-50 | -0.11981 | 0.123 | 0.307 | 3.38E-46 |
| FAM172A  | 2.28E-50 | 0.187995 | 0.266 | 0.321 | 3.41E-46 |
| ATL3     | 2.30E-50 | -0.24305 | 0.028 | 0.216 | 3.43E-46 |
| PFDN2    | 2.34E-50 | 0.212815 | 0.818 | 0.817 | 3.50E-46 |
| DPYSL5   | 2.46E-50 | 0.305358 | 0.341 | 0.33  | 3.67E-46 |
| MEA1     | 2.49E-50 | -0.22599 | 0.408 | 0.696 | 3.73E-46 |
| SBDS     | 2.52E-50 | 0.135507 | 0.72  | 0.802 | 3.77E-46 |
| WDR61    | 2.70E-50 | -0.25019 | 0.253 | 0.519 | 4.04E-46 |
| PCED1A   | 2.72E-50 | -0.10007 | 0.085 | 0.252 | 4.07E-46 |
| TOB1     | 2.87E-50 | 0.109516 | 0.268 | 0.378 | 4.29E-46 |
| SF3B2    | 2.93E-50 | 0.139264 | 0.699 | 0.777 | 4.38E-46 |
| GLRX5    | 2.93E-50 | -0.26918 | 0.342 | 0.638 | 4.38E-46 |
| TEAD2    | 2.94E-50 | -0.14547 | 0.068 | 0.24  | 4.39E-46 |
| SHPRH    | 3.03E-50 | 0.243647 | 0.205 | 0.225 | 4.53E-46 |
| DPM1     | 3.05E-50 | -0.15461 | 0.383 | 0.631 | 4.55E-46 |

|          |          |          |       |       |          |
|----------|----------|----------|-------|-------|----------|
| ARHGAP35 | 3.23E-50 | -0.15663 | 0.134 | 0.34  | 4.83E-46 |
| SSRP1    | 3.28E-50 | -0.28839 | 0.444 | 0.749 | 4.90E-46 |
| NDUFA8   | 3.29E-50 | 0.140523 | 0.588 | 0.674 | 4.91E-46 |
| LBR      | 3.29E-50 | -0.27009 | 0.286 | 0.569 | 4.91E-46 |
| APEH     | 3.50E-50 | -0.13854 | 0.124 | 0.316 | 5.23E-46 |
| IQGAP3   | 3.54E-50 | -0.29417 | 0.002 | 0.153 | 5.29E-46 |
| PGM1     | 3.63E-50 | -0.13816 | 0.237 | 0.458 | 5.43E-46 |
| CENPJ    | 3.67E-50 | -0.10651 | 0.137 | 0.325 | 5.48E-46 |
| TCEAL8   | 3.79E-50 | 0.156614 | 0.468 | 0.551 | 5.66E-46 |
| FCGRT    | 3.97E-50 | -0.2591  | 0.115 | 0.344 | 5.93E-46 |
| AKIRIN2  | 3.99E-50 | 0.162876 | 0.526 | 0.61  | 5.97E-46 |
| DDX6     | 4.23E-50 | 0.290046 | 0.29  | 0.283 | 6.32E-46 |
| SYS1     | 4.35E-50 | -0.12872 | 0.133 | 0.326 | 6.51E-46 |
| ZNF117   | 4.36E-50 | 0.447127 | 0.28  | 0.174 | 6.52E-46 |
| MTHFD2   | 4.62E-50 | -0.32102 | 0.163 | 0.427 | 6.90E-46 |
| SREBF2   | 4.80E-50 | -0.17817 | 0.057 | 0.243 | 7.17E-46 |
| BCHE     | 4.90E-50 | -0.35068 | 0.172 | 0.444 | 7.32E-46 |
| SMTN     | 5.16E-50 | -0.30703 | 0.023 | 0.214 | 7.71E-46 |
| TRIM16   | 5.39E-50 | 0.149886 | 0.178 | 0.241 | 8.06E-46 |
| C7orf50  | 5.59E-50 | 0.125096 | 0.72  | 0.799 | 8.36E-46 |
| PLOD3    | 5.81E-50 | -0.19761 | 0.137 | 0.358 | 8.68E-46 |
| ATM      | 5.97E-50 | -0.10099 | 0.111 | 0.286 | 8.93E-46 |
| C15orf40 | 5.98E-50 | -0.19704 | 0.076 | 0.274 | 8.93E-46 |
| PINK1    | 6.02E-50 | 0.314329 | 0.288 | 0.265 | 9.00E-46 |
| PRKD3    | 6.48E-50 | -0.13519 | 0.128 | 0.322 | 9.68E-46 |
| CCDC22   | 6.55E-50 | -0.1171  | 0.064 | 0.225 | 9.79E-46 |
| NID1     | 7.40E-50 | -0.19342 | 0.003 | 0.154 | 1.11E-45 |
| ZNF608   | 7.46E-50 | 0.209959 | 0.245 | 0.283 | 1.11E-45 |
| HEBP2    | 7.59E-50 | -0.11181 | 0.197 | 0.402 | 1.13E-45 |
| DHCR7    | 7.72E-50 | -0.29425 | 0.088 | 0.32  | 1.15E-45 |
| ARFGAP3  | 7.85E-50 | -0.13894 | 0.185 | 0.395 | 1.17E-45 |
| IL17RB   | 8.36E-50 | -0.40056 | 0.015 | 0.201 | 1.25E-45 |
| NCAN     | 8.46E-50 | 0.652604 | 0.342 | 0.084 | 1.26E-45 |
| KDM6B    | 9.00E-50 | 0.525363 | 0.295 | 0.148 | 1.34E-45 |
| NUPL2    | 9.33E-50 | 0.133289 | 0.39  | 0.48  | 1.39E-45 |
| SWAP70   | 9.63E-50 | -0.21787 | 0.064 | 0.263 | 1.44E-45 |
| SNAP47   | 9.95E-50 | 0.158226 | 0.299 | 0.381 | 1.49E-45 |
| PRKAG1   | 9.98E-50 | 0.116383 | 0.317 | 0.422 | 1.49E-45 |
| TRAPPC1  | 1.03E-49 | 0.169637 | 0.606 | 0.673 | 1.54E-45 |
| ZNF85    | 1.04E-49 | -0.19185 | 0.097 | 0.302 | 1.55E-45 |
| CNTLN    | 1.04E-49 | -0.33699 | 0.094 | 0.337 | 1.56E-45 |
| CDK4     | 1.04E-49 | -0.45868 | 0.525 | 0.837 | 1.56E-45 |
| TPM4     | 1.06E-49 | -0.4694  | 0.423 | 0.744 | 1.58E-45 |
| DPP9     | 1.08E-49 | -0.22814 | 0.068 | 0.273 | 1.61E-45 |
| FKBP3    | 1.09E-49 | -0.16406 | 0.504 | 0.77  | 1.62E-45 |
| ITGB1    | 1.09E-49 | -0.53913 | 0.191 | 0.505 | 1.63E-45 |
| MAP6     | 1.10E-49 | 0.379357 | 0.24  | 0.175 | 1.65E-45 |
| DNAJC10  | 1.16E-49 | -0.11498 | 0.132 | 0.32  | 1.74E-45 |
| MDM2     | 1.24E-49 | -0.38429 | 0.18  | 0.459 | 1.86E-45 |
| ACD      | 1.28E-49 | 0.102825 | 0.258 | 0.368 | 1.91E-45 |
| RBM14    | 1.28E-49 | -0.12301 | 0.223 | 0.438 | 1.91E-45 |

|          |          |          |       |       |          |
|----------|----------|----------|-------|-------|----------|
| STK24    | 1.33E-49 | -0.18224 | 0.043 | 0.223 | 1.98E-45 |
| NFS1     | 1.33E-49 | -0.1441  | 0.077 | 0.262 | 1.99E-45 |
| EMG1     | 1.37E-49 | -0.13328 | 0.165 | 0.367 | 2.05E-45 |
| ICT1     | 1.50E-49 | -0.18759 | 0.189 | 0.417 | 2.25E-45 |
| C9orf16  | 1.55E-49 | 0.22201  | 0.75  | 0.76  | 2.31E-45 |
| CCDC80   | 1.57E-49 | -0.38144 | 0.029 | 0.232 | 2.35E-45 |
| TMEM132A | 1.61E-49 | 0.136266 | 0.226 | 0.305 | 2.40E-45 |
| RCOR1    | 1.70E-49 | -0.16048 | 0.023 | 0.178 | 2.54E-45 |
| IREB2    | 1.76E-49 | -0.12963 | 0.096 | 0.277 | 2.62E-45 |
| LGALS3BP | 1.81E-49 | -0.4751  | 0.203 | 0.51  | 2.71E-45 |
| WNK3     | 1.85E-49 | 0.302608 | 0.24  | 0.241 | 2.76E-45 |
| NEDD4L   | 1.88E-49 | 0.508176 | 0.35  | 0.193 | 2.81E-45 |
| SPG7     | 1.97E-49 | 0.106516 | 0.279 | 0.388 | 2.94E-45 |
| RBL1     | 1.98E-49 | -0.24385 | 0.029 | 0.217 | 2.96E-45 |
| BLMH     | 1.98E-49 | -0.16384 | 0.187 | 0.41  | 2.96E-45 |
| DGKZ     | 2.00E-49 | -0.12923 | 0.153 | 0.349 | 2.99E-45 |
| CINP     | 2.03E-49 | -0.15585 | 0.163 | 0.372 | 3.03E-45 |
| SPTBN1   | 2.03E-49 | 0.105396 | 0.407 | 0.521 | 3.03E-45 |
| RAB4B    | 2.05E-49 | 0.244197 | 0.266 | 0.294 | 3.06E-45 |
| HEG1     | 2.08E-49 | -0.17063 | 0.024 | 0.188 | 3.11E-45 |
| TSKU     | 2.17E-49 | -0.18084 | 0.044 | 0.223 | 3.24E-45 |
| ZNF322   | 2.18E-49 | 0.192135 | 0.203 | 0.241 | 3.26E-45 |
| EPHA3    | 2.27E-49 | -0.20791 | 0.004 | 0.162 | 3.39E-45 |
| ANKS3    | 2.47E-49 | 0.171955 | 0.258 | 0.33  | 3.69E-45 |
| IRS2     | 2.48E-49 | -0.18328 | 0.212 | 0.448 | 3.70E-45 |
| DUS1L    | 2.49E-49 | -0.17656 | 0.078 | 0.27  | 3.72E-45 |
| EHMT1    | 2.59E-49 | 0.123965 | 0.191 | 0.273 | 3.88E-45 |
| CHD6     | 2.62E-49 | 0.196241 | 0.359 | 0.412 | 3.91E-45 |
| SMOX     | 2.79E-49 | -0.17241 | 0.155 | 0.369 | 4.18E-45 |
| WBP2     | 2.81E-49 | 0.107437 | 0.423 | 0.527 | 4.20E-45 |
| RARS2    | 2.81E-49 | 0.121872 | 0.253 | 0.341 | 4.20E-45 |
| LONP2    | 2.85E-49 | 0.237296 | 0.324 | 0.352 | 4.25E-45 |
| ST5      | 2.86E-49 | -0.12524 | 0.086 | 0.26  | 4.28E-45 |
| MTHFS    | 2.87E-49 | -0.13116 | 0.07  | 0.243 | 4.29E-45 |
| NBEAL1   | 2.87E-49 | -0.32971 | 0.324 | 0.625 | 4.30E-45 |
| P4HA1    | 2.90E-49 | -0.20234 | 0.053 | 0.241 | 4.34E-45 |
| ZNHIT1   | 2.98E-49 | 0.172453 | 0.767 | 0.812 | 4.45E-45 |
| ERBB4    | 3.07E-49 | 0.616401 | 0.288 | 0.072 | 4.58E-45 |
| TBCB     | 3.13E-49 | 0.244195 | 0.883 | 0.864 | 4.68E-45 |
| RTKN     | 3.24E-49 | -0.11651 | 0.121 | 0.302 | 4.85E-45 |
| DBF4B    | 3.24E-49 | -0.23222 | 0.039 | 0.231 | 4.85E-45 |
| CD59     | 3.39E-49 | 0.149043 | 0.549 | 0.626 | 5.06E-45 |
| FAR1     | 3.40E-49 | -0.11395 | 0.076 | 0.24  | 5.08E-45 |
| AZIN1    | 3.47E-49 | 0.240587 | 0.46  | 0.48  | 5.18E-45 |
| XPR1     | 3.55E-49 | 0.323334 | 0.24  | 0.201 | 5.31E-45 |
| TPMT     | 3.56E-49 | -0.1909  | 0.076 | 0.268 | 5.32E-45 |
| TYK2     | 3.77E-49 | -0.14188 | 0.046 | 0.21  | 5.63E-45 |
| GINS3    | 3.77E-49 | -0.30084 | 0.014 | 0.193 | 5.63E-45 |
| ZNF83    | 3.82E-49 | -0.1558  | 0.214 | 0.432 | 5.70E-45 |
| HDHD2    | 3.85E-49 | -0.11914 | 0.243 | 0.451 | 5.75E-45 |
| CSNK1G3  | 3.85E-49 | 0.130359 | 0.241 | 0.322 | 5.76E-45 |

|          |          |          |       |       |          |
|----------|----------|----------|-------|-------|----------|
| MTMR4    | 4.12E-49 | 0.248045 | 0.281 | 0.306 | 6.16E-45 |
| TMEM245  | 4.14E-49 | -0.13616 | 0.116 | 0.306 | 6.19E-45 |
| TRIB2    | 4.14E-49 | -0.31862 | 0.316 | 0.619 | 6.19E-45 |
| FAHD1    | 4.15E-49 | 0.253139 | 0.259 | 0.288 | 6.21E-45 |
| MOSPD1   | 4.22E-49 | 0.244699 | 0.196 | 0.214 | 6.31E-45 |
| ANXA6    | 4.25E-49 | -0.22972 | 0.144 | 0.374 | 6.36E-45 |
| HNRNPK   | 4.42E-49 | 0.188693 | 0.949 | 0.938 | 6.60E-45 |
| CDH6     | 4.47E-49 | -0.21381 | 0.007 | 0.163 | 6.68E-45 |
| EIF4E    | 4.52E-49 | 0.100049 | 0.599 | 0.698 | 6.75E-45 |
| SSH2     | 4.70E-49 | -0.16007 | 0.138 | 0.343 | 7.02E-45 |
| POP7     | 4.75E-49 | 0.178807 | 0.699 | 0.759 | 7.10E-45 |
| TOPBP1   | 4.78E-49 | -0.18287 | 0.108 | 0.314 | 7.14E-45 |
| GPC1     | 4.78E-49 | -0.53438 | 0.179 | 0.488 | 7.14E-45 |
| NASP     | 4.86E-49 | -0.32658 | 0.508 | 0.815 | 7.26E-45 |
| GPATCH4  | 4.88E-49 | -0.23845 | 0.119 | 0.343 | 7.30E-45 |
| REXO2    | 4.94E-49 | -0.22036 | 0.14  | 0.367 | 7.39E-45 |
| BECN1    | 5.01E-49 | -0.10496 | 0.156 | 0.337 | 7.49E-45 |
| CREB1    | 5.06E-49 | 0.160882 | 0.375 | 0.447 | 7.56E-45 |
| USP3     | 5.07E-49 | -0.1078  | 0.126 | 0.309 | 7.57E-45 |
| LAPTM4B  | 5.27E-49 | 0.118454 | 0.581 | 0.7   | 7.88E-45 |
| SRRM4    | 5.36E-49 | 0.608871 | 0.227 | 0.02  | 8.00E-45 |
| VPS13C   | 5.40E-49 | -0.11822 | 0.075 | 0.241 | 8.07E-45 |
| MAGEF1   | 5.48E-49 | 0.153682 | 0.605 | 0.675 | 8.19E-45 |
| MCM6     | 5.61E-49 | -0.46939 | 0.077 | 0.331 | 8.39E-45 |
| KATNA1   | 5.64E-49 | -0.16315 | 0.106 | 0.302 | 8.43E-45 |
| ZCCHC7   | 5.70E-49 | 0.186234 | 0.207 | 0.258 | 8.52E-45 |
| SRSF6    | 5.79E-49 | -0.13221 | 0.383 | 0.615 | 8.65E-45 |
| DNAJC21  | 5.85E-49 | -0.17325 | 0.064 | 0.252 | 8.74E-45 |
| NUP160   | 6.43E-49 | 0.286923 | 0.313 | 0.317 | 9.62E-45 |
| NFU1     | 6.49E-49 | 0.16705  | 0.411 | 0.483 | 9.69E-45 |
| PRKX     | 6.82E-49 | 0.414798 | 0.276 | 0.177 | 1.02E-44 |
| TMPO-AS1 | 6.89E-49 | -0.21111 | 0.027 | 0.194 | 1.03E-44 |
| GPR180   | 6.91E-49 | -0.18714 | 0.035 | 0.211 | 1.03E-44 |
| COMMD7   | 7.09E-49 | 0.14903  | 0.519 | 0.607 | 1.06E-44 |
| NUP35    | 7.29E-49 | -0.27654 | 0.122 | 0.359 | 1.09E-44 |
| KDELC2   | 7.32E-49 | -0.27814 | 0.042 | 0.241 | 1.09E-44 |
| CCDC136  | 7.54E-49 | 0.562278 | 0.313 | 0.126 | 1.13E-44 |
| TMBIM1   | 7.66E-49 | -0.2057  | 0.019 | 0.185 | 1.14E-44 |
| RIT2     | 8.13E-49 | 0.680054 | 0.326 | 0.096 | 1.22E-44 |
| GYG1     | 8.16E-49 | -0.10085 | 0.13  | 0.305 | 1.22E-44 |
| C7orf55  | 8.29E-49 | 0.112345 | 0.626 | 0.744 | 1.24E-44 |
| GTF3C5   | 8.60E-49 | -0.13616 | 0.212 | 0.43  | 1.29E-44 |
| PNPLA2   | 8.79E-49 | -0.14228 | 0.115 | 0.307 | 1.31E-44 |
| LY6E     | 9.13E-49 | 0.105087 | 0.363 | 0.493 | 1.36E-44 |
| NRXN2    | 9.44E-49 | 0.548515 | 0.38  | 0.19  | 1.41E-44 |
| EFR3A    | 9.53E-49 | -0.11657 | 0.045 | 0.202 | 1.42E-44 |
| ELOVL4   | 9.61E-49 | 0.514208 | 0.258 | 0.1   | 1.44E-44 |
| SNUPN    | 9.68E-49 | -0.17391 | 0.101 | 0.3   | 1.45E-44 |
| NDUFA6   | 9.83E-49 | -0.34195 | 0.506 | 0.817 | 1.47E-44 |
| REEP2    | 9.95E-49 | 0.148639 | 0.311 | 0.395 | 1.49E-44 |
| FBXL3    | 1.03E-48 | 0.103865 | 0.213 | 0.317 | 1.54E-44 |

|           |           |           |        |        |           |
|-----------|-----------|-----------|--------|--------|-----------|
| RIMKLB    | 1. 07E-48 | 0. 293837 | 0. 324 | 0. 32  | 1. 60E-44 |
| CSNK1G2   | 1. 09E-48 | -0. 23901 | 0. 083 | 0. 295 | 1. 63E-44 |
| XBP1      | 1. 12E-48 | -0. 14007 | 0. 189 | 0. 398 | 1. 67E-44 |
| RNF13     | 1. 13E-48 | -0. 10096 | 0. 265 | 0. 467 | 1. 69E-44 |
| C4orf46   | 1. 14E-48 | -0. 18164 | 0. 104 | 0. 305 | 1. 71E-44 |
| MYL6B     | 1. 17E-48 | 0. 209671 | 0. 745 | 0. 765 | 1. 76E-44 |
| RAD1      | 1. 17E-48 | -0. 16178 | 0. 258 | 0. 483 | 1. 76E-44 |
| PCMT1     | 1. 19E-48 | 0. 145959 | 0. 699 | 0. 767 | 1. 79E-44 |
| UBALD1    | 1. 23E-48 | 0. 171823 | 0. 211 | 0. 279 | 1. 84E-44 |
| TOMM40    | 1. 24E-48 | -0. 14433 | 0. 39  | 0. 631 | 1. 86E-44 |
| PXN       | 1. 26E-48 | -0. 18619 | 0. 044 | 0. 225 | 1. 88E-44 |
| RNASET2   | 1. 27E-48 | 0. 254681 | 0. 266 | 0. 284 | 1. 90E-44 |
| ZNF680    | 1. 30E-48 | -0. 23949 | 0. 242 | 0. 501 | 1. 95E-44 |
| PCBD2     | 1. 36E-48 | -0. 27596 | 0. 025 | 0. 209 | 2. 03E-44 |
| GOPC      | 1. 36E-48 | 0. 218875 | 0. 403 | 0. 442 | 2. 04E-44 |
| CCT6A     | 1. 38E-48 | 0. 188824 | 0. 841 | 0. 842 | 2. 06E-44 |
| EFHC1     | 1. 55E-48 | 0. 10797  | 0. 225 | 0. 332 | 2. 32E-44 |
| SLC12A2   | 1. 60E-48 | -0. 19338 | 0. 079 | 0. 277 | 2. 39E-44 |
| NSUN5     | 1. 61E-48 | 0. 136803 | 0. 313 | 0. 401 | 2. 41E-44 |
| POR       | 1. 69E-48 | 0. 261833 | 0. 363 | 0. 368 | 2. 53E-44 |
| ALKBH4    | 1. 85E-48 | 0. 152987 | 0. 31  | 0. 388 | 2. 77E-44 |
| SLC47A1   | 1. 92E-48 | -0. 19907 | 0. 005 | 0. 156 | 2. 87E-44 |
| IMPDH2    | 1. 96E-48 | -0. 20304 | 0. 351 | 0. 616 | 2. 93E-44 |
| LAMTOR3   | 1. 98E-48 | 0. 144266 | 0. 279 | 0. 359 | 2. 96E-44 |
| RRAGC     | 2. 10E-48 | 0. 219665 | 0. 305 | 0. 344 | 3. 14E-44 |
| NDRG3     | 2. 12E-48 | 0. 181041 | 0. 243 | 0. 302 | 3. 17E-44 |
| KBTBD6    | 2. 18E-48 | 0. 271021 | 0. 296 | 0. 291 | 3. 26E-44 |
| CERS6     | 2. 22E-48 | 0. 346578 | 0. 306 | 0. 254 | 3. 32E-44 |
| VIM-AS1   | 2. 27E-48 | -0. 22117 | 0. 019 | 0. 191 | 3. 39E-44 |
| ANXA2R    | 2. 34E-48 | 0. 120198 | 0. 257 | 0. 374 | 3. 50E-44 |
| PSMC1     | 2. 37E-48 | -0. 32988 | 0. 302 | 0. 6   | 3. 54E-44 |
| PNKP      | 2. 37E-48 | -0. 11843 | 0. 121 | 0. 31  | 3. 54E-44 |
| CRYZ      | 2. 46E-48 | -0. 23544 | 0. 031 | 0. 21  | 3. 67E-44 |
| STRN4     | 2. 68E-48 | -0. 12394 | 0. 131 | 0. 326 | 4. 01E-44 |
| TFPT      | 2. 73E-48 | -0. 16443 | 0. 189 | 0. 41  | 4. 08E-44 |
| SORBS2    | 2. 74E-48 | 0. 604571 | 0. 285 | 0. 062 | 4. 10E-44 |
| ATP6VOE2  | 2. 75E-48 | 0. 178562 | 0. 767 | 0. 79  | 4. 11E-44 |
| FANCB     | 2. 75E-48 | -0. 24091 | 0. 008 | 0. 17  | 4. 12E-44 |
| MORF4L2   | 2. 91E-48 | 0. 193074 | 0. 862 | 0. 857 | 4. 34E-44 |
| IP6K1     | 2. 95E-48 | 0. 131744 | 0. 202 | 0. 283 | 4. 41E-44 |
| GBA       | 2. 95E-48 | -0. 25597 | 0. 053 | 0. 258 | 4. 42E-44 |
| SCP2      | 3. 02E-48 | -0. 2218  | 0. 445 | 0. 722 | 4. 51E-44 |
| IL13RA1   | 3. 05E-48 | -0. 15436 | 0. 018 | 0. 17  | 4. 55E-44 |
| ARPC1B    | 3. 25E-48 | -0. 18827 | 0. 203 | 0. 432 | 4. 85E-44 |
| MGAT4B    | 3. 35E-48 | -0. 11731 | 0. 038 | 0. 188 | 5. 01E-44 |
| MPHOSPH1C | 3. 49E-48 | 0. 200378 | 0. 363 | 0. 417 | 5. 22E-44 |
| DDX50     | 3. 50E-48 | -0. 10204 | 0. 126 | 0. 305 | 5. 23E-44 |
| TAOK3     | 3. 53E-48 | 0. 22079  | 0. 438 | 0. 475 | 5. 27E-44 |
| DCTN3     | 3. 55E-48 | 0. 211693 | 0. 808 | 0. 802 | 5. 31E-44 |
| SHKBP1    | 3. 60E-48 | -0. 15206 | 0. 097 | 0. 285 | 5. 38E-44 |
| COQ7      | 3. 62E-48 | 0. 18372  | 0. 321 | 0. 388 | 5. 40E-44 |



|           |          |          |       |       |          |
|-----------|----------|----------|-------|-------|----------|
| BIN1      | 3.62E-48 | 0.388646 | 0.337 | 0.256 | 5.41E-44 |
| MANF      | 3.82E-48 | -0.138   | 0.436 | 0.68  | 5.70E-44 |
| PCDH9     | 3.84E-48 | -0.25379 | 0.173 | 0.412 | 5.73E-44 |
| FKBP1B    | 3.96E-48 | 0.355351 | 0.233 | 0.194 | 5.92E-44 |
| CDC73     | 4.43E-48 | -0.13003 | 0.106 | 0.29  | 6.61E-44 |
| HAUS6     | 4.59E-48 | -0.16781 | 0.092 | 0.28  | 6.85E-44 |
| DNAJC8    | 4.99E-48 | 0.1274   | 0.698 | 0.77  | 7.45E-44 |
| SNRNP25   | 5.02E-48 | -0.16797 | 0.408 | 0.665 | 7.50E-44 |
| SOAT1     | 5.11E-48 | -0.19198 | 0.042 | 0.219 | 7.64E-44 |
| EDEM2     | 5.14E-48 | -0.14394 | 0.112 | 0.304 | 7.68E-44 |
| NOSIP     | 5.20E-48 | -0.14086 | 0.422 | 0.665 | 7.77E-44 |
| PRKAR2B   | 5.37E-48 | 0.547258 | 0.301 | 0.117 | 8.03E-44 |
| SERPINE2  | 5.42E-48 | -0.3562  | 0.318 | 0.625 | 8.11E-44 |
| RNF168    | 5.56E-48 | -0.11663 | 0.178 | 0.374 | 8.31E-44 |
| PPP1R16A  | 6.48E-48 | 0.195968 | 0.246 | 0.284 | 9.68E-44 |
| LINC01003 | 6.60E-48 | 0.182253 | 0.243 | 0.314 | 9.86E-44 |
| DZIP1     | 6.78E-48 | -0.12691 | 0.083 | 0.259 | 1.01E-43 |
| STK11     | 7.03E-48 | -0.19281 | 0.046 | 0.226 | 1.05E-43 |
| MLF1      | 7.04E-48 | 0.153059 | 0.29  | 0.367 | 1.05E-43 |
| CES2      | 7.11E-48 | 0.186113 | 0.237 | 0.289 | 1.06E-43 |
| WBP5      | 7.17E-48 | 0.189417 | 0.72  | 0.777 | 1.07E-43 |
| RAD50     | 7.18E-48 | 0.134408 | 0.345 | 0.425 | 1.07E-43 |
| GNPNAT1   | 7.22E-48 | -0.22462 | 0.047 | 0.236 | 1.08E-43 |
| NFE2L1    | 7.28E-48 | -0.14109 | 0.127 | 0.323 | 1.09E-43 |
| GBE1      | 7.31E-48 | -0.32079 | 0.063 | 0.278 | 1.09E-43 |
| SAMD1     | 7.37E-48 | -0.18037 | 0.075 | 0.263 | 1.10E-43 |
| CRTAP     | 7.46E-48 | -0.25224 | 0.091 | 0.31  | 1.12E-43 |
| PIGU      | 8.02E-48 | -0.18687 | 0.142 | 0.349 | 1.20E-43 |
| ENSA      | 8.34E-48 | -0.35355 | 0.378 | 0.691 | 1.25E-43 |
| ATG3      | 8.50E-48 | -0.15476 | 0.307 | 0.543 | 1.27E-43 |
| PPP5C     | 8.53E-48 | -0.23523 | 0.185 | 0.427 | 1.27E-43 |
| TMEM100   | 8.56E-48 | -0.52933 | 0.042 | 0.264 | 1.28E-43 |
| ANKRD35   | 8.85E-48 | -0.14448 | 0.1   | 0.285 | 1.32E-43 |
| CLIP1     | 9.00E-48 | 0.165966 | 0.246 | 0.302 | 1.35E-43 |
| ZEB2      | 9.32E-48 | 0.210177 | 0.382 | 0.433 | 1.39E-43 |
| MYO6      | 9.33E-48 | 0.293701 | 0.396 | 0.369 | 1.39E-43 |
| SLC05A1   | 9.43E-48 | 0.607803 | 0.258 | 0.049 | 1.41E-43 |
| PSPH      | 9.47E-48 | -0.10131 | 0.198 | 0.388 | 1.41E-43 |
| MEX3C     | 9.57E-48 | -0.13883 | 0.067 | 0.237 | 1.43E-43 |
| DHTKD1    | 9.64E-48 | -0.14966 | 0.078 | 0.257 | 1.44E-43 |
| GALK1     | 9.82E-48 | -0.23288 | 0.076 | 0.279 | 1.47E-43 |
| DFNA5     | 1.04E-47 | 0.460587 | 0.339 | 0.221 | 1.56E-43 |
| FADS2     | 1.04E-47 | -0.13404 | 0.159 | 0.359 | 1.56E-43 |
| BAZ2B     | 1.05E-47 | 0.230114 | 0.506 | 0.533 | 1.58E-43 |
| SLC25A37  | 1.08E-47 | -0.20856 | 0.11  | 0.321 | 1.62E-43 |
| BOD1L1    | 1.08E-47 | 0.24285  | 0.231 | 0.253 | 1.62E-43 |
| PRKACB    | 1.09E-47 | 0.135434 | 0.225 | 0.306 | 1.63E-43 |
| SLC39A3   | 1.13E-47 | -0.25822 | 0.344 | 0.628 | 1.68E-43 |
| RAB5B     | 1.13E-47 | 0.17526  | 0.223 | 0.29  | 1.68E-43 |
| AC004381  | 1.15E-47 | -0.38515 | 0.029 | 0.228 | 1.71E-43 |
| HEXIM1    | 1.15E-47 | -0.21766 | 0.095 | 0.302 | 1.72E-43 |

|          |          |          |       |       |          |
|----------|----------|----------|-------|-------|----------|
| GOLGA2   | 1.16E-47 | 0.118954 | 0.222 | 0.306 | 1.74E-43 |
| RANBP1   | 1.17E-47 | -0.39197 | 0.745 | 0.931 | 1.75E-43 |
| PIK3C2A  | 1.22E-47 | -0.12503 | 0.086 | 0.26  | 1.82E-43 |
| CAPN1    | 1.28E-47 | 0.316417 | 0.308 | 0.275 | 1.91E-43 |
| MBD4     | 1.34E-47 | -0.15407 | 0.204 | 0.42  | 2.00E-43 |
| E2F2     | 1.36E-47 | -0.29373 | 0.002 | 0.146 | 2.04E-43 |
| ALDH3A2  | 1.46E-47 | -0.19344 | 0.219 | 0.457 | 2.18E-43 |
| CDK2AP2  | 1.46E-47 | -0.18703 | 0.235 | 0.47  | 2.18E-43 |
| PLRG1    | 1.48E-47 | 0.14449  | 0.313 | 0.391 | 2.22E-43 |
| TMTC3    | 1.50E-47 | -0.15337 | 0.051 | 0.215 | 2.24E-43 |
| NIPSNAP1 | 1.58E-47 | 0.309847 | 0.286 | 0.275 | 2.36E-43 |
| FGFRL1   | 1.60E-47 | -0.17466 | 0.002 | 0.138 | 2.40E-43 |
| LRRC59   | 1.60E-47 | -0.14474 | 0.375 | 0.611 | 2.40E-43 |
| TIMM21   | 1.66E-47 | -0.21248 | 0.105 | 0.315 | 2.48E-43 |
| STOX2    | 1.67E-47 | 0.508262 | 0.291 | 0.148 | 2.50E-43 |
| CWC15    | 1.68E-47 | 0.186693 | 0.617 | 0.664 | 2.50E-43 |
| GSE1     | 1.72E-47 | 0.531596 | 0.32  | 0.172 | 2.57E-43 |
| AUP1     | 1.85E-47 | -0.11479 | 0.474 | 0.712 | 2.76E-43 |
| PACSIN3  | 1.93E-47 | -0.19696 | 0.004 | 0.151 | 2.88E-43 |
| GPX8     | 1.98E-47 | -0.18473 | 0.002 | 0.147 | 2.96E-43 |
| CLCC1    | 2.00E-47 | -0.12374 | 0.102 | 0.278 | 2.98E-43 |
| MSRB2    | 2.04E-47 | 0.23908  | 0.251 | 0.288 | 3.05E-43 |
| GADD45A  | 2.21E-47 | -0.42901 | 0.176 | 0.463 | 3.31E-43 |
| NSMCE4A  | 2.22E-47 | -0.23027 | 0.116 | 0.337 | 3.32E-43 |
| AIDA     | 2.33E-47 | -0.137   | 0.155 | 0.351 | 3.48E-43 |
| RPP14    | 2.33E-47 | 0.177912 | 0.257 | 0.314 | 3.48E-43 |
| RGS12    | 2.33E-47 | 0.113717 | 0.344 | 0.446 | 3.48E-43 |
| LMO7     | 2.35E-47 | -0.31381 | 0.022 | 0.205 | 3.52E-43 |
| NADK     | 2.37E-47 | -0.1934  | 0.086 | 0.281 | 3.54E-43 |
| CACUL1   | 2.38E-47 | 0.167899 | 0.217 | 0.285 | 3.56E-43 |
| ACAP3    | 2.68E-47 | 0.248309 | 0.405 | 0.433 | 4.01E-43 |
| TOP3A    | 2.76E-47 | -0.16169 | 0.103 | 0.295 | 4.12E-43 |
| KAT6A    | 2.78E-47 | 0.20762  | 0.244 | 0.293 | 4.15E-43 |
| STIM2    | 2.86E-47 | -0.19276 | 0.127 | 0.34  | 4.28E-43 |
| ANKRD52  | 2.88E-47 | -0.11267 | 0.044 | 0.193 | 4.30E-43 |
| NGLY1    | 3.04E-47 | -0.1577  | 0.175 | 0.385 | 4.54E-43 |
| AZI2     | 3.04E-47 | 0.13093  | 0.344 | 0.436 | 4.54E-43 |
| FIP1L1   | 3.08E-47 | -0.15134 | 0.372 | 0.612 | 4.61E-43 |
| XAB2     | 3.31E-47 | -0.11127 | 0.16  | 0.346 | 4.94E-43 |
| PRIM1    | 3.37E-47 | -0.3047  | 0.108 | 0.342 | 5.04E-43 |
| ANK2     | 3.46E-47 | 0.114356 | 0.231 | 0.323 | 5.17E-43 |
| OXCT1    | 3.66E-47 | -0.30503 | 0.159 | 0.412 | 5.47E-43 |
| ARC      | 3.68E-47 | 0.429252 | 0.503 | 0.401 | 5.50E-43 |
| ARNT2    | 3.69E-47 | -0.21899 | 0.081 | 0.284 | 5.52E-43 |
| RAE1     | 3.81E-47 | -0.1123  | 0.333 | 0.548 | 5.70E-43 |
| COPG1    | 3.85E-47 | 0.224007 | 0.29  | 0.31  | 5.76E-43 |
| C12orf43 | 3.94E-47 | 0.113711 | 0.217 | 0.309 | 5.89E-43 |
| FAHD2A   | 4.22E-47 | -0.10591 | 0.173 | 0.358 | 6.31E-43 |
| MESP1    | 4.41E-47 | -0.13396 | 0.152 | 0.348 | 6.60E-43 |
| GTF2A1   | 4.57E-47 | -0.15026 | 0.071 | 0.248 | 6.82E-43 |
| POLRMT   | 4.83E-47 | -0.12383 | 0.081 | 0.252 | 7.22E-43 |

|           |          |          |       |       |          |
|-----------|----------|----------|-------|-------|----------|
| XPA       | 5.05E-47 | 0.168179 | 0.288 | 0.348 | 7.54E-43 |
| MTCH2     | 5.16E-47 | -0.11351 | 0.43  | 0.658 | 7.71E-43 |
| VPS53     | 5.18E-47 | 0.255858 | 0.215 | 0.23  | 7.74E-43 |
| RHOB      | 5.53E-47 | 0.254362 | 0.719 | 0.738 | 8.26E-43 |
| YWHAB     | 5.91E-47 | 0.229186 | 0.917 | 0.869 | 8.83E-43 |
| NDUFB5    | 5.93E-47 | -0.16484 | 0.489 | 0.742 | 8.86E-43 |
| STRBP     | 5.94E-47 | 0.280393 | 0.289 | 0.277 | 8.87E-43 |
| AKT2      | 6.01E-47 | -0.1105  | 0.171 | 0.357 | 8.98E-43 |
| PHF12     | 6.30E-47 | -0.10352 | 0.079 | 0.241 | 9.41E-43 |
| SDSL      | 6.47E-47 | -0.11208 | 0.053 | 0.206 | 9.66E-43 |
| RAP1B     | 6.52E-47 | -0.28219 | 0.273 | 0.546 | 9.74E-43 |
| MTMR2     | 6.54E-47 | -0.17243 | 0.123 | 0.323 | 9.77E-43 |
| GATAD2A   | 6.80E-47 | -0.22085 | 0.07  | 0.26  | 1.02E-42 |
| ERP44     | 6.84E-47 | 0.115567 | 0.342 | 0.435 | 1.02E-42 |
| RNF180    | 7.06E-47 | -0.11256 | 0.189 | 0.38  | 1.05E-42 |
| OTUD4     | 7.39E-47 | -0.1102  | 0.072 | 0.231 | 1.10E-42 |
| GABPB1    | 7.50E-47 | -0.13925 | 0.105 | 0.285 | 1.12E-42 |
| TXNIP     | 8.31E-47 | -0.30171 | 0.321 | 0.602 | 1.24E-42 |
| NPM3      | 8.31E-47 | -0.16807 | 0.119 | 0.311 | 1.24E-42 |
| PPP2R5A   | 8.46E-47 | -0.21063 | 0.009 | 0.17  | 1.26E-42 |
| THAP10    | 8.46E-47 | -0.22128 | 0.024 | 0.191 | 1.26E-42 |
| TULP4     | 8.79E-47 | 0.2627   | 0.251 | 0.246 | 1.31E-42 |
| ARL4C     | 9.17E-47 | 0.380283 | 0.692 | 0.627 | 1.37E-42 |
| CHD3      | 9.26E-47 | 0.479408 | 0.323 | 0.195 | 1.38E-42 |
| VPS37A    | 9.39E-47 | 0.108967 | 0.227 | 0.322 | 1.40E-42 |
| MAPRE2    | 9.53E-47 | 0.336127 | 0.284 | 0.23  | 1.42E-42 |
| SPRY4     | 1.00E-46 | -0.18379 | 0.016 | 0.175 | 1.50E-42 |
| AKAP13    | 1.03E-46 | -0.17296 | 0.127 | 0.326 | 1.54E-42 |
| AIG1      | 1.05E-46 | -0.16816 | 0.223 | 0.449 | 1.56E-42 |
| IGBP1     | 1.06E-46 | 0.222927 | 0.374 | 0.416 | 1.59E-42 |
| ANKRD40   | 1.11E-46 | -0.19293 | 0.1   | 0.299 | 1.66E-42 |
| LARP6     | 1.13E-46 | -0.15867 | 0.163 | 0.364 | 1.69E-42 |
| XRCC1     | 1.14E-46 | -0.26755 | 0.104 | 0.328 | 1.70E-42 |
| C14orf119 | 1.15E-46 | -0.12439 | 0.235 | 0.442 | 1.71E-42 |
| YIPF5     | 1.15E-46 | 0.229525 | 0.312 | 0.336 | 1.72E-42 |
| HOXA7     | 1.20E-46 | 0.560943 | 0.412 | 0.199 | 1.79E-42 |
| DNALI1    | 1.22E-46 | -0.25517 | 0.069 | 0.275 | 1.83E-42 |
| ARL14EP   | 1.23E-46 | 0.139662 | 0.216 | 0.295 | 1.84E-42 |
| RBBP9     | 1.30E-46 | -0.17392 | 0.064 | 0.244 | 1.95E-42 |
| CHIC2     | 1.37E-46 | -0.19185 | 0.252 | 0.489 | 2.05E-42 |
| PLA2G5    | 1.37E-46 | -0.37336 | 0     | 0.13  | 2.05E-42 |
| DOLK      | 1.43E-46 | -0.13849 | 0.068 | 0.238 | 2.13E-42 |
| TMED2     | 1.49E-46 | 0.167948 | 0.746 | 0.775 | 2.23E-42 |
| MAX       | 1.55E-46 | 0.179847 | 0.252 | 0.317 | 2.31E-42 |
| UGP2      | 1.61E-46 | -0.2998  | 0.411 | 0.706 | 2.41E-42 |
| CCSER2    | 1.64E-46 | 0.249396 | 0.307 | 0.316 | 2.45E-42 |
| ACO04540. | 1.65E-46 | 0.528798 | 0.471 | 0.278 | 2.46E-42 |
| REV1      | 1.80E-46 | 0.105521 | 0.276 | 0.372 | 2.69E-42 |
| RAD21     | 1.82E-46 | -0.3522  | 0.5   | 0.806 | 2.72E-42 |
| FAM53C    | 1.86E-46 | 0.269895 | 0.279 | 0.288 | 2.77E-42 |
| UBALD2    | 1.88E-46 | -0.3211  | 0.234 | 0.511 | 2.81E-42 |

|          |           |           |        |        |           |
|----------|-----------|-----------|--------|--------|-----------|
| CENPT    | 1. 88E-46 | -0. 13981 | 0. 269 | 0. 486 | 2. 81E-42 |
| CCDC174  | 1. 91E-46 | 0. 169843 | 0. 222 | 0. 294 | 2. 85E-42 |
| CTHRC1   | 1. 94E-46 | -0. 27822 | 0. 024 | 0. 211 | 2. 89E-42 |
| CYB5R1   | 1. 94E-46 | 0. 128127 | 0. 196 | 0. 275 | 2. 90E-42 |
| TMEM35   | 1. 95E-46 | 0. 548911 | 0. 392 | 0. 189 | 2. 92E-42 |
| ZNF281   | 1. 99E-46 | 0. 368188 | 0. 364 | 0. 294 | 2. 98E-42 |
| CRKL     | 2. 12E-46 | -0. 14183 | 0. 082 | 0. 258 | 3. 17E-42 |
| SMIM7    | 2. 12E-46 | -0. 12676 | 0. 499 | 0. 728 | 3. 17E-42 |
| MBIP     | 2. 24E-46 | 0. 183746 | 0. 266 | 0. 323 | 3. 35E-42 |
| AAAS     | 2. 33E-46 | -0. 20547 | 0. 2   | 0. 433 | 3. 48E-42 |
| UPF3B    | 2. 37E-46 | 0. 208784 | 0. 43  | 0. 467 | 3. 54E-42 |
| CLINT1   | 2. 41E-46 | -0. 11391 | 0. 166 | 0. 354 | 3. 60E-42 |
| KIF1C    | 2. 45E-46 | -0. 24911 | 0. 02  | 0. 194 | 3. 66E-42 |
| ZNF451   | 2. 51E-46 | 0. 103278 | 0. 214 | 0. 307 | 3. 75E-42 |
| XRCC4    | 2. 53E-46 | -0. 12487 | 0. 081 | 0. 248 | 3. 78E-42 |
| CHCHD1   | 2. 57E-46 | -0. 14526 | 0. 178 | 0. 379 | 3. 84E-42 |
| PCDHB10  | 2. 61E-46 | 0. 533916 | 0. 35  | 0. 184 | 3. 90E-42 |
| HES6     | 2. 70E-46 | -0. 53447 | 0. 435 | 0. 752 | 4. 04E-42 |
| TIPRL    | 2. 94E-46 | 0. 160856 | 0. 353 | 0. 412 | 4. 39E-42 |
| MTFR1    | 2. 95E-46 | -0. 10849 | 0. 075 | 0. 235 | 4. 41E-42 |
| GDI2     | 2. 96E-46 | -0. 18052 | 0. 365 | 0. 614 | 4. 42E-42 |
| ZNF100   | 3. 04E-46 | -0. 19275 | 0. 055 | 0. 232 | 4. 55E-42 |
| FDFT1    | 3. 15E-46 | -0. 2288  | 0. 237 | 0. 481 | 4. 71E-42 |
| AMFR     | 3. 17E-46 | -0. 10086 | 0. 115 | 0. 289 | 4. 74E-42 |
| IGFBP3   | 3. 35E-46 | -0. 65444 | 0. 092 | 0. 344 | 5. 00E-42 |
| HM13     | 3. 35E-46 | -0. 14882 | 0. 35  | 0. 581 | 5. 01E-42 |
| TMEM261  | 3. 38E-46 | -0. 12383 | 0. 297 | 0. 511 | 5. 04E-42 |
| PSMF1    | 3. 45E-46 | -0. 12206 | 0. 367 | 0. 595 | 5. 15E-42 |
| CAMK1    | 3. 70E-46 | -0. 10237 | 0. 167 | 0. 349 | 5. 53E-42 |
| HCFC1    | 3. 74E-46 | -0. 13482 | 0. 137 | 0. 326 | 5. 59E-42 |
| SLC38A10 | 3. 85E-46 | -0. 11841 | 0. 097 | 0. 27  | 5. 75E-42 |
| PES1     | 3. 86E-46 | -0. 12882 | 0. 146 | 0. 34  | 5. 77E-42 |
| CAHM     | 3. 95E-46 | -0. 21236 | 0. 055 | 0. 233 | 5. 90E-42 |
| TPR      | 3. 99E-46 | -0. 16335 | 0. 473 | 0. 725 | 5. 96E-42 |
| SNX8     | 4. 21E-46 | -0. 16775 | 0. 064 | 0. 242 | 6. 29E-42 |
| UBAC1    | 4. 39E-46 | -0. 10799 | 0. 191 | 0. 383 | 6. 56E-42 |
| KLC2     | 4. 54E-46 | 0. 267008 | 0. 234 | 0. 23  | 6. 78E-42 |
| ATP6VOA2 | 4. 54E-46 | -0. 16362 | 0. 077 | 0. 256 | 6. 79E-42 |
| PGRMC1   | 4. 56E-46 | 0. 144122 | 0. 681 | 0. 749 | 6. 81E-42 |
| YBEY     | 4. 79E-46 | 0. 161031 | 0. 26  | 0. 331 | 7. 16E-42 |
| VPS41    | 4. 96E-46 | 0. 259983 | 0. 328 | 0. 321 | 7. 41E-42 |
| CNKS3    | 4. 96E-46 | -0. 20943 | 0. 058 | 0. 247 | 7. 42E-42 |
| DHRS13   | 5. 42E-46 | -0. 22286 | 0. 063 | 0. 258 | 8. 10E-42 |
| NCSTN    | 5. 53E-46 | -0. 11403 | 0. 187 | 0. 377 | 8. 26E-42 |
| PI4K2B   | 6. 03E-46 | -0. 19239 | 0. 035 | 0. 206 | 9. 01E-42 |
| ACTG1    | 6. 17E-46 | 0. 138634 | 0. 998 | 0. 981 | 9. 22E-42 |
| LIFR     | 6. 48E-46 | -0. 31713 | 0. 028 | 0. 214 | 9. 68E-42 |
| ARHGEF7  | 6. 49E-46 | 0. 374496 | 0. 338 | 0. 264 | 9. 70E-42 |
| MIA3     | 6. 49E-46 | 0. 146216 | 0. 258 | 0. 323 | 9. 70E-42 |
| RIN1     | 6. 58E-46 | -0. 22349 | 0. 008 | 0. 163 | 9. 84E-42 |
| EFHD2    | 7. 07E-46 | -0. 13679 | 0. 09  | 0. 265 | 1. 06E-41 |

|          |          |          |       |       |          |
|----------|----------|----------|-------|-------|----------|
| SPATA33  | 7.30E-46 | -0.18388 | 0.186 | 0.409 | 1.09E-41 |
| MAP2K2   | 7.65E-46 | -0.32995 | 0.26  | 0.546 | 1.14E-41 |
| AKTIP    | 8.43E-46 | 0.120351 | 0.182 | 0.263 | 1.26E-41 |
| UBE2N    | 9.15E-46 | 0.141973 | 0.687 | 0.747 | 1.37E-41 |
| ECHS1    | 9.73E-46 | -0.1184  | 0.357 | 0.581 | 1.45E-41 |
| MOXD1    | 9.86E-46 | -0.23503 | 0.011 | 0.167 | 1.47E-41 |
| CCNL1    | 9.91E-46 | 0.131155 | 0.581 | 0.663 | 1.48E-41 |
| GLIS3    | 1.18E-45 | -0.22444 | 0.007 | 0.16  | 1.76E-41 |
| MOB2     | 1.20E-45 | 0.123164 | 0.221 | 0.302 | 1.80E-41 |
| ACADM    | 1.22E-45 | 0.100018 | 0.434 | 0.538 | 1.83E-41 |
| NUDT11   | 1.27E-45 | 0.360625 | 0.328 | 0.268 | 1.90E-41 |
| LAMP1    | 1.29E-45 | -0.15568 | 0.427 | 0.674 | 1.93E-41 |
| CCDC53   | 1.30E-45 | 0.156237 | 0.393 | 0.472 | 1.94E-41 |
| NOL8     | 1.30E-45 | -0.11448 | 0.161 | 0.344 | 1.95E-41 |
| LIN7B    | 1.32E-45 | 0.278862 | 0.222 | 0.231 | 1.97E-41 |
| C1orf216 | 1.32E-45 | 0.384549 | 0.252 | 0.173 | 1.97E-41 |
| NPRL2    | 1.38E-45 | 0.266307 | 0.227 | 0.237 | 2.06E-41 |
| ERC1     | 1.42E-45 | 0.307769 | 0.221 | 0.199 | 2.12E-41 |
| CBFA2T2  | 1.44E-45 | 0.267027 | 0.215 | 0.223 | 2.16E-41 |
| PBX3     | 1.54E-45 | 0.125296 | 0.159 | 0.238 | 2.31E-41 |
| SPRYD7   | 1.55E-45 | 0.107214 | 0.207 | 0.286 | 2.32E-41 |
| RFWD2    | 1.56E-45 | 0.139304 | 0.239 | 0.311 | 2.34E-41 |
| GUCD1    | 1.71E-45 | -0.19858 | 0.069 | 0.256 | 2.55E-41 |
| SOCS4    | 1.71E-45 | -0.13542 | 0.053 | 0.212 | 2.56E-41 |
| CENPB    | 1.73E-45 | -0.13572 | 0.07  | 0.237 | 2.58E-41 |
| BST2     | 1.91E-45 | -0.72579 | 0.031 | 0.232 | 2.85E-41 |
| MDC1     | 1.91E-45 | -0.19835 | 0.042 | 0.216 | 2.85E-41 |
| SPA17    | 1.96E-45 | -0.23512 | 0.06  | 0.249 | 2.93E-41 |
| SLC35D2  | 2.00E-45 | -0.20114 | 0.032 | 0.202 | 2.99E-41 |
| JAK1     | 2.00E-45 | 0.203404 | 0.271 | 0.315 | 2.99E-41 |
| RAC1     | 2.10E-45 | 0.168253 | 0.987 | 0.941 | 3.14E-41 |
| LRRC4B   | 2.11E-45 | 0.142777 | 0.212 | 0.285 | 3.16E-41 |
| DTNBP1   | 2.15E-45 | 0.185555 | 0.27  | 0.32  | 3.22E-41 |
| ITPK1    | 2.17E-45 | -0.21933 | 0.046 | 0.228 | 3.24E-41 |
| NEUROD2  | 2.18E-45 | 0.607464 | 0.187 | 0.014 | 3.25E-41 |
| DDRGK1   | 2.25E-45 | -0.10756 | 0.357 | 0.574 | 3.36E-41 |
| ZHX1     | 2.26E-45 | 0.239497 | 0.295 | 0.319 | 3.37E-41 |
| NLN      | 2.34E-45 | 0.169565 | 0.228 | 0.28  | 3.50E-41 |
| GPANK1   | 2.35E-45 | -0.18624 | 0.181 | 0.402 | 3.51E-41 |
| RBMXL1   | 2.40E-45 | -0.16599 | 0.158 | 0.363 | 3.58E-41 |
| SNRPG    | 2.75E-45 | -0.35563 | 0.7   | 0.907 | 4.10E-41 |
| CTDNBP1  | 2.81E-45 | -0.16887 | 0.32  | 0.557 | 4.19E-41 |
| SPRED2   | 2.83E-45 | -0.22722 | 0.053 | 0.243 | 4.23E-41 |
| CLUAP1   | 2.85E-45 | 0.202609 | 0.239 | 0.285 | 4.26E-41 |
| CAMSAP2  | 2.92E-45 | 0.115686 | 0.22  | 0.296 | 4.36E-41 |
| NAP1L5   | 2.96E-45 | 0.491924 | 0.333 | 0.165 | 4.42E-41 |
| SLC25A22 | 3.02E-45 | 0.209177 | 0.233 | 0.258 | 4.52E-41 |
| CDC23    | 3.03E-45 | -0.22343 | 0.105 | 0.31  | 4.53E-41 |
| CCNK     | 3.05E-45 | -0.13153 | 0.064 | 0.228 | 4.56E-41 |
| TRIM7    | 3.17E-45 | -0.13542 | 0.013 | 0.147 | 4.74E-41 |
| FOSL2    | 3.19E-45 | -0.14354 | 0.049 | 0.204 | 4.76E-41 |

|          |          |          |       |       |          |
|----------|----------|----------|-------|-------|----------|
| CHD1L    | 3.46E-45 | -0.11162 | 0.082 | 0.242 | 5.17E-41 |
| C19orf60 | 3.55E-45 | 0.135673 | 0.495 | 0.591 | 5.30E-41 |
| ICAM3    | 3.67E-45 | -0.16357 | 0.009 | 0.151 | 5.48E-41 |
| DIRAS1   | 3.75E-45 | 0.318786 | 0.244 | 0.207 | 5.60E-41 |
| CHP1     | 3.83E-45 | -0.15472 | 0.1   | 0.279 | 5.73E-41 |
| NUCB1    | 4.00E-45 | -0.1023  | 0.311 | 0.514 | 5.98E-41 |
| TBC1D1   | 4.04E-45 | -0.1355  | 0.065 | 0.231 | 6.03E-41 |
| HDAC9    | 4.29E-45 | 0.510075 | 0.294 | 0.141 | 6.41E-41 |
| SERTAD1  | 4.41E-45 | -0.2978  | 0.09  | 0.306 | 6.59E-41 |
| BTBD1    | 4.49E-45 | -0.12832 | 0.086 | 0.254 | 6.71E-41 |
| C14orf37 | 4.51E-45 | 0.398717 | 0.26  | 0.184 | 6.74E-41 |
| DDR1     | 4.96E-45 | -0.16607 | 0.39  | 0.637 | 7.41E-41 |
| NDUFV1   | 5.15E-45 | -0.13683 | 0.5   | 0.735 | 7.70E-41 |
| TSR2     | 5.19E-45 | -0.11709 | 0.259 | 0.464 | 7.76E-41 |
| SRSF5    | 5.26E-45 | 0.159434 | 0.748 | 0.802 | 7.86E-41 |
| AGPAT3   | 5.41E-45 | -0.17163 | 0.073 | 0.253 | 8.09E-41 |
| GPR161   | 5.41E-45 | 0.378511 | 0.255 | 0.172 | 8.09E-41 |
| MYL12A   | 5.66E-45 | -0.37022 | 0.196 | 0.477 | 8.45E-41 |
| DOT1L    | 6.04E-45 | -0.17064 | 0.054 | 0.225 | 9.03E-41 |
| CERK     | 6.31E-45 | 0.248934 | 0.216 | 0.23  | 9.43E-41 |
| HOMER2   | 6.89E-45 | -0.14894 | 0.023 | 0.172 | 1.03E-40 |
| RQCD1    | 7.22E-45 | -0.10526 | 0.224 | 0.419 | 1.08E-40 |
| PCCB     | 7.32E-45 | -0.25476 | 0.102 | 0.314 | 1.09E-40 |
| CBX5     | 7.89E-45 | -0.22832 | 0.493 | 0.767 | 1.18E-40 |
| AP3D1    | 7.92E-45 | -0.1393  | 0.331 | 0.552 | 1.18E-40 |
| ATG5     | 8.10E-45 | 0.137601 | 0.251 | 0.325 | 1.21E-40 |
| SOBP     | 8.18E-45 | 0.338048 | 0.299 | 0.262 | 1.22E-40 |
| NUP107   | 8.22E-45 | -0.46104 | 0.277 | 0.579 | 1.23E-40 |
| VASP     | 8.37E-45 | -0.10909 | 0.102 | 0.268 | 1.25E-40 |
| SLC39A10 | 8.57E-45 | 0.232151 | 0.241 | 0.267 | 1.28E-40 |
| GNG4     | 8.66E-45 | -0.20809 | 0.23  | 0.468 | 1.29E-40 |
| ARFIP2   | 8.93E-45 | 0.103308 | 0.284 | 0.378 | 1.33E-40 |
| QTRT1    | 9.06E-45 | -0.12399 | 0.303 | 0.514 | 1.35E-40 |
| PFN2     | 9.30E-45 | 0.269285 | 0.822 | 0.783 | 1.39E-40 |
| TIAL1    | 9.58E-45 | -0.13502 | 0.161 | 0.354 | 1.43E-40 |
| GOSR2    | 9.75E-45 | 0.133311 | 0.22  | 0.304 | 1.46E-40 |
| SQSTM1   | 9.86E-45 | -0.18016 | 0.329 | 0.574 | 1.47E-40 |
| CERS1    | 1.02E-44 | -0.20977 | 0.065 | 0.253 | 1.53E-40 |
| ZBED5    | 1.03E-44 | 0.163259 | 0.301 | 0.36  | 1.54E-40 |
| ZNF439   | 1.05E-44 | 0.269209 | 0.288 | 0.29  | 1.57E-40 |
| SLC7A1   | 1.08E-44 | -0.12253 | 0.049 | 0.2   | 1.61E-40 |
| CBX4     | 1.10E-44 | 0.292384 | 0.229 | 0.225 | 1.64E-40 |
| SLC35A5  | 1.13E-44 | 0.133585 | 0.224 | 0.304 | 1.70E-40 |
| VKORC1   | 1.14E-44 | -0.15903 | 0.387 | 0.63  | 1.70E-40 |
| MED30    | 1.15E-44 | 0.140426 | 0.412 | 0.494 | 1.72E-40 |
| RCAN1    | 1.20E-44 | -0.35227 | 0.156 | 0.409 | 1.79E-40 |
| PAF1     | 1.20E-44 | -0.1672  | 0.212 | 0.425 | 1.79E-40 |
| ACTR1B   | 1.26E-44 | 0.144621 | 0.269 | 0.343 | 1.88E-40 |
| DPY19L4  | 1.30E-44 | -0.12169 | 0.069 | 0.228 | 1.94E-40 |
| ABHD8    | 1.34E-44 | 0.168239 | 0.165 | 0.209 | 2.00E-40 |
| MAP3K2   | 1.36E-44 | 0.119756 | 0.189 | 0.274 | 2.03E-40 |

|          |          |          |       |       |          |
|----------|----------|----------|-------|-------|----------|
| UBE2L3   | 1.36E-44 | -0.27841 | 0.467 | 0.756 | 2.03E-40 |
| FBXO22   | 1.46E-44 | -0.1513  | 0.08  | 0.253 | 2.18E-40 |
| GSN      | 1.48E-44 | -0.29596 | 0.104 | 0.327 | 2.21E-40 |
| HEY2     | 1.53E-44 | -0.22461 | 0.009 | 0.163 | 2.29E-40 |
| IFT57    | 1.53E-44 | -0.11867 | 0.24  | 0.436 | 2.29E-40 |
| TTC17    | 1.54E-44 | 0.120976 | 0.255 | 0.336 | 2.29E-40 |
| OCIAD1   | 1.57E-44 | 0.177644 | 0.777 | 0.806 | 2.34E-40 |
| HSD17B10 | 1.57E-44 | -0.16352 | 0.487 | 0.735 | 2.35E-40 |
| GNAO1    | 1.61E-44 | 0.593757 | 0.319 | 0.094 | 2.41E-40 |
| S100A10  | 1.67E-44 | -0.49889 | 0.241 | 0.542 | 2.49E-40 |
| PARVB    | 1.67E-44 | -0.16037 | 0.027 | 0.181 | 2.50E-40 |
| TSC22D2  | 1.68E-44 | 0.313533 | 0.248 | 0.22  | 2.51E-40 |
| MLH1     | 1.70E-44 | -0.1539  | 0.172 | 0.365 | 2.54E-40 |
| IRF2     | 1.71E-44 | -0.1767  | 0.082 | 0.262 | 2.55E-40 |
| TBC1D14  | 1.79E-44 | 0.332777 | 0.278 | 0.232 | 2.67E-40 |
| NAV1     | 1.88E-44 | 0.121275 | 0.267 | 0.356 | 2.82E-40 |
| KIAA1549 | 1.98E-44 | 0.38458  | 0.313 | 0.237 | 2.96E-40 |
| RTTN     | 1.98E-44 | -0.18419 | 0.007 | 0.152 | 2.96E-40 |
| FAM60A   | 2.01E-44 | 0.207165 | 0.291 | 0.332 | 3.00E-40 |
| ADK      | 2.04E-44 | -0.17263 | 0.108 | 0.298 | 3.05E-40 |
| IGSF10   | 2.15E-44 | -0.20888 | 0.051 | 0.231 | 3.22E-40 |
| GMPR2    | 2.18E-44 | -0.1693  | 0.101 | 0.289 | 3.25E-40 |
| DDX3Y    | 2.18E-44 | -0.12431 | 0.046 | 0.194 | 3.26E-40 |
| METTL2B  | 2.23E-44 | 0.207749 | 0.345 | 0.379 | 3.34E-40 |
| RFX2     | 2.25E-44 | -0.24701 | 0.042 | 0.226 | 3.36E-40 |
| NKX2-5   | 2.29E-44 | 0.614581 | 0.241 | 0.064 | 3.42E-40 |
| SMARCA1  | 2.42E-44 | 0.157822 | 0.306 | 0.362 | 3.62E-40 |
| KATNB1   | 2.50E-44 | 0.119842 | 0.181 | 0.256 | 3.74E-40 |
| ZFHX3    | 2.57E-44 | 0.121387 | 0.174 | 0.262 | 3.83E-40 |
| STOML2   | 2.60E-44 | -0.18096 | 0.405 | 0.656 | 3.89E-40 |
| HS6ST2   | 2.69E-44 | -0.19318 | 0.003 | 0.143 | 4.02E-40 |
| DNM1     | 2.90E-44 | 0.104466 | 0.105 | 0.165 | 4.34E-40 |
| RNF216   | 3.05E-44 | 0.234885 | 0.338 | 0.352 | 4.55E-40 |
| RAB8A    | 3.05E-44 | -0.21736 | 0.272 | 0.517 | 4.56E-40 |
| DCAKD    | 3.14E-44 | -0.15003 | 0.143 | 0.338 | 4.70E-40 |
| LDHA     | 3.22E-44 | -0.4333  | 0.606 | 0.865 | 4.81E-40 |
| FRMD8    | 3.25E-44 | -0.15328 | 0.059 | 0.225 | 4.86E-40 |
| NOP56    | 3.25E-44 | -0.2851  | 0.459 | 0.751 | 4.86E-40 |
| TAF15    | 3.26E-44 | -0.19498 | 0.323 | 0.564 | 4.87E-40 |
| TP73     | 3.31E-44 | -0.19026 | 0.029 | 0.18  | 4.94E-40 |
| SLC35F2  | 3.33E-44 | -0.10232 | 0.069 | 0.221 | 4.97E-40 |
| PDCL     | 3.50E-44 | 0.135771 | 0.271 | 0.342 | 5.23E-40 |
| TMEM109  | 3.53E-44 | -0.1071  | 0.067 | 0.217 | 5.28E-40 |
| TCEAL1   | 3.55E-44 | 0.285037 | 0.306 | 0.305 | 5.30E-40 |
| TPT1-AS1 | 3.58E-44 | 0.194114 | 0.207 | 0.247 | 5.36E-40 |
| SERPINB6 | 3.82E-44 | -0.24742 | 0.284 | 0.541 | 5.70E-40 |
| C12orf73 | 3.84E-44 | 0.197119 | 0.222 | 0.256 | 5.74E-40 |
| KIAA2026 | 3.84E-44 | 0.352807 | 0.268 | 0.209 | 5.74E-40 |
| METTL21A | 3.93E-44 | -0.15547 | 0.177 | 0.375 | 5.88E-40 |
| ZCCHC12  | 4.18E-44 | 0.512459 | 0.186 | 0.012 | 6.24E-40 |
| PCMTD2   | 4.25E-44 | 0.105421 | 0.317 | 0.419 | 6.35E-40 |

|          |          |          |       |       |          |
|----------|----------|----------|-------|-------|----------|
| DLEU1    | 4.28E-44 | -0.21198 | 0.059 | 0.243 | 6.39E-40 |
| TADA3    | 4.46E-44 | -0.1269  | 0.409 | 0.636 | 6.66E-40 |
| THUMPDI  | 4.69E-44 | 0.188131 | 0.306 | 0.343 | 7.01E-40 |
| PTPN13   | 4.82E-44 | -0.15625 | 0.026 | 0.172 | 7.20E-40 |
| CHRNA5   | 4.82E-44 | -0.21465 | 0.024 | 0.186 | 7.20E-40 |
| SNRPB2   | 4.87E-44 | 0.181632 | 0.74  | 0.772 | 7.28E-40 |
| PI4KB    | 5.00E-44 | 0.122379 | 0.226 | 0.305 | 7.47E-40 |
| KIAA1586 | 5.14E-44 | 0.195256 | 0.232 | 0.269 | 7.68E-40 |
| HRH1     | 5.21E-44 | -0.16896 | 0.009 | 0.153 | 7.79E-40 |
| MBOAT2   | 5.37E-44 | -0.11596 | 0.242 | 0.438 | 8.03E-40 |
| TRPM3    | 5.47E-44 | -0.19725 | 0.002 | 0.138 | 8.18E-40 |
| TMEM19   | 5.91E-44 | -0.17125 | 0.117 | 0.306 | 8.84E-40 |
| PTPN9    | 5.97E-44 | -0.14818 | 0.067 | 0.236 | 8.92E-40 |
| UQCRC1   | 6.44E-44 | -0.18007 | 0.498 | 0.747 | 9.63E-40 |
| SEC14L2  | 6.52E-44 | -0.19891 | 0.037 | 0.202 | 9.75E-40 |
| KIAA1033 | 6.86E-44 | -0.19852 | 0.094 | 0.291 | 1.02E-39 |
| KCTD13   | 7.21E-44 | 0.342368 | 0.313 | 0.267 | 1.08E-39 |
| TPD52    | 7.29E-44 | -0.10431 | 0.181 | 0.358 | 1.09E-39 |
| RABGAP1  | 7.83E-44 | 0.104334 | 0.152 | 0.233 | 1.17E-39 |
| TCF7L2   | 8.19E-44 | -0.25997 | 0.023 | 0.193 | 1.22E-39 |
| CLDN10   | 8.28E-44 | -0.44409 | 0.003 | 0.143 | 1.24E-39 |
| LMAN2    | 8.44E-44 | -0.18309 | 0.488 | 0.743 | 1.26E-39 |
| TRIM47   | 8.52E-44 | -0.21969 | 0.112 | 0.322 | 1.27E-39 |
| TPST2    | 8.64E-44 | -0.1443  | 0.03  | 0.175 | 1.29E-39 |
| NFKBIB   | 8.64E-44 | -0.17982 | 0.109 | 0.304 | 1.29E-39 |
| TULP3    | 8.65E-44 | -0.13027 | 0.135 | 0.316 | 1.29E-39 |
| NONO     | 9.10E-44 | -0.20232 | 0.552 | 0.807 | 1.36E-39 |
| ZNF48    | 9.12E-44 | 0.172486 | 0.184 | 0.228 | 1.36E-39 |
| G2E3     | 9.17E-44 | -0.30494 | 0.121 | 0.346 | 1.37E-39 |
| MBTPS1   | 9.25E-44 | 0.117297 | 0.205 | 0.284 | 1.38E-39 |
| KLF6     | 9.27E-44 | -0.25948 | 0.258 | 0.505 | 1.39E-39 |
| STRN3    | 9.28E-44 | -0.17134 | 0.089 | 0.273 | 1.39E-39 |
| WDR47    | 9.32E-44 | 0.382961 | 0.264 | 0.18  | 1.39E-39 |
| SPAST    | 9.85E-44 | 0.221298 | 0.2   | 0.223 | 1.47E-39 |
| LPAR6    | 1.01E-43 | -0.20469 | 0.017 | 0.169 | 1.50E-39 |
| CBX2     | 1.01E-43 | -0.23578 | 0.08  | 0.277 | 1.51E-39 |
| C16orf72 | 1.04E-43 | 0.112493 | 0.137 | 0.209 | 1.55E-39 |
| EFCAB2   | 1.07E-43 | -0.27928 | 0.064 | 0.259 | 1.59E-39 |
| FAM217B  | 1.08E-43 | 0.246301 | 0.238 | 0.244 | 1.61E-39 |
| USP6NL   | 1.09E-43 | -0.11838 | 0.027 | 0.165 | 1.63E-39 |
| GPATCH11 | 1.12E-43 | -0.18797 | 0.115 | 0.312 | 1.68E-39 |
| NME7     | 1.13E-43 | 0.151284 | 0.219 | 0.293 | 1.69E-39 |
| JAM3     | 1.22E-43 | -0.19575 | 0.111 | 0.31  | 1.82E-39 |
| GAS7     | 1.28E-43 | -0.37391 | 0.02  | 0.194 | 1.92E-39 |
| AFAP1    | 1.33E-43 | 0.276562 | 0.189 | 0.185 | 1.99E-39 |
| TWISTNB  | 1.41E-43 | 0.120774 | 0.31  | 0.406 | 2.10E-39 |
| PTPRN    | 1.44E-43 | 0.559422 | 0.258 | 0.059 | 2.15E-39 |
| MAGI1    | 1.49E-43 | 0.261068 | 0.489 | 0.493 | 2.22E-39 |
| SMARCD2  | 1.67E-43 | -0.18693 | 0.018 | 0.172 | 2.49E-39 |
| PPM1K    | 1.71E-43 | 0.23566  | 0.32  | 0.331 | 2.56E-39 |
| ST7      | 1.71E-43 | 0.434349 | 0.297 | 0.191 | 2.56E-39 |



|           |          |          |       |       |          |
|-----------|----------|----------|-------|-------|----------|
| TMEM242   | 1.78E-43 | 0.119517 | 0.268 | 0.353 | 2.66E-39 |
| CPSF3     | 1.79E-43 | -0.10893 | 0.214 | 0.407 | 2.68E-39 |
| LAMB2     | 1.81E-43 | -0.16963 | 0.005 | 0.142 | 2.70E-39 |
| MDGA1     | 1.94E-43 | -0.11489 | 0.046 | 0.189 | 2.90E-39 |
| WDR45B    | 1.95E-43 | -0.12366 | 0.408 | 0.631 | 2.91E-39 |
| RPP38     | 1.96E-43 | -0.20225 | 0.073 | 0.259 | 2.93E-39 |
| SORD      | 2.11E-43 | -0.23175 | 0.027 | 0.198 | 3.16E-39 |
| RHOC      | 2.15E-43 | -0.46193 | 0.31  | 0.621 | 3.22E-39 |
| WRNIP1    | 2.23E-43 | -0.10102 | 0.115 | 0.281 | 3.34E-39 |
| RP11-161M | 2.28E-43 | 0.372318 | 0.371 | 0.319 | 3.41E-39 |
| FUCA1     | 2.36E-43 | 0.104055 | 0.12  | 0.178 | 3.52E-39 |
| XRCC3     | 2.44E-43 | -0.22407 | 0.016 | 0.17  | 3.64E-39 |
| C19orf24  | 2.49E-43 | -0.1908  | 0.296 | 0.537 | 3.72E-39 |
| CDH4      | 2.61E-43 | 0.281617 | 0.218 | 0.202 | 3.89E-39 |
| KLHL12    | 2.66E-43 | 0.208094 | 0.189 | 0.21  | 3.97E-39 |
| OSMR      | 2.72E-43 | -0.16757 | 0.008 | 0.147 | 4.06E-39 |
| LITAF     | 2.78E-43 | -0.1116  | 0.229 | 0.421 | 4.16E-39 |
| UMPS      | 2.86E-43 | -0.15748 | 0.122 | 0.305 | 4.28E-39 |
| FGF14     | 2.93E-43 | 0.281466 | 0.167 | 0.156 | 4.38E-39 |
| PCNT      | 3.14E-43 | -0.13131 | 0.075 | 0.24  | 4.69E-39 |
| C10orf35  | 3.16E-43 | 0.568768 | 0.25  | 0.041 | 4.72E-39 |
| IFT20     | 3.33E-43 | 0.127754 | 0.36  | 0.443 | 4.97E-39 |
| TSPAN6    | 3.33E-43 | -0.13121 | 0.119 | 0.295 | 4.98E-39 |
| ALKBH3    | 3.33E-43 | 0.141693 | 0.149 | 0.212 | 4.98E-39 |
| SLC9A3R2  | 3.40E-43 | 0.233715 | 0.163 | 0.177 | 5.09E-39 |
| ZNF724P   | 3.47E-43 | -0.29736 | 0.033 | 0.216 | 5.19E-39 |
| LRIG1     | 3.70E-43 | -0.16794 | 0.038 | 0.195 | 5.54E-39 |
| USP33     | 3.73E-43 | 0.205228 | 0.264 | 0.29  | 5.57E-39 |
| ACSBG1    | 3.75E-43 | -0.2107  | 0.002 | 0.132 | 5.61E-39 |
| CHMP4B    | 3.99E-43 | -0.31817 | 0.318 | 0.607 | 5.96E-39 |
| NDUFAF3   | 4.03E-43 | -0.12342 | 0.489 | 0.717 | 6.02E-39 |
| UFL1      | 4.05E-43 | -0.10741 | 0.142 | 0.316 | 6.05E-39 |
| STON2     | 4.06E-43 | -0.20022 | 0.006 | 0.148 | 6.07E-39 |
| XPNPEP3   | 4.10E-43 | -0.15099 | 0.051 | 0.207 | 6.13E-39 |
| CDC7      | 4.20E-43 | -0.27536 | 0.042 | 0.227 | 6.28E-39 |
| LRRC41    | 4.24E-43 | 0.184303 | 0.258 | 0.302 | 6.33E-39 |
| 2-Sep     | 4.43E-43 | -0.31102 | 0.581 | 0.86  | 6.62E-39 |
| CD320     | 4.85E-43 | -0.25893 | 0.397 | 0.675 | 7.24E-39 |
| SUV39H1   | 4.90E-43 | -0.22182 | 0.024 | 0.186 | 7.32E-39 |
| MANEA     | 5.04E-43 | -0.14838 | 0.038 | 0.194 | 7.54E-39 |
| PQLC3     | 5.30E-43 | -0.10907 | 0.046 | 0.186 | 7.92E-39 |
| MDFI      | 5.51E-43 | -0.26137 | 0.038 | 0.211 | 8.23E-39 |
| TMEM129   | 5.91E-43 | -0.17482 | 0.112 | 0.3   | 8.82E-39 |
| PRPF31    | 6.00E-43 | -0.2178  | 0.369 | 0.622 | 8.97E-39 |
| LSM12     | 6.15E-43 | -0.21318 | 0.251 | 0.486 | 9.18E-39 |
| CA12      | 6.18E-43 | -0.26113 | 0.02  | 0.18  | 9.24E-39 |
| SLC37A4   | 6.64E-43 | -0.12912 | 0.072 | 0.235 | 9.92E-39 |
| ZNF354A   | 6.76E-43 | 0.241762 | 0.207 | 0.214 | 1.01E-38 |
| ATG4C     | 7.54E-43 | -0.2679  | 0.067 | 0.258 | 1.13E-38 |
| ABI2      | 8.08E-43 | -0.20424 | 0.474 | 0.736 | 1.21E-38 |
| NIPSNAP3A | 8.51E-43 | 0.171509 | 0.194 | 0.235 | 1.27E-38 |

|           |           |           |        |        |           |
|-----------|-----------|-----------|--------|--------|-----------|
| CASP7     | 8. 61E-43 | -0. 2715  | 0. 005 | 0. 146 | 1. 29E-38 |
| ZADH2     | 8. 70E-43 | 0. 130508 | 0. 181 | 0. 246 | 1. 30E-38 |
| LGMN      | 8. 86E-43 | -0. 22686 | 0. 143 | 0. 354 | 1. 32E-38 |
| PTX3      | 9. 15E-43 | -0. 16005 | 0. 053 | 0. 216 | 1. 37E-38 |
| ANO6      | 9. 46E-43 | -0. 19732 | 0. 013 | 0. 159 | 1. 41E-38 |
| NPHP1     | 9. 83E-43 | -0. 15574 | 0. 02  | 0. 17  | 1. 47E-38 |
| CCL2      | 1. 01E-42 | -0. 36653 | 0. 047 | 0. 247 | 1. 51E-38 |
| RGS17     | 1. 01E-42 | 0. 269255 | 0. 321 | 0. 317 | 1. 51E-38 |
| PDGFD     | 1. 02E-42 | -0. 16759 | 0. 006 | 0. 143 | 1. 52E-38 |
| GLIPR2    | 1. 03E-42 | -0. 27222 | 0. 116 | 0. 331 | 1. 54E-38 |
| POLR3GL   | 1. 12E-42 | 0. 108494 | 0. 364 | 0. 454 | 1. 67E-38 |
| GATAD2B   | 1. 13E-42 | 0. 255191 | 0. 257 | 0. 263 | 1. 68E-38 |
| VWA9      | 1. 13E-42 | -0. 1805  | 0. 083 | 0. 265 | 1. 69E-38 |
| HIPK2     | 1. 14E-42 | 0. 148508 | 0. 314 | 0. 385 | 1. 70E-38 |
| NCOA3     | 1. 15E-42 | -0. 14272 | 0. 071 | 0. 231 | 1. 72E-38 |
| LINC00094 | 1. 18E-42 | 0. 237216 | 0. 191 | 0. 188 | 1. 76E-38 |
| PHACTR2   | 1. 22E-42 | -0. 15353 | 0. 003 | 0. 137 | 1. 82E-38 |
| UQCRB     | 1. 28E-42 | 0. 177524 | 0. 826 | 0. 83  | 1. 91E-38 |
| BNIP3     | 1. 34E-42 | -0. 25701 | 0. 124 | 0. 335 | 2. 00E-38 |
| SLC7A6OS  | 1. 39E-42 | 0. 16859  | 0. 175 | 0. 222 | 2. 07E-38 |
| DDX56     | 1. 39E-42 | 0. 103953 | 0. 365 | 0. 456 | 2. 07E-38 |
| LINC00511 | 1. 43E-42 | -0. 22846 | 0. 089 | 0. 285 | 2. 13E-38 |
| ATF4      | 1. 44E-42 | -0. 1424  | 0. 497 | 0. 731 | 2. 15E-38 |
| BTBD10    | 1. 46E-42 | 0. 120491 | 0. 276 | 0. 353 | 2. 19E-38 |
| HEXB      | 1. 47E-42 | -0. 33125 | 0. 227 | 0. 49  | 2. 20E-38 |
| RPUSD1    | 1. 49E-42 | 0. 111461 | 0. 174 | 0. 253 | 2. 23E-38 |
| PPIF      | 1. 51E-42 | -0. 27399 | 0. 135 | 0. 367 | 2. 26E-38 |
| B4GALT5   | 1. 52E-42 | -0. 15299 | 0. 18  | 0. 38  | 2. 27E-38 |
| POLR2L    | 1. 74E-42 | -0. 38207 | 0. 571 | 0. 847 | 2. 60E-38 |
| FAM162A   | 1. 78E-42 | -0. 27167 | 0. 185 | 0. 417 | 2. 66E-38 |
| YAE1D1    | 1. 79E-42 | 0. 326913 | 0. 322 | 0. 291 | 2. 68E-38 |
| SLC43A3   | 1. 82E-42 | -0. 19095 | 0. 104 | 0. 299 | 2. 72E-38 |
| DCAF10    | 1. 90E-42 | 0. 19166  | 0. 262 | 0. 306 | 2. 83E-38 |
| MAT2B     | 1. 97E-42 | -0. 14513 | 0. 112 | 0. 288 | 2. 95E-38 |
| RAB30-AS1 | 2. 02E-42 | -0. 11081 | 0. 137 | 0. 31  | 3. 02E-38 |
| INO80C    | 2. 07E-42 | -0. 14798 | 0. 135 | 0. 32  | 3. 09E-38 |
| COPRS     | 2. 13E-42 | -0. 315   | 0. 336 | 0. 625 | 3. 19E-38 |
| FAM118B   | 2. 22E-42 | 0. 142614 | 0. 189 | 0. 258 | 3. 31E-38 |
| GUSB      | 2. 23E-42 | -0. 15976 | 0. 213 | 0. 421 | 3. 33E-38 |
| NR2C2AP   | 2. 27E-42 | -0. 20013 | 0. 158 | 0. 37  | 3. 39E-38 |
| ABHD14B   | 2. 34E-42 | -0. 17621 | 0. 009 | 0. 149 | 3. 50E-38 |
| SUN2      | 2. 36E-42 | -0. 13158 | 0. 218 | 0. 414 | 3. 53E-38 |
| LAMP5     | 2. 44E-42 | 0. 184087 | 0. 182 | 0. 235 | 3. 64E-38 |
| DEDD2     | 2. 45E-42 | 0. 419055 | 0. 292 | 0. 188 | 3. 66E-38 |
| UBAP1     | 2. 50E-42 | 0. 150437 | 0. 185 | 0. 242 | 3. 73E-38 |
| DYRK4     | 2. 67E-42 | -0. 12033 | 0. 124 | 0. 296 | 3. 99E-38 |
| ENKUR     | 2. 69E-42 | -0. 20293 | 0. 008 | 0. 146 | 4. 01E-38 |
| VMP1      | 2. 79E-42 | -0. 21762 | 0. 347 | 0. 598 | 4. 17E-38 |
| AGA       | 2. 79E-42 | -0. 1353  | 0. 06  | 0. 214 | 4. 17E-38 |
| PDHA1     | 2. 79E-42 | -0. 14668 | 0. 353 | 0. 568 | 4. 18E-38 |
| GDF15     | 2. 84E-42 | -0. 43408 | 0. 007 | 0. 154 | 4. 24E-38 |

|           |          |          |       |       |          |
|-----------|----------|----------|-------|-------|----------|
| TMEM59    | 2.95E-42 | 0.168073 | 0.839 | 0.854 | 4.41E-38 |
| ACAT1     | 3.13E-42 | 0.217711 | 0.412 | 0.43  | 4.68E-38 |
| PIEZO1    | 3.14E-42 | -0.21788 | 0.003 | 0.136 | 4.70E-38 |
| DDX54     | 3.21E-42 | -0.13165 | 0.158 | 0.342 | 4.79E-38 |
| DNAJA3    | 3.29E-42 | -0.12183 | 0.174 | 0.357 | 4.91E-38 |
| EIF2S3    | 3.50E-42 | -0.16452 | 0.184 | 0.388 | 5.22E-38 |
| PTPRA     | 3.51E-42 | -0.23061 | 0.384 | 0.648 | 5.25E-38 |
| ZYG11B    | 3.77E-42 | 0.196186 | 0.221 | 0.253 | 5.63E-38 |
| SPATA13   | 3.90E-42 | -0.13153 | 0.053 | 0.206 | 5.82E-38 |
| FKBP8     | 3.96E-42 | 0.154615 | 0.701 | 0.754 | 5.92E-38 |
| OLFM2     | 4.17E-42 | 0.439831 | 0.384 | 0.265 | 6.24E-38 |
| CHMP2A    | 4.26E-42 | 0.108299 | 0.682 | 0.763 | 6.37E-38 |
| FHL3      | 4.35E-42 | -0.12824 | 0.066 | 0.223 | 6.50E-38 |
| CCDC86    | 4.62E-42 | -0.12285 | 0.057 | 0.212 | 6.91E-38 |
| MPC1      | 4.72E-42 | -0.26988 | 0.416 | 0.696 | 7.05E-38 |
| SLC25A19  | 4.72E-42 | -0.19247 | 0.044 | 0.209 | 7.05E-38 |
| CCDC8     | 4.85E-42 | -0.15315 | 0.013 | 0.148 | 7.25E-38 |
| DNAJB14   | 5.01E-42 | 0.107716 | 0.206 | 0.284 | 7.49E-38 |
| PIK3R1    | 5.18E-42 | 0.337994 | 0.49  | 0.422 | 7.74E-38 |
| PPP6R3    | 5.24E-42 | -0.13546 | 0.076 | 0.241 | 7.83E-38 |
| CBX8      | 5.28E-42 | 0.231425 | 0.145 | 0.156 | 7.88E-38 |
| PHYKPL    | 5.47E-42 | 0.131545 | 0.169 | 0.236 | 8.18E-38 |
| NUP188    | 5.80E-42 | -0.19176 | 0.057 | 0.226 | 8.66E-38 |
| PPP1CA    | 5.93E-42 | -0.30637 | 0.43  | 0.722 | 8.86E-38 |
| SERGEF    | 5.97E-42 | 0.129503 | 0.157 | 0.22  | 8.93E-38 |
| TMEM51    | 5.99E-42 | -0.19587 | 0.024 | 0.175 | 8.95E-38 |
| FAF2      | 6.02E-42 | 0.109054 | 0.263 | 0.352 | 8.99E-38 |
| ZNF677    | 6.08E-42 | 0.237714 | 0.325 | 0.333 | 9.09E-38 |
| CLVS1     | 6.11E-42 | 0.538087 | 0.219 | 0.026 | 9.13E-38 |
| RFX4      | 6.24E-42 | -0.30667 | 0.102 | 0.317 | 9.32E-38 |
| TMEM214   | 6.28E-42 | -0.13369 | 0.067 | 0.228 | 9.38E-38 |
| FUBP1     | 6.28E-42 | 0.237611 | 0.43  | 0.43  | 9.39E-38 |
| ATP9A     | 6.37E-42 | 0.212738 | 0.199 | 0.22  | 9.52E-38 |
| SSB       | 6.56E-42 | 0.127278 | 0.731 | 0.801 | 9.80E-38 |
| GAN       | 6.73E-42 | 0.16129  | 0.199 | 0.246 | 1.01E-37 |
| RP11-262H | 6.80E-42 | 0.159205 | 0.196 | 0.253 | 1.02E-37 |
| STX6      | 6.82E-42 | 0.202497 | 0.228 | 0.269 | 1.02E-37 |
| TBL1X     | 7.01E-42 | -0.11423 | 0.02  | 0.148 | 1.05E-37 |
| ISYNA1    | 7.06E-42 | 0.178523 | 0.247 | 0.285 | 1.05E-37 |
| SATB2     | 7.60E-42 | -0.12482 | 0.03  | 0.17  | 1.14E-37 |
| ARHGAP33  | 8.01E-42 | -0.10478 | 0.174 | 0.351 | 1.20E-37 |
| MTSS1     | 8.03E-42 | 0.419719 | 0.46  | 0.333 | 1.20E-37 |
| AHCTF1    | 8.38E-42 | -0.11133 | 0.059 | 0.204 | 1.25E-37 |
| PPCDC     | 8.73E-42 | -0.16826 | 0.02  | 0.164 | 1.30E-37 |
| KDM2B     | 8.75E-42 | 0.170224 | 0.223 | 0.267 | 1.31E-37 |
| MKS1      | 8.95E-42 | -0.16461 | 0.061 | 0.228 | 1.34E-37 |
| POLE2     | 9.16E-42 | -0.21204 | 0.034 | 0.19  | 1.37E-37 |
| COX7A2    | 9.41E-42 | 0.185708 | 0.965 | 0.928 | 1.41E-37 |
| CNOT10    | 9.48E-42 | -0.1243  | 0.126 | 0.296 | 1.42E-37 |
| TEAD4     | 9.75E-42 | -0.15958 | 0.002 | 0.13  | 1.46E-37 |
| PEAK1     | 9.90E-42 | -0.18006 | 0.018 | 0.165 | 1.48E-37 |

|           |          |          |       |       |          |
|-----------|----------|----------|-------|-------|----------|
| CTC-260E6 | 9.91E-42 | -0.22559 | 0.017 | 0.173 | 1.48E-37 |
| NIN       | 1.03E-41 | -0.15678 | 0.117 | 0.299 | 1.54E-37 |
| JPH4      | 1.04E-41 | 0.582379 | 0.254 | 0.051 | 1.56E-37 |
| LYRM1     | 1.09E-41 | 0.102867 | 0.252 | 0.338 | 1.63E-37 |
| DHPS      | 1.10E-41 | 0.171333 | 0.71  | 0.757 | 1.65E-37 |
| ARL4A     | 1.13E-41 | -0.39009 | 0.273 | 0.553 | 1.69E-37 |
| NYAP1     | 1.17E-41 | 0.525195 | 0.213 | 0.03  | 1.74E-37 |
| PARP1     | 1.17E-41 | -0.29956 | 0.518 | 0.802 | 1.75E-37 |
| ZHX3      | 1.20E-41 | -0.25351 | 0.071 | 0.262 | 1.80E-37 |
| EXOSC1    | 1.22E-41 | -0.20107 | 0.104 | 0.291 | 1.83E-37 |
| LAMA4     | 1.24E-41 | -0.201   | 0.009 | 0.143 | 1.86E-37 |
| PDXDC1    | 1.28E-41 | 0.150856 | 0.238 | 0.299 | 1.91E-37 |
| PRPF4     | 1.28E-41 | -0.14742 | 0.184 | 0.379 | 1.92E-37 |
| PLEKHH2   | 1.33E-41 | -0.23187 | 0.024 | 0.181 | 1.99E-37 |
| SPEN      | 1.34E-41 | 0.103052 | 0.199 | 0.279 | 2.00E-37 |
| PCGF5     | 1.34E-41 | -0.17896 | 0.047 | 0.207 | 2.01E-37 |
| RBMX      | 1.35E-41 | -0.34818 | 0.656 | 0.901 | 2.02E-37 |
| ZFAND1    | 1.37E-41 | 0.165437 | 0.178 | 0.235 | 2.05E-37 |
| CDK2AP1   | 1.45E-41 | -0.14287 | 0.069 | 0.231 | 2.17E-37 |
| HES4      | 1.48E-41 | -0.29923 | 0.185 | 0.432 | 2.21E-37 |
| DNAJC30   | 1.50E-41 | 0.198141 | 0.212 | 0.249 | 2.25E-37 |
| C20orf27  | 1.55E-41 | -0.21261 | 0.263 | 0.5   | 2.32E-37 |
| PITPNB    | 1.56E-41 | -0.13824 | 0.149 | 0.332 | 2.33E-37 |
| PFKM      | 1.61E-41 | 0.237577 | 0.256 | 0.263 | 2.41E-37 |
| ADAL      | 1.78E-41 | -0.13556 | 0.077 | 0.24  | 2.66E-37 |
| TMEM165   | 1.86E-41 | -0.2001  | 0.439 | 0.689 | 2.77E-37 |
| SLC25A39  | 1.90E-41 | -0.13378 | 0.344 | 0.562 | 2.84E-37 |
| RARRES2   | 1.92E-41 | -0.62449 | 0.06  | 0.277 | 2.88E-37 |
| TMEM55B   | 2.05E-41 | 0.108576 | 0.239 | 0.33  | 3.07E-37 |
| HERPUD2   | 2.24E-41 | 0.234863 | 0.245 | 0.257 | 3.34E-37 |
| KAT6B     | 2.35E-41 | 0.391111 | 0.289 | 0.19  | 3.51E-37 |
| TMEM230   | 2.35E-41 | -0.31579 | 0.49  | 0.78  | 3.51E-37 |
| MDH2      | 2.42E-41 | 0.173719 | 0.845 | 0.849 | 3.61E-37 |
| TOM1L1    | 2.48E-41 | -0.18165 | 0.005 | 0.138 | 3.71E-37 |
| NISCH     | 2.49E-41 | 0.112554 | 0.156 | 0.228 | 3.72E-37 |
| MVP       | 2.60E-41 | -0.11231 | 0.02  | 0.144 | 3.88E-37 |
| CRBN      | 2.63E-41 | 0.251772 | 0.355 | 0.363 | 3.93E-37 |
| IGF2BP2   | 2.73E-41 | -0.16317 | 0.043 | 0.198 | 4.08E-37 |
| SSSCA1    | 2.75E-41 | -0.14499 | 0.1   | 0.273 | 4.11E-37 |
| SCAMP1    | 2.76E-41 | 0.22599  | 0.354 | 0.372 | 4.12E-37 |
| GRK4      | 2.81E-41 | 0.377064 | 0.24  | 0.169 | 4.20E-37 |
| HAUS7     | 2.85E-41 | -0.12499 | 0.075 | 0.232 | 4.26E-37 |
| SYNM      | 2.88E-41 | -0.16778 | 0.005 | 0.135 | 4.31E-37 |
| MPND      | 2.97E-41 | -0.11147 | 0.056 | 0.204 | 4.43E-37 |
| HTT       | 3.20E-41 | 0.10967  | 0.13  | 0.205 | 4.78E-37 |
| ZC3H6     | 3.24E-41 | 0.272751 | 0.272 | 0.273 | 4.84E-37 |
| SMPD4     | 3.51E-41 | -0.14136 | 0.109 | 0.283 | 5.24E-37 |
| DIXDC1    | 3.51E-41 | 0.38112  | 0.21  | 0.133 | 5.24E-37 |
| WDR1      | 3.59E-41 | -0.19477 | 0.312 | 0.549 | 5.37E-37 |
| CCNG1     | 3.63E-41 | -0.20734 | 0.198 | 0.41  | 5.43E-37 |
| ITGA3     | 3.67E-41 | -0.16117 | 0.054 | 0.215 | 5.48E-37 |

|           |          |          |       |       |          |
|-----------|----------|----------|-------|-------|----------|
| EYA4      | 4.06E-41 | -0.15317 | 0.001 | 0.122 | 6.07E-37 |
| ATP13A2   | 4.07E-41 | 0.233398 | 0.218 | 0.227 | 6.08E-37 |
| KLF10     | 4.16E-41 | 0.360246 | 0.35  | 0.3   | 6.22E-37 |
| PPP3CB    | 4.18E-41 | 0.250562 | 0.183 | 0.18  | 6.24E-37 |
| SSBP4     | 4.22E-41 | -0.11677 | 0.266 | 0.47  | 6.30E-37 |
| CRISPLD1  | 4.24E-41 | -0.32723 | 0.06  | 0.258 | 6.33E-37 |
| LRP4      | 4.47E-41 | -0.23832 | 0.013 | 0.159 | 6.68E-37 |
| PRKCZ     | 4.50E-41 | 0.446842 | 0.272 | 0.132 | 6.73E-37 |
| KLRC2     | 4.51E-41 | 0.578505 | 0.433 | 0.198 | 6.74E-37 |
| SERINC2   | 4.56E-41 | -0.1738  | 0.054 | 0.219 | 6.81E-37 |
| BCAT2     | 4.72E-41 | -0.12784 | 0.064 | 0.216 | 7.06E-37 |
| ASPHD1    | 4.75E-41 | 0.283393 | 0.223 | 0.212 | 7.09E-37 |
| LRRC8A    | 4.93E-41 | 0.103357 | 0.243 | 0.326 | 7.37E-37 |
| EPHA4     | 5.12E-41 | -0.23359 | 0.031 | 0.198 | 7.65E-37 |
| ARV1      | 5.42E-41 | 0.113168 | 0.224 | 0.302 | 8.09E-37 |
| POLR2M    | 5.43E-41 | -0.20249 | 0.111 | 0.304 | 8.11E-37 |
| SMIM18    | 5.48E-41 | 0.559232 | 0.342 | 0.116 | 8.19E-37 |
| RNF170    | 5.48E-41 | 0.172771 | 0.205 | 0.252 | 8.20E-37 |
| EPOR      | 5.98E-41 | -0.18035 | 0.026 | 0.174 | 8.94E-37 |
| PEA15     | 6.31E-41 | -0.16388 | 0.423 | 0.651 | 9.44E-37 |
| TRAF2     | 6.53E-41 | -0.10126 | 0.075 | 0.225 | 9.76E-37 |
| ANKMY2    | 6.94E-41 | 0.31382  | 0.277 | 0.227 | 1.04E-36 |
| SERP2     | 6.98E-41 | 0.491009 | 0.308 | 0.16  | 1.04E-36 |
| CEP44     | 7.23E-41 | -0.11675 | 0.059 | 0.207 | 1.08E-36 |
| CDK12     | 7.25E-41 | 0.101656 | 0.192 | 0.275 | 1.08E-36 |
| Clorf112  | 7.50E-41 | -0.21513 | 0.027 | 0.181 | 1.12E-36 |
| RIOK1     | 7.51E-41 | 0.1291   | 0.203 | 0.27  | 1.12E-36 |
| KALRN     | 7.60E-41 | 0.289863 | 0.185 | 0.159 | 1.14E-36 |
| CNTFR     | 7.95E-41 | 0.164596 | 0.308 | 0.359 | 1.19E-36 |
| CPEB4     | 8.57E-41 | 0.345533 | 0.35  | 0.29  | 1.28E-36 |
| TBC1D17   | 1.00E-40 | 0.301184 | 0.208 | 0.177 | 1.50E-36 |
| PPA2      | 1.02E-40 | -0.1202  | 0.243 | 0.435 | 1.52E-36 |
| HERC5     | 1.07E-40 | -0.21904 | 0.01  | 0.152 | 1.60E-36 |
| COL5A2    | 1.11E-40 | -0.19303 | 0.009 | 0.147 | 1.66E-36 |
| CHRN1     | 1.12E-40 | 0.330994 | 0.211 | 0.167 | 1.68E-36 |
| ATF2      | 1.21E-40 | 0.212989 | 0.247 | 0.278 | 1.81E-36 |
| GPD1      | 1.22E-40 | 0.574285 | 0.216 | 0.036 | 1.82E-36 |
| BLVRB     | 1.23E-40 | -0.10901 | 0.131 | 0.296 | 1.83E-36 |
| ZNF726    | 1.32E-40 | -0.27096 | 0.027 | 0.194 | 1.97E-36 |
| SNHG10    | 1.40E-40 | -0.11855 | 0.079 | 0.232 | 2.08E-36 |
| DCAF6     | 1.42E-40 | 0.139548 | 0.14  | 0.195 | 2.12E-36 |
| CKB       | 1.42E-40 | -0.27159 | 0.918 | 0.968 | 2.12E-36 |
| NUDT15    | 1.45E-40 | -0.15418 | 0.125 | 0.307 | 2.17E-36 |
| TAF13     | 1.51E-40 | -0.1673  | 0.075 | 0.246 | 2.26E-36 |
| CLEC11A   | 1.53E-40 | 0.251457 | 0.256 | 0.281 | 2.29E-36 |
| ACAT2     | 1.54E-40 | -0.15356 | 0.395 | 0.622 | 2.30E-36 |
| DDB2      | 1.56E-40 | -0.18912 | 0.029 | 0.183 | 2.34E-36 |
| CCPG1     | 1.66E-40 | -0.14003 | 0.124 | 0.299 | 2.49E-36 |
| AP006222. | 1.73E-40 | -0.12522 | 0.118 | 0.283 | 2.59E-36 |
| DICER1    | 1.73E-40 | 0.141673 | 0.174 | 0.238 | 2.59E-36 |
| ISG20L2   | 1.78E-40 | 0.132662 | 0.269 | 0.342 | 2.66E-36 |

|           |          |          |       |       |          |
|-----------|----------|----------|-------|-------|----------|
| CTTNBP2NL | 1.78E-40 | 0.225665 | 0.203 | 0.211 | 2.66E-36 |
| EAF1      | 1.84E-40 | 0.1139   | 0.123 | 0.179 | 2.75E-36 |
| AP2M1     | 1.87E-40 | 0.162053 | 0.859 | 0.862 | 2.79E-36 |
| BRI3BP    | 2.00E-40 | -0.19499 | 0.077 | 0.256 | 2.99E-36 |
| MGARP     | 2.00E-40 | -0.10946 | 0.031 | 0.165 | 2.99E-36 |
| C14orf166 | 2.01E-40 | -0.28198 | 0.485 | 0.765 | 3.00E-36 |
| PRDX2     | 2.04E-40 | 0.176365 | 0.962 | 0.932 | 3.05E-36 |
| SLC5A6    | 2.05E-40 | -0.11884 | 0.08  | 0.238 | 3.07E-36 |
| TCEB1     | 2.12E-40 | 0.183311 | 0.803 | 0.823 | 3.17E-36 |
| SLC25A5   | 2.13E-40 | -0.36959 | 0.651 | 0.896 | 3.18E-36 |
| ITM2B     | 2.15E-40 | 0.197684 | 0.919 | 0.895 | 3.21E-36 |
| AGBL5     | 2.15E-40 | -0.13434 | 0.061 | 0.219 | 3.21E-36 |
| KIN       | 2.17E-40 | 0.102347 | 0.143 | 0.222 | 3.24E-36 |
| TMEM25    | 2.30E-40 | 0.281341 | 0.198 | 0.186 | 3.44E-36 |
| RPS6KL1   | 2.37E-40 | 0.451781 | 0.297 | 0.18  | 3.55E-36 |
| P4HB      | 2.42E-40 | -0.40187 | 0.483 | 0.769 | 3.61E-36 |
| EIF2B5    | 2.50E-40 | 0.125338 | 0.229 | 0.296 | 3.74E-36 |
| CBX3      | 2.63E-40 | 0.171049 | 0.876 | 0.879 | 3.94E-36 |
| TBRG1     | 2.79E-40 | 0.139668 | 0.258 | 0.326 | 4.17E-36 |
| FAM126B   | 2.87E-40 | 0.300298 | 0.252 | 0.217 | 4.28E-36 |
| TIPIN     | 2.91E-40 | -0.22104 | 0.078 | 0.262 | 4.35E-36 |
| SLC35F5   | 2.93E-40 | -0.117   | 0.068 | 0.214 | 4.37E-36 |
| AEN       | 2.96E-40 | -0.28067 | 0.053 | 0.242 | 4.42E-36 |
| GFM1      | 3.05E-40 | 0.148452 | 0.215 | 0.281 | 4.56E-36 |
| ZNF12     | 3.10E-40 | 0.117876 | 0.189 | 0.262 | 4.64E-36 |
| ANKRD36   | 3.21E-40 | 0.132495 | 0.291 | 0.36  | 4.79E-36 |
| CFL2      | 3.53E-40 | -0.11464 | 0.343 | 0.546 | 5.28E-36 |
| IFI16     | 3.55E-40 | -0.43665 | 0.142 | 0.396 | 5.31E-36 |
| SS18L1    | 3.74E-40 | 0.179051 | 0.159 | 0.198 | 5.60E-36 |
| TRIM69    | 3.79E-40 | -0.21874 | 0.156 | 0.365 | 5.67E-36 |
| CAB39     | 3.89E-40 | 0.121439 | 0.186 | 0.252 | 5.82E-36 |
| ACO09506  | 3.98E-40 | -0.33139 | 0.059 | 0.253 | 5.95E-36 |
| ZNF138    | 4.00E-40 | 0.105464 | 0.307 | 0.393 | 5.98E-36 |
| SNRNP35   | 4.02E-40 | 0.166521 | 0.272 | 0.33  | 6.01E-36 |
| NRP2      | 4.08E-40 | -0.17267 | 0.133 | 0.311 | 6.09E-36 |
| AMN1      | 4.20E-40 | 0.33298  | 0.266 | 0.219 | 6.28E-36 |
| ARPC3     | 4.34E-40 | 0.189021 | 0.812 | 0.817 | 6.49E-36 |
| ELP2      | 4.61E-40 | 0.212655 | 0.263 | 0.281 | 6.90E-36 |
| GAB1      | 5.09E-40 | -0.19749 | 0.049 | 0.214 | 7.60E-36 |
| KIF3C     | 5.16E-40 | 0.365771 | 0.241 | 0.18  | 7.71E-36 |
| TMEM68    | 5.38E-40 | 0.113438 | 0.255 | 0.341 | 8.04E-36 |
| SLC35F1   | 5.38E-40 | -0.11253 | 0.124 | 0.283 | 8.05E-36 |
| ZDHHC6    | 5.43E-40 | -0.16909 | 0.105 | 0.28  | 8.12E-36 |
| ARL10     | 5.49E-40 | 0.218462 | 0.177 | 0.185 | 8.20E-36 |
| ADAMTS6   | 5.55E-40 | -0.26027 | 0.016 | 0.17  | 8.29E-36 |
| KIAA0586  | 5.59E-40 | -0.17404 | 0.062 | 0.226 | 8.36E-36 |
| ITCH      | 5.76E-40 | -0.13283 | 0.048 | 0.194 | 8.61E-36 |
| GEN1      | 6.21E-40 | -0.19411 | 0.018 | 0.164 | 9.28E-36 |
| PARD3     | 6.34E-40 | -0.1244  | 0.038 | 0.179 | 9.47E-36 |
| NAPB      | 6.90E-40 | 0.472955 | 0.236 | 0.099 | 1.03E-35 |
| LRP12     | 7.69E-40 | 0.366284 | 0.218 | 0.149 | 1.15E-35 |

|           |          |          |       |       |          |
|-----------|----------|----------|-------|-------|----------|
| JAKMIP1   | 7.76E-40 | 0.487501 | 0.198 | 0.02  | 1.16E-35 |
| SP110     | 7.82E-40 | -0.25812 | 0.016 | 0.165 | 1.17E-35 |
| LRRC40    | 8.05E-40 | 0.273562 | 0.312 | 0.288 | 1.20E-35 |
| BUD31     | 8.11E-40 | 0.176407 | 0.841 | 0.853 | 1.21E-35 |
| FTO       | 8.16E-40 | 0.111812 | 0.189 | 0.263 | 1.22E-35 |
| UBA3      | 8.20E-40 | 0.108167 | 0.288 | 0.372 | 1.23E-35 |
| EID2      | 8.36E-40 | 0.146459 | 0.183 | 0.243 | 1.25E-35 |
| EMID1     | 8.42E-40 | -0.10069 | 0.055 | 0.193 | 1.26E-35 |
| MAPKAPK3  | 8.56E-40 | -0.11688 | 0.026 | 0.154 | 1.28E-35 |
| NDP       | 8.73E-40 | -0.18822 | 0.041 | 0.198 | 1.30E-35 |
| EIF1      | 9.49E-40 | 0.132879 | 0.995 | 0.983 | 1.42E-35 |
| PKP4      | 1.03E-39 | -0.17875 | 0.044 | 0.204 | 1.53E-35 |
| SMIM13    | 1.03E-39 | -0.11078 | 0.049 | 0.189 | 1.54E-35 |
| MIER1     | 1.04E-39 | -0.13107 | 0.112 | 0.279 | 1.56E-35 |
| AUNIP     | 1.09E-39 | -0.25891 | 0.003 | 0.13  | 1.63E-35 |
| CD302     | 1.15E-39 | -0.16163 | 0.016 | 0.152 | 1.72E-35 |
| PDP1      | 1.20E-39 | 0.155937 | 0.167 | 0.21  | 1.79E-35 |
| OSER1-AS1 | 1.39E-39 | 0.14416  | 0.194 | 0.251 | 2.08E-35 |
| SESTD1    | 1.42E-39 | 0.215876 | 0.343 | 0.365 | 2.12E-35 |
| CDC37     | 1.44E-39 | -0.16399 | 0.505 | 0.747 | 2.14E-35 |
| SMG9      | 1.47E-39 | -0.1359  | 0.094 | 0.256 | 2.20E-35 |
| POC1B     | 1.53E-39 | -0.18721 | 0.044 | 0.205 | 2.29E-35 |
| C6orf203  | 1.54E-39 | 0.142071 | 0.233 | 0.291 | 2.30E-35 |
| PSMG1     | 1.56E-39 | -0.15324 | 0.191 | 0.385 | 2.33E-35 |
| TRAPPC2P1 | 1.64E-39 | 0.276907 | 0.317 | 0.296 | 2.45E-35 |
| TOP1      | 1.64E-39 | -0.25606 | 0.394 | 0.667 | 2.45E-35 |
| FBXW7     | 1.66E-39 | 0.18725  | 0.218 | 0.262 | 2.48E-35 |
| EML3      | 1.73E-39 | -0.13015 | 0.024 | 0.154 | 2.58E-35 |
| RARS      | 1.76E-39 | 0.115665 | 0.288 | 0.36  | 2.62E-35 |
| C6orf48   | 1.81E-39 | -0.30116 | 0.573 | 0.842 | 2.70E-35 |
| LRP1      | 1.85E-39 | -0.15173 | 0.194 | 0.39  | 2.76E-35 |
| CCND2     | 1.87E-39 | -0.31717 | 0.427 | 0.705 | 2.79E-35 |
| RXRБ      | 1.95E-39 | 0.197947 | 0.234 | 0.252 | 2.91E-35 |
| SAP18     | 1.95E-39 | 0.155648 | 0.859 | 0.878 | 2.91E-35 |
| SLC2A8    | 2.01E-39 | -0.11036 | 0.097 | 0.252 | 3.00E-35 |
| NECAB3    | 2.15E-39 | -0.15874 | 0.043 | 0.195 | 3.21E-35 |
| MAP3K4    | 2.17E-39 | -0.15098 | 0.049 | 0.201 | 3.25E-35 |
| POLR2E    | 2.24E-39 | -0.24558 | 0.504 | 0.772 | 3.34E-35 |
| NUDT6     | 2.44E-39 | -0.11232 | 0.057 | 0.198 | 3.64E-35 |
| BAMBI     | 2.52E-39 | -0.20671 | 0.039 | 0.196 | 3.76E-35 |
| ECI2      | 2.59E-39 | -0.28379 | 0.285 | 0.543 | 3.86E-35 |
| POLR2F    | 2.79E-39 | -0.20669 | 0.562 | 0.819 | 4.17E-35 |
| FBX044    | 2.80E-39 | 0.209212 | 0.163 | 0.19  | 4.19E-35 |
| FAM168A   | 3.03E-39 | -0.13144 | 0.075 | 0.228 | 4.54E-35 |
| HECTD4    | 3.05E-39 | 0.237275 | 0.175 | 0.188 | 4.55E-35 |
| DDA1      | 3.05E-39 | -0.13173 | 0.319 | 0.527 | 4.55E-35 |
| C12orf45  | 3.07E-39 | -0.1059  | 0.152 | 0.325 | 4.59E-35 |
| GCSH      | 3.12E-39 | -0.35119 | 0.364 | 0.653 | 4.66E-35 |
| SAV1      | 3.16E-39 | -0.14606 | 0.068 | 0.223 | 4.72E-35 |
| TMEM243   | 3.16E-39 | -0.25949 | 0.086 | 0.283 | 4.72E-35 |
| DPP3      | 3.27E-39 | 0.21671  | 0.237 | 0.257 | 4.89E-35 |

|           |          |          |       |       |          |
|-----------|----------|----------|-------|-------|----------|
| MDFIC     | 3.42E-39 | -0.16405 | 0.002 | 0.123 | 5.11E-35 |
| FAM184B   | 3.48E-39 | -0.17375 | 0.038 | 0.191 | 5.20E-35 |
| ZYX       | 3.64E-39 | -0.29879 | 0.248 | 0.507 | 5.43E-35 |
| DLC1      | 3.75E-39 | -0.21616 | 0.009 | 0.149 | 5.60E-35 |
| MAN1C1    | 3.80E-39 | -0.1434  | 0.002 | 0.116 | 5.68E-35 |
| FAM69C    | 3.84E-39 | -0.15793 | 0.002 | 0.121 | 5.74E-35 |
| PCDH10    | 4.41E-39 | -0.17523 | 0.005 | 0.13  | 6.59E-35 |
| YY1AP1    | 4.50E-39 | 0.115038 | 0.227 | 0.294 | 6.72E-35 |
| ZNF462    | 4.53E-39 | 0.147761 | 0.3   | 0.362 | 6.78E-35 |
| ANKRA2    | 4.59E-39 | 0.146234 | 0.187 | 0.243 | 6.86E-35 |
| CEP68     | 4.64E-39 | 0.231926 | 0.211 | 0.228 | 6.93E-35 |
| SLC38A2   | 5.03E-39 | 0.127623 | 0.288 | 0.362 | 7.52E-35 |
| MAP3K1    | 5.04E-39 | -0.21052 | 0.031 | 0.189 | 7.54E-35 |
| NDUFC1    | 5.10E-39 | -0.26068 | 0.467 | 0.74  | 7.62E-35 |
| TOPORS    | 5.10E-39 | 0.21079  | 0.297 | 0.312 | 7.63E-35 |
| ZNF217    | 5.29E-39 | -0.13688 | 0.02  | 0.156 | 7.90E-35 |
| SYT4      | 5.42E-39 | 0.479739 | 0.167 | 0.01  | 8.10E-35 |
| FAM131A   | 5.44E-39 | 0.260224 | 0.214 | 0.202 | 8.12E-35 |
| SNX10     | 5.50E-39 | 0.219351 | 0.24  | 0.243 | 8.22E-35 |
| BDH2      | 6.03E-39 | -0.16448 | 0.007 | 0.132 | 9.01E-35 |
| FAM118A   | 6.50E-39 | 0.426867 | 0.266 | 0.151 | 9.71E-35 |
| TOMM34    | 6.60E-39 | -0.17205 | 0.101 | 0.274 | 9.86E-35 |
| MED25     | 7.16E-39 | -0.28062 | 0.083 | 0.281 | 1.07E-34 |
| UBL7      | 7.50E-39 | -0.12439 | 0.173 | 0.349 | 1.12E-34 |
| C11orf58  | 7.63E-39 | 0.167967 | 0.829 | 0.84  | 1.14E-34 |
| ATG10     | 8.07E-39 | 0.200387 | 0.222 | 0.258 | 1.21E-34 |
| LINC00632 | 8.43E-39 | 0.593398 | 0.375 | 0.137 | 1.26E-34 |
| USP42     | 8.59E-39 | 0.188761 | 0.221 | 0.251 | 1.28E-34 |
| C19orf53  | 8.97E-39 | -0.39518 | 0.562 | 0.821 | 1.34E-34 |
| SLC26A2   | 9.38E-39 | -0.15601 | 0.049 | 0.204 | 1.40E-34 |
| METTL10   | 9.39E-39 | -0.17364 | 0.085 | 0.253 | 1.40E-34 |
| USP18     | 9.63E-39 | -0.23247 | 0.007 | 0.144 | 1.44E-34 |
| GAD1      | 9.94E-39 | 0.335576 | 0.284 | 0.23  | 1.49E-34 |
| MED21     | 1.02E-38 | 0.113425 | 0.321 | 0.402 | 1.52E-34 |
| TBC1D31   | 1.04E-38 | -0.25882 | 0.036 | 0.205 | 1.56E-34 |
| RAP1GDS1  | 1.06E-38 | 0.155464 | 0.214 | 0.262 | 1.58E-34 |
| TMEM47    | 1.07E-38 | -0.23677 | 0.03  | 0.193 | 1.60E-34 |
| LACTB2    | 1.08E-38 | -0.26645 | 0.035 | 0.199 | 1.61E-34 |
| IBTK      | 1.09E-38 | 0.11866  | 0.176 | 0.238 | 1.62E-34 |
| SAMD8     | 1.13E-38 | -0.12042 | 0.068 | 0.217 | 1.69E-34 |
| RAB35     | 1.17E-38 | 0.112977 | 0.185 | 0.257 | 1.74E-34 |
| NKAIN3    | 1.18E-38 | 0.236856 | 0.272 | 0.283 | 1.77E-34 |
| UGGT1     | 1.19E-38 | -0.12166 | 0.1   | 0.262 | 1.77E-34 |
| CNPY4     | 1.19E-38 | -0.15259 | 0.073 | 0.231 | 1.78E-34 |
| LRRC16A   | 1.20E-38 | -0.16404 | 0.023 | 0.162 | 1.79E-34 |
| IPO8      | 1.22E-38 | -0.12938 | 0.033 | 0.17  | 1.82E-34 |
| POLK      | 1.23E-38 | 0.149586 | 0.233 | 0.293 | 1.84E-34 |
| TAF8      | 1.24E-38 | -0.14403 | 0.037 | 0.177 | 1.86E-34 |
| B3GAT3    | 1.26E-38 | -0.1652  | 0.341 | 0.567 | 1.88E-34 |
| ZNF775    | 1.27E-38 | 0.127084 | 0.16  | 0.225 | 1.89E-34 |
| RAB7A     | 1.34E-38 | 0.114579 | 0.707 | 0.774 | 2.01E-34 |



|           |          |          |       |       |          |
|-----------|----------|----------|-------|-------|----------|
| PIM3      | 1.35E-38 | -0.19313 | 0.128 | 0.319 | 2.01E-34 |
| CYSTM1    | 1.38E-38 | -0.10725 | 0.194 | 0.372 | 2.06E-34 |
| GCFC2     | 1.39E-38 | -0.15006 | 0.102 | 0.272 | 2.07E-34 |
| SOX6      | 1.39E-38 | 0.166703 | 0.193 | 0.247 | 2.08E-34 |
| DIS3L     | 1.47E-38 | -0.11642 | 0.093 | 0.246 | 2.20E-34 |
| ABHD17B   | 1.48E-38 | 0.318979 | 0.276 | 0.226 | 2.21E-34 |
| RNF166    | 1.49E-38 | 0.133839 | 0.184 | 0.241 | 2.23E-34 |
| TRIO      | 1.71E-38 | -0.18803 | 0.137 | 0.325 | 2.55E-34 |
| TDP2      | 1.86E-38 | 0.253105 | 0.237 | 0.23  | 2.78E-34 |
| APEX2     | 1.92E-38 | -0.18208 | 0.031 | 0.178 | 2.88E-34 |
| ADAMTS9   | 2.01E-38 | -0.20551 | 0.01  | 0.144 | 3.01E-34 |
| SP1       | 2.28E-38 | -0.14562 | 0.028 | 0.172 | 3.40E-34 |
| SMURF2    | 2.43E-38 | 0.102599 | 0.148 | 0.215 | 3.63E-34 |
| NMT2      | 2.47E-38 | -0.13281 | 0.103 | 0.267 | 3.69E-34 |
| NRIP1     | 2.59E-38 | -0.10824 | 0.074 | 0.216 | 3.87E-34 |
| CADM3     | 2.63E-38 | 0.521782 | 0.236 | 0.048 | 3.93E-34 |
| TRIM33    | 2.68E-38 | 0.159297 | 0.294 | 0.338 | 4.00E-34 |
| OPTN      | 2.73E-38 | 0.234671 | 0.193 | 0.19  | 4.08E-34 |
| UGGT2     | 2.79E-38 | -0.15228 | 0.053 | 0.206 | 4.16E-34 |
| GSTCD     | 2.85E-38 | -0.12244 | 0.031 | 0.164 | 4.26E-34 |
| PXMP4     | 2.90E-38 | -0.20132 | 0.028 | 0.173 | 4.33E-34 |
| ANKRD39   | 2.99E-38 | 0.105037 | 0.205 | 0.286 | 4.47E-34 |
| RASSF8-AS | 3.22E-38 | 0.134887 | 0.218 | 0.286 | 4.82E-34 |
| SGCB      | 3.30E-38 | -0.18139 | 0.495 | 0.728 | 4.93E-34 |
| TSPAN7    | 3.37E-38 | 0.185672 | 0.52  | 0.557 | 5.03E-34 |
| FOXN3     | 3.85E-38 | 0.168288 | 0.246 | 0.286 | 5.76E-34 |
| NMI       | 4.01E-38 | -0.22408 | 0.021 | 0.17  | 5.99E-34 |
| TCF7      | 4.03E-38 | 0.244174 | 0.225 | 0.219 | 6.03E-34 |
| NBN       | 4.04E-38 | -0.14386 | 0.111 | 0.28  | 6.04E-34 |
| RNPEPL1   | 4.07E-38 | -0.12468 | 0.042 | 0.181 | 6.08E-34 |
| PPP1R14B  | 4.29E-38 | 0.132551 | 0.54  | 0.626 | 6.42E-34 |
| RASGRP1   | 4.41E-38 | -0.17985 | 0.023 | 0.17  | 6.59E-34 |
| KNTC1     | 4.73E-38 | -0.25455 | 0.013 | 0.156 | 7.07E-34 |
| STX4      | 5.08E-38 | -0.10062 | 0.131 | 0.286 | 7.59E-34 |
| NKX2-2    | 5.51E-38 | 0.531162 | 0.481 | 0.253 | 8.23E-34 |
| TUBA1C    | 5.89E-38 | -0.5531  | 0.326 | 0.616 | 8.81E-34 |
| KLHL23    | 6.04E-38 | 0.238876 | 0.47  | 0.459 | 9.03E-34 |
| CEP89     | 6.06E-38 | -0.12123 | 0.175 | 0.344 | 9.05E-34 |
| ZNF704    | 6.19E-38 | 0.225967 | 0.307 | 0.319 | 9.25E-34 |
| LPCAT1    | 6.35E-38 | 0.126188 | 0.285 | 0.352 | 9.49E-34 |
| ELAC2     | 6.41E-38 | -0.15962 | 0.12  | 0.296 | 9.58E-34 |
| BBS2      | 6.49E-38 | -0.22454 | 0.107 | 0.298 | 9.70E-34 |
| CBL       | 6.66E-38 | -0.11332 | 0.069 | 0.215 | 9.96E-34 |
| ELM01     | 6.82E-38 | 0.566232 | 0.321 | 0.106 | 1.02E-33 |
| PRPS1     | 7.31E-38 | -0.22271 | 0.144 | 0.346 | 1.09E-33 |
| CNTROB    | 7.44E-38 | -0.18262 | 0.085 | 0.257 | 1.11E-33 |
| ZFAND6    | 7.57E-38 | -0.27773 | 0.353 | 0.607 | 1.13E-33 |
| TMEM127   | 7.58E-38 | 0.174892 | 0.152 | 0.196 | 1.13E-33 |
| PDAP1     | 7.61E-38 | 0.123805 | 0.761 | 0.821 | 1.14E-33 |
| ALDH16A1  | 7.99E-38 | -0.17001 | 0.054 | 0.209 | 1.19E-33 |
| SCN2A     | 8.22E-38 | 0.489432 | 0.183 | 0.017 | 1.23E-33 |

|           |          |          |       |       |          |
|-----------|----------|----------|-------|-------|----------|
| ZFAS1     | 8.38E-38 | -0.32171 | 0.596 | 0.856 | 1.25E-33 |
| OAF       | 8.44E-38 | -0.14771 | 0.002 | 0.114 | 1.26E-33 |
| CALCOCO1  | 8.58E-38 | 0.352952 | 0.241 | 0.173 | 1.28E-33 |
| CSNK2B    | 9.07E-38 | -0.10891 | 0.605 | 0.81  | 1.36E-33 |
| NUP214    | 9.07E-38 | -0.11013 | 0.094 | 0.244 | 1.36E-33 |
| EIF4EBP1  | 9.50E-38 | -0.16588 | 0.417 | 0.648 | 1.42E-33 |
| STK3      | 9.67E-38 | -0.15151 | 0.028 | 0.165 | 1.45E-33 |
| ZNF140    | 9.92E-38 | 0.248817 | 0.192 | 0.195 | 1.48E-33 |
| SLC25A46  | 9.95E-38 | 0.200451 | 0.178 | 0.201 | 1.49E-33 |
| NDEL1     | 1.01E-37 | 0.256646 | 0.194 | 0.189 | 1.51E-33 |
| LINC00493 | 1.02E-37 | -0.14689 | 0.463 | 0.696 | 1.52E-33 |
| CDK13     | 1.02E-37 | 0.121472 | 0.159 | 0.221 | 1.53E-33 |
| SLC27A1   | 1.04E-37 | -0.12709 | 0.068 | 0.221 | 1.56E-33 |
| CANX      | 1.05E-37 | -0.24604 | 0.456 | 0.715 | 1.58E-33 |
| NAA35     | 1.07E-37 | 0.14052  | 0.219 | 0.27  | 1.60E-33 |
| NCOR1     | 1.09E-37 | 0.131995 | 0.668 | 0.728 | 1.62E-33 |
| HMBX1     | 1.10E-37 | 0.328014 | 0.346 | 0.29  | 1.65E-33 |
| PABPC1L   | 1.13E-37 | -0.15143 | 0.027 | 0.167 | 1.69E-33 |
| SND1      | 1.16E-37 | 0.164618 | 0.295 | 0.337 | 1.73E-33 |
| CREBZF    | 1.17E-37 | 0.100756 | 0.196 | 0.268 | 1.75E-33 |
| SEMA5A    | 1.18E-37 | -0.24935 | 0.036 | 0.2   | 1.77E-33 |
| DENND2A   | 1.23E-37 | -0.16399 | 0.075 | 0.238 | 1.84E-33 |
| PRMT1     | 1.24E-37 | 0.119987 | 0.736 | 0.805 | 1.85E-33 |
| CLPP      | 1.26E-37 | -0.28001 | 0.383 | 0.648 | 1.88E-33 |
| SKP2      | 1.26E-37 | -0.19297 | 0.038 | 0.189 | 1.89E-33 |
| YARS      | 1.27E-37 | -0.1065  | 0.203 | 0.374 | 1.90E-33 |
| PLCG1     | 1.38E-37 | -0.13741 | 0.08  | 0.235 | 2.06E-33 |
| DYNC2LI1  | 1.38E-37 | 0.174713 | 0.204 | 0.242 | 2.07E-33 |
| GNG7      | 1.48E-37 | -0.29267 | 0.104 | 0.311 | 2.21E-33 |
| CDKN2D    | 1.51E-37 | 0.134049 | 0.442 | 0.51  | 2.25E-33 |
| HEXDC     | 1.61E-37 | 0.138161 | 0.123 | 0.173 | 2.40E-33 |
| CDKN2AIP  | 1.61E-37 | 0.199794 | 0.275 | 0.298 | 2.41E-33 |
| TMEM192   | 1.79E-37 | 0.394392 | 0.291 | 0.183 | 2.68E-33 |
| TEX2      | 1.80E-37 | -0.1276  | 0.024 | 0.153 | 2.69E-33 |
| ZNF493    | 1.83E-37 | 0.248817 | 0.255 | 0.26  | 2.74E-33 |
| TTPAL     | 1.92E-37 | 0.17291  | 0.194 | 0.228 | 2.87E-33 |
| HSD17B11  | 1.95E-37 | -0.26982 | 0.161 | 0.378 | 2.92E-33 |
| EXOSC9    | 2.12E-37 | -0.23238 | 0.165 | 0.369 | 3.16E-33 |
| RYK       | 2.15E-37 | -0.10215 | 0.062 | 0.199 | 3.21E-33 |
| ATP5G1    | 2.16E-37 | 0.135362 | 0.751 | 0.805 | 3.22E-33 |
| CHRDL1    | 2.27E-37 | -0.24018 | 0.014 | 0.157 | 3.40E-33 |
| ADORA1    | 2.29E-37 | -0.14129 | 0.036 | 0.175 | 3.42E-33 |
| MLXIP     | 2.29E-37 | 0.166575 | 0.224 | 0.269 | 3.43E-33 |
| DNAJC4    | 2.43E-37 | 0.171216 | 0.178 | 0.227 | 3.63E-33 |
| RCN2      | 2.47E-37 | 0.192906 | 0.806 | 0.801 | 3.69E-33 |
| PYGL      | 2.67E-37 | -0.19246 | 0.013 | 0.147 | 3.98E-33 |
| N6AMT2    | 2.68E-37 | 0.108684 | 0.161 | 0.232 | 4.00E-33 |
| SOX21-AS1 | 2.70E-37 | -0.19718 | 0.01  | 0.143 | 4.04E-33 |
| HOXA5     | 2.70E-37 | 0.540011 | 0.271 | 0.086 | 4.04E-33 |
| ZIC1      | 2.76E-37 | -0.30739 | 0.111 | 0.322 | 4.13E-33 |
| MAPRE1    | 2.86E-37 | -0.15992 | 0.516 | 0.741 | 4.27E-33 |

|           |          |          |       |       |          |
|-----------|----------|----------|-------|-------|----------|
| RP11-192H | 2.90E-37 | 0.223672 | 0.224 | 0.223 | 4.33E-33 |
| HAUS5     | 2.91E-37 | -0.21209 | 0.055 | 0.223 | 4.35E-33 |
| CCT7      | 2.92E-37 | 0.103102 | 0.718 | 0.788 | 4.36E-33 |
| NIT2      | 2.99E-37 | -0.13679 | 0.166 | 0.341 | 4.47E-33 |
| IRX3      | 3.12E-37 | -0.14549 | 0     | 0.104 | 4.67E-33 |
| LEMD1     | 3.46E-37 | 0.467501 | 0.185 | 0.042 | 5.18E-33 |
| C18orf54  | 3.51E-37 | -0.19662 | 0.013 | 0.148 | 5.25E-33 |
| EMILIN3   | 3.60E-37 | -0.29796 | 0.009 | 0.141 | 5.38E-33 |
| PGAM5     | 3.62E-37 | -0.12172 | 0.032 | 0.163 | 5.41E-33 |
| GTF2A2    | 3.77E-37 | -0.13378 | 0.513 | 0.733 | 5.63E-33 |
| IGF2BP3   | 4.01E-37 | -0.16573 | 0.112 | 0.289 | 6.00E-33 |
| BEST3     | 4.09E-37 | -0.49536 | 0.09  | 0.307 | 6.11E-33 |
| LMO4      | 4.42E-37 | 0.243256 | 0.774 | 0.78  | 6.61E-33 |
| MIB1      | 4.66E-37 | -0.11149 | 0.078 | 0.222 | 6.97E-33 |
| BATF3     | 4.81E-37 | -0.19855 | 0.01  | 0.144 | 7.18E-33 |
| PPIA      | 5.14E-37 | -0.25097 | 0.914 | 0.983 | 7.68E-33 |
| TSPAN3    | 5.20E-37 | -0.26419 | 0.5   | 0.765 | 7.77E-33 |
| KLHDC10   | 5.33E-37 | 0.108    | 0.191 | 0.256 | 7.97E-33 |
| MTOR      | 5.56E-37 | -0.12263 | 0.044 | 0.183 | 8.32E-33 |
| KTN1      | 5.89E-37 | -0.1617  | 0.519 | 0.759 | 8.80E-33 |
| PGK1      | 6.34E-37 | 0.101537 | 0.727 | 0.804 | 9.48E-33 |
| HSD17B4   | 6.38E-37 | 0.135539 | 0.226 | 0.288 | 9.53E-33 |
| NLGN3     | 6.39E-37 | -0.16324 | 0.112 | 0.284 | 9.56E-33 |
| IGF2R     | 6.42E-37 | -0.12469 | 0.031 | 0.163 | 9.59E-33 |
| CCNB1IP1  | 6.95E-37 | -0.13358 | 0.167 | 0.338 | 1.04E-32 |
| BCL3      | 7.02E-37 | -0.14028 | 0.02  | 0.148 | 1.05E-32 |
| PRMT5     | 7.05E-37 | -0.21813 | 0.103 | 0.286 | 1.05E-32 |
| ZNF883    | 7.13E-37 | 0.107632 | 0.212 | 0.28  | 1.07E-32 |
| EFEMP1    | 7.35E-37 | -0.29719 | 0.06  | 0.241 | 1.10E-32 |
| IFT80     | 7.84E-37 | -0.14144 | 0.041 | 0.179 | 1.17E-32 |
| MAPK8     | 8.04E-37 | 0.264423 | 0.213 | 0.189 | 1.20E-32 |
| PLK3      | 8.41E-37 | 0.24476  | 0.2   | 0.191 | 1.26E-32 |
| KLHL13    | 8.77E-37 | 0.147875 | 0.196 | 0.246 | 1.31E-32 |
| MEIS1     | 9.25E-37 | -0.2001  | 0.072 | 0.24  | 1.38E-32 |
| ZFAND2A   | 9.42E-37 | 0.155367 | 0.391 | 0.452 | 1.41E-32 |
| COX17     | 9.60E-37 | -0.2449  | 0.427 | 0.681 | 1.43E-32 |
| CRELD1    | 9.77E-37 | 0.142532 | 0.153 | 0.205 | 1.46E-32 |
| SYCE1L    | 1.00E-36 | -0.1316  | 0.022 | 0.153 | 1.50E-32 |
| POLR2B    | 1.01E-36 | 0.123378 | 0.438 | 0.51  | 1.51E-32 |
| NT5C2     | 1.04E-36 | 0.187714 | 0.158 | 0.179 | 1.55E-32 |
| OAS3      | 1.06E-36 | -0.1762  | 0.013 | 0.138 | 1.59E-32 |
| TRMT13    | 1.08E-36 | 0.127508 | 0.189 | 0.249 | 1.61E-32 |
| CEP192    | 1.10E-36 | -0.15844 | 0.025 | 0.16  | 1.64E-32 |
| TMTC4     | 1.13E-36 | 0.326958 | 0.211 | 0.177 | 1.69E-32 |
| PGAM1     | 1.15E-36 | -0.33184 | 0.407 | 0.684 | 1.72E-32 |
| HNRNPA1L2 | 1.16E-36 | -0.25347 | 0.197 | 0.421 | 1.73E-32 |
| PHF10     | 1.17E-36 | -0.12118 | 0.048 | 0.185 | 1.74E-32 |
| HILPDA    | 1.17E-36 | -0.13163 | 0.261 | 0.452 | 1.75E-32 |
| CCDC77    | 1.22E-36 | -0.16433 | 0.068 | 0.223 | 1.82E-32 |
| CSRP1     | 1.26E-36 | -0.19739 | 0.104 | 0.284 | 1.88E-32 |
| TMEM198   | 1.29E-36 | 0.27325  | 0.228 | 0.201 | 1.92E-32 |

|           |          |          |       |       |          |
|-----------|----------|----------|-------|-------|----------|
| SNAI2     | 1.53E-36 | -0.1754  | 0.007 | 0.128 | 2.29E-32 |
| DPAGT1    | 1.56E-36 | -0.1287  | 0.079 | 0.228 | 2.34E-32 |
| RP5-1085F | 1.58E-36 | 0.12955  | 0.147 | 0.193 | 2.37E-32 |
| OXA1L     | 1.60E-36 | -0.16705 | 0.145 | 0.326 | 2.38E-32 |
| TSC22D3   | 1.81E-36 | 0.298954 | 0.443 | 0.374 | 2.71E-32 |
| MED15     | 1.83E-36 | -0.10737 | 0.084 | 0.231 | 2.74E-32 |
| AMER2     | 1.86E-36 | 0.501332 | 0.321 | 0.138 | 2.78E-32 |
| PLCB3     | 1.94E-36 | -0.12605 | 0.009 | 0.125 | 2.90E-32 |
| DBX2      | 1.98E-36 | -0.20703 | 0.003 | 0.121 | 2.96E-32 |
| SSBP3     | 2.01E-36 | 0.135791 | 0.218 | 0.273 | 3.01E-32 |
| COR01A    | 2.03E-36 | 0.297891 | 0.24  | 0.199 | 3.03E-32 |
| KIAA0895L | 2.09E-36 | 0.434998 | 0.275 | 0.144 | 3.12E-32 |
| ZNF880    | 2.12E-36 | 0.184779 | 0.212 | 0.246 | 3.16E-32 |
| ETV6      | 2.12E-36 | -0.1065  | 0.06  | 0.195 | 3.17E-32 |
| TAB2      | 2.24E-36 | -0.10686 | 0.057 | 0.193 | 3.35E-32 |
| DNAJB1    | 2.34E-36 | -0.11738 | 0.56  | 0.773 | 3.50E-32 |
| CLN8      | 2.35E-36 | 0.287906 | 0.253 | 0.215 | 3.52E-32 |
| KPNA2     | 2.45E-36 | -0.44182 | 0.526 | 0.795 | 3.66E-32 |
| POLD1     | 2.54E-36 | -0.20059 | 0.038 | 0.191 | 3.79E-32 |
| CTNNB1    | 2.67E-36 | -0.18261 | 0.293 | 0.509 | 4.00E-32 |
| MKKS      | 2.68E-36 | -0.28847 | 0.396 | 0.669 | 4.00E-32 |
| KCNMB4    | 2.83E-36 | 0.127461 | 0.149 | 0.2   | 4.22E-32 |
| STX7      | 2.87E-36 | 0.336995 | 0.271 | 0.216 | 4.29E-32 |
| PEX19     | 2.88E-36 | -0.11007 | 0.127 | 0.28  | 4.31E-32 |
| FAM96B    | 3.27E-36 | 0.142588 | 0.775 | 0.816 | 4.89E-32 |
| TRAPPC6A  | 3.29E-36 | 0.147435 | 0.185 | 0.249 | 4.92E-32 |
| NUP210    | 3.29E-36 | -0.12696 | 0.036 | 0.168 | 4.92E-32 |
| RIC3      | 3.38E-36 | 0.345943 | 0.452 | 0.364 | 5.04E-32 |
| SEL1L     | 3.52E-36 | -0.11283 | 0.081 | 0.223 | 5.25E-32 |
| GPR82     | 3.53E-36 | 0.351821 | 0.193 | 0.123 | 5.28E-32 |
| LYRM9     | 3.69E-36 | 0.164935 | 0.19  | 0.233 | 5.51E-32 |
| THSD1     | 3.69E-36 | -0.15891 | 0.05  | 0.201 | 5.52E-32 |
| WHAMM     | 3.71E-36 | -0.14448 | 0.053 | 0.198 | 5.54E-32 |
| SGK1      | 3.76E-36 | -0.23632 | 0.094 | 0.277 | 5.62E-32 |
| ZZZ3      | 4.04E-36 | 0.106657 | 0.13  | 0.191 | 6.04E-32 |
| FHL2      | 4.05E-36 | -0.29611 | 0.013 | 0.149 | 6.05E-32 |
| PMEP1     | 4.13E-36 | -0.30789 | 0.181 | 0.415 | 6.17E-32 |
| CNOT11    | 4.46E-36 | -0.13193 | 0.085 | 0.24  | 6.67E-32 |
| CPVL      | 4.47E-36 | -0.11652 | 0.042 | 0.17  | 6.67E-32 |
| PPIP5K2   | 4.47E-36 | 0.160898 | 0.175 | 0.209 | 6.69E-32 |
| KLHL20    | 4.63E-36 | 0.163601 | 0.185 | 0.227 | 6.91E-32 |
| E2F3      | 4.64E-36 | -0.17423 | 0.072 | 0.23  | 6.94E-32 |
| NAPEPLD   | 4.69E-36 | -0.18167 | 0.074 | 0.235 | 7.02E-32 |
| RAD23A    | 4.73E-36 | -0.35656 | 0.54  | 0.806 | 7.06E-32 |
| FOXO1     | 4.75E-36 | -0.24097 | 0.019 | 0.159 | 7.09E-32 |
| DUSP8     | 4.90E-36 | 0.48133  | 0.214 | 0.073 | 7.32E-32 |
| SCRIB     | 4.97E-36 | -0.14413 | 0.055 | 0.2   | 7.42E-32 |
| FAXC      | 5.11E-36 | 0.41149  | 0.307 | 0.2   | 7.64E-32 |
| NADSYN1   | 6.34E-36 | -0.12888 | 0.044 | 0.184 | 9.48E-32 |
| MIR155HG  | 6.59E-36 | -0.13169 | 0     | 0.1   | 9.84E-32 |
| TTYH2     | 6.76E-36 | -0.10199 | 0.021 | 0.137 | 1.01E-31 |

|           |          |          |       |       |          |
|-----------|----------|----------|-------|-------|----------|
| LLGL1     | 6.82E-36 | -0.12111 | 0.075 | 0.217 | 1.02E-31 |
| DMTF1     | 6.83E-36 | 0.119135 | 0.24  | 0.307 | 1.02E-31 |
| ANKS1B    | 7.00E-36 | 0.519025 | 0.337 | 0.149 | 1.05E-31 |
| DENND5B   | 7.05E-36 | 0.193482 | 0.183 | 0.207 | 1.05E-31 |
| RER1      | 7.13E-36 | -0.21835 | 0.453 | 0.705 | 1.07E-31 |
| FAM134B   | 7.38E-36 | 0.239302 | 0.213 | 0.217 | 1.10E-31 |
| CTSL      | 7.71E-36 | -0.11341 | 0.219 | 0.389 | 1.15E-31 |
| HIST1H2BK | 7.82E-36 | -0.22552 | 0.073 | 0.246 | 1.17E-31 |
| DNAL1     | 7.93E-36 | -0.11518 | 0.078 | 0.221 | 1.19E-31 |
| TRIM25    | 8.51E-36 | -0.13413 | 0.013 | 0.136 | 1.27E-31 |
| MCCC2     | 8.54E-36 | -0.13402 | 0.071 | 0.212 | 1.28E-31 |
| SLIRP     | 8.54E-36 | -0.28321 | 0.566 | 0.826 | 1.28E-31 |
| ATP13A3   | 8.60E-36 | -0.13989 | 0.079 | 0.231 | 1.28E-31 |
| OXNAD1    | 8.62E-36 | -0.15487 | 0.034 | 0.172 | 1.29E-31 |
| PPCS      | 8.91E-36 | 0.110548 | 0.21  | 0.275 | 1.33E-31 |
| C17orf53  | 9.09E-36 | -0.18818 | 0.012 | 0.14  | 1.36E-31 |
| HPS3      | 9.27E-36 | -0.10502 | 0.061 | 0.196 | 1.38E-31 |
| YPEL3     | 9.37E-36 | 0.202987 | 0.261 | 0.293 | 1.40E-31 |
| ENKD1     | 9.75E-36 | -0.10743 | 0.057 | 0.194 | 1.46E-31 |
| SMKR1     | 1.01E-35 | 0.478509 | 0.223 | 0.077 | 1.51E-31 |
| ZFYVE19   | 1.02E-35 | -0.11937 | 0.05  | 0.184 | 1.52E-31 |
| WDYHV1    | 1.07E-35 | 0.107659 | 0.167 | 0.238 | 1.59E-31 |
| LSM5      | 1.07E-35 | -0.3216  | 0.642 | 0.88  | 1.60E-31 |
| OAT       | 1.07E-35 | 0.24987  | 0.262 | 0.26  | 1.60E-31 |
| SAAL1     | 1.11E-35 | -0.19832 | 0.139 | 0.326 | 1.66E-31 |
| YEATS4    | 1.16E-35 | -0.43962 | 0.327 | 0.599 | 1.73E-31 |
| XRCC5     | 1.18E-35 | 0.144109 | 0.822 | 0.84  | 1.76E-31 |
| CLIP2     | 1.21E-35 | 0.167853 | 0.295 | 0.346 | 1.80E-31 |
| NHLH1     | 1.26E-35 | 0.587727 | 0.157 | 0.02  | 1.89E-31 |
| ELMOD1    | 1.34E-35 | -0.13799 | 0.027 | 0.159 | 2.00E-31 |
| CTPS1     | 1.39E-35 | -0.15477 | 0.161 | 0.341 | 2.07E-31 |
| TATDN3    | 1.42E-35 | 0.157478 | 0.189 | 0.233 | 2.12E-31 |
| TMEM43    | 1.48E-35 | 0.10879  | 0.196 | 0.263 | 2.20E-31 |
| FLYWCH1   | 1.54E-35 | 0.136816 | 0.143 | 0.181 | 2.30E-31 |
| SPATA2L   | 1.54E-35 | 0.212226 | 0.155 | 0.148 | 2.30E-31 |
| RABL2B    | 1.55E-35 | 0.11343  | 0.142 | 0.195 | 2.32E-31 |
| ZSCAN21   | 1.76E-35 | 0.169575 | 0.187 | 0.215 | 2.62E-31 |
| ZFR2      | 1.86E-35 | 0.47353  | 0.203 | 0.028 | 2.77E-31 |
| UTP23     | 1.94E-35 | 0.126998 | 0.196 | 0.253 | 2.90E-31 |
| NAGA      | 1.99E-35 | -0.13618 | 0.028 | 0.159 | 2.98E-31 |
| ELOVL6    | 2.00E-35 | 0.111181 | 0.132 | 0.189 | 2.98E-31 |
| CSPG5     | 2.01E-35 | -0.433   | 0.053 | 0.243 | 3.01E-31 |
| ST13      | 2.09E-35 | -0.13956 | 0.612 | 0.828 | 3.12E-31 |
| PLCB1     | 2.12E-35 | 0.253995 | 0.202 | 0.189 | 3.17E-31 |
| GNB1L     | 2.15E-35 | -0.10639 | 0.067 | 0.201 | 3.22E-31 |
| NEO1      | 2.22E-35 | -0.11287 | 0.034 | 0.158 | 3.32E-31 |
| NXT2      | 2.25E-35 | -0.21564 | 0.027 | 0.178 | 3.37E-31 |
| BAX       | 2.26E-35 | -0.11129 | 0.501 | 0.705 | 3.37E-31 |
| CREG1     | 2.34E-35 | 0.1686   | 0.165 | 0.2   | 3.50E-31 |
| ZNF692    | 2.57E-35 | 0.194435 | 0.186 | 0.206 | 3.84E-31 |
| RNF41     | 2.81E-35 | 0.177413 | 0.222 | 0.252 | 4.19E-31 |

|           |          |          |       |       |          |
|-----------|----------|----------|-------|-------|----------|
| NEDD9     | 2.96E-35 | -0.15746 | 0.104 | 0.267 | 4.42E-31 |
| ZNF205    | 3.06E-35 | 0.181455 | 0.178 | 0.199 | 4.57E-31 |
| Clorf50   | 3.24E-35 | 0.188228 | 0.212 | 0.237 | 4.84E-31 |
| IFT122    | 3.51E-35 | -0.17323 | 0.024 | 0.164 | 5.25E-31 |
| AMDHD2    | 3.62E-35 | -0.1058  | 0.05  | 0.184 | 5.41E-31 |
| ZNF273    | 3.62E-35 | -0.24548 | 0.141 | 0.34  | 5.42E-31 |
| CYTH1     | 3.78E-35 | 0.335509 | 0.214 | 0.163 | 5.65E-31 |
| NENF      | 4.57E-35 | -0.16073 | 0.529 | 0.757 | 6.82E-31 |
| ELK3      | 5.07E-35 | -0.14334 | 0.005 | 0.12  | 7.58E-31 |
| DTX3L     | 5.16E-35 | -0.14567 | 0.005 | 0.119 | 7.72E-31 |
| GUK1      | 5.43E-35 | 0.175671 | 0.848 | 0.846 | 8.11E-31 |
| SFT2D2    | 5.48E-35 | -0.13531 | 0.063 | 0.206 | 8.19E-31 |
| ZNF254    | 5.63E-35 | 0.203946 | 0.253 | 0.268 | 8.41E-31 |
| RDH10     | 5.63E-35 | -0.2078  | 0.016 | 0.149 | 8.42E-31 |
| CEP85L    | 5.74E-35 | 0.189361 | 0.173 | 0.189 | 8.58E-31 |
| EGLN1     | 6.01E-35 | 0.142439 | 0.214 | 0.263 | 8.99E-31 |
| DPF1      | 6.09E-35 | 0.146535 | 0.38  | 0.422 | 9.09E-31 |
| AAGAB     | 7.02E-35 | -0.13313 | 0.096 | 0.251 | 1.05E-30 |
| ST18      | 7.32E-35 | 0.422963 | 0.15  | 0.007 | 1.09E-30 |
| CADM2     | 7.54E-35 | 0.328901 | 0.405 | 0.346 | 1.13E-30 |
| FAM101B   | 7.86E-35 | -0.14993 | 0.013 | 0.135 | 1.17E-30 |
| CENPC     | 7.99E-35 | -0.12147 | 0.128 | 0.281 | 1.19E-30 |
| MIR210HG  | 8.31E-35 | -0.13062 | 0.025 | 0.146 | 1.24E-30 |
| RABL2A    | 8.98E-35 | 0.358559 | 0.17  | 0.101 | 1.34E-30 |
| ADORA2B   | 9.17E-35 | -0.10534 | 0.004 | 0.105 | 1.37E-30 |
| DGCR2     | 9.27E-35 | -0.13264 | 0.137 | 0.301 | 1.39E-30 |
| GRAMD3    | 9.93E-35 | -0.24663 | 0.013 | 0.146 | 1.48E-30 |
| ZNF667    | 1.00E-34 | 0.325827 | 0.18  | 0.121 | 1.50E-30 |
| C19orf12  | 1.05E-34 | 0.163331 | 0.18  | 0.209 | 1.56E-30 |
| CDK8      | 1.09E-34 | 0.220206 | 0.148 | 0.147 | 1.63E-30 |
| NSMF      | 1.12E-34 | 0.214645 | 0.178 | 0.178 | 1.68E-30 |
| PUSL1     | 1.15E-34 | -0.13655 | 0.076 | 0.227 | 1.71E-30 |
| FANCL     | 1.16E-34 | -0.21215 | 0.183 | 0.385 | 1.73E-30 |
| PHF11     | 1.19E-34 | -0.14057 | 0.011 | 0.13  | 1.77E-30 |
| RP1-79C4. | 1.19E-34 | -0.16446 | 0.015 | 0.137 | 1.78E-30 |
| ZNF268    | 1.23E-34 | 0.19053  | 0.196 | 0.227 | 1.84E-30 |
| GTF2IRD2E | 1.26E-34 | 0.348236 | 0.284 | 0.209 | 1.89E-30 |
| LRRC57    | 1.29E-34 | -0.13064 | 0.043 | 0.177 | 1.93E-30 |
| RP11-51J9 | 1.34E-34 | 0.119582 | 0.15  | 0.214 | 2.00E-30 |
| CTBS      | 1.35E-34 | -0.10158 | 0.027 | 0.144 | 2.01E-30 |
| RP13-1032 | 1.46E-34 | -0.14872 | 0.059 | 0.204 | 2.18E-30 |
| PTPN14    | 1.46E-34 | -0.12582 | 0.013 | 0.131 | 2.18E-30 |
| IQCE      | 1.47E-34 | 0.233004 | 0.225 | 0.222 | 2.20E-30 |
| CXCR4     | 1.47E-34 | -0.30516 | 0.102 | 0.293 | 2.20E-30 |
| PLEKHG1   | 1.61E-34 | -0.12301 | 0.008 | 0.121 | 2.40E-30 |
| TRNT1     | 1.75E-34 | -0.15775 | 0.086 | 0.242 | 2.61E-30 |
| SP100     | 1.75E-34 | -0.27157 | 0.023 | 0.163 | 2.62E-30 |
| ARID1B    | 1.85E-34 | 0.185306 | 0.212 | 0.235 | 2.77E-30 |
| DARS2     | 1.87E-34 | -0.15134 | 0.011 | 0.132 | 2.80E-30 |
| SH3RF1    | 1.87E-34 | 0.105605 | 0.149 | 0.201 | 2.80E-30 |
| NR2E1     | 2.01E-34 | -0.15361 | 0.011 | 0.133 | 3.00E-30 |

|           |          |          |       |       |          |
|-----------|----------|----------|-------|-------|----------|
| CDIP1     | 2.06E-34 | 0.149252 | 0.218 | 0.264 | 3.07E-30 |
| ZNF512    | 2.14E-34 | 0.315973 | 0.307 | 0.247 | 3.20E-30 |
| ZNF577    | 2.26E-34 | -0.20485 | 0.053 | 0.211 | 3.38E-30 |
| INCENP    | 2.26E-34 | -0.15792 | 0.026 | 0.16  | 3.38E-30 |
| CDC42EP4  | 2.30E-34 | -0.20437 | 0.231 | 0.43  | 3.44E-30 |
| FBXL15    | 2.35E-34 | 0.299544 | 0.207 | 0.163 | 3.51E-30 |
| ZNF429    | 2.41E-34 | 0.224974 | 0.226 | 0.236 | 3.60E-30 |
| GBP1      | 2.49E-34 | -0.34248 | 0.008 | 0.133 | 3.72E-30 |
| HIGD2A    | 2.51E-34 | -0.11795 | 0.46  | 0.664 | 3.75E-30 |
| RGS2      | 2.54E-34 | 0.480463 | 0.42  | 0.227 | 3.80E-30 |
| KLHL9     | 2.65E-34 | 0.233033 | 0.21  | 0.204 | 3.96E-30 |
| ABCC5     | 2.84E-34 | 0.316011 | 0.182 | 0.128 | 4.25E-30 |
| 5-Mar     | 2.90E-34 | 0.127706 | 0.252 | 0.298 | 4.34E-30 |
| IRF1      | 2.96E-34 | -0.2885  | 0.111 | 0.306 | 4.43E-30 |
| CCDC102A  | 2.98E-34 | -0.137   | 0.001 | 0.104 | 4.45E-30 |
| BIVM      | 3.11E-34 | 0.214645 | 0.203 | 0.217 | 4.65E-30 |
| PKD2      | 3.30E-34 | -0.11165 | 0.057 | 0.188 | 4.93E-30 |
| AP4M1     | 3.47E-34 | 0.203038 | 0.344 | 0.357 | 5.18E-30 |
| TRAF3IP2  | 3.47E-34 | -0.12622 | 0.081 | 0.226 | 5.19E-30 |
| TMEM201   | 3.50E-34 | -0.14049 | 0.027 | 0.156 | 5.23E-30 |
| HMG5      | 3.63E-34 | -0.30406 | 0.047 | 0.216 | 5.43E-30 |
| HOMER1    | 3.76E-34 | -0.10475 | 0.192 | 0.354 | 5.61E-30 |
| ARHGFB39  | 3.82E-34 | -0.17744 | 0.01  | 0.128 | 5.71E-30 |
| RAI2      | 3.82E-34 | 0.423268 | 0.149 | 0.009 | 5.71E-30 |
| MTMR6     | 4.03E-34 | 0.134968 | 0.186 | 0.233 | 6.03E-30 |
| TNKS1BP1  | 4.04E-34 | -0.11081 | 0.022 | 0.138 | 6.03E-30 |
| KDM4B     | 4.10E-34 | 0.124083 | 0.176 | 0.235 | 6.13E-30 |
| CAPG      | 4.34E-34 | -0.13168 | 0.084 | 0.227 | 6.49E-30 |
| GAPDH     | 4.49E-34 | -0.18604 | 0.995 | 0.996 | 6.71E-30 |
| CDK9      | 4.57E-34 | 0.164241 | 0.162 | 0.191 | 6.82E-30 |
| TCTN3     | 4.60E-34 | -0.13651 | 0.089 | 0.238 | 6.88E-30 |
| GALNT7    | 5.04E-34 | -0.13645 | 0.032 | 0.16  | 7.53E-30 |
| P2RX4     | 5.08E-34 | -0.12081 | 0.049 | 0.18  | 7.59E-30 |
| BAG3      | 5.11E-34 | -0.132   | 0.013 | 0.127 | 7.64E-30 |
| PCOLCE    | 5.13E-34 | 0.149741 | 0.126 | 0.169 | 7.67E-30 |
| NME2      | 5.14E-34 | -0.11293 | 0.032 | 0.156 | 7.68E-30 |
| SNRPC     | 5.30E-34 | -0.12282 | 0.555 | 0.76  | 7.92E-30 |
| CCDC93    | 5.32E-34 | 0.193646 | 0.217 | 0.238 | 7.96E-30 |
| SLC22A4   | 5.58E-34 | -0.15106 | 0.009 | 0.125 | 8.34E-30 |
| CHSY1     | 5.70E-34 | -0.1406  | 0.027 | 0.158 | 8.51E-30 |
| PRMT3     | 5.81E-34 | -0.10416 | 0.075 | 0.206 | 8.68E-30 |
| QSOX1     | 6.08E-34 | 0.131195 | 0.189 | 0.236 | 9.09E-30 |
| RPS6KA4   | 6.10E-34 | -0.11287 | 0.046 | 0.177 | 9.12E-30 |
| RP11-977G | 6.32E-34 | -0.11363 | 0.023 | 0.14  | 9.44E-30 |
| RAB9B     | 6.74E-34 | 0.455548 | 0.229 | 0.081 | 1.01E-29 |
| INSIG1    | 7.37E-34 | -0.17688 | 0.138 | 0.311 | 1.10E-29 |
| COMMD6    | 7.61E-34 | 0.202115 | 0.841 | 0.823 | 1.14E-29 |
| NOP10     | 7.97E-34 | -0.22117 | 0.48  | 0.728 | 1.19E-29 |
| CCDC91    | 8.00E-34 | 0.270074 | 0.268 | 0.242 | 1.20E-29 |
| C1orf198  | 8.08E-34 | 0.276438 | 0.183 | 0.153 | 1.21E-29 |
| FRMD4A    | 8.23E-34 | 0.455316 | 0.287 | 0.153 | 1.23E-29 |

|          |          |          |       |       |          |
|----------|----------|----------|-------|-------|----------|
| THAP2    | 9.22E-34 | 0.232938 | 0.17  | 0.167 | 1.38E-29 |
| RGP1     | 9.41E-34 | 0.172577 | 0.156 | 0.183 | 1.41E-29 |
| TMCC1    | 1.01E-33 | 0.166141 | 0.156 | 0.186 | 1.50E-29 |
| FAM219A  | 1.02E-33 | 0.153215 | 0.156 | 0.188 | 1.52E-29 |
| TP53INP2 | 1.04E-33 | 0.117484 | 0.114 | 0.165 | 1.55E-29 |
| YAP1     | 1.04E-33 | -0.1306  | 0     | 0.094 | 1.56E-29 |
| TSPYL4   | 1.04E-33 | 0.335989 | 0.22  | 0.163 | 1.56E-29 |
| EEFSEC   | 1.08E-33 | 0.142475 | 0.152 | 0.196 | 1.61E-29 |
| EGR2     | 1.11E-33 | -0.14752 | 0.066 | 0.209 | 1.65E-29 |
| EMC6     | 1.13E-33 | -0.16645 | 0.456 | 0.683 | 1.69E-29 |
| PDE7A    | 1.17E-33 | 0.153801 | 0.163 | 0.21  | 1.76E-29 |
| SORBS1   | 1.23E-33 | -0.16839 | 0.057 | 0.207 | 1.83E-29 |
| ABR      | 1.33E-33 | 0.163934 | 0.134 | 0.158 | 1.98E-29 |
| TRIM13   | 1.45E-33 | 0.21885  | 0.386 | 0.388 | 2.16E-29 |
| HCG18    | 1.45E-33 | 0.201903 | 0.165 | 0.18  | 2.17E-29 |
| ARHGEF3  | 1.49E-33 | 0.168889 | 0.108 | 0.13  | 2.23E-29 |
| SMAP2    | 1.53E-33 | 0.193037 | 0.17  | 0.185 | 2.28E-29 |
| RCHY1    | 1.54E-33 | 0.201773 | 0.284 | 0.298 | 2.30E-29 |
| LMBRD1   | 1.55E-33 | 0.129648 | 0.159 | 0.212 | 2.32E-29 |
| SH3BP4   | 1.57E-33 | -0.16751 | 0.057 | 0.199 | 2.35E-29 |
| ZNF266   | 1.61E-33 | -0.11715 | 0.081 | 0.216 | 2.41E-29 |
| CHST11   | 1.76E-33 | -0.15636 | 0.115 | 0.272 | 2.63E-29 |
| PLCD3    | 1.79E-33 | -0.14573 | 0.01  | 0.132 | 2.67E-29 |
| FAM199X  | 1.80E-33 | -0.1078  | 0.057 | 0.184 | 2.69E-29 |
| 4-Sep    | 1.92E-33 | 0.236712 | 0.163 | 0.157 | 2.87E-29 |
| MTA3     | 1.93E-33 | -0.11828 | 0.042 | 0.169 | 2.88E-29 |
| MSX1     | 1.99E-33 | -0.15979 | 0.03  | 0.162 | 2.97E-29 |
| CYR61    | 2.01E-33 | -0.36844 | 0.053 | 0.228 | 3.01E-29 |
| UBR5     | 2.04E-33 | 0.107959 | 0.156 | 0.219 | 3.05E-29 |
| PPP1CB   | 2.10E-33 | -0.36205 | 0.468 | 0.737 | 3.14E-29 |
| SLC29A1  | 2.33E-33 | -0.18281 | 0.019 | 0.151 | 3.49E-29 |
| AFTPH    | 2.39E-33 | 0.131473 | 0.233 | 0.284 | 3.57E-29 |
| TET1     | 2.40E-33 | 0.151834 | 0.121 | 0.153 | 3.59E-29 |
| RILPL2   | 2.41E-33 | -0.10869 | 0.021 | 0.133 | 3.60E-29 |
| 9-Sep    | 2.53E-33 | -0.23316 | 0.371 | 0.612 | 3.78E-29 |
| RAB40B   | 2.75E-33 | 0.309274 | 0.191 | 0.142 | 4.11E-29 |
| RNF38    | 2.77E-33 | 0.151119 | 0.146 | 0.183 | 4.14E-29 |
| DOCK1    | 2.82E-33 | -0.16486 | 0.005 | 0.116 | 4.21E-29 |
| FGF2     | 2.88E-33 | -0.10717 | 0.009 | 0.111 | 4.30E-29 |
| CBLN4    | 2.89E-33 | -0.15458 | 0.015 | 0.123 | 4.32E-29 |
| PDZRN3   | 2.96E-33 | 0.37938  | 0.213 | 0.128 | 4.42E-29 |
| DALRD3   | 2.96E-33 | 0.142229 | 0.197 | 0.241 | 4.42E-29 |
| PRR3     | 3.03E-33 | 0.122286 | 0.163 | 0.219 | 4.53E-29 |
| ACSL3    | 3.10E-33 | -0.13302 | 0.391 | 0.591 | 4.64E-29 |
| RPP30    | 3.20E-33 | -0.1641  | 0.128 | 0.296 | 4.78E-29 |
| APBA3    | 3.23E-33 | -0.12655 | 0.043 | 0.172 | 4.83E-29 |
| SRSF12   | 3.29E-33 | 0.108184 | 0.151 | 0.214 | 4.92E-29 |
| WARS     | 3.39E-33 | -0.17653 | 0.106 | 0.269 | 5.06E-29 |
| WDR48    | 3.74E-33 | 0.24511  | 0.255 | 0.232 | 5.59E-29 |
| GTF3C1   | 3.75E-33 | -0.14282 | 0.074 | 0.22  | 5.61E-29 |
| ZC3H4    | 3.77E-33 | -0.13316 | 0.057 | 0.193 | 5.64E-29 |



|           |          |          |       |       |          |
|-----------|----------|----------|-------|-------|----------|
| PCLO      | 3.92E-33 | 0.434371 | 0.181 | 0.027 | 5.86E-29 |
| SOCS3     | 3.93E-33 | -0.23142 | 0.147 | 0.332 | 5.87E-29 |
| CHRNA9    | 4.08E-33 | -0.13843 | 0.001 | 0.1   | 6.10E-29 |
| ADIPOR2   | 4.36E-33 | -0.11578 | 0.112 | 0.258 | 6.52E-29 |
| BBC3      | 4.57E-33 | 0.361335 | 0.17  | 0.098 | 6.83E-29 |
| SLC30A1   | 4.90E-33 | -0.13993 | 0.017 | 0.137 | 7.32E-29 |
| SMYD3     | 4.90E-33 | 0.132906 | 0.174 | 0.228 | 7.33E-29 |
| PTP4A3    | 4.94E-33 | 0.321306 | 0.173 | 0.125 | 7.38E-29 |
| GYPE      | 5.17E-33 | -0.28308 | 0.052 | 0.215 | 7.73E-29 |
| FZD2      | 5.28E-33 | -0.12782 | 0.015 | 0.128 | 7.90E-29 |
| PKN3      | 5.55E-33 | -0.16775 | 0.003 | 0.11  | 8.29E-29 |
| FGFR10P   | 5.72E-33 | -0.16733 | 0.075 | 0.227 | 8.55E-29 |
| STRIP1    | 5.81E-33 | 0.317301 | 0.267 | 0.205 | 8.69E-29 |
| SLC1A2    | 5.88E-33 | -0.26905 | 0.096 | 0.279 | 8.78E-29 |
| ZNF599    | 6.14E-33 | -0.16418 | 0.038 | 0.175 | 9.18E-29 |
| MLLT3     | 6.38E-33 | 0.257532 | 0.216 | 0.201 | 9.53E-29 |
| ZNF232    | 7.46E-33 | -0.10063 | 0.116 | 0.254 | 1.12E-28 |
| COL16A1   | 7.54E-33 | -0.15035 | 0.009 | 0.125 | 1.13E-28 |
| KAT8      | 7.55E-33 | 0.108369 | 0.196 | 0.259 | 1.13E-28 |
| CCBL2     | 8.49E-33 | -0.13794 | 0.07  | 0.207 | 1.27E-28 |
| MEF2C     | 8.98E-33 | 0.234643 | 0.201 | 0.194 | 1.34E-28 |
| LINC00844 | 9.12E-33 | -0.40561 | 0.031 | 0.19  | 1.36E-28 |
| CTD-3138E | 9.24E-33 | -0.12267 | 0.021 | 0.138 | 1.38E-28 |
| DNASE1    | 9.70E-33 | 0.288326 | 0.196 | 0.154 | 1.45E-28 |
| VAX2      | 9.83E-33 | 0.301717 | 0.225 | 0.188 | 1.47E-28 |
| MUTYH     | 9.84E-33 | -0.13604 | 0.104 | 0.252 | 1.47E-28 |
| ERAP2     | 1.00E-32 | -0.15775 | 0.007 | 0.119 | 1.50E-28 |
| ABL1      | 1.02E-32 | -0.14985 | 0.053 | 0.19  | 1.52E-28 |
| NARS2     | 1.06E-32 | 0.111808 | 0.172 | 0.227 | 1.59E-28 |
| CARKD     | 1.12E-32 | 0.201719 | 0.228 | 0.236 | 1.67E-28 |
| SRD5A3    | 1.14E-32 | -0.14519 | 0.134 | 0.295 | 1.70E-28 |
| TOX4      | 1.21E-32 | 0.115268 | 0.295 | 0.36  | 1.80E-28 |
| ACAA2     | 1.21E-32 | -0.15328 | 0.117 | 0.278 | 1.80E-28 |
| REL       | 1.27E-32 | 0.13857  | 0.207 | 0.264 | 1.91E-28 |
| LAMTOR5   | 1.30E-32 | 0.126946 | 0.765 | 0.806 | 1.94E-28 |
| C17orf10C | 1.32E-32 | 0.116717 | 0.125 | 0.178 | 1.97E-28 |
| SMAD9     | 1.34E-32 | 0.28347  | 0.237 | 0.198 | 2.01E-28 |
| SYBU      | 1.37E-32 | 0.25503  | 0.148 | 0.126 | 2.04E-28 |
| PUS7L     | 1.38E-32 | 0.269862 | 0.241 | 0.214 | 2.06E-28 |
| CAMK2B    | 1.47E-32 | 0.22932  | 0.191 | 0.191 | 2.20E-28 |
| ZFHX4-AS1 | 1.53E-32 | -0.14429 | 0.01  | 0.121 | 2.28E-28 |
| SRD5A1    | 1.56E-32 | 0.219237 | 0.181 | 0.174 | 2.33E-28 |
| CASP4     | 1.58E-32 | -0.10196 | 0.012 | 0.115 | 2.36E-28 |
| PPP1CC    | 1.72E-32 | -0.17137 | 0.541 | 0.76  | 2.57E-28 |
| ZNRF3     | 1.77E-32 | -0.12341 | 0.013 | 0.122 | 2.64E-28 |
| ERRFI1    | 1.80E-32 | -0.22248 | 0.096 | 0.269 | 2.69E-28 |
| CMTM8     | 1.89E-32 | -0.11928 | 0.013 | 0.126 | 2.82E-28 |
| SLC37A3   | 1.91E-32 | 0.322827 | 0.307 | 0.251 | 2.86E-28 |
| FCF1      | 1.92E-32 | -0.13072 | 0.029 | 0.151 | 2.87E-28 |
| FAM13B    | 1.94E-32 | 0.15582  | 0.148 | 0.174 | 2.90E-28 |
| CHCHD7    | 1.96E-32 | 0.107478 | 0.186 | 0.254 | 2.92E-28 |

|          |           |           |        |        |           |
|----------|-----------|-----------|--------|--------|-----------|
| ARL9     | 1. 97E-32 | 0. 15475  | 0. 176 | 0. 219 | 2. 95E-28 |
| ARHGFB40 | 2. 02E-32 | -0. 11052 | 0. 067 | 0. 195 | 3. 02E-28 |
| TONSL    | 2. 07E-32 | -0. 19831 | 0. 015 | 0. 14  | 3. 09E-28 |
| HSP90B1  | 2. 14E-32 | -0. 32152 | 0. 606 | 0. 847 | 3. 20E-28 |
| SIX5     | 2. 15E-32 | -0. 10789 | 0      | 0. 09  | 3. 22E-28 |
| DZIP3    | 2. 17E-32 | 0. 229236 | 0. 284 | 0. 285 | 3. 25E-28 |
| VSIG10   | 2. 18E-32 | -0. 15994 | 0. 042 | 0. 178 | 3. 26E-28 |
| CHST8    | 2. 23E-32 | -0. 12509 | 0. 028 | 0. 146 | 3. 33E-28 |
| ROB03    | 2. 23E-32 | 0. 333425 | 0. 162 | 0. 125 | 3. 34E-28 |
| SLC19A1  | 2. 25E-32 | -0. 12434 | 0. 035 | 0. 159 | 3. 37E-28 |
| TRAFD1   | 2. 32E-32 | 0. 109685 | 0. 156 | 0. 215 | 3. 46E-28 |
| SH3KBP1  | 2. 35E-32 | -0. 13244 | 0. 137 | 0. 288 | 3. 51E-28 |
| REM2     | 2. 39E-32 | 0. 384542 | 0. 122 | 0. 004 | 3. 56E-28 |
| ADAM12   | 2. 60E-32 | -0. 16378 | 0. 002 | 0. 105 | 3. 89E-28 |
| COX5A    | 2. 71E-32 | -0. 29599 | 0. 575 | 0. 822 | 4. 05E-28 |
| KLF9     | 2. 79E-32 | -0. 17748 | 0. 031 | 0. 156 | 4. 17E-28 |
| EHD1     | 2. 80E-32 | 0. 168145 | 0. 171 | 0. 196 | 4. 18E-28 |
| LIN9     | 2. 81E-32 | -0. 17925 | 0. 037 | 0. 172 | 4. 20E-28 |
| KDELC1   | 2. 83E-32 | -0. 14589 | 0. 024 | 0. 148 | 4. 23E-28 |
| GGCX     | 2. 88E-32 | -0. 12513 | 0. 14  | 0. 296 | 4. 30E-28 |
| INSM1    | 2. 91E-32 | 0. 249746 | 0. 353 | 0. 347 | 4. 35E-28 |
| AASS     | 3. 06E-32 | -0. 13942 | 0. 091 | 0. 237 | 4. 58E-28 |
| ACTR3B   | 3. 08E-32 | 0. 242592 | 0. 223 | 0. 204 | 4. 61E-28 |
| PTPN4    | 3. 17E-32 | 0. 245834 | 0. 214 | 0. 202 | 4. 73E-28 |
| UBE2I    | 3. 22E-32 | 0. 123535 | 0. 788 | 0. 827 | 4. 81E-28 |
| NUP205   | 3. 25E-32 | -0. 12808 | 0. 061 | 0. 196 | 4. 86E-28 |
| ORMDL3   | 3. 27E-32 | 0. 15384  | 0. 201 | 0. 236 | 4. 89E-28 |
| HLA-C    | 3. 38E-32 | -0. 52125 | 0. 497 | 0. 716 | 5. 04E-28 |
| RYBP     | 3. 51E-32 | 0. 111179 | 0. 15  | 0. 201 | 5. 25E-28 |
| EIF3G    | 3. 52E-32 | -0. 21227 | 0. 528 | 0. 768 | 5. 26E-28 |
| LIN54    | 3. 54E-32 | -0. 19116 | 0. 018 | 0. 146 | 5. 28E-28 |
| ACVR1    | 3. 57E-32 | 0. 191478 | 0. 116 | 0. 132 | 5. 33E-28 |
| CEP128   | 3. 66E-32 | -0. 16317 | 0. 008 | 0. 122 | 5. 47E-28 |
| CACFD1   | 3. 72E-32 | 0. 262116 | 0. 189 | 0. 164 | 5. 56E-28 |
| EVA1C    | 3. 74E-32 | -0. 19848 | 0. 013 | 0. 135 | 5. 59E-28 |
| RAB30    | 3. 76E-32 | 0. 253379 | 0. 151 | 0. 131 | 5. 61E-28 |
| COG1     | 3. 89E-32 | 0. 107554 | 0. 143 | 0. 194 | 5. 81E-28 |
| PDIA3    | 4. 05E-32 | -0. 24093 | 0. 485 | 0. 73  | 6. 05E-28 |
| NOVA2    | 4. 19E-32 | 0. 374256 | 0. 223 | 0. 121 | 6. 27E-28 |
| BOK      | 4. 23E-32 | -0. 1048  | 0. 012 | 0. 117 | 6. 32E-28 |
| B3GNT5   | 4. 25E-32 | -0. 14982 | 0. 069 | 0. 204 | 6. 35E-28 |
| SRPX2    | 4. 55E-32 | -0. 13339 | 0. 002 | 0. 098 | 6. 80E-28 |
| TFPI     | 4. 62E-32 | -0. 28597 | 0. 006 | 0. 121 | 6. 90E-28 |
| FANCF    | 4. 63E-32 | 0. 352629 | 0. 179 | 0. 109 | 6. 91E-28 |
| CMBL     | 4. 83E-32 | 0. 102266 | 0. 154 | 0. 211 | 7. 23E-28 |
| DIS3     | 4. 86E-32 | 0. 167877 | 0. 222 | 0. 251 | 7. 26E-28 |
| MAFB     | 4. 99E-32 | 0. 519073 | 0. 344 | 0. 159 | 7. 45E-28 |
| MF12-AS1 | 5. 14E-32 | -0. 11705 | 0. 097 | 0. 241 | 7. 68E-28 |
| HDAC5    | 5. 27E-32 | 0. 147234 | 0. 174 | 0. 207 | 7. 87E-28 |
| HBP1     | 5. 43E-32 | 0. 271013 | 0. 245 | 0. 217 | 8. 12E-28 |
| LSM3     | 5. 50E-32 | -0. 26246 | 0. 629 | 0. 863 | 8. 22E-28 |

|           |          |          |       |       |          |
|-----------|----------|----------|-------|-------|----------|
| NADK2     | 5.68E-32 | -0.10256 | 0.073 | 0.202 | 8.49E-28 |
| SLC2A10   | 5.77E-32 | -0.12003 | 0.009 | 0.116 | 8.63E-28 |
| FBN2      | 6.15E-32 | -0.14673 | 0.006 | 0.114 | 9.19E-28 |
| OSGEP     | 6.17E-32 | -0.11303 | 0.164 | 0.314 | 9.22E-28 |
| DSTYK     | 6.21E-32 | 0.164454 | 0.157 | 0.19  | 9.27E-28 |
| CEP70     | 6.21E-32 | -0.1482  | 0.159 | 0.321 | 9.28E-28 |
| GLDC      | 6.36E-32 | -0.12195 | 0.049 | 0.175 | 9.50E-28 |
| PCDH19    | 6.41E-32 | -0.16008 | 0.042 | 0.177 | 9.59E-28 |
| HSPA8     | 6.55E-32 | 0.11203  | 0.956 | 0.959 | 9.79E-28 |
| TUBGCP4   | 6.67E-32 | 0.115245 | 0.193 | 0.248 | 9.97E-28 |
| POLE      | 6.99E-32 | -0.15908 | 0.029 | 0.157 | 1.04E-27 |
| SERF2     | 8.44E-32 | -0.27971 | 0.767 | 0.914 | 1.26E-27 |
| PSMB2     | 8.47E-32 | -0.15543 | 0.588 | 0.791 | 1.27E-27 |
| GEM       | 8.59E-32 | -0.17251 | 0.022 | 0.147 | 1.28E-27 |
| NOC3L     | 8.82E-32 | -0.11129 | 0.046 | 0.168 | 1.32E-27 |
| RAB23     | 9.23E-32 | -0.15251 | 0.053 | 0.194 | 1.38E-27 |
| ACSF2     | 9.65E-32 | -0.10783 | 0.001 | 0.095 | 1.44E-27 |
| FAM20B    | 9.91E-32 | -0.13104 | 0.045 | 0.174 | 1.48E-27 |
| TYW3      | 9.94E-32 | -0.13285 | 0.078 | 0.219 | 1.49E-27 |
| ZCRB1     | 1.01E-31 | -0.10643 | 0.567 | 0.763 | 1.52E-27 |
| TUBGCP3   | 1.06E-31 | -0.17727 | 0.101 | 0.264 | 1.59E-27 |
| RNF113A   | 1.14E-31 | 0.107171 | 0.145 | 0.2   | 1.70E-27 |
| PNMA2     | 1.14E-31 | 0.100754 | 0.248 | 0.314 | 1.71E-27 |
| KDM4A     | 1.18E-31 | 0.105267 | 0.148 | 0.209 | 1.76E-27 |
| ANK3      | 1.21E-31 | 0.417215 | 0.186 | 0.057 | 1.80E-27 |
| RASSF4    | 1.24E-31 | -0.17574 | 0.07  | 0.219 | 1.85E-27 |
| BUD13     | 1.24E-31 | -0.16445 | 0.077 | 0.221 | 1.86E-27 |
| SLC2A1    | 1.34E-31 | -0.1237  | 0.098 | 0.238 | 2.00E-27 |
| ATP2B1    | 1.36E-31 | -0.21929 | 0.332 | 0.549 | 2.03E-27 |
| KIF13A    | 1.38E-31 | -0.10749 | 0.024 | 0.136 | 2.06E-27 |
| C1QB      | 1.42E-31 | 0.309114 | 0.386 | 0.31  | 2.12E-27 |
| CSNK1G1   | 1.64E-31 | -0.10643 | 0.037 | 0.154 | 2.45E-27 |
| CDK6      | 1.70E-31 | -0.3279  | 0.251 | 0.486 | 2.53E-27 |
| SLC39A9   | 1.75E-31 | -0.12756 | 0.055 | 0.19  | 2.61E-27 |
| CBWD1     | 1.87E-31 | 0.268703 | 0.297 | 0.256 | 2.79E-27 |
| SLC12A4   | 1.88E-31 | -0.11185 | 0.022 | 0.131 | 2.81E-27 |
| RP1-39G22 | 1.90E-31 | 0.125281 | 0.184 | 0.244 | 2.84E-27 |
| LMBR1     | 1.98E-31 | 0.173707 | 0.167 | 0.193 | 2.96E-27 |
| CDKAL1    | 2.04E-31 | 0.14161  | 0.174 | 0.216 | 3.05E-27 |
| DLGAP1-AS | 2.09E-31 | -0.16633 | 0.009 | 0.125 | 3.13E-27 |
| BAALC     | 2.12E-31 | -0.14366 | 0.471 | 0.672 | 3.16E-27 |
| MSANTD4   | 2.19E-31 | 0.130044 | 0.191 | 0.227 | 3.27E-27 |
| AHDC1     | 2.21E-31 | 0.243394 | 0.178 | 0.164 | 3.30E-27 |
| TMEM64    | 2.29E-31 | -0.14063 | 0.014 | 0.126 | 3.42E-27 |
| DCLRE1B   | 2.36E-31 | -0.19043 | 0.054 | 0.204 | 3.53E-27 |
| DDIT3     | 2.39E-31 | -0.10697 | 0.441 | 0.627 | 3.57E-27 |
| TCEA1     | 2.42E-31 | -0.17188 | 0.539 | 0.756 | 3.62E-27 |
| TBX2      | 2.47E-31 | -0.14592 | 0.011 | 0.122 | 3.70E-27 |
| RUFY1     | 2.49E-31 | -0.10075 | 0.099 | 0.232 | 3.73E-27 |
| NUP155    | 2.68E-31 | -0.16207 | 0.064 | 0.206 | 4.00E-27 |
| TP53BP2   | 2.69E-31 | -0.10329 | 0.084 | 0.215 | 4.03E-27 |

|           |          |          |       |       |          |
|-----------|----------|----------|-------|-------|----------|
| KLHL18    | 2.71E-31 | 0.121725 | 0.141 | 0.186 | 4.04E-27 |
| S100B     | 2.72E-31 | -0.27475 | 0.511 | 0.754 | 4.07E-27 |
| KBTBD4    | 2.76E-31 | 0.194595 | 0.156 | 0.165 | 4.12E-27 |
| NCEH1     | 2.86E-31 | -0.14352 | 0.009 | 0.119 | 4.27E-27 |
| EXOSC2    | 3.04E-31 | -0.13493 | 0.096 | 0.241 | 4.55E-27 |
| HYI       | 3.09E-31 | -0.10191 | 0.152 | 0.301 | 4.62E-27 |
| CREBL2    | 3.12E-31 | 0.114469 | 0.122 | 0.169 | 4.66E-27 |
| UCP2      | 3.18E-31 | -0.28609 | 0.104 | 0.29  | 4.76E-27 |
| FGF9      | 3.21E-31 | 0.510011 | 0.276 | 0.099 | 4.79E-27 |
| HSF2      | 3.23E-31 | 0.322695 | 0.336 | 0.257 | 4.83E-27 |
| NPC1      | 3.26E-31 | -0.10685 | 0.023 | 0.135 | 4.87E-27 |
| KPNB1     | 3.28E-31 | -0.17577 | 0.576 | 0.794 | 4.89E-27 |
| FAM110B   | 3.37E-31 | 0.104867 | 0.267 | 0.336 | 5.03E-27 |
| GABBR1    | 3.37E-31 | 0.291161 | 0.176 | 0.132 | 5.04E-27 |
| STK32B    | 3.60E-31 | -0.10643 | 0.049 | 0.172 | 5.39E-27 |
| GSG1L     | 3.66E-31 | -0.21992 | 0.015 | 0.135 | 5.47E-27 |
| STK33     | 3.71E-31 | -0.11103 | 0.036 | 0.151 | 5.54E-27 |
| RELT      | 3.72E-31 | -0.10687 | 0.039 | 0.157 | 5.56E-27 |
| HID1      | 3.80E-31 | 0.382643 | 0.17  | 0.059 | 5.67E-27 |
| SENP7     | 3.85E-31 | 0.239933 | 0.156 | 0.138 | 5.76E-27 |
| TECPR1    | 3.92E-31 | 0.1655   | 0.188 | 0.211 | 5.86E-27 |
| ZNF71     | 3.97E-31 | 0.220015 | 0.184 | 0.181 | 5.93E-27 |
| N4BP2     | 4.42E-31 | 0.123505 | 0.207 | 0.258 | 6.60E-27 |
| LTBP1     | 4.55E-31 | -0.14235 | 0.009 | 0.121 | 6.80E-27 |
| GPR162    | 4.56E-31 | 0.2883   | 0.187 | 0.154 | 6.82E-27 |
| SH2B2     | 4.70E-31 | 0.263905 | 0.243 | 0.209 | 7.03E-27 |
| SPATA5    | 4.83E-31 | -0.10375 | 0.033 | 0.147 | 7.22E-27 |
| ARMCX2    | 4.90E-31 | 0.2003   | 0.163 | 0.177 | 7.33E-27 |
| METAP1    | 5.04E-31 | -0.10191 | 0.079 | 0.205 | 7.53E-27 |
| VPS37D    | 5.30E-31 | 0.385115 | 0.193 | 0.1   | 7.91E-27 |
| TUBG2     | 5.36E-31 | 0.151174 | 0.127 | 0.16  | 8.01E-27 |
| H6PD      | 5.41E-31 | -0.11593 | 0.025 | 0.142 | 8.09E-27 |
| ANGPTL1   | 5.76E-31 | -0.21061 | 0.002 | 0.099 | 8.61E-27 |
| MEF2A     | 5.90E-31 | -0.13586 | 0.06  | 0.195 | 8.82E-27 |
| ZNF107    | 6.44E-31 | -0.20451 | 0.023 | 0.151 | 9.63E-27 |
| ANKZF1    | 6.54E-31 | 0.230901 | 0.187 | 0.18  | 9.78E-27 |
| PDIA5     | 6.58E-31 | -0.10601 | 0.013 | 0.119 | 9.84E-27 |
| KB-1980E6 | 7.33E-31 | 0.403968 | 0.123 | 0.011 | 1.10E-26 |
| KDELR2    | 7.48E-31 | -0.18108 | 0.592 | 0.812 | 1.12E-26 |
| CLK4      | 7.94E-31 | 0.247419 | 0.25  | 0.232 | 1.19E-26 |
| EFNB1     | 8.02E-31 | 0.228582 | 0.232 | 0.227 | 1.20E-26 |
| PIGW      | 8.19E-31 | -0.11382 | 0.035 | 0.151 | 1.22E-26 |
| PSMC3     | 8.31E-31 | -0.21114 | 0.621 | 0.842 | 1.24E-26 |
| C19orf70  | 8.52E-31 | -0.20987 | 0.437 | 0.667 | 1.27E-26 |
| C9orf40   | 8.65E-31 | -0.10995 | 0.06  | 0.185 | 1.29E-26 |
| MDM1      | 8.71E-31 | -0.16788 | 0.049 | 0.186 | 1.30E-26 |
| MICAL1    | 8.81E-31 | 0.336455 | 0.219 | 0.152 | 1.32E-26 |
| RAB3C     | 8.82E-31 | 0.453229 | 0.21  | 0.046 | 1.32E-26 |
| KIAA1211L | 8.91E-31 | -0.12356 | 0.002 | 0.101 | 1.33E-26 |
| CASC15    | 9.14E-31 | 0.472777 | 0.293 | 0.152 | 1.37E-26 |
| DLAT      | 9.36E-31 | -0.10506 | 0.118 | 0.253 | 1.40E-26 |

|           |          |          |       |       |          |
|-----------|----------|----------|-------|-------|----------|
| PRKAR1B   | 9.80E-31 | 0.354837 | 0.306 | 0.215 | 1.46E-26 |
| TLL1      | 1.03E-30 | 0.167321 | 0.121 | 0.144 | 1.54E-26 |
| EID2B     | 1.07E-30 | 0.175529 | 0.159 | 0.19  | 1.60E-26 |
| MON1A     | 1.07E-30 | 0.136088 | 0.13  | 0.17  | 1.60E-26 |
| RP11-452F | 1.09E-30 | -0.10186 | 0.04  | 0.153 | 1.62E-26 |
| MOV10     | 1.13E-30 | -0.13648 | 0.013 | 0.123 | 1.68E-26 |
| PHTF2     | 1.14E-30 | -0.11405 | 0.118 | 0.26  | 1.70E-26 |
| NDUFC2    | 1.15E-30 | 0.14992  | 0.888 | 0.88  | 1.72E-26 |
| RP11-620J | 1.18E-30 | -0.2791  | 0.378 | 0.612 | 1.76E-26 |
| CYFIP2    | 1.21E-30 | 0.280589 | 0.257 | 0.21  | 1.81E-26 |
| DDHD2     | 1.24E-30 | 0.271241 | 0.2   | 0.17  | 1.85E-26 |
| ANTXR1    | 1.34E-30 | -0.11029 | 0.088 | 0.221 | 2.00E-26 |
| ZBTB43    | 1.35E-30 | 0.13787  | 0.197 | 0.237 | 2.02E-26 |
| ADM       | 1.37E-30 | -0.32815 | 0.047 | 0.204 | 2.04E-26 |
| CCDC126   | 1.38E-30 | 0.386055 | 0.264 | 0.172 | 2.06E-26 |
| VAR2      | 1.38E-30 | -0.10105 | 0.027 | 0.137 | 2.07E-26 |
| ZNF559    | 1.41E-30 | 0.103764 | 0.207 | 0.263 | 2.11E-26 |
| TMEM246   | 1.42E-30 | 0.457538 | 0.198 | 0.057 | 2.12E-26 |
| RP11-295G | 1.44E-30 | -0.16139 | 0.003 | 0.104 | 2.15E-26 |
| PRPSAP1   | 1.47E-30 | -0.13801 | 0.434 | 0.638 | 2.19E-26 |
| CDK5R2    | 1.47E-30 | 0.491063 | 0.19  | 0.049 | 2.19E-26 |
| RHOBTB3   | 1.47E-30 | -0.10011 | 0.639 | 0.826 | 2.19E-26 |
| TSTD2     | 1.52E-30 | 0.103971 | 0.115 | 0.168 | 2.27E-26 |
| RAB33A    | 1.54E-30 | 0.481582 | 0.298 | 0.136 | 2.30E-26 |
| MFS2A     | 1.60E-30 | -0.10167 | 0.056 | 0.172 | 2.39E-26 |
| RAD54B    | 1.60E-30 | -0.1736  | 0.026 | 0.151 | 2.39E-26 |
| C1orf54   | 1.62E-30 | -0.17122 | 0.014 | 0.128 | 2.43E-26 |
| MPP6      | 1.63E-30 | -0.11924 | 0.075 | 0.209 | 2.44E-26 |
| ONECUT2   | 1.63E-30 | 0.479039 | 0.241 | 0.074 | 2.44E-26 |
| KANK1     | 1.68E-30 | -0.19385 | 0.02  | 0.144 | 2.50E-26 |
| C17orf89  | 1.83E-30 | -0.21894 | 0.452 | 0.694 | 2.74E-26 |
| BRSK1     | 1.86E-30 | 0.174454 | 0.162 | 0.178 | 2.78E-26 |
| EPHB4     | 1.97E-30 | -0.11672 | 0.004 | 0.1   | 2.95E-26 |
| FAM131B   | 2.34E-30 | 0.213811 | 0.152 | 0.149 | 3.50E-26 |
| CACNA2D3  | 2.38E-30 | 0.38123  | 0.13  | 0.006 | 3.55E-26 |
| FEM1B     | 2.40E-30 | -0.12661 | 0.075 | 0.21  | 3.58E-26 |
| CSTF2T    | 2.43E-30 | -0.14178 | 0.093 | 0.235 | 3.63E-26 |
| ABCA1     | 2.56E-30 | 0.211496 | 0.183 | 0.184 | 3.83E-26 |
| TAF2      | 2.65E-30 | 0.116667 | 0.137 | 0.181 | 3.96E-26 |
| PSAP      | 2.80E-30 | 0.130726 | 0.74  | 0.76  | 4.18E-26 |
| FANCM     | 2.84E-30 | -0.16503 | 0.008 | 0.116 | 4.24E-26 |
| RP11-83A2 | 2.85E-30 | 0.246621 | 0.229 | 0.209 | 4.26E-26 |
| CYLD      | 2.96E-30 | 0.214744 | 0.148 | 0.137 | 4.42E-26 |
| HAPLN3    | 3.02E-30 | -0.10707 | 0.009 | 0.109 | 4.52E-26 |
| TAF1B     | 3.03E-30 | -0.1038  | 0.078 | 0.206 | 4.53E-26 |
| RP11-395G | 3.09E-30 | -0.13061 | 0.178 | 0.337 | 4.62E-26 |
| YTHDF3-AS | 3.12E-30 | -0.14762 | 0.023 | 0.141 | 4.67E-26 |
| ASNA1     | 3.19E-30 | -0.17277 | 0.523 | 0.74  | 4.76E-26 |
| RNF20     | 3.20E-30 | 0.108275 | 0.207 | 0.259 | 4.78E-26 |
| ST8SIA1   | 3.28E-30 | -0.15581 | 0.05  | 0.185 | 4.90E-26 |
| SLC35E4   | 3.29E-30 | -0.13125 | 0.025 | 0.142 | 4.92E-26 |

|           |          |          |       |       |          |
|-----------|----------|----------|-------|-------|----------|
| DUS4L     | 3.41E-30 | 0.106662 | 0.132 | 0.181 | 5.09E-26 |
| FAM200A   | 3.51E-30 | 0.283469 | 0.198 | 0.165 | 5.25E-26 |
| CDC37L1   | 3.52E-30 | 0.222343 | 0.229 | 0.221 | 5.26E-26 |
| CAPN7     | 3.63E-30 | 0.142387 | 0.162 | 0.194 | 5.43E-26 |
| LINC00599 | 3.76E-30 | 0.494976 | 0.179 | 0.033 | 5.62E-26 |
| EIF2S2    | 3.81E-30 | -0.3191  | 0.533 | 0.78  | 5.70E-26 |
| SLC4A3    | 3.89E-30 | 0.199438 | 0.138 | 0.144 | 5.81E-26 |
| PARP4     | 3.90E-30 | -0.13878 | 0.017 | 0.128 | 5.83E-26 |
| LZTS2     | 3.97E-30 | -0.1143  | 0.027 | 0.14  | 5.93E-26 |
| CTSC      | 4.29E-30 | -0.2297  | 0.053 | 0.202 | 6.41E-26 |
| TMEFF2    | 4.71E-30 | 0.481158 | 0.276 | 0.112 | 7.05E-26 |
| PPP1R14C  | 4.73E-30 | -0.19867 | 0.046 | 0.186 | 7.06E-26 |
| MTFP1     | 4.74E-30 | -0.11716 | 0.013 | 0.12  | 7.08E-26 |
| INPP5K    | 4.97E-30 | 0.130484 | 0.167 | 0.205 | 7.43E-26 |
| WWC3      | 5.07E-30 | -0.11509 | 0.032 | 0.143 | 7.58E-26 |
| SMARCAD1  | 5.08E-30 | 0.177234 | 0.186 | 0.194 | 7.60E-26 |
| MVB12B    | 5.28E-30 | 0.230281 | 0.191 | 0.177 | 7.89E-26 |
| MZF1      | 5.31E-30 | 0.311666 | 0.17  | 0.1   | 7.93E-26 |
| RRAGB     | 5.48E-30 | 0.319497 | 0.204 | 0.146 | 8.20E-26 |
| MINPP1    | 5.50E-30 | 0.101689 | 0.127 | 0.179 | 8.22E-26 |
| MTRNR2L1  | 5.82E-30 | 0.598912 | 0.333 | 0.174 | 8.70E-26 |
| OSBPL10   | 6.03E-30 | -0.15056 | 0.01  | 0.117 | 9.01E-26 |
| C3orf58   | 6.04E-30 | -0.15867 | 0.021 | 0.142 | 9.02E-26 |
| HDDC3     | 6.55E-30 | -0.10908 | 0.063 | 0.188 | 9.78E-26 |
| MAEL      | 6.69E-30 | -0.13151 | 0.003 | 0.098 | 9.99E-26 |
| ZNF583    | 7.20E-30 | 0.260339 | 0.203 | 0.172 | 1.08E-25 |
| ARL17A    | 7.62E-30 | -0.12118 | 0.039 | 0.158 | 1.14E-25 |
| FAM84B    | 7.68E-30 | -0.14881 | 0.06  | 0.19  | 1.15E-25 |
| SETBP1    | 7.77E-30 | 0.310613 | 0.203 | 0.132 | 1.16E-25 |
| GRIK3     | 8.14E-30 | -0.20782 | 0.026 | 0.157 | 1.22E-25 |
| IGSF11    | 8.15E-30 | -0.12532 | 0.046 | 0.165 | 1.22E-25 |
| KCNJ2     | 8.15E-30 | -0.19591 | 0.009 | 0.121 | 1.22E-25 |
| BAK1      | 8.49E-30 | -0.13279 | 0.051 | 0.18  | 1.27E-25 |
| AC004158. | 8.51E-30 | 0.261195 | 0.255 | 0.226 | 1.27E-25 |
| POLG      | 8.56E-30 | -0.10238 | 0.062 | 0.184 | 1.28E-25 |
| SLC35E3   | 8.59E-30 | -0.24199 | 0.23  | 0.428 | 1.28E-25 |
| TRH       | 9.20E-30 | 0.34322  | 0.132 | 0.007 | 1.37E-25 |
| C14orf132 | 9.28E-30 | 0.492747 | 0.327 | 0.149 | 1.39E-25 |
| TMOD2     | 1.09E-29 | 0.109532 | 0.143 | 0.19  | 1.63E-25 |
| KAT2B     | 1.13E-29 | -0.17812 | 0.022 | 0.142 | 1.68E-25 |
| COX20     | 1.14E-29 | -0.12415 | 0.57  | 0.759 | 1.70E-25 |
| RARRES3   | 1.16E-29 | -0.14637 | 0.018 | 0.127 | 1.73E-25 |
| DIRAS3    | 1.22E-29 | -0.23101 | 0.02  | 0.144 | 1.83E-25 |
| DYNLRB1   | 1.24E-29 | 0.145613 | 0.797 | 0.826 | 1.85E-25 |
| RREB1     | 1.25E-29 | -0.11362 | 0.005 | 0.1   | 1.87E-25 |
| IFI44L    | 1.26E-29 | -0.39564 | 0.002 | 0.099 | 1.88E-25 |
| OSBPL3    | 1.26E-29 | -0.14855 | 0.007 | 0.111 | 1.89E-25 |
| CD63      | 1.32E-29 | -0.33918 | 0.829 | 0.9   | 1.97E-25 |
| GPSM1     | 1.36E-29 | 0.256182 | 0.165 | 0.153 | 2.03E-25 |
| LRRC28    | 1.38E-29 | -0.11711 | 0.058 | 0.185 | 2.06E-25 |
| CDKN1C    | 1.40E-29 | 0.390453 | 0.174 | 0.102 | 2.09E-25 |

|           |          |          |       |       |          |
|-----------|----------|----------|-------|-------|----------|
| RMI1      | 1.64E-29 | -0.15746 | 0.094 | 0.237 | 2.45E-25 |
| DIS3L2    | 1.68E-29 | 0.149714 | 0.141 | 0.17  | 2.51E-25 |
| DLG4      | 1.76E-29 | 0.157437 | 0.119 | 0.148 | 2.64E-25 |
| MPI       | 1.83E-29 | -0.10284 | 0.055 | 0.173 | 2.73E-25 |
| ZNF669    | 1.86E-29 | 0.276766 | 0.214 | 0.17  | 2.78E-25 |
| TST       | 2.07E-29 | -0.12575 | 0.025 | 0.137 | 3.09E-25 |
| PIN1      | 2.09E-29 | -0.27534 | 0.61  | 0.84  | 3.12E-25 |
| ARHGAP32  | 2.16E-29 | 0.110484 | 0.131 | 0.175 | 3.23E-25 |
| WAC-AS1   | 2.18E-29 | 0.113385 | 0.15  | 0.195 | 3.25E-25 |
| TTL5      | 2.18E-29 | -0.11831 | 0.037 | 0.149 | 3.26E-25 |
| CCNE1     | 2.27E-29 | -0.21533 | 0.045 | 0.186 | 3.40E-25 |
| HMGA2     | 2.46E-29 | -0.13956 | 0     | 0.081 | 3.67E-25 |
| FNTB      | 2.52E-29 | -0.22071 | 0.038 | 0.177 | 3.77E-25 |
| HNRNPA3   | 2.62E-29 | -0.25121 | 0.61  | 0.838 | 3.91E-25 |
| FAM181A   | 2.62E-29 | -0.16368 | 0.003 | 0.099 | 3.91E-25 |
| SLC4A4    | 2.70E-29 | -0.15743 | 0.043 | 0.168 | 4.03E-25 |
| ITFG2     | 3.30E-29 | 0.103789 | 0.13  | 0.185 | 4.93E-25 |
| PTN       | 3.42E-29 | -0.27389 | 0.861 | 0.916 | 5.11E-25 |
| TRAM2     | 3.45E-29 | -0.1081  | 0.011 | 0.112 | 5.15E-25 |
| EPC2      | 3.47E-29 | 0.173184 | 0.163 | 0.185 | 5.18E-25 |
| EEF1A1    | 3.51E-29 | -0.35074 | 0.682 | 0.878 | 5.24E-25 |
| COX7C     | 3.53E-29 | 0.142473 | 0.949 | 0.938 | 5.28E-25 |
| SYN1      | 3.59E-29 | 0.416845 | 0.178 | 0.035 | 5.37E-25 |
| GLI3      | 3.64E-29 | -0.177   | 0.005 | 0.104 | 5.44E-25 |
| AEBP1     | 3.72E-29 | -0.12962 | 0.065 | 0.194 | 5.56E-25 |
| SPIN2B    | 3.81E-29 | 0.1875   | 0.148 | 0.148 | 5.69E-25 |
| UNC93B1   | 3.86E-29 | -0.10091 | 0.012 | 0.11  | 5.77E-25 |
| RELB      | 3.88E-29 | -0.11063 | 0.013 | 0.116 | 5.79E-25 |
| SUMO1     | 3.93E-29 | 0.122088 | 0.844 | 0.863 | 5.87E-25 |
| ZW10      | 4.01E-29 | -0.14094 | 0.057 | 0.185 | 5.99E-25 |
| CLSTN3    | 4.02E-29 | 0.375765 | 0.167 | 0.057 | 6.00E-25 |
| TRMT61B   | 4.04E-29 | 0.161176 | 0.254 | 0.285 | 6.03E-25 |
| NANP      | 4.07E-29 | -0.10327 | 0.037 | 0.148 | 6.08E-25 |
| FAM72A    | 4.18E-29 | -0.16823 | 0.007 | 0.11  | 6.24E-25 |
| IFT46     | 4.23E-29 | -0.11212 | 0.105 | 0.238 | 6.32E-25 |
| CA8       | 4.33E-29 | 0.537954 | 0.246 | 0.078 | 6.46E-25 |
| LRRN3     | 4.42E-29 | 0.338079 | 0.272 | 0.206 | 6.60E-25 |
| ARL6IP4   | 4.49E-29 | -0.26301 | 0.543 | 0.781 | 6.71E-25 |
| LRTM1     | 4.94E-29 | 0.409661 | 0.132 | 0.01  | 7.38E-25 |
| ZCCHC8    | 5.00E-29 | -0.10734 | 0.086 | 0.216 | 7.47E-25 |
| FAM114A1  | 5.03E-29 | -0.11352 | 0.038 | 0.153 | 7.52E-25 |
| SDC2      | 5.13E-29 | -0.10428 | 0.072 | 0.193 | 7.66E-25 |
| ZFP14     | 5.25E-29 | 0.290605 | 0.205 | 0.162 | 7.85E-25 |
| ZNF536    | 5.42E-29 | 0.441858 | 0.196 | 0.043 | 8.10E-25 |
| RP3-428L1 | 5.75E-29 | -0.11101 | 0.038 | 0.152 | 8.60E-25 |
| CAD       | 6.12E-29 | -0.15317 | 0.031 | 0.153 | 9.15E-25 |
| S100A6    | 6.17E-29 | -0.43479 | 0.365 | 0.62  | 9.22E-25 |
| PRKD1     | 6.47E-29 | -0.13487 | 0.023 | 0.135 | 9.67E-25 |
| DUSP11    | 6.55E-29 | 0.137943 | 0.202 | 0.24  | 9.79E-25 |
| SMCR5     | 6.69E-29 | 0.168215 | 0.178 | 0.2   | 9.99E-25 |
| DCHS1     | 7.08E-29 | 0.118599 | 0.15  | 0.196 | 1.06E-24 |

|           |          |          |       |       |          |
|-----------|----------|----------|-------|-------|----------|
| Clorf61   | 7.40E-29 | -0.32983 | 0.72  | 0.893 | 1.11E-24 |
| KLHDC9    | 7.42E-29 | 0.313507 | 0.159 | 0.09  | 1.11E-24 |
| SAMD14    | 7.50E-29 | 0.407996 | 0.229 | 0.11  | 1.12E-24 |
| SIN3A     | 7.66E-29 | -0.12452 | 0.074 | 0.204 | 1.14E-24 |
| F12       | 7.86E-29 | 0.224053 | 0.145 | 0.132 | 1.17E-24 |
| ARG2      | 7.88E-29 | 0.420911 | 0.204 | 0.083 | 1.18E-24 |
| ATL1      | 8.22E-29 | 0.219281 | 0.246 | 0.246 | 1.23E-24 |
| GZF1      | 8.73E-29 | 0.145857 | 0.109 | 0.135 | 1.30E-24 |
| ZNF263    | 8.74E-29 | 0.166562 | 0.2   | 0.221 | 1.31E-24 |
| LRP6      | 8.98E-29 | 0.150901 | 0.181 | 0.214 | 1.34E-24 |
| SREBF1    | 9.53E-29 | 0.160147 | 0.086 | 0.106 | 1.42E-24 |
| ETFB      | 1.01E-28 | -0.24384 | 0.419 | 0.651 | 1.51E-24 |
| HDAC7     | 1.05E-28 | 0.131006 | 0.115 | 0.147 | 1.56E-24 |
| RNF44     | 1.08E-28 | 0.135518 | 0.154 | 0.194 | 1.62E-24 |
| NT5E      | 1.11E-28 | -0.23671 | 0.014 | 0.132 | 1.67E-24 |
| NDUFS5    | 1.13E-28 | 0.15577  | 0.954 | 0.93  | 1.70E-24 |
| STOM      | 1.21E-28 | -0.14329 | 0.028 | 0.142 | 1.81E-24 |
| POLR3C    | 1.27E-28 | -0.12186 | 0.058 | 0.18  | 1.89E-24 |
| MXI1      | 1.28E-28 | 0.352597 | 0.207 | 0.119 | 1.92E-24 |
| FOXP1     | 1.29E-28 | -0.35378 | 0.062 | 0.228 | 1.92E-24 |
| ZNF236    | 1.46E-28 | 0.281108 | 0.165 | 0.127 | 2.18E-24 |
| PPP1R21   | 1.55E-28 | 0.209607 | 0.152 | 0.148 | 2.32E-24 |
| PSMA6     | 1.56E-28 | -0.12793 | 0.159 | 0.299 | 2.33E-24 |
| MBD2      | 1.57E-28 | -0.12348 | 0.008 | 0.109 | 2.35E-24 |
| FAH       | 1.66E-28 | -0.13226 | 0.023 | 0.135 | 2.49E-24 |
| FKBP14    | 1.70E-28 | -0.13956 | 0.057 | 0.188 | 2.54E-24 |
| RTN2      | 1.78E-28 | 0.405613 | 0.179 | 0.057 | 2.65E-24 |
| ZNF394    | 1.83E-28 | 0.188936 | 0.161 | 0.174 | 2.74E-24 |
| SATB1     | 1.92E-28 | 0.414005 | 0.277 | 0.156 | 2.87E-24 |
| HPRT1     | 2.00E-28 | 0.196907 | 0.267 | 0.279 | 2.99E-24 |
| RNF103    | 2.05E-28 | 0.15134  | 0.147 | 0.179 | 3.06E-24 |
| UPP1      | 2.09E-28 | -0.16783 | 0.133 | 0.284 | 3.12E-24 |
| FBXO4     | 2.09E-28 | -0.21114 | 0.046 | 0.185 | 3.13E-24 |
| NAP1L1    | 2.15E-28 | -0.29388 | 0.642 | 0.859 | 3.21E-24 |
| RP11-498C | 2.29E-28 | -0.10646 | 0.024 | 0.13  | 3.42E-24 |
| DNAJB5    | 2.47E-28 | 0.318475 | 0.222 | 0.154 | 3.69E-24 |
| ISG15     | 2.51E-28 | -0.25201 | 0.189 | 0.374 | 3.75E-24 |
| FOXK1     | 2.56E-28 | 0.153373 | 0.156 | 0.179 | 3.83E-24 |
| NGFRAP1   | 2.64E-28 | 0.148446 | 0.963 | 0.953 | 3.95E-24 |
| WASF1     | 2.75E-28 | 0.332362 | 0.26  | 0.173 | 4.12E-24 |
| BCL2L13   | 2.81E-28 | -0.11458 | 0.089 | 0.22  | 4.20E-24 |
| PDE4D     | 2.84E-28 | 0.223981 | 0.179 | 0.163 | 4.24E-24 |
| L3MBTL2   | 2.87E-28 | -0.10631 | 0.075 | 0.2   | 4.30E-24 |
| PDCD5     | 3.01E-28 | -0.15097 | 0.618 | 0.817 | 4.50E-24 |
| SMO       | 3.04E-28 | -0.15174 | 0.03  | 0.149 | 4.54E-24 |
| ARHGAP1   | 3.10E-28 | 0.205459 | 0.182 | 0.19  | 4.64E-24 |
| ZMYM5     | 3.16E-28 | 0.157951 | 0.197 | 0.219 | 4.73E-24 |
| PARP6     | 3.17E-28 | 0.294561 | 0.22  | 0.16  | 4.73E-24 |
| ARPC2     | 3.20E-28 | 0.151519 | 0.841 | 0.849 | 4.78E-24 |
| CAMSAP1   | 3.36E-28 | 0.215677 | 0.168 | 0.17  | 5.02E-24 |
| POT1      | 3.38E-28 | -0.11345 | 0.077 | 0.199 | 5.05E-24 |



|           |          |          |       |       |          |
|-----------|----------|----------|-------|-------|----------|
| KCNMA1    | 3.44E-28 | -0.16448 | 0.036 | 0.162 | 5.14E-24 |
| SLC25A18  | 3.46E-28 | -0.22534 | 0.004 | 0.101 | 5.17E-24 |
| KIAA1109  | 3.56E-28 | 0.14369  | 0.141 | 0.172 | 5.32E-24 |
| CTB-58E17 | 3.68E-28 | -0.11684 | 0.02  | 0.126 | 5.50E-24 |
| TTC13     | 3.71E-28 | 0.256747 | 0.168 | 0.132 | 5.54E-24 |
| ADD2      | 4.05E-28 | 0.21571  | 0.244 | 0.235 | 6.05E-24 |
| CAMKV     | 4.12E-28 | 0.348623 | 0.126 | 0.007 | 6.15E-24 |
| YEATS2    | 4.23E-28 | -0.12959 | 0.054 | 0.177 | 6.32E-24 |
| RP11-294J | 4.26E-28 | -0.1017  | 0.093 | 0.219 | 6.37E-24 |
| VAV3      | 4.36E-28 | -0.18031 | 0.026 | 0.146 | 6.51E-24 |
| NAA40     | 4.52E-28 | 0.153916 | 0.131 | 0.153 | 6.75E-24 |
| RAB20     | 4.64E-28 | -0.1033  | 0.013 | 0.107 | 6.93E-24 |
| CEP76     | 4.87E-28 | -0.11786 | 0.05  | 0.167 | 7.28E-24 |
| CNPY1     | 4.96E-28 | -0.18731 | 0.139 | 0.299 | 7.41E-24 |
| LPIN1     | 5.07E-28 | 0.305672 | 0.238 | 0.186 | 7.58E-24 |
| DSCC1     | 5.10E-28 | -0.18964 | 0.098 | 0.252 | 7.62E-24 |
| SEPP1     | 5.22E-28 | -0.26488 | 0.034 | 0.168 | 7.81E-24 |
| STYX      | 5.48E-28 | -0.10387 | 0.026 | 0.127 | 8.19E-24 |
| CCNE2     | 5.59E-28 | -0.30609 | 0.12  | 0.302 | 8.35E-24 |
| FAM193A   | 5.60E-28 | 0.109611 | 0.108 | 0.153 | 8.37E-24 |
| INTS8     | 6.25E-28 | 0.186969 | 0.148 | 0.152 | 9.34E-24 |
| FAT3      | 6.29E-28 | -0.16089 | 0.03  | 0.152 | 9.40E-24 |
| MFSD3     | 6.41E-28 | 0.16019  | 0.123 | 0.151 | 9.59E-24 |
| SNRPF     | 6.62E-28 | -0.11897 | 0.64  | 0.821 | 9.90E-24 |
| ZNF280B   | 6.85E-28 | -0.15514 | 0.013 | 0.122 | 1.02E-23 |
| RPN2      | 7.18E-28 | -0.26889 | 0.59  | 0.819 | 1.07E-23 |
| FAM8A1    | 7.25E-28 | 0.172072 | 0.118 | 0.12  | 1.08E-23 |
| FBXL17    | 7.71E-28 | 0.131751 | 0.093 | 0.114 | 1.15E-23 |
| DNAJC12   | 7.76E-28 | 0.367433 | 0.159 | 0.074 | 1.16E-23 |
| FAM65A    | 7.87E-28 | 0.130938 | 0.134 | 0.163 | 1.18E-23 |
| GOLGA3    | 7.89E-28 | 0.102326 | 0.109 | 0.152 | 1.18E-23 |
| SH2D3C    | 8.37E-28 | 0.341869 | 0.126 | 0.011 | 1.25E-23 |
| SLC2A6    | 8.46E-28 | 0.229801 | 0.145 | 0.115 | 1.26E-23 |
| ATAD1     | 8.47E-28 | 0.150544 | 0.233 | 0.257 | 1.27E-23 |
| ITPR2     | 8.92E-28 | -0.1426  | 0.019 | 0.126 | 1.33E-23 |
| ELF1      | 9.18E-28 | -0.11533 | 0.031 | 0.141 | 1.37E-23 |
| ATP5J     | 9.43E-28 | 0.143479 | 0.875 | 0.88  | 1.41E-23 |
| BHLHE22   | 9.55E-28 | 0.484567 | 0.108 | 0.002 | 1.43E-23 |
| FAM49A    | 9.80E-28 | 0.204531 | 0.151 | 0.141 | 1.46E-23 |
| EPB41L1   | 9.80E-28 | 0.163647 | 0.123 | 0.137 | 1.47E-23 |
| LDOC1     | 1.05E-27 | 0.45668  | 0.236 | 0.07  | 1.57E-23 |
| ACTR8     | 1.10E-27 | 0.125593 | 0.148 | 0.183 | 1.65E-23 |
| BCL10     | 1.17E-27 | 0.1529   | 0.145 | 0.168 | 1.75E-23 |
| TOE1      | 1.18E-27 | -0.17296 | 0.068 | 0.204 | 1.77E-23 |
| SSR4      | 1.26E-27 | 0.10215  | 0.756 | 0.815 | 1.88E-23 |
| FBN1      | 1.26E-27 | -0.10655 | 0.005 | 0.099 | 1.88E-23 |
| NUP43     | 1.27E-27 | -0.13846 | 0.079 | 0.209 | 1.90E-23 |
| SNRPD1    | 1.28E-27 | -0.2322  | 0.645 | 0.858 | 1.91E-23 |
| POLB      | 1.34E-27 | 0.329919 | 0.19  | 0.122 | 2.00E-23 |
| PARD6A    | 1.35E-27 | 0.124259 | 0.154 | 0.194 | 2.01E-23 |
| LRRC27    | 1.52E-27 | 0.202519 | 0.131 | 0.125 | 2.27E-23 |

|          |           |           |        |        |           |
|----------|-----------|-----------|--------|--------|-----------|
| PAG1     | 1. 57E-27 | 0. 224668 | 0. 204 | 0. 196 | 2. 34E-23 |
| GORAB    | 1. 58E-27 | -0. 12287 | 0. 035 | 0. 144 | 2. 35E-23 |
| ZDHHC21  | 1. 75E-27 | 0. 118756 | 0. 115 | 0. 147 | 2. 62E-23 |
| FAM188A  | 1. 89E-27 | 0. 123069 | 0. 119 | 0. 154 | 2. 82E-23 |
| FOXDI    | 1. 95E-27 | -0. 1081  | 0. 016 | 0. 112 | 2. 91E-23 |
| ZNF277   | 1. 99E-27 | 0. 107865 | 0. 188 | 0. 236 | 2. 98E-23 |
| C1S      | 2. 13E-27 | -0. 16562 | 0. 023 | 0. 135 | 3. 18E-23 |
| BTN3A2   | 2. 16E-27 | -0. 17523 | 0. 028 | 0. 151 | 3. 23E-23 |
| NACAD    | 2. 17E-27 | 0. 302958 | 0. 185 | 0. 121 | 3. 25E-23 |
| TSTD1    | 2. 21E-27 | -0. 27154 | 0. 075 | 0. 221 | 3. 31E-23 |
| UTP3     | 2. 22E-27 | 0. 105179 | 0. 142 | 0. 191 | 3. 32E-23 |
| ALG6     | 2. 26E-27 | -0. 1434  | 0. 09  | 0. 227 | 3. 37E-23 |
| PAK1     | 2. 29E-27 | 0. 322503 | 0. 236 | 0. 165 | 3. 42E-23 |
| HAS2     | 2. 41E-27 | -0. 12698 | 0. 002 | 0. 086 | 3. 59E-23 |
| ZNF253   | 2. 64E-27 | 0. 222415 | 0. 182 | 0. 181 | 3. 94E-23 |
| PPP1R9A  | 2. 64E-27 | 0. 457253 | 0. 284 | 0. 116 | 3. 95E-23 |
| MTMR11   | 2. 78E-27 | -0. 14064 | 0. 003 | 0. 09  | 4. 16E-23 |
| CIRBP    | 3. 10E-27 | 0. 152761 | 0. 952 | 0. 94  | 4. 63E-23 |
| OXTR     | 3. 19E-27 | -0. 13255 | 0. 007 | 0. 104 | 4. 77E-23 |
| SKAP2    | 3. 23E-27 | 0. 448567 | 0. 33  | 0. 179 | 4. 82E-23 |
| CPT1C    | 3. 37E-27 | 0. 344198 | 0. 237 | 0. 154 | 5. 03E-23 |
| TCEAL6   | 3. 42E-27 | 0. 428274 | 0. 179 | 0. 032 | 5. 11E-23 |
| STK17B   | 3. 46E-27 | -0. 21656 | 0. 019 | 0. 137 | 5. 18E-23 |
| PSMA4    | 3. 51E-27 | -0. 13764 | 0. 592 | 0. 781 | 5. 24E-23 |
| TLE2     | 3. 59E-27 | 0. 12799  | 0. 17  | 0. 207 | 5. 36E-23 |
| JARID2   | 3. 90E-27 | 0. 120381 | 0. 14  | 0. 178 | 5. 83E-23 |
| CACNB4   | 3. 95E-27 | 0. 175529 | 0. 143 | 0. 151 | 5. 90E-23 |
| HMGAI    | 3. 95E-27 | -0. 24807 | 0. 342 | 0. 565 | 5. 91E-23 |
| SCAI     | 4. 15E-27 | 0. 207706 | 0. 172 | 0. 165 | 6. 21E-23 |
| NOS1AP   | 4. 65E-27 | 0. 262416 | 0. 155 | 0. 119 | 6. 95E-23 |
| ACSL1    | 4. 70E-27 | 0. 315972 | 0. 18  | 0. 11  | 7. 03E-23 |
| ZNF426   | 4. 76E-27 | 0. 101192 | 0. 16  | 0. 206 | 7. 11E-23 |
| MMP15    | 5. 03E-27 | 0. 193135 | 0. 125 | 0. 119 | 7. 52E-23 |
| GTF2IRD2 | 5. 22E-27 | 0. 247925 | 0. 213 | 0. 185 | 7. 81E-23 |
| RARA     | 5. 27E-27 | 0. 149699 | 0. 145 | 0. 169 | 7. 87E-23 |
| ZNF250   | 5. 43E-27 | 0. 296002 | 0. 209 | 0. 154 | 8. 11E-23 |
| ZNF668   | 5. 93E-27 | 0. 133893 | 0. 134 | 0. 159 | 8. 86E-23 |
| TMEM44   | 6. 02E-27 | 0. 223834 | 0. 132 | 0. 114 | 9. 00E-23 |
| ASUN     | 6. 03E-27 | -0. 10522 | 0. 097 | 0. 219 | 9. 01E-23 |
| FAM171B  | 6. 13E-27 | 0. 286478 | 0. 258 | 0. 205 | 9. 16E-23 |
| BRAP     | 6. 34E-27 | 0. 11192  | 0. 137 | 0. 174 | 9. 47E-23 |
| PIANP    | 6. 53E-27 | 0. 188818 | 0. 152 | 0. 16  | 9. 76E-23 |
| KIFC2    | 6. 65E-27 | 0. 208834 | 0. 134 | 0. 125 | 9. 94E-23 |
| PFN1     | 6. 79E-27 | -0. 23216 | 0. 835 | 0. 905 | 1. 01E-22 |
| HMGB3    | 7. 33E-27 | -0. 21954 | 0. 616 | 0. 823 | 1. 10E-22 |
| PIGO     | 8. 03E-27 | -0. 13294 | 0. 019 | 0. 12  | 1. 20E-22 |
| SLC27A3  | 8. 20E-27 | -0. 11209 | 0. 109 | 0. 235 | 1. 23E-22 |
| CCDC74A  | 8. 93E-27 | -0. 10899 | 0. 079 | 0. 199 | 1. 33E-22 |
| DNAJC22  | 9. 25E-27 | -0. 13579 | 0. 008 | 0. 104 | 1. 38E-22 |
| ZNF33A   | 9. 29E-27 | 0. 183388 | 0. 119 | 0. 12  | 1. 39E-22 |
| ERLIN1   | 9. 33E-27 | -0. 10732 | 0. 029 | 0. 133 | 1. 39E-22 |

|           |          |          |       |       |          |
|-----------|----------|----------|-------|-------|----------|
| MED12L    | 9.80E-27 | -0.1138  | 0.025 | 0.13  | 1.46E-22 |
| NPNT      | 9.95E-27 | -0.14638 | 0     | 0.074 | 1.49E-22 |
| POLH      | 1.03E-26 | -0.1525  | 0.043 | 0.164 | 1.54E-22 |
| CREB3L1   | 1.07E-26 | -0.1554  | 0.012 | 0.117 | 1.60E-22 |
| B3GALT1   | 1.12E-26 | -0.12442 | 0.019 | 0.12  | 1.68E-22 |
| UBE3B     | 1.14E-26 | -0.12376 | 0.072 | 0.191 | 1.70E-22 |
| NBEA      | 1.16E-26 | 0.396516 | 0.178 | 0.057 | 1.73E-22 |
| DOK4      | 1.19E-26 | 0.338127 | 0.166 | 0.072 | 1.77E-22 |
| SLC35D1   | 1.24E-26 | -0.10567 | 0.02  | 0.121 | 1.85E-22 |
| MCM7      | 1.28E-26 | -0.37084 | 0.485 | 0.725 | 1.92E-22 |
| NKIRAS1   | 1.46E-26 | 0.138006 | 0.154 | 0.186 | 2.18E-22 |
| CTB-5506. | 1.48E-26 | -0.13249 | 0.011 | 0.11  | 2.21E-22 |
| HNRNPC    | 1.49E-26 | -0.18848 | 0.712 | 0.899 | 2.23E-22 |
| ATP5G3    | 1.55E-26 | 0.14571  | 0.893 | 0.884 | 2.32E-22 |
| FOSL1     | 1.62E-26 | -0.12075 | 0.003 | 0.09  | 2.42E-22 |
| SNCB      | 1.63E-26 | 0.388372 | 0.144 | 0.03  | 2.43E-22 |
| ATP50     | 1.64E-26 | 0.115578 | 0.872 | 0.893 | 2.44E-22 |
| RDX       | 1.71E-26 | -0.23282 | 0.608 | 0.827 | 2.56E-22 |
| TREX1     | 1.72E-26 | -0.16127 | 0.025 | 0.136 | 2.57E-22 |
| CPT2      | 1.74E-26 | -0.12789 | 0.061 | 0.181 | 2.60E-22 |
| ZNF789    | 1.75E-26 | 0.142548 | 0.155 | 0.178 | 2.62E-22 |
| N4BP2L1   | 1.76E-26 | 0.258555 | 0.168 | 0.135 | 2.64E-22 |
| NFKBIZ    | 1.78E-26 | -0.18019 | 0.034 | 0.149 | 2.67E-22 |
| CAB39L    | 1.85E-26 | 0.270088 | 0.162 | 0.114 | 2.77E-22 |
| IZUMO4    | 1.86E-26 | -0.11046 | 0.02  | 0.115 | 2.79E-22 |
| FAM98C    | 1.88E-26 | -0.10312 | 0.087 | 0.209 | 2.80E-22 |
| FANCC     | 2.03E-26 | -0.1827  | 0.016 | 0.127 | 3.04E-22 |
| KCTD9     | 2.09E-26 | -0.14957 | 0.038 | 0.151 | 3.12E-22 |
| CNR1      | 2.15E-26 | 0.128445 | 0.109 | 0.128 | 3.21E-22 |
| TOM1L2    | 2.20E-26 | 0.13387  | 0.141 | 0.174 | 3.29E-22 |
| SLC25A14  | 2.24E-26 | 0.108906 | 0.161 | 0.202 | 3.35E-22 |
| PCSK5     | 2.32E-26 | -0.14539 | 0.006 | 0.101 | 3.46E-22 |
| MICU3     | 2.56E-26 | 0.386854 | 0.214 | 0.11  | 3.82E-22 |
| RRN3      | 2.57E-26 | 0.243924 | 0.236 | 0.212 | 3.84E-22 |
| RP11-545E | 2.58E-26 | -0.10615 | 0.004 | 0.089 | 3.86E-22 |
| GOLGA8A   | 2.64E-26 | -0.11063 | 0.024 | 0.125 | 3.94E-22 |
| CPLX1     | 2.65E-26 | 0.445083 | 0.197 | 0.049 | 3.96E-22 |
| LIN52     | 2.67E-26 | -0.11633 | 0.06  | 0.175 | 3.99E-22 |
| PPIB      | 2.68E-26 | -0.14241 | 0.61  | 0.801 | 4.01E-22 |
| SHC4      | 2.76E-26 | -0.10576 | 0.027 | 0.125 | 4.13E-22 |
| GPR137C   | 2.78E-26 | 0.194119 | 0.139 | 0.137 | 4.16E-22 |
| DPH6      | 3.02E-26 | -0.15841 | 0.037 | 0.157 | 4.52E-22 |
| GLUD1     | 3.04E-26 | -0.25913 | 0.115 | 0.286 | 4.54E-22 |
| CLOCK     | 3.23E-26 | -0.13794 | 0.171 | 0.321 | 4.82E-22 |
| SELM      | 3.65E-26 | 0.270114 | 0.152 | 0.105 | 5.45E-22 |
| HOXA2     | 3.74E-26 | 0.423847 | 0.328 | 0.188 | 5.58E-22 |
| ADSSL1    | 3.81E-26 | -0.10118 | 0.018 | 0.109 | 5.69E-22 |
| SPOCK2    | 3.84E-26 | -0.18677 | 0.036 | 0.162 | 5.74E-22 |
| ANKRD36C  | 3.90E-26 | 0.163569 | 0.31  | 0.32  | 5.83E-22 |
| AP3M2     | 3.95E-26 | 0.19631  | 0.196 | 0.191 | 5.91E-22 |
| STK35     | 4.09E-26 | -0.11178 | 0.028 | 0.132 | 6.10E-22 |

|           |          |          |       |       |          |
|-----------|----------|----------|-------|-------|----------|
| DHX57     | 4.18E-26 | 0.120665 | 0.159 | 0.196 | 6.25E-22 |
| PPP3CC    | 4.20E-26 | 0.172019 | 0.213 | 0.215 | 6.28E-22 |
| TMEM205   | 4.39E-26 | -0.12279 | 0.405 | 0.58  | 6.56E-22 |
| TPI1      | 4.46E-26 | -0.25332 | 0.854 | 0.953 | 6.66E-22 |
| AL592183. | 4.64E-26 | 0.282098 | 0.209 | 0.153 | 6.94E-22 |
| PWWP2A    | 4.72E-26 | 0.181789 | 0.206 | 0.211 | 7.05E-22 |
| RALGDS    | 4.77E-26 | 0.319357 | 0.237 | 0.165 | 7.13E-22 |
| DBNDD1    | 5.03E-26 | 0.218541 | 0.121 | 0.111 | 7.51E-22 |
| SHROOM3   | 5.06E-26 | -0.10943 | 0.003 | 0.089 | 7.56E-22 |
| CDC25A    | 5.19E-26 | -0.20182 | 0.035 | 0.16  | 7.75E-22 |
| PDLIM3    | 5.24E-26 | -0.21148 | 0.07  | 0.21  | 7.83E-22 |
| RNF165    | 5.45E-26 | 0.27399  | 0.207 | 0.156 | 8.14E-22 |
| MSANTD2   | 5.45E-26 | 0.131562 | 0.097 | 0.122 | 8.14E-22 |
| FNIP2     | 5.63E-26 | 0.112889 | 0.186 | 0.238 | 8.41E-22 |
| LTBP4     | 5.90E-26 | 0.173388 | 0.09  | 0.095 | 8.82E-22 |
| PTK2B     | 6.17E-26 | -0.15637 | 0.02  | 0.132 | 9.23E-22 |
| LRRC17    | 6.31E-26 | -0.26496 | 0.06  | 0.206 | 9.43E-22 |
| MAML1     | 6.67E-26 | -0.16081 | 0.05  | 0.168 | 9.97E-22 |
| L1CAM     | 6.87E-26 | 0.434055 | 0.186 | 0.041 | 1.03E-21 |
| KTI12     | 7.17E-26 | 0.200338 | 0.188 | 0.188 | 1.07E-21 |
| METTL1    | 7.19E-26 | -0.30596 | 0.123 | 0.3   | 1.08E-21 |
| C6orf15   | 7.32E-26 | -0.44283 | 0     | 0.072 | 1.09E-21 |
| PDCD2L    | 7.89E-26 | 0.170597 | 0.177 | 0.189 | 1.18E-21 |
| NNMT      | 7.94E-26 | -0.38377 | 0.035 | 0.17  | 1.19E-21 |
| RICTOR    | 8.24E-26 | 0.195969 | 0.25  | 0.252 | 1.23E-21 |
| SS18      | 8.54E-26 | -0.12327 | 0.035 | 0.142 | 1.28E-21 |
| VANGL2    | 8.64E-26 | 0.112474 | 0.129 | 0.165 | 1.29E-21 |
| KCNJ16    | 8.70E-26 | -0.18319 | 0.023 | 0.137 | 1.30E-21 |
| MEMO1     | 8.84E-26 | 0.132394 | 0.151 | 0.175 | 1.32E-21 |
| MTRNR2L12 | 8.95E-26 | -0.27879 | 0.041 | 0.18  | 1.34E-21 |
| GAP43     | 9.22E-26 | 0.288554 | 0.8   | 0.638 | 1.38E-21 |
| TMEM79    | 9.57E-26 | -0.16656 | 0.052 | 0.18  | 1.43E-21 |
| IGFBP5    | 1.10E-25 | -0.26921 | 0.194 | 0.379 | 1.64E-21 |
| EMILIN1   | 1.10E-25 | -0.14924 | 0.014 | 0.12  | 1.64E-21 |
| SCD5      | 1.10E-25 | -0.1938  | 0.571 | 0.775 | 1.65E-21 |
| ANKRD37   | 1.16E-25 | 0.126995 | 0.121 | 0.157 | 1.74E-21 |
| PPFIA2    | 1.18E-25 | 0.403227 | 0.183 | 0.042 | 1.76E-21 |
| C12orf4   | 1.25E-25 | -0.10229 | 0.077 | 0.194 | 1.87E-21 |
| ELP4      | 1.25E-25 | -0.13992 | 0.042 | 0.153 | 1.87E-21 |
| UBAP2     | 1.26E-25 | 0.164944 | 0.148 | 0.16  | 1.88E-21 |
| PLEKHA5   | 1.29E-25 | 0.100066 | 0.095 | 0.14  | 1.93E-21 |
| APOL6     | 1.29E-25 | -0.1154  | 0.007 | 0.09  | 1.93E-21 |
| STX3      | 1.31E-25 | 0.306242 | 0.118 | 0.03  | 1.96E-21 |
| AARSD1    | 1.33E-25 | 0.163341 | 0.141 | 0.162 | 1.99E-21 |
| PCGF3     | 1.38E-25 | 0.143064 | 0.152 | 0.179 | 2.07E-21 |
| SAMD9L    | 1.38E-25 | -0.18255 | 0.002 | 0.086 | 2.07E-21 |
| ZNF566    | 1.38E-25 | 0.181602 | 0.203 | 0.207 | 2.07E-21 |
| ACO09005. | 1.42E-25 | -0.12398 | 0.002 | 0.083 | 2.12E-21 |
| HNRNPD    | 1.43E-25 | -0.1547  | 0.579 | 0.778 | 2.14E-21 |
| RP11-263K | 1.46E-25 | -0.11491 | 0.006 | 0.095 | 2.18E-21 |
| SEC61B    | 1.47E-25 | 0.151904 | 0.84  | 0.831 | 2.19E-21 |

|           |          |          |       |       |          |
|-----------|----------|----------|-------|-------|----------|
| COX8A     | 1.47E-25 | -0.24184 | 0.8   | 0.931 | 2.20E-21 |
| KPNA5     | 1.53E-25 | 0.299641 | 0.19  | 0.136 | 2.28E-21 |
| ADAM19    | 1.56E-25 | -0.14875 | 0.045 | 0.162 | 2.33E-21 |
| PCDHB2    | 1.57E-25 | 0.152867 | 0.143 | 0.158 | 2.34E-21 |
| PPP2R3A   | 1.63E-25 | 0.246511 | 0.126 | 0.088 | 2.44E-21 |
| SETMAR    | 1.64E-25 | 0.198462 | 0.115 | 0.107 | 2.45E-21 |
| CEP72     | 1.64E-25 | -0.23317 | 0.02  | 0.132 | 2.46E-21 |
| ZFP1      | 1.66E-25 | 0.195436 | 0.167 | 0.156 | 2.47E-21 |
| ZUFSP     | 1.75E-25 | 0.170868 | 0.128 | 0.14  | 2.61E-21 |
| CEP85     | 1.79E-25 | -0.13348 | 0.02  | 0.12  | 2.68E-21 |
| CPLX2     | 1.80E-25 | 0.379894 | 0.152 | 0.022 | 2.69E-21 |
| TMEM116   | 1.87E-25 | -0.11457 | 0.061 | 0.173 | 2.79E-21 |
| COPZ2     | 1.98E-25 | -0.10558 | 0     | 0.07  | 2.96E-21 |
| SCFD2     | 2.04E-25 | -0.20068 | 0.082 | 0.227 | 3.05E-21 |
| AMPD2     | 2.14E-25 | 0.16038  | 0.122 | 0.13  | 3.20E-21 |
| NLK       | 2.26E-25 | -0.10253 | 0.046 | 0.152 | 3.38E-21 |
| WDR90     | 2.33E-25 | -0.12531 | 0.029 | 0.136 | 3.48E-21 |
| GS1-124K5 | 2.33E-25 | 0.129089 | 0.151 | 0.194 | 3.49E-21 |
| FLVCR1-AS | 2.38E-25 | -0.1405  | 0.016 | 0.115 | 3.55E-21 |
| LRRC24    | 2.40E-25 | 0.335906 | 0.203 | 0.117 | 3.59E-21 |
| YJEFN3    | 2.42E-25 | 0.297951 | 0.148 | 0.09  | 3.62E-21 |
| MFAP3L    | 2.56E-25 | -0.10397 | 0.005 | 0.09  | 3.83E-21 |
| NCS1      | 2.57E-25 | 0.110873 | 0.097 | 0.131 | 3.83E-21 |
| FMNL3     | 2.65E-25 | -0.12284 | 0.02  | 0.12  | 3.97E-21 |
| SMG5      | 2.69E-25 | -0.13421 | 0.051 | 0.17  | 4.02E-21 |
| SMPDL3A   | 2.76E-25 | 0.152811 | 0.093 | 0.101 | 4.13E-21 |
| C11orf1   | 2.81E-25 | 0.116925 | 0.148 | 0.188 | 4.20E-21 |
| RP11-386G | 2.82E-25 | -0.12129 | 0.093 | 0.215 | 4.22E-21 |
| KIAA0930  | 2.83E-25 | 0.211041 | 0.131 | 0.123 | 4.22E-21 |
| USP15     | 2.96E-25 | 0.127788 | 0.251 | 0.293 | 4.43E-21 |
| DPCD      | 2.99E-25 | -0.1165  | 0.105 | 0.228 | 4.46E-21 |
| SRP14     | 3.29E-25 | 0.145249 | 0.954 | 0.93  | 4.92E-21 |
| FAM43A    | 3.29E-25 | -0.11071 | 0.002 | 0.083 | 4.92E-21 |
| 9-Mar     | 3.34E-25 | -0.17244 | 0.214 | 0.381 | 4.99E-21 |
| SLC29A4   | 3.36E-25 | 0.264939 | 0.181 | 0.143 | 5.02E-21 |
| FGF1      | 3.37E-25 | -0.10928 | 0.001 | 0.075 | 5.04E-21 |
| RNF219    | 3.40E-25 | 0.138795 | 0.25  | 0.28  | 5.08E-21 |
| EPHB2     | 3.43E-25 | 0.110736 | 0.13  | 0.164 | 5.12E-21 |
| MBOAT1    | 3.43E-25 | -0.1222  | 0.005 | 0.091 | 5.13E-21 |
| NDUFA2    | 3.55E-25 | -0.10103 | 0.581 | 0.758 | 5.30E-21 |
| GFOD1     | 3.71E-25 | 0.320547 | 0.167 | 0.098 | 5.55E-21 |
| PDGFA     | 3.79E-25 | -0.29763 | 0.042 | 0.175 | 5.67E-21 |
| SMS       | 3.97E-25 | -0.20269 | 0.581 | 0.789 | 5.93E-21 |
| NDUFS6    | 4.00E-25 | -0.24612 | 0.651 | 0.856 | 5.98E-21 |
| MATN2     | 5.12E-25 | -0.17876 | 0.013 | 0.115 | 7.65E-21 |
| GAL       | 5.16E-25 | 0.371799 | 0.098 | 0.067 | 7.70E-21 |
| DUOX1     | 5.26E-25 | 0.377279 | 0.219 | 0.111 | 7.86E-21 |
| ZNF793    | 5.45E-25 | 0.12951  | 0.193 | 0.221 | 8.14E-21 |
| TMED9     | 5.58E-25 | -0.14304 | 0.623 | 0.805 | 8.34E-21 |
| PIBF1     | 5.60E-25 | 0.119651 | 0.153 | 0.188 | 8.37E-21 |
| ZKSCAN5   | 6.06E-25 | 0.126855 | 0.127 | 0.154 | 9.06E-21 |

|           |          |          |       |       |          |
|-----------|----------|----------|-------|-------|----------|
| COBL      | 6.39E-25 | 0.253317 | 0.121 | 0.096 | 9.55E-21 |
| CBLB      | 6.40E-25 | 0.217254 | 0.112 | 0.098 | 9.56E-21 |
| NMNAT2    | 6.45E-25 | 0.336473 | 0.131 | 0.015 | 9.64E-21 |
| SETD6     | 6.97E-25 | 0.138694 | 0.155 | 0.18  | 1.04E-20 |
| YPEL4     | 7.14E-25 | 0.389641 | 0.141 | 0.02  | 1.07E-20 |
| TMOD1     | 8.10E-25 | 0.306517 | 0.228 | 0.158 | 1.21E-20 |
| CXXC4     | 8.46E-25 | 0.190752 | 0.184 | 0.196 | 1.26E-20 |
| GPR37L1   | 8.54E-25 | -0.36715 | 0.014 | 0.122 | 1.28E-20 |
| CD163L1   | 8.64E-25 | 0.408195 | 0.135 | 0.022 | 1.29E-20 |
| METTL17   | 8.85E-25 | -0.10133 | 0.09  | 0.205 | 1.32E-20 |
| CPT1A     | 9.01E-25 | -0.12276 | 0.019 | 0.115 | 1.35E-20 |
| TMEM150C  | 9.26E-25 | 0.36949  | 0.174 | 0.059 | 1.38E-20 |
| PCMTD1    | 9.66E-25 | 0.300599 | 0.205 | 0.144 | 1.44E-20 |
| NUDT14    | 1.01E-24 | 0.162631 | 0.124 | 0.144 | 1.51E-20 |
| ERCC6L    | 1.02E-24 | -0.1513  | 0.001 | 0.077 | 1.53E-20 |
| MZT2B     | 1.07E-24 | -0.2621  | 0.723 | 0.877 | 1.60E-20 |
| ZDHHC17   | 1.08E-24 | 0.111969 | 0.118 | 0.144 | 1.62E-20 |
| C1QA      | 1.10E-24 | 0.205924 | 0.312 | 0.294 | 1.65E-20 |
| GCA       | 1.12E-24 | 0.151348 | 0.215 | 0.249 | 1.67E-20 |
| C20orf194 | 1.16E-24 | 0.103858 | 0.13  | 0.17  | 1.74E-20 |
| HIP1R     | 1.26E-24 | 0.244001 | 0.233 | 0.196 | 1.88E-20 |
| RIC8B     | 1.29E-24 | 0.101748 | 0.148 | 0.188 | 1.93E-20 |
| KCNH2     | 1.30E-24 | 0.408313 | 0.238 | 0.1   | 1.94E-20 |
| PYCRL     | 1.35E-24 | -0.15261 | 0.038 | 0.149 | 2.01E-20 |
| GJB2      | 1.45E-24 | -0.15001 | 0     | 0.068 | 2.17E-20 |
| KRBOX4    | 1.50E-24 | 0.182761 | 0.189 | 0.193 | 2.24E-20 |
| GALC      | 1.54E-24 | -0.11024 | 0.02  | 0.114 | 2.30E-20 |
| ZBTB22    | 1.60E-24 | 0.151726 | 0.104 | 0.112 | 2.39E-20 |
| NKX2-1    | 1.62E-24 | 0.334923 | 0.119 | 0.01  | 2.42E-20 |
| ZBTB8A    | 1.63E-24 | 0.107437 | 0.207 | 0.249 | 2.43E-20 |
| ZNF300    | 1.63E-24 | 0.235163 | 0.218 | 0.194 | 2.44E-20 |
| HOXD-AS2  | 1.64E-24 | -0.13207 | 0.024 | 0.126 | 2.45E-20 |
| IFITM10   | 1.64E-24 | 0.430761 | 0.215 | 0.105 | 2.45E-20 |
| HMGN3     | 1.69E-24 | -0.12297 | 0.658 | 0.835 | 2.53E-20 |
| ACSS1     | 1.72E-24 | -0.11321 | 0.053 | 0.157 | 2.56E-20 |
| SH3BP5L   | 1.78E-24 | 0.1695   | 0.108 | 0.106 | 2.66E-20 |
| TIMP4     | 1.81E-24 | -0.35364 | 0.015 | 0.123 | 2.70E-20 |
| SRSF7     | 1.87E-24 | -0.1637  | 0.648 | 0.84  | 2.79E-20 |
| ROMO1     | 1.95E-24 | -0.1904  | 0.592 | 0.802 | 2.92E-20 |
| C2CD4A    | 1.97E-24 | -0.103   | 0.001 | 0.075 | 2.95E-20 |
| IRF9      | 2.00E-24 | -0.19729 | 0.033 | 0.148 | 2.98E-20 |
| USP28     | 2.01E-24 | -0.13636 | 0.04  | 0.149 | 3.00E-20 |
| AVEN      | 2.09E-24 | -0.11077 | 0.012 | 0.101 | 3.12E-20 |
| NDUFA3    | 2.31E-24 | -0.20037 | 0.603 | 0.809 | 3.45E-20 |
| WIPF3     | 2.77E-24 | 0.254201 | 0.152 | 0.099 | 4.14E-20 |
| LRRC49    | 2.92E-24 | 0.163196 | 0.13  | 0.14  | 4.37E-20 |
| ZNF568    | 2.96E-24 | 0.170489 | 0.158 | 0.165 | 4.42E-20 |
| FIG4      | 3.07E-24 | 0.208283 | 0.166 | 0.151 | 4.59E-20 |
| UBN2      | 3.19E-24 | 0.165852 | 0.194 | 0.201 | 4.76E-20 |
| LINC0091C | 3.32E-24 | 0.103506 | 0.135 | 0.169 | 4.96E-20 |
| SCN3A     | 3.33E-24 | 0.409181 | 0.263 | 0.125 | 4.97E-20 |

|           |          |          |       |       |          |
|-----------|----------|----------|-------|-------|----------|
| NDUFB11   | 3.37E-24 | 0.120591 | 0.891 | 0.902 | 5.03E-20 |
| PHLPP1    | 3.69E-24 | -0.16305 | 0.042 | 0.158 | 5.52E-20 |
| SMIM10    | 3.72E-24 | -0.12176 | 0.011 | 0.099 | 5.57E-20 |
| XAF1      | 3.92E-24 | -0.30489 | 0.004 | 0.089 | 5.86E-20 |
| EMILIN2   | 3.99E-24 | -0.14116 | 0.005 | 0.091 | 5.97E-20 |
| CACNB3    | 4.02E-24 | 0.195927 | 0.156 | 0.147 | 6.00E-20 |
| FAM98A    | 4.35E-24 | 0.117976 | 0.205 | 0.241 | 6.49E-20 |
| BCL11A    | 4.58E-24 | 0.370897 | 0.179 | 0.079 | 6.85E-20 |
| ERGIC3    | 4.59E-24 | -0.21684 | 0.565 | 0.777 | 6.86E-20 |
| TJP2      | 4.77E-24 | -0.129   | 0.009 | 0.098 | 7.12E-20 |
| ARHGAP19  | 4.81E-24 | -0.11765 | 0.002 | 0.079 | 7.19E-20 |
| CALB2     | 5.22E-24 | 0.384246 | 0.121 | 0.014 | 7.80E-20 |
| DNM3      | 5.27E-24 | 0.238981 | 0.203 | 0.165 | 7.88E-20 |
| AGAP3     | 5.28E-24 | 0.146751 | 0.17  | 0.194 | 7.89E-20 |
| MCPH1     | 5.47E-24 | 0.108247 | 0.117 | 0.143 | 8.18E-20 |
| SPEG      | 5.78E-24 | 0.211131 | 0.127 | 0.1   | 8.64E-20 |
| CTA-384D8 | 5.92E-24 | -0.13848 | 0.022 | 0.121 | 8.85E-20 |
| HRASLS    | 6.10E-24 | -0.10754 | 0.035 | 0.135 | 9.12E-20 |
| INSR      | 6.25E-24 | 0.172787 | 0.201 | 0.206 | 9.34E-20 |
| RP11-445F | 6.35E-24 | 0.432137 | 0.135 | 0.057 | 9.49E-20 |
| CORO7     | 6.77E-24 | 0.167857 | 0.178 | 0.189 | 1.01E-19 |
| KIF5A     | 6.92E-24 | 0.385139 | 0.285 | 0.226 | 1.03E-19 |
| ZNF286A   | 7.24E-24 | 0.220159 | 0.15  | 0.126 | 1.08E-19 |
| ARNTL     | 7.28E-24 | -0.13387 | 0.054 | 0.167 | 1.09E-19 |
| NELL2     | 7.57E-24 | 0.104509 | 0.217 | 0.272 | 1.13E-19 |
| C5orf30   | 7.59E-24 | 0.173479 | 0.158 | 0.157 | 1.13E-19 |
| ARAP2     | 7.90E-24 | -0.12337 | 0.018 | 0.111 | 1.18E-19 |
| GPC4      | 8.05E-24 | -0.15231 | 0.01  | 0.101 | 1.20E-19 |
| CTTNBP2   | 8.07E-24 | 0.24512  | 0.25  | 0.23  | 1.21E-19 |
| LINC00685 | 8.39E-24 | 0.174616 | 0.198 | 0.207 | 1.25E-19 |
| AC004540. | 8.80E-24 | 0.399018 | 0.249 | 0.151 | 1.31E-19 |
| PHB       | 9.68E-24 | -0.16031 | 0.577 | 0.773 | 1.45E-19 |
| RDM1      | 9.70E-24 | -0.13474 | 0.002 | 0.08  | 1.45E-19 |
| CDKL3     | 1.03E-23 | 0.154604 | 0.156 | 0.173 | 1.54E-19 |
| CEP19     | 1.11E-23 | 0.180543 | 0.17  | 0.172 | 1.67E-19 |
| MINOS1    | 1.21E-23 | -0.2476  | 0.56  | 0.775 | 1.80E-19 |
| NOTCH4    | 1.23E-23 | 0.222195 | 0.13  | 0.117 | 1.84E-19 |
| NDUFV2    | 1.29E-23 | -0.15763 | 0.57  | 0.751 | 1.93E-19 |
| CALR      | 1.30E-23 | -0.27946 | 0.617 | 0.82  | 1.95E-19 |
| CNN3      | 1.41E-23 | -0.26659 | 0.615 | 0.822 | 2.11E-19 |
| ZNF101    | 1.46E-23 | -0.12644 | 0.02  | 0.121 | 2.18E-19 |
| ANXA11    | 1.53E-23 | -0.17803 | 0.016 | 0.115 | 2.29E-19 |
| PDIA6     | 1.60E-23 | -0.22272 | 0.65  | 0.849 | 2.39E-19 |
| HSPB1     | 1.65E-23 | -0.15539 | 0.597 | 0.794 | 2.47E-19 |
| HDHD3     | 1.69E-23 | 0.210194 | 0.13  | 0.101 | 2.52E-19 |
| CBWD5     | 1.70E-23 | 0.10278  | 0.15  | 0.188 | 2.53E-19 |
| RP11-315A | 1.72E-23 | -0.16007 | 0.01  | 0.1   | 2.57E-19 |
| PTPRK     | 1.77E-23 | 0.40965  | 0.156 | 0.058 | 2.64E-19 |
| ATP1A2    | 1.77E-23 | -0.35881 | 0.005 | 0.093 | 2.65E-19 |
| GPRASP2   | 1.88E-23 | 0.252551 | 0.18  | 0.146 | 2.81E-19 |
| PABPC1    | 1.96E-23 | -0.11745 | 0.683 | 0.849 | 2.93E-19 |

|           |          |          |       |       |          |
|-----------|----------|----------|-------|-------|----------|
| IGDCC3    | 2.11E-23 | 0.167455 | 0.123 | 0.128 | 3.15E-19 |
| IMMP2L    | 2.18E-23 | 0.255192 | 0.193 | 0.165 | 3.26E-19 |
| PFDN5     | 2.25E-23 | 0.129539 | 0.903 | 0.906 | 3.37E-19 |
| JUP       | 2.33E-23 | 0.297636 | 0.107 | 0.01  | 3.48E-19 |
| KIAA0226L | 2.37E-23 | -0.2619  | 0.026 | 0.143 | 3.54E-19 |
| SOX2      | 2.42E-23 | -0.22496 | 0.715 | 0.895 | 3.61E-19 |
| CD151     | 2.43E-23 | -0.24299 | 0.387 | 0.605 | 3.63E-19 |
| DACT3     | 2.45E-23 | 0.28277  | 0.156 | 0.095 | 3.67E-19 |
| KLF16     | 2.53E-23 | -0.1033  | 0.016 | 0.105 | 3.78E-19 |
| SERBP1    | 2.65E-23 | -0.12157 | 0.675 | 0.846 | 3.96E-19 |
| PTBP2     | 2.71E-23 | 0.323234 | 0.299 | 0.199 | 4.05E-19 |
| GPR85     | 2.71E-23 | 0.363626 | 0.137 | 0.023 | 4.06E-19 |
| SEMA6C    | 3.04E-23 | 0.299711 | 0.12  | 0.041 | 4.55E-19 |
| MRE11A    | 3.05E-23 | -0.18048 | 0.037 | 0.151 | 4.57E-19 |
| ARSK      | 3.54E-23 | -0.13502 | 0.024 | 0.12  | 5.29E-19 |
| ETAA1     | 3.57E-23 | -0.17447 | 0.019 | 0.12  | 5.33E-19 |
| DLGAP1    | 3.60E-23 | 0.354207 | 0.181 | 0.072 | 5.38E-19 |
| PTP4A2    | 3.74E-23 | -0.15272 | 0.496 | 0.683 | 5.59E-19 |
| LIN7A     | 4.76E-23 | -0.12874 | 0.011 | 0.101 | 7.11E-19 |
| ZNF606    | 4.82E-23 | 0.116465 | 0.122 | 0.151 | 7.21E-19 |
| ARNTL2    | 4.90E-23 | -0.10416 | 0.024 | 0.122 | 7.33E-19 |
| SAMHD1    | 5.22E-23 | -0.11023 | 0.072 | 0.184 | 7.80E-19 |
| FAM160B2  | 5.57E-23 | 0.10418  | 0.082 | 0.111 | 8.33E-19 |
| MCF2L     | 5.67E-23 | 0.3395   | 0.183 | 0.099 | 8.47E-19 |
| XRCC6BP1  | 6.04E-23 | -0.32072 | 0.087 | 0.243 | 9.03E-19 |
| ZNF708    | 6.16E-23 | 0.145371 | 0.156 | 0.168 | 9.21E-19 |
| RBX1      | 6.30E-23 | -0.123   | 0.648 | 0.825 | 9.42E-19 |
| UBA6-AS1  | 6.39E-23 | 0.110549 | 0.128 | 0.163 | 9.54E-19 |
| GRIA4     | 7.01E-23 | 0.182267 | 0.24  | 0.24  | 1.05E-18 |
| AGPAT4    | 7.27E-23 | 0.105318 | 0.145 | 0.175 | 1.09E-18 |
| CMPK2     | 7.46E-23 | 0.259792 | 0.119 | 0.065 | 1.11E-18 |
| GNG11     | 7.79E-23 | -0.2338  | 0.005 | 0.09  | 1.16E-18 |
| FN1       | 7.95E-23 | -0.1121  | 0.056 | 0.164 | 1.19E-18 |
| SYNE1     | 8.23E-23 | 0.185588 | 0.203 | 0.202 | 1.23E-18 |
| WASF3     | 8.26E-23 | -0.10788 | 0.046 | 0.143 | 1.23E-18 |
| AP5Z1     | 8.85E-23 | 0.14143  | 0.16  | 0.184 | 1.32E-18 |
| ACTA2     | 9.14E-23 | -0.10867 | 0.006 | 0.088 | 1.37E-18 |
| TCF7L1    | 9.71E-23 | -0.11242 | 0.005 | 0.084 | 1.45E-18 |
| PRMT6     | 1.01E-22 | -0.10125 | 0.086 | 0.196 | 1.52E-18 |
| ZMIZ2     | 1.03E-22 | 0.162621 | 0.159 | 0.169 | 1.55E-18 |
| FKBP2     | 1.04E-22 | -0.1393  | 0.463 | 0.643 | 1.56E-18 |
| CHI3L1    | 1.10E-22 | -0.53482 | 0.294 | 0.506 | 1.64E-18 |
| HOXA3     | 1.10E-22 | 0.394093 | 0.278 | 0.143 | 1.64E-18 |
| TSFM      | 1.13E-22 | -0.24005 | 0.318 | 0.509 | 1.68E-18 |
| C14orf2   | 1.17E-22 | -0.2089  | 0.658 | 0.851 | 1.74E-18 |
| ETFDH     | 1.35E-22 | 0.111781 | 0.182 | 0.219 | 2.02E-18 |
| RTN1      | 1.44E-22 | -0.31906 | 0.097 | 0.252 | 2.16E-18 |
| IDS       | 1.69E-22 | -0.20688 | 0.292 | 0.474 | 2.53E-18 |
| GAL3ST3   | 1.79E-22 | 0.22401  | 0.13  | 0.105 | 2.68E-18 |
| PCDHB3    | 1.85E-22 | 0.259864 | 0.114 | 0.057 | 2.77E-18 |
| TMEM187   | 1.95E-22 | -0.11362 | 0.037 | 0.136 | 2.91E-18 |



|           |           |           |        |        |           |
|-----------|-----------|-----------|--------|--------|-----------|
| SALL3     | 2. 20E-22 | -0. 20649 | 0. 028 | 0. 14  | 3. 29E-18 |
| ICA1      | 2. 34E-22 | 0. 279211 | 0. 207 | 0. 138 | 3. 49E-18 |
| SLC16A14  | 2. 40E-22 | -0. 11523 | 0. 043 | 0. 148 | 3. 58E-18 |
| TIFA      | 2. 54E-22 | -0. 12907 | 0. 018 | 0. 111 | 3. 80E-18 |
| PA2G4     | 2. 77E-22 | -0. 19439 | 0. 608 | 0. 804 | 4. 13E-18 |
| TNFRSF11E | 2. 92E-22 | -0. 11447 | 0. 005 | 0. 084 | 4. 36E-18 |
| FRS2      | 3. 09E-22 | -0. 17163 | 0. 111 | 0. 241 | 4. 61E-18 |
| ORAOV1    | 3. 26E-22 | 0. 140074 | 0. 13  | 0. 144 | 4. 87E-18 |
| FKBP7     | 3. 45E-22 | 0. 223491 | 0. 176 | 0. 167 | 5. 16E-18 |
| SH2D4A    | 3. 45E-22 | -0. 1094  | 0. 001 | 0. 069 | 5. 16E-18 |
| MYL6      | 3. 49E-22 | 0. 123874 | 0. 987 | 0. 964 | 5. 22E-18 |
| PDIK1L    | 3. 50E-22 | 0. 146474 | 0. 127 | 0. 132 | 5. 23E-18 |
| RGAG4     | 3. 60E-22 | 0. 100509 | 0. 086 | 0. 11  | 5. 38E-18 |
| MBD6      | 3. 90E-22 | -0. 22747 | 0. 146 | 0. 298 | 5. 83E-18 |
| SHFM1     | 3. 99E-22 | 0. 118881 | 0. 868 | 0. 884 | 5. 96E-18 |
| NME1-NME2 | 4. 26E-22 | -0. 13794 | 0. 039 | 0. 146 | 6. 37E-18 |
| FAM127C   | 4. 58E-22 | 0. 126828 | 0. 124 | 0. 149 | 6. 85E-18 |
| TBC1D24   | 5. 48E-22 | 0. 111948 | 0. 123 | 0. 147 | 8. 19E-18 |
| COX4I1    | 6. 19E-22 | 0. 121339 | 0. 95  | 0. 941 | 9. 25E-18 |
| PAPD5     | 6. 28E-22 | 0. 110751 | 0. 111 | 0. 138 | 9. 38E-18 |
| ZNF324    | 6. 39E-22 | 0. 169009 | 0. 134 | 0. 135 | 9. 54E-18 |
| FBXO32    | 6. 64E-22 | 0. 201214 | 0. 107 | 0. 102 | 9. 92E-18 |
| MCAM      | 6. 75E-22 | -0. 12199 | 0. 029 | 0. 123 | 1. 01E-17 |
| PWAR6     | 6. 77E-22 | 0. 271475 | 0. 152 | 0. 086 | 1. 01E-17 |
| RCAN2     | 6. 93E-22 | 0. 294758 | 0. 123 | 0. 015 | 1. 04E-17 |
| PREP      | 7. 15E-22 | 0. 212755 | 0. 165 | 0. 143 | 1. 07E-17 |
| CYP3A5    | 7. 26E-22 | 0. 129683 | 0. 097 | 0. 12  | 1. 09E-17 |
| GAD2      | 7. 53E-22 | 0. 493333 | 0. 117 | 0. 014 | 1. 13E-17 |
| RPS6KA2   | 7. 64E-22 | 0. 232469 | 0. 146 | 0. 115 | 1. 14E-17 |
| KLHL28    | 7. 68E-22 | 0. 192047 | 0. 17  | 0. 169 | 1. 15E-17 |
| STARD9    | 8. 06E-22 | -0. 11673 | 0. 02  | 0. 111 | 1. 20E-17 |
| MNT       | 8. 19E-22 | 0. 129171 | 0. 104 | 0. 115 | 1. 22E-17 |
| SC5D      | 8. 63E-22 | 0. 117983 | 0. 184 | 0. 21  | 1. 29E-17 |
| IDNK      | 9. 02E-22 | 0. 231909 | 0. 122 | 0. 101 | 1. 35E-17 |
| RND1      | 9. 13E-22 | 0. 358606 | 0. 209 | 0. 104 | 1. 36E-17 |
| TRIM56    | 9. 34E-22 | -0. 13927 | 0. 006 | 0. 088 | 1. 40E-17 |
| SH3BGR    | 9. 38E-22 | 0. 180577 | 0. 145 | 0. 144 | 1. 40E-17 |
| NCDN      | 1. 02E-21 | 0. 178096 | 0. 121 | 0. 106 | 1. 52E-17 |
| TARBP1    | 1. 05E-21 | 0. 110885 | 0. 091 | 0. 107 | 1. 57E-17 |
| RAB6B     | 1. 07E-21 | 0. 232434 | 0. 125 | 0. 081 | 1. 60E-17 |
| MORC2     | 1. 17E-21 | 0. 145927 | 0. 108 | 0. 109 | 1. 75E-17 |
| CASKIN2   | 1. 19E-21 | -0. 10211 | 0. 02  | 0. 105 | 1. 78E-17 |
| SERPINI1  | 1. 24E-21 | 0. 312634 | 0. 144 | 0. 054 | 1. 86E-17 |
| KCNJ10    | 1. 35E-21 | -0. 12035 | 0. 006 | 0. 08  | 2. 01E-17 |
| XKR4      | 1. 38E-21 | 0. 365686 | 0. 189 | 0. 079 | 2. 06E-17 |
| BCL11B    | 1. 39E-21 | 0. 387942 | 0. 174 | 0. 057 | 2. 08E-17 |
| JUNB      | 1. 40E-21 | 0. 137203 | 0. 773 | 0. 767 | 2. 10E-17 |
| FRMD6     | 1. 43E-21 | -0. 158   | 0. 006 | 0. 086 | 2. 14E-17 |
| PSMB5     | 1. 43E-21 | -0. 11981 | 0. 687 | 0. 847 | 2. 14E-17 |
| TTC23     | 1. 50E-21 | -0. 16378 | 0. 01  | 0. 096 | 2. 24E-17 |
| ZNF420    | 1. 57E-21 | 0. 190175 | 0. 19  | 0. 183 | 2. 35E-17 |

|           |          |          |       |       |          |
|-----------|----------|----------|-------|-------|----------|
| SYNGR3    | 1.82E-21 | 0.276936 | 0.112 | 0.046 | 2.72E-17 |
| RP11-127E | 1.98E-21 | 0.230495 | 0.14  | 0.096 | 2.95E-17 |
| FSD1L     | 1.98E-21 | 0.261569 | 0.156 | 0.102 | 2.96E-17 |
| ZNF274    | 2.22E-21 | 0.108007 | 0.197 | 0.23  | 3.32E-17 |
| CIQC      | 2.30E-21 | 0.287979 | 0.276 | 0.205 | 3.44E-17 |
| CIQBP     | 2.37E-21 | 0.109937 | 0.776 | 0.802 | 3.55E-17 |
| PLEKHA8   | 2.38E-21 | 0.159714 | 0.141 | 0.138 | 3.56E-17 |
| RP11-563K | 2.51E-21 | 0.10657  | 0.135 | 0.177 | 3.75E-17 |
| ZNF853    | 2.53E-21 | -0.10274 | 0.041 | 0.138 | 3.78E-17 |
| S1PR3     | 2.97E-21 | -0.1159  | 0.01  | 0.091 | 4.43E-17 |
| LDLRAP1   | 2.97E-21 | -0.11592 | 0.002 | 0.072 | 4.43E-17 |
| LDHB      | 3.02E-21 | -0.22751 | 0.849 | 0.967 | 4.52E-17 |
| ZNF786    | 3.15E-21 | 0.113246 | 0.126 | 0.149 | 4.70E-17 |
| C11orf95  | 3.23E-21 | 0.268677 | 0.129 | 0.073 | 4.83E-17 |
| JUN       | 3.38E-21 | 0.10709  | 0.857 | 0.883 | 5.05E-17 |
| DDR2      | 3.49E-21 | -0.10919 | 0.014 | 0.099 | 5.22E-17 |
| ACVR1B    | 3.71E-21 | 0.283477 | 0.191 | 0.125 | 5.54E-17 |
| NEDD4     | 3.84E-21 | -0.106   | 0.004 | 0.075 | 5.74E-17 |
| SYTL4     | 3.89E-21 | -0.14223 | 0.003 | 0.073 | 5.81E-17 |
| SLC16A9   | 3.95E-21 | -0.10173 | 0.051 | 0.147 | 5.91E-17 |
| NPM2      | 4.09E-21 | 0.303745 | 0.097 | 0.007 | 6.12E-17 |
| ZNF592    | 4.12E-21 | -0.1025  | 0.021 | 0.11  | 6.16E-17 |
| PSMC5     | 4.78E-21 | -0.18865 | 0.577 | 0.772 | 7.14E-17 |
| C9orf72   | 4.93E-21 | 0.302289 | 0.22  | 0.147 | 7.37E-17 |
| FASTKD2   | 5.29E-21 | 0.12451  | 0.14  | 0.158 | 7.90E-17 |
| DDX25     | 5.33E-21 | 0.338807 | 0.17  | 0.065 | 7.96E-17 |
| TRIM5     | 5.55E-21 | -0.11091 | 0.005 | 0.078 | 8.30E-17 |
| ZNF454    | 5.58E-21 | 0.258447 | 0.145 | 0.08  | 8.34E-17 |
| PICK1     | 5.70E-21 | 0.22011  | 0.115 | 0.094 | 8.52E-17 |
| MITF      | 5.73E-21 | -0.13711 | 0.005 | 0.078 | 8.56E-17 |
| RANBP6    | 5.74E-21 | 0.228496 | 0.144 | 0.107 | 8.57E-17 |
| PPP1R12B  | 5.90E-21 | 0.108317 | 0.101 | 0.121 | 8.81E-17 |
| SLC35A1   | 6.35E-21 | 0.165397 | 0.194 | 0.198 | 9.49E-17 |
| TMEM163   | 6.72E-21 | 0.310268 | 0.135 | 0.028 | 1.00E-16 |
| AGO1      | 6.96E-21 | 0.107647 | 0.115 | 0.144 | 1.04E-16 |
| KLHDC4    | 7.11E-21 | -0.12318 | 0.046 | 0.143 | 1.06E-16 |
| TECPR2    | 7.18E-21 | -0.10377 | 0.027 | 0.115 | 1.07E-16 |
| GATS      | 7.20E-21 | 0.302994 | 0.185 | 0.102 | 1.08E-16 |
| FGF14-AS2 | 7.83E-21 | -0.15073 | 0.023 | 0.12  | 1.17E-16 |
| SCG2      | 8.10E-21 | 0.290135 | 0.526 | 0.443 | 1.21E-16 |
| AGAP2-AS1 | 8.11E-21 | -0.27025 | 0.114 | 0.258 | 1.21E-16 |
| SAMD13    | 8.69E-21 | -0.13139 | 0.004 | 0.077 | 1.30E-16 |
| ACVR2A    | 8.87E-21 | 0.147402 | 0.126 | 0.127 | 1.33E-16 |
| SYNPR     | 8.91E-21 | 0.35266  | 0.091 | 0.005 | 1.33E-16 |
| UVRAG     | 9.12E-21 | 0.112822 | 0.102 | 0.126 | 1.36E-16 |
| PLSCR4    | 9.34E-21 | -0.11159 | 0.002 | 0.072 | 1.40E-16 |
| SCRT1     | 9.48E-21 | 0.348644 | 0.134 | 0.027 | 1.42E-16 |
| ARHGFB9   | 9.86E-21 | 0.242375 | 0.235 | 0.193 | 1.47E-16 |
| ARSD      | 9.86E-21 | 0.193292 | 0.101 | 0.094 | 1.47E-16 |
| PTCH1     | 1.02E-20 | -0.10758 | 0.043 | 0.135 | 1.52E-16 |
| FAM220A   | 1.07E-20 | 0.185003 | 0.141 | 0.128 | 1.60E-16 |

|           |           |           |        |        |           |
|-----------|-----------|-----------|--------|--------|-----------|
| HEATR5A   | 1. 07E-20 | -0. 11891 | 0. 019 | 0. 106 | 1. 60E-16 |
| SLC1A5    | 1. 11E-20 | -0. 15962 | 0. 02  | 0. 117 | 1. 66E-16 |
| GDPD1     | 1. 21E-20 | 0. 258072 | 0. 144 | 0. 091 | 1. 81E-16 |
| ZNF620    | 1. 27E-20 | 0. 11631  | 0. 146 | 0. 165 | 1. 90E-16 |
| ZNF74     | 1. 50E-20 | 0. 181154 | 0. 12  | 0. 119 | 2. 25E-16 |
| RASA4     | 1. 52E-20 | 0. 288144 | 0. 133 | 0. 049 | 2. 28E-16 |
| MTDH      | 1. 55E-20 | 0. 161157 | 0. 793 | 0. 786 | 2. 32E-16 |
| GALM      | 1. 55E-20 | -0. 12626 | 0. 017 | 0. 105 | 2. 32E-16 |
| KIF5B     | 1. 57E-20 | -0. 23086 | 0. 607 | 0. 802 | 2. 35E-16 |
| SMARCA2   | 1. 62E-20 | 0. 193098 | 0. 18  | 0. 162 | 2. 42E-16 |
| NPB       | 1. 70E-20 | 0. 181467 | 0. 125 | 0. 125 | 2. 54E-16 |
| C15orf41  | 1. 80E-20 | 0. 264231 | 0. 139 | 0. 095 | 2. 69E-16 |
| ZNF574    | 1. 96E-20 | 0. 167406 | 0. 174 | 0. 169 | 2. 92E-16 |
| CLCN4     | 2. 01E-20 | 0. 289923 | 0. 129 | 0. 046 | 3. 00E-16 |
| ENOX2     | 2. 04E-20 | -0. 13618 | 0. 026 | 0. 121 | 3. 05E-16 |
| MTRNR2L8  | 2. 17E-20 | -0. 17715 | 0. 042 | 0. 149 | 3. 24E-16 |
| MAFF      | 2. 49E-20 | 0. 262104 | 0. 21  | 0. 164 | 3. 72E-16 |
| TBC1D25   | 2. 50E-20 | 0. 133754 | 0. 115 | 0. 135 | 3. 74E-16 |
| ZFYVE27   | 2. 57E-20 | 0. 20255  | 0. 128 | 0. 105 | 3. 85E-16 |
| C7orf60   | 2. 75E-20 | 0. 216004 | 0. 156 | 0. 133 | 4. 11E-16 |
| HSF4      | 2. 75E-20 | 0. 277295 | 0. 093 | 0. 02  | 4. 11E-16 |
| SMPD3     | 2. 90E-20 | 0. 364037 | 0. 159 | 0. 041 | 4. 34E-16 |
| CASP1     | 2. 95E-20 | -0. 23961 | 0. 012 | 0. 1   | 4. 41E-16 |
| TBCK      | 3. 13E-20 | 0. 116966 | 0. 112 | 0. 136 | 4. 67E-16 |
| PHLDA2    | 3. 28E-20 | -0. 13049 | 0. 007 | 0. 083 | 4. 90E-16 |
| RBM15     | 3. 31E-20 | -0. 12958 | 0. 038 | 0. 135 | 4. 94E-16 |
| PROS1     | 3. 42E-20 | -0. 10623 | 0. 028 | 0. 117 | 5. 11E-16 |
| LTA4H     | 3. 64E-20 | 0. 10258  | 0. 174 | 0. 205 | 5. 44E-16 |
| H3F3A     | 3. 86E-20 | -0. 13933 | 0. 681 | 0. 838 | 5. 76E-16 |
| MAP3K7CL  | 3. 89E-20 | -0. 139   | 0. 004 | 0. 075 | 5. 81E-16 |
| ASGR1     | 3. 98E-20 | 0. 239802 | 0. 114 | 0. 073 | 5. 95E-16 |
| TSHZ1     | 4. 02E-20 | 0. 175866 | 0. 17  | 0. 164 | 6. 01E-16 |
| RAB27A    | 4. 02E-20 | -0. 1137  | 0. 017 | 0. 098 | 6. 01E-16 |
| SNX13     | 4. 04E-20 | -0. 12831 | 0. 128 | 0. 247 | 6. 03E-16 |
| GPATCH1   | 4. 06E-20 | 0. 124884 | 0. 12  | 0. 132 | 6. 07E-16 |
| NRG2      | 4. 08E-20 | 0. 114255 | 0. 075 | 0. 098 | 6. 09E-16 |
| RAB39B    | 4. 17E-20 | 0. 202713 | 0. 152 | 0. 135 | 6. 24E-16 |
| ABCA8     | 4. 23E-20 | -0. 12962 | 0. 001 | 0. 063 | 6. 32E-16 |
| PCNXL2    | 4. 25E-20 | 0. 111059 | 0. 09  | 0. 112 | 6. 34E-16 |
| ATP10B    | 4. 37E-20 | -0. 15382 | 0. 001 | 0. 063 | 6. 53E-16 |
| EEF1B2    | 4. 39E-20 | -0. 19756 | 0. 723 | 0. 89  | 6. 57E-16 |
| IFIT1     | 4. 52E-20 | -0. 19368 | 0. 002 | 0. 07  | 6. 75E-16 |
| TMEM145   | 4. 81E-20 | 0. 244507 | 0. 178 | 0. 132 | 7. 19E-16 |
| NDUFB4    | 5. 38E-20 | 0. 117725 | 0. 77  | 0. 788 | 8. 05E-16 |
| NCKAP5L   | 6. 34E-20 | 0. 241305 | 0. 149 | 0. 11  | 9. 47E-16 |
| KLC4      | 6. 38E-20 | 0. 1641   | 0. 138 | 0. 133 | 9. 53E-16 |
| COG6      | 6. 55E-20 | 0. 130783 | 0. 115 | 0. 123 | 9. 79E-16 |
| RP11-676J | 6. 57E-20 | -0. 26419 | 0. 028 | 0. 135 | 9. 81E-16 |
| 1-Mar     | 6. 57E-20 | 0. 396121 | 0. 292 | 0. 168 | 9. 82E-16 |
| SOX5      | 7. 60E-20 | 0. 204742 | 0. 181 | 0. 159 | 1. 14E-15 |
| VASH1     | 7. 64E-20 | 0. 123546 | 0. 109 | 0. 136 | 1. 14E-15 |

|           |          |          |       |       |          |
|-----------|----------|----------|-------|-------|----------|
| EFNA2     | 7.66E-20 | 0.106193 | 0.107 | 0.135 | 1.14E-15 |
| GRAMD1C   | 8.01E-20 | -0.11483 | 0.005 | 0.077 | 1.20E-15 |
| TOX3      | 8.02E-20 | 0.382499 | 0.262 | 0.172 | 1.20E-15 |
| FTX       | 8.87E-20 | 0.312868 | 0.199 | 0.123 | 1.33E-15 |
| ZNF675    | 9.58E-20 | 0.115264 | 0.112 | 0.133 | 1.43E-15 |
| IRGQ      | 9.59E-20 | 0.116346 | 0.137 | 0.156 | 1.43E-15 |
| SAMD10    | 1.00E-19 | 0.133724 | 0.102 | 0.107 | 1.50E-15 |
| SSPN      | 1.00E-19 | -0.10109 | 0.024 | 0.107 | 1.50E-15 |
| PER3      | 1.02E-19 | -0.1185  | 0.009 | 0.086 | 1.53E-15 |
| CASP9     | 1.07E-19 | -0.16036 | 0.042 | 0.142 | 1.59E-15 |
| NPW       | 1.09E-19 | -0.13309 | 0.011 | 0.089 | 1.63E-15 |
| LHX1      | 1.11E-19 | 0.308478 | 0.115 | 0.068 | 1.67E-15 |
| CHN2      | 1.23E-19 | 0.262392 | 0.145 | 0.081 | 1.84E-15 |
| HPCA      | 1.25E-19 | 0.349557 | 0.205 | 0.123 | 1.86E-15 |
| FBX043    | 1.32E-19 | -0.12369 | 0.007 | 0.081 | 1.97E-15 |
| C1orf106  | 1.33E-19 | -0.1084  | 0.006 | 0.075 | 1.99E-15 |
| EIF5AL1   | 1.34E-19 | -0.15428 | 0.091 | 0.212 | 2.01E-15 |
| RBAK-RBAK | 1.39E-19 | 0.195117 | 0.189 | 0.184 | 2.08E-15 |
| XRN1      | 1.40E-19 | 0.119175 | 0.115 | 0.135 | 2.10E-15 |
| WDSUB1    | 1.52E-19 | 0.195119 | 0.13  | 0.117 | 2.28E-15 |
| DGCR5     | 1.54E-19 | 0.347533 | 0.123 | 0.027 | 2.31E-15 |
| TCF20     | 1.55E-19 | 0.100064 | 0.09  | 0.121 | 2.32E-15 |
| TP53I11   | 1.59E-19 | 0.138264 | 0.084 | 0.086 | 2.37E-15 |
| SNRPD2    | 1.59E-19 | -0.20692 | 0.735 | 0.896 | 2.38E-15 |
| PNRC2     | 1.60E-19 | -0.21472 | 0.018 | 0.11  | 2.39E-15 |
| ULBP2     | 1.62E-19 | 0.233748 | 0.105 | 0.058 | 2.42E-15 |
| PEG3      | 1.63E-19 | 0.333673 | 0.181 | 0.078 | 2.43E-15 |
| ATF7IP    | 1.68E-19 | 0.144484 | 0.188 | 0.194 | 2.51E-15 |
| NXPH1     | 1.72E-19 | 0.156079 | 0.274 | 0.284 | 2.58E-15 |
| PPP1R1A   | 1.75E-19 | 0.28914  | 0.078 | 0.002 | 2.62E-15 |
| ARHGAP10  | 1.78E-19 | -0.10261 | 0.007 | 0.079 | 2.66E-15 |
| ALAD      | 1.88E-19 | 0.145124 | 0.111 | 0.127 | 2.81E-15 |
| ZNF627    | 2.05E-19 | 0.107238 | 0.119 | 0.144 | 3.07E-15 |
| SVOP      | 2.06E-19 | 0.262441 | 0.094 | 0.009 | 3.08E-15 |
| THBS4     | 2.14E-19 | -0.10582 | 0.016 | 0.099 | 3.20E-15 |
| EPHB3     | 2.30E-19 | -0.11545 | 0.028 | 0.117 | 3.44E-15 |
| NCALD     | 2.44E-19 | 0.177346 | 0.223 | 0.225 | 3.65E-15 |
| CDKN2A    | 2.54E-19 | -0.4954  | 0.083 | 0.217 | 3.79E-15 |
| ENTPD3-AS | 2.68E-19 | -0.11595 | 0.043 | 0.132 | 4.01E-15 |
| ARMC5     | 2.74E-19 | 0.120177 | 0.086 | 0.096 | 4.09E-15 |
| GBP3      | 2.74E-19 | -0.2062  | 0.002 | 0.064 | 4.10E-15 |
| DENND1B   | 2.96E-19 | 0.188448 | 0.153 | 0.143 | 4.42E-15 |
| MPP1      | 3.00E-19 | 0.194857 | 0.148 | 0.131 | 4.49E-15 |
| MYT1      | 3.15E-19 | 0.350169 | 0.163 | 0.056 | 4.70E-15 |
| PER1      | 3.18E-19 | -0.16346 | 0.07  | 0.181 | 4.75E-15 |
| NME6      | 3.21E-19 | 0.111172 | 0.152 | 0.172 | 4.79E-15 |
| UBR3      | 3.28E-19 | 0.119133 | 0.098 | 0.117 | 4.90E-15 |
| ARVCF     | 3.39E-19 | 0.149316 | 0.108 | 0.109 | 5.07E-15 |
| HIST2H2BE | 3.50E-19 | 0.293208 | 0.176 | 0.094 | 5.24E-15 |
| LMO3      | 3.76E-19 | 0.412401 | 0.231 | 0.122 | 5.62E-15 |
| SFR1      | 4.28E-19 | -0.17559 | 0.024 | 0.117 | 6.40E-15 |

|          |          |          |       |       |          |
|----------|----------|----------|-------|-------|----------|
| RINT1    | 4.32E-19 | 0.13357  | 0.163 | 0.168 | 6.46E-15 |
| NMNAT1   | 4.52E-19 | -0.10567 | 0.036 | 0.123 | 6.76E-15 |
| MEX3B    | 4.72E-19 | 0.2438   | 0.208 | 0.17  | 7.06E-15 |
| KCNMB2   | 4.86E-19 | 0.364415 | 0.16  | 0.051 | 7.27E-15 |
| PEX5     | 4.88E-19 | 0.20719  | 0.162 | 0.138 | 7.30E-15 |
| RALYL    | 4.89E-19 | 0.362606 | 0.152 | 0.037 | 7.31E-15 |
| MIEF2    | 4.96E-19 | 0.162406 | 0.107 | 0.094 | 7.41E-15 |
| NRSN1    | 4.99E-19 | 0.26514  | 0.196 | 0.138 | 7.45E-15 |
| CAMKK2   | 5.31E-19 | 0.272352 | 0.149 | 0.089 | 7.93E-15 |
| SLC1A6   | 5.33E-19 | 0.267587 | 0.101 | 0.011 | 7.97E-15 |
| TSEN2    | 5.62E-19 | 0.104888 | 0.131 | 0.162 | 8.40E-15 |
| ARSE     | 5.67E-19 | -0.13079 | 0     | 0.052 | 8.47E-15 |
| PANX1    | 5.76E-19 | 0.104266 | 0.09  | 0.109 | 8.60E-15 |
| LEAP2    | 5.76E-19 | 0.143537 | 0.118 | 0.123 | 8.61E-15 |
| APOE     | 5.87E-19 | 0.135639 | 0.724 | 0.67  | 8.78E-15 |
| ANXA1    | 6.02E-19 | -0.56488 | 0.068 | 0.198 | 9.00E-15 |
| PVRL1    | 6.54E-19 | 0.173579 | 0.102 | 0.096 | 9.77E-15 |
| PKD1     | 6.81E-19 | 0.136503 | 0.111 | 0.123 | 1.02E-14 |
| URGCP    | 6.83E-19 | 0.133518 | 0.204 | 0.216 | 1.02E-14 |
| RAI14    | 7.01E-19 | 0.164842 | 0.132 | 0.135 | 1.05E-14 |
| FAM107B  | 7.03E-19 | 0.161461 | 0.169 | 0.17  | 1.05E-14 |
| BRF2     | 7.07E-19 | 0.120551 | 0.131 | 0.146 | 1.06E-14 |
| MGAT5    | 7.31E-19 | 0.12167  | 0.086 | 0.104 | 1.09E-14 |
| TMEM196  | 8.58E-19 | 0.328476 | 0.145 | 0.042 | 1.28E-14 |
| GIGYF1   | 8.75E-19 | 0.132097 | 0.164 | 0.18  | 1.31E-14 |
| GAS6     | 8.80E-19 | 0.112958 | 0.117 | 0.136 | 1.32E-14 |
| LRCH2    | 8.86E-19 | 0.320643 | 0.145 | 0.04  | 1.32E-14 |
| SCML4    | 8.89E-19 | 0.239829 | 0.089 | 0.006 | 1.33E-14 |
| GABRG2   | 9.34E-19 | 0.228086 | 0.079 | 0.004 | 1.40E-14 |
| SNRPE    | 9.53E-19 | -0.13231 | 0.723 | 0.873 | 1.42E-14 |
| PLCXD1   | 9.64E-19 | -0.10302 | 0.055 | 0.147 | 1.44E-14 |
| PHLDA1   | 1.02E-18 | -0.32012 | 0.414 | 0.617 | 1.53E-14 |
| COX7B    | 1.03E-18 | -0.14916 | 0.677 | 0.837 | 1.53E-14 |
| RAN      | 1.03E-18 | -0.20605 | 0.873 | 0.947 | 1.54E-14 |
| TMEM150A | 1.05E-18 | 0.123218 | 0.079 | 0.09  | 1.57E-14 |
| HSPB6    | 1.07E-18 | -0.13467 | 0.025 | 0.109 | 1.60E-14 |
| ABHD4    | 1.15E-18 | -0.17449 | 0.016 | 0.101 | 1.71E-14 |
| GPR153   | 1.22E-18 | 0.268844 | 0.112 | 0.067 | 1.82E-14 |
| AVIL     | 1.22E-18 | -0.17816 | 0.119 | 0.242 | 1.83E-14 |
| SLC37A1  | 1.29E-18 | 0.30725  | 0.15  | 0.057 | 1.93E-14 |
| ADCYAP1  | 1.30E-18 | 0.309371 | 0.099 | 0.014 | 1.95E-14 |
| GNAI1    | 1.40E-18 | 0.338297 | 0.273 | 0.159 | 2.09E-14 |
| FBXL7    | 1.49E-18 | -0.11218 | 0.013 | 0.091 | 2.23E-14 |
| FRRS1L   | 1.53E-18 | 0.275129 | 0.112 | 0.026 | 2.28E-14 |
| TSPYL2   | 1.55E-18 | 0.216526 | 0.187 | 0.154 | 2.31E-14 |
| ANAPC11  | 1.61E-18 | -0.19816 | 0.826 | 0.917 | 2.41E-14 |
| PTTG2    | 1.63E-18 | -0.15214 | 0.001 | 0.058 | 2.44E-14 |
| ZNF585A  | 1.70E-18 | 0.110909 | 0.101 | 0.116 | 2.55E-14 |
| SPATA20  | 1.75E-18 | 0.140726 | 0.091 | 0.096 | 2.62E-14 |
| ANKS6    | 1.93E-18 | -0.11077 | 0.009 | 0.083 | 2.88E-14 |
| MPP2     | 2.27E-18 | 0.222385 | 0.137 | 0.094 | 3.39E-14 |

|           |          |          |       |       |          |
|-----------|----------|----------|-------|-------|----------|
| SOX13     | 2.28E-18 | -0.10321 | 0.007 | 0.074 | 3.41E-14 |
| ZNF713    | 2.38E-18 | 0.157939 | 0.12  | 0.119 | 3.56E-14 |
| PCBP2     | 2.39E-18 | -0.13394 | 0.715 | 0.873 | 3.58E-14 |
| KCNA5     | 2.43E-18 | 0.247065 | 0.084 | 0.006 | 3.63E-14 |
| PGGT1B    | 2.43E-18 | -0.13421 | 0.057 | 0.157 | 3.64E-14 |
| DMTN      | 2.57E-18 | 0.247352 | 0.091 | 0.014 | 3.84E-14 |
| NKD1      | 2.61E-18 | -0.14314 | 0.019 | 0.1   | 3.89E-14 |
| FAM214B   | 2.67E-18 | 0.19529  | 0.128 | 0.1   | 3.99E-14 |
| ZNF14     | 2.92E-18 | 0.143886 | 0.091 | 0.089 | 4.37E-14 |
| MPP3      | 3.20E-18 | 0.288454 | 0.125 | 0.042 | 4.79E-14 |
| KIF21B    | 3.25E-18 | 0.307508 | 0.123 | 0.028 | 4.85E-14 |
| MAST1     | 3.51E-18 | 0.245134 | 0.138 | 0.094 | 5.24E-14 |
| PRKAG2    | 3.54E-18 | 0.295889 | 0.149 | 0.089 | 5.30E-14 |
| ZBTB11    | 3.73E-18 | 0.118937 | 0.104 | 0.117 | 5.57E-14 |
| CHGA      | 3.91E-18 | 0.34348  | 0.147 | 0.036 | 5.84E-14 |
| COL28A1   | 4.07E-18 | -0.12721 | 0     | 0.049 | 6.08E-14 |
| MAOB      | 4.08E-18 | 0.272062 | 0.178 | 0.115 | 6.10E-14 |
| GBA2      | 4.57E-18 | 0.122707 | 0.11  | 0.123 | 6.83E-14 |
| AC008060. | 4.66E-18 | 0.311237 | 0.111 | 0.02  | 6.97E-14 |
| SNX3      | 4.80E-18 | -0.21668 | 0.714 | 0.869 | 7.17E-14 |
| PNP       | 4.88E-18 | -0.17189 | 0.024 | 0.115 | 7.30E-14 |
| RWDD2A    | 4.90E-18 | 0.161452 | 0.101 | 0.093 | 7.33E-14 |
| RGN       | 5.12E-18 | 0.301087 | 0.137 | 0.064 | 7.65E-14 |
| MADD      | 5.41E-18 | 0.114414 | 0.078 | 0.091 | 8.08E-14 |
| CACNA1A   | 6.04E-18 | 0.307279 | 0.247 | 0.2   | 9.03E-14 |
| LGALS8    | 6.12E-18 | 0.141322 | 0.153 | 0.153 | 9.15E-14 |
| ZNF408    | 6.33E-18 | 0.169582 | 0.13  | 0.119 | 9.46E-14 |
| AUH       | 6.96E-18 | 0.110657 | 0.081 | 0.098 | 1.04E-13 |
| CYP2R1    | 7.19E-18 | 0.137007 | 0.089 | 0.094 | 1.07E-13 |
| RCOR2     | 8.34E-18 | 0.279735 | 0.138 | 0.083 | 1.25E-13 |
| NPAS1     | 8.86E-18 | 0.142148 | 0.056 | 0.053 | 1.32E-13 |
| TMEM176B  | 8.90E-18 | 0.291862 | 0.164 | 0.091 | 1.33E-13 |
| RSPH3     | 8.93E-18 | 0.16342  | 0.104 | 0.09  | 1.33E-13 |
| CLP1      | 9.34E-18 | 0.12784  | 0.104 | 0.114 | 1.40E-13 |
| OLFM3     | 9.37E-18 | 0.275162 | 0.072 | 0.002 | 1.40E-13 |
| TSGA10    | 9.48E-18 | 0.156248 | 0.097 | 0.094 | 1.42E-13 |
| JMY       | 9.73E-18 | 0.157993 | 0.14  | 0.123 | 1.45E-13 |
| RP13-650J | 1.07E-17 | -0.12161 | 0.005 | 0.073 | 1.60E-13 |
| SNRK      | 1.27E-17 | 0.155345 | 0.149 | 0.151 | 1.90E-13 |
| TLE3      | 1.33E-17 | 0.21151  | 0.191 | 0.165 | 1.98E-13 |
| ARHGEF4   | 1.37E-17 | 0.147659 | 0.087 | 0.088 | 2.04E-13 |
| PTPRD     | 1.39E-17 | 0.224185 | 0.162 | 0.127 | 2.08E-13 |
| LRRK2     | 1.43E-17 | -0.19209 | 0.009 | 0.083 | 2.13E-13 |
| CCNT2     | 1.43E-17 | 0.122392 | 0.137 | 0.153 | 2.14E-13 |
| BRAF      | 1.46E-17 | 0.10541  | 0.104 | 0.125 | 2.18E-13 |
| FAM155A   | 1.49E-17 | 0.319426 | 0.158 | 0.047 | 2.23E-13 |
| LINC00205 | 1.53E-17 | 0.210156 | 0.096 | 0.049 | 2.28E-13 |
| SERPINE1  | 1.68E-17 | -0.2627  | 0.014 | 0.096 | 2.51E-13 |
| LRRC1     | 1.71E-17 | 0.128288 | 0.157 | 0.173 | 2.55E-13 |
| MBTD1     | 1.72E-17 | 0.102144 | 0.084 | 0.102 | 2.57E-13 |
| SRGN      | 1.73E-17 | 0.357814 | 0.31  | 0.16  | 2.58E-13 |

|           |          |          |       |       |          |
|-----------|----------|----------|-------|-------|----------|
| METTL22   | 1.73E-17 | 0.122534 | 0.101 | 0.109 | 2.59E-13 |
| ZNF25     | 1.80E-17 | 0.106793 | 0.104 | 0.12  | 2.70E-13 |
| FAM13A    | 2.08E-17 | 0.114173 | 0.093 | 0.11  | 3.10E-13 |
| DNAJC6    | 2.11E-17 | 0.13536  | 0.074 | 0.073 | 3.16E-13 |
| TMEM178B  | 2.13E-17 | 0.217737 | 0.131 | 0.099 | 3.18E-13 |
| SCGN      | 2.16E-17 | 0.331081 | 0.09  | 0.009 | 3.23E-13 |
| TRO       | 2.20E-17 | 0.258748 | 0.149 | 0.086 | 3.29E-13 |
| RNF175    | 2.22E-17 | 0.312337 | 0.152 | 0.046 | 3.32E-13 |
| GARNL3    | 2.28E-17 | 0.231238 | 0.088 | 0.04  | 3.41E-13 |
| PHPT1     | 2.30E-17 | -0.15906 | 0.69  | 0.848 | 3.44E-13 |
| CCER2     | 2.34E-17 | 0.380129 | 0.191 | 0.078 | 3.49E-13 |
| SGK3      | 2.46E-17 | -0.11572 | 0.009 | 0.078 | 3.67E-13 |
| TRIM22    | 2.59E-17 | -0.11726 | 0.017 | 0.095 | 3.87E-13 |
| FBXL16    | 2.60E-17 | 0.138179 | 0.103 | 0.105 | 3.88E-13 |
| IFIT5     | 2.62E-17 | 0.134748 | 0.11  | 0.114 | 3.91E-13 |
| PDE9A     | 2.64E-17 | 0.14666  | 0.127 | 0.136 | 3.95E-13 |
| RP5-940J5 | 2.83E-17 | -0.16129 | 0.066 | 0.169 | 4.22E-13 |
| SLC25A42  | 2.87E-17 | 0.107205 | 0.079 | 0.096 | 4.30E-13 |
| PLLP      | 2.91E-17 | -0.20223 | 0.011 | 0.086 | 4.34E-13 |
| FOSB      | 3.04E-17 | 0.221941 | 0.321 | 0.28  | 4.54E-13 |
| PRRT1     | 3.05E-17 | 0.144093 | 0.079 | 0.083 | 4.55E-13 |
| GPR75-ASE | 3.06E-17 | -0.10163 | 0.093 | 0.186 | 4.58E-13 |
| RAB3D     | 3.07E-17 | 0.121875 | 0.086 | 0.089 | 4.59E-13 |
| FBLIM1    | 3.29E-17 | 0.143518 | 0.119 | 0.119 | 4.92E-13 |
| MTUS1     | 3.35E-17 | 0.253342 | 0.225 | 0.152 | 5.00E-13 |
| LGALS1    | 3.45E-17 | 0.129599 | 0.118 | 0.128 | 5.16E-13 |
| CD3EAP    | 3.85E-17 | -0.10875 | 0.073 | 0.17  | 5.76E-13 |
| PPP1R3E   | 4.14E-17 | 0.11061  | 0.084 | 0.107 | 6.19E-13 |
| TRAPPC9   | 4.22E-17 | 0.11901  | 0.096 | 0.111 | 6.31E-13 |
| HBB       | 4.78E-17 | 0.210816 | 0.5   | 0.332 | 7.15E-13 |
| TP53      | 4.97E-17 | -0.1123  | 0.122 | 0.227 | 7.43E-13 |
| TRIM52    | 5.17E-17 | 0.108469 | 0.104 | 0.123 | 7.72E-13 |
| LANCL2    | 5.33E-17 | 0.212663 | 0.333 | 0.281 | 7.97E-13 |
| GCC1      | 5.56E-17 | 0.210155 | 0.137 | 0.102 | 8.31E-13 |
| SPSB1     | 5.62E-17 | -0.11228 | 0.016 | 0.089 | 8.40E-13 |
| DGKG      | 5.69E-17 | -0.13796 | 0.009 | 0.078 | 8.50E-13 |
| CREBRF    | 5.75E-17 | 0.260803 | 0.164 | 0.104 | 8.60E-13 |
| GLI4      | 5.77E-17 | 0.159146 | 0.169 | 0.17  | 8.62E-13 |
| TACC2     | 6.04E-17 | 0.108658 | 0.102 | 0.114 | 9.02E-13 |
| YWHAE     | 6.41E-17 | 0.102465 | 0.969 | 0.946 | 9.57E-13 |
| RECQL5    | 6.68E-17 | -0.10181 | 0.031 | 0.111 | 9.98E-13 |
| STYXL1    | 7.38E-17 | 0.207711 | 0.175 | 0.163 | 1.10E-12 |
| PROM1     | 7.75E-17 | -0.16875 | 0.01  | 0.084 | 1.16E-12 |
| BACE2     | 8.00E-17 | -0.11078 | 0.006 | 0.072 | 1.20E-12 |
| RBM48     | 8.39E-17 | 0.167001 | 0.139 | 0.138 | 1.25E-12 |
| HOXA6     | 8.44E-17 | 0.297333 | 0.134 | 0.035 | 1.26E-12 |
| SASH1     | 8.63E-17 | -0.13177 | 0.023 | 0.104 | 1.29E-12 |
| FEV       | 8.98E-17 | 0.37097  | 0.08  | 0.007 | 1.34E-12 |
| RAMP3     | 9.51E-17 | 0.301748 | 0.086 | 0.009 | 1.42E-12 |
| UPRT      | 1.03E-16 | 0.220592 | 0.122 | 0.079 | 1.54E-12 |
| MOB3B     | 1.08E-16 | 0.217619 | 0.165 | 0.142 | 1.61E-12 |

|           |          |          |       |       |          |
|-----------|----------|----------|-------|-------|----------|
| NRXN3     | 1.09E-16 | 0.289173 | 0.115 | 0.023 | 1.63E-12 |
| FGGY      | 1.23E-16 | -0.13168 | 0.031 | 0.116 | 1.83E-12 |
| SLC38A7   | 1.25E-16 | 0.12054  | 0.133 | 0.144 | 1.87E-12 |
| MYC       | 1.31E-16 | -0.11952 | 0.092 | 0.185 | 1.96E-12 |
| RAPGEF5   | 1.43E-16 | 0.285227 | 0.109 | 0.022 | 2.13E-12 |
| MFAP4     | 1.52E-16 | -0.22367 | 0.041 | 0.146 | 2.28E-12 |
| CDS1      | 1.54E-16 | 0.195179 | 0.064 | 0.001 | 2.30E-12 |
| UBE2E2    | 1.55E-16 | 0.264782 | 0.351 | 0.285 | 2.32E-12 |
| APOC1     | 1.65E-16 | 0.183726 | 0.327 | 0.302 | 2.46E-12 |
| CTSV      | 1.69E-16 | -0.11316 | 0.006 | 0.072 | 2.52E-12 |
| THEM4     | 1.70E-16 | 0.172481 | 0.12  | 0.098 | 2.53E-12 |
| NKRF      | 1.73E-16 | 0.230581 | 0.146 | 0.095 | 2.58E-12 |
| PRDM8     | 1.75E-16 | 0.306315 | 0.125 | 0.047 | 2.61E-12 |
| RBFOX3    | 1.78E-16 | 0.307047 | 0.082 | 0.011 | 2.67E-12 |
| RP5-1024C | 1.91E-16 | -0.1372  | 0.007 | 0.073 | 2.85E-12 |
| MIR503HG  | 1.99E-16 | -0.13391 | 0.005 | 0.067 | 2.97E-12 |
| ERC2      | 2.00E-16 | 0.254122 | 0.103 | 0.025 | 2.98E-12 |
| SCAMP5    | 2.26E-16 | 0.231821 | 0.199 | 0.152 | 3.37E-12 |
| METTTL21B | 2.27E-16 | -0.14597 | 0.033 | 0.121 | 3.40E-12 |
| FGD4      | 2.29E-16 | 0.279024 | 0.148 | 0.07  | 3.43E-12 |
| ZNF398    | 2.30E-16 | 0.103659 | 0.094 | 0.112 | 3.44E-12 |
| CCL3      | 2.30E-16 | 0.24721  | 0.297 | 0.247 | 3.44E-12 |
| ZSCAN16   | 2.44E-16 | 0.170131 | 0.148 | 0.14  | 3.65E-12 |
| AQP11     | 2.51E-16 | 0.131184 | 0.069 | 0.078 | 3.76E-12 |
| C8orf46   | 2.58E-16 | 0.277478 | 0.319 | 0.236 | 3.85E-12 |
| KIAA1324L | 2.66E-16 | 0.298501 | 0.104 | 0.026 | 3.98E-12 |
| BANF1     | 2.74E-16 | -0.18416 | 0.72  | 0.873 | 4.09E-12 |
| ALDH1L1   | 2.87E-16 | -0.24191 | 0.003 | 0.062 | 4.29E-12 |
| CA11      | 2.93E-16 | 0.134721 | 0.088 | 0.094 | 4.37E-12 |
| SVIP      | 2.97E-16 | -0.27508 | 0.118 | 0.26  | 4.44E-12 |
| DHRS12    | 3.09E-16 | 0.117001 | 0.095 | 0.102 | 4.61E-12 |
| PLXNA3    | 3.33E-16 | 0.220565 | 0.106 | 0.065 | 4.97E-12 |
| SGIP1     | 3.63E-16 | 0.310131 | 0.141 | 0.044 | 5.42E-12 |
| SCN9A     | 3.96E-16 | 0.303462 | 0.127 | 0.036 | 5.92E-12 |
| CADPS     | 4.05E-16 | 0.281525 | 0.106 | 0.021 | 6.05E-12 |
| ASIC1     | 4.26E-16 | 0.297317 | 0.147 | 0.067 | 6.36E-12 |
| TMEM169   | 4.29E-16 | 0.186397 | 0.138 | 0.116 | 6.41E-12 |
| ACO05076. | 4.30E-16 | -0.11819 | 0.03  | 0.105 | 6.42E-12 |
| IFI27     | 4.33E-16 | -0.37192 | 0.013 | 0.09  | 6.47E-12 |
| EDF1      | 4.37E-16 | 0.104806 | 0.878 | 0.886 | 6.53E-12 |
| PTPN5     | 4.71E-16 | 0.238668 | 0.093 | 0.014 | 7.03E-12 |
| LPAR2     | 5.32E-16 | 0.25643  | 0.107 | 0.033 | 7.95E-12 |
| OAS1      | 5.72E-16 | -0.30085 | 0.005 | 0.068 | 8.55E-12 |
| KBTBD7    | 5.75E-16 | 0.204636 | 0.175 | 0.14  | 8.59E-12 |
| DOCK4     | 6.13E-16 | 0.16803  | 0.116 | 0.1   | 9.17E-12 |
| EGR3      | 6.78E-16 | 0.262074 | 0.136 | 0.086 | 1.01E-11 |
| TENM3     | 6.82E-16 | -0.22157 | 0.024 | 0.114 | 1.02E-11 |
| EFHD1     | 6.85E-16 | -0.1566  | 0.032 | 0.114 | 1.02E-11 |
| TXNDC16   | 7.38E-16 | 0.117748 | 0.111 | 0.114 | 1.10E-11 |
| AACS      | 7.86E-16 | 0.135731 | 0.103 | 0.104 | 1.18E-11 |
| CARD16    | 8.12E-16 | -0.30619 | 0.01  | 0.081 | 1.21E-11 |



|           |          |          |       |       |          |
|-----------|----------|----------|-------|-------|----------|
| SLITRK2   | 8.46E-16 | -0.18755 | 0.021 | 0.105 | 1.26E-11 |
| GBP2      | 8.51E-16 | -0.15914 | 0.013 | 0.085 | 1.27E-11 |
| ZDHC13    | 8.53E-16 | 0.256081 | 0.183 | 0.115 | 1.27E-11 |
| FOS       | 8.55E-16 | 0.105164 | 0.844 | 0.791 | 1.28E-11 |
| CTC-534A2 | 8.74E-16 | 0.106176 | 0.086 | 0.099 | 1.31E-11 |
| GRID2     | 9.01E-16 | -0.15765 | 0.035 | 0.122 | 1.35E-11 |
| RASAL2    | 9.38E-16 | 0.127472 | 0.129 | 0.13  | 1.40E-11 |
| EPSTI1    | 9.41E-16 | -0.28266 | 0.016 | 0.096 | 1.41E-11 |
| SNX29     | 9.47E-16 | 0.130835 | 0.106 | 0.109 | 1.42E-11 |
| SFXN3     | 1.01E-15 | 0.115007 | 0.063 | 0.065 | 1.50E-11 |
| GNAZ      | 1.02E-15 | 0.159285 | 0.125 | 0.125 | 1.52E-11 |
| MORC2-AS1 | 1.17E-15 | 0.226956 | 0.117 | 0.074 | 1.75E-11 |
| LRRC73    | 1.24E-15 | 0.133058 | 0.074 | 0.062 | 1.85E-11 |
| MAP1LC3B2 | 1.35E-15 | 0.273634 | 0.126 | 0.073 | 2.02E-11 |
| ZNF654    | 1.37E-15 | 0.105848 | 0.073 | 0.081 | 2.04E-11 |
| ZNF595    | 1.50E-15 | 0.110159 | 0.126 | 0.141 | 2.25E-11 |
| JAZF1     | 1.57E-15 | 0.141606 | 0.115 | 0.116 | 2.34E-11 |
| PEX1      | 1.59E-15 | 0.135409 | 0.13  | 0.126 | 2.37E-11 |
| AIFM2     | 1.71E-15 | -0.10375 | 0.006 | 0.067 | 2.55E-11 |
| MTAP      | 1.74E-15 | -0.16937 | 0.022 | 0.1   | 2.60E-11 |
| CD74      | 1.79E-15 | 0.154677 | 0.596 | 0.527 | 2.68E-11 |
| RIPPLY2   | 1.81E-15 | 0.150269 | 0.086 | 0.079 | 2.70E-11 |
| MB21D2    | 1.84E-15 | 0.235804 | 0.108 | 0.049 | 2.75E-11 |
| GADD45GIF | 1.97E-15 | -0.16286 | 0.628 | 0.794 | 2.95E-11 |
| VPS8      | 1.98E-15 | 0.124754 | 0.121 | 0.13  | 2.96E-11 |
| CXorf40A  | 2.01E-15 | 0.130398 | 0.097 | 0.095 | 3.00E-11 |
| RABGAP1L  | 2.04E-15 | 0.193858 | 0.108 | 0.073 | 3.05E-11 |
| PELI1     | 2.06E-15 | 0.146326 | 0.241 | 0.243 | 3.08E-11 |
| MTURN     | 2.11E-15 | 0.223441 | 0.18  | 0.128 | 3.16E-11 |
| IGFBP6    | 2.47E-15 | 0.173321 | 0.08  | 0.07  | 3.69E-11 |
| GADD45B   | 2.50E-15 | -0.32927 | 0.197 | 0.348 | 3.73E-11 |
| ATAD2B    | 2.56E-15 | 0.124451 | 0.097 | 0.099 | 3.83E-11 |
| GSX1      | 2.58E-15 | -0.19747 | 0.016 | 0.091 | 3.86E-11 |
| RHOBTB2   | 2.61E-15 | 0.121263 | 0.084 | 0.085 | 3.91E-11 |
| AC079922. | 2.67E-15 | -0.13337 | 0.02  | 0.094 | 3.99E-11 |
| FAM117B   | 2.72E-15 | 0.278586 | 0.133 | 0.048 | 4.07E-11 |
| NAT16     | 3.20E-15 | 0.263925 | 0.113 | 0.033 | 4.78E-11 |
| SNX30     | 3.38E-15 | 0.127832 | 0.071 | 0.073 | 5.06E-11 |
| TRUB1     | 3.41E-15 | 0.172109 | 0.093 | 0.072 | 5.10E-11 |
| ARHGFE10  | 3.59E-15 | 0.100106 | 0.093 | 0.11  | 5.36E-11 |
| ZNF350    | 3.78E-15 | 0.157425 | 0.116 | 0.104 | 5.65E-11 |
| RGS11     | 3.82E-15 | 0.244179 | 0.101 | 0.031 | 5.71E-11 |
| RELL2     | 3.87E-15 | 0.182045 | 0.089 | 0.051 | 5.78E-11 |
| AC002454. | 4.00E-15 | -0.16623 | 0.013 | 0.08  | 5.97E-11 |
| ST8SIA4   | 4.09E-15 | 0.17189  | 0.086 | 0.053 | 6.11E-11 |
| HARS2     | 4.41E-15 | 0.145125 | 0.132 | 0.128 | 6.59E-11 |
| LRRC26    | 4.51E-15 | 0.306755 | 0.126 | 0.033 | 6.73E-11 |
| HAUS4     | 5.09E-15 | -0.13874 | 0.012 | 0.08  | 7.61E-11 |
| TBC1D19   | 5.34E-15 | 0.187689 | 0.112 | 0.085 | 7.98E-11 |
| TAC3      | 5.41E-15 | 0.350047 | 0.13  | 0.032 | 8.09E-11 |
| PLAA      | 5.58E-15 | 0.145915 | 0.153 | 0.148 | 8.34E-11 |

|           |          |          |       |       |          |
|-----------|----------|----------|-------|-------|----------|
| SCRT2     | 5.66E-15 | 0.292416 | 0.116 | 0.027 | 8.45E-11 |
| PTGS1     | 6.67E-15 | -0.11152 | 0.009 | 0.074 | 9.96E-11 |
| TRMT10B   | 6.68E-15 | 0.103288 | 0.13  | 0.151 | 9.99E-11 |
| C19orf54  | 6.83E-15 | -0.10447 | 0.019 | 0.088 | 1.02E-10 |
| RAB33B    | 6.97E-15 | 0.126303 | 0.088 | 0.091 | 1.04E-10 |
| CASD1     | 7.29E-15 | 0.205525 | 0.174 | 0.14  | 1.09E-10 |
| APOL2     | 7.46E-15 | -0.11272 | 0.025 | 0.099 | 1.11E-10 |
| EFNA1     | 7.47E-15 | 0.141006 | 0.109 | 0.109 | 1.12E-10 |
| KIAA1522  | 7.58E-15 | 0.129854 | 0.07  | 0.06  | 1.13E-10 |
| HOXD3     | 7.94E-15 | 0.265582 | 0.123 | 0.044 | 1.19E-10 |
| ZNF781    | 8.78E-15 | 0.107307 | 0.084 | 0.094 | 1.31E-10 |
| MORN4     | 9.00E-15 | 0.115504 | 0.079 | 0.079 | 1.34E-10 |
| DMD       | 9.22E-15 | -0.10516 | 0.068 | 0.157 | 1.38E-10 |
| SFRP2     | 9.45E-15 | -0.13162 | 0.002 | 0.051 | 1.41E-10 |
| SPIRE2    | 9.63E-15 | 0.156024 | 0.11  | 0.095 | 1.44E-10 |
| PARK7     | 9.64E-15 | -0.19511 | 0.786 | 0.906 | 1.44E-10 |
| PHACTR3   | 1.03E-14 | 0.319833 | 0.264 | 0.138 | 1.54E-10 |
| CCDC170   | 1.04E-14 | 0.246392 | 0.101 | 0.026 | 1.55E-10 |
| DLL1      | 1.08E-14 | -0.23968 | 0.089 | 0.207 | 1.62E-10 |
| STRIP2    | 1.11E-14 | -0.1144  | 0.013 | 0.081 | 1.65E-10 |
| CA10      | 1.11E-14 | -0.15281 | 0.032 | 0.11  | 1.65E-10 |
| SRSF2     | 1.13E-14 | -0.17896 | 0.745 | 0.878 | 1.70E-10 |
| FCER1G    | 1.16E-14 | 0.114805 | 0.165 | 0.175 | 1.74E-10 |
| NXN       | 1.25E-14 | 0.298083 | 0.14  | 0.06  | 1.86E-10 |
| FAM109A   | 1.30E-14 | 0.187821 | 0.104 | 0.073 | 1.95E-10 |
| LINC00237 | 1.31E-14 | 0.264514 | 0.131 | 0.047 | 1.96E-10 |
| OPHN1     | 1.40E-14 | 0.189919 | 0.137 | 0.117 | 2.09E-10 |
| SLC7A5    | 1.42E-14 | 0.123059 | 0.09  | 0.095 | 2.12E-10 |
| PPP1R1C   | 1.47E-14 | -0.12557 | 0.003 | 0.056 | 2.19E-10 |
| COX5B     | 1.51E-14 | 0.108734 | 0.931 | 0.916 | 2.26E-10 |
| PSD2      | 1.59E-14 | 0.297868 | 0.145 | 0.054 | 2.38E-10 |
| ZNF385A   | 1.60E-14 | 0.103304 | 0.084 | 0.094 | 2.39E-10 |
| SNX32     | 1.60E-14 | 0.219765 | 0.091 | 0.021 | 2.39E-10 |
| ST8SIA3   | 1.69E-14 | 0.250685 | 0.105 | 0.022 | 2.53E-10 |
| PTPRO     | 1.78E-14 | 0.273886 | 0.14  | 0.047 | 2.67E-10 |
| THUMPD2   | 1.81E-14 | -0.10942 | 0.095 | 0.185 | 2.71E-10 |
| WDR86     | 1.96E-14 | 0.255885 | 0.104 | 0.054 | 2.93E-10 |
| ZFP36     | 2.22E-14 | -0.37894 | 0.178 | 0.327 | 3.32E-10 |
| MB21D1    | 2.32E-14 | -0.11409 | 0.007 | 0.064 | 3.46E-10 |
| RUNX1T1   | 2.39E-14 | 0.183067 | 0.076 | 0.052 | 3.57E-10 |
| HOXC6     | 2.47E-14 | 0.300643 | 0.134 | 0.047 | 3.69E-10 |
| FHOD3     | 2.52E-14 | 0.102002 | 0.091 | 0.102 | 3.76E-10 |
| PPP2R2C   | 2.58E-14 | 0.167378 | 0.056 | 0.001 | 3.85E-10 |
| PCDHB15   | 3.11E-14 | 0.231993 | 0.09  | 0.016 | 4.64E-10 |
| VWA5A     | 3.20E-14 | 0.118783 | 0.084 | 0.083 | 4.78E-10 |
| RP11-108M | 3.28E-14 | -0.11688 | 0.028 | 0.1   | 4.90E-10 |
| SLC17A6   | 3.33E-14 | 0.249721 | 0.097 | 0.02  | 4.98E-10 |
| KLHL21    | 3.56E-14 | -0.11133 | 0.011 | 0.074 | 5.33E-10 |
| RP6-65G23 | 3.68E-14 | 0.241461 | 0.079 | 0.015 | 5.51E-10 |
| SLC25A12  | 3.73E-14 | 0.159634 | 0.116 | 0.104 | 5.57E-10 |
| C7orf43   | 3.80E-14 | 0.11928  | 0.108 | 0.115 | 5.67E-10 |

|           |          |          |       |       |          |
|-----------|----------|----------|-------|-------|----------|
| ZNF879    | 3.87E-14 | 0.107242 | 0.069 | 0.073 | 5.79E-10 |
| APBB3     | 4.00E-14 | 0.174333 | 0.106 | 0.079 | 5.98E-10 |
| CYBA      | 4.13E-14 | 0.233511 | 0.194 | 0.135 | 6.17E-10 |
| NACA2     | 4.16E-14 | -0.13976 | 0.074 | 0.165 | 6.22E-10 |
| ZNF623    | 4.18E-14 | 0.113965 | 0.081 | 0.086 | 6.25E-10 |
| PRKAB2    | 4.21E-14 | 0.10965  | 0.086 | 0.094 | 6.29E-10 |
| USP49     | 4.56E-14 | 0.139391 | 0.109 | 0.101 | 6.81E-10 |
| CRB1      | 4.75E-14 | 0.152058 | 0.147 | 0.148 | 7.10E-10 |
| FNDC5     | 5.43E-14 | 0.233252 | 0.085 | 0.015 | 8.11E-10 |
| CCL4      | 5.75E-14 | 0.162028 | 0.247 | 0.228 | 8.59E-10 |
| DACT1     | 6.16E-14 | 0.271147 | 0.112 | 0.044 | 9.21E-10 |
| SOD3      | 6.44E-14 | -0.13256 | 0.008 | 0.065 | 9.63E-10 |
| PCP4      | 6.54E-14 | 0.385186 | 0.159 | 0.057 | 9.77E-10 |
| DAGLB     | 6.71E-14 | 0.137144 | 0.118 | 0.112 | 1.00E-09 |
| ANKRD13B  | 6.73E-14 | 0.119652 | 0.098 | 0.102 | 1.01E-09 |
| HDX       | 6.87E-14 | 0.171787 | 0.096 | 0.068 | 1.03E-09 |
| ACSL4     | 7.35E-14 | 0.138746 | 0.083 | 0.08  | 1.10E-09 |
| RP4-798A1 | 7.57E-14 | 0.10305  | 0.077 | 0.094 | 1.13E-09 |
| SCRG1     | 7.70E-14 | -0.18784 | 0.487 | 0.642 | 1.15E-09 |
| FBXL2     | 7.72E-14 | 0.214163 | 0.095 | 0.036 | 1.15E-09 |
| HBEGF     | 8.16E-14 | 0.190574 | 0.12  | 0.094 | 1.22E-09 |
| MAGEE1    | 8.28E-14 | 0.213067 | 0.096 | 0.019 | 1.24E-09 |
| TFAP2A    | 8.33E-14 | 0.238414 | 0.146 | 0.107 | 1.24E-09 |
| SAMD11    | 9.09E-14 | 0.208959 | 0.07  | 0.01  | 1.36E-09 |
| C2CD2L    | 9.60E-14 | 0.144581 | 0.076 | 0.063 | 1.43E-09 |
| RBFOX1    | 1.00E-13 | 0.223868 | 0.058 | 0.004 | 1.50E-09 |
| RPRML     | 1.07E-13 | -0.11377 | 0.007 | 0.062 | 1.61E-09 |
| ME3       | 1.13E-13 | 0.189902 | 0.101 | 0.078 | 1.69E-09 |
| HECW1     | 1.13E-13 | 0.275934 | 0.129 | 0.038 | 1.69E-09 |
| SAMD9     | 1.15E-13 | -0.12903 | 0.016 | 0.081 | 1.72E-09 |
| C5orf63   | 1.17E-13 | 0.108519 | 0.104 | 0.117 | 1.76E-09 |
| SLC16A1-A | 1.21E-13 | -0.19964 | 0.031 | 0.112 | 1.81E-09 |
| CLU       | 1.24E-13 | -0.29611 | 0.765 | 0.828 | 1.86E-09 |
| AP2S1     | 1.26E-13 | -0.10194 | 0.705 | 0.83  | 1.89E-09 |
| ARMCX5    | 1.28E-13 | 0.163243 | 0.144 | 0.128 | 1.92E-09 |
| MYBPC1    | 1.52E-13 | -0.17369 | 0.003 | 0.053 | 2.27E-09 |
| EN1       | 1.62E-13 | 0.255605 | 0.169 | 0.107 | 2.42E-09 |
| MYOM2     | 1.64E-13 | 0.176566 | 0.078 | 0.054 | 2.46E-09 |
| EPS8L1    | 1.68E-13 | 0.126808 | 0.071 | 0.063 | 2.51E-09 |
| RAPGEF4   | 1.75E-13 | 0.230693 | 0.119 | 0.059 | 2.62E-09 |
| ARID3A    | 1.84E-13 | 0.108771 | 0.101 | 0.107 | 2.74E-09 |
| EFCAB7    | 1.84E-13 | 0.126619 | 0.128 | 0.132 | 2.75E-09 |
| SH3BGRL3  | 1.86E-13 | 0.113685 | 0.701 | 0.705 | 2.77E-09 |
| SERPINF1  | 2.11E-13 | 0.129624 | 0.064 | 0.07  | 3.16E-09 |
| ZFP37     | 2.22E-13 | 0.142526 | 0.133 | 0.11  | 3.31E-09 |
| PLXNA2    | 2.30E-13 | 0.123099 | 0.079 | 0.08  | 3.44E-09 |
| SLFN11    | 2.47E-13 | -0.11962 | 0.006 | 0.06  | 3.69E-09 |
| CABYR     | 2.50E-13 | 0.175781 | 0.082 | 0.053 | 3.73E-09 |
| RAB11FIP4 | 2.70E-13 | 0.246189 | 0.098 | 0.037 | 4.03E-09 |
| RCL1      | 2.74E-13 | 0.112458 | 0.111 | 0.114 | 4.10E-09 |
| TMTC2     | 2.78E-13 | 0.221725 | 0.102 | 0.059 | 4.16E-09 |

|           |          |          |       |       |          |
|-----------|----------|----------|-------|-------|----------|
| DHFRL1    | 2.95E-13 | -0.113   | 0.043 | 0.115 | 4.41E-09 |
| ZNF804A   | 3.05E-13 | 0.279492 | 0.139 | 0.057 | 4.55E-09 |
| P2RX7     | 3.21E-13 | -0.15237 | 0.035 | 0.116 | 4.79E-09 |
| PAPOLG    | 4.18E-13 | 0.131114 | 0.096 | 0.102 | 6.24E-09 |
| RP11-834C | 4.22E-13 | 0.288078 | 0.162 | 0.074 | 6.31E-09 |
| NOS2      | 4.24E-13 | -0.1423  | 0.002 | 0.046 | 6.33E-09 |
| PEX6      | 4.25E-13 | 0.141955 | 0.092 | 0.083 | 6.34E-09 |
| CAMK2G    | 4.31E-13 | 0.134147 | 0.135 | 0.126 | 6.43E-09 |
| TXNDC17   | 4.37E-13 | -0.14278 | 0.562 | 0.712 | 6.53E-09 |
| ZBTB8B    | 4.40E-13 | 0.160779 | 0.11  | 0.083 | 6.57E-09 |
| BHLHB9    | 4.44E-13 | 0.212057 | 0.109 | 0.063 | 6.64E-09 |
| TMEM151A  | 4.47E-13 | 0.192231 | 0.07  | 0.017 | 6.68E-09 |
| MGAT5B    | 4.51E-13 | 0.11518  | 0.073 | 0.075 | 6.74E-09 |
| CCDC157   | 4.56E-13 | 0.129619 | 0.078 | 0.065 | 6.82E-09 |
| 5-Sep     | 4.56E-13 | 0.138846 | 0.083 | 0.078 | 6.82E-09 |
| AFF3      | 4.76E-13 | 0.23839  | 0.175 | 0.117 | 7.11E-09 |
| QPRT      | 4.77E-13 | -0.13585 | 0.063 | 0.146 | 7.12E-09 |
| CTSH      | 4.94E-13 | -0.10182 | 0.027 | 0.095 | 7.39E-09 |
| KIAA0895  | 5.26E-13 | 0.193888 | 0.101 | 0.058 | 7.87E-09 |
| ZNF548    | 5.46E-13 | 0.136387 | 0.148 | 0.14  | 8.16E-09 |
| EEF1G     | 5.99E-13 | -0.11071 | 0.038 | 0.111 | 8.95E-09 |
| PIP5KL1   | 7.53E-13 | 0.140709 | 0.056 | 0.033 | 1.13E-08 |
| TAF1A     | 7.77E-13 | 0.120016 | 0.123 | 0.12  | 1.16E-08 |
| FAM65B    | 8.09E-13 | 0.132716 | 0.068 | 0.056 | 1.21E-08 |
| RALGPS1   | 8.60E-13 | 0.126688 | 0.12  | 0.115 | 1.29E-08 |
| EEF1A2    | 9.43E-13 | 0.105347 | 0.08  | 0.093 | 1.41E-08 |
| FXVD5     | 9.60E-13 | -0.11704 | 0.057 | 0.132 | 1.43E-08 |
| RP11-22P6 | 9.80E-13 | 0.163301 | 0.084 | 0.072 | 1.46E-08 |
| PGM5      | 9.89E-13 | -0.10452 | 0.002 | 0.044 | 1.48E-08 |
| NKAIN1    | 1.04E-12 | 0.227642 | 0.083 | 0.019 | 1.55E-08 |
| CCDC24    | 1.06E-12 | 0.121179 | 0.08  | 0.081 | 1.58E-08 |
| CPM       | 1.07E-12 | -0.27882 | 0.049 | 0.144 | 1.60E-08 |
| CACNA1E   | 1.20E-12 | 0.159779 | 0.057 | 0.004 | 1.80E-08 |
| TSPAN18   | 1.22E-12 | 0.22727  | 0.092 | 0.033 | 1.82E-08 |
| SHD       | 1.24E-12 | 0.254638 | 0.43  | 0.351 | 1.86E-08 |
| RHEB      | 1.44E-12 | -0.16922 | 0.821 | 0.926 | 2.15E-08 |
| STC1      | 1.46E-12 | 0.279859 | 0.126 | 0.044 | 2.18E-08 |
| BMPER     | 1.47E-12 | 0.130857 | 0.069 | 0.062 | 2.20E-08 |
| PRCD      | 1.50E-12 | 0.313906 | 0.123 | 0.046 | 2.24E-08 |
| ARHGEF11  | 1.61E-12 | 0.113341 | 0.068 | 0.072 | 2.41E-08 |
| ATP2B4    | 1.68E-12 | 0.123951 | 0.086 | 0.086 | 2.51E-08 |
| NTRK2     | 1.72E-12 | -0.32035 | 0.053 | 0.149 | 2.57E-08 |
| MAGI2     | 1.79E-12 | 0.149566 | 0.199 | 0.183 | 2.68E-08 |
| DYRK1B    | 1.80E-12 | 0.180686 | 0.085 | 0.057 | 2.69E-08 |
| 4-Mar     | 1.85E-12 | 0.195183 | 0.053 | 0.005 | 2.77E-08 |
| RCBTB2    | 1.91E-12 | 0.134562 | 0.207 | 0.195 | 2.86E-08 |
| CELSR3    | 1.95E-12 | 0.241059 | 0.12  | 0.059 | 2.91E-08 |
| C9orf3    | 2.06E-12 | 0.140568 | 0.159 | 0.158 | 3.08E-08 |
| RP11-69E1 | 2.07E-12 | 0.191189 | 0.101 | 0.064 | 3.09E-08 |
| RP11-629G | 2.11E-12 | -0.13562 | 0.012 | 0.07  | 3.15E-08 |
| ZSCAN9    | 2.24E-12 | 0.136548 | 0.146 | 0.133 | 3.35E-08 |

|           |          |          |       |       |          |
|-----------|----------|----------|-------|-------|----------|
| EFNA5     | 2.29E-12 | 0.211327 | 0.062 | 0.011 | 3.42E-08 |
| PDZD4     | 2.29E-12 | 0.155013 | 0.139 | 0.128 | 3.43E-08 |
| SRI       | 2.45E-12 | -0.18054 | 0.868 | 0.946 | 3.66E-08 |
| RP11-196G | 2.48E-12 | -0.11683 | 0.01  | 0.068 | 3.71E-08 |
| FAM66C    | 2.81E-12 | 0.170015 | 0.091 | 0.064 | 4.20E-08 |
| TRIM59    | 2.82E-12 | -0.14605 | 0.009 | 0.067 | 4.21E-08 |
| UCN       | 2.90E-12 | 0.199678 | 0.09  | 0.031 | 4.34E-08 |
| BTBD17    | 3.08E-12 | 0.279821 | 0.152 | 0.083 | 4.60E-08 |
| USF1      | 3.21E-12 | 0.214685 | 0.118 | 0.089 | 4.80E-08 |
| VASH2     | 3.34E-12 | 0.233785 | 0.104 | 0.043 | 4.99E-08 |
| IGFBPL1   | 3.36E-12 | 0.222177 | 0.088 | 0.021 | 5.02E-08 |
| MYLIP     | 3.36E-12 | 0.15997  | 0.086 | 0.074 | 5.02E-08 |
| RUSC2     | 3.74E-12 | 0.185158 | 0.093 | 0.052 | 5.59E-08 |
| BBS9      | 3.75E-12 | 0.151087 | 0.09  | 0.074 | 5.60E-08 |
| PCSK2     | 3.88E-12 | -0.13496 | 0.054 | 0.128 | 5.79E-08 |
| THSD4     | 4.05E-12 | -0.17633 | 0.002 | 0.046 | 6.05E-08 |
| NOL4      | 4.86E-12 | 0.190448 | 0.218 | 0.177 | 7.26E-08 |
| RP11-195F | 4.89E-12 | 0.143865 | 0.18  | 0.165 | 7.30E-08 |
| NUDT10    | 4.93E-12 | 0.154768 | 0.145 | 0.132 | 7.37E-08 |
| RP11-490M | 5.14E-12 | 0.140273 | 0.082 | 0.068 | 7.68E-08 |
| COL20A1   | 5.48E-12 | -0.12763 | 0.004 | 0.051 | 8.19E-08 |
| C16orf70  | 5.57E-12 | 0.113832 | 0.082 | 0.078 | 8.33E-08 |
| TLDC1     | 5.69E-12 | 0.13437  | 0.073 | 0.058 | 8.50E-08 |
| ZNF135    | 6.27E-12 | 0.197209 | 0.108 | 0.059 | 9.38E-08 |
| ZCCHC18   | 7.20E-12 | 0.200038 | 0.092 | 0.046 | 1.08E-07 |
| NFX1      | 7.48E-12 | 0.111333 | 0.119 | 0.117 | 1.12E-07 |
| EGR1      | 7.80E-12 | 0.140352 | 0.726 | 0.659 | 1.17E-07 |
| CD14      | 8.33E-12 | 0.186983 | 0.142 | 0.11  | 1.24E-07 |
| FRY       | 8.55E-12 | 0.216772 | 0.089 | 0.026 | 1.28E-07 |
| CREB3L4   | 9.00E-12 | 0.148464 | 0.091 | 0.079 | 1.35E-07 |
| ATP8A2    | 9.17E-12 | 0.157346 | 0.057 | 0.005 | 1.37E-07 |
| BOLA3-AS1 | 9.80E-12 | 0.104729 | 0.071 | 0.077 | 1.46E-07 |
| NUAK1     | 9.89E-12 | 0.17334  | 0.098 | 0.075 | 1.48E-07 |
| MAPK8IP2  | 9.92E-12 | 0.214137 | 0.109 | 0.068 | 1.48E-07 |
| KDM7A     | 1.03E-11 | 0.23819  | 0.124 | 0.041 | 1.54E-07 |
| KCNK12    | 1.07E-11 | 0.196662 | 0.065 | 0.021 | 1.60E-07 |
| SLC17A5   | 1.10E-11 | 0.121909 | 0.092 | 0.085 | 1.64E-07 |
| CGREF1    | 1.10E-11 | 0.105803 | 0.056 | 0.06  | 1.64E-07 |
| ZNF618    | 1.14E-11 | 0.20455  | 0.102 | 0.053 | 1.71E-07 |
| GALT      | 1.16E-11 | 0.184256 | 0.106 | 0.067 | 1.74E-07 |
| TYROBP    | 1.28E-11 | 0.126265 | 0.161 | 0.151 | 1.91E-07 |
| RASGRP2   | 1.29E-11 | 0.179272 | 0.075 | 0.038 | 1.92E-07 |
| AIF1      | 1.35E-11 | 0.157764 | 0.134 | 0.117 | 2.01E-07 |
| PCAT6     | 1.35E-11 | 0.187248 | 0.075 | 0.028 | 2.01E-07 |
| AURKAIP1  | 1.44E-11 | -0.10038 | 0.694 | 0.817 | 2.15E-07 |
| CTC-503J8 | 1.66E-11 | 0.158612 | 0.071 | 0.041 | 2.49E-07 |
| CDK20     | 1.73E-11 | 0.149933 | 0.088 | 0.068 | 2.59E-07 |
| GTF2IRD1  | 2.31E-11 | 0.110055 | 0.132 | 0.133 | 3.45E-07 |
| MYOT      | 2.36E-11 | -0.11725 | 0.003 | 0.044 | 3.53E-07 |
| RNF182    | 2.43E-11 | 0.105481 | 0.138 | 0.141 | 3.63E-07 |
| DUSP16    | 2.44E-11 | 0.121315 | 0.06  | 0.053 | 3.65E-07 |

|           |          |          |       |       |          |
|-----------|----------|----------|-------|-------|----------|
| TRIM46    | 2.46E-11 | 0.206212 | 0.077 | 0.022 | 3.68E-07 |
| ABLIM1    | 2.53E-11 | -0.1107  | 0.024 | 0.089 | 3.78E-07 |
| FRAT2     | 2.70E-11 | 0.176791 | 0.093 | 0.064 | 4.03E-07 |
| ZNF573    | 2.80E-11 | 0.183145 | 0.117 | 0.084 | 4.18E-07 |
| RGCC      | 2.80E-11 | -0.29937 | 0.095 | 0.204 | 4.19E-07 |
| XKR6      | 2.81E-11 | 0.152099 | 0.065 | 0.048 | 4.20E-07 |
| CTNNA2    | 2.83E-11 | 0.276403 | 0.181 | 0.105 | 4.22E-07 |
| DHRS3     | 2.92E-11 | -0.12227 | 0.012 | 0.067 | 4.36E-07 |
| RAB3B     | 2.96E-11 | 0.163763 | 0.093 | 0.077 | 4.43E-07 |
| LINGO1    | 2.99E-11 | 0.19083  | 0.104 | 0.073 | 4.47E-07 |
| IGSF3     | 3.65E-11 | 0.122533 | 0.095 | 0.089 | 5.46E-07 |
| HAPLN4    | 3.84E-11 | 0.180109 | 0.071 | 0.021 | 5.74E-07 |
| PPIL6     | 3.86E-11 | 0.142701 | 0.078 | 0.06  | 5.77E-07 |
| RNF112    | 3.88E-11 | 0.157643 | 0.105 | 0.079 | 5.79E-07 |
| AP001372. | 3.95E-11 | 0.10992  | 0.092 | 0.088 | 5.90E-07 |
| TUSC1     | 4.29E-11 | 0.181555 | 0.189 | 0.148 | 6.41E-07 |
| CTSZ      | 4.30E-11 | 0.139623 | 0.075 | 0.072 | 6.43E-07 |
| FXVD7     | 4.31E-11 | 0.337582 | 0.24  | 0.141 | 6.45E-07 |
| SNAP91    | 4.45E-11 | 0.216638 | 0.081 | 0.016 | 6.65E-07 |
| RP11-111M | 4.65E-11 | 0.110608 | 0.084 | 0.085 | 6.95E-07 |
| ACHE      | 4.75E-11 | 0.180362 | 0.086 | 0.067 | 7.10E-07 |
| RP11-166F | 4.90E-11 | 0.143295 | 0.063 | 0.036 | 7.33E-07 |
| AGTPBP1   | 4.95E-11 | 0.141284 | 0.079 | 0.072 | 7.39E-07 |
| PRPF40B   | 5.03E-11 | 0.125476 | 0.108 | 0.098 | 7.52E-07 |
| PLCB4     | 5.52E-11 | 0.181919 | 0.075 | 0.02  | 8.25E-07 |
| UNC13A    | 5.66E-11 | 0.138729 | 0.079 | 0.057 | 8.45E-07 |
| LINC00839 | 5.76E-11 | 0.19031  | 0.083 | 0.021 | 8.62E-07 |
| BCAR3     | 5.80E-11 | -0.10424 | 0.009 | 0.057 | 8.67E-07 |
| APOD      | 5.91E-11 | -0.16714 | 0.056 | 0.132 | 8.84E-07 |
| ALDOC     | 6.01E-11 | 0.24315  | 0.152 | 0.102 | 8.97E-07 |
| C4orf36   | 6.59E-11 | -0.10886 | 0.031 | 0.09  | 9.85E-07 |
| FAM71E1   | 6.67E-11 | 0.210143 | 0.097 | 0.031 | 9.97E-07 |
| GRIN2B    | 7.92E-11 | 0.208448 | 0.092 | 0.025 | 1.18E-06 |
| NEUROD1   | 8.22E-11 | 0.295198 | 0.174 | 0.075 | 1.23E-06 |
| ZNF540    | 8.24E-11 | 0.16287  | 0.057 | 0.009 | 1.23E-06 |
| PDZD7     | 8.74E-11 | 0.144638 | 0.047 | 0.004 | 1.31E-06 |
| TP53INP1  | 8.91E-11 | 0.102687 | 0.062 | 0.063 | 1.33E-06 |
| TIGD3     | 9.63E-11 | 0.154832 | 0.083 | 0.049 | 1.44E-06 |
| TCP11L1   | 9.77E-11 | -0.10617 | 0.035 | 0.098 | 1.46E-06 |
| ZNF850    | 9.79E-11 | -0.10518 | 0.011 | 0.062 | 1.46E-06 |
| KHDC1     | 1.01E-10 | 0.138949 | 0.143 | 0.135 | 1.51E-06 |
| HSPA2     | 1.06E-10 | -0.12722 | 0.086 | 0.158 | 1.58E-06 |
| ZFP28     | 1.06E-10 | 0.157811 | 0.099 | 0.073 | 1.58E-06 |
| PRKCDBP   | 1.10E-10 | -0.11407 | 0.005 | 0.048 | 1.65E-06 |
| DDIT4     | 1.13E-10 | -0.16297 | 0.213 | 0.312 | 1.69E-06 |
| EPHB1     | 1.16E-10 | 0.20482  | 0.128 | 0.081 | 1.73E-06 |
| DIRAS2    | 1.17E-10 | -0.11241 | 0.093 | 0.173 | 1.76E-06 |
| NMRK1     | 1.29E-10 | 0.110259 | 0.09  | 0.086 | 1.93E-06 |
| ATP8A1    | 1.30E-10 | 0.119348 | 0.066 | 0.054 | 1.94E-06 |
| BACH2     | 1.46E-10 | 0.149794 | 0.079 | 0.053 | 2.18E-06 |
| FBXL20    | 1.58E-10 | 0.130039 | 0.075 | 0.059 | 2.37E-06 |

|           |          |          |       |       |          |
|-----------|----------|----------|-------|-------|----------|
| PGAM2     | 2.15E-10 | 0.226639 | 0.098 | 0.037 | 3.21E-06 |
| PPP1R3F   | 2.33E-10 | 0.204832 | 0.098 | 0.053 | 3.48E-06 |
| DDX60     | 2.34E-10 | -0.10486 | 0.008 | 0.054 | 3.49E-06 |
| AMOTL2    | 2.47E-10 | 0.104396 | 0.162 | 0.177 | 3.68E-06 |
| PIR       | 2.51E-10 | -0.10756 | 0.024 | 0.084 | 3.75E-06 |
| RP5-1177M | 2.51E-10 | 0.31308  | 0.168 | 0.098 | 3.76E-06 |
| HIST1H2BJ | 2.99E-10 | -0.26659 | 0.005 | 0.049 | 4.47E-06 |
| ZNF641    | 3.00E-10 | 0.11457  | 0.064 | 0.053 | 4.48E-06 |
| FBX016    | 3.13E-10 | 0.170386 | 0.098 | 0.058 | 4.67E-06 |
| PDLIM4    | 3.13E-10 | -0.19518 | 0.018 | 0.078 | 4.68E-06 |
| MYH7      | 3.30E-10 | 0.182518 | 0.051 | 0.007 | 4.94E-06 |
| LINC-PINT | 3.33E-10 | 0.160351 | 0.09  | 0.073 | 4.98E-06 |
| LDLRAD4   | 3.43E-10 | 0.107397 | 0.116 | 0.119 | 5.13E-06 |
| TRIQK     | 3.52E-10 | 0.195137 | 0.097 | 0.058 | 5.26E-06 |
| RP11-686C | 3.73E-10 | 0.13469  | 0.064 | 0.058 | 5.58E-06 |
| RP11-1391 | 4.23E-10 | 0.104748 | 0.067 | 0.057 | 6.33E-06 |
| PURG      | 4.36E-10 | 0.120971 | 0.057 | 0.044 | 6.51E-06 |
| PNCK      | 4.51E-10 | 0.177233 | 0.076 | 0.019 | 6.75E-06 |
| CNTN2     | 4.66E-10 | 0.183902 | 0.074 | 0.016 | 6.96E-06 |
| ZFP69B    | 4.69E-10 | 0.16369  | 0.081 | 0.048 | 7.01E-06 |
| CLEC2B    | 5.03E-10 | -0.13269 | 0.026 | 0.088 | 7.51E-06 |
| VIP       | 5.07E-10 | 0.161857 | 0.031 | 0     | 7.58E-06 |
| SRCIN1    | 5.23E-10 | 0.188414 | 0.078 | 0.028 | 7.81E-06 |
| CLMN      | 5.52E-10 | -0.1076  | 0.009 | 0.054 | 8.25E-06 |
| PCDHB7    | 5.53E-10 | 0.195414 | 0.207 | 0.163 | 8.26E-06 |
| GPRIN1    | 5.71E-10 | 0.11553  | 0.106 | 0.106 | 8.54E-06 |
| PEG10     | 5.72E-10 | 0.272613 | 0.335 | 0.242 | 8.55E-06 |
| GPR173    | 5.93E-10 | 0.151547 | 0.078 | 0.057 | 8.87E-06 |
| NR4A2     | 6.19E-10 | 0.191598 | 0.123 | 0.083 | 9.24E-06 |
| WNT5A     | 6.39E-10 | -0.12107 | 0.02  | 0.074 | 9.54E-06 |
| GPR19     | 6.77E-10 | 0.252414 | 0.161 | 0.089 | 1.01E-05 |
| TBC1D9    | 7.22E-10 | 0.134972 | 0.059 | 0.037 | 1.08E-05 |
| ZNF527    | 7.23E-10 | 0.129803 | 0.089 | 0.069 | 1.08E-05 |
| ARSF      | 7.29E-10 | 0.164912 | 0.057 | 0.007 | 1.09E-05 |
| PDE2A     | 7.75E-10 | 0.129158 | 0.043 | 0.002 | 1.16E-05 |
| RP11-2E11 | 7.76E-10 | 0.155056 | 0.093 | 0.063 | 1.16E-05 |
| RADIL     | 8.13E-10 | 0.162548 | 0.071 | 0.037 | 1.21E-05 |
| CLDN15    | 8.21E-10 | 0.110266 | 0.101 | 0.098 | 1.23E-05 |
| CHST9     | 8.35E-10 | -0.10768 | 0.026 | 0.083 | 1.25E-05 |
| RIMS3     | 9.10E-10 | 0.15833  | 0.053 | 0.006 | 1.36E-05 |
| KLF15     | 1.21E-09 | -0.11953 | 0.013 | 0.062 | 1.80E-05 |
| YPEL2     | 1.23E-09 | 0.183405 | 0.077 | 0.03  | 1.84E-05 |
| KCTD16    | 1.28E-09 | -0.12966 | 0.011 | 0.06  | 1.91E-05 |
| GNAS      | 1.32E-09 | -0.16028 | 0.805 | 0.893 | 1.97E-05 |
| ZNF596    | 1.36E-09 | 0.154196 | 0.075 | 0.053 | 2.04E-05 |
| CPEB3     | 1.38E-09 | 0.149459 | 0.052 | 0.007 | 2.07E-05 |
| ADAMTS10  | 1.43E-09 | 0.193608 | 0.108 | 0.06  | 2.14E-05 |
| B4GALNT4  | 1.46E-09 | 0.170785 | 0.103 | 0.075 | 2.18E-05 |
| ASAH2B    | 1.50E-09 | 0.145194 | 0.09  | 0.065 | 2.24E-05 |
| CAP2      | 1.50E-09 | 0.112065 | 0.111 | 0.104 | 2.25E-05 |
| C3orf18   | 1.54E-09 | 0.137911 | 0.066 | 0.043 | 2.31E-05 |

|           |          |          |       |       |          |
|-----------|----------|----------|-------|-------|----------|
| TSHZ2     | 1.56E-09 | 0.239799 | 0.124 | 0.058 | 2.33E-05 |
| ETS2      | 1.64E-09 | 0.14175  | 0.086 | 0.074 | 2.45E-05 |
| RP11-713F | 1.67E-09 | 0.234654 | 0.09  | 0.033 | 2.50E-05 |
| BRSK2     | 1.90E-09 | 0.181392 | 0.106 | 0.069 | 2.84E-05 |
| RHBDL1    | 2.12E-09 | 0.153476 | 0.06  | 0.026 | 3.16E-05 |
| TOMM40L   | 2.25E-09 | 0.100768 | 0.082 | 0.08  | 3.36E-05 |
| TSHZ3     | 2.30E-09 | 0.198877 | 0.085 | 0.041 | 3.44E-05 |
| DOPEY1    | 2.38E-09 | 0.139525 | 0.075 | 0.053 | 3.55E-05 |
| DLG2      | 2.40E-09 | 0.16098  | 0.106 | 0.074 | 3.59E-05 |
| ZNF502    | 2.55E-09 | 0.102876 | 0.078 | 0.075 | 3.81E-05 |
| ZC4H2     | 2.56E-09 | 0.180067 | 0.167 | 0.126 | 3.82E-05 |
| HOXD8     | 2.72E-09 | 0.172517 | 0.104 | 0.058 | 4.07E-05 |
| WNT6      | 2.98E-09 | 0.158365 | 0.044 | 0.004 | 4.46E-05 |
| BSG       | 3.15E-09 | -0.14141 | 0.834 | 0.915 | 4.71E-05 |
| ALOX5AP   | 3.42E-09 | 0.20309  | 0.134 | 0.084 | 5.10E-05 |
| NCAM2     | 3.45E-09 | 0.139499 | 0.127 | 0.111 | 5.16E-05 |
| CACNG2    | 3.56E-09 | 0.224602 | 0.086 | 0.025 | 5.32E-05 |
| PPDPF     | 3.64E-09 | -0.10172 | 0.884 | 0.916 | 5.44E-05 |
| MDK       | 3.77E-09 | 0.118921 | 0.874 | 0.867 | 5.63E-05 |
| HEATR5B   | 3.81E-09 | 0.113711 | 0.066 | 0.06  | 5.69E-05 |
| ESRRG     | 3.91E-09 | 0.221085 | 0.109 | 0.043 | 5.84E-05 |
| SEMA6B    | 3.97E-09 | 0.169132 | 0.09  | 0.056 | 5.94E-05 |
| LOX       | 3.98E-09 | -0.14843 | 0.016 | 0.068 | 5.94E-05 |
| HYAL3     | 4.26E-09 | 0.10521  | 0.04  | 0.03  | 6.37E-05 |
| ZNF554    | 4.27E-09 | 0.134662 | 0.079 | 0.049 | 6.39E-05 |
| RASD1     | 4.53E-09 | 0.239676 | 0.197 | 0.131 | 6.77E-05 |
| TUFT1     | 4.62E-09 | 0.130468 | 0.071 | 0.048 | 6.91E-05 |
| CSDC2     | 4.87E-09 | 0.177594 | 0.074 | 0.02  | 7.28E-05 |
| LRRTM4    | 4.89E-09 | 0.182454 | 0.069 | 0.016 | 7.31E-05 |
| LMTK3     | 4.89E-09 | 0.128568 | 0.042 | 0.02  | 7.31E-05 |
| TBC1D22B  | 4.91E-09 | 0.102737 | 0.074 | 0.068 | 7.34E-05 |
| LHX9      | 4.98E-09 | 0.199492 | 0.082 | 0.026 | 7.44E-05 |
| ZNF783    | 4.98E-09 | 0.142637 | 0.079 | 0.057 | 7.45E-05 |
| SCNN1A    | 5.42E-09 | 0.329416 | 0.14  | 0.074 | 8.10E-05 |
| TMEM176A  | 5.70E-09 | 0.118599 | 0.082 | 0.074 | 8.51E-05 |
| SRSF3     | 5.73E-09 | -0.11362 | 0.861 | 0.943 | 8.57E-05 |
| GMIP      | 6.18E-09 | 0.131774 | 0.058 | 0.035 | 9.23E-05 |
| ZMYM6     | 6.23E-09 | -0.11097 | 0.043 | 0.099 | 9.31E-05 |
| SCML1     | 6.33E-09 | -0.10832 | 0.087 | 0.158 | 9.46E-05 |
| APOL4     | 7.06E-09 | 0.196781 | 0.113 | 0.064 | 0.000105 |
| KCNQ3     | 8.04E-09 | 0.209496 | 0.082 | 0.025 | 0.00012  |
| FAM212B-A | 8.83E-09 | 0.147325 | 0.073 | 0.051 | 0.000132 |
| FRS3      | 8.86E-09 | 0.119642 | 0.064 | 0.046 | 0.000132 |
| UQCR11    | 9.47E-09 | -0.26084 | 0     | 0.022 | 0.000141 |
| NPY       | 9.54E-09 | -0.19126 | 0.027 | 0.088 | 0.000143 |
| GLIPR1L2  | 1.01E-08 | 0.124845 | 0.053 | 0.036 | 0.000151 |
| DTX1      | 1.06E-08 | 0.188401 | 0.084 | 0.041 | 0.000158 |
| CYGB      | 1.07E-08 | 0.139611 | 0.04  | 0.005 | 0.00016  |
| AMBRA1    | 1.08E-08 | 0.114333 | 0.056 | 0.042 | 0.000162 |
| MCM3AP-AS | 1.18E-08 | 0.205863 | 0.093 | 0.046 | 0.000176 |
| ASXL3     | 1.18E-08 | 0.180231 | 0.116 | 0.07  | 0.000177 |



|           |          |          |       |       |          |
|-----------|----------|----------|-------|-------|----------|
| ARHGAP24  | 1.19E-08 | 0.221139 | 0.083 | 0.027 | 0.000178 |
| GABRB1    | 1.21E-08 | 0.156922 | 0.071 | 0.017 | 0.000181 |
| TMEM130   | 1.29E-08 | 0.11375  | 0.043 | 0.009 | 0.000193 |
| RNF150    | 1.29E-08 | 0.16551  | 0.091 | 0.057 | 0.000193 |
| MKNK1     | 1.37E-08 | 0.112711 | 0.085 | 0.077 | 0.000204 |
| SLC9B2    | 1.37E-08 | 0.109966 | 0.094 | 0.081 | 0.000205 |
| HOXC10    | 1.44E-08 | 0.212242 | 0.153 | 0.101 | 0.000215 |
| CAMK4     | 1.48E-08 | 0.176403 | 0.106 | 0.058 | 0.000221 |
| PRPH      | 1.49E-08 | 0.159075 | 0.045 | 0.01  | 0.000222 |
| ALDOA     | 1.56E-08 | -0.18011 | 0.816 | 0.89  | 0.000233 |
| DAB1      | 1.56E-08 | 0.115071 | 0.041 | 0.004 | 0.000233 |
| SPTBN4    | 1.62E-08 | 0.157423 | 0.058 | 0.027 | 0.000242 |
| COMTD1    | 1.63E-08 | 0.11225  | 0.064 | 0.053 | 0.000244 |
| C10orf88  | 1.65E-08 | 0.103493 | 0.065 | 0.054 | 0.000247 |
| SVEP1     | 1.67E-08 | 0.167338 | 0.059 | 0.017 | 0.00025  |
| RP11-455F | 1.71E-08 | 0.106215 | 0.068 | 0.063 | 0.000256 |
| ZNF589    | 1.81E-08 | 0.132881 | 0.09  | 0.069 | 0.00027  |
| CRY2      | 1.82E-08 | 0.126676 | 0.074 | 0.056 | 0.000273 |
| TMEM179   | 1.87E-08 | 0.187601 | 0.128 | 0.081 | 0.000279 |
| ST8SIA5   | 1.89E-08 | 0.140701 | 0.118 | 0.096 | 0.000282 |
| EPB41     | 1.90E-08 | 0.132827 | 0.136 | 0.119 | 0.000284 |
| GJA1      | 1.91E-08 | -0.12213 | 0.011 | 0.054 | 0.000285 |
| SH3RF3    | 1.94E-08 | 0.128462 | 0.06  | 0.04  | 0.00029  |
| RP11-357K | 1.96E-08 | 0.207267 | 0.064 | 0.016 | 0.000293 |
| SH3GL2    | 1.97E-08 | 0.192001 | 0.1   | 0.037 | 0.000294 |
| VWC2L     | 1.97E-08 | 0.145763 | 0.046 | 0.009 | 0.000295 |
| PITX2     | 2.16E-08 | -0.15481 | 0.047 | 0.116 | 0.000324 |
| MAFK      | 2.17E-08 | 0.113625 | 0.052 | 0.031 | 0.000325 |
| ABCG1     | 2.18E-08 | 0.210038 | 0.125 | 0.059 | 0.000326 |
| SIK1      | 2.24E-08 | 0.119285 | 0.064 | 0.056 | 0.000335 |
| PLP1      | 2.28E-08 | -0.11274 | 0.147 | 0.217 | 0.00034  |
| PGBD5     | 2.29E-08 | 0.145952 | 0.057 | 0.035 | 0.000342 |
| ZNF124    | 2.38E-08 | 0.14873  | 0.092 | 0.063 | 0.000355 |
| ST6GAL1   | 2.46E-08 | 0.19325  | 0.082 | 0.044 | 0.000367 |
| ANKRD44   | 2.70E-08 | 0.137597 | 0.108 | 0.085 | 0.000403 |
| HNMT      | 2.71E-08 | -0.11607 | 0.053 | 0.115 | 0.000405 |
| IFIT2     | 2.80E-08 | -0.10083 | 0.007 | 0.046 | 0.000418 |
| MAP3K9    | 2.84E-08 | 0.150196 | 0.057 | 0.015 | 0.000424 |
| S100A8    | 2.92E-08 | 0.139267 | 0.06  | 0.036 | 0.000437 |
| ABCC8     | 3.37E-08 | 0.150808 | 0.053 | 0.011 | 0.000503 |
| PTCHD2    | 3.40E-08 | 0.19386  | 0.068 | 0.023 | 0.000509 |
| ZNF222    | 3.48E-08 | 0.14026  | 0.105 | 0.074 | 0.000521 |
| RGS1      | 3.56E-08 | 0.144278 | 0.174 | 0.146 | 0.000531 |
| SPON2     | 3.61E-08 | 0.136476 | 0.048 | 0.012 | 0.000539 |
| CDKL2     | 3.85E-08 | 0.10622  | 0.037 | 0.002 | 0.000576 |
| ANKRD65   | 3.97E-08 | -0.1585  | 0.008 | 0.046 | 0.000593 |
| FAM13C    | 4.00E-08 | 0.128564 | 0.071 | 0.052 | 0.000598 |
| SLC12A5   | 4.16E-08 | 0.166575 | 0.125 | 0.088 | 0.000621 |
| PRSS27    | 4.93E-08 | 0.131694 | 0.068 | 0.053 | 0.000736 |
| CTC-239J1 | 4.95E-08 | 0.146838 | 0.06  | 0.046 | 0.00074  |
| NAP1L2    | 5.78E-08 | 0.117654 | 0.046 | 0.006 | 0.000864 |

|           |           |           |        |        |           |
|-----------|-----------|-----------|--------|--------|-----------|
| AC005618. | 5. 81E-08 | 0. 192427 | 0. 13  | 0. 084 | 0. 000869 |
| NEU4      | 5. 87E-08 | -0. 21401 | 0. 042 | 0. 109 | 0. 000877 |
| DOCK11    | 5. 88E-08 | 0. 157912 | 0. 066 | 0. 027 | 0. 000879 |
| ANKH      | 5. 99E-08 | 0. 121754 | 0. 152 | 0. 137 | 0. 000895 |
| PDE7B     | 6. 12E-08 | -0. 11257 | 0. 002 | 0. 032 | 0. 000915 |
| NEGR1     | 6. 37E-08 | 0. 198215 | 0. 09  | 0. 036 | 0. 000953 |
| ZGLP1     | 6. 49E-08 | 0. 124692 | 0. 066 | 0. 043 | 0. 000969 |
| HNRNPA1   | 6. 88E-08 | -0. 11854 | 0. 94  | 0. 98  | 0. 001028 |
| HOXA10    | 7. 30E-08 | 0. 230026 | 0. 27  | 0. 195 | 0. 001091 |
| EN2       | 7. 38E-08 | 0. 177964 | 0. 095 | 0. 059 | 0. 001102 |
| TMBIM6    | 7. 81E-08 | -0. 10473 | 0. 803 | 0. 893 | 0. 001167 |
| PKNOX2    | 7. 94E-08 | 0. 139731 | 0. 062 | 0. 025 | 0. 001187 |
| CROCC     | 8. 03E-08 | 0. 125114 | 0. 068 | 0. 052 | 0. 001201 |
| ZNF582-AS | 8. 07E-08 | 0. 153889 | 0. 113 | 0. 086 | 0. 001206 |
| GABRB3    | 8. 14E-08 | 0. 178657 | 0. 067 | 0. 019 | 0. 001217 |
| MURC      | 8. 35E-08 | 0. 160099 | 0. 081 | 0. 048 | 0. 001248 |
| IGLON5    | 8. 67E-08 | 0. 199295 | 0. 146 | 0. 085 | 0. 001295 |
| NT5DC3    | 8. 91E-08 | 0. 11211  | 0. 068 | 0. 046 | 0. 001332 |
| CSGALNACT | 9. 08E-08 | 0. 106311 | 0. 065 | 0. 058 | 0. 001357 |
| SLC39A8   | 9. 77E-08 | -0. 13119 | 0. 006 | 0. 042 | 0. 00146  |
| HLA-DMA   | 1. 02E-07 | 0. 115344 | 0. 115 | 0. 107 | 0. 001519 |
| HOXB3     | 1. 04E-07 | 0. 111705 | 0. 099 | 0. 102 | 0. 001555 |
| NAV3      | 1. 19E-07 | 0. 133015 | 0. 053 | 0. 019 | 0. 001781 |
| MXD1      | 1. 20E-07 | 0. 11002  | 0. 116 | 0. 104 | 0. 001798 |
| ITM2A     | 1. 21E-07 | 0. 267154 | 0. 124 | 0. 056 | 0. 001804 |
| VAMP8     | 1. 25E-07 | 0. 119083 | 0. 062 | 0. 049 | 0. 001872 |
| PIP5K1B   | 1. 28E-07 | 0. 146929 | 0. 054 | 0. 014 | 0. 001914 |
| RIMS1     | 1. 34E-07 | 0. 173488 | 0. 083 | 0. 035 | 0. 002    |
| VWA3B     | 1. 35E-07 | 0. 103496 | 0. 048 | 0. 036 | 0. 002015 |
| LYG2      | 1. 40E-07 | 0. 145539 | 0. 063 | 0. 027 | 0. 002093 |
| PIK3IP1   | 1. 49E-07 | 0. 163736 | 0. 064 | 0. 026 | 0. 002232 |
| HLA-DRB1  | 1. 50E-07 | 0. 105703 | 0. 189 | 0. 172 | 0. 002237 |
| CAMKK1    | 1. 61E-07 | -0. 11055 | 0. 024 | 0. 074 | 0. 002399 |
| FAM50B    | 1. 61E-07 | 0. 172451 | 0. 079 | 0. 026 | 0. 0024   |
| HOXB5     | 1. 69E-07 | 0. 197381 | 0. 07  | 0. 036 | 0. 002521 |
| CTIF      | 1. 81E-07 | 0. 128867 | 0. 089 | 0. 065 | 0. 002703 |
| PHF21B    | 1. 81E-07 | 0. 111266 | 0. 072 | 0. 063 | 0. 002708 |
| PRKAG2-AS | 1. 82E-07 | 0. 173344 | 0. 115 | 0. 088 | 0. 002715 |
| FAM133A   | 1. 82E-07 | 0. 169841 | 0. 071 | 0. 025 | 0. 002722 |
| FERMT1    | 1. 93E-07 | -0. 10191 | 0. 046 | 0. 101 | 0. 002888 |
| KCNN2     | 1. 96E-07 | 0. 135704 | 0. 076 | 0. 057 | 0. 002922 |
| HCN3      | 2. 29E-07 | 0. 132082 | 0. 078 | 0. 053 | 0. 003425 |
| LINC01122 | 2. 31E-07 | 0. 188191 | 0. 086 | 0. 031 | 0. 003447 |
| SEMA4A    | 2. 61E-07 | 0. 125618 | 0. 047 | 0. 011 | 0. 003899 |
| KCNC1     | 2. 61E-07 | 0. 158894 | 0. 079 | 0. 036 | 0. 003904 |
| TNFSF13B  | 2. 66E-07 | -0. 10817 | 0. 018 | 0. 062 | 0. 003972 |
| COCH      | 2. 72E-07 | 0. 119596 | 0. 105 | 0. 093 | 0. 004063 |
| LINC00884 | 2. 97E-07 | 0. 126559 | 0. 044 | 0. 014 | 0. 004443 |
| PCYT1B    | 3. 07E-07 | 0. 13774  | 0. 07  | 0. 042 | 0. 004592 |
| GABBR2    | 3. 22E-07 | 0. 13343  | 0. 062 | 0. 025 | 0. 004809 |
| DGKB      | 3. 24E-07 | -0. 12094 | 0. 052 | 0. 112 | 0. 004836 |

|           |          |          |       |       |          |
|-----------|----------|----------|-------|-------|----------|
| TRPC1     | 3.48E-07 | 0.104328 | 0.054 | 0.041 | 0.005207 |
| RP11-527E | 3.59E-07 | 0.154585 | 0.049 | 0.011 | 0.005372 |
| KCNN1     | 3.67E-07 | 0.13013  | 0.046 | 0.016 | 0.005478 |
| VSTM2B    | 3.73E-07 | 0.109488 | 0.045 | 0.007 | 0.005572 |
| GPLD1     | 3.75E-07 | 0.127377 | 0.055 | 0.035 | 0.005603 |
| RGS14     | 3.75E-07 | 0.126766 | 0.056 | 0.019 | 0.005605 |
| ARHGDIG   | 3.83E-07 | 0.124701 | 0.051 | 0.021 | 0.005724 |
| WNT7A     | 3.92E-07 | 0.144002 | 0.053 | 0.021 | 0.005853 |
| LRP1B     | 3.97E-07 | 0.104624 | 0.048 | 0.037 | 0.005932 |
| MROH8     | 4.08E-07 | -0.10218 | 0.036 | 0.084 | 0.006096 |
| DSCAML1   | 4.58E-07 | 0.170059 | 0.077 | 0.035 | 0.006842 |
| CACNA1C   | 4.71E-07 | 0.134157 | 0.05  | 0.01  | 0.007037 |
| UNC79     | 4.89E-07 | 0.135271 | 0.054 | 0.026 | 0.007301 |
| HAND2     | 5.00E-07 | 0.149969 | 0.066 | 0.026 | 0.007479 |
| SSTR2     | 5.64E-07 | 0.147782 | 0.047 | 0.021 | 0.008425 |
| MDGA2     | 5.67E-07 | 0.141182 | 0.048 | 0.01  | 0.008475 |
| DLL3      | 6.00E-07 | 0.210257 | 0.416 | 0.316 | 0.008962 |
| HHIP      | 6.29E-07 | -0.10063 | 0.008 | 0.042 | 0.009397 |
| ALX3      | 6.39E-07 | 0.16771  | 0.09  | 0.041 | 0.009552 |
| RP11-480C | 6.95E-07 | 0.14357  | 0.075 | 0.037 | 0.010393 |
| HOXA-AS2  | 7.42E-07 | 0.192061 | 0.131 | 0.077 | 0.011085 |
| FMNL1     | 7.72E-07 | 0.132352 | 0.059 | 0.025 | 0.011538 |
| MYCL      | 7.77E-07 | 0.143215 | 0.056 | 0.017 | 0.011619 |
| ADCYAP1R1 | 8.48E-07 | 0.123323 | 0.075 | 0.047 | 0.01267  |
| ABLIM2    | 8.63E-07 | 0.143627 | 0.071 | 0.038 | 0.012895 |
| MT1G      | 8.65E-07 | -0.12623 | 0.022 | 0.065 | 0.012926 |
| TNFRSF25  | 8.79E-07 | 0.114509 | 0.04  | 0.006 | 0.01313  |
| SERPING1  | 9.71E-07 | 0.134704 | 0.092 | 0.065 | 0.014511 |
| PCDHB14   | 1.03E-06 | 0.140997 | 0.08  | 0.049 | 0.015366 |
| GFAP      | 1.16E-06 | -0.20144 | 0.255 | 0.354 | 0.017332 |
| KCNJ6     | 1.23E-06 | 0.137509 | 0.04  | 0.01  | 0.018406 |
| ZFP69     | 1.25E-06 | 0.123403 | 0.049 | 0.014 | 0.018627 |
| SMOC1     | 1.28E-06 | -0.15757 | 0.028 | 0.077 | 0.019152 |
| LRRC4     | 1.47E-06 | 0.15066  | 0.124 | 0.094 | 0.021961 |
| CACNA2D2  | 1.82E-06 | 0.140894 | 0.044 | 0.009 | 0.027169 |
| NDRG2     | 1.82E-06 | -0.11127 | 0.312 | 0.385 | 0.027239 |
| ZXDA      | 1.93E-06 | 0.108397 | 0.046 | 0.026 | 0.028813 |
| FCGBP     | 1.97E-06 | 0.135853 | 0.071 | 0.051 | 0.029502 |
| CACNB1    | 2.01E-06 | 0.124781 | 0.06  | 0.023 | 0.030015 |
| LINC00882 | 2.06E-06 | 0.12077  | 0.058 | 0.032 | 0.030764 |
| VM01      | 2.12E-06 | 0.106876 | 0.058 | 0.04  | 0.031741 |
| L3MBTL3   | 2.18E-06 | 0.121743 | 0.049 | 0.016 | 0.032607 |
| LA16c-444 | 2.41E-06 | 0.104155 | 0.029 | 0.002 | 0.035953 |
| LYZ       | 2.50E-06 | 0.125418 | 0.073 | 0.048 | 0.037289 |
| GABRA2    | 2.50E-06 | 0.122185 | 0.049 | 0.011 | 0.037397 |
| SPOCK3    | 2.61E-06 | 0.129229 | 0.029 | 0.004 | 0.038951 |
| ZNF518B   | 2.62E-06 | 0.119591 | 0.057 | 0.021 | 0.039154 |
| MAPT-AS1  | 2.71E-06 | 0.185805 | 0.06  | 0.019 | 0.040446 |
| HOXC8     | 2.74E-06 | 0.183697 | 0.107 | 0.062 | 0.040879 |
| C19orf81  | 2.77E-06 | 0.186133 | 0.092 | 0.043 | 0.041455 |
| TUB       | 2.82E-06 | 0.115273 | 0.048 | 0.03  | 0.042119 |

|           |          |          |       |       |          |
|-----------|----------|----------|-------|-------|----------|
| FGD3      | 2.85E-06 | 0.118883 | 0.047 | 0.012 | 0.042529 |
| SLC03A1   | 3.00E-06 | 0.117954 | 0.045 | 0.011 | 0.044873 |
| FBX041    | 3.06E-06 | 0.13393  | 0.049 | 0.021 | 0.045723 |
| LINC01117 | 3.06E-06 | 0.103676 | 0.06  | 0.053 | 0.045793 |
| RGS7      | 3.13E-06 | 0.143808 | 0.056 | 0.023 | 0.046759 |
| LRRTM1    | 3.22E-06 | 0.155867 | 0.09  | 0.052 | 0.048128 |
| TFR2      | 3.43E-06 | 0.102736 | 0.053 | 0.041 | 0.051315 |
| HNRNPA2B1 | 3.53E-06 | -0.11137 | 0.958 | 0.974 | 0.052733 |
| BTBD8     | 3.59E-06 | 0.107477 | 0.042 | 0.017 | 0.053656 |
| EPHX2     | 3.64E-06 | 0.11831  | 0.053 | 0.028 | 0.054444 |
| MYCNOS    | 3.72E-06 | 0.165108 | 0.06  | 0.026 | 0.055574 |
| CLSTN2    | 3.72E-06 | 0.165814 | 0.078 | 0.033 | 0.055628 |
| FPR1      | 3.88E-06 | 0.118111 | 0.046 | 0.014 | 0.057985 |
| KIAA1211  | 3.98E-06 | 0.108022 | 0.084 | 0.073 | 0.059485 |
| KIF26A    | 4.03E-06 | 0.143312 | 0.05  | 0.015 | 0.06027  |
| SRC       | 4.07E-06 | 0.129098 | 0.091 | 0.057 | 0.060861 |
| MAP2K6    | 4.98E-06 | 0.102451 | 0.055 | 0.036 | 0.074364 |
| ZNF737    | 5.07E-06 | 0.146842 | 0.083 | 0.04  | 0.075761 |
| LAPTM5    | 5.24E-06 | 0.170343 | 0.159 | 0.096 | 0.078306 |
| PSMA2     | 5.47E-06 | -0.17175 | 0.001 | 0.02  | 0.081723 |
| HYDIN     | 5.64E-06 | 0.114869 | 0.047 | 0.016 | 0.084271 |
| RP11-266J | 6.20E-06 | 0.105319 | 0.041 | 0.014 | 0.092713 |
| MAB21L1   | 6.31E-06 | 0.142877 | 0.059 | 0.028 | 0.09434  |
| FCGR3A    | 6.66E-06 | 0.129678 | 0.077 | 0.048 | 0.099468 |
| RNF122    | 6.68E-06 | 0.143085 | 0.07  | 0.04  | 0.099836 |
| WNK2      | 6.85E-06 | 0.136864 | 0.069 | 0.031 | 0.102428 |
| HINT1     | 6.91E-06 | -0.10792 | 0.922 | 0.963 | 0.103251 |
| ARRB1     | 7.81E-06 | 0.109485 | 0.038 | 0.011 | 0.116725 |
| FAM26F    | 7.85E-06 | 0.101713 | 0.034 | 0.006 | 0.117369 |
| SIM2      | 8.05E-06 | 0.155393 | 0.068 | 0.025 | 0.120367 |
| EBF1      | 8.72E-06 | 0.15412  | 0.073 | 0.041 | 0.130285 |
| RP13-188A | 8.87E-06 | 0.140784 | 0.051 | 0.017 | 0.132544 |
| CD247     | 9.07E-06 | 0.145328 | 0.046 | 0.02  | 0.135475 |
| PNMAL2    | 9.80E-06 | 0.109521 | 0.041 | 0.019 | 0.146476 |
| CD163     | 1.06E-05 | 0.130288 | 0.064 | 0.036 | 0.159123 |
| NYAP2     | 1.10E-05 | 0.134419 | 0.049 | 0.014 | 0.164556 |
| C11orf63  | 1.11E-05 | 0.121885 | 0.058 | 0.021 | 0.165296 |
| STX1B     | 1.11E-05 | 0.142866 | 0.065 | 0.028 | 0.165735 |
| RAMP2-AS1 | 1.11E-05 | 0.1172   | 0.045 | 0.02  | 0.165912 |
| RP11-259K | 1.12E-05 | 0.156054 | 0.071 | 0.03  | 0.167347 |
| WDR66     | 1.18E-05 | 0.102892 | 0.042 | 0.019 | 0.176801 |
| NOVA1     | 1.36E-05 | 0.13425  | 0.876 | 0.879 | 0.203599 |
| MMP24     | 1.38E-05 | 0.124041 | 0.063 | 0.036 | 0.205631 |
| ARL15     | 1.49E-05 | 0.108287 | 0.082 | 0.065 | 0.222633 |
| ZSWIM5    | 1.60E-05 | 0.12268  | 0.041 | 0.012 | 0.239551 |
| RP11-725F | 1.78E-05 | 0.149839 | 0.078 | 0.048 | 0.265437 |
| OPCML     | 1.79E-05 | 0.134303 | 0.059 | 0.021 | 0.268016 |
| NFE2L3    | 1.83E-05 | 0.130704 | 0.075 | 0.044 | 0.272812 |
| CTGF      | 1.93E-05 | 0.134451 | 0.045 | 0.028 | 0.288572 |
| WFDC2     | 2.25E-05 | 0.106417 | 0.081 | 0.067 | 0.33653  |
| ASPDH     | 2.27E-05 | 0.114179 | 0.038 | 0.009 | 0.33849  |

|           |          |          |       |       |          |
|-----------|----------|----------|-------|-------|----------|
| NDUFB8    | 2.44E-05 | -0.10524 | 0     | 0.012 | 0.364745 |
| BSN       | 2.47E-05 | 0.129199 | 0.054 | 0.021 | 0.369406 |
| RHCE      | 2.52E-05 | 0.120187 | 0.044 | 0.012 | 0.376478 |
| HLA-G     | 2.54E-05 | 0.116115 | 0.043 | 0.02  | 0.379452 |
| PLIN2     | 2.75E-05 | 0.139329 | 0.154 | 0.115 | 0.410862 |
| CAV1      | 2.78E-05 | -0.23522 | 0.023 | 0.063 | 0.415808 |
| PSD       | 2.81E-05 | 0.106036 | 0.061 | 0.038 | 0.420556 |
| ADORA3    | 2.90E-05 | 0.113379 | 0.059 | 0.037 | 0.433967 |
| PLCL1     | 3.08E-05 | 0.121442 | 0.064 | 0.03  | 0.460373 |
| SLC6A11   | 3.20E-05 | 0.103442 | 0.046 | 0.016 | 0.478643 |
| DIO2      | 3.38E-05 | -0.11048 | 0.01  | 0.04  | 0.505064 |
| S100A1    | 3.51E-05 | -0.10731 | 0.002 | 0.022 | 0.524025 |
| SUSD4     | 3.54E-05 | 0.14468  | 0.08  | 0.048 | 0.529089 |
| AC068535. | 3.64E-05 | 0.174016 | 0.083 | 0.049 | 0.543647 |
| PIRT      | 3.67E-05 | 0.10839  | 0.031 | 0.006 | 0.548755 |
| CD55      | 4.32E-05 | 0.109762 | 0.039 | 0.015 | 0.644862 |
| HOXC-AS1  | 4.38E-05 | 0.142476 | 0.077 | 0.051 | 0.654499 |
| CACNA2D1  | 5.06E-05 | 0.155271 | 0.114 | 0.079 | 0.755424 |
| SYT6      | 5.48E-05 | 0.126962 | 0.096 | 0.067 | 0.818949 |
| HOXA4     | 5.61E-05 | 0.103543 | 0.071 | 0.028 | 0.83905  |
| NDUFA4L2  | 5.77E-05 | 0.131687 | 0.092 | 0.044 | 0.862513 |
| STXBP5L   | 6.00E-05 | 0.116848 | 0.053 | 0.023 | 0.896376 |
| RP11-545I | 6.94E-05 | 0.106147 | 0.045 | 0.027 | 1        |
| NR2F2     | 7.04E-05 | -0.11925 | 0.039 | 0.084 | 1        |
| HSD17B14  | 7.19E-05 | 0.130356 | 0.063 | 0.037 | 1        |
| VAT1L     | 7.39E-05 | 0.134055 | 0.064 | 0.027 | 1        |
| NMNAT3    | 7.90E-05 | 0.121992 | 0.082 | 0.044 | 1        |
| HOXA9     | 8.30E-05 | 0.126765 | 0.121 | 0.104 | 1        |
| HOXB-AS1  | 8.33E-05 | 0.108985 | 0.064 | 0.054 | 1        |
| S100A4    | 9.03E-05 | 0.125668 | 0.089 | 0.051 | 1        |
| CDKL5     | 9.09E-05 | 0.102466 | 0.038 | 0.015 | 1        |
| STC2      | 9.12E-05 | 0.141137 | 0.075 | 0.06  | 1        |
| DHRS2     | 9.50E-05 | -0.17924 | 0.001 | 0.016 | 1        |
| ANKRD53   | 0.000101 | 0.124681 | 0.057 | 0.026 | 1        |
| NALCN     | 0.000115 | 0.104996 | 0.044 | 0.017 | 1        |
| ARPP21    | 0.00014  | 0.138244 | 0.095 | 0.067 | 1        |
| ZFPM2     | 0.000143 | 0.121779 | 0.088 | 0.073 | 1        |
| SLC16A7   | 0.000164 | 0.1044   | 0.048 | 0.02  | 1        |
| RP11-436K | 0.000169 | 0.114199 | 0.096 | 0.07  | 1        |
| GPR183    | 0.00017  | 0.138669 | 0.083 | 0.044 | 1        |
| CPPED1    | 0.000181 | 0.103027 | 0.038 | 0.014 | 1        |
| AC114730. | 0.000185 | -0.11415 | 0.02  | 0.053 | 1        |
| JPH3      | 0.000276 | 0.100289 | 0.048 | 0.017 | 1        |
| GPX4      | 0.000316 | -0.10149 | 0.88  | 0.917 | 1        |
| PLCL2     | 0.00032  | 0.101745 | 0.06  | 0.032 | 1        |
| SERPINA1  | 0.000331 | 0.117431 | 0.057 | 0.027 | 1        |
| NHLH2     | 0.000332 | 0.135763 | 0.051 | 0.023 | 1        |
| MGST1     | 0.00034  | -0.13098 | 0.02  | 0.052 | 1        |
| GALNT13   | 0.000466 | 0.124771 | 0.098 | 0.079 | 1        |
| VSIG4     | 0.000503 | 0.103241 | 0.092 | 0.057 | 1        |
| GBP4      | 0.000648 | -0.12829 | 0.027 | 0.062 | 1        |

|           |          |          |       |       |   |
|-----------|----------|----------|-------|-------|---|
| AC073283. | 0.000688 | 0.108722 | 0.064 | 0.04  | 1 |
| THNSL2    | 0.000722 | 0.119199 | 0.039 | 0.015 | 1 |
| HOXB2     | 0.000765 | 0.131076 | 0.236 | 0.207 | 1 |
| IGF2      | 0.000957 | -0.15929 | 0.002 | 0.016 | 1 |
| FGF12     | 0.000969 | 0.150314 | 0.132 | 0.093 | 1 |
| NKAIN4    | 0.001069 | -0.13643 | 0.154 | 0.216 | 1 |
| NANOS1    | 0.001172 | 0.112756 | 0.059 | 0.035 | 1 |
| GUCY1B3   | 0.00122  | 0.111006 | 0.079 | 0.06  | 1 |
| ZBTB16    | 0.002765 | 0.114007 | 0.2   | 0.174 | 1 |
| H3F3C     | 0.003253 | -0.1118  | 0.024 | 0.048 | 1 |
| NTN4      | 0.004964 | 0.102111 | 0.064 | 0.035 | 1 |
| SST       | 0.005989 | 0.108192 | 0.016 | 0.002 | 1 |
| HSPA6     | 0.009834 | 0.157019 | 0.086 | 0.063 | 1 |
| C10orf10  | 0.053278 | -0.19805 | 0.02  | 0.037 | 1 |
| FABP5     | 0.199555 | -0.12456 | 0.357 | 0.338 | 1 |
| HLA-A     | 0.299448 | -0.11218 | 0.816 | 0.841 | 1 |
