# Supplementary material for: A Novel Molecular Classification Method for Glioblastoma Based on Tumor Cell Differentiation Trajectories
Source: Hindawi journal article supplement (doi:10.1155/2023/2826815), 2023-02-22
Supplement: f8 [file 2826815.f8.pdf]

|          | p_val     | avg_logFC | pct.1 | pct.2 | p_val_adj             |
|----------|-----------|-----------|-------|-------|-----------------------|
| ZWINT    | 0         | -1.22286  | 0.021 | 0.7   | 0                     |
| NUF2     | 0         | -1.25918  | 0.012 | 0.669 | 0                     |
| SGOL1    | 0         | -1.25999  | 0.005 | 0.698 | 0                     |
| TYMS     | 0         | -1.32476  | 0.079 | 0.802 | 0                     |
| CENPU    | 0         | -1.36516  | 0.031 | 0.772 | 0                     |
| CDK1     | 0         | -1.4535   | 0.025 | 0.717 | 0                     |
| UBE2T    | 0         | -1.46367  | 0.054 | 0.835 | 0                     |
| KIAA0101 | 0         | -1.46976  | 0.034 | 0.769 | 0                     |
| FAM64A   | 0         | -1.49497  | 0.01  | 0.717 | 0                     |
| PBK      | 0         | -1.62211  | 0.017 | 0.802 | 0                     |
| CENPF    | 0         | -1.63856  | 0.034 | 0.772 | 0                     |
| BIRC5    | 0         | -1.68635  | 0.025 | 0.809 | 0                     |
| NUSAP1   | 0         | -1.68695  | 0.032 | 0.814 | 0                     |
| TOP2A    | 0         | -1.71731  | 0.02  | 0.785 | 0                     |
| UBE2C    | 0         | -1.81904  | 0.039 | 0.833 | 0                     |
| SMC4     | 1.5316035 | -1.35777  | 0.136 | 0.859 | 2.28882827354999e-318 |
| MKI67    | 2.2145998 | -1.28005  | 0.007 | 0.637 | 3.30949801721306e-315 |
| RRM2     | 7.0188447 | -1.32401  | 0.009 | 0.647 | 1.04889616459785e-314 |
| HMGB2    | 2.1034561 | -1.19379  | 0.36  | 0.977 | 3.14340492081735e-310 |
| TPX2     | 2.1332280 | -1.38167  | 0.032 | 0.69  | 3.18789596367352e-310 |
| PRC1     | #####     | -1.26222  | 0.033 | 0.702 | #####                 |
| CENPK    | #####     | -1.15737  | 0.039 | 0.71  | #####                 |
| MAD2L1   | #####     | -1.21196  | 0.098 | 0.814 | #####                 |
| HIST1H4C | #####     | -1.51388  | 0.203 | 0.851 | #####                 |
| SPC25    | #####     | -1.15708  | 0.011 | 0.62  | #####                 |
| CHI3L1   | #####     | 1.963068  | 0.845 | 0.506 | #####                 |
| CCNA2    | #####     | -1.1424   | 0.008 | 0.601 | #####                 |
| STMN1    | #####     | -1.03895  | 0.426 | 0.995 | #####                 |
| UBE2S    | #####     | -1.42973  | 0.166 | 0.812 | #####                 |
| GTSE1    | #####     | -1.11967  | 0.015 | 0.614 | #####                 |
| HMGB3    | #####     | -1.23198  | 0.126 | 0.823 | #####                 |
| CENPM    | #####     | -1.06347  | 0.015 | 0.615 | #####                 |
| AURKB    | #####     | -1.15938  | 0.007 | 0.58  | #####                 |
| FTL      | #####     | 0.887242  | 0.99  | 0.981 | #####                 |
| LMNB1    | #####     | -1.14129  | 0.055 | 0.707 | #####                 |
| MT1X     | #####     | 1.560649  | 0.844 | 0.614 | #####                 |
| CKAP2L   | #####     | -1.04417  | 0.008 | 0.574 | #####                 |
| CDKN3    | #####     | -1.34532  | 0.04  | 0.665 | #####                 |
| FOXM1    | #####     | -0.9456   | 0.007 | 0.568 | #####                 |
| KIFC1    | #####     | -1.00104  | 0.014 | 0.593 | #####                 |
| CRYAB    | #####     | 1.710304  | 0.831 | 0.506 | #####                 |
| MXD3     | #####     | -1.06067  | 0.016 | 0.59  | #####                 |
| SOD2     | #####     | 1.687139  | 0.754 | 0.443 | #####                 |
| CENPV    | #####     | -1.1241   | 0.074 | 0.707 | #####                 |
| PTTG1    | #####     | -1.35919  | 0.192 | 0.831 | #####                 |
| HJURP    | #####     | -1.01924  | 0.004 | 0.525 | #####                 |
| CKAP2    | #####     | -1.19564  | 0.079 | 0.711 | #####                 |
| CENPN    | #####     | -1.03871  | 0.038 | 0.636 | #####                 |
| CCNB2    | #####     | -1.21971  | 0.013 | 0.56  | #####                 |
| TACC3    | #####     | -0.98667  | 0.015 | 0.57  | #####                 |

|          |       |          |       |       |       |
|----------|-------|----------|-------|-------|-------|
| TMPO     | ##### | -1.04741 | 0.086 | 0.731 | ##### |
| H2AFX    | ##### | -1.16582 | 0.162 | 0.783 | ##### |
| ASPM     | ##### | -1.09055 | 0.009 | 0.535 | ##### |
| NDC80    | ##### | -1.02483 | 0.009 | 0.53  | ##### |
| EZH2     | ##### | -0.99522 | 0.072 | 0.688 | ##### |
| CDC20    | ##### | -1.28699 | 0.016 | 0.543 | ##### |
| CDCA5    | ##### | -0.88458 | 0.009 | 0.523 | ##### |
| SGOL2    | ##### | -1.12511 | 0.052 | 0.633 | ##### |
| ASF1B    | ##### | -0.95349 | 0.024 | 0.573 | ##### |
| CENPW    | ##### | -0.9598  | 0.041 | 0.615 | ##### |
| ORC6     | ##### | -0.9876  | 0.052 | 0.641 | ##### |
| NCAPG    | ##### | -0.86513 | 0.007 | 0.506 | ##### |
| TK1      | ##### | -0.95469 | 0.014 | 0.533 | ##### |
| KIF2C    | ##### | -0.92294 | 0.005 | 0.496 | ##### |
| SPC24    | ##### | -0.92024 | 0.01  | 0.517 | ##### |
| C21orf58 | ##### | -0.83975 | 0.011 | 0.516 | ##### |
| CENPH    | ##### | -0.93973 | 0.093 | 0.71  | ##### |
| CDCA3    | ##### | -1.05722 | 0.009 | 0.509 | ##### |
| SMC2     | ##### | -1.03983 | 0.151 | 0.78  | ##### |
| CENPE    | ##### | -1.11521 | 0.013 | 0.517 | ##### |
| MELK     | ##### | -0.85715 | 0.012 | 0.515 | ##### |
| RAD51AP1 | ##### | -0.90011 | 0.016 | 0.53  | ##### |
| TMSB15A  | ##### | -1.02738 | 0.056 | 0.635 | ##### |
| MYBL2    | ##### | -0.90215 | 0.007 | 0.491 | ##### |
| CLU      | ##### | 1.157008 | 0.969 | 0.828 | ##### |
| CKS2     | ##### | -1.12174 | 0.228 | 0.846 | ##### |
| HES6     | ##### | -1.25903 | 0.135 | 0.752 | ##### |
| DHFR     | ##### | -0.99392 | 0.073 | 0.66  | ##### |
| NUDT1    | ##### | -0.86067 | 0.21  | 0.842 | ##### |
| CENPA    | ##### | -1.0544  | 0.015 | 0.504 | ##### |
| NAMPT    | ##### | 1.685599 | 0.683 | 0.293 | ##### |
| DEK      | ##### | -0.96895 | 0.311 | 0.87  | ##### |
| ESCO2    | ##### | -0.786   | 0.005 | 0.462 | ##### |
| ECT2     | ##### | -0.87656 | 0.018 | 0.512 | ##### |
| GGH      | ##### | -0.92038 | 0.199 | 0.822 | ##### |
| RNASEH2A | ##### | -0.87719 | 0.156 | 0.774 | ##### |
| MARCKSL1 | ##### | -0.94937 | 0.382 | 0.906 | ##### |
| GLUL     | ##### | 1.122213 | 0.812 | 0.732 | ##### |
| CHI3L2   | ##### | 2.294984 | 0.592 | 0.059 | ##### |
| SHCBP1   | ##### | -0.7561  | 0.009 | 0.467 | ##### |
| PKMYT1   | ##### | -0.77076 | 0.008 | 0.462 | ##### |
| CKB      | ##### | -0.84436 | 0.455 | 0.968 | ##### |
| RACGAP1  | ##### | -0.90208 | 0.045 | 0.573 | ##### |
| KIF23    | ##### | -0.83405 | 0.008 | 0.456 | ##### |
| GINS2    | ##### | -1.0162  | 0.036 | 0.541 | ##### |
| DLGAP5   | ##### | -0.86399 | 0.003 | 0.43  | ##### |
| CDCA8    | ##### | -0.92248 | 0.008 | 0.456 | ##### |
| H2AFV    | ##### | -0.8597  | 0.381 | 0.925 | ##### |
| ASCL1    | ##### | -1.0267  | 0.057 | 0.594 | ##### |
| AURKA    | ##### | -1.09201 | 0.022 | 0.502 | ##### |
| MARCKS   | ##### | -0.93303 | 0.3   | 0.87  | ##### |

|           |       |          |       |       |       |
|-----------|-------|----------|-------|-------|-------|
| MND1      | ##### | -0.74093 | 0.01  | 0.456 | ##### |
| CCNB1     | ##### | -1.13936 | 0.064 | 0.599 | ##### |
| NCAPH     | ##### | -0.75642 | 0.004 | 0.422 | ##### |
| SKA3      | ##### | -0.66356 | 0.004 | 0.419 | ##### |
| SPAG5     | ##### | -0.79153 | 0.013 | 0.462 | ##### |
| TROAP     | ##### | -0.87003 | 0.007 | 0.436 | ##### |
| S100A6    | ##### | 1.274052 | 0.84  | 0.62  | ##### |
| FAM181B   | ##### | -0.97765 | 0.048 | 0.552 | ##### |
| KIF15     | ##### | -0.70751 | 0.007 | 0.428 | ##### |
| S100A10   | ##### | 1.131129 | 0.741 | 0.542 | ##### |
| POC1A     | ##### | -0.79302 | 0.026 | 0.494 | ##### |
| MGST1     | ##### | 1.973136 | 0.577 | 0.052 | ##### |
| CD44      | ##### | 1.512141 | 0.64  | 0.285 | ##### |
| PRR11     | ##### | -0.77511 | 0.017 | 0.46  | ##### |
| H1FX      | ##### | -0.95199 | 0.173 | 0.749 | ##### |
| OIP5      | ##### | -0.73168 | 0.007 | 0.423 | ##### |
| DTYMK     | ##### | -0.8194  | 0.264 | 0.842 | ##### |
| SKA2      | ##### | -0.88912 | 0.166 | 0.735 | ##### |
| SPP1      | ##### | 1.137098 | 0.856 | 0.753 | ##### |
| BUB1      | ##### | -0.81359 | 0.008 | 0.421 | ##### |
| FXVD6     | ##### | -0.79693 | 0.331 | 0.902 | ##### |
| KIF4A     | ##### | -0.71234 | 0.007 | 0.414 | ##### |
| DEPDC1    | ##### | -0.73577 | 0.007 | 0.414 | ##### |
| TRIP13    | ##### | -0.65126 | 0.018 | 0.453 | ##### |
| CCDC34    | ##### | -0.88756 | 0.135 | 0.696 | ##### |
| CDT1      | ##### | -0.84049 | 0.022 | 0.469 | ##### |
| PLK1      | ##### | -1.04218 | 0.019 | 0.458 | ##### |
| NEK2      | ##### | -0.82124 | 0.005 | 0.405 | ##### |
| CLSPN     | ##### | -0.86653 | 0.025 | 0.475 | ##### |
| NT5DC2    | ##### | -0.74546 | 0.054 | 0.546 | ##### |
| HNRNPD    | ##### | -0.87763 | 0.215 | 0.778 | ##### |
| TCF12     | ##### | -0.83245 | 0.088 | 0.615 | ##### |
| FANCI     | ##### | -0.67962 | 0.011 | 0.423 | ##### |
| ODC1      | ##### | -0.91186 | 0.253 | 0.806 | ##### |
| ARHGAP11A | ##### | -0.7164  | 0.006 | 0.401 | ##### |
| ATAD2     | ##### | -0.81651 | 0.044 | 0.52  | ##### |
| MIS18BP1  | ##### | -0.75176 | 0.031 | 0.486 | ##### |
| PGK1      | ##### | 0.746329 | 0.772 | 0.804 | ##### |
| C8orf4    | ##### | 1.56299  | 0.614 | 0.298 | ##### |
| CHAF1A    | ##### | -0.75739 | 0.04  | 0.507 | ##### |
| CASC5     | ##### | -0.62003 | 0.004 | 0.385 | ##### |
| CD74      | ##### | 1.333077 | 0.805 | 0.527 | ##### |
| SERPING1  | ##### | 1.978002 | 0.548 | 0.065 | ##### |
| RANBP1    | ##### | -0.80373 | 0.418 | 0.931 | ##### |
| ETV1      | ##### | -0.92012 | 0.12  | 0.658 | ##### |
| CDC45     | ##### | -0.69733 | 0.005 | 0.388 | ##### |
| CDCA2     | ##### | -0.67144 | 0.006 | 0.39  | ##### |
| SKA1      | ##### | -0.66835 | 0.004 | 0.381 | ##### |
| YWHAH     | ##### | -0.79662 | 0.245 | 0.81  | ##### |
| TMSB15B   | ##### | -0.79666 | 0.08  | 0.586 | ##### |
| ASRGL1    | ##### | -0.82663 | 0.129 | 0.667 | ##### |

|          |       |          |       |       |       |
|----------|-------|----------|-------|-------|-------|
| HMMR     | ##### | -0.76542 | 0.007 | 0.394 | ##### |
| ATP6VOE1 | ##### | 0.836885 | 0.746 | 0.726 | ##### |
| EIF1     | ##### | 0.616316 | 0.948 | 0.983 | ##### |
| NPC2     | ##### | 1.281206 | 0.683 | 0.489 | ##### |
| DNMT1    | ##### | -0.83242 | 0.161 | 0.71  | ##### |
| UBC      | ##### | 0.586054 | 0.924 | 0.97  | ##### |
| FBX05    | ##### | -0.87504 | 0.066 | 0.552 | ##### |
| PDGFRA   | ##### | -0.94094 | 0.045 | 0.505 | ##### |
| LGALS3   | ##### | 1.453795 | 0.786 | 0.47  | ##### |
| ANXA1    | ##### | 1.44101  | 0.692 | 0.198 | ##### |
| MT2A     | ##### | 0.874688 | 0.948 | 0.889 | ##### |
| RFC3     | ##### | -0.7263  | 0.062 | 0.537 | ##### |
| C19orf48 | ##### | -0.80698 | 0.161 | 0.704 | ##### |
| TRAF4    | ##### | -0.84055 | 0.096 | 0.602 | ##### |
| SMARCA4  | ##### | -0.73091 | 0.197 | 0.748 | ##### |
| NETO2    | ##### | -0.75302 | 0.041 | 0.49  | ##### |
| RTKN2    | ##### | -0.61702 | 0.006 | 0.375 | ##### |
| SOX4     | ##### | -0.95381 | 0.292 | 0.832 | ##### |
| TIMP1    | ##### | 1.27405  | 0.858 | 0.628 | ##### |
| DRAXIN   | ##### | -0.71079 | 0.057 | 0.52  | ##### |
| FAM83D   | ##### | -0.80236 | 0.011 | 0.4   | ##### |
| OLIG1    | ##### | -0.94406 | 0.036 | 0.474 | ##### |
| CDKN2C   | ##### | -0.7755  | 0.196 | 0.737 | ##### |
| MAD2L2   | ##### | -0.68753 | 0.268 | 0.819 | ##### |
| S100A11  | ##### | 1.357588 | 0.691 | 0.474 | ##### |
| PHF19    | ##### | -0.70357 | 0.069 | 0.541 | ##### |
| TIMELESS | ##### | -0.62908 | 0.014 | 0.399 | ##### |
| EIF1AY   | ##### | -0.6256  | 0.031 | 0.449 | ##### |
| KHDRBS1  | ##### | -0.74306 | 0.295 | 0.84  | ##### |
| C1R      | ##### | 1.570086 | 0.582 | 0.227 | ##### |
| TCF4     | ##### | -0.73782 | 0.331 | 0.864 | ##### |
| KIF20A   | ##### | -0.64994 | 0.002 | 0.342 | ##### |
| LTF      | ##### | 2.270432 | 0.496 | 0.032 | ##### |
| SAT1     | ##### | 1.032921 | 0.781 | 0.707 | ##### |
| MAP2     | ##### | -0.70313 | 0.181 | 0.712 | ##### |
| DBF4     | ##### | -0.76262 | 0.109 | 0.611 | ##### |
| C14orf80 | ##### | -0.57794 | 0.015 | 0.4   | ##### |
| RALY     | ##### | -0.79476 | 0.265 | 0.798 | ##### |
| SOX8     | ##### | -0.79    | 0.036 | 0.46  | ##### |
| KIAA1524 | ##### | -0.6656  | 0.017 | 0.406 | ##### |
| UBE2E3   | ##### | -0.67211 | 0.269 | 0.811 | ##### |
| LMNB2    | ##### | -0.71548 | 0.061 | 0.521 | ##### |
| MEX3A    | ##### | -0.7085  | 0.038 | 0.465 | ##### |
| XRCC2    | ##### | -0.68153 | 0.015 | 0.399 | ##### |
| SLPI     | ##### | 2.333678 | 0.488 | 0.037 | ##### |
| KIF20B   | ##### | -0.71606 | 0.036 | 0.454 | ##### |
| NASP     | ##### | -0.71582 | 0.276 | 0.815 | ##### |
| NCAPG2   | ##### | -0.6226  | 0.032 | 0.443 | ##### |
| CDCA4    | ##### | -0.72297 | 0.064 | 0.52  | ##### |
| RAD21    | ##### | -0.72669 | 0.27  | 0.806 | ##### |
| HLA-DRA  | ##### | 1.541978 | 0.702 | 0.335 | ##### |

|           |       |          |       |       |       |
|-----------|-------|----------|-------|-------|-------|
| POU3F2    | ##### | -0.83616 | 0.102 | 0.591 | ##### |
| GINS1     | ##### | -0.635   | 0.02  | 0.41  | ##### |
| EFEMP1    | ##### | 1.671002 | 0.577 | 0.241 | ##### |
| TMEM160   | ##### | -0.82354 | 0.243 | 0.76  | ##### |
| HNRNPAB   | ##### | -0.74265 | 0.225 | 0.758 | ##### |
| PAFAH1B3  | ##### | -0.68033 | 0.294 | 0.828 | ##### |
| FEN1      | ##### | -0.79369 | 0.105 | 0.595 | ##### |
| SYNE2     | ##### | -0.66201 | 0.109 | 0.595 | ##### |
| LRR1      | ##### | -0.63196 | 0.042 | 0.46  | ##### |
| KNSTRN    | ##### | -0.7994  | 0.043 | 0.47  | ##### |
| PSIP1     | ##### | -0.76327 | 0.284 | 0.817 | ##### |
| KIF22     | ##### | -0.58999 | 0.169 | 0.679 | ##### |
| BUB1B     | ##### | -0.53121 | 0.001 | 0.325 | ##### |
| CCDC14    | ##### | -0.56378 | 0.135 | 0.627 | ##### |
| WHSC1     | ##### | -0.69879 | 0.08  | 0.549 | ##### |
| PGP       | ##### | -0.69771 | 0.1   | 0.583 | ##### |
| ALDOA     | ##### | 0.606174 | 0.877 | 0.89  | ##### |
| E2F1      | ##### | -0.75836 | 0.014 | 0.383 | ##### |
| YBX1      | ##### | -0.6369  | 0.539 | 0.959 | ##### |
| KIF14     | ##### | -0.59986 | 0.007 | 0.354 | ##### |
| KLHDC8A   | ##### | -0.78445 | 0.091 | 0.567 | ##### |
| HN1       | ##### | -0.69975 | 0.44  | 0.914 | ##### |
| ZWILCH    | ##### | -0.57754 | 0.027 | 0.417 | ##### |
| FSCN1     | ##### | -0.79177 | 0.246 | 0.774 | ##### |
| FTH1      | ##### | 0.267873 | 0.833 | 0.981 | ##### |
| C12orf75  | ##### | -0.75617 | 0.059 | 0.501 | ##### |
| OLIG2     | ##### | -0.89258 | 0.059 | 0.501 | ##### |
| ARHGAP11E | ##### | -0.60091 | 0.008 | 0.356 | ##### |
| SAE1      | ##### | -0.79898 | 0.184 | 0.702 | ##### |
| SKP1      | ##### | 0.643119 | 0.899 | 0.936 | ##### |
| NREP      | ##### | -0.66299 | 0.109 | 0.585 | ##### |
| TMBIM6    | ##### | 0.592874 | 0.837 | 0.893 | ##### |
| NFIB      | ##### | -0.73955 | 0.263 | 0.79  | ##### |
| AES       | ##### | -0.67919 | 0.226 | 0.749 | ##### |
| MCM7      | ##### | -0.88379 | 0.207 | 0.725 | ##### |
| SOX11     | ##### | -0.781   | 0.134 | 0.628 | ##### |
| SOX2      | ##### | -0.7131  | 0.396 | 0.895 | ##### |
| VRK1      | ##### | -0.65763 | 0.051 | 0.472 | ##### |
| SAPCD2    | ##### | -0.70361 | 0.018 | 0.386 | ##### |
| ITM2C     | ##### | 0.548838 | 0.51  | 0.646 | ##### |
| ITGB3BP   | ##### | -0.66202 | 0.107 | 0.579 | ##### |
| ACYP1     | ##### | -0.59133 | 0.125 | 0.599 | ##### |
| HSPA5     | ##### | 0.676538 | 0.694 | 0.71  | ##### |
| BRCA1     | ##### | -0.55554 | 0.032 | 0.415 | ##### |
| DEPDC1B   | ##### | -0.60471 | 0.013 | 0.367 | ##### |
| CD9       | ##### | 0.954472 | 0.737 | 0.615 | ##### |
| RNASEH2B  | ##### | -0.70467 | 0.132 | 0.621 | ##### |
| SOGA1     | ##### | -0.66004 | 0.061 | 0.493 | ##### |
| ANLN      | ##### | -0.54752 | 0.015 | 0.37  | ##### |
| RAC3      | ##### | -0.66685 | 0.081 | 0.533 | ##### |
| DNAJC9    | ##### | -0.5914  | 0.114 | 0.581 | ##### |

|         |       |          |       |       |       |
|---------|-------|----------|-------|-------|-------|
| CD63    | ##### | 0.792575 | 0.941 | 0.9   | ##### |
| PODXL2  | ##### | -0.75113 | 0.148 | 0.641 | ##### |
| GAS2L3  | ##### | -0.57326 | 0.01  | 0.347 | ##### |
| BARD1   | ##### | -0.65539 | 0.114 | 0.583 | ##### |
| CHD7    | ##### | -0.69678 | 0.114 | 0.585 | ##### |
| KPNA2   | ##### | -0.79171 | 0.286 | 0.795 | ##### |
| CKS1B   | ##### | -0.73423 | 0.228 | 0.738 | ##### |
| PARPBP  | ##### | -0.56886 | 0.019 | 0.377 | ##### |
| PCSK1N  | ##### | -0.61659 | 0.282 | 0.784 | ##### |
| CBX5    | ##### | -0.56894 | 0.258 | 0.767 | ##### |
| CBX1    | ##### | -0.60841 | 0.243 | 0.752 | ##### |
| PSMC3IP | ##### | -0.67128 | 0.051 | 0.463 | ##### |
| CEP55   | ##### | -0.51532 | 0.002 | 0.304 | ##### |
| DBN1    | ##### | -0.66027 | 0.157 | 0.644 | ##### |
| GAPDH   | ##### | 0.592907 | 0.986 | 0.996 | ##### |
| LDHA    | ##### | 0.718507 | 0.854 | 0.865 | ##### |
| HAUS8   | ##### | -0.57595 | 0.045 | 0.433 | ##### |
| SFPQ    | ##### | -0.68347 | 0.358 | 0.854 | ##### |
| DSEL    | ##### | -0.7501  | 0.152 | 0.638 | ##### |
| PRDX5   | ##### | 0.68947  | 0.781 | 0.799 | ##### |
| CDC25C  | ##### | -0.55387 | 0.002 | 0.301 | ##### |
| ATAD5   | ##### | -0.66159 | 0.049 | 0.457 | ##### |
| HMG1    | ##### | -0.63345 | 0.478 | 0.923 | ##### |
| GLRX5   | ##### | -0.76003 | 0.153 | 0.638 | ##### |
| KIF18B  | ##### | -0.45361 | 0.002 | 0.295 | ##### |
| NCAPD2  | ##### | -0.52499 | 0.019 | 0.365 | ##### |
| CEP135  | ##### | -0.69786 | 0.04  | 0.432 | ##### |
| RHOBTB3 | ##### | -0.61024 | 0.321 | 0.826 | ##### |
| IFITM3  | ##### | 1.266113 | 0.61  | 0.416 | ##### |
| DSN1    | ##### | -0.66324 | 0.076 | 0.51  | ##### |
| CSTB    | ##### | 0.658257 | 0.672 | 0.691 | ##### |
| FAU     | ##### | 0.544891 | 0.912 | 0.969 | ##### |
| CRNDE   | ##### | -0.67488 | 0.158 | 0.643 | ##### |
| GMNN    | ##### | -0.50224 | 0.196 | 0.67  | ##### |
| DUT     | ##### | -0.73153 | 0.325 | 0.819 | ##### |
| RHN01   | ##### | -0.48445 | 0.143 | 0.6   | ##### |
| SAA1    | ##### | 2.368165 | 0.433 | 0.026 | ##### |
| HMGXB4  | ##### | -0.60075 | 0.135 | 0.596 | ##### |
| A2M     | ##### | 1.295822 | 0.479 | 0.326 | ##### |
| CCNF    | ##### | -0.57191 | 0.01  | 0.337 | ##### |
| RAC1    | ##### | -0.55996 | 0.484 | 0.941 | ##### |
| MCM4    | ##### | -0.73282 | 0.063 | 0.48  | ##### |
| TTK     | ##### | -0.62534 | 0.004 | 0.306 | ##### |
| FANCA   | ##### | -0.58749 | 0.023 | 0.379 | ##### |
| EGFR    | ##### | -0.84967 | 0.23  | 0.723 | ##### |
| TRIB2   | ##### | -0.66307 | 0.146 | 0.619 | ##### |
| CHEK1   | ##### | -0.60726 | 0.053 | 0.451 | ##### |
| PRDX1   | ##### | 0.552348 | 0.795 | 0.868 | ##### |
| MNS1    | ##### | -0.61344 | 0.054 | 0.453 | ##### |
| ANP32E  | ##### | -0.77285 | 0.221 | 0.714 | ##### |
| MCM10   | ##### | -0.47975 | 0.002 | 0.29  | ##### |

|          |       |          |       |       |       |
|----------|-------|----------|-------|-------|-------|
| SQSTM1   | ##### | 0.519925 | 0.555 | 0.574 | ##### |
| H2AFY    | ##### | -0.65024 | 0.401 | 0.878 | ##### |
| ANP32B   | ##### | -0.66881 | 0.313 | 0.81  | ##### |
| C16orf59 | ##### | -0.57712 | 0.016 | 0.354 | ##### |
| SRM      | ##### | -0.6859  | 0.18  | 0.663 | ##### |
| CCND2    | ##### | -0.76346 | 0.213 | 0.705 | ##### |
| HNRNPUL1 | ##### | -0.59677 | 0.234 | 0.725 | ##### |
| CCDC88A  | ##### | -0.56179 | 0.215 | 0.701 | ##### |
| GNG4     | ##### | -0.65019 | 0.062 | 0.468 | ##### |
| B2M      | ##### | 0.651971 | 0.968 | 0.968 | ##### |
| LHX2     | ##### | -0.65484 | 0.04  | 0.42  | ##### |
| C1S      | ##### | 1.525454 | 0.483 | 0.135 | ##### |
| SET      | ##### | -0.60328 | 0.367 | 0.853 | ##### |
| MAGI1    | ##### | -0.6309  | 0.079 | 0.493 | ##### |
| NUPR1    | ##### | 1.264542 | 0.533 | 0.196 | ##### |
| RFC4     | ##### | -0.66447 | 0.146 | 0.61  | ##### |
| BRD7     | ##### | -0.62811 | 0.136 | 0.596 | ##### |
| TMEM97   | ##### | -0.58064 | 0.143 | 0.599 | ##### |
| NFIX     | ##### | -0.65123 | 0.193 | 0.674 | ##### |
| ZNF738   | ##### | -0.54008 | 0.084 | 0.491 | ##### |
| LAPTM4A  | ##### | 0.553161 | 0.801 | 0.872 | ##### |
| MT1E     | ##### | 1.056609 | 0.645 | 0.483 | ##### |
| TOMM7    | ##### | 0.616017 | 0.842 | 0.915 | ##### |
| PTMS     | ##### | -0.70283 | 0.402 | 0.856 | ##### |
| NCAPH2   | ##### | -0.56685 | 0.066 | 0.469 | ##### |
| WDR34    | ##### | -0.68578 | 0.195 | 0.677 | ##### |
| PPM1G    | ##### | -0.65895 | 0.276 | 0.767 | ##### |
| NFIA     | ##### | -0.51401 | 0.276 | 0.757 | ##### |
| PARP1    | ##### | -0.65148 | 0.313 | 0.802 | ##### |
| SBDS     | ##### | 0.479555 | 0.698 | 0.802 | ##### |
| H2AFZ    | ##### | -0.50709 | 0.669 | 0.98  | ##### |
| PHIP     | ##### | -0.56561 | 0.203 | 0.674 | ##### |
| DIAPH3   | ##### | -0.53627 | 0.016 | 0.341 | ##### |
| CCDC167  | ##### | -0.52939 | 0.271 | 0.757 | ##### |
| HLA-B    | ##### | 0.764369 | 0.867 | 0.796 | ##### |
| LAMTOR5  | ##### | 0.560439 | 0.74  | 0.806 | ##### |
| TRIM36   | ##### | -0.57621 | 0.066 | 0.467 | ##### |
| MPST     | ##### | -0.54374 | 0.138 | 0.58  | ##### |
| USP1     | ##### | -0.58299 | 0.225 | 0.706 | ##### |
| CAV1     | ##### | 1.570547 | 0.489 | 0.063 | ##### |
| ARF4     | ##### | 0.501726 | 0.671 | 0.764 | ##### |
| TCF19    | ##### | -0.602   | 0.025 | 0.372 | ##### |
| MGP      | ##### | 1.942439 | 0.423 | 0.028 | ##### |
| SOD1     | ##### | 0.584388 | 0.8   | 0.863 | ##### |
| BTG1     | ##### | -0.26524 | 0.429 | 0.831 | ##### |
| TMEM59   | ##### | 0.51105  | 0.764 | 0.854 | ##### |
| SMARCB1  | ##### | -0.60948 | 0.244 | 0.728 | ##### |
| CALD1    | ##### | 0.408434 | 0.586 | 0.746 | ##### |
| WTAP     | ##### | 0.230923 | 0.428 | 0.635 | ##### |
| PTPRZ1   | ##### | -0.64651 | 0.363 | 0.841 | ##### |
| HELLS    | ##### | -0.66664 | 0.029 | 0.381 | ##### |

|          |       |          |       |       |       |
|----------|-------|----------|-------|-------|-------|
| PTOV1    | ##### | -0.58731 | 0.304 | 0.789 | ##### |
| PCNA     | ##### | -0.66477 | 0.298 | 0.783 | ##### |
| BMP7     | ##### | -0.6529  | 0.099 | 0.528 | ##### |
| CPXM1    | ##### | -0.53108 | 0.036 | 0.389 | ##### |
| CSE1L    | ##### | -0.57887 | 0.16  | 0.62  | ##### |
| ROB01    | ##### | -0.58471 | 0.051 | 0.433 | ##### |
| RABL6    | ##### | -0.61666 | 0.102 | 0.533 | ##### |
| LSM4     | ##### | -0.58546 | 0.467 | 0.904 | ##### |
| SRSF2    | ##### | -0.62504 | 0.425 | 0.878 | ##### |
| TUBB2B   | ##### | -0.43163 | 0.578 | 0.973 | ##### |
| SAC3D1   | ##### | -0.65469 | 0.099 | 0.527 | ##### |
| GAS1     | ##### | -0.74716 | 0.065 | 0.463 | ##### |
| CENPO    | ##### | -0.49834 | 0.02  | 0.348 | ##### |
| PKM      | ##### | 0.686108 | 0.871 | 0.878 | ##### |
| DCX      | ##### | -0.68395 | 0.034 | 0.388 | ##### |
| INSM1    | ##### | -0.63246 | 0.019 | 0.347 | ##### |
| SHD      | ##### | -0.76079 | 0.02  | 0.351 | ##### |
| ZFP36    | ##### | 1.21481  | 0.631 | 0.327 | ##### |
| MCM2     | ##### | -0.63956 | 0.027 | 0.37  | ##### |
| CHMP2A   | ##### | 0.634681 | 0.7   | 0.763 | ##### |
| TUBG1    | ##### | -0.52339 | 0.188 | 0.647 | ##### |
| APBA2    | ##### | -0.51378 | 0.073 | 0.465 | ##### |
| RCN2     | ##### | -0.63239 | 0.322 | 0.801 | ##### |
| ALYREF   | ##### | -0.59547 | 0.062 | 0.452 | ##### |
| RRM1     | ##### | -0.65529 | 0.167 | 0.626 | ##### |
| ENC1     | ##### | -0.61028 | 0.1   | 0.52  | ##### |
| HLA-DRB1 | ##### | 1.510561 | 0.524 | 0.172 | ##### |
| PSAP     | ##### | 0.553323 | 0.711 | 0.76  | ##### |
| BCAN     | ##### | -0.8109  | 0.187 | 0.651 | ##### |
| BNIP3L   | ##### | 0.541572 | 0.59  | 0.663 | ##### |
| LAPTM4B  | ##### | -0.61357 | 0.229 | 0.7   | ##### |
| CDKN2D   | ##### | -0.67791 | 0.094 | 0.51  | ##### |
| CTSB     | ##### | 0.879005 | 0.716 | 0.689 | ##### |
| MGME1    | ##### | -0.48908 | 0.111 | 0.525 | ##### |
| XPO1     | ##### | -0.50529 | 0.17  | 0.611 | ##### |
| DAD1     | ##### | 0.556818 | 0.746 | 0.82  | ##### |
| CALM3    | ##### | -0.58136 | 0.429 | 0.883 | ##### |
| WDR76    | ##### | -0.60784 | 0.022 | 0.349 | ##### |
| JMJD1C   | ##### | -0.50063 | 0.123 | 0.533 | ##### |
| CMC2     | ##### | -0.43356 | 0.246 | 0.705 | ##### |
| EMC9     | ##### | -0.56017 | 0.122 | 0.536 | ##### |
| CDK6     | ##### | -0.74055 | 0.083 | 0.486 | ##### |
| MIS18A   | ##### | -0.55074 | 0.098 | 0.504 | ##### |
| KIF21A   | ##### | -0.68834 | 0.191 | 0.652 | ##### |
| TEX30    | ##### | -0.53861 | 0.157 | 0.596 | ##### |
| GADD45B  | ##### | 1.188513 | 0.618 | 0.348 | ##### |
| KIF5B    | ##### | -0.65518 | 0.338 | 0.802 | ##### |
| EWSR1    | ##### | -0.37517 | 0.332 | 0.786 | ##### |
| MGST3    | ##### | 0.531506 | 0.684 | 0.783 | ##### |
| MZT1     | ##### | -0.62689 | 0.238 | 0.706 | ##### |
| GPSM2    | ##### | -0.64433 | 0.151 | 0.594 | ##### |



|          |       |          |       |       |       |
|----------|-------|----------|-------|-------|-------|
| C9orf142 | ##### | -0.58271 | 0.219 | 0.683 | ##### |
| TMEM205  | ##### | 0.848203 | 0.657 | 0.58  | ##### |
| ENHO     | ##### | -0.46787 | 0.045 | 0.391 | ##### |
| TRMT112  | ##### | 0.597611 | 0.748 | 0.802 | ##### |
| KIF11    | ##### | -0.465   | 0.006 | 0.281 | ##### |
| SSR4     | ##### | 0.56791  | 0.724 | 0.815 | ##### |
| FANCD2   | ##### | -0.53083 | 0.015 | 0.319 | ##### |
| TMEM98   | ##### | -0.4286  | 0.179 | 0.606 | ##### |
| CSNK1E   | ##### | -0.48265 | 0.146 | 0.568 | ##### |
| ATP6V1F  | ##### | 0.502427 | 0.744 | 0.852 | ##### |
| MAP1LC3B | ##### | 0.209581 | 0.485 | 0.664 | ##### |
| DAZAP1   | ##### | -0.54293 | 0.129 | 0.551 | ##### |
| SF3A2    | ##### | -0.41918 | 0.182 | 0.6   | ##### |
| FAM210B  | ##### | -0.67989 | 0.143 | 0.581 | ##### |
| IGFBP2   | ##### | -0.58301 | 0.353 | 0.819 | ##### |
| POSTN    | ##### | -0.74214 | 0.017 | 0.327 | ##### |
| RAD51    | ##### | -0.50676 | 0.007 | 0.283 | ##### |
| HNRNPM   | ##### | -0.59154 | 0.377 | 0.84  | ##### |
| TFDP1    | ##### | -0.60568 | 0.084 | 0.483 | ##### |
| HNRNPU   | ##### | -0.49384 | 0.36  | 0.821 | ##### |
| PPIB     | ##### | 0.554424 | 0.709 | 0.801 | ##### |
| ILF3     | ##### | -0.48343 | 0.3   | 0.763 | ##### |
| CEP78    | ##### | -0.52604 | 0.06  | 0.43  | ##### |
| NACA     | ##### | 0.425557 | 0.877 | 0.962 | ##### |
| IDH2     | ##### | -0.61713 | 0.24  | 0.705 | ##### |
| CD59     | ##### | 0.70596  | 0.585 | 0.626 | ##### |
| TRIM28   | ##### | -0.37869 | 0.174 | 0.583 | ##### |
| C4orf3   | ##### | 0.644617 | 0.647 | 0.704 | ##### |
| TSPAN5   | ##### | -0.68717 | 0.149 | 0.589 | ##### |
| RBMX     | ##### | -0.46315 | 0.462 | 0.901 | ##### |
| SSRP1    | ##### | -0.54718 | 0.285 | 0.749 | ##### |
| NCAM1    | ##### | -0.4773  | 0.239 | 0.686 | ##### |
| COQ2     | ##### | -0.53973 | 0.059 | 0.43  | ##### |
| SCD5     | ##### | -0.52522 | 0.32  | 0.775 | ##### |
| PLEKH01  | ##### | -0.46731 | 0.117 | 0.507 | ##### |
| NONO     | ##### | -0.50654 | 0.347 | 0.807 | ##### |
| MCM5     | ##### | -0.63412 | 0.04  | 0.388 | ##### |
| TMED9    | ##### | 0.458646 | 0.7   | 0.805 | ##### |
| SAP30    | ##### | -0.63129 | 0.115 | 0.535 | ##### |
| ARL6IP5  | ##### | 0.689358 | 0.598 | 0.565 | ##### |
| SPARC    | ##### | 0.805788 | 0.615 | 0.616 | ##### |
| HDAC2    | ##### | -0.56525 | 0.325 | 0.789 | ##### |
| ECI1     | ##### | -0.61807 | 0.102 | 0.512 | ##### |
| KCNQ2    | ##### | -0.4461  | 0.121 | 0.521 | ##### |
| MCM3     | ##### | -0.71383 | 0.101 | 0.509 | ##### |
| TPI1     | ##### | 0.494825 | 0.878 | 0.953 | ##### |
| CKAP5    | ##### | -0.59511 | 0.095 | 0.494 | ##### |
| SUZ12    | ##### | -0.57684 | 0.104 | 0.51  | ##### |
| MZT2B    | ##### | -0.61342 | 0.455 | 0.877 | ##### |
| CTSD     | ##### | 0.567652 | 0.511 | 0.588 | ##### |
| PRDX6    | ##### | 0.812722 | 0.78  | 0.751 | ##### |

|          |       |          |       |       |       |
|----------|-------|----------|-------|-------|-------|
| PHF14    | ##### | -0.41825 | 0.322 | 0.76  | ##### |
| WDR62    | ##### | -0.47231 | 0.009 | 0.29  | ##### |
| MEST     | ##### | -0.62766 | 0.31  | 0.772 | ##### |
| COMMD4   | ##### | -0.33376 | 0.224 | 0.637 | ##### |
| ZEB1     | ##### | -0.60802 | 0.105 | 0.509 | ##### |
| KPNB1    | ##### | -0.48065 | 0.338 | 0.794 | ##### |
| KIF1B    | ##### | -0.39231 | 0.15  | 0.549 | ##### |
| HNRNPA3  | ##### | -0.42495 | 0.386 | 0.838 | ##### |
| JUNB     | ##### | 0.205395 | 0.587 | 0.767 | ##### |
| PABPN1   | ##### | -0.31885 | 0.213 | 0.625 | ##### |
| ANP32A   | ##### | -0.25946 | 0.232 | 0.651 | ##### |
| METRN    | ##### | -0.69464 | 0.203 | 0.652 | ##### |
| ATP5D    | ##### | -0.59885 | 0.397 | 0.847 | ##### |
| C22orf39 | ##### | -0.58537 | 0.133 | 0.553 | ##### |
| MYL6     | ##### | 0.602897 | 0.921 | 0.964 | ##### |
| CDC25B   | ##### | -0.70159 | 0.142 | 0.568 | ##### |
| APOE     | ##### | 0.373669 | 0.528 | 0.67  | ##### |
| MCM8     | ##### | -0.42766 | 0.018 | 0.312 | ##### |
| TMEM237  | ##### | -0.38906 | 0.198 | 0.611 | ##### |
| SPECC1   | ##### | -0.48351 | 0.182 | 0.616 | ##### |
| OAZ1     | ##### | 0.395657 | 0.876 | 0.965 | ##### |
| TIA1     | ##### | -0.43738 | 0.152 | 0.557 | ##### |
| NMU      | ##### | -0.65259 | 0.008 | 0.283 | ##### |
| SEZ6     | ##### | -0.7213  | 0.034 | 0.365 | ##### |
| BAZ1A    | ##### | -0.50502 | 0.158 | 0.577 | ##### |
| CNIH2    | ##### | -0.5379  | 0.034 | 0.365 | ##### |
| CCDC18   | ##### | -0.55206 | 0.04  | 0.377 | ##### |
| ABI2     | ##### | -0.50539 | 0.283 | 0.736 | ##### |
| SPDL1    | ##### | -0.50936 | 0.048 | 0.386 | ##### |
| CNP      | ##### | -0.48083 | 0.229 | 0.665 | ##### |
| 15-Sep   | ##### | 0.618324 | 0.694 | 0.707 | ##### |
| SUGP2    | ##### | -0.52163 | 0.173 | 0.596 | ##### |
| COL9A3   | ##### | -0.82833 | 0.063 | 0.428 | ##### |
| NDUFA1   | ##### | 0.460272 | 0.688 | 0.789 | ##### |
| PRKDC    | ##### | -0.56842 | 0.191 | 0.63  | ##### |
| FAM111A  | ##### | -0.61784 | 0.074 | 0.451 | ##### |
| CENPQ    | ##### | -0.44763 | 0.069 | 0.425 | ##### |
| KHSRP    | ##### | -0.41773 | 0.147 | 0.542 | ##### |
| TMSB10   | ##### | 0.647232 | 0.972 | 0.974 | ##### |
| ARHGAP33 | ##### | -0.48571 | 0.034 | 0.351 | ##### |
| BCL7C    | ##### | -0.61854 | 0.15  | 0.574 | ##### |
| NBPF1    | ##### | -0.5224  | 0.125 | 0.53  | ##### |
| ACAT2    | ##### | -0.5587  | 0.19  | 0.622 | ##### |
| PHGDH    | ##### | -0.46158 | 0.25  | 0.673 | ##### |
| GOLM1    | ##### | -0.3707  | 0.245 | 0.657 | ##### |
| USP22    | ##### | -0.42159 | 0.179 | 0.593 | ##### |
| PXMP2    | ##### | -0.57941 | 0.172 | 0.602 | ##### |
| ELOVL2   | ##### | -0.44795 | 0.025 | 0.321 | ##### |
| RAD51C   | ##### | -0.41146 | 0.204 | 0.621 | ##### |
| B4GALNT1 | ##### | -0.83003 | 0.07  | 0.441 | ##### |
| UBE2B    | ##### | 0.263045 | 0.464 | 0.631 | ##### |

|           |       |          |       |       |          |
|-----------|-------|----------|-------|-------|----------|
| SPARCL1   | ##### | 0.704549 | 0.573 | 0.604 | #####    |
| SRSF9     | ##### | -0.58804 | 0.382 | 0.827 | #####    |
| TUBB      | ##### | -0.35993 | 0.698 | 0.995 | #####    |
| QKI       | ##### | -0.54806 | 0.285 | 0.737 | #####    |
| ARHGAP21  | ##### | -0.48781 | 0.096 | 0.469 | #####    |
| SAP18     | ##### | 0.439444 | 0.764 | 0.878 | #####    |
| SEPP1     | ##### | 1.46408  | 0.495 | 0.168 | #####    |
| ACTG1     | ##### | 0.592499 | 0.975 | 0.981 | #####    |
| BTG3      | ##### | -0.43906 | 0.335 | 0.774 | #####    |
| CAPZA2    | ##### | 0.277645 | 0.611 | 0.816 | #####    |
| CBX3      | ##### | -0.51026 | 0.448 | 0.879 | #####    |
| GNB2      | ##### | -0.47731 | 0.398 | 0.838 | #####    |
| SDCBP     | ##### | 0.519923 | 0.684 | 0.742 | #####    |
| PLK4      | ##### | -0.39228 | 0.006 | 0.26  | #####    |
| UBTF      | ##### | -0.49186 | 0.126 | 0.521 | #####    |
| RANGAP1   | ##### | -0.46423 | 0.053 | 0.39  | #####    |
| PDCD6     | ##### | 0.180582 | 0.497 | 0.717 | #####    |
| ITGAE     | ##### | -0.35369 | 0.276 | 0.707 | #####    |
| DTL       | ##### | -0.53215 | 0.006 | 0.264 | #####    |
| COX4I1    | ##### | 0.488534 | 0.861 | 0.941 | #####    |
| HIST2H2AC | ##### | -0.49994 | 0.017 | 0.304 | #####    |
| TRAIP     | ##### | -0.3991  | 0.015 | 0.289 | #####    |
| KIF18A    | ##### | -0.42468 | 0.014 | 0.291 | #####    |
| TPGS2     | ##### | -0.31696 | 0.271 | 0.679 | #####    |
| NAP1L4    | ##### | -0.4575  | 0.303 | 0.747 | #####    |
| ELAVL1    | ##### | -0.53194 | 0.227 | 0.664 | #####    |
| PCM1      | ##### | -0.47796 | 0.226 | 0.656 | #####    |
| ENAH      | ##### | -0.50912 | 0.164 | 0.578 | #####    |
| RNF145    | ##### | -0.52323 | 0.197 | 0.627 | #####    |
| BRD2      | ##### | -0.13064 | 0.332 | 0.684 | #####    |
| CUX1      | ##### | -0.39954 | 0.12  | 0.491 | #####    |
| MPHOSPH9  | ##### | -0.47707 | 0.059 | 0.4   | #####    |
| HLA-A     | ##### | 0.681204 | 0.889 | 0.841 | #####    |
| UQCRB     | ##### | -0.18556 | 0.46  | 0.83  | #####    |
| KLHL23    | ##### | -0.65145 | 0.082 | 0.459 | #####    |
| PTPRS     | ##### | -0.47165 | 0.144 | 0.542 | #####    |
| SNRPB     | ##### | -0.5002  | 0.481 | 0.894 | #####    |
| TPT1      | ##### | 0.568406 | 0.924 | 0.959 | #####    |
| THOP1     | ##### | -0.4772  | 0.138 | 0.535 | #####    |
| EXO1      | ##### | -0.41546 | 0.002 | 0.242 | #####    |
| BAZ1B     | ##### | -0.48963 | 0.225 | 0.653 | #####    |
| EIF4A2    | ##### | 0.3353   | 0.704 | 0.847 | #####    |
| SGCB      | ##### | -0.41141 | 0.296 | 0.728 | #####    |
| ELAVL3    | ##### | -0.57351 | 0.18  | 0.605 | #####    |
| SMARCC1   | ##### | -0.49574 | 0.143 | 0.547 | #####    |
| RPAIN     | ##### | -0.31938 | 0.379 | 0.799 | #####    |
| RABAC1    | ##### | 0.415893 | 0.659 | 0.799 | 1.59E-99 |
| PTTG1IP   | ##### | 0.299333 | 0.434 | 0.546 | 1.81E-99 |
| RPA3      | ##### | -0.32905 | 0.382 | 0.806 | 1.88E-99 |
| CDC6      | ##### | -0.52123 | 0.018 | 0.306 | 1.93E-99 |
| KDM1A     | ##### | -0.42303 | 0.097 | 0.463 | 3.15E-99 |

|          |       |          |       |       |          |
|----------|-------|----------|-------|-------|----------|
| RNF157   | ##### | -0.38078 | 0.054 | 0.374 | 3.21E-99 |
| FAM89B   | ##### | -0.52528 | 0.09  | 0.468 | 4.87E-99 |
| ZNHIT1   | ##### | 0.427535 | 0.691 | 0.812 | 5.78E-99 |
| NUP107   | ##### | -0.78604 | 0.159 | 0.579 | 6.26E-99 |
| ATXN10   | ##### | -0.35379 | 0.281 | 0.7   | 1.15E-98 |
| REEP4    | ##### | -0.54041 | 0.054 | 0.391 | 1.18E-98 |
| NCAPD3   | ##### | -0.44498 | 0.049 | 0.37  | 1.70E-98 |
| SSR3     | ##### | 0.67419  | 0.587 | 0.628 | 1.90E-98 |
| APOBEC3B | ##### | -0.46253 | 0.006 | 0.259 | 1.90E-98 |
| SPCS1    | ##### | 0.460818 | 0.728 | 0.84  | 2.07E-98 |
| PFDN5    | ##### | 0.456199 | 0.813 | 0.906 | 2.35E-98 |
| ATP6VOE2 | ##### | -0.41559 | 0.357 | 0.79  | 3.22E-98 |
| GPM6A    | ##### | -0.16676 | 0.471 | 0.865 | 3.45E-98 |
| VEZF1    | ##### | -0.44127 | 0.144 | 0.535 | 3.72E-98 |
| HIST1H1D | ##### | -0.55314 | 0.008 | 0.269 | 3.88E-98 |
| PTBP1    | ##### | -0.41269 | 0.243 | 0.659 | 4.04E-98 |
| GNB1     | ##### | -0.48284 | 0.236 | 0.664 | 4.57E-98 |
| CYR61    | ##### | 0.98155  | 0.433 | 0.228 | 5.98E-98 |
| NES      | ##### | -0.66705 | 0.206 | 0.637 | 8.81E-98 |
| SPCS2    | ##### | 0.432418 | 0.756 | 0.872 | 9.77E-98 |
| MMP2     | ##### | -0.45626 | 0.041 | 0.347 | 1.02E-97 |
| SLC25A11 | ##### | -0.3924  | 0.274 | 0.699 | 1.10E-97 |
| FOS      | ##### | 0.711881 | 0.841 | 0.791 | 1.17E-97 |
| HP1BP3   | ##### | -0.55898 | 0.316 | 0.759 | 1.28E-97 |
| C3       | ##### | 1.303808 | 0.438 | 0.125 | 1.41E-97 |
| SRSF1    | ##### | -0.26611 | 0.338 | 0.743 | 1.58E-97 |
| WEE1     | ##### | -0.38975 | 0.139 | 0.51  | 1.81E-97 |
| ACTB     | ##### | 0.567746 | 0.992 | 0.996 | 1.81E-97 |
| RCC1     | ##### | -0.47689 | 0.061 | 0.399 | 2.44E-97 |
| HERPUD1  | ##### | 0.744565 | 0.549 | 0.494 | 2.45E-97 |
| FJX1     | ##### | -0.52256 | 0.074 | 0.431 | 3.24E-97 |
| TPRKB    | ##### | -0.29938 | 0.29  | 0.7   | 3.47E-97 |
| ALDH7A1  | ##### | -0.26803 | 0.212 | 0.598 | 3.52E-97 |
| SPATS2   | ##### | -0.41314 | 0.182 | 0.584 | 4.10E-97 |
| NEAT1    | ##### | 0.68546  | 0.741 | 0.669 | 5.70E-97 |
| IPO9     | ##### | -0.384   | 0.158 | 0.549 | 6.74E-97 |
| CDCA7L   | ##### | -0.50872 | 0.132 | 0.527 | 7.03E-97 |
| RAB1A    | ##### | 0.309527 | 0.583 | 0.735 | 8.28E-97 |
| ZFP36L2  | ##### | 0.123104 | 0.391 | 0.61  | 8.44E-97 |
| CHD9     | ##### | -0.4361  | 0.313 | 0.744 | 1.06E-96 |
| RCN1     | ##### | 0.108685 | 0.434 | 0.62  | 1.19E-96 |
| LAMTOR4  | ##### | 0.385055 | 0.687 | 0.848 | 1.26E-96 |
| LBR      | ##### | -0.57615 | 0.158 | 0.569 | 1.38E-96 |
| KIF5C    | ##### | -0.48768 | 0.117 | 0.499 | 1.43E-96 |
| HSPB1    | ##### | 0.416355 | 0.685 | 0.794 | 1.86E-96 |
| LIMA1    | ##### | -0.5441  | 0.253 | 0.689 | 1.90E-96 |
| GPC2     | ##### | -0.6414  | 0.037 | 0.354 | 2.04E-96 |
| RAD54L   | ##### | -0.38495 | 0.002 | 0.231 | 2.37E-96 |
| CKLF     | ##### | -0.32088 | 0.341 | 0.762 | 2.47E-96 |
| BLVRB    | ##### | 1.099148 | 0.498 | 0.296 | 3.07E-96 |
| PTP4A1   | ##### | -0.37798 | 0.261 | 0.663 | 3.25E-96 |

|           |          |          |       |       |          |
|-----------|----------|----------|-------|-------|----------|
| PAQR4     | #####    | -0.60965 | 0.06  | 0.406 | 3.61E-96 |
| TAF7      | #####    | 0.345125 | 0.656 | 0.794 | 3.67E-96 |
| SPSB4     | #####    | -0.36482 | 0.004 | 0.242 | 6.33E-96 |
| CARHSP1   | #####    | -0.19375 | 0.389 | 0.788 | 6.67E-96 |
| PPP1R14B  | #####    | -0.54777 | 0.202 | 0.626 | 7.63E-96 |
| UBALD2    | #####    | -0.63176 | 0.12  | 0.511 | 8.82E-96 |
| FBLN1     | #####    | -0.66778 | 0.033 | 0.337 | 9.20E-96 |
| BPTF      | #####    | -0.53778 | 0.166 | 0.578 | 9.67E-96 |
| MAP1B     | #####    | 0.349529 | 0.672 | 0.836 | 1.01E-95 |
| MZT2A     | #####    | -0.3922  | 0.328 | 0.756 | 1.02E-95 |
| SEC62     | #####    | 0.370711 | 0.65  | 0.802 | 1.23E-95 |
| PMEPA1    | #####    | -0.6216  | 0.065 | 0.415 | 1.27E-95 |
| CYC1      | #####    | -0.43099 | 0.406 | 0.825 | 1.38E-95 |
| HILPDA    | 1.02E-99 | 0.747518 | 0.424 | 0.452 | 1.52E-95 |
| KCNF1     | 1.15E-99 | -0.56292 | 0.019 | 0.301 | 1.72E-95 |
| ACOT7     | 1.21E-99 | -0.44834 | 0.134 | 0.514 | 1.81E-95 |
| ATP6AP2   | 1.21E-99 | 0.432921 | 0.608 | 0.714 | 1.82E-95 |
| TUBB4B    | 1.26E-99 | -0.46651 | 0.452 | 0.872 | 1.89E-95 |
| STMN3     | 1.32E-99 | -0.3982  | 0.254 | 0.675 | 1.97E-95 |
| ZBTB20    | 1.91E-99 | -0.34504 | 0.323 | 0.731 | 2.86E-95 |
| FYN       | 1.96E-99 | -0.44931 | 0.233 | 0.653 | 2.92E-95 |
| ZNF428    | 2.39E-99 | -0.51246 | 0.449 | 0.868 | 3.57E-95 |
| WDR830S   | 2.53E-99 | 0.610534 | 0.773 | 0.828 | 3.78E-95 |
| SRRM2     | 2.67E-99 | -0.47951 | 0.362 | 0.795 | 4.00E-95 |
| VAMP5     | 2.72E-99 | 1.091527 | 0.546 | 0.405 | 4.07E-95 |
| C7orf50   | 3.22E-99 | -0.18713 | 0.431 | 0.799 | 4.81E-95 |
| MFGE8     | 3.62E-99 | -0.35909 | 0.147 | 0.504 | 5.41E-95 |
| RMI2      | 4.21E-99 | -0.47127 | 0.007 | 0.258 | 6.29E-95 |
| GLTSCR2   | 5.30E-99 | -0.27877 | 0.353 | 0.733 | 7.92E-95 |
| PPP2R5C   | 6.05E-99 | -0.36067 | 0.134 | 0.499 | 9.04E-95 |
| DPF1      | 6.21E-99 | -0.44297 | 0.079 | 0.422 | 9.28E-95 |
| RP11-161M | 6.87E-99 | -0.56261 | 0.025 | 0.319 | 1.03E-94 |
| PNN       | 6.97E-99 | -0.37967 | 0.301 | 0.72  | 1.04E-94 |
| MPPED2    | 9.30E-99 | -0.54428 | 0.026 | 0.32  | 1.39E-94 |
| APLP1     | 9.71E-99 | -0.38682 | 0.237 | 0.633 | 1.45E-94 |
| SEZ6L     | 1.28E-98 | -0.5445  | 0.017 | 0.286 | 1.92E-94 |
| PSPC1     | 1.46E-98 | -0.49991 | 0.129 | 0.512 | 2.18E-94 |
| C2orf69   | 1.67E-98 | -0.49321 | 0.139 | 0.528 | 2.50E-94 |
| NFE2L2    | 1.83E-98 | 0.168857 | 0.428 | 0.606 | 2.74E-94 |
| KMT2A     | 2.16E-98 | -0.40725 | 0.142 | 0.517 | 3.23E-94 |
| HLA-DRB5  | 2.29E-98 | 1.506559 | 0.383 | 0.07  | 3.43E-94 |
| CTCF      | 2.60E-98 | -0.50696 | 0.085 | 0.443 | 3.89E-94 |
| TXN       | 2.79E-98 | 0.486662 | 0.717 | 0.817 | 4.17E-94 |
| EXOSC8    | 2.98E-98 | -0.32932 | 0.283 | 0.691 | 4.46E-94 |
| SLC35B2   | 3.04E-98 | -0.50059 | 0.183 | 0.594 | 4.55E-94 |
| CTSL      | 3.27E-98 | 0.947546 | 0.561 | 0.389 | 4.88E-94 |
| WHSC1L1   | 3.45E-98 | -0.51268 | 0.241 | 0.664 | 5.16E-94 |
| RTF1      | 3.84E-98 | -0.38455 | 0.297 | 0.712 | 5.73E-94 |
| CNN3      | 3.91E-98 | 0.33587  | 0.682 | 0.822 | 5.84E-94 |
| HNRNPA0   | 4.12E-98 | -0.41788 | 0.491 | 0.894 | 6.16E-94 |
| ENO1      | 4.91E-98 | 0.515695 | 0.853 | 0.895 | 7.34E-94 |

|           |          |          |       |       |          |
|-----------|----------|----------|-------|-------|----------|
| PPP2R5E   | 5.62E-98 | -0.43165 | 0.14  | 0.52  | 8.40E-94 |
| TTC3      | 5.67E-98 | -0.34495 | 0.405 | 0.805 | 8.47E-94 |
| SYNCRIP   | 5.99E-98 | -0.3813  | 0.277 | 0.683 | 8.95E-94 |
| CYSTM1    | 6.79E-98 | 0.851271 | 0.489 | 0.372 | 1.01E-93 |
| SEC61G    | 7.85E-98 | 0.783264 | 0.959 | 0.923 | 1.17E-93 |
| SNRNP70   | 8.27E-98 | -0.37644 | 0.346 | 0.753 | 1.24E-93 |
| SNRPA     | 8.67E-98 | -0.40959 | 0.184 | 0.574 | 1.30E-93 |
| SMC3      | 8.78E-98 | -0.44615 | 0.223 | 0.635 | 1.31E-93 |
| CDC34     | 1.04E-97 | -0.46371 | 0.127 | 0.5   | 1.55E-93 |
| DGCR6L    | 1.06E-97 | -0.35823 | 0.203 | 0.589 | 1.59E-93 |
| TIMP2     | 1.07E-97 | -0.23842 | 0.169 | 0.496 | 1.60E-93 |
| LAMP1     | 1.15E-97 | -0.19326 | 0.341 | 0.674 | 1.72E-93 |
| YEATS4    | 1.53E-97 | -0.78419 | 0.183 | 0.599 | 2.29E-93 |
| CTNNBIP1  | 1.85E-97 | -0.50314 | 0.094 | 0.459 | 2.77E-93 |
| CPNE2     | 1.88E-97 | -0.57944 | 0.057 | 0.391 | 2.81E-93 |
| PRDX4     | 1.90E-97 | 0.546518 | 0.621 | 0.721 | 2.84E-93 |
| CIB2      | 2.04E-97 | -0.34756 | 0.015 | 0.27  | 3.05E-93 |
| WSCD1     | 2.47E-97 | -0.48761 | 0.038 | 0.341 | 3.70E-93 |
| PLD3      | 2.80E-97 | 0.48521  | 0.504 | 0.6   | 4.19E-93 |
| UBA2      | 3.57E-97 | -0.33135 | 0.3   | 0.694 | 5.33E-93 |
| C4orf27   | 4.17E-97 | -0.19813 | 0.268 | 0.649 | 6.22E-93 |
| CD99      | 4.62E-97 | 0.816565 | 0.746 | 0.674 | 6.90E-93 |
| REEP5     | 4.74E-97 | 0.55151  | 0.596 | 0.628 | 7.09E-93 |
| TRA2B     | 6.31E-97 | -0.32214 | 0.414 | 0.826 | 9.43E-93 |
| HIRIP3    | 9.25E-97 | -0.46659 | 0.148 | 0.531 | 1.38E-92 |
| EMP3      | 9.29E-97 | 0.845586 | 0.606 | 0.447 | 1.39E-92 |
| KLC1      | 9.54E-97 | -0.44616 | 0.19  | 0.584 | 1.43E-92 |
| DHRX      | 9.54E-97 | -0.42547 | 0.128 | 0.493 | 1.43E-92 |
| GNB2L1    | 1.08E-96 | 0.381366 | 0.888 | 0.979 | 1.62E-92 |
| GABARAPL2 | 1.12E-96 | 0.407196 | 0.723 | 0.857 | 1.68E-92 |
| DDX17     | 1.37E-96 | -0.44389 | 0.24  | 0.648 | 2.04E-92 |
| GLCCI1    | 1.37E-96 | -0.66857 | 0.058 | 0.393 | 2.05E-92 |
| CEP152    | 1.41E-96 | -0.41926 | 0.009 | 0.26  | 2.11E-92 |
| STRA13    | 1.53E-96 | -0.24479 | 0.371 | 0.769 | 2.29E-92 |
| HMG2      | 1.73E-96 | -0.54139 | 0.515 | 0.884 | 2.59E-92 |
| GPS1      | 1.74E-96 | -0.38082 | 0.194 | 0.589 | 2.60E-92 |
| ATRAID    | 1.83E-96 | 0.414565 | 0.621 | 0.79  | 2.74E-92 |
| CCNE2     | 1.88E-96 | -0.63964 | 0.021 | 0.302 | 2.81E-92 |
| NT5C3B    | 2.54E-96 | -0.32645 | 0.268 | 0.652 | 3.79E-92 |
| PRPSAP1   | 3.31E-96 | -0.57541 | 0.216 | 0.638 | 4.95E-92 |
| HLA-DPA1  | 3.43E-96 | 1.301435 | 0.521 | 0.2   | 5.13E-92 |
| ATP5EP2   | 3.47E-96 | 0.587432 | 0.383 | 0.514 | 5.18E-92 |
| ASAH1     | 3.71E-96 | 0.42163  | 0.498 | 0.64  | 5.55E-92 |
| NOL12     | 4.10E-96 | -0.2846  | 0.123 | 0.467 | 6.12E-92 |
| PDPN      | 4.21E-96 | 0.616893 | 0.543 | 0.662 | 6.29E-92 |
| SLC10A4   | 4.66E-96 | -0.39419 | 0.013 | 0.272 | 6.97E-92 |
| TSR3      | 4.87E-96 | -0.47009 | 0.135 | 0.517 | 7.28E-92 |
| CAMLG     | 5.05E-96 | 0.310695 | 0.508 | 0.683 | 7.54E-92 |
| CORO1C    | 5.28E-96 | -0.35007 | 0.238 | 0.638 | 7.90E-92 |
| MYEF2     | 5.94E-96 | -0.56779 | 0.111 | 0.488 | 8.88E-92 |
| TPST1     | 6.19E-96 | 0.378203 | 0.351 | 0.401 | 9.25E-92 |

|          |          |          |       |       |          |
|----------|----------|----------|-------|-------|----------|
| MED10    | 6.29E-96 | 0.483825 | 0.572 | 0.67  | 9.40E-92 |
| KDELR2   | 6.32E-96 | -0.12131 | 0.498 | 0.812 | 9.44E-92 |
| ZNF43    | 9.07E-96 | -0.45918 | 0.092 | 0.44  | 1.36E-91 |
| CNBP     | 1.01E-95 | 0.374484 | 0.751 | 0.891 | 1.50E-91 |
| CDK2     | 1.01E-95 | -0.51227 | 0.074 | 0.416 | 1.51E-91 |
| TTYH3    | 1.02E-95 | -0.38662 | 0.106 | 0.451 | 1.52E-91 |
| ATP6V1G1 | 1.09E-95 | 0.442117 | 0.718 | 0.84  | 1.63E-91 |
| COX7C    | 1.33E-95 | 0.413862 | 0.834 | 0.938 | 1.98E-91 |
| EME1     | 1.40E-95 | -0.38026 | 0.012 | 0.265 | 2.09E-91 |
| SNRPD3   | 1.44E-95 | -0.31718 | 0.311 | 0.719 | 2.15E-91 |
| TMED2    | 1.55E-95 | 0.120489 | 0.546 | 0.775 | 2.32E-91 |
| HSPA9    | 1.61E-95 | 0.305394 | 0.517 | 0.679 | 2.40E-91 |
| PIF1     | 1.86E-95 | -0.60702 | 0.017 | 0.285 | 2.78E-91 |
| NDUFA5   | 2.44E-95 | 0.362421 | 0.649 | 0.788 | 3.65E-91 |
| TNRC6B   | 2.49E-95 | -0.33495 | 0.199 | 0.567 | 3.73E-91 |
| PDS5B    | 2.54E-95 | -0.40362 | 0.098 | 0.442 | 3.79E-91 |
| SLAIN1   | 2.98E-95 | -0.47115 | 0.055 | 0.378 | 4.45E-91 |
| SAT2     | 3.10E-95 | 0.55625  | 0.615 | 0.689 | 4.63E-91 |
| NUP62    | 3.12E-95 | -0.35763 | 0.155 | 0.526 | 4.67E-91 |
| C4orf48  | 3.53E-95 | -0.43556 | 0.252 | 0.641 | 5.27E-91 |
| ETV5     | 4.41E-95 | -0.4756  | 0.099 | 0.456 | 6.59E-91 |
| SH3BGRL3 | 5.21E-95 | 0.752011 | 0.706 | 0.705 | 7.78E-91 |
| GRK6     | 5.27E-95 | -0.44013 | 0.042 | 0.352 | 7.87E-91 |
| CPE      | 5.43E-95 | 0.15317  | 0.435 | 0.663 | 8.11E-91 |
| CDCA7    | 6.47E-95 | -0.53447 | 0.035 | 0.331 | 9.67E-91 |
| SUPT16H  | 7.50E-95 | -0.39848 | 0.178 | 0.559 | 1.12E-90 |
| TAX1BP1  | 7.84E-95 | 0.183431 | 0.493 | 0.691 | 1.17E-90 |
| GOLIM4   | 1.06E-94 | -0.42815 | 0.201 | 0.59  | 1.59E-90 |
| PCMT1    | 1.07E-94 | 0.174245 | 0.545 | 0.767 | 1.61E-90 |
| DYNLL2   | 1.10E-94 | -0.41294 | 0.113 | 0.47  | 1.64E-90 |
| FAM111B  | 1.16E-94 | -0.52713 | 0.008 | 0.251 | 1.73E-90 |
| HNRNPH3  | 1.29E-94 | -0.40876 | 0.336 | 0.756 | 1.93E-90 |
| ARF1     | 1.46E-94 | 0.29631  | 0.629 | 0.804 | 2.19E-90 |
| NENF     | 1.53E-94 | -0.37325 | 0.358 | 0.757 | 2.29E-90 |
| SLC3A2   | 1.67E-94 | 0.318835 | 0.583 | 0.757 | 2.49E-90 |
| TMEM54   | 2.74E-94 | -0.44578 | 0.151 | 0.531 | 4.09E-90 |
| COLGALT2 | 2.96E-94 | -0.39946 | 0.049 | 0.344 | 4.42E-90 |
| PCBP4    | 3.06E-94 | -0.46985 | 0.136 | 0.512 | 4.57E-90 |
| NUCKS1   | 3.34E-94 | -0.43389 | 0.578 | 0.94  | 5.00E-90 |
| RBM17    | 3.96E-94 | -0.46731 | 0.216 | 0.62  | 5.92E-90 |
| HSP90B1  | 4.49E-94 | 0.144807 | 0.616 | 0.847 | 6.71E-90 |
| VEGFA    | 4.60E-94 | 0.594185 | 0.347 | 0.32  | 6.87E-90 |
| COA3     | 4.99E-94 | 0.278341 | 0.466 | 0.691 | 7.45E-90 |
| GDI1     | 5.15E-94 | -0.32552 | 0.388 | 0.79  | 7.69E-90 |
| RBM25    | 7.55E-94 | -0.30448 | 0.296 | 0.69  | 1.13E-89 |
| QSER1    | 7.61E-94 | -0.37076 | 0.052 | 0.359 | 1.14E-89 |
| TUBB2A   | 8.39E-94 | -0.44119 | 0.416 | 0.83  | 1.25E-89 |
| RSF1     | 8.55E-94 | -0.20717 | 0.312 | 0.677 | 1.28E-89 |
| LIG1     | 1.05E-93 | -0.55353 | 0.043 | 0.353 | 1.57E-89 |
| RARRES3  | 1.20E-93 | 1.332676 | 0.389 | 0.127 | 1.79E-89 |
| CTDNEP1  | 1.21E-93 | -0.53046 | 0.16  | 0.557 | 1.81E-89 |

|         |          |          |       |       |          |
|---------|----------|----------|-------|-------|----------|
| TMED10  | 1.30E-93 | 0.692245 | 0.655 | 0.674 | 1.94E-89 |
| SETD5   | 1.42E-93 | -0.42866 | 0.172 | 0.553 | 2.12E-89 |
| MTA1    | 1.56E-93 | -0.44329 | 0.094 | 0.438 | 2.34E-89 |
| KLHDC3  | 1.70E-93 | -0.34961 | 0.241 | 0.642 | 2.53E-89 |
| FANCG   | 2.00E-93 | -0.40024 | 0.031 | 0.311 | 2.99E-89 |
| COPS3   | 2.01E-93 | -0.16158 | 0.314 | 0.674 | 3.00E-89 |
| PGAP1   | 2.05E-93 | -0.43915 | 0.101 | 0.449 | 3.06E-89 |
| RNF126  | 2.12E-93 | -0.40847 | 0.203 | 0.589 | 3.17E-89 |
| XRCC5   | 2.17E-93 | -0.34759 | 0.435 | 0.84  | 3.25E-89 |
| SNF8    | 2.20E-93 | -0.35285 | 0.319 | 0.719 | 3.28E-89 |
| WBP11   | 2.33E-93 | -0.19471 | 0.249 | 0.593 | 3.48E-89 |
| MTCH1   | 2.38E-93 | -0.19721 | 0.431 | 0.774 | 3.55E-89 |
| ZNF90   | 2.44E-93 | 0.779371 | 0.44  | 0.435 | 3.65E-89 |
| STK25   | 2.49E-93 | -0.41955 | 0.192 | 0.581 | 3.73E-89 |
| PRRC2A  | 2.69E-93 | -0.40113 | 0.141 | 0.506 | 4.03E-89 |
| DCLRE1C | 2.84E-93 | -0.4324  | 0.069 | 0.395 | 4.24E-89 |
| ENOPH1  | 3.08E-93 | -0.33698 | 0.338 | 0.731 | 4.61E-89 |
| TCEA2   | 3.12E-93 | -0.50452 | 0.287 | 0.709 | 4.67E-89 |
| PRADC1  | 3.69E-93 | -0.3521  | 0.173 | 0.536 | 5.51E-89 |
| RDX     | 3.79E-93 | -0.33975 | 0.435 | 0.827 | 5.67E-89 |
| SMC1A   | 4.02E-93 | -0.49972 | 0.15  | 0.533 | 6.01E-89 |
| TOMM40  | 4.17E-93 | -0.43584 | 0.235 | 0.631 | 6.23E-89 |
| TERF2IP | 5.16E-93 | -0.1179  | 0.406 | 0.719 | 7.71E-89 |
| DTD1    | 5.51E-93 | -0.43856 | 0.263 | 0.673 | 8.23E-89 |
| ANAPC5  | 5.81E-93 | -0.18443 | 0.323 | 0.672 | 8.68E-89 |
| POP7    | 6.67E-93 | -0.21015 | 0.375 | 0.759 | 9.96E-89 |
| TRIM24  | 6.83E-93 | -0.45724 | 0.099 | 0.451 | 1.02E-88 |
| ARL6IP6 | 6.99E-93 | -0.43678 | 0.265 | 0.674 | 1.04E-88 |
| 9-Mar   | 7.41E-93 | -0.70462 | 0.056 | 0.381 | 1.11E-88 |
| GPAA1   | 8.68E-93 | -0.29242 | 0.288 | 0.665 | 1.30E-88 |
| MALAT1  | 9.23E-93 | 0.448219 | 0.996 | 0.988 | 1.38E-88 |
| RFC5    | 9.74E-93 | -0.46071 | 0.078 | 0.414 | 1.45E-88 |
| SNRNP25 | 1.02E-92 | -0.29154 | 0.272 | 0.665 | 1.52E-88 |
| STUB1   | 1.09E-92 | -0.40407 | 0.325 | 0.728 | 1.63E-88 |
| DLL3    | 1.21E-92 | -0.80777 | 0.031 | 0.316 | 1.81E-88 |
| CYTH2   | 1.23E-92 | -0.45911 | 0.231 | 0.635 | 1.83E-88 |
| RSRC2   | 1.26E-92 | -0.12064 | 0.405 | 0.747 | 1.89E-88 |
| YY1     | 1.34E-92 | -0.32226 | 0.23  | 0.61  | 2.01E-88 |
| RSL1D1  | 1.45E-92 | 0.217874 | 0.449 | 0.658 | 2.16E-88 |
| NAA10   | 1.97E-92 | -0.34978 | 0.286 | 0.683 | 2.94E-88 |
| NRM     | 2.16E-92 | -0.44603 | 0.034 | 0.325 | 3.23E-88 |
| CLN6    | 2.41E-92 | -0.45166 | 0.034 | 0.323 | 3.61E-88 |
| CUTA    | 2.49E-92 | 0.273614 | 0.652 | 0.814 | 3.73E-88 |
| NEURL1B | 3.64E-92 | -0.43371 | 0.008 | 0.246 | 5.44E-88 |
| SCP2    | 3.75E-92 | 0.412709 | 0.58  | 0.722 | 5.60E-88 |
| NOVA1   | 3.83E-92 | -0.52054 | 0.495 | 0.879 | 5.72E-88 |
| ASXL1   | 4.00E-92 | -0.41065 | 0.092 | 0.426 | 5.98E-88 |
| CLSTN1  | 4.61E-92 | -0.23711 | 0.165 | 0.509 | 6.89E-88 |
| UBE2L6  | 4.98E-92 | 0.660144 | 0.497 | 0.56  | 7.44E-88 |
| GINS4   | 5.02E-92 | -0.39756 | 0.018 | 0.273 | 7.50E-88 |
| CXXC5   | 5.15E-92 | -0.4784  | 0.268 | 0.68  | 7.70E-88 |



|          |          |          |       |       |          |
|----------|----------|----------|-------|-------|----------|
| RFC2     | 5.70E-92 | -0.47787 | 0.207 | 0.605 | 8.52E-88 |
| CETN2    | 7.74E-92 | 0.798011 | 0.474 | 0.409 | 1.16E-87 |
| AKIRIN2  | 7.76E-92 | -0.45707 | 0.216 | 0.61  | 1.16E-87 |
| CDH2     | 7.83E-92 | -0.48294 | 0.22  | 0.626 | 1.17E-87 |
| CCDC112  | 7.92E-92 | -0.4353  | 0.122 | 0.477 | 1.18E-87 |
| SLC39A3  | 8.84E-92 | -0.53636 | 0.218 | 0.628 | 1.32E-87 |
| PRIM1    | 9.05E-92 | -0.50253 | 0.042 | 0.342 | 1.35E-87 |
| UBE3A    | 9.10E-92 | -0.41094 | 0.172 | 0.548 | 1.36E-87 |
| RASSF2   | 1.33E-91 | -0.38423 | 0.073 | 0.391 | 1.99E-87 |
| SPAG9    | 1.88E-91 | -0.4219  | 0.228 | 0.623 | 2.82E-87 |
| PEBP1    | 1.95E-91 | 0.341202 | 0.801 | 0.932 | 2.91E-87 |
| SOX9     | 1.99E-91 | -0.68576 | 0.207 | 0.612 | 2.98E-87 |
| CHN1     | 2.26E-91 | -0.4618  | 0.174 | 0.556 | 3.37E-87 |
| REXO2    | 2.26E-91 | 0.92743  | 0.497 | 0.367 | 3.38E-87 |
| SRSF10   | 2.27E-91 | -0.28053 | 0.21  | 0.573 | 3.39E-87 |
| CLTA     | 2.27E-91 | -0.29914 | 0.454 | 0.822 | 3.40E-87 |
| RPA1     | 2.32E-91 | -0.3878  | 0.199 | 0.579 | 3.47E-87 |
| ACIN1    | 2.71E-91 | -0.34478 | 0.15  | 0.501 | 4.05E-87 |
| C17orf89 | 2.77E-91 | -0.54475 | 0.275 | 0.694 | 4.14E-87 |
| SNRPD2   | 3.05E-91 | 0.370489 | 0.763 | 0.896 | 4.55E-87 |
| ZNF326   | 3.19E-91 | -0.38008 | 0.172 | 0.542 | 4.76E-87 |
| SRPK2    | 4.12E-91 | -0.30848 | 0.342 | 0.725 | 6.15E-87 |
| HAUS1    | 4.75E-91 | -0.37381 | 0.18  | 0.552 | 7.10E-87 |
| F2R      | 6.11E-91 | -0.40394 | 0.088 | 0.417 | 9.14E-87 |
| POLA2    | 6.92E-91 | -0.42598 | 0.024 | 0.295 | 1.03E-86 |
| RHBDD2   | 7.76E-91 | 0.180852 | 0.481 | 0.694 | 1.16E-86 |
| MAP2K2   | 8.80E-91 | -0.58012 | 0.158 | 0.546 | 1.31E-86 |
| SYF2     | 9.28E-91 | 0.395443 | 0.49  | 0.64  | 1.39E-86 |
| NPM1     | 1.01E-90 | 0.364778 | 0.821 | 0.938 | 1.51E-86 |
| FOXRED2  | 1.16E-90 | -0.35416 | 0.031 | 0.296 | 1.73E-86 |
| FARP1    | 1.54E-90 | -0.37237 | 0.089 | 0.41  | 2.31E-86 |
| MAGED2   | 1.80E-90 | 0.262688 | 0.503 | 0.683 | 2.69E-86 |
| CACYBP   | 2.02E-90 | -0.21673 | 0.44  | 0.814 | 3.02E-86 |
| MAZ      | 2.03E-90 | -0.44886 | 0.181 | 0.563 | 3.03E-86 |
| TMEM106C | 2.10E-90 | -0.33517 | 0.299 | 0.702 | 3.14E-86 |
| FAM127A  | 2.21E-90 | 0.127986 | 0.441 | 0.681 | 3.30E-86 |
| AP1S1    | 2.25E-90 | 0.311337 | 0.501 | 0.695 | 3.36E-86 |
| SH3BGRL  | 2.57E-90 | 0.273178 | 0.476 | 0.702 | 3.83E-86 |
| LSM14A   | 2.66E-90 | -0.20913 | 0.334 | 0.681 | 3.98E-86 |
| ERI3     | 2.78E-90 | -0.12648 | 0.316 | 0.654 | 4.15E-86 |
| NME4     | 3.20E-90 | -0.28452 | 0.327 | 0.695 | 4.78E-86 |
| COX20    | 3.38E-90 | -0.15743 | 0.388 | 0.759 | 5.05E-86 |
| FIS1     | 3.43E-90 | 0.165754 | 0.534 | 0.788 | 5.12E-86 |
| CSNK1A1  | 4.36E-90 | -0.25435 | 0.428 | 0.786 | 6.52E-86 |
| DNAJC7   | 5.63E-90 | -0.14298 | 0.339 | 0.696 | 8.42E-86 |
| EMC10    | 6.19E-90 | -0.27005 | 0.298 | 0.659 | 9.25E-86 |
| CCM2     | 6.56E-90 | -0.3325  | 0.193 | 0.552 | 9.81E-86 |
| CCSAP    | 7.06E-90 | -0.45274 | 0.036 | 0.323 | 1.06E-85 |
| BASP1    | 7.95E-90 | -0.64602 | 0.121 | 0.491 | 1.19E-85 |
| IPO5     | 8.94E-90 | -0.37239 | 0.146 | 0.502 | 1.34E-85 |
| COA1     | 9.43E-90 | -0.13202 | 0.359 | 0.719 | 1.41E-85 |

|           |          |          |       |       |          |
|-----------|----------|----------|-------|-------|----------|
| RUVBL2    | 9.44E-90 | -0.40976 | 0.276 | 0.675 | 1.41E-85 |
| UBL5      | 1.00E-89 | 0.510195 | 0.846 | 0.896 | 1.49E-85 |
| PIGX      | 1.04E-89 | -0.46492 | 0.189 | 0.575 | 1.55E-85 |
| NOTCH1    | 1.14E-89 | -0.43517 | 0.042 | 0.332 | 1.70E-85 |
| MAP4K4    | 1.15E-89 | -0.28218 | 0.146 | 0.478 | 1.72E-85 |
| PSENNEN   | 1.19E-89 | 0.652436 | 0.525 | 0.575 | 1.77E-85 |
| GJC1      | 1.52E-89 | -0.40614 | 0.029 | 0.306 | 2.27E-85 |
| SEMA6D    | 1.57E-89 | -0.43678 | 0.05  | 0.352 | 2.35E-85 |
| EIF4A3    | 1.79E-89 | -0.23529 | 0.32  | 0.669 | 2.67E-85 |
| DDAH2     | 1.96E-89 | -0.10137 | 0.336 | 0.673 | 2.93E-85 |
| MT1M      | 1.99E-89 | 0.784554 | 0.475 | 0.458 | 2.97E-85 |
| LINC00461 | 1.99E-89 | -0.25412 | 0.254 | 0.612 | 2.97E-85 |
| KIF2A     | 2.12E-89 | -0.42351 | 0.127 | 0.483 | 3.16E-85 |
| LIMD2     | 3.11E-89 | -0.38854 | 0.043 | 0.331 | 4.65E-85 |
| C2orf80   | 3.14E-89 | -0.46735 | 0.074 | 0.398 | 4.69E-85 |
| DNAJB11   | 3.44E-89 | -0.12728 | 0.34  | 0.681 | 5.15E-85 |
| MDH2      | 3.47E-89 | 0.26168  | 0.657 | 0.849 | 5.18E-85 |
| EIF4A1    | 3.51E-89 | 0.249153 | 0.795 | 0.937 | 5.25E-85 |
| ZNF667-AS | 3.54E-89 | 0.329226 | 0.515 | 0.672 | 5.29E-85 |
| RTN4      | 3.54E-89 | -0.33187 | 0.518 | 0.888 | 5.29E-85 |
| PTPRA     | 3.58E-89 | -0.48814 | 0.243 | 0.648 | 5.36E-85 |
| ZNF704    | 4.11E-89 | -0.47171 | 0.035 | 0.319 | 6.15E-85 |
| CSTF3     | 4.54E-89 | -0.2719  | 0.221 | 0.584 | 6.78E-85 |
| NUP50     | 4.73E-89 | -0.39806 | 0.057 | 0.359 | 7.08E-85 |
| MLLT11    | 4.95E-89 | -0.30733 | 0.411 | 0.798 | 7.40E-85 |
| ASAP2     | 4.96E-89 | -0.38225 | 0.038 | 0.32  | 7.42E-85 |
| KRTCAP2   | 4.97E-89 | 0.433618 | 0.559 | 0.672 | 7.43E-85 |
| MMS22L    | 5.08E-89 | -0.45058 | 0.044 | 0.333 | 7.59E-85 |
| TXN2      | 5.53E-89 | -0.24298 | 0.289 | 0.66  | 8.26E-85 |
| CHMP5     | 5.92E-89 | 0.36089  | 0.523 | 0.647 | 8.84E-85 |
| SSB       | 5.95E-89 | 0.277972 | 0.611 | 0.801 | 8.89E-85 |
| C7orf55   | 7.01E-89 | -0.15915 | 0.378 | 0.744 | 1.05E-84 |
| S100B     | 7.38E-89 | 0.21343  | 0.499 | 0.754 | 1.10E-84 |
| LUC7L3    | 7.56E-89 | -0.14728 | 0.452 | 0.794 | 1.13E-84 |
| RP11-1094 | 7.63E-89 | -0.3124  | 0.154 | 0.498 | 1.14E-84 |
| NAV1      | 7.83E-89 | -0.43225 | 0.053 | 0.356 | 1.17E-84 |
| USP13     | 8.04E-89 | -0.403   | 0.026 | 0.295 | 1.20E-84 |
| PNMA1     | 8.73E-89 | -0.42018 | 0.173 | 0.544 | 1.30E-84 |
| PCNP      | 8.76E-89 | 0.245465 | 0.566 | 0.754 | 1.31E-84 |
| TBL1XR1   | 1.13E-88 | -0.41384 | 0.109 | 0.452 | 1.69E-84 |
| LYPLA1    | 1.17E-88 | -0.39988 | 0.251 | 0.643 | 1.75E-84 |
| CEP57     | 1.24E-88 | -0.31444 | 0.176 | 0.526 | 1.85E-84 |
| UFD1L     | 1.24E-88 | -0.34249 | 0.235 | 0.616 | 1.86E-84 |
| NUBP2     | 1.45E-88 | -0.12734 | 0.328 | 0.67  | 2.16E-84 |
| FAM136A   | 1.53E-88 | -0.22489 | 0.188 | 0.528 | 2.28E-84 |
| SELT      | 1.60E-88 | 0.441987 | 0.612 | 0.714 | 2.39E-84 |
| SMARCE1   | 1.68E-88 | -0.16555 | 0.292 | 0.652 | 2.51E-84 |
| EIF3I     | 1.88E-88 | 0.288316 | 0.627 | 0.804 | 2.80E-84 |
| MATR3     | 1.91E-88 | -0.352   | 0.379 | 0.764 | 2.85E-84 |
| DHX36     | 1.96E-88 | -0.25355 | 0.315 | 0.677 | 2.93E-84 |
| CAPRIN1   | 2.01E-88 | -0.40253 | 0.203 | 0.58  | 3.01E-84 |

|          |          |          |       |       |          |
|----------|----------|----------|-------|-------|----------|
| RFC1     | 2.25E-88 | -0.30559 | 0.214 | 0.584 | 3.36E-84 |
| CHTF18   | 2.67E-88 | -0.38175 | 0.019 | 0.272 | 3.98E-84 |
| ARPP19   | 2.72E-88 | -0.22619 | 0.342 | 0.719 | 4.06E-84 |
| PHACTR4  | 2.98E-88 | -0.34498 | 0.124 | 0.452 | 4.45E-84 |
| TMEM259  | 3.19E-88 | -0.32688 | 0.208 | 0.559 | 4.77E-84 |
| C8orf33  | 3.94E-88 | -0.19677 | 0.264 | 0.607 | 5.89E-84 |
| ARPC3    | 3.98E-88 | 0.397381 | 0.683 | 0.817 | 5.94E-84 |
| FEZ1     | 4.33E-88 | -0.32283 | 0.399 | 0.784 | 6.47E-84 |
| ARF6     | 4.41E-88 | -0.40018 | 0.18  | 0.547 | 6.59E-84 |
| PAX6     | 5.49E-88 | -0.43034 | 0.064 | 0.368 | 8.20E-84 |
| BLOC1S1  | 5.57E-88 | 0.241404 | 0.525 | 0.783 | 8.33E-84 |
| DEF8     | 5.78E-88 | -0.36163 | 0.157 | 0.506 | 8.64E-84 |
| SF1      | 6.42E-88 | -0.23741 | 0.388 | 0.753 | 9.59E-84 |
| PON2     | 6.96E-88 | 0.346871 | 0.539 | 0.684 | 1.04E-83 |
| RAMP1    | 6.97E-88 | 0.670939 | 0.621 | 0.709 | 1.04E-83 |
| MAGOHB   | 7.89E-88 | -0.29952 | 0.217 | 0.583 | 1.18E-83 |
| NDUFS5   | 9.67E-88 | 0.291527 | 0.789 | 0.93  | 1.44E-83 |
| MIDN     | 1.13E-87 | -0.38218 | 0.26  | 0.643 | 1.69E-83 |
| HAGH     | 1.24E-87 | -0.43673 | 0.225 | 0.611 | 1.86E-83 |
| SLC22A17 | 1.28E-87 | -0.30573 | 0.196 | 0.544 | 1.91E-83 |
| CBX2     | 1.68E-87 | -0.41752 | 0.021 | 0.277 | 2.51E-83 |
| NUTF2    | 1.78E-87 | -0.14449 | 0.332 | 0.69  | 2.65E-83 |
| PDIA4    | 1.91E-87 | 0.196797 | 0.483 | 0.707 | 2.85E-83 |
| TRAPPC1  | 2.31E-87 | 0.533039 | 0.579 | 0.673 | 3.45E-83 |
| TPR      | 2.73E-87 | -0.3684  | 0.33  | 0.725 | 4.08E-83 |
| BID      | 2.83E-87 | -0.18694 | 0.169 | 0.477 | 4.23E-83 |
| GRB2     | 2.89E-87 | -0.33734 | 0.226 | 0.59  | 4.32E-83 |
| ABHD12   | 2.93E-87 | -0.56882 | 0.188 | 0.58  | 4.38E-83 |
| NARS     | 3.29E-87 | 0.312442 | 0.467 | 0.621 | 4.92E-83 |
| ARL4C    | 3.49E-87 | -0.44564 | 0.237 | 0.627 | 5.22E-83 |
| HNRNPR   | 3.52E-87 | -0.33689 | 0.455 | 0.847 | 5.27E-83 |
| PRPF40A  | 3.53E-87 | -0.19775 | 0.358 | 0.721 | 5.28E-83 |
| YPEL1    | 3.83E-87 | -0.33841 | 0.029 | 0.293 | 5.72E-83 |
| WIPI2    | 3.93E-87 | -0.24526 | 0.276 | 0.614 | 5.87E-83 |
| PCBP1    | 4.06E-87 | -0.34286 | 0.403 | 0.793 | 6.07E-83 |
| COPS8    | 4.08E-87 | 0.202114 | 0.541 | 0.767 | 6.10E-83 |
| CPNE4    | 4.60E-87 | -0.36448 | 0.016 | 0.259 | 6.87E-83 |
| RGS12    | 4.68E-87 | -0.38955 | 0.115 | 0.446 | 6.99E-83 |
| LSM5     | 4.94E-87 | -0.28412 | 0.503 | 0.88  | 7.38E-83 |
| LGR4     | 5.58E-87 | -0.37556 | 0.019 | 0.273 | 8.34E-83 |
| REEP3    | 6.67E-87 | -0.46062 | 0.091 | 0.425 | 9.97E-83 |
| TRIOBP   | 7.29E-87 | -0.35188 | 0.036 | 0.299 | 1.09E-82 |
| BRCA2    | 7.52E-87 | -0.45534 | 0.045 | 0.34  | 1.12E-82 |
| FAM200B  | 7.68E-87 | -0.1268  | 0.299 | 0.644 | 1.15E-82 |
| TMEM251  | 7.87E-87 | -0.15653 | 0.15  | 0.462 | 1.18E-82 |
| FAM212B  | 8.36E-87 | -0.40627 | 0.031 | 0.304 | 1.25E-82 |
| NELFE    | 8.92E-87 | -0.10735 | 0.338 | 0.681 | 1.33E-82 |
| ID3      | 9.03E-87 | 0.73281  | 0.366 | 0.454 | 1.35E-82 |
| FAM96B   | 9.05E-87 | 0.327094 | 0.667 | 0.816 | 1.35E-82 |
| TTYH1    | 1.00E-86 | -0.52971 | 0.196 | 0.573 | 1.50E-82 |
| DDX18    | 1.10E-86 | 0.149303 | 0.46  | 0.72  | 1.65E-82 |

|           |           |           |        |        |           |
|-----------|-----------|-----------|--------|--------|-----------|
| TCEAL4    | 1. 25E-86 | 0. 32217  | 0. 533 | 0. 728 | 1. 86E-82 |
| GSPT1     | 1. 27E-86 | -0. 39723 | 0. 241 | 0. 623 | 1. 90E-82 |
| PPP2R3C   | 1. 30E-86 | -0. 22557 | 0. 22  | 0. 572 | 1. 94E-82 |
| CIB1      | 1. 31E-86 | 0. 63495  | 0. 5   | 0. 501 | 1. 96E-82 |
| GTF2I     | 1. 39E-86 | -0. 43454 | 0. 292 | 0. 686 | 2. 08E-82 |
| CNPY2     | 1. 60E-86 | 0. 146202 | 0. 506 | 0. 767 | 2. 40E-82 |
| DCTN3     | 1. 65E-86 | -0. 27625 | 0. 426 | 0. 802 | 2. 46E-82 |
| SEC11C    | 1. 68E-86 | 0. 235226 | 0. 483 | 0. 679 | 2. 51E-82 |
| NCOR2     | 1. 73E-86 | -0. 3984  | 0. 094 | 0. 419 | 2. 59E-82 |
| ILF2      | 1. 75E-86 | -0. 26436 | 0. 539 | 0. 902 | 2. 62E-82 |
| MTPN      | 1. 80E-86 | -0. 1004  | 0. 353 | 0. 653 | 2. 68E-82 |
| SPOCD1    | 1. 82E-86 | 1. 089713 | 0. 474 | 0. 301 | 2. 71E-82 |
| N4BP2L2   | 2. 03E-86 | 0. 119581 | 0. 443 | 0. 657 | 3. 03E-82 |
| TMC01     | 2. 15E-86 | 0. 473443 | 0. 629 | 0. 723 | 3. 22E-82 |
| WSB2      | 2. 19E-86 | -0. 39396 | 0. 122 | 0. 463 | 3. 27E-82 |
| PRPF38B   | 2. 26E-86 | -0. 28549 | 0. 307 | 0. 668 | 3. 38E-82 |
| CDKN2AIPN | 2. 40E-86 | -0. 20593 | 0. 194 | 0. 537 | 3. 58E-82 |
| BOD1      | 3. 42E-86 | -0. 2312  | 0. 263 | 0. 606 | 5. 12E-82 |
| MUM1      | 3. 45E-86 | -0. 30272 | 0. 227 | 0. 59  | 5. 16E-82 |
| NLGN1     | 3. 85E-86 | -0. 44702 | 0. 066 | 0. 377 | 5. 75E-82 |
| DPYSL4    | 4. 08E-86 | -0. 44112 | 0. 069 | 0. 383 | 6. 09E-82 |
| UPF3A     | 4. 68E-86 | -0. 17188 | 0. 312 | 0. 662 | 6. 99E-82 |
| NUDT3     | 4. 82E-86 | -0. 38641 | 0. 208 | 0. 583 | 7. 21E-82 |
| DHRS11    | 4. 88E-86 | -0. 31836 | 0. 031 | 0. 285 | 7. 30E-82 |
| ERP29     | 5. 64E-86 | 0. 362849 | 0. 568 | 0. 714 | 8. 43E-82 |
| CNOT7     | 6. 37E-86 | -0. 18614 | 0. 293 | 0. 637 | 9. 52E-82 |
| GNAS      | 6. 62E-86 | -0. 44511 | 0. 518 | 0. 893 | 9. 89E-82 |
| SSBP1     | 7. 80E-86 | 0. 265929 | 0. 636 | 0. 847 | 1. 17E-81 |
| CBR1      | 8. 65E-86 | 0. 219018 | 0. 476 | 0. 677 | 1. 29E-81 |
| DDX39A    | 9. 33E-86 | -0. 28089 | 0. 404 | 0. 786 | 1. 39E-81 |
| PIK3R3    | 9. 43E-86 | -0. 22633 | 0. 06  | 0. 331 | 1. 41E-81 |
| KRT10     | 1. 04E-85 | -0. 20483 | 0. 478 | 0. 811 | 1. 56E-81 |
| FDPS      | 1. 06E-85 | -0. 24227 | 0. 357 | 0. 73  | 1. 58E-81 |
| BAZ2B     | 1. 17E-85 | -0. 44333 | 0. 166 | 0. 533 | 1. 75E-81 |
| CDK16     | 1. 20E-85 | -0. 34607 | 0. 182 | 0. 536 | 1. 79E-81 |
| VPS37B    | 1. 33E-85 | -0. 39305 | 0. 108 | 0. 441 | 1. 99E-81 |
| CHCHD3    | 1. 39E-85 | -0. 22041 | 0. 351 | 0. 716 | 2. 07E-81 |
| POLR2F    | 1. 43E-85 | -0. 2551  | 0. 438 | 0. 819 | 2. 14E-81 |
| SMARCD1   | 1. 75E-85 | -0. 34163 | 0. 123 | 0. 456 | 2. 62E-81 |
| RNF181    | 1. 78E-85 | 0. 457338 | 0. 521 | 0. 642 | 2. 66E-81 |
| UQCC2     | 1. 80E-85 | -0. 13797 | 0. 338 | 0. 694 | 2. 69E-81 |
| ATP5G1    | 1. 83E-85 | 0. 269051 | 0. 605 | 0. 805 | 2. 74E-81 |
| RP11-553L | 2. 02E-85 | -0. 36172 | 0. 141 | 0. 475 | 3. 02E-81 |
| PAIP1     | 2. 40E-85 | -0. 43417 | 0. 285 | 0. 678 | 3. 58E-81 |
| PSMA3     | 2. 48E-85 | 0. 223754 | 0. 435 | 0. 691 | 3. 71E-81 |
| UBXN2A    | 2. 57E-85 | -0. 34816 | 0. 139 | 0. 473 | 3. 84E-81 |
| 11-Sep    | 2. 59E-85 | -0. 44841 | 0. 229 | 0. 616 | 3. 87E-81 |
| SACS      | 2. 66E-85 | -0. 43022 | 0. 062 | 0. 364 | 3. 97E-81 |
| HMG3      | 2. 74E-85 | -0. 22445 | 0. 462 | 0. 835 | 4. 10E-81 |
| AHCY      | 2. 74E-85 | -0. 32996 | 0. 217 | 0. 586 | 4. 10E-81 |
| ANKRD11   | 3. 05E-85 | -0. 33496 | 0. 195 | 0. 541 | 4. 56E-81 |

|         |          |          |       |       |          |
|---------|----------|----------|-------|-------|----------|
| PPP1CC  | 3.13E-85 | -0.43449 | 0.361 | 0.76  | 4.68E-81 |
| GCAT    | 3.41E-85 | -0.44965 | 0.094 | 0.426 | 5.09E-81 |
| SSH2    | 3.60E-85 | -0.39474 | 0.055 | 0.343 | 5.39E-81 |
| MAML2   | 3.87E-85 | -0.33634 | 0.095 | 0.407 | 5.78E-81 |
| DTNA    | 3.95E-85 | 0.823298 | 0.415 | 0.358 | 5.91E-81 |
| GFAP    | 4.04E-85 | 1.155293 | 0.519 | 0.354 | 6.04E-81 |
| MYL6B   | 4.17E-85 | -0.17984 | 0.407 | 0.765 | 6.23E-81 |
| ACAP3   | 4.27E-85 | -0.48948 | 0.096 | 0.433 | 6.39E-81 |
| ARHGEF2 | 4.41E-85 | -0.25243 | 0.185 | 0.504 | 6.59E-81 |
| SCARA3  | 4.70E-85 | -0.28731 | 0.115 | 0.421 | 7.02E-81 |
| DHX9    | 4.73E-85 | -0.33885 | 0.18  | 0.533 | 7.06E-81 |
| ARL5A   | 4.90E-85 | -0.2764  | 0.33  | 0.695 | 7.33E-81 |
| NRN1    | 5.14E-85 | 0.654986 | 0.416 | 0.433 | 7.68E-81 |
| BUB3    | 5.95E-85 | -0.40345 | 0.262 | 0.648 | 8.89E-81 |
| NDUFB2  | 6.66E-85 | 0.418806 | 0.786 | 0.905 | 9.95E-81 |
| AP1S2   | 7.46E-85 | -0.47193 | 0.322 | 0.723 | 1.11E-80 |
| ATP1B3  | 7.55E-85 | -0.28655 | 0.353 | 0.717 | 1.13E-80 |
| CADM4   | 7.76E-85 | -0.38534 | 0.167 | 0.517 | 1.16E-80 |
| CNTRF   | 8.73E-85 | -0.48281 | 0.056 | 0.359 | 1.31E-80 |
| C8orf59 | 9.37E-85 | -0.21383 | 0.305 | 0.646 | 1.40E-80 |
| FRYL    | 1.01E-84 | -0.4086  | 0.087 | 0.409 | 1.51E-80 |
| IGFBP5  | 1.03E-84 | 0.942142 | 0.505 | 0.379 | 1.53E-80 |
| PDCD2   | 1.05E-84 | -0.47247 | 0.178 | 0.548 | 1.56E-80 |
| MTFR2   | 1.06E-84 | -0.37963 | 0.003 | 0.205 | 1.58E-80 |
| DCK     | 1.07E-84 | -0.44778 | 0.128 | 0.472 | 1.60E-80 |
| NLRP1   | 1.09E-84 | -0.27537 | 0.248 | 0.6   | 1.64E-80 |
| RERE    | 1.14E-84 | -0.31563 | 0.091 | 0.393 | 1.71E-80 |
| WBP5    | 1.17E-84 | 0.401458 | 0.648 | 0.777 | 1.75E-80 |
| KTN1    | 1.21E-84 | -0.40313 | 0.361 | 0.759 | 1.80E-80 |
| HAT1    | 1.30E-84 | -0.3007  | 0.307 | 0.684 | 1.94E-80 |
| RFWD3   | 1.31E-84 | -0.39062 | 0.028 | 0.285 | 1.95E-80 |
| ARMC1   | 1.51E-84 | -0.33524 | 0.201 | 0.552 | 2.26E-80 |
| CENPL   | 1.54E-84 | -0.34997 | 0.039 | 0.304 | 2.30E-80 |
| ZCRB1   | 1.63E-84 | 0.114294 | 0.48  | 0.763 | 2.44E-80 |
| PBRM1   | 1.65E-84 | -0.42842 | 0.137 | 0.486 | 2.46E-80 |
| ANAPC15 | 1.69E-84 | -0.21463 | 0.156 | 0.478 | 2.52E-80 |
| DDR1    | 1.87E-84 | -0.2419  | 0.286 | 0.637 | 2.80E-80 |
| SCARB2  | 1.91E-84 | -0.23702 | 0.246 | 0.574 | 2.86E-80 |
| PSMA4   | 2.11E-84 | -0.18119 | 0.417 | 0.781 | 3.15E-80 |
| FMNL2   | 2.16E-84 | -0.40084 | 0.097 | 0.421 | 3.22E-80 |
| FREM2   | 2.26E-84 | -0.30353 | 0.009 | 0.227 | 3.38E-80 |
| ZFAND5  | 2.27E-84 | -0.19164 | 0.271 | 0.59  | 3.39E-80 |
| C9orf16 | 2.55E-84 | -0.17349 | 0.409 | 0.76  | 3.81E-80 |
| IMMP1L  | 2.64E-84 | -0.2459  | 0.191 | 0.536 | 3.95E-80 |
| GSTK1   | 2.70E-84 | 0.695963 | 0.48  | 0.504 | 4.04E-80 |
| PGD     | 2.76E-84 | -0.34607 | 0.136 | 0.469 | 4.12E-80 |
| HMGA1   | 2.80E-84 | -0.52633 | 0.185 | 0.565 | 4.19E-80 |
| ATRX    | 3.03E-84 | -0.30046 | 0.294 | 0.657 | 4.53E-80 |
| PHPT1   | 3.22E-84 | 0.207378 | 0.643 | 0.848 | 4.81E-80 |
| ARID1A  | 3.35E-84 | -0.43301 | 0.131 | 0.478 | 5.01E-80 |
| MAGOH   | 3.60E-84 | 0.172269 | 0.411 | 0.647 | 5.38E-80 |

|          |          |          |       |       |          |
|----------|----------|----------|-------|-------|----------|
| RIF1     | 3.64E-84 | -0.43777 | 0.158 | 0.522 | 5.44E-80 |
| UBE2L3   | 4.01E-84 | -0.24209 | 0.38  | 0.756 | 5.99E-80 |
| EIF3K    | 4.67E-84 | 0.392665 | 0.679 | 0.835 | 6.98E-80 |
| CDK4     | 4.81E-84 | -0.52069 | 0.446 | 0.837 | 7.19E-80 |
| CEP170   | 4.83E-84 | -0.46827 | 0.1   | 0.433 | 7.21E-80 |
| CRIP2    | 5.29E-84 | -0.13063 | 0.281 | 0.604 | 7.90E-80 |
| NDUFB5   | 5.73E-84 | 0.194544 | 0.509 | 0.742 | 8.57E-80 |
| TOP1     | 6.18E-84 | -0.42944 | 0.277 | 0.667 | 9.23E-80 |
| NDUFA12  | 6.55E-84 | 0.154734 | 0.532 | 0.788 | 9.78E-80 |
| EIF1B    | 6.70E-84 | 0.301725 | 0.597 | 0.78  | 1.00E-79 |
| COPS6    | 6.83E-84 | 0.132831 | 0.608 | 0.859 | 1.02E-79 |
| GSS      | 6.99E-84 | -0.31005 | 0.151 | 0.486 | 1.04E-79 |
| C1QBP    | 7.17E-84 | -0.36156 | 0.425 | 0.802 | 1.07E-79 |
| SLC44A2  | 7.89E-84 | -0.28952 | 0.139 | 0.459 | 1.18E-79 |
| LSM2     | 8.13E-84 | -0.10752 | 0.405 | 0.743 | 1.21E-79 |
| CENPP    | 8.34E-84 | -0.38064 | 0.03  | 0.28  | 1.25E-79 |
| 2-Sep    | 9.00E-84 | -0.26537 | 0.5   | 0.86  | 1.35E-79 |
| HADHB    | 9.04E-84 | 0.143335 | 0.415 | 0.637 | 1.35E-79 |
| JUN      | 1.02E-83 | -0.11025 | 0.606 | 0.883 | 1.53E-79 |
| FOXG1    | 1.04E-83 | -0.37653 | 0.086 | 0.391 | 1.55E-79 |
| NAA38    | 1.16E-83 | 0.134305 | 0.456 | 0.757 | 1.74E-79 |
| POLR3K   | 1.28E-83 | -0.28221 | 0.138 | 0.463 | 1.91E-79 |
| TRAM1    | 1.32E-83 | 0.402851 | 0.45  | 0.516 | 1.97E-79 |
| COMMD6   | 1.32E-83 | 0.444731 | 0.726 | 0.823 | 1.98E-79 |
| GTF2H5   | 1.35E-83 | 0.201759 | 0.378 | 0.575 | 2.02E-79 |
| COPE     | 1.41E-83 | 0.317911 | 0.759 | 0.889 | 2.11E-79 |
| GGCT     | 1.49E-83 | 0.203634 | 0.44  | 0.699 | 2.23E-79 |
| GOLGA7   | 1.74E-83 | 0.18709  | 0.467 | 0.68  | 2.59E-79 |
| DENR     | 1.89E-83 | -0.28228 | 0.24  | 0.594 | 2.82E-79 |
| VPS28    | 2.02E-83 | 0.19257  | 0.504 | 0.746 | 3.02E-79 |
| TAF10    | 2.04E-83 | -0.38743 | 0.091 | 0.41  | 3.06E-79 |
| C7orf73  | 2.09E-83 | 0.393661 | 0.581 | 0.746 | 3.12E-79 |
| HN1L     | 2.10E-83 | -0.32979 | 0.112 | 0.435 | 3.14E-79 |
| POMP     | 2.19E-83 | 0.291529 | 0.676 | 0.838 | 3.28E-79 |
| RAF1     | 2.21E-83 | -0.36523 | 0.188 | 0.546 | 3.30E-79 |
| TMEM14C  | 2.21E-83 | 0.27742  | 0.544 | 0.715 | 3.31E-79 |
| ATP6VOB  | 2.41E-83 | 0.251433 | 0.659 | 0.828 | 3.60E-79 |
| MBD3     | 2.62E-83 | -0.32423 | 0.097 | 0.404 | 3.92E-79 |
| ILKAP    | 2.73E-83 | -0.35491 | 0.162 | 0.507 | 4.07E-79 |
| SYPL1    | 2.85E-83 | 0.666735 | 0.529 | 0.494 | 4.26E-79 |
| DCAF7    | 2.92E-83 | -0.44323 | 0.23  | 0.615 | 4.36E-79 |
| OLA1     | 3.01E-83 | -0.10744 | 0.441 | 0.784 | 4.49E-79 |
| PAIP2    | 3.01E-83 | 0.212267 | 0.578 | 0.764 | 4.50E-79 |
| NIPA2    | 3.12E-83 | -0.30318 | 0.176 | 0.512 | 4.67E-79 |
| LEPROTL1 | 3.26E-83 | -0.18167 | 0.247 | 0.586 | 4.88E-79 |
| DGUOK    | 3.77E-83 | 0.164221 | 0.515 | 0.767 | 5.63E-79 |
| WRB      | 3.85E-83 | 0.249639 | 0.451 | 0.665 | 5.75E-79 |
| PAICS    | 3.85E-83 | -0.36072 | 0.302 | 0.694 | 5.75E-79 |
| HRAS     | 3.98E-83 | -0.45107 | 0.204 | 0.583 | 5.95E-79 |
| HDGF     | 4.13E-83 | -0.47171 | 0.229 | 0.616 | 6.18E-79 |
| EIF3H    | 4.38E-83 | 0.26605  | 0.587 | 0.765 | 6.55E-79 |

|          |          |          |       |       |          |
|----------|----------|----------|-------|-------|----------|
| AKIRIN1  | 4.53E-83 | -0.21342 | 0.282 | 0.607 | 6.77E-79 |
| C9orf78  | 4.69E-83 | 0.108416 | 0.409 | 0.652 | 7.01E-79 |
| MCRS1    | 4.92E-83 | -0.26529 | 0.193 | 0.537 | 7.36E-79 |
| NDUFB3   | 5.99E-83 | 0.17222  | 0.493 | 0.743 | 8.95E-79 |
| PLEKHJ1  | 6.48E-83 | -0.17855 | 0.292 | 0.633 | 9.69E-79 |
| C16orf45 | 6.67E-83 | -0.20576 | 0.28  | 0.632 | 9.97E-79 |
| DBF4B    | 6.68E-83 | -0.29956 | 0.011 | 0.231 | 9.98E-79 |
| RFFL     | 6.83E-83 | -0.43911 | 0.056 | 0.354 | 1.02E-78 |
| HSBP1    | 7.85E-83 | 0.257578 | 0.699 | 0.874 | 1.17E-78 |
| KNOP1    | 8.03E-83 | -0.28839 | 0.209 | 0.558 | 1.20E-78 |
| SIAH1    | 8.44E-83 | -0.35395 | 0.142 | 0.47  | 1.26E-78 |
| CHD4     | 8.92E-83 | -0.29576 | 0.199 | 0.544 | 1.33E-78 |
| PPP2R1A  | 9.19E-83 | -0.20231 | 0.418 | 0.764 | 1.37E-78 |
| PPT1     | 9.32E-83 | 0.217825 | 0.433 | 0.614 | 1.39E-78 |
| MAPRE1   | 9.50E-83 | -0.30348 | 0.362 | 0.741 | 1.42E-78 |
| ADSL     | 9.78E-83 | -0.2576  | 0.158 | 0.481 | 1.46E-78 |
| U2AF2    | 1.05E-82 | -0.15928 | 0.211 | 0.527 | 1.57E-78 |
| EXOC5    | 1.14E-82 | -0.38099 | 0.099 | 0.415 | 1.71E-78 |
| NFKBIA   | 1.14E-82 | 0.616051 | 0.483 | 0.419 | 1.71E-78 |
| NCL      | 1.21E-82 | -0.33322 | 0.434 | 0.811 | 1.81E-78 |
| MPDU1    | 1.29E-82 | -0.23856 | 0.226 | 0.564 | 1.93E-78 |
| GPX1     | 1.37E-82 | 0.375717 | 0.69  | 0.84  | 2.05E-78 |
| FKBP8    | 1.38E-82 | 0.361349 | 0.62  | 0.754 | 2.07E-78 |
| POU3F3   | 1.42E-82 | -0.37529 | 0.071 | 0.365 | 2.12E-78 |
| GSTP1    | 1.58E-82 | 0.435922 | 0.821 | 0.923 | 2.37E-78 |
| RAD1     | 1.75E-82 | -0.36674 | 0.147 | 0.483 | 2.61E-78 |
| EIF3E    | 1.81E-82 | 0.149856 | 0.523 | 0.746 | 2.71E-78 |
| TTC19    | 1.84E-82 | -0.24208 | 0.261 | 0.594 | 2.75E-78 |
| NTHL1    | 2.05E-82 | -0.29066 | 0.122 | 0.441 | 3.07E-78 |
| MIF      | 2.07E-82 | 0.205463 | 0.615 | 0.795 | 3.09E-78 |
| SLTM     | 2.35E-82 | -0.20233 | 0.239 | 0.565 | 3.52E-78 |
| PSD3     | 2.77E-82 | -0.31334 | 0.089 | 0.393 | 4.14E-78 |
| PPP2CA   | 2.88E-82 | -0.30264 | 0.368 | 0.735 | 4.30E-78 |
| HNRNPL   | 3.11E-82 | -0.28506 | 0.166 | 0.489 | 4.65E-78 |
| FIP1L1   | 3.16E-82 | -0.3501  | 0.247 | 0.612 | 4.72E-78 |
| CASC4    | 3.20E-82 | -0.34476 | 0.115 | 0.436 | 4.78E-78 |
| MASTL    | 3.39E-82 | -0.42027 | 0.007 | 0.22  | 5.06E-78 |
| DCP2     | 3.51E-82 | -0.41583 | 0.083 | 0.394 | 5.25E-78 |
| MPC1     | 3.52E-82 | 0.153651 | 0.462 | 0.696 | 5.26E-78 |
| ADNP     | 3.81E-82 | -0.36869 | 0.1   | 0.411 | 5.70E-78 |
| SSR2     | 3.89E-82 | 0.132648 | 0.636 | 0.869 | 5.81E-78 |
| TMEM165  | 4.10E-82 | -0.46588 | 0.3   | 0.689 | 6.13E-78 |
| HSPB11   | 4.14E-82 | -0.33332 | 0.254 | 0.619 | 6.19E-78 |
| TMEM9B   | 4.22E-82 | 0.244636 | 0.46  | 0.642 | 6.30E-78 |
| FUS      | 5.16E-82 | -0.25865 | 0.543 | 0.898 | 7.72E-78 |
| BTF3     | 5.47E-82 | 0.368113 | 0.854 | 0.954 | 8.18E-78 |
| ARGLU1   | 6.27E-82 | -0.28095 | 0.361 | 0.714 | 9.36E-78 |
| MEAF6    | 6.31E-82 | 0.209626 | 0.478 | 0.688 | 9.43E-78 |
| MAT2A    | 6.37E-82 | -0.1707  | 0.283 | 0.606 | 9.53E-78 |
| DHPS     | 6.67E-82 | -0.13258 | 0.415 | 0.757 | 9.96E-78 |
| CPSF6    | 6.84E-82 | -0.33862 | 0.236 | 0.604 | 1.02E-77 |

|          |          |          |       |       |          |
|----------|----------|----------|-------|-------|----------|
| RAB7A    | 7.52E-82 | 0.22912  | 0.609 | 0.774 | 1.12E-77 |
| SRRT     | 8.79E-82 | -0.38285 | 0.181 | 0.532 | 1.31E-77 |
| ILDR2    | 8.82E-82 | -0.28074 | 0.02  | 0.249 | 1.32E-77 |
| NCOR1    | 1.12E-81 | -0.43644 | 0.335 | 0.728 | 1.67E-77 |
| PSMC3    | 1.18E-81 | -0.10994 | 0.497 | 0.842 | 1.76E-77 |
| CCT5     | 1.18E-81 | -0.15676 | 0.447 | 0.791 | 1.77E-77 |
| GANAB    | 1.25E-81 | -0.33207 | 0.192 | 0.537 | 1.87E-77 |
| PPP2R3B  | 1.33E-81 | -0.32719 | 0.02  | 0.258 | 1.99E-77 |
| ZNF680   | 1.40E-81 | -0.40403 | 0.155 | 0.501 | 2.09E-77 |
| RNF5     | 1.48E-81 | -0.21451 | 0.308 | 0.659 | 2.20E-77 |
| LSM3     | 1.48E-81 | -0.1852  | 0.508 | 0.863 | 2.22E-77 |
| LHFPL3   | 1.49E-81 | -0.64752 | 0.053 | 0.348 | 2.23E-77 |
| UQCRFS1  | 1.51E-81 | -0.37306 | 0.437 | 0.812 | 2.26E-77 |
| FGD5-AS1 | 1.55E-81 | -0.37249 | 0.224 | 0.583 | 2.32E-77 |
| COX7A2L  | 1.66E-81 | 0.376449 | 0.578 | 0.712 | 2.48E-77 |
| TAF15    | 1.68E-81 | -0.3396  | 0.203 | 0.564 | 2.51E-77 |
| NDE1     | 1.77E-81 | -0.40964 | 0.056 | 0.347 | 2.65E-77 |
| EIF5B    | 1.83E-81 | 0.151651 | 0.51  | 0.767 | 2.74E-77 |
| XRN2     | 2.16E-81 | -0.29432 | 0.361 | 0.731 | 3.23E-77 |
| NSL1     | 2.19E-81 | -0.12107 | 0.303 | 0.627 | 3.27E-77 |
| NSRP1    | 2.61E-81 | -0.12817 | 0.317 | 0.638 | 3.90E-77 |
| CBR3     | 2.67E-81 | -0.34189 | 0.094 | 0.388 | 3.98E-77 |
| EIF2AK1  | 2.75E-81 | -0.31902 | 0.284 | 0.635 | 4.11E-77 |
| FUNDC2   | 2.79E-81 | 0.109757 | 0.386 | 0.643 | 4.17E-77 |
| PNRC1    | 2.79E-81 | 0.191848 | 0.372 | 0.514 | 4.17E-77 |
| PPIH     | 2.95E-81 | -0.21068 | 0.201 | 0.528 | 4.41E-77 |
| RRP7A    | 2.98E-81 | -0.2131  | 0.203 | 0.537 | 4.45E-77 |
| BUD31    | 3.03E-81 | 0.302375 | 0.695 | 0.853 | 4.53E-77 |
| SCLT1    | 3.13E-81 | -0.35485 | 0.03  | 0.283 | 4.68E-77 |
| APOLD1   | 3.47E-81 | -0.49457 | 0.043 | 0.32  | 5.19E-77 |
| SNRNP200 | 3.48E-81 | -0.28552 | 0.22  | 0.568 | 5.19E-77 |
| PCGF2    | 3.71E-81 | -0.28114 | 0.098 | 0.386 | 5.54E-77 |
| PSMB1    | 4.02E-81 | 0.359579 | 0.713 | 0.853 | 6.01E-77 |
| OSBPL6   | 4.20E-81 | -0.33608 | 0.089 | 0.388 | 6.27E-77 |
| TMEM258  | 4.41E-81 | 0.327605 | 0.696 | 0.847 | 6.59E-77 |
| TSPAN3   | 4.49E-81 | -0.33251 | 0.387 | 0.765 | 6.70E-77 |
| PPP1R10  | 4.54E-81 | -0.28341 | 0.142 | 0.456 | 6.78E-77 |
| SMARCA5  | 4.95E-81 | -0.384   | 0.251 | 0.619 | 7.40E-77 |
| TJP1     | 5.67E-81 | -0.25563 | 0.126 | 0.428 | 8.47E-77 |
| IP6K2    | 5.93E-81 | 0.169151 | 0.452 | 0.688 | 8.87E-77 |
| RNH1     | 6.11E-81 | 0.340695 | 0.506 | 0.627 | 9.13E-77 |
| TAGLN3   | 6.15E-81 | -0.62509 | 0.055 | 0.349 | 9.19E-77 |
| RRP36    | 6.44E-81 | -0.33568 | 0.059 | 0.343 | 9.62E-77 |
| IFRD1    | 7.06E-81 | 0.316739 | 0.512 | 0.626 | 1.06E-76 |
| MARK3    | 7.20E-81 | -0.26    | 0.194 | 0.505 | 1.08E-76 |
| RNPS1    | 7.52E-81 | -0.23819 | 0.476 | 0.831 | 1.12E-76 |
| FKBP1A   | 8.35E-81 | 0.35382  | 0.648 | 0.81  | 1.25E-76 |
| CTNNA1   | 8.48E-81 | 0.170367 | 0.391 | 0.558 | 1.27E-76 |
| ACBD6    | 8.57E-81 | -0.26165 | 0.195 | 0.537 | 1.28E-76 |
| SERF2    | 9.28E-81 | 0.474802 | 0.837 | 0.914 | 1.39E-76 |
| UBE2J2   | 1.00E-80 | -0.31866 | 0.236 | 0.58  | 1.50E-76 |



|          |           |           |        |        |           |
|----------|-----------|-----------|--------|--------|-----------|
| KATNBL1  | 1. 01E-80 | -0. 27647 | 0. 147 | 0. 472 | 1. 51E-76 |
| POLDIP2  | 1. 06E-80 | -0. 41388 | 0. 243 | 0. 619 | 1. 58E-76 |
| SHFM1    | 1. 13E-80 | 0. 397662 | 0. 773 | 0. 884 | 1. 69E-76 |
| ABHD17A  | 1. 17E-80 | -0. 41285 | 0. 101 | 0. 422 | 1. 75E-76 |
| ATP2A2   | 1. 23E-80 | -0. 26821 | 0. 177 | 0. 496 | 1. 84E-76 |
| TP53I13  | 1. 25E-80 | -0. 52058 | 0. 147 | 0. 507 | 1. 86E-76 |
| SOCS3    | 1. 39E-80 | 0. 485018 | 0. 342 | 0. 332 | 2. 08E-76 |
| ELOVL5   | 1. 61E-80 | -0. 17697 | 0. 268 | 0. 6   | 2. 40E-76 |
| LSM1     | 1. 62E-80 | 0. 198993 | 0. 445 | 0. 66  | 2. 42E-76 |
| RBBP4    | 1. 66E-80 | -0. 25199 | 0. 362 | 0. 728 | 2. 49E-76 |
| UBE2R2   | 1. 89E-80 | -0. 40377 | 0. 164 | 0. 515 | 2. 82E-76 |
| CEP57L1  | 1. 90E-80 | -0. 33445 | 0. 071 | 0. 364 | 2. 84E-76 |
| GLOD4    | 1. 90E-80 | -0. 10431 | 0. 343 | 0. 673 | 2. 84E-76 |
| AKAP12   | 1. 94E-80 | 0. 339168 | 0. 31  | 0. 414 | 2. 90E-76 |
| NBEAL1   | 2. 27E-80 | 0. 774857 | 0. 648 | 0. 625 | 3. 40E-76 |
| CXCL14   | 2. 34E-80 | 1. 090713 | 0. 333 | 0. 101 | 3. 49E-76 |
| LAMTOR1  | 2. 40E-80 | 0. 34738  | 0. 563 | 0. 727 | 3. 58E-76 |
| FZD3     | 2. 50E-80 | -0. 27468 | 0. 231 | 0. 577 | 3. 74E-76 |
| C16orf87 | 2. 53E-80 | -0. 36202 | 0. 13  | 0. 453 | 3. 79E-76 |
| KMT2E    | 2. 53E-80 | -0. 15781 | 0. 432 | 0. 767 | 3. 79E-76 |
| PGRMC1   | 2. 85E-80 | -0. 18874 | 0. 427 | 0. 749 | 4. 26E-76 |
| SON      | 2. 99E-80 | 0. 249527 | 0. 651 | 0. 848 | 4. 46E-76 |
| FSD1     | 3. 00E-80 | -0. 36445 | 0. 082 | 0. 381 | 4. 48E-76 |
| WBSCR22  | 3. 04E-80 | 0. 14717  | 0. 483 | 0. 728 | 4. 55E-76 |
| UBE2E1   | 3. 15E-80 | 0. 279526 | 0. 459 | 0. 626 | 4. 70E-76 |
| UBE2I    | 3. 46E-80 | -0. 21296 | 0. 469 | 0. 827 | 5. 17E-76 |
| TLK1     | 4. 09E-80 | -0. 40998 | 0. 168 | 0. 52  | 6. 11E-76 |
| DESI2    | 4. 12E-80 | -0. 37986 | 0. 135 | 0. 464 | 6. 16E-76 |
| PDIA6    | 4. 13E-80 | 0. 223777 | 0. 659 | 0. 849 | 6. 17E-76 |
| CELF2    | 4. 53E-80 | -0. 22387 | 0. 165 | 0. 472 | 6. 76E-76 |
| ENOSF1   | 4. 55E-80 | -0. 25808 | 0. 029 | 0. 264 | 6. 80E-76 |
| ROBO2    | 4. 64E-80 | -0. 39241 | 0. 029 | 0. 284 | 6. 94E-76 |
| HSD17B12 | 4. 84E-80 | 0. 247803 | 0. 417 | 0. 568 | 7. 24E-76 |
| PGLS     | 4. 91E-80 | -0. 23192 | 0. 348 | 0. 686 | 7. 34E-76 |
| IMPDH2   | 5. 30E-80 | 0. 386855 | 0. 492 | 0. 616 | 7. 93E-76 |
| GALNT1   | 5. 34E-80 | -0. 35663 | 0. 077 | 0. 369 | 7. 98E-76 |
| NNMT     | 5. 62E-80 | 1. 172293 | 0. 392 | 0. 17  | 8. 40E-76 |
| CSNK2A1  | 5. 74E-80 | -0. 25849 | 0. 251 | 0. 593 | 8. 58E-76 |
| C3orf70  | 5. 96E-80 | -0. 4567  | 0. 037 | 0. 301 | 8. 91E-76 |
| IFI27L1  | 6. 22E-80 | -0. 19009 | 0. 165 | 0. 464 | 9. 30E-76 |
| LMAN2    | 6. 34E-80 | 0. 29645  | 0. 564 | 0. 743 | 9. 48E-76 |
| PSMD1    | 6. 69E-80 | -0. 30068 | 0. 251 | 0. 605 | 1. 00E-75 |
| PSMD3    | 6. 73E-80 | -0. 16862 | 0. 347 | 0. 658 | 1. 01E-75 |
| RNF26    | 7. 07E-80 | -0. 38282 | 0. 111 | 0. 437 | 1. 06E-75 |
| NDUFV1   | 7. 18E-80 | -0. 11025 | 0. 41  | 0. 735 | 1. 07E-75 |
| PRELID1  | 7. 32E-80 | -0. 24834 | 0. 433 | 0. 767 | 1. 09E-75 |
| AIF1L    | 7. 63E-80 | -0. 5943  | 0. 036 | 0. 304 | 1. 14E-75 |
| PLA2G16  | 8. 31E-80 | 0. 777064 | 0. 437 | 0. 374 | 1. 24E-75 |
| SEC61B   | 9. 48E-80 | 0. 337725 | 0. 708 | 0. 831 | 1. 42E-75 |
| DCTPP1   | 9. 84E-80 | -0. 18869 | 0. 253 | 0. 586 | 1. 47E-75 |
| SRSF6    | 9. 98E-80 | -0. 31118 | 0. 26  | 0. 615 | 1. 49E-75 |

|           |          |          |       |       |          |
|-----------|----------|----------|-------|-------|----------|
| NDUFA13   | 1.09E-79 | 0.521178 | 0.769 | 0.862 | 1.63E-75 |
| TMEM50A   | 1.14E-79 | 0.444298 | 0.567 | 0.689 | 1.70E-75 |
| SRSF5     | 1.15E-79 | 0.194411 | 0.599 | 0.802 | 1.72E-75 |
| METTL9    | 1.16E-79 | -0.3012  | 0.361 | 0.714 | 1.73E-75 |
| TMEM208   | 1.16E-79 | 0.319369 | 0.491 | 0.651 | 1.74E-75 |
| ANXA2R    | 1.26E-79 | -0.26433 | 0.094 | 0.374 | 1.89E-75 |
| EIF3F     | 1.27E-79 | -0.18654 | 0.448 | 0.767 | 1.90E-75 |
| IRF2BPL   | 1.31E-79 | -0.41035 | 0.154 | 0.494 | 1.96E-75 |
| AKAP8L    | 1.33E-79 | -0.12524 | 0.181 | 0.438 | 1.99E-75 |
| SARS      | 1.33E-79 | 0.301573 | 0.448 | 0.591 | 1.99E-75 |
| NOP56     | 1.33E-79 | -0.23871 | 0.38  | 0.751 | 1.99E-75 |
| NDUFA4    | 1.44E-79 | 0.434847 | 0.906 | 0.975 | 2.15E-75 |
| BLMH      | 1.50E-79 | -0.3065  | 0.105 | 0.41  | 2.24E-75 |
| OSBPL8    | 1.52E-79 | -0.31898 | 0.183 | 0.515 | 2.28E-75 |
| TFDP2     | 1.57E-79 | -0.41411 | 0.106 | 0.426 | 2.35E-75 |
| C4orf46   | 1.62E-79 | -0.34809 | 0.045 | 0.305 | 2.42E-75 |
| SQLE      | 1.64E-79 | -0.37306 | 0.187 | 0.537 | 2.44E-75 |
| TBCB      | 1.66E-79 | 0.113086 | 0.612 | 0.864 | 2.48E-75 |
| HNRNPA1L2 | 1.67E-79 | -0.49146 | 0.097 | 0.421 | 2.49E-75 |
| SNRNP40   | 1.69E-79 | -0.10076 | 0.317 | 0.64  | 2.53E-75 |
| OSTC      | 2.02E-79 | 0.45313  | 0.53  | 0.651 | 3.01E-75 |
| CCL2      | 2.05E-79 | 1.222899 | 0.328 | 0.247 | 3.06E-75 |
| PHC2      | 2.37E-79 | -0.15574 | 0.176 | 0.467 | 3.54E-75 |
| RP11-472N | 2.60E-79 | -0.30594 | 0.012 | 0.216 | 3.89E-75 |
| R3HDM1    | 2.73E-79 | -0.31158 | 0.057 | 0.331 | 4.09E-75 |
| EI24      | 2.75E-79 | -0.2177  | 0.398 | 0.737 | 4.11E-75 |
| TMX4      | 3.02E-79 | -0.37074 | 0.183 | 0.532 | 4.51E-75 |
| HSPH1     | 3.23E-79 | -0.18787 | 0.284 | 0.61  | 4.83E-75 |
| ADI1      | 3.28E-79 | -0.10401 | 0.323 | 0.614 | 4.91E-75 |
| EBP       | 3.65E-79 | -0.17053 | 0.156 | 0.458 | 5.46E-75 |
| RDH11     | 3.80E-79 | -0.14435 | 0.288 | 0.609 | 5.67E-75 |
| HNRNPUL2  | 3.91E-79 | -0.35382 | 0.087 | 0.386 | 5.85E-75 |
| RHEB      | 4.00E-79 | -0.30357 | 0.594 | 0.926 | 5.97E-75 |
| HYAL2     | 4.12E-79 | -0.31918 | 0.128 | 0.437 | 6.15E-75 |
| LDHB      | 4.15E-79 | 0.136262 | 0.768 | 0.967 | 6.20E-75 |
| TAX1BP3   | 4.36E-79 | 0.390155 | 0.346 | 0.464 | 6.52E-75 |
| ARL9      | 4.49E-79 | -0.33749 | 0.009 | 0.219 | 6.71E-75 |
| LMO4      | 4.62E-79 | -0.37254 | 0.396 | 0.78  | 6.91E-75 |
| CENPJ     | 4.81E-79 | -0.38284 | 0.05  | 0.325 | 7.19E-75 |
| TOP2B     | 5.21E-79 | -0.33568 | 0.121 | 0.432 | 7.78E-75 |
| DPYSL5    | 5.27E-79 | -0.438   | 0.049 | 0.33  | 7.88E-75 |
| EIF3L     | 5.83E-79 | -0.1391  | 0.402 | 0.744 | 8.72E-75 |
| CLNS1A    | 5.86E-79 | 0.179608 | 0.461 | 0.686 | 8.76E-75 |
| OCIAD1    | 6.00E-79 | 0.280208 | 0.621 | 0.806 | 8.97E-75 |
| POLR2J    | 6.13E-79 | 0.219109 | 0.664 | 0.878 | 9.16E-75 |
| GPBP1     | 6.25E-79 | -0.12653 | 0.378 | 0.693 | 9.34E-75 |
| CHID1     | 6.45E-79 | 0.148818 | 0.416 | 0.675 | 9.64E-75 |
| ECH1      | 6.90E-79 | 0.371921 | 0.555 | 0.704 | 1.03E-74 |
| RSBN1L    | 7.02E-79 | -0.17361 | 0.282 | 0.611 | 1.05E-74 |
| SRR       | 7.52E-79 | -0.24057 | 0.106 | 0.39  | 1.12E-74 |
| CREB5     | 7.55E-79 | -0.35525 | 0.178 | 0.511 | 1.13E-74 |

|           |          |          |       |       |          |
|-----------|----------|----------|-------|-------|----------|
| TMEM206   | 7.64E-79 | -0.27752 | 0.113 | 0.41  | 1.14E-74 |
| POLR2G    | 8.55E-79 | 0.274701 | 0.544 | 0.759 | 1.28E-74 |
| ID2       | 8.80E-79 | 0.485695 | 0.539 | 0.595 | 1.32E-74 |
| APP       | 8.96E-79 | -0.12329 | 0.497 | 0.786 | 1.34E-74 |
| 7-Sep     | 9.12E-79 | 0.112622 | 0.724 | 0.933 | 1.36E-74 |
| CCAR1     | 9.34E-79 | -0.31907 | 0.166 | 0.495 | 1.40E-74 |
| NCK2      | 9.44E-79 | -0.28994 | 0.033 | 0.279 | 1.41E-74 |
| SNHG7     | 1.01E-78 | -0.10082 | 0.29  | 0.56  | 1.50E-74 |
| BCLAF1    | 1.02E-78 | -0.25031 | 0.281 | 0.627 | 1.53E-74 |
| UBE2D3    | 1.03E-78 | 0.331116 | 0.678 | 0.802 | 1.54E-74 |
| U2SURP    | 1.05E-78 | -0.14532 | 0.304 | 0.628 | 1.57E-74 |
| MTF2      | 1.28E-78 | -0.30246 | 0.157 | 0.472 | 1.91E-74 |
| MYL12B    | 1.32E-78 | 0.446349 | 0.693 | 0.804 | 1.97E-74 |
| EMC3      | 1.50E-78 | 0.267967 | 0.427 | 0.616 | 2.25E-74 |
| CTDSPL2   | 1.52E-78 | -0.35857 | 0.066 | 0.347 | 2.27E-74 |
| COMMD2    | 1.60E-78 | -0.13448 | 0.228 | 0.532 | 2.40E-74 |
| IPO7      | 1.63E-78 | -0.29337 | 0.148 | 0.458 | 2.43E-74 |
| PABPC4    | 1.68E-78 | -0.28399 | 0.168 | 0.48  | 2.51E-74 |
| SRSF4     | 1.70E-78 | -0.3183  | 0.27  | 0.625 | 2.54E-74 |
| U2AF1     | 1.82E-78 | -0.3245  | 0.517 | 0.875 | 2.72E-74 |
| LINC00116 | 2.07E-78 | 0.253983 | 0.368 | 0.567 | 3.09E-74 |
| SRPK1     | 2.19E-78 | -0.38338 | 0.111 | 0.426 | 3.28E-74 |
| MAGED1    | 2.29E-78 | -0.14972 | 0.307 | 0.635 | 3.43E-74 |
| YIF1A     | 2.40E-78 | 0.511296 | 0.47  | 0.527 | 3.58E-74 |
| EPC1      | 2.50E-78 | -0.29619 | 0.163 | 0.485 | 3.74E-74 |
| BCL7B     | 2.52E-78 | -0.28944 | 0.237 | 0.58  | 3.76E-74 |
| MAPK1     | 2.54E-78 | -0.37517 | 0.122 | 0.441 | 3.80E-74 |
| SORT1     | 2.78E-78 | -0.31186 | 0.105 | 0.401 | 4.16E-74 |
| SGTA      | 2.98E-78 | -0.22422 | 0.261 | 0.581 | 4.46E-74 |
| MAPK1IP1L | 3.00E-78 | -0.12823 | 0.289 | 0.616 | 4.49E-74 |
| CCND1     | 3.13E-78 | -0.47511 | 0.083 | 0.379 | 4.67E-74 |
| LDLRAD3   | 3.23E-78 | -0.24254 | 0.082 | 0.359 | 4.82E-74 |
| AK1       | 3.25E-78 | 0.130841 | 0.301 | 0.54  | 4.85E-74 |
| LAMP2     | 4.01E-78 | 0.624768 | 0.501 | 0.486 | 5.99E-74 |
| JAG1      | 4.38E-78 | -0.41481 | 0.086 | 0.383 | 6.55E-74 |
| PFDN4     | 4.93E-78 | -0.30367 | 0.254 | 0.604 | 7.37E-74 |
| ITGB8     | 5.31E-78 | -0.2679  | 0.184 | 0.505 | 7.94E-74 |
| POLD2     | 5.72E-78 | 0.121732 | 0.509 | 0.775 | 8.54E-74 |
| SYT11     | 5.76E-78 | -0.24835 | 0.297 | 0.647 | 8.60E-74 |
| ATP5J2    | 5.76E-78 | 0.320847 | 0.781 | 0.922 | 8.61E-74 |
| RBM38     | 6.56E-78 | -0.32197 | 0.07  | 0.344 | 9.81E-74 |
| PDCD7     | 6.62E-78 | -0.37322 | 0.123 | 0.446 | 9.90E-74 |
| MAF1      | 6.75E-78 | -0.31605 | 0.275 | 0.622 | 1.01E-73 |
| RUVBL1    | 6.90E-78 | -0.10528 | 0.239 | 0.554 | 1.03E-73 |
| OST4      | 7.15E-78 | 0.414715 | 0.734 | 0.852 | 1.07E-73 |
| FN3KRP    | 7.37E-78 | -0.17972 | 0.167 | 0.473 | 1.10E-73 |
| BCAP31    | 7.42E-78 | 0.441872 | 0.562 | 0.662 | 1.11E-73 |
| DDX24     | 7.54E-78 | 0.200221 | 0.402 | 0.615 | 1.13E-73 |
| THAP11    | 7.68E-78 | -0.33291 | 0.099 | 0.4   | 1.15E-73 |
| MPLKIP    | 7.86E-78 | 0.123799 | 0.428 | 0.673 | 1.17E-73 |
| SRSF7     | 7.93E-78 | -0.13989 | 0.504 | 0.84  | 1.19E-73 |

|           |          |          |       |       |          |
|-----------|----------|----------|-------|-------|----------|
| OAZ2      | 8.14E-78 | 0.211515 | 0.427 | 0.651 | 1.22E-73 |
| PSMB2     | 8.39E-78 | 0.326889 | 0.609 | 0.791 | 1.25E-73 |
| PIN4      | 8.52E-78 | 0.240681 | 0.422 | 0.631 | 1.27E-73 |
| GCSH      | 8.55E-78 | -0.45317 | 0.276 | 0.653 | 1.28E-73 |
| UFC1      | 9.06E-78 | 0.186034 | 0.484 | 0.712 | 1.35E-73 |
| FCGRT     | 9.07E-78 | 0.814878 | 0.452 | 0.344 | 1.36E-73 |
| RAB11A    | 9.41E-78 | 0.228585 | 0.428 | 0.637 | 1.41E-73 |
| PSMD8     | 1.04E-77 | 0.280918 | 0.689 | 0.873 | 1.56E-73 |
| NHP2      | 1.05E-77 | 0.143406 | 0.561 | 0.798 | 1.56E-73 |
| RBM26     | 1.19E-77 | -0.29261 | 0.117 | 0.414 | 1.77E-73 |
| AP3S1     | 1.39E-77 | 0.136411 | 0.398 | 0.605 | 2.08E-73 |
| IKBIP     | 1.43E-77 | -0.18466 | 0.194 | 0.502 | 2.14E-73 |
| DNAJB6    | 1.46E-77 | 0.189572 | 0.654 | 0.848 | 2.18E-73 |
| COX16     | 1.58E-77 | -0.10505 | 0.403 | 0.716 | 2.36E-73 |
| YWHAQ     | 1.68E-77 | -0.38169 | 0.575 | 0.916 | 2.52E-73 |
| WNK1      | 1.69E-77 | -0.21926 | 0.168 | 0.473 | 2.52E-73 |
| YIPF3     | 1.76E-77 | 0.281678 | 0.48  | 0.652 | 2.64E-73 |
| HNRNPC    | 1.88E-77 | 0.13134  | 0.677 | 0.899 | 2.82E-73 |
| RAD23B    | 1.92E-77 | -0.17542 | 0.318 | 0.625 | 2.87E-73 |
| PARP2     | 1.93E-77 | -0.38375 | 0.097 | 0.391 | 2.89E-73 |
| CTNBL1    | 1.99E-77 | -0.19744 | 0.24  | 0.565 | 2.98E-73 |
| POLD4     | 2.03E-77 | 0.80185  | 0.364 | 0.31  | 3.04E-73 |
| ZNF580    | 2.22E-77 | -0.38099 | 0.182 | 0.522 | 3.32E-73 |
| NGFRAP1   | 2.41E-77 | 0.295299 | 0.78  | 0.953 | 3.60E-73 |
| POLR2A    | 2.51E-77 | -0.23208 | 0.131 | 0.417 | 3.76E-73 |
| RAE1      | 2.58E-77 | -0.26566 | 0.221 | 0.548 | 3.85E-73 |
| RHOA      | 2.58E-77 | 0.286874 | 0.697 | 0.857 | 3.85E-73 |
| RP11-71N1 | 2.63E-77 | -0.28531 | 0.056 | 0.3   | 3.92E-73 |
| VIMP      | 2.65E-77 | 0.258625 | 0.435 | 0.611 | 3.97E-73 |
| DCTN6     | 2.73E-77 | 0.142453 | 0.392 | 0.616 | 4.08E-73 |
| CORO2B    | 2.82E-77 | -0.30862 | 0.031 | 0.264 | 4.22E-73 |
| PRPF8     | 2.85E-77 | -0.21954 | 0.172 | 0.465 | 4.26E-73 |
| NPTXR     | 2.94E-77 | -0.2928  | 0.037 | 0.275 | 4.40E-73 |
| EPN1      | 3.07E-77 | -0.36715 | 0.208 | 0.558 | 4.58E-73 |
| SBN01     | 3.11E-77 | -0.11686 | 0.222 | 0.505 | 4.65E-73 |
| PSMA5     | 3.53E-77 | 0.137886 | 0.411 | 0.64  | 5.28E-73 |
| CAP1      | 3.76E-77 | 0.212099 | 0.497 | 0.657 | 5.62E-73 |
| EIF3D     | 3.83E-77 | -0.13506 | 0.339 | 0.652 | 5.73E-73 |
| SDHD      | 3.93E-77 | 0.364044 | 0.426 | 0.549 | 5.88E-73 |
| CECR5     | 4.07E-77 | -0.33273 | 0.145 | 0.47  | 6.08E-73 |
| IFT27     | 4.13E-77 | -0.23594 | 0.157 | 0.458 | 6.18E-73 |
| TMEM14B   | 4.33E-77 | 0.127187 | 0.463 | 0.72  | 6.47E-73 |
| AMD1      | 4.47E-77 | 0.328865 | 0.39  | 0.516 | 6.68E-73 |
| CENPT     | 4.48E-77 | -0.43149 | 0.147 | 0.486 | 6.70E-73 |
| PRKCA     | 4.60E-77 | -0.36406 | 0.083 | 0.377 | 6.87E-73 |
| NELFB     | 4.68E-77 | -0.27388 | 0.083 | 0.351 | 6.99E-73 |
| SF3B1     | 4.70E-77 | -0.22476 | 0.322 | 0.654 | 7.03E-73 |
| SSNA1     | 4.71E-77 | -0.2189  | 0.322 | 0.662 | 7.04E-73 |
| MANF      | 4.72E-77 | 0.156584 | 0.46  | 0.68  | 7.05E-73 |
| PAK2      | 4.92E-77 | -0.34522 | 0.208 | 0.549 | 7.35E-73 |
| PPP2CB    | 4.97E-77 | -0.336   | 0.205 | 0.552 | 7.42E-73 |

|           |          |          |       |       |          |
|-----------|----------|----------|-------|-------|----------|
| NCKAP1    | 4.97E-77 | -0.25938 | 0.16  | 0.467 | 7.42E-73 |
| SELK      | 5.44E-77 | 0.24461  | 0.683 | 0.862 | 8.13E-73 |
| PDE6D     | 5.44E-77 | -0.31946 | 0.114 | 0.411 | 8.13E-73 |
| NT5C3A    | 5.57E-77 | -0.21096 | 0.28  | 0.602 | 8.33E-73 |
| POLDIP3   | 5.62E-77 | -0.27483 | 0.12  | 0.416 | 8.40E-73 |
| OLFM1     | 5.76E-77 | -0.38799 | 0.15  | 0.477 | 8.61E-73 |
| MPC2      | 6.04E-77 | 0.35362  | 0.558 | 0.698 | 9.02E-73 |
| LAMTOR2   | 6.28E-77 | 0.317947 | 0.514 | 0.691 | 9.38E-73 |
| SAFB      | 6.39E-77 | -0.19953 | 0.22  | 0.528 | 9.55E-73 |
| UCHL1     | 6.43E-77 | 0.345109 | 0.534 | 0.673 | 9.61E-73 |
| ATAD3A    | 6.76E-77 | -0.29702 | 0.108 | 0.399 | 1.01E-72 |
| SLC39A6   | 7.31E-77 | -0.26762 | 0.278 | 0.626 | 1.09E-72 |
| TIMM22    | 7.42E-77 | -0.20589 | 0.185 | 0.5   | 1.11E-72 |
| ANXA5     | 7.47E-77 | 0.385686 | 0.753 | 0.837 | 1.12E-72 |
| BRD3      | 7.66E-77 | -0.41379 | 0.156 | 0.494 | 1.14E-72 |
| SNRPE     | 7.66E-77 | -0.12593 | 0.548 | 0.873 | 1.15E-72 |
| FAM192A   | 8.38E-77 | -0.21787 | 0.264 | 0.598 | 1.25E-72 |
| DDX52     | 8.57E-77 | -0.258   | 0.161 | 0.473 | 1.28E-72 |
| COX6B1    | 8.81E-77 | 0.374036 | 0.805 | 0.906 | 1.32E-72 |
| TOMM22    | 9.45E-77 | -0.17201 | 0.331 | 0.675 | 1.41E-72 |
| ARID5B    | 9.69E-77 | 0.673975 | 0.38  | 0.344 | 1.45E-72 |
| TRMU      | 1.08E-76 | -0.26618 | 0.08  | 0.353 | 1.61E-72 |
| C5orf24   | 1.08E-76 | -0.29639 | 0.23  | 0.569 | 1.61E-72 |
| EXTL3     | 1.10E-76 | -0.28004 | 0.058 | 0.315 | 1.64E-72 |
| MLEC      | 1.10E-76 | -0.2685  | 0.305 | 0.648 | 1.64E-72 |
| APMAP     | 1.13E-76 | -0.15938 | 0.35  | 0.678 | 1.68E-72 |
| TIMM50    | 1.26E-76 | -0.23343 | 0.248 | 0.572 | 1.88E-72 |
| VCP       | 1.27E-76 | -0.18953 | 0.305 | 0.601 | 1.90E-72 |
| UXT       | 1.31E-76 | 0.330924 | 0.506 | 0.684 | 1.96E-72 |
| GRHPR     | 1.32E-76 | -0.29964 | 0.265 | 0.612 | 1.97E-72 |
| ROCK1     | 1.34E-76 | -0.31457 | 0.173 | 0.498 | 2.01E-72 |
| C1orf35   | 1.47E-76 | -0.22985 | 0.213 | 0.525 | 2.19E-72 |
| C7orf55-L | 1.49E-76 | -0.32137 | 0.301 | 0.654 | 2.23E-72 |
| SMARCC2   | 1.59E-76 | -0.27009 | 0.172 | 0.488 | 2.37E-72 |
| CCT6A     | 1.59E-76 | -0.1091  | 0.534 | 0.842 | 2.38E-72 |
| CALR      | 1.71E-76 | 0.32595  | 0.683 | 0.82  | 2.55E-72 |
| SLC25A3   | 1.85E-76 | 0.213136 | 0.66  | 0.868 | 2.77E-72 |
| HSD17B10  | 1.85E-76 | 0.236947 | 0.514 | 0.735 | 2.77E-72 |
| ING2      | 1.92E-76 | -0.3175  | 0.179 | 0.504 | 2.87E-72 |
| CTPS1     | 1.98E-76 | -0.40445 | 0.06  | 0.341 | 2.95E-72 |
| CHPF      | 2.18E-76 | 0.124232 | 0.299 | 0.463 | 3.26E-72 |
| GAP43     | 2.19E-76 | 0.829409 | 0.713 | 0.638 | 3.27E-72 |
| RSRC1     | 2.23E-76 | -0.20205 | 0.25  | 0.585 | 3.33E-72 |
| ERI1      | 2.24E-76 | -0.16008 | 0.097 | 0.343 | 3.35E-72 |
| TMED4     | 2.27E-76 | 0.198157 | 0.449 | 0.657 | 3.39E-72 |
| TARDBP    | 2.29E-76 | -0.20651 | 0.228 | 0.541 | 3.42E-72 |
| COMMD7    | 2.32E-76 | -0.39863 | 0.247 | 0.607 | 3.47E-72 |
| CSRP2     | 2.35E-76 | 0.651821 | 0.549 | 0.668 | 3.52E-72 |
| ERAL1     | 2.40E-76 | -0.16687 | 0.194 | 0.5   | 3.59E-72 |
| EPN2      | 2.41E-76 | -0.35987 | 0.138 | 0.462 | 3.60E-72 |
| HOMER1    | 2.42E-76 | -0.44706 | 0.064 | 0.354 | 3.61E-72 |

|           |          |          |       |       |          |
|-----------|----------|----------|-------|-------|----------|
| DR1       | 2.47E-76 | -0.35536 | 0.154 | 0.48  | 3.69E-72 |
| HLA-C     | 2.54E-76 | 0.606924 | 0.809 | 0.716 | 3.80E-72 |
| TNPO2     | 2.58E-76 | -0.20945 | 0.141 | 0.42  | 3.86E-72 |
| FDX1      | 2.59E-76 | -0.25107 | 0.2   | 0.514 | 3.87E-72 |
| TMEM147   | 2.65E-76 | 0.309966 | 0.586 | 0.725 | 3.96E-72 |
| NKIRAS2   | 2.79E-76 | -0.2074  | 0.191 | 0.5   | 4.16E-72 |
| JADE1     | 2.87E-76 | -0.39117 | 0.104 | 0.409 | 4.28E-72 |
| TGOLN2    | 2.98E-76 | -0.19873 | 0.221 | 0.528 | 4.46E-72 |
| PIPOX     | 3.13E-76 | -0.4388  | 0.057 | 0.332 | 4.67E-72 |
| AC009501. | 3.23E-76 | 1.310045 | 0.335 | 0.115 | 4.82E-72 |
| ASF1A     | 3.36E-76 | -0.37424 | 0.162 | 0.498 | 5.02E-72 |
| RWDD1     | 3.46E-76 | 0.205176 | 0.516 | 0.72  | 5.17E-72 |
| CTXN1     | 3.65E-76 | -0.37742 | 0.065 | 0.349 | 5.46E-72 |
| ELP6      | 3.74E-76 | -0.18906 | 0.169 | 0.473 | 5.60E-72 |
| MAGEF1    | 3.99E-76 | -0.27338 | 0.33  | 0.675 | 5.96E-72 |
| SDHC      | 4.16E-76 | 0.432782 | 0.558 | 0.669 | 6.21E-72 |
| GNL1      | 4.29E-76 | -0.25713 | 0.203 | 0.528 | 6.41E-72 |
| DDX46     | 4.29E-76 | -0.22751 | 0.334 | 0.681 | 6.42E-72 |
| HTRA1     | 4.44E-76 | -0.34227 | 0.27  | 0.61  | 6.63E-72 |
| CDC5L     | 4.67E-76 | -0.36915 | 0.214 | 0.56  | 6.98E-72 |
| NIN       | 5.71E-76 | -0.403   | 0.04  | 0.299 | 8.53E-72 |
| TAF11     | 5.85E-76 | -0.21996 | 0.178 | 0.486 | 8.75E-72 |
| TKT       | 6.22E-76 | 0.34477  | 0.479 | 0.598 | 9.30E-72 |
| ATP5G2    | 6.24E-76 | 0.359341 | 0.789 | 0.914 | 9.33E-72 |
| SLC2A4RG  | 6.48E-76 | -0.39172 | 0.08  | 0.375 | 9.68E-72 |
| MLST8     | 7.72E-76 | -0.18818 | 0.19  | 0.488 | 1.15E-71 |
| ATP5F1    | 8.11E-76 | 0.343275 | 0.639 | 0.773 | 1.21E-71 |
| PRRC2C    | 8.14E-76 | -0.16526 | 0.361 | 0.693 | 1.22E-71 |
| BEST3     | 8.83E-76 | -0.67941 | 0.041 | 0.307 | 1.32E-71 |
| GTF3A     | 9.95E-76 | -0.29805 | 0.35  | 0.699 | 1.49E-71 |
| DPM3      | 1.24E-75 | 0.13129  | 0.308 | 0.535 | 1.85E-71 |
| ARL1      | 1.47E-75 | 0.513756 | 0.425 | 0.454 | 2.20E-71 |
| MTHFD1    | 1.52E-75 | -0.37367 | 0.129 | 0.451 | 2.27E-71 |
| POLR2I    | 1.61E-75 | 0.311561 | 0.624 | 0.791 | 2.41E-71 |
| CCDC85B   | 1.74E-75 | -0.34279 | 0.256 | 0.604 | 2.60E-71 |
| ABHD2     | 1.79E-75 | -0.22421 | 0.123 | 0.4   | 2.68E-71 |
| SAP30L    | 1.80E-75 | -0.41478 | 0.037 | 0.294 | 2.69E-71 |
| EBPL      | 1.90E-75 | -0.41146 | 0.179 | 0.517 | 2.84E-71 |
| SLC25A4   | 1.91E-75 | 0.14347  | 0.44  | 0.662 | 2.85E-71 |
| C19orf70  | 2.09E-75 | 0.44629  | 0.584 | 0.667 | 3.12E-71 |
| ARPC5L    | 2.46E-75 | -0.24079 | 0.312 | 0.644 | 3.68E-71 |
| SEC13     | 2.49E-75 | 0.17384  | 0.343 | 0.574 | 3.73E-71 |
| COX5A     | 2.55E-75 | -0.32068 | 0.467 | 0.822 | 3.81E-71 |
| NARF      | 2.55E-75 | -0.15725 | 0.266 | 0.579 | 3.81E-71 |
| TCEB1     | 2.70E-75 | 0.122233 | 0.579 | 0.823 | 4.04E-71 |
| PKN1      | 3.36E-75 | -0.35563 | 0.129 | 0.442 | 5.03E-71 |
| STIL      | 3.55E-75 | -0.29418 | 0.006 | 0.195 | 5.31E-71 |
| NELFCD    | 3.79E-75 | -0.28932 | 0.282 | 0.631 | 5.66E-71 |
| EIF3B     | 3.80E-75 | -0.17305 | 0.195 | 0.485 | 5.68E-71 |
| ITGA7     | 4.01E-75 | -0.25734 | 0.068 | 0.317 | 6.00E-71 |
| CMSS1     | 4.01E-75 | -0.12833 | 0.291 | 0.602 | 6.00E-71 |

|           |          |          |       |       |          |
|-----------|----------|----------|-------|-------|----------|
| MDK       | 4.08E-75 | 0.170445 | 0.583 | 0.867 | 6.09E-71 |
| GRIA3     | 4.09E-75 | -0.25739 | 0.095 | 0.358 | 6.11E-71 |
| MVB12A    | 4.47E-75 | -0.14552 | 0.24  | 0.541 | 6.68E-71 |
| ARPC5     | 4.59E-75 | 0.272089 | 0.596 | 0.793 | 6.86E-71 |
| ZNF414    | 4.86E-75 | -0.36372 | 0.089 | 0.383 | 7.26E-71 |
| ZNF138    | 4.89E-75 | -0.37038 | 0.097 | 0.393 | 7.31E-71 |
| DCAF15    | 4.99E-75 | -0.32027 | 0.065 | 0.331 | 7.45E-71 |
| MUS81     | 5.13E-75 | -0.26207 | 0.12  | 0.402 | 7.66E-71 |
| SOX12     | 5.64E-75 | -0.2871  | 0.038 | 0.278 | 8.44E-71 |
| SMAD1     | 6.07E-75 | -0.27994 | 0.119 | 0.411 | 9.07E-71 |
| POLR2C    | 6.75E-75 | 0.139047 | 0.385 | 0.595 | 1.01E-70 |
| EIF3M     | 6.79E-75 | 0.298473 | 0.513 | 0.659 | 1.01E-70 |
| RANBP3    | 6.88E-75 | -0.26381 | 0.152 | 0.447 | 1.03E-70 |
| SDF4      | 7.72E-75 | -0.34483 | 0.288 | 0.633 | 1.15E-70 |
| DDX42     | 7.83E-75 | -0.20397 | 0.169 | 0.449 | 1.17E-70 |
| YWHAG     | 7.96E-75 | -0.17259 | 0.29  | 0.6   | 1.19E-70 |
| THYN1     | 8.41E-75 | 0.176641 | 0.41  | 0.647 | 1.26E-70 |
| ARID4A    | 8.55E-75 | -0.32759 | 0.15  | 0.465 | 1.28E-70 |
| NUDC      | 8.65E-75 | 0.126487 | 0.597 | 0.812 | 1.29E-70 |
| VMA21     | 8.67E-75 | -0.26498 | 0.192 | 0.507 | 1.30E-70 |
| NXT1      | 8.73E-75 | -0.13847 | 0.282 | 0.573 | 1.31E-70 |
| RAD18     | 8.88E-75 | -0.36327 | 0.036 | 0.28  | 1.33E-70 |
| GNAQ      | 8.93E-75 | -0.3715  | 0.122 | 0.437 | 1.33E-70 |
| FAM110A   | 9.19E-75 | -0.3747  | 0.02  | 0.249 | 1.37E-70 |
| SF3B5     | 1.03E-74 | 0.270575 | 0.58  | 0.765 | 1.54E-70 |
| KBTBD2    | 1.12E-74 | -0.35583 | 0.066 | 0.343 | 1.67E-70 |
| STARD7    | 1.13E-74 | -0.32661 | 0.236 | 0.574 | 1.68E-70 |
| ACSL3     | 1.26E-74 | -0.48411 | 0.225 | 0.591 | 1.89E-70 |
| GPM6B     | 1.31E-74 | 0.46462  | 0.823 | 0.937 | 1.95E-70 |
| PPAT      | 1.31E-74 | -0.45442 | 0.099 | 0.411 | 1.95E-70 |
| ISCU      | 1.33E-74 | 0.11835  | 0.469 | 0.689 | 1.99E-70 |
| MT1F      | 1.43E-74 | 0.658988 | 0.408 | 0.34  | 2.14E-70 |
| SUPT20H   | 1.56E-74 | -0.26347 | 0.134 | 0.433 | 2.33E-70 |
| PSMD7     | 1.61E-74 | 0.202862 | 0.473 | 0.699 | 2.40E-70 |
| ZIC1      | 1.65E-74 | -0.45103 | 0.052 | 0.322 | 2.46E-70 |
| OCIAD2    | 1.73E-74 | 1.041238 | 0.645 | 0.495 | 2.59E-70 |
| HPS4      | 1.74E-74 | -0.16846 | 0.102 | 0.351 | 2.60E-70 |
| PHF20L1   | 1.76E-74 | -0.26469 | 0.216 | 0.526 | 2.63E-70 |
| PITPNA-AS | 1.77E-74 | -0.11324 | 0.176 | 0.454 | 2.64E-70 |
| NDUFS8    | 1.90E-74 | 0.292703 | 0.606 | 0.804 | 2.84E-70 |
| ACO04381. | 1.96E-74 | -0.44336 | 0.014 | 0.228 | 2.93E-70 |
| OGFOD3    | 2.10E-74 | -0.3454  | 0.109 | 0.409 | 3.13E-70 |
| TXNL1     | 2.17E-74 | 0.313433 | 0.509 | 0.667 | 3.25E-70 |
| POLR2B    | 2.26E-74 | -0.43124 | 0.17  | 0.51  | 3.38E-70 |
| RTCB      | 2.29E-74 | -0.24622 | 0.199 | 0.507 | 3.42E-70 |
| ARL8A     | 2.29E-74 | -0.22012 | 0.14  | 0.427 | 3.43E-70 |
| HOOK3     | 2.34E-74 | -0.26969 | 0.161 | 0.464 | 3.49E-70 |
| TAF1D     | 2.40E-74 | 0.414445 | 0.354 | 0.422 | 3.59E-70 |
| NPDC1     | 2.47E-74 | -0.39051 | 0.225 | 0.567 | 3.70E-70 |
| MKRN1     | 2.61E-74 | -0.22604 | 0.309 | 0.631 | 3.90E-70 |
| SF3B3     | 2.62E-74 | -0.32771 | 0.145 | 0.459 | 3.92E-70 |

|          |          |          |       |       |          |
|----------|----------|----------|-------|-------|----------|
| SLC16A1  | 2.70E-74 | 0.288811 | 0.365 | 0.479 | 4.03E-70 |
| PIN1     | 2.88E-74 | -0.29158 | 0.478 | 0.84  | 4.31E-70 |
| BLVRA    | 2.91E-74 | 0.326147 | 0.372 | 0.558 | 4.35E-70 |
| RECQL4   | 3.09E-74 | -0.36786 | 0.015 | 0.232 | 4.62E-70 |
| UFM1     | 3.19E-74 | 0.225409 | 0.33  | 0.474 | 4.76E-70 |
| TMEM203  | 3.23E-74 | -0.38846 | 0.159 | 0.491 | 4.83E-70 |
| DNAJC19  | 3.25E-74 | 0.231463 | 0.408 | 0.621 | 4.86E-70 |
| DDOST    | 3.32E-74 | 0.279503 | 0.446 | 0.632 | 4.96E-70 |
| CNPY1    | 3.37E-74 | -0.51439 | 0.04  | 0.299 | 5.04E-70 |
| ARHGAP35 | 3.38E-74 | -0.37194 | 0.063 | 0.34  | 5.05E-70 |
| CMPK1    | 3.44E-74 | -0.17934 | 0.308 | 0.607 | 5.14E-70 |
| PSMD2    | 3.48E-74 | -0.13529 | 0.402 | 0.715 | 5.21E-70 |
| NIPBL    | 3.71E-74 | -0.35277 | 0.131 | 0.441 | 5.55E-70 |
| GPATCH8  | 4.06E-74 | -0.166   | 0.232 | 0.533 | 6.07E-70 |
| GHITM    | 4.11E-74 | 0.42503  | 0.473 | 0.577 | 6.14E-70 |
| TIMM10   | 4.19E-74 | -0.28351 | 0.272 | 0.628 | 6.26E-70 |
| CIT      | 4.25E-74 | -0.31357 | 0.02  | 0.236 | 6.35E-70 |
| CCZ1     | 4.49E-74 | -0.24858 | 0.286 | 0.61  | 6.70E-70 |
| PLTP     | 4.57E-74 | 0.836046 | 0.463 | 0.385 | 6.83E-70 |
| PAFAH1B2 | 4.78E-74 | -0.25902 | 0.234 | 0.546 | 7.14E-70 |
| RCC2     | 4.88E-74 | -0.31    | 0.079 | 0.354 | 7.30E-70 |
| SEMA6A   | 5.01E-74 | -0.36375 | 0.109 | 0.414 | 7.49E-70 |
| SRGAP2   | 5.12E-74 | -0.39899 | 0.071 | 0.358 | 7.66E-70 |
| TMEM183A | 5.16E-74 | -0.24177 | 0.211 | 0.517 | 7.71E-70 |
| LCORL    | 5.36E-74 | -0.30027 | 0.051 | 0.296 | 8.01E-70 |
| GBAS     | 5.55E-74 | -0.16737 | 0.348 | 0.641 | 8.29E-70 |
| AP2B1    | 5.77E-74 | -0.23921 | 0.264 | 0.589 | 8.63E-70 |
| MSH2     | 5.94E-74 | -0.41241 | 0.077 | 0.364 | 8.88E-70 |
| TMEM9    | 5.97E-74 | 0.364364 | 0.428 | 0.547 | 8.92E-70 |
| ZFAND2B  | 6.04E-74 | -0.13815 | 0.143 | 0.402 | 9.03E-70 |
| TRAF7    | 6.37E-74 | -0.29211 | 0.111 | 0.407 | 9.51E-70 |
| SUV39H2  | 6.47E-74 | -0.30106 | 0.036 | 0.265 | 9.67E-70 |
| SCOC     | 6.73E-74 | 0.154101 | 0.436 | 0.643 | 1.01E-69 |
| TRAPPC4  | 7.36E-74 | 0.272873 | 0.463 | 0.62  | 1.10E-69 |
| ATF6B    | 7.46E-74 | -0.16439 | 0.272 | 0.581 | 1.11E-69 |
| PSMC4    | 7.49E-74 | 0.275356 | 0.482 | 0.652 | 1.12E-69 |
| NLGN3    | 8.97E-74 | -0.3538  | 0.04  | 0.284 | 1.34E-69 |
| FADS1    | 1.03E-73 | -0.3539  | 0.16  | 0.477 | 1.54E-69 |
| IAH1     | 1.05E-73 | 0.155224 | 0.384 | 0.599 | 1.57E-69 |
| DARS     | 1.07E-73 | 0.391636 | 0.448 | 0.523 | 1.60E-69 |
| FKBP2    | 1.12E-73 | 0.533505 | 0.599 | 0.643 | 1.67E-69 |
| IER2     | 1.12E-73 | -0.37662 | 0.426 | 0.778 | 1.68E-69 |
| DYNC1H1  | 1.13E-73 | -0.25456 | 0.212 | 0.526 | 1.69E-69 |
| HDDC2    | 1.18E-73 | 0.123946 | 0.365 | 0.614 | 1.76E-69 |
| CHMP3    | 1.22E-73 | -0.12159 | 0.268 | 0.574 | 1.83E-69 |
| WAC      | 1.26E-73 | -0.27966 | 0.147 | 0.448 | 1.88E-69 |
| NAT14    | 1.45E-73 | -0.2601  | 0.117 | 0.394 | 2.17E-69 |
| RALA     | 1.48E-73 | -0.13053 | 0.329 | 0.63  | 2.22E-69 |
| ABHD3    | 1.51E-73 | -0.39709 | 0.118 | 0.422 | 2.26E-69 |
| CAPZB    | 1.57E-73 | 0.259803 | 0.551 | 0.741 | 2.34E-69 |
| GAMT     | 1.69E-73 | -0.42673 | 0.21  | 0.562 | 2.52E-69 |



|          |          |          |       |       |          |
|----------|----------|----------|-------|-------|----------|
| RNF168   | 1.69E-73 | -0.36765 | 0.086 | 0.374 | 2.52E-69 |
| APRT     | 1.72E-73 | 0.569712 | 0.462 | 0.51  | 2.57E-69 |
| TERF1    | 1.74E-73 | -0.25427 | 0.267 | 0.604 | 2.59E-69 |
| ZFHX4    | 1.76E-73 | -0.30249 | 0.09  | 0.365 | 2.63E-69 |
| PSMC2    | 1.83E-73 | 0.245075 | 0.474 | 0.658 | 2.74E-69 |
| DYNC1LI2 | 1.85E-73 | -0.20812 | 0.274 | 0.59  | 2.76E-69 |
| SPPL3    | 1.86E-73 | -0.29322 | 0.102 | 0.379 | 2.77E-69 |
| PSMB3    | 1.87E-73 | 0.400328 | 0.701 | 0.842 | 2.79E-69 |
| ATP50    | 1.94E-73 | 0.208652 | 0.689 | 0.893 | 2.90E-69 |
| MTDH     | 2.03E-73 | -0.37233 | 0.423 | 0.786 | 3.04E-69 |
| SFRP1    | 2.07E-73 | -0.2992  | 0.036 | 0.259 | 3.09E-69 |
| SP3      | 2.08E-73 | -0.32285 | 0.132 | 0.433 | 3.10E-69 |
| CANX     | 2.17E-73 | 0.186892 | 0.542 | 0.715 | 3.24E-69 |
| PSMB4    | 2.17E-73 | 0.217816 | 0.4   | 0.612 | 3.24E-69 |
| NDUFS4   | 2.30E-73 | 0.209323 | 0.503 | 0.71  | 3.44E-69 |
| BSG      | 2.42E-73 | 0.302844 | 0.776 | 0.915 | 3.62E-69 |
| ARMC10   | 2.57E-73 | -0.20716 | 0.241 | 0.526 | 3.84E-69 |
| CD276    | 2.57E-73 | -0.11614 | 0.145 | 0.407 | 3.85E-69 |
| TMEM256  | 2.72E-73 | 0.119902 | 0.338 | 0.577 | 4.06E-69 |
| PITHD1   | 2.77E-73 | -0.2754  | 0.29  | 0.619 | 4.14E-69 |
| RQCD1    | 2.80E-73 | -0.32169 | 0.122 | 0.419 | 4.18E-69 |
| HSP90AB1 | 2.80E-73 | 0.127296 | 0.755 | 0.933 | 4.19E-69 |
| ATP1A1   | 3.14E-73 | 0.245422 | 0.437 | 0.552 | 4.69E-69 |
| POLE3    | 3.31E-73 | -0.12622 | 0.255 | 0.541 | 4.95E-69 |
| GGNBP2   | 3.38E-73 | -0.12634 | 0.334 | 0.62  | 5.05E-69 |
| PRDX3    | 3.39E-73 | 0.429363 | 0.454 | 0.573 | 5.07E-69 |
| HIF1A    | 3.40E-73 | -0.23649 | 0.313 | 0.657 | 5.09E-69 |
| PPM1B    | 3.62E-73 | -0.31873 | 0.209 | 0.533 | 5.41E-69 |
| CDKN1B   | 3.85E-73 | -0.36033 | 0.204 | 0.536 | 5.76E-69 |
| SPTSSA   | 4.01E-73 | 0.409239 | 0.53  | 0.631 | 6.00E-69 |
| EIF3J    | 4.07E-73 | -0.14714 | 0.29  | 0.594 | 6.08E-69 |
| TIMM17A  | 4.42E-73 | 0.323875 | 0.406 | 0.567 | 6.60E-69 |
| ATP5J    | 4.70E-73 | 0.284519 | 0.716 | 0.88  | 7.03E-69 |
| MIIP     | 4.82E-73 | -0.1928  | 0.126 | 0.381 | 7.20E-69 |
| HIVEP3   | 5.36E-73 | -0.33165 | 0.043 | 0.294 | 8.01E-69 |
| STRN4    | 5.40E-73 | -0.31906 | 0.063 | 0.326 | 8.07E-69 |
| CRMP1    | 5.54E-73 | -0.48352 | 0.172 | 0.515 | 8.29E-69 |
| ACLY     | 5.57E-73 | -0.21606 | 0.129 | 0.401 | 8.32E-69 |
| PSMA1    | 6.21E-73 | 0.434957 | 0.627 | 0.731 | 9.29E-69 |
| RANGRF   | 6.28E-73 | -0.14571 | 0.161 | 0.449 | 9.38E-69 |
| MMP16    | 6.38E-73 | -0.3851  | 0.028 | 0.265 | 9.54E-69 |
| BAALC    | 7.19E-73 | -0.22146 | 0.356 | 0.672 | 1.07E-68 |
| PDCD5    | 7.25E-73 | 0.216729 | 0.601 | 0.817 | 1.08E-68 |
| CNTRL    | 7.69E-73 | -0.35104 | 0.068 | 0.34  | 1.15E-68 |
| TACC1    | 7.72E-73 | -0.38532 | 0.178 | 0.514 | 1.15E-68 |
| TM2D1    | 8.07E-73 | 0.283669 | 0.385 | 0.554 | 1.21E-68 |
| CRLS1    | 8.74E-73 | -0.38476 | 0.195 | 0.531 | 1.31E-68 |
| NOL11    | 8.90E-73 | -0.1462  | 0.17  | 0.436 | 1.33E-68 |
| SUPT4H1  | 9.55E-73 | 0.200597 | 0.412 | 0.614 | 1.43E-68 |
| SLC35B1  | 9.77E-73 | -0.12567 | 0.329 | 0.641 | 1.46E-68 |
| DHX30    | 1.03E-72 | -0.13347 | 0.189 | 0.479 | 1.54E-68 |

|           |          |          |       |       |          |
|-----------|----------|----------|-------|-------|----------|
| DNAJB9    | 1.07E-72 | 0.819774 | 0.467 | 0.323 | 1.60E-68 |
| PSRC1     | 1.11E-72 | -0.38295 | 0.238 | 0.591 | 1.65E-68 |
| EIF5      | 1.15E-72 | -0.1914  | 0.551 | 0.868 | 1.72E-68 |
| SLC39A1   | 1.16E-72 | 0.21559  | 0.372 | 0.552 | 1.73E-68 |
| PPA1      | 1.26E-72 | 0.329378 | 0.454 | 0.599 | 1.89E-68 |
| NFIC      | 1.29E-72 | -0.31911 | 0.388 | 0.753 | 1.93E-68 |
| TOMM20    | 1.38E-72 | 0.142734 | 0.448 | 0.657 | 2.06E-68 |
| RBM10     | 1.45E-72 | -0.31585 | 0.148 | 0.458 | 2.17E-68 |
| HIST1H2BH | 1.55E-72 | -0.36837 | 0.004 | 0.184 | 2.32E-68 |
| ANKRD12   | 1.55E-72 | 0.246637 | 0.362 | 0.522 | 2.32E-68 |
| EZR       | 1.57E-72 | -0.24674 | 0.237 | 0.562 | 2.35E-68 |
| LARS      | 1.63E-72 | -0.14818 | 0.296 | 0.583 | 2.43E-68 |
| ZNF714    | 1.84E-72 | -0.413   | 0.076 | 0.353 | 2.75E-68 |
| SFT2D1    | 1.87E-72 | 0.191727 | 0.391 | 0.584 | 2.79E-68 |
| DCPS      | 1.90E-72 | -0.20069 | 0.131 | 0.402 | 2.85E-68 |
| IFI27L2   | 1.94E-72 | 0.507653 | 0.427 | 0.507 | 2.89E-68 |
| GTPBP6    | 2.12E-72 | -0.29577 | 0.119 | 0.409 | 3.17E-68 |
| HNRNPLL   | 2.18E-72 | -0.38805 | 0.129 | 0.442 | 3.26E-68 |
| NRGN      | 2.23E-72 | -0.26556 | 0.034 | 0.252 | 3.33E-68 |
| AAMP      | 2.35E-72 | 0.197111 | 0.438 | 0.627 | 3.51E-68 |
| UBE2M     | 2.42E-72 | -0.31842 | 0.145 | 0.453 | 3.62E-68 |
| RBBP8     | 2.52E-72 | -0.38529 | 0.079 | 0.367 | 3.76E-68 |
| TBC1D7    | 2.65E-72 | -0.25951 | 0.084 | 0.347 | 3.97E-68 |
| SH3GL1    | 2.66E-72 | -0.30855 | 0.191 | 0.51  | 3.98E-68 |
| AKR7A2    | 2.92E-72 | -0.31791 | 0.229 | 0.548 | 4.37E-68 |
| SNRNP27   | 3.15E-72 | -0.13241 | 0.303 | 0.611 | 4.71E-68 |
| SORBS3    | 3.43E-72 | -0.33531 | 0.12  | 0.416 | 5.12E-68 |
| DCXR      | 3.79E-72 | -0.26293 | 0.396 | 0.751 | 5.67E-68 |
| PHF20     | 3.87E-72 | -0.1198  | 0.242 | 0.533 | 5.78E-68 |
| OGFR      | 3.87E-72 | -0.25688 | 0.161 | 0.454 | 5.78E-68 |
| RP11-390F | 4.05E-72 | -0.27349 | 0.047 | 0.283 | 6.05E-68 |
| KMT2C     | 4.13E-72 | -0.27411 | 0.159 | 0.454 | 6.18E-68 |
| CBX6      | 4.29E-72 | -0.26466 | 0.157 | 0.448 | 6.42E-68 |
| RABEP1    | 4.33E-72 | -0.40803 | 0.146 | 0.47  | 6.48E-68 |
| RBBP6     | 4.42E-72 | -0.13765 | 0.241 | 0.519 | 6.60E-68 |
| RCAN1     | 4.49E-72 | 0.695417 | 0.366 | 0.409 | 6.71E-68 |
| ENY2      | 4.58E-72 | 0.14166  | 0.54  | 0.786 | 6.84E-68 |
| RALGAPA2  | 4.62E-72 | -0.2897  | 0.036 | 0.265 | 6.91E-68 |
| ST3GAL4   | 4.91E-72 | -0.4379  | 0.06  | 0.335 | 7.34E-68 |
| RBFOX2    | 5.12E-72 | -0.37229 | 0.098 | 0.39  | 7.65E-68 |
| COX5B     | 5.27E-72 | 0.336769 | 0.812 | 0.916 | 7.88E-68 |
| ARL3      | 5.47E-72 | 0.129242 | 0.344 | 0.563 | 8.18E-68 |
| CADM3     | 5.50E-72 | 0.995328 | 0.316 | 0.048 | 8.22E-68 |
| PSMB6     | 5.58E-72 | 0.265406 | 0.672 | 0.852 | 8.33E-68 |
| SLC25A1   | 5.60E-72 | -0.41861 | 0.094 | 0.391 | 8.37E-68 |
| ABCF1     | 5.67E-72 | -0.29005 | 0.226 | 0.548 | 8.48E-68 |
| DBNL      | 5.74E-72 | -0.1198  | 0.253 | 0.547 | 8.57E-68 |
| STAU1     | 5.85E-72 | -0.19809 | 0.299 | 0.612 | 8.74E-68 |
| TCEA1     | 5.86E-72 | -0.10568 | 0.457 | 0.756 | 8.76E-68 |
| DVL3      | 6.08E-72 | -0.27768 | 0.085 | 0.354 | 9.09E-68 |
| RPN1      | 6.16E-72 | 0.290116 | 0.406 | 0.578 | 9.21E-68 |

|          |          |          |       |       |          |
|----------|----------|----------|-------|-------|----------|
| SMIM7    | 6.20E-72 | 0.261401 | 0.556 | 0.728 | 9.27E-68 |
| UBE2D2   | 6.32E-72 | -0.27172 | 0.473 | 0.815 | 9.45E-68 |
| POLR2D   | 6.33E-72 | -0.33005 | 0.106 | 0.401 | 9.46E-68 |
| BRD4     | 6.56E-72 | -0.18474 | 0.261 | 0.575 | 9.81E-68 |
| FAM104A  | 6.59E-72 | -0.23961 | 0.179 | 0.486 | 9.84E-68 |
| DUSP6    | 6.87E-72 | -0.11532 | 0.177 | 0.435 | 1.03E-67 |
| CCDC59   | 6.88E-72 | 0.149528 | 0.288 | 0.491 | 1.03E-67 |
| KHDRBS3  | 7.00E-72 | -0.3028  | 0.155 | 0.462 | 1.05E-67 |
| ZMAT2    | 7.11E-72 | 0.198994 | 0.387 | 0.575 | 1.06E-67 |
| EFEMP2   | 7.32E-72 | 0.19521  | 0.27  | 0.443 | 1.09E-67 |
| SNRPD1   | 7.37E-72 | -0.11425 | 0.541 | 0.858 | 1.10E-67 |
| DPM1     | 7.43E-72 | 0.125814 | 0.394 | 0.631 | 1.11E-67 |
| SPRED1   | 7.47E-72 | -0.37906 | 0.069 | 0.344 | 1.12E-67 |
| TMEM176B | 7.51E-72 | 0.951898 | 0.335 | 0.091 | 1.12E-67 |
| MTHFD2L  | 7.58E-72 | -0.17458 | 0.15  | 0.433 | 1.13E-67 |
| DKC1     | 7.60E-72 | -0.23417 | 0.22  | 0.542 | 1.14E-67 |
| MYL12A   | 7.71E-72 | 0.577295 | 0.455 | 0.477 | 1.15E-67 |
| JTB      | 8.48E-72 | -0.16421 | 0.491 | 0.791 | 1.27E-67 |
| NDUFA8   | 9.40E-72 | 0.167671 | 0.464 | 0.674 | 1.40E-67 |
| ACTR3    | 1.00E-71 | 0.118217 | 0.48  | 0.7   | 1.50E-67 |
| ZNF146   | 1.01E-71 | -0.12568 | 0.213 | 0.481 | 1.51E-67 |
| SUN2     | 1.04E-71 | -0.42889 | 0.109 | 0.414 | 1.55E-67 |
| GBP2     | 1.04E-71 | 1.016515 | 0.341 | 0.085 | 1.55E-67 |
| KLF6     | 1.06E-71 | 0.482414 | 0.462 | 0.505 | 1.59E-67 |
| LRPAP1   | 1.15E-71 | 0.256815 | 0.481 | 0.649 | 1.72E-67 |
| RBM42    | 1.16E-71 | -0.18813 | 0.363 | 0.669 | 1.73E-67 |
| CIRBP    | 1.26E-71 | 0.291605 | 0.811 | 0.94  | 1.88E-67 |
| EEF1D    | 1.28E-71 | 0.324138 | 0.782 | 0.911 | 1.91E-67 |
| TOPBP1   | 1.28E-71 | -0.34949 | 0.057 | 0.314 | 1.91E-67 |
| ARL2     | 1.32E-71 | 0.325572 | 0.435 | 0.591 | 1.98E-67 |
| WDR18    | 1.35E-71 | -0.3294  | 0.196 | 0.521 | 2.01E-67 |
| SRP72    | 1.41E-71 | -0.18095 | 0.383 | 0.714 | 2.11E-67 |
| CDC42BPA | 1.43E-71 | -0.38149 | 0.137 | 0.448 | 2.13E-67 |
| NUDT2    | 1.48E-71 | -0.27177 | 0.087 | 0.352 | 2.21E-67 |
| G2E3     | 1.55E-71 | -0.43996 | 0.071 | 0.346 | 2.32E-67 |
| TXNRD1   | 1.67E-71 | -0.23532 | 0.176 | 0.469 | 2.50E-67 |
| ZNF367   | 2.05E-71 | -0.42588 | 0.019 | 0.238 | 3.07E-67 |
| ARID4B   | 2.07E-71 | -0.22574 | 0.281 | 0.599 | 3.09E-67 |
| CUEDC1   | 2.20E-71 | -0.25778 | 0.042 | 0.284 | 3.29E-67 |
| NUCB2    | 2.47E-71 | 0.101083 | 0.39  | 0.619 | 3.70E-67 |
| LRRTM2   | 2.56E-71 | -0.36421 | 0.028 | 0.252 | 3.83E-67 |
| GSK3A    | 2.75E-71 | -0.29175 | 0.119 | 0.401 | 4.11E-67 |
| LYRM2    | 2.88E-71 | -0.24328 | 0.255 | 0.57  | 4.30E-67 |
| TCF3     | 3.01E-71 | -0.31565 | 0.073 | 0.342 | 4.50E-67 |
| TDG      | 3.03E-71 | -0.16322 | 0.18  | 0.459 | 4.53E-67 |
| SV2A     | 3.09E-71 | -0.27206 | 0.133 | 0.423 | 4.62E-67 |
| GTF3C5   | 3.13E-71 | -0.28364 | 0.138 | 0.43  | 4.68E-67 |
| YTHDC1   | 3.16E-71 | -0.31479 | 0.212 | 0.53  | 4.72E-67 |
| ATP6VOD1 | 3.27E-71 | 0.142785 | 0.364 | 0.569 | 4.89E-67 |
| UBE2K    | 3.33E-71 | -0.11258 | 0.224 | 0.502 | 4.98E-67 |
| AMZ2     | 3.59E-71 | 0.13086  | 0.341 | 0.589 | 5.36E-67 |

|          |          |          |       |       |          |
|----------|----------|----------|-------|-------|----------|
| NAE1     | 3.68E-71 | -0.14668 | 0.341 | 0.663 | 5.51E-67 |
| SPRY2    | 3.71E-71 | -0.47635 | 0.134 | 0.458 | 5.55E-67 |
| ACTL6A   | 3.98E-71 | -0.23474 | 0.246 | 0.572 | 5.95E-67 |
| RNASEH1  | 4.12E-71 | -0.18064 | 0.177 | 0.46  | 6.16E-67 |
| RBX1     | 4.45E-71 | -0.12524 | 0.502 | 0.825 | 6.65E-67 |
| PCIF1    | 4.59E-71 | -0.17039 | 0.069 | 0.307 | 6.87E-67 |
| USP16    | 4.82E-71 | -0.11543 | 0.292 | 0.588 | 7.20E-67 |
| NDUFB9   | 5.23E-71 | 0.196495 | 0.665 | 0.86  | 7.82E-67 |
| TTL7     | 5.32E-71 | -0.26323 | 0.167 | 0.464 | 7.95E-67 |
| THAP7    | 5.49E-71 | -0.18232 | 0.164 | 0.438 | 8.20E-67 |
| NAB1     | 5.56E-71 | -0.33816 | 0.055 | 0.314 | 8.30E-67 |
| DEAF1    | 5.71E-71 | -0.3177  | 0.118 | 0.41  | 8.54E-67 |
| PSMG2    | 5.82E-71 | 0.131686 | 0.39  | 0.621 | 8.70E-67 |
| TTL      | 5.98E-71 | -0.31283 | 0.059 | 0.312 | 8.94E-67 |
| SCAND1   | 6.24E-71 | -0.37234 | 0.436 | 0.794 | 9.32E-67 |
| EIF1AX   | 6.29E-71 | -0.1024  | 0.499 | 0.798 | 9.40E-67 |
| HERC2    | 6.61E-71 | -0.26865 | 0.111 | 0.385 | 9.88E-67 |
| RBMS1    | 6.69E-71 | -0.32019 | 0.104 | 0.39  | 9.99E-67 |
| IMP4     | 6.76E-71 | 0.171678 | 0.352 | 0.54  | 1.01E-66 |
| C19orf25 | 7.17E-71 | -0.22193 | 0.221 | 0.515 | 1.07E-66 |
| ITFG1    | 7.41E-71 | -0.15575 | 0.255 | 0.553 | 1.11E-66 |
| RBM4     | 8.29E-71 | -0.27089 | 0.137 | 0.432 | 1.24E-66 |
| WDHD1    | 8.40E-71 | -0.35776 | 0.013 | 0.216 | 1.26E-66 |
| ARMC6    | 8.42E-71 | -0.30814 | 0.102 | 0.384 | 1.26E-66 |
| AP2S1    | 8.46E-71 | -0.2516  | 0.487 | 0.83  | 1.26E-66 |
| ZEB2     | 8.65E-71 | -0.3506  | 0.13  | 0.433 | 1.29E-66 |
| PRTFDC1  | 9.58E-71 | -0.26062 | 0.109 | 0.38  | 1.43E-66 |
| TRABD    | 9.65E-71 | -0.26748 | 0.105 | 0.377 | 1.44E-66 |
| MTSS1    | 1.00E-70 | -0.53669 | 0.059 | 0.333 | 1.50E-66 |
| TCERG1   | 1.02E-70 | -0.3252  | 0.154 | 0.463 | 1.52E-66 |
| ATAT1    | 1.19E-70 | -0.27706 | 0.179 | 0.494 | 1.77E-66 |
| C12orf57 | 1.29E-70 | 0.217952 | 0.617 | 0.828 | 1.93E-66 |
| G6PC3    | 1.31E-70 | 0.116476 | 0.341 | 0.56  | 1.96E-66 |
| ARNT2    | 1.32E-70 | -0.29059 | 0.049 | 0.284 | 1.97E-66 |
| BRK1     | 1.38E-70 | 0.256362 | 0.713 | 0.873 | 2.07E-66 |
| TAOK1    | 1.39E-70 | -0.31582 | 0.148 | 0.449 | 2.08E-66 |
| HADH     | 1.47E-70 | -0.1869  | 0.169 | 0.462 | 2.20E-66 |
| STX8     | 1.49E-70 | 0.281306 | 0.33  | 0.506 | 2.23E-66 |
| RNF7     | 1.50E-70 | 0.340873 | 0.504 | 0.649 | 2.24E-66 |
| SMCHD1   | 1.52E-70 | -0.35406 | 0.121 | 0.421 | 2.27E-66 |
| PDGFC    | 1.75E-70 | -0.28968 | 0.075 | 0.336 | 2.62E-66 |
| FABP7    | 1.82E-70 | -0.4705  | 0.386 | 0.752 | 2.72E-66 |
| ASAP1    | 1.83E-70 | -0.35278 | 0.126 | 0.43  | 2.74E-66 |
| YWHAB    | 1.91E-70 | -0.31069 | 0.526 | 0.869 | 2.86E-66 |
| SSBP4    | 1.93E-70 | -0.42122 | 0.146 | 0.47  | 2.88E-66 |
| FEZ2     | 1.96E-70 | -0.23197 | 0.302 | 0.604 | 2.93E-66 |
| TTF1     | 2.11E-70 | -0.31082 | 0.172 | 0.484 | 3.15E-66 |
| UQCRH    | 2.13E-70 | 0.129825 | 0.739 | 0.927 | 3.18E-66 |
| AP3D1    | 2.15E-70 | -0.36523 | 0.223 | 0.552 | 3.21E-66 |
| NDUFC2   | 2.21E-70 | 0.28363  | 0.715 | 0.88  | 3.31E-66 |
| NKTR     | 2.23E-70 | -0.12327 | 0.303 | 0.581 | 3.33E-66 |

|          |          |          |       |       |          |
|----------|----------|----------|-------|-------|----------|
| RHOJ     | 2.25E-70 | -0.19722 | 0.038 | 0.258 | 3.36E-66 |
| RAB3IP   | 2.25E-70 | -0.59866 | 0.183 | 0.53  | 3.37E-66 |
| YIPF4    | 2.29E-70 | -0.10476 | 0.295 | 0.565 | 3.42E-66 |
| EMD      | 2.30E-70 | -0.13967 | 0.238 | 0.526 | 3.44E-66 |
| MYO10    | 2.37E-70 | -0.37407 | 0.136 | 0.443 | 3.54E-66 |
| MDH1     | 2.42E-70 | 0.136536 | 0.552 | 0.779 | 3.62E-66 |
| UBE2Q2   | 2.66E-70 | -0.26631 | 0.112 | 0.389 | 3.97E-66 |
| SRI      | 2.66E-70 | 0.256387 | 0.791 | 0.946 | 3.98E-66 |
| FARSA    | 2.82E-70 | -0.1005  | 0.275 | 0.553 | 4.22E-66 |
| VMP1     | 2.84E-70 | 0.295847 | 0.472 | 0.598 | 4.24E-66 |
| SLC25A33 | 2.86E-70 | -0.25244 | 0.151 | 0.431 | 4.28E-66 |
| DAZAP2   | 3.01E-70 | 0.306409 | 0.461 | 0.586 | 4.50E-66 |
| CUL3     | 3.05E-70 | -0.29624 | 0.119 | 0.4   | 4.56E-66 |
| SIGMAR1  | 3.12E-70 | -0.35906 | 0.106 | 0.401 | 4.67E-66 |
| FBXO32   | 3.22E-70 | 0.894354 | 0.305 | 0.102 | 4.81E-66 |
| TRAP1    | 3.93E-70 | -0.25927 | 0.218 | 0.527 | 5.87E-66 |
| CDK5     | 4.16E-70 | -0.14324 | 0.156 | 0.426 | 6.22E-66 |
| FAM50A   | 4.23E-70 | -0.38094 | 0.216 | 0.553 | 6.33E-66 |
| VPS4A    | 4.68E-70 | -0.26863 | 0.248 | 0.569 | 6.99E-66 |
| CLTB     | 4.72E-70 | -0.29419 | 0.289 | 0.619 | 7.06E-66 |
| HECTD1   | 4.95E-70 | -0.23717 | 0.14  | 0.415 | 7.40E-66 |
| MED28    | 5.20E-70 | 0.288069 | 0.331 | 0.49  | 7.76E-66 |
| DEGS1    | 5.57E-70 | 0.193366 | 0.445 | 0.62  | 8.33E-66 |
| SRP19    | 6.01E-70 | 0.207066 | 0.382 | 0.593 | 8.98E-66 |
| PCBP2    | 6.20E-70 | -0.23212 | 0.545 | 0.873 | 9.26E-66 |
| RER1     | 6.48E-70 | -0.12208 | 0.408 | 0.705 | 9.68E-66 |
| APOA1BP  | 6.66E-70 | -0.1516  | 0.326 | 0.631 | 9.96E-66 |
| WIZ      | 7.14E-70 | -0.20827 | 0.055 | 0.281 | 1.07E-65 |
| PRDX2    | 7.73E-70 | 0.293752 | 0.774 | 0.932 | 1.15E-65 |
| SEPHS2   | 8.59E-70 | 0.161899 | 0.3   | 0.43  | 1.28E-65 |
| SOX21    | 8.92E-70 | -0.32561 | 0.042 | 0.283 | 1.33E-65 |
| EDF1     | 9.55E-70 | 0.161006 | 0.688 | 0.886 | 1.43E-65 |
| 9-Sep    | 9.89E-70 | -0.30485 | 0.277 | 0.612 | 1.48E-65 |
| PMP2     | 9.91E-70 | 0.181828 | 0.434 | 0.677 | 1.48E-65 |
| APPL1    | 1.00E-69 | -0.27666 | 0.207 | 0.516 | 1.50E-65 |
| RBM6     | 1.01E-69 | -0.23048 | 0.206 | 0.507 | 1.50E-65 |
| POLR2J3  | 1.01E-69 | -0.17586 | 0.297 | 0.621 | 1.50E-65 |
| TBCD     | 1.03E-69 | -0.32258 | 0.069 | 0.336 | 1.53E-65 |
| RAB5A    | 1.03E-69 | 0.151814 | 0.397 | 0.584 | 1.54E-65 |
| OXCT1    | 1.04E-69 | -0.346   | 0.118 | 0.412 | 1.56E-65 |
| MAP7D1   | 1.05E-69 | -0.32548 | 0.189 | 0.509 | 1.57E-65 |
| NIF3L1   | 1.09E-69 | -0.18585 | 0.108 | 0.359 | 1.63E-65 |
| TMX2     | 1.14E-69 | 0.213571 | 0.416 | 0.6   | 1.71E-65 |
| HNRNPH1  | 1.19E-69 | -0.31199 | 0.376 | 0.727 | 1.78E-65 |
| PANK2    | 1.21E-69 | -0.33627 | 0.114 | 0.411 | 1.81E-65 |
| TSPO     | 1.25E-69 | 0.40943  | 0.422 | 0.531 | 1.87E-65 |
| PSMD13   | 1.30E-69 | 0.190595 | 0.406 | 0.59  | 1.95E-65 |
| ZNF724P  | 1.32E-69 | -0.32879 | 0.016 | 0.216 | 1.97E-65 |
| RMDN3    | 1.34E-69 | -0.27938 | 0.158 | 0.459 | 2.01E-65 |
| USF2     | 1.40E-69 | -0.29887 | 0.154 | 0.451 | 2.09E-65 |
| NIFK     | 1.42E-69 | 0.109396 | 0.366 | 0.599 | 2.13E-65 |

|          |           |           |        |        |           |
|----------|-----------|-----------|--------|--------|-----------|
| ZNF292   | 1. 52E-69 | -0. 29081 | 0. 173 | 0. 477 | 2. 27E-65 |
| TSSC1    | 1. 52E-69 | -0. 15342 | 0. 189 | 0. 468 | 2. 27E-65 |
| GGA1     | 1. 56E-69 | -0. 15198 | 0. 143 | 0. 414 | 2. 33E-65 |
| TSEN15   | 1. 60E-69 | -0. 19209 | 0. 206 | 0. 499 | 2. 40E-65 |
| IMPAD1   | 1. 65E-69 | -0. 25307 | 0. 102 | 0. 367 | 2. 47E-65 |
| SEC11A   | 1. 66E-69 | 0. 25681  | 0. 503 | 0. 716 | 2. 48E-65 |
| PRPSAP2  | 1. 98E-69 | -0. 10988 | 0. 219 | 0. 494 | 2. 96E-65 |
| VDAC1    | 1. 99E-69 | 0. 309246 | 0. 652 | 0. 781 | 2. 98E-65 |
| KPNA3    | 2. 09E-69 | -0. 3314  | 0. 186 | 0. 501 | 3. 13E-65 |
| PRR13    | 2. 12E-69 | 0. 577965 | 0. 506 | 0. 53  | 3. 17E-65 |
| GRIA2    | 2. 30E-69 | -0. 45323 | 0. 106 | 0. 407 | 3. 44E-65 |
| ZNF22    | 2. 34E-69 | -0. 16129 | 0. 209 | 0. 498 | 3. 50E-65 |
| PSMB7    | 3. 00E-69 | 0. 122629 | 0. 629 | 0. 852 | 4. 49E-65 |
| DGKZ     | 3. 02E-69 | -0. 37978 | 0. 074 | 0. 349 | 4. 52E-65 |
| JKAMP    | 3. 07E-69 | -0. 13121 | 0. 18  | 0. 459 | 4. 59E-65 |
| SAA2     | 3. 10E-69 | 1. 723605 | 0. 23  | 0. 006 | 4. 64E-65 |
| MACF1    | 3. 29E-69 | -0. 27746 | 0. 192 | 0. 505 | 4. 92E-65 |
| COPRS    | 3. 30E-69 | -0. 39713 | 0. 273 | 0. 625 | 4. 94E-65 |
| TUG1     | 3. 51E-69 | -0. 31245 | 0. 099 | 0. 373 | 5. 25E-65 |
| POLR2L   | 3. 57E-69 | 0. 21374  | 0. 644 | 0. 847 | 5. 33E-65 |
| LRRC47   | 3. 65E-69 | -0. 28823 | 0. 155 | 0. 451 | 5. 45E-65 |
| TPGS1    | 3. 73E-69 | -0. 34123 | 0. 168 | 0. 479 | 5. 58E-65 |
| STAG2    | 4. 02E-69 | -0. 25809 | 0. 174 | 0. 472 | 6. 00E-65 |
| PLOD2    | 4. 11E-69 | 0. 403725 | 0. 281 | 0. 299 | 6. 14E-65 |
| CNOT1    | 4. 22E-69 | -0. 23039 | 0. 094 | 0. 341 | 6. 31E-65 |
| ASPSCR1  | 4. 22E-69 | -0. 28159 | 0. 154 | 0. 443 | 6. 31E-65 |
| XXYLT1   | 4. 24E-69 | -0. 34923 | 0. 049 | 0. 298 | 6. 33E-65 |
| STAG1    | 4. 39E-69 | -0. 25215 | 0. 087 | 0. 346 | 6. 55E-65 |
| SLBP     | 4. 48E-69 | -0. 44011 | 0. 241 | 0. 593 | 6. 70E-65 |
| NSD1     | 4. 84E-69 | -0. 28533 | 0. 131 | 0. 419 | 7. 23E-65 |
| DDX49    | 4. 87E-69 | -0. 11019 | 0. 224 | 0. 493 | 7. 28E-65 |
| ABAT     | 4. 91E-69 | -0. 41261 | 0. 086 | 0. 367 | 7. 33E-65 |
| C19orf43 | 5. 08E-69 | -0. 28284 | 0. 566 | 0. 891 | 7. 60E-65 |
| CEBPD    | 5. 36E-69 | 0. 410079 | 0. 402 | 0. 396 | 8. 01E-65 |
| COL4A2   | 5. 64E-69 | -0. 34328 | 0. 078 | 0. 342 | 8. 43E-65 |
| RAB34    | 6. 02E-69 | -0. 1864  | 0. 158 | 0. 426 | 9. 00E-65 |
| HLTF     | 6. 06E-69 | -0. 31366 | 0. 12  | 0. 406 | 9. 05E-65 |
| PTCD3    | 6. 13E-69 | -0. 21132 | 0. 181 | 0. 479 | 9. 16E-65 |
| CCT8     | 6. 19E-69 | 0. 153093 | 0. 541 | 0. 738 | 9. 26E-65 |
| MCUR1    | 6. 21E-69 | -0. 41365 | 0. 185 | 0. 519 | 9. 27E-65 |
| SLC44A1  | 6. 28E-69 | -0. 11333 | 0. 248 | 0. 5   | 9. 39E-65 |
| PPP1R35  | 6. 79E-69 | -0. 40516 | 0. 088 | 0. 38  | 1. 01E-64 |
| SSX2IP   | 7. 34E-69 | -0. 24805 | 0. 054 | 0. 288 | 1. 10E-64 |
| ANKRD9   | 7. 52E-69 | -0. 29271 | 0. 02  | 0. 228 | 1. 12E-64 |
| DAG1     | 8. 22E-69 | -0. 25655 | 0. 133 | 0. 407 | 1. 23E-64 |
| TXNDC12  | 8. 35E-69 | 0. 169412 | 0. 448 | 0. 633 | 1. 25E-64 |
| PDHA1    | 8. 47E-69 | -0. 2387  | 0. 252 | 0. 568 | 1. 27E-64 |
| VPS26B   | 8. 68E-69 | -0. 35395 | 0. 134 | 0. 438 | 1. 30E-64 |
| CHPT1    | 8. 87E-69 | -0. 33316 | 0. 213 | 0. 536 | 1. 33E-64 |
| GNL3     | 9. 60E-69 | 0. 261622 | 0. 37  | 0. 526 | 1. 43E-64 |
| MIS12    | 1. 07E-68 | -0. 27474 | 0. 129 | 0. 402 | 1. 60E-64 |

|          |          |          |       |       |          |
|----------|----------|----------|-------|-------|----------|
| TXNIP    | 1.08E-68 | 0.170755 | 0.422 | 0.602 | 1.62E-64 |
| TPM4     | 1.13E-68 | -0.12509 | 0.434 | 0.744 | 1.68E-64 |
| GRSF1    | 1.19E-68 | -0.22898 | 0.224 | 0.528 | 1.78E-64 |
| HIST1H1B | 1.20E-68 | -0.29761 | 0.002 | 0.162 | 1.80E-64 |
| RNF4     | 1.21E-68 | -0.20098 | 0.136 | 0.406 | 1.80E-64 |
| ZNF358   | 1.23E-68 | -0.30672 | 0.081 | 0.344 | 1.83E-64 |
| AATF     | 1.23E-68 | -0.18165 | 0.237 | 0.531 | 1.84E-64 |
| DSTN     | 1.32E-68 | 0.308109 | 0.705 | 0.827 | 1.97E-64 |
| PMVK     | 1.35E-68 | 0.199972 | 0.398 | 0.601 | 2.02E-64 |
| ZCCHC11  | 1.36E-68 | -0.17099 | 0.167 | 0.437 | 2.03E-64 |
| COX14    | 1.37E-68 | 0.416264 | 0.424 | 0.53  | 2.04E-64 |
| KCMF1    | 1.38E-68 | -0.25206 | 0.13  | 0.412 | 2.06E-64 |
| PRKD3    | 1.38E-68 | -0.26929 | 0.073 | 0.322 | 2.07E-64 |
| PSME1    | 1.49E-68 | 0.512357 | 0.562 | 0.627 | 2.23E-64 |
| CHAMP1   | 1.69E-68 | -0.35205 | 0.081 | 0.356 | 2.53E-64 |
| GIPC1    | 1.77E-68 | -0.23678 | 0.193 | 0.491 | 2.65E-64 |
| LRRC58   | 1.80E-68 | -0.20933 | 0.142 | 0.411 | 2.70E-64 |
| NUFIP2   | 1.94E-68 | -0.22566 | 0.139 | 0.411 | 2.89E-64 |
| CTDSP2   | 1.97E-68 | -0.43836 | 0.169 | 0.495 | 2.94E-64 |
| WBP4     | 2.11E-68 | 0.110155 | 0.288 | 0.519 | 3.16E-64 |
| EPB41L2  | 2.17E-68 | -0.32342 | 0.115 | 0.41  | 3.25E-64 |
| CD320    | 2.30E-68 | -0.28797 | 0.339 | 0.675 | 3.44E-64 |
| PAFAH1B1 | 2.45E-68 | -0.22388 | 0.258 | 0.562 | 3.66E-64 |
| NT5C     | 2.63E-68 | -0.26658 | 0.187 | 0.485 | 3.92E-64 |
| MYO9B    | 2.68E-68 | -0.19516 | 0.133 | 0.391 | 4.00E-64 |
| CAMTA1   | 2.85E-68 | -0.26756 | 0.364 | 0.707 | 4.26E-64 |
| KAT7     | 2.94E-68 | -0.34139 | 0.084 | 0.356 | 4.39E-64 |
| PRIM2    | 2.95E-68 | -0.35841 | 0.034 | 0.262 | 4.41E-64 |
| THRAP3   | 2.96E-68 | -0.15947 | 0.348 | 0.646 | 4.42E-64 |
| SRSF3    | 3.04E-68 | -0.17787 | 0.65  | 0.943 | 4.54E-64 |
| LRRN1    | 3.04E-68 | -0.50602 | 0.042 | 0.29  | 4.54E-64 |
| EIF3A    | 3.21E-68 | -0.26851 | 0.206 | 0.512 | 4.79E-64 |
| NDUFA6   | 3.39E-68 | 0.143465 | 0.571 | 0.817 | 5.07E-64 |
| PLGRKT   | 4.04E-68 | -0.10277 | 0.203 | 0.477 | 6.04E-64 |
| ARHGDI1A | 4.08E-68 | -0.13619 | 0.43  | 0.742 | 6.09E-64 |
| INO80E   | 4.30E-68 | -0.2304  | 0.158 | 0.446 | 6.42E-64 |
| SURF1    | 4.30E-68 | -0.19402 | 0.223 | 0.506 | 6.43E-64 |
| BTBD3    | 4.39E-68 | -0.25069 | 0.051 | 0.285 | 6.56E-64 |
| ATP5A1   | 4.47E-68 | 0.224801 | 0.64  | 0.831 | 6.68E-64 |
| NUP88    | 4.66E-68 | -0.29979 | 0.092 | 0.365 | 6.96E-64 |
| SDHAF1   | 4.72E-68 | -0.1892  | 0.129 | 0.378 | 7.05E-64 |
| MAP1LC3A | 5.33E-68 | -0.1666  | 0.301 | 0.583 | 7.97E-64 |
| GNB4     | 5.50E-68 | -0.30308 | 0.096 | 0.375 | 8.22E-64 |
| LUC7L    | 5.66E-68 | -0.19339 | 0.188 | 0.472 | 8.46E-64 |
| SCG3     | 5.71E-68 | -0.40238 | 0.177 | 0.494 | 8.53E-64 |
| ABCD3    | 5.75E-68 | -0.27343 | 0.15  | 0.438 | 8.59E-64 |
| MPHOSPH8 | 6.14E-68 | 0.103948 | 0.344 | 0.553 | 9.18E-64 |
| GAS2L1   | 6.18E-68 | -0.31682 | 0.093 | 0.359 | 9.24E-64 |
| CS       | 6.37E-68 | -0.28713 | 0.089 | 0.349 | 9.52E-64 |
| STK17A   | 6.59E-68 | -0.20803 | 0.222 | 0.507 | 9.85E-64 |
| AFF4     | 6.78E-68 | -0.27999 | 0.219 | 0.526 | 1.01E-63 |

|          |          |          |       |       |          |
|----------|----------|----------|-------|-------|----------|
| ROMO1    | 6.92E-68 | 0.1402   | 0.579 | 0.802 | 1.03E-63 |
| RHOC     | 7.00E-68 | 0.548193 | 0.631 | 0.621 | 1.05E-63 |
| RNFT1    | 7.08E-68 | -0.20605 | 0.107 | 0.373 | 1.06E-63 |
| ZFAND3   | 7.71E-68 | -0.25363 | 0.181 | 0.477 | 1.15E-63 |
| SEPHS1   | 8.01E-68 | -0.28086 | 0.059 | 0.301 | 1.20E-63 |
| CNOT3    | 8.48E-68 | -0.22908 | 0.119 | 0.378 | 1.27E-63 |
| ANAPC16  | 8.68E-68 | 0.51107  | 0.463 | 0.552 | 1.30E-63 |
| PRR4     | 8.90E-68 | -0.30004 | 0.146 | 0.441 | 1.33E-63 |
| C11orf31 | 9.03E-68 | 0.190721 | 0.572 | 0.783 | 1.35E-63 |
| PRKACA   | 9.74E-68 | -0.252   | 0.067 | 0.307 | 1.46E-63 |
| ACTR2    | 9.80E-68 | -0.19102 | 0.274 | 0.579 | 1.46E-63 |
| HEY1     | 1.01E-67 | -0.39569 | 0.22  | 0.549 | 1.51E-63 |
| LMAN1    | 1.04E-67 | 0.370972 | 0.338 | 0.441 | 1.56E-63 |
| NDUFB4   | 1.04E-67 | 0.342397 | 0.673 | 0.788 | 1.56E-63 |
| NDRG1    | 1.05E-67 | 1.004322 | 0.312 | 0.074 | 1.57E-63 |
| WBP2     | 1.08E-67 | 0.338185 | 0.445 | 0.527 | 1.61E-63 |
| C7orf49  | 1.11E-67 | -0.19836 | 0.178 | 0.457 | 1.65E-63 |
| PSME3    | 1.12E-67 | -0.13992 | 0.167 | 0.443 | 1.67E-63 |
| CDK5RAP2 | 1.13E-67 | -0.16531 | 0.117 | 0.363 | 1.69E-63 |
| POLR2E   | 1.18E-67 | -0.11749 | 0.46  | 0.772 | 1.76E-63 |
| ARSJ     | 1.24E-67 | -0.20013 | 0.08  | 0.315 | 1.86E-63 |
| GATM     | 1.26E-67 | -0.20367 | 0.242 | 0.53  | 1.88E-63 |
| SREK1IP1 | 1.27E-67 | 0.185269 | 0.322 | 0.532 | 1.89E-63 |
| CIAO1    | 1.33E-67 | -0.1652  | 0.169 | 0.437 | 1.99E-63 |
| SAMM50   | 1.39E-67 | -0.18169 | 0.126 | 0.386 | 2.08E-63 |
| THOC3    | 1.44E-67 | -0.1577  | 0.148 | 0.401 | 2.15E-63 |
| NSA2     | 1.54E-67 | -0.14716 | 0.293 | 0.598 | 2.30E-63 |
| REST     | 1.56E-67 | -0.40537 | 0.122 | 0.425 | 2.34E-63 |
| TANC2    | 1.69E-67 | -0.27727 | 0.075 | 0.326 | 2.52E-63 |
| EXOC7    | 1.75E-67 | -0.18843 | 0.241 | 0.548 | 2.61E-63 |
| NFATC2IP | 1.81E-67 | -0.32525 | 0.113 | 0.396 | 2.70E-63 |
| CCNI     | 1.82E-67 | -0.33012 | 0.541 | 0.872 | 2.72E-63 |
| WDR82    | 1.91E-67 | -0.33744 | 0.151 | 0.453 | 2.86E-63 |
| H2AFY2   | 1.97E-67 | -0.25215 | 0.018 | 0.217 | 2.94E-63 |
| DNAJC15  | 2.07E-67 | 0.32478  | 0.355 | 0.526 | 3.09E-63 |
| CHMP4A   | 2.10E-67 | 0.120374 | 0.365 | 0.604 | 3.14E-63 |
| STX10    | 2.16E-67 | -0.18462 | 0.276 | 0.58  | 3.22E-63 |
| THOC2    | 2.28E-67 | -0.22095 | 0.248 | 0.548 | 3.40E-63 |
| TFAM     | 2.33E-67 | -0.16517 | 0.143 | 0.41  | 3.48E-63 |
| NDUFS2   | 2.35E-67 | 0.241211 | 0.517 | 0.694 | 3.51E-63 |
| SOCS6    | 2.40E-67 | -0.27604 | 0.084 | 0.341 | 3.58E-63 |
| AP2A1    | 2.40E-67 | -0.24638 | 0.177 | 0.467 | 3.59E-63 |
| TAF6     | 2.44E-67 | -0.21953 | 0.221 | 0.511 | 3.65E-63 |
| PRNP     | 2.53E-67 | 0.272067 | 0.471 | 0.599 | 3.79E-63 |
| E2F8     | 2.54E-67 | -0.29024 | 0.004 | 0.17  | 3.80E-63 |
| RHOT1    | 2.69E-67 | -0.28691 | 0.155 | 0.447 | 4.02E-63 |
| RBM15B   | 2.77E-67 | -0.33382 | 0.087 | 0.359 | 4.13E-63 |
| SUMF2    | 2.92E-67 | -0.10529 | 0.265 | 0.533 | 4.36E-63 |
| STK4     | 3.01E-67 | -0.16533 | 0.149 | 0.409 | 4.50E-63 |
| HCFC1    | 3.01E-67 | -0.28073 | 0.074 | 0.326 | 4.50E-63 |
| UBL7-AS1 | 3.19E-67 | -0.31558 | 0.031 | 0.251 | 4.76E-63 |



|          |          |          |       |       |          |
|----------|----------|----------|-------|-------|----------|
| NUDT5    | 3.21E-67 | -0.16376 | 0.206 | 0.499 | 4.80E-63 |
| CGGBP1   | 3.22E-67 | -0.24451 | 0.206 | 0.505 | 4.80E-63 |
| EFTUD2   | 3.84E-67 | -0.20567 | 0.139 | 0.414 | 5.74E-63 |
| LAGE3    | 4.03E-67 | -0.12015 | 0.328 | 0.61  | 6.03E-63 |
| PA2G4    | 4.27E-67 | -0.20986 | 0.479 | 0.804 | 6.38E-63 |
| C17orf58 | 4.35E-67 | -0.26384 | 0.141 | 0.427 | 6.50E-63 |
| VTI1B    | 4.37E-67 | -0.14549 | 0.226 | 0.512 | 6.54E-63 |
| CHIC2    | 4.50E-67 | -0.30586 | 0.185 | 0.489 | 6.72E-63 |
| DIAPH1   | 4.61E-67 | -0.30451 | 0.062 | 0.31  | 6.88E-63 |
| BORA     | 4.74E-67 | -0.37376 | 0.02  | 0.228 | 7.08E-63 |
| TLE1     | 4.84E-67 | -0.28125 | 0.127 | 0.401 | 7.23E-63 |
| TMEM181  | 5.07E-67 | -0.30663 | 0.075 | 0.335 | 7.58E-63 |
| TRIM37   | 5.18E-67 | -0.32181 | 0.096 | 0.373 | 7.74E-63 |
| TRIM44   | 5.19E-67 | -0.20357 | 0.212 | 0.493 | 7.76E-63 |
| BRI3     | 5.51E-67 | -0.29408 | 0.297 | 0.627 | 8.24E-63 |
| CWC15    | 5.76E-67 | 0.154407 | 0.431 | 0.664 | 8.61E-63 |
| DFFA     | 5.88E-67 | -0.18492 | 0.136 | 0.404 | 8.79E-63 |
| MED4     | 5.95E-67 | 0.196884 | 0.394 | 0.601 | 8.90E-63 |
| MT3      | 5.96E-67 | 0.551063 | 0.722 | 0.768 | 8.90E-63 |
| EVA1B    | 6.29E-67 | -0.32297 | 0.031 | 0.259 | 9.41E-63 |
| SOCS2    | 6.50E-67 | -0.49085 | 0.082 | 0.36  | 9.71E-63 |
| CRELD2   | 6.86E-67 | -0.29536 | 0.171 | 0.467 | 1.03E-62 |
| IFNGR2   | 7.01E-67 | -0.26619 | 0.206 | 0.501 | 1.05E-62 |
| C5orf15  | 7.02E-67 | 0.136707 | 0.309 | 0.479 | 1.05E-62 |
| RBM14    | 7.31E-67 | -0.29721 | 0.149 | 0.438 | 1.09E-62 |
| UNC50    | 7.68E-67 | 0.196141 | 0.369 | 0.538 | 1.15E-62 |
| VAPB     | 7.84E-67 | -0.2522  | 0.162 | 0.442 | 1.17E-62 |
| MED13    | 7.95E-67 | -0.22063 | 0.08  | 0.321 | 1.19E-62 |
| EIF2AK2  | 8.06E-67 | -0.23014 | 0.221 | 0.522 | 1.20E-62 |
| DAP      | 8.57E-67 | -0.23117 | 0.203 | 0.491 | 1.28E-62 |
| ATP5H    | 8.69E-67 | 0.261297 | 0.6   | 0.783 | 1.30E-62 |
| RB1      | 8.88E-67 | -0.24304 | 0.099 | 0.349 | 1.33E-62 |
| 8-Sep    | 8.99E-67 | -0.27758 | 0.122 | 0.393 | 1.34E-62 |
| NNT      | 9.15E-67 | -0.34532 | 0.078 | 0.341 | 1.37E-62 |
| SASS6    | 9.33E-67 | -0.27338 | 0.047 | 0.274 | 1.39E-62 |
| TDP1     | 9.67E-67 | -0.24146 | 0.038 | 0.242 | 1.45E-62 |
| SAMD4B   | 9.88E-67 | -0.11656 | 0.176 | 0.432 | 1.48E-62 |
| CYCS     | 9.92E-67 | 0.158866 | 0.738 | 0.931 | 1.48E-62 |
| TGFB1    | 1.01E-66 | -0.16451 | 0.064 | 0.265 | 1.51E-62 |
| ZNF638   | 1.02E-66 | -0.13705 | 0.188 | 0.443 | 1.52E-62 |
| PTP4A2   | 1.13E-66 | -0.36051 | 0.335 | 0.683 | 1.68E-62 |
| ZKSCAN1  | 1.13E-66 | -0.14855 | 0.224 | 0.504 | 1.69E-62 |
| BAG5     | 1.17E-66 | -0.11311 | 0.148 | 0.385 | 1.75E-62 |
| TTC1     | 1.17E-66 | 0.329779 | 0.374 | 0.483 | 1.75E-62 |
| IQGAP3   | 1.20E-66 | -0.29665 | 0.001 | 0.153 | 1.80E-62 |
| ZMYND11  | 1.21E-66 | -0.27018 | 0.069 | 0.314 | 1.81E-62 |
| RAB5C    | 1.21E-66 | 0.160977 | 0.543 | 0.757 | 1.82E-62 |
| HSPBP1   | 1.35E-66 | -0.12129 | 0.269 | 0.542 | 2.02E-62 |
| DAXX     | 1.42E-66 | -0.15534 | 0.193 | 0.452 | 2.12E-62 |
| LARP1    | 1.49E-66 | -0.12692 | 0.188 | 0.431 | 2.22E-62 |
| FAM72D   | 1.71E-66 | -0.26552 | 0.002 | 0.163 | 2.56E-62 |

|          |           |           |        |        |           |
|----------|-----------|-----------|--------|--------|-----------|
| SEC22C   | 1. 77E-66 | -0. 23781 | 0. 176 | 0. 458 | 2. 65E-62 |
| FBXW2    | 1. 78E-66 | -0. 23887 | 0. 13  | 0. 39  | 2. 65E-62 |
| HIST1H1E | 1. 81E-66 | -0. 26396 | 0. 01  | 0. 188 | 2. 71E-62 |
| GABARAP  | 1. 86E-66 | 0. 624804 | 0. 399 | 0. 417 | 2. 78E-62 |
| TIMMDC1  | 1. 93E-66 | 0. 25639  | 0. 397 | 0. 547 | 2. 88E-62 |
| PTPN1    | 1. 98E-66 | -0. 16294 | 0. 115 | 0. 352 | 2. 97E-62 |
| APBB2    | 2. 04E-66 | -0. 3656  | 0. 074 | 0. 337 | 3. 05E-62 |
| CLPTM1L  | 2. 14E-66 | -0. 27112 | 0. 068 | 0. 311 | 3. 20E-62 |
| TOP3A    | 2. 17E-66 | -0. 30909 | 0. 054 | 0. 295 | 3. 24E-62 |
| ARPC1A   | 2. 23E-66 | 0. 100691 | 0. 592 | 0. 837 | 3. 33E-62 |
| GDE1     | 2. 24E-66 | -0. 20551 | 0. 185 | 0. 47  | 3. 34E-62 |
| AGPAT1   | 2. 36E-66 | -0. 17746 | 0. 16  | 0. 428 | 3. 53E-62 |
| PRCP     | 2. 42E-66 | -0. 13262 | 0. 309 | 0. 598 | 3. 61E-62 |
| LRRC59   | 2. 46E-66 | -0. 14322 | 0. 32  | 0. 611 | 3. 68E-62 |
| DHRS7    | 2. 64E-66 | 0. 280122 | 0. 363 | 0. 523 | 3. 95E-62 |
| BMI1     | 2. 64E-66 | -0. 20889 | 0. 07  | 0. 307 | 3. 95E-62 |
| TFG      | 2. 79E-66 | 0. 10044  | 0. 438 | 0. 64  | 4. 17E-62 |
| FAM229B  | 2. 94E-66 | 0. 103883 | 0. 316 | 0. 515 | 4. 39E-62 |
| CNPY3    | 3. 20E-66 | -0. 12103 | 0. 213 | 0. 481 | 4. 77E-62 |
| RAB18    | 3. 75E-66 | 0. 250214 | 0. 358 | 0. 502 | 5. 61E-62 |
| ALDH3A2  | 3. 76E-66 | -0. 1974  | 0. 172 | 0. 457 | 5. 62E-62 |
| NNT-AS1  | 3. 76E-66 | -0. 24142 | 0. 173 | 0. 457 | 5. 62E-62 |
| BCL2L12  | 3. 81E-66 | -0. 41299 | 0. 09  | 0. 372 | 5. 69E-62 |
| ATP5I    | 3. 84E-66 | 0. 19908  | 0. 693 | 0. 869 | 5. 74E-62 |
| REV1     | 4. 00E-66 | -0. 30352 | 0. 101 | 0. 372 | 5. 98E-62 |
| VPS25    | 4. 09E-66 | 0. 217805 | 0. 315 | 0. 505 | 6. 12E-62 |
| LRWD1    | 4. 18E-66 | -0. 22338 | 0. 152 | 0. 419 | 6. 25E-62 |
| CTBP1    | 4. 32E-66 | -0. 22469 | 0. 136 | 0. 402 | 6. 45E-62 |
| FAM96A   | 4. 34E-66 | 0. 103866 | 0. 257 | 0. 48  | 6. 49E-62 |
| ZNF85    | 4. 48E-66 | -0. 33022 | 0. 057 | 0. 302 | 6. 69E-62 |
| ARL6IP4  | 4. 91E-66 | -0. 28077 | 0. 449 | 0. 781 | 7. 34E-62 |
| EMC7     | 4. 97E-66 | 0. 16294  | 0. 388 | 0. 595 | 7. 42E-62 |
| OTUB1    | 4. 99E-66 | 0. 19965  | 0. 333 | 0. 511 | 7. 46E-62 |
| SHARPIN  | 5. 19E-66 | -0. 27431 | 0. 177 | 0. 469 | 7. 76E-62 |
| TMEM179B | 5. 46E-66 | 0. 353304 | 0. 384 | 0. 49  | 8. 16E-62 |
| SCAMP4   | 5. 70E-66 | -0. 21379 | 0. 195 | 0. 489 | 8. 51E-62 |
| PLXNB2   | 6. 30E-66 | -0. 15174 | 0. 09  | 0. 317 | 9. 42E-62 |
| PRKRIR   | 6. 51E-66 | -0. 26165 | 0. 05  | 0. 28  | 9. 73E-62 |
| POLD3    | 6. 69E-66 | -0. 41196 | 0. 08  | 0. 354 | 1. 00E-61 |
| CIAPIN1  | 6. 98E-66 | -0. 16519 | 0. 218 | 0. 51  | 1. 04E-61 |
| SYNRG    | 7. 34E-66 | -0. 19069 | 0. 11  | 0. 362 | 1. 10E-61 |
| HTATSF1  | 7. 37E-66 | -0. 2652  | 0. 224 | 0. 531 | 1. 10E-61 |
| COMMD1   | 7. 41E-66 | 0. 21889  | 0. 295 | 0. 484 | 1. 11E-61 |
| BCAS2    | 7. 52E-66 | 0. 232515 | 0. 422 | 0. 602 | 1. 12E-61 |
| DNTTIP1  | 7. 80E-66 | -0. 15733 | 0. 286 | 0. 584 | 1. 17E-61 |
| EXOG     | 7. 95E-66 | -0. 2894  | 0. 107 | 0. 372 | 1. 19E-61 |
| BAG6     | 8. 71E-66 | -0. 13183 | 0. 259 | 0. 535 | 1. 30E-61 |
| CHURC1   | 8. 92E-66 | 0. 314639 | 0. 357 | 0. 5   | 1. 33E-61 |
| PROX1    | 9. 00E-66 | -0. 31037 | 0. 066 | 0. 314 | 1. 35E-61 |
| PSAT1    | 9. 49E-66 | -0. 16666 | 0. 244 | 0. 5   | 1. 42E-61 |
| FKBP4    | 9. 57E-66 | -0. 18359 | 0. 266 | 0. 552 | 1. 43E-61 |

|          |          |          |       |       |          |
|----------|----------|----------|-------|-------|----------|
| CCNG2    | 9.95E-66 | -0.42479 | 0.084 | 0.356 | 1.49E-61 |
| PCDH17   | 1.01E-65 | -0.30826 | 0.158 | 0.451 | 1.52E-61 |
| DNM2     | 1.06E-65 | -0.16536 | 0.123 | 0.365 | 1.58E-61 |
| ATP5B    | 1.13E-65 | 0.161037 | 0.734 | 0.917 | 1.69E-61 |
| GLIPR1   | 1.13E-65 | 0.807894 | 0.334 | 0.262 | 1.69E-61 |
| KIAA1715 | 1.17E-65 | -0.15518 | 0.202 | 0.477 | 1.74E-61 |
| DOK5     | 1.22E-65 | 0.356813 | 0.253 | 0.33  | 1.82E-61 |
| COTL1    | 1.25E-65 | -0.30918 | 0.246 | 0.554 | 1.87E-61 |
| IDH1     | 1.27E-65 | -0.23181 | 0.26  | 0.572 | 1.90E-61 |
| CCDC82   | 1.43E-65 | -0.17171 | 0.218 | 0.512 | 2.14E-61 |
| C19orf53 | 1.54E-65 | 0.426047 | 0.722 | 0.821 | 2.29E-61 |
| NPAS3    | 1.66E-65 | -0.35329 | 0.065 | 0.321 | 2.48E-61 |
| AUTS2    | 1.68E-65 | -0.30597 | 0.047 | 0.283 | 2.50E-61 |
| STAMBP   | 1.81E-65 | -0.10496 | 0.222 | 0.494 | 2.70E-61 |
| DYNC1I2  | 1.81E-65 | -0.16666 | 0.362 | 0.667 | 2.71E-61 |
| PKIG     | 1.95E-65 | 0.384013 | 0.426 | 0.533 | 2.92E-61 |
| VKORC1   | 2.00E-65 | 0.276716 | 0.475 | 0.63  | 2.99E-61 |
| SCAF11   | 2.00E-65 | -0.12377 | 0.303 | 0.585 | 3.00E-61 |
| CKAP4    | 2.19E-65 | -0.2328  | 0.171 | 0.446 | 3.28E-61 |
| EMC8     | 2.24E-65 | -0.2959  | 0.218 | 0.527 | 3.34E-61 |
| WRAP53   | 2.35E-65 | -0.21549 | 0.072 | 0.304 | 3.51E-61 |
| MSL1     | 2.39E-65 | -0.2258  | 0.092 | 0.336 | 3.57E-61 |
| RNF114   | 2.47E-65 | -0.1011  | 0.344 | 0.631 | 3.68E-61 |
| F8A1     | 2.54E-65 | -0.2988  | 0.052 | 0.294 | 3.80E-61 |
| SALL1    | 2.56E-65 | -0.34451 | 0.062 | 0.316 | 3.83E-61 |
| SPTBN1   | 2.60E-65 | -0.21328 | 0.229 | 0.521 | 3.88E-61 |
| PRRC2B   | 2.70E-65 | -0.21223 | 0.135 | 0.396 | 4.04E-61 |
| F13A1    | 2.76E-65 | 1.289213 | 0.254 | 0.02  | 4.12E-61 |
| DRAP1    | 3.16E-65 | 0.133758 | 0.608 | 0.796 | 4.72E-61 |
| SRRD     | 3.22E-65 | -0.23893 | 0.049 | 0.274 | 4.82E-61 |
| FARSB    | 3.25E-65 | -0.10685 | 0.224 | 0.495 | 4.86E-61 |
| AKR1A1   | 3.33E-65 | 0.192993 | 0.363 | 0.54  | 4.98E-61 |
| SPAG16   | 3.37E-65 | 0.130926 | 0.351 | 0.537 | 5.04E-61 |
| MDM2     | 3.47E-65 | -0.52432 | 0.147 | 0.459 | 5.19E-61 |
| CAPZA1   | 3.48E-65 | -0.23127 | 0.23  | 0.521 | 5.20E-61 |
| PRR7     | 3.49E-65 | -0.36759 | 0.102 | 0.384 | 5.21E-61 |
| ANXA2    | 3.65E-65 | 0.876616 | 0.696 | 0.477 | 5.46E-61 |
| REPIN1   | 3.65E-65 | -0.24426 | 0.207 | 0.493 | 5.46E-61 |
| ZNF131   | 3.70E-65 | -0.29572 | 0.161 | 0.454 | 5.53E-61 |
| H3F3B    | 3.78E-65 | 0.361138 | 0.935 | 0.981 | 5.65E-61 |
| SGSM3    | 3.81E-65 | -0.26552 | 0.104 | 0.363 | 5.69E-61 |
| EIF4E    | 3.97E-65 | -0.11069 | 0.403 | 0.698 | 5.93E-61 |
| PNPLA8   | 4.15E-65 | 0.253559 | 0.383 | 0.511 | 6.19E-61 |
| ELOF1    | 4.25E-65 | 0.184957 | 0.45  | 0.649 | 6.35E-61 |
| RASSF1   | 4.33E-65 | -0.19206 | 0.129 | 0.373 | 6.48E-61 |
| TRAPPC3  | 4.36E-65 | 0.317687 | 0.433 | 0.569 | 6.51E-61 |
| TNC      | 4.41E-65 | 0.657598 | 0.345 | 0.344 | 6.59E-61 |
| HSF1     | 4.42E-65 | -0.19446 | 0.212 | 0.493 | 6.60E-61 |
| CBFB     | 4.50E-65 | -0.201   | 0.183 | 0.459 | 6.73E-61 |
| GSN      | 4.51E-65 | 0.666214 | 0.391 | 0.327 | 6.73E-61 |
| DID01    | 4.84E-65 | -0.26003 | 0.089 | 0.338 | 7.23E-61 |

|           |          |          |       |       |          |
|-----------|----------|----------|-------|-------|----------|
| AK2       | 5.16E-65 | 0.403535 | 0.457 | 0.57  | 7.72E-61 |
| ZFP36L1   | 5.35E-65 | 0.502391 | 0.561 | 0.609 | 8.00E-61 |
| TRIM2     | 5.41E-65 | -0.1436  | 0.178 | 0.412 | 8.09E-61 |
| TRAPPC2L  | 5.59E-65 | 0.253796 | 0.381 | 0.543 | 8.35E-61 |
| SAMD1     | 5.59E-65 | -0.2659  | 0.044 | 0.263 | 8.35E-61 |
| CLDND1    | 5.82E-65 | 0.176363 | 0.416 | 0.602 | 8.70E-61 |
| HINT2     | 5.88E-65 | -0.36075 | 0.27  | 0.606 | 8.78E-61 |
| CD164     | 6.14E-65 | 0.364165 | 0.451 | 0.505 | 9.18E-61 |
| RGS19     | 6.24E-65 | -0.28477 | 0.055 | 0.288 | 9.32E-61 |
| GNAI2     | 6.61E-65 | -0.32303 | 0.248 | 0.569 | 9.88E-61 |
| USP11     | 6.73E-65 | -0.148   | 0.325 | 0.617 | 1.01E-60 |
| NDUFS1    | 7.48E-65 | -0.23274 | 0.203 | 0.49  | 1.12E-60 |
| SNCAIP    | 7.82E-65 | -0.32383 | 0.037 | 0.26  | 1.17E-60 |
| AP2M1     | 8.75E-65 | 0.157757 | 0.664 | 0.862 | 1.31E-60 |
| ARRB2     | 8.97E-65 | -0.22446 | 0.147 | 0.425 | 1.34E-60 |
| DECR1     | 9.06E-65 | 0.279652 | 0.391 | 0.575 | 1.35E-60 |
| RBPJ      | 9.20E-65 | -0.19847 | 0.308 | 0.605 | 1.38E-60 |
| IGF2BP3   | 9.23E-65 | -0.33285 | 0.051 | 0.289 | 1.38E-60 |
| ZBTB7A    | 9.33E-65 | -0.27804 | 0.084 | 0.328 | 1.39E-60 |
| GFER      | 9.74E-65 | -0.36868 | 0.117 | 0.405 | 1.46E-60 |
| CRK       | 9.75E-65 | -0.25112 | 0.255 | 0.557 | 1.46E-60 |
| RAB22A    | 1.03E-64 | -0.31257 | 0.149 | 0.441 | 1.53E-60 |
| MBOAT2    | 1.03E-64 | -0.3564  | 0.144 | 0.438 | 1.54E-60 |
| FAM49B    | 1.08E-64 | -0.20316 | 0.237 | 0.527 | 1.61E-60 |
| C6orf1    | 1.10E-64 | 0.436408 | 0.363 | 0.43  | 1.65E-60 |
| NCBP2-AS2 | 1.12E-64 | -0.2241  | 0.237 | 0.523 | 1.68E-60 |
| ZNF148    | 1.20E-64 | -0.22298 | 0.16  | 0.436 | 1.79E-60 |
| FUT8      | 1.27E-64 | -0.18091 | 0.066 | 0.277 | 1.89E-60 |
| EAPP      | 1.27E-64 | 0.365542 | 0.356 | 0.488 | 1.89E-60 |
| ZDHHC4    | 1.28E-64 | 0.196889 | 0.373 | 0.564 | 1.91E-60 |
| CMTM3     | 1.30E-64 | -0.14933 | 0.202 | 0.457 | 1.95E-60 |
| RBL1      | 1.31E-64 | -0.27558 | 0.02  | 0.217 | 1.96E-60 |
| PBX1      | 1.56E-64 | -0.35742 | 0.16  | 0.464 | 2.33E-60 |
| NGDN      | 1.69E-64 | 0.127619 | 0.262 | 0.453 | 2.53E-60 |
| DRG1      | 1.71E-64 | -0.11825 | 0.191 | 0.451 | 2.55E-60 |
| SMARCD3   | 1.73E-64 | -0.26036 | 0.183 | 0.47  | 2.59E-60 |
| MDGA1     | 1.76E-64 | -0.22068 | 0.013 | 0.189 | 2.63E-60 |
| IER5      | 2.00E-64 | -0.21259 | 0.111 | 0.354 | 2.99E-60 |
| POLR3H    | 2.00E-64 | -0.12868 | 0.146 | 0.404 | 3.00E-60 |
| DNAJB1    | 2.05E-64 | 0.361175 | 0.608 | 0.773 | 3.06E-60 |
| CASP2     | 2.07E-64 | -0.33824 | 0.062 | 0.311 | 3.10E-60 |
| SIK3      | 2.10E-64 | -0.21114 | 0.039 | 0.241 | 3.14E-60 |
| ATP2B1    | 2.47E-64 | -0.36206 | 0.229 | 0.549 | 3.70E-60 |
| WDR61     | 2.50E-64 | 0.235735 | 0.341 | 0.519 | 3.74E-60 |
| CDK2AP1   | 2.55E-64 | -0.27767 | 0.025 | 0.231 | 3.81E-60 |
| TMEM230   | 2.61E-64 | 0.259241 | 0.61  | 0.78  | 3.90E-60 |
| ATP6V1D   | 2.65E-64 | 0.271803 | 0.365 | 0.526 | 3.96E-60 |
| SPATA33   | 2.71E-64 | -0.23574 | 0.139 | 0.409 | 4.05E-60 |
| CCDC15    | 2.72E-64 | -0.29264 | 0.027 | 0.232 | 4.06E-60 |
| AKAP7     | 2.80E-64 | -0.33824 | 0.091 | 0.358 | 4.19E-60 |
| AEBP1     | 2.84E-64 | 0.67952  | 0.296 | 0.194 | 4.24E-60 |

|           |          |          |       |       |          |
|-----------|----------|----------|-------|-------|----------|
| POMGNT1   | 2.87E-64 | -0.2723  | 0.173 | 0.464 | 4.29E-60 |
| SREK1     | 2.97E-64 | -0.10521 | 0.303 | 0.568 | 4.43E-60 |
| ZNF302    | 2.97E-64 | 0.22656  | 0.369 | 0.568 | 4.45E-60 |
| MSI2      | 3.02E-64 | -0.22695 | 0.299 | 0.619 | 4.52E-60 |
| CHAF1B    | 3.04E-64 | -0.34552 | 0.027 | 0.237 | 4.54E-60 |
| HSPA8     | 3.12E-64 | 0.249944 | 0.834 | 0.959 | 4.66E-60 |
| AC004540. | 3.52E-64 | -0.4689  | 0.043 | 0.278 | 5.25E-60 |
| MKLN1     | 3.71E-64 | -0.19525 | 0.173 | 0.442 | 5.54E-60 |
| TXNL4A    | 3.94E-64 | -0.23405 | 0.315 | 0.64  | 5.89E-60 |
| CCDC66    | 3.96E-64 | -0.13775 | 0.186 | 0.437 | 5.91E-60 |
| AGTRAP    | 4.06E-64 | 0.802655 | 0.34  | 0.309 | 6.06E-60 |
| NXPH1     | 4.26E-64 | -0.49369 | 0.044 | 0.284 | 6.37E-60 |
| ACTR10    | 4.32E-64 | 0.235354 | 0.355 | 0.536 | 6.46E-60 |
| TMEM131   | 4.68E-64 | -0.26932 | 0.063 | 0.301 | 7.00E-60 |
| MIEN1     | 4.68E-64 | 0.16457  | 0.429 | 0.642 | 7.00E-60 |
| APOO      | 4.83E-64 | -0.14758 | 0.204 | 0.478 | 7.22E-60 |
| CHST10    | 5.32E-64 | -0.20349 | 0.082 | 0.315 | 7.95E-60 |
| ANKRD17   | 5.41E-64 | -0.33478 | 0.124 | 0.405 | 8.09E-60 |
| CCDC150   | 5.52E-64 | -0.27763 | 0.011 | 0.188 | 8.26E-60 |
| CEBPB     | 5.55E-64 | 0.18209  | 0.275 | 0.414 | 8.30E-60 |
| CELF1     | 5.74E-64 | -0.13356 | 0.233 | 0.493 | 8.58E-60 |
| ZFAS1     | 6.01E-64 | 0.208221 | 0.664 | 0.856 | 8.98E-60 |
| ANKLE2    | 6.17E-64 | -0.20953 | 0.137 | 0.395 | 9.22E-60 |
| ABCD4     | 6.25E-64 | -0.10095 | 0.164 | 0.402 | 9.34E-60 |
| DMWD      | 6.38E-64 | -0.31096 | 0.072 | 0.325 | 9.54E-60 |
| AHCYL1    | 6.64E-64 | 0.354684 | 0.377 | 0.526 | 9.92E-60 |
| COL4A1    | 7.50E-64 | -0.30813 | 0.055 | 0.286 | 1.12E-59 |
| S100A13   | 7.61E-64 | 0.755793 | 0.452 | 0.402 | 1.14E-59 |
| MYEOV2    | 8.39E-64 | 0.20171  | 0.62  | 0.836 | 1.25E-59 |
| NCOA6     | 8.62E-64 | -0.31973 | 0.063 | 0.307 | 1.29E-59 |
| ZMYND8    | 8.66E-64 | -0.30912 | 0.12  | 0.394 | 1.29E-59 |
| CNIH1     | 8.82E-64 | 0.264647 | 0.368 | 0.537 | 1.32E-59 |
| NCLN      | 8.85E-64 | -0.23947 | 0.1   | 0.349 | 1.32E-59 |
| ZNF273    | 8.87E-64 | -0.36604 | 0.08  | 0.34  | 1.33E-59 |
| FUBP3     | 8.98E-64 | -0.18861 | 0.192 | 0.457 | 1.34E-59 |
| TNKS      | 9.08E-64 | -0.2634  | 0.09  | 0.336 | 1.36E-59 |
| FADS2     | 9.50E-64 | -0.24989 | 0.104 | 0.359 | 1.42E-59 |
| CCDC137   | 9.55E-64 | -0.29719 | 0.147 | 0.43  | 1.43E-59 |
| TCEB2     | 9.66E-64 | 0.305693 | 0.795 | 0.911 | 1.44E-59 |
| CFL1      | 1.09E-63 | 0.392813 | 0.908 | 0.964 | 1.62E-59 |
| NR2F6     | 1.11E-63 | -0.22941 | 0.08  | 0.311 | 1.65E-59 |
| MRPS23    | 1.13E-63 | 0.132554 | 0.335 | 0.563 | 1.68E-59 |
| TP73      | 1.14E-63 | -0.28037 | 0.01  | 0.18  | 1.70E-59 |
| CCT2      | 1.22E-63 | -0.26665 | 0.511 | 0.833 | 1.82E-59 |
| SH3GLB1   | 1.25E-63 | 0.284867 | 0.431 | 0.564 | 1.86E-59 |
| TEAD1     | 1.25E-63 | -0.35326 | 0.089 | 0.36  | 1.87E-59 |
| CCP110    | 1.28E-63 | -0.33946 | 0.092 | 0.359 | 1.92E-59 |
| TEAD2     | 1.29E-63 | -0.31299 | 0.027 | 0.24  | 1.92E-59 |
| PPP1R15A  | 1.29E-63 | 0.362656 | 0.364 | 0.407 | 1.93E-59 |
| EFHD2     | 1.32E-63 | -0.31331 | 0.042 | 0.265 | 1.97E-59 |
| ATPIF1    | 1.42E-63 | 0.212796 | 0.589 | 0.756 | 2.12E-59 |

|           |          |          |       |       |          |
|-----------|----------|----------|-------|-------|----------|
| CLCN3     | 1.46E-63 | -0.14243 | 0.185 | 0.433 | 2.18E-59 |
| CDC42SE1  | 1.47E-63 | -0.18245 | 0.166 | 0.422 | 2.20E-59 |
| EHMT2     | 1.51E-63 | -0.32416 | 0.116 | 0.391 | 2.26E-59 |
| VIPR2     | 1.56E-63 | -0.61278 | 0.03  | 0.247 | 2.33E-59 |
| MRGBP     | 1.59E-63 | -0.2918  | 0.092 | 0.346 | 2.38E-59 |
| ASPH      | 1.86E-63 | -0.13624 | 0.282 | 0.542 | 2.78E-59 |
| E2F2      | 1.92E-63 | -0.29777 | 0.001 | 0.146 | 2.87E-59 |
| ZNF664    | 1.96E-63 | -0.21305 | 0.097 | 0.331 | 2.93E-59 |
| APEX1     | 2.12E-63 | 0.131196 | 0.457 | 0.694 | 3.16E-59 |
| CIZ1      | 2.21E-63 | -0.23667 | 0.133 | 0.395 | 3.30E-59 |
| TNP01     | 2.22E-63 | -0.22389 | 0.198 | 0.477 | 3.31E-59 |
| PHLDA1    | 2.24E-63 | -0.52175 | 0.27  | 0.617 | 3.35E-59 |
| ACTN4     | 2.27E-63 | -0.11509 | 0.311 | 0.575 | 3.38E-59 |
| HM13      | 2.27E-63 | 0.141687 | 0.412 | 0.581 | 3.39E-59 |
| EGLN2     | 2.28E-63 | -0.21833 | 0.191 | 0.474 | 3.40E-59 |
| CALM1     | 2.32E-63 | -0.22178 | 0.656 | 0.94  | 3.47E-59 |
| ME2       | 2.38E-63 | -0.27288 | 0.116 | 0.384 | 3.55E-59 |
| PREX1     | 2.61E-63 | -0.27694 | 0.055 | 0.283 | 3.91E-59 |
| IDI1      | 2.72E-63 | -0.19138 | 0.22  | 0.507 | 4.07E-59 |
| NME3      | 2.74E-63 | 0.166927 | 0.315 | 0.478 | 4.09E-59 |
| MKKS      | 2.75E-63 | -0.23865 | 0.335 | 0.669 | 4.11E-59 |
| PDS5A     | 3.06E-63 | -0.2093  | 0.112 | 0.359 | 4.57E-59 |
| STT3B     | 3.06E-63 | -0.24578 | 0.123 | 0.385 | 4.58E-59 |
| ZC3H18    | 3.24E-63 | -0.29214 | 0.096 | 0.359 | 4.85E-59 |
| PITPNC1   | 3.33E-63 | -0.2559  | 0.066 | 0.296 | 4.97E-59 |
| RP11-698N | 3.34E-63 | -0.19869 | 0.023 | 0.193 | 4.99E-59 |
| SLC52A2   | 3.44E-63 | -0.2041  | 0.222 | 0.495 | 5.15E-59 |
| SMAP1     | 3.52E-63 | -0.21448 | 0.225 | 0.506 | 5.26E-59 |
| CLPTM1    | 3.80E-63 | -0.13907 | 0.297 | 0.562 | 5.68E-59 |
| STIM2     | 3.87E-63 | -0.27012 | 0.086 | 0.34  | 5.79E-59 |
| ODF2      | 3.91E-63 | -0.39079 | 0.118 | 0.405 | 5.85E-59 |
| LRRC45    | 4.37E-63 | -0.29368 | 0.031 | 0.246 | 6.54E-59 |
| SAR1B     | 4.52E-63 | 0.253126 | 0.347 | 0.469 | 6.76E-59 |
| KEAP1     | 4.90E-63 | -0.1591  | 0.251 | 0.52  | 7.32E-59 |
| ZC3H13    | 4.94E-63 | -0.10547 | 0.242 | 0.502 | 7.38E-59 |
| JOSD1     | 5.17E-63 | -0.25483 | 0.051 | 0.274 | 7.73E-59 |
| LINC00493 | 5.41E-63 | 0.244233 | 0.522 | 0.696 | 8.09E-59 |
| TSEN34    | 5.55E-63 | -0.21242 | 0.344 | 0.632 | 8.29E-59 |
| COX6A1    | 5.71E-63 | 0.318169 | 0.827 | 0.931 | 8.54E-59 |
| LMO1      | 5.89E-63 | -0.56675 | 0.03  | 0.248 | 8.81E-59 |
| DLGAP4    | 6.13E-63 | -0.13713 | 0.209 | 0.479 | 9.15E-59 |
| TMPO-AS1  | 6.18E-63 | -0.30346 | 0.013 | 0.194 | 9.24E-59 |
| EVL       | 6.50E-63 | -0.23383 | 0.095 | 0.333 | 9.72E-59 |
| HES4      | 6.73E-63 | -0.43711 | 0.134 | 0.432 | 1.01E-58 |
| AAAS      | 6.92E-63 | -0.25447 | 0.159 | 0.433 | 1.03E-58 |
| CCDC107   | 7.09E-63 | -0.12114 | 0.295 | 0.557 | 1.06E-58 |
| SMS       | 7.24E-63 | 0.126107 | 0.565 | 0.789 | 1.08E-58 |
| VPS51     | 7.31E-63 | -0.31882 | 0.153 | 0.438 | 1.09E-58 |
| NDUFC1    | 7.33E-63 | 0.315964 | 0.591 | 0.74  | 1.09E-58 |
| UNC119    | 7.44E-63 | -0.23417 | 0.114 | 0.367 | 1.11E-58 |
| STAT1     | 7.67E-63 | -0.31903 | 0.143 | 0.428 | 1.15E-58 |

|          |          |          |       |       |          |
|----------|----------|----------|-------|-------|----------|
| MCM6     | 8.28E-63 | -0.49632 | 0.068 | 0.331 | 1.24E-58 |
| GIT1     | 8.69E-63 | -0.22968 | 0.059 | 0.28  | 1.30E-58 |
| RGMA     | 8.72E-63 | -0.26432 | 0.171 | 0.448 | 1.30E-58 |
| TPM2     | 8.91E-63 | -0.49312 | 0.107 | 0.395 | 1.33E-58 |
| CREB1    | 9.00E-63 | -0.27311 | 0.16  | 0.447 | 1.35E-58 |
| TMEM261  | 9.28E-63 | 0.109056 | 0.312 | 0.511 | 1.39E-58 |
| TMEM45A  | 1.01E-62 | 0.649422 | 0.343 | 0.298 | 1.51E-58 |
| NF2      | 1.04E-62 | -0.21295 | 0.077 | 0.309 | 1.55E-58 |
| DPP4     | 1.05E-62 | -0.11513 | 0.034 | 0.204 | 1.57E-58 |
| CISD1    | 1.13E-62 | 0.438361 | 0.393 | 0.504 | 1.68E-58 |
| ERGIC3   | 1.14E-62 | 0.139014 | 0.553 | 0.777 | 1.70E-58 |
| C1QL1    | 1.15E-62 | -0.43394 | 0.085 | 0.357 | 1.72E-58 |
| DYNLL1   | 1.19E-62 | 0.273851 | 0.848 | 0.964 | 1.78E-58 |
| ZNF649   | 1.19E-62 | -0.3013  | 0.04  | 0.262 | 1.78E-58 |
| ELAVL4   | 1.22E-62 | -0.67855 | 0.061 | 0.312 | 1.83E-58 |
| RNF10    | 1.24E-62 | -0.10337 | 0.264 | 0.51  | 1.85E-58 |
| IMMT     | 1.24E-62 | -0.20474 | 0.232 | 0.525 | 1.85E-58 |
| HSPA14   | 1.28E-62 | -0.22112 | 0.104 | 0.347 | 1.92E-58 |
| KCTD17   | 1.29E-62 | -0.29644 | 0.066 | 0.306 | 1.93E-58 |
| EXTL2    | 1.29E-62 | -0.22852 | 0.126 | 0.385 | 1.93E-58 |
| ATOX1    | 1.45E-62 | 0.397796 | 0.591 | 0.71  | 2.16E-58 |
| CHD1     | 1.49E-62 | -0.31307 | 0.168 | 0.463 | 2.23E-58 |
| GRAMD1A  | 1.50E-62 | -0.28783 | 0.145 | 0.425 | 2.25E-58 |
| URM1     | 1.59E-62 | 0.192323 | 0.339 | 0.507 | 2.37E-58 |
| PAK4     | 1.65E-62 | -0.27475 | 0.104 | 0.36  | 2.47E-58 |
| ZFR      | 1.68E-62 | -0.26299 | 0.247 | 0.548 | 2.52E-58 |
| BEND5    | 1.70E-62 | -0.10421 | 0.098 | 0.309 | 2.54E-58 |
| SUB1     | 1.78E-62 | -0.13433 | 0.689 | 0.956 | 2.66E-58 |
| NUP54    | 1.79E-62 | -0.15097 | 0.169 | 0.414 | 2.68E-58 |
| FZR1     | 1.83E-62 | -0.35948 | 0.11  | 0.386 | 2.73E-58 |
| DDX3Y    | 1.85E-62 | -0.26349 | 0.014 | 0.194 | 2.77E-58 |
| RAB9A    | 1.99E-62 | 0.134587 | 0.278 | 0.475 | 2.98E-58 |
| COX6C    | 2.07E-62 | 0.311491 | 0.795 | 0.923 | 3.09E-58 |
| ADM      | 2.22E-62 | 0.865588 | 0.348 | 0.204 | 3.31E-58 |
| TXLNA    | 2.24E-62 | -0.23885 | 0.085 | 0.325 | 3.34E-58 |
| ARIH2    | 2.26E-62 | -0.11994 | 0.197 | 0.447 | 3.38E-58 |
| CD151    | 2.31E-62 | 0.591676 | 0.566 | 0.605 | 3.46E-58 |
| PCMTD2   | 2.37E-62 | -0.34983 | 0.132 | 0.419 | 3.55E-58 |
| DERL2    | 2.42E-62 | 0.389963 | 0.396 | 0.507 | 3.62E-58 |
| MCOLN1   | 2.50E-62 | -0.18161 | 0.149 | 0.394 | 3.74E-58 |
| 7-Mar    | 2.82E-62 | -0.18005 | 0.19  | 0.457 | 4.21E-58 |
| CSTF1    | 3.06E-62 | -0.18631 | 0.098 | 0.331 | 4.58E-58 |
| YTHDF1   | 3.30E-62 | -0.14658 | 0.149 | 0.389 | 4.93E-58 |
| TNFRSF19 | 3.41E-62 | -0.23167 | 0.063 | 0.28  | 5.09E-58 |
| GLT8D1   | 3.50E-62 | -0.11882 | 0.277 | 0.532 | 5.23E-58 |
| ATXN2L   | 3.51E-62 | -0.18673 | 0.124 | 0.359 | 5.24E-58 |
| KPNA6    | 3.52E-62 | -0.13398 | 0.18  | 0.426 | 5.26E-58 |
| NF1      | 3.53E-62 | -0.23959 | 0.132 | 0.396 | 5.27E-58 |
| TOMM5    | 3.54E-62 | -0.16224 | 0.154 | 0.407 | 5.29E-58 |
| ANKRD54  | 3.60E-62 | -0.1688  | 0.095 | 0.326 | 5.38E-58 |
| SEZ6L2   | 3.72E-62 | -0.11413 | 0.225 | 0.473 | 5.56E-58 |

|           |          |          |       |       |          |
|-----------|----------|----------|-------|-------|----------|
| USP48     | 4.04E-62 | -0.2167  | 0.17  | 0.426 | 6.04E-58 |
| TECR      | 4.37E-62 | 0.251714 | 0.579 | 0.747 | 6.54E-58 |
| UCP2      | 4.72E-62 | -0.44713 | 0.051 | 0.29  | 7.05E-58 |
| LGALS3BP  | 4.75E-62 | 0.579061 | 0.509 | 0.51  | 7.09E-58 |
| LSM14B    | 4.90E-62 | -0.30639 | 0.042 | 0.265 | 7.33E-58 |
| TSPAN12   | 5.46E-62 | -0.48481 | 0.1   | 0.381 | 8.16E-58 |
| ZNF83     | 5.59E-62 | -0.25117 | 0.159 | 0.432 | 8.36E-58 |
| ICMT      | 5.61E-62 | -0.36388 | 0.068 | 0.325 | 8.38E-58 |
| C20orf24  | 6.11E-62 | -0.33457 | 0.364 | 0.7   | 9.14E-58 |
| LRRCC1    | 6.26E-62 | -0.1546  | 0.159 | 0.405 | 9.35E-58 |
| FN1       | 6.49E-62 | 0.700771 | 0.258 | 0.164 | 9.70E-58 |
| SDHA      | 6.95E-62 | -0.10587 | 0.271 | 0.517 | 1.04E-57 |
| 6-Mar     | 7.52E-62 | -0.12315 | 0.271 | 0.551 | 1.12E-57 |
| CDC7      | 7.57E-62 | -0.3249  | 0.027 | 0.227 | 1.13E-57 |
| NDC1      | 7.76E-62 | -0.2634  | 0.039 | 0.242 | 1.16E-57 |
| ACO09506. | 7.87E-62 | -0.37441 | 0.037 | 0.253 | 1.18E-57 |
| HIP1      | 8.28E-62 | -0.17076 | 0.106 | 0.336 | 1.24E-57 |
| NRSN2     | 8.51E-62 | -0.18302 | 0.124 | 0.369 | 1.27E-57 |
| MEOX2     | 8.89E-62 | -0.29129 | 0.051 | 0.273 | 1.33E-57 |
| DUS1L     | 8.97E-62 | -0.27695 | 0.046 | 0.27  | 1.34E-57 |
| GAD1      | 9.50E-62 | -0.23091 | 0.044 | 0.23  | 1.42E-57 |
| AAK1      | 9.73E-62 | -0.2435  | 0.181 | 0.457 | 1.45E-57 |
| NKAIN3    | 1.00E-61 | -0.28651 | 0.06  | 0.283 | 1.50E-57 |
| UBE2Q1    | 1.05E-61 | -0.18593 | 0.086 | 0.315 | 1.57E-57 |
| TMEM128   | 1.07E-61 | 0.108484 | 0.28  | 0.464 | 1.60E-57 |
| RNF180    | 1.12E-61 | -0.27922 | 0.12  | 0.38  | 1.67E-57 |
| EDNRB     | 1.14E-61 | -0.25649 | 0.137 | 0.401 | 1.70E-57 |
| CHRNA5    | 1.18E-61 | -0.26591 | 0.011 | 0.186 | 1.77E-57 |
| SRP14     | 1.21E-61 | 0.222239 | 0.771 | 0.93  | 1.81E-57 |
| COPZ1     | 1.22E-61 | 0.261231 | 0.496 | 0.656 | 1.82E-57 |
| ETV4      | 1.26E-61 | -0.29023 | 0.05  | 0.274 | 1.88E-57 |
| PLP2      | 1.26E-61 | 0.538791 | 0.475 | 0.478 | 1.89E-57 |
| ACTR1A    | 1.28E-61 | -0.20933 | 0.15  | 0.414 | 1.92E-57 |
| IL6ST     | 1.32E-61 | -0.11104 | 0.191 | 0.428 | 1.98E-57 |
| TOR1A     | 1.33E-61 | -0.17818 | 0.191 | 0.462 | 1.99E-57 |
| PHF6      | 1.35E-61 | -0.28039 | 0.111 | 0.377 | 2.01E-57 |
| SNRPG     | 1.37E-61 | -0.13647 | 0.62  | 0.907 | 2.05E-57 |
| MRFAP1    | 1.42E-61 | 0.115169 | 0.681 | 0.885 | 2.13E-57 |
| KRAS      | 1.46E-61 | -0.29272 | 0.155 | 0.433 | 2.18E-57 |
| PAF1      | 1.47E-61 | -0.19179 | 0.164 | 0.425 | 2.19E-57 |
| BAD       | 1.47E-61 | 0.161457 | 0.44  | 0.626 | 2.19E-57 |
| ALCAM     | 1.48E-61 | -0.27234 | 0.078 | 0.32  | 2.21E-57 |
| METTL4    | 1.63E-61 | -0.14603 | 0.056 | 0.248 | 2.44E-57 |
| CNTLN     | 1.65E-61 | -0.38356 | 0.078 | 0.337 | 2.47E-57 |
| UQCRQ     | 1.67E-61 | 0.264866 | 0.768 | 0.915 | 2.50E-57 |
| FAM84A    | 1.90E-61 | -0.26828 | 0.085 | 0.319 | 2.84E-57 |
| HMOX2     | 1.96E-61 | 0.438436 | 0.298 | 0.39  | 2.93E-57 |
| ING5      | 1.98E-61 | -0.26328 | 0.083 | 0.33  | 2.95E-57 |
| TMEM126A  | 2.00E-61 | 0.150461 | 0.279 | 0.483 | 2.99E-57 |
| ISCA1     | 2.02E-61 | 0.119907 | 0.283 | 0.468 | 3.02E-57 |
| FAHD2A    | 2.02E-61 | -0.21231 | 0.11  | 0.358 | 3.02E-57 |



|          |          |          |       |       |          |
|----------|----------|----------|-------|-------|----------|
| ZNF530   | 2.07E-61 | -0.28812 | 0.062 | 0.289 | 3.09E-57 |
| POGZ     | 2.13E-61 | -0.28794 | 0.128 | 0.4   | 3.19E-57 |
| DVL2     | 2.23E-61 | -0.20392 | 0.126 | 0.381 | 3.34E-57 |
| GLRX     | 2.36E-61 | 1.008807 | 0.345 | 0.204 | 3.53E-57 |
| BLOC1S4  | 2.39E-61 | -0.24336 | 0.161 | 0.433 | 3.57E-57 |
| USP3     | 2.41E-61 | -0.19006 | 0.086 | 0.309 | 3.60E-57 |
| COQ7     | 2.42E-61 | -0.23795 | 0.132 | 0.388 | 3.62E-57 |
| TMED3    | 2.56E-61 | 0.200059 | 0.266 | 0.401 | 3.83E-57 |
| C11orf58 | 2.63E-61 | 0.174585 | 0.658 | 0.84  | 3.94E-57 |
| WRNIP1   | 2.90E-61 | -0.26205 | 0.054 | 0.281 | 4.33E-57 |
| PPP5C    | 3.02E-61 | -0.27914 | 0.146 | 0.427 | 4.51E-57 |
| MORF4L1  | 3.03E-61 | 0.229226 | 0.711 | 0.846 | 4.53E-57 |
| SLC25A39 | 3.12E-61 | -0.24395 | 0.268 | 0.562 | 4.67E-57 |
| SDC1     | 3.20E-61 | -0.34124 | 0.042 | 0.268 | 4.78E-57 |
| TMEM219  | 3.29E-61 | 0.298337 | 0.436 | 0.573 | 4.92E-57 |
| ELP5     | 3.49E-61 | -0.13173 | 0.241 | 0.514 | 5.21E-57 |
| NSMCE1   | 3.49E-61 | 0.290086 | 0.397 | 0.543 | 5.21E-57 |
| AIMP1    | 3.59E-61 | 0.236792 | 0.37  | 0.538 | 5.37E-57 |
| PITPNA   | 3.66E-61 | -0.2118  | 0.096 | 0.326 | 5.47E-57 |
| SURF2    | 3.83E-61 | -0.24916 | 0.164 | 0.444 | 5.73E-57 |
| AFG3L2   | 3.90E-61 | -0.18109 | 0.153 | 0.398 | 5.83E-57 |
| SRA1     | 3.94E-61 | -0.11417 | 0.301 | 0.588 | 5.89E-57 |
| URI1     | 3.96E-61 | -0.22211 | 0.16  | 0.423 | 5.92E-57 |
| SLN      | 4.35E-61 | 1.241869 | 0.332 | 0.221 | 6.50E-57 |
| ZNF644   | 4.40E-61 | -0.19007 | 0.205 | 0.469 | 6.57E-57 |
| ID4      | 4.85E-61 | -0.38365 | 0.138 | 0.421 | 7.24E-57 |
| C1orf43  | 4.88E-61 | 0.200192 | 0.58  | 0.726 | 7.29E-57 |
| SIAH2    | 4.93E-61 | -0.21894 | 0.141 | 0.388 | 7.36E-57 |
| FAM162A  | 5.66E-61 | 0.670198 | 0.473 | 0.417 | 8.45E-57 |
| TMEM14A  | 5.70E-61 | 0.301594 | 0.349 | 0.475 | 8.52E-57 |
| C20orf96 | 5.99E-61 | -0.16103 | 0.102 | 0.325 | 8.95E-57 |
| TRIM27   | 6.60E-61 | -0.2032  | 0.137 | 0.384 | 9.86E-57 |
| TMEM189  | 6.69E-61 | -0.28482 | 0.111 | 0.375 | 1.00E-56 |
| SNN      | 7.04E-61 | -0.27185 | 0.13  | 0.39  | 1.05E-56 |
| KIAA2013 | 7.14E-61 | -0.16748 | 0.068 | 0.265 | 1.07E-56 |
| BCHE     | 7.55E-61 | -0.30886 | 0.161 | 0.444 | 1.13E-56 |
| PRKRIP1  | 7.71E-61 | -0.12189 | 0.204 | 0.467 | 1.15E-56 |
| IFT43    | 8.90E-61 | 0.150923 | 0.261 | 0.444 | 1.33E-56 |
| ASNA1    | 8.99E-61 | 0.152958 | 0.538 | 0.74  | 1.34E-56 |
| BRD9     | 9.20E-61 | -0.31899 | 0.121 | 0.395 | 1.37E-56 |
| FXR1     | 9.26E-61 | -0.22565 | 0.259 | 0.554 | 1.38E-56 |
| GSTA4    | 9.77E-61 | -0.1214  | 0.227 | 0.504 | 1.46E-56 |
| KLHL7    | 1.03E-60 | -0.29326 | 0.23  | 0.528 | 1.53E-56 |
| LMF2     | 1.03E-60 | -0.23097 | 0.13  | 0.399 | 1.54E-56 |
| CYB5B    | 1.03E-60 | 0.156271 | 0.363 | 0.548 | 1.54E-56 |
| TRIP12   | 1.07E-60 | -0.1331  | 0.092 | 0.315 | 1.60E-56 |
| SCNM1    | 1.09E-60 | 0.132545 | 0.287 | 0.477 | 1.62E-56 |
| UBN1     | 1.31E-60 | -0.28582 | 0.106 | 0.364 | 1.96E-56 |
| ATP6V1E1 | 1.33E-60 | 0.231907 | 0.357 | 0.527 | 1.99E-56 |
| DBI      | 1.33E-60 | 0.44339  | 0.862 | 0.957 | 1.99E-56 |
| DYNLRB1  | 1.33E-60 | 0.21138  | 0.647 | 0.826 | 1.99E-56 |

|           |          |          |       |       |          |
|-----------|----------|----------|-------|-------|----------|
| HIGD2A    | 1.34E-60 | 0.338419 | 0.525 | 0.664 | 2.01E-56 |
| UBE2G2    | 1.39E-60 | -0.16849 | 0.196 | 0.459 | 2.08E-56 |
| UBR7      | 1.39E-60 | -0.25572 | 0.097 | 0.34  | 2.08E-56 |
| ITPA      | 1.52E-60 | 0.106605 | 0.356 | 0.591 | 2.28E-56 |
| ILK       | 1.54E-60 | 0.339382 | 0.351 | 0.49  | 2.30E-56 |
| SLC30A9   | 1.55E-60 | -0.17987 | 0.193 | 0.462 | 2.31E-56 |
| LRRC37B   | 1.55E-60 | -0.27431 | 0.056 | 0.284 | 2.31E-56 |
| BOC       | 1.57E-60 | -0.23649 | 0.032 | 0.228 | 2.35E-56 |
| CPSF3     | 1.58E-60 | -0.26576 | 0.137 | 0.407 | 2.36E-56 |
| KDM2B     | 1.60E-60 | -0.29714 | 0.046 | 0.267 | 2.39E-56 |
| CDC27     | 1.80E-60 | -0.32442 | 0.104 | 0.37  | 2.68E-56 |
| DLL1      | 1.80E-60 | -0.47533 | 0.017 | 0.207 | 2.69E-56 |
| TSC22D4   | 2.04E-60 | 0.170136 | 0.476 | 0.672 | 3.06E-56 |
| SUDS3     | 2.13E-60 | -0.26203 | 0.134 | 0.395 | 3.18E-56 |
| MMD       | 2.24E-60 | -0.15349 | 0.167 | 0.419 | 3.34E-56 |
| TSG101    | 2.45E-60 | 0.248418 | 0.397 | 0.558 | 3.66E-56 |
| NTPCR     | 3.06E-60 | 0.140281 | 0.242 | 0.435 | 4.58E-56 |
| RWDD4     | 3.08E-60 | -0.21827 | 0.181 | 0.447 | 4.61E-56 |
| C8orf88   | 3.32E-60 | -0.1924  | 0.027 | 0.214 | 4.96E-56 |
| PEPD      | 3.36E-60 | 0.36163  | 0.37  | 0.499 | 5.03E-56 |
| ADAT1     | 3.39E-60 | -0.23498 | 0.058 | 0.277 | 5.07E-56 |
| NTAN1     | 3.41E-60 | -0.19905 | 0.123 | 0.377 | 5.10E-56 |
| ZNF92     | 3.55E-60 | -0.33694 | 0.126 | 0.399 | 5.30E-56 |
| RP11-849I | 3.63E-60 | -0.47577 | 0.119 | 0.407 | 5.42E-56 |
| C10orf10  | 3.66E-60 | 1.047114 | 0.275 | 0.037 | 5.47E-56 |
| CLIC4     | 3.73E-60 | 0.282253 | 0.472 | 0.589 | 5.58E-56 |
| PITX1     | 3.91E-60 | -0.25114 | 0.031 | 0.232 | 5.84E-56 |
| CLASP1    | 4.15E-60 | -0.20832 | 0.075 | 0.293 | 6.20E-56 |
| MAPK6     | 4.19E-60 | -0.1763  | 0.12  | 0.347 | 6.26E-56 |
| METTTL23  | 4.23E-60 | -0.10039 | 0.252 | 0.514 | 6.33E-56 |
| FDX1L     | 4.32E-60 | 0.141308 | 0.24  | 0.43  | 6.46E-56 |
| TCEAL8    | 4.54E-60 | 0.26397  | 0.39  | 0.551 | 6.79E-56 |
| COX11     | 4.58E-60 | 0.133983 | 0.315 | 0.496 | 6.84E-56 |
| RNMT      | 4.71E-60 | 0.154685 | 0.274 | 0.406 | 7.05E-56 |
| TAGLN     | 4.72E-60 | 1.250877 | 0.228 | 0.038 | 7.05E-56 |
| TMEM33    | 4.99E-60 | -0.10293 | 0.21  | 0.452 | 7.46E-56 |
| UNK       | 5.07E-60 | -0.162   | 0.089 | 0.301 | 7.58E-56 |
| OXR1      | 5.09E-60 | -0.16912 | 0.157 | 0.409 | 7.60E-56 |
| C12orf10  | 5.17E-60 | 0.238341 | 0.302 | 0.46  | 7.72E-56 |
| MDC1      | 5.35E-60 | -0.26091 | 0.026 | 0.216 | 8.00E-56 |
| PRKAR2A   | 5.43E-60 | -0.10732 | 0.205 | 0.444 | 8.11E-56 |
| ZNRF1     | 5.45E-60 | -0.26923 | 0.058 | 0.285 | 8.15E-56 |
| DCLK2     | 6.08E-60 | -0.28944 | 0.117 | 0.378 | 9.09E-56 |
| MFSD12    | 6.24E-60 | -0.22261 | 0.072 | 0.296 | 9.33E-56 |
| TRPC4AP   | 6.25E-60 | -0.2001  | 0.173 | 0.427 | 9.35E-56 |
| MED1      | 6.75E-60 | -0.23157 | 0.065 | 0.286 | 1.01E-55 |
| ISCA2     | 6.84E-60 | 0.136388 | 0.269 | 0.478 | 1.02E-55 |
| ACAA1     | 7.19E-60 | -0.13492 | 0.229 | 0.468 | 1.07E-55 |
| MORN2     | 7.45E-60 | 0.24204  | 0.315 | 0.467 | 1.11E-55 |
| RNF2      | 7.47E-60 | -0.12311 | 0.093 | 0.307 | 1.12E-55 |
| TMEM222   | 8.04E-60 | 0.133965 | 0.297 | 0.474 | 1.20E-55 |

|          |          |          |       |       |          |
|----------|----------|----------|-------|-------|----------|
| CXXC1    | 8.07E-60 | -0.12236 | 0.146 | 0.384 | 1.21E-55 |
| IFNAR2   | 8.19E-60 | -0.18985 | 0.124 | 0.36  | 1.22E-55 |
| SMIM4    | 8.59E-60 | -0.10603 | 0.195 | 0.443 | 1.28E-55 |
| ATN1     | 9.17E-60 | -0.15898 | 0.126 | 0.362 | 1.37E-55 |
| USE1     | 9.40E-60 | 0.341656 | 0.341 | 0.479 | 1.40E-55 |
| PCSK7    | 1.07E-59 | -0.15902 | 0.206 | 0.463 | 1.60E-55 |
| PHF23    | 1.13E-59 | -0.1153  | 0.129 | 0.359 | 1.69E-55 |
| PSMG4    | 1.14E-59 | -0.21159 | 0.132 | 0.383 | 1.70E-55 |
| CLPP     | 1.16E-59 | -0.23799 | 0.341 | 0.648 | 1.74E-55 |
| SAP30BP  | 1.17E-59 | 0.117741 | 0.342 | 0.542 | 1.75E-55 |
| CERK     | 1.23E-59 | -0.28952 | 0.028 | 0.23  | 1.83E-55 |
| GPI      | 1.26E-59 | 0.323597 | 0.361 | 0.451 | 1.89E-55 |
| PQBP1    | 1.33E-59 | 0.162499 | 0.306 | 0.494 | 1.98E-55 |
| SLC20A1  | 1.34E-59 | -0.2647  | 0.137 | 0.4   | 2.01E-55 |
| FAM173A  | 1.38E-59 | -0.28127 | 0.127 | 0.386 | 2.07E-55 |
| ADD1     | 1.39E-59 | -0.12942 | 0.228 | 0.478 | 2.08E-55 |
| SNX21    | 1.43E-59 | -0.19986 | 0.078 | 0.291 | 2.13E-55 |
| DHX15    | 1.48E-59 | -0.13246 | 0.212 | 0.468 | 2.22E-55 |
| XBP1     | 1.52E-59 | 0.204194 | 0.29  | 0.398 | 2.27E-55 |
| EIF3G    | 1.75E-59 | 0.160669 | 0.569 | 0.768 | 2.62E-55 |
| BCAT1    | 1.81E-59 | -0.22984 | 0.149 | 0.402 | 2.71E-55 |
| HIPK2    | 1.86E-59 | -0.29533 | 0.122 | 0.385 | 2.78E-55 |
| CPSF2    | 1.95E-59 | -0.12564 | 0.073 | 0.263 | 2.92E-55 |
| NEDD1    | 2.02E-59 | -0.25413 | 0.077 | 0.309 | 3.01E-55 |
| COIL     | 2.03E-59 | -0.17685 | 0.142 | 0.393 | 3.03E-55 |
| Clorf174 | 2.05E-59 | -0.11596 | 0.132 | 0.351 | 3.06E-55 |
| MAFG     | 2.08E-59 | -0.193   | 0.109 | 0.336 | 3.11E-55 |
| DUSP4    | 2.08E-59 | -0.1211  | 0.103 | 0.295 | 3.11E-55 |
| SLC25A6  | 2.10E-59 | 0.112376 | 0.717 | 0.927 | 3.14E-55 |
| NUP93    | 2.19E-59 | -0.25262 | 0.142 | 0.415 | 3.27E-55 |
| NEMF     | 2.19E-59 | -0.13241 | 0.23  | 0.481 | 3.27E-55 |
| MTMR2    | 2.20E-59 | -0.25055 | 0.087 | 0.323 | 3.28E-55 |
| TYRO3    | 2.23E-59 | -0.23825 | 0.058 | 0.272 | 3.34E-55 |
| ZNF511   | 2.26E-59 | -0.3007  | 0.09  | 0.343 | 3.37E-55 |
| GNA11    | 2.31E-59 | -0.21203 | 0.07  | 0.29  | 3.45E-55 |
| PMM1     | 2.31E-59 | 0.263642 | 0.26  | 0.396 | 3.45E-55 |
| VPS16    | 2.31E-59 | -0.13603 | 0.118 | 0.343 | 3.46E-55 |
| ATP5SL   | 2.52E-59 | -0.17987 | 0.179 | 0.435 | 3.76E-55 |
| ATP5L    | 2.54E-59 | 0.242688 | 0.778 | 0.92  | 3.79E-55 |
| FNBP4    | 2.55E-59 | -0.20966 | 0.201 | 0.459 | 3.80E-55 |
| SERINC1  | 2.66E-59 | 0.223184 | 0.369 | 0.491 | 3.97E-55 |
| AURKAIP1 | 2.67E-59 | -0.12816 | 0.535 | 0.817 | 3.99E-55 |
| AGPAT5   | 2.91E-59 | 0.130275 | 0.228 | 0.402 | 4.36E-55 |
| TBC1D31  | 2.94E-59 | -0.31402 | 0.018 | 0.205 | 4.40E-55 |
| MESP1    | 3.05E-59 | -0.37639 | 0.088 | 0.348 | 4.56E-55 |
| HEBP2    | 3.20E-59 | -0.31815 | 0.127 | 0.402 | 4.79E-55 |
| CNRIP1   | 3.26E-59 | -0.21623 | 0.167 | 0.431 | 4.87E-55 |
| TAGLN2   | 3.31E-59 | 0.650872 | 0.671 | 0.544 | 4.95E-55 |
| ANK2     | 3.31E-59 | -0.24145 | 0.092 | 0.323 | 4.95E-55 |
| ZNF32    | 3.32E-59 | -0.18004 | 0.127 | 0.365 | 4.96E-55 |
| NUP35    | 3.33E-59 | -0.15588 | 0.12  | 0.359 | 4.98E-55 |

|           |          |          |       |       |          |
|-----------|----------|----------|-------|-------|----------|
| FAM103A1  | 3.35E-59 | 0.170991 | 0.223 | 0.411 | 5.01E-55 |
| ERBB2IP   | 3.81E-59 | -0.11404 | 0.15  | 0.378 | 5.70E-55 |
| TM7SF3    | 4.59E-59 | -0.34456 | 0.168 | 0.458 | 6.86E-55 |
| NDUFV2    | 4.67E-59 | 0.224003 | 0.576 | 0.751 | 6.98E-55 |
| AKT1      | 4.79E-59 | -0.18217 | 0.083 | 0.296 | 7.16E-55 |
| CCDC50    | 5.07E-59 | -0.20841 | 0.192 | 0.456 | 7.57E-55 |
| C15orf61  | 5.20E-59 | -0.16508 | 0.132 | 0.358 | 7.77E-55 |
| EFS       | 5.33E-59 | -0.24849 | 0.055 | 0.264 | 7.97E-55 |
| SUGT1     | 5.45E-59 | 0.124724 | 0.351 | 0.536 | 8.14E-55 |
| SPTAN1    | 5.68E-59 | -0.12321 | 0.193 | 0.438 | 8.50E-55 |
| CDK2AP2   | 5.88E-59 | 0.192212 | 0.324 | 0.47  | 8.79E-55 |
| RAB13     | 6.10E-59 | 0.552905 | 0.449 | 0.51  | 9.12E-55 |
| IFT81     | 6.24E-59 | -0.28589 | 0.142 | 0.41  | 9.33E-55 |
| LRRC4B    | 6.30E-59 | -0.27812 | 0.059 | 0.285 | 9.42E-55 |
| PLEKHA3   | 6.99E-59 | -0.20275 | 0.168 | 0.417 | 1.04E-54 |
| HUWE1     | 7.13E-59 | -0.24626 | 0.096 | 0.331 | 1.07E-54 |
| FAM134A   | 7.17E-59 | -0.26773 | 0.22  | 0.504 | 1.07E-54 |
| INIP      | 7.59E-59 | -0.1804  | 0.155 | 0.42  | 1.13E-54 |
| SERTAD1   | 8.34E-59 | 0.762263 | 0.399 | 0.306 | 1.25E-54 |
| DCTN2     | 9.87E-59 | -0.28636 | 0.438 | 0.757 | 1.48E-54 |
| CEP41     | 1.00E-58 | -0.2826  | 0.114 | 0.369 | 1.49E-54 |
| TMEM19    | 1.01E-58 | -0.27984 | 0.076 | 0.306 | 1.51E-54 |
| ALDH9A1   | 1.04E-58 | 0.321037 | 0.386 | 0.462 | 1.56E-54 |
| PKN2      | 1.14E-58 | -0.19972 | 0.154 | 0.4   | 1.70E-54 |
| DYNLT3    | 1.19E-58 | 0.452029 | 0.365 | 0.374 | 1.78E-54 |
| BLM       | 1.20E-58 | -0.23583 | 0.044 | 0.246 | 1.79E-54 |
| DDX23     | 1.37E-58 | -0.22747 | 0.124 | 0.375 | 2.05E-54 |
| PTGES2    | 1.45E-58 | -0.26659 | 0.168 | 0.44  | 2.16E-54 |
| NDUFA11   | 1.46E-58 | 0.217108 | 0.675 | 0.862 | 2.18E-54 |
| EFNB2     | 1.47E-58 | -0.26454 | 0.048 | 0.262 | 2.20E-54 |
| PURA      | 1.51E-58 | -0.33289 | 0.112 | 0.379 | 2.26E-54 |
| CLIP2     | 1.51E-58 | -0.33111 | 0.091 | 0.346 | 2.26E-54 |
| DDIT3     | 1.52E-58 | 0.131771 | 0.44  | 0.627 | 2.28E-54 |
| RUFY3     | 1.55E-58 | -0.1792  | 0.217 | 0.469 | 2.32E-54 |
| ZNF100    | 1.60E-58 | -0.29495 | 0.031 | 0.232 | 2.39E-54 |
| IL32      | 1.76E-58 | 0.784723 | 0.245 | 0.088 | 2.63E-54 |
| SERTAD2   | 1.79E-58 | -0.17054 | 0.068 | 0.275 | 2.67E-54 |
| UBE2A     | 1.79E-58 | 0.185318 | 0.422 | 0.583 | 2.68E-54 |
| DCAF11    | 1.84E-58 | -0.11088 | 0.119 | 0.34  | 2.75E-54 |
| CXADR     | 1.91E-58 | -0.17249 | 0.172 | 0.42  | 2.86E-54 |
| SEC14L1   | 1.97E-58 | -0.11127 | 0.159 | 0.404 | 2.95E-54 |
| NUMA1     | 2.16E-58 | -0.17816 | 0.115 | 0.342 | 3.23E-54 |
| CBS       | 2.35E-58 | -0.28881 | 0.121 | 0.37  | 3.51E-54 |
| ANKRD13D  | 2.44E-58 | -0.18844 | 0.084 | 0.295 | 3.65E-54 |
| SLC39A14  | 2.48E-58 | 0.684485 | 0.268 | 0.088 | 3.70E-54 |
| FAM120AOS | 2.71E-58 | -0.21485 | 0.13  | 0.374 | 4.05E-54 |
| SLC43A2   | 2.79E-58 | -0.22309 | 0.097 | 0.32  | 4.16E-54 |
| ARHGAP12  | 2.80E-58 | -0.30509 | 0.087 | 0.333 | 4.18E-54 |
| GOT2      | 3.13E-58 | -0.21557 | 0.133 | 0.381 | 4.68E-54 |
| KRI1      | 3.40E-58 | -0.19121 | 0.084 | 0.296 | 5.07E-54 |
| HMBS      | 3.62E-58 | -0.13866 | 0.139 | 0.379 | 5.41E-54 |

|           |          |          |       |       |          |
|-----------|----------|----------|-------|-------|----------|
| TMEM106B  | 3.65E-58 | 0.178111 | 0.328 | 0.493 | 5.46E-54 |
| MINOS1    | 3.75E-58 | 0.155044 | 0.557 | 0.775 | 5.60E-54 |
| NUCB1     | 3.90E-58 | 0.130926 | 0.349 | 0.514 | 5.84E-54 |
| NSMCE4A   | 3.91E-58 | -0.35904 | 0.085 | 0.337 | 5.84E-54 |
| ORAI1     | 4.01E-58 | -0.27172 | 0.037 | 0.247 | 6.00E-54 |
| 10-Sep    | 4.38E-58 | -0.35755 | 0.1   | 0.365 | 6.54E-54 |
| RP11-111M | 4.54E-58 | -0.18949 | 0.066 | 0.277 | 6.78E-54 |
| CUL5      | 5.39E-58 | -0.18819 | 0.162 | 0.406 | 8.06E-54 |
| ATG3      | 5.48E-58 | -0.13637 | 0.282 | 0.543 | 8.19E-54 |
| CEP350    | 5.87E-58 | -0.23793 | 0.104 | 0.34  | 8.78E-54 |
| NEDD8     | 6.16E-58 | 0.303711 | 0.683 | 0.848 | 9.20E-54 |
| MAPKAPK5  | 6.52E-58 | -0.19279 | 0.133 | 0.372 | 9.75E-54 |
| FUZ       | 6.53E-58 | -0.20087 | 0.157 | 0.4   | 9.75E-54 |
| EIF4G2    | 6.54E-58 | -0.19334 | 0.552 | 0.849 | 9.77E-54 |
| FBX07     | 6.64E-58 | -0.18973 | 0.193 | 0.448 | 9.93E-54 |
| TMUB1     | 6.74E-58 | -0.22082 | 0.211 | 0.477 | 1.01E-53 |
| SNX27     | 6.75E-58 | -0.21338 | 0.156 | 0.405 | 1.01E-53 |
| ATG4D     | 7.15E-58 | -0.27321 | 0.118 | 0.37  | 1.07E-53 |
| ZNF3      | 7.31E-58 | -0.28799 | 0.151 | 0.425 | 1.09E-53 |
| STK39     | 8.09E-58 | -0.26392 | 0.048 | 0.258 | 1.21E-53 |
| EXOSC3    | 8.21E-58 | -0.27009 | 0.112 | 0.363 | 1.23E-53 |
| TEN1      | 8.31E-58 | -0.16788 | 0.098 | 0.316 | 1.24E-53 |
| NDUFAF6   | 8.48E-58 | -0.27095 | 0.126 | 0.384 | 1.27E-53 |
| TP53RK    | 8.49E-58 | -0.16598 | 0.149 | 0.377 | 1.27E-53 |
| DAPK3     | 8.70E-58 | -0.11842 | 0.224 | 0.453 | 1.30E-53 |
| TCHP      | 8.76E-58 | -0.24626 | 0.072 | 0.295 | 1.31E-53 |
| ZNF106    | 8.85E-58 | -0.1077  | 0.15  | 0.377 | 1.32E-53 |
| PALLD     | 9.00E-58 | -0.127   | 0.187 | 0.417 | 1.34E-53 |
| HINT1     | 9.27E-58 | 0.272904 | 0.84  | 0.963 | 1.39E-53 |
| SESTD1    | 1.00E-57 | -0.36584 | 0.101 | 0.365 | 1.50E-53 |
| HLA-DPB1  | 1.03E-57 | 0.955485 | 0.413 | 0.202 | 1.55E-53 |
| ENO2      | 1.06E-57 | 0.237171 | 0.366 | 0.472 | 1.58E-53 |
| KLF13     | 1.06E-57 | -0.26587 | 0.033 | 0.233 | 1.58E-53 |
| UBAC1     | 1.06E-57 | -0.27343 | 0.12  | 0.383 | 1.59E-53 |
| KLHL4     | 1.08E-57 | -0.15318 | 0.086 | 0.306 | 1.61E-53 |
| CCHCR1    | 1.16E-57 | -0.25246 | 0.065 | 0.284 | 1.73E-53 |
| LINC00657 | 1.21E-57 | -0.13865 | 0.264 | 0.509 | 1.81E-53 |
| AIG1      | 1.25E-57 | 0.282442 | 0.305 | 0.449 | 1.86E-53 |
| FNBP1L    | 1.32E-57 | -0.35895 | 0.091 | 0.348 | 1.97E-53 |
| CDKN2A    | 1.33E-57 | -0.70653 | 0.023 | 0.217 | 1.98E-53 |
| ARMCX3    | 1.33E-57 | 0.188313 | 0.394 | 0.551 | 1.99E-53 |
| MIF4GD    | 1.38E-57 | -0.1723  | 0.139 | 0.378 | 2.06E-53 |
| RB1CC1    | 1.40E-57 | -0.11414 | 0.213 | 0.448 | 2.10E-53 |
| YWHAE     | 1.41E-57 | -0.13434 | 0.693 | 0.946 | 2.11E-53 |
| ROCK2     | 1.55E-57 | -0.2352  | 0.1   | 0.341 | 2.32E-53 |
| LYRM5     | 1.57E-57 | 0.265469 | 0.335 | 0.468 | 2.35E-53 |
| UBE20     | 1.61E-57 | -0.20314 | 0.053 | 0.249 | 2.40E-53 |
| PSMD6     | 1.76E-57 | 0.127511 | 0.358 | 0.57  | 2.63E-53 |
| CD01      | 1.84E-57 | 0.417648 | 0.334 | 0.407 | 2.74E-53 |
| USP39     | 2.07E-57 | -0.17895 | 0.152 | 0.383 | 3.09E-53 |
| LZIC      | 2.24E-57 | -0.13277 | 0.134 | 0.362 | 3.35E-53 |

|           |          |          |       |       |          |
|-----------|----------|----------|-------|-------|----------|
| SHISA5    | 2.29E-57 | 0.216926 | 0.321 | 0.447 | 3.42E-53 |
| RP9       | 2.38E-57 | -0.14256 | 0.17  | 0.405 | 3.55E-53 |
| RHBDD3    | 2.40E-57 | -0.16753 | 0.095 | 0.307 | 3.59E-53 |
| RSU1      | 2.72E-57 | 0.292745 | 0.232 | 0.317 | 4.06E-53 |
| DHCR24    | 2.73E-57 | -0.10098 | 0.054 | 0.217 | 4.08E-53 |
| SRP54     | 2.88E-57 | 0.269772 | 0.305 | 0.414 | 4.31E-53 |
| TMED5     | 3.09E-57 | 0.2714   | 0.33  | 0.44  | 4.62E-53 |
| HMGB1     | 3.13E-57 | -0.17089 | 0.806 | 0.991 | 4.68E-53 |
| UCK1      | 3.17E-57 | -0.23579 | 0.134 | 0.386 | 4.73E-53 |
| RP11-277F | 3.24E-57 | -0.40059 | 0.02  | 0.206 | 4.84E-53 |
| C14orf166 | 3.36E-57 | 0.119747 | 0.545 | 0.765 | 5.03E-53 |
| DUSP1     | 3.37E-57 | 0.281931 | 0.417 | 0.48  | 5.03E-53 |
| DENND2A   | 3.56E-57 | -0.23912 | 0.042 | 0.238 | 5.32E-53 |
| MTIF3     | 3.83E-57 | 0.305373 | 0.312 | 0.441 | 5.73E-53 |
| MPND      | 3.92E-57 | -0.22735 | 0.021 | 0.204 | 5.86E-53 |
| SSBP2     | 4.04E-57 | 0.405851 | 0.358 | 0.457 | 6.03E-53 |
| ZNF91     | 4.13E-57 | -0.114   | 0.156 | 0.38  | 6.17E-53 |
| WDR1      | 4.36E-57 | 0.130534 | 0.359 | 0.549 | 6.52E-53 |
| PPP2R5D   | 4.58E-57 | -0.21885 | 0.046 | 0.241 | 6.84E-53 |
| EFCAB11   | 4.92E-57 | -0.24706 | 0.038 | 0.232 | 7.35E-53 |
| TMEM50B   | 4.94E-57 | 0.354073 | 0.347 | 0.422 | 7.38E-53 |
| HTRA2     | 5.02E-57 | -0.17994 | 0.173 | 0.428 | 7.50E-53 |
| CANT1     | 5.16E-57 | -0.21034 | 0.141 | 0.393 | 7.72E-53 |
| GMPS      | 5.28E-57 | -0.24303 | 0.141 | 0.398 | 7.89E-53 |
| TTC14     | 5.47E-57 | 0.153818 | 0.249 | 0.411 | 8.18E-53 |
| ZNF232    | 5.50E-57 | -0.26703 | 0.048 | 0.254 | 8.21E-53 |
| MED30     | 5.54E-57 | -0.25879 | 0.211 | 0.494 | 8.28E-53 |
| UGGT1     | 5.61E-57 | -0.17832 | 0.062 | 0.262 | 8.39E-53 |
| SNHG8     | 5.68E-57 | 0.565735 | 0.428 | 0.451 | 8.49E-53 |
| CCNE1     | 6.12E-57 | -0.32587 | 0.013 | 0.186 | 9.14E-53 |
| BICD1     | 6.60E-57 | -0.29809 | 0.145 | 0.41  | 9.87E-53 |
| ZCCHC3    | 6.73E-57 | -0.26486 | 0.046 | 0.257 | 1.01E-52 |
| DNAAF2    | 6.92E-57 | -0.1363  | 0.106 | 0.315 | 1.03E-52 |
| ZNF593    | 6.92E-57 | 0.156039 | 0.275 | 0.459 | 1.03E-52 |
| MED16     | 6.95E-57 | -0.18662 | 0.112 | 0.333 | 1.04E-52 |
| SMOX      | 7.11E-57 | 0.527345 | 0.367 | 0.369 | 1.06E-52 |
| ADO       | 7.25E-57 | -0.23714 | 0.053 | 0.262 | 1.08E-52 |
| CA12      | 7.60E-57 | 0.511079 | 0.246 | 0.18  | 1.14E-52 |
| GADD45A   | 7.84E-57 | 0.404217 | 0.421 | 0.463 | 1.17E-52 |
| ZNF639    | 7.84E-57 | -0.25654 | 0.082 | 0.312 | 1.17E-52 |
| RAP1A     | 8.04E-57 | 0.307473 | 0.397 | 0.5   | 1.20E-52 |
| MCFD2     | 8.31E-57 | 0.182792 | 0.274 | 0.417 | 1.24E-52 |
| KLHL13    | 9.10E-57 | -0.30149 | 0.038 | 0.246 | 1.36E-52 |
| DDX21     | 9.13E-57 | 0.111209 | 0.243 | 0.402 | 1.36E-52 |
| HLA-DQA1  | 1.01E-56 | 1.160225 | 0.213 | 0.026 | 1.51E-52 |
| TAF9B     | 1.01E-56 | -0.2538  | 0.107 | 0.344 | 1.51E-52 |
| DNAJC3    | 1.16E-56 | 0.222587 | 0.278 | 0.383 | 1.73E-52 |
| ZNF524    | 1.17E-56 | -0.17568 | 0.103 | 0.32  | 1.75E-52 |
| MLH1      | 1.20E-56 | -0.21466 | 0.121 | 0.365 | 1.79E-52 |
| BMPR2     | 1.21E-56 | -0.27325 | 0.081 | 0.314 | 1.80E-52 |
| ARFRP1    | 1.24E-56 | -0.17034 | 0.182 | 0.431 | 1.85E-52 |

|           |           |           |        |        |           |
|-----------|-----------|-----------|--------|--------|-----------|
| RNF11     | 1. 27E-56 | -0. 14877 | 0. 202 | 0. 441 | 1. 90E-52 |
| RBM5      | 1. 41E-56 | -0. 16897 | 0. 19  | 0. 435 | 2. 11E-52 |
| EXOSC10   | 1. 45E-56 | -0. 19579 | 0. 107 | 0. 332 | 2. 17E-52 |
| UBE2G1    | 1. 49E-56 | -0. 18965 | 0. 181 | 0. 431 | 2. 22E-52 |
| FKBP10    | 1. 49E-56 | 0. 240059 | 0. 304 | 0. 423 | 2. 23E-52 |
| PDPK1     | 1. 62E-56 | -0. 27146 | 0. 121 | 0. 373 | 2. 42E-52 |
| CPSF3L    | 1. 62E-56 | 0. 15437  | 0. 266 | 0. 438 | 2. 43E-52 |
| BDP1      | 1. 67E-56 | -0. 20803 | 0. 197 | 0. 459 | 2. 50E-52 |
| KIAA1549  | 1. 68E-56 | -0. 3297  | 0. 034 | 0. 237 | 2. 51E-52 |
| TMEM121   | 1. 69E-56 | -0. 3504  | 0. 038 | 0. 248 | 2. 53E-52 |
| FAM110B   | 1. 72E-56 | -0. 27638 | 0. 095 | 0. 336 | 2. 57E-52 |
| FAM92A1   | 1. 76E-56 | -0. 15327 | 0. 183 | 0. 446 | 2. 63E-52 |
| ARFGAP2   | 1. 85E-56 | -0. 14369 | 0. 205 | 0. 454 | 2. 77E-52 |
| SPATC1L   | 1. 86E-56 | -0. 29369 | 0. 112 | 0. 367 | 2. 78E-52 |
| CAHM      | 1. 87E-56 | -0. 35042 | 0. 032 | 0. 233 | 2. 79E-52 |
| CDH4      | 1. 88E-56 | -0. 26964 | 0. 022 | 0. 202 | 2. 81E-52 |
| B4GALT7   | 1. 92E-56 | -0. 14305 | 0. 137 | 0. 367 | 2. 87E-52 |
| RNF13     | 1. 93E-56 | 0. 355261 | 0. 4   | 0. 467 | 2. 89E-52 |
| CBR4      | 1. 93E-56 | -0. 24649 | 0. 116 | 0. 357 | 2. 89E-52 |
| CDC42EP1  | 1. 95E-56 | -0. 22916 | 0. 079 | 0. 299 | 2. 91E-52 |
| FAM168B   | 2. 00E-56 | -0. 15831 | 0. 119 | 0. 34  | 2. 98E-52 |
| NQO2      | 2. 10E-56 | 0. 173136 | 0. 235 | 0. 388 | 3. 14E-52 |
| CDYL      | 2. 11E-56 | -0. 27197 | 0. 053 | 0. 268 | 3. 15E-52 |
| SH3GLB2   | 2. 14E-56 | -0. 20671 | 0. 047 | 0. 254 | 3. 19E-52 |
| GPCPD1    | 2. 18E-56 | -0. 20021 | 0. 09  | 0. 315 | 3. 26E-52 |
| SCAF4     | 2. 20E-56 | -0. 22935 | 0. 087 | 0. 309 | 3. 29E-52 |
| HOMER2    | 2. 23E-56 | -0. 11945 | 0. 027 | 0. 172 | 3. 33E-52 |
| RRP1B     | 2. 24E-56 | -0. 22166 | 0. 103 | 0. 341 | 3. 35E-52 |
| ENTPD6    | 2. 26E-56 | -0. 17731 | 0. 127 | 0. 364 | 3. 37E-52 |
| ZNF711    | 2. 33E-56 | -0. 39553 | 0. 076 | 0. 322 | 3. 48E-52 |
| SPRY1     | 2. 41E-56 | -0. 38965 | 0. 164 | 0. 443 | 3. 60E-52 |
| NDUFB7    | 2. 47E-56 | 0. 274964 | 0. 724 | 0. 869 | 3. 69E-52 |
| DLD       | 2. 53E-56 | 0. 309241 | 0. 386 | 0. 5   | 3. 78E-52 |
| LAP3      | 2. 58E-56 | 0. 396984 | 0. 421 | 0. 528 | 3. 85E-52 |
| MEPCE     | 2. 77E-56 | -0. 20328 | 0. 084 | 0. 302 | 4. 14E-52 |
| DCAF16    | 2. 90E-56 | -0. 20043 | 0. 09  | 0. 31  | 4. 34E-52 |
| SDF2L1    | 2. 91E-56 | -0. 25176 | 0. 25  | 0. 519 | 4. 36E-52 |
| TRIM69    | 2. 92E-56 | -0. 17399 | 0. 13  | 0. 365 | 4. 37E-52 |
| MYH10     | 3. 02E-56 | -0. 31406 | 0. 124 | 0. 389 | 4. 52E-52 |
| CNTROB    | 3. 19E-56 | -0. 28738 | 0. 048 | 0. 257 | 4. 77E-52 |
| UQCRC2    | 3. 26E-56 | 0. 212436 | 0. 436 | 0. 595 | 4. 87E-52 |
| EIF4G1    | 3. 30E-56 | -0. 10753 | 0. 23  | 0. 464 | 4. 94E-52 |
| VSTM2A    | 3. 37E-56 | 0. 95592  | 0. 296 | 0. 079 | 5. 03E-52 |
| STX18     | 3. 47E-56 | -0. 12298 | 0. 102 | 0. 319 | 5. 18E-52 |
| ANAPC7    | 3. 67E-56 | -0. 17664 | 0. 123 | 0. 36  | 5. 49E-52 |
| HMG20B    | 3. 68E-56 | -0. 32213 | 0. 254 | 0. 556 | 5. 49E-52 |
| ATPAF2    | 3. 83E-56 | -0. 1147  | 0. 126 | 0. 344 | 5. 72E-52 |
| AGAP1     | 3. 87E-56 | -0. 19918 | 0. 072 | 0. 279 | 5. 79E-52 |
| XRCC3     | 3. 91E-56 | -0. 23166 | 0. 011 | 0. 17  | 5. 84E-52 |
| SNAP29    | 3. 96E-56 | -0. 18892 | 0. 12  | 0. 351 | 5. 92E-52 |
| ASB16-AS1 | 4. 00E-56 | -0. 21087 | 0. 053 | 0. 247 | 5. 98E-52 |

|          |          |          |       |       |          |
|----------|----------|----------|-------|-------|----------|
| LSM12    | 4.08E-56 | -0.28888 | 0.196 | 0.486 | 6.09E-52 |
| PFKL     | 4.37E-56 | -0.10147 | 0.277 | 0.51  | 6.53E-52 |
| PCBD1    | 4.57E-56 | 0.187925 | 0.281 | 0.437 | 6.82E-52 |
| PRDM2    | 4.61E-56 | -0.20384 | 0.068 | 0.275 | 6.89E-52 |
| PPP2R2D  | 4.87E-56 | -0.22337 | 0.04  | 0.231 | 7.28E-52 |
| NFATC3   | 5.24E-56 | -0.2025  | 0.096 | 0.317 | 7.83E-52 |
| PEX10    | 5.33E-56 | -0.11688 | 0.156 | 0.377 | 7.97E-52 |
| LAMA5    | 5.47E-56 | -0.2164  | 0.057 | 0.259 | 8.18E-52 |
| C19orf52 | 6.01E-56 | -0.24299 | 0.133 | 0.38  | 8.99E-52 |
| HNRNPH2  | 6.55E-56 | 0.268653 | 0.369 | 0.491 | 9.79E-52 |
| MFS10    | 6.59E-56 | 0.164424 | 0.248 | 0.407 | 9.85E-52 |
| KCTD20   | 6.79E-56 | -0.24317 | 0.108 | 0.352 | 1.02E-51 |
| P4HTM    | 6.95E-56 | -0.10713 | 0.23  | 0.449 | 1.04E-51 |
| KIAA0586 | 6.95E-56 | -0.25891 | 0.034 | 0.226 | 1.04E-51 |
| MGAT2    | 6.99E-56 | -0.19986 | 0.135 | 0.369 | 1.04E-51 |
| CD68     | 7.31E-56 | 0.756072 | 0.317 | 0.165 | 1.09E-51 |
| DKK3     | 7.36E-56 | -0.16309 | 0.173 | 0.4   | 1.10E-51 |
| UBL3     | 7.74E-56 | -0.10573 | 0.239 | 0.475 | 1.16E-51 |
| POFUT1   | 8.19E-56 | -0.18204 | 0.077 | 0.291 | 1.22E-51 |
| TSR1     | 8.24E-56 | -0.1048  | 0.161 | 0.398 | 1.23E-51 |
| NUCD2    | 8.28E-56 | -0.11043 | 0.404 | 0.695 | 1.24E-51 |
| SCAF1    | 8.60E-56 | -0.1971  | 0.095 | 0.306 | 1.29E-51 |
| PPDPF    | 8.86E-56 | -0.15957 | 0.639 | 0.916 | 1.32E-51 |
| KXD1     | 9.53E-56 | 0.234811 | 0.479 | 0.652 | 1.42E-51 |
| PTX3     | 9.76E-56 | 0.426599 | 0.178 | 0.216 | 1.46E-51 |
| STX12    | 1.01E-55 | 0.273588 | 0.356 | 0.477 | 1.51E-51 |
| TRIP6    | 1.03E-55 | 0.540687 | 0.358 | 0.347 | 1.54E-51 |
| GSTO1    | 1.04E-55 | 0.296752 | 0.341 | 0.452 | 1.55E-51 |
| ING1     | 1.04E-55 | -0.18968 | 0.107 | 0.338 | 1.56E-51 |
| TNRC6C   | 1.06E-55 | -0.2212  | 0.114 | 0.347 | 1.59E-51 |
| FDFT1    | 1.11E-55 | -0.15137 | 0.223 | 0.481 | 1.66E-51 |
| MEIS1    | 1.23E-55 | -0.30803 | 0.038 | 0.24  | 1.83E-51 |
| NTN1     | 1.23E-55 | -0.14041 | 0.042 | 0.212 | 1.84E-51 |
| MTMR4    | 1.23E-55 | -0.22802 | 0.087 | 0.306 | 1.85E-51 |
| DCTN1    | 1.29E-55 | -0.18853 | 0.133 | 0.365 | 1.92E-51 |
| RBMXL1   | 1.31E-55 | -0.25307 | 0.124 | 0.363 | 1.95E-51 |
| TAPBP    | 1.36E-55 | 0.108318 | 0.258 | 0.399 | 2.03E-51 |
| DONSON   | 1.39E-55 | -0.29715 | 0.075 | 0.307 | 2.08E-51 |
| CCDC106  | 1.52E-55 | -0.23638 | 0.157 | 0.412 | 2.27E-51 |
| GRN      | 1.56E-55 | 0.201567 | 0.365 | 0.523 | 2.32E-51 |
| C8orf82  | 1.57E-55 | -0.28036 | 0.091 | 0.327 | 2.35E-51 |
| TMEM132A | 1.59E-55 | -0.17425 | 0.096 | 0.305 | 2.38E-51 |
| ERI2     | 1.71E-55 | -0.21151 | 0.028 | 0.201 | 2.55E-51 |
| CYB5A    | 1.82E-55 | 0.411182 | 0.355 | 0.457 | 2.72E-51 |
| AGT      | 1.82E-55 | 0.7357   | 0.366 | 0.326 | 2.72E-51 |
| CXXC4    | 1.85E-55 | -0.30447 | 0.02  | 0.196 | 2.76E-51 |
| PCNT     | 1.87E-55 | -0.24178 | 0.043 | 0.24  | 2.80E-51 |
| OSER1    | 1.94E-55 | 0.19523  | 0.255 | 0.419 | 2.91E-51 |
| RRP1     | 1.96E-55 | -0.11773 | 0.159 | 0.401 | 2.93E-51 |
| TCEAL7   | 2.02E-55 | 0.125255 | 0.293 | 0.498 | 3.02E-51 |
| PPP4R2   | 2.14E-55 | -0.17612 | 0.206 | 0.463 | 3.20E-51 |



|           |          |          |       |       |          |
|-----------|----------|----------|-------|-------|----------|
| GOPC      | 2.17E-55 | -0.21899 | 0.188 | 0.442 | 3.24E-51 |
| NUDT4     | 2.17E-55 | -0.16786 | 0.175 | 0.416 | 3.25E-51 |
| SDHAF2    | 2.23E-55 | 0.126838 | 0.252 | 0.423 | 3.33E-51 |
| EMC6      | 2.23E-55 | -0.18001 | 0.393 | 0.683 | 3.34E-51 |
| CEP63     | 2.23E-55 | -0.22928 | 0.14  | 0.381 | 3.34E-51 |
| UPF3B     | 2.26E-55 | -0.18039 | 0.21  | 0.467 | 3.38E-51 |
| GOLT1B    | 2.41E-55 | 0.235081 | 0.273 | 0.381 | 3.60E-51 |
| PRSS23    | 2.43E-55 | 0.738891 | 0.257 | 0.091 | 3.63E-51 |
| GPATCH2L  | 2.49E-55 | -0.14631 | 0.139 | 0.359 | 3.72E-51 |
| SMAD4     | 2.50E-55 | -0.19245 | 0.075 | 0.283 | 3.74E-51 |
| APC       | 2.60E-55 | -0.19765 | 0.13  | 0.357 | 3.88E-51 |
| UTP18     | 2.61E-55 | -0.16096 | 0.21  | 0.458 | 3.90E-51 |
| PYGB      | 2.62E-55 | -0.12702 | 0.169 | 0.399 | 3.92E-51 |
| DNM1L     | 2.72E-55 | -0.16494 | 0.169 | 0.415 | 4.07E-51 |
| RMI1      | 2.77E-55 | -0.35015 | 0.036 | 0.237 | 4.13E-51 |
| FLYWCH2   | 2.83E-55 | 0.17978  | 0.308 | 0.475 | 4.22E-51 |
| CSNK1G2   | 2.88E-55 | -0.30028 | 0.069 | 0.295 | 4.31E-51 |
| CD81      | 2.90E-55 | 0.108784 | 0.248 | 0.422 | 4.34E-51 |
| BTG2      | 2.95E-55 | 0.302213 | 0.335 | 0.449 | 4.41E-51 |
| AKT2      | 3.00E-55 | -0.19911 | 0.125 | 0.357 | 4.48E-51 |
| EPHA3     | 3.20E-55 | -0.18714 | 0.01  | 0.162 | 4.78E-51 |
| REV3L     | 3.29E-55 | -0.29879 | 0.168 | 0.436 | 4.92E-51 |
| AP5M1     | 3.45E-55 | -0.17744 | 0.108 | 0.33  | 5.15E-51 |
| ZSCAN16-A | 3.68E-55 | -0.16787 | 0.186 | 0.441 | 5.50E-51 |
| PNPT1     | 3.76E-55 | -0.14698 | 0.154 | 0.384 | 5.62E-51 |
| CLTC      | 3.83E-55 | -0.19806 | 0.229 | 0.494 | 5.72E-51 |
| SMAD2     | 3.88E-55 | -0.11186 | 0.138 | 0.352 | 5.79E-51 |
| ERP44     | 3.91E-55 | 0.234727 | 0.331 | 0.435 | 5.84E-51 |
| POMGNT2   | 3.98E-55 | -0.18665 | 0.115 | 0.343 | 5.95E-51 |
| PEF1      | 4.18E-55 | 0.101851 | 0.316 | 0.512 | 6.24E-51 |
| SIRT7     | 4.28E-55 | -0.16912 | 0.139 | 0.367 | 6.40E-51 |
| SPATA6    | 4.30E-55 | -0.23286 | 0.091 | 0.32  | 6.43E-51 |
| ATXN2     | 4.34E-55 | -0.11349 | 0.152 | 0.369 | 6.49E-51 |
| CTTN      | 4.46E-55 | 0.191237 | 0.279 | 0.411 | 6.66E-51 |
| LRRFIP2   | 4.59E-55 | -0.11793 | 0.17  | 0.389 | 6.86E-51 |
| KCTD5     | 4.61E-55 | -0.27287 | 0.134 | 0.385 | 6.88E-51 |
| VEZT      | 4.66E-55 | -0.15676 | 0.155 | 0.394 | 6.96E-51 |
| DSCC1     | 4.86E-55 | -0.33757 | 0.043 | 0.252 | 7.27E-51 |
| SF3A1     | 4.87E-55 | -0.23573 | 0.106 | 0.343 | 7.27E-51 |
| SSFA2     | 5.10E-55 | -0.16418 | 0.146 | 0.369 | 7.62E-51 |
| SNX5      | 5.11E-55 | -0.29946 | 0.305 | 0.622 | 7.64E-51 |
| FANCB     | 5.87E-55 | -0.21133 | 0.014 | 0.17  | 8.77E-51 |
| RFXANK    | 5.94E-55 | 0.161458 | 0.303 | 0.486 | 8.88E-51 |
| FBXW11    | 6.21E-55 | -0.13598 | 0.131 | 0.343 | 9.28E-51 |
| NAA20     | 6.52E-55 | 0.180004 | 0.47  | 0.651 | 9.74E-51 |
| ANGPTL4   | 7.38E-55 | 0.941125 | 0.254 | 0.033 | 1.10E-50 |
| TMEM59L   | 7.62E-55 | -0.10346 | 0.223 | 0.438 | 1.14E-50 |
| POLE2     | 7.70E-55 | -0.25376 | 0.023 | 0.19  | 1.15E-50 |
| MBD6      | 8.13E-55 | -0.52886 | 0.063 | 0.298 | 1.21E-50 |
| ZNF771    | 8.16E-55 | -0.27559 | 0.108 | 0.353 | 1.22E-50 |
| CPNE3     | 8.47E-55 | 0.234271 | 0.327 | 0.459 | 1.27E-50 |

|          |          |          |       |       |          |
|----------|----------|----------|-------|-------|----------|
| CHCHD10  | 8.73E-55 | -0.29244 | 0.175 | 0.441 | 1.31E-50 |
| DNAJC5   | 9.00E-55 | -0.23325 | 0.103 | 0.332 | 1.35E-50 |
| PCYT2    | 9.47E-55 | -0.13268 | 0.106 | 0.307 | 1.42E-50 |
| CHERP    | 9.57E-55 | -0.14384 | 0.152 | 0.37  | 1.43E-50 |
| RBM12    | 9.76E-55 | -0.23748 | 0.066 | 0.278 | 1.46E-50 |
| PAK3     | 1.09E-54 | -0.34284 | 0.035 | 0.233 | 1.63E-50 |
| TUBA1B   | 1.13E-54 | -0.13536 | 0.842 | 1     | 1.68E-50 |
| PHLDB1   | 1.16E-54 | -0.12711 | 0.062 | 0.241 | 1.73E-50 |
| CAPRIN2  | 1.21E-54 | -0.20596 | 0.066 | 0.268 | 1.81E-50 |
| SREBF2   | 1.22E-54 | -0.19138 | 0.054 | 0.243 | 1.82E-50 |
| SLU7     | 1.22E-54 | 0.248894 | 0.301 | 0.407 | 1.82E-50 |
| LSM7     | 1.25E-54 | -0.10988 | 0.579 | 0.859 | 1.86E-50 |
| BLOC1S6  | 1.29E-54 | -0.21116 | 0.169 | 0.415 | 1.92E-50 |
| TSPAN14  | 1.31E-54 | -0.24827 | 0.052 | 0.254 | 1.96E-50 |
| UROS     | 1.31E-54 | -0.24876 | 0.133 | 0.375 | 1.96E-50 |
| TM2D2    | 1.32E-54 | 0.528827 | 0.372 | 0.405 | 1.97E-50 |
| ANKIB1   | 1.33E-54 | -0.20241 | 0.134 | 0.365 | 1.99E-50 |
| PUM1     | 1.33E-54 | -0.11031 | 0.16  | 0.375 | 1.99E-50 |
| ZNF362   | 1.34E-54 | -0.20903 | 0.031 | 0.207 | 2.01E-50 |
| C1orf52  | 1.39E-54 | 0.204414 | 0.322 | 0.465 | 2.08E-50 |
| FH       | 1.42E-54 | -0.15504 | 0.2   | 0.453 | 2.12E-50 |
| APPBP2   | 1.43E-54 | -0.10116 | 0.157 | 0.377 | 2.14E-50 |
| WDR5     | 1.45E-54 | -0.17589 | 0.108 | 0.322 | 2.17E-50 |
| ERH      | 1.51E-54 | 0.164996 | 0.726 | 0.914 | 2.26E-50 |
| ZNF726   | 1.54E-54 | -0.25619 | 0.023 | 0.194 | 2.31E-50 |
| SLC25A37 | 1.62E-54 | 0.51144  | 0.322 | 0.321 | 2.42E-50 |
| DHX33    | 1.62E-54 | -0.24399 | 0.074 | 0.291 | 2.42E-50 |
| PCDH19   | 1.64E-54 | -0.25175 | 0.014 | 0.177 | 2.45E-50 |
| LIMD1    | 1.64E-54 | -0.20564 | 0.033 | 0.214 | 2.45E-50 |
| DDX11    | 1.75E-54 | -0.30229 | 0.039 | 0.24  | 2.61E-50 |
| NUP85    | 1.76E-54 | -0.2204  | 0.102 | 0.33  | 2.63E-50 |
| TNFAIP1  | 1.78E-54 | -0.16749 | 0.122 | 0.348 | 2.66E-50 |
| CCDC53   | 1.79E-54 | 0.226355 | 0.327 | 0.472 | 2.67E-50 |
| ANAPC13  | 1.82E-54 | 0.150641 | 0.369 | 0.525 | 2.72E-50 |
| C19orf24 | 2.08E-54 | -0.15397 | 0.278 | 0.537 | 3.10E-50 |
| RGS2     | 2.08E-54 | 1.017987 | 0.422 | 0.227 | 3.11E-50 |
| CDV3     | 2.14E-54 | -0.20518 | 0.175 | 0.423 | 3.19E-50 |
| IQGAP2   | 2.21E-54 | -0.24363 | 0.062 | 0.267 | 3.30E-50 |
| PPP1R12C | 2.44E-54 | -0.12728 | 0.042 | 0.207 | 3.64E-50 |
| CFL2     | 2.48E-54 | 0.240276 | 0.406 | 0.546 | 3.71E-50 |
| TEX264   | 2.52E-54 | 0.418469 | 0.393 | 0.478 | 3.77E-50 |
| RNF34    | 2.52E-54 | -0.12141 | 0.167 | 0.4   | 3.77E-50 |
| PRPF31   | 2.53E-54 | -0.10895 | 0.358 | 0.622 | 3.79E-50 |
| SMC6     | 2.59E-54 | -0.31292 | 0.106 | 0.357 | 3.87E-50 |
| IWS1     | 2.65E-54 | -0.19693 | 0.161 | 0.414 | 3.96E-50 |
| MFS11    | 2.65E-54 | -0.1136  | 0.135 | 0.363 | 3.96E-50 |
| CSAD     | 2.68E-54 | -0.23344 | 0.097 | 0.328 | 4.00E-50 |
| NUDT15   | 2.70E-54 | -0.20085 | 0.094 | 0.307 | 4.04E-50 |
| SERPINB6 | 2.82E-54 | 0.226562 | 0.398 | 0.541 | 4.22E-50 |
| MTMR9    | 2.93E-54 | -0.20728 | 0.124 | 0.356 | 4.37E-50 |
| TNFRSF1A | 2.96E-54 | 0.186307 | 0.347 | 0.432 | 4.43E-50 |

|           |          |          |       |       |          |
|-----------|----------|----------|-------|-------|----------|
| ACYP2     | 2.98E-54 | 0.370121 | 0.31  | 0.411 | 4.46E-50 |
| CDH24     | 3.00E-54 | -0.26084 | 0.01  | 0.169 | 4.48E-50 |
| TSPAN7    | 3.07E-54 | 0.19848  | 0.395 | 0.557 | 4.58E-50 |
| SMIM20    | 3.08E-54 | 0.273151 | 0.329 | 0.446 | 4.61E-50 |
| PRPF4B    | 3.17E-54 | -0.13313 | 0.195 | 0.44  | 4.74E-50 |
| LY6E      | 3.19E-54 | 0.217607 | 0.336 | 0.493 | 4.77E-50 |
| MAP3K7    | 3.60E-54 | -0.10731 | 0.156 | 0.372 | 5.37E-50 |
| CNOT2     | 3.61E-54 | 0.146828 | 0.292 | 0.464 | 5.39E-50 |
| MLLT4     | 3.61E-54 | -0.32627 | 0.101 | 0.348 | 5.40E-50 |
| CC2D1A    | 3.94E-54 | -0.22873 | 0.126 | 0.363 | 5.89E-50 |
| PDE4B     | 3.95E-54 | -0.15137 | 0.129 | 0.338 | 5.91E-50 |
| EPHX1     | 4.12E-54 | 0.257901 | 0.238 | 0.354 | 6.16E-50 |
| TMEM132B  | 4.67E-54 | -0.26231 | 0.018 | 0.19  | 6.98E-50 |
| DZIP1     | 5.54E-54 | -0.19736 | 0.057 | 0.259 | 8.29E-50 |
| ACAT1     | 5.58E-54 | 0.469747 | 0.424 | 0.43  | 8.34E-50 |
| TWSG1     | 5.66E-54 | 0.352266 | 0.231 | 0.302 | 8.46E-50 |
| PKNOX1    | 5.81E-54 | -0.21082 | 0.083 | 0.296 | 8.69E-50 |
| SLC25A25  | 5.84E-54 | -0.19651 | 0.136 | 0.363 | 8.73E-50 |
| ZNF75A    | 5.85E-54 | -0.15697 | 0.201 | 0.446 | 8.74E-50 |
| JAGN1     | 6.15E-54 | 0.228691 | 0.341 | 0.509 | 9.19E-50 |
| NBL1      | 6.50E-54 | -0.20336 | 0.086 | 0.298 | 9.71E-50 |
| TLK2      | 6.58E-54 | -0.18326 | 0.072 | 0.277 | 9.84E-50 |
| DCAF13    | 6.98E-54 | 0.162206 | 0.365 | 0.52  | 1.04E-49 |
| USP34     | 7.08E-54 | -0.16793 | 0.135 | 0.36  | 1.06E-49 |
| CRAT      | 7.42E-54 | -0.24461 | 0.123 | 0.362 | 1.11E-49 |
| RARRES2   | 7.91E-54 | 0.922336 | 0.461 | 0.277 | 1.18E-49 |
| CARS2     | 8.30E-54 | -0.17023 | 0.076 | 0.278 | 1.24E-49 |
| LAMC1     | 8.34E-54 | -0.13714 | 0.069 | 0.253 | 1.25E-49 |
| ALKBH4    | 8.83E-54 | -0.14359 | 0.16  | 0.388 | 1.32E-49 |
| ICT1      | 9.37E-54 | -0.15123 | 0.17  | 0.417 | 1.40E-49 |
| CDC25A    | 9.70E-54 | -0.30024 | 0.008 | 0.16  | 1.45E-49 |
| XRCC1     | 1.02E-53 | -0.23391 | 0.103 | 0.328 | 1.52E-49 |
| IARS2     | 1.02E-53 | -0.14155 | 0.152 | 0.378 | 1.53E-49 |
| SEC31A    | 1.03E-53 | 0.124921 | 0.213 | 0.333 | 1.54E-49 |
| BCS1L     | 1.04E-53 | -0.17254 | 0.138 | 0.368 | 1.56E-49 |
| MAN1A2    | 1.05E-53 | -0.21111 | 0.141 | 0.377 | 1.57E-49 |
| TRMT6     | 1.11E-53 | -0.13022 | 0.154 | 0.385 | 1.66E-49 |
| PFDN6     | 1.15E-53 | 0.124784 | 0.334 | 0.535 | 1.71E-49 |
| CHMP2B    | 1.18E-53 | 0.272475 | 0.305 | 0.416 | 1.76E-49 |
| TMEM178A  | 1.19E-53 | -0.32078 | 0.05  | 0.259 | 1.77E-49 |
| VKORC1L1  | 1.22E-53 | -0.20591 | 0.101 | 0.309 | 1.83E-49 |
| GLYR1     | 1.25E-53 | -0.19384 | 0.154 | 0.39  | 1.88E-49 |
| RP11-620J | 1.28E-53 | -0.35371 | 0.302 | 0.612 | 1.91E-49 |
| RAB4A     | 1.28E-53 | -0.2433  | 0.262 | 0.542 | 1.91E-49 |
| TGIF2     | 1.33E-53 | -0.26852 | 0.026 | 0.209 | 1.98E-49 |
| LEPROT    | 1.38E-53 | 0.165923 | 0.311 | 0.469 | 2.06E-49 |
| B3GALT6   | 1.41E-53 | -0.24626 | 0.061 | 0.265 | 2.10E-49 |
| ERF       | 1.52E-53 | -0.21926 | 0.114 | 0.332 | 2.27E-49 |
| B4GALT5   | 1.52E-53 | -0.19329 | 0.136 | 0.38  | 2.28E-49 |
| GLTP      | 1.53E-53 | -0.15344 | 0.215 | 0.454 | 2.29E-49 |
| GTF2E2    | 1.86E-53 | -0.21826 | 0.122 | 0.353 | 2.77E-49 |

|           |          |          |       |       |          |
|-----------|----------|----------|-------|-------|----------|
| PKP4      | 1.96E-53 | -0.2533  | 0.024 | 0.204 | 2.92E-49 |
| XIAP      | 1.97E-53 | -0.20154 | 0.149 | 0.385 | 2.94E-49 |
| AIMP2     | 2.01E-53 | 0.100158 | 0.259 | 0.442 | 3.01E-49 |
| DPP6      | 2.11E-53 | -0.24687 | 0.117 | 0.351 | 3.15E-49 |
| EMID1     | 2.16E-53 | -0.2057  | 0.023 | 0.193 | 3.22E-49 |
| HELZ      | 2.43E-53 | -0.16582 | 0.113 | 0.331 | 3.63E-49 |
| ZNF462    | 2.76E-53 | -0.26211 | 0.112 | 0.362 | 4.13E-49 |
| ATP6VOA2  | 2.82E-53 | -0.24448 | 0.051 | 0.256 | 4.21E-49 |
| TAC01     | 2.97E-53 | -0.25268 | 0.114 | 0.351 | 4.43E-49 |
| ZC3H14    | 3.00E-53 | -0.12188 | 0.186 | 0.42  | 4.48E-49 |
| TTF2      | 3.12E-53 | -0.24118 | 0.041 | 0.236 | 4.66E-49 |
| HSPE1     | 3.15E-53 | 0.111304 | 0.714 | 0.902 | 4.71E-49 |
| BLOC1S2   | 3.22E-53 | 0.226895 | 0.293 | 0.438 | 4.81E-49 |
| RBBP9     | 3.28E-53 | -0.24586 | 0.046 | 0.244 | 4.90E-49 |
| H2AFJ     | 3.29E-53 | -0.33083 | 0.079 | 0.311 | 4.92E-49 |
| TMA7      | 3.33E-53 | 0.312104 | 0.815 | 0.914 | 4.98E-49 |
| IFI16     | 3.37E-53 | 0.681703 | 0.489 | 0.396 | 5.03E-49 |
| BCL7A     | 3.52E-53 | -0.31086 | 0.069 | 0.289 | 5.26E-49 |
| RTKN      | 3.72E-53 | -0.1308  | 0.093 | 0.302 | 5.56E-49 |
| JUND      | 3.80E-53 | -0.1209  | 0.286 | 0.526 | 5.68E-49 |
| CSNK1G3   | 3.89E-53 | -0.27771 | 0.092 | 0.322 | 5.81E-49 |
| DNASE2    | 3.89E-53 | 0.301771 | 0.284 | 0.384 | 5.82E-49 |
| NAA50     | 3.90E-53 | -0.15862 | 0.23  | 0.477 | 5.83E-49 |
| FAM122B   | 4.01E-53 | -0.283   | 0.081 | 0.305 | 5.99E-49 |
| SPIN1     | 4.31E-53 | -0.19515 | 0.099 | 0.312 | 6.45E-49 |
| IFT57     | 4.69E-53 | 0.355755 | 0.363 | 0.436 | 7.01E-49 |
| RCOR1     | 4.74E-53 | -0.18173 | 0.022 | 0.178 | 7.08E-49 |
| SETD2     | 4.79E-53 | -0.20479 | 0.092 | 0.302 | 7.16E-49 |
| MSN       | 5.02E-53 | 0.180611 | 0.285 | 0.416 | 7.50E-49 |
| SUPT6H    | 5.32E-53 | -0.18384 | 0.084 | 0.293 | 7.95E-49 |
| KLHL42    | 5.36E-53 | -0.28701 | 0.109 | 0.348 | 8.01E-49 |
| SART1     | 5.86E-53 | -0.24832 | 0.137 | 0.38  | 8.76E-49 |
| CHEK2     | 5.91E-53 | -0.24094 | 0.037 | 0.221 | 8.82E-49 |
| LYRM7     | 6.08E-53 | -0.18602 | 0.161 | 0.395 | 9.08E-49 |
| ENDOG     | 6.09E-53 | -0.19581 | 0.085 | 0.293 | 9.09E-49 |
| STARD4-AS | 6.13E-53 | -0.30654 | 0.046 | 0.249 | 9.17E-49 |
| EXOSC9    | 6.47E-53 | -0.31922 | 0.12  | 0.369 | 9.67E-49 |
| SMAD5     | 6.53E-53 | -0.12456 | 0.157 | 0.388 | 9.77E-49 |
| PAXBP1    | 6.81E-53 | -0.19172 | 0.111 | 0.331 | 1.02E-48 |
| CREM      | 6.85E-53 | -0.31316 | 0.154 | 0.415 | 1.02E-48 |
| NDUFAF5   | 7.27E-53 | -0.17545 | 0.09  | 0.298 | 1.09E-48 |
| CTNNB1    | 7.29E-53 | -0.11774 | 0.262 | 0.509 | 1.09E-48 |
| BST2      | 7.93E-53 | 0.862832 | 0.461 | 0.232 | 1.18E-48 |
| TM2D3     | 7.97E-53 | 0.282021 | 0.319 | 0.417 | 1.19E-48 |
| G3BP2     | 8.93E-53 | -0.16459 | 0.176 | 0.406 | 1.33E-48 |
| GEMIN2    | 9.51E-53 | -0.15365 | 0.098 | 0.304 | 1.42E-48 |
| SCRN1     | 9.91E-53 | -0.16016 | 0.13  | 0.347 | 1.48E-48 |
| CEP97     | 1.00E-52 | -0.22539 | 0.046 | 0.236 | 1.50E-48 |
| ZNF682    | 1.06E-52 | -0.31107 | 0.05  | 0.26  | 1.59E-48 |
| WDR74     | 1.08E-52 | 0.179083 | 0.23  | 0.374 | 1.62E-48 |
| SENP6     | 1.09E-52 | -0.14502 | 0.159 | 0.375 | 1.62E-48 |

|           |           |           |        |        |           |
|-----------|-----------|-----------|--------|--------|-----------|
| PTDSS2    | 1. 15E-52 | -0. 24937 | 0. 092 | 0. 317 | 1. 72E-48 |
| ICA1L     | 1. 28E-52 | -0. 21704 | 0. 085 | 0. 302 | 1. 91E-48 |
| RP11-262H | 1. 34E-52 | -0. 21667 | 0. 057 | 0. 253 | 2. 00E-48 |
| TRIM33    | 1. 35E-52 | -0. 26992 | 0. 107 | 0. 338 | 2. 02E-48 |
| SNTG1     | 1. 36E-52 | 0. 175045 | 0. 168 | 0. 33  | 2. 03E-48 |
| COPB1     | 1. 36E-52 | 0. 109453 | 0. 274 | 0. 433 | 2. 03E-48 |
| ZNF579    | 1. 40E-52 | -0. 20174 | 0. 048 | 0. 237 | 2. 09E-48 |
| TMSB4X    | 1. 41E-52 | 0. 506385 | 0. 992 | 0. 994 | 2. 11E-48 |
| BNIP2     | 1. 42E-52 | -0. 12787 | 0. 159 | 0. 37  | 2. 12E-48 |
| GEN1      | 1. 42E-52 | -0. 20875 | 0. 014 | 0. 164 | 2. 12E-48 |
| PSPH      | 1. 48E-52 | -0. 12778 | 0. 17  | 0. 388 | 2. 21E-48 |
| E2F5      | 1. 48E-52 | -0. 13234 | 0. 03  | 0. 193 | 2. 21E-48 |
| IGSF10    | 1. 58E-52 | -0. 23343 | 0. 045 | 0. 231 | 2. 37E-48 |
| MAD1L1    | 1. 59E-52 | -0. 23001 | 0. 093 | 0. 314 | 2. 38E-48 |
| COPS7B    | 1. 64E-52 | -0. 10376 | 0. 157 | 0. 38  | 2. 45E-48 |
| MTG2      | 1. 64E-52 | -0. 15902 | 0. 093 | 0. 304 | 2. 45E-48 |
| USP47     | 1. 78E-52 | -0. 12886 | 0. 205 | 0. 435 | 2. 66E-48 |
| DOHH      | 1. 89E-52 | -0. 17402 | 0. 152 | 0. 377 | 2. 83E-48 |
| TMEM70    | 1. 95E-52 | 0. 104565 | 0. 322 | 0. 479 | 2. 91E-48 |
| POLR3GL   | 1. 97E-52 | 0. 109388 | 0. 282 | 0. 454 | 2. 94E-48 |
| SMTN      | 2. 01E-52 | -0. 28502 | 0. 03  | 0. 214 | 3. 00E-48 |
| SFXN5     | 2. 12E-52 | 0. 156749 | 0. 218 | 0. 375 | 3. 17E-48 |
| PSME2     | 2. 15E-52 | 0. 176386 | 0. 522 | 0. 727 | 3. 21E-48 |
| TAOK3     | 2. 15E-52 | -0. 12051 | 0. 239 | 0. 475 | 3. 21E-48 |
| TMED1     | 2. 43E-52 | 0. 363098 | 0. 344 | 0. 46  | 3. 64E-48 |
| FAM60A    | 2. 44E-52 | -0. 25583 | 0. 1   | 0. 332 | 3. 64E-48 |
| MYCBP2    | 2. 63E-52 | -0. 31145 | 0. 134 | 0. 391 | 3. 92E-48 |
| ATF6      | 2. 66E-52 | -0. 10832 | 0. 172 | 0. 378 | 3. 98E-48 |
| NCOA1     | 2. 93E-52 | -0. 1171  | 0. 099 | 0. 293 | 4. 38E-48 |
| NACC1     | 3. 17E-52 | -0. 15883 | 0. 097 | 0. 305 | 4. 74E-48 |
| ATF3      | 3. 20E-52 | 0. 560719 | 0. 334 | 0. 228 | 4. 79E-48 |
| ZC3H8     | 3. 32E-52 | -0. 20569 | 0. 111 | 0. 34  | 4. 96E-48 |
| IFI6      | 3. 42E-52 | 0. 290498 | 0. 421 | 0. 502 | 5. 11E-48 |
| MFAP1     | 3. 48E-52 | -0. 11706 | 0. 149 | 0. 363 | 5. 20E-48 |
| TBC1D20   | 3. 59E-52 | -0. 15265 | 0. 128 | 0. 335 | 5. 37E-48 |
| FAM120A   | 3. 83E-52 | -0. 1646  | 0. 122 | 0. 342 | 5. 73E-48 |
| YBX3      | 4. 29E-52 | -0. 10501 | 0. 356 | 0. 594 | 6. 41E-48 |
| USP5      | 4. 61E-52 | -0. 22057 | 0. 184 | 0. 44  | 6. 89E-48 |
| EMILIN3   | 4. 76E-52 | -0. 32074 | 0. 004 | 0. 141 | 7. 11E-48 |
| CTBP2     | 4. 80E-52 | -0. 25756 | 0. 072 | 0. 29  | 7. 17E-48 |
| UBAP2L    | 4. 93E-52 | -0. 16167 | 0. 158 | 0. 38  | 7. 36E-48 |
| MDM4      | 4. 93E-52 | -0. 21661 | 0. 171 | 0. 414 | 7. 37E-48 |
| CASP4     | 4. 95E-52 | 0. 804133 | 0. 255 | 0. 115 | 7. 40E-48 |
| ZNF827    | 4. 95E-52 | -0. 27703 | 0. 056 | 0. 267 | 7. 40E-48 |
| FBXO11    | 5. 19E-52 | -0. 22393 | 0. 12  | 0. 349 | 7. 75E-48 |
| TMC03     | 5. 25E-52 | -0. 10572 | 0. 186 | 0. 396 | 7. 85E-48 |
| NRBF2     | 5. 50E-52 | -0. 10536 | 0. 173 | 0. 398 | 8. 21E-48 |
| SETD9     | 5. 53E-52 | -0. 1167  | 0. 079 | 0. 272 | 8. 27E-48 |
| FZD7      | 5. 64E-52 | -0. 21807 | 0. 046 | 0. 237 | 8. 43E-48 |
| E2F7      | 5. 78E-52 | -0. 1912  | 0. 009 | 0. 153 | 8. 63E-48 |
| KANSL1    | 5. 83E-52 | -0. 26911 | 0. 088 | 0. 31  | 8. 72E-48 |

|           |          |          |       |       |          |
|-----------|----------|----------|-------|-------|----------|
| PPIE      | 5.98E-52 | 0.116029 | 0.28  | 0.442 | 8.93E-48 |
| EML4      | 6.00E-52 | -0.19743 | 0.09  | 0.302 | 8.96E-48 |
| SCAMP2    | 6.71E-52 | 0.226279 | 0.221 | 0.356 | 1.00E-47 |
| DAAM1     | 7.37E-52 | -0.13955 | 0.194 | 0.432 | 1.10E-47 |
| SPRED2    | 7.53E-52 | -0.21811 | 0.055 | 0.243 | 1.12E-47 |
| YES1      | 7.66E-52 | -0.24175 | 0.095 | 0.316 | 1.14E-47 |
| G6PD      | 7.69E-52 | -0.12789 | 0.138 | 0.359 | 1.15E-47 |
| STX16     | 8.02E-52 | -0.11476 | 0.173 | 0.383 | 1.20E-47 |
| PARK7     | 8.47E-52 | 0.241181 | 0.745 | 0.906 | 1.27E-47 |
| FAM20C    | 8.48E-52 | 0.403723 | 0.274 | 0.304 | 1.27E-47 |
| GABPB1    | 9.25E-52 | -0.20498 | 0.077 | 0.285 | 1.38E-47 |
| DHRS13    | 1.01E-51 | -0.18223 | 0.07  | 0.258 | 1.52E-47 |
| CEP70     | 1.06E-51 | -0.31508 | 0.088 | 0.321 | 1.59E-47 |
| RP11-332H | 1.14E-51 | -0.22818 | 0.106 | 0.332 | 1.71E-47 |
| FANCL     | 1.26E-51 | -0.25116 | 0.137 | 0.385 | 1.89E-47 |
| HAUS2     | 1.28E-51 | -0.24247 | 0.061 | 0.268 | 1.91E-47 |
| STK24     | 1.32E-51 | -0.15406 | 0.049 | 0.223 | 1.98E-47 |
| HABP4     | 1.33E-51 | -0.23635 | 0.077 | 0.29  | 1.99E-47 |
| ITGAV     | 1.38E-51 | -0.1709  | 0.172 | 0.406 | 2.06E-47 |
| YPEL5     | 1.40E-51 | 0.482945 | 0.409 | 0.401 | 2.10E-47 |
| TGS1      | 1.42E-51 | -0.15977 | 0.129 | 0.359 | 2.13E-47 |
| NEU1      | 1.50E-51 | 0.178813 | 0.247 | 0.364 | 2.24E-47 |
| PDDC1     | 1.76E-51 | -0.11402 | 0.11  | 0.31  | 2.64E-47 |
| MYC       | 1.89E-51 | 0.757258 | 0.333 | 0.185 | 2.83E-47 |
| ZNF821    | 1.95E-51 | -0.27745 | 0.072 | 0.288 | 2.92E-47 |
| TUBGCP2   | 2.00E-51 | -0.16172 | 0.108 | 0.322 | 2.98E-47 |
| UACA      | 2.02E-51 | -0.17715 | 0.032 | 0.2   | 3.03E-47 |
| MAP3K1    | 2.17E-51 | -0.24568 | 0.022 | 0.189 | 3.24E-47 |
| ATPAF1    | 2.35E-51 | -0.309   | 0.181 | 0.442 | 3.51E-47 |
| CASP3     | 2.35E-51 | -0.24001 | 0.146 | 0.386 | 3.51E-47 |
| DLST      | 2.36E-51 | -0.11017 | 0.099 | 0.29  | 3.53E-47 |
| PPIF      | 2.41E-51 | -0.26445 | 0.124 | 0.367 | 3.60E-47 |
| APITD1    | 2.44E-51 | -0.13746 | 0.073 | 0.264 | 3.64E-47 |
| CAST      | 2.47E-51 | 0.288519 | 0.308 | 0.356 | 3.69E-47 |
| C12orf76  | 2.49E-51 | 0.168463 | 0.231 | 0.391 | 3.72E-47 |
| BANF1     | 2.68E-51 | 0.128304 | 0.677 | 0.873 | 4.00E-47 |
| SLC36A4   | 2.70E-51 | -0.18724 | 0.175 | 0.404 | 4.03E-47 |
| CHD6      | 2.87E-51 | -0.20336 | 0.168 | 0.412 | 4.29E-47 |
| ABHD17C   | 2.88E-51 | -0.17324 | 0.038 | 0.207 | 4.31E-47 |
| DLG1      | 2.96E-51 | -0.16564 | 0.106 | 0.311 | 4.42E-47 |
| HIST1H1C  | 3.07E-51 | 0.189117 | 0.181 | 0.344 | 4.59E-47 |
| KLHL5     | 3.22E-51 | -0.18372 | 0.075 | 0.274 | 4.81E-47 |
| CIR1      | 3.22E-51 | 0.208415 | 0.301 | 0.426 | 4.81E-47 |
| PLA2G12A  | 3.33E-51 | -0.14908 | 0.184 | 0.401 | 4.98E-47 |
| MESDC2    | 3.34E-51 | 0.368237 | 0.398 | 0.523 | 4.99E-47 |
| NMT2      | 3.41E-51 | -0.25685 | 0.06  | 0.267 | 5.09E-47 |
| TSR2      | 3.45E-51 | -0.12609 | 0.218 | 0.464 | 5.16E-47 |
| FAM98B    | 3.46E-51 | -0.201   | 0.045 | 0.226 | 5.18E-47 |
| TMEM209   | 3.52E-51 | -0.1988  | 0.1   | 0.32  | 5.25E-47 |
| POLR3F    | 3.62E-51 | -0.15593 | 0.119 | 0.323 | 5.41E-47 |
| CLASP2    | 3.80E-51 | -0.33384 | 0.09  | 0.32  | 5.68E-47 |

|           |          |          |       |       |          |
|-----------|----------|----------|-------|-------|----------|
| GNB5      | 3.86E-51 | -0.24054 | 0.075 | 0.281 | 5.76E-47 |
| SLC25A29  | 4.16E-51 | -0.22441 | 0.096 | 0.305 | 6.22E-47 |
| COX17     | 4.18E-51 | 0.117654 | 0.469 | 0.681 | 6.25E-47 |
| MBOAT7    | 4.30E-51 | -0.21535 | 0.16  | 0.398 | 6.42E-47 |
| NR3C1     | 4.32E-51 | -0.16123 | 0.2   | 0.432 | 6.46E-47 |
| WDR77     | 4.52E-51 | -0.13785 | 0.167 | 0.394 | 6.76E-47 |
| CEP89     | 4.63E-51 | -0.15933 | 0.129 | 0.344 | 6.92E-47 |
| QTRT1     | 4.78E-51 | 0.2197   | 0.367 | 0.514 | 7.14E-47 |
| KLHL8     | 4.84E-51 | -0.18167 | 0.088 | 0.283 | 7.24E-47 |
| ZDHHC3    | 4.98E-51 | -0.122   | 0.139 | 0.348 | 7.44E-47 |
| TBCA      | 5.00E-51 | 0.159719 | 0.727 | 0.9   | 7.47E-47 |
| METTL7B   | 5.41E-51 | 0.35719  | 0.218 | 0.374 | 8.09E-47 |
| SMC5      | 5.51E-51 | -0.17791 | 0.161 | 0.388 | 8.23E-47 |
| ARID2     | 5.61E-51 | -0.27114 | 0.06  | 0.267 | 8.39E-47 |
| MLF1      | 5.72E-51 | 0.288167 | 0.29  | 0.367 | 8.54E-47 |
| MTX1      | 5.91E-51 | 0.119586 | 0.196 | 0.36  | 8.82E-47 |
| EXOSC6    | 6.02E-51 | -0.15117 | 0.037 | 0.204 | 8.99E-47 |
| M6PR      | 6.08E-51 | 0.114776 | 0.276 | 0.427 | 9.09E-47 |
| TSKU      | 6.09E-51 | -0.21518 | 0.04  | 0.223 | 9.10E-47 |
| TMEM158   | 6.26E-51 | -0.2751  | 0.106 | 0.342 | 9.35E-47 |
| MED27     | 6.38E-51 | -0.2073  | 0.11  | 0.328 | 9.53E-47 |
| SRP68     | 6.99E-51 | -0.11513 | 0.208 | 0.431 | 1.04E-46 |
| DOT1L     | 7.06E-51 | -0.18042 | 0.051 | 0.225 | 1.06E-46 |
| ADAM17    | 7.14E-51 | -0.11589 | 0.175 | 0.386 | 1.07E-46 |
| TBCC      | 7.26E-51 | -0.23933 | 0.138 | 0.368 | 1.09E-46 |
| KIDINS22C | 7.42E-51 | -0.1679  | 0.168 | 0.389 | 1.11E-46 |
| PDCL3     | 7.47E-51 | 0.115292 | 0.249 | 0.444 | 1.12E-46 |
| RBMX2     | 7.52E-51 | -0.1199  | 0.204 | 0.431 | 1.12E-46 |
| PHTF2     | 7.61E-51 | -0.23916 | 0.064 | 0.26  | 1.14E-46 |
| SH3BGR    | 7.72E-51 | 0.785278 | 0.295 | 0.144 | 1.15E-46 |
| ASH2L     | 8.11E-51 | -0.1889  | 0.136 | 0.363 | 1.21E-46 |
| DLEU1     | 8.45E-51 | -0.13648 | 0.061 | 0.243 | 1.26E-46 |
| REEP2     | 8.64E-51 | -0.20407 | 0.166 | 0.395 | 1.29E-46 |
| ZMYM4     | 8.67E-51 | -0.21976 | 0.056 | 0.252 | 1.30E-46 |
| TANK      | 9.47E-51 | 0.245352 | 0.331 | 0.448 | 1.41E-46 |
| FABP5     | 9.52E-51 | 1.314348 | 0.513 | 0.338 | 1.42E-46 |
| MLF2      | 9.88E-51 | 0.100655 | 0.639 | 0.823 | 1.48E-46 |
| FKBP9     | 1.04E-50 | 0.105305 | 0.213 | 0.341 | 1.55E-46 |
| PPM1D     | 1.11E-50 | -0.27368 | 0.067 | 0.279 | 1.66E-46 |
| UBE2J1    | 1.13E-50 | -0.13814 | 0.205 | 0.425 | 1.69E-46 |
| DCHS1     | 1.16E-50 | -0.2416  | 0.026 | 0.196 | 1.73E-46 |
| PNKP      | 1.16E-50 | -0.15992 | 0.109 | 0.31  | 1.73E-46 |
| CTHRC1    | 1.16E-50 | -0.27148 | 0.029 | 0.211 | 1.74E-46 |
| GTPBP1    | 1.26E-50 | -0.25152 | 0.049 | 0.24  | 1.88E-46 |
| BRI3BP    | 1.31E-50 | -0.24835 | 0.056 | 0.256 | 1.95E-46 |
| CASP6     | 1.42E-50 | -0.13808 | 0.1   | 0.311 | 2.12E-46 |
| CHRAC1    | 1.45E-50 | -0.21703 | 0.107 | 0.319 | 2.17E-46 |
| RASL11B   | 1.59E-50 | -0.50436 | 0.014 | 0.174 | 2.37E-46 |
| GGT7      | 1.60E-50 | -0.15325 | 0.117 | 0.33  | 2.39E-46 |
| SYCE1L    | 1.79E-50 | -0.12502 | 0.018 | 0.153 | 2.67E-46 |
| YLPM1     | 1.80E-50 | -0.20178 | 0.063 | 0.258 | 2.69E-46 |

|           |           |           |        |        |           |
|-----------|-----------|-----------|--------|--------|-----------|
| MAP1S     | 1. 82E-50 | -0. 12315 | 0. 117 | 0. 31  | 2. 72E-46 |
| AP3B1     | 1. 85E-50 | -0. 20393 | 0. 096 | 0. 314 | 2. 76E-46 |
| AHI1      | 1. 91E-50 | -0. 11174 | 0. 218 | 0. 448 | 2. 86E-46 |
| CYHR1     | 1. 97E-50 | 0. 185117 | 0. 285 | 0. 4   | 2. 94E-46 |
| GADD45GIF | 1. 99E-50 | -0. 23239 | 0. 506 | 0. 794 | 2. 98E-46 |
| RP3-525N1 | 2. 12E-50 | -0. 24111 | 0. 072 | 0. 27  | 3. 17E-46 |
| CHCHD2    | 2. 12E-50 | 0. 24353  | 0. 869 | 0. 97  | 3. 17E-46 |
| USP6NL    | 2. 14E-50 | -0. 10784 | 0. 026 | 0. 165 | 3. 20E-46 |
| UBTD2     | 2. 18E-50 | -0. 23328 | 0. 059 | 0. 259 | 3. 26E-46 |
| RP11-676J | 2. 24E-50 | -0. 34692 | 0. 004 | 0. 135 | 3. 35E-46 |
| GSK3B     | 2. 45E-50 | -0. 20942 | 0. 103 | 0. 317 | 3. 66E-46 |
| SRPRB     | 2. 48E-50 | 0. 148881 | 0. 263 | 0. 41  | 3. 70E-46 |
| NFYC      | 2. 58E-50 | -0. 11268 | 0. 159 | 0. 379 | 3. 86E-46 |
| DKAKD     | 2. 59E-50 | -0. 12395 | 0. 112 | 0. 338 | 3. 88E-46 |
| MEX3D     | 2. 72E-50 | -0. 20159 | 0. 025 | 0. 19  | 4. 07E-46 |
| SLC2A1    | 2. 76E-50 | 0. 371836 | 0. 231 | 0. 238 | 4. 12E-46 |
| WIPF1     | 2. 78E-50 | -0. 13754 | 0. 067 | 0. 246 | 4. 15E-46 |
| TSPAN13   | 2. 83E-50 | -0. 38587 | 0. 222 | 0. 51  | 4. 22E-46 |
| TXNDC15   | 2. 91E-50 | 0. 310696 | 0. 326 | 0. 419 | 4. 35E-46 |
| SNX10     | 2. 94E-50 | 0. 224517 | 0. 196 | 0. 243 | 4. 39E-46 |
| SMIM14    | 3. 06E-50 | 0. 272828 | 0. 359 | 0. 485 | 4. 58E-46 |
| RSBN1     | 3. 25E-50 | -0. 11443 | 0. 183 | 0. 391 | 4. 85E-46 |
| LIX1L     | 3. 26E-50 | -0. 25582 | 0. 069 | 0. 275 | 4. 87E-46 |
| POGK      | 3. 29E-50 | -0. 17347 | 0. 075 | 0. 272 | 4. 92E-46 |
| ARHGFEF12 | 3. 51E-50 | -0. 13156 | 0. 11  | 0. 3   | 5. 24E-46 |
| SCD       | 3. 53E-50 | 0. 101459 | 0. 16  | 0. 284 | 5. 27E-46 |
| KPNA4     | 3. 75E-50 | -0. 15087 | 0. 122 | 0. 332 | 5. 60E-46 |
| PPP1R11   | 4. 36E-50 | 0. 136183 | 0. 302 | 0. 467 | 6. 52E-46 |
| MARK2     | 4. 46E-50 | -0. 20498 | 0. 068 | 0. 267 | 6. 67E-46 |
| E2F4      | 4. 46E-50 | -0. 13068 | 0. 158 | 0. 358 | 6. 67E-46 |
| ATP6V1B2  | 4. 54E-50 | 0. 14739  | 0. 279 | 0. 419 | 6. 78E-46 |
| RASGRP1   | 4. 63E-50 | -0. 18095 | 0. 019 | 0. 17  | 6. 92E-46 |
| MRPS25    | 4. 64E-50 | 0. 218516 | 0. 254 | 0. 407 | 6. 93E-46 |
| WRAP73    | 4. 82E-50 | -0. 10546 | 0. 118 | 0. 311 | 7. 20E-46 |
| MED24     | 5. 47E-50 | -0. 21938 | 0. 111 | 0. 331 | 8. 18E-46 |
| EPB41L4A- | 5. 75E-50 | 0. 293737 | 0. 293 | 0. 37  | 8. 59E-46 |
| COPS4     | 6. 37E-50 | 0. 133787 | 0. 325 | 0. 48  | 9. 52E-46 |
| NDUFAF2   | 6. 41E-50 | 0. 282846 | 0. 324 | 0. 414 | 9. 58E-46 |
| UROD      | 6. 47E-50 | 0. 504133 | 0. 425 | 0. 431 | 9. 67E-46 |
| OPA1      | 6. 56E-50 | -0. 22793 | 0. 065 | 0. 258 | 9. 80E-46 |
| ETF1      | 6. 83E-50 | 0. 261425 | 0. 302 | 0. 42  | 1. 02E-45 |
| UAP1      | 7. 09E-50 | 0. 36446  | 0. 254 | 0. 323 | 1. 06E-45 |
| NUDT22    | 7. 17E-50 | 0. 189171 | 0. 21  | 0. 362 | 1. 07E-45 |
| GPX4      | 7. 20E-50 | 0. 306913 | 0. 803 | 0. 917 | 1. 08E-45 |
| FOXN3     | 7. 60E-50 | -0. 1885  | 0. 091 | 0. 286 | 1. 14E-45 |
| CNOT10    | 8. 03E-50 | -0. 18539 | 0. 093 | 0. 296 | 1. 20E-45 |
| PCDH9     | 8. 41E-50 | 0. 234342 | 0. 267 | 0. 412 | 1. 26E-45 |
| VCAM1     | 8. 43E-50 | 0. 872719 | 0. 206 | 0. 042 | 1. 26E-45 |
| TBC1D9B   | 8. 72E-50 | -0. 10639 | 0. 084 | 0. 256 | 1. 30E-45 |
| LZTS1     | 8. 75E-50 | -0. 1202  | 0. 026 | 0. 158 | 1. 31E-45 |
| PELP1     | 9. 83E-50 | -0. 19759 | 0. 117 | 0. 328 | 1. 47E-45 |



|          |          |          |       |       |          |
|----------|----------|----------|-------|-------|----------|
| TMEM245  | 9.95E-50 | -0.20926 | 0.099 | 0.306 | 1.49E-45 |
| SLC47A1  | 1.01E-49 | -0.16001 | 0.014 | 0.156 | 1.50E-45 |
| PPFIA3   | 1.01E-49 | -0.21586 | 0.041 | 0.22  | 1.51E-45 |
| CHMP4B   | 1.04E-49 | -0.16448 | 0.348 | 0.607 | 1.55E-45 |
| ERV3-1   | 1.07E-49 | -0.1286  | 0.213 | 0.446 | 1.59E-45 |
| CERS6    | 1.08E-49 | -0.24139 | 0.059 | 0.254 | 1.61E-45 |
| CHRD1    | 1.08E-49 | -0.26593 | 0.009 | 0.157 | 1.61E-45 |
| COPB2    | 1.08E-49 | 0.249735 | 0.327 | 0.44  | 1.62E-45 |
| HYI      | 1.09E-49 | -0.26081 | 0.089 | 0.301 | 1.64E-45 |
| EIF4G3   | 1.12E-49 | -0.23711 | 0.084 | 0.301 | 1.67E-45 |
| RRAGD    | 1.17E-49 | -0.178   | 0.091 | 0.29  | 1.74E-45 |
| NUP37    | 1.18E-49 | -0.14191 | 0.136 | 0.359 | 1.76E-45 |
| FASN     | 1.22E-49 | -0.20712 | 0.053 | 0.238 | 1.83E-45 |
| PTGFRN   | 1.25E-49 | -0.10954 | 0.079 | 0.253 | 1.87E-45 |
| SUV39H1  | 1.37E-49 | -0.22292 | 0.025 | 0.186 | 2.05E-45 |
| SCO1     | 1.42E-49 | -0.13512 | 0.136 | 0.337 | 2.12E-45 |
| E2F3     | 1.42E-49 | -0.32005 | 0.037 | 0.23  | 2.12E-45 |
| VWA1     | 1.43E-49 | -0.26113 | 0.06  | 0.263 | 2.13E-45 |
| SHISA4   | 1.46E-49 | 0.115127 | 0.217 | 0.368 | 2.18E-45 |
| MBNL1    | 1.50E-49 | -0.16034 | 0.11  | 0.31  | 2.24E-45 |
| ZBED5    | 1.61E-49 | -0.24078 | 0.129 | 0.36  | 2.40E-45 |
| CALM2    | 1.62E-49 | 0.21779  | 0.888 | 0.989 | 2.43E-45 |
| ACTN1    | 1.65E-49 | 0.333623 | 0.346 | 0.405 | 2.46E-45 |
| PCDHB16  | 1.67E-49 | -0.29968 | 0.086 | 0.311 | 2.50E-45 |
| DMRTA2   | 1.72E-49 | -0.16055 | 0.057 | 0.227 | 2.56E-45 |
| FUBP1    | 1.75E-49 | -0.26925 | 0.176 | 0.43  | 2.61E-45 |
| CASC3    | 1.78E-49 | -0.23209 | 0.141 | 0.372 | 2.66E-45 |
| PHF12    | 1.82E-49 | -0.18144 | 0.058 | 0.241 | 2.73E-45 |
| BCAR1    | 1.85E-49 | -0.14876 | 0.146 | 0.359 | 2.76E-45 |
| TREM1    | 1.88E-49 | 1.039328 | 0.208 | 0.02  | 2.82E-45 |
| KCTD3    | 1.91E-49 | -0.18892 | 0.108 | 0.314 | 2.85E-45 |
| CCS      | 1.93E-49 | 0.454986 | 0.268 | 0.286 | 2.88E-45 |
| TANC1    | 1.99E-49 | -0.23034 | 0.059 | 0.253 | 2.98E-45 |
| ILVBL    | 2.00E-49 | -0.12167 | 0.241 | 0.484 | 2.98E-45 |
| PDE7A    | 2.18E-49 | -0.23373 | 0.036 | 0.21  | 3.25E-45 |
| INCENP   | 2.23E-49 | -0.20222 | 0.013 | 0.16  | 3.33E-45 |
| MAP2K7   | 2.30E-49 | -0.14237 | 0.145 | 0.354 | 3.44E-45 |
| SYTL2    | 2.40E-49 | 0.692789 | 0.249 | 0.064 | 3.58E-45 |
| CCDC92   | 2.41E-49 | -0.10016 | 0.051 | 0.209 | 3.60E-45 |
| LARP6    | 2.49E-49 | -0.12565 | 0.164 | 0.364 | 3.72E-45 |
| PDLIM7   | 2.56E-49 | -0.12476 | 0.18  | 0.4   | 3.82E-45 |
| MSH6     | 2.62E-49 | -0.37522 | 0.098 | 0.34  | 3.92E-45 |
| PGM3     | 2.67E-49 | 0.1118   | 0.226 | 0.333 | 4.00E-45 |
| FBLN7    | 2.78E-49 | -0.27923 | 0.036 | 0.225 | 4.15E-45 |
| FUNDC1   | 2.82E-49 | 0.244213 | 0.254 | 0.393 | 4.22E-45 |
| LMO7     | 3.17E-49 | -0.32425 | 0.027 | 0.205 | 4.73E-45 |
| REXO4    | 3.28E-49 | -0.16999 | 0.139 | 0.349 | 4.90E-45 |
| CPSF4    | 3.30E-49 | -0.13332 | 0.201 | 0.422 | 4.93E-45 |
| BDH2     | 3.33E-49 | 0.692779 | 0.262 | 0.132 | 4.97E-45 |
| KIAA1586 | 3.33E-49 | -0.1611  | 0.079 | 0.269 | 4.98E-45 |
| GINS3    | 3.49E-49 | -0.23911 | 0.028 | 0.193 | 5.22E-45 |

|           |          |          |       |       |          |
|-----------|----------|----------|-------|-------|----------|
| TNFAIP8L1 | 3.93E-49 | -0.25817 | 0.063 | 0.258 | 5.87E-45 |
| PES1      | 3.99E-49 | -0.2238  | 0.117 | 0.34  | 5.97E-45 |
| PTAR1     | 4.20E-49 | -0.24207 | 0.091 | 0.306 | 6.28E-45 |
| CRLF3     | 4.35E-49 | -0.13996 | 0.046 | 0.215 | 6.50E-45 |
| DIRAS3    | 4.92E-49 | 0.987602 | 0.301 | 0.144 | 7.35E-45 |
| PTDSS1    | 4.99E-49 | -0.14195 | 0.139 | 0.353 | 7.46E-45 |
| ZFHX3     | 5.04E-49 | -0.14369 | 0.083 | 0.262 | 7.53E-45 |
| FAM161A   | 5.28E-49 | -0.22075 | 0.109 | 0.327 | 7.89E-45 |
| COL6A1    | 5.33E-49 | 0.319511 | 0.342 | 0.402 | 7.96E-45 |
| LGALS1    | 5.92E-49 | 0.505616 | 0.801 | 0.767 | 8.85E-45 |
| NDFIP2    | 5.97E-49 | 0.107251 | 0.194 | 0.349 | 8.92E-45 |
| SLC35E3   | 6.04E-49 | -0.50786 | 0.156 | 0.428 | 9.03E-45 |
| CAMK2D    | 6.15E-49 | -0.14654 | 0.211 | 0.446 | 9.20E-45 |
| SOCS4     | 6.15E-49 | -0.15311 | 0.046 | 0.212 | 9.20E-45 |
| FBX018    | 6.26E-49 | -0.13302 | 0.073 | 0.249 | 9.35E-45 |
| MEX3B     | 6.36E-49 | -0.30545 | 0.015 | 0.17  | 9.50E-45 |
| AK3       | 6.66E-49 | -0.12036 | 0.201 | 0.414 | 9.95E-45 |
| NOTCH2    | 6.76E-49 | -0.14417 | 0.104 | 0.296 | 1.01E-44 |
| CREBBP    | 8.00E-49 | -0.23895 | 0.079 | 0.285 | 1.20E-44 |
| YRDC      | 8.17E-49 | -0.15164 | 0.121 | 0.32  | 1.22E-44 |
| GMFB      | 8.45E-49 | -0.10743 | 0.144 | 0.347 | 1.26E-44 |
| SSBP3     | 8.48E-49 | -0.24759 | 0.07  | 0.273 | 1.27E-44 |
| GRIK3     | 8.70E-49 | -0.24106 | 0.013 | 0.157 | 1.30E-44 |
| SLC4A7    | 8.79E-49 | -0.22802 | 0.121 | 0.344 | 1.31E-44 |
| TMEM184B  | 8.80E-49 | -0.22748 | 0.072 | 0.275 | 1.31E-44 |
| ABCB8     | 8.93E-49 | -0.13968 | 0.09  | 0.28  | 1.34E-44 |
| VAMP3     | 9.38E-49 | 0.262129 | 0.304 | 0.426 | 1.40E-44 |
| ZFAND6    | 9.39E-49 | 0.158642 | 0.426 | 0.607 | 1.40E-44 |
| PCNXLA    | 9.75E-49 | -0.15139 | 0.084 | 0.285 | 1.46E-44 |
| POLD1     | 1.04E-48 | -0.22813 | 0.027 | 0.191 | 1.55E-44 |
| PLEKHB1   | 1.05E-48 | 0.271551 | 0.225 | 0.302 | 1.57E-44 |
| SLC25A26  | 1.10E-48 | 0.232051 | 0.23  | 0.36  | 1.65E-44 |
| AC093323. | 1.15E-48 | -0.19523 | 0.062 | 0.253 | 1.72E-44 |
| PHKB      | 1.18E-48 | -0.23284 | 0.112 | 0.333 | 1.76E-44 |
| TTI1      | 1.25E-48 | -0.17097 | 0.071 | 0.262 | 1.86E-44 |
| ATP6V1H   | 1.31E-48 | 0.188327 | 0.271 | 0.398 | 1.96E-44 |
| MT1G      | 1.32E-48 | 0.984321 | 0.266 | 0.065 | 1.97E-44 |
| HOXA2     | 1.32E-48 | -0.37526 | 0.02  | 0.188 | 1.97E-44 |
| SECISBP2L | 1.37E-48 | -0.11054 | 0.096 | 0.273 | 2.04E-44 |
| ZNF451    | 1.41E-48 | -0.12403 | 0.109 | 0.307 | 2.10E-44 |
| ZC3H7A    | 1.49E-48 | -0.25619 | 0.103 | 0.321 | 2.22E-44 |
| BAP1      | 1.52E-48 | -0.16367 | 0.097 | 0.305 | 2.27E-44 |
| BET1      | 1.58E-48 | 0.531726 | 0.335 | 0.325 | 2.36E-44 |
| CABIN1    | 1.59E-48 | -0.10137 | 0.086 | 0.256 | 2.37E-44 |
| CLOCK     | 1.61E-48 | -0.35663 | 0.091 | 0.321 | 2.40E-44 |
| LINC01003 | 1.66E-48 | -0.28995 | 0.09  | 0.314 | 2.48E-44 |
| PUM2      | 1.72E-48 | -0.20743 | 0.103 | 0.31  | 2.57E-44 |
| C9orf40   | 1.78E-48 | -0.24442 | 0.02  | 0.185 | 2.65E-44 |
| HEG1      | 1.81E-48 | -0.15159 | 0.03  | 0.188 | 2.70E-44 |
| DGAT1     | 1.82E-48 | -0.21591 | 0.03  | 0.2   | 2.73E-44 |
| ID1       | 1.83E-48 | -0.14326 | 0.111 | 0.298 | 2.74E-44 |

|          |          |          |       |       |          |
|----------|----------|----------|-------|-------|----------|
| SLC12A2  | 1.97E-48 | -0.1782  | 0.085 | 0.277 | 2.94E-44 |
| MITD1    | 2.01E-48 | 0.245655 | 0.269 | 0.377 | 3.01E-44 |
| SNX2     | 2.02E-48 | 0.176237 | 0.332 | 0.475 | 3.02E-44 |
| CASK     | 2.05E-48 | -0.15665 | 0.075 | 0.259 | 3.07E-44 |
| CDK5RAP1 | 2.17E-48 | -0.17757 | 0.108 | 0.315 | 3.24E-44 |
| KNTC1    | 2.23E-48 | -0.27457 | 0.01  | 0.156 | 3.33E-44 |
| SNX24    | 2.24E-48 | -0.1352  | 0.072 | 0.248 | 3.35E-44 |
| SLC25A23 | 2.25E-48 | -0.13194 | 0.078 | 0.262 | 3.37E-44 |
| USP46    | 2.28E-48 | -0.36098 | 0.084 | 0.311 | 3.41E-44 |
| LETM1    | 2.29E-48 | -0.18169 | 0.12  | 0.338 | 3.42E-44 |
| CNOT8    | 2.37E-48 | -0.15337 | 0.133 | 0.341 | 3.54E-44 |
| HINT3    | 2.59E-48 | -0.14347 | 0.147 | 0.351 | 3.86E-44 |
| ZFYVE21  | 2.70E-48 | 0.122591 | 0.246 | 0.393 | 4.04E-44 |
| MFI2-AS1 | 2.73E-48 | -0.31301 | 0.045 | 0.241 | 4.08E-44 |
| CBL      | 2.77E-48 | -0.1802  | 0.043 | 0.215 | 4.14E-44 |
| CHST14   | 2.78E-48 | -0.19555 | 0.033 | 0.205 | 4.15E-44 |
| MAPK7    | 2.79E-48 | -0.15407 | 0.097 | 0.295 | 4.17E-44 |
| CHST3    | 2.87E-48 | -0.12183 | 0.031 | 0.174 | 4.28E-44 |
| COG4     | 2.88E-48 | -0.21265 | 0.133 | 0.356 | 4.30E-44 |
| POLR1E   | 2.88E-48 | -0.15907 | 0.091 | 0.284 | 4.30E-44 |
| NNAT     | 2.94E-48 | -0.68663 | 0.123 | 0.264 | 4.39E-44 |
| N4BP2    | 3.37E-48 | -0.27907 | 0.06  | 0.258 | 5.04E-44 |
| CFLAR    | 3.65E-48 | 0.262703 | 0.287 | 0.383 | 5.45E-44 |
| ARPC1B   | 3.70E-48 | 0.282105 | 0.312 | 0.432 | 5.54E-44 |
| RMND5B   | 3.73E-48 | -0.16267 | 0.118 | 0.33  | 5.57E-44 |
| FBXW5    | 3.80E-48 | -0.16973 | 0.196 | 0.414 | 5.68E-44 |
| DST      | 4.05E-48 | -0.21822 | 0.275 | 0.537 | 6.05E-44 |
| MLC1     | 4.57E-48 | -0.11854 | 0.127 | 0.321 | 6.83E-44 |
| LSM10    | 4.58E-48 | 0.232022 | 0.375 | 0.531 | 6.84E-44 |
| RECQL    | 4.59E-48 | -0.17049 | 0.156 | 0.373 | 6.86E-44 |
| NDN      | 4.74E-48 | -0.11322 | 0.146 | 0.33  | 7.08E-44 |
| ZNF439   | 4.88E-48 | -0.21726 | 0.09  | 0.29  | 7.30E-44 |
| C5orf34  | 4.96E-48 | -0.30785 | 0.024 | 0.191 | 7.41E-44 |
| NDRG3    | 5.12E-48 | -0.15992 | 0.097 | 0.302 | 7.66E-44 |
| IFT20    | 5.24E-48 | 0.233194 | 0.332 | 0.443 | 7.83E-44 |
| CPD      | 5.75E-48 | 0.17671  | 0.171 | 0.275 | 8.59E-44 |
| IRS2     | 6.26E-48 | 0.175503 | 0.322 | 0.448 | 9.36E-44 |
| HAUS3    | 6.27E-48 | -0.21042 | 0.077 | 0.267 | 9.37E-44 |
| CYB5R1   | 6.29E-48 | 0.437414 | 0.229 | 0.275 | 9.40E-44 |
| POM121   | 7.10E-48 | -0.19159 | 0.119 | 0.33  | 1.06E-43 |
| RNMTL1   | 7.29E-48 | -0.17159 | 0.091 | 0.291 | 1.09E-43 |
| MTIF2    | 8.04E-48 | -0.11328 | 0.099 | 0.285 | 1.20E-43 |
| MEIS2    | 8.30E-48 | -0.27519 | 0.156 | 0.404 | 1.24E-43 |
| R3HDM4   | 8.74E-48 | -0.19306 | 0.138 | 0.356 | 1.31E-43 |
| METTLL2A | 8.86E-48 | -0.14005 | 0.135 | 0.342 | 1.32E-43 |
| BGN      | 9.16E-48 | 0.788311 | 0.246 | 0.044 | 1.37E-43 |
| AKT1S1   | 9.19E-48 | -0.1175  | 0.2   | 0.406 | 1.37E-43 |
| STRBP    | 9.21E-48 | -0.28776 | 0.067 | 0.277 | 1.38E-43 |
| CNIH3    | 9.66E-48 | -0.14096 | 0.143 | 0.348 | 1.44E-43 |
| NCBP1    | 9.81E-48 | -0.16729 | 0.047 | 0.22  | 1.47E-43 |
| MGAT1    | 1.00E-47 | 0.128601 | 0.234 | 0.344 | 1.50E-43 |

|           |           |           |        |        |           |
|-----------|-----------|-----------|--------|--------|-----------|
| ANKFY1    | 1. 01E-47 | -0. 12067 | 0. 087 | 0. 26  | 1. 50E-43 |
| CDK19     | 1. 06E-47 | -0. 20439 | 0. 063 | 0. 244 | 1. 59E-43 |
| SPATS2L   | 1. 06E-47 | -0. 35631 | 0. 253 | 0. 546 | 1. 59E-43 |
| SH3PXD2B  | 1. 08E-47 | -0. 10056 | 0. 061 | 0. 221 | 1. 61E-43 |
| CRYL1     | 1. 11E-47 | 0. 32493  | 0. 288 | 0. 359 | 1. 65E-43 |
| SMG1      | 1. 13E-47 | -0. 11799 | 0. 108 | 0. 291 | 1. 69E-43 |
| BEX1      | 1. 13E-47 | -0. 12229 | 0. 34  | 0. 578 | 1. 69E-43 |
| MAPKAPK5- | 1. 14E-47 | 0. 2296   | 0. 221 | 0. 344 | 1. 71E-43 |
| MACROD1   | 1. 17E-47 | -0. 2339  | 0. 092 | 0. 307 | 1. 75E-43 |
| FAM127B   | 1. 22E-47 | 0. 394133 | 0. 354 | 0. 385 | 1. 82E-43 |
| CDC16     | 1. 23E-47 | -0. 10768 | 0. 17  | 0. 364 | 1. 84E-43 |
| AGBL5     | 1. 24E-47 | -0. 1676  | 0. 049 | 0. 219 | 1. 85E-43 |
| PPM1A     | 1. 30E-47 | -0. 23149 | 0. 1   | 0. 316 | 1. 94E-43 |
| CTC-260E6 | 1. 32E-47 | -0. 22691 | 0. 019 | 0. 173 | 1. 98E-43 |
| POLE      | 1. 34E-47 | -0. 22498 | 0. 012 | 0. 157 | 2. 00E-43 |
| SNAPC5    | 1. 35E-47 | 0. 126076 | 0. 198 | 0. 344 | 2. 02E-43 |
| PTK7      | 1. 56E-47 | -0. 18632 | 0. 069 | 0. 256 | 2. 33E-43 |
| SESN3     | 1. 58E-47 | -0. 18211 | 0. 073 | 0. 259 | 2. 36E-43 |
| SHMT1     | 1. 59E-47 | -0. 16451 | 0. 08  | 0. 268 | 2. 38E-43 |
| MAD2L1BP  | 1. 61E-47 | -0. 16884 | 0. 123 | 0. 325 | 2. 41E-43 |
| AC004158. | 1. 73E-47 | -0. 17694 | 0. 051 | 0. 226 | 2. 59E-43 |
| ZBED1     | 1. 74E-47 | -0. 28983 | 0. 085 | 0. 304 | 2. 60E-43 |
| TTC28     | 1. 75E-47 | -0. 14944 | 0. 056 | 0. 23  | 2. 61E-43 |
| CYB561D2  | 1. 79E-47 | 0. 130611 | 0. 158 | 0. 306 | 2. 67E-43 |
| PLSCR1    | 1. 83E-47 | 0. 41884  | 0. 293 | 0. 351 | 2. 74E-43 |
| RAB30-AS1 | 1. 89E-47 | -0. 12957 | 0. 112 | 0. 31  | 2. 83E-43 |
| IFI35     | 1. 95E-47 | 0. 627811 | 0. 261 | 0. 204 | 2. 91E-43 |
| GPANK1    | 1. 98E-47 | -0. 24812 | 0. 16  | 0. 402 | 2. 96E-43 |
| SYNC      | 2. 06E-47 | -0. 25237 | 0. 159 | 0. 386 | 3. 08E-43 |
| NR2F1     | 2. 24E-47 | -0. 12369 | 0. 163 | 0. 357 | 3. 35E-43 |
| ATP13A1   | 2. 28E-47 | -0. 12077 | 0. 111 | 0. 301 | 3. 41E-43 |
| ALG12     | 2. 28E-47 | -0. 12505 | 0. 034 | 0. 188 | 3. 41E-43 |
| MED31     | 2. 38E-47 | 0. 121023 | 0. 224 | 0. 377 | 3. 56E-43 |
| RNFT2     | 2. 50E-47 | -0. 25993 | 0. 022 | 0. 185 | 3. 74E-43 |
| LIN9      | 2. 50E-47 | -0. 25306 | 0. 017 | 0. 172 | 3. 74E-43 |
| KBTBD6    | 2. 53E-47 | -0. 20103 | 0. 088 | 0. 291 | 3. 79E-43 |
| RHOG      | 2. 57E-47 | 0. 21119  | 0. 207 | 0. 32  | 3. 84E-43 |
| RPS6KL1   | 2. 58E-47 | -0. 30314 | 0. 019 | 0. 18  | 3. 86E-43 |
| PSMA7     | 2. 68E-47 | 0. 142524 | 0. 758 | 0. 923 | 4. 01E-43 |
| PIGC      | 2. 93E-47 | 0. 150736 | 0. 206 | 0. 351 | 4. 38E-43 |
| SWI5      | 3. 02E-47 | 0. 287193 | 0. 282 | 0. 401 | 4. 51E-43 |
| TOMM70A   | 3. 21E-47 | -0. 18749 | 0. 08  | 0. 275 | 4. 80E-43 |
| CUL1      | 3. 33E-47 | -0. 11898 | 0. 2   | 0. 417 | 4. 97E-43 |
| SLC39A10  | 3. 37E-47 | -0. 15307 | 0. 086 | 0. 267 | 5. 04E-43 |
| SHROOM2   | 3. 50E-47 | -0. 18013 | 0. 015 | 0. 153 | 5. 23E-43 |
| DPF3      | 3. 52E-47 | -0. 10787 | 0. 065 | 0. 232 | 5. 27E-43 |
| ZADH2     | 3. 85E-47 | -0. 22034 | 0. 055 | 0. 246 | 5. 75E-43 |
| STRN3     | 3. 90E-47 | -0. 11524 | 0. 094 | 0. 273 | 5. 83E-43 |
| MEX3C     | 3. 94E-47 | -0. 13114 | 0. 073 | 0. 237 | 5. 88E-43 |
| AGAP2     | 3. 98E-47 | -0. 32453 | 0. 007 | 0. 143 | 5. 94E-43 |
| EEF1A1    | 4. 28E-47 | 0. 439405 | 0. 803 | 0. 878 | 6. 39E-43 |

|          |          |          |       |       |          |
|----------|----------|----------|-------|-------|----------|
| VHL      | 4.32E-47 | -0.17734 | 0.115 | 0.316 | 6.46E-43 |
| SMARCA1  | 4.40E-47 | -0.20927 | 0.14  | 0.362 | 6.58E-43 |
| ANAPC10  | 4.51E-47 | 0.111571 | 0.173 | 0.337 | 6.74E-43 |
| PPP6R2   | 4.54E-47 | -0.20806 | 0.064 | 0.252 | 6.79E-43 |
| MCC      | 4.60E-47 | -0.18775 | 0.09  | 0.283 | 6.87E-43 |
| GALNT2   | 4.70E-47 | 0.111865 | 0.197 | 0.34  | 7.02E-43 |
| PTGR1    | 4.81E-47 | 0.229039 | 0.212 | 0.337 | 7.18E-43 |
| CHAC2    | 4.85E-47 | -0.15833 | 0.043 | 0.21  | 7.25E-43 |
| TRIM7    | 5.01E-47 | -0.15994 | 0.01  | 0.147 | 7.48E-43 |
| COQ10B   | 5.06E-47 | 0.294188 | 0.269 | 0.351 | 7.55E-43 |
| AGO3     | 5.12E-47 | -0.14903 | 0.138 | 0.336 | 7.65E-43 |
| AGPAT3   | 5.18E-47 | -0.21013 | 0.066 | 0.253 | 7.74E-43 |
| MCAT     | 5.50E-47 | -0.17177 | 0.079 | 0.267 | 8.22E-43 |
| ELMO2    | 5.52E-47 | -0.1817  | 0.09  | 0.289 | 8.24E-43 |
| SLC35F1  | 5.72E-47 | -0.25154 | 0.077 | 0.283 | 8.55E-43 |
| MAP4K5   | 5.74E-47 | -0.18248 | 0.101 | 0.295 | 8.57E-43 |
| SH3BP5   | 5.75E-47 | -0.11826 | 0.084 | 0.251 | 8.59E-43 |
| UCKL1    | 5.78E-47 | -0.15231 | 0.119 | 0.316 | 8.63E-43 |
| RANBP2   | 5.83E-47 | -0.1199  | 0.104 | 0.29  | 8.72E-43 |
| GNG7     | 6.24E-47 | -0.18175 | 0.11  | 0.311 | 9.33E-43 |
| SNX8     | 6.62E-47 | -0.10824 | 0.069 | 0.242 | 9.89E-43 |
| USP14    | 6.85E-47 | -0.12713 | 0.222 | 0.432 | 1.02E-42 |
| HIBADH   | 7.90E-47 | 0.325791 | 0.25  | 0.314 | 1.18E-42 |
| CAMSAP2  | 8.25E-47 | -0.20619 | 0.093 | 0.296 | 1.23E-42 |
| PQLC1    | 8.53E-47 | -0.19328 | 0.051 | 0.232 | 1.28E-42 |
| SCG5     | 9.29E-47 | 0.664987 | 0.369 | 0.322 | 1.39E-42 |
| LEMD2    | 9.36E-47 | -0.16576 | 0.098 | 0.291 | 1.40E-42 |
| MED8     | 1.02E-46 | 0.181141 | 0.234 | 0.362 | 1.52E-42 |
| TSNAX    | 1.04E-46 | 0.182973 | 0.294 | 0.435 | 1.55E-42 |
| COL6A2   | 1.05E-46 | 0.166722 | 0.22  | 0.332 | 1.56E-42 |
| ADD2     | 1.07E-46 | -0.24391 | 0.05  | 0.235 | 1.60E-42 |
| MAPK8IP1 | 1.08E-46 | -0.11624 | 0.107 | 0.293 | 1.62E-42 |
| NAV2     | 1.11E-46 | -0.23745 | 0.091 | 0.291 | 1.66E-42 |
| FAM168A  | 1.16E-46 | -0.20576 | 0.051 | 0.228 | 1.73E-42 |
| FAM76B   | 1.24E-46 | -0.21247 | 0.071 | 0.257 | 1.85E-42 |
| TXNDC17  | 1.24E-46 | 0.178215 | 0.525 | 0.712 | 1.85E-42 |
| LRCH3    | 1.61E-46 | -0.17294 | 0.085 | 0.27  | 2.41E-42 |
| UQCR11   | 1.82E-46 | 1.444807 | 0.212 | 0.022 | 2.73E-42 |
| KRIT1    | 1.87E-46 | -0.14023 | 0.205 | 0.427 | 2.80E-42 |
| ZNF655   | 1.92E-46 | -0.13309 | 0.154 | 0.369 | 2.87E-42 |
| NELL2    | 1.95E-46 | -0.365   | 0.064 | 0.272 | 2.92E-42 |
| IRAK1    | 1.96E-46 | -0.19323 | 0.084 | 0.279 | 2.92E-42 |
| PLCG1    | 1.98E-46 | -0.2145  | 0.055 | 0.235 | 2.95E-42 |
| AMH      | 2.03E-46 | -0.23692 | 0.037 | 0.211 | 3.04E-42 |
| SNX14    | 2.04E-46 | -0.13023 | 0.152 | 0.356 | 3.05E-42 |
| TMX3     | 2.08E-46 | -0.10066 | 0.127 | 0.319 | 3.11E-42 |
| POU2F1   | 2.11E-46 | -0.20642 | 0.089 | 0.293 | 3.15E-42 |
| PMPCB    | 2.27E-46 | 0.152394 | 0.345 | 0.514 | 3.40E-42 |
| KIAA1841 | 2.32E-46 | -0.23488 | 0.037 | 0.21  | 3.47E-42 |
| USP7     | 2.37E-46 | -0.14986 | 0.083 | 0.267 | 3.55E-42 |
| AP5S1    | 2.44E-46 | -0.11926 | 0.042 | 0.199 | 3.65E-42 |

|          |          |          |       |       |          |
|----------|----------|----------|-------|-------|----------|
| MAPK10   | 2.47E-46 | -0.20858 | 0.115 | 0.33  | 3.69E-42 |
| ELF2     | 2.51E-46 | -0.12017 | 0.126 | 0.311 | 3.75E-42 |
| DLX1     | 2.56E-46 | -0.35734 | 0.03  | 0.201 | 3.83E-42 |
| MESDC1   | 2.57E-46 | -0.24064 | 0.039 | 0.217 | 3.84E-42 |
| EMP2     | 2.59E-46 | 0.181929 | 0.19  | 0.321 | 3.87E-42 |
| FTSJ1    | 2.78E-46 | -0.11728 | 0.101 | 0.28  | 4.15E-42 |
| CAPG     | 2.92E-46 | 0.675566 | 0.304 | 0.227 | 4.37E-42 |
| POMZP3   | 3.45E-46 | -0.31239 | 0.048 | 0.243 | 5.15E-42 |
| POP4     | 3.93E-46 | 0.202578 | 0.243 | 0.385 | 5.87E-42 |
| EMG1     | 3.98E-46 | 0.289197 | 0.27  | 0.367 | 5.95E-42 |
| EYA2     | 4.05E-46 | -0.12686 | 0.063 | 0.227 | 6.05E-42 |
| ZBTB17   | 4.10E-46 | -0.11038 | 0.061 | 0.221 | 6.13E-42 |
| GRWD1    | 4.34E-46 | -0.15659 | 0.117 | 0.317 | 6.49E-42 |
| PPP4R1   | 4.39E-46 | -0.18081 | 0.076 | 0.265 | 6.57E-42 |
| AUNIP    | 4.57E-46 | -0.25702 | 0.005 | 0.13  | 6.83E-42 |
| DERL1    | 4.74E-46 | 0.234947 | 0.298 | 0.409 | 7.08E-42 |
| LYSMD2   | 4.86E-46 | -0.22088 | 0.061 | 0.251 | 7.27E-42 |
| GPALPP1  | 5.43E-46 | -0.1005  | 0.09  | 0.267 | 8.11E-42 |
| GNG2     | 5.80E-46 | -0.2202  | 0.098 | 0.305 | 8.66E-42 |
| YDJC     | 5.99E-46 | -0.19368 | 0.071 | 0.256 | 8.95E-42 |
| C21orf2  | 6.20E-46 | -0.17055 | 0.123 | 0.325 | 9.26E-42 |
| C18orf32 | 6.58E-46 | 0.133082 | 0.196 | 0.315 | 9.83E-42 |
| GBP1     | 7.26E-46 | 0.781663 | 0.318 | 0.133 | 1.08E-41 |
| DPP8     | 7.27E-46 | -0.14586 | 0.095 | 0.28  | 1.09E-41 |
| GNG5     | 7.36E-46 | 0.251871 | 0.677 | 0.798 | 1.10E-41 |
| GBE1     | 7.43E-46 | 0.491639 | 0.316 | 0.278 | 1.11E-41 |
| BEST1    | 7.56E-46 | 0.337438 | 0.242 | 0.285 | 1.13E-41 |
| EXOSC7   | 8.59E-46 | 0.178203 | 0.232 | 0.374 | 1.28E-41 |
| CHTF8    | 8.78E-46 | -0.10454 | 0.135 | 0.326 | 1.31E-41 |
| RRAGC    | 9.19E-46 | 0.131119 | 0.237 | 0.344 | 1.37E-41 |
| SHMT2    | 9.30E-46 | 0.126734 | 0.26  | 0.411 | 1.39E-41 |
| SYDE1    | 1.08E-45 | -0.12893 | 0.066 | 0.231 | 1.62E-41 |
| MYO5A    | 1.09E-45 | -0.15604 | 0.034 | 0.186 | 1.63E-41 |
| WDR13    | 1.11E-45 | 0.203763 | 0.29  | 0.411 | 1.67E-41 |
| QRICH1   | 1.12E-45 | -0.15844 | 0.098 | 0.286 | 1.68E-41 |
| CARD8    | 1.12E-45 | -0.16286 | 0.06  | 0.237 | 1.68E-41 |
| TUBB6    | 1.31E-45 | 0.162522 | 0.274 | 0.42  | 1.96E-41 |
| ISOC2    | 1.39E-45 | 0.159833 | 0.359 | 0.512 | 2.08E-41 |
| SH3KBP1  | 1.48E-45 | -0.30747 | 0.078 | 0.288 | 2.21E-41 |
| RTTN     | 1.49E-45 | -0.16542 | 0.015 | 0.152 | 2.23E-41 |
| MED29    | 1.51E-45 | 0.152451 | 0.239 | 0.385 | 2.26E-41 |
| SLAIN2   | 1.54E-45 | -0.17955 | 0.079 | 0.268 | 2.30E-41 |
| KIF3B    | 1.55E-45 | -0.15605 | 0.076 | 0.251 | 2.31E-41 |
| TPP1     | 1.69E-45 | 0.380345 | 0.218 | 0.251 | 2.52E-41 |
| PCED1A   | 1.72E-45 | -0.10647 | 0.086 | 0.252 | 2.57E-41 |
| TCTN1    | 1.78E-45 | 0.240835 | 0.255 | 0.365 | 2.66E-41 |
| FAM57A   | 1.81E-45 | -0.13323 | 0.084 | 0.258 | 2.70E-41 |
| HSPA1A   | 1.84E-45 | -0.47527 | 0.296 | 0.584 | 2.75E-41 |
| SLC2A3   | 1.87E-45 | 0.614175 | 0.279 | 0.178 | 2.79E-41 |
| NRXN1    | 1.96E-45 | -0.52143 | 0.096 | 0.326 | 2.93E-41 |
| PBX3     | 1.99E-45 | -0.19797 | 0.06  | 0.238 | 2.98E-41 |

|           |          |          |       |       |          |
|-----------|----------|----------|-------|-------|----------|
| TRPM3     | 2.04E-45 | -0.14378 | 0.015 | 0.138 | 3.05E-41 |
| AP1B1     | 2.13E-45 | -0.13914 | 0.078 | 0.249 | 3.18E-41 |
| LAMTOR3   | 2.14E-45 | 0.24305  | 0.272 | 0.359 | 3.20E-41 |
| CALCOCO2  | 2.15E-45 | 0.229732 | 0.219 | 0.296 | 3.21E-41 |
| PTPN9     | 2.22E-45 | -0.15575 | 0.062 | 0.236 | 3.32E-41 |
| NAT9      | 2.23E-45 | 0.113261 | 0.211 | 0.346 | 3.34E-41 |
| ATRN      | 2.26E-45 | -0.12256 | 0.062 | 0.216 | 3.38E-41 |
| ADAL      | 2.31E-45 | -0.13758 | 0.072 | 0.24  | 3.45E-41 |
| ALG3      | 2.38E-45 | 0.201979 | 0.208 | 0.338 | 3.56E-41 |
| DCBLD2    | 2.50E-45 | -0.26731 | 0.115 | 0.338 | 3.74E-41 |
| SIL1      | 2.51E-45 | 0.352979 | 0.237 | 0.29  | 3.75E-41 |
| C1QB      | 2.54E-45 | 0.709666 | 0.444 | 0.31  | 3.80E-41 |
| SPG7      | 2.56E-45 | -0.17507 | 0.173 | 0.388 | 3.83E-41 |
| PRPF4     | 2.60E-45 | -0.12957 | 0.165 | 0.379 | 3.89E-41 |
| RNF139    | 2.77E-45 | -0.15981 | 0.172 | 0.39  | 4.14E-41 |
| CENPB     | 2.77E-45 | -0.17218 | 0.061 | 0.237 | 4.14E-41 |
| HGSNAT    | 2.77E-45 | -0.18526 | 0.1   | 0.3   | 4.14E-41 |
| FAF1      | 2.80E-45 | -0.2037  | 0.135 | 0.352 | 4.18E-41 |
| MTRNR2L12 | 2.84E-45 | 0.95364  | 0.228 | 0.18  | 4.25E-41 |
| DPH7      | 2.94E-45 | -0.11298 | 0.157 | 0.341 | 4.39E-41 |
| GSKIP     | 2.97E-45 | -0.11992 | 0.107 | 0.29  | 4.44E-41 |
| NUP210    | 3.03E-45 | -0.179   | 0.021 | 0.168 | 4.53E-41 |
| PIGP      | 3.46E-45 | 0.266302 | 0.197 | 0.289 | 5.18E-41 |
| DUSP14    | 3.63E-45 | 0.241541 | 0.224 | 0.335 | 5.42E-41 |
| C18orf54  | 3.71E-45 | -0.21883 | 0.01  | 0.148 | 5.54E-41 |
| EID2      | 3.77E-45 | -0.22506 | 0.057 | 0.243 | 5.63E-41 |
| RASD1     | 3.98E-45 | 0.69806  | 0.307 | 0.131 | 5.95E-41 |
| SOBP      | 4.03E-45 | -0.22616 | 0.072 | 0.262 | 6.02E-41 |
| HEXA      | 4.09E-45 | 0.247342 | 0.249 | 0.375 | 6.11E-41 |
| PRKACB    | 4.16E-45 | -0.10609 | 0.123 | 0.306 | 6.22E-41 |
| CHMP1B    | 4.28E-45 | 0.328043 | 0.35  | 0.401 | 6.39E-41 |
| COMMD10   | 4.39E-45 | 0.197834 | 0.215 | 0.353 | 6.55E-41 |
| SRD5A3    | 4.48E-45 | -0.23619 | 0.095 | 0.295 | 6.70E-41 |
| SPRY4     | 4.73E-45 | -0.1049  | 0.037 | 0.175 | 7.07E-41 |
| P4HA1     | 5.12E-45 | 0.361357 | 0.234 | 0.241 | 7.65E-41 |
| STOM      | 5.24E-45 | 0.665311 | 0.236 | 0.142 | 7.83E-41 |
| RDH14     | 5.47E-45 | -0.12952 | 0.154 | 0.347 | 8.17E-41 |
| OTP       | 5.60E-45 | -0.19468 | 0.005 | 0.125 | 8.37E-41 |
| STX2      | 6.19E-45 | -0.22474 | 0.065 | 0.254 | 9.25E-41 |
| ING3      | 6.26E-45 | -0.22549 | 0.157 | 0.394 | 9.36E-41 |
| ZNF609    | 6.51E-45 | -0.17866 | 0.024 | 0.173 | 9.73E-41 |
| EIF2AK4   | 6.56E-45 | -0.14041 | 0.118 | 0.31  | 9.80E-41 |
| TMEM38B   | 6.56E-45 | 0.405566 | 0.269 | 0.309 | 9.81E-41 |
| ELN       | 6.74E-45 | -0.10336 | 0.138 | 0.344 | 1.01E-40 |
| PDXDC1    | 6.80E-45 | -0.1232  | 0.121 | 0.299 | 1.02E-40 |
| KAT6A     | 6.89E-45 | -0.20643 | 0.095 | 0.293 | 1.03E-40 |
| NOL3      | 7.05E-45 | 0.521937 | 0.23  | 0.156 | 1.05E-40 |
| PSMD9     | 7.07E-45 | 0.213837 | 0.288 | 0.399 | 1.06E-40 |
| TWF2      | 7.21E-45 | 0.175561 | 0.222 | 0.348 | 1.08E-40 |
| ATP9A     | 7.80E-45 | -0.16554 | 0.053 | 0.22  | 1.17E-40 |
| C11orf96  | 7.90E-45 | -0.17521 | 0.114 | 0.306 | 1.18E-40 |

|           |          |          |       |       |          |
|-----------|----------|----------|-------|-------|----------|
| SYS1      | 7.94E-45 | 0.136293 | 0.197 | 0.326 | 1.19E-40 |
| PIK3C2A   | 8.04E-45 | -0.16001 | 0.084 | 0.26  | 1.20E-40 |
| GTF2A1    | 8.20E-45 | -0.15564 | 0.074 | 0.248 | 1.23E-40 |
| TBC1D10B  | 8.28E-45 | -0.18608 | 0.048 | 0.215 | 1.24E-40 |
| S100A16   | 8.47E-45 | 0.676808 | 0.586 | 0.48  | 1.27E-40 |
| TUBGCP3   | 8.56E-45 | -0.28863 | 0.065 | 0.264 | 1.28E-40 |
| ZFP91     | 8.66E-45 | -0.18707 | 0.087 | 0.274 | 1.29E-40 |
| PPCS      | 8.83E-45 | 0.535287 | 0.325 | 0.275 | 1.32E-40 |
| NOTCH3    | 9.06E-45 | -0.10928 | 0.033 | 0.17  | 1.35E-40 |
| GMCL1     | 9.08E-45 | -0.19038 | 0.15  | 0.365 | 1.36E-40 |
| ARID1B    | 9.36E-45 | -0.23278 | 0.056 | 0.235 | 1.40E-40 |
| CAMK2N1   | 9.40E-45 | -0.26328 | 0.248 | 0.499 | 1.40E-40 |
| LRP1      | 1.02E-44 | 0.23332  | 0.28  | 0.39  | 1.52E-40 |
| ZFAND2A   | 1.04E-44 | 0.204546 | 0.299 | 0.452 | 1.55E-40 |
| MSI1      | 1.08E-44 | -0.22954 | 0.1   | 0.307 | 1.62E-40 |
| YARS      | 1.10E-44 | 0.102386 | 0.246 | 0.374 | 1.64E-40 |
| DESI1     | 1.12E-44 | -0.10628 | 0.086 | 0.252 | 1.68E-40 |
| CERS1     | 1.13E-44 | -0.12081 | 0.083 | 0.253 | 1.69E-40 |
| C15orf40  | 1.17E-44 | 0.165962 | 0.154 | 0.274 | 1.75E-40 |
| TMEM161B  | 1.25E-44 | -0.13243 | 0.253 | 0.489 | 1.86E-40 |
| UCHL3     | 1.29E-44 | 0.149143 | 0.232 | 0.379 | 1.93E-40 |
| ST3GAL2   | 1.37E-44 | -0.13958 | 0.059 | 0.223 | 2.04E-40 |
| AC004951  | 1.38E-44 | -0.22575 | 0.106 | 0.315 | 2.06E-40 |
| PPP3CA    | 1.39E-44 | -0.12326 | 0.187 | 0.385 | 2.08E-40 |
| THSD1     | 1.44E-44 | -0.19254 | 0.037 | 0.201 | 2.15E-40 |
| CXCL2     | 1.52E-44 | 0.850525 | 0.167 | 0.011 | 2.27E-40 |
| ZNF48     | 1.58E-44 | -0.18373 | 0.058 | 0.228 | 2.36E-40 |
| ARHGEF6   | 1.65E-44 | -0.14159 | 0.054 | 0.217 | 2.47E-40 |
| DUS3L     | 1.66E-44 | -0.17113 | 0.11  | 0.299 | 2.48E-40 |
| CCAR2     | 1.72E-44 | -0.1545  | 0.119 | 0.33  | 2.57E-40 |
| BTBD1     | 1.85E-44 | -0.14207 | 0.083 | 0.254 | 2.77E-40 |
| POR       | 1.95E-44 | 0.248825 | 0.295 | 0.368 | 2.92E-40 |
| SYT17     | 2.07E-44 | -0.15235 | 0.088 | 0.265 | 3.10E-40 |
| CARM1     | 2.19E-44 | -0.13787 | 0.045 | 0.193 | 3.27E-40 |
| FAM58A    | 2.22E-44 | -0.14683 | 0.089 | 0.27  | 3.32E-40 |
| MPRIP     | 2.29E-44 | -0.10463 | 0.121 | 0.305 | 3.42E-40 |
| GEMIN7    | 2.31E-44 | 0.115485 | 0.144 | 0.273 | 3.46E-40 |
| C1orf112  | 2.32E-44 | -0.23837 | 0.025 | 0.181 | 3.46E-40 |
| USP9X     | 2.36E-44 | -0.10361 | 0.133 | 0.316 | 3.53E-40 |
| RNPEPL1   | 2.42E-44 | -0.15326 | 0.031 | 0.181 | 3.62E-40 |
| HEPN1     | 2.43E-44 | 0.277485 | 0.262 | 0.374 | 3.63E-40 |
| CCZ1B     | 2.62E-44 | -0.10844 | 0.117 | 0.301 | 3.92E-40 |
| PITPNB    | 2.76E-44 | -0.15725 | 0.123 | 0.332 | 4.12E-40 |
| MEN1      | 2.76E-44 | -0.14562 | 0.092 | 0.264 | 4.13E-40 |
| HAUS5     | 2.84E-44 | -0.17853 | 0.057 | 0.223 | 4.24E-40 |
| PRKAG1    | 2.89E-44 | 0.129238 | 0.265 | 0.422 | 4.32E-40 |
| TESK1     | 2.96E-44 | -0.13769 | 0.04  | 0.185 | 4.43E-40 |
| TMEM260   | 2.96E-44 | -0.13341 | 0.029 | 0.167 | 4.43E-40 |
| RP11-345J | 2.97E-44 | -0.16886 | 0.18  | 0.393 | 4.44E-40 |
| LRRRC16A  | 3.02E-44 | -0.15714 | 0.025 | 0.162 | 4.51E-40 |
| HS6ST2    | 3.07E-44 | -0.16112 | 0.013 | 0.143 | 4.59E-40 |



|           |          |          |       |       |          |
|-----------|----------|----------|-------|-------|----------|
| ATP1A3    | 3.40E-44 | -0.43026 | 0.038 | 0.219 | 5.08E-40 |
| AKAP17A   | 3.41E-44 | -0.17826 | 0.109 | 0.302 | 5.10E-40 |
| IGBP1     | 3.45E-44 | 0.146463 | 0.27  | 0.416 | 5.16E-40 |
| ABHD14A   | 3.51E-44 | -0.15972 | 0.129 | 0.336 | 5.25E-40 |
| PSMB9     | 3.74E-44 | 0.362476 | 0.377 | 0.472 | 5.60E-40 |
| SMPD4     | 4.02E-44 | -0.15893 | 0.096 | 0.283 | 6.01E-40 |
| LDOC1L    | 4.04E-44 | -0.24458 | 0.037 | 0.209 | 6.04E-40 |
| HMGCS1    | 4.11E-44 | -0.10264 | 0.143 | 0.34  | 6.14E-40 |
| DHTKD1    | 4.21E-44 | -0.1689  | 0.074 | 0.257 | 6.29E-40 |
| ZFP90     | 4.24E-44 | -0.19912 | 0.085 | 0.277 | 6.33E-40 |
| ZDHHC22   | 4.29E-44 | -0.22808 | 0.007 | 0.13  | 6.41E-40 |
| EFHC1     | 4.37E-44 | 0.275511 | 0.231 | 0.332 | 6.53E-40 |
| RAD17     | 4.45E-44 | -0.12593 | 0.108 | 0.283 | 6.65E-40 |
| TBC1D1    | 4.65E-44 | -0.20757 | 0.054 | 0.231 | 6.95E-40 |
| DNPEP     | 4.70E-44 | 0.125728 | 0.241 | 0.347 | 7.03E-40 |
| SLC35D2   | 4.78E-44 | -0.20627 | 0.037 | 0.202 | 7.14E-40 |
| API5      | 4.91E-44 | -0.11479 | 0.164 | 0.363 | 7.33E-40 |
| FBXO9     | 5.06E-44 | -0.17227 | 0.145 | 0.349 | 7.56E-40 |
| DGCR8     | 5.09E-44 | -0.18073 | 0.059 | 0.228 | 7.60E-40 |
| SCPEP1    | 5.24E-44 | 0.571636 | 0.257 | 0.207 | 7.83E-40 |
| GTF2H1    | 5.31E-44 | 0.139092 | 0.186 | 0.311 | 7.94E-40 |
| UCHL5     | 5.83E-44 | -0.1573  | 0.136 | 0.338 | 8.71E-40 |
| NAB2      | 6.07E-44 | -0.11202 | 0.099 | 0.265 | 9.07E-40 |
| ZHX3      | 6.90E-44 | -0.27796 | 0.069 | 0.262 | 1.03E-39 |
| PTPN18    | 7.07E-44 | -0.15534 | 0.094 | 0.277 | 1.06E-39 |
| HSD11B1L  | 7.14E-44 | -0.12915 | 0.14  | 0.332 | 1.07E-39 |
| SPOCK2    | 7.42E-44 | 0.553493 | 0.253 | 0.162 | 1.11E-39 |
| AKAP11    | 7.48E-44 | -0.14343 | 0.091 | 0.273 | 1.12E-39 |
| GUCD1     | 7.63E-44 | -0.20551 | 0.074 | 0.256 | 1.14E-39 |
| PATZ1     | 7.95E-44 | -0.21107 | 0.035 | 0.201 | 1.19E-39 |
| PGBD1     | 8.15E-44 | -0.19373 | 0.049 | 0.22  | 1.22E-39 |
| CIC       | 8.46E-44 | -0.15444 | 0.079 | 0.248 | 1.26E-39 |
| DIS3L     | 8.52E-44 | -0.24387 | 0.06  | 0.246 | 1.27E-39 |
| NARFL     | 8.87E-44 | -0.11106 | 0.11  | 0.294 | 1.33E-39 |
| PAK1IP1   | 8.91E-44 | 0.179762 | 0.25  | 0.368 | 1.33E-39 |
| ABCC3     | 8.98E-44 | 0.68512  | 0.2   | 0.053 | 1.34E-39 |
| CACNG7    | 9.33E-44 | -0.17044 | 0.032 | 0.185 | 1.39E-39 |
| DPP9      | 9.41E-44 | -0.19359 | 0.088 | 0.273 | 1.41E-39 |
| TWISTNB   | 9.77E-44 | 0.19211  | 0.277 | 0.406 | 1.46E-39 |
| SCFD1     | 1.00E-43 | 0.234588 | 0.259 | 0.36  | 1.50E-39 |
| SPRTN     | 1.02E-43 | -0.14653 | 0.099 | 0.278 | 1.53E-39 |
| ITPK1     | 1.12E-43 | -0.19267 | 0.053 | 0.228 | 1.67E-39 |
| ZNF770    | 1.13E-43 | -0.11448 | 0.094 | 0.26  | 1.69E-39 |
| PXDC1     | 1.18E-43 | -0.18885 | 0.09  | 0.279 | 1.77E-39 |
| C14orf119 | 1.19E-43 | 0.143044 | 0.295 | 0.442 | 1.78E-39 |
| PLRG1     | 1.22E-43 | 0.149331 | 0.259 | 0.391 | 1.82E-39 |
| TPPP3     | 1.44E-43 | 0.457018 | 0.233 | 0.198 | 2.14E-39 |
| RAB11B-AS | 1.49E-43 | -0.18375 | 0.065 | 0.243 | 2.23E-39 |
| ARHGEF26  | 1.50E-43 | -0.22646 | 0.1   | 0.3   | 2.24E-39 |
| GYG1      | 1.66E-43 | 0.369723 | 0.258 | 0.305 | 2.48E-39 |
| KDM5A     | 1.68E-43 | -0.12753 | 0.185 | 0.38  | 2.51E-39 |

|           |          |          |       |       |          |
|-----------|----------|----------|-------|-------|----------|
| BBOX1     | 1.69E-43 | 0.556087 | 0.211 | 0.248 | 2.52E-39 |
| SETD3     | 1.96E-43 | -0.13755 | 0.091 | 0.263 | 2.94E-39 |
| HDAC6     | 2.00E-43 | -0.2277  | 0.079 | 0.272 | 2.99E-39 |
| MYO19     | 2.02E-43 | -0.13872 | 0.054 | 0.211 | 3.01E-39 |
| GOLPH3    | 2.02E-43 | -0.20087 | 0.117 | 0.322 | 3.02E-39 |
| ZNF519    | 2.05E-43 | -0.24824 | 0.02  | 0.163 | 3.07E-39 |
| DIP2B     | 2.10E-43 | -0.14488 | 0.051 | 0.202 | 3.14E-39 |
| HBS1L     | 2.13E-43 | -0.1638  | 0.166 | 0.373 | 3.18E-39 |
| DHX8      | 2.14E-43 | -0.1289  | 0.075 | 0.235 | 3.20E-39 |
| EHBP1     | 2.19E-43 | -0.10599 | 0.14  | 0.32  | 3.27E-39 |
| TRIM47    | 2.19E-43 | 0.179771 | 0.216 | 0.322 | 3.28E-39 |
| LITAF     | 2.27E-43 | 0.298268 | 0.336 | 0.421 | 3.39E-39 |
| HOMER3    | 2.36E-43 | -0.16312 | 0.153 | 0.359 | 3.52E-39 |
| ZBTB18    | 2.36E-43 | -0.2316  | 0.013 | 0.146 | 3.53E-39 |
| NUB1      | 2.44E-43 | 0.133965 | 0.26  | 0.379 | 3.65E-39 |
| ASCC2     | 2.59E-43 | -0.15844 | 0.134 | 0.33  | 3.87E-39 |
| DNMT3A    | 2.70E-43 | -0.21239 | 0.042 | 0.209 | 4.03E-39 |
| PTK2      | 2.74E-43 | -0.13446 | 0.132 | 0.319 | 4.10E-39 |
| PREPL     | 2.80E-43 | 0.131877 | 0.188 | 0.305 | 4.19E-39 |
| CCDC109B  | 2.84E-43 | -0.35138 | 0.253 | 0.528 | 4.24E-39 |
| ARFIP2    | 2.90E-43 | 0.128229 | 0.255 | 0.378 | 4.33E-39 |
| PPP1R9B   | 2.90E-43 | -0.14576 | 0.041 | 0.189 | 4.34E-39 |
| ARID5A    | 2.94E-43 | 0.220737 | 0.226 | 0.337 | 4.40E-39 |
| MKS1      | 2.95E-43 | -0.10323 | 0.07  | 0.228 | 4.41E-39 |
| SRSF12    | 2.95E-43 | -0.15361 | 0.048 | 0.214 | 4.41E-39 |
| ADA       | 3.02E-43 | -0.22272 | 0.033 | 0.196 | 4.51E-39 |
| ZNF775    | 3.18E-43 | -0.21796 | 0.049 | 0.225 | 4.75E-39 |
| PDXK      | 3.25E-43 | 0.124365 | 0.206 | 0.347 | 4.86E-39 |
| PHTF1     | 3.54E-43 | -0.15245 | 0.079 | 0.257 | 5.28E-39 |
| GTF3C2    | 3.91E-43 | -0.14626 | 0.057 | 0.223 | 5.84E-39 |
| RP11-126K | 3.94E-43 | -0.19795 | 0.038 | 0.195 | 5.89E-39 |
| LEO1      | 4.03E-43 | -0.13787 | 0.108 | 0.295 | 6.02E-39 |
| PAM       | 4.21E-43 | 0.199284 | 0.214 | 0.286 | 6.29E-39 |
| ATP1B2    | 4.34E-43 | 0.108599 | 0.257 | 0.394 | 6.49E-39 |
| ROGDI     | 4.85E-43 | -0.19626 | 0.092 | 0.281 | 7.25E-39 |
| BRD8      | 5.02E-43 | -0.19444 | 0.165 | 0.379 | 7.50E-39 |
| PJA2      | 5.08E-43 | -0.1272  | 0.28  | 0.51  | 7.60E-39 |
| STK11     | 5.16E-43 | -0.19413 | 0.056 | 0.226 | 7.71E-39 |
| MUTYH     | 5.49E-43 | -0.22484 | 0.071 | 0.252 | 8.21E-39 |
| BCL2L1    | 5.69E-43 | 0.196391 | 0.22  | 0.323 | 8.50E-39 |
| VIM       | 5.76E-43 | 0.312476 | 0.761 | 0.722 | 8.61E-39 |
| DNAJC1    | 5.96E-43 | -0.19647 | 0.15  | 0.357 | 8.91E-39 |
| RBM18     | 6.36E-43 | 0.121316 | 0.205 | 0.332 | 9.50E-39 |
| ARL14EP   | 7.08E-43 | 0.128318 | 0.164 | 0.295 | 1.06E-38 |
| ETHE1     | 7.18E-43 | 0.382892 | 0.253 | 0.298 | 1.07E-38 |
| DNAL4     | 7.28E-43 | -0.16244 | 0.083 | 0.262 | 1.09E-38 |
| EHMT1     | 7.60E-43 | -0.15851 | 0.09  | 0.273 | 1.14E-38 |
| KLHL22    | 8.10E-43 | -0.17567 | 0.058 | 0.221 | 1.21E-38 |
| MVD       | 8.17E-43 | -0.17914 | 0.11  | 0.305 | 1.22E-38 |
| TMEM5     | 8.20E-43 | 0.123106 | 0.2   | 0.325 | 1.22E-38 |
| RP11-395G | 8.35E-43 | -0.23161 | 0.129 | 0.337 | 1.25E-38 |

|          |          |          |       |       |          |
|----------|----------|----------|-------|-------|----------|
| SMCR5    | 8.42E-43 | -0.19895 | 0.041 | 0.2   | 1.26E-38 |
| C9orf69  | 8.54E-43 | -0.19226 | 0.044 | 0.21  | 1.28E-38 |
| WDR45    | 8.67E-43 | 0.309947 | 0.233 | 0.315 | 1.30E-38 |
| TMEM63B  | 8.87E-43 | -0.10764 | 0.085 | 0.251 | 1.33E-38 |
| CCDC6    | 9.15E-43 | -0.10182 | 0.063 | 0.21  | 1.37E-38 |
| PCID2    | 9.22E-43 | 0.137949 | 0.207 | 0.33  | 1.38E-38 |
| CXCL16   | 9.77E-43 | 0.144805 | 0.235 | 0.39  | 1.46E-38 |
| ZNF436   | 9.81E-43 | -0.19193 | 0.037 | 0.193 | 1.47E-38 |
| CCDC77   | 9.91E-43 | -0.2514  | 0.049 | 0.223 | 1.48E-38 |
| RRP15    | 1.02E-42 | 0.112574 | 0.197 | 0.354 | 1.53E-38 |
| PLIN2    | 1.06E-42 | 0.9996   | 0.306 | 0.115 | 1.59E-38 |
| PPIC     | 1.08E-42 | 0.465521 | 0.266 | 0.322 | 1.61E-38 |
| WARS     | 1.11E-42 | 0.349766 | 0.255 | 0.269 | 1.66E-38 |
| ELOVL1   | 1.15E-42 | 0.120821 | 0.149 | 0.29  | 1.72E-38 |
| SKIL     | 1.19E-42 | -0.27865 | 0.117 | 0.337 | 1.78E-38 |
| PIM3     | 1.20E-42 | -0.21402 | 0.116 | 0.319 | 1.80E-38 |
| GSTCD    | 1.21E-42 | -0.16856 | 0.022 | 0.164 | 1.81E-38 |
| TRAPPC11 | 1.23E-42 | -0.18313 | 0.042 | 0.2   | 1.83E-38 |
| COMMD9   | 1.24E-42 | 0.143051 | 0.222 | 0.348 | 1.85E-38 |
| TMEM201  | 1.28E-42 | -0.17442 | 0.018 | 0.156 | 1.92E-38 |
| CACNA1A  | 1.30E-42 | -0.28138 | 0.038 | 0.2   | 1.94E-38 |
| MTRNR2L8 | 1.30E-42 | 0.846762 | 0.221 | 0.149 | 1.95E-38 |
| UBQLN2   | 1.40E-42 | -0.14783 | 0.165 | 0.363 | 2.09E-38 |
| LAMP5    | 1.41E-42 | -0.23383 | 0.055 | 0.235 | 2.10E-38 |
| TLE4     | 1.44E-42 | -0.13358 | 0.109 | 0.284 | 2.16E-38 |
| NADK     | 1.50E-42 | -0.13368 | 0.099 | 0.281 | 2.24E-38 |
| PHACTR2  | 1.60E-42 | -0.13641 | 0.011 | 0.137 | 2.39E-38 |
| SKIV2L2  | 1.61E-42 | -0.21321 | 0.129 | 0.337 | 2.41E-38 |
| PXDN     | 1.75E-42 | -0.14687 | 0.077 | 0.247 | 2.61E-38 |
| SEC61A2  | 1.79E-42 | -0.12933 | 0.043 | 0.19  | 2.67E-38 |
| NRIP1    | 2.02E-42 | -0.18215 | 0.05  | 0.216 | 3.02E-38 |
| C17orf53 | 2.04E-42 | -0.18768 | 0.012 | 0.14  | 3.05E-38 |
| ELAVL2   | 2.09E-42 | -0.33612 | 0.018 | 0.165 | 3.13E-38 |
| PTRF     | 2.16E-42 | 0.252677 | 0.285 | 0.336 | 3.23E-38 |
| FBXL3    | 2.21E-42 | -0.12259 | 0.138 | 0.317 | 3.30E-38 |
| SKP2     | 2.24E-42 | -0.19729 | 0.034 | 0.189 | 3.35E-38 |
| IFNGR1   | 2.29E-42 | 0.31478  | 0.31  | 0.352 | 3.43E-38 |
| TAF4     | 2.37E-42 | -0.14643 | 0.029 | 0.169 | 3.55E-38 |
| GAR1     | 2.48E-42 | 0.19123  | 0.228 | 0.353 | 3.70E-38 |
| APAF1    | 2.57E-42 | -0.19136 | 0.025 | 0.172 | 3.83E-38 |
| RFWD2    | 2.59E-42 | -0.21797 | 0.108 | 0.311 | 3.87E-38 |
| ATP5E    | 2.69E-42 | 0.275158 | 0.845 | 0.933 | 4.02E-38 |
| CHST11   | 2.71E-42 | -0.25737 | 0.079 | 0.272 | 4.05E-38 |
| ANKS3    | 3.01E-42 | -0.11276 | 0.144 | 0.33  | 4.50E-38 |
| C17orf80 | 3.11E-42 | -0.16576 | 0.052 | 0.215 | 4.64E-38 |
| FOXN2    | 3.13E-42 | -0.2025  | 0.055 | 0.226 | 4.68E-38 |
| PPFIA1   | 3.21E-42 | -0.13677 | 0.124 | 0.307 | 4.80E-38 |
| U2AF1L4  | 3.85E-42 | 0.274799 | 0.194 | 0.289 | 5.76E-38 |
| MTHFD1L  | 3.93E-42 | -0.11417 | 0.063 | 0.22  | 5.87E-38 |
| FZD2     | 4.05E-42 | -0.1383  | 0.009 | 0.128 | 6.05E-38 |
| EBF4     | 4.12E-42 | -0.13719 | 0.025 | 0.165 | 6.16E-38 |

|         |          |          |       |       |          |
|---------|----------|----------|-------|-------|----------|
| CCDC138 | 4.39E-42 | -0.20849 | 0.031 | 0.186 | 6.57E-38 |
| NCK1    | 4.59E-42 | 0.162046 | 0.228 | 0.356 | 6.86E-38 |
| RAP2A   | 4.63E-42 | -0.14237 | 0.078 | 0.248 | 6.92E-38 |
| BEND6   | 4.69E-42 | -0.17382 | 0.079 | 0.263 | 7.01E-38 |
| NLGN4X  | 5.08E-42 | -0.2454  | 0.074 | 0.26  | 7.60E-38 |
| PEAK1   | 5.11E-42 | -0.15751 | 0.027 | 0.165 | 7.64E-38 |
| TMEM39B | 5.13E-42 | -0.10469 | 0.088 | 0.263 | 7.66E-38 |
| UFSP2   | 5.18E-42 | 0.123555 | 0.216 | 0.358 | 7.74E-38 |
| CDH6    | 5.43E-42 | -0.14461 | 0.028 | 0.163 | 8.12E-38 |
| TRIM13  | 5.84E-42 | -0.28792 | 0.158 | 0.388 | 8.73E-38 |
| DPY19L4 | 6.37E-42 | -0.14614 | 0.068 | 0.228 | 9.51E-38 |
| CENPC   | 6.55E-42 | -0.21743 | 0.091 | 0.281 | 9.79E-38 |
| CTNNA1  | 6.75E-42 | -0.20362 | 0.203 | 0.433 | 1.01E-37 |
| UBE2H   | 6.93E-42 | -0.14804 | 0.175 | 0.375 | 1.04E-37 |
| GPR108  | 7.04E-42 | 0.226453 | 0.242 | 0.34  | 1.05E-37 |
| TPD52   | 7.17E-42 | 0.20981  | 0.262 | 0.358 | 1.07E-37 |
| FAT1    | 7.42E-42 | -0.16028 | 0.041 | 0.194 | 1.11E-37 |
| EML1    | 7.49E-42 | -0.10108 | 0.042 | 0.178 | 1.12E-37 |
| EPAS1   | 7.49E-42 | 0.577248 | 0.218 | 0.09  | 1.12E-37 |
| POM121C | 7.70E-42 | -0.14898 | 0.109 | 0.29  | 1.15E-37 |
| FBX045  | 8.19E-42 | -0.17661 | 0.034 | 0.184 | 1.22E-37 |
| CEP192  | 9.53E-42 | -0.16194 | 0.024 | 0.16  | 1.42E-37 |
| SEC23A  | 9.60E-42 | 0.1033   | 0.183 | 0.307 | 1.43E-37 |
| LRRC17  | 9.79E-42 | -0.28573 | 0.042 | 0.206 | 1.46E-37 |
| KAT5    | 1.00E-41 | 0.123324 | 0.226 | 0.363 | 1.50E-37 |
| PTN     | 1.03E-41 | 0.379736 | 0.809 | 0.916 | 1.55E-37 |
| CA14    | 1.04E-41 | -0.30111 | 0.009 | 0.136 | 1.55E-37 |
| CCND3   | 1.20E-41 | 0.235388 | 0.221 | 0.342 | 1.79E-37 |
| NUP155  | 1.20E-41 | -0.20311 | 0.046 | 0.206 | 1.80E-37 |
| GTDC1   | 1.21E-41 | -0.20404 | 0.053 | 0.225 | 1.81E-37 |
| DTNBP1  | 1.21E-41 | -0.10609 | 0.144 | 0.32  | 1.81E-37 |
| SMYD2   | 1.26E-41 | -0.14982 | 0.1   | 0.283 | 1.88E-37 |
| GAK     | 1.28E-41 | -0.14357 | 0.08  | 0.248 | 1.92E-37 |
| KATNB1  | 1.28E-41 | -0.21871 | 0.07  | 0.256 | 1.92E-37 |
| CYB5R4  | 1.29E-41 | -0.13088 | 0.066 | 0.228 | 1.93E-37 |
| SELM    | 1.35E-41 | 0.53016  | 0.222 | 0.105 | 2.01E-37 |
| NANS    | 1.45E-41 | 0.300607 | 0.306 | 0.364 | 2.17E-37 |
| NEIL2   | 1.47E-41 | 0.223471 | 0.217 | 0.31  | 2.20E-37 |
| STEAP3  | 1.50E-41 | 0.5783   | 0.22  | 0.181 | 2.24E-37 |
| RPP38   | 1.50E-41 | -0.18331 | 0.077 | 0.259 | 2.24E-37 |
| LLPH    | 1.55E-41 | 0.169894 | 0.262 | 0.386 | 2.32E-37 |
| UBL4A   | 1.57E-41 | -0.12414 | 0.14  | 0.333 | 2.34E-37 |
| RMND5A  | 1.65E-41 | -0.12815 | 0.079 | 0.237 | 2.46E-37 |
| COQ5    | 1.72E-41 | 0.105983 | 0.197 | 0.342 | 2.58E-37 |
| CBX4    | 1.73E-41 | -0.19058 | 0.06  | 0.225 | 2.59E-37 |
| LRP10   | 1.79E-41 | 0.28304  | 0.227 | 0.265 | 2.67E-37 |
| HGS     | 1.85E-41 | -0.10593 | 0.186 | 0.379 | 2.76E-37 |
| KLHDC10 | 2.02E-41 | -0.16036 | 0.087 | 0.256 | 3.03E-37 |
| PDLIM2  | 2.03E-41 | 0.360919 | 0.269 | 0.312 | 3.04E-37 |
| SS18L1  | 2.06E-41 | -0.12792 | 0.053 | 0.198 | 3.08E-37 |
| PPIL4   | 2.08E-41 | 0.121757 | 0.235 | 0.374 | 3.11E-37 |

|           |          |          |       |       |          |
|-----------|----------|----------|-------|-------|----------|
| CADM2     | 2.18E-41 | -0.33042 | 0.125 | 0.346 | 3.26E-37 |
| TRIO      | 2.18E-41 | -0.21835 | 0.126 | 0.325 | 3.26E-37 |
| GCFC2     | 2.29E-41 | -0.15327 | 0.102 | 0.272 | 3.42E-37 |
| NOB1      | 2.30E-41 | 0.171702 | 0.204 | 0.299 | 3.44E-37 |
| TOR3A     | 2.34E-41 | -0.14144 | 0.162 | 0.356 | 3.49E-37 |
| ZNF93     | 2.34E-41 | -0.19579 | 0.043 | 0.202 | 3.50E-37 |
| PGM2L1    | 2.35E-41 | 0.205627 | 0.298 | 0.427 | 3.51E-37 |
| MKNK2     | 2.38E-41 | 0.179803 | 0.16  | 0.236 | 3.56E-37 |
| GATAD2B   | 2.45E-41 | -0.18128 | 0.086 | 0.263 | 3.66E-37 |
| SPG20     | 2.58E-41 | 0.122238 | 0.272 | 0.386 | 3.85E-37 |
| KLF3      | 2.58E-41 | -0.14994 | 0.118 | 0.299 | 3.86E-37 |
| DTNB      | 2.61E-41 | -0.19919 | 0.035 | 0.191 | 3.89E-37 |
| B3GNT5    | 2.66E-41 | -0.23434 | 0.045 | 0.204 | 3.98E-37 |
| AP001347. | 2.67E-41 | -0.22983 | 0.005 | 0.121 | 3.99E-37 |
| PALM      | 2.69E-41 | -0.20092 | 0.075 | 0.252 | 4.03E-37 |
| IMPDH1    | 2.79E-41 | -0.13012 | 0.096 | 0.264 | 4.18E-37 |
| SPEN      | 2.94E-41 | -0.13235 | 0.106 | 0.279 | 4.40E-37 |
| OXA1L     | 3.14E-41 | 0.250935 | 0.219 | 0.326 | 4.69E-37 |
| ATP6V1C1  | 3.17E-41 | 0.154794 | 0.198 | 0.31  | 4.74E-37 |
| PCSK2     | 3.34E-41 | -0.33415 | 0.008 | 0.128 | 4.99E-37 |
| NOP16     | 3.42E-41 | 0.195988 | 0.224 | 0.349 | 5.11E-37 |
| FBXW7     | 3.44E-41 | -0.20344 | 0.08  | 0.262 | 5.14E-37 |
| STX6      | 3.48E-41 | -0.18038 | 0.09  | 0.269 | 5.20E-37 |
| TM9SF3    | 3.55E-41 | -0.139   | 0.137 | 0.319 | 5.31E-37 |
| RBM7      | 3.66E-41 | 0.33837  | 0.289 | 0.311 | 5.47E-37 |
| CXCR4     | 3.92E-41 | 0.369568 | 0.244 | 0.293 | 5.86E-37 |
| TMEM176A  | 4.16E-41 | 0.670221 | 0.227 | 0.074 | 6.21E-37 |
| RFT1      | 4.18E-41 | -0.13477 | 0.103 | 0.285 | 6.25E-37 |
| GAB1      | 4.30E-41 | -0.2264  | 0.046 | 0.214 | 6.43E-37 |
| HES1      | 4.37E-41 | 0.151464 | 0.236 | 0.343 | 6.52E-37 |
| KIAA1958  | 4.40E-41 | -0.19762 | 0.029 | 0.178 | 6.57E-37 |
| CA10      | 4.42E-41 | -0.25426 | 0.004 | 0.11  | 6.60E-37 |
| NIT2      | 4.68E-41 | 0.266894 | 0.232 | 0.341 | 6.99E-37 |
| CNKS3     | 4.79E-41 | -0.13961 | 0.074 | 0.247 | 7.16E-37 |
| PAXIP1-AS | 4.83E-41 | -0.17946 | 0.161 | 0.368 | 7.22E-37 |
| RRBP1     | 5.21E-41 | -0.22725 | 0.211 | 0.432 | 7.79E-37 |
| RCE1      | 5.36E-41 | -0.1177  | 0.097 | 0.26  | 8.01E-37 |
| TRAF3IP2  | 5.42E-41 | -0.16479 | 0.101 | 0.28  | 8.10E-37 |
| NOTCH2NL  | 5.44E-41 | -0.10911 | 0.133 | 0.304 | 8.12E-37 |
| B3GALNT1  | 5.63E-41 | -0.14199 | 0.136 | 0.341 | 8.42E-37 |
| FBXO34    | 5.64E-41 | -0.16828 | 0.049 | 0.204 | 8.43E-37 |
| EXOC4     | 5.85E-41 | -0.17693 | 0.134 | 0.331 | 8.75E-37 |
| GALNT15   | 6.07E-41 | 0.654949 | 0.153 | 0.007 | 9.08E-37 |
| APOD      | 6.41E-41 | 0.954325 | 0.313 | 0.132 | 9.58E-37 |
| SLC9A3R1  | 6.45E-41 | -0.23554 | 0.109 | 0.309 | 9.64E-37 |
| EPOR      | 6.60E-41 | -0.16177 | 0.033 | 0.174 | 9.87E-37 |
| RABGGTB   | 6.68E-41 | 0.228023 | 0.279 | 0.335 | 9.98E-37 |
| DRAM2     | 6.98E-41 | 0.197971 | 0.248 | 0.34  | 1.04E-36 |
| PLS3      | 6.99E-41 | 0.13446  | 0.245 | 0.395 | 1.04E-36 |
| TXNRD2    | 7.10E-41 | -0.16459 | 0.066 | 0.226 | 1.06E-36 |
| RP5-940J5 | 7.32E-41 | 0.611725 | 0.247 | 0.169 | 1.09E-36 |

|           |          |          |       |       |          |
|-----------|----------|----------|-------|-------|----------|
| ACSS3     | 7.37E-41 | -0.11473 | 0.087 | 0.248 | 1.10E-36 |
| ZNF625    | 7.44E-41 | -0.17051 | 0.033 | 0.172 | 1.11E-36 |
| CRKL      | 7.52E-41 | -0.16194 | 0.085 | 0.258 | 1.12E-36 |
| GPATCH11  | 7.57E-41 | -0.24259 | 0.107 | 0.312 | 1.13E-36 |
| CCDC127   | 7.65E-41 | 0.110112 | 0.131 | 0.244 | 1.14E-36 |
| PYGL      | 7.80E-41 | 0.530871 | 0.196 | 0.147 | 1.17E-36 |
| MAP3K11   | 7.99E-41 | -0.14364 | 0.102 | 0.288 | 1.19E-36 |
| C11orf84  | 8.19E-41 | -0.14384 | 0.017 | 0.148 | 1.22E-36 |
| R3HDM2    | 8.30E-41 | -0.11992 | 0.092 | 0.272 | 1.24E-36 |
| PARD3     | 9.08E-41 | -0.11876 | 0.039 | 0.179 | 1.36E-36 |
| PDCL      | 9.32E-41 | -0.16574 | 0.146 | 0.342 | 1.39E-36 |
| FAM217B   | 9.36E-41 | -0.1992  | 0.072 | 0.244 | 1.40E-36 |
| RPF2      | 1.00E-40 | 0.29924  | 0.266 | 0.357 | 1.50E-36 |
| GRIA4     | 1.02E-40 | -0.2993  | 0.058 | 0.24  | 1.52E-36 |
| CEP112    | 1.03E-40 | -0.12847 | 0.055 | 0.207 | 1.53E-36 |
| COLGALT1  | 1.04E-40 | -0.13824 | 0.09  | 0.264 | 1.55E-36 |
| RNF220    | 1.07E-40 | -0.16024 | 0.078 | 0.249 | 1.60E-36 |
| ZNF652    | 1.10E-40 | -0.15439 | 0.081 | 0.253 | 1.64E-36 |
| XRCC6BP1  | 1.11E-40 | -0.42656 | 0.055 | 0.243 | 1.65E-36 |
| C7orf26   | 1.11E-40 | -0.19849 | 0.115 | 0.309 | 1.66E-36 |
| METTL10   | 1.17E-40 | -0.15115 | 0.083 | 0.253 | 1.75E-36 |
| ARFGEF1   | 1.21E-40 | -0.13606 | 0.061 | 0.216 | 1.81E-36 |
| PIP4K2B   | 1.23E-40 | -0.13153 | 0.059 | 0.21  | 1.83E-36 |
| AGPAT2    | 1.25E-40 | -0.11814 | 0.076 | 0.222 | 1.87E-36 |
| MGEA5     | 1.28E-40 | -0.11953 | 0.155 | 0.335 | 1.91E-36 |
| MIB1      | 1.43E-40 | -0.16321 | 0.062 | 0.222 | 2.14E-36 |
| ANXA7     | 1.44E-40 | 0.349292 | 0.316 | 0.36  | 2.15E-36 |
| PIFO      | 1.44E-40 | 0.685865 | 0.193 | 0.026 | 2.16E-36 |
| LINC00667 | 1.46E-40 | 0.167648 | 0.235 | 0.359 | 2.18E-36 |
| BAIAP2    | 1.51E-40 | 0.175677 | 0.189 | 0.281 | 2.26E-36 |
| CACUL1    | 1.53E-40 | -0.1352  | 0.109 | 0.285 | 2.28E-36 |
| CSPG5     | 1.56E-40 | -0.41493 | 0.056 | 0.243 | 2.33E-36 |
| SLC25A22  | 1.57E-40 | -0.12793 | 0.089 | 0.258 | 2.34E-36 |
| NID1      | 1.60E-40 | -0.12236 | 0.025 | 0.154 | 2.39E-36 |
| CA2       | 1.60E-40 | 0.501772 | 0.263 | 0.296 | 2.39E-36 |
| NACC2     | 1.61E-40 | -0.14287 | 0.057 | 0.207 | 2.41E-36 |
| DDAH1     | 1.64E-40 | -0.19769 | 0.13  | 0.331 | 2.46E-36 |
| KATNAL1   | 1.66E-40 | -0.11823 | 0.061 | 0.221 | 2.48E-36 |
| RFX3      | 1.70E-40 | -0.14722 | 0.052 | 0.2   | 2.53E-36 |
| RBM28     | 1.71E-40 | -0.15014 | 0.138 | 0.331 | 2.55E-36 |
| TRAF3IP2  | 1.73E-40 | -0.18354 | 0.057 | 0.226 | 2.58E-36 |
| SCAMP3    | 1.84E-40 | 0.150083 | 0.292 | 0.41  | 2.75E-36 |
| BUD13     | 1.87E-40 | -0.20952 | 0.057 | 0.221 | 2.79E-36 |
| GPR180    | 1.94E-40 | -0.18301 | 0.049 | 0.211 | 2.90E-36 |
| CEP128    | 1.98E-40 | -0.162   | 0.008 | 0.122 | 2.96E-36 |
| RP11-563K | 2.10E-40 | -0.22187 | 0.03  | 0.177 | 3.14E-36 |
| ANKRD36   | 2.20E-40 | -0.2604  | 0.145 | 0.36  | 3.29E-36 |
| MAX       | 2.22E-40 | 0.240289 | 0.237 | 0.317 | 3.31E-36 |
| SPHK2     | 2.24E-40 | -0.18131 | 0.085 | 0.263 | 3.35E-36 |
| ANKRD39   | 2.41E-40 | -0.15215 | 0.101 | 0.286 | 3.60E-36 |
| NOC4L     | 2.57E-40 | -0.1995  | 0.126 | 0.317 | 3.85E-36 |

|           |          |          |       |       |          |
|-----------|----------|----------|-------|-------|----------|
| FIGN      | 2.59E-40 | -0.17111 | 0.085 | 0.262 | 3.87E-36 |
| TBRG1     | 2.65E-40 | 0.1214   | 0.206 | 0.326 | 3.96E-36 |
| KIF9      | 2.71E-40 | 0.212259 | 0.239 | 0.348 | 4.05E-36 |
| TMEM242   | 2.74E-40 | 0.130741 | 0.214 | 0.353 | 4.09E-36 |
| SLC35F2   | 3.07E-40 | -0.11345 | 0.061 | 0.221 | 4.59E-36 |
| C6orf47   | 3.08E-40 | -0.13683 | 0.1   | 0.273 | 4.60E-36 |
| TTY15     | 3.16E-40 | -0.16481 | 0.009 | 0.121 | 4.72E-36 |
| IRF2BP1   | 3.51E-40 | -0.151   | 0.074 | 0.24  | 5.24E-36 |
| KCNAB3    | 3.65E-40 | -0.20354 | 0.012 | 0.136 | 5.45E-36 |
| RAD54B    | 3.94E-40 | -0.19337 | 0.019 | 0.151 | 5.89E-36 |
| MANEA     | 4.04E-40 | -0.10747 | 0.045 | 0.194 | 6.04E-36 |
| RP13-1032 | 4.13E-40 | -0.20493 | 0.043 | 0.204 | 6.17E-36 |
| FAM184B   | 4.17E-40 | 0.101245 | 0.092 | 0.191 | 6.23E-36 |
| RIMKLB    | 4.40E-40 | -0.20234 | 0.12  | 0.32  | 6.57E-36 |
| DCLRE1B   | 4.69E-40 | -0.20351 | 0.045 | 0.204 | 7.02E-36 |
| ANKRD26   | 4.80E-40 | -0.16862 | 0.08  | 0.256 | 7.17E-36 |
| SLC25A19  | 5.03E-40 | -0.1451  | 0.06  | 0.209 | 7.52E-36 |
| TONSL     | 5.12E-40 | -0.19329 | 0.013 | 0.14  | 7.66E-36 |
| SMURF2    | 5.14E-40 | -0.16533 | 0.056 | 0.215 | 7.69E-36 |
| ATM       | 5.24E-40 | -0.10867 | 0.118 | 0.286 | 7.83E-36 |
| ATP2C1    | 5.45E-40 | -0.11328 | 0.173 | 0.353 | 8.15E-36 |
| KDM2A     | 5.55E-40 | -0.10933 | 0.075 | 0.226 | 8.30E-36 |
| PURB      | 5.84E-40 | -0.12201 | 0.134 | 0.311 | 8.72E-36 |
| FAXC      | 6.22E-40 | -0.27054 | 0.038 | 0.2   | 9.30E-36 |
| ZBTB8A    | 6.35E-40 | -0.20698 | 0.075 | 0.249 | 9.49E-36 |
| CDKN1A    | 6.44E-40 | 0.382631 | 0.33  | 0.332 | 9.63E-36 |
| BRWD1     | 6.47E-40 | -0.21758 | 0.172 | 0.388 | 9.67E-36 |
| INPP1     | 6.78E-40 | -0.1827  | 0.112 | 0.298 | 1.01E-35 |
| C11orf68  | 6.99E-40 | -0.11741 | 0.067 | 0.216 | 1.04E-35 |
| NIPSNAP1  | 7.24E-40 | -0.17473 | 0.091 | 0.275 | 1.08E-35 |
| MSANTD3   | 7.55E-40 | -0.15992 | 0.057 | 0.221 | 1.13E-35 |
| KLF12     | 8.06E-40 | -0.22629 | 0.042 | 0.206 | 1.20E-35 |
| LINC00662 | 8.28E-40 | 0.134408 | 0.191 | 0.3   | 1.24E-35 |
| CTU2      | 8.40E-40 | -0.15672 | 0.11  | 0.289 | 1.26E-35 |
| COPG2     | 8.48E-40 | -0.22015 | 0.084 | 0.28  | 1.27E-35 |
| MAPK9     | 8.89E-40 | -0.17886 | 0.037 | 0.189 | 1.33E-35 |
| THSD7A    | 9.44E-40 | -0.40672 | 0.06  | 0.249 | 1.41E-35 |
| TULP4     | 9.52E-40 | -0.16146 | 0.081 | 0.246 | 1.42E-35 |
| FOXO3     | 9.55E-40 | -0.12909 | 0.187 | 0.381 | 1.43E-35 |
| FAT3      | 9.60E-40 | -0.19805 | 0.018 | 0.152 | 1.44E-35 |
| SPATA5    | 9.67E-40 | -0.11044 | 0.027 | 0.147 | 1.44E-35 |
| ANTXR1    | 1.01E-39 | -0.26663 | 0.049 | 0.221 | 1.51E-35 |
| CARS      | 1.02E-39 | 0.240057 | 0.277 | 0.348 | 1.52E-35 |
| TMEM68    | 1.05E-39 | -0.1104  | 0.162 | 0.341 | 1.57E-35 |
| YIPF5     | 1.05E-39 | 0.325373 | 0.301 | 0.336 | 1.57E-35 |
| NCOA3     | 1.18E-39 | -0.21706 | 0.061 | 0.231 | 1.77E-35 |
| STK32B    | 1.26E-39 | -0.1517  | 0.034 | 0.172 | 1.89E-35 |
| NECAB3    | 1.32E-39 | -0.18486 | 0.04  | 0.195 | 1.98E-35 |
| ZNF672    | 1.46E-39 | -0.17383 | 0.084 | 0.258 | 2.18E-35 |
| TEX261    | 1.48E-39 | -0.20521 | 0.129 | 0.327 | 2.22E-35 |
| HSPB8     | 1.49E-39 | 0.596466 | 0.165 | 0.012 | 2.22E-35 |

|           |           |           |        |        |           |
|-----------|-----------|-----------|--------|--------|-----------|
| CDC42BPB  | 1. 50E-39 | -0. 16505 | 0. 053 | 0. 209 | 2. 24E-35 |
| NUP188    | 1. 54E-39 | -0. 20024 | 0. 059 | 0. 226 | 2. 30E-35 |
| ZNF280D   | 1. 69E-39 | -0. 1773  | 0. 045 | 0. 196 | 2. 52E-35 |
| DNAJC21   | 1. 71E-39 | -0. 18655 | 0. 077 | 0. 252 | 2. 55E-35 |
| UCK2      | 1. 71E-39 | -0. 10355 | 0. 049 | 0. 186 | 2. 56E-35 |
| GMPPA     | 1. 73E-39 | 0. 158861 | 0. 167 | 0. 28  | 2. 58E-35 |
| EIF2S3    | 1. 79E-39 | 0. 121491 | 0. 271 | 0. 388 | 2. 67E-35 |
| CCDC115   | 1. 83E-39 | 0. 289327 | 0. 289 | 0. 359 | 2. 74E-35 |
| CEP72     | 1. 98E-39 | -0. 26915 | 0. 01  | 0. 132 | 2. 95E-35 |
| THAP10    | 2. 01E-39 | -0. 15501 | 0. 044 | 0. 191 | 3. 00E-35 |
| LINC00152 | 2. 02E-39 | 0. 269815 | 0. 27  | 0. 38  | 3. 02E-35 |
| CCNK      | 2. 04E-39 | -0. 11752 | 0. 076 | 0. 228 | 3. 05E-35 |
| WNK3      | 2. 07E-39 | -0. 14513 | 0. 078 | 0. 241 | 3. 09E-35 |
| FBF1      | 2. 13E-39 | -0. 15047 | 0. 023 | 0. 153 | 3. 18E-35 |
| DENND5B   | 2. 37E-39 | -0. 17709 | 0. 049 | 0. 207 | 3. 54E-35 |
| NPM3      | 2. 39E-39 | 0. 171373 | 0. 195 | 0. 311 | 3. 58E-35 |
| ZNF76     | 2. 43E-39 | -0. 15766 | 0. 068 | 0. 231 | 3. 63E-35 |
| CEP44     | 2. 52E-39 | -0. 11766 | 0. 06  | 0. 207 | 3. 77E-35 |
| MTHFS     | 2. 62E-39 | 0. 246707 | 0. 158 | 0. 243 | 3. 91E-35 |
| TMEM51    | 2. 65E-39 | -0. 21829 | 0. 027 | 0. 175 | 3. 97E-35 |
| ZNF37A    | 2. 81E-39 | -0. 14467 | 0. 086 | 0. 257 | 4. 20E-35 |
| KCTD13    | 2. 85E-39 | -0. 27943 | 0. 077 | 0. 267 | 4. 26E-35 |
| RP11-398K | 3. 09E-39 | -0. 1927  | 0. 045 | 0. 199 | 4. 62E-35 |
| UPP1      | 3. 30E-39 | 0. 465914 | 0. 296 | 0. 284 | 4. 92E-35 |
| SHOX2     | 3. 32E-39 | -0. 17167 | 0. 034 | 0. 184 | 4. 96E-35 |
| CDC42EP4  | 3. 40E-39 | -0. 15481 | 0. 225 | 0. 43  | 5. 09E-35 |
| ZNF12     | 3. 49E-39 | -0. 14678 | 0. 092 | 0. 262 | 5. 21E-35 |
| WDR46     | 3. 76E-39 | 0. 141357 | 0. 223 | 0. 354 | 5. 62E-35 |
| SPAST     | 4. 08E-39 | -0. 22737 | 0. 052 | 0. 223 | 6. 10E-35 |
| CHMP7     | 4. 26E-39 | -0. 12313 | 0. 121 | 0. 3   | 6. 36E-35 |
| EP400     | 4. 31E-39 | -0. 16133 | 0. 073 | 0. 238 | 6. 45E-35 |
| PXN-AS1   | 4. 33E-39 | -0. 14812 | 0. 041 | 0. 19  | 6. 47E-35 |
| LPCAT3    | 4. 41E-39 | 0. 188682 | 0. 142 | 0. 263 | 6. 59E-35 |
| RP5-1085F | 4. 55E-39 | -0. 11783 | 0. 056 | 0. 193 | 6. 80E-35 |
| PILRB     | 4. 61E-39 | -0. 1981  | 0. 139 | 0. 333 | 6. 89E-35 |
| GALNS     | 4. 67E-39 | -0. 17004 | 0. 084 | 0. 26  | 6. 97E-35 |
| ACBD5     | 4. 68E-39 | -0. 1571  | 0. 091 | 0. 267 | 7. 00E-35 |
| LOXL1     | 5. 47E-39 | -0. 15764 | 0. 036 | 0. 178 | 8. 17E-35 |
| ZFYVE16   | 5. 59E-39 | -0. 14717 | 0. 099 | 0. 272 | 8. 35E-35 |
| PIAS4     | 5. 77E-39 | -0. 19163 | 0. 105 | 0. 288 | 8. 62E-35 |
| RELT      | 5. 96E-39 | -0. 15822 | 0. 024 | 0. 157 | 8. 90E-35 |
| PPP1R16A  | 6. 03E-39 | 0. 173025 | 0. 214 | 0. 284 | 9. 01E-35 |
| TSPAN6    | 6. 21E-39 | 0. 202804 | 0. 194 | 0. 295 | 9. 28E-35 |
| SLC8A1    | 6. 55E-39 | -0. 20004 | 0. 048 | 0. 2   | 9. 79E-35 |
| ULK3      | 6. 64E-39 | -0. 13003 | 0. 092 | 0. 26  | 9. 93E-35 |
| CHST7     | 6. 71E-39 | -0. 16547 | 0. 065 | 0. 228 | 1. 00E-34 |
| PHYHIP1L  | 6. 78E-39 | -0. 25378 | 0. 139 | 0. 351 | 1. 01E-34 |
| MGAT4B    | 6. 98E-39 | -0. 10552 | 0. 052 | 0. 188 | 1. 04E-34 |
| GATAD2A   | 7. 19E-39 | -0. 17455 | 0. 087 | 0. 26  | 1. 07E-34 |
| ZNF107    | 7. 61E-39 | -0. 22697 | 0. 019 | 0. 151 | 1. 14E-34 |
| KDM3B     | 7. 74E-39 | -0. 17392 | 0. 054 | 0. 209 | 1. 16E-34 |



|          |          |          |       |       |          |
|----------|----------|----------|-------|-------|----------|
| MORC4    | 7.80E-39 | -0.28804 | 0.051 | 0.226 | 1.17E-34 |
| TMEM55A  | 8.12E-39 | 0.221251 | 0.251 | 0.319 | 1.21E-34 |
| SNHG15   | 8.59E-39 | 0.314893 | 0.213 | 0.288 | 1.28E-34 |
| DNAJA3   | 8.60E-39 | -0.115   | 0.179 | 0.357 | 1.29E-34 |
| DCAF8    | 8.70E-39 | 0.130584 | 0.176 | 0.285 | 1.30E-34 |
| EXOSC2   | 8.80E-39 | -0.11266 | 0.081 | 0.241 | 1.32E-34 |
| CAT      | 8.84E-39 | 0.496888 | 0.295 | 0.278 | 1.32E-34 |
| LPCAT1   | 9.46E-39 | -0.21098 | 0.152 | 0.352 | 1.41E-34 |
| TMEM35   | 9.65E-39 | -0.31548 | 0.032 | 0.189 | 1.44E-34 |
| RAI1     | 9.95E-39 | -0.1474  | 0.029 | 0.163 | 1.49E-34 |
| ITGB1    | 1.02E-38 | -0.20673 | 0.259 | 0.505 | 1.52E-34 |
| ARHGEF39 | 1.05E-38 | -0.1841  | 0.011 | 0.128 | 1.58E-34 |
| PDCD6IP  | 1.07E-38 | 0.197085 | 0.249 | 0.358 | 1.60E-34 |
| ELAC2    | 1.14E-38 | -0.1631  | 0.112 | 0.296 | 1.70E-34 |
| PEX26    | 1.17E-38 | -0.10525 | 0.062 | 0.206 | 1.75E-34 |
| RUFY2    | 1.18E-38 | -0.14133 | 0.099 | 0.263 | 1.76E-34 |
| ARAP3    | 1.19E-38 | -0.15142 | 0.023 | 0.146 | 1.79E-34 |
| FGFBP3   | 1.26E-38 | -0.17886 | 0.027 | 0.165 | 1.88E-34 |
| MTRF1L   | 1.31E-38 | -0.13107 | 0.162 | 0.344 | 1.95E-34 |
| MTOR     | 1.38E-38 | -0.11995 | 0.041 | 0.183 | 2.06E-34 |
| SCAP     | 1.38E-38 | -0.13177 | 0.107 | 0.289 | 2.06E-34 |
| CRYZL1   | 1.42E-38 | 0.216038 | 0.244 | 0.333 | 2.12E-34 |
| PLEKHF2  | 1.53E-38 | -0.16071 | 0.078 | 0.244 | 2.29E-34 |
| MVP      | 1.56E-38 | 0.526824 | 0.202 | 0.144 | 2.34E-34 |
| ALDH16A1 | 1.62E-38 | -0.19665 | 0.052 | 0.209 | 2.42E-34 |
| PIK3R1   | 1.69E-38 | -0.31581 | 0.187 | 0.422 | 2.52E-34 |
| BRAT1    | 1.70E-38 | -0.2331  | 0.158 | 0.37  | 2.54E-34 |
| DCAF10   | 1.72E-38 | -0.10852 | 0.142 | 0.306 | 2.57E-34 |
| TCOF1    | 1.74E-38 | -0.16241 | 0.108 | 0.289 | 2.60E-34 |
| AGFG1    | 1.87E-38 | -0.1583  | 0.07  | 0.237 | 2.79E-34 |
| GLB1     | 1.89E-38 | 0.218279 | 0.211 | 0.272 | 2.83E-34 |
| SLC27A4  | 1.90E-38 | -0.15019 | 0.018 | 0.141 | 2.83E-34 |
| CMTM8    | 1.90E-38 | -0.11735 | 0.014 | 0.126 | 2.84E-34 |
| NUP205   | 1.99E-38 | -0.17819 | 0.049 | 0.196 | 2.97E-34 |
| CEP164   | 2.18E-38 | -0.14601 | 0.122 | 0.301 | 3.25E-34 |
| SMAD9    | 2.20E-38 | -0.17972 | 0.05  | 0.198 | 3.29E-34 |
| TAF3     | 2.30E-38 | -0.17182 | 0.075 | 0.243 | 3.44E-34 |
| ZNF581   | 2.33E-38 | 0.2333   | 0.143 | 0.206 | 3.48E-34 |
| FAF2     | 2.39E-38 | -0.12012 | 0.167 | 0.352 | 3.57E-34 |
| TRRAP    | 2.42E-38 | -0.1362  | 0.06  | 0.206 | 3.61E-34 |
| C21orf62 | 2.46E-38 | 0.178385 | 0.209 | 0.311 | 3.67E-34 |
| CELSR2   | 2.53E-38 | -0.12476 | 0.04  | 0.178 | 3.78E-34 |
| DMTF1    | 2.55E-38 | -0.15283 | 0.127 | 0.307 | 3.81E-34 |
| EDEM2    | 2.57E-38 | 0.206    | 0.195 | 0.304 | 3.84E-34 |
| SLC35B4  | 2.63E-38 | -0.12206 | 0.156 | 0.338 | 3.93E-34 |
| RALGAPB  | 2.74E-38 | -0.1581  | 0.065 | 0.221 | 4.09E-34 |
| ALDH2    | 2.87E-38 | 0.264263 | 0.275 | 0.3   | 4.29E-34 |
| NPAT     | 3.27E-38 | -0.12816 | 0.061 | 0.215 | 4.88E-34 |
| SLC4A8   | 3.27E-38 | -0.16627 | 0.056 | 0.209 | 4.89E-34 |
| TUBA1A   | 3.45E-38 | 0.139201 | 0.859 | 0.989 | 5.16E-34 |
| NQO1     | 3.46E-38 | 0.221294 | 0.136 | 0.22  | 5.18E-34 |

|          |          |          |       |       |          |
|----------|----------|----------|-------|-------|----------|
| C5orf45  | 3.53E-38 | 0.175035 | 0.161 | 0.241 | 5.27E-34 |
| PARVB    | 3.55E-38 | -0.13048 | 0.044 | 0.181 | 5.31E-34 |
| ZNF768   | 3.83E-38 | -0.13379 | 0.066 | 0.216 | 5.72E-34 |
| CLASRP   | 3.92E-38 | -0.11524 | 0.126 | 0.29  | 5.86E-34 |
| CIQA     | 4.51E-38 | 0.560356 | 0.371 | 0.294 | 6.75E-34 |
| C2orf68  | 4.58E-38 | -0.10933 | 0.099 | 0.265 | 6.84E-34 |
| MLLT10   | 4.58E-38 | -0.11741 | 0.079 | 0.238 | 6.84E-34 |
| TMEM57   | 5.10E-38 | -0.1582  | 0.118 | 0.291 | 7.63E-34 |
| FAM20B   | 5.20E-38 | -0.16226 | 0.034 | 0.174 | 7.77E-34 |
| GLA      | 5.23E-38 | -0.19612 | 0.095 | 0.274 | 7.82E-34 |
| STX4     | 5.77E-38 | 0.368619 | 0.265 | 0.286 | 8.62E-34 |
| NUP214   | 6.18E-38 | -0.15707 | 0.083 | 0.244 | 9.23E-34 |
| PMS1     | 6.19E-38 | -0.15047 | 0.087 | 0.249 | 9.25E-34 |
| MAP6D1   | 6.43E-38 | -0.2269  | 0.028 | 0.177 | 9.62E-34 |
| C19orf66 | 6.44E-38 | 0.203628 | 0.244 | 0.326 | 9.63E-34 |
| MAP9     | 6.57E-38 | 0.128955 | 0.206 | 0.31  | 9.83E-34 |
| DHRS4L2  | 6.58E-38 | 0.256026 | 0.221 | 0.319 | 9.83E-34 |
| TSPAN17  | 6.66E-38 | -0.16878 | 0.09  | 0.262 | 9.95E-34 |
| PHC1     | 6.72E-38 | -0.18316 | 0.051 | 0.204 | 1.00E-33 |
| ZNF280B  | 6.99E-38 | -0.13809 | 0.011 | 0.122 | 1.04E-33 |
| ADAMTS6  | 7.22E-38 | -0.21185 | 0.027 | 0.17  | 1.08E-33 |
| ZBTB1    | 7.45E-38 | -0.18864 | 0.091 | 0.27  | 1.11E-33 |
| NTRK2    | 8.05E-38 | 0.660663 | 0.333 | 0.149 | 1.20E-33 |
| RPUSD1   | 8.57E-38 | -0.19008 | 0.078 | 0.253 | 1.28E-33 |
| UMPS     | 8.98E-38 | -0.12472 | 0.129 | 0.305 | 1.34E-33 |
| POLR2M   | 9.01E-38 | -0.19995 | 0.117 | 0.304 | 1.35E-33 |
| CEP290   | 9.23E-38 | -0.14253 | 0.13  | 0.304 | 1.38E-33 |
| DPH3     | 9.25E-38 | 0.259942 | 0.239 | 0.332 | 1.38E-33 |
| MAP3K4   | 9.61E-38 | -0.14691 | 0.054 | 0.201 | 1.44E-33 |
| GOLGB1   | 9.64E-38 | 0.146785 | 0.226 | 0.319 | 1.44E-33 |
| CLN5     | 1.00E-37 | 0.155701 | 0.195 | 0.279 | 1.50E-33 |
| TRAF2    | 1.01E-37 | -0.15279 | 0.069 | 0.225 | 1.51E-33 |
| TP53TG1  | 1.02E-37 | 0.524526 | 0.242 | 0.226 | 1.52E-33 |
| CNOT6    | 1.04E-37 | -0.19395 | 0.03  | 0.172 | 1.55E-33 |
| RTN1     | 1.05E-37 | -0.36433 | 0.069 | 0.252 | 1.57E-33 |
| NRBP2    | 1.06E-37 | -0.15013 | 0.068 | 0.222 | 1.58E-33 |
| ZCCHC9   | 1.15E-37 | 0.112132 | 0.155 | 0.262 | 1.72E-33 |
| GTPBP3   | 1.18E-37 | -0.10796 | 0.104 | 0.262 | 1.76E-33 |
| MSH3     | 1.18E-37 | -0.1381  | 0.067 | 0.221 | 1.76E-33 |
| CAMK1D   | 1.21E-37 | -0.18407 | 0.03  | 0.168 | 1.80E-33 |
| MDFI     | 1.22E-37 | -0.22879 | 0.052 | 0.211 | 1.82E-33 |
| RND2     | 1.31E-37 | 0.214038 | 0.162 | 0.24  | 1.95E-33 |
| SDC2     | 1.33E-37 | 0.458955 | 0.257 | 0.193 | 1.99E-33 |
| ICK      | 1.42E-37 | -0.17263 | 0.042 | 0.189 | 2.12E-33 |
| ZBTB44   | 1.48E-37 | -0.1202  | 0.086 | 0.242 | 2.21E-33 |
| POC1B    | 1.60E-37 | -0.12713 | 0.06  | 0.205 | 2.40E-33 |
| UBXN7    | 1.67E-37 | -0.11522 | 0.075 | 0.231 | 2.50E-33 |
| VARS     | 1.69E-37 | -0.15558 | 0.087 | 0.254 | 2.53E-33 |
| CCNG1    | 1.70E-37 | 0.219502 | 0.317 | 0.41  | 2.54E-33 |
| OTUD4    | 1.87E-37 | -0.21327 | 0.059 | 0.231 | 2.79E-33 |
| FAM3A    | 1.97E-37 | 0.177425 | 0.207 | 0.322 | 2.95E-33 |

|           |          |          |       |       |          |
|-----------|----------|----------|-------|-------|----------|
| ZNF322    | 1.99E-37 | -0.11077 | 0.086 | 0.241 | 2.97E-33 |
| PDHX      | 2.02E-37 | 0.240987 | 0.183 | 0.253 | 3.02E-33 |
| GSDMD     | 2.04E-37 | 0.232027 | 0.136 | 0.198 | 3.04E-33 |
| FPGS      | 2.10E-37 | -0.14281 | 0.079 | 0.247 | 3.14E-33 |
| ASPHD2    | 2.12E-37 | -0.12874 | 0.022 | 0.148 | 3.17E-33 |
| NAPEPLD   | 2.13E-37 | -0.127   | 0.082 | 0.235 | 3.18E-33 |
| ZMYND19   | 2.17E-37 | -0.19563 | 0.025 | 0.164 | 3.25E-33 |
| IKBKG     | 2.18E-37 | -0.16769 | 0.064 | 0.225 | 3.26E-33 |
| SLC16A14  | 2.20E-37 | -0.20051 | 0.018 | 0.148 | 3.28E-33 |
| CAD       | 2.23E-37 | -0.14232 | 0.031 | 0.153 | 3.33E-33 |
| ZDHHC9    | 2.35E-37 | 0.424736 | 0.228 | 0.227 | 3.51E-33 |
| ATMIN     | 2.38E-37 | -0.14017 | 0.063 | 0.212 | 3.56E-33 |
| B3GALNT2  | 2.42E-37 | -0.14382 | 0.06  | 0.206 | 3.62E-33 |
| CETN3     | 2.48E-37 | -0.12086 | 0.131 | 0.311 | 3.70E-33 |
| HECTD4    | 2.50E-37 | -0.13443 | 0.045 | 0.188 | 3.74E-33 |
| FAM222B   | 2.51E-37 | -0.12939 | 0.05  | 0.196 | 3.75E-33 |
| NDUF4F4   | 2.52E-37 | 0.241058 | 0.235 | 0.338 | 3.76E-33 |
| AP2A2     | 2.53E-37 | -0.10393 | 0.167 | 0.336 | 3.78E-33 |
| SMARCD2   | 2.53E-37 | -0.12768 | 0.036 | 0.172 | 3.79E-33 |
| MVB12B    | 2.68E-37 | -0.15523 | 0.037 | 0.177 | 4.01E-33 |
| MOGS      | 2.75E-37 | -0.12393 | 0.074 | 0.22  | 4.12E-33 |
| CYBRD1    | 2.76E-37 | 0.355646 | 0.22  | 0.251 | 4.13E-33 |
| ZCCHC8    | 2.86E-37 | -0.15558 | 0.06  | 0.216 | 4.27E-33 |
| PDSS1     | 2.90E-37 | -0.1428  | 0.022 | 0.149 | 4.33E-33 |
| PIGQ      | 3.04E-37 | -0.16102 | 0.08  | 0.246 | 4.54E-33 |
| TRAPPC2P1 | 3.05E-37 | 0.397679 | 0.28  | 0.296 | 4.55E-33 |
| HAUS6     | 3.09E-37 | -0.2053  | 0.095 | 0.28  | 4.61E-33 |
| RP11-25K1 | 3.13E-37 | -0.16577 | 0.044 | 0.189 | 4.68E-33 |
| ZNF444    | 3.14E-37 | -0.13808 | 0.115 | 0.281 | 4.70E-33 |
| PRR14L    | 3.38E-37 | -0.12621 | 0.038 | 0.173 | 5.06E-33 |
| KDELC2    | 3.41E-37 | -0.17411 | 0.072 | 0.241 | 5.10E-33 |
| MICU1     | 3.43E-37 | -0.12256 | 0.082 | 0.24  | 5.12E-33 |
| GLIPR2    | 3.49E-37 | 0.151283 | 0.24  | 0.331 | 5.22E-33 |
| C1QTNF2   | 3.54E-37 | -0.23823 | 0.013 | 0.136 | 5.28E-33 |
| TTC37     | 3.64E-37 | -0.13474 | 0.128 | 0.305 | 5.44E-33 |
| DDX54     | 3.82E-37 | -0.15781 | 0.155 | 0.342 | 5.71E-33 |
| POLG      | 3.91E-37 | -0.14237 | 0.048 | 0.184 | 5.85E-33 |
| DHX40     | 3.92E-37 | -0.15081 | 0.117 | 0.291 | 5.85E-33 |
| UBB       | 4.14E-37 | 0.170216 | 0.843 | 0.965 | 6.18E-33 |
| NFS1      | 4.36E-37 | -0.10425 | 0.102 | 0.262 | 6.51E-33 |
| EXOC1     | 4.42E-37 | -0.16794 | 0.212 | 0.422 | 6.61E-33 |
| NRSN1     | 4.52E-37 | -0.17626 | 0.02  | 0.138 | 6.75E-33 |
| PCBD2     | 4.59E-37 | -0.1704  | 0.051 | 0.209 | 6.86E-33 |
| SDCCAG3   | 4.75E-37 | -0.15059 | 0.049 | 0.198 | 7.10E-33 |
| RP3-428L1 | 4.85E-37 | -0.1644  | 0.023 | 0.152 | 7.25E-33 |
| LINC00665 | 4.92E-37 | 0.130411 | 0.236 | 0.347 | 7.36E-33 |
| FAM53C    | 5.20E-37 | 0.129503 | 0.179 | 0.288 | 7.77E-33 |
| ARHGEF7   | 5.47E-37 | -0.20637 | 0.09  | 0.264 | 8.17E-33 |
| CDKN2AIP  | 5.52E-37 | -0.1063  | 0.125 | 0.298 | 8.25E-33 |
| SNHG10    | 5.52E-37 | -0.15787 | 0.073 | 0.232 | 8.25E-33 |
| TERF2     | 5.64E-37 | -0.16121 | 0.049 | 0.199 | 8.43E-33 |

|          |          |          |       |       |          |
|----------|----------|----------|-------|-------|----------|
| YEATS2   | 5.86E-37 | -0.16249 | 0.039 | 0.177 | 8.76E-33 |
| COPG1    | 6.17E-37 | 0.171144 | 0.236 | 0.31  | 9.22E-33 |
| GRPEL1   | 6.44E-37 | 0.112725 | 0.243 | 0.378 | 9.62E-33 |
| GJA1     | 6.46E-37 | 0.657964 | 0.229 | 0.054 | 9.65E-33 |
| AFTPH    | 7.26E-37 | -0.1388  | 0.115 | 0.284 | 1.09E-32 |
| SEH1L    | 7.32E-37 | -0.10333 | 0.076 | 0.23  | 1.09E-32 |
| TMBIM1   | 7.56E-37 | 0.528188 | 0.232 | 0.185 | 1.13E-32 |
| AVIL     | 7.59E-37 | -0.39081 | 0.062 | 0.242 | 1.13E-32 |
| AFAP1    | 7.62E-37 | -0.14025 | 0.048 | 0.185 | 1.14E-32 |
| DHCR7    | 8.10E-37 | -0.15067 | 0.135 | 0.32  | 1.21E-32 |
| FBXO22   | 8.51E-37 | 0.128543 | 0.136 | 0.253 | 1.27E-32 |
| SOS2     | 9.49E-37 | -0.13171 | 0.033 | 0.162 | 1.42E-32 |
| NEK1     | 9.71E-37 | -0.14005 | 0.102 | 0.274 | 1.45E-32 |
| LRP4     | 9.75E-37 | -0.14876 | 0.034 | 0.159 | 1.46E-32 |
| CTTNBP2  | 1.02E-36 | -0.29254 | 0.056 | 0.23  | 1.52E-32 |
| SCMH1    | 1.02E-36 | -0.16821 | 0.058 | 0.211 | 1.52E-32 |
| ZNF787   | 1.02E-36 | -0.11305 | 0.042 | 0.17  | 1.53E-32 |
| RARS     | 1.06E-36 | 0.141227 | 0.25  | 0.36  | 1.58E-32 |
| TLE2     | 1.10E-36 | -0.26264 | 0.047 | 0.207 | 1.64E-32 |
| FGFR10P2 | 1.19E-36 | 0.159909 | 0.313 | 0.428 | 1.78E-32 |
| DGCR2    | 1.23E-36 | -0.15753 | 0.12  | 0.301 | 1.84E-32 |
| BRF1     | 1.27E-36 | -0.16594 | 0.053 | 0.201 | 1.90E-32 |
| NVL      | 1.29E-36 | -0.22725 | 0.082 | 0.254 | 1.93E-32 |
| EPHB2    | 1.31E-36 | -0.21851 | 0.026 | 0.164 | 1.96E-32 |
| TMEM101  | 1.32E-36 | 0.139095 | 0.185 | 0.305 | 1.98E-32 |
| NME7     | 1.33E-36 | 0.195336 | 0.206 | 0.293 | 1.99E-32 |
| SLC38A2  | 1.37E-36 | 0.115675 | 0.252 | 0.362 | 2.05E-32 |
| SAV1     | 1.46E-36 | -0.16542 | 0.064 | 0.223 | 2.18E-32 |
| AK4      | 1.46E-36 | 0.2758   | 0.262 | 0.298 | 2.18E-32 |
| ZNF513   | 1.56E-36 | -0.12468 | 0.026 | 0.144 | 2.33E-32 |
| NAA30    | 1.85E-36 | -0.11648 | 0.043 | 0.174 | 2.77E-32 |
| ZNF266   | 1.86E-36 | -0.16521 | 0.068 | 0.216 | 2.78E-32 |
| LMBR1L   | 1.88E-36 | -0.11375 | 0.094 | 0.251 | 2.81E-32 |
| CRNKL1   | 1.88E-36 | -0.10336 | 0.12  | 0.277 | 2.81E-32 |
| PHF13    | 1.91E-36 | -0.15342 | 0.049 | 0.189 | 2.86E-32 |
| PIP5K1C  | 1.92E-36 | -0.15593 | 0.053 | 0.202 | 2.87E-32 |
| NMRAL1   | 2.04E-36 | 0.222498 | 0.231 | 0.336 | 3.04E-32 |
| CCDC174  | 2.06E-36 | 0.1406   | 0.187 | 0.294 | 3.08E-32 |
| ZSWIM6   | 2.25E-36 | -0.15967 | 0.045 | 0.188 | 3.37E-32 |
| GALK1    | 2.30E-36 | 0.167796 | 0.169 | 0.279 | 3.43E-32 |
| RNF165   | 2.44E-36 | -0.21193 | 0.023 | 0.156 | 3.64E-32 |
| MCMBP    | 2.58E-36 | -0.13857 | 0.11  | 0.273 | 3.86E-32 |
| GNB1L    | 2.66E-36 | -0.15791 | 0.056 | 0.201 | 3.97E-32 |
| MAPK8    | 2.67E-36 | -0.17992 | 0.046 | 0.189 | 4.00E-32 |
| PPP6R3   | 2.70E-36 | -0.10069 | 0.089 | 0.241 | 4.03E-32 |
| EFNB1    | 2.74E-36 | -0.22293 | 0.063 | 0.227 | 4.10E-32 |
| CDC23    | 2.85E-36 | -0.14976 | 0.129 | 0.31  | 4.25E-32 |
| ECHDC2   | 2.87E-36 | 0.270628 | 0.218 | 0.272 | 4.29E-32 |
| LLGL1    | 2.93E-36 | -0.15811 | 0.062 | 0.217 | 4.37E-32 |
| GLDC     | 2.99E-36 | -0.14428 | 0.04  | 0.175 | 4.47E-32 |
| B3GAT1   | 3.37E-36 | -0.20393 | 0.032 | 0.175 | 5.04E-32 |

|           |          |          |       |       |          |
|-----------|----------|----------|-------|-------|----------|
| RNF219    | 3.44E-36 | -0.23515 | 0.097 | 0.28  | 5.15E-32 |
| TRAPPC12  | 3.45E-36 | -0.13095 | 0.125 | 0.295 | 5.15E-32 |
| PTGDS     | 3.69E-36 | 1.045311 | 0.271 | 0.123 | 5.52E-32 |
| XPO6      | 3.70E-36 | -0.13476 | 0.065 | 0.216 | 5.52E-32 |
| PSMB8     | 3.76E-36 | 0.234414 | 0.364 | 0.478 | 5.62E-32 |
| PACS1     | 3.79E-36 | -0.10408 | 0.051 | 0.183 | 5.66E-32 |
| ADAM19    | 3.83E-36 | -0.22696 | 0.025 | 0.162 | 5.73E-32 |
| BNIP3     | 3.85E-36 | 0.287628 | 0.263 | 0.335 | 5.75E-32 |
| MAFG-AS1  | 4.02E-36 | -0.11789 | 0.039 | 0.174 | 6.01E-32 |
| ITGA2     | 4.22E-36 | -0.22125 | 0.044 | 0.2   | 6.30E-32 |
| PI4K2B    | 4.36E-36 | -0.16647 | 0.054 | 0.206 | 6.51E-32 |
| HLA-DQA2  | 4.75E-36 | 0.879263 | 0.128 | 0.005 | 7.10E-32 |
| UBE2D4    | 4.91E-36 | -0.11367 | 0.171 | 0.342 | 7.33E-32 |
| CNOT11    | 4.99E-36 | -0.21322 | 0.069 | 0.24  | 7.46E-32 |
| EGR1      | 5.02E-36 | -0.24677 | 0.414 | 0.659 | 7.50E-32 |
| SIKE1     | 5.05E-36 | 0.139026 | 0.193 | 0.296 | 7.54E-32 |
| GPR137C   | 5.10E-36 | -0.15316 | 0.02  | 0.137 | 7.62E-32 |
| TEL02     | 5.35E-36 | -0.15218 | 0.09  | 0.262 | 7.99E-32 |
| ADCK2     | 5.36E-36 | -0.14295 | 0.056 | 0.204 | 8.01E-32 |
| RP11-538F | 6.07E-36 | -0.18272 | 0.054 | 0.212 | 9.08E-32 |
| EIF3J-AS1 | 6.74E-36 | 0.102077 | 0.118 | 0.227 | 1.01E-31 |
| TOX3      | 7.64E-36 | -0.33451 | 0.028 | 0.172 | 1.14E-31 |
| GSX1      | 7.92E-36 | -0.25703 | 0.002 | 0.091 | 1.18E-31 |
| IGDCC3    | 8.41E-36 | -0.17493 | 0.014 | 0.128 | 1.26E-31 |
| RP11-212F | 8.49E-36 | -0.18737 | 0.045 | 0.188 | 1.27E-31 |
| CD58      | 9.05E-36 | 0.112091 | 0.155 | 0.259 | 1.35E-31 |
| MED25     | 9.05E-36 | -0.24277 | 0.099 | 0.281 | 1.35E-31 |
| RFX4      | 9.13E-36 | 0.144053 | 0.209 | 0.317 | 1.36E-31 |
| SCRIB     | 9.68E-36 | -0.18422 | 0.051 | 0.2   | 1.45E-31 |
| DDB2      | 9.98E-36 | 0.145239 | 0.106 | 0.183 | 1.49E-31 |
| CTBS      | 1.01E-35 | 0.24003  | 0.134 | 0.144 | 1.50E-31 |
| WWC3      | 1.03E-35 | -0.14799 | 0.021 | 0.143 | 1.54E-31 |
| TCEAL1    | 1.09E-35 | 0.35355  | 0.266 | 0.305 | 1.64E-31 |
| FOXRED1   | 1.10E-35 | -0.1545  | 0.086 | 0.246 | 1.64E-31 |
| ATP13A2   | 1.11E-35 | -0.18024 | 0.069 | 0.227 | 1.66E-31 |
| ARHGEF40  | 1.17E-35 | -0.14832 | 0.053 | 0.195 | 1.75E-31 |
| RP11-192H | 1.17E-35 | -0.14902 | 0.072 | 0.223 | 1.75E-31 |
| RAP2B     | 1.33E-35 | -0.11583 | 0.086 | 0.246 | 1.99E-31 |
| PBDC1     | 1.34E-35 | 0.166529 | 0.257 | 0.372 | 2.00E-31 |
| MAP3K2    | 1.35E-35 | -0.11989 | 0.114 | 0.274 | 2.02E-31 |
| PKD2      | 1.37E-35 | -0.13527 | 0.049 | 0.188 | 2.04E-31 |
| FANCC     | 1.39E-35 | -0.17008 | 0.014 | 0.127 | 2.07E-31 |
| CD82      | 1.39E-35 | -0.18317 | 0.21  | 0.42  | 2.08E-31 |
| LIMK1     | 1.45E-35 | -0.12884 | 0.062 | 0.209 | 2.16E-31 |
| FADS3     | 1.47E-35 | 0.223411 | 0.197 | 0.216 | 2.20E-31 |
| SFMBT1    | 1.51E-35 | -0.18474 | 0.05  | 0.2   | 2.25E-31 |
| AP006222. | 1.55E-35 | 0.130603 | 0.159 | 0.283 | 2.32E-31 |
| NLGN2     | 1.58E-35 | -0.20042 | 0.052 | 0.207 | 2.36E-31 |
| ALMS1     | 1.60E-35 | -0.17047 | 0.021 | 0.149 | 2.39E-31 |
| CUL2      | 1.65E-35 | -0.14148 | 0.068 | 0.216 | 2.46E-31 |
| REX01     | 1.68E-35 | -0.11792 | 0.033 | 0.154 | 2.51E-31 |

|           |           |           |        |        |           |
|-----------|-----------|-----------|--------|--------|-----------|
| TMEM129   | 1. 80E-35 | -0. 19875 | 0. 119 | 0. 3   | 2. 70E-31 |
| TFCP2     | 1. 92E-35 | -0. 13746 | 0. 076 | 0. 226 | 2. 87E-31 |
| AMOTL1    | 1. 97E-35 | -0. 15789 | 0. 04  | 0. 181 | 2. 94E-31 |
| ANXA6     | 2. 02E-35 | -0. 11862 | 0. 185 | 0. 374 | 3. 02E-31 |
| BCCIP     | 2. 02E-35 | 0. 14258  | 0. 169 | 0. 283 | 3. 03E-31 |
| TP53BP2   | 2. 24E-35 | -0. 15163 | 0. 062 | 0. 215 | 3. 34E-31 |
| TMOD2     | 2. 27E-35 | -0. 11501 | 0. 054 | 0. 19  | 3. 39E-31 |
| SETX      | 2. 35E-35 | -0. 14643 | 0. 098 | 0. 262 | 3. 51E-31 |
| DUSP10    | 2. 35E-35 | -0. 16278 | 0. 114 | 0. 277 | 3. 52E-31 |
| FNIP2     | 2. 40E-35 | -0. 14557 | 0. 087 | 0. 238 | 3. 58E-31 |
| IKBKB     | 2. 42E-35 | -0. 11164 | 0. 06  | 0. 207 | 3. 62E-31 |
| MAP4K3    | 2. 50E-35 | -0. 12489 | 0. 04  | 0. 165 | 3. 74E-31 |
| ACSF3     | 2. 55E-35 | -0. 15003 | 0. 057 | 0. 205 | 3. 80E-31 |
| LINC00511 | 2. 56E-35 | -0. 11087 | 0. 131 | 0. 285 | 3. 82E-31 |
| CHD3      | 2. 57E-35 | -0. 24425 | 0. 044 | 0. 195 | 3. 84E-31 |
| SH3BP4    | 2. 61E-35 | -0. 20499 | 0. 047 | 0. 199 | 3. 90E-31 |
| PN01      | 2. 62E-35 | 0. 151493 | 0. 251 | 0. 351 | 3. 91E-31 |
| ZNF195    | 2. 66E-35 | -0. 14448 | 0. 105 | 0. 274 | 3. 97E-31 |
| USP42     | 2. 76E-35 | -0. 17131 | 0. 089 | 0. 251 | 4. 13E-31 |
| PTPRF     | 2. 79E-35 | 0. 141885 | 0. 142 | 0. 211 | 4. 17E-31 |
| QRSL1     | 2. 83E-35 | -0. 13773 | 0. 092 | 0. 259 | 4. 24E-31 |
| HMGCL     | 2. 87E-35 | 0. 25442  | 0. 213 | 0. 284 | 4. 29E-31 |
| ASL       | 3. 06E-35 | 0. 346414 | 0. 189 | 0. 223 | 4. 57E-31 |
| ETV2      | 3. 06E-35 | -0. 12506 | 0. 016 | 0. 117 | 4. 58E-31 |
| AAMDC     | 3. 11E-35 | 0. 199362 | 0. 236 | 0. 335 | 4. 65E-31 |
| TBC1D5    | 3. 13E-35 | -0. 12036 | 0. 094 | 0. 247 | 4. 68E-31 |
| CAMSAP1   | 3. 24E-35 | -0. 20377 | 0. 032 | 0. 17  | 4. 84E-31 |
| GFOD2     | 3. 28E-35 | -0. 1117  | 0. 102 | 0. 254 | 4. 91E-31 |
| SORD      | 3. 31E-35 | -0. 11274 | 0. 053 | 0. 198 | 4. 95E-31 |
| COASY     | 3. 33E-35 | 0. 122171 | 0. 191 | 0. 291 | 4. 97E-31 |
| TP53INP2  | 3. 39E-35 | -0. 11107 | 0. 041 | 0. 165 | 5. 06E-31 |
| MMP14     | 3. 43E-35 | 0. 233372 | 0. 18  | 0. 228 | 5. 13E-31 |
| TPP2      | 3. 58E-35 | -0. 11324 | 0. 085 | 0. 227 | 5. 35E-31 |
| DDX6      | 3. 63E-35 | 0. 104255 | 0. 154 | 0. 283 | 5. 43E-31 |
| GTF3C4    | 3. 90E-35 | -0. 14319 | 0. 042 | 0. 174 | 5. 83E-31 |
| COMMD8    | 3. 91E-35 | 0. 138403 | 0. 167 | 0. 27  | 5. 84E-31 |
| IGFBP3    | 3. 98E-35 | 0. 29193  | 0. 269 | 0. 344 | 5. 95E-31 |
| ASIC4     | 4. 02E-35 | -0. 37763 | 0. 05  | 0. 215 | 6. 01E-31 |
| SCAMP1    | 4. 12E-35 | -0. 19507 | 0. 172 | 0. 372 | 6. 15E-31 |
| MID1IP1   | 4. 19E-35 | 0. 261136 | 0. 244 | 0. 306 | 6. 26E-31 |
| CSRP2BP   | 4. 21E-35 | -0. 1844  | 0. 04  | 0. 183 | 6. 29E-31 |
| SLC35E2B  | 4. 64E-35 | -0. 14348 | 0. 089 | 0. 249 | 6. 93E-31 |
| DYRK4     | 4. 81E-35 | 0. 187797 | 0. 213 | 0. 296 | 7. 18E-31 |
| NIPSNAP3A | 4. 87E-35 | 0. 170064 | 0. 158 | 0. 235 | 7. 28E-31 |
| NAA16     | 4. 97E-35 | -0. 16698 | 0. 102 | 0. 275 | 7. 43E-31 |
| OSBPL1A   | 5. 05E-35 | -0. 18524 | 0. 124 | 0. 306 | 7. 55E-31 |
| C16orf52  | 5. 15E-35 | -0. 15552 | 0. 056 | 0. 206 | 7. 70E-31 |
| MEIS3     | 5. 39E-35 | -0. 13188 | 0. 072 | 0. 226 | 8. 05E-31 |
| HRS12     | 5. 41E-35 | 0. 320462 | 0. 243 | 0. 29  | 8. 09E-31 |
| SLC1A2    | 5. 60E-35 | -0. 10966 | 0. 118 | 0. 279 | 8. 36E-31 |
| MAPK11    | 5. 63E-35 | -0. 17934 | 0. 019 | 0. 147 | 8. 41E-31 |

|           |          |          |       |       |          |
|-----------|----------|----------|-------|-------|----------|
| CPVL      | 5.64E-35 | 0.364394 | 0.136 | 0.17  | 8.43E-31 |
| NSF       | 5.98E-35 | -0.11278 | 0.092 | 0.247 | 8.93E-31 |
| TENM3     | 6.19E-35 | -0.26954 | 0.007 | 0.114 | 9.25E-31 |
| ZDHC24    | 6.37E-35 | -0.12851 | 0.102 | 0.263 | 9.52E-31 |
| SSSCA1    | 6.44E-35 | 0.175245 | 0.17  | 0.273 | 9.62E-31 |
| ARHGEF25  | 6.66E-35 | -0.30436 | 0.031 | 0.174 | 9.96E-31 |
| CELF5     | 7.35E-35 | -0.29276 | 0.021 | 0.151 | 1.10E-30 |
| ZYG11B    | 7.44E-35 | -0.13684 | 0.095 | 0.253 | 1.11E-30 |
| FAM69C    | 7.72E-35 | -0.12017 | 0.014 | 0.121 | 1.15E-30 |
| PGAM5     | 7.87E-35 | -0.11123 | 0.036 | 0.163 | 1.18E-30 |
| TIMM10B   | 8.12E-35 | 0.209102 | 0.17  | 0.268 | 1.21E-30 |
| SLC2A8    | 8.60E-35 | -0.11637 | 0.094 | 0.252 | 1.28E-30 |
| CTB-3102C | 9.03E-35 | -0.21317 | 0.073 | 0.233 | 1.35E-30 |
| ZBTB10    | 9.09E-35 | -0.19851 | 0.057 | 0.214 | 1.36E-30 |
| AKAP1     | 9.23E-35 | -0.12845 | 0.097 | 0.249 | 1.38E-30 |
| GTF2B     | 9.39E-35 | 0.281391 | 0.246 | 0.302 | 1.40E-30 |
| SFI1      | 9.48E-35 | -0.19447 | 0.027 | 0.16  | 1.42E-30 |
| TET1      | 9.63E-35 | -0.11171 | 0.034 | 0.153 | 1.44E-30 |
| GTF3C1    | 9.89E-35 | -0.12865 | 0.071 | 0.22  | 1.48E-30 |
| LYRM1     | 9.96E-35 | 0.134733 | 0.203 | 0.338 | 1.49E-30 |
| ENKD1     | 1.01E-34 | -0.15447 | 0.051 | 0.194 | 1.51E-30 |
| HMGCR     | 1.03E-34 | -0.10846 | 0.073 | 0.212 | 1.53E-30 |
| MAST2     | 1.03E-34 | -0.17709 | 0.046 | 0.188 | 1.53E-30 |
| EFCAB2    | 1.03E-34 | -0.15884 | 0.096 | 0.259 | 1.55E-30 |
| NBN       | 1.08E-34 | -0.16626 | 0.108 | 0.28  | 1.61E-30 |
| YTHDC2    | 1.12E-34 | -0.11583 | 0.076 | 0.216 | 1.67E-30 |
| NCOA5     | 1.13E-34 | -0.16549 | 0.052 | 0.196 | 1.68E-30 |
| LIN7B     | 1.14E-34 | -0.12346 | 0.084 | 0.231 | 1.70E-30 |
| ZC3H4     | 1.23E-34 | -0.20535 | 0.046 | 0.193 | 1.83E-30 |
| PPP3CB    | 1.23E-34 | -0.11914 | 0.05  | 0.18  | 1.84E-30 |
| MOB3A     | 1.28E-34 | -0.10322 | 0.086 | 0.235 | 1.91E-30 |
| ST5       | 1.33E-34 | 0.168389 | 0.177 | 0.26  | 1.98E-30 |
| BRSK1     | 1.34E-34 | -0.1443  | 0.041 | 0.178 | 2.01E-30 |
| TADA2A    | 1.39E-34 | -0.17785 | 0.046 | 0.189 | 2.08E-30 |
| RP11-498C | 1.41E-34 | -0.13365 | 0.017 | 0.13  | 2.11E-30 |
| PPIL2     | 1.49E-34 | -0.11728 | 0.071 | 0.215 | 2.22E-30 |
| ACOT13    | 1.49E-34 | 0.312515 | 0.228 | 0.288 | 2.23E-30 |
| TIPARP    | 1.50E-34 | 0.396283 | 0.21  | 0.158 | 2.23E-30 |
| LIPE      | 1.53E-34 | -0.18758 | 0.029 | 0.162 | 2.29E-30 |
| RP11-1114 | 1.61E-34 | -0.16426 | 0.045 | 0.178 | 2.41E-30 |
| MLLT3     | 1.63E-34 | -0.14292 | 0.059 | 0.201 | 2.43E-30 |
| CSRP1     | 1.64E-34 | 0.382526 | 0.237 | 0.284 | 2.45E-30 |
| FAM208A   | 1.79E-34 | -0.152   | 0.098 | 0.26  | 2.67E-30 |
| GSTM4     | 1.88E-34 | 0.133118 | 0.145 | 0.24  | 2.81E-30 |
| SALL3     | 1.95E-34 | -0.2418  | 0.017 | 0.14  | 2.92E-30 |
| TSEFM     | 1.99E-34 | -0.24946 | 0.275 | 0.509 | 2.97E-30 |
| USO1      | 2.17E-34 | 0.120829 | 0.197 | 0.301 | 3.25E-30 |
| DNAJC11   | 2.23E-34 | -0.10558 | 0.062 | 0.204 | 3.33E-30 |
| FAM101B   | 2.23E-34 | -0.16144 | 0.016 | 0.135 | 3.33E-30 |
| SLC50A1   | 2.23E-34 | 0.256815 | 0.127 | 0.18  | 3.34E-30 |
| PTPN2     | 2.24E-34 | 0.185962 | 0.193 | 0.274 | 3.35E-30 |

|           |          |          |       |       |          |
|-----------|----------|----------|-------|-------|----------|
| KIAA1211L | 2.30E-34 | -0.10198 | 0.008 | 0.101 | 3.44E-30 |
| COR07     | 2.42E-34 | -0.19722 | 0.043 | 0.189 | 3.62E-30 |
| FOSB      | 2.43E-34 | 0.530662 | 0.345 | 0.28  | 3.64E-30 |
| CSK       | 2.50E-34 | -0.15853 | 0.032 | 0.16  | 3.74E-30 |
| GMEB1     | 2.56E-34 | -0.15385 | 0.069 | 0.211 | 3.83E-30 |
| RRAS      | 2.64E-34 | 0.121482 | 0.098 | 0.156 | 3.95E-30 |
| TFAP2B    | 2.75E-34 | -0.25992 | 0.006 | 0.106 | 4.11E-30 |
| PTMA      | 2.99E-34 | 0.225893 | 0.911 | 0.985 | 4.47E-30 |
| SP1       | 3.01E-34 | -0.11234 | 0.044 | 0.172 | 4.50E-30 |
| DDX39B    | 3.26E-34 | -0.17586 | 0.06  | 0.206 | 4.88E-30 |
| KCNMA1    | 3.30E-34 | -0.15866 | 0.035 | 0.162 | 4.93E-30 |
| KIAA0232  | 3.37E-34 | -0.13988 | 0.091 | 0.247 | 5.04E-30 |
| PLXNA1    | 3.37E-34 | -0.12322 | 0.042 | 0.175 | 5.04E-30 |
| OTUD6B    | 3.50E-34 | -0.14706 | 0.099 | 0.256 | 5.23E-30 |
| CAB39     | 3.61E-34 | -0.14921 | 0.094 | 0.252 | 5.40E-30 |
| SUCLG2    | 3.67E-34 | 0.222545 | 0.219 | 0.284 | 5.48E-30 |
| DYRK1A    | 3.90E-34 | -0.16093 | 0.049 | 0.186 | 5.82E-30 |
| KDELC1    | 3.90E-34 | -0.15063 | 0.025 | 0.148 | 5.83E-30 |
| AQP4      | 3.94E-34 | 0.597207 | 0.288 | 0.211 | 5.89E-30 |
| ARL10     | 4.20E-34 | -0.10942 | 0.054 | 0.185 | 6.28E-30 |
| PHF10     | 4.33E-34 | -0.12688 | 0.055 | 0.185 | 6.48E-30 |
| HIP1R     | 4.65E-34 | -0.23946 | 0.046 | 0.196 | 6.95E-30 |
| ARHGEF1   | 4.79E-34 | -0.13012 | 0.107 | 0.26  | 7.16E-30 |
| DNAJC18   | 4.83E-34 | -0.2074  | 0.085 | 0.249 | 7.22E-30 |
| DZIP3     | 5.10E-34 | -0.19306 | 0.111 | 0.285 | 7.62E-30 |
| PCOLCE    | 5.29E-34 | 0.247541 | 0.097 | 0.169 | 7.91E-30 |
| KIF3C     | 5.44E-34 | -0.16667 | 0.042 | 0.18  | 8.13E-30 |
| GPR137B   | 5.58E-34 | 0.167871 | 0.175 | 0.23  | 8.34E-30 |
| DGCR14    | 5.74E-34 | -0.13542 | 0.086 | 0.236 | 8.57E-30 |
| FBX028    | 5.87E-34 | -0.11131 | 0.066 | 0.201 | 8.77E-30 |
| CCPG1     | 5.94E-34 | 0.101905 | 0.193 | 0.299 | 8.88E-30 |
| PI4KA     | 6.14E-34 | -0.14983 | 0.045 | 0.183 | 9.18E-30 |
| SRBD1     | 6.15E-34 | -0.15609 | 0.05  | 0.185 | 9.19E-30 |
| UBE2Z     | 6.57E-34 | -0.10761 | 0.13  | 0.293 | 9.82E-30 |
| FAM189B   | 6.60E-34 | -0.14461 | 0.059 | 0.201 | 9.86E-30 |
| FAM219B   | 6.91E-34 | -0.11938 | 0.091 | 0.236 | 1.03E-29 |
| SERGEF    | 7.38E-34 | 0.307815 | 0.201 | 0.22  | 1.10E-29 |
| DHX57     | 7.64E-34 | -0.12707 | 0.064 | 0.196 | 1.14E-29 |
| LINC01116 | 7.66E-34 | -0.14494 | 0.137 | 0.307 | 1.14E-29 |
| ROM1      | 7.67E-34 | 0.594234 | 0.196 | 0.127 | 1.15E-29 |
| TNPO3     | 7.81E-34 | -0.20703 | 0.137 | 0.323 | 1.17E-29 |
| PLCB1     | 8.08E-34 | -0.20743 | 0.043 | 0.189 | 1.21E-29 |
| HEY2      | 8.31E-34 | -0.12529 | 0.041 | 0.163 | 1.24E-29 |
| MAPK14    | 8.34E-34 | -0.10819 | 0.067 | 0.195 | 1.25E-29 |
| PCGF6     | 8.51E-34 | -0.1443  | 0.059 | 0.201 | 1.27E-29 |
| PKN3      | 8.90E-34 | -0.15414 | 0.008 | 0.11  | 1.33E-29 |
| KCNQ10T1  | 9.05E-34 | -0.25581 | 0.213 | 0.426 | 1.35E-29 |
| THOC5     | 9.61E-34 | -0.10473 | 0.042 | 0.17  | 1.44E-29 |
| TRAK1     | 9.85E-34 | -0.1414  | 0.035 | 0.163 | 1.47E-29 |
| TSEN54    | 9.92E-34 | -0.14549 | 0.076 | 0.225 | 1.48E-29 |
| RND3      | 9.92E-34 | -0.11775 | 0.214 | 0.395 | 1.48E-29 |



|           |           |           |        |        |           |
|-----------|-----------|-----------|--------|--------|-----------|
| SDC4      | 1. 01E-33 | 0. 358049 | 0. 184 | 0. 2   | 1. 51E-29 |
| YPEL3     | 1. 04E-33 | -0. 10757 | 0. 135 | 0. 293 | 1. 55E-29 |
| INSIG2    | 1. 05E-33 | 0. 365408 | 0. 261 | 0. 284 | 1. 58E-29 |
| VAX2      | 1. 21E-33 | -0. 23058 | 0. 039 | 0. 188 | 1. 81E-29 |
| SLC39A9   | 1. 22E-33 | -0. 12413 | 0. 058 | 0. 19  | 1. 82E-29 |
| ZFHX4-AS1 | 1. 26E-33 | -0. 15471 | 0. 011 | 0. 121 | 1. 89E-29 |
| FMR1      | 1. 32E-33 | -0. 11527 | 0. 066 | 0. 209 | 1. 98E-29 |
| MAOB      | 1. 37E-33 | 0. 686529 | 0. 234 | 0. 115 | 2. 04E-29 |
| ORMDL2    | 1. 42E-33 | 0. 362663 | 0. 237 | 0. 27  | 2. 11E-29 |
| MYO6      | 1. 48E-33 | -0. 12574 | 0. 2   | 0. 369 | 2. 21E-29 |
| CNOT6L    | 1. 55E-33 | -0. 10488 | 0. 05  | 0. 175 | 2. 32E-29 |
| ACAA2     | 1. 62E-33 | 0. 297474 | 0. 197 | 0. 278 | 2. 42E-29 |
| TMCC1     | 1. 64E-33 | -0. 14486 | 0. 047 | 0. 186 | 2. 45E-29 |
| NDP       | 1. 65E-33 | 0. 173394 | 0. 113 | 0. 198 | 2. 46E-29 |
| CPQ       | 1. 66E-33 | 0. 517565 | 0. 173 | 0. 107 | 2. 49E-29 |
| RNF166    | 1. 68E-33 | -0. 16591 | 0. 082 | 0. 241 | 2. 50E-29 |
| FER       | 1. 74E-33 | -0. 19374 | 0. 044 | 0. 19  | 2. 60E-29 |
| TNFRSF21  | 1. 74E-33 | -0. 1586  | 0. 085 | 0. 236 | 2. 60E-29 |
| PLEKHH3   | 1. 88E-33 | -0. 13832 | 0. 044 | 0. 178 | 2. 81E-29 |
| KDM4B     | 1. 93E-33 | -0. 16208 | 0. 082 | 0. 235 | 2. 88E-29 |
| MAPK3     | 2. 05E-33 | 0. 198065 | 0. 17  | 0. 253 | 3. 06E-29 |
| TECPR1    | 2. 05E-33 | -0. 12494 | 0. 067 | 0. 211 | 3. 06E-29 |
| GEM       | 2. 09E-33 | 0. 565121 | 0. 212 | 0. 147 | 3. 12E-29 |
| MFS6      | 2. 16E-33 | -0. 14236 | 0. 032 | 0. 158 | 3. 23E-29 |
| ACACA     | 2. 20E-33 | -0. 13693 | 0. 052 | 0. 185 | 3. 28E-29 |
| TIMP3     | 2. 38E-33 | 0. 365979 | 0. 203 | 0. 164 | 3. 56E-29 |
| ZNF226    | 2. 39E-33 | 0. 387204 | 0. 246 | 0. 258 | 3. 57E-29 |
| NOA1      | 2. 41E-33 | -0. 263   | 0. 098 | 0. 28  | 3. 60E-29 |
| LIG3      | 2. 60E-33 | -0. 15127 | 0. 031 | 0. 159 | 3. 89E-29 |
| ALG2      | 2. 61E-33 | 0. 165968 | 0. 179 | 0. 23  | 3. 90E-29 |
| FAM72A    | 2. 69E-33 | -0. 16819 | 0. 008 | 0. 11  | 4. 03E-29 |
| LRFN4     | 2. 69E-33 | -0. 16223 | 0. 026 | 0. 152 | 4. 03E-29 |
| BRCC3     | 2. 71E-33 | -0. 11976 | 0. 081 | 0. 225 | 4. 05E-29 |
| MED14     | 2. 78E-33 | -0. 13838 | 0. 036 | 0. 158 | 4. 16E-29 |
| RASSF4    | 2. 79E-33 | 0. 391093 | 0. 224 | 0. 219 | 4. 17E-29 |
| ZC3H6     | 2. 89E-33 | -0. 11825 | 0. 119 | 0. 273 | 4. 32E-29 |
| CLIP1     | 2. 91E-33 | 0. 145261 | 0. 196 | 0. 302 | 4. 34E-29 |
| UBQLN4    | 3. 03E-33 | -0. 22488 | 0. 074 | 0. 235 | 4. 52E-29 |
| CEP76     | 3. 03E-33 | -0. 10989 | 0. 051 | 0. 167 | 4. 53E-29 |
| PTPN4     | 3. 06E-33 | -0. 18621 | 0. 057 | 0. 202 | 4. 58E-29 |
| ZNF608    | 3. 07E-33 | -0. 10017 | 0. 127 | 0. 283 | 4. 58E-29 |
| HLA-E     | 3. 08E-33 | 0. 253303 | 0. 434 | 0. 462 | 4. 60E-29 |
| TAF6L     | 3. 09E-33 | -0. 14683 | 0. 048 | 0. 191 | 4. 62E-29 |
| HDAC8     | 3. 14E-33 | -0. 1466  | 0. 06  | 0. 201 | 4. 69E-29 |
| MIER1     | 3. 17E-33 | -0. 13522 | 0. 118 | 0. 279 | 4. 74E-29 |
| MARK4     | 3. 59E-33 | -0. 15594 | 0. 032 | 0. 16  | 5. 37E-29 |
| MDFIC     | 3. 65E-33 | -0. 11798 | 0. 017 | 0. 123 | 5. 46E-29 |
| CSTF2T    | 3. 78E-33 | -0. 15048 | 0. 076 | 0. 235 | 5. 64E-29 |
| ARL17A    | 3. 89E-33 | -0. 1485  | 0. 032 | 0. 158 | 5. 82E-29 |
| FAM171A1  | 4. 03E-33 | -0. 1752  | 0. 025 | 0. 153 | 6. 03E-29 |
| FAM57B    | 4. 18E-33 | -0. 26181 | 0. 027 | 0. 157 | 6. 25E-29 |

|          |          |          |       |       |          |
|----------|----------|----------|-------|-------|----------|
| ZNF521   | 4.41E-33 | -0.11774 | 0.051 | 0.183 | 6.58E-29 |
| EED      | 4.60E-33 | -0.14022 | 0.088 | 0.244 | 6.87E-29 |
| ARHGAP23 | 4.60E-33 | -0.11059 | 0.018 | 0.123 | 6.87E-29 |
| CDKAL1   | 4.64E-33 | -0.20423 | 0.061 | 0.216 | 6.94E-29 |
| TSC22D3  | 4.79E-33 | 0.275311 | 0.297 | 0.374 | 7.16E-29 |
| TCF7L2   | 4.89E-33 | -0.11065 | 0.062 | 0.193 | 7.31E-29 |
| PCYOX1L  | 5.04E-33 | -0.16294 | 0.024 | 0.146 | 7.54E-29 |
| RYBP     | 5.16E-33 | -0.14873 | 0.06  | 0.201 | 7.71E-29 |
| TAOK2    | 5.17E-33 | -0.13265 | 0.064 | 0.2   | 7.73E-29 |
| TMTC3    | 5.20E-33 | -0.13228 | 0.069 | 0.215 | 7.76E-29 |
| FEM1B    | 5.24E-33 | -0.1286  | 0.073 | 0.21  | 7.83E-29 |
| NUFIP1   | 5.46E-33 | -0.14054 | 0.102 | 0.258 | 8.16E-29 |
| KIF1C    | 5.67E-33 | -0.14791 | 0.057 | 0.194 | 8.48E-29 |
| ADD3     | 5.68E-33 | 0.192692 | 0.173 | 0.259 | 8.49E-29 |
| TOX      | 5.89E-33 | -0.11263 | 0.027 | 0.138 | 8.80E-29 |
| CLIC1    | 6.13E-33 | 0.356401 | 0.578 | 0.631 | 9.16E-29 |
| KDM4A    | 6.61E-33 | -0.11826 | 0.07  | 0.209 | 9.87E-29 |
| Clorf56  | 6.77E-33 | -0.10764 | 0.126 | 0.286 | 1.01E-28 |
| NSUN6    | 7.46E-33 | -0.17449 | 0.044 | 0.181 | 1.12E-28 |
| ALG13    | 7.77E-33 | 0.186731 | 0.193 | 0.262 | 1.16E-28 |
| TUBGCP4  | 7.80E-33 | -0.14865 | 0.092 | 0.248 | 1.17E-28 |
| CDK5R1   | 7.92E-33 | -0.16548 | 0.032 | 0.153 | 1.18E-28 |
| FAM122A  | 8.27E-33 | -0.18569 | 0.091 | 0.252 | 1.24E-28 |
| ERICH1   | 8.59E-33 | 0.103092 | 0.174 | 0.289 | 1.28E-28 |
| LIPE-AS1 | 8.74E-33 | -0.12562 | 0.057 | 0.193 | 1.31E-28 |
| SBK1     | 9.60E-33 | -0.20003 | 0.021 | 0.14  | 1.43E-28 |
| RNASET2  | 9.73E-33 | 0.183399 | 0.236 | 0.284 | 1.45E-28 |
| PRKX     | 9.78E-33 | -0.20747 | 0.036 | 0.177 | 1.46E-28 |
| POC5     | 1.05E-32 | -0.14014 | 0.047 | 0.174 | 1.57E-28 |
| SOX6     | 1.05E-32 | -0.23191 | 0.079 | 0.247 | 1.57E-28 |
| PI3      | 1.06E-32 | 1.043069 | 0.156 | 0.046 | 1.59E-28 |
| CFI      | 1.07E-32 | 0.486553 | 0.173 | 0.073 | 1.60E-28 |
| BAMBI    | 1.09E-32 | -0.22793 | 0.046 | 0.196 | 1.62E-28 |
| SMARCAD1 | 1.11E-32 | -0.19635 | 0.05  | 0.194 | 1.66E-28 |
| SERTAD3  | 1.17E-32 | 0.366687 | 0.176 | 0.217 | 1.76E-28 |
| VAV3     | 1.21E-32 | -0.18255 | 0.026 | 0.146 | 1.81E-28 |
| MMP15    | 1.25E-32 | -0.1306  | 0.015 | 0.119 | 1.86E-28 |
| ADIPOR2  | 1.33E-32 | -0.16119 | 0.099 | 0.258 | 1.99E-28 |
| HP       | 1.34E-32 | 0.994729 | 0.11  | 0.001 | 2.01E-28 |
| YIPF1    | 1.37E-32 | 0.183733 | 0.148 | 0.232 | 2.05E-28 |
| PSMA6    | 1.37E-32 | 0.283881 | 0.245 | 0.299 | 2.05E-28 |
| NOL4     | 1.38E-32 | -0.26751 | 0.036 | 0.177 | 2.06E-28 |
| NPRL2    | 1.38E-32 | 0.234269 | 0.189 | 0.237 | 2.07E-28 |
| OS9      | 1.50E-32 | -0.23738 | 0.425 | 0.653 | 2.25E-28 |
| VANGL2   | 1.51E-32 | -0.1195  | 0.045 | 0.165 | 2.25E-28 |
| SCG2     | 1.54E-32 | -0.2529  | 0.22  | 0.443 | 2.30E-28 |
| NKD1     | 1.57E-32 | -0.20382 | 0.005 | 0.1   | 2.34E-28 |
| EIF4EBP2 | 1.59E-32 | -0.15202 | 0.076 | 0.22  | 2.38E-28 |
| NLK      | 1.60E-32 | -0.17779 | 0.028 | 0.152 | 2.39E-28 |
| TNK2     | 1.61E-32 | -0.20616 | 0.065 | 0.22  | 2.41E-28 |
| TAB2     | 1.71E-32 | -0.10443 | 0.065 | 0.193 | 2.55E-28 |

|           |          |          |       |       |          |
|-----------|----------|----------|-------|-------|----------|
| CTSC      | 1.78E-32 | 0.533476 | 0.219 | 0.202 | 2.65E-28 |
| CPOX      | 1.82E-32 | -0.1179  | 0.033 | 0.151 | 2.71E-28 |
| PELI1     | 1.82E-32 | -0.25732 | 0.077 | 0.243 | 2.72E-28 |
| KIAA1328  | 2.04E-32 | -0.12139 | 0.048 | 0.172 | 3.05E-28 |
| STMN2     | 2.05E-32 | -0.56046 | 0.059 | 0.221 | 3.07E-28 |
| AGAP2-AS1 | 2.06E-32 | -0.48888 | 0.08  | 0.258 | 3.08E-28 |
| ATCAY     | 2.10E-32 | -0.30012 | 0.061 | 0.221 | 3.14E-28 |
| SLC25A13  | 2.10E-32 | -0.1308  | 0.083 | 0.235 | 3.15E-28 |
| MIAT      | 2.12E-32 | -0.17346 | 0.069 | 0.209 | 3.16E-28 |
| ZMIZ1     | 2.13E-32 | -0.22153 | 0.059 | 0.211 | 3.19E-28 |
| NLE1      | 2.18E-32 | -0.12147 | 0.04  | 0.16  | 3.25E-28 |
| LPGAT1    | 2.22E-32 | -0.14091 | 0.078 | 0.228 | 3.32E-28 |
| PHYH      | 2.34E-32 | 0.131638 | 0.16  | 0.246 | 3.50E-28 |
| RP11-448A | 2.37E-32 | -0.10839 | 0.059 | 0.183 | 3.54E-28 |
| ATL1      | 2.54E-32 | -0.10453 | 0.097 | 0.246 | 3.80E-28 |
| GEMIN4    | 2.74E-32 | -0.11687 | 0.04  | 0.159 | 4.09E-28 |
| ARL5B     | 2.79E-32 | -0.13889 | 0.039 | 0.165 | 4.16E-28 |
| PABPC1L   | 2.83E-32 | -0.10712 | 0.045 | 0.167 | 4.23E-28 |
| N4BP1     | 2.90E-32 | -0.14718 | 0.048 | 0.181 | 4.33E-28 |
| PRKCI     | 2.99E-32 | -0.1125  | 0.083 | 0.217 | 4.46E-28 |
| TRIB3     | 3.03E-32 | 0.413521 | 0.148 | 0.093 | 4.53E-28 |
| CBFA2T2   | 3.13E-32 | -0.10999 | 0.087 | 0.223 | 4.68E-28 |
| AZGP1     | 3.29E-32 | 0.603071 | 0.187 | 0.038 | 4.91E-28 |
| ZBTB38    | 3.31E-32 | 0.307095 | 0.188 | 0.219 | 4.95E-28 |
| ZDHH16    | 3.38E-32 | -0.10123 | 0.067 | 0.2   | 5.06E-28 |
| SMIM13    | 3.40E-32 | -0.14954 | 0.053 | 0.189 | 5.09E-28 |
| ST3GAL3   | 3.66E-32 | -0.17952 | 0.066 | 0.215 | 5.48E-28 |
| SSH1      | 3.80E-32 | -0.13288 | 0.03  | 0.146 | 5.68E-28 |
| Clorf159  | 3.85E-32 | -0.16827 | 0.031 | 0.16  | 5.75E-28 |
| RDH10     | 3.94E-32 | 0.374119 | 0.187 | 0.149 | 5.89E-28 |
| SLC25A44  | 4.31E-32 | -0.12508 | 0.067 | 0.209 | 6.44E-28 |
| TOX4      | 4.34E-32 | 0.130247 | 0.26  | 0.36  | 6.48E-28 |
| LPL       | 4.35E-32 | 0.224584 | 0.168 | 0.251 | 6.50E-28 |
| FIGNL1    | 4.43E-32 | -0.25716 | 0.031 | 0.167 | 6.61E-28 |
| PDLIM4    | 4.50E-32 | 0.573981 | 0.203 | 0.078 | 6.72E-28 |
| ISG15     | 4.59E-32 | 0.109033 | 0.264 | 0.374 | 6.86E-28 |
| MARK1     | 4.60E-32 | -0.15872 | 0.033 | 0.16  | 6.87E-28 |
| LRRC41    | 4.92E-32 | 0.243843 | 0.238 | 0.302 | 7.36E-28 |
| LYPLAL1   | 5.19E-32 | 0.276522 | 0.245 | 0.288 | 7.76E-28 |
| EFNA1     | 5.26E-32 | 0.602041 | 0.22  | 0.109 | 7.87E-28 |
| RPS6KA4   | 5.88E-32 | -0.1294  | 0.048 | 0.177 | 8.79E-28 |
| KLRC2     | 6.30E-32 | -0.39549 | 0.047 | 0.198 | 9.41E-28 |
| GNPDA1    | 6.89E-32 | 0.254655 | 0.209 | 0.278 | 1.03E-27 |
| MAGI3     | 7.24E-32 | -0.15574 | 0.023 | 0.143 | 1.08E-27 |
| TLCD1     | 7.64E-32 | -0.16343 | 0.029 | 0.156 | 1.14E-27 |
| FAM84B    | 7.69E-32 | -0.22934 | 0.046 | 0.19  | 1.15E-27 |
| LIN54     | 7.98E-32 | -0.14415 | 0.031 | 0.146 | 1.19E-27 |
| MTA2      | 8.17E-32 | -0.18039 | 0.032 | 0.162 | 1.22E-27 |
| TOB2      | 8.27E-32 | 0.129157 | 0.166 | 0.237 | 1.24E-27 |
| ATG4C     | 8.48E-32 | -0.15716 | 0.102 | 0.258 | 1.27E-27 |
| NEDD4L    | 8.61E-32 | -0.11964 | 0.06  | 0.193 | 1.29E-27 |

|           |          |          |       |       |          |
|-----------|----------|----------|-------|-------|----------|
| VAT1      | 8.67E-32 | 0.243854 | 0.179 | 0.205 | 1.30E-27 |
| UGDH      | 8.70E-32 | 0.250742 | 0.227 | 0.288 | 1.30E-27 |
| RFTN2     | 8.72E-32 | -0.30635 | 0.077 | 0.251 | 1.30E-27 |
| PNMAL1    | 8.86E-32 | -0.22611 | 0.056 | 0.205 | 1.32E-27 |
| CWF19L2   | 9.66E-32 | 0.121439 | 0.176 | 0.263 | 1.44E-27 |
| SGK1      | 1.02E-31 | 0.203766 | 0.225 | 0.277 | 1.53E-27 |
| ARV1      | 1.14E-31 | 0.177757 | 0.217 | 0.302 | 1.70E-27 |
| CA9       | 1.19E-31 | 0.507112 | 0.175 | 0.027 | 1.78E-27 |
| PPP2R2B   | 1.21E-31 | 0.222819 | 0.234 | 0.326 | 1.80E-27 |
| PCNX      | 1.21E-31 | -0.13507 | 0.045 | 0.17  | 1.81E-27 |
| RGS16     | 1.24E-31 | 0.321401 | 0.262 | 0.328 | 1.86E-27 |
| IGFBP6    | 1.27E-31 | 0.585854 | 0.176 | 0.07  | 1.89E-27 |
| POLR1A    | 1.28E-31 | -0.11864 | 0.024 | 0.133 | 1.92E-27 |
| TMEM79    | 1.29E-31 | -0.10419 | 0.054 | 0.18  | 1.93E-27 |
| C17orf10C | 1.32E-31 | -0.1021  | 0.052 | 0.178 | 1.97E-27 |
| MAML1     | 1.33E-31 | -0.19616 | 0.039 | 0.168 | 1.98E-27 |
| FOLR1     | 1.35E-31 | 0.642243 | 0.128 | 0.012 | 2.01E-27 |
| SAP130    | 1.37E-31 | -0.12246 | 0.031 | 0.147 | 2.05E-27 |
| HCFC1R1   | 1.39E-31 | 0.117435 | 0.218 | 0.337 | 2.08E-27 |
| NOM1      | 1.45E-31 | -0.16953 | 0.109 | 0.273 | 2.17E-27 |
| GPC1      | 1.74E-31 | -0.2265  | 0.262 | 0.488 | 2.61E-27 |
| LARP4B    | 1.76E-31 | -0.11835 | 0.041 | 0.167 | 2.62E-27 |
| PARD6G    | 1.95E-31 | -0.11611 | 0.01  | 0.105 | 2.92E-27 |
| FOXDI     | 2.00E-31 | -0.14982 | 0.01  | 0.112 | 2.98E-27 |
| PLA2G2A   | 2.08E-31 | 1.191985 | 0.136 | 0.028 | 3.10E-27 |
| XPNPEP3   | 2.10E-31 | -0.12251 | 0.071 | 0.207 | 3.13E-27 |
| 3-Sep     | 2.19E-31 | -0.17457 | 0.022 | 0.138 | 3.27E-27 |
| HEPACAM   | 2.34E-31 | 0.19297  | 0.201 | 0.295 | 3.50E-27 |
| NT5M      | 2.40E-31 | -0.1634  | 0.021 | 0.136 | 3.58E-27 |
| SARS2     | 2.43E-31 | -0.12713 | 0.034 | 0.148 | 3.63E-27 |
| ZNF300    | 2.48E-31 | -0.22251 | 0.05  | 0.194 | 3.71E-27 |
| AGPS      | 2.49E-31 | -0.16157 | 0.065 | 0.212 | 3.73E-27 |
| C17orf51  | 2.57E-31 | -0.11325 | 0.042 | 0.167 | 3.84E-27 |
| SMIM18    | 2.62E-31 | -0.27371 | 0.011 | 0.116 | 3.91E-27 |
| B9D1      | 2.67E-31 | 0.187373 | 0.118 | 0.21  | 3.99E-27 |
| ZNF337    | 2.81E-31 | -0.12011 | 0.042 | 0.165 | 4.20E-27 |
| KIAA0141  | 2.87E-31 | -0.11868 | 0.06  | 0.189 | 4.29E-27 |
| SPECC1L   | 2.98E-31 | -0.12262 | 0.025 | 0.135 | 4.46E-27 |
| NBPF10    | 3.07E-31 | -0.1604  | 0.108 | 0.264 | 4.58E-27 |
| VSIG10    | 3.10E-31 | -0.10096 | 0.053 | 0.178 | 4.63E-27 |
| FGFR10P   | 3.26E-31 | -0.10989 | 0.079 | 0.227 | 4.88E-27 |
| DIP2C     | 3.28E-31 | -0.12228 | 0.042 | 0.163 | 4.90E-27 |
| SCAPER    | 3.71E-31 | -0.19127 | 0.076 | 0.225 | 5.55E-27 |
| DCUN1D4   | 3.73E-31 | -0.11713 | 0.093 | 0.233 | 5.58E-27 |
| EFNA2     | 3.78E-31 | -0.18274 | 0.019 | 0.135 | 5.65E-27 |
| AADAT     | 3.82E-31 | -0.14029 | 0.025 | 0.137 | 5.71E-27 |
| OSMR      | 4.06E-31 | 0.272644 | 0.151 | 0.147 | 6.07E-27 |
| LIN52     | 4.09E-31 | -0.15369 | 0.045 | 0.175 | 6.11E-27 |
| CAPN10    | 4.36E-31 | -0.13858 | 0.048 | 0.177 | 6.52E-27 |
| ANKRD36C  | 4.47E-31 | -0.25576 | 0.136 | 0.32  | 6.67E-27 |
| LRP3      | 4.48E-31 | -0.13511 | 0.027 | 0.138 | 6.70E-27 |

|           |          |          |       |       |          |
|-----------|----------|----------|-------|-------|----------|
| CACNG4    | 4.60E-31 | -0.17918 | 0.025 | 0.143 | 6.88E-27 |
| PLEKHH2   | 4.61E-31 | -0.15431 | 0.048 | 0.181 | 6.89E-27 |
| CHKA      | 4.80E-31 | -0.20934 | 0.112 | 0.28  | 7.17E-27 |
| ZMYM1     | 5.19E-31 | -0.13772 | 0.033 | 0.157 | 7.76E-27 |
| AHCTF1    | 6.03E-31 | -0.11604 | 0.072 | 0.204 | 9.01E-27 |
| GALNT7    | 6.10E-31 | -0.10221 | 0.048 | 0.16  | 9.12E-27 |
| ANXA4     | 6.22E-31 | 0.532056 | 0.218 | 0.136 | 9.29E-27 |
| SPG11     | 6.30E-31 | -0.11122 | 0.055 | 0.189 | 9.41E-27 |
| Clorf50   | 6.40E-31 | 0.121933 | 0.139 | 0.237 | 9.57E-27 |
| HRH1      | 6.53E-31 | 0.394844 | 0.164 | 0.153 | 9.76E-27 |
| REL       | 6.92E-31 | -0.11925 | 0.111 | 0.264 | 1.03E-26 |
| ZNF865    | 7.16E-31 | -0.13133 | 0.036 | 0.156 | 1.07E-26 |
| APPL2     | 7.78E-31 | 0.123821 | 0.155 | 0.26  | 1.16E-26 |
| PRRT2     | 8.24E-31 | -0.12113 | 0.082 | 0.219 | 1.23E-26 |
| TMTC4     | 8.42E-31 | -0.18311 | 0.044 | 0.177 | 1.26E-26 |
| IGFBP4    | 8.58E-31 | -0.13693 | 0.077 | 0.219 | 1.28E-26 |
| SDSL      | 9.07E-31 | 0.211074 | 0.131 | 0.206 | 1.36E-26 |
| PITX2     | 9.09E-31 | -0.23841 | 0.013 | 0.116 | 1.36E-26 |
| YTHDF3-AS | 9.43E-31 | -0.11553 | 0.031 | 0.141 | 1.41E-26 |
| METTL8    | 9.43E-31 | -0.14326 | 0.084 | 0.23  | 1.41E-26 |
| NUDT16    | 9.47E-31 | 0.145723 | 0.13  | 0.21  | 1.41E-26 |
| AKTIP     | 9.79E-31 | 0.242406 | 0.204 | 0.263 | 1.46E-26 |
| WDR90     | 1.02E-30 | -0.12864 | 0.026 | 0.136 | 1.52E-26 |
| MAT2B     | 1.04E-30 | 0.106201 | 0.182 | 0.288 | 1.55E-26 |
| MDP1      | 1.10E-30 | 0.176118 | 0.112 | 0.188 | 1.64E-26 |
| ZNF628    | 1.11E-30 | -0.14318 | 0.018 | 0.128 | 1.66E-26 |
| FKBPL     | 1.11E-30 | -0.11422 | 0.063 | 0.199 | 1.66E-26 |
| FBX042    | 1.12E-30 | -0.10979 | 0.064 | 0.185 | 1.67E-26 |
| KCNJ16    | 1.16E-30 | -0.18582 | 0.022 | 0.137 | 1.74E-26 |
| PPP3R1    | 1.24E-30 | -0.19285 | 0.071 | 0.222 | 1.85E-26 |
| FLVCR1    | 1.27E-30 | -0.15965 | 0.051 | 0.18  | 1.90E-26 |
| DCBLD1    | 1.36E-30 | -0.15687 | 0.064 | 0.202 | 2.03E-26 |
| SLC16A2   | 1.37E-30 | -0.12845 | 0.024 | 0.133 | 2.05E-26 |
| PHRF1     | 1.39E-30 | -0.14673 | 0.043 | 0.168 | 2.07E-26 |
| ELP2      | 1.51E-30 | 0.170455 | 0.216 | 0.281 | 2.25E-26 |
| ZC2HC1A   | 1.57E-30 | -0.17922 | 0.156 | 0.335 | 2.34E-26 |
| SCFD2     | 1.75E-30 | -0.26382 | 0.068 | 0.227 | 2.62E-26 |
| OTUD7B    | 1.82E-30 | 0.149041 | 0.12  | 0.168 | 2.72E-26 |
| ATXN80S   | 1.85E-30 | 0.87281  | 0.142 | 0.015 | 2.77E-26 |
| NHSL1     | 1.93E-30 | -0.15358 | 0.063 | 0.2   | 2.89E-26 |
| GPR161    | 1.94E-30 | -0.18143 | 0.039 | 0.172 | 2.90E-26 |
| PRMT6     | 1.94E-30 | -0.14315 | 0.064 | 0.196 | 2.90E-26 |
| TRIM26    | 1.99E-30 | -0.13634 | 0.069 | 0.211 | 2.98E-26 |
| SOWAHC    | 1.99E-30 | -0.14467 | 0.042 | 0.168 | 2.98E-26 |
| ZNF281    | 2.05E-30 | -0.21733 | 0.12  | 0.294 | 3.06E-26 |
| IPO8      | 2.11E-30 | -0.11422 | 0.041 | 0.17  | 3.15E-26 |
| DNAJC4    | 2.35E-30 | 0.23354  | 0.177 | 0.227 | 3.52E-26 |
| MAPK12    | 2.44E-30 | -0.13616 | 0.033 | 0.158 | 3.64E-26 |
| SCYL2     | 2.46E-30 | -0.12488 | 0.082 | 0.22  | 3.67E-26 |
| RAB23     | 2.49E-30 | -0.1377  | 0.061 | 0.194 | 3.72E-26 |
| WDR73     | 2.52E-30 | 0.107877 | 0.132 | 0.228 | 3.77E-26 |

|          |          |          |       |       |          |
|----------|----------|----------|-------|-------|----------|
| THRA     | 2.69E-30 | -0.11639 | 0.21  | 0.386 | 4.02E-26 |
| ZFAND1   | 2.80E-30 | 0.11535  | 0.152 | 0.235 | 4.19E-26 |
| PFAS     | 2.93E-30 | -0.11259 | 0.017 | 0.115 | 4.38E-26 |
| LRRC8D   | 2.99E-30 | -0.14761 | 0.035 | 0.154 | 4.47E-26 |
| HLA-DMA  | 3.11E-30 | 0.716053 | 0.246 | 0.107 | 4.65E-26 |
| BCL3     | 3.15E-30 | -0.10919 | 0.037 | 0.148 | 4.71E-26 |
| C17orf96 | 3.30E-30 | -0.15152 | 0.031 | 0.149 | 4.93E-26 |
| ZNF330   | 3.49E-30 | 0.258457 | 0.212 | 0.256 | 5.21E-26 |
| DIRAS2   | 3.87E-30 | -0.26064 | 0.039 | 0.173 | 5.79E-26 |
| RNF169   | 3.90E-30 | -0.1028  | 0.051 | 0.169 | 5.83E-26 |
| PROSER1  | 4.00E-30 | -0.12212 | 0.041 | 0.16  | 5.97E-26 |
| DTX3     | 4.15E-30 | -0.40697 | 0.21  | 0.432 | 6.20E-26 |
| NMD3     | 4.28E-30 | 0.141312 | 0.242 | 0.325 | 6.39E-26 |
| PTRH2    | 4.40E-30 | 0.214351 | 0.156 | 0.204 | 6.57E-26 |
| BCL9     | 4.60E-30 | -0.10388 | 0.019 | 0.119 | 6.88E-26 |
| SHC1     | 4.64E-30 | 0.176266 | 0.13  | 0.202 | 6.93E-26 |
| DYNC2LI1 | 4.83E-30 | 0.359372 | 0.228 | 0.242 | 7.22E-26 |
| SNRPN    | 4.93E-30 | 0.781423 | 0.158 | 0.078 | 7.37E-26 |
| CSRNP2   | 4.96E-30 | -0.16934 | 0.057 | 0.195 | 7.42E-26 |
| ADAM22   | 5.05E-30 | -0.2739  | 0.03  | 0.159 | 7.55E-26 |
| RBM12B   | 5.37E-30 | -0.11404 | 0.051 | 0.172 | 8.02E-26 |
| PRMT7    | 5.86E-30 | -0.17209 | 0.073 | 0.215 | 8.75E-26 |
| HSD17B4  | 5.95E-30 | 0.112459 | 0.196 | 0.288 | 8.90E-26 |
| DHRS1    | 6.27E-30 | 0.250272 | 0.134 | 0.191 | 9.37E-26 |
| INTS1    | 6.31E-30 | -0.13358 | 0.054 | 0.188 | 9.44E-26 |
| EMC2     | 6.55E-30 | 0.234377 | 0.231 | 0.311 | 9.79E-26 |
| RNF214   | 6.62E-30 | -0.16964 | 0.069 | 0.214 | 9.89E-26 |
| SLC27A5  | 6.63E-30 | 0.209428 | 0.143 | 0.212 | 9.91E-26 |
| INTS7    | 6.68E-30 | -0.15817 | 0.046 | 0.179 | 9.98E-26 |
| TMEM43   | 6.71E-30 | 0.196636 | 0.22  | 0.263 | 1.00E-25 |
| RLIM     | 7.08E-30 | -0.13255 | 0.073 | 0.206 | 1.06E-25 |
| ADORA1   | 7.14E-30 | 0.196845 | 0.132 | 0.175 | 1.07E-25 |
| XIST     | 7.49E-30 | 0.514811 | 0.357 | 0.146 | 1.12E-25 |
| ORC3     | 7.55E-30 | -0.14676 | 0.097 | 0.247 | 1.13E-25 |
| ZNF253   | 7.88E-30 | -0.17742 | 0.049 | 0.181 | 1.18E-25 |
| DUSP23   | 8.56E-30 | 0.606116 | 0.201 | 0.049 | 1.28E-25 |
| CRBN     | 8.56E-30 | 0.117221 | 0.267 | 0.363 | 1.28E-25 |
| SP100    | 8.68E-30 | 0.627134 | 0.253 | 0.163 | 1.30E-25 |
| ZW10     | 9.08E-30 | -0.15306 | 0.054 | 0.185 | 1.36E-25 |
| FMNL3    | 9.16E-30 | -0.1371  | 0.017 | 0.12  | 1.37E-25 |
| EMP1     | 9.16E-30 | 0.415652 | 0.324 | 0.283 | 1.37E-25 |
| DCLK1    | 9.39E-30 | 0.157051 | 0.146 | 0.216 | 1.40E-25 |
| FANCM    | 9.43E-30 | -0.14247 | 0.016 | 0.116 | 1.41E-25 |
| FRS2     | 1.01E-29 | -0.3167  | 0.076 | 0.241 | 1.52E-25 |
| CDR2L    | 1.07E-29 | -0.1159  | 0.029 | 0.141 | 1.60E-25 |
| PFKM     | 1.13E-29 | 0.151265 | 0.183 | 0.263 | 1.69E-25 |
| AGA      | 1.14E-29 | 0.350037 | 0.196 | 0.214 | 1.71E-25 |
| SND1     | 1.19E-29 | 0.165192 | 0.241 | 0.337 | 1.78E-25 |
| MFS2A    | 1.23E-29 | 0.327061 | 0.177 | 0.172 | 1.84E-25 |
| MFS2B    | 1.26E-29 | 0.211719 | 0.173 | 0.225 | 1.88E-25 |
| FBN2     | 1.28E-29 | -0.11125 | 0.017 | 0.114 | 1.91E-25 |

|           |           |           |        |        |           |
|-----------|-----------|-----------|--------|--------|-----------|
| PXMP4     | 1. 33E-29 | -0. 18745 | 0. 042 | 0. 173 | 1. 99E-25 |
| GPX3      | 1. 34E-29 | 0. 377086 | 0. 125 | 0. 121 | 2. 01E-25 |
| CACFD1    | 1. 36E-29 | -0. 12073 | 0. 046 | 0. 164 | 2. 03E-25 |
| PEX13     | 1. 36E-29 | 0. 122637 | 0. 173 | 0. 284 | 2. 03E-25 |
| PLIN3     | 1. 40E-29 | 0. 138491 | 0. 333 | 0. 453 | 2. 10E-25 |
| ABCA1     | 1. 56E-29 | 0. 281428 | 0. 21  | 0. 184 | 2. 32E-25 |
| ST6GAL2   | 1. 57E-29 | -0. 21937 | 0. 005 | 0. 093 | 2. 34E-25 |
| NFKBIZ    | 1. 66E-29 | 0. 424752 | 0. 204 | 0. 149 | 2. 48E-25 |
| PLEKHG2   | 1. 70E-29 | -0. 13385 | 0. 019 | 0. 117 | 2. 54E-25 |
| VASH1     | 1. 79E-29 | -0. 13802 | 0. 025 | 0. 136 | 2. 68E-25 |
| CH25H     | 1. 80E-29 | 0. 738295 | 0. 153 | 0. 023 | 2. 70E-25 |
| PLAU      | 1. 81E-29 | -0. 10631 | 0. 082 | 0. 206 | 2. 71E-25 |
| L3MBTL2   | 1. 95E-29 | -0. 16959 | 0. 06  | 0. 2   | 2. 91E-25 |
| HOXD-AS2  | 1. 99E-29 | -0. 17359 | 0. 017 | 0. 126 | 2. 98E-25 |
| MBOAT1    | 2. 05E-29 | -0. 11965 | 0. 007 | 0. 091 | 3. 06E-25 |
| C1QC      | 2. 12E-29 | 0. 666091 | 0. 313 | 0. 205 | 3. 17E-25 |
| ZNF286A   | 2. 30E-29 | -0. 14174 | 0. 022 | 0. 126 | 3. 44E-25 |
| NOL9      | 2. 35E-29 | -0. 12191 | 0. 071 | 0. 2   | 3. 51E-25 |
| SRPX2     | 2. 46E-29 | 0. 466132 | 0. 135 | 0. 098 | 3. 68E-25 |
| XPO7      | 2. 60E-29 | -0. 1655  | 0. 071 | 0. 215 | 3. 89E-25 |
| ZBTB2     | 2. 64E-29 | -0. 14253 | 0. 056 | 0. 184 | 3. 95E-25 |
| ATXN1L    | 2. 85E-29 | -0. 11127 | 0. 051 | 0. 169 | 4. 26E-25 |
| ALKBH3    | 2. 91E-29 | 0. 209486 | 0. 15  | 0. 212 | 4. 34E-25 |
| GPSM1     | 3. 36E-29 | -0. 16031 | 0. 033 | 0. 153 | 5. 02E-25 |
| VAMP7     | 3. 51E-29 | 0. 138303 | 0. 159 | 0. 241 | 5. 24E-25 |
| RP11-119E | 3. 53E-29 | -0. 14135 | 0. 032 | 0. 151 | 5. 27E-25 |
| PLAUR     | 3. 59E-29 | 0. 528452 | 0. 251 | 0. 162 | 5. 36E-25 |
| FRMD4A    | 3. 62E-29 | -0. 17989 | 0. 031 | 0. 153 | 5. 41E-25 |
| ASXL2     | 3. 76E-29 | -0. 10446 | 0. 059 | 0. 178 | 5. 61E-25 |
| ADNP2     | 3. 78E-29 | -0. 1284  | 0. 06  | 0. 183 | 5. 64E-25 |
| DLAT      | 4. 10E-29 | -0. 14229 | 0. 107 | 0. 253 | 6. 13E-25 |
| WIP11     | 4. 26E-29 | 0. 258621 | 0. 132 | 0. 126 | 6. 37E-25 |
| HOXB2     | 4. 44E-29 | -0. 35918 | 0. 056 | 0. 207 | 6. 64E-25 |
| RP11-400F | 4. 56E-29 | -0. 10625 | 0. 042 | 0. 154 | 6. 81E-25 |
| PMP22     | 4. 59E-29 | 0. 321704 | 0. 509 | 0. 557 | 6. 86E-25 |
| OAT       | 4. 60E-29 | 0. 376637 | 0. 273 | 0. 26  | 6. 87E-25 |
| FGF14     | 4. 87E-29 | -0. 11007 | 0. 045 | 0. 156 | 7. 28E-25 |
| MIR181A1H | 4. 92E-29 | -0. 20298 | 0. 039 | 0. 169 | 7. 35E-25 |
| ANKRA2    | 4. 93E-29 | 0. 15256  | 0. 164 | 0. 243 | 7. 37E-25 |
| KIAA0196  | 5. 11E-29 | -0. 11302 | 0. 066 | 0. 19  | 7. 64E-25 |
| FAIM      | 5. 31E-29 | 0. 138805 | 0. 155 | 0. 252 | 7. 93E-25 |
| ZNF512B   | 5. 38E-29 | -0. 10348 | 0. 035 | 0. 142 | 8. 04E-25 |
| IQCG      | 5. 80E-29 | 0. 368914 | 0. 188 | 0. 185 | 8. 67E-25 |
| PAPD4     | 6. 59E-29 | 0. 171747 | 0. 157 | 0. 217 | 9. 85E-25 |
| CHCHD7    | 6. 75E-29 | 0. 308419 | 0. 22  | 0. 254 | 1. 01E-24 |
| ABHD17B   | 6. 79E-29 | -0. 18102 | 0. 08  | 0. 226 | 1. 02E-24 |
| ZNF598    | 6. 86E-29 | -0. 13228 | 0. 051 | 0. 173 | 1. 03E-24 |
| TSC22D2   | 6. 87E-29 | -0. 10187 | 0. 092 | 0. 22  | 1. 03E-24 |
| RNF6      | 7. 13E-29 | 0. 139352 | 0. 139 | 0. 207 | 1. 06E-24 |
| NUP43     | 7. 58E-29 | -0. 17174 | 0. 069 | 0. 209 | 1. 13E-24 |
| 5-Mar     | 7. 64E-29 | -0. 10483 | 0. 152 | 0. 298 | 1. 14E-24 |

|           |          |          |       |       |          |
|-----------|----------|----------|-------|-------|----------|
| ATF1      | 7.91E-29 | 0.151867 | 0.158 | 0.225 | 1.18E-24 |
| CP        | 8.02E-29 | 0.50286  | 0.132 | 0.019 | 1.20E-24 |
| DHX38     | 8.18E-29 | -0.10044 | 0.084 | 0.209 | 1.22E-24 |
| ICAM1     | 8.39E-29 | 0.494633 | 0.159 | 0.058 | 1.25E-24 |
| GPD2      | 8.44E-29 | -0.16131 | 0.058 | 0.195 | 1.26E-24 |
| SPPL2A    | 9.32E-29 | -0.16211 | 0.096 | 0.248 | 1.39E-24 |
| TBC1D14   | 9.46E-29 | -0.11665 | 0.093 | 0.232 | 1.41E-24 |
| TBX2      | 9.70E-29 | -0.14564 | 0.017 | 0.122 | 1.45E-24 |
| CLCF1     | 9.78E-29 | 0.469372 | 0.136 | 0.037 | 1.46E-24 |
| CHML      | 1.02E-28 | -0.1363  | 0.015 | 0.115 | 1.52E-24 |
| STARD9    | 1.10E-28 | -0.14774 | 0.013 | 0.111 | 1.65E-24 |
| SERPINE1  | 1.11E-28 | 0.648249 | 0.212 | 0.096 | 1.65E-24 |
| GRIK2     | 1.11E-28 | -0.15779 | 0.011 | 0.104 | 1.66E-24 |
| ERCC6L    | 1.20E-28 | -0.13911 | 0.003 | 0.077 | 1.79E-24 |
| CYFIP2    | 1.20E-28 | -0.18972 | 0.068 | 0.21  | 1.79E-24 |
| FBX043    | 1.21E-28 | -0.13916 | 0.003 | 0.081 | 1.80E-24 |
| TRAPPC6A  | 1.21E-28 | 0.40954  | 0.246 | 0.249 | 1.81E-24 |
| LRP6      | 1.32E-28 | -0.20111 | 0.068 | 0.214 | 1.98E-24 |
| ASNS      | 1.34E-28 | 0.121738 | 0.226 | 0.299 | 2.00E-24 |
| CBLN4     | 1.38E-28 | -0.10726 | 0.031 | 0.123 | 2.07E-24 |
| DUSP3     | 1.46E-28 | 0.209205 | 0.143 | 0.195 | 2.18E-24 |
| EAF1      | 1.47E-28 | 0.262394 | 0.125 | 0.179 | 2.20E-24 |
| ZNF577    | 1.47E-28 | -0.19141 | 0.069 | 0.211 | 2.20E-24 |
| FAM131B   | 1.56E-28 | -0.11077 | 0.04  | 0.149 | 2.33E-24 |
| RP11-182L | 1.66E-28 | -0.13203 | 0.036 | 0.146 | 2.48E-24 |
| HUNK      | 1.69E-28 | -0.11743 | 0.016 | 0.11  | 2.52E-24 |
| RGP1      | 1.70E-28 | -0.16214 | 0.051 | 0.183 | 2.55E-24 |
| LMAN2L    | 1.81E-28 | -0.13185 | 0.118 | 0.263 | 2.70E-24 |
| TTC9B     | 1.83E-28 | -0.3834  | 0.029 | 0.153 | 2.74E-24 |
| CLUAP1    | 1.91E-28 | 0.189776 | 0.197 | 0.285 | 2.85E-24 |
| CYTH1     | 1.92E-28 | -0.14722 | 0.042 | 0.163 | 2.87E-24 |
| DPAGT1    | 1.92E-28 | 0.144244 | 0.15  | 0.228 | 2.87E-24 |
| EEFSEC    | 1.93E-28 | -0.10425 | 0.072 | 0.196 | 2.89E-24 |
| BHLHE40   | 1.94E-28 | 0.358909 | 0.162 | 0.179 | 2.90E-24 |
| GOLGA3    | 2.05E-28 | 0.156104 | 0.114 | 0.152 | 3.07E-24 |
| LMO2      | 2.12E-28 | -0.11693 | 0.089 | 0.228 | 3.17E-24 |
| PLA2G5    | 2.15E-28 | 0.65224  | 0.204 | 0.13  | 3.21E-24 |
| SLC19A1   | 2.23E-28 | -0.1121  | 0.042 | 0.159 | 3.33E-24 |
| ABCA3     | 2.32E-28 | -0.14743 | 0.056 | 0.189 | 3.47E-24 |
| STRN      | 2.33E-28 | -0.10152 | 0.025 | 0.127 | 3.48E-24 |
| DNM3      | 2.40E-28 | -0.17093 | 0.041 | 0.165 | 3.59E-24 |
| GRID2     | 2.52E-28 | -0.24438 | 0.016 | 0.122 | 3.77E-24 |
| METAP1    | 2.53E-28 | -0.10983 | 0.07  | 0.205 | 3.79E-24 |
| DUSP15    | 2.58E-28 | -0.13195 | 0.042 | 0.16  | 3.85E-24 |
| CHD1L     | 2.65E-28 | 0.131201 | 0.156 | 0.242 | 3.97E-24 |
| PACS2     | 2.66E-28 | -0.1695  | 0.063 | 0.196 | 3.98E-24 |
| DIRC2     | 2.67E-28 | -0.12007 | 0.032 | 0.142 | 3.99E-24 |
| HSDL1     | 2.82E-28 | -0.1299  | 0.094 | 0.238 | 4.21E-24 |
| NARS2     | 2.83E-28 | -0.12465 | 0.092 | 0.227 | 4.22E-24 |
| CHST8     | 2.96E-28 | -0.14036 | 0.031 | 0.146 | 4.42E-24 |
| GUF1      | 2.98E-28 | -0.10686 | 0.062 | 0.18  | 4.45E-24 |



|           |          |          |       |       |          |
|-----------|----------|----------|-------|-------|----------|
| KCTD15    | 3.09E-28 | -0.15436 | 0.03  | 0.143 | 4.62E-24 |
| LCA5      | 3.27E-28 | -0.11149 | 0.032 | 0.14  | 4.88E-24 |
| ZNF689    | 3.32E-28 | -0.13641 | 0.038 | 0.151 | 4.96E-24 |
| IL17RB    | 3.51E-28 | -0.12908 | 0.073 | 0.201 | 5.24E-24 |
| BCOR      | 3.52E-28 | -0.17687 | 0.024 | 0.136 | 5.26E-24 |
| PNMA2     | 3.53E-28 | -0.10351 | 0.156 | 0.314 | 5.28E-24 |
| SCLY      | 3.56E-28 | -0.1288  | 0.018 | 0.12  | 5.32E-24 |
| PARD6A    | 4.10E-28 | -0.16402 | 0.06  | 0.194 | 6.12E-24 |
| CPSF1     | 4.74E-28 | -0.17619 | 0.057 | 0.188 | 7.08E-24 |
| TMSB4Y    | 4.97E-28 | -0.12098 | 0.004 | 0.083 | 7.42E-24 |
| MFN2      | 4.98E-28 | -0.11082 | 0.078 | 0.204 | 7.45E-24 |
| PDZD4     | 5.24E-28 | -0.20096 | 0.019 | 0.128 | 7.83E-24 |
| ECE1      | 5.37E-28 | 0.12106  | 0.115 | 0.18  | 8.03E-24 |
| POU4F1    | 5.55E-28 | -0.19666 | 0.004 | 0.085 | 8.30E-24 |
| GKAP1     | 5.67E-28 | -0.19501 | 0.069 | 0.211 | 8.48E-24 |
| TMEM169   | 5.70E-28 | -0.15212 | 0.016 | 0.116 | 8.52E-24 |
| RIT1      | 6.21E-28 | 0.153362 | 0.17  | 0.242 | 9.27E-24 |
| ZNF611    | 6.21E-28 | -0.15039 | 0.037 | 0.151 | 9.28E-24 |
| BRE       | 6.24E-28 | 0.158406 | 0.214 | 0.296 | 9.32E-24 |
| BAG4      | 6.28E-28 | -0.11831 | 0.075 | 0.205 | 9.38E-24 |
| OSTF1     | 6.44E-28 | 0.126387 | 0.104 | 0.2   | 9.62E-24 |
| IGSF11    | 6.58E-28 | -0.15606 | 0.043 | 0.165 | 9.83E-24 |
| ZNF620    | 6.69E-28 | -0.14446 | 0.043 | 0.165 | 1.00E-23 |
| RNF113A   | 6.78E-28 | 0.125724 | 0.123 | 0.2   | 1.01E-23 |
| RP1-79C4  | 6.95E-28 | -0.13249 | 0.03  | 0.137 | 1.04E-23 |
| STXBP1    | 7.41E-28 | -0.13733 | 0.084 | 0.22  | 1.11E-23 |
| TOPORS    | 7.44E-28 | -0.17042 | 0.152 | 0.312 | 1.11E-23 |
| AGAP3     | 7.62E-28 | -0.2093  | 0.055 | 0.194 | 1.14E-23 |
| POLA1     | 7.78E-28 | -0.15053 | 0.015 | 0.114 | 1.16E-23 |
| TOE1      | 9.29E-28 | -0.17084 | 0.068 | 0.204 | 1.39E-23 |
| SLC16A3   | 9.62E-28 | 0.310734 | 0.162 | 0.13  | 1.44E-23 |
| ALG6      | 9.80E-28 | -0.1117  | 0.091 | 0.227 | 1.46E-23 |
| KLHL9     | 1.03E-27 | -0.13373 | 0.072 | 0.204 | 1.54E-23 |
| MICAL1    | 1.04E-27 | -0.16203 | 0.037 | 0.152 | 1.55E-23 |
| KAT2B     | 1.10E-27 | -0.13012 | 0.034 | 0.142 | 1.64E-23 |
| C2        | 1.16E-27 | 0.554551 | 0.141 | 0.026 | 1.74E-23 |
| CRISPLD1  | 1.23E-27 | -0.1819  | 0.109 | 0.258 | 1.83E-23 |
| CPNE5     | 1.25E-27 | -0.11673 | 0.01  | 0.095 | 1.87E-23 |
| CTA-384D8 | 1.30E-27 | -0.16573 | 0.018 | 0.121 | 1.94E-23 |
| SLC12A9   | 1.32E-27 | -0.16704 | 0.1   | 0.248 | 1.97E-23 |
| MPP6      | 1.33E-27 | -0.1387  | 0.074 | 0.209 | 1.99E-23 |
| KCTD1     | 1.46E-27 | -0.16577 | 0.054 | 0.179 | 2.18E-23 |
| EYA4      | 1.52E-27 | -0.10088 | 0.023 | 0.122 | 2.27E-23 |
| ARNTL2    | 1.61E-27 | -0.12874 | 0.019 | 0.122 | 2.40E-23 |
| CAPN1     | 1.61E-27 | 0.147475 | 0.191 | 0.275 | 2.40E-23 |
| FOSL2     | 1.62E-27 | 0.126644 | 0.153 | 0.204 | 2.42E-23 |
| DLX5      | 1.64E-27 | -0.43537 | 0.046 | 0.185 | 2.45E-23 |
| LRRC8B    | 1.64E-27 | -0.15203 | 0.053 | 0.183 | 2.46E-23 |
| PLCXD1    | 1.64E-27 | -0.17923 | 0.032 | 0.147 | 2.46E-23 |
| AGRN      | 1.69E-27 | -0.15385 | 0.046 | 0.167 | 2.53E-23 |
| SIX1      | 1.78E-27 | -0.18552 | 0.037 | 0.158 | 2.67E-23 |

|           |          |          |       |       |          |
|-----------|----------|----------|-------|-------|----------|
| RNF44     | 1.86E-27 | -0.13577 | 0.064 | 0.194 | 2.78E-23 |
| FBX08     | 1.89E-27 | 0.156535 | 0.176 | 0.238 | 2.82E-23 |
| TGFBRAP1  | 1.95E-27 | -0.10648 | 0.025 | 0.128 | 2.91E-23 |
| PIANP     | 1.95E-27 | -0.15481 | 0.041 | 0.16  | 2.92E-23 |
| TMEM243   | 2.12E-27 | 0.207615 | 0.218 | 0.283 | 3.17E-23 |
| LANCL2    | 2.16E-27 | -0.33222 | 0.11  | 0.281 | 3.23E-23 |
| SRGAP3    | 2.24E-27 | -0.18333 | 0.053 | 0.181 | 3.35E-23 |
| RGS3      | 2.87E-27 | -0.15077 | 0.071 | 0.199 | 4.29E-23 |
| PFKFB3    | 2.89E-27 | 0.133762 | 0.13  | 0.173 | 4.32E-23 |
| ERCC3     | 2.94E-27 | -0.14038 | 0.114 | 0.268 | 4.40E-23 |
| PHLPP1    | 2.97E-27 | -0.13449 | 0.044 | 0.158 | 4.44E-23 |
| DUSP28    | 3.03E-27 | -0.15453 | 0.048 | 0.169 | 4.53E-23 |
| FBX044    | 3.08E-27 | 0.158334 | 0.126 | 0.19  | 4.60E-23 |
| OAS3      | 3.13E-27 | -0.10314 | 0.033 | 0.138 | 4.67E-23 |
| PIGZ      | 3.18E-27 | -0.11102 | 0.035 | 0.14  | 4.76E-23 |
| ZDHHC7    | 3.41E-27 | -0.12598 | 0.097 | 0.233 | 5.09E-23 |
| AQR       | 3.49E-27 | -0.12165 | 0.034 | 0.14  | 5.21E-23 |
| USP18     | 3.50E-27 | -0.13971 | 0.034 | 0.144 | 5.23E-23 |
| LRRN2     | 3.66E-27 | -0.12729 | 0.023 | 0.125 | 5.47E-23 |
| ASMTL     | 3.79E-27 | 0.104533 | 0.146 | 0.228 | 5.66E-23 |
| HPCAL1    | 3.84E-27 | -0.11601 | 0.106 | 0.238 | 5.75E-23 |
| HOXA9     | 4.08E-27 | -0.24521 | 0.01  | 0.104 | 6.09E-23 |
| ISG20     | 4.29E-27 | 0.561594 | 0.151 | 0.067 | 6.40E-23 |
| CSF1      | 4.71E-27 | 0.277203 | 0.154 | 0.122 | 7.04E-23 |
| ZFP1      | 4.86E-27 | -0.14936 | 0.039 | 0.156 | 7.27E-23 |
| DDIT4     | 4.88E-27 | 0.239655 | 0.286 | 0.312 | 7.29E-23 |
| CACNB3    | 5.19E-27 | -0.1546  | 0.034 | 0.147 | 7.76E-23 |
| EIF4ENIF1 | 5.32E-27 | -0.1226  | 0.044 | 0.159 | 7.95E-23 |
| HIST1H2BK | 5.48E-27 | 0.101647 | 0.164 | 0.246 | 8.20E-23 |
| TRIM41    | 5.91E-27 | -0.15378 | 0.073 | 0.204 | 8.84E-23 |
| APOC1     | 6.16E-27 | 0.636777 | 0.372 | 0.302 | 9.20E-23 |
| TNFAIP6   | 6.34E-27 | 0.301084 | 0.236 | 0.294 | 9.48E-23 |
| CCNDBP1   | 6.38E-27 | 0.128527 | 0.137 | 0.206 | 9.54E-23 |
| TAP1      | 6.51E-27 | -0.15494 | 0.219 | 0.388 | 9.73E-23 |
| ADCK3     | 6.81E-27 | 0.148167 | 0.133 | 0.189 | 1.02E-22 |
| ZNF629    | 6.82E-27 | -0.12329 | 0.034 | 0.138 | 1.02E-22 |
| SULF2     | 6.85E-27 | -0.15392 | 0.105 | 0.252 | 1.02E-22 |
| ZDHHC15   | 7.06E-27 | -0.11106 | 0.031 | 0.141 | 1.06E-22 |
| SEC16A    | 7.25E-27 | -0.10101 | 0.084 | 0.206 | 1.08E-22 |
| AVEN      | 7.56E-27 | -0.12755 | 0.01  | 0.101 | 1.13E-22 |
| KPTN      | 7.65E-27 | -0.17614 | 0.046 | 0.172 | 1.14E-22 |
| ZP3       | 8.04E-27 | -0.15881 | 0.055 | 0.185 | 1.20E-22 |
| PPP1R14C  | 8.39E-27 | -0.24271 | 0.05  | 0.186 | 1.25E-22 |
| MAP6      | 8.46E-27 | -0.11342 | 0.056 | 0.175 | 1.26E-22 |
| NKAIN4    | 8.46E-27 | -0.34414 | 0.066 | 0.216 | 1.26E-22 |
| SPIN4     | 8.69E-27 | -0.16041 | 0.01  | 0.101 | 1.30E-22 |
| IRF1      | 8.74E-27 | 0.184071 | 0.232 | 0.306 | 1.31E-22 |
| ZNF318    | 8.80E-27 | -0.1335  | 0.029 | 0.133 | 1.32E-22 |
| IGSF21    | 9.02E-27 | -0.24982 | 0.03  | 0.141 | 1.35E-22 |
| RRP8      | 9.07E-27 | 0.130167 | 0.124 | 0.206 | 1.36E-22 |
| AGL       | 9.50E-27 | -0.11043 | 0.053 | 0.164 | 1.42E-22 |

|           |          |          |       |       |          |
|-----------|----------|----------|-------|-------|----------|
| MEGF9     | 9.50E-27 | -0.11596 | 0.047 | 0.163 | 1.42E-22 |
| OSBPL10   | 1.01E-26 | -0.12312 | 0.021 | 0.117 | 1.51E-22 |
| BBS2      | 1.04E-26 | 0.239224 | 0.234 | 0.298 | 1.56E-22 |
| RCHY1     | 1.09E-26 | 0.14404  | 0.217 | 0.298 | 1.62E-22 |
| RP11-66N1 | 1.11E-26 | -0.10959 | 0.041 | 0.151 | 1.66E-22 |
| TASP1     | 1.12E-26 | 0.161519 | 0.092 | 0.167 | 1.68E-22 |
| UBXN11    | 1.15E-26 | 0.269068 | 0.181 | 0.199 | 1.72E-22 |
| RTN4IP1   | 1.18E-26 | -0.10568 | 0.032 | 0.131 | 1.77E-22 |
| SIMC1     | 1.19E-26 | -0.15201 | 0.038 | 0.157 | 1.77E-22 |
| NCALD     | 1.19E-26 | -0.13074 | 0.094 | 0.225 | 1.78E-22 |
| HHLA3     | 1.24E-26 | 0.339553 | 0.189 | 0.219 | 1.85E-22 |
| ARFGEF2   | 1.25E-26 | -0.11151 | 0.032 | 0.14  | 1.87E-22 |
| ZNF184    | 1.28E-26 | -0.18418 | 0.03  | 0.143 | 1.92E-22 |
| USP28     | 1.35E-26 | -0.12401 | 0.042 | 0.149 | 2.02E-22 |
| ZNF844    | 1.38E-26 | -0.10394 | 0.052 | 0.157 | 2.06E-22 |
| KAT6B     | 1.40E-26 | -0.12405 | 0.068 | 0.19  | 2.09E-22 |
| CCDC97    | 1.43E-26 | -0.1465  | 0.068 | 0.196 | 2.13E-22 |
| AC093673. | 1.43E-26 | 0.185628 | 0.211 | 0.263 | 2.14E-22 |
| SLC35E4   | 1.48E-26 | -0.12264 | 0.033 | 0.142 | 2.21E-22 |
| NPHP1     | 1.50E-26 | 0.135533 | 0.096 | 0.17  | 2.23E-22 |
| RNF20     | 1.52E-26 | -0.10834 | 0.119 | 0.259 | 2.27E-22 |
| SAMHD1    | 1.54E-26 | -0.14403 | 0.06  | 0.184 | 2.30E-22 |
| SMO       | 1.58E-26 | -0.12793 | 0.038 | 0.149 | 2.35E-22 |
| LINC0091C | 1.62E-26 | -0.12835 | 0.055 | 0.169 | 2.43E-22 |
| UBR1      | 1.72E-26 | -0.14865 | 0.044 | 0.163 | 2.57E-22 |
| LYRM9     | 1.72E-26 | 0.24842  | 0.168 | 0.233 | 2.57E-22 |
| CAPN5     | 1.79E-26 | -0.10918 | 0.054 | 0.164 | 2.68E-22 |
| CD46      | 1.84E-26 | 0.134266 | 0.178 | 0.263 | 2.74E-22 |
| C19orf57  | 1.84E-26 | -0.1432  | 0.02  | 0.119 | 2.75E-22 |
| SLC16A9   | 1.88E-26 | -0.16927 | 0.033 | 0.147 | 2.81E-22 |
| C19orf12  | 1.91E-26 | 0.116763 | 0.125 | 0.209 | 2.85E-22 |
| TNRC18    | 2.00E-26 | -0.14212 | 0.036 | 0.146 | 3.00E-22 |
| PIK3R2    | 2.06E-26 | -0.11421 | 0.024 | 0.116 | 3.07E-22 |
| BIVM      | 2.26E-26 | -0.16688 | 0.079 | 0.217 | 3.38E-22 |
| FKTN      | 2.42E-26 | -0.1086  | 0.041 | 0.149 | 3.62E-22 |
| TRNT1     | 2.48E-26 | 0.161488 | 0.15  | 0.242 | 3.71E-22 |
| USP37     | 2.50E-26 | -0.12854 | 0.051 | 0.167 | 3.73E-22 |
| TMEM198   | 2.67E-26 | -0.12156 | 0.073 | 0.201 | 4.00E-22 |
| FUCA1     | 2.69E-26 | 0.176995 | 0.128 | 0.178 | 4.02E-22 |
| SAYSD1    | 2.91E-26 | 0.1007   | 0.127 | 0.207 | 4.35E-22 |
| B3GALT1   | 3.16E-26 | -0.13566 | 0.02  | 0.12  | 4.72E-22 |
| HOXB3     | 3.20E-26 | -0.16433 | 0.016 | 0.102 | 4.79E-22 |
| RHOU      | 3.37E-26 | -0.22875 | 0.07  | 0.212 | 5.04E-22 |
| ZBED3     | 3.52E-26 | -0.12368 | 0.038 | 0.151 | 5.26E-22 |
| LRRC14    | 3.64E-26 | -0.15557 | 0.043 | 0.159 | 5.45E-22 |
| IMMP2L    | 3.84E-26 | 0.445838 | 0.228 | 0.165 | 5.74E-22 |
| HIC2      | 3.95E-26 | -0.12162 | 0.013 | 0.102 | 5.90E-22 |
| RP11-386G | 3.98E-26 | 0.170489 | 0.137 | 0.215 | 5.95E-22 |
| OPTN      | 4.00E-26 | 0.133822 | 0.149 | 0.19  | 5.98E-22 |
| ZCCHC24   | 4.01E-26 | -0.12574 | 0.063 | 0.185 | 5.99E-22 |
| IFI44     | 4.03E-26 | -0.13778 | 0.103 | 0.244 | 6.02E-22 |

|           |          |          |       |       |          |
|-----------|----------|----------|-------|-------|----------|
| ZNF71     | 4.11E-26 | -0.11147 | 0.067 | 0.181 | 6.14E-22 |
| RP11-73E1 | 4.40E-26 | -0.14521 | 0.017 | 0.112 | 6.58E-22 |
| GSE1      | 4.78E-26 | -0.16205 | 0.052 | 0.172 | 7.15E-22 |
| ATP6V1G2  | 4.93E-26 | -0.12631 | 0.087 | 0.215 | 7.36E-22 |
| FAS       | 5.10E-26 | 0.538336 | 0.159 | 0.068 | 7.62E-22 |
| LZTS2     | 5.47E-26 | -0.11693 | 0.035 | 0.14  | 8.17E-22 |
| EPHB3     | 5.49E-26 | -0.14699 | 0.019 | 0.117 | 8.20E-22 |
| SEMA7A    | 5.92E-26 | -0.10156 | 0.011 | 0.094 | 8.84E-22 |
| KIAA1456  | 6.68E-26 | -0.10098 | 0.018 | 0.11  | 9.99E-22 |
| PPP1R14A  | 6.69E-26 | -0.15168 | 0.057 | 0.172 | 1.00E-21 |
| PIP4K2C   | 6.87E-26 | -0.27493 | 0.078 | 0.23  | 1.03E-21 |
| DSCAM     | 7.18E-26 | -0.25414 | 0.055 | 0.193 | 1.07E-21 |
| SPIRE1    | 7.30E-26 | -0.10192 | 0.069 | 0.186 | 1.09E-21 |
| LMBRD1    | 7.98E-26 | 0.348743 | 0.187 | 0.212 | 1.19E-21 |
| TADA1     | 8.01E-26 | -0.10611 | 0.04  | 0.141 | 1.20E-21 |
| USP15     | 8.25E-26 | -0.10436 | 0.156 | 0.293 | 1.23E-21 |
| IRGQ      | 8.40E-26 | -0.153   | 0.041 | 0.156 | 1.26E-21 |
| PSMA2     | 8.64E-26 | 0.904556 | 0.14  | 0.02  | 1.29E-21 |
| MAPK8IP3  | 9.30E-26 | -0.11828 | 0.043 | 0.149 | 1.39E-21 |
| LRP11     | 9.65E-26 | -0.12262 | 0.033 | 0.138 | 1.44E-21 |
| AKAP5     | 9.72E-26 | -0.10563 | 0.013 | 0.094 | 1.45E-21 |
| LYST      | 1.00E-25 | 0.237559 | 0.147 | 0.152 | 1.49E-21 |
| PDE4DIP   | 1.04E-25 | 0.414913 | 0.287 | 0.231 | 1.56E-21 |
| SFT2D3    | 1.05E-25 | -0.11762 | 0.024 | 0.122 | 1.57E-21 |
| SIPA1     | 1.05E-25 | -0.10068 | 0.027 | 0.126 | 1.57E-21 |
| PDE9A     | 1.08E-25 | -0.14562 | 0.029 | 0.136 | 1.61E-21 |
| NDEL1     | 1.12E-25 | 0.184323 | 0.141 | 0.189 | 1.68E-21 |
| RAD54L2   | 1.12E-25 | -0.11437 | 0.078 | 0.2   | 1.68E-21 |
| UGT8      | 1.20E-25 | -0.20517 | 0.008 | 0.091 | 1.79E-21 |
| C1RL      | 1.21E-25 | 0.458695 | 0.12  | 0.021 | 1.81E-21 |
| TMBIM4    | 1.22E-25 | 0.879201 | 0.115 | 0.01  | 1.83E-21 |
| FAM114A1  | 1.39E-25 | 0.376542 | 0.194 | 0.153 | 2.08E-21 |
| HOXA10    | 1.46E-25 | -0.35971 | 0.06  | 0.195 | 2.18E-21 |
| STK3      | 1.52E-25 | 0.226505 | 0.139 | 0.165 | 2.27E-21 |
| MYL5      | 1.52E-25 | 0.184844 | 0.089 | 0.136 | 2.28E-21 |
| RP11-395A | 1.54E-25 | -0.11299 | 0.045 | 0.156 | 2.31E-21 |
| FGF9      | 1.57E-25 | -0.19384 | 0.012 | 0.099 | 2.34E-21 |
| ZNF16     | 1.61E-25 | -0.10502 | 0.046 | 0.154 | 2.41E-21 |
| ZNF853    | 1.62E-25 | -0.14453 | 0.031 | 0.138 | 2.42E-21 |
| ZNF713    | 1.66E-25 | -0.10982 | 0.027 | 0.119 | 2.48E-21 |
| ENTPD5    | 1.67E-25 | -0.10632 | 0.027 | 0.125 | 2.50E-21 |
| SCO2      | 1.81E-25 | 0.10633  | 0.112 | 0.198 | 2.71E-21 |
| RP11-345F | 1.89E-25 | -0.17609 | 0.123 | 0.277 | 2.82E-21 |
| FBRSL1    | 2.00E-25 | -0.11491 | 0.02  | 0.115 | 2.99E-21 |
| PBXIP1    | 2.04E-25 | 0.445248 | 0.152 | 0.101 | 3.05E-21 |
| TMEM42    | 2.17E-25 | 0.239954 | 0.172 | 0.201 | 3.25E-21 |
| ZNF512    | 2.19E-25 | -0.15132 | 0.104 | 0.247 | 3.27E-21 |
| CRB1      | 2.26E-25 | -0.17043 | 0.038 | 0.148 | 3.37E-21 |
| CEP85     | 2.27E-25 | -0.14575 | 0.021 | 0.12  | 3.40E-21 |
| CRYZ      | 2.42E-25 | 0.235084 | 0.161 | 0.21  | 3.62E-21 |
| SELO      | 2.59E-25 | -0.11336 | 0.028 | 0.128 | 3.87E-21 |

|          |          |          |       |       |          |
|----------|----------|----------|-------|-------|----------|
| PLEKHA2  | 2.64E-25 | -0.1532  | 0.045 | 0.162 | 3.94E-21 |
| LETMD1   | 2.69E-25 | 0.150651 | 0.145 | 0.209 | 4.02E-21 |
| SARM1    | 2.77E-25 | -0.13398 | 0.024 | 0.125 | 4.14E-21 |
| NLGN4Y   | 2.89E-25 | -0.13152 | 0.007 | 0.088 | 4.32E-21 |
| BIN3     | 2.93E-25 | 0.133542 | 0.17  | 0.259 | 4.38E-21 |
| BAG3     | 2.94E-25 | 0.234526 | 0.146 | 0.127 | 4.39E-21 |
| FAIM2    | 2.95E-25 | 0.21287  | 0.19  | 0.26  | 4.42E-21 |
| LAMB2    | 3.20E-25 | 0.158511 | 0.106 | 0.142 | 4.78E-21 |
| GPX8     | 3.22E-25 | 0.130535 | 0.084 | 0.147 | 4.82E-21 |
| ALKBH6   | 3.28E-25 | -0.14511 | 0.064 | 0.188 | 4.90E-21 |
| REC8     | 3.36E-25 | -0.24712 | 0.039 | 0.16  | 5.02E-21 |
| TMEM44   | 3.41E-25 | -0.10082 | 0.022 | 0.114 | 5.10E-21 |
| CRELD1   | 3.49E-25 | 0.212648 | 0.159 | 0.205 | 5.21E-21 |
| FOXP1    | 3.53E-25 | 0.63892  | 0.254 | 0.228 | 5.27E-21 |
| PTCH1    | 3.59E-25 | -0.14776 | 0.029 | 0.135 | 5.36E-21 |
| RPP21    | 3.61E-25 | 0.11356  | 0.138 | 0.214 | 5.40E-21 |
| KIAA1614 | 3.69E-25 | -0.15424 | 0.011 | 0.099 | 5.51E-21 |
| ALDOC    | 3.75E-25 | 0.564753 | 0.236 | 0.102 | 5.61E-21 |
| SCARF2   | 3.91E-25 | -0.10622 | 0.018 | 0.111 | 5.84E-21 |
| TMEM179  | 3.98E-25 | -0.16919 | 0.005 | 0.081 | 5.95E-21 |
| ZSCAN29  | 4.04E-25 | -0.11371 | 0.016 | 0.105 | 6.04E-21 |
| ARMCX1   | 4.11E-25 | 0.259017 | 0.22  | 0.24  | 6.14E-21 |
| ANKRD13A | 4.27E-25 | -0.12076 | 0.059 | 0.177 | 6.39E-21 |
| SLC35G2  | 4.28E-25 | 0.289833 | 0.167 | 0.211 | 6.39E-21 |
| LRRC4    | 4.31E-25 | -0.18987 | 0.009 | 0.094 | 6.45E-21 |
| POLR3C   | 4.59E-25 | -0.11077 | 0.061 | 0.18  | 6.85E-21 |
| EPDR1    | 4.82E-25 | 0.128125 | 0.164 | 0.23  | 7.20E-21 |
| PCOLCE2  | 5.50E-25 | 0.259445 | 0.134 | 0.133 | 8.22E-21 |
| RIC3     | 5.85E-25 | 0.225473 | 0.288 | 0.364 | 8.75E-21 |
| STK35    | 5.92E-25 | -0.10425 | 0.032 | 0.132 | 8.85E-21 |
| CHRNA1   | 6.03E-25 | 0.336316 | 0.157 | 0.167 | 9.02E-21 |
| TYW3     | 6.20E-25 | 0.108596 | 0.131 | 0.219 | 9.26E-21 |
| KIFAP3   | 6.56E-25 | 0.235004 | 0.215 | 0.26  | 9.81E-21 |
| DPCD     | 6.60E-25 | 0.228859 | 0.187 | 0.228 | 9.86E-21 |
| PAG1     | 7.20E-25 | -0.13624 | 0.073 | 0.196 | 1.08E-20 |
| CD14     | 7.35E-25 | 0.529364 | 0.227 | 0.11  | 1.10E-20 |
| NPPA     | 7.40E-25 | -0.26155 | 0.004 | 0.075 | 1.11E-20 |
| HSF2     | 7.47E-25 | -0.15726 | 0.112 | 0.257 | 1.12E-20 |
| CAMK2N2  | 7.68E-25 | -0.16703 | 0.009 | 0.093 | 1.15E-20 |
| ZNF660   | 8.39E-25 | -0.10894 | 0.03  | 0.128 | 1.25E-20 |
| ATXN3    | 8.52E-25 | 0.109521 | 0.127 | 0.202 | 1.27E-20 |
| HEBP1    | 9.74E-25 | 0.240777 | 0.188 | 0.202 | 1.45E-20 |
| SYP      | 1.01E-24 | -0.13912 | 0.074 | 0.198 | 1.52E-20 |
| C14orf37 | 1.05E-24 | -0.14829 | 0.062 | 0.184 | 1.56E-20 |
| EGLN3    | 1.07E-24 | 0.459306 | 0.16  | 0.068 | 1.60E-20 |
| FAM107B  | 1.16E-24 | -0.23792 | 0.044 | 0.17  | 1.74E-20 |
| TRIM11   | 1.17E-24 | -0.11561 | 0.077 | 0.196 | 1.75E-20 |
| FAM184A  | 1.18E-24 | -0.15927 | 0.034 | 0.147 | 1.77E-20 |
| TSHZ1    | 1.22E-24 | -0.19798 | 0.043 | 0.164 | 1.82E-20 |
| 1-Mar    | 1.33E-24 | -0.23962 | 0.046 | 0.168 | 1.98E-20 |
| FXND7    | 1.35E-24 | -0.33949 | 0.029 | 0.141 | 2.02E-20 |

|           |          |          |       |       |          |
|-----------|----------|----------|-------|-------|----------|
| RALGAPA1  | 1.38E-24 | -0.15127 | 0.08  | 0.206 | 2.06E-20 |
| CRTC1     | 1.43E-24 | -0.11893 | 0.059 | 0.169 | 2.14E-20 |
| ACO02454. | 1.46E-24 | -0.20298 | 0.005 | 0.08  | 2.18E-20 |
| STOML1    | 1.49E-24 | 0.177331 | 0.103 | 0.179 | 2.22E-20 |
| MPI       | 1.53E-24 | 0.177055 | 0.121 | 0.173 | 2.28E-20 |
| TGFBR1    | 1.56E-24 | -0.16662 | 0.046 | 0.164 | 2.33E-20 |
| STOX2     | 1.59E-24 | -0.15935 | 0.038 | 0.148 | 2.37E-20 |
| TSPAN31   | 1.66E-24 | -0.14366 | 0.255 | 0.43  | 2.48E-20 |
| CROT      | 1.68E-24 | 0.301549 | 0.176 | 0.209 | 2.51E-20 |
| RP11-977G | 1.79E-24 | -0.10792 | 0.033 | 0.13  | 2.67E-20 |
| ZNF74     | 1.79E-24 | -0.11819 | 0.025 | 0.119 | 2.67E-20 |
| ARHGEF9   | 1.99E-24 | -0.16895 | 0.065 | 0.193 | 2.98E-20 |
| PIEZ01    | 2.26E-24 | -0.11435 | 0.032 | 0.136 | 3.38E-20 |
| TMEM109   | 2.35E-24 | 0.148346 | 0.139 | 0.217 | 3.50E-20 |
| RP4-665J2 | 2.36E-24 | 0.112169 | 0.124 | 0.19  | 3.52E-20 |
| DNMT3B    | 2.46E-24 | -0.11142 | 0.004 | 0.072 | 3.67E-20 |
| KLF10     | 2.55E-24 | 0.179373 | 0.225 | 0.3   | 3.81E-20 |
| MAEL      | 2.68E-24 | -0.11631 | 0.013 | 0.098 | 4.01E-20 |
| METTL1    | 2.74E-24 | -0.22673 | 0.138 | 0.3   | 4.10E-20 |
| NUDT8     | 2.78E-24 | -0.12872 | 0.039 | 0.151 | 4.16E-20 |
| FANCE     | 2.86E-24 | -0.12149 | 0.013 | 0.098 | 4.28E-20 |
| LRRC23    | 2.91E-24 | 0.122125 | 0.143 | 0.22  | 4.35E-20 |
| AASS      | 2.93E-24 | -0.115   | 0.106 | 0.237 | 4.38E-20 |
| ADAMTS9   | 3.09E-24 | -0.10061 | 0.047 | 0.144 | 4.62E-20 |
| ZNF346    | 3.18E-24 | -0.14438 | 0.042 | 0.153 | 4.75E-20 |
| PCGF5     | 3.37E-24 | 0.211486 | 0.16  | 0.207 | 5.04E-20 |
| ERCC6L2   | 3.64E-24 | -0.14736 | 0.059 | 0.184 | 5.44E-20 |
| SERPINB1  | 3.68E-24 | 0.558379 | 0.134 | 0.025 | 5.50E-20 |
| RP11-108M | 3.77E-24 | -0.19205 | 0.012 | 0.1   | 5.63E-20 |
| RARA      | 3.80E-24 | -0.10841 | 0.057 | 0.169 | 5.68E-20 |
| GPRIN1    | 4.00E-24 | -0.1595  | 0.015 | 0.106 | 5.98E-20 |
| PHACTR3   | 4.14E-24 | -0.23513 | 0.031 | 0.138 | 6.19E-20 |
| OCEL1     | 4.17E-24 | 0.309291 | 0.16  | 0.157 | 6.23E-20 |
| GADD45G   | 4.35E-24 | -0.33987 | 0.18  | 0.364 | 6.50E-20 |
| STK32C    | 4.49E-24 | -0.16045 | 0.043 | 0.157 | 6.71E-20 |
| GAS7      | 4.53E-24 | -0.21297 | 0.067 | 0.194 | 6.76E-20 |
| PLEKHA5   | 4.63E-24 | -0.11707 | 0.037 | 0.14  | 6.92E-20 |
| DBX2      | 4.66E-24 | -0.13005 | 0.029 | 0.121 | 6.96E-20 |
| KCNJ2     | 4.88E-24 | -0.15332 | 0.024 | 0.121 | 7.29E-20 |
| PRUNE2    | 4.99E-24 | 0.543244 | 0.212 | 0.088 | 7.46E-20 |
| ACO09005. | 5.25E-24 | -0.10364 | 0.008 | 0.083 | 7.84E-20 |
| KLHL25    | 5.74E-24 | -0.12655 | 0.03  | 0.132 | 8.58E-20 |
| NOVA1-AS1 | 5.80E-24 | -0.12464 | 0.013 | 0.098 | 8.67E-20 |
| NDRG2     | 6.02E-24 | 0.301566 | 0.345 | 0.385 | 8.99E-20 |
| HIST1H2AC | 6.18E-24 | 0.544244 | 0.212 | 0.078 | 9.23E-20 |
| ZNF133    | 6.20E-24 | -0.10076 | 0.05  | 0.156 | 9.27E-20 |
| PARP9     | 6.48E-24 | 0.166875 | 0.148 | 0.194 | 9.68E-20 |
| ZNF335    | 7.30E-24 | -0.11317 | 0.054 | 0.162 | 1.09E-19 |
| ZNF766    | 7.40E-24 | -0.12023 | 0.11  | 0.236 | 1.11E-19 |
| SHF       | 7.71E-24 | -0.12833 | 0.013 | 0.094 | 1.15E-19 |
| TP53BP1   | 7.91E-24 | -0.13266 | 0.062 | 0.18  | 1.18E-19 |

|           |          |          |       |       |          |
|-----------|----------|----------|-------|-------|----------|
| INF2      | 8.22E-24 | -0.12622 | 0.028 | 0.127 | 1.23E-19 |
| RP5-1177M | 8.35E-24 | -0.25093 | 0.011 | 0.098 | 1.25E-19 |
| RFXAP     | 8.53E-24 | -0.13634 | 0.09  | 0.217 | 1.27E-19 |
| RECK      | 9.13E-24 | -0.12484 | 0.043 | 0.147 | 1.36E-19 |
| OSGEPL1   | 1.02E-23 | -0.10068 | 0.053 | 0.159 | 1.52E-19 |
| CLEC11A   | 1.03E-23 | -0.14387 | 0.136 | 0.281 | 1.53E-19 |
| PTBP2     | 1.08E-23 | -0.23722 | 0.063 | 0.199 | 1.61E-19 |
| STMN4     | 1.10E-23 | -0.36323 | 0.186 | 0.373 | 1.64E-19 |
| ZC3H3     | 1.14E-23 | -0.10959 | 0.059 | 0.165 | 1.70E-19 |
| SOX5      | 1.26E-23 | -0.11436 | 0.044 | 0.159 | 1.88E-19 |
| FBXL16    | 1.26E-23 | -0.11502 | 0.018 | 0.105 | 1.89E-19 |
| FAH       | 1.34E-23 | 0.251666 | 0.106 | 0.135 | 2.01E-19 |
| CUTC      | 1.42E-23 | 0.147403 | 0.107 | 0.167 | 2.12E-19 |
| MOB3B     | 1.45E-23 | -0.16981 | 0.034 | 0.142 | 2.17E-19 |
| MORC3     | 1.56E-23 | -0.11943 | 0.063 | 0.175 | 2.33E-19 |
| CSPG4     | 1.64E-23 | -0.11923 | 0.011 | 0.09  | 2.45E-19 |
| PSEN2     | 1.71E-23 | 0.216074 | 0.105 | 0.151 | 2.56E-19 |
| CTPS2     | 1.74E-23 | -0.11741 | 0.027 | 0.123 | 2.60E-19 |
| LINC00094 | 1.79E-23 | 0.112462 | 0.142 | 0.188 | 2.67E-19 |
| FAM69B    | 1.79E-23 | -0.10629 | 0.021 | 0.111 | 2.68E-19 |
| SLC35A2   | 1.82E-23 | 0.250057 | 0.179 | 0.22  | 2.72E-19 |
| NUP133    | 1.82E-23 | -0.17584 | 0.073 | 0.201 | 2.72E-19 |
| ATF7IP    | 1.82E-23 | -0.19214 | 0.065 | 0.194 | 2.72E-19 |
| LY96      | 1.96E-23 | 0.207707 | 0.118 | 0.107 | 2.94E-19 |
| TAF5L     | 2.00E-23 | -0.11163 | 0.021 | 0.111 | 2.98E-19 |
| MID1      | 2.02E-23 | -0.10151 | 0.05  | 0.149 | 3.03E-19 |
| CMBL      | 2.05E-23 | 0.125098 | 0.154 | 0.211 | 3.06E-19 |
| 4-Sep     | 2.22E-23 | 0.123692 | 0.097 | 0.157 | 3.32E-19 |
| TMOD1     | 2.23E-23 | 0.347059 | 0.214 | 0.158 | 3.33E-19 |
| AP3M2     | 2.25E-23 | -0.13474 | 0.072 | 0.191 | 3.36E-19 |
| ITSN1     | 2.59E-23 | -0.10964 | 0.107 | 0.226 | 3.87E-19 |
| TMEM69    | 2.59E-23 | 0.125878 | 0.168 | 0.247 | 3.87E-19 |
| LRRC20    | 2.72E-23 | -0.14212 | 0.024 | 0.119 | 4.07E-19 |
| RP11-1275 | 2.90E-23 | -0.14967 | 0.041 | 0.147 | 4.33E-19 |
| GRK4      | 2.91E-23 | -0.10224 | 0.061 | 0.169 | 4.34E-19 |
| ZBTB33    | 3.02E-23 | -0.13394 | 0.039 | 0.144 | 4.51E-19 |
| DLGAP1-AS | 3.05E-23 | 0.255204 | 0.106 | 0.125 | 4.56E-19 |
| SESN2     | 3.11E-23 | 0.289632 | 0.149 | 0.11  | 4.64E-19 |
| TMEM53    | 3.23E-23 | 0.217461 | 0.104 | 0.151 | 4.83E-19 |
| NOP14     | 3.67E-23 | -0.11428 | 0.056 | 0.165 | 5.48E-19 |
| PIK3CA    | 3.72E-23 | -0.10743 | 0.061 | 0.165 | 5.56E-19 |
| CLK4      | 3.97E-23 | 0.121133 | 0.165 | 0.232 | 5.94E-19 |
| DDIT4L    | 4.19E-23 | 0.330012 | 0.08  | 0.001 | 6.27E-19 |
| ANGPTL1   | 4.27E-23 | -0.17603 | 0.014 | 0.099 | 6.38E-19 |
| HBP1      | 4.34E-23 | 0.257249 | 0.218 | 0.217 | 6.49E-19 |
| SLC22A4   | 4.60E-23 | -0.11427 | 0.028 | 0.125 | 6.88E-19 |
| HOXB4     | 4.61E-23 | -0.15737 | 0.011 | 0.084 | 6.89E-19 |
| PLEKHG3   | 4.94E-23 | -0.14169 | 0.005 | 0.077 | 7.39E-19 |
| CABLES2   | 4.95E-23 | -0.12076 | 0.014 | 0.1   | 7.40E-19 |
| CHPF2     | 4.96E-23 | 0.11854  | 0.165 | 0.227 | 7.41E-19 |
| CAND2     | 5.61E-23 | -0.10336 | 0.01  | 0.081 | 8.38E-19 |

|           |          |          |       |       |          |
|-----------|----------|----------|-------|-------|----------|
| PHKG2     | 5.92E-23 | 0.221611 | 0.13  | 0.174 | 8.85E-19 |
| TP53      | 6.01E-23 | -0.13136 | 0.092 | 0.227 | 8.98E-19 |
| DDX20     | 6.17E-23 | -0.1199  | 0.059 | 0.168 | 9.22E-19 |
| POLH      | 6.21E-23 | -0.11628 | 0.057 | 0.164 | 9.27E-19 |
| CCDC117   | 6.22E-23 | -0.10248 | 0.036 | 0.131 | 9.30E-19 |
| CSRNP3    | 7.06E-23 | -0.22865 | 0.043 | 0.162 | 1.06E-18 |
| DPYD      | 7.47E-23 | 0.401126 | 0.135 | 0.025 | 1.12E-18 |
| CCDC88C   | 7.64E-23 | -0.1339  | 0.01  | 0.09  | 1.14E-18 |
| MIR22HG   | 8.00E-23 | 0.545579 | 0.15  | 0.054 | 1.19E-18 |
| TENM1     | 9.08E-23 | -0.13896 | 0.035 | 0.131 | 1.36E-18 |
| GRB10     | 9.53E-23 | 0.136446 | 0.1   | 0.132 | 1.42E-18 |
| HLA-DQB1  | 9.69E-23 | 0.47683  | 0.136 | 0.04  | 1.45E-18 |
| SNX11     | 1.06E-22 | -0.11566 | 0.059 | 0.173 | 1.59E-18 |
| TMEM8B    | 1.07E-22 | -0.10614 | 0.034 | 0.128 | 1.59E-18 |
| MSL2      | 1.10E-22 | -0.10297 | 0.04  | 0.131 | 1.64E-18 |
| CCDC159   | 1.14E-22 | 0.287185 | 0.137 | 0.154 | 1.70E-18 |
| CTD-2017D | 1.14E-22 | -0.10298 | 0.029 | 0.117 | 1.70E-18 |
| C5orf28   | 1.16E-22 | 0.269995 | 0.166 | 0.158 | 1.74E-18 |
| H1FX-AS1  | 1.21E-22 | -0.12141 | 0.015 | 0.094 | 1.80E-18 |
| MGST2     | 1.25E-22 | 0.418816 | 0.139 | 0.135 | 1.87E-18 |
| RABL2B    | 1.32E-22 | 0.115337 | 0.121 | 0.195 | 1.97E-18 |
| MT1A      | 1.43E-22 | 0.4763   | 0.109 | 0.012 | 2.14E-18 |
| ERLIN2    | 1.45E-22 | 0.162334 | 0.132 | 0.19  | 2.17E-18 |
| RP11-263K | 1.46E-22 | 0.26842  | 0.114 | 0.095 | 2.18E-18 |
| B3GALT2   | 1.50E-22 | -0.19208 | 0.011 | 0.093 | 2.24E-18 |
| STRIP1    | 1.63E-22 | -0.14752 | 0.083 | 0.205 | 2.44E-18 |
| RFX7      | 1.80E-22 | -0.11178 | 0.016 | 0.098 | 2.69E-18 |
| SMYD3     | 1.86E-22 | 0.1729   | 0.157 | 0.228 | 2.78E-18 |
| RCBTB1    | 1.87E-22 | -0.15415 | 0.036 | 0.137 | 2.79E-18 |
| SRGN      | 1.87E-22 | 0.579384 | 0.312 | 0.16  | 2.80E-18 |
| BCR       | 1.89E-22 | -0.14159 | 0.036 | 0.137 | 2.82E-18 |
| CCDC74A   | 2.02E-22 | -0.10478 | 0.084 | 0.199 | 3.02E-18 |
| EEF1A2    | 2.05E-22 | -0.16891 | 0.011 | 0.093 | 3.07E-18 |
| MVK       | 2.07E-22 | -0.12622 | 0.048 | 0.146 | 3.09E-18 |
| ENKUR     | 2.11E-22 | 0.2826   | 0.117 | 0.146 | 3.15E-18 |
| LNPEP     | 2.15E-22 | -0.10507 | 0.073 | 0.179 | 3.22E-18 |
| KIF5A     | 2.20E-22 | -0.29456 | 0.083 | 0.226 | 3.29E-18 |
| GGA2      | 2.25E-22 | -0.10922 | 0.069 | 0.175 | 3.36E-18 |
| CDC37L1   | 2.29E-22 | 0.125213 | 0.164 | 0.221 | 3.42E-18 |
| EPC2      | 2.31E-22 | -0.11081 | 0.072 | 0.185 | 3.46E-18 |
| KCND3     | 2.82E-22 | -0.10509 | 0.028 | 0.112 | 4.22E-18 |
| SLC38A6   | 2.89E-22 | 0.195106 | 0.113 | 0.14  | 4.32E-18 |
| NACA2     | 3.24E-22 | 0.368079 | 0.178 | 0.165 | 4.85E-18 |
| CREBL2    | 3.27E-22 | 0.156802 | 0.123 | 0.169 | 4.89E-18 |
| PEX11B    | 3.55E-22 | 0.198209 | 0.125 | 0.168 | 5.30E-18 |
| SGCE      | 3.72E-22 | 0.467662 | 0.323 | 0.305 | 5.56E-18 |
| ZNF736    | 3.73E-22 | -0.14443 | 0.028 | 0.123 | 5.58E-18 |
| MAN1C1    | 3.73E-22 | 0.120768 | 0.076 | 0.116 | 5.58E-18 |
| MYADM     | 3.86E-22 | 0.165292 | 0.169 | 0.21  | 5.76E-18 |
| ZNF433    | 3.96E-22 | -0.10554 | 0.034 | 0.126 | 5.91E-18 |
| BRPF1     | 4.01E-22 | -0.11986 | 0.043 | 0.146 | 6.00E-18 |



|          |          |          |       |       |          |
|----------|----------|----------|-------|-------|----------|
| KIRREL3  | 4.20E-22 | -0.13708 | 0.004 | 0.067 | 6.27E-18 |
| SLC48A1  | 4.21E-22 | 0.136924 | 0.126 | 0.184 | 6.30E-18 |
| SH2B2    | 4.23E-22 | -0.1964  | 0.075 | 0.209 | 6.32E-18 |
| C19orf47 | 4.26E-22 | -0.11617 | 0.027 | 0.111 | 6.37E-18 |
| PRR12    | 4.29E-22 | -0.11387 | 0.018 | 0.104 | 6.41E-18 |
| TAB1     | 4.72E-22 | -0.11172 | 0.045 | 0.147 | 7.05E-18 |
| ANKRD37  | 4.72E-22 | 0.149956 | 0.115 | 0.157 | 7.06E-18 |
| GRAMD3   | 4.92E-22 | 0.37138  | 0.193 | 0.146 | 7.36E-18 |
| PHF7     | 4.99E-22 | -0.10445 | 0.034 | 0.13  | 7.46E-18 |
| PLP1     | 5.05E-22 | -0.10739 | 0.097 | 0.217 | 7.54E-18 |
| CTSH     | 5.26E-22 | 0.443549 | 0.153 | 0.095 | 7.86E-18 |
| ELFN1    | 5.39E-22 | -0.1061  | 0.005 | 0.07  | 8.05E-18 |
| NRG2     | 5.45E-22 | -0.13554 | 0.014 | 0.098 | 8.15E-18 |
| RDM1     | 5.78E-22 | -0.12121 | 0.008 | 0.08  | 8.64E-18 |
| LRRC1    | 5.86E-22 | -0.19519 | 0.053 | 0.173 | 8.75E-18 |
| GPR1     | 5.98E-22 | -0.16694 | 0.014 | 0.098 | 8.94E-18 |
| DYNC1I1  | 6.01E-22 | -0.28482 | 0.028 | 0.128 | 8.99E-18 |
| MMP7     | 6.07E-22 | 0.677107 | 0.1   | 0.014 | 9.07E-18 |
| EXOSC5   | 6.12E-22 | 0.210208 | 0.18  | 0.233 | 9.15E-18 |
| C11orf1  | 6.17E-22 | 0.377836 | 0.182 | 0.188 | 9.21E-18 |
| NEK3     | 7.07E-22 | -0.11544 | 0.034 | 0.13  | 1.06E-17 |
| TMEM37   | 7.40E-22 | 0.540611 | 0.091 | 0.026 | 1.11E-17 |
| NPY      | 7.42E-22 | -0.24313 | 0.013 | 0.088 | 1.11E-17 |
| KLHDC4   | 8.30E-22 | -0.1322  | 0.043 | 0.143 | 1.24E-17 |
| PKIA     | 8.80E-22 | -0.22586 | 0.046 | 0.162 | 1.32E-17 |
| REEP1    | 9.50E-22 | -0.20207 | 0.038 | 0.148 | 1.42E-17 |
| PELO     | 9.60E-22 | 0.13006  | 0.133 | 0.183 | 1.44E-17 |
| ATP9B    | 9.98E-22 | -0.11066 | 0.039 | 0.132 | 1.49E-17 |
| HMOX1    | 1.10E-21 | 0.523883 | 0.174 | 0.095 | 1.64E-17 |
| CDH10    | 1.14E-21 | -0.16768 | 0.01  | 0.088 | 1.71E-17 |
| TUBG2    | 1.17E-21 | 0.223971 | 0.134 | 0.16  | 1.75E-17 |
| CCDC152  | 1.17E-21 | 0.109524 | 0.057 | 0.106 | 1.75E-17 |
| METTL15  | 1.18E-21 | 0.103026 | 0.13  | 0.181 | 1.76E-17 |
| C1orf106 | 1.18E-21 | -0.11637 | 0.006 | 0.075 | 1.76E-17 |
| GPC6     | 1.22E-21 | 0.136356 | 0.076 | 0.127 | 1.82E-17 |
| ZMIZ2    | 1.22E-21 | -0.10674 | 0.061 | 0.169 | 1.82E-17 |
| ERBB2    | 1.22E-21 | 0.122324 | 0.06  | 0.109 | 1.83E-17 |
| C9orf116 | 1.27E-21 | 0.137178 | 0.104 | 0.142 | 1.90E-17 |
| HMG5     | 1.29E-21 | -0.18022 | 0.085 | 0.216 | 1.93E-17 |
| ZIK1     | 1.30E-21 | -0.11647 | 0.052 | 0.151 | 1.94E-17 |
| TFAP2A   | 1.31E-21 | -0.18915 | 0.018 | 0.107 | 1.96E-17 |
| ZNF114   | 1.32E-21 | -0.10368 | 0.009 | 0.077 | 1.97E-17 |
| ZNF568   | 1.36E-21 | 0.120091 | 0.119 | 0.165 | 2.04E-17 |
| MIR210HG | 1.39E-21 | 0.165759 | 0.112 | 0.146 | 2.08E-17 |
| HDAC10   | 1.54E-21 | -0.1103  | 0.038 | 0.135 | 2.31E-17 |
| DHRS3    | 1.55E-21 | 0.475164 | 0.168 | 0.067 | 2.31E-17 |
| PRKAR1B  | 1.69E-21 | -0.13332 | 0.09  | 0.215 | 2.53E-17 |
| TBC1D17  | 1.80E-21 | 0.125857 | 0.144 | 0.177 | 2.69E-17 |
| PARP11   | 1.81E-21 | -0.10228 | 0.045 | 0.147 | 2.70E-17 |
| CBWD1    | 1.85E-21 | 0.221658 | 0.227 | 0.256 | 2.76E-17 |
| BEX2     | 2.01E-21 | 0.445693 | 0.329 | 0.263 | 3.00E-17 |

|           |          |          |       |       |          |
|-----------|----------|----------|-------|-------|----------|
| ZNF181    | 2.06E-21 | 0.108343 | 0.115 | 0.17  | 3.07E-17 |
| CCBL2     | 2.07E-21 | 0.100005 | 0.142 | 0.207 | 3.10E-17 |
| USP19     | 2.07E-21 | -0.11908 | 0.047 | 0.148 | 3.10E-17 |
| TFE3      | 2.11E-21 | 0.186461 | 0.111 | 0.138 | 3.16E-17 |
| ALDH18A1  | 2.16E-21 | -0.13086 | 0.073 | 0.185 | 3.23E-17 |
| CCDC61    | 2.18E-21 | -0.1069  | 0.014 | 0.089 | 3.26E-17 |
| RRNAD1    | 2.24E-21 | 0.102366 | 0.117 | 0.181 | 3.35E-17 |
| BEX4      | 2.31E-21 | 0.361278 | 0.428 | 0.409 | 3.46E-17 |
| TMEM150A  | 2.43E-21 | 0.388125 | 0.138 | 0.09  | 3.63E-17 |
| GDAP1     | 2.68E-21 | -0.19317 | 0.091 | 0.221 | 4.00E-17 |
| TMEM145   | 2.73E-21 | -0.11254 | 0.041 | 0.132 | 4.07E-17 |
| HYLS1     | 2.75E-21 | -0.25794 | 0.027 | 0.126 | 4.11E-17 |
| KIAA1429  | 3.17E-21 | -0.10781 | 0.084 | 0.2   | 4.74E-17 |
| HOXA3     | 3.34E-21 | -0.23102 | 0.037 | 0.143 | 4.99E-17 |
| PTK2B     | 3.44E-21 | 0.140668 | 0.079 | 0.132 | 5.14E-17 |
| CLN8      | 3.46E-21 | 0.10538  | 0.139 | 0.215 | 5.16E-17 |
| TCF20     | 3.59E-21 | -0.1096  | 0.03  | 0.121 | 5.37E-17 |
| AFF3      | 3.85E-21 | -0.20673 | 0.023 | 0.117 | 5.75E-17 |
| HPCA      | 4.01E-21 | -0.21044 | 0.028 | 0.123 | 5.99E-17 |
| UTP14C    | 4.30E-21 | -0.12808 | 0.053 | 0.159 | 6.43E-17 |
| WASF1     | 4.44E-21 | -0.123   | 0.065 | 0.173 | 6.63E-17 |
| SLC24A3   | 4.91E-21 | -0.11277 | 0.009 | 0.08  | 7.33E-17 |
| GFM2      | 5.35E-21 | -0.10361 | 0.078 | 0.181 | 8.00E-17 |
| ACTR3B    | 5.46E-21 | -0.10368 | 0.094 | 0.204 | 8.16E-17 |
| KIAA0100  | 5.66E-21 | -0.11873 | 0.049 | 0.153 | 8.46E-17 |
| ARHGEF3   | 5.79E-21 | 0.119144 | 0.087 | 0.13  | 8.65E-17 |
| AHNAK     | 5.98E-21 | 0.326256 | 0.134 | 0.094 | 8.94E-17 |
| PLK3      | 5.98E-21 | 0.135266 | 0.148 | 0.191 | 8.94E-17 |
| ARMCX2    | 6.16E-21 | 0.345771 | 0.172 | 0.177 | 9.21E-17 |
| KIAA1211  | 6.67E-21 | -0.14104 | 0.006 | 0.073 | 9.96E-17 |
| C8orf46   | 6.82E-21 | -0.24043 | 0.099 | 0.236 | 1.02E-16 |
| GGA3      | 6.89E-21 | -0.10018 | 0.049 | 0.147 | 1.03E-16 |
| NDUFA7    | 7.06E-21 | 0.699407 | 0.103 | 0.012 | 1.06E-16 |
| SPIRE2    | 7.08E-21 | -0.10604 | 0.018 | 0.095 | 1.06E-16 |
| MIR155HG  | 7.31E-21 | 0.168517 | 0.063 | 0.1   | 1.09E-16 |
| RCBTB2    | 7.57E-21 | -0.15514 | 0.077 | 0.195 | 1.13E-16 |
| TBC1D15   | 7.65E-21 | 0.145879 | 0.18  | 0.215 | 1.14E-16 |
| DOCK10    | 8.01E-21 | -0.11091 | 0.026 | 0.11  | 1.20E-16 |
| PDLIM3    | 8.10E-21 | 0.417532 | 0.258 | 0.21  | 1.21E-16 |
| CASD1     | 8.31E-21 | -0.16266 | 0.037 | 0.14  | 1.24E-16 |
| ELF1      | 8.32E-21 | 0.165719 | 0.121 | 0.141 | 1.24E-16 |
| ITGA5     | 9.04E-21 | 0.244355 | 0.087 | 0.069 | 1.35E-16 |
| ZNF627    | 9.15E-21 | -0.10369 | 0.046 | 0.144 | 1.37E-16 |
| GDF15     | 9.53E-21 | 0.219814 | 0.135 | 0.154 | 1.42E-16 |
| IGLON5    | 1.03E-20 | -0.16663 | 0.01  | 0.085 | 1.54E-16 |
| KITLG     | 1.03E-20 | -0.1413  | 0.019 | 0.105 | 1.54E-16 |
| RP11-390E | 1.03E-20 | 0.132653 | 0.135 | 0.216 | 1.55E-16 |
| TIMP4     | 1.04E-20 | 0.602593 | 0.218 | 0.123 | 1.56E-16 |
| DHX34     | 1.07E-20 | -0.12858 | 0.037 | 0.128 | 1.60E-16 |
| DEDD2     | 1.11E-20 | 0.171214 | 0.164 | 0.188 | 1.66E-16 |
| AMOTL2    | 1.21E-20 | -0.17925 | 0.057 | 0.177 | 1.80E-16 |

|           |          |          |       |       |          |
|-----------|----------|----------|-------|-------|----------|
| TMEM100   | 1.23E-20 | -0.11623 | 0.13  | 0.264 | 1.83E-16 |
| ASXL3     | 1.24E-20 | -0.13519 | 0.006 | 0.07  | 1.85E-16 |
| FKBP11    | 1.24E-20 | 0.257295 | 0.131 | 0.158 | 1.86E-16 |
| PEG10     | 1.26E-20 | -0.31364 | 0.097 | 0.242 | 1.88E-16 |
| RP5-1136G | 1.37E-20 | -0.11443 | 0.024 | 0.111 | 2.04E-16 |
| RNF182    | 1.38E-20 | -0.1722  | 0.037 | 0.141 | 2.06E-16 |
| SLC6A8    | 1.66E-20 | 0.128986 | 0.113 | 0.146 | 2.48E-16 |
| CTD-2035E | 1.67E-20 | -0.13501 | 0.018 | 0.099 | 2.50E-16 |
| ABHD14B   | 1.74E-20 | 0.288293 | 0.138 | 0.149 | 2.60E-16 |
| NFASC     | 1.75E-20 | 0.409363 | 0.152 | 0.084 | 2.62E-16 |
| BIRC3     | 1.76E-20 | 0.494531 | 0.115 | 0.032 | 2.63E-16 |
| C12orf49  | 1.82E-20 | -0.10245 | 0.065 | 0.175 | 2.73E-16 |
| PTPRD     | 1.92E-20 | -0.14941 | 0.033 | 0.127 | 2.87E-16 |
| RP11-488C | 2.28E-20 | -0.15092 | 0.026 | 0.114 | 3.41E-16 |
| NMI       | 2.42E-20 | 0.343211 | 0.188 | 0.17  | 3.62E-16 |
| PHF2      | 2.43E-20 | -0.1502  | 0.037 | 0.132 | 3.63E-16 |
| DENND6A   | 2.68E-20 | -0.12815 | 0.031 | 0.121 | 4.00E-16 |
| KDM5D     | 2.79E-20 | -0.10734 | 0.008 | 0.078 | 4.16E-16 |
| CASP9     | 2.85E-20 | -0.1461  | 0.044 | 0.142 | 4.27E-16 |
| PTTG2     | 2.88E-20 | -0.13851 | 0.003 | 0.058 | 4.31E-16 |
| SLITRK1   | 2.98E-20 | -0.12519 | 0.003 | 0.062 | 4.45E-16 |
| DDHD1     | 3.22E-20 | -0.10847 | 0.051 | 0.149 | 4.81E-16 |
| AGO1      | 3.23E-20 | -0.11399 | 0.048 | 0.144 | 4.83E-16 |
| CCDC151   | 3.32E-20 | 0.307064 | 0.089 | 0.052 | 4.96E-16 |
| SIAE      | 3.43E-20 | 0.100019 | 0.08  | 0.147 | 5.13E-16 |
| AASDH     | 3.48E-20 | -0.10495 | 0.158 | 0.29  | 5.20E-16 |
| TMED8     | 3.61E-20 | -0.11514 | 0.034 | 0.127 | 5.40E-16 |
| AC159540. | 3.66E-20 | -0.11479 | 0.067 | 0.173 | 5.47E-16 |
| ANGPTL2   | 3.70E-20 | 0.189504 | 0.127 | 0.153 | 5.53E-16 |
| UTP3      | 3.91E-20 | 0.173135 | 0.146 | 0.191 | 5.84E-16 |
| KRT7      | 4.03E-20 | 0.326671 | 0.07  | 0.057 | 6.03E-16 |
| ANKRD49   | 4.26E-20 | 0.113583 | 0.113 | 0.158 | 6.37E-16 |
| CA3       | 4.38E-20 | 0.730474 | 0.141 | 0.049 | 6.54E-16 |
| MAST1     | 4.68E-20 | -0.10357 | 0.018 | 0.094 | 7.00E-16 |
| CFB       | 4.71E-20 | 0.385551 | 0.09  | 0.01  | 7.04E-16 |
| SPAG4     | 4.72E-20 | 0.432666 | 0.115 | 0.03  | 7.05E-16 |
| ACTR5     | 4.76E-20 | -0.10239 | 0.039 | 0.131 | 7.11E-16 |
| CARD16    | 4.86E-20 | 0.56407  | 0.212 | 0.081 | 7.27E-16 |
| DFNA5     | 4.93E-20 | 0.242632 | 0.197 | 0.221 | 7.36E-16 |
| LINGO1    | 4.95E-20 | -0.1148  | 0.007 | 0.073 | 7.39E-16 |
| RBM15     | 5.11E-20 | -0.10614 | 0.044 | 0.135 | 7.64E-16 |
| ZSCAN16   | 5.11E-20 | -0.16302 | 0.039 | 0.14  | 7.64E-16 |
| ADSSL1    | 5.34E-20 | 0.122431 | 0.084 | 0.109 | 7.98E-16 |
| MYLK      | 5.66E-20 | 0.212483 | 0.064 | 0.078 | 8.46E-16 |
| FCHSD2    | 5.70E-20 | -0.1199  | 0.037 | 0.133 | 8.52E-16 |
| MTRNR2L1C | 5.86E-20 | 0.586191 | 0.107 | 0.016 | 8.75E-16 |
| DGKB      | 6.11E-20 | -0.19881 | 0.024 | 0.112 | 9.13E-16 |
| MCAM      | 6.28E-20 | -0.14374 | 0.031 | 0.123 | 9.38E-16 |
| HSD17B7   | 6.35E-20 | 0.236356 | 0.115 | 0.137 | 9.49E-16 |
| LDLRAD4   | 6.71E-20 | -0.10831 | 0.031 | 0.119 | 1.00E-15 |
| MINA      | 6.82E-20 | 0.135498 | 0.139 | 0.188 | 1.02E-15 |

|           |          |          |       |       |          |
|-----------|----------|----------|-------|-------|----------|
| TSLP      | 7.05E-20 | 0.416115 | 0.086 | 0.011 | 1.05E-15 |
| SATB1     | 7.08E-20 | -0.17345 | 0.047 | 0.156 | 1.06E-15 |
| MRE11A    | 7.43E-20 | -0.11102 | 0.059 | 0.151 | 1.11E-15 |
| RAB20     | 7.62E-20 | 0.192728 | 0.094 | 0.107 | 1.14E-15 |
| DUSP11    | 7.65E-20 | 0.126108 | 0.177 | 0.24  | 1.14E-15 |
| FRZB      | 7.77E-20 | 0.495915 | 0.137 | 0.06  | 1.16E-15 |
| TDP2      | 8.38E-20 | 0.145651 | 0.161 | 0.23  | 1.25E-15 |
| LIPA      | 8.77E-20 | 0.257758 | 0.145 | 0.149 | 1.31E-15 |
| OPN3      | 9.19E-20 | -0.11171 | 0.033 | 0.121 | 1.37E-15 |
| EHD2      | 9.73E-20 | 0.27334  | 0.13  | 0.079 | 1.45E-15 |
| TACC2     | 1.02E-19 | -0.13659 | 0.026 | 0.114 | 1.52E-15 |
| IL13RA2   | 1.04E-19 | 0.541857 | 0.212 | 0.086 | 1.55E-15 |
| BHLHE41   | 1.04E-19 | 0.142397 | 0.141 | 0.173 | 1.56E-15 |
| C9orf9    | 1.16E-19 | 0.177236 | 0.137 | 0.168 | 1.73E-15 |
| AC016700. | 1.16E-19 | -0.11854 | 0.028 | 0.112 | 1.74E-15 |
| TCTA      | 1.17E-19 | 0.188748 | 0.169 | 0.23  | 1.75E-15 |
| TRIB1     | 1.18E-19 | 0.341267 | 0.153 | 0.073 | 1.77E-15 |
| MIOS      | 1.31E-19 | -0.13873 | 0.076 | 0.191 | 1.96E-15 |
| COQ3      | 1.33E-19 | -0.13447 | 0.048 | 0.149 | 1.99E-15 |
| RP11-196G | 1.35E-19 | -0.1198  | 0.006 | 0.068 | 2.01E-15 |
| PDIA5     | 1.35E-19 | 0.203269 | 0.09  | 0.119 | 2.01E-15 |
| CADPS     | 1.41E-19 | 0.447608 | 0.114 | 0.021 | 2.11E-15 |
| ATO8      | 1.43E-19 | -0.15305 | 0.023 | 0.106 | 2.13E-15 |
| CTD-2090I | 1.48E-19 | 0.585219 | 0.089 | 0.009 | 2.21E-15 |
| FAM181A   | 1.49E-19 | 0.447018 | 0.135 | 0.099 | 2.23E-15 |
| CDK7      | 1.82E-19 | 0.130024 | 0.114 | 0.165 | 2.72E-15 |
| RP5-1024C | 1.84E-19 | -0.12672 | 0.008 | 0.073 | 2.75E-15 |
| TRMT11    | 1.93E-19 | 0.154995 | 0.165 | 0.205 | 2.88E-15 |
| GMEB2     | 1.98E-19 | -0.11825 | 0.032 | 0.12  | 2.96E-15 |
| CYLD      | 2.37E-19 | 0.158313 | 0.115 | 0.137 | 3.54E-15 |
| RP11-571M | 2.38E-19 | -0.13392 | 0.016 | 0.091 | 3.56E-15 |
| CEPT1     | 2.82E-19 | 0.121715 | 0.17  | 0.223 | 4.21E-15 |
| SC5D      | 2.99E-19 | 0.123928 | 0.155 | 0.21  | 4.47E-15 |
| NRXN2     | 3.05E-19 | -0.17634 | 0.074 | 0.19  | 4.56E-15 |
| MAGI2     | 3.08E-19 | -0.15789 | 0.071 | 0.183 | 4.60E-15 |
| BACE1     | 3.35E-19 | -0.11546 | 0.085 | 0.196 | 5.01E-15 |
| SP4       | 3.48E-19 | -0.10224 | 0.038 | 0.122 | 5.20E-15 |
| ZNF274    | 3.53E-19 | -0.10089 | 0.114 | 0.23  | 5.27E-15 |
| CTSV      | 3.58E-19 | -0.10109 | 0.008 | 0.072 | 5.35E-15 |
| PDZRN3    | 3.68E-19 | -0.1492  | 0.034 | 0.128 | 5.50E-15 |
| TGFBI     | 4.03E-19 | 0.361476 | 0.122 | 0.026 | 6.03E-15 |
| APOL2     | 4.10E-19 | 0.659489 | 0.171 | 0.099 | 6.13E-15 |
| C15orf57  | 4.19E-19 | 0.116833 | 0.088 | 0.159 | 6.25E-15 |
| SYVN1     | 4.35E-19 | 0.108125 | 0.112 | 0.151 | 6.49E-15 |
| RALGPS1   | 4.56E-19 | -0.14103 | 0.029 | 0.115 | 6.81E-15 |
| ICA1      | 4.80E-19 | -0.15956 | 0.04  | 0.138 | 7.18E-15 |
| HSD17B8   | 4.98E-19 | 0.171517 | 0.087 | 0.115 | 7.44E-15 |
| SMIM3     | 4.99E-19 | 0.705794 | 0.082 | 0.006 | 7.46E-15 |
| ELL2      | 5.16E-19 | 0.374491 | 0.157 | 0.069 | 7.70E-15 |
| MTMR11    | 5.37E-19 | 0.29465  | 0.122 | 0.09  | 8.03E-15 |
| RP11-445F | 5.99E-19 | -0.11886 | 0.004 | 0.057 | 8.95E-15 |

|           |          |          |       |       |          |
|-----------|----------|----------|-------|-------|----------|
| ARVCF     | 6.02E-19 | -0.11887 | 0.025 | 0.109 | 9.00E-15 |
| MKL2      | 6.05E-19 | 0.124875 | 0.097 | 0.123 | 9.05E-15 |
| BCL6      | 6.26E-19 | 0.322903 | 0.167 | 0.102 | 9.35E-15 |
| N4BP2L1   | 6.37E-19 | 0.272694 | 0.149 | 0.135 | 9.51E-15 |
| WIPF3     | 6.40E-19 | -0.11596 | 0.02  | 0.099 | 9.56E-15 |
| VAV2      | 6.42E-19 | -0.11717 | 0.03  | 0.117 | 9.60E-15 |
| GCA       | 6.58E-19 | 0.137627 | 0.201 | 0.249 | 9.83E-15 |
| APH1B     | 7.07E-19 | 0.147838 | 0.092 | 0.122 | 1.06E-14 |
| SEMA4C    | 7.33E-19 | -0.15595 | 0.055 | 0.162 | 1.09E-14 |
| FBLIM1    | 7.60E-19 | 0.179805 | 0.09  | 0.119 | 1.14E-14 |
| HRASLS    | 8.61E-19 | -0.14126 | 0.038 | 0.135 | 1.29E-14 |
| SNRK      | 8.64E-19 | -0.11809 | 0.053 | 0.151 | 1.29E-14 |
| LZTFL1    | 8.93E-19 | 0.31841  | 0.152 | 0.106 | 1.33E-14 |
| CXCL3     | 9.11E-19 | 0.514631 | 0.121 | 0.025 | 1.36E-14 |
| C5orf30   | 9.18E-19 | -0.12779 | 0.057 | 0.157 | 1.37E-14 |
| PRKCG     | 9.49E-19 | 0.459053 | 0.082 | 0.01  | 1.42E-14 |
| SCAMP5    | 1.01E-18 | -0.14189 | 0.049 | 0.152 | 1.51E-14 |
| NFKBIE    | 1.07E-18 | -0.10217 | 0.07  | 0.172 | 1.60E-14 |
| PASK      | 1.11E-18 | -0.10983 | 0.007 | 0.069 | 1.66E-14 |
| HSD3B7    | 1.15E-18 | 0.345273 | 0.104 | 0.021 | 1.72E-14 |
| USP49     | 1.20E-18 | -0.10714 | 0.025 | 0.101 | 1.79E-14 |
| MCF2L     | 1.23E-18 | -0.14538 | 0.019 | 0.099 | 1.84E-14 |
| B3GAT2    | 1.38E-18 | -0.1825  | 0.063 | 0.177 | 2.06E-14 |
| ZNF829    | 1.41E-18 | -0.11506 | 0.039 | 0.127 | 2.11E-14 |
| NEU4      | 1.44E-18 | -0.28987 | 0.024 | 0.109 | 2.15E-14 |
| PHF11     | 1.48E-18 | 0.111847 | 0.089 | 0.13  | 2.21E-14 |
| LIFR      | 1.51E-18 | -0.1118  | 0.105 | 0.214 | 2.26E-14 |
| BTN3A2    | 1.54E-18 | 0.286255 | 0.13  | 0.151 | 2.30E-14 |
| ZNF395    | 1.65E-18 | 0.137894 | 0.113 | 0.137 | 2.46E-14 |
| C9orf85   | 1.67E-18 | -0.1092  | 0.06  | 0.158 | 2.50E-14 |
| SSPN      | 1.73E-18 | 0.316426 | 0.154 | 0.107 | 2.58E-14 |
| FAM195B   | 1.75E-18 | 0.440281 | 0.095 | 0.068 | 2.61E-14 |
| NKX2-2    | 1.80E-18 | -0.25041 | 0.114 | 0.253 | 2.69E-14 |
| ZC4H2     | 1.82E-18 | -0.21787 | 0.031 | 0.126 | 2.73E-14 |
| ABHD5     | 1.84E-18 | 0.184337 | 0.117 | 0.149 | 2.76E-14 |
| SEMA3A    | 1.97E-18 | -0.10438 | 0.037 | 0.125 | 2.94E-14 |
| RP11-318A | 2.00E-18 | -0.10217 | 0.004 | 0.059 | 2.99E-14 |
| BRINP2    | 2.03E-18 | -0.14023 | 0.031 | 0.121 | 3.04E-14 |
| TMEM216   | 2.10E-18 | 0.310691 | 0.101 | 0.104 | 3.14E-14 |
| LHX1      | 2.18E-18 | -0.11227 | 0.008 | 0.068 | 3.26E-14 |
| GS1-124K5 | 2.21E-18 | 0.162099 | 0.134 | 0.194 | 3.31E-14 |
| PSMB10    | 2.32E-18 | 0.294064 | 0.166 | 0.162 | 3.47E-14 |
| PARP6     | 2.38E-18 | -0.10717 | 0.064 | 0.16  | 3.56E-14 |
| AC004540. | 2.43E-18 | -0.18858 | 0.049 | 0.151 | 3.63E-14 |
| RBM41     | 2.46E-18 | -0.15745 | 0.063 | 0.165 | 3.67E-14 |
| YIPF2     | 2.65E-18 | 0.422897 | 0.167 | 0.138 | 3.95E-14 |
| RP11-437L | 2.87E-18 | 0.361117 | 0.056 | 0     | 4.29E-14 |
| 3-Mar     | 2.87E-18 | 0.315838 | 0.135 | 0.11  | 4.29E-14 |
| AC079922. | 2.97E-18 | -0.12304 | 0.019 | 0.094 | 4.43E-14 |
| FBXL7     | 3.19E-18 | -0.10266 | 0.018 | 0.091 | 4.77E-14 |
| STRIP2    | 3.22E-18 | -0.12019 | 0.012 | 0.081 | 4.81E-14 |

|           |          |          |       |       |          |
|-----------|----------|----------|-------|-------|----------|
| GNAZ      | 3.63E-18 | -0.11494 | 0.037 | 0.125 | 5.42E-14 |
| RSPH1     | 3.75E-18 | 0.318747 | 0.091 | 0.012 | 5.61E-14 |
| ST8SIA5   | 3.75E-18 | -0.13013 | 0.024 | 0.096 | 5.61E-14 |
| NGRN      | 3.90E-18 | 0.118723 | 0.091 | 0.137 | 5.82E-14 |
| ATRIP     | 3.93E-18 | -0.10108 | 0.025 | 0.1   | 5.87E-14 |
| ZNF394    | 4.29E-18 | 0.111246 | 0.125 | 0.174 | 6.41E-14 |
| NHSL2     | 4.53E-18 | 0.513315 | 0.086 | 0.01  | 6.77E-14 |
| PORCN     | 4.97E-18 | 0.113609 | 0.071 | 0.119 | 7.42E-14 |
| EPB41     | 5.85E-18 | -0.16809 | 0.03  | 0.119 | 8.75E-14 |
| CAAP1     | 6.02E-18 | -0.10721 | 0.077 | 0.179 | 8.99E-14 |
| ZNF480    | 6.72E-18 | -0.10082 | 0.057 | 0.149 | 1.00E-13 |
| HOXA7     | 7.27E-18 | -0.10715 | 0.091 | 0.199 | 1.09E-13 |
| ZMYM5     | 7.34E-18 | 0.105677 | 0.156 | 0.219 | 1.10E-13 |
| DNAJC25   | 7.85E-18 | 0.127486 | 0.109 | 0.133 | 1.17E-13 |
| GDAP1L1   | 8.26E-18 | -0.13736 | 0.05  | 0.14  | 1.23E-13 |
| VWA5A     | 8.31E-18 | 0.347026 | 0.145 | 0.083 | 1.24E-13 |
| C6orf141  | 8.53E-18 | 0.357915 | 0.091 | 0.028 | 1.27E-13 |
| C6orf15   | 9.32E-18 | -0.4037  | 0.008 | 0.072 | 1.39E-13 |
| INO80B    | 9.46E-18 | -0.14496 | 0.041 | 0.137 | 1.41E-13 |
| FAM171B   | 9.92E-18 | -0.12706 | 0.094 | 0.205 | 1.48E-13 |
| ANKRD13B  | 9.93E-18 | -0.11756 | 0.023 | 0.102 | 1.48E-13 |
| ACTA2     | 1.02E-17 | 0.338541 | 0.115 | 0.088 | 1.52E-13 |
| LOX       | 1.12E-17 | 0.406437 | 0.135 | 0.068 | 1.68E-13 |
| RILPL2    | 1.21E-17 | 0.199651 | 0.109 | 0.133 | 1.81E-13 |
| MYCN      | 1.21E-17 | -0.11371 | 0.006 | 0.063 | 1.81E-13 |
| AC011043. | 1.31E-17 | -0.10976 | 0.075 | 0.172 | 1.95E-13 |
| PROS1     | 1.34E-17 | 0.139288 | 0.104 | 0.117 | 2.01E-13 |
| THUMP2    | 1.54E-17 | -0.1328  | 0.083 | 0.185 | 2.30E-13 |
| LSS       | 1.54E-17 | 0.104034 | 0.078 | 0.122 | 2.30E-13 |
| TMCC3     | 1.59E-17 | -0.11382 | 0.015 | 0.084 | 2.38E-13 |
| CPT1A     | 1.66E-17 | -0.10902 | 0.033 | 0.115 | 2.47E-13 |
| TBK1      | 1.90E-17 | 0.117514 | 0.135 | 0.185 | 2.84E-13 |
| MFNG      | 2.05E-17 | -0.16966 | 0.01  | 0.074 | 3.07E-13 |
| MANEAL    | 2.07E-17 | -0.13049 | 0.021 | 0.101 | 3.09E-13 |
| DEPDC7    | 2.09E-17 | -0.13276 | 0.009 | 0.073 | 3.12E-13 |
| APLN      | 2.21E-17 | 0.336056 | 0.119 | 0.031 | 3.30E-13 |
| GNPMB     | 2.22E-17 | 0.491544 | 0.132 | 0.062 | 3.32E-13 |
| ROBO3     | 2.44E-17 | 0.241638 | 0.129 | 0.125 | 3.65E-13 |
| STX7      | 2.50E-17 | 0.136187 | 0.159 | 0.216 | 3.74E-13 |
| LL22NC03- | 2.62E-17 | -0.11783 | 0.016 | 0.086 | 3.91E-13 |
| TNR       | 2.93E-17 | -0.21471 | 0.025 | 0.106 | 4.38E-13 |
| FBLN5     | 2.96E-17 | 0.488872 | 0.098 | 0.03  | 4.43E-13 |
| SLC44A3   | 3.10E-17 | 0.367488 | 0.084 | 0.019 | 4.63E-13 |
| LTA4H     | 3.23E-17 | 0.245232 | 0.215 | 0.205 | 4.83E-13 |
| TXNDC16   | 3.36E-17 | -0.10736 | 0.037 | 0.114 | 5.01E-13 |
| RGS1      | 3.37E-17 | 0.436545 | 0.228 | 0.146 | 5.04E-13 |
| IL6       | 3.43E-17 | 0.401723 | 0.089 | 0.015 | 5.13E-13 |
| TYROBP    | 3.57E-17 | 0.425239 | 0.207 | 0.151 | 5.34E-13 |
| DNAJB4    | 3.63E-17 | 0.130176 | 0.145 | 0.196 | 5.43E-13 |
| RPS6KC1   | 4.36E-17 | -0.13515 | 0.044 | 0.135 | 6.51E-13 |
| LACTB2    | 4.40E-17 | 0.259877 | 0.192 | 0.199 | 6.57E-13 |

|           |          |          |       |       |          |
|-----------|----------|----------|-------|-------|----------|
| DUOX1     | 4.45E-17 | -0.15094 | 0.029 | 0.111 | 6.65E-13 |
| GJB2      | 4.48E-17 | 0.33638  | 0.103 | 0.068 | 6.69E-13 |
| RGMB      | 4.74E-17 | -0.19913 | 0.096 | 0.22  | 7.08E-13 |
| AC015936. | 5.00E-17 | 0.346381 | 0.074 | 0.01  | 7.48E-13 |
| CLDN10    | 5.06E-17 | 0.322147 | 0.115 | 0.143 | 7.56E-13 |
| TVP23B    | 5.09E-17 | 0.107014 | 0.122 | 0.16  | 7.61E-13 |
| CAPS      | 5.15E-17 | 0.224341 | 0.114 | 0.095 | 7.70E-13 |
| SETD7     | 5.27E-17 | 0.158298 | 0.095 | 0.141 | 7.88E-13 |
| OPHN1     | 5.30E-17 | -0.13728 | 0.036 | 0.117 | 7.92E-13 |
| P4HA2     | 5.34E-17 | 0.142007 | 0.092 | 0.121 | 7.98E-13 |
| RAB33A    | 5.36E-17 | -0.16653 | 0.043 | 0.136 | 8.01E-13 |
| PTPRN2    | 5.62E-17 | 0.101403 | 0.164 | 0.231 | 8.39E-13 |
| ANKRD50   | 5.90E-17 | -0.10286 | 0.029 | 0.101 | 8.82E-13 |
| HAP1      | 6.22E-17 | 0.293369 | 0.124 | 0.075 | 9.29E-13 |
| ZNF286B   | 6.47E-17 | -0.10279 | 0.017 | 0.086 | 9.66E-13 |
| SPTSSB    | 6.85E-17 | 0.328741 | 0.073 | 0.053 | 1.02E-12 |
| TRAK2     | 6.95E-17 | -0.11448 | 0.049 | 0.133 | 1.04E-12 |
| SREBF1    | 6.96E-17 | 0.120838 | 0.089 | 0.106 | 1.04E-12 |
| EYA1      | 7.14E-17 | -0.16615 | 0.016 | 0.089 | 1.07E-12 |
| GABARAPL1 | 7.50E-17 | 0.235254 | 0.2   | 0.22  | 1.12E-12 |
| ARHGAP1   | 8.26E-17 | 0.172925 | 0.149 | 0.19  | 1.23E-12 |
| ASS1      | 8.42E-17 | 0.41894  | 0.102 | 0.021 | 1.26E-12 |
| FAM134C   | 8.81E-17 | -0.1025  | 0.083 | 0.184 | 1.32E-12 |
| GLI4      | 8.96E-17 | -0.1839  | 0.062 | 0.17  | 1.34E-12 |
| UNG       | 9.65E-17 | -0.10202 | 0.135 | 0.263 | 1.44E-12 |
| NUDT10    | 1.02E-16 | -0.12222 | 0.045 | 0.132 | 1.52E-12 |
| COL9A2    | 1.24E-16 | -0.10186 | 0.043 | 0.121 | 1.85E-12 |
| SNHG12    | 1.24E-16 | 0.290182 | 0.154 | 0.149 | 1.85E-12 |
| HDHD3     | 1.26E-16 | 0.341215 | 0.135 | 0.101 | 1.88E-12 |
| STAT2     | 1.29E-16 | 0.122764 | 0.104 | 0.141 | 1.93E-12 |
| SETBP1    | 1.32E-16 | -0.10072 | 0.045 | 0.132 | 1.98E-12 |
| SERPINA1  | 1.34E-16 | 0.38614  | 0.111 | 0.027 | 2.01E-12 |
| TNFRSF10E | 1.37E-16 | 0.239805 | 0.129 | 0.111 | 2.05E-12 |
| DNAJB5    | 1.41E-16 | -0.11106 | 0.063 | 0.154 | 2.10E-12 |
| GPR75-ASE | 1.45E-16 | -0.13107 | 0.088 | 0.186 | 2.17E-12 |
| CCDC28A   | 1.46E-16 | 0.239351 | 0.149 | 0.146 | 2.18E-12 |
| TDRD3     | 1.48E-16 | -0.11493 | 0.073 | 0.167 | 2.20E-12 |
| TTY14     | 1.51E-16 | -0.13624 | 0.005 | 0.058 | 2.26E-12 |
| CCDC142   | 1.55E-16 | -0.10649 | 0.045 | 0.132 | 2.32E-12 |
| POFUT2    | 1.61E-16 | 0.114193 | 0.12  | 0.149 | 2.41E-12 |
| IER3IP1   | 1.69E-16 | 0.589835 | 0.086 | 0.011 | 2.53E-12 |
| DLX2      | 1.94E-16 | -0.24935 | 0.038 | 0.131 | 2.90E-12 |
| RGCC      | 2.00E-16 | -0.30889 | 0.084 | 0.204 | 2.99E-12 |
| TEX26     | 2.02E-16 | 0.262202 | 0.091 | 0.014 | 3.02E-12 |
| RCOR2     | 2.03E-16 | -0.12969 | 0.016 | 0.083 | 3.03E-12 |
| SLC25A24  | 2.13E-16 | -0.13385 | 0.048 | 0.142 | 3.18E-12 |
| SPATA20   | 2.32E-16 | 0.290961 | 0.129 | 0.096 | 3.47E-12 |
| NEUROD1   | 2.32E-16 | -0.20553 | 0.011 | 0.075 | 3.47E-12 |
| LRP5      | 2.48E-16 | -0.10731 | 0.029 | 0.107 | 3.71E-12 |
| KBTBD3    | 2.76E-16 | 0.104357 | 0.097 | 0.137 | 4.13E-12 |
| FHOD3     | 2.78E-16 | -0.11845 | 0.026 | 0.102 | 4.16E-12 |

|           |          |          |       |       |          |
|-----------|----------|----------|-------|-------|----------|
| PCSK1     | 2.91E-16 | 0.403377 | 0.105 | 0.035 | 4.35E-12 |
| ADCY6     | 2.94E-16 | -0.1024  | 0.029 | 0.102 | 4.40E-12 |
| CTSO      | 3.41E-16 | 0.128673 | 0.109 | 0.126 | 5.10E-12 |
| PRKAR2B   | 3.66E-16 | -0.13474 | 0.034 | 0.117 | 5.47E-12 |
| ZNF615    | 4.36E-16 | -0.1244  | 0.032 | 0.109 | 6.52E-12 |
| RP11-195F | 4.62E-16 | 0.229866 | 0.164 | 0.165 | 6.91E-12 |
| RPH3A     | 4.88E-16 | -0.1401  | 0.008 | 0.065 | 7.29E-12 |
| SEC24D    | 5.13E-16 | 0.161497 | 0.1   | 0.105 | 7.66E-12 |
| SYBU      | 5.24E-16 | 0.106785 | 0.091 | 0.126 | 7.83E-12 |
| PODXL     | 5.40E-16 | 0.103978 | 0.086 | 0.125 | 8.07E-12 |
| ABCA8     | 5.64E-16 | 0.317271 | 0.097 | 0.063 | 8.44E-12 |
| SVIP      | 5.99E-16 | -0.21509 | 0.131 | 0.26  | 8.95E-12 |
| BACE2     | 6.09E-16 | 0.266005 | 0.141 | 0.072 | 9.10E-12 |
| ANGPT2    | 6.11E-16 | 0.294852 | 0.079 | 0.057 | 9.13E-12 |
| HRCT1     | 6.82E-16 | 0.123778 | 0.052 | 0.078 | 1.02E-11 |
| SERP2     | 7.00E-16 | -0.1033  | 0.07  | 0.16  | 1.05E-11 |
| FGF1      | 7.20E-16 | 0.262531 | 0.099 | 0.075 | 1.08E-11 |
| RNF149    | 7.41E-16 | 0.211807 | 0.17  | 0.14  | 1.11E-11 |
| PCDHB10   | 7.57E-16 | -0.18963 | 0.073 | 0.184 | 1.13E-11 |
| SORL1     | 8.86E-16 | 0.123022 | 0.083 | 0.111 | 1.32E-11 |
| GLI3      | 8.97E-16 | -0.1022  | 0.03  | 0.104 | 1.34E-11 |
| TMEM170B  | 9.04E-16 | -0.10428 | 0.024 | 0.096 | 1.35E-11 |
| ZRANB3    | 9.08E-16 | -0.10036 | 0.015 | 0.08  | 1.36E-11 |
| RP11-146F | 9.21E-16 | -0.11591 | 0.024 | 0.098 | 1.38E-11 |
| PLLP      | 9.83E-16 | -0.18678 | 0.017 | 0.086 | 1.47E-11 |
| CYB561    | 1.04E-15 | 0.156491 | 0.104 | 0.127 | 1.55E-11 |
| ZHX2      | 1.05E-15 | -0.14451 | 0.03  | 0.111 | 1.57E-11 |
| FAM127C   | 1.11E-15 | 0.201956 | 0.115 | 0.149 | 1.66E-11 |
| SLC6A6    | 1.16E-15 | 0.297897 | 0.08  | 0.019 | 1.74E-11 |
| SLC16A1-A | 1.22E-15 | -0.10194 | 0.041 | 0.112 | 1.83E-11 |
| LINC01094 | 1.30E-15 | 0.428428 | 0.084 | 0.019 | 1.95E-11 |
| DLX6      | 1.41E-15 | -0.19303 | 0.017 | 0.086 | 2.10E-11 |
| S1PR3     | 1.47E-15 | 0.119236 | 0.069 | 0.091 | 2.20E-11 |
| Clorf54   | 1.51E-15 | 0.181371 | 0.099 | 0.128 | 2.25E-11 |
| Clorf198  | 1.51E-15 | 0.10887  | 0.118 | 0.153 | 2.26E-11 |
| GNG10     | 1.55E-15 | 0.18708  | 0.077 | 0.074 | 2.32E-11 |
| FICD      | 1.85E-15 | 0.140267 | 0.116 | 0.137 | 2.77E-11 |
| TMEM2     | 2.03E-15 | -0.11535 | 0.03  | 0.105 | 3.04E-11 |
| BBC3      | 2.16E-15 | 0.162817 | 0.102 | 0.098 | 3.22E-11 |
| RP4-569M2 | 2.27E-15 | 0.100906 | 0.028 | 0.063 | 3.39E-11 |
| MYL9      | 2.42E-15 | 0.366396 | 0.089 | 0.027 | 3.62E-11 |
| CAMKK1    | 2.44E-15 | -0.13862 | 0.012 | 0.074 | 3.64E-11 |
| SLC1A5    | 2.49E-15 | 0.103573 | 0.099 | 0.117 | 3.72E-11 |
| ANKS1B    | 2.50E-15 | -0.13547 | 0.059 | 0.149 | 3.74E-11 |
| AMER2     | 2.62E-15 | -0.15379 | 0.05  | 0.138 | 3.92E-11 |
| TUBA4A    | 2.79E-15 | 0.329278 | 0.117 | 0.041 | 4.17E-11 |
| TRIM56    | 2.95E-15 | 0.308101 | 0.13  | 0.088 | 4.41E-11 |
| RRAGB     | 3.08E-15 | 0.114814 | 0.1   | 0.146 | 4.60E-11 |
| SFRP4     | 3.08E-15 | 0.381121 | 0.107 | 0.069 | 4.61E-11 |
| POLR1C    | 3.46E-15 | 0.191065 | 0.149 | 0.177 | 5.17E-11 |
| BLZF1     | 3.46E-15 | 0.123259 | 0.147 | 0.179 | 5.17E-11 |



|           |          |          |       |       |          |
|-----------|----------|----------|-------|-------|----------|
| TTC8      | 3.53E-15 | 0.100598 | 0.096 | 0.151 | 5.28E-11 |
| VPS54     | 3.54E-15 | -0.11016 | 0.038 | 0.116 | 5.29E-11 |
| GAS6      | 3.66E-15 | 0.165559 | 0.146 | 0.136 | 5.47E-11 |
| BTBD17    | 3.78E-15 | -0.16532 | 0.016 | 0.083 | 5.65E-11 |
| ANKRD28   | 3.80E-15 | 0.256522 | 0.146 | 0.125 | 5.68E-11 |
| TSPYL2    | 4.21E-15 | 0.178363 | 0.146 | 0.154 | 6.29E-11 |
| LRRC2     | 4.53E-15 | 0.270485 | 0.069 | 0.007 | 6.77E-11 |
| ABCC5     | 5.01E-15 | 0.129361 | 0.081 | 0.128 | 7.49E-11 |
| SPTLC1    | 5.14E-15 | 0.111949 | 0.087 | 0.128 | 7.67E-11 |
| DENND1B   | 5.23E-15 | -0.13105 | 0.053 | 0.143 | 7.82E-11 |
| PDGFA     | 5.42E-15 | -0.19544 | 0.074 | 0.175 | 8.10E-11 |
| ZNF212    | 5.58E-15 | -0.11466 | 0.064 | 0.154 | 8.34E-11 |
| RALB      | 5.84E-15 | 0.116847 | 0.115 | 0.175 | 8.73E-11 |
| NMRK1     | 5.95E-15 | 0.317943 | 0.138 | 0.086 | 8.89E-11 |
| SLC22A18  | 6.39E-15 | 0.224239 | 0.086 | 0.078 | 9.55E-11 |
| BCL11B    | 8.58E-15 | -0.10199 | 0.008 | 0.057 | 1.28E-10 |
| LNX1      | 8.65E-15 | -0.20882 | 0.051 | 0.146 | 1.29E-10 |
| ZNF385A   | 8.68E-15 | 0.182153 | 0.088 | 0.094 | 1.30E-10 |
| PROCR     | 9.25E-15 | 0.284616 | 0.072 | 0.04  | 1.38E-10 |
| TMEM117   | 1.07E-14 | -0.10266 | 0.022 | 0.089 | 1.60E-10 |
| ANG       | 1.14E-14 | 0.360106 | 0.124 | 0.057 | 1.70E-10 |
| KIAA0895L | 1.16E-14 | -0.12405 | 0.057 | 0.144 | 1.73E-10 |
| GCNT2     | 1.22E-14 | -0.11441 | 0.015 | 0.078 | 1.82E-10 |
| HK2       | 1.23E-14 | 0.14913  | 0.079 | 0.077 | 1.83E-10 |
| SPEG      | 1.26E-14 | 0.130603 | 0.08  | 0.1   | 1.88E-10 |
| ENPP5     | 1.36E-14 | 0.305261 | 0.071 | 0.007 | 2.04E-10 |
| FAM107A   | 1.39E-14 | 0.361654 | 0.114 | 0.042 | 2.08E-10 |
| QSOX2     | 1.45E-14 | -0.10084 | 0.037 | 0.106 | 2.16E-10 |
| IFITM2    | 1.47E-14 | 0.310681 | 0.147 | 0.065 | 2.19E-10 |
| DNAJC27   | 1.48E-14 | -0.13841 | 0.031 | 0.102 | 2.21E-10 |
| MXRA8     | 1.51E-14 | 0.267172 | 0.086 | 0.027 | 2.26E-10 |
| TFRC      | 1.59E-14 | 0.146386 | 0.147 | 0.165 | 2.38E-10 |
| SCN3A     | 1.66E-14 | -0.1751  | 0.039 | 0.125 | 2.48E-10 |
| PAX3      | 1.66E-14 | -0.10381 | 0.006 | 0.054 | 2.48E-10 |
| SH3BP2    | 1.85E-14 | 0.212798 | 0.115 | 0.106 | 2.77E-10 |
| GM2A      | 1.99E-14 | 0.143751 | 0.08  | 0.091 | 2.98E-10 |
| SPSB1     | 2.20E-14 | 0.248371 | 0.118 | 0.089 | 3.29E-10 |
| THBS1     | 2.26E-14 | 0.289512 | 0.086 | 0.017 | 3.37E-10 |
| TMEM192   | 2.36E-14 | 0.208253 | 0.168 | 0.183 | 3.52E-10 |
| VASN      | 2.54E-14 | 0.224433 | 0.076 | 0.014 | 3.79E-10 |
| RAMP3     | 2.64E-14 | 0.301383 | 0.072 | 0.009 | 3.94E-10 |
| ITPKB     | 2.72E-14 | 0.153549 | 0.073 | 0.072 | 4.07E-10 |
| ZFP37     | 2.74E-14 | -0.10957 | 0.04  | 0.11  | 4.10E-10 |
| CAMKMT    | 2.76E-14 | -0.11848 | 0.057 | 0.146 | 4.12E-10 |
| TCN2      | 3.19E-14 | 0.19876  | 0.071 | 0.074 | 4.77E-10 |
| CASC15    | 3.19E-14 | -0.13565 | 0.062 | 0.152 | 4.77E-10 |
| ATP5L2    | 3.27E-14 | 0.208966 | 0.085 | 0.106 | 4.88E-10 |
| SAA4      | 3.41E-14 | 0.397894 | 0.05  | 0.001 | 5.10E-10 |
| KLRG1     | 3.71E-14 | -0.10245 | 0.017 | 0.077 | 5.54E-10 |
| OXSM      | 3.87E-14 | 0.180754 | 0.094 | 0.101 | 5.79E-10 |
| WDR55     | 4.04E-14 | 0.116911 | 0.103 | 0.133 | 6.03E-10 |

|           |          |          |       |       |          |
|-----------|----------|----------|-------|-------|----------|
| SLC39A4   | 4.45E-14 | 0.263597 | 0.074 | 0.033 | 6.65E-10 |
| PTPRN     | 4.61E-14 | 0.307691 | 0.136 | 0.059 | 6.89E-10 |
| SARNP     | 4.63E-14 | 0.184015 | 0.125 | 0.164 | 6.92E-10 |
| HOXC9     | 4.80E-14 | -0.20567 | 0.056 | 0.151 | 7.17E-10 |
| PDK1      | 4.81E-14 | 0.112246 | 0.101 | 0.123 | 7.20E-10 |
| LAPTM5    | 5.10E-14 | 0.410232 | 0.197 | 0.096 | 7.63E-10 |
| MCEE      | 5.56E-14 | 0.100137 | 0.115 | 0.149 | 8.30E-10 |
| PCDHB7    | 5.67E-14 | -0.1805  | 0.064 | 0.163 | 8.48E-10 |
| EPS8      | 6.07E-14 | -0.15822 | 0.114 | 0.231 | 9.07E-10 |
| ACO05076. | 6.35E-14 | -0.13846 | 0.032 | 0.105 | 9.49E-10 |
| AMPH      | 6.51E-14 | -0.12656 | 0.015 | 0.077 | 9.73E-10 |
| FILIP1L   | 6.55E-14 | 0.109468 | 0.088 | 0.104 | 9.79E-10 |
| HHIP-AS1  | 6.57E-14 | -0.10608 | 0.009 | 0.062 | 9.82E-10 |
| TRIM59    | 7.31E-14 | -0.12457 | 0.011 | 0.067 | 1.09E-09 |
| AMPD2     | 7.87E-14 | 0.117167 | 0.107 | 0.13  | 1.18E-09 |
| IRAK4     | 8.05E-14 | 0.114085 | 0.091 | 0.116 | 1.20E-09 |
| MYT1      | 8.11E-14 | -0.10347 | 0.007 | 0.056 | 1.21E-09 |
| SP110     | 9.21E-14 | 0.11313  | 0.135 | 0.165 | 1.38E-09 |
| PGAM2     | 9.92E-14 | 0.43541  | 0.098 | 0.037 | 1.48E-09 |
| DDR2      | 1.01E-13 | 0.199924 | 0.103 | 0.099 | 1.50E-09 |
| CCL4      | 1.12E-13 | -0.15217 | 0.118 | 0.228 | 1.68E-09 |
| LINC01023 | 1.15E-13 | 0.111679 | 0.056 | 0.083 | 1.71E-09 |
| PREP      | 1.15E-13 | -0.10329 | 0.061 | 0.143 | 1.72E-09 |
| SMOC1     | 1.15E-13 | -0.18211 | 0.015 | 0.077 | 1.72E-09 |
| RCAN2     | 1.35E-13 | 0.260957 | 0.084 | 0.015 | 2.01E-09 |
| LUCAT1    | 1.40E-13 | 0.207593 | 0.059 | 0.016 | 2.09E-09 |
| TMEM38A   | 1.43E-13 | 0.185392 | 0.1   | 0.074 | 2.13E-09 |
| RP11-118F | 1.44E-13 | -0.10865 | 0.004 | 0.043 | 2.15E-09 |
| NDUFB8    | 1.62E-13 | 0.552566 | 0.079 | 0.012 | 2.43E-09 |
| TCP11L1   | 1.66E-13 | -0.13147 | 0.027 | 0.098 | 2.48E-09 |
| TNFAIP3   | 1.69E-13 | 0.329042 | 0.112 | 0.049 | 2.53E-09 |
| CLP1      | 1.71E-13 | 0.102477 | 0.082 | 0.114 | 2.56E-09 |
| CLEC2B    | 1.85E-13 | 0.428131 | 0.108 | 0.088 | 2.76E-09 |
| ASIC1     | 2.00E-13 | -0.10357 | 0.013 | 0.067 | 2.99E-09 |
| RRM2B     | 2.03E-13 | 0.148534 | 0.103 | 0.109 | 3.04E-09 |
| PDZK1IP1  | 2.06E-13 | 0.228956 | 0.053 | 0.002 | 3.08E-09 |
| LINC-PINT | 2.37E-13 | 0.310668 | 0.136 | 0.073 | 3.54E-09 |
| MXI1      | 2.40E-13 | 0.235097 | 0.15  | 0.119 | 3.59E-09 |
| ACO02456. | 3.21E-13 | 0.178937 | 0.063 | 0.089 | 4.80E-09 |
| DHRS12    | 3.25E-13 | 0.17013  | 0.085 | 0.102 | 4.86E-09 |
| RINT1     | 3.52E-13 | 0.118692 | 0.147 | 0.168 | 5.25E-09 |
| GPRC5A    | 3.66E-13 | 0.201831 | 0.048 | 0.002 | 5.47E-09 |
| HAS2      | 3.93E-13 | 0.257261 | 0.092 | 0.086 | 5.88E-09 |
| DLX6-AS1  | 4.01E-13 | -0.21924 | 0.036 | 0.114 | 5.99E-09 |
| KCNIP1    | 4.13E-13 | -0.15698 | 0.059 | 0.144 | 6.17E-09 |
| TUBB4A    | 4.13E-13 | -0.16644 | 0.03  | 0.101 | 6.18E-09 |
| RP11-479J | 4.60E-13 | 0.252772 | 0.048 | 0.014 | 6.88E-09 |
| NCOA7     | 4.83E-13 | 0.144532 | 0.114 | 0.132 | 7.22E-09 |
| PCGF1     | 5.26E-13 | 0.135837 | 0.125 | 0.149 | 7.85E-09 |
| RIOK2     | 5.38E-13 | 0.113003 | 0.14  | 0.185 | 8.04E-09 |
| IDNK      | 5.98E-13 | 0.289507 | 0.123 | 0.101 | 8.94E-09 |

|           |          |          |       |       |          |
|-----------|----------|----------|-------|-------|----------|
| SLC30A3   | 6.05E-13 | -0.11537 | 0.01  | 0.062 | 9.04E-09 |
| SQRDL     | 6.16E-13 | 0.304577 | 0.101 | 0.052 | 9.20E-09 |
| HSPB2     | 6.26E-13 | 0.259554 | 0.061 | 0.007 | 9.35E-09 |
| MAFB      | 6.64E-13 | 0.319187 | 0.203 | 0.159 | 9.92E-09 |
| SYT6      | 6.74E-13 | -0.12582 | 0.012 | 0.067 | 1.01E-08 |
| MYBPH     | 6.74E-13 | 0.217905 | 0.062 | 0.01  | 1.01E-08 |
| CTSS      | 6.76E-13 | 0.396393 | 0.136 | 0.083 | 1.01E-08 |
| MUC12     | 6.98E-13 | 0.335717 | 0.095 | 0.051 | 1.04E-08 |
| LIN37     | 7.15E-13 | 0.109492 | 0.05  | 0.067 | 1.07E-08 |
| C11orf70  | 7.30E-13 | 0.256282 | 0.073 | 0.011 | 1.09E-08 |
| FXVD5     | 8.47E-13 | 0.186181 | 0.118 | 0.132 | 1.27E-08 |
| SLC12A5   | 8.60E-13 | -0.1646  | 0.022 | 0.088 | 1.28E-08 |
| SPRYD4    | 8.75E-13 | 0.10404  | 0.059 | 0.098 | 1.31E-08 |
| MIR497HG  | 9.13E-13 | 0.162262 | 0.115 | 0.149 | 1.37E-08 |
| CASP1     | 9.43E-13 | 0.365889 | 0.164 | 0.1   | 1.41E-08 |
| COL8A1    | 9.62E-13 | 0.330701 | 0.08  | 0.015 | 1.44E-08 |
| NABP1     | 9.65E-13 | 0.36466  | 0.106 | 0.036 | 1.44E-08 |
| COL20A1   | 9.72E-13 | -0.1129  | 0.006 | 0.051 | 1.45E-08 |
| CPM       | 9.72E-13 | -0.27148 | 0.059 | 0.144 | 1.45E-08 |
| SFXN3     | 1.06E-12 | 0.19495  | 0.077 | 0.065 | 1.59E-08 |
| P2RX7     | 1.14E-12 | -0.1165  | 0.04  | 0.116 | 1.71E-08 |
| HDAC4     | 1.14E-12 | -0.11084 | 0.027 | 0.091 | 1.71E-08 |
| ZFPM2     | 1.19E-12 | -0.17904 | 0.015 | 0.073 | 1.78E-08 |
| TOM1      | 1.20E-12 | 0.100423 | 0.094 | 0.125 | 1.79E-08 |
| COL9A1    | 1.24E-12 | -0.10593 | 0.006 | 0.051 | 1.85E-08 |
| ATP6VOE2- | 1.31E-12 | -0.10318 | 0.018 | 0.074 | 1.96E-08 |
| KCND2     | 1.33E-12 | -0.13565 | 0.031 | 0.1   | 1.99E-08 |
| TLE3      | 1.37E-12 | -0.10387 | 0.083 | 0.165 | 2.05E-08 |
| LIX1      | 1.39E-12 | 0.31703  | 0.068 | 0.012 | 2.08E-08 |
| TTC21B    | 1.41E-12 | -0.13099 | 0.039 | 0.114 | 2.11E-08 |
| SP140L    | 1.52E-12 | 0.28774  | 0.089 | 0.062 | 2.27E-08 |
| TAPBP1    | 1.53E-12 | 0.34116  | 0.143 | 0.09  | 2.28E-08 |
| CACNA2D1  | 1.58E-12 | -0.15581 | 0.021 | 0.079 | 2.36E-08 |
| SPRYD3    | 1.69E-12 | 0.15746  | 0.097 | 0.1   | 2.53E-08 |
| LY6H      | 1.93E-12 | 0.278523 | 0.106 | 0.038 | 2.89E-08 |
| FAM19A5   | 2.16E-12 | -0.12548 | 0.036 | 0.109 | 3.22E-08 |
| CLYBL     | 2.55E-12 | 0.171617 | 0.075 | 0.078 | 3.82E-08 |
| SLC47A2   | 2.59E-12 | 0.237358 | 0.063 | 0.042 | 3.88E-08 |
| SLC25A18  | 2.80E-12 | 0.291421 | 0.107 | 0.101 | 4.18E-08 |
| RP11-783K | 2.90E-12 | 0.313778 | 0.075 | 0.059 | 4.33E-08 |
| PACRG     | 3.40E-12 | 0.335553 | 0.088 | 0.032 | 5.08E-08 |
| RPRML     | 3.54E-12 | -0.11694 | 0.011 | 0.062 | 5.29E-08 |
| STYXL1    | 3.55E-12 | 0.180025 | 0.143 | 0.163 | 5.31E-08 |
| XKR4      | 3.63E-12 | -0.11437 | 0.02  | 0.079 | 5.42E-08 |
| MIR4458HG | 3.80E-12 | 0.398526 | 0.258 | 0.185 | 5.68E-08 |
| C1orf53   | 3.88E-12 | 0.22405  | 0.099 | 0.112 | 5.79E-08 |
| ORAI3     | 3.94E-12 | 0.201924 | 0.113 | 0.089 | 5.88E-08 |
| DMKN      | 4.07E-12 | 0.271715 | 0.043 | 0.001 | 6.08E-08 |
| ZNF211    | 4.10E-12 | 0.101387 | 0.081 | 0.107 | 6.13E-08 |
| GBP3      | 4.19E-12 | 0.31166  | 0.145 | 0.064 | 6.27E-08 |
| USF1      | 4.21E-12 | -0.13572 | 0.025 | 0.089 | 6.29E-08 |

|           |          |          |       |       |          |
|-----------|----------|----------|-------|-------|----------|
| IL33      | 4.58E-12 | 0.281476 | 0.104 | 0.058 | 6.85E-08 |
| IL1R1     | 4.62E-12 | 0.207116 | 0.052 | 0.014 | 6.90E-08 |
| SLC39A8   | 4.66E-12 | 0.227114 | 0.119 | 0.042 | 6.96E-08 |
| CCER2     | 5.39E-12 | -0.15998 | 0.018 | 0.078 | 8.05E-08 |
| CRB2      | 5.42E-12 | 0.39731  | 0.079 | 0.035 | 8.10E-08 |
| FPR1      | 5.45E-12 | 0.279819 | 0.066 | 0.014 | 8.14E-08 |
| ANKRD6    | 5.55E-12 | -0.11957 | 0.042 | 0.115 | 8.29E-08 |
| FRMD3     | 5.55E-12 | 0.272746 | 0.118 | 0.059 | 8.30E-08 |
| CD83      | 7.27E-12 | 0.189378 | 0.12  | 0.151 | 1.09E-07 |
| TGM2      | 7.29E-12 | 0.217709 | 0.071 | 0.035 | 1.09E-07 |
| TGDS      | 7.61E-12 | 0.141012 | 0.111 | 0.123 | 1.14E-07 |
| MARCO     | 8.90E-12 | 0.310602 | 0.059 | 0.007 | 1.33E-07 |
| MAOA      | 9.17E-12 | 0.28362  | 0.073 | 0.016 | 1.37E-07 |
| THBS3     | 9.85E-12 | 0.113147 | 0.059 | 0.059 | 1.47E-07 |
| ARHGAP29  | 1.04E-11 | 0.218599 | 0.095 | 0.044 | 1.55E-07 |
| RP3-460G2 | 1.12E-11 | 0.465822 | 0.098 | 0.052 | 1.68E-07 |
| TFB2M     | 1.14E-11 | 0.153682 | 0.111 | 0.136 | 1.71E-07 |
| FCGBP     | 1.16E-11 | 0.302666 | 0.113 | 0.051 | 1.74E-07 |
| KLHL24    | 1.39E-11 | 0.165427 | 0.14  | 0.146 | 2.07E-07 |
| ZRSR2     | 1.47E-11 | 0.145872 | 0.127 | 0.13  | 2.20E-07 |
| SLC16A4   | 1.47E-11 | 0.118545 | 0.091 | 0.104 | 2.20E-07 |
| APOBEC3C  | 1.54E-11 | 0.153863 | 0.074 | 0.104 | 2.30E-07 |
| CTGF      | 1.55E-11 | 0.312013 | 0.078 | 0.028 | 2.32E-07 |
| ACTL6B    | 1.56E-11 | -0.11712 | 0.022 | 0.078 | 2.33E-07 |
| FAM13A    | 1.59E-11 | 0.197718 | 0.118 | 0.11  | 2.37E-07 |
| GDPD2     | 1.61E-11 | 0.219728 | 0.075 | 0.042 | 2.41E-07 |
| NXN       | 1.69E-11 | -0.11288 | 0.011 | 0.06  | 2.52E-07 |
| CCDC170   | 1.78E-11 | 0.192906 | 0.092 | 0.026 | 2.66E-07 |
| HVCN1     | 1.78E-11 | 0.132124 | 0.056 | 0.064 | 2.66E-07 |
| HNMT      | 1.90E-11 | 0.415721 | 0.163 | 0.115 | 2.84E-07 |
| ADCY2     | 2.00E-11 | 0.18428  | 0.064 | 0.035 | 2.99E-07 |
| DYNLRB2   | 2.04E-11 | 0.198399 | 0.046 | 0.002 | 3.04E-07 |
| DMXL2     | 2.29E-11 | -0.10055 | 0.036 | 0.1   | 3.42E-07 |
| HBEGF     | 2.44E-11 | 0.128469 | 0.094 | 0.094 | 3.64E-07 |
| CLGN      | 2.74E-11 | -0.17526 | 0.044 | 0.121 | 4.09E-07 |
| ARHGEF10  | 2.84E-11 | 0.123636 | 0.089 | 0.11  | 4.25E-07 |
| TSHZ2     | 2.94E-11 | 0.316289 | 0.129 | 0.058 | 4.39E-07 |
| PLSCR4    | 2.95E-11 | 0.190094 | 0.085 | 0.072 | 4.41E-07 |
| RASL10A   | 3.00E-11 | -0.11787 | 0.011 | 0.06  | 4.49E-07 |
| RP11-436K | 3.12E-11 | -0.12391 | 0.017 | 0.07  | 4.67E-07 |
| SERPINB8  | 3.13E-11 | 0.111643 | 0.084 | 0.095 | 4.68E-07 |
| ASTE1     | 3.39E-11 | 0.100027 | 0.062 | 0.096 | 5.06E-07 |
| FANCF     | 3.56E-11 | 0.110993 | 0.093 | 0.109 | 5.32E-07 |
| KLHDC9    | 3.65E-11 | 0.140246 | 0.087 | 0.09  | 5.46E-07 |
| LRRC24    | 3.69E-11 | -0.13423 | 0.043 | 0.117 | 5.51E-07 |
| CCDC88B   | 3.69E-11 | 0.294447 | 0.09  | 0.051 | 5.52E-07 |
| AQP1      | 3.74E-11 | 0.186858 | 0.055 | 0.064 | 5.59E-07 |
| PCMTD1    | 3.82E-11 | 0.128425 | 0.13  | 0.144 | 5.71E-07 |
| C16orf89  | 3.98E-11 | 0.246618 | 0.046 | 0.004 | 5.94E-07 |
| NR1D1     | 4.09E-11 | 0.163623 | 0.082 | 0.073 | 6.11E-07 |
| SMIM10    | 4.34E-11 | 0.132799 | 0.077 | 0.099 | 6.49E-07 |

|           |          |          |       |       |          |
|-----------|----------|----------|-------|-------|----------|
| FGGY      | 4.82E-11 | 0.144362 | 0.098 | 0.116 | 7.20E-07 |
| MICU3     | 4.89E-11 | -0.10573 | 0.042 | 0.11  | 7.31E-07 |
| EEF1G     | 4.90E-11 | 0.152814 | 0.079 | 0.111 | 7.32E-07 |
| EDARADD   | 5.45E-11 | 0.206209 | 0.057 | 0.025 | 8.14E-07 |
| LINC00844 | 5.63E-11 | -0.10047 | 0.105 | 0.19  | 8.42E-07 |
| PLEKHF1   | 6.48E-11 | 0.119822 | 0.062 | 0.051 | 9.68E-07 |
| RENBP     | 6.72E-11 | 0.222232 | 0.071 | 0.022 | 1.00E-06 |
| FERMT1    | 7.26E-11 | -0.18062 | 0.033 | 0.101 | 1.08E-06 |
| RP1-17K7. | 7.33E-11 | 0.453927 | 0.102 | 0.04  | 1.10E-06 |
| PRTN3     | 7.41E-11 | 0.13382  | 0.032 | 0     | 1.11E-06 |
| HGF       | 9.46E-11 | 0.158276 | 0.043 | 0.002 | 1.41E-06 |
| FCER1G    | 9.82E-11 | 0.224385 | 0.172 | 0.175 | 1.47E-06 |
| CCDC181   | 1.03E-10 | 0.152142 | 0.148 | 0.16  | 1.54E-06 |
| HIST2H2BE | 1.04E-10 | 0.245507 | 0.11  | 0.094 | 1.55E-06 |
| ANKRD42   | 1.09E-10 | 0.113195 | 0.077 | 0.079 | 1.63E-06 |
| ECM2      | 1.18E-10 | 0.238586 | 0.062 | 0.01  | 1.76E-06 |
| ARHGAP5-A | 1.22E-10 | 0.131298 | 0.042 | 0.049 | 1.82E-06 |
| MAP3K7CL  | 1.22E-10 | 0.21461  | 0.095 | 0.075 | 1.82E-06 |
| HLA-DMB   | 1.31E-10 | 0.268068 | 0.1   | 0.042 | 1.96E-06 |
| TRIM22    | 1.41E-10 | 0.114532 | 0.085 | 0.095 | 2.11E-06 |
| HSD11B1   | 1.60E-10 | 0.297273 | 0.054 | 0.015 | 2.39E-06 |
| MTURN     | 1.69E-10 | -0.12358 | 0.055 | 0.128 | 2.53E-06 |
| PINLYP    | 1.82E-10 | 0.145589 | 0.083 | 0.104 | 2.72E-06 |
| CTSK      | 1.87E-10 | 0.265692 | 0.111 | 0.078 | 2.80E-06 |
| RNF144B   | 2.06E-10 | 0.181558 | 0.042 | 0.002 | 3.08E-06 |
| RGN       | 2.07E-10 | 0.250746 | 0.1   | 0.064 | 3.09E-06 |
| TGFB2     | 2.07E-10 | 0.197009 | 0.117 | 0.075 | 3.10E-06 |
| FAM149A   | 2.17E-10 | -0.11936 | 0.007 | 0.047 | 3.24E-06 |
| ALOX5AP   | 2.17E-10 | 0.33355  | 0.154 | 0.084 | 3.24E-06 |
| LINC00869 | 2.40E-10 | 0.319297 | 0.042 | 0.002 | 3.58E-06 |
| MMP19     | 2.42E-10 | 0.217963 | 0.062 | 0.014 | 3.61E-06 |
| C14orf132 | 2.76E-10 | -0.10999 | 0.072 | 0.149 | 4.13E-06 |
| ATP6AP1L  | 2.98E-10 | 0.134956 | 0.068 | 0.073 | 4.45E-06 |
| SERPINA3  | 3.24E-10 | 0.245386 | 0.03  | 0     | 4.84E-06 |
| ATP10B    | 3.50E-10 | -0.11683 | 0.014 | 0.063 | 5.23E-06 |
| CSRNP1    | 3.60E-10 | 0.163871 | 0.133 | 0.121 | 5.39E-06 |
| STAP2     | 3.88E-10 | 0.132565 | 0.048 | 0.051 | 5.79E-06 |
| GGT5      | 3.95E-10 | 0.146426 | 0.056 | 0.012 | 5.90E-06 |
| CTH       | 4.13E-10 | 0.223832 | 0.094 | 0.06  | 6.16E-06 |
| CXorf40A  | 4.15E-10 | 0.136254 | 0.085 | 0.095 | 6.20E-06 |
| STX3      | 4.20E-10 | 0.17734  | 0.068 | 0.03  | 6.28E-06 |
| HSPB6     | 4.29E-10 | 0.156124 | 0.122 | 0.109 | 6.40E-06 |
| MYOT      | 4.32E-10 | -0.11581 | 0.006 | 0.044 | 6.45E-06 |
| CMTM5     | 4.41E-10 | -0.15223 | 0.074 | 0.156 | 6.59E-06 |
| FGFBP2    | 5.08E-10 | 0.173133 | 0.036 | 0.001 | 7.59E-06 |
| CXCL12    | 5.14E-10 | 0.227628 | 0.057 | 0.011 | 7.68E-06 |
| OLFML3    | 5.96E-10 | 0.149102 | 0.068 | 0.063 | 8.90E-06 |
| CHIT1     | 6.10E-10 | 0.357541 | 0.039 | 0.002 | 9.12E-06 |
| TNFRSF14  | 6.21E-10 | 0.223922 | 0.082 | 0.046 | 9.27E-06 |
| CYBA      | 6.77E-10 | 0.199626 | 0.165 | 0.135 | 1.01E-05 |
| TNFAIP2   | 6.77E-10 | 0.217415 | 0.06  | 0.021 | 1.01E-05 |

|           |          |          |       |       |          |
|-----------|----------|----------|-------|-------|----------|
| ALDH1L1   | 7.19E-10 | 0.317204 | 0.143 | 0.062 | 1.07E-05 |
| PTGES     | 7.79E-10 | 0.243424 | 0.064 | 0.021 | 1.16E-05 |
| PPP1R3C   | 8.08E-10 | 0.231896 | 0.072 | 0.025 | 1.21E-05 |
| TVP23A    | 8.36E-10 | 0.24142  | 0.074 | 0.021 | 1.25E-05 |
| PRSS35    | 8.85E-10 | 0.151628 | 0.059 | 0.01  | 1.32E-05 |
| PPP1R9A   | 8.87E-10 | -0.16964 | 0.046 | 0.116 | 1.33E-05 |
| NCAN      | 9.56E-10 | -0.13694 | 0.027 | 0.084 | 1.43E-05 |
| ARG2      | 9.61E-10 | 0.116849 | 0.067 | 0.083 | 1.44E-05 |
| COL5A1    | 9.62E-10 | 0.155798 | 0.053 | 0.009 | 1.44E-05 |
| VSIG4     | 9.63E-10 | 0.347595 | 0.121 | 0.057 | 1.44E-05 |
| CREBRF    | 9.77E-10 | 0.188644 | 0.12  | 0.104 | 1.46E-05 |
| MAPK8IP2  | 1.07E-09 | -0.10381 | 0.018 | 0.068 | 1.59E-05 |
| NTM       | 1.09E-09 | -0.22582 | 0.106 | 0.2   | 1.62E-05 |
| SLFN5     | 1.09E-09 | 0.202116 | 0.069 | 0.038 | 1.63E-05 |
| GSTM5     | 1.13E-09 | 0.199255 | 0.036 | 0.001 | 1.69E-05 |
| HOPX      | 1.14E-09 | -0.17781 | 0.347 | 0.465 | 1.70E-05 |
| ARHGAP24  | 1.25E-09 | 0.259039 | 0.087 | 0.027 | 1.87E-05 |
| NR4A1     | 1.34E-09 | 0.161051 | 0.154 | 0.151 | 2.00E-05 |
| SYT1      | 1.40E-09 | -0.1669  | 0.053 | 0.126 | 2.09E-05 |
| IL18BP    | 1.49E-09 | 0.131697 | 0.037 | 0.026 | 2.22E-05 |
| LDOC1     | 1.54E-09 | 0.36319  | 0.147 | 0.07  | 2.30E-05 |
| COLEC12   | 1.72E-09 | 0.185494 | 0.06  | 0.012 | 2.58E-05 |
| PPIL6     | 1.79E-09 | 0.200213 | 0.098 | 0.06  | 2.67E-05 |
| HBB       | 1.81E-09 | 0.229945 | 0.417 | 0.332 | 2.70E-05 |
| LRRK2     | 1.89E-09 | -0.12227 | 0.027 | 0.083 | 2.82E-05 |
| RABL2A    | 1.91E-09 | 0.137943 | 0.084 | 0.101 | 2.85E-05 |
| HLA-DOA   | 1.91E-09 | 0.171352 | 0.044 | 0.005 | 2.85E-05 |
| INCA1     | 2.03E-09 | 0.100533 | 0.031 | 0.041 | 3.04E-05 |
| GOS2      | 2.09E-09 | 0.405096 | 0.124 | 0.138 | 3.12E-05 |
| IL6R      | 2.19E-09 | 0.134289 | 0.051 | 0.009 | 3.28E-05 |
| ZNF350    | 2.26E-09 | 0.115805 | 0.101 | 0.104 | 3.38E-05 |
| MAST4     | 2.29E-09 | 0.16811  | 0.084 | 0.079 | 3.42E-05 |
| SELENBP1  | 2.31E-09 | 0.219921 | 0.053 | 0.01  | 3.46E-05 |
| LCAT      | 2.32E-09 | 0.127462 | 0.041 | 0.052 | 3.46E-05 |
| ZNF419    | 2.48E-09 | 0.151663 | 0.087 | 0.083 | 3.71E-05 |
| NIM1K     | 2.51E-09 | 0.228577 | 0.122 | 0.089 | 3.75E-05 |
| PDCD4     | 2.84E-09 | 0.135453 | 0.1   | 0.106 | 4.24E-05 |
| APOBEC3G  | 2.86E-09 | 0.165493 | 0.071 | 0.07  | 4.28E-05 |
| RP11-326C | 3.01E-09 | 0.183301 | 0.038 | 0.002 | 4.50E-05 |
| TF        | 3.06E-09 | 0.249225 | 0.098 | 0.053 | 4.57E-05 |
| SLITRK2   | 3.11E-09 | -0.114   | 0.042 | 0.105 | 4.65E-05 |
| C5AR1     | 3.24E-09 | 0.197038 | 0.077 | 0.031 | 4.84E-05 |
| LOXL2     | 3.29E-09 | 0.191819 | 0.076 | 0.052 | 4.91E-05 |
| CCL3      | 3.30E-09 | 0.175566 | 0.219 | 0.247 | 4.93E-05 |
| H1FO      | 3.33E-09 | 0.126587 | 0.265 | 0.291 | 4.98E-05 |
| RNASE4    | 3.34E-09 | 0.239868 | 0.058 | 0.014 | 5.00E-05 |
| PEX12     | 3.53E-09 | 0.124704 | 0.073 | 0.083 | 5.27E-05 |
| RCN3      | 3.69E-09 | 0.152677 | 0.086 | 0.062 | 5.51E-05 |
| CYB5R2    | 3.71E-09 | 0.177393 | 0.037 | 0.035 | 5.54E-05 |
| SAMD14    | 4.21E-09 | -0.10478 | 0.045 | 0.11  | 6.29E-05 |
| PLK2      | 4.40E-09 | 0.13632  | 0.127 | 0.147 | 6.57E-05 |

|           |          |          |       |       |          |
|-----------|----------|----------|-------|-------|----------|
| CRABP1    | 4.45E-09 | -0.20525 | 0.002 | 0.03  | 6.65E-05 |
| HHIP      | 5.14E-09 | -0.10552 | 0.007 | 0.042 | 7.68E-05 |
| SLC15A4   | 5.18E-09 | 0.178257 | 0.078 | 0.056 | 7.74E-05 |
| MS4A7     | 5.30E-09 | 0.193251 | 0.075 | 0.063 | 7.92E-05 |
| TTC26     | 5.42E-09 | 0.103357 | 0.079 | 0.106 | 8.09E-05 |
| HLA-G     | 5.50E-09 | 0.173794 | 0.048 | 0.02  | 8.21E-05 |
| OSR1      | 5.64E-09 | 0.397057 | 0.051 | 0.009 | 8.43E-05 |
| RP11-160C | 5.79E-09 | 0.105828 | 0.032 | 0.043 | 8.65E-05 |
| EEPDI     | 5.81E-09 | 0.178198 | 0.085 | 0.052 | 8.69E-05 |
| OSGIN1    | 5.86E-09 | 0.166449 | 0.057 | 0.023 | 8.76E-05 |
| ONECUT2   | 5.89E-09 | -0.11669 | 0.022 | 0.074 | 8.80E-05 |
| KLF4      | 6.00E-09 | 0.186078 | 0.115 | 0.091 | 8.97E-05 |
| MYOF      | 6.61E-09 | 0.160887 | 0.05  | 0.011 | 9.88E-05 |
| THSD4     | 6.86E-09 | -0.16039 | 0.008 | 0.046 | 0.000102 |
| C4orf47   | 7.01E-09 | 0.222017 | 0.086 | 0.047 | 0.000105 |
| CKMT2     | 7.21E-09 | 0.137797 | 0.032 | 0.001 | 0.000108 |
| KCTD11    | 7.53E-09 | 0.113786 | 0.069 | 0.063 | 0.000113 |
| RCCD1     | 8.34E-09 | -0.11832 | 0.039 | 0.098 | 0.000125 |
| ATP2B4    | 8.96E-09 | 0.139665 | 0.097 | 0.086 | 0.000134 |
| FSTL3     | 9.12E-09 | 0.191826 | 0.08  | 0.043 | 0.000136 |
| TNFAIP8L3 | 1.01E-08 | 0.129252 | 0.032 | 0.001 | 0.000151 |
| RP11-536C | 1.01E-08 | -0.11113 | 0.004 | 0.033 | 0.000151 |
| ST8SIA4   | 1.11E-08 | 0.141648 | 0.055 | 0.053 | 0.000166 |
| ITGB4     | 1.12E-08 | 0.196287 | 0.064 | 0.044 | 0.000168 |
| GOLPH3L   | 1.13E-08 | 0.121639 | 0.11  | 0.123 | 0.000168 |
| ASIP      | 1.33E-08 | 0.141431 | 0.043 | 0.017 | 0.000199 |
| MICA      | 1.39E-08 | 0.130325 | 0.064 | 0.043 | 0.000208 |
| PIR       | 1.45E-08 | 0.137468 | 0.076 | 0.084 | 0.000217 |
| SDCBP2    | 1.45E-08 | 0.174395 | 0.082 | 0.054 | 0.000217 |
| ZC3H12A   | 1.69E-08 | 0.204276 | 0.086 | 0.035 | 0.000253 |
| TRIM38    | 1.83E-08 | 0.11804  | 0.042 | 0.049 | 0.000274 |
| NOS2      | 1.85E-08 | -0.11658 | 0.009 | 0.046 | 0.000276 |
| RAB6B     | 1.87E-08 | 0.113076 | 0.085 | 0.081 | 0.000279 |
| ALDH3B1   | 1.92E-08 | 0.223661 | 0.063 | 0.023 | 0.000287 |
| ZNF550    | 2.13E-08 | 0.135797 | 0.079 | 0.077 | 0.000318 |
| ZNF582-AS | 2.15E-08 | 0.297093 | 0.135 | 0.086 | 0.000322 |
| WDR19     | 2.23E-08 | 0.121038 | 0.066 | 0.068 | 0.000334 |
| DUSP22    | 2.63E-08 | 0.123789 | 0.085 | 0.091 | 0.000394 |
| PTPRU     | 2.64E-08 | 0.165261 | 0.04  | 0.019 | 0.000394 |
| NKD2      | 2.81E-08 | 0.100906 | 0.042 | 0.005 | 0.000421 |
| HPS1      | 2.94E-08 | 0.198958 | 0.062 | 0.019 | 0.00044  |
| HSF4      | 3.10E-08 | 0.130791 | 0.053 | 0.02  | 0.000464 |
| PNPLA4    | 3.37E-08 | 0.283631 | 0.078 | 0.028 | 0.000503 |
| CLIC2     | 3.54E-08 | 0.21169  | 0.048 | 0.012 | 0.000529 |
| RHPN2     | 3.57E-08 | 0.176171 | 0.069 | 0.06  | 0.000533 |
| TNFSF13B  | 3.66E-08 | 0.254104 | 0.115 | 0.062 | 0.000547 |
| TREM2     | 3.76E-08 | 0.259438 | 0.092 | 0.051 | 0.000562 |
| PSORS1C1  | 4.14E-08 | 0.176938 | 0.054 | 0.046 | 0.000619 |
| RP11-395E | 4.34E-08 | 0.210426 | 0.052 | 0.027 | 0.000649 |
| ACBD4     | 4.60E-08 | 0.122892 | 0.049 | 0.052 | 0.000687 |
| GFPT2     | 4.62E-08 | 0.230191 | 0.11  | 0.083 | 0.00069  |

|           |          |          |       |       |          |
|-----------|----------|----------|-------|-------|----------|
| NOV       | 4.82E-08 | 0.126314 | 0.043 | 0.006 | 0.000721 |
| NKX2-5    | 5.15E-08 | 0.169607 | 0.085 | 0.064 | 0.00077  |
| RORA      | 5.16E-08 | 0.114071 | 0.099 | 0.088 | 0.000772 |
| PHYHD1    | 5.23E-08 | 0.189422 | 0.053 | 0.011 | 0.000782 |
| CCDC3     | 5.23E-08 | 0.119956 | 0.042 | 0.011 | 0.000782 |
| APLNR     | 6.15E-08 | 0.202322 | 0.042 | 0.006 | 0.000918 |
| C9orf3    | 6.60E-08 | 0.121709 | 0.138 | 0.158 | 0.000986 |
| LSR       | 6.66E-08 | 0.102582 | 0.048 | 0.051 | 0.000995 |
| GLIPR1L2  | 6.84E-08 | 0.195202 | 0.069 | 0.036 | 0.001021 |
| SERPINF1  | 6.93E-08 | 0.10186  | 0.048 | 0.07  | 0.001036 |
| CTD-2270L | 6.98E-08 | 0.172025 | 0.057 | 0.06  | 0.001043 |
| ADAMTS9-A | 7.79E-08 | 0.141496 | 0.042 | 0.017 | 0.001164 |
| NEBL      | 7.87E-08 | 0.117304 | 0.052 | 0.011 | 0.001177 |
| BEX5      | 7.99E-08 | 0.309223 | 0.11  | 0.051 | 0.001194 |
| EFHD1     | 8.14E-08 | -0.10909 | 0.055 | 0.114 | 0.001217 |
| RSPH3     | 8.51E-08 | 0.109701 | 0.078 | 0.09  | 0.001272 |
| ERICH2    | 9.50E-08 | 0.135742 | 0.063 | 0.051 | 0.00142  |
| PLXNA3    | 9.59E-08 | 0.109618 | 0.052 | 0.065 | 0.001433 |
| EPHX2     | 9.85E-08 | 0.249273 | 0.072 | 0.028 | 0.001473 |
| MFAP4     | 9.95E-08 | 0.101912 | 0.1   | 0.146 | 0.001486 |
| PLA2G4C   | 1.12E-07 | 0.145619 | 0.067 | 0.028 | 0.00168  |
| SCN9A     | 1.17E-07 | 0.247941 | 0.089 | 0.036 | 0.001748 |
| LRRN4CL   | 1.22E-07 | 0.126717 | 0.031 | 0.002 | 0.001825 |
| KCNN3     | 1.27E-07 | 0.172076 | 0.06  | 0.023 | 0.001898 |
| RNASE1    | 1.27E-07 | 0.299494 | 0.082 | 0.043 | 0.001901 |
| ZNF557    | 1.30E-07 | 0.112759 | 0.041 | 0.067 | 0.001936 |
| AC114803. | 1.50E-07 | 0.163463 | 0.037 | 0.006 | 0.002239 |
| KIAA0040  | 1.52E-07 | 0.196461 | 0.088 | 0.035 | 0.002279 |
| GREM1     | 1.59E-07 | 0.335835 | 0.037 | 0.005 | 0.00237  |
| ZNF503    | 1.60E-07 | -0.1339  | 0.085 | 0.157 | 0.002398 |
| THEMIS2   | 1.65E-07 | 0.107183 | 0.049 | 0.057 | 0.00247  |
| CAMP      | 1.69E-07 | 0.220907 | 0.021 | 0     | 0.00253  |
| MX1       | 1.75E-07 | 0.213406 | 0.097 | 0.053 | 0.002618 |
| HSBP1L1   | 1.79E-07 | 0.145189 | 0.08  | 0.035 | 0.002672 |
| CD163     | 1.84E-07 | 0.239797 | 0.081 | 0.036 | 0.002752 |
| MAP1LC3B2 | 2.00E-07 | 0.118875 | 0.072 | 0.073 | 0.002984 |
| PCDH11X   | 2.00E-07 | -0.14163 | 0.029 | 0.075 | 0.002995 |
| HMGN4     | 2.11E-07 | 0.115693 | 0.044 | 0.037 | 0.00316  |
| S100A4    | 2.35E-07 | 0.319464 | 0.1   | 0.051 | 0.003506 |
| RNPC3     | 2.49E-07 | 0.107611 | 0.104 | 0.101 | 0.003728 |
| SLC7A5    | 2.51E-07 | 0.116622 | 0.096 | 0.095 | 0.003747 |
| GNAI1     | 2.54E-07 | -0.16368 | 0.086 | 0.159 | 0.003803 |
| GPR183    | 2.61E-07 | 0.229336 | 0.099 | 0.044 | 0.003896 |
| STAB1     | 2.87E-07 | 0.125961 | 0.034 | 0.016 | 0.004288 |
| HLA-F     | 2.94E-07 | 0.193705 | 0.088 | 0.047 | 0.004396 |
| IL1B      | 3.01E-07 | 0.207629 | 0.107 | 0.073 | 0.004494 |
| C11orf71  | 3.03E-07 | 0.26879  | 0.041 | 0.02  | 0.00453  |
| CD163L1   | 3.14E-07 | 0.141541 | 0.068 | 0.022 | 0.0047   |
| LRRC61    | 3.42E-07 | 0.204241 | 0.098 | 0.043 | 0.005109 |
| HSD17B14  | 3.42E-07 | 0.202277 | 0.089 | 0.037 | 0.005109 |
| NME5      | 3.49E-07 | 0.131474 | 0.07  | 0.072 | 0.005211 |



|           |          |          |       |       |          |
|-----------|----------|----------|-------|-------|----------|
| KCTD16    | 3.84E-07 | -0.10241 | 0.019 | 0.06  | 0.005745 |
| CDK20     | 3.88E-07 | 0.143617 | 0.089 | 0.068 | 0.005797 |
| SBF2-AS1  | 3.91E-07 | 0.102544 | 0.045 | 0.041 | 0.005848 |
| PRKAG2    | 4.19E-07 | 0.127815 | 0.079 | 0.089 | 0.006255 |
| HRH2      | 4.35E-07 | 0.102397 | 0.037 | 0.005 | 0.006496 |
| WNT5A     | 4.59E-07 | -0.12391 | 0.027 | 0.074 | 0.006856 |
| LINC01088 | 5.22E-07 | 0.183239 | 0.031 | 0.005 | 0.007801 |
| ZMYND12   | 5.58E-07 | 0.150715 | 0.027 | 0.001 | 0.008345 |
| CYP19A1   | 5.92E-07 | 0.176308 | 0.03  | 0.005 | 0.008852 |
| EVA1A     | 6.14E-07 | 0.137031 | 0.055 | 0.021 | 0.009181 |
| RMDN2     | 6.54E-07 | 0.144837 | 0.046 | 0.048 | 0.009766 |
| SLC25A20  | 6.82E-07 | 0.138426 | 0.065 | 0.084 | 0.010193 |
| FAM180A   | 6.86E-07 | 0.122968 | 0.03  | 0.002 | 0.010253 |
| RBKS      | 6.88E-07 | 0.133821 | 0.045 | 0.022 | 0.010284 |
| RP11-806H | 7.81E-07 | 0.152155 | 0.051 | 0.032 | 0.011668 |
| BCO2      | 7.95E-07 | 0.147602 | 0.05  | 0.022 | 0.011887 |
| ECE2      | 8.53E-07 | 0.134359 | 0.063 | 0.056 | 0.012753 |
| LSP1      | 8.62E-07 | 0.156675 | 0.053 | 0.021 | 0.012888 |
| FGF12     | 8.77E-07 | -0.16013 | 0.042 | 0.093 | 0.013108 |
| CTSZ      | 8.83E-07 | 0.114832 | 0.085 | 0.072 | 0.013202 |
| FGF7      | 9.12E-07 | 0.233643 | 0.047 | 0.016 | 0.013635 |
| S100A9    | 9.37E-07 | 0.22401  | 0.074 | 0.067 | 0.014004 |
| EMX2      | 9.80E-07 | 0.121785 | 0.053 | 0.048 | 0.014641 |
| MR1       | 1.06E-06 | 0.156371 | 0.071 | 0.052 | 0.015823 |
| C12orf54  | 1.07E-06 | 0.116247 | 0.018 | 0     | 0.015971 |
| TNFSF10   | 1.16E-06 | 0.274634 | 0.05  | 0.017 | 0.017384 |
| LINC01152 | 1.18E-06 | 0.189048 | 0.042 | 0.035 | 0.017637 |
| CMYA5     | 1.20E-06 | 0.150103 | 0.072 | 0.037 | 0.017893 |
| OSR2      | 1.31E-06 | 0.19285  | 0.043 | 0.028 | 0.019554 |
| IGFBP7-AS | 1.32E-06 | 0.21198  | 0.076 | 0.051 | 0.019668 |
| LINC00882 | 1.40E-06 | 0.226602 | 0.062 | 0.032 | 0.020918 |
| STEAP1    | 1.47E-06 | 0.263462 | 0.074 | 0.038 | 0.02191  |
| NEK11     | 1.58E-06 | 0.177446 | 0.093 | 0.068 | 0.023622 |
| SYNPO     | 1.62E-06 | 0.165607 | 0.066 | 0.026 | 0.024231 |
| SKAP2     | 1.63E-06 | 0.148077 | 0.168 | 0.179 | 0.024395 |
| HCLS1     | 1.69E-06 | 0.165164 | 0.061 | 0.019 | 0.025304 |
| MBP       | 1.74E-06 | -0.13225 | 0.1   | 0.173 | 0.026029 |
| ZNF295-AS | 1.78E-06 | 0.123193 | 0.025 | 0.002 | 0.026536 |
| TLDC1     | 1.97E-06 | 0.139443 | 0.052 | 0.058 | 0.02942  |
| MORN5     | 2.07E-06 | 0.128986 | 0.043 | 0.01  | 0.030984 |
| VAMP8     | 2.12E-06 | 0.153205 | 0.062 | 0.049 | 0.031667 |
| HSD17B6   | 2.14E-06 | 0.112697 | 0.032 | 0.04  | 0.032055 |
| ZBTB11-AS | 2.32E-06 | 0.105774 | 0.031 | 0.037 | 0.034694 |
| FAM198B   | 2.51E-06 | 0.185232 | 0.053 | 0.023 | 0.037583 |
| AIF1      | 2.63E-06 | 0.20871  | 0.138 | 0.117 | 0.03924  |
| DYRK3     | 2.66E-06 | 0.105327 | 0.053 | 0.036 | 0.039682 |
| SMKR1     | 2.67E-06 | 0.114298 | 0.087 | 0.077 | 0.039929 |
| RBFOX3    | 2.74E-06 | 0.187165 | 0.033 | 0.011 | 0.04091  |
| CEBPA     | 2.87E-06 | 0.123528 | 0.039 | 0.014 | 0.042943 |
| GSAP      | 2.99E-06 | 0.16464  | 0.068 | 0.056 | 0.044671 |
| CCL7      | 3.08E-06 | 0.176357 | 0.023 | 0.006 | 0.046088 |

|           |          |          |       |       |          |
|-----------|----------|----------|-------|-------|----------|
| MLIP      | 3.10E-06 | 0.134873 | 0.05  | 0.014 | 0.046254 |
| PIGV      | 3.29E-06 | 0.102781 | 0.068 | 0.077 | 0.04921  |
| ETS2      | 3.45E-06 | 0.139926 | 0.096 | 0.074 | 0.051625 |
| CFH       | 3.50E-06 | 0.132057 | 0.042 | 0.011 | 0.052342 |
| PTGS2     | 3.53E-06 | 0.132396 | 0.041 | 0.01  | 0.052798 |
| GUCY1B3   | 3.62E-06 | -0.11326 | 0.022 | 0.06  | 0.054137 |
| CYP1B1    | 3.75E-06 | 0.120228 | 0.037 | 0.007 | 0.056076 |
| VWA3B     | 3.78E-06 | 0.105893 | 0.052 | 0.036 | 0.056458 |
| CA8       | 3.94E-06 | -0.12779 | 0.032 | 0.078 | 0.058866 |
| C1QTNF1   | 4.11E-06 | 0.165788 | 0.073 | 0.041 | 0.061422 |
| MKNK1     | 4.42E-06 | 0.104718 | 0.064 | 0.077 | 0.066086 |
| KISS1R    | 4.55E-06 | 0.112315 | 0.041 | 0.016 | 0.067934 |
| PPP1R13L  | 4.64E-06 | 0.124651 | 0.039 | 0.04  | 0.069385 |
| ELM01     | 4.68E-06 | 0.255932 | 0.136 | 0.106 | 0.069882 |
| C1orf194  | 4.99E-06 | 0.155625 | 0.054 | 0.016 | 0.074541 |
| TNXB      | 5.01E-06 | 0.106775 | 0.039 | 0.011 | 0.074804 |
| AKR1C3    | 5.39E-06 | 0.136428 | 0.029 | 0.004 | 0.080574 |
| SLC7A8    | 5.41E-06 | 0.126631 | 0.033 | 0.009 | 0.080837 |
| TMEFF2    | 5.56E-06 | -0.11446 | 0.058 | 0.112 | 0.083019 |
| LAMA2     | 5.71E-06 | 0.184228 | 0.046 | 0.012 | 0.085309 |
| LGALS9    | 5.82E-06 | 0.141063 | 0.056 | 0.038 | 0.087012 |
| EIF4EBP3  | 5.89E-06 | 0.16063  | 0.023 | 0.001 | 0.088039 |
| PLXDC2    | 5.97E-06 | 0.16114  | 0.045 | 0.021 | 0.089167 |
| IGFLR1    | 6.38E-06 | 0.154664 | 0.04  | 0.035 | 0.095352 |
| CD37      | 6.59E-06 | 0.152441 | 0.047 | 0.032 | 0.09852  |
| PLCD1     | 6.64E-06 | 0.141514 | 0.068 | 0.047 | 0.099278 |
| COX7A1    | 6.77E-06 | 0.110894 | 0.016 | 0     | 0.10113  |
| UNC5B     | 6.87E-06 | 0.101044 | 0.052 | 0.033 | 0.1026   |
| FCGR3A    | 7.13E-06 | 0.218767 | 0.083 | 0.048 | 0.106534 |
| FBX02     | 7.24E-06 | 0.102841 | 0.034 | 0.006 | 0.108267 |
| ITGB2     | 7.30E-06 | 0.17026  | 0.064 | 0.063 | 0.109044 |
| SLC9A9    | 7.32E-06 | 0.145107 | 0.058 | 0.026 | 0.109356 |
| GCNT1     | 8.12E-06 | 0.117618 | 0.031 | 0.009 | 0.121304 |
| TCTEX1D1  | 8.68E-06 | 0.137754 | 0.038 | 0.009 | 0.129753 |
| MT1H      | 8.99E-06 | 0.149952 | 0.028 | 0.006 | 0.134318 |
| C10orf107 | 9.40E-06 | 0.13588  | 0.048 | 0.041 | 0.1405   |
| PALMD     | 1.05E-05 | 0.148977 | 0.057 | 0.019 | 0.156981 |
| UPRT      | 1.11E-05 | 0.110623 | 0.085 | 0.079 | 0.16627  |
| CHST9     | 1.17E-05 | -0.10756 | 0.037 | 0.083 | 0.174799 |
| IFI30     | 1.18E-05 | 0.141253 | 0.034 | 0.02  | 0.176353 |
| EGOT      | 1.20E-05 | 0.118417 | 0.022 | 0.002 | 0.179176 |
| C1QTNF3   | 1.37E-05 | -0.16467 | 0.017 | 0.051 | 0.20408  |
| GALNT13   | 1.48E-05 | -0.12261 | 0.037 | 0.079 | 0.220506 |
| DNAH11    | 1.50E-05 | 0.146347 | 0.064 | 0.027 | 0.224176 |
| SLC04A1   | 1.57E-05 | 0.109345 | 0.066 | 0.06  | 0.235309 |
| C2orf74   | 1.90E-05 | 0.218355 | 0.038 | 0.022 | 0.283714 |
| TDRP      | 1.92E-05 | 0.103074 | 0.044 | 0.02  | 0.286514 |
| APOL3     | 1.94E-05 | 0.116445 | 0.04  | 0.014 | 0.289815 |
| C1orf167  | 2.34E-05 | 0.134257 | 0.026 | 0.004 | 0.349034 |
| SPRED3    | 2.49E-05 | 0.130222 | 0.026 | 0.02  | 0.371974 |
| RP11-367J | 2.57E-05 | 0.130116 | 0.027 | 0.009 | 0.384487 |

|           |          |          |       |       |          |
|-----------|----------|----------|-------|-------|----------|
| PIK3IP1   | 2.60E-05 | 0.147756 | 0.051 | 0.026 | 0.387853 |
| RP11-92G1 | 2.74E-05 | 0.179562 | 0.041 | 0.011 | 0.410041 |
| H3F3C     | 2.75E-05 | 0.199928 | 0.069 | 0.048 | 0.41148  |
| LCA5L     | 2.81E-05 | 0.109206 | 0.045 | 0.02  | 0.420486 |
| LST1      | 2.84E-05 | 0.150495 | 0.069 | 0.041 | 0.424745 |
| CDH13     | 3.00E-05 | -0.11652 | 0.053 | 0.101 | 0.447629 |
| NDUFA4L2  | 3.06E-05 | 0.164112 | 0.083 | 0.044 | 0.457205 |
| RIT2      | 3.39E-05 | 0.16458  | 0.096 | 0.096 | 0.506024 |
| ENTPD1    | 3.44E-05 | 0.128547 | 0.041 | 0.022 | 0.514257 |
| RP11-138A | 3.47E-05 | 0.140136 | 0.085 | 0.067 | 0.518924 |
| TMEM163   | 3.50E-05 | 0.114318 | 0.065 | 0.028 | 0.522307 |
| HS3ST1    | 3.50E-05 | 0.121984 | 0.052 | 0.044 | 0.522564 |
| RTP4      | 3.64E-05 | 0.164119 | 0.048 | 0.017 | 0.543904 |
| SLC11A1   | 3.73E-05 | 0.118142 | 0.073 | 0.067 | 0.557052 |
| AC104653  | 4.01E-05 | 0.125821 | 0.018 | 0.004 | 0.599879 |
| RP11-745C | 4.11E-05 | 0.158578 | 0.028 | 0.007 | 0.614619 |
| CA4       | 4.16E-05 | 0.195362 | 0.018 | 0.001 | 0.621147 |
| AC007228  | 4.19E-05 | 0.130635 | 0.039 | 0.023 | 0.625828 |
| CBX7      | 4.30E-05 | 0.105993 | 0.054 | 0.063 | 0.643194 |
| SNCA      | 4.32E-05 | 0.135688 | 0.024 | 0.004 | 0.645783 |
| C10orf11  | 4.36E-05 | 0.12827  | 0.055 | 0.021 | 0.652152 |
| EPSTI1    | 4.50E-05 | -0.14155 | 0.052 | 0.096 | 0.672616 |
| C1orf162  | 4.60E-05 | 0.174068 | 0.062 | 0.028 | 0.687174 |
| IL34      | 4.68E-05 | 0.101369 | 0.028 | 0.007 | 0.699692 |
| CD70      | 4.90E-05 | 0.161037 | 0.037 | 0.011 | 0.732439 |
| CNTNAP3B  | 5.25E-05 | 0.144515 | 0.062 | 0.053 | 0.78424  |
| CCL20     | 5.65E-05 | 0.152972 | 0.034 | 0.01  | 0.844715 |
| FBXL2     | 5.75E-05 | 0.135235 | 0.061 | 0.036 | 0.859471 |
| PAPPA2    | 5.88E-05 | 0.117945 | 0.03  | 0.006 | 0.878385 |
| ADCYAP1R1 | 5.89E-05 | 0.102135 | 0.054 | 0.047 | 0.880203 |
| MSRB3     | 5.89E-05 | 0.130982 | 0.046 | 0.022 | 0.880339 |
| RP11-22N1 | 6.00E-05 | 0.120087 | 0.04  | 0.028 | 0.895897 |
| IQCA1     | 6.06E-05 | 0.124805 | 0.045 | 0.014 | 0.906276 |
| MYBPC1    | 6.35E-05 | 0.220483 | 0.084 | 0.053 | 0.948913 |
| CD53      | 6.43E-05 | 0.166293 | 0.052 | 0.022 | 0.961261 |
| SAMD9L    | 6.58E-05 | 0.112647 | 0.088 | 0.086 | 0.983876 |
| SLC7A11   | 6.65E-05 | 0.105964 | 0.058 | 0.025 | 0.99406  |
| SELPLG    | 6.81E-05 | 0.133001 | 0.034 | 0.017 | 1        |
| ARHGDIB   | 7.35E-05 | 0.175745 | 0.096 | 0.07  | 1        |
| TCEAL5    | 7.46E-05 | 0.102467 | 0.142 | 0.154 | 1        |
| RP11-446N | 7.94E-05 | 0.118171 | 0.021 | 0.006 | 1        |
| LY86      | 8.50E-05 | 0.134391 | 0.033 | 0.028 | 1        |
| IER3      | 8.53E-05 | 0.108368 | 0.088 | 0.084 | 1        |
| DENND2D   | 9.60E-05 | 0.144352 | 0.035 | 0.012 | 1        |
| FAM183A   | 9.61E-05 | 0.120875 | 0.028 | 0.006 | 1        |
| DHRS2     | 9.68E-05 | -0.17175 | 0.002 | 0.016 | 1        |
| NPTX1     | 0.0001   | 0.115273 | 0.022 | 0.005 | 1        |
| TD02      | 0.000101 | 0.102387 | 0.022 | 0.004 | 1        |
| C12orf66  | 0.000102 | 0.120637 | 0.05  | 0.031 | 1        |
| PPM1N     | 0.000104 | 0.121422 | 0.034 | 0.017 | 1        |
| METTL20   | 0.000104 | 0.118055 | 0.044 | 0.047 | 1        |

|           |          |          |       |       |   |
|-----------|----------|----------|-------|-------|---|
| FHIT      | 0.000104 | 0.142705 | 0.096 | 0.08  | 1 |
| PCDHB14   | 0.000105 | 0.125096 | 0.079 | 0.049 | 1 |
| RP1-122K4 | 0.000108 | 0.115214 | 0.016 | 0.005 | 1 |
| DNAH9     | 0.000115 | 0.12554  | 0.062 | 0.036 | 1 |
| AXL       | 0.000117 | 0.160394 | 0.06  | 0.037 | 1 |
| CCDC122   | 0.000125 | 0.107036 | 0.04  | 0.021 | 1 |
| WDR78     | 0.000127 | 0.122876 | 0.042 | 0.028 | 1 |
| CSGALNACT | 0.000131 | 0.12937  | 0.05  | 0.058 | 1 |
| SNHG18    | 0.000138 | 0.137142 | 0.056 | 0.027 | 1 |
| ALPK1     | 0.000139 | 0.113548 | 0.028 | 0.02  | 1 |
| GIMAP2    | 0.000149 | 0.119092 | 0.042 | 0.035 | 1 |
| RP11-434H | 0.000151 | 0.100823 | 0.036 | 0.03  | 1 |
| RP11-834C | 0.000151 | 0.179589 | 0.114 | 0.074 | 1 |
| RRP12     | 0.000153 | 0.116356 | 0.036 | 0.04  | 1 |
| ACY1      | 0.000153 | 0.12373  | 0.028 | 0.019 | 1 |
| AC018647. | 0.00016  | 0.114166 | 0.049 | 0.025 | 1 |
| FXYD1     | 0.000161 | 0.147943 | 0.053 | 0.037 | 1 |
| CDIPT-AS1 | 0.000167 | 0.134407 | 0.027 | 0.006 | 1 |
| TEX29     | 0.000188 | 0.132285 | 0.024 | 0.006 | 1 |
| RP11-499E | 0.000192 | 0.142135 | 0.073 | 0.057 | 1 |
| ACOT11    | 0.000194 | 0.116844 | 0.033 | 0.019 | 1 |
| HSPA2     | 0.0002   | 0.199671 | 0.162 | 0.158 | 1 |
| APOL4     | 0.000213 | 0.106097 | 0.064 | 0.064 | 1 |
| RP3-325F2 | 0.000223 | 0.111055 | 0.028 | 0.01  | 1 |
| PDK4      | 0.000224 | 0.137059 | 0.062 | 0.03  | 1 |
| LYN       | 0.000229 | 0.114561 | 0.056 | 0.056 | 1 |
| MASP1     | 0.000229 | 0.120797 | 0.07  | 0.069 | 1 |
| RASA4     | 0.000249 | 0.114566 | 0.054 | 0.049 | 1 |
| RP11-11N9 | 0.000254 | 0.209369 | 0.069 | 0.035 | 1 |
| GPR37     | 0.000279 | 0.130851 | 0.074 | 0.062 | 1 |
| CSF1R     | 0.000296 | 0.13135  | 0.036 | 0.023 | 1 |
| TMEM144   | 0.000318 | 0.139537 | 0.039 | 0.019 | 1 |
| DEPTOR    | 0.000322 | 0.100844 | 0.02  | 0.007 | 1 |
| UNC79     | 0.000327 | 0.108073 | 0.033 | 0.026 | 1 |
| TMEM255B  | 0.000328 | 0.125944 | 0.028 | 0.011 | 1 |
| LINC0032C | 0.000363 | 0.132309 | 0.022 | 0.005 | 1 |
| CLN3      | 0.000377 | 0.210993 | 0.022 | 0.005 | 1 |
| SLC38A5   | 0.000383 | 0.104855 | 0.023 | 0.006 | 1 |
| SLC14A1   | 0.000392 | 0.135017 | 0.027 | 0.01  | 1 |
| SULT1A1   | 0.000394 | 0.140744 | 0.033 | 0.016 | 1 |
| CCL5      | 0.000398 | 0.100927 | 0.031 | 0.016 | 1 |
| PDGFRL    | 0.00043  | 0.127931 | 0.038 | 0.02  | 1 |
| CLEC18B   | 0.000441 | 0.131752 | 0.033 | 0.02  | 1 |
| DAB2      | 0.000446 | 0.130639 | 0.062 | 0.033 | 1 |
| MAPK4     | 0.000452 | 0.100387 | 0.048 | 0.042 | 1 |
| TNS1      | 0.000477 | 0.107585 | 0.048 | 0.043 | 1 |
| SLC16A7   | 0.000497 | 0.108764 | 0.047 | 0.02  | 1 |
| MS4A6A    | 0.000545 | 0.156467 | 0.075 | 0.058 | 1 |
| EFNA3     | 0.000548 | 0.100445 | 0.054 | 0.033 | 1 |
| TNFAIP8   | 0.000585 | 0.146973 | 0.042 | 0.027 | 1 |
| CCK       | 0.000592 | 0.115899 | 0.019 | 0.002 | 1 |

|           |          |          |       |       |   |
|-----------|----------|----------|-------|-------|---|
| HIST1H2BC | 0.000651 | 0.135622 | 0.053 | 0.031 | 1 |
| RP11-138A | 0.000666 | 0.113615 | 0.11  | 0.094 | 1 |
| HIST1H2BJ | 0.000753 | -0.18312 | 0.021 | 0.049 | 1 |
| SMIM5     | 0.000763 | 0.118044 | 0.022 | 0.006 | 1 |
| FABP3     | 0.000946 | 0.129311 | 0.032 | 0.01  | 1 |
| LINC00632 | 0.000978 | -0.10789 | 0.092 | 0.137 | 1 |
| ETV7      | 0.001035 | 0.108276 | 0.025 | 0.011 | 1 |
| SUSD4     | 0.001127 | 0.139862 | 0.071 | 0.048 | 1 |
| TMEM44-AS | 0.001169 | 0.101287 | 0.038 | 0.03  | 1 |
| RP11-46H1 | 0.001171 | 0.136713 | 0.033 | 0.012 | 1 |
| FCGR2A    | 0.001185 | 0.17051  | 0.052 | 0.03  | 1 |
| TUBB3     | 0.001242 | 0.115786 | 0.008 | 0     | 1 |
| MGMT      | 0.001276 | 0.211776 | 0.098 | 0.064 | 1 |
| AC015987. | 0.001318 | 0.108518 | 0.023 | 0.007 | 1 |
| RP11-244H | 0.001372 | 0.106866 | 0.021 | 0.007 | 1 |
| NAA60     | 0.001442 | 0.175053 | 0.025 | 0.006 | 1 |
| AC069363. | 0.001521 | 0.179098 | 0.039 | 0.019 | 1 |
| LRRC69    | 0.001528 | 0.110079 | 0.033 | 0.036 | 1 |
| MILR1     | 0.001653 | 0.147773 | 0.038 | 0.023 | 1 |
| GLDN      | 0.001931 | 0.12641  | 0.021 | 0.005 | 1 |
| AC006946. | 0.002043 | 0.10305  | 0.017 | 0.004 | 1 |
| C3AR1     | 0.002233 | 0.122113 | 0.033 | 0.012 | 1 |
| C10orf35  | 0.00226  | 0.141543 | 0.072 | 0.041 | 1 |
| ACSM5     | 0.002308 | 0.122885 | 0.019 | 0.004 | 1 |
| CALB1     | 0.002328 | 0.222655 | 0.03  | 0.011 | 1 |
| LINC00623 | 0.002361 | 0.177626 | 0.022 | 0.009 | 1 |
| MAF       | 0.002599 | 0.128984 | 0.068 | 0.067 | 1 |
| FAM50B    | 0.002867 | 0.130993 | 0.053 | 0.026 | 1 |
| FST       | 0.002886 | 0.111166 | 0.038 | 0.025 | 1 |
| C10orf54  | 0.003172 | 0.113633 | 0.068 | 0.04  | 1 |
| FAM178B   | 0.0032   | 0.102203 | 0.019 | 0.005 | 1 |
| ZNF665    | 0.003412 | 0.115014 | 0.038 | 0.022 | 1 |
| S100A8    | 0.003452 | 0.16409  | 0.043 | 0.036 | 1 |
| AMT       | 0.003733 | 0.108383 | 0.046 | 0.04  | 1 |
| YPEL4     | 0.004081 | 0.115642 | 0.043 | 0.02  | 1 |
| TSIX      | 0.004159 | 0.116723 | 0.031 | 0.02  | 1 |
| LINC00987 | 0.004691 | 0.10677  | 0.014 | 0.004 | 1 |
| STEAP2    | 0.004947 | 0.133217 | 0.034 | 0.021 | 1 |
| MS4A4A    | 0.005264 | 0.135124 | 0.046 | 0.025 | 1 |
| CLDN11    | 0.005287 | 0.200949 | 0.031 | 0.021 | 1 |
| IFI27     | 0.005313 | 0.152936 | 0.118 | 0.09  | 1 |
| ANKRD65   | 0.005589 | -0.104   | 0.024 | 0.046 | 1 |
| SGIP1     | 0.005669 | 0.118392 | 0.055 | 0.044 | 1 |
| LRAT      | 0.005732 | 0.114043 | 0.028 | 0.025 | 1 |
| LUC7L2    | 0.006701 | 0.114891 | 0.015 | 0.002 | 1 |
| LINC01114 | 0.006879 | 0.125233 | 0.07  | 0.052 | 1 |
| THTPA     | 0.007311 | 0.124201 | 0.019 | 0.005 | 1 |
| FLNC      | 0.008195 | 0.100581 | 0.059 | 0.049 | 1 |
| HCST      | 0.00863  | 0.123628 | 0.043 | 0.028 | 1 |
| GNG11     | 0.008984 | 0.134575 | 0.084 | 0.09  | 1 |
| NUDT7     | 0.009975 | 0.110433 | 0.053 | 0.035 | 1 |

|           |          |          |       |       |   |
|-----------|----------|----------|-------|-------|---|
| MSC       | 0.01253  | 0.12488  | 0.018 | 0.011 | 1 |
| EAF1-AS1  | 0.01504  | 0.109916 | 0.02  | 0.011 | 1 |
| MIR7-3HG  | 0.018101 | 0.106619 | 0.022 | 0.011 | 1 |
| RP11-284F | 0.023702 | 0.113077 | 0.02  | 0.007 | 1 |
| HSPA6     | 0.025611 | 0.211165 | 0.074 | 0.063 | 1 |
| KRBOX1    | 0.030784 | 0.133325 | 0.013 | 0.004 | 1 |
| NMNAT3    | 0.033196 | 0.101401 | 0.06  | 0.044 | 1 |
| ZBTB16    | 0.048086 | 0.13746  | 0.199 | 0.174 | 1 |
| STC2      | 0.050683 | 0.101784 | 0.079 | 0.06  | 1 |
| FOLR2     | 0.05756  | 0.12173  | 0.028 | 0.023 | 1 |
| IFI44L    | 0.110566 | -0.10357 | 0.076 | 0.099 | 1 |
| PCP4      | 0.15449  | 0.121483 | 0.059 | 0.057 | 1 |
