# Supplementary material for: A Novel Molecular Classification Method for Glioblastoma Based on Tumor Cell Differentiation Trajectories
Source: Hindawi journal article supplement (doi:10.1155/2023/2826815), 2023-02-22
Supplement: f9 [file 2826815.f9.pdf]

|           | p_val | avg_logFC | pct.1 | pct.2 | p_val_adj |
|-----------|-------|-----------|-------|-------|-----------|
| FTL       | ##### | 0.855064  | 0.956 | 0.981 | #####     |
| MALAT1    | ##### | 0.619855  | 0.991 | 0.988 | #####     |
| UBE2T     | ##### | -1.54966  | 0.01  | 0.835 | #####     |
| UBE2C     | ##### | -1.86966  | 0.01  | 0.833 | #####     |
| NUSAP1    | ##### | -1.67432  | 0.01  | 0.814 | #####     |
| FAU       | ##### | 0.72561   | 0.892 | 0.969 | #####     |
| HMGB2     | ##### | -1.18078  | 0.187 | 0.977 | #####     |
| ATP6V1G1  | ##### | 0.571737  | 0.534 | 0.84  | #####     |
| LAMTOR4   | ##### | 0.527485  | 0.513 | 0.848 | #####     |
| PBK       | ##### | -1.47489  | 0.016 | 0.802 | #####     |
| SKP1      | ##### | 0.719564  | 0.798 | 0.936 | #####     |
| MAD2L1    | ##### | -1.24951  | 0.03  | 0.814 | #####     |
| SMC4      | ##### | -1.21794  | 0.063 | 0.859 | #####     |
| SOD1      | ##### | 0.625973  | 0.604 | 0.863 | #####     |
| NUDT1     | ##### | -0.49446  | 0.138 | 0.842 | #####     |
| GABARAPL2 | ##### | 0.524424  | 0.541 | 0.857 | #####     |
| TOP2A     | ##### | -1.70301  | 0.007 | 0.785 | #####     |
| TOMM7     | ##### | 0.64552   | 0.695 | 0.915 | #####     |
| NDUFA1    | ##### | 0.565595  | 0.473 | 0.789 | #####     |
| ATP6V1F   | ##### | 0.484144  | 0.482 | 0.852 | #####     |
| LAMTOR5   | ##### | 0.584446  | 0.496 | 0.806 | #####     |
| NHP2      | ##### | 0.331539  | 0.373 | 0.798 | #####     |
| DEK       | ##### | -0.98403  | 0.113 | 0.87  | #####     |
| BIRC5     | ##### | -1.61729  | 0.021 | 0.809 | #####     |
| ATP5G1    | ##### | 0.417532  | 0.412 | 0.805 | #####     |
| MYEOV2    | ##### | 0.210523  | 0.377 | 0.836 | #####     |
| BANF1     | ##### | 0.225275  | 0.442 | 0.873 | #####     |
| NDUFB2    | ##### | 0.54648   | 0.639 | 0.905 | #####     |
| EDF1      | ##### | 0.369434  | 0.517 | 0.886 | #####     |
| H2AFV     | ##### | -0.75718  | 0.192 | 0.925 | #####     |
| LSM3      | ##### | -0.16056  | 0.267 | 0.863 | #####     |
| ATP5J     | ##### | 0.460537  | 0.558 | 0.88  | #####     |
| CENPF     | ##### | -1.70872  | 0.005 | 0.772 | #####     |
| TYMS      | ##### | -1.20758  | 0.037 | 0.802 | #####     |
| PSMB6     | ##### | 0.372491  | 0.459 | 0.852 | #####     |
| POLR2J    | ##### | 0.348674  | 0.475 | 0.878 | #####     |
| WDR83OS   | ##### | 0.651661  | 0.545 | 0.828 | #####     |
| OST4      | ##### | 0.455976  | 0.524 | 0.852 | #####     |
| COMMD6    | ##### | 0.486434  | 0.478 | 0.823 | #####     |
| ATP5I     | ##### | 0.387681  | 0.511 | 0.869 | #####     |
| NDUFB3    | ##### | 0.328162  | 0.305 | 0.743 | #####     |
| CENPU     | ##### | -1.31091  | 0.012 | 0.772 | #####     |
| CNBP      | ##### | 0.461281  | 0.553 | 0.891 | #####     |
| DTYMK     | ##### | -0.9027   | 0.103 | 0.842 | #####     |
| PTTG1     | ##### | -1.50897  | 0.047 | 0.831 | #####     |
| SNRPB2    | ##### | 0.194043  | 0.309 | 0.772 | #####     |
| SELK      | ##### | 0.203144  | 0.4   | 0.862 | #####     |
| PRMT1     | ##### | 0.292366  | 0.366 | 0.805 | #####     |
| NDUFA13   | ##### | 0.583092  | 0.632 | 0.862 | #####     |
| ATP6VOE1  | ##### | 0.735391  | 0.473 | 0.726 | #####     |

|           |       |          |       |       |       |
|-----------|-------|----------|-------|-------|-------|
| PRDX5     | ##### | 0.605042 | 0.532 | 0.799 | ##### |
| TRMT112   | ##### | 0.484959 | 0.445 | 0.802 | ##### |
| SPCS1     | ##### | 0.473212 | 0.496 | 0.84  | ##### |
| CSNK2B    | ##### | 0.117203 | 0.29  | 0.81  | ##### |
| CHMP2A    | ##### | 0.715312 | 0.49  | 0.763 | ##### |
| LSM5      | ##### | -0.45287 | 0.209 | 0.88  | ##### |
| COX6A1    | ##### | 0.444482 | 0.681 | 0.931 | ##### |
| ATP5L     | ##### | 0.443383 | 0.63  | 0.92  | ##### |
| ATP5G2    | ##### | 0.575032 | 0.691 | 0.914 | ##### |
| TMEM258   | ##### | 0.413893 | 0.489 | 0.847 | ##### |
| CIRBP     | ##### | 0.542592 | 0.742 | 0.94  | ##### |
| SEC62     | ##### | 0.364927 | 0.419 | 0.802 | ##### |
| UBL5      | ##### | 0.587437 | 0.684 | 0.896 | ##### |
| SMC2      | ##### | -1.06846 | 0.042 | 0.78  | ##### |
| SNRPD1    | ##### | -0.14322 | 0.277 | 0.858 | ##### |
| SNRPD2    | ##### | 0.534504 | 0.606 | 0.896 | ##### |
| PFDN5     | ##### | 0.63721  | 0.695 | 0.906 | ##### |
| KIAA0101  | ##### | -1.41108 | 0.016 | 0.769 | ##### |
| COX4I1    | ##### | 0.644069 | 0.766 | 0.941 | ##### |
| FAM96B    | ##### | 0.242157 | 0.36  | 0.816 | ##### |
| ATP50     | ##### | 0.348416 | 0.508 | 0.893 | ##### |
| NDUFS8    | ##### | 0.253621 | 0.358 | 0.804 | ##### |
| NDUFC2    | ##### | 0.376513 | 0.518 | 0.88  | ##### |
| MGST3     | ##### | 0.621527 | 0.476 | 0.783 | ##### |
| COX6B1    | ##### | 0.610492 | 0.688 | 0.906 | ##### |
| ATRAID    | ##### | 0.453345 | 0.412 | 0.79  | ##### |
| SSB       | ##### | 0.365826 | 0.384 | 0.801 | ##### |
| UQCRH     | ##### | 0.347527 | 0.569 | 0.927 | ##### |
| COX7C     | ##### | 0.650596 | 0.77  | 0.938 | ##### |
| EIF1      | ##### | 0.647822 | 0.899 | 0.983 | ##### |
| PARK7     | ##### | 0.458437 | 0.611 | 0.906 | ##### |
| VBP1      | ##### | -0.18592 | 0.222 | 0.825 | ##### |
| HSBP1     | ##### | 0.383168 | 0.492 | 0.874 | ##### |
| C4orf3    | ##### | 0.549982 | 0.36  | 0.704 | ##### |
| ERH       | ##### | 0.229764 | 0.504 | 0.914 | ##### |
| SAP18     | ##### | 0.437779 | 0.524 | 0.878 | ##### |
| ZNHIT1    | ##### | 0.498824 | 0.466 | 0.812 | ##### |
| POLR2I    | ##### | 0.399214 | 0.387 | 0.791 | ##### |
| NDUFA6    | ##### | 0.279839 | 0.386 | 0.817 | ##### |
| BUD31     | ##### | 0.163904 | 0.386 | 0.853 | ##### |
| NDUFB9    | ##### | 0.305421 | 0.468 | 0.86  | ##### |
| PSMB3     | ##### | 0.328837 | 0.431 | 0.842 | ##### |
| PRDX4     | ##### | 0.356052 | 0.326 | 0.721 | ##### |
| CNPY2     | ##### | 0.235021 | 0.328 | 0.767 | ##### |
| ATP6VOB   | ##### | 0.288455 | 0.421 | 0.828 | ##### |
| TIMM8B    | ##### | 0.182622 | 0.295 | 0.754 | ##### |
| CYC1      | ##### | -0.14295 | 0.248 | 0.825 | ##### |
| LINC00493 | ##### | 0.195238 | 0.244 | 0.696 | ##### |
| SEC61B    | ##### | 0.391716 | 0.475 | 0.831 | ##### |
| DAD1      | ##### | 0.517484 | 0.476 | 0.82  | ##### |
| SPCS2     | ##### | 0.425515 | 0.518 | 0.872 | ##### |

|          |       |          |       |       |       |
|----------|-------|----------|-------|-------|-------|
| RHOA     | ##### | 0.224301 | 0.417 | 0.857 | ##### |
| BRK1     | ##### | 0.367821 | 0.515 | 0.873 | ##### |
| CLTA     | ##### | -0.18297 | 0.225 | 0.822 | ##### |
| BTF3     | ##### | 0.574653 | 0.78  | 0.954 | ##### |
| AP2M1    | ##### | 0.226158 | 0.447 | 0.862 | ##### |
| POLR2L   | ##### | 0.318213 | 0.455 | 0.847 | ##### |
| U2AF1    | ##### | -0.28028 | 0.274 | 0.875 | ##### |
| UQCRQ    | ##### | 0.433135 | 0.63  | 0.915 | ##### |
| PEBP1    | ##### | 0.509483 | 0.688 | 0.932 | ##### |
| TMBIM6   | ##### | 0.488419 | 0.623 | 0.893 | ##### |
| NDUFS5   | ##### | 0.585095 | 0.724 | 0.93  | ##### |
| GGH      | ##### | -0.86283 | 0.098 | 0.822 | ##### |
| ASNA1    | ##### | 0.13513  | 0.262 | 0.74  | ##### |
| COPS6    | ##### | 0.186739 | 0.391 | 0.859 | ##### |
| BLOC1S1  | ##### | 0.295307 | 0.36  | 0.783 | ##### |
| PYURF    | ##### | -0.1761  | 0.215 | 0.775 | ##### |
| SRP14    | ##### | 0.390844 | 0.64  | 0.93  | ##### |
| ARPC3    | ##### | 0.303428 | 0.419 | 0.817 | ##### |
| PPIB     | ##### | 0.509078 | 0.468 | 0.801 | ##### |
| SHFM1    | ##### | 0.343039 | 0.515 | 0.884 | ##### |
| SERF2    | ##### | 0.555441 | 0.703 | 0.914 | ##### |
| NACA     | ##### | 0.553408 | 0.785 | 0.962 | ##### |
| ROMO1    | ##### | 0.213684 | 0.372 | 0.802 | ##### |
| DYNLRB1  | ##### | 0.240256 | 0.405 | 0.826 | ##### |
| TCEB2    | ##### | 0.397703 | 0.623 | 0.911 | ##### |
| MRFAP1   | ##### | 0.117084 | 0.431 | 0.885 | ##### |
| NDUFB7   | ##### | 0.492493 | 0.581 | 0.869 | ##### |
| MT1X     | ##### | 1.318041 | 0.576 | 0.614 | ##### |
| TMA7     | ##### | 0.461077 | 0.674 | 0.914 | ##### |
| KDELR2   | ##### | -0.48192 | 0.164 | 0.812 | ##### |
| RBX1     | ##### | 0.162454 | 0.36  | 0.825 | ##### |
| UBE2I    | ##### | -0.39383 | 0.197 | 0.827 | ##### |
| ILF2     | ##### | -0.29102 | 0.286 | 0.902 | ##### |
| ATP5J2   | ##### | 0.413418 | 0.621 | 0.922 | ##### |
| FKBP8    | ##### | 0.282639 | 0.344 | 0.754 | ##### |
| FKBP1A   | ##### | 0.233501 | 0.393 | 0.81  | ##### |
| ZNF428   | ##### | -0.12462 | 0.318 | 0.868 | ##### |
| SSBP1    | ##### | 0.228079 | 0.387 | 0.847 | ##### |
| PRDX1    | ##### | 0.690556 | 0.665 | 0.868 | ##### |
| LSM2     | ##### | -0.31245 | 0.147 | 0.743 | ##### |
| SSR2     | ##### | 0.197644 | 0.431 | 0.869 | ##### |
| TMEM59   | ##### | 0.395084 | 0.482 | 0.854 | ##### |
| NDUFA12  | ##### | 0.305568 | 0.337 | 0.788 | ##### |
| GNB2L1   | ##### | 0.674312 | 0.916 | 0.979 | ##### |
| C12orf57 | ##### | 0.290936 | 0.401 | 0.828 | ##### |
| RPA3     | ##### | -0.53238 | 0.131 | 0.806 | ##### |
| PCNP     | ##### | 0.14682  | 0.283 | 0.754 | ##### |
| SAT2     | ##### | 0.55429  | 0.36  | 0.689 | ##### |
| ANP32B   | ##### | -0.72036 | 0.11  | 0.81  | ##### |
| CUTA     | ##### | 0.270521 | 0.398 | 0.814 | ##### |
| PAFAH1B3 | ##### | -0.16357 | 0.243 | 0.828 | ##### |

|          |       |          |       |       |       |
|----------|-------|----------|-------|-------|-------|
| SON      | ##### | 0.198451 | 0.408 | 0.848 | ##### |
| HNRNPR   | ##### | -0.31628 | 0.239 | 0.847 | ##### |
| MYL12B   | ##### | 0.325461 | 0.4   | 0.804 | ##### |
| STRA13   | ##### | -0.26071 | 0.169 | 0.769 | ##### |
| PDAP1    | ##### | -0.10746 | 0.265 | 0.821 | ##### |
| PGK1     | ##### | 0.62539  | 0.49  | 0.804 | ##### |
| TBCB     | ##### | 0.236086 | 0.435 | 0.864 | ##### |
| KRT10    | ##### | -0.28173 | 0.23  | 0.811 | ##### |
| H2AFX    | ##### | -1.21685 | 0.045 | 0.783 | ##### |
| RWDD1    | ##### | 0.339522 | 0.309 | 0.72  | ##### |
| GPX1     | ##### | 0.180901 | 0.396 | 0.84  | ##### |
| SSR4     | ##### | 0.509033 | 0.487 | 0.815 | ##### |
| GSTP1    | ##### | 0.463365 | 0.653 | 0.923 | ##### |
| H2AFY    | ##### | -0.54488 | 0.215 | 0.878 | ##### |
| SNRPB    | ##### | -0.47599 | 0.248 | 0.894 | ##### |
| SRSF2    | ##### | -0.57672 | 0.215 | 0.878 | ##### |
| SRP9     | ##### | 0.119661 | 0.475 | 0.919 | ##### |
| C14orf2  | ##### | 0.15553  | 0.389 | 0.851 | ##### |
| HMG1     | ##### | -0.58416 | 0.267 | 0.923 | ##### |
| PRDX2    | ##### | 0.529363 | 0.716 | 0.932 | ##### |
| TTC3     | ##### | -0.19487 | 0.229 | 0.805 | ##### |
| PIN1     | ##### | -0.30953 | 0.237 | 0.84  | ##### |
| COX6C    | ##### | 0.513616 | 0.712 | 0.923 | ##### |
| CCT3     | ##### | 0.187868 | 0.366 | 0.827 | ##### |
| PSMA3    | ##### | 0.139259 | 0.213 | 0.691 | ##### |
| BSG      | ##### | 0.401123 | 0.635 | 0.915 | ##### |
| RBMX     | ##### | -0.32708 | 0.286 | 0.901 | ##### |
| ZFAS1    | ##### | 0.297772 | 0.462 | 0.856 | ##### |
| UQCR10   | ##### | 0.214302 | 0.443 | 0.86  | ##### |
| PSMD8    | ##### | 0.236788 | 0.443 | 0.873 | ##### |
| TPT1     | ##### | 0.667526 | 0.873 | 0.959 | ##### |
| HNRNPA0  | ##### | -0.36264 | 0.271 | 0.894 | ##### |
| PSMB5    | ##### | 0.28278  | 0.417 | 0.847 | ##### |
| RPAIN    | ##### | -0.10712 | 0.237 | 0.799 | ##### |
| MAD2L2   | ##### | -0.67508 | 0.136 | 0.819 | ##### |
| ENY2     | ##### | 0.151805 | 0.318 | 0.786 | ##### |
| CYCS     | ##### | 0.138254 | 0.483 | 0.931 | ##### |
| HMGB3    | ##### | -0.81066 | 0.108 | 0.823 | ##### |
| EEF1B2   | ##### | 0.149735 | 0.445 | 0.89  | ##### |
| DUT      | ##### | -0.77434 | 0.12  | 0.819 | ##### |
| TBCA     | ##### | 0.353706 | 0.562 | 0.9   | ##### |
| HNRNPM   | ##### | -0.53204 | 0.175 | 0.84  | ##### |
| KHDRBS1  | ##### | -0.56973 | 0.164 | 0.84  | ##### |
| CAPZA2   | ##### | 0.160633 | 0.335 | 0.816 | ##### |
| RNA5H2A  | ##### | -0.85059 | 0.075 | 0.774 | ##### |
| C19orf43 | ##### | -0.29667 | 0.297 | 0.891 | ##### |
| NDUFA11  | ##### | 0.345521 | 0.51  | 0.862 | ##### |
| TPI1     | ##### | 0.569972 | 0.766 | 0.953 | ##### |
| RANBP1   | ##### | -0.37773 | 0.298 | 0.931 | ##### |
| HNRNPC   | ##### | 0.33958  | 0.532 | 0.899 | ##### |
| CLU      | ##### | 1.015751 | 0.838 | 0.828 | ##### |

|          |       |          |       |       |       |
|----------|-------|----------|-------|-------|-------|
| PSMB1    | ##### | 0.300971 | 0.452 | 0.853 | ##### |
| SRSF5    | ##### | 0.14919  | 0.333 | 0.802 | ##### |
| OCIAD1   | ##### | 0.357255 | 0.433 | 0.806 | ##### |
| 15-Sep   | ##### | 0.440114 | 0.353 | 0.707 | ##### |
| SLC25A3  | ##### | 0.238364 | 0.45  | 0.868 | ##### |
| RHEB     | ##### | -0.35478 | 0.318 | 0.926 | ##### |
| MDH2     | ##### | 0.277588 | 0.438 | 0.849 | ##### |
| PARP1    | ##### | -0.38874 | 0.175 | 0.802 | ##### |
| SF3B2    | ##### | -0.14399 | 0.222 | 0.777 | ##### |
| CKLF     | ##### | -0.33488 | 0.152 | 0.762 | ##### |
| RABAC1   | ##### | 0.481489 | 0.457 | 0.799 | ##### |
| CALM3    | ##### | -0.63839 | 0.195 | 0.883 | ##### |
| HSD17B10 | ##### | 0.317116 | 0.302 | 0.735 | ##### |
| COPE     | ##### | 0.472015 | 0.6   | 0.889 | ##### |
| C11orf58 | ##### | 0.245369 | 0.447 | 0.84  | ##### |
| NONO     | ##### | -0.20646 | 0.215 | 0.807 | ##### |
| SEC11A   | ##### | 0.379541 | 0.319 | 0.716 | ##### |
| DBI      | ##### | 0.734477 | 0.867 | 0.957 | ##### |
| GNB2     | ##### | -0.46197 | 0.202 | 0.838 | ##### |
| RBM8A    | ##### | 0.114505 | 0.344 | 0.822 | ##### |
| PA2G4    | ##### | -0.1812  | 0.227 | 0.804 | ##### |
| H3F3B    | ##### | 0.530411 | 0.911 | 0.981 | ##### |
| RCN2     | ##### | -0.36354 | 0.199 | 0.801 | ##### |
| GPM6B    | ##### | 0.57405  | 0.794 | 0.937 | ##### |
| USMG5    | ##### | 0.195678 | 0.277 | 0.728 | ##### |
| GLUL     | ##### | 0.836277 | 0.508 | 0.732 | ##### |
| NAA38    | ##### | 0.164672 | 0.265 | 0.757 | ##### |
| RNPS1    | ##### | -0.19504 | 0.264 | 0.831 | ##### |
| SLC25A6  | ##### | 0.36642  | 0.635 | 0.927 | ##### |
| TMEM14C  | ##### | 0.145725 | 0.253 | 0.715 | ##### |
| ARHGDI1A | ##### | -0.20498 | 0.188 | 0.742 | ##### |
| HNRNPA3  | ##### | -0.23859 | 0.25  | 0.838 | ##### |
| COX7A2   | ##### | 0.24066  | 0.567 | 0.928 | ##### |
| SF3B5    | ##### | 0.103857 | 0.286 | 0.765 | ##### |
| CACYBP   | ##### | -0.26431 | 0.211 | 0.814 | ##### |
| ACTG1    | ##### | 0.541503 | 0.92  | 0.981 | ##### |
| FAM64A   | ##### | -1.49073 | 0.005 | 0.717 | ##### |
| RTN4     | ##### | -0.319   | 0.309 | 0.888 | ##### |
| ST13     | ##### | 0.133205 | 0.36  | 0.828 | ##### |
| PNISR    | ##### | 0.230936 | 0.405 | 0.83  | ##### |
| YWHAH    | ##### | -0.65152 | 0.136 | 0.81  | ##### |
| MORF4L1  | ##### | 0.189757 | 0.417 | 0.846 | ##### |
| HNRNPU   | ##### | -0.25571 | 0.225 | 0.821 | ##### |
| HNRNPK   | ##### | 0.334498 | 0.634 | 0.938 | ##### |
| COA3     | ##### | 0.300641 | 0.269 | 0.691 | ##### |
| PPIG     | ##### | -0.16732 | 0.202 | 0.777 | ##### |
| NDUFA4   | ##### | 0.564833 | 0.857 | 0.975 | ##### |
| POP7     | ##### | -0.49395 | 0.122 | 0.759 | ##### |
| TIMM13   | ##### | 0.336262 | 0.405 | 0.772 | ##### |
| SEPW1    | ##### | 0.423361 | 0.483 | 0.841 | ##### |
| TCP1     | ##### | -0.35195 | 0.204 | 0.822 | ##### |

|          |       |          |       |       |       |
|----------|-------|----------|-------|-------|-------|
| COX5B    | ##### | 0.481298 | 0.696 | 0.916 | ##### |
| SLC25A5  | ##### | 0.263837 | 0.483 | 0.896 | ##### |
| CENPK    | ##### | -1.16653 | 0.01  | 0.71  | ##### |
| PHPT1    | ##### | 0.313104 | 0.447 | 0.848 | ##### |
| CSNK1A1  | ##### | -0.31135 | 0.204 | 0.786 | ##### |
| LSM4     | ##### | -0.59582 | 0.239 | 0.904 | ##### |
| ATP5G3   | ##### | 0.226426 | 0.468 | 0.884 | ##### |
| RNF7     | ##### | 0.363487 | 0.265 | 0.649 | ##### |
| PHB      | ##### | 0.193939 | 0.34  | 0.773 | ##### |
| ATP5A1   | ##### | 0.416302 | 0.468 | 0.831 | ##### |
| NDUFB11  | ##### | 0.18977  | 0.48  | 0.902 | ##### |
| RAD21    | ##### | -0.71424 | 0.119 | 0.806 | ##### |
| DRAP1    | ##### | 0.114353 | 0.349 | 0.796 | ##### |
| HNRNPAB  | ##### | -0.64497 | 0.101 | 0.758 | ##### |
| FKBP3    | ##### | 0.169482 | 0.302 | 0.77  | ##### |
| RALY     | ##### | -0.90309 | 0.094 | 0.798 | ##### |
| POMP     | ##### | 0.186535 | 0.389 | 0.838 | ##### |
| LMAN2    | ##### | 0.20465  | 0.298 | 0.743 | ##### |
| NASP     | ##### | -0.49687 | 0.159 | 0.815 | ##### |
| YWHAB    | ##### | -0.13366 | 0.346 | 0.869 | ##### |
| FIS1     | ##### | 0.330604 | 0.382 | 0.788 | ##### |
| PFDN2    | ##### | 0.104526 | 0.332 | 0.817 | ##### |
| RDX      | ##### | -0.4942  | 0.19  | 0.827 | ##### |
| C7orf50  | ##### | -0.21405 | 0.22  | 0.799 | ##### |
| ATOX1    | ##### | 0.384837 | 0.344 | 0.71  | ##### |
| GAPDH    | ##### | 0.700238 | 0.991 | 0.996 | ##### |
| NEDD8    | ##### | 0.487388 | 0.557 | 0.848 | ##### |
| NDUFB4   | ##### | 0.379285 | 0.433 | 0.788 | ##### |
| CSTB     | ##### | 0.506338 | 0.361 | 0.691 | ##### |
| C7orf73  | ##### | 0.295593 | 0.337 | 0.746 | ##### |
| ARF1     | ##### | 0.106017 | 0.33  | 0.804 | ##### |
| C11orf31 | ##### | 0.175554 | 0.372 | 0.783 | ##### |
| EIF5B    | ##### | 0.206543 | 0.3   | 0.767 | ##### |
| CAMLG    | ##### | 0.384854 | 0.288 | 0.683 | ##### |
| EIF3K    | ##### | 0.610283 | 0.571 | 0.835 | ##### |
| ATP5C1   | ##### | 0.105362 | 0.262 | 0.733 | ##### |
| SBDS     | ##### | 0.245721 | 0.366 | 0.802 | ##### |
| PPP1CA   | ##### | -0.10399 | 0.202 | 0.722 | ##### |
| EI24     | ##### | -0.24063 | 0.166 | 0.737 | ##### |
| ATP5H    | ##### | 0.259485 | 0.353 | 0.783 | ##### |
| NGFRAP1  | ##### | 0.557967 | 0.771 | 0.953 | ##### |
| CDK1     | ##### | -1.41404 | 0.01  | 0.717 | ##### |
| TXN      | ##### | 0.415764 | 0.469 | 0.817 | ##### |
| NDUFA3   | ##### | 0.189952 | 0.391 | 0.809 | ##### |
| XRN2     | ##### | -0.26449 | 0.15  | 0.731 | ##### |
| SRI      | ##### | 0.556646 | 0.757 | 0.946 | ##### |
| SGOL1    | ##### | -1.26451 | 0.002 | 0.698 | ##### |
| NDUFC1   | ##### | 0.367421 | 0.358 | 0.74  | ##### |
| SMARCA4  | ##### | -0.42618 | 0.136 | 0.748 | ##### |
| SRRM2    | ##### | -0.23279 | 0.229 | 0.795 | ##### |
| EEF1D    | ##### | 0.433233 | 0.611 | 0.911 | ##### |

|           |       |          |       |       |       |
|-----------|-------|----------|-------|-------|-------|
| NDUFB1    | ##### | 0.313461 | 0.389 | 0.79  | ##### |
| HINT1     | ##### | 0.350102 | 0.686 | 0.963 | ##### |
| SRSF9     | ##### | -0.36047 | 0.229 | 0.827 | ##### |
| UBC       | ##### | 0.644027 | 0.862 | 0.97  | ##### |
| RTFDC1    | ##### | -0.1522  | 0.18  | 0.74  | ##### |
| JTB       | ##### | -0.27766 | 0.206 | 0.791 | ##### |
| EIF4H     | ##### | -0.18148 | 0.239 | 0.8   | ##### |
| PDCD5     | ##### | 0.137211 | 0.337 | 0.817 | ##### |
| PCBP1     | ##### | -0.24647 | 0.213 | 0.793 | ##### |
| C1QBP     | ##### | -0.27432 | 0.222 | 0.802 | ##### |
| C14orf166 | ##### | 0.20116  | 0.316 | 0.765 | ##### |
| SET       | ##### | -0.27795 | 0.267 | 0.853 | ##### |
| COX5A     | ##### | -0.11005 | 0.269 | 0.822 | ##### |
| EID1      | ##### | 0.290727 | 0.532 | 0.895 | ##### |
| CLNS1A    | ##### | 0.238942 | 0.25  | 0.686 | ##### |
| COX7A2L   | ##### | 0.387904 | 0.337 | 0.712 | ##### |
| HDAC2     | ##### | -0.56963 | 0.133 | 0.789 | ##### |
| AURKAIP1  | ##### | -0.12344 | 0.279 | 0.817 | ##### |
| POLR2G    | ##### | 0.295829 | 0.344 | 0.759 | ##### |
| SAT1      | ##### | 0.741058 | 0.461 | 0.707 | ##### |
| VAMP2     | ##### | 0.111544 | 0.375 | 0.844 | ##### |
| SELT      | ##### | 0.421482 | 0.354 | 0.714 | ##### |
| PSMD7     | ##### | 0.101167 | 0.218 | 0.699 | ##### |
| C6orf48   | ##### | 0.123785 | 0.375 | 0.842 | ##### |
| NAP1L4    | ##### | -0.33674 | 0.155 | 0.747 | ##### |
| CCT4      | ##### | -0.16024 | 0.243 | 0.822 | ##### |
| CENPH     | ##### | -1.04953 | 0.017 | 0.71  | ##### |
| PKM       | ##### | 0.542042 | 0.642 | 0.878 | ##### |
| HNRNPUL1  | ##### | -0.39617 | 0.12  | 0.725 | ##### |
| EIF3G     | ##### | 0.189272 | 0.332 | 0.768 | ##### |
| LAPTM4A   | ##### | 0.273797 | 0.471 | 0.872 | ##### |
| METTL9    | ##### | -0.25867 | 0.152 | 0.714 | ##### |
| PUF60     | ##### | 0.115806 | 0.298 | 0.763 | ##### |
| MTCH1     | ##### | -0.45942 | 0.15  | 0.774 | ##### |
| MZT2A     | ##### | -0.41607 | 0.141 | 0.756 | ##### |
| NME1      | ##### | 0.101853 | 0.401 | 0.864 | ##### |
| ZWINT     | ##### | -1.23924 | 0.005 | 0.7   | ##### |
| METAP2    | ##### | 0.176954 | 0.253 | 0.711 | ##### |
| TMED9     | ##### | 0.350712 | 0.433 | 0.805 | ##### |
| NDFIP1    | ##### | -0.13751 | 0.243 | 0.781 | ##### |
| COA4      | ##### | 0.109678 | 0.178 | 0.635 | ##### |
| MED10     | ##### | 0.259389 | 0.246 | 0.67  | ##### |
| VPS28     | ##### | 0.430944 | 0.379 | 0.746 | ##### |
| CBX3      | ##### | -0.44904 | 0.248 | 0.879 | ##### |
| DPY30     | ##### | 0.199548 | 0.271 | 0.74  | ##### |
| TRAPPC1   | ##### | 0.412204 | 0.323 | 0.673 | ##### |
| RHOBTB3   | ##### | -0.19524 | 0.253 | 0.826 | ##### |
| ITGAE     | ##### | -0.3016  | 0.129 | 0.707 | ##### |
| EIF3E     | ##### | 0.503077 | 0.394 | 0.746 | ##### |
| ECH1      | ##### | 0.534439 | 0.377 | 0.704 | ##### |
| CD63      | ##### | 0.850906 | 0.866 | 0.9   | ##### |

|          |       |          |       |       |       |
|----------|-------|----------|-------|-------|-------|
| COA1     | ##### | -0.14227 | 0.173 | 0.719 | ##### |
| UBE2E3   | ##### | -0.40431 | 0.187 | 0.811 | ##### |
| TSC22D1  | ##### | 0.207434 | 0.459 | 0.854 | ##### |
| TMED10   | ##### | 0.597332 | 0.396 | 0.674 | ##### |
| NDUFB5   | ##### | 0.219056 | 0.295 | 0.742 | ##### |
| CCDC167  | ##### | -0.38197 | 0.152 | 0.757 | ##### |
| TMSB10   | ##### | 0.642735 | 0.899 | 0.974 | ##### |
| PRPF40A  | ##### | -0.30592 | 0.141 | 0.721 | ##### |
| SKA2     | ##### | -0.68468 | 0.087 | 0.735 | ##### |
| HIGD2A   | ##### | 0.576844 | 0.379 | 0.664 | ##### |
| ANXA5    | ##### | 0.622472 | 0.621 | 0.837 | ##### |
| LAMTOR2  | ##### | 0.272422 | 0.264 | 0.691 | ##### |
| TCEAL4   | ##### | 0.428619 | 0.363 | 0.728 | ##### |
| EWSR1    | ##### | -0.35167 | 0.168 | 0.786 | ##### |
| CCNI     | ##### | -0.22201 | 0.328 | 0.872 | ##### |
| PTOV1    | ##### | -0.39703 | 0.178 | 0.789 | ##### |
| SH3BGRL3 | ##### | 0.663863 | 0.462 | 0.705 | ##### |
| RNF181   | ##### | 0.304137 | 0.23  | 0.642 | ##### |
| EIF3F    | ##### | -0.1409  | 0.215 | 0.767 | ##### |
| PET100   | ##### | 0.20229  | 0.283 | 0.71  | ##### |
| UBXN1    | ##### | 0.113035 | 0.257 | 0.723 | ##### |
| TECR     | ##### | 0.381858 | 0.387 | 0.747 | ##### |
| ATP5B    | ##### | 0.347961 | 0.586 | 0.917 | ##### |
| LDHB     | ##### | 0.531528 | 0.75  | 0.967 | ##### |
| PSMA1    | ##### | 0.393429 | 0.368 | 0.731 | ##### |
| C8orf59  | ##### | -0.10425 | 0.136 | 0.646 | ##### |
| NENF     | ##### | -0.27687 | 0.183 | 0.757 | ##### |
| SLIRP    | ##### | 0.147754 | 0.384 | 0.826 | ##### |
| PRC1     | ##### | -1.25918 | 0.012 | 0.702 | ##### |
| NUCKS1   | ##### | -0.23674 | 0.382 | 0.94  | ##### |
| UQCRC1   | ##### | -0.13994 | 0.195 | 0.747 | ##### |
| CBX1     | ##### | -0.43397 | 0.134 | 0.752 | ##### |
| HNRNPD   | ##### | -0.60125 | 0.141 | 0.778 | ##### |
| B2M      | ##### | 0.7968   | 0.946 | 0.968 | ##### |
| HAX1     | ##### | 0.135583 | 0.204 | 0.66  | ##### |
| SCP2     | ##### | 0.299344 | 0.314 | 0.722 | ##### |
| WBP5     | ##### | 0.328975 | 0.368 | 0.777 | ##### |
| EIF4A2   | ##### | 0.408047 | 0.499 | 0.847 | ##### |
| KTN1     | ##### | -0.38114 | 0.171 | 0.759 | ##### |
| NDUFV2   | ##### | 0.210007 | 0.325 | 0.751 | ##### |
| PGLS     | ##### | -0.20584 | 0.154 | 0.686 | ##### |
| ARPP19   | ##### | -0.16947 | 0.171 | 0.719 | ##### |
| EEF1A1   | ##### | 0.714054 | 0.82  | 0.878 | ##### |
| COPS8    | ##### | 0.111065 | 0.272 | 0.767 | ##### |
| ENO1     | ##### | 0.600737 | 0.696 | 0.895 | ##### |
| SFPQ     | ##### | -0.47536 | 0.225 | 0.854 | ##### |
| MYL6     | ##### | 0.538252 | 0.815 | 0.964 | ##### |
| TMPO     | ##### | -0.99268 | 0.04  | 0.731 | ##### |
| ERGIC3   | ##### | 0.135941 | 0.333 | 0.777 | ##### |
| NUTF2    | ##### | -0.21287 | 0.133 | 0.69  | ##### |
| PSMB7    | ##### | 0.268066 | 0.443 | 0.852 | ##### |



|          |       |          |       |       |       |
|----------|-------|----------|-------|-------|-------|
| OSTC     | ##### | 0.255313 | 0.239 | 0.651 | ##### |
| SOX2     | ##### | -0.19598 | 0.365 | 0.895 | ##### |
| TRA2B    | ##### | -0.19208 | 0.255 | 0.826 | ##### |
| PSMD2    | ##### | -0.16744 | 0.175 | 0.715 | ##### |
| PRELID1  | ##### | -0.33193 | 0.183 | 0.767 | ##### |
| UBE2L3   | ##### | -0.23268 | 0.182 | 0.756 | ##### |
| NDUFA5   | ##### | 0.435452 | 0.415 | 0.788 | ##### |
| UQCRFS1  | ##### | -0.16439 | 0.246 | 0.812 | ##### |
| TMEM106C | ##### | -0.48742 | 0.099 | 0.702 | ##### |
| KIF5B    | ##### | -0.53105 | 0.169 | 0.802 | ##### |
| NOP56    | ##### | -0.35956 | 0.154 | 0.751 | ##### |
| C17orf89 | ##### | -0.39187 | 0.129 | 0.694 | ##### |
| MZT2B    | ##### | -0.49107 | 0.258 | 0.877 | ##### |
| MEAF6    | ##### | 0.181657 | 0.234 | 0.688 | ##### |
| CMC2     | ##### | -0.52231 | 0.091 | 0.705 | ##### |
| RAD23A   | ##### | -0.15951 | 0.267 | 0.806 | ##### |
| ATPIF1   | ##### | 0.272082 | 0.347 | 0.756 | ##### |
| RTF1     | ##### | -0.28144 | 0.148 | 0.712 | ##### |
| KPNB1    | ##### | -0.54639 | 0.152 | 0.794 | ##### |
| NUF2     | ##### | -1.30208 | 0     | 0.669 | ##### |
| SMIM7    | ##### | 0.348051 | 0.323 | 0.728 | ##### |
| C19orf70 | ##### | 0.586903 | 0.393 | 0.667 | ##### |
| FEZ1     | ##### | -0.11237 | 0.25  | 0.784 | ##### |
| CWC15    | ##### | 0.174655 | 0.227 | 0.664 | ##### |
| PSMG2    | ##### | 0.154786 | 0.175 | 0.621 | ##### |
| UQCRB    | ##### | 0.171166 | 0.363 | 0.83  | ##### |
| SDHC     | ##### | 0.499757 | 0.332 | 0.669 | ##### |
| SRSF7    | ##### | -0.15714 | 0.288 | 0.84  | ##### |
| ENOPH1   | ##### | -0.41424 | 0.133 | 0.731 | ##### |
| PSMB2    | ##### | 0.288985 | 0.372 | 0.791 | ##### |
| ATP5F1   | ##### | 0.408317 | 0.41  | 0.773 | ##### |
| MTPN     | ##### | -0.18226 | 0.122 | 0.653 | ##### |
| CFL1     | ##### | 0.482666 | 0.857 | 0.964 | ##### |
| CALU     | ##### | -0.23303 | 0.183 | 0.747 | ##### |
| NCL      | ##### | -0.24336 | 0.239 | 0.811 | ##### |
| YWHAQ    | ##### | -0.34129 | 0.335 | 0.916 | ##### |
| TOMM22   | ##### | -0.10821 | 0.161 | 0.675 | ##### |
| LSM1     | ##### | 0.245441 | 0.241 | 0.66  | ##### |
| GLOD4    | ##### | -0.12245 | 0.154 | 0.673 | ##### |
| TUBB4B   | ##### | -0.70681 | 0.192 | 0.872 | ##### |
| ILF3     | ##### | -0.38389 | 0.157 | 0.763 | ##### |
| UBE2S    | ##### | -1.21228 | 0.089 | 0.812 | ##### |
| STUB1    | ##### | -0.32576 | 0.154 | 0.728 | ##### |
| CKS1B    | ##### | -0.93808 | 0.068 | 0.738 | ##### |
| UBE2D2   | ##### | -0.39767 | 0.216 | 0.815 | ##### |
| COMT     | ##### | 0.12534  | 0.223 | 0.668 | ##### |
| PPM1G    | ##### | -0.69697 | 0.106 | 0.767 | ##### |
| OAZ1     | ##### | 0.408529 | 0.736 | 0.965 | ##### |
| TPX2     | ##### | -1.38009 | 0.009 | 0.69  | ##### |
| ERP29    | ##### | 0.300637 | 0.302 | 0.714 | ##### |
| ARF4     | ##### | 0.281484 | 0.34  | 0.764 | ##### |

|           |       |          |       |       |       |
|-----------|-------|----------|-------|-------|-------|
| ALDOA     | ##### | 0.64692  | 0.742 | 0.89  | ##### |
| TPR       | ##### | -0.27289 | 0.157 | 0.725 | ##### |
| MT2A      | ##### | 0.915263 | 0.848 | 0.889 | ##### |
| EIF5      | ##### | -0.14214 | 0.333 | 0.868 | ##### |
| COX16     | ##### | -0.16771 | 0.178 | 0.716 | ##### |
| MAPRE1    | ##### | -0.34873 | 0.152 | 0.741 | ##### |
| CCT5      | ##### | -0.25158 | 0.202 | 0.791 | ##### |
| HNRNPDL   | ##### | 0.184457 | 0.565 | 0.937 | ##### |
| RSL1D1    | ##### | 0.179513 | 0.208 | 0.658 | ##### |
| CKS2      | ##### | -1.06314 | 0.126 | 0.846 | ##### |
| SRSF3     | ##### | -0.13109 | 0.433 | 0.943 | ##### |
| CAMTA1    | ##### | -0.21037 | 0.173 | 0.707 | ##### |
| GLO1      | ##### | -0.29824 | 0.159 | 0.732 | ##### |
| HSP90AB1  | ##### | 0.287768 | 0.602 | 0.933 | ##### |
| EIF3H     | ##### | 0.277125 | 0.337 | 0.765 | ##### |
| TMEM230   | ##### | 0.288275 | 0.401 | 0.78  | ##### |
| AES       | ##### | -0.15199 | 0.202 | 0.749 | ##### |
| AKR1B1    | ##### | -0.12091 | 0.215 | 0.748 | ##### |
| GPM6A     | ##### | 0.231567 | 0.471 | 0.865 | ##### |
| NFIC      | ##### | -0.35236 | 0.169 | 0.753 | ##### |
| CARHSP1   | ##### | -0.23503 | 0.206 | 0.788 | ##### |
| TMC01     | ##### | 0.421726 | 0.366 | 0.723 | ##### |
| GCSH      | ##### | -0.13723 | 0.154 | 0.653 | ##### |
| HNRNPH3   | ##### | -0.39577 | 0.159 | 0.756 | ##### |
| UXT       | ##### | 0.32721  | 0.279 | 0.684 | ##### |
| PAIP2     | ##### | 0.263397 | 0.346 | 0.764 | ##### |
| DCTN3     | ##### | -0.15185 | 0.243 | 0.802 | ##### |
| CRYAB     | ##### | 1.394409 | 0.56  | 0.506 | ##### |
| SSRP1     | ##### | -0.60082 | 0.108 | 0.749 | ##### |
| ZNF667-AS | ##### | 0.401758 | 0.3   | 0.672 | ##### |
| C19orf53  | ##### | 0.499432 | 0.534 | 0.821 | ##### |
| MIEN1     | ##### | 0.199317 | 0.223 | 0.642 | ##### |
| CCT6A     | ##### | -0.15797 | 0.297 | 0.842 | ##### |
| LAMTOR1   | ##### | 0.246551 | 0.319 | 0.727 | ##### |
| PRRC2C    | ##### | -0.13211 | 0.175 | 0.693 | ##### |
| SMARCB1   | ##### | -0.45063 | 0.131 | 0.728 | ##### |
| EEF2      | ##### | 0.353855 | 0.644 | 0.936 | ##### |
| PCNA      | ##### | -0.72592 | 0.11  | 0.783 | ##### |
| BTG3      | ##### | -0.66853 | 0.119 | 0.774 | ##### |
| TCF4      | ##### | -0.13775 | 0.333 | 0.864 | ##### |
| SUB1      | ##### | 0.210783 | 0.62  | 0.956 | ##### |
| SRSF1     | ##### | -0.27007 | 0.173 | 0.743 | ##### |
| NDUFS2    | ##### | 0.372481 | 0.326 | 0.694 | ##### |
| GDI1      | ##### | -0.12757 | 0.243 | 0.79  | ##### |
| SEC11C    | ##### | 0.132671 | 0.225 | 0.679 | ##### |
| ABI2      | ##### | -0.38583 | 0.15  | 0.736 | ##### |
| MDH1      | ##### | 0.104725 | 0.3   | 0.779 | ##### |
| RAB10     | ##### | -0.22909 | 0.138 | 0.688 | ##### |
| TXNDC17   | ##### | 0.179064 | 0.295 | 0.712 | ##### |
| AUP1      | ##### | -0.17852 | 0.178 | 0.712 | ##### |
| SLC25A11  | ##### | -0.32875 | 0.127 | 0.699 | ##### |

|          |       |          |       |       |       |
|----------|-------|----------|-------|-------|-------|
| TMEM160  | ##### | -0.6943  | 0.112 | 0.76  | ##### |
| CCDC34   | ##### | -0.92049 | 0.042 | 0.696 | ##### |
| CHID1    | ##### | 0.222388 | 0.251 | 0.675 | ##### |
| NDUFA8   | ##### | 0.21463  | 0.234 | 0.674 | ##### |
| ADRM1    | ##### | -0.18393 | 0.195 | 0.733 | ##### |
| PSIP1    | ##### | -0.72275 | 0.14  | 0.817 | ##### |
| TMEM208  | ##### | 0.271882 | 0.237 | 0.651 | ##### |
| C1orf43  | ##### | 0.107701 | 0.269 | 0.726 | ##### |
| MARCKS   | ##### | -0.27397 | 0.312 | 0.87  | ##### |
| COX17    | ##### | 0.19058  | 0.255 | 0.681 | ##### |
| WBSCR22  | ##### | 0.218311 | 0.297 | 0.728 | ##### |
| DYNLL1   | ##### | 0.32602  | 0.695 | 0.964 | ##### |
| DPM2     | ##### | -0.12078 | 0.12  | 0.622 | ##### |
| CD99     | ##### | 0.64906  | 0.483 | 0.674 | ##### |
| EIF4E    | ##### | -0.11024 | 0.178 | 0.698 | ##### |
| USP1     | ##### | -0.70572 | 0.07  | 0.706 | ##### |
| PPP4C    | ##### | -0.34831 | 0.152 | 0.722 | ##### |
| CKAP2    | ##### | -1.19865 | 0.026 | 0.711 | ##### |
| APMAP    | ##### | -0.18104 | 0.157 | 0.678 | ##### |
| CDKN3    | ##### | -1.41946 | 0.003 | 0.665 | ##### |
| PABPC1   | ##### | 0.108627 | 0.384 | 0.849 | ##### |
| ANAPC11  | ##### | 0.209824 | 0.55  | 0.917 | ##### |
| RPN2     | ##### | -0.11357 | 0.297 | 0.819 | ##### |
| ODC1     | ##### | -0.66487 | 0.155 | 0.806 | ##### |
| COX20    | ##### | -0.15036 | 0.208 | 0.759 | ##### |
| KPNA2    | ##### | -1.0728  | 0.089 | 0.795 | ##### |
| BRD2     | ##### | -0.32026 | 0.126 | 0.684 | ##### |
| EIF4A1   | ##### | 0.289498 | 0.628 | 0.937 | ##### |
| FAM32A   | ##### | 0.108808 | 0.213 | 0.684 | ##### |
| MPC1     | ##### | 0.132026 | 0.244 | 0.696 | ##### |
| RAN      | ##### | 0.173782 | 0.579 | 0.947 | ##### |
| PNKD     | ##### | 0.186594 | 0.279 | 0.726 | ##### |
| TMEM205  | ##### | 0.718117 | 0.361 | 0.58  | ##### |
| C9orf142 | ##### | -0.54771 | 0.08  | 0.683 | ##### |
| WSB1     | ##### | 0.242389 | 0.377 | 0.775 | ##### |
| NPM1     | ##### | 0.438399 | 0.686 | 0.938 | ##### |
| SDCBP    | ##### | 0.420781 | 0.412 | 0.742 | ##### |
| HSPE1    | ##### | 0.216865 | 0.538 | 0.902 | ##### |
| SNRNP25  | ##### | -0.22355 | 0.129 | 0.665 | ##### |
| SNRNP70  | ##### | -0.38017 | 0.166 | 0.753 | ##### |
| AP1S1    | ##### | 0.258631 | 0.265 | 0.695 | ##### |
| TPRKB    | ##### | -0.44883 | 0.099 | 0.7   | ##### |
| OAZ2     | ##### | 0.208085 | 0.23  | 0.651 | ##### |
| UFC1     | ##### | 0.286677 | 0.297 | 0.712 | ##### |
| SMS      | ##### | -0.11102 | 0.269 | 0.789 | ##### |
| CD151    | ##### | 0.548966 | 0.342 | 0.605 | ##### |
| PIN4     | ##### | 0.303995 | 0.241 | 0.631 | ##### |
| LMNB1    | ##### | -1.0208  | 0.033 | 0.707 | ##### |
| NUBP2    | ##### | -0.22249 | 0.138 | 0.67  | ##### |
| MATR3    | ##### | -0.36573 | 0.169 | 0.764 | ##### |
| SIVA1    | ##### | -0.11182 | 0.234 | 0.762 | ##### |

|           |       |          |       |       |       |
|-----------|-------|----------|-------|-------|-------|
| NCOR1     | ##### | -0.28838 | 0.175 | 0.728 | ##### |
| PCSK1N    | ##### | -0.34332 | 0.227 | 0.784 | ##### |
| EIF4G2    | ##### | -0.21884 | 0.318 | 0.849 | ##### |
| XRCC5     | ##### | -0.38101 | 0.227 | 0.84  | ##### |
| SF1       | ##### | -0.30441 | 0.185 | 0.753 | ##### |
| NAA10     | ##### | -0.4533  | 0.094 | 0.683 | ##### |
| ATP6AP2   | ##### | 0.219295 | 0.311 | 0.714 | ##### |
| CSDE1     | ##### | -0.18226 | 0.225 | 0.774 | ##### |
| RER1      | ##### | -0.41918 | 0.129 | 0.705 | ##### |
| EIF4A3    | ##### | -0.353   | 0.103 | 0.669 | ##### |
| NAA20     | ##### | 0.121597 | 0.208 | 0.651 | ##### |
| SSNA1     | ##### | -0.35163 | 0.11  | 0.662 | ##### |
| GNB1      | ##### | -0.33196 | 0.113 | 0.664 | ##### |
| DCXR      | ##### | -0.3478  | 0.18  | 0.751 | ##### |
| NELFE     | ##### | -0.22838 | 0.141 | 0.681 | ##### |
| PSMB4     | ##### | 0.248615 | 0.201 | 0.612 | ##### |
| PSMD4     | ##### | 0.116591 | 0.277 | 0.737 | ##### |
| WDR34     | ##### | -0.66493 | 0.066 | 0.677 | ##### |
| PRDX6     | ##### | 0.5532   | 0.489 | 0.751 | ##### |
| UGP2      | ##### | -0.14995 | 0.185 | 0.706 | ##### |
| WRB       | ##### | 0.220796 | 0.236 | 0.665 | ##### |
| SNF8      | ##### | -0.27361 | 0.162 | 0.719 | ##### |
| RAC1      | ##### | -0.14748 | 0.459 | 0.941 | ##### |
| PPP1CC    | ##### | -0.39814 | 0.168 | 0.76  | ##### |
| ISCU      | ##### | -0.14523 | 0.171 | 0.689 | ##### |
| VDAC1     | ##### | 0.2261   | 0.372 | 0.781 | ##### |
| GNAS      | ##### | 0.196631 | 0.497 | 0.893 | ##### |
| GADD45GIF | ##### | -0.11858 | 0.283 | 0.794 | ##### |
| TMEM147   | ##### | 0.22065  | 0.321 | 0.725 | ##### |
| SERP1     | ##### | -0.20262 | 0.19  | 0.736 | ##### |
| TMEM50A   | ##### | 0.13839  | 0.237 | 0.689 | ##### |
| CHCHD5    | ##### | 0.110949 | 0.171 | 0.606 | ##### |
| CBX5      | ##### | -0.38157 | 0.166 | 0.767 | ##### |
| P4HB      | ##### | -0.27398 | 0.218 | 0.769 | ##### |
| EIF1B     | ##### | 0.238354 | 0.339 | 0.78  | ##### |
| ARL5A     | ##### | -0.10743 | 0.182 | 0.695 | ##### |
| AP1S2     | ##### | -0.37948 | 0.147 | 0.723 | ##### |
| PAPOLA    | ##### | -0.13269 | 0.19  | 0.72  | ##### |
| CALD1     | ##### | 0.224671 | 0.318 | 0.746 | ##### |
| DPM3      | ##### | 0.313717 | 0.188 | 0.535 | ##### |
| CNP       | ##### | -0.13645 | 0.15  | 0.665 | ##### |
| QKI       | ##### | -0.18831 | 0.211 | 0.737 | ##### |
| ARL6IP4   | ##### | -0.30093 | 0.216 | 0.781 | ##### |
| LSM14A    | ##### | -0.3222  | 0.122 | 0.681 | ##### |
| SPP1      | ##### | 0.945638 | 0.637 | 0.753 | ##### |
| TAF7      | ##### | 0.330743 | 0.412 | 0.794 | ##### |
| BCAP31    | ##### | 0.332841 | 0.281 | 0.662 | ##### |
| RAB11A    | ##### | 0.249549 | 0.218 | 0.637 | ##### |
| PGRMC1    | ##### | -0.33081 | 0.171 | 0.749 | ##### |
| FXVD6     | ##### | 0.284112 | 0.525 | 0.902 | ##### |
| BTF3L4    | ##### | 0.130156 | 0.243 | 0.694 | ##### |

|          |       |          |       |       |       |
|----------|-------|----------|-------|-------|-------|
| PPP2CA   | ##### | -0.21738 | 0.18  | 0.735 | ##### |
| PTN      | ##### | 0.67554  | 0.827 | 0.916 | ##### |
| BZW1     | ##### | -0.12618 | 0.257 | 0.788 | ##### |
| NBEAL1   | ##### | 0.857737 | 0.447 | 0.625 | ##### |
| DDX39A   | ##### | -0.42198 | 0.175 | 0.786 | ##### |
| RNF5     | ##### | -0.11838 | 0.143 | 0.659 | ##### |
| ELOF1    | ##### | 0.146438 | 0.223 | 0.649 | ##### |
| ARGLU1   | ##### | -0.29137 | 0.166 | 0.714 | ##### |
| C16orf13 | ##### | -0.25774 | 0.145 | 0.686 | ##### |
| CTSB     | ##### | 0.444833 | 0.37  | 0.689 | ##### |
| PSAP     | ##### | 0.396795 | 0.438 | 0.76  | ##### |
| CNN3     | ##### | 0.193366 | 0.417 | 0.822 | ##### |
| PTBP1    | ##### | -0.4393  | 0.087 | 0.659 | ##### |
| TOP1     | ##### | -0.45312 | 0.105 | 0.667 | ##### |
| NPC2     | ##### | 0.869887 | 0.311 | 0.489 | ##### |
| NDUFS4   | ##### | 0.409637 | 0.34  | 0.71  | ##### |
| SYF2     | ##### | 0.312616 | 0.251 | 0.64  | ##### |
| SCAND1   | ##### | -0.29132 | 0.234 | 0.794 | ##### |
| LDHA     | ##### | 0.484066 | 0.579 | 0.865 | ##### |
| BOLA3    | ##### | -0.14087 | 0.126 | 0.61  | ##### |
| TCEA2    | ##### | -0.38419 | 0.145 | 0.709 | ##### |
| MTDH     | ##### | -0.34964 | 0.223 | 0.786 | ##### |
| HIST1H4C | ##### | -1.23997 | 0.136 | 0.851 | ##### |
| APLP2    | ##### | -0.1745  | 0.223 | 0.737 | ##### |
| LAPTM4B  | ##### | -0.17182 | 0.173 | 0.7   | ##### |
| 7-Sep    | ##### | 0.309647 | 0.595 | 0.933 | ##### |
| THYN1    | ##### | 0.330325 | 0.269 | 0.647 | ##### |
| PAIP1    | ##### | -0.43314 | 0.108 | 0.678 | ##### |
| DNMT1    | ##### | -0.77863 | 0.065 | 0.71  | ##### |
| PLD3     | ##### | 0.25675  | 0.22  | 0.6   | ##### |
| YIPF3    | ##### | 0.183598 | 0.232 | 0.652 | ##### |
| S100B    | ##### | 0.864597 | 0.613 | 0.754 | ##### |
| COPS3    | ##### | -0.29418 | 0.12  | 0.674 | ##### |
| C4orf27  | ##### | -0.20015 | 0.113 | 0.649 | ##### |
| GTF3A    | ##### | -0.4041  | 0.127 | 0.699 | ##### |
| PDIA3    | ##### | -0.17708 | 0.199 | 0.73  | ##### |
| VDAC3    | ##### | -0.16578 | 0.194 | 0.737 | ##### |
| CD9      | ##### | 1.165764 | 0.66  | 0.615 | ##### |
| MLEC     | ##### | -0.32605 | 0.105 | 0.648 | ##### |
| HSPA8    | ##### | 0.411877 | 0.742 | 0.959 | ##### |
| RRM2     | ##### | -1.34589 | 0.002 | 0.647 | ##### |
| CD59     | ##### | 0.492782 | 0.304 | 0.626 | ##### |
| DDT      | ##### | -0.18231 | 0.19  | 0.721 | ##### |
| BTG1     | ##### | -0.15677 | 0.295 | 0.831 | ##### |
| MKKS     | ##### | -0.2605  | 0.15  | 0.669 | ##### |
| FAM200B  | ##### | -0.11119 | 0.138 | 0.644 | ##### |
| SSR3     | ##### | 0.114069 | 0.188 | 0.628 | ##### |
| NDUFS7   | ##### | 0.279329 | 0.358 | 0.74  | ##### |
| RAB1A    | ##### | 0.154558 | 0.291 | 0.735 | ##### |
| RSRC2    | ##### | -0.14489 | 0.202 | 0.747 | ##### |
| PDZD11   | ##### | 0.222476 | 0.19  | 0.594 | ##### |

|          |       |          |       |       |       |
|----------|-------|----------|-------|-------|-------|
| SLC3A2   | ##### | 0.14773  | 0.328 | 0.757 | ##### |
| ACTR3    | ##### | -0.12335 | 0.188 | 0.7   | ##### |
| TOMM20   | ##### | 0.218955 | 0.251 | 0.657 | ##### |
| MAP2     | ##### | -0.22414 | 0.176 | 0.712 | ##### |
| CCT8     | ##### | 0.101008 | 0.265 | 0.738 | ##### |
| MT3      | ##### | 1.037298 | 0.752 | 0.768 | ##### |
| HIGD1A   | ##### | 0.168515 | 0.222 | 0.636 | ##### |
| PLEKHJ1  | ##### | -0.12968 | 0.14  | 0.633 | ##### |
| LAMP1    | ##### | -0.27395 | 0.148 | 0.674 | ##### |
| ATP5E    | ##### | 0.426962 | 0.729 | 0.933 | ##### |
| STMN3    | ##### | -0.30983 | 0.134 | 0.675 | ##### |
| KLHDC3   | ##### | -0.31667 | 0.101 | 0.642 | ##### |
| IP6K2    | ##### | 0.358373 | 0.304 | 0.688 | ##### |
| ASAH1    | ##### | 0.264612 | 0.248 | 0.64  | ##### |
| CHCHD3   | ##### | -0.28217 | 0.152 | 0.716 | ##### |
| HN1      | ##### | -0.32675 | 0.349 | 0.914 | ##### |
| TCEA1    | ##### | -0.24208 | 0.208 | 0.756 | ##### |
| ANP32E   | ##### | -0.81337 | 0.072 | 0.714 | ##### |
| TXNL1    | ##### | 0.114454 | 0.209 | 0.667 | ##### |
| CCDC124  | ##### | -0.11438 | 0.202 | 0.716 | ##### |
| SUCLG1   | ##### | 0.273335 | 0.244 | 0.648 | ##### |
| IMPDH2   | ##### | 0.359597 | 0.239 | 0.616 | ##### |
| TUBG1    | ##### | -0.67282 | 0.049 | 0.647 | ##### |
| KIF22    | ##### | -0.5378  | 0.086 | 0.679 | ##### |
| PSMA7    | ##### | 0.194667 | 0.572 | 0.923 | ##### |
| HDCC2    | ##### | 0.161635 | 0.194 | 0.614 | ##### |
| KRTCAP2  | ##### | 0.278    | 0.279 | 0.672 | ##### |
| HNRNPF   | ##### | -0.21494 | 0.171 | 0.705 | ##### |
| NME4     | ##### | -0.32997 | 0.134 | 0.695 | ##### |
| RSRC1    | ##### | -0.19249 | 0.094 | 0.585 | ##### |
| MKI67    | ##### | -1.24465 | 0.003 | 0.637 | ##### |
| MAGED2   | ##### | 0.331548 | 0.305 | 0.683 | ##### |
| STIP1    | ##### | -0.26803 | 0.11  | 0.638 | ##### |
| HP1BP3   | ##### | -0.56977 | 0.141 | 0.759 | ##### |
| DHX36    | ##### | -0.10218 | 0.169 | 0.677 | ##### |
| SH3BGRL  | ##### | 0.323013 | 0.307 | 0.702 | ##### |
| C1orf61  | ##### | 0.504573 | 0.658 | 0.893 | ##### |
| ESD      | ##### | 0.148915 | 0.239 | 0.688 | ##### |
| SUPT4H1  | ##### | 0.17461  | 0.187 | 0.614 | ##### |
| LGALS3   | ##### | 1.213197 | 0.501 | 0.47  | ##### |
| POLDIP2  | ##### | -0.36535 | 0.099 | 0.619 | ##### |
| APOPT1   | ##### | 0.137292 | 0.194 | 0.621 | ##### |
| CBR1     | ##### | 0.201197 | 0.267 | 0.677 | ##### |
| DNAJB11  | ##### | -0.389   | 0.112 | 0.681 | ##### |
| TUBB2A   | ##### | -0.31189 | 0.264 | 0.83  | ##### |
| CCDC88A  | ##### | -0.34932 | 0.14  | 0.701 | ##### |
| NDUFAF3  | ##### | -0.15623 | 0.183 | 0.717 | ##### |
| ITGB1BP1 | ##### | -0.21236 | 0.157 | 0.678 | ##### |
| STMN1    | ##### | -0.36204 | 0.468 | 0.995 | ##### |
| SARS     | ##### | 0.347521 | 0.23  | 0.591 | ##### |
| EMC7     | ##### | 0.20457  | 0.192 | 0.595 | ##### |

|          |       |          |       |       |       |
|----------|-------|----------|-------|-------|-------|
| DTD1     | ##### | -0.32287 | 0.133 | 0.673 | ##### |
| YY1      | ##### | -0.23898 | 0.108 | 0.61  | ##### |
| DCTN6    | ##### | 0.250969 | 0.216 | 0.616 | ##### |
| TRAPPC3  | ##### | 0.233952 | 0.188 | 0.569 | ##### |
| CALM1    | ##### | 0.227338 | 0.597 | 0.94  | ##### |
| ERI3     | ##### | -0.12746 | 0.145 | 0.654 | ##### |
| CENPN    | ##### | -1.0536  | 0.007 | 0.636 | ##### |
| PTP4A2   | ##### | -0.33998 | 0.143 | 0.683 | ##### |
| PHF14    | ##### | -0.21507 | 0.208 | 0.76  | ##### |
| ETFB     | ##### | 0.123689 | 0.229 | 0.651 | ##### |
| CCDC47   | ##### | -0.2218  | 0.133 | 0.643 | ##### |
| PTPRA    | ##### | -0.2145  | 0.148 | 0.648 | ##### |
| CHD9     | ##### | -0.19065 | 0.202 | 0.744 | ##### |
| DENR     | ##### | -0.22535 | 0.094 | 0.594 | ##### |
| N4BP2L2  | ##### | 0.172955 | 0.248 | 0.657 | ##### |
| RHOC     | ##### | 0.604277 | 0.417 | 0.621 | ##### |
| DHFR     | ##### | -0.89298 | 0.033 | 0.66  | ##### |
| PSME1    | ##### | 0.568066 | 0.333 | 0.627 | ##### |
| S100A6   | ##### | 1.034587 | 0.574 | 0.62  | ##### |
| TSEN34   | ##### | -0.2722  | 0.119 | 0.632 | ##### |
| SPARC    | ##### | 0.644747 | 0.403 | 0.616 | ##### |
| EMC6     | ##### | -0.35831 | 0.143 | 0.683 | ##### |
| STOML2   | ##### | -0.13699 | 0.159 | 0.656 | ##### |
| VKORC1   | ##### | 0.15031  | 0.222 | 0.63  | ##### |
| PSMD3    | ##### | -0.37574 | 0.103 | 0.658 | ##### |
| GPBP1    | ##### | -0.11891 | 0.19  | 0.693 | ##### |
| PSMC4    | ##### | 0.392717 | 0.297 | 0.652 | ##### |
| ATXN10   | ##### | -0.24271 | 0.166 | 0.7   | ##### |
| YIF1A    | ##### | 0.413271 | 0.227 | 0.527 | ##### |
| ARPC5L   | ##### | -0.51054 | 0.08  | 0.644 | ##### |
| KMT2E    | ##### | 0.108724 | 0.307 | 0.767 | ##### |
| PSENN    | ##### | 0.58733  | 0.3   | 0.575 | ##### |
| CIB1     | ##### | 0.449704 | 0.208 | 0.501 | ##### |
| EMC3     | ##### | 0.242525 | 0.218 | 0.616 | ##### |
| CST3     | ##### | 0.422404 | 0.616 | 0.925 | ##### |
| EXOSC8   | ##### | -0.2847  | 0.136 | 0.691 | ##### |
| TMEM219  | ##### | 0.332692 | 0.23  | 0.573 | ##### |
| TPM4     | ##### | -0.51099 | 0.155 | 0.744 | ##### |
| NUDCD2   | ##### | -0.18386 | 0.175 | 0.695 | ##### |
| PFN1     | ##### | -0.13673 | 0.417 | 0.905 | ##### |
| SRM      | ##### | -0.1159  | 0.166 | 0.663 | ##### |
| NOL7     | ##### | -0.19441 | 0.141 | 0.656 | ##### |
| ATP1B3   | ##### | -0.51005 | 0.119 | 0.717 | ##### |
| FKBP2    | ##### | 0.54635  | 0.372 | 0.643 | ##### |
| CCDC12   | ##### | 0.156118 | 0.225 | 0.651 | ##### |
| SAE1     | ##### | -0.66086 | 0.084 | 0.702 | ##### |
| CD320    | ##### | -0.32696 | 0.134 | 0.675 | ##### |
| ELAVL1   | ##### | -0.35394 | 0.124 | 0.664 | ##### |
| CHTOP    | ##### | -0.25332 | 0.122 | 0.652 | ##### |
| GSTK1    | ##### | 0.697376 | 0.281 | 0.504 | ##### |
| C19orf48 | ##### | -0.71394 | 0.079 | 0.704 | ##### |

|           |       |          |       |       |       |
|-----------|-------|----------|-------|-------|-------|
| DNAJC19   | ##### | 0.183886 | 0.206 | 0.621 | ##### |
| LMO4      | ##### | -0.12672 | 0.283 | 0.78  | ##### |
| TADA3     | ##### | -0.12821 | 0.152 | 0.636 | ##### |
| NDUFA10   | ##### | 0.181573 | 0.206 | 0.62  | ##### |
| WBP11     | ##### | -0.30905 | 0.08  | 0.593 | ##### |
| MED4      | ##### | 0.154113 | 0.183 | 0.601 | ##### |
| UBE2B     | ##### | 0.123491 | 0.187 | 0.631 | ##### |
| TPGS2     | ##### | -0.41282 | 0.112 | 0.679 | ##### |
| COMMD4    | ##### | -0.33762 | 0.101 | 0.637 | ##### |
| RBBP4     | ##### | -0.10743 | 0.213 | 0.728 | ##### |
| SDF4      | ##### | -0.42287 | 0.092 | 0.633 | ##### |
| THRAP3    | ##### | -0.20584 | 0.14  | 0.646 | ##### |
| THOC7     | ##### | -0.20585 | 0.113 | 0.625 | ##### |
| CNOT7     | ##### | -0.30895 | 0.099 | 0.637 | ##### |
| PPP1CB    | ##### | -0.18088 | 0.22  | 0.737 | ##### |
| LINC00116 | ##### | 0.173778 | 0.171 | 0.567 | ##### |
| TOMM40    | ##### | -0.22126 | 0.119 | 0.631 | ##### |
| UBE2L6    | ##### | 0.615621 | 0.291 | 0.56  | ##### |
| ARL6IP5   | ##### | 0.741406 | 0.361 | 0.565 | ##### |
| SNRNP27   | ##### | -0.15666 | 0.122 | 0.611 | ##### |
| EZH2      | ##### | -0.89163 | 0.045 | 0.688 | ##### |
| UFD1L     | ##### | -0.32617 | 0.087 | 0.616 | ##### |
| DGCR6L    | ##### | -0.15375 | 0.11  | 0.589 | ##### |
| PSMD11    | ##### | -0.25424 | 0.117 | 0.633 | ##### |
| TIMP1     | ##### | 1.023184 | 0.62  | 0.628 | ##### |
| FYN       | ##### | -0.10971 | 0.166 | 0.653 | ##### |
| ZNF207    | ##### | -0.24611 | 0.169 | 0.701 | ##### |
| ZBTB20    | ##### | -0.10358 | 0.225 | 0.731 | ##### |
| IDH2      | ##### | -0.51716 | 0.115 | 0.705 | ##### |
| UBA2      | ##### | -0.43385 | 0.113 | 0.694 | ##### |
| CHMP5     | ##### | 0.197516 | 0.225 | 0.647 | ##### |
| SCCPDH    | ##### | -0.18476 | 0.145 | 0.659 | ##### |
| RSF1      | ##### | -0.14886 | 0.171 | 0.677 | ##### |
| GMNN      | ##### | -0.66361 | 0.068 | 0.67  | ##### |
| ATP5EP2   | ##### | 0.573499 | 0.271 | 0.514 | ##### |
| PCM1      | ##### | -0.44797 | 0.096 | 0.656 | ##### |
| TSPO      | ##### | 0.393145 | 0.223 | 0.531 | ##### |
| FUNDC2    | ##### | 0.16265  | 0.208 | 0.643 | ##### |
| TRIB2     | ##### | -0.12661 | 0.145 | 0.619 | ##### |
| CLDND1    | ##### | 0.139883 | 0.187 | 0.602 | ##### |
| FSCN1     | ##### | -0.39035 | 0.192 | 0.774 | ##### |
| HSPB11    | ##### | -0.10901 | 0.126 | 0.619 | ##### |
| LYPLA1    | ##### | -0.18535 | 0.136 | 0.643 | ##### |
| PPA1      | ##### | 0.209337 | 0.195 | 0.599 | ##### |
| TROVE2    | ##### | 0.102904 | 0.23  | 0.685 | ##### |
| PDPN      | ##### | 0.400185 | 0.325 | 0.662 | ##### |
| GPS1      | ##### | -0.1712  | 0.113 | 0.589 | ##### |
| CENPV     | ##### | -0.94588 | 0.063 | 0.707 | ##### |
| LAGE3     | ##### | -0.16818 | 0.119 | 0.61  | ##### |
| BRI3      | ##### | -0.17613 | 0.143 | 0.627 | ##### |
| GPX4      | ##### | 0.180995 | 0.565 | 0.917 | ##### |



|           |       |          |       |       |       |
|-----------|-------|----------|-------|-------|-------|
| MANF      | ##### | -0.2374  | 0.161 | 0.68  | ##### |
| TRAPPC4   | ##### | 0.122288 | 0.192 | 0.62  | ##### |
| BRD4      | ##### | -0.27961 | 0.092 | 0.575 | ##### |
| UBB       | ##### | 0.356248 | 0.768 | 0.965 | ##### |
| RNF114    | ##### | -0.36208 | 0.103 | 0.631 | ##### |
| BNIP3L    | ##### | 0.316125 | 0.29  | 0.663 | ##### |
| SLC39A6   | ##### | -0.20563 | 0.133 | 0.626 | ##### |
| SLC25A4   | ##### | 0.122707 | 0.232 | 0.662 | ##### |
| DDAH2     | ##### | -0.28002 | 0.134 | 0.673 | ##### |
| MAGEF1    | ##### | -0.15708 | 0.173 | 0.675 | ##### |
| SGOL2     | ##### | -1.17036 | 0.01  | 0.633 | ##### |
| PFDN4     | ##### | -0.33787 | 0.086 | 0.604 | ##### |
| GSPT1     | ##### | -0.40155 | 0.087 | 0.623 | ##### |
| SRSF4     | ##### | -0.32818 | 0.103 | 0.625 | ##### |
| DDX17     | ##### | -0.19689 | 0.15  | 0.648 | ##### |
| TMEM256   | ##### | 0.197342 | 0.175 | 0.577 | ##### |
| SNRNP40   | ##### | -0.24675 | 0.113 | 0.64  | ##### |
| HLA-A     | ##### | 0.759938 | 0.789 | 0.841 | ##### |
| PAICS     | ##### | -0.17277 | 0.176 | 0.694 | ##### |
| CAPRIN1   | ##### | -0.31604 | 0.079 | 0.58  | ##### |
| PSME2     | ##### | 0.255888 | 0.325 | 0.727 | ##### |
| HSPB1     | ##### | 0.233168 | 0.403 | 0.794 | ##### |
| GTSE1     | ##### | -1.1614  | 0.002 | 0.614 | ##### |
| SLC39A1   | ##### | -0.10302 | 0.115 | 0.552 | ##### |
| SMARCE1   | ##### | -0.33997 | 0.112 | 0.652 | ##### |
| TERF2IP   | ##### | -0.15671 | 0.197 | 0.719 | ##### |
| PRR13     | ##### | 0.402285 | 0.206 | 0.53  | ##### |
| AKIRIN1   | ##### | -0.36707 | 0.077 | 0.607 | ##### |
| EIF3J     | ##### | -0.27282 | 0.099 | 0.594 | ##### |
| CNIH4     | ##### | -0.10079 | 0.168 | 0.658 | ##### |
| UBE2E1    | ##### | 0.241582 | 0.23  | 0.626 | ##### |
| FAM192A   | ##### | -0.15776 | 0.117 | 0.598 | ##### |
| HSPA9     | ##### | 0.116612 | 0.237 | 0.679 | ##### |
| TKT       | ##### | 0.174076 | 0.199 | 0.598 | ##### |
| RAD23B    | ##### | -0.17316 | 0.126 | 0.625 | ##### |
| RAD51C    | ##### | -0.30641 | 0.103 | 0.621 | ##### |
| GNG5      | ##### | 0.303632 | 0.461 | 0.798 | ##### |
| ORC6      | ##### | -0.99885 | 0.019 | 0.641 | ##### |
| SYNCRIP   | ##### | -0.47012 | 0.108 | 0.683 | ##### |
| TIMM17A   | ##### | 0.10384  | 0.147 | 0.567 | ##### |
| NELFCD    | ##### | -0.25706 | 0.126 | 0.631 | ##### |
| C20orf24  | ##### | -0.6733  | 0.101 | 0.7   | ##### |
| PRKDC     | ##### | -0.40804 | 0.098 | 0.63  | ##### |
| CCDC14    | ##### | -0.46906 | 0.079 | 0.627 | ##### |
| NSA2      | ##### | -0.14476 | 0.129 | 0.598 | ##### |
| NT5C3B    | ##### | -0.52532 | 0.084 | 0.652 | ##### |
| RHOB      | ##### | 0.121572 | 0.304 | 0.738 | ##### |
| SDHD      | ##### | 0.287546 | 0.192 | 0.549 | ##### |
| U2SURP    | ##### | -0.14506 | 0.134 | 0.628 | ##### |
| MAPK1IP1L | ##### | -0.10963 | 0.145 | 0.616 | ##### |
| HADHB     | ##### | 0.124727 | 0.206 | 0.637 | ##### |

|         |       |          |       |       |       |
|---------|-------|----------|-------|-------|-------|
| BRD7    | ##### | -0.37104 | 0.084 | 0.596 | ##### |
| ACAT2   | ##### | -0.55495 | 0.061 | 0.622 | ##### |
| ZMAT2   | ##### | 0.196628 | 0.183 | 0.575 | ##### |
| SEC61A1 | ##### | -0.13404 | 0.117 | 0.599 | ##### |
| DYNC1I2 | ##### | -0.20662 | 0.161 | 0.667 | ##### |
| EIF3M   | ##### | 0.39691  | 0.309 | 0.659 | ##### |
| LRPAP1  | ##### | 0.297691 | 0.293 | 0.649 | ##### |
| IGFBP2  | ##### | 0.10693  | 0.394 | 0.819 | ##### |
| CHI3L1  | ##### | 1.376049 | 0.475 | 0.506 | ##### |
| NIFK    | ##### | 0.120283 | 0.173 | 0.599 | ##### |
| FLOT1   | ##### | -0.18691 | 0.159 | 0.643 | ##### |
| APOA1BP | ##### | -0.1884  | 0.136 | 0.631 | ##### |
| SPC25   | ##### | -1.10161 | 0.01  | 0.62  | ##### |
| TM2D1   | ##### | 0.223943 | 0.183 | 0.554 | ##### |
| MSI2    | ##### | 0.165811 | 0.237 | 0.619 | ##### |
| HDLBP   | ##### | -0.12489 | 0.11  | 0.569 | ##### |
| BAALC   | ##### | 0.110524 | 0.243 | 0.672 | ##### |
| CENPW   | ##### | -0.99863 | 0.012 | 0.615 | ##### |
| SGTA    | ##### | -0.27489 | 0.086 | 0.581 | ##### |
| STAU1   | ##### | -0.43861 | 0.084 | 0.612 | ##### |
| DDX24   | ##### | 0.169643 | 0.201 | 0.615 | ##### |
| GTF2H5  | ##### | 0.152001 | 0.164 | 0.575 | ##### |
| ANP32A  | ##### | -0.28411 | 0.122 | 0.651 | ##### |
| S100A11 | ##### | 0.90496  | 0.34  | 0.474 | ##### |
| PPIA    | ##### | 0.380109 | 0.791 | 0.983 | ##### |
| CENPM   | ##### | -1.04793 | 0.007 | 0.615 | ##### |
| PSMC2   | ##### | 0.110752 | 0.22  | 0.658 | ##### |
| STX10   | ##### | -0.12167 | 0.124 | 0.58  | ##### |
| CLTB    | ##### | -0.25601 | 0.117 | 0.619 | ##### |
| GBAS    | ##### | -0.25711 | 0.117 | 0.641 | ##### |
| H1FX    | ##### | -0.72938 | 0.122 | 0.749 | ##### |
| FBL     | ##### | 0.158196 | 0.218 | 0.646 | ##### |
| SUMO2   | ##### | 0.180323 | 0.642 | 0.957 | ##### |
| DNAJB1  | ##### | 0.385767 | 0.407 | 0.773 | ##### |
| GRHPR   | ##### | -0.10076 | 0.14  | 0.612 | ##### |
| MED28   | ##### | 0.318088 | 0.161 | 0.49  | ##### |
| PHIP    | ##### | -0.45183 | 0.11  | 0.674 | ##### |
| CCDC85B | ##### | -0.25784 | 0.115 | 0.604 | ##### |
| 11-Sep  | ##### | -0.17095 | 0.129 | 0.616 | ##### |
| LSM10   | ##### | 0.222278 | 0.164 | 0.531 | ##### |
| PEA15   | ##### | 0.245372 | 0.26  | 0.651 | ##### |
| JUN     | ##### | 0.100772 | 0.459 | 0.883 | ##### |
| ERCC1   | ##### | 0.229661 | 0.232 | 0.631 | ##### |
| ITM2C   | ##### | 0.173777 | 0.248 | 0.646 | ##### |
| FAM3C   | ##### | -0.15533 | 0.211 | 0.721 | ##### |
| WTAP    | ##### | -0.17776 | 0.138 | 0.635 | ##### |
| TIMMDC1 | ##### | 0.189173 | 0.171 | 0.547 | ##### |
| PTP4A1  | ##### | -0.49255 | 0.094 | 0.663 | ##### |
| TIMM10  | ##### | -0.35441 | 0.11  | 0.628 | ##### |
| ARL3    | ##### | 0.137138 | 0.162 | 0.563 | ##### |
| UBE2J2  | ##### | -0.40379 | 0.063 | 0.58  | ##### |

|          |       |          |       |       |       |
|----------|-------|----------|-------|-------|-------|
| PTMS     | ##### | -0.43071 | 0.283 | 0.856 | ##### |
| CMSS1    | ##### | -0.25766 | 0.105 | 0.602 | ##### |
| C4orf48  | ##### | -0.34945 | 0.126 | 0.641 | ##### |
| PSMC1    | ##### | 0.161227 | 0.199 | 0.6   | ##### |
| ACTB     | ##### | 0.440815 | 0.934 | 0.996 | ##### |
| CHMP4B   | ##### | -0.24854 | 0.129 | 0.607 | ##### |
| REEP5    | ##### | 0.378088 | 0.283 | 0.628 | ##### |
| MZT1     | ##### | -0.77214 | 0.084 | 0.706 | ##### |
| CD74     | ##### | 1.199111 | 0.621 | 0.527 | ##### |
| APEX1    | ##### | 0.377665 | 0.342 | 0.694 | ##### |
| PRKRA    | ##### | -0.1702  | 0.127 | 0.594 | ##### |
| NAE1     | ##### | -0.25986 | 0.143 | 0.663 | ##### |
| BAZ1B    | ##### | -0.6253  | 0.07  | 0.653 | ##### |
| SEC63    | ##### | -0.2466  | 0.105 | 0.609 | ##### |
| GPAA1    | ##### | -0.46713 | 0.112 | 0.665 | ##### |
| HIF1A    | ##### | -0.25015 | 0.157 | 0.657 | ##### |
| MAP1LC3B | ##### | -0.16638 | 0.166 | 0.664 | ##### |
| HSD17B12 | ##### | 0.123088 | 0.169 | 0.568 | ##### |
| CLPP     | ##### | -0.13496 | 0.168 | 0.648 | ##### |
| RNASEH2B | ##### | -0.6633  | 0.045 | 0.621 | ##### |
| RALBP1   | ##### | -0.16975 | 0.082 | 0.527 | ##### |
| PIH1D1   | ##### | 0.153449 | 0.171 | 0.564 | ##### |
| ANAPC16  | ##### | 0.349184 | 0.201 | 0.552 | ##### |
| C8orf33  | ##### | -0.17679 | 0.126 | 0.607 | ##### |
| AK2      | ##### | 0.262364 | 0.19  | 0.57  | ##### |
| RBM42    | ##### | -0.33732 | 0.129 | 0.669 | ##### |
| TUBA1A   | ##### | 0.37623  | 0.864 | 0.989 | ##### |
| SLC39A3  | ##### | -0.37495 | 0.112 | 0.628 | ##### |
| ZDHHC4   | ##### | 0.203679 | 0.185 | 0.564 | ##### |
| RHN01    | ##### | -0.53336 | 0.059 | 0.6   | ##### |
| USP22    | ##### | -0.30232 | 0.103 | 0.593 | ##### |
| HAT1     | ##### | -0.34106 | 0.131 | 0.684 | ##### |
| EMC10    | ##### | -0.10714 | 0.173 | 0.659 | ##### |
| TMEM11   | ##### | -0.11499 | 0.127 | 0.594 | ##### |
| URM1     | ##### | 0.187032 | 0.145 | 0.507 | ##### |
| GHITM    | ##### | 0.284795 | 0.208 | 0.577 | ##### |
| SNX6     | ##### | 0.194741 | 0.175 | 0.56  | ##### |
| IFITM3   | ##### | 1.15046  | 0.396 | 0.416 | ##### |
| IAH1     | ##### | 0.131015 | 0.19  | 0.599 | ##### |
| CHCHD2   | ##### | 0.317297 | 0.77  | 0.97  | ##### |
| RBM17    | ##### | -0.48913 | 0.08  | 0.62  | ##### |
| BOD1     | ##### | -0.38343 | 0.087 | 0.606 | ##### |
| TMEM237  | ##### | -0.54072 | 0.056 | 0.611 | ##### |
| CISD2    | ##### | -0.12877 | 0.134 | 0.606 | ##### |
| TTC19    | ##### | -0.18152 | 0.119 | 0.594 | ##### |
| HSP90AA1 | ##### | 0.335915 | 0.799 | 0.986 | ##### |
| WDR45B   | ##### | -0.2941  | 0.129 | 0.631 | ##### |
| TSG101   | ##### | 0.21959  | 0.187 | 0.558 | ##### |
| XP01     | ##### | -0.36558 | 0.087 | 0.611 | ##### |
| SRP72    | ##### | -0.26606 | 0.173 | 0.714 | ##### |
| KIF21A   | ##### | -0.1207  | 0.162 | 0.652 | ##### |

|          |       |          |       |       |       |
|----------|-------|----------|-------|-------|-------|
| WIP12    | ##### | -0.34808 | 0.094 | 0.614 | ##### |
| PXMP2    | ##### | -0.50653 | 0.063 | 0.602 | ##### |
| VPS25    | ##### | 0.154677 | 0.126 | 0.505 | ##### |
| CCNA2    | ##### | -1.13321 | 0.005 | 0.601 | ##### |
| NFIB     | ##### | -0.26227 | 0.239 | 0.79  | ##### |
| MXD3     | ##### | -0.99853 | 0.007 | 0.59  | ##### |
| COPRS    | ##### | -0.56164 | 0.08  | 0.625 | ##### |
| CTNNA1   | ##### | 0.136697 | 0.176 | 0.558 | ##### |
| UNC50    | ##### | 0.158072 | 0.162 | 0.538 | ##### |
| WHSC1L1  | ##### | -0.49825 | 0.101 | 0.664 | ##### |
| TEX30    | ##### | -0.56203 | 0.052 | 0.596 | ##### |
| SMARCA5  | ##### | -0.45194 | 0.086 | 0.619 | ##### |
| NSMCE1   | ##### | 0.327184 | 0.206 | 0.543 | ##### |
| CDH2     | ##### | -0.31667 | 0.12  | 0.626 | ##### |
| CTSD     | ##### | 0.247151 | 0.218 | 0.588 | ##### |
| NUCB2    | ##### | -0.14935 | 0.133 | 0.619 | ##### |
| TMEM98   | ##### | -0.31097 | 0.112 | 0.606 | ##### |
| YBX1     | ##### | -0.23344 | 0.478 | 0.959 | ##### |
| SLC35B2  | ##### | -0.48627 | 0.075 | 0.594 | ##### |
| NARF     | ##### | -0.34712 | 0.089 | 0.579 | ##### |
| C14orf1  | ##### | 0.224776 | 0.169 | 0.523 | ##### |
| AHCY     | ##### | -0.26358 | 0.103 | 0.586 | ##### |
| NFIX     | ##### | -0.30391 | 0.154 | 0.674 | ##### |
| ZNF580   | ##### | -0.18734 | 0.084 | 0.522 | ##### |
| LEPROTL1 | ##### | -0.19663 | 0.106 | 0.586 | ##### |
| PRPF38B  | ##### | -0.18465 | 0.161 | 0.668 | ##### |
| SRPK2    | ##### | -0.26266 | 0.183 | 0.725 | ##### |
| SPECC1   | ##### | -0.45473 | 0.091 | 0.616 | ##### |
| DBF4     | ##### | -0.99878 | 0.017 | 0.611 | ##### |
| MAP1LC3A | ##### | -0.19176 | 0.124 | 0.583 | ##### |
| RFXANK   | ##### | 0.342555 | 0.175 | 0.486 | ##### |
| EIF2AK1  | ##### | -0.51809 | 0.079 | 0.635 | ##### |
| ASRGL1   | ##### | -0.76461 | 0.063 | 0.667 | ##### |
| PHAX     | ##### | -0.14427 | 0.105 | 0.564 | ##### |
| KIFC1    | ##### | -0.84643 | 0.019 | 0.593 | ##### |
| CYB5B    | ##### | 0.118902 | 0.148 | 0.548 | ##### |
| COMMD7   | ##### | -0.37708 | 0.094 | 0.607 | ##### |
| CSNK2A1  | ##### | -0.30399 | 0.099 | 0.593 | ##### |
| EIF2S1   | ##### | -0.23524 | 0.091 | 0.568 | ##### |
| CMPK1    | ##### | -0.30447 | 0.105 | 0.607 | ##### |
| TMEM97   | ##### | -0.55379 | 0.054 | 0.599 | ##### |
| SLTM     | ##### | -0.18025 | 0.098 | 0.565 | ##### |
| PRPSAP1  | ##### | -0.55597 | 0.089 | 0.638 | ##### |
| RNF126   | ##### | -0.57507 | 0.052 | 0.589 | ##### |
| KARS     | ##### | -0.25171 | 0.119 | 0.614 | ##### |
| SNRPA    | ##### | -0.27232 | 0.084 | 0.574 | ##### |
| SPAG9    | ##### | -0.21269 | 0.143 | 0.623 | ##### |
| PRPF6    | ##### | -0.19996 | 0.122 | 0.598 | ##### |
| RAMP1    | ##### | 0.789052 | 0.613 | 0.709 | ##### |
| HLA-B    | ##### | 0.781118 | 0.716 | 0.796 | ##### |
| PTS      | ##### | -0.23414 | 0.089 | 0.564 | ##### |

|          |       |          |       |       |       |
|----------|-------|----------|-------|-------|-------|
| SPTSSA   | ##### | 0.282678 | 0.264 | 0.631 | ##### |
| PTMA     | ##### | 0.445195 | 0.895 | 0.985 | ##### |
| CCDC90B  | ##### | 0.130118 | 0.201 | 0.609 | ##### |
| ARL4C    | ##### | -0.4389  | 0.113 | 0.627 | ##### |
| GLRX5    | ##### | -0.51386 | 0.087 | 0.638 | ##### |
| HNRNPA1  | ##### | 0.266818 | 0.742 | 0.98  | ##### |
| SF3B1    | ##### | -0.16376 | 0.161 | 0.654 | ##### |
| PEPD     | ##### | 0.285456 | 0.169 | 0.499 | ##### |
| LRRC59   | ##### | -0.57003 | 0.068 | 0.611 | ##### |
| TMSB15A  | ##### | -0.89314 | 0.037 | 0.635 | ##### |
| RFC4     | ##### | -0.69247 | 0.044 | 0.61  | ##### |
| MAGED1   | ##### | 0.122054 | 0.215 | 0.635 | ##### |
| FAM229B  | ##### | 0.294828 | 0.176 | 0.515 | ##### |
| MYL12A   | ##### | 0.195438 | 0.143 | 0.477 | ##### |
| SPG21    | ##### | -0.17792 | 0.08  | 0.525 | ##### |
| HSPA5    | ##### | 0.384182 | 0.386 | 0.71  | ##### |
| GRB2     | ##### | -0.38406 | 0.082 | 0.59  | ##### |
| SOD2     | ##### | 1.089525 | 0.33  | 0.443 | ##### |
| HNRNPH1  | ##### | -0.24471 | 0.206 | 0.727 | ##### |
| RPA1     | ##### | -0.42461 | 0.061 | 0.579 | ##### |
| CRIP1    | ##### | 0.109406 | 0.131 | 0.509 | ##### |
| PPDPF    | ##### | -0.12113 | 0.478 | 0.916 | ##### |
| PRKAR1A  | ##### | -0.13201 | 0.162 | 0.627 | ##### |
| HSPH1    | ##### | -0.37568 | 0.087 | 0.61  | ##### |
| PPP1R14B | ##### | -0.27522 | 0.138 | 0.626 | ##### |
| COX14    | ##### | 0.319696 | 0.19  | 0.53  | ##### |
| SEC61G   | ##### | 0.780187 | 0.845 | 0.923 | ##### |
| MESDC2   | ##### | 0.248087 | 0.188 | 0.523 | ##### |
| NEAT1    | ##### | 0.731202 | 0.581 | 0.669 | ##### |
| DAZAP2   | ##### | 0.261031 | 0.223 | 0.586 | ##### |
| DNMT1P1  | ##### | -0.24368 | 0.113 | 0.584 | ##### |
| APRT     | ##### | 0.408874 | 0.225 | 0.51  | ##### |
| HMGXB4   | ##### | -0.50414 | 0.061 | 0.596 | ##### |
| ERLEC1   | ##### | -0.10089 | 0.122 | 0.573 | ##### |
| PQBP1    | ##### | 0.220866 | 0.141 | 0.494 | ##### |
| CYTH2    | ##### | -0.40823 | 0.098 | 0.635 | ##### |
| ARL6IP6  | ##### | -0.55556 | 0.099 | 0.674 | ##### |
| ZFAND6   | ##### | 0.175341 | 0.22  | 0.607 | ##### |
| PRDX3    | ##### | 0.24807  | 0.195 | 0.573 | ##### |
| YWHAG    | ##### | -0.1658  | 0.124 | 0.6   | ##### |
| ANKRD12  | ##### | 0.173313 | 0.162 | 0.522 | ##### |
| RPA2     | ##### | -0.2041  | 0.136 | 0.635 | ##### |
| TMSB4X   | ##### | 0.554269 | 0.977 | 0.994 | ##### |
| TCF12    | ##### | -0.11671 | 0.154 | 0.615 | ##### |
| 9-Sep    | ##### | -0.26741 | 0.133 | 0.612 | ##### |
| NUDT5    | ##### | -0.1027  | 0.082 | 0.499 | ##### |
| KNOP1    | ##### | -0.12446 | 0.106 | 0.558 | ##### |
| WBP4     | ##### | 0.157963 | 0.136 | 0.519 | ##### |
| PIGT     | ##### | -0.2215  | 0.113 | 0.586 | ##### |
| SLC25A39 | ##### | -0.26397 | 0.094 | 0.562 | ##### |
| CSE1L    | ##### | -0.6208  | 0.056 | 0.62  | ##### |

|           |       |          |       |       |       |
|-----------|-------|----------|-------|-------|-------|
| DCUN1D5   | ##### | -0.13908 | 0.087 | 0.514 | ##### |
| MCM7      | ##### | -0.78255 | 0.105 | 0.725 | ##### |
| GNAI3     | ##### | -0.21222 | 0.098 | 0.573 | ##### |
| RALA      | ##### | -0.39606 | 0.099 | 0.63  | ##### |
| VPS4A     | ##### | -0.4468  | 0.058 | 0.569 | ##### |
| BPTF      | ##### | -0.23125 | 0.108 | 0.578 | ##### |
| TERF1     | ##### | -0.12519 | 0.138 | 0.604 | ##### |
| MAF1      | ##### | -0.29126 | 0.115 | 0.622 | ##### |
| HRAS      | ##### | -0.57748 | 0.051 | 0.583 | ##### |
| GTF2I     | ##### | -0.10346 | 0.209 | 0.686 | ##### |
| CDK4      | ##### | -0.32958 | 0.279 | 0.837 | ##### |
| CCNB1     | ##### | -1.31875 | 0.01  | 0.599 | ##### |
| MAT2A     | ##### | -0.14327 | 0.138 | 0.606 | ##### |
| CRNDE     | ##### | -0.66639 | 0.066 | 0.643 | ##### |
| SF3B4     | ##### | -0.13147 | 0.113 | 0.564 | ##### |
| ACSL3     | ##### | -0.27239 | 0.113 | 0.591 | ##### |
| S100A10   | ##### | 0.968736 | 0.492 | 0.542 | ##### |
| VMP1      | ##### | 0.162992 | 0.215 | 0.598 | ##### |
| UQCRC2    | ##### | 0.181763 | 0.204 | 0.595 | ##### |
| AP2B1     | ##### | -0.35745 | 0.096 | 0.589 | ##### |
| CTNBL1    | ##### | -0.1983  | 0.096 | 0.565 | ##### |
| HINT2     | ##### | -0.31783 | 0.113 | 0.606 | ##### |
| LSM6      | ##### | 0.146027 | 0.166 | 0.557 | ##### |
| NLRP1     | ##### | -0.12473 | 0.15  | 0.6   | ##### |
| PHF5A     | ##### | -0.11309 | 0.126 | 0.578 | ##### |
| SMC3      | ##### | -0.52592 | 0.08  | 0.635 | ##### |
| ASF1B     | ##### | -0.94172 | 0.007 | 0.573 | ##### |
| SLC1A3    | ##### | 0.375147 | 0.3   | 0.595 | ##### |
| ITGB3BP   | ##### | -0.39768 | 0.068 | 0.579 | ##### |
| HNRNPA2B1 | ##### | 0.20353  | 0.717 | 0.974 | ##### |
| HAGH      | ##### | -0.54296 | 0.072 | 0.611 | ##### |
| RNF145    | ##### | -0.38158 | 0.115 | 0.627 | ##### |
| H2AFZ     | ##### | -0.32268 | 0.49  | 0.98  | ##### |
| CSTF3     | ##### | -0.2409  | 0.099 | 0.584 | ##### |
| KHSRP     | ##### | -0.45606 | 0.049 | 0.542 | ##### |
| VGLL4     | ##### | -0.21157 | 0.122 | 0.58  | ##### |
| STARD3NL  | ##### | -0.17342 | 0.164 | 0.647 | ##### |
| TMEM165   | ##### | -0.38485 | 0.148 | 0.689 | ##### |
| ACTR2     | ##### | -0.28964 | 0.099 | 0.579 | ##### |
| SCARB2    | ##### | -0.15022 | 0.119 | 0.574 | ##### |
| ATRX      | ##### | -0.1089  | 0.185 | 0.657 | ##### |
| CUEDC2    | ##### | 0.154389 | 0.195 | 0.584 | ##### |
| CKAP2L    | ##### | -1.05142 | 0.002 | 0.574 | ##### |
| ARMCX3    | ##### | 0.316329 | 0.222 | 0.551 | ##### |
| AURKB     | ##### | -1.1628  | 0.003 | 0.58  | ##### |
| BCAS2     | ##### | 0.200703 | 0.213 | 0.602 | ##### |
| CNDP2     | ##### | 0.110909 | 0.127 | 0.498 | ##### |
| IDH3G     | ##### | 0.192752 | 0.168 | 0.537 | ##### |
| ATP6V1D   | ##### | 0.101055 | 0.134 | 0.526 | ##### |
| B3GAT3    | ##### | -0.10546 | 0.134 | 0.567 | ##### |
| FEN1      | ##### | -0.87495 | 0.024 | 0.595 | ##### |

|          |       |          |       |       |       |
|----------|-------|----------|-------|-------|-------|
| ACBD6    | ##### | -0.15382 | 0.091 | 0.537 | ##### |
| SQSTM1   | ##### | 0.185021 | 0.202 | 0.574 | ##### |
| PTPMT1   | ##### | -0.22659 | 0.084 | 0.536 | ##### |
| OTUB1    | ##### | 0.207926 | 0.154 | 0.511 | ##### |
| C5orf24  | ##### | -0.39782 | 0.075 | 0.569 | ##### |
| CCNB2    | ##### | -1.25941 | 0     | 0.56  | ##### |
| AKR1A1   | ##### | 0.171417 | 0.161 | 0.54  | ##### |
| ARF3     | ##### | 0.11533  | 0.147 | 0.515 | ##### |
| ACTR10   | ##### | 0.223575 | 0.176 | 0.536 | ##### |
| LYRM2    | ##### | -0.1705  | 0.108 | 0.57  | ##### |
| ALDH7A1  | ##### | 0.127046 | 0.19  | 0.598 | ##### |
| LMAN1    | ##### | 0.21301  | 0.117 | 0.441 | ##### |
| SF3A2    | ##### | -0.5364  | 0.07  | 0.6   | ##### |
| RUVBL2   | ##### | -0.35902 | 0.133 | 0.675 | ##### |
| SCAF11   | ##### | -0.15053 | 0.133 | 0.585 | ##### |
| MKRN1    | ##### | -0.26968 | 0.122 | 0.631 | ##### |
| C19orf24 | ##### | -0.34794 | 0.072 | 0.537 | ##### |
| SUGP2    | ##### | -0.29407 | 0.101 | 0.596 | ##### |
| ZFAND5   | ##### | -0.10092 | 0.145 | 0.59  | ##### |
| SGCB     | ##### | -0.11706 | 0.227 | 0.728 | ##### |
| FOXM1    | ##### | -0.92095 | 0.005 | 0.568 | ##### |
| CHMP3    | ##### | -0.12722 | 0.124 | 0.574 | ##### |
| NT5DC2   | ##### | -0.59225 | 0.035 | 0.546 | ##### |
| TMEM9    | ##### | 0.405862 | 0.239 | 0.547 | ##### |
| ENAH     | ##### | -0.40383 | 0.08  | 0.578 | ##### |
| ACYP1    | ##### | -0.57684 | 0.058 | 0.599 | ##### |
| NES      | ##### | -0.2041  | 0.175 | 0.637 | ##### |
| PKIG     | ##### | 0.268107 | 0.195 | 0.533 | ##### |
| ELOVL5   | ##### | -0.40059 | 0.087 | 0.6   | ##### |
| NRBP1    | ##### | -0.22996 | 0.098 | 0.56  | ##### |
| DCAF7    | ##### | -0.35218 | 0.105 | 0.615 | ##### |
| ARL6IP1  | ##### | -0.22859 | 0.407 | 0.916 | ##### |
| EPN1     | ##### | -0.24192 | 0.098 | 0.558 | ##### |
| CCZ1     | ##### | -0.21861 | 0.136 | 0.61  | ##### |
| SS18L2   | ##### | -0.17082 | 0.087 | 0.53  | ##### |
| ISOC2    | ##### | 0.280783 | 0.194 | 0.512 | ##### |
| TMEM54   | ##### | -0.45839 | 0.045 | 0.531 | ##### |
| PGP      | ##### | -0.82716 | 0.017 | 0.583 | ##### |
| PPP2R3C  | ##### | -0.19117 | 0.106 | 0.572 | ##### |
| NT5C3A   | ##### | -0.31588 | 0.101 | 0.602 | ##### |
| LARP7    | ##### | -0.21644 | 0.115 | 0.59  | ##### |
| SRSF6    | ##### | -0.32727 | 0.112 | 0.615 | ##### |
| GGNBP2   | ##### | -0.27962 | 0.126 | 0.62  | ##### |
| CTDNEP1  | ##### | -0.46295 | 0.065 | 0.557 | ##### |
| SNX5     | ##### | -0.40643 | 0.119 | 0.622 | ##### |
| IDI1     | ##### | -0.15166 | 0.079 | 0.507 | ##### |
| EIF4EBP1 | ##### | -0.2494  | 0.15  | 0.648 | ##### |
| APLP1    | ##### | -0.26654 | 0.14  | 0.633 | ##### |
| TACC3    | ##### | -0.94972 | 0.009 | 0.57  | ##### |
| CD47     | ##### | -0.29777 | 0.112 | 0.602 | ##### |
| PIGX     | ##### | -0.39926 | 0.073 | 0.575 | ##### |

|          |       |          |       |       |       |
|----------|-------|----------|-------|-------|-------|
| AKAP9    | ##### | 0.105029 | 0.204 | 0.605 | ##### |
| RAB18    | ##### | 0.235591 | 0.164 | 0.502 | ##### |
| DPYSL2   | ##### | -0.18164 | 0.134 | 0.611 | ##### |
| BLVRA    | ##### | 0.163661 | 0.173 | 0.558 | ##### |
| CYB5R3   | ##### | -0.15318 | 0.12  | 0.562 | ##### |
| TMEM222  | ##### | 0.169939 | 0.127 | 0.474 | ##### |
| CORO1C   | ##### | -0.10974 | 0.171 | 0.638 | ##### |
| FAM136A  | ##### | -0.22734 | 0.079 | 0.528 | ##### |
| CRIP2    | ##### | 0.111951 | 0.209 | 0.604 | ##### |
| C6orf62  | ##### | -0.34268 | 0.103 | 0.595 | ##### |
| SNHG7    | ##### | -0.11445 | 0.122 | 0.56  | ##### |
| FIP1L1   | ##### | -0.27544 | 0.117 | 0.612 | ##### |
| TSPAN5   | ##### | -0.29993 | 0.105 | 0.589 | ##### |
| MPST     | ##### | -0.46697 | 0.065 | 0.58  | ##### |
| RFC1     | ##### | -0.30576 | 0.092 | 0.584 | ##### |
| BCL7B    | ##### | -0.31181 | 0.092 | 0.58  | ##### |
| DHRS7    | ##### | 0.276581 | 0.208 | 0.523 | ##### |
| LAP3     | ##### | 0.587419 | 0.288 | 0.528 | ##### |
| TRIM28   | ##### | -0.35493 | 0.086 | 0.583 | ##### |
| METRN    | ##### | -0.20469 | 0.178 | 0.652 | ##### |
| CHN1     | ##### | -0.22097 | 0.089 | 0.556 | ##### |
| AHCYL1   | ##### | 0.341686 | 0.215 | 0.526 | ##### |
| MPG      | ##### | 0.13968  | 0.127 | 0.468 | ##### |
| RFC2     | ##### | -0.53369 | 0.068 | 0.605 | ##### |
| PSMD1    | ##### | -0.20349 | 0.124 | 0.605 | ##### |
| BUB3     | ##### | -0.52545 | 0.096 | 0.648 | ##### |
| STX8     | ##### | 0.281657 | 0.171 | 0.506 | ##### |
| CCM2     | ##### | -0.35797 | 0.07  | 0.552 | ##### |
| PHF20    | ##### | -0.16979 | 0.098 | 0.533 | ##### |
| TMEM123  | ##### | -0.19981 | 0.108 | 0.563 | ##### |
| ATP1A1   | ##### | 0.243634 | 0.215 | 0.552 | ##### |
| FEZ2     | ##### | -0.22512 | 0.134 | 0.604 | ##### |
| CHURC1   | ##### | 0.169481 | 0.159 | 0.5   | ##### |
| GRINA    | ##### | 0.121383 | 0.143 | 0.499 | ##### |
| HDGF     | ##### | -0.55181 | 0.075 | 0.616 | ##### |
| BCLAF1   | ##### | -0.27403 | 0.138 | 0.627 | ##### |
| DNAJC9   | ##### | -0.63233 | 0.042 | 0.581 | ##### |
| TMEM183A | ##### | -0.43227 | 0.042 | 0.517 | ##### |
| C20orf27 | ##### | -0.19215 | 0.086 | 0.5   | ##### |
| ERAL1    | ##### | -0.12136 | 0.089 | 0.5   | ##### |
| MVB12A   | ##### | -0.19702 | 0.099 | 0.541 | ##### |
| CCDC82   | ##### | -0.18001 | 0.094 | 0.512 | ##### |
| STARD7   | ##### | -0.15985 | 0.12  | 0.574 | ##### |
| SH3GLB1  | ##### | -0.19093 | 0.113 | 0.564 | ##### |
| CCDC107  | ##### | -0.20471 | 0.099 | 0.557 | ##### |
| RRM1     | ##### | -0.73312 | 0.056 | 0.626 | ##### |
| PON2     | ##### | 0.417678 | 0.382 | 0.684 | ##### |
| CRLS1    | ##### | -0.29435 | 0.075 | 0.531 | ##### |
| ZFP36L1  | ##### | 0.248552 | 0.281 | 0.609 | ##### |
| GNAI2    | ##### | -0.17389 | 0.129 | 0.569 | ##### |
| MPHOSPH8 | ##### | 0.210271 | 0.178 | 0.553 | ##### |



|           |       |          |       |       |       |
|-----------|-------|----------|-------|-------|-------|
| EMC8      | ##### | -0.25544 | 0.075 | 0.527 | ##### |
| THOP1     | ##### | -0.66307 | 0.019 | 0.535 | ##### |
| NUDT3     | ##### | -0.24145 | 0.113 | 0.583 | ##### |
| IMMP1L    | ##### | -0.19521 | 0.089 | 0.536 | ##### |
| TRAF4     | ##### | -0.3347  | 0.112 | 0.602 | ##### |
| DDRGK1    | ##### | -0.13599 | 0.136 | 0.574 | ##### |
| MTIF3     | ##### | 0.118775 | 0.092 | 0.441 | ##### |
| GANAB     | ##### | -0.2698  | 0.084 | 0.537 | ##### |
| RACGAP1   | ##### | -0.95027 | 0.012 | 0.573 | ##### |
| ILK       | ##### | 0.196463 | 0.145 | 0.49  | ##### |
| NOP58     | ##### | -0.33468 | 0.096 | 0.599 | ##### |
| TTC1      | ##### | 0.208374 | 0.138 | 0.483 | ##### |
| SIRT2     | ##### | 0.294945 | 0.197 | 0.542 | ##### |
| FKBP4     | ##### | -0.34494 | 0.072 | 0.552 | ##### |
| ARID4B    | ##### | -0.13019 | 0.15  | 0.599 | ##### |
| DECR1     | ##### | 0.243359 | 0.222 | 0.575 | ##### |
| RAB14     | ##### | -0.15955 | 0.141 | 0.6   | ##### |
| SUMO3     | ##### | -0.19001 | 0.124 | 0.591 | ##### |
| PAK2      | ##### | -0.32893 | 0.082 | 0.549 | ##### |
| TSEN15    | ##### | -0.17766 | 0.072 | 0.499 | ##### |
| SYNE2     | ##### | -0.68082 | 0.049 | 0.595 | ##### |
| UBE3A     | ##### | -0.40849 | 0.07  | 0.548 | ##### |
| BARD1     | ##### | -0.75562 | 0.033 | 0.583 | ##### |
| CCND2     | ##### | -0.25561 | 0.187 | 0.705 | ##### |
| ADI1      | ##### | -0.29115 | 0.117 | 0.614 | ##### |
| CREB3     | ##### | -0.12924 | 0.086 | 0.504 | ##### |
| ACTL6A    | ##### | -0.34634 | 0.08  | 0.572 | ##### |
| TMEM179B  | ##### | 0.230356 | 0.155 | 0.49  | ##### |
| PPIH      | ##### | -0.29403 | 0.066 | 0.528 | ##### |
| TSC22D4   | ##### | 0.656301 | 0.475 | 0.672 | ##### |
| AKIRIN2   | ##### | -0.46349 | 0.087 | 0.61  | ##### |
| PHGDH     | ##### | -0.29813 | 0.152 | 0.673 | ##### |
| C7orf55-L | ##### | -0.37577 | 0.129 | 0.654 | ##### |
| PITHD1    | ##### | -0.5724  | 0.073 | 0.619 | ##### |
| EZR       | ##### | -0.32327 | 0.087 | 0.562 | ##### |
| RABL6     | ##### | -0.39085 | 0.063 | 0.533 | ##### |
| CDKN2AIPN | ##### | -0.27385 | 0.077 | 0.537 | ##### |
| DCAF13    | ##### | 0.262962 | 0.194 | 0.52  | ##### |
| JUNB      | ##### | 0.288313 | 0.424 | 0.767 | ##### |
| RSBN1L    | ##### | -0.19555 | 0.134 | 0.611 | ##### |
| UCHL1     | ##### | 0.363191 | 0.358 | 0.673 | ##### |
| CDC123    | ##### | 0.105946 | 0.12  | 0.483 | ##### |
| DARS      | ##### | 0.258266 | 0.182 | 0.523 | ##### |
| NXT1      | ##### | -0.48133 | 0.068 | 0.573 | ##### |
| PPP2CB    | ##### | -0.38977 | 0.08  | 0.552 | ##### |
| TMED1     | ##### | 0.436028 | 0.19  | 0.46  | ##### |
| TRAPPC2L  | ##### | 0.13381  | 0.159 | 0.543 | ##### |
| FGD5-AS1  | ##### | -0.41912 | 0.082 | 0.583 | ##### |
| MPDU1     | ##### | -0.12807 | 0.126 | 0.564 | ##### |
| ECI1      | ##### | -0.44524 | 0.045 | 0.512 | ##### |
| QDPR      | ##### | 0.147399 | 0.162 | 0.538 | ##### |

|          |       |          |       |       |       |
|----------|-------|----------|-------|-------|-------|
| HMG20B   | ##### | -0.27192 | 0.103 | 0.556 | ##### |
| SUPT16H  | ##### | -0.10071 | 0.117 | 0.559 | ##### |
| AKR7A2   | ##### | -0.26215 | 0.084 | 0.548 | ##### |
| NPDC1    | ##### | -0.11017 | 0.14  | 0.567 | ##### |
| CDKN2C   | ##### | -0.30289 | 0.216 | 0.737 | ##### |
| TIMM22   | ##### | -0.16378 | 0.08  | 0.5   | ##### |
| COMMD3   | ##### | 0.215861 | 0.154 | 0.494 | ##### |
| ETV1     | ##### | -0.27802 | 0.157 | 0.658 | ##### |
| PSMD12   | ##### | -0.29329 | 0.092 | 0.557 | ##### |
| NIPA2    | ##### | -0.34115 | 0.056 | 0.512 | ##### |
| SYAP1    | ##### | -0.10499 | 0.087 | 0.489 | ##### |
| GORASP2  | ##### | -0.22749 | 0.082 | 0.521 | ##### |
| PAFAH1B1 | ##### | -0.38302 | 0.086 | 0.562 | ##### |
| ATG3     | ##### | -0.22739 | 0.089 | 0.543 | ##### |
| PMP2     | ##### | 0.200305 | 0.344 | 0.677 | ##### |
| UBE2K    | ##### | -0.17759 | 0.077 | 0.502 | ##### |
| FTH1     | ##### | 0.343226 | 0.806 | 0.981 | ##### |
| WDR61    | ##### | 0.314658 | 0.194 | 0.519 | ##### |
| GINM1    | ##### | -0.20272 | 0.075 | 0.491 | ##### |
| CCNL1    | ##### | -0.12062 | 0.194 | 0.663 | ##### |
| DCTN2    | ##### | -0.23305 | 0.236 | 0.757 | ##### |
| VPS35    | ##### | -0.18577 | 0.14  | 0.611 | ##### |
| DTNA     | ##### | 0.840852 | 0.222 | 0.358 | ##### |
| NREP     | ##### | -0.29656 | 0.103 | 0.585 | ##### |
| GRN      | ##### | 0.141094 | 0.175 | 0.523 | ##### |
| FNTA     | ##### | -0.33791 | 0.094 | 0.585 | ##### |
| PAFAH1B2 | ##### | -0.28679 | 0.084 | 0.546 | ##### |
| UTP11L   | ##### | -0.10661 | 0.092 | 0.507 | ##### |
| C21orf59 | ##### | -0.21707 | 0.092 | 0.533 | ##### |
| LYRM5    | ##### | 0.344761 | 0.176 | 0.468 | ##### |
| SMIM20   | ##### | 0.183806 | 0.12  | 0.446 | ##### |
| DBN1     | ##### | -0.43584 | 0.117 | 0.644 | ##### |
| COMMD1   | ##### | 0.308391 | 0.175 | 0.484 | ##### |
| SYPL1    | ##### | 0.330778 | 0.19  | 0.494 | ##### |
| MAZ      | ##### | -0.53192 | 0.052 | 0.563 | ##### |
| DAZAP1   | ##### | -0.47644 | 0.052 | 0.551 | ##### |
| GAMT     | ##### | -0.53471 | 0.058 | 0.562 | ##### |
| KLC1     | ##### | -0.19535 | 0.124 | 0.584 | ##### |
| EIF2AK2  | ##### | -0.11899 | 0.099 | 0.522 | ##### |
| TMSB15B  | ##### | -0.60909 | 0.052 | 0.586 | ##### |
| SLBP     | ##### | -0.58435 | 0.063 | 0.593 | ##### |
| RAC3     | ##### | -0.55194 | 0.042 | 0.533 | ##### |
| CNIH1    | ##### | 0.193758 | 0.175 | 0.537 | ##### |
| CALM2    | ##### | 0.324395 | 0.815 | 0.989 | ##### |
| C12orf10 | ##### | 0.233881 | 0.134 | 0.46  | ##### |
| RAP1A    | ##### | 0.130358 | 0.143 | 0.5   | ##### |
| 6-Mar    | ##### | -0.12329 | 0.115 | 0.551 | ##### |
| RBCK1    | ##### | -0.34015 | 0.07  | 0.528 | ##### |
| PPP2R5E  | ##### | -0.44637 | 0.049 | 0.52  | ##### |
| DLGAP4   | ##### | -0.13045 | 0.079 | 0.479 | ##### |
| TSR3     | ##### | -0.26888 | 0.082 | 0.517 | ##### |

|          |       |          |       |       |       |
|----------|-------|----------|-------|-------|-------|
| MLST8    | ##### | -0.12999 | 0.079 | 0.488 | ##### |
| TAF15    | ##### | -0.42526 | 0.073 | 0.564 | ##### |
| LCMT1    | ##### | -0.20793 | 0.068 | 0.495 | ##### |
| CFL2     | ##### | 0.126785 | 0.168 | 0.546 | ##### |
| RAE1     | ##### | -0.28612 | 0.084 | 0.548 | ##### |
| CHD4     | ##### | -0.24814 | 0.098 | 0.544 | ##### |
| RUVBL1   | ##### | -0.2244  | 0.099 | 0.554 | ##### |
| TK1      | ##### | -0.94118 | 0.003 | 0.533 | ##### |
| ZFAND3   | ##### | -0.11891 | 0.08  | 0.477 | ##### |
| PEF1     | ##### | 0.256061 | 0.175 | 0.512 | ##### |
| TUBB     | ##### | -0.26391 | 0.56  | 0.995 | ##### |
| NDUFA9   | ##### | 0.176451 | 0.204 | 0.579 | ##### |
| TMEM259  | ##### | -0.3103  | 0.089 | 0.559 | ##### |
| IFNGR2   | ##### | -0.24669 | 0.073 | 0.501 | ##### |
| WDR1     | ##### | -0.13066 | 0.127 | 0.549 | ##### |
| SPATS2   | ##### | -0.28298 | 0.112 | 0.584 | ##### |
| VAMP5    | ##### | 0.739355 | 0.241 | 0.405 | ##### |
| SH3GL1   | ##### | -0.3082  | 0.066 | 0.51  | ##### |
| BCL7C    | ##### | -0.81701 | 0.031 | 0.574 | ##### |
| IFT52    | ##### | -0.21159 | 0.079 | 0.507 | ##### |
| TSSC4    | ##### | -0.24712 | 0.098 | 0.556 | ##### |
| YIF1B    | ##### | -0.14488 | 0.096 | 0.517 | ##### |
| MAGOHB   | ##### | -0.45459 | 0.073 | 0.583 | ##### |
| TIMM9    | ##### | 0.126991 | 0.129 | 0.486 | ##### |
| GNL1     | ##### | -0.38794 | 0.065 | 0.528 | ##### |
| STK25    | ##### | -0.5302  | 0.066 | 0.581 | ##### |
| CEBPZ    | ##### | -0.18433 | 0.082 | 0.515 | ##### |
| PODXL2   | ##### | -0.4252  | 0.12  | 0.641 | ##### |
| CMTM6    | ##### | -0.19361 | 0.105 | 0.549 | ##### |
| PJA2     | ##### | -0.15872 | 0.106 | 0.51  | ##### |
| ASPM     | ##### | -1.09622 | 0.002 | 0.535 | ##### |
| STX12    | ##### | 0.193418 | 0.15  | 0.477 | ##### |
| SNRNP200 | ##### | -0.27753 | 0.096 | 0.568 | ##### |
| MAP2K2   | ##### | -0.3605  | 0.087 | 0.546 | ##### |
| USE1     | ##### | 0.444808 | 0.209 | 0.479 | ##### |
| EGFR     | ##### | -0.13274 | 0.257 | 0.723 | ##### |
| BAZ1A    | ##### | -0.33575 | 0.099 | 0.577 | ##### |
| NKIRAS2  | ##### | -0.16622 | 0.077 | 0.5   | ##### |
| PPP1R12A | ##### | -0.10239 | 0.12  | 0.541 | ##### |
| HJURP    | ##### | -1.02929 | 0     | 0.525 | ##### |
| HNRNP2   | ##### | 0.298526 | 0.19  | 0.491 | ##### |
| FAM210B  | ##### | -0.71575 | 0.049 | 0.581 | ##### |
| PDHB     | ##### | 0.243968 | 0.185 | 0.533 | ##### |
| CISD1    | ##### | 0.225351 | 0.168 | 0.504 | ##### |
| CDK16    | ##### | -0.35387 | 0.072 | 0.536 | ##### |
| TMX4     | ##### | -0.55061 | 0.042 | 0.532 | ##### |
| SPATS2L  | ##### | -0.23952 | 0.11  | 0.546 | ##### |
| CSNK1E   | ##### | -0.14759 | 0.133 | 0.568 | ##### |
| MCRS1    | ##### | -0.32003 | 0.073 | 0.537 | ##### |
| ATP6V1E1 | ##### | 0.190693 | 0.175 | 0.527 | ##### |
| FZD3     | ##### | -0.29013 | 0.108 | 0.577 | ##### |

|           |       |          |       |       |       |
|-----------|-------|----------|-------|-------|-------|
| FAM96A    | ##### | 0.146058 | 0.133 | 0.48  | ##### |
| ANKRD11   | ##### | -0.25142 | 0.094 | 0.541 | ##### |
| FBX05     | ##### | -0.87939 | 0.016 | 0.552 | ##### |
| TUSC2     | ##### | -0.23678 | 0.087 | 0.532 | ##### |
| C22orf39  | ##### | -0.42872 | 0.066 | 0.553 | ##### |
| POU3F2    | ##### | -0.5525  | 0.08  | 0.591 | ##### |
| PDCD2     | ##### | -0.37176 | 0.072 | 0.548 | ##### |
| BAG6      | ##### | -0.26117 | 0.086 | 0.535 | ##### |
| UBE2R2    | ##### | -0.36952 | 0.058 | 0.515 | ##### |
| TRAP1     | ##### | -0.36099 | 0.063 | 0.527 | ##### |
| DDX27     | ##### | -0.14931 | 0.07  | 0.459 | ##### |
| C19orf25  | ##### | -0.23048 | 0.08  | 0.515 | ##### |
| ELP5      | ##### | -0.44264 | 0.047 | 0.514 | ##### |
| MT1M      | ##### | 0.645026 | 0.239 | 0.458 | ##### |
| PHF19     | ##### | -0.45722 | 0.054 | 0.541 | ##### |
| POLE3     | ##### | -0.26757 | 0.086 | 0.541 | ##### |
| TAX1BP3   | ##### | 0.17079  | 0.126 | 0.464 | ##### |
| WDR18     | ##### | -0.23823 | 0.08  | 0.521 | ##### |
| DKC1      | ##### | -0.22061 | 0.094 | 0.542 | ##### |
| NBPF1     | ##### | -0.45818 | 0.049 | 0.53  | ##### |
| NCBP2-AS2 | ##### | -0.31797 | 0.07  | 0.523 | ##### |
| C6orf1    | ##### | 0.342431 | 0.152 | 0.43  | ##### |
| NME3      | ##### | 0.12291  | 0.145 | 0.478 | ##### |
| ARMC10    | ##### | -0.27192 | 0.075 | 0.526 | ##### |
| STK17A    | ##### | -0.21052 | 0.084 | 0.507 | ##### |
| ZNF24     | ##### | 0.173301 | 0.148 | 0.494 | ##### |
| GPN3      | ##### | -0.13261 | 0.075 | 0.474 | ##### |
| ABHD12    | ##### | -0.48913 | 0.082 | 0.58  | ##### |
| MTX2      | ##### | -0.19044 | 0.106 | 0.551 | ##### |
| HES6      | ##### | -0.3365  | 0.218 | 0.752 | ##### |
| C1orf35   | ##### | -0.39262 | 0.056 | 0.525 | ##### |
| THOC2     | ##### | -0.13714 | 0.12  | 0.548 | ##### |
| SMIM19    | ##### | -0.11587 | 0.099 | 0.505 | ##### |
| METTTL23  | ##### | -0.29091 | 0.077 | 0.514 | ##### |
| HAUS1     | ##### | -0.30983 | 0.08  | 0.552 | ##### |
| TIA1      | ##### | -0.15059 | 0.113 | 0.557 | ##### |
| MCUR1     | ##### | -0.52379 | 0.042 | 0.519 | ##### |
| CDC20     | ##### | -1.28996 | 0.005 | 0.543 | ##### |
| DNPH1     | ##### | 0.109253 | 0.145 | 0.496 | ##### |
| ID2       | ##### | 0.443403 | 0.3   | 0.595 | ##### |
| GSS       | ##### | -0.26709 | 0.063 | 0.486 | ##### |
| SSBP4     | ##### | -0.1724  | 0.079 | 0.47  | ##### |
| TJP1      | ##### | -0.25862 | 0.04  | 0.428 | ##### |
| LAMP2     | ##### | 0.334484 | 0.213 | 0.486 | ##### |
| RAD51AP1  | ##### | -0.91276 | 0.003 | 0.53  | ##### |
| MORN2     | ##### | 0.141846 | 0.115 | 0.467 | ##### |
| ADSL      | ##### | -0.13198 | 0.082 | 0.481 | ##### |
| WBP2      | ##### | 0.351598 | 0.223 | 0.527 | ##### |
| ABCF1     | ##### | -0.38145 | 0.072 | 0.548 | ##### |
| RP11-1094 | ##### | -0.10649 | 0.089 | 0.498 | ##### |
| PLEKHB2   | ##### | -0.16711 | 0.108 | 0.546 | ##### |

|          |       |          |       |       |       |
|----------|-------|----------|-------|-------|-------|
| PHF20L1  | ##### | -0.24576 | 0.089 | 0.526 | ##### |
| TEX264   | ##### | 0.334014 | 0.185 | 0.478 | ##### |
| NUP62    | ##### | -0.32245 | 0.066 | 0.526 | ##### |
| SF3A3    | ##### | -0.23826 | 0.079 | 0.522 | ##### |
| ASPH     | ##### | -0.33771 | 0.077 | 0.542 | ##### |
| GTF2F2   | ##### | 0.125562 | 0.134 | 0.478 | ##### |
| CRK      | ##### | -0.27101 | 0.108 | 0.557 | ##### |
| RRP7A    | ##### | -0.48284 | 0.052 | 0.537 | ##### |
| GLT8D1   | ##### | -0.30152 | 0.079 | 0.532 | ##### |
| VEZF1    | ##### | -0.36374 | 0.068 | 0.535 | ##### |
| KEAP1    | ##### | -0.22536 | 0.091 | 0.52  | ##### |
| MAP7D1   | ##### | -0.32542 | 0.068 | 0.509 | ##### |
| RFC3     | ##### | -0.80453 | 0.012 | 0.537 | ##### |
| WDR33    | ##### | -0.13769 | 0.089 | 0.511 | ##### |
| GATM     | ##### | 0.114158 | 0.173 | 0.53  | ##### |
| AATF     | ##### | -0.31898 | 0.075 | 0.531 | ##### |
| PDHA1    | ##### | -0.15963 | 0.12  | 0.568 | ##### |
| SAFB2    | ##### | -0.28358 | 0.098 | 0.554 | ##### |
| DEF8     | ##### | -0.27689 | 0.065 | 0.506 | ##### |
| EFEMP2   | ##### | -0.23944 | 0.054 | 0.443 | ##### |
| FAM104A  | ##### | -0.34455 | 0.056 | 0.486 | ##### |
| ACYP2    | ##### | 0.423519 | 0.168 | 0.411 | ##### |
| ILF3-AS1 | ##### | 0.14089  | 0.162 | 0.522 | ##### |
| GOLIM4   | ##### | -0.26576 | 0.126 | 0.59  | ##### |
| IMMT     | ##### | -0.24864 | 0.082 | 0.525 | ##### |
| NDC80    | ##### | -1.02331 | 0.003 | 0.53  | ##### |
| FTSJ2    | ##### | -0.15293 | 0.086 | 0.501 | ##### |
| SERINC3  | ##### | -0.13205 | 0.101 | 0.501 | ##### |
| ZNF90    | ##### | 0.9113   | 0.372 | 0.435 | ##### |
| CHMP1A   | ##### | -0.19752 | 0.07  | 0.484 | ##### |
| LIMS1    | ##### | -0.18088 | 0.101 | 0.509 | ##### |
| KLHDC8A  | ##### | -0.25849 | 0.108 | 0.567 | ##### |
| SUCLA2   | ##### | 0.143292 | 0.154 | 0.501 | ##### |
| ZNF326   | ##### | -0.32677 | 0.079 | 0.542 | ##### |
| DRG2     | ##### | 0.13454  | 0.087 | 0.381 | ##### |
| MRT04    | ##### | -0.14518 | 0.077 | 0.478 | ##### |
| EAPP     | ##### | 0.338662 | 0.183 | 0.488 | ##### |
| DDX42    | ##### | -0.19067 | 0.058 | 0.449 | ##### |
| ITFG1    | ##### | -0.24497 | 0.105 | 0.553 | ##### |
| TAOK1    | ##### | -0.16832 | 0.072 | 0.449 | ##### |
| SMAP1    | ##### | -0.27439 | 0.065 | 0.506 | ##### |
| ACO2     | ##### | 0.153364 | 0.173 | 0.522 | ##### |
| PNMA1    | ##### | -0.25588 | 0.101 | 0.544 | ##### |
| EIF3A    | ##### | -0.27904 | 0.072 | 0.512 | ##### |
| KLHDC2   | ##### | -0.16842 | 0.094 | 0.517 | ##### |
| OCIAD2   | ##### | 0.722607 | 0.365 | 0.495 | ##### |
| ARMC1    | ##### | -0.33539 | 0.084 | 0.552 | ##### |
| OSBPL8   | ##### | -0.40038 | 0.059 | 0.515 | ##### |
| ILKAP    | ##### | -0.26913 | 0.068 | 0.507 | ##### |
| NOL12    | ##### | -0.22609 | 0.061 | 0.467 | ##### |
| DHX9     | ##### | -0.13103 | 0.11  | 0.533 | ##### |

|          |       |          |       |       |       |
|----------|-------|----------|-------|-------|-------|
| SDR39U1  | ##### | 0.252393 | 0.168 | 0.491 | ##### |
| COTL1    | ##### | -0.33628 | 0.084 | 0.554 | ##### |
| KPNA3    | ##### | -0.27763 | 0.066 | 0.501 | ##### |
| C17orf62 | ##### | -0.29672 | 0.079 | 0.499 | ##### |
| SRSF10   | ##### | -0.13674 | 0.131 | 0.573 | ##### |
| VMA21    | ##### | -0.23774 | 0.077 | 0.507 | ##### |
| MT1E     | ##### | 0.872734 | 0.38  | 0.483 | ##### |
| APPL1    | ##### | -0.36326 | 0.063 | 0.516 | ##### |
| ELAVL3   | ##### | -0.36159 | 0.12  | 0.605 | ##### |
| FXR1     | ##### | -0.13331 | 0.127 | 0.554 | ##### |
| HMGA1    | ##### | -0.56789 | 0.066 | 0.565 | ##### |
| PRCC     | ##### | -0.12605 | 0.113 | 0.536 | ##### |
| CAPZA1   | ##### | -0.32563 | 0.075 | 0.521 | ##### |
| FAM50A   | ##### | -0.32191 | 0.096 | 0.553 | ##### |
| DHX30    | ##### | -0.18287 | 0.073 | 0.479 | ##### |
| LEPROT   | ##### | 0.207086 | 0.147 | 0.469 | ##### |
| PPP1R11  | ##### | 0.142767 | 0.133 | 0.467 | ##### |
| ECT2     | ##### | -0.90897 | 0.002 | 0.512 | ##### |
| ACIN1    | ##### | -0.10992 | 0.096 | 0.501 | ##### |
| NRCAM    | ##### | -0.1408  | 0.147 | 0.574 | ##### |
| PRADC1   | ##### | -0.51361 | 0.049 | 0.536 | ##### |
| HILPDA   | ##### | 0.48169  | 0.155 | 0.452 | ##### |
| TMEM261  | ##### | 0.146675 | 0.152 | 0.511 | ##### |
| TM2D2    | ##### | 0.269471 | 0.136 | 0.405 | ##### |
| CBFB     | ##### | -0.24842 | 0.056 | 0.459 | ##### |
| TMEM203  | ##### | -0.24198 | 0.072 | 0.491 | ##### |
| ATAD2    | ##### | -0.89878 | 0.003 | 0.52  | ##### |
| SAP30    | ##### | -0.72267 | 0.028 | 0.535 | ##### |
| DNAJC2   | ##### | -0.1782  | 0.112 | 0.553 | ##### |
| MAPKAP1  | ##### | -0.10939 | 0.079 | 0.443 | ##### |
| WEE1     | ##### | -0.47874 | 0.044 | 0.51  | ##### |
| EBPL     | ##### | -0.17481 | 0.098 | 0.517 | ##### |
| IER2     | ##### | -0.21556 | 0.277 | 0.778 | ##### |
| RAB8A    | ##### | -0.13273 | 0.096 | 0.517 | ##### |
| SQLE     | ##### | -0.30435 | 0.087 | 0.537 | ##### |
| RIC8A    | ##### | -0.20132 | 0.087 | 0.516 | ##### |
| TMEM106B | ##### | 0.104703 | 0.148 | 0.493 | ##### |
| ZFR      | ##### | -0.17278 | 0.112 | 0.548 | ##### |
| HSPBP1   | ##### | -0.21698 | 0.101 | 0.542 | ##### |
| TCEAL8   | ##### | 0.257357 | 0.211 | 0.551 | ##### |
| RBBP6    | ##### | -0.25171 | 0.086 | 0.519 | ##### |
| TGOLN2   | ##### | -0.27016 | 0.089 | 0.528 | ##### |
| AP3D1    | ##### | -0.29367 | 0.098 | 0.552 | ##### |
| ANAPC13  | ##### | 0.167077 | 0.159 | 0.525 | ##### |
| NCAPG    | ##### | -0.88763 | 0     | 0.506 | ##### |
| CSNK1D   | ##### | -0.21812 | 0.072 | 0.475 | ##### |
| ROCK1    | ##### | -0.31798 | 0.059 | 0.498 | ##### |
| WHSC1    | ##### | -0.55552 | 0.051 | 0.549 | ##### |
| BRMS1    | ##### | -0.2879  | 0.072 | 0.509 | ##### |
| C21orf58 | ##### | -0.83147 | 0.003 | 0.516 | ##### |
| NUCB1    | ##### | 0.195995 | 0.178 | 0.514 | ##### |

|           |       |          |       |       |       |
|-----------|-------|----------|-------|-------|-------|
| SPTBN1    | ##### | -0.10139 | 0.115 | 0.521 | ##### |
| PARL      | ##### | -0.12643 | 0.094 | 0.496 | ##### |
| TRIM44    | ##### | 0.195748 | 0.161 | 0.493 | ##### |
| ARF6      | ##### | -0.25202 | 0.096 | 0.547 | ##### |
| CDCA3     | ##### | -1.05911 | 0.002 | 0.509 | ##### |
| CPSF6     | ##### | -0.18331 | 0.147 | 0.604 | ##### |
| IPO9      | ##### | -0.36661 | 0.077 | 0.549 | ##### |
| PRPF19    | ##### | -0.17647 | 0.075 | 0.473 | ##### |
| FOS       | ##### | 0.701145 | 0.667 | 0.791 | ##### |
| ALKBH5    | ##### | -0.4487  | 0.056 | 0.515 | ##### |
| PCBP4     | ##### | -0.30018 | 0.079 | 0.512 | ##### |
| POLR3K    | ##### | -0.13698 | 0.073 | 0.463 | ##### |
| MELK      | ##### | -0.8061  | 0.009 | 0.515 | ##### |
| TNRC6B    | ##### | -0.13321 | 0.143 | 0.567 | ##### |
| SPC24     | ##### | -0.92515 | 0.003 | 0.517 | ##### |
| LGALS3BP  | ##### | 0.55104  | 0.307 | 0.51  | ##### |
| AP2A1     | ##### | -0.1715  | 0.072 | 0.467 | ##### |
| SBN01     | ##### | -0.27041 | 0.073 | 0.505 | ##### |
| CAPNS1    | ##### | -0.13357 | 0.101 | 0.499 | ##### |
| COA6      | ##### | -0.13025 | 0.082 | 0.477 | ##### |
| C2orf69   | ##### | -0.61912 | 0.031 | 0.528 | ##### |
| PHC2      | ##### | -0.16444 | 0.077 | 0.467 | ##### |
| PPP1R2    | ##### | -0.12007 | 0.098 | 0.491 | ##### |
| DDA1      | ##### | -0.11885 | 0.119 | 0.527 | ##### |
| COMMD2    | ##### | -0.15852 | 0.108 | 0.532 | ##### |
| A2M       | ##### | 0.777731 | 0.19  | 0.326 | ##### |
| EMD       | ##### | -0.45795 | 0.056 | 0.526 | ##### |
| ARL1      | ##### | 0.188735 | 0.138 | 0.454 | ##### |
| USP8      | ##### | 0.133913 | 0.089 | 0.389 | ##### |
| DSEL      | ##### | -0.30221 | 0.152 | 0.638 | ##### |
| CDCA5     | ##### | -0.84652 | 0.009 | 0.523 | ##### |
| HDAC1     | ##### | -0.10574 | 0.059 | 0.416 | ##### |
| HLA-C     | ##### | 0.686187 | 0.64  | 0.716 | ##### |
| CHPT1     | ##### | -0.23608 | 0.099 | 0.536 | ##### |
| CDC5L     | ##### | -0.47104 | 0.07  | 0.56  | ##### |
| RAF1      | ##### | -0.39526 | 0.075 | 0.546 | ##### |
| PLEKH01   | ##### | -0.43842 | 0.047 | 0.507 | ##### |
| SURF1     | ##### | -0.30897 | 0.066 | 0.506 | ##### |
| COQ4      | ##### | -0.10179 | 0.091 | 0.468 | ##### |
| TLK1      | ##### | -0.35242 | 0.072 | 0.52  | ##### |
| THY1      | ##### | 0.116466 | 0.171 | 0.521 | ##### |
| CENPE     | ##### | -1.11838 | 0.003 | 0.517 | ##### |
| RAB4A     | ##### | -0.20044 | 0.113 | 0.542 | ##### |
| FDX1      | ##### | -0.38216 | 0.061 | 0.514 | ##### |
| ZNF292    | ##### | -0.15208 | 0.084 | 0.477 | ##### |
| NT5C      | ##### | -0.16639 | 0.089 | 0.485 | ##### |
| PRRC2A    | ##### | -0.30492 | 0.08  | 0.506 | ##### |
| PMP22     | ##### | 0.401491 | 0.311 | 0.557 | ##### |
| IFI27L2   | ##### | 0.521016 | 0.271 | 0.507 | ##### |
| PITPNA-AS | ##### | -0.15676 | 0.063 | 0.454 | ##### |
| KATNB1    | ##### | -0.28273 | 0.059 | 0.472 | ##### |

|         |       |          |       |       |       |
|---------|-------|----------|-------|-------|-------|
| TTYH1   | ##### | 0.376035 | 0.277 | 0.573 | ##### |
| YIPF6   | ##### | 0.151998 | 0.152 | 0.486 | ##### |
| TAF11   | ##### | -0.1935  | 0.077 | 0.486 | ##### |
| SLC52A2 | ##### | -0.34024 | 0.065 | 0.495 | ##### |
| FAM49B  | ##### | -0.20262 | 0.098 | 0.527 | ##### |
| RNF10   | ##### | -0.13611 | 0.098 | 0.51  | ##### |
| GGPS1   | ##### | 0.100917 | 0.145 | 0.502 | ##### |
| QTRT1   | ##### | 0.306124 | 0.206 | 0.514 | ##### |
| LMNB2   | ##### | -0.7712  | 0.014 | 0.521 | ##### |
| EPC1    | ##### | -0.27868 | 0.065 | 0.485 | ##### |
| NAMPT   | ##### | 1.097607 | 0.276 | 0.293 | ##### |
| SUZ12   | ##### | -0.50191 | 0.045 | 0.51  | ##### |
| EIF3B   | ##### | -0.23502 | 0.075 | 0.485 | ##### |
| SAFB    | ##### | -0.405   | 0.063 | 0.528 | ##### |
| CD2BP2  | ##### | 0.111907 | 0.113 | 0.457 | ##### |
| PFKL    | ##### | -0.19293 | 0.096 | 0.51  | ##### |
| G3BP1   | ##### | -0.11909 | 0.122 | 0.533 | ##### |
| TAF6    | ##### | -0.22535 | 0.082 | 0.511 | ##### |
| SAC3D1  | ##### | -0.63408 | 0.033 | 0.527 | ##### |
| MEG3    | ##### | 0.762735 | 0.445 | 0.528 | ##### |
| GABARAP | ##### | 0.571082 | 0.232 | 0.417 | ##### |
| PSRC1   | ##### | -0.30952 | 0.129 | 0.591 | ##### |
| SMC1A   | ##### | -0.43474 | 0.061 | 0.533 | ##### |
| HSF1    | ##### | -0.2431  | 0.079 | 0.493 | ##### |
| SMARCC1 | ##### | -0.49818 | 0.056 | 0.547 | ##### |
| CIAPIN1 | ##### | -0.15572 | 0.094 | 0.51  | ##### |
| DLD     | ##### | 0.137783 | 0.159 | 0.5   | ##### |
| GPSM2   | ##### | -0.53233 | 0.086 | 0.594 | ##### |
| CCNC    | ##### | -0.13644 | 0.087 | 0.486 | ##### |
| TAGLN2  | ##### | 0.728984 | 0.471 | 0.544 | ##### |
| RANGRF  | ##### | -0.13185 | 0.068 | 0.449 | ##### |
| FAM92A1 | ##### | -0.19034 | 0.063 | 0.446 | ##### |
| CADM4   | ##### | -0.14197 | 0.105 | 0.517 | ##### |
| TP53I13 | ##### | -0.5747  | 0.044 | 0.507 | ##### |
| SHISA4  | ##### | 0.330498 | 0.131 | 0.368 | ##### |
| DRAXIN  | ##### | -0.51273 | 0.051 | 0.52  | ##### |
| MIS18A  | ##### | -0.55773 | 0.033 | 0.504 | ##### |
| CDC25B  | ##### | -0.65253 | 0.063 | 0.568 | ##### |
| KMT2A   | ##### | -0.34639 | 0.068 | 0.517 | ##### |
| FDX1L   | ##### | 0.117366 | 0.11  | 0.43  | ##### |
| NFYB    | ##### | -0.2241  | 0.059 | 0.46  | ##### |
| AKIP1   | ##### | -0.12446 | 0.077 | 0.456 | ##### |
| CD164   | ##### | 0.141724 | 0.175 | 0.505 | ##### |
| ING2    | ##### | -0.34147 | 0.063 | 0.504 | ##### |
| MTX1    | ##### | 0.15981  | 0.073 | 0.36  | ##### |
| WSB2    | ##### | -0.32527 | 0.047 | 0.463 | ##### |
| RMDN3   | ##### | -0.21315 | 0.066 | 0.459 | ##### |
| CHD7    | ##### | -0.17954 | 0.14  | 0.585 | ##### |
| PPP2R5C | ##### | -0.25045 | 0.072 | 0.499 | ##### |
| JMJD1C  | ##### | -0.22335 | 0.108 | 0.533 | ##### |
| U2AF2   | ##### | -0.36134 | 0.068 | 0.527 | ##### |



|          |       |          |       |       |       |
|----------|-------|----------|-------|-------|-------|
| RTCB     | ##### | -0.2627  | 0.082 | 0.507 | ##### |
| BLOC1S2  | ##### | 0.121423 | 0.11  | 0.438 | ##### |
| IKBIP    | ##### | -0.54582 | 0.037 | 0.502 | ##### |
| IPO5     | ##### | -0.27318 | 0.073 | 0.502 | ##### |
| YTHDC1   | ##### | -0.28892 | 0.086 | 0.53  | ##### |
| HIRIP3   | ##### | -0.54867 | 0.044 | 0.531 | ##### |
| ADIPOR1  | ##### | -0.3334  | 0.058 | 0.488 | ##### |
| ACOT7    | ##### | -0.40348 | 0.058 | 0.514 | ##### |
| CENPA    | ##### | -1.09124 | 0.002 | 0.504 | ##### |
| CYB5A    | ##### | 0.163356 | 0.131 | 0.457 | ##### |
| RAB13    | ##### | 0.458424 | 0.243 | 0.51  | ##### |
| TSPAN7   | ##### | 0.374121 | 0.277 | 0.557 | ##### |
| PRPF8    | ##### | -0.18401 | 0.073 | 0.465 | ##### |
| HMOX2    | ##### | 0.337586 | 0.122 | 0.39  | ##### |
| NINJ1    | ##### | -0.2711  | 0.065 | 0.48  | ##### |
| RIF1     | ##### | -0.44437 | 0.056 | 0.522 | ##### |
| ECHDC1   | ##### | -0.11049 | 0.098 | 0.494 | ##### |
| PRPSAP2  | ##### | -0.1173  | 0.099 | 0.494 | ##### |
| TWF1     | ##### | -0.14437 | 0.082 | 0.47  | ##### |
| SOGA1    | ##### | -0.45679 | 0.049 | 0.493 | ##### |
| PLP2     | ##### | 0.128113 | 0.147 | 0.478 | ##### |
| CDC34    | ##### | -0.26899 | 0.073 | 0.5   | ##### |
| CDCA4    | ##### | -0.82158 | 0.014 | 0.52  | ##### |
| NTPCR    | ##### | 0.248395 | 0.134 | 0.435 | ##### |
| RSPRY1   | ##### | -0.20565 | 0.065 | 0.462 | ##### |
| SOX9     | ##### | -0.43635 | 0.131 | 0.612 | ##### |
| WNK1     | ##### | -0.29793 | 0.056 | 0.473 | ##### |
| H3F3A    | ##### | 0.394419 | 0.684 | 0.838 | ##### |
| CTNNBIP1 | ##### | -0.42963 | 0.031 | 0.459 | ##### |
| GDE1     | ##### | -0.28294 | 0.059 | 0.47  | ##### |
| SOX11    | ##### | -0.43647 | 0.127 | 0.628 | ##### |
| ACAA1    | ##### | -0.12696 | 0.082 | 0.468 | ##### |
| SORT1    | ##### | -0.14729 | 0.047 | 0.401 | ##### |
| CETN2    | ##### | 0.549169 | 0.195 | 0.409 | ##### |
| CEP57    | ##### | -0.40583 | 0.068 | 0.526 | ##### |
| MFGES    | ##### | -0.28672 | 0.079 | 0.504 | ##### |
| GPI      | ##### | 0.427764 | 0.206 | 0.451 | ##### |
| TSTA3    | ##### | -0.18841 | 0.066 | 0.459 | ##### |
| HDAC3    | ##### | -0.15575 | 0.068 | 0.446 | ##### |
| NDUFS1   | ##### | -0.22131 | 0.079 | 0.49  | ##### |
| AIG1     | ##### | 0.209003 | 0.143 | 0.449 | ##### |
| PABPC4   | ##### | -0.30239 | 0.056 | 0.48  | ##### |
| KLHL7    | ##### | -0.26435 | 0.096 | 0.528 | ##### |
| ARL4A    | ##### | 0.349219 | 0.262 | 0.553 | ##### |
| SERINC1  | ##### | 0.167132 | 0.175 | 0.491 | ##### |
| TIMP2    | ##### | -0.30467 | 0.068 | 0.496 | ##### |
| GSTO1    | ##### | 0.297176 | 0.15  | 0.452 | ##### |
| FYTTD1   | ##### | -0.23931 | 0.068 | 0.484 | ##### |
| TRA2A    | ##### | -0.13767 | 0.127 | 0.543 | ##### |
| TMEM14A  | ##### | 0.145243 | 0.138 | 0.475 | ##### |
| DNASE2   | ##### | 0.258963 | 0.12  | 0.384 | ##### |

|           |       |          |       |       |       |
|-----------|-------|----------|-------|-------|-------|
| GINS2     | ##### | -0.8552  | 0.028 | 0.541 | ##### |
| ATG4B     | ##### | -0.24455 | 0.066 | 0.473 | ##### |
| MYBL2     | ##### | -0.90555 | 0.002 | 0.491 | ##### |
| MED19     | ##### | -0.14597 | 0.105 | 0.517 | ##### |
| NRN1      | ##### | 0.581533 | 0.209 | 0.433 | ##### |
| RANBP3    | ##### | -0.20418 | 0.059 | 0.447 | ##### |
| RSU1      | ##### | 0.346356 | 0.094 | 0.317 | ##### |
| PPM1B     | ##### | -0.19995 | 0.108 | 0.533 | ##### |
| HTRA1     | ##### | 0.164855 | 0.244 | 0.61  | ##### |
| HTATSF1   | ##### | -0.2795  | 0.087 | 0.531 | ##### |
| TFDP1     | ##### | -0.52182 | 0.03  | 0.483 | ##### |
| SEPHS2    | ##### | -0.14679 | 0.065 | 0.43  | ##### |
| SERPINE2  | ##### | -0.1521  | 0.18  | 0.625 | ##### |
| GSTA4     | ##### | 0.168274 | 0.166 | 0.504 | ##### |
| PSMB8     | ##### | 0.221144 | 0.166 | 0.478 | ##### |
| TMEM87A   | ##### | -0.11872 | 0.087 | 0.468 | ##### |
| CCDC109B  | ##### | -0.63335 | 0.058 | 0.528 | ##### |
| CD81      | ##### | 0.307894 | 0.15  | 0.422 | ##### |
| DAP       | ##### | -0.47001 | 0.04  | 0.491 | ##### |
| PMPCB     | ##### | 0.246327 | 0.194 | 0.514 | ##### |
| PALLD     | ##### | -0.22497 | 0.056 | 0.417 | ##### |
| CHAF1A    | ##### | -0.81263 | 0.009 | 0.507 | ##### |
| CNPY3     | ##### | -0.19514 | 0.077 | 0.481 | ##### |
| CKAP5     | ##### | -0.66699 | 0.023 | 0.494 | ##### |
| UBTF      | ##### | -0.34561 | 0.072 | 0.521 | ##### |
| TMEM30A   | ##### | -0.11852 | 0.113 | 0.502 | ##### |
| CKAP4     | ##### | -0.21266 | 0.07  | 0.446 | ##### |
| ADAM9     | ##### | -0.11288 | 0.099 | 0.467 | ##### |
| IFT43     | ##### | 0.13944  | 0.122 | 0.444 | ##### |
| EMC9      | ##### | -0.59408 | 0.052 | 0.536 | ##### |
| KRR1      | ##### | -0.12992 | 0.072 | 0.447 | ##### |
| PLGRKT    | ##### | -0.23642 | 0.065 | 0.477 | ##### |
| CDC26     | ##### | 0.125323 | 0.079 | 0.383 | ##### |
| MGME1     | ##### | -0.52241 | 0.047 | 0.525 | ##### |
| PKN1      | ##### | -0.46495 | 0.023 | 0.442 | ##### |
| SPARCL1   | ##### | 0.493483 | 0.373 | 0.604 | ##### |
| C12orf75  | ##### | -0.84251 | 0.007 | 0.501 | ##### |
| SRRT      | ##### | -0.40526 | 0.072 | 0.532 | ##### |
| SYMPK     | ##### | 0.181877 | 0.112 | 0.399 | ##### |
| PRKAR2A   | ##### | -0.17893 | 0.072 | 0.444 | ##### |
| APOE      | ##### | 0.288116 | 0.33  | 0.67  | ##### |
| MARK3     | ##### | -0.11622 | 0.112 | 0.505 | ##### |
| MOB1A     | ##### | -0.1403  | 0.068 | 0.44  | ##### |
| BMP7      | ##### | -0.30816 | 0.086 | 0.528 | ##### |
| TTC14     | ##### | 0.167539 | 0.122 | 0.411 | ##### |
| LBR       | ##### | -0.56732 | 0.072 | 0.569 | ##### |
| EIF1AY    | ##### | -0.34793 | 0.045 | 0.449 | ##### |
| POLR3GL   | ##### | 0.325319 | 0.171 | 0.454 | ##### |
| WAC       | ##### | -0.24146 | 0.059 | 0.448 | ##### |
| RP11-14N7 | ##### | 0.22493  | 0.124 | 0.398 | ##### |
| SMIM14    | ##### | 0.116047 | 0.134 | 0.485 | ##### |

|          |       |          |       |       |       |
|----------|-------|----------|-------|-------|-------|
| FN3KRP   | ##### | -0.26108 | 0.065 | 0.473 | ##### |
| ILVBL    | ##### | -0.12597 | 0.096 | 0.484 | ##### |
| KIF2C    | ##### | -0.91155 | 0.003 | 0.496 | ##### |
| FADS1    | ##### | -0.27146 | 0.066 | 0.477 | ##### |
| FUBP3    | ##### | -0.14154 | 0.077 | 0.457 | ##### |
| TMEM60   | ##### | -0.29168 | 0.063 | 0.484 | ##### |
| DSN1     | ##### | -0.80091 | 0.012 | 0.51  | ##### |
| ALDH3A2  | ##### | -0.13834 | 0.094 | 0.457 | ##### |
| UBL3     | ##### | -0.16184 | 0.082 | 0.475 | ##### |
| TMEM251  | ##### | -0.24376 | 0.063 | 0.462 | ##### |
| KDM1A    | ##### | -0.28991 | 0.056 | 0.463 | ##### |
| DHX29    | ##### | -0.24829 | 0.089 | 0.516 | ##### |
| SV2A     | ##### | -0.13858 | 0.066 | 0.423 | ##### |
| TGIF1    | ##### | -0.27729 | 0.096 | 0.516 | ##### |
| CDKN1B   | ##### | -0.42591 | 0.07  | 0.536 | ##### |
| TM2D3    | ##### | 0.39144  | 0.164 | 0.417 | ##### |
| KCNQ2    | ##### | -0.37386 | 0.08  | 0.521 | ##### |
| CCDC130  | ##### | -0.12256 | 0.073 | 0.427 | ##### |
| KLF6     | ##### | 0.406421 | 0.251 | 0.505 | ##### |
| SHARPIN  | ##### | -0.21635 | 0.073 | 0.469 | ##### |
| DHRS7B   | ##### | -0.13409 | 0.061 | 0.412 | ##### |
| HADH     | ##### | -0.16694 | 0.075 | 0.462 | ##### |
| AGTRAP   | ##### | 0.474014 | 0.117 | 0.309 | ##### |
| FARSB    | ##### | -0.11837 | 0.099 | 0.495 | ##### |
| TMEM50B  | ##### | 0.175738 | 0.129 | 0.422 | ##### |
| ITGB8    | ##### | -0.15953 | 0.106 | 0.505 | ##### |
| STAG2    | ##### | -0.17419 | 0.082 | 0.472 | ##### |
| SWI5     | ##### | 0.233369 | 0.105 | 0.401 | ##### |
| RNF24    | ##### | -0.19127 | 0.073 | 0.464 | ##### |
| ARRDC3   | ##### | -0.27045 | 0.073 | 0.486 | ##### |
| POC1A    | ##### | -0.82947 | 0.005 | 0.494 | ##### |
| TTF1     | ##### | -0.31718 | 0.063 | 0.484 | ##### |
| CCDC53   | ##### | 0.165939 | 0.143 | 0.472 | ##### |
| UBE2M    | ##### | -0.37528 | 0.045 | 0.453 | ##### |
| PTGES2   | ##### | -0.20548 | 0.061 | 0.44  | ##### |
| LSM12    | ##### | -0.56511 | 0.03  | 0.486 | ##### |
| C21orf33 | ##### | 0.146888 | 0.138 | 0.473 | ##### |
| BLVRB    | ##### | 0.773657 | 0.178 | 0.296 | ##### |
| ENC1     | ##### | -0.57699 | 0.051 | 0.52  | ##### |
| TACC1    | ##### | -0.57765 | 0.04  | 0.514 | ##### |
| HOOK3    | ##### | -0.1465  | 0.082 | 0.464 | ##### |
| CAPN2    | ##### | -0.13097 | 0.079 | 0.442 | ##### |
| ZEB1     | ##### | -0.13375 | 0.106 | 0.509 | ##### |
| EGLN2    | ##### | -0.35519 | 0.054 | 0.474 | ##### |
| S100A16  | ##### | 0.638892 | 0.363 | 0.48  | ##### |
| FAM103A1 | ##### | 0.145908 | 0.094 | 0.411 | ##### |
| TMEM128  | ##### | -0.12646 | 0.091 | 0.464 | ##### |
| RTCA     | ##### | -0.13045 | 0.068 | 0.437 | ##### |
| EIF2B1   | ##### | -0.21191 | 0.089 | 0.504 | ##### |
| DDB1     | ##### | -0.12557 | 0.094 | 0.486 | ##### |
| AP1M1    | ##### | -0.10413 | 0.075 | 0.433 | ##### |

|           |       |          |       |       |       |
|-----------|-------|----------|-------|-------|-------|
| DAXX      | ##### | -0.282   | 0.054 | 0.452 | ##### |
| SCAMP4    | ##### | -0.18876 | 0.091 | 0.489 | ##### |
| DYNLL2    | ##### | -0.45044 | 0.033 | 0.47  | ##### |
| DESI2     | ##### | -0.41628 | 0.038 | 0.464 | ##### |
| KIF2A     | ##### | -0.36272 | 0.056 | 0.483 | ##### |
| CCDC50    | ##### | -0.29747 | 0.047 | 0.456 | ##### |
| PSPC1     | ##### | -0.46732 | 0.052 | 0.512 | ##### |
| TMEM199   | ##### | -0.12742 | 0.061 | 0.422 | ##### |
| GNG4      | ##### | -0.456   | 0.035 | 0.468 | ##### |
| ATAT1     | ##### | -0.15773 | 0.098 | 0.494 | ##### |
| AURKA     | ##### | -1.08137 | 0.009 | 0.502 | ##### |
| USP10     | ##### | -0.15406 | 0.07  | 0.447 | ##### |
| OXLD1     | ##### | -0.19002 | 0.061 | 0.42  | ##### |
| TSSC1     | ##### | -0.19825 | 0.075 | 0.468 | ##### |
| ASH1L     | ##### | -0.12097 | 0.098 | 0.484 | ##### |
| KIF5C     | ##### | -0.28156 | 0.086 | 0.499 | ##### |
| KIAA1715  | ##### | -0.24242 | 0.075 | 0.477 | ##### |
| CDKN2D    | ##### | -0.74065 | 0.023 | 0.51  | ##### |
| TOMM5     | ##### | -0.21206 | 0.044 | 0.407 | ##### |
| NGDN      | ##### | 0.188071 | 0.147 | 0.453 | ##### |
| FAM89B    | ##### | -0.40772 | 0.047 | 0.468 | ##### |
| NDUFAF2   | ##### | 0.221916 | 0.122 | 0.414 | ##### |
| DHRX      | ##### | -0.24809 | 0.08  | 0.493 | ##### |
| ABHD17A   | ##### | -0.27126 | 0.049 | 0.422 | ##### |
| ZNF146    | ##### | -0.14193 | 0.096 | 0.481 | ##### |
| CELF1     | ##### | -0.24247 | 0.08  | 0.493 | ##### |
| CDCA7L    | ##### | -0.42461 | 0.068 | 0.527 | ##### |
| UTP18     | ##### | -0.26225 | 0.061 | 0.458 | ##### |
| ZYX       | ##### | -0.12202 | 0.127 | 0.507 | ##### |
| BDP1      | ##### | -0.22437 | 0.066 | 0.459 | ##### |
| PPP4R2    | ##### | -0.21954 | 0.072 | 0.463 | ##### |
| AKAP8L    | ##### | -0.17586 | 0.063 | 0.438 | ##### |
| GOSR1     | ##### | -0.16847 | 0.079 | 0.465 | ##### |
| IFI27L1   | ##### | -0.10157 | 0.086 | 0.464 | ##### |
| IPO7      | ##### | -0.33812 | 0.045 | 0.458 | ##### |
| CYHR1     | ##### | 0.175377 | 0.122 | 0.4   | ##### |
| RNF13     | ##### | 0.369796 | 0.213 | 0.467 | ##### |
| MIS18BP1  | ##### | -0.76333 | 0.01  | 0.486 | ##### |
| SMARCD1   | ##### | -0.32247 | 0.051 | 0.456 | ##### |
| ZCCHC11   | ##### | -0.15816 | 0.072 | 0.437 | ##### |
| IFNAR1    | ##### | -0.23644 | 0.065 | 0.454 | ##### |
| ATP2A2    | ##### | -0.16984 | 0.101 | 0.496 | ##### |
| JKAMP     | ##### | -0.13967 | 0.091 | 0.459 | ##### |
| EBP       | ##### | -0.12854 | 0.079 | 0.458 | ##### |
| TPM1      | ##### | -0.12156 | 0.096 | 0.467 | ##### |
| LITAF     | ##### | 0.322519 | 0.159 | 0.421 | ##### |
| AC010642. | ##### | -0.26996 | 0.042 | 0.426 | ##### |
| DDX52     | ##### | -0.30191 | 0.072 | 0.473 | ##### |
| RBM26     | ##### | -0.17683 | 0.058 | 0.414 | ##### |
| FABP5     | ##### | 1.425689 | 0.485 | 0.338 | ##### |
| FH        | ##### | -0.134   | 0.079 | 0.453 | ##### |

|           |       |          |       |       |       |
|-----------|-------|----------|-------|-------|-------|
| BCKDK     | ##### | -0.25379 | 0.066 | 0.451 | ##### |
| CGGBP1    | ##### | -0.30949 | 0.075 | 0.505 | ##### |
| ABCE1     | ##### | -0.2086  | 0.066 | 0.447 | ##### |
| SPCS3     | ##### | -0.25828 | 0.059 | 0.451 | ##### |
| IRF2BPL   | ##### | -0.32332 | 0.079 | 0.494 | ##### |
| AFF4      | ##### | -0.20166 | 0.113 | 0.526 | ##### |
| SLC25A33  | ##### | -0.32987 | 0.037 | 0.431 | ##### |
| BEX1      | ##### | 0.541296 | 0.384 | 0.578 | ##### |
| GLRX3     | ##### | -0.19186 | 0.073 | 0.462 | ##### |
| REPIN1    | ##### | -0.28424 | 0.077 | 0.493 | ##### |
| CYSTM1    | ##### | 0.428593 | 0.145 | 0.372 | ##### |
| TMUB1     | ##### | -0.35468 | 0.056 | 0.477 | ##### |
| OGFR      | ##### | -0.35073 | 0.047 | 0.454 | ##### |
| CUX1      | ##### | -0.27534 | 0.075 | 0.491 | ##### |
| UBQLN1    | ##### | -0.26168 | 0.058 | 0.451 | ##### |
| RBM10     | ##### | -0.30291 | 0.054 | 0.458 | ##### |
| SEC22C    | ##### | -0.25588 | 0.061 | 0.458 | ##### |
| CCDC112   | ##### | -0.42521 | 0.047 | 0.477 | ##### |
| MMP24-AS1 | ##### | -0.17785 | 0.063 | 0.405 | ##### |
| DHX15     | ##### | -0.2068  | 0.077 | 0.468 | ##### |
| CASC4     | ##### | -0.31143 | 0.047 | 0.436 | ##### |
| SLC39A7   | ##### | -0.1433  | 0.105 | 0.493 | ##### |
| UBE2D1    | ##### | -0.18757 | 0.04  | 0.378 | ##### |
| GSTM3     | ##### | 0.25499  | 0.147 | 0.442 | ##### |
| PRKRIP1   | ##### | -0.25979 | 0.065 | 0.467 | ##### |
| IL6ST     | ##### | -0.19664 | 0.063 | 0.428 | ##### |
| C14orf119 | ##### | 0.169192 | 0.122 | 0.442 | ##### |
| ASF1A     | ##### | -0.26646 | 0.086 | 0.498 | ##### |
| C7orf49   | ##### | -0.32379 | 0.049 | 0.457 | ##### |
| C12orf76  | ##### | 0.242964 | 0.119 | 0.391 | ##### |
| IFT27     | ##### | -0.34393 | 0.052 | 0.458 | ##### |
| RP11-345J | ##### | -0.26594 | 0.035 | 0.393 | ##### |
| LUC7L     | ##### | -0.15688 | 0.084 | 0.472 | ##### |
| SPAG5     | ##### | -0.82898 | 0     | 0.462 | ##### |
| UBXN2A    | ##### | -0.4065  | 0.049 | 0.473 | ##### |
| ZNF738    | ##### | -0.34401 | 0.063 | 0.491 | ##### |
| PLTP      | ##### | 0.439265 | 0.194 | 0.385 | ##### |
| SHCBP1    | ##### | -0.76329 | 0.002 | 0.467 | ##### |
| BCAN      | ##### | 0.300582 | 0.354 | 0.651 | ##### |
| ITGB1     | ##### | -0.38611 | 0.086 | 0.505 | ##### |
| FABP7     | ##### | 0.231764 | 0.461 | 0.752 | ##### |
| CIA01     | ##### | -0.19088 | 0.063 | 0.437 | ##### |
| VCAN      | ##### | 0.169503 | 0.141 | 0.457 | ##### |
| NCKAP1    | ##### | -0.27668 | 0.065 | 0.467 | ##### |
| YPEL5     | ##### | 0.424696 | 0.182 | 0.401 | ##### |
| SRP68     | ##### | -0.13454 | 0.072 | 0.431 | ##### |
| SDF2L1    | ##### | -0.16794 | 0.105 | 0.519 | ##### |
| HLA-DRA   | ##### | 1.178453 | 0.41  | 0.335 | ##### |
| CDK5      | ##### | -0.14319 | 0.059 | 0.426 | ##### |
| P4HTM     | ##### | -0.12286 | 0.089 | 0.449 | ##### |
| SORBS3    | ##### | -0.23578 | 0.047 | 0.416 | ##### |

|          |       |          |       |       |       |
|----------|-------|----------|-------|-------|-------|
| ABCD4    | ##### | 0.105952 | 0.103 | 0.402 | ##### |
| SURF2    | ##### | -0.16066 | 0.072 | 0.444 | ##### |
| TXNDC9   | ##### | -0.16113 | 0.068 | 0.442 | ##### |
| TAF1D    | ##### | 0.150468 | 0.119 | 0.422 | ##### |
| TXNRD1   | ##### | -0.37729 | 0.052 | 0.469 | ##### |
| ARID1A   | ##### | -0.35098 | 0.059 | 0.478 | ##### |
| PNPLA8   | ##### | -0.28293 | 0.091 | 0.511 | ##### |
| TBL1XR1  | ##### | -0.30198 | 0.058 | 0.452 | ##### |
| LYPD1    | ##### | 0.123422 | 0.094 | 0.385 | ##### |
| TMEM70   | ##### | -0.18148 | 0.084 | 0.479 | ##### |
| FAM134A  | ##### | -0.29272 | 0.086 | 0.504 | ##### |
| CMTM3    | ##### | -0.32895 | 0.056 | 0.457 | ##### |
| PPP2R4   | ##### | -0.12771 | 0.065 | 0.411 | ##### |
| S100A13  | ##### | 0.646908 | 0.239 | 0.402 | ##### |
| PRR11    | ##### | -0.78443 | 0.003 | 0.46  | ##### |
| YTHDF1   | ##### | -0.21516 | 0.042 | 0.389 | ##### |
| GAP43    | ##### | 0.471332 | 0.447 | 0.638 | ##### |
| FJX1     | ##### | -0.20675 | 0.066 | 0.431 | ##### |
| PLEKHA3  | ##### | -0.16409 | 0.059 | 0.417 | ##### |
| NUFIP2   | ##### | -0.26656 | 0.044 | 0.411 | ##### |
| HSPA4    | ##### | -0.18228 | 0.073 | 0.458 | ##### |
| JMJD6    | ##### | -0.33707 | 0.049 | 0.452 | ##### |
| TDG      | ##### | -0.13086 | 0.089 | 0.459 | ##### |
| MTHFD2L  | ##### | -0.12205 | 0.08  | 0.433 | ##### |
| NCAPH2   | ##### | -0.55492 | 0.024 | 0.469 | ##### |
| AFG3L2   | ##### | -0.18883 | 0.047 | 0.398 | ##### |
| CD44     | ##### | 0.852597 | 0.225 | 0.285 | ##### |
| TUBA1C   | ##### | -0.3834  | 0.15  | 0.616 | ##### |
| BIRC2    | ##### | -0.1142  | 0.065 | 0.405 | ##### |
| STK4     | ##### | -0.16422 | 0.054 | 0.409 | ##### |
| EIF4G1   | ##### | -0.17911 | 0.082 | 0.464 | ##### |
| CLSPN    | ##### | -0.88666 | 0.007 | 0.475 | ##### |
| IARS     | ##### | -0.16089 | 0.086 | 0.452 | ##### |
| NIPBL    | ##### | -0.17513 | 0.073 | 0.441 | ##### |
| HYAL2    | ##### | -0.36195 | 0.042 | 0.437 | ##### |
| MAGI1    | ##### | -0.21128 | 0.092 | 0.493 | ##### |
| VPS37B   | ##### | -0.21559 | 0.066 | 0.441 | ##### |
| UBE2G2   | ##### | -0.11304 | 0.086 | 0.459 | ##### |
| TNP01    | ##### | -0.20105 | 0.084 | 0.477 | ##### |
| GADD45A  | ##### | 0.23089  | 0.176 | 0.463 | ##### |
| C16orf87 | ##### | -0.24426 | 0.065 | 0.453 | ##### |
| ETV5     | ##### | -0.28161 | 0.061 | 0.456 | ##### |
| RRAGA    | ##### | -0.10107 | 0.126 | 0.51  | ##### |
| LRWD1    | ##### | -0.21987 | 0.051 | 0.419 | ##### |
| BLOC1S4  | ##### | -0.28053 | 0.051 | 0.433 | ##### |
| ACTN1    | ##### | -0.2277  | 0.063 | 0.405 | ##### |
| PTPRS    | ##### | -0.17582 | 0.127 | 0.542 | ##### |
| PHACTR4  | ##### | -0.18945 | 0.075 | 0.452 | ##### |
| COMMD10  | ##### | 0.269881 | 0.103 | 0.353 | ##### |
| RABEP1   | ##### | -0.45032 | 0.045 | 0.47  | ##### |
| C1orf21  | ##### | 0.126221 | 0.126 | 0.438 | ##### |

|           |       |          |       |       |       |
|-----------|-------|----------|-------|-------|-------|
| TANK      | ##### | 0.122855 | 0.134 | 0.448 | ##### |
| VOPP1     | ##### | -0.30889 | 0.068 | 0.48  | ##### |
| CRELD2    | ##### | -0.46195 | 0.042 | 0.467 | ##### |
| NAA50     | ##### | -0.22464 | 0.082 | 0.477 | ##### |
| TRIP13    | ##### | -0.67391 | 0.003 | 0.453 | ##### |
| CXCL16    | ##### | -0.1079  | 0.061 | 0.39  | ##### |
| PSME3     | ##### | -0.25842 | 0.061 | 0.443 | ##### |
| RWDD4     | ##### | -0.17977 | 0.075 | 0.447 | ##### |
| PKIB      | ##### | 0.120677 | 0.119 | 0.425 | ##### |
| LRR1      | ##### | -0.67845 | 0.01  | 0.46  | ##### |
| PHLDA1    | ##### | -0.37008 | 0.164 | 0.617 | ##### |
| MCM3      | ##### | -0.53475 | 0.054 | 0.509 | ##### |
| RAB22A    | ##### | -0.2835  | 0.054 | 0.441 | ##### |
| ARFRP1    | ##### | -0.13336 | 0.07  | 0.431 | ##### |
| ESCO2     | ##### | -0.78968 | 0.002 | 0.462 | ##### |
| PLA2G16   | ##### | 0.436431 | 0.159 | 0.374 | ##### |
| CDV3      | ##### | -0.32002 | 0.045 | 0.423 | ##### |
| ABCD3     | ##### | -0.23104 | 0.058 | 0.438 | ##### |
| AZIN1     | ##### | -0.11384 | 0.106 | 0.48  | ##### |
| RNASEH1   | ##### | -0.37468 | 0.047 | 0.46  | ##### |
| THAP9-AS1 | ##### | -0.15272 | 0.077 | 0.443 | ##### |
| TOR1A     | ##### | -0.34217 | 0.054 | 0.462 | ##### |
| PDCD7     | ##### | -0.26046 | 0.059 | 0.446 | ##### |
| SHISA5    | ##### | 0.131142 | 0.141 | 0.447 | ##### |
| SLC30A5   | ##### | -0.15544 | 0.052 | 0.389 | ##### |
| UBE2J1    | ##### | -0.18598 | 0.066 | 0.425 | ##### |
| USP48     | ##### | -0.22443 | 0.052 | 0.426 | ##### |
| CENPT     | ##### | -0.31696 | 0.073 | 0.486 | ##### |
| THAP7     | ##### | -0.17184 | 0.07  | 0.438 | ##### |
| RP11-553L | ##### | -0.11416 | 0.113 | 0.475 | ##### |
| YKT6      | ##### | -0.12062 | 0.059 | 0.406 | ##### |
| IGBP1     | ##### | 0.226258 | 0.133 | 0.416 | ##### |
| RHOT1     | ##### | -0.37854 | 0.042 | 0.447 | ##### |
| TM7SF3    | ##### | -0.34993 | 0.051 | 0.458 | ##### |
| ASCL1     | ##### | -0.41094 | 0.129 | 0.594 | ##### |
| REXO2     | ##### | 0.462644 | 0.162 | 0.367 | ##### |
| DAG1      | ##### | -0.17284 | 0.056 | 0.407 | ##### |
| VRK1      | ##### | -0.5692  | 0.03  | 0.472 | ##### |
| PRPF4B    | ##### | -0.12863 | 0.086 | 0.44  | ##### |
| C16orf91  | ##### | -0.16079 | 0.058 | 0.411 | ##### |
| RGS12     | ##### | 0.106145 | 0.127 | 0.446 | ##### |
| IFT20     | ##### | 0.126174 | 0.14  | 0.443 | ##### |
| LAMTOR3   | ##### | 0.151332 | 0.096 | 0.359 | ##### |
| PYCR1     | ##### | -0.15725 | 0.07  | 0.421 | ##### |
| TM9SF2    | ##### | -0.21061 | 0.084 | 0.478 | ##### |
| RNF130    | ##### | -0.35997 | 0.08  | 0.507 | ##### |
| SLC30A9   | ##### | -0.26191 | 0.066 | 0.462 | ##### |
| GNAQ      | ##### | -0.25417 | 0.058 | 0.437 | ##### |
| PSMB9     | ##### | 0.389953 | 0.211 | 0.472 | ##### |
| MCM4      | ##### | -0.789   | 0.014 | 0.48  | ##### |
| SEC23B    | ##### | -0.15241 | 0.065 | 0.422 | ##### |

|         |       |          |       |       |          |
|---------|-------|----------|-------|-------|----------|
| LRP1    | ##### | 0.423124 | 0.182 | 0.39  | #####    |
| SNX27   | ##### | -0.16849 | 0.056 | 0.405 | #####    |
| FUNDC1  | ##### | 0.185218 | 0.112 | 0.393 | #####    |
| SUPT20H | ##### | -0.1656  | 0.07  | 0.433 | #####    |
| GID8    | ##### | -0.26444 | 0.051 | 0.422 | #####    |
| CTSF    | ##### | 0.147198 | 0.101 | 0.389 | #####    |
| CDT1    | ##### | -0.84828 | 0.007 | 0.469 | #####    |
| EBAG9   | ##### | -0.1989  | 0.058 | 0.428 | #####    |
| PCDH9   | ##### | 0.436428 | 0.194 | 0.412 | #####    |
| DRG1    | ##### | -0.17552 | 0.075 | 0.451 | #####    |
| MTF2    | ##### | -0.25932 | 0.073 | 0.472 | #####    |
| KRAS    | ##### | -0.24597 | 0.058 | 0.433 | #####    |
| MYEF2   | ##### | -0.40855 | 0.058 | 0.488 | #####    |
| ALYREF  | ##### | -0.554   | 0.028 | 0.452 | #####    |
| CTSL    | ##### | 0.611858 | 0.222 | 0.389 | #####    |
| SMARCC2 | ##### | -0.16836 | 0.105 | 0.488 | #####    |
| PGM2L1  | ##### | 0.206004 | 0.159 | 0.427 | #####    |
| FAM181B | ##### | -0.41643 | 0.105 | 0.552 | #####    |
| UBALD2  | ##### | -0.48657 | 0.068 | 0.511 | #####    |
| CTTN    | ##### | -0.12051 | 0.07  | 0.411 | #####    |
| NMB     | ##### | 0.322402 | 0.133 | 0.398 | #####    |
| SNHG8   | ##### | 0.405065 | 0.209 | 0.451 | #####    |
| SCRG1   | ##### | 0.166828 | 0.302 | 0.642 | #####    |
| VAPB    | ##### | -0.44278 | 0.031 | 0.442 | #####    |
| PLIN3   | ##### | 0.288427 | 0.199 | 0.453 | #####    |
| PBRM1   | ##### | -0.44411 | 0.052 | 0.486 | #####    |
| DOK5    | ##### | 0.121982 | 0.075 | 0.33  | #####    |
| TMEM33  | ##### | -0.23924 | 0.072 | 0.452 | #####    |
| FOPNL   | ##### | -0.17819 | 0.068 | 0.433 | #####    |
| RNF26   | ##### | -0.40567 | 0.035 | 0.437 | #####    |
| HERPUD1 | ##### | 0.33126  | 0.234 | 0.494 | #####    |
| LONP1   | ##### | -0.15811 | 0.052 | 0.4   | #####    |
| AAK1    | ##### | -0.12715 | 0.101 | 0.457 | #####    |
| CAMK2N1 | ##### | -0.19729 | 0.108 | 0.499 | #####    |
| POLR2B  | ##### | -0.3408  | 0.08  | 0.51  | #####    |
| MNS1    | ##### | -0.66833 | 0.012 | 0.453 | #####    |
| MLX     | ##### | -0.19228 | 0.066 | 0.433 | #####    |
| PDLIM5  | ##### | -0.13619 | 0.066 | 0.41  | #####    |
| ARMCX6  | ##### | 0.192359 | 0.089 | 0.338 | #####    |
| NETO2   | ##### | -0.56475 | 0.04  | 0.49  | #####    |
| BAZ2B   | ##### | -0.15735 | 0.138 | 0.533 | #####    |
| CDC48   | ##### | -0.93503 | 0.002 | 0.456 | #####    |
| EMG1    | ##### | 0.166246 | 0.091 | 0.367 | #####    |
| MYO9B   | ##### | -0.1037  | 0.072 | 0.391 | #####    |
| TRPC4AP | ##### | -0.31921 | 0.044 | 0.427 | #####    |
| SPATC1L | ##### | -0.1548  | 0.045 | 0.367 | 1.08E-99 |
| PKMYT1  | ##### | -0.78401 | 0.003 | 0.462 | 1.12E-99 |
| NTHL1   | ##### | -0.21518 | 0.068 | 0.441 | 1.19E-99 |
| GADD45B | ##### | 1.154124 | 0.433 | 0.348 | 1.33E-99 |
| F2R     | ##### | -0.10262 | 0.075 | 0.417 | 1.38E-99 |
| CTBP1   | ##### | -0.13768 | 0.061 | 0.402 | 1.44E-99 |



|          |       |          |       |       |          |
|----------|-------|----------|-------|-------|----------|
| IN080E   | ##### | -0.3279  | 0.054 | 0.446 | 1.54E-99 |
| SMOX     | ##### | 0.320265 | 0.124 | 0.369 | 1.69E-99 |
| TFAM     | ##### | -0.21074 | 0.054 | 0.41  | 1.75E-99 |
| HEXB     | ##### | -0.32981 | 0.079 | 0.49  | 1.76E-99 |
| PTPN1    | ##### | -0.2132  | 0.03  | 0.352 | 1.81E-99 |
| USP5     | ##### | -0.19981 | 0.066 | 0.44  | 1.96E-99 |
| MTFR1L   | ##### | -0.14434 | 0.087 | 0.451 | 2.13E-99 |
| COQ2     | ##### | -0.48713 | 0.019 | 0.43  | 2.49E-99 |
| CD276    | ##### | -0.14592 | 0.065 | 0.407 | 2.54E-99 |
| MED30    | ##### | -0.30761 | 0.079 | 0.494 | 2.68E-99 |
| CD01     | ##### | 0.248887 | 0.133 | 0.407 | 2.98E-99 |
| MND1     | ##### | -0.70807 | 0.007 | 0.456 | 3.22E-99 |
| SEPN1    | ##### | -0.21706 | 0.051 | 0.4   | 3.34E-99 |
| DCK      | ##### | -0.60944 | 0.026 | 0.472 | 3.93E-99 |
| SRPK1    | ##### | -0.31495 | 0.04  | 0.426 | 4.50E-99 |
| NFKBIL1  | ##### | -0.13765 | 0.054 | 0.381 | 4.54E-99 |
| GNB4     | ##### | -0.12154 | 0.045 | 0.375 | 4.75E-99 |
| SPATA33  | ##### | -0.14176 | 0.061 | 0.409 | 4.94E-99 |
| GTPBP6   | ##### | -0.21921 | 0.049 | 0.409 | 5.05E-99 |
| FLNA     | ##### | -0.30368 | 0.072 | 0.449 | 5.24E-99 |
| ICT1     | ##### | -0.19963 | 0.059 | 0.417 | 5.24E-99 |
| PLSCR1   | ##### | 0.311738 | 0.12  | 0.351 | 5.33E-99 |
| TTYH3    | ##### | -0.32473 | 0.059 | 0.451 | 5.93E-99 |
| HECTD1   | ##### | -0.16264 | 0.063 | 0.415 | 7.45E-99 |
| 7-Mar    | ##### | -0.19822 | 0.079 | 0.457 | 7.65E-99 |
| TRIM24   | ##### | -0.39849 | 0.042 | 0.451 | 8.60E-99 |
| ACAT1    | ##### | 0.298939 | 0.168 | 0.43  | 8.79E-99 |
| CHCHD10  | ##### | -0.17078 | 0.084 | 0.441 | 8.97E-99 |
| SLC44A2  | ##### | -0.23065 | 0.077 | 0.459 | 9.01E-99 |
| ABCF2    | ##### | -0.11314 | 0.073 | 0.411 | 9.13E-99 |
| POLDIP3  | ##### | -0.28559 | 0.045 | 0.416 | 1.02E-98 |
| NRBF2    | ##### | -0.20839 | 0.054 | 0.398 | 1.10E-98 |
| DAPK3    | ##### | -0.3317  | 0.054 | 0.453 | 1.17E-98 |
| FMNL2    | ##### | -0.29018 | 0.052 | 0.421 | 1.26E-98 |
| PPP5C    | ##### | -0.10014 | 0.077 | 0.427 | 1.68E-98 |
| EMP3     | ##### | 0.500534 | 0.251 | 0.447 | 1.68E-98 |
| PPID     | ##### | -0.12621 | 0.054 | 0.391 | 1.77E-98 |
| CUL5     | ##### | -0.20798 | 0.051 | 0.406 | 1.91E-98 |
| KIF23    | ##### | -0.83662 | 0.003 | 0.456 | 2.23E-98 |
| TSR1     | ##### | -0.21469 | 0.045 | 0.398 | 2.34E-98 |
| EEA1     | ##### | -0.19488 | 0.059 | 0.419 | 2.47E-98 |
| CDC42BPA | ##### | -0.20923 | 0.072 | 0.448 | 2.52E-98 |
| POLD4    | ##### | 0.363638 | 0.117 | 0.31  | 2.99E-98 |
| CECR5    | ##### | -0.37959 | 0.061 | 0.47  | 3.29E-98 |
| RNF4     | ##### | -0.24062 | 0.047 | 0.406 | 3.41E-98 |
| RBM14    | ##### | -0.32002 | 0.049 | 0.438 | 3.97E-98 |
| TRIM36   | ##### | -0.5896  | 0.026 | 0.467 | 4.13E-98 |
| HIBCH    | ##### | 0.195236 | 0.138 | 0.41  | 4.21E-98 |
| USP47    | ##### | -0.10113 | 0.084 | 0.435 | 4.79E-98 |
| ID3      | ##### | 0.210957 | 0.15  | 0.454 | 5.16E-98 |
| JOSD2    | ##### | -0.11917 | 0.089 | 0.438 | 5.43E-98 |

|           |       |          |       |       |          |
|-----------|-------|----------|-------|-------|----------|
| TSR2      | ##### | -0.12266 | 0.098 | 0.464 | 5.56E-98 |
| IFT81     | ##### | -0.28444 | 0.042 | 0.41  | 5.58E-98 |
| ATP1B2    | ##### | 0.26088  | 0.157 | 0.394 | 6.67E-98 |
| KCMF1     | ##### | -0.28762 | 0.044 | 0.412 | 7.20E-98 |
| URI1      | ##### | -0.22184 | 0.059 | 0.423 | 7.95E-98 |
| PTCD3     | ##### | -0.3189  | 0.07  | 0.479 | 8.88E-98 |
| FBX07     | ##### | -0.2617  | 0.061 | 0.448 | 9.22E-98 |
| SP3       | ##### | -0.2624  | 0.059 | 0.433 | 9.37E-98 |
| BPGM      | ##### | -0.10477 | 0.094 | 0.457 | 1.07E-97 |
| SCG5      | ##### | 0.879323 | 0.284 | 0.322 | 1.38E-97 |
| ARRB2     | ##### | -0.18486 | 0.066 | 0.425 | 1.46E-97 |
| POLE4     | ##### | -0.22094 | 0.084 | 0.477 | 1.51E-97 |
| BRD3      | ##### | -0.26736 | 0.091 | 0.494 | 1.55E-97 |
| POMGNT1   | ##### | -0.18258 | 0.086 | 0.464 | 1.77E-97 |
| SCARA3    | ##### | -0.17816 | 0.066 | 0.421 | 2.60E-97 |
| ITGAV     | ##### | -0.17813 | 0.066 | 0.406 | 3.20E-97 |
| PSMC3IP   | ##### | -0.73217 | 0.012 | 0.463 | 3.46E-97 |
| DNTTIP2   | ##### | -0.13061 | 0.079 | 0.43  | 3.58E-97 |
| PLK1      | ##### | -1.02351 | 0.007 | 0.458 | 3.72E-97 |
| ZNF644    | ##### | -0.19497 | 0.089 | 0.469 | 3.95E-97 |
| YEATS4    | ##### | -0.62926 | 0.103 | 0.599 | 5.16E-97 |
| CENPQ     | ##### | -0.49306 | 0.017 | 0.425 | 5.17E-97 |
| KNSTRN    | ##### | -0.83396 | 0.014 | 0.47  | 5.22E-97 |
| USF2      | ##### | -0.1892  | 0.075 | 0.451 | 5.36E-97 |
| TMEM218   | ##### | -0.22987 | 0.054 | 0.417 | 5.44E-97 |
| DDIT3     | ##### | -0.13548 | 0.202 | 0.627 | 7.62E-97 |
| UBE2G1    | ##### | -0.22443 | 0.066 | 0.431 | 8.81E-97 |
| TMEM115   | ##### | -0.15048 | 0.056 | 0.388 | 8.85E-97 |
| HNRNPUL2  | ##### | -0.23926 | 0.037 | 0.386 | 9.63E-97 |
| FCGRT     | ##### | 0.622274 | 0.194 | 0.344 | 9.99E-97 |
| KMT2C     | ##### | -0.20787 | 0.082 | 0.454 | 1.07E-96 |
| SF3B3     | ##### | -0.28205 | 0.065 | 0.459 | 1.09E-96 |
| TNC       | ##### | 0.341052 | 0.129 | 0.344 | 1.21E-96 |
| RCAN1     | ##### | 0.37752  | 0.173 | 0.409 | 1.28E-96 |
| TINF2     | ##### | -0.17487 | 0.058 | 0.407 | 1.32E-96 |
| STX5      | ##### | -0.16004 | 0.068 | 0.43  | 1.54E-96 |
| HTRA2     | ##### | -0.20169 | 0.072 | 0.428 | 1.56E-96 |
| TLE1      | ##### | -0.26825 | 0.045 | 0.401 | 1.58E-96 |
| SIGMAR1   | ##### | -0.15984 | 0.061 | 0.401 | 1.63E-96 |
| TAF10     | ##### | -0.38775 | 0.031 | 0.41  | 1.73E-96 |
| RP11-620J | ##### | -0.29368 | 0.164 | 0.612 | 1.80E-96 |
| MAPK1     | ##### | -0.33898 | 0.054 | 0.441 | 1.97E-96 |
| ZNF830    | ##### | -0.1176  | 0.063 | 0.39  | 2.06E-96 |
| REEP2     | ##### | -0.12497 | 0.061 | 0.395 | 2.08E-96 |
| CCDC66    | ##### | -0.37658 | 0.042 | 0.437 | 2.15E-96 |
| ATAD5     | ##### | -0.69954 | 0.012 | 0.457 | 2.73E-96 |
| GRAMD1A   | ##### | -0.13227 | 0.082 | 0.425 | 3.12E-96 |
| MGAT2     | ##### | -0.19217 | 0.04  | 0.369 | 3.14E-96 |
| SYS1      | ##### | 0.202879 | 0.08  | 0.326 | 3.17E-96 |
| PDS5B     | ##### | -0.28227 | 0.058 | 0.442 | 3.46E-96 |
| FAM111A   | ##### | -0.6833  | 0.014 | 0.451 | 3.58E-96 |

|          |          |          |       |       |          |
|----------|----------|----------|-------|-------|----------|
| CEP78    | #####    | -0.51889 | 0.016 | 0.43  | 3.93E-96 |
| GTF3C5   | #####    | -0.22598 | 0.059 | 0.43  | 4.39E-96 |
| REEP3    | #####    | -0.27902 | 0.054 | 0.425 | 4.48E-96 |
| SPNS1    | #####    | -0.30007 | 0.047 | 0.423 | 4.49E-96 |
| CCDC28B  | #####    | 0.22381  | 0.099 | 0.347 | 4.76E-96 |
| DLGAP5   | #####    | -0.87126 | 0     | 0.43  | 4.91E-96 |
| POLR2A   | #####    | -0.2287  | 0.058 | 0.417 | 5.23E-96 |
| TCERG1   | #####    | -0.41826 | 0.047 | 0.463 | 6.32E-96 |
| ZNF148   | #####    | -0.16412 | 0.075 | 0.436 | 7.10E-96 |
| RFK      | #####    | -0.15855 | 0.072 | 0.42  | 8.35E-96 |
| PAF1     | #####    | -0.15663 | 0.068 | 0.425 | 8.96E-96 |
| TRAF7    | #####    | -0.30173 | 0.038 | 0.407 | 9.67E-96 |
| MTHFD1   | #####    | -0.25323 | 0.072 | 0.451 | 1.04E-95 |
| TMCO3    | #####    | -0.15051 | 0.059 | 0.396 | 1.08E-95 |
| MAGEH1   | #####    | 0.167287 | 0.168 | 0.463 | 1.09E-95 |
| KIF15    | #####    | -0.72687 | 0     | 0.428 | 1.10E-95 |
| FARP1    | #####    | -0.20501 | 0.058 | 0.41  | 1.15E-95 |
| PDCD10   | #####    | -0.1117  | 0.063 | 0.394 | 1.20E-95 |
| GARS     | #####    | -0.24522 | 0.098 | 0.495 | 1.36E-95 |
| TP53RK   | #####    | -0.24918 | 0.035 | 0.377 | 1.42E-95 |
| YME1L1   | #####    | -0.11642 | 0.058 | 0.389 | 1.44E-95 |
| DNAJC3   | #####    | -0.12703 | 0.052 | 0.383 | 1.47E-95 |
| ADPRHL2  | 1.03E-99 | -0.19773 | 0.065 | 0.426 | 1.54E-95 |
| DERA     | 1.18E-99 | -0.1344  | 0.087 | 0.443 | 1.76E-95 |
| C8orf4   | 1.20E-99 | 1.074546 | 0.262 | 0.298 | 1.79E-95 |
| SEMA6A   | 1.29E-99 | -0.15276 | 0.07  | 0.414 | 1.93E-95 |
| SMCHD1   | 1.30E-99 | -0.41266 | 0.03  | 0.421 | 1.95E-95 |
| MAN1A2   | 1.34E-99 | -0.12334 | 0.047 | 0.377 | 2.00E-95 |
| WDR82    | 1.66E-99 | -0.21205 | 0.082 | 0.453 | 2.48E-95 |
| GOPC     | 1.81E-99 | -0.13218 | 0.086 | 0.442 | 2.70E-95 |
| TNFRSF1A | 1.97E-99 | -0.24633 | 0.073 | 0.432 | 2.94E-95 |
| HNRNPLL  | 2.02E-99 | -0.23254 | 0.063 | 0.442 | 3.02E-95 |
| GART     | 2.08E-99 | -0.12302 | 0.061 | 0.398 | 3.10E-95 |
| CCDC106  | 2.08E-99 | -0.26735 | 0.052 | 0.412 | 3.11E-95 |
| DR1      | 2.32E-99 | -0.3507  | 0.065 | 0.48  | 3.47E-95 |
| SMAD1    | 2.48E-99 | -0.30246 | 0.051 | 0.411 | 3.71E-95 |
| ABHD2    | 3.09E-99 | -0.13838 | 0.068 | 0.4   | 4.61E-95 |
| USP14    | 3.34E-99 | -0.31461 | 0.051 | 0.432 | 4.99E-95 |
| PDLIM7   | 3.74E-99 | -0.30988 | 0.045 | 0.4   | 5.58E-95 |
| AGPAT1   | 4.37E-99 | -0.22394 | 0.068 | 0.428 | 6.53E-95 |
| WDR77    | 4.60E-99 | -0.12387 | 0.059 | 0.394 | 6.87E-95 |
| SLC25A36 | 4.75E-99 | -0.12632 | 0.07  | 0.405 | 7.09E-95 |
| ZFYVE21  | 4.86E-99 | 0.184423 | 0.12  | 0.393 | 7.27E-95 |
| POP4     | 4.99E-99 | 0.177127 | 0.108 | 0.385 | 7.46E-95 |
| SDC3     | 5.18E-99 | 0.439188 | 0.148 | 0.348 | 7.74E-95 |
| NUDT4    | 5.42E-99 | -0.19798 | 0.058 | 0.416 | 8.09E-95 |
| FNDC4    | 6.45E-99 | -0.27386 | 0.04  | 0.393 | 9.63E-95 |
| ENHO     | 6.58E-99 | -0.22689 | 0.051 | 0.391 | 9.84E-95 |
| SRR      | 7.30E-99 | -0.12642 | 0.063 | 0.39  | 1.09E-94 |
| TMEM248  | 7.34E-99 | -0.15441 | 0.073 | 0.425 | 1.10E-94 |
| BLOC1S6  | 7.48E-99 | -0.2214  | 0.056 | 0.415 | 1.12E-94 |

|           |          |          |       |       |          |
|-----------|----------|----------|-------|-------|----------|
| AHI1      | 7.91E-99 | -0.35374 | 0.054 | 0.448 | 1.18E-94 |
| KIAA1143  | 8.21E-99 | -0.31756 | 0.038 | 0.415 | 1.23E-94 |
| MPHOSPH1C | 8.38E-99 | -0.10579 | 0.075 | 0.417 | 1.25E-94 |
| TROAP     | 1.05E-98 | -0.84898 | 0.003 | 0.436 | 1.57E-94 |
| NMT1      | 1.11E-98 | -0.23044 | 0.068 | 0.436 | 1.66E-94 |
| GPN1      | 1.13E-98 | -0.1169  | 0.056 | 0.384 | 1.68E-94 |
| SIAH1     | 1.18E-98 | -0.25254 | 0.08  | 0.47  | 1.77E-94 |
| UFSP2     | 1.20E-98 | 0.247646 | 0.108 | 0.358 | 1.80E-94 |
| ATP6V1B2  | 1.48E-98 | -0.13113 | 0.077 | 0.419 | 2.20E-94 |
| LZIC      | 1.62E-98 | -0.1114  | 0.045 | 0.362 | 2.42E-94 |
| EFTUD2    | 1.68E-98 | -0.19819 | 0.058 | 0.414 | 2.51E-94 |
| PGAP1     | 1.86E-98 | -0.26086 | 0.072 | 0.449 | 2.78E-94 |
| IFI6      | 1.97E-98 | 0.448206 | 0.251 | 0.502 | 2.95E-94 |
| HEXA      | 2.03E-98 | 0.198742 | 0.124 | 0.375 | 3.03E-94 |
| LRRFIP2   | 2.03E-98 | -0.30949 | 0.026 | 0.389 | 3.03E-94 |
| ZSCAN16-A | 2.04E-98 | -0.14216 | 0.084 | 0.441 | 3.05E-94 |
| ASPSCR1   | 2.05E-98 | -0.21643 | 0.073 | 0.443 | 3.06E-94 |
| HLTF      | 2.14E-98 | -0.27818 | 0.042 | 0.406 | 3.20E-94 |
| CCDC137   | 2.25E-98 | -0.39094 | 0.042 | 0.43  | 3.37E-94 |
| TMEM59L   | 2.40E-98 | 0.102577 | 0.145 | 0.438 | 3.59E-94 |
| PANK2     | 2.46E-98 | -0.33045 | 0.04  | 0.411 | 3.68E-94 |
| HAUS8     | 2.52E-98 | -0.42955 | 0.031 | 0.433 | 3.77E-94 |
| SRPRB     | 3.15E-98 | -0.15645 | 0.066 | 0.41  | 4.71E-94 |
| UROD      | 3.27E-98 | 0.271037 | 0.157 | 0.431 | 4.89E-94 |
| DDX41     | 3.61E-98 | -0.21368 | 0.047 | 0.388 | 5.40E-94 |
| SCAMP3    | 3.83E-98 | 0.206951 | 0.131 | 0.41  | 5.73E-94 |
| RBM4      | 3.87E-98 | -0.16762 | 0.073 | 0.432 | 5.78E-94 |
| FAM162A   | 3.90E-98 | 0.572254 | 0.237 | 0.417 | 5.84E-94 |
| AGGF1     | 3.97E-98 | -0.14649 | 0.051 | 0.378 | 5.93E-94 |
| NFYC      | 4.03E-98 | 0.109773 | 0.096 | 0.379 | 6.03E-94 |
| ZNF131    | 4.28E-98 | -0.23731 | 0.077 | 0.454 | 6.39E-94 |
| GPC1      | 5.02E-98 | -0.2907  | 0.106 | 0.488 | 7.50E-94 |
| CHIC2     | 5.50E-98 | -0.4372  | 0.063 | 0.489 | 8.21E-94 |
| ZNF680    | 5.94E-98 | -0.28961 | 0.096 | 0.501 | 8.88E-94 |
| GSK3A     | 6.18E-98 | -0.22815 | 0.051 | 0.401 | 9.24E-94 |
| RAD1      | 6.26E-98 | -0.27674 | 0.082 | 0.483 | 9.36E-94 |
| CEBPG     | 6.88E-98 | -0.22878 | 0.066 | 0.435 | 1.03E-93 |
| PYGB      | 6.96E-98 | -0.16124 | 0.065 | 0.399 | 1.04E-93 |
| SPRY2     | 7.29E-98 | -0.29036 | 0.08  | 0.458 | 1.09E-93 |
| MBD4      | 8.25E-98 | -0.12458 | 0.073 | 0.42  | 1.23E-93 |
| CBY1      | 8.46E-98 | -0.13908 | 0.047 | 0.375 | 1.26E-93 |
| BUB1      | 9.11E-98 | -0.83094 | 0     | 0.421 | 1.36E-93 |
| ACD       | 1.05E-97 | -0.1268  | 0.054 | 0.368 | 1.57E-93 |
| HMG2      | 1.10E-97 | -0.21923 | 0.461 | 0.884 | 1.64E-93 |
| RRBP1     | 1.20E-97 | -0.28779 | 0.07  | 0.432 | 1.79E-93 |
| USP39     | 1.32E-97 | -0.25785 | 0.037 | 0.383 | 1.98E-93 |
| RBM27     | 1.50E-97 | -0.33377 | 0.04  | 0.405 | 2.24E-93 |
| AKT1S1    | 1.51E-97 | -0.17658 | 0.058 | 0.406 | 2.25E-93 |
| PGRMC2    | 1.84E-97 | -0.13746 | 0.063 | 0.399 | 2.74E-93 |
| CBX6      | 2.03E-97 | -0.1588  | 0.094 | 0.448 | 3.03E-93 |
| OLFM1     | 2.22E-97 | -0.28195 | 0.084 | 0.477 | 3.32E-93 |

|           |          |          |       |       |          |
|-----------|----------|----------|-------|-------|----------|
| COIL      | 2.50E-97 | -0.20932 | 0.045 | 0.393 | 3.74E-93 |
| PRRC2B    | 2.67E-97 | -0.18978 | 0.059 | 0.396 | 4.00E-93 |
| DEAF1     | 2.79E-97 | -0.18979 | 0.059 | 0.41  | 4.18E-93 |
| TRUB2     | 2.94E-97 | 0.139976 | 0.092 | 0.352 | 4.40E-93 |
| THOC3     | 3.18E-97 | -0.3906  | 0.026 | 0.401 | 4.76E-93 |
| BTG2      | 3.46E-97 | 0.497887 | 0.257 | 0.449 | 5.17E-93 |
| MLF1      | 3.52E-97 | 0.149028 | 0.103 | 0.367 | 5.26E-93 |
| G6PD      | 3.55E-97 | -0.15854 | 0.04  | 0.359 | 5.30E-93 |
| TOP2B     | 3.61E-97 | -0.2198  | 0.068 | 0.432 | 5.39E-93 |
| CHEK1     | 3.73E-97 | -0.6501  | 0.019 | 0.451 | 5.57E-93 |
| RNF157    | 4.19E-97 | -0.11255 | 0.054 | 0.374 | 6.26E-93 |
| SKA3      | 4.50E-97 | -0.67921 | 0     | 0.419 | 6.72E-93 |
| ZFAND2A   | 5.87E-97 | 0.169087 | 0.145 | 0.452 | 8.77E-93 |
| ME2       | 6.47E-97 | -0.24805 | 0.038 | 0.384 | 9.66E-93 |
| PUM1      | 6.61E-97 | -0.10211 | 0.065 | 0.375 | 9.88E-93 |
| ACLY      | 6.88E-97 | -0.2077  | 0.059 | 0.401 | 1.03E-92 |
| CTNNAL1   | 7.05E-97 | -0.38717 | 0.049 | 0.433 | 1.05E-92 |
| RRP1      | 8.03E-97 | -0.2166  | 0.054 | 0.401 | 1.20E-92 |
| PIGC      | 8.48E-97 | 0.129952 | 0.079 | 0.351 | 1.27E-92 |
| STX16     | 1.06E-96 | -0.11443 | 0.061 | 0.383 | 1.58E-92 |
| NCAPG2    | 1.34E-96 | -0.56233 | 0.023 | 0.443 | 2.00E-92 |
| OGFOD3    | 1.41E-96 | -0.35084 | 0.04  | 0.409 | 2.10E-92 |
| MUS81     | 1.42E-96 | -0.29421 | 0.042 | 0.402 | 2.13E-92 |
| LINC00152 | 1.45E-96 | 0.229348 | 0.131 | 0.38  | 2.17E-92 |
| ATP6V1H   | 1.61E-96 | 0.107896 | 0.105 | 0.398 | 2.40E-92 |
| NEK6      | 1.80E-96 | -0.3245  | 0.068 | 0.422 | 2.69E-92 |
| SERPINH1  | 2.23E-96 | -0.10145 | 0.068 | 0.391 | 3.33E-92 |
| RQCD1     | 2.39E-96 | -0.2806  | 0.051 | 0.419 | 3.57E-92 |
| GPR137    | 2.42E-96 | -0.23714 | 0.042 | 0.384 | 3.62E-92 |
| VPS26B    | 2.48E-96 | -0.32865 | 0.054 | 0.438 | 3.70E-92 |
| VTA1      | 2.58E-96 | -0.12781 | 0.051 | 0.356 | 3.86E-92 |
| CTCF      | 2.59E-96 | -0.41868 | 0.044 | 0.443 | 3.88E-92 |
| FSD1      | 2.67E-96 | -0.17509 | 0.052 | 0.381 | 4.00E-92 |
| ATF6      | 2.71E-96 | -0.17862 | 0.049 | 0.378 | 4.05E-92 |
| ZNF791    | 2.78E-96 | 0.11254  | 0.143 | 0.432 | 4.15E-92 |
| MBD3      | 2.78E-96 | -0.32478 | 0.04  | 0.404 | 4.15E-92 |
| CCNL2     | 2.83E-96 | -0.10726 | 0.087 | 0.42  | 4.23E-92 |
| ROB01     | 3.00E-96 | -0.58786 | 0.017 | 0.433 | 4.48E-92 |
| LRRC47    | 3.06E-96 | -0.35238 | 0.054 | 0.451 | 4.57E-92 |
| CRMP1     | 3.42E-96 | -0.29344 | 0.113 | 0.515 | 5.11E-92 |
| CHMP1B    | 3.83E-96 | 0.112894 | 0.117 | 0.401 | 5.72E-92 |
| GINS1     | 3.94E-96 | -0.54367 | 0.012 | 0.41  | 5.89E-92 |
| CHD1      | 4.05E-96 | -0.41694 | 0.056 | 0.463 | 6.05E-92 |
| HN1L      | 4.37E-96 | -0.50309 | 0.024 | 0.435 | 6.54E-92 |
| FNBP4     | 4.79E-96 | -0.27554 | 0.077 | 0.459 | 7.16E-92 |
| ASXL1     | 4.92E-96 | -0.2704  | 0.061 | 0.426 | 7.35E-92 |
| KIF20B    | 4.94E-96 | -0.71078 | 0.017 | 0.454 | 7.38E-92 |
| GCAT      | 5.16E-96 | -0.22697 | 0.061 | 0.426 | 7.72E-92 |
| NQO2      | 5.30E-96 | -0.17848 | 0.052 | 0.388 | 7.92E-92 |
| VPS51     | 5.49E-96 | -0.17498 | 0.08  | 0.438 | 8.21E-92 |
| TRIM37    | 6.21E-96 | -0.26035 | 0.031 | 0.373 | 9.28E-92 |

|          |          |          |       |       |          |
|----------|----------|----------|-------|-------|----------|
| PSD3     | 6.35E-96 | -0.16229 | 0.059 | 0.393 | 9.49E-92 |
| NTAN1    | 6.53E-96 | -0.37252 | 0.023 | 0.377 | 9.76E-92 |
| G3BP2    | 6.54E-96 | -0.26115 | 0.051 | 0.406 | 9.78E-92 |
| ZFAND2B  | 6.57E-96 | -0.20997 | 0.054 | 0.402 | 9.82E-92 |
| PTPN12   | 6.71E-96 | -0.17023 | 0.065 | 0.396 | 1.00E-91 |
| NSD1     | 7.40E-96 | -0.1114  | 0.086 | 0.419 | 1.11E-91 |
| SLC25A26 | 7.56E-96 | 0.117632 | 0.098 | 0.36  | 1.13E-91 |
| TNPO2    | 8.02E-96 | -0.15377 | 0.073 | 0.42  | 1.20E-91 |
| EFHC1    | 8.24E-96 | 0.350745 | 0.131 | 0.332 | 1.23E-91 |
| RECQL    | 8.34E-96 | -0.25224 | 0.035 | 0.373 | 1.25E-91 |
| ZNF43    | 8.97E-96 | -0.29412 | 0.061 | 0.44  | 1.34E-91 |
| C17orf58 | 9.77E-96 | -0.42949 | 0.035 | 0.427 | 1.46E-91 |
| DEPDC1   | 1.08E-95 | -0.75468 | 0     | 0.414 | 1.61E-91 |
| KIF4A    | 1.08E-95 | -0.73412 | 0     | 0.414 | 1.61E-91 |
| ISG15    | 1.18E-95 | 0.636721 | 0.208 | 0.374 | 1.77E-91 |
| SCYL1    | 1.19E-95 | -0.24956 | 0.042 | 0.383 | 1.77E-91 |
| FANCI    | 1.20E-95 | -0.57337 | 0.014 | 0.423 | 1.79E-91 |
| FBXW2    | 1.25E-95 | -0.27224 | 0.04  | 0.39  | 1.87E-91 |
| EPB41L2  | 1.28E-95 | -0.38616 | 0.035 | 0.41  | 1.91E-91 |
| B4GALT5  | 1.28E-95 | -0.25408 | 0.045 | 0.38  | 1.92E-91 |
| PDGFRA   | 1.30E-95 | -0.5695  | 0.065 | 0.505 | 1.95E-91 |
| RB1CC1   | 1.33E-95 | -0.3002  | 0.07  | 0.448 | 1.99E-91 |
| THAP11   | 1.59E-95 | -0.34362 | 0.033 | 0.4   | 2.37E-91 |
| NSUN5    | 1.65E-95 | -0.13115 | 0.066 | 0.401 | 2.47E-91 |
| LHX2     | 1.67E-95 | -0.60142 | 0.017 | 0.42  | 2.50E-91 |
| CIZ1     | 1.74E-95 | -0.16314 | 0.059 | 0.395 | 2.60E-91 |
| OIP5     | 2.10E-95 | -0.74062 | 0.002 | 0.423 | 3.14E-91 |
| ZNF358   | 2.37E-95 | -0.16721 | 0.04  | 0.344 | 3.55E-91 |
| NAT14    | 2.59E-95 | -0.19165 | 0.056 | 0.394 | 3.87E-91 |
| CNRIP1   | 2.60E-95 | -0.21451 | 0.072 | 0.431 | 3.89E-91 |
| SCFD1    | 2.67E-95 | 0.24235  | 0.122 | 0.36  | 3.99E-91 |
| NUP93    | 2.72E-95 | -0.30276 | 0.045 | 0.415 | 4.07E-91 |
| MAP3K7   | 3.07E-95 | -0.10503 | 0.056 | 0.372 | 4.59E-91 |
| KIF9     | 3.79E-95 | 0.115099 | 0.086 | 0.348 | 5.67E-91 |
| BASP1    | 3.92E-95 | -0.69076 | 0.042 | 0.491 | 5.86E-91 |
| ORAI2    | 4.20E-95 | -0.22018 | 0.075 | 0.436 | 6.28E-91 |
| NCLN     | 4.47E-95 | -0.19399 | 0.031 | 0.349 | 6.68E-91 |
| SMPD1    | 5.30E-95 | -0.23339 | 0.052 | 0.389 | 7.91E-91 |
| NCAPH    | 5.30E-95 | -0.75257 | 0.002 | 0.422 | 7.93E-91 |
| TOR1AIP2 | 5.67E-95 | -0.155   | 0.077 | 0.417 | 8.48E-91 |
| ATP6VOA1 | 5.78E-95 | 0.273326 | 0.126 | 0.356 | 8.64E-91 |
| SART1    | 7.64E-95 | -0.29606 | 0.033 | 0.38  | 1.14E-90 |
| MEX3A    | 7.94E-95 | -0.38764 | 0.066 | 0.465 | 1.19E-90 |
| CPSF4    | 8.06E-95 | -0.21564 | 0.07  | 0.422 | 1.20E-90 |
| IGFBP5   | 1.13E-94 | 0.876338 | 0.307 | 0.379 | 1.70E-90 |
| NOB1     | 1.15E-94 | 0.229745 | 0.073 | 0.299 | 1.72E-90 |
| BICD1    | 1.18E-94 | -0.30654 | 0.047 | 0.41  | 1.77E-90 |
| PCMTD2   | 1.22E-94 | -0.13315 | 0.084 | 0.419 | 1.82E-90 |
| FAM46A   | 1.24E-94 | 0.175728 | 0.117 | 0.378 | 1.85E-90 |
| CEP350   | 1.47E-94 | -0.19586 | 0.031 | 0.34  | 2.19E-90 |
| FGFR10P2 | 1.48E-94 | -0.14069 | 0.079 | 0.428 | 2.21E-90 |

|           |          |          |       |       |          |
|-----------|----------|----------|-------|-------|----------|
| HS2ST1    | 1.55E-94 | -0.18107 | 0.054 | 0.383 | 2.32E-90 |
| SPOCD1    | 1.78E-94 | 0.575437 | 0.175 | 0.301 | 2.65E-90 |
| WASL      | 1.94E-94 | -0.14012 | 0.058 | 0.374 | 2.90E-90 |
| NCOR2     | 2.20E-94 | -0.19381 | 0.07  | 0.419 | 3.30E-90 |
| NDUFAF6   | 2.26E-94 | -0.19012 | 0.049 | 0.384 | 3.37E-90 |
| BAG5      | 2.26E-94 | -0.14056 | 0.052 | 0.385 | 3.37E-90 |
| PROSC     | 2.58E-94 | -0.1599  | 0.063 | 0.398 | 3.85E-90 |
| LINC00667 | 2.75E-94 | 0.251523 | 0.12  | 0.359 | 4.11E-90 |
| COX19     | 2.78E-94 | -0.14727 | 0.072 | 0.404 | 4.16E-90 |
| FOXG1     | 2.85E-94 | -0.2534  | 0.051 | 0.391 | 4.26E-90 |
| PEX16     | 3.06E-94 | 0.211526 | 0.08  | 0.311 | 4.57E-90 |
| ENO2      | 3.10E-94 | 0.136007 | 0.157 | 0.472 | 4.63E-90 |
| IWS1      | 3.41E-94 | -0.22768 | 0.059 | 0.414 | 5.09E-90 |
| CCNG1     | 3.57E-94 | 0.147415 | 0.126 | 0.41  | 5.34E-90 |
| CXXC1     | 3.95E-94 | -0.18513 | 0.045 | 0.384 | 5.90E-90 |
| CREB1     | 4.94E-94 | -0.14922 | 0.096 | 0.447 | 7.39E-90 |
| FBXW5     | 5.06E-94 | -0.2687  | 0.052 | 0.414 | 7.57E-90 |
| DNM2      | 5.45E-94 | -0.16462 | 0.047 | 0.365 | 8.14E-90 |
| MBOAT7    | 6.07E-94 | -0.2938  | 0.04  | 0.398 | 9.07E-90 |
| LYPLA2    | 7.28E-94 | 0.112283 | 0.073 | 0.315 | 1.09E-89 |
| GOLT1B    | 8.33E-94 | -0.10314 | 0.063 | 0.381 | 1.25E-89 |
| VPS16     | 9.00E-94 | -0.13548 | 0.04  | 0.343 | 1.34E-89 |
| PBDC1     | 9.26E-94 | 0.175215 | 0.099 | 0.372 | 1.38E-89 |
| CINP      | 1.06E-93 | 0.137441 | 0.101 | 0.372 | 1.58E-89 |
| HSPA14    | 1.08E-93 | -0.24315 | 0.026 | 0.347 | 1.61E-89 |
| UBAC1     | 1.10E-93 | -0.24493 | 0.042 | 0.383 | 1.64E-89 |
| NR3C1     | 1.26E-93 | -0.17507 | 0.082 | 0.432 | 1.89E-89 |
| CCS       | 1.55E-93 | 0.510931 | 0.14  | 0.286 | 2.32E-89 |
| HEBP2     | 1.57E-93 | -0.48768 | 0.021 | 0.402 | 2.35E-89 |
| HES4      | 1.87E-93 | -0.52097 | 0.031 | 0.432 | 2.79E-89 |
| PCGF2     | 2.18E-93 | -0.29458 | 0.038 | 0.386 | 3.26E-89 |
| MTA1      | 2.23E-93 | -0.26924 | 0.07  | 0.438 | 3.34E-89 |
| REV3L     | 2.45E-93 | -0.15016 | 0.091 | 0.436 | 3.66E-89 |
| IFRD2     | 2.80E-93 | -0.18179 | 0.059 | 0.383 | 4.19E-89 |
| ASAP1     | 3.25E-93 | -0.22138 | 0.073 | 0.43  | 4.86E-89 |
| MIS12     | 3.32E-93 | -0.2006  | 0.058 | 0.402 | 4.96E-89 |
| GFER      | 3.42E-93 | -0.36837 | 0.037 | 0.405 | 5.11E-89 |
| SEPP1     | 3.44E-93 | 1.250569 | 0.314 | 0.168 | 5.14E-89 |
| DENND5A   | 3.51E-93 | -0.1162  | 0.038 | 0.326 | 5.24E-89 |
| ZEB2      | 3.55E-93 | -0.1335  | 0.096 | 0.433 | 5.31E-89 |
| ATAD3A    | 4.24E-93 | -0.32553 | 0.035 | 0.399 | 6.34E-89 |
| STRADB    | 4.64E-93 | -0.27349 | 0.042 | 0.389 | 6.94E-89 |
| NUP107    | 5.87E-93 | -0.40336 | 0.134 | 0.579 | 8.77E-89 |
| RHOT2     | 5.96E-93 | -0.15304 | 0.08  | 0.421 | 8.91E-89 |
| BFAR      | 7.08E-93 | -0.19789 | 0.058 | 0.391 | 1.06E-88 |
| GSN       | 7.61E-93 | 0.355913 | 0.124 | 0.327 | 1.14E-88 |
| CDK5RAP2  | 7.69E-93 | -0.28572 | 0.026 | 0.363 | 1.15E-88 |
| SIL1      | 9.63E-93 | 0.187215 | 0.077 | 0.29  | 1.44E-88 |
| SMUG1     | 1.07E-92 | 0.126791 | 0.079 | 0.322 | 1.59E-88 |
| ARID5B    | 1.09E-92 | 0.313235 | 0.12  | 0.344 | 1.63E-88 |
| KCTD20    | 1.15E-92 | -0.10812 | 0.052 | 0.352 | 1.71E-88 |

|           |          |          |       |       |          |
|-----------|----------|----------|-------|-------|----------|
| CDIPT     | 1.68E-92 | -0.10393 | 0.07  | 0.396 | 2.51E-88 |
| PKN2      | 1.70E-92 | -0.27158 | 0.047 | 0.4   | 2.54E-88 |
| GFAP      | 1.82E-92 | 0.916463 | 0.346 | 0.354 | 2.71E-88 |
| CDK2      | 2.22E-92 | -0.554   | 0.019 | 0.416 | 3.31E-88 |
| CCDC115   | 2.27E-92 | 0.217773 | 0.113 | 0.359 | 3.39E-88 |
| PLA2G12A  | 2.51E-92 | -0.17799 | 0.063 | 0.401 | 3.75E-88 |
| GAS1      | 2.78E-92 | -0.36928 | 0.073 | 0.463 | 4.15E-88 |
| GMPS      | 3.06E-92 | -0.42901 | 0.024 | 0.398 | 4.57E-88 |
| HOMER3    | 3.23E-92 | -0.24504 | 0.04  | 0.359 | 4.83E-88 |
| BCAR1     | 3.27E-92 | -0.16257 | 0.051 | 0.359 | 4.88E-88 |
| ZWILCH    | 3.30E-92 | -0.5719  | 0.014 | 0.417 | 4.93E-88 |
| COL4A2    | 3.49E-92 | -0.25243 | 0.03  | 0.342 | 5.21E-88 |
| FIBIN     | 3.64E-92 | 0.347805 | 0.194 | 0.406 | 5.44E-88 |
| TMEM5     | 3.64E-92 | 0.137318 | 0.084 | 0.325 | 5.44E-88 |
| RAD50     | 3.67E-92 | -0.11836 | 0.089 | 0.425 | 5.48E-88 |
| CTNNB1    | 3.92E-92 | -0.26489 | 0.112 | 0.509 | 5.85E-88 |
| LGALS1    | 4.86E-92 | 0.306494 | 0.539 | 0.767 | 7.26E-88 |
| LRRC58    | 5.00E-92 | -0.30188 | 0.049 | 0.411 | 7.47E-88 |
| KLHL23    | 6.02E-92 | -0.55804 | 0.044 | 0.459 | 9.00E-88 |
| LINC00665 | 6.41E-92 | 0.234473 | 0.105 | 0.347 | 9.58E-88 |
| SUDS3     | 7.67E-92 | -0.28917 | 0.045 | 0.395 | 1.15E-87 |
| BRD9      | 7.79E-92 | -0.2295  | 0.054 | 0.395 | 1.16E-87 |
| PET117    | 7.96E-92 | -0.14227 | 0.051 | 0.353 | 1.19E-87 |
| FAM173A   | 8.05E-92 | -0.19005 | 0.059 | 0.386 | 1.20E-87 |
| PSMD9     | 8.70E-92 | 0.130363 | 0.131 | 0.399 | 1.30E-87 |
| ZNF83     | 8.77E-92 | -0.27832 | 0.063 | 0.432 | 1.31E-87 |
| WDR45     | 9.91E-92 | 0.331019 | 0.112 | 0.315 | 1.48E-87 |
| ERBB2IP   | 1.10E-91 | -0.22725 | 0.045 | 0.378 | 1.64E-87 |
| HOOK2     | 1.33E-91 | 0.242067 | 0.117 | 0.356 | 1.99E-87 |
| CDC42EP4  | 1.57E-91 | 0.128697 | 0.126 | 0.43  | 2.35E-87 |
| TRIP6     | 1.58E-91 | 0.252929 | 0.122 | 0.347 | 2.37E-87 |
| MCOLN1    | 1.63E-91 | -0.33104 | 0.037 | 0.394 | 2.43E-87 |
| PDE6D     | 1.68E-91 | -0.21902 | 0.063 | 0.411 | 2.52E-87 |
| CEP170    | 1.77E-91 | -0.34228 | 0.052 | 0.433 | 2.64E-87 |
| CNOT3     | 1.86E-91 | -0.3163  | 0.031 | 0.378 | 2.78E-87 |
| KIAA1524  | 2.12E-91 | -0.6446  | 0.007 | 0.406 | 3.17E-87 |
| CANT1     | 2.22E-91 | -0.32478 | 0.04  | 0.393 | 3.32E-87 |
| TUBB6     | 2.70E-91 | -0.1859  | 0.075 | 0.42  | 4.03E-87 |
| ARHGAP12  | 2.71E-91 | 0.231493 | 0.099 | 0.333 | 4.05E-87 |
| ADNP      | 2.84E-91 | -0.34502 | 0.045 | 0.411 | 4.25E-87 |
| EPB41L4A- | 3.16E-91 | 0.247005 | 0.127 | 0.37  | 4.72E-87 |
| GAR1      | 3.53E-91 | -0.16667 | 0.042 | 0.353 | 5.27E-87 |
| HLA-E     | 3.55E-91 | 0.411874 | 0.236 | 0.462 | 5.31E-87 |
| SNAPC2    | 3.68E-91 | -0.11543 | 0.044 | 0.34  | 5.50E-87 |
| UBAP2L    | 4.43E-91 | -0.16153 | 0.056 | 0.38  | 6.62E-87 |
| SCG3      | 4.48E-91 | 0.398416 | 0.272 | 0.494 | 6.69E-87 |
| CEP135    | 5.32E-91 | -0.66828 | 0.017 | 0.432 | 7.95E-87 |
| PURA      | 5.67E-91 | -0.158   | 0.063 | 0.379 | 8.47E-87 |
| BLMH      | 6.35E-91 | -0.37202 | 0.038 | 0.41  | 9.50E-87 |
| CUL3      | 6.60E-91 | -0.22634 | 0.061 | 0.4   | 9.86E-87 |
| WWTR1     | 6.88E-91 | -0.25094 | 0.031 | 0.336 | 1.03E-86 |



|           |          |          |       |       |          |
|-----------|----------|----------|-------|-------|----------|
| SLC2A4RG  | 7.31E-91 | -0.36618 | 0.024 | 0.375 | 1.09E-86 |
| HERC2     | 7.49E-91 | -0.11944 | 0.07  | 0.385 | 1.12E-86 |
| TMEM189   | 7.68E-91 | -0.37132 | 0.024 | 0.375 | 1.15E-86 |
| FAM120AOS | 8.08E-91 | -0.25382 | 0.037 | 0.374 | 1.21E-86 |
| ATN1      | 8.27E-91 | -0.15894 | 0.052 | 0.362 | 1.24E-86 |
| TRIM27    | 8.50E-91 | -0.14723 | 0.063 | 0.384 | 1.27E-86 |
| METTL7B   | 8.67E-91 | 0.529686 | 0.208 | 0.374 | 1.30E-86 |
| BCL2L1    | 8.69E-91 | 0.304431 | 0.115 | 0.323 | 1.30E-86 |
| STARD3    | 8.83E-91 | -0.24167 | 0.049 | 0.39  | 1.32E-86 |
| TLN1      | 9.00E-91 | -0.13036 | 0.04  | 0.335 | 1.34E-86 |
| CPSF3     | 1.09E-90 | -0.29462 | 0.045 | 0.407 | 1.63E-86 |
| TFDP2     | 1.23E-90 | -0.28996 | 0.061 | 0.426 | 1.83E-86 |
| SLC36A4   | 1.26E-90 | -0.3027  | 0.047 | 0.404 | 1.89E-86 |
| PEX10     | 1.29E-90 | -0.19215 | 0.052 | 0.377 | 1.93E-86 |
| ANAPC7    | 1.42E-90 | -0.12472 | 0.056 | 0.36  | 2.12E-86 |
| ETHE1     | 1.54E-90 | 0.33736  | 0.103 | 0.298 | 2.30E-86 |
| ADAM17    | 1.54E-90 | -0.23723 | 0.056 | 0.386 | 2.31E-86 |
| TCF3      | 1.63E-90 | -0.23176 | 0.031 | 0.342 | 2.43E-86 |
| PPP3CA    | 1.78E-90 | -0.13177 | 0.066 | 0.385 | 2.67E-86 |
| PLXNB2    | 1.88E-90 | -0.18482 | 0.033 | 0.317 | 2.81E-86 |
| CD82      | 1.94E-90 | 0.180551 | 0.155 | 0.42  | 2.89E-86 |
| GUSB      | 2.27E-90 | -0.12644 | 0.084 | 0.421 | 3.39E-86 |
| B4GALT7   | 2.44E-90 | -0.23636 | 0.04  | 0.367 | 3.65E-86 |
| XIAP      | 2.61E-90 | -0.18255 | 0.056 | 0.385 | 3.90E-86 |
| SLC20A1   | 2.64E-90 | -0.44226 | 0.031 | 0.4   | 3.95E-86 |
| EPHX1     | 2.89E-90 | -0.11383 | 0.054 | 0.354 | 4.32E-86 |
| SLC25A1   | 2.99E-90 | -0.20542 | 0.054 | 0.391 | 4.47E-86 |
| UXS1      | 3.05E-90 | -0.16729 | 0.047 | 0.356 | 4.56E-86 |
| ANKRD17   | 3.37E-90 | -0.15235 | 0.072 | 0.405 | 5.04E-86 |
| FAM20C    | 3.81E-90 | 0.228149 | 0.091 | 0.304 | 5.69E-86 |
| C1R       | 4.14E-90 | 1.053974 | 0.257 | 0.227 | 6.19E-86 |
| SIRT7     | 4.40E-90 | -0.2466  | 0.04  | 0.367 | 6.58E-86 |
| C14orf80  | 4.61E-90 | -0.47188 | 0.017 | 0.4   | 6.89E-86 |
| CRYZL1    | 4.79E-90 | 0.250462 | 0.117 | 0.333 | 7.16E-86 |
| IGFBP7    | 4.91E-90 | 0.227002 | 0.232 | 0.516 | 7.34E-86 |
| BRCA1     | 5.03E-90 | -0.58924 | 0.01  | 0.415 | 7.52E-86 |
| GALE      | 5.13E-90 | -0.12717 | 0.028 | 0.294 | 7.67E-86 |
| POLR2D    | 5.68E-90 | -0.37884 | 0.033 | 0.401 | 8.48E-86 |
| RAB5B     | 5.69E-90 | 0.231058 | 0.092 | 0.29  | 8.51E-86 |
| GRK6      | 6.14E-90 | -0.37496 | 0.016 | 0.352 | 9.17E-86 |
| DDX23     | 6.79E-90 | -0.27333 | 0.038 | 0.375 | 1.02E-85 |
| FAM104B   | 6.90E-90 | -0.25253 | 0.049 | 0.388 | 1.03E-85 |
| ABHD3     | 7.02E-90 | -0.53558 | 0.026 | 0.422 | 1.05E-85 |
| MT1F      | 7.61E-90 | 0.540246 | 0.192 | 0.34  | 1.14E-85 |
| RBMS1     | 7.69E-90 | -0.18301 | 0.065 | 0.39  | 1.15E-85 |
| NEK2      | 7.91E-90 | -0.82708 | 0.002 | 0.405 | 1.18E-85 |
| PPP1R15A  | 8.55E-90 | 0.201197 | 0.155 | 0.407 | 1.28E-85 |
| ACP2      | 8.84E-90 | 0.140656 | 0.087 | 0.333 | 1.32E-85 |
| GPX7      | 8.88E-90 | -0.10852 | 0.056 | 0.364 | 1.33E-85 |
| IMPAD1    | 9.74E-90 | -0.1365  | 0.054 | 0.367 | 1.46E-85 |
| PPCS      | 9.81E-90 | 0.420872 | 0.112 | 0.275 | 1.47E-85 |

|          |           |           |        |        |           |
|----------|-----------|-----------|--------|--------|-----------|
| OXCT1    | 1. 05E-89 | -0. 21631 | 0. 063 | 0. 412 | 1. 57E-85 |
| PMEPA1   | 1. 13E-89 | -0. 50134 | 0. 038 | 0. 415 | 1. 69E-85 |
| RNF138   | 1. 16E-89 | -0. 17573 | 0. 044 | 0. 353 | 1. 73E-85 |
| FRYL     | 1. 21E-89 | -0. 31489 | 0. 052 | 0. 409 | 1. 80E-85 |
| RNFT1    | 1. 40E-89 | -0. 32517 | 0. 03  | 0. 373 | 2. 10E-85 |
| MAEA     | 1. 45E-89 | -0. 15231 | 0. 066 | 0. 385 | 2. 17E-85 |
| NUP54    | 1. 54E-89 | -0. 32073 | 0. 051 | 0. 414 | 2. 31E-85 |
| TRMT6    | 1. 65E-89 | -0. 2614  | 0. 045 | 0. 385 | 2. 47E-85 |
| CRAT     | 1. 66E-89 | -0. 21268 | 0. 044 | 0. 362 | 2. 48E-85 |
| SNX14    | 1. 70E-89 | -0. 13416 | 0. 052 | 0. 356 | 2. 54E-85 |
| CEBPB    | 1. 90E-89 | -0. 12117 | 0. 094 | 0. 414 | 2. 84E-85 |
| EXTL2    | 1. 95E-89 | -0. 16652 | 0. 059 | 0. 385 | 2. 91E-85 |
| ABRACL   | 2. 15E-89 | -0. 25597 | 0. 042 | 0. 372 | 3. 21E-85 |
| FUZ      | 2. 18E-89 | -0. 22239 | 0. 056 | 0. 4   | 3. 26E-85 |
| RANGAP1  | 2. 37E-89 | -0. 53533 | 0. 009 | 0. 39  | 3. 55E-85 |
| PPIL3    | 2. 81E-89 | -0. 30668 | 0. 038 | 0. 386 | 4. 20E-85 |
| CDCA2    | 3. 05E-89 | -0. 6852  | 0      | 0. 39  | 4. 56E-85 |
| DVL2     | 3. 19E-89 | -0. 3088  | 0. 04  | 0. 381 | 4. 77E-85 |
| PSMG4    | 3. 25E-89 | -0. 1715  | 0. 059 | 0. 383 | 4. 85E-85 |
| MFS11    | 3. 71E-89 | -0. 15678 | 0. 049 | 0. 363 | 5. 54E-85 |
| FAM120A  | 3. 84E-89 | -0. 2316  | 0. 031 | 0. 342 | 5. 73E-85 |
| FAM127B  | 4. 28E-89 | 0. 192933 | 0. 129 | 0. 385 | 6. 40E-85 |
| RP9      | 4. 61E-89 | -0. 24456 | 0. 061 | 0. 405 | 6. 89E-85 |
| BET1     | 4. 82E-89 | 0. 233933 | 0. 11  | 0. 325 | 7. 20E-85 |
| IST1     | 4. 87E-89 | -0. 26419 | 0. 061 | 0. 407 | 7. 28E-85 |
| REST     | 5. 12E-89 | -0. 40173 | 0. 045 | 0. 425 | 7. 66E-85 |
| ERGIC1   | 6. 00E-89 | 0. 102328 | 0. 098 | 0. 364 | 8. 97E-85 |
| RCC1     | 6. 74E-89 | -0. 46439 | 0. 019 | 0. 399 | 1. 01E-84 |
| CBR3     | 7. 56E-89 | -0. 39725 | 0. 03  | 0. 388 | 1. 13E-84 |
| REEP4    | 7. 77E-89 | -0. 59419 | 0. 01  | 0. 391 | 1. 16E-84 |
| FAM207A  | 7. 97E-89 | -0. 19474 | 0. 038 | 0. 347 | 1. 19E-84 |
| MMD      | 8. 02E-89 | -0. 52708 | 0. 024 | 0. 419 | 1. 20E-84 |
| ZNF511   | 8. 81E-89 | -0. 25872 | 0. 031 | 0. 343 | 1. 32E-84 |
| LARP6    | 9. 41E-89 | -0. 16699 | 0. 052 | 0. 364 | 1. 41E-84 |
| UBE2Q2   | 1. 01E-88 | -0. 33984 | 0. 035 | 0. 389 | 1. 51E-84 |
| C6orf89  | 1. 15E-88 | -0. 17239 | 0. 054 | 0. 368 | 1. 72E-84 |
| C15orf61 | 1. 24E-88 | -0. 12539 | 0. 049 | 0. 358 | 1. 86E-84 |
| EHBP1    | 1. 31E-88 | -0. 17472 | 0. 033 | 0. 32  | 1. 95E-84 |
| DCTN1    | 1. 42E-88 | -0. 11915 | 0. 061 | 0. 365 | 2. 12E-84 |
| CDC45    | 1. 42E-88 | -0. 70925 | 0      | 0. 388 | 2. 13E-84 |
| NFATC2IP | 1. 49E-88 | -0. 36405 | 0. 037 | 0. 396 | 2. 23E-84 |
| ROCK2    | 1. 62E-88 | -0. 19211 | 0. 038 | 0. 341 | 2. 42E-84 |
| RRP36    | 1. 79E-88 | -0. 35634 | 0. 014 | 0. 343 | 2. 67E-84 |
| LTBP3    | 1. 94E-88 | -0. 15207 | 0. 061 | 0. 373 | 2. 90E-84 |
| DCP2     | 2. 22E-88 | -0. 35773 | 0. 035 | 0. 394 | 3. 32E-84 |
| FAM83D   | 2. 49E-88 | -0. 82652 | 0. 002 | 0. 4   | 3. 73E-84 |
| STT3B    | 2. 65E-88 | -0. 1802  | 0. 063 | 0. 385 | 3. 96E-84 |
| PRPF4    | 2. 69E-88 | -0. 2074  | 0. 051 | 0. 379 | 4. 03E-84 |
| SLAIN1   | 2. 81E-88 | -0. 30652 | 0. 04  | 0. 378 | 4. 19E-84 |
| HEPN1    | 2. 91E-88 | 0. 404979 | 0. 182 | 0. 374 | 4. 34E-84 |
| TGS1     | 3. 01E-88 | -0. 12091 | 0. 052 | 0. 359 | 4. 49E-84 |

|           |          |          |       |       |          |
|-----------|----------|----------|-------|-------|----------|
| TEAD1     | 3.55E-88 | -0.26528 | 0.042 | 0.36  | 5.31E-84 |
| GOT2      | 3.59E-88 | -0.16332 | 0.058 | 0.381 | 5.37E-84 |
| CNIH3     | 3.75E-88 | -0.11761 | 0.058 | 0.348 | 5.60E-84 |
| WDR43     | 4.08E-88 | -0.24243 | 0.037 | 0.365 | 6.09E-84 |
| ARSJ      | 4.24E-88 | -0.12879 | 0.04  | 0.315 | 6.34E-84 |
| HMMR      | 4.54E-88 | -0.74407 | 0.003 | 0.394 | 6.79E-84 |
| RFFL      | 4.56E-88 | -0.31358 | 0.033 | 0.354 | 6.82E-84 |
| MPHOSPH9  | 6.10E-88 | -0.3528  | 0.04  | 0.4   | 9.12E-84 |
| PIGP      | 6.30E-88 | 0.197761 | 0.07  | 0.289 | 9.42E-84 |
| CASC5     | 6.61E-88 | -0.62971 | 0     | 0.385 | 9.88E-84 |
| EXOC5     | 6.90E-88 | -0.22607 | 0.066 | 0.415 | 1.03E-83 |
| TBC1D7    | 6.96E-88 | -0.14491 | 0.045 | 0.347 | 1.04E-83 |
| UTP6      | 7.27E-88 | -0.11457 | 0.054 | 0.352 | 1.09E-83 |
| RPP25L    | 7.37E-88 | 0.136162 | 0.058 | 0.274 | 1.10E-83 |
| NFKBIA    | 8.71E-88 | 0.244599 | 0.168 | 0.419 | 1.30E-83 |
| CXADR     | 9.70E-88 | -0.25617 | 0.07  | 0.42  | 1.45E-83 |
| AP006222. | 1.34E-87 | 0.159373 | 0.063 | 0.283 | 2.01E-83 |
| METTL2A   | 1.52E-87 | -0.19302 | 0.038 | 0.342 | 2.26E-83 |
| LYAR      | 1.54E-87 | -0.2154  | 0.047 | 0.377 | 2.30E-83 |
| IER5      | 1.56E-87 | -0.20927 | 0.04  | 0.354 | 2.34E-83 |
| PRR14     | 1.96E-87 | -0.17971 | 0.054 | 0.364 | 2.92E-83 |
| RNA5H1-A  | 2.05E-87 | -0.21838 | 0.044 | 0.36  | 3.06E-83 |
| TBC1D20   | 2.29E-87 | -0.21066 | 0.03  | 0.335 | 3.42E-83 |
| REX04     | 2.54E-87 | -0.11876 | 0.054 | 0.349 | 3.79E-83 |
| SOX8      | 2.69E-87 | -0.20121 | 0.103 | 0.46  | 4.02E-83 |
| MSL1      | 2.83E-87 | -0.10429 | 0.049 | 0.336 | 4.22E-83 |
| C19orf52  | 2.90E-87 | -0.34341 | 0.031 | 0.38  | 4.33E-83 |
| TRPT1     | 2.91E-87 | -0.16983 | 0.072 | 0.41  | 4.35E-83 |
| ANKLE2    | 3.15E-87 | -0.35359 | 0.037 | 0.395 | 4.71E-83 |
| ARMC6     | 3.30E-87 | -0.11347 | 0.068 | 0.384 | 4.94E-83 |
| NMRAL1    | 3.31E-87 | 0.190127 | 0.101 | 0.336 | 4.95E-83 |
| OSTM1     | 3.89E-87 | -0.17629 | 0.035 | 0.333 | 5.81E-83 |
| DCAF11    | 3.89E-87 | -0.15932 | 0.042 | 0.34  | 5.81E-83 |
| QSER1     | 4.12E-87 | -0.37338 | 0.017 | 0.359 | 6.15E-83 |
| PREB      | 5.11E-87 | -0.15639 | 0.056 | 0.365 | 7.63E-83 |
| IVNS1ABP  | 5.56E-87 | -0.27656 | 0.042 | 0.373 | 8.31E-83 |
| ERI1      | 7.31E-87 | -0.18796 | 0.04  | 0.343 | 1.09E-82 |
| WIPF2     | 7.31E-87 | -0.16982 | 0.047 | 0.346 | 1.09E-82 |
| PLS3      | 7.44E-87 | -0.14797 | 0.075 | 0.395 | 1.11E-82 |
| NUP37     | 8.34E-87 | -0.21044 | 0.04  | 0.359 | 1.25E-82 |
| OSBPL6    | 9.11E-87 | -0.35271 | 0.037 | 0.388 | 1.36E-82 |
| AAAS      | 1.16E-86 | -0.18025 | 0.087 | 0.433 | 1.73E-82 |
| CS        | 1.16E-86 | -0.26164 | 0.028 | 0.349 | 1.73E-82 |
| ANLN      | 1.24E-86 | -0.51811 | 0.007 | 0.37  | 1.86E-82 |
| BCS1L     | 1.37E-86 | -0.12171 | 0.061 | 0.368 | 2.05E-82 |
| TMED7     | 1.43E-86 | -0.13804 | 0.08  | 0.402 | 2.14E-82 |
| GEMIN6    | 1.47E-86 | -0.17936 | 0.051 | 0.356 | 2.20E-82 |
| UROS      | 1.67E-86 | -0.274   | 0.042 | 0.375 | 2.49E-82 |
| KAT7      | 1.74E-86 | -0.15363 | 0.051 | 0.356 | 2.60E-82 |
| ATG4D     | 1.74E-86 | -0.30231 | 0.037 | 0.37  | 2.60E-82 |
| DVL3      | 1.82E-86 | -0.24417 | 0.033 | 0.354 | 2.72E-82 |

|           |          |          |       |       |          |
|-----------|----------|----------|-------|-------|----------|
| FOXO3     | 1.95E-86 | -0.14801 | 0.066 | 0.381 | 2.91E-82 |
| TACO1     | 1.99E-86 | -0.31023 | 0.026 | 0.351 | 2.98E-82 |
| EHMT2     | 2.28E-86 | -0.16263 | 0.075 | 0.391 | 3.41E-82 |
| SMAD2     | 2.41E-86 | -0.10804 | 0.056 | 0.352 | 3.60E-82 |
| PPAT      | 2.44E-86 | -0.36674 | 0.045 | 0.411 | 3.64E-82 |
| LRRRC8A   | 3.05E-86 | 0.114854 | 0.087 | 0.326 | 4.56E-82 |
| IARS2     | 3.11E-86 | -0.22863 | 0.049 | 0.378 | 4.65E-82 |
| KPNA4     | 3.38E-86 | -0.2273  | 0.03  | 0.332 | 5.04E-82 |
| CEP63     | 3.48E-86 | -0.30726 | 0.038 | 0.381 | 5.20E-82 |
| ORC4      | 3.80E-86 | -0.25909 | 0.059 | 0.404 | 5.68E-82 |
| BCL2L12   | 4.43E-86 | -0.55951 | 0.01  | 0.372 | 6.62E-82 |
| ANXA7     | 4.55E-86 | 0.131724 | 0.106 | 0.36  | 6.80E-82 |
| GLIPR1    | 4.58E-86 | 0.115268 | 0.058 | 0.262 | 6.85E-82 |
| NGLY1     | 4.74E-86 | -0.2127  | 0.054 | 0.385 | 7.08E-82 |
| XRCC2     | 4.76E-86 | -0.6858  | 0.005 | 0.399 | 7.12E-82 |
| SAMM50    | 4.87E-86 | -0.20812 | 0.061 | 0.386 | 7.28E-82 |
| ZDHHC3    | 5.07E-86 | -0.28609 | 0.024 | 0.348 | 7.58E-82 |
| LETM1     | 5.24E-86 | -0.1449  | 0.045 | 0.338 | 7.83E-82 |
| ARL14EP   | 6.56E-86 | 0.130974 | 0.072 | 0.295 | 9.80E-82 |
| WDR46     | 6.61E-86 | -0.16129 | 0.049 | 0.354 | 9.89E-82 |
| ARHGAP11A | 6.75E-86 | -0.70613 | 0.005 | 0.401 | 1.01E-81 |
| ZFP36     | 6.84E-86 | 1.07186  | 0.41  | 0.327 | 1.02E-81 |
| U2AF1L4   | 6.97E-86 | 0.468275 | 0.129 | 0.289 | 1.04E-81 |
| PCF11     | 7.47E-86 | -0.10817 | 0.063 | 0.354 | 1.12E-81 |
| RNF115    | 7.49E-86 | -0.22626 | 0.068 | 0.409 | 1.12E-81 |
| TRABD     | 7.81E-86 | -0.31186 | 0.037 | 0.377 | 1.17E-81 |
| SMC5      | 8.28E-86 | -0.2753  | 0.049 | 0.388 | 1.24E-81 |
| APC       | 8.72E-86 | -0.14804 | 0.058 | 0.357 | 1.30E-81 |
| LRRCC1    | 9.11E-86 | -0.38845 | 0.042 | 0.405 | 1.36E-81 |
| CDK6      | 9.50E-86 | -0.31288 | 0.103 | 0.486 | 1.42E-81 |
| LDLRAD3   | 9.56E-86 | -0.13474 | 0.059 | 0.359 | 1.43E-81 |
| KCTD5     | 1.05E-85 | -0.17938 | 0.063 | 0.385 | 1.58E-81 |
| EFEMP1    | 1.06E-85 | 0.902699 | 0.225 | 0.241 | 1.58E-81 |
| UNC119    | 1.09E-85 | -0.28365 | 0.037 | 0.367 | 1.63E-81 |
| MED13     | 1.09E-85 | -0.17918 | 0.035 | 0.321 | 1.64E-81 |
| PITPNA    | 1.14E-85 | -0.2812  | 0.024 | 0.326 | 1.70E-81 |
| KDSR      | 1.20E-85 | -0.1591  | 0.068 | 0.378 | 1.80E-81 |
| SNTG1     | 1.24E-85 | 0.455588 | 0.171 | 0.33  | 1.85E-81 |
| RBM38     | 1.29E-85 | -0.2015  | 0.038 | 0.344 | 1.93E-81 |
| NUP50     | 1.31E-85 | -0.36896 | 0.019 | 0.359 | 1.96E-81 |
| TMEM55A   | 1.51E-85 | 0.212237 | 0.094 | 0.319 | 2.25E-81 |
| DPP6      | 1.53E-85 | 0.13611  | 0.108 | 0.351 | 2.28E-81 |
| NRSN2     | 1.65E-85 | -0.30182 | 0.035 | 0.369 | 2.47E-81 |
| MYH10     | 1.70E-85 | -0.27044 | 0.054 | 0.389 | 2.53E-81 |
| GLYR1     | 1.73E-85 | -0.26403 | 0.051 | 0.39  | 2.58E-81 |
| NPM3      | 2.00E-85 | 0.201672 | 0.087 | 0.311 | 3.00E-81 |
| RFC5      | 2.04E-85 | -0.50138 | 0.028 | 0.414 | 3.05E-81 |
| ZNF430    | 2.17E-85 | -0.16634 | 0.077 | 0.404 | 3.25E-81 |
| SIAH2     | 2.17E-85 | -0.32453 | 0.042 | 0.388 | 3.25E-81 |
| EPM2AIP1  | 2.28E-85 | -0.11521 | 0.068 | 0.372 | 3.41E-81 |
| CAMK1     | 2.37E-85 | -0.1839  | 0.044 | 0.349 | 3.55E-81 |

|          |          |          |       |       |          |
|----------|----------|----------|-------|-------|----------|
| COQ7     | 2.43E-85 | -0.11461 | 0.073 | 0.388 | 3.63E-81 |
| C2orf80  | 2.76E-85 | -0.3125  | 0.054 | 0.398 | 4.13E-81 |
| STIM2    | 3.14E-85 | -0.12348 | 0.051 | 0.34  | 4.70E-81 |
| NDN      | 3.14E-85 | -0.18954 | 0.03  | 0.33  | 4.70E-81 |
| RAB32    | 3.47E-85 | -0.19973 | 0.023 | 0.298 | 5.18E-81 |
| MYCBP2   | 4.01E-85 | -0.17458 | 0.068 | 0.391 | 5.99E-81 |
| MAP2K7   | 4.01E-85 | -0.1301  | 0.061 | 0.354 | 6.00E-81 |
| UCK1     | 4.06E-85 | -0.11515 | 0.073 | 0.386 | 6.07E-81 |
| DGKZ     | 4.16E-85 | -0.22273 | 0.04  | 0.349 | 6.22E-81 |
| CASP3    | 4.27E-85 | -0.31448 | 0.045 | 0.386 | 6.38E-81 |
| CDC27    | 4.34E-85 | -0.45316 | 0.019 | 0.37  | 6.48E-81 |
| SAPCD2   | 4.36E-85 | -0.51361 | 0.021 | 0.386 | 6.51E-81 |
| DNAAF2   | 4.86E-85 | -0.10163 | 0.049 | 0.315 | 7.26E-81 |
| TIMELESS | 5.14E-85 | -0.62636 | 0.009 | 0.399 | 7.69E-81 |
| RNF139   | 5.29E-85 | -0.2094  | 0.063 | 0.39  | 7.91E-81 |
| DEXI     | 5.47E-85 | -0.11965 | 0.047 | 0.332 | 8.17E-81 |
| HRSP12   | 6.29E-85 | 0.421636 | 0.129 | 0.29  | 9.40E-81 |
| DCAKD    | 6.62E-85 | -0.22469 | 0.031 | 0.338 | 9.90E-81 |
| ID4      | 6.98E-85 | -0.22954 | 0.084 | 0.421 | 1.04E-80 |
| TOR3A    | 7.36E-85 | -0.19058 | 0.047 | 0.356 | 1.10E-80 |
| USP34    | 9.94E-85 | -0.18306 | 0.051 | 0.36  | 1.49E-80 |
| HGS      | 1.06E-84 | -0.19584 | 0.061 | 0.379 | 1.58E-80 |
| RGL2     | 1.12E-84 | -0.10269 | 0.054 | 0.33  | 1.67E-80 |
| GNL2     | 1.13E-84 | -0.18583 | 0.056 | 0.374 | 1.69E-80 |
| RBM15B   | 1.15E-84 | -0.25493 | 0.038 | 0.359 | 1.72E-80 |
| SNRNP35  | 1.31E-84 | 0.144641 | 0.091 | 0.33  | 1.96E-80 |
| HCCS     | 1.33E-84 | -0.10674 | 0.037 | 0.312 | 1.98E-80 |
| CNOT1    | 1.37E-84 | -0.28861 | 0.024 | 0.341 | 2.05E-80 |
| ZBED5    | 1.44E-84 | -0.13357 | 0.058 | 0.36  | 2.15E-80 |
| PPP1R35  | 1.50E-84 | -0.36755 | 0.035 | 0.38  | 2.24E-80 |
| FBX09    | 1.71E-84 | -0.1749  | 0.042 | 0.349 | 2.56E-80 |
| SRGAP2   | 1.73E-84 | -0.1895  | 0.047 | 0.358 | 2.58E-80 |
| ZNF414   | 1.85E-84 | -0.32636 | 0.037 | 0.383 | 2.76E-80 |
| PAK4     | 2.01E-84 | -0.32862 | 0.028 | 0.36  | 3.00E-80 |
| E2F4     | 2.22E-84 | -0.2784  | 0.031 | 0.358 | 3.31E-80 |
| ARFIP2   | 2.26E-84 | -0.14121 | 0.07  | 0.378 | 3.38E-80 |
| POMGNT2  | 2.52E-84 | -0.11664 | 0.051 | 0.343 | 3.76E-80 |
| TMEM80   | 2.60E-84 | -0.10626 | 0.042 | 0.312 | 3.89E-80 |
| NCAPD3   | 2.80E-84 | -0.47066 | 0.012 | 0.37  | 4.18E-80 |
| CHAMP1   | 2.81E-84 | -0.28995 | 0.031 | 0.356 | 4.20E-80 |
| TCF19    | 2.86E-84 | -0.67919 | 0     | 0.372 | 4.28E-80 |
| ODF2     | 2.88E-84 | -0.50524 | 0.03  | 0.405 | 4.30E-80 |
| UBAC2    | 3.03E-84 | -0.20301 | 0.052 | 0.368 | 4.52E-80 |
| FGFR1    | 3.09E-84 | -0.18611 | 0.054 | 0.363 | 4.62E-80 |
| SNN      | 3.46E-84 | -0.24172 | 0.056 | 0.39  | 5.18E-80 |
| FAHD2A   | 3.54E-84 | -0.14133 | 0.056 | 0.358 | 5.29E-80 |
| R3HDM1   | 3.58E-84 | -0.17458 | 0.04  | 0.331 | 5.35E-80 |
| GMPPA    | 3.87E-84 | 0.126392 | 0.061 | 0.28  | 5.79E-80 |
| UBA5     | 4.06E-84 | -0.13341 | 0.052 | 0.352 | 6.06E-80 |
| RASSF1   | 4.93E-84 | -0.28213 | 0.04  | 0.373 | 7.37E-80 |
| RTKN     | 5.09E-84 | 0.195195 | 0.091 | 0.302 | 7.60E-80 |

|           |          |          |       |       |          |
|-----------|----------|----------|-------|-------|----------|
| SYNRG     | 5.30E-84 | -0.26164 | 0.037 | 0.362 | 7.92E-80 |
| PDS5A     | 5.47E-84 | -0.33099 | 0.028 | 0.359 | 8.17E-80 |
| HSDL2     | 5.66E-84 | -0.153   | 0.037 | 0.333 | 8.46E-80 |
| PAXIP1-AS | 5.93E-84 | -0.1199  | 0.068 | 0.368 | 8.87E-80 |
| TARBP2    | 6.48E-84 | -0.11293 | 0.035 | 0.299 | 9.68E-80 |
| TSPAN13   | 6.83E-84 | -0.44117 | 0.103 | 0.51  | 1.02E-79 |
| RARS2     | 7.15E-84 | -0.2478  | 0.031 | 0.341 | 1.07E-79 |
| GALNT1    | 7.24E-84 | -0.38315 | 0.026 | 0.369 | 1.08E-79 |
| PDLIM2    | 8.61E-84 | 0.237058 | 0.101 | 0.312 | 1.29E-79 |
| FBXW11    | 1.00E-83 | -0.27502 | 0.031 | 0.343 | 1.50E-79 |
| MAX       | 1.04E-83 | 0.204695 | 0.096 | 0.317 | 1.56E-79 |
| NFATC3    | 1.08E-83 | -0.16601 | 0.035 | 0.317 | 1.62E-79 |
| YIPF5     | 1.15E-83 | 0.121974 | 0.094 | 0.336 | 1.71E-79 |
| RBFOX2    | 1.16E-83 | -0.13768 | 0.082 | 0.39  | 1.74E-79 |
| SKA1      | 1.17E-83 | -0.66675 | 0.002 | 0.381 | 1.75E-79 |
| FAF1      | 1.22E-83 | -0.24628 | 0.035 | 0.352 | 1.83E-79 |
| PPFIA1    | 1.25E-83 | -0.12985 | 0.042 | 0.307 | 1.87E-79 |
| GALNT11   | 1.27E-83 | -0.1395  | 0.058 | 0.367 | 1.90E-79 |
| FAM168B   | 1.41E-83 | -0.23226 | 0.035 | 0.34  | 2.10E-79 |
| BEX4      | 1.44E-83 | 0.51677  | 0.269 | 0.409 | 2.15E-79 |
| C18orf32  | 1.49E-83 | 0.13279  | 0.086 | 0.315 | 2.23E-79 |
| COQ5      | 1.50E-83 | -0.10653 | 0.052 | 0.342 | 2.24E-79 |
| TPD52     | 1.52E-83 | 0.136936 | 0.099 | 0.358 | 2.28E-79 |
| RBBP8     | 1.61E-83 | -0.4904  | 0.012 | 0.367 | 2.40E-79 |
| TOB1      | 1.70E-83 | -0.11751 | 0.075 | 0.378 | 2.55E-79 |
| SNX1      | 1.78E-83 | -0.10934 | 0.052 | 0.337 | 2.66E-79 |
| FBXO11    | 1.90E-83 | -0.16122 | 0.052 | 0.349 | 2.84E-79 |
| ATXN2L    | 1.94E-83 | -0.25633 | 0.042 | 0.359 | 2.90E-79 |
| TMEM158   | 2.04E-83 | -0.19942 | 0.047 | 0.342 | 3.05E-79 |
| SPDL1     | 2.27E-83 | -0.60609 | 0.007 | 0.386 | 3.39E-79 |
| TNFAIP1   | 2.36E-83 | -0.22132 | 0.038 | 0.348 | 3.52E-79 |
| GTF2H2    | 2.50E-83 | -0.12671 | 0.065 | 0.364 | 3.73E-79 |
| EDNRB     | 2.53E-83 | -0.23695 | 0.07  | 0.401 | 3.79E-79 |
| ITGA7     | 2.55E-83 | -0.17199 | 0.037 | 0.317 | 3.81E-79 |
| SCPEP1    | 2.58E-83 | 0.304771 | 0.07  | 0.207 | 3.86E-79 |
| VEGFA     | 2.65E-83 | 0.299156 | 0.12  | 0.32  | 3.97E-79 |
| ENTPD6    | 2.66E-83 | -0.26767 | 0.042 | 0.364 | 3.97E-79 |
| CHERP     | 2.66E-83 | -0.20715 | 0.056 | 0.37  | 3.97E-79 |
| MTMR2     | 3.13E-83 | -0.22244 | 0.03  | 0.323 | 4.67E-79 |
| SUN2      | 3.47E-83 | -0.44596 | 0.042 | 0.414 | 5.18E-79 |
| ZC3H11A   | 4.13E-83 | -0.19643 | 0.04  | 0.343 | 6.17E-79 |
| REV1      | 4.36E-83 | -0.20633 | 0.052 | 0.372 | 6.51E-79 |
| DCAF8     | 5.10E-83 | 0.134866 | 0.073 | 0.285 | 7.62E-79 |
| E2F6      | 5.70E-83 | -0.2475  | 0.023 | 0.32  | 8.52E-79 |
| TMEM45A   | 5.98E-83 | 0.479173 | 0.136 | 0.298 | 8.94E-79 |
| SMARCA1   | 6.35E-83 | -0.16733 | 0.054 | 0.362 | 9.48E-79 |
| ZNF664    | 6.82E-83 | -0.12555 | 0.049 | 0.331 | 1.02E-78 |
| HMCES     | 6.84E-83 | -0.12205 | 0.051 | 0.341 | 1.02E-78 |
| CA2       | 6.97E-83 | 0.649588 | 0.195 | 0.296 | 1.04E-78 |
| RABIF     | 8.49E-83 | -0.11598 | 0.042 | 0.326 | 1.27E-78 |
| PLEKHB1   | 8.50E-83 | 0.273858 | 0.099 | 0.302 | 1.27E-78 |

|           |          |          |       |       |          |
|-----------|----------|----------|-------|-------|----------|
| NUP85     | 8.99E-83 | -0.11384 | 0.047 | 0.33  | 1.34E-78 |
| DCLRE1C   | 9.31E-83 | -0.43267 | 0.028 | 0.395 | 1.39E-78 |
| CTDSP2    | 1.16E-82 | -0.29946 | 0.112 | 0.495 | 1.73E-78 |
| PAQR4     | 1.23E-82 | -0.50109 | 0.035 | 0.406 | 1.83E-78 |
| MTRNR2L8  | 1.40E-82 | 1.12711  | 0.243 | 0.149 | 2.09E-78 |
| LMF2      | 1.41E-82 | -0.39235 | 0.04  | 0.399 | 2.10E-78 |
| PCIF1     | 1.48E-82 | -0.11757 | 0.038 | 0.307 | 2.22E-78 |
| CDC42SE2  | 1.66E-82 | -0.11074 | 0.049 | 0.321 | 2.48E-78 |
| UBLCP1    | 2.05E-82 | -0.22278 | 0.035 | 0.336 | 3.06E-78 |
| FAM228B   | 2.20E-82 | -0.11483 | 0.052 | 0.344 | 3.28E-78 |
| EGR1      | 2.63E-82 | 0.110494 | 0.356 | 0.659 | 3.93E-78 |
| GCDH      | 2.71E-82 | 0.100694 | 0.089 | 0.333 | 4.05E-78 |
| SF3A1     | 2.77E-82 | -0.14109 | 0.047 | 0.343 | 4.14E-78 |
| CHMP6     | 3.42E-82 | -0.13468 | 0.037 | 0.315 | 5.12E-78 |
| RRP1B     | 3.57E-82 | -0.30853 | 0.024 | 0.341 | 5.34E-78 |
| RRAGC     | 3.76E-82 | -0.10649 | 0.052 | 0.344 | 5.62E-78 |
| SACS      | 4.45E-82 | -0.40949 | 0.023 | 0.364 | 6.65E-78 |
| FNDC3A    | 4.79E-82 | -0.1593  | 0.051 | 0.346 | 7.16E-78 |
| BEST1     | 4.79E-82 | 0.326509 | 0.084 | 0.285 | 7.16E-78 |
| USB1      | 5.16E-82 | -0.24109 | 0.033 | 0.338 | 7.72E-78 |
| RIC3      | 5.22E-82 | 0.500871 | 0.213 | 0.364 | 7.80E-78 |
| SMC6      | 5.32E-82 | -0.26751 | 0.044 | 0.357 | 7.95E-78 |
| ZNF3      | 5.42E-82 | -0.17344 | 0.094 | 0.425 | 8.10E-78 |
| NDE1      | 5.50E-82 | -0.31276 | 0.024 | 0.347 | 8.22E-78 |
| HIP1      | 5.70E-82 | 0.13097  | 0.098 | 0.336 | 8.52E-78 |
| RP11-792A | 5.95E-82 | 0.106724 | 0.103 | 0.352 | 8.89E-78 |
| POM121    | 6.17E-82 | -0.17566 | 0.04  | 0.33  | 9.21E-78 |
| BTBD10    | 6.47E-82 | -0.29826 | 0.033 | 0.353 | 9.67E-78 |
| PRR7      | 6.69E-82 | -0.44252 | 0.028 | 0.384 | 1.00E-77 |
| DEPDC1B   | 6.79E-82 | -0.62286 | 0.002 | 0.367 | 1.01E-77 |
| CYB5R1    | 6.93E-82 | 0.397104 | 0.112 | 0.275 | 1.04E-77 |
| SLC25A37  | 6.94E-82 | 0.239449 | 0.119 | 0.321 | 1.04E-77 |
| TMEM223   | 7.01E-82 | -0.10585 | 0.058 | 0.343 | 1.05E-77 |
| AAMDC     | 7.26E-82 | 0.202125 | 0.099 | 0.335 | 1.09E-77 |
| GCLM      | 7.75E-82 | -0.11    | 0.047 | 0.325 | 1.16E-77 |
| NUP88     | 8.05E-82 | -0.39227 | 0.023 | 0.365 | 1.20E-77 |
| NIF3L1    | 8.21E-82 | -0.22414 | 0.042 | 0.359 | 1.23E-77 |
| ZCCHC9    | 8.82E-82 | 0.100803 | 0.054 | 0.262 | 1.32E-77 |
| MDM4      | 9.12E-82 | -0.12833 | 0.096 | 0.414 | 1.36E-77 |
| AGT       | 9.30E-82 | 0.607785 | 0.209 | 0.326 | 1.39E-77 |
| STAG1     | 9.73E-82 | -0.21562 | 0.042 | 0.346 | 1.45E-77 |
| HNRNPA1L2 | 9.83E-82 | -0.16291 | 0.084 | 0.421 | 1.47E-77 |
| FANCL     | 1.04E-81 | -0.25024 | 0.058 | 0.385 | 1.56E-77 |
| BNIP2     | 1.14E-81 | -0.27841 | 0.045 | 0.37  | 1.70E-77 |
| PRTFDC1   | 1.24E-81 | -0.19676 | 0.063 | 0.38  | 1.85E-77 |
| E2F1      | 1.38E-81 | -0.73534 | 0.007 | 0.383 | 2.06E-77 |
| PDPK1     | 1.44E-81 | -0.27837 | 0.042 | 0.373 | 2.14E-77 |
| TPM2      | 1.59E-81 | -0.48775 | 0.042 | 0.395 | 2.37E-77 |
| NCAPD2    | 1.67E-81 | -0.55798 | 0.003 | 0.365 | 2.49E-77 |
| UBN1      | 1.74E-81 | -0.47401 | 0.01  | 0.364 | 2.59E-77 |
| ANKRD54   | 1.82E-81 | -0.16217 | 0.042 | 0.326 | 2.71E-77 |

|           |          |          |       |       |          |
|-----------|----------|----------|-------|-------|----------|
| FDXR      | 1.86E-81 | -0.18369 | 0.03  | 0.309 | 2.78E-77 |
| HBS1L     | 2.11E-81 | -0.17096 | 0.063 | 0.373 | 3.16E-77 |
| NELFB     | 2.11E-81 | -0.34582 | 0.021 | 0.351 | 3.16E-77 |
| C1QB      | 2.19E-81 | 0.67808  | 0.25  | 0.31  | 3.27E-77 |
| DPH5      | 2.51E-81 | 0.218269 | 0.075 | 0.259 | 3.75E-77 |
| CCNB1IP1  | 2.60E-81 | 0.11012  | 0.099 | 0.338 | 3.89E-77 |
| RSBN1     | 2.65E-81 | -0.35195 | 0.045 | 0.391 | 3.96E-77 |
| RNF14     | 2.79E-81 | -0.28069 | 0.038 | 0.362 | 4.17E-77 |
| XBP1      | 2.82E-81 | -0.23153 | 0.066 | 0.398 | 4.21E-77 |
| NDRG2     | 3.13E-81 | 0.754328 | 0.342 | 0.385 | 4.67E-77 |
| PPIF      | 3.22E-81 | -0.39031 | 0.026 | 0.367 | 4.82E-77 |
| BECN1     | 3.79E-81 | -0.22009 | 0.035 | 0.337 | 5.66E-77 |
| OLIG1     | 3.86E-81 | 0.182395 | 0.209 | 0.474 | 5.77E-77 |
| WDR6      | 3.98E-81 | 0.149504 | 0.11  | 0.335 | 5.95E-77 |
| TEN1      | 4.09E-81 | -0.28929 | 0.017 | 0.316 | 6.12E-77 |
| RNF168    | 4.16E-81 | -0.43582 | 0.021 | 0.374 | 6.22E-77 |
| DAAMI     | 4.56E-81 | -0.17446 | 0.101 | 0.432 | 6.81E-77 |
| TIMM10B   | 4.68E-81 | 0.17778  | 0.072 | 0.268 | 7.00E-77 |
| EXOSC3    | 4.72E-81 | -0.38515 | 0.024 | 0.363 | 7.06E-77 |
| DPYSL4    | 4.73E-81 | -0.37911 | 0.037 | 0.383 | 7.07E-77 |
| HOMER1    | 4.74E-81 | -0.26913 | 0.04  | 0.354 | 7.09E-77 |
| RGS16     | 4.90E-81 | 0.408969 | 0.143 | 0.328 | 7.33E-77 |
| SYNC      | 5.09E-81 | -0.2249  | 0.058 | 0.386 | 7.61E-77 |
| SERTAD1   | 5.26E-81 | 0.509402 | 0.157 | 0.306 | 7.86E-77 |
| HIPK2     | 5.68E-81 | -0.20706 | 0.07  | 0.385 | 8.49E-77 |
| UAP1      | 5.91E-81 | -0.16214 | 0.04  | 0.323 | 8.84E-77 |
| UBL4A     | 6.06E-81 | -0.22391 | 0.037 | 0.333 | 9.06E-77 |
| KIAA0319L | 6.14E-81 | 0.115736 | 0.075 | 0.3   | 9.18E-77 |
| DCAF16    | 6.27E-81 | -0.23123 | 0.024 | 0.31  | 9.37E-77 |
| DNAJA3    | 6.36E-81 | -0.14827 | 0.054 | 0.357 | 9.50E-77 |
| KLHL42    | 6.42E-81 | -0.11623 | 0.061 | 0.348 | 9.59E-77 |
| GNG12     | 6.47E-81 | -0.2169  | 0.03  | 0.325 | 9.66E-77 |
| TRIP12    | 6.59E-81 | -0.23856 | 0.021 | 0.315 | 9.84E-77 |
| SNAPC1    | 7.03E-81 | -0.16116 | 0.042 | 0.337 | 1.05E-76 |
| PGM3      | 7.57E-81 | -0.15442 | 0.049 | 0.333 | 1.13E-76 |
| API5      | 8.20E-81 | -0.12082 | 0.068 | 0.363 | 1.23E-76 |
| RTKN2     | 8.33E-81 | -0.56855 | 0.009 | 0.375 | 1.24E-76 |
| EMP2      | 8.63E-81 | -0.12557 | 0.045 | 0.321 | 1.29E-76 |
| MAFG      | 9.43E-81 | -0.2203  | 0.033 | 0.336 | 1.41E-76 |
| NUDT2     | 9.74E-81 | -0.30806 | 0.028 | 0.352 | 1.45E-76 |
| RELA      | 9.79E-81 | -0.10713 | 0.038 | 0.305 | 1.46E-76 |
| LGMN      | 9.93E-81 | 0.208575 | 0.113 | 0.354 | 1.48E-76 |
| PARPBP    | 9.98E-81 | -0.61812 | 0.003 | 0.377 | 1.49E-76 |
| DNAJC1    | 1.12E-80 | -0.30068 | 0.035 | 0.357 | 1.68E-76 |
| DPF1      | 1.16E-80 | -0.22919 | 0.079 | 0.422 | 1.73E-76 |
| CNTRL     | 1.20E-80 | -0.34054 | 0.019 | 0.34  | 1.80E-76 |
| SALL1     | 1.27E-80 | -0.13477 | 0.049 | 0.316 | 1.90E-76 |
| C1QL1     | 1.27E-80 | -0.16002 | 0.061 | 0.357 | 1.90E-76 |
| SGSM3     | 1.35E-80 | -0.17009 | 0.058 | 0.363 | 2.02E-76 |
| BRWD1     | 1.37E-80 | -0.2381  | 0.059 | 0.388 | 2.04E-76 |
| CPXM1     | 1.41E-80 | -0.36169 | 0.044 | 0.389 | 2.11E-76 |



|           |          |          |       |       |          |
|-----------|----------|----------|-------|-------|----------|
| LRRRC41   | 1.43E-80 | 0.117554 | 0.084 | 0.302 | 2.13E-76 |
| ZNF524    | 1.58E-80 | -0.28239 | 0.019 | 0.32  | 2.37E-76 |
| C1orf174  | 1.63E-80 | -0.28957 | 0.031 | 0.351 | 2.43E-76 |
| FANCA     | 1.74E-80 | -0.58588 | 0.009 | 0.379 | 2.60E-76 |
| MAPKAPK5  | 1.85E-80 | -0.32656 | 0.037 | 0.372 | 2.76E-76 |
| UBL7      | 1.86E-80 | -0.11626 | 0.058 | 0.349 | 2.78E-76 |
| HSPA1B    | 2.15E-80 | 0.132543 | 0.239 | 0.541 | 3.22E-76 |
| POLR3F    | 2.17E-80 | -0.1651  | 0.037 | 0.323 | 3.24E-76 |
| EXOSC9    | 2.40E-80 | -0.29671 | 0.04  | 0.369 | 3.58E-76 |
| STX4      | 2.47E-80 | 0.23491  | 0.092 | 0.286 | 3.69E-76 |
| EXT2      | 2.54E-80 | -0.17625 | 0.038 | 0.315 | 3.79E-76 |
| COMMD8    | 3.13E-80 | 0.13754  | 0.07  | 0.27  | 4.68E-76 |
| 10-Sep    | 3.22E-80 | -0.4337  | 0.019 | 0.365 | 4.82E-76 |
| HCFC1R1   | 3.35E-80 | 0.151127 | 0.101 | 0.337 | 5.00E-76 |
| TNKS      | 3.42E-80 | -0.27635 | 0.03  | 0.336 | 5.11E-76 |
| DNAJB14   | 3.60E-80 | 0.100349 | 0.068 | 0.284 | 5.38E-76 |
| NACC1     | 3.68E-80 | -0.16715 | 0.033 | 0.305 | 5.49E-76 |
| GRWD1     | 3.86E-80 | -0.11406 | 0.038 | 0.317 | 5.77E-76 |
| NANS      | 4.03E-80 | -0.17291 | 0.058 | 0.364 | 6.03E-76 |
| NR2F1     | 4.12E-80 | -0.23523 | 0.049 | 0.357 | 6.16E-76 |
| UBQLN2    | 4.13E-80 | -0.21045 | 0.054 | 0.363 | 6.18E-76 |
| TMEM242   | 4.64E-80 | -0.10008 | 0.066 | 0.353 | 6.93E-76 |
| RAB4B     | 4.86E-80 | 0.123933 | 0.073 | 0.294 | 7.26E-76 |
| CHL1      | 4.87E-80 | -0.16742 | 0.045 | 0.323 | 7.28E-76 |
| ZNF138    | 5.24E-80 | -0.31639 | 0.054 | 0.393 | 7.83E-76 |
| FUBP1     | 5.42E-80 | -0.29256 | 0.077 | 0.43  | 8.10E-76 |
| VPS41     | 5.56E-80 | -0.10265 | 0.052 | 0.321 | 8.32E-76 |
| SLC4A7    | 7.00E-80 | -0.21996 | 0.044 | 0.344 | 1.05E-75 |
| ASH2L     | 7.11E-80 | -0.30645 | 0.033 | 0.363 | 1.06E-75 |
| THAP4     | 7.44E-80 | -0.31873 | 0.026 | 0.343 | 1.11E-75 |
| PAAF1     | 9.76E-80 | 0.22379  | 0.11  | 0.326 | 1.46E-75 |
| GTF2B     | 9.93E-80 | 0.142113 | 0.086 | 0.302 | 1.48E-75 |
| METTL2B   | 1.06E-79 | -0.21262 | 0.059 | 0.379 | 1.59E-75 |
| POLD3     | 1.12E-79 | -0.45405 | 0.017 | 0.354 | 1.68E-75 |
| HSPA1A    | 1.17E-79 | -0.1191  | 0.209 | 0.584 | 1.74E-75 |
| RPAP2     | 1.21E-79 | -0.13363 | 0.056 | 0.335 | 1.81E-75 |
| PES1      | 1.27E-79 | -0.20556 | 0.038 | 0.34  | 1.89E-75 |
| INO80C    | 1.55E-79 | -0.1871  | 0.033 | 0.32  | 2.31E-75 |
| RBM7      | 1.56E-79 | 0.123418 | 0.087 | 0.311 | 2.33E-75 |
| RP11-71N1 | 1.59E-79 | 0.298902 | 0.112 | 0.3   | 2.37E-75 |
| TAP1      | 1.78E-79 | 0.155144 | 0.129 | 0.388 | 2.66E-75 |
| HSD17B11  | 1.99E-79 | 0.10035  | 0.124 | 0.378 | 2.98E-75 |
| MTMR14    | 2.14E-79 | -0.17316 | 0.037 | 0.317 | 3.19E-75 |
| MSM01     | 2.16E-79 | 0.110905 | 0.077 | 0.311 | 3.22E-75 |
| GTPBP4    | 2.18E-79 | -0.11827 | 0.066 | 0.353 | 3.25E-75 |
| SIRT6     | 2.37E-79 | -0.12192 | 0.052 | 0.338 | 3.55E-75 |
| RNF40     | 2.40E-79 | -0.11465 | 0.042 | 0.31  | 3.58E-75 |
| RB1       | 3.09E-79 | -0.27933 | 0.037 | 0.349 | 4.61E-75 |
| MED16     | 3.24E-79 | -0.26482 | 0.03  | 0.333 | 4.84E-75 |
| CDK11A    | 3.44E-79 | -0.23664 | 0.047 | 0.348 | 5.14E-75 |
| ST3GAL4   | 3.69E-79 | -0.25342 | 0.033 | 0.335 | 5.51E-75 |

|           |          |          |       |       |          |
|-----------|----------|----------|-------|-------|----------|
| SLC25A17  | 3.89E-79 | -0.1096  | 0.047 | 0.328 | 5.81E-75 |
| ATG5      | 3.97E-79 | -0.15425 | 0.045 | 0.325 | 5.93E-75 |
| MCM2      | 4.28E-79 | -0.61684 | 0.01  | 0.37  | 6.40E-75 |
| GPT2      | 4.37E-79 | -0.29609 | 0.037 | 0.347 | 6.52E-75 |
| CNOT8     | 4.40E-79 | -0.2191  | 0.037 | 0.341 | 6.58E-75 |
| BMI1      | 4.70E-79 | -0.17818 | 0.031 | 0.307 | 7.02E-75 |
| GYG1      | 4.75E-79 | 0.114073 | 0.08  | 0.305 | 7.10E-75 |
| C20orf96  | 5.18E-79 | -0.15189 | 0.04  | 0.325 | 7.74E-75 |
| ZNF451    | 5.31E-79 | -0.1044  | 0.047 | 0.307 | 7.94E-75 |
| DOHH      | 5.64E-79 | -0.45478 | 0.021 | 0.377 | 8.43E-75 |
| FZR1      | 5.93E-79 | -0.43241 | 0.03  | 0.386 | 8.86E-75 |
| RNF19A    | 6.24E-79 | -0.28334 | 0.04  | 0.347 | 9.33E-75 |
| POU3F3    | 6.33E-79 | -0.23175 | 0.052 | 0.365 | 9.46E-75 |
| IFI16     | 6.94E-79 | 0.269241 | 0.178 | 0.396 | 1.04E-74 |
| HINT3     | 7.52E-79 | -0.20514 | 0.047 | 0.351 | 1.12E-74 |
| RNF8      | 8.03E-79 | -0.20548 | 0.033 | 0.322 | 1.20E-74 |
| CDC16     | 8.78E-79 | -0.29706 | 0.037 | 0.364 | 1.31E-74 |
| MCM5      | 8.88E-79 | -0.56161 | 0.026 | 0.388 | 1.33E-74 |
| IFNAR2    | 9.31E-79 | -0.3965  | 0.019 | 0.36  | 1.39E-74 |
| CEP89     | 1.05E-78 | -0.18856 | 0.045 | 0.344 | 1.57E-74 |
| LINC00662 | 1.09E-78 | 0.266244 | 0.108 | 0.3   | 1.63E-74 |
| BST2      | 1.15E-78 | 1.221358 | 0.403 | 0.232 | 1.72E-74 |
| GRIA2     | 1.19E-78 | 0.116869 | 0.152 | 0.407 | 1.77E-74 |
| COLGALT2  | 1.24E-78 | -0.1358  | 0.054 | 0.344 | 1.85E-74 |
| TMF1      | 1.40E-78 | -0.14608 | 0.045 | 0.323 | 2.09E-74 |
| ARHGAP35  | 1.46E-78 | -0.34383 | 0.024 | 0.34  | 2.18E-74 |
| PRKCA     | 1.50E-78 | -0.39938 | 0.033 | 0.377 | 2.24E-74 |
| DUSP1     | 1.53E-78 | 0.347682 | 0.271 | 0.48  | 2.28E-74 |
| SEPHS1    | 1.57E-78 | -0.19623 | 0.026 | 0.301 | 2.34E-74 |
| NLGN1     | 1.63E-78 | -0.25289 | 0.059 | 0.377 | 2.44E-74 |
| EXTL3     | 1.64E-78 | -0.13785 | 0.04  | 0.315 | 2.45E-74 |
| UBE2D4    | 1.68E-78 | -0.12294 | 0.054 | 0.342 | 2.51E-74 |
| PIK3R3    | 1.77E-78 | -0.16673 | 0.045 | 0.331 | 2.64E-74 |
| YRDC      | 1.95E-78 | -0.16753 | 0.04  | 0.32  | 2.92E-74 |
| TRIM69    | 2.09E-78 | -0.19638 | 0.058 | 0.365 | 3.12E-74 |
| ICMT      | 2.16E-78 | -0.30006 | 0.023 | 0.325 | 3.22E-74 |
| CLINT1    | 2.33E-78 | -0.20413 | 0.052 | 0.354 | 3.48E-74 |
| PHF1      | 2.35E-78 | -0.26927 | 0.035 | 0.348 | 3.51E-74 |
| PI4KB     | 2.40E-78 | 0.172171 | 0.086 | 0.305 | 3.59E-74 |
| BNIP3     | 2.51E-78 | 0.213353 | 0.108 | 0.335 | 3.75E-74 |
| DDX6      | 2.53E-78 | 0.121766 | 0.073 | 0.283 | 3.79E-74 |
| MRGBP     | 2.93E-78 | -0.42048 | 0.014 | 0.346 | 4.37E-74 |
| TRMU      | 3.02E-78 | -0.24509 | 0.044 | 0.353 | 4.51E-74 |
| SEMA6D    | 3.32E-78 | -0.44184 | 0.021 | 0.352 | 4.97E-74 |
| C12orf29  | 4.34E-78 | -0.13419 | 0.051 | 0.328 | 6.49E-74 |
| NME7      | 5.10E-78 | 0.127528 | 0.079 | 0.293 | 7.63E-74 |
| EPS15L1   | 5.28E-78 | -0.14756 | 0.038 | 0.312 | 7.89E-74 |
| CHST2     | 5.51E-78 | -0.29365 | 0.012 | 0.284 | 8.23E-74 |
| SNX7      | 5.78E-78 | -0.12098 | 0.051 | 0.335 | 8.64E-74 |
| GAS2L1    | 6.01E-78 | -0.23944 | 0.051 | 0.359 | 8.98E-74 |
| NR2F6     | 6.25E-78 | -0.2684  | 0.021 | 0.311 | 9.33E-74 |

|          |          |          |       |       |          |
|----------|----------|----------|-------|-------|----------|
| ASAP2    | 6.32E-78 | -0.27223 | 0.024 | 0.32  | 9.45E-74 |
| LTV1     | 6.92E-78 | -0.10055 | 0.045 | 0.307 | 1.03E-73 |
| DYRK4    | 7.06E-78 | 0.235724 | 0.094 | 0.296 | 1.06E-73 |
| ACBD3    | 7.14E-78 | -0.10542 | 0.033 | 0.288 | 1.07E-73 |
| CCP110   | 7.75E-78 | -0.25516 | 0.044 | 0.359 | 1.16E-73 |
| TXLNA    | 8.19E-78 | -0.22716 | 0.033 | 0.325 | 1.22E-73 |
| PPP2R2B  | 8.38E-78 | 0.433944 | 0.157 | 0.326 | 1.25E-73 |
| COL6A2   | 8.52E-78 | -0.16126 | 0.059 | 0.332 | 1.27E-73 |
| SCD      | 9.62E-78 | 0.129723 | 0.072 | 0.284 | 1.44E-73 |
| TBCD     | 1.01E-77 | -0.30083 | 0.024 | 0.336 | 1.51E-73 |
| PDGFC    | 1.03E-77 | -0.29341 | 0.031 | 0.336 | 1.53E-73 |
| MDM2     | 1.03E-77 | -0.34865 | 0.091 | 0.459 | 1.54E-73 |
| GNPDA1   | 1.04E-77 | 0.136879 | 0.072 | 0.278 | 1.56E-73 |
| TBCC     | 1.06E-77 | -0.24547 | 0.054 | 0.368 | 1.59E-73 |
| ING3     | 1.07E-77 | -0.27212 | 0.065 | 0.394 | 1.61E-73 |
| EMC2     | 1.08E-77 | 0.182184 | 0.091 | 0.311 | 1.61E-73 |
| INTS12   | 1.08E-77 | 0.109853 | 0.077 | 0.301 | 1.62E-73 |
| CASC3    | 1.12E-77 | -0.28821 | 0.045 | 0.372 | 1.67E-73 |
| GTF2E2   | 1.12E-77 | -0.38022 | 0.023 | 0.353 | 1.67E-73 |
| GEMIN2   | 1.21E-77 | -0.11873 | 0.04  | 0.304 | 1.81E-73 |
| TCEB3    | 1.22E-77 | -0.1889  | 0.033 | 0.305 | 1.82E-73 |
| CCND1    | 1.23E-77 | -0.10829 | 0.087 | 0.379 | 1.84E-73 |
| SPRED1   | 1.42E-77 | -0.31073 | 0.033 | 0.344 | 2.11E-73 |
| MTHFS    | 1.43E-77 | 0.16915  | 0.065 | 0.243 | 2.14E-73 |
| RGS17    | 1.45E-77 | -0.19566 | 0.038 | 0.317 | 2.17E-73 |
| BROX     | 1.46E-77 | -0.34941 | 0.028 | 0.348 | 2.18E-73 |
| C15orf40 | 1.47E-77 | 0.162387 | 0.066 | 0.274 | 2.20E-73 |
| RPIA     | 1.56E-77 | -0.16794 | 0.038 | 0.317 | 2.34E-73 |
| TSPAN6   | 1.59E-77 | 0.293785 | 0.108 | 0.295 | 2.37E-73 |
| PKNOX1   | 1.67E-77 | -0.13224 | 0.037 | 0.296 | 2.49E-73 |
| SFSWAP   | 1.73E-77 | -0.21311 | 0.033 | 0.325 | 2.59E-73 |
| JADE1    | 1.74E-77 | -0.5072  | 0.037 | 0.409 | 2.61E-73 |
| TANC2    | 1.95E-77 | -0.1317  | 0.049 | 0.326 | 2.91E-73 |
| ANKRD13D | 2.00E-77 | -0.10107 | 0.042 | 0.295 | 2.98E-73 |
| CEP41    | 2.00E-77 | -0.22867 | 0.054 | 0.369 | 2.99E-73 |
| TSFM     | 2.12E-77 | -0.21235 | 0.145 | 0.509 | 3.17E-73 |
| CNIH2    | 2.30E-77 | -0.47634 | 0.021 | 0.365 | 3.44E-73 |
| UBR7     | 2.35E-77 | -0.23538 | 0.037 | 0.34  | 3.52E-73 |
| PAX6     | 2.40E-77 | -0.46331 | 0.023 | 0.368 | 3.59E-73 |
| TUG1     | 2.47E-77 | -0.28931 | 0.045 | 0.373 | 3.69E-73 |
| TTC9C    | 2.69E-77 | -0.29912 | 0.033 | 0.343 | 4.02E-73 |
| MMP2     | 2.71E-77 | -0.12509 | 0.063 | 0.347 | 4.05E-73 |
| TNRC6C   | 2.76E-77 | -0.20495 | 0.051 | 0.347 | 4.12E-73 |
| MEIS2    | 2.87E-77 | -0.19691 | 0.082 | 0.404 | 4.28E-73 |
| USP9X    | 2.87E-77 | -0.11761 | 0.049 | 0.316 | 4.29E-73 |
| ZNF639   | 3.15E-77 | -0.24396 | 0.026 | 0.312 | 4.70E-73 |
| PVRL2    | 3.15E-77 | -0.13485 | 0.035 | 0.294 | 4.70E-73 |
| MTMR9    | 3.29E-77 | -0.16337 | 0.061 | 0.356 | 4.91E-73 |
| RBMXL1   | 3.32E-77 | -0.34732 | 0.035 | 0.363 | 4.96E-73 |
| EIF2AK4  | 3.53E-77 | -0.19166 | 0.033 | 0.31  | 5.28E-73 |
| DIMT1    | 3.63E-77 | -0.23162 | 0.038 | 0.335 | 5.42E-73 |

|           |          |          |       |       |          |
|-----------|----------|----------|-------|-------|----------|
| EXOC1     | 4.03E-77 | -0.20655 | 0.091 | 0.422 | 6.03E-73 |
| ANXA6     | 4.63E-77 | -0.13013 | 0.077 | 0.374 | 6.92E-73 |
| MTRNR2L12 | 5.35E-77 | 1.034533 | 0.237 | 0.18  | 8.00E-73 |
| LIG1      | 5.52E-77 | -0.51591 | 0.014 | 0.353 | 8.24E-73 |
| SPATA6    | 6.04E-77 | -0.16516 | 0.042 | 0.32  | 9.02E-73 |
| DIAPH1    | 6.09E-77 | -0.19719 | 0.035 | 0.31  | 9.10E-73 |
| C16orf59  | 6.31E-77 | -0.607   | 0.002 | 0.354 | 9.43E-73 |
| CSTF1     | 7.11E-77 | -0.2774  | 0.026 | 0.331 | 1.06E-72 |
| TM4SF1    | 7.11E-77 | -0.17046 | 0.051 | 0.332 | 1.06E-72 |
| NF2       | 7.38E-77 | -0.18814 | 0.031 | 0.309 | 1.10E-72 |
| BRE       | 7.56E-77 | 0.169332 | 0.086 | 0.296 | 1.13E-72 |
| NSMCE4A   | 7.73E-77 | -0.28965 | 0.03  | 0.337 | 1.15E-72 |
| GNG7      | 9.72E-77 | 0.367082 | 0.133 | 0.311 | 1.45E-72 |
| MGAT1     | 1.03E-76 | -0.26944 | 0.033 | 0.344 | 1.53E-72 |
| CEP57L1   | 1.14E-76 | -0.48699 | 0.016 | 0.364 | 1.71E-72 |
| CCSAP     | 1.26E-76 | -0.23864 | 0.031 | 0.323 | 1.88E-72 |
| BBOX1     | 1.27E-76 | 0.452093 | 0.112 | 0.248 | 1.89E-72 |
| NUP35     | 1.32E-76 | -0.20765 | 0.056 | 0.359 | 1.98E-72 |
| XXYLT1    | 1.43E-76 | -0.1675  | 0.026 | 0.298 | 2.14E-72 |
| MED17     | 1.43E-76 | -0.12626 | 0.054 | 0.325 | 2.14E-72 |
| TMEM181   | 1.47E-76 | -0.24317 | 0.033 | 0.335 | 2.20E-72 |
| KIF20A    | 1.60E-76 | -0.65421 | 0     | 0.342 | 2.39E-72 |
| ST5       | 1.64E-76 | 0.258024 | 0.08  | 0.26  | 2.45E-72 |
| RP11-390F | 1.68E-76 | -0.10565 | 0.031 | 0.283 | 2.51E-72 |
| PREPL     | 1.68E-76 | -0.11342 | 0.045 | 0.305 | 2.51E-72 |
| MBIP      | 1.75E-76 | 0.105101 | 0.094 | 0.323 | 2.61E-72 |
| DIDO1     | 1.77E-76 | -0.31004 | 0.03  | 0.338 | 2.64E-72 |
| CCAR2     | 1.78E-76 | -0.18438 | 0.044 | 0.33  | 2.66E-72 |
| MED24     | 1.80E-76 | -0.14641 | 0.049 | 0.331 | 2.69E-72 |
| MTRF1L    | 2.00E-76 | -0.34653 | 0.028 | 0.344 | 2.99E-72 |
| CLPTM1L   | 2.00E-76 | -0.19461 | 0.033 | 0.311 | 3.00E-72 |
| DHX33     | 2.04E-76 | -0.11405 | 0.042 | 0.291 | 3.05E-72 |
| CAT       | 2.08E-76 | 0.253304 | 0.099 | 0.278 | 3.10E-72 |
| NRM       | 2.12E-76 | -0.33915 | 0.017 | 0.325 | 3.18E-72 |
| CEBPD     | 2.14E-76 | 0.459868 | 0.229 | 0.396 | 3.20E-72 |
| SESTD1    | 2.14E-76 | -0.35323 | 0.038 | 0.365 | 3.20E-72 |
| CTXN1     | 2.28E-76 | -0.40496 | 0.021 | 0.349 | 3.41E-72 |
| SKIL      | 2.32E-76 | -0.18304 | 0.044 | 0.337 | 3.46E-72 |
| DTNBP1    | 2.44E-76 | -0.13451 | 0.047 | 0.32  | 3.65E-72 |
| ZC3H18    | 2.65E-76 | -0.36499 | 0.03  | 0.359 | 3.96E-72 |
| TCEAL1    | 3.06E-76 | 0.291616 | 0.124 | 0.305 | 4.57E-72 |
| NXF1      | 3.25E-76 | -0.11818 | 0.054 | 0.338 | 4.85E-72 |
| CTPS1     | 3.40E-76 | -0.38773 | 0.021 | 0.341 | 5.07E-72 |
| ACOT13    | 3.56E-76 | 0.185964 | 0.073 | 0.288 | 5.32E-72 |
| SCO1      | 3.69E-76 | -0.23689 | 0.038 | 0.337 | 5.51E-72 |
| XAB2      | 3.86E-76 | -0.22614 | 0.044 | 0.346 | 5.76E-72 |
| TLK2      | 4.45E-76 | -0.16719 | 0.024 | 0.277 | 6.65E-72 |
| SLC25A25  | 4.47E-76 | -0.2488  | 0.056 | 0.363 | 6.68E-72 |
| CTNND2    | 4.56E-76 | 0.102932 | 0.089 | 0.319 | 6.81E-72 |
| SRRD      | 4.86E-76 | -0.13667 | 0.026 | 0.274 | 7.27E-72 |
| LIMD2     | 4.92E-76 | -0.3061  | 0.026 | 0.331 | 7.35E-72 |

|          |          |          |       |       |          |
|----------|----------|----------|-------|-------|----------|
| MSH2     | 5.00E-76 | -0.45962 | 0.023 | 0.364 | 7.47E-72 |
| CISD3    | 5.16E-76 | -0.17172 | 0.038 | 0.315 | 7.72E-72 |
| TRIO     | 5.38E-76 | 0.34146  | 0.133 | 0.325 | 8.04E-72 |
| BRD8     | 5.71E-76 | -0.16374 | 0.073 | 0.379 | 8.53E-72 |
| CSNK1G3  | 5.92E-76 | -0.20671 | 0.037 | 0.322 | 8.85E-72 |
| UBE2Q1   | 5.99E-76 | -0.25812 | 0.026 | 0.315 | 8.95E-72 |
| GLIPR2   | 6.23E-76 | 0.274682 | 0.113 | 0.331 | 9.31E-72 |
| DPH3     | 6.44E-76 | -0.21034 | 0.044 | 0.332 | 9.63E-72 |
| CASP6    | 6.79E-76 | -0.20837 | 0.035 | 0.311 | 1.01E-71 |
| BRCA2    | 6.88E-76 | -0.59735 | 0     | 0.34  | 1.03E-71 |
| CENPJ    | 7.11E-76 | -0.32473 | 0.021 | 0.325 | 1.06E-71 |
| SCAF1    | 8.80E-76 | -0.17864 | 0.031 | 0.306 | 1.32E-71 |
| GSK3B    | 8.84E-76 | -0.12952 | 0.051 | 0.317 | 1.32E-71 |
| ING5     | 9.12E-76 | -0.18576 | 0.044 | 0.33  | 1.36E-71 |
| FAM3A    | 9.25E-76 | -0.15392 | 0.049 | 0.322 | 1.38E-71 |
| METTL4   | 1.09E-75 | -0.11928 | 0.019 | 0.248 | 1.62E-71 |
| FNBP1L   | 1.12E-75 | -0.34523 | 0.03  | 0.348 | 1.67E-71 |
| LRP10    | 1.14E-75 | 0.173709 | 0.075 | 0.265 | 1.70E-71 |
| TUBGCP2  | 1.16E-75 | -0.2005  | 0.033 | 0.322 | 1.73E-71 |
| GAS2L3   | 1.22E-75 | -0.59815 | 0.002 | 0.347 | 1.82E-71 |
| CSAD     | 1.36E-75 | -0.18687 | 0.045 | 0.328 | 2.04E-71 |
| TNIP2    | 1.40E-75 | -0.17525 | 0.028 | 0.291 | 2.09E-71 |
| ACTR1B   | 1.45E-75 | -0.12066 | 0.059 | 0.343 | 2.17E-71 |
| DCAF15   | 1.45E-75 | -0.4004  | 0.012 | 0.331 | 2.17E-71 |
| VPS37A   | 1.45E-75 | -0.13722 | 0.047 | 0.322 | 2.17E-71 |
| ZNF92    | 1.61E-75 | -0.29319 | 0.068 | 0.399 | 2.41E-71 |
| C1orf109 | 1.64E-75 | -0.19551 | 0.037 | 0.325 | 2.46E-71 |
| SCAMP1   | 1.67E-75 | -0.19824 | 0.065 | 0.372 | 2.49E-71 |
| C8orf82  | 1.86E-75 | -0.23524 | 0.037 | 0.327 | 2.79E-71 |
| FADS2    | 2.13E-75 | -0.32861 | 0.04  | 0.359 | 3.18E-71 |
| CDK5RAP1 | 2.15E-75 | -0.24799 | 0.03  | 0.315 | 3.22E-71 |
| FKBP9    | 2.29E-75 | -0.13622 | 0.063 | 0.341 | 3.42E-71 |
| DNAJC10  | 2.52E-75 | -0.12692 | 0.052 | 0.32  | 3.76E-71 |
| PPP1R18  | 2.67E-75 | -0.21965 | 0.031 | 0.316 | 3.99E-71 |
| KIF14    | 2.89E-75 | -0.56536 | 0.007 | 0.354 | 4.32E-71 |
| R3HDM4   | 2.94E-75 | -0.29443 | 0.038 | 0.356 | 4.40E-71 |
| NFE2L1   | 3.19E-75 | -0.19836 | 0.038 | 0.323 | 4.77E-71 |
| FNBP1    | 3.49E-75 | -0.1477  | 0.04  | 0.305 | 5.21E-71 |
| ARHGAP33 | 3.69E-75 | -0.47377 | 0.014 | 0.351 | 5.51E-71 |
| ZMYND11  | 3.74E-75 | -0.26775 | 0.023 | 0.314 | 5.58E-71 |
| MOB2     | 3.97E-75 | -0.14062 | 0.038 | 0.302 | 5.93E-71 |
| CRBN     | 4.61E-75 | 0.11277  | 0.119 | 0.363 | 6.89E-71 |
| C9orf114 | 4.67E-75 | -0.12721 | 0.04  | 0.302 | 6.98E-71 |
| CHTF8    | 4.91E-75 | -0.22515 | 0.035 | 0.326 | 7.34E-71 |
| TRIM13   | 5.24E-75 | -0.19129 | 0.084 | 0.388 | 7.83E-71 |
| CCL2     | 5.35E-75 | 0.601463 | 0.091 | 0.247 | 8.00E-71 |
| STRN4    | 5.89E-75 | -0.3469  | 0.017 | 0.326 | 8.79E-71 |
| RAB3GAP2 | 5.94E-75 | -0.13981 | 0.045 | 0.322 | 8.87E-71 |
| SNX21    | 6.45E-75 | -0.1513  | 0.031 | 0.291 | 9.63E-71 |
| HELLS    | 6.47E-75 | -0.60279 | 0.023 | 0.381 | 9.66E-71 |
| TPP1     | 6.95E-75 | 0.29195  | 0.092 | 0.251 | 1.04E-70 |

|          |          |          |       |       |          |
|----------|----------|----------|-------|-------|----------|
| BTBD3    | 7.44E-75 | -0.16923 | 0.028 | 0.285 | 1.11E-70 |
| PHLDB1   | 7.62E-75 | 0.174135 | 0.063 | 0.241 | 1.14E-70 |
| PCYT2    | 9.03E-75 | -0.25842 | 0.023 | 0.307 | 1.35E-70 |
| HEPACAM  | 9.43E-75 | 0.511337 | 0.175 | 0.295 | 1.41E-70 |
| RPE      | 9.91E-75 | -0.11637 | 0.051 | 0.31  | 1.48E-70 |
| RNF2     | 1.02E-74 | -0.1843  | 0.035 | 0.307 | 1.53E-70 |
| CHST10   | 1.04E-74 | -0.13192 | 0.052 | 0.315 | 1.55E-70 |
| KBTBD2   | 1.05E-74 | -0.29559 | 0.035 | 0.343 | 1.57E-70 |
| TSC22D3  | 1.14E-74 | 0.118118 | 0.127 | 0.374 | 1.71E-70 |
| PARP2    | 1.16E-74 | -0.35053 | 0.054 | 0.391 | 1.74E-70 |
| UHMK1    | 1.16E-74 | -0.11191 | 0.042 | 0.296 | 1.74E-70 |
| KCTD17   | 1.22E-74 | -0.26133 | 0.021 | 0.306 | 1.83E-70 |
| NOL8     | 1.25E-74 | -0.18735 | 0.051 | 0.344 | 1.87E-70 |
| ZNF771   | 1.32E-74 | -0.37129 | 0.03  | 0.353 | 1.97E-70 |
| DDX54    | 1.33E-74 | -0.24753 | 0.042 | 0.342 | 1.99E-70 |
| DPH7     | 1.43E-74 | -0.32428 | 0.028 | 0.341 | 2.14E-70 |
| GTF2H1   | 1.56E-74 | -0.11215 | 0.047 | 0.311 | 2.32E-70 |
| NNT      | 1.57E-74 | -0.23609 | 0.042 | 0.341 | 2.35E-70 |
| METTL21A | 1.59E-74 | -0.2967  | 0.051 | 0.375 | 2.37E-70 |
| ZBTB7A   | 1.62E-74 | -0.29462 | 0.028 | 0.328 | 2.42E-70 |
| PELP1    | 1.82E-74 | -0.28255 | 0.028 | 0.328 | 2.72E-70 |
| PINK1    | 2.04E-74 | 0.115892 | 0.058 | 0.265 | 3.05E-70 |
| ZNRF1    | 2.13E-74 | -0.27531 | 0.014 | 0.285 | 3.19E-70 |
| CCDC174  | 2.14E-74 | 0.1669   | 0.079 | 0.294 | 3.19E-70 |
| DNAJC5   | 2.36E-74 | -0.27814 | 0.035 | 0.332 | 3.52E-70 |
| RANBP9   | 2.36E-74 | -0.12753 | 0.035 | 0.283 | 3.52E-70 |
| CTDSPL2  | 2.81E-74 | -0.43372 | 0.012 | 0.347 | 4.20E-70 |
| VPS45    | 3.16E-74 | -0.1368  | 0.063 | 0.348 | 4.73E-70 |
| MAPT     | 3.30E-74 | 0.156373 | 0.15  | 0.384 | 4.93E-70 |
| CCDC18   | 3.45E-74 | -0.5553  | 0.017 | 0.377 | 5.15E-70 |
| HMGCL    | 3.83E-74 | 0.241174 | 0.101 | 0.284 | 5.73E-70 |
| WDR5     | 4.54E-74 | -0.25971 | 0.028 | 0.322 | 6.78E-70 |
| NCK2     | 4.55E-74 | -0.23337 | 0.017 | 0.279 | 6.80E-70 |
| RANBP2   | 4.57E-74 | -0.15187 | 0.03  | 0.29  | 6.83E-70 |
| ZBED1    | 4.67E-74 | -0.19402 | 0.035 | 0.304 | 6.98E-70 |
| TSPAN4   | 4.92E-74 | -0.23463 | 0.024 | 0.299 | 7.35E-70 |
| DNAJB9   | 5.46E-74 | 0.449687 | 0.19  | 0.323 | 8.16E-70 |
| UHL5     | 5.51E-74 | -0.40228 | 0.017 | 0.338 | 8.23E-70 |
| PNPLA2   | 5.74E-74 | -0.22343 | 0.033 | 0.307 | 8.57E-70 |
| PUM2     | 5.78E-74 | -0.16835 | 0.04  | 0.31  | 8.64E-70 |
| TNIP1    | 5.79E-74 | -0.15894 | 0.035 | 0.298 | 8.66E-70 |
| PITPNB   | 6.81E-74 | -0.21433 | 0.042 | 0.332 | 1.02E-69 |
| GLB1     | 6.89E-74 | 0.233438 | 0.092 | 0.272 | 1.03E-69 |
| COL9A3   | 7.05E-74 | -0.12655 | 0.119 | 0.428 | 1.05E-69 |
| DDX19B   | 7.63E-74 | -0.25933 | 0.037 | 0.328 | 1.14E-69 |
| MCM8     | 8.37E-74 | -0.34794 | 0.012 | 0.312 | 1.25E-69 |
| PITPNC1  | 9.41E-74 | -0.25662 | 0.023 | 0.296 | 1.41E-69 |
| ASCC2    | 9.76E-74 | -0.20724 | 0.042 | 0.33  | 1.46E-69 |
| GPCPD1   | 9.85E-74 | -0.29765 | 0.023 | 0.315 | 1.47E-69 |
| SSH2     | 1.17E-73 | -0.3311  | 0.035 | 0.343 | 1.74E-69 |
| SLC35F6  | 1.21E-73 | -0.14997 | 0.04  | 0.298 | 1.80E-69 |

|           |           |           |        |        |           |
|-----------|-----------|-----------|--------|--------|-----------|
| MBNL1     | 1. 21E-73 | -0. 2043  | 0. 037 | 0. 31  | 1. 81E-69 |
| SLC43A2   | 1. 23E-73 | -0. 20566 | 0. 045 | 0. 32  | 1. 84E-69 |
| RMND5B    | 1. 44E-73 | -0. 22356 | 0. 038 | 0. 33  | 2. 15E-69 |
| LYPLAL1   | 1. 54E-73 | 0. 269153 | 0. 105 | 0. 288 | 2. 31E-69 |
| SH3YL1    | 1. 97E-73 | 0. 116147 | 0. 068 | 0. 29  | 2. 95E-69 |
| DIAPH3    | 1. 99E-73 | -0. 57019 | 0. 002 | 0. 341 | 2. 97E-69 |
| RP11-849I | 2. 02E-73 | -0. 40476 | 0. 063 | 0. 407 | 3. 01E-69 |
| POLR1E    | 2. 02E-73 | -0. 12316 | 0. 031 | 0. 284 | 3. 02E-69 |
| SND1      | 2. 19E-73 | -0. 12834 | 0. 058 | 0. 337 | 3. 27E-69 |
| CPSF7     | 2. 19E-73 | -0. 15709 | 0. 059 | 0. 343 | 3. 28E-69 |
| AKTIP     | 2. 30E-73 | 0. 20811  | 0. 079 | 0. 263 | 3. 44E-69 |
| HABP4     | 2. 65E-73 | -0. 1802  | 0. 03  | 0. 29  | 3. 96E-69 |
| TPRA1     | 2. 96E-73 | -0. 13879 | 0. 033 | 0. 288 | 4. 43E-69 |
| HSD17B4   | 3. 13E-73 | 0. 156914 | 0. 086 | 0. 288 | 4. 67E-69 |
| JAK1      | 3. 30E-73 | -0. 20203 | 0. 035 | 0. 315 | 4. 94E-69 |
| NAV1      | 3. 38E-73 | -0. 28113 | 0. 044 | 0. 356 | 5. 05E-69 |
| ENOSF1    | 3. 83E-73 | -0. 24426 | 0. 009 | 0. 264 | 5. 73E-69 |
| CLIP2     | 4. 97E-73 | -0. 10103 | 0. 075 | 0. 346 | 7. 43E-69 |
| YIPF1     | 5. 13E-73 | 0. 178204 | 0. 054 | 0. 232 | 7. 66E-69 |
| TAF9B     | 5. 46E-73 | -0. 25445 | 0. 04  | 0. 344 | 8. 17E-69 |
| STX18     | 6. 23E-73 | -0. 18949 | 0. 04  | 0. 319 | 9. 31E-69 |
| AP5M1     | 6. 67E-73 | -0. 21877 | 0. 044 | 0. 33  | 9. 96E-69 |
| CENPO     | 6. 68E-73 | -0. 52982 | 0. 007 | 0. 348 | 9. 98E-69 |
| DPYSL5    | 6. 77E-73 | -0. 2768  | 0. 035 | 0. 33  | 1. 01E-68 |
| ING1      | 7. 08E-73 | -0. 28086 | 0. 037 | 0. 338 | 1. 06E-68 |
| ALCAM     | 7. 56E-73 | -0. 10115 | 0. 061 | 0. 32  | 1. 13E-68 |
| FAM195A   | 9. 00E-73 | -0. 11447 | 0. 045 | 0. 306 | 1. 35E-68 |
| ELP2      | 9. 59E-73 | 0. 167673 | 0. 087 | 0. 281 | 1. 43E-68 |
| ERICH1    | 1. 02E-72 | 0. 117805 | 0. 073 | 0. 289 | 1. 52E-68 |
| C11orf24  | 1. 13E-72 | -0. 24877 | 0. 019 | 0. 285 | 1. 68E-68 |
| RP11-395G | 1. 13E-72 | -0. 37926 | 0. 03  | 0. 337 | 1. 69E-68 |
| MGRN1     | 1. 16E-72 | -0. 17926 | 0. 054 | 0. 325 | 1. 73E-68 |
| ARHGAP11E | 1. 24E-72 | -0. 56558 | 0. 01  | 0. 356 | 1. 86E-68 |
| MAPK6     | 1. 27E-72 | -0. 27212 | 0. 04  | 0. 347 | 1. 90E-68 |
| CCNF      | 1. 30E-72 | -0. 54746 | 0. 005 | 0. 337 | 1. 95E-68 |
| TMEM68    | 1. 32E-72 | -0. 17767 | 0. 054 | 0. 341 | 1. 98E-68 |
| SETD2     | 1. 36E-72 | -0. 24028 | 0. 026 | 0. 302 | 2. 03E-68 |
| UCKL1     | 1. 72E-72 | -0. 21617 | 0. 037 | 0. 316 | 2. 57E-68 |
| EXOC4     | 1. 73E-72 | -0. 14495 | 0. 056 | 0. 331 | 2. 59E-68 |
| GGT7      | 1. 74E-72 | -0. 14698 | 0. 054 | 0. 33  | 2. 60E-68 |
| HLA-DRB1  | 1. 75E-72 | 1. 078579 | 0. 265 | 0. 172 | 2. 62E-68 |
| MECP2     | 1. 79E-72 | 0. 116952 | 0. 07  | 0. 283 | 2. 68E-68 |
| KBTBD6    | 1. 92E-72 | -0. 10954 | 0. 044 | 0. 291 | 2. 87E-68 |
| HELZ      | 2. 02E-72 | -0. 11714 | 0. 061 | 0. 331 | 3. 02E-68 |
| DCBLD2    | 2. 25E-72 | -0. 44272 | 0. 019 | 0. 338 | 3. 36E-68 |
| PAXBP1    | 2. 36E-72 | -0. 23412 | 0. 044 | 0. 331 | 3. 52E-68 |
| NUDT15    | 2. 44E-72 | -0. 17632 | 0. 035 | 0. 307 | 3. 65E-68 |
| FZD7      | 2. 55E-72 | -0. 16094 | 0. 017 | 0. 237 | 3. 81E-68 |
| GMPR2     | 2. 78E-72 | 0. 17466  | 0. 086 | 0. 289 | 4. 15E-68 |
| RHBDD3    | 2. 94E-72 | -0. 16011 | 0. 042 | 0. 307 | 4. 39E-68 |
| ELAC2     | 2. 94E-72 | -0. 20737 | 0. 026 | 0. 296 | 4. 40E-68 |

|          |          |          |       |       |          |
|----------|----------|----------|-------|-------|----------|
| SLC35B4  | 3.04E-72 | -0.17702 | 0.056 | 0.338 | 4.55E-68 |
| EIF2B3   | 3.18E-72 | -0.12173 | 0.059 | 0.335 | 4.76E-68 |
| RFWD2    | 3.30E-72 | -0.18856 | 0.04  | 0.311 | 4.94E-68 |
| FKBP5    | 3.54E-72 | 0.195333 | 0.131 | 0.347 | 5.29E-68 |
| AP3B1    | 3.65E-72 | -0.17384 | 0.04  | 0.314 | 5.45E-68 |
| TOMM70A  | 3.87E-72 | -0.20862 | 0.023 | 0.275 | 5.78E-68 |
| PICALM   | 3.91E-72 | -0.16848 | 0.033 | 0.3   | 5.84E-68 |
| MLLT4    | 3.91E-72 | -0.18609 | 0.061 | 0.348 | 5.84E-68 |
| C4orf46  | 3.94E-72 | -0.30673 | 0.017 | 0.305 | 5.90E-68 |
| TMEM41B  | 4.05E-72 | -0.14126 | 0.045 | 0.306 | 6.05E-68 |
| BUB1B    | 4.07E-72 | -0.53419 | 0     | 0.325 | 6.08E-68 |
| DUSP4    | 4.16E-72 | -0.10481 | 0.044 | 0.295 | 6.22E-68 |
| MED27    | 4.42E-72 | -0.22038 | 0.038 | 0.328 | 6.61E-68 |
| PHKB     | 4.50E-72 | -0.19423 | 0.049 | 0.333 | 6.72E-68 |
| HIVEP3   | 4.68E-72 | -0.26337 | 0.021 | 0.294 | 6.99E-68 |
| OXA1L    | 6.84E-72 | 0.21609  | 0.113 | 0.326 | 1.02E-67 |
| RND2     | 7.27E-72 | 0.329421 | 0.096 | 0.24  | 1.09E-67 |
| C6orf47  | 7.37E-72 | -0.19343 | 0.019 | 0.273 | 1.10E-67 |
| HCFC1    | 7.51E-72 | -0.3123  | 0.028 | 0.326 | 1.12E-67 |
| TSPYL1   | 7.72E-72 | -0.1303  | 0.063 | 0.332 | 1.15E-67 |
| TOPBP1   | 7.75E-72 | -0.38981 | 0.012 | 0.314 | 1.16E-67 |
| MTG2     | 8.20E-72 | -0.25492 | 0.024 | 0.304 | 1.22E-67 |
| OGG1     | 8.92E-72 | -0.14255 | 0.047 | 0.317 | 1.33E-67 |
| KRI1     | 8.93E-72 | -0.23532 | 0.023 | 0.296 | 1.33E-67 |
| WARS     | 9.12E-72 | 0.336982 | 0.098 | 0.269 | 1.36E-67 |
| SAP30L   | 9.65E-72 | -0.3144  | 0.016 | 0.294 | 1.44E-67 |
| TIMM21   | 9.88E-72 | -0.19185 | 0.037 | 0.315 | 1.48E-67 |
| ZC3H7A   | 1.18E-71 | -0.2891  | 0.03  | 0.321 | 1.76E-67 |
| LPL      | 1.41E-71 | 0.357712 | 0.105 | 0.251 | 2.10E-67 |
| BEND5    | 1.48E-71 | -0.11982 | 0.047 | 0.309 | 2.21E-67 |
| FAF2     | 2.18E-71 | -0.29259 | 0.045 | 0.352 | 3.26E-67 |
| ANXA2    | 2.28E-71 | 0.225215 | 0.265 | 0.477 | 3.41E-67 |
| ACAP2    | 2.28E-71 | -0.11866 | 0.037 | 0.283 | 3.41E-67 |
| EIF2B4   | 2.60E-71 | -0.20968 | 0.049 | 0.344 | 3.89E-67 |
| ZHX1     | 2.60E-71 | -0.13473 | 0.051 | 0.319 | 3.89E-67 |
| RCHY1    | 2.69E-71 | 0.108761 | 0.084 | 0.298 | 4.03E-67 |
| MAPK7    | 2.71E-71 | -0.22665 | 0.023 | 0.295 | 4.05E-67 |
| VKORC1L1 | 2.83E-71 | -0.217   | 0.037 | 0.309 | 4.23E-67 |
| CDC42EP1 | 2.96E-71 | -0.21531 | 0.03  | 0.299 | 4.42E-67 |
| GSTM4    | 2.96E-71 | 0.181649 | 0.068 | 0.24  | 4.43E-67 |
| FAM57A   | 3.19E-71 | -0.16345 | 0.017 | 0.258 | 4.77E-67 |
| CRTAP    | 3.23E-71 | -0.12405 | 0.045 | 0.31  | 4.83E-67 |
| G2E3     | 3.56E-71 | -0.45009 | 0.024 | 0.346 | 5.32E-67 |
| NDRG3    | 3.83E-71 | -0.13668 | 0.044 | 0.302 | 5.72E-67 |
| SLC4A1AP | 4.09E-71 | -0.19657 | 0.033 | 0.302 | 6.12E-67 |
| IRAK1    | 4.67E-71 | -0.13818 | 0.028 | 0.279 | 6.98E-67 |
| CITED2   | 5.32E-71 | -0.12011 | 0.089 | 0.365 | 7.96E-67 |
| CYBRD1   | 5.47E-71 | 0.160799 | 0.066 | 0.251 | 8.18E-67 |
| MED1     | 5.86E-71 | -0.22375 | 0.021 | 0.286 | 8.75E-67 |
| CSNK1G2  | 5.91E-71 | -0.28208 | 0.019 | 0.295 | 8.83E-67 |
| GMCL1    | 6.85E-71 | -0.38703 | 0.038 | 0.365 | 1.02E-66 |



|           |          |          |       |       |          |
|-----------|----------|----------|-------|-------|----------|
| TRAPPC2P1 | 7.18E-71 | 0.182835 | 0.094 | 0.296 | 1.07E-66 |
| GSKIP     | 7.19E-71 | -0.1328  | 0.038 | 0.29  | 1.07E-66 |
| N6AMT2    | 7.88E-71 | 0.227445 | 0.063 | 0.232 | 1.18E-66 |
| SOCS2     | 8.78E-71 | -0.36241 | 0.047 | 0.36  | 1.31E-66 |
| NRP2      | 9.06E-71 | -0.27184 | 0.03  | 0.311 | 1.35E-66 |
| SMAD4     | 9.07E-71 | -0.23463 | 0.021 | 0.283 | 1.35E-66 |
| LEMD2     | 9.13E-71 | -0.25875 | 0.017 | 0.291 | 1.36E-66 |
| SSX2IP    | 9.73E-71 | -0.28094 | 0.014 | 0.288 | 1.45E-66 |
| ZNF397    | 1.08E-70 | 0.100984 | 0.079 | 0.272 | 1.62E-66 |
| GPBP1L1   | 1.15E-70 | -0.17334 | 0.042 | 0.309 | 1.72E-66 |
| IFI35     | 1.17E-70 | 0.444517 | 0.089 | 0.204 | 1.75E-66 |
| EXOSC10   | 1.23E-70 | -0.16939 | 0.054 | 0.332 | 1.84E-66 |
| H2AFJ     | 1.28E-70 | -0.35034 | 0.017 | 0.311 | 1.91E-66 |
| GNA11     | 1.37E-70 | -0.25944 | 0.019 | 0.29  | 2.05E-66 |
| NOL10     | 1.43E-70 | -0.2137  | 0.042 | 0.331 | 2.14E-66 |
| PDXDC1    | 1.47E-70 | -0.16878 | 0.033 | 0.299 | 2.19E-66 |
| PKD1      | 1.66E-70 | 0.130126 | 0.065 | 0.242 | 2.48E-66 |
| MFS12     | 1.71E-70 | -0.27195 | 0.021 | 0.296 | 2.56E-66 |
| ID1       | 1.83E-70 | -0.13352 | 0.04  | 0.298 | 2.74E-66 |
| RFX4      | 1.96E-70 | 0.314048 | 0.148 | 0.317 | 2.93E-66 |
| PRPS2     | 2.05E-70 | -0.17349 | 0.023 | 0.264 | 3.06E-66 |
| CTBP2     | 2.08E-70 | -0.1606  | 0.033 | 0.29  | 3.12E-66 |
| ANKRD40   | 2.40E-70 | -0.22275 | 0.03  | 0.299 | 3.59E-66 |
| FTSJ1     | 2.90E-70 | -0.12616 | 0.033 | 0.28  | 4.33E-66 |
| PPM1A     | 2.99E-70 | -0.35734 | 0.017 | 0.316 | 4.46E-66 |
| BRAT1     | 3.41E-70 | -0.15401 | 0.077 | 0.37  | 5.10E-66 |
| ATP2C1    | 3.42E-70 | -0.19177 | 0.061 | 0.353 | 5.12E-66 |
| MAP1S     | 3.71E-70 | -0.31037 | 0.019 | 0.31  | 5.55E-66 |
| DCX       | 3.74E-70 | -0.33454 | 0.068 | 0.388 | 5.58E-66 |
| YES1      | 3.76E-70 | -0.25168 | 0.033 | 0.316 | 5.62E-66 |
| ANKRD35   | 4.08E-70 | -0.18069 | 0.028 | 0.285 | 6.10E-66 |
| XRCC1     | 4.08E-70 | -0.21785 | 0.044 | 0.328 | 6.10E-66 |
| FAM53C    | 4.21E-70 | 0.146922 | 0.087 | 0.288 | 6.29E-66 |
| PRKACA    | 4.28E-70 | -0.27112 | 0.024 | 0.307 | 6.39E-66 |
| TTC37     | 4.59E-70 | -0.13463 | 0.049 | 0.305 | 6.86E-66 |
| SCAF4     | 5.63E-70 | -0.16078 | 0.045 | 0.309 | 8.42E-66 |
| WDR76     | 6.20E-70 | -0.56722 | 0.016 | 0.349 | 9.26E-66 |
| MAD1L1    | 6.59E-70 | -0.18538 | 0.045 | 0.314 | 9.85E-66 |
| PXDC1     | 7.52E-70 | -0.12345 | 0.035 | 0.279 | 1.12E-65 |
| MVD       | 7.94E-70 | -0.18527 | 0.035 | 0.305 | 1.19E-65 |
| C5orf45   | 8.34E-70 | 0.24875  | 0.079 | 0.241 | 1.25E-65 |
| NUBP1     | 8.53E-70 | -0.2232  | 0.04  | 0.323 | 1.27E-65 |
| PCID2     | 8.67E-70 | -0.20105 | 0.047 | 0.33  | 1.30E-65 |
| ZNF800    | 9.62E-70 | -0.23195 | 0.038 | 0.323 | 1.44E-65 |
| NEDD1     | 9.62E-70 | -0.36351 | 0.014 | 0.309 | 1.44E-65 |
| MIA3      | 1.03E-69 | -0.14465 | 0.056 | 0.323 | 1.55E-65 |
| FANCG     | 1.20E-69 | -0.41112 | 0.009 | 0.311 | 1.79E-65 |
| TRMT13    | 1.33E-69 | 0.116714 | 0.063 | 0.249 | 1.98E-65 |
| DMWD      | 1.33E-69 | -0.22644 | 0.044 | 0.325 | 1.99E-65 |
| CNTFR     | 1.33E-69 | -0.28892 | 0.054 | 0.359 | 1.99E-65 |
| NAB1      | 1.51E-69 | -0.28426 | 0.03  | 0.314 | 2.26E-65 |

|           |          |          |       |       |          |
|-----------|----------|----------|-------|-------|----------|
| PRKD3     | 2.10E-69 | -0.21694 | 0.047 | 0.322 | 3.14E-65 |
| ZNF85     | 2.12E-69 | -0.30527 | 0.019 | 0.302 | 3.17E-65 |
| APBB1     | 2.14E-69 | -0.14369 | 0.059 | 0.322 | 3.19E-65 |
| DOCK7     | 2.20E-69 | -0.10167 | 0.03  | 0.251 | 3.29E-65 |
| VHL       | 2.21E-69 | -0.21961 | 0.04  | 0.316 | 3.31E-65 |
| RFT1      | 2.40E-69 | -0.15766 | 0.031 | 0.285 | 3.58E-65 |
| GOLGB1    | 2.59E-69 | -0.21283 | 0.042 | 0.319 | 3.88E-65 |
| NRAS      | 2.61E-69 | -0.20464 | 0.044 | 0.321 | 3.91E-65 |
| UBE2W     | 2.76E-69 | -0.16209 | 0.042 | 0.305 | 4.12E-65 |
| ELOVL2    | 2.76E-69 | -0.18829 | 0.044 | 0.321 | 4.12E-65 |
| CASP2     | 2.77E-69 | -0.27854 | 0.028 | 0.311 | 4.14E-65 |
| MESP1     | 2.88E-69 | -0.38462 | 0.03  | 0.348 | 4.30E-65 |
| WBSR16    | 2.91E-69 | -0.18184 | 0.026 | 0.279 | 4.35E-65 |
| ATP13A1   | 2.97E-69 | -0.19735 | 0.035 | 0.301 | 4.44E-65 |
| RARRES3   | 3.05E-69 | 1.10225  | 0.178 | 0.127 | 4.56E-65 |
| C1QA      | 3.32E-69 | 0.392853 | 0.155 | 0.294 | 4.96E-65 |
| SHKBP1    | 3.38E-69 | -0.18249 | 0.03  | 0.285 | 5.05E-65 |
| SLC27A1   | 3.85E-69 | 0.149806 | 0.051 | 0.221 | 5.76E-65 |
| SLC43A3   | 4.12E-69 | -0.14859 | 0.044 | 0.299 | 6.16E-65 |
| NCOA1     | 5.07E-69 | -0.11889 | 0.049 | 0.293 | 7.58E-65 |
| STRN3     | 5.11E-69 | -0.17378 | 0.024 | 0.273 | 7.64E-65 |
| RNPEP     | 5.74E-69 | -0.19021 | 0.03  | 0.286 | 8.58E-65 |
| CLN6      | 6.08E-69 | -0.37602 | 0.021 | 0.323 | 9.08E-65 |
| USP3      | 6.74E-69 | -0.25461 | 0.028 | 0.309 | 1.01E-64 |
| TMEM55B   | 6.89E-69 | -0.16667 | 0.052 | 0.33  | 1.03E-64 |
| MAD2L1BP  | 7.62E-69 | -0.23078 | 0.044 | 0.325 | 1.14E-64 |
| TCHP      | 7.69E-69 | -0.13428 | 0.042 | 0.295 | 1.15E-64 |
| OSBPL1A   | 7.72E-69 | -0.16734 | 0.042 | 0.306 | 1.15E-64 |
| DYNC2LI1  | 8.07E-69 | 0.184992 | 0.065 | 0.242 | 1.21E-64 |
| POFUT1    | 8.35E-69 | -0.21022 | 0.028 | 0.291 | 1.25E-64 |
| ACO04951. | 8.91E-69 | -0.22996 | 0.044 | 0.315 | 1.33E-64 |
| ZNF626    | 9.62E-69 | 0.110192 | 0.059 | 0.244 | 1.44E-64 |
| SAAL1     | 9.66E-69 | -0.25649 | 0.038 | 0.326 | 1.44E-64 |
| NBL1      | 9.86E-69 | -0.32115 | 0.016 | 0.298 | 1.47E-64 |
| CHRAC1    | 1.01E-68 | -0.23308 | 0.038 | 0.319 | 1.51E-64 |
| DONSON    | 1.06E-68 | -0.42307 | 0.007 | 0.307 | 1.58E-64 |
| TNFRSF12A | 1.06E-68 | -0.27351 | 0.113 | 0.425 | 1.59E-64 |
| CAMSAP2   | 1.08E-68 | -0.12549 | 0.049 | 0.296 | 1.61E-64 |
| ANK2      | 1.17E-68 | -0.24811 | 0.04  | 0.323 | 1.75E-64 |
| MEPCE     | 1.27E-68 | -0.12849 | 0.045 | 0.302 | 1.90E-64 |
| MACROD1   | 1.38E-68 | -0.29824 | 0.024 | 0.307 | 2.06E-64 |
| WRAP53    | 1.56E-68 | -0.20245 | 0.035 | 0.304 | 2.33E-64 |
| IGFBP3    | 1.59E-68 | -0.19736 | 0.073 | 0.344 | 2.38E-64 |
| GJC1      | 1.70E-68 | -0.32664 | 0.017 | 0.306 | 2.54E-64 |
| MCM6      | 1.72E-68 | -0.51153 | 0.017 | 0.331 | 2.58E-64 |
| ICA1L     | 1.79E-68 | -0.16868 | 0.047 | 0.302 | 2.67E-64 |
| B4GALNT1  | 1.88E-68 | -0.5821  | 0.068 | 0.441 | 2.80E-64 |
| PHYHIPL   | 2.04E-68 | 0.322462 | 0.183 | 0.351 | 3.04E-64 |
| SCAP      | 2.23E-68 | -0.21226 | 0.03  | 0.289 | 3.33E-64 |
| PLAT      | 2.37E-68 | 0.219322 | 0.086 | 0.268 | 3.54E-64 |
| NOC4L     | 2.69E-68 | -0.31634 | 0.028 | 0.317 | 4.01E-64 |

|           |          |          |       |       |          |
|-----------|----------|----------|-------|-------|----------|
| C21orf2   | 3.05E-68 | -0.22677 | 0.042 | 0.325 | 4.55E-64 |
| WRAP73    | 3.20E-68 | -0.2231  | 0.038 | 0.311 | 4.78E-64 |
| AGAP1     | 3.23E-68 | -0.18163 | 0.03  | 0.279 | 4.83E-64 |
| COL4A1    | 3.36E-68 | -0.25349 | 0.024 | 0.286 | 5.02E-64 |
| CES2      | 3.45E-68 | -0.16141 | 0.035 | 0.289 | 5.15E-64 |
| GPATCH11  | 3.45E-68 | -0.1802  | 0.044 | 0.312 | 5.15E-64 |
| ZNF576    | 3.52E-68 | 0.172306 | 0.07  | 0.257 | 5.26E-64 |
| TMEM209   | 3.53E-68 | -0.34525 | 0.021 | 0.32  | 5.28E-64 |
| ZNF711    | 4.34E-68 | -0.15451 | 0.056 | 0.322 | 6.49E-64 |
| LRRC37B   | 5.16E-68 | -0.20633 | 0.024 | 0.284 | 7.72E-64 |
| TMEM131   | 5.41E-68 | -0.28996 | 0.023 | 0.301 | 8.08E-64 |
| TSPAN12   | 5.94E-68 | -0.16384 | 0.091 | 0.381 | 8.88E-64 |
| PPP2R3B   | 6.17E-68 | -0.22951 | 0.01  | 0.258 | 9.22E-64 |
| NCOA6     | 6.75E-68 | -0.29304 | 0.024 | 0.307 | 1.01E-63 |
| C11orf96  | 7.61E-68 | -0.16861 | 0.052 | 0.306 | 1.14E-63 |
| TEX261    | 7.88E-68 | -0.27621 | 0.038 | 0.327 | 1.18E-63 |
| SPIN1     | 7.90E-68 | -0.31032 | 0.026 | 0.312 | 1.18E-63 |
| COLGALT1  | 8.00E-68 | -0.12368 | 0.028 | 0.264 | 1.20E-63 |
| DNAJC4    | 8.01E-68 | 0.118066 | 0.052 | 0.227 | 1.20E-63 |
| APOC1     | 8.34E-68 | 0.36495  | 0.159 | 0.302 | 1.25E-63 |
| NOTCH2NL  | 8.36E-68 | -0.25648 | 0.03  | 0.304 | 1.25E-63 |
| SOX21     | 8.67E-68 | -0.16468 | 0.035 | 0.283 | 1.30E-63 |
| B3GALNT1  | 8.82E-68 | -0.27367 | 0.044 | 0.341 | 1.32E-63 |
| MIB2      | 9.06E-68 | -0.14457 | 0.03  | 0.262 | 1.35E-63 |
| FAIM2     | 9.30E-68 | 0.320927 | 0.106 | 0.26  | 1.39E-63 |
| TULP3     | 9.61E-68 | -0.2519  | 0.031 | 0.316 | 1.44E-63 |
| TM7SF2    | 9.62E-68 | 0.110816 | 0.079 | 0.281 | 1.44E-63 |
| PRIM1     | 1.00E-67 | -0.49309 | 0.019 | 0.342 | 1.50E-63 |
| MMS22L    | 1.01E-67 | -0.3298  | 0.035 | 0.333 | 1.51E-63 |
| KLHL8     | 1.08E-67 | -0.13119 | 0.038 | 0.283 | 1.61E-63 |
| MAP3K2    | 1.14E-67 | -0.152   | 0.033 | 0.274 | 1.70E-63 |
| TIPIN     | 1.21E-67 | 0.222772 | 0.077 | 0.262 | 1.81E-63 |
| RIMKLB    | 1.48E-67 | -0.20503 | 0.047 | 0.32  | 2.21E-63 |
| IQGAP2    | 1.62E-67 | -0.13392 | 0.033 | 0.267 | 2.42E-63 |
| TTK       | 1.75E-67 | -0.63588 | 0     | 0.306 | 2.61E-63 |
| PTAR1     | 1.76E-67 | -0.25279 | 0.03  | 0.306 | 2.63E-63 |
| LINC01116 | 1.86E-67 | -0.10151 | 0.059 | 0.307 | 2.78E-63 |
| C8orf76   | 1.88E-67 | -0.14759 | 0.038 | 0.29  | 2.81E-63 |
| FOXRED2   | 1.91E-67 | -0.321   | 0.019 | 0.296 | 2.86E-63 |
| ZNF273    | 2.07E-67 | -0.27389 | 0.049 | 0.34  | 3.09E-63 |
| PRMT5     | 2.30E-67 | 0.114135 | 0.08  | 0.286 | 3.44E-63 |
| HEXIM1    | 2.39E-67 | -0.10241 | 0.056 | 0.302 | 3.57E-63 |
| BMPR2     | 2.49E-67 | -0.13486 | 0.054 | 0.314 | 3.72E-63 |
| PCDHB16   | 2.52E-67 | -0.2398  | 0.044 | 0.311 | 3.76E-63 |
| CDC23     | 2.68E-67 | -0.21571 | 0.038 | 0.31  | 4.01E-63 |
| SLC35E1   | 2.80E-67 | -0.11997 | 0.04  | 0.279 | 4.18E-63 |
| FAM122B   | 2.99E-67 | -0.27539 | 0.026 | 0.305 | 4.46E-63 |
| BBS2      | 3.10E-67 | 0.182143 | 0.106 | 0.298 | 4.63E-63 |
| CEP164    | 3.15E-67 | -0.12981 | 0.047 | 0.301 | 4.71E-63 |
| RPP14     | 3.23E-67 | -0.22613 | 0.038 | 0.314 | 4.83E-63 |
| CWC25     | 3.62E-67 | -0.25256 | 0.052 | 0.346 | 5.41E-63 |

|           |          |          |       |       |          |
|-----------|----------|----------|-------|-------|----------|
| ZMYM4     | 3.68E-67 | -0.12445 | 0.026 | 0.252 | 5.50E-63 |
| NADK      | 3.80E-67 | -0.16708 | 0.028 | 0.281 | 5.68E-63 |
| PTDSS2    | 3.80E-67 | -0.2398  | 0.038 | 0.317 | 5.68E-63 |
| ISYNA1    | 3.98E-67 | -0.20543 | 0.03  | 0.285 | 5.94E-63 |
| KAT6A     | 4.69E-67 | -0.11604 | 0.045 | 0.293 | 7.02E-63 |
| CDC6      | 5.19E-67 | -0.4686  | 0.009 | 0.306 | 7.75E-63 |
| PILRB     | 5.36E-67 | -0.14165 | 0.066 | 0.333 | 8.01E-63 |
| FAM161A   | 5.54E-67 | -0.36276 | 0.028 | 0.327 | 8.27E-63 |
| RP11-161M | 5.83E-67 | 0.2124   | 0.122 | 0.319 | 8.71E-63 |
| P4HA1     | 5.90E-67 | 0.172711 | 0.072 | 0.241 | 8.82E-63 |
| CEP55     | 7.14E-67 | -0.51883 | 0     | 0.304 | 1.07E-62 |
| SMG1      | 8.93E-67 | -0.14854 | 0.044 | 0.291 | 1.33E-62 |
| PNMA2     | 9.13E-67 | -0.15958 | 0.051 | 0.314 | 1.36E-62 |
| ACBD5     | 1.01E-66 | -0.1524  | 0.033 | 0.267 | 1.51E-62 |
| LPCAT1    | 1.02E-66 | -0.2162  | 0.066 | 0.352 | 1.52E-62 |
| CCNG2     | 1.31E-66 | -0.35821 | 0.049 | 0.356 | 1.96E-62 |
| SLC9A3R1  | 1.37E-66 | -0.15256 | 0.049 | 0.309 | 2.04E-62 |
| MAP3K11   | 1.37E-66 | -0.13792 | 0.038 | 0.288 | 2.05E-62 |
| ARC       | 1.49E-66 | 0.102878 | 0.166 | 0.401 | 2.23E-62 |
| EMP1      | 1.62E-66 | 0.411522 | 0.147 | 0.283 | 2.42E-62 |
| ZNF581    | 1.70E-66 | 0.244049 | 0.056 | 0.206 | 2.54E-62 |
| CETN3     | 1.83E-66 | -0.24206 | 0.037 | 0.311 | 2.74E-62 |
| BPPL      | 1.89E-66 | -0.11753 | 0.054 | 0.3   | 2.82E-62 |
| POLR2M    | 1.98E-66 | -0.23805 | 0.033 | 0.304 | 2.95E-62 |
| CCHCR1    | 1.98E-66 | -0.28632 | 0.014 | 0.284 | 2.96E-62 |
| DNALI1    | 2.00E-66 | -0.10098 | 0.037 | 0.275 | 2.99E-62 |
| ACOX1     | 2.09E-66 | -0.15636 | 0.03  | 0.27  | 3.12E-62 |
| EFCAB14   | 2.47E-66 | -0.13049 | 0.035 | 0.269 | 3.70E-62 |
| KPNA1     | 2.50E-66 | -0.16337 | 0.03  | 0.278 | 3.73E-62 |
| GCA       | 2.56E-66 | 0.252959 | 0.091 | 0.249 | 3.83E-62 |
| ATM       | 2.61E-66 | -0.13865 | 0.042 | 0.286 | 3.90E-62 |
| LCORL     | 2.66E-66 | -0.31119 | 0.017 | 0.296 | 3.98E-62 |
| CDC25C    | 2.91E-66 | -0.5596  | 0     | 0.301 | 4.34E-62 |
| NDUFAF5   | 3.19E-66 | -0.23154 | 0.03  | 0.298 | 4.77E-62 |
| CEP70     | 3.22E-66 | -0.34849 | 0.03  | 0.321 | 4.81E-62 |
| RBM12     | 3.28E-66 | -0.14189 | 0.037 | 0.278 | 4.91E-62 |
| DUS3L     | 3.52E-66 | -0.20234 | 0.037 | 0.299 | 5.26E-62 |
| KLHL5     | 3.57E-66 | -0.21826 | 0.019 | 0.274 | 5.33E-62 |
| TTI1      | 3.59E-66 | -0.15763 | 0.026 | 0.262 | 5.37E-62 |
| CCZ1B     | 3.80E-66 | -0.22198 | 0.037 | 0.301 | 5.67E-62 |
| STK39     | 3.87E-66 | -0.15972 | 0.024 | 0.258 | 5.79E-62 |
| BOLA1     | 3.91E-66 | -0.15127 | 0.038 | 0.289 | 5.85E-62 |
| CD46      | 4.14E-66 | 0.118553 | 0.075 | 0.263 | 6.19E-62 |
| RP11-660L | 4.86E-66 | 0.109665 | 0.049 | 0.227 | 7.27E-62 |
| TNFRSF19  | 4.88E-66 | -0.2021  | 0.031 | 0.28  | 7.29E-62 |
| NPTXR     | 4.88E-66 | -0.18881 | 0.028 | 0.275 | 7.30E-62 |
| FANCD2    | 5.20E-66 | -0.50319 | 0.009 | 0.319 | 7.77E-62 |
| CREBBP    | 5.56E-66 | -0.11719 | 0.044 | 0.285 | 8.31E-62 |
| TRAIP     | 5.57E-66 | -0.35824 | 0.009 | 0.289 | 8.33E-62 |
| NUDCD1    | 5.60E-66 | -0.1518  | 0.023 | 0.252 | 8.36E-62 |
| HIST2H2AC | 5.81E-66 | -0.51298 | 0.003 | 0.304 | 8.68E-62 |

|           |          |          |       |       |          |
|-----------|----------|----------|-------|-------|----------|
| ZFAND1    | 5.81E-66 | 0.143583 | 0.068 | 0.235 | 8.68E-62 |
| ZFP91     | 5.99E-66 | -0.15645 | 0.031 | 0.274 | 8.96E-62 |
| ANKFY1    | 6.03E-66 | -0.10802 | 0.031 | 0.26  | 9.01E-62 |
| SOCS3     | 6.48E-66 | 0.19667  | 0.124 | 0.332 | 9.68E-62 |
| PTRH2     | 7.46E-66 | 0.14089  | 0.045 | 0.204 | 1.11E-61 |
| YPEL1     | 7.55E-66 | -0.30955 | 0.016 | 0.293 | 1.13E-61 |
| TTL       | 7.67E-66 | -0.36029 | 0.019 | 0.312 | 1.15E-61 |
| TMOD3     | 8.13E-66 | -0.12437 | 0.023 | 0.246 | 1.22E-61 |
| ARCN1     | 8.69E-66 | -0.23343 | 0.023 | 0.281 | 1.30E-61 |
| FUT8      | 8.97E-66 | -0.20374 | 0.03  | 0.277 | 1.34E-61 |
| MBD1      | 9.09E-66 | -0.14831 | 0.04  | 0.288 | 1.36E-61 |
| INPP1     | 9.20E-66 | -0.11953 | 0.047 | 0.298 | 1.37E-61 |
| ORAI1     | 9.24E-66 | -0.17978 | 0.019 | 0.247 | 1.38E-61 |
| ZCCHC3    | 1.00E-65 | -0.15666 | 0.023 | 0.257 | 1.50E-61 |
| MSH6      | 1.11E-65 | -0.43198 | 0.028 | 0.34  | 1.66E-61 |
| ZADH2     | 1.14E-65 | -0.14152 | 0.023 | 0.246 | 1.70E-61 |
| CUEDC1    | 1.17E-65 | -0.30895 | 0.012 | 0.284 | 1.74E-61 |
| MTMR4     | 1.23E-65 | -0.20413 | 0.037 | 0.306 | 1.84E-61 |
| TSPAN17   | 1.36E-65 | -0.12388 | 0.033 | 0.262 | 2.03E-61 |
| FSTL1     | 1.36E-65 | -0.2134  | 0.026 | 0.277 | 2.04E-61 |
| PTPN18    | 1.43E-65 | -0.15695 | 0.033 | 0.277 | 2.13E-61 |
| ZNF530    | 1.48E-65 | -0.39694 | 0.007 | 0.289 | 2.22E-61 |
| RP11-332H | 1.53E-65 | -0.32504 | 0.037 | 0.332 | 2.28E-61 |
| HHLA3     | 1.78E-65 | 0.354685 | 0.087 | 0.219 | 2.66E-61 |
| TRIOBP    | 1.87E-65 | -0.40454 | 0.007 | 0.299 | 2.79E-61 |
| AGA       | 2.02E-65 | 0.222732 | 0.066 | 0.214 | 3.01E-61 |
| ALKBH3    | 2.34E-65 | 0.179728 | 0.054 | 0.212 | 3.49E-61 |
| MSI1      | 2.37E-65 | -0.13987 | 0.052 | 0.307 | 3.54E-61 |
| UBE2Z     | 2.64E-65 | -0.19249 | 0.037 | 0.293 | 3.94E-61 |
| PPP4R1    | 2.68E-65 | -0.21001 | 0.023 | 0.265 | 4.00E-61 |
| APOD      | 2.68E-65 | 1.14713  | 0.255 | 0.132 | 4.01E-61 |
| SMG6      | 2.72E-65 | -0.13431 | 0.026 | 0.247 | 4.06E-61 |
| KIF18A    | 2.73E-65 | -0.42749 | 0.003 | 0.291 | 4.08E-61 |
| TOP3A     | 2.84E-65 | -0.21847 | 0.035 | 0.295 | 4.24E-61 |
| RUSC1     | 2.95E-65 | -0.18045 | 0.023 | 0.259 | 4.41E-61 |
| NARFL     | 3.27E-65 | -0.1447  | 0.042 | 0.294 | 4.88E-61 |
| NIN       | 3.57E-65 | -0.23715 | 0.035 | 0.299 | 5.34E-61 |
| CTU2      | 3.62E-65 | -0.1316  | 0.044 | 0.289 | 5.41E-61 |
| CNOT10    | 3.72E-65 | -0.11023 | 0.052 | 0.296 | 5.55E-61 |
| RRAGD     | 3.81E-65 | -0.29621 | 0.017 | 0.29  | 5.69E-61 |
| SASS6     | 3.84E-65 | -0.26768 | 0.014 | 0.274 | 5.73E-61 |
| DCAF10    | 3.85E-65 | -0.16037 | 0.049 | 0.306 | 5.76E-61 |
| POSTN     | 4.06E-65 | -0.31878 | 0.045 | 0.327 | 6.07E-61 |
| THOC1     | 4.59E-65 | -0.19923 | 0.037 | 0.298 | 6.86E-61 |
| TRAPPC12  | 4.60E-65 | -0.14993 | 0.044 | 0.295 | 6.87E-61 |
| HAUS2     | 4.67E-65 | -0.27731 | 0.014 | 0.268 | 6.99E-61 |
| GOLGA5    | 5.42E-65 | -0.11832 | 0.035 | 0.265 | 8.10E-61 |
| PTPRF     | 5.81E-65 | 0.217811 | 0.068 | 0.211 | 8.68E-61 |
| CGRRF1    | 6.09E-65 | 0.121402 | 0.08  | 0.279 | 9.10E-61 |
| ZNF439    | 6.68E-65 | -0.16504 | 0.04  | 0.29  | 9.98E-61 |
| CCDC58    | 6.91E-65 | -0.15929 | 0.035 | 0.28  | 1.03E-60 |

|          |          |          |       |       |          |
|----------|----------|----------|-------|-------|----------|
| NOTCH1   | 7.19E-65 | -0.32114 | 0.037 | 0.332 | 1.08E-60 |
| MLLT6    | 7.59E-65 | -0.10907 | 0.031 | 0.242 | 1.13E-60 |
| BAP1     | 8.07E-65 | -0.28889 | 0.026 | 0.305 | 1.21E-60 |
| TOPORS   | 8.74E-65 | -0.19005 | 0.051 | 0.312 | 1.31E-60 |
| FADD     | 8.97E-65 | -0.20931 | 0.021 | 0.264 | 1.34E-60 |
| CLASP1   | 9.64E-65 | -0.16583 | 0.042 | 0.293 | 1.44E-60 |
| ADAL     | 1.00E-64 | -0.14194 | 0.021 | 0.24  | 1.50E-60 |
| CPNE4    | 1.05E-64 | -0.27835 | 0.012 | 0.259 | 1.56E-60 |
| ADAT1    | 1.14E-64 | -0.19884 | 0.03  | 0.277 | 1.71E-60 |
| SOX12    | 1.18E-64 | -0.27962 | 0.016 | 0.278 | 1.76E-60 |
| MCC      | 1.21E-64 | -0.15309 | 0.033 | 0.283 | 1.80E-60 |
| EHMT1    | 1.28E-64 | -0.1678  | 0.031 | 0.273 | 1.91E-60 |
| ZNF562   | 1.30E-64 | 0.170857 | 0.07  | 0.233 | 1.94E-60 |
| RALGAPA2 | 1.39E-64 | -0.146   | 0.031 | 0.265 | 2.07E-60 |
| CENPL    | 1.40E-64 | -0.36758 | 0.016 | 0.304 | 2.09E-60 |
| RNMTL1   | 1.44E-64 | -0.2928  | 0.021 | 0.291 | 2.15E-60 |
| SGK1     | 1.53E-64 | 0.250211 | 0.099 | 0.277 | 2.29E-60 |
| SRPX     | 1.61E-64 | 0.298093 | 0.152 | 0.342 | 2.41E-60 |
| NOTCH2   | 1.64E-64 | -0.25813 | 0.028 | 0.296 | 2.45E-60 |
| SUCO     | 1.75E-64 | -0.21723 | 0.031 | 0.293 | 2.62E-60 |
| ZNF608   | 1.83E-64 | -0.20455 | 0.031 | 0.283 | 2.73E-60 |
| CHD1L    | 1.83E-64 | -0.10155 | 0.024 | 0.242 | 2.74E-60 |
| LYRM9    | 1.99E-64 | 0.21293  | 0.075 | 0.233 | 2.98E-60 |
| TLE4     | 2.19E-64 | -0.15916 | 0.04  | 0.284 | 3.28E-60 |
| ZNF704   | 2.40E-64 | -0.24688 | 0.045 | 0.319 | 3.59E-60 |
| TMEM63B  | 2.43E-64 | -0.10251 | 0.03  | 0.251 | 3.63E-60 |
| ETNK1    | 2.46E-64 | -0.11932 | 0.058 | 0.305 | 3.67E-60 |
| ZNF559   | 2.46E-64 | 0.180137 | 0.089 | 0.263 | 3.68E-60 |
| ABHD11   | 2.48E-64 | -0.28095 | 0.035 | 0.31  | 3.71E-60 |
| MEN1     | 2.60E-64 | -0.16371 | 0.024 | 0.264 | 3.89E-60 |
| C7orf26  | 2.64E-64 | -0.24088 | 0.038 | 0.309 | 3.94E-60 |
| LRRC40   | 2.95E-64 | -0.18581 | 0.038 | 0.288 | 4.41E-60 |
| INSM1    | 2.99E-64 | -0.48079 | 0.031 | 0.347 | 4.47E-60 |
| TMEM57   | 3.49E-64 | -0.15392 | 0.045 | 0.291 | 5.21E-60 |
| ZFP90    | 3.71E-64 | -0.15496 | 0.04  | 0.277 | 5.55E-60 |
| ROB2     | 3.79E-64 | -0.24428 | 0.028 | 0.284 | 5.67E-60 |
| ZDHHC6   | 3.86E-64 | -0.16987 | 0.035 | 0.28  | 5.76E-60 |
| IGSF8    | 4.00E-64 | 0.182918 | 0.082 | 0.256 | 5.98E-60 |
| OAT      | 4.04E-64 | 0.260219 | 0.103 | 0.26  | 6.03E-60 |
| AKAP17A  | 4.05E-64 | -0.30062 | 0.024 | 0.302 | 6.05E-60 |
| LIX1L    | 4.10E-64 | -0.19077 | 0.028 | 0.275 | 6.13E-60 |
| BCAT2    | 4.18E-64 | 0.348467 | 0.08  | 0.216 | 6.24E-60 |
| CAPRIN2  | 4.28E-64 | -0.19928 | 0.028 | 0.268 | 6.40E-60 |
| CPSF2    | 4.40E-64 | -0.16062 | 0.03  | 0.263 | 6.58E-60 |
| C11orf1  | 4.42E-64 | 0.347453 | 0.068 | 0.188 | 6.61E-60 |
| UBE20    | 4.59E-64 | -0.14316 | 0.026 | 0.249 | 6.86E-60 |
| POGK     | 5.08E-64 | -0.2375  | 0.019 | 0.272 | 7.59E-60 |
| KCNF1    | 5.47E-64 | -0.4365  | 0.017 | 0.301 | 8.17E-60 |
| TMEM19   | 5.57E-64 | -0.28017 | 0.033 | 0.306 | 8.33E-60 |
| GIT1     | 5.79E-64 | -0.24138 | 0.021 | 0.28  | 8.65E-60 |
| SENP5    | 5.88E-64 | -0.17904 | 0.03  | 0.267 | 8.79E-60 |

|           |          |          |       |       |          |
|-----------|----------|----------|-------|-------|----------|
| CNTLN     | 6.38E-64 | -0.37338 | 0.035 | 0.337 | 9.54E-60 |
| F8A1      | 6.99E-64 | -0.32625 | 0.016 | 0.294 | 1.04E-59 |
| EID2      | 7.06E-64 | -0.19046 | 0.016 | 0.243 | 1.05E-59 |
| STEAP3    | 7.35E-64 | 0.194397 | 0.052 | 0.181 | 1.10E-59 |
| KANSL1    | 7.80E-64 | -0.25792 | 0.037 | 0.31  | 1.17E-59 |
| ZNF714    | 8.99E-64 | -0.23291 | 0.065 | 0.353 | 1.34E-59 |
| SOX6      | 9.36E-64 | 0.226113 | 0.096 | 0.247 | 1.40E-59 |
| IRF1      | 9.41E-64 | 0.223329 | 0.124 | 0.306 | 1.41E-59 |
| FAM129A   | 1.00E-63 | -0.13444 | 0.017 | 0.214 | 1.50E-59 |
| MARK2     | 1.04E-63 | -0.19871 | 0.023 | 0.267 | 1.55E-59 |
| SH2B1     | 1.04E-63 | -0.11997 | 0.035 | 0.257 | 1.55E-59 |
| TAGLN3    | 1.07E-63 | -0.13021 | 0.086 | 0.349 | 1.60E-59 |
| ADORA1    | 1.21E-63 | 0.226742 | 0.056 | 0.175 | 1.81E-59 |
| KIF18B    | 1.26E-63 | -0.4471  | 0.002 | 0.295 | 1.88E-59 |
| ZBTB38    | 1.37E-63 | 0.126845 | 0.056 | 0.219 | 2.05E-59 |
| IRF2      | 1.38E-63 | 0.165309 | 0.077 | 0.262 | 2.06E-59 |
| LINC00511 | 1.46E-63 | -0.11773 | 0.047 | 0.285 | 2.18E-59 |
| ZC3HAV1   | 1.47E-63 | -0.13165 | 0.03  | 0.253 | 2.19E-59 |
| SYDE1     | 1.51E-63 | -0.13924 | 0.016 | 0.231 | 2.25E-59 |
| WRNIP1    | 1.75E-63 | -0.31371 | 0.012 | 0.281 | 2.61E-59 |
| GNPDA2    | 1.83E-63 | -0.11628 | 0.049 | 0.284 | 2.74E-59 |
| SIGIRR    | 1.92E-63 | -0.1243  | 0.017 | 0.219 | 2.87E-59 |
| POLA2     | 2.16E-63 | -0.40702 | 0.01  | 0.295 | 3.23E-59 |
| DICER1    | 2.22E-63 | 0.111464 | 0.068 | 0.238 | 3.32E-59 |
| C1S       | 2.63E-63 | 0.895888 | 0.162 | 0.135 | 3.94E-59 |
| SHMT1     | 2.78E-63 | -0.20596 | 0.023 | 0.268 | 4.16E-59 |
| TNPO3     | 3.06E-63 | -0.26953 | 0.044 | 0.323 | 4.57E-59 |
| FIGN      | 3.11E-63 | -0.15566 | 0.035 | 0.262 | 4.65E-59 |
| SLC35E3   | 3.20E-63 | -0.23344 | 0.117 | 0.428 | 4.78E-59 |
| HMBX1     | 3.22E-63 | 0.204968 | 0.106 | 0.29  | 4.82E-59 |
| TTC32     | 3.60E-63 | -0.1249  | 0.049 | 0.291 | 5.39E-59 |
| TYW1      | 3.93E-63 | -0.15471 | 0.026 | 0.254 | 5.87E-59 |
| CIB2      | 4.35E-63 | -0.36342 | 0.003 | 0.27  | 6.49E-59 |
| REPS1     | 4.70E-63 | -0.24637 | 0.017 | 0.269 | 7.02E-59 |
| JOSD1     | 4.85E-63 | -0.23814 | 0.021 | 0.274 | 7.25E-59 |
| ANKRD26   | 4.86E-63 | -0.1363  | 0.031 | 0.256 | 7.26E-59 |
| ZNF770    | 4.97E-63 | -0.15819 | 0.03  | 0.26  | 7.43E-59 |
| USP7      | 5.35E-63 | -0.15615 | 0.035 | 0.267 | 8.00E-59 |
| NUPR1     | 5.89E-63 | 0.879466 | 0.182 | 0.196 | 8.80E-59 |
| GLRX      | 6.16E-63 | 0.599709 | 0.127 | 0.204 | 9.20E-59 |
| BEX2      | 6.41E-63 | 0.604208 | 0.202 | 0.263 | 9.58E-59 |
| ZFHX3     | 6.70E-63 | -0.16897 | 0.026 | 0.262 | 1.00E-58 |
| LEO1      | 6.93E-63 | -0.11485 | 0.049 | 0.295 | 1.04E-58 |
| MCMBP     | 7.84E-63 | -0.12072 | 0.044 | 0.273 | 1.17E-58 |
| RAD18     | 7.87E-63 | -0.32124 | 0.014 | 0.28  | 1.18E-58 |
| RNF219    | 8.70E-63 | -0.15095 | 0.037 | 0.28  | 1.30E-58 |
| PRKRIR    | 9.40E-63 | -0.28815 | 0.017 | 0.28  | 1.40E-58 |
| TMEM243   | 9.45E-63 | 0.103535 | 0.082 | 0.283 | 1.41E-58 |
| SLC25A29  | 9.63E-63 | -0.33519 | 0.024 | 0.305 | 1.44E-58 |
| ROGDI     | 1.18E-62 | -0.14114 | 0.038 | 0.281 | 1.76E-58 |
| FAM118B   | 1.26E-62 | -0.10752 | 0.031 | 0.258 | 1.88E-58 |

|           |           |           |        |        |           |
|-----------|-----------|-----------|--------|--------|-----------|
| TGFB1     | 1. 26E-62 | -0. 23667 | 0. 019 | 0. 265 | 1. 89E-58 |
| KDM2B     | 1. 29E-62 | -0. 21327 | 0. 024 | 0. 267 | 1. 93E-58 |
| DMTF1     | 1. 30E-62 | -0. 18598 | 0. 051 | 0. 307 | 1. 94E-58 |
| COPG2     | 1. 35E-62 | -0. 19696 | 0. 033 | 0. 28  | 2. 01E-58 |
| CDYL      | 1. 38E-62 | -0. 27048 | 0. 016 | 0. 268 | 2. 06E-58 |
| MPPED2    | 1. 41E-62 | -0. 46161 | 0. 021 | 0. 32  | 2. 11E-58 |
| RP11-111M | 1. 47E-62 | -0. 16213 | 0. 038 | 0. 277 | 2. 20E-58 |
| GBE1      | 1. 49E-62 | 0. 104893 | 0. 08  | 0. 278 | 2. 23E-58 |
| TMEM245   | 1. 50E-62 | -0. 18051 | 0. 051 | 0. 306 | 2. 24E-58 |
| DNAJC21   | 1. 50E-62 | -0. 14681 | 0. 024 | 0. 252 | 2. 25E-58 |
| SLC31A1   | 1. 50E-62 | -0. 11067 | 0. 031 | 0. 252 | 2. 25E-58 |
| WDR73     | 1. 66E-62 | 0. 109313 | 0. 059 | 0. 228 | 2. 47E-58 |
| FAM58A    | 1. 88E-62 | -0. 23551 | 0. 019 | 0. 27  | 2. 81E-58 |
| BYSL      | 1. 90E-62 | -0. 13535 | 0. 021 | 0. 244 | 2. 84E-58 |
| PSMA6     | 1. 98E-62 | 0. 169797 | 0. 112 | 0. 299 | 2. 96E-58 |
| THOC6     | 2. 27E-62 | -0. 12089 | 0. 03  | 0. 252 | 3. 39E-58 |
| RAB11B-AS | 2. 32E-62 | -0. 10415 | 0. 03  | 0. 243 | 3. 46E-58 |
| POM121C   | 2. 33E-62 | -0. 22274 | 0. 033 | 0. 29  | 3. 49E-58 |
| SERTAD3   | 2. 44E-62 | 0. 289145 | 0. 072 | 0. 217 | 3. 64E-58 |
| SIRPA     | 2. 66E-62 | -0. 19605 | 0. 017 | 0. 251 | 3. 98E-58 |
| RGS19     | 2. 80E-62 | -0. 34822 | 0. 01  | 0. 288 | 4. 18E-58 |
| SLC27A5   | 2. 89E-62 | 0. 4189   | 0. 094 | 0. 212 | 4. 32E-58 |
| GABPB1    | 2. 90E-62 | -0. 30378 | 0. 019 | 0. 285 | 4. 33E-58 |
| SLC35F1   | 2. 90E-62 | -0. 18266 | 0. 035 | 0. 283 | 4. 34E-58 |
| CHTF18    | 2. 98E-62 | -0. 30303 | 0. 012 | 0. 272 | 4. 45E-58 |
| TMEM43    | 3. 20E-62 | 0. 117479 | 0. 08  | 0. 263 | 4. 79E-58 |
| SLC5A6    | 3. 27E-62 | -0. 11384 | 0. 024 | 0. 238 | 4. 89E-58 |
| NAA16     | 3. 76E-62 | -0. 23407 | 0. 026 | 0. 275 | 5. 62E-58 |
| ZNF330    | 4. 24E-62 | 0. 102855 | 0. 066 | 0. 256 | 6. 34E-58 |
| GLCCI1    | 4. 42E-62 | -0. 17165 | 0. 11  | 0. 393 | 6. 60E-58 |
| TP53TG1   | 4. 43E-62 | 0. 397212 | 0. 103 | 0. 226 | 6. 62E-58 |
| ABCB8     | 4. 83E-62 | -0. 19576 | 0. 031 | 0. 28  | 7. 22E-58 |
| UBTD2     | 4. 98E-62 | -0. 1997  | 0. 021 | 0. 259 | 7. 44E-58 |
| SNCAIP    | 5. 48E-62 | -0. 11927 | 0. 04  | 0. 26  | 8. 19E-58 |
| YY1AP1    | 6. 00E-62 | -0. 15471 | 0. 044 | 0. 294 | 8. 96E-58 |
| GAK       | 6. 23E-62 | -0. 15451 | 0. 024 | 0. 248 | 9. 31E-58 |
| SCLT1     | 6. 36E-62 | -0. 32092 | 0. 014 | 0. 283 | 9. 50E-58 |
| SLC12A2   | 6. 87E-62 | -0. 20233 | 0. 03  | 0. 277 | 1. 03E-57 |
| LRPPRC    | 7. 06E-62 | -0. 28416 | 0. 03  | 0. 301 | 1. 06E-57 |
| AUTS2     | 7. 82E-62 | -0. 26051 | 0. 024 | 0. 283 | 1. 17E-57 |
| PIM3      | 8. 26E-62 | -0. 41845 | 0. 023 | 0. 319 | 1. 23E-57 |
| ZIC1      | 9. 08E-62 | -0. 19568 | 0. 061 | 0. 322 | 1. 36E-57 |
| STRBP     | 9. 66E-62 | -0. 25268 | 0. 023 | 0. 277 | 1. 44E-57 |
| NMU       | 9. 69E-62 | -0. 67953 | 0      | 0. 283 | 1. 45E-57 |
| WDR62     | 9. 71E-62 | -0. 44807 | 0. 005 | 0. 29  | 1. 45E-57 |
| ZNF254    | 1. 07E-61 | -0. 12318 | 0. 04  | 0. 268 | 1. 59E-57 |
| GNPTAB    | 1. 20E-61 | 0. 174438 | 0. 04  | 0. 168 | 1. 80E-57 |
| LAMC1     | 1. 21E-61 | -0. 16649 | 0. 024 | 0. 253 | 1. 81E-57 |
| TOMM34    | 1. 34E-61 | -0. 19717 | 0. 028 | 0. 274 | 2. 01E-57 |
| RAD9A     | 1. 50E-61 | -0. 18067 | 0. 038 | 0. 283 | 2. 24E-57 |
| TRAF3IP2  | 1. 52E-61 | -0. 14932 | 0. 044 | 0. 28  | 2. 26E-57 |



|          |          |          |       |       |          |
|----------|----------|----------|-------|-------|----------|
| 9-Mar    | 1.66E-61 | -0.34654 | 0.075 | 0.381 | 2.48E-57 |
| CLASP2   | 1.69E-61 | -0.11086 | 0.07  | 0.32  | 2.52E-57 |
| IREB2    | 1.77E-61 | -0.20208 | 0.031 | 0.277 | 2.64E-57 |
| PXDN     | 1.79E-61 | -0.11652 | 0.028 | 0.247 | 2.68E-57 |
| MCM10    | 1.81E-61 | -0.47339 | 0.002 | 0.29  | 2.70E-57 |
| SH3KBP1  | 1.83E-61 | -0.24483 | 0.028 | 0.288 | 2.73E-57 |
| SLC10A4  | 1.98E-61 | -0.28885 | 0.017 | 0.272 | 2.96E-57 |
| ZC3H6    | 2.05E-61 | -0.17775 | 0.04  | 0.273 | 3.07E-57 |
| NEDD9    | 2.14E-61 | 0.133402 | 0.082 | 0.267 | 3.19E-57 |
| R3HDM2   | 2.24E-61 | -0.2186  | 0.026 | 0.272 | 3.35E-57 |
| SRD5A3   | 2.30E-61 | -0.36869 | 0.017 | 0.295 | 3.44E-57 |
| RPP30    | 2.73E-61 | -0.17966 | 0.044 | 0.296 | 4.09E-57 |
| SEN2     | 2.95E-61 | -0.10262 | 0.035 | 0.251 | 4.41E-57 |
| NBN      | 3.11E-61 | -0.18035 | 0.037 | 0.28  | 4.65E-57 |
| GRIA4    | 3.25E-61 | 0.272146 | 0.092 | 0.24  | 4.86E-57 |
| SLC30A7  | 3.41E-61 | -0.1194  | 0.038 | 0.259 | 5.10E-57 |
| WIPF1    | 3.92E-61 | -0.11161 | 0.03  | 0.246 | 5.86E-57 |
| GALNS    | 4.28E-61 | -0.22788 | 0.021 | 0.26  | 6.40E-57 |
| KIAA2013 | 4.30E-61 | -0.23889 | 0.021 | 0.265 | 6.42E-57 |
| MMP16    | 4.32E-61 | -0.13983 | 0.042 | 0.265 | 6.45E-57 |
| CHST11   | 4.59E-61 | -0.13648 | 0.042 | 0.272 | 6.86E-57 |
| DUS1L    | 4.62E-61 | -0.22088 | 0.023 | 0.27  | 6.90E-57 |
| TRAPPC6A | 4.72E-61 | 0.328477 | 0.101 | 0.249 | 7.05E-57 |
| NAA35    | 4.72E-61 | -0.22598 | 0.026 | 0.27  | 7.05E-57 |
| LSM14B   | 4.88E-61 | -0.21929 | 0.023 | 0.265 | 7.30E-57 |
| NIPSNAP1 | 5.15E-61 | -0.18675 | 0.033 | 0.275 | 7.70E-57 |
| MTSS1    | 5.35E-61 | -0.29818 | 0.054 | 0.333 | 7.99E-57 |
| STX6     | 5.63E-61 | -0.16476 | 0.033 | 0.269 | 8.42E-57 |
| CCDC80   | 5.79E-61 | 0.415657 | 0.115 | 0.232 | 8.65E-57 |
| PRDM2    | 6.04E-61 | -0.12744 | 0.042 | 0.275 | 9.03E-57 |
| EGLN1    | 7.27E-61 | -0.11358 | 0.035 | 0.263 | 1.09E-56 |
| CENPP    | 7.57E-61 | -0.45483 | 0.005 | 0.28  | 1.13E-56 |
| VWA1     | 7.99E-61 | -0.19989 | 0.026 | 0.263 | 1.19E-56 |
| SSBP3    | 8.07E-61 | -0.1966  | 0.033 | 0.273 | 1.21E-56 |
| CDKN2AIP | 8.24E-61 | -0.26741 | 0.033 | 0.298 | 1.23E-56 |
| EFS      | 8.76E-61 | -0.10327 | 0.044 | 0.264 | 1.31E-56 |
| USP13    | 9.04E-61 | -0.35395 | 0.017 | 0.295 | 1.35E-56 |
| SERTAD2  | 9.10E-61 | -0.20367 | 0.033 | 0.275 | 1.36E-56 |
| C3orf70  | 9.11E-61 | -0.25704 | 0.038 | 0.301 | 1.36E-56 |
| RASSF4   | 9.65E-61 | 0.517699 | 0.131 | 0.219 | 1.44E-56 |
| METTL7A  | 1.01E-60 | 0.25895  | 0.133 | 0.304 | 1.50E-56 |
| STX2     | 1.01E-60 | -0.203   | 0.021 | 0.254 | 1.50E-56 |
| DHRS11   | 1.02E-60 | -0.38634 | 0.005 | 0.285 | 1.52E-56 |
| ZNF12    | 1.05E-60 | -0.14171 | 0.035 | 0.262 | 1.57E-56 |
| SGCE     | 1.24E-60 | 0.177702 | 0.145 | 0.305 | 1.86E-56 |
| GLUD1    | 1.36E-60 | 0.191949 | 0.11  | 0.286 | 2.04E-56 |
| SLC35G2  | 1.40E-60 | 0.173637 | 0.068 | 0.211 | 2.09E-56 |
| YLPM1    | 1.43E-60 | -0.15239 | 0.033 | 0.258 | 2.14E-56 |
| ZNF821   | 1.44E-60 | -0.17655 | 0.047 | 0.288 | 2.15E-56 |
| CTR9     | 1.45E-60 | -0.19372 | 0.038 | 0.286 | 2.17E-56 |
| ATXN3    | 1.47E-60 | 0.31611  | 0.084 | 0.202 | 2.20E-56 |

|           |          |          |       |       |          |
|-----------|----------|----------|-------|-------|----------|
| SLC1A2    | 1.56E-60 | 0.286657 | 0.112 | 0.279 | 2.33E-56 |
| TMEM129   | 1.88E-60 | -0.15274 | 0.049 | 0.3   | 2.80E-56 |
| SPRED2    | 1.97E-60 | -0.10592 | 0.03  | 0.243 | 2.94E-56 |
| SMPD4     | 2.21E-60 | -0.2694  | 0.023 | 0.283 | 3.30E-56 |
| CRNKL1    | 2.34E-60 | -0.16996 | 0.035 | 0.277 | 3.50E-56 |
| EMC1      | 2.40E-60 | -0.14966 | 0.03  | 0.254 | 3.59E-56 |
| APOLD1    | 2.71E-60 | -0.49844 | 0.019 | 0.32  | 4.04E-56 |
| DDIT4     | 2.88E-60 | 0.503687 | 0.206 | 0.312 | 4.30E-56 |
| SFRP1     | 2.90E-60 | -0.30416 | 0.01  | 0.259 | 4.33E-56 |
| SREBF2    | 2.98E-60 | -0.12127 | 0.031 | 0.243 | 4.45E-56 |
| 2-Mar     | 3.16E-60 | -0.12946 | 0.028 | 0.246 | 4.72E-56 |
| CHCHD4    | 3.25E-60 | -0.10536 | 0.024 | 0.236 | 4.86E-56 |
| C3        | 3.33E-60 | 1.007703 | 0.194 | 0.125 | 4.97E-56 |
| CDCA7     | 3.35E-60 | -0.38665 | 0.042 | 0.331 | 5.01E-56 |
| HDAC6     | 3.40E-60 | -0.19372 | 0.03  | 0.272 | 5.08E-56 |
| ATP6VOA2  | 3.68E-60 | -0.19746 | 0.023 | 0.256 | 5.50E-56 |
| EVA1B     | 3.86E-60 | -0.35923 | 0.002 | 0.259 | 5.76E-56 |
| PTK7      | 4.41E-60 | -0.25179 | 0.014 | 0.256 | 6.59E-56 |
| NDP       | 4.46E-60 | 0.259601 | 0.068 | 0.198 | 6.66E-56 |
| SAMD1     | 4.49E-60 | -0.23667 | 0.023 | 0.263 | 6.70E-56 |
| UTP23     | 4.99E-60 | -0.12894 | 0.033 | 0.253 | 7.46E-56 |
| ZNF226    | 5.06E-60 | 0.259502 | 0.096 | 0.258 | 7.55E-56 |
| CBX2      | 5.29E-60 | -0.40099 | 0.009 | 0.277 | 7.90E-56 |
| TMEM69    | 5.48E-60 | 0.186652 | 0.086 | 0.247 | 8.18E-56 |
| PIGQ      | 5.60E-60 | -0.14386 | 0.026 | 0.246 | 8.38E-56 |
| ZC2HC1A   | 6.00E-60 | -0.15881 | 0.075 | 0.335 | 8.97E-56 |
| DHX40     | 6.01E-60 | -0.30359 | 0.024 | 0.291 | 8.98E-56 |
| HOPX      | 6.95E-60 | 0.31583  | 0.321 | 0.465 | 1.04E-55 |
| SIK3      | 7.08E-60 | -0.17595 | 0.019 | 0.241 | 1.06E-55 |
| UBALD1    | 7.10E-60 | -0.15606 | 0.04  | 0.279 | 1.06E-55 |
| TCOF1     | 7.22E-60 | -0.1652  | 0.044 | 0.289 | 1.08E-55 |
| ANKRD46   | 7.29E-60 | 0.113649 | 0.075 | 0.252 | 1.09E-55 |
| SH3BP5    | 7.60E-60 | -0.22187 | 0.019 | 0.251 | 1.14E-55 |
| LAS1L     | 7.83E-60 | -0.13053 | 0.031 | 0.263 | 1.17E-55 |
| PIAS4     | 7.86E-60 | -0.21784 | 0.033 | 0.288 | 1.17E-55 |
| RPP38     | 8.33E-60 | -0.14662 | 0.031 | 0.259 | 1.24E-55 |
| SUV39H2   | 9.75E-60 | -0.25186 | 0.019 | 0.265 | 1.46E-55 |
| PPM1D     | 9.92E-60 | -0.29769 | 0.019 | 0.279 | 1.48E-55 |
| VIM       | 1.10E-59 | 0.351631 | 0.588 | 0.722 | 1.64E-55 |
| GNB5      | 1.17E-59 | -0.33275 | 0.017 | 0.281 | 1.75E-55 |
| SETD3     | 1.18E-59 | -0.17598 | 0.031 | 0.263 | 1.77E-55 |
| DESI1     | 1.25E-59 | -0.15322 | 0.028 | 0.252 | 1.87E-55 |
| AC093323. | 1.28E-59 | -0.21613 | 0.019 | 0.253 | 1.92E-55 |
| MOB3A     | 1.33E-59 | -0.12133 | 0.026 | 0.235 | 1.98E-55 |
| LGR4      | 1.37E-59 | -0.34262 | 0.01  | 0.273 | 2.05E-55 |
| RND3      | 1.41E-59 | -0.27642 | 0.096 | 0.395 | 2.11E-55 |
| ZNF429    | 1.54E-59 | 0.17181  | 0.073 | 0.236 | 2.29E-55 |
| BRI3BP    | 1.58E-59 | -0.2514  | 0.016 | 0.256 | 2.36E-55 |
| FTO       | 1.61E-59 | -0.16136 | 0.033 | 0.263 | 2.41E-55 |
| LARP1B    | 1.64E-59 | -0.22425 | 0.024 | 0.265 | 2.45E-55 |
| TMEM67    | 1.65E-59 | 0.217314 | 0.052 | 0.185 | 2.46E-55 |

|           |          |          |       |       |          |
|-----------|----------|----------|-------|-------|----------|
| IL1RAP    | 1.66E-59 | -0.20245 | 0.03  | 0.249 | 2.49E-55 |
| DLEU1     | 1.83E-59 | -0.13805 | 0.026 | 0.243 | 2.73E-55 |
| BCL7A     | 1.86E-59 | -0.23548 | 0.04  | 0.289 | 2.79E-55 |
| TMBIM1    | 2.17E-59 | 0.227883 | 0.056 | 0.185 | 3.24E-55 |
| RTN1      | 2.26E-59 | 0.549867 | 0.143 | 0.252 | 3.37E-55 |
| NKAIN3    | 2.26E-59 | -0.21788 | 0.04  | 0.283 | 3.38E-55 |
| EFNB2     | 2.33E-59 | -0.29923 | 0.01  | 0.262 | 3.48E-55 |
| CORO2B    | 2.36E-59 | -0.24206 | 0.023 | 0.264 | 3.53E-55 |
| GPALPP1   | 2.40E-59 | -0.17428 | 0.033 | 0.267 | 3.59E-55 |
| HLA-DPA1  | 2.40E-59 | 0.946085 | 0.257 | 0.2   | 3.59E-55 |
| ZNF277    | 2.43E-59 | 0.136126 | 0.066 | 0.236 | 3.63E-55 |
| MYCBP     | 2.44E-59 | -0.10402 | 0.017 | 0.212 | 3.65E-55 |
| GTF2A1    | 2.46E-59 | -0.1747  | 0.023 | 0.248 | 3.68E-55 |
| MED25     | 2.55E-59 | -0.1364  | 0.044 | 0.281 | 3.81E-55 |
| PPP6R2    | 2.64E-59 | -0.13746 | 0.031 | 0.252 | 3.94E-55 |
| ARID2     | 3.36E-59 | -0.1264  | 0.044 | 0.267 | 5.03E-55 |
| ACO09501. | 3.62E-59 | 0.894712 | 0.18  | 0.115 | 5.41E-55 |
| IGF2BP3   | 3.66E-59 | -0.23181 | 0.037 | 0.289 | 5.47E-55 |
| HYI       | 3.80E-59 | -0.29577 | 0.033 | 0.301 | 5.69E-55 |
| TMEM42    | 4.26E-59 | 0.227393 | 0.061 | 0.201 | 6.37E-55 |
| ACSS3     | 5.45E-59 | -0.15498 | 0.028 | 0.248 | 8.14E-55 |
| GINS4     | 5.52E-59 | -0.34532 | 0.012 | 0.273 | 8.26E-55 |
| ARMCX1    | 5.68E-59 | 0.277626 | 0.106 | 0.24  | 8.48E-55 |
| UNC45A    | 6.01E-59 | 0.120681 | 0.068 | 0.248 | 8.98E-55 |
| GNPNAT1   | 6.74E-59 | -0.13569 | 0.023 | 0.236 | 1.01E-54 |
| ELMOD3    | 7.58E-59 | -0.17027 | 0.033 | 0.26  | 1.13E-54 |
| OLFM2     | 8.45E-59 | 0.333322 | 0.136 | 0.265 | 1.26E-54 |
| CIT       | 9.09E-59 | -0.15767 | 0.023 | 0.236 | 1.36E-54 |
| SLAIN2    | 9.78E-59 | -0.27017 | 0.019 | 0.268 | 1.46E-54 |
| RCE1      | 9.86E-59 | -0.22908 | 0.023 | 0.26  | 1.47E-54 |
| USP46     | 9.98E-59 | -0.3536  | 0.035 | 0.311 | 1.49E-54 |
| KDELC2    | 1.02E-58 | -0.20955 | 0.017 | 0.241 | 1.52E-54 |
| RP11-51J9 | 1.08E-58 | 0.282203 | 0.084 | 0.214 | 1.61E-54 |
| SH3PXD2B  | 1.16E-58 | -0.1391  | 0.016 | 0.221 | 1.73E-54 |
| CBWD1     | 1.19E-58 | 0.207743 | 0.101 | 0.256 | 1.78E-54 |
| PCNT      | 1.22E-58 | -0.10801 | 0.028 | 0.24  | 1.82E-54 |
| MLXIP     | 1.22E-58 | -0.1215  | 0.045 | 0.269 | 1.82E-54 |
| IMPDH1    | 1.23E-58 | -0.27682 | 0.016 | 0.264 | 1.83E-54 |
| LRRC4B    | 1.27E-58 | -0.28369 | 0.023 | 0.285 | 1.90E-54 |
| UQCR11    | 1.32E-58 | 1.699738 | 0.312 | 0.022 | 1.98E-54 |
| CUL4A     | 1.33E-58 | -0.10275 | 0.033 | 0.242 | 1.98E-54 |
| CHKA      | 1.34E-58 | -0.14871 | 0.044 | 0.28  | 2.00E-54 |
| EFR3A     | 1.51E-58 | -0.11112 | 0.016 | 0.202 | 2.26E-54 |
| KIF3B     | 1.55E-58 | -0.2169  | 0.019 | 0.251 | 2.32E-54 |
| HRH1      | 1.82E-58 | 0.237761 | 0.044 | 0.153 | 2.71E-54 |
| 5-Mar     | 1.93E-58 | -0.22219 | 0.042 | 0.298 | 2.89E-54 |
| CLIP3     | 2.04E-58 | 0.229818 | 0.087 | 0.244 | 3.05E-54 |
| OPA1      | 2.10E-58 | -0.24006 | 0.019 | 0.258 | 3.13E-54 |
| LYSMD2    | 2.28E-58 | -0.11077 | 0.031 | 0.251 | 3.41E-54 |
| SPRTN     | 2.29E-58 | -0.15543 | 0.045 | 0.278 | 3.42E-54 |
| SPEN      | 2.29E-58 | -0.13853 | 0.051 | 0.279 | 3.43E-54 |

|          |          |          |       |       |          |
|----------|----------|----------|-------|-------|----------|
| DZIP3    | 2.36E-58 | -0.20308 | 0.04  | 0.285 | 3.53E-54 |
| FEM1C    | 2.46E-58 | -0.10584 | 0.035 | 0.248 | 3.68E-54 |
| RPS6KB1  | 2.56E-58 | -0.15611 | 0.023 | 0.236 | 3.83E-54 |
| APITD1   | 2.69E-58 | -0.30377 | 0.012 | 0.264 | 4.03E-54 |
| B3GALT6  | 2.74E-58 | -0.23046 | 0.021 | 0.265 | 4.09E-54 |
| AAGAB    | 3.36E-58 | -0.11322 | 0.033 | 0.251 | 5.02E-54 |
| AFTPH    | 3.56E-58 | -0.24557 | 0.03  | 0.284 | 5.32E-54 |
| ZFP82    | 3.70E-58 | -0.13846 | 0.037 | 0.252 | 5.53E-54 |
| OTUD6B   | 4.07E-58 | -0.1494  | 0.035 | 0.256 | 6.08E-54 |
| ZNF331   | 4.32E-58 | -0.32903 | 0.028 | 0.301 | 6.45E-54 |
| AGFG1    | 5.02E-58 | -0.1554  | 0.024 | 0.237 | 7.50E-54 |
| DHCR24   | 5.03E-58 | -0.10636 | 0.023 | 0.217 | 7.51E-54 |
| PHTF1    | 5.09E-58 | -0.24928 | 0.017 | 0.257 | 7.60E-54 |
| ZNF814   | 5.48E-58 | 0.133264 | 0.056 | 0.212 | 8.20E-54 |
| LSAMP    | 5.64E-58 | 0.399772 | 0.147 | 0.257 | 8.43E-54 |
| HAUS6    | 5.69E-58 | -0.37631 | 0.01  | 0.28  | 8.50E-54 |
| VAC14    | 5.73E-58 | -0.21034 | 0.017 | 0.248 | 8.57E-54 |
| FBXW9    | 6.32E-58 | -0.11239 | 0.026 | 0.225 | 9.45E-54 |
| CAPG     | 6.48E-58 | 0.173698 | 0.077 | 0.227 | 9.68E-54 |
| RAB3GAP1 | 6.87E-58 | -0.15031 | 0.031 | 0.247 | 1.03E-53 |
| RPUSD1   | 8.17E-58 | -0.16489 | 0.031 | 0.253 | 1.22E-53 |
| C6orf136 | 8.69E-58 | -0.12065 | 0.021 | 0.226 | 1.30E-53 |
| TPST2    | 8.78E-58 | 0.128251 | 0.035 | 0.175 | 1.31E-53 |
| GCFC2    | 8.87E-58 | -0.2015  | 0.031 | 0.272 | 1.33E-53 |
| CHCHD7   | 9.35E-58 | 0.132361 | 0.077 | 0.254 | 1.40E-53 |
| MYH9     | 9.64E-58 | -0.17318 | 0.021 | 0.231 | 1.44E-53 |
| GATAD2A  | 1.06E-57 | -0.21999 | 0.024 | 0.26  | 1.59E-53 |
| RFWD3    | 1.12E-57 | -0.45807 | 0.005 | 0.285 | 1.68E-53 |
| KLF10    | 1.21E-57 | -0.13993 | 0.065 | 0.3   | 1.81E-53 |
| ZNF827   | 1.28E-57 | -0.13184 | 0.042 | 0.267 | 1.91E-53 |
| SDC1     | 1.29E-57 | -0.37923 | 0.007 | 0.268 | 1.93E-53 |
| ERCC3    | 1.30E-57 | -0.16429 | 0.038 | 0.268 | 1.94E-53 |
| CENPC    | 1.30E-57 | -0.37763 | 0.016 | 0.281 | 1.95E-53 |
| POLRMT   | 1.36E-57 | -0.1617  | 0.028 | 0.252 | 2.03E-53 |
| EME1     | 1.36E-57 | -0.4139  | 0     | 0.265 | 2.03E-53 |
| PQLC1    | 1.52E-57 | -0.11251 | 0.026 | 0.232 | 2.27E-53 |
| RGS6     | 1.68E-57 | 0.187968 | 0.051 | 0.19  | 2.51E-53 |
| SPHK2    | 1.72E-57 | -0.13641 | 0.04  | 0.263 | 2.57E-53 |
| MTFR1    | 1.72E-57 | -0.17798 | 0.019 | 0.235 | 2.57E-53 |
| H2AFY2   | 1.90E-57 | -0.19079 | 0.012 | 0.217 | 2.84E-53 |
| BTBD1    | 1.92E-57 | -0.17936 | 0.031 | 0.254 | 2.87E-53 |
| KIF11    | 2.23E-57 | -0.42052 | 0.009 | 0.281 | 3.33E-53 |
| TYRO3    | 2.31E-57 | -0.18858 | 0.037 | 0.272 | 3.45E-53 |
| SH3GLB2  | 2.32E-57 | -0.27198 | 0.012 | 0.254 | 3.46E-53 |
| CYB5R4   | 2.32E-57 | -0.13397 | 0.023 | 0.228 | 3.47E-53 |
| TAF13    | 2.48E-57 | -0.17085 | 0.026 | 0.246 | 3.71E-53 |
| PIF1     | 2.53E-57 | -0.63778 | 0.003 | 0.285 | 3.79E-53 |
| SHD      | 2.82E-57 | -0.31495 | 0.079 | 0.351 | 4.21E-53 |
| TRAF2    | 3.04E-57 | -0.17951 | 0.014 | 0.225 | 4.54E-53 |
| RBBP9    | 3.15E-57 | -0.22154 | 0.016 | 0.244 | 4.71E-53 |
| TULP4    | 3.29E-57 | -0.18305 | 0.024 | 0.246 | 4.91E-53 |

|           |          |          |       |       |          |
|-----------|----------|----------|-------|-------|----------|
| KDM5B     | 3.34E-57 | -0.14918 | 0.037 | 0.257 | 4.99E-53 |
| FAM208A   | 3.44E-57 | -0.26509 | 0.019 | 0.26  | 5.14E-53 |
| APTX      | 3.64E-57 | -0.18887 | 0.023 | 0.246 | 5.44E-53 |
| RUNX1     | 3.85E-57 | -0.11012 | 0.028 | 0.225 | 5.75E-53 |
| RP3-525N1 | 3.87E-57 | 0.123056 | 0.098 | 0.27  | 5.78E-53 |
| CLOCK     | 3.95E-57 | -0.37642 | 0.037 | 0.321 | 5.91E-53 |
| NRGN      | 4.16E-57 | -0.31699 | 0.007 | 0.252 | 6.21E-53 |
| GPC2      | 4.16E-57 | -0.33661 | 0.07  | 0.354 | 6.22E-53 |
| FOXP1     | 4.18E-57 | 0.616185 | 0.199 | 0.228 | 6.24E-53 |
| CCDC22    | 4.62E-57 | -0.10943 | 0.028 | 0.225 | 6.91E-53 |
| C1GALT1   | 4.71E-57 | -0.19532 | 0.037 | 0.274 | 7.04E-53 |
| SPA17     | 4.76E-57 | -0.12088 | 0.033 | 0.249 | 7.11E-53 |
| RUFY2     | 4.92E-57 | -0.27427 | 0.017 | 0.263 | 7.35E-53 |
| TMEM178A  | 5.35E-57 | -0.11924 | 0.038 | 0.259 | 8.00E-53 |
| SERPING1  | 5.72E-57 | 1.287004 | 0.213 | 0.065 | 8.54E-53 |
| CERS6     | 7.01E-57 | -0.20032 | 0.024 | 0.254 | 1.05E-52 |
| AEBP1     | 7.04E-57 | 0.305621 | 0.082 | 0.194 | 1.05E-52 |
| EXOSC5    | 7.41E-57 | 0.264224 | 0.091 | 0.233 | 1.11E-52 |
| CROT      | 7.93E-57 | 0.134473 | 0.052 | 0.209 | 1.18E-52 |
| NLGN4X    | 8.00E-57 | -0.1273  | 0.038 | 0.26  | 1.20E-52 |
| RDH5      | 8.01E-57 | 0.27169  | 0.066 | 0.188 | 1.20E-52 |
| SEZ6L     | 8.27E-57 | 0.126879 | 0.103 | 0.286 | 1.24E-52 |
| ORC3      | 8.63E-57 | -0.16565 | 0.026 | 0.247 | 1.29E-52 |
| MMP14     | 9.95E-57 | 0.111571 | 0.061 | 0.228 | 1.49E-52 |
| MED7      | 1.03E-56 | -0.10791 | 0.033 | 0.243 | 1.54E-52 |
| SYNGR2    | 1.05E-56 | -0.11838 | 0.024 | 0.219 | 1.57E-52 |
| DHRS1     | 1.06E-56 | 0.198149 | 0.058 | 0.191 | 1.58E-52 |
| TMEM39B   | 1.11E-56 | -0.21507 | 0.026 | 0.263 | 1.66E-52 |
| BTN2A1    | 1.21E-56 | -0.13983 | 0.031 | 0.247 | 1.80E-52 |
| ULK3      | 1.21E-56 | -0.10184 | 0.042 | 0.26  | 1.81E-52 |
| RAD51     | 1.24E-56 | -0.4893  | 0.007 | 0.283 | 1.86E-52 |
| PBX3      | 1.37E-56 | -0.19792 | 0.019 | 0.238 | 2.04E-52 |
| DNAJC11   | 1.40E-56 | 0.112948 | 0.047 | 0.204 | 2.10E-52 |
| ATG4C     | 1.51E-56 | -0.20306 | 0.028 | 0.258 | 2.25E-52 |
| NUFIP1    | 1.61E-56 | -0.12582 | 0.035 | 0.258 | 2.41E-52 |
| CHI3L2    | 1.68E-56 | 1.494652 | 0.197 | 0.059 | 2.51E-52 |
| LAMP5     | 1.75E-56 | -0.12724 | 0.026 | 0.235 | 2.62E-52 |
| ZNF649    | 1.85E-56 | -0.27629 | 0.017 | 0.262 | 2.77E-52 |
| KATNB1    | 1.91E-56 | -0.18523 | 0.03  | 0.256 | 2.86E-52 |
| SNX8      | 1.95E-56 | -0.15111 | 0.028 | 0.242 | 2.91E-52 |
| DHRS13    | 1.99E-56 | -0.29444 | 0.012 | 0.258 | 2.97E-52 |
| PLK4      | 2.02E-56 | -0.43517 | 0     | 0.26  | 3.02E-52 |
| DTX3      | 2.06E-56 | -0.30245 | 0.12  | 0.432 | 3.08E-52 |
| ZDHHC16   | 2.20E-56 | -0.15403 | 0.01  | 0.2   | 3.29E-52 |
| KLF13     | 2.36E-56 | -0.10386 | 0.03  | 0.233 | 3.52E-52 |
| UBL7-AS1  | 2.47E-56 | -0.24581 | 0.017 | 0.251 | 3.69E-52 |
| CENPB     | 2.52E-56 | -0.19396 | 0.017 | 0.237 | 3.77E-52 |
| PHTF2     | 2.58E-56 | -0.34675 | 0.01  | 0.26  | 3.85E-52 |
| PGS1      | 2.58E-56 | -0.13333 | 0.033 | 0.24  | 3.86E-52 |
| SLN       | 2.62E-56 | 0.651945 | 0.143 | 0.221 | 3.92E-52 |
| NOM1      | 2.65E-56 | -0.3117  | 0.021 | 0.273 | 3.95E-52 |

|           |          |          |       |       |          |
|-----------|----------|----------|-------|-------|----------|
| BLM       | 2.74E-56 | -0.12431 | 0.037 | 0.246 | 4.10E-52 |
| CYR61     | 2.90E-56 | 0.527715 | 0.143 | 0.228 | 4.33E-52 |
| KLHDC10   | 3.05E-56 | -0.13061 | 0.037 | 0.256 | 4.55E-52 |
| PRKAB1    | 3.15E-56 | -0.15173 | 0.033 | 0.253 | 4.70E-52 |
| HAUS3     | 3.22E-56 | -0.24061 | 0.03  | 0.267 | 4.82E-52 |
| CNTROB    | 3.61E-56 | -0.27959 | 0.016 | 0.257 | 5.40E-52 |
| RP11-386G | 3.67E-56 | 0.209194 | 0.07  | 0.215 | 5.49E-52 |
| TTF2      | 3.69E-56 | -0.24121 | 0.014 | 0.236 | 5.52E-52 |
| PATL1     | 4.16E-56 | -0.13892 | 0.017 | 0.205 | 6.22E-52 |
| CAB39     | 4.37E-56 | -0.15267 | 0.033 | 0.252 | 6.53E-52 |
| UBXN2B    | 4.40E-56 | -0.13248 | 0.031 | 0.243 | 6.57E-52 |
| CRKL      | 4.82E-56 | -0.19566 | 0.028 | 0.258 | 7.21E-52 |
| IFI44     | 4.91E-56 | 0.133009 | 0.077 | 0.244 | 7.33E-52 |
| UGGT1     | 5.24E-56 | -0.20394 | 0.031 | 0.262 | 7.83E-52 |
| SESN3     | 5.42E-56 | -0.11112 | 0.042 | 0.259 | 8.10E-52 |
| LHFPL3    | 5.57E-56 | -0.32256 | 0.07  | 0.348 | 8.33E-52 |
| GTPBP3    | 6.30E-56 | -0.1685  | 0.031 | 0.262 | 9.42E-52 |
| FRMD8     | 7.25E-56 | -0.14372 | 0.023 | 0.225 | 1.08E-51 |
| REL       | 7.40E-56 | -0.12409 | 0.047 | 0.264 | 1.11E-51 |
| MTMR6     | 7.65E-56 | -0.15155 | 0.026 | 0.233 | 1.14E-51 |
| TELO2     | 8.49E-56 | -0.20243 | 0.031 | 0.262 | 1.27E-51 |
| MIR4458HG | 8.79E-56 | 0.668769 | 0.173 | 0.185 | 1.31E-51 |
| BEND6     | 9.13E-56 | -0.31613 | 0.012 | 0.263 | 1.36E-51 |
| ZYG11B    | 9.43E-56 | -0.1948  | 0.026 | 0.253 | 1.41E-51 |
| DPP4      | 9.45E-56 | -0.19389 | 0.005 | 0.204 | 1.41E-51 |
| TNFAIP6   | 1.08E-55 | 0.230367 | 0.115 | 0.294 | 1.62E-51 |
| DMRTA2    | 1.15E-55 | -0.15659 | 0.021 | 0.227 | 1.72E-51 |
| TMEM127   | 1.65E-55 | 0.103165 | 0.049 | 0.196 | 2.47E-51 |
| HEBP1     | 1.78E-55 | 0.147894 | 0.052 | 0.202 | 2.65E-51 |
| FASN      | 2.00E-55 | -0.2004  | 0.019 | 0.238 | 2.99E-51 |
| DALRD3    | 2.04E-55 | -0.19076 | 0.023 | 0.241 | 3.05E-51 |
| MPI       | 2.09E-55 | 0.187957 | 0.044 | 0.173 | 3.12E-51 |
| SART3     | 2.11E-55 | -0.12235 | 0.037 | 0.247 | 3.16E-51 |
| CCDC86    | 2.19E-55 | -0.1067  | 0.021 | 0.212 | 3.27E-51 |
| HIST1H1D  | 2.21E-55 | -0.54201 | 0.003 | 0.269 | 3.30E-51 |
| MLLT10    | 2.28E-55 | -0.12352 | 0.031 | 0.238 | 3.41E-51 |
| DENND5B   | 2.50E-55 | -0.10667 | 0.019 | 0.207 | 3.73E-51 |
| CNPY1     | 3.10E-55 | -0.44435 | 0.026 | 0.299 | 4.64E-51 |
| UCP2      | 3.92E-55 | -0.44818 | 0.019 | 0.29  | 5.86E-51 |
| DDX10     | 4.38E-55 | -0.13063 | 0.028 | 0.235 | 6.54E-51 |
| N4BP2     | 4.60E-55 | -0.24986 | 0.023 | 0.258 | 6.88E-51 |
| HERPUD2   | 5.02E-55 | -0.18192 | 0.031 | 0.257 | 7.51E-51 |
| RABGAP1   | 5.08E-55 | -0.14147 | 0.026 | 0.233 | 7.59E-51 |
| MCAT      | 5.14E-55 | -0.26464 | 0.023 | 0.267 | 7.68E-51 |
| C17orf75  | 5.52E-55 | -0.12626 | 0.024 | 0.221 | 8.25E-51 |
| C6orf120  | 5.67E-55 | -0.12228 | 0.019 | 0.209 | 8.47E-51 |
| CD99L2    | 6.45E-55 | -0.13144 | 0.021 | 0.223 | 9.63E-51 |
| PALM      | 7.60E-55 | -0.17101 | 0.03  | 0.252 | 1.14E-50 |
| YTHDC2    | 7.77E-55 | -0.10126 | 0.023 | 0.216 | 1.16E-50 |
| ANKRD39   | 8.02E-55 | -0.31695 | 0.028 | 0.286 | 1.20E-50 |
| PMS1      | 8.32E-55 | -0.14911 | 0.03  | 0.249 | 1.24E-50 |

|           |           |           |        |        |           |
|-----------|-----------|-----------|--------|--------|-----------|
| ASB16-AS1 | 9. 61E-55 | -0. 25252 | 0. 016 | 0. 247 | 1. 44E-50 |
| GAN       | 1. 08E-54 | -0. 10465 | 0. 042 | 0. 246 | 1. 62E-50 |
| STK24     | 1. 14E-54 | -0. 11672 | 0. 023 | 0. 223 | 1. 70E-50 |
| SNRNP48   | 1. 16E-54 | -0. 13174 | 0. 031 | 0. 241 | 1. 73E-50 |
| SEZ6      | 1. 18E-54 | -0. 27527 | 0. 086 | 0. 365 | 1. 76E-50 |
| LRRTM2    | 1. 19E-54 | -0. 13153 | 0. 038 | 0. 252 | 1. 77E-50 |
| POMT1     | 1. 20E-54 | -0. 13009 | 0. 03  | 0. 236 | 1. 79E-50 |
| IGSF10    | 1. 21E-54 | -0. 13602 | 0. 026 | 0. 231 | 1. 80E-50 |
| DTL       | 1. 28E-54 | -0. 51102 | 0. 003 | 0. 264 | 1. 91E-50 |
| FOXRED1   | 1. 31E-54 | -0. 10277 | 0. 037 | 0. 246 | 1. 95E-50 |
| FBLN1     | 1. 34E-54 | -0. 46673 | 0. 049 | 0. 337 | 2. 01E-50 |
| C18orf8   | 1. 44E-54 | -0. 23518 | 0. 014 | 0. 237 | 2. 15E-50 |
| METTL10   | 1. 54E-54 | -0. 18127 | 0. 03  | 0. 253 | 2. 30E-50 |
| C8orf88   | 1. 57E-54 | -0. 20739 | 0. 007 | 0. 214 | 2. 34E-50 |
| MSANTD3   | 1. 65E-54 | -0. 13234 | 0. 023 | 0. 221 | 2. 47E-50 |
| CRYZ      | 1. 68E-54 | 0. 167666 | 0. 065 | 0. 21  | 2. 51E-50 |
| SPSB4     | 1. 70E-54 | -0. 1956  | 0. 023 | 0. 242 | 2. 55E-50 |
| YDJC      | 1. 76E-54 | -0. 26177 | 0. 017 | 0. 256 | 2. 63E-50 |
| CEP152    | 1. 88E-54 | -0. 41372 | 0. 003 | 0. 26  | 2. 81E-50 |
| ZNF232    | 2. 13E-54 | -0. 21235 | 0. 026 | 0. 254 | 3. 19E-50 |
| CRELD1    | 2. 17E-54 | 0. 115037 | 0. 051 | 0. 205 | 3. 24E-50 |
| FAM126B   | 2. 44E-54 | 0. 11581  | 0. 065 | 0. 217 | 3. 64E-50 |
| FAM217B   | 2. 53E-54 | -0. 15079 | 0. 033 | 0. 244 | 3. 77E-50 |
| TBC1D1    | 2. 85E-54 | -0. 17274 | 0. 021 | 0. 231 | 4. 26E-50 |
| NRP1      | 2. 95E-54 | -0. 21285 | 0. 017 | 0. 231 | 4. 41E-50 |
| UNG       | 3. 12E-54 | -0. 12323 | 0. 049 | 0. 263 | 4. 66E-50 |
| IBTK      | 3. 83E-54 | -0. 10889 | 0. 035 | 0. 238 | 5. 72E-50 |
| CHAF1B    | 4. 60E-54 | -0. 30535 | 0. 01  | 0. 237 | 6. 87E-50 |
| ZNF682    | 5. 04E-54 | -0. 31821 | 0. 017 | 0. 26  | 7. 54E-50 |
| EIF4EBP2  | 5. 33E-54 | -0. 11222 | 0. 026 | 0. 22  | 7. 96E-50 |
| SNX10     | 5. 60E-54 | -0. 21703 | 0. 024 | 0. 243 | 8. 37E-50 |
| DHX8      | 5. 93E-54 | -0. 19665 | 0. 019 | 0. 235 | 8. 87E-50 |
| AGBL5     | 6. 30E-54 | -0. 21537 | 0. 01  | 0. 219 | 9. 41E-50 |
| MFS5      | 6. 98E-54 | -0. 1039  | 0. 016 | 0. 191 | 1. 04E-49 |
| LETMD1    | 7. 83E-54 | 0. 140916 | 0. 058 | 0. 209 | 1. 17E-49 |
| PUSL1     | 8. 11E-54 | -0. 21155 | 0. 016 | 0. 227 | 1. 21E-49 |
| CNPY4     | 8. 19E-54 | -0. 17319 | 0. 024 | 0. 231 | 1. 22E-49 |
| CD68      | 8. 20E-54 | 0. 478188 | 0. 099 | 0. 165 | 1. 23E-49 |
| NPAT      | 8. 65E-54 | -0. 10062 | 0. 03  | 0. 215 | 1. 29E-49 |
| EFCAB11   | 9. 09E-54 | -0. 20758 | 0. 014 | 0. 232 | 1. 36E-49 |
| PPP2R5B   | 9. 14E-54 | -0. 13702 | 0. 026 | 0. 232 | 1. 37E-49 |
| E4F1      | 9. 78E-54 | -0. 10087 | 0. 033 | 0. 232 | 1. 46E-49 |
| PPFIA3    | 1. 16E-53 | -0. 18659 | 0. 014 | 0. 22  | 1. 74E-49 |
| ZNF48     | 1. 20E-53 | -0. 19319 | 0. 016 | 0. 228 | 1. 79E-49 |
| RUNDC1    | 1. 20E-53 | -0. 1088  | 0. 031 | 0. 23  | 1. 80E-49 |
| RMI2      | 1. 23E-53 | -0. 38931 | 0. 01  | 0. 258 | 1. 84E-49 |
| CDADC1    | 1. 24E-53 | -0. 15045 | 0. 024 | 0. 231 | 1. 86E-49 |
| CNKSR3    | 1. 26E-53 | -0. 20879 | 0. 026 | 0. 247 | 1. 89E-49 |
| UBXN7     | 1. 29E-53 | -0. 11391 | 0. 037 | 0. 231 | 1. 93E-49 |
| RAP2B     | 1. 30E-53 | -0. 29812 | 0. 009 | 0. 246 | 1. 94E-49 |
| MGAT4B    | 1. 34E-53 | -0. 11536 | 0. 01  | 0. 188 | 2. 01E-49 |

|          |          |          |       |       |          |
|----------|----------|----------|-------|-------|----------|
| TNIK     | 1.41E-53 | -0.11964 | 0.033 | 0.236 | 2.10E-49 |
| MAN2C1   | 1.47E-53 | 0.197742 | 0.054 | 0.178 | 2.20E-49 |
| APOBEC3B | 1.48E-53 | -0.43312 | 0.005 | 0.259 | 2.21E-49 |
| IQCG     | 1.48E-53 | 0.204594 | 0.052 | 0.185 | 2.21E-49 |
| PTPRN2   | 1.48E-53 | 0.287906 | 0.103 | 0.231 | 2.21E-49 |
| BRCC3    | 1.55E-53 | -0.1422  | 0.023 | 0.225 | 2.32E-49 |
| TEAD2    | 1.57E-53 | -0.23431 | 0.017 | 0.24  | 2.34E-49 |
| BCAS4    | 1.58E-53 | 0.158091 | 0.047 | 0.177 | 2.37E-49 |
| AP1G1    | 1.66E-53 | -0.20212 | 0.024 | 0.247 | 2.48E-49 |
| BIN1     | 1.67E-53 | -0.11515 | 0.045 | 0.256 | 2.49E-49 |
| GLA      | 1.76E-53 | -0.14271 | 0.047 | 0.274 | 2.63E-49 |
| LRRC45   | 1.78E-53 | -0.29606 | 0.009 | 0.246 | 2.66E-49 |
| PDE4DIP  | 1.79E-53 | 0.410685 | 0.131 | 0.231 | 2.67E-49 |
| UBE3C    | 1.91E-53 | -0.15453 | 0.024 | 0.225 | 2.85E-49 |
| RNF166   | 1.93E-53 | -0.17894 | 0.026 | 0.241 | 2.88E-49 |
| SVIP     | 1.97E-53 | -0.57139 | 0.003 | 0.26  | 2.95E-49 |
| FAM111B  | 1.99E-53 | -0.48302 | 0.005 | 0.251 | 2.97E-49 |
| MEX3C    | 1.99E-53 | -0.20432 | 0.017 | 0.237 | 2.98E-49 |
| LMAN2L   | 2.22E-53 | -0.15137 | 0.042 | 0.263 | 3.31E-49 |
| AGPAT3   | 2.34E-53 | -0.18981 | 0.028 | 0.253 | 3.50E-49 |
| EPDR1    | 2.40E-53 | -0.10073 | 0.035 | 0.23  | 3.59E-49 |
| UBE4A    | 2.45E-53 | -0.1854  | 0.03  | 0.248 | 3.66E-49 |
| MTHFD1L  | 2.56E-53 | -0.23973 | 0.007 | 0.22  | 3.82E-49 |
| LONRF1   | 2.58E-53 | -0.16386 | 0.023 | 0.225 | 3.85E-49 |
| USP42    | 2.63E-53 | -0.22462 | 0.026 | 0.251 | 3.92E-49 |
| SC5D     | 2.86E-53 | 0.28413  | 0.087 | 0.21  | 4.27E-49 |
| ABCF3    | 3.01E-53 | -0.15167 | 0.031 | 0.244 | 4.50E-49 |
| NT5C2    | 3.03E-53 | 0.112501 | 0.044 | 0.179 | 4.53E-49 |
| GLRX2    | 3.16E-53 | -0.26341 | 0.021 | 0.258 | 4.72E-49 |
| LPGAT1   | 3.22E-53 | -0.14387 | 0.023 | 0.228 | 4.81E-49 |
| DFNA5    | 3.28E-53 | 0.196914 | 0.079 | 0.221 | 4.91E-49 |
| FAM122A  | 3.44E-53 | -0.28063 | 0.017 | 0.252 | 5.14E-49 |
| NACC2    | 3.62E-53 | -0.1205  | 0.019 | 0.207 | 5.40E-49 |
| LIMCH1   | 3.90E-53 | 0.116002 | 0.072 | 0.232 | 5.83E-49 |
| TUBGCP3  | 4.16E-53 | -0.27706 | 0.026 | 0.264 | 6.22E-49 |
| MPP5     | 4.33E-53 | -0.15287 | 0.016 | 0.211 | 6.47E-49 |
| ZBTB44   | 4.44E-53 | -0.14085 | 0.035 | 0.242 | 6.63E-49 |
| PGBD1    | 4.60E-53 | -0.18132 | 0.017 | 0.22  | 6.88E-49 |
| GUCD1    | 4.81E-53 | -0.22209 | 0.024 | 0.256 | 7.18E-49 |
| MPND     | 5.18E-53 | -0.17162 | 0.01  | 0.204 | 7.74E-49 |
| CDK19    | 5.36E-53 | -0.21021 | 0.024 | 0.244 | 8.01E-49 |
| CNOT11   | 5.75E-53 | -0.19353 | 0.023 | 0.24  | 8.59E-49 |
| NOA1     | 6.30E-53 | -0.2368  | 0.04  | 0.28  | 9.41E-49 |
| NBPF10   | 7.09E-53 | -0.22489 | 0.035 | 0.264 | 1.06E-48 |
| MDP1     | 7.29E-53 | 0.136395 | 0.051 | 0.188 | 1.09E-48 |
| CLN8     | 7.96E-53 | 0.145532 | 0.068 | 0.215 | 1.19E-48 |
| SLC2A8   | 8.94E-53 | -0.20675 | 0.028 | 0.252 | 1.34E-48 |
| PLEKHF2  | 9.06E-53 | -0.20752 | 0.021 | 0.244 | 1.35E-48 |
| ELP3     | 9.33E-53 | -0.16657 | 0.03  | 0.242 | 1.39E-48 |
| FOSB     | 9.77E-53 | 0.340412 | 0.157 | 0.28  | 1.46E-48 |
| UBXN11   | 9.87E-53 | 0.196714 | 0.07  | 0.199 | 1.48E-48 |



|           |           |           |        |        |           |
|-----------|-----------|-----------|--------|--------|-----------|
| ORMDL3    | 1. 11E-52 | -0. 1235  | 0. 035 | 0. 236 | 1. 66E-48 |
| TMEM53    | 1. 14E-52 | 0. 203782 | 0. 045 | 0. 151 | 1. 71E-48 |
| FAM222B   | 1. 23E-52 | -0. 10732 | 0. 019 | 0. 196 | 1. 83E-48 |
| ZNF672    | 1. 28E-52 | -0. 2865  | 0. 017 | 0. 258 | 1. 91E-48 |
| QRSL1     | 1. 29E-52 | -0. 22198 | 0. 028 | 0. 259 | 1. 92E-48 |
| DNAL4     | 1. 31E-52 | -0. 22068 | 0. 031 | 0. 262 | 1. 96E-48 |
| DDX55     | 1. 33E-52 | -0. 1014  | 0. 038 | 0. 241 | 1. 98E-48 |
| AGPS      | 1. 38E-52 | -0. 11484 | 0. 023 | 0. 212 | 2. 06E-48 |
| KLC2      | 1. 47E-52 | -0. 23943 | 0. 014 | 0. 23  | 2. 20E-48 |
| FBX044    | 1. 57E-52 | 0. 162555 | 0. 058 | 0. 19  | 2. 35E-48 |
| ZDHHC7    | 1. 59E-52 | -0. 13309 | 0. 033 | 0. 233 | 2. 37E-48 |
| KIFAP3    | 1. 70E-52 | -0. 17007 | 0. 04  | 0. 26  | 2. 54E-48 |
| RASA1     | 1. 83E-52 | -0. 10664 | 0. 021 | 0. 196 | 2. 73E-48 |
| TP53I3    | 1. 84E-52 | -0. 21382 | 0. 033 | 0. 264 | 2. 74E-48 |
| ABHD8     | 2. 04E-52 | -0. 12098 | 0. 021 | 0. 209 | 3. 04E-48 |
| SLC25A19  | 2. 07E-52 | -0. 12642 | 0. 021 | 0. 209 | 3. 09E-48 |
| MAP2K3    | 2. 15E-52 | -0. 2541  | 0. 016 | 0. 241 | 3. 22E-48 |
| FAM76B    | 2. 16E-52 | -0. 24136 | 0. 026 | 0. 257 | 3. 23E-48 |
| GSPT2     | 2. 23E-52 | -0. 18116 | 0. 028 | 0. 24  | 3. 33E-48 |
| CASP4     | 2. 24E-52 | 0. 391048 | 0. 066 | 0. 115 | 3. 35E-48 |
| SEC14L2   | 2. 36E-52 | 0. 165459 | 0. 052 | 0. 202 | 3. 53E-48 |
| CARD8     | 2. 39E-52 | -0. 13187 | 0. 031 | 0. 237 | 3. 57E-48 |
| FBX028    | 2. 48E-52 | -0. 10314 | 0. 021 | 0. 201 | 3. 71E-48 |
| NDC1      | 2. 54E-52 | -0. 31014 | 0. 009 | 0. 242 | 3. 79E-48 |
| CHRNB1    | 2. 75E-52 | 0. 365883 | 0. 08  | 0. 167 | 4. 11E-48 |
| CA12      | 3. 16E-52 | 0. 319952 | 0. 073 | 0. 18  | 4. 72E-48 |
| SLC35A3   | 3. 57E-52 | -0. 14341 | 0. 031 | 0. 236 | 5. 33E-48 |
| EXOSC6    | 3. 62E-52 | -0. 14321 | 0. 016 | 0. 204 | 5. 40E-48 |
| NMI       | 3. 78E-52 | 0. 417766 | 0. 079 | 0. 17  | 5. 65E-48 |
| EFCAB2    | 3. 87E-52 | -0. 19872 | 0. 035 | 0. 259 | 5. 78E-48 |
| NACA2     | 3. 90E-52 | 0. 63634  | 0. 136 | 0. 165 | 5. 83E-48 |
| OTUD7B    | 3. 98E-52 | 0. 118834 | 0. 044 | 0. 168 | 5. 94E-48 |
| SLC35D2   | 4. 46E-52 | -0. 1301  | 0. 017 | 0. 202 | 6. 66E-48 |
| TAF3      | 4. 68E-52 | -0. 28975 | 0. 012 | 0. 243 | 7. 00E-48 |
| PXN       | 4. 76E-52 | -0. 16211 | 0. 024 | 0. 225 | 7. 11E-48 |
| SPPL2A    | 4. 87E-52 | -0. 10823 | 0. 042 | 0. 248 | 7. 28E-48 |
| LPAR6     | 5. 40E-52 | 0. 128941 | 0. 045 | 0. 169 | 8. 06E-48 |
| POLR1C    | 5. 77E-52 | 0. 294403 | 0. 068 | 0. 177 | 8. 62E-48 |
| PITX1     | 5. 99E-52 | -0. 27136 | 0. 007 | 0. 232 | 8. 95E-48 |
| TPPP3     | 6. 24E-52 | 0. 44868  | 0. 101 | 0. 198 | 9. 32E-48 |
| ATP13A3   | 7. 39E-52 | -0. 16983 | 0. 023 | 0. 231 | 1. 10E-47 |
| CCNE2     | 7. 54E-52 | -0. 55031 | 0. 024 | 0. 302 | 1. 13E-47 |
| ZNF880    | 7. 81E-52 | -0. 11807 | 0. 038 | 0. 246 | 1. 17E-47 |
| GABARAPL1 | 8. 42E-52 | 0. 254666 | 0. 098 | 0. 22  | 1. 26E-47 |
| TSPAN14   | 8. 86E-52 | -0. 15865 | 0. 038 | 0. 254 | 1. 32E-47 |
| TMEM100   | 9. 05E-52 | 0. 143227 | 0. 115 | 0. 264 | 1. 35E-47 |
| ARMCX2    | 9. 96E-52 | 0. 319609 | 0. 08  | 0. 177 | 1. 49E-47 |
| QSOX1     | 1. 17E-51 | -0. 11433 | 0. 033 | 0. 236 | 1. 74E-47 |
| ANKRD9    | 1. 17E-51 | -0. 30325 | 0. 003 | 0. 228 | 1. 75E-47 |
| KLHL12    | 1. 23E-51 | -0. 15087 | 0. 017 | 0. 21  | 1. 84E-47 |
| TNFRSF21  | 1. 30E-51 | -0. 12277 | 0. 03  | 0. 236 | 1. 94E-47 |

|          |          |          |       |       |          |
|----------|----------|----------|-------|-------|----------|
| EED      | 1.40E-51 | -0.26304 | 0.017 | 0.244 | 2.10E-47 |
| HPCAL1   | 1.49E-51 | -0.17153 | 0.026 | 0.238 | 2.22E-47 |
| ZNF512   | 1.52E-51 | -0.11841 | 0.042 | 0.247 | 2.28E-47 |
| AASDH    | 1.59E-51 | -0.11974 | 0.065 | 0.29  | 2.37E-47 |
| C16orf52 | 1.74E-51 | -0.135   | 0.019 | 0.206 | 2.61E-47 |
| TMEM121  | 1.87E-51 | -0.11816 | 0.045 | 0.248 | 2.80E-47 |
| HKR1     | 1.88E-51 | 0.132988 | 0.072 | 0.219 | 2.81E-47 |
| CPVL     | 1.91E-51 | 0.162239 | 0.054 | 0.17  | 2.86E-47 |
| MAP3K4   | 2.01E-51 | -0.16259 | 0.012 | 0.201 | 3.01E-47 |
| CBL      | 2.02E-51 | -0.15383 | 0.017 | 0.215 | 3.02E-47 |
| MYO19    | 2.06E-51 | -0.10677 | 0.026 | 0.211 | 3.08E-47 |
| TUBGCP4  | 2.10E-51 | -0.22854 | 0.024 | 0.248 | 3.13E-47 |
| CEP97    | 2.17E-51 | -0.20136 | 0.023 | 0.236 | 3.24E-47 |
| CAMK2B   | 2.22E-51 | 0.252563 | 0.066 | 0.191 | 3.31E-47 |
| PRIM2    | 2.22E-51 | -0.41423 | 0.01  | 0.262 | 3.32E-47 |
| ST3GAL2  | 2.27E-51 | -0.17637 | 0.019 | 0.223 | 3.40E-47 |
| PPP3R1   | 2.28E-51 | -0.19982 | 0.016 | 0.222 | 3.41E-47 |
| ANKRD52  | 2.35E-51 | -0.1332  | 0.014 | 0.193 | 3.51E-47 |
| RFXAP    | 2.70E-51 | -0.13983 | 0.024 | 0.217 | 4.04E-47 |
| RALGAPB  | 2.81E-51 | -0.18641 | 0.017 | 0.221 | 4.21E-47 |
| TMEM25   | 2.82E-51 | 0.187086 | 0.063 | 0.186 | 4.22E-47 |
| TCTA     | 3.14E-51 | 0.125289 | 0.07  | 0.23  | 4.70E-47 |
| NRBP2    | 3.30E-51 | -0.1091  | 0.035 | 0.222 | 4.93E-47 |
| ALG6     | 3.32E-51 | -0.14973 | 0.026 | 0.227 | 4.96E-47 |
| LRRN1    | 3.50E-51 | -0.30537 | 0.044 | 0.29  | 5.24E-47 |
| PARVB    | 3.72E-51 | -0.12846 | 0.009 | 0.181 | 5.55E-47 |
| SKI      | 3.82E-51 | -0.12656 | 0.019 | 0.21  | 5.70E-47 |
| ITSN2    | 4.23E-51 | -0.10088 | 0.026 | 0.216 | 6.33E-47 |
| PPP2R2D  | 4.29E-51 | -0.25507 | 0.01  | 0.231 | 6.41E-47 |
| KALRN    | 4.32E-51 | 0.133437 | 0.04  | 0.159 | 6.46E-47 |
| SLC4A4   | 4.40E-51 | 0.496986 | 0.105 | 0.168 | 6.57E-47 |
| KLHL13   | 4.66E-51 | -0.23427 | 0.021 | 0.246 | 6.96E-47 |
| TCF7     | 4.70E-51 | 0.11283  | 0.066 | 0.219 | 7.03E-47 |
| GTF3C1   | 5.16E-51 | -0.11485 | 0.026 | 0.22  | 7.71E-47 |
| RBL1     | 5.20E-51 | -0.25483 | 0.009 | 0.217 | 7.77E-47 |
| PCOLCE   | 5.45E-51 | 0.121083 | 0.04  | 0.169 | 8.14E-47 |
| ANAPC2   | 5.53E-51 | -0.13654 | 0.031 | 0.236 | 8.26E-47 |
| IFT46    | 5.54E-51 | -0.11141 | 0.037 | 0.238 | 8.27E-47 |
| ABHD17C  | 5.71E-51 | -0.20377 | 0.01  | 0.207 | 8.53E-47 |
| EYA2     | 5.76E-51 | -0.15025 | 0.026 | 0.227 | 8.61E-47 |
| C17orf80 | 5.77E-51 | -0.18459 | 0.014 | 0.215 | 8.62E-47 |
| DSCC1    | 5.77E-51 | -0.34704 | 0.014 | 0.252 | 8.63E-47 |
| ATL3     | 6.23E-51 | -0.13906 | 0.021 | 0.216 | 9.31E-47 |
| PRR3     | 6.56E-51 | -0.14502 | 0.023 | 0.219 | 9.80E-47 |
| DPCD     | 6.56E-51 | 0.109123 | 0.061 | 0.228 | 9.81E-47 |
| DIRAS3   | 6.99E-51 | 0.78289  | 0.147 | 0.144 | 1.04E-46 |
| PPP2R5D  | 7.42E-51 | -0.30073 | 0.009 | 0.241 | 1.11E-46 |
| ECE1     | 7.56E-51 | 0.147679 | 0.051 | 0.18  | 1.13E-46 |
| HELZ2    | 8.21E-51 | 0.10163  | 0.049 | 0.188 | 1.23E-46 |
| FAM110A  | 8.24E-51 | -0.29362 | 0.017 | 0.249 | 1.23E-46 |
| SOCS4    | 9.07E-51 | -0.15707 | 0.019 | 0.212 | 1.36E-46 |

|           |           |           |        |        |           |
|-----------|-----------|-----------|--------|--------|-----------|
| TFCP2     | 1. 11E-50 | -0. 16335 | 0. 026 | 0. 226 | 1. 66E-46 |
| POC1B     | 1. 13E-50 | -0. 10512 | 0. 021 | 0. 205 | 1. 69E-46 |
| MON1B     | 1. 31E-50 | -0. 12442 | 0. 019 | 0. 201 | 1. 96E-46 |
| BIVM      | 1. 41E-50 | -0. 11715 | 0. 026 | 0. 217 | 2. 11E-46 |
| RGS2      | 1. 58E-50 | 0. 468191 | 0. 136 | 0. 227 | 2. 36E-46 |
| DIS3L     | 1. 63E-50 | -0. 25206 | 0. 019 | 0. 246 | 2. 43E-46 |
| TMTC3     | 1. 69E-50 | -0. 1981  | 0. 016 | 0. 215 | 2. 52E-46 |
| CLCN7     | 1. 77E-50 | -0. 22655 | 0. 023 | 0. 241 | 2. 64E-46 |
| ZNF766    | 1. 77E-50 | -0. 11416 | 0. 037 | 0. 236 | 2. 65E-46 |
| LPIN2     | 1. 84E-50 | -0. 20442 | 0. 017 | 0. 232 | 2. 75E-46 |
| SNHG10    | 1. 90E-50 | -0. 1733  | 0. 026 | 0. 232 | 2. 83E-46 |
| KCTD13    | 1. 92E-50 | -0. 19137 | 0. 04  | 0. 267 | 2. 87E-46 |
| LLGL1     | 1. 94E-50 | -0. 21087 | 0. 016 | 0. 217 | 2. 90E-46 |
| METTTL16  | 1. 99E-50 | -0. 11373 | 0. 028 | 0. 216 | 2. 98E-46 |
| AQP4      | 2. 27E-50 | 0. 709731 | 0. 202 | 0. 211 | 3. 39E-46 |
| SPAST     | 2. 52E-50 | -0. 14875 | 0. 026 | 0. 223 | 3. 77E-46 |
| RMND5A    | 2. 66E-50 | -0. 17974 | 0. 031 | 0. 237 | 3. 97E-46 |
| RECQL4    | 2. 76E-50 | -0. 33509 | 0. 005 | 0. 232 | 4. 12E-46 |
| DNMT3A    | 2. 80E-50 | -0. 10049 | 0. 023 | 0. 209 | 4. 19E-46 |
| C9orf69   | 2. 88E-50 | -0. 15897 | 0. 016 | 0. 21  | 4. 30E-46 |
| ATF3      | 2. 99E-50 | 0. 359726 | 0. 108 | 0. 228 | 4. 47E-46 |
| PARN      | 3. 04E-50 | -0. 2287  | 0. 023 | 0. 241 | 4. 54E-46 |
| KLHL22    | 3. 06E-50 | -0. 14817 | 0. 024 | 0. 221 | 4. 58E-46 |
| HSF2      | 3. 07E-50 | -0. 30399 | 0. 023 | 0. 257 | 4. 59E-46 |
| RFTN1     | 3. 13E-50 | -0. 14567 | 0. 016 | 0. 198 | 4. 68E-46 |
| PLEKHM2   | 3. 27E-50 | 0. 149771 | 0. 037 | 0. 142 | 4. 89E-46 |
| SLC35E2B  | 3. 29E-50 | -0. 21392 | 0. 031 | 0. 249 | 4. 91E-46 |
| ARID1B    | 3. 40E-50 | -0. 22938 | 0. 021 | 0. 235 | 5. 08E-46 |
| DBF4B     | 3. 95E-50 | -0. 302   | 0. 005 | 0. 231 | 5. 91E-46 |
| MFI2-AS1  | 4. 04E-50 | -0. 21669 | 0. 024 | 0. 241 | 6. 04E-46 |
| ATL1      | 4. 55E-50 | -0. 13674 | 0. 042 | 0. 246 | 6. 80E-46 |
| LTA4H     | 4. 71E-50 | 0. 203409 | 0. 075 | 0. 205 | 7. 03E-46 |
| RP11-698N | 5. 18E-50 | 0. 108833 | 0. 045 | 0. 193 | 7. 75E-46 |
| GTPBP1    | 6. 57E-50 | -0. 29632 | 0. 014 | 0. 24  | 9. 82E-46 |
| DDX11     | 6. 86E-50 | -0. 31288 | 0. 012 | 0. 24  | 1. 03E-45 |
| VSTM2A    | 7. 32E-50 | 1. 093902 | 0. 237 | 0. 079 | 1. 09E-45 |
| GS1-124K5 | 7. 33E-50 | 0. 160542 | 0. 061 | 0. 194 | 1. 10E-45 |
| OTUD5     | 7. 63E-50 | -0. 12133 | 0. 026 | 0. 216 | 1. 14E-45 |
| BTN3A2    | 7. 63E-50 | 0. 443814 | 0. 084 | 0. 151 | 1. 14E-45 |
| SEMA5A    | 7. 83E-50 | 0. 176081 | 0. 068 | 0. 2   | 1. 17E-45 |
| ZNF263    | 8. 57E-50 | -0. 10963 | 0. 03  | 0. 221 | 1. 28E-45 |
| FBXW7     | 8. 65E-50 | -0. 28851 | 0. 024 | 0. 262 | 1. 29E-45 |
| NOL3      | 9. 08E-50 | 0. 366937 | 0. 086 | 0. 156 | 1. 36E-45 |
| ARL4D     | 9. 97E-50 | -0. 17312 | 0. 042 | 0. 257 | 1. 49E-45 |
| LIMD1     | 1. 02E-49 | -0. 1765  | 0. 019 | 0. 214 | 1. 52E-45 |
| TESK1     | 1. 03E-49 | -0. 12959 | 0. 012 | 0. 185 | 1. 54E-45 |
| EXO1      | 1. 08E-49 | -0. 4107  | 0. 002 | 0. 242 | 1. 61E-45 |
| TTC28     | 1. 08E-49 | -0. 19347 | 0. 023 | 0. 23  | 1. 62E-45 |
| ZNF100    | 1. 11E-49 | -0. 13361 | 0. 033 | 0. 232 | 1. 67E-45 |
| STK11     | 1. 13E-49 | -0. 25941 | 0. 01  | 0. 226 | 1. 69E-45 |
| SNRPN     | 1. 19E-49 | 1. 032861 | 0. 18  | 0. 078 | 1. 77E-45 |

|           |           |           |        |        |           |
|-----------|-----------|-----------|--------|--------|-----------|
| ACAD9     | 1. 26E-49 | -0. 1443  | 0. 021 | 0. 209 | 1. 88E-45 |
| TUBG2     | 1. 34E-49 | 0. 145785 | 0. 044 | 0. 16  | 2. 00E-45 |
| RARRES2   | 1. 39E-49 | 0. 416469 | 0. 176 | 0. 277 | 2. 08E-45 |
| CEP104    | 1. 51E-49 | -0. 10962 | 0. 021 | 0. 199 | 2. 25E-45 |
| RICTOR    | 1. 54E-49 | 0. 152278 | 0. 106 | 0. 252 | 2. 30E-45 |
| RAD54L    | 1. 66E-49 | -0. 38683 | 0      | 0. 231 | 2. 49E-45 |
| CBX4      | 1. 67E-49 | -0. 15855 | 0. 03  | 0. 225 | 2. 50E-45 |
| ALG2      | 1. 71E-49 | -0. 16809 | 0. 028 | 0. 23  | 2. 55E-45 |
| SPTY2D1   | 1. 79E-49 | -0. 10371 | 0. 026 | 0. 21  | 2. 68E-45 |
| CTSC      | 1. 85E-49 | 0. 23282  | 0. 073 | 0. 202 | 2. 76E-45 |
| CARKD     | 1. 85E-49 | -0. 15416 | 0. 035 | 0. 236 | 2. 77E-45 |
| DCUN1D4   | 1. 86E-49 | -0. 12878 | 0. 037 | 0. 233 | 2. 79E-45 |
| RHOQ      | 2. 21E-49 | -0. 24118 | 0. 012 | 0. 226 | 3. 30E-45 |
| TNFAIP8L1 | 2. 24E-49 | -0. 34911 | 0. 019 | 0. 258 | 3. 34E-45 |
| ADCK2     | 2. 29E-49 | -0. 19049 | 0. 01  | 0. 204 | 3. 42E-45 |
| ABHD17B   | 2. 43E-49 | -0. 15865 | 0. 03  | 0. 226 | 3. 63E-45 |
| HBP1      | 2. 43E-49 | 0. 249139 | 0. 092 | 0. 217 | 3. 64E-45 |
| CDC42BPB  | 2. 84E-49 | -0. 16073 | 0. 017 | 0. 209 | 4. 25E-45 |
| TECPR1    | 2. 99E-49 | -0. 10269 | 0. 031 | 0. 211 | 4. 47E-45 |
| ATP6V1A   | 3. 10E-49 | -0. 25073 | 0. 016 | 0. 231 | 4. 63E-45 |
| CTB-3102C | 3. 56E-49 | -0. 11939 | 0. 038 | 0. 233 | 5. 31E-45 |
| HSDL1     | 3. 65E-49 | -0. 20295 | 0. 024 | 0. 238 | 5. 45E-45 |
| CERK      | 3. 88E-49 | -0. 28482 | 0. 009 | 0. 23  | 5. 80E-45 |
| STMN4     | 3. 96E-49 | 0. 174404 | 0. 204 | 0. 373 | 5. 92E-45 |
| ZCCHC8    | 4. 14E-49 | -0. 15504 | 0. 023 | 0. 216 | 6. 19E-45 |
| TDP1      | 4. 39E-49 | -0. 31356 | 0. 01  | 0. 242 | 6. 57E-45 |
| PQLC2     | 4. 43E-49 | -0. 12516 | 0. 023 | 0. 207 | 6. 62E-45 |
| SLC35F2   | 4. 58E-49 | -0. 23415 | 0. 014 | 0. 221 | 6. 84E-45 |
| SAV1      | 4. 67E-49 | -0. 19286 | 0. 021 | 0. 223 | 6. 97E-45 |
| DGAT1     | 5. 10E-49 | -0. 16987 | 0. 012 | 0. 2   | 7. 62E-45 |
| MYC       | 5. 15E-49 | 0. 499847 | 0. 124 | 0. 185 | 7. 70E-45 |
| DNAJC18   | 5. 59E-49 | -0. 13581 | 0. 042 | 0. 249 | 8. 35E-45 |
| MSH3      | 5. 70E-49 | -0. 24372 | 0. 01  | 0. 221 | 8. 52E-45 |
| RNF214    | 5. 71E-49 | -0. 11782 | 0. 024 | 0. 214 | 8. 53E-45 |
| FGF14     | 5. 77E-49 | 0. 115997 | 0. 04  | 0. 156 | 8. 62E-45 |
| NVL       | 5. 92E-49 | -0. 10233 | 0. 051 | 0. 254 | 8. 85E-45 |
| NRIP1     | 5. 94E-49 | -0. 24686 | 0. 009 | 0. 216 | 8. 87E-45 |
| ATF5      | 5. 99E-49 | -0. 15272 | 0. 028 | 0. 227 | 8. 95E-45 |
| SLC2A3    | 6. 32E-49 | 0. 364087 | 0. 092 | 0. 178 | 9. 44E-45 |
| MOGS      | 6. 42E-49 | -0. 20472 | 0. 017 | 0. 22  | 9. 59E-45 |
| TBC1D17   | 7. 98E-49 | 0. 218104 | 0. 065 | 0. 177 | 1. 19E-44 |
| CCDC93    | 8. 05E-49 | -0. 18743 | 0. 028 | 0. 238 | 1. 20E-44 |
| PAK3      | 8. 69E-49 | -0. 12506 | 0. 049 | 0. 233 | 1. 30E-44 |
| KIAA0586  | 8. 69E-49 | -0. 1855  | 0. 024 | 0. 226 | 1. 30E-44 |
| TCEAL2    | 8. 77E-49 | 0. 114857 | 0. 15  | 0. 309 | 1. 31E-44 |
| NEURL1B   | 9. 88E-49 | -0. 39981 | 0. 007 | 0. 246 | 1. 48E-44 |
| MANEA     | 9. 91E-49 | -0. 15926 | 0. 014 | 0. 194 | 1. 48E-44 |
| FOXN2     | 1. 00E-48 | -0. 13974 | 0. 031 | 0. 226 | 1. 49E-44 |
| MTF1      | 1. 04E-48 | -0. 15978 | 0. 021 | 0. 216 | 1. 55E-44 |
| UGGT2     | 1. 04E-48 | -0. 11228 | 0. 024 | 0. 206 | 1. 55E-44 |
| CREBL2    | 1. 11E-48 | 0. 166102 | 0. 047 | 0. 169 | 1. 65E-44 |

|           |          |          |       |       |          |
|-----------|----------|----------|-------|-------|----------|
| USP15     | 1.19E-48 | -0.13764 | 0.07  | 0.293 | 1.77E-44 |
| CAHM      | 1.25E-48 | -0.20675 | 0.026 | 0.233 | 1.86E-44 |
| CTC-524C5 | 1.27E-48 | -0.24647 | 0.012 | 0.221 | 1.91E-44 |
| IKBKG     | 1.38E-48 | -0.17772 | 0.021 | 0.225 | 2.07E-44 |
| PPP1R12C  | 1.39E-48 | -0.21816 | 0.007 | 0.207 | 2.08E-44 |
| NCBP1     | 1.44E-48 | -0.22651 | 0.012 | 0.22  | 2.15E-44 |
| RP11-472N | 1.53E-48 | -0.20104 | 0.017 | 0.216 | 2.28E-44 |
| CRLF3     | 1.58E-48 | -0.10616 | 0.033 | 0.215 | 2.37E-44 |
| LIN7B     | 1.67E-48 | -0.24029 | 0.016 | 0.231 | 2.50E-44 |
| ERI2      | 1.78E-48 | -0.22882 | 0.007 | 0.201 | 2.65E-44 |
| ZBTB43    | 1.79E-48 | -0.12796 | 0.037 | 0.237 | 2.68E-44 |
| DEDD      | 1.98E-48 | -0.17819 | 0.021 | 0.217 | 2.96E-44 |
| ZBTB10    | 2.13E-48 | -0.1048  | 0.033 | 0.214 | 3.19E-44 |
| NXPH1     | 2.19E-48 | -0.14216 | 0.072 | 0.284 | 3.27E-44 |
| IRF2BP1   | 2.25E-48 | -0.26951 | 0.016 | 0.24  | 3.35E-44 |
| RP11-390E | 2.27E-48 | 0.152216 | 0.075 | 0.216 | 3.40E-44 |
| ZNF367    | 2.32E-48 | -0.44645 | 0.003 | 0.238 | 3.47E-44 |
| METTL1    | 2.44E-48 | -0.16043 | 0.073 | 0.3   | 3.65E-44 |
| SEH1L     | 2.80E-48 | -0.17329 | 0.024 | 0.23  | 4.19E-44 |
| CTD-3138E | 2.82E-48 | 0.109027 | 0.024 | 0.138 | 4.21E-44 |
| NELL2     | 2.96E-48 | -0.22304 | 0.051 | 0.272 | 4.42E-44 |
| CRISPLD1  | 3.06E-48 | -0.28917 | 0.03  | 0.258 | 4.57E-44 |
| CEND1     | 3.24E-48 | 0.156503 | 0.07  | 0.207 | 4.85E-44 |
| CDC37L1   | 3.38E-48 | -0.10072 | 0.033 | 0.221 | 5.06E-44 |
| BRMS1L    | 3.71E-48 | -0.18649 | 0.026 | 0.232 | 5.54E-44 |
| TP53INP2  | 3.80E-48 | -0.10519 | 0.01  | 0.165 | 5.67E-44 |
| ADA       | 4.11E-48 | -0.19434 | 0.009 | 0.196 | 6.15E-44 |
| MESDC1    | 4.29E-48 | -0.21789 | 0.014 | 0.217 | 6.41E-44 |
| BBS7      | 4.47E-48 | -0.15649 | 0.017 | 0.201 | 6.68E-44 |
| ARL9      | 4.55E-48 | -0.21426 | 0.017 | 0.219 | 6.80E-44 |
| EFNB1     | 4.72E-48 | -0.16524 | 0.033 | 0.227 | 7.05E-44 |
| CBFA2T2   | 4.76E-48 | -0.18807 | 0.023 | 0.223 | 7.11E-44 |
| SLC18B1   | 5.79E-48 | 0.195527 | 0.079 | 0.219 | 8.65E-44 |
| METTL3    | 5.91E-48 | 0.17698  | 0.079 | 0.209 | 8.84E-44 |
| HLA-DPB1  | 5.93E-48 | 0.534745 | 0.155 | 0.202 | 8.87E-44 |
| RYBP      | 6.09E-48 | -0.13244 | 0.021 | 0.201 | 9.09E-44 |
| RBM33     | 6.21E-48 | -0.19247 | 0.031 | 0.241 | 9.29E-44 |
| NRDE2     | 6.55E-48 | 0.127213 | 0.051 | 0.184 | 9.78E-44 |
| ICK       | 6.57E-48 | -0.1318  | 0.016 | 0.189 | 9.82E-44 |
| ZNF768    | 6.61E-48 | -0.16669 | 0.021 | 0.216 | 9.88E-44 |
| CEP44     | 7.38E-48 | -0.1705  | 0.016 | 0.207 | 1.10E-43 |
| RP5-1085F | 7.45E-48 | -0.11347 | 0.019 | 0.193 | 1.11E-43 |
| HIST1H1E  | 7.81E-48 | -0.18671 | 0.01  | 0.188 | 1.17E-43 |
| AC009506. | 8.51E-48 | -0.26345 | 0.035 | 0.253 | 1.27E-43 |
| NUP205    | 8.54E-48 | -0.13354 | 0.019 | 0.196 | 1.28E-43 |
| LAMB2     | 8.65E-48 | 0.202615 | 0.044 | 0.142 | 1.29E-43 |
| INPP5K    | 9.05E-48 | -0.13933 | 0.021 | 0.205 | 1.35E-43 |
| FBLN7     | 9.09E-48 | -0.32316 | 0.003 | 0.225 | 1.36E-43 |
| LACTB2    | 9.13E-48 | 0.10738  | 0.051 | 0.199 | 1.36E-43 |
| DIP2B     | 1.02E-47 | -0.11797 | 0.024 | 0.202 | 1.52E-43 |
| DOLPP1    | 1.03E-47 | -0.13869 | 0.026 | 0.216 | 1.54E-43 |

|           |          |          |       |       |          |
|-----------|----------|----------|-------|-------|----------|
| FKBP1B    | 1.03E-47 | -0.15815 | 0.01  | 0.194 | 1.55E-43 |
| OXSRI     | 1.25E-47 | -0.11087 | 0.021 | 0.199 | 1.87E-43 |
| ADM       | 1.28E-47 | 0.484352 | 0.112 | 0.204 | 1.91E-43 |
| ARFGEF1   | 1.33E-47 | -0.23361 | 0.009 | 0.216 | 1.99E-43 |
| CDKAL1    | 1.39E-47 | -0.14325 | 0.026 | 0.216 | 2.07E-43 |
| STK3      | 1.96E-47 | 0.155062 | 0.047 | 0.165 | 2.92E-43 |
| PEX11B    | 1.98E-47 | 0.248304 | 0.054 | 0.168 | 2.96E-43 |
| TIMM8A    | 2.15E-47 | -0.11204 | 0.024 | 0.209 | 3.21E-43 |
| EMID1     | 2.28E-47 | -0.13839 | 0.017 | 0.193 | 3.40E-43 |
| CRADD     | 2.38E-47 | -0.12711 | 0.019 | 0.196 | 3.56E-43 |
| MIB1      | 2.48E-47 | -0.22446 | 0.016 | 0.222 | 3.71E-43 |
| LRRRC4C   | 2.87E-47 | 0.197791 | 0.077 | 0.195 | 4.28E-43 |
| BDH2      | 2.96E-47 | 0.356459 | 0.063 | 0.132 | 4.42E-43 |
| DCAF6     | 2.99E-47 | -0.10921 | 0.023 | 0.195 | 4.47E-43 |
| FAH       | 3.12E-47 | 0.185697 | 0.03  | 0.135 | 4.66E-43 |
| SLPI      | 3.34E-47 | 1.646678 | 0.202 | 0.037 | 4.99E-43 |
| ELAVL4    | 3.44E-47 | -0.11128 | 0.113 | 0.312 | 5.14E-43 |
| UBTD1     | 3.45E-47 | -0.15827 | 0.017 | 0.202 | 5.15E-43 |
| NCOA3     | 4.29E-47 | -0.17908 | 0.03  | 0.231 | 6.42E-43 |
| DOT1L     | 4.43E-47 | -0.26087 | 0.012 | 0.225 | 6.63E-43 |
| TSC22D2   | 5.04E-47 | -0.17511 | 0.023 | 0.22  | 7.53E-43 |
| HEG1      | 5.24E-47 | -0.11715 | 0.014 | 0.188 | 7.84E-43 |
| XPO7      | 5.63E-47 | -0.15113 | 0.026 | 0.215 | 8.42E-43 |
| MASTL     | 5.82E-47 | -0.43686 | 0     | 0.22  | 8.70E-43 |
| DDX3Y     | 6.21E-47 | -0.15956 | 0.014 | 0.194 | 9.28E-43 |
| TP53      | 6.31E-47 | -0.12635 | 0.04  | 0.227 | 9.44E-43 |
| ZNF93     | 6.41E-47 | -0.20881 | 0.01  | 0.202 | 9.58E-43 |
| AMOTL1    | 7.10E-47 | -0.14331 | 0.014 | 0.181 | 1.06E-42 |
| ZNF567    | 8.67E-47 | -0.12264 | 0.028 | 0.216 | 1.30E-42 |
| GTDC1     | 8.75E-47 | -0.16626 | 0.03  | 0.225 | 1.31E-42 |
| FREM2     | 8.83E-47 | -0.25757 | 0.012 | 0.227 | 1.32E-42 |
| ZNF362    | 8.99E-47 | -0.14008 | 0.026 | 0.207 | 1.34E-42 |
| TSTD1     | 9.37E-47 | 0.324569 | 0.105 | 0.221 | 1.40E-42 |
| SNAP25    | 1.05E-46 | 0.173963 | 0.087 | 0.219 | 1.57E-42 |
| ATP13A2   | 1.07E-46 | -0.13655 | 0.03  | 0.227 | 1.60E-42 |
| E2F3      | 1.11E-46 | -0.33165 | 0.009 | 0.23  | 1.66E-42 |
| MGST1     | 1.20E-46 | 1.268913 | 0.195 | 0.052 | 1.79E-42 |
| RP11-538F | 1.21E-46 | -0.1543  | 0.024 | 0.212 | 1.81E-42 |
| BPNT1     | 1.25E-46 | 0.148693 | 0.054 | 0.177 | 1.86E-42 |
| IQCE      | 1.33E-46 | -0.1606  | 0.03  | 0.222 | 1.99E-42 |
| ZNF775    | 1.35E-46 | -0.18966 | 0.03  | 0.225 | 2.02E-42 |
| PARD6A    | 1.39E-46 | -0.1079  | 0.019 | 0.194 | 2.08E-42 |
| FAM160A2  | 1.64E-46 | -0.13852 | 0.023 | 0.2   | 2.46E-42 |
| CCDC15    | 1.73E-46 | -0.36739 | 0.005 | 0.232 | 2.59E-42 |
| OSBP      | 1.87E-46 | -0.11295 | 0.016 | 0.178 | 2.79E-42 |
| CHAC2     | 2.13E-46 | -0.27592 | 0.007 | 0.21  | 3.18E-42 |
| MTSS1L    | 2.17E-46 | 0.178966 | 0.059 | 0.16  | 3.24E-42 |
| OTUD4     | 2.20E-46 | -0.27483 | 0.01  | 0.231 | 3.29E-42 |
| RPRD1B    | 2.27E-46 | -0.21803 | 0.014 | 0.215 | 3.40E-42 |
| RP5-940J5 | 2.53E-46 | 0.58397  | 0.122 | 0.169 | 3.78E-42 |
| CSPG5     | 2.69E-46 | 0.298562 | 0.126 | 0.243 | 4.02E-42 |

|           |          |          |       |       |          |
|-----------|----------|----------|-------|-------|----------|
| RMI1      | 2.85E-46 | -0.27337 | 0.023 | 0.237 | 4.26E-42 |
| E2F5      | 3.03E-46 | -0.18019 | 0.007 | 0.193 | 4.53E-42 |
| ROM1      | 3.05E-46 | 0.352948 | 0.061 | 0.127 | 4.55E-42 |
| METTL6    | 3.11E-46 | -0.14    | 0.024 | 0.206 | 4.64E-42 |
| UTRN      | 3.36E-46 | -0.17002 | 0.009 | 0.185 | 5.02E-42 |
| BUD13     | 3.36E-46 | -0.21352 | 0.021 | 0.221 | 5.02E-42 |
| MVP       | 3.39E-46 | 0.151025 | 0.038 | 0.144 | 5.06E-42 |
| SMTN      | 3.44E-46 | -0.281   | 0.009 | 0.214 | 5.15E-42 |
| FAM168A   | 3.81E-46 | -0.24799 | 0.014 | 0.228 | 5.69E-42 |
| MYO5A     | 4.10E-46 | -0.13593 | 0.017 | 0.186 | 6.13E-42 |
| NNMT      | 4.17E-46 | 0.622515 | 0.124 | 0.17  | 6.23E-42 |
| ZMIZ1     | 4.44E-46 | -0.10526 | 0.033 | 0.211 | 6.63E-42 |
| ANXA1     | 4.68E-46 | 0.893717 | 0.286 | 0.198 | 7.00E-42 |
| PKD2      | 4.79E-46 | -0.16544 | 0.012 | 0.188 | 7.16E-42 |
| CTTNBP2NL | 4.86E-46 | -0.19346 | 0.017 | 0.211 | 7.26E-42 |
| CSTF2T    | 5.57E-46 | -0.25368 | 0.023 | 0.235 | 8.33E-42 |
| RAPGEF1   | 6.03E-46 | 0.138097 | 0.028 | 0.13  | 9.01E-42 |
| SORBS1    | 6.33E-46 | -0.16484 | 0.019 | 0.207 | 9.46E-42 |
| NSUN2     | 6.53E-46 | -0.13029 | 0.026 | 0.205 | 9.76E-42 |
| NECAB3    | 6.82E-46 | -0.11909 | 0.021 | 0.195 | 1.02E-41 |
| SLC25A14  | 7.02E-46 | -0.11943 | 0.024 | 0.202 | 1.05E-41 |
| POMZP3    | 7.51E-46 | -0.33155 | 0.014 | 0.243 | 1.12E-41 |
| SIN3A     | 7.57E-46 | -0.13934 | 0.023 | 0.204 | 1.13E-41 |
| HAUS5     | 7.75E-46 | -0.2368  | 0.017 | 0.223 | 1.16E-41 |
| RASGRP1   | 8.41E-46 | -0.1318  | 0.009 | 0.17  | 1.26E-41 |
| ZNF266    | 8.84E-46 | -0.17221 | 0.026 | 0.216 | 1.32E-41 |
| IL13RA1   | 8.97E-46 | -0.14654 | 0.007 | 0.17  | 1.34E-41 |
| ENKD1     | 1.00E-45 | -0.1622  | 0.014 | 0.194 | 1.50E-41 |
| ELK4      | 1.05E-45 | -0.12378 | 0.021 | 0.195 | 1.56E-41 |
| CARM1     | 1.08E-45 | -0.13547 | 0.021 | 0.193 | 1.61E-41 |
| TAB2      | 1.13E-45 | -0.13944 | 0.016 | 0.193 | 1.69E-41 |
| SHOX2     | 1.20E-45 | -0.13643 | 0.014 | 0.184 | 1.80E-41 |
| TXNRD2    | 1.30E-45 | -0.24621 | 0.016 | 0.226 | 1.94E-41 |
| PPP1R9B   | 1.41E-45 | -0.12873 | 0.019 | 0.189 | 2.11E-41 |
| AC004381. | 1.63E-45 | -0.41649 | 0.007 | 0.228 | 2.44E-41 |
| SCFD2     | 1.70E-45 | -0.21088 | 0.026 | 0.227 | 2.54E-41 |
| KIAA1841  | 1.80E-45 | -0.19315 | 0.019 | 0.21  | 2.69E-41 |
| NR2C1     | 1.81E-45 | -0.11781 | 0.023 | 0.195 | 2.70E-41 |
| RP11-421L | 1.82E-45 | 0.121991 | 0.04  | 0.162 | 2.72E-41 |
| DHX38     | 2.12E-45 | -0.1626  | 0.023 | 0.209 | 3.17E-41 |
| YARS2     | 2.13E-45 | -0.14376 | 0.019 | 0.196 | 3.18E-41 |
| PM20D2    | 2.15E-45 | -0.13509 | 0.016 | 0.188 | 3.21E-41 |
| FBX025    | 2.24E-45 | -0.13347 | 0.03  | 0.211 | 3.35E-41 |
| IMPA1     | 2.38E-45 | 0.100742 | 0.066 | 0.211 | 3.56E-41 |
| LRRN3     | 2.58E-45 | 0.133683 | 0.072 | 0.206 | 3.85E-41 |
| ENKUR     | 2.60E-45 | 0.300851 | 0.065 | 0.146 | 3.88E-41 |
| B4GALT2   | 2.71E-45 | -0.1136  | 0.014 | 0.172 | 4.05E-41 |
| STK33     | 2.92E-45 | 0.119409 | 0.035 | 0.151 | 4.36E-41 |
| XPNPEP3   | 2.98E-45 | -0.13319 | 0.026 | 0.207 | 4.45E-41 |
| MORC4     | 3.08E-45 | -0.29433 | 0.012 | 0.226 | 4.61E-41 |
| LDOC1L    | 3.25E-45 | -0.21988 | 0.014 | 0.209 | 4.86E-41 |

|           |          |          |       |       |          |
|-----------|----------|----------|-------|-------|----------|
| LRR8B     | 3.26E-45 | -0.15693 | 0.012 | 0.183 | 4.88E-41 |
| RNF38     | 3.28E-45 | -0.16238 | 0.01  | 0.183 | 4.90E-41 |
| AEN       | 3.34E-45 | -0.24311 | 0.028 | 0.242 | 4.99E-41 |
| FKBP11    | 3.41E-45 | 0.168078 | 0.047 | 0.158 | 5.09E-41 |
| LRP6      | 3.47E-45 | -0.11172 | 0.033 | 0.214 | 5.18E-41 |
| RASSF8    | 3.58E-45 | -0.13315 | 0.021 | 0.199 | 5.35E-41 |
| KIF1C     | 3.68E-45 | -0.14502 | 0.017 | 0.194 | 5.49E-41 |
| FGFR10P   | 3.69E-45 | -0.24834 | 0.017 | 0.227 | 5.51E-41 |
| DGCR8     | 3.75E-45 | -0.19244 | 0.028 | 0.228 | 5.61E-41 |
| THAP10    | 3.86E-45 | -0.14687 | 0.016 | 0.191 | 5.77E-41 |
| TERF2     | 3.89E-45 | -0.12791 | 0.024 | 0.199 | 5.81E-41 |
| UBQLN4    | 4.19E-45 | -0.19214 | 0.03  | 0.235 | 6.26E-41 |
| SCAPER    | 4.25E-45 | -0.11359 | 0.037 | 0.225 | 6.35E-41 |
| CAPN7     | 4.72E-45 | -0.11497 | 0.021 | 0.194 | 7.05E-41 |
| TOE1      | 4.97E-45 | -0.16857 | 0.019 | 0.204 | 7.42E-41 |
| CREG1     | 5.94E-45 | -0.12684 | 0.024 | 0.2   | 8.88E-41 |
| AGPAT2    | 6.02E-45 | -0.29521 | 0.007 | 0.222 | 9.00E-41 |
| ARMC9     | 6.07E-45 | 0.11273  | 0.042 | 0.154 | 9.06E-41 |
| UPF1      | 6.13E-45 | -0.10108 | 0.019 | 0.184 | 9.16E-41 |
| ZNF274    | 6.22E-45 | -0.14386 | 0.042 | 0.23  | 9.30E-41 |
| SRSF12    | 6.46E-45 | -0.21893 | 0.017 | 0.214 | 9.66E-41 |
| WDHD1     | 6.75E-45 | -0.28199 | 0.012 | 0.216 | 1.01E-40 |
| TRPM3     | 6.77E-45 | 0.126515 | 0.03  | 0.138 | 1.01E-40 |
| ELMSAN1   | 6.90E-45 | -0.11925 | 0.026 | 0.204 | 1.03E-40 |
| MAFG-AS1  | 6.96E-45 | -0.1494  | 0.009 | 0.174 | 1.04E-40 |
| MMGT1     | 6.99E-45 | -0.13461 | 0.019 | 0.194 | 1.05E-40 |
| PINX1     | 7.34E-45 | -0.11775 | 0.028 | 0.201 | 1.10E-40 |
| RFX3      | 7.90E-45 | -0.16024 | 0.017 | 0.2   | 1.18E-40 |
| BAG4      | 9.33E-45 | -0.14645 | 0.021 | 0.205 | 1.39E-40 |
| GMEB1     | 9.47E-45 | -0.12674 | 0.028 | 0.211 | 1.42E-40 |
| RYK       | 9.59E-45 | -0.17993 | 0.014 | 0.199 | 1.43E-40 |
| ANTXR1    | 1.02E-44 | -0.13062 | 0.037 | 0.221 | 1.52E-40 |
| PLA2G5    | 1.03E-44 | 0.85859  | 0.157 | 0.13  | 1.54E-40 |
| SLC25A44  | 1.07E-44 | -0.26289 | 0.009 | 0.209 | 1.59E-40 |
| HPS3      | 1.07E-44 | -0.17442 | 0.016 | 0.196 | 1.60E-40 |
| FN1       | 1.18E-44 | 0.287468 | 0.066 | 0.164 | 1.77E-40 |
| SLC20A2   | 1.21E-44 | 0.310385 | 0.063 | 0.141 | 1.80E-40 |
| IGFBP4    | 1.29E-44 | -0.24448 | 0.017 | 0.219 | 1.93E-40 |
| ZNF253    | 1.43E-44 | -0.12085 | 0.019 | 0.181 | 2.14E-40 |
| GNA13     | 1.50E-44 | -0.18275 | 0.009 | 0.184 | 2.25E-40 |
| MFN2      | 1.54E-44 | -0.10174 | 0.028 | 0.204 | 2.30E-40 |
| SLC38A6   | 1.75E-44 | 0.206616 | 0.045 | 0.14  | 2.61E-40 |
| BORA      | 1.77E-44 | -0.40191 | 0.005 | 0.228 | 2.64E-40 |
| LIFR      | 1.79E-44 | 0.130555 | 0.072 | 0.214 | 2.68E-40 |
| PDE7A     | 1.84E-44 | -0.2013  | 0.017 | 0.21  | 2.76E-40 |
| RGS3      | 1.86E-44 | -0.12071 | 0.026 | 0.199 | 2.78E-40 |
| STOM      | 1.98E-44 | 0.303773 | 0.061 | 0.142 | 2.96E-40 |
| GPD2      | 2.02E-44 | -0.14331 | 0.023 | 0.195 | 3.02E-40 |
| RP13-1032 | 2.07E-44 | -0.2033  | 0.016 | 0.204 | 3.09E-40 |
| STXBP1    | 2.34E-44 | -0.16357 | 0.03  | 0.22  | 3.50E-40 |
| FER       | 2.39E-44 | -0.10239 | 0.023 | 0.19  | 3.57E-40 |



|           |          |          |       |       |          |
|-----------|----------|----------|-------|-------|----------|
| TMOD1     | 2.54E-44 | 0.630561 | 0.129 | 0.158 | 3.80E-40 |
| AKAP6     | 2.58E-44 | 0.214468 | 0.052 | 0.157 | 3.85E-40 |
| GPX3      | 2.73E-44 | 0.194111 | 0.035 | 0.121 | 4.08E-40 |
| COG1      | 3.05E-44 | -0.15144 | 0.017 | 0.194 | 4.56E-40 |
| ELK1      | 3.19E-44 | -0.17159 | 0.012 | 0.19  | 4.76E-40 |
| DLC1      | 3.69E-44 | 0.13722  | 0.038 | 0.149 | 5.51E-40 |
| PCGF6     | 3.88E-44 | -0.16319 | 0.019 | 0.201 | 5.80E-40 |
| FOSL2     | 3.98E-44 | -0.11815 | 0.028 | 0.204 | 5.95E-40 |
| ERC1      | 4.03E-44 | -0.10083 | 0.028 | 0.199 | 6.03E-40 |
| BBS4      | 4.09E-44 | 0.126253 | 0.045 | 0.158 | 6.11E-40 |
| MAPK9     | 4.17E-44 | -0.14106 | 0.017 | 0.189 | 6.23E-40 |
| CEP112    | 4.32E-44 | -0.24569 | 0.007 | 0.207 | 6.45E-40 |
| RP11-126K | 4.38E-44 | -0.12756 | 0.024 | 0.195 | 6.54E-40 |
| MYO1C     | 4.53E-44 | -0.1573  | 0.019 | 0.194 | 6.77E-40 |
| PHF13     | 4.57E-44 | -0.14237 | 0.017 | 0.189 | 6.83E-40 |
| LMCD1     | 4.63E-44 | -0.15941 | 0.014 | 0.186 | 6.92E-40 |
| KATNAL1   | 4.99E-44 | -0.23057 | 0.017 | 0.221 | 7.45E-40 |
| ST3GAL3   | 5.83E-44 | -0.22647 | 0.017 | 0.215 | 8.71E-40 |
| C1QC      | 6.09E-44 | 0.331892 | 0.117 | 0.205 | 9.10E-40 |
| RMND1     | 6.53E-44 | -0.17949 | 0.017 | 0.201 | 9.76E-40 |
| RAI1      | 7.17E-44 | -0.12405 | 0.009 | 0.163 | 1.07E-39 |
| SCMH1     | 7.33E-44 | -0.20584 | 0.019 | 0.211 | 1.10E-39 |
| ACACA     | 7.51E-44 | -0.13996 | 0.017 | 0.185 | 1.12E-39 |
| SS18L1    | 7.54E-44 | -0.17193 | 0.014 | 0.198 | 1.13E-39 |
| RAB23     | 8.38E-44 | -0.20277 | 0.01  | 0.194 | 1.25E-39 |
| GAD1      | 8.40E-44 | -0.29668 | 0.017 | 0.23  | 1.26E-39 |
| GBP1      | 8.71E-44 | 0.814243 | 0.14  | 0.133 | 1.30E-39 |
| GAB1      | 8.89E-44 | -0.14964 | 0.03  | 0.214 | 1.33E-39 |
| PDLIM3    | 9.90E-44 | 0.278362 | 0.115 | 0.21  | 1.48E-39 |
| CSRNP2    | 9.96E-44 | -0.10309 | 0.024 | 0.195 | 1.49E-39 |
| NXT2      | 1.16E-43 | -0.13394 | 0.014 | 0.178 | 1.73E-39 |
| MDC1      | 1.18E-43 | -0.2575  | 0.012 | 0.216 | 1.76E-39 |
| PELI1     | 1.18E-43 | -0.20821 | 0.045 | 0.243 | 1.77E-39 |
| NUP155    | 1.19E-43 | -0.15739 | 0.026 | 0.206 | 1.77E-39 |
| CDC7      | 1.19E-43 | -0.25508 | 0.019 | 0.227 | 1.78E-39 |
| MTFR2     | 1.31E-43 | -0.38661 | 0     | 0.205 | 1.95E-39 |
| CHEK2     | 1.33E-43 | -0.3156  | 0.01  | 0.221 | 1.98E-39 |
| SP2       | 1.34E-43 | -0.11315 | 0.021 | 0.189 | 2.01E-39 |
| IGF1R     | 1.55E-43 | 0.115459 | 0.035 | 0.148 | 2.31E-39 |
| MBD6      | 1.68E-43 | -0.40981 | 0.051 | 0.298 | 2.52E-39 |
| ASUN      | 1.77E-43 | -0.17045 | 0.026 | 0.219 | 2.65E-39 |
| MIR210HG  | 1.81E-43 | 0.101339 | 0.04  | 0.146 | 2.71E-39 |
| FBX034    | 1.84E-43 | -0.17484 | 0.021 | 0.204 | 2.76E-39 |
| PSMB10    | 1.86E-43 | 0.278567 | 0.072 | 0.162 | 2.78E-39 |
| ZNF587    | 1.90E-43 | -0.1108  | 0.021 | 0.186 | 2.83E-39 |
| ZNF789    | 2.07E-43 | -0.10597 | 0.019 | 0.178 | 3.10E-39 |
| ALG12     | 2.31E-43 | -0.14691 | 0.016 | 0.188 | 3.46E-39 |
| ITGA2     | 2.34E-43 | -0.28064 | 0.007 | 0.2   | 3.49E-39 |
| HSD17B7   | 2.48E-43 | 0.251346 | 0.056 | 0.137 | 3.71E-39 |
| KIAA1549  | 2.54E-43 | -0.28593 | 0.024 | 0.237 | 3.80E-39 |
| NME6      | 2.98E-43 | 0.183247 | 0.056 | 0.172 | 4.46E-39 |

|           |          |          |       |       |          |
|-----------|----------|----------|-------|-------|----------|
| CCDC77    | 3.56E-43 | -0.20618 | 0.026 | 0.223 | 5.32E-39 |
| NDRG4     | 3.86E-43 | 0.209308 | 0.072 | 0.183 | 5.77E-39 |
| PTK2B     | 4.18E-43 | 0.105387 | 0.026 | 0.132 | 6.25E-39 |
| DPY19L3   | 4.21E-43 | 0.138275 | 0.044 | 0.149 | 6.28E-39 |
| HYOU1     | 4.60E-43 | -0.13197 | 0.03  | 0.214 | 6.88E-39 |
| RPUSD4    | 5.27E-43 | -0.10999 | 0.019 | 0.18  | 7.87E-39 |
| RP11-398K | 5.27E-43 | -0.12923 | 0.026 | 0.199 | 7.88E-39 |
| PRRC1     | 5.36E-43 | -0.12957 | 0.028 | 0.205 | 8.01E-39 |
| LIPE-AS1  | 6.00E-43 | -0.10582 | 0.024 | 0.193 | 8.96E-39 |
| WHAMM     | 6.10E-43 | -0.14611 | 0.019 | 0.198 | 9.11E-39 |
| TRIM26    | 6.43E-43 | -0.19547 | 0.024 | 0.211 | 9.61E-39 |
| CDH4      | 6.52E-43 | -0.20645 | 0.016 | 0.202 | 9.74E-39 |
| PI4K2B    | 6.64E-43 | -0.20872 | 0.014 | 0.206 | 9.92E-39 |
| NUP153    | 6.71E-43 | -0.10659 | 0.019 | 0.175 | 1.00E-38 |
| ALDOC     | 7.34E-43 | 0.899471 | 0.188 | 0.102 | 1.10E-38 |
| RALGAPA1  | 7.84E-43 | -0.13363 | 0.028 | 0.206 | 1.17E-38 |
| PYGL      | 8.09E-43 | 0.250445 | 0.056 | 0.147 | 1.21E-38 |
| UCK2      | 8.62E-43 | -0.10309 | 0.023 | 0.186 | 1.29E-38 |
| APEX2     | 8.66E-43 | -0.11455 | 0.016 | 0.178 | 1.29E-38 |
| ASIC4     | 9.05E-43 | 0.270258 | 0.129 | 0.215 | 1.35E-38 |
| RP11-25K1 | 9.07E-43 | -0.16369 | 0.016 | 0.189 | 1.35E-38 |
| INTS5     | 9.16E-43 | -0.11417 | 0.019 | 0.183 | 1.37E-38 |
| PCOLCE2   | 1.01E-42 | 0.292956 | 0.058 | 0.133 | 1.51E-38 |
| ADNP2     | 1.06E-42 | -0.16228 | 0.012 | 0.183 | 1.59E-38 |
| PKP4      | 1.08E-42 | -0.22731 | 0.012 | 0.204 | 1.61E-38 |
| CTD-3184A | 1.17E-42 | -0.18428 | 0.007 | 0.179 | 1.74E-38 |
| B3GNT5    | 1.19E-42 | -0.2854  | 0.007 | 0.204 | 1.78E-38 |
| BAMBI     | 1.31E-42 | -0.19929 | 0.016 | 0.196 | 1.96E-38 |
| CCDC159   | 1.49E-42 | 0.231517 | 0.065 | 0.154 | 2.23E-38 |
| AMH       | 1.60E-42 | -0.26321 | 0.01  | 0.211 | 2.38E-38 |
| WIPI1     | 1.73E-42 | 0.104401 | 0.03  | 0.126 | 2.58E-38 |
| PCBD2     | 1.80E-42 | -0.26543 | 0.012 | 0.209 | 2.68E-38 |
| C5orf28   | 1.81E-42 | 0.165123 | 0.052 | 0.158 | 2.71E-38 |
| AHCTF1    | 1.85E-42 | -0.17162 | 0.019 | 0.204 | 2.76E-38 |
| FAM173B   | 1.95E-42 | -0.10477 | 0.017 | 0.169 | 2.92E-38 |
| PARD3     | 2.01E-42 | -0.14973 | 0.01  | 0.179 | 3.01E-38 |
| L3MBTL2   | 2.28E-42 | -0.19519 | 0.017 | 0.2   | 3.41E-38 |
| ZP3       | 2.39E-42 | -0.12192 | 0.024 | 0.185 | 3.57E-38 |
| STAT2     | 2.43E-42 | 0.201787 | 0.052 | 0.141 | 3.63E-38 |
| HLA-DRB5  | 2.45E-42 | 0.937014 | 0.138 | 0.07  | 3.67E-38 |
| SFMBT1    | 2.52E-42 | -0.20592 | 0.016 | 0.2   | 3.76E-38 |
| GDAP1     | 2.79E-42 | 0.194454 | 0.096 | 0.221 | 4.17E-38 |
| COL22A1   | 2.99E-42 | -0.1436  | 0.016 | 0.175 | 4.47E-38 |
| SYP       | 3.05E-42 | 0.140345 | 0.075 | 0.198 | 4.56E-38 |
| RP11-539L | 3.23E-42 | 0.151063 | 0.052 | 0.179 | 4.83E-38 |
| FAM84B    | 3.28E-42 | 0.148533 | 0.065 | 0.19  | 4.91E-38 |
| PHC1      | 3.33E-42 | -0.15933 | 0.026 | 0.204 | 4.97E-38 |
| ANGPTL2   | 3.43E-42 | 0.398364 | 0.099 | 0.153 | 5.12E-38 |
| GKAP1     | 3.71E-42 | -0.26409 | 0.016 | 0.211 | 5.55E-38 |
| MLLT3     | 3.84E-42 | -0.12843 | 0.03  | 0.201 | 5.73E-38 |
| DDX39B    | 4.09E-42 | -0.11996 | 0.035 | 0.206 | 6.11E-38 |

|          |          |          |       |       |          |
|----------|----------|----------|-------|-------|----------|
| TRIM41   | 4.17E-42 | -0.13283 | 0.03  | 0.204 | 6.23E-38 |
| METAP1D  | 4.53E-42 | 0.124839 | 0.08  | 0.205 | 6.76E-38 |
| GTF2IRD2 | 4.93E-42 | 0.116096 | 0.068 | 0.185 | 7.37E-38 |
| ZNF436   | 4.97E-42 | -0.22479 | 0.009 | 0.193 | 7.43E-38 |
| RNF169   | 5.17E-42 | -0.10863 | 0.014 | 0.169 | 7.73E-38 |
| CCDC74A  | 6.04E-42 | -0.22119 | 0.014 | 0.199 | 9.02E-38 |
| CTHRC1   | 6.05E-42 | -0.3153  | 0.005 | 0.211 | 9.03E-38 |
| PNMAL1   | 6.16E-42 | -0.16556 | 0.023 | 0.205 | 9.21E-38 |
| MSTO1    | 6.39E-42 | -0.23122 | 0.007 | 0.191 | 9.55E-38 |
| DCBLD1   | 6.44E-42 | -0.1489  | 0.023 | 0.202 | 9.62E-38 |
| SH3BP4   | 6.44E-42 | -0.10832 | 0.035 | 0.199 | 9.63E-38 |
| SERINC2  | 6.51E-42 | -0.29224 | 0.009 | 0.219 | 9.73E-38 |
| C12orf4  | 6.58E-42 | -0.15829 | 0.017 | 0.194 | 9.83E-38 |
| TOR2A    | 6.61E-42 | -0.19672 | 0.019 | 0.206 | 9.88E-38 |
| RLIM     | 7.70E-42 | -0.17419 | 0.023 | 0.206 | 1.15E-37 |
| CCDC138  | 7.83E-42 | -0.20489 | 0.01  | 0.186 | 1.17E-37 |
| RNPEPL1  | 8.08E-42 | -0.1327  | 0.019 | 0.181 | 1.21E-37 |
| PRDM4    | 8.39E-42 | -0.15277 | 0.012 | 0.181 | 1.25E-37 |
| FAM219A  | 8.46E-42 | -0.14623 | 0.017 | 0.188 | 1.26E-37 |
| ZNF71    | 8.49E-42 | -0.10961 | 0.021 | 0.181 | 1.27E-37 |
| SLC26A11 | 9.11E-42 | -0.10436 | 0.021 | 0.178 | 1.36E-37 |
| SLC39A9  | 9.64E-42 | -0.17147 | 0.016 | 0.19  | 1.44E-37 |
| GUF1     | 9.80E-42 | -0.12388 | 0.017 | 0.18  | 1.46E-37 |
| NHSL1    | 1.07E-41 | -0.10006 | 0.033 | 0.2   | 1.59E-37 |
| KLF12    | 1.09E-41 | -0.19049 | 0.026 | 0.206 | 1.63E-37 |
| FAXC     | 1.11E-41 | -0.16877 | 0.026 | 0.2   | 1.66E-37 |
| CRTC3    | 1.13E-41 | -0.10711 | 0.026 | 0.19  | 1.69E-37 |
| CXXC4    | 1.16E-41 | -0.16926 | 0.026 | 0.196 | 1.74E-37 |
| LOXL1    | 1.23E-41 | -0.16752 | 0.01  | 0.178 | 1.83E-37 |
| TADA2A   | 1.36E-41 | -0.22071 | 0.009 | 0.189 | 2.03E-37 |
| TAF4     | 1.50E-41 | -0.13142 | 0.01  | 0.169 | 2.24E-37 |
| BACE1    | 1.50E-41 | -0.10436 | 0.031 | 0.196 | 2.25E-37 |
| ELMOD2   | 1.51E-41 | 0.108396 | 0.044 | 0.163 | 2.26E-37 |
| BCL3     | 1.59E-41 | -0.10404 | 0.009 | 0.148 | 2.38E-37 |
| TRIM11   | 1.63E-41 | -0.16291 | 0.021 | 0.196 | 2.44E-37 |
| TRRAP    | 1.65E-41 | -0.19364 | 0.021 | 0.206 | 2.46E-37 |
| ALDH16A1 | 1.73E-41 | -0.26416 | 0.01  | 0.209 | 2.58E-37 |
| PWWP2A   | 1.84E-41 | -0.15041 | 0.031 | 0.211 | 2.75E-37 |
| PPP1R14C | 1.88E-41 | -0.22411 | 0.01  | 0.186 | 2.81E-37 |
| TGIF2    | 2.05E-41 | -0.27743 | 0.009 | 0.209 | 3.07E-37 |
| SP110    | 2.10E-41 | 0.223302 | 0.061 | 0.165 | 3.14E-37 |
| STIL     | 2.12E-41 | -0.33204 | 0     | 0.195 | 3.16E-37 |
| ZNF584   | 2.36E-41 | -0.15546 | 0.012 | 0.181 | 3.53E-37 |
| TRIM7    | 2.40E-41 | -0.12513 | 0.003 | 0.147 | 3.59E-37 |
| APC2     | 2.53E-41 | 0.184694 | 0.066 | 0.163 | 3.79E-37 |
| ELOVL6   | 2.78E-41 | -0.12532 | 0.023 | 0.189 | 4.15E-37 |
| FBX045   | 2.90E-41 | -0.22689 | 0.005 | 0.184 | 4.33E-37 |
| FAT1     | 2.94E-41 | -0.1937  | 0.014 | 0.194 | 4.40E-37 |
| ZNF532   | 3.07E-41 | -0.12826 | 0.019 | 0.179 | 4.59E-37 |
| RFX5     | 3.36E-41 | -0.10713 | 0.026 | 0.183 | 5.02E-37 |
| SEC16A   | 3.51E-41 | -0.18011 | 0.024 | 0.206 | 5.25E-37 |

|          |          |          |       |       |          |
|----------|----------|----------|-------|-------|----------|
| MIOS     | 3.60E-41 | -0.11971 | 0.024 | 0.191 | 5.37E-37 |
| ADD2     | 3.68E-41 | -0.34274 | 0.017 | 0.235 | 5.51E-37 |
| XRCC6BP1 | 4.32E-41 | -0.41044 | 0.026 | 0.243 | 6.46E-37 |
| TBC1D31  | 4.69E-41 | -0.35872 | 0.002 | 0.205 | 7.01E-37 |
| GEMIN4   | 4.72E-41 | -0.10006 | 0.014 | 0.159 | 7.05E-37 |
| CCDC150  | 4.77E-41 | -0.22747 | 0.009 | 0.188 | 7.13E-37 |
| FAM49A   | 4.80E-41 | 0.130631 | 0.038 | 0.141 | 7.18E-37 |
| WDR3     | 5.20E-41 | -0.12339 | 0.023 | 0.189 | 7.78E-37 |
| POLG     | 5.31E-41 | -0.15102 | 0.016 | 0.184 | 7.94E-37 |
| SLC4A8   | 5.40E-41 | -0.19483 | 0.023 | 0.209 | 8.06E-37 |
| DCHS1    | 5.46E-41 | -0.12992 | 0.024 | 0.196 | 8.16E-37 |
| TIMP3    | 5.75E-41 | 0.356035 | 0.091 | 0.164 | 8.60E-37 |
| CHST14   | 5.89E-41 | -0.2542  | 0.009 | 0.205 | 8.79E-37 |
| SUV39H1  | 6.01E-41 | -0.2262  | 0.007 | 0.186 | 8.97E-37 |
| TUBD1    | 6.11E-41 | -0.19766 | 0.021 | 0.206 | 9.13E-37 |
| TFRC     | 6.27E-41 | 0.163122 | 0.052 | 0.165 | 9.37E-37 |
| RAD54L2  | 6.93E-41 | -0.15456 | 0.024 | 0.2   | 1.04E-36 |
| CCDC102B | 7.20E-41 | 0.303494 | 0.063 | 0.137 | 1.08E-36 |
| EML1     | 7.85E-41 | -0.14379 | 0.016 | 0.178 | 1.17E-36 |
| DCLRE1B  | 7.99E-41 | -0.25849 | 0.012 | 0.204 | 1.19E-36 |
| TFIP11   | 8.02E-41 | -0.1029  | 0.026 | 0.189 | 1.20E-36 |
| AP3M2    | 8.20E-41 | -0.16827 | 0.017 | 0.191 | 1.23E-36 |
| IRF7     | 8.28E-41 | -0.10324 | 0.017 | 0.168 | 1.24E-36 |
| MAPK14   | 8.36E-41 | -0.15945 | 0.017 | 0.195 | 1.25E-36 |
| TTC8     | 9.55E-41 | 0.140238 | 0.042 | 0.151 | 1.43E-36 |
| TRAPPC11 | 1.06E-40 | -0.18451 | 0.019 | 0.2   | 1.58E-36 |
| DHX16    | 1.11E-40 | -0.16769 | 0.016 | 0.188 | 1.65E-36 |
| PLP1     | 1.16E-40 | 0.380306 | 0.133 | 0.217 | 1.74E-36 |
| PRKAR1B  | 1.16E-40 | -0.12181 | 0.04  | 0.215 | 1.74E-36 |
| NOTCH3   | 1.17E-40 | -0.12636 | 0.01  | 0.17  | 1.75E-36 |
| SPICE1   | 1.18E-40 | 0.112687 | 0.021 | 0.109 | 1.76E-36 |
| GTF3C4   | 1.22E-40 | -0.17133 | 0.01  | 0.174 | 1.82E-36 |
| C9orf40  | 1.24E-40 | -0.25225 | 0.003 | 0.185 | 1.85E-36 |
| LMO7     | 1.26E-40 | -0.30638 | 0.009 | 0.205 | 1.89E-36 |
| FBX032   | 1.27E-40 | 0.547042 | 0.089 | 0.102 | 1.90E-36 |
| HBB      | 1.36E-40 | 0.438996 | 0.202 | 0.332 | 2.03E-36 |
| DUS4L    | 1.40E-40 | -0.13621 | 0.019 | 0.181 | 2.10E-36 |
| AHDC1    | 1.41E-40 | 0.192886 | 0.063 | 0.164 | 2.11E-36 |
| TAOK2    | 1.42E-40 | -0.22574 | 0.012 | 0.2   | 2.12E-36 |
| ZSWIM6   | 1.58E-40 | -0.16512 | 0.017 | 0.188 | 2.36E-36 |
| TMEM168  | 1.64E-40 | 0.120828 | 0.056 | 0.178 | 2.44E-36 |
| ADAMTS9  | 1.66E-40 | 0.185991 | 0.044 | 0.144 | 2.48E-36 |
| UBFD1    | 1.96E-40 | -0.15242 | 0.021 | 0.19  | 2.92E-36 |
| POLE2    | 2.00E-40 | -0.23096 | 0.012 | 0.19  | 2.99E-36 |
| CPQ      | 2.03E-40 | 0.265488 | 0.047 | 0.107 | 3.03E-36 |
| C8orf46  | 2.06E-40 | -0.20909 | 0.044 | 0.236 | 3.08E-36 |
| ZBTB2    | 2.27E-40 | -0.12222 | 0.024 | 0.184 | 3.39E-36 |
| RFNG     | 2.28E-40 | -0.11656 | 0.024 | 0.185 | 3.41E-36 |
| NUP43    | 2.35E-40 | -0.23859 | 0.017 | 0.209 | 3.52E-36 |
| NKAIN4   | 2.52E-40 | 0.17577  | 0.108 | 0.216 | 3.77E-36 |
| DPH2     | 2.58E-40 | 0.163047 | 0.051 | 0.158 | 3.86E-36 |

|         |          |          |       |       |          |
|---------|----------|----------|-------|-------|----------|
| CAMSAP1 | 2.89E-40 | -0.11249 | 0.019 | 0.17  | 4.32E-36 |
| ZW10    | 2.94E-40 | -0.16378 | 0.017 | 0.185 | 4.39E-36 |
| BOLA2B  | 3.03E-40 | 0.215789 | 0.037 | 0.116 | 4.52E-36 |
| FAM13B  | 3.19E-40 | -0.12706 | 0.019 | 0.174 | 4.77E-36 |
| PRMT6   | 3.60E-40 | -0.1125  | 0.03  | 0.196 | 5.38E-36 |
| CCDC71  | 3.62E-40 | -0.15911 | 0.014 | 0.178 | 5.40E-36 |
| AMDHD2  | 3.73E-40 | -0.14931 | 0.016 | 0.184 | 5.57E-36 |
| DHODH   | 4.18E-40 | 0.117714 | 0.037 | 0.147 | 6.25E-36 |
| FAM127C | 4.48E-40 | 0.100986 | 0.04  | 0.149 | 6.70E-36 |
| CNOT6L  | 4.91E-40 | -0.13526 | 0.017 | 0.175 | 7.34E-36 |
| ZNF724P | 4.96E-40 | -0.3202  | 0.012 | 0.216 | 7.41E-36 |
| SH2B2   | 5.15E-40 | -0.24847 | 0.019 | 0.209 | 7.70E-36 |
| DYRK1A  | 5.20E-40 | -0.18059 | 0.014 | 0.186 | 7.77E-36 |
| KLHL9   | 5.36E-40 | -0.24335 | 0.016 | 0.204 | 8.01E-36 |
| SARNP   | 5.48E-40 | 0.204497 | 0.065 | 0.164 | 8.19E-36 |
| URGCP   | 6.27E-40 | -0.18761 | 0.031 | 0.216 | 9.37E-36 |
| TXNL4B  | 6.50E-40 | -0.13227 | 0.021 | 0.183 | 9.71E-36 |
| RAP2C   | 7.61E-40 | -0.15375 | 0.01  | 0.169 | 1.14E-35 |
| FAM20B  | 7.65E-40 | -0.15771 | 0.012 | 0.174 | 1.14E-35 |
| POLD1   | 8.14E-40 | -0.22741 | 0.012 | 0.191 | 1.22E-35 |
| MDGA1   | 8.99E-40 | -0.23618 | 0.005 | 0.189 | 1.34E-35 |
| RC3H2   | 9.13E-40 | -0.21361 | 0.007 | 0.184 | 1.36E-35 |
| GEM     | 9.43E-40 | 0.194876 | 0.045 | 0.147 | 1.41E-35 |
| SMCR5   | 9.50E-40 | -0.15355 | 0.026 | 0.2   | 1.42E-35 |
| PRMT7   | 1.07E-39 | -0.18887 | 0.028 | 0.215 | 1.61E-35 |
| IL17RB  | 1.10E-39 | -0.17515 | 0.026 | 0.201 | 1.64E-35 |
| ELP4    | 1.20E-39 | 0.208371 | 0.054 | 0.153 | 1.80E-35 |
| PATZ1   | 1.26E-39 | -0.17587 | 0.026 | 0.201 | 1.88E-35 |
| MIAT    | 1.30E-39 | 0.100557 | 0.082 | 0.209 | 1.94E-35 |
| RNFT2   | 1.38E-39 | -0.21626 | 0.01  | 0.185 | 2.07E-35 |
| IMMP2L  | 1.39E-39 | 0.173656 | 0.063 | 0.165 | 2.08E-35 |
| SP100   | 1.46E-39 | 0.370706 | 0.098 | 0.163 | 2.19E-35 |
| TBL1X   | 1.79E-39 | -0.11978 | 0.005 | 0.148 | 2.67E-35 |
| AFAP1   | 1.80E-39 | -0.18445 | 0.016 | 0.185 | 2.69E-35 |
| CSRP2BP | 1.84E-39 | -0.1437  | 0.019 | 0.183 | 2.76E-35 |
| TMEM260 | 1.86E-39 | -0.11937 | 0.016 | 0.167 | 2.78E-35 |
| NFRKB   | 1.98E-39 | -0.17472 | 0.014 | 0.179 | 2.96E-35 |
| VAX2    | 2.01E-39 | -0.1477  | 0.021 | 0.188 | 3.01E-35 |
| XRCC3   | 2.06E-39 | -0.16255 | 0.01  | 0.17  | 3.08E-35 |
| NOS1AP  | 2.11E-39 | 0.219148 | 0.033 | 0.119 | 3.15E-35 |
| PLAUR   | 2.18E-39 | 0.256315 | 0.068 | 0.162 | 3.26E-35 |
| THSD7A  | 2.46E-39 | -0.15175 | 0.068 | 0.249 | 3.67E-35 |
| ABCA3   | 2.47E-39 | -0.13952 | 0.021 | 0.189 | 3.69E-35 |
| RPS6KA4 | 2.52E-39 | -0.14513 | 0.014 | 0.177 | 3.77E-35 |
| CHD3    | 2.59E-39 | -0.17413 | 0.023 | 0.195 | 3.88E-35 |
| FKBPL   | 2.63E-39 | -0.21928 | 0.016 | 0.199 | 3.93E-35 |
| PRMT3   | 2.75E-39 | -0.21928 | 0.019 | 0.206 | 4.10E-35 |
| LRRC57  | 2.85E-39 | -0.15473 | 0.014 | 0.177 | 4.26E-35 |
| ZNF598  | 2.90E-39 | -0.19388 | 0.007 | 0.173 | 4.33E-35 |
| HS1BP3  | 2.92E-39 | 0.104127 | 0.026 | 0.123 | 4.37E-35 |
| HINFP   | 3.16E-39 | 0.152216 | 0.051 | 0.156 | 4.73E-35 |

|           |          |          |       |       |          |
|-----------|----------|----------|-------|-------|----------|
| PIP4K2C   | 3.24E-39 | -0.25083 | 0.037 | 0.23  | 4.84E-35 |
| SKP2      | 3.67E-39 | -0.23437 | 0.01  | 0.189 | 5.48E-35 |
| ABCC5     | 3.94E-39 | 0.174741 | 0.044 | 0.128 | 5.89E-35 |
| ASXL2     | 4.12E-39 | -0.14666 | 0.016 | 0.178 | 6.16E-35 |
| GRAMD3    | 4.12E-39 | 0.337469 | 0.08  | 0.146 | 6.16E-35 |
| FAM199X   | 4.28E-39 | -0.14785 | 0.019 | 0.184 | 6.39E-35 |
| CAPN5     | 4.35E-39 | -0.10993 | 0.017 | 0.164 | 6.51E-35 |
| LIPA      | 4.78E-39 | 0.135339 | 0.045 | 0.149 | 7.15E-35 |
| PIK3C3    | 4.96E-39 | -0.11411 | 0.023 | 0.178 | 7.42E-35 |
| SMAD9     | 5.50E-39 | -0.19762 | 0.017 | 0.198 | 8.22E-35 |
| ATL2      | 5.76E-39 | -0.11784 | 0.014 | 0.169 | 8.61E-35 |
| CXCL14    | 5.79E-39 | 0.651362 | 0.106 | 0.101 | 8.65E-35 |
| DLGAP1-AS | 5.99E-39 | 0.148825 | 0.035 | 0.125 | 8.94E-35 |
| HIST1H2BH | 6.14E-39 | -0.38068 | 0     | 0.184 | 9.17E-35 |
| ZNF569    | 6.78E-39 | -0.2017  | 0.016 | 0.188 | 1.01E-34 |
| ZNF726    | 6.97E-39 | -0.28437 | 0.007 | 0.194 | 1.04E-34 |
| PCDH19    | 7.14E-39 | -0.12761 | 0.016 | 0.177 | 1.07E-34 |
| PIP5K1C   | 7.24E-39 | -0.12698 | 0.03  | 0.202 | 1.08E-34 |
| PPP3CC    | 7.49E-39 | -0.2013  | 0.031 | 0.215 | 1.12E-34 |
| DTNB      | 7.61E-39 | -0.23026 | 0.009 | 0.191 | 1.14E-34 |
| SS18      | 7.79E-39 | 0.142482 | 0.044 | 0.142 | 1.16E-34 |
| RFX1      | 7.82E-39 | -0.15158 | 0.016 | 0.179 | 1.17E-34 |
| TMEM192   | 8.23E-39 | 0.168271 | 0.08  | 0.183 | 1.23E-34 |
| PCGF3     | 8.85E-39 | -0.10163 | 0.024 | 0.179 | 1.32E-34 |
| UTP14C    | 8.89E-39 | -0.10365 | 0.014 | 0.159 | 1.33E-34 |
| PRKX      | 9.25E-39 | -0.19818 | 0.01  | 0.177 | 1.38E-34 |
| VSIG10    | 1.09E-38 | -0.12701 | 0.021 | 0.178 | 1.62E-34 |
| FANCB     | 1.11E-38 | -0.23058 | 0.002 | 0.17  | 1.66E-34 |
| AKAP10    | 1.13E-38 | -0.12997 | 0.017 | 0.172 | 1.69E-34 |
| ALDH18A1  | 1.20E-38 | -0.14452 | 0.023 | 0.185 | 1.80E-34 |
| TAF6L     | 1.22E-38 | -0.21066 | 0.012 | 0.191 | 1.83E-34 |
| PDGFD     | 1.28E-38 | -0.11856 | 0.007 | 0.143 | 1.91E-34 |
| SLC19A1   | 1.47E-38 | -0.16752 | 0.007 | 0.159 | 2.20E-34 |
| FRS2      | 1.48E-38 | -0.19722 | 0.049 | 0.241 | 2.21E-34 |
| PGGT1B    | 1.48E-38 | 0.100351 | 0.045 | 0.157 | 2.21E-34 |
| BEST3     | 1.49E-38 | -0.20277 | 0.094 | 0.307 | 2.23E-34 |
| FAM91A1   | 1.57E-38 | -0.1604  | 0.019 | 0.189 | 2.35E-34 |
| CORO7     | 1.58E-38 | -0.13498 | 0.028 | 0.189 | 2.37E-34 |
| KTI12     | 1.61E-38 | -0.16852 | 0.019 | 0.188 | 2.41E-34 |
| GINS3     | 1.67E-38 | -0.25039 | 0.012 | 0.193 | 2.50E-34 |
| FBF1      | 1.84E-38 | -0.13269 | 0.007 | 0.153 | 2.76E-34 |
| PPP3CB    | 1.90E-38 | -0.13348 | 0.019 | 0.18  | 2.83E-34 |
| PYG02     | 1.91E-38 | -0.19332 | 0.009 | 0.174 | 2.85E-34 |
| PIBF1     | 1.99E-38 | -0.15357 | 0.023 | 0.188 | 2.97E-34 |
| MKL2      | 2.02E-38 | 0.121912 | 0.028 | 0.123 | 3.02E-34 |
| C1orf112  | 2.04E-38 | -0.21173 | 0.01  | 0.181 | 3.05E-34 |
| NKX2-2    | 2.16E-38 | -0.2126  | 0.065 | 0.253 | 3.23E-34 |
| HNRNPU-AS | 2.29E-38 | -0.12536 | 0.031 | 0.195 | 3.43E-34 |
| CACNG8    | 2.42E-38 | 0.135093 | 0.026 | 0.116 | 3.61E-34 |
| RBM12B    | 2.50E-38 | -0.10477 | 0.023 | 0.172 | 3.73E-34 |
| IFT80     | 2.58E-38 | -0.12401 | 0.023 | 0.179 | 3.85E-34 |

|           |          |          |       |       |          |
|-----------|----------|----------|-------|-------|----------|
| CEP76     | 2.70E-38 | -0.168   | 0.01  | 0.167 | 4.04E-34 |
| ALKBH6    | 2.74E-38 | -0.17289 | 0.017 | 0.188 | 4.10E-34 |
| N4BP2L1   | 2.79E-38 | 0.284779 | 0.063 | 0.135 | 4.17E-34 |
| CDK17     | 2.94E-38 | -0.18458 | 0.028 | 0.207 | 4.40E-34 |
| AL592183. | 3.12E-38 | 0.187538 | 0.065 | 0.153 | 4.66E-34 |
| WDTC1     | 3.25E-38 | -0.10909 | 0.021 | 0.172 | 4.85E-34 |
| TMEM150A  | 3.58E-38 | 0.35588  | 0.054 | 0.09  | 5.35E-34 |
| KDELR3    | 3.60E-38 | -0.1067  | 0.01  | 0.148 | 5.38E-34 |
| CDKL3     | 3.64E-38 | -0.10471 | 0.024 | 0.173 | 5.43E-34 |
| LINC00844 | 3.87E-38 | 0.181056 | 0.084 | 0.19  | 5.78E-34 |
| ZMYND19   | 3.88E-38 | -0.18303 | 0.007 | 0.164 | 5.79E-34 |
| ZNF787    | 4.36E-38 | -0.17305 | 0.007 | 0.17  | 6.52E-34 |
| SOWAHC    | 4.65E-38 | -0.14802 | 0.014 | 0.168 | 6.94E-34 |
| C5orf42   | 4.87E-38 | -0.13427 | 0.021 | 0.181 | 7.28E-34 |
| HOXA2     | 5.09E-38 | -0.21204 | 0.031 | 0.188 | 7.61E-34 |
| KIF3C     | 5.37E-38 | -0.18607 | 0.017 | 0.18  | 8.03E-34 |
| CCNE1     | 6.40E-38 | -0.33957 | 0.002 | 0.186 | 9.57E-34 |
| PEG10     | 6.74E-38 | -0.14954 | 0.07  | 0.242 | 1.01E-33 |
| CHRNA5    | 6.77E-38 | -0.2391  | 0.009 | 0.186 | 1.01E-33 |
| EPS8      | 6.97E-38 | -0.25094 | 0.04  | 0.231 | 1.04E-33 |
| CPSF1     | 7.50E-38 | -0.15849 | 0.024 | 0.188 | 1.12E-33 |
| RP11-563K | 7.81E-38 | -0.13651 | 0.019 | 0.177 | 1.17E-33 |
| RP11-977G | 8.00E-38 | -0.10008 | 0.009 | 0.14  | 1.20E-33 |
| ANXA4     | 8.22E-38 | 0.25842  | 0.058 | 0.136 | 1.23E-33 |
| ARL5B     | 8.32E-38 | -0.16517 | 0.007 | 0.165 | 1.24E-33 |
| GSTCD     | 8.51E-38 | -0.15605 | 0.009 | 0.164 | 1.27E-33 |
| RP11-212F | 9.40E-38 | -0.13463 | 0.028 | 0.188 | 1.40E-33 |
| HSD17B8   | 9.44E-38 | 0.201531 | 0.037 | 0.115 | 1.41E-33 |
| LAMA4     | 1.02E-37 | 0.124025 | 0.037 | 0.143 | 1.52E-33 |
| SLC2A13   | 1.03E-37 | -0.11584 | 0.019 | 0.172 | 1.55E-33 |
| ZC3H4     | 1.04E-37 | -0.16099 | 0.024 | 0.193 | 1.56E-33 |
| EML3      | 1.06E-37 | -0.10421 | 0.012 | 0.154 | 1.59E-33 |
| MAST2     | 1.08E-37 | -0.11309 | 0.028 | 0.188 | 1.62E-33 |
| FXN       | 1.09E-37 | -0.11028 | 0.017 | 0.169 | 1.63E-33 |
| MGST2     | 1.10E-37 | 0.243769 | 0.052 | 0.135 | 1.64E-33 |
| C5orf34   | 1.16E-37 | -0.34839 | 0.005 | 0.191 | 1.73E-33 |
| PLAU      | 1.16E-37 | -0.26479 | 0.019 | 0.206 | 1.73E-33 |
| CD3EAP    | 1.21E-37 | -0.10203 | 0.021 | 0.17  | 1.81E-33 |
| RIC8B     | 1.30E-37 | -0.10234 | 0.03  | 0.188 | 1.94E-33 |
| NEDD4L    | 1.40E-37 | -0.19625 | 0.023 | 0.193 | 2.09E-33 |
| SIAE      | 1.60E-37 | 0.152187 | 0.049 | 0.147 | 2.39E-33 |
| MAPK8     | 1.74E-37 | -0.23296 | 0.01  | 0.189 | 2.60E-33 |
| ZNF335    | 1.83E-37 | -0.12789 | 0.014 | 0.162 | 2.73E-33 |
| TIPARP    | 1.94E-37 | 0.238058 | 0.066 | 0.158 | 2.90E-33 |
| TMPO-AS1  | 2.10E-37 | -0.29578 | 0.007 | 0.194 | 3.14E-33 |
| SOS2      | 2.11E-37 | -0.12263 | 0.016 | 0.162 | 3.16E-33 |
| CSK       | 2.20E-37 | -0.11801 | 0.014 | 0.16  | 3.29E-33 |
| RNF103    | 2.48E-37 | -0.10922 | 0.028 | 0.179 | 3.71E-33 |
| N4BP1     | 2.55E-37 | -0.19786 | 0.012 | 0.181 | 3.81E-33 |
| TYMP      | 2.69E-37 | -0.1085  | 0.019 | 0.165 | 4.02E-33 |
| MEX3D     | 2.70E-37 | -0.25547 | 0.005 | 0.19  | 4.04E-33 |

|           |          |          |       |       |          |
|-----------|----------|----------|-------|-------|----------|
| SH3BGR    | 3.23E-37 | 0.278337 | 0.065 | 0.144 | 4.83E-33 |
| LARP4B    | 3.54E-37 | -0.17736 | 0.007 | 0.167 | 5.28E-33 |
| TP53BP1   | 3.55E-37 | -0.11601 | 0.023 | 0.18  | 5.30E-33 |
| PBXIP1    | 3.65E-37 | 0.299782 | 0.052 | 0.101 | 5.46E-33 |
| KCTD1     | 3.89E-37 | -0.18341 | 0.016 | 0.179 | 5.81E-33 |
| MAPK12    | 3.95E-37 | -0.11827 | 0.012 | 0.158 | 5.91E-33 |
| RGCC      | 4.16E-37 | 0.275483 | 0.108 | 0.204 | 6.22E-33 |
| ZNF668    | 5.36E-37 | -0.11406 | 0.017 | 0.159 | 8.01E-33 |
| GLIS3     | 5.72E-37 | -0.11995 | 0.016 | 0.16  | 8.54E-33 |
| ARL17A    | 5.89E-37 | -0.11596 | 0.014 | 0.158 | 8.80E-33 |
| STK32B    | 5.98E-37 | -0.17939 | 0.01  | 0.172 | 8.94E-33 |
| SLC47A1   | 6.61E-37 | -0.11439 | 0.014 | 0.156 | 9.88E-33 |
| SYCE1L    | 6.81E-37 | -0.15016 | 0.005 | 0.153 | 1.02E-32 |
| BRSK1     | 7.35E-37 | -0.18125 | 0.016 | 0.178 | 1.10E-32 |
| C17orf96  | 7.44E-37 | -0.13014 | 0.009 | 0.149 | 1.11E-32 |
| ATXN1L    | 7.82E-37 | -0.22943 | 0.003 | 0.169 | 1.17E-32 |
| CEP192    | 7.91E-37 | -0.18002 | 0.007 | 0.16  | 1.18E-32 |
| NOP14     | 9.47E-37 | -0.15861 | 0.01  | 0.165 | 1.42E-32 |
| DMD       | 9.63E-37 | 0.133894 | 0.051 | 0.157 | 1.44E-32 |
| KIAA1958  | 1.08E-36 | -0.18651 | 0.012 | 0.178 | 1.62E-32 |
| THOC5     | 1.17E-36 | -0.14752 | 0.014 | 0.17  | 1.74E-32 |
| KDELC1    | 1.23E-36 | -0.11074 | 0.009 | 0.148 | 1.84E-32 |
| RP11-395A | 1.26E-36 | -0.15994 | 0.007 | 0.156 | 1.88E-32 |
| COL16A1   | 1.50E-36 | 0.172843 | 0.04  | 0.125 | 2.24E-32 |
| ZBTB33    | 1.52E-36 | -0.1059  | 0.01  | 0.144 | 2.27E-32 |
| KHK       | 1.54E-36 | -0.18043 | 0.019 | 0.18  | 2.30E-32 |
| THEM6     | 1.65E-36 | -0.12059 | 0.017 | 0.165 | 2.46E-32 |
| COA7      | 1.68E-36 | 0.128548 | 0.035 | 0.123 | 2.51E-32 |
| LONRF2    | 1.76E-36 | -0.15477 | 0.021 | 0.179 | 2.63E-32 |
| IFT122    | 1.80E-36 | -0.18495 | 0.007 | 0.164 | 2.68E-32 |
| DLX1      | 2.25E-36 | -0.25505 | 0.026 | 0.201 | 3.36E-32 |
| PAQR3     | 2.28E-36 | -0.17253 | 0.012 | 0.168 | 3.41E-32 |
| AGAP3     | 2.33E-36 | -0.20178 | 0.023 | 0.194 | 3.48E-32 |
| YEATS2    | 2.41E-36 | -0.1027  | 0.028 | 0.177 | 3.60E-32 |
| RCBTB2    | 2.47E-36 | -0.21726 | 0.024 | 0.195 | 3.70E-32 |
| AMPD2     | 2.63E-36 | 0.173003 | 0.045 | 0.13  | 3.94E-32 |
| EPC2      | 2.64E-36 | -0.18652 | 0.019 | 0.185 | 3.95E-32 |
| AVIL      | 2.67E-36 | -0.17429 | 0.059 | 0.242 | 3.99E-32 |
| GSE1      | 2.67E-36 | -0.13427 | 0.023 | 0.172 | 3.99E-32 |
| ZNF669    | 2.74E-36 | -0.12331 | 0.024 | 0.17  | 4.10E-32 |
| PTPN23    | 2.78E-36 | -0.1463  | 0.007 | 0.153 | 4.16E-32 |
| FAM175B   | 2.90E-36 | 0.113443 | 0.035 | 0.136 | 4.34E-32 |
| GTPBP10   | 3.02E-36 | 0.140181 | 0.051 | 0.148 | 4.52E-32 |
| MARK1     | 3.30E-36 | -0.18607 | 0.007 | 0.16  | 4.93E-32 |
| KCTD12    | 3.38E-36 | 0.172217 | 0.033 | 0.12  | 5.05E-32 |
| ASPHD2    | 3.51E-36 | -0.10974 | 0.009 | 0.148 | 5.25E-32 |
| ZNF143    | 3.77E-36 | -0.13775 | 0.017 | 0.165 | 5.63E-32 |
| MFSD6     | 4.17E-36 | -0.15397 | 0.009 | 0.158 | 6.23E-32 |
| PTBP2     | 4.47E-36 | -0.15564 | 0.037 | 0.199 | 6.68E-32 |
| SPHK1     | 4.64E-36 | -0.23949 | 0.003 | 0.173 | 6.94E-32 |
| MTRNR2L1C | 4.76E-36 | 1.034209 | 0.182 | 0.016 | 7.12E-32 |



|            |          |          |       |       |          |
|------------|----------|----------|-------|-------|----------|
| IRAK4      | 4.80E-36 | 0.109449 | 0.035 | 0.116 | 7.18E-32 |
| LIN52      | 5.14E-36 | -0.24399 | 0.009 | 0.175 | 7.69E-32 |
| LSS        | 5.48E-36 | 0.19525  | 0.044 | 0.122 | 8.20E-32 |
| E2F8       | 5.81E-36 | -0.30446 | 0     | 0.17  | 8.69E-32 |
| HEY2       | 6.15E-36 | -0.11473 | 0.017 | 0.163 | 9.18E-32 |
| NUP133     | 6.38E-36 | -0.25125 | 0.019 | 0.201 | 9.53E-32 |
| AC159540.  | 6.78E-36 | -0.1086  | 0.026 | 0.173 | 1.01E-31 |
| ZNHIT2     | 7.06E-36 | -0.13006 | 0.012 | 0.162 | 1.06E-31 |
| SMIM13     | 7.24E-36 | -0.2433  | 0.009 | 0.189 | 1.08E-31 |
| ZNF300     | 7.30E-36 | -0.28424 | 0.012 | 0.194 | 1.09E-31 |
| STK32A     | 8.24E-36 | 0.1613   | 0.026 | 0.1   | 1.23E-31 |
| DUSP15     | 8.97E-36 | -0.18228 | 0.007 | 0.16  | 1.34E-31 |
| LMO1       | 1.05E-35 | -0.4171  | 0.038 | 0.248 | 1.57E-31 |
| TLE2       | 1.08E-35 | -0.18184 | 0.031 | 0.207 | 1.62E-31 |
| GGA2       | 1.16E-35 | -0.18189 | 0.016 | 0.175 | 1.73E-31 |
| IFFO1      | 1.17E-35 | -0.11543 | 0.023 | 0.164 | 1.75E-31 |
| TMEM216    | 1.18E-35 | 0.139487 | 0.031 | 0.104 | 1.76E-31 |
| GALNT7     | 1.19E-35 | -0.14032 | 0.014 | 0.16  | 1.78E-31 |
| VCPIP1     | 1.49E-35 | -0.1419  | 0.009 | 0.151 | 2.23E-31 |
| TMTC4      | 1.51E-35 | -0.16572 | 0.017 | 0.177 | 2.25E-31 |
| CSGALNACT1 | 1.54E-35 | -0.13212 | 0.016 | 0.162 | 2.30E-31 |
| RTTN       | 1.59E-35 | -0.14385 | 0.007 | 0.152 | 2.38E-31 |
| DROSHA     | 1.66E-35 | -0.11212 | 0.021 | 0.173 | 2.49E-31 |
| CAMK1D     | 1.82E-35 | -0.10532 | 0.023 | 0.168 | 2.72E-31 |
| EBF4       | 1.87E-35 | -0.1367  | 0.016 | 0.165 | 2.79E-31 |
| ZBTB25     | 1.88E-35 | -0.12108 | 0.017 | 0.159 | 2.81E-31 |
| THUMPD2    | 1.92E-35 | -0.12484 | 0.031 | 0.185 | 2.86E-31 |
| HLA-DMA    | 2.05E-35 | 0.57084  | 0.112 | 0.107 | 3.06E-31 |
| MAPKAPK3   | 2.11E-35 | -0.14803 | 0.009 | 0.154 | 3.15E-31 |
| PIM1       | 2.13E-35 | -0.10517 | 0.033 | 0.186 | 3.18E-31 |
| APAF1      | 2.25E-35 | -0.19718 | 0.01  | 0.172 | 3.36E-31 |
| ZNF865     | 2.31E-35 | -0.1391  | 0.01  | 0.156 | 3.46E-31 |
| ACSBG1     | 2.66E-35 | 0.134206 | 0.037 | 0.132 | 3.98E-31 |
| PXMP4      | 2.68E-35 | -0.23337 | 0.009 | 0.173 | 4.00E-31 |
| C1orf54    | 2.70E-35 | 0.116093 | 0.03  | 0.128 | 4.04E-31 |
| PIP4K2A    | 2.71E-35 | -0.11282 | 0.016 | 0.158 | 4.05E-31 |
| KANK1      | 2.89E-35 | 0.108361 | 0.042 | 0.144 | 4.32E-31 |
| ANKRD13A   | 2.89E-35 | -0.15648 | 0.023 | 0.177 | 4.32E-31 |
| UNC119B    | 2.95E-35 | -0.17764 | 0.01  | 0.167 | 4.41E-31 |
| LIG3       | 3.02E-35 | -0.15156 | 0.01  | 0.159 | 4.51E-31 |
| UHRF2      | 3.08E-35 | -0.14431 | 0.012 | 0.156 | 4.61E-31 |
| NME2       | 3.28E-35 | -0.16003 | 0.007 | 0.156 | 4.90E-31 |
| ATP1A3     | 3.33E-35 | -0.14569 | 0.059 | 0.219 | 4.97E-31 |
| NUDT8      | 3.58E-35 | -0.1357  | 0.012 | 0.151 | 5.35E-31 |
| ACSS2      | 3.87E-35 | -0.11271 | 0.012 | 0.147 | 5.79E-31 |
| WASF3      | 4.43E-35 | 0.136797 | 0.042 | 0.143 | 6.62E-31 |
| NLE1       | 4.65E-35 | -0.18769 | 0.005 | 0.16  | 6.94E-31 |
| HERC1      | 4.77E-35 | -0.112   | 0.016 | 0.156 | 7.12E-31 |
| BANP       | 4.94E-35 | -0.2052  | 0.012 | 0.178 | 7.39E-31 |
| TET1       | 6.88E-35 | -0.15918 | 0.007 | 0.153 | 1.03E-30 |
| NID1       | 8.03E-35 | -0.16441 | 0.003 | 0.154 | 1.20E-30 |

|           |          |          |       |       |          |
|-----------|----------|----------|-------|-------|----------|
| LINC0091C | 8.24E-35 | -0.15889 | 0.019 | 0.169 | 1.23E-30 |
| ARNTL     | 8.40E-35 | -0.15176 | 0.014 | 0.167 | 1.25E-30 |
| SIX1      | 9.11E-35 | -0.12525 | 0.019 | 0.158 | 1.36E-30 |
| GSG1L     | 9.66E-35 | 0.269555 | 0.058 | 0.135 | 1.44E-30 |
| TP73      | 9.88E-35 | -0.24382 | 0.01  | 0.18  | 1.48E-30 |
| Clorf159  | 9.93E-35 | -0.20813 | 0.005 | 0.16  | 1.48E-30 |
| KCNIP1    | 1.07E-34 | 0.404093 | 0.087 | 0.144 | 1.60E-30 |
| SIDT2     | 1.13E-34 | 0.16939  | 0.037 | 0.107 | 1.68E-30 |
| CTC-260E6 | 1.14E-34 | -0.26806 | 0.002 | 0.173 | 1.71E-30 |
| CDH24     | 1.22E-34 | -0.21687 | 0.009 | 0.169 | 1.82E-30 |
| PAK1      | 1.30E-34 | -0.12951 | 0.023 | 0.165 | 1.95E-30 |
| ATCAY     | 1.40E-34 | -0.16881 | 0.049 | 0.221 | 2.10E-30 |
| DDHD2     | 1.42E-34 | -0.14294 | 0.021 | 0.17  | 2.13E-30 |
| DBR1      | 1.61E-34 | -0.11563 | 0.021 | 0.165 | 2.41E-30 |
| MIR497HG  | 1.67E-34 | 0.193841 | 0.065 | 0.149 | 2.50E-30 |
| SETDB1    | 1.70E-34 | 0.110893 | 0.035 | 0.128 | 2.54E-30 |
| ZNF667    | 1.79E-34 | 0.156023 | 0.042 | 0.121 | 2.68E-30 |
| TYROBP    | 1.95E-34 | 0.337278 | 0.098 | 0.151 | 2.91E-30 |
| ALS2      | 2.00E-34 | -0.12748 | 0.009 | 0.144 | 2.99E-30 |
| CEP19     | 2.08E-34 | -0.10367 | 0.026 | 0.172 | 3.12E-30 |
| GEN1      | 2.23E-34 | -0.14297 | 0.016 | 0.164 | 3.34E-30 |
| HMG20A    | 2.25E-34 | -0.13717 | 0.019 | 0.172 | 3.37E-30 |
| FKTN      | 2.27E-34 | -0.11097 | 0.014 | 0.149 | 3.39E-30 |
| FAM72D    | 2.36E-34 | -0.27045 | 0     | 0.163 | 3.53E-30 |
| FAM195B   | 2.48E-34 | 0.818485 | 0.122 | 0.068 | 3.71E-30 |
| RP11-400F | 2.80E-34 | -0.14372 | 0.01  | 0.154 | 4.18E-30 |
| RELT      | 2.84E-34 | -0.18585 | 0.005 | 0.157 | 4.24E-30 |
| SPATA5    | 2.85E-34 | -0.10798 | 0.014 | 0.147 | 4.26E-30 |
| TOM1L1    | 3.61E-34 | -0.1043  | 0.01  | 0.138 | 5.39E-30 |
| CDK5R1    | 3.86E-34 | -0.1203  | 0.016 | 0.153 | 5.76E-30 |
| MVB12B    | 4.15E-34 | -0.14608 | 0.021 | 0.177 | 6.20E-30 |
| EPHA3     | 4.37E-34 | -0.2154  | 0     | 0.162 | 6.53E-30 |
| HIST1H1B  | 4.37E-34 | -0.30848 | 0     | 0.162 | 6.53E-30 |
| ZMYM1     | 4.41E-34 | -0.17101 | 0.007 | 0.157 | 6.59E-30 |
| TMEM79    | 4.91E-34 | -0.19493 | 0.017 | 0.18  | 7.34E-30 |
| VPS13A    | 5.05E-34 | -0.13301 | 0.014 | 0.156 | 7.54E-30 |
| MGLL      | 5.24E-34 | 0.182956 | 0.066 | 0.168 | 7.83E-30 |
| IL32      | 5.81E-34 | 0.385494 | 0.047 | 0.088 | 8.69E-30 |
| CDK8      | 5.83E-34 | -0.10157 | 0.012 | 0.147 | 8.72E-30 |
| PHRF1     | 6.27E-34 | -0.18342 | 0.014 | 0.168 | 9.37E-30 |
| CDR2L     | 6.51E-34 | -0.10928 | 0.01  | 0.141 | 9.74E-30 |
| PIANP     | 6.80E-34 | -0.13368 | 0.017 | 0.16  | 1.02E-29 |
| EPOR      | 6.86E-34 | -0.22827 | 0.007 | 0.174 | 1.03E-29 |
| COL5A2    | 7.23E-34 | -0.13079 | 0.01  | 0.147 | 1.08E-29 |
| IRF9      | 7.29E-34 | 0.383933 | 0.084 | 0.148 | 1.09E-29 |
| FAM107B   | 7.88E-34 | -0.15404 | 0.019 | 0.17  | 1.18E-29 |
| TMEM176B  | 9.70E-34 | 0.651152 | 0.105 | 0.091 | 1.45E-29 |
| FNTB      | 1.07E-33 | -0.13953 | 0.023 | 0.177 | 1.60E-29 |
| VCL       | 1.24E-33 | -0.13236 | 0.017 | 0.162 | 1.86E-29 |
| GPR75-ASE | 1.34E-33 | -0.22406 | 0.021 | 0.186 | 2.00E-29 |
| CPT2      | 1.35E-33 | -0.2034  | 0.017 | 0.181 | 2.02E-29 |

|           |          |          |       |       |          |
|-----------|----------|----------|-------|-------|----------|
| CSF1      | 1.39E-33 | 0.150854 | 0.04  | 0.122 | 2.08E-29 |
| LCA5      | 1.65E-33 | -0.12212 | 0.009 | 0.14  | 2.47E-29 |
| DNAJB5    | 1.68E-33 | -0.10196 | 0.019 | 0.154 | 2.51E-29 |
| MEX3B     | 1.86E-33 | -0.18128 | 0.023 | 0.17  | 2.78E-29 |
| CAAP1     | 2.37E-33 | -0.17077 | 0.021 | 0.179 | 3.54E-29 |
| ALMS1     | 2.51E-33 | -0.15286 | 0.009 | 0.149 | 3.75E-29 |
| RNGTT     | 2.67E-33 | -0.18362 | 0.014 | 0.168 | 4.00E-29 |
| POC5      | 2.77E-33 | -0.17383 | 0.017 | 0.174 | 4.14E-29 |
| ROB03     | 3.49E-33 | 0.191766 | 0.054 | 0.125 | 5.21E-29 |
| STON2     | 3.59E-33 | -0.12704 | 0.012 | 0.148 | 5.37E-29 |
| KIAA0100  | 3.70E-33 | -0.11549 | 0.016 | 0.153 | 5.53E-29 |
| SLC27A4   | 3.90E-33 | -0.11242 | 0.01  | 0.141 | 5.82E-29 |
| TLL5      | 4.05E-33 | -0.11215 | 0.016 | 0.149 | 6.06E-29 |
| RINT1     | 4.16E-33 | -0.12924 | 0.026 | 0.168 | 6.22E-29 |
| LIPE      | 4.21E-33 | -0.17344 | 0.014 | 0.162 | 6.30E-29 |
| VIPR2     | 4.38E-33 | -0.3089  | 0.061 | 0.247 | 6.55E-29 |
| NUDT14    | 4.43E-33 | -0.12506 | 0.01  | 0.144 | 6.62E-29 |
| CD200     | 4.81E-33 | -0.1299  | 0.012 | 0.146 | 7.19E-29 |
| PBX2      | 4.90E-33 | 0.116446 | 0.038 | 0.125 | 7.33E-29 |
| POLH      | 5.33E-33 | -0.22585 | 0.007 | 0.164 | 7.96E-29 |
| DDX20     | 5.35E-33 | -0.20842 | 0.012 | 0.168 | 7.99E-29 |
| C11orf80  | 5.58E-33 | -0.11512 | 0.003 | 0.125 | 8.34E-29 |
| CC2D2A    | 6.87E-33 | 0.188139 | 0.04  | 0.114 | 1.03E-28 |
| ZNF625    | 7.31E-33 | -0.22295 | 0.009 | 0.172 | 1.09E-28 |
| SGTB      | 7.64E-33 | -0.10104 | 0.014 | 0.144 | 1.14E-28 |
| GMPR      | 7.82E-33 | 0.161866 | 0.033 | 0.098 | 1.17E-28 |
| GABBR1    | 8.13E-33 | 0.109435 | 0.045 | 0.132 | 1.21E-28 |
| AGAP2-AS1 | 8.19E-33 | -0.44758 | 0.049 | 0.258 | 1.22E-28 |
| LIN9      | 8.56E-33 | -0.27142 | 0.005 | 0.172 | 1.28E-28 |
| RPS6KL1   | 8.89E-33 | -0.14636 | 0.033 | 0.18  | 1.33E-28 |
| B3GAT2    | 1.00E-32 | -0.17308 | 0.028 | 0.177 | 1.50E-28 |
| CPOX      | 1.07E-32 | -0.10723 | 0.014 | 0.151 | 1.60E-28 |
| GPR161    | 1.12E-32 | -0.20976 | 0.012 | 0.172 | 1.67E-28 |
| TBC1D24   | 1.41E-32 | -0.10348 | 0.016 | 0.147 | 2.10E-28 |
| OGFRL1    | 1.45E-32 | -0.16043 | 0.012 | 0.154 | 2.17E-28 |
| LTF       | 1.59E-32 | 1.291069 | 0.162 | 0.032 | 2.37E-28 |
| RP11-119E | 1.63E-32 | -0.13403 | 0.014 | 0.151 | 2.43E-28 |
| MTA2      | 1.64E-32 | -0.16036 | 0.016 | 0.162 | 2.44E-28 |
| STK38     | 1.95E-32 | -0.10853 | 0.014 | 0.144 | 2.91E-28 |
| MBP       | 1.97E-32 | 0.4558   | 0.124 | 0.173 | 2.95E-28 |
| REX01     | 2.01E-32 | -0.15736 | 0.01  | 0.154 | 3.01E-28 |
| USP37     | 2.25E-32 | -0.23565 | 0.009 | 0.167 | 3.37E-28 |
| RBM19     | 2.31E-32 | -0.1024  | 0.017 | 0.149 | 3.46E-28 |
| PHACTR2   | 2.41E-32 | -0.14269 | 0.002 | 0.137 | 3.60E-28 |
| SPTLC2    | 2.48E-32 | -0.12013 | 0.019 | 0.157 | 3.70E-28 |
| SMG5      | 2.84E-32 | -0.10045 | 0.026 | 0.17  | 4.24E-28 |
| ATG16L1   | 2.88E-32 | -0.17044 | 0.009 | 0.153 | 4.30E-28 |
| CPT1C     | 3.01E-32 | 0.13713  | 0.063 | 0.154 | 4.50E-28 |
| IQGAP3    | 3.18E-32 | -0.29754 | 0     | 0.153 | 4.75E-28 |
| CSTF2     | 3.22E-32 | -0.16592 | 0.016 | 0.162 | 4.81E-28 |
| NR2E1     | 3.42E-32 | -0.10834 | 0.01  | 0.133 | 5.11E-28 |

|           |          |          |       |       |          |
|-----------|----------|----------|-------|-------|----------|
| GPSM1     | 3.49E-32 | -0.11754 | 0.016 | 0.153 | 5.21E-28 |
| EPHB2     | 3.91E-32 | -0.18185 | 0.014 | 0.164 | 5.84E-28 |
| KIF5A     | 5.13E-32 | -0.2452  | 0.047 | 0.226 | 7.67E-28 |
| HOXB2     | 5.15E-32 | -0.42897 | 0.021 | 0.207 | 7.70E-28 |
| MPV17L    | 5.62E-32 | 0.198973 | 0.04  | 0.101 | 8.39E-28 |
| RASD1     | 6.31E-32 | 0.480124 | 0.113 | 0.131 | 9.43E-28 |
| ZC3H3     | 6.85E-32 | -0.17743 | 0.014 | 0.165 | 1.02E-27 |
| OXSM      | 7.45E-32 | 0.133871 | 0.026 | 0.101 | 1.11E-27 |
| PYCRL     | 7.66E-32 | -0.14507 | 0.014 | 0.149 | 1.14E-27 |
| ZZEF1     | 7.73E-32 | -0.12461 | 0.014 | 0.147 | 1.15E-27 |
| EFNA1     | 8.24E-32 | 0.489244 | 0.092 | 0.109 | 1.23E-27 |
| HOXA10    | 8.41E-32 | -0.37574 | 0.023 | 0.195 | 1.26E-27 |
| MOXD1     | 9.09E-32 | -0.24453 | 0.005 | 0.167 | 1.36E-27 |
| MCPH1     | 9.26E-32 | -0.11539 | 0.014 | 0.143 | 1.38E-27 |
| SFI1      | 9.64E-32 | -0.13846 | 0.019 | 0.16  | 1.44E-27 |
| XIST      | 9.65E-32 | 0.603968 | 0.175 | 0.146 | 1.44E-27 |
| PROSER1   | 1.01E-31 | -0.20044 | 0.01  | 0.16  | 1.51E-27 |
| MAPK11    | 1.07E-31 | -0.12707 | 0.012 | 0.147 | 1.60E-27 |
| ICAM3     | 1.08E-31 | -0.19597 | 0     | 0.151 | 1.61E-27 |
| GBP2      | 1.08E-31 | 0.655866 | 0.099 | 0.085 | 1.62E-27 |
| GLRB      | 1.08E-31 | -0.10019 | 0.017 | 0.147 | 1.62E-27 |
| CHRD1     | 1.11E-31 | -0.21315 | 0.007 | 0.157 | 1.66E-27 |
| E2F7      | 1.20E-31 | -0.19917 | 0.003 | 0.153 | 1.79E-27 |
| TRAPPC10  | 1.25E-31 | -0.18836 | 0.005 | 0.159 | 1.87E-27 |
| CAD       | 1.28E-31 | -0.17917 | 0.009 | 0.153 | 1.91E-27 |
| SEMA4C    | 1.29E-31 | -0.10674 | 0.024 | 0.162 | 1.93E-27 |
| LRRC14    | 1.32E-31 | -0.10989 | 0.021 | 0.159 | 1.98E-27 |
| ZFP62     | 1.33E-31 | -0.10384 | 0.024 | 0.16  | 1.98E-27 |
| RP11-412E | 1.34E-31 | 0.104902 | 0.031 | 0.114 | 2.00E-27 |
| CDC25A    | 1.42E-31 | -0.26015 | 0.005 | 0.16  | 2.12E-27 |
| GK        | 1.50E-31 | -0.14325 | 0.012 | 0.149 | 2.24E-27 |
| PCDHB2    | 1.80E-31 | -0.13732 | 0.019 | 0.158 | 2.70E-27 |
| NDUFA7    | 1.82E-31 | 1.010059 | 0.157 | 0.012 | 2.72E-27 |
| PGAM5     | 1.84E-31 | -0.22259 | 0.002 | 0.163 | 2.75E-27 |
| FGGY      | 2.07E-31 | 0.25718  | 0.051 | 0.116 | 3.10E-27 |
| MAML1     | 2.15E-31 | -0.18349 | 0.017 | 0.168 | 3.21E-27 |
| KCTD9     | 2.38E-31 | -0.15934 | 0.012 | 0.151 | 3.55E-27 |
| FBLIM1    | 2.40E-31 | 0.240551 | 0.061 | 0.119 | 3.59E-27 |
| SRPX2     | 2.41E-31 | 0.202856 | 0.033 | 0.098 | 3.61E-27 |
| TDRD3     | 2.52E-31 | -0.17543 | 0.017 | 0.167 | 3.76E-27 |
| MIR181A1H | 2.59E-31 | -0.11868 | 0.033 | 0.169 | 3.88E-27 |
| SLC16A14  | 2.61E-31 | -0.22166 | 0.002 | 0.148 | 3.91E-27 |
| ZSCAN32   | 2.65E-31 | -0.12172 | 0.016 | 0.147 | 3.95E-27 |
| SLC25A32  | 2.83E-31 | -0.16788 | 0.012 | 0.157 | 4.23E-27 |
| TTC26     | 2.85E-31 | 0.120233 | 0.026 | 0.106 | 4.27E-27 |
| YTHDF3-AS | 3.06E-31 | -0.10103 | 0.014 | 0.141 | 4.58E-27 |
| E2F2      | 3.18E-31 | -0.2681  | 0.002 | 0.146 | 4.76E-27 |
| INCENP    | 3.24E-31 | -0.22999 | 0.002 | 0.16  | 4.85E-27 |
| IPO11     | 3.55E-31 | -0.1199  | 0.01  | 0.137 | 5.30E-27 |
| THAP8     | 3.57E-31 | 0.103153 | 0.033 | 0.122 | 5.34E-27 |
| BDH1      | 3.93E-31 | 0.116496 | 0.035 | 0.128 | 5.87E-27 |

|           |          |          |       |       |          |
|-----------|----------|----------|-------|-------|----------|
| SLC30A1   | 3.97E-31 | -0.15062 | 0.003 | 0.137 | 5.93E-27 |
| KNTC1     | 4.26E-31 | -0.18546 | 0.012 | 0.156 | 6.37E-27 |
| AHNAK     | 4.27E-31 | 0.110518 | 0.023 | 0.094 | 6.38E-27 |
| RP11-182L | 4.43E-31 | -0.13721 | 0.016 | 0.146 | 6.61E-27 |
| SMO       | 4.53E-31 | -0.12057 | 0.016 | 0.149 | 6.77E-27 |
| GOS2      | 4.55E-31 | 0.226754 | 0.058 | 0.138 | 6.80E-27 |
| CCDC117   | 5.32E-31 | -0.12977 | 0.007 | 0.131 | 7.95E-27 |
| RP11-277F | 5.35E-31 | -0.23571 | 0.037 | 0.206 | 8.00E-27 |
| RP11-263K | 5.44E-31 | 0.198727 | 0.037 | 0.095 | 8.13E-27 |
| NTM       | 6.15E-31 | 0.112026 | 0.101 | 0.2   | 9.18E-27 |
| PARP11    | 7.07E-31 | -0.13212 | 0.014 | 0.147 | 1.06E-26 |
| SLC16A2   | 7.35E-31 | -0.12066 | 0.009 | 0.133 | 1.10E-26 |
| KLF9      | 8.01E-31 | 0.103886 | 0.059 | 0.156 | 1.20E-26 |
| TMEM231   | 8.10E-31 | 0.11618  | 0.033 | 0.111 | 1.21E-26 |
| ZFP1      | 9.05E-31 | -0.12408 | 0.021 | 0.156 | 1.35E-26 |
| YIPF2     | 9.29E-31 | 0.122699 | 0.047 | 0.138 | 1.39E-26 |
| NLK       | 1.05E-30 | -0.14705 | 0.012 | 0.152 | 1.57E-26 |
| MFHAS1    | 1.18E-30 | -0.14861 | 0.007 | 0.14  | 1.76E-26 |
| FIGNL1    | 1.22E-30 | -0.24571 | 0.014 | 0.167 | 1.82E-26 |
| KBTBD3    | 1.29E-30 | 0.100021 | 0.045 | 0.137 | 1.93E-26 |
| ZNF611    | 1.31E-30 | -0.145   | 0.016 | 0.151 | 1.96E-26 |
| ZKSCAN5   | 1.33E-30 | -0.11885 | 0.019 | 0.154 | 1.99E-26 |
| VAR2      | 1.47E-30 | -0.10031 | 0.014 | 0.137 | 2.19E-26 |
| STK35     | 1.67E-30 | -0.11808 | 0.007 | 0.132 | 2.49E-26 |
| WWC3      | 1.75E-30 | -0.14865 | 0.009 | 0.143 | 2.62E-26 |
| RNF182    | 1.88E-30 | -0.15359 | 0.012 | 0.141 | 2.81E-26 |
| PLIN2     | 1.99E-30 | 0.534285 | 0.096 | 0.115 | 2.97E-26 |
| SPAG1     | 2.03E-30 | -0.12405 | 0.009 | 0.135 | 3.03E-26 |
| POLE      | 2.12E-30 | -0.21011 | 0.009 | 0.157 | 3.16E-26 |
| LRFN4     | 2.26E-30 | -0.13163 | 0.014 | 0.152 | 3.37E-26 |
| MAGI3     | 2.28E-30 | -0.16705 | 0.007 | 0.143 | 3.40E-26 |
| FAM181A   | 2.38E-30 | 0.379151 | 0.065 | 0.099 | 3.56E-26 |
| ZMYM3     | 2.97E-30 | -0.12879 | 0.014 | 0.146 | 4.44E-26 |
| C17orf53  | 3.23E-30 | -0.20533 | 0.002 | 0.14  | 4.82E-26 |
| ZNF512B   | 3.31E-30 | -0.17077 | 0.003 | 0.142 | 4.95E-26 |
| NTRK3     | 3.40E-30 | 0.2348   | 0.051 | 0.116 | 5.08E-26 |
| ZIK1      | 3.56E-30 | -0.2168  | 0.009 | 0.151 | 5.32E-26 |
| BDNF-AS   | 4.47E-30 | 0.114879 | 0.03  | 0.099 | 6.68E-26 |
| TUSC1     | 4.59E-30 | -0.20227 | 0.014 | 0.148 | 6.86E-26 |
| FIZ1      | 5.24E-30 | -0.13066 | 0.005 | 0.127 | 7.83E-26 |
| ARHGFE25  | 5.51E-30 | -0.17413 | 0.031 | 0.174 | 8.24E-26 |
| ATXN80S   | 5.57E-30 | 0.99749  | 0.166 | 0.015 | 8.32E-26 |
| MXI1      | 5.58E-30 | 0.12074  | 0.04  | 0.119 | 8.34E-26 |
| TMEM201   | 6.11E-30 | -0.18343 | 0.007 | 0.156 | 9.13E-26 |
| PLXNB1    | 6.16E-30 | 0.190332 | 0.047 | 0.117 | 9.20E-26 |
| STOX2     | 6.59E-30 | -0.12199 | 0.023 | 0.148 | 9.85E-26 |
| ZNF200    | 6.67E-30 | -0.11003 | 0.01  | 0.128 | 9.97E-26 |
| RIT2      | 6.79E-30 | 0.455852 | 0.082 | 0.096 | 1.02E-25 |
| APOL2     | 6.88E-30 | 0.409643 | 0.063 | 0.099 | 1.03E-25 |
| HDHD3     | 7.07E-30 | 0.151681 | 0.038 | 0.101 | 1.06E-25 |
| ZNF519    | 7.32E-30 | -0.22393 | 0.014 | 0.163 | 1.09E-25 |

|           |          |          |       |       |          |
|-----------|----------|----------|-------|-------|----------|
| NDST1     | 7.46E-30 | -0.11893 | 0.01  | 0.137 | 1.12E-25 |
| CACNB3    | 7.88E-30 | -0.2044  | 0.007 | 0.147 | 1.18E-25 |
| RGS1      | 8.24E-30 | 0.159524 | 0.07  | 0.146 | 1.23E-25 |
| TCEAL5    | 8.96E-30 | 0.188912 | 0.073 | 0.154 | 1.34E-25 |
| PIGZ      | 9.62E-30 | -0.18837 | 0.003 | 0.14  | 1.44E-25 |
| ZNRF3     | 9.83E-30 | -0.10238 | 0.007 | 0.122 | 1.47E-25 |
| RECK      | 9.94E-30 | -0.14971 | 0.012 | 0.147 | 1.48E-25 |
| SPATA2    | 1.10E-29 | -0.15088 | 0.002 | 0.132 | 1.64E-25 |
| PRSS23    | 1.14E-29 | 0.285826 | 0.051 | 0.091 | 1.71E-25 |
| SCAF8     | 1.15E-29 | -0.16661 | 0.007 | 0.143 | 1.71E-25 |
| STRN      | 1.17E-29 | -0.10637 | 0.007 | 0.127 | 1.74E-25 |
| TGFBR1    | 1.21E-29 | -0.18765 | 0.016 | 0.164 | 1.81E-25 |
| ZNF689    | 1.34E-29 | -0.14183 | 0.017 | 0.151 | 2.01E-25 |
| RP3-428L1 | 1.41E-29 | -0.22447 | 0.002 | 0.152 | 2.10E-25 |
| C18orf54  | 1.49E-29 | -0.18942 | 0.007 | 0.148 | 2.23E-25 |
| UBR1      | 1.64E-29 | -0.19709 | 0.014 | 0.163 | 2.45E-25 |
| ZNF384    | 1.64E-29 | -0.14271 | 0.017 | 0.152 | 2.46E-25 |
| AP4S1     | 1.70E-29 | 0.143839 | 0.03  | 0.102 | 2.54E-25 |
| ZNF703    | 1.73E-29 | -0.11758 | 0.014 | 0.142 | 2.59E-25 |
| FAM118A   | 1.83E-29 | -0.11159 | 0.023 | 0.151 | 2.73E-25 |
| USP40     | 1.86E-29 | -0.10557 | 0.019 | 0.146 | 2.78E-25 |
| TOX3      | 1.89E-29 | -0.18763 | 0.033 | 0.172 | 2.83E-25 |
| WDR36     | 1.90E-29 | -0.14887 | 0.014 | 0.148 | 2.84E-25 |
| LCLAT1    | 1.96E-29 | -0.11808 | 0.01  | 0.135 | 2.93E-25 |
| GRIK3     | 2.09E-29 | -0.1366  | 0.021 | 0.157 | 3.12E-25 |
| NEK3      | 2.33E-29 | -0.13194 | 0.007 | 0.13  | 3.48E-25 |
| EVA1C     | 2.67E-29 | -0.11049 | 0.012 | 0.135 | 3.99E-25 |
| SRGN      | 2.76E-29 | 0.392077 | 0.136 | 0.16  | 4.12E-25 |
| GPR137C   | 3.14E-29 | -0.13332 | 0.012 | 0.137 | 4.70E-25 |
| TEX10     | 3.16E-29 | -0.15732 | 0.017 | 0.154 | 4.72E-25 |
| PTGDS     | 3.26E-29 | 0.644082 | 0.126 | 0.123 | 4.87E-25 |
| PLAA      | 3.36E-29 | -0.21378 | 0.007 | 0.148 | 5.02E-25 |
| ZBTB18    | 3.42E-29 | -0.2024  | 0.009 | 0.146 | 5.12E-25 |
| PUS1      | 3.83E-29 | -0.13953 | 0.01  | 0.14  | 5.72E-25 |
| HOXC9     | 4.39E-29 | -0.30545 | 0.009 | 0.151 | 6.56E-25 |
| ACTA2     | 4.42E-29 | 0.124175 | 0.019 | 0.088 | 6.60E-25 |
| SIMC1     | 4.44E-29 | -0.20541 | 0.009 | 0.157 | 6.64E-25 |
| TSGA10    | 4.49E-29 | 0.122058 | 0.031 | 0.094 | 6.71E-25 |
| TUBGCP5   | 4.51E-29 | -0.11945 | 0.012 | 0.137 | 6.75E-25 |
| TOX       | 4.78E-29 | -0.13222 | 0.009 | 0.138 | 7.14E-25 |
| NR4A1     | 4.80E-29 | 0.141389 | 0.065 | 0.151 | 7.18E-25 |
| SLC22A4   | 4.93E-29 | -0.15205 | 0.002 | 0.125 | 7.37E-25 |
| MRE11A    | 5.02E-29 | -0.15798 | 0.016 | 0.151 | 7.50E-25 |
| TXNDC11   | 5.17E-29 | -0.10087 | 0.012 | 0.131 | 7.73E-25 |
| NCKAP5L   | 5.19E-29 | 0.169927 | 0.042 | 0.11  | 7.76E-25 |
| AGO1      | 5.29E-29 | -0.1283  | 0.016 | 0.144 | 7.90E-25 |
| ZNF629    | 6.62E-29 | -0.16768 | 0.007 | 0.138 | 9.89E-25 |
| PIEZ01    | 7.97E-29 | -0.13514 | 0.009 | 0.136 | 1.19E-24 |
| OSBPL10   | 8.18E-29 | -0.11922 | 0.003 | 0.117 | 1.22E-24 |
| LIMK2     | 8.68E-29 | -0.1193  | 0.007 | 0.126 | 1.30E-24 |
| MGP       | 1.02E-28 | 1.187544 | 0.131 | 0.028 | 1.53E-24 |

|           |          |          |       |       |          |
|-----------|----------|----------|-------|-------|----------|
| ISG20     | 1.02E-28 | 0.549914 | 0.073 | 0.067 | 1.53E-24 |
| CEP128    | 1.06E-28 | -0.12425 | 0.005 | 0.122 | 1.58E-24 |
| SPRYD4    | 1.06E-28 | 0.155118 | 0.026 | 0.098 | 1.58E-24 |
| FGF1      | 1.07E-28 | 0.329254 | 0.042 | 0.075 | 1.60E-24 |
| SLC39A14  | 1.11E-28 | 0.258215 | 0.045 | 0.088 | 1.66E-24 |
| NEK4      | 1.31E-28 | -0.11332 | 0.021 | 0.147 | 1.96E-24 |
| ZNF574    | 1.34E-28 | -0.18792 | 0.023 | 0.169 | 2.00E-24 |
| HDAC10    | 1.34E-28 | -0.15458 | 0.007 | 0.135 | 2.00E-24 |
| DENND1B   | 1.35E-28 | -0.19559 | 0.007 | 0.143 | 2.02E-24 |
| WDR53     | 1.44E-28 | -0.14641 | 0.01  | 0.141 | 2.15E-24 |
| MATN2     | 1.53E-28 | 0.159577 | 0.047 | 0.115 | 2.28E-24 |
| TRIM22    | 1.62E-28 | 0.295601 | 0.052 | 0.095 | 2.43E-24 |
| MICAL1    | 1.63E-28 | -0.12923 | 0.023 | 0.152 | 2.43E-24 |
| GALM      | 1.86E-28 | 0.196191 | 0.04  | 0.105 | 2.78E-24 |
| NOL4      | 2.08E-28 | -0.23719 | 0.023 | 0.177 | 3.11E-24 |
| TNFRSF11E | 2.19E-28 | 0.194204 | 0.033 | 0.084 | 3.28E-24 |
| MSL2      | 2.51E-28 | -0.10599 | 0.016 | 0.131 | 3.75E-24 |
| SCML1     | 2.54E-28 | -0.11715 | 0.031 | 0.158 | 3.79E-24 |
| ZCCHC6    | 2.59E-28 | -0.13795 | 0.019 | 0.153 | 3.87E-24 |
| CACNG4    | 2.64E-28 | -0.13965 | 0.017 | 0.143 | 3.95E-24 |
| ATP5L2    | 2.67E-28 | 0.302143 | 0.061 | 0.106 | 3.99E-24 |
| ARAP2     | 2.89E-28 | 0.115351 | 0.037 | 0.111 | 4.33E-24 |
| C3orf58   | 2.95E-28 | -0.12693 | 0.016 | 0.142 | 4.40E-24 |
| KCTD2     | 2.96E-28 | -0.13655 | 0.007 | 0.136 | 4.43E-24 |
| ZNF628    | 3.03E-28 | -0.12145 | 0.009 | 0.128 | 4.52E-24 |
| SAA1      | 3.09E-28 | 1.389227 | 0.131 | 0.026 | 4.61E-24 |
| 1-Mar     | 3.10E-28 | -0.14064 | 0.04  | 0.168 | 4.63E-24 |
| INO80B    | 3.15E-28 | -0.11686 | 0.016 | 0.137 | 4.71E-24 |
| FBXL6     | 3.32E-28 | -0.147   | 0.01  | 0.137 | 4.96E-24 |
| GDF15     | 3.56E-28 | 0.191026 | 0.063 | 0.154 | 5.31E-24 |
| SELO      | 3.56E-28 | -0.15955 | 0.002 | 0.128 | 5.32E-24 |
| MT1G      | 4.31E-28 | 0.699194 | 0.112 | 0.065 | 6.43E-24 |
| FAM101B   | 4.40E-28 | -0.17221 | 0.003 | 0.135 | 6.58E-24 |
| AMMECR1   | 4.43E-28 | -0.13614 | 0.005 | 0.127 | 6.62E-24 |
| ANKRD28   | 4.48E-28 | 0.146271 | 0.047 | 0.125 | 6.69E-24 |
| EPAS1     | 4.76E-28 | 0.309415 | 0.051 | 0.09  | 7.12E-24 |
| WDR90     | 4.83E-28 | -0.11963 | 0.016 | 0.136 | 7.22E-24 |
| CAPS      | 4.99E-28 | 0.140865 | 0.028 | 0.095 | 7.46E-24 |
| ZNF35     | 5.04E-28 | -0.11702 | 0.017 | 0.142 | 7.53E-24 |
| RP5-827C2 | 5.17E-28 | 0.169921 | 0.044 | 0.104 | 7.73E-24 |
| CAMKMT    | 5.45E-28 | -0.10046 | 0.024 | 0.146 | 8.14E-24 |
| CACTIN    | 5.56E-28 | -0.16731 | 0.007 | 0.14  | 8.30E-24 |
| FTX       | 6.54E-28 | 0.175556 | 0.066 | 0.123 | 9.77E-24 |
| PLCD3     | 7.14E-28 | -0.11809 | 0.009 | 0.132 | 1.07E-23 |
| GNAI1     | 8.06E-28 | -0.16772 | 0.026 | 0.159 | 1.20E-23 |
| FXVD5     | 8.76E-28 | 0.164587 | 0.054 | 0.132 | 1.31E-23 |
| PAPD5     | 8.86E-28 | -0.13774 | 0.012 | 0.138 | 1.32E-23 |
| CEP72     | 9.29E-28 | -0.3018  | 0     | 0.132 | 1.39E-23 |
| TMEM176A  | 9.49E-28 | 0.442216 | 0.07  | 0.074 | 1.42E-23 |
| RIMKLA    | 9.50E-28 | -0.11047 | 0.007 | 0.119 | 1.42E-23 |
| EEF1G     | 1.01E-27 | 0.226935 | 0.056 | 0.111 | 1.52E-23 |

|           |          |          |       |       |          |
|-----------|----------|----------|-------|-------|----------|
| LIN54     | 1.06E-27 | -0.23027 | 0.003 | 0.146 | 1.58E-23 |
| TNRC18    | 1.07E-27 | -0.11055 | 0.021 | 0.146 | 1.60E-23 |
| CAV1      | 1.07E-27 | 0.963138 | 0.162 | 0.063 | 1.60E-23 |
| ETV2      | 1.11E-27 | -0.11271 | 0.005 | 0.117 | 1.66E-23 |
| ZNF829    | 1.13E-27 | -0.10278 | 0.014 | 0.127 | 1.69E-23 |
| CMTM5     | 1.18E-27 | 0.255666 | 0.098 | 0.156 | 1.77E-23 |
| ELAVL2    | 1.19E-27 | -0.28891 | 0.017 | 0.165 | 1.78E-23 |
| SFT2D3    | 1.24E-27 | -0.12009 | 0.009 | 0.122 | 1.85E-23 |
| RBM15     | 1.24E-27 | -0.11917 | 0.014 | 0.135 | 1.86E-23 |
| GFPT1     | 1.27E-27 | -0.23357 | 0.017 | 0.167 | 1.89E-23 |
| USP28     | 1.29E-27 | -0.22213 | 0.007 | 0.149 | 1.92E-23 |
| FHL2      | 1.35E-27 | -0.193   | 0.014 | 0.149 | 2.01E-23 |
| CTPS2     | 1.39E-27 | -0.14059 | 0.007 | 0.123 | 2.07E-23 |
| PREP      | 1.45E-27 | -0.13708 | 0.017 | 0.143 | 2.17E-23 |
| CCDC152   | 1.50E-27 | 0.206214 | 0.045 | 0.106 | 2.24E-23 |
| ACTR5     | 1.64E-27 | -0.12907 | 0.009 | 0.131 | 2.45E-23 |
| FZD2      | 1.67E-27 | -0.12573 | 0.007 | 0.128 | 2.50E-23 |
| SLC16A9   | 1.70E-27 | -0.15345 | 0.017 | 0.147 | 2.54E-23 |
| ARNTL2    | 1.78E-27 | -0.13535 | 0.003 | 0.122 | 2.67E-23 |
| VCPKMT    | 1.93E-27 | -0.1432  | 0.017 | 0.146 | 2.88E-23 |
| CSRNP1    | 1.97E-27 | 0.101633 | 0.04  | 0.121 | 2.94E-23 |
| SPEG      | 2.52E-27 | 0.142801 | 0.035 | 0.1   | 3.76E-23 |
| ZNF184    | 2.53E-27 | -0.184   | 0.012 | 0.143 | 3.78E-23 |
| RP11-486G | 2.56E-27 | 0.145972 | 0.038 | 0.105 | 3.82E-23 |
| BOK       | 2.58E-27 | -0.1248  | 0.002 | 0.117 | 3.86E-23 |
| EMILIN1   | 2.60E-27 | -0.1112  | 0.007 | 0.12  | 3.89E-23 |
| CLYBL     | 2.64E-27 | 0.243913 | 0.031 | 0.078 | 3.94E-23 |
| APOL6     | 2.66E-27 | 0.159374 | 0.028 | 0.09  | 3.97E-23 |
| GPRASP2   | 3.11E-27 | -0.1523  | 0.017 | 0.146 | 4.65E-23 |
| HAGHL     | 3.13E-27 | 0.130504 | 0.031 | 0.091 | 4.68E-23 |
| VAV3      | 3.25E-27 | -0.1212  | 0.019 | 0.146 | 4.86E-23 |
| IDNK      | 3.47E-27 | 0.116291 | 0.031 | 0.101 | 5.18E-23 |
| SLC22A18  | 3.50E-27 | 0.155643 | 0.023 | 0.078 | 5.23E-23 |
| MDFIC     | 3.57E-27 | -0.14792 | 0.002 | 0.123 | 5.33E-23 |
| F12       | 3.60E-27 | -0.1082  | 0.016 | 0.132 | 5.38E-23 |
| TTC13     | 4.07E-27 | -0.13655 | 0.01  | 0.132 | 6.08E-23 |
| TBCCD1    | 4.77E-27 | -0.15443 | 0.017 | 0.151 | 7.12E-23 |
| C1QTNF2   | 5.31E-27 | -0.18517 | 0.01  | 0.136 | 7.94E-23 |
| AUNIP     | 5.38E-27 | -0.23747 | 0.002 | 0.13  | 8.04E-23 |
| SIPA1     | 5.38E-27 | -0.13764 | 0.003 | 0.126 | 8.05E-23 |
| SEMA3A    | 6.24E-27 | -0.12025 | 0.009 | 0.125 | 9.33E-23 |
| AADAT     | 6.64E-27 | -0.19828 | 0.005 | 0.137 | 9.93E-23 |
| IGSF21    | 6.74E-27 | 0.114108 | 0.065 | 0.141 | 1.01E-22 |
| RP11-498C | 6.86E-27 | -0.16001 | 0.003 | 0.13  | 1.02E-22 |
| DHX32     | 7.40E-27 | -0.13559 | 0.007 | 0.128 | 1.11E-22 |
| C7orf60   | 7.88E-27 | -0.11556 | 0.017 | 0.133 | 1.18E-22 |
| C19orf57  | 8.06E-27 | -0.14518 | 0.005 | 0.119 | 1.20E-22 |
| FAM120B   | 8.62E-27 | -0.10385 | 0.017 | 0.14  | 1.29E-22 |
| ZNF853    | 1.02E-26 | -0.10296 | 0.019 | 0.138 | 1.52E-22 |
| CELF5     | 1.06E-26 | -0.1913  | 0.024 | 0.151 | 1.58E-22 |
| MED12L    | 1.10E-26 | -0.12797 | 0.01  | 0.13  | 1.64E-22 |



|           |          |          |       |       |          |
|-----------|----------|----------|-------|-------|----------|
| DNAJC3-AS | 1.16E-26 | 0.2084   | 0.047 | 0.09  | 1.74E-22 |
| CD14      | 1.27E-26 | 0.220554 | 0.056 | 0.11  | 1.90E-22 |
| UBASH3B   | 1.30E-26 | -0.13652 | 0.003 | 0.126 | 1.94E-22 |
| TARSL2    | 1.37E-26 | -0.12428 | 0.021 | 0.143 | 2.05E-22 |
| PHF2      | 1.51E-26 | -0.11105 | 0.016 | 0.132 | 2.25E-22 |
| SORL1     | 1.54E-26 | 0.173019 | 0.052 | 0.111 | 2.30E-22 |
| ARHGAP20  | 1.98E-26 | -0.11777 | 0.003 | 0.116 | 2.96E-22 |
| ZNF605    | 2.00E-26 | 0.159691 | 0.056 | 0.125 | 2.99E-22 |
| MED20     | 2.13E-26 | -0.10201 | 0.009 | 0.119 | 3.18E-22 |
| ZNF107    | 2.20E-26 | -0.22627 | 0.01  | 0.151 | 3.29E-22 |
| REEP1     | 2.48E-26 | -0.18118 | 0.017 | 0.148 | 3.71E-22 |
| SLC25A24  | 2.58E-26 | -0.20007 | 0.009 | 0.142 | 3.86E-22 |
| PINLYP    | 2.87E-26 | 0.141602 | 0.031 | 0.104 | 4.28E-22 |
| NFASC     | 3.42E-26 | 0.310017 | 0.054 | 0.084 | 5.12E-22 |
| PLCXD1    | 3.67E-26 | -0.18395 | 0.014 | 0.147 | 5.49E-22 |
| RRAS2     | 3.95E-26 | -0.13346 | 0.009 | 0.13  | 5.90E-22 |
| SP4       | 4.58E-26 | -0.1202  | 0.012 | 0.122 | 6.84E-22 |
| ARHGEF39  | 4.97E-26 | -0.18921 | 0.003 | 0.128 | 7.42E-22 |
| WWP2      | 5.12E-26 | -0.16614 | 0.005 | 0.133 | 7.65E-22 |
| RP5-1136G | 5.23E-26 | -0.11315 | 0.005 | 0.111 | 7.82E-22 |
| ZNF681    | 5.77E-26 | -0.10572 | 0.014 | 0.122 | 8.63E-22 |
| ATAD3B    | 5.79E-26 | -0.11541 | 0.01  | 0.125 | 8.65E-22 |
| OTP       | 6.11E-26 | -0.17715 | 0.003 | 0.125 | 9.14E-22 |
| ACO02456. | 7.32E-26 | 0.145534 | 0.026 | 0.089 | 1.09E-21 |
| OPN3      | 7.70E-26 | -0.1426  | 0.007 | 0.121 | 1.15E-21 |
| LINC00672 | 7.87E-26 | 0.121565 | 0.026 | 0.086 | 1.18E-21 |
| FLVCR1-AS | 8.69E-26 | -0.10063 | 0.01  | 0.115 | 1.30E-21 |
| ANTXR2    | 9.27E-26 | -0.11842 | 0.01  | 0.119 | 1.39E-21 |
| PHF7      | 1.05E-25 | -0.16021 | 0.007 | 0.13  | 1.56E-21 |
| APO01347. | 1.05E-25 | -0.19095 | 0.003 | 0.121 | 1.58E-21 |
| SSPN      | 1.10E-25 | 0.130932 | 0.038 | 0.107 | 1.65E-21 |
| PLEKHA8   | 1.11E-25 | -0.21535 | 0.003 | 0.138 | 1.66E-21 |
| KIAA1551  | 1.17E-25 | -0.12722 | 0.005 | 0.116 | 1.75E-21 |
| NAT10     | 1.19E-25 | -0.11637 | 0.019 | 0.142 | 1.78E-21 |
| PKIA      | 1.20E-25 | -0.16831 | 0.031 | 0.162 | 1.79E-21 |
| FGF2      | 1.38E-25 | -0.12296 | 0.002 | 0.111 | 2.06E-21 |
| RP11-1275 | 1.53E-25 | -0.12166 | 0.028 | 0.147 | 2.29E-21 |
| TRAF6     | 1.63E-25 | -0.10889 | 0.009 | 0.116 | 2.43E-21 |
| CLP1      | 1.67E-25 | -0.10987 | 0.009 | 0.114 | 2.50E-21 |
| TIAM2     | 1.80E-25 | 0.101759 | 0.031 | 0.105 | 2.69E-21 |
| USP31     | 1.86E-25 | -0.16407 | 0.003 | 0.119 | 2.78E-21 |
| ASAP3     | 1.87E-25 | -0.1355  | 0.003 | 0.119 | 2.79E-21 |
| KCTD15    | 2.09E-25 | -0.15434 | 0.017 | 0.143 | 3.12E-21 |
| LRP11     | 2.09E-25 | -0.19662 | 0.003 | 0.138 | 3.13E-21 |
| ZBTB16    | 2.11E-25 | 0.261919 | 0.126 | 0.174 | 3.15E-21 |
| KLHL25    | 2.18E-25 | -0.12818 | 0.016 | 0.132 | 3.25E-21 |
| FANCM     | 2.41E-25 | -0.16255 | 0.002 | 0.116 | 3.60E-21 |
| RHBDF1    | 2.43E-25 | 0.12596  | 0.019 | 0.08  | 3.63E-21 |
| RABL3     | 2.46E-25 | -0.1141  | 0.009 | 0.117 | 3.68E-21 |
| TIFA      | 2.52E-25 | -0.10222 | 0.009 | 0.111 | 3.77E-21 |
| STK17B    | 2.54E-25 | -0.10379 | 0.023 | 0.137 | 3.80E-21 |

|           |          |          |       |       |          |
|-----------|----------|----------|-------|-------|----------|
| CASP1     | 2.56E-25 | 0.437158 | 0.079 | 0.1   | 3.82E-21 |
| ICA1      | 2.60E-25 | -0.17015 | 0.014 | 0.138 | 3.89E-21 |
| SCAMP5    | 2.72E-25 | -0.13509 | 0.026 | 0.152 | 4.06E-21 |
| FHIT      | 2.99E-25 | 0.225655 | 0.038 | 0.08  | 4.47E-21 |
| ENTPD5    | 3.64E-25 | -0.15354 | 0.005 | 0.125 | 5.44E-21 |
| BCOR      | 3.85E-25 | -0.14472 | 0.014 | 0.136 | 5.75E-21 |
| STMN2     | 3.87E-25 | -0.12929 | 0.089 | 0.221 | 5.78E-21 |
| KIFC2     | 4.07E-25 | -0.11217 | 0.012 | 0.125 | 6.08E-21 |
| KLHDC4    | 4.08E-25 | -0.21183 | 0.01  | 0.143 | 6.10E-21 |
| RELB      | 4.63E-25 | -0.13777 | 0.002 | 0.116 | 6.92E-21 |
| OMG       | 4.71E-25 | 0.254163 | 0.072 | 0.112 | 7.03E-21 |
| ETAA1     | 5.24E-25 | -0.1091  | 0.012 | 0.12  | 7.83E-21 |
| TRIM8     | 5.74E-25 | -0.17402 | 0.005 | 0.131 | 8.58E-21 |
| HAS2      | 5.95E-25 | 0.139409 | 0.028 | 0.086 | 8.90E-21 |
| HNMT      | 6.06E-25 | 0.185808 | 0.049 | 0.115 | 9.06E-21 |
| DIEXF     | 6.35E-25 | 0.116078 | 0.026 | 0.085 | 9.49E-21 |
| FAS       | 6.37E-25 | 0.200423 | 0.028 | 0.068 | 9.53E-21 |
| VWA5A     | 6.38E-25 | 0.290511 | 0.058 | 0.083 | 9.54E-21 |
| SPATA5L1  | 6.55E-25 | -0.10317 | 0.01  | 0.115 | 9.78E-21 |
| NNAT      | 7.40E-25 | -0.41561 | 0.086 | 0.264 | 1.11E-20 |
| CDKN2A    | 7.67E-25 | -0.42395 | 0.049 | 0.217 | 1.15E-20 |
| BCL6      | 8.03E-25 | 0.193429 | 0.052 | 0.102 | 1.20E-20 |
| HBA2      | 8.41E-25 | 0.335252 | 0.079 | 0.177 | 1.26E-20 |
| CCDC74B   | 9.64E-25 | -0.15353 | 0.005 | 0.122 | 1.44E-20 |
| PNRC2     | 9.66E-25 | 0.185055 | 0.044 | 0.11  | 1.44E-20 |
| TCFL5     | 1.02E-24 | -0.12278 | 0.002 | 0.109 | 1.52E-20 |
| NTRK2     | 1.12E-24 | 0.401982 | 0.133 | 0.149 | 1.67E-20 |
| CMTM8     | 1.22E-24 | -0.1503  | 0.002 | 0.126 | 1.82E-20 |
| HUNK      | 1.29E-24 | -0.11898 | 0.005 | 0.11  | 1.93E-20 |
| ACVR2A    | 1.44E-24 | -0.17607 | 0.005 | 0.127 | 2.16E-20 |
| AK9       | 1.50E-24 | -0.14047 | 0.012 | 0.123 | 2.24E-20 |
| PTCHD1    | 1.56E-24 | 0.143561 | 0.023 | 0.064 | 2.33E-20 |
| RP5-1068E | 1.58E-24 | 0.12082  | 0.017 | 0.067 | 2.37E-20 |
| EFNA2     | 1.64E-24 | -0.16253 | 0.012 | 0.135 | 2.45E-20 |
| FGF14-AS2 | 1.66E-24 | -0.13706 | 0.009 | 0.12  | 2.49E-20 |
| CEP85     | 1.77E-24 | -0.18773 | 0.002 | 0.12  | 2.64E-20 |
| TRIM56    | 1.79E-24 | 0.260984 | 0.049 | 0.088 | 2.68E-20 |
| CLGN      | 1.83E-24 | -0.20344 | 0.01  | 0.121 | 2.74E-20 |
| SPIN4     | 1.86E-24 | -0.10367 | 0.005 | 0.101 | 2.78E-20 |
| VPS18     | 1.98E-24 | -0.1485  | 0.009 | 0.126 | 2.96E-20 |
| HOXA3     | 2.09E-24 | -0.26907 | 0.012 | 0.143 | 3.13E-20 |
| SFR1      | 2.10E-24 | -0.10252 | 0.014 | 0.117 | 3.14E-20 |
| TIMP4     | 2.60E-24 | 0.455498 | 0.106 | 0.123 | 3.89E-20 |
| VCAM1     | 2.90E-24 | 0.451233 | 0.047 | 0.042 | 4.33E-20 |
| ORAI3     | 2.95E-24 | 0.101989 | 0.026 | 0.089 | 4.41E-20 |
| SELM      | 2.99E-24 | 0.120301 | 0.038 | 0.105 | 4.47E-20 |
| FAM72A    | 3.06E-24 | -0.11918 | 0.007 | 0.11  | 4.58E-20 |
| SAMD9L    | 3.08E-24 | 0.209543 | 0.033 | 0.086 | 4.61E-20 |
| KANSL3    | 3.16E-24 | -0.12542 | 0.014 | 0.126 | 4.72E-20 |
| MTMR11    | 3.71E-24 | 0.120855 | 0.03  | 0.09  | 5.54E-20 |
| LINC00632 | 3.80E-24 | -0.12332 | 0.035 | 0.137 | 5.67E-20 |

|           |          |          |       |       |          |
|-----------|----------|----------|-------|-------|----------|
| ITPRIPL2  | 3.95E-24 | -0.11257 | 0.003 | 0.109 | 5.90E-20 |
| OPHN1     | 4.52E-24 | 0.162409 | 0.063 | 0.117 | 6.76E-20 |
| EXT1      | 4.54E-24 | -0.12176 | 0.002 | 0.105 | 6.78E-20 |
| RCBTB1    | 4.58E-24 | -0.14511 | 0.016 | 0.137 | 6.85E-20 |
| ARHGAP23  | 5.02E-24 | -0.1574  | 0.002 | 0.123 | 7.50E-20 |
| GLIS2     | 5.34E-24 | -0.10362 | 0.005 | 0.105 | 7.98E-20 |
| SLC1A4    | 5.72E-24 | -0.10031 | 0.009 | 0.112 | 8.55E-20 |
| HSPA2     | 5.86E-24 | 0.176435 | 0.084 | 0.158 | 8.76E-20 |
| CTSS      | 5.92E-24 | 0.250196 | 0.042 | 0.083 | 8.84E-20 |
| IGDCC3    | 6.12E-24 | -0.18162 | 0.007 | 0.128 | 9.15E-20 |
| HARS2     | 6.20E-24 | -0.10335 | 0.016 | 0.128 | 9.26E-20 |
| CADM3     | 7.87E-24 | 0.589151 | 0.08  | 0.048 | 1.18E-19 |
| EMILIN3   | 9.35E-24 | -0.10076 | 0.028 | 0.141 | 1.40E-19 |
| NIPA1     | 9.50E-24 | -0.14148 | 0.005 | 0.122 | 1.42E-19 |
| KCNJ2     | 9.88E-24 | -0.14425 | 0.01  | 0.121 | 1.48E-19 |
| RAB2B     | 1.05E-23 | -0.10934 | 0.019 | 0.131 | 1.57E-19 |
| FANCC     | 1.11E-23 | -0.16107 | 0.01  | 0.127 | 1.66E-19 |
| WIPF3     | 1.30E-23 | -0.11888 | 0.003 | 0.099 | 1.95E-19 |
| ZNF582-AS | 1.33E-23 | 0.3423   | 0.059 | 0.086 | 1.99E-19 |
| PSMA2     | 1.35E-23 | 0.970066 | 0.159 | 0.02  | 2.01E-19 |
| FOXDI     | 1.35E-23 | -0.14595 | 0.003 | 0.112 | 2.01E-19 |
| NDRG1     | 1.38E-23 | 0.603648 | 0.087 | 0.074 | 2.07E-19 |
| LMO3      | 1.41E-23 | 0.204067 | 0.07  | 0.122 | 2.11E-19 |
| MANSC1    | 1.43E-23 | -0.10901 | 0.017 | 0.125 | 2.14E-19 |
| NMRK1     | 1.58E-23 | 0.143921 | 0.028 | 0.086 | 2.36E-19 |
| RASAL2    | 2.06E-23 | -0.17405 | 0.009 | 0.13  | 3.08E-19 |
| RNPC3     | 2.07E-23 | 0.186715 | 0.049 | 0.101 | 3.09E-19 |
| ZNF34     | 2.11E-23 | 0.100513 | 0.026 | 0.094 | 3.16E-19 |
| CA11      | 2.14E-23 | 0.130114 | 0.038 | 0.094 | 3.21E-19 |
| HSD17B1   | 2.28E-23 | -0.1229  | 0.005 | 0.112 | 3.41E-19 |
| SBK1      | 2.34E-23 | -0.16195 | 0.019 | 0.14  | 3.49E-19 |
| C4orf33   | 2.58E-23 | -0.10681 | 0.009 | 0.107 | 3.86E-19 |
| ITPKB     | 2.69E-23 | 0.152612 | 0.024 | 0.072 | 4.02E-19 |
| CREBRF    | 2.72E-23 | 0.100884 | 0.031 | 0.104 | 4.07E-19 |
| CCDC30    | 2.82E-23 | 0.107788 | 0.024 | 0.081 | 4.21E-19 |
| C7orf43   | 3.04E-23 | -0.15428 | 0.005 | 0.115 | 4.54E-19 |
| ZNF280B   | 3.47E-23 | -0.11863 | 0.014 | 0.122 | 5.18E-19 |
| CTA-384D8 | 3.60E-23 | -0.20621 | 0.002 | 0.121 | 5.38E-19 |
| ELMO1     | 3.72E-23 | 0.349797 | 0.087 | 0.106 | 5.56E-19 |
| POLA1     | 3.91E-23 | -0.1319  | 0.007 | 0.114 | 5.84E-19 |
| NCAM2     | 4.08E-23 | 0.104314 | 0.042 | 0.111 | 6.10E-19 |
| PKN3      | 4.11E-23 | -0.17814 | 0     | 0.11  | 6.14E-19 |
| VAV2      | 4.32E-23 | -0.13358 | 0.009 | 0.117 | 6.45E-19 |
| CTSH      | 4.41E-23 | 0.152007 | 0.038 | 0.095 | 6.60E-19 |
| MGAT5     | 4.58E-23 | -0.12878 | 0.002 | 0.104 | 6.85E-19 |
| BGN       | 5.05E-23 | 0.627654 | 0.096 | 0.044 | 7.54E-19 |
| JMY       | 5.47E-23 | -0.11944 | 0.014 | 0.123 | 8.18E-19 |
| FSD1L     | 5.53E-23 | -0.10754 | 0.007 | 0.102 | 8.26E-19 |
| ICAM1     | 5.55E-23 | 0.321549 | 0.042 | 0.058 | 8.30E-19 |
| MCAM      | 5.57E-23 | -0.10241 | 0.019 | 0.123 | 8.33E-19 |
| CCNYL1    | 5.59E-23 | -0.13472 | 0.002 | 0.111 | 8.36E-19 |

|           |          |          |       |       |          |
|-----------|----------|----------|-------|-------|----------|
| ANKRD16   | 6.15E-23 | -0.13362 | 0.002 | 0.114 | 9.19E-19 |
| CEP120    | 6.24E-23 | -0.10259 | 0.012 | 0.116 | 9.32E-19 |
| FBXL16    | 7.41E-23 | -0.10002 | 0.007 | 0.105 | 1.11E-18 |
| HMOX1     | 7.55E-23 | 0.239344 | 0.042 | 0.095 | 1.13E-18 |
| RCL1      | 7.60E-23 | -0.13463 | 0.009 | 0.114 | 1.14E-18 |
| AGAP2     | 7.71E-23 | -0.20207 | 0.023 | 0.143 | 1.15E-18 |
| GPR37L1   | 8.47E-23 | 0.515535 | 0.127 | 0.122 | 1.27E-18 |
| IFITM10   | 8.71E-23 | 0.18419  | 0.058 | 0.105 | 1.30E-18 |
| DLX5      | 8.85E-23 | -0.28341 | 0.044 | 0.185 | 1.32E-18 |
| RP11-783K | 1.02E-22 | 0.140039 | 0.017 | 0.059 | 1.52E-18 |
| F13A1     | 1.12E-22 | 0.832443 | 0.099 | 0.02  | 1.68E-18 |
| RP11-73E1 | 1.12E-22 | -0.153   | 0.005 | 0.112 | 1.68E-18 |
| SLC1A5    | 1.13E-22 | -0.10657 | 0.012 | 0.117 | 1.68E-18 |
| SLC25A18  | 1.16E-22 | 0.33522  | 0.068 | 0.101 | 1.73E-18 |
| TBX2      | 1.19E-22 | -0.13992 | 0.009 | 0.122 | 1.78E-18 |
| HIST2H2BE | 1.28E-22 | 0.244009 | 0.047 | 0.094 | 1.91E-18 |
| SEC23IP   | 1.30E-22 | -0.10403 | 0.012 | 0.116 | 1.94E-18 |
| MAST4     | 1.43E-22 | 0.209198 | 0.047 | 0.079 | 2.13E-18 |
| SLC25A28  | 1.47E-22 | -0.12778 | 0.005 | 0.109 | 2.19E-18 |
| SALL3     | 1.70E-22 | -0.18501 | 0.017 | 0.14  | 2.54E-18 |
| TRAPPC5   | 1.82E-22 | 0.100418 | 0.021 | 0.07  | 2.71E-18 |
| TTC31     | 1.85E-22 | -0.13199 | 0.012 | 0.122 | 2.76E-18 |
| HBEGF     | 1.86E-22 | 0.103716 | 0.031 | 0.094 | 2.79E-18 |
| CTB-5506. | 2.07E-22 | -0.10972 | 0.009 | 0.11  | 3.09E-18 |
| ATG16L2   | 2.29E-22 | -0.11764 | 0.005 | 0.107 | 3.42E-18 |
| NDUFB8    | 2.33E-22 | 0.938094 | 0.134 | 0.012 | 3.48E-18 |
| PAPOLG    | 2.33E-22 | -0.10304 | 0.009 | 0.102 | 3.48E-18 |
| MAOB      | 2.37E-22 | 0.114331 | 0.047 | 0.115 | 3.55E-18 |
| SFXN3     | 2.71E-22 | 0.152172 | 0.026 | 0.065 | 4.05E-18 |
| ADCK1     | 2.96E-22 | 0.113338 | 0.014 | 0.062 | 4.43E-18 |
| SGK223    | 3.16E-22 | -0.13235 | 0.005 | 0.114 | 4.72E-18 |
| HYLS1     | 3.50E-22 | -0.27911 | 0.007 | 0.126 | 5.23E-18 |
| RASL11B   | 4.26E-22 | -0.2615  | 0.042 | 0.174 | 6.37E-18 |
| TLL12     | 4.48E-22 | -0.15938 | 0.007 | 0.126 | 6.69E-18 |
| ARRDC4    | 5.05E-22 | -0.10492 | 0.021 | 0.122 | 7.54E-18 |
| RP11-315A | 5.20E-22 | 0.176092 | 0.049 | 0.1   | 7.77E-18 |
| ACVR1B    | 5.59E-22 | -0.16844 | 0.012 | 0.125 | 8.36E-18 |
| TCF20     | 5.60E-22 | -0.1299  | 0.012 | 0.121 | 8.36E-18 |
| FRMD4B    | 5.61E-22 | 0.108024 | 0.03  | 0.089 | 8.38E-18 |
| PRKAR2B   | 5.84E-22 | -0.12138 | 0.016 | 0.117 | 8.72E-18 |
| MORC2     | 6.60E-22 | -0.1205  | 0.007 | 0.109 | 9.87E-18 |
| ZNF230    | 6.76E-22 | -0.11299 | 0.019 | 0.127 | 1.01E-17 |
| SLC25A20  | 6.89E-22 | 0.102383 | 0.023 | 0.084 | 1.03E-17 |
| GAL3ST4   | 7.01E-22 | 0.135788 | 0.045 | 0.095 | 1.05E-17 |
| EPB41     | 8.43E-22 | -0.15257 | 0.012 | 0.119 | 1.26E-17 |
| FAM57B    | 8.43E-22 | -0.14432 | 0.037 | 0.157 | 1.26E-17 |
| ANXA11    | 8.61E-22 | -0.11996 | 0.012 | 0.115 | 1.29E-17 |
| ERMARD    | 8.96E-22 | -0.10509 | 0.01  | 0.11  | 1.34E-17 |
| ACO16700. | 9.83E-22 | -0.11845 | 0.017 | 0.112 | 1.47E-17 |
| NET1      | 9.90E-22 | -0.10884 | 0.003 | 0.101 | 1.48E-17 |
| UTP15     | 9.93E-22 | -0.10776 | 0.01  | 0.109 | 1.48E-17 |

|           |          |          |       |       |          |
|-----------|----------|----------|-------|-------|----------|
| MTMR10    | 1.07E-21 | 0.10008  | 0.021 | 0.075 | 1.60E-17 |
| IGFBP6    | 1.08E-21 | 0.195925 | 0.031 | 0.07  | 1.62E-17 |
| EZH1      | 1.14E-21 | 0.164748 | 0.044 | 0.101 | 1.70E-17 |
| EPSTI1    | 1.17E-21 | 0.468657 | 0.08  | 0.096 | 1.75E-17 |
| LNK1      | 1.24E-21 | -0.13717 | 0.035 | 0.146 | 1.85E-17 |
| NRF1      | 1.39E-21 | -0.15261 | 0     | 0.102 | 2.08E-17 |
| KDM1B     | 1.41E-21 | -0.12984 | 0.005 | 0.109 | 2.10E-17 |
| ZCCHC14   | 1.55E-21 | -0.13409 | 0.007 | 0.109 | 2.32E-17 |
| RP11-455F | 1.68E-21 | 0.185091 | 0.026 | 0.063 | 2.51E-17 |
| NCKIPSD   | 1.98E-21 | -0.12857 | 0.01  | 0.114 | 2.96E-17 |
| RECQL5    | 1.99E-21 | -0.12509 | 0.009 | 0.111 | 2.98E-17 |
| CHML      | 2.18E-21 | -0.17246 | 0.002 | 0.115 | 3.26E-17 |
| TBC1D13   | 2.19E-21 | -0.11568 | 0.01  | 0.114 | 3.27E-17 |
| ZDHHC13   | 2.27E-21 | -0.12387 | 0.016 | 0.115 | 3.39E-17 |
| MTURN     | 2.30E-21 | -0.16835 | 0.016 | 0.128 | 3.43E-17 |
| AP4B1     | 2.30E-21 | -0.10477 | 0.017 | 0.119 | 3.44E-17 |
| SPTSSB    | 2.45E-21 | 0.21948  | 0.024 | 0.053 | 3.67E-17 |
| KITLG     | 2.88E-21 | -0.10492 | 0.01  | 0.105 | 4.30E-17 |
| TMEM38A   | 2.96E-21 | 0.103794 | 0.024 | 0.074 | 4.43E-17 |
| DICER1-AS | 2.96E-21 | 0.16482  | 0.033 | 0.08  | 4.43E-17 |
| SP140L    | 2.97E-21 | 0.147306 | 0.023 | 0.062 | 4.45E-17 |
| PRUNE2    | 3.11E-21 | 0.378387 | 0.077 | 0.088 | 4.64E-17 |
| DNAJC12   | 3.32E-21 | 0.184626 | 0.03  | 0.074 | 4.97E-17 |
| GNG10     | 3.34E-21 | 0.104259 | 0.024 | 0.074 | 4.99E-17 |
| MAP3K3    | 3.67E-21 | -0.12039 | 0.003 | 0.102 | 5.49E-17 |
| APOBEC3G  | 3.87E-21 | 0.17954  | 0.031 | 0.07  | 5.78E-17 |
| TBC1D19   | 3.97E-21 | 0.101201 | 0.028 | 0.085 | 5.93E-17 |
| MTRNR2L1  | 4.19E-21 | 0.440281 | 0.206 | 0.174 | 6.26E-17 |
| GID4      | 4.59E-21 | -0.10982 | 0.009 | 0.107 | 6.85E-17 |
| ACO09948. | 4.67E-21 | -0.11002 | 0.009 | 0.105 | 6.98E-17 |
| OSBPL5    | 5.02E-21 | -0.10435 | 0.009 | 0.105 | 7.50E-17 |
| ZNF77     | 5.11E-21 | -0.15871 | 0.003 | 0.107 | 7.63E-17 |
| FHOD3     | 5.61E-21 | -0.10885 | 0.01  | 0.102 | 8.39E-17 |
| TENM3     | 6.25E-21 | -0.19953 | 0.012 | 0.114 | 9.35E-17 |
| ATP1A2    | 6.42E-21 | 0.534803 | 0.101 | 0.093 | 9.59E-17 |
| GLI3      | 6.64E-21 | -0.10842 | 0.01  | 0.104 | 9.93E-17 |
| LIN37     | 6.66E-21 | 0.162329 | 0.026 | 0.067 | 9.96E-17 |
| TCN2      | 6.96E-21 | 0.141121 | 0.031 | 0.074 | 1.04E-16 |
| ZC4H2     | 7.34E-21 | -0.11853 | 0.024 | 0.126 | 1.10E-16 |
| PCSK2     | 9.11E-21 | -0.22778 | 0.019 | 0.128 | 1.36E-16 |
| TMEM17    | 9.24E-21 | -0.13061 | 0.007 | 0.106 | 1.38E-16 |
| RHPN2     | 1.03E-20 | 0.171216 | 0.026 | 0.06  | 1.53E-16 |
| LHPP      | 1.10E-20 | 0.213176 | 0.042 | 0.08  | 1.64E-16 |
| TRO       | 1.16E-20 | 0.159339 | 0.037 | 0.086 | 1.73E-16 |
| ATP2B4    | 1.22E-20 | 0.162378 | 0.04  | 0.086 | 1.83E-16 |
| MAEL      | 1.29E-20 | -0.10143 | 0.005 | 0.098 | 1.92E-16 |
| CLDN10    | 1.34E-20 | 0.121562 | 0.059 | 0.143 | 2.00E-16 |
| HOXB3     | 1.41E-20 | -0.13009 | 0.012 | 0.102 | 2.11E-16 |
| BTBD6     | 1.80E-20 | -0.10723 | 0.003 | 0.093 | 2.68E-16 |
| HAP1      | 2.58E-20 | 0.141724 | 0.033 | 0.075 | 3.86E-16 |
| ZNF526    | 2.61E-20 | -0.10863 | 0.016 | 0.111 | 3.90E-16 |

|            |          |          |       |       |          |
|------------|----------|----------|-------|-------|----------|
| FANCE      | 2.63E-20 | -0.14515 | 0.002 | 0.098 | 3.94E-16 |
| TMCC1-AS1  | 2.65E-20 | 0.112638 | 0.023 | 0.069 | 3.96E-16 |
| AC005076.  | 2.70E-20 | -0.15261 | 0.009 | 0.105 | 4.04E-16 |
| FERMT1     | 3.15E-20 | 0.199586 | 0.059 | 0.101 | 4.70E-16 |
| CHGB       | 3.37E-20 | 0.167454 | 0.044 | 0.085 | 5.04E-16 |
| SPIRE2     | 3.46E-20 | -0.10187 | 0.007 | 0.095 | 5.17E-16 |
| DGKB       | 3.57E-20 | -0.10251 | 0.024 | 0.112 | 5.33E-16 |
| CTNNA2     | 3.78E-20 | 0.102969 | 0.049 | 0.105 | 5.65E-16 |
| GNG11      | 4.03E-20 | 0.143613 | 0.038 | 0.09  | 6.02E-16 |
| RP11-295G  | 4.05E-20 | -0.11257 | 0.007 | 0.104 | 6.06E-16 |
| PSMG3-AS1  | 4.52E-20 | -0.10655 | 0.009 | 0.101 | 6.75E-16 |
| LINC-PINTI | 5.50E-20 | 0.292635 | 0.058 | 0.073 | 8.22E-16 |
| ZNF180     | 5.74E-20 | -0.12959 | 0.01  | 0.112 | 8.57E-16 |
| MAF        | 6.56E-20 | 0.291439 | 0.051 | 0.067 | 9.81E-16 |
| PDPR       | 6.83E-20 | 0.108791 | 0.028 | 0.083 | 1.02E-15 |
| TTC9B      | 6.93E-20 | -0.18188 | 0.04  | 0.153 | 1.04E-15 |
| ZSCAN5A    | 6.97E-20 | 0.130439 | 0.031 | 0.081 | 1.04E-15 |
| TAGLN      | 7.23E-20 | 0.427733 | 0.045 | 0.038 | 1.08E-15 |
| WDR89      | 7.58E-20 | -0.14169 | 0.003 | 0.1   | 1.13E-15 |
| QSOX2      | 7.98E-20 | -0.10304 | 0.012 | 0.106 | 1.19E-15 |
| TRMT2B     | 8.49E-20 | -0.13997 | 0.005 | 0.102 | 1.27E-15 |
| CAPN10-AS  | 8.99E-20 | -0.13805 | 0.007 | 0.1   | 1.34E-15 |
| C1orf226   | 9.11E-20 | 0.213059 | 0.024 | 0.052 | 1.36E-15 |
| GPRIN1     | 9.34E-20 | -0.12711 | 0.01  | 0.106 | 1.40E-15 |
| LAYN       | 1.02E-19 | -0.10491 | 0.003 | 0.096 | 1.52E-15 |
| AVEN       | 1.03E-19 | -0.12909 | 0.003 | 0.101 | 1.55E-15 |
| SERPINE1   | 1.08E-19 | 0.313898 | 0.063 | 0.096 | 1.62E-15 |
| PRUNE      | 1.12E-19 | -0.13048 | 0.005 | 0.1   | 1.68E-15 |
| VPS54      | 1.13E-19 | -0.16397 | 0.01  | 0.116 | 1.68E-15 |
| GRID2      | 1.13E-19 | -0.13758 | 0.023 | 0.122 | 1.69E-15 |
| SYTL2      | 1.14E-19 | 0.359943 | 0.063 | 0.064 | 1.71E-15 |
| ABCA8      | 1.14E-19 | 0.396733 | 0.061 | 0.063 | 1.71E-15 |
| TRAPPC8    | 1.30E-19 | -0.10589 | 0.009 | 0.102 | 1.94E-15 |
| SMIM18     | 1.34E-19 | -0.12093 | 0.023 | 0.116 | 2.00E-15 |
| FAM214B    | 1.38E-19 | -0.1067  | 0.009 | 0.1   | 2.06E-15 |
| RP11-676J  | 1.49E-19 | -0.25367 | 0.019 | 0.135 | 2.22E-15 |
| PCDHGC3    | 1.64E-19 | -0.13069 | 0.003 | 0.098 | 2.46E-15 |
| TMEM117    | 1.66E-19 | -0.11417 | 0.003 | 0.089 | 2.49E-15 |
| THEM4      | 2.01E-19 | -0.10408 | 0.009 | 0.098 | 3.01E-15 |
| RABGAP1L   | 2.02E-19 | 0.132363 | 0.028 | 0.073 | 3.02E-15 |
| TFAP2A     | 2.06E-19 | -0.13314 | 0.016 | 0.107 | 3.08E-15 |
| LCAT       | 2.14E-19 | 0.16361  | 0.017 | 0.052 | 3.20E-15 |
| IER3IP1    | 2.27E-19 | 0.81285  | 0.108 | 0.011 | 3.40E-15 |
| NPL        | 2.47E-19 | 0.152062 | 0.042 | 0.083 | 3.70E-15 |
| SLC9A6     | 2.58E-19 | -0.1139  | 0.007 | 0.099 | 3.85E-15 |
| GPATCH3    | 2.83E-19 | -0.15098 | 0.003 | 0.102 | 4.22E-15 |
| KIAA1614   | 3.01E-19 | -0.13119 | 0.007 | 0.099 | 4.50E-15 |
| ADCY6      | 3.06E-19 | -0.13207 | 0.007 | 0.102 | 4.57E-15 |
| USP49      | 3.29E-19 | -0.13005 | 0.007 | 0.101 | 4.92E-15 |
| AFF3       | 3.55E-19 | -0.10126 | 0.026 | 0.117 | 5.30E-15 |
| LIN7A      | 3.55E-19 | -0.12104 | 0.007 | 0.101 | 5.31E-15 |

|           |          |          |       |       |          |
|-----------|----------|----------|-------|-------|----------|
| CLCN6     | 3.68E-19 | 0.114135 | 0.024 | 0.069 | 5.49E-15 |
| SWSAP1    | 3.74E-19 | 0.107396 | 0.016 | 0.059 | 5.58E-15 |
| DLX6-AS1  | 4.13E-19 | -0.11998 | 0.023 | 0.114 | 6.17E-15 |
| UBE2V1    | 4.74E-19 | -0.10793 | 0.009 | 0.099 | 7.09E-15 |
| IGDCC4    | 5.10E-19 | -0.10344 | 0.005 | 0.094 | 7.62E-15 |
| HECA      | 6.33E-19 | -0.12173 | 0.005 | 0.098 | 9.45E-15 |
| DYNC1I1   | 6.37E-19 | -0.22525 | 0.021 | 0.128 | 9.51E-15 |
| IFIT3     | 6.79E-19 | 0.394269 | 0.068 | 0.085 | 1.01E-14 |
| TRMT1L    | 6.79E-19 | -0.11526 | 0.01  | 0.105 | 1.02E-14 |
| CARD16    | 6.88E-19 | 0.610087 | 0.119 | 0.081 | 1.03E-14 |
| PI3       | 6.95E-19 | 0.577231 | 0.045 | 0.046 | 1.04E-14 |
| MAST3     | 7.19E-19 | -0.10495 | 0.003 | 0.089 | 1.08E-14 |
| RP11-127E | 8.21E-19 | -0.11714 | 0.007 | 0.096 | 1.23E-14 |
| RHBDD1    | 8.75E-19 | 0.118549 | 0.021 | 0.065 | 1.31E-14 |
| CTH       | 8.83E-19 | 0.209575 | 0.031 | 0.06  | 1.32E-14 |
| ZNF573    | 9.85E-19 | 0.112213 | 0.031 | 0.084 | 1.47E-14 |
| MTX3      | 1.00E-18 | -0.11153 | 0.003 | 0.091 | 1.50E-14 |
| APBB3     | 1.08E-18 | 0.11647  | 0.028 | 0.079 | 1.61E-14 |
| IFI44L    | 1.15E-18 | 0.517838 | 0.103 | 0.099 | 1.73E-14 |
| STAG3     | 1.16E-18 | 0.210011 | 0.049 | 0.075 | 1.74E-14 |
| ASTE1     | 1.16E-18 | -0.12524 | 0.005 | 0.096 | 1.74E-14 |
| TTC21B    | 1.22E-18 | -0.12332 | 0.017 | 0.114 | 1.83E-14 |
| EARS2     | 1.23E-18 | 0.106131 | 0.024 | 0.074 | 1.83E-14 |
| PIM2      | 1.32E-18 | -0.11535 | 0.007 | 0.1   | 1.97E-14 |
| C19orf47  | 1.32E-18 | -0.1285  | 0.012 | 0.111 | 1.98E-14 |
| IFIT1     | 1.36E-18 | 0.369027 | 0.056 | 0.07  | 2.03E-14 |
| SHF       | 1.39E-18 | -0.10585 | 0.009 | 0.094 | 2.08E-14 |
| PITX2     | 1.42E-18 | -0.17734 | 0.019 | 0.116 | 2.12E-14 |
| PALB2     | 1.51E-18 | -0.12683 | 0     | 0.088 | 2.26E-14 |
| TAPBP1    | 1.65E-18 | 0.240879 | 0.054 | 0.09  | 2.47E-14 |
| PVRL3     | 1.66E-18 | 0.130757 | 0.023 | 0.062 | 2.48E-14 |
| NR1D1     | 1.77E-18 | 0.129136 | 0.024 | 0.073 | 2.64E-14 |
| GCC1      | 2.00E-18 | -0.10908 | 0.012 | 0.102 | 2.99E-14 |
| DUOX1     | 2.06E-18 | -0.16865 | 0.012 | 0.111 | 3.07E-14 |
| CHST9     | 2.16E-18 | 0.135588 | 0.037 | 0.083 | 3.22E-14 |
| ABCC3     | 2.19E-18 | 0.212553 | 0.035 | 0.053 | 3.28E-14 |
| SCN1B     | 2.43E-18 | -0.10557 | 0.003 | 0.09  | 3.63E-14 |
| ZNF785    | 2.44E-18 | 0.14474  | 0.028 | 0.072 | 3.64E-14 |
| SLC11A1   | 2.77E-18 | 0.232643 | 0.042 | 0.067 | 4.14E-14 |
| MOB1B     | 2.90E-18 | -0.15823 | 0.002 | 0.094 | 4.34E-14 |
| BTN3A1    | 2.97E-18 | 0.175339 | 0.031 | 0.07  | 4.44E-14 |
| SLC30A6   | 3.17E-18 | -0.12187 | 0.01  | 0.102 | 4.74E-14 |
| NHSL2     | 3.83E-18 | 0.705119 | 0.094 | 0.01  | 5.72E-14 |
| FAM24B    | 3.83E-18 | -0.10046 | 0.005 | 0.088 | 5.73E-14 |
| ZNF615    | 3.99E-18 | -0.10264 | 0.017 | 0.109 | 5.96E-14 |
| DYRK2     | 4.20E-18 | -0.12476 | 0.007 | 0.098 | 6.28E-14 |
| KRT7      | 4.24E-18 | 0.121455 | 0.017 | 0.057 | 6.33E-14 |
| HLA-DQA1  | 4.36E-18 | 0.515136 | 0.054 | 0.026 | 6.52E-14 |
| SGPP1     | 4.67E-18 | -0.11471 | 0.005 | 0.093 | 6.98E-14 |
| COL18A1   | 4.72E-18 | 0.119289 | 0.023 | 0.068 | 7.05E-14 |
| H1FX-AS1  | 4.91E-18 | -0.10764 | 0.009 | 0.094 | 7.34E-14 |

|           |          |          |       |       |          |
|-----------|----------|----------|-------|-------|----------|
| PPIL6     | 5.02E-18 | 0.132487 | 0.024 | 0.06  | 7.51E-14 |
| IFI27     | 5.03E-18 | 0.609569 | 0.112 | 0.09  | 7.51E-14 |
| SRP14-AS1 | 5.08E-18 | 0.10513  | 0.031 | 0.083 | 7.60E-14 |
| NPNT      | 5.47E-18 | 0.122149 | 0.026 | 0.074 | 8.17E-14 |
| NEK11     | 5.54E-18 | 0.125816 | 0.026 | 0.068 | 8.27E-14 |
| SLC38A9   | 6.49E-18 | -0.10144 | 0.014 | 0.101 | 9.70E-14 |
| HVCN1     | 7.24E-18 | 0.133619 | 0.024 | 0.064 | 1.08E-13 |
| BEX5      | 7.36E-18 | 0.583597 | 0.092 | 0.051 | 1.10E-13 |
| PDZD2     | 7.55E-18 | 0.180011 | 0.037 | 0.068 | 1.13E-13 |
| EFTUD1    | 7.67E-18 | -0.10657 | 0.01  | 0.099 | 1.15E-13 |
| PLLP      | 7.92E-18 | 0.295964 | 0.061 | 0.086 | 1.18E-13 |
| AREL1     | 8.15E-18 | -0.10189 | 0.007 | 0.09  | 1.22E-13 |
| RCAN3     | 8.58E-18 | -0.12147 | 0     | 0.084 | 1.28E-13 |
| CYB561D1  | 8.79E-18 | 0.115201 | 0.017 | 0.054 | 1.31E-13 |
| MBOAT1    | 1.02E-17 | -0.13263 | 0.002 | 0.091 | 1.53E-13 |
| XKR4      | 1.14E-17 | 0.123441 | 0.04  | 0.079 | 1.70E-13 |
| DLX2      | 1.22E-17 | -0.1877  | 0.026 | 0.131 | 1.82E-13 |
| GSX1      | 1.22E-17 | -0.16829 | 0.009 | 0.091 | 1.82E-13 |
| PDLIM4    | 1.24E-17 | 0.389797 | 0.072 | 0.078 | 1.86E-13 |
| ALOX5AP   | 1.35E-17 | 0.202453 | 0.056 | 0.084 | 2.02E-13 |
| CLCF1     | 1.39E-17 | 0.239846 | 0.024 | 0.037 | 2.08E-13 |
| ZNF557    | 1.53E-17 | 0.118336 | 0.028 | 0.067 | 2.28E-13 |
| FAM43A    | 1.53E-17 | -0.11912 | 0     | 0.083 | 2.28E-13 |
| AC079922. | 1.66E-17 | -0.15757 | 0.005 | 0.094 | 2.49E-13 |
| ATP11C    | 1.73E-17 | -0.1266  | 0.003 | 0.091 | 2.59E-13 |
| HMG2      | 1.84E-17 | -0.10348 | 0.003 | 0.081 | 2.76E-13 |
| TNR       | 1.89E-17 | 0.120522 | 0.063 | 0.106 | 2.83E-13 |
| TMEFF2    | 2.01E-17 | -0.12443 | 0.024 | 0.112 | 3.01E-13 |
| SYT1      | 2.16E-17 | -0.19676 | 0.026 | 0.126 | 3.23E-13 |
| TET3      | 2.18E-17 | -0.10537 | 0.009 | 0.093 | 3.26E-13 |
| LRRC34    | 2.35E-17 | -0.10868 | 0.005 | 0.088 | 3.52E-13 |
| EGLN3     | 2.49E-17 | 0.168214 | 0.028 | 0.068 | 3.72E-13 |
| NEU4      | 2.84E-17 | 0.201353 | 0.079 | 0.109 | 4.24E-13 |
| MPP2      | 3.28E-17 | -0.10444 | 0.009 | 0.094 | 4.91E-13 |
| SMOC1     | 3.66E-17 | 0.195539 | 0.045 | 0.077 | 5.46E-13 |
| SAA2      | 3.74E-17 | 0.915825 | 0.063 | 0.006 | 5.60E-13 |
| TMSB4Y    | 3.96E-17 | -0.102   | 0.003 | 0.083 | 5.92E-13 |
| RDM1      | 4.85E-17 | -0.14213 | 0     | 0.08  | 7.24E-13 |
| ENTPD1-AS | 5.74E-17 | -0.12566 | 0.007 | 0.09  | 8.57E-13 |
| CDH13     | 6.07E-17 | 0.180014 | 0.063 | 0.101 | 9.06E-13 |
| AP001372. | 6.27E-17 | -0.1039  | 0.007 | 0.088 | 9.36E-13 |
| XAF1      | 6.71E-17 | 0.405583 | 0.077 | 0.089 | 1.00E-12 |
| GJA1      | 6.71E-17 | 0.520768 | 0.08  | 0.054 | 1.00E-12 |
| APCDD1    | 6.92E-17 | 0.132435 | 0.023 | 0.062 | 1.03E-12 |
| ANGPT2    | 6.92E-17 | 0.221763 | 0.031 | 0.057 | 1.03E-12 |
| CTD-2035E | 6.95E-17 | -0.16402 | 0.005 | 0.099 | 1.04E-12 |
| TMEM170B  | 7.50E-17 | -0.11203 | 0.009 | 0.096 | 1.12E-12 |
| SUPV3L1   | 9.28E-17 | -0.12424 | 0.009 | 0.093 | 1.39E-12 |
| ECE2      | 9.57E-17 | 0.110157 | 0.016 | 0.056 | 1.43E-12 |
| MANBA     | 1.03E-16 | 0.119505 | 0.026 | 0.063 | 1.53E-12 |
| OAS1      | 1.08E-16 | 0.578757 | 0.096 | 0.068 | 1.61E-12 |



|           |          |          |       |       |          |
|-----------|----------|----------|-------|-------|----------|
| NR2F2     | 1.13E-16 | 0.142684 | 0.042 | 0.084 | 1.69E-12 |
| ARHGAP26  | 1.15E-16 | 0.205634 | 0.028 | 0.057 | 1.72E-12 |
| DHRS3     | 1.46E-16 | 0.282008 | 0.045 | 0.067 | 2.18E-12 |
| RP11-108M | 1.52E-16 | -0.10176 | 0.016 | 0.1   | 2.27E-12 |
| PPP1R1C   | 1.68E-16 | 0.312951 | 0.045 | 0.056 | 2.51E-12 |
| LPCAT4    | 2.28E-16 | -0.11798 | 0.009 | 0.093 | 3.41E-12 |
| KIAA1549L | 2.47E-16 | -0.12081 | 0.003 | 0.086 | 3.69E-12 |
| LRRC4     | 2.50E-16 | -0.10287 | 0.016 | 0.094 | 3.74E-12 |
| SLITRK2   | 2.64E-16 | -0.11767 | 0.021 | 0.105 | 3.95E-12 |
| PLXNA3    | 2.69E-16 | 0.153988 | 0.031 | 0.065 | 4.01E-12 |
| ELL2      | 3.00E-16 | 0.215582 | 0.044 | 0.069 | 4.48E-12 |
| FAM122C   | 3.01E-16 | -0.12973 | 0.003 | 0.088 | 4.50E-12 |
| EVI2A     | 3.30E-16 | 0.286184 | 0.045 | 0.053 | 4.94E-12 |
| RGN       | 3.41E-16 | 0.142062 | 0.026 | 0.064 | 5.10E-12 |
| GALT      | 3.67E-16 | 0.165028 | 0.035 | 0.067 | 5.48E-12 |
| TNFRSF14  | 3.97E-16 | 0.235143 | 0.033 | 0.046 | 5.93E-12 |
| MX1       | 4.18E-16 | 0.215282 | 0.031 | 0.053 | 6.24E-12 |
| C2CD4A    | 4.84E-16 | -0.1049  | 0     | 0.075 | 7.23E-12 |
| PAQR6     | 4.86E-16 | 0.159748 | 0.04  | 0.074 | 7.27E-12 |
| C4orf36   | 5.09E-16 | -0.15628 | 0.007 | 0.09  | 7.60E-12 |
| PIFO      | 6.43E-16 | 0.489443 | 0.054 | 0.026 | 9.60E-12 |
| ARHGAP5-A | 6.51E-16 | 0.195039 | 0.024 | 0.049 | 9.73E-12 |
| SGMS1     | 6.66E-16 | -0.10422 | 0.002 | 0.083 | 9.95E-12 |
| HOXA9     | 6.71E-16 | -0.20913 | 0.012 | 0.104 | 1.00E-11 |
| SLC12A7   | 7.61E-16 | 0.115137 | 0.017 | 0.051 | 1.14E-11 |
| TFAP2B    | 7.84E-16 | -0.201   | 0.014 | 0.106 | 1.17E-11 |
| DLX6      | 9.46E-16 | -0.18341 | 0.007 | 0.086 | 1.41E-11 |
| PPM1L     | 9.94E-16 | -0.13155 | 0.003 | 0.086 | 1.49E-11 |
| SDCBP2    | 1.00E-15 | 0.16547  | 0.024 | 0.054 | 1.49E-11 |
| IL1B      | 1.05E-15 | 0.152637 | 0.04  | 0.073 | 1.56E-11 |
| ZNF783    | 1.05E-15 | 0.186666 | 0.028 | 0.057 | 1.57E-11 |
| HDAC4     | 1.13E-15 | -0.13405 | 0.009 | 0.091 | 1.69E-11 |
| IGLON5    | 1.29E-15 | -0.10723 | 0.014 | 0.085 | 1.92E-11 |
| ERCC6L    | 1.37E-15 | -0.12989 | 0.002 | 0.077 | 2.05E-11 |
| CCDC88B   | 1.41E-15 | 0.166841 | 0.024 | 0.051 | 2.10E-11 |
| ZNF286B   | 1.59E-15 | -0.10595 | 0.007 | 0.086 | 2.37E-11 |
| MS4A7     | 1.64E-15 | 0.14265  | 0.031 | 0.063 | 2.45E-11 |
| DUSP26    | 1.66E-15 | 0.139804 | 0.058 | 0.091 | 2.47E-11 |
| DAPK1     | 1.71E-15 | -0.10665 | 0.003 | 0.079 | 2.55E-11 |
| TCP11L1   | 1.73E-15 | -0.13987 | 0.012 | 0.098 | 2.59E-11 |
| CDK18     | 1.86E-15 | 0.277287 | 0.049 | 0.065 | 2.78E-11 |
| TAF5      | 1.92E-15 | -0.10304 | 0.005 | 0.08  | 2.88E-11 |
| LINC00342 | 2.10E-15 | -0.13242 | 0.003 | 0.083 | 3.13E-11 |
| INADL     | 2.17E-15 | -0.12987 | 0.003 | 0.081 | 3.24E-11 |
| SLC25A45  | 2.35E-15 | 0.12247  | 0.021 | 0.052 | 3.51E-11 |
| GPR1      | 2.51E-15 | -0.18712 | 0.009 | 0.098 | 3.76E-11 |
| C7orf61   | 2.58E-15 | 0.23505  | 0.042 | 0.054 | 3.86E-11 |
| TREM2     | 2.65E-15 | 0.236077 | 0.038 | 0.051 | 3.95E-11 |
| LAPTM5    | 2.73E-15 | 0.177023 | 0.058 | 0.096 | 4.07E-11 |
| RPH3A     | 2.78E-15 | 0.184878 | 0.04  | 0.065 | 4.15E-11 |
| MGMT      | 2.96E-15 | 0.211743 | 0.044 | 0.064 | 4.43E-11 |

|           |          |          |       |       |          |
|-----------|----------|----------|-------|-------|----------|
| SERPINF1  | 3.12E-15 | 0.215486 | 0.045 | 0.07  | 4.66E-11 |
| CTD-2090I | 3.18E-15 | 0.607836 | 0.079 | 0.009 | 4.75E-11 |
| PLA2G2A   | 3.23E-15 | 0.549385 | 0.038 | 0.028 | 4.83E-11 |
| MIR22HG   | 3.89E-15 | 0.105987 | 0.023 | 0.054 | 5.81E-11 |
| ASIC1     | 4.10E-15 | 0.160142 | 0.038 | 0.067 | 6.12E-11 |
| ALDH1L1   | 4.21E-15 | 0.545876 | 0.112 | 0.062 | 6.29E-11 |
| USP54     | 5.69E-15 | 0.108103 | 0.024 | 0.064 | 8.50E-11 |
| EPB41L4A  | 7.49E-15 | -0.10851 | 0.01  | 0.091 | 1.12E-10 |
| PTHLH     | 7.66E-15 | 0.147893 | 0.023 | 0.049 | 1.14E-10 |
| BCL11A    | 7.95E-15 | -0.13251 | 0.003 | 0.079 | 1.19E-10 |
| PTPRN     | 8.25E-15 | 0.272119 | 0.051 | 0.059 | 1.23E-10 |
| GPNMB     | 8.72E-15 | 0.226662 | 0.037 | 0.062 | 1.30E-10 |
| TLDC1     | 9.37E-15 | 0.10757  | 0.024 | 0.058 | 1.40E-10 |
| ZMYM6     | 9.94E-15 | -0.14798 | 0.014 | 0.099 | 1.49E-10 |
| RP3-460G2 | 1.08E-14 | 0.422395 | 0.07  | 0.052 | 1.62E-10 |
| FCH02     | 1.18E-14 | -0.12808 | 0.009 | 0.09  | 1.76E-10 |
| SLC6A9    | 1.40E-14 | 0.11604  | 0.024 | 0.062 | 2.09E-10 |
| TNFAIP3   | 1.63E-14 | 0.290205 | 0.038 | 0.049 | 2.43E-10 |
| CA3       | 1.63E-14 | 0.364641 | 0.037 | 0.049 | 2.43E-10 |
| PROCR     | 1.75E-14 | 0.11086  | 0.012 | 0.04  | 2.62E-10 |
| MASP1     | 1.77E-14 | 0.168221 | 0.045 | 0.069 | 2.65E-10 |
| CYB5R2    | 1.79E-14 | 0.229678 | 0.026 | 0.035 | 2.67E-10 |
| RP11-138A | 2.01E-14 | 0.215079 | 0.054 | 0.067 | 3.01E-10 |
| LFNG      | 2.32E-14 | 0.130505 | 0.03  | 0.067 | 3.46E-10 |
| NPY       | 2.33E-14 | -0.21363 | 0.01  | 0.088 | 3.48E-10 |
| KCNJ3     | 2.37E-14 | 0.119915 | 0.038 | 0.07  | 3.54E-10 |
| PCDHB14   | 2.59E-14 | 0.291585 | 0.047 | 0.049 | 3.88E-10 |
| MR1       | 2.61E-14 | 0.11386  | 0.021 | 0.052 | 3.90E-10 |
| TREM1     | 3.16E-14 | 0.587263 | 0.059 | 0.02  | 4.72E-10 |
| ST6GAL2   | 3.44E-14 | -0.15033 | 0.012 | 0.093 | 5.14E-10 |
| POU4F1    | 3.48E-14 | -0.10001 | 0.016 | 0.085 | 5.21E-10 |
| HEATR3    | 3.92E-14 | -0.13075 | 0.002 | 0.077 | 5.87E-10 |
| MIR7-3HG  | 3.97E-14 | 0.620532 | 0.059 | 0.011 | 5.94E-10 |
| ARPP21    | 4.12E-14 | 0.216612 | 0.049 | 0.067 | 6.15E-10 |
| LYN       | 4.23E-14 | 0.110371 | 0.019 | 0.056 | 6.32E-10 |
| AMPH      | 4.37E-14 | -0.16341 | 0.002 | 0.077 | 6.53E-10 |
| SFRP4     | 4.48E-14 | 0.140432 | 0.031 | 0.069 | 6.70E-10 |
| AP1S3     | 5.15E-14 | -0.11301 | 0.002 | 0.074 | 7.69E-10 |
| PROM1     | 7.13E-14 | -0.10409 | 0.014 | 0.084 | 1.07E-09 |
| GBP3      | 7.16E-14 | 0.36683  | 0.059 | 0.064 | 1.07E-09 |
| ONECUT2   | 7.50E-14 | -0.12506 | 0.007 | 0.074 | 1.12E-09 |
| NCAN      | 7.87E-14 | 0.118792 | 0.051 | 0.084 | 1.18E-09 |
| TMBIM4    | 7.95E-14 | 0.677544 | 0.086 | 0.01  | 1.19E-09 |
| FRMD3     | 8.28E-14 | 0.295473 | 0.047 | 0.059 | 1.24E-09 |
| XXbac-BPG | 9.15E-14 | 0.115488 | 0.024 | 0.053 | 1.37E-09 |
| CTSV      | 9.25E-14 | -0.118   | 0.002 | 0.072 | 1.38E-09 |
| ZNF468    | 9.72E-14 | -0.11393 | 0.003 | 0.077 | 1.45E-09 |
| SOD3      | 1.01E-13 | -0.12995 | 0.002 | 0.065 | 1.51E-09 |
| SUOX      | 1.09E-13 | 0.109075 | 0.026 | 0.054 | 1.63E-09 |
| GLIPR1L2  | 1.10E-13 | 0.172317 | 0.016 | 0.036 | 1.65E-09 |
| PLCD1     | 1.14E-13 | 0.135929 | 0.021 | 0.047 | 1.71E-09 |

|           |          |          |       |       |          |
|-----------|----------|----------|-------|-------|----------|
| GPR37     | 1.28E-13 | 0.229069 | 0.051 | 0.062 | 1.92E-09 |
| AFAP1L1   | 1.34E-13 | 0.12144  | 0.023 | 0.056 | 2.00E-09 |
| HSPA6     | 1.48E-13 | 0.422433 | 0.054 | 0.063 | 2.21E-09 |
| RP13-650J | 1.48E-13 | -0.1023  | 0.005 | 0.073 | 2.21E-09 |
| 5-Sep     | 1.55E-13 | -0.10259 | 0.007 | 0.078 | 2.32E-09 |
| CCER2     | 1.59E-13 | 0.161509 | 0.058 | 0.078 | 2.37E-09 |
| MUC12     | 1.62E-13 | 0.260015 | 0.04  | 0.051 | 2.42E-09 |
| ELFN1     | 1.70E-13 | -0.10229 | 0.003 | 0.07  | 2.55E-09 |
| CAMKK1    | 1.75E-13 | -0.1347  | 0.005 | 0.074 | 2.62E-09 |
| PTPRK     | 1.81E-13 | 0.112124 | 0.028 | 0.058 | 2.71E-09 |
| ZNF510    | 1.91E-13 | -0.11303 | 0.003 | 0.073 | 2.85E-09 |
| CLSTN3    | 2.15E-13 | 0.116612 | 0.03  | 0.057 | 3.21E-09 |
| IFIT2     | 2.20E-13 | 0.288942 | 0.037 | 0.046 | 3.29E-09 |
| FCGBP     | 2.46E-13 | 0.149992 | 0.035 | 0.051 | 3.67E-09 |
| SLC30A3   | 2.60E-13 | -0.14827 | 0     | 0.062 | 3.89E-09 |
| LDLRAP1   | 3.23E-13 | -0.11676 | 0.002 | 0.072 | 4.82E-09 |
| RP11-258C | 3.88E-13 | -0.1394  | 0.003 | 0.075 | 5.79E-09 |
| ADCY2     | 4.03E-13 | 0.156321 | 0.023 | 0.035 | 6.02E-09 |
| TRMT44    | 4.30E-13 | -0.10399 | 0.002 | 0.069 | 6.43E-09 |
| C1RL      | 4.54E-13 | 0.327422 | 0.038 | 0.021 | 6.79E-09 |
| DFFB      | 4.58E-13 | 0.102029 | 0.021 | 0.052 | 6.84E-09 |
| PSORS1C1  | 5.18E-13 | 0.276073 | 0.035 | 0.046 | 7.74E-09 |
| ARHGAP22  | 5.45E-13 | -0.10189 | 0.002 | 0.068 | 8.15E-09 |
| ARHGDIB   | 5.69E-13 | 0.112188 | 0.035 | 0.07  | 8.51E-09 |
| DNMT3B    | 5.84E-13 | -0.12054 | 0.002 | 0.072 | 8.73E-09 |
| TMEM37    | 5.85E-13 | 0.236938 | 0.024 | 0.026 | 8.74E-09 |
| TMEM179   | 7.17E-13 | -0.14758 | 0.007 | 0.081 | 1.07E-08 |
| WNT5A     | 7.52E-13 | -0.13223 | 0.007 | 0.074 | 1.12E-08 |
| LOX       | 8.25E-13 | 0.145086 | 0.03  | 0.068 | 1.23E-08 |
| SERF1A    | 8.46E-13 | 0.111087 | 0.017 | 0.038 | 1.26E-08 |
| RP11-196G | 9.84E-13 | -0.13313 | 0.002 | 0.068 | 1.47E-08 |
| LDOC1     | 1.18E-12 | 0.132738 | 0.038 | 0.07  | 1.76E-08 |
| ARHGEF11  | 1.19E-12 | -0.10146 | 0.005 | 0.072 | 1.78E-08 |
| KIAA0556  | 1.38E-12 | -0.11015 | 0.007 | 0.074 | 2.06E-08 |
| PTTG2     | 1.43E-12 | -0.15542 | 0     | 0.058 | 2.14E-08 |
| GRAMD1C   | 1.51E-12 | -0.10336 | 0.007 | 0.077 | 2.26E-08 |
| ZNF823    | 1.53E-12 | -0.11236 | 0.003 | 0.069 | 2.28E-08 |
| KCTD14    | 1.53E-12 | 0.118284 | 0.012 | 0.033 | 2.29E-08 |
| AGTPBP1   | 1.57E-12 | -0.11383 | 0.003 | 0.072 | 2.35E-08 |
| ADCYAP1R1 | 1.71E-12 | 0.160861 | 0.026 | 0.047 | 2.55E-08 |
| MB21D1    | 1.78E-12 | -0.1222  | 0.002 | 0.064 | 2.65E-08 |
| MORN3     | 1.81E-12 | 0.20156  | 0.019 | 0.035 | 2.71E-08 |
| SMIM3     | 2.14E-12 | 0.643136 | 0.068 | 0.006 | 3.19E-08 |
| DEPDC7    | 2.24E-12 | -0.12119 | 0.005 | 0.073 | 3.35E-08 |
| TSHZ2     | 2.30E-12 | 0.23344  | 0.045 | 0.058 | 3.44E-08 |
| ITGB4     | 2.40E-12 | 0.120714 | 0.021 | 0.044 | 3.59E-08 |
| APOL4     | 2.47E-12 | 0.115461 | 0.028 | 0.064 | 3.68E-08 |
| TNFSF13B  | 2.54E-12 | 0.1368   | 0.03  | 0.062 | 3.79E-08 |
| HSD17B6   | 2.79E-12 | 0.176625 | 0.024 | 0.04  | 4.16E-08 |
| RARRES1   | 3.96E-12 | -0.11127 | 0.005 | 0.07  | 5.92E-08 |
| MAMSTR    | 4.22E-12 | -0.1123  | 0.002 | 0.064 | 6.30E-08 |

|           |          |          |       |       |          |
|-----------|----------|----------|-------|-------|----------|
| RP1-17K7. | 4.46E-12 | 0.347138 | 0.063 | 0.04  | 6.67E-08 |
| GIMAP2    | 4.53E-12 | 0.182753 | 0.019 | 0.035 | 6.77E-08 |
| TPTEP1    | 4.54E-12 | 0.21002  | 0.03  | 0.049 | 6.79E-08 |
| RP11-499E | 4.66E-12 | 0.107011 | 0.023 | 0.057 | 6.97E-08 |
| FGF7      | 5.46E-12 | 0.350267 | 0.038 | 0.016 | 8.16E-08 |
| C2orf74   | 5.49E-12 | 0.431592 | 0.044 | 0.022 | 8.21E-08 |
| PPT2      | 5.67E-12 | 0.121401 | 0.023 | 0.049 | 8.47E-08 |
| CNTN1     | 6.52E-12 | 0.109136 | 0.037 | 0.065 | 9.75E-08 |
| NPPA      | 7.36E-12 | 0.175775 | 0.049 | 0.075 | 1.10E-07 |
| HOXC11    | 9.09E-12 | -0.11881 | 0.005 | 0.064 | 1.36E-07 |
| LINC01114 | 9.81E-12 | 0.194935 | 0.038 | 0.052 | 1.47E-07 |
| HLA-DQB1  | 1.06E-11 | 0.253238 | 0.042 | 0.04  | 1.58E-07 |
| GBP4      | 1.23E-11 | 0.267592 | 0.051 | 0.062 | 1.83E-07 |
| ANGPTL4   | 1.48E-11 | 0.536007 | 0.07  | 0.033 | 2.21E-07 |
| DNAJA4    | 1.65E-11 | -0.1272  | 0.012 | 0.079 | 2.46E-07 |
| MT1A      | 1.65E-11 | 0.470059 | 0.052 | 0.012 | 2.46E-07 |
| BIRC3     | 1.70E-11 | 0.229731 | 0.021 | 0.032 | 2.55E-07 |
| SLC39A4   | 1.76E-11 | 0.209794 | 0.026 | 0.033 | 2.63E-07 |
| MAP2K6    | 1.82E-11 | 0.116117 | 0.016 | 0.036 | 2.71E-07 |
| AZGP1     | 2.03E-11 | 0.418846 | 0.063 | 0.038 | 3.03E-07 |
| TBCEL     | 2.04E-11 | -0.11318 | 0.002 | 0.063 | 3.05E-07 |
| VAMP8     | 2.46E-11 | 0.100237 | 0.021 | 0.049 | 3.68E-07 |
| C10orf10  | 2.52E-11 | 0.539699 | 0.08  | 0.037 | 3.77E-07 |
| MYBPC1    | 2.61E-11 | 0.234273 | 0.038 | 0.053 | 3.90E-07 |
| METTL20   | 2.77E-11 | 0.133121 | 0.023 | 0.047 | 4.14E-07 |
| RPRML     | 3.13E-11 | -0.11769 | 0.003 | 0.062 | 4.68E-07 |
| NEUROD1   | 3.46E-11 | -0.11486 | 0.014 | 0.075 | 5.17E-07 |
| LINC01152 | 3.85E-11 | 0.117471 | 0.014 | 0.035 | 5.75E-07 |
| LINC00869 | 4.06E-11 | 0.508556 | 0.054 | 0.002 | 6.07E-07 |
| CXCL2     | 4.06E-11 | 0.445952 | 0.042 | 0.011 | 6.07E-07 |
| ZNF850    | 4.32E-11 | -0.11193 | 0.003 | 0.062 | 6.45E-07 |
| S100A4    | 4.35E-11 | 0.156172 | 0.026 | 0.051 | 6.51E-07 |
| RP11-395E | 4.69E-11 | 0.178567 | 0.019 | 0.027 | 7.01E-07 |
| FAM107A   | 5.16E-11 | 0.227614 | 0.033 | 0.042 | 7.70E-07 |
| BRINP3    | 5.54E-11 | 0.183571 | 0.031 | 0.044 | 8.28E-07 |
| KCTD16    | 5.70E-11 | -0.11374 | 0.005 | 0.06  | 8.52E-07 |
| FAXDC2    | 6.51E-11 | 0.169553 | 0.03  | 0.044 | 9.73E-07 |
| IFITM2    | 6.80E-11 | 0.219944 | 0.044 | 0.065 | 1.02E-06 |
| LAIR1     | 7.09E-11 | 0.12559  | 0.03  | 0.044 | 1.06E-06 |
| HIST1H2AC | 7.54E-11 | 0.279855 | 0.072 | 0.078 | 1.13E-06 |
| NMNAT3    | 7.68E-11 | 0.17641  | 0.03  | 0.044 | 1.15E-06 |
| PRKCG     | 8.51E-11 | 0.454093 | 0.047 | 0.01  | 1.27E-06 |
| CAMK4     | 8.65E-11 | -0.11722 | 0.002 | 0.058 | 1.29E-06 |
| ZNF154    | 9.74E-11 | 0.133131 | 0.026 | 0.043 | 1.46E-06 |
| TRIM59    | 9.82E-11 | -0.13929 | 0.005 | 0.067 | 1.47E-06 |
| STX3      | 1.01E-10 | 0.13974  | 0.021 | 0.03  | 1.51E-06 |
| ARHGAP18  | 1.08E-10 | 0.160028 | 0.021 | 0.042 | 1.61E-06 |
| GPRC5C    | 1.37E-10 | 0.288693 | 0.047 | 0.052 | 2.04E-06 |
| STEAP1    | 1.95E-10 | 0.21529  | 0.026 | 0.038 | 2.91E-06 |
| HHIP-AS1  | 2.06E-10 | -0.12048 | 0.003 | 0.062 | 3.07E-06 |
| KLF15     | 2.32E-10 | 0.109589 | 0.035 | 0.062 | 3.47E-06 |

|           |          |          |       |       |          |
|-----------|----------|----------|-------|-------|----------|
| ZNF582    | 2.61E-10 | 0.111036 | 0.026 | 0.049 | 3.91E-06 |
| BBS1      | 2.76E-10 | 0.109959 | 0.017 | 0.031 | 4.12E-06 |
| IGFLR1    | 2.90E-10 | 0.129573 | 0.021 | 0.035 | 4.33E-06 |
| MYO1F     | 3.57E-10 | 0.202612 | 0.023 | 0.035 | 5.33E-06 |
| LGALS9    | 3.93E-10 | 0.138907 | 0.019 | 0.038 | 5.88E-06 |
| EHD3      | 4.37E-10 | 0.131163 | 0.017 | 0.031 | 6.53E-06 |
| PGAM2     | 4.42E-10 | 0.298157 | 0.035 | 0.037 | 6.60E-06 |
| ZNF415    | 4.66E-10 | 0.1462   | 0.026 | 0.048 | 6.97E-06 |
| SULT1C4   | 4.76E-10 | 0.10511  | 0.023 | 0.042 | 7.11E-06 |
| NXN       | 5.60E-10 | -0.12265 | 0.003 | 0.06  | 8.37E-06 |
| TNS1      | 5.76E-10 | 0.172557 | 0.033 | 0.043 | 8.61E-06 |
| PCDH15    | 6.97E-10 | 0.237618 | 0.03  | 0.03  | 1.04E-05 |
| GUCY1B3   | 7.57E-10 | -0.11267 | 0.007 | 0.06  | 1.13E-05 |
| UNC80     | 7.58E-10 | 0.160966 | 0.035 | 0.046 | 1.13E-05 |
| DNAH9     | 7.81E-10 | 0.125467 | 0.019 | 0.036 | 1.17E-05 |
| IRAK2     | 8.78E-10 | 0.125624 | 0.014 | 0.03  | 1.31E-05 |
| C2        | 8.91E-10 | 0.246602 | 0.03  | 0.026 | 1.33E-05 |
| AC016831. | 9.43E-10 | 0.113899 | 0.026 | 0.048 | 1.41E-05 |
| LST1      | 1.03E-09 | 0.119636 | 0.021 | 0.041 | 1.54E-05 |
| DZIP1L    | 1.17E-09 | -0.10549 | 0.002 | 0.053 | 1.74E-05 |
| VWA3B     | 1.18E-09 | 0.136621 | 0.023 | 0.036 | 1.76E-05 |
| NUDT7     | 1.18E-09 | 0.211416 | 0.031 | 0.035 | 1.76E-05 |
| FXYP1     | 1.43E-09 | 0.187813 | 0.037 | 0.037 | 2.13E-05 |
| CRABP2    | 1.44E-09 | 0.106979 | 0.024 | 0.054 | 2.15E-05 |
| CMYA5     | 1.51E-09 | 0.167652 | 0.023 | 0.037 | 2.26E-05 |
| CTC-479C5 | 1.53E-09 | 0.134283 | 0.021 | 0.032 | 2.29E-05 |
| ZNF84     | 1.57E-09 | 0.172627 | 0.028 | 0.028 | 2.35E-05 |
| RNASE1    | 1.81E-09 | 0.221169 | 0.037 | 0.043 | 2.70E-05 |
| FAM71E1   | 1.83E-09 | 0.207317 | 0.023 | 0.031 | 2.74E-05 |
| DUSP23    | 1.93E-09 | 0.268053 | 0.045 | 0.049 | 2.89E-05 |
| DIO2      | 1.98E-09 | 0.358167 | 0.049 | 0.04  | 2.96E-05 |
| RP1-43E13 | 2.32E-09 | 0.119145 | 0.019 | 0.042 | 3.47E-05 |
| RP11-22N1 | 2.36E-09 | 0.14572  | 0.016 | 0.028 | 3.52E-05 |
| RP11-326G | 3.29E-09 | 0.100175 | 0.016 | 0.033 | 4.92E-05 |
| CLEC2D    | 3.36E-09 | 0.119134 | 0.019 | 0.031 | 5.03E-05 |
| FAM105A   | 3.63E-09 | -0.10821 | 0.002 | 0.051 | 5.43E-05 |
| SLC44A3   | 3.89E-09 | 0.160503 | 0.016 | 0.019 | 5.81E-05 |
| PDE6B     | 4.23E-09 | 0.114643 | 0.03  | 0.047 | 6.32E-05 |
| SPAG4     | 4.49E-09 | 0.107888 | 0.012 | 0.03  | 6.71E-05 |
| AC023590. | 4.96E-09 | 0.156799 | 0.03  | 0.036 | 7.41E-05 |
| TCEAL6    | 6.31E-09 | 0.234323 | 0.028 | 0.032 | 9.43E-05 |
| NEGR1     | 7.36E-09 | 0.142902 | 0.026 | 0.036 | 0.00011  |
| FOLR1     | 8.23E-09 | 0.302098 | 0.028 | 0.012 | 0.000123 |
| PCSK1     | 8.25E-09 | 0.157737 | 0.023 | 0.035 | 0.000123 |
| AC009961. | 8.37E-09 | -0.11146 | 0.002 | 0.049 | 0.000125 |
| HS3ST1    | 8.77E-09 | 0.113739 | 0.03  | 0.044 | 0.000131 |
| TRIM21    | 1.01E-08 | 0.109557 | 0.014 | 0.03  | 0.000151 |
| PACRG     | 1.01E-08 | 0.110601 | 0.019 | 0.032 | 0.000152 |
| ARHGAP24  | 1.09E-08 | 0.347273 | 0.056 | 0.027 | 0.000162 |
| CH25H     | 1.23E-08 | 0.395173 | 0.047 | 0.023 | 0.000184 |
| TUBA4A    | 1.30E-08 | 0.103245 | 0.016 | 0.041 | 0.000194 |

|           |    |        |          |       |       |          |
|-----------|----|--------|----------|-------|-------|----------|
| AC114730. | 1. | 32E-08 | 0.199746 | 0.044 | 0.053 | 0.000198 |
| C6orf141  | 1. | 79E-08 | 0.141516 | 0.017 | 0.028 | 0.000268 |
| HCST      | 1. | 82E-08 | 0.131672 | 0.021 | 0.028 | 0.000272 |
| SERPINB1  | 2. | 32E-08 | 0.328994 | 0.035 | 0.025 | 0.000347 |
| SCN3B     | 2. | 62E-08 | 0.130417 | 0.038 | 0.047 | 0.000392 |
| CADPS     | 2. | 81E-08 | 0.266262 | 0.033 | 0.021 | 0.00042  |
| RP11-11N9 | 3. | 17E-08 | 0.147469 | 0.019 | 0.035 | 0.000474 |
| JPH4      | 3. | 32E-08 | 0.101401 | 0.038 | 0.051 | 0.000496 |
| ACSL6     | 3. | 33E-08 | 0.100682 | 0.028 | 0.043 | 0.000497 |
| KCNN3     | 3. | 40E-08 | 0.104622 | 0.012 | 0.023 | 0.000508 |
| DPYD      | 3. | 47E-08 | 0.254095 | 0.037 | 0.025 | 0.000519 |
| LY86      | 3. | 68E-08 | 0.114536 | 0.017 | 0.028 | 0.00055  |
| SLC6A6    | 3. | 93E-08 | 0.245012 | 0.026 | 0.019 | 0.000587 |
| MYH7B     | 4. | 05E-08 | 0.112429 | 0.019 | 0.027 | 0.000606 |
| SGIP1     | 4. | 13E-08 | 0.11354  | 0.03  | 0.044 | 0.000617 |
| ZFPM2     | 4. | 17E-08 | -0.12585 | 0.017 | 0.073 | 0.000623 |
| AGMO      | 4. | 68E-08 | 0.104905 | 0.019 | 0.036 | 0.0007   |
| PCAT6     | 5. | 23E-08 | 0.104312 | 0.016 | 0.028 | 0.000782 |
| FCGR2A    | 5. | 80E-08 | 0.161639 | 0.021 | 0.03  | 0.000867 |
| SCN9A     | 6. | 00E-08 | 0.106328 | 0.021 | 0.036 | 0.000896 |
| C11orf71  | 6. | 18E-08 | 0.20755  | 0.023 | 0.02  | 0.000924 |
| CD37      | 7. | 02E-08 | 0.120554 | 0.023 | 0.032 | 0.001049 |
| HLA-DQA2  | 8. | 18E-08 | 0.362776 | 0.033 | 0.005 | 0.001223 |
| C1QTNF3   | 8. | 41E-08 | 0.160893 | 0.031 | 0.051 | 0.001258 |
| RSPH1     | 9. | 52E-08 | 0.255162 | 0.026 | 0.012 | 0.001423 |
| LGR6      | 9. | 95E-08 | 0.185968 | 0.023 | 0.026 | 0.001487 |
| SLITRK3   | 1. | 11E-07 | 0.102527 | 0.016 | 0.028 | 0.001654 |
| MYCNOS    | 1. | 11E-07 | 0.116558 | 0.016 | 0.026 | 0.001659 |
| C6orf15   | 1. | 12E-07 | 0.262429 | 0.063 | 0.072 | 0.001672 |
| RP11-479J | 1. | 13E-07 | 0.162682 | 0.014 | 0.014 | 0.001681 |
| SERPINA1  | 1. | 17E-07 | 0.217264 | 0.03  | 0.027 | 0.001745 |
| RP11-713F | 1. | 19E-07 | 0.165426 | 0.028 | 0.033 | 0.001774 |
| MYOT      | 1. | 25E-07 | -0.12633 | 0.002 | 0.044 | 0.001865 |
| PNPLA4    | 1. | 36E-07 | 0.213139 | 0.03  | 0.028 | 0.002033 |
| FBLN5     | 1. | 41E-07 | 0.204836 | 0.024 | 0.03  | 0.00211  |
| H3F3C     | 1. | 44E-07 | 0.233412 | 0.058 | 0.048 | 0.002152 |
| NDUFA4L2  | 1. | 48E-07 | 0.188501 | 0.031 | 0.044 | 0.002209 |
| HLA-DMB   | 1. | 62E-07 | 0.183599 | 0.033 | 0.042 | 0.002422 |
| CD163     | 1. | 70E-07 | 0.110214 | 0.021 | 0.036 | 0.002543 |
| LINC00882 | 2. | 09E-07 | 0.132681 | 0.019 | 0.032 | 0.003131 |
| SPOCK1    | 2. | 14E-07 | 0.147472 | 0.033 | 0.04  | 0.003191 |
| KIAA0040  | 2. | 46E-07 | 0.185084 | 0.03  | 0.035 | 0.003679 |
| CLDN11    | 2. | 66E-07 | 0.210052 | 0.023 | 0.021 | 0.003971 |
| TNFAIP2   | 2. | 69E-07 | 0.149433 | 0.016 | 0.021 | 0.004023 |
| HIF3A     | 3. | 00E-07 | 0.156213 | 0.035 | 0.041 | 0.004485 |
| RP3-508I1 | 3. | 54E-07 | 0.292828 | 0.037 | 0.019 | 0.005285 |
| IFI30     | 4. | 43E-07 | 0.109454 | 0.012 | 0.02  | 0.006616 |
| LTBR      | 4. | 81E-07 | 0.155082 | 0.024 | 0.023 | 0.007188 |
| ZNF665    | 5. | 69E-07 | 0.151124 | 0.019 | 0.022 | 0.008509 |
| FAM149A   | 5. | 95E-07 | -0.10559 | 0.005 | 0.047 | 0.008892 |
| RENBP     | 6. | 39E-07 | 0.167878 | 0.019 | 0.022 | 0.009554 |

|           |          |          |       |       |          |
|-----------|----------|----------|-------|-------|----------|
| MTRNR2L3  | 6.49E-07 | 0.150647 | 0.019 | 0.02  | 0.009704 |
| CTD-2020K | 6.69E-07 | 0.184377 | 0.024 | 0.015 | 0.009993 |
| MMP7      | 6.69E-07 | 0.339829 | 0.026 | 0.014 | 0.010002 |
| ZNF404    | 8.06E-07 | 0.113464 | 0.016 | 0.028 | 0.012038 |
| C5AR1     | 8.26E-07 | 0.133228 | 0.021 | 0.031 | 0.012349 |
| CRISPLD2  | 9.05E-07 | 0.228482 | 0.033 | 0.03  | 0.013522 |
| THSD4     | 1.02E-06 | 0.176607 | 0.035 | 0.046 | 0.015301 |
| APLN      | 1.15E-06 | 0.110957 | 0.016 | 0.031 | 0.017225 |
| FGF22     | 1.19E-06 | 0.128399 | 0.016 | 0.019 | 0.01785  |
| PTGES     | 1.33E-06 | 0.10328  | 0.014 | 0.021 | 0.019845 |
| HSD11B1   | 1.42E-06 | 0.166229 | 0.016 | 0.015 | 0.021148 |
| SSTR2     | 1.49E-06 | 0.108126 | 0.014 | 0.021 | 0.022226 |
| NR2F2-AS1 | 1.83E-06 | 0.153752 | 0.028 | 0.026 | 0.027342 |
| OR4N2     | 1.94E-06 | 0.206508 | 0.028 | 0.021 | 0.029007 |
| RP11-118F | 2.01E-06 | -0.10081 | 0.005 | 0.043 | 0.030047 |
| CEACAM1   | 2.05E-06 | 0.138659 | 0.021 | 0.022 | 0.030662 |
| SPRED3    | 2.34E-06 | 0.153829 | 0.016 | 0.02  | 0.035002 |
| ACOT11    | 2.60E-06 | 0.151457 | 0.019 | 0.019 | 0.038842 |
| HP        | 2.60E-06 | 0.396525 | 0.026 | 0.001 | 0.038922 |
| HSD17B14  | 2.74E-06 | 0.17     | 0.028 | 0.037 | 0.040875 |
| MYO16     | 2.93E-06 | 0.100089 | 0.016 | 0.026 | 0.043713 |
| RP11-46H1 | 3.05E-06 | 0.270902 | 0.035 | 0.012 | 0.045526 |
| TMEM144   | 3.21E-06 | 0.133505 | 0.014 | 0.019 | 0.047962 |
| LRRC2     | 3.63E-06 | 0.214477 | 0.026 | 0.007 | 0.054295 |
| PDGFRL    | 4.39E-06 | 0.123611 | 0.019 | 0.02  | 0.065662 |
| GPR17     | 4.44E-06 | 0.100406 | 0.019 | 0.031 | 0.066356 |
| IL1R1     | 4.78E-06 | 0.124745 | 0.012 | 0.014 | 0.071459 |
| GALNT15   | 5.05E-06 | 0.226549 | 0.024 | 0.007 | 0.075461 |
| RP11-138I | 5.64E-06 | 0.12053  | 0.024 | 0.033 | 0.084222 |
| ETV7      | 5.68E-06 | 0.195445 | 0.016 | 0.011 | 0.084924 |
| OPCML     | 6.32E-06 | 0.128578 | 0.019 | 0.021 | 0.094377 |
| STAB1     | 7.12E-06 | 0.123547 | 0.012 | 0.016 | 0.106393 |
| ENTPD1    | 7.24E-06 | 0.10728  | 0.016 | 0.022 | 0.108187 |
| AC015936  | 7.75E-06 | 0.17789  | 0.023 | 0.01  | 0.115825 |
| PPM1N     | 8.02E-06 | 0.175748 | 0.023 | 0.017 | 0.119786 |
| RBF0X3    | 8.53E-06 | 0.192624 | 0.023 | 0.011 | 0.127404 |
| DES       | 8.82E-06 | 0.127184 | 0.026 | 0.031 | 0.131826 |
| FPR1      | 9.02E-06 | 0.202212 | 0.023 | 0.014 | 0.134755 |
| FAM198B   | 9.16E-06 | 0.148221 | 0.019 | 0.023 | 0.136842 |
| TSIX      | 9.65E-06 | 0.206274 | 0.033 | 0.02  | 0.144276 |
| HLA-G     | 1.00E-05 | 0.137209 | 0.023 | 0.02  | 0.149845 |
| BCL2L15   | 1.11E-05 | 0.200961 | 0.026 | 0.006 | 0.165251 |
| RNASE4    | 1.18E-05 | 0.204968 | 0.03  | 0.014 | 0.176763 |
| HPS1      | 1.32E-05 | 0.130357 | 0.017 | 0.019 | 0.197753 |
| PPP1R3C   | 1.38E-05 | 0.100583 | 0.014 | 0.025 | 0.206249 |
| GREM1     | 1.39E-05 | 0.274848 | 0.035 | 0.005 | 0.207577 |
| CSF1R     | 1.40E-05 | 0.124426 | 0.019 | 0.023 | 0.208519 |
| CCL5      | 1.40E-05 | 0.103687 | 0.014 | 0.016 | 0.209363 |
| PAIP2B    | 1.45E-05 | 0.112266 | 0.012 | 0.017 | 0.217409 |
| BCAS1     | 1.47E-05 | 0.257894 | 0.044 | 0.033 | 0.219377 |
| CTGF      | 1.73E-05 | 0.128053 | 0.024 | 0.028 | 0.25813  |

|           |          |          |       |       |          |
|-----------|----------|----------|-------|-------|----------|
| TAC3      | 1.81E-05 | -0.16787 | 0.002 | 0.032 | 0.270462 |
| RP11-437L | 1.83E-05 | 0.217501 | 0.019 | 0     | 0.272907 |
| ALDH1L1-A | 2.15E-05 | 0.205207 | 0.026 | 0.005 | 0.320636 |
| TVP23A    | 2.18E-05 | 0.137638 | 0.024 | 0.021 | 0.325555 |
| HSD3B7    | 2.56E-05 | 0.111718 | 0.017 | 0.021 | 0.383204 |
| CHIT1     | 2.74E-05 | 0.303321 | 0.021 | 0.002 | 0.409984 |
| METTL25   | 2.94E-05 | 0.105136 | 0.014 | 0.023 | 0.439141 |
| RP4-613B2 | 3.63E-05 | 0.108497 | 0.014 | 0.017 | 0.541905 |
| TNFSF10   | 3.74E-05 | 0.187182 | 0.023 | 0.017 | 0.558456 |
| RTP4      | 3.84E-05 | 0.22929  | 0.023 | 0.017 | 0.574449 |
| SLC6A11   | 4.23E-05 | 0.160414 | 0.017 | 0.016 | 0.632582 |
| RP11-49I1 | 4.51E-05 | 0.125136 | 0.01  | 0.012 | 0.674135 |
| RP11-16E1 | 5.80E-05 | 0.119698 | 0.014 | 0.021 | 0.866456 |
| LGI1      | 6.20E-05 | 0.136864 | 0.028 | 0.03  | 0.926396 |
| IL6       | 6.54E-05 | 0.186236 | 0.017 | 0.015 | 0.977862 |
| HSPB8     | 7.16E-05 | 0.165888 | 0.019 | 0.012 | 1        |
| KRBOX1    | 7.31E-05 | 0.275662 | 0.026 | 0.004 | 1        |
| MARVELD3  | 7.31E-05 | 0.139989 | 0.019 | 0.017 | 1        |
| MYH14     | 7.35E-05 | 0.152094 | 0.016 | 0.014 | 1        |
| TMEM255B  | 7.91E-05 | 0.123776 | 0.01  | 0.011 | 1        |
| S100A1    | 8.78E-05 | 0.192311 | 0.019 | 0.022 | 1        |
| CFH       | 9.56E-05 | 0.111859 | 0.01  | 0.011 | 1        |
| THBS1     | 9.68E-05 | 0.147624 | 0.019 | 0.017 | 1        |
| RP11-284F | 0.000104 | 0.22823  | 0.03  | 0.007 | 1        |
| C10orf11  | 0.000108 | 0.10633  | 0.014 | 0.021 | 1        |
| TGFBR3    | 0.000114 | 0.140918 | 0.014 | 0.016 | 1        |
| TRIM72    | 0.000117 | 0.132997 | 0.016 | 0     | 1        |
| ALG1L     | 0.000117 | 0.117674 | 0.009 | 0.014 | 1        |
| MAPT-AS1  | 0.000119 | 0.17139  | 0.033 | 0.019 | 1        |
| MUC20     | 0.000124 | 0.102886 | 0.014 | 0.02  | 1        |
| PLIN5     | 0.000131 | 0.11478  | 0.016 | 0.02  | 1        |
| CDKN2B    | 0.000136 | 0.13177  | 0.028 | 0.02  | 1        |
| CA9       | 0.00014  | 0.168818 | 0.026 | 0.027 | 1        |
| RP1-122K4 | 0.000145 | 0.168267 | 0.014 | 0.005 | 1        |
| CHRM3     | 0.000147 | 0.132222 | 0.019 | 0.022 | 1        |
| CSF2RA    | 0.00015  | 0.127625 | 0.016 | 0.012 | 1        |
| SYNPO2L   | 0.000151 | 0.144138 | 0.017 | 0.014 | 1        |
| SELPLG    | 0.000155 | 0.121054 | 0.017 | 0.017 | 1        |
| EIF4EBP3  | 0.000167 | 0.180245 | 0.023 | 0.001 | 1        |
| CLN3      | 0.000177 | 0.239774 | 0.023 | 0.005 | 1        |
| C1orf194  | 0.000195 | 0.166814 | 0.017 | 0.016 | 1        |
| SYT4      | 0.000243 | 0.160014 | 0.017 | 0.01  | 1        |
| ZNF517    | 0.000245 | 0.120184 | 0.014 | 0.012 | 1        |
| SLC8A3    | 0.000268 | 0.128144 | 0.017 | 0.014 | 1        |
| CDIPT-AS1 | 0.000274 | 0.265516 | 0.024 | 0.006 | 1        |
| DMKN      | 0.000316 | 0.176761 | 0.019 | 0.001 | 1        |
| RP11-299L | 0.000347 | 0.101755 | 0.017 | 0.017 | 1        |
| DEPTOR    | 0.000365 | 0.162465 | 0.01  | 0.007 | 1        |
| NAA60     | 0.000389 | 0.279265 | 0.031 | 0.006 | 1        |
| COLEC12   | 0.000397 | 0.114899 | 0.014 | 0.012 | 1        |
| PLCG2     | 0.000401 | 0.193437 | 0.017 | 0.004 | 1        |



|           |          |          |       |       |   |
|-----------|----------|----------|-------|-------|---|
| GPR158-AS | 0.00041  | 0.152444 | 0.014 | 0.01  | 1 |
| TNXB      | 0.000502 | 0.106822 | 0.014 | 0.011 | 1 |
| RIIAD1    | 0.000591 | 0.160197 | 0.014 | 0.005 | 1 |
| HSPB2     | 0.000614 | 0.152323 | 0.017 | 0.007 | 1 |
| GPR89B    | 0.000615 | 0.156749 | 0.017 | 0.01  | 1 |
| SELENBP1  | 0.000652 | 0.131596 | 0.01  | 0.01  | 1 |
| RP11-373N | 0.000656 | 0.121065 | 0.016 | 0.01  | 1 |
| CRIP1     | 0.000662 | 0.103564 | 0.01  | 0.019 | 1 |
| CXCL3     | 0.000697 | 0.204745 | 0.03  | 0.025 | 1 |
| RGR       | 0.000707 | 0.157719 | 0.019 | 0.009 | 1 |
| RP13-188A | 0.000744 | 0.110981 | 0.019 | 0.017 | 1 |
| SERPINA3  | 0.000755 | 0.138399 | 0.012 | 0     | 1 |
| SLITRK4   | 0.000755 | 0.135777 | 0.012 | 0     | 1 |
| C11orf70  | 0.000904 | 0.18758  | 0.021 | 0.011 | 1 |
| IL6R      | 0.001077 | 0.103072 | 0.017 | 0.009 | 1 |
| ASPA      | 0.001207 | 0.139623 | 0.014 | 0.006 | 1 |
| BATF2     | 0.001222 | 0.161029 | 0.023 | 0.02  | 1 |
| LUC7L2    | 0.001234 | 0.216151 | 0.021 | 0.002 | 1 |
| MT1H      | 0.001246 | 0.117348 | 0.016 | 0.006 | 1 |
| PRPH      | 0.001302 | 0.106496 | 0.012 | 0.01  | 1 |
| DYNLRB2   | 0.001356 | 0.179306 | 0.016 | 0.002 | 1 |
| MAOA      | 0.001373 | 0.106134 | 0.016 | 0.016 | 1 |
| CLDN5     | 0.001414 | 0.123714 | 0.016 | 0.02  | 1 |
| CFB       | 0.001528 | 0.100556 | 0.012 | 0.01  | 1 |
| DCN       | 0.00157  | 0.101629 | 0.009 | 0.007 | 1 |
| CD70      | 0.001598 | 0.114027 | 0.01  | 0.011 | 1 |
| GLRA3     | 0.002077 | 0.15514  | 0.021 | 0.009 | 1 |
| FABP3     | 0.002149 | 0.308625 | 0.021 | 0.01  | 1 |
| SLC7A8    | 0.002365 | 0.119204 | 0.017 | 0.009 | 1 |
| RP11-643M | 0.00239  | 0.11732  | 0.009 | 0.009 | 1 |
| ZNF556    | 0.002551 | 0.117353 | 0.014 | 0.001 | 1 |
| P2RX6     | 0.002555 | 0.116623 | 0.014 | 0.01  | 1 |
| RP11-469H | 0.002579 | 0.139978 | 0.01  | 0.007 | 1 |
| TEX29     | 0.002716 | 0.153845 | 0.012 | 0.006 | 1 |
| COL8A1    | 0.003442 | 0.105924 | 0.016 | 0.015 | 1 |
| NEBL      | 0.003816 | 0.125728 | 0.019 | 0.011 | 1 |
| HIST1H2BG | 0.003901 | 0.131052 | 0.012 | 0.007 | 1 |
| RNF144B   | 0.004114 | 0.165945 | 0.014 | 0.002 | 1 |
| PTPRH     | 0.004649 | 0.106257 | 0.01  | 0.004 | 1 |
| GNLY      | 0.00493  | 0.113779 | 0.01  | 0.007 | 1 |
| RP11-495F | 0.004998 | 0.14041  | 0.009 | 0     | 1 |
| ITGAL     | 0.004998 | 0.102048 | 0.009 | 0     | 1 |
| DHRS4-AS1 | 0.005332 | 0.14788  | 0.016 | 0.002 | 1 |
| NPTX1     | 0.005437 | 0.146408 | 0.01  | 0.005 | 1 |
| TFCP2L1   | 0.005708 | 0.149012 | 0.016 | 0.011 | 1 |
| C5AR2     | 0.005902 | 0.177123 | 0.021 | 0.005 | 1 |
| KCNA7     | 0.006149 | 0.104632 | 0.014 | 0.001 | 1 |
| PTPRT     | 0.006268 | 0.124795 | 0.01  | 0.009 | 1 |
| SLC5A3    | 0.007183 | 0.115861 | 0.012 | 0.001 | 1 |
| BCL2L14   | 0.00795  | 0.113457 | 0.014 | 0.004 | 1 |
| CA5A      | 0.008271 | 0.117064 | 0.014 | 0.002 | 1 |

|           |          |          |       |       |   |
|-----------|----------|----------|-------|-------|---|
| CCL4L2    | 0.00953  | 0.12828  | 0.012 | 0.002 | 1 |
| ECM2      | 0.00982  | 0.103178 | 0.012 | 0.01  | 1 |
| ZNF490    | 0.01001  | 0.100129 | 0.009 | 0.009 | 1 |
| LRRN4CL   | 0.010062 | 0.122403 | 0.01  | 0.002 | 1 |
| WFDC1     | 0.011823 | 0.103707 | 0.01  | 0.007 | 1 |
| AL592528. | 0.012146 | 0.153191 | 0.012 | 0.004 | 1 |
| CAMP      | 0.013059 | 0.129131 | 0.007 | 0     | 1 |
| PCDH18    | 0.013272 | 0.119469 | 0.014 | 0.006 | 1 |
| DHRS2     | 0.014692 | -0.16744 | 0.002 | 0.016 | 1 |
| SAA4      | 0.015434 | 0.138435 | 0.01  | 0.001 | 1 |
| TLR3      | 0.015461 | 0.112815 | 0.009 | 0.004 | 1 |
| KCNK6     | 0.016295 | 0.107332 | 0.009 | 0.002 | 1 |
| TEKT1     | 0.018245 | 0.122334 | 0.012 | 0.004 | 1 |
| RAMP3     | 0.020074 | 0.108706 | 0.012 | 0.009 | 1 |
| MYO15A    | 0.020553 | 0.114964 | 0.012 | 0.002 | 1 |
| LAMA2     | 0.022832 | 0.113883 | 0.016 | 0.012 | 1 |
| ZMYND12   | 0.025961 | 0.145004 | 0.01  | 0.001 | 1 |
| CCBE1     | 0.031065 | 0.120167 | 0.021 | 0.01  | 1 |
| OSR1      | 0.031295 | 0.15264  | 0.016 | 0.009 | 1 |
| RP11-306G | 0.033719 | 0.118783 | 0.014 | 0.002 | 1 |
| RP11-326C | 0.038882 | 0.101575 | 0.012 | 0.002 | 1 |
| LINC0032C | 0.040963 | 0.139566 | 0.012 | 0.005 | 1 |
| ENPP5     | 0.042932 | 0.130474 | 0.014 | 0.007 | 1 |
| CTD-2369F | 0.043768 | 0.124074 | 0.014 | 0.002 | 1 |
| GS1-18A18 | 0.051875 | 0.113161 | 0.009 | 0.007 | 1 |
| LXN       | 0.053094 | 0.107988 | 0.01  | 0.001 | 1 |
| PRMT5-AS1 | 0.061404 | 0.107404 | 0.007 | 0.002 | 1 |
| IGF2      | 0.063668 | 0.157078 | 0.019 | 0.016 | 1 |
| GJC3      | 0.070494 | 0.116668 | 0.01  | 0.002 | 1 |
| GPR27     | 0.076968 | 0.101099 | 0.009 | 0.004 | 1 |
| PDZK1IP1  | 0.077912 | 0.108934 | 0.009 | 0.002 | 1 |
| AC002451. | 0.084548 | 0.101804 | 0.009 | 0.001 | 1 |
| THTPA     | 0.090803 | 0.121855 | 0.012 | 0.005 | 1 |
| ABHD1     | 0.09198  | 0.120148 | 0.012 | 0.006 | 1 |
| RP11-242E | 0.137456 | 0.108354 | 0.012 | 0.005 | 1 |
