# Supplementary material for: A Novel Molecular Classification Method for Glioblastoma Based on Tumor Cell Differentiation Trajectories
Source: Hindawi journal article supplement (doi:10.1155/2023/2826815), 2023-02-22
Supplement: f10 [file 2826815.f10.pdf]

|           | CSCL     | Class-G  | Opc-G    | Neo-G    | Ac-G     | Undiff-G1 | Undiff-G2 |
|-----------|----------|----------|----------|----------|----------|-----------|-----------|
| GO-CONDEN | 0.629478 | 0.02663  | 0.036356 | 0.063204 | -0.06858 | -0.06261  | -0.04563  |
| GO-MCM-CC | 0.426188 | #####    | 0.188863 | 0.053144 | -0.03604 | -0.01087  | -0.01635  |
| GO-MITOTI | 0.468391 | 0.09031  | 0.098213 | 0.004852 | 0.042448 | 0.014404  | 0.008347  |
| GO-DNA-LI | 0.436284 | 0.065282 | 0.098187 | 0.057879 | 0.007697 | -0.07752  | -0.17969  |
| GO-MITOTI | 0.678    | 0.311487 | 0.038421 | 0.017791 | -0.12883 | -0.21048  | -0.20501  |
| GO-CHROMC | 0.320796 | -0.02194 | 0.071588 | 0.064163 | -0.09276 | -0.06482  | -0.04573  |
| GO-COHESI | 0.314341 | 0.019496 | 0.027226 | 0.013737 | -0.11855 | -0.14403  | -0.15115  |
| GO-CONDEN | 0.330829 | 0.037115 | 0.073809 | 0.075335 | -0.02337 | -0.0486   | -0.05126  |
| GO-CENTRC | 0.634833 | 0.361556 | 0.137113 | 0.107586 | -0.08828 | -0.27072  | -0.32341  |
| GO-HISTON | 0.546558 | 0.275767 | 0.098696 | 0.098525 | -0.03036 | -0.09202  | -0.06085  |
| GO-REGULA | 0.330699 | 0.664526 | 0.05893  | 0.012686 | -0.01839 | -0.24635  | -0.31518  |
| GO-REGULA | 0.222206 | 0.542173 | -0.07552 | -0.1541  | -0.00935 | -0.31888  | -0.35686  |
| GO-SECONC | 0.006931 | 0.322271 | -0.12688 | -0.05424 | 0.058081 | -0.25376  | -0.27855  |
| NGO-MALIG | 0.33348  | 0.620212 | -0.18086 | -0.18773 | 0.203572 | -0.2155   | -0.34825  |
| GO-AMYLOI | 0.033744 | 0.307313 | -0.12829 | -0.10466 | 0.119441 | -0.14016  | -0.09322  |
| GO-L-ASCC | 0.233664 | 0.506753 | -0.05748 | -0.0783  | -0.01047 | -0.25494  | -0.27084  |
| KEGG-PENT | 0.272816 | 0.535324 | -0.07157 | -0.08731 | 0.009638 | -0.31088  | -0.39144  |
| GO-FILOPC | 0.264715 | 0.525946 | -0.04177 | -0.13447 | -0.13911 | -0.32904  | -0.41198  |
| GO-RETROG | 0.294733 | 0.546186 | 0.036214 | 0.083145 | -0.06374 | -0.30054  | -0.39178  |
| GO-AXONAL | 0.238191 | 0.480694 | 0.134175 | 0.25885  | -0.02717 | -0.28811  | -0.42848  |
| GO-CERAMI | 0.049903 | 0.283111 | -0.06359 | -0.0786  | -0.09784 | -0.31136  | -0.30211  |
| GO-PHAGOC | 0.073488 | 0.303705 | -0.14653 | -0.15088 | -0.10504 | -0.30745  | -0.33139  |
| GO-REGULA | -0.17745 | 0.128765 | 0.107503 | -0.0003  | 1.33E-05 | -0.03575  | -0.08682  |
| GO-POSITI | -0.19654 | 0.156503 | 0.174529 | 0.121322 | 0.058038 | 0.021119  | -0.02521  |
| GO-MONOCY | -0.20245 | 0.065838 | 0.174047 | 0.108244 | 0.121995 | -0.09752  | -0.13068  |
| GO-EXCITA | 0.101124 | 0.16149  | 0.23889  | 0.186305 | -0.02548 | -0.00357  | -0.00779  |
| GO-SPINAL | -0.18646 | 0.004445 | 0.13817  | 0.105242 | -0.09523 | -0.07629  | -0.10024  |
| GO-POSITI | -0.19724 | 0.041488 | 0.184866 | 0.161144 | 0.072452 | 0.092524  | 0.027224  |
| GO-POSITI | -0.2092  | 0.001686 | 0.162128 | 0.153624 | 0.128695 | -0.03332  | 0.005812  |
| GO-NEURON | -0.20595 | 0.022024 | 0.23964  | 0.204067 | 0.037266 | 0.087424  | 0.089389  |
| GO-CELL-D | -0.19561 | -0.01911 | 0.200314 | 0.135012 | -0.04343 | 0.051861  | 0.064465  |
| GO-PARANC | -0.1848  | 0.014622 | 0.306959 | 0.275842 | 0.221699 | 0.189013  | 0.185214  |
| GO-NEURON | -0.07686 | 0.092539 | 0.306401 | 0.284076 | 0.105634 | 0.183968  | 0.190531  |
| GO-NEUROT | -0.19047 | 0.044923 | 0.213305 | 0.13703  | 0.15268  | 0.151715  | 0.152134  |
| GO-NEUROT | -0.03281 | 0.11389  | 0.171018 | 0.155766 | 0.140661 | 0.128067  | 0.115039  |
| GO-DENDRI | -0.13378 | 0.036978 | 0.29545  | 0.225178 | 0.240113 | 0.232296  | 0.244753  |
| GO-CEREBE | -0.20031 | -0.03724 | 0.239096 | 0.1938   | 0.086849 | 0.156807  | 0.189178  |
| GO-POSITI | -0.20667 | 0.073388 | 0.18996  | 0.121391 | 0.143167 | 0.093049  | 0.157818  |
| GO-POSITI | -0.23606 | 0.094577 | 0.287258 | 0.510884 | 0.094542 | -0.01942  | 0.033476  |
| GO-OLFACT | -0.16317 | 0.02696  | 0.220353 | 0.342327 | 0.015972 | 0.048691  | 0.089631  |
| GO-POSITI | -0.16878 | -0.01624 | 0.209951 | 0.298451 | 0.185452 | 0.219992  | 0.257109  |
| GO-MOTOR- | -0.20559 | 0.043253 | 0.114528 | 0.181769 | -0.1083  | -0.12898  | -0.15305  |
| GO-REGULA | -0.19157 | 0.131576 | 0.163163 | 0.252929 | 0.011794 | -0.0471   | -0.04879  |
| GO-MODULA | -0.21252 | 0.08746  | 0.130857 | 0.187734 | 0.035244 | 0.111045  | 0.105274  |
| GO-DOPAMI | -0.24796 | 0.111081 | 0.142326 | 0.193851 | 0.024044 | -0.00559  | -0.0047   |
| GO-CEREBR | 0.195014 | 0.215652 | 0.171596 | 0.296039 | -0.04002 | -0.14654  | -0.17763  |
| GO-SYNAPT | -0.2009  | 0.068817 | -0.00388 | 0.124584 | -0.0663  | -0.11333  | -0.13051  |
| GO-CENTRA | -0.16416 | 0.091735 | 0.099325 | 0.142071 | -0.08283 | -0.08416  | -0.09777  |
| GO-FIBRIN | -0.20327 | 0.012952 | -0.01879 | 0.012005 | 0.298194 | -0.02124  | 0.116081  |
| GO-METALL | -0.16334 | 0.1366   | -0.03961 | -0.07233 | 0.26934  | 0.128651  | 0.159382  |

|           |          |          |          |          |          |          |          |
|-----------|----------|----------|----------|----------|----------|----------|----------|
| GO-M-BANC | 0.119109 | 0.211142 | -0.05539 | -0.08182 | 0.2481   | 0.203055 | 0.17862  |
| GO-MUSCLE | -0.15925 | -0.04575 | -0.07737 | -0.00465 | 0.175905 | 0.111263 | 0.062465 |
| GO-HYDROG | -0.18731 | 0.243116 | 0.042624 | -0.01994 | 0.291616 | -0.03027 | -0.09393 |
| GO-ANTIOX | -0.22184 | 0.2035   | -0.02697 | -0.02625 | 0.210045 | -0.10443 | -0.15072 |
| GO-MYELIN | -0.3578  | 0.114854 | -0.03298 | -0.01248 | 0.185466 | 0.017799 | 0.017275 |
| KEGG-COMP | -0.20149 | 0.025395 | -0.04545 | -0.0242  | 0.17118  | -0.15669 | -0.07525 |
| GO-COLLAG | -0.20007 | 0.089291 | -0.01972 | -0.06737 | 0.189879 | -0.02058 | 0.001077 |
| GO-COMPLE | -0.22245 | 0.05598  | -0.07616 | -0.06285 | 0.121245 | -0.20984 | -0.15904 |
| GO-INTERM | -0.19639 | 0.034118 | 0.023305 | 0.017507 | 0.215663 | 0.023431 | -0.10668 |
| GO-ANTIGE | -0.18388 | -0.00139 | -0.03737 | -0.03904 | 0.136175 | 0.041308 | 0.055739 |
| GO-EOSINC | -0.18024 | 0.143696 | 0.101989 | 0.148838 | 0.263373 | 0.057344 | 0.144815 |
| GO-OXIDOR | -0.01144 | 0.157886 | 0.248244 | 0.265822 | 0.392032 | 0.198473 | 0.220789 |
| GO-IMMUNE | -0.18372 | -0.12208 | 0.037796 | 0.043491 | 0.142487 | 0.046    | 0.118588 |
| GO-NEUROT | -0.19531 | 0.075071 | 0.021421 | 0.040075 | 0.114446 | -0.05905 | -0.08713 |
| GO-NEUTRC | -0.20048 | 0.01554  | 0.114707 | 0.080131 | 0.199088 | 0.087536 | 0.115802 |
| GO-REGULA | -0.18803 | -0.03584 | 0.090512 | 0.097819 | 0.174271 | -0.04789 | -0.00161 |
| GO-OXIDOR | -0.21054 | 0.097656 | 0.187794 | 0.154529 | 0.262292 | 0.13055  | 0.161246 |
| GO-CHEMOK | -0.23105 | -0.16342 | 0.137978 | 0.135083 | 0.197573 | 0.171947 | 0.189812 |
| GO-T-HELP | -0.20122 | 0.044681 | 0.115747 | 0.064478 | 0.172008 | 0.055903 | 0.098036 |
| GO-REGULA | -0.09004 | 0.096993 | 0.115512 | -0.07515 | 0.159874 | 0.053256 | 0.032406 |
| GO-POSITI | -0.19118 | 0.046704 | 0.086874 | 0.057562 | 0.127507 | 0.008299 | 0.022704 |
| GO-CELL-F | -0.1884  | -0.08036 | 0.01747  | -0.03545 | -0.02411 | 0.117131 | 0.115212 |
| GO-CELL-F | -0.20485 | -0.04804 | 0.137519 | 0.05676  | 0.04079  | 0.183376 | 0.189636 |
| GO-ENDODE | -0.17798 | -0.14332 | 0.047133 | 0.012917 | 0.00352  | 0.206831 | 0.192522 |
| GO-REGULA | 0.033476 | -0.05221 | 0.118169 | 0.116657 | 0.080209 | 0.171079 | 0.150225 |
| GO-CELL-C | -0.19169 | -0.15454 | 0.069778 | 0.078342 | 0.09024  | 0.145172 | 0.139002 |
| GO-NEUROF | -0.18993 | -0.12479 | 0.340201 | 0.368381 | 0.302318 | 0.415349 | 0.336889 |
| GO-PEPTIC | -0.17884 | -0.05684 | 0.154896 | 0.171191 | 0.084699 | 0.183679 | 0.10541  |
| GO-GAMMA- | -0.22066 | -0.23329 | 0.085362 | 0.064821 | 0.042712 | 0.222509 | 0.174757 |
| GO-IMMUNE | -0.19444 | -0.17199 | 0.157678 | 0.139808 | 0.16898  | 0.303226 | 0.265618 |
| GO-ENDOCR | -0.20303 | -0.15983 | 0.099302 | 0.10019  | 0.179177 | 0.272868 | 0.266235 |
| GO-STRUCT | -0.03837 | -0.14751 | 0.083225 | 0.199859 | 0.152825 | 0.2336   | 0.477066 |
| GO-RETINC | -0.19541 | -0.11695 | 0.165737 | 0.149719 | 0.251156 | 0.416667 | 0.590617 |
| GO-REGULA | -0.20826 | 0.073456 | -0.01923 | -0.07841 | 0.043862 | 0.22456  | 0.344279 |
| GO-REGULA | -0.24104 | 0.013225 | 0.124184 | 0.06591  | 0.133308 | 0.330971 | 0.439438 |
| GO-REGULA | -0.01692 | -0.11228 | 0.142118 | 0.123651 | 0.171962 | 0.329306 | 0.434834 |
| GO-REGULA | -0.18413 | -0.08221 | 0.108764 | 0.141218 | 0.077338 | 0.209708 | 0.309928 |
| GO-ACTIVI | -0.18988 | -0.07245 | 0.055915 | 0.086701 | 0.105796 | 0.098494 | 0.197397 |
| GO-WNT-AC | -0.19605 | -0.12111 | -0.05608 | -0.09351 | 0.038373 | 0.3383   | 0.43321  |
| GO-COMPLE | -0.17926 | -0.2397  | 0.168516 | 0.148903 | 0.37023  | 0.635475 | 0.730108 |
| GO-SPHING | 0.021119 | -0.1926  | 0.173717 | 0.190951 | 0.183197 | 0.353187 | 0.447425 |
| GO-AXONEM | -0.17619 | -0.30128 | 0.19206  | 0.206737 | 0.386995 | 0.687201 | 0.77762  |
| GO-REGULA | -0.21542 | -0.05154 | 0.049138 | 0.038371 | 0.076141 | 0.096347 | 0.180648 |
| GO-MYOSIN | -0.21944 | -0.20771 | 0.19457  | 0.243258 | 0.276502 | 0.468529 | 0.549832 |
| GO-FIBRIL | -0.20414 | -0.26712 | 0.229789 | 0.228071 | 0.432044 | 0.661401 | 0.737465 |
| GO-WNT-PR | -0.2022  | -0.07747 | 0.033359 | -0.00277 | 0.150367 | 0.360428 | 0.43389  |
| GO-NADPLU | -0.2257  | 0.055559 | 0.047638 | 0.026831 | 0.021202 | 0.123073 | 0.196262 |
| KEGG-HEDG | -0.18366 | -0.17679 | 0.033288 | 0.011764 | 0.058435 | 0.332446 | 0.401405 |
