# Supplementary material for: A Novel Molecular Classification Method for Glioblastoma Based on Tumor Cell Differentiation Trajectories
Source: Hindawi journal article supplement (doi:10.1155/2023/2826815), 2023-02-22
Supplement: f11 [file 2826815.f11.pdf]

**Supplementary Table 9** Clinical characteristics of 137 human IDH-mut GBM samples

|                            |                 | <b>Total</b><br>(n=137) | <b>Ac_G</b><br>(n=21) | <b>Class_G</b><br>(n=62) | <b>Neo_G</b><br>(n=14) | <b>OpcG</b><br>(n=29) | <b>Undiff</b><br>(n=11) | <b>p-value</b> |
|----------------------------|-----------------|-------------------------|-----------------------|--------------------------|------------------------|-----------------------|-------------------------|----------------|
| <b>Event (%)</b>           | Alive           | 18 (13.1)               | 4 (19.0)              | 7 (11.3)                 | 6 (42.9)               | 3 (10.3)              | 0 (0.0)                 | <b>0.016</b>   |
|                            | Death           | 119 (86.9)              | 17 (81.0)             | 55 (88.7)                | 8 (57.1)               | 26 (89.7)             | 11 (100.0)              |                |
| <b>Age (median [IQR])</b>  |                 | 55.00 [45.00, 62.00]    | 47.00 [40.00, 58.00]  | 55.50 [45.00, 62.00]     | 54.50 [48.75, 59.50]   | 57.00 [49.00, 63.00]  | 50.00 [44.00, 64.00]    | 0.626          |
| <b>Gender (%)</b>          | Female          | 54 (39.4)               | 9 (42.9)              | 22 (35.5)                | 5 (35.7)               | 14 (48.3)             | 4 (36.4)                | 0.812          |
|                            | Male            | 83 (60.6)               | 12 (57.1)             | 40 (64.5)                | 9 (64.3)               | 15 (51.7)             | 7 (63.6)                |                |
| <b>Radiotherapy (%)</b>    | No              | 24 (17.5)               | 2 (9.5)               | 10 (16.1)                | 3 (21.4)               | 8 (27.6)              | 1 (9.1)                 | 0.443          |
|                            | Yes             | 113 (82.5)              | 19 (90.5)             | 52 (83.9)                | 11 (78.6)              | 21 (72.4)             | 10 (90.9)               |                |
| <b>Chemotherapy (%)</b>    | No              | 23 (16.8)               | 4 (19.0)              | 11 (17.7)                | 1 (7.1)                | 6 (20.7)              | 1 (9.1)                 | 0.767          |
|                            | Yes             | 114 (83.2)              | 17 (81.0)             | 51 (82.3)                | 13 (92.9)              | 23 (79.3)             | 10 (90.9)               |                |
| <b>Size (median [IQR])</b> |                 | 4.78 [3.95, 5.50]       | 4.74 [4.20, 5.31]     | 4.90 [3.94, 5.58]        | 5.06 [4.36, 5.27]      | 4.73 [3.95, 5.56]     | 4.86 [3.92, 5.32]       | 0.988          |
| <b>Surgery-type (%)</b>    | Biopsy          | 10 (7.3)                | 1 (4.8)               | 5 (8.1)                  | 1 (7.1)                | 1 (3.4)               | 2 (18.2)                | 0.077          |
|                            | Sub-resection   | 47 (34.3)               | 13 (61.9)             | 16 (25.8)                | 7 (50.0)               | 8 (27.6)              | 3 (27.3)                |                |
|                            | Total-resection | 80 (58.4)               | 7 (33.3)              | 41 (66.1)                | 6 (42.9)               | 20 (69.0)             | 6 (54.5)                |                |
