# Supplementary material for: A Novel Molecular Classification Method for Glioblastoma Based on Tumor Cell Differentiation Trajectories
Source: Hindawi journal article supplement (doi:10.1155/2023/2826815), 2023-02-22
Supplement: f12 [file 2826815.f12.pdf]

**Supplementary Table 10** Univariate and multivariate Cox proportional hazards analyses of clinicopathological variables and 5 classifications in 137 human IDH-mut GBM samples

| Variables                | Univariate<br>cox |           |                       | Multivariate<br>cox |           |             |
|--------------------------|-------------------|-----------|-----------------------|---------------------|-----------|-------------|
|                          | Hazard<br>ratio   | 95% CI    | p-val<br>ue           | Hazard<br>ratio     | 95% CI    | p-val<br>ue |
| <b>Gender</b>            |                   |           |                       |                     |           |             |
| Female                   | -                 | -         | -                     | -                   | -         | -           |
| Male                     | 0.88              | 0.78-1.65 | 0.516                 |                     |           |             |
| <b>Age</b>               |                   |           |                       |                     |           |             |
| ≤35                      | -                 | -         | -                     | -                   | -         | -           |
| >35                      | 0.58              | 1.04-2.87 | 0.035                 | 1.76                | 1.05-2.94 | 0.034       |
| <b>Size</b>              |                   |           |                       |                     |           |             |
| ≤3.5                     | -                 | -         | -                     | -                   | -         | -           |
| >3.5                     | 1.668             | 0.68-4.1  | 0.264                 |                     |           |             |
| <b>Radiothera<br/>py</b> |                   |           |                       |                     |           |             |
| No                       | -                 | -         | -                     | -                   | -         | -           |
| Yes                      | 1.87              | 0.36-0.8  | <b>0.002</b>          | 0.58                | 0.38-0.88 | 0.016       |
| <b>Chemother<br/>apy</b> |                   |           |                       |                     |           |             |
| No                       | -                 | -         | -                     | -                   | -         | -           |
| Yes                      | 1.86              | 0.35-0.83 | <b>0.005</b>          |                     |           |             |
| <b>Surgery-ty<br/>pe</b> |                   |           |                       |                     |           |             |
| Biopsy                   | -                 | -         | -                     | -                   | -         | -           |
| Sub_section              | 1.34              | 0.95-1.88 | 0.091                 | 1.18                | 0.83-1.69 | 0.351       |
| Total_sectio<br>n        | 0.54              | 0.35-0.81 | <b>&lt;0.00<br/>1</b> | 0.57                | 0.38-0.87 | 0.017       |
| <b>Group</b>             |                   |           |                       |                     |           |             |
| Ac-G                     | -                 | -         | -                     | -                   | -         | -           |
| Class_G                  | 1.34              | 0.78-2.31 | 0.297                 | 1.3                 | 0.74-2.27 | 0.362       |
| Neo-G                    | 0.45              | 0.2-0.98  | <b>0.031</b>          | 0.46                | 0.21-1.01 | 0.045       |

|          |      |           |       |      |           |       |
|----------|------|-----------|-------|------|-----------|-------|
| Opc-G    | 0.83 | 0.45-1.54 | 0.566 | 0.88 | 0.47-1.64 | 0.694 |
| Undiff-G | 1.42 | 0.66-3.05 | 0.374 | 1.58 | 0.73-3.42 | 0.241 |

---
